# Supplementary material for: Multiomics coupled with vibrational spectroscopy identify early mechanisms of experimental aortic valve stenosis
Source: Research Square preprint supplement (doi:10.21203/rs.3.rs-4330270/v1), 2024-05-02

LOC100340199:  $\log_{10} q = -25.61$

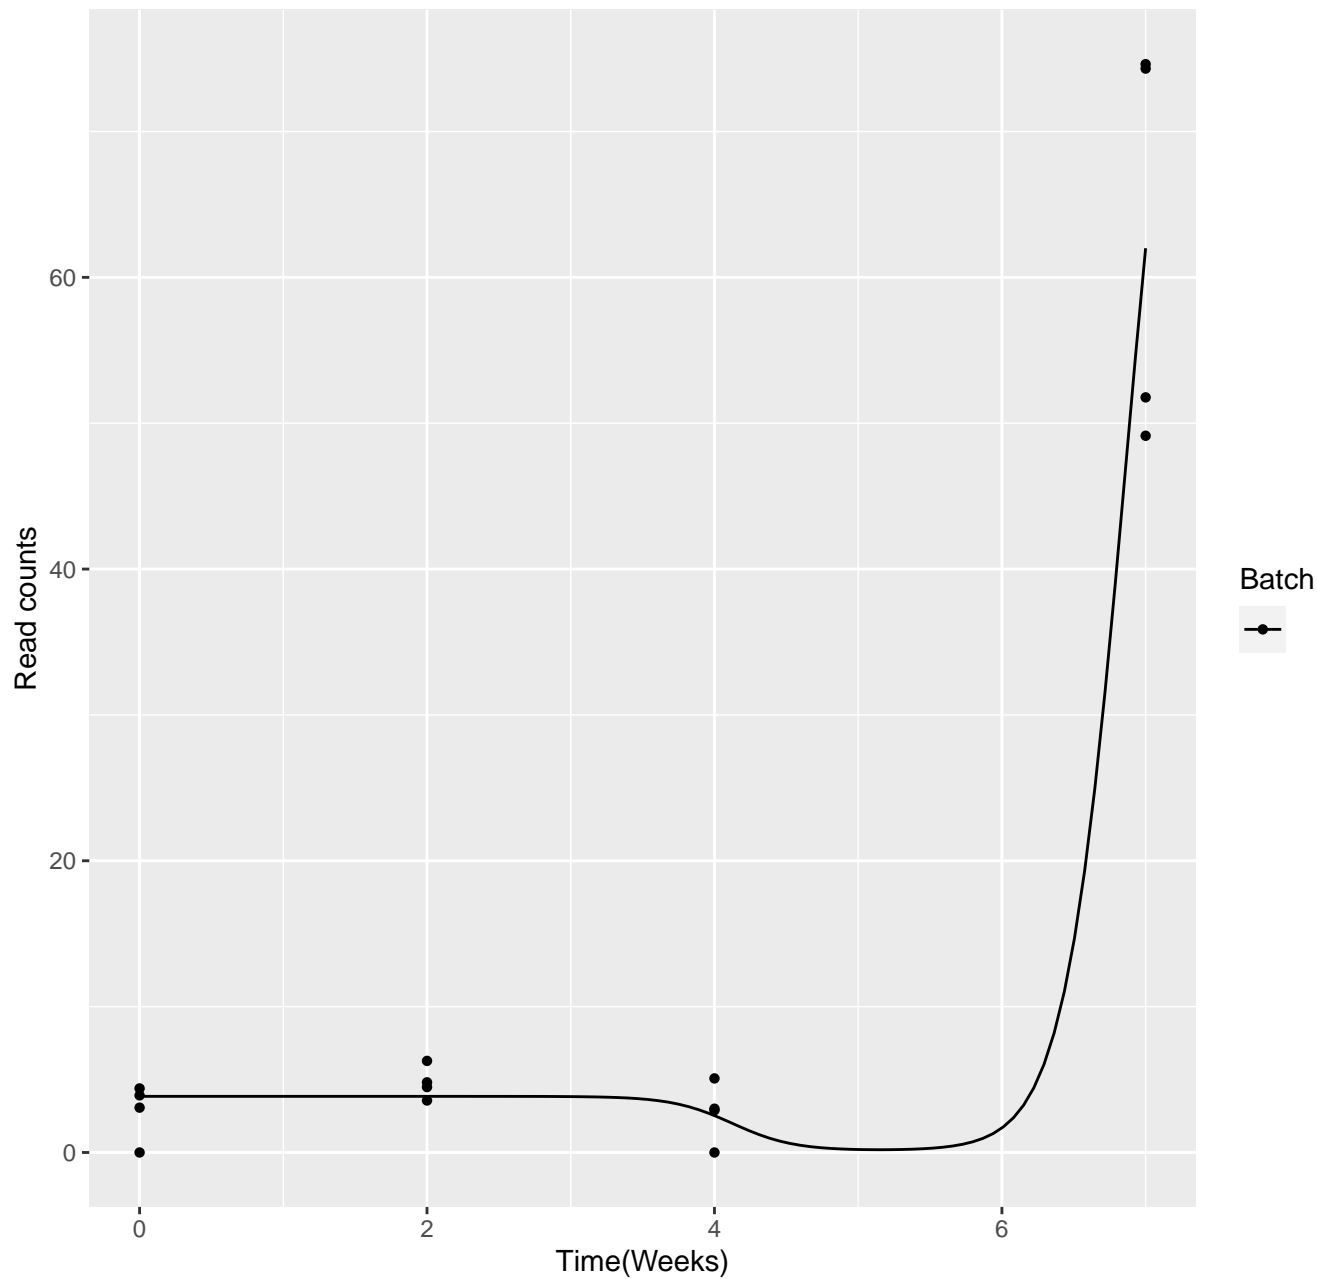

LOC100339471:  $\log_{10} q = -21.6$

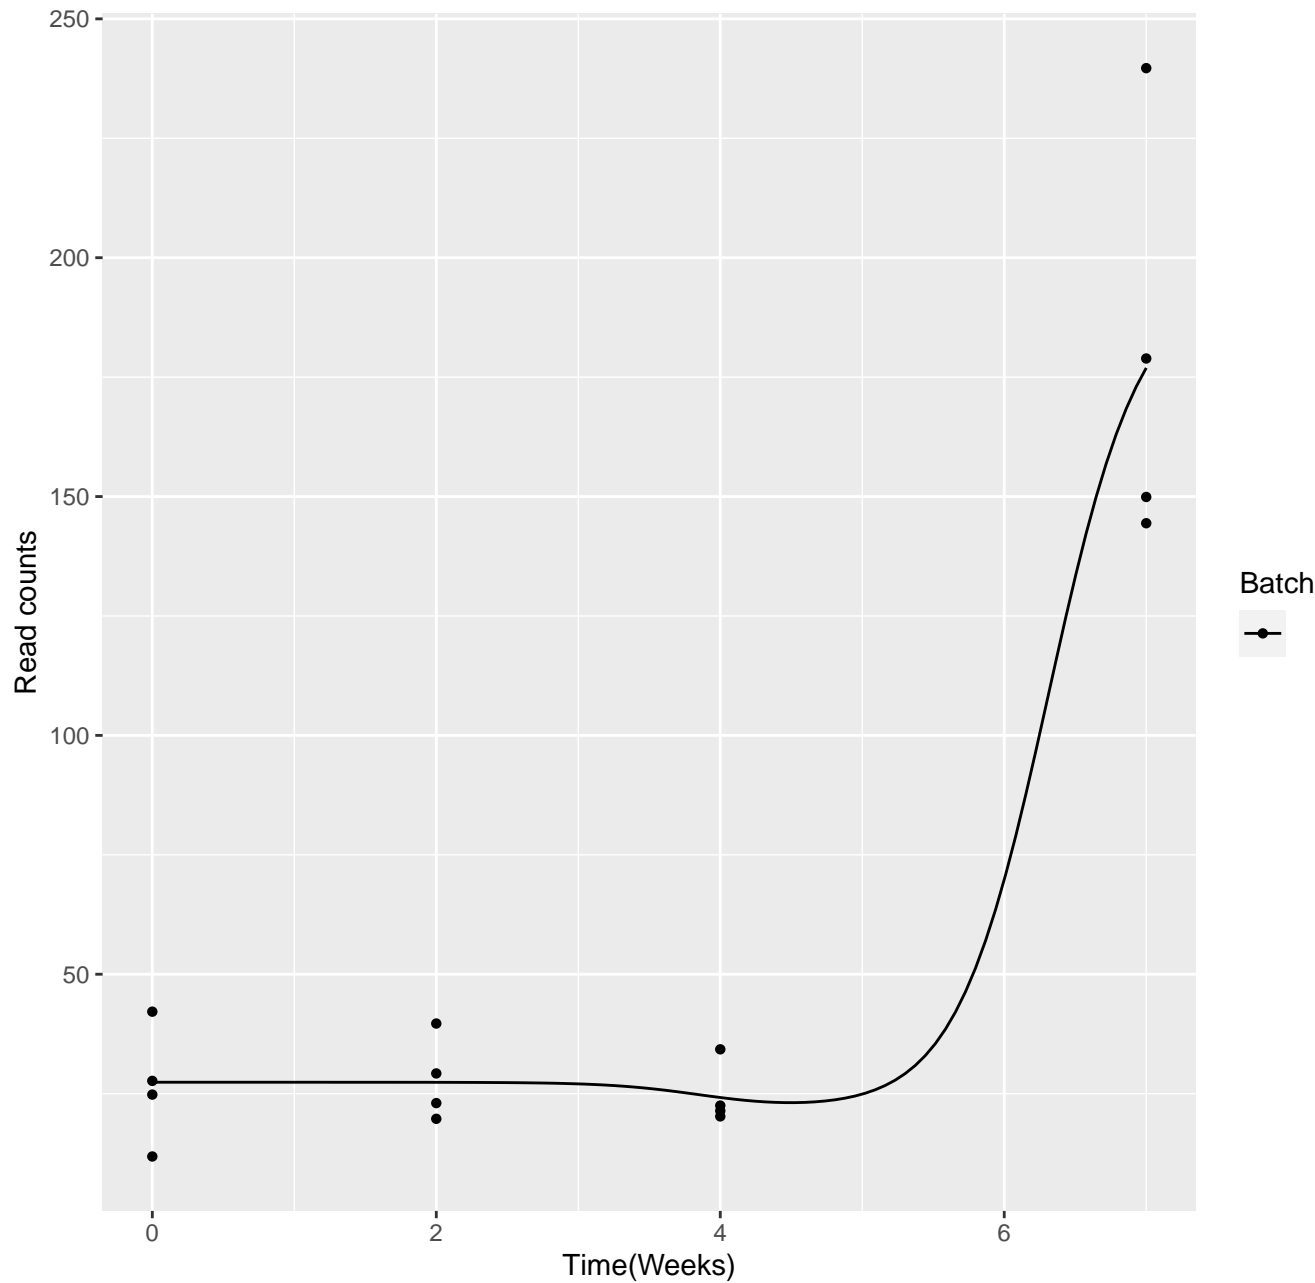

LOC100353302:  $\log_{10} q = -19.78$

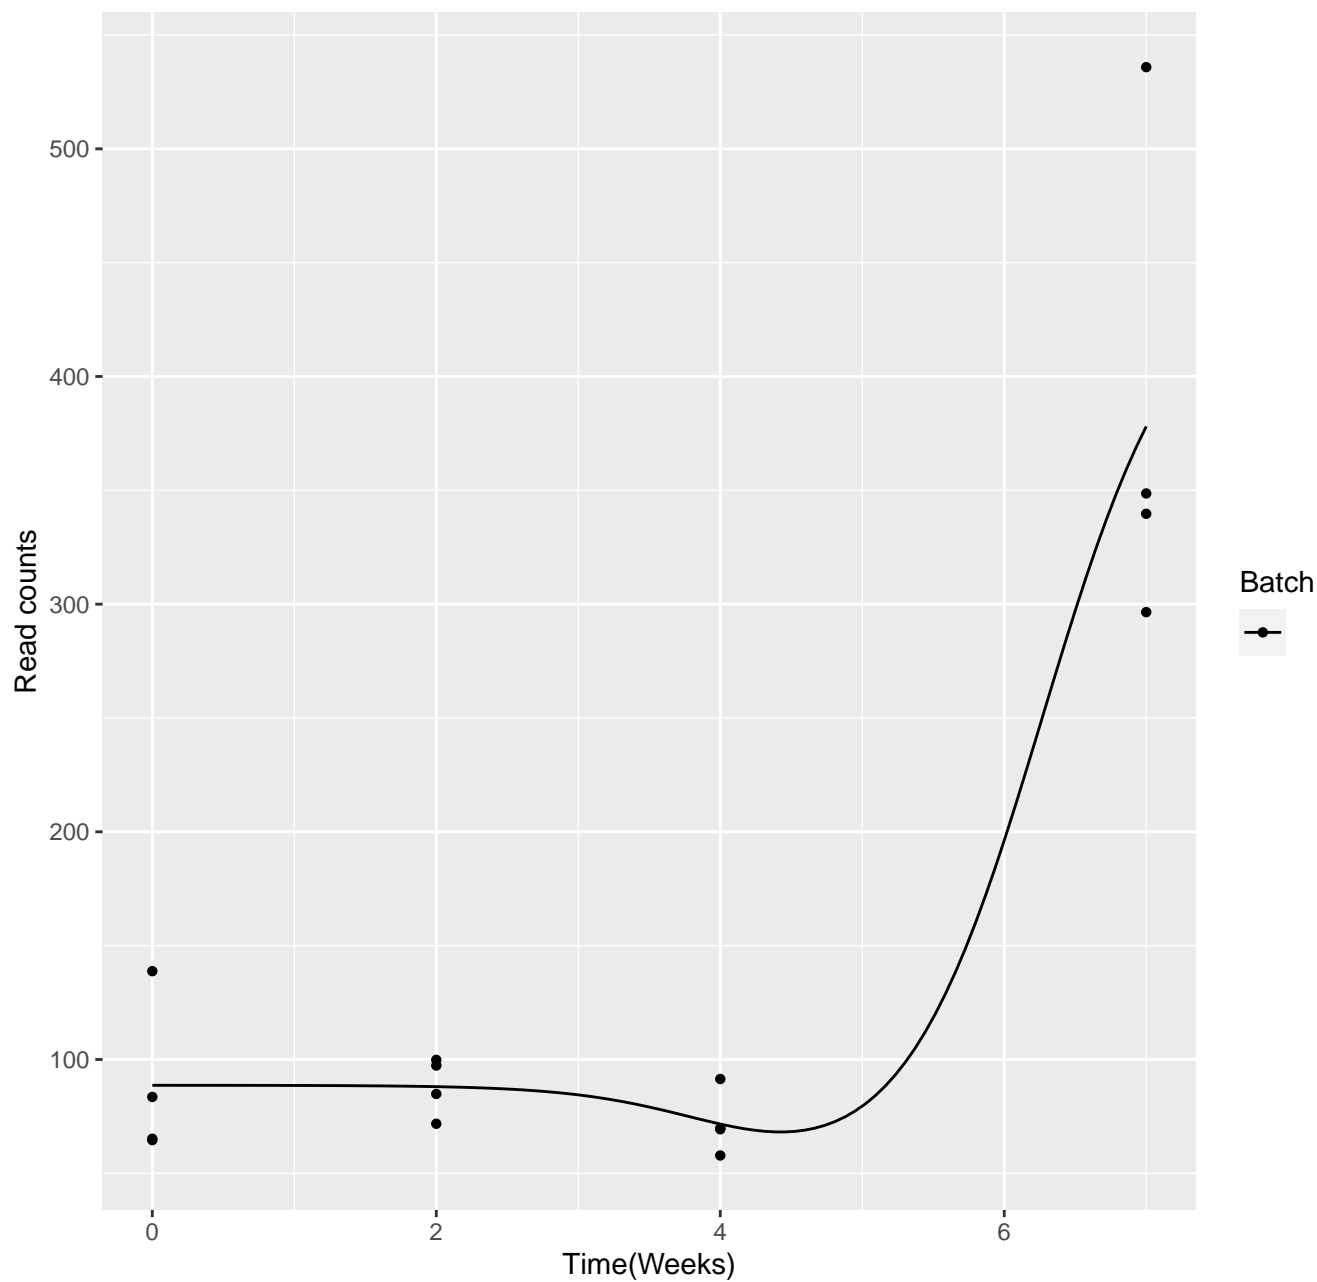

HSPG2:  $\log_{10} q = -17.4$

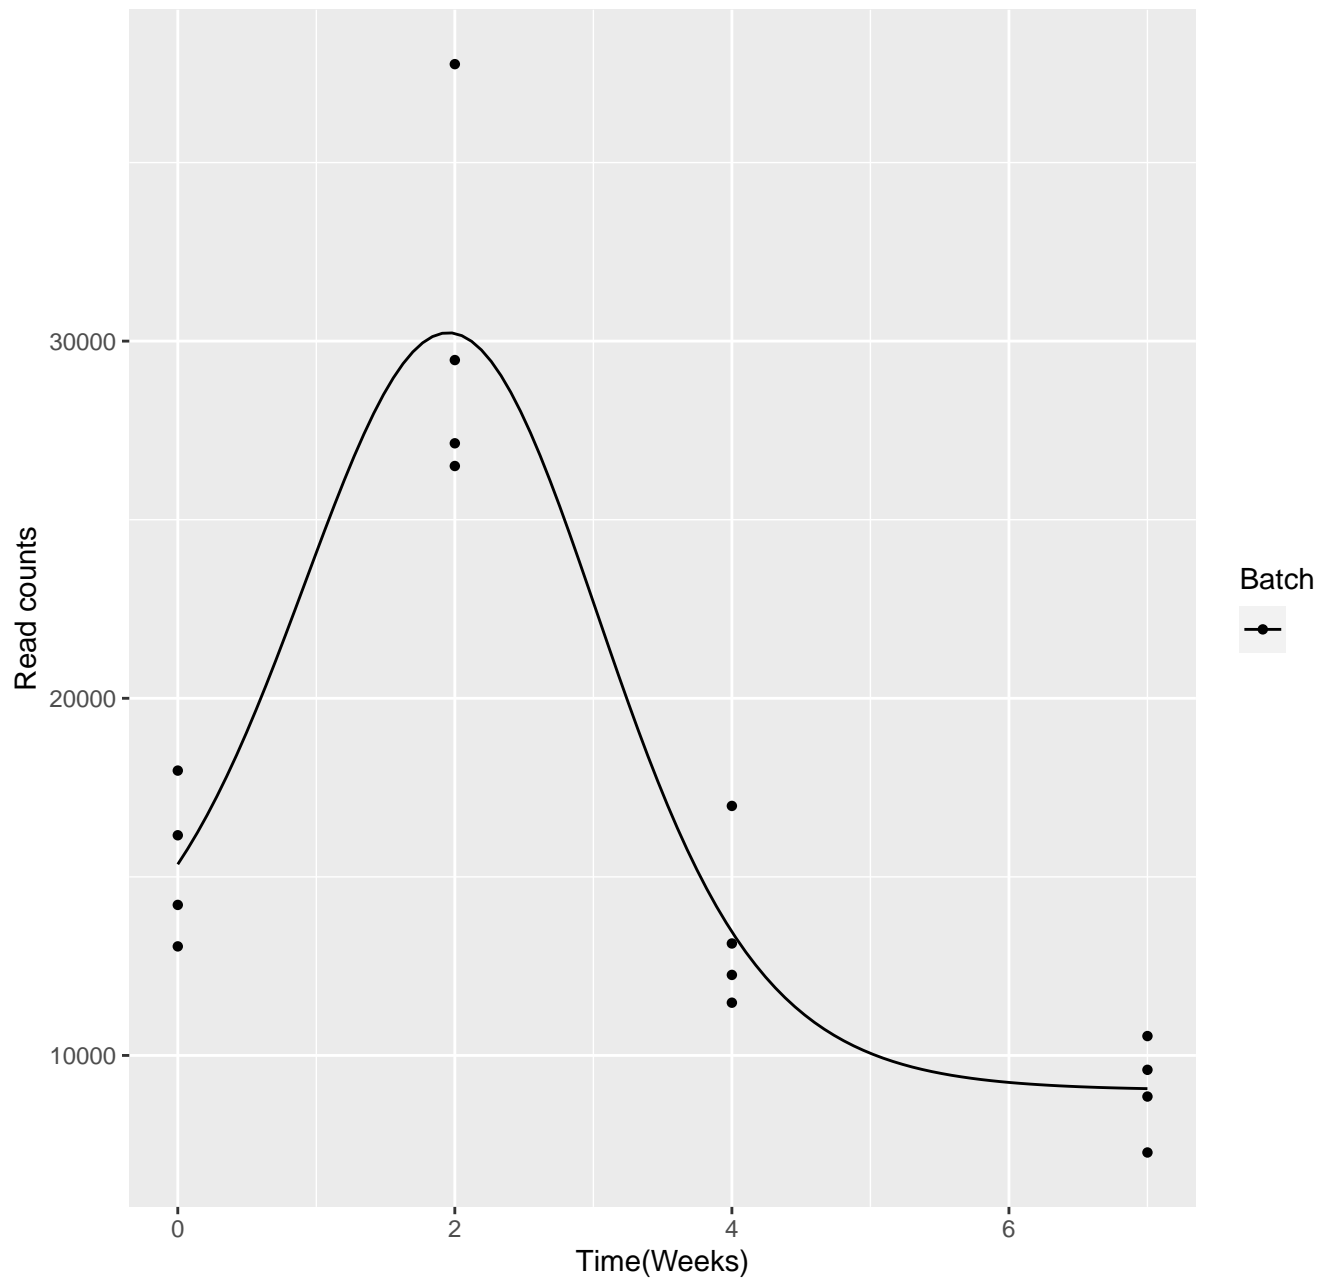

PKD1:  $\log_{10} q = -16.6$

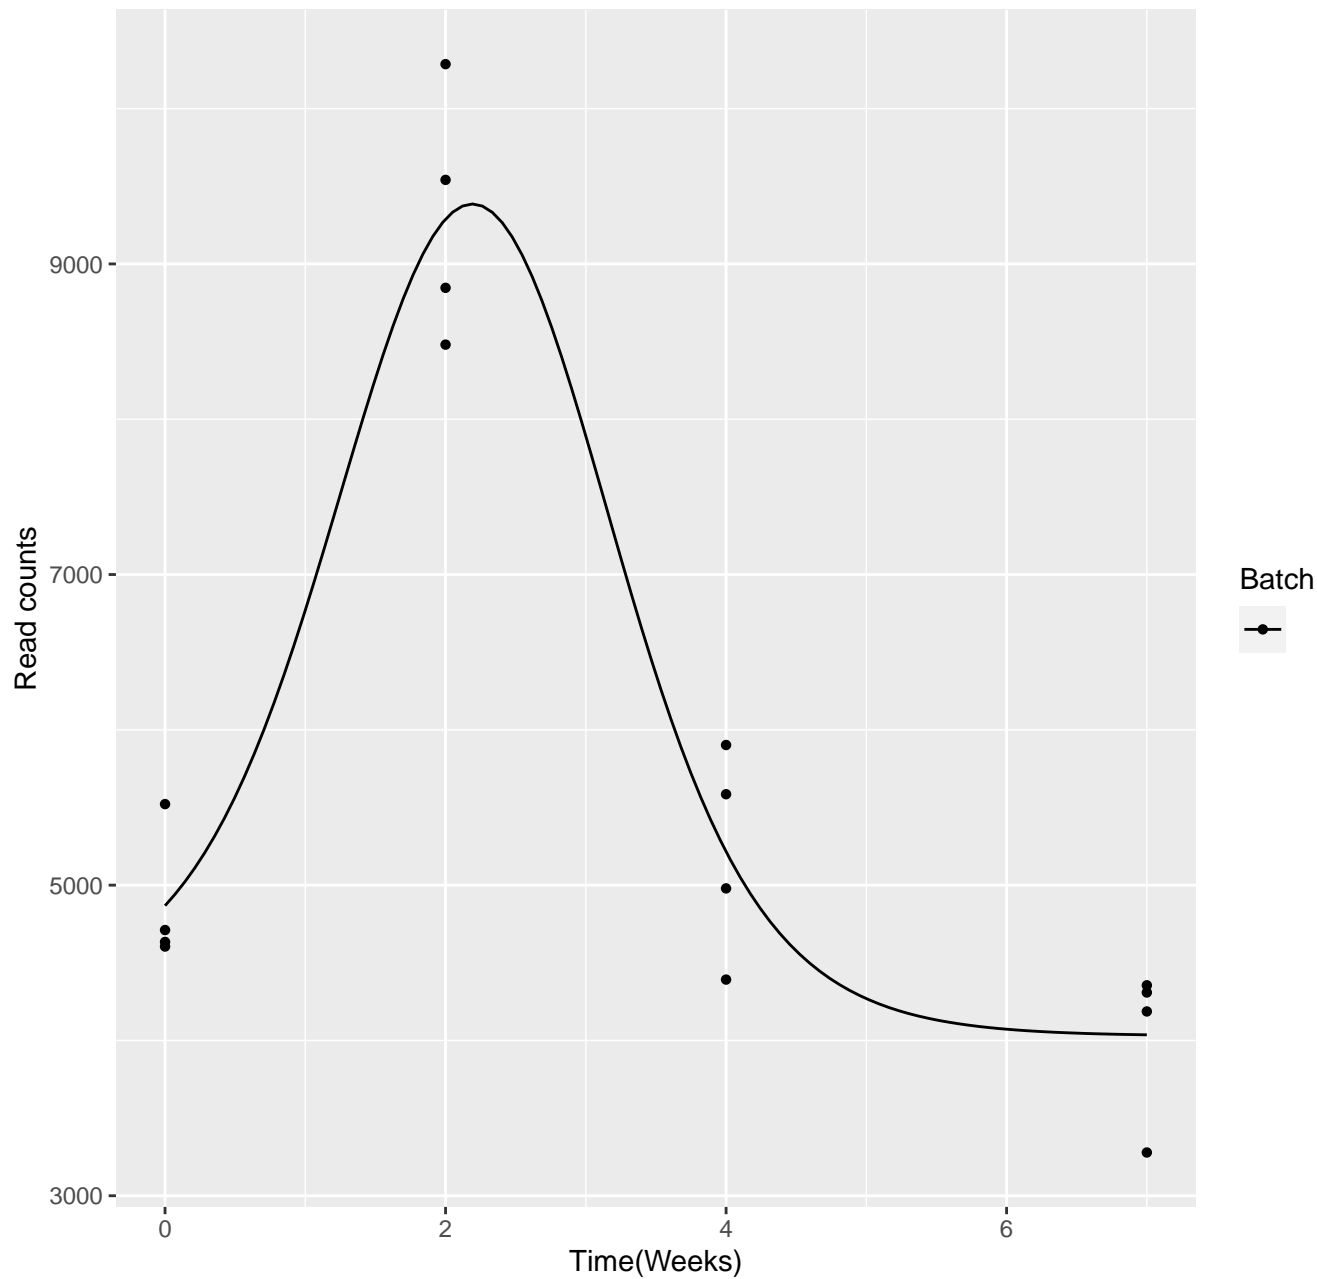

PRR15:  $\log_{10} q = -16.52$

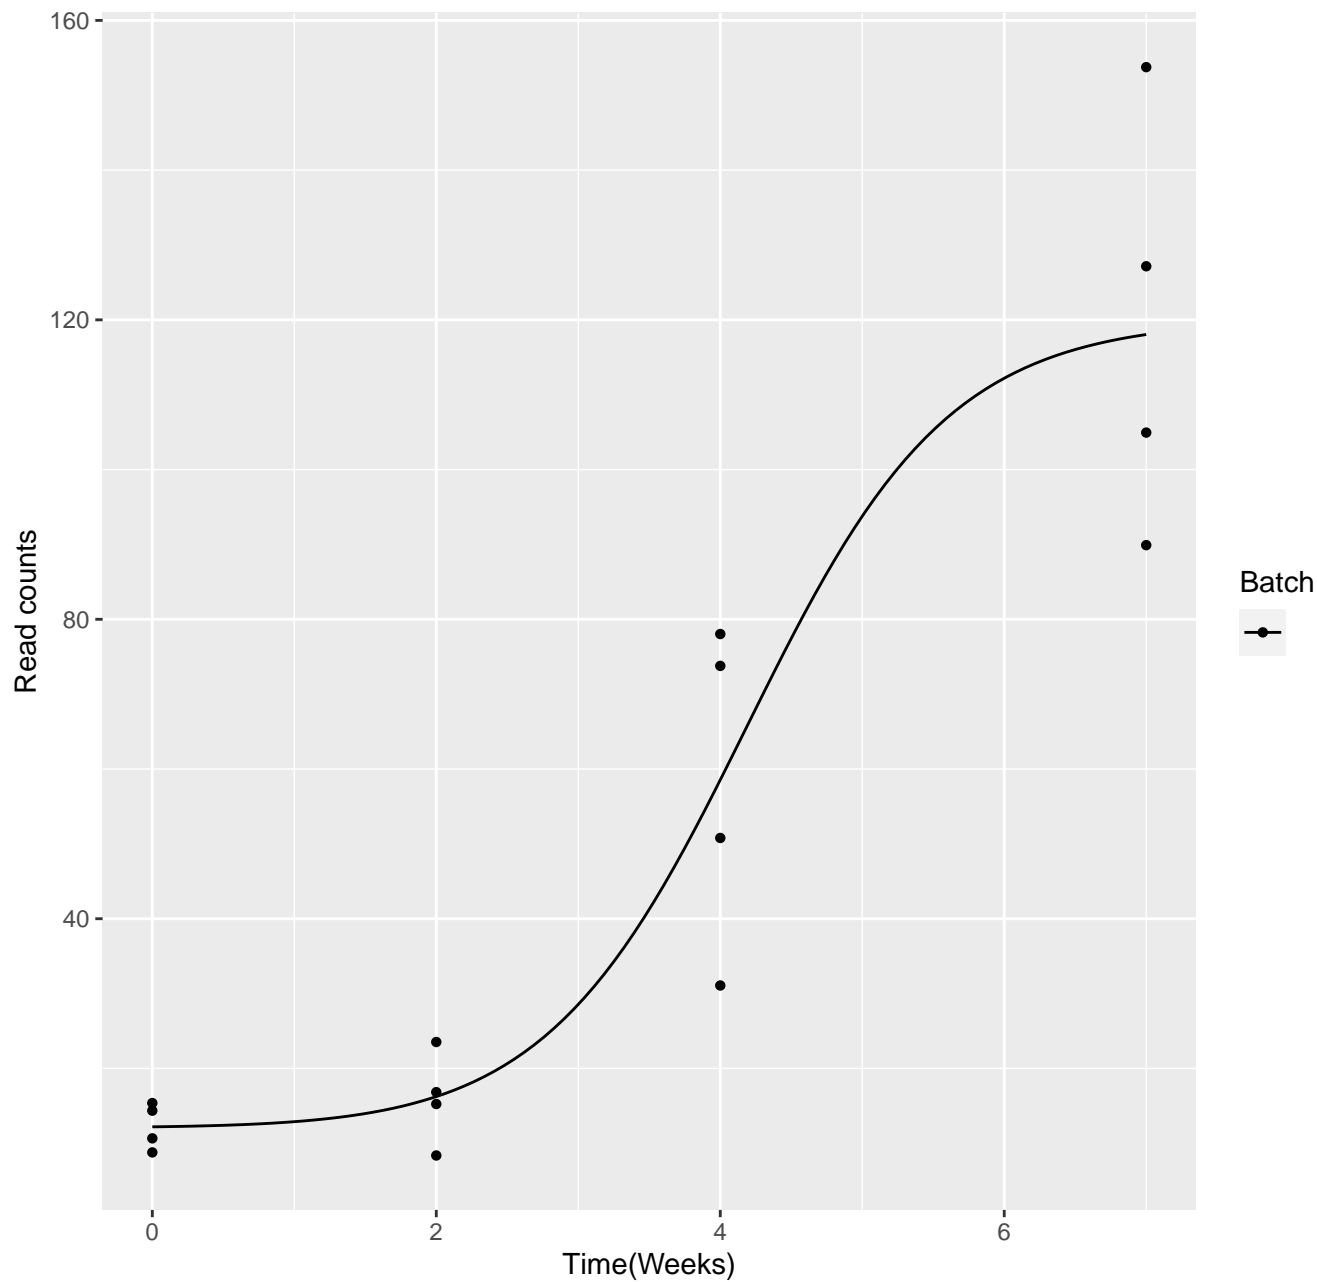

FBLN5:  $\log_{10} q = -15.49$

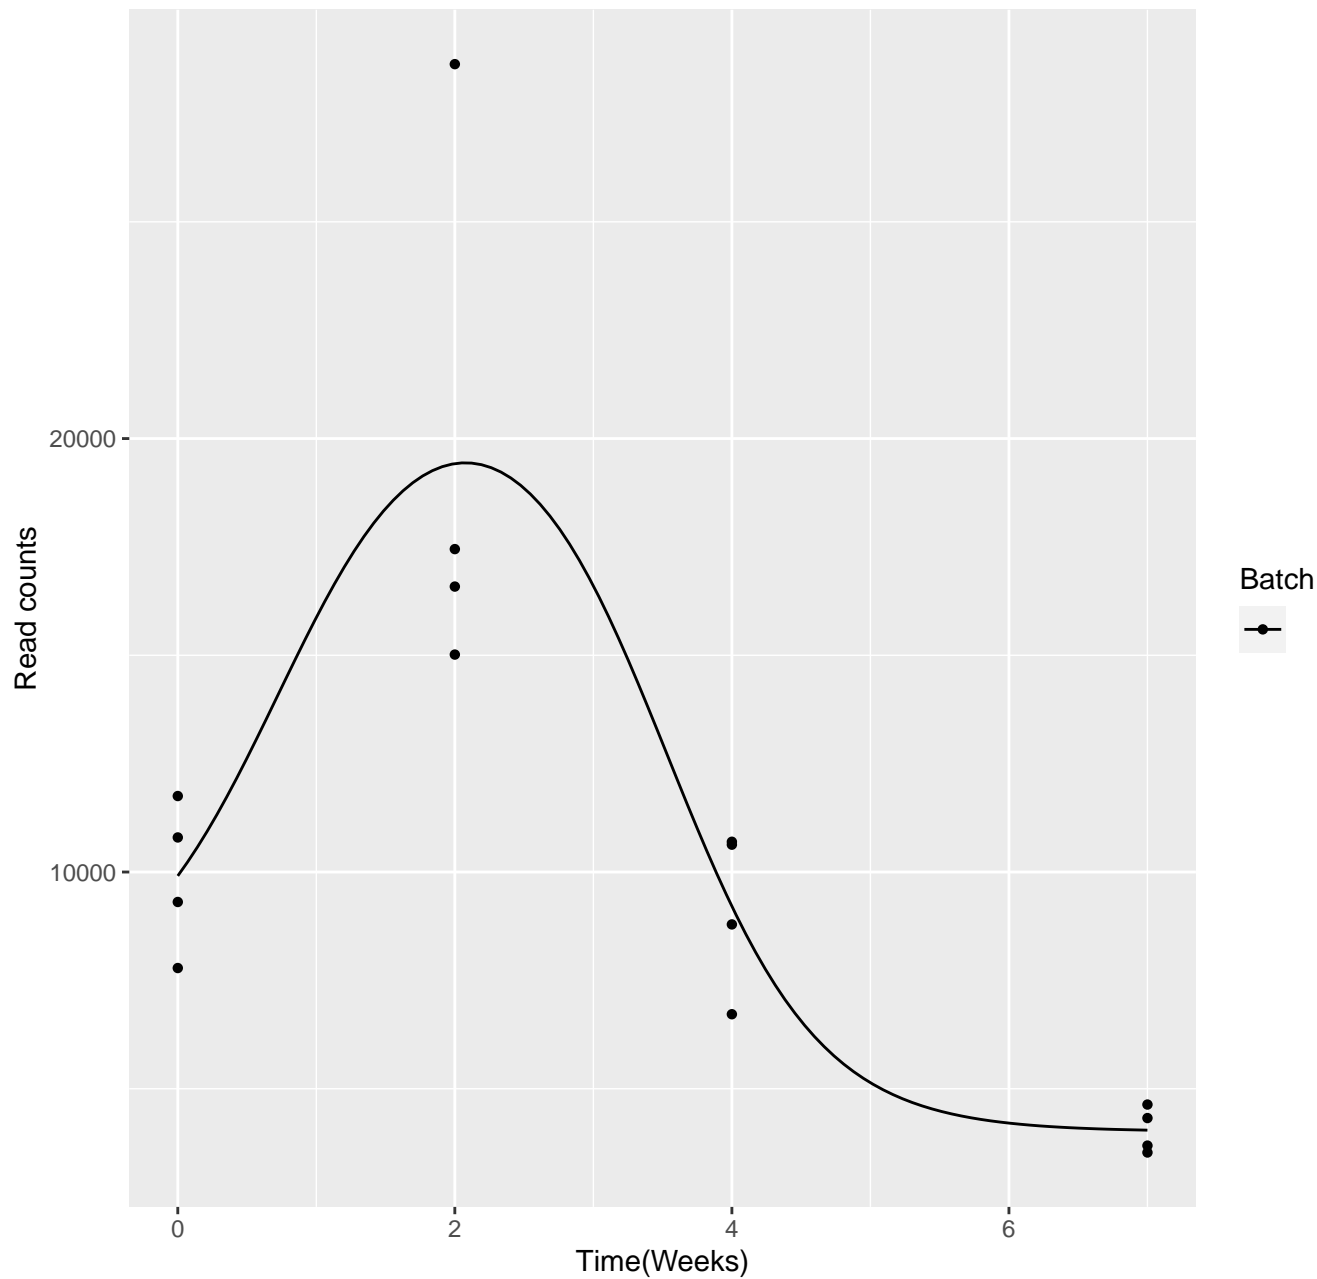

C1QTNF7:  $\log_{10} q = -15.45$

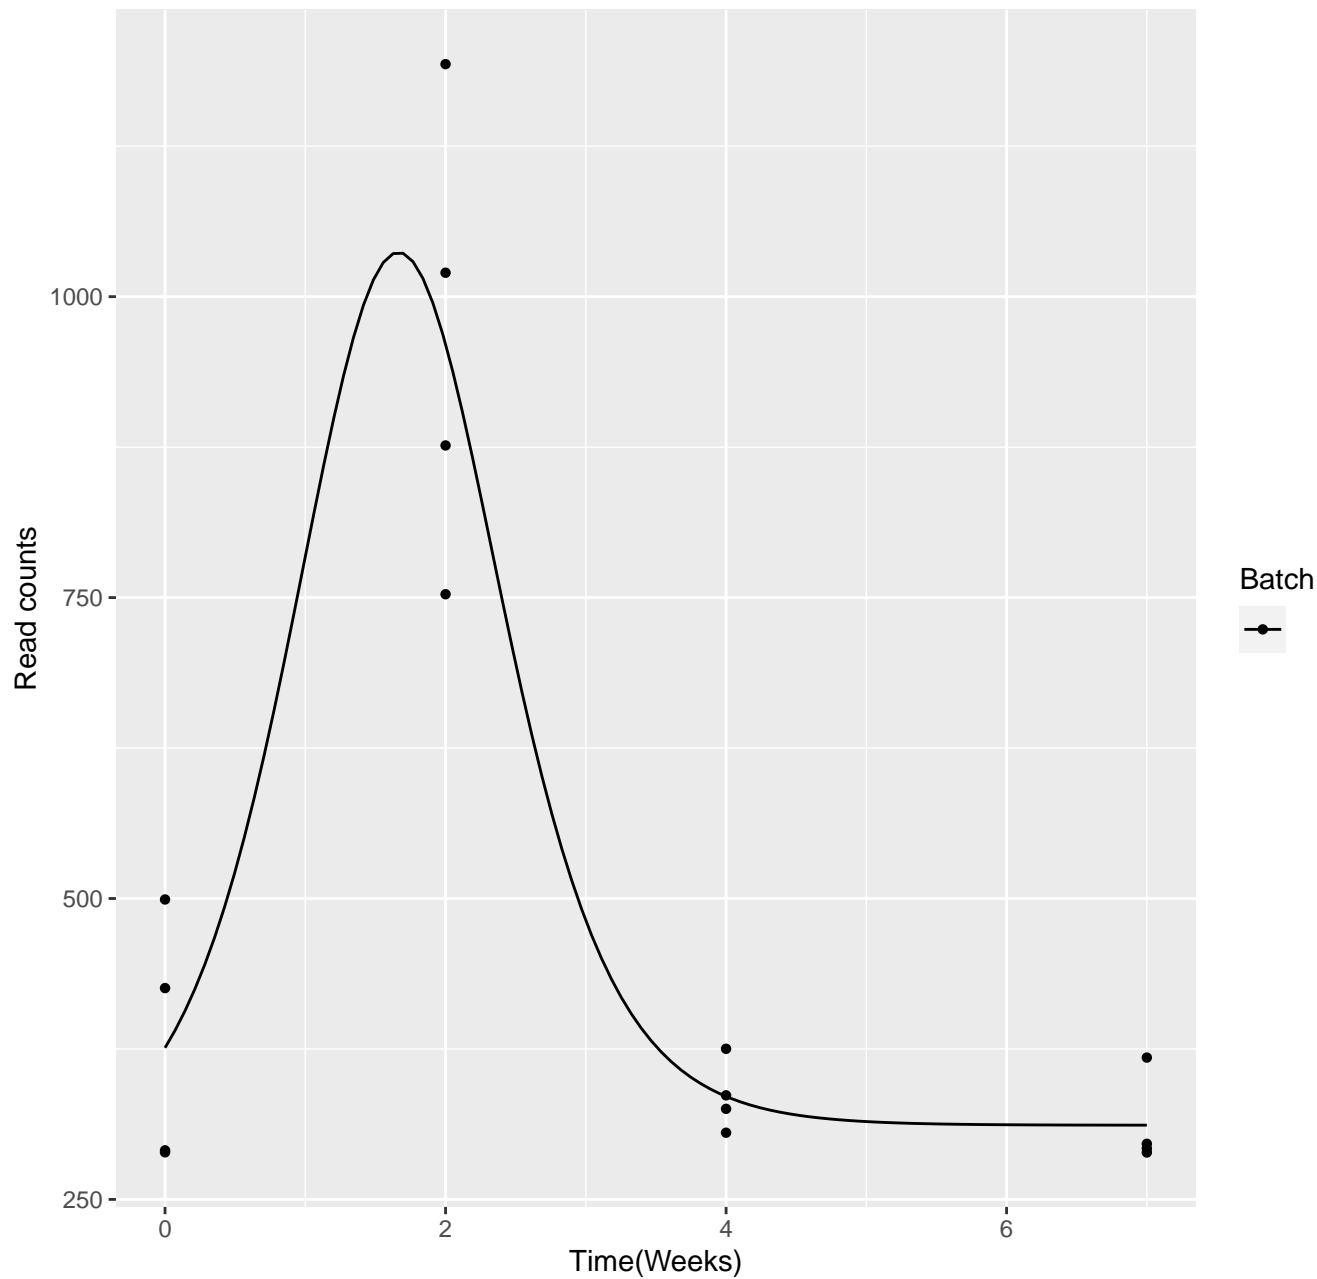



NOS2:  $\log_{10} q = -15.31$

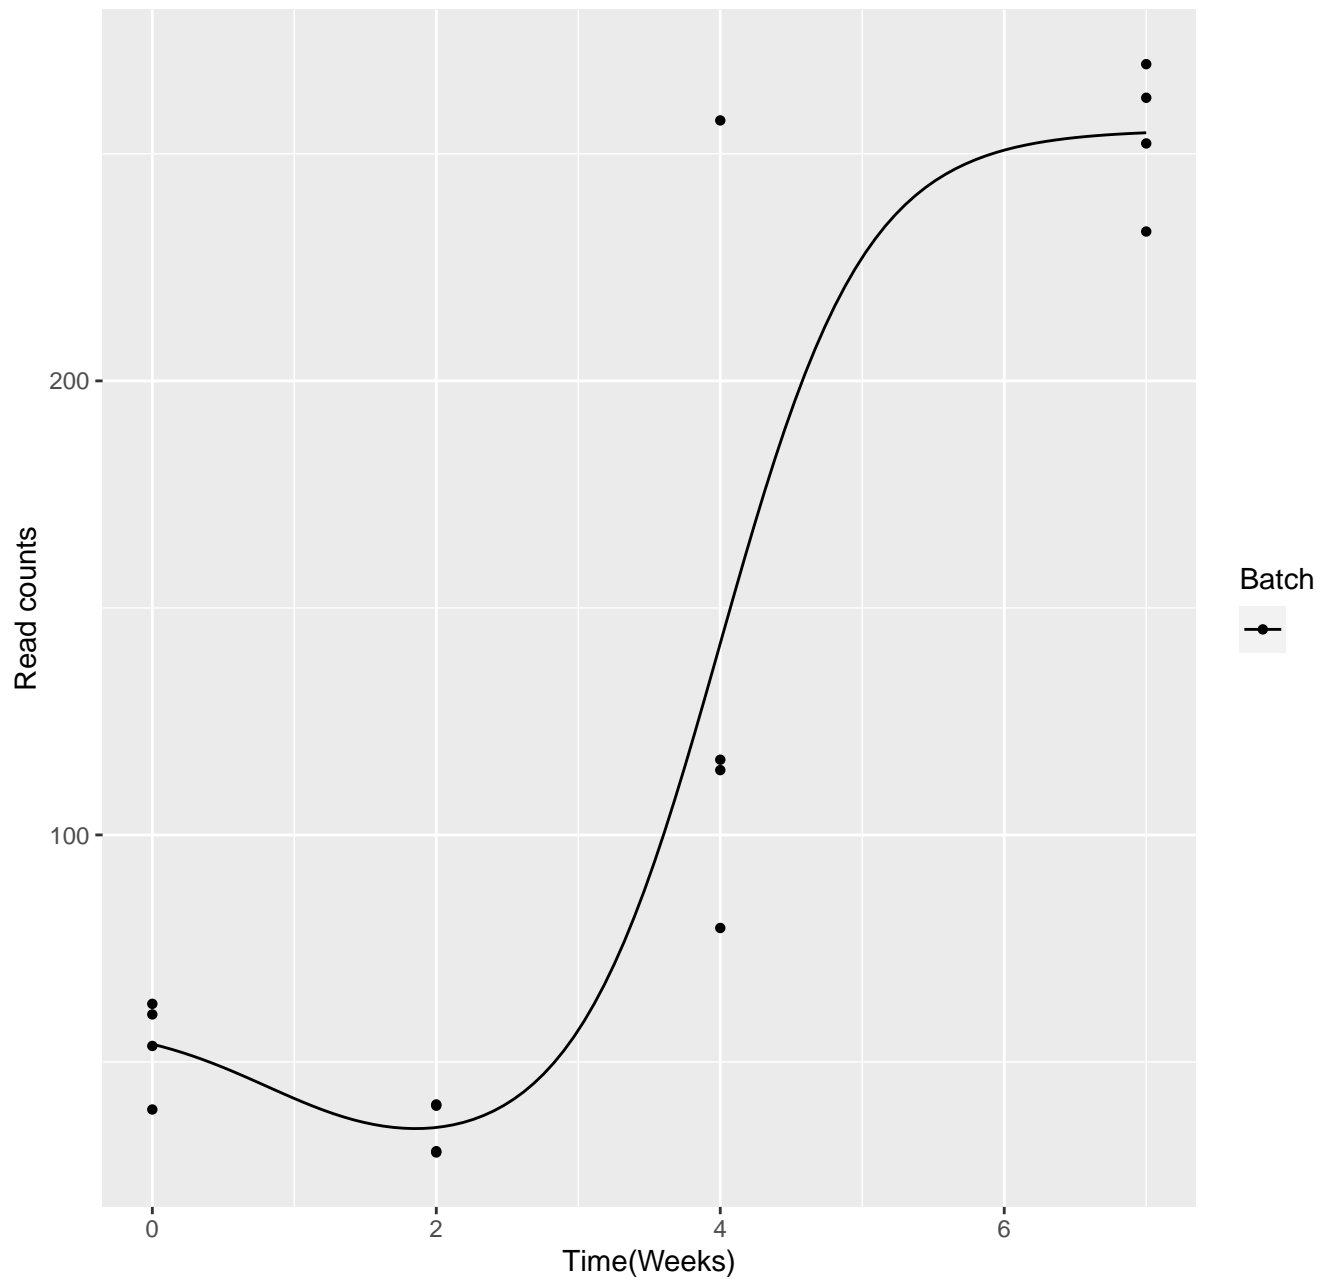

ATP10A:  $\log_{10} q = -15.25$

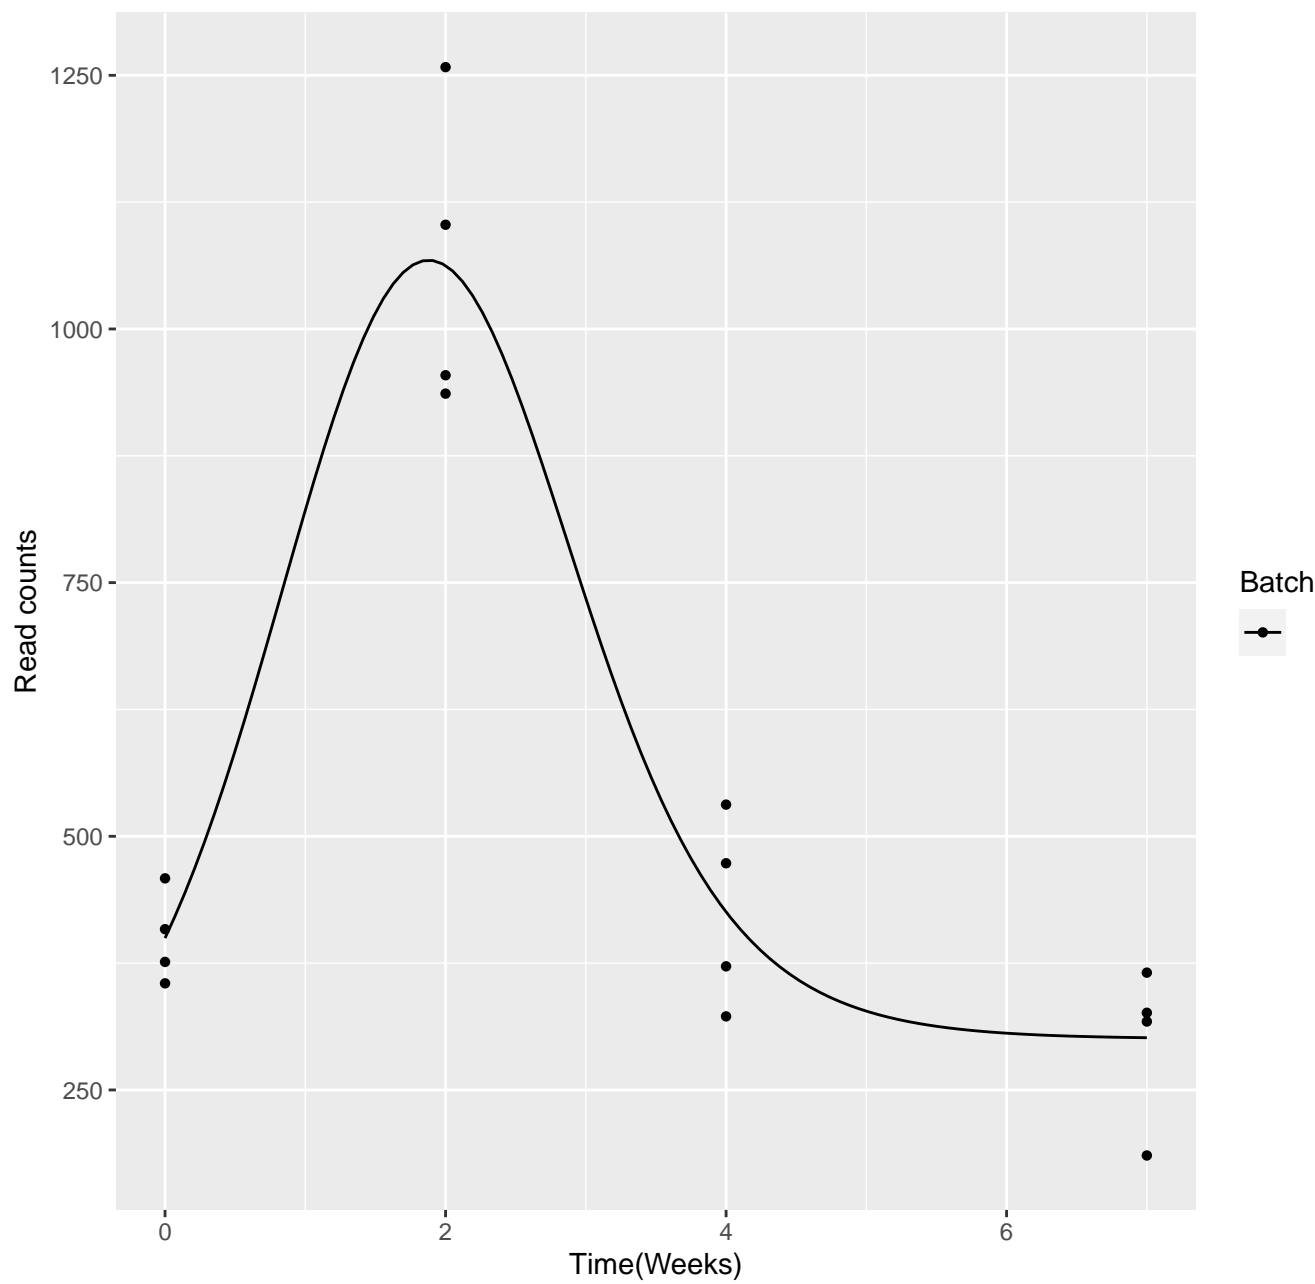

LOC100344156:  $\log_{10} q = -14.95$

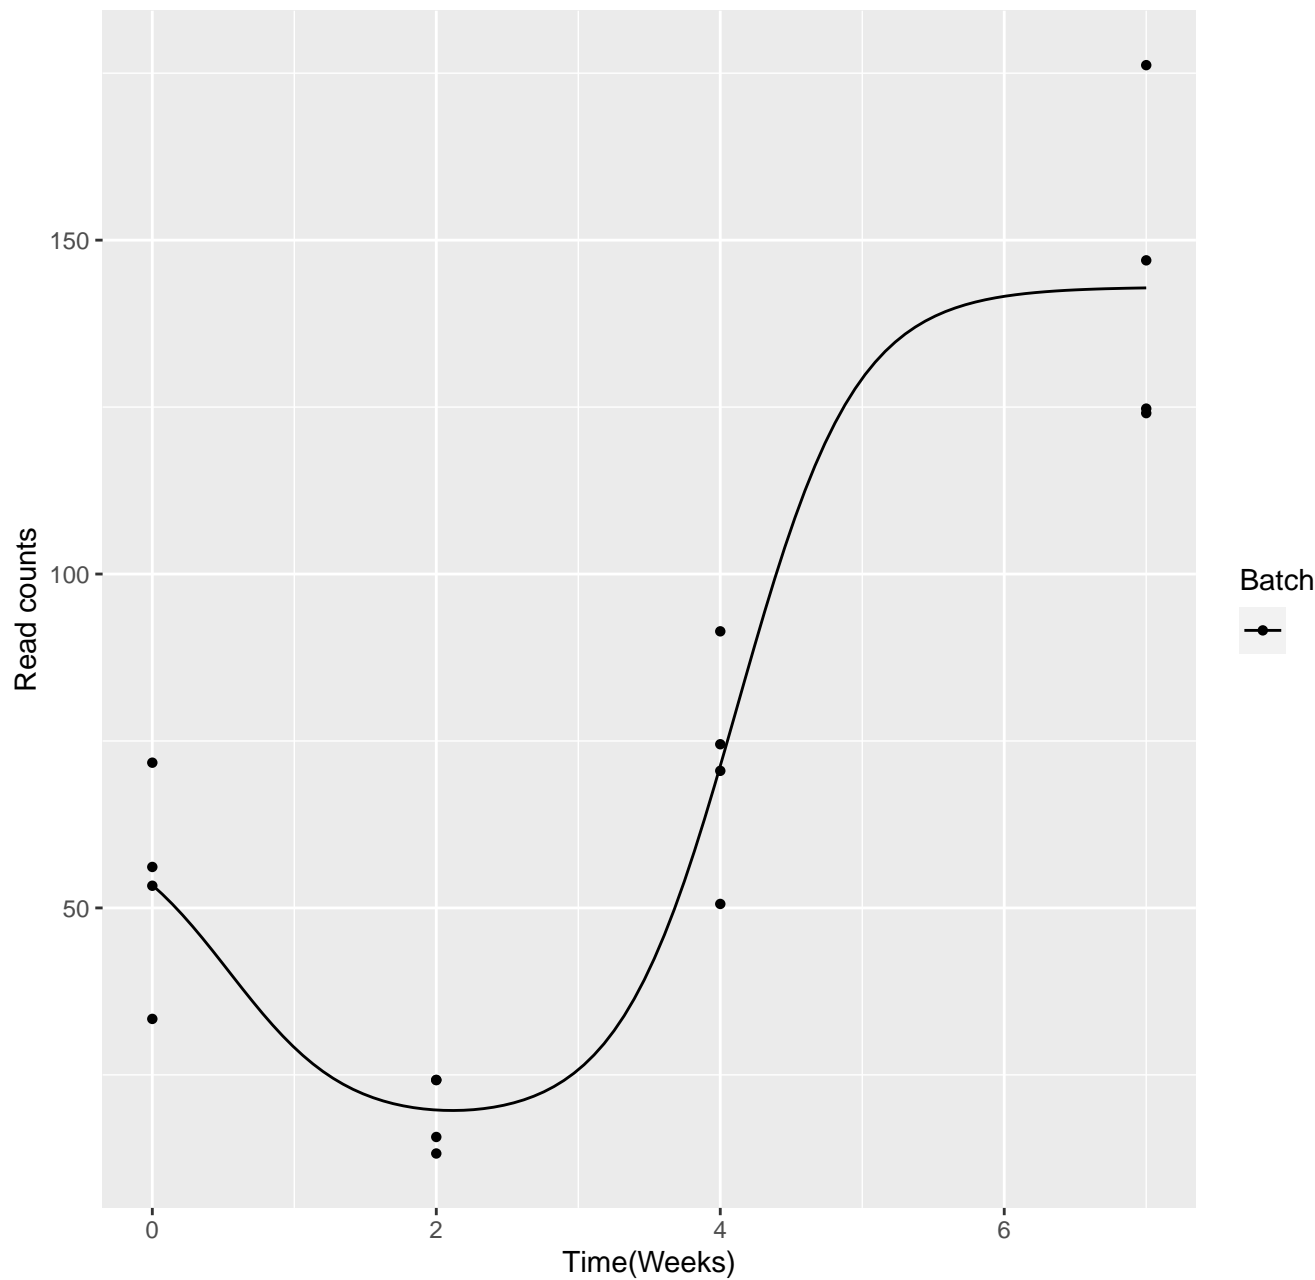

TNN:  $\log_{10} q = -14.78$

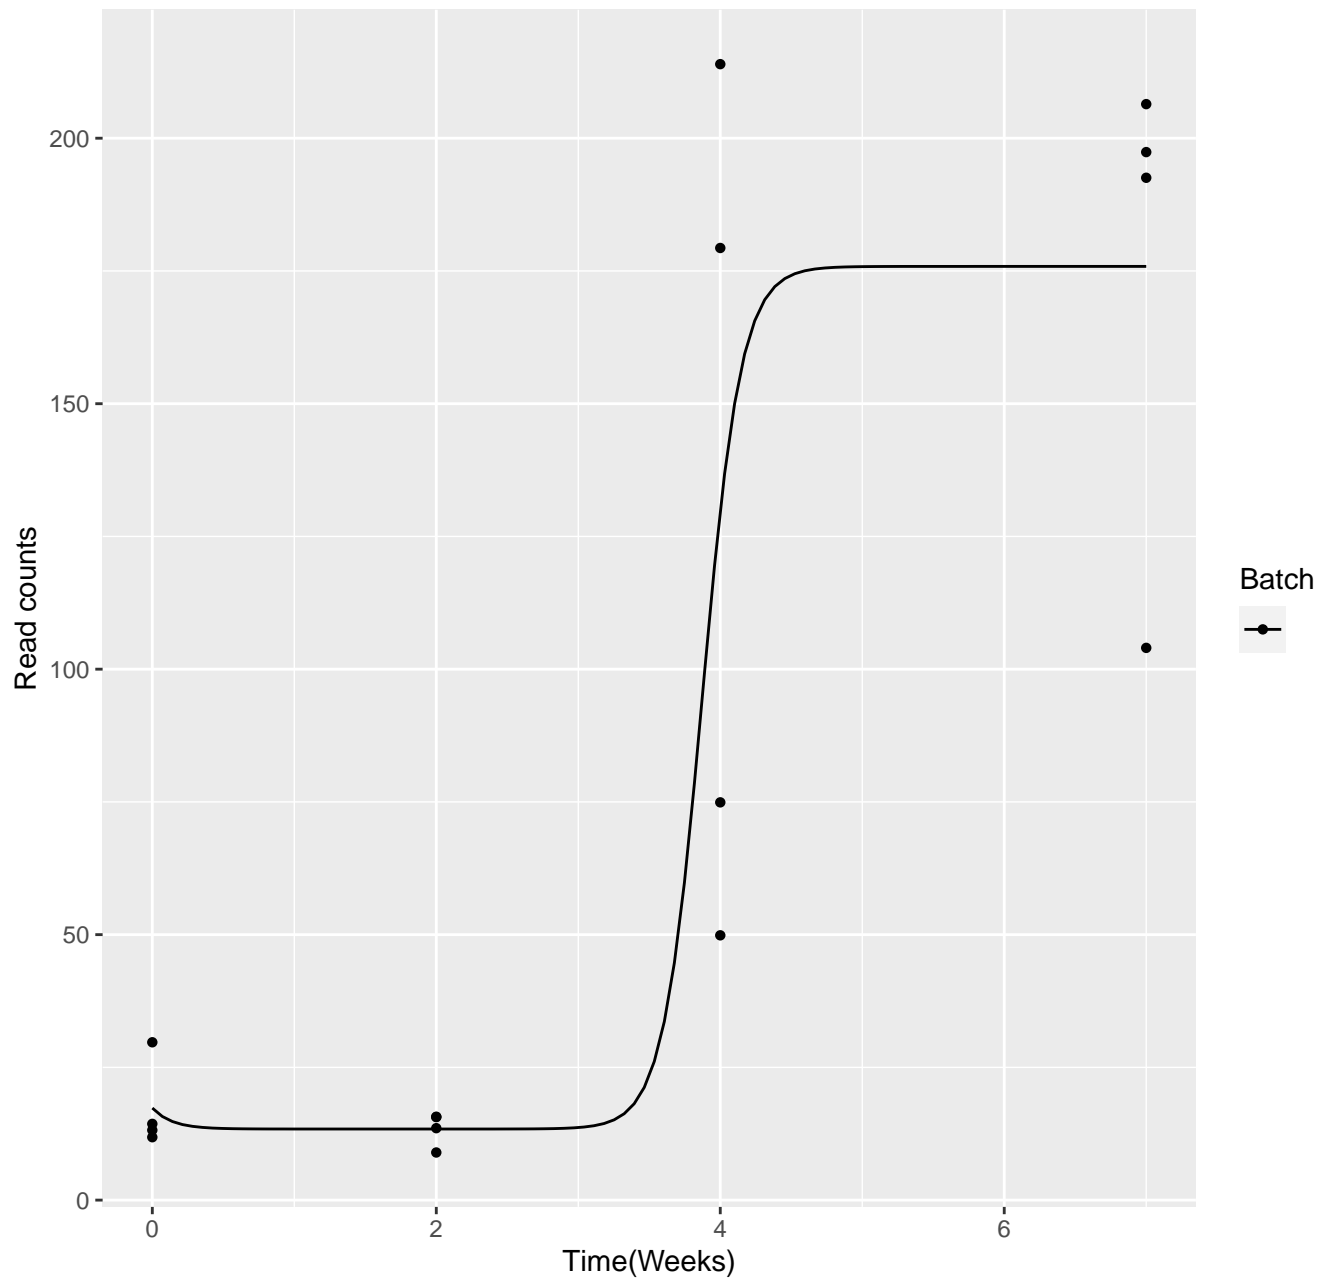

CRLF1:  $\log_{10} q = -14.67$

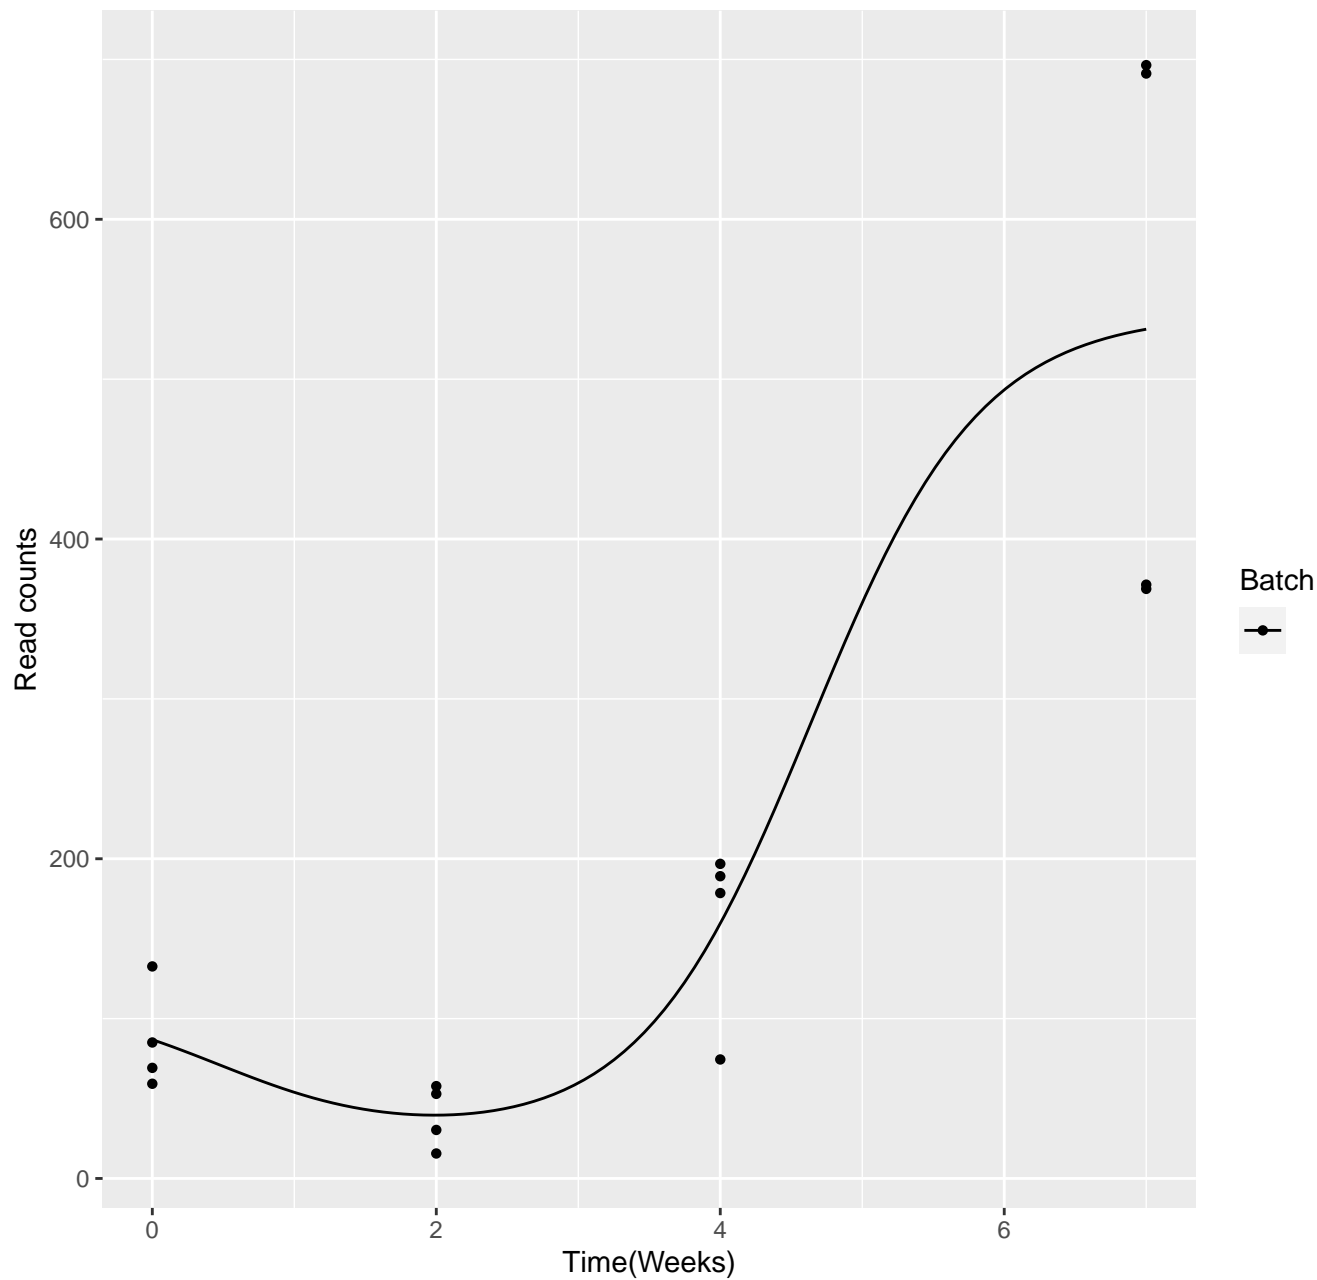

LOC100342677:  $\log_{10} q = -14.38$

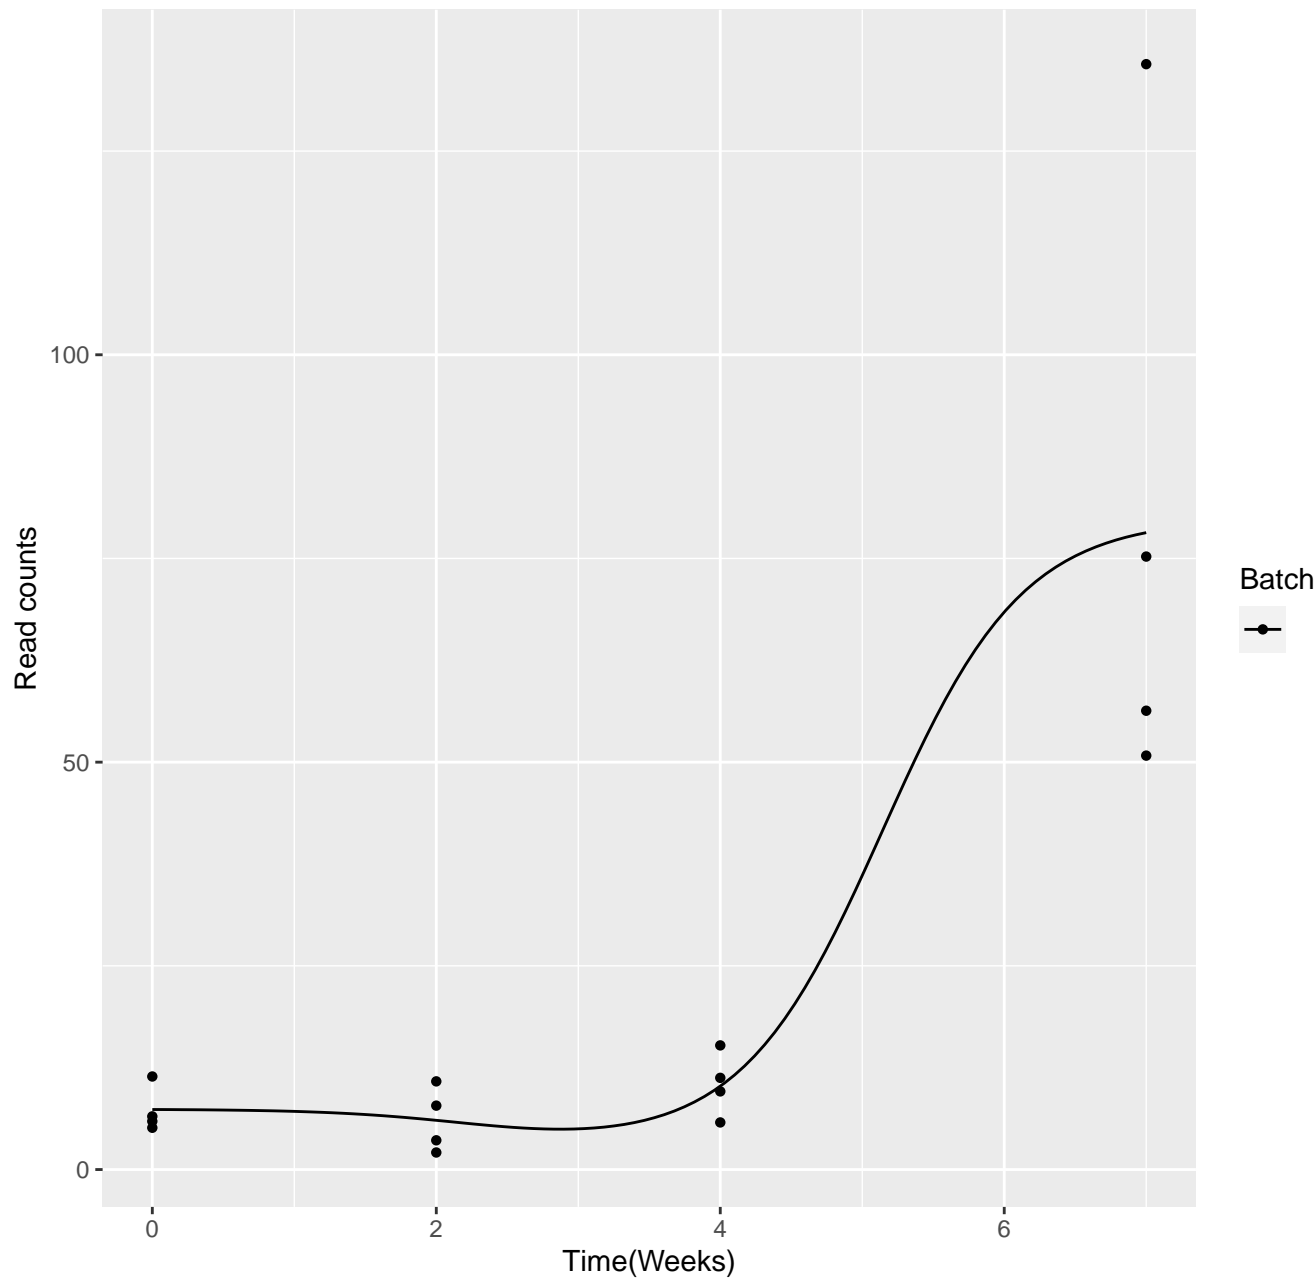

LOC100341094:  $\log_{10} q = -13.83$

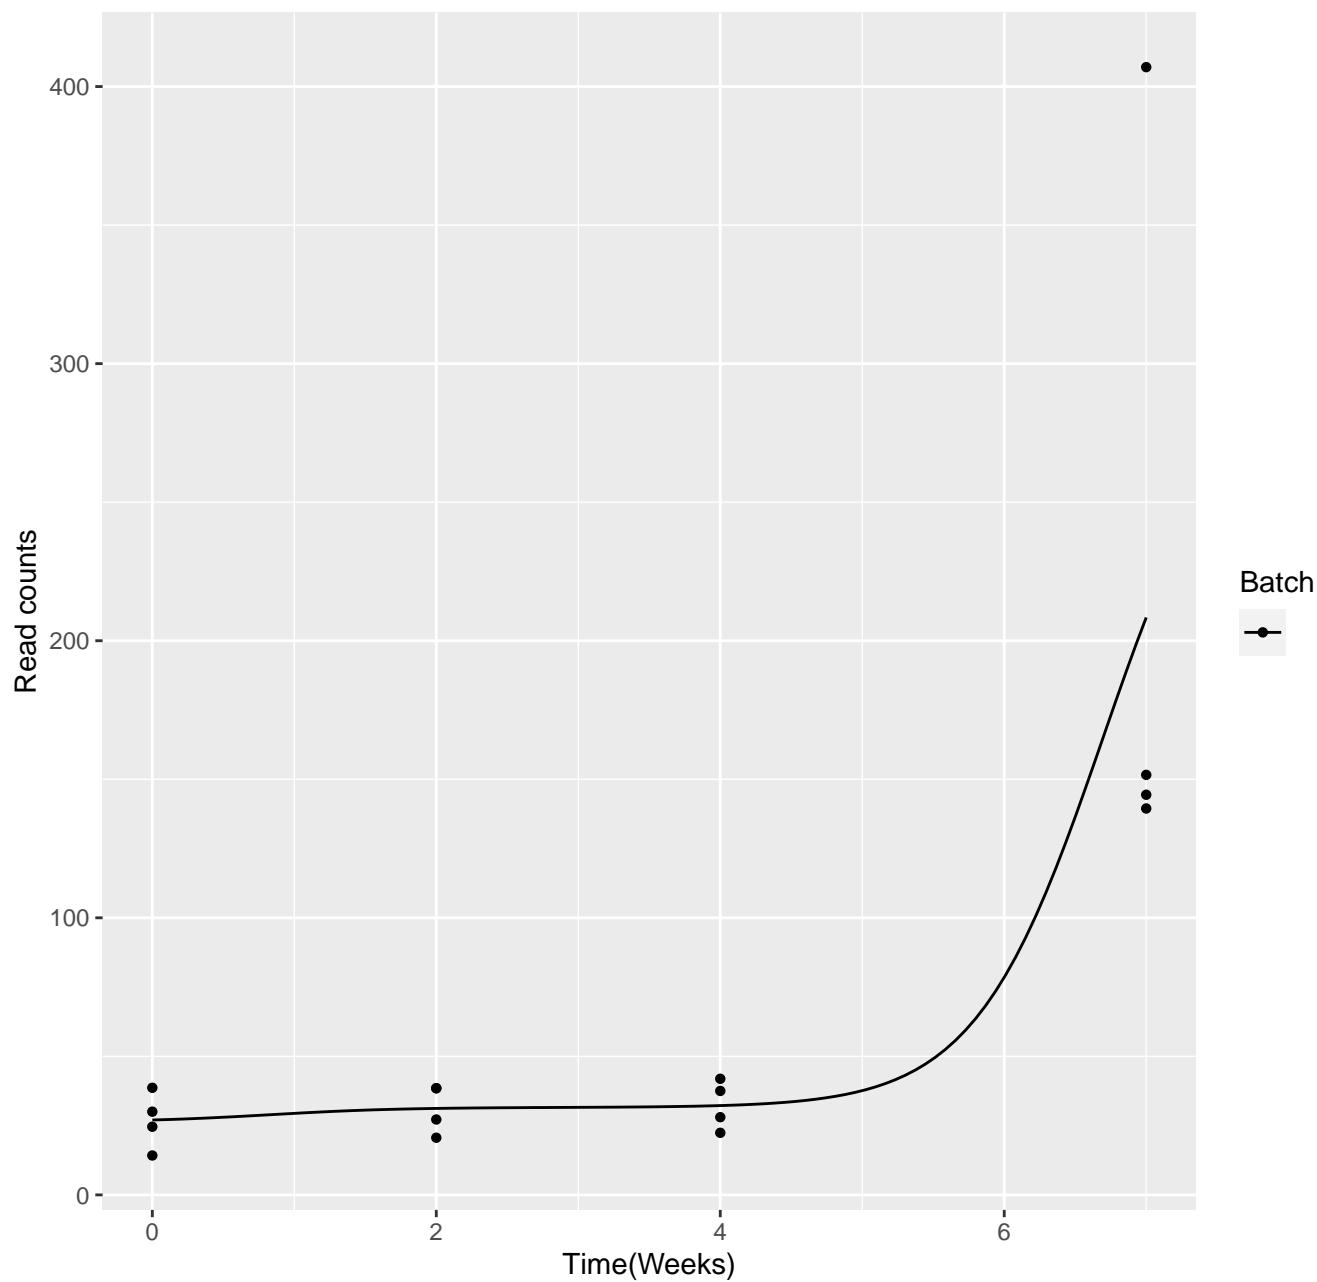

PDLIM3:  $\log_{10} q = -13.73$

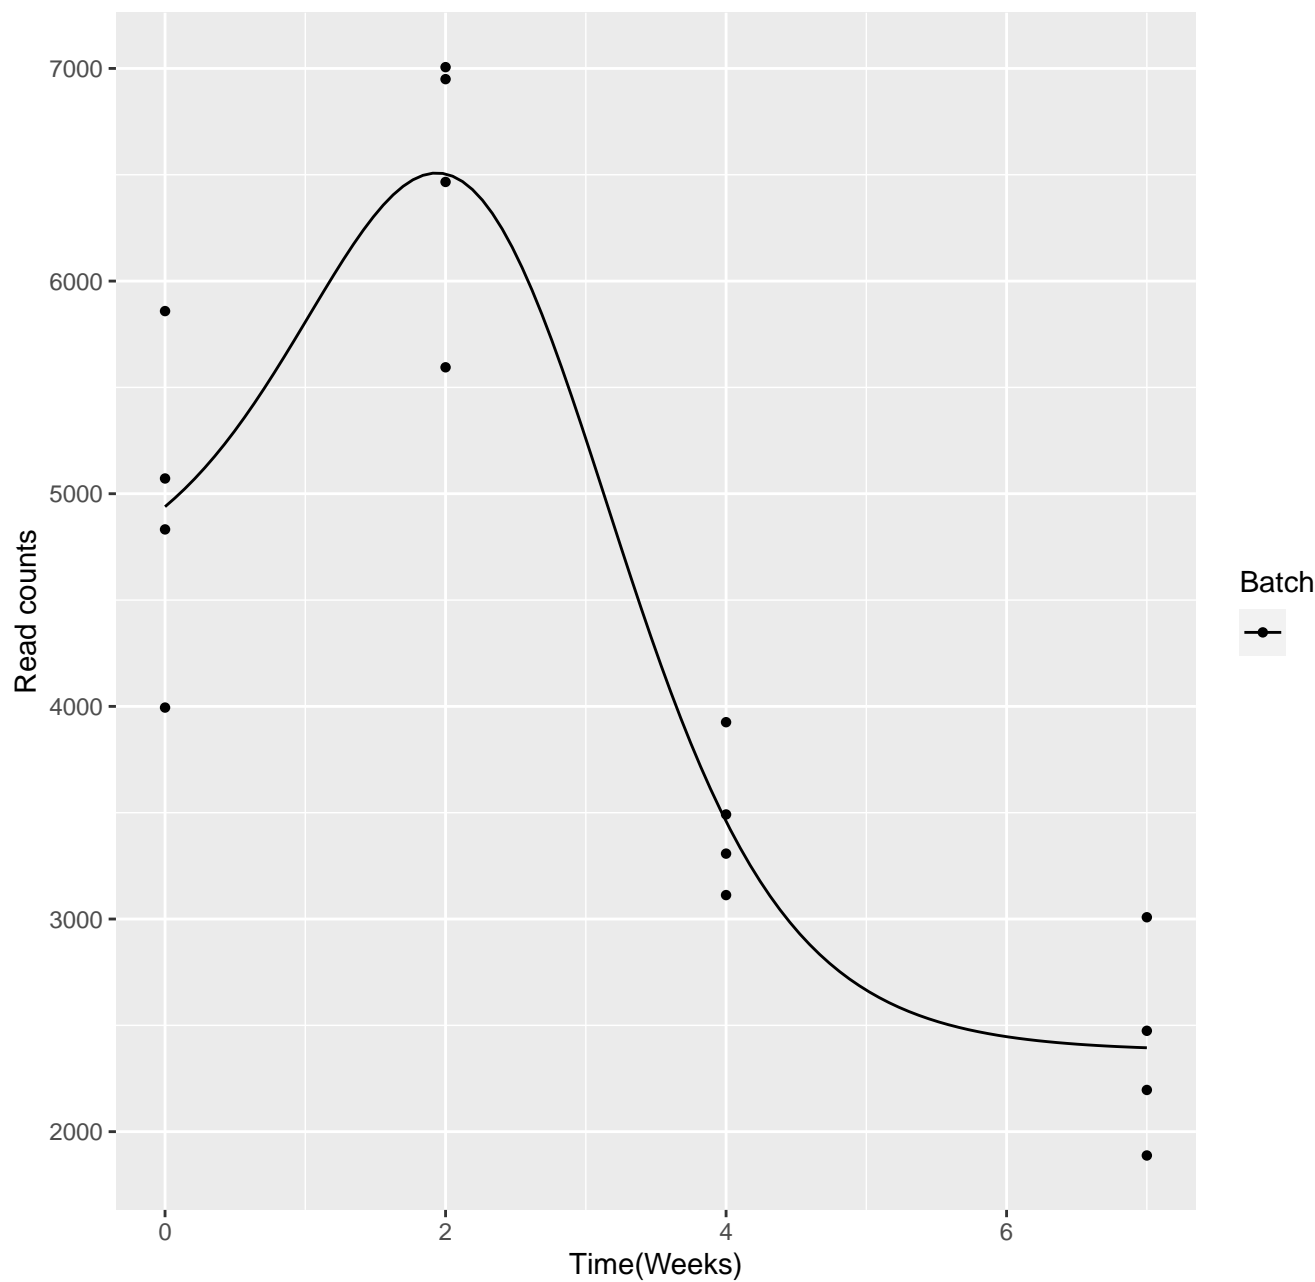



LOC103346238:  $\log_{10} q = -13.68$

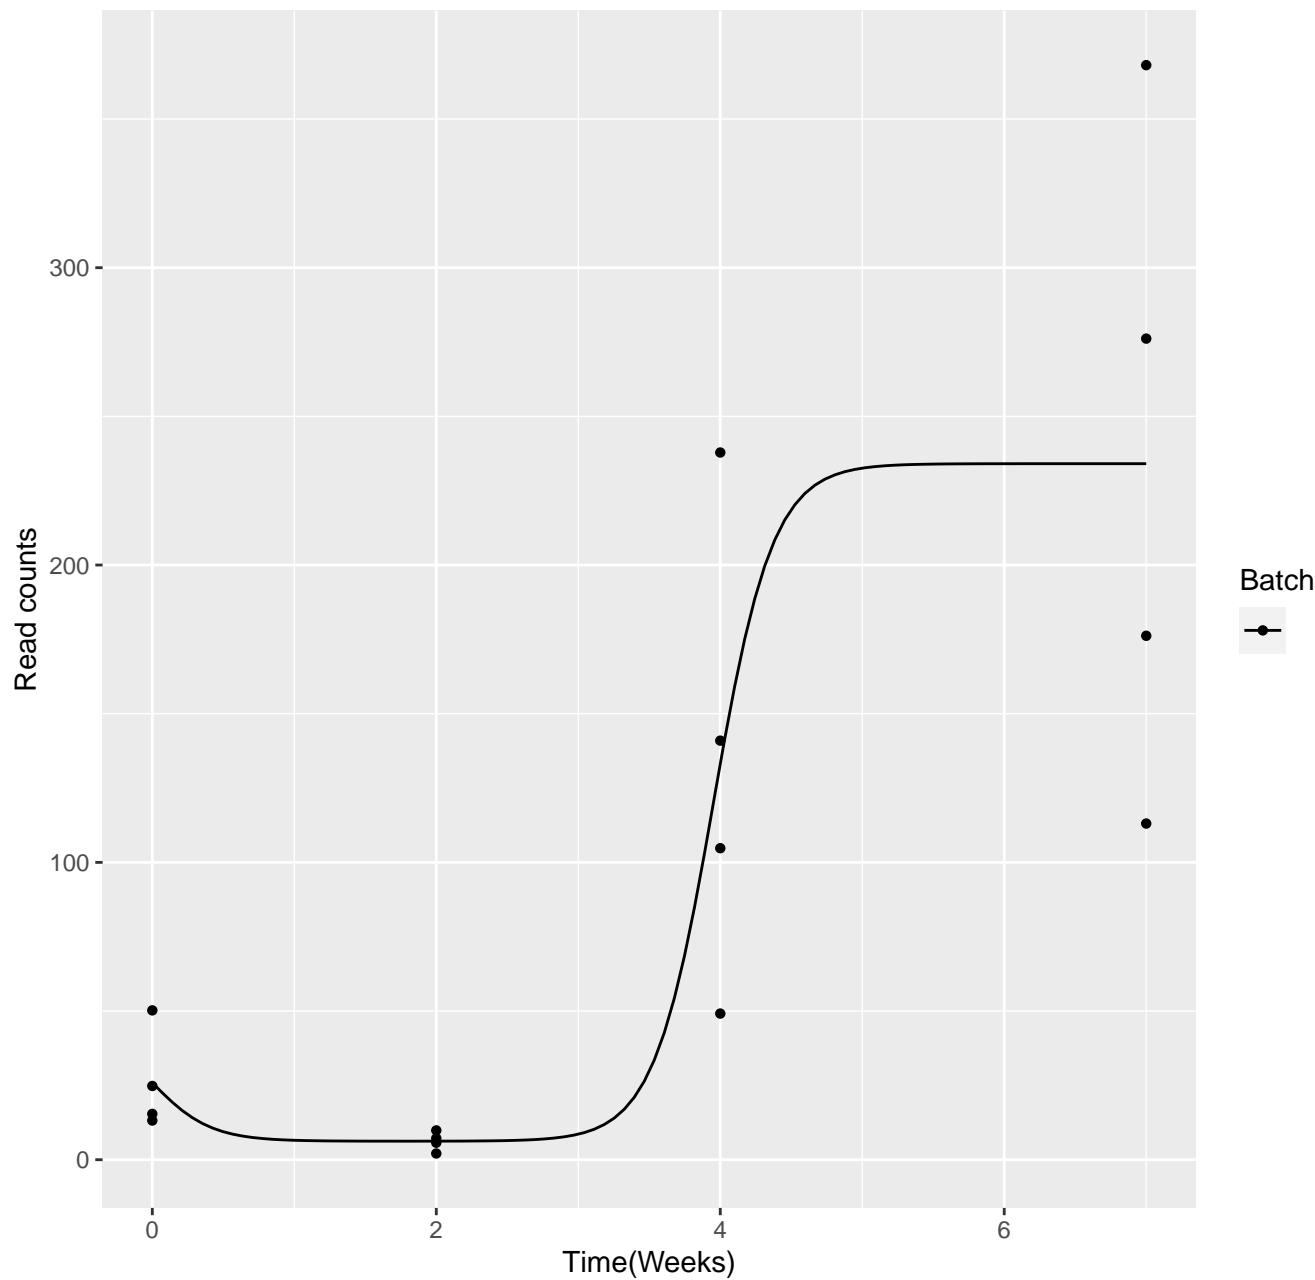

LOC100346213:  $\log_{10} q = -13.59$

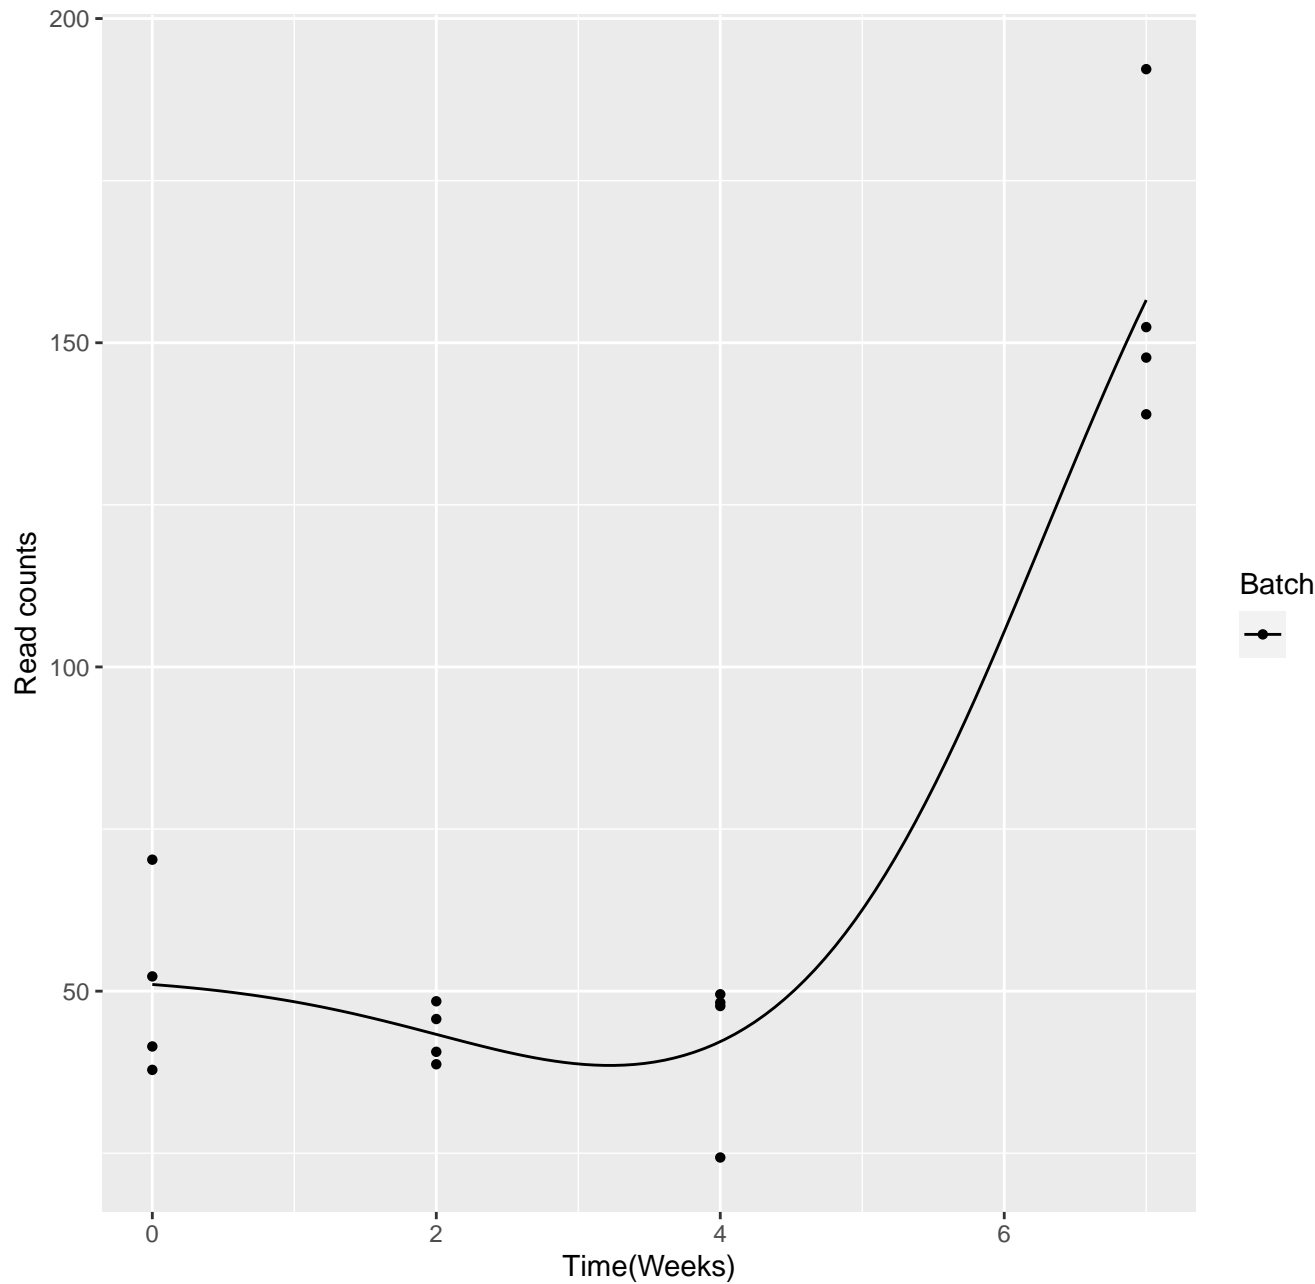

CD22:  $\log_{10} q = -13.32$

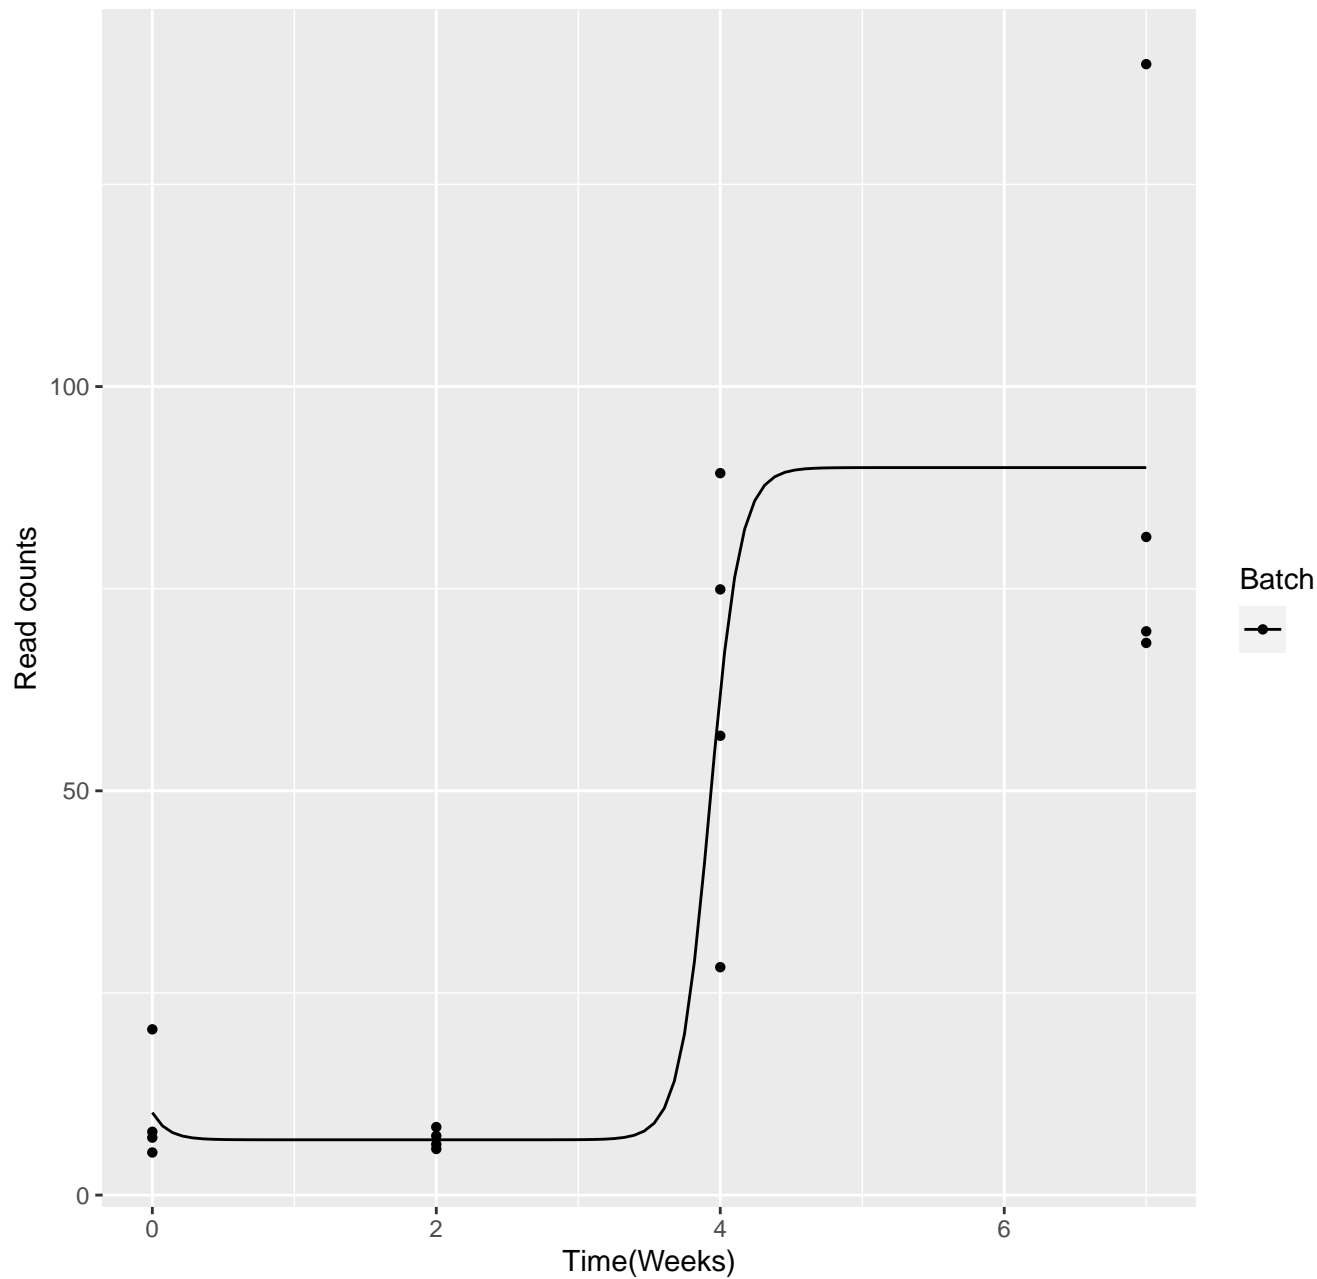

LTBP4:  $\log_{10} q = -12.49$

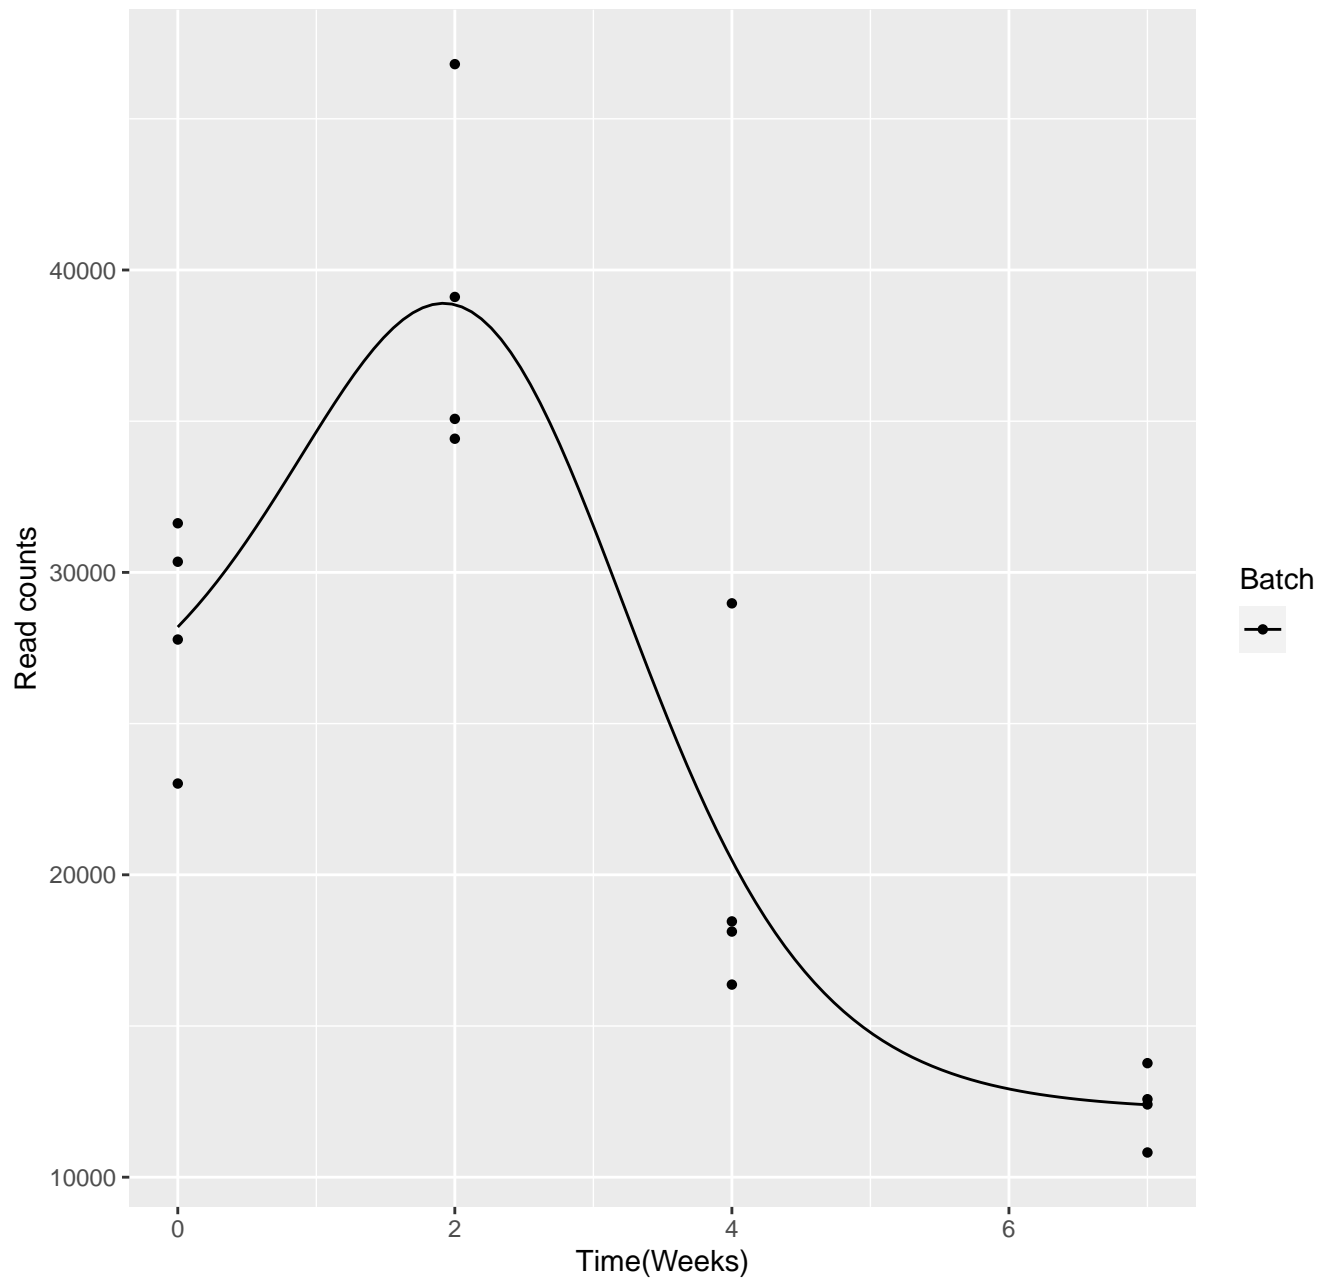

PRSS53:  $\log_{10} q = -12.45$

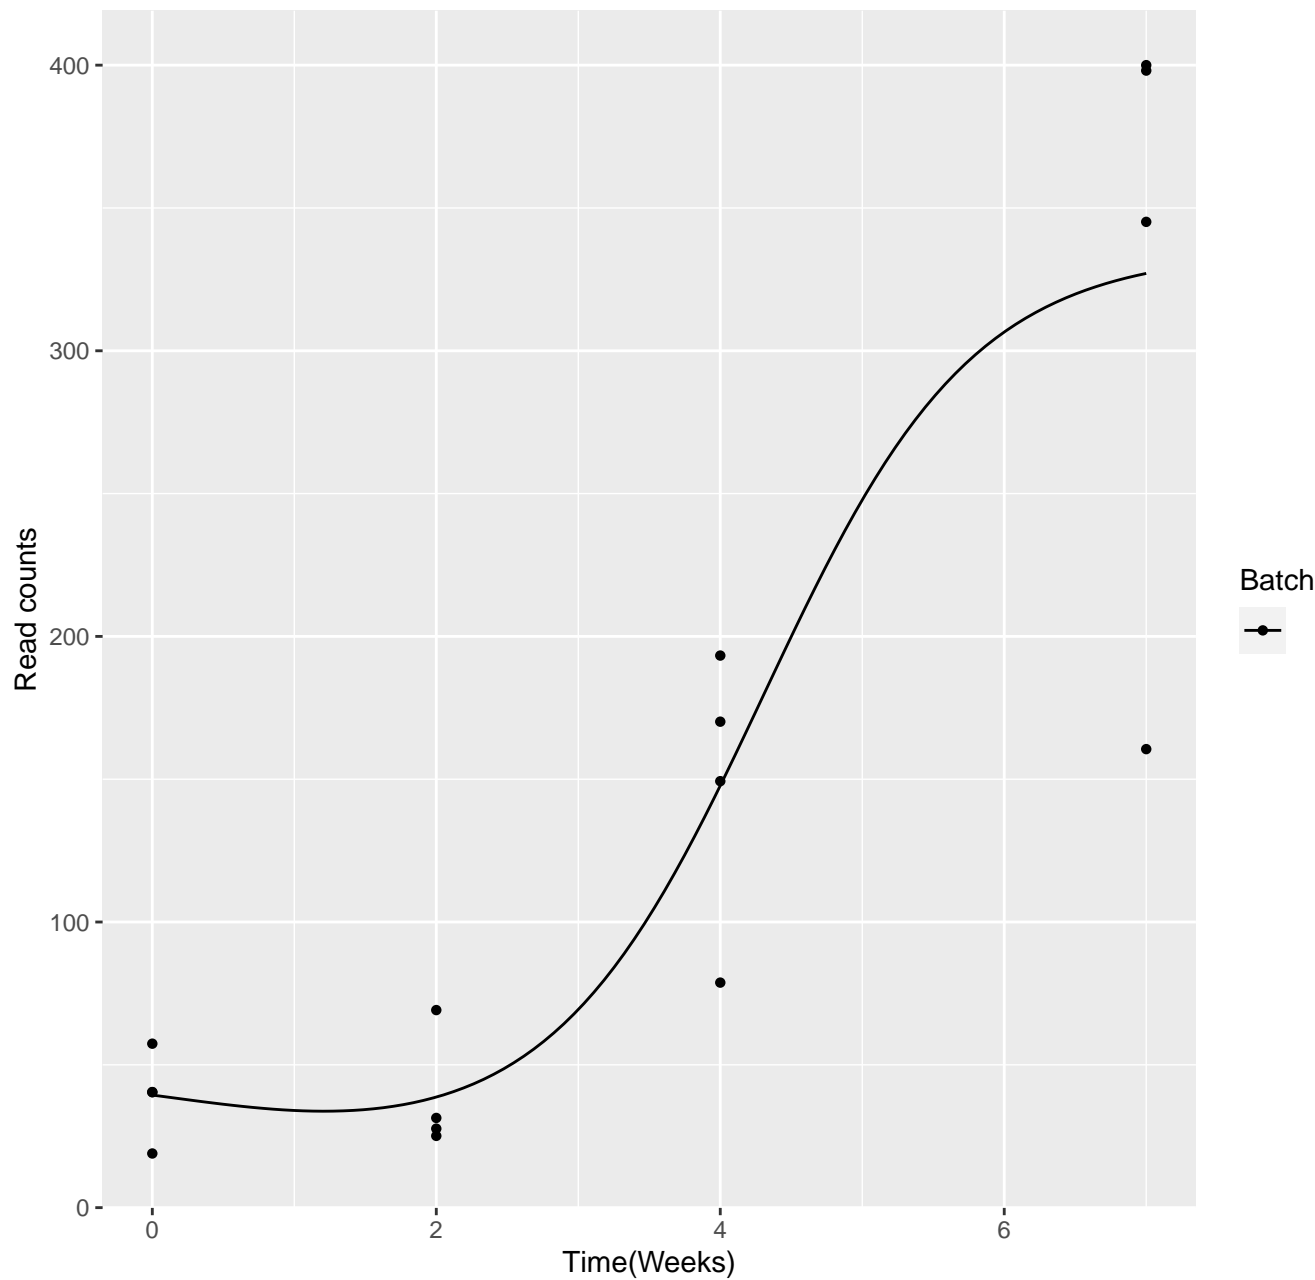

HRH1:  $\log_{10} q = -12.35$

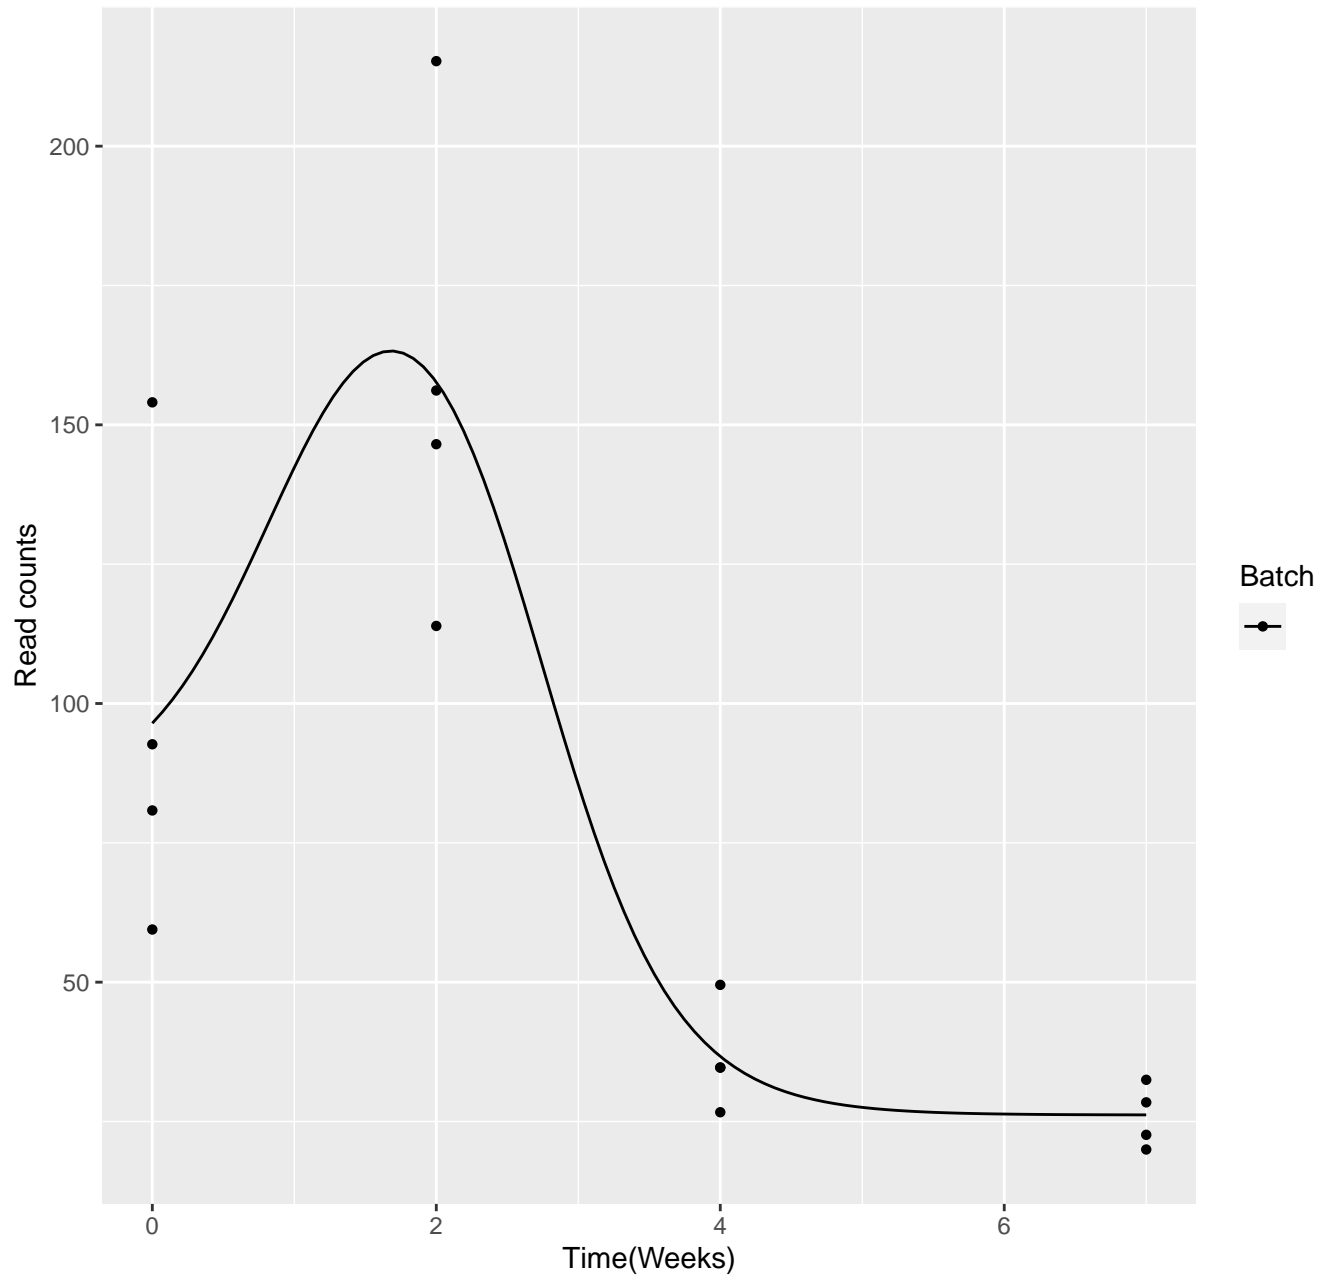

LMCD1:  $\log_{10} q = -12.06$

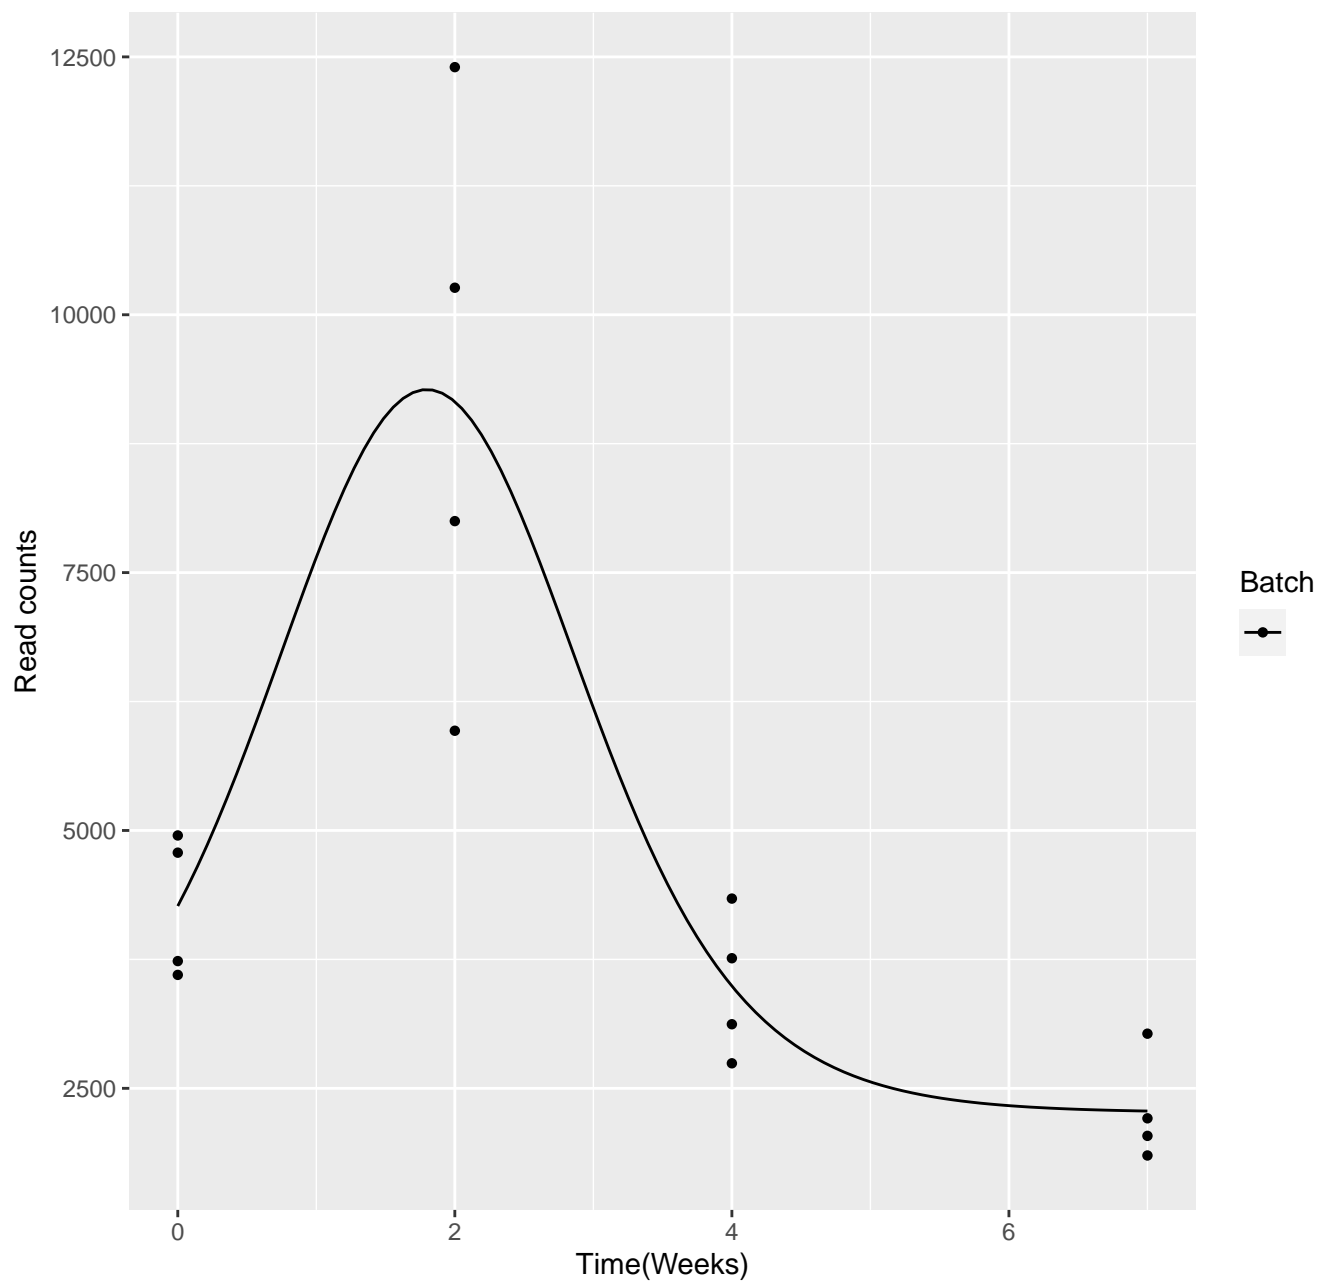

LOC127488978:  $\log_{10} q = -11.98$

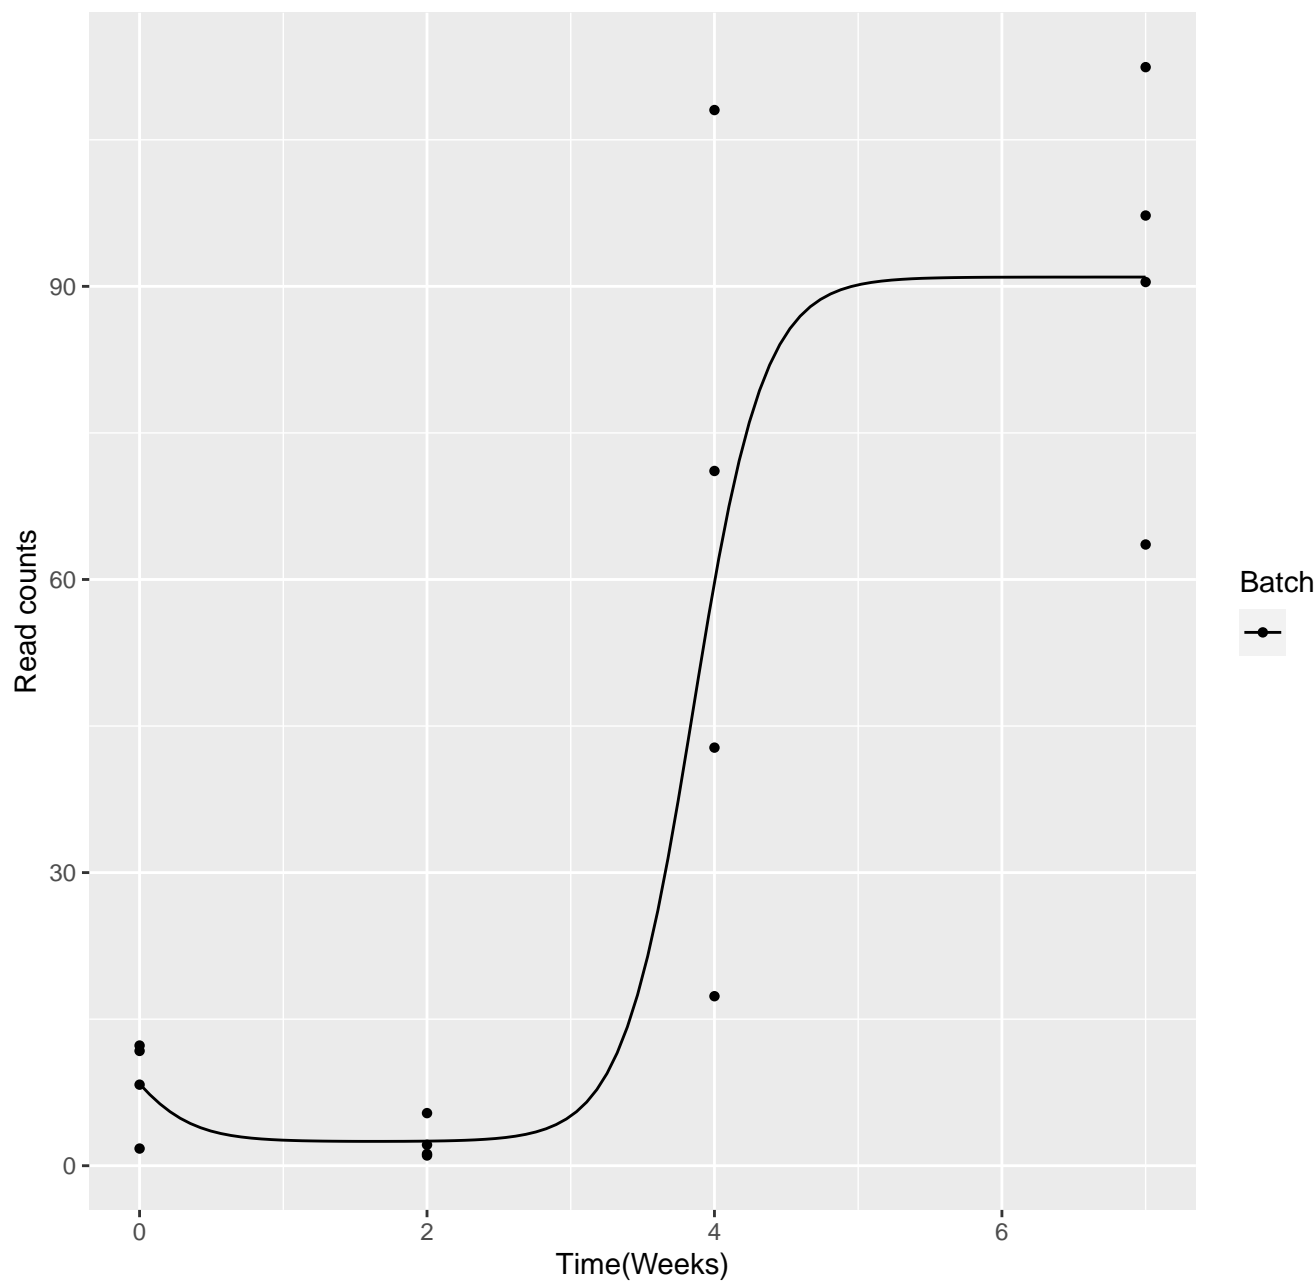



LOC100340903:  $\log_{10} q = -11.9$

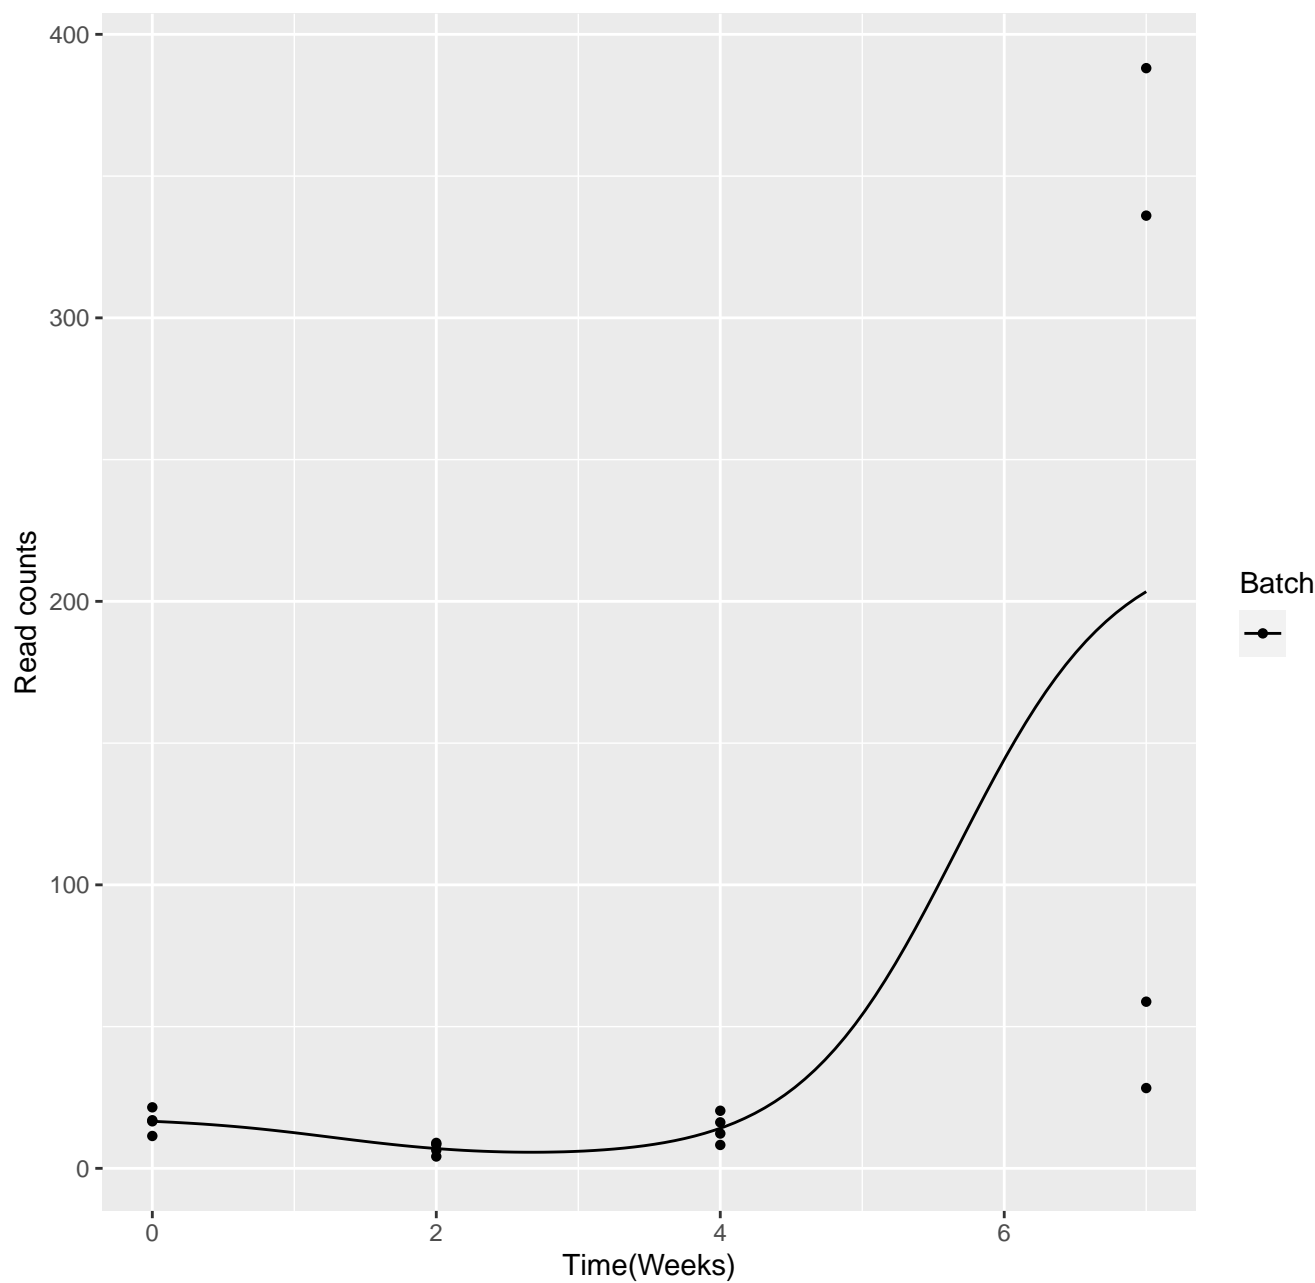

CDS2:  $\log_{10} q = -11.72$

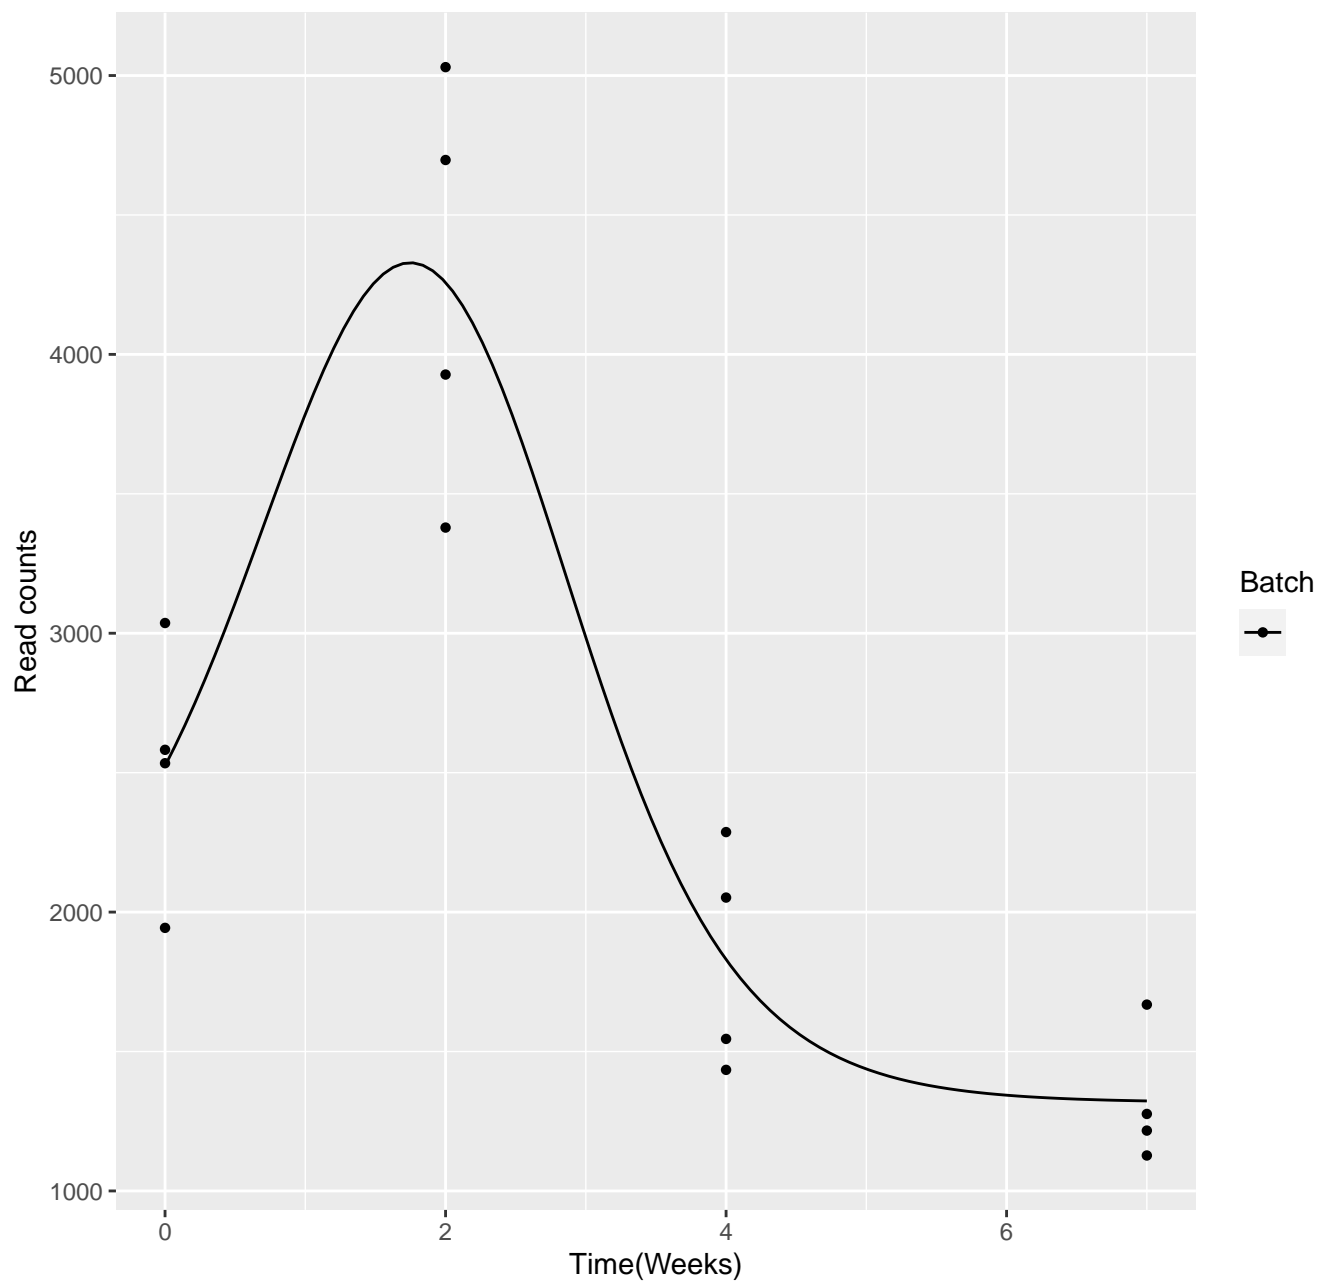

MCP-1:  $\log_{10} q = -11.6$

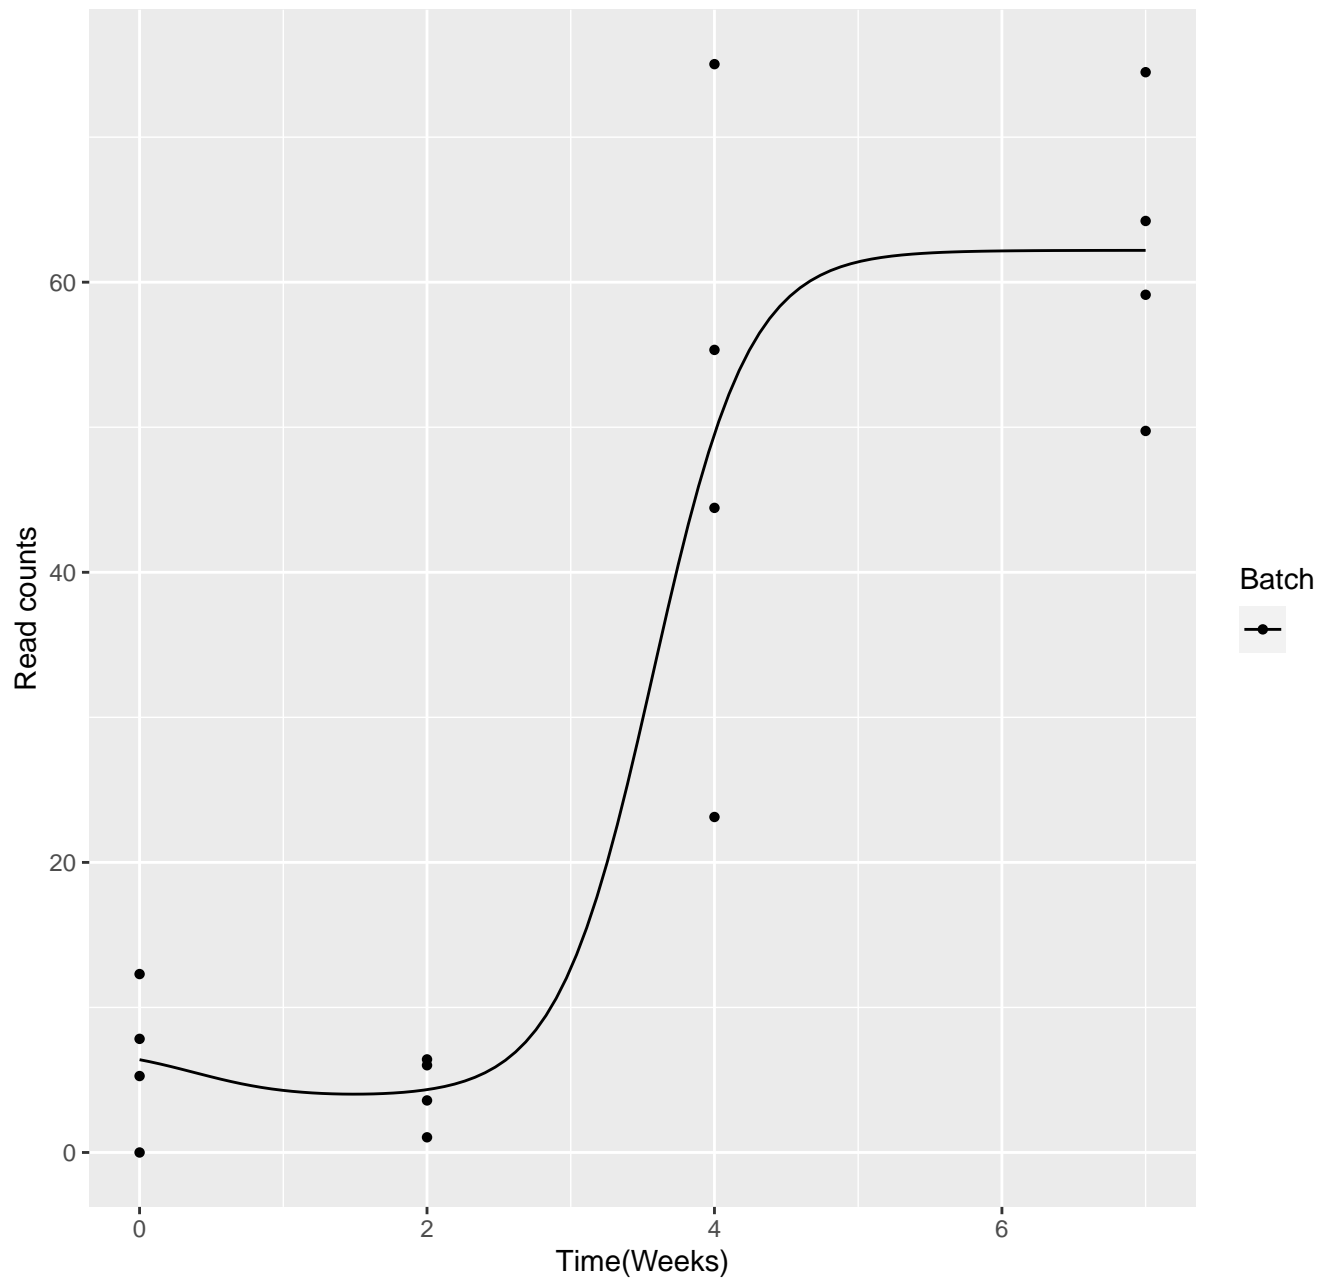

SLC37A2:  $\log_{10} q = -11.49$

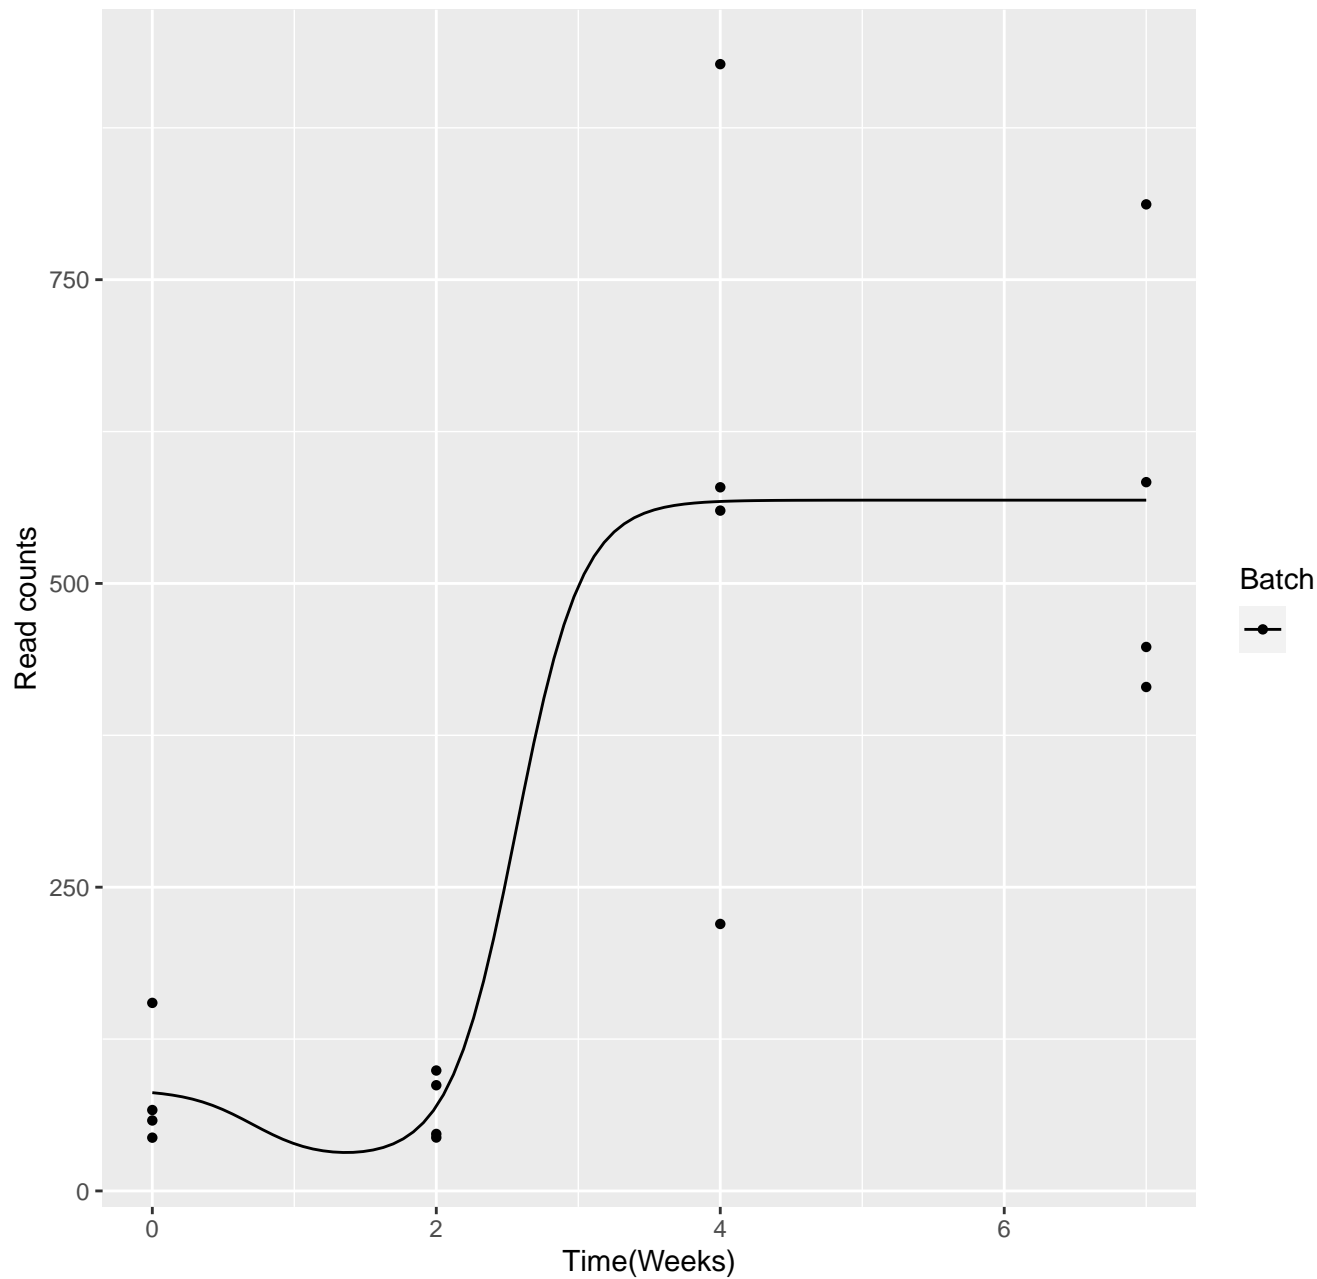

LOC100353606:  $\log_{10} q = -11.48$

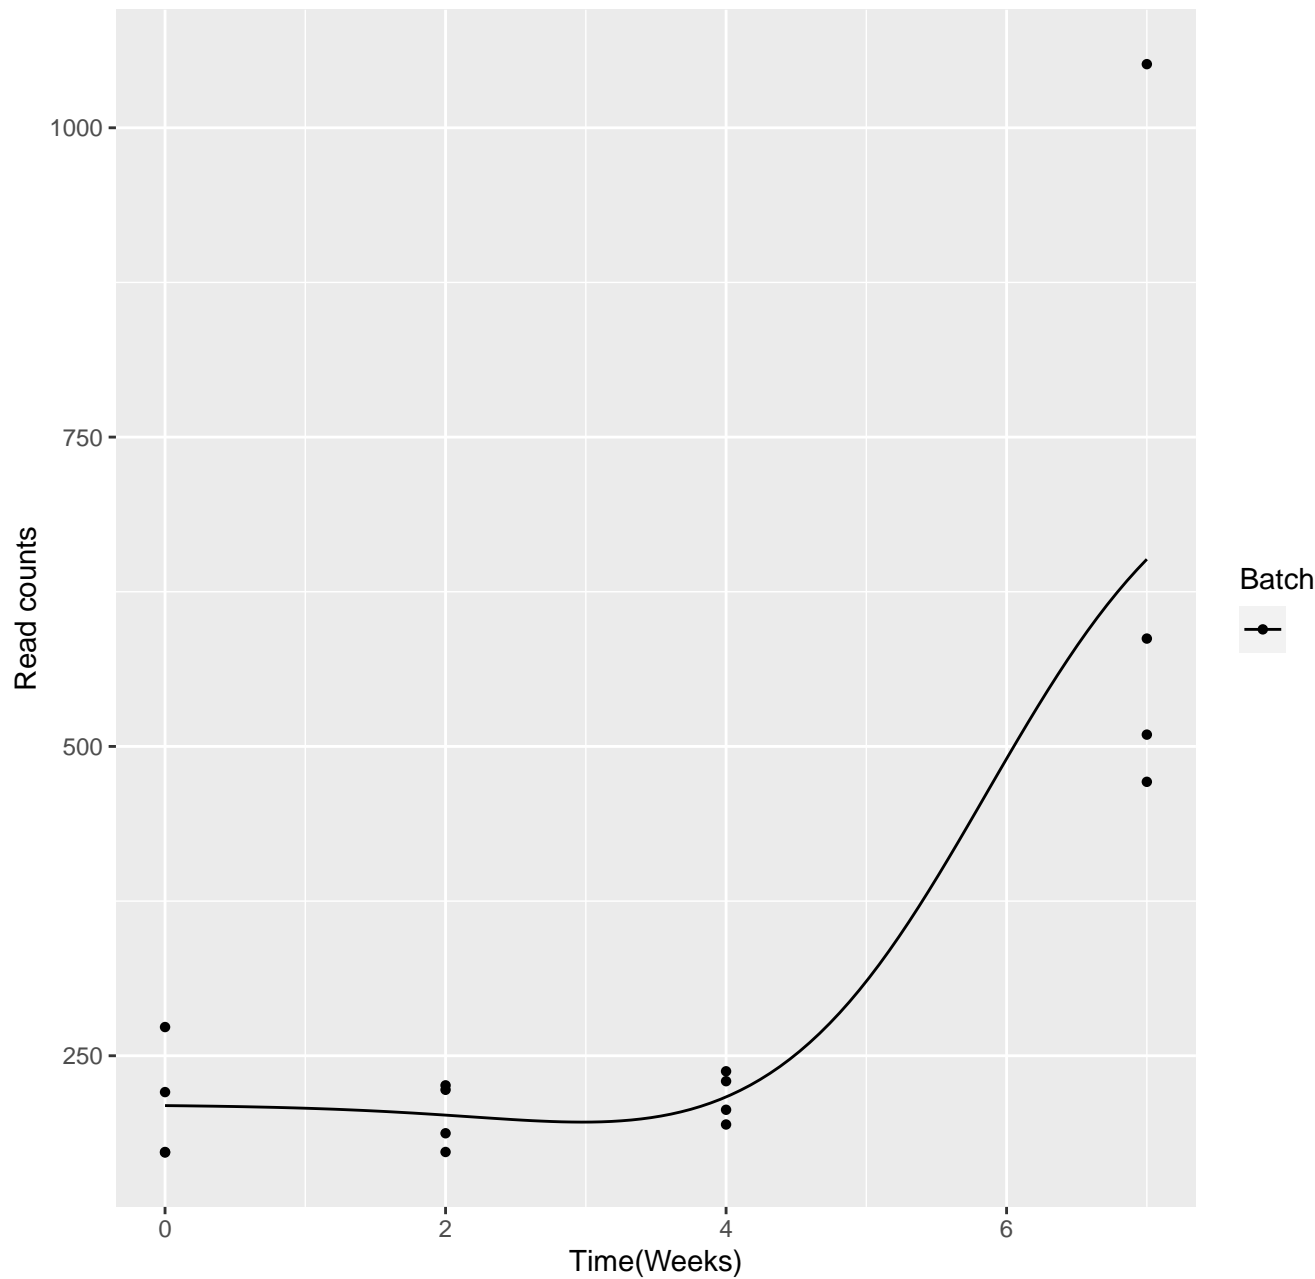

LOC100345136:  $\log_{10} q = -11.41$

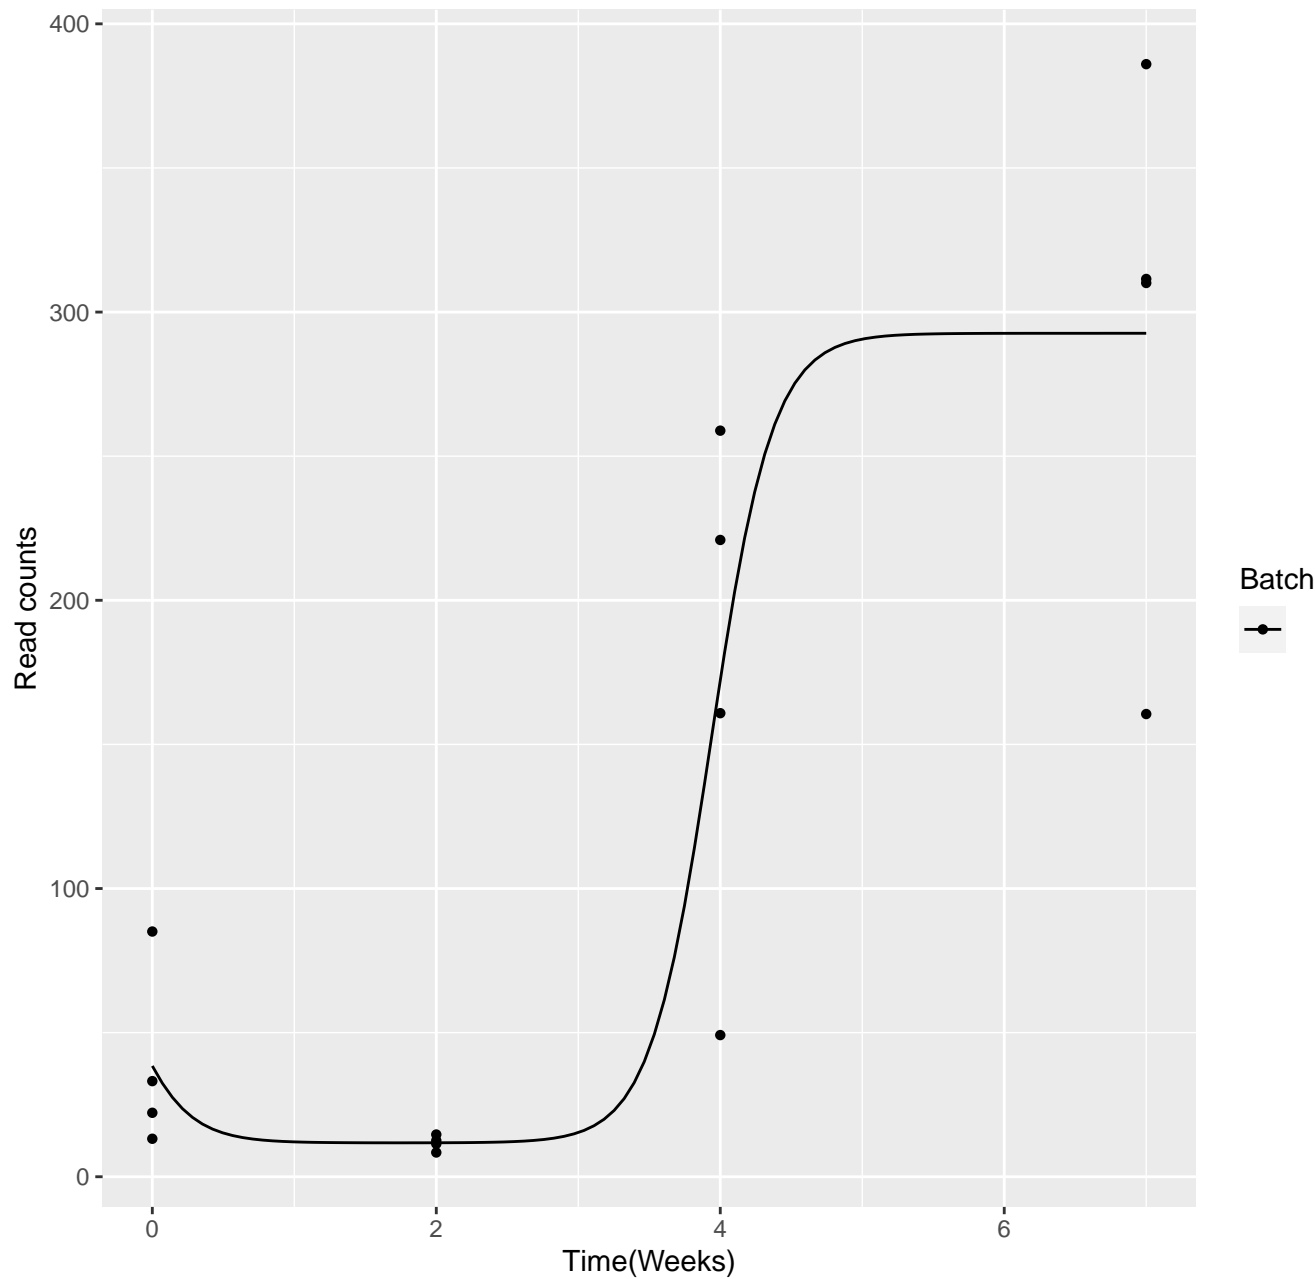

SPHK1:  $\log_{10} q = -11.32$

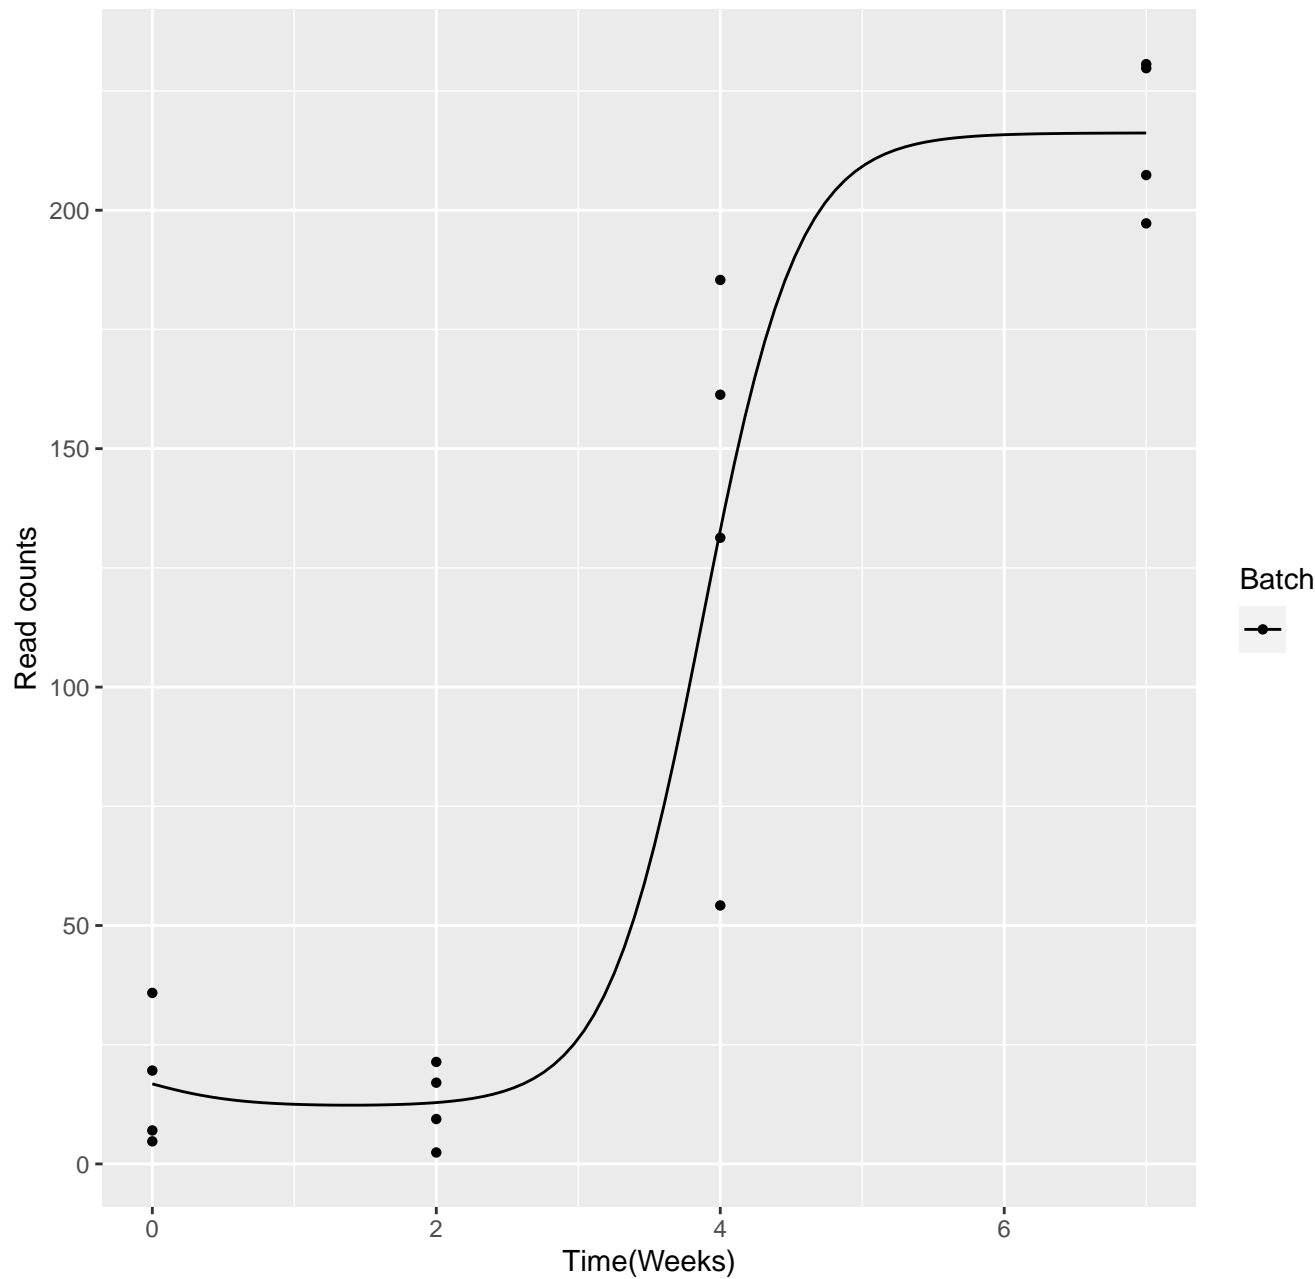

ALDH18A1:  $\log_{10} q = -11.32$

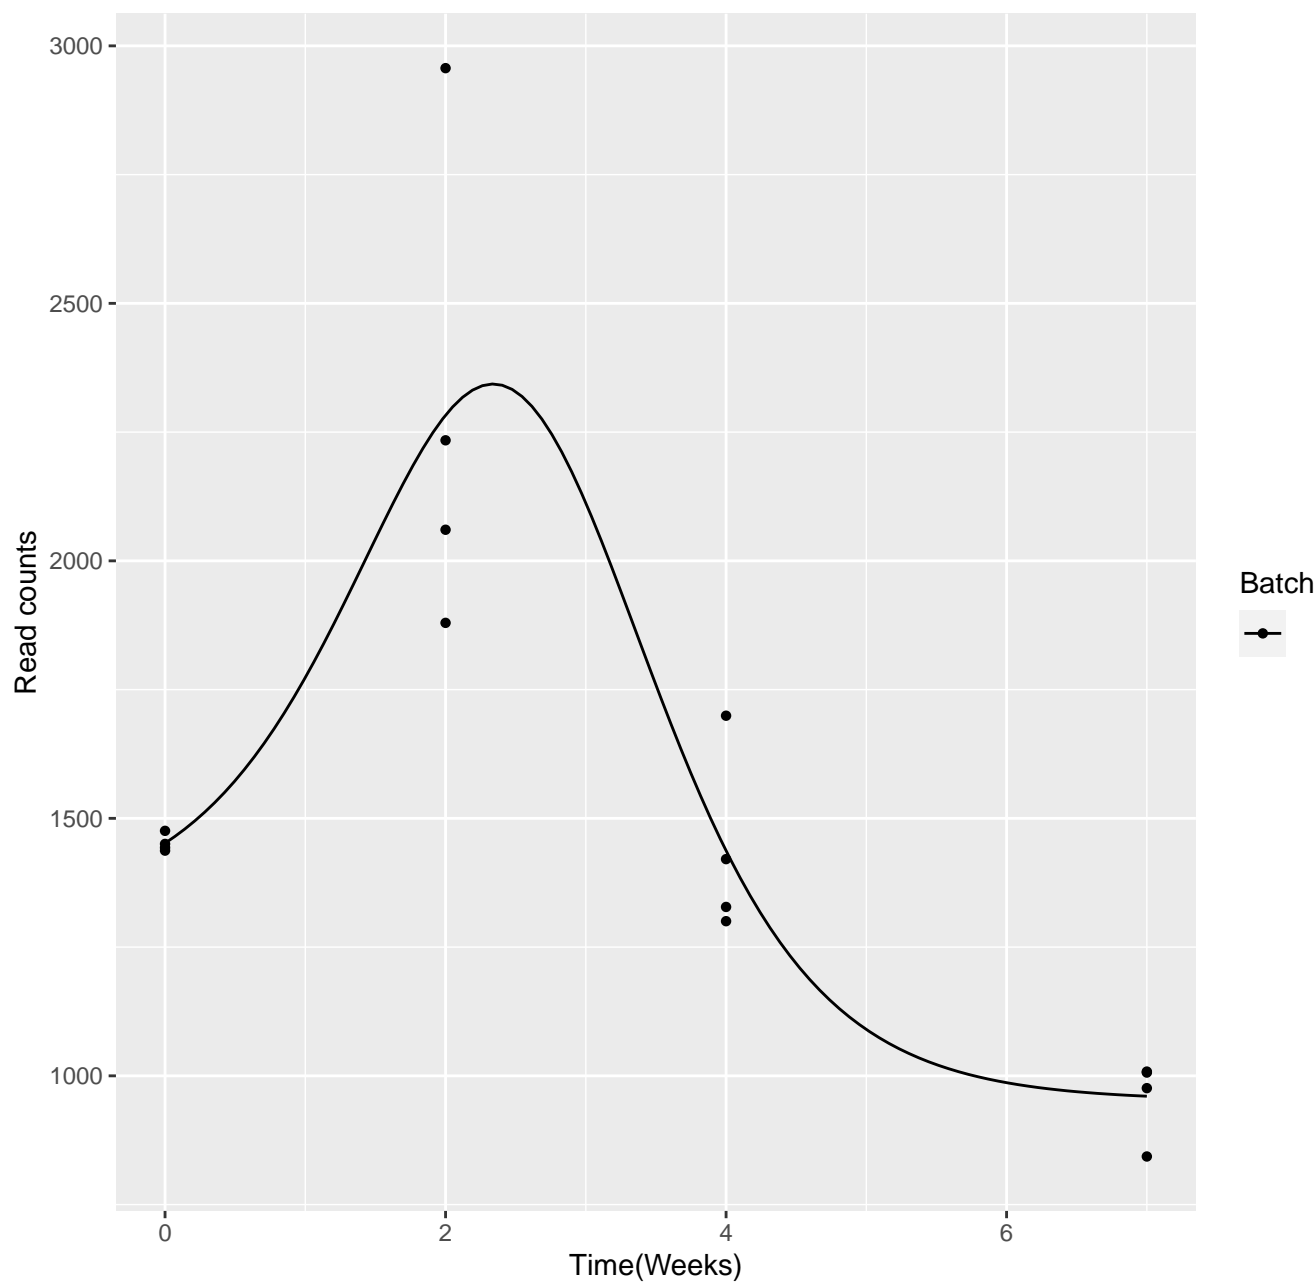



PLAUR:  $\log_{10} q = -11.14$

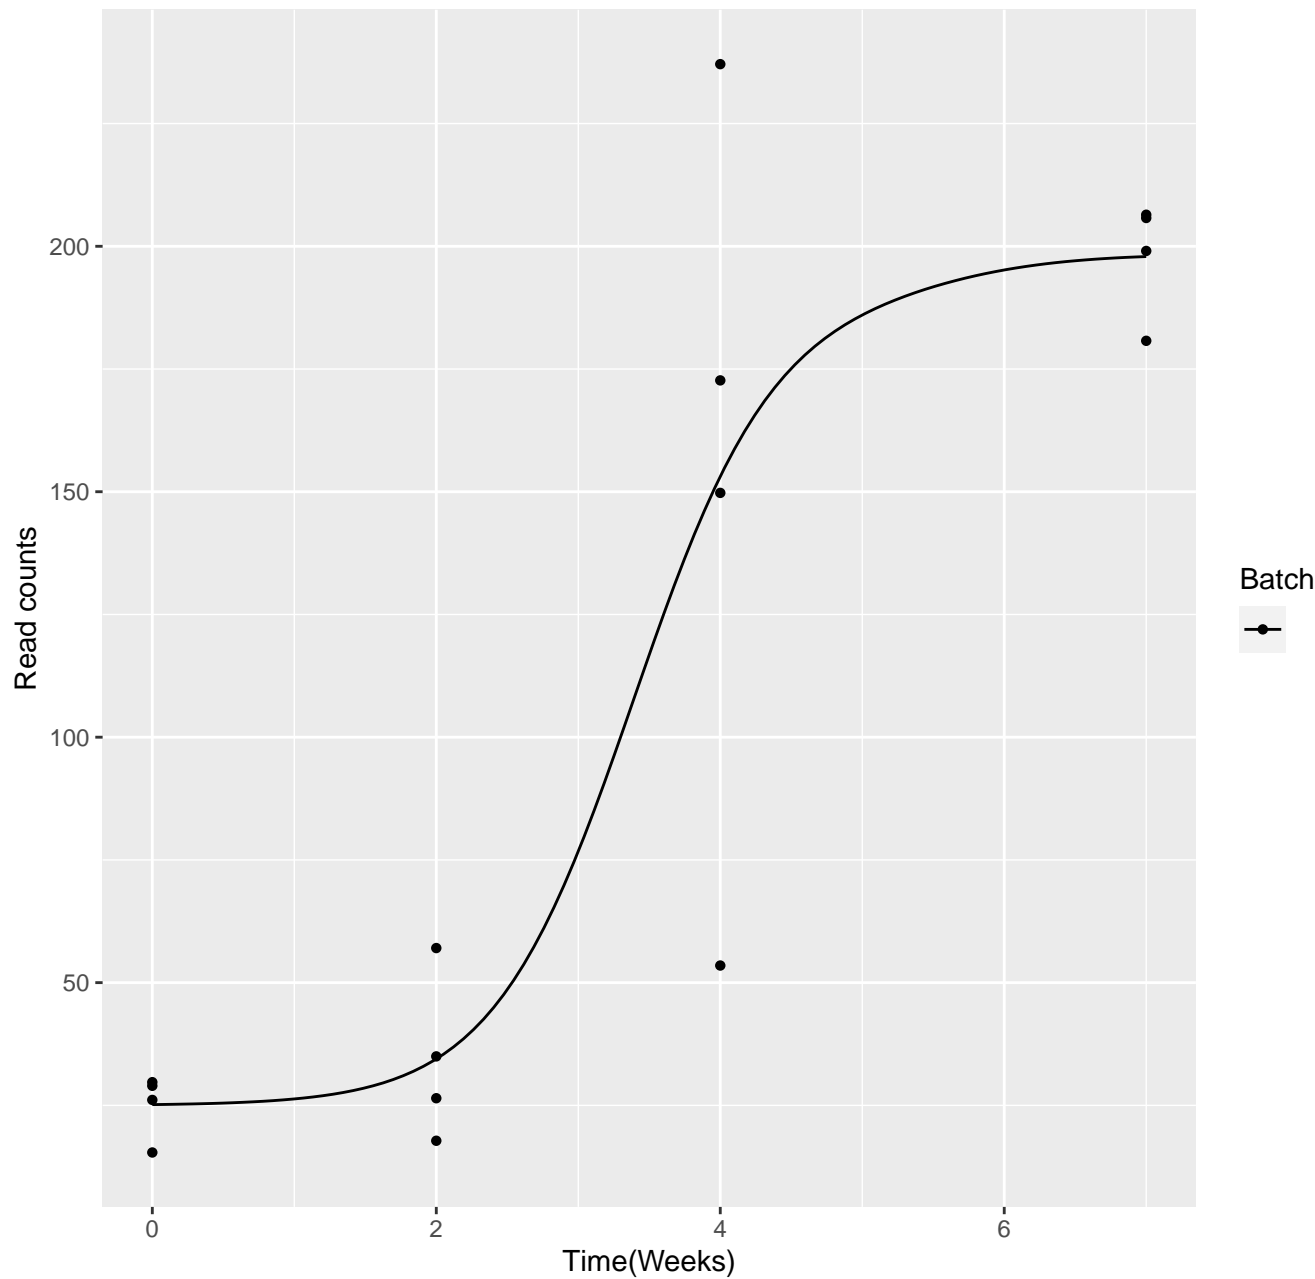

AIF1:  $\log_{10} q = -10.98$

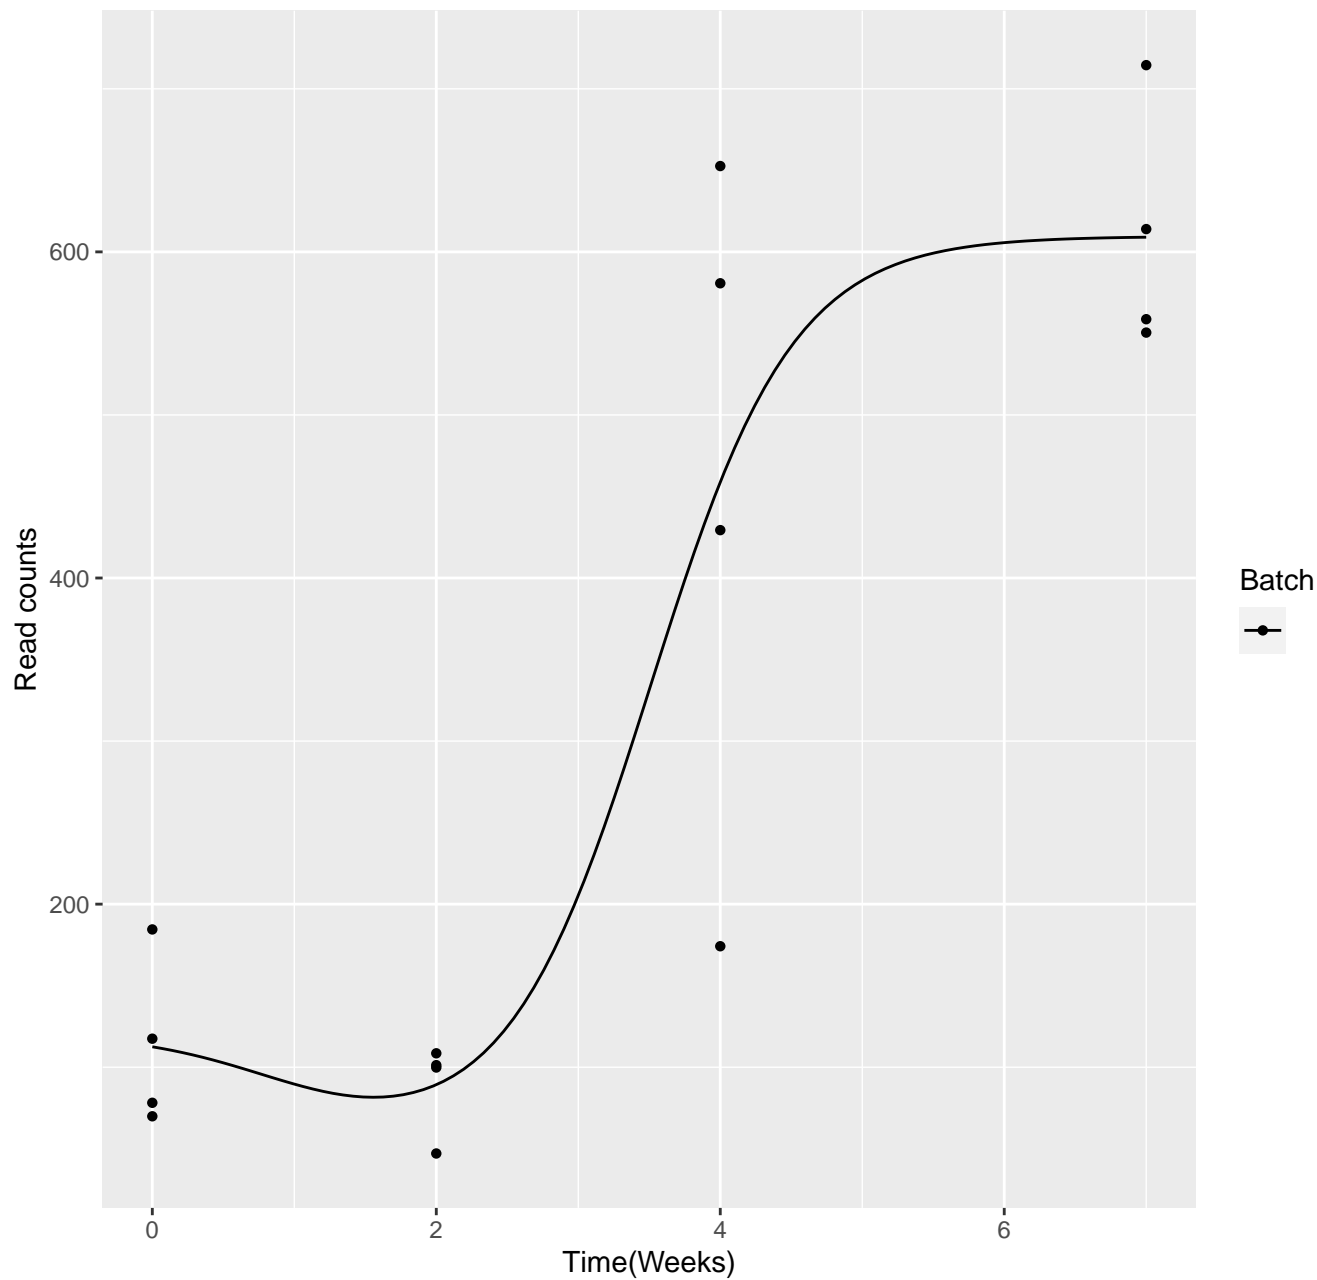

KLRG1:  $\log_{10} q = -10.93$

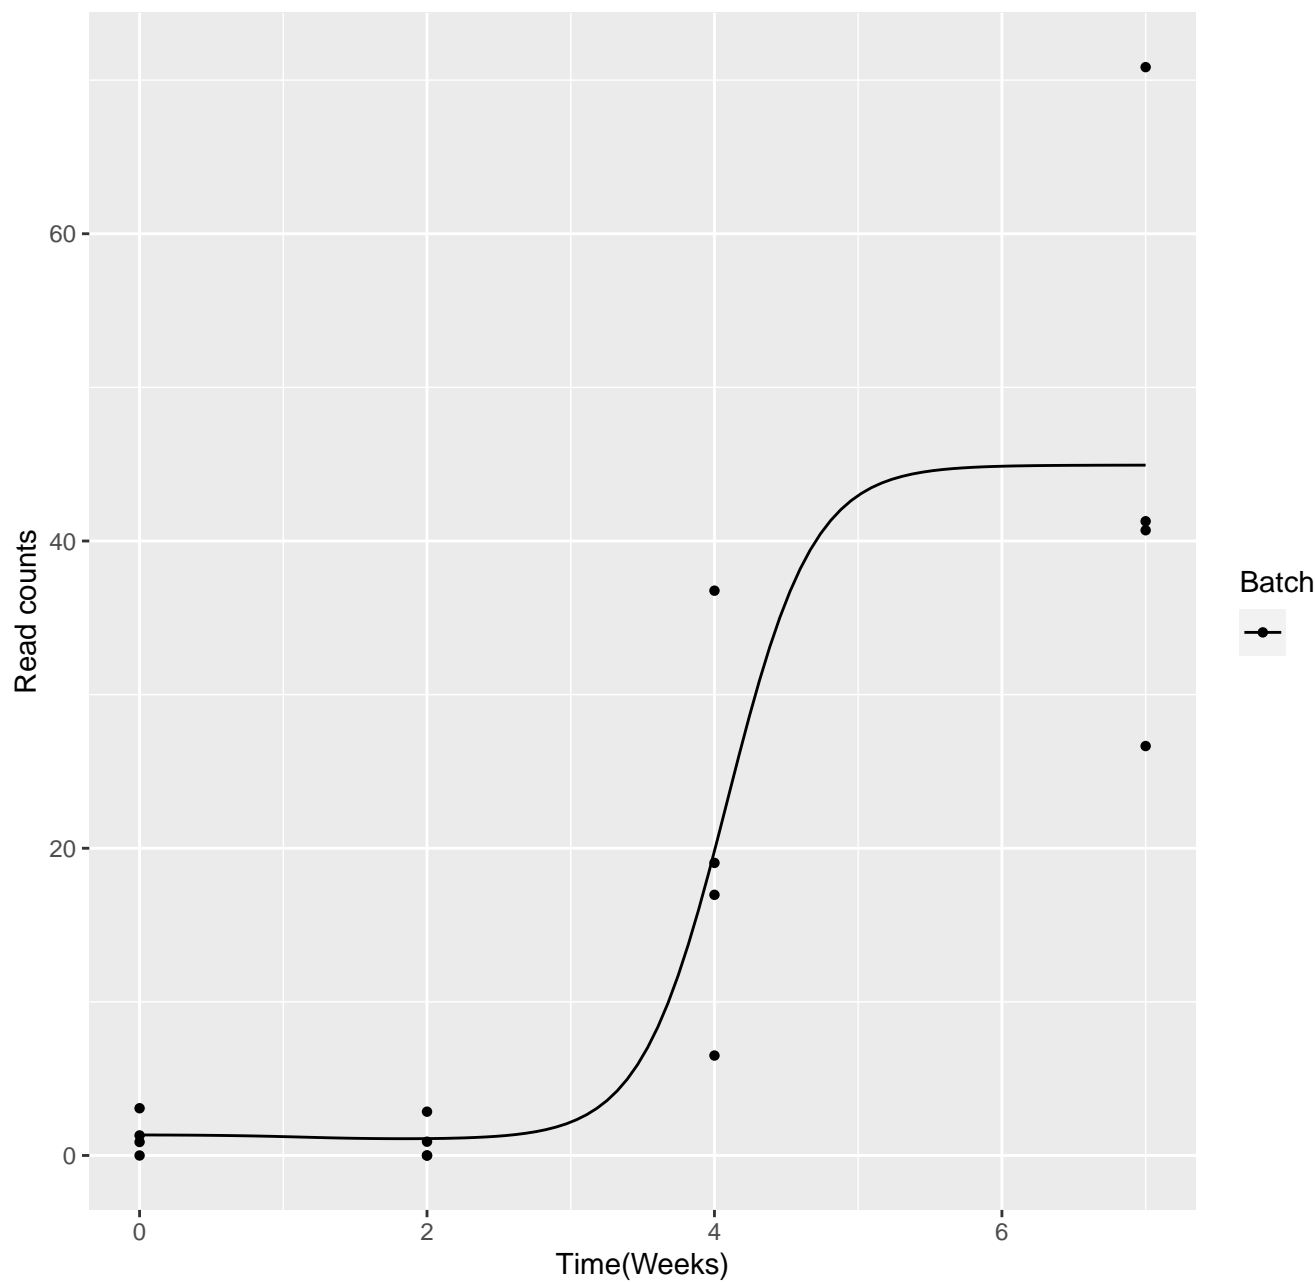

GMFG:  $\log_{10} q = -10.9$

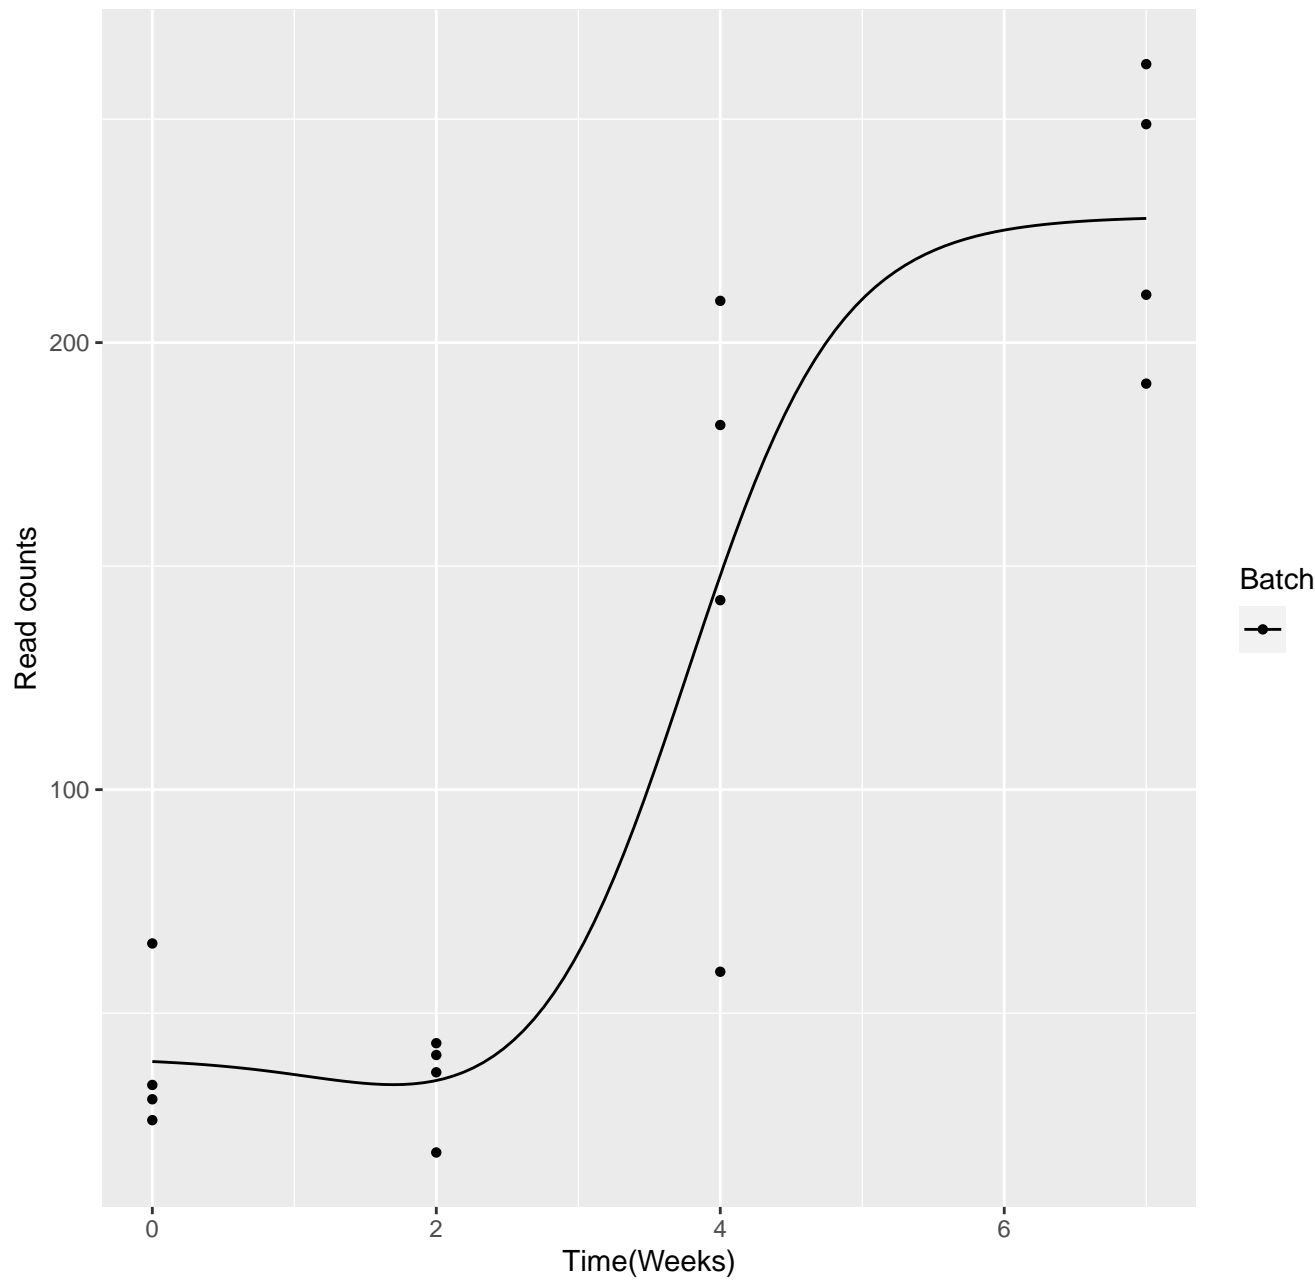

PFKP:  $\log_{10} q = -10.9$

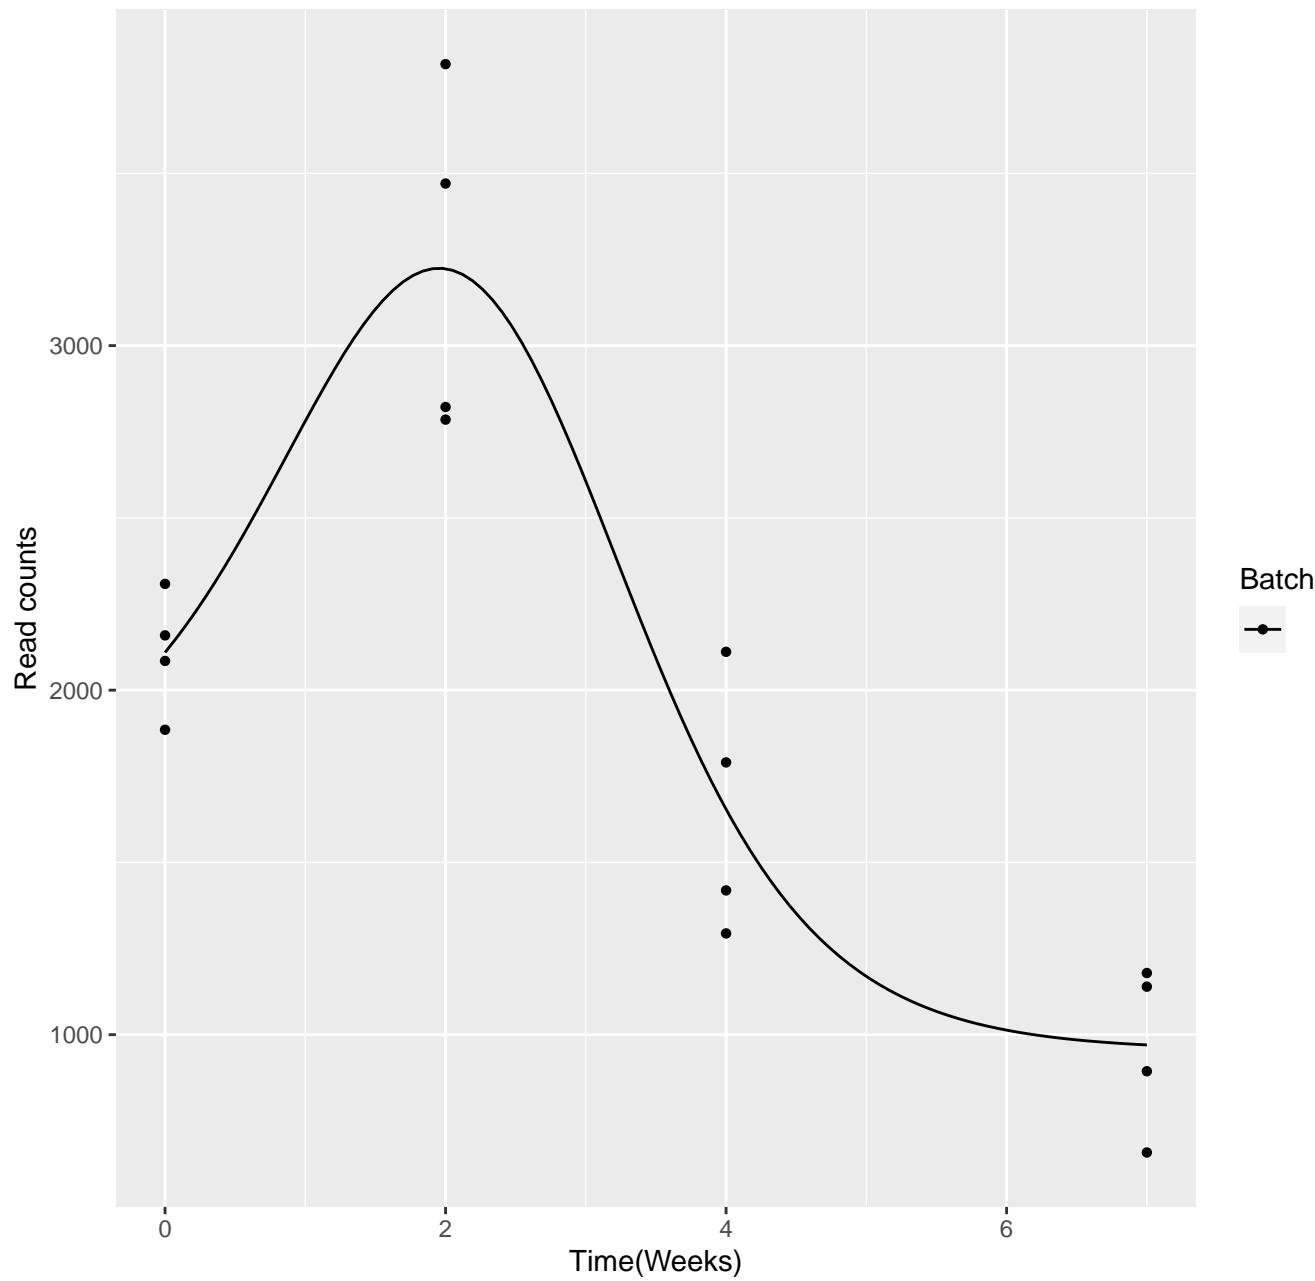

LOC127484430:  $\log_{10} q = -10.86$

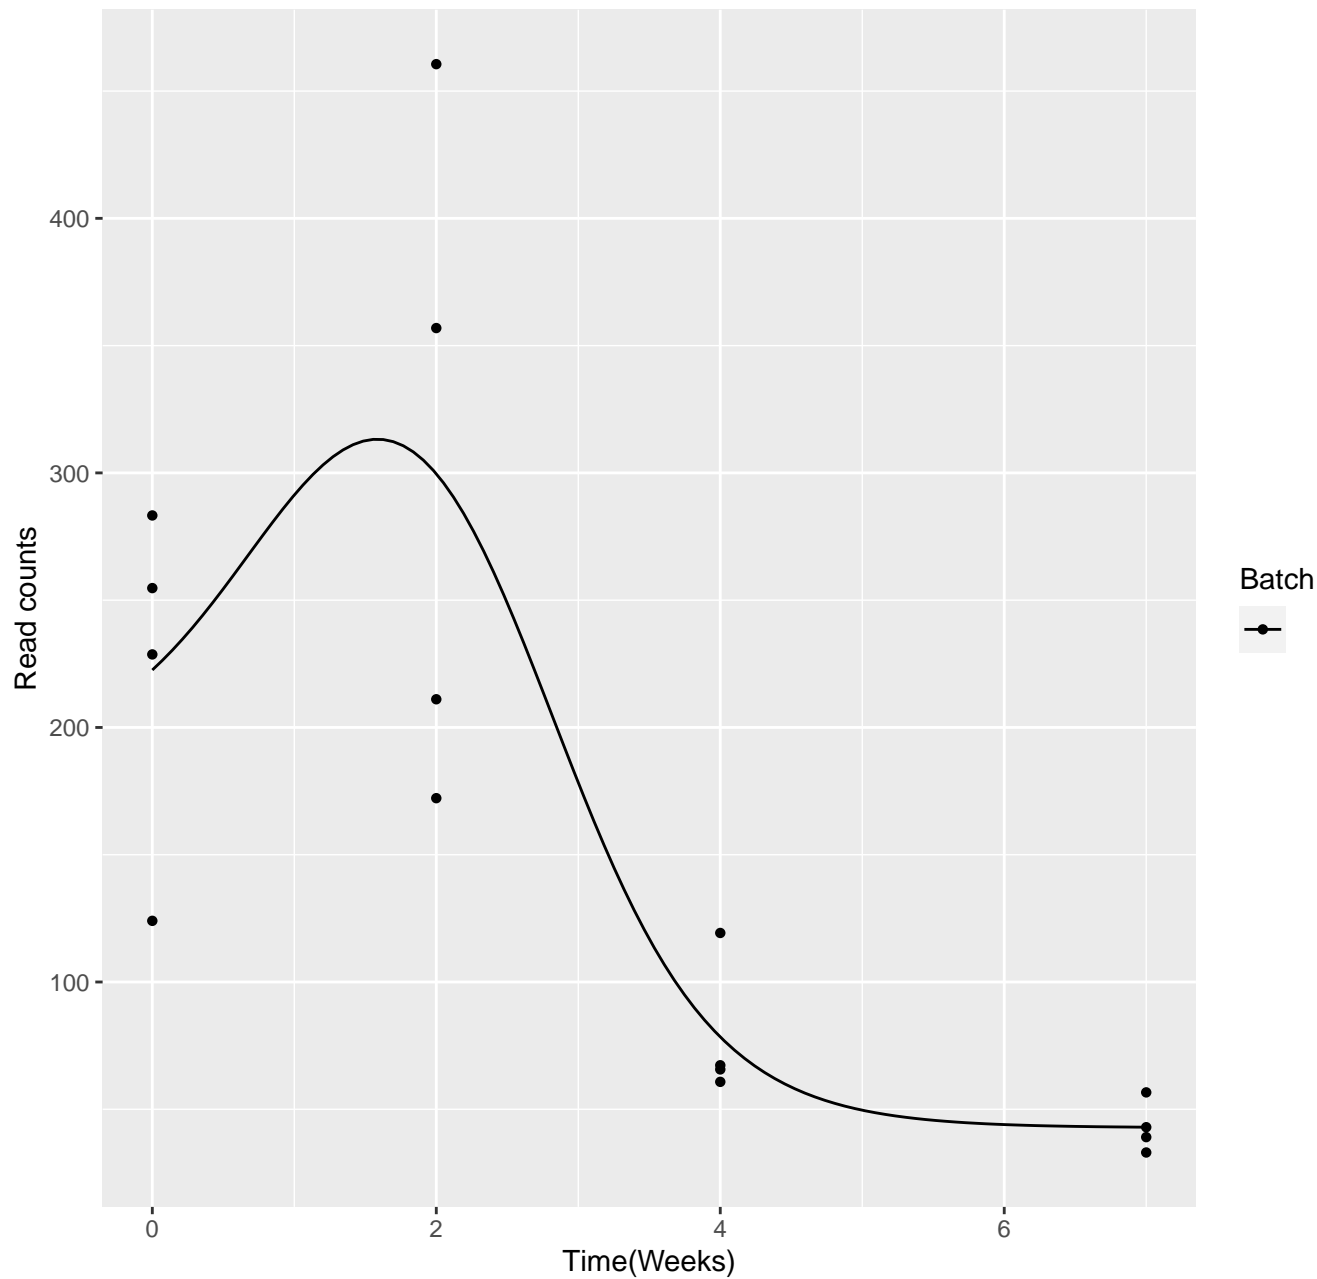

C5AR1:  $\log_{10} q = -10.83$

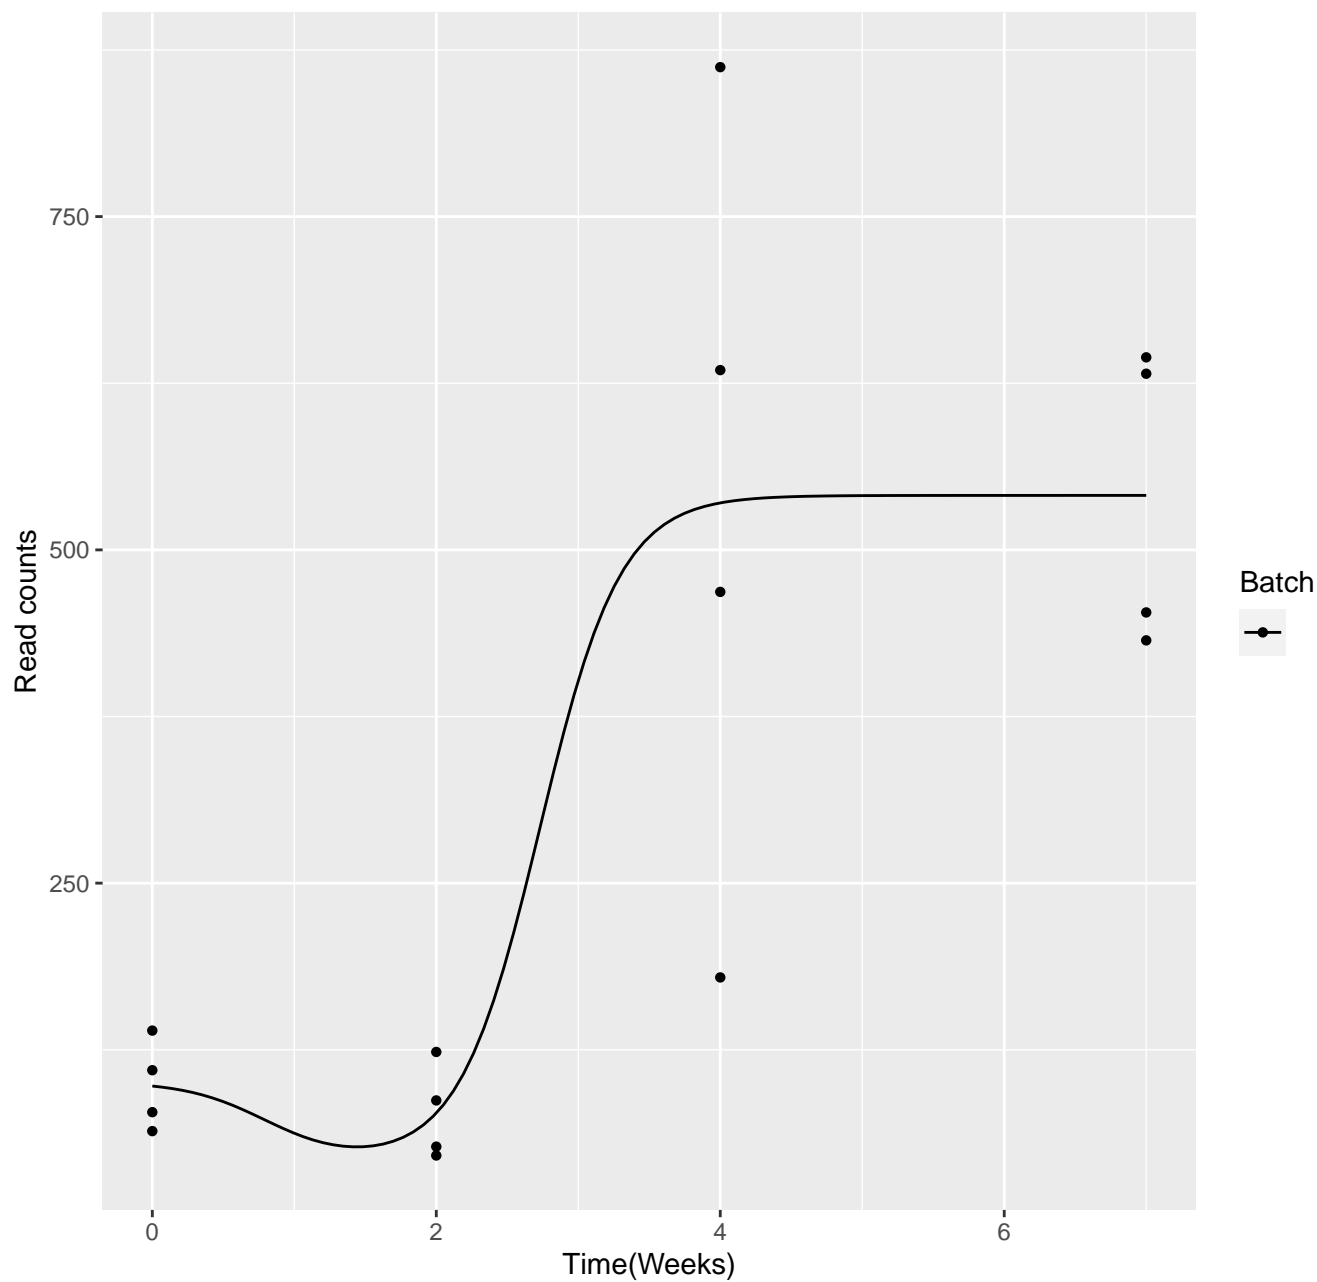

NFAM1:  $\log_{10} q = -10.83$

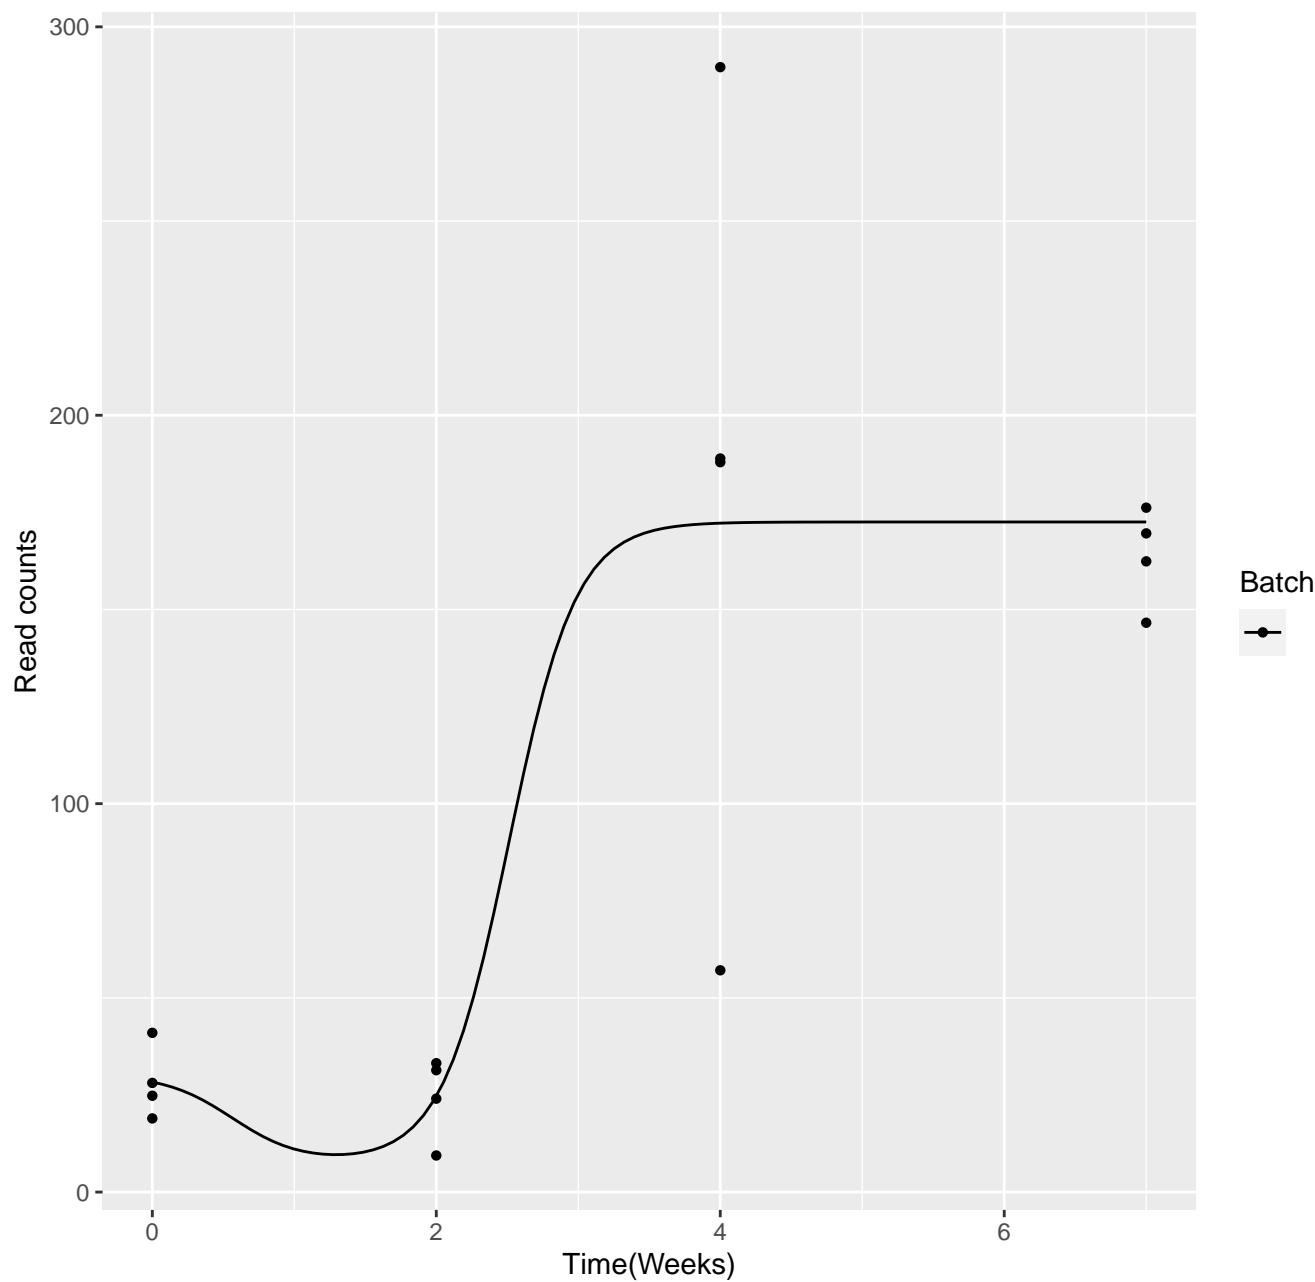



RPS6KA1:  $\log_{10} q = -10.81$

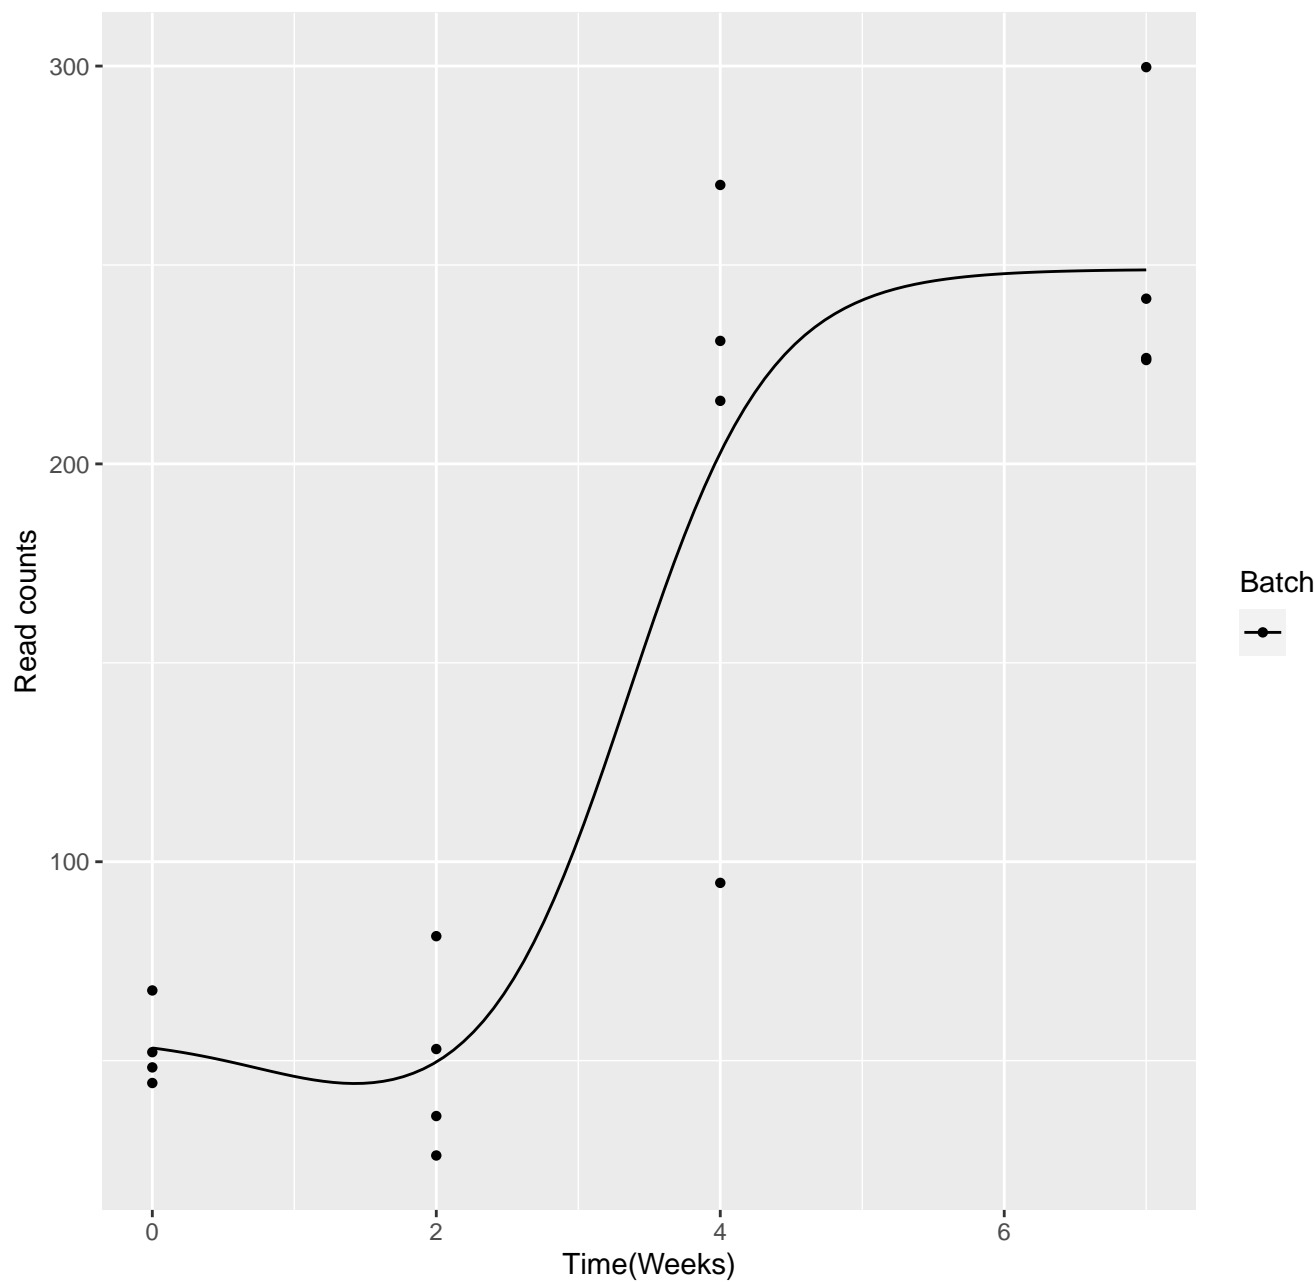

TIMP1:  $\log_{10} q = -10.8$

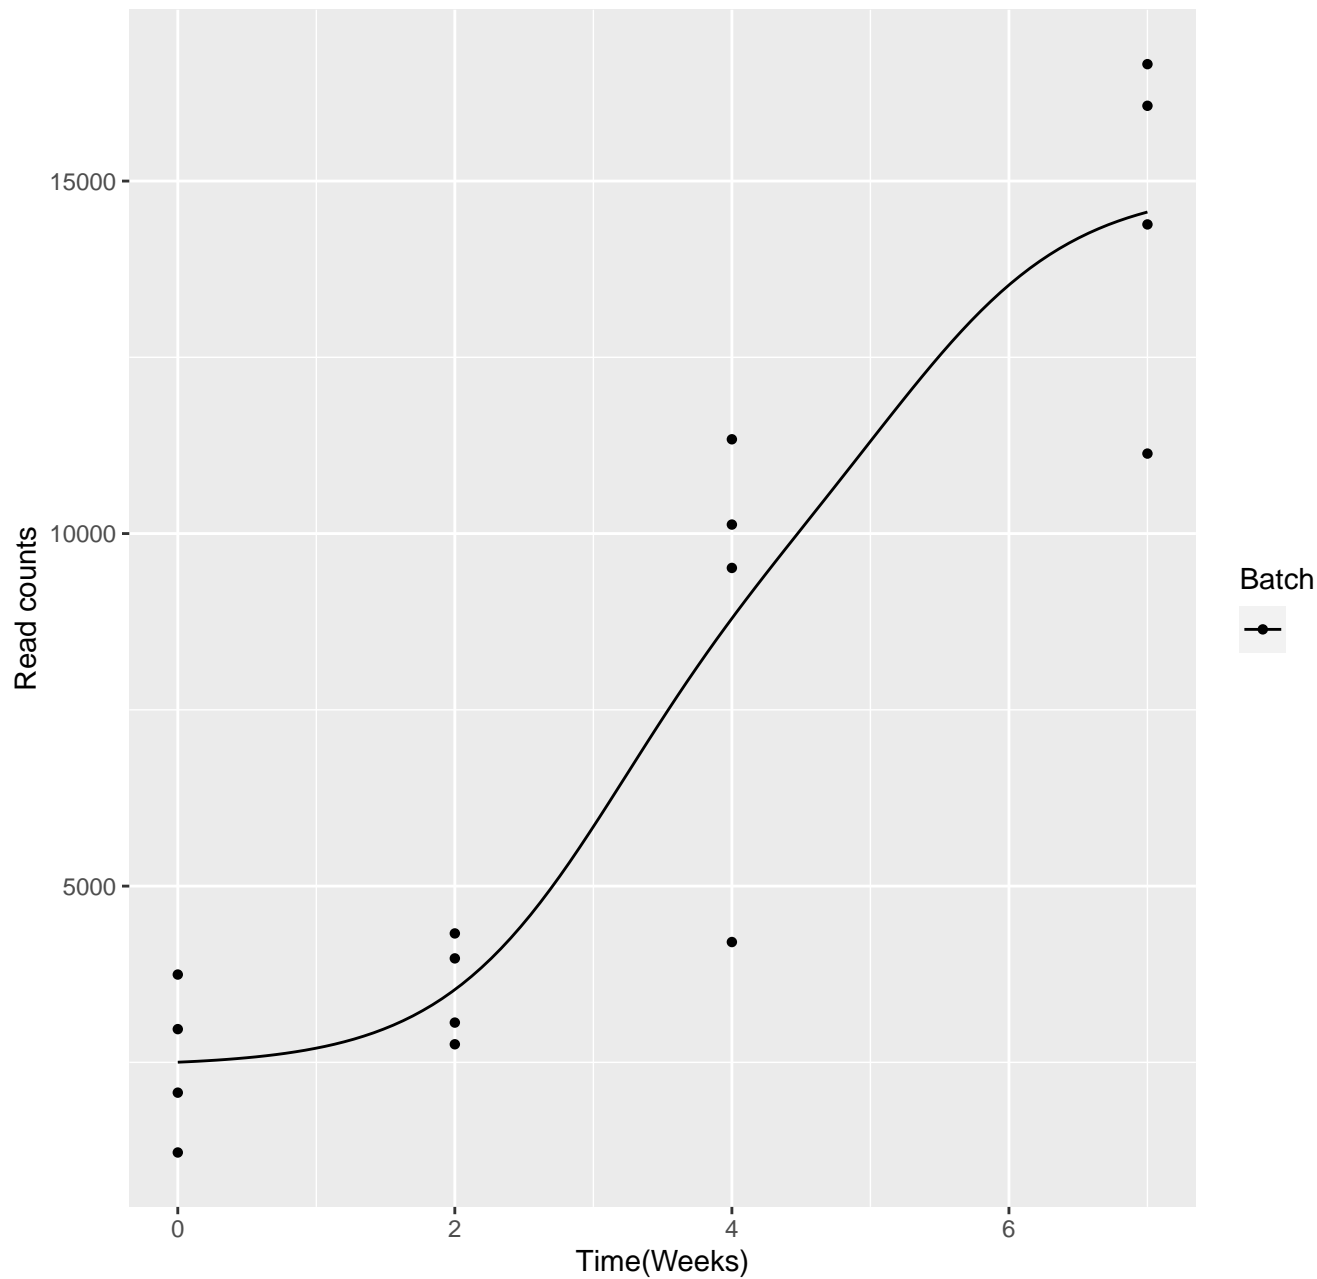

CTSE:  $\log_{10} q = -10.76$

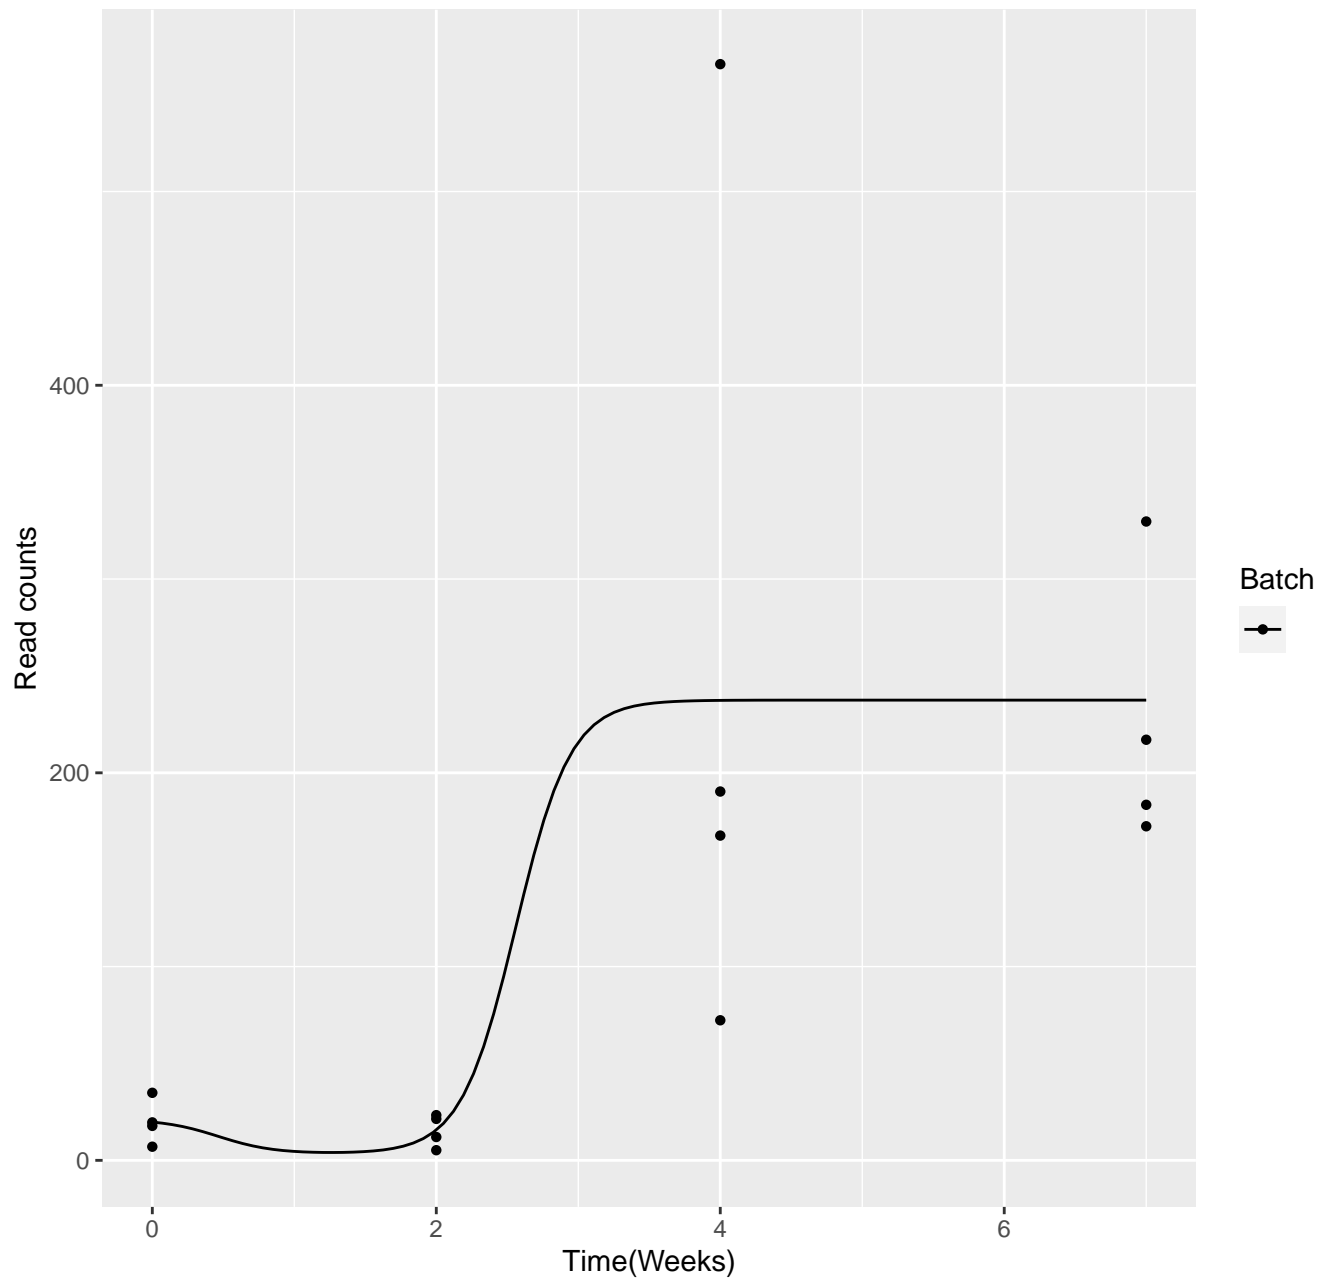

LOC100349729:  $\log_{10} q = -10.76$

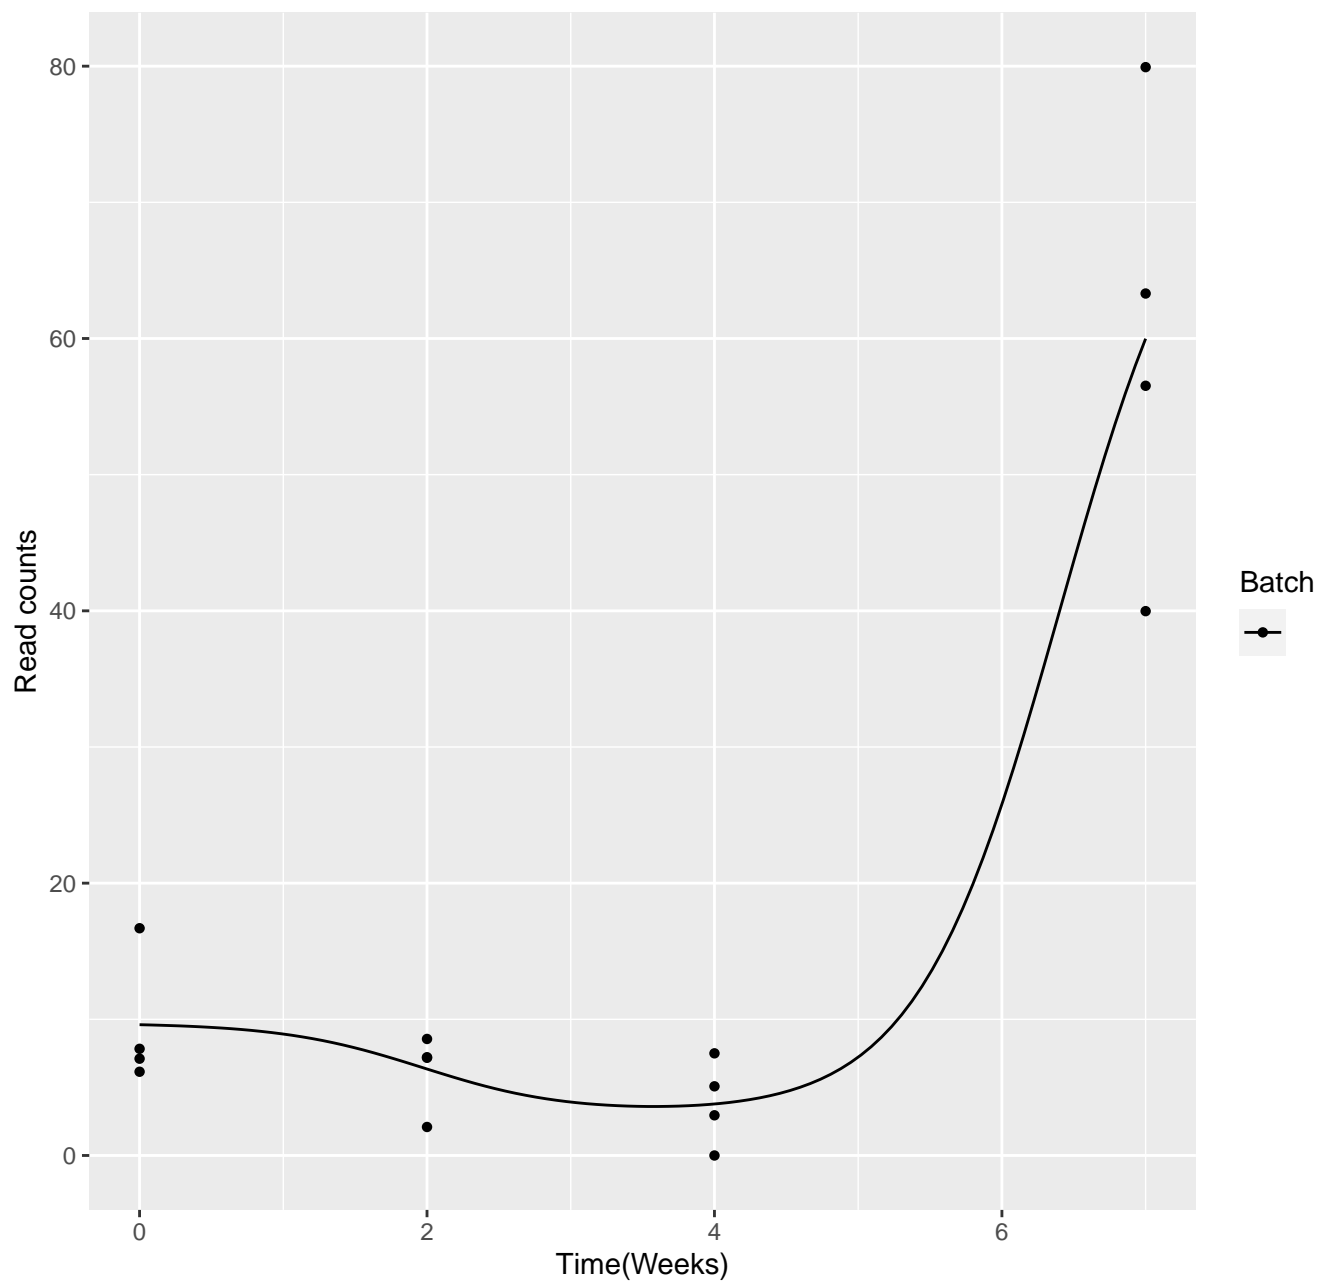

IRF5:  $\log_{10} q = -10.73$

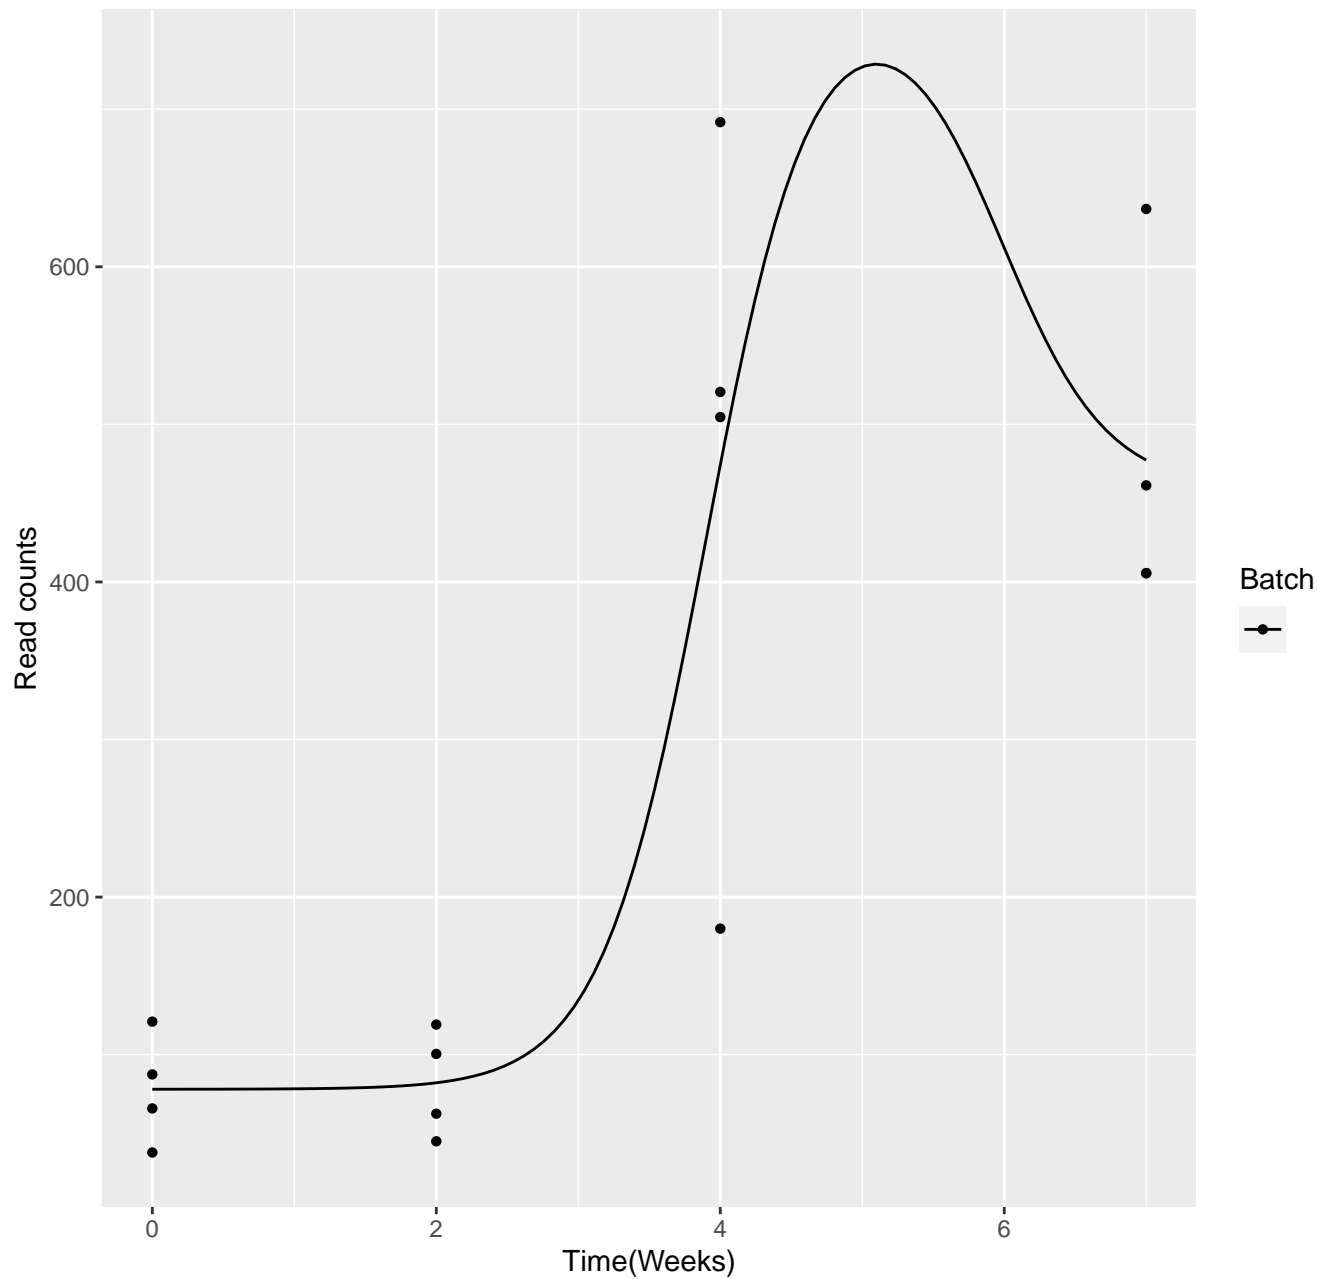

OSR1:  $\log_{10} q = -10.73$

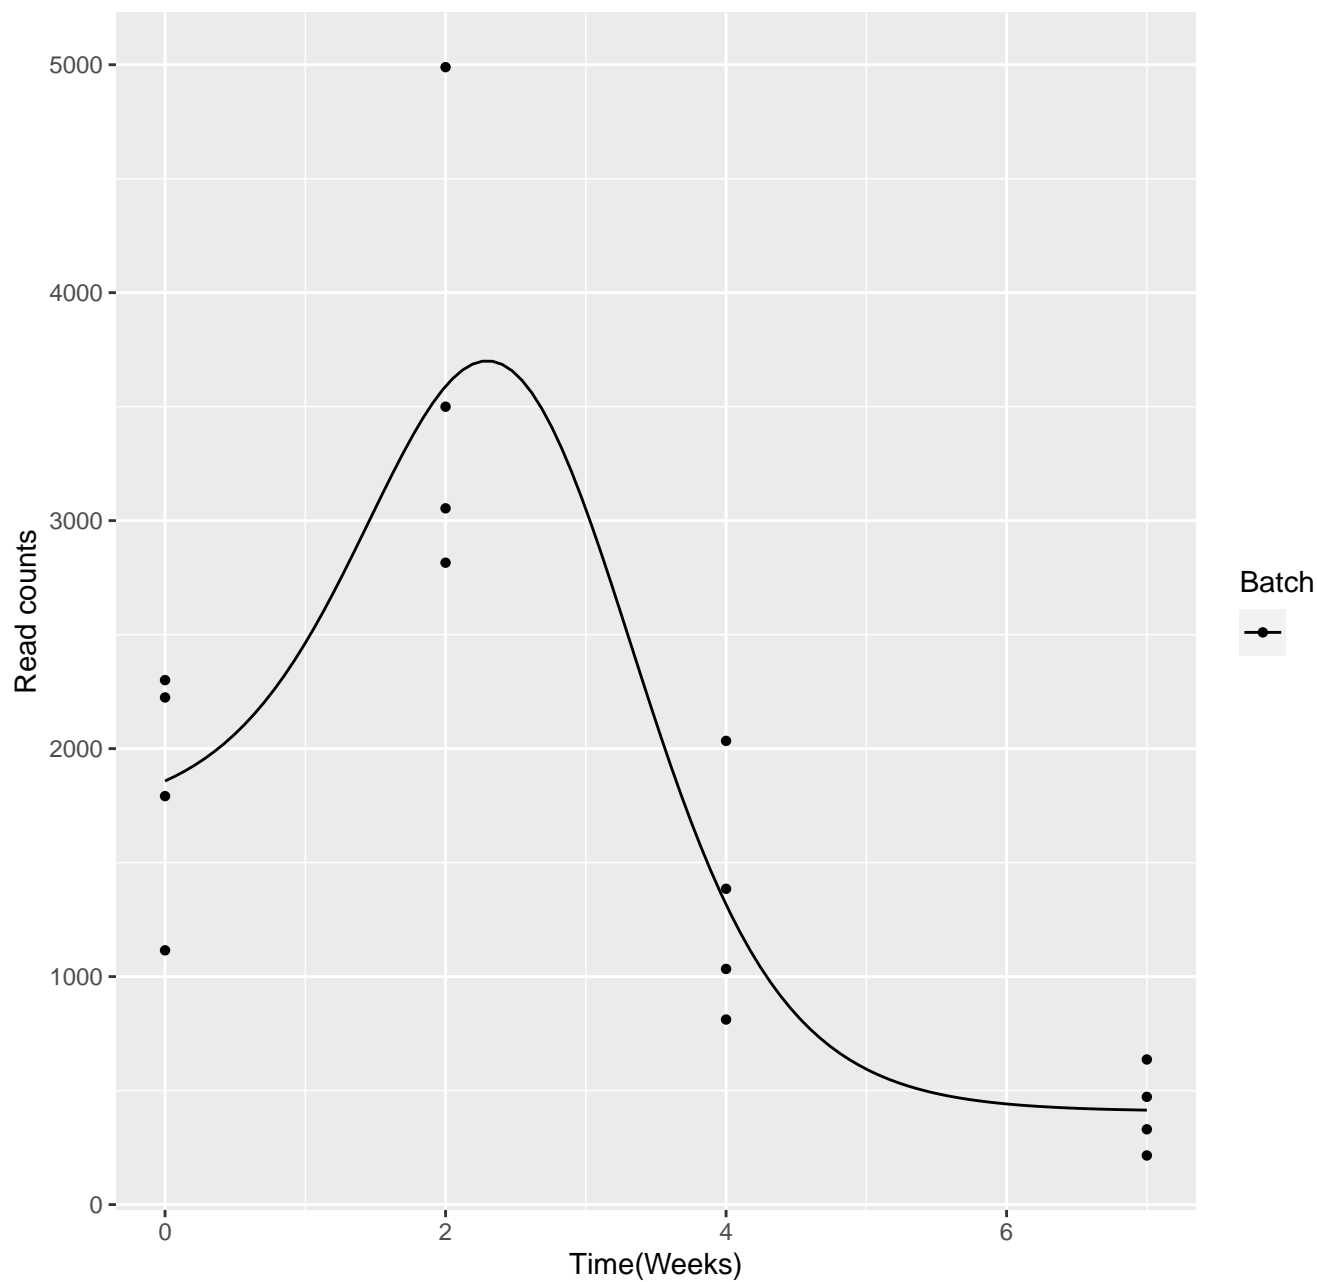

LOC100009286:  $\log_{10} q = -10.68$

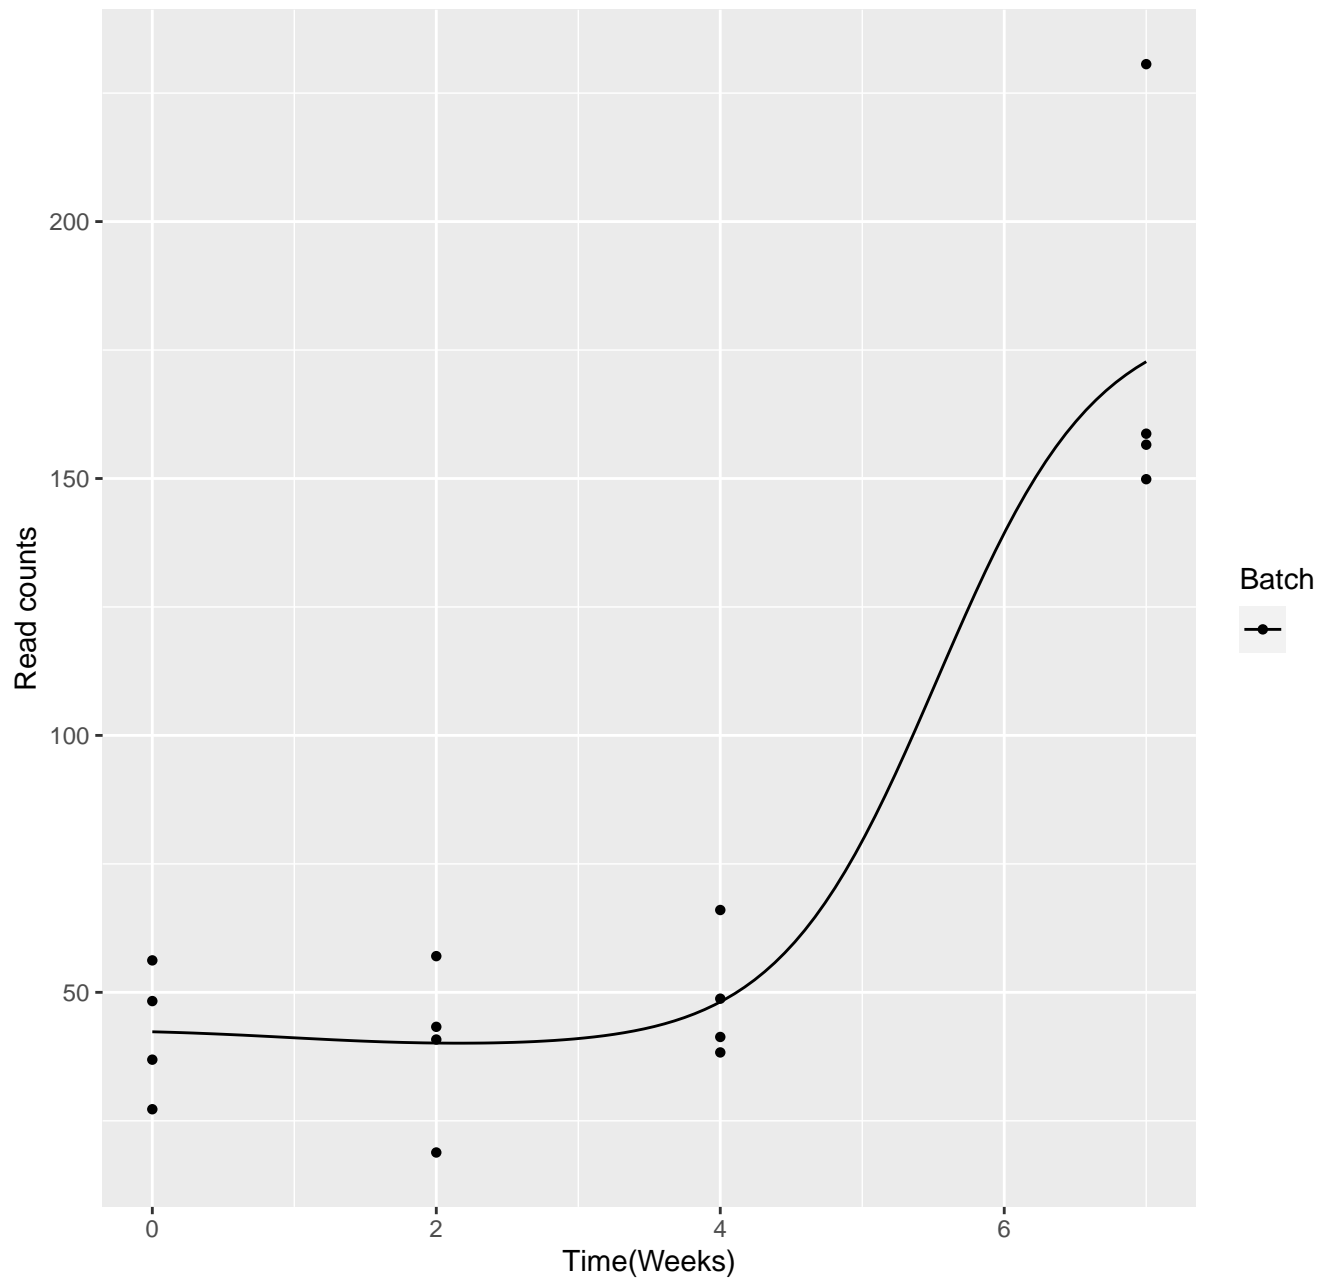

PTK2B:  $\log_{10} q = -10.66$

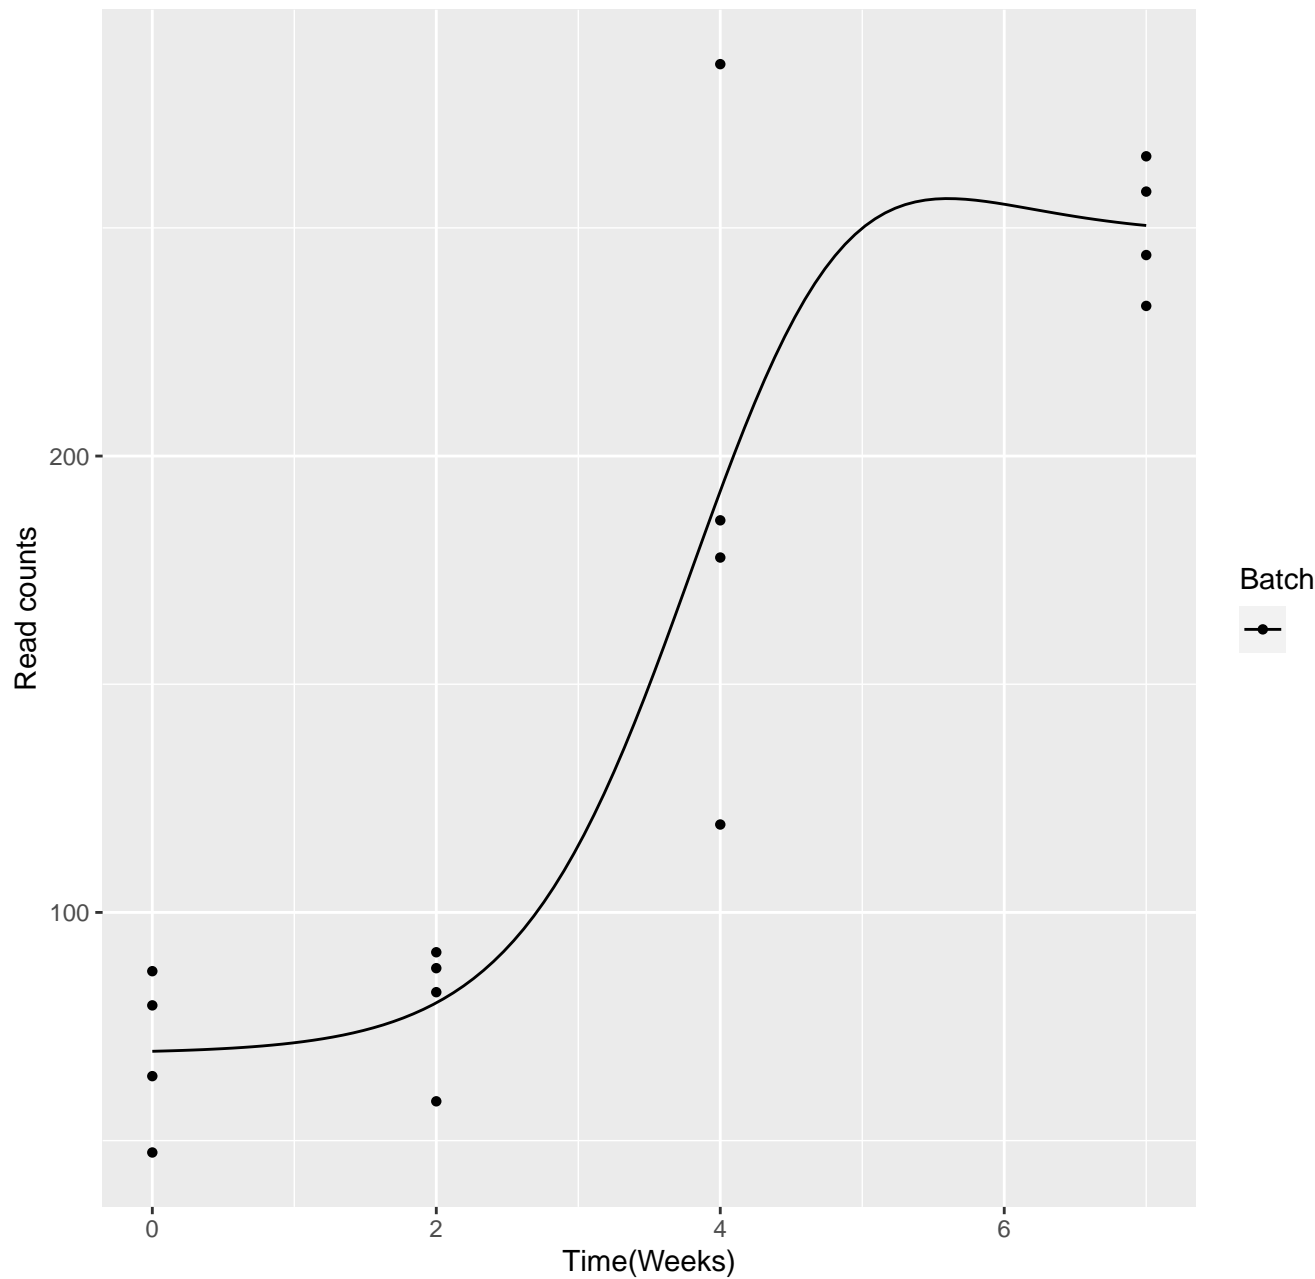



LAPTM5:  $\log_{10} q = -10.54$

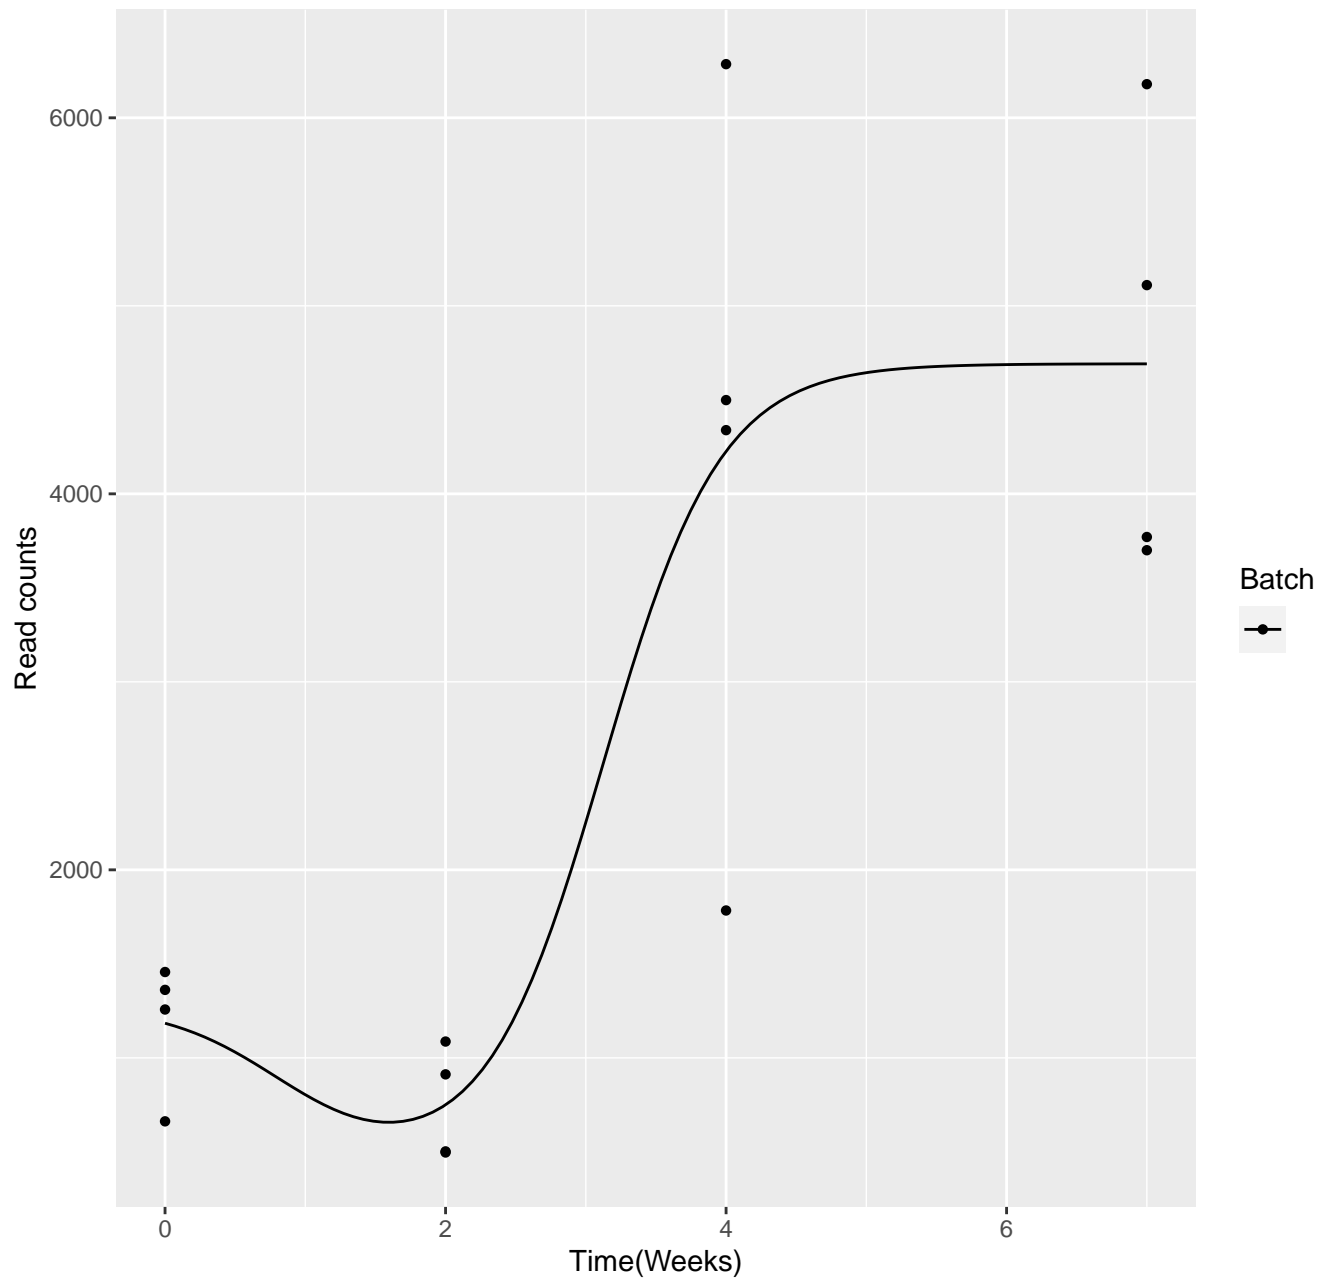

SLMAP:  $\log_{10} q = -10.4$

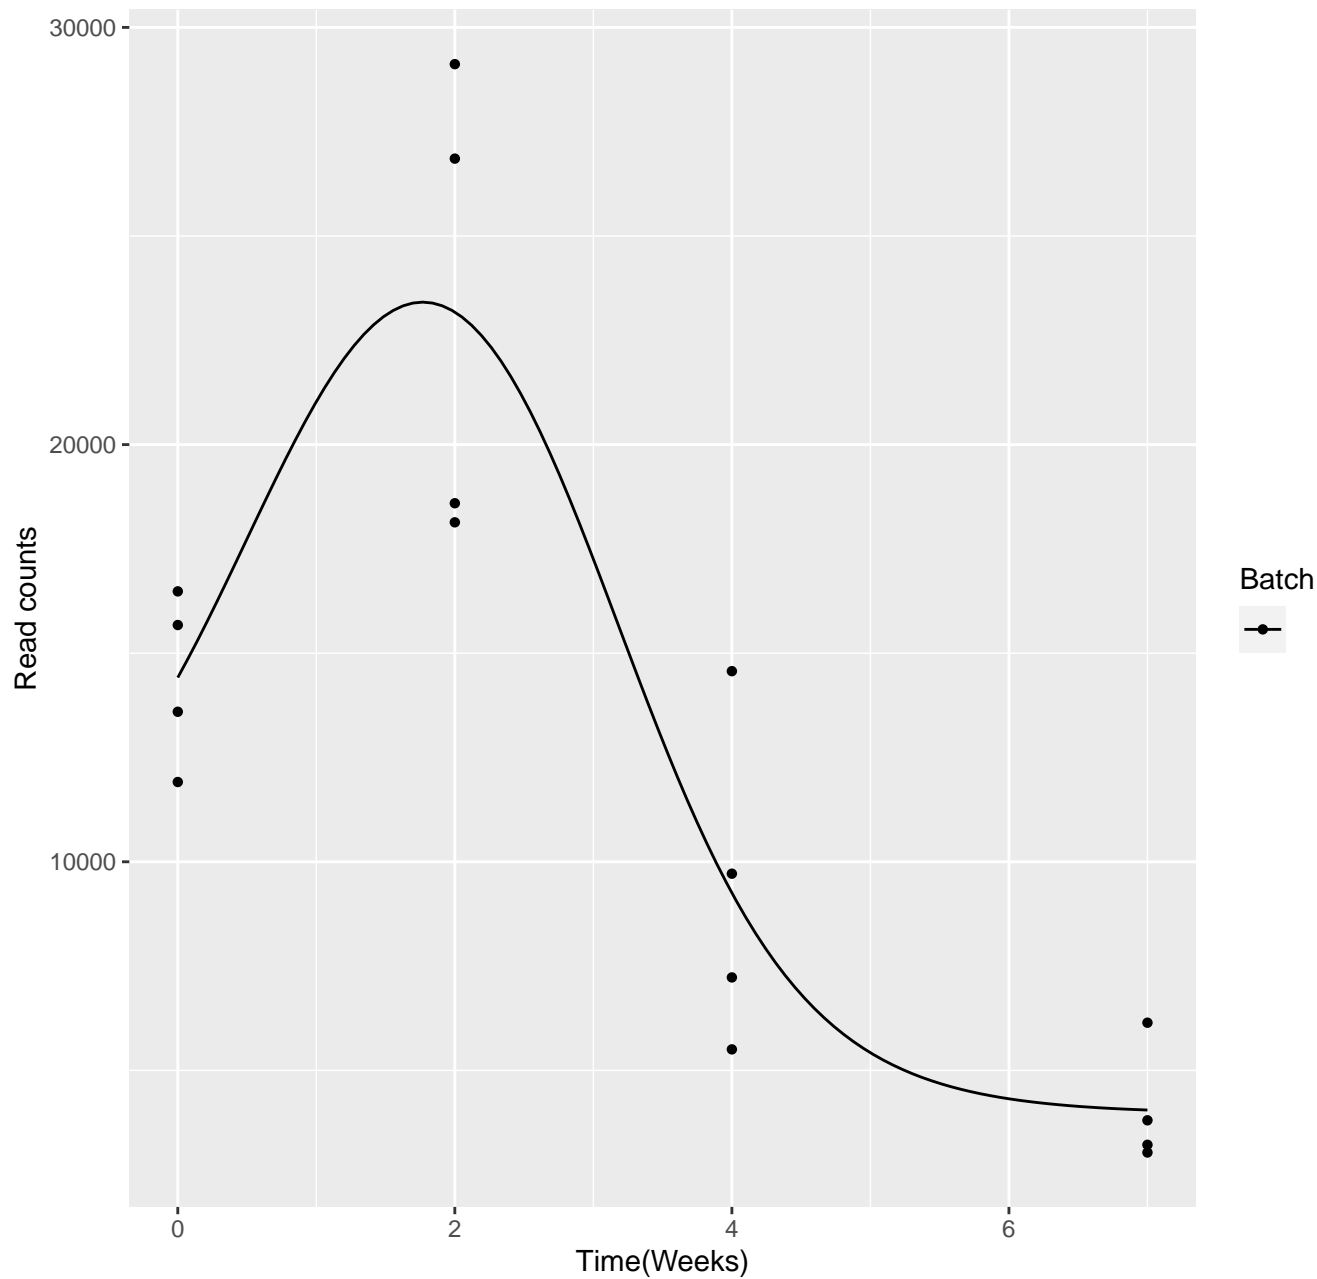

FCGR1A:  $\log_{10} q = -10.38$

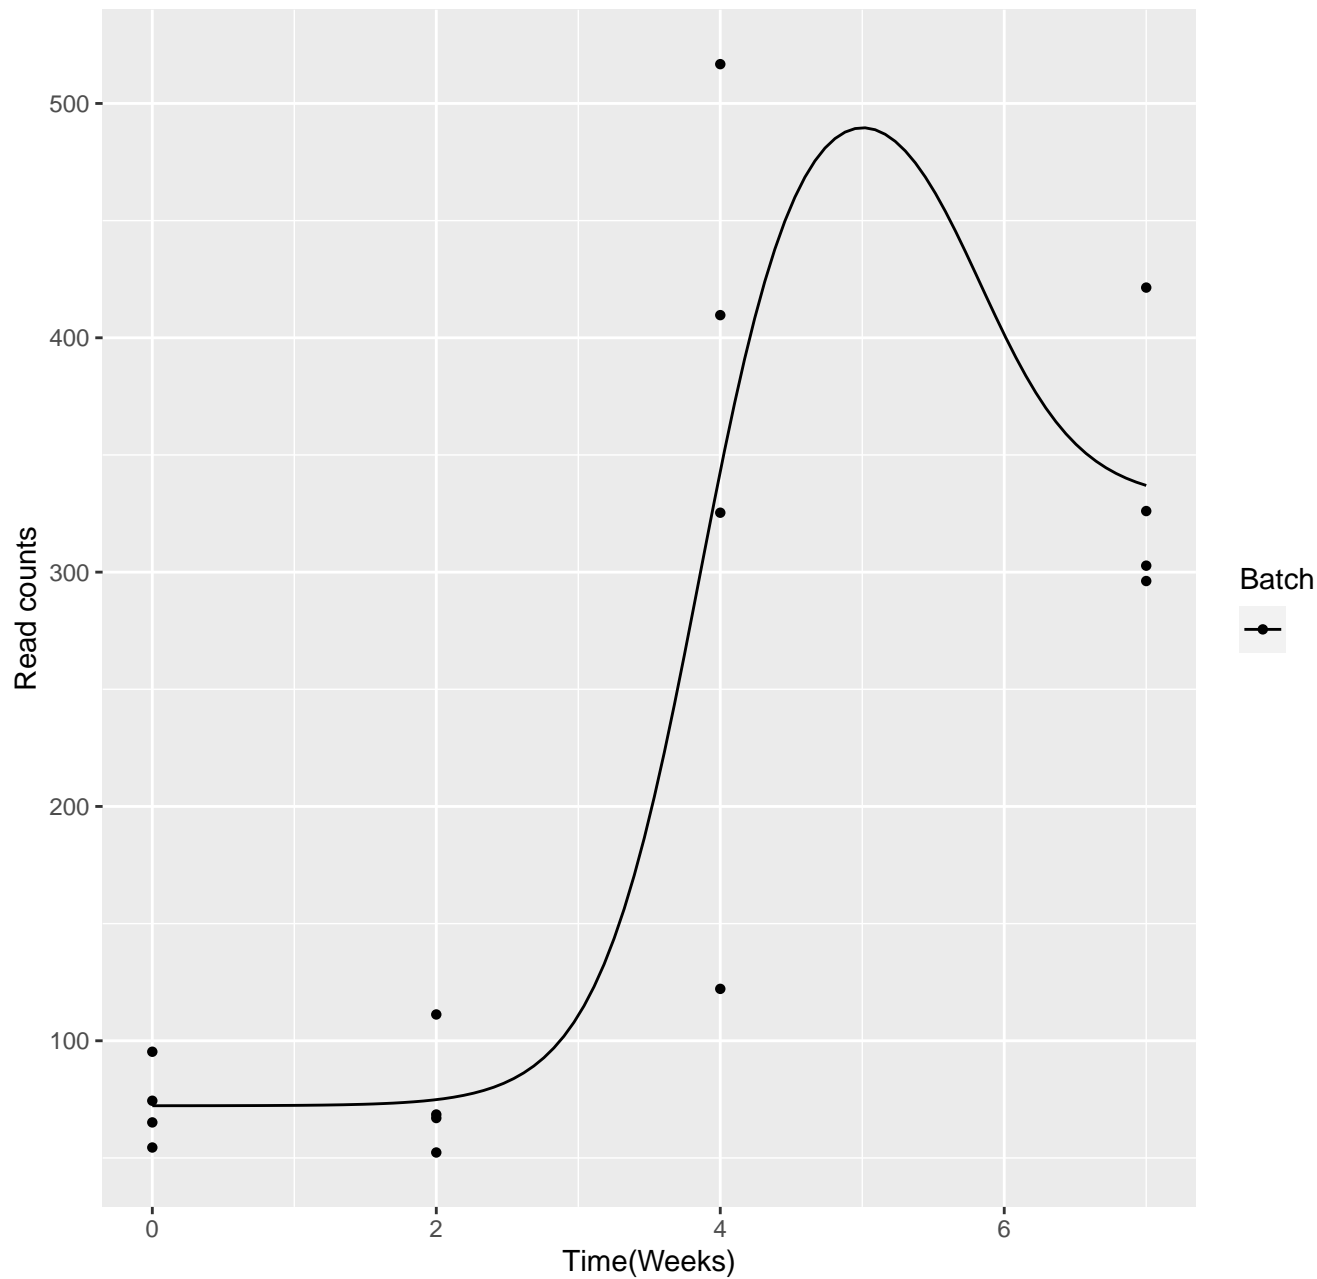

CD48:  $\log_{10} q = -10.35$

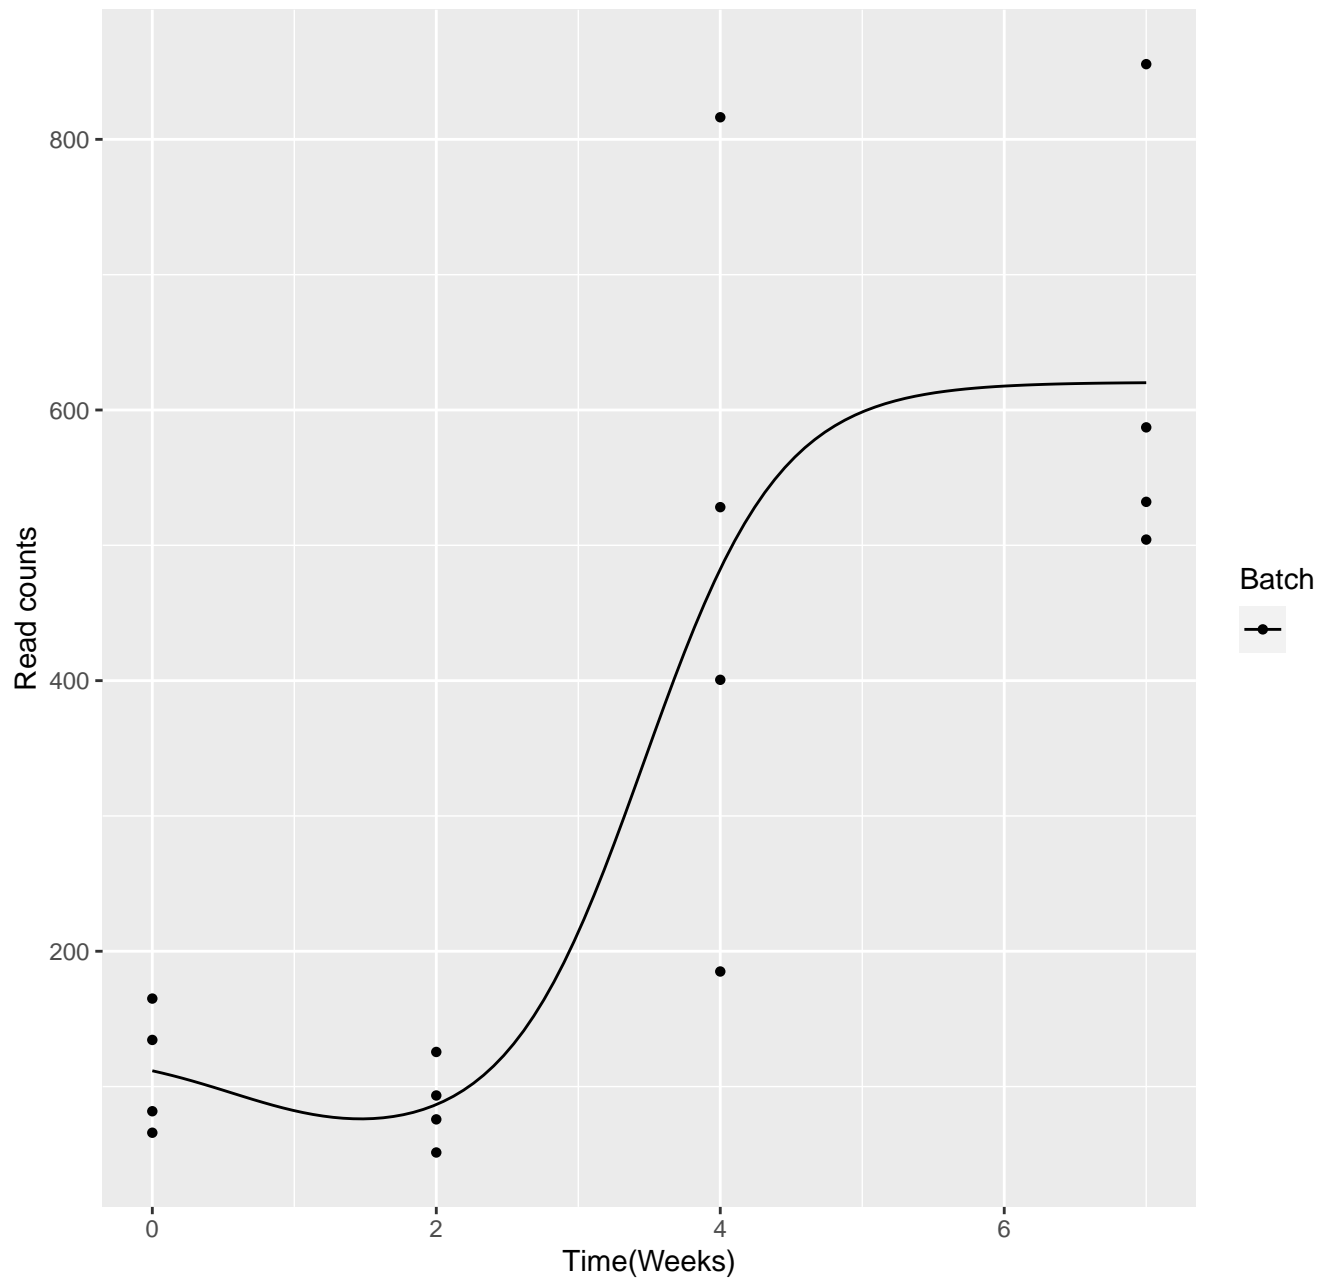

LOC100358778:  $\log_{10} q = -10.35$

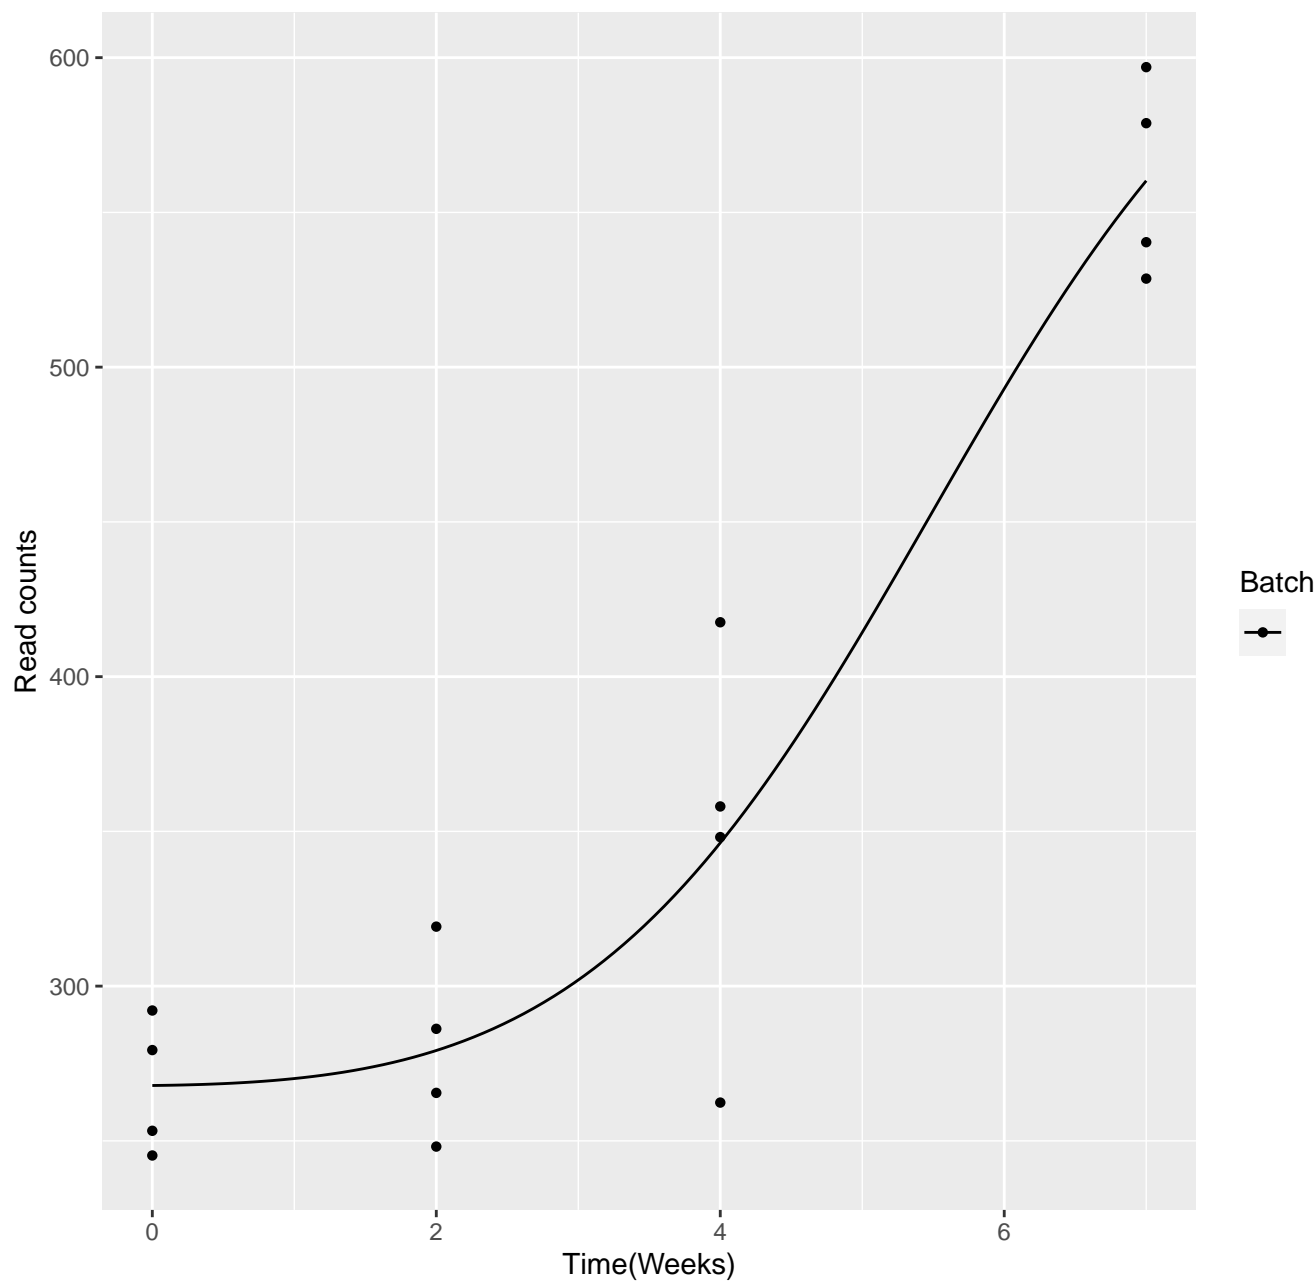

CD14:  $\log_{10} q = -10.35$

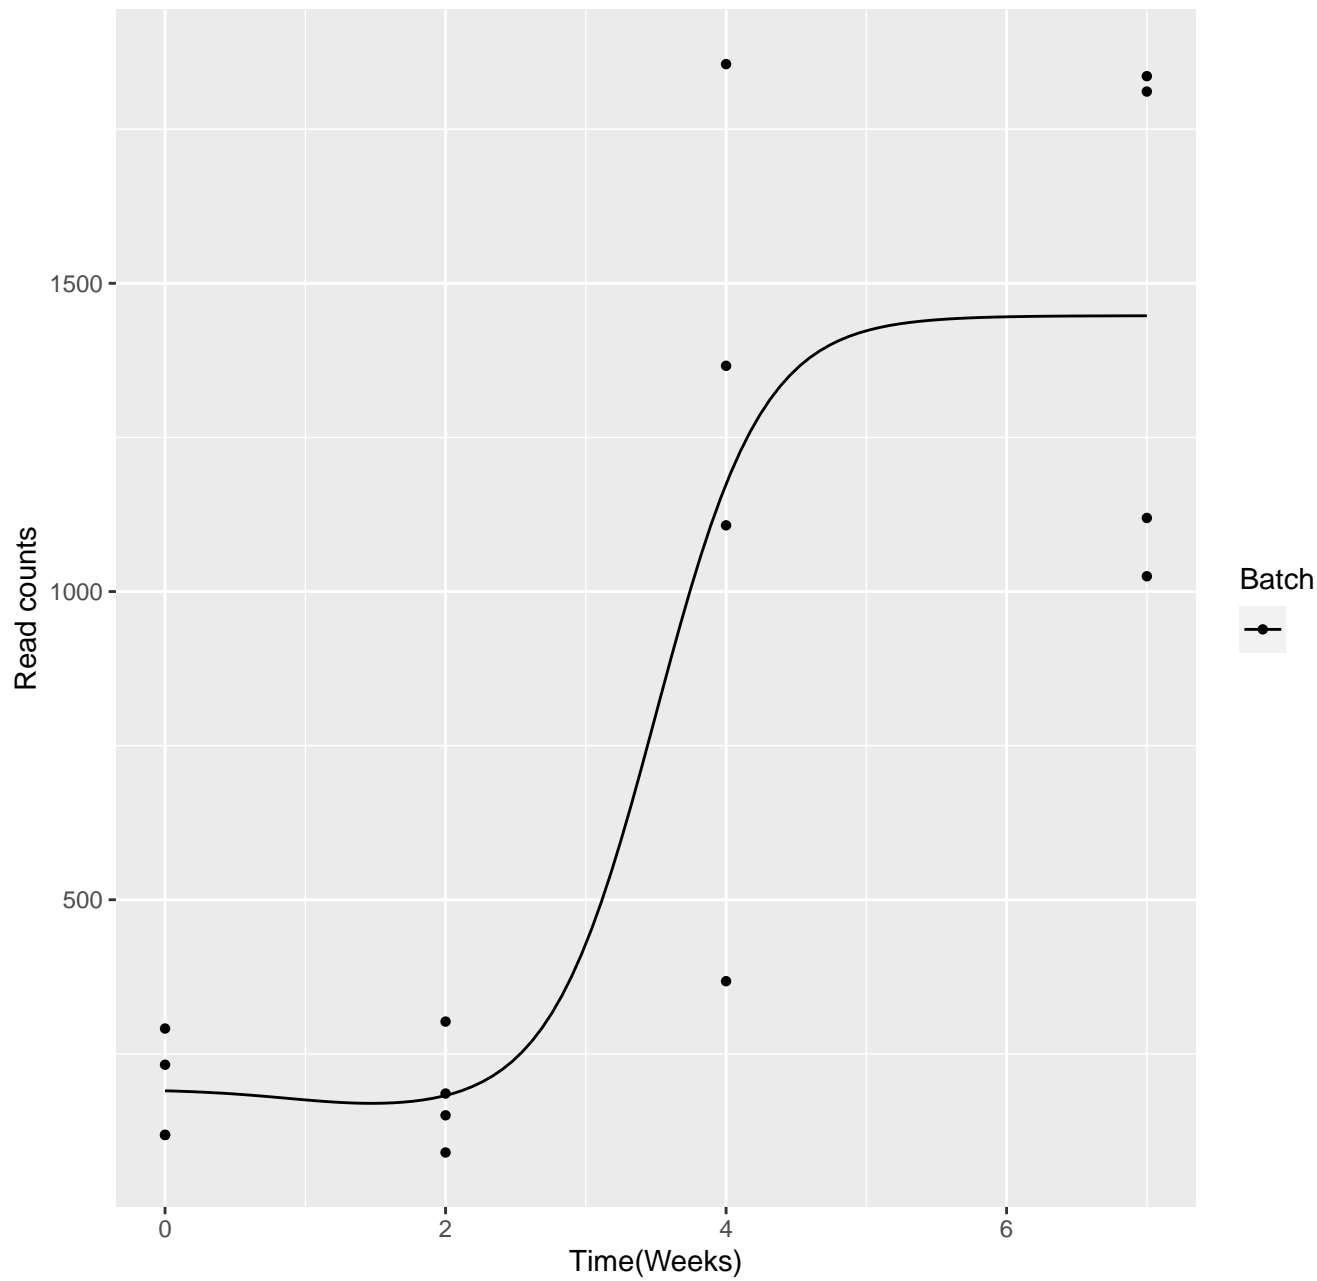

NDUFA4L2:  $\log_{10} q = -10.35$

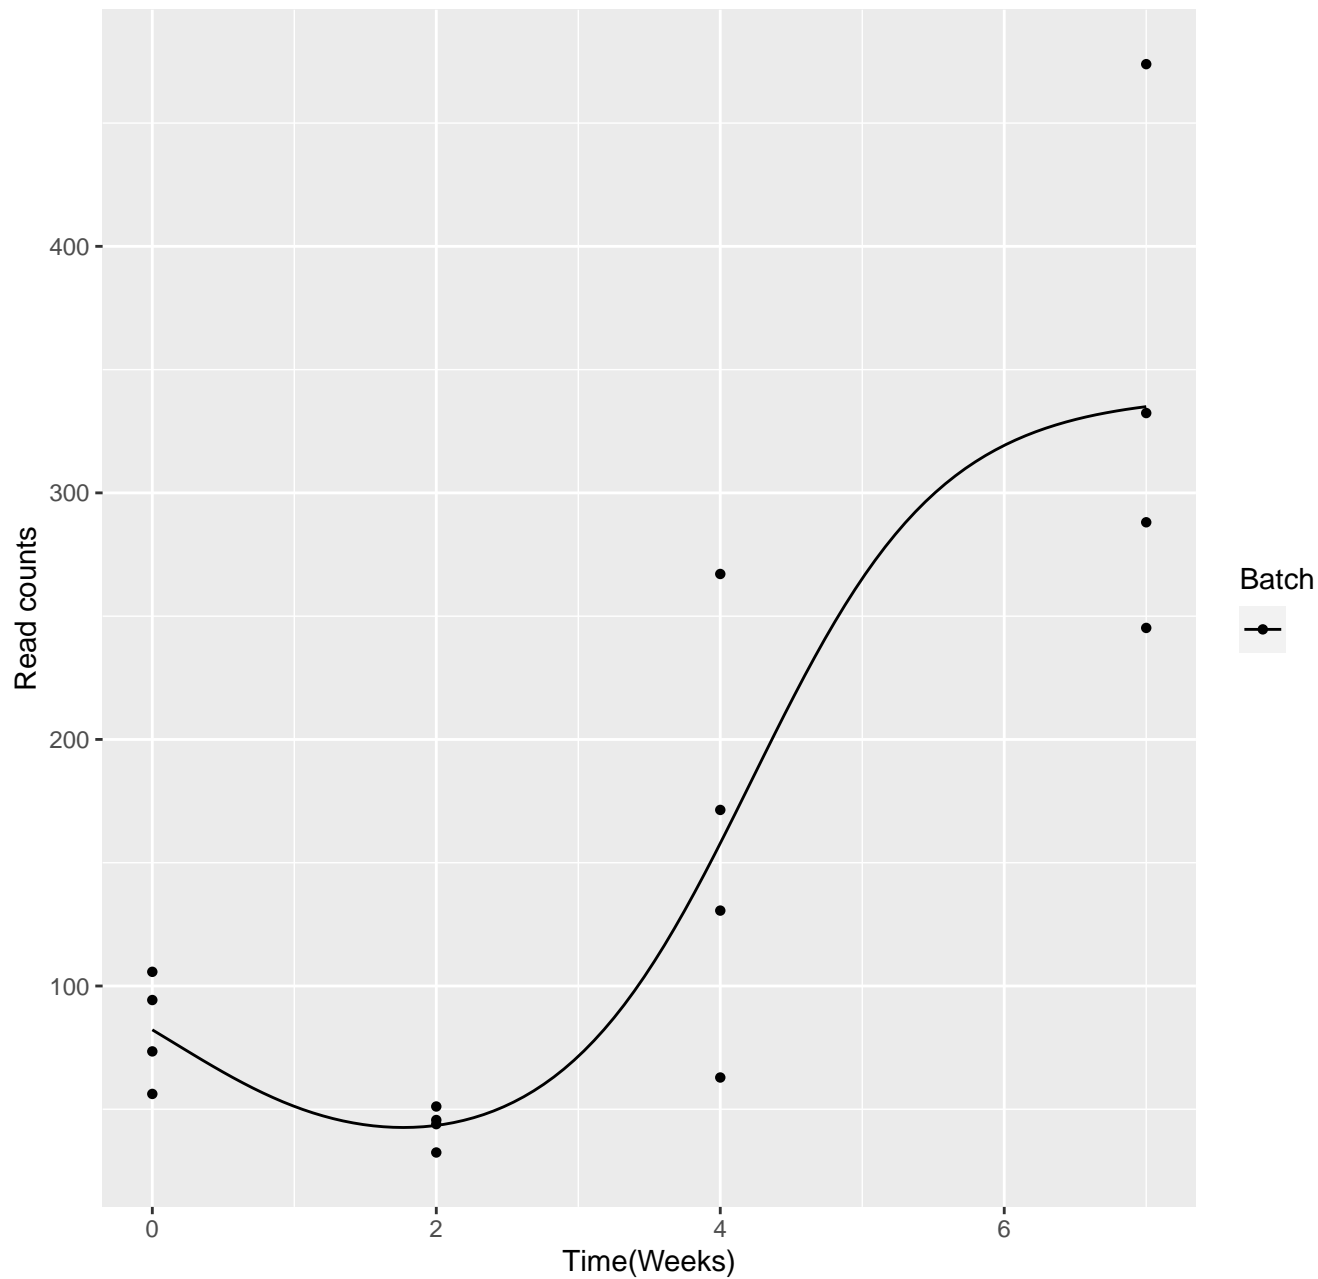

AMIGO2:  $\log_{10} q = -10.23$

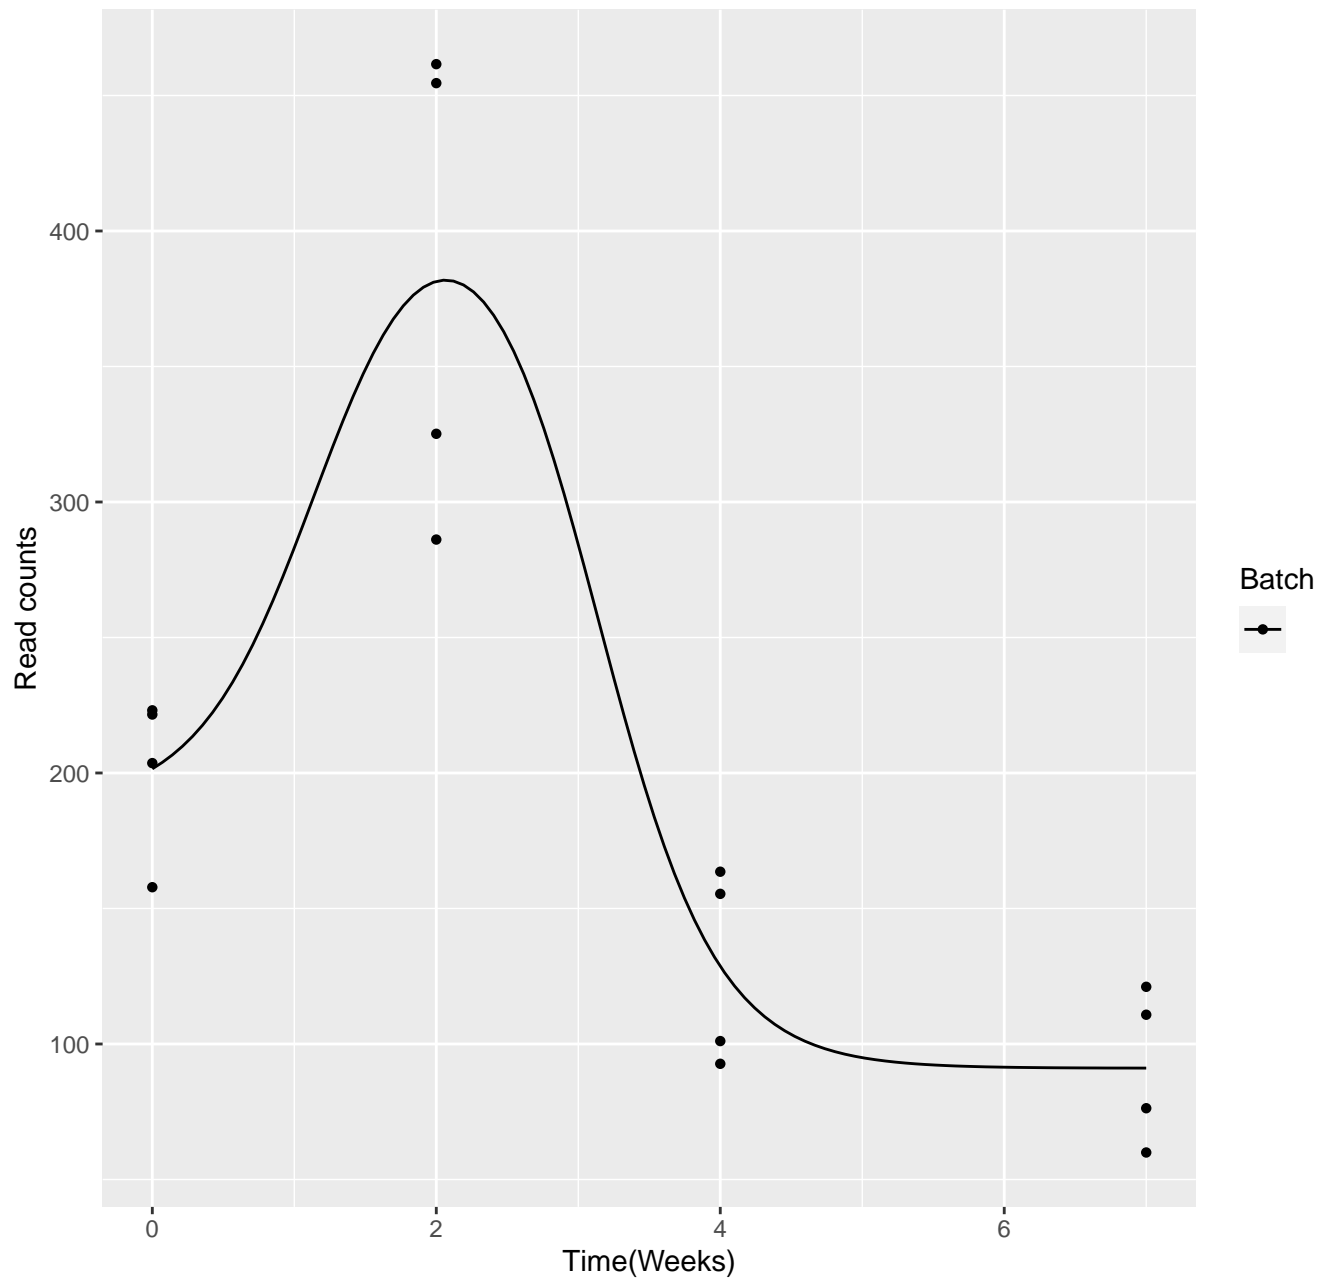



LAT2:  $\log_{10} q = -10.23$

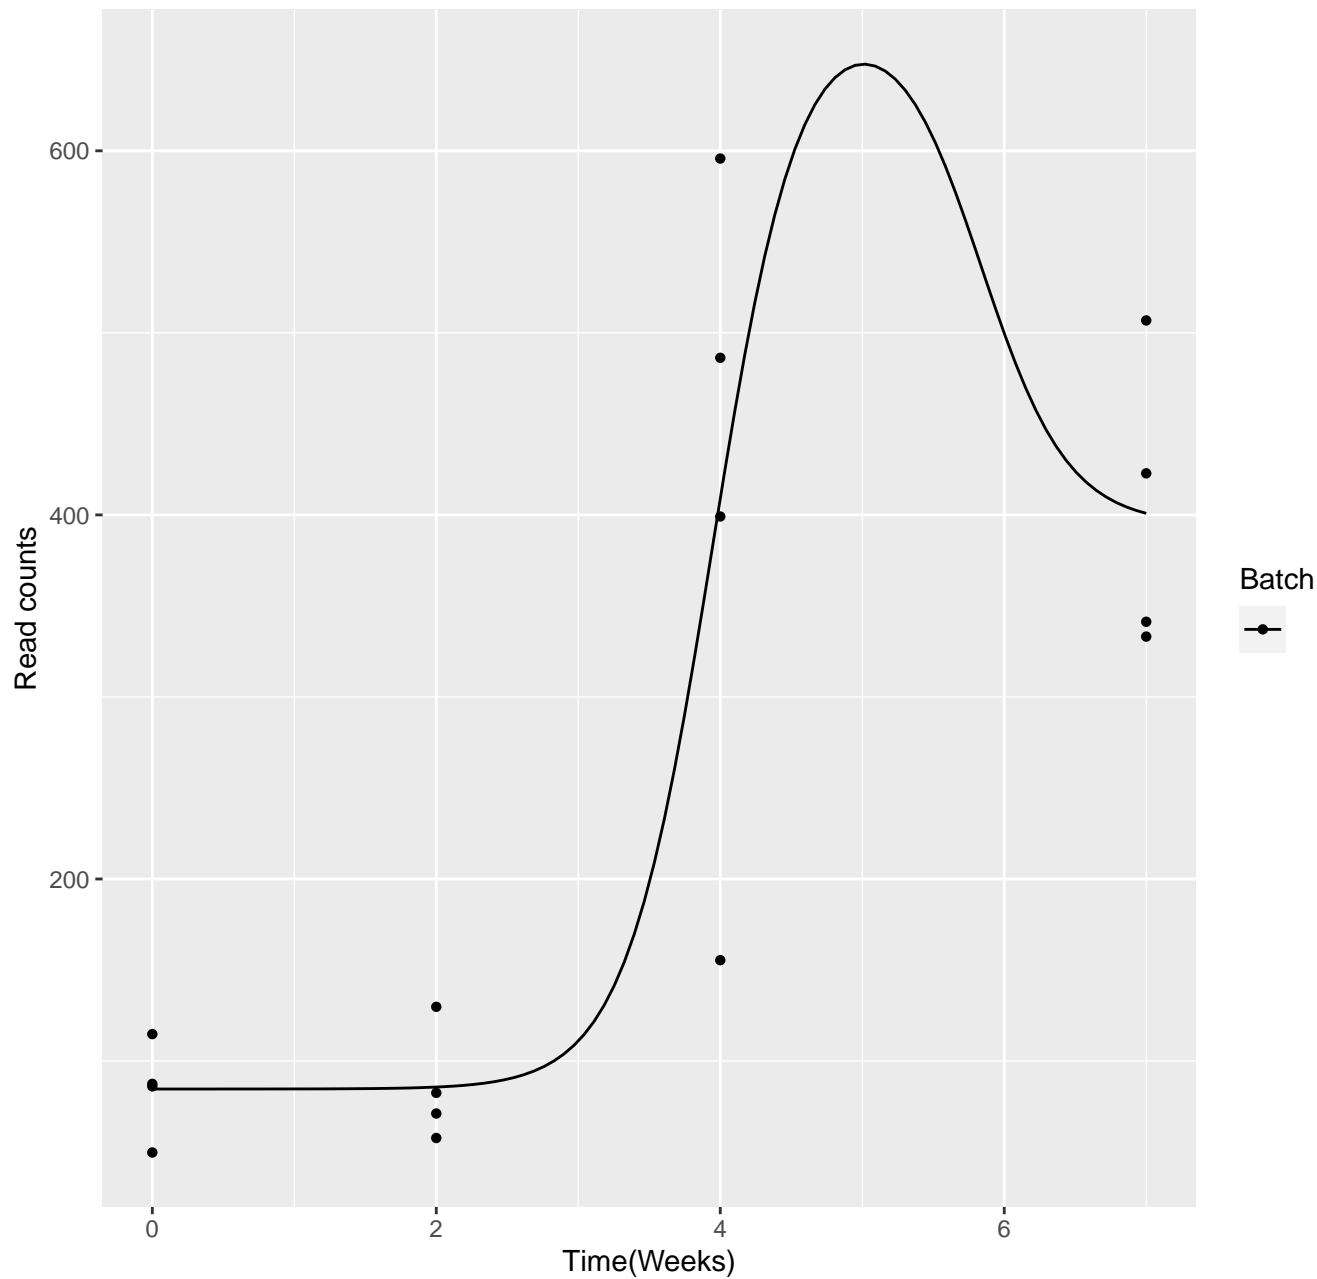

LCP1:  $\log_{10} q = -10.23$

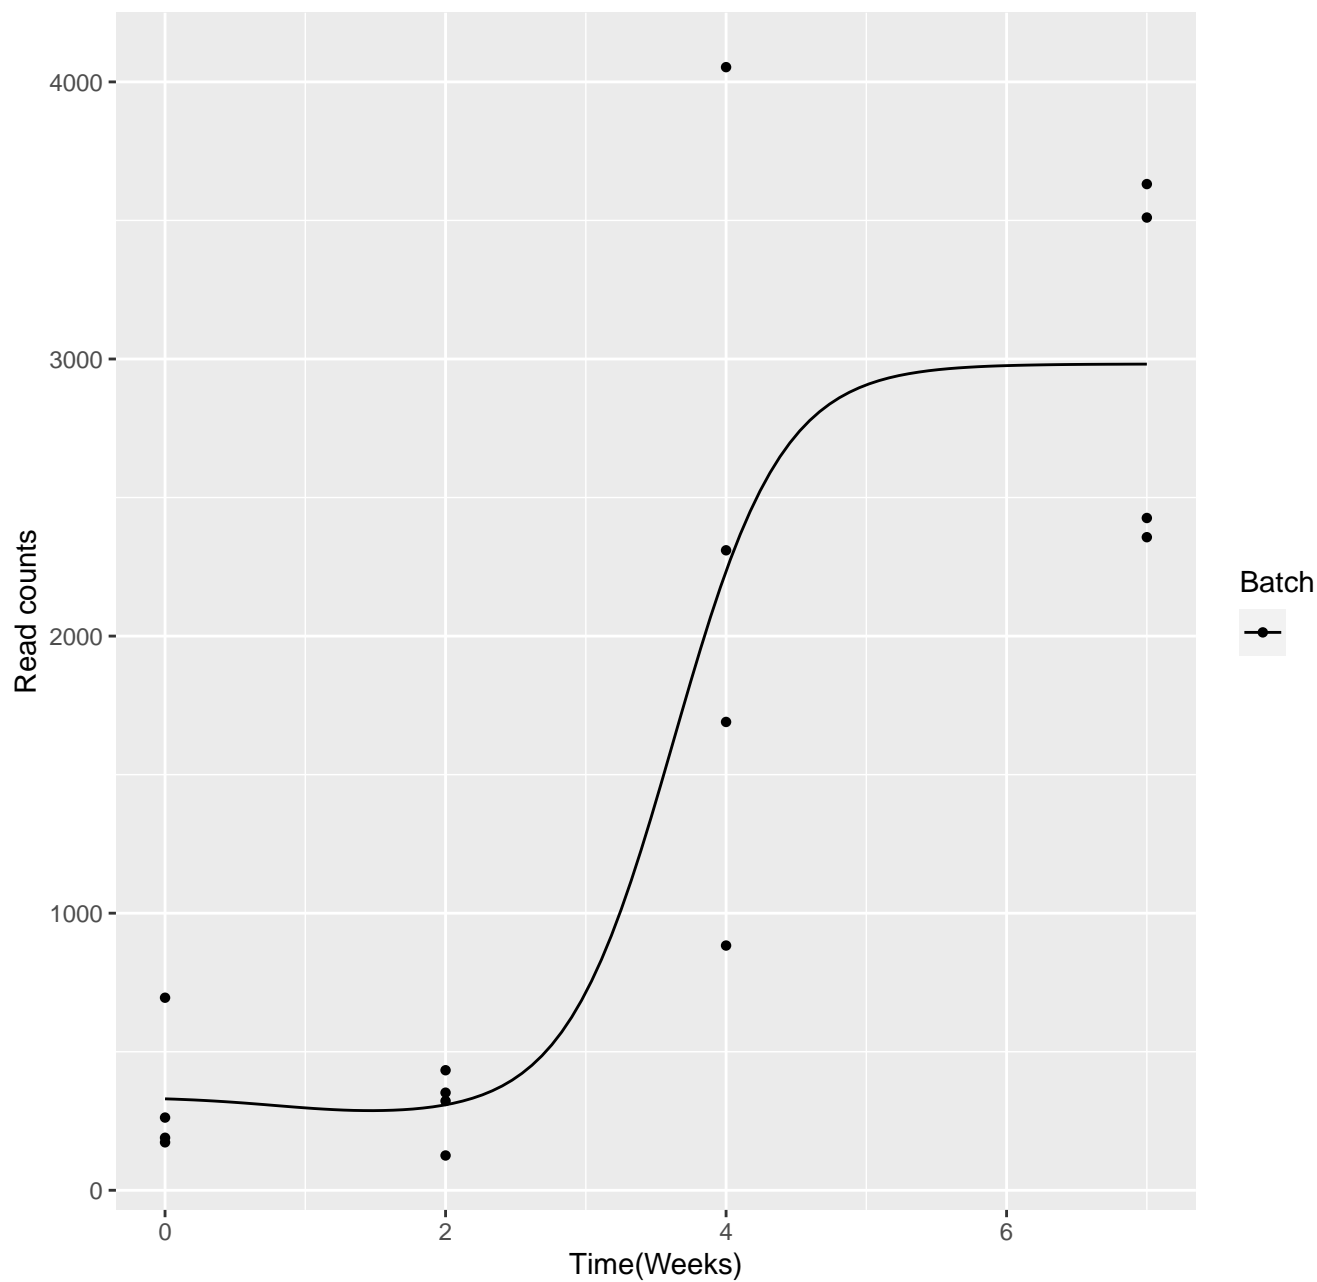

PTPN6:  $\log_{10} q = -10.16$

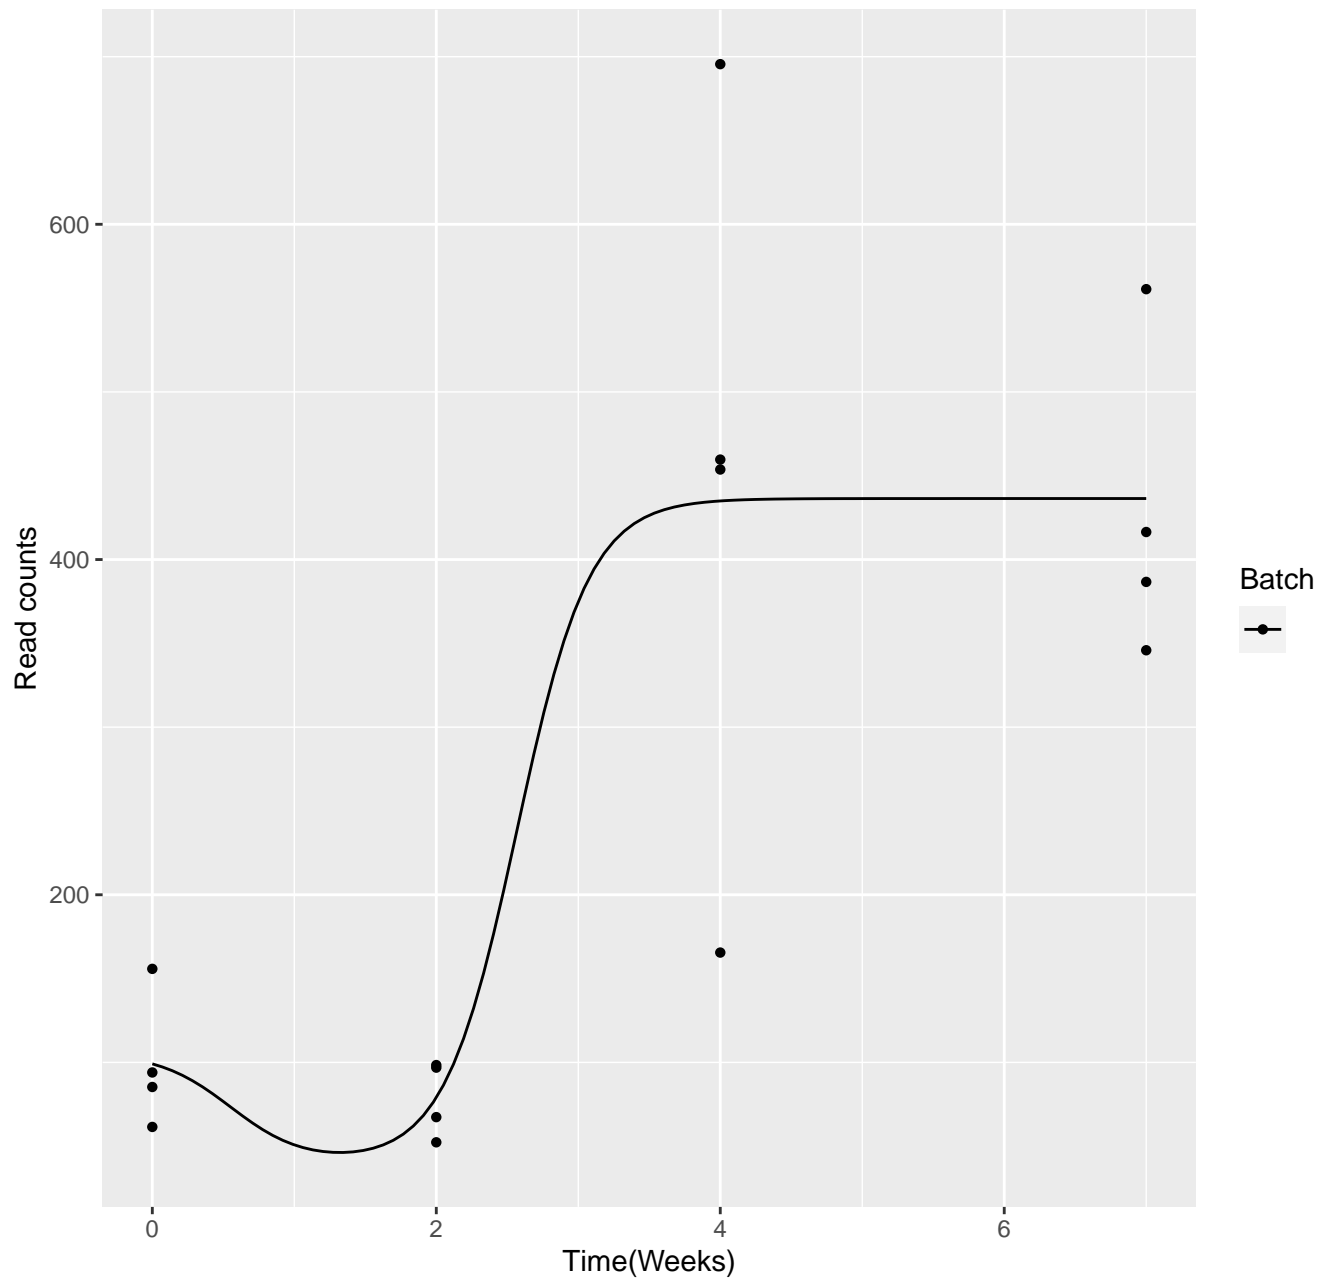

EFHD1:  $\log_{10} q = -10.15$

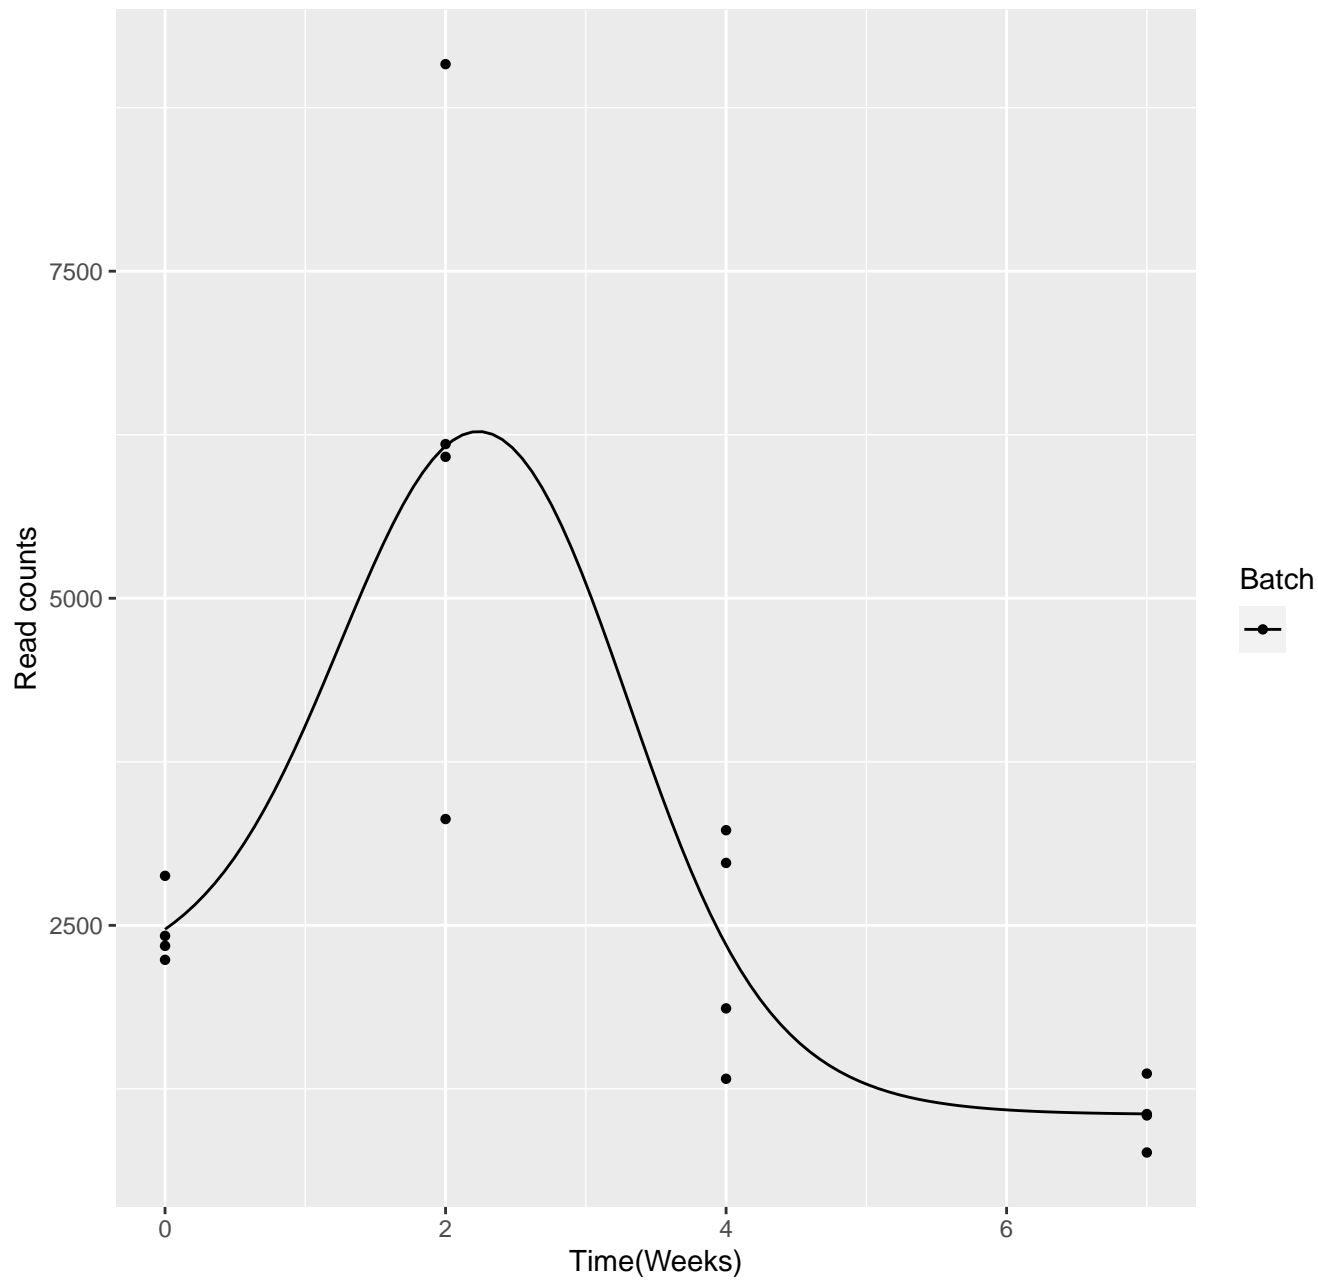

SELPLG:  $\log_{10} q = -10.03$

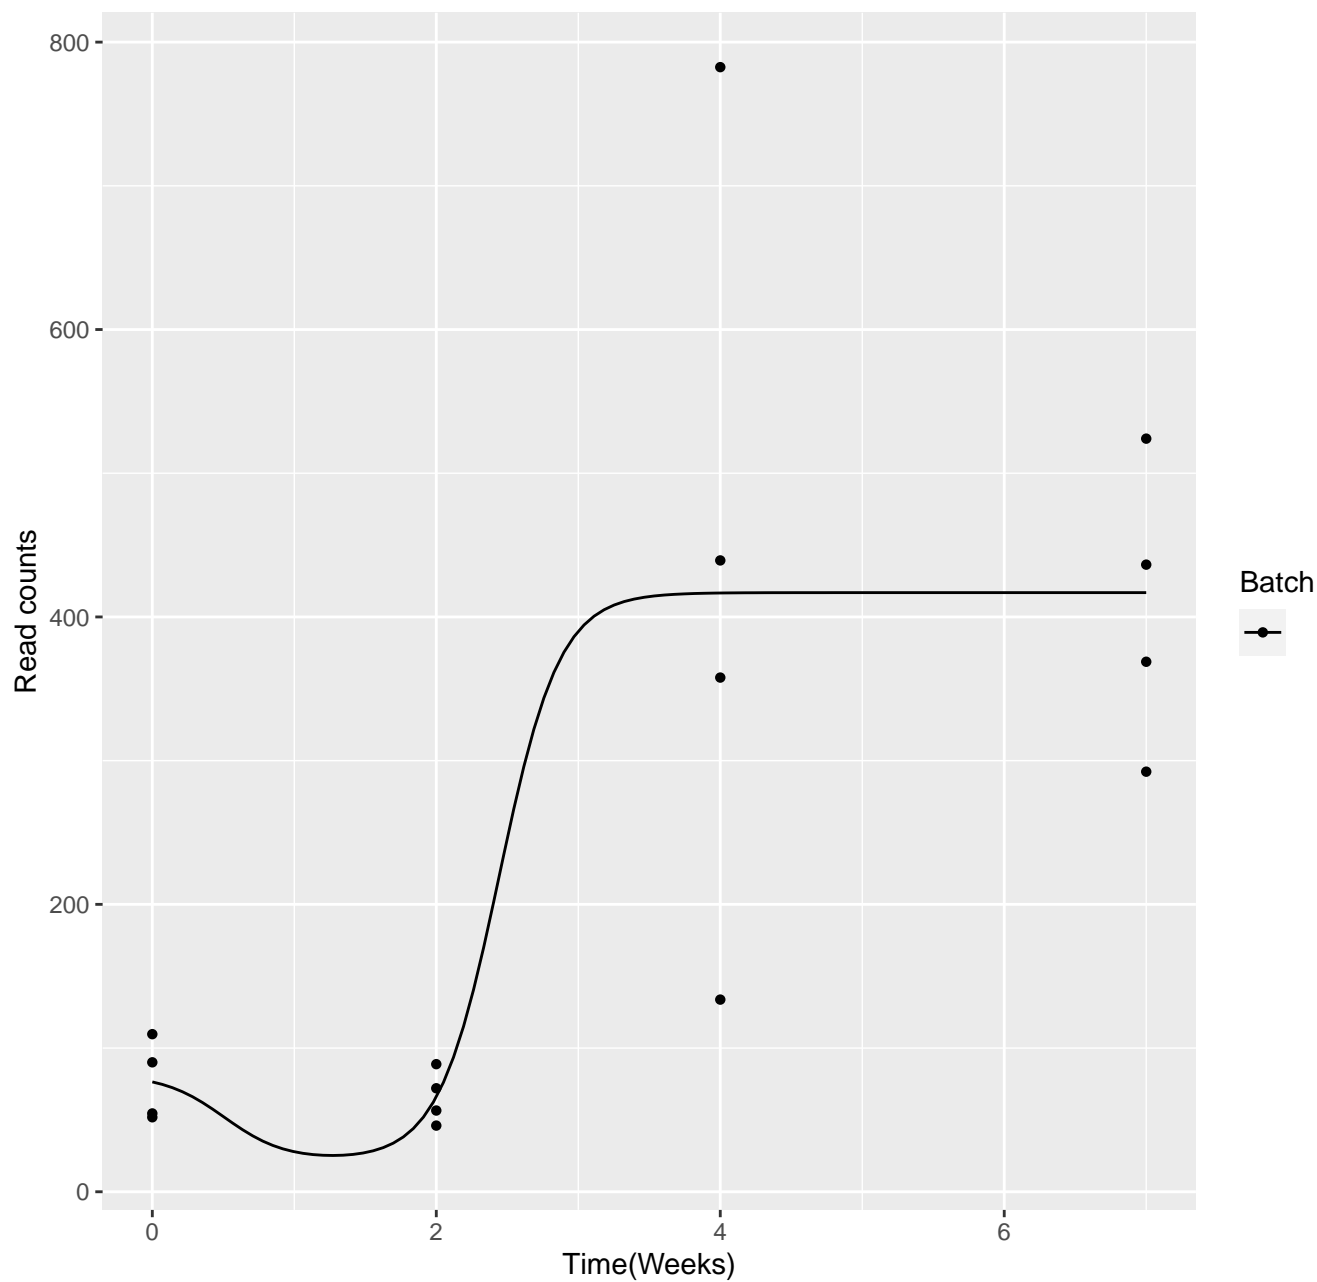

CLU:  $\log_{10} q = -9.99$

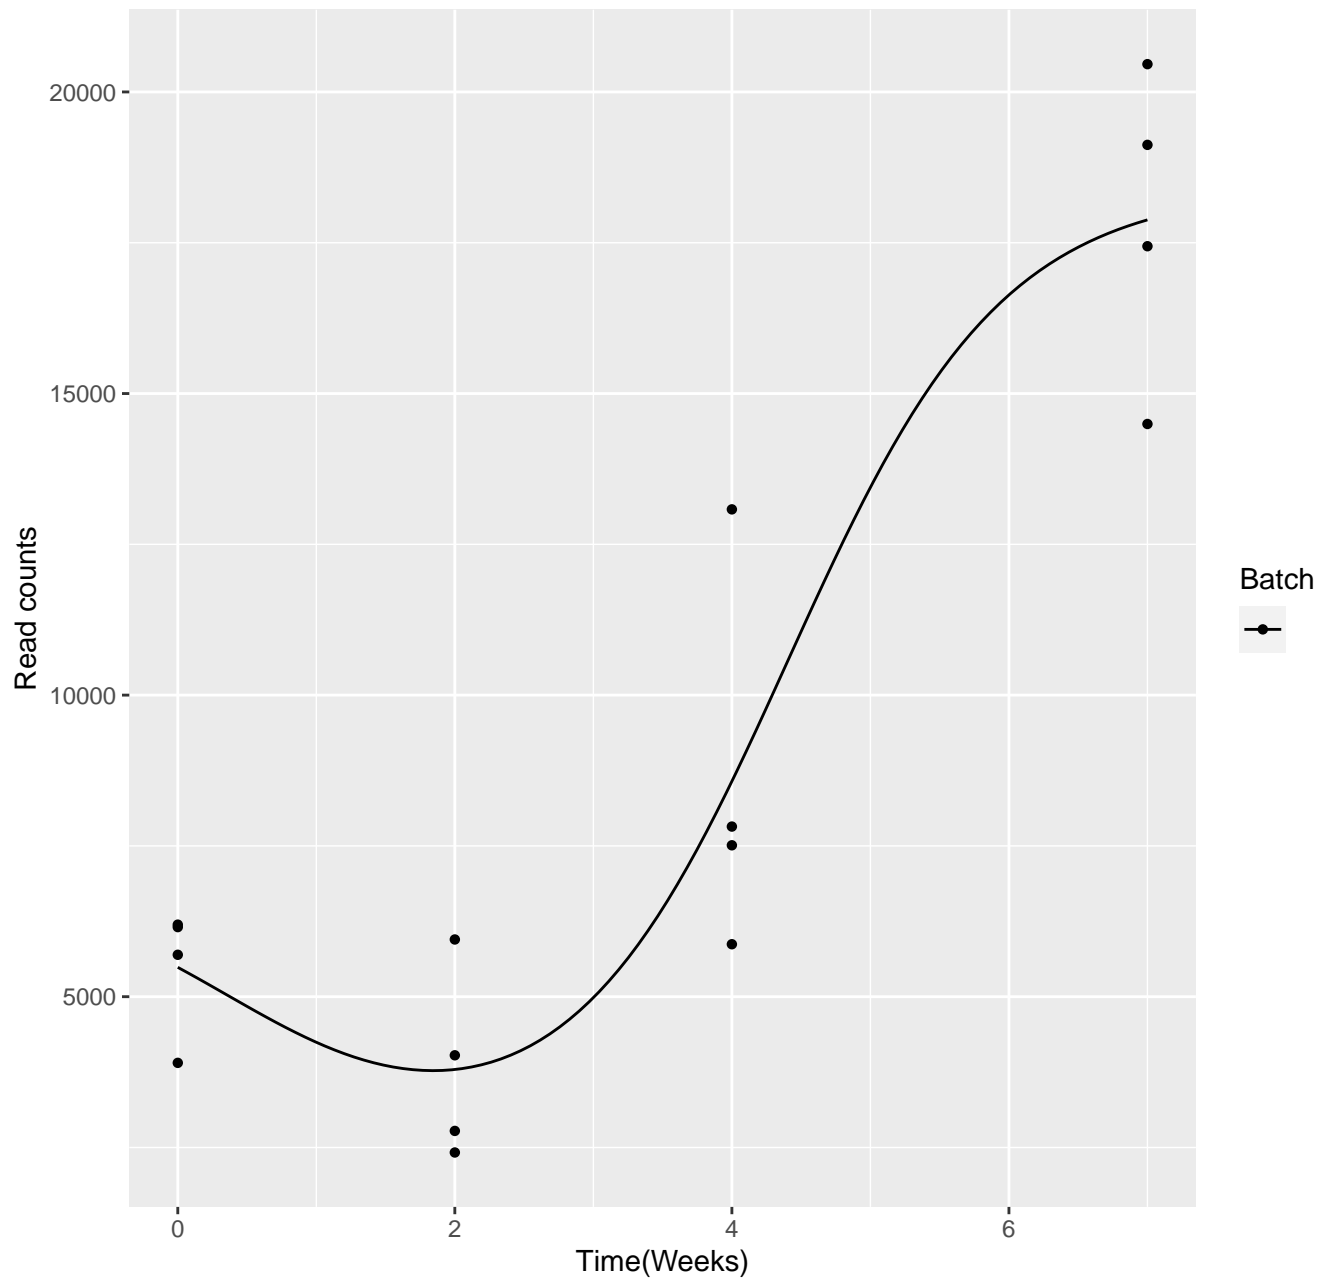

TSPAN33:  $\log_{10} q = -9.99$

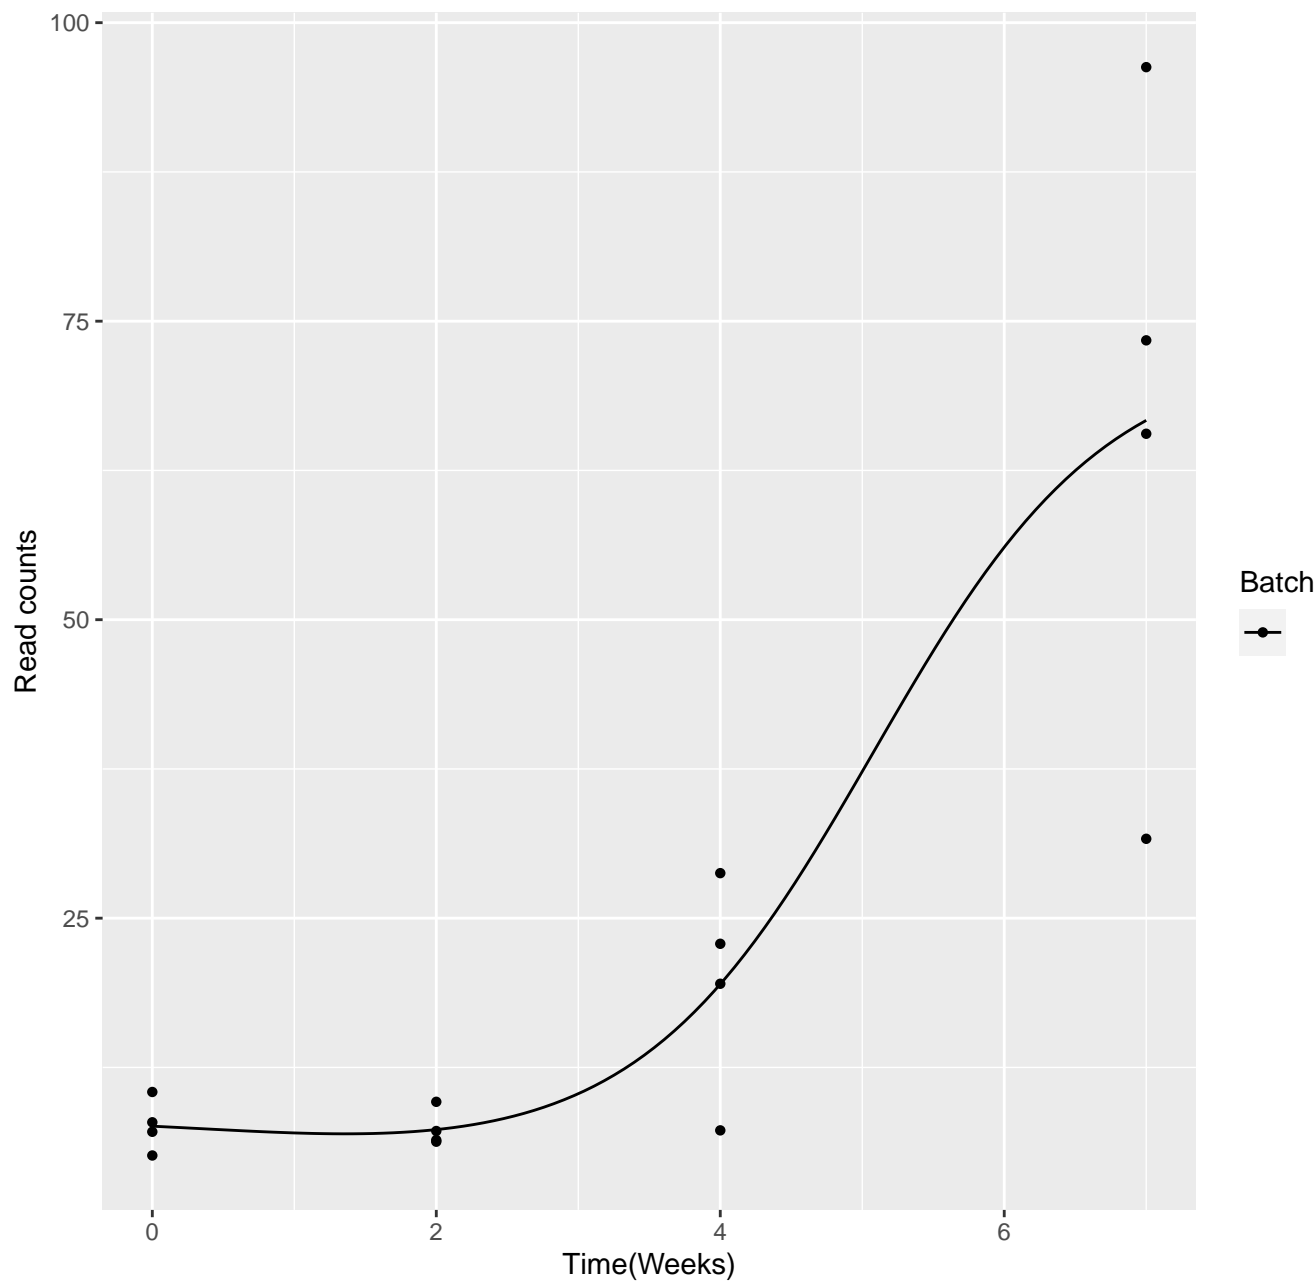

ADAMTSL4:  $\log_{10} q = -9.93$

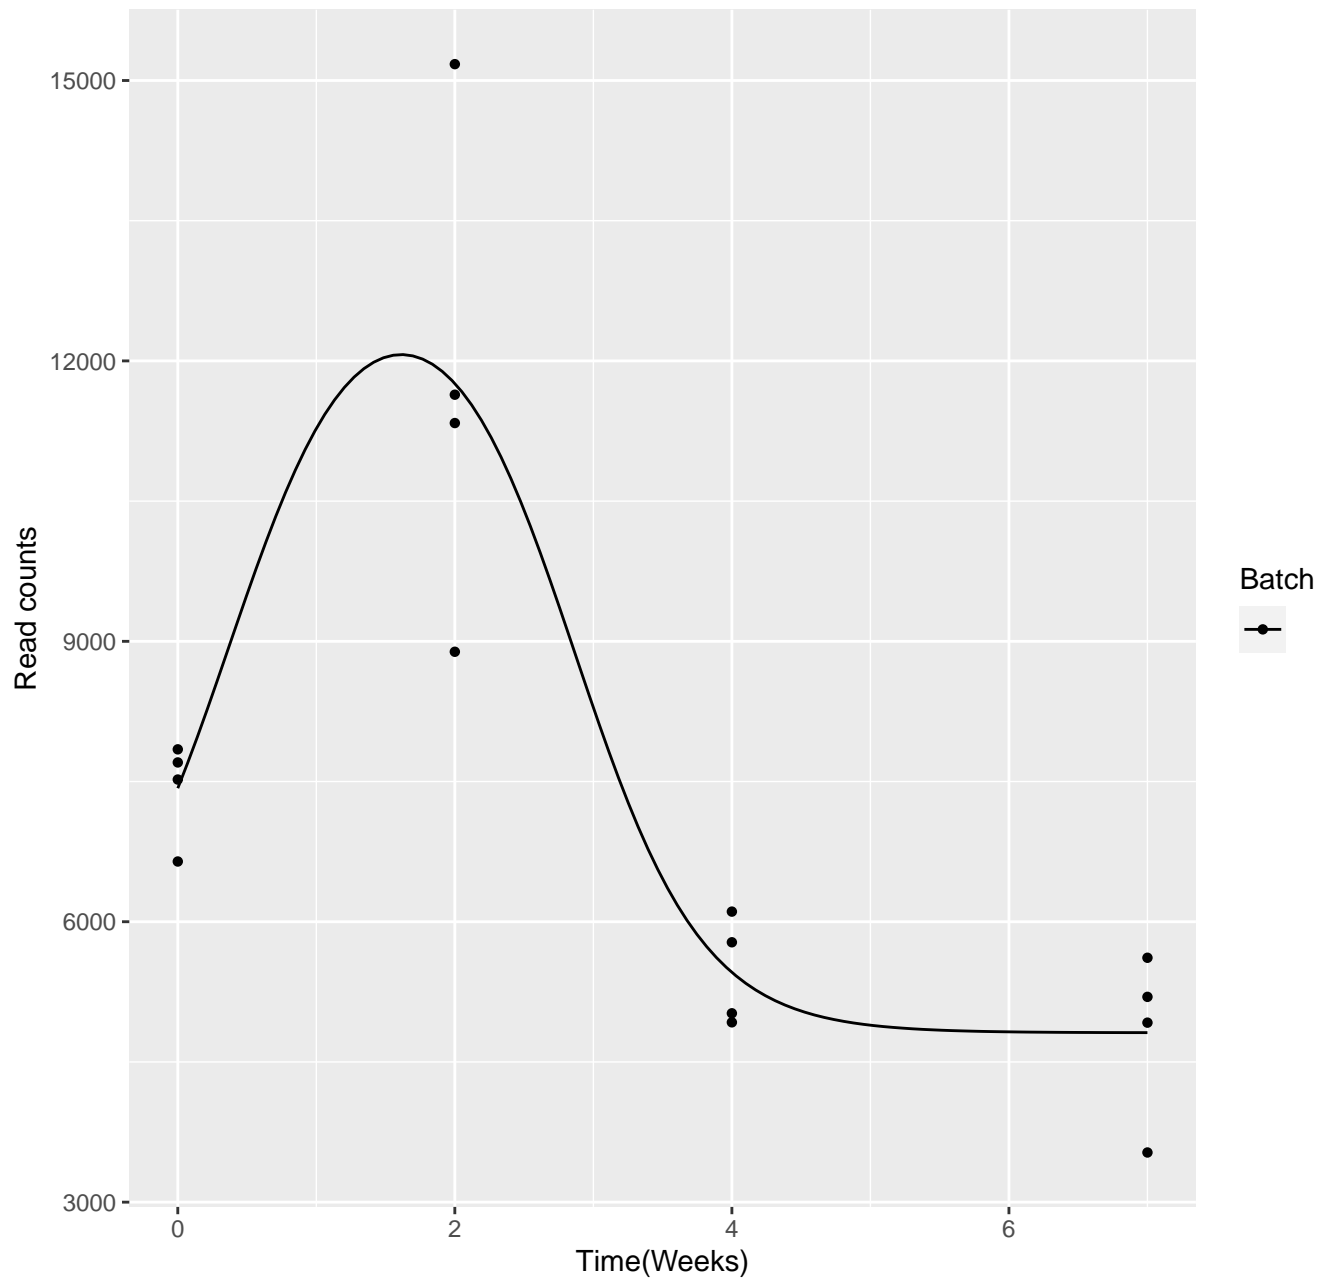



RUNX1:  $\log_{10} q = -9.85$

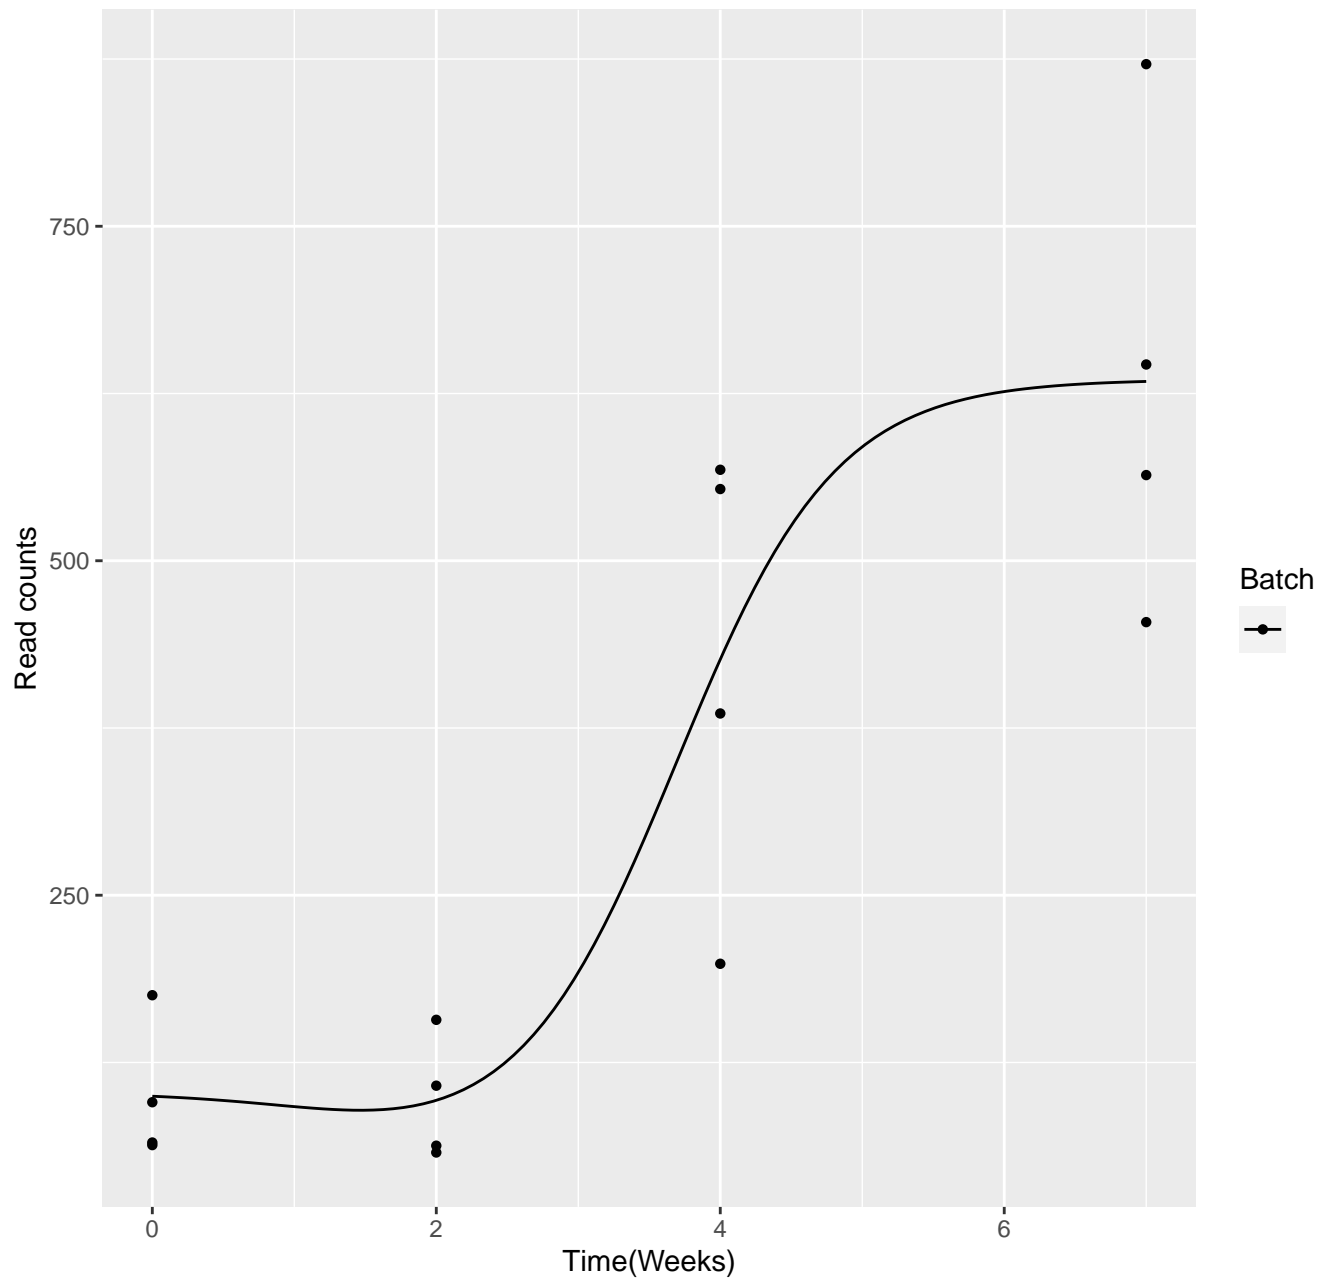

C1QTNF2:  $\log_{10} q = -9.83$

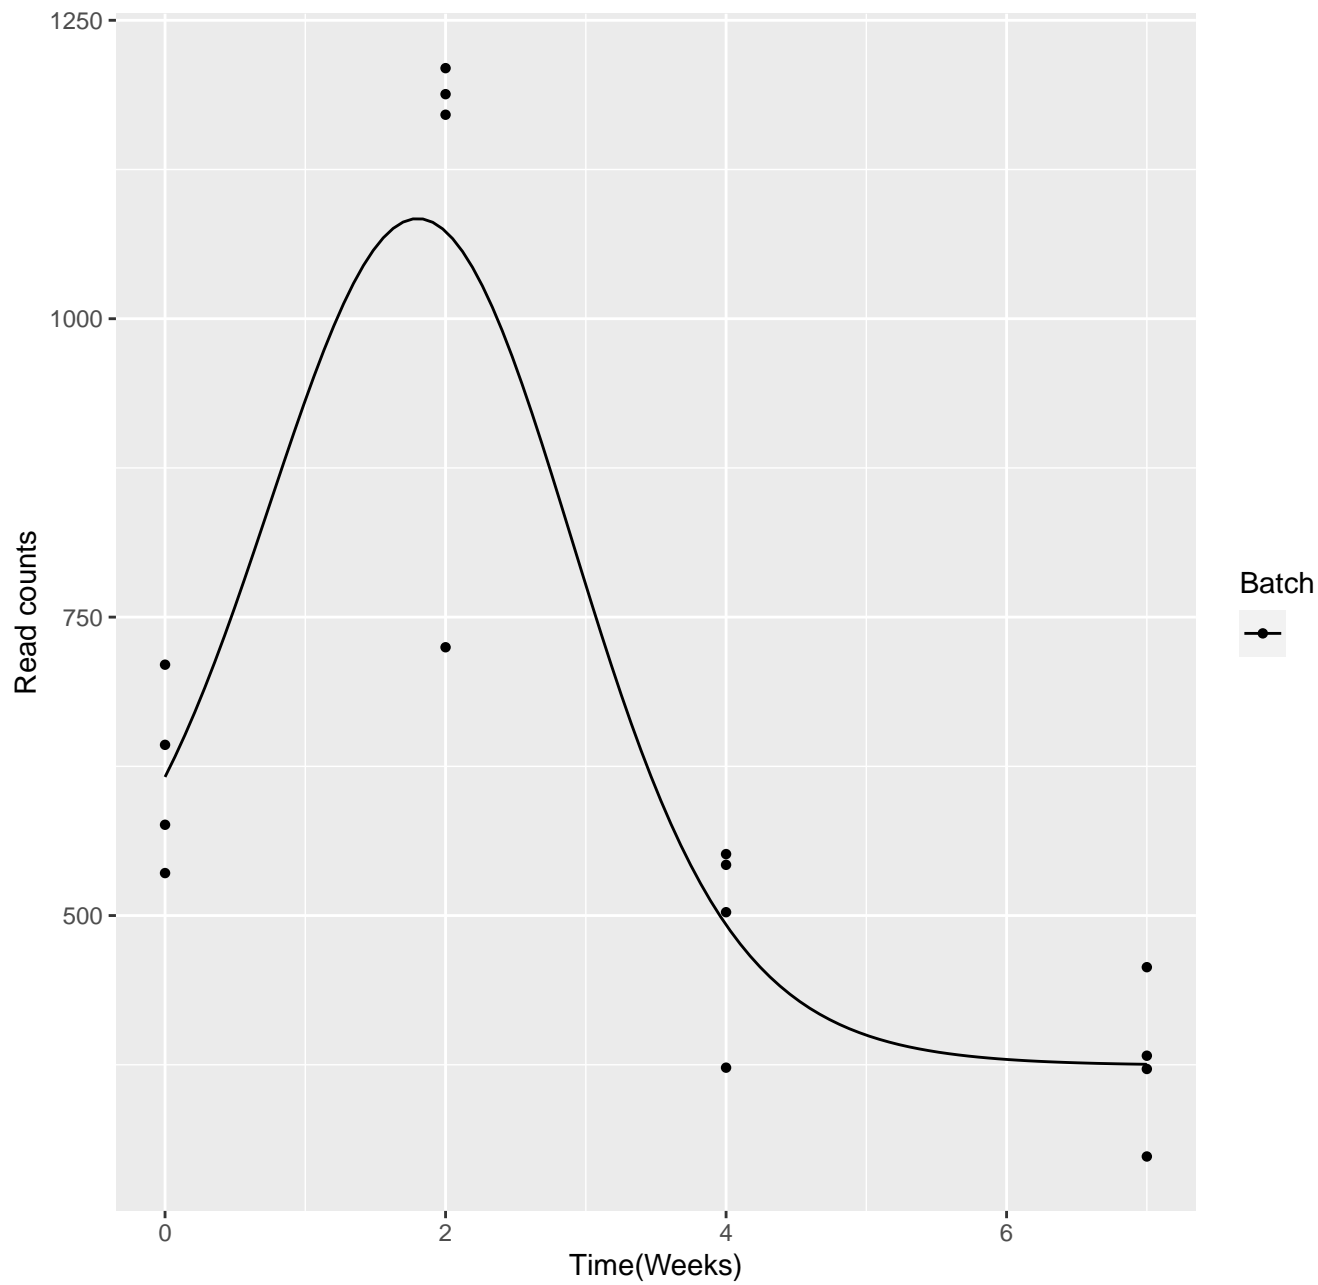

CSF2RA:  $\log_{10} q = -9.82$

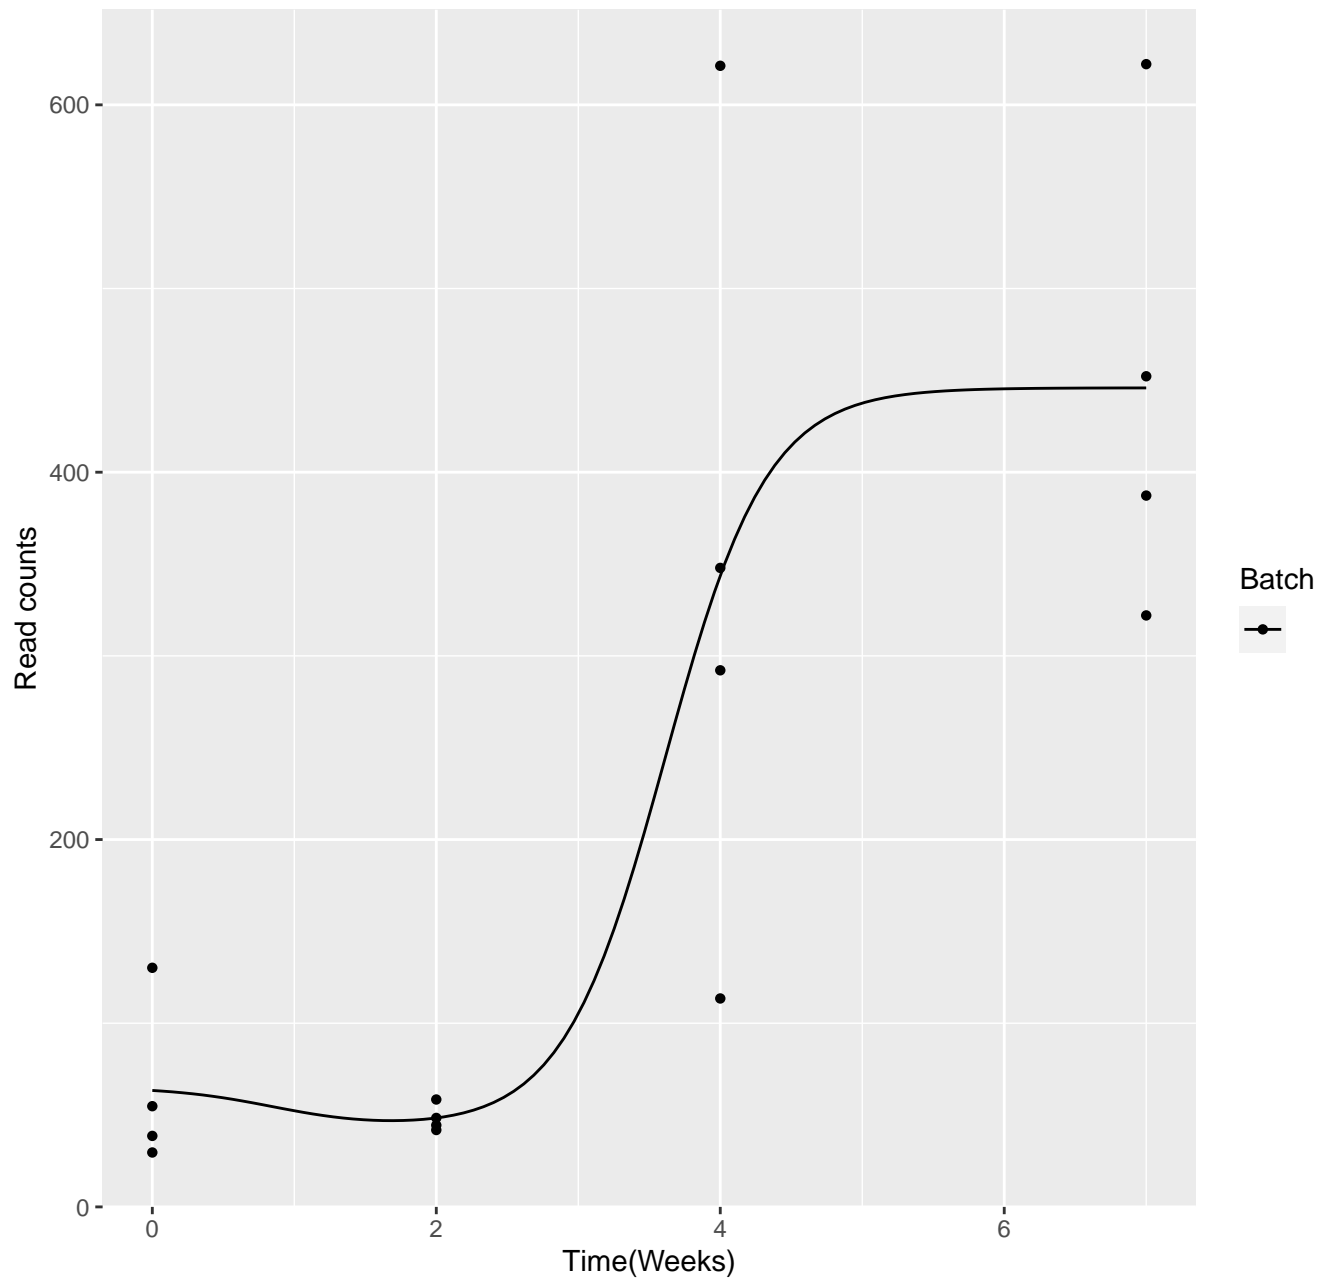

LOC100339459:  $\log_{10} q = -9.77$

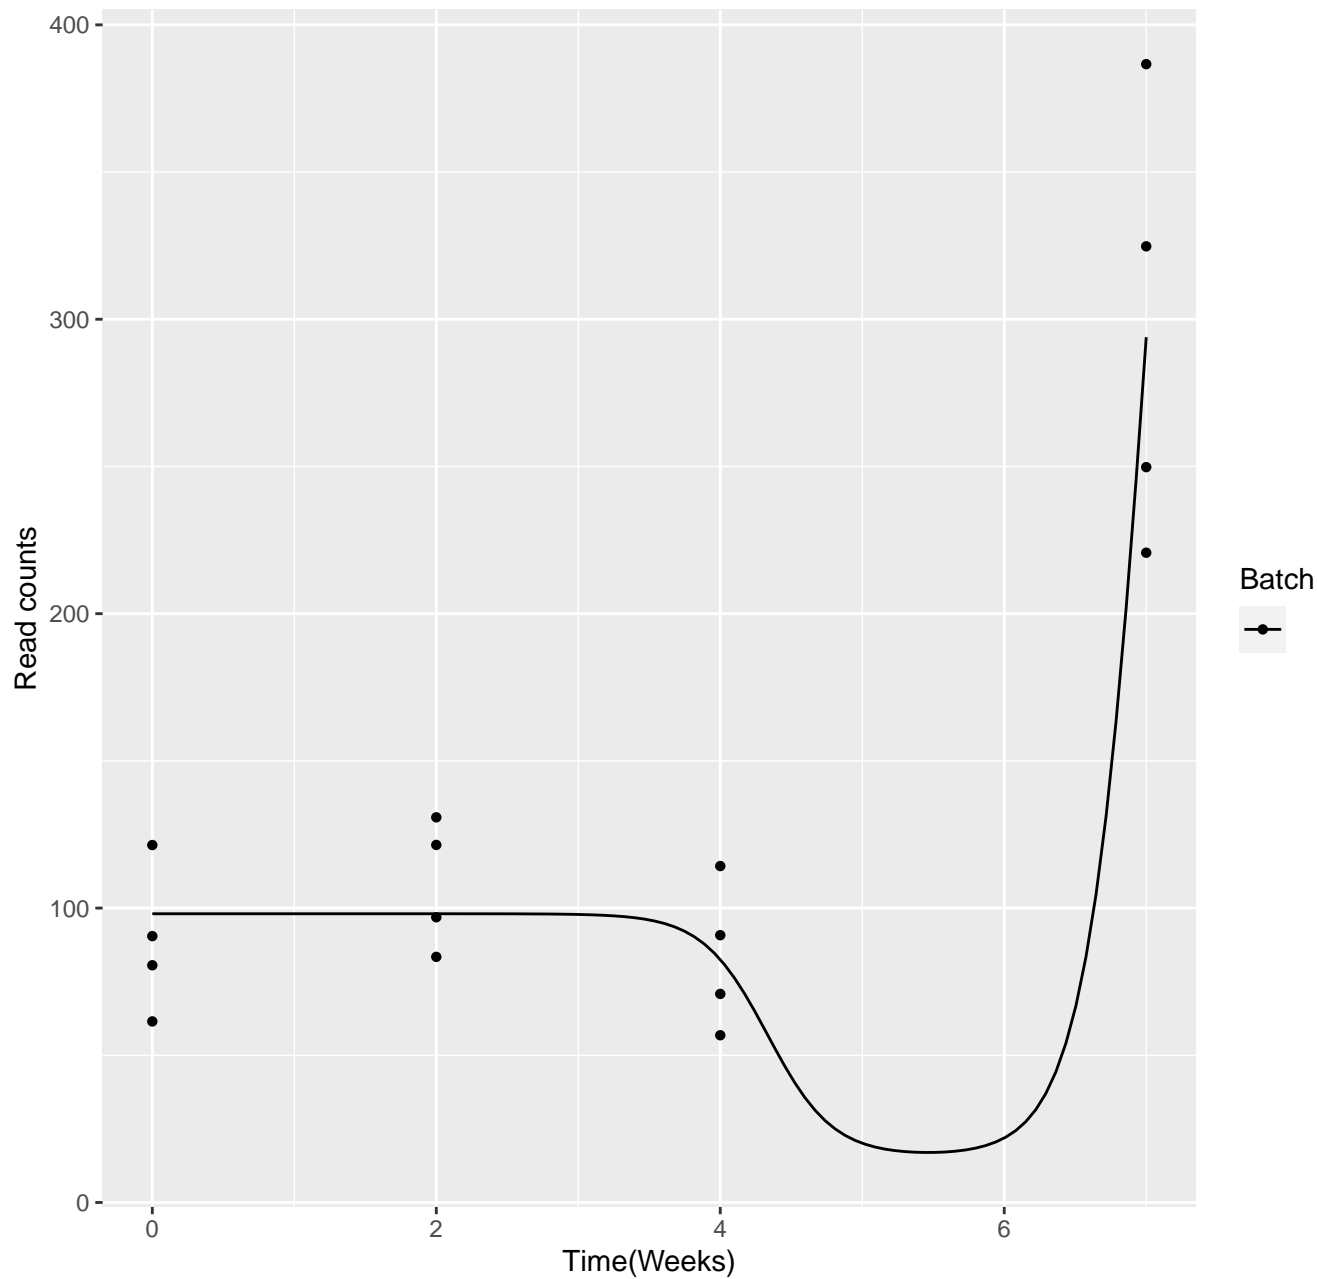

CXCL14:  $\log_{10} q = -9.74$

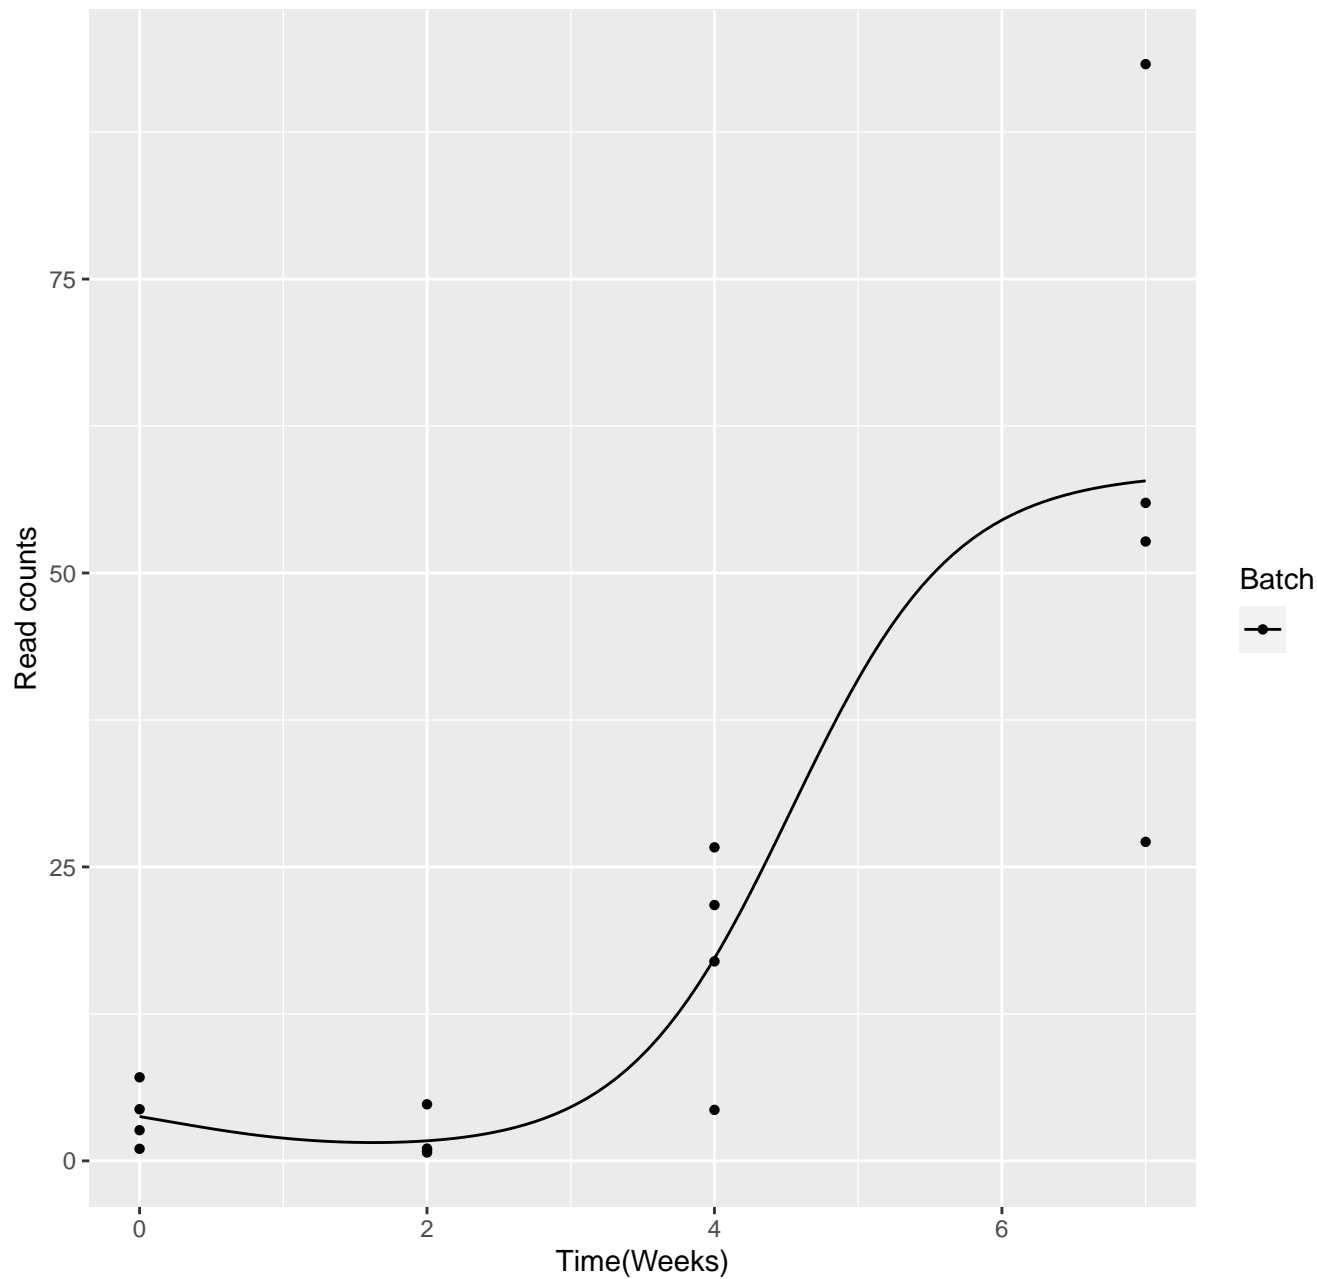

TYROBP:  $\log_{10} q = -9.74$

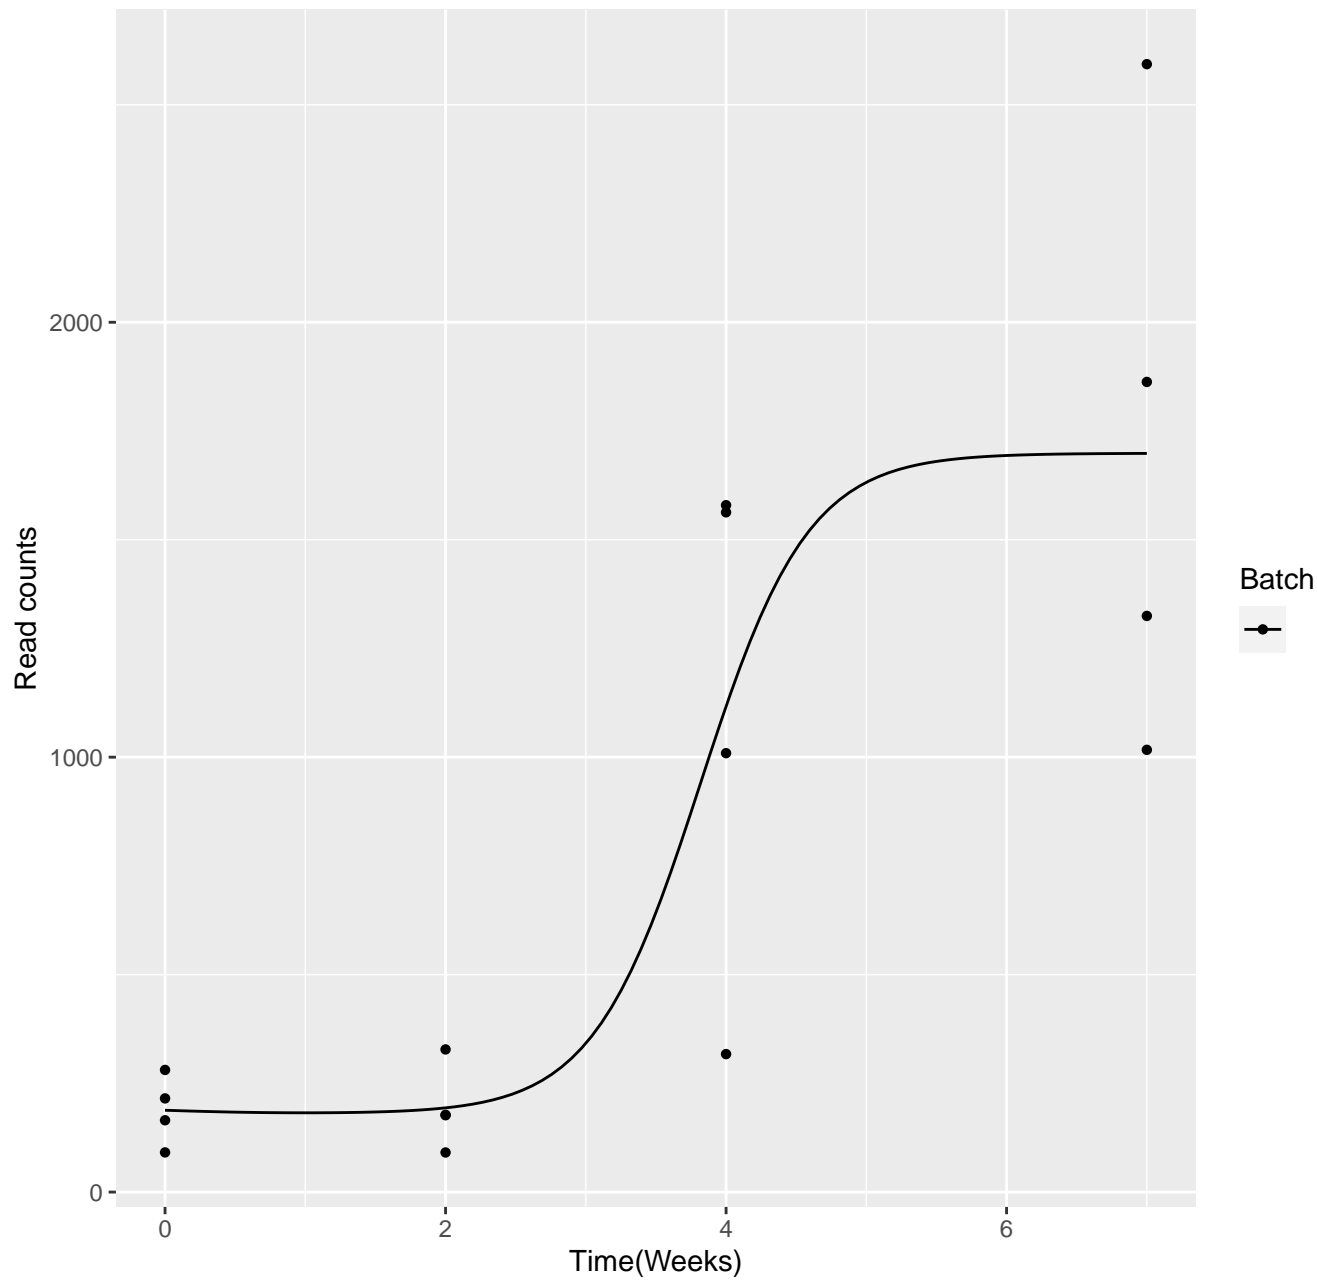

PVALB:  $\log_{10} q = -9.73$

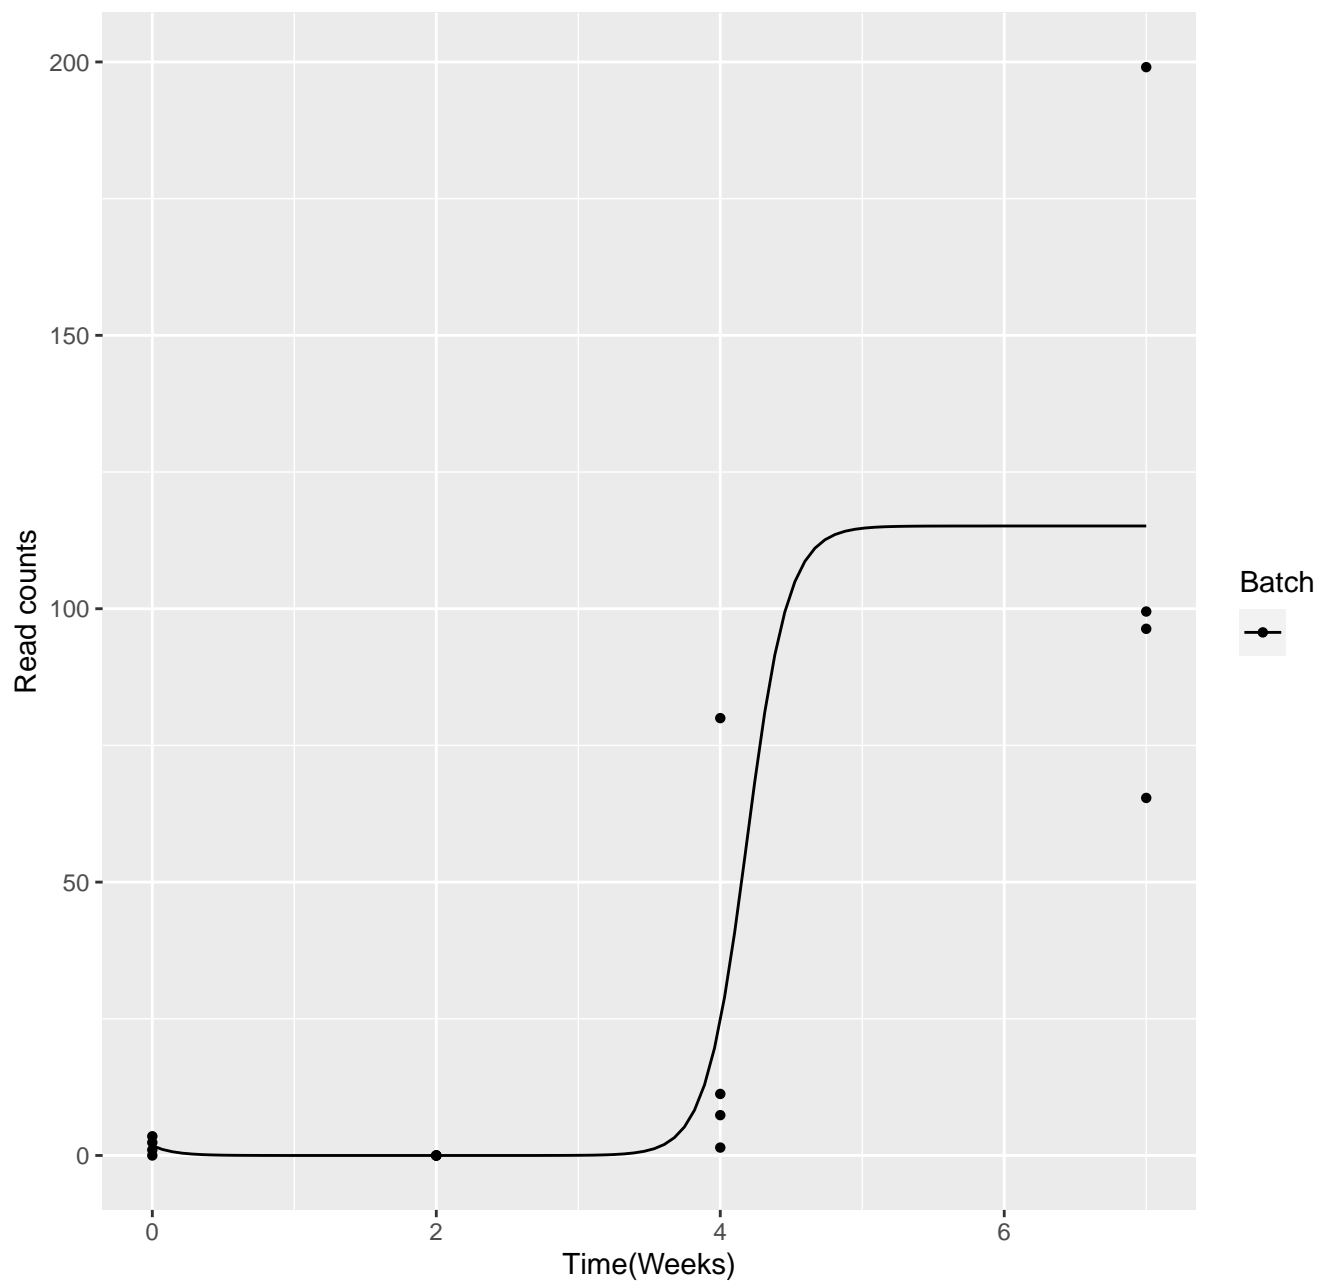

BPGM:  $\log_{10} q = -9.67$

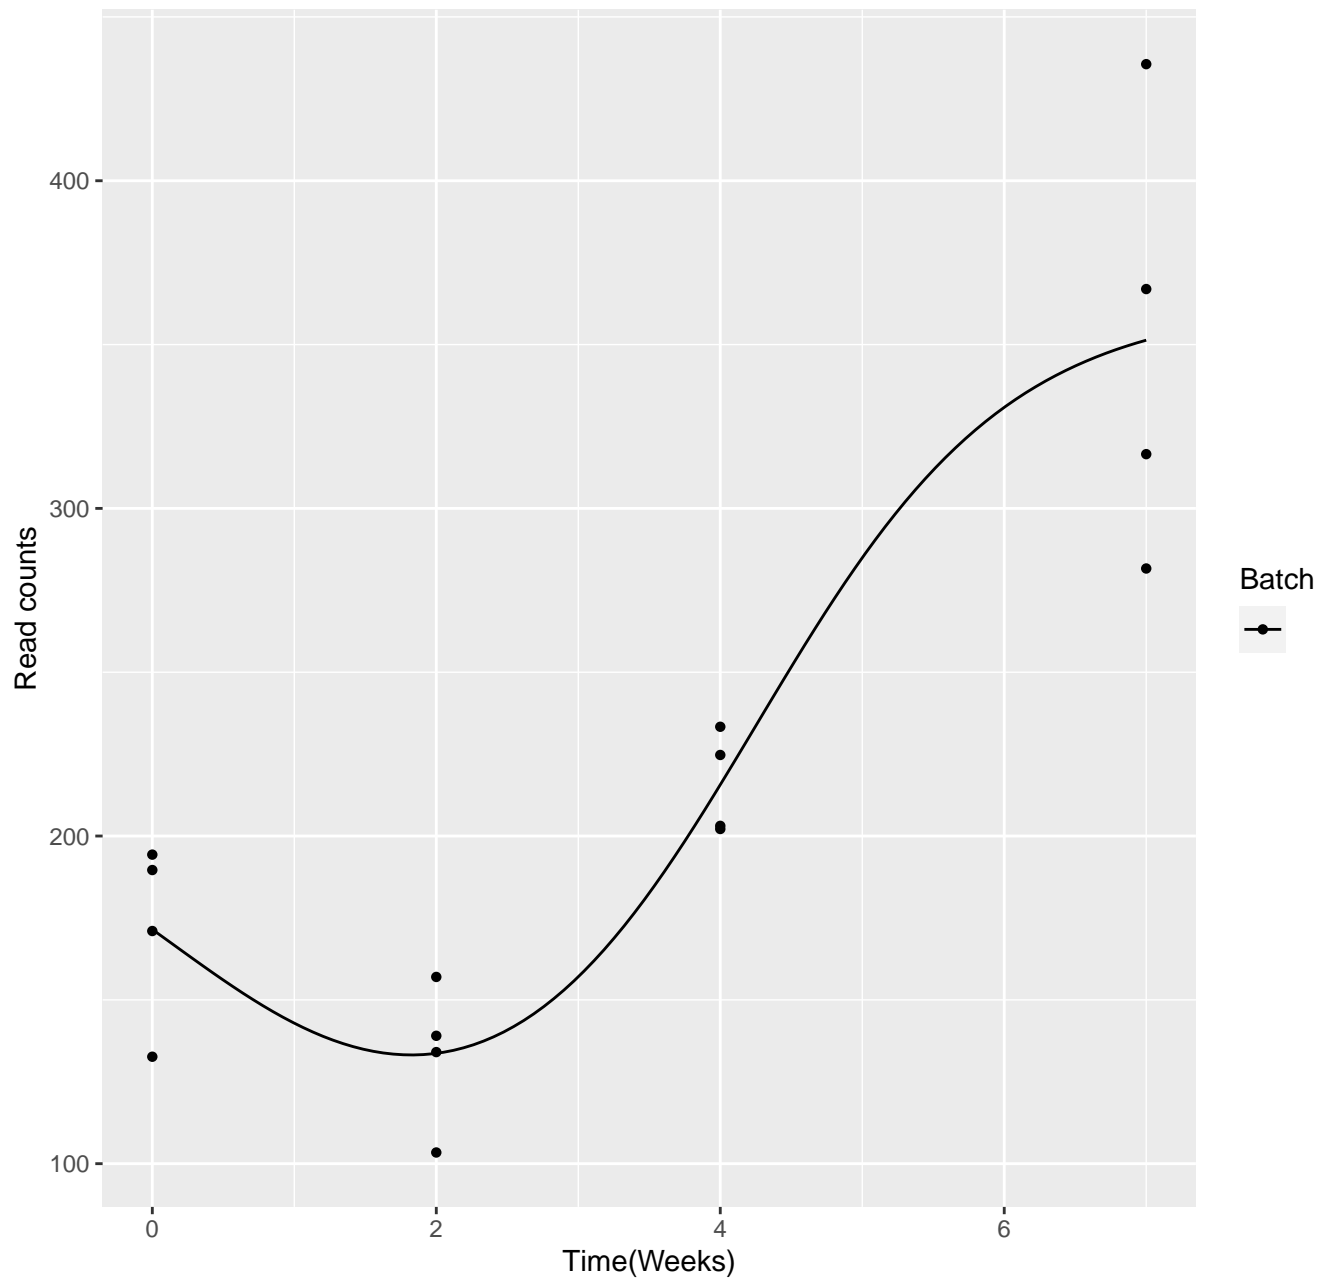



MATK:  $\log_{10} q = -9.66$

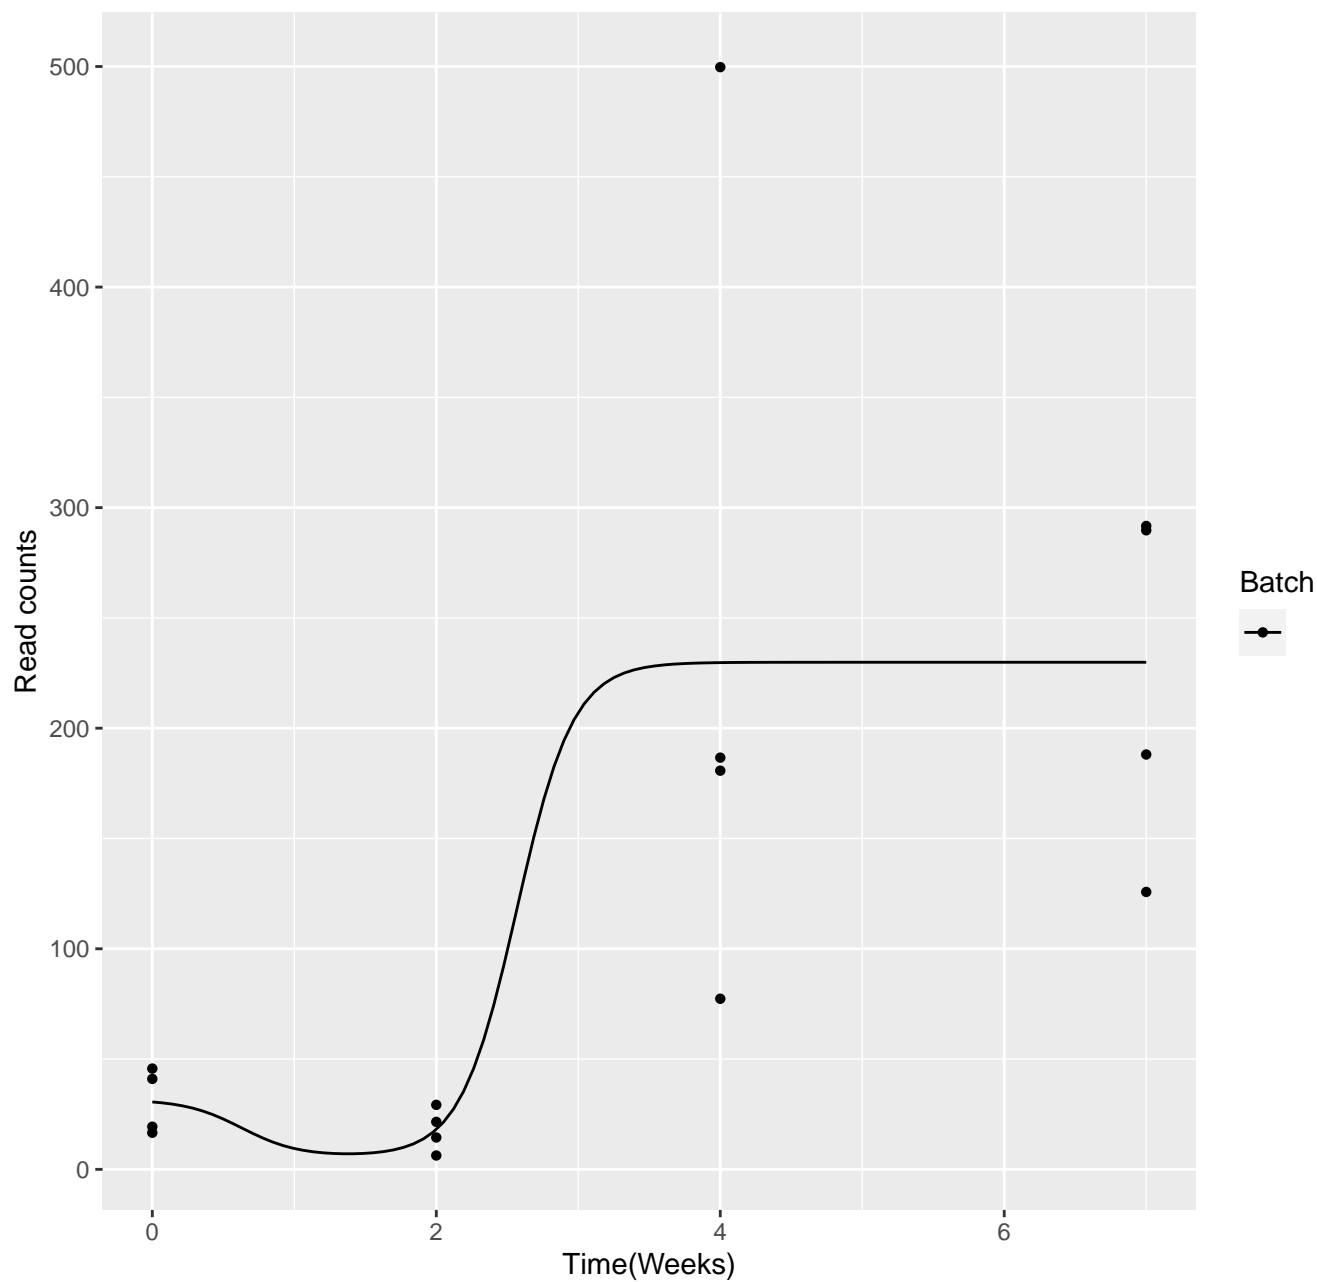

CCN3:  $\log_{10} q = -9.62$

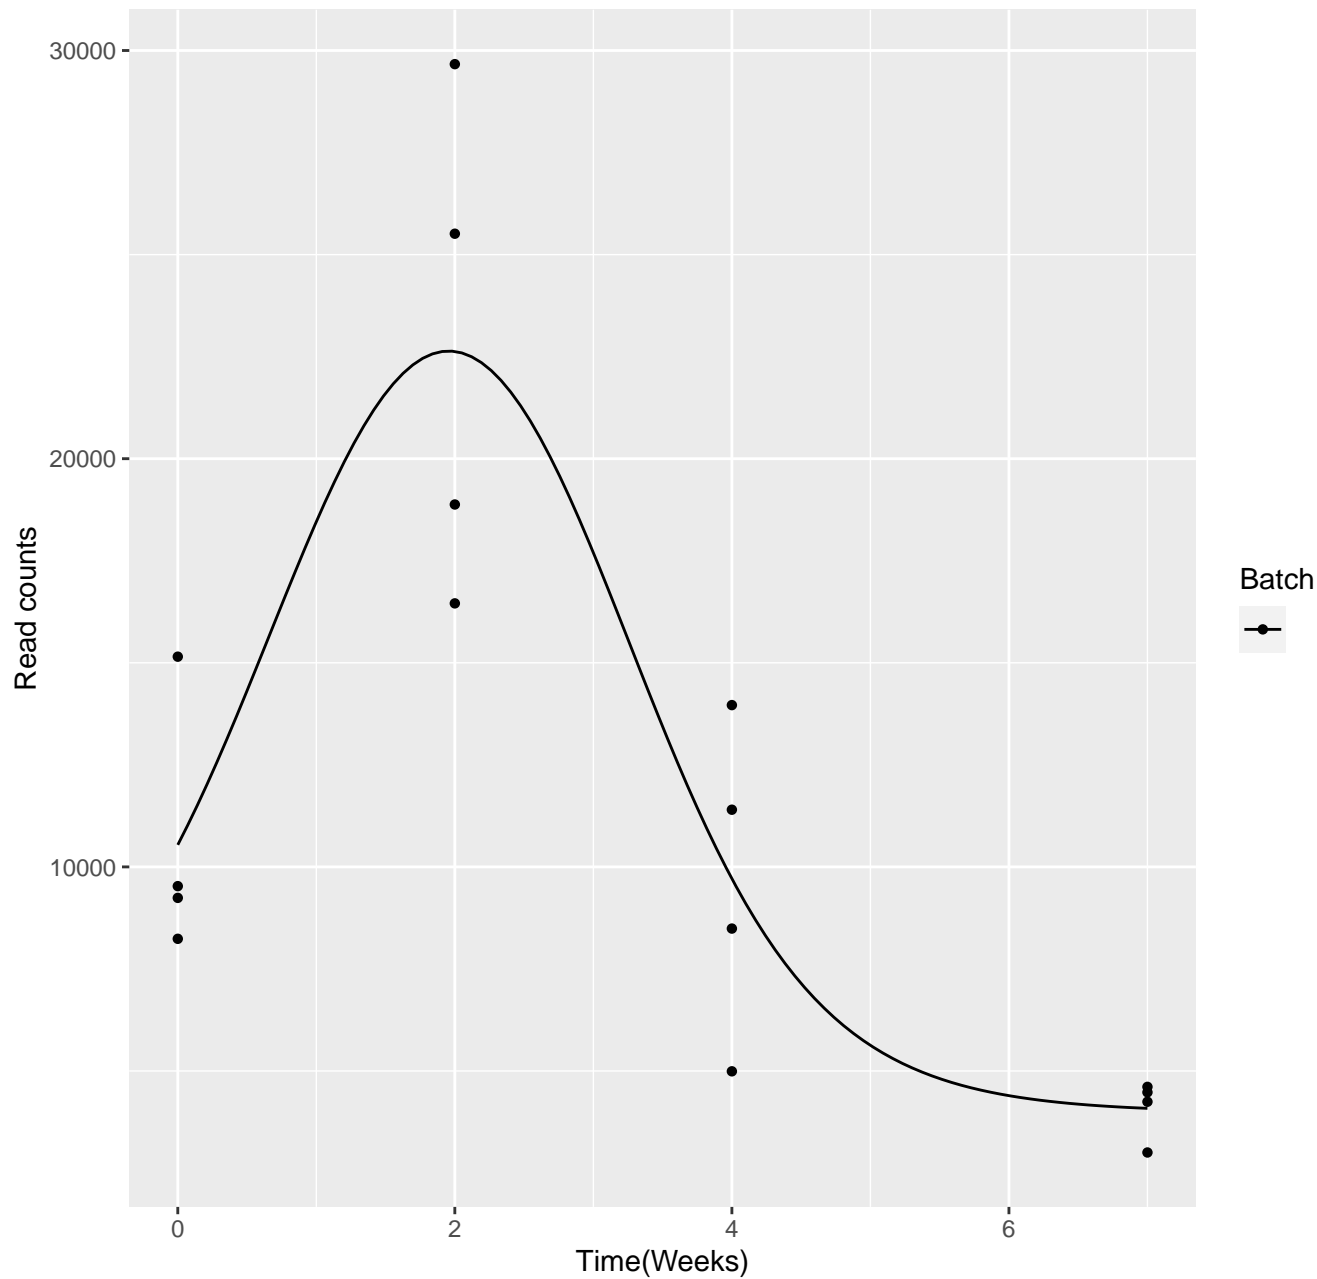

CORO1A:  $\log_{10} q = -9.61$

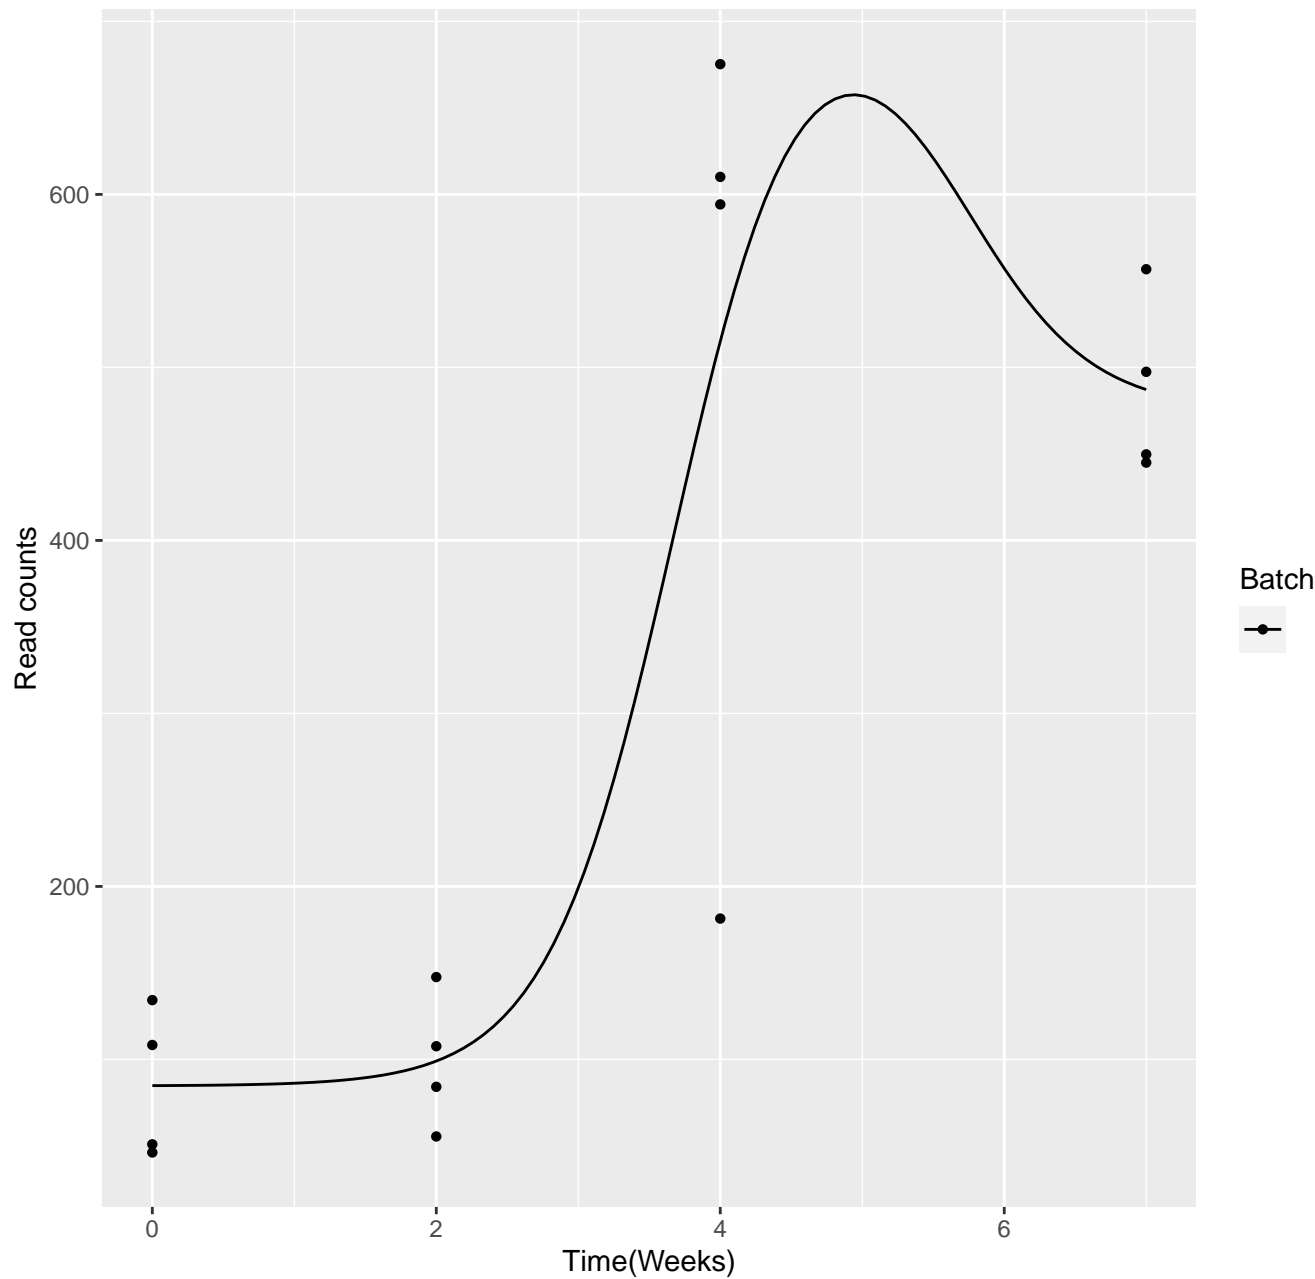

LOC100347041:  $\log_{10} q = -9.58$

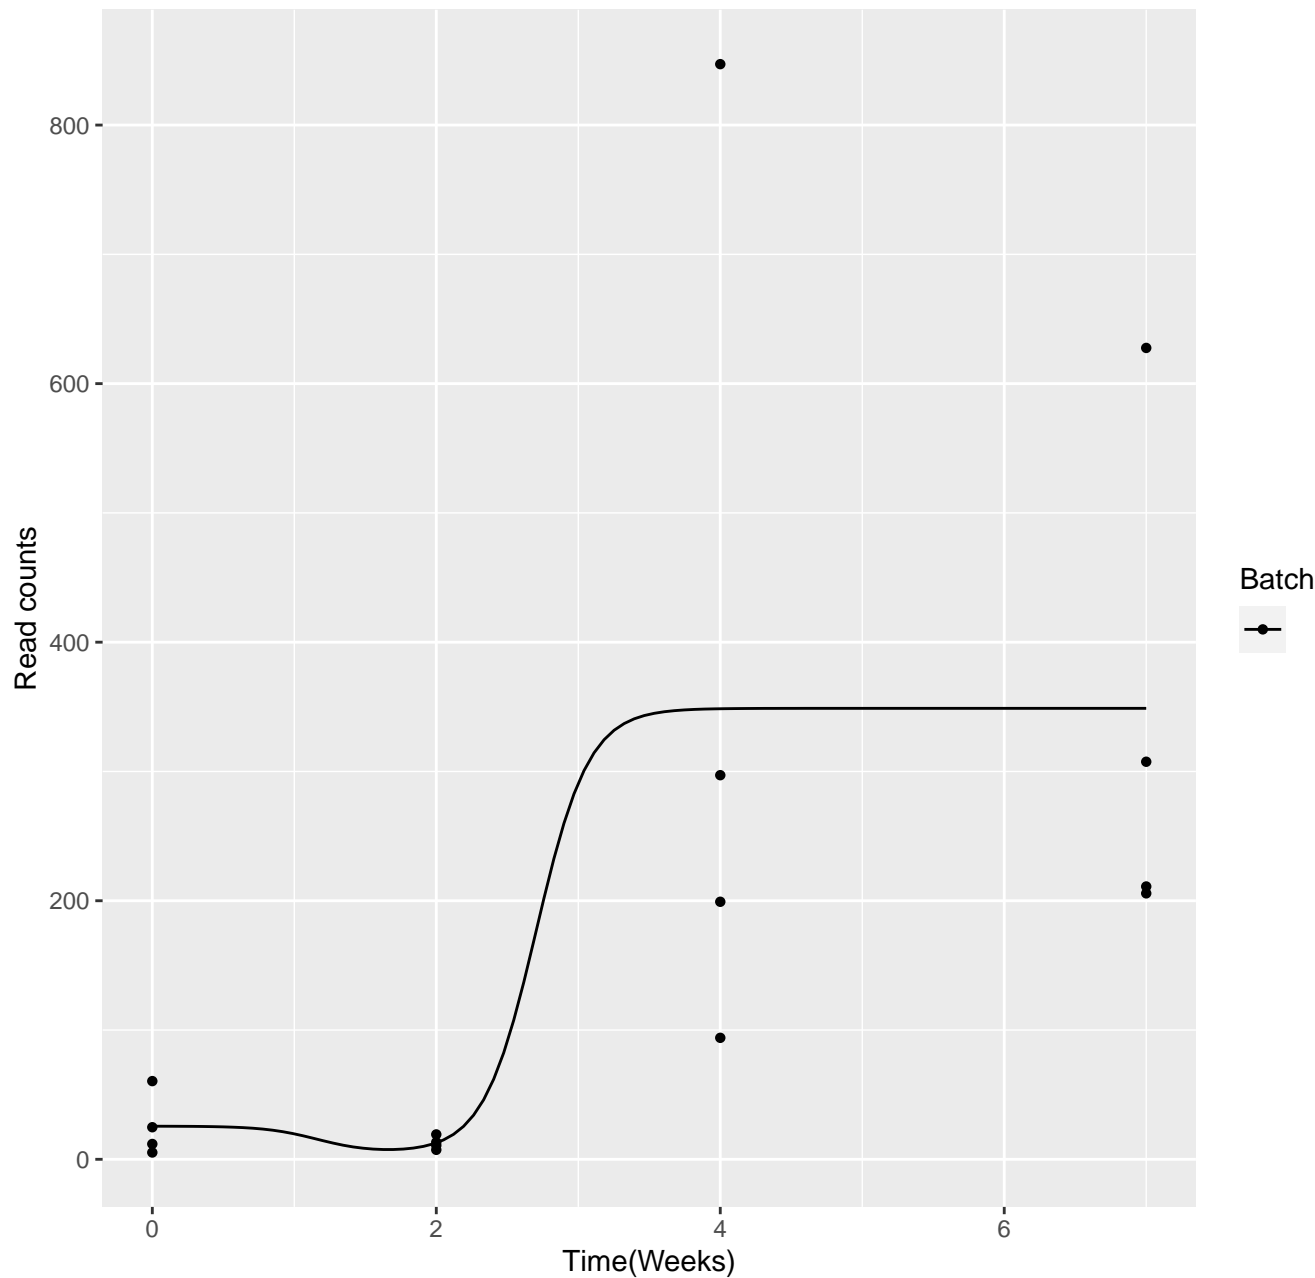

LOC103347778:  $\log_{10} q = -9.56$

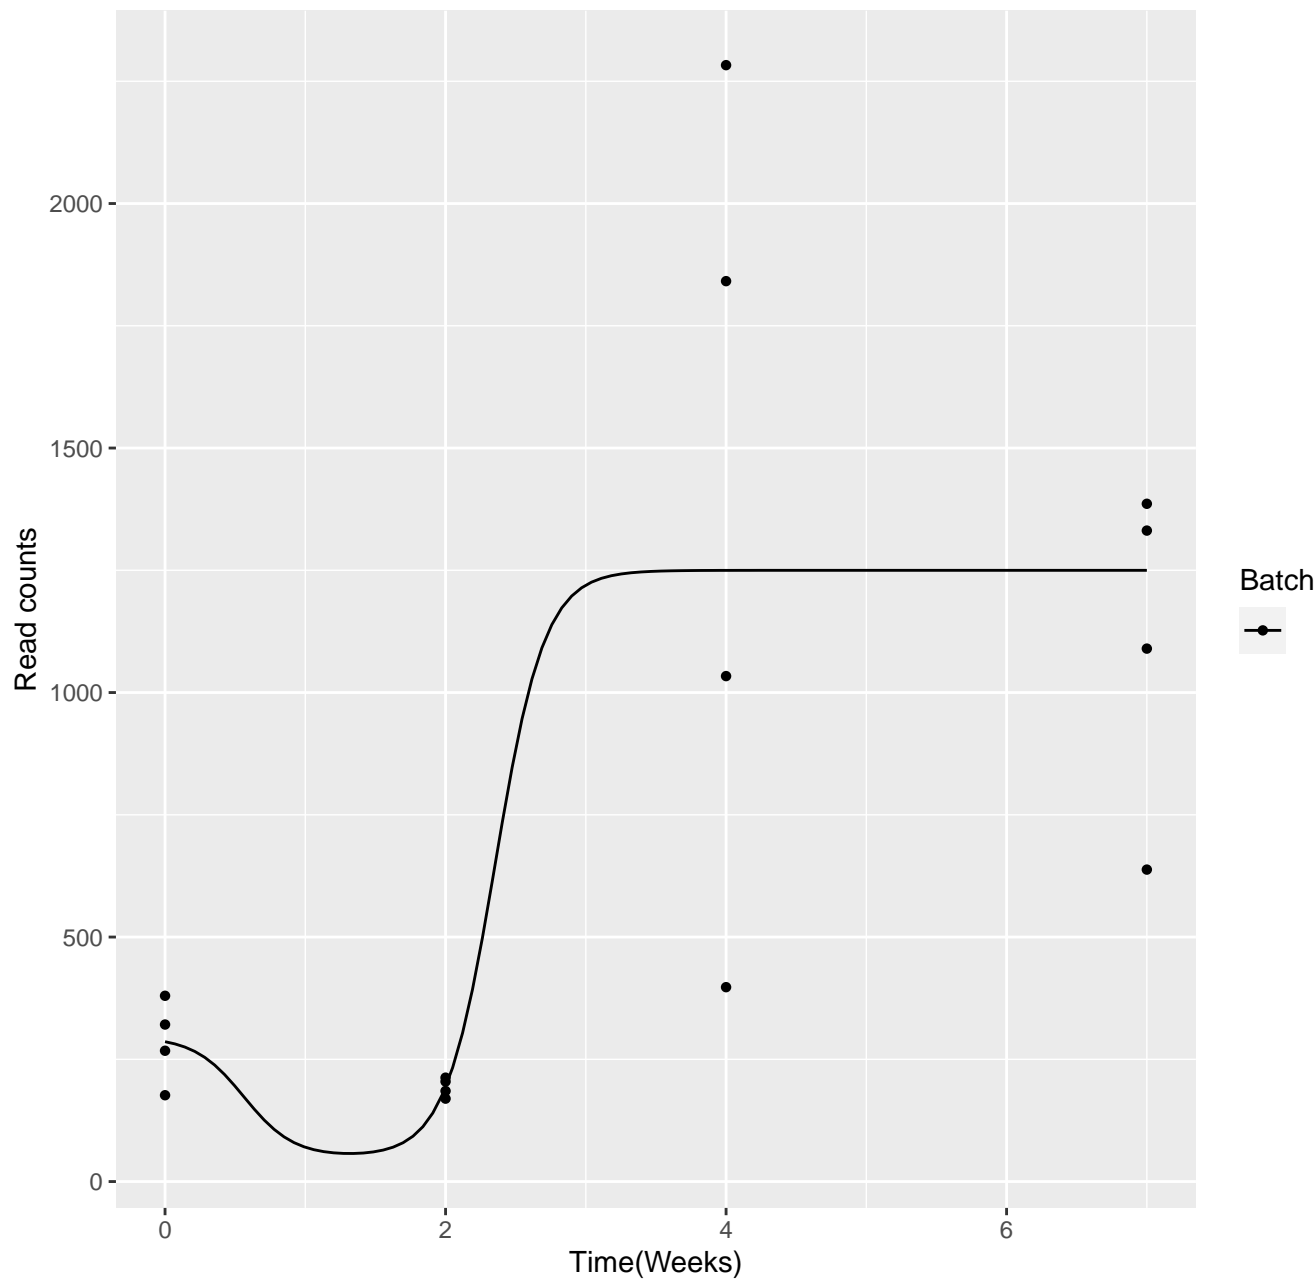

NIBAN1:  $\log_{10} q = -9.51$

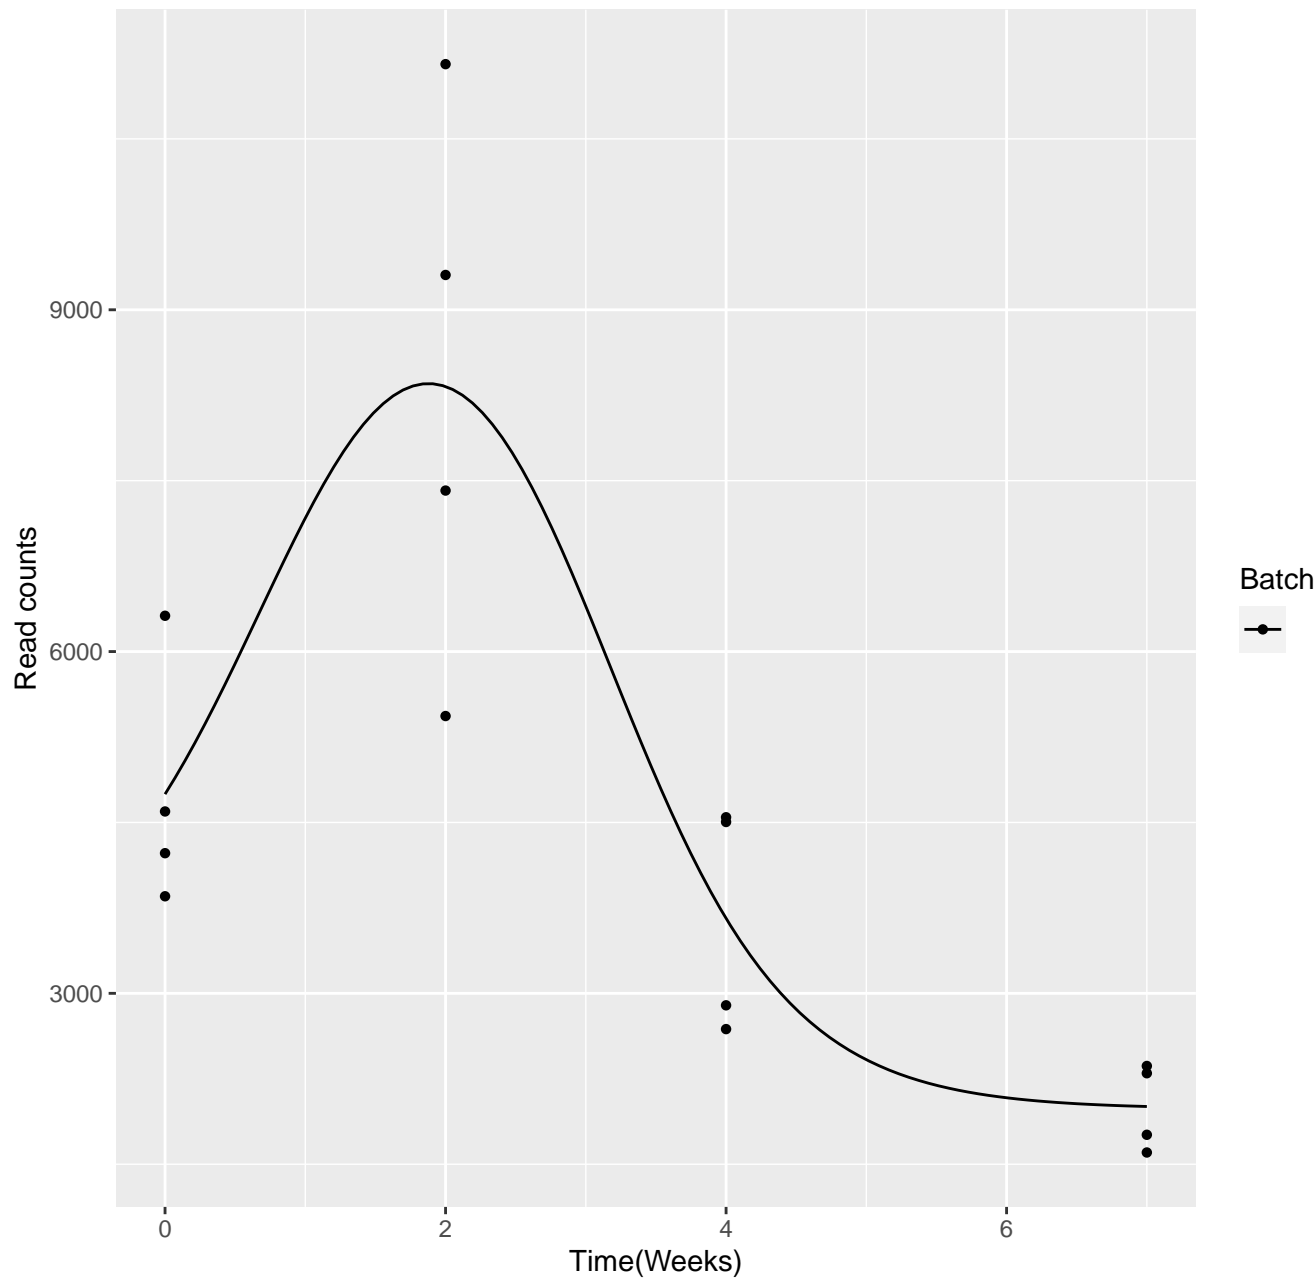

TNFAIP8L2:  $\log_{10} q = -9.48$

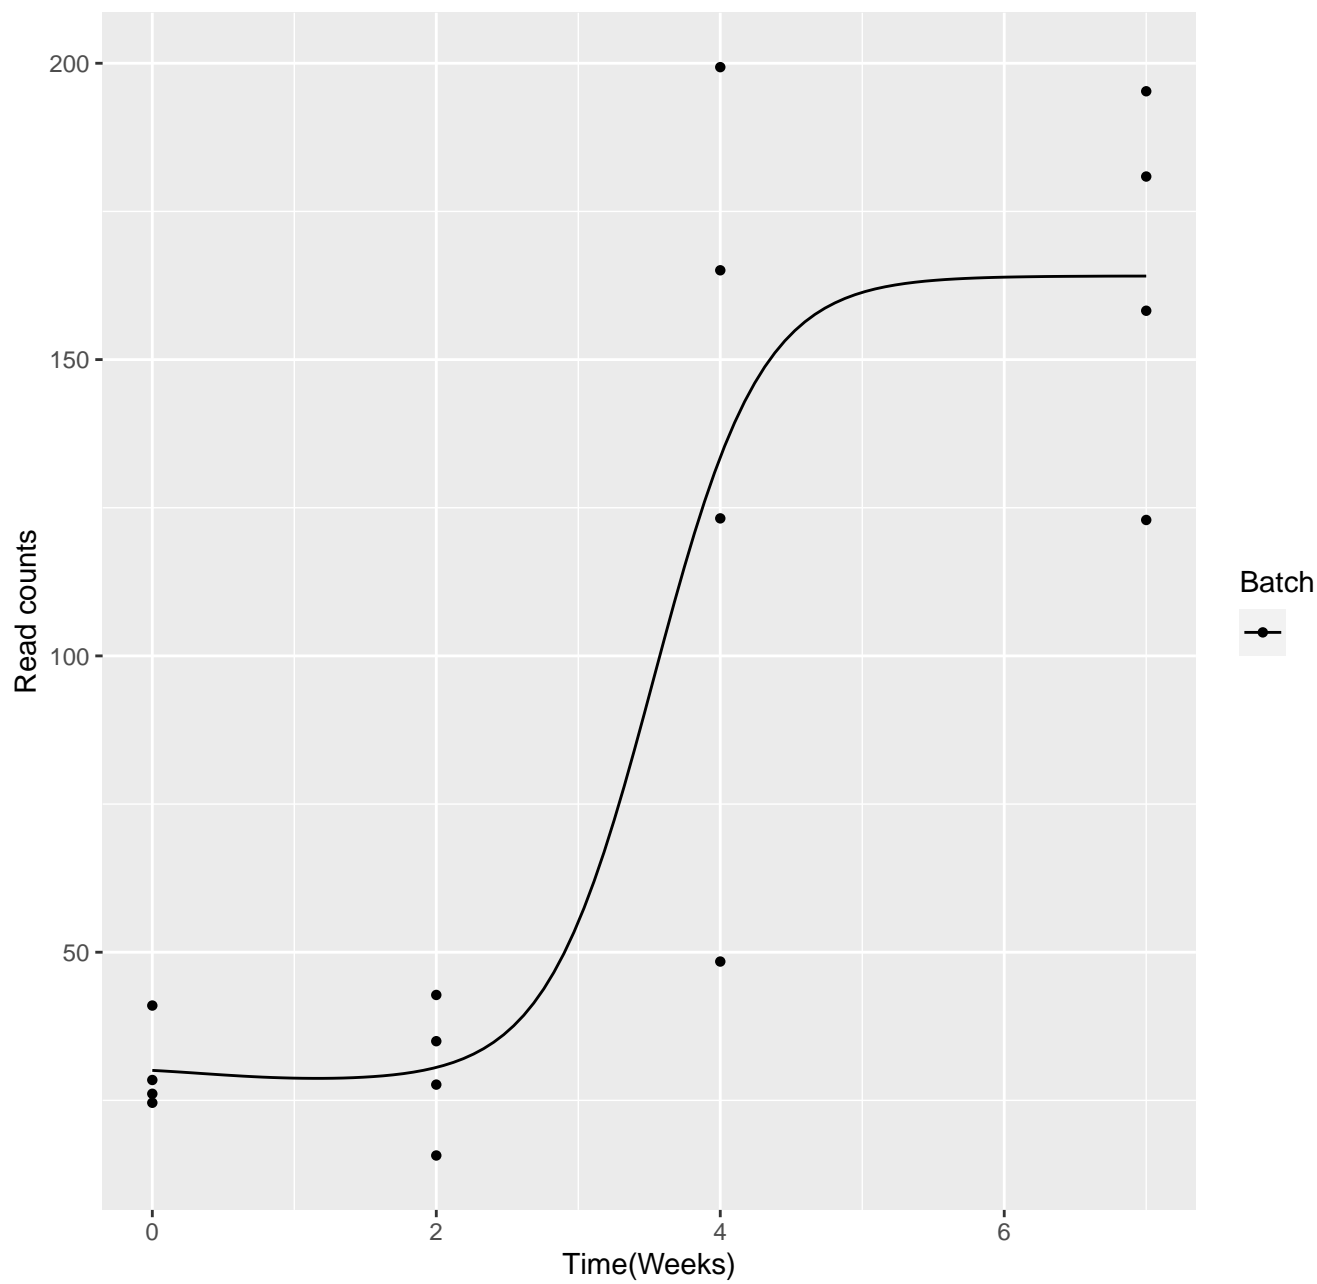

LOC100350957:  $\log_{10} q = -9.45$

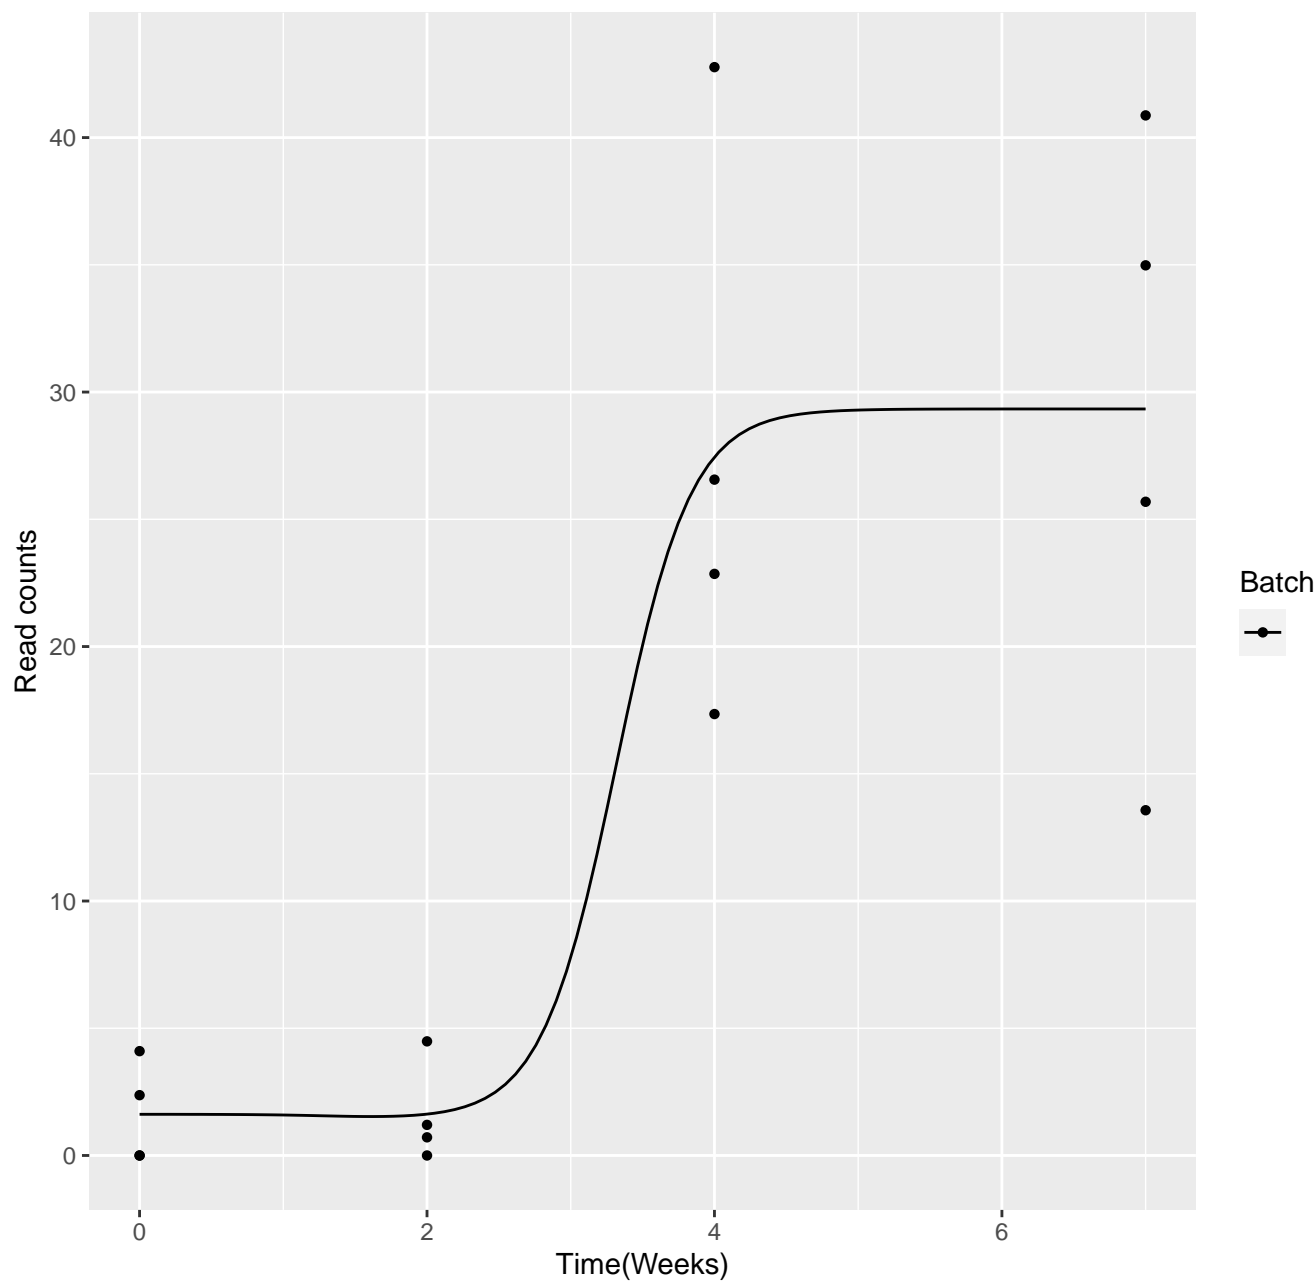



LOC100337909:  $\log_{10} q = -9.32$

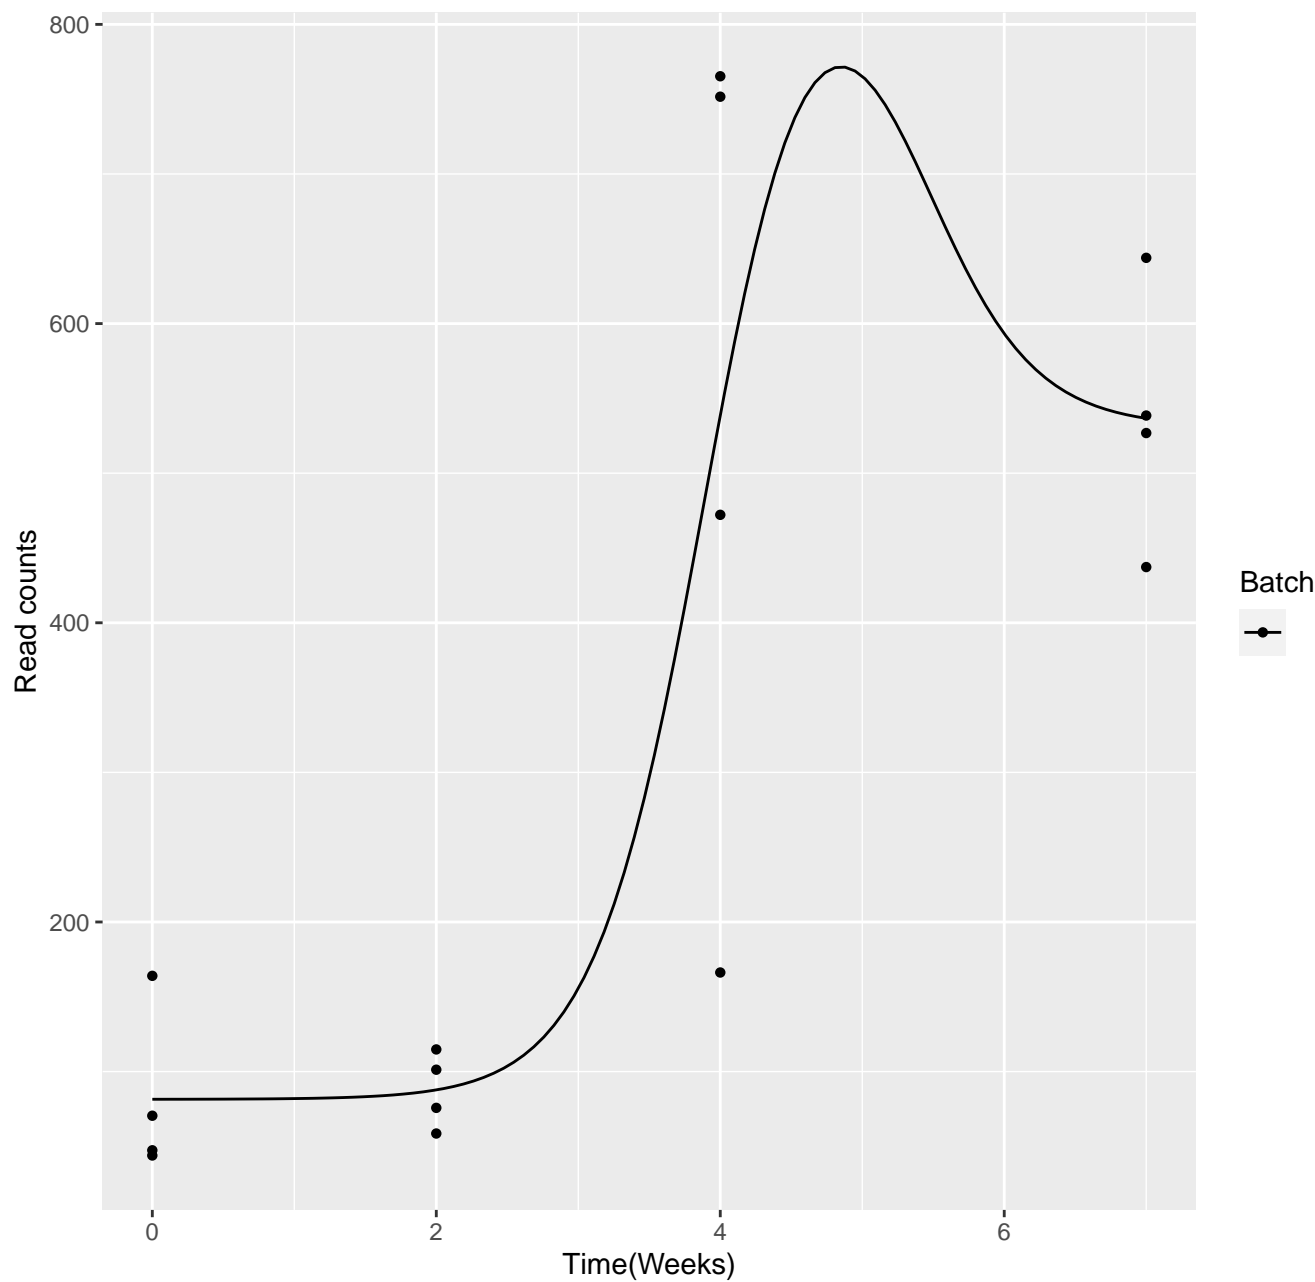

TREM2:  $\log_{10} q = -9.32$

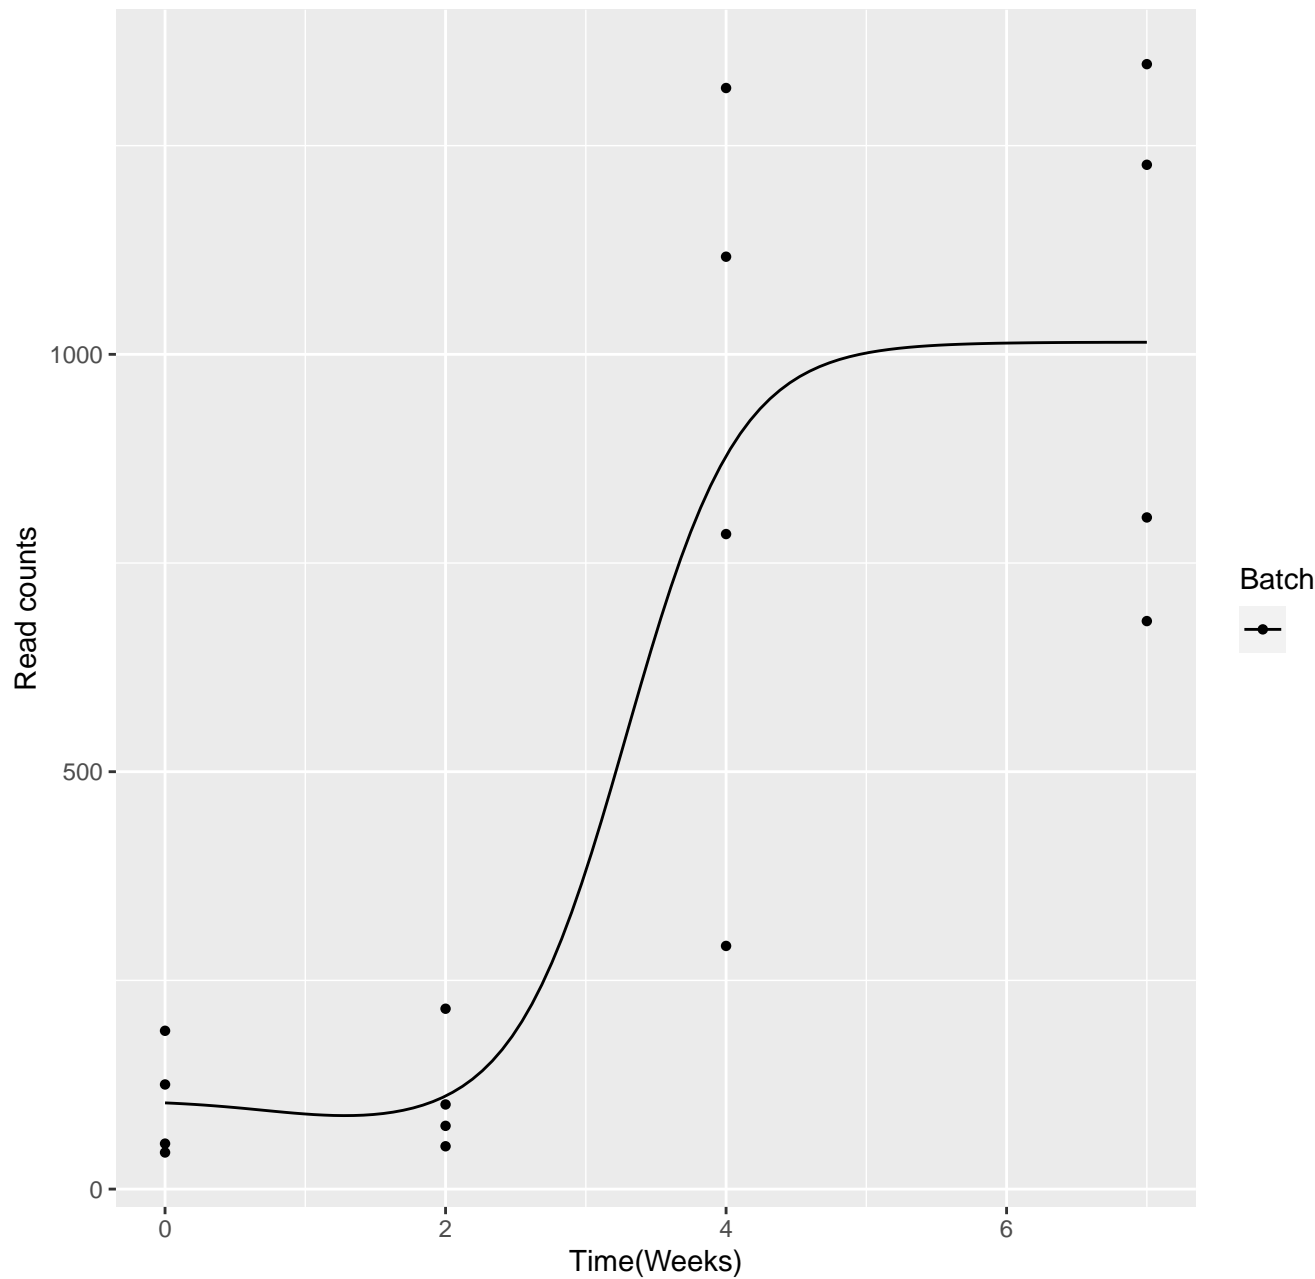

RUSC2:  $\log_{10} q = -9.27$

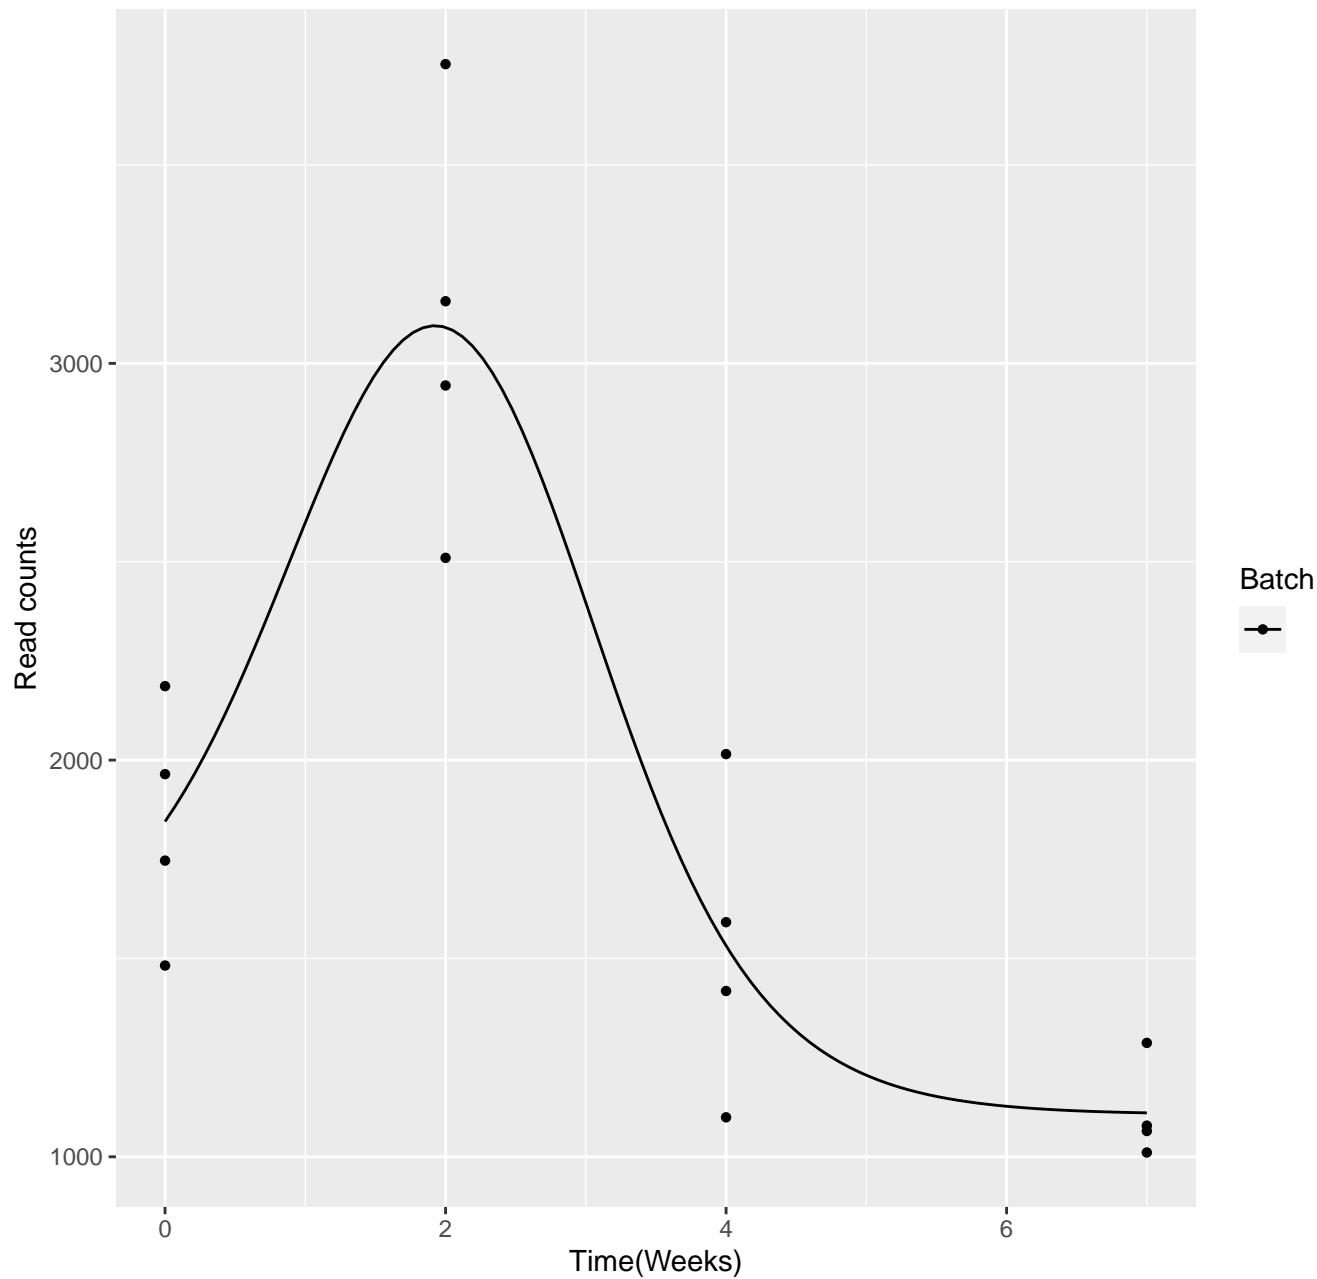

FCER1G:  $\log_{10} q = -9.16$

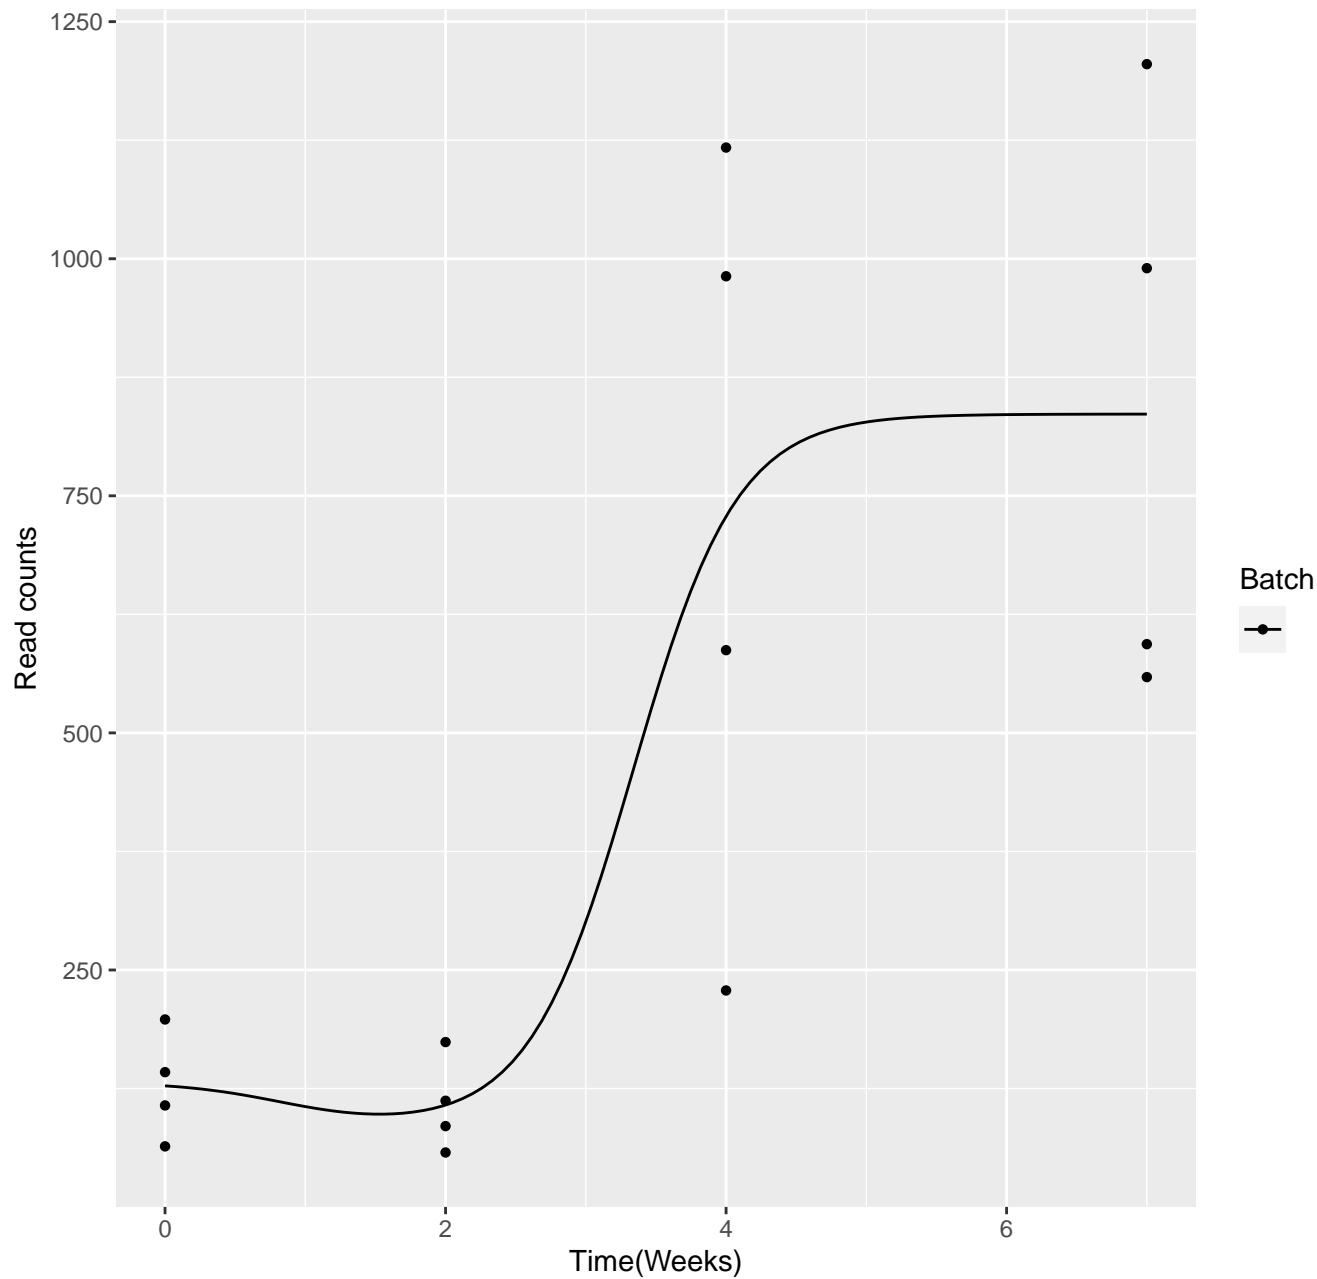

ATP8B4:  $\log_{10} q = -9.12$

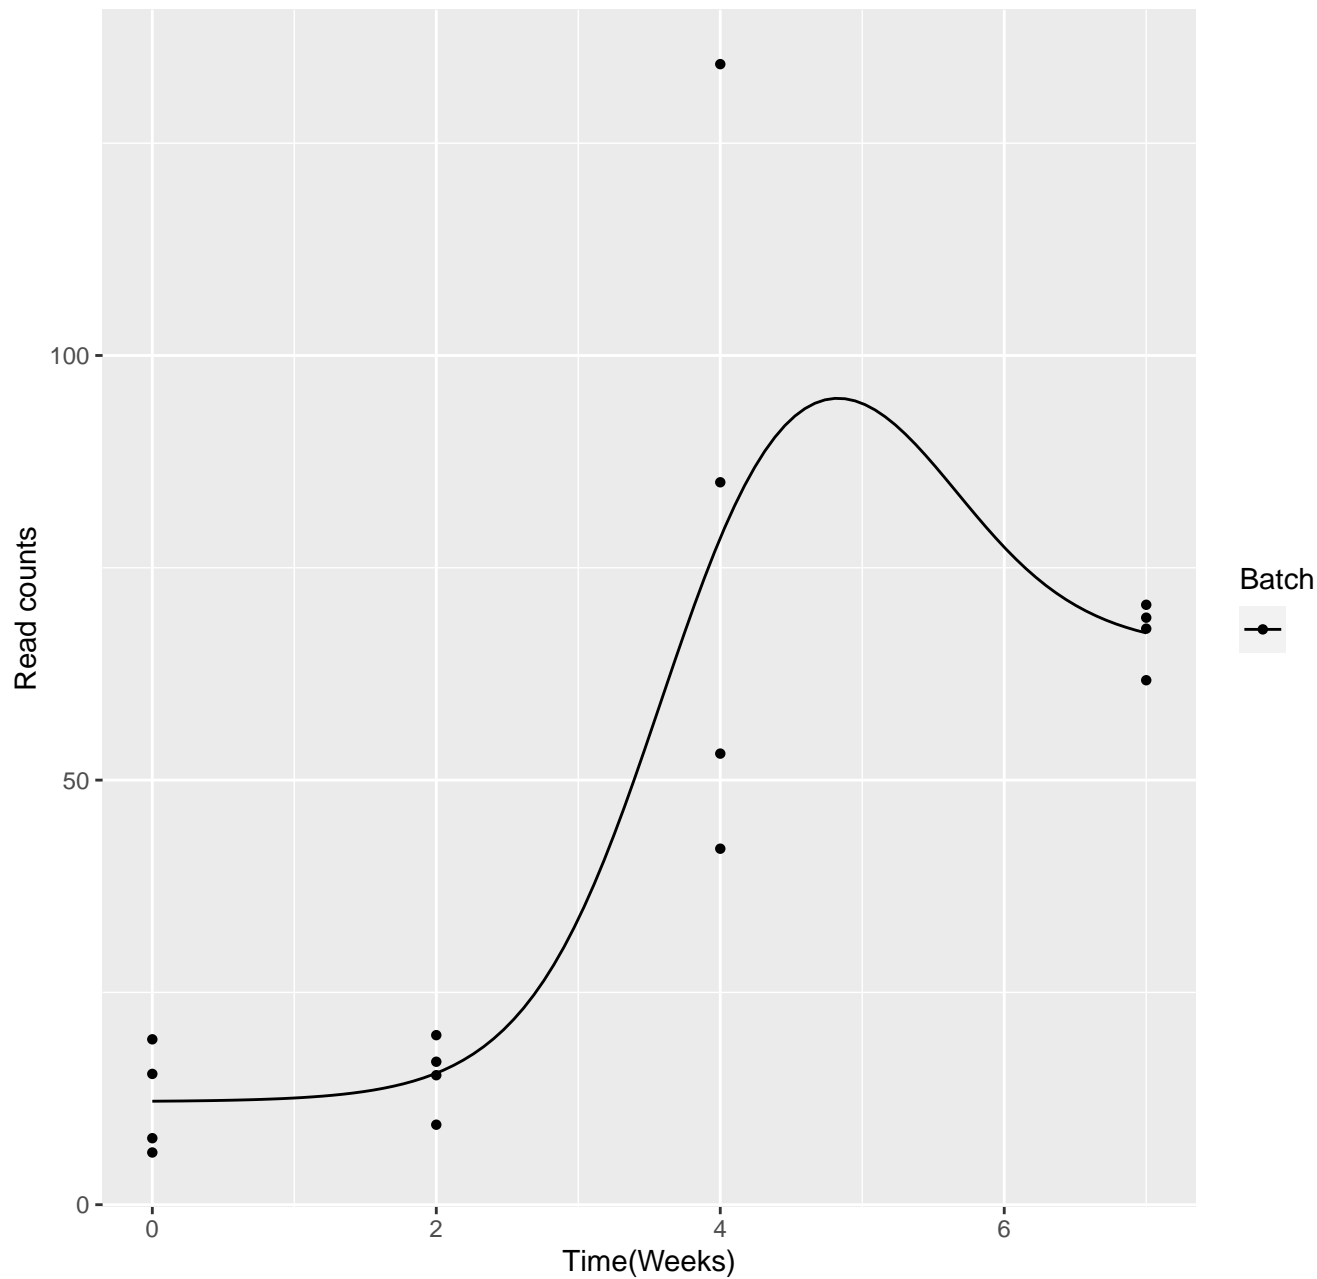

ADAP2:  $\log_{10} q = -9.1$

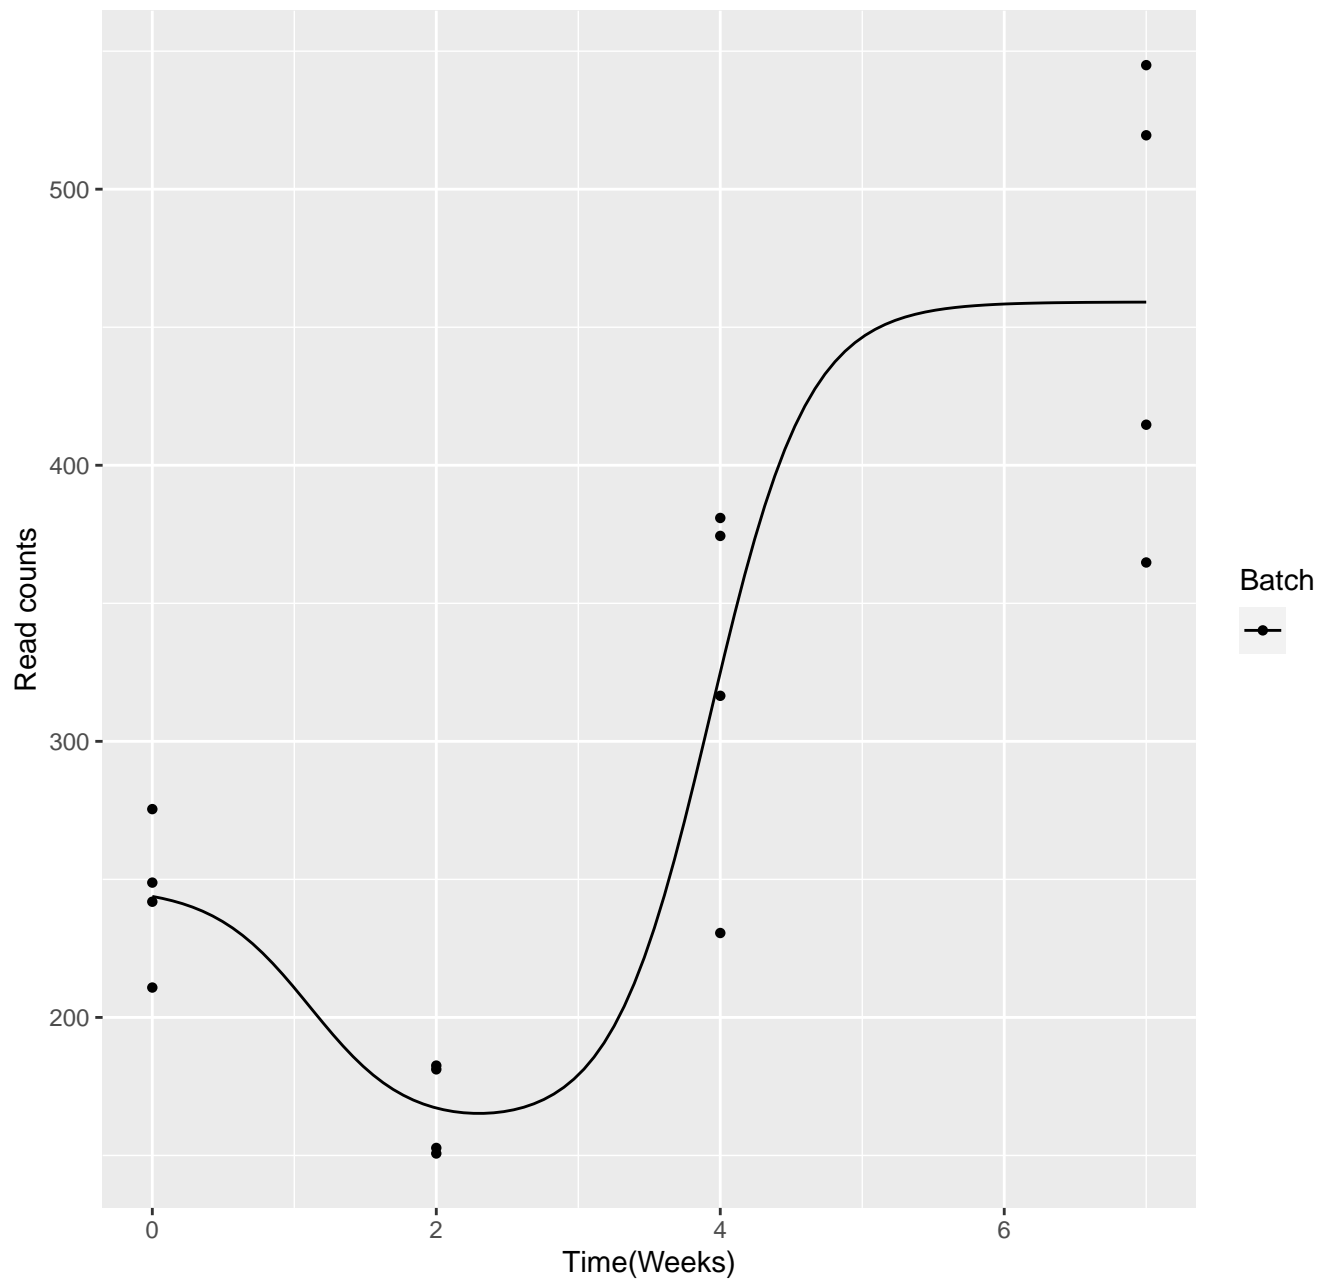

CSPG4:  $\log_{10} q = -9.06$

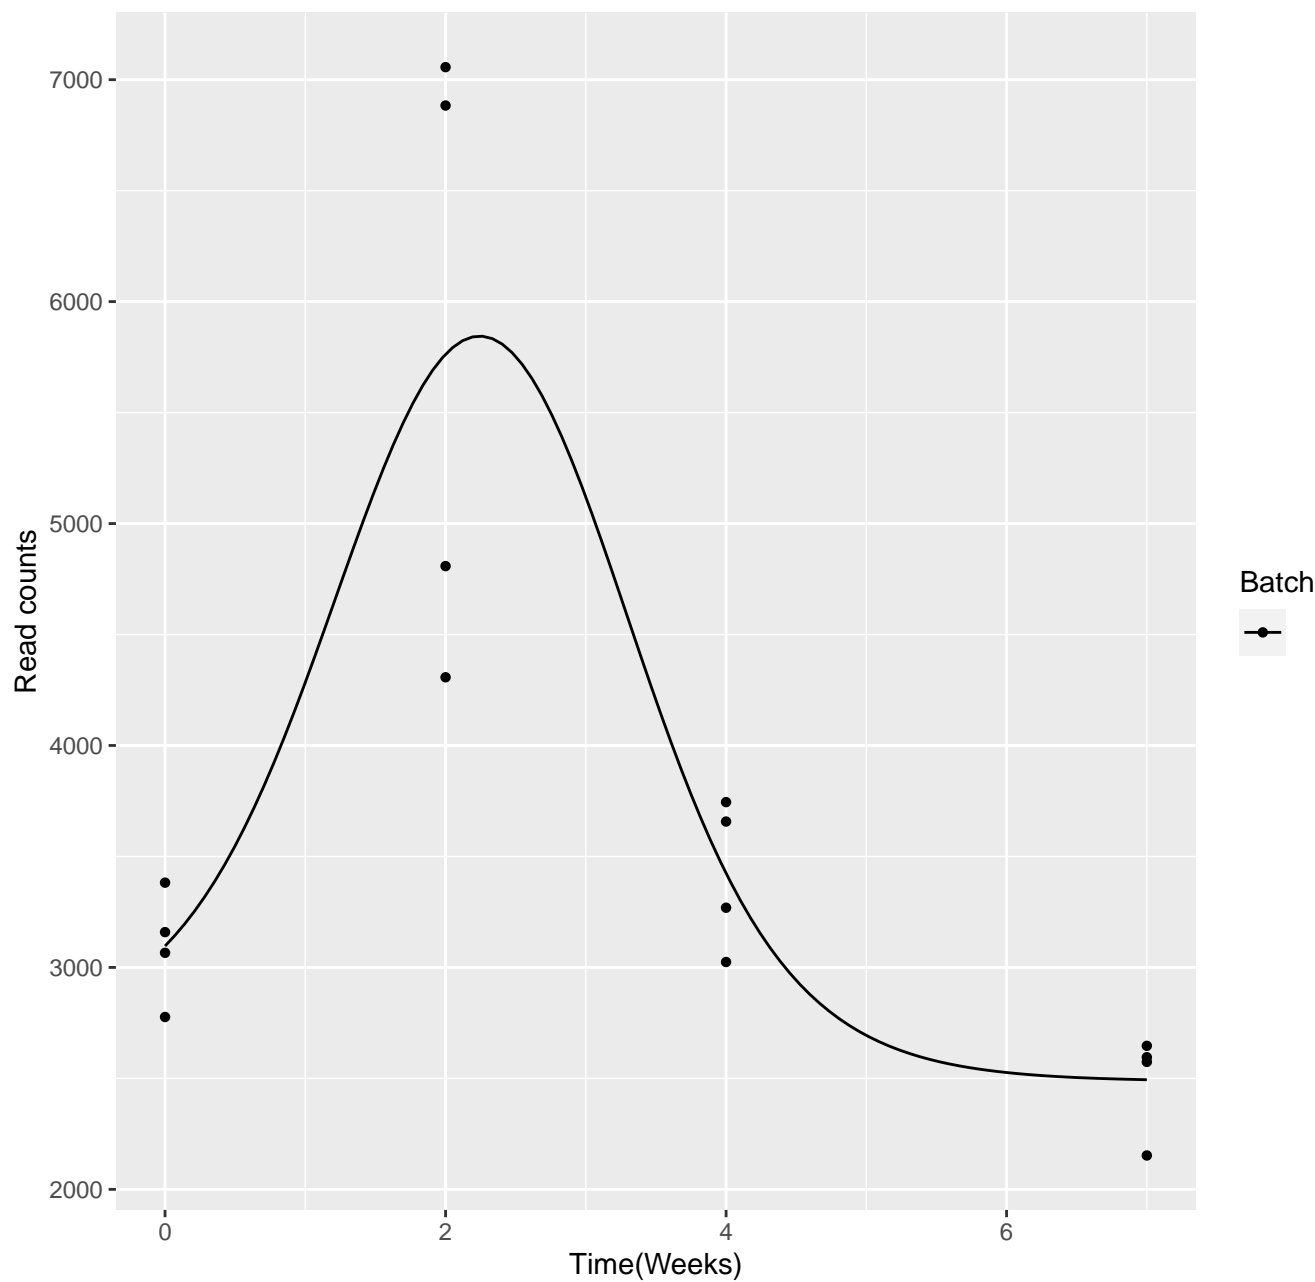

LOC100344175:  $\log_{10} q = -9.06$

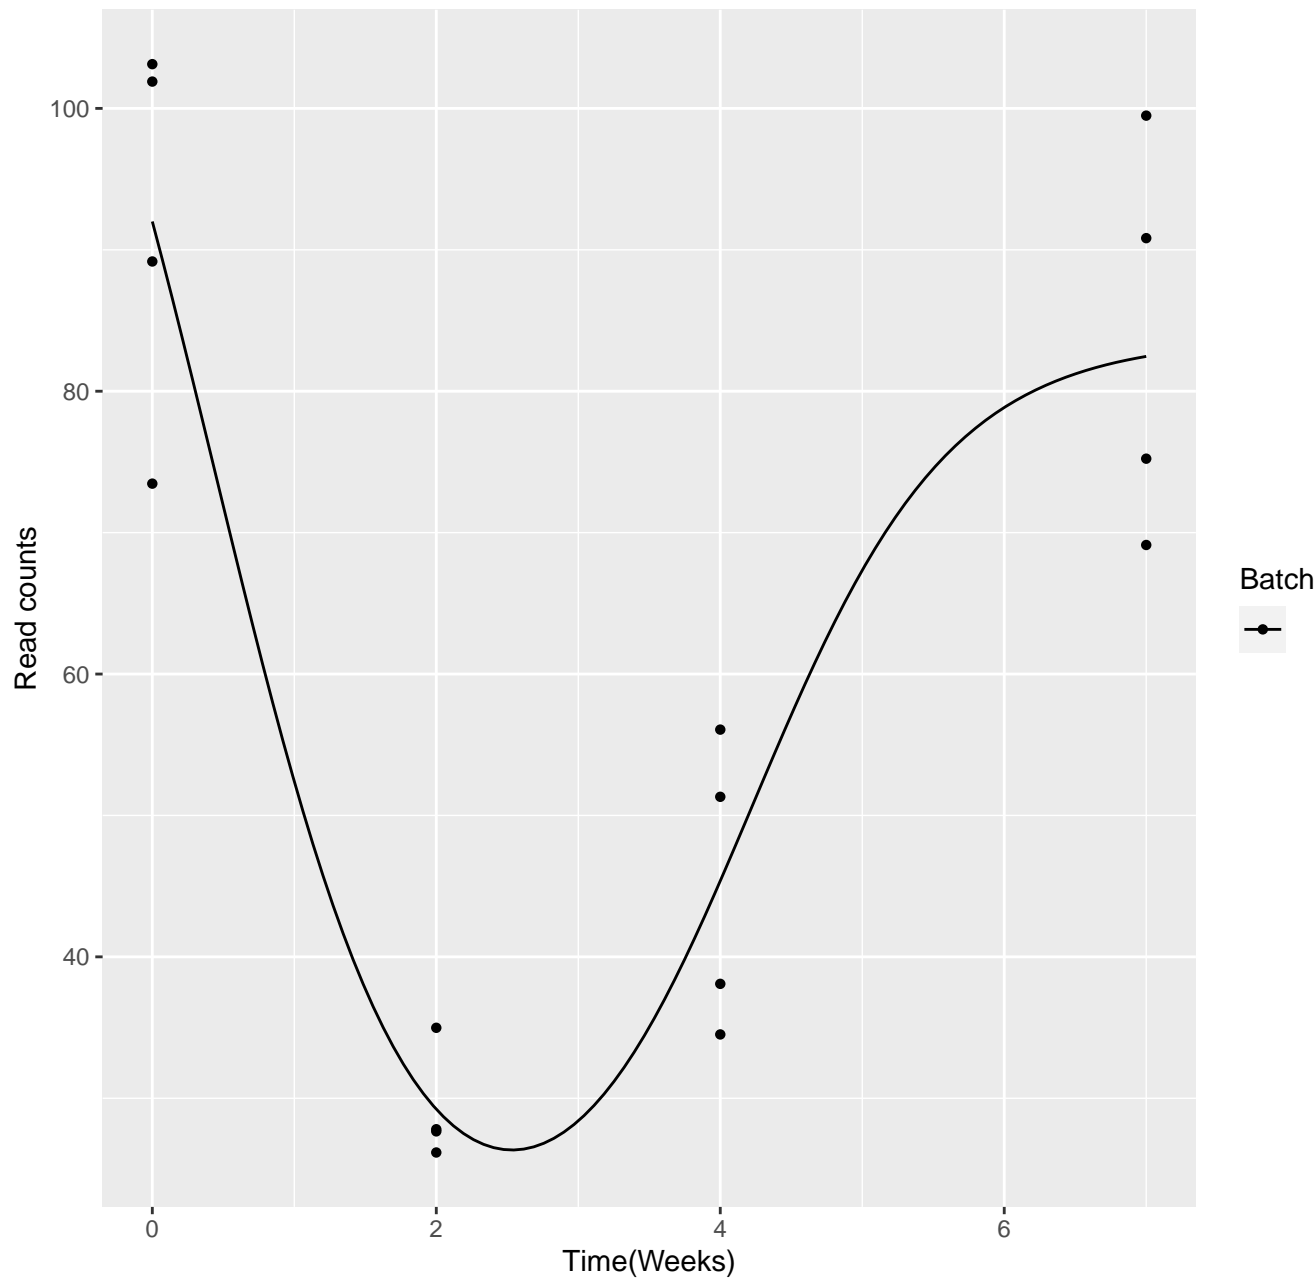



ARPC1B:  $\log_{10} q = -9.05$

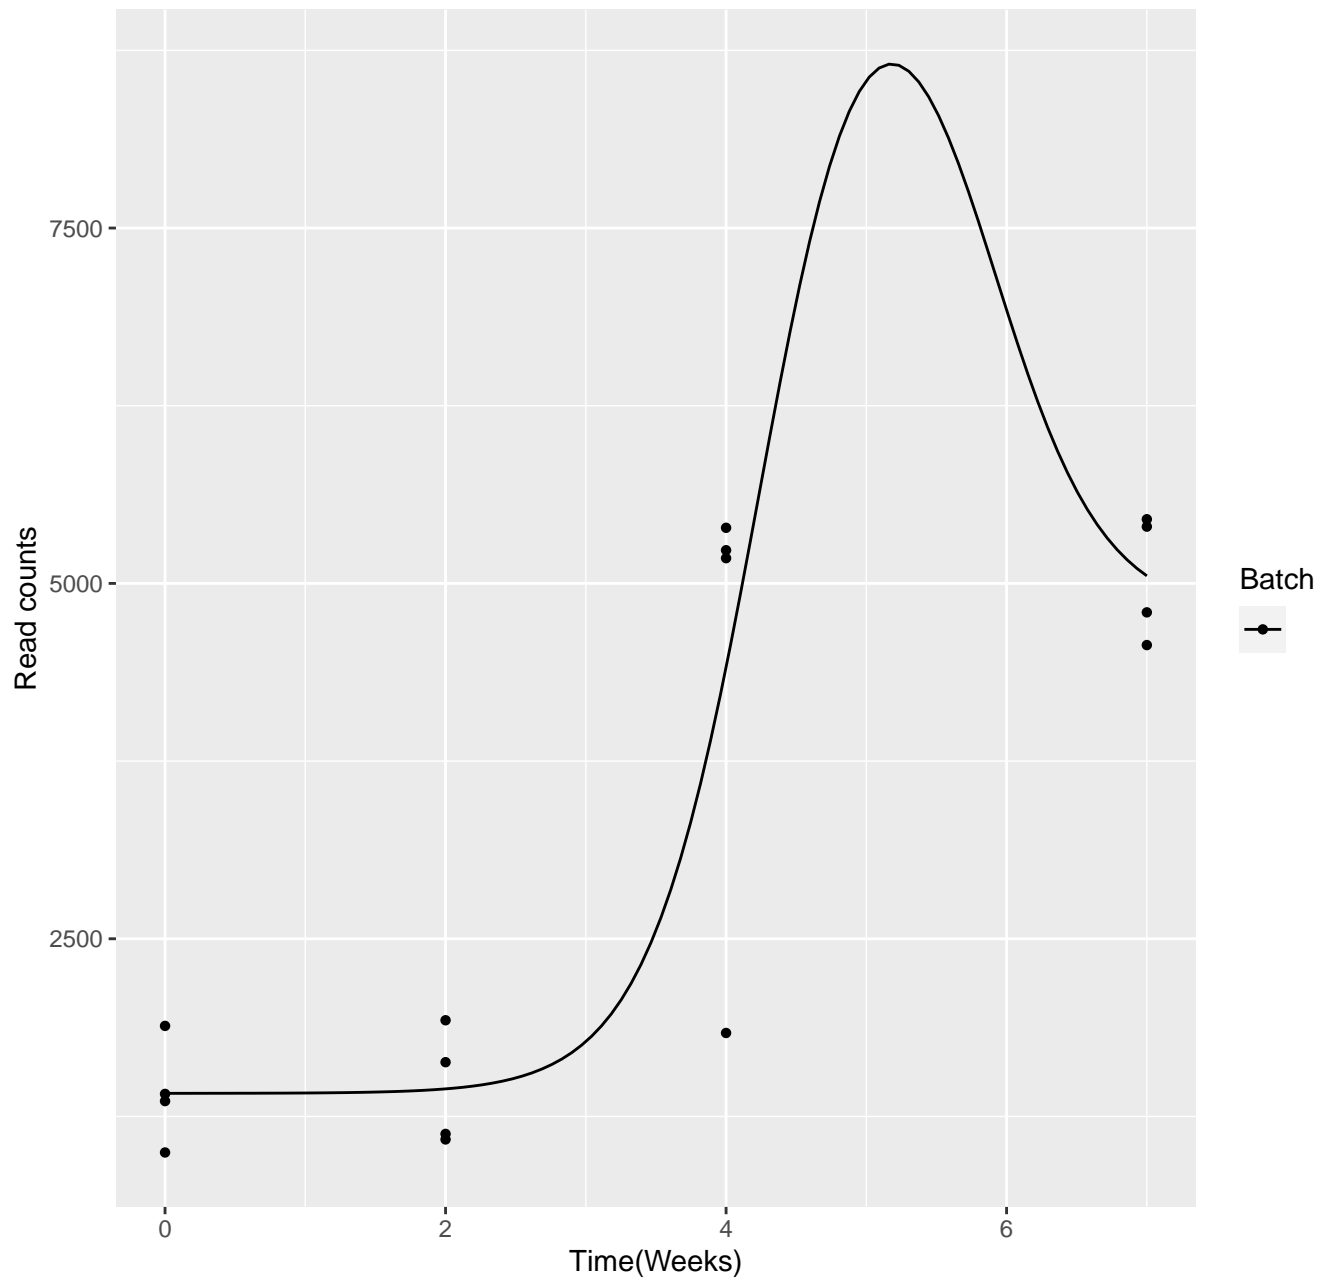

POU2F2:  $\log_{10} q = -9.05$

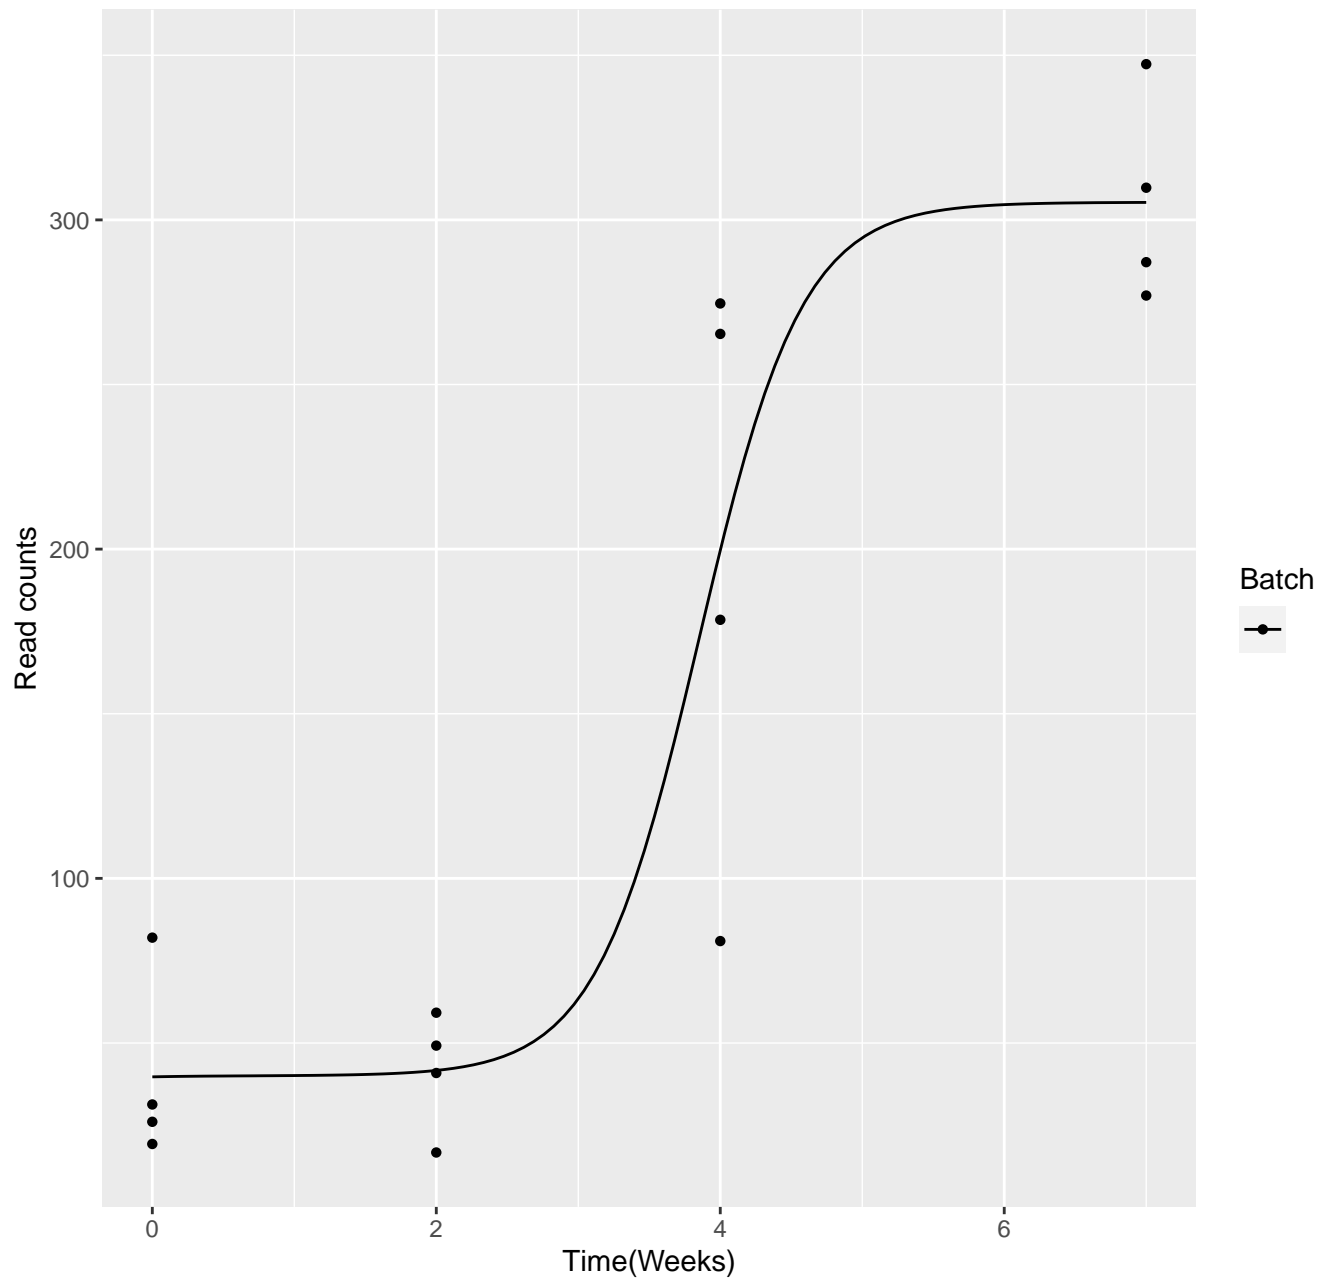

DOCK2:  $\log_{10} q = -9.03$

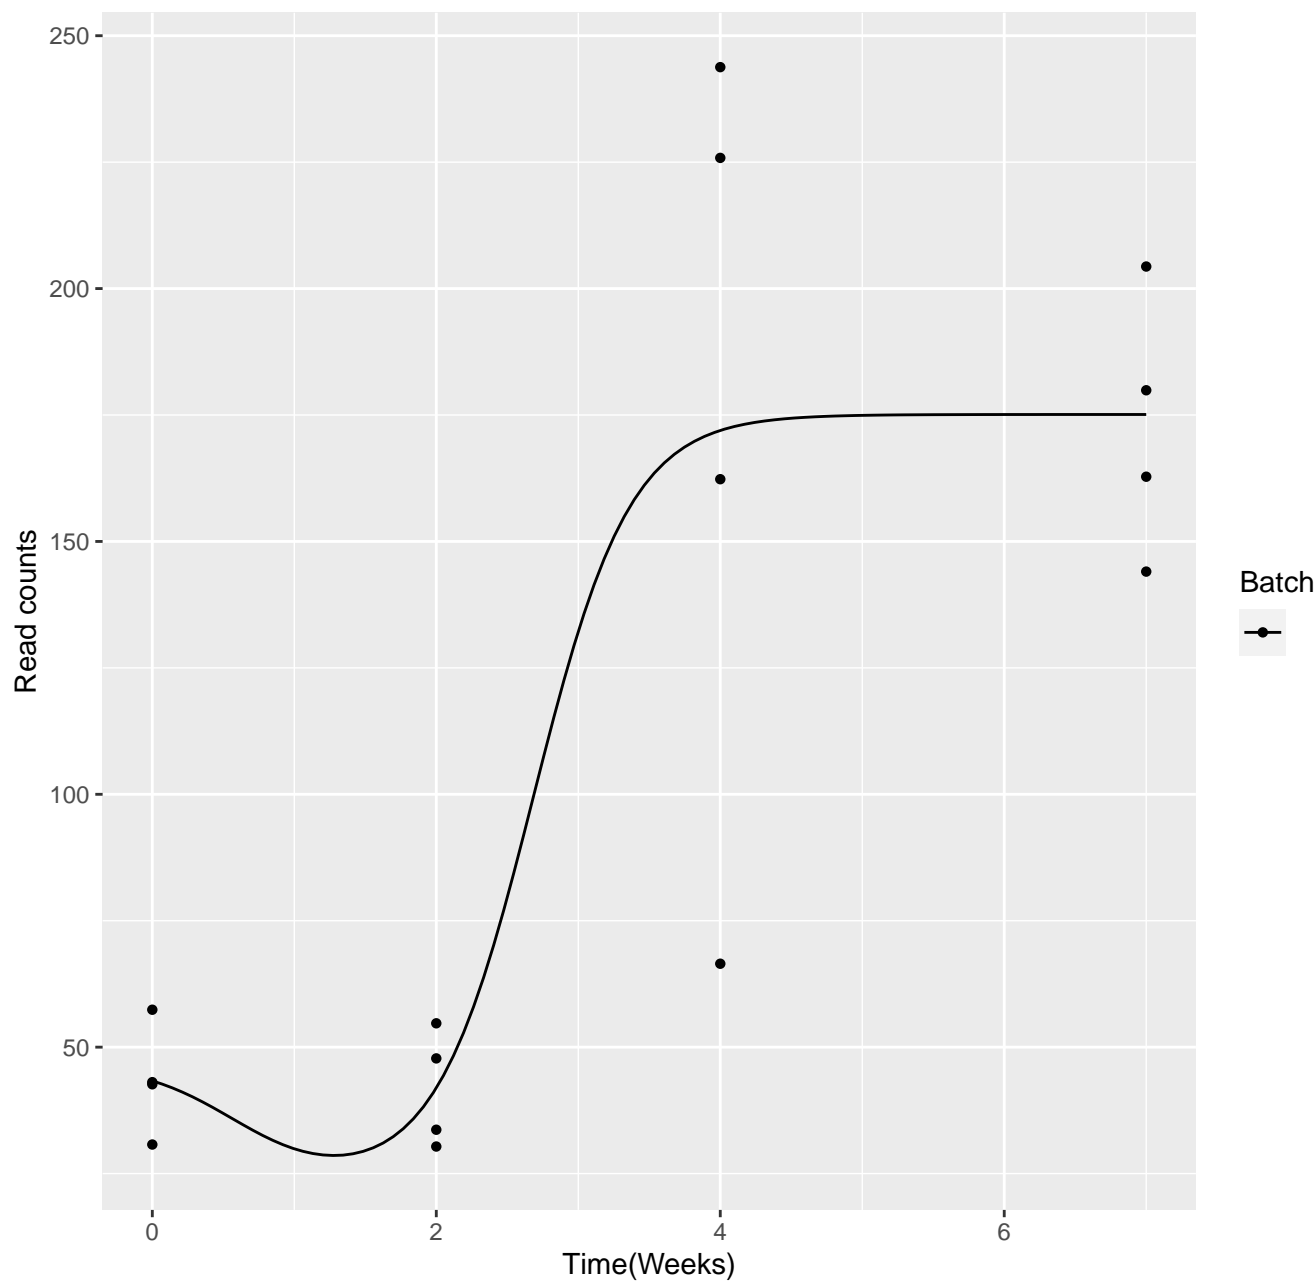

LOC100009097:  $\log_{10} q = -9.03$

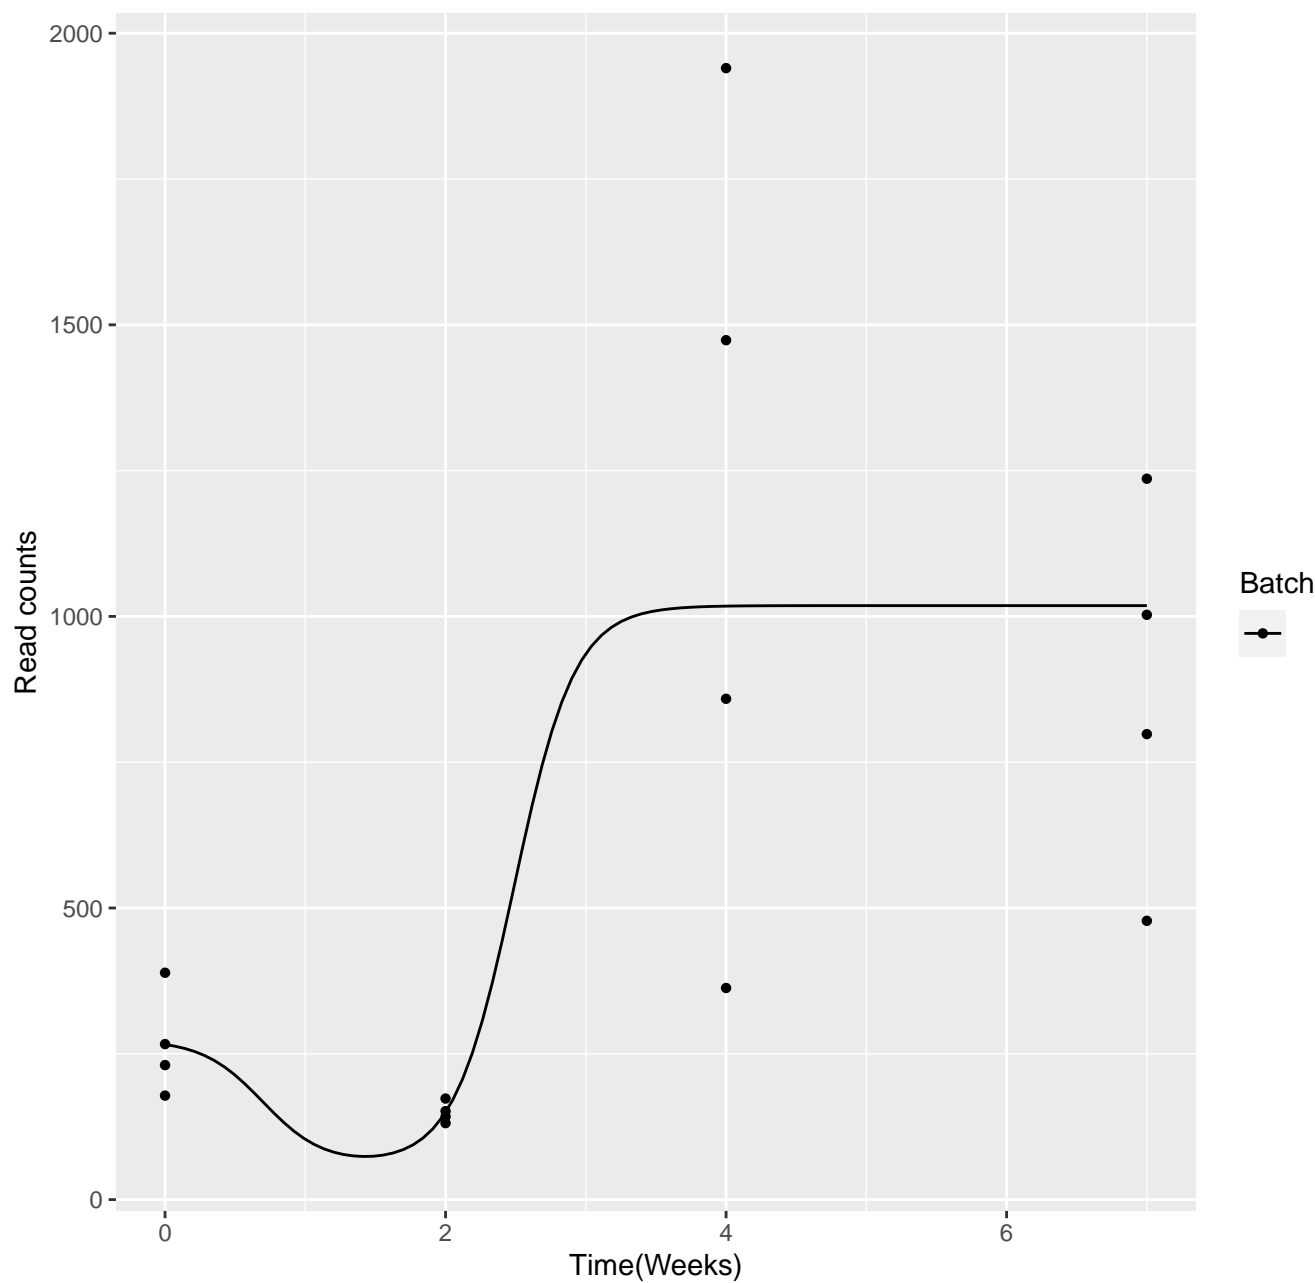

CD68:  $\log_{10} q = -9.03$

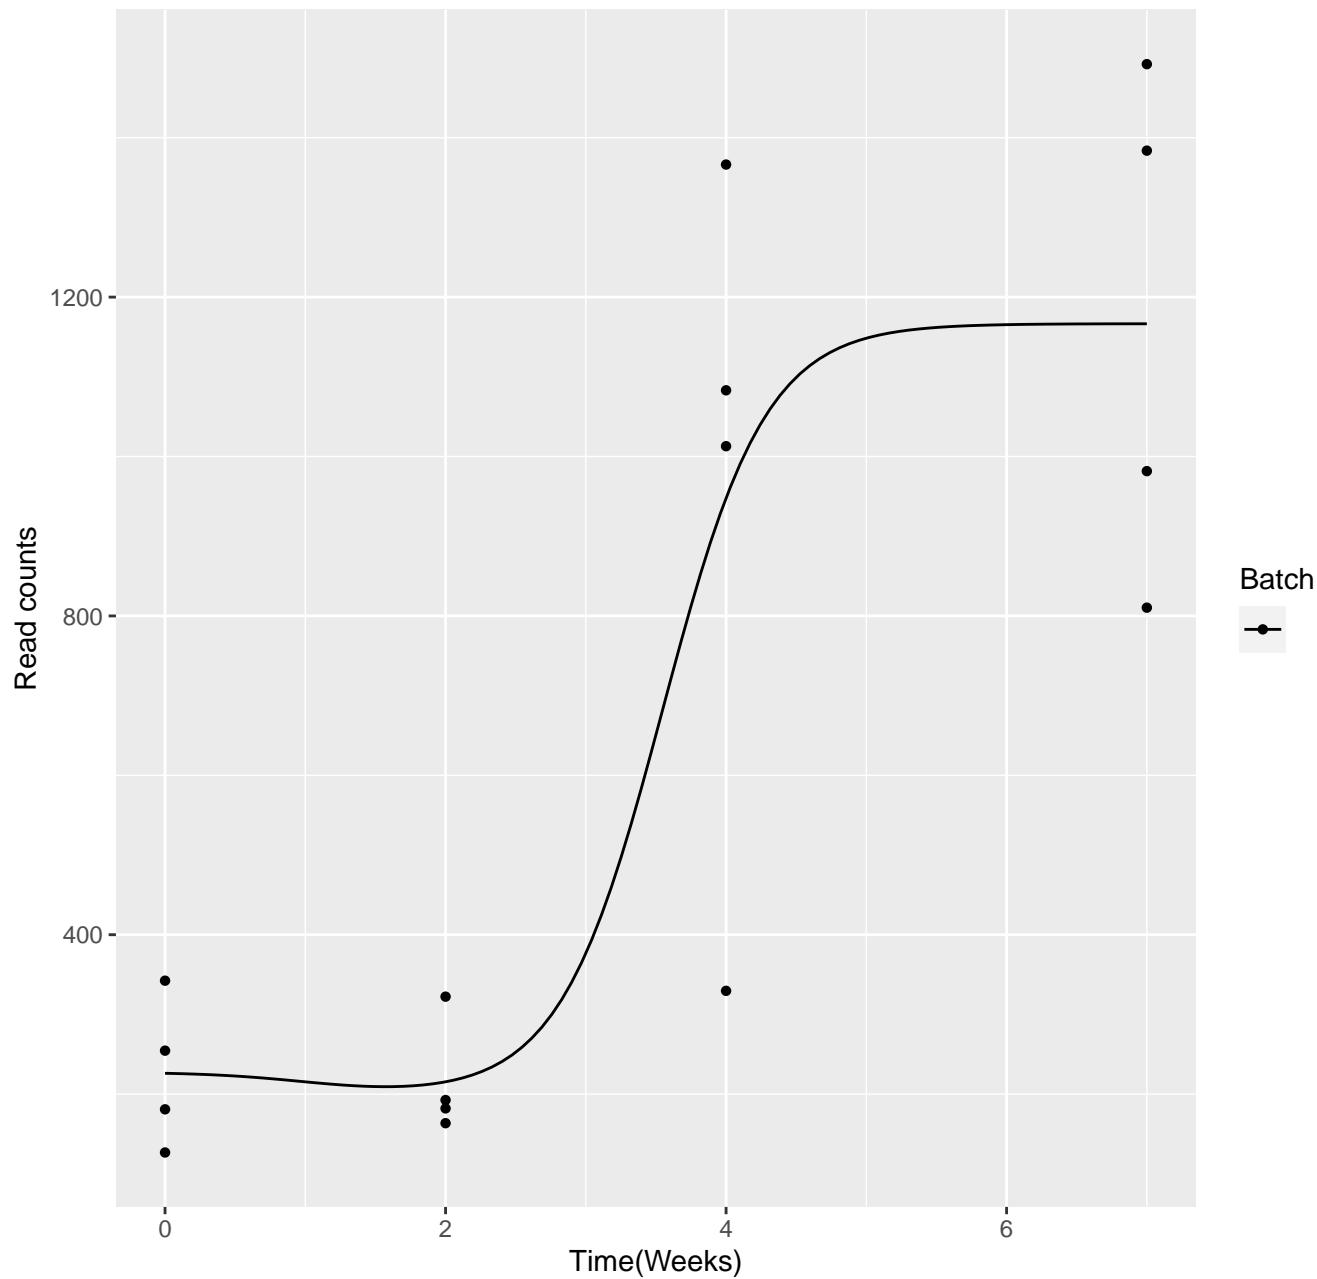

LOC100356803:  $\log_{10} q = -9.02$

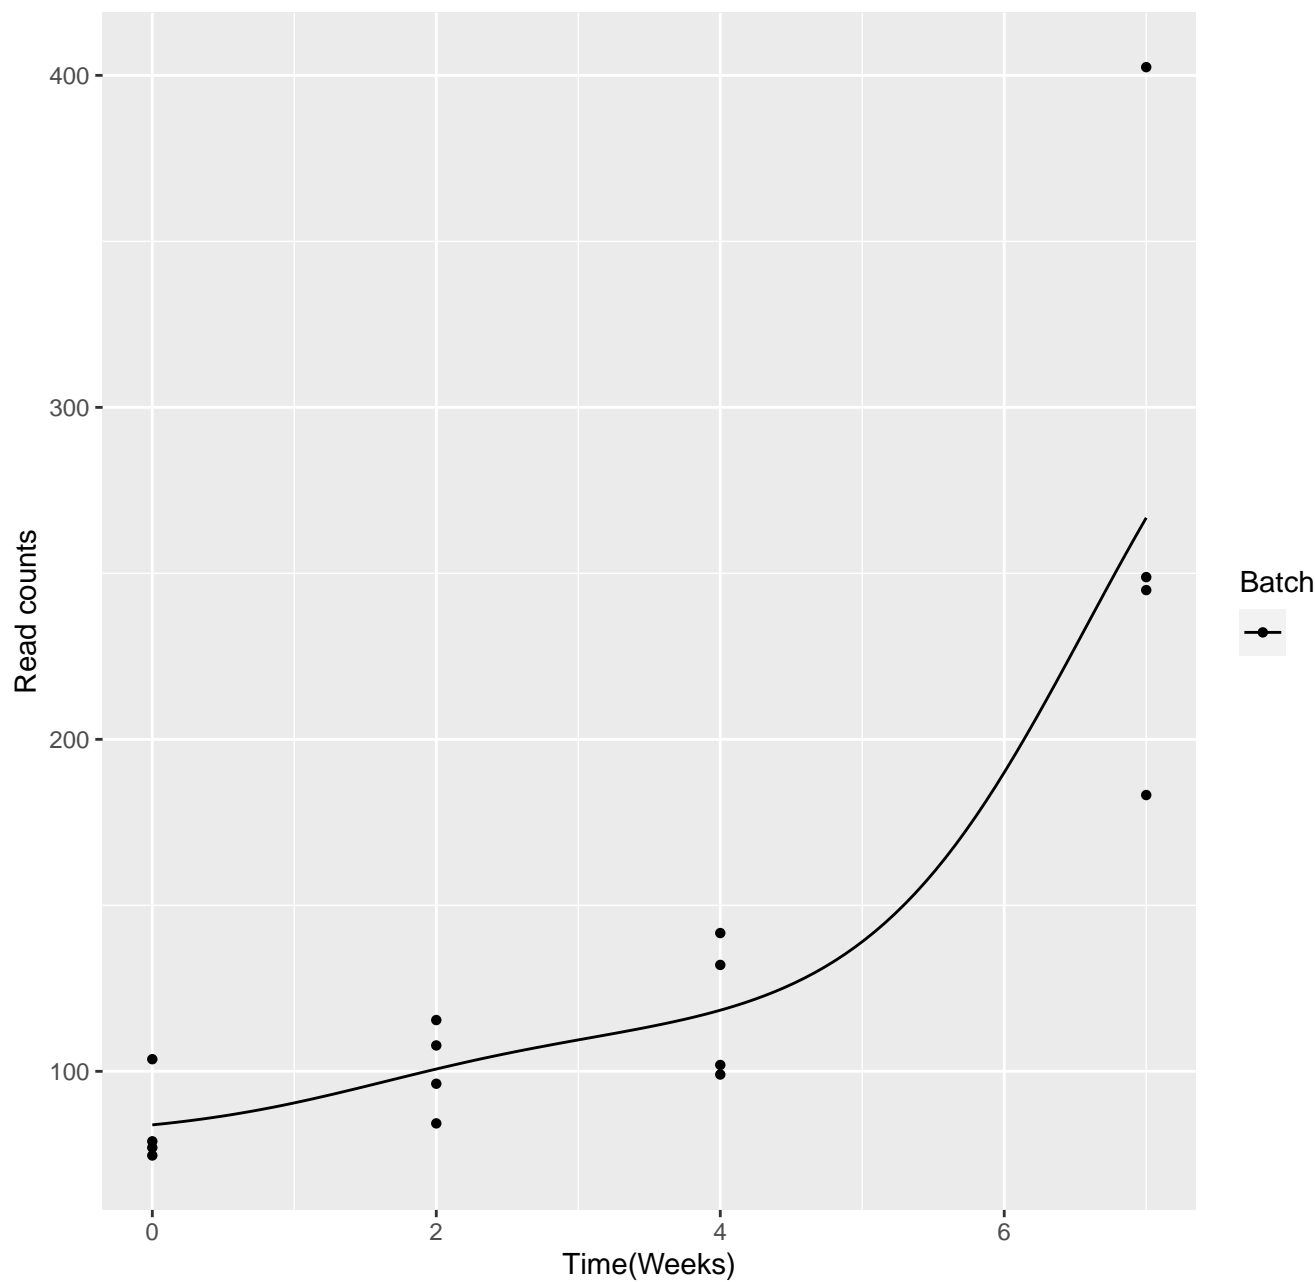

LOC127486108:  $\log_{10} q = -9$

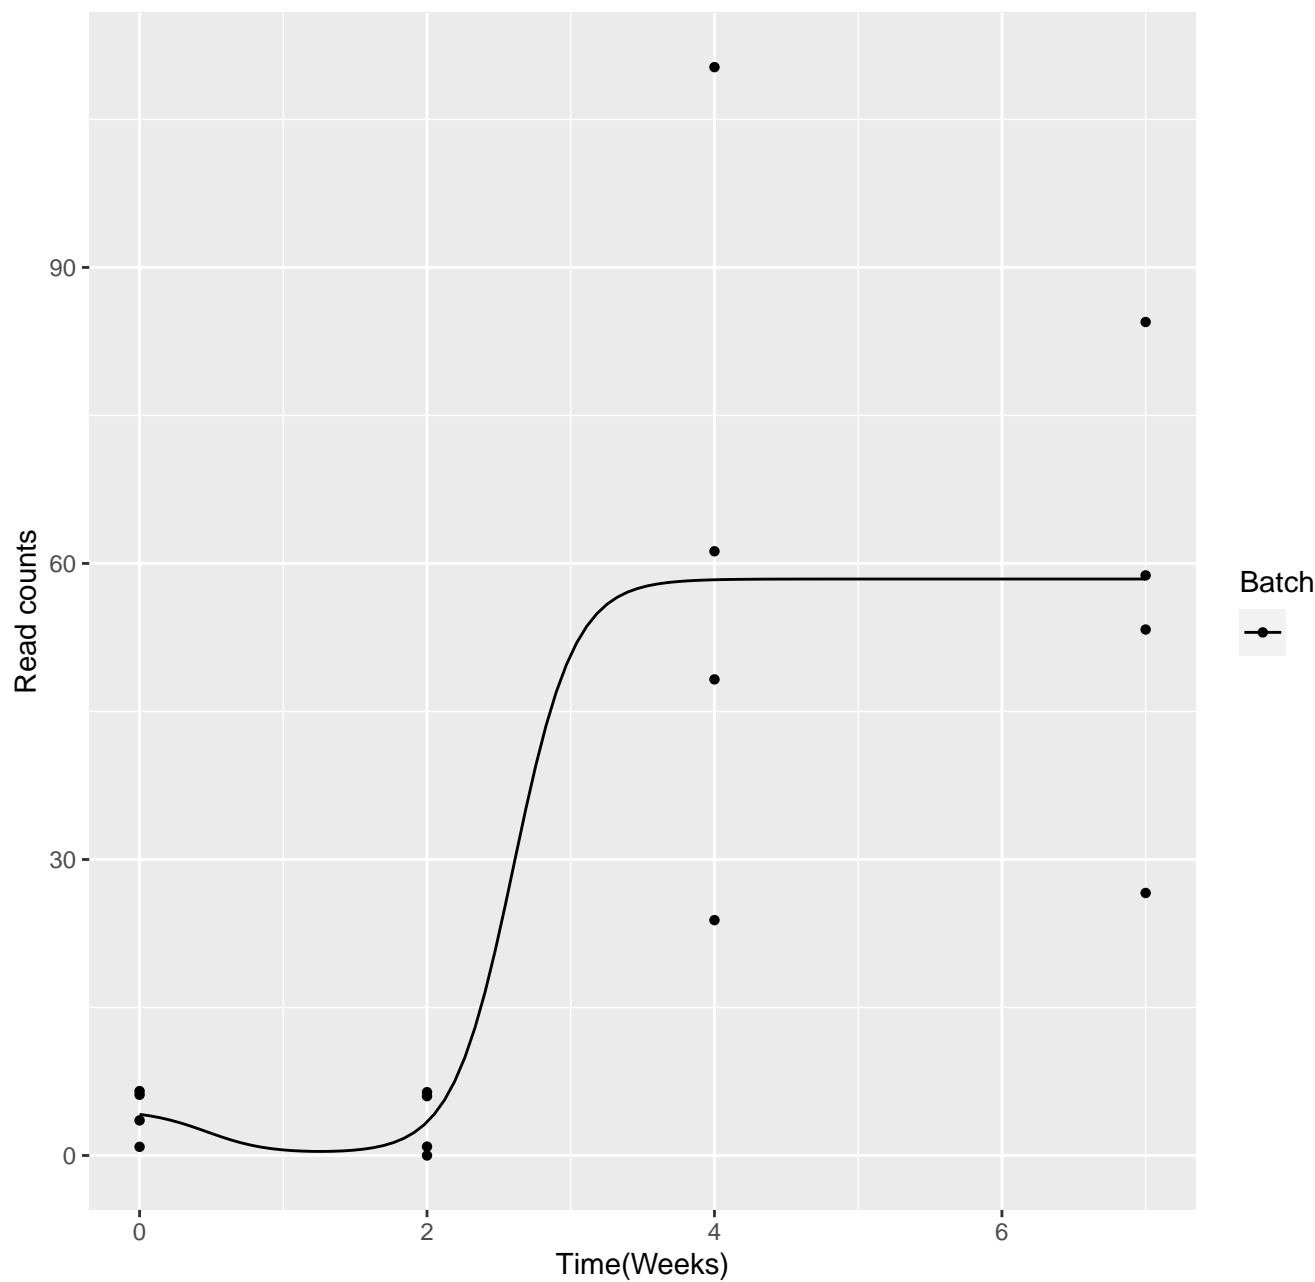

KIAA0040:  $\log_{10} q = -8.99$

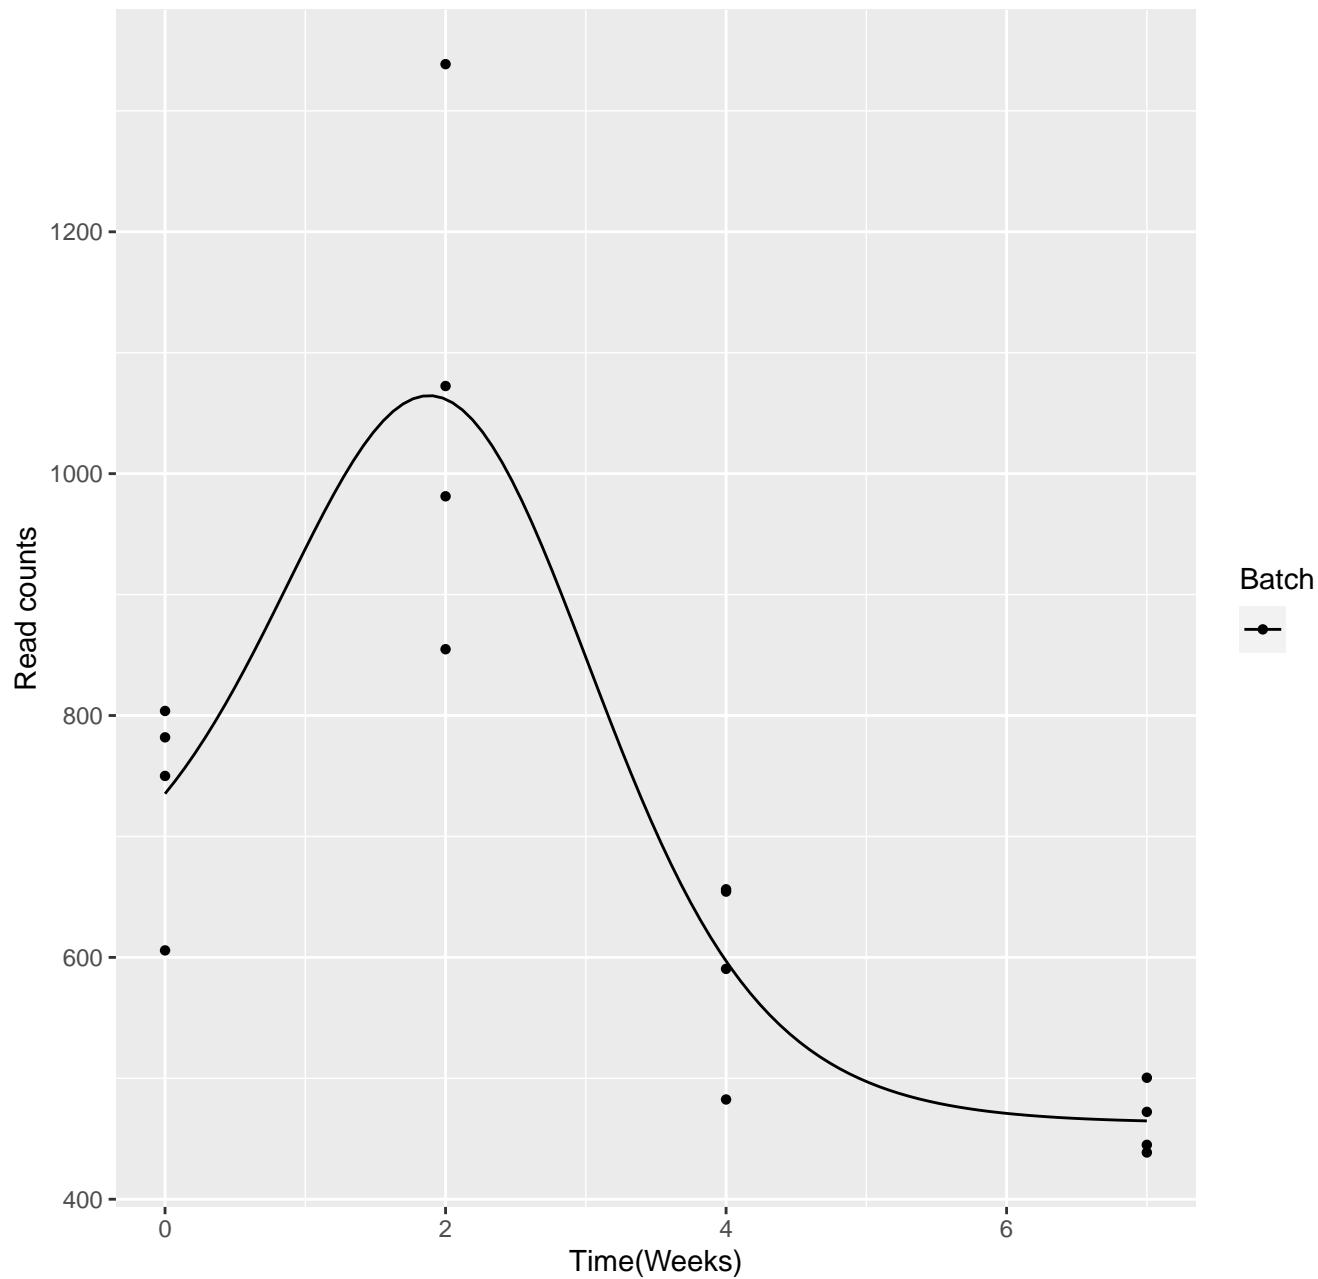



BCL2A1:  $\log_{10} q = -8.98$

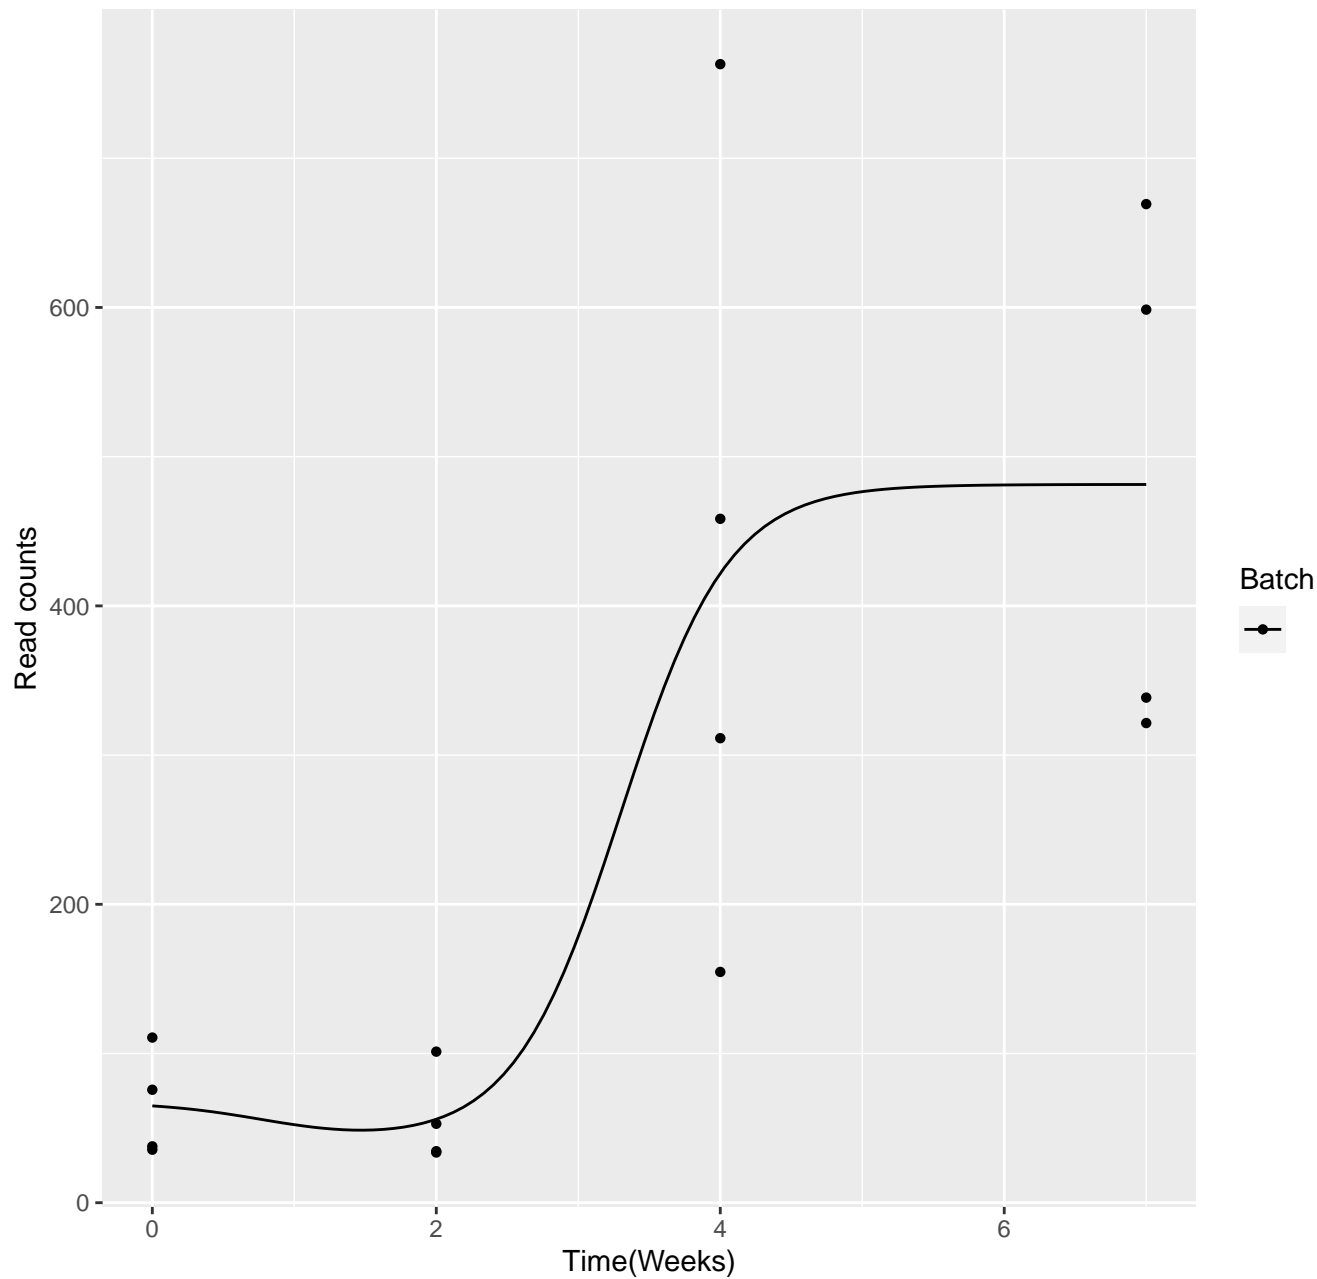

LOC100345060:  $\log_{10} q = -8.97$

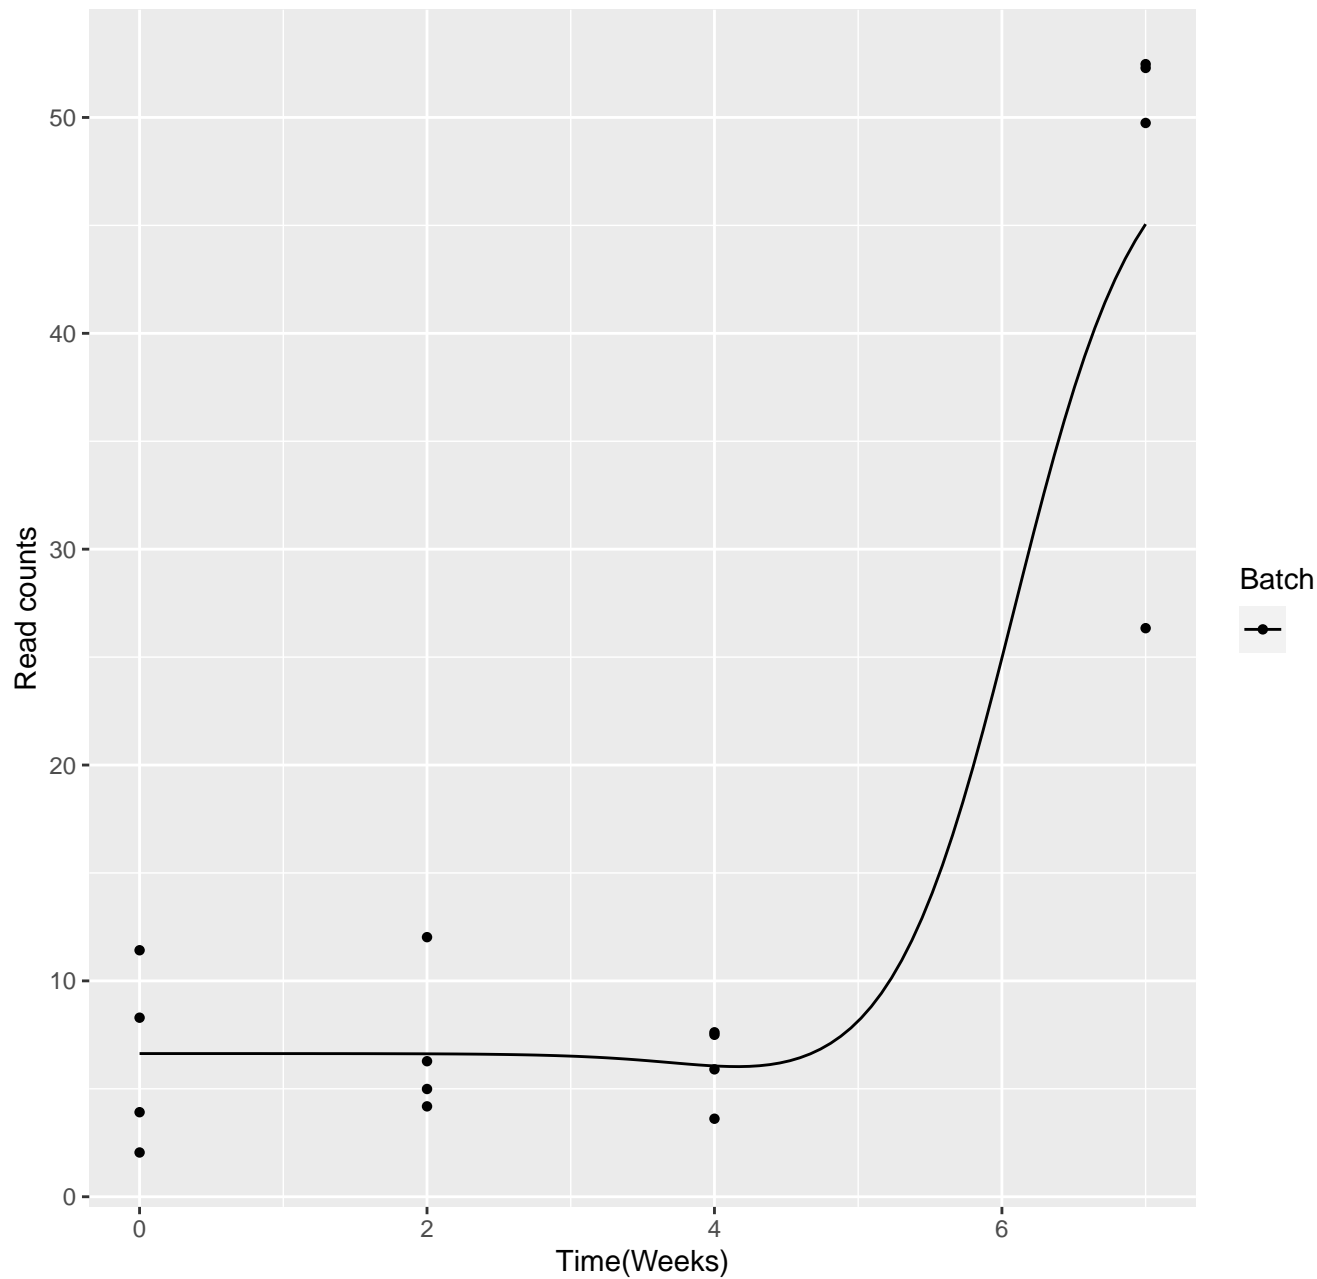

LOC100341783:  $\log_{10} q = -8.96$

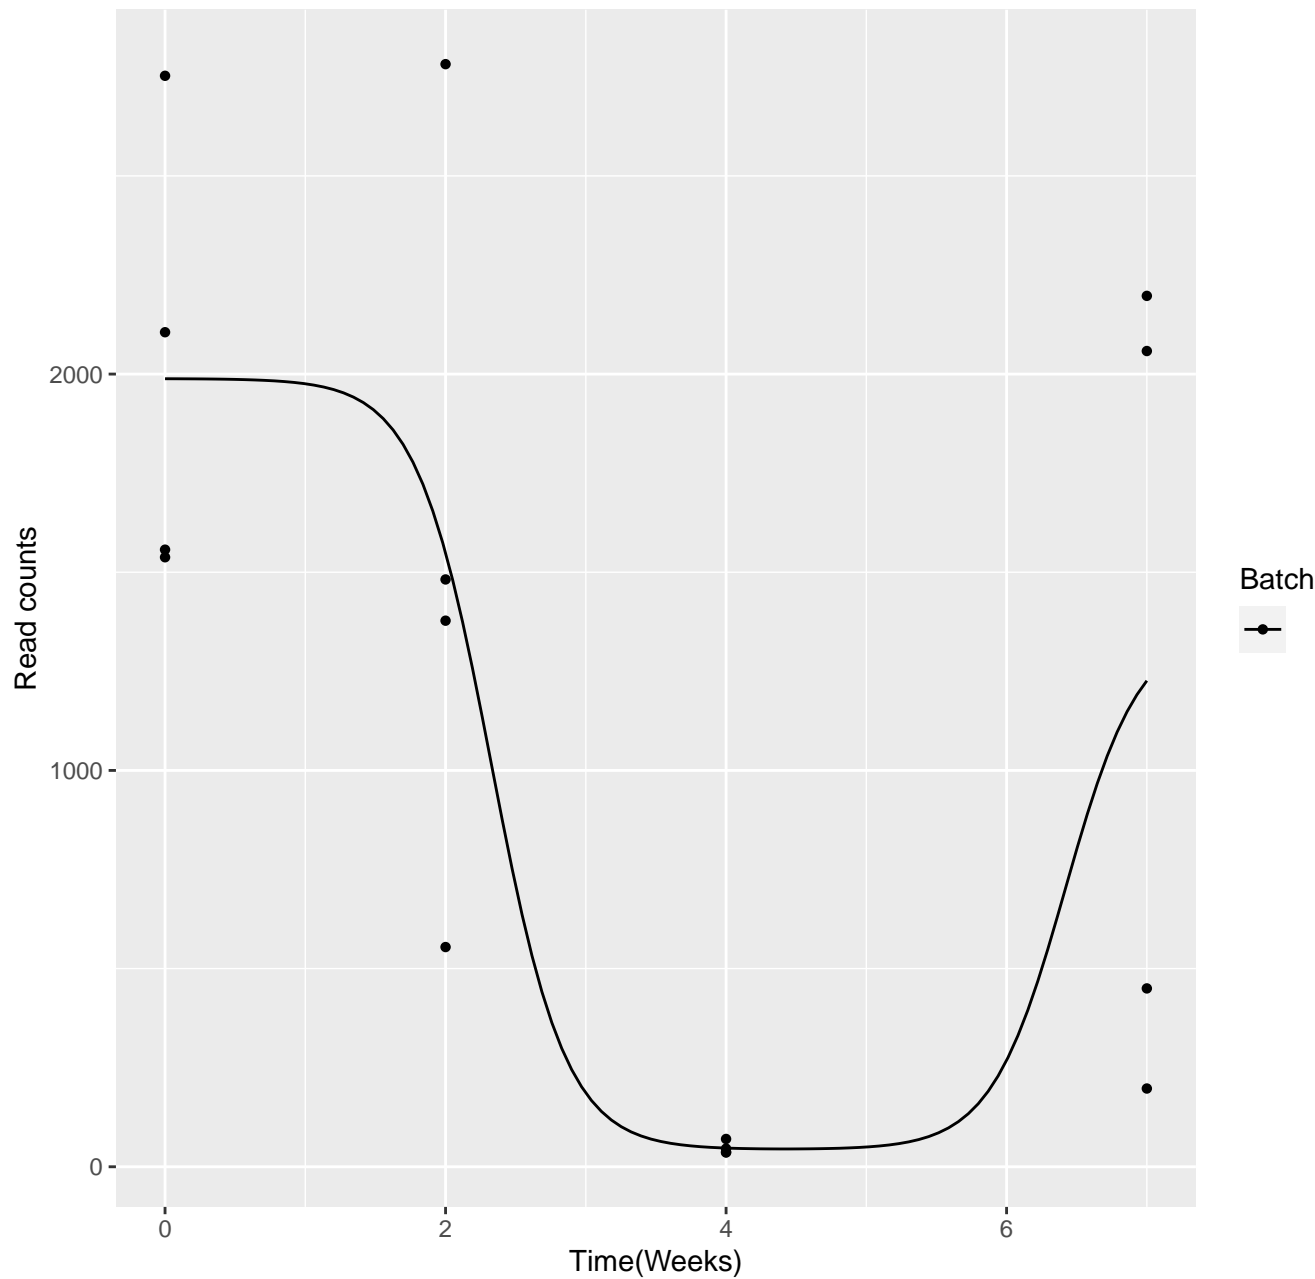

NPAS4:  $\log_{10} q = -8.92$

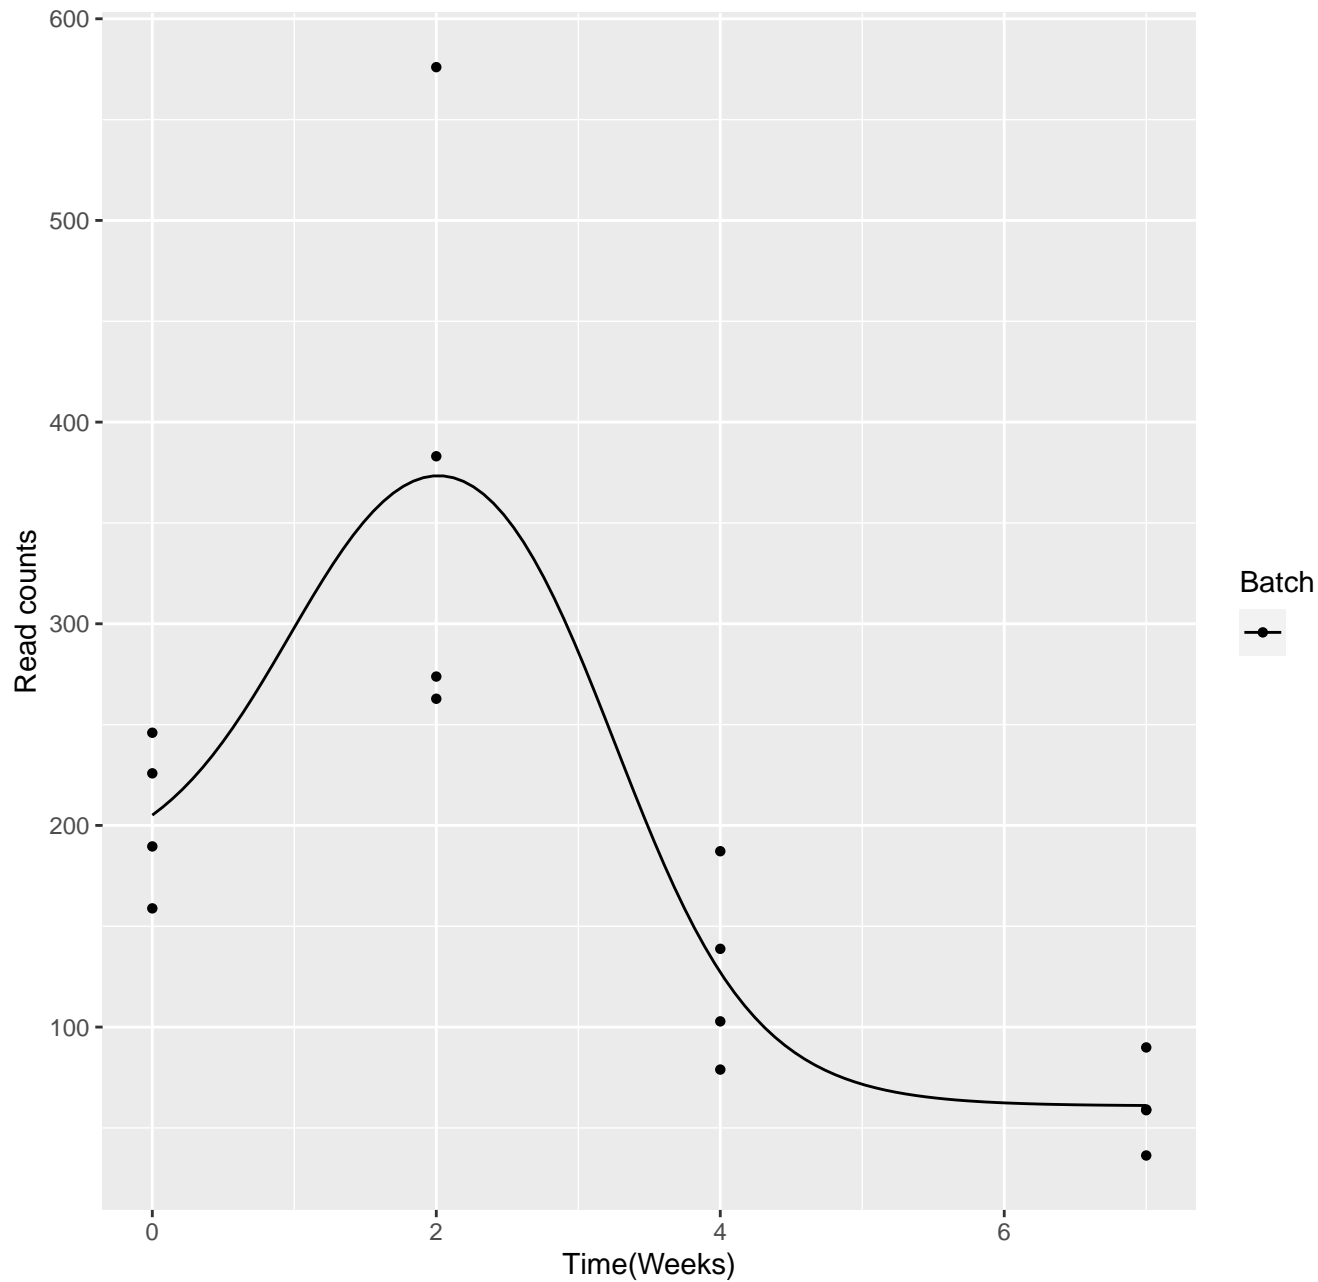

VSIG4:  $\log_{10} q = -8.91$

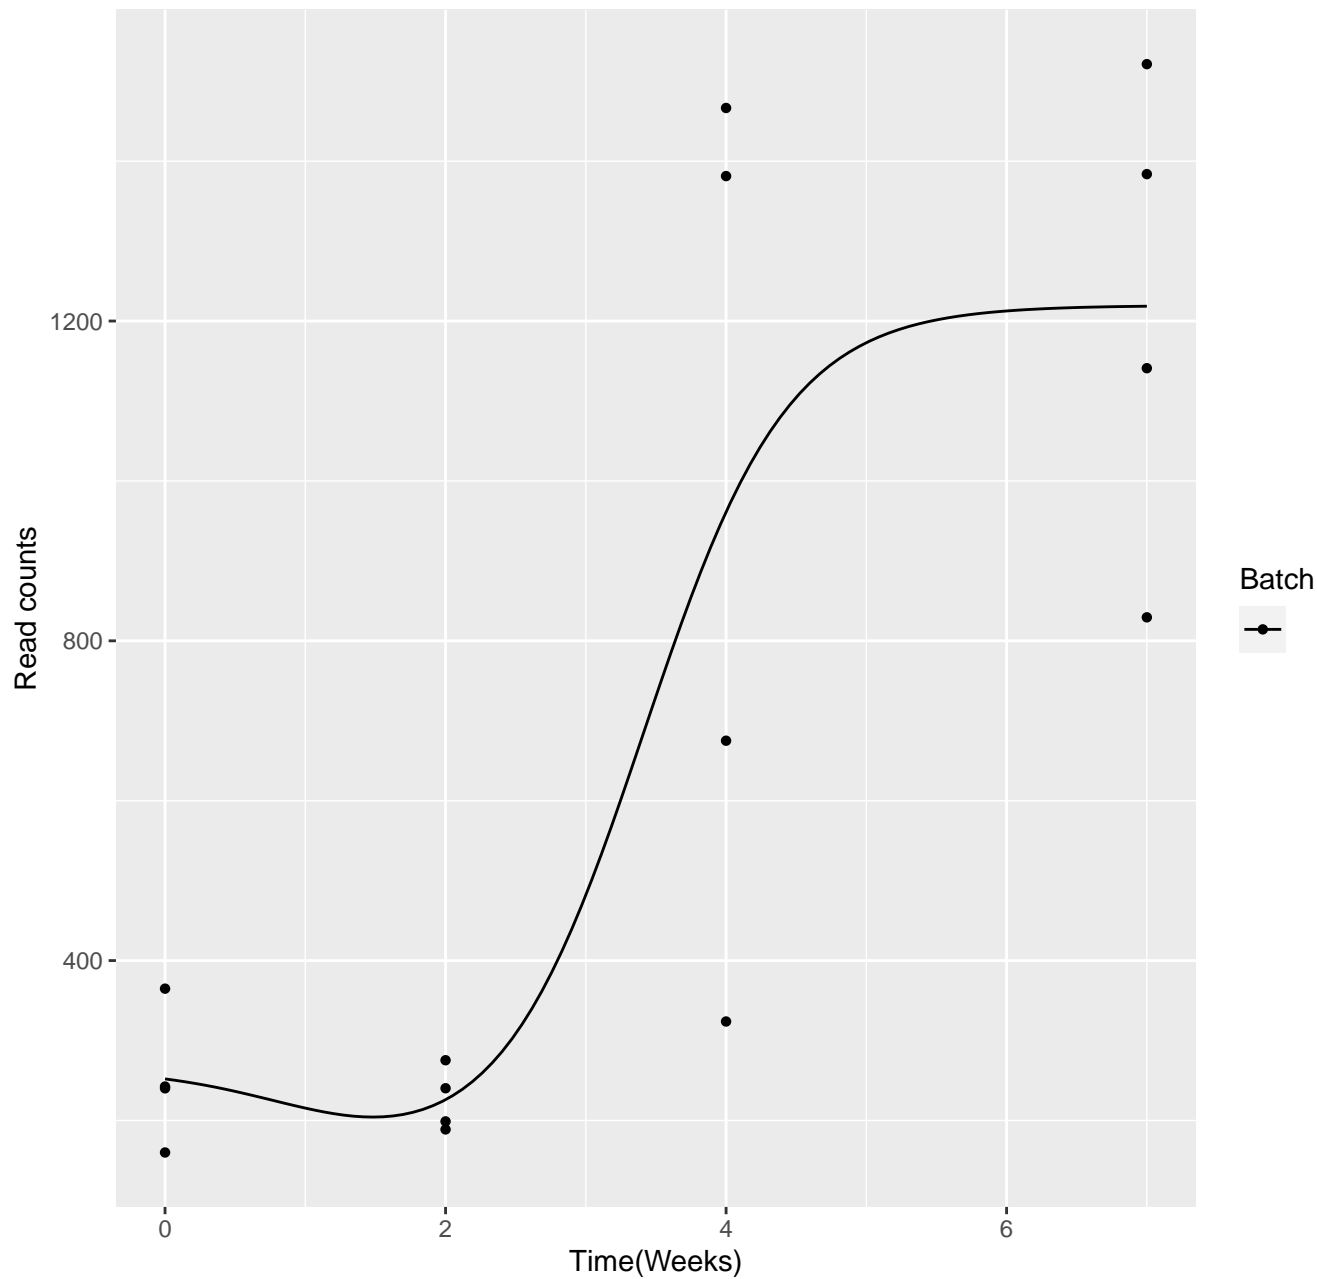

LOC127482604:  $\log_{10} q = -8.87$

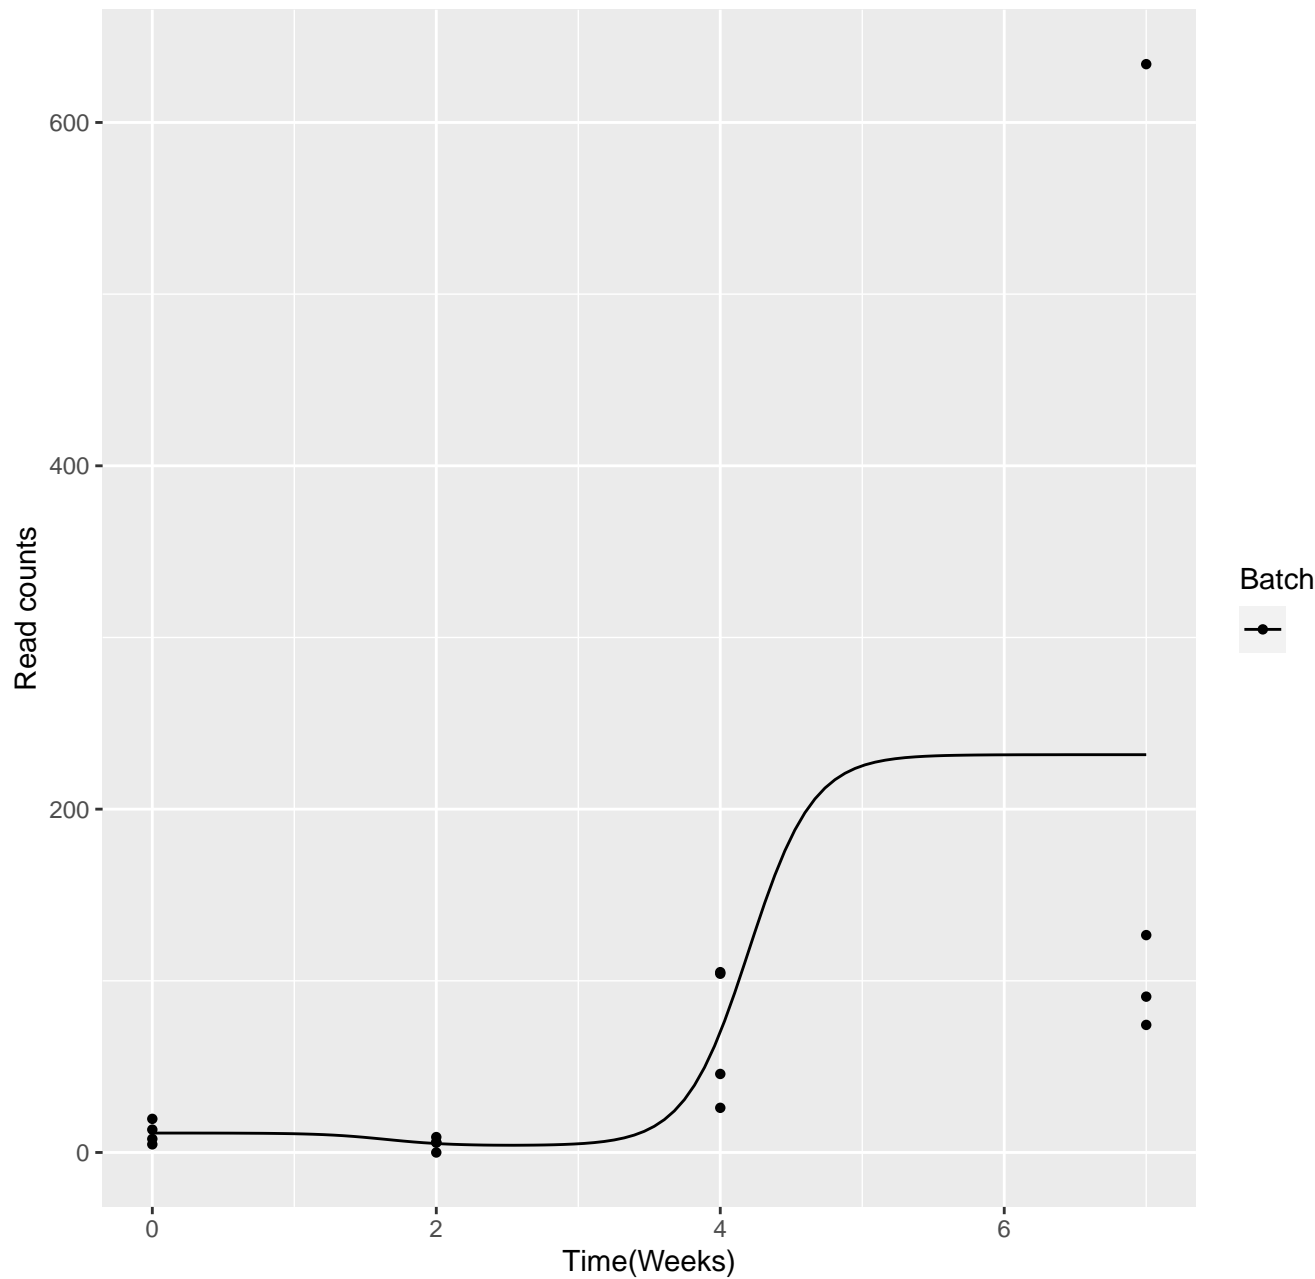

LOC100357892:  $\log_{10} q = -8.87$

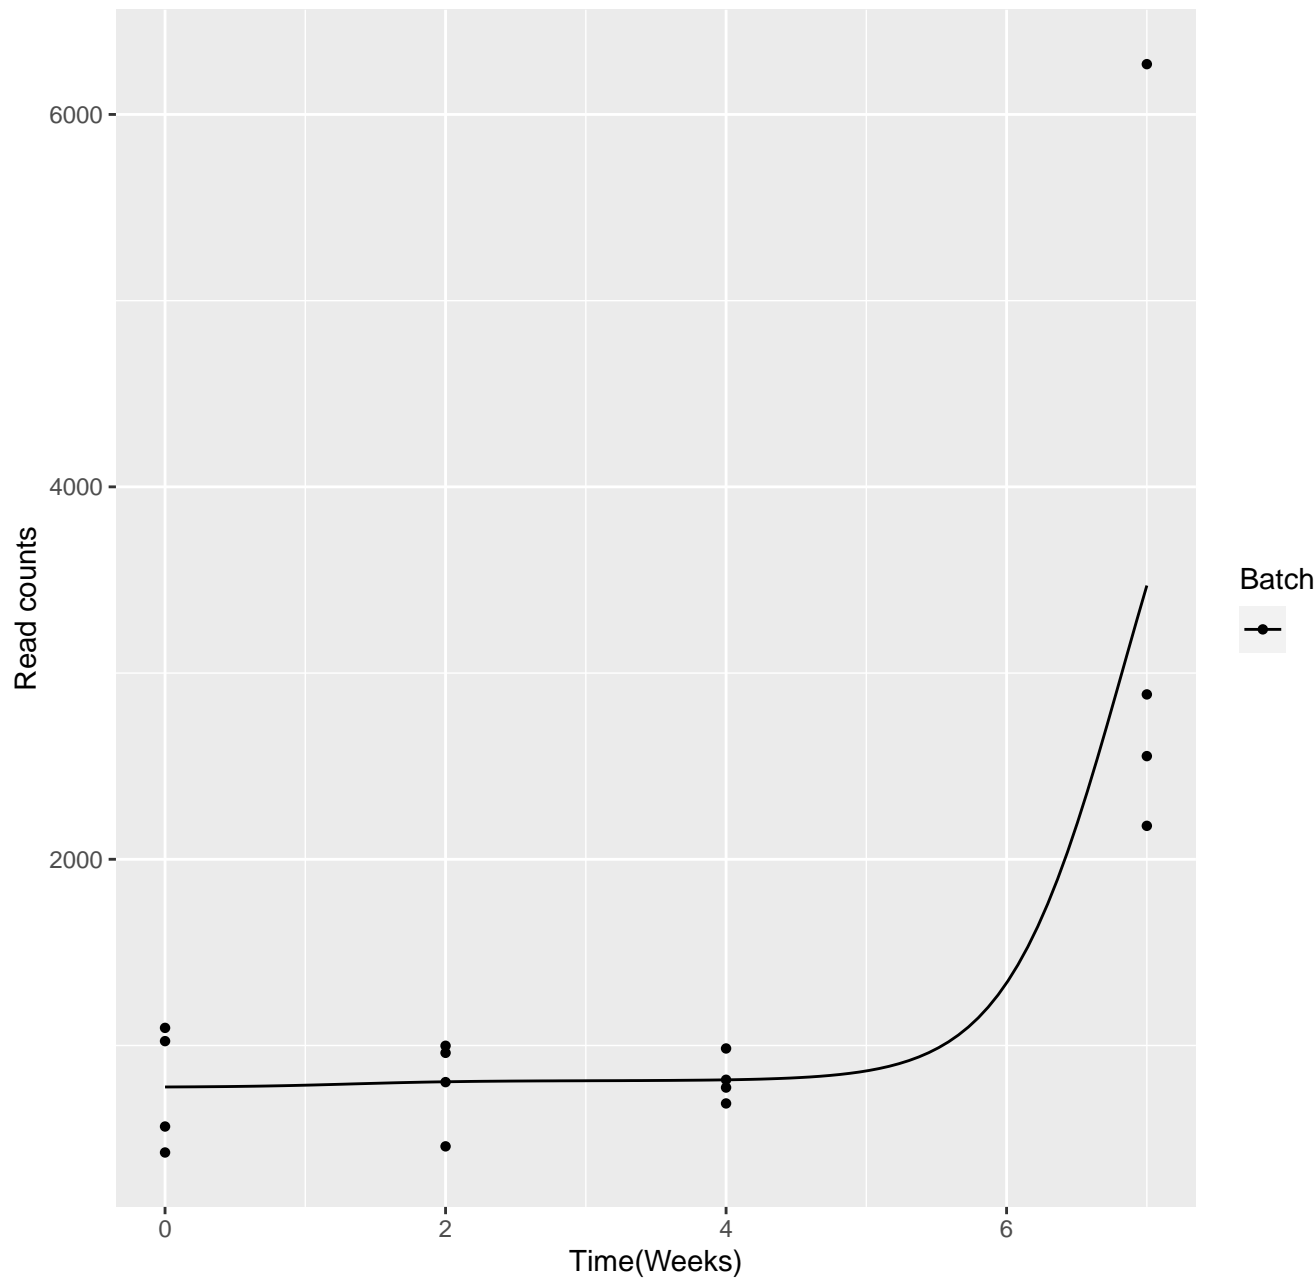

ITGB2:  $\log_{10} q = -8.87$

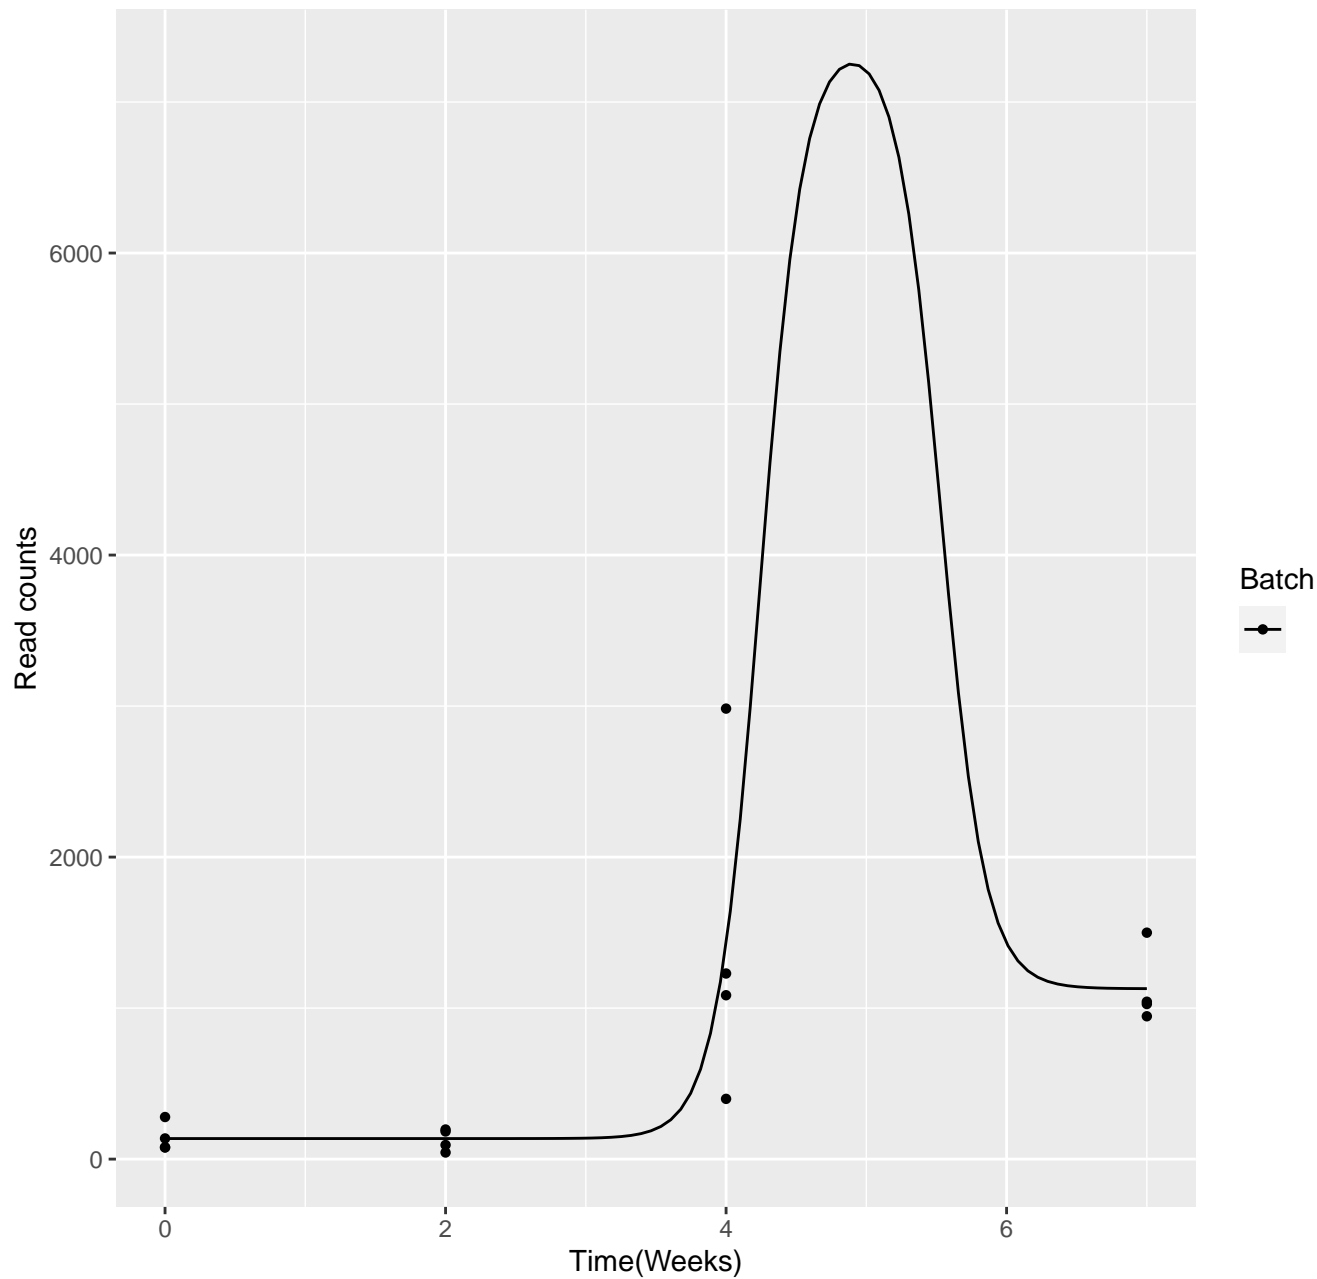



CD84:  $\log_{10} q = -8.85$

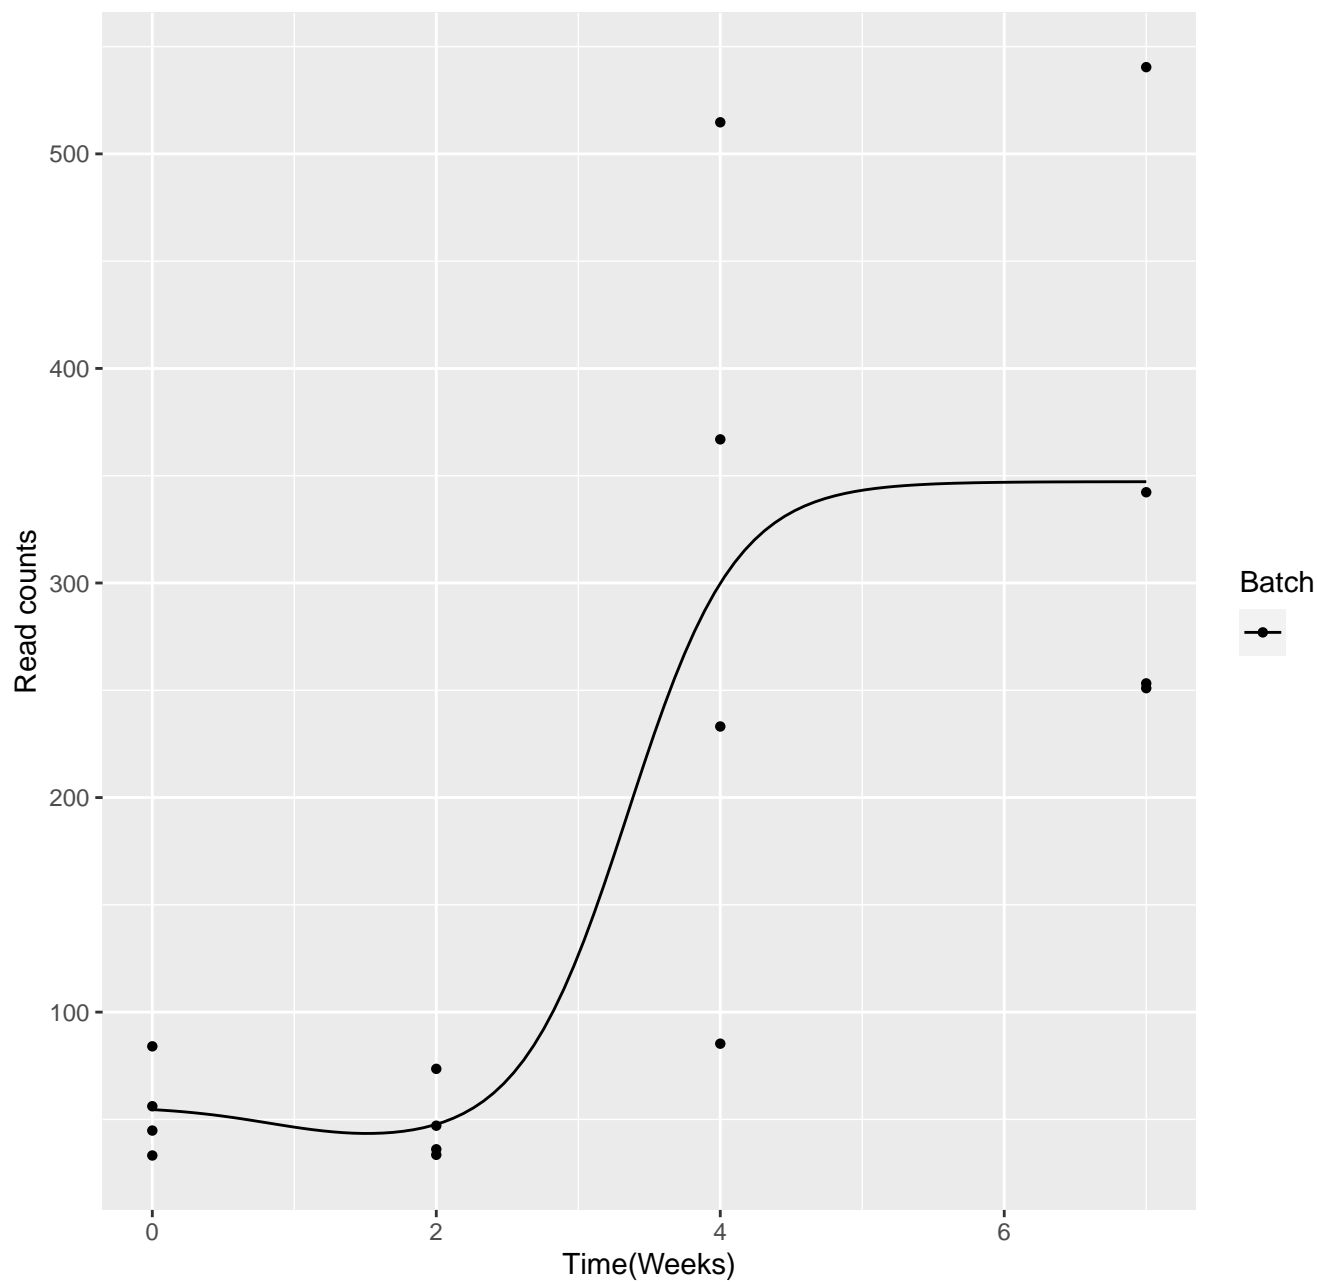

NPNT:  $\log_{10} q = -8.78$

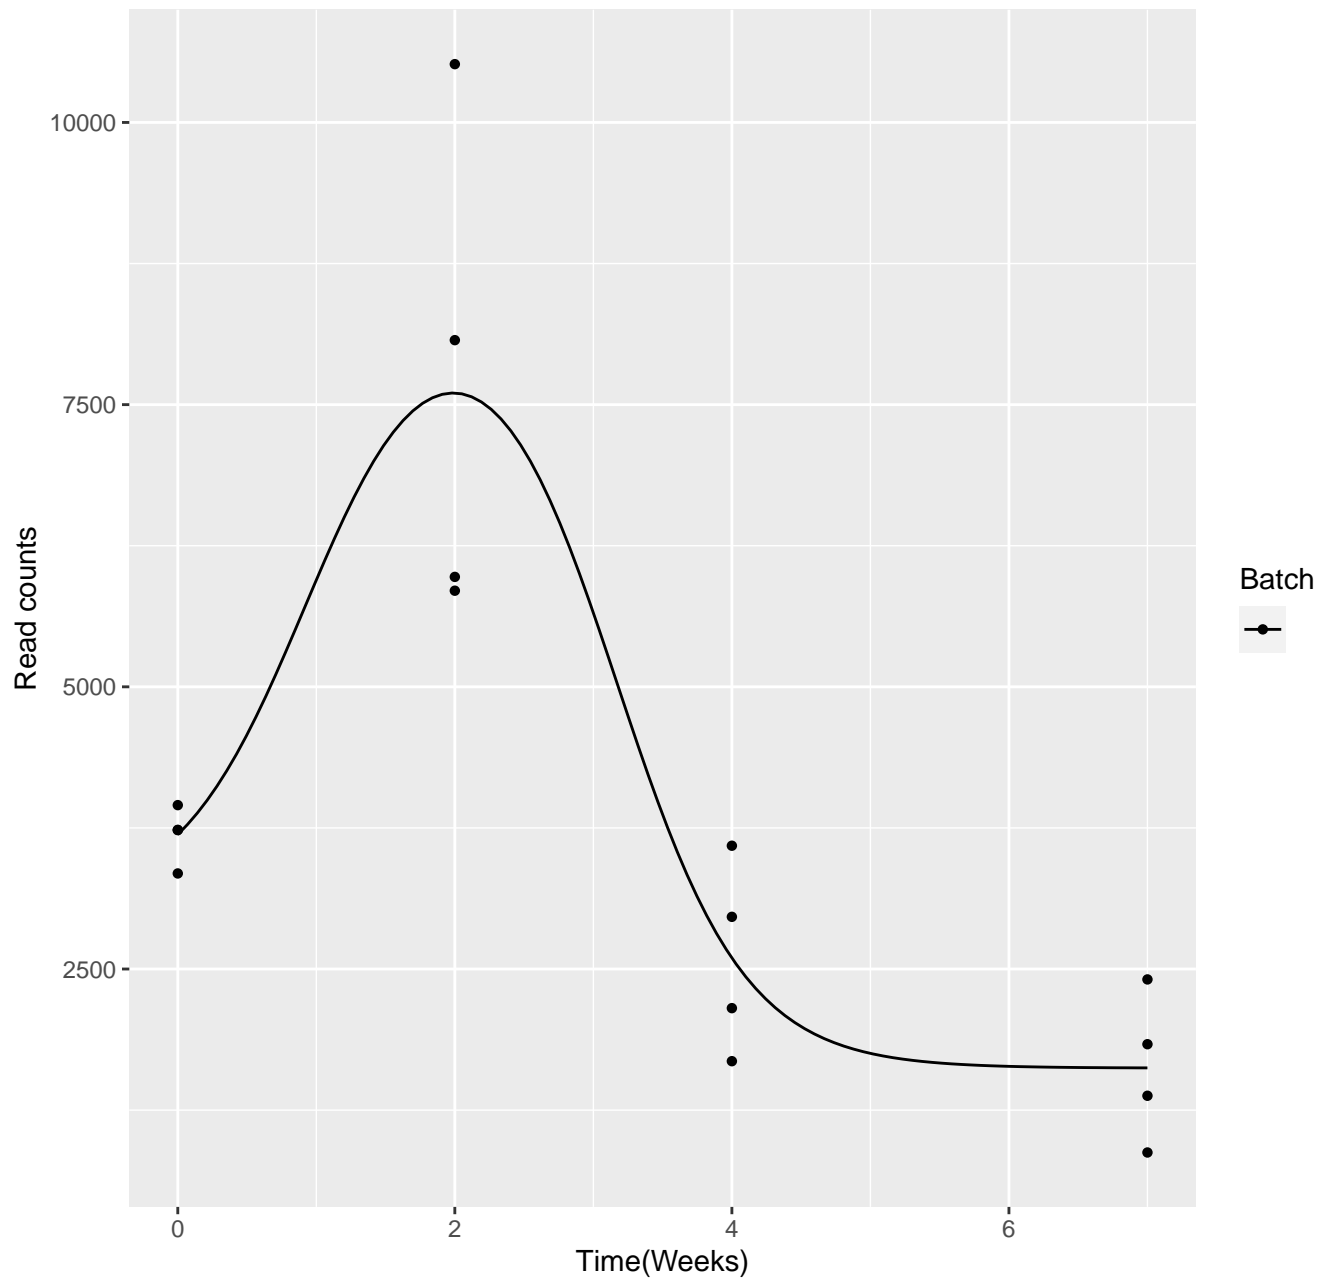

LST1:  $\log_{10} q = -8.77$

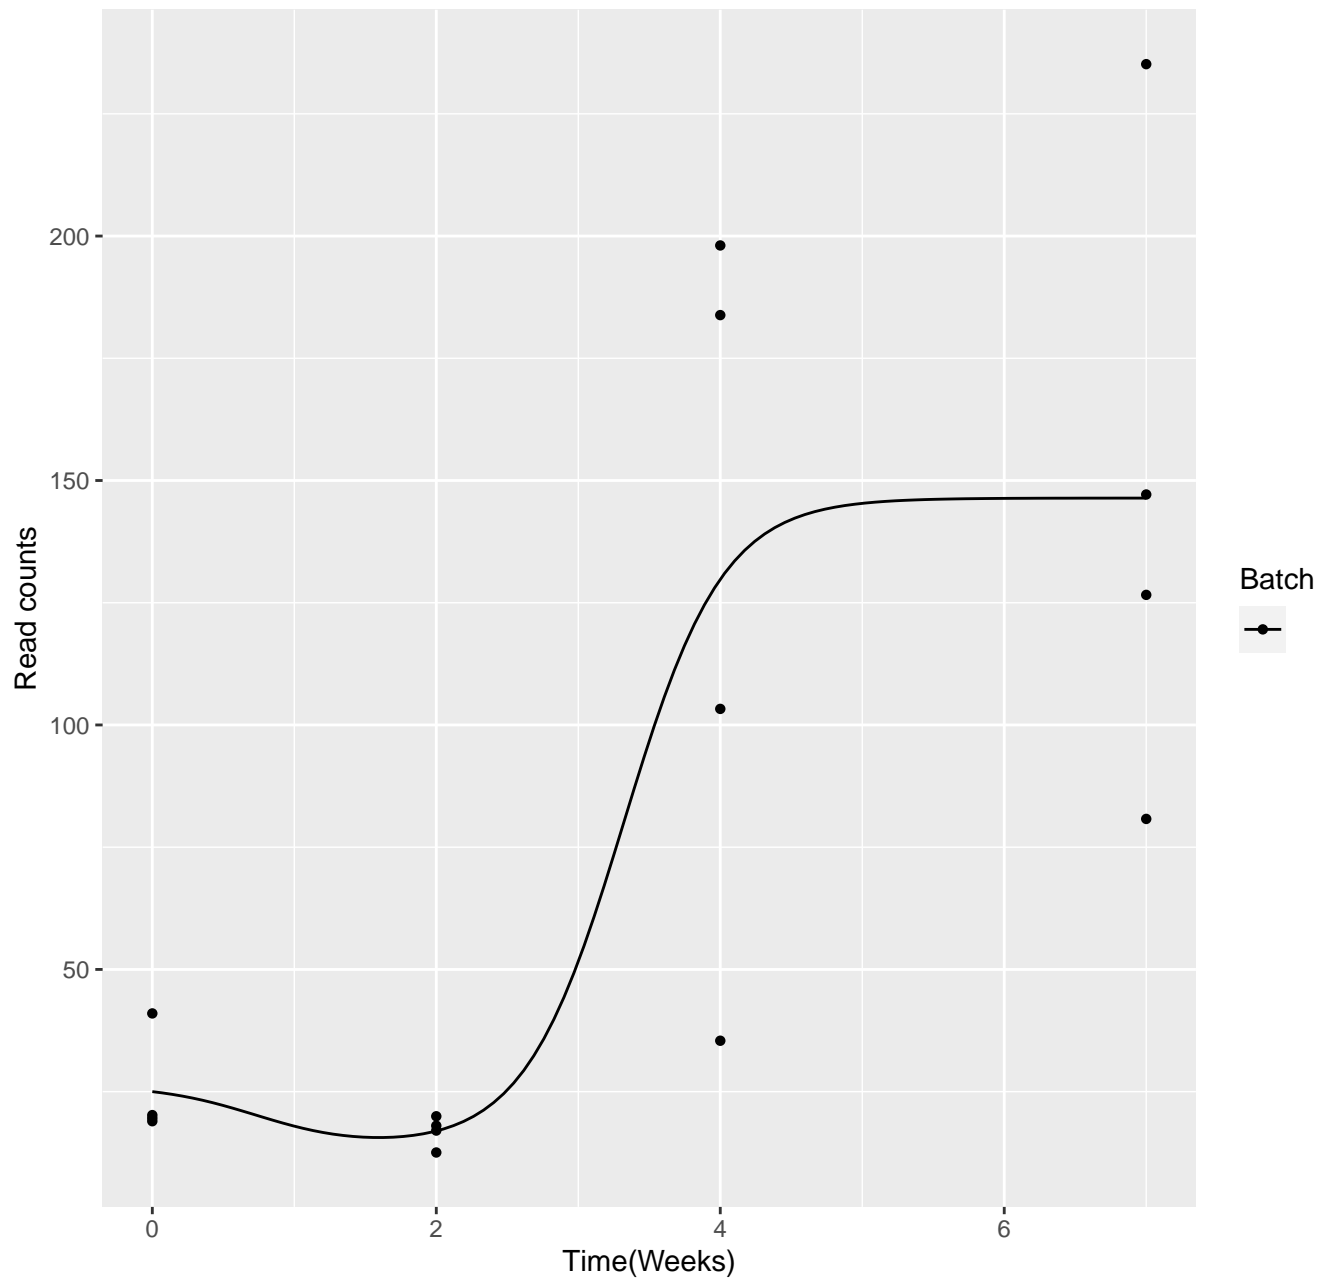

MYO1F:  $\log_{10} q = -8.7$

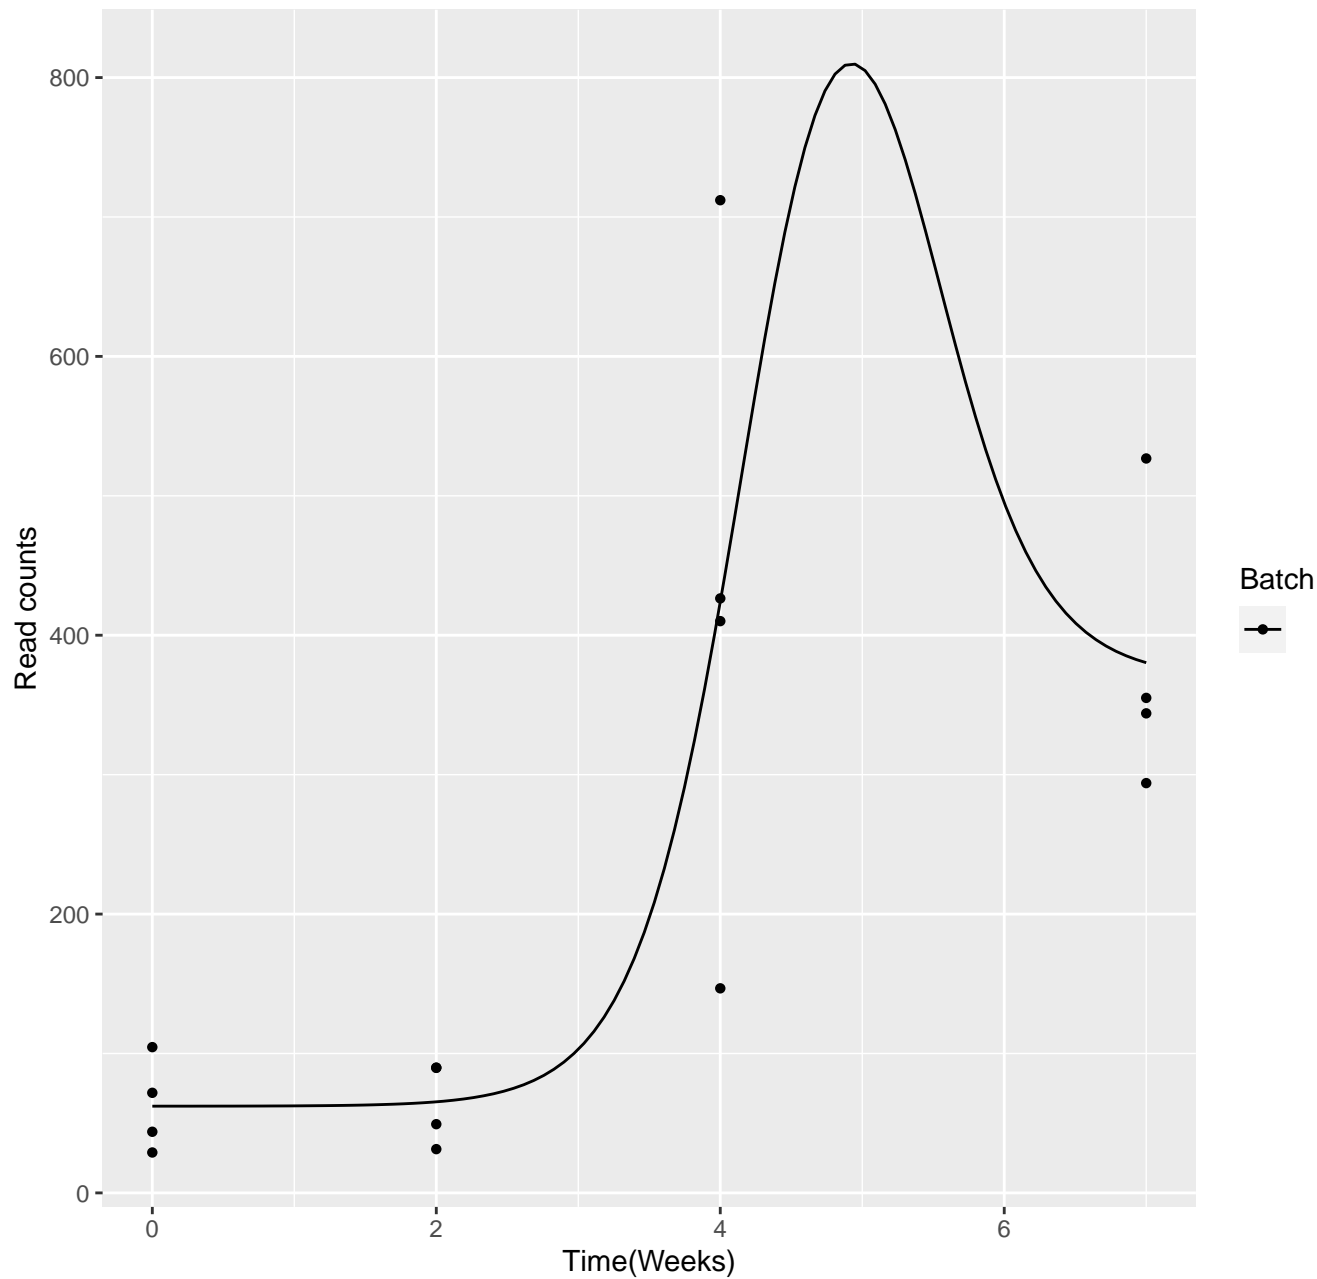

LOC100349285:  $\log_{10} q = -8.69$

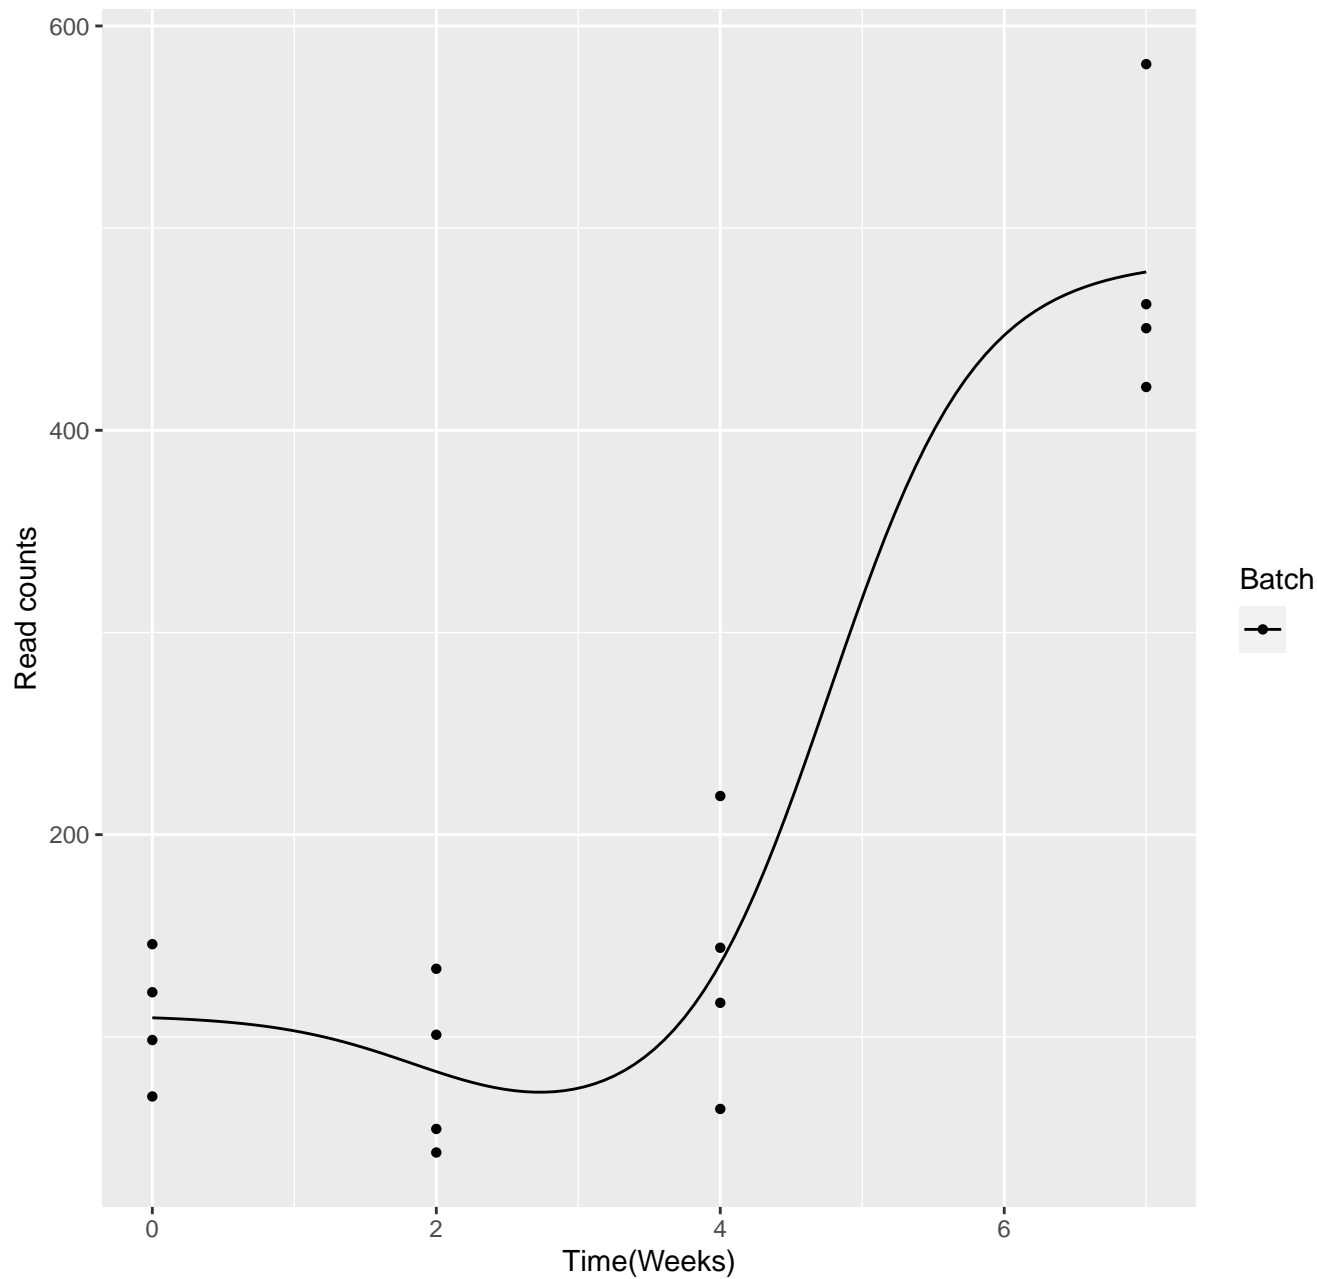

HCST:  $\log_{10} q = -8.62$

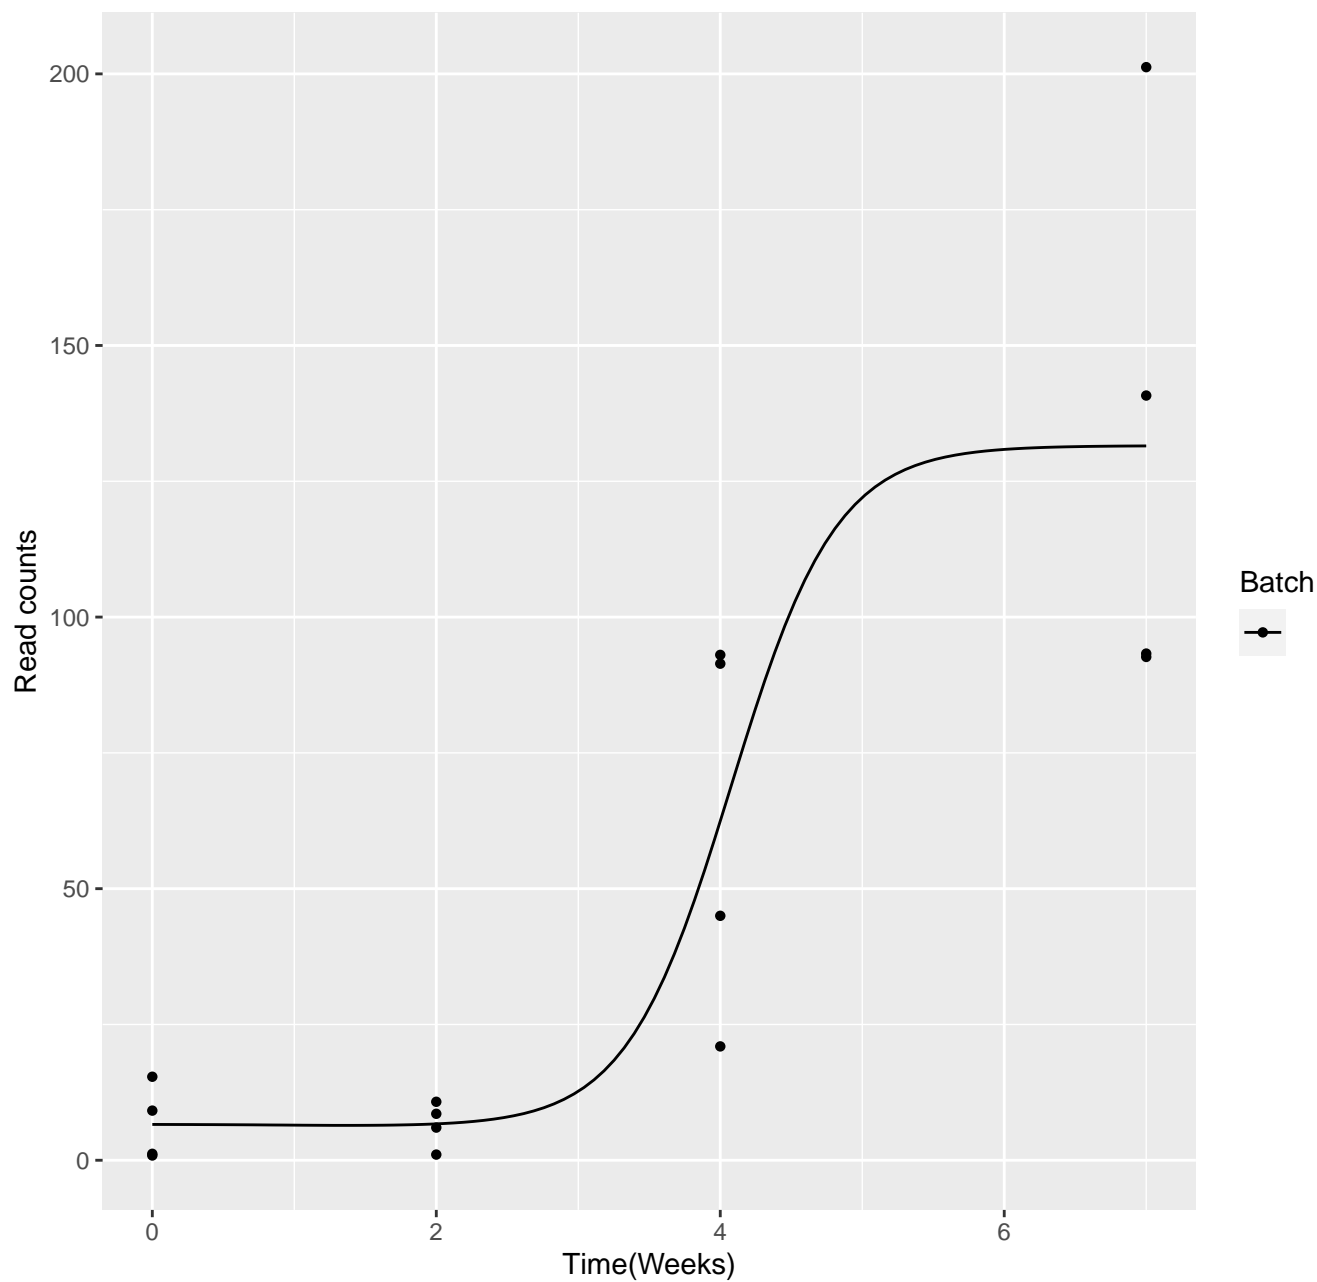

AOAH:  $\log_{10} q = -8.58$

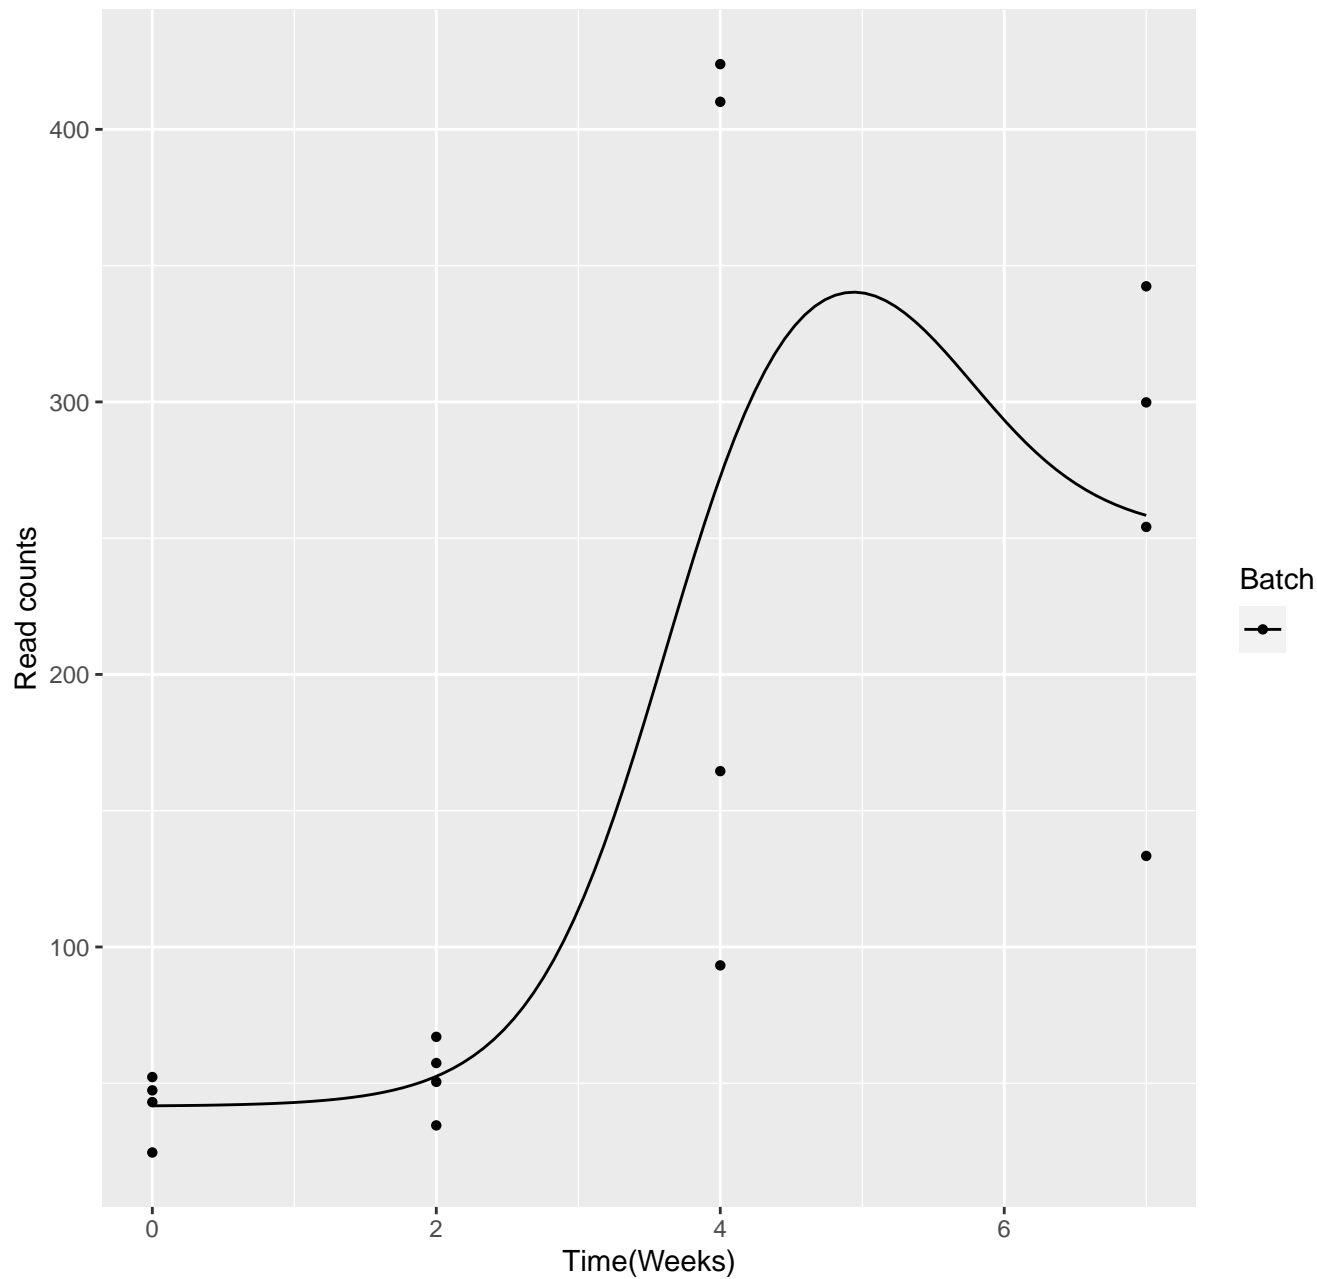

MICAL2:  $\log_{10} q = -8.52$

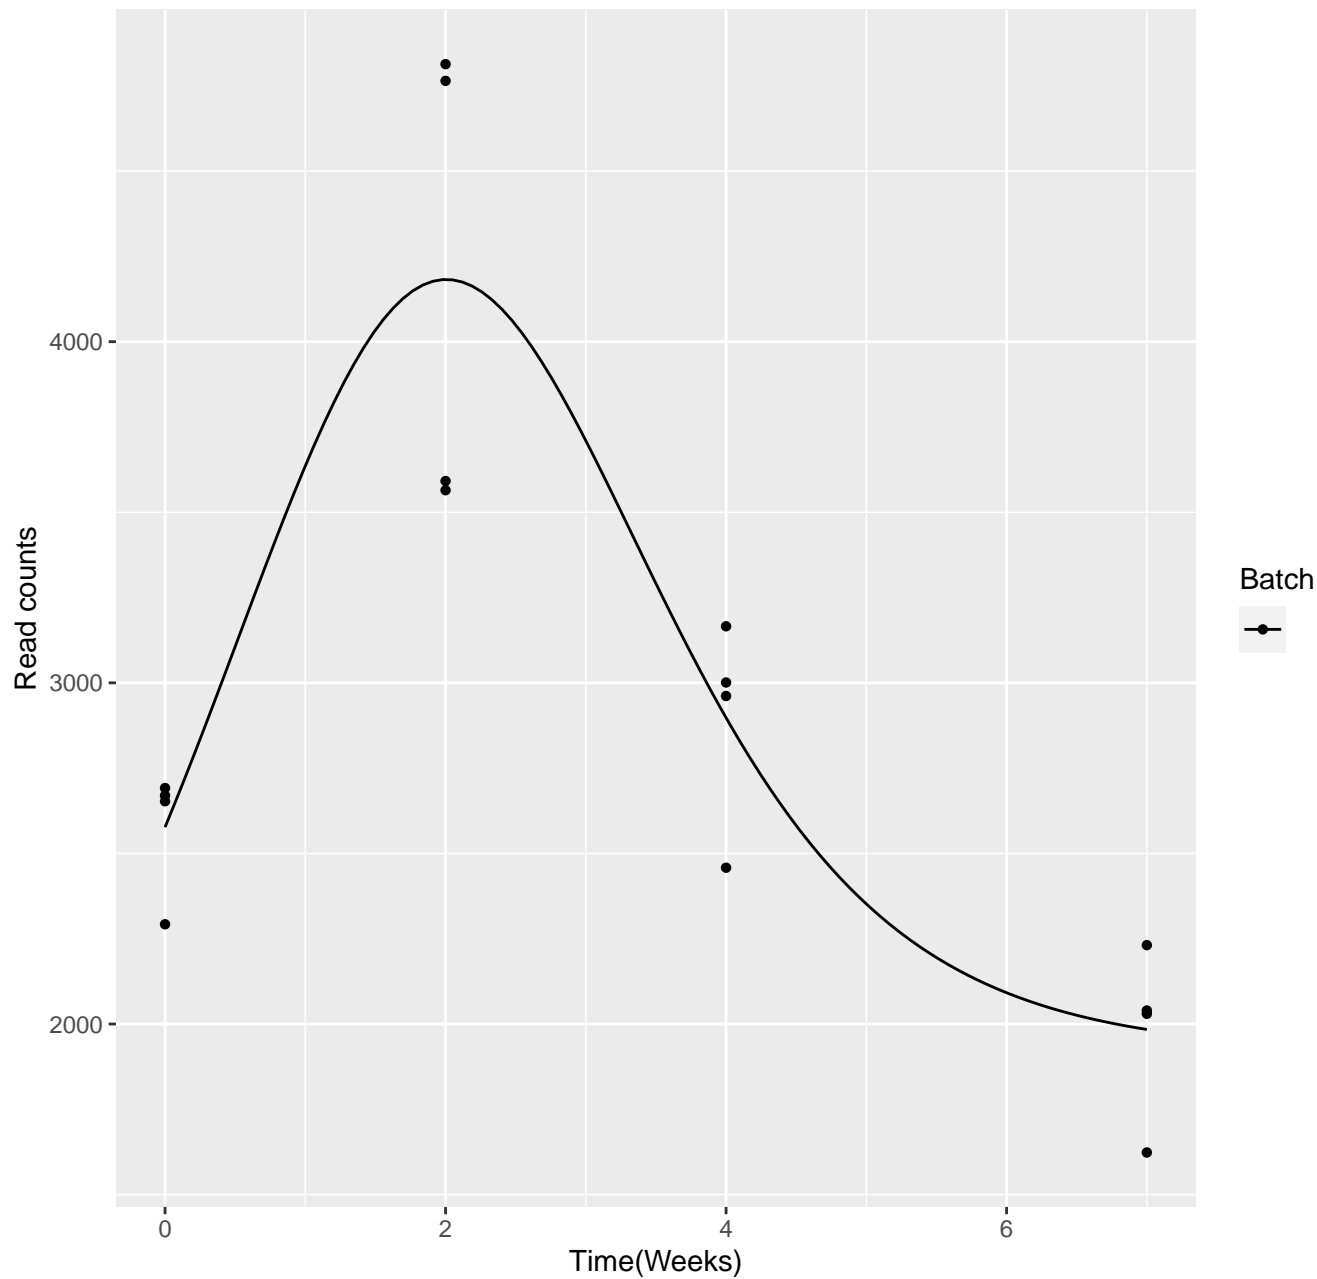



MMP13:  $\log_{10} q = -8.38$

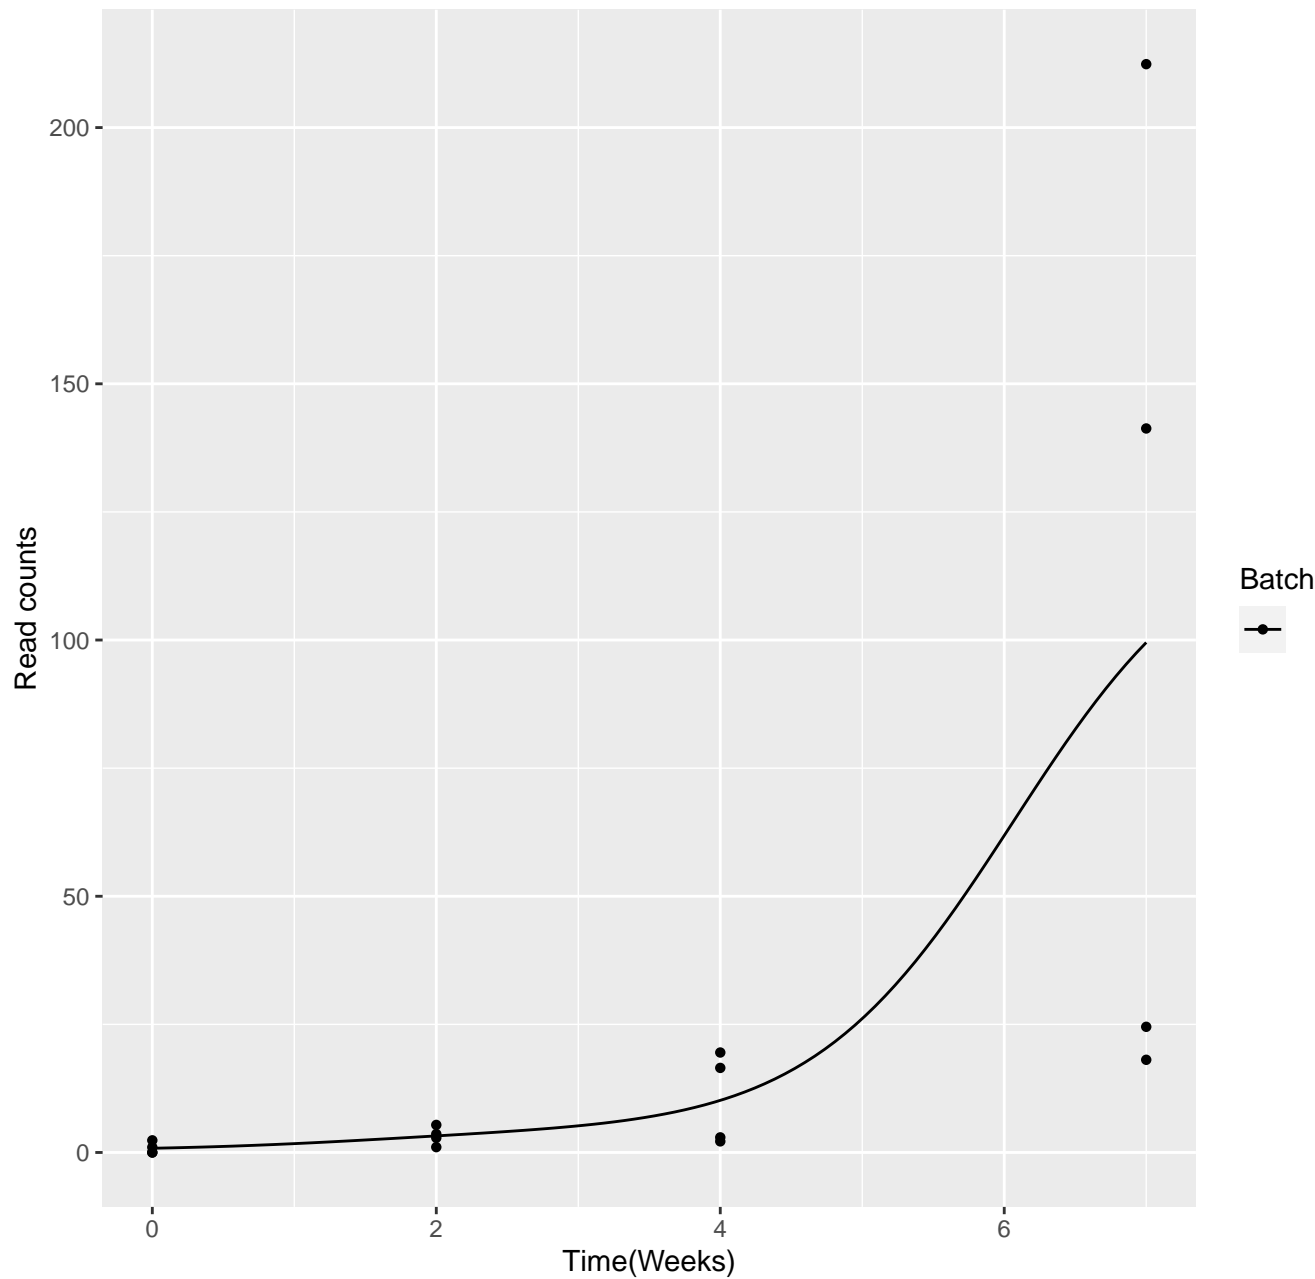

ADAMTS8:  $\log_{10} q = -8.35$

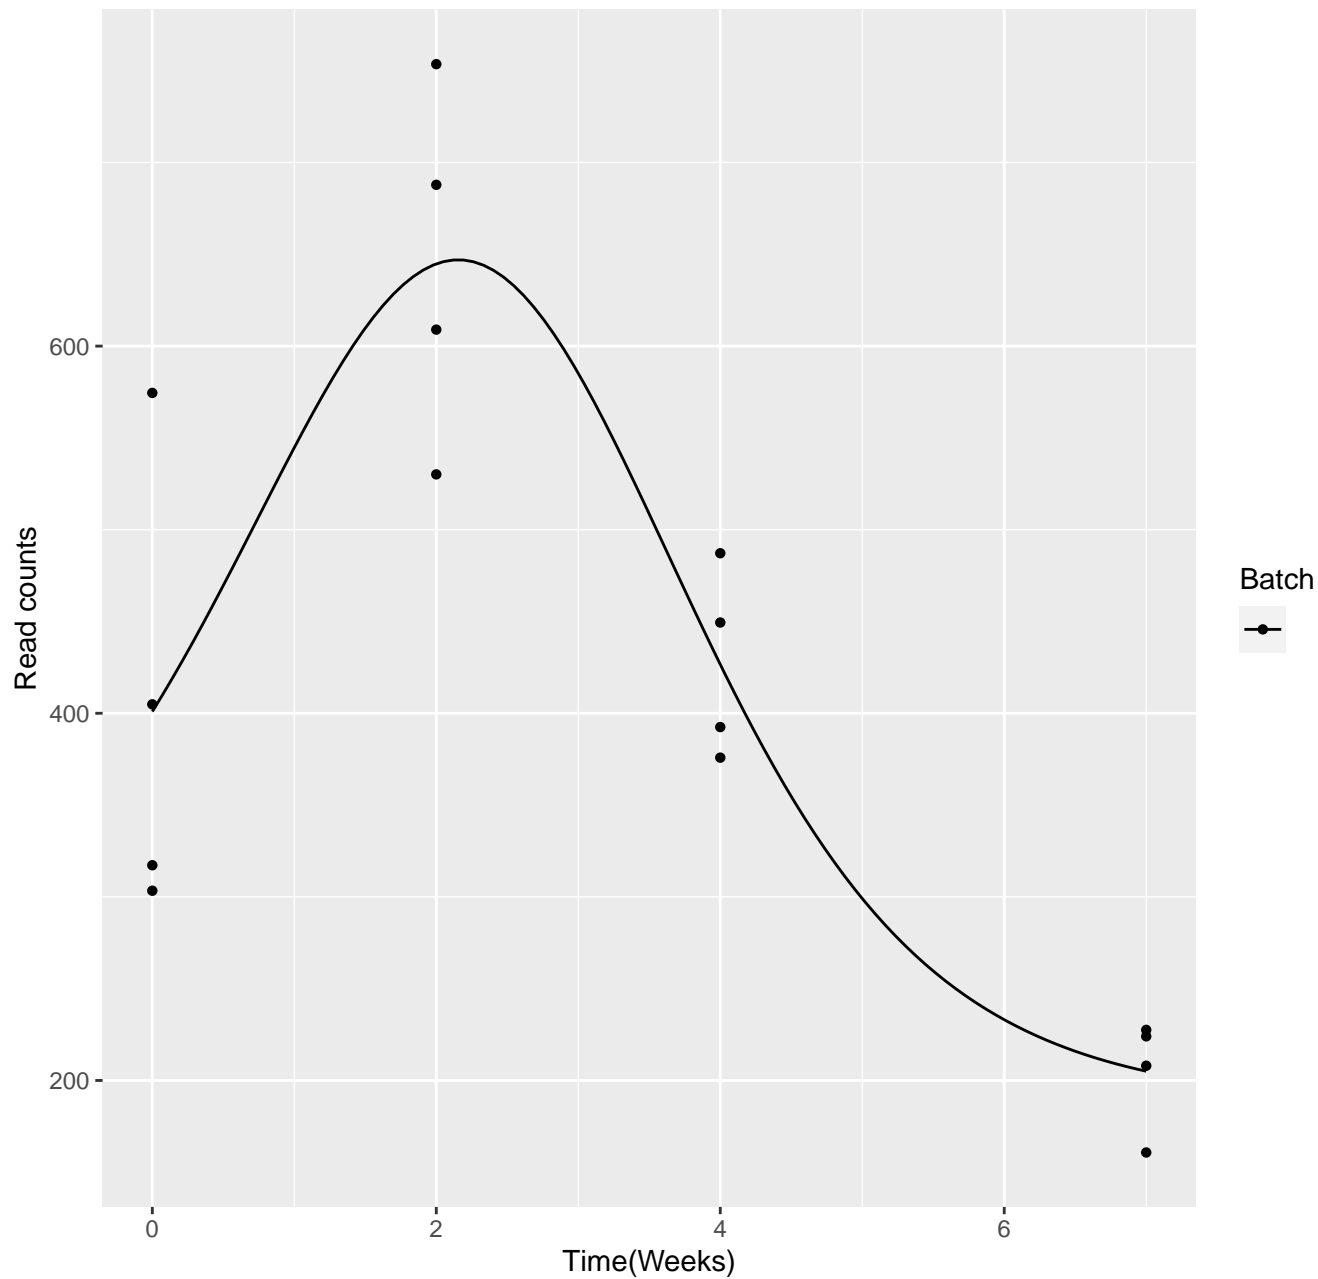

CLEC5A:  $\log_{10} q = -8.32$

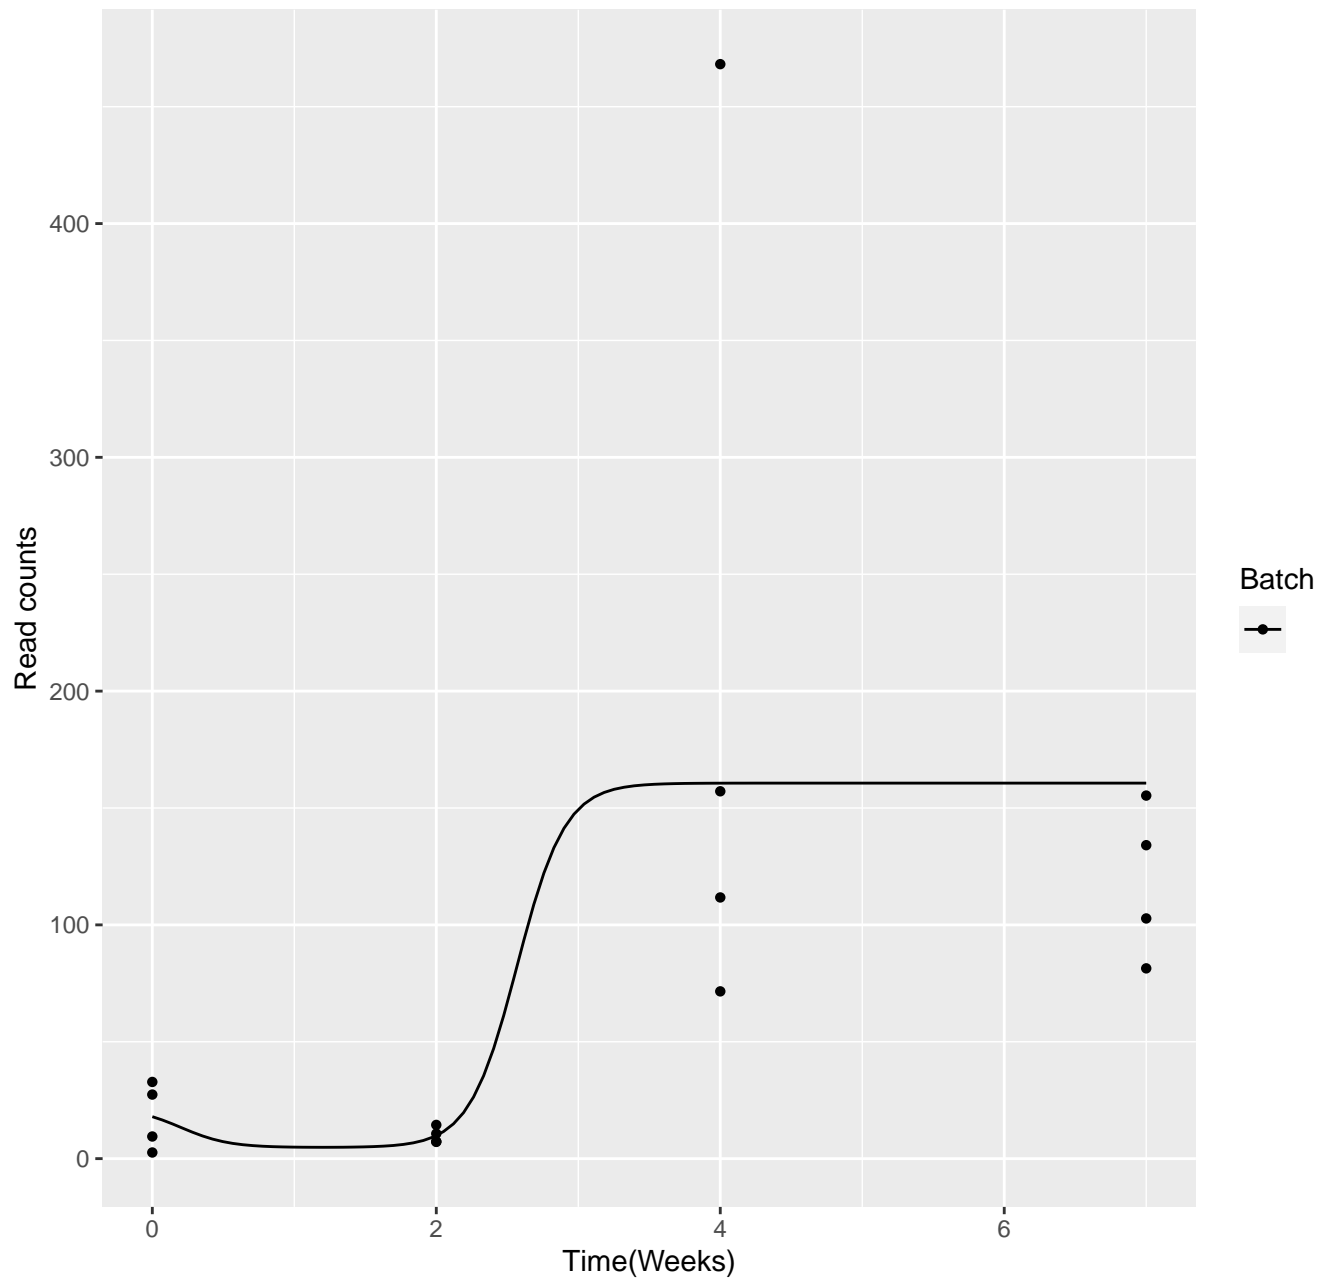

CTSS:  $\log_{10} q = -8.31$

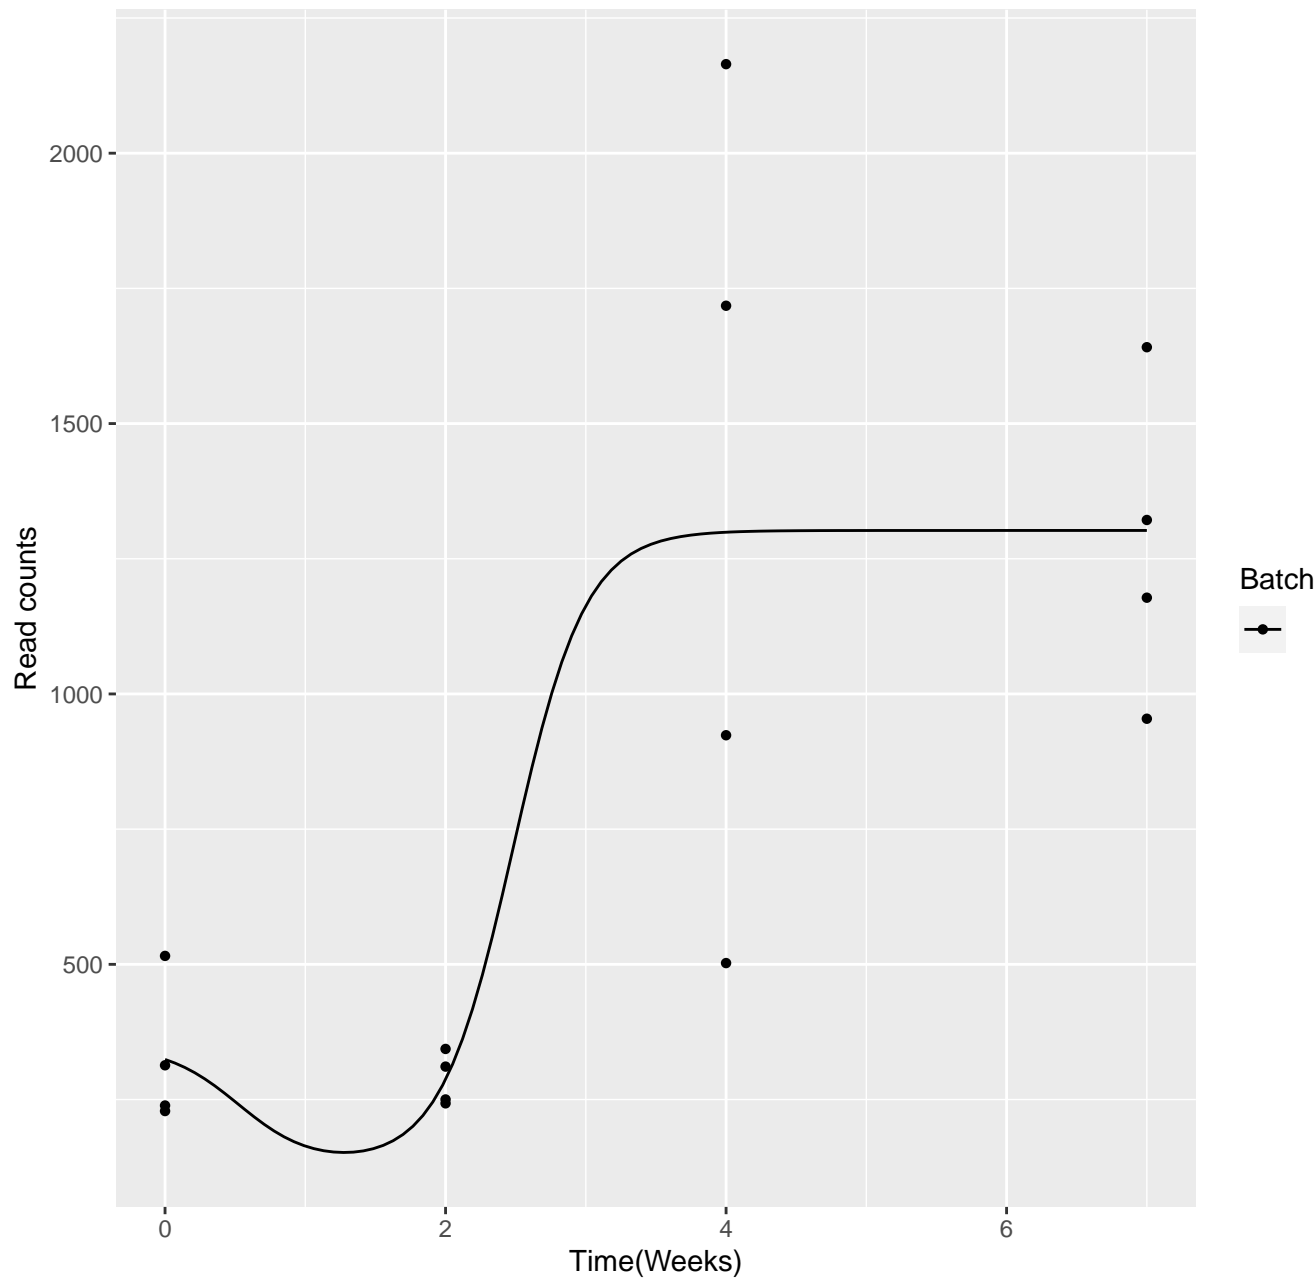

SPI1:  $\log_{10} q = -8.29$

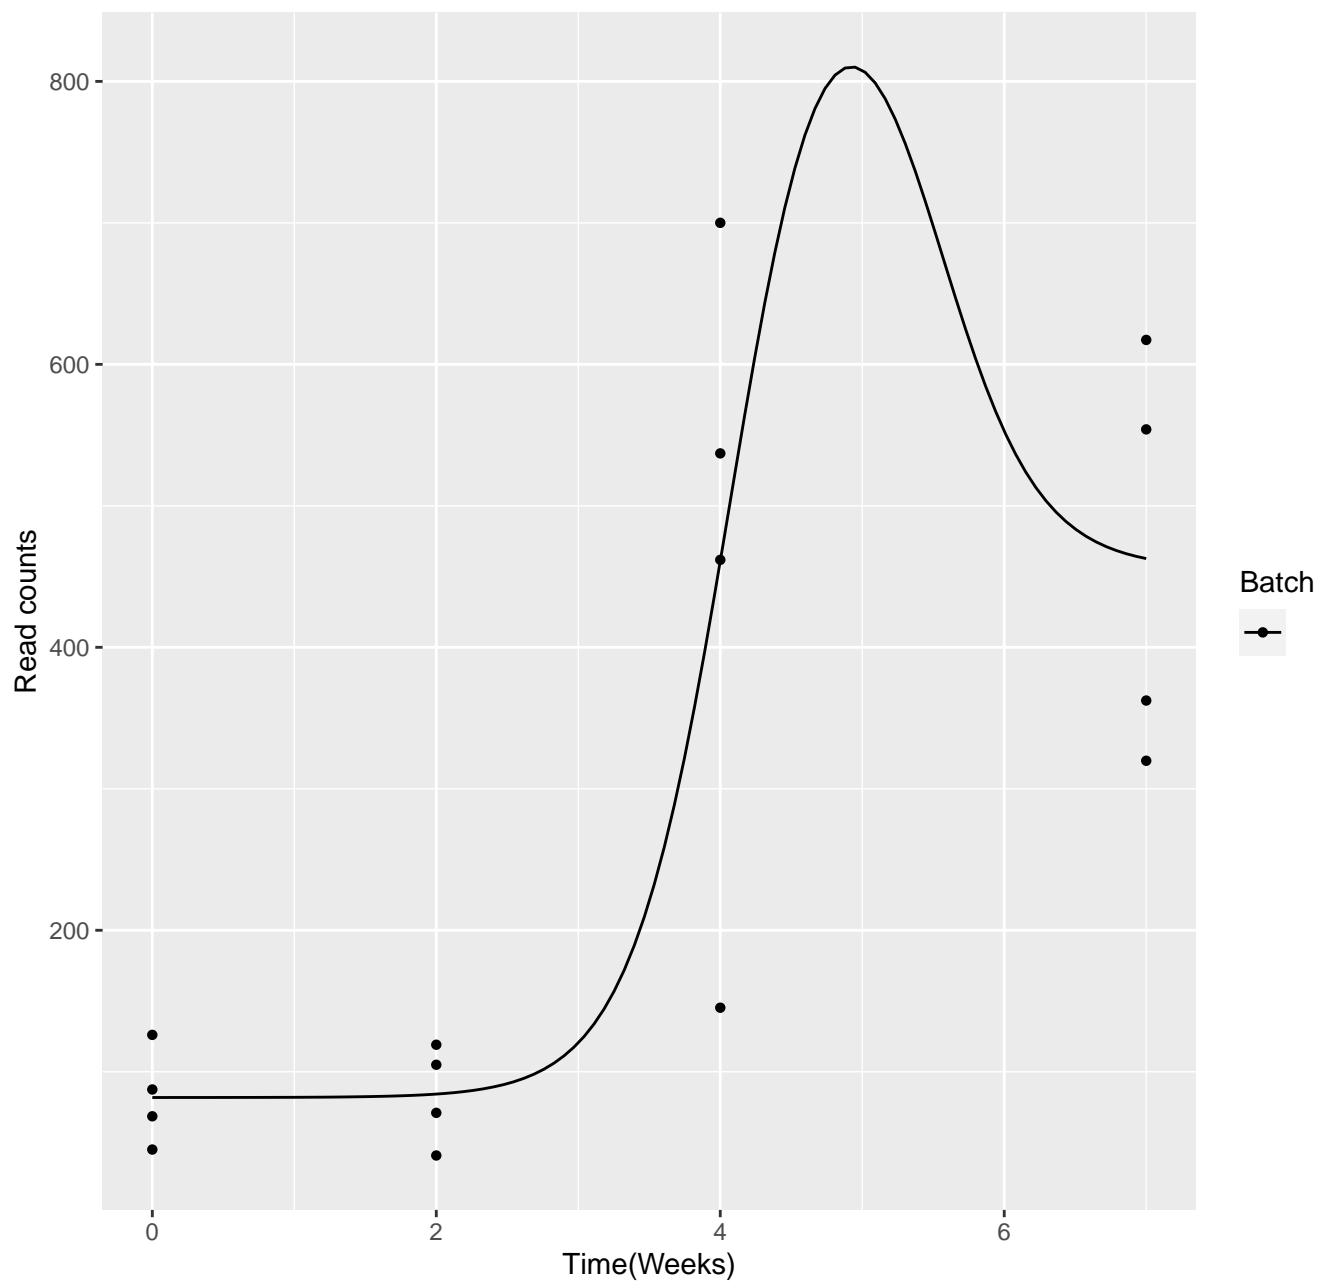

HCK:  $\log_{10} q = -8.27$

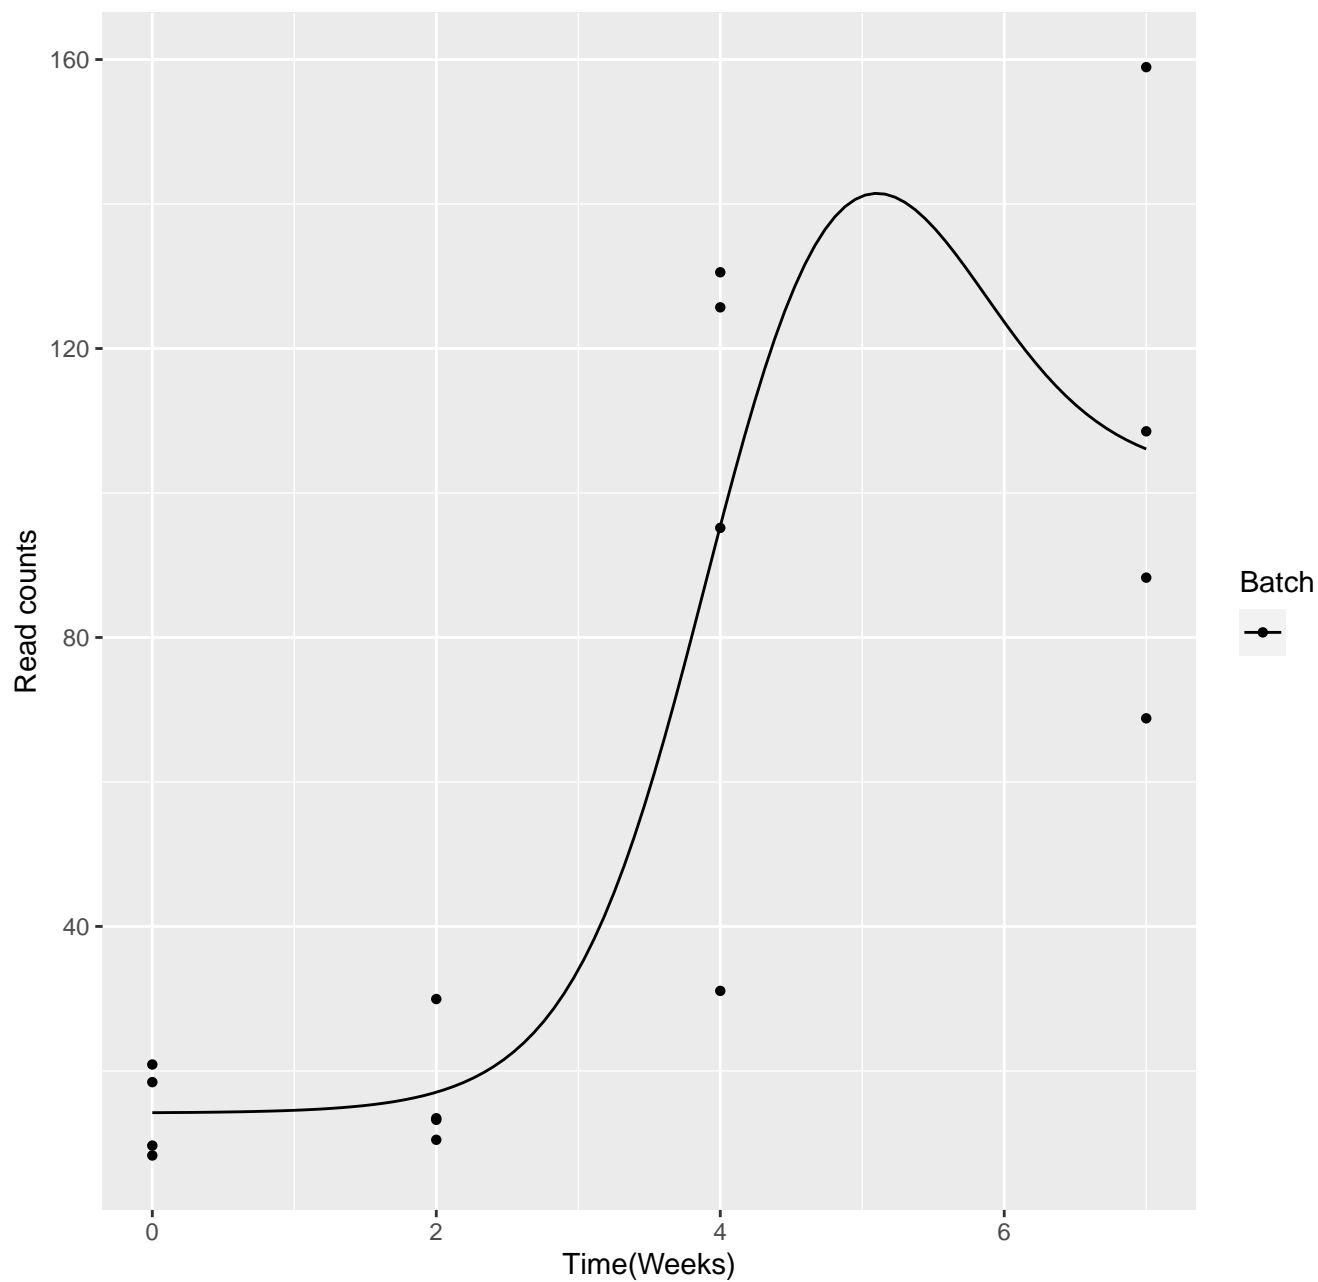

CH25H:  $\log_{10} q = -8.26$

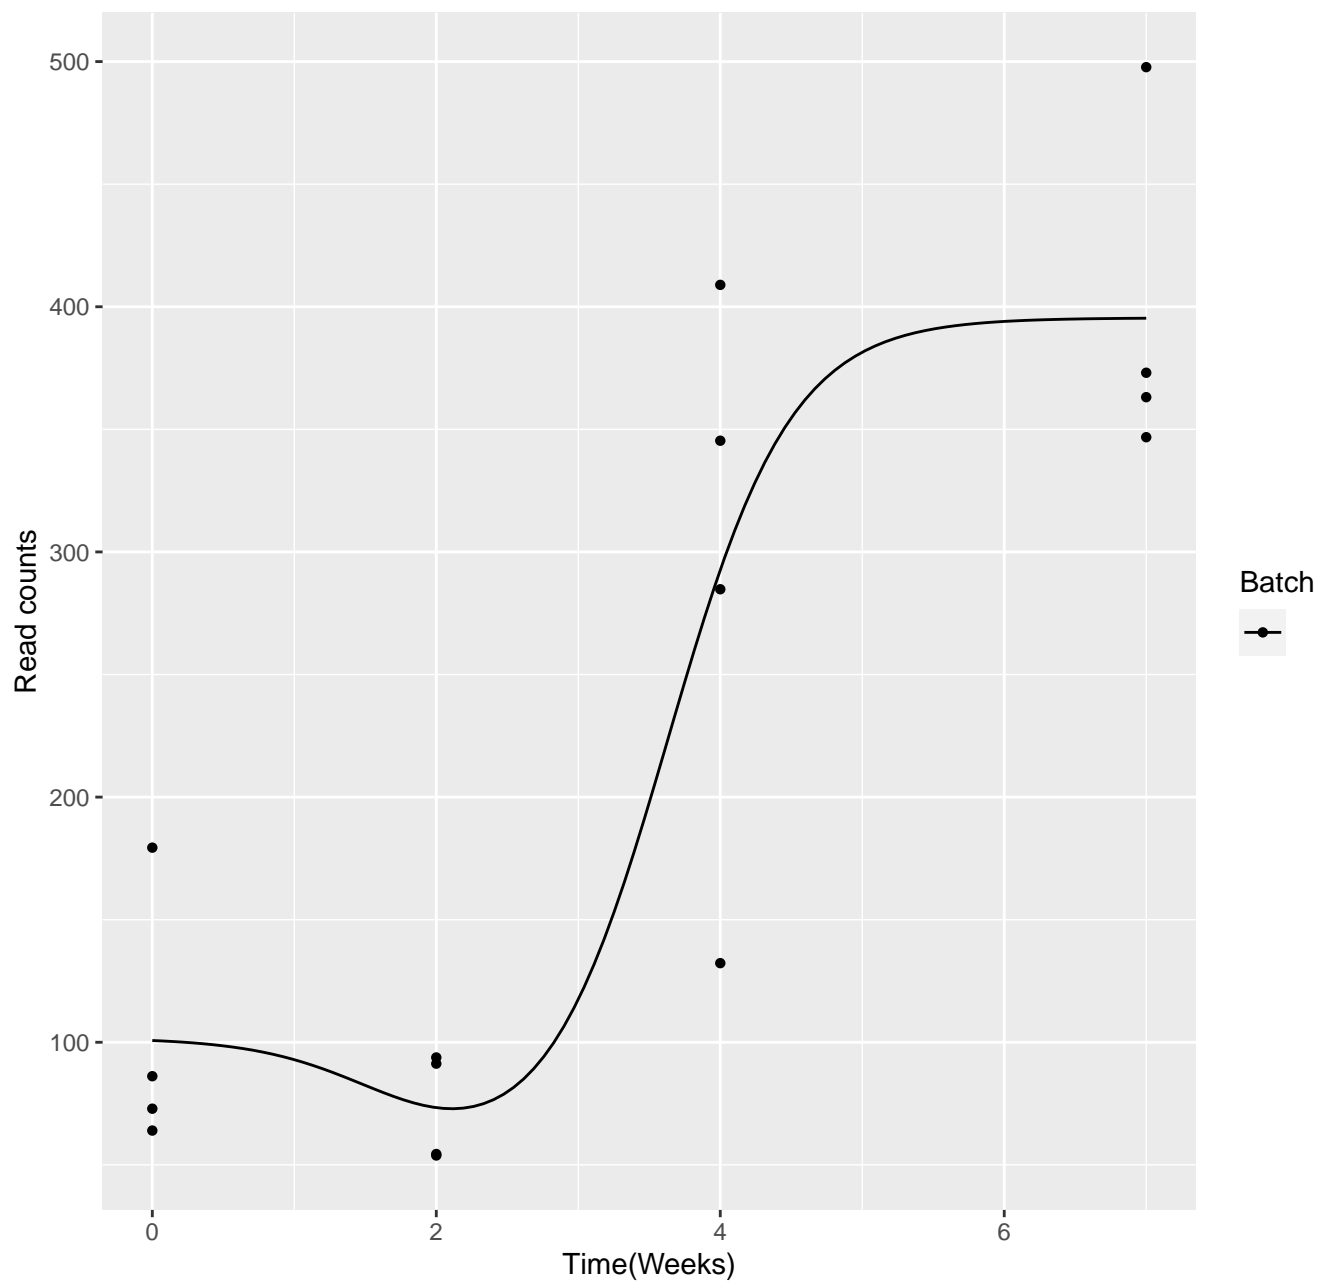

NCKAP1L:  $\log_{10} q = -8.26$

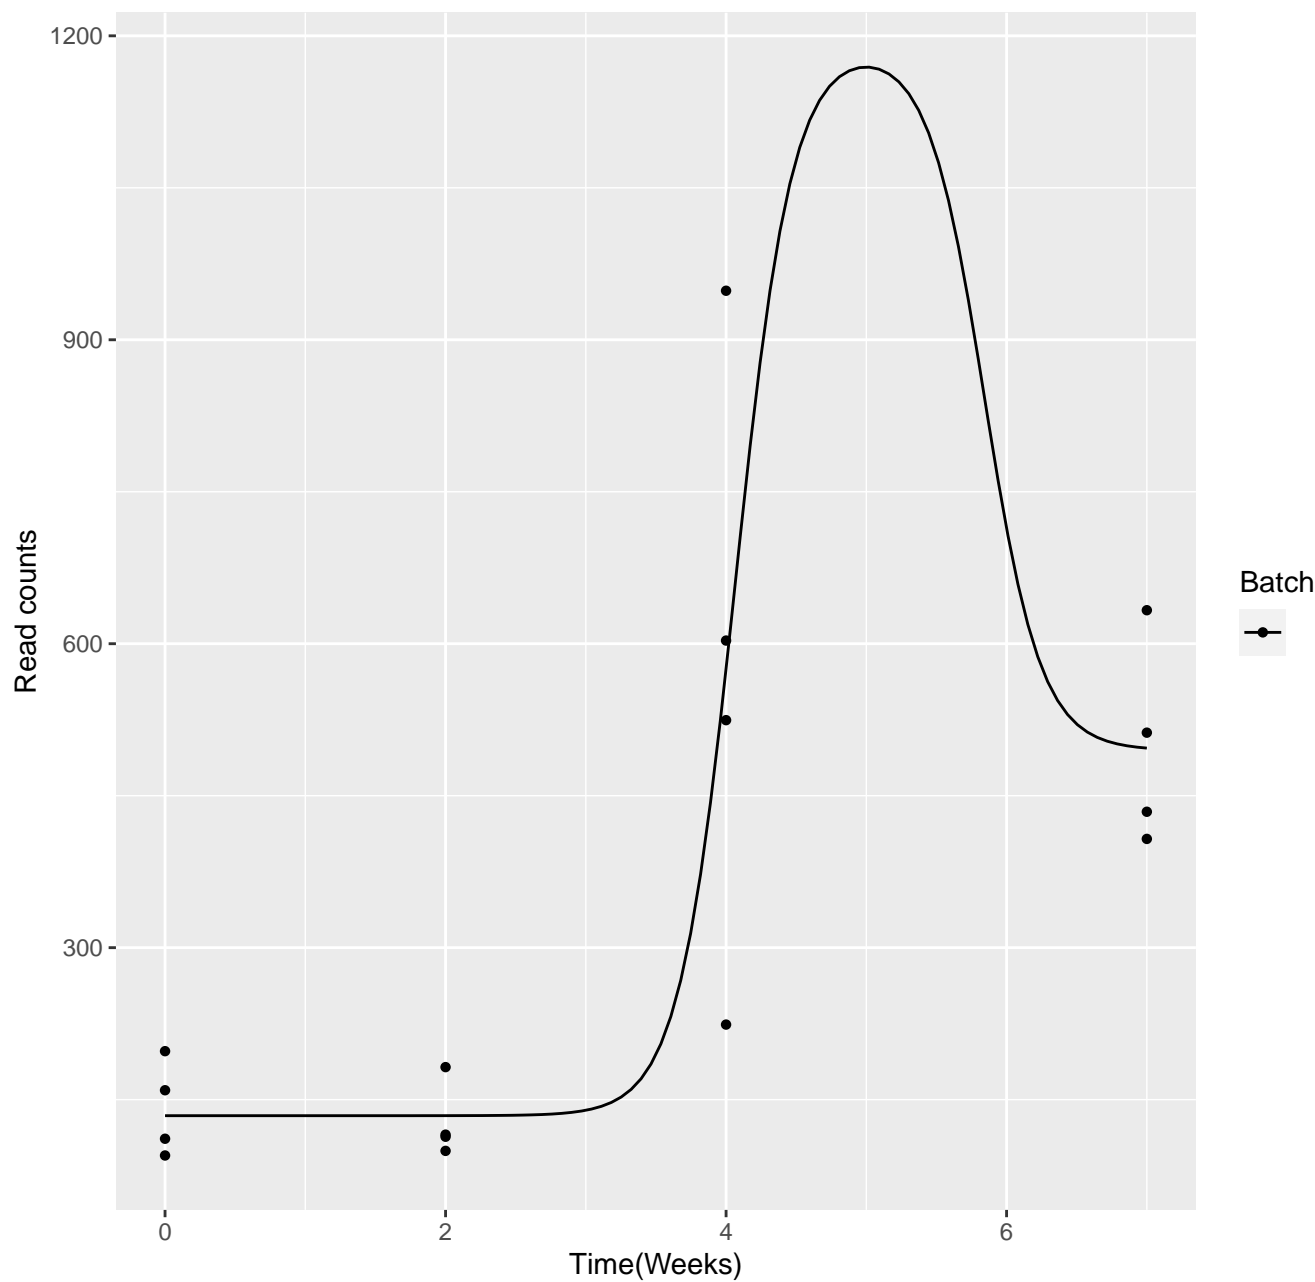



LOC108176037:  $\log_{10} q = -8.22$

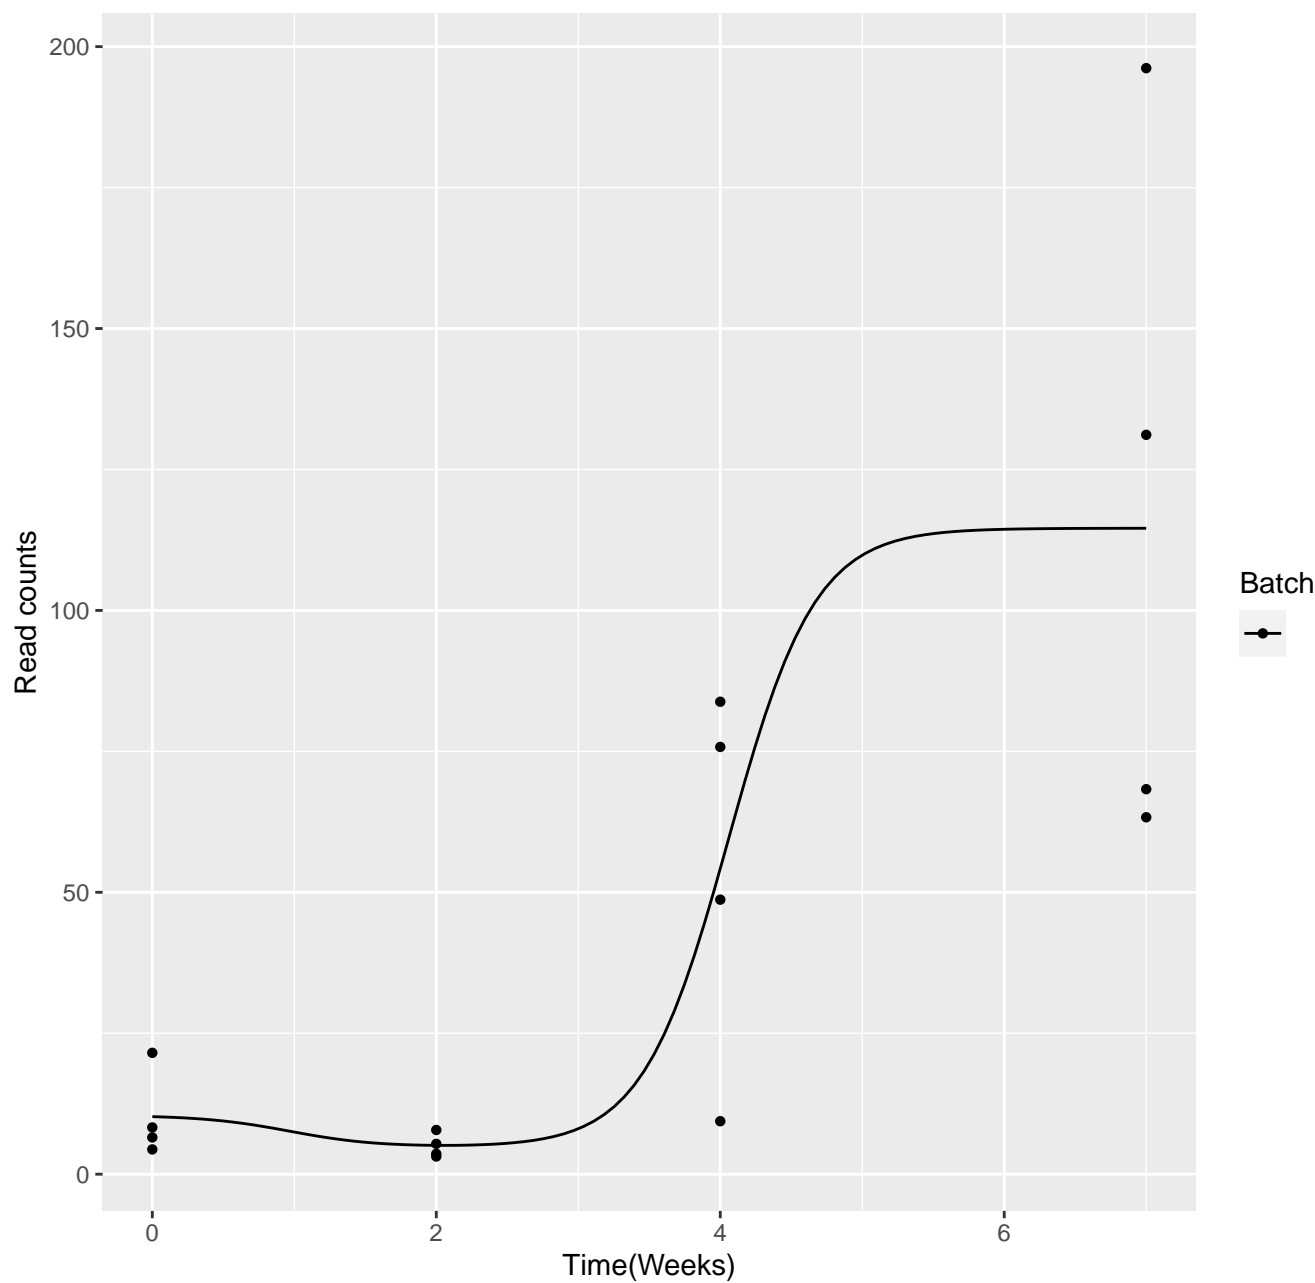

TGFB2:  $\log_{10} q = -8.2$

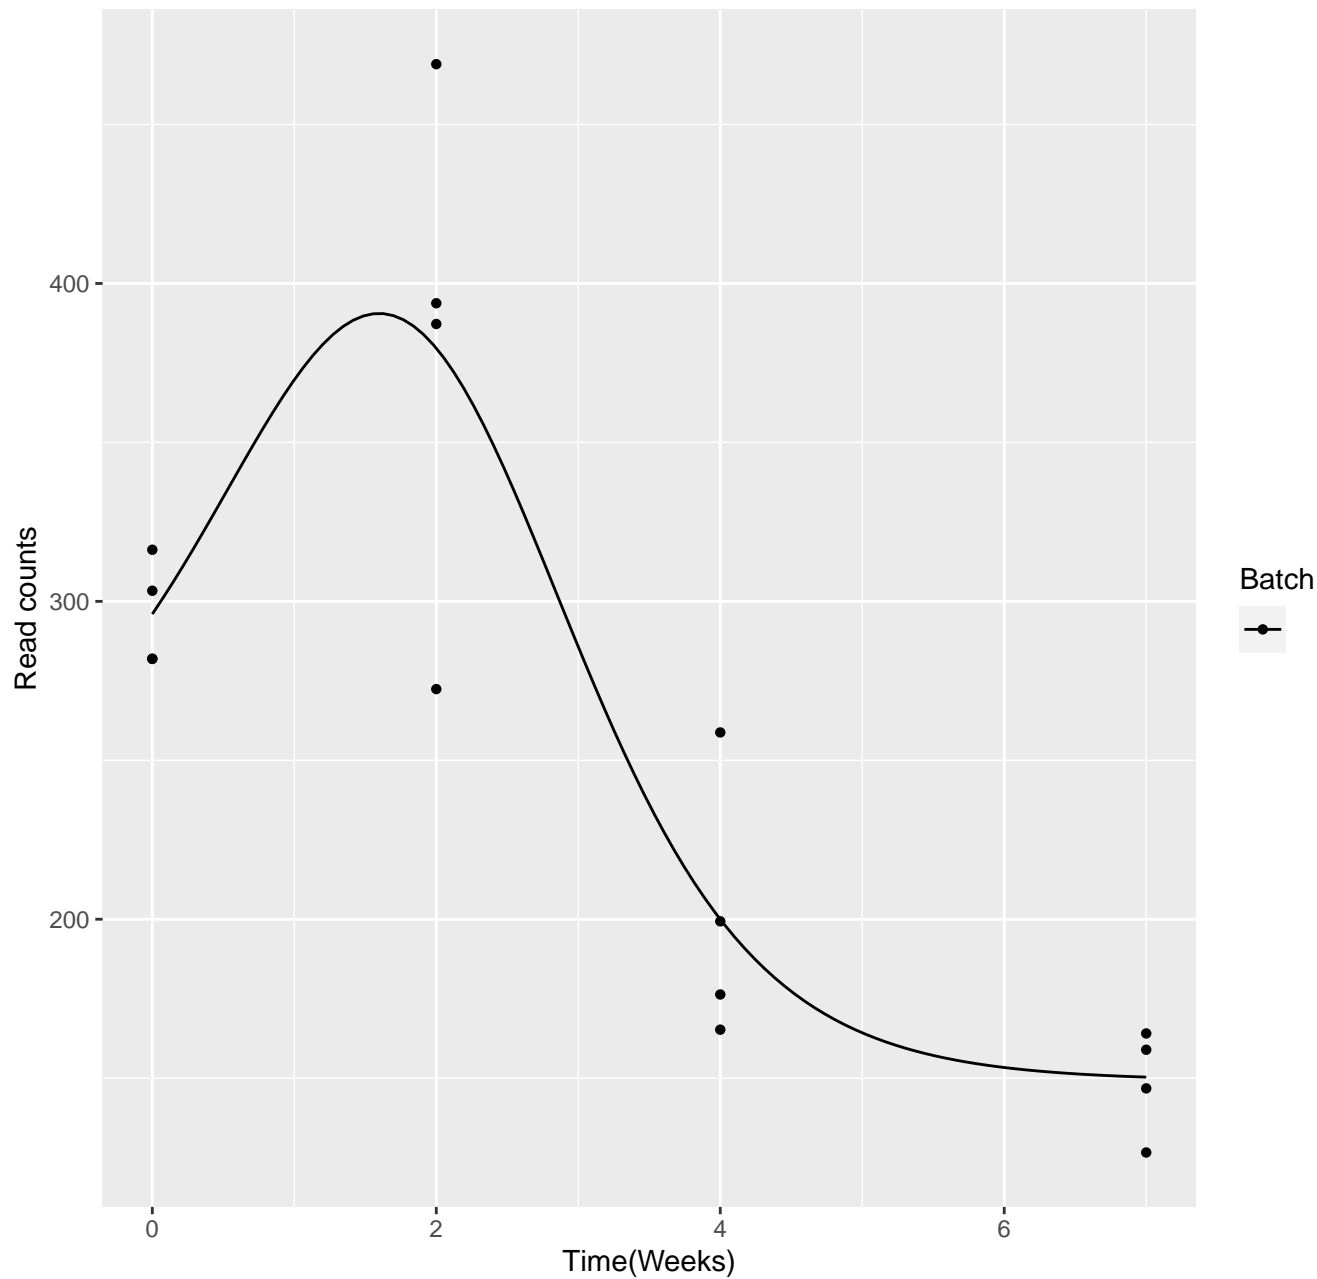

FNBP1:  $\log_{10} q = -8.19$

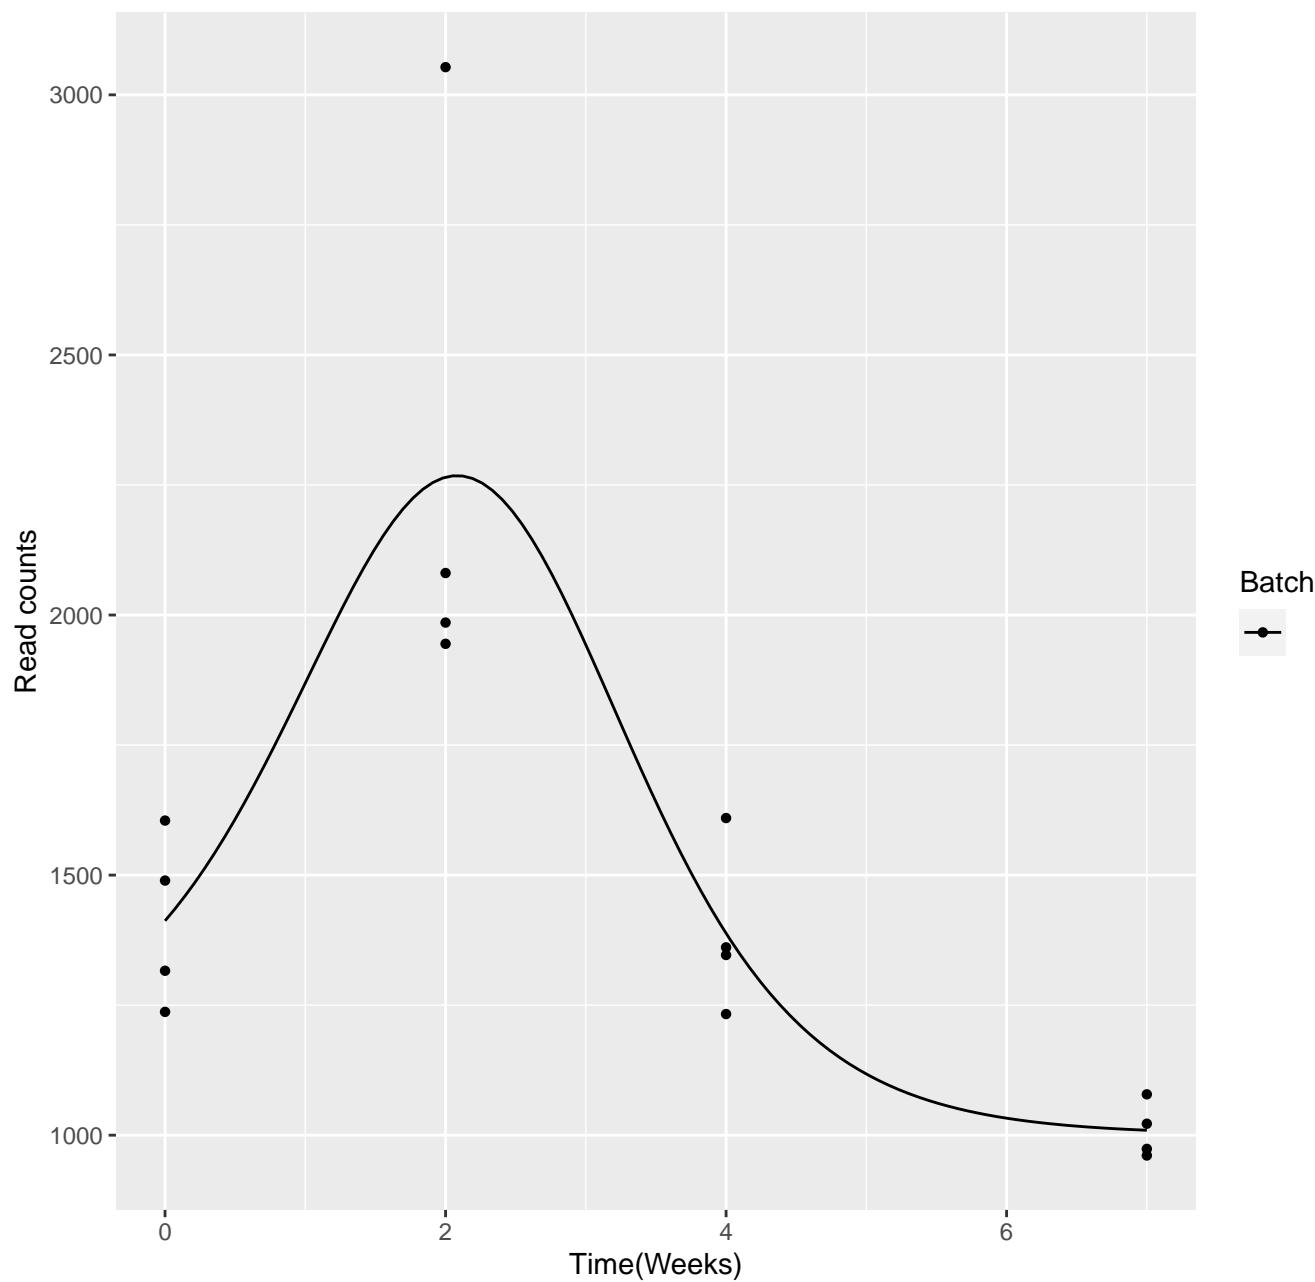

LOC127488880:  $\log_{10} q = -8.17$

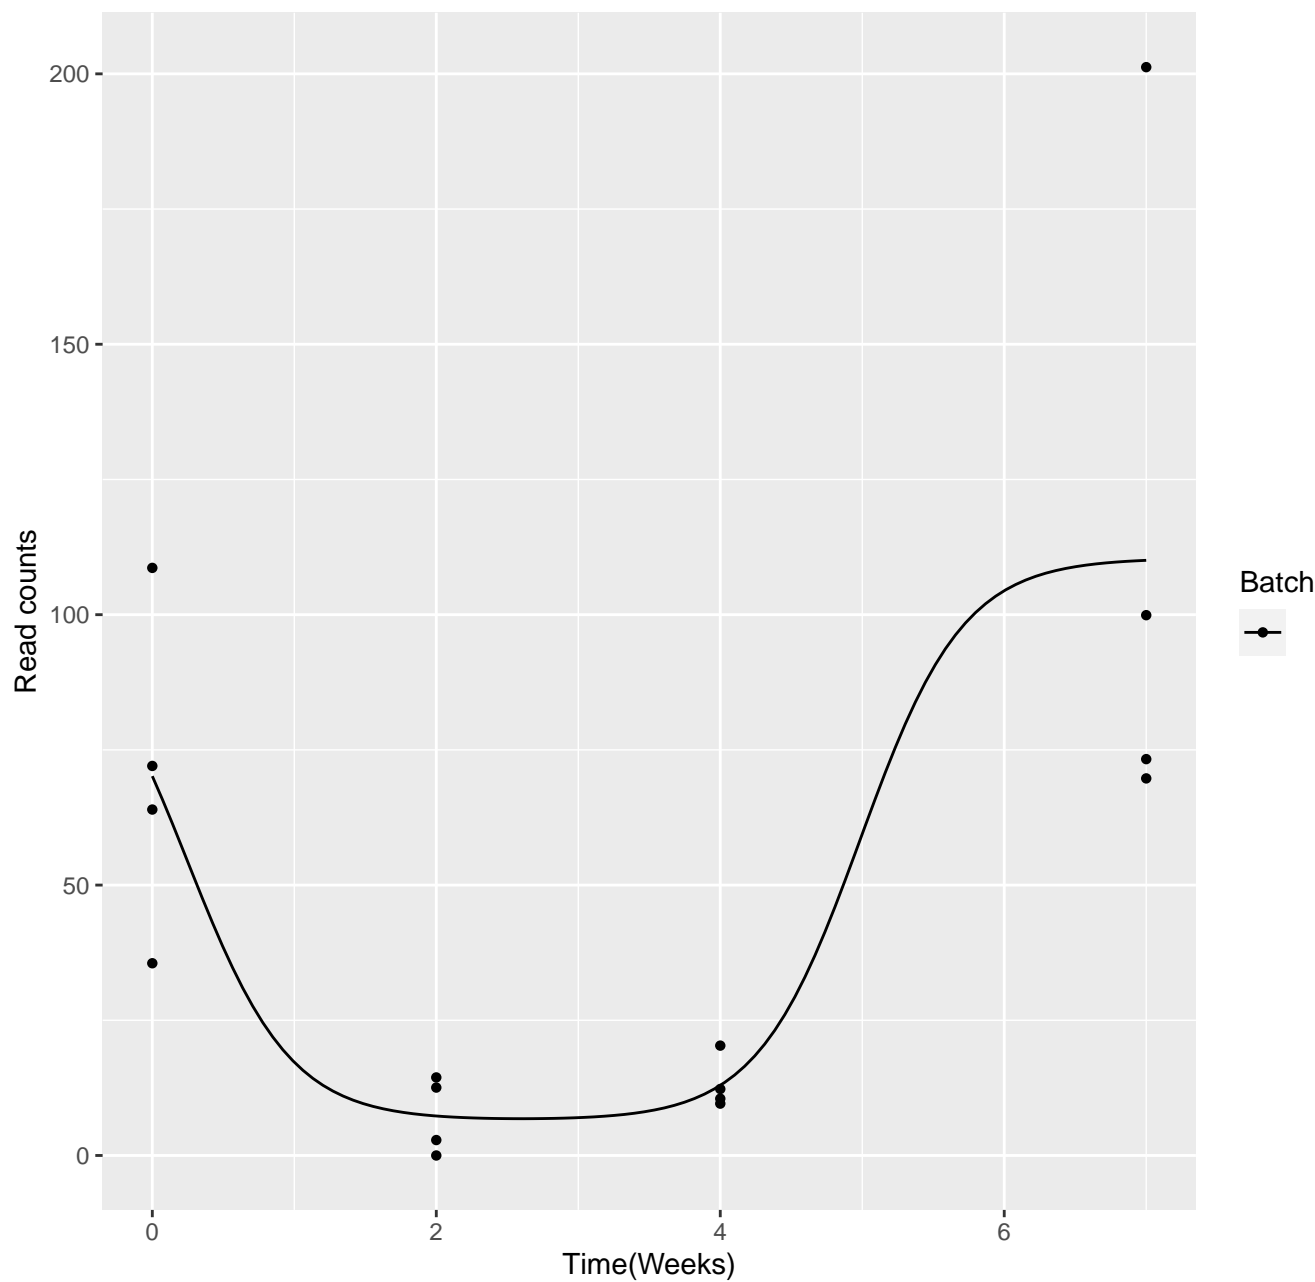

ZNF362:  $\log_{10} q = -8.13$

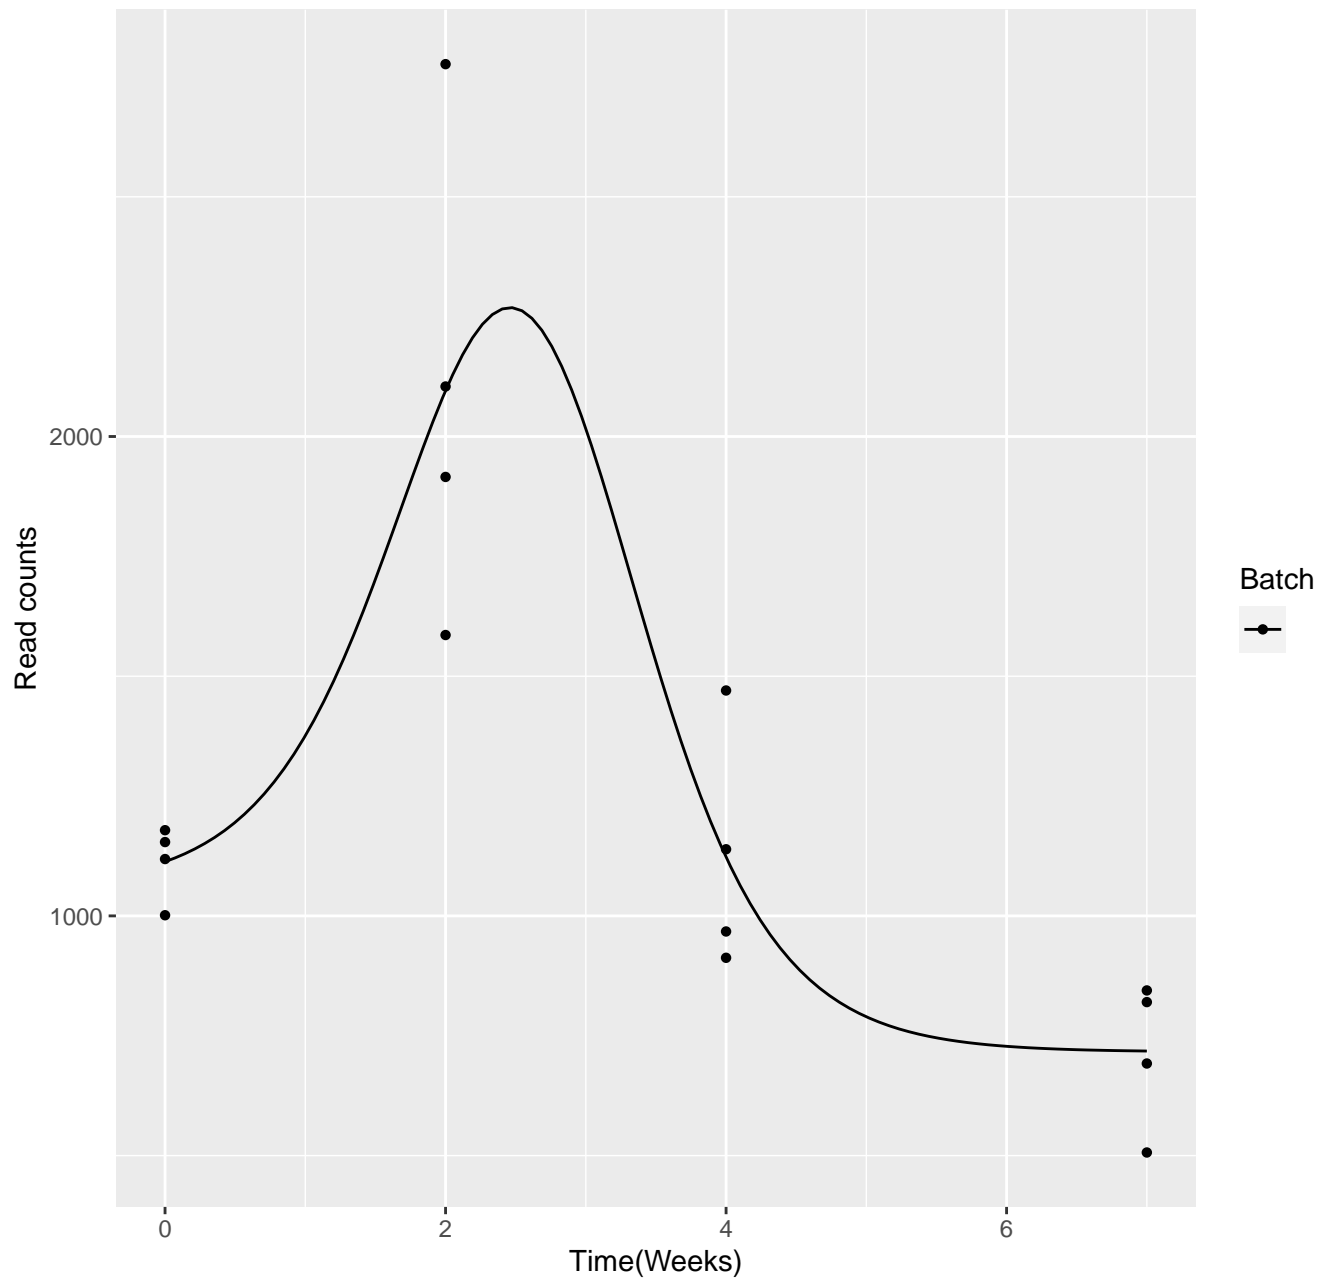

MAN2A2:  $\log_{10} q = -8.08$

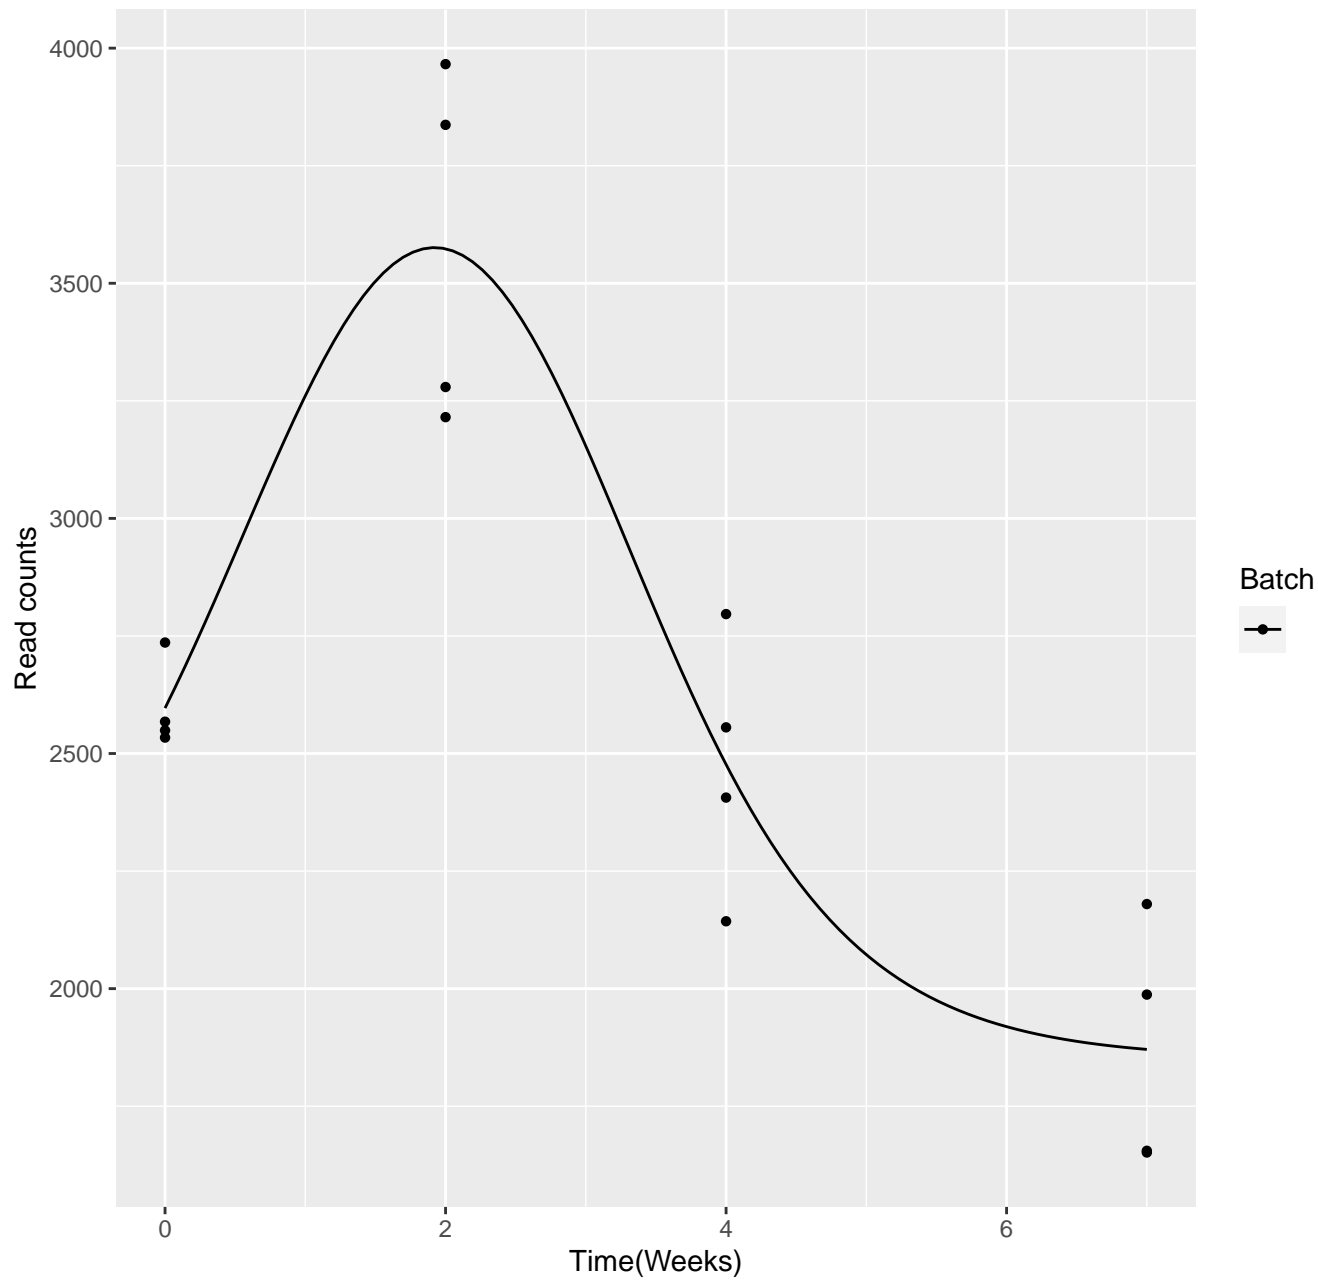

MSR1:  $\log_{10} q = -8.05$

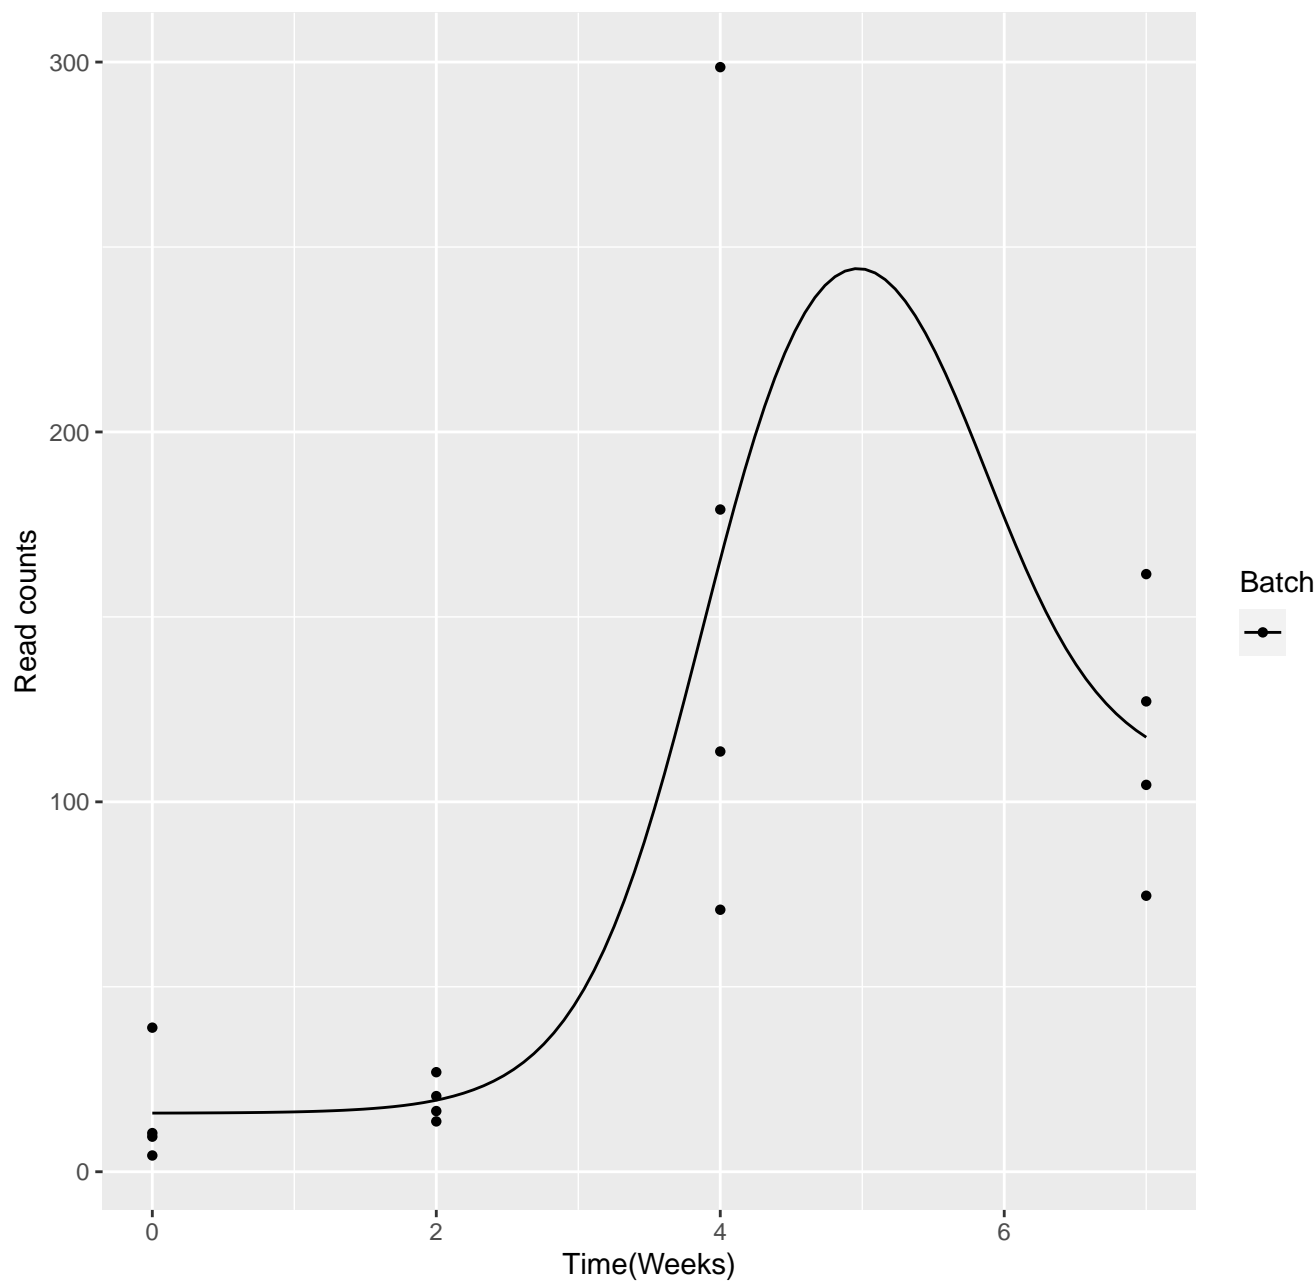

PKIB:  $\log_{10} q = -8.05$

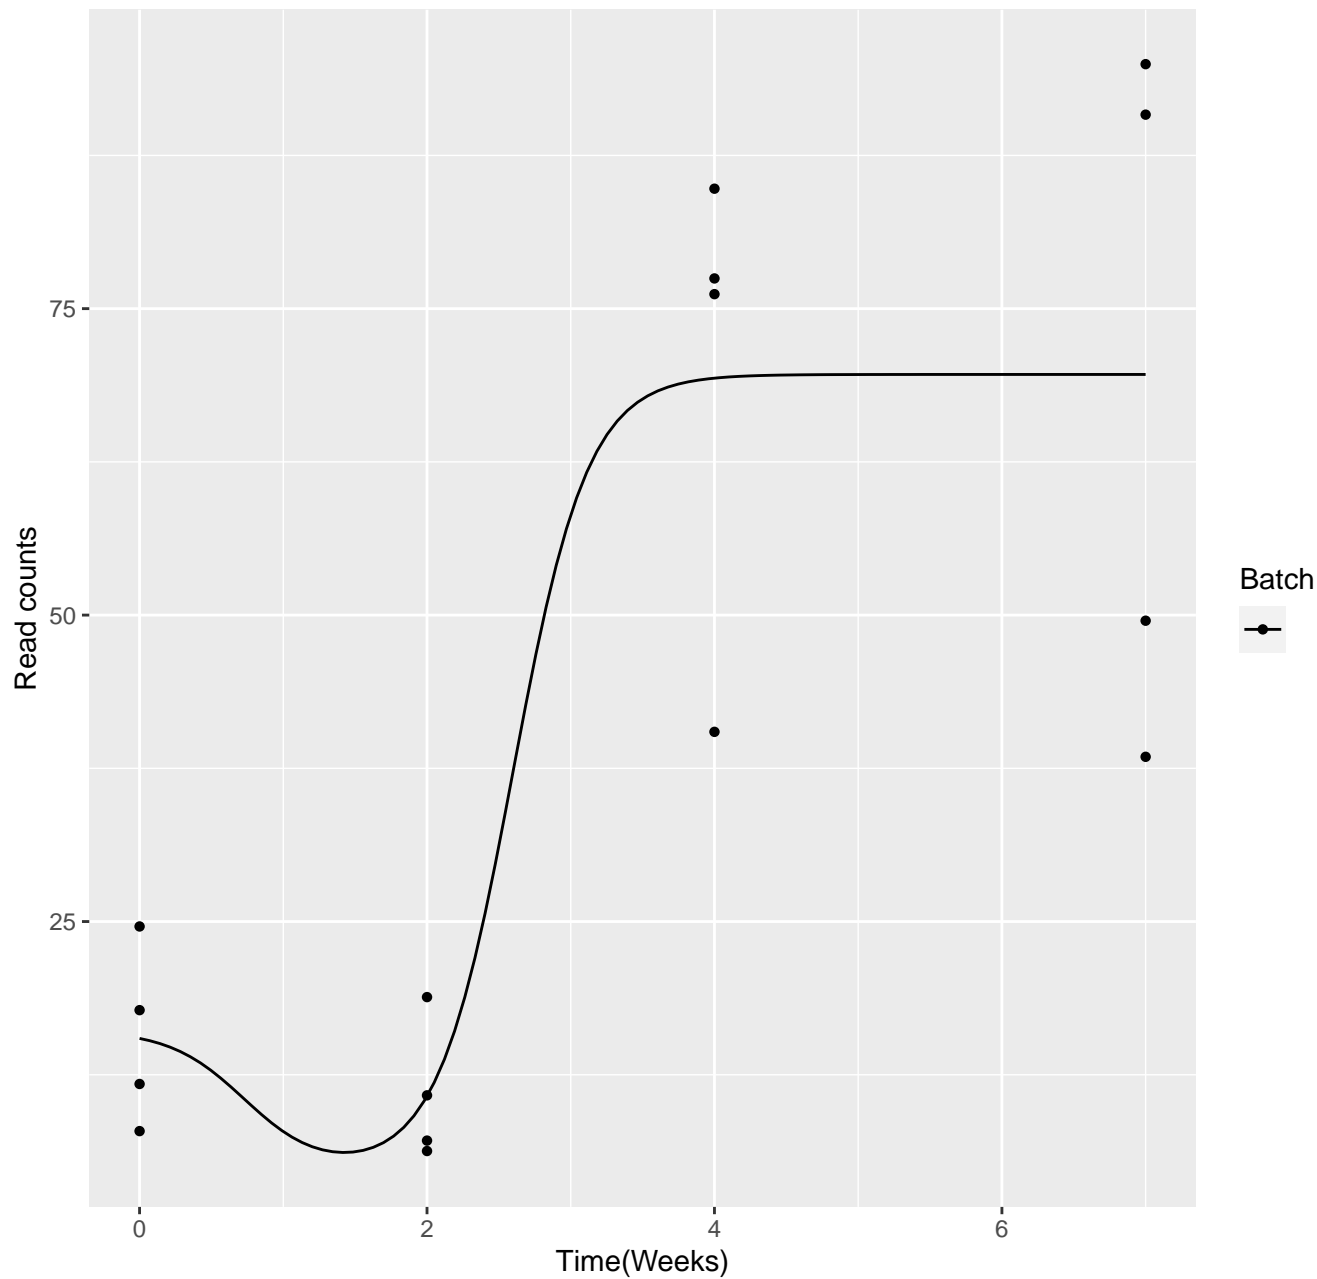



RANBP3L:  $\log_{10} q = -8.04$

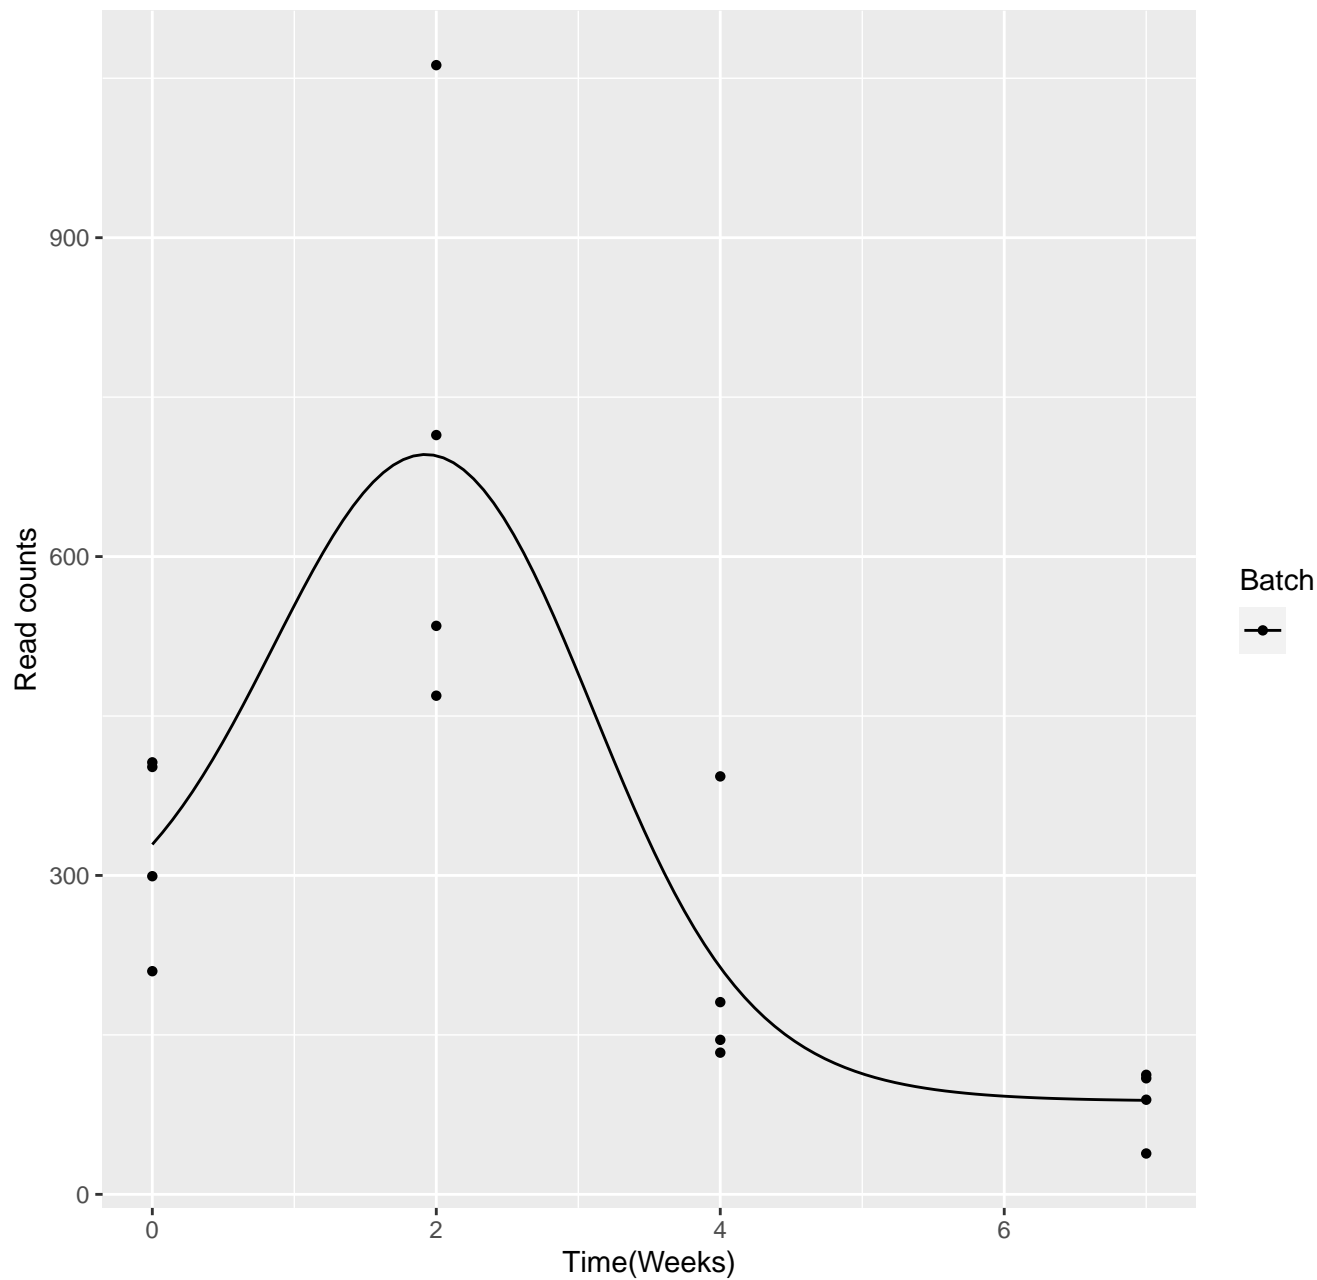

ASAP2:  $\log_{10} q = -8.02$

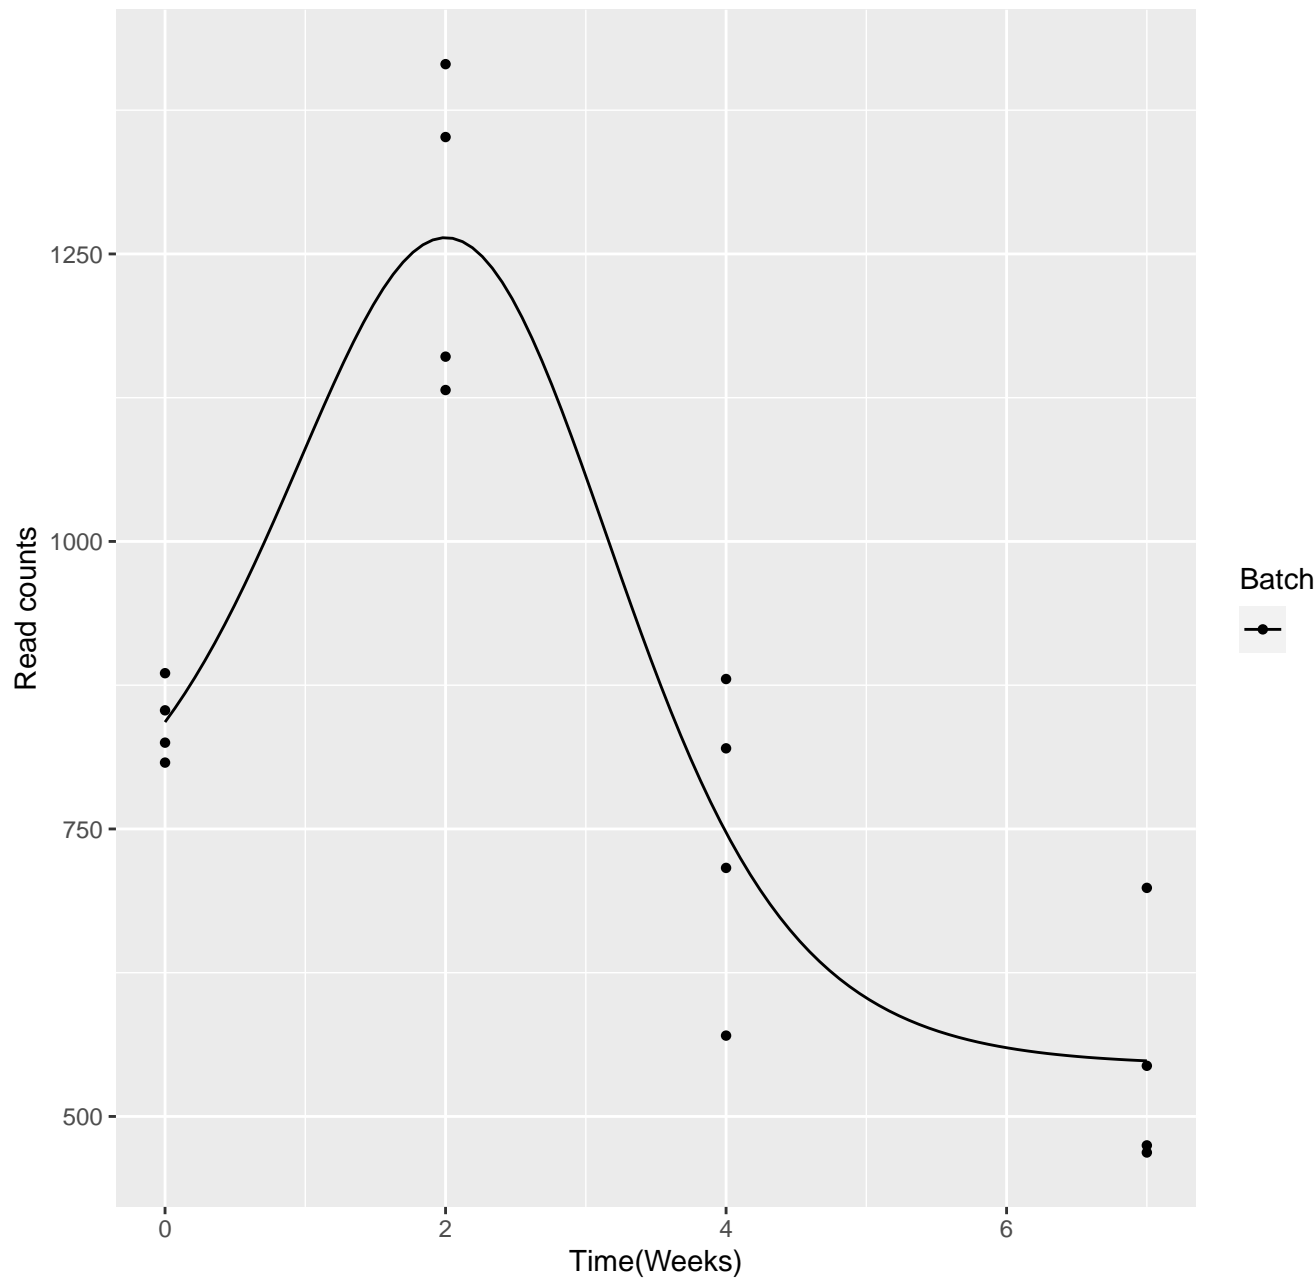

TNFRSF1B:  $\log_{10} q = -7.99$

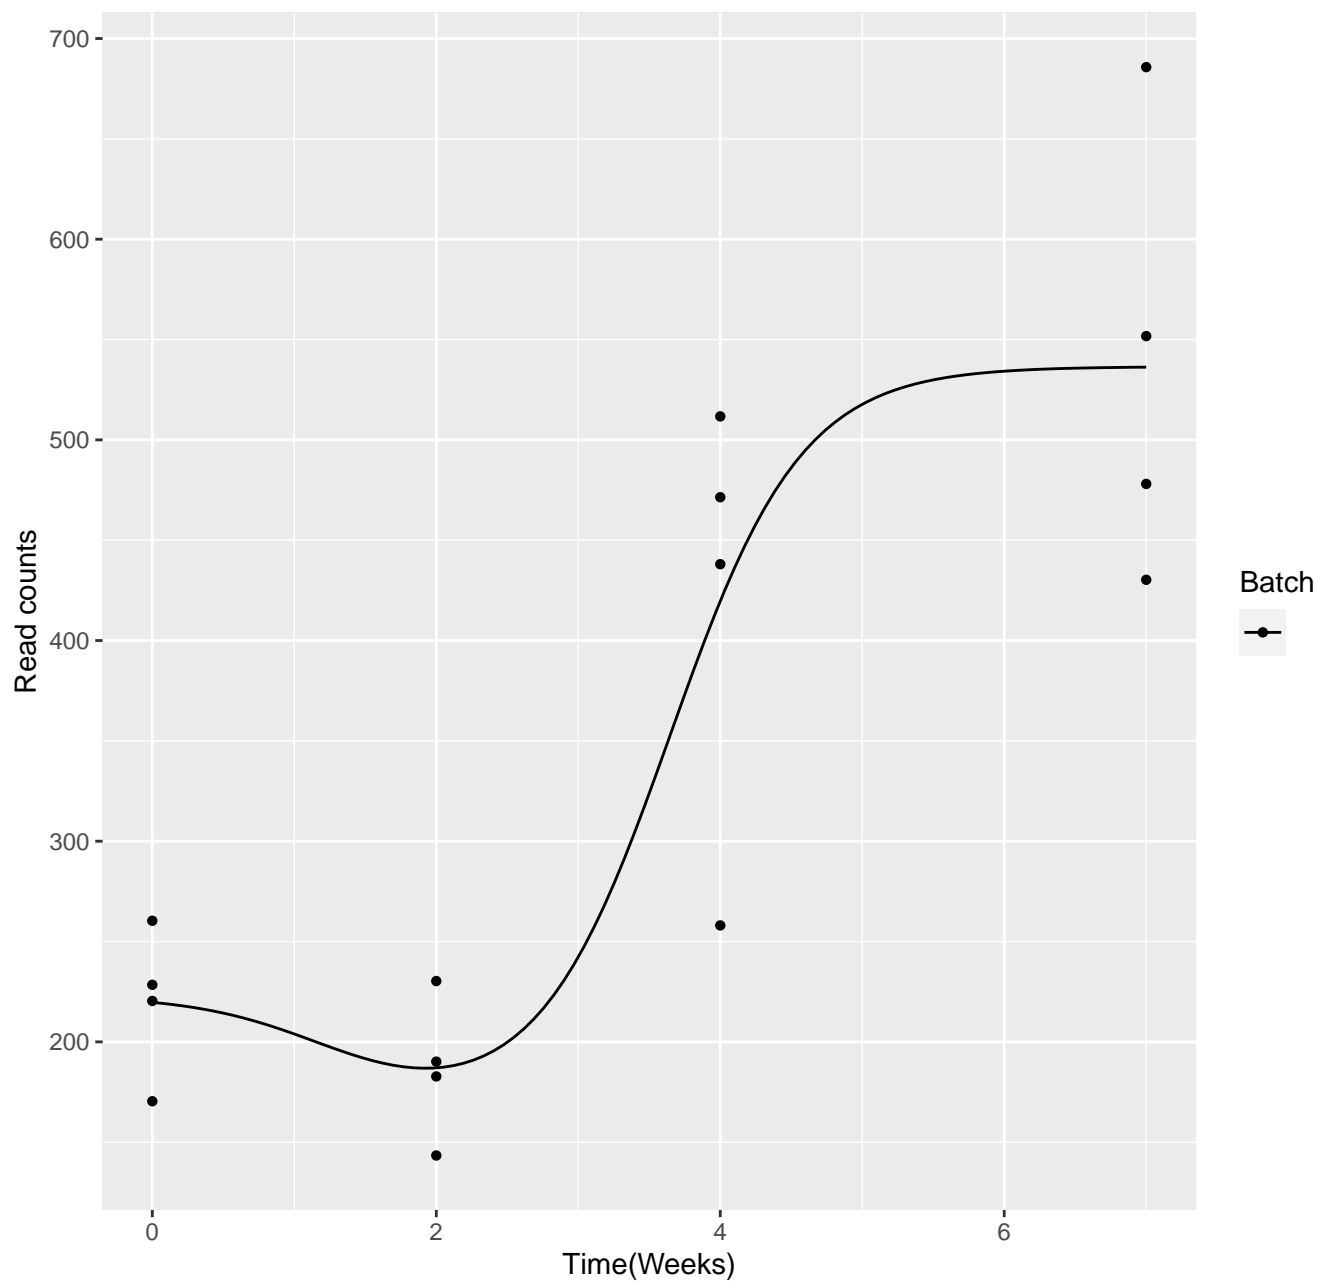

LOC100357554:  $\log_{10} q = -7.98$

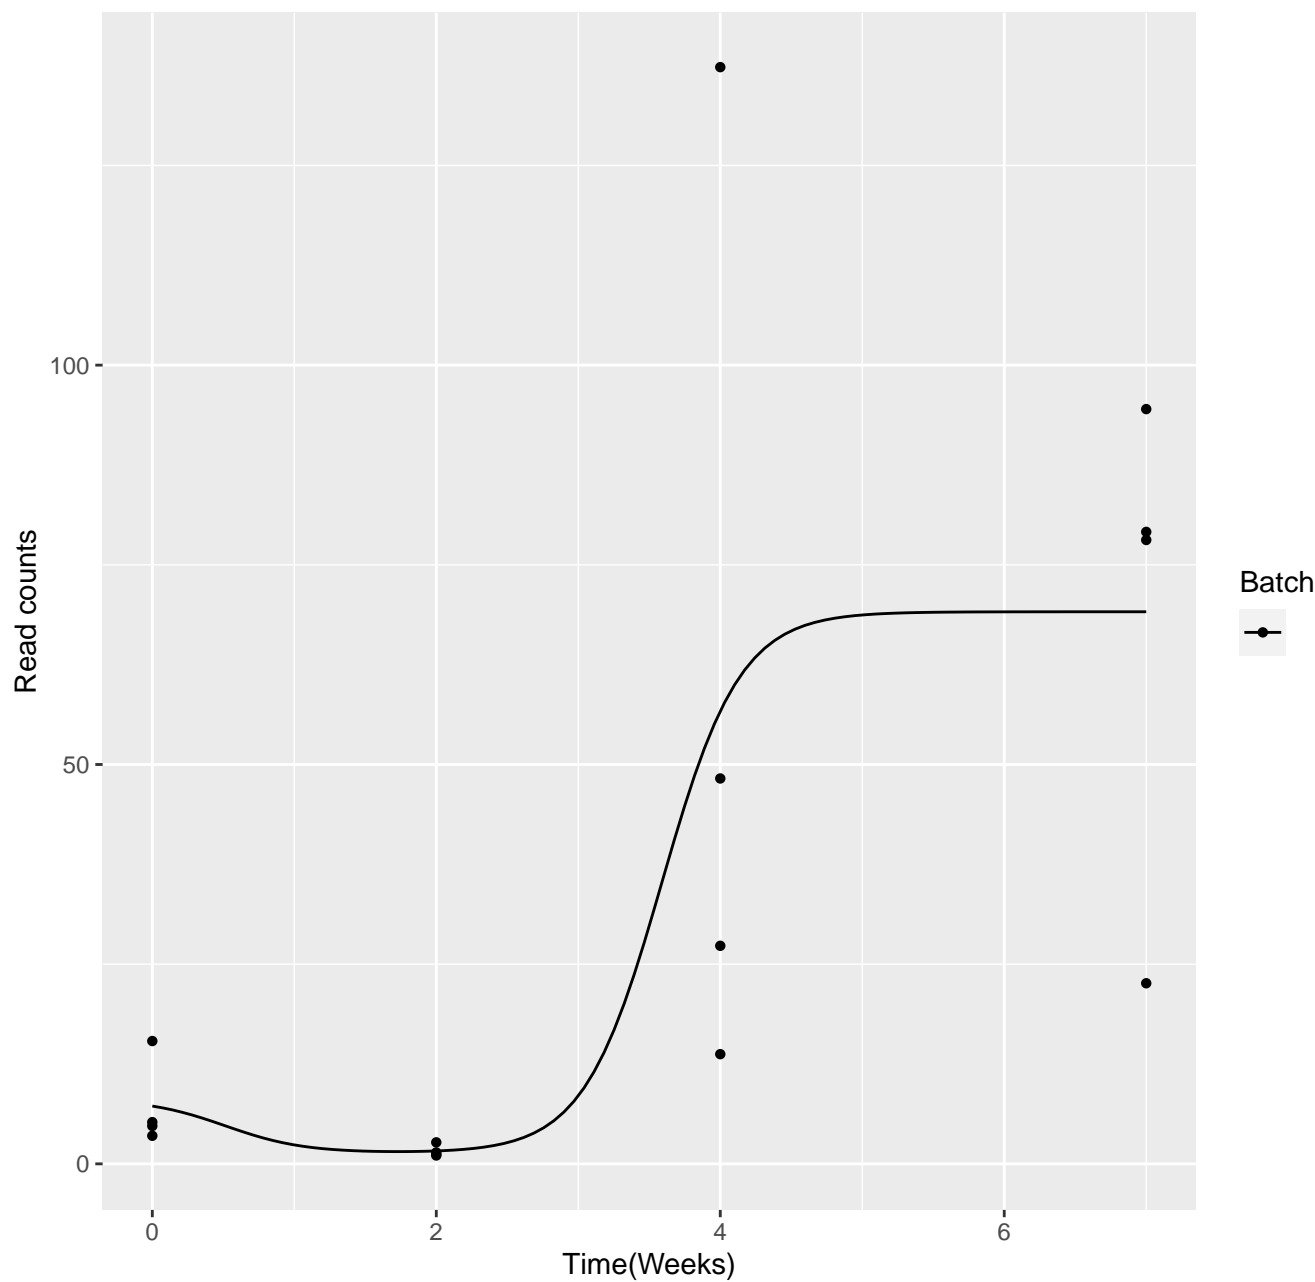

LOC100339650:  $\log_{10} q = -7.92$

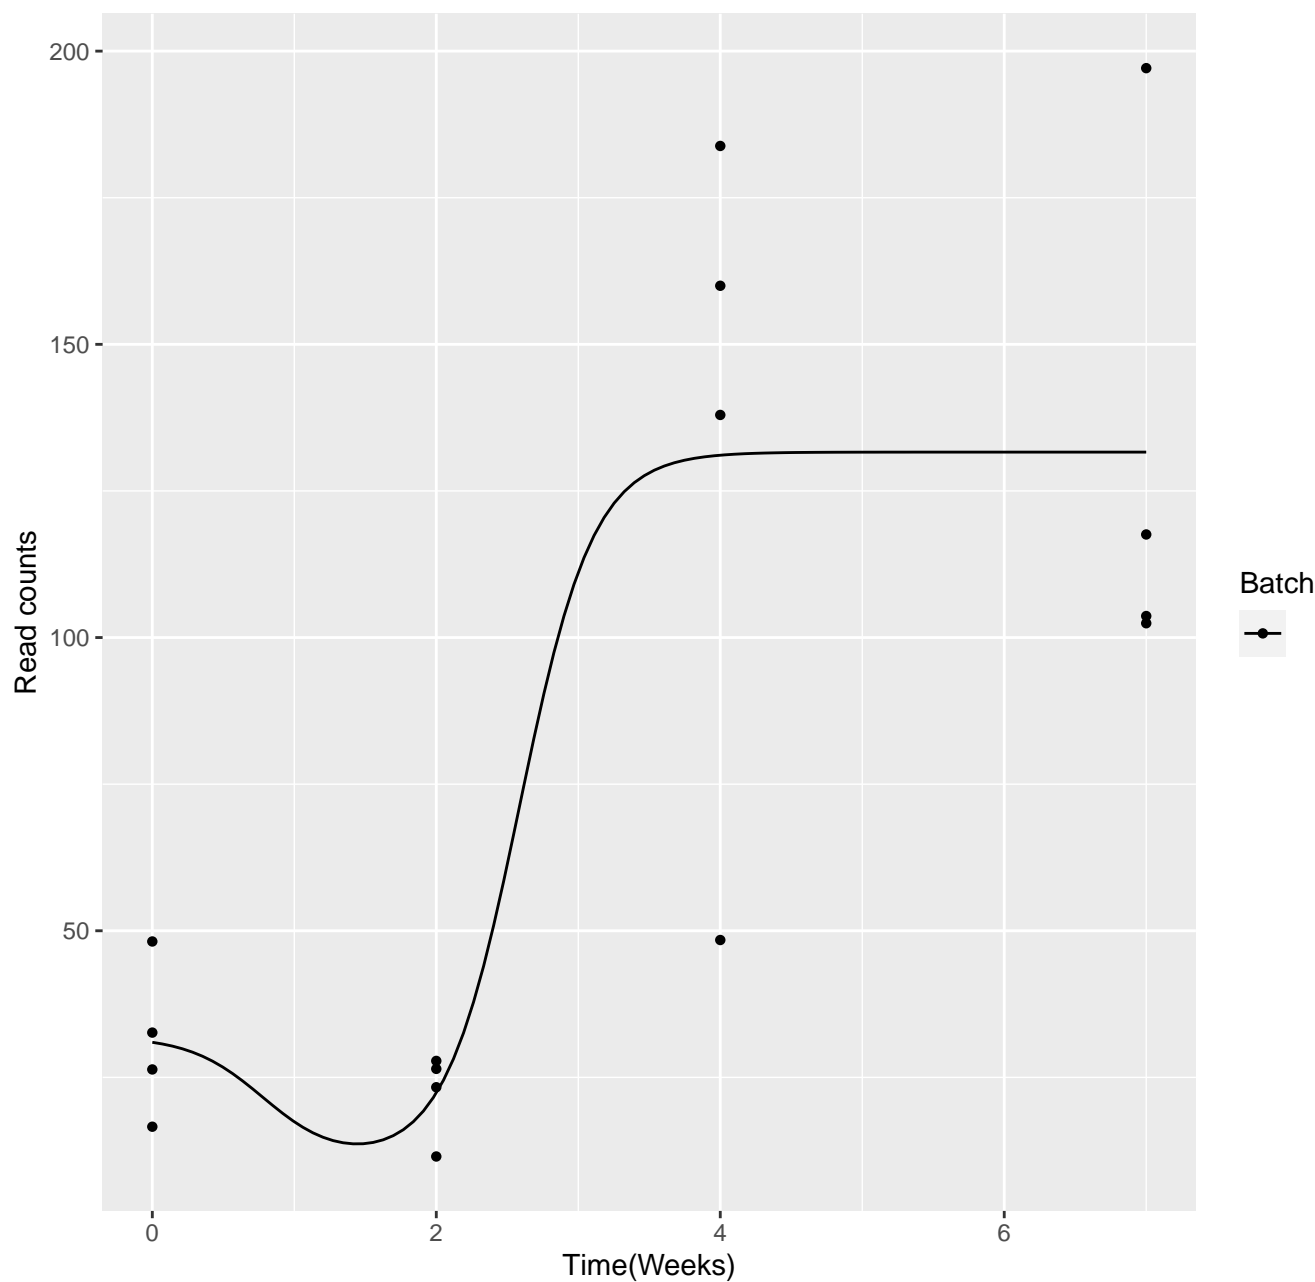

IL10RA:  $\log_{10} q = -7.89$

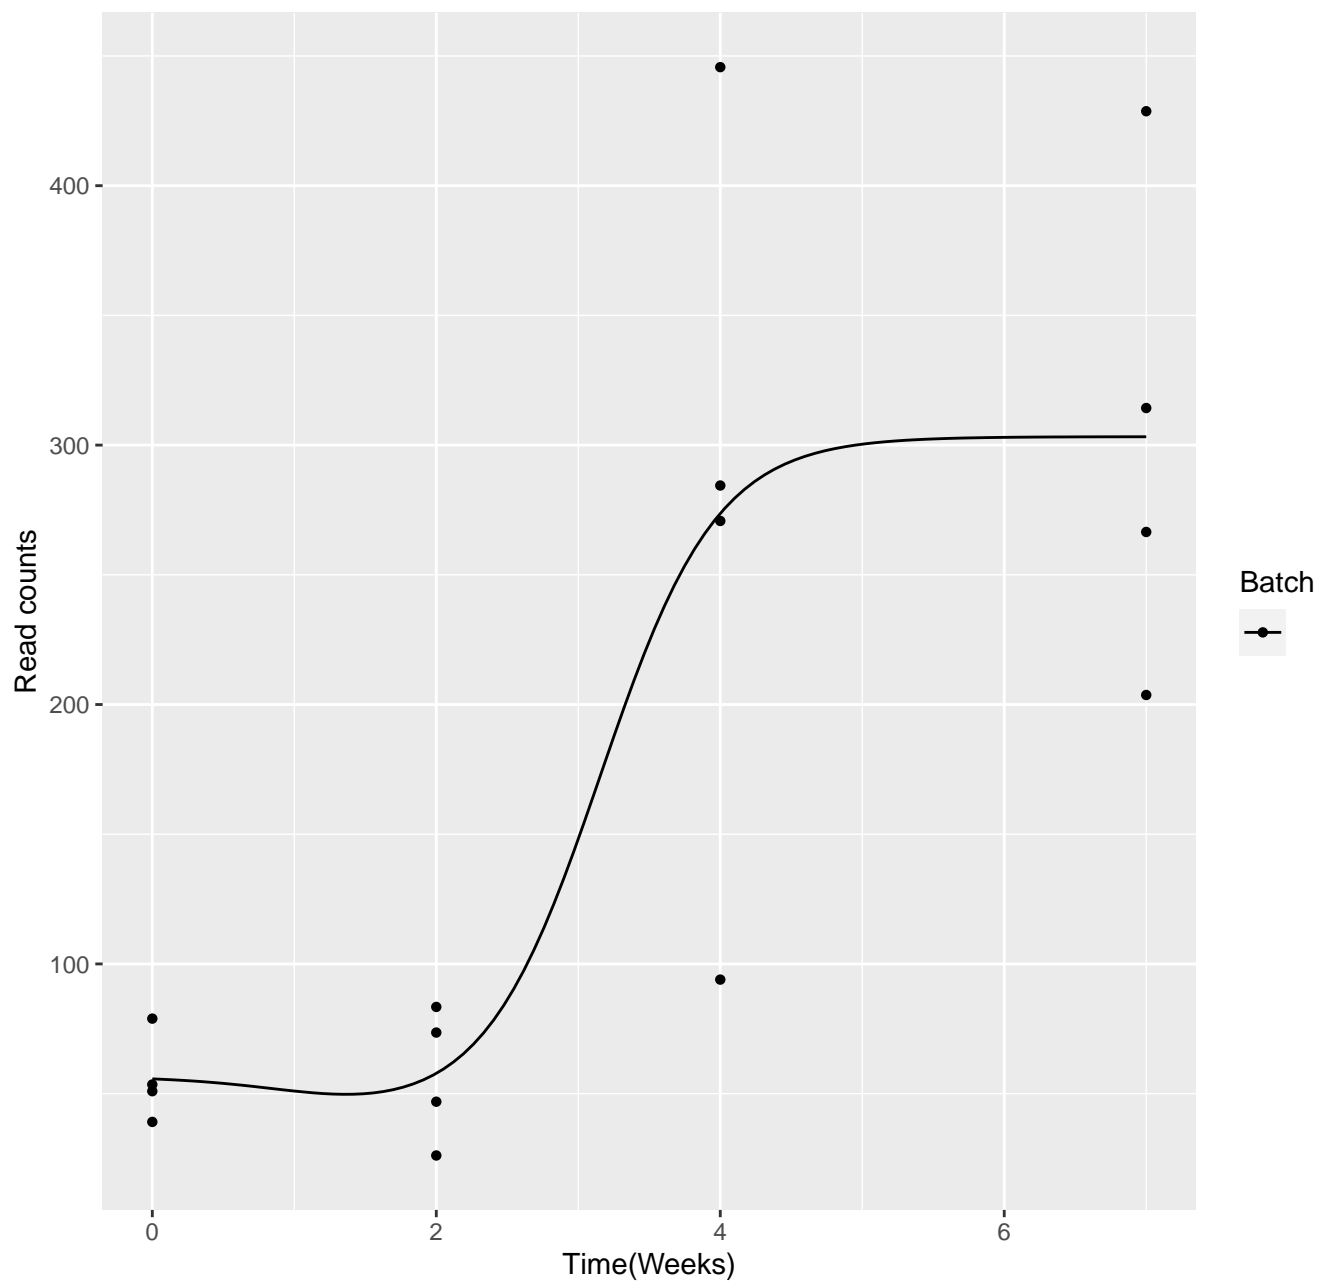

SMOC2:  $\log_{10} q = -7.89$

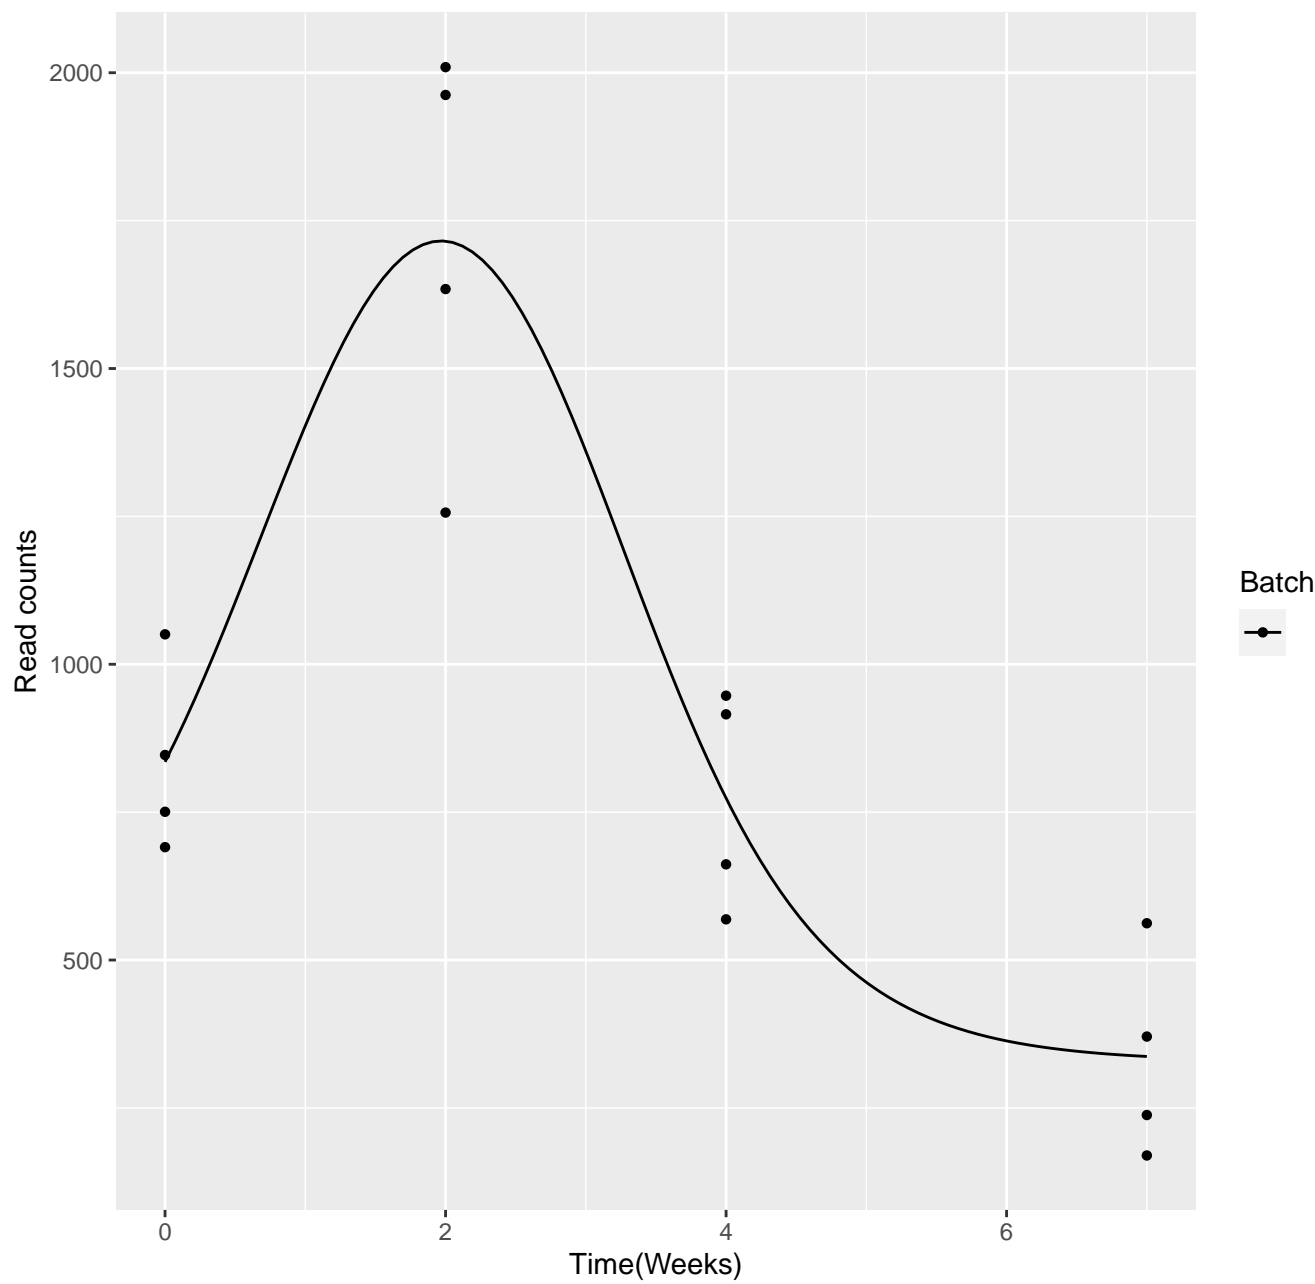

HCLS1:  $\log_{10} q = -7.88$

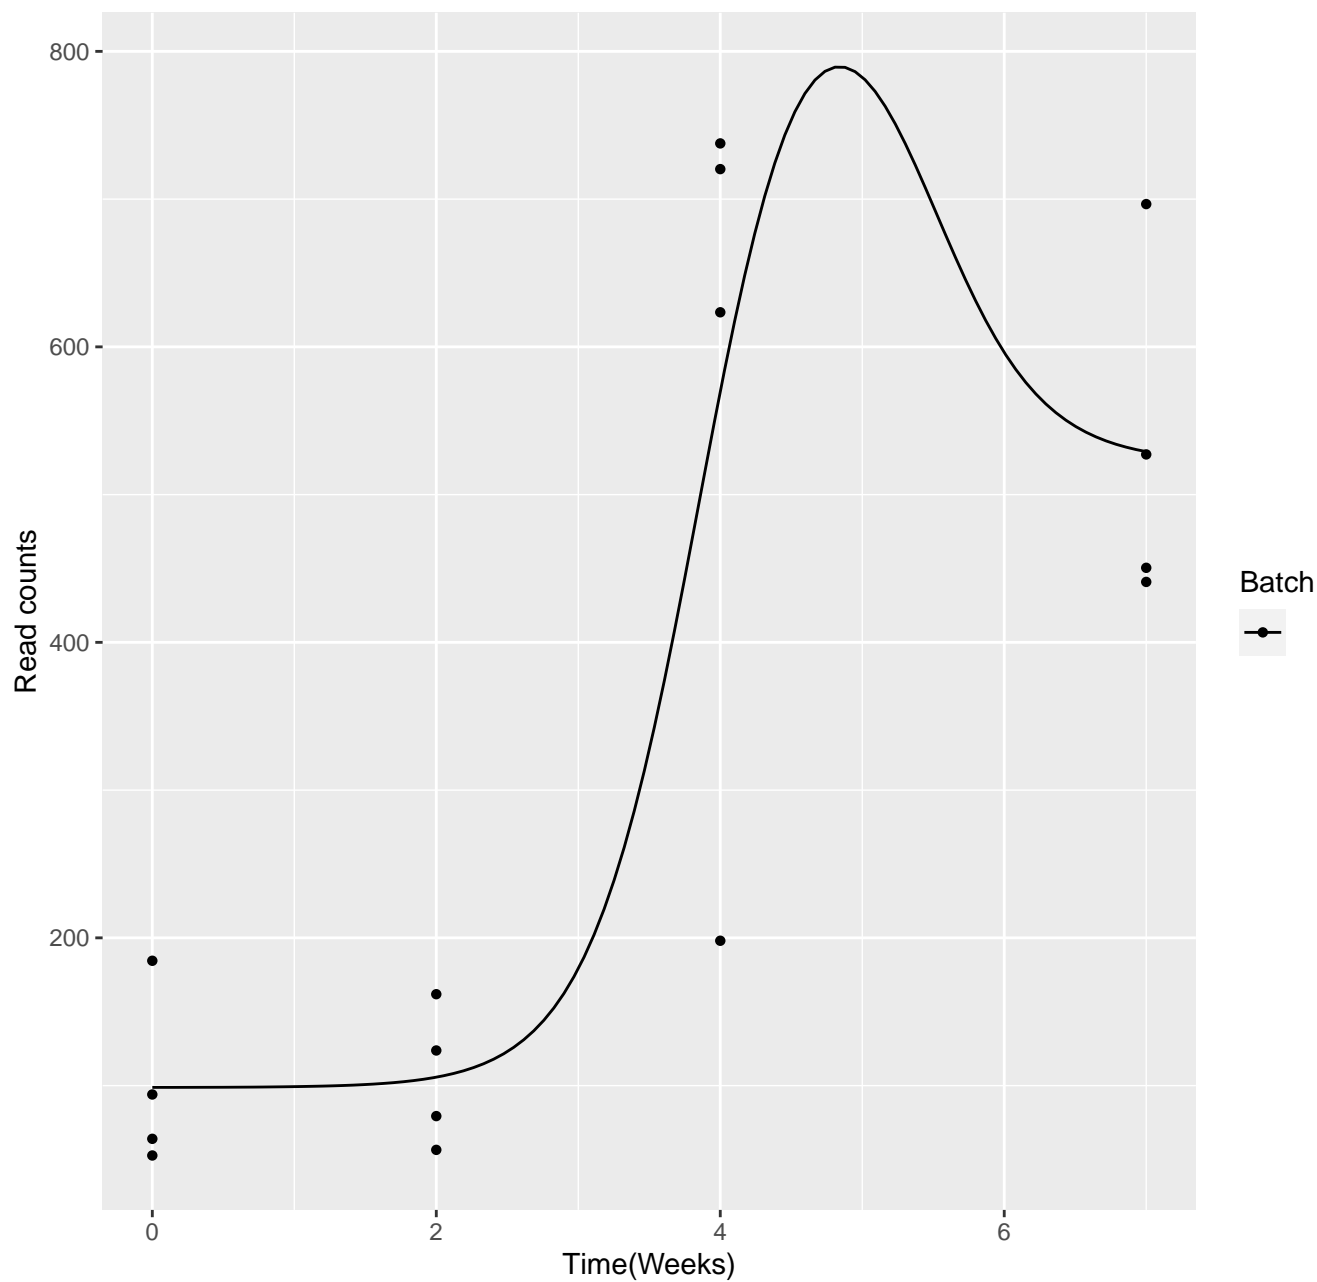



WNT8A:  $\log_{10} q = -7.88$

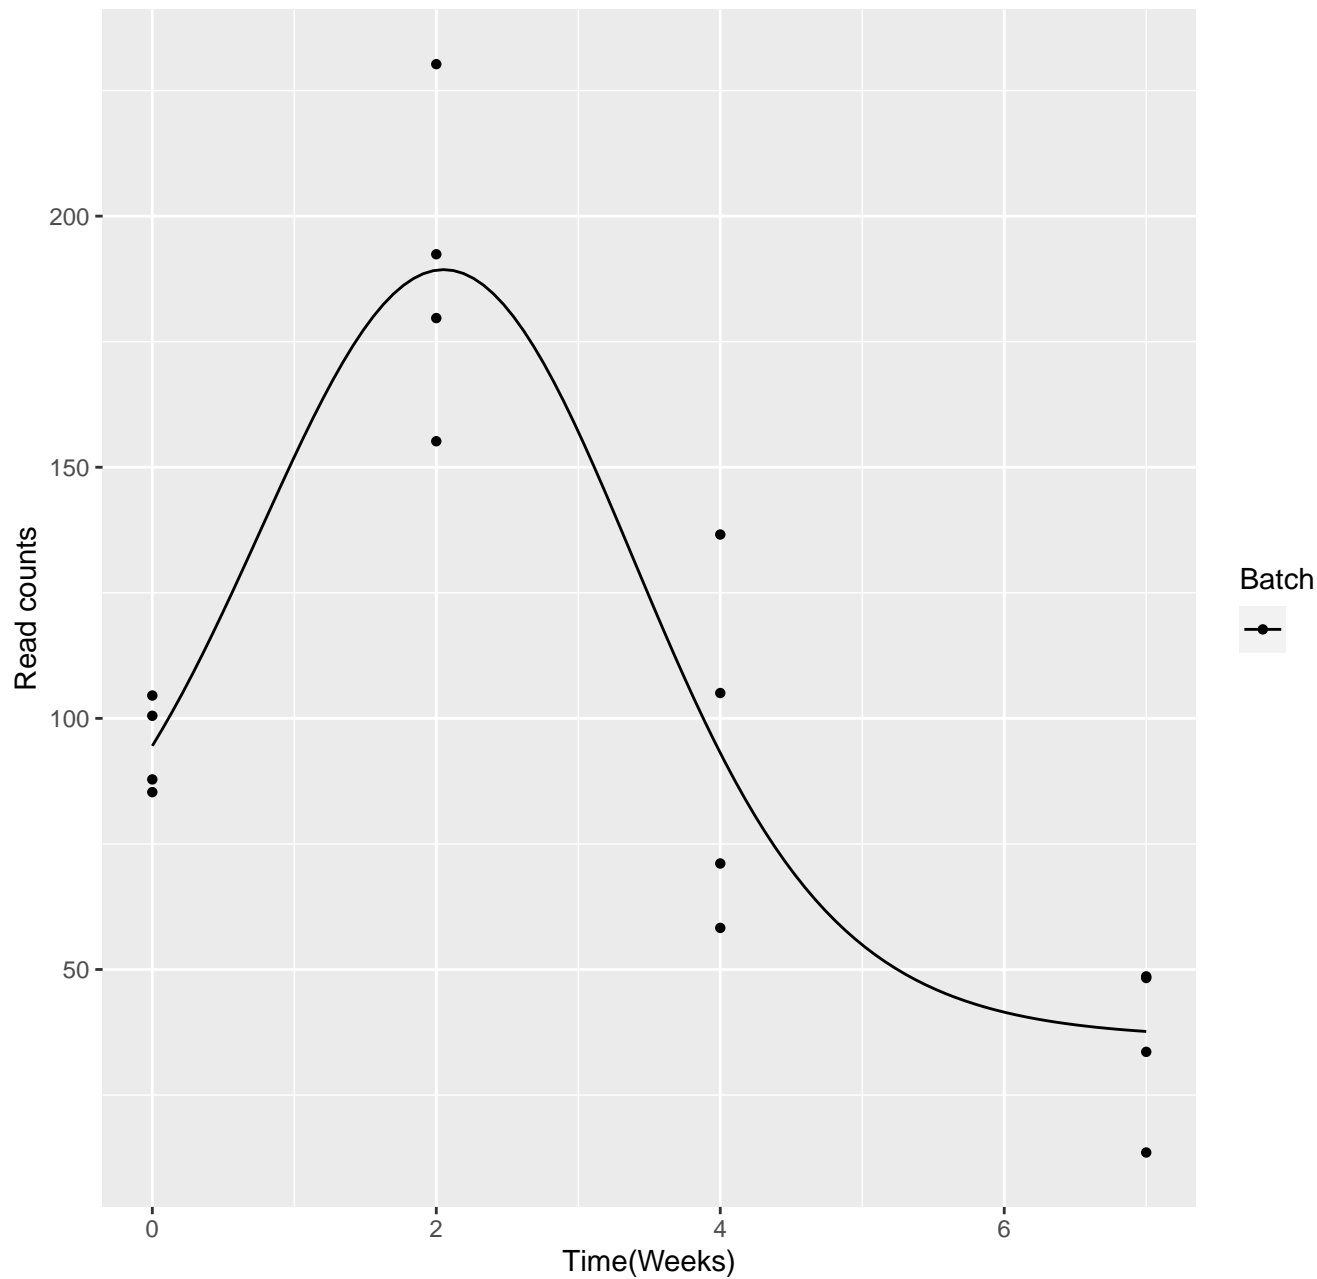

GPNMB:  $\log_{10} q = -7.87$

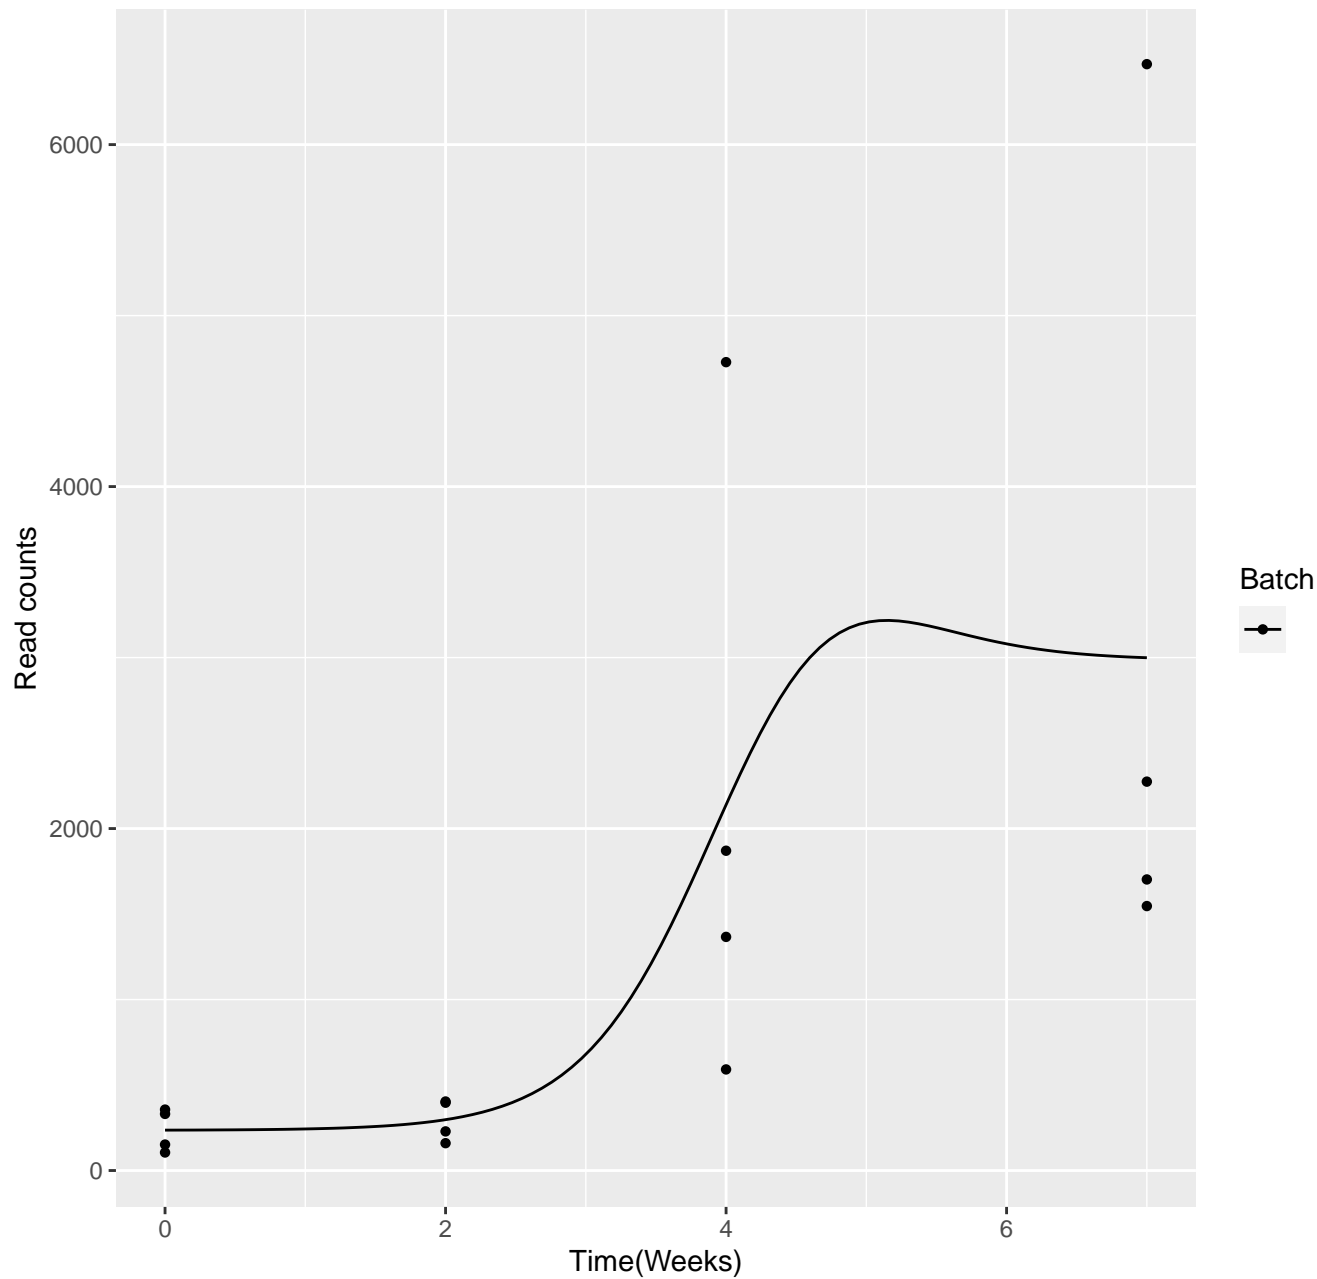

LOC100356864:  $\log_{10} q = -7.85$

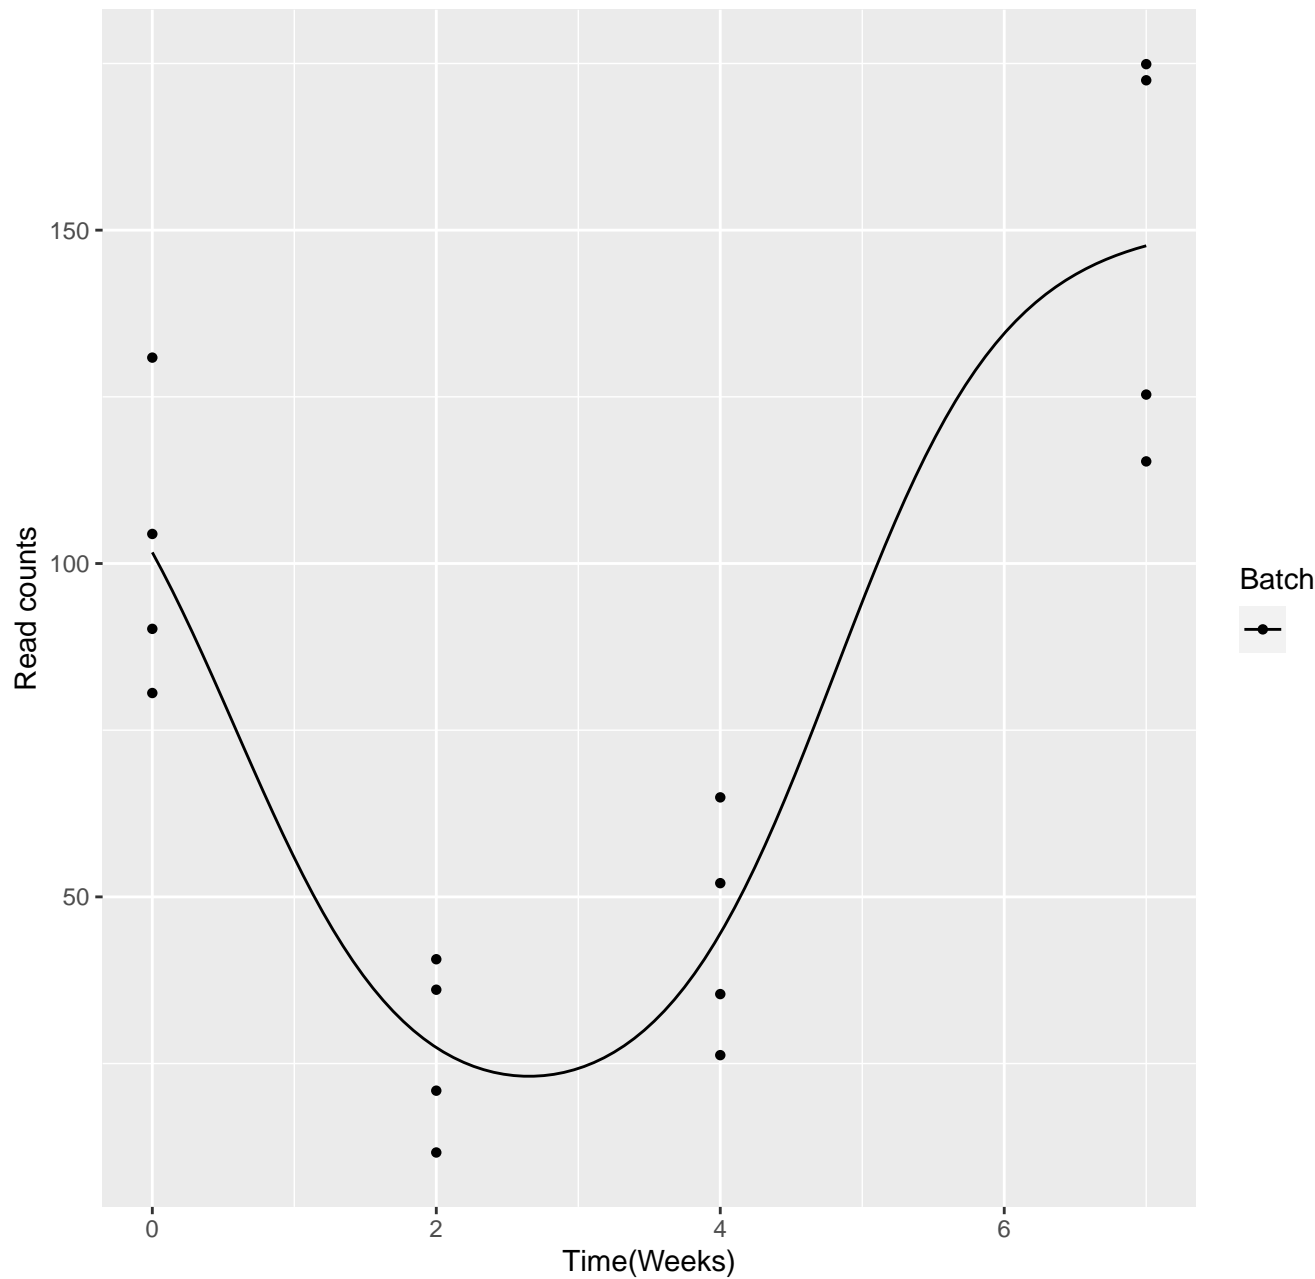

GJB5:  $\log_{10} q = -7.85$

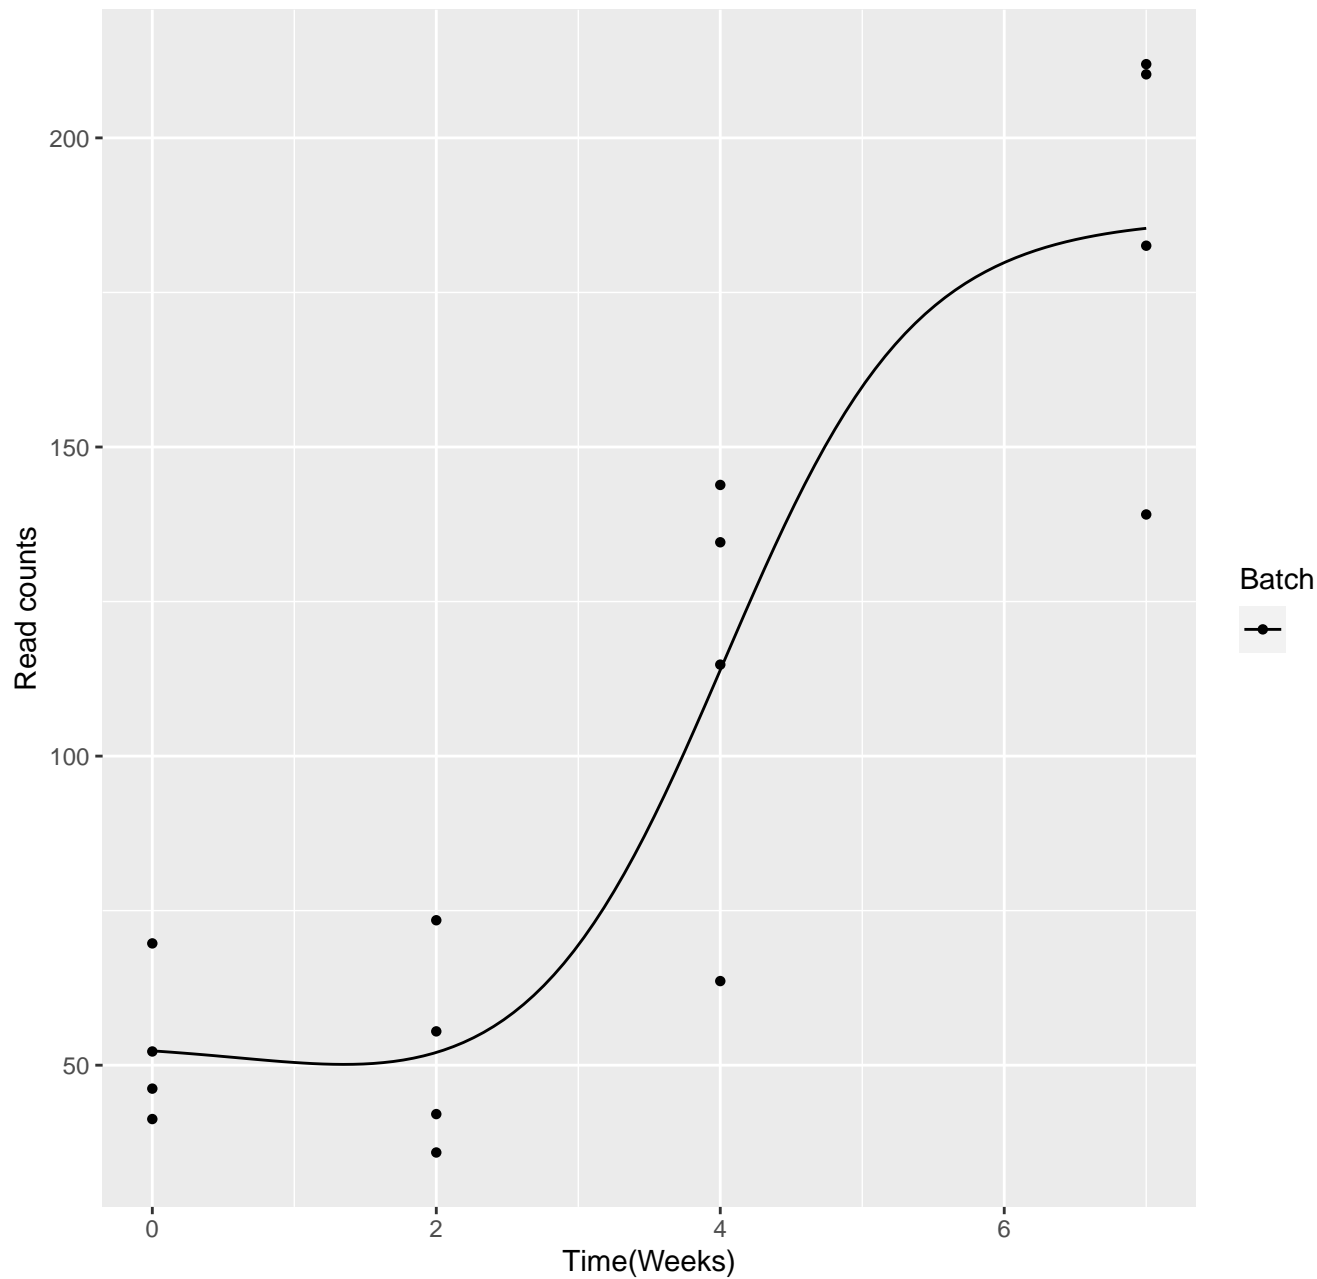

LOC100343623:  $\log_{10} q = -7.84$

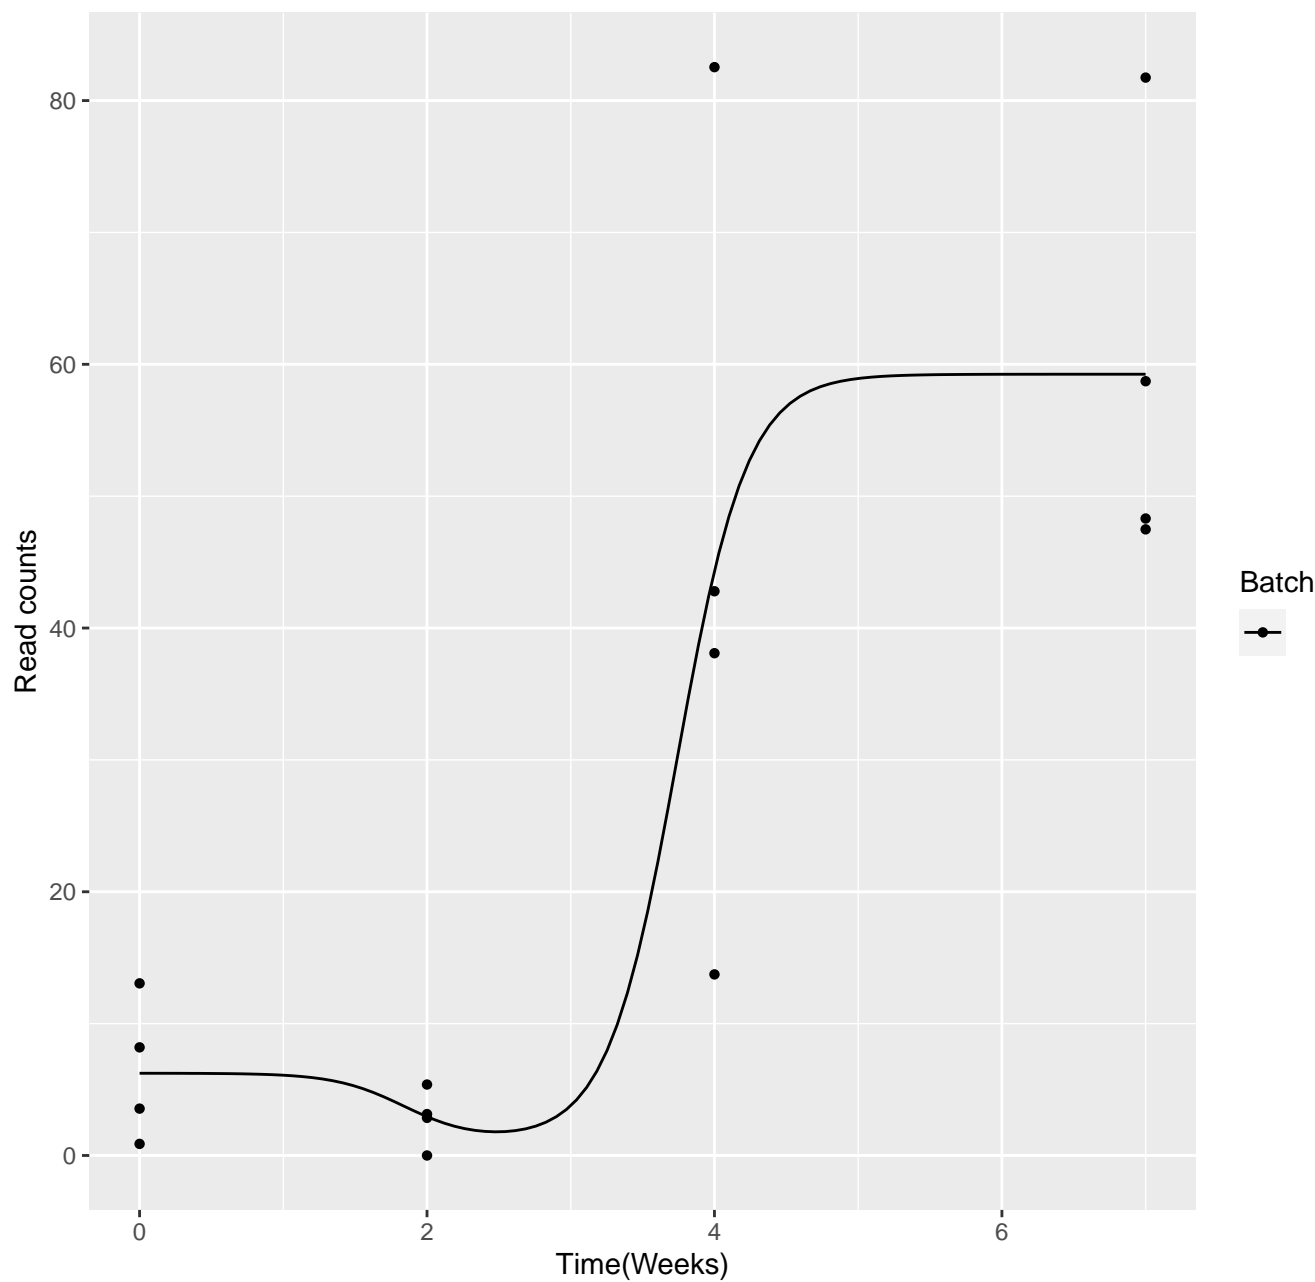

PDZD2:  $\log_{10} q = -7.84$

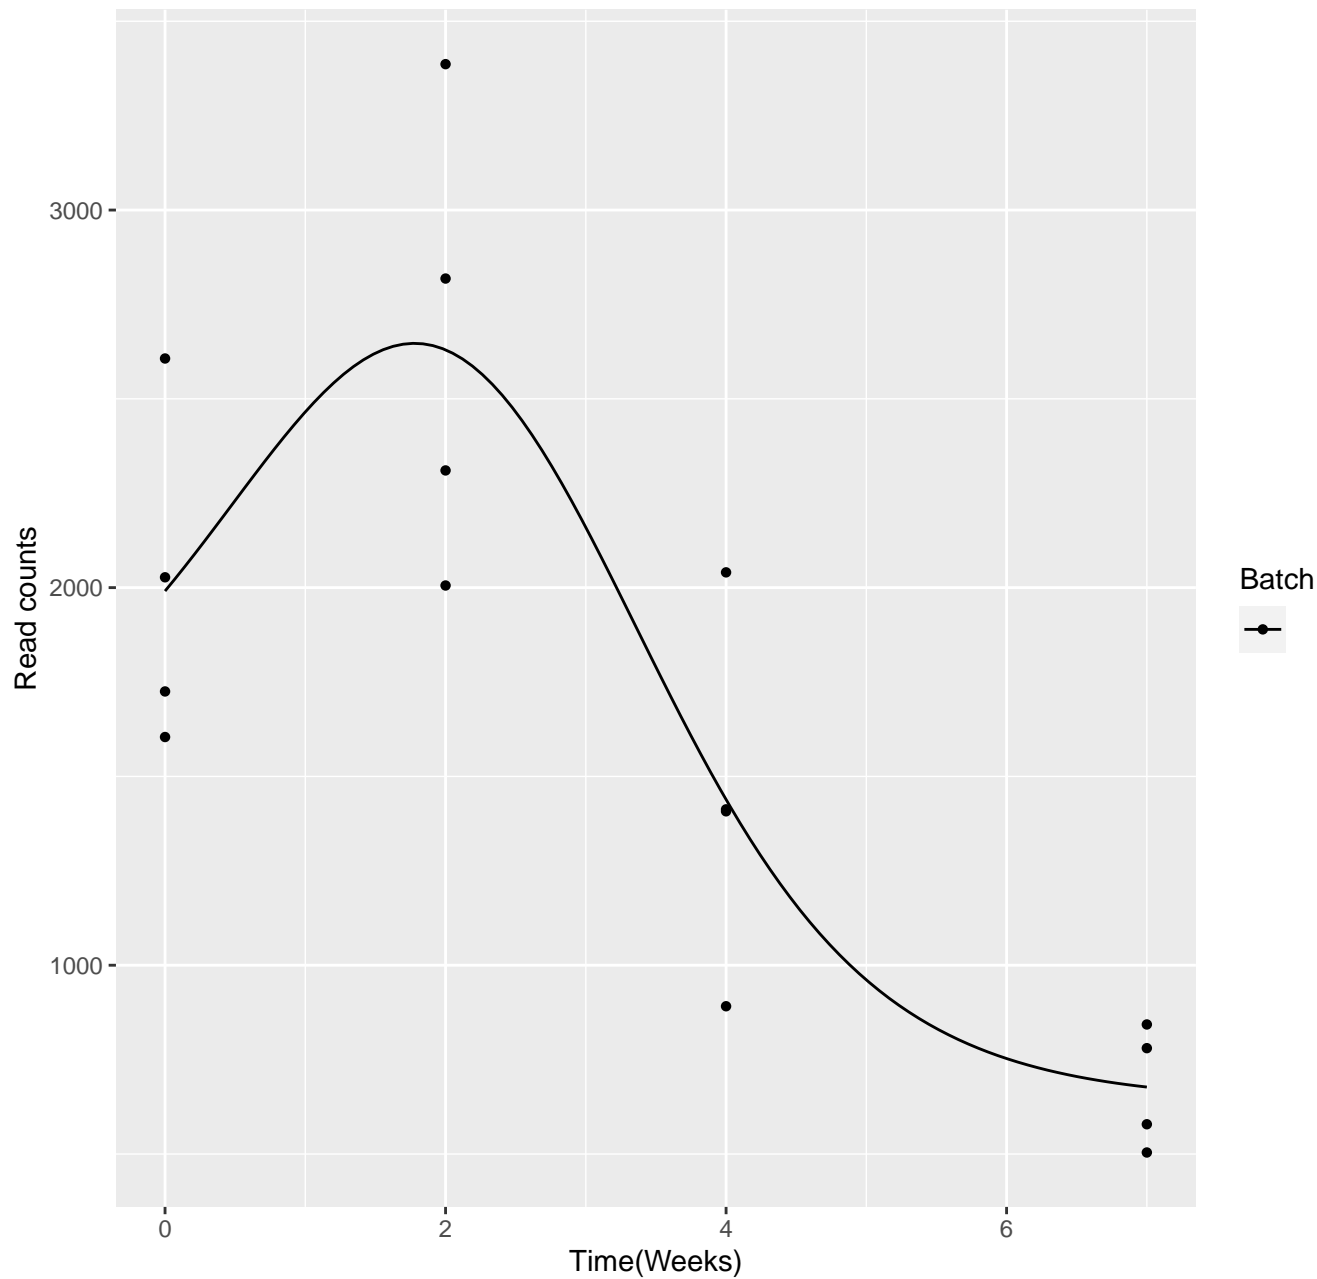

CBX6:  $\log_{10} q = -7.81$

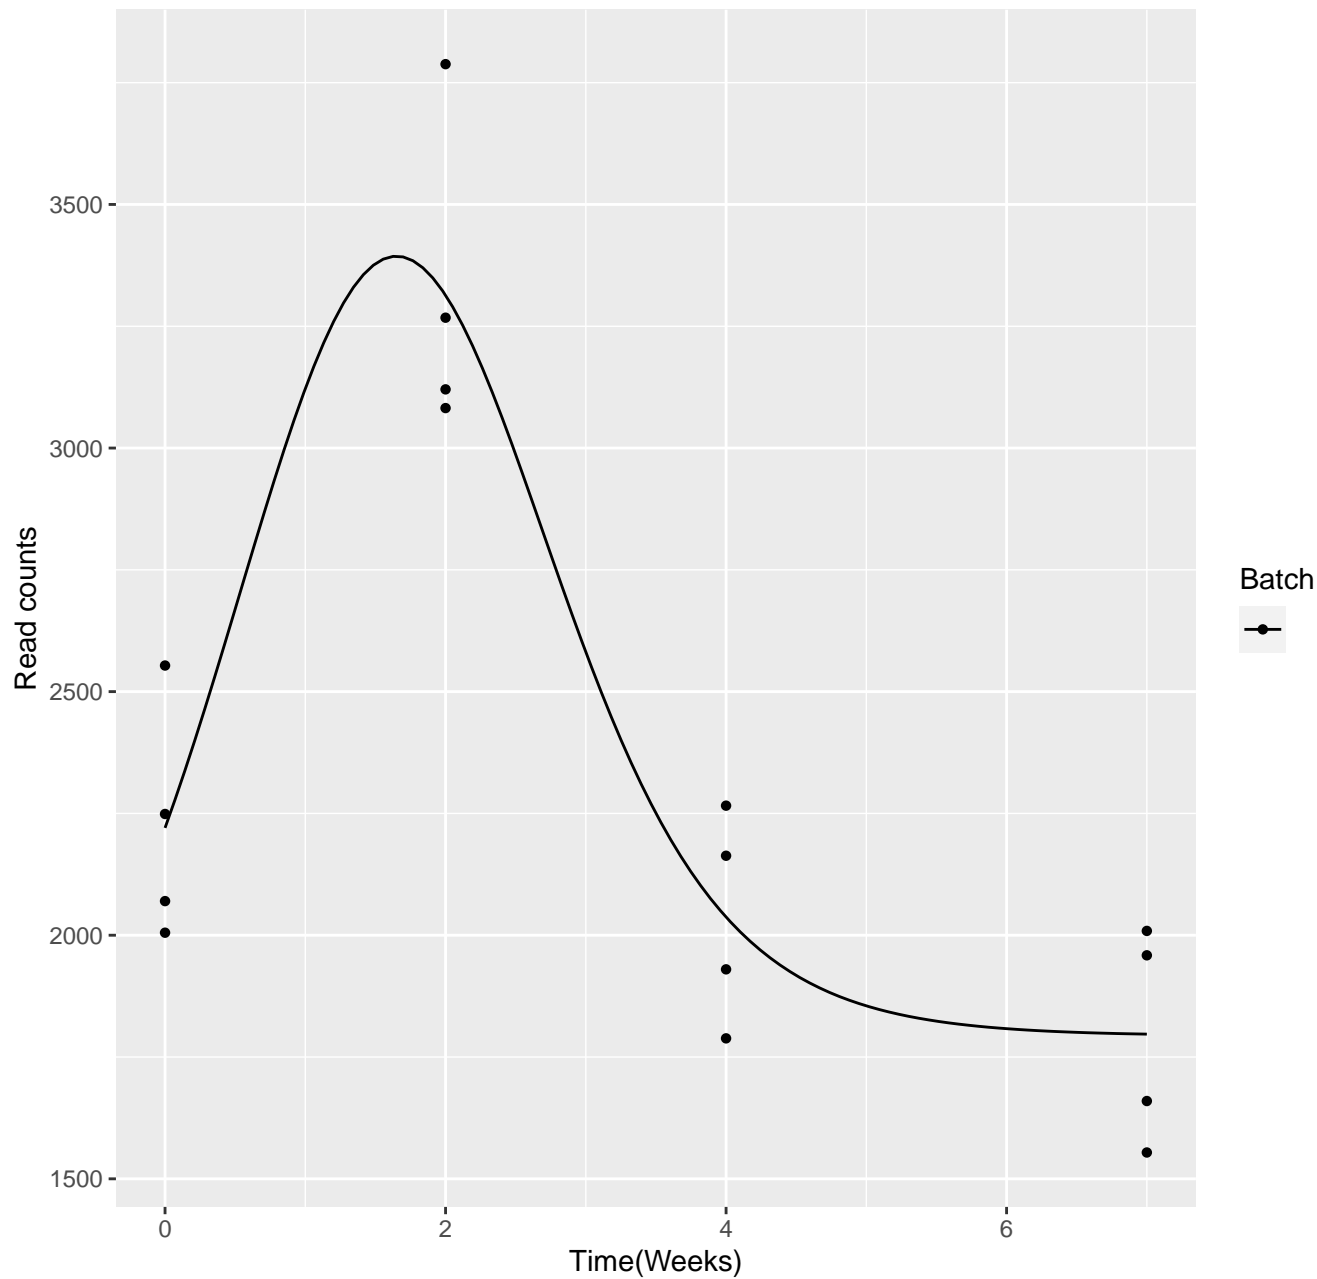

SUSD3:  $\log_{10} q = -7.8$

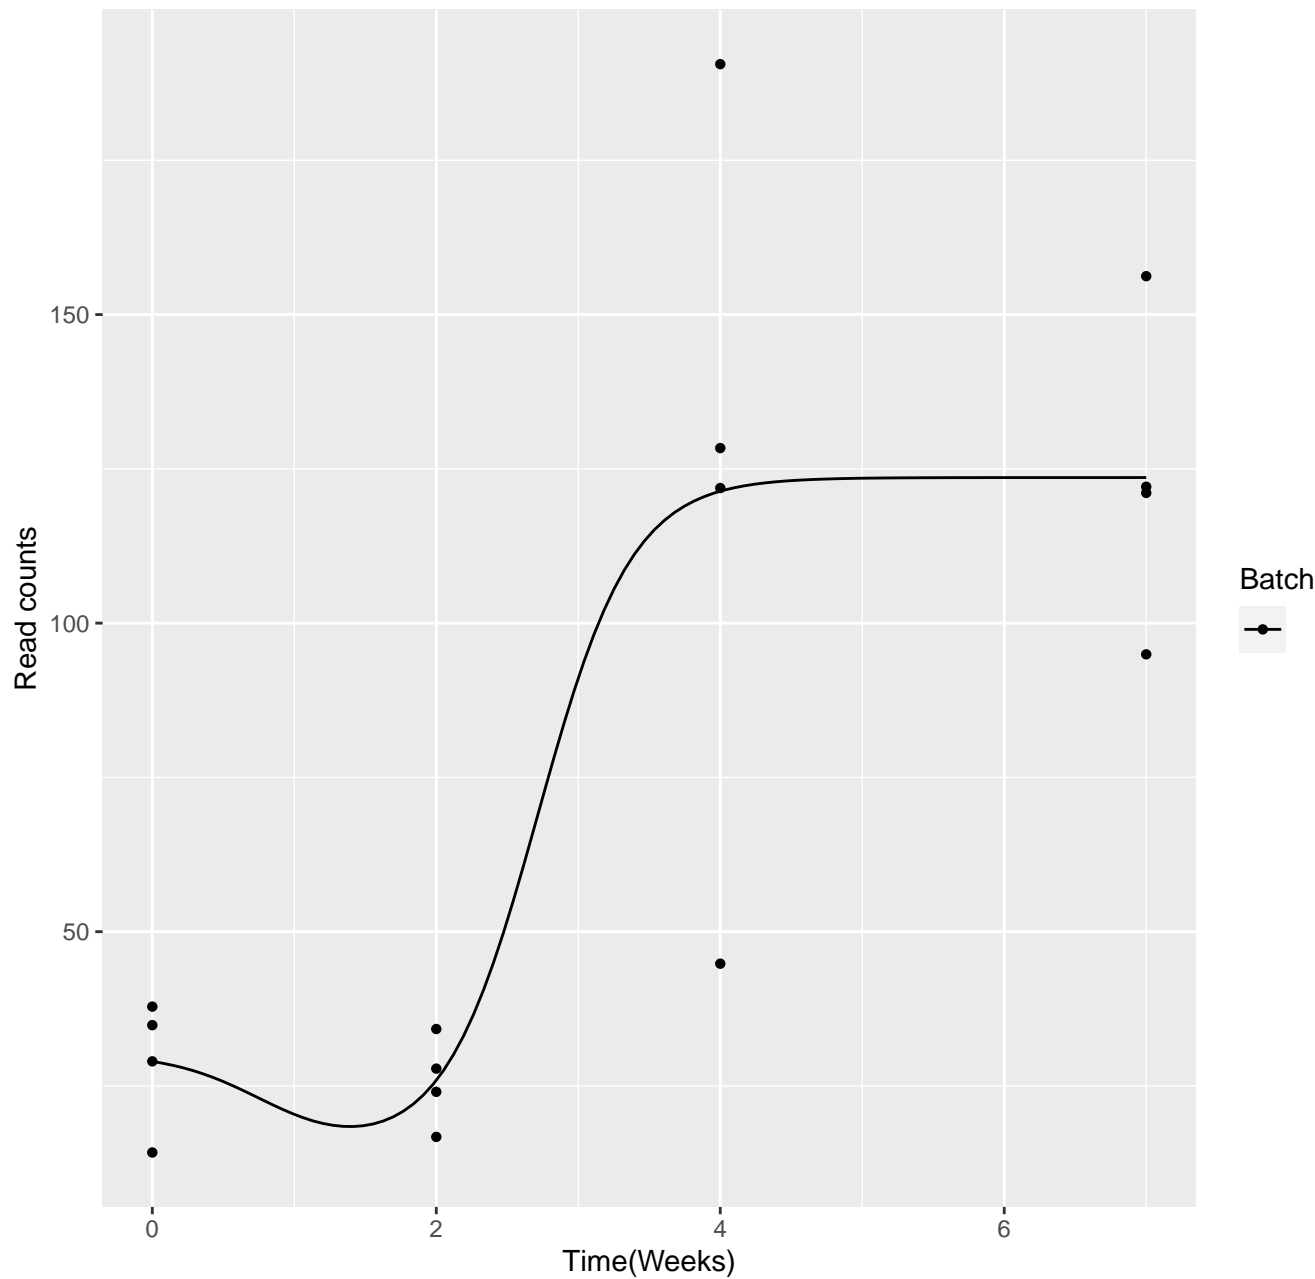



ARHGEF17:  $\log_{10} q = -7.78$

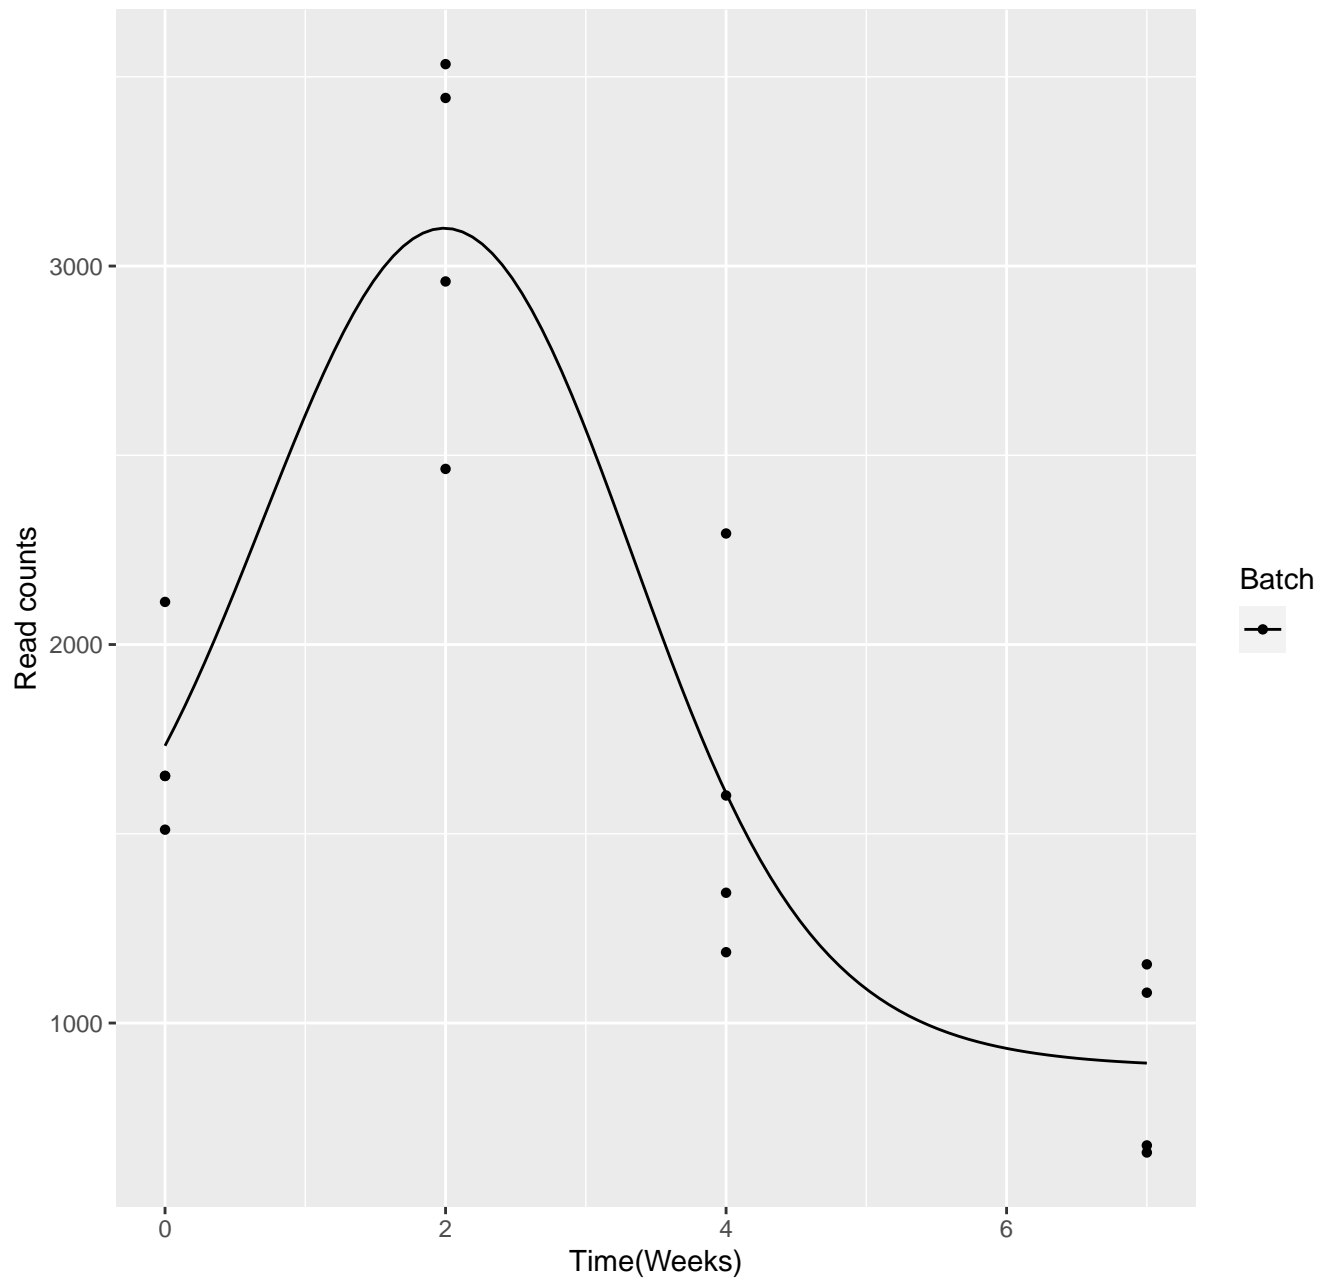

DOK2:  $\log_{10} q = -7.75$

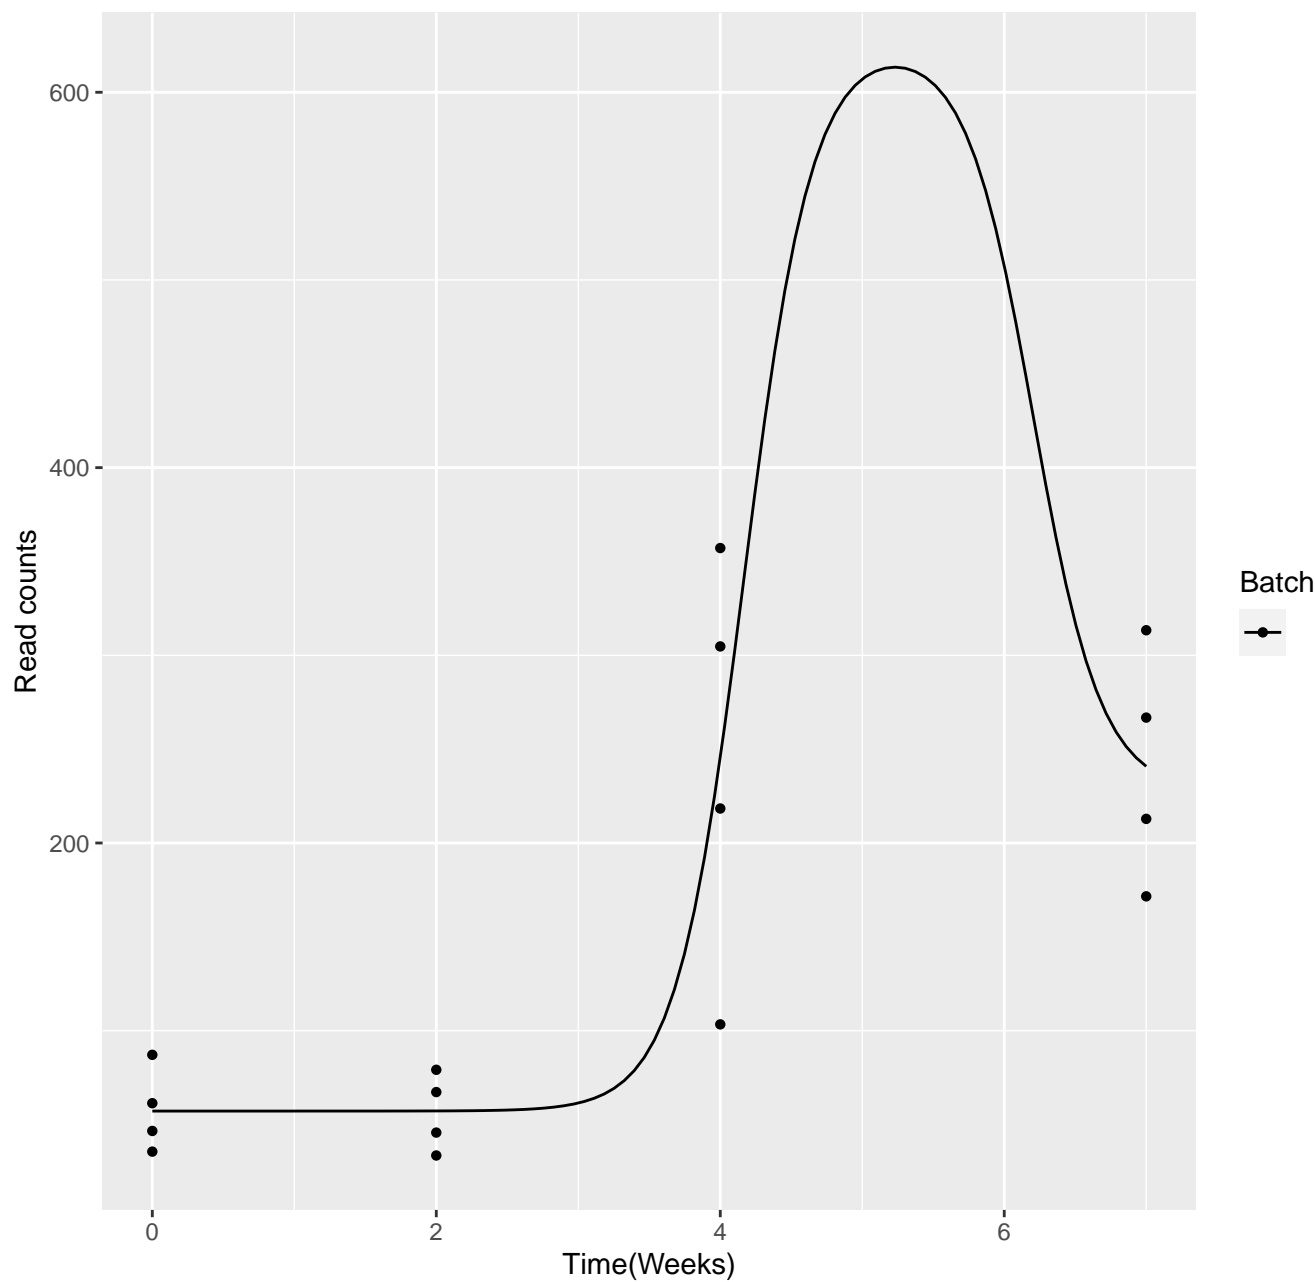

BLNK:  $\log_{10} q = -7.74$

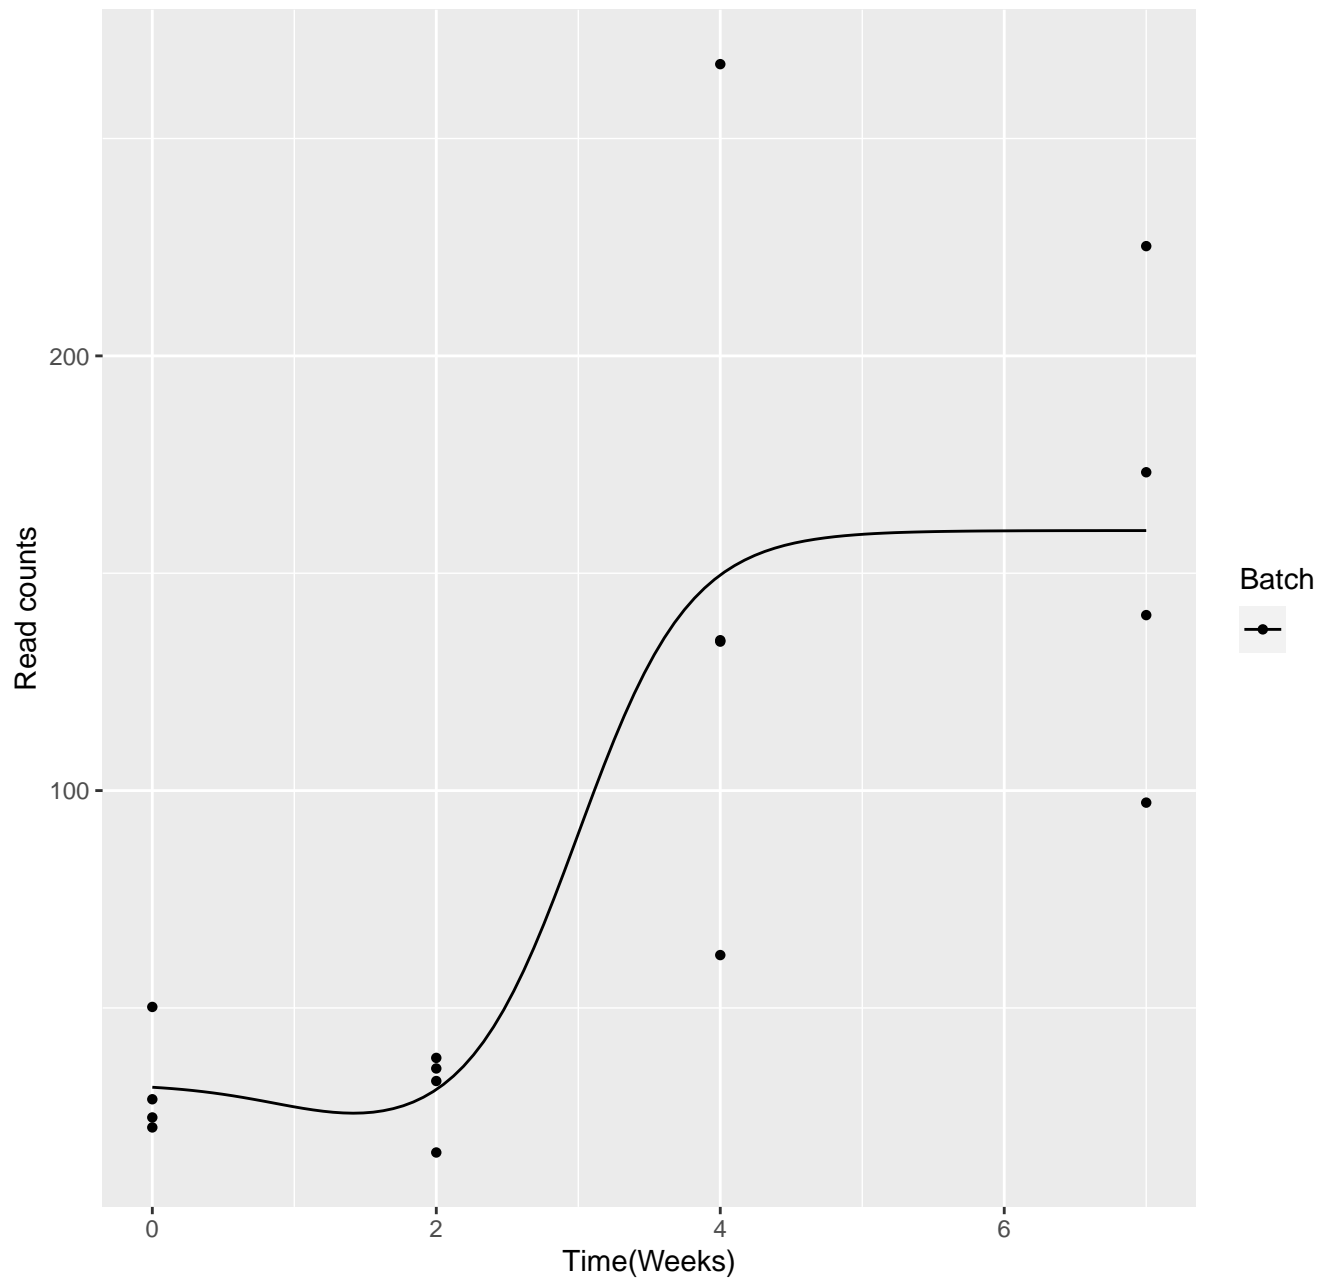

DNAJB6:  $\log_{10} q = -7.74$

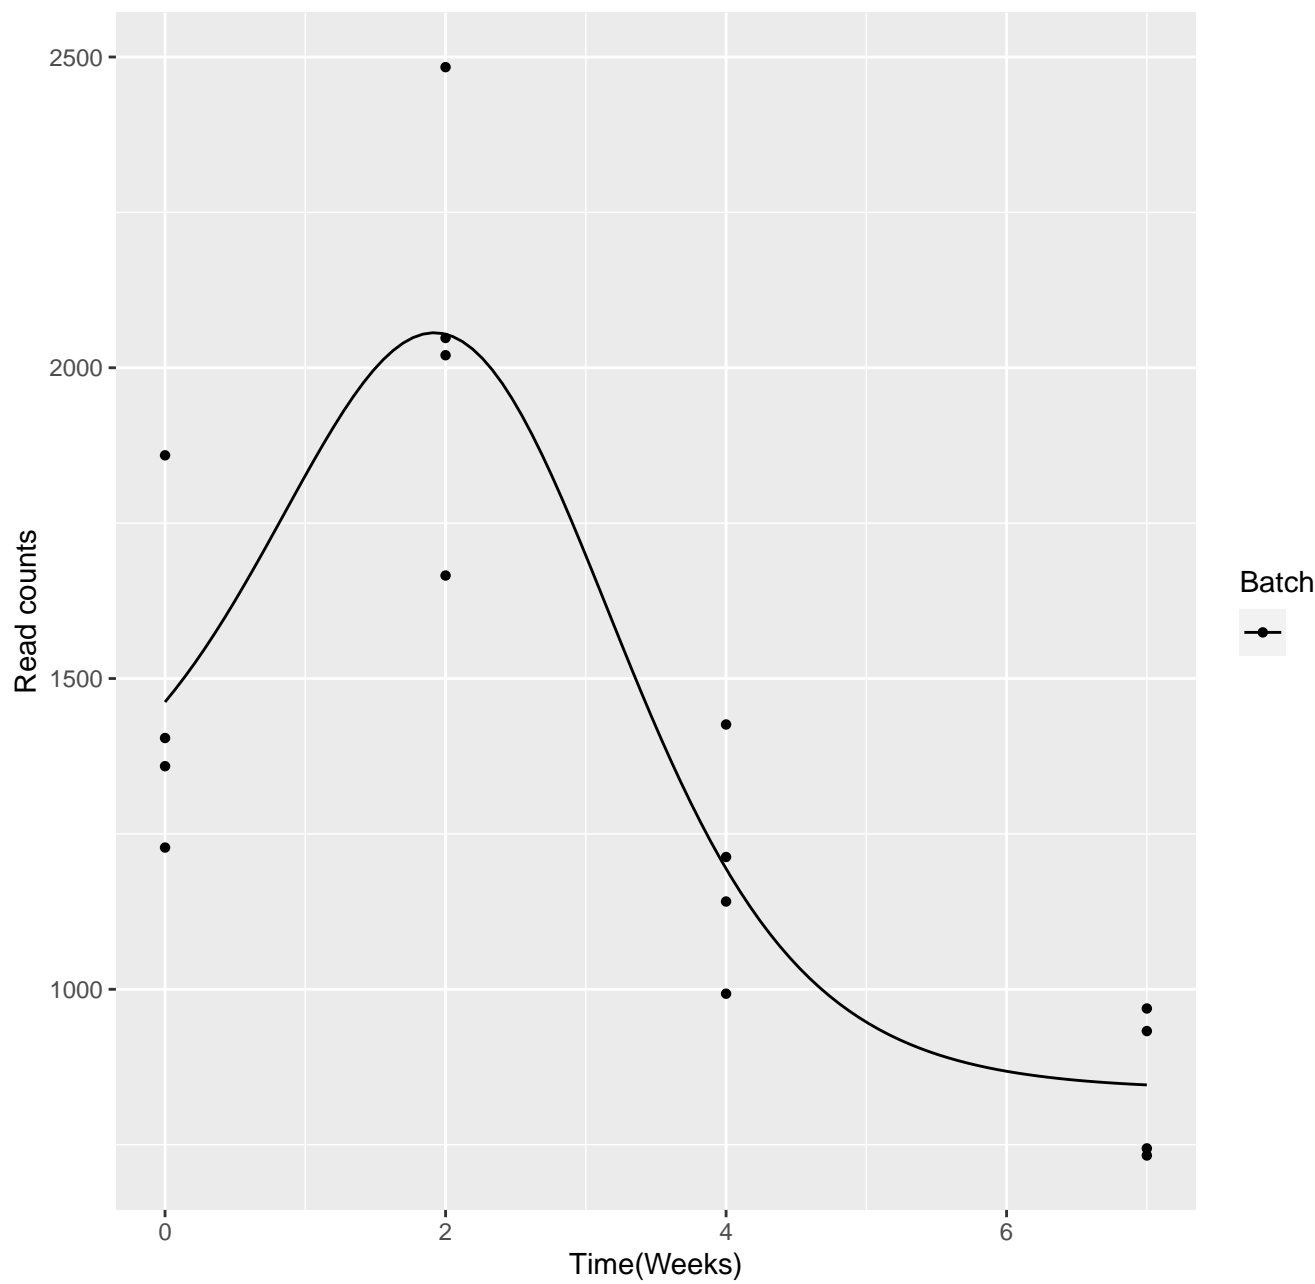

P2RX6:  $\log_{10} q = -7.74$

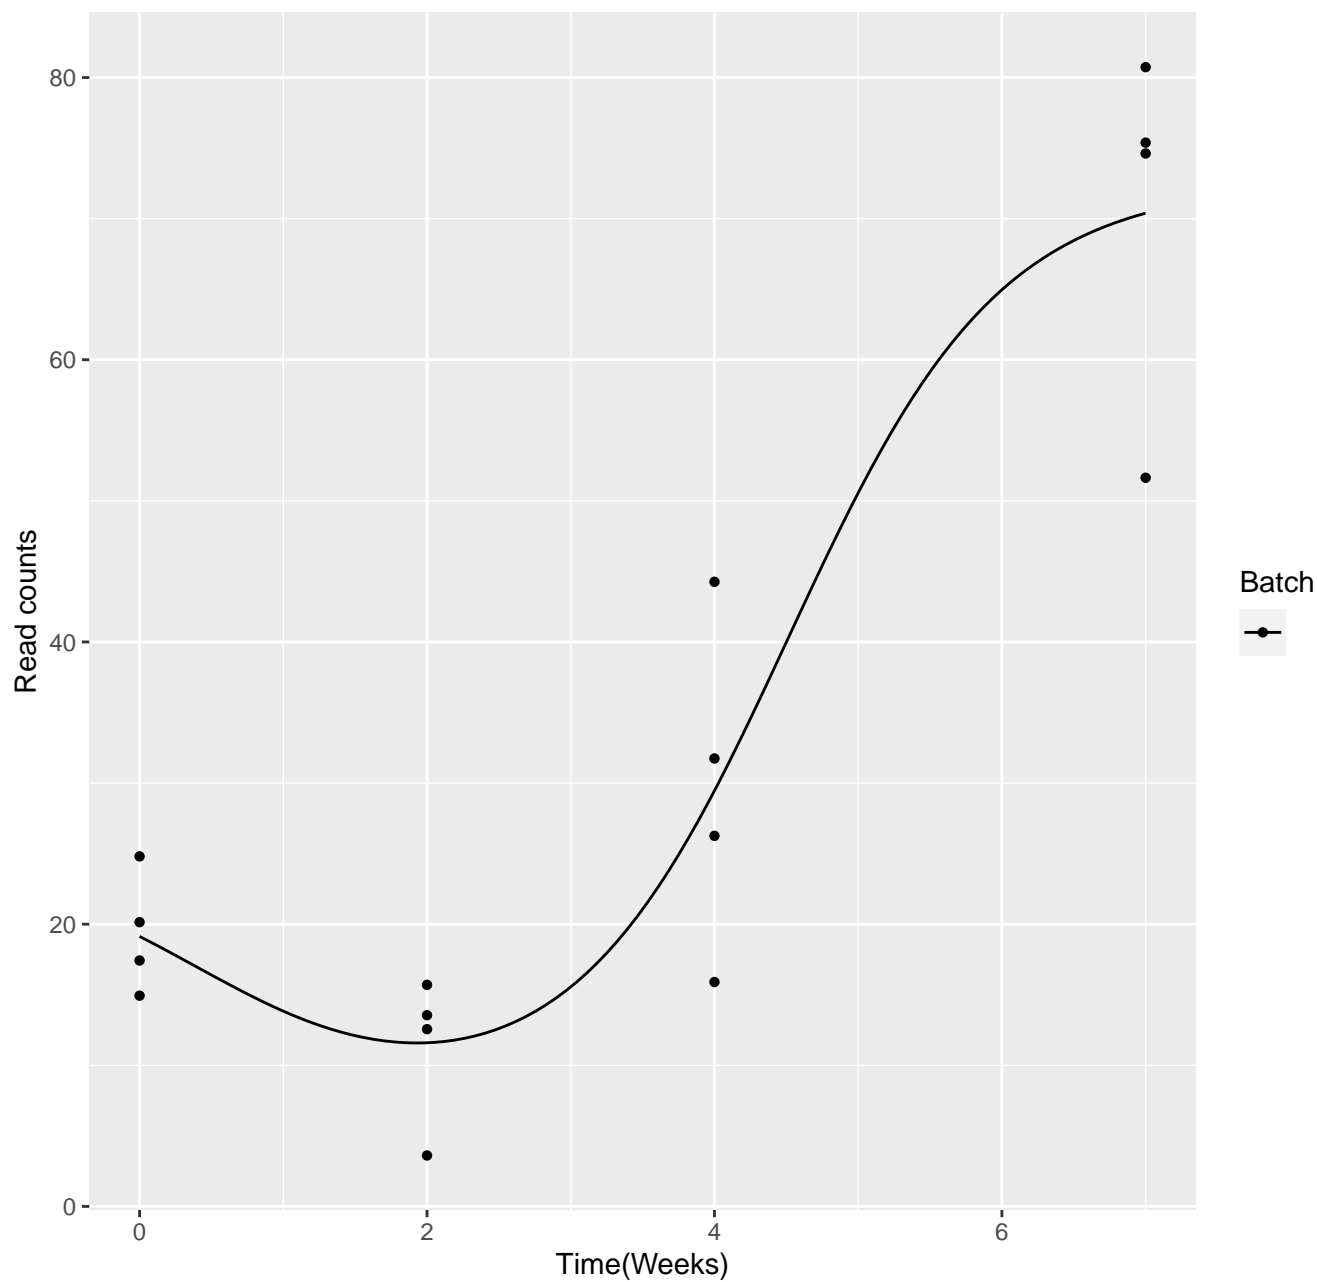

LOC127488977:  $\log_{10} q = -7.74$

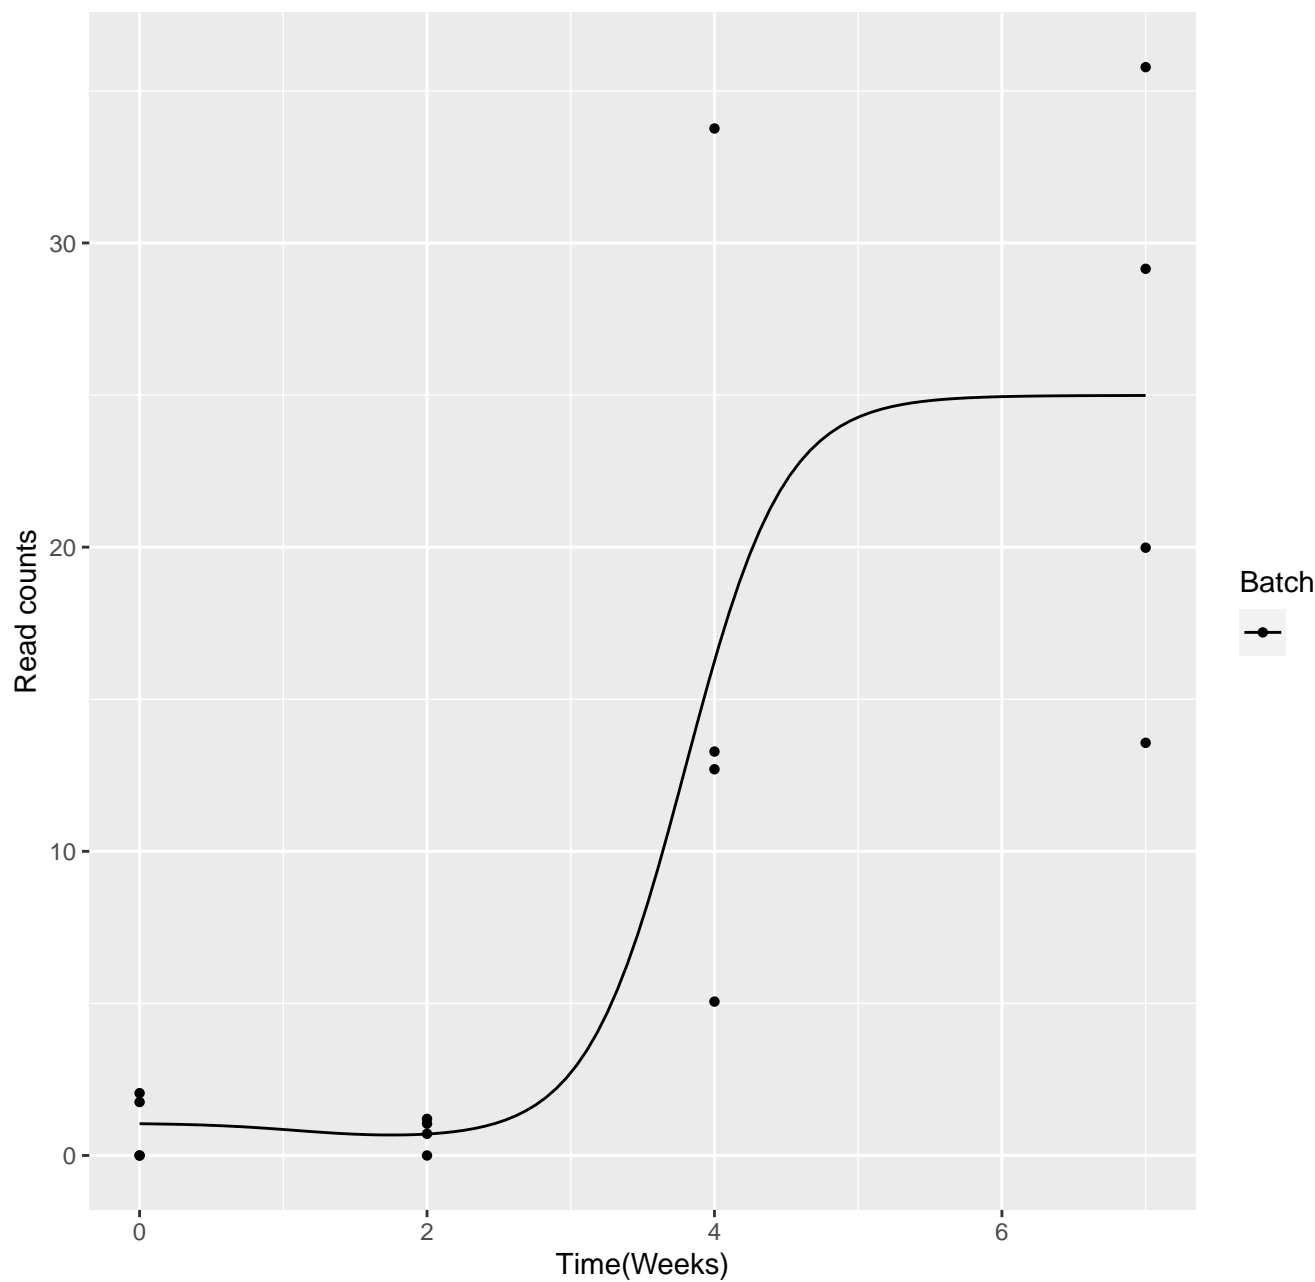

LOC100340313:  $\log_{10} q = -7.67$

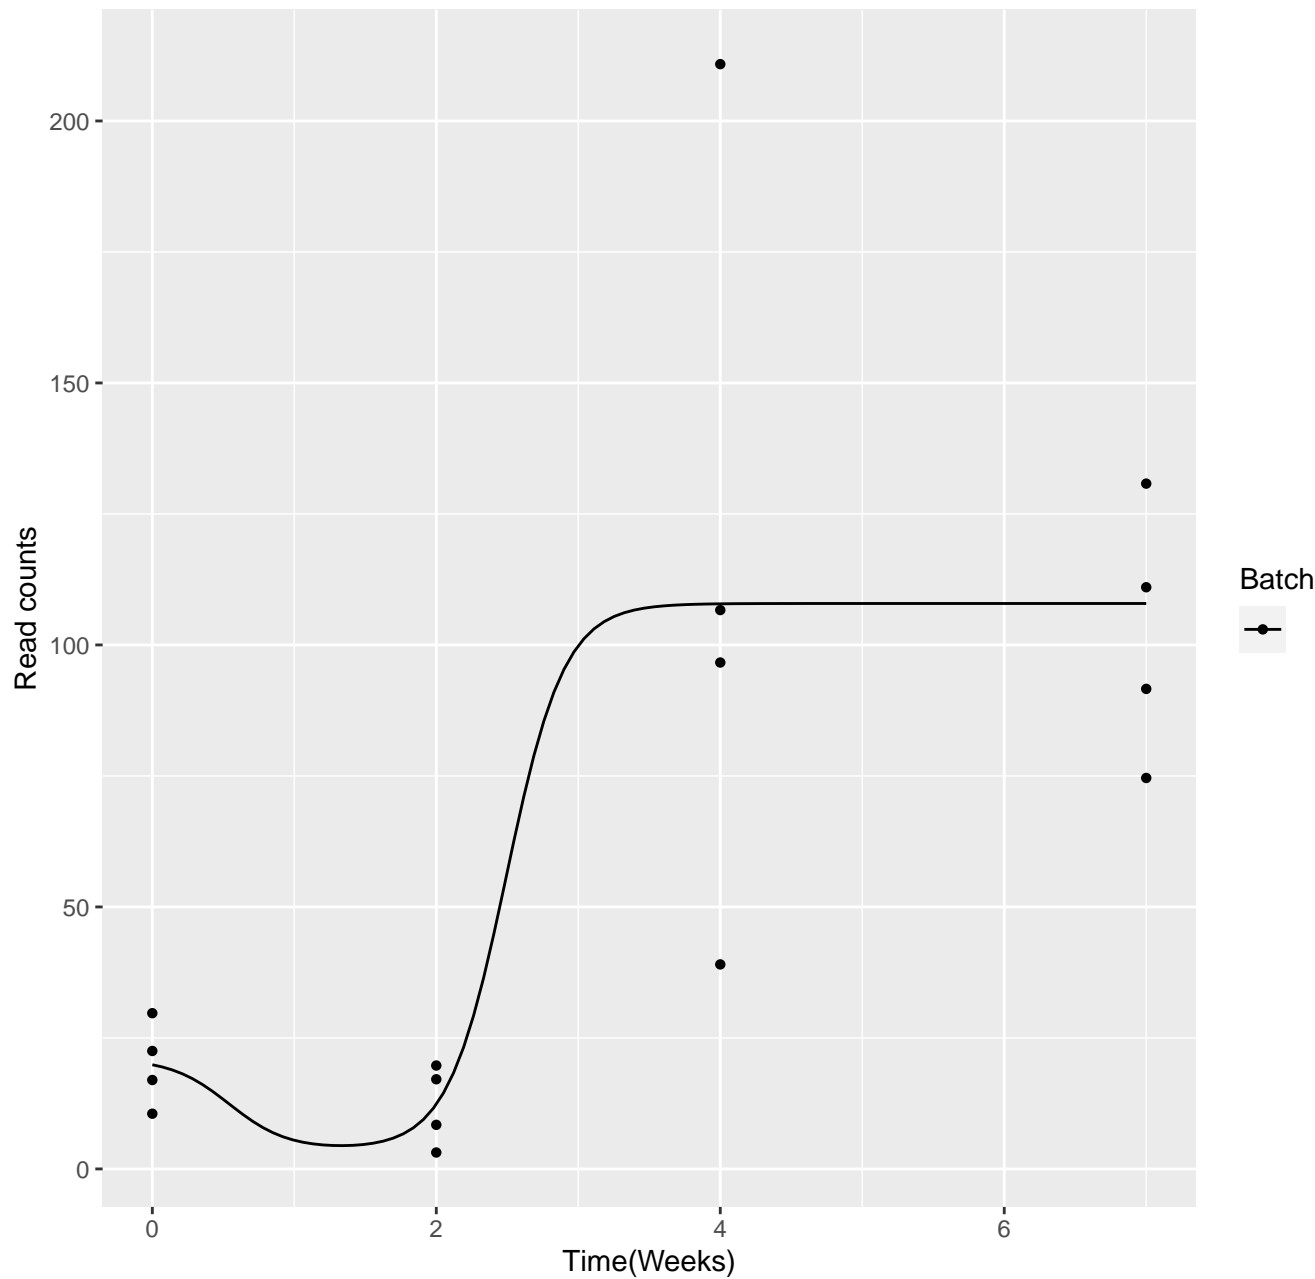

LOC103346239:  $\log_{10} q = -7.67$

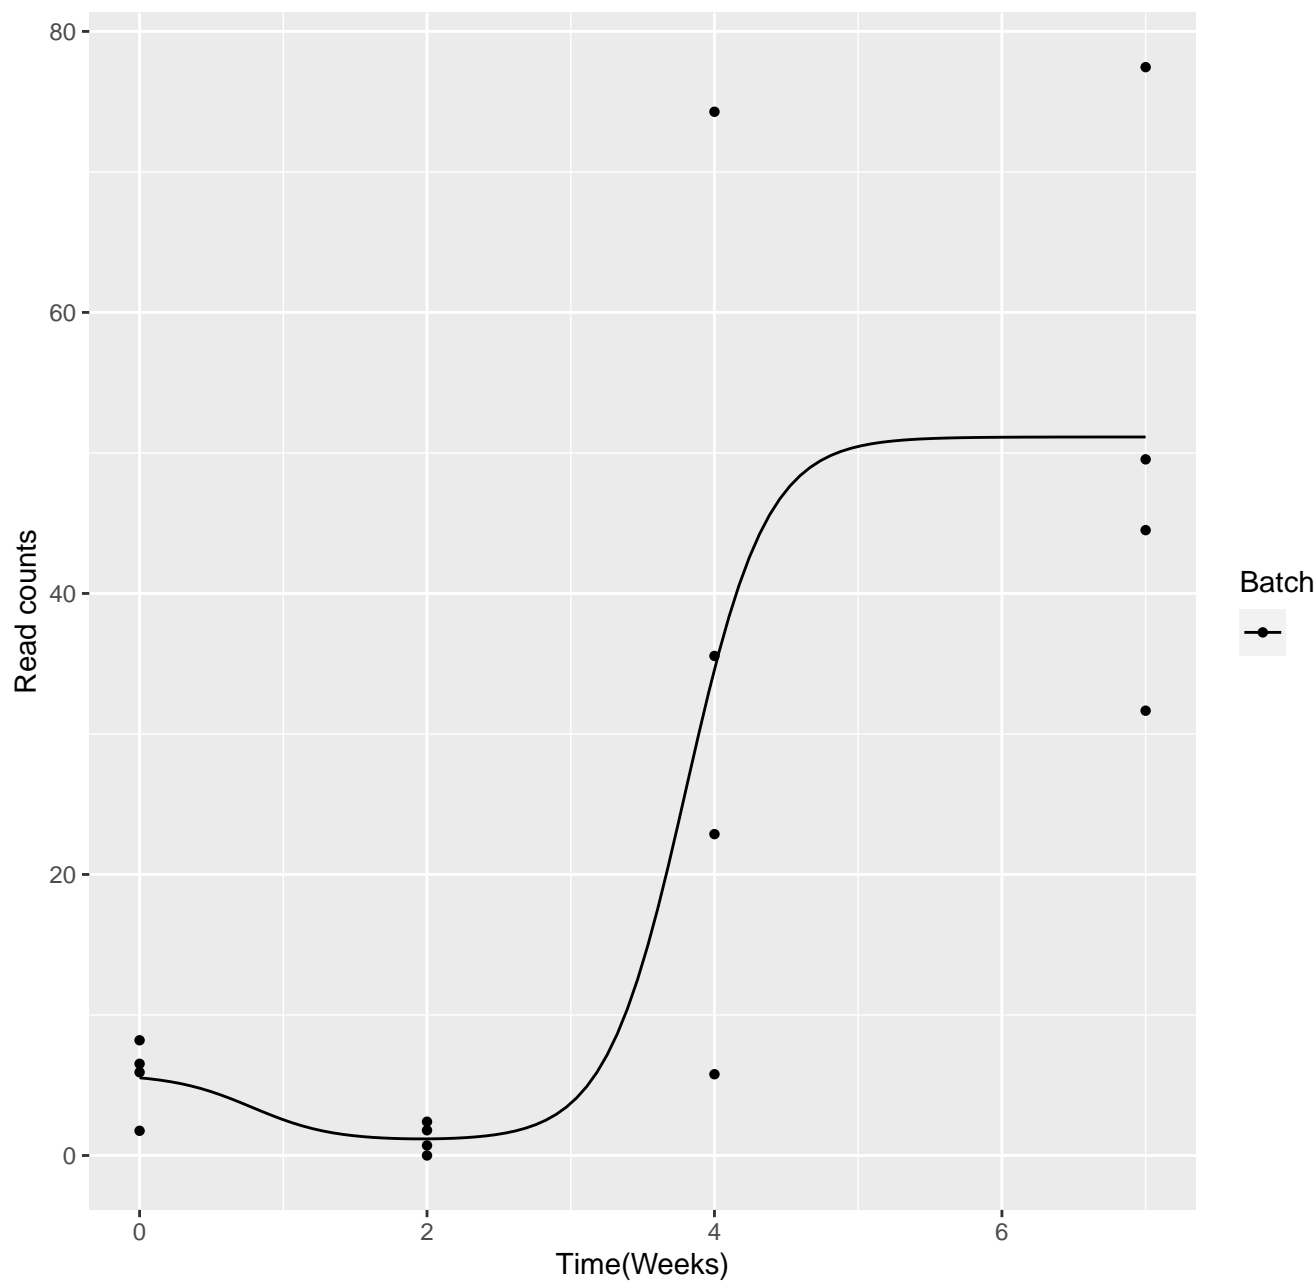



C3AR1:  $\log_{10} q = -7.67$

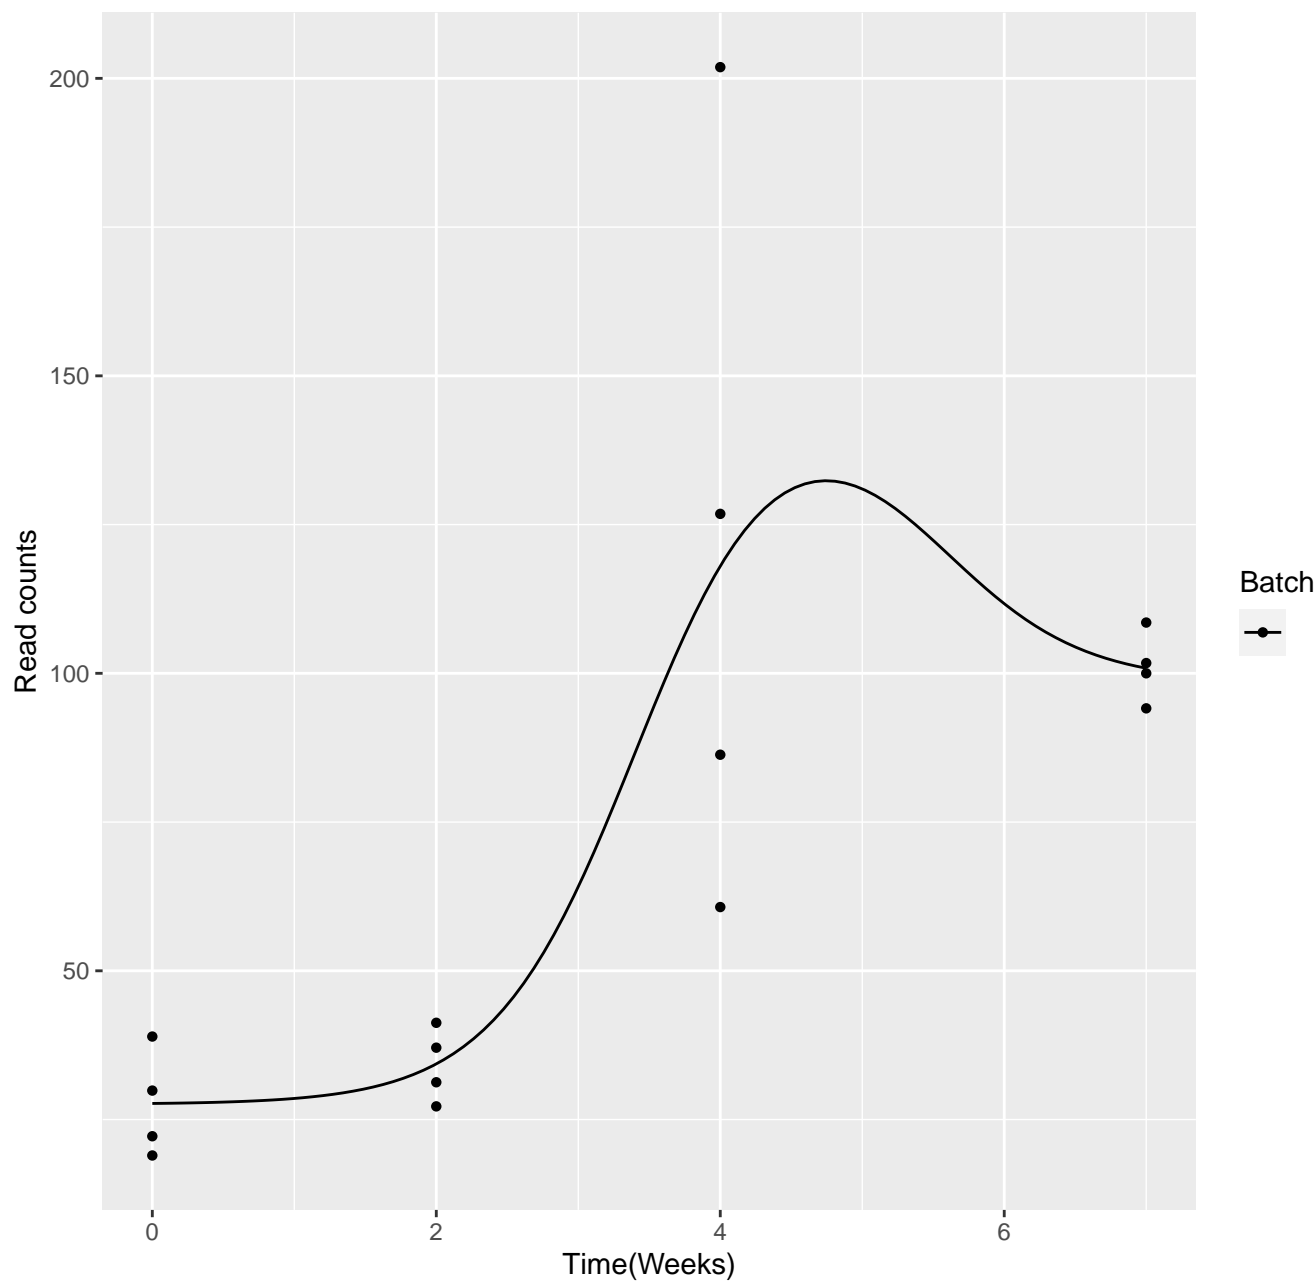

SIGLEC15:  $\log_{10} q = -7.66$

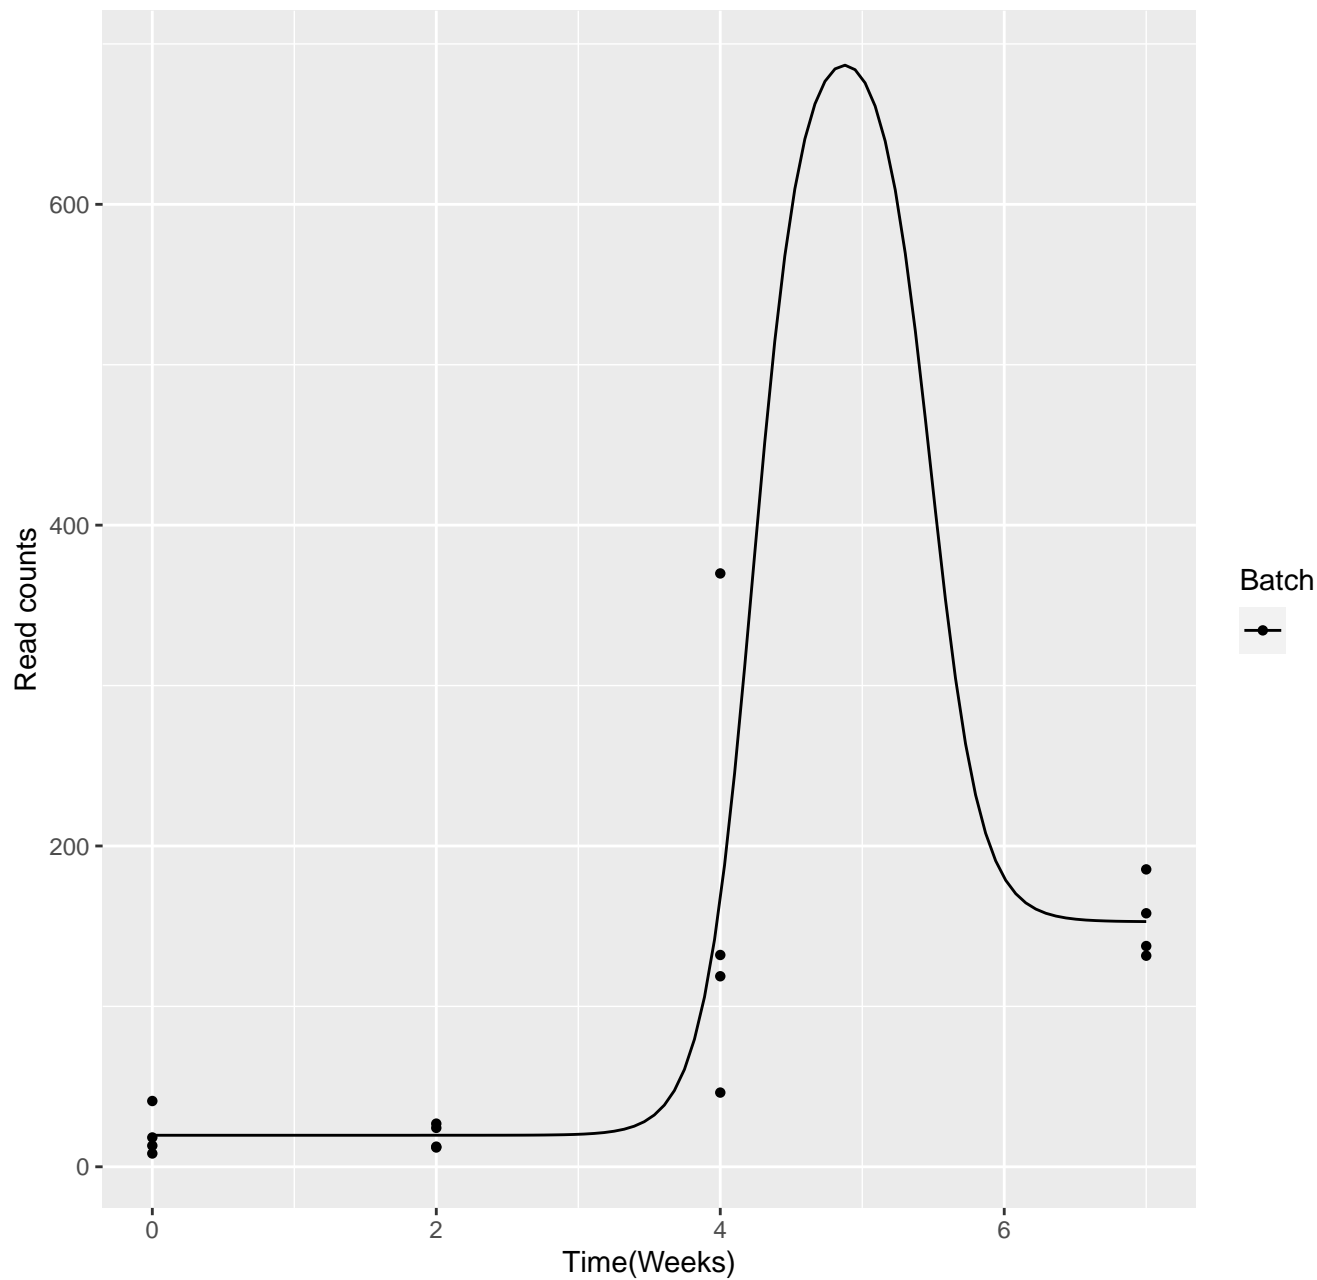

CHIT1:  $\log_{10} q = -7.63$

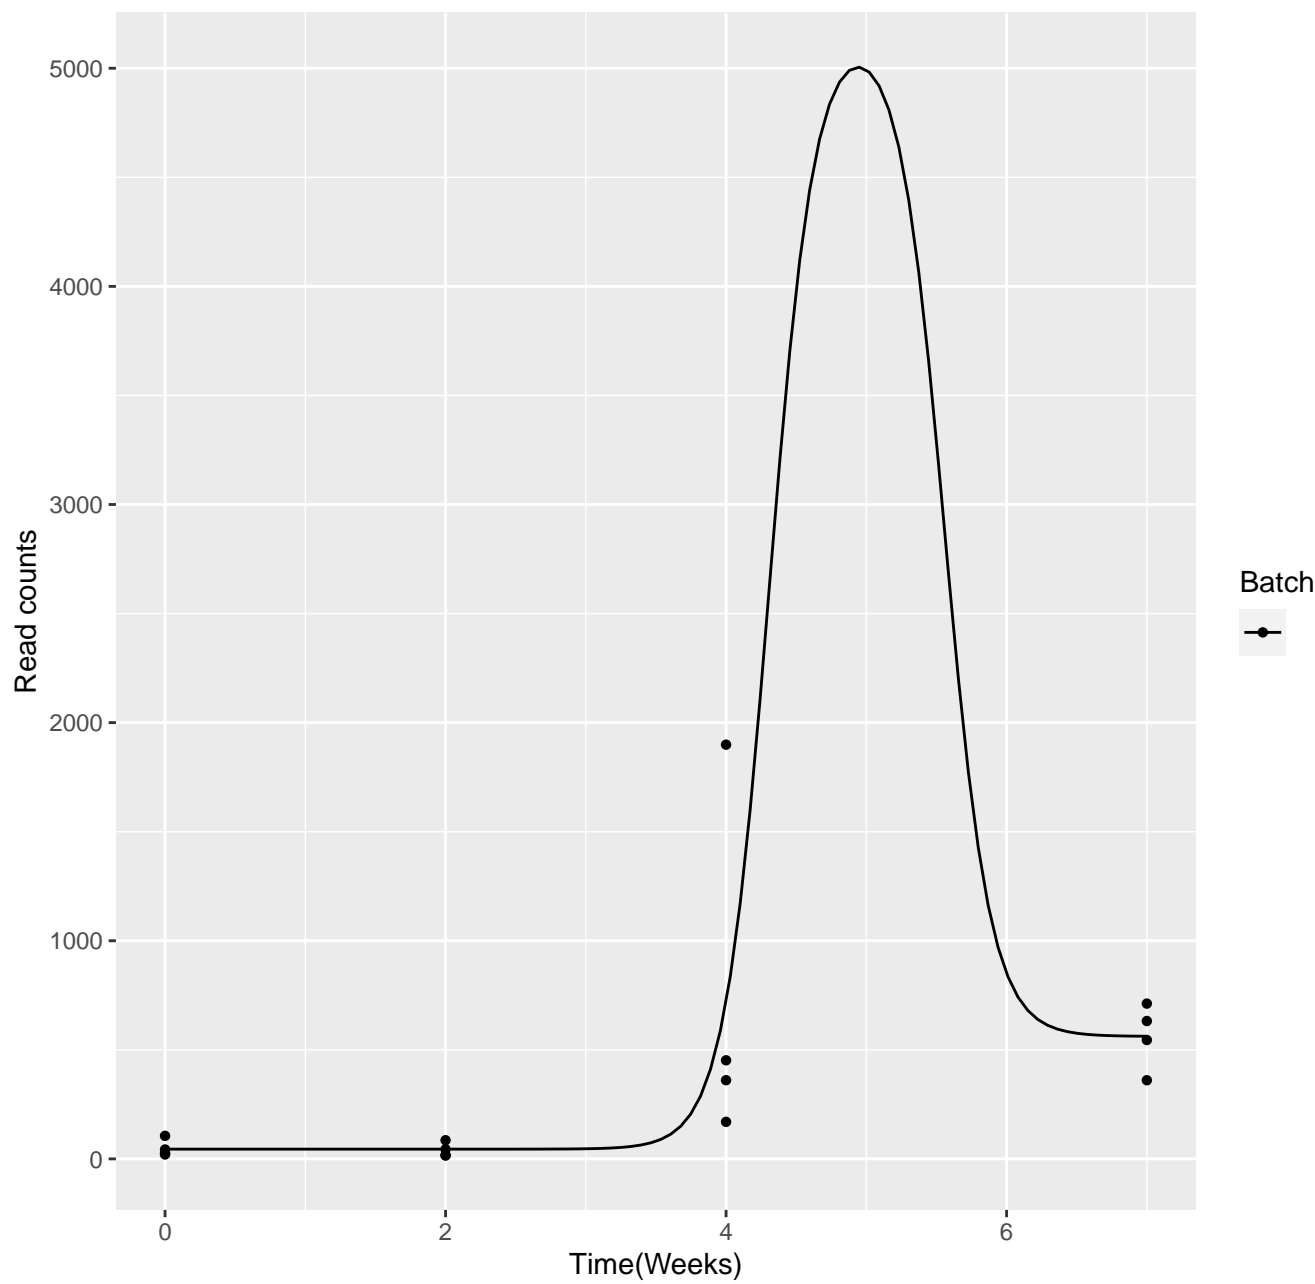

UCP2:  $\log_{10} q = -7.57$

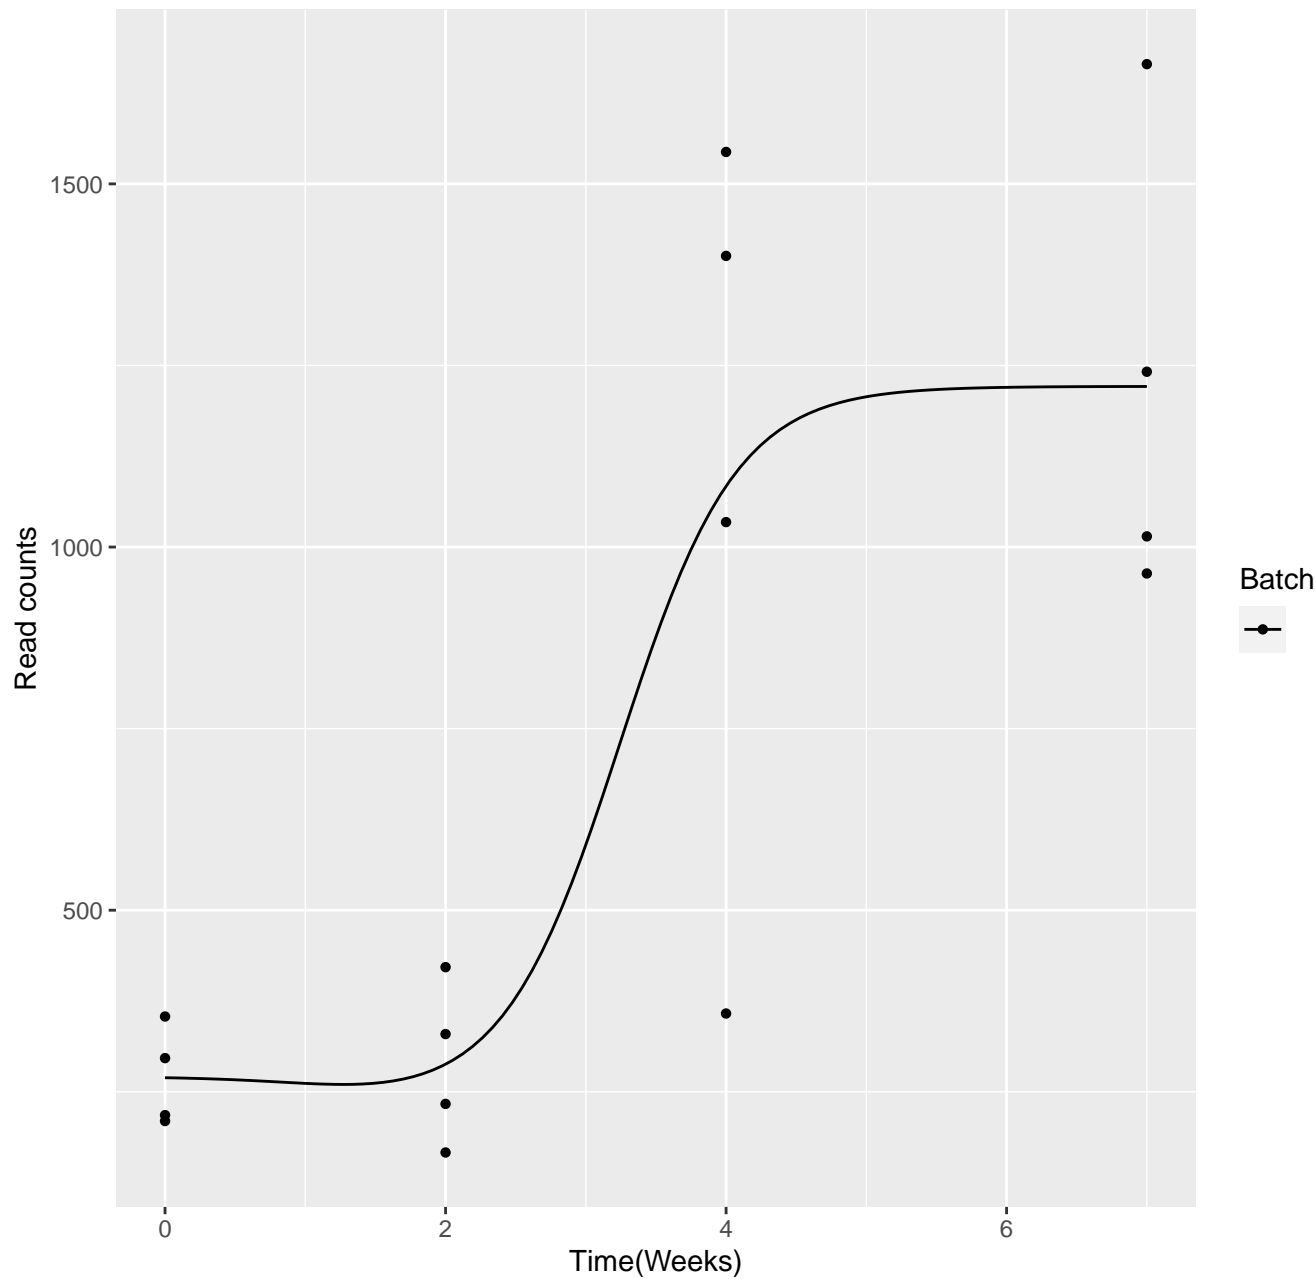

PCOLCE2:  $\log_{10} q = -7.56$

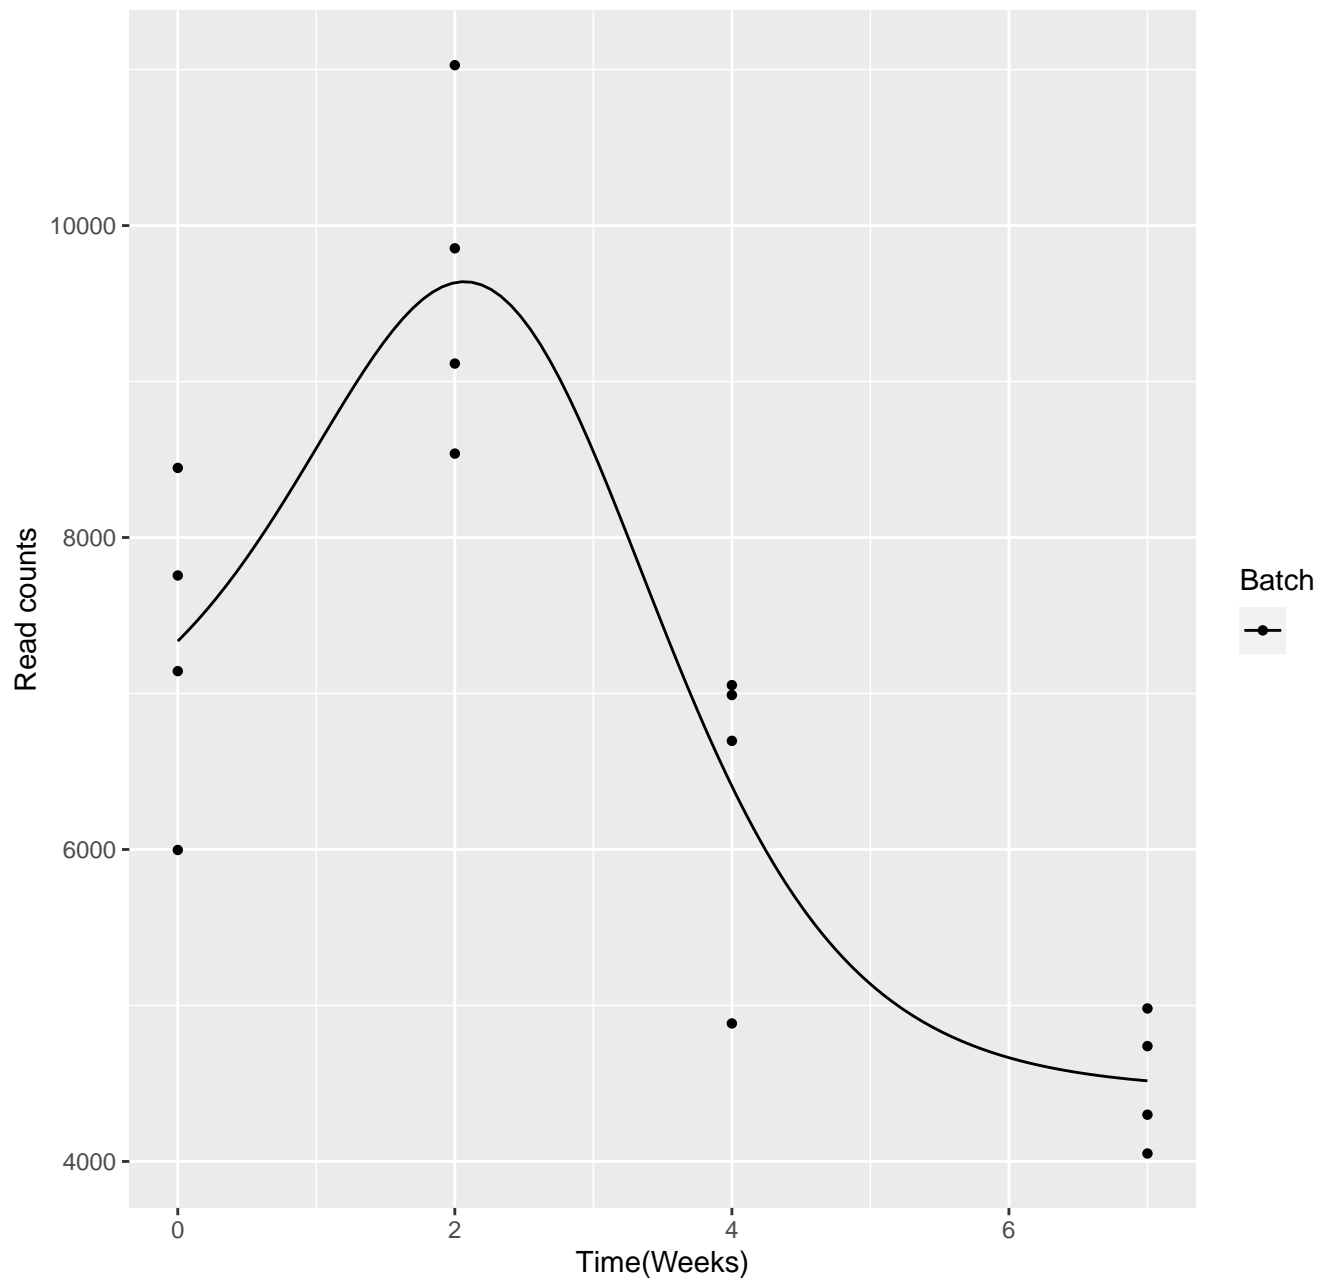

ARL4C:  $\log_{10} q = -7.53$

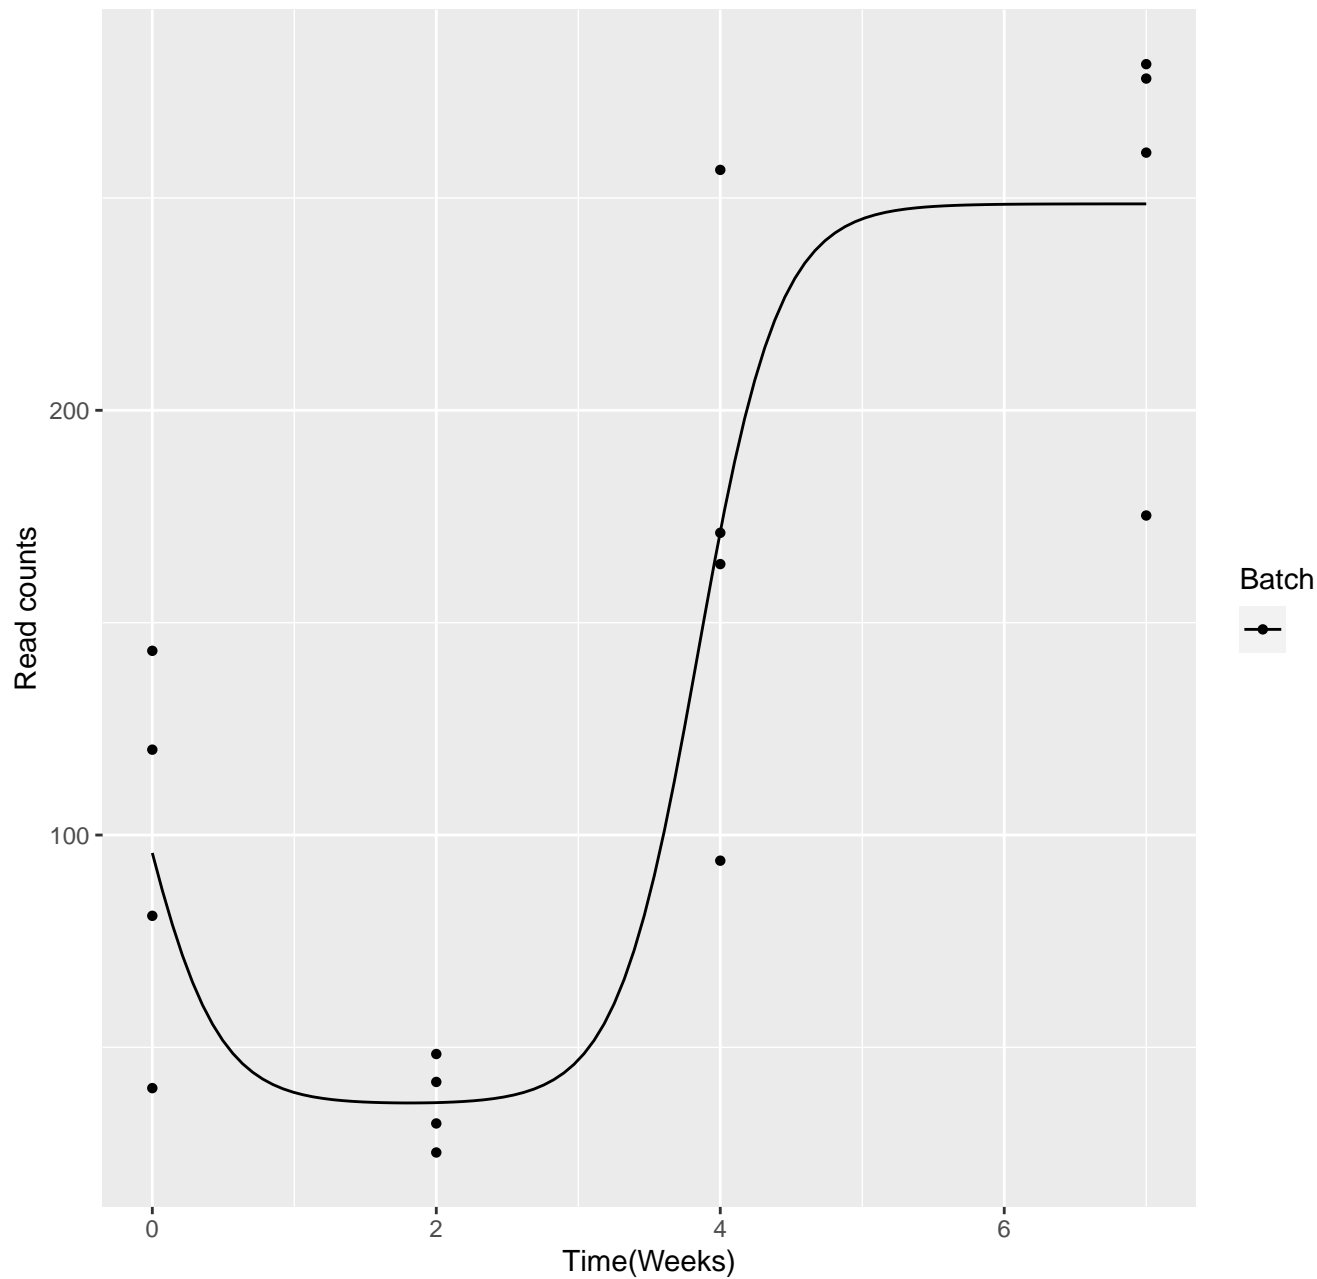

ITGA8:  $\log_{10} q = -7.53$

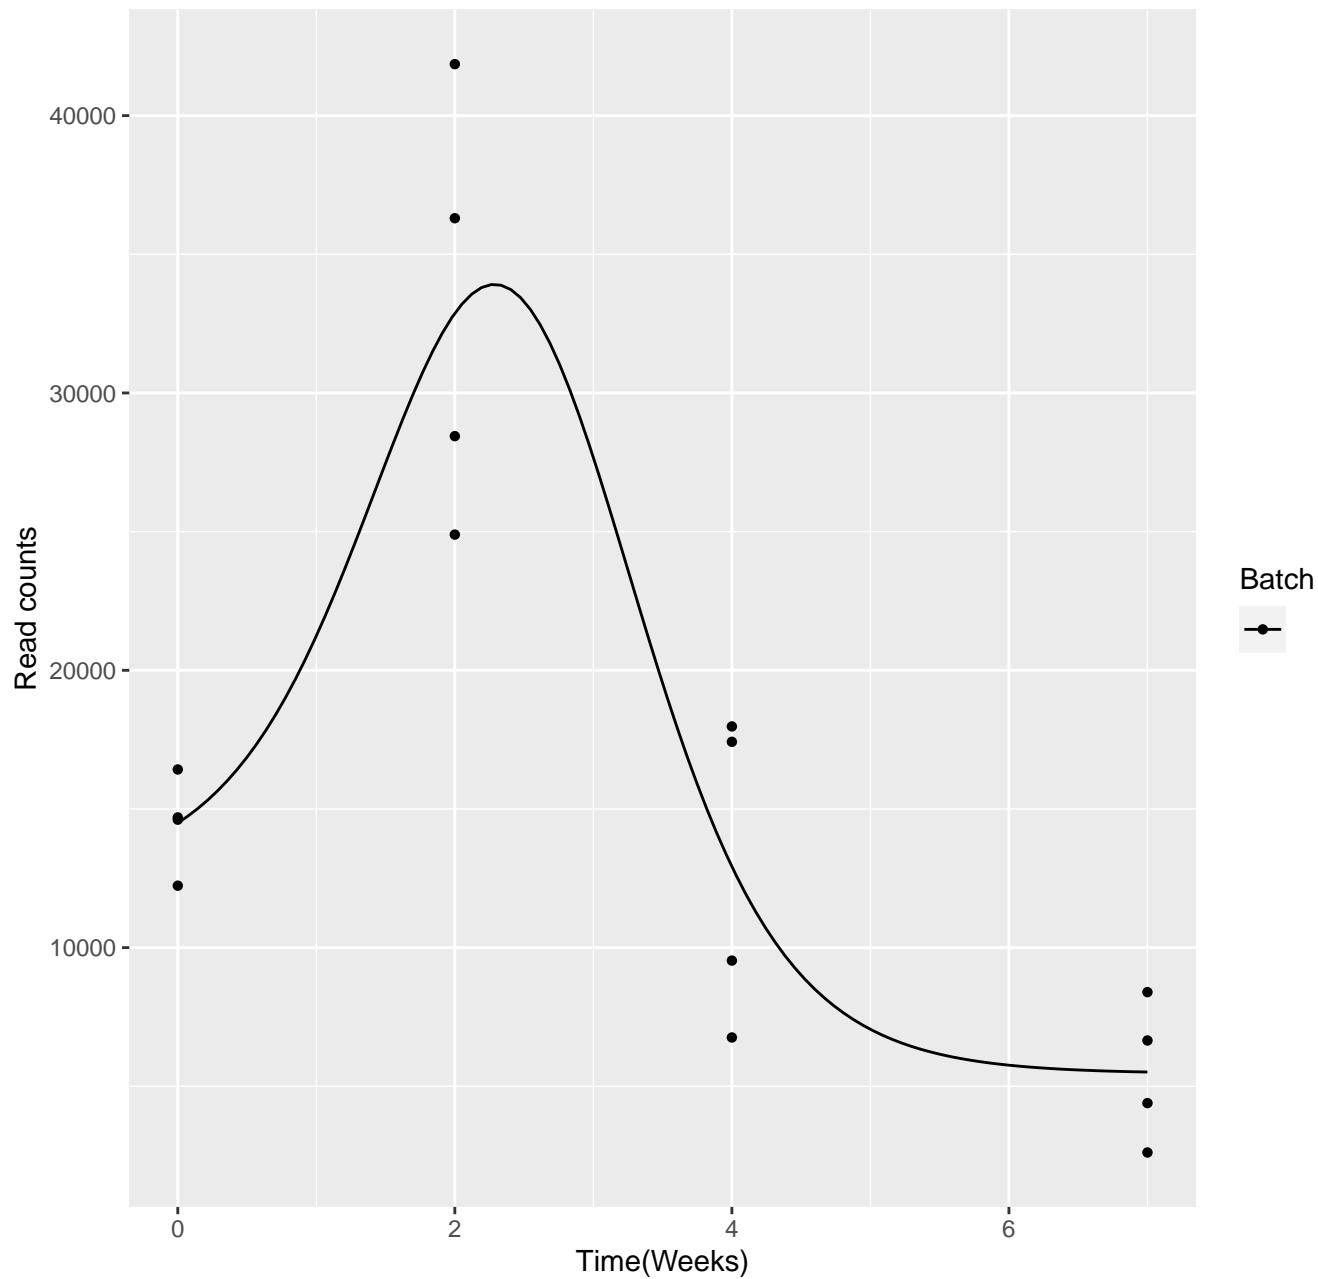

IL1RN:  $\log_{10} q = -7.52$

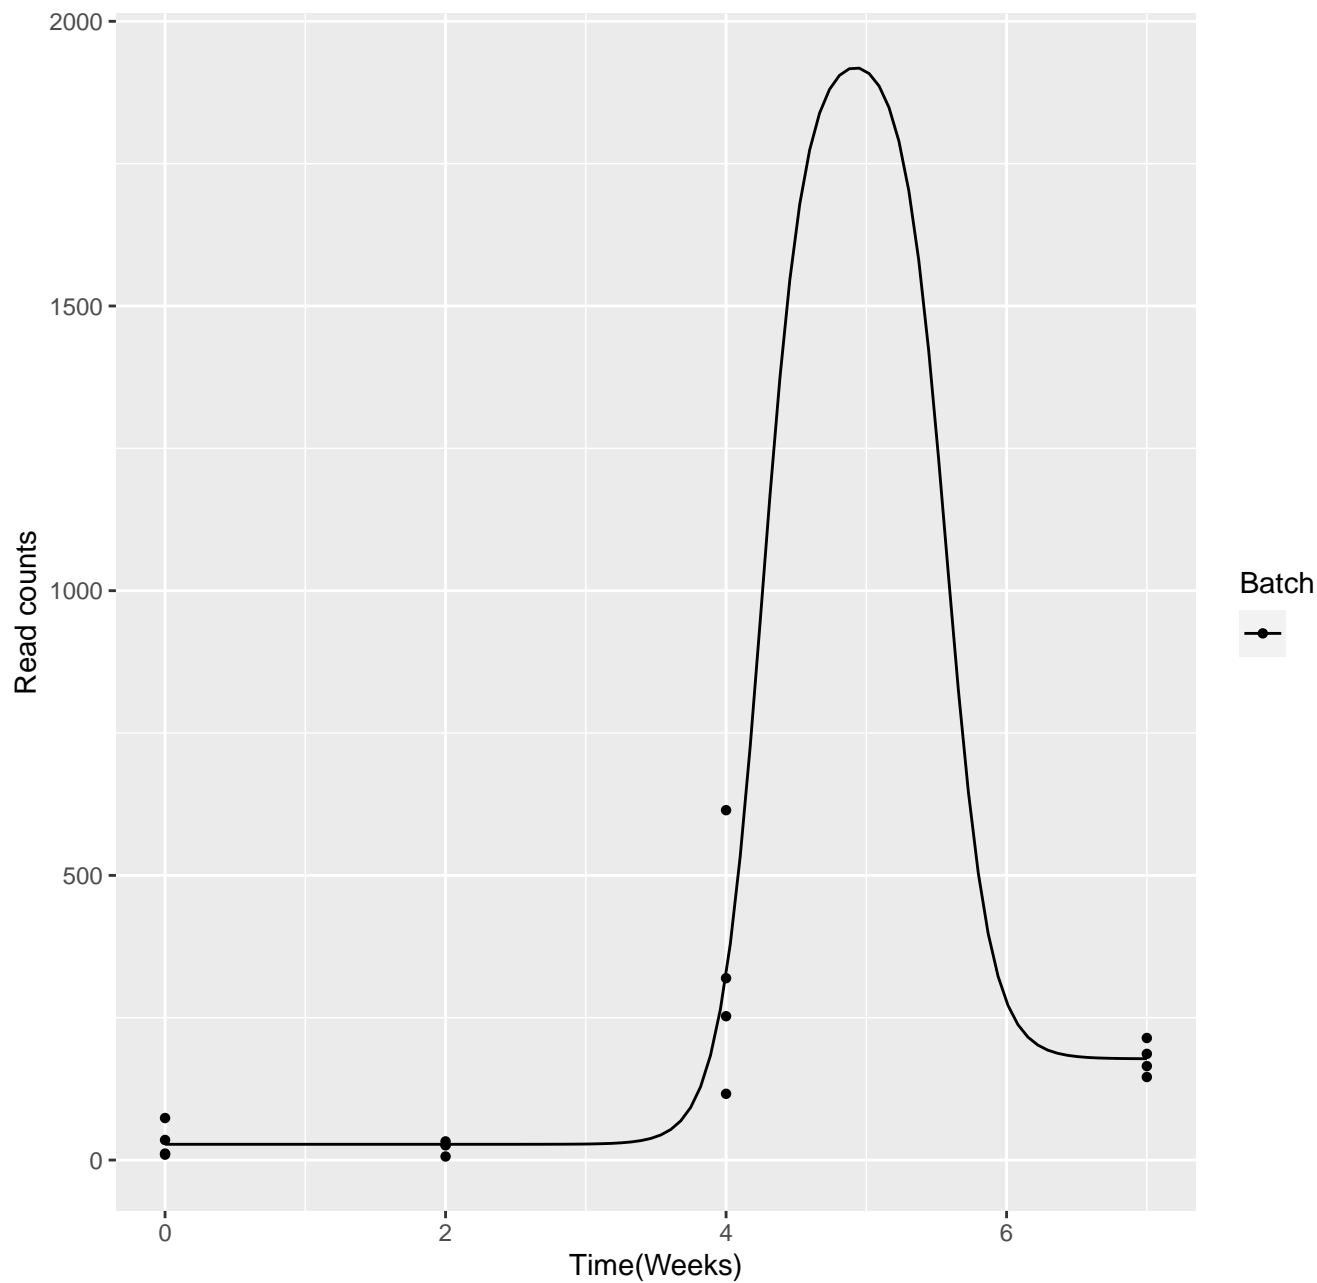



ITGAX:  $\log_{10} q = -7.51$

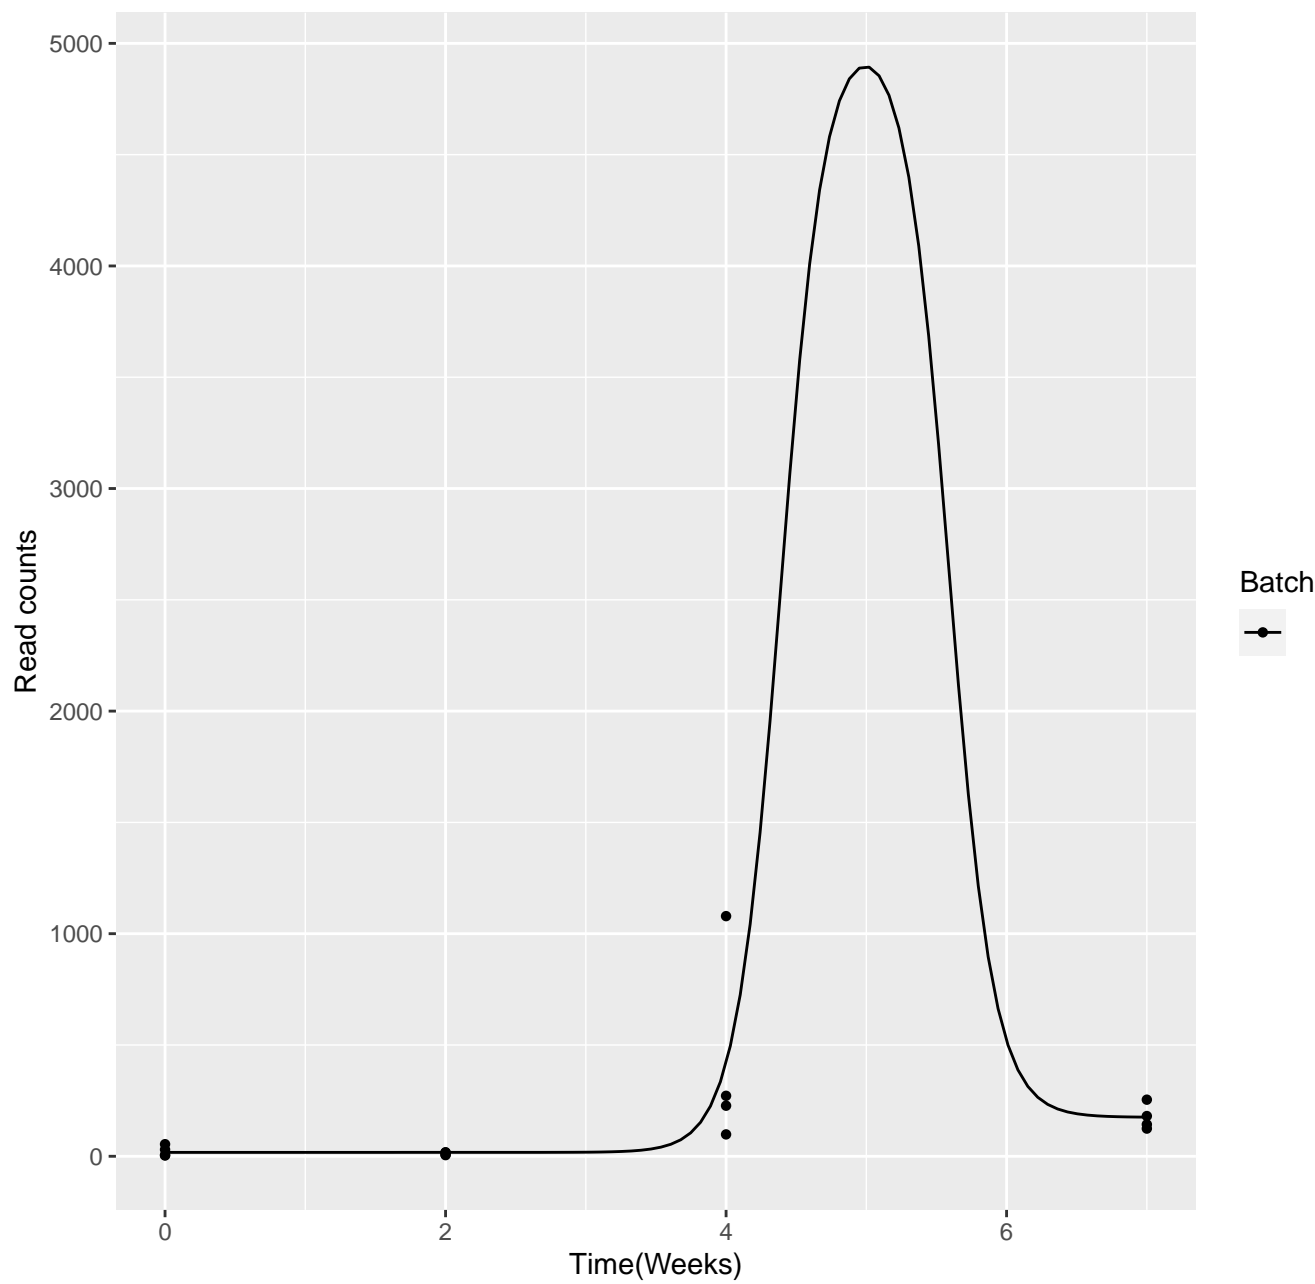

LDLRAD4:  $\log_{10} q = -7.48$

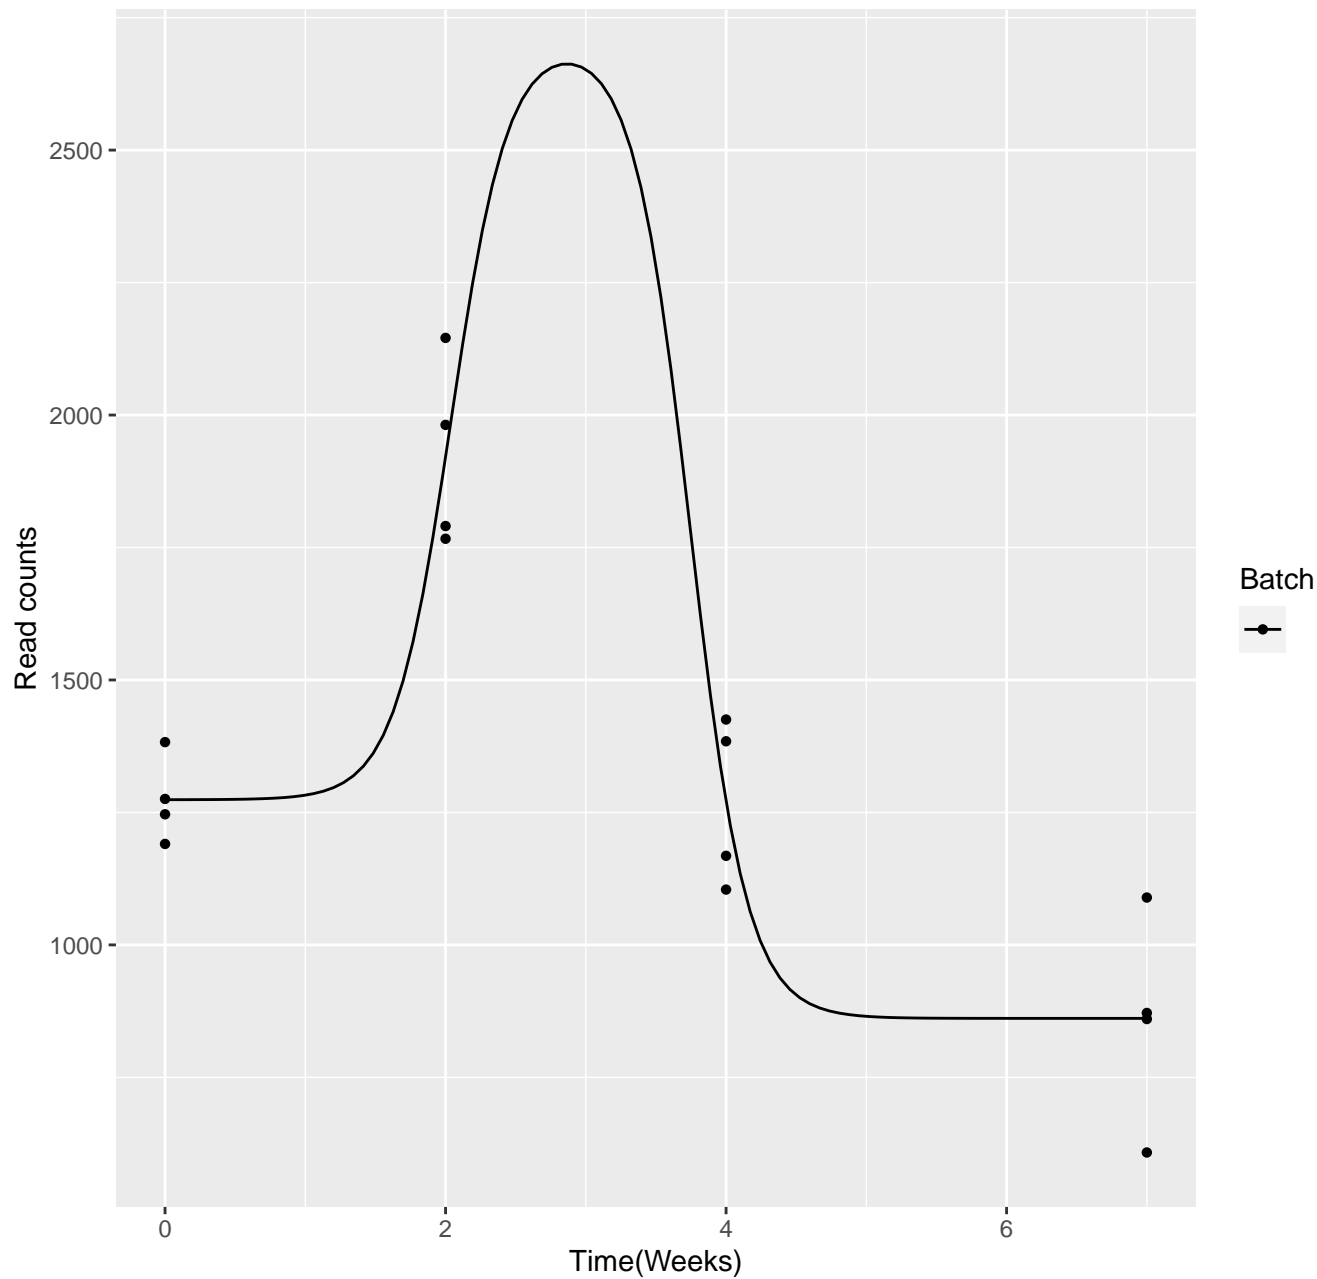

VIL1:  $\log_{10} q = -7.47$

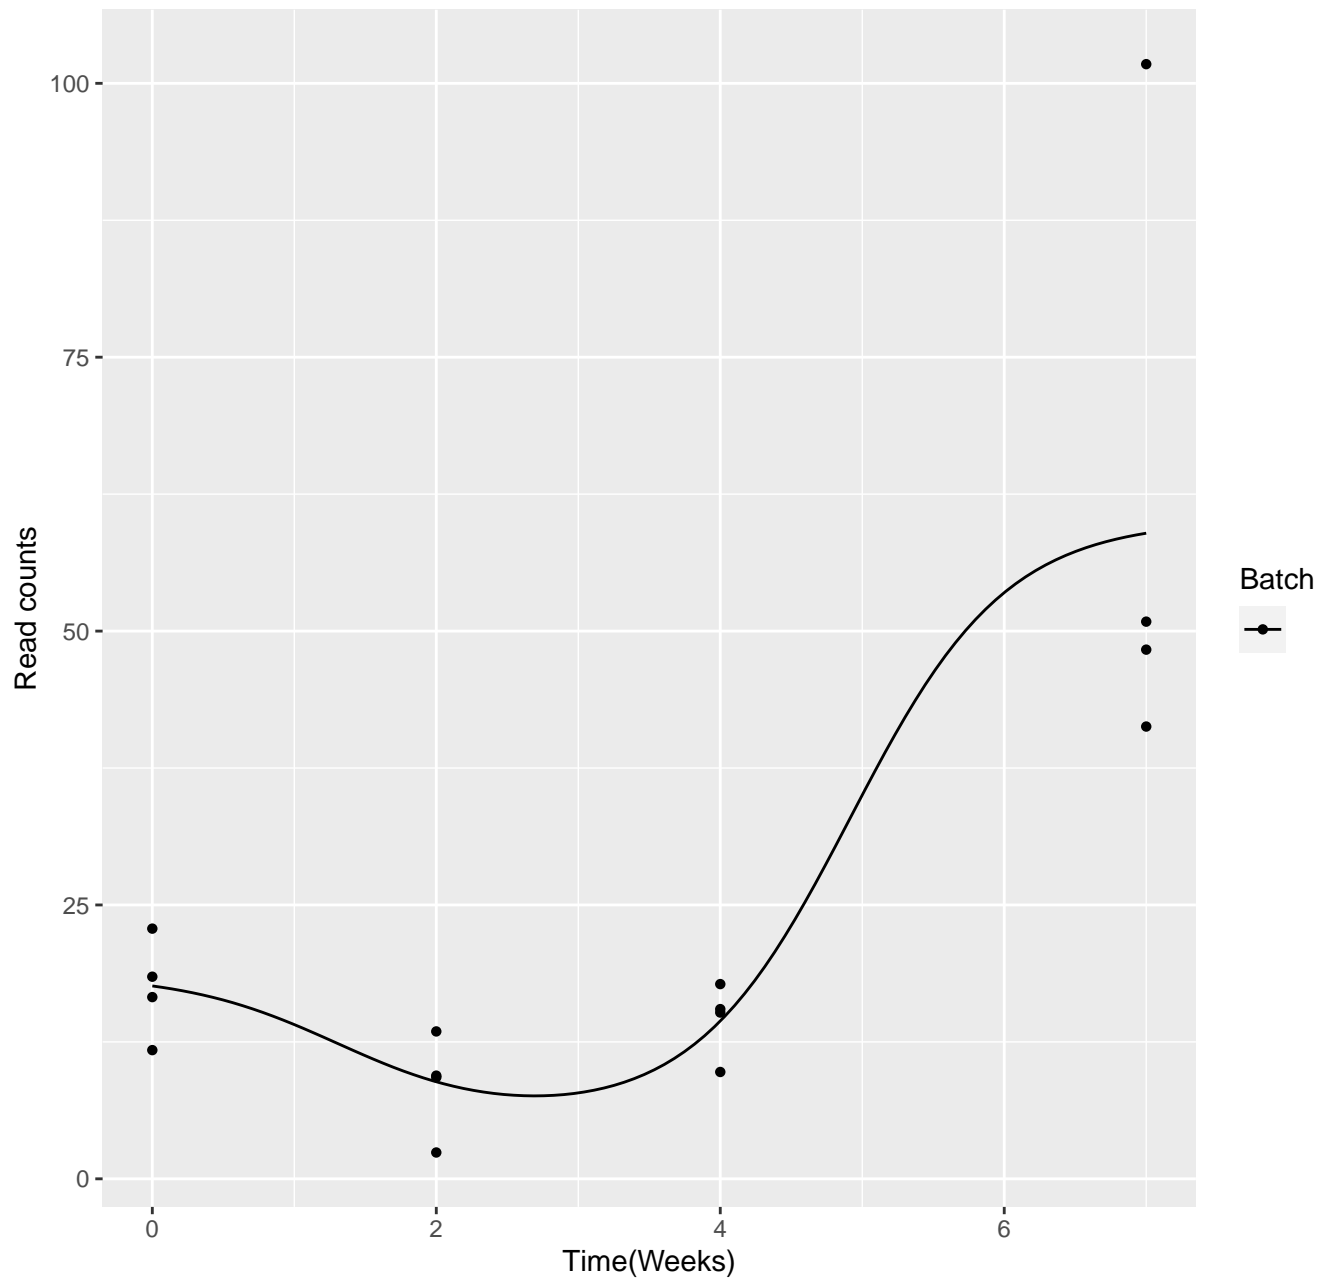

ATP6V0D2:  $\log_{10} q = -7.47$

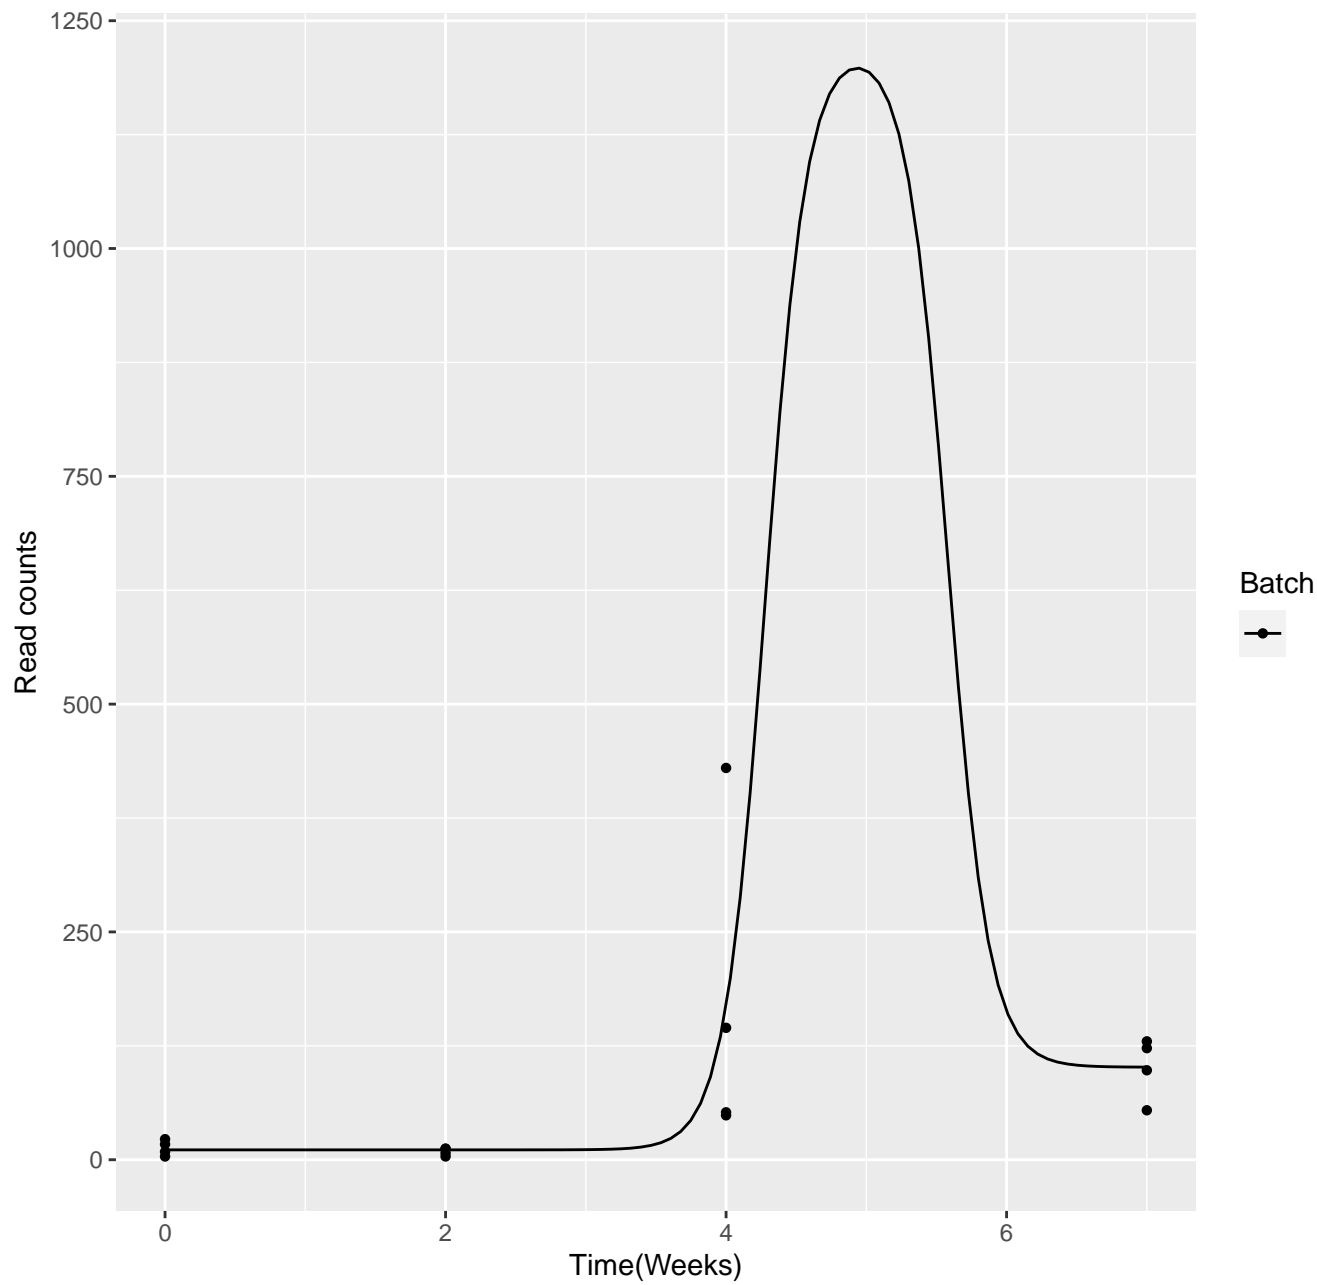

LOC127485727:  $\log_{10} q = -7.47$

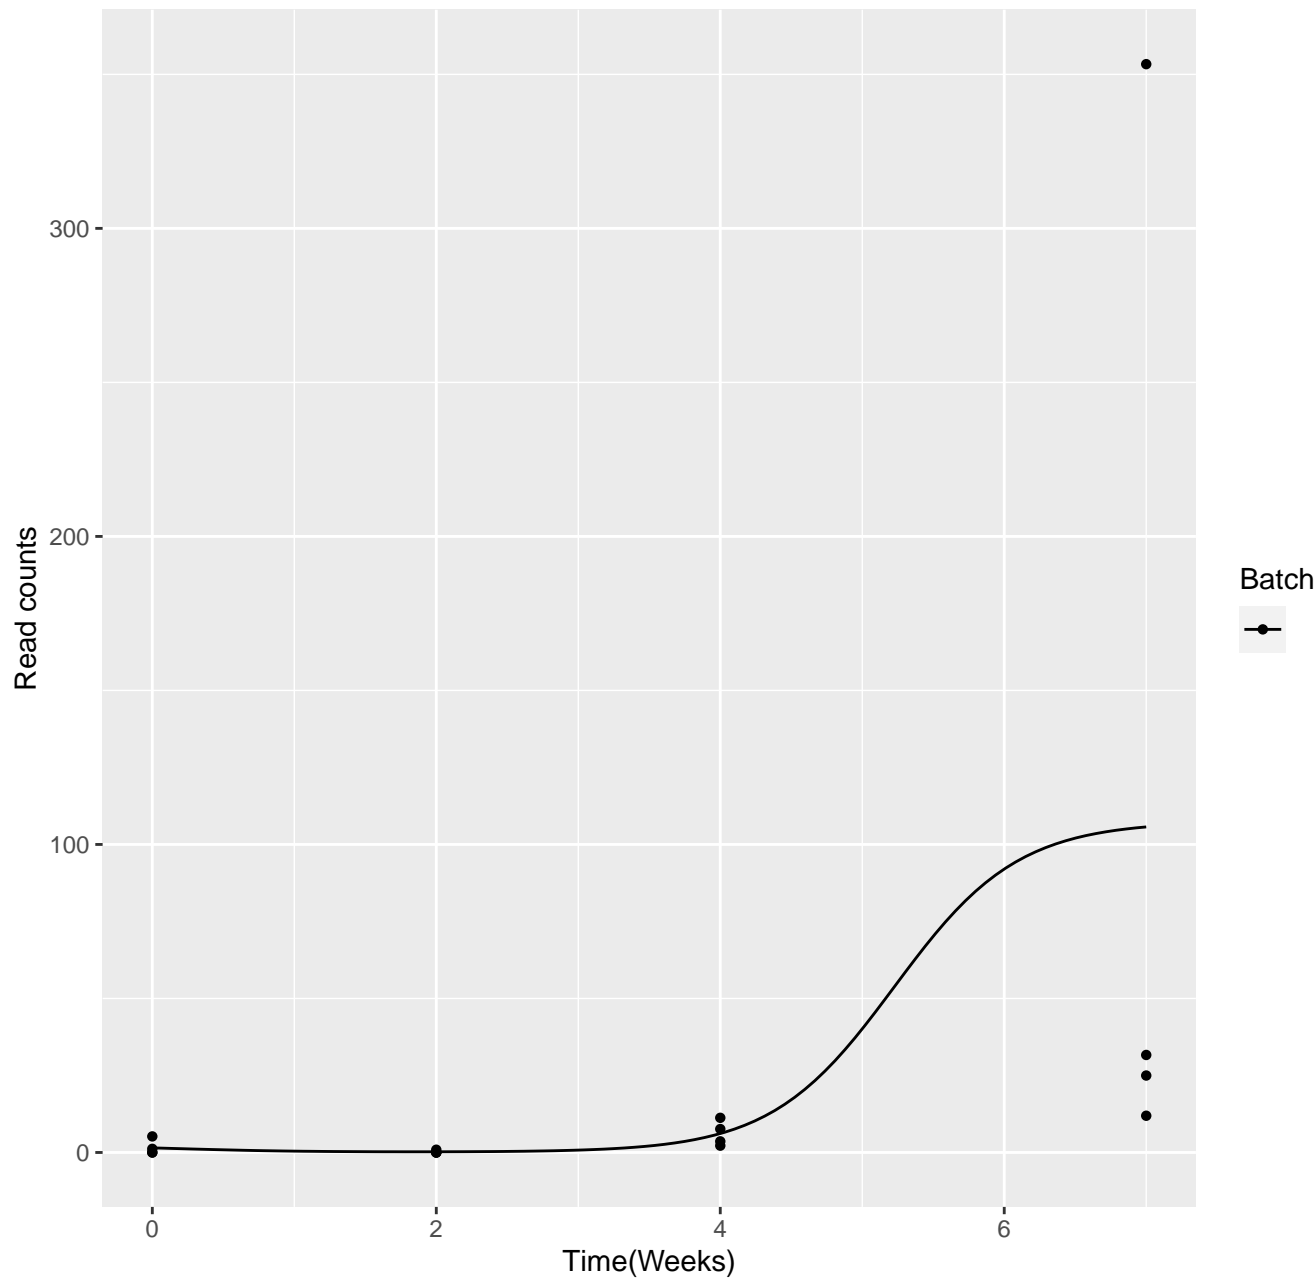

MAFF:  $\log_{10} q = -7.47$

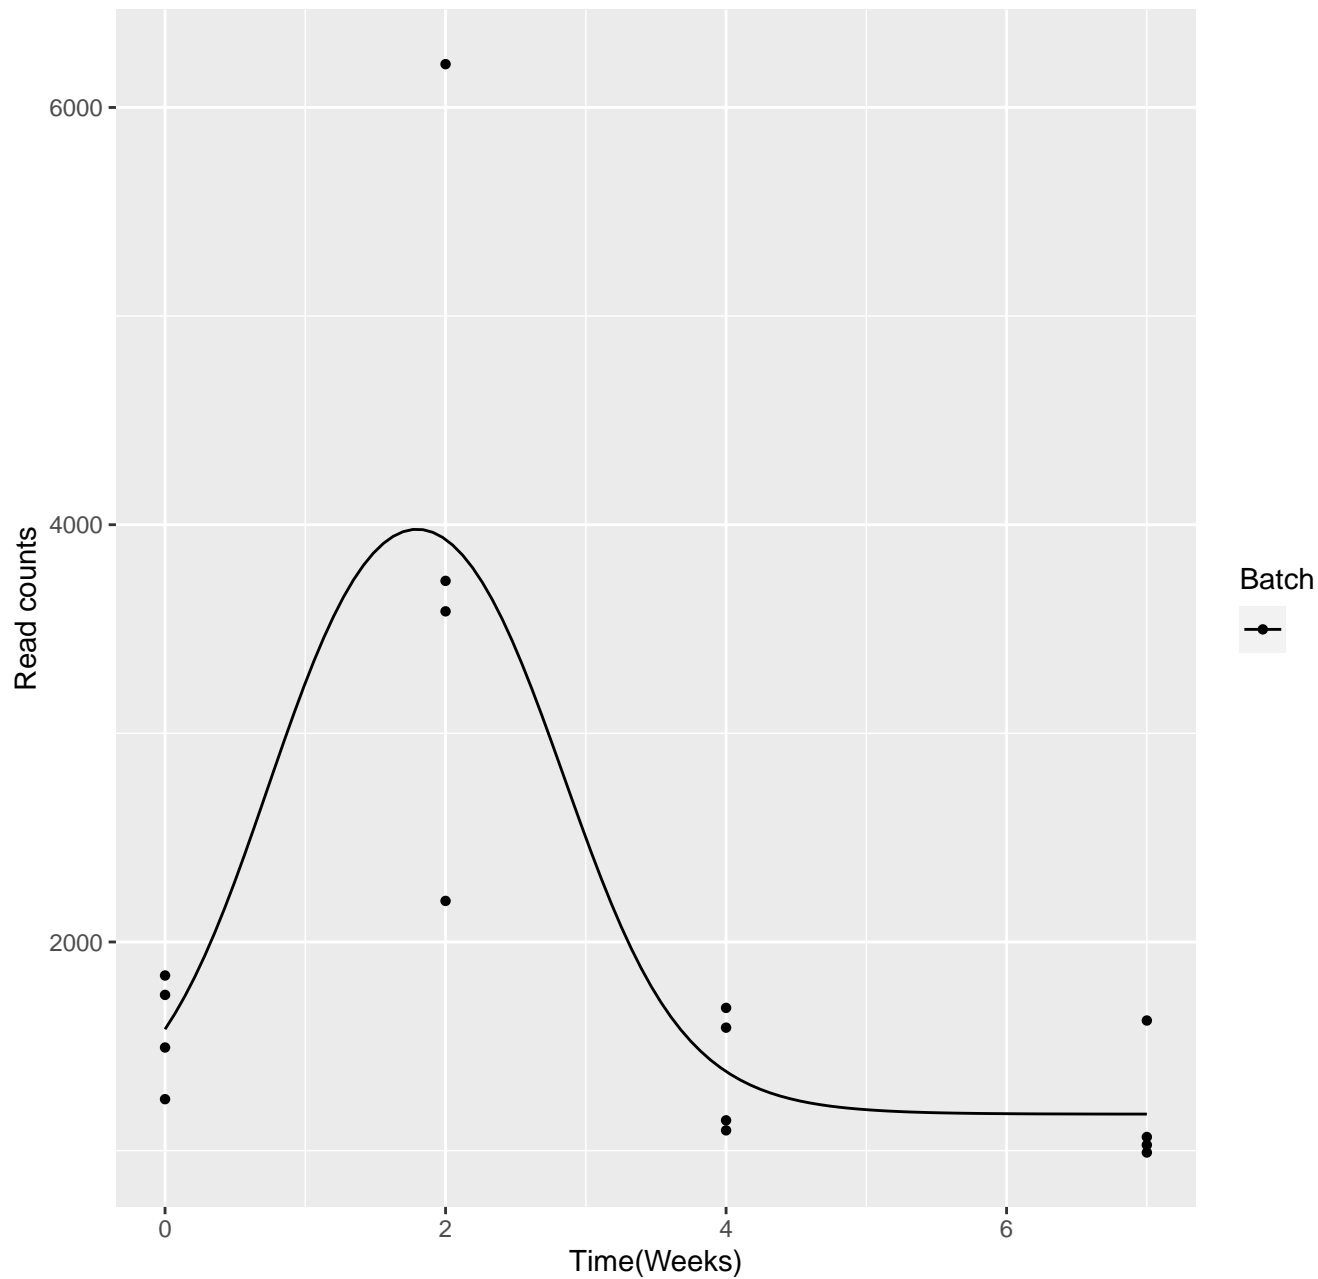

CD79A:  $\log_{10} q = -7.43$

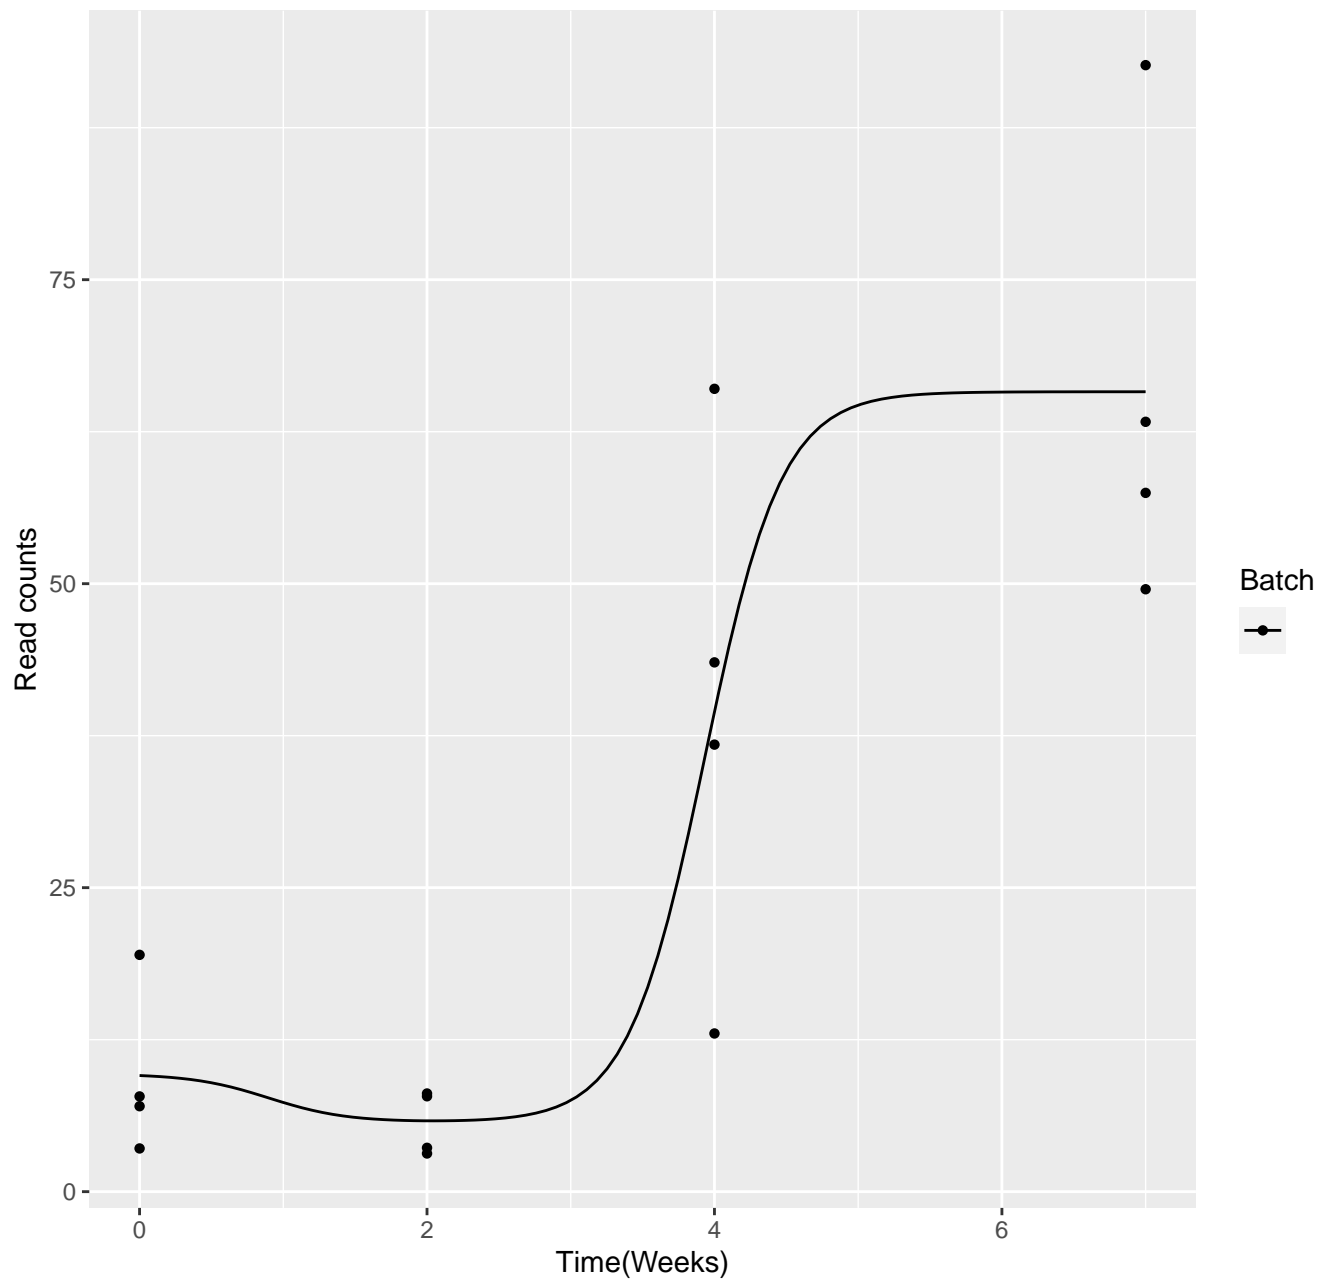

SOCS3:  $\log_{10} q = -7.39$

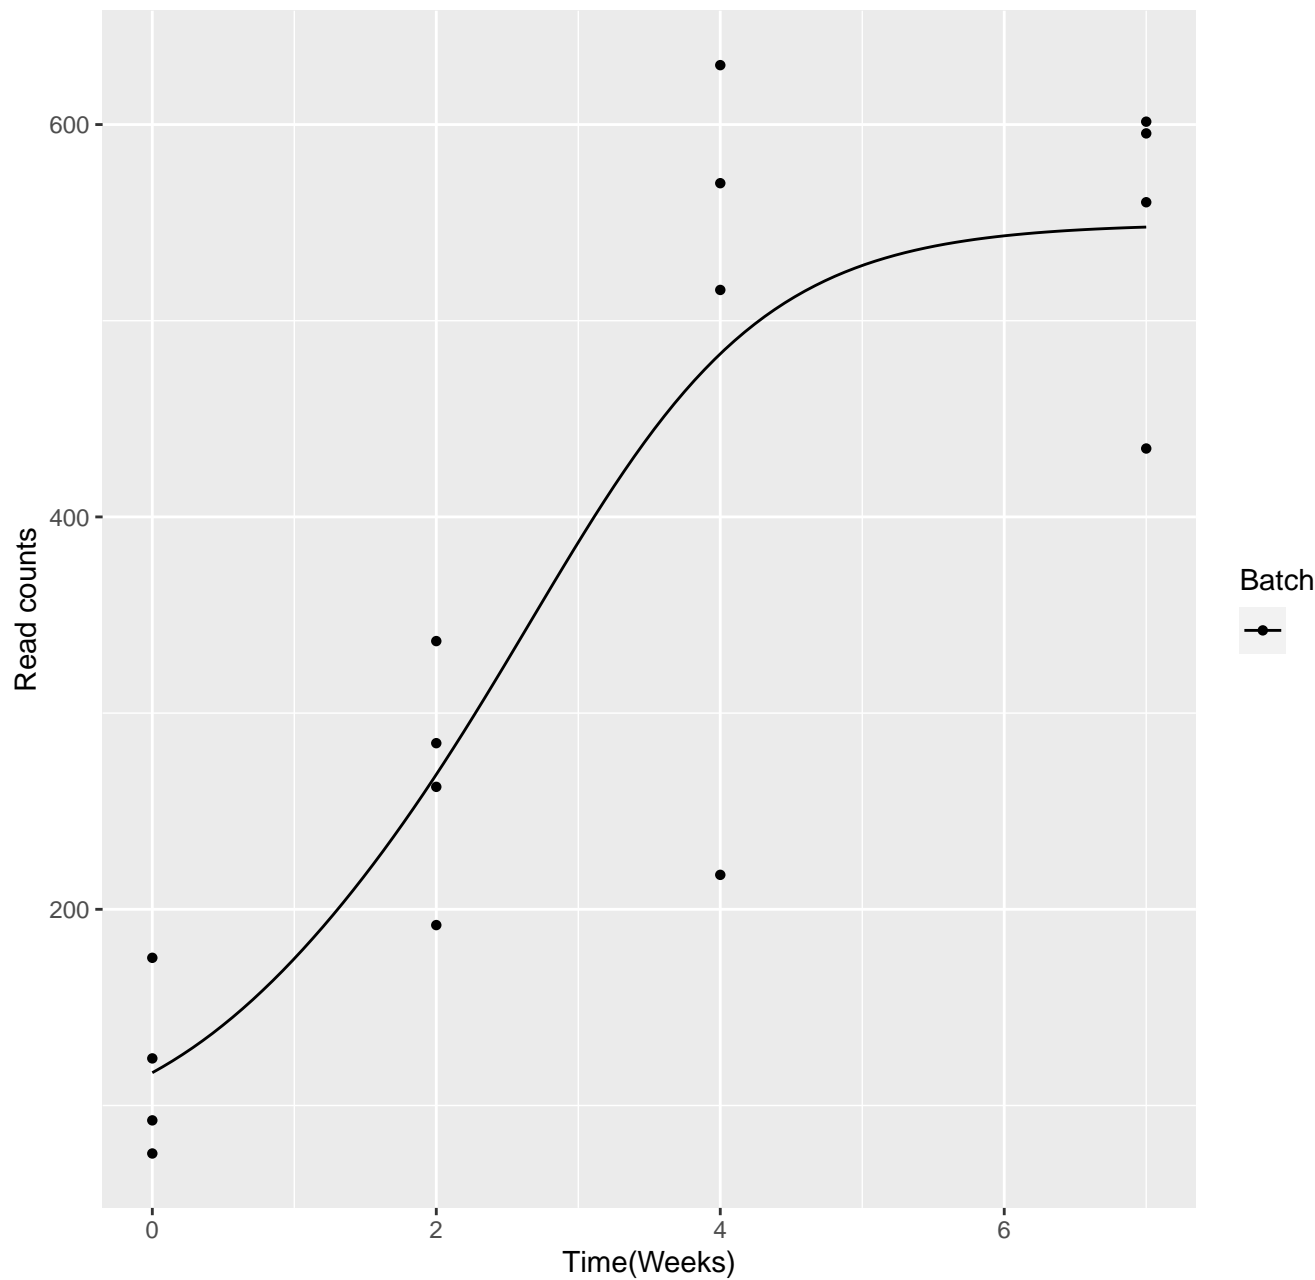



ERGIC1:  $\log_{10} q = -7.31$

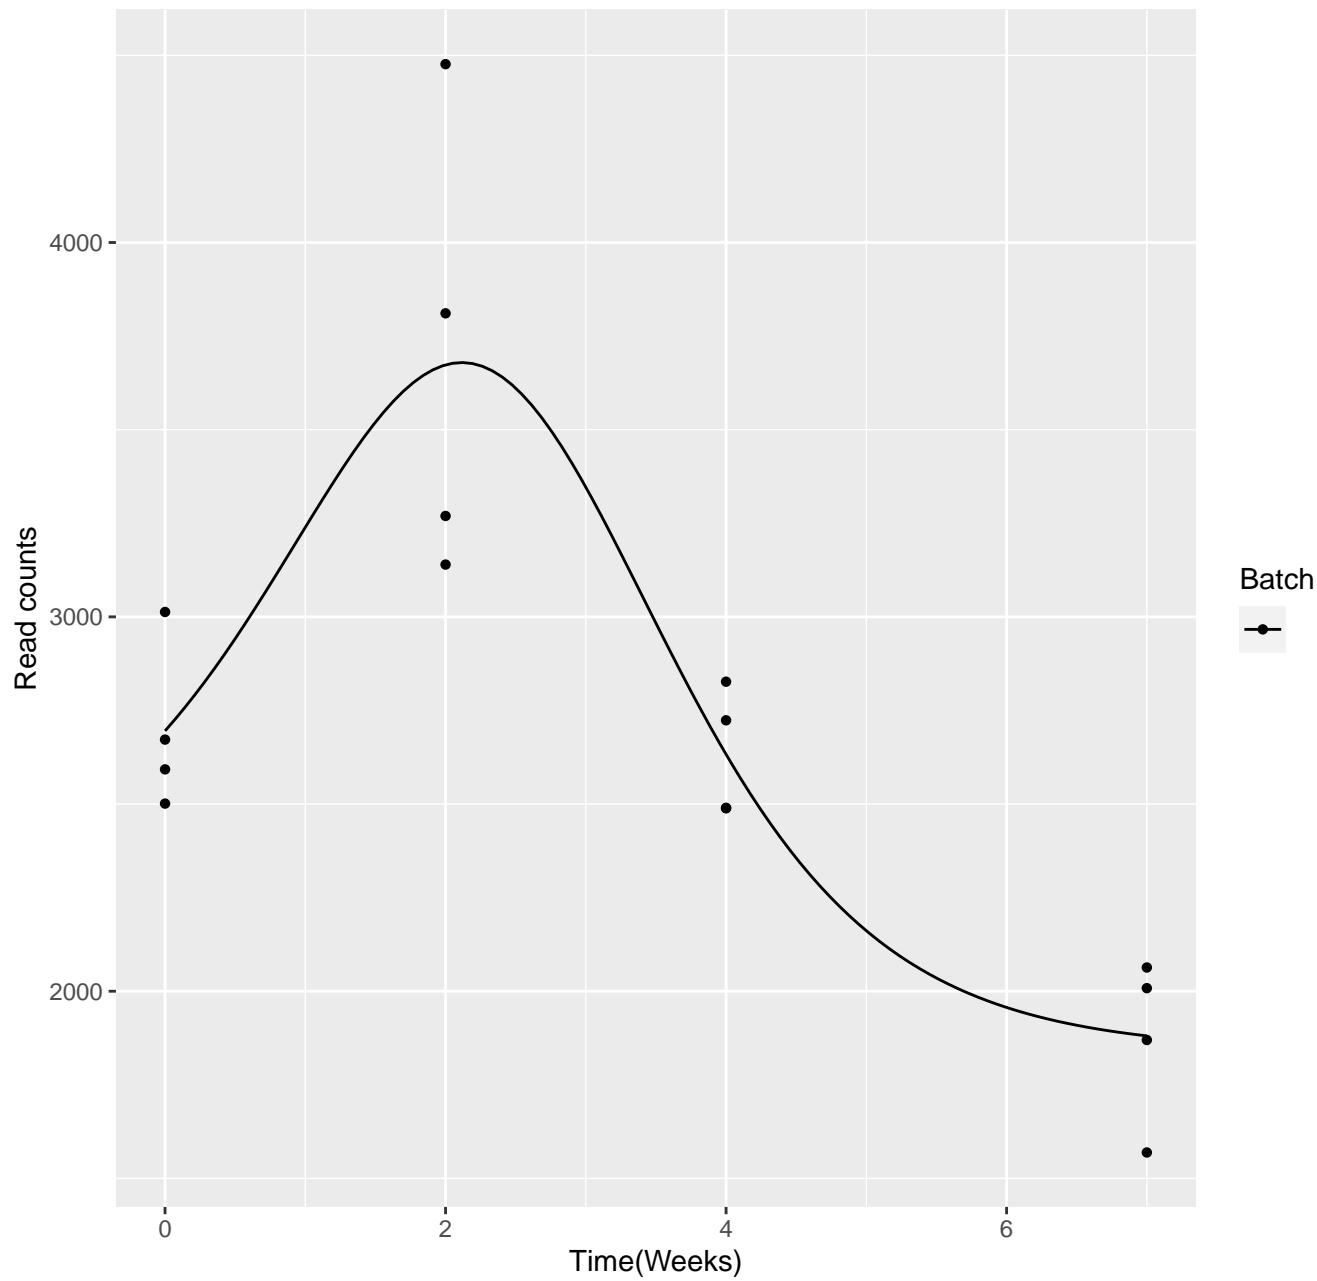

SUSD5:  $\log_{10} q = -7.31$

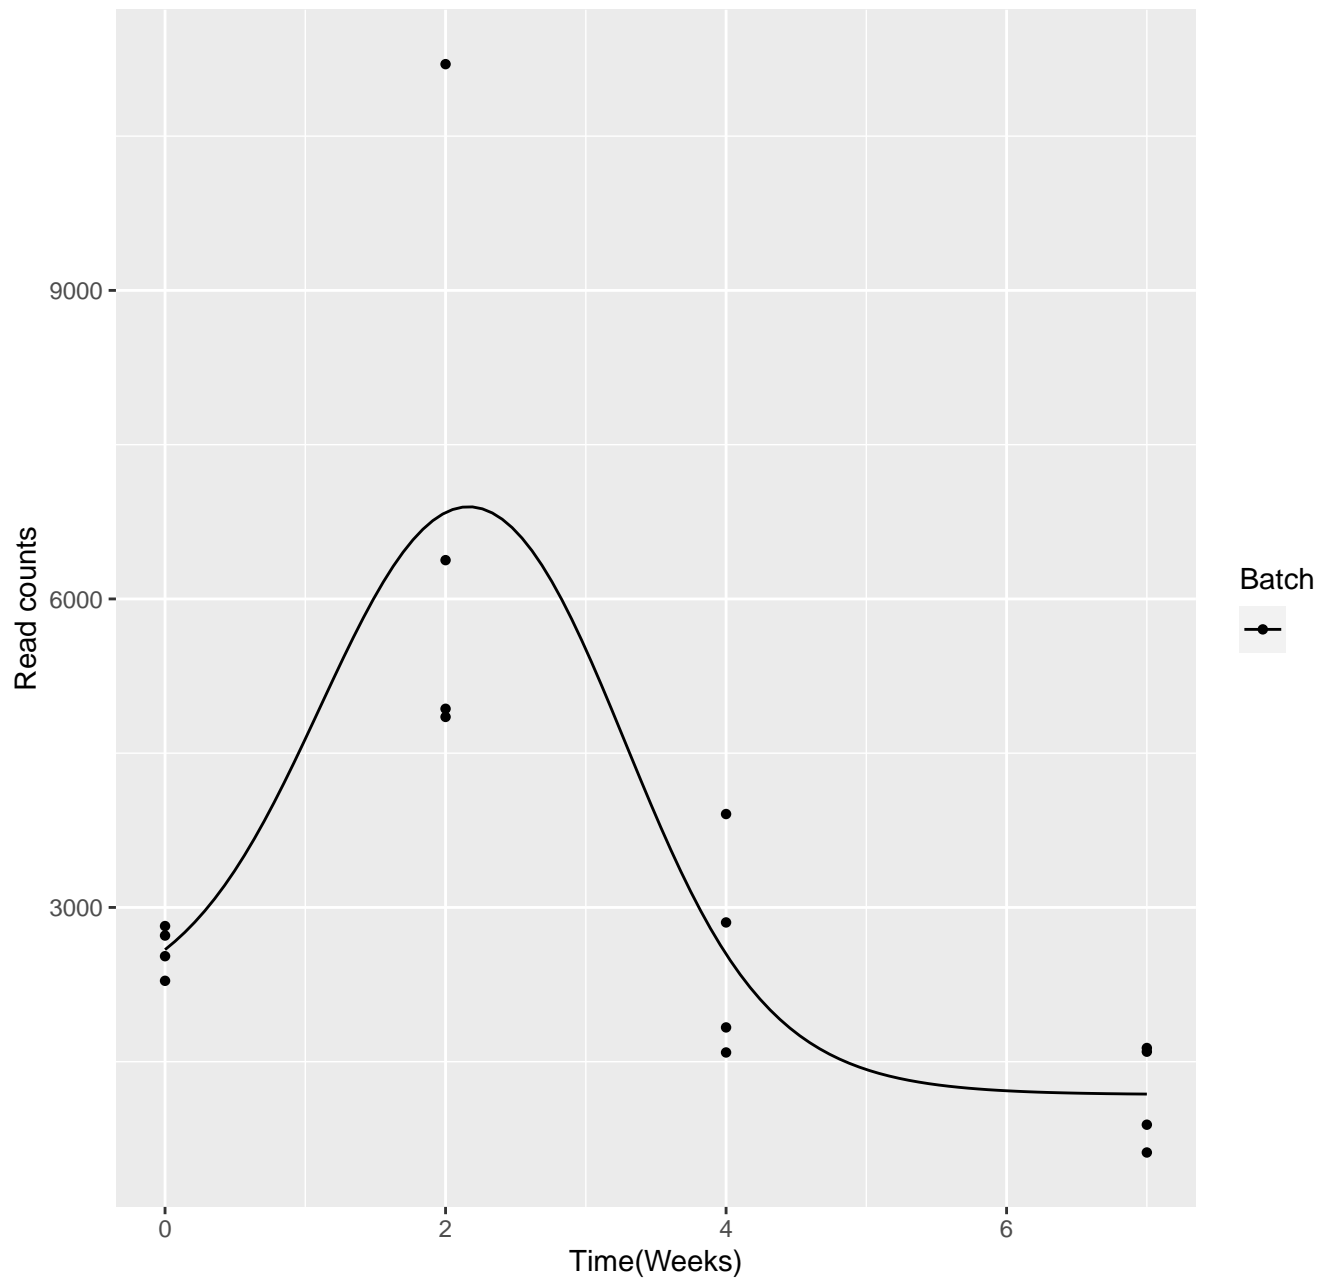

GPR65:  $\log_{10} q = -7.3$

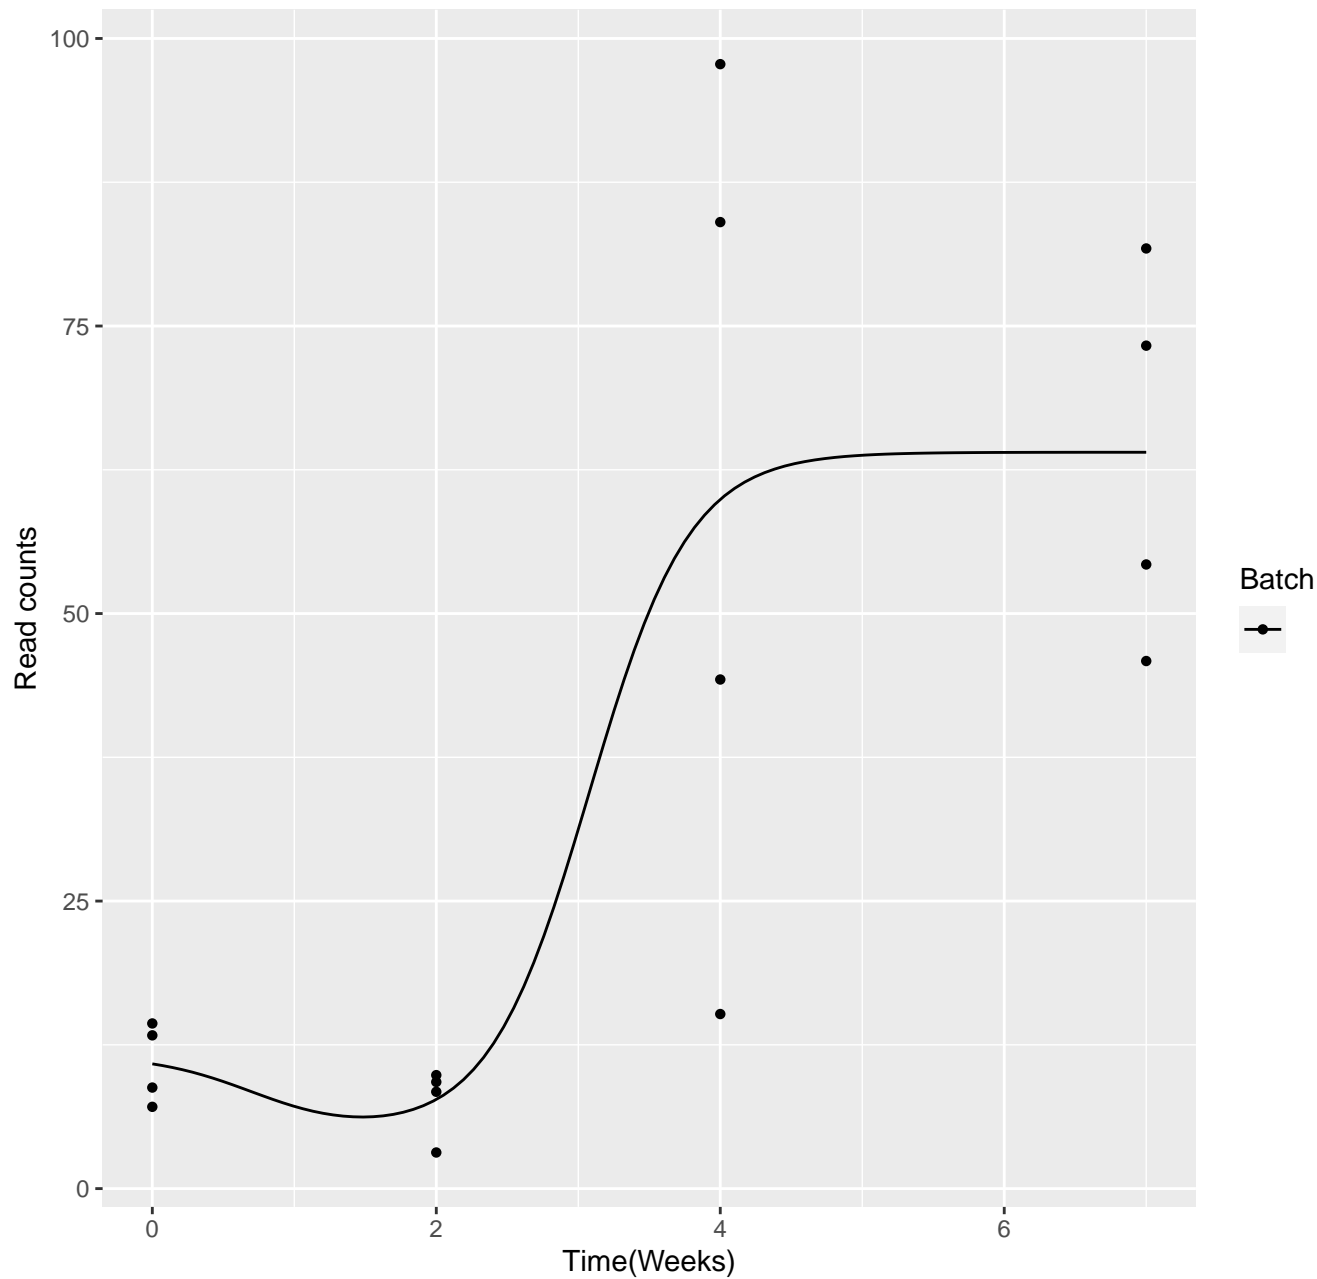

BAMBI:  $\log_{10} q = -7.27$

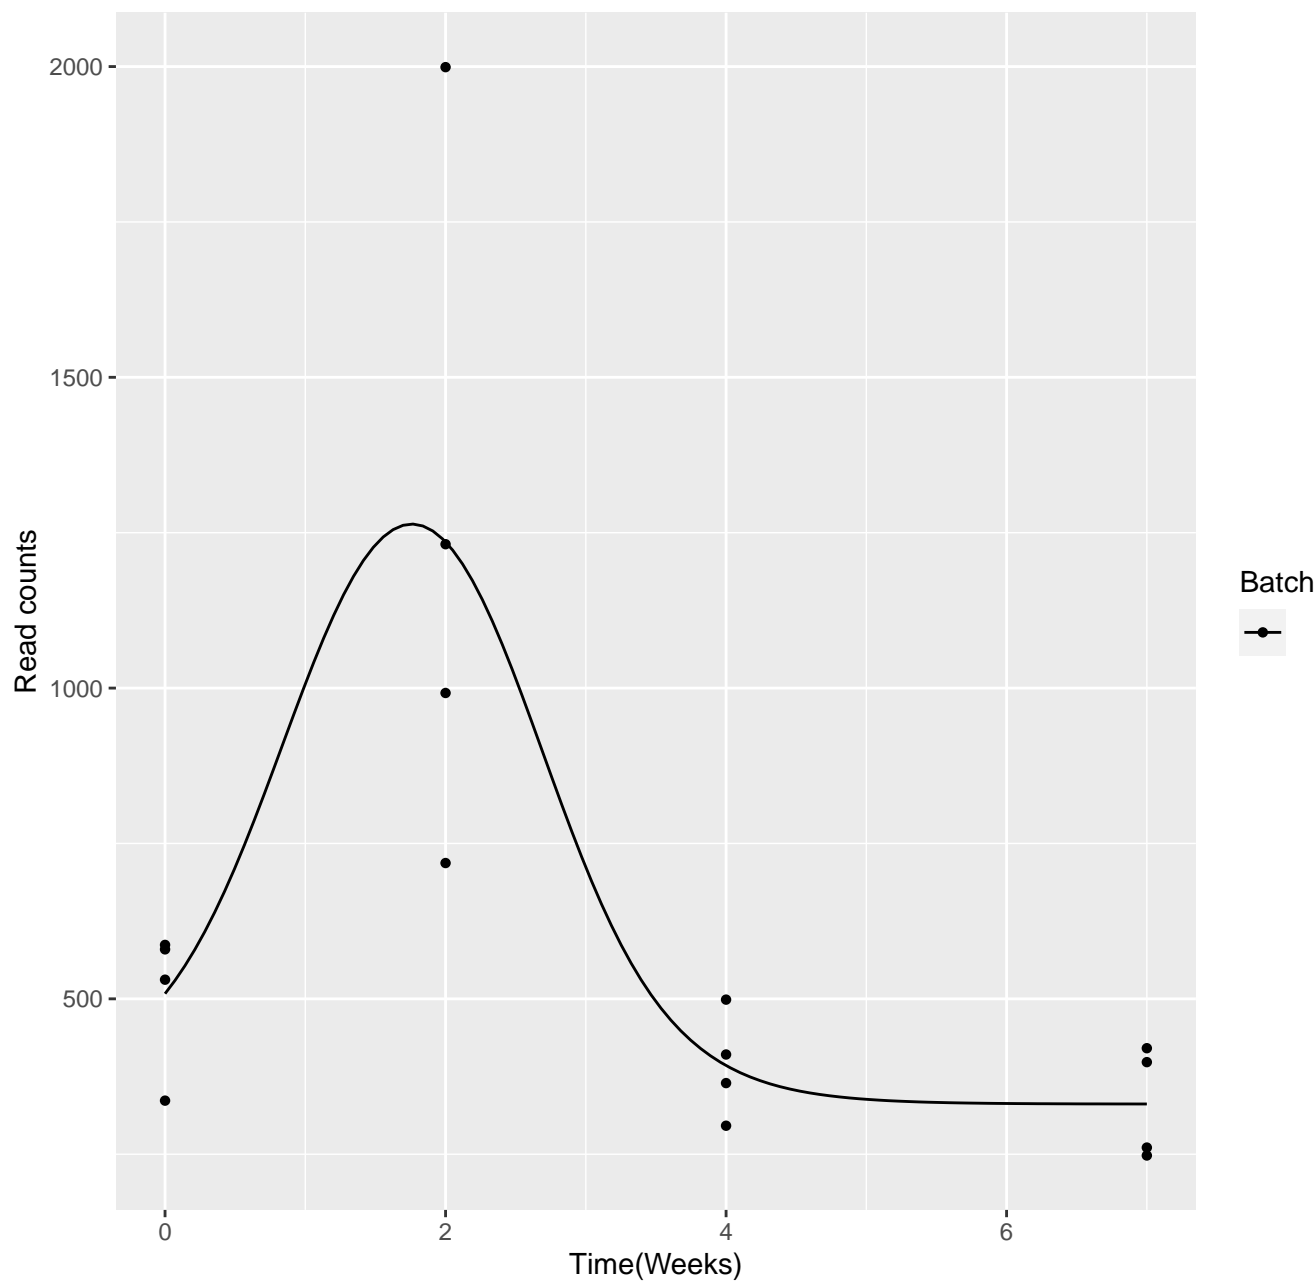

MYO1C:  $\log_{10} q = -7.26$

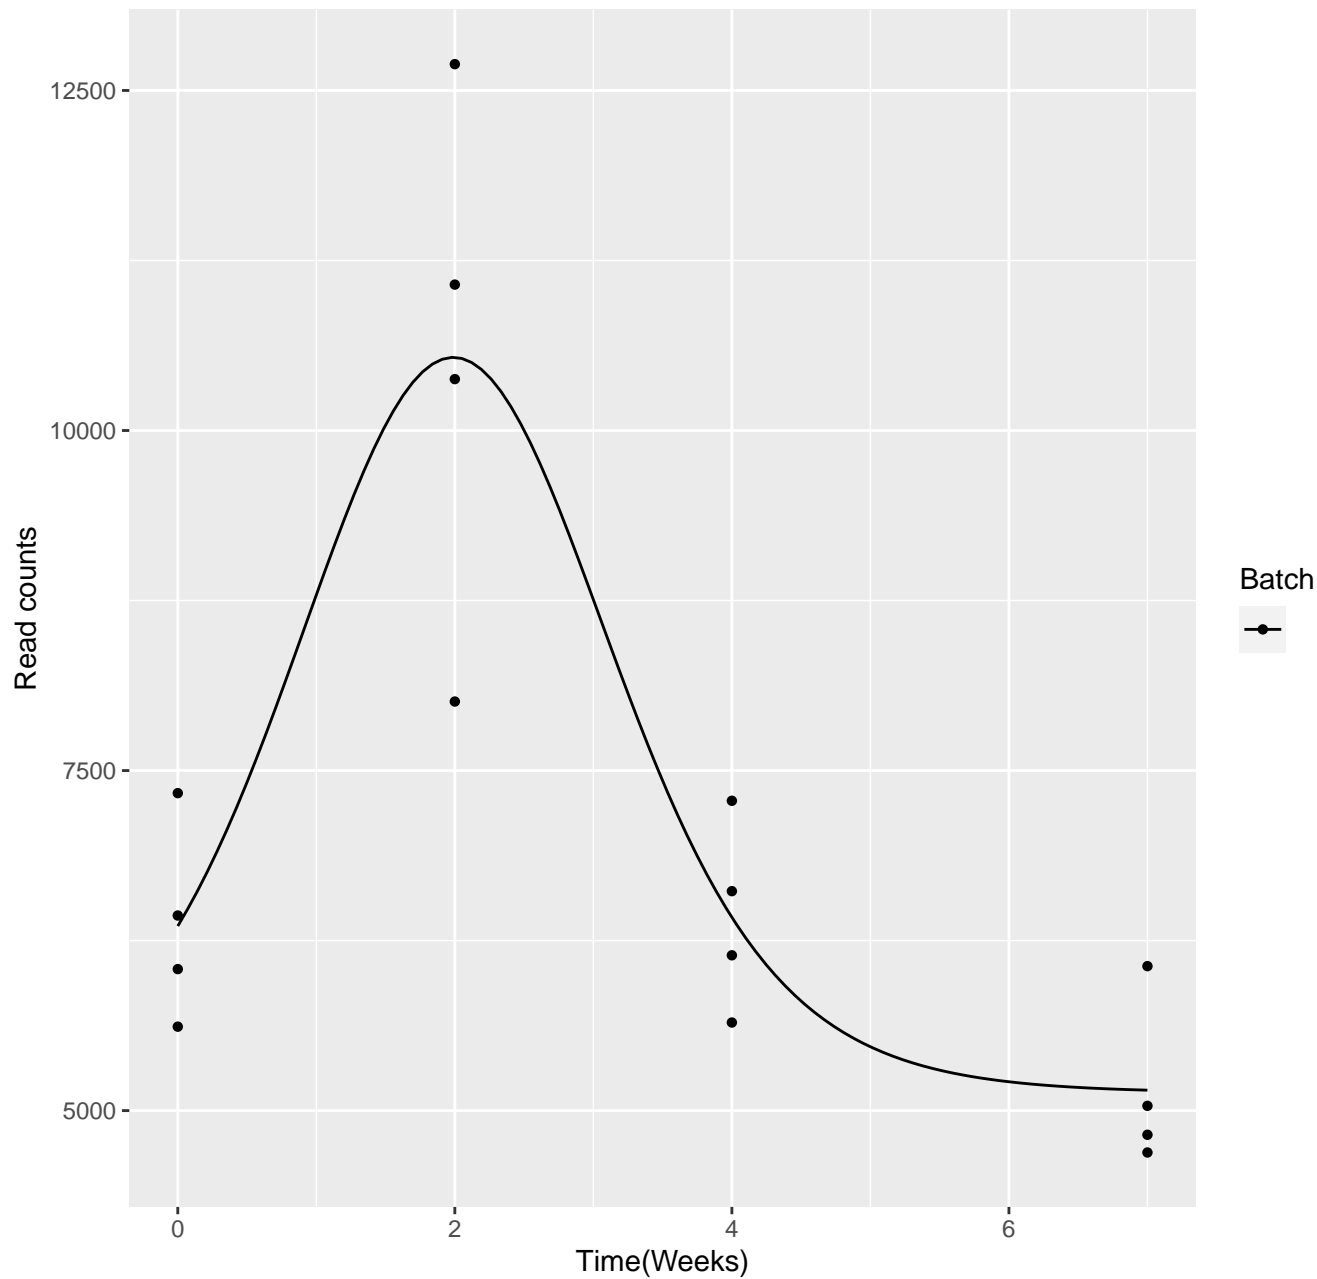

PLCB2:  $\log_{10} q = -7.22$

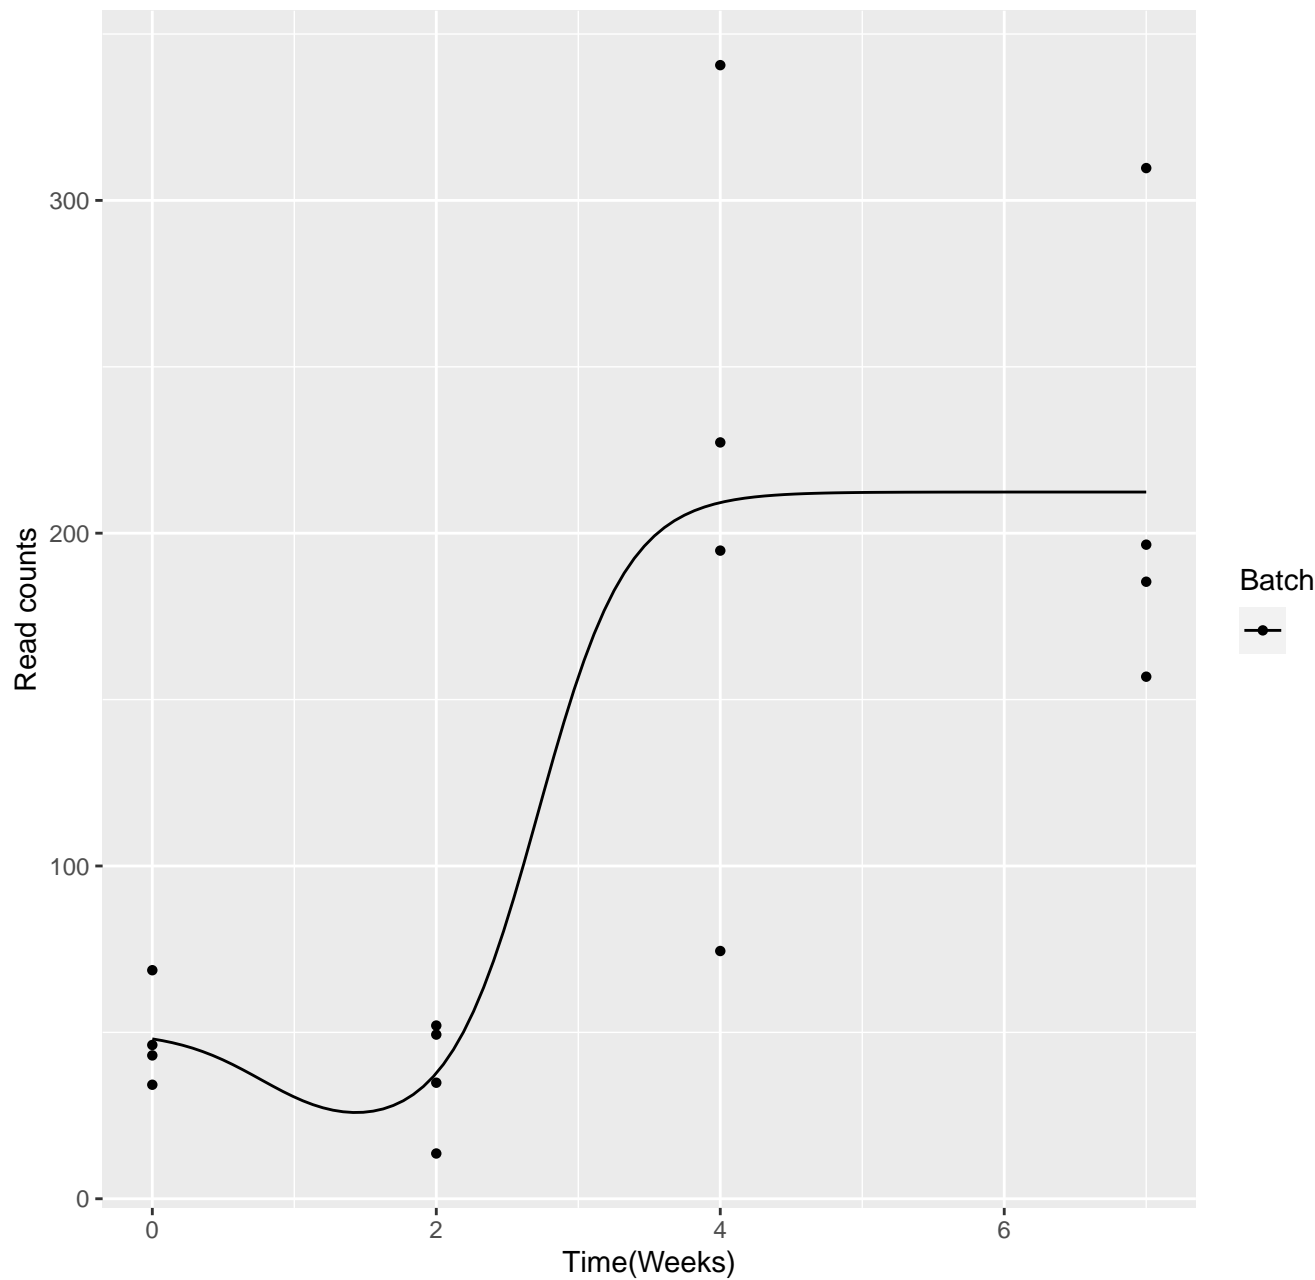

DOK3:  $\log_{10} q = -7.18$

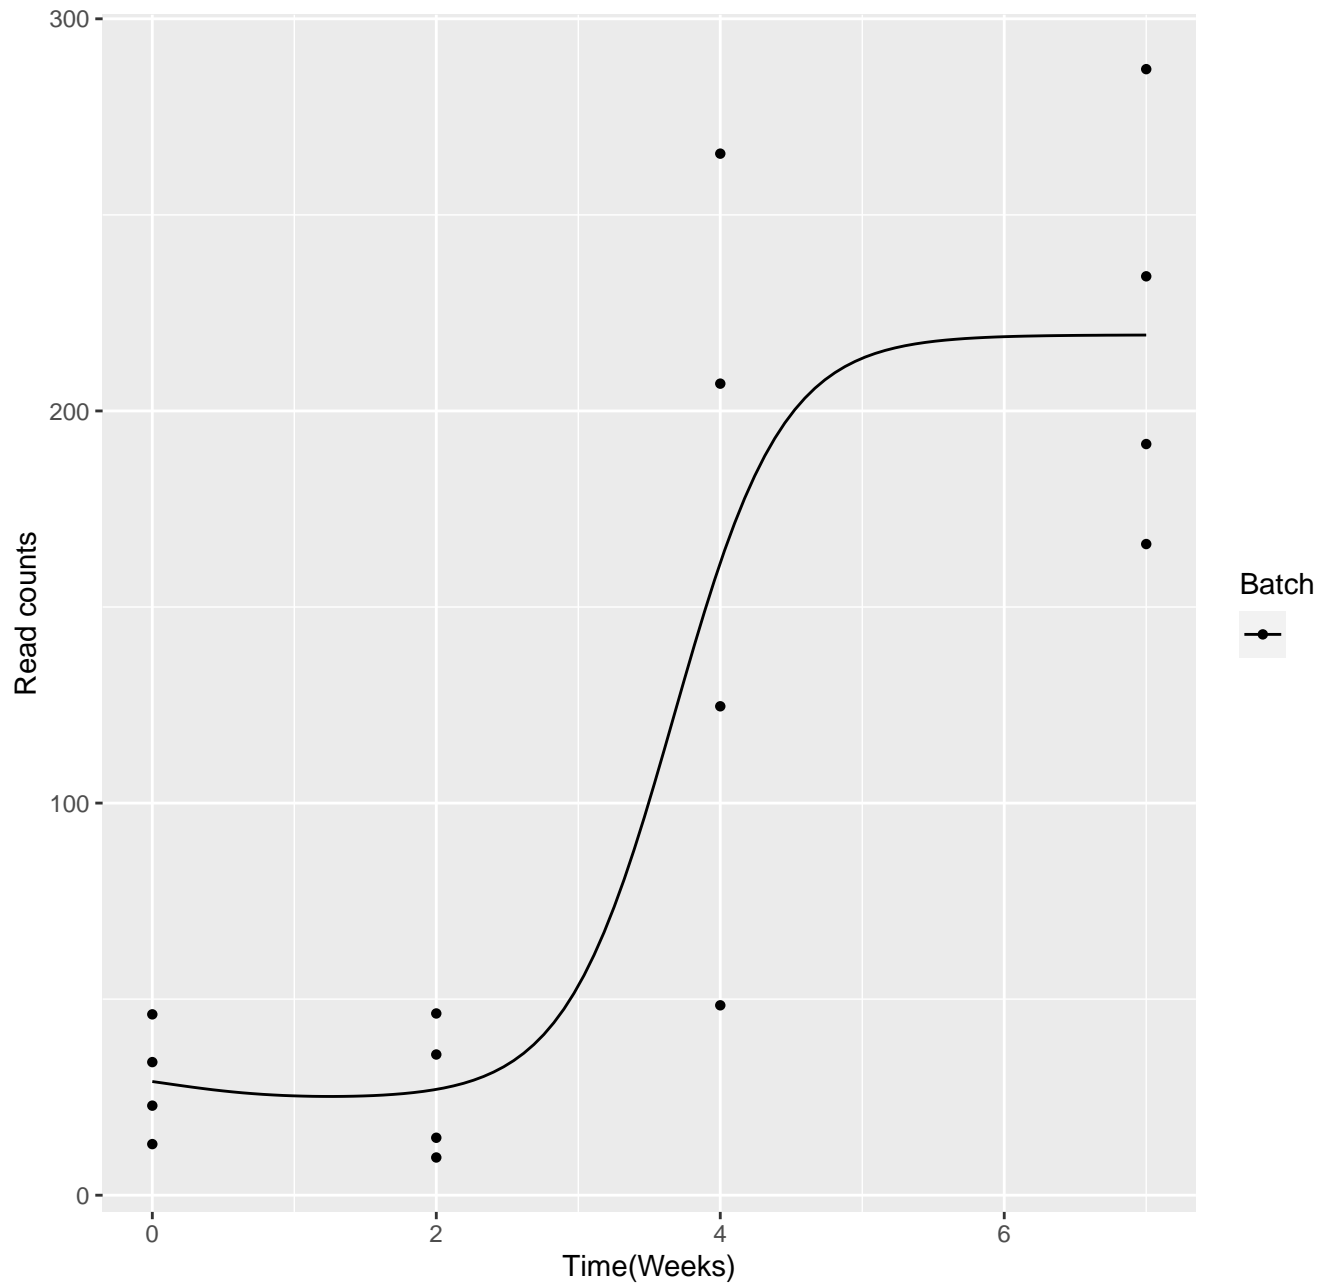

LOC100350232:  $\log_{10} q = -7.18$

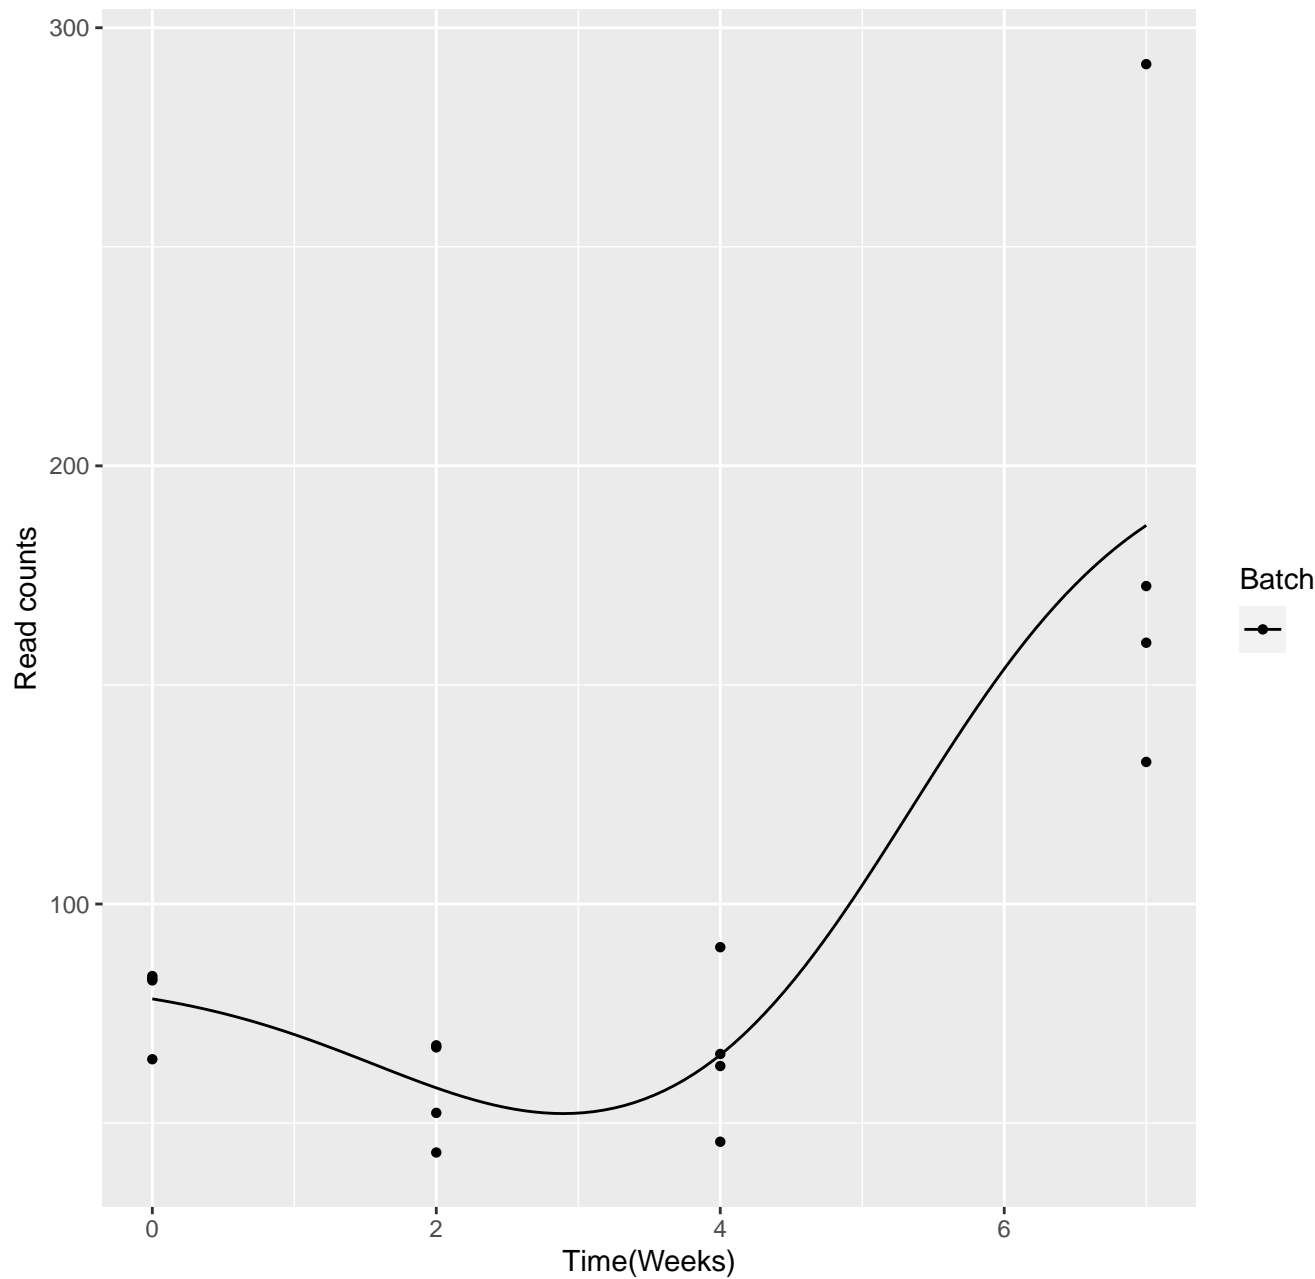



PRKCB:  $\log_{10} q = -7.13$

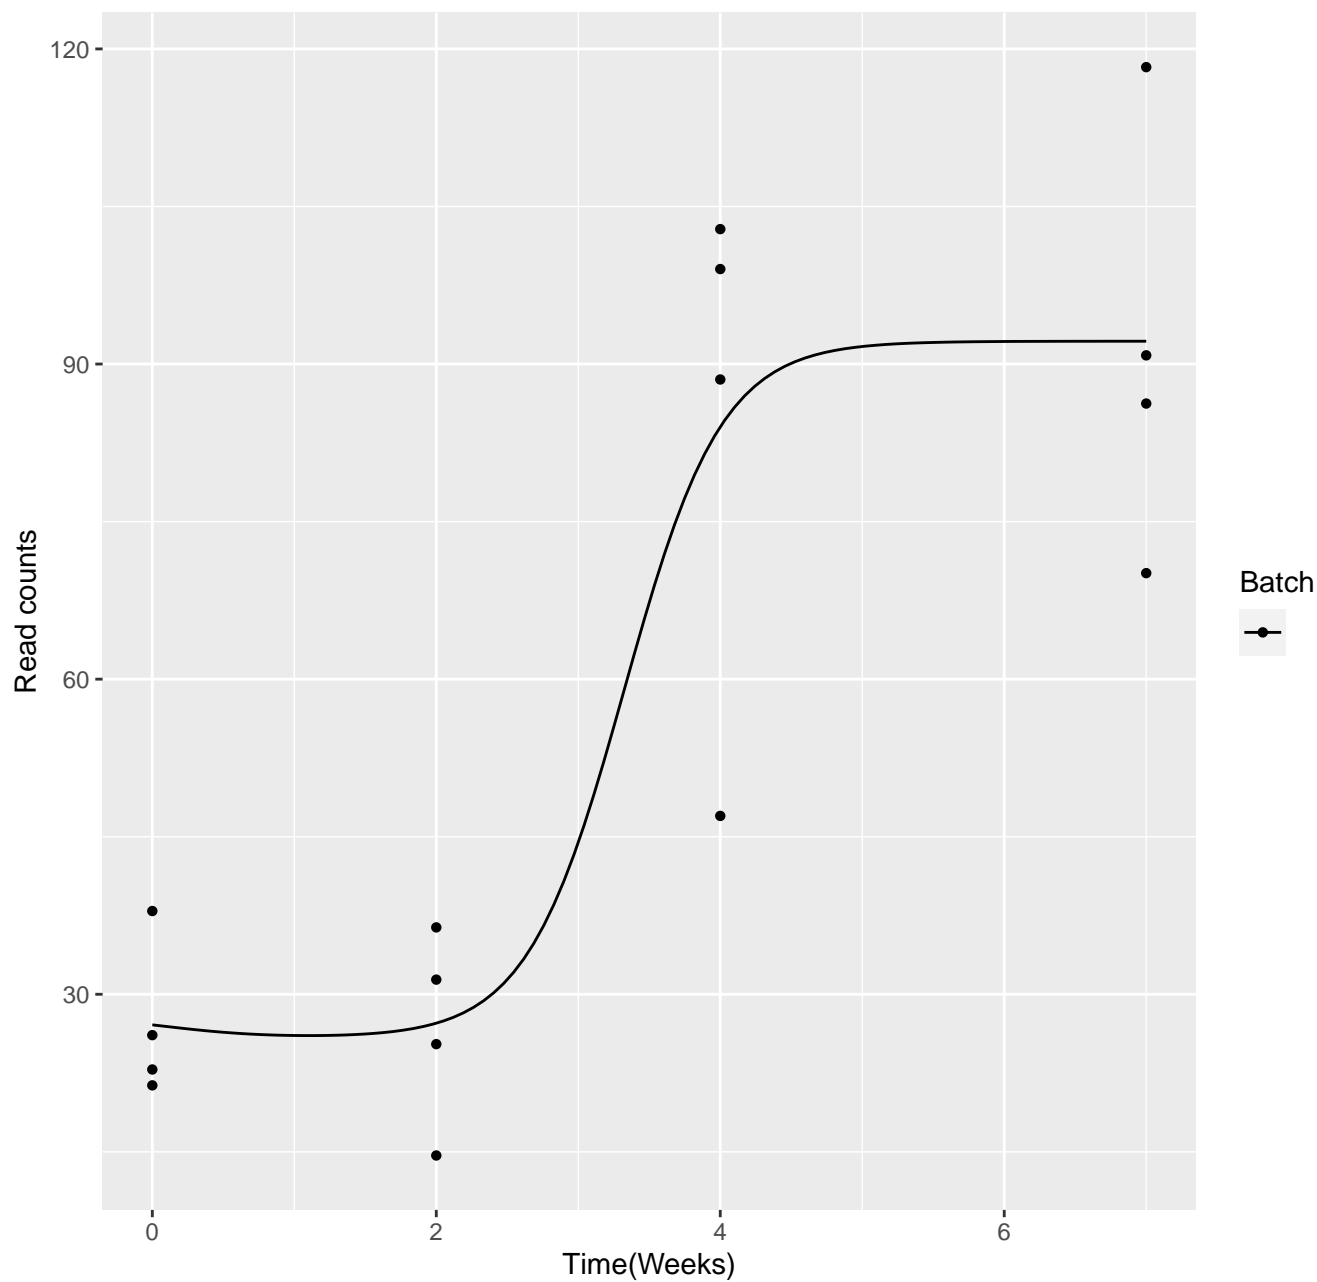

MPEG1:  $\log_{10} q = -7.12$

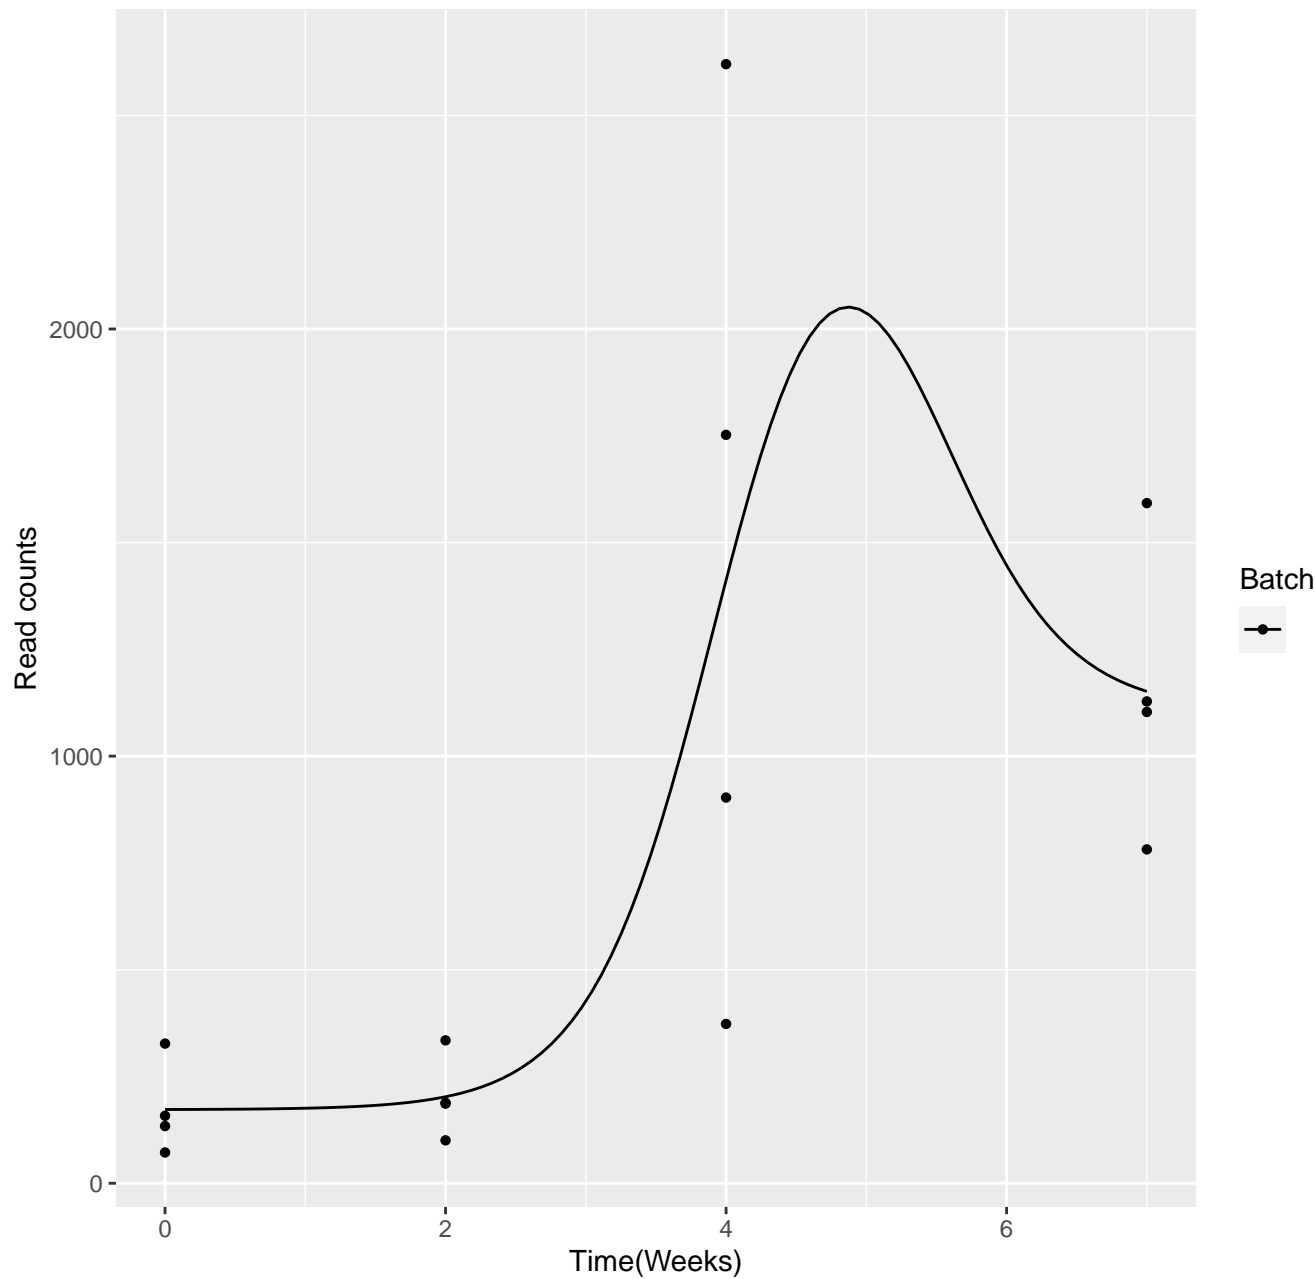

CPLX2:  $\log_{10} q = -7.12$

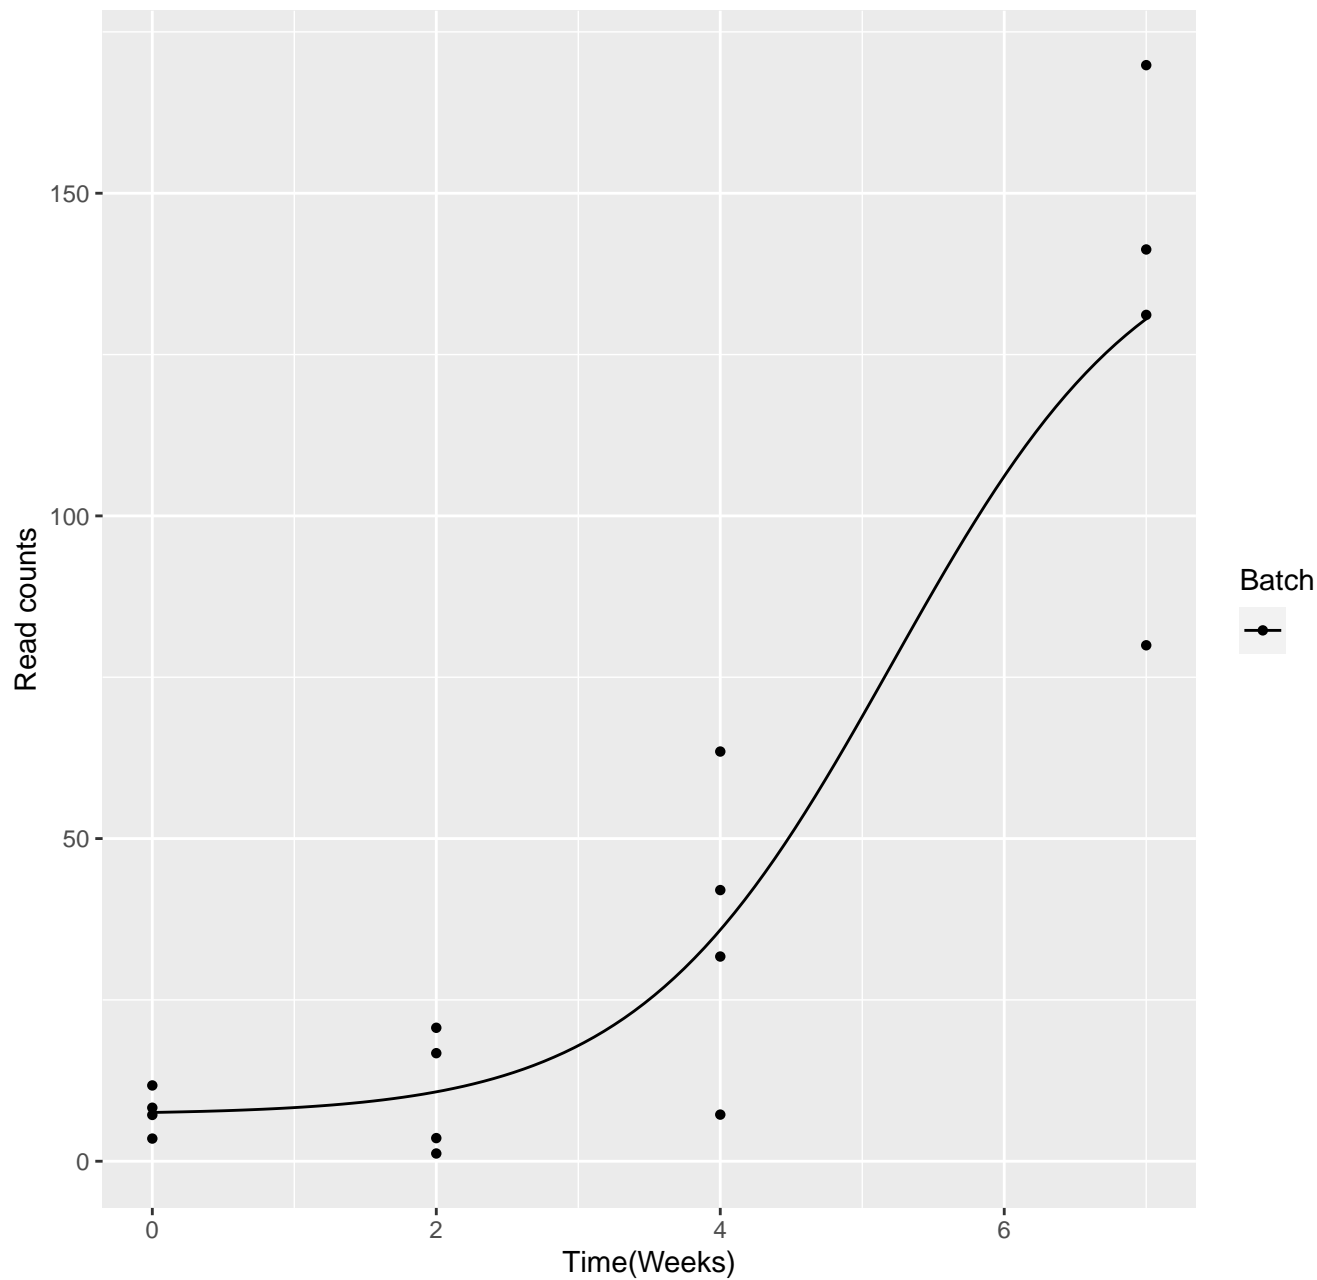

SLC46A1:  $\log_{10} q = -7.1$

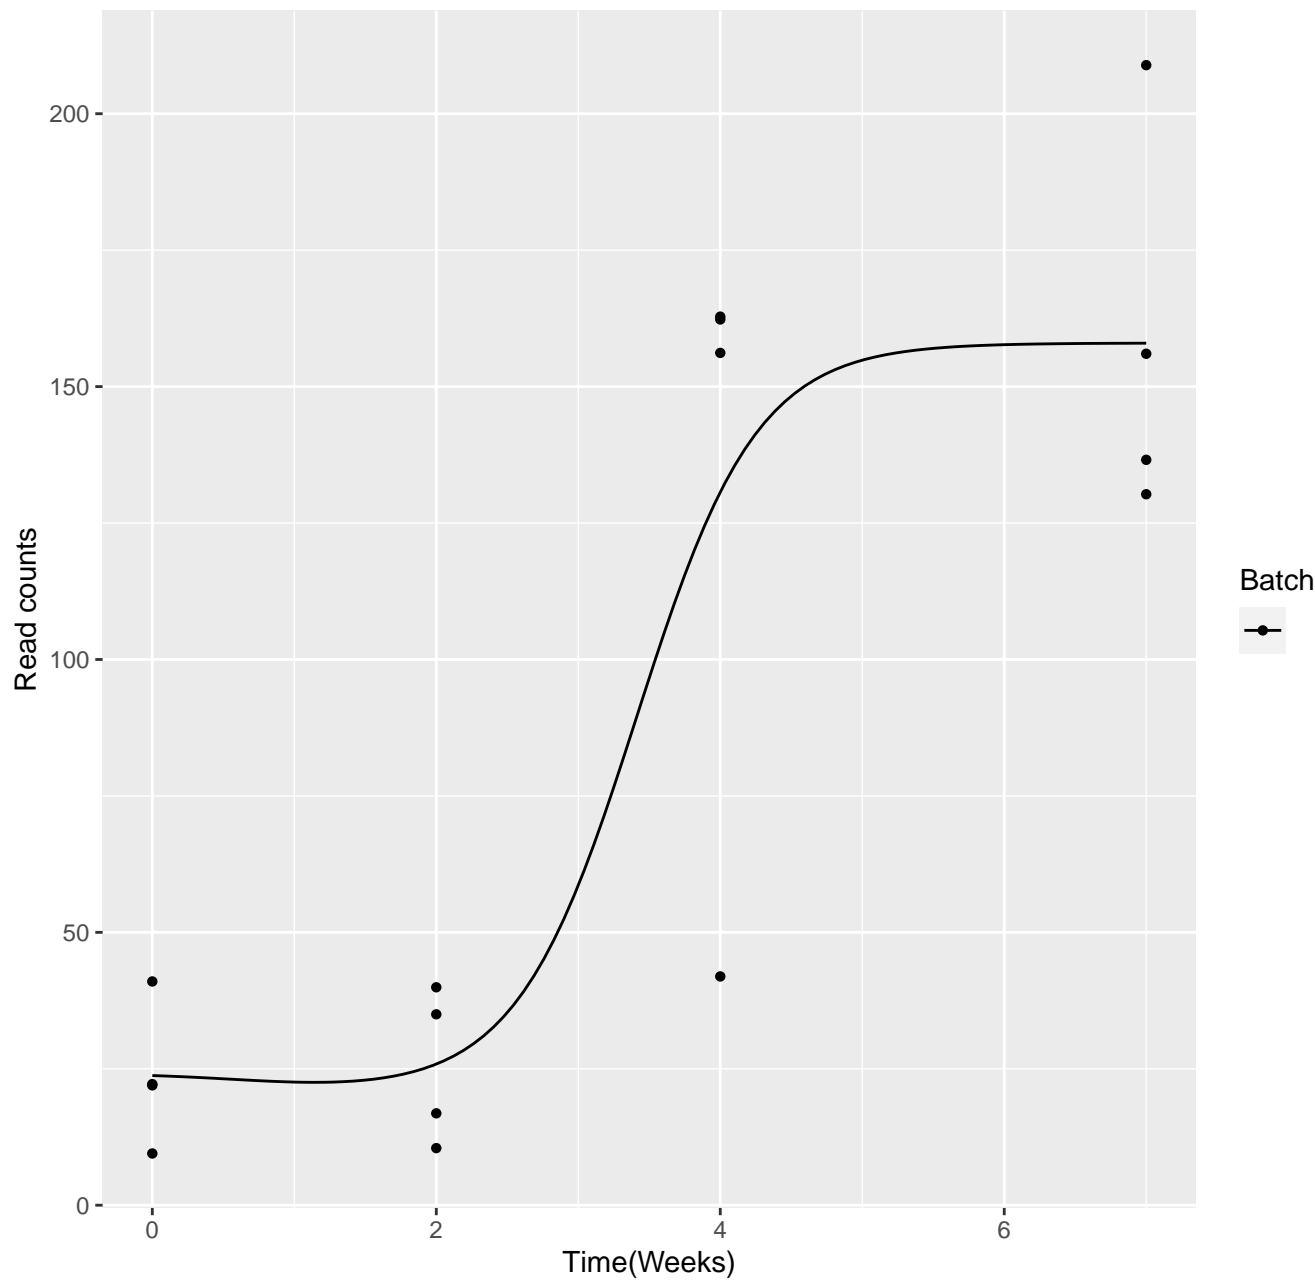

CKMT1B:  $\log_{10} q = -7.09$

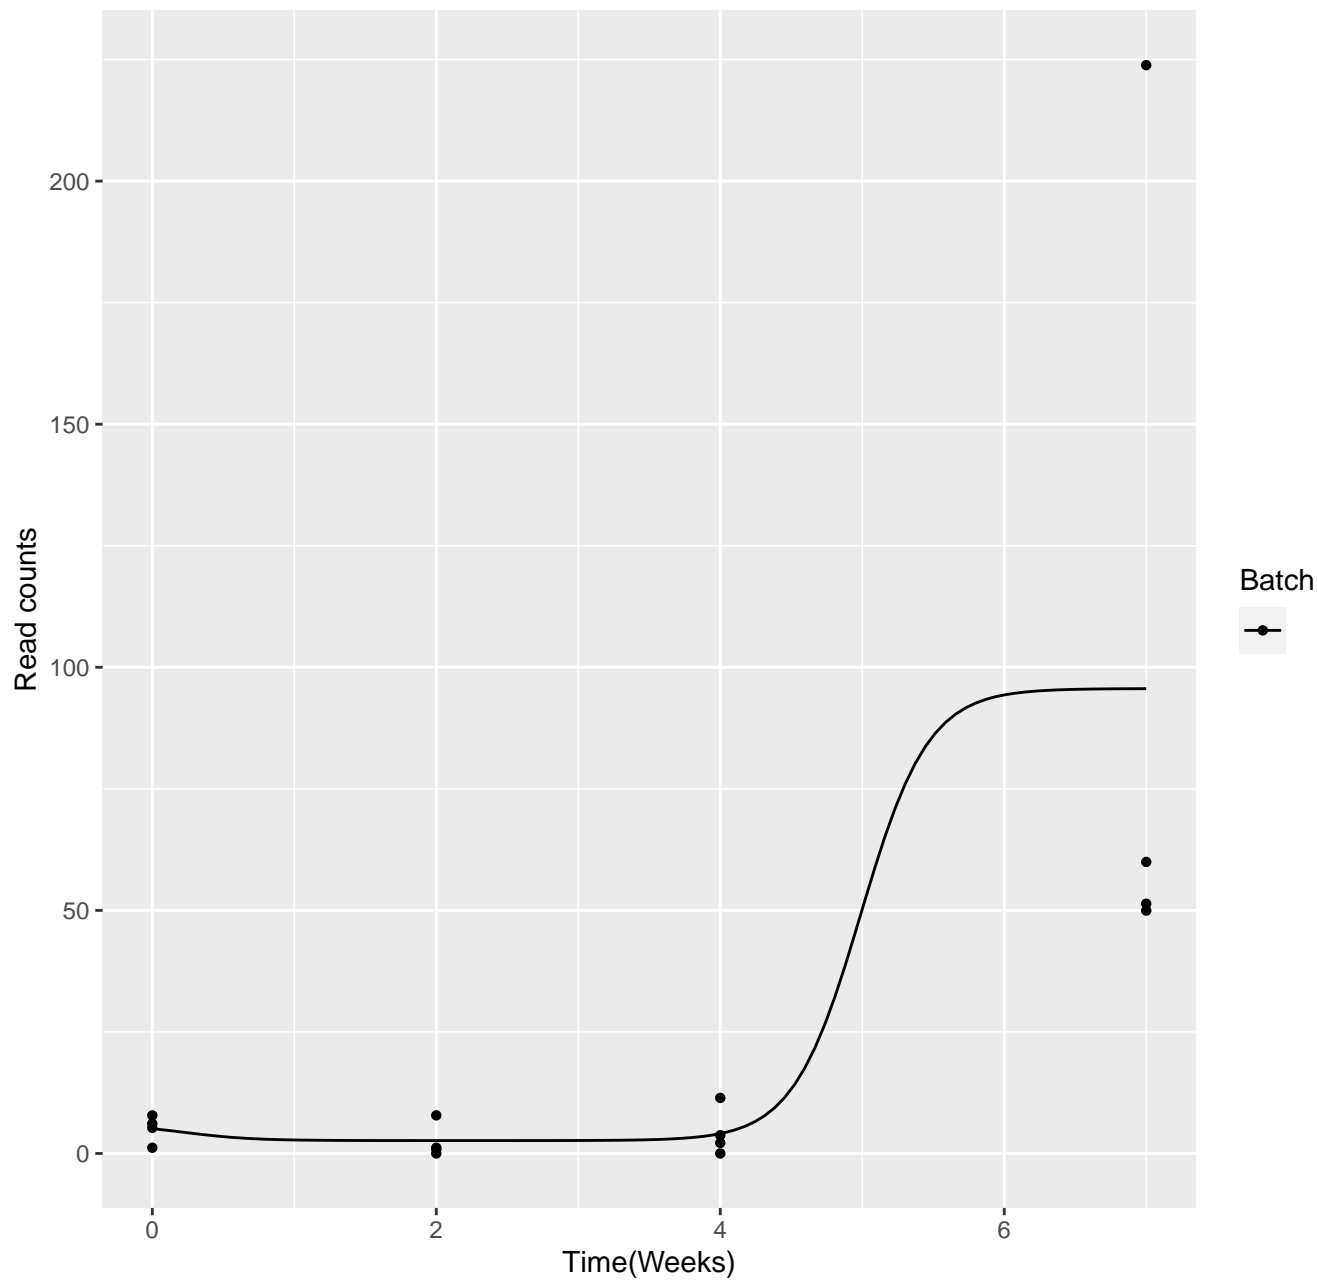

LOC100352110:  $\log_{10} q = -7.08$

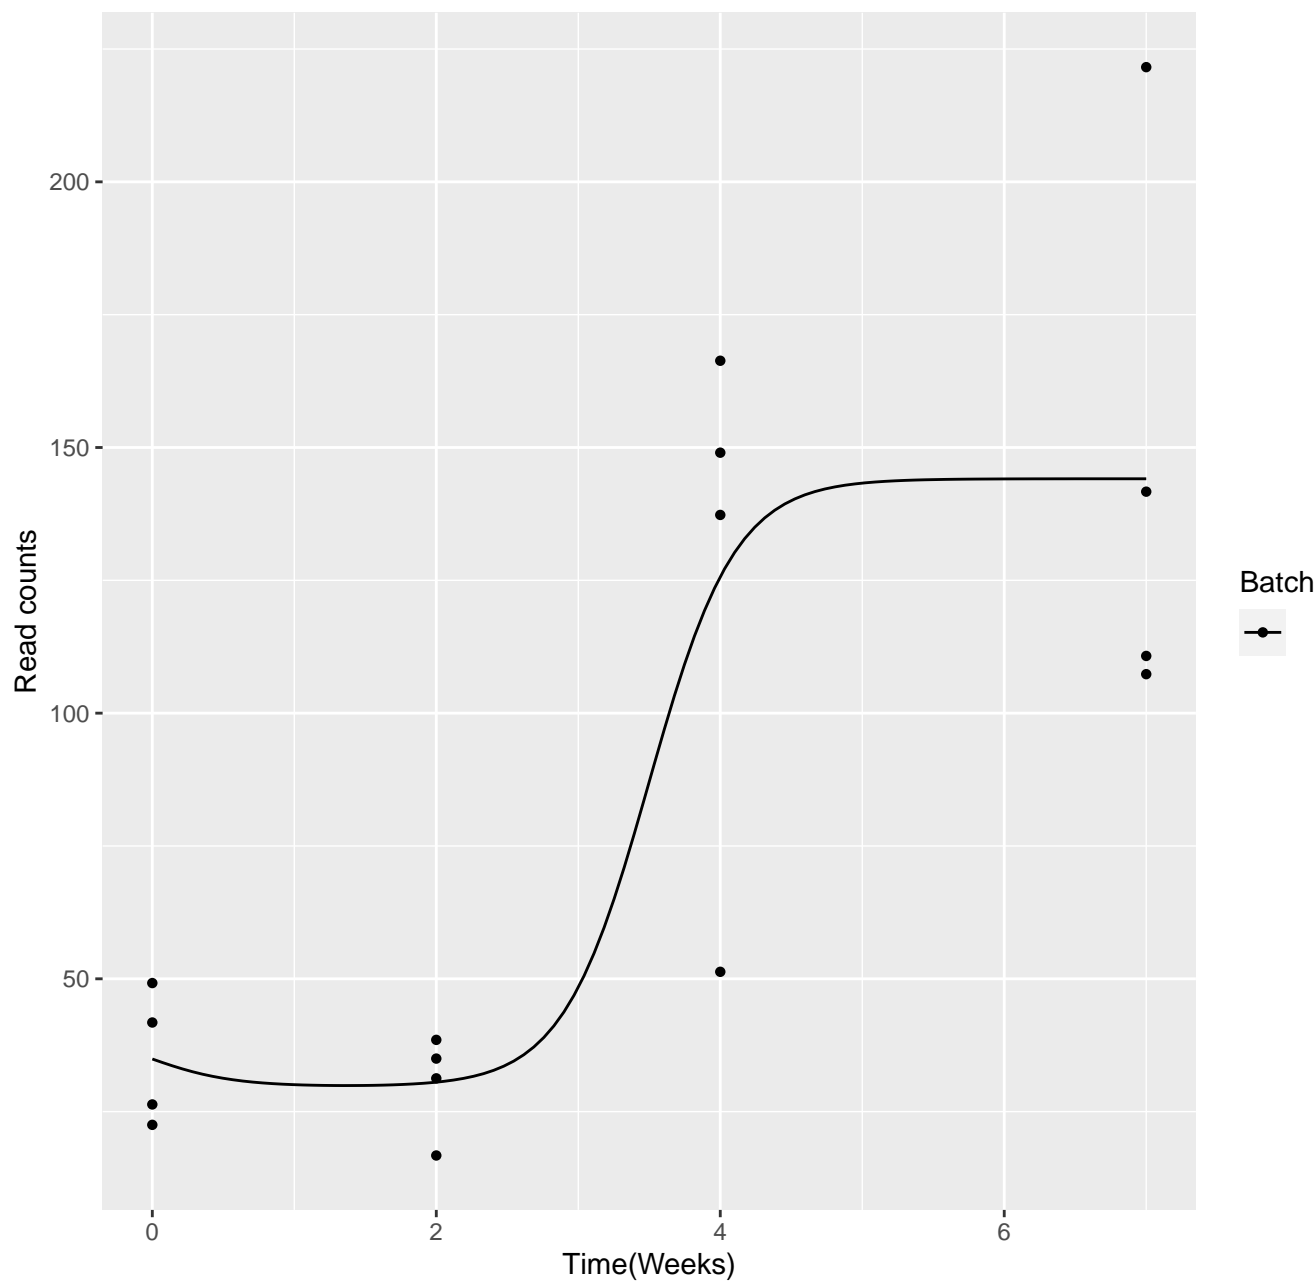

ZYX:  $\log_{10} q = -7.08$

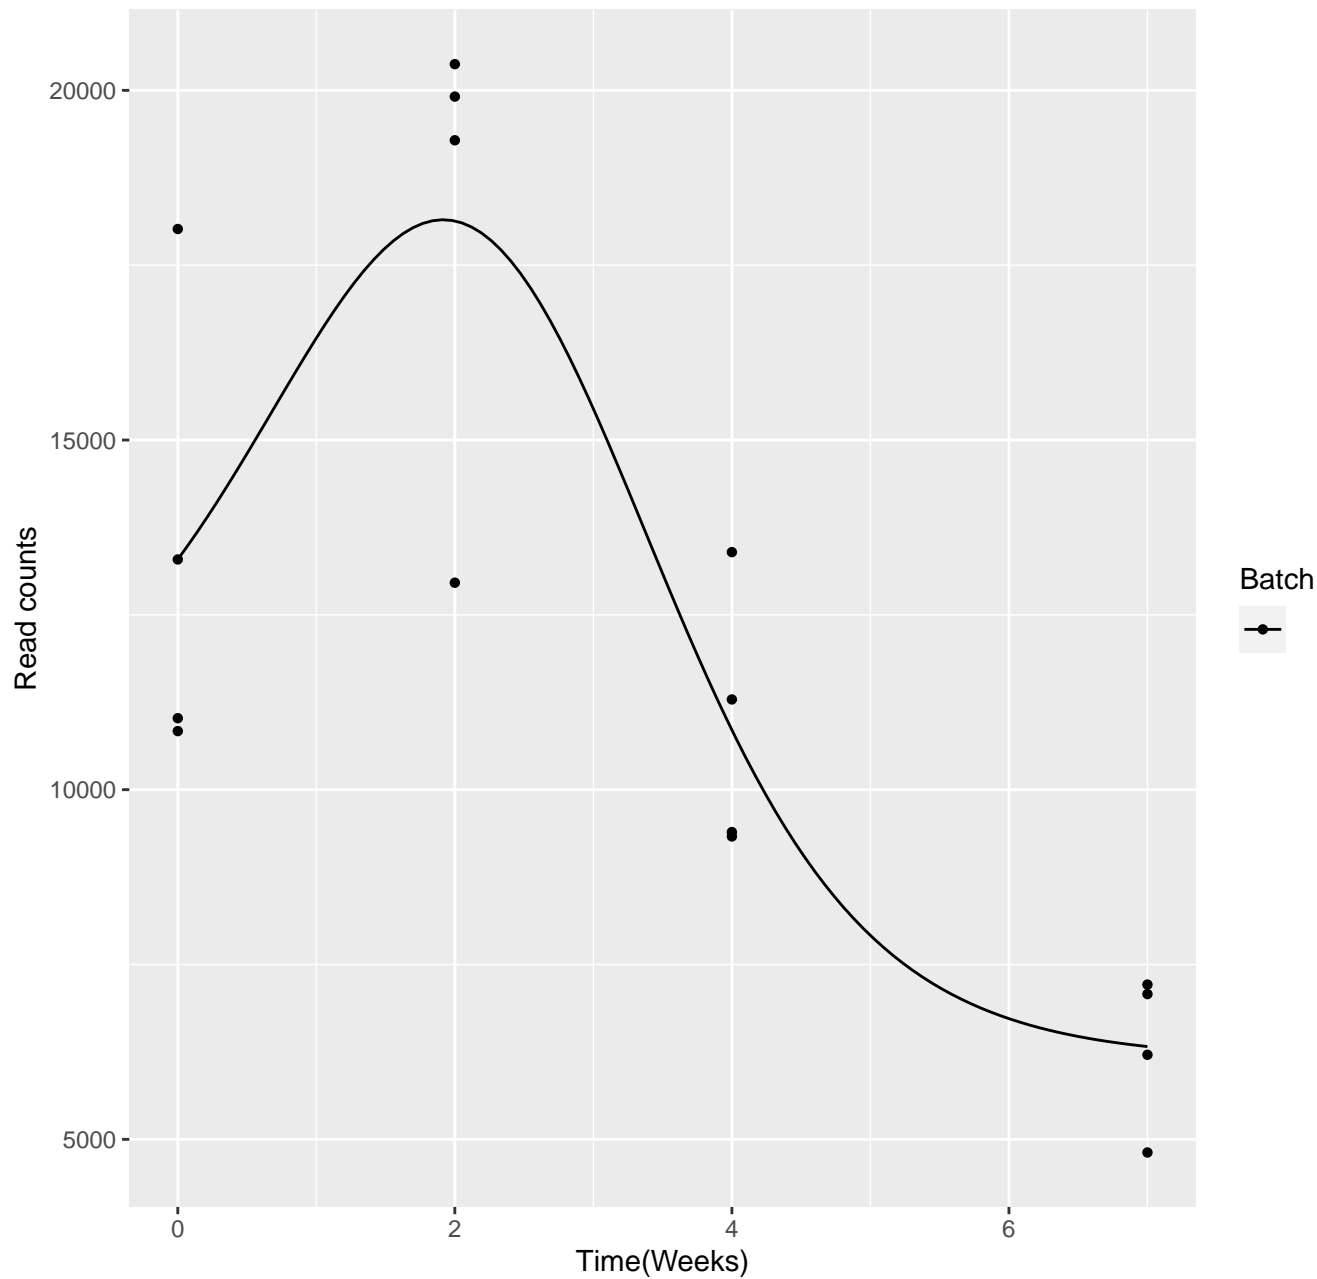

MILR1:  $\log_{10} q = -7.08$

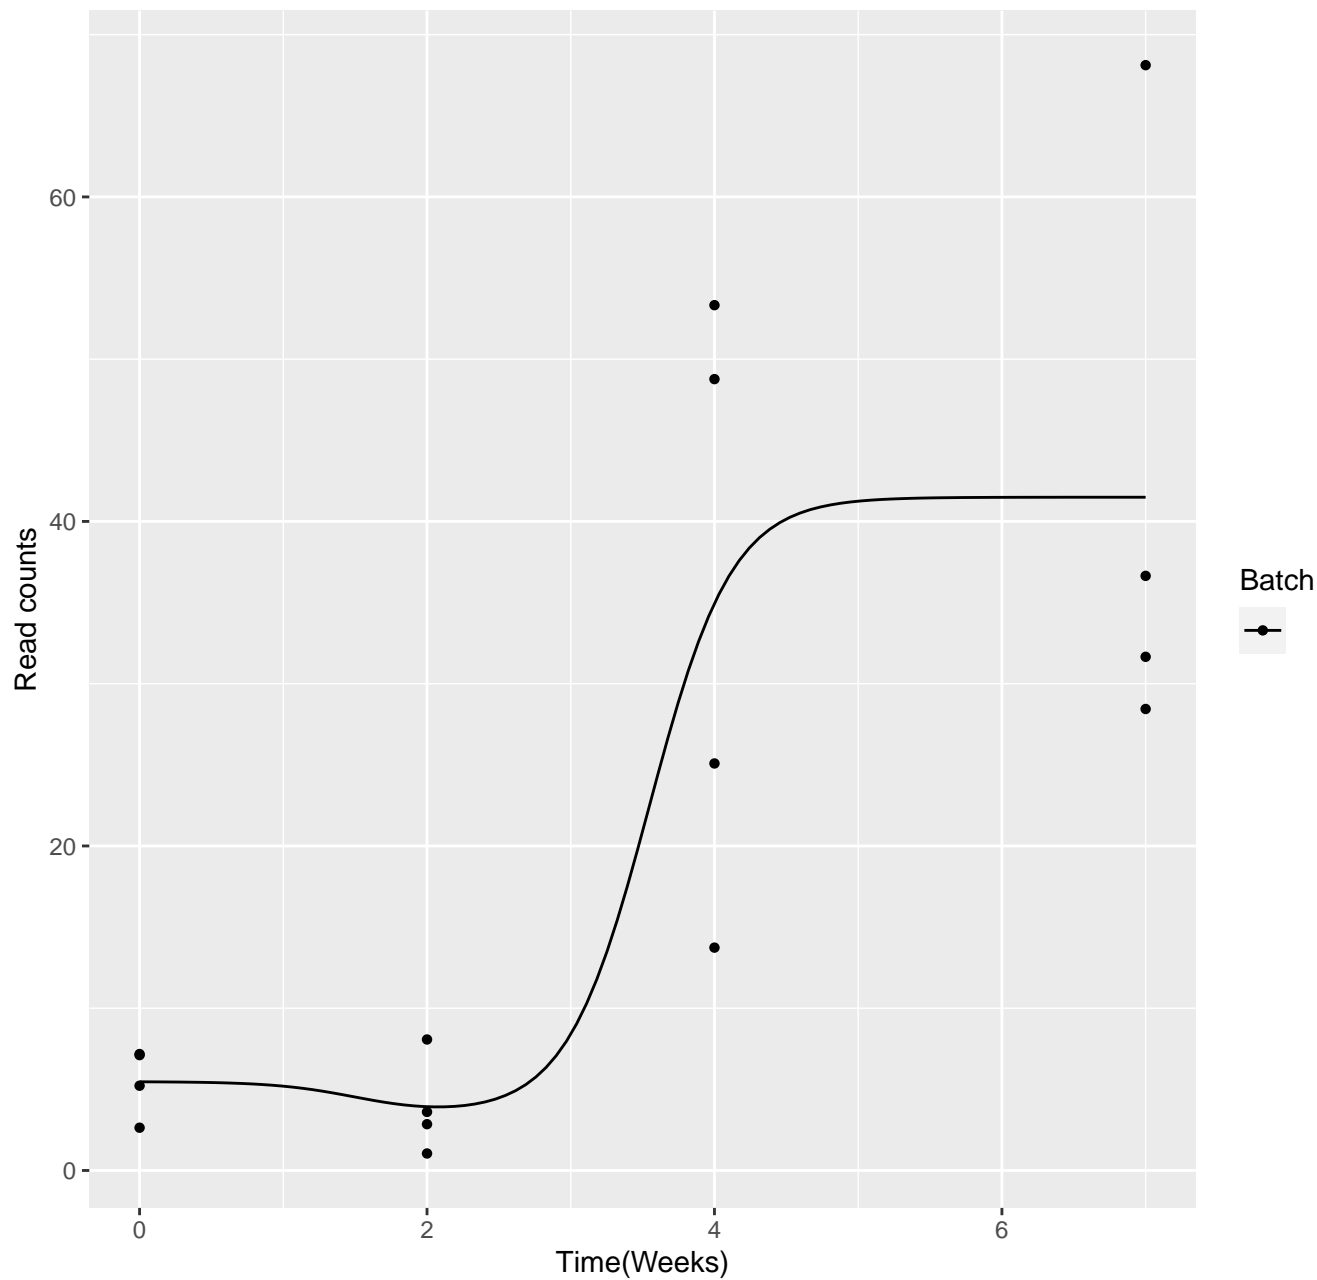



ACTN4:  $\log_{10} q = -7.08$

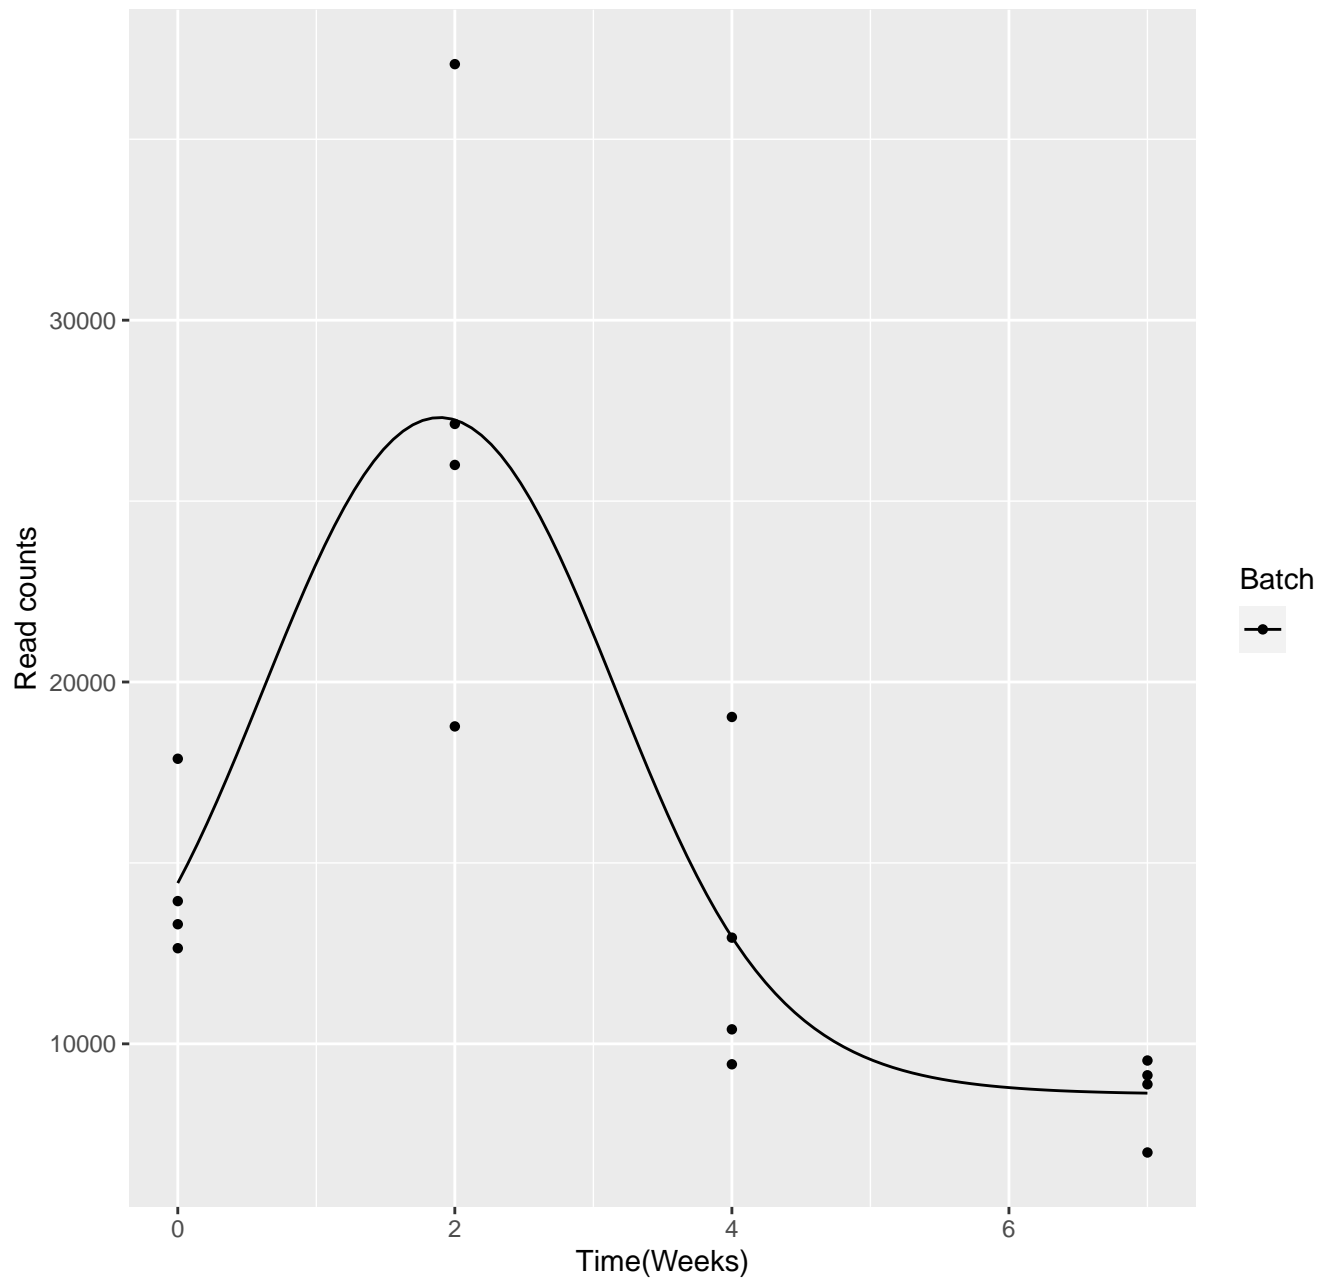

CP:  $\log_{10} q = -7.05$

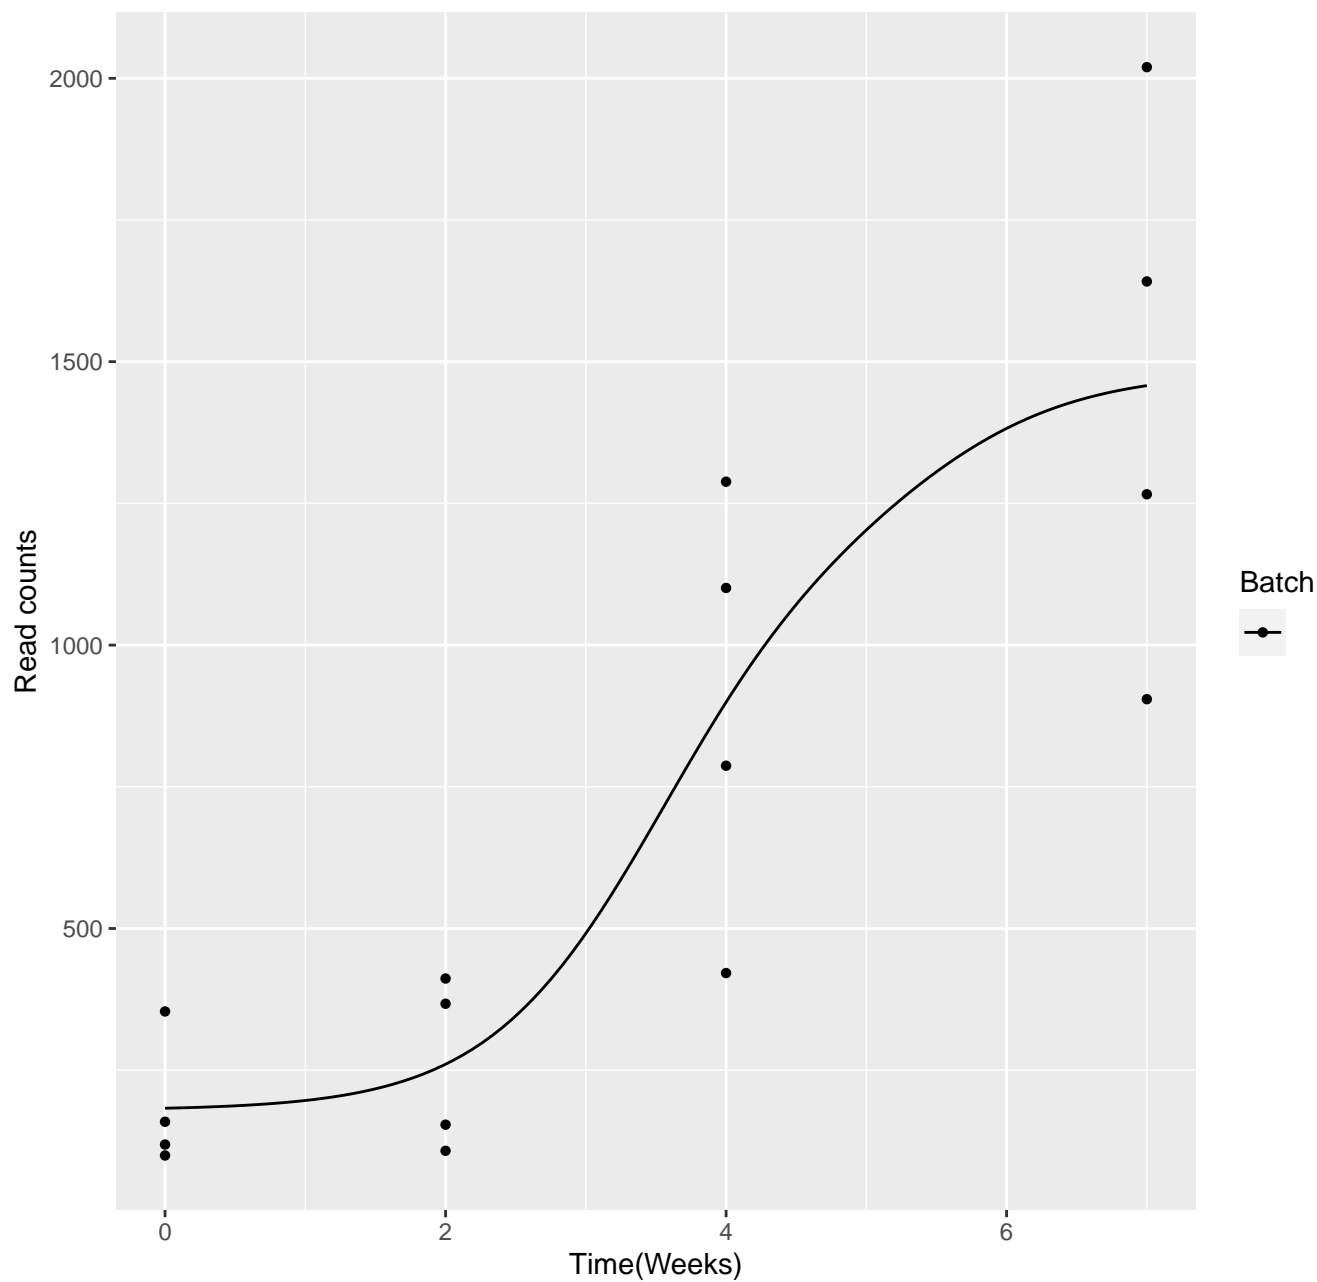

PHTF2:  $\log_{10} q = -7.03$

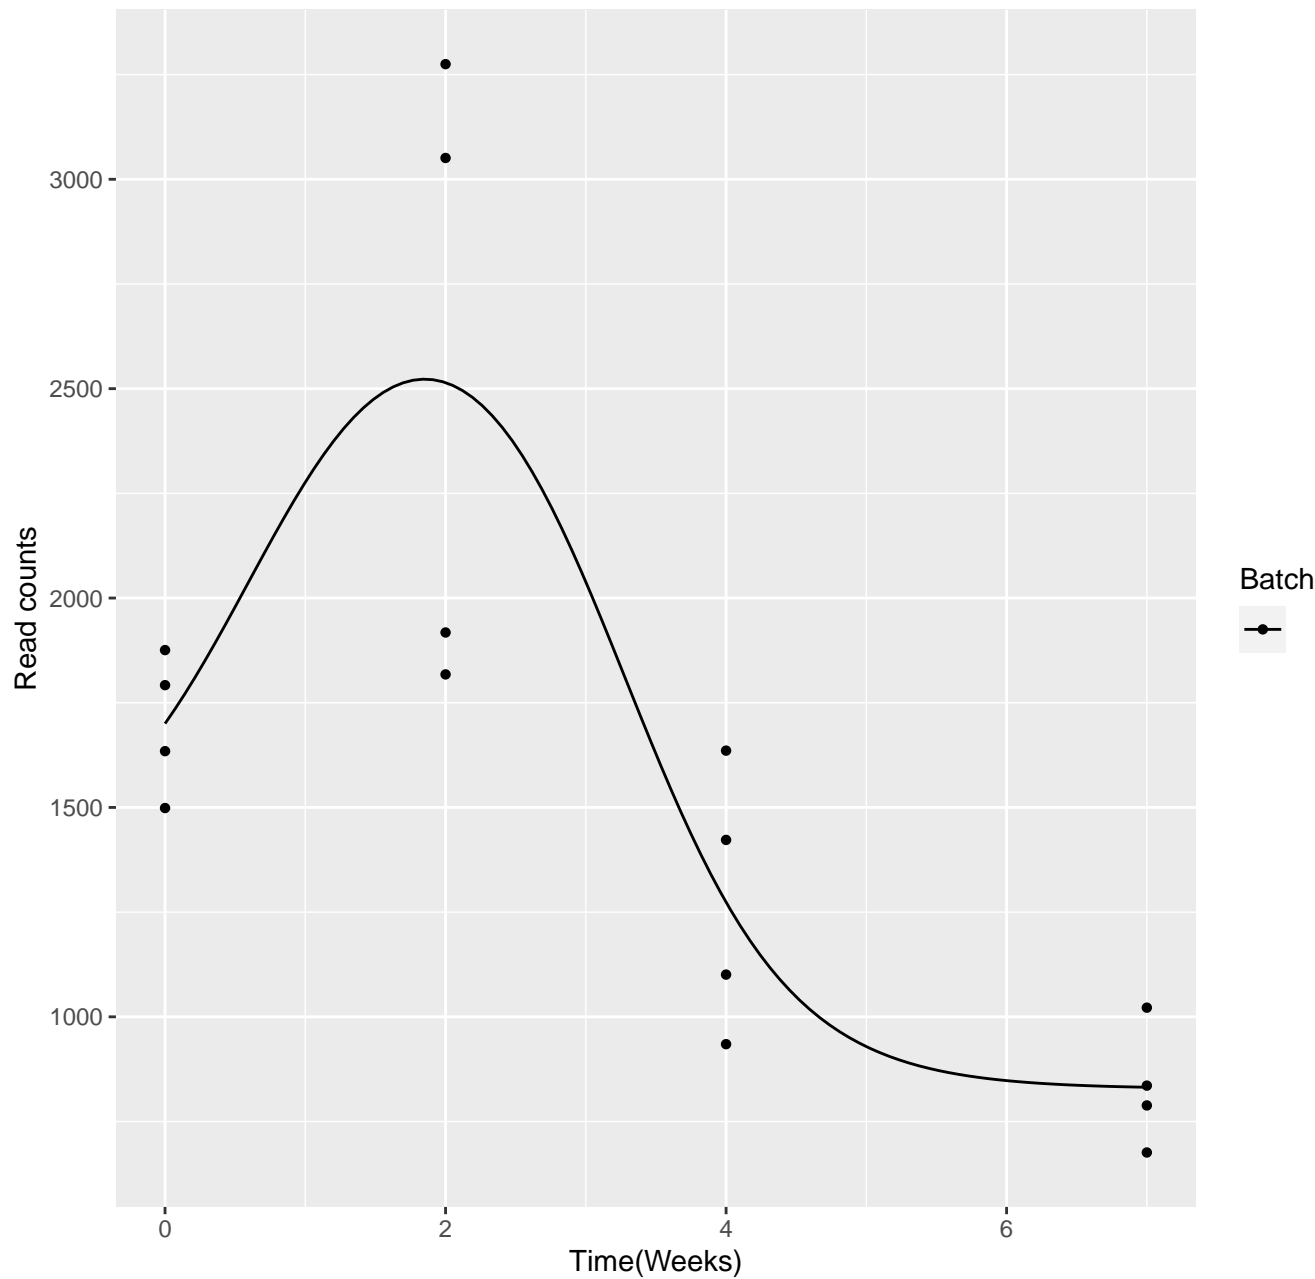

LOC100353463:  $\log_{10} q = -7.03$

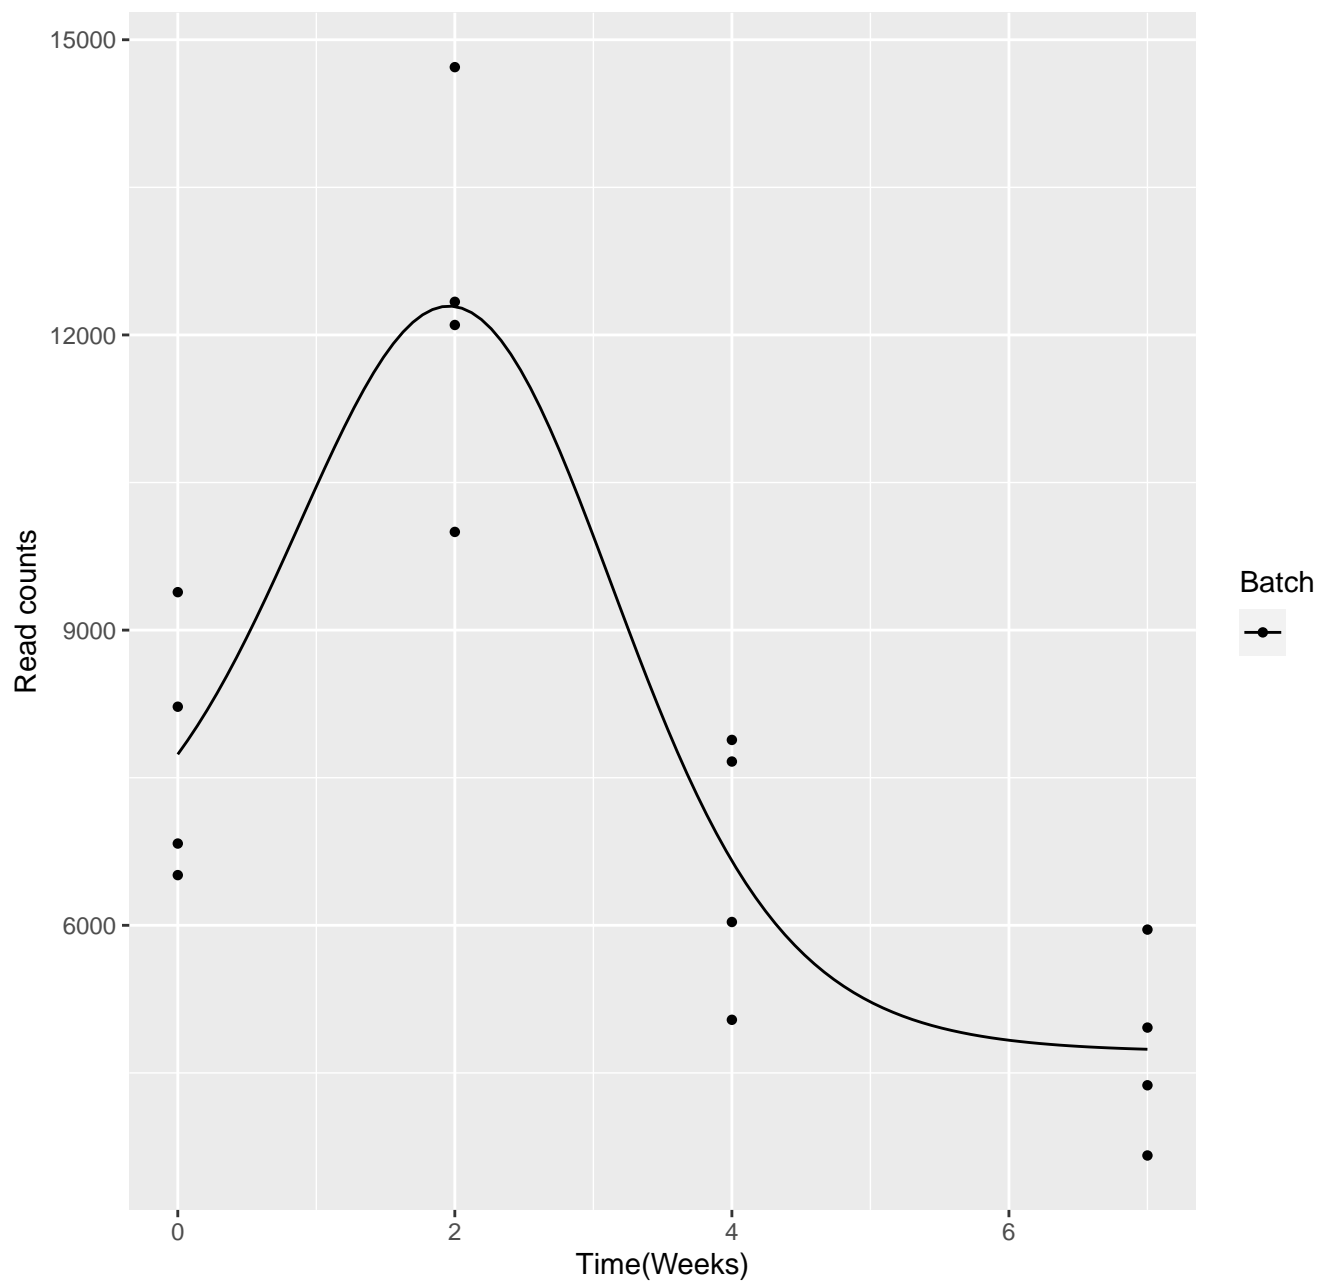

EFR3A:  $\log_{10} q = -7.02$

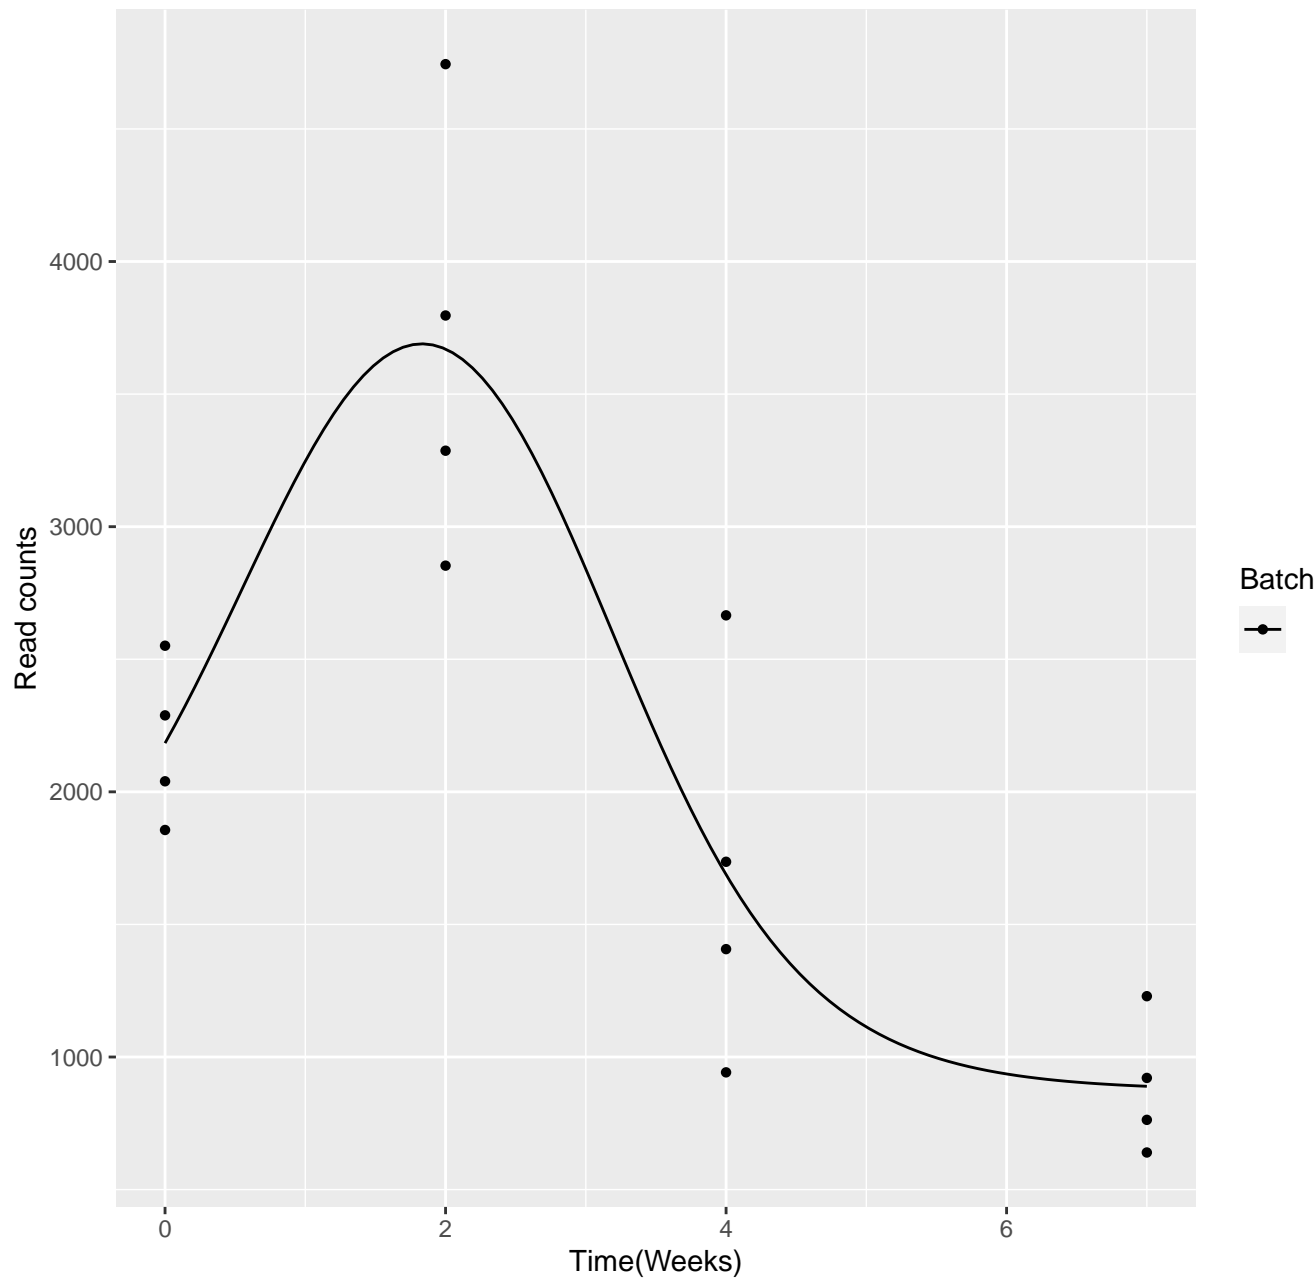

LOC127484200:  $\log_{10} q = -7.01$

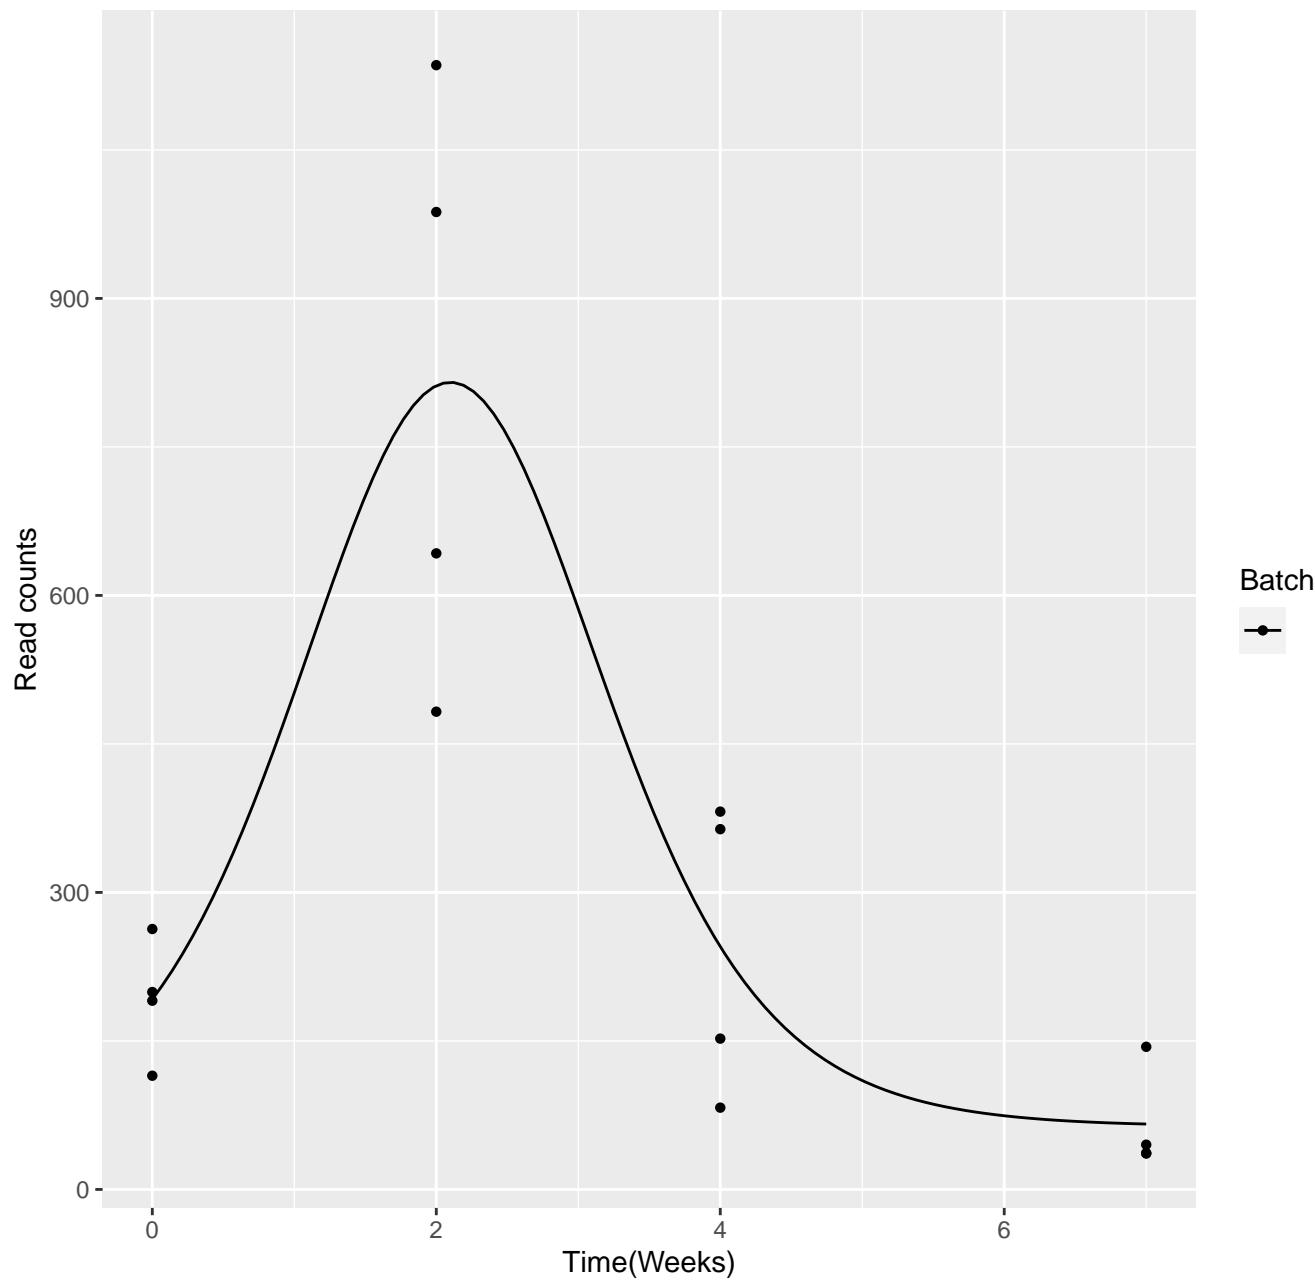

PTPDC1:  $\log_{10} q = -7.01$

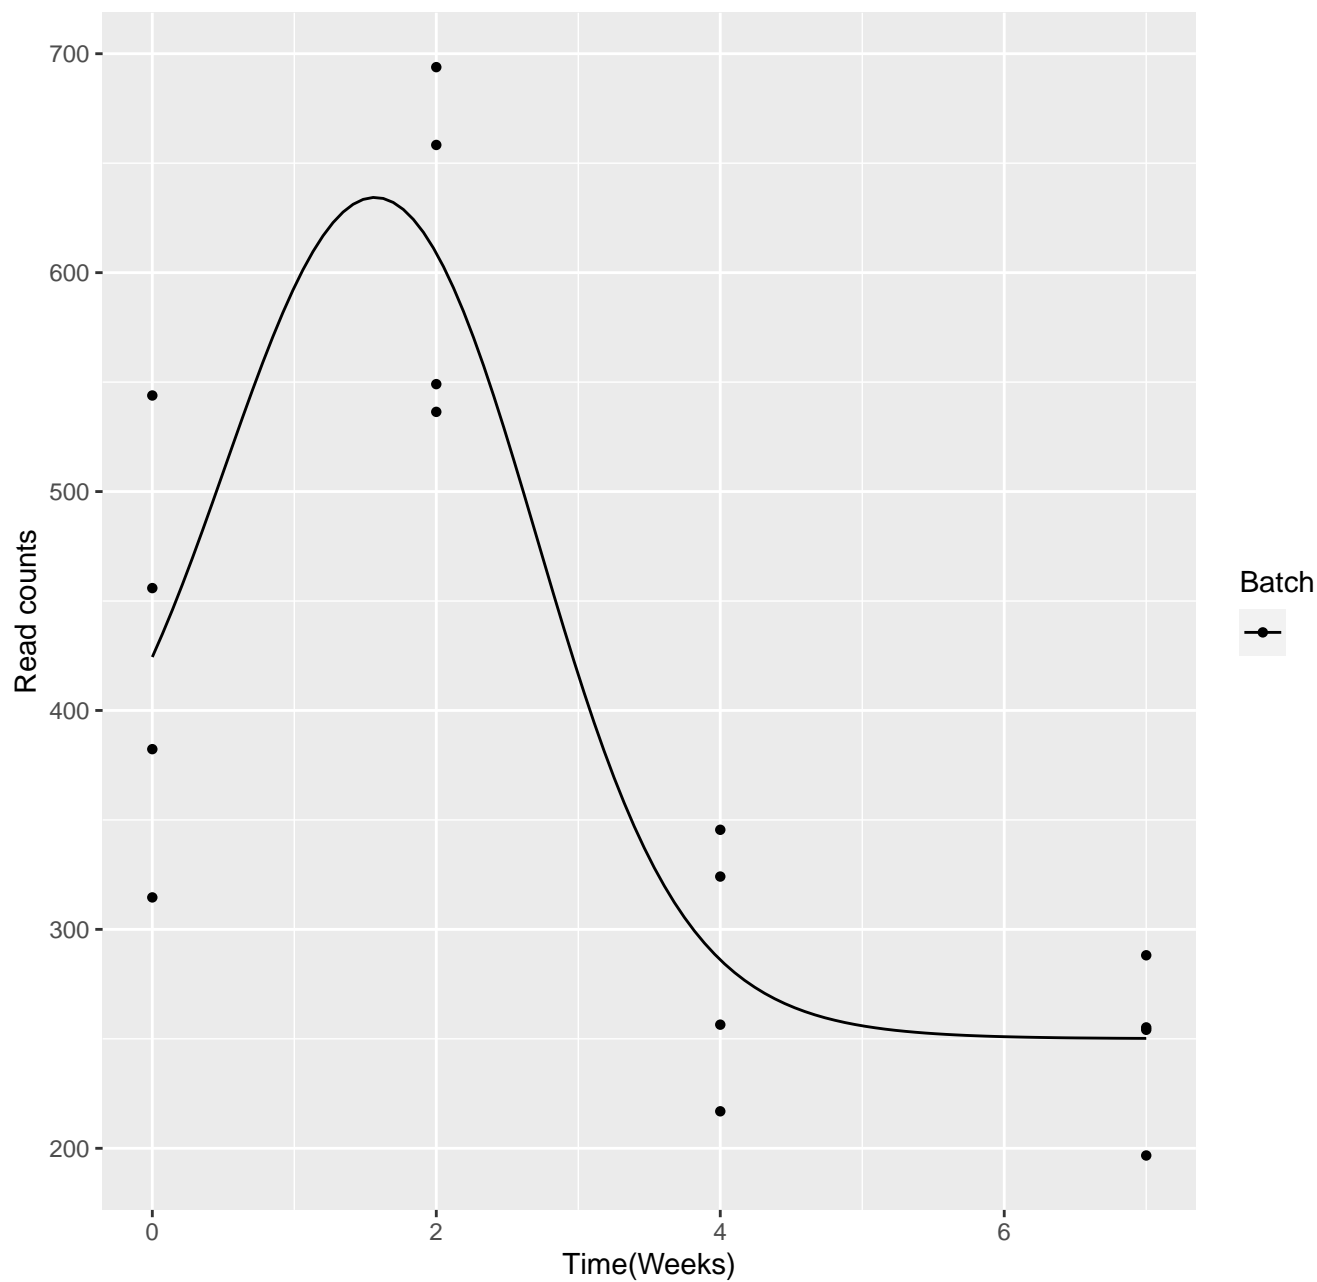

NTF3:  $\log_{10} q = -7.01$

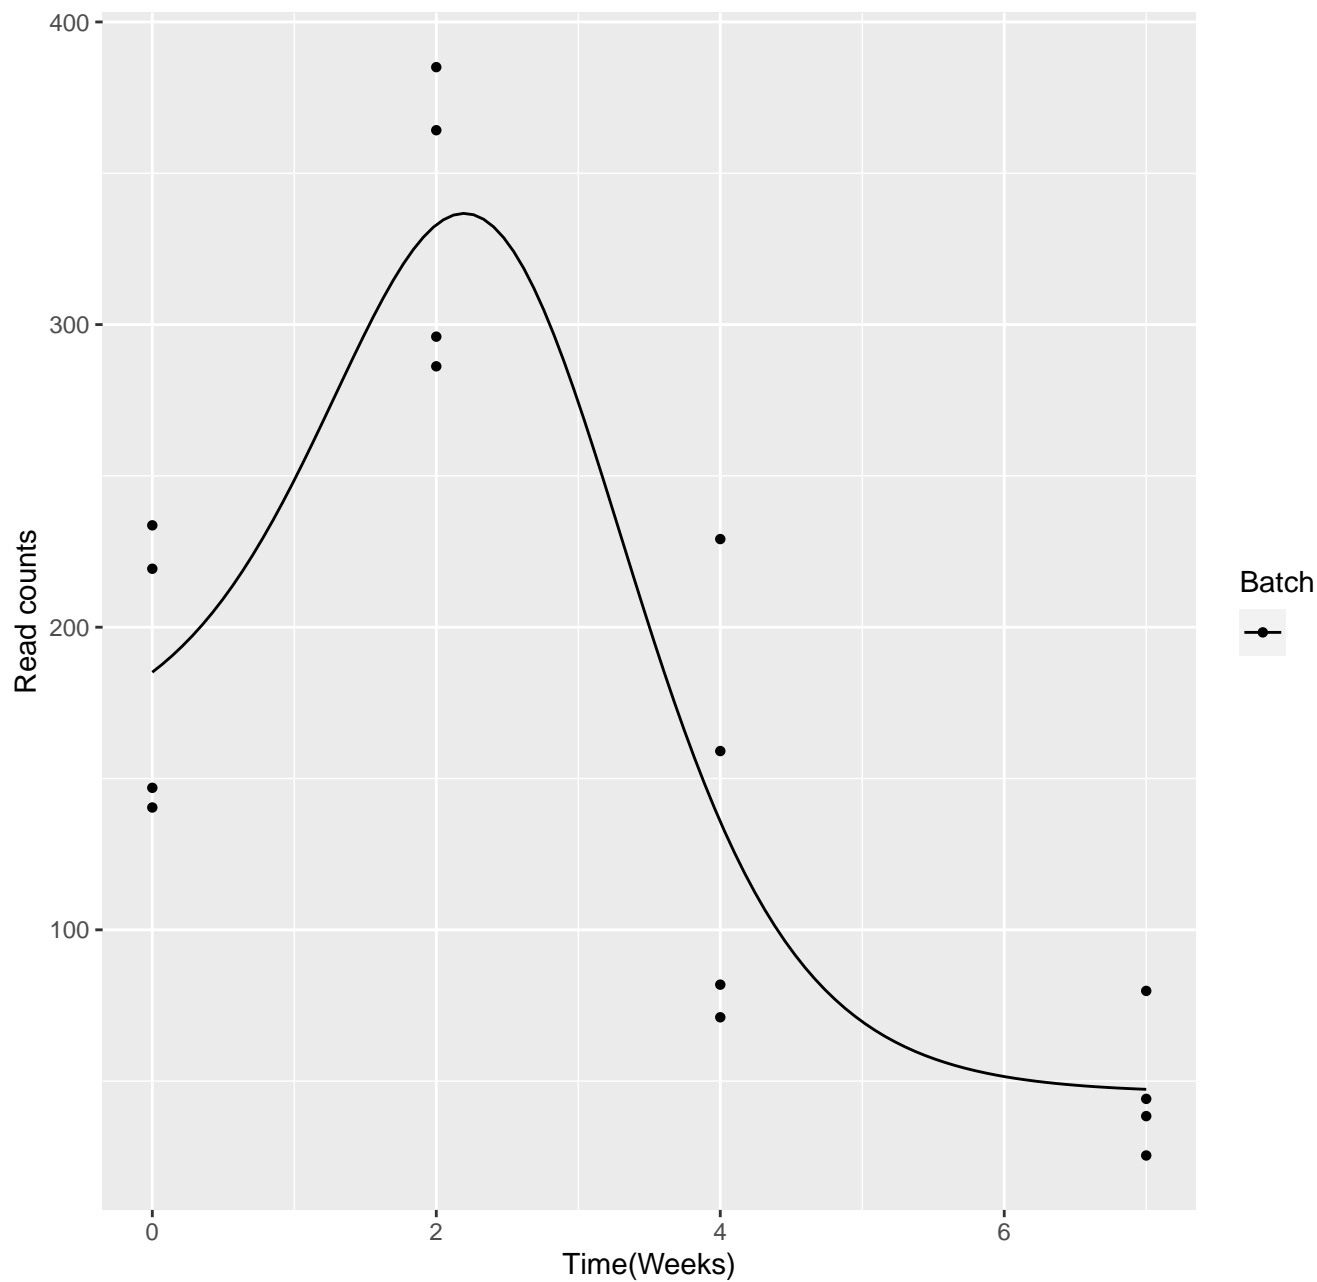



IGSF9B:  $\log_{10} q = -7.01$

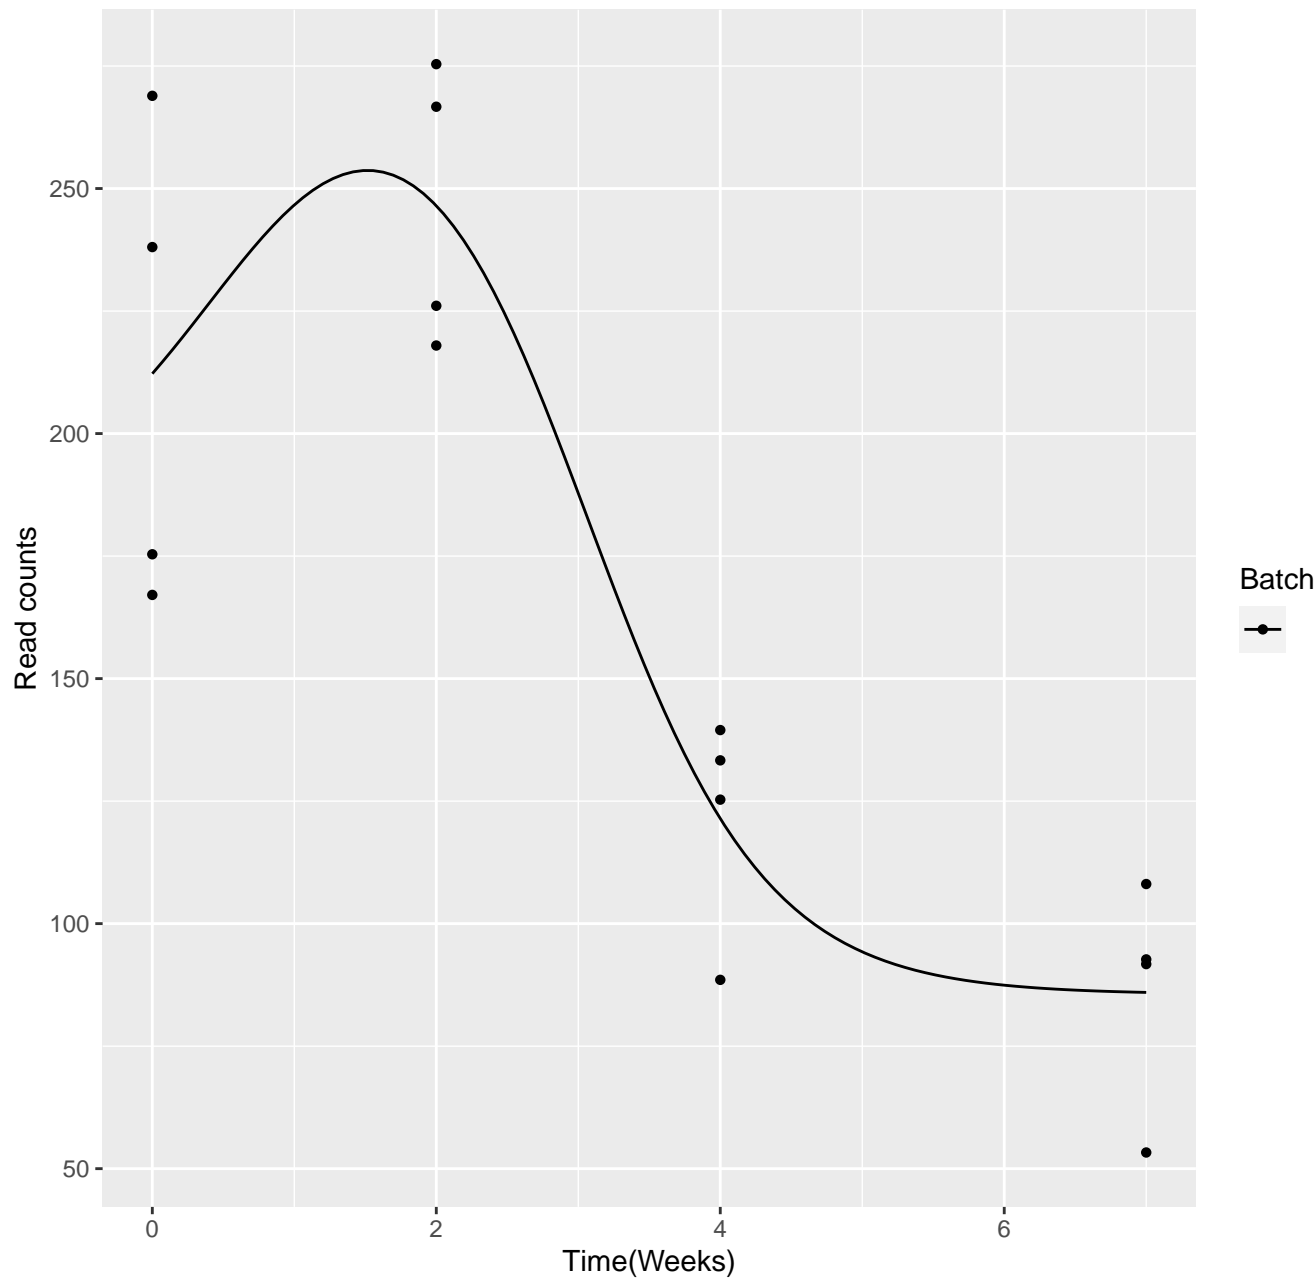

MYH10:  $\log_{10} q = -6.98$

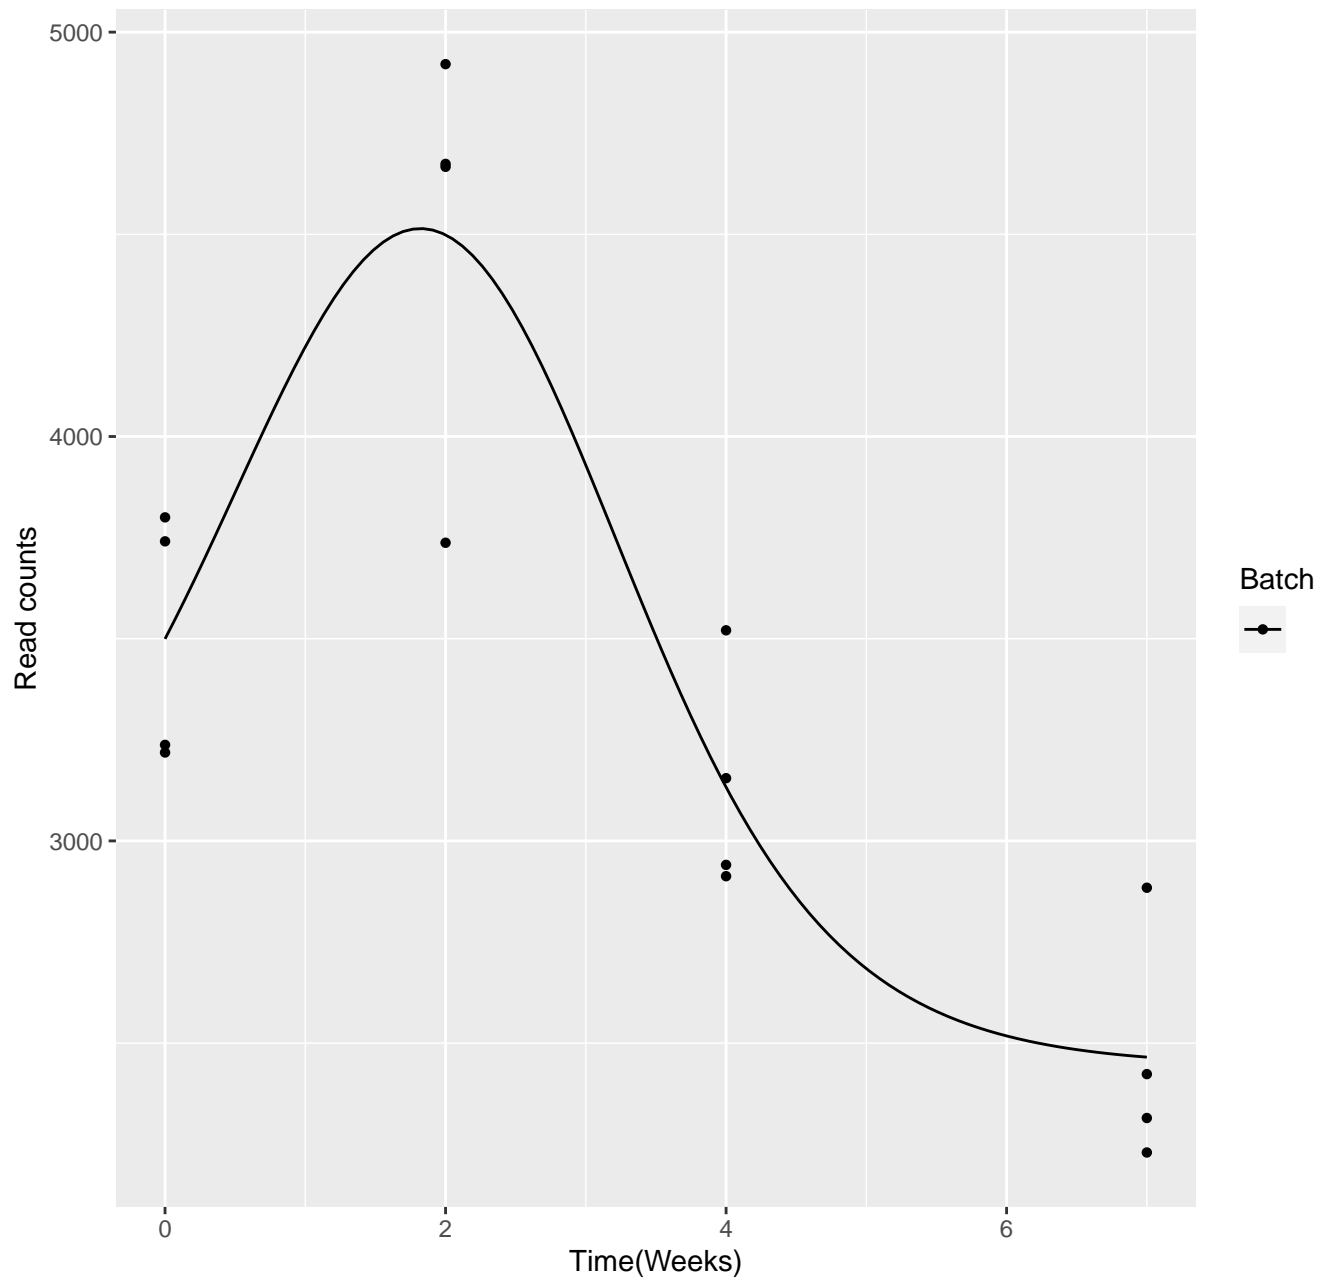

SLC22A3:  $\log_{10} q = -6.97$

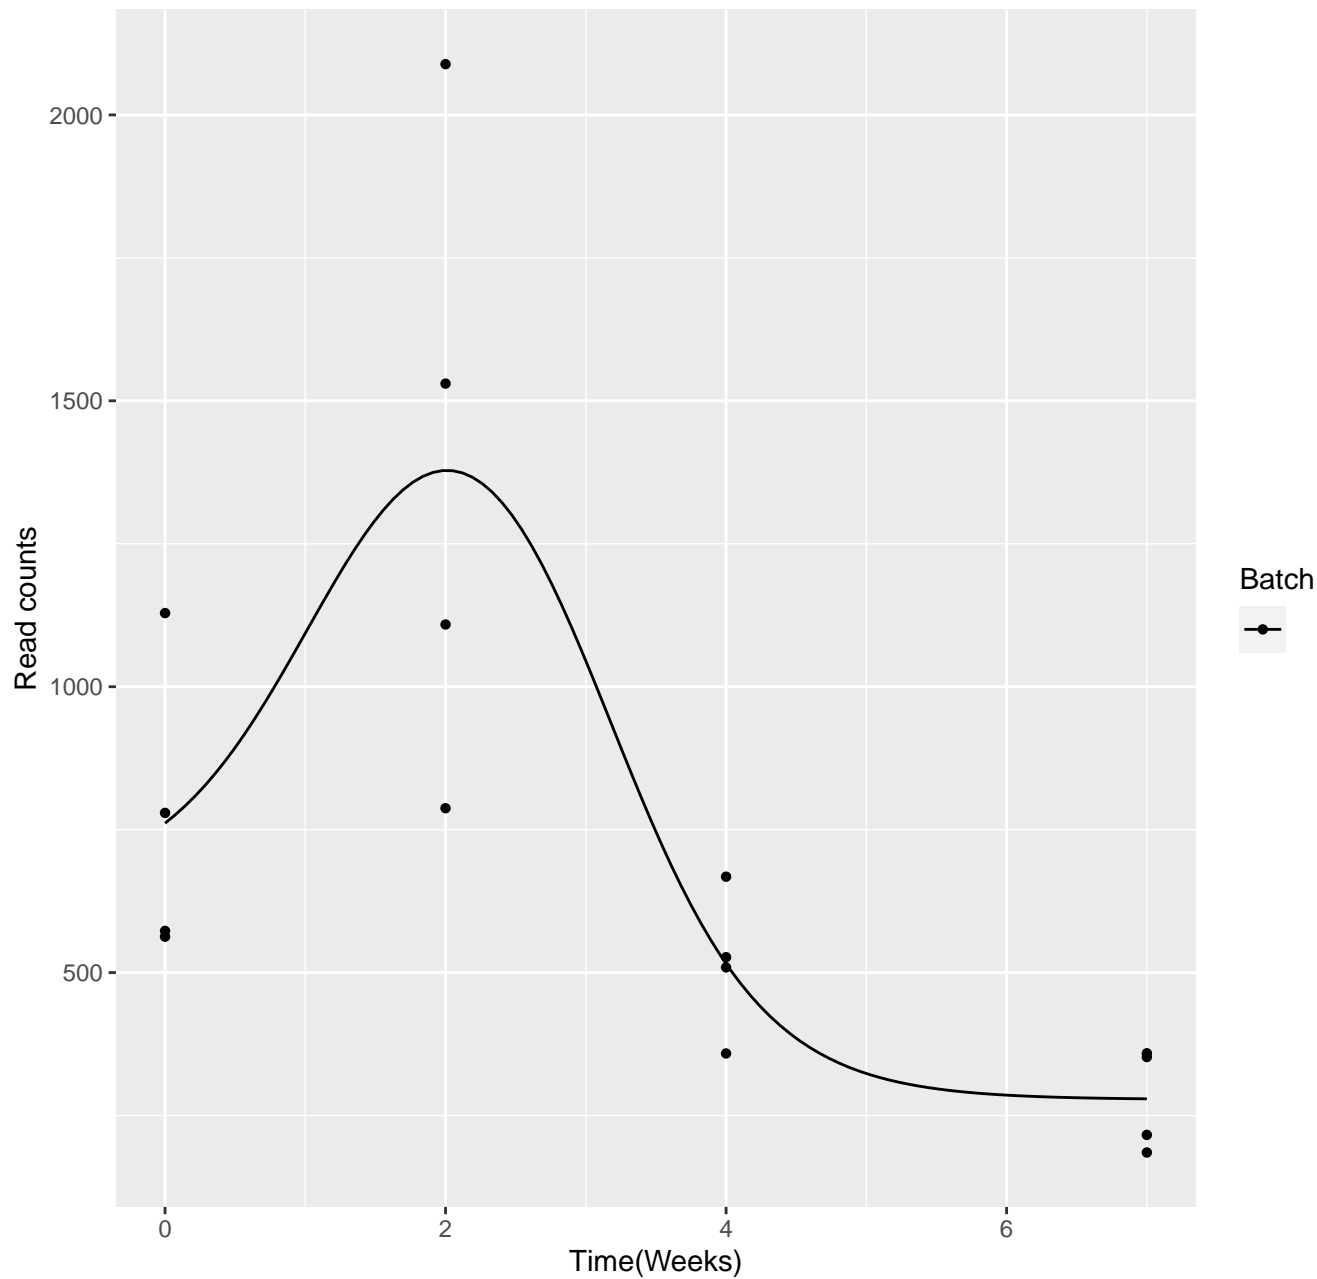

CTDSPL:  $\log_{10} q = -6.92$

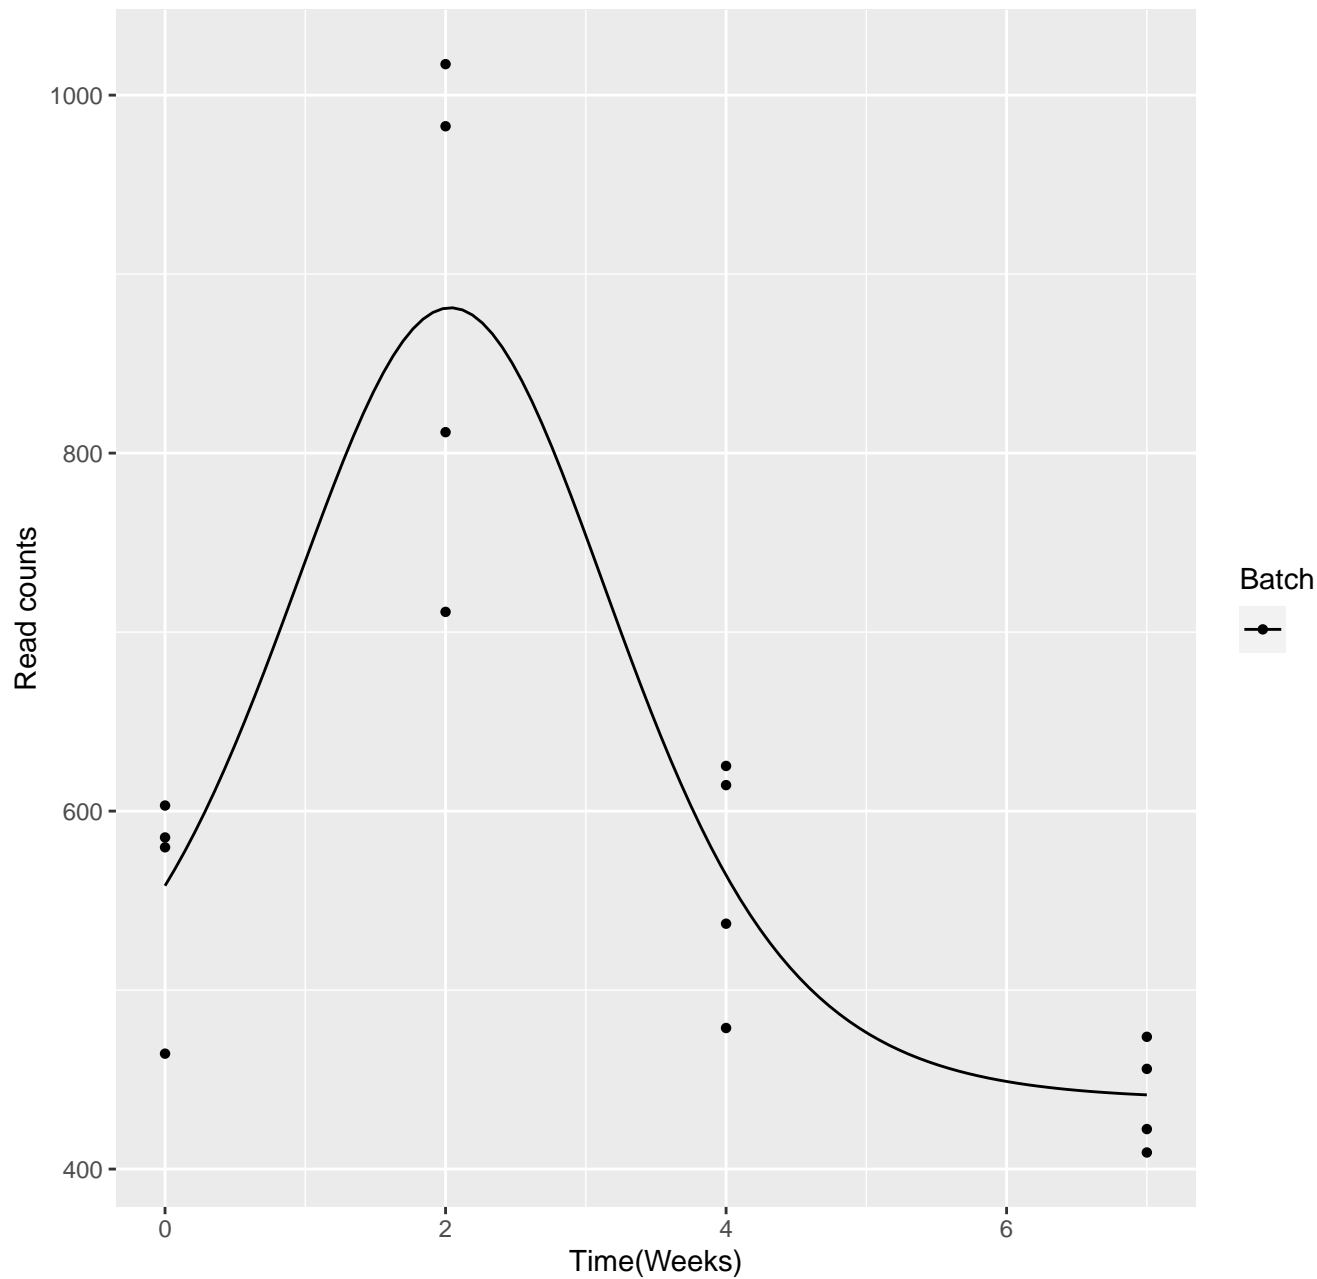

LOC108178418:  $\log_{10} q = -6.9$

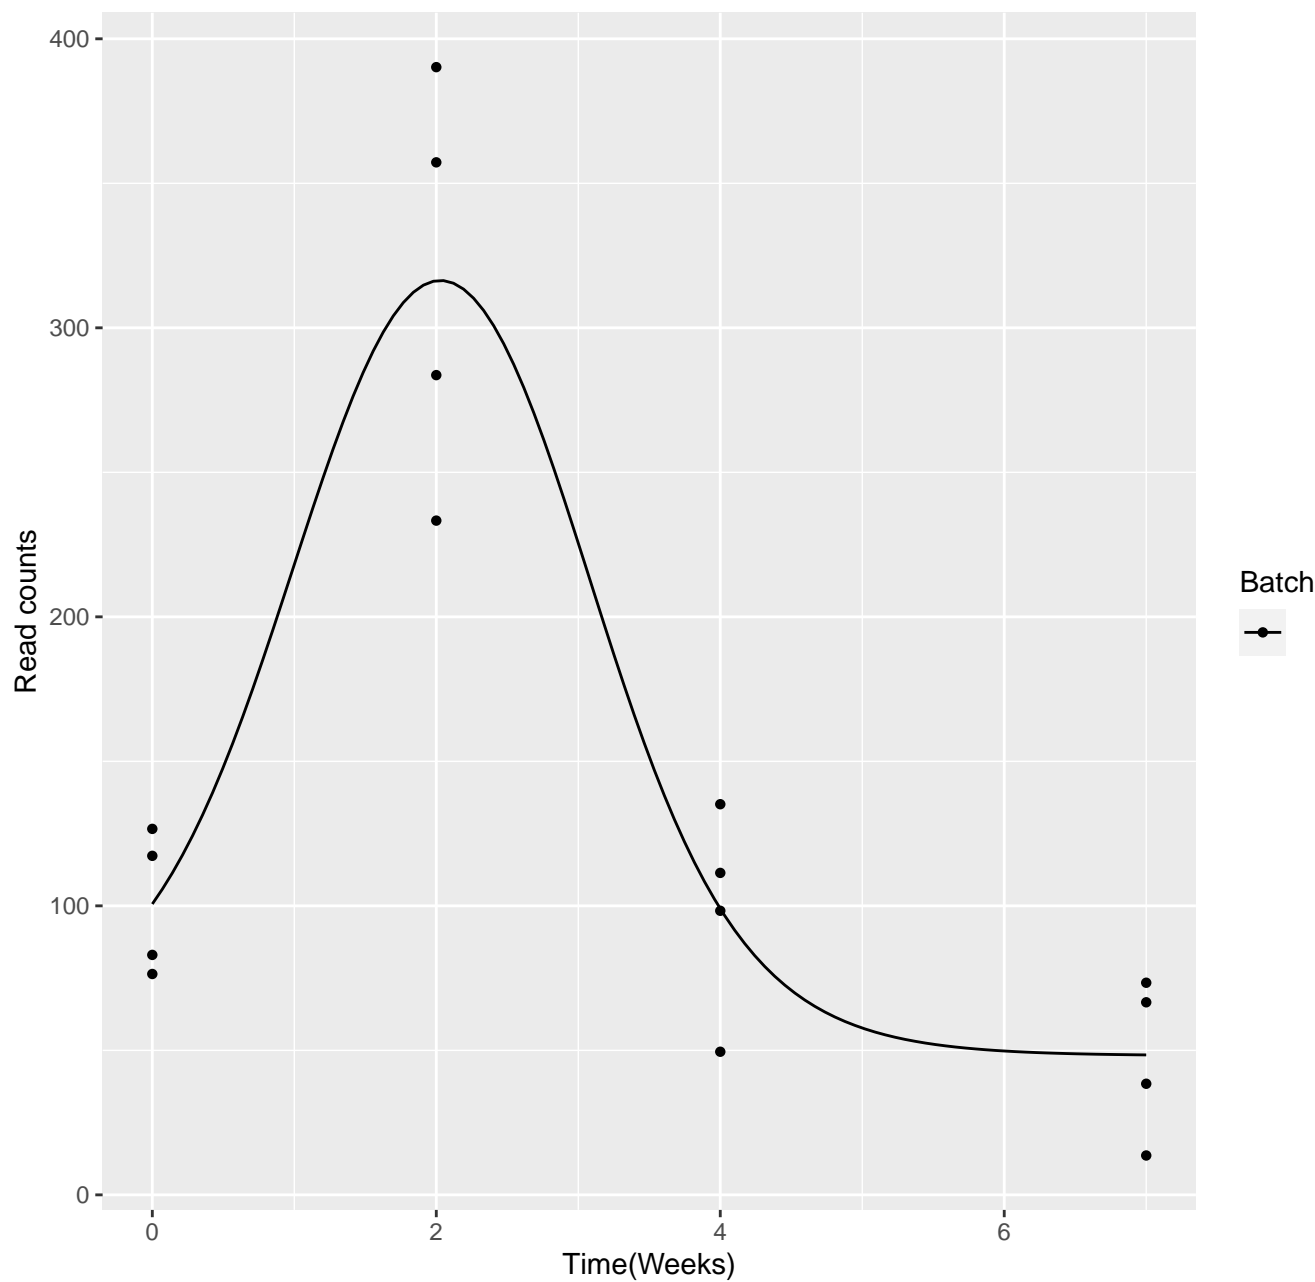

CD80:  $\log_{10} q = -6.9$

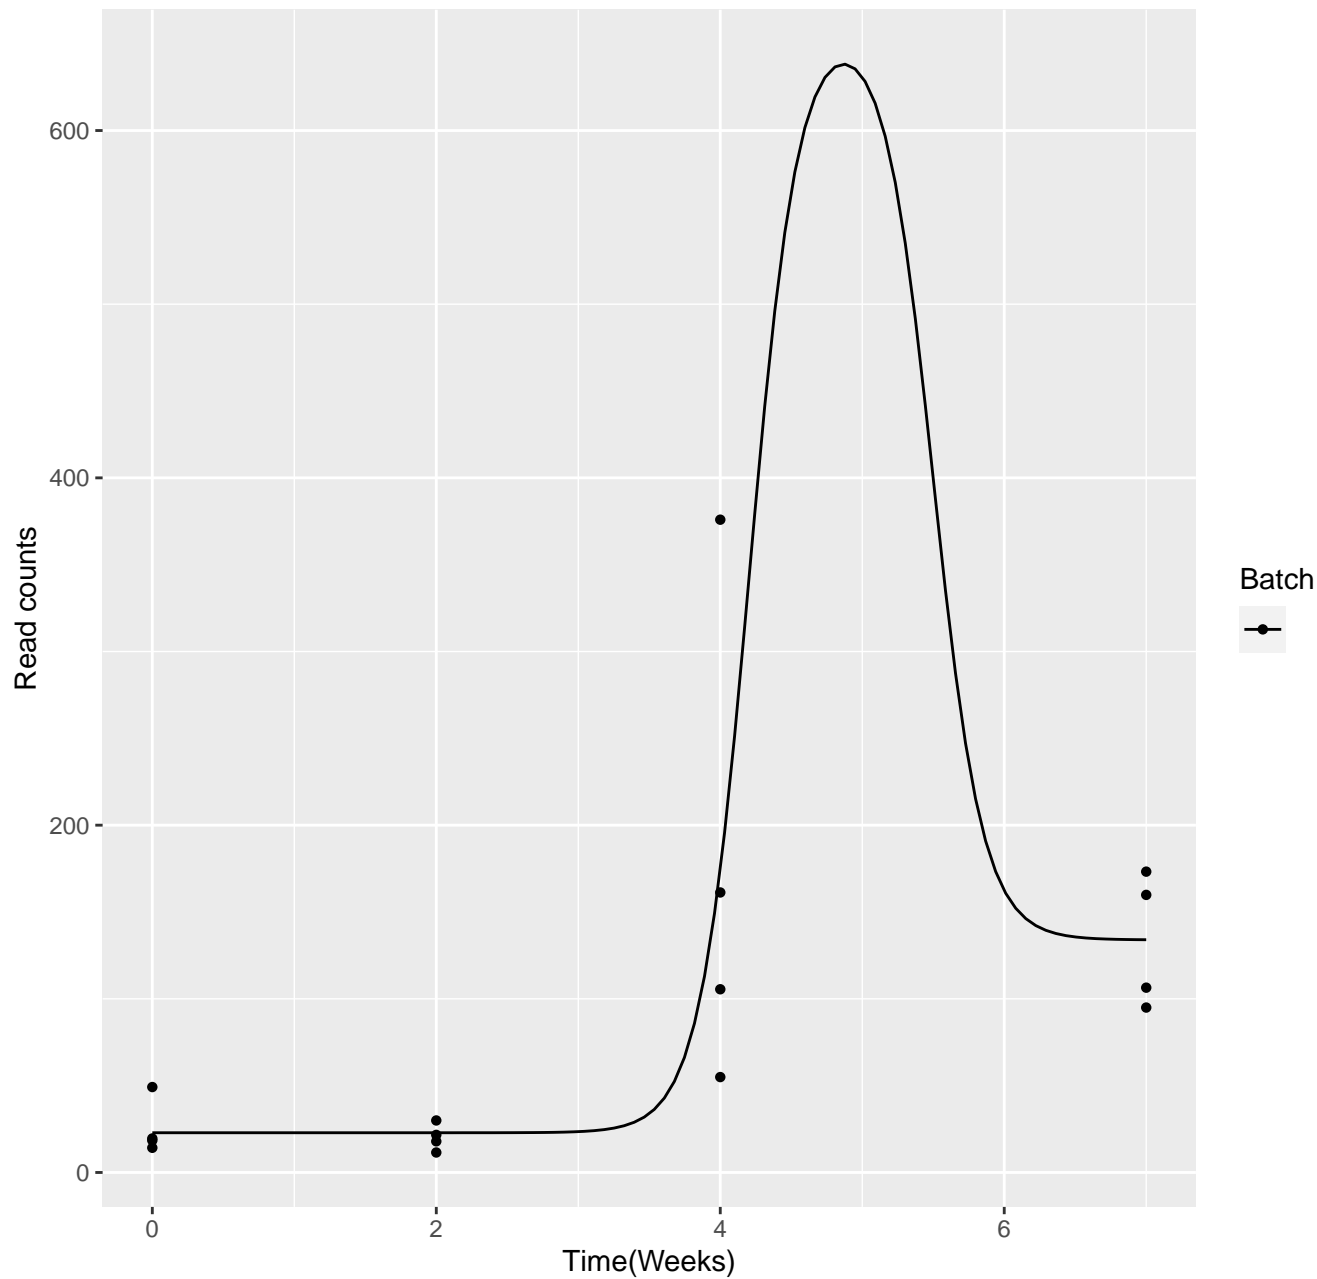

ARHGAP22:  $\log_{10} q = -6.88$

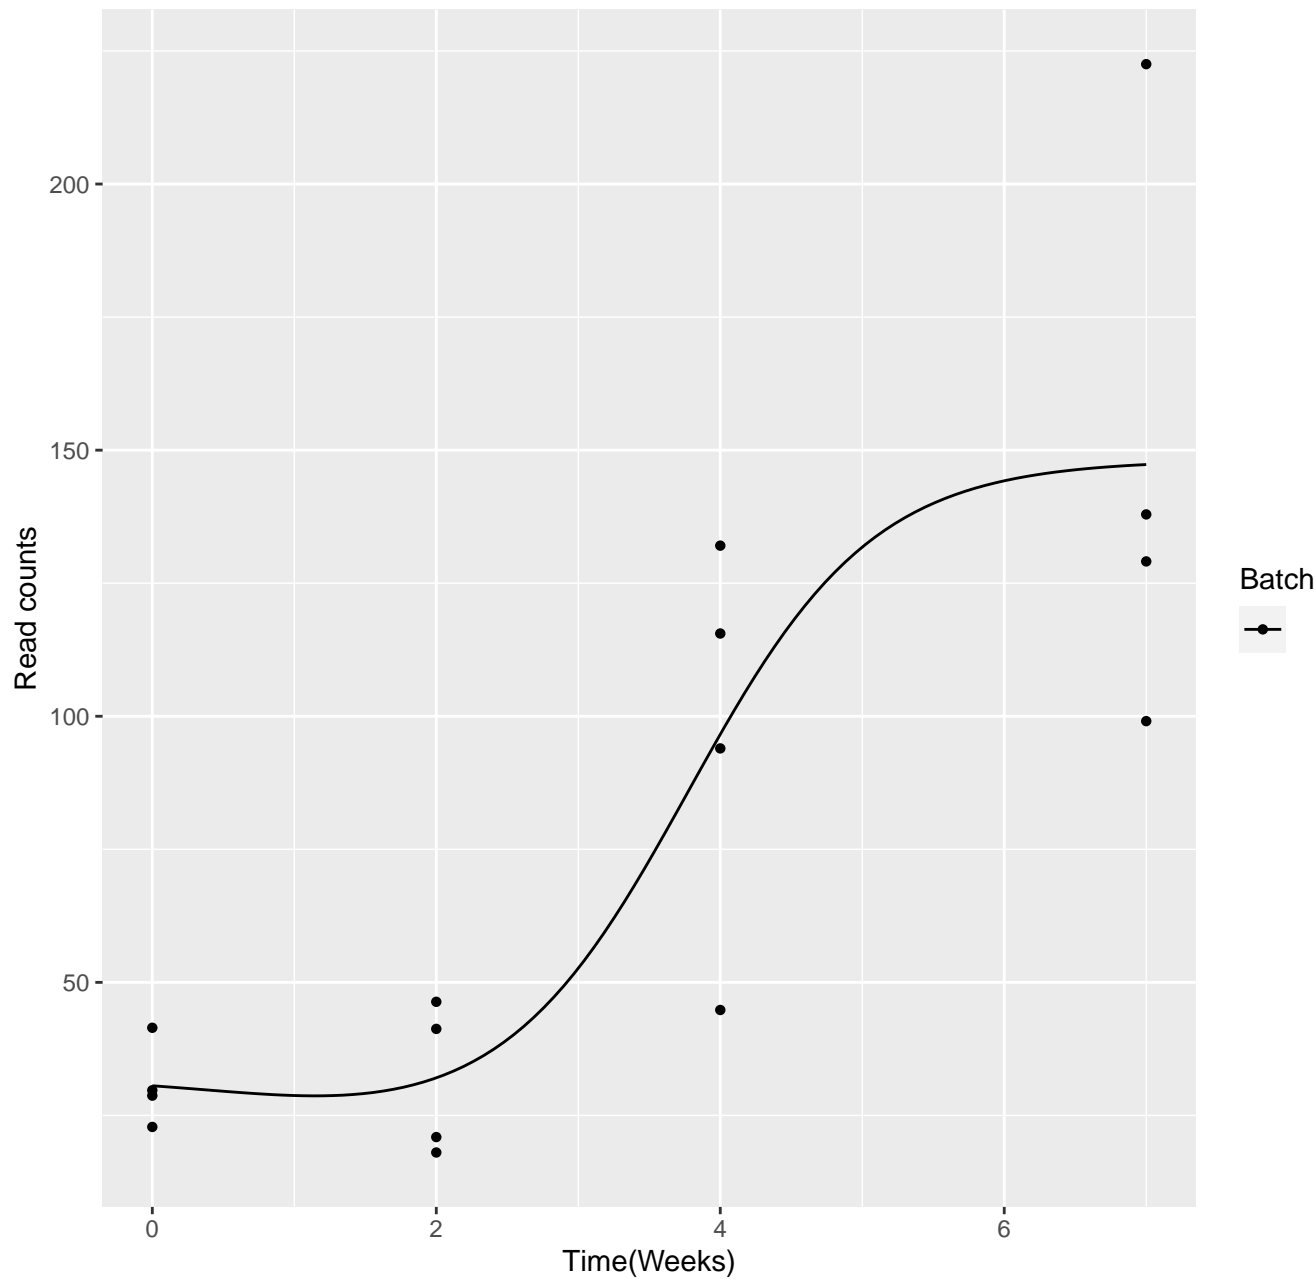

SMURF1:  $\log_{10} q = -6.87$

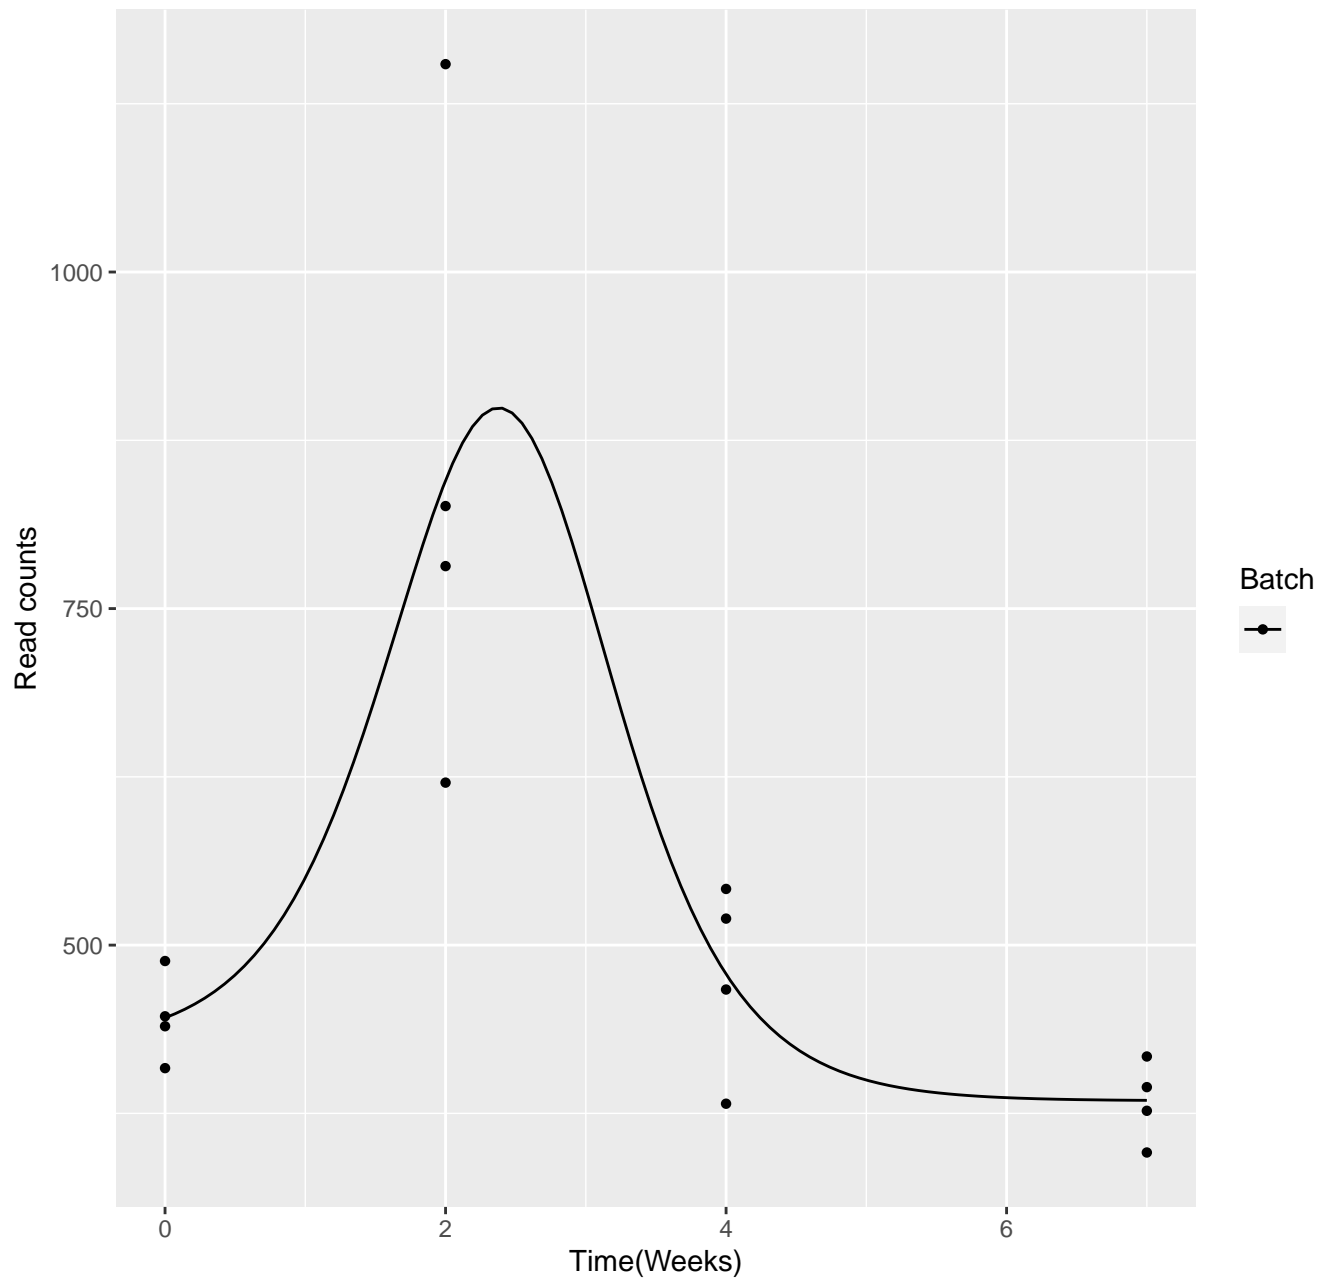



SOST:  $\log_{10} q = -6.87$

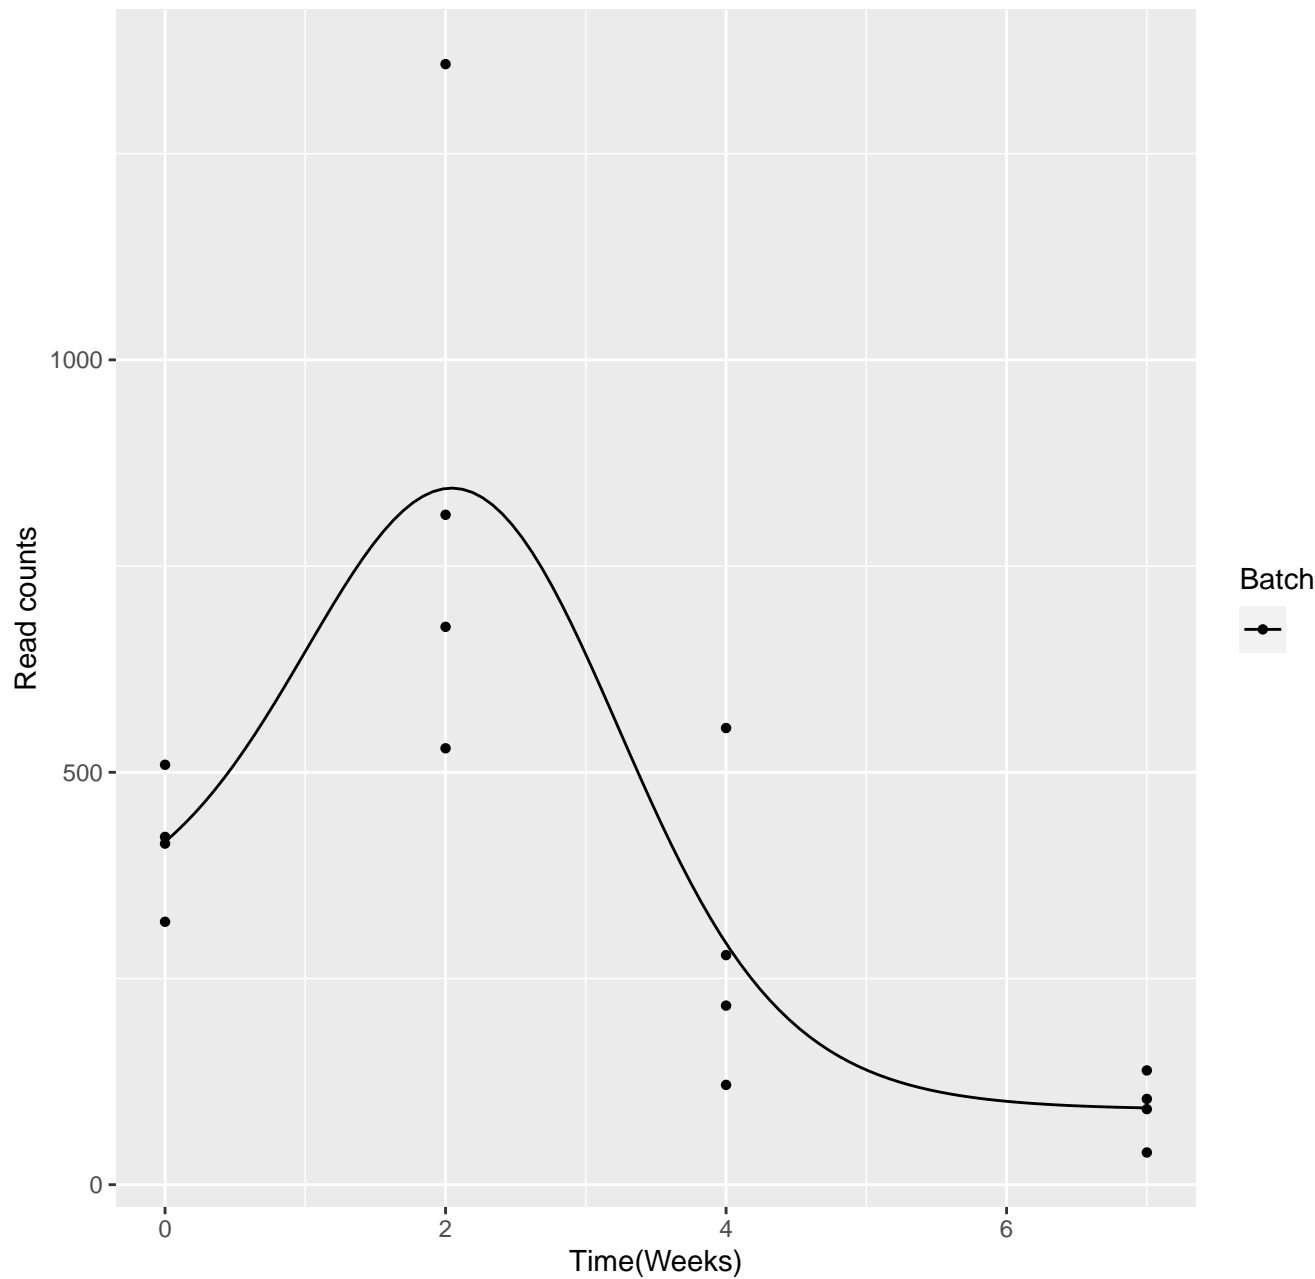

WAS:  $\log_{10} q = -6.86$

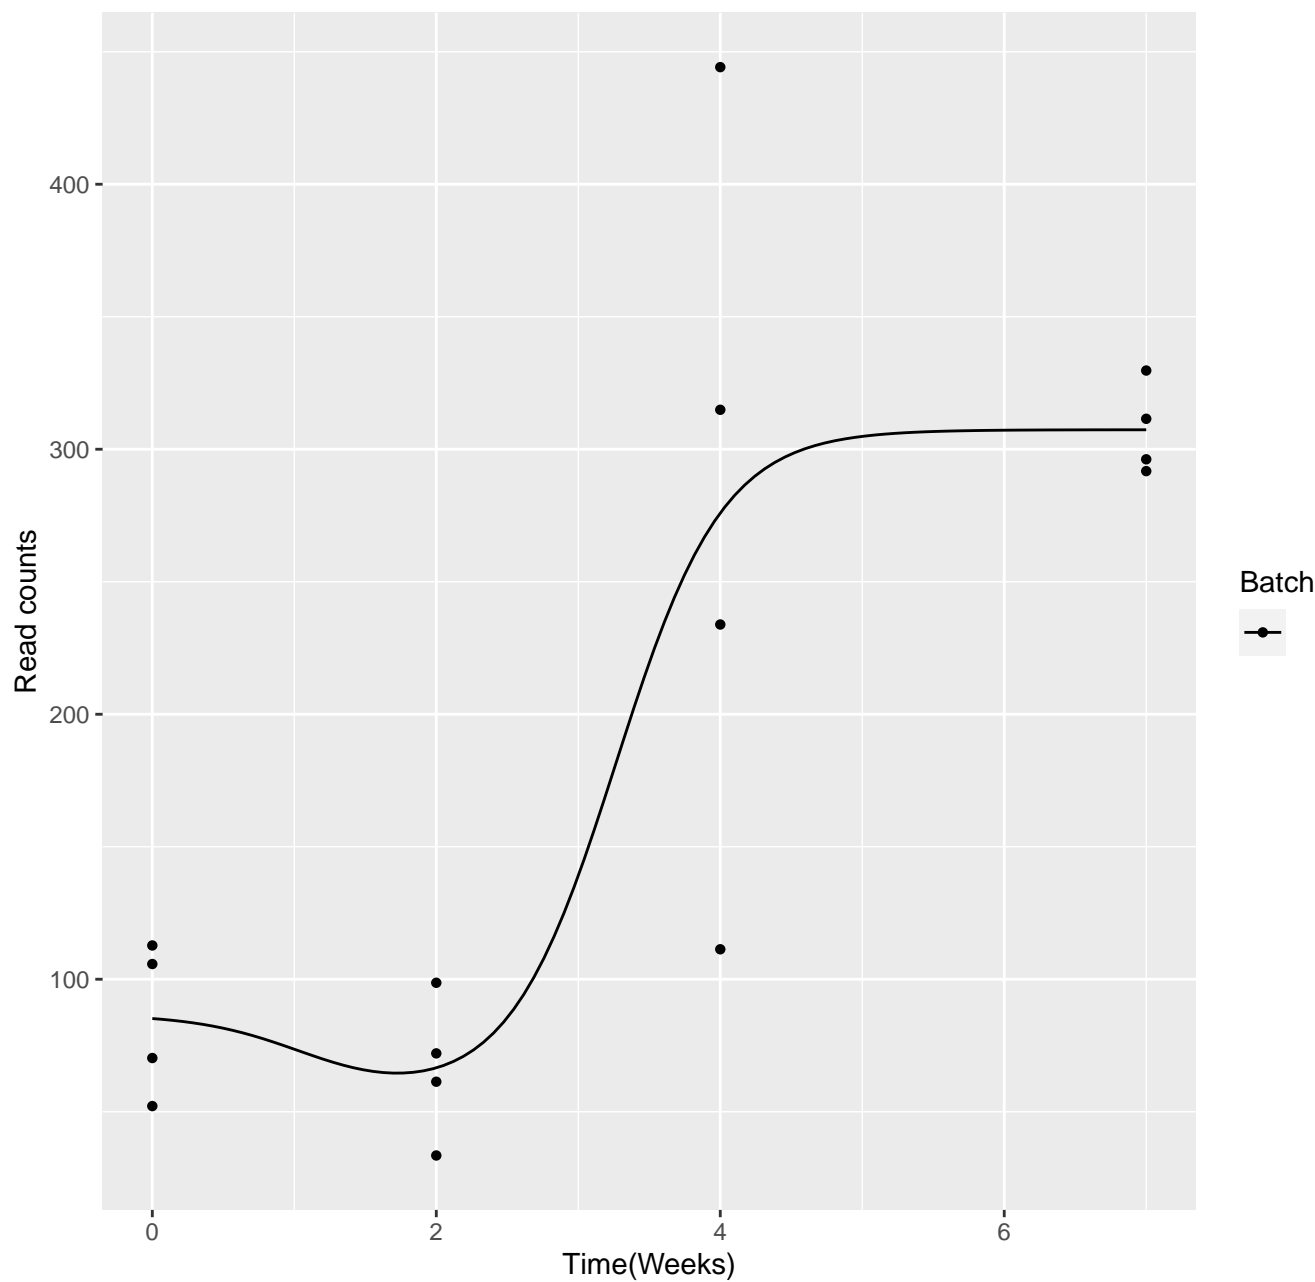

INPP4A:  $\log_{10} q = -6.85$

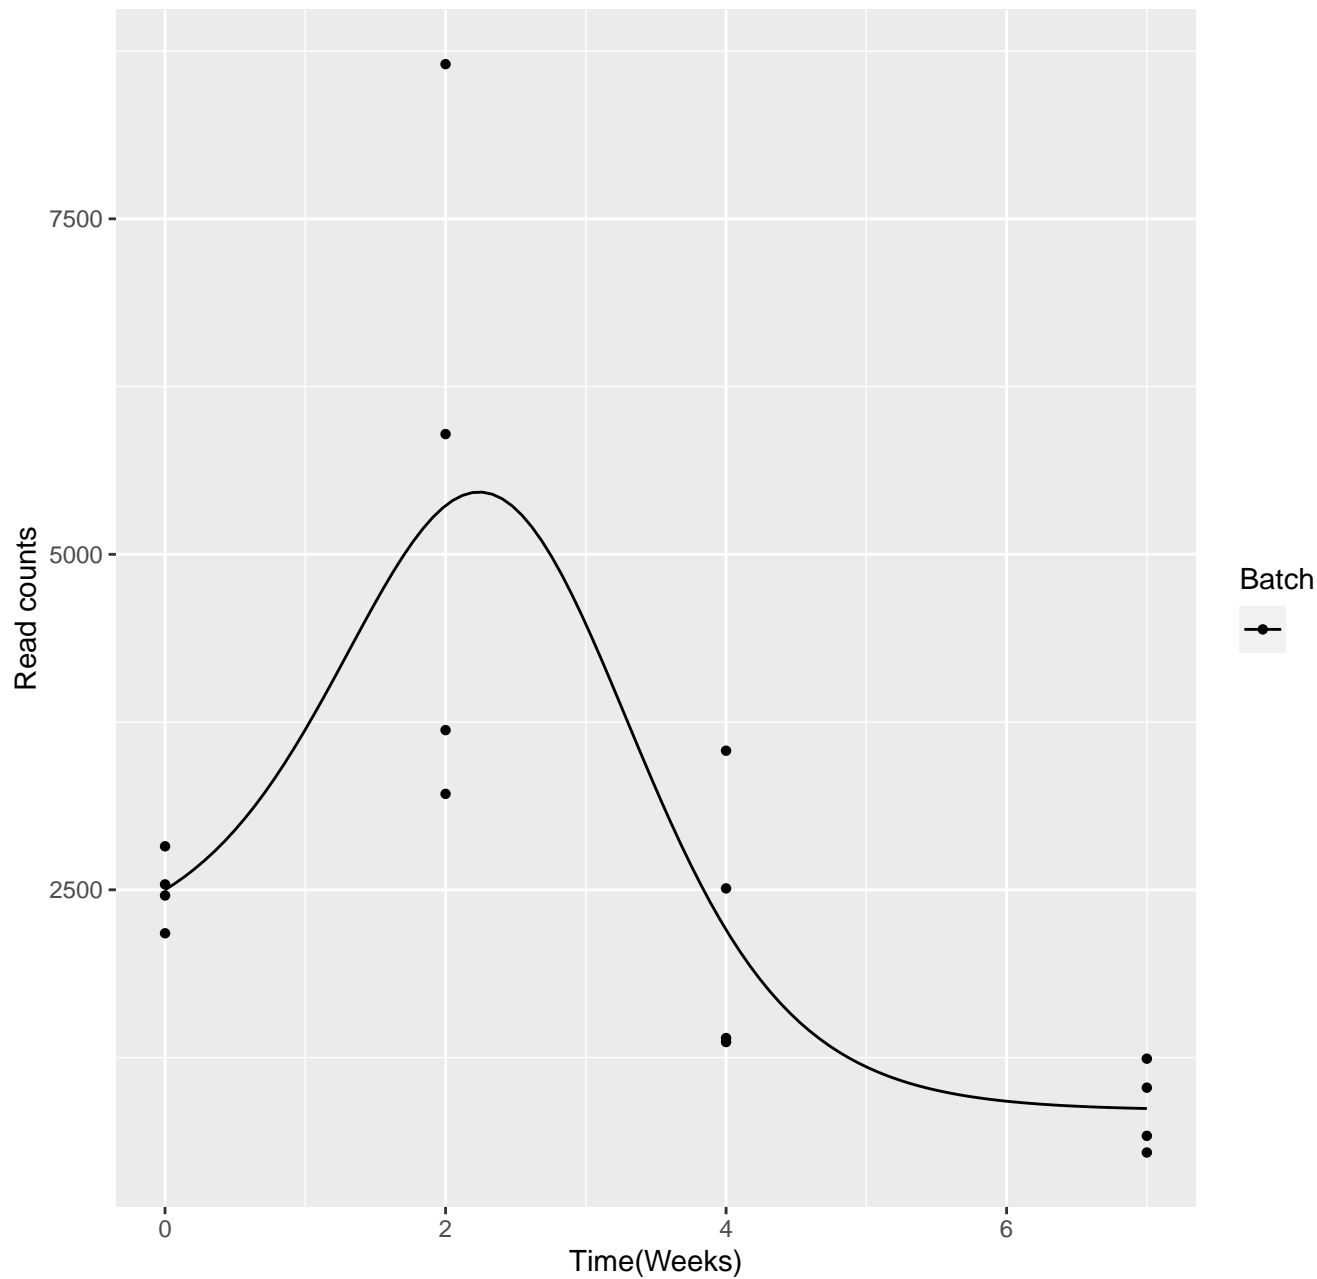

TEF:  $\log_{10} q = -6.81$

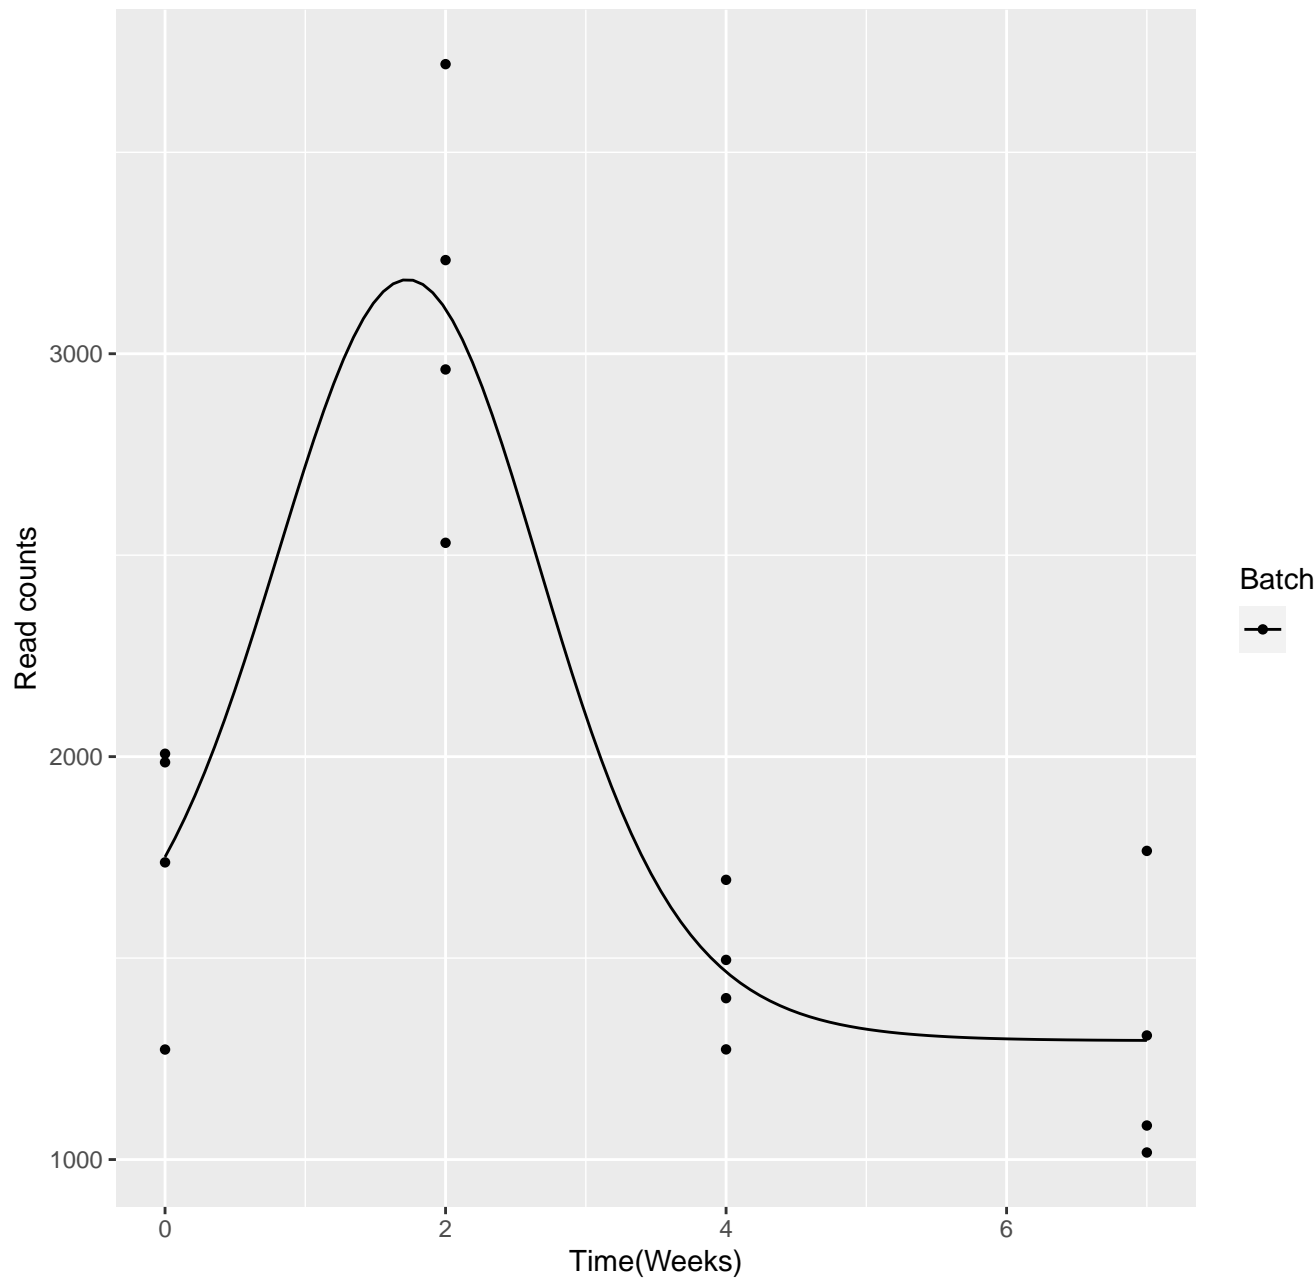

FABP5:  $\log_{10} q = -6.81$

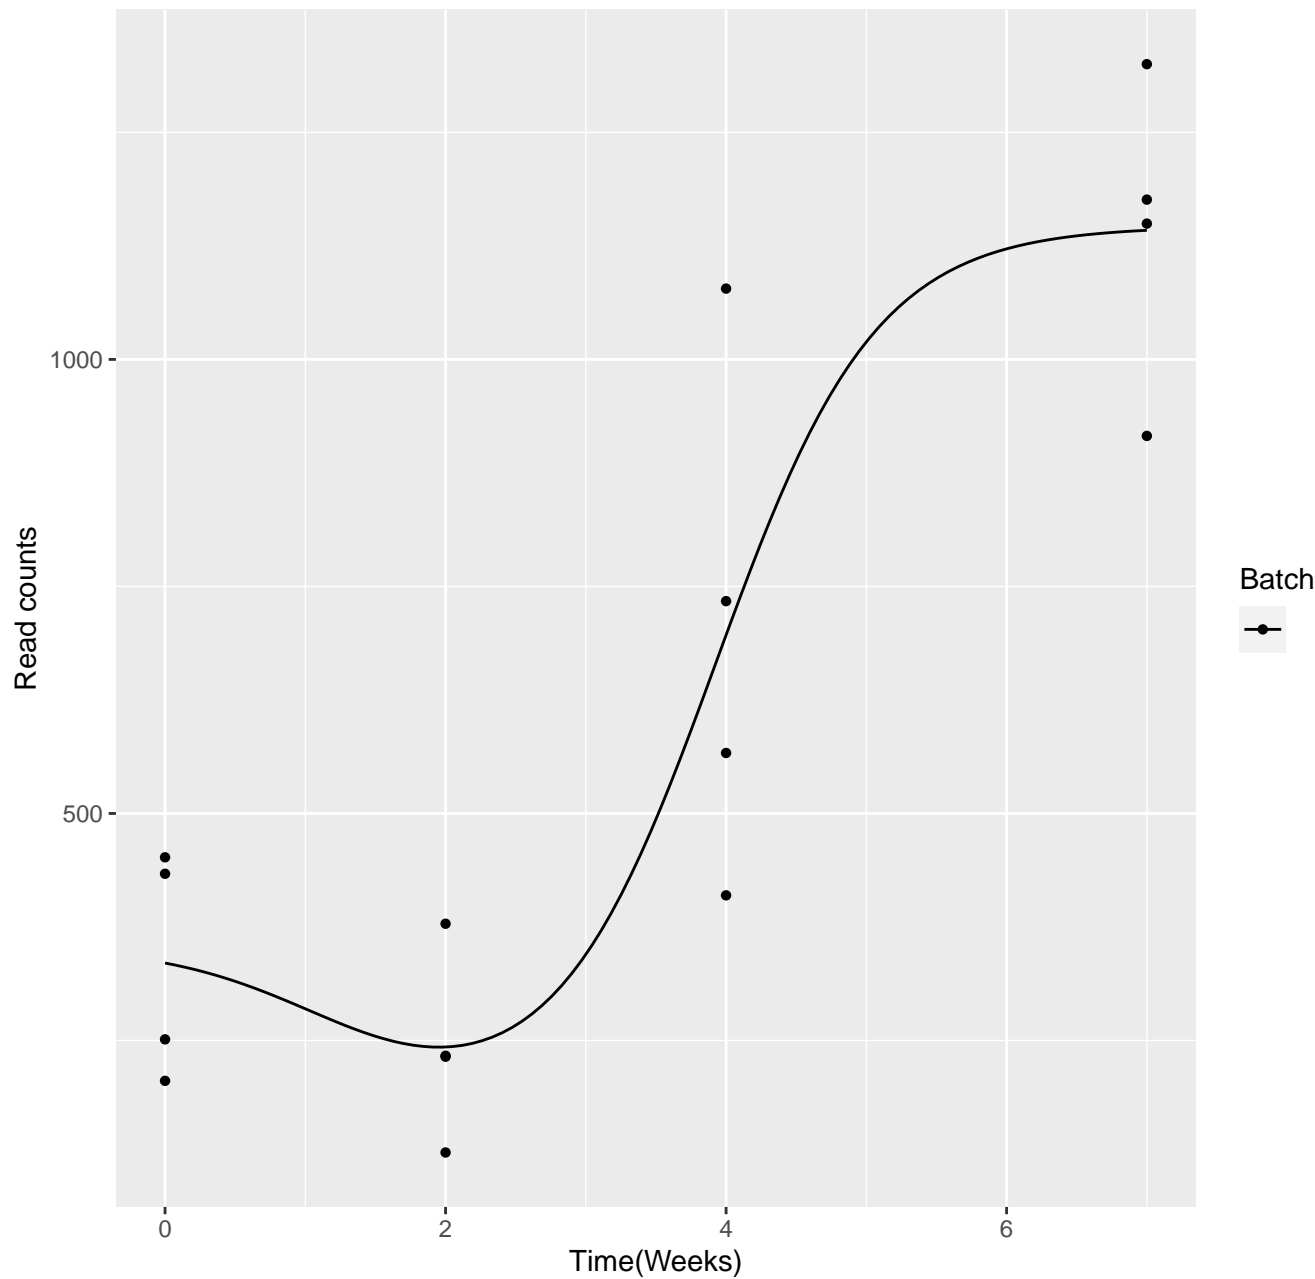

KRT75:  $\log_{10} q = -6.81$

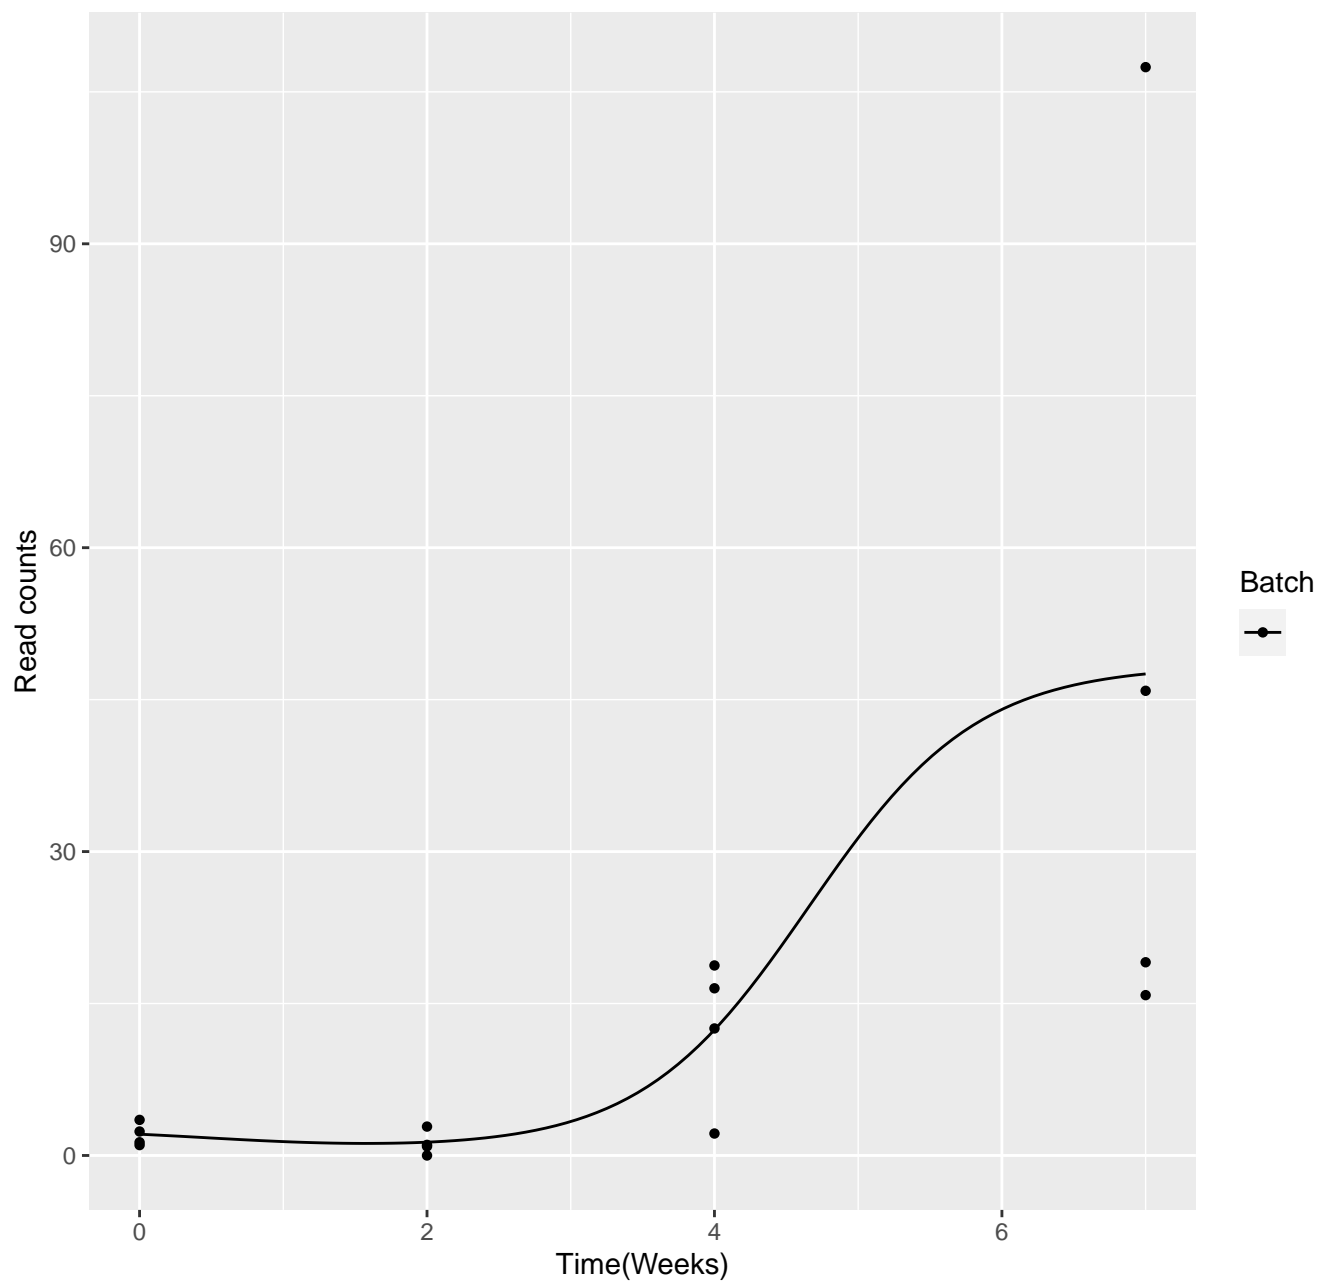

LOC100345649:  $\log_{10} q = -6.81$

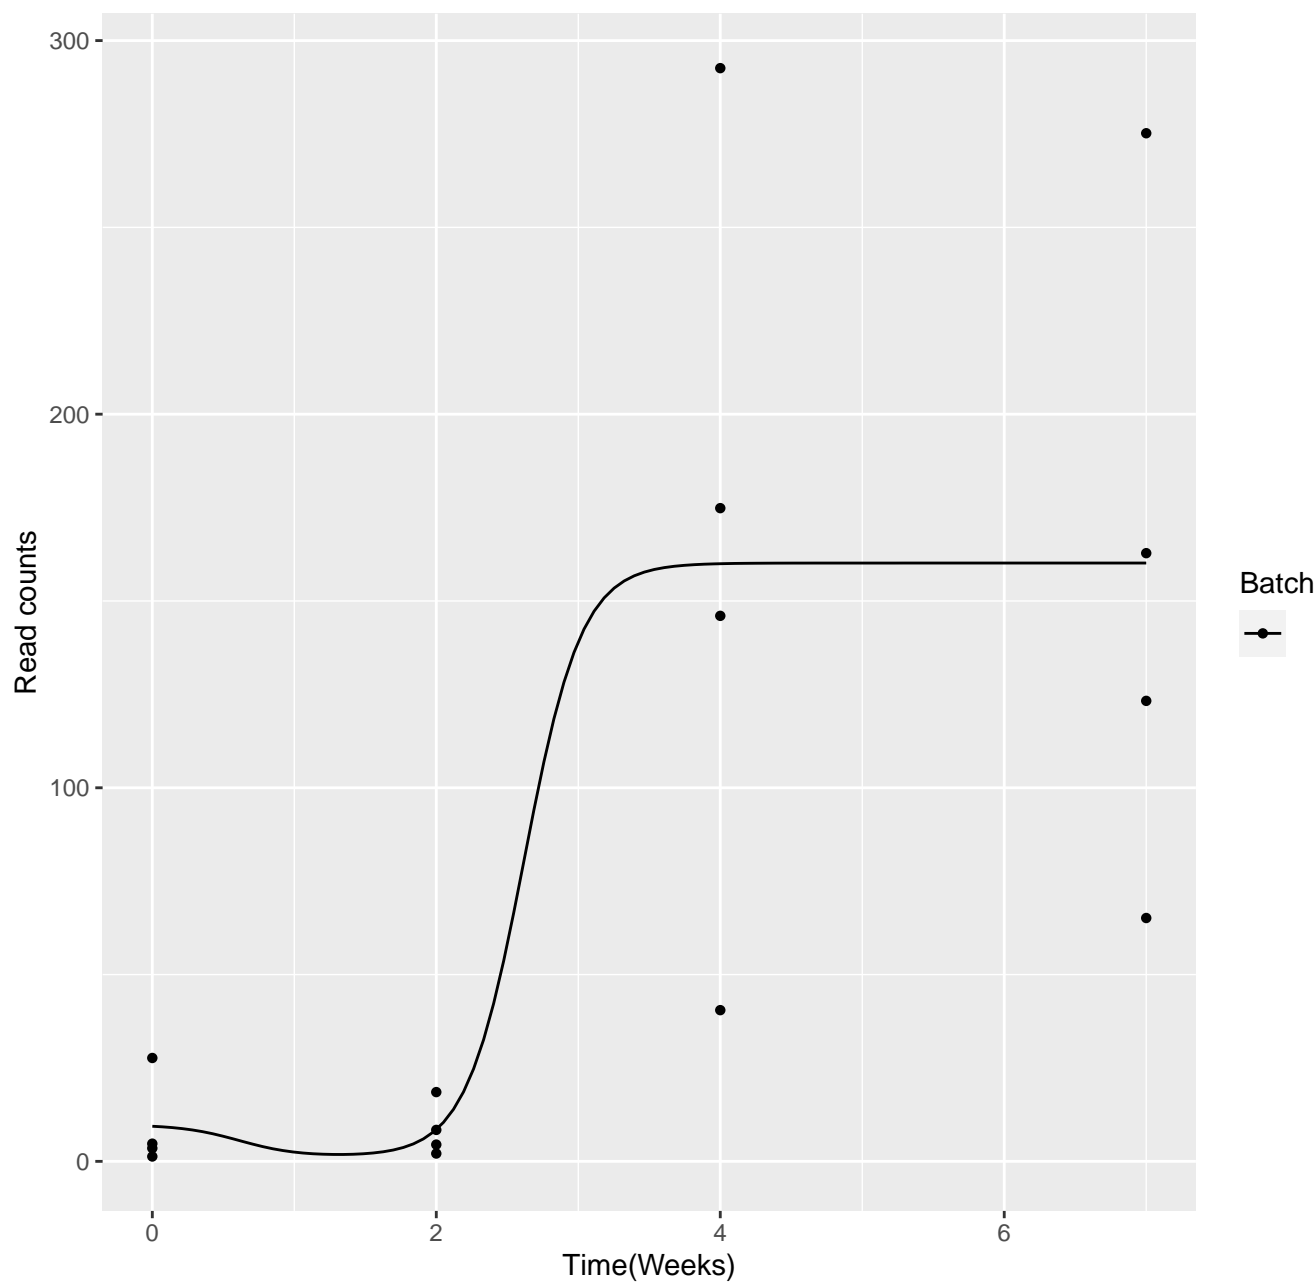

IRF8:  $\log_{10} q = -6.79$

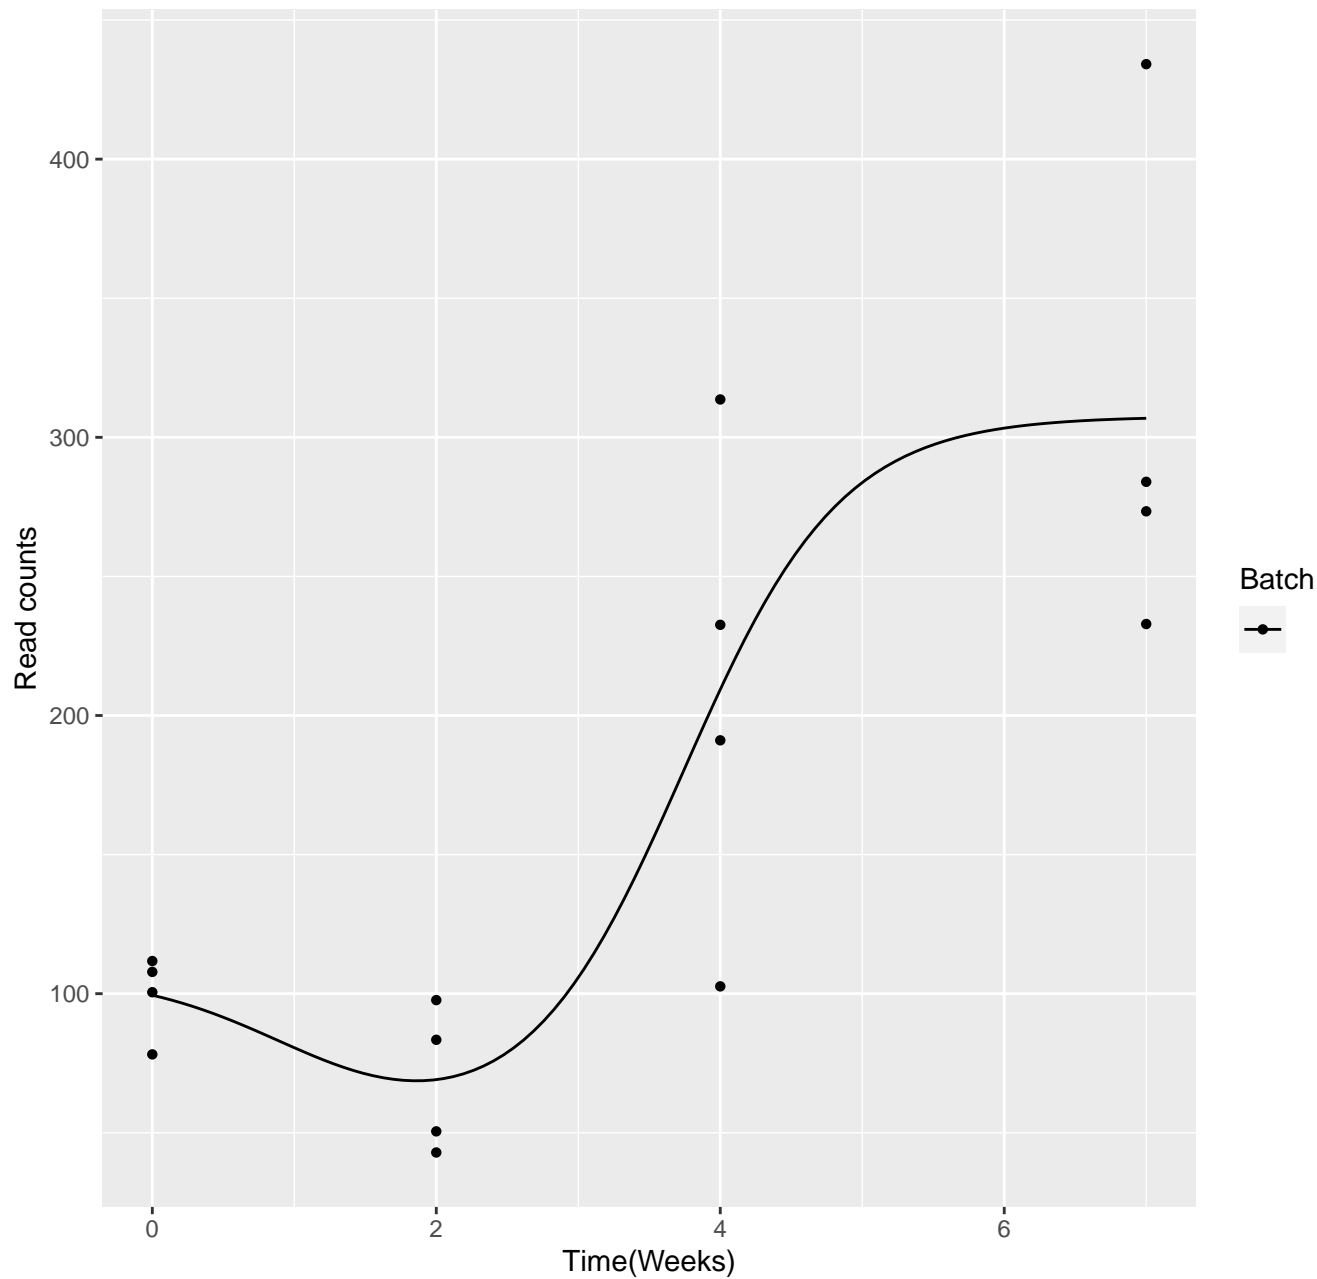



PTPN18:  $\log_{10} q = -6.79$

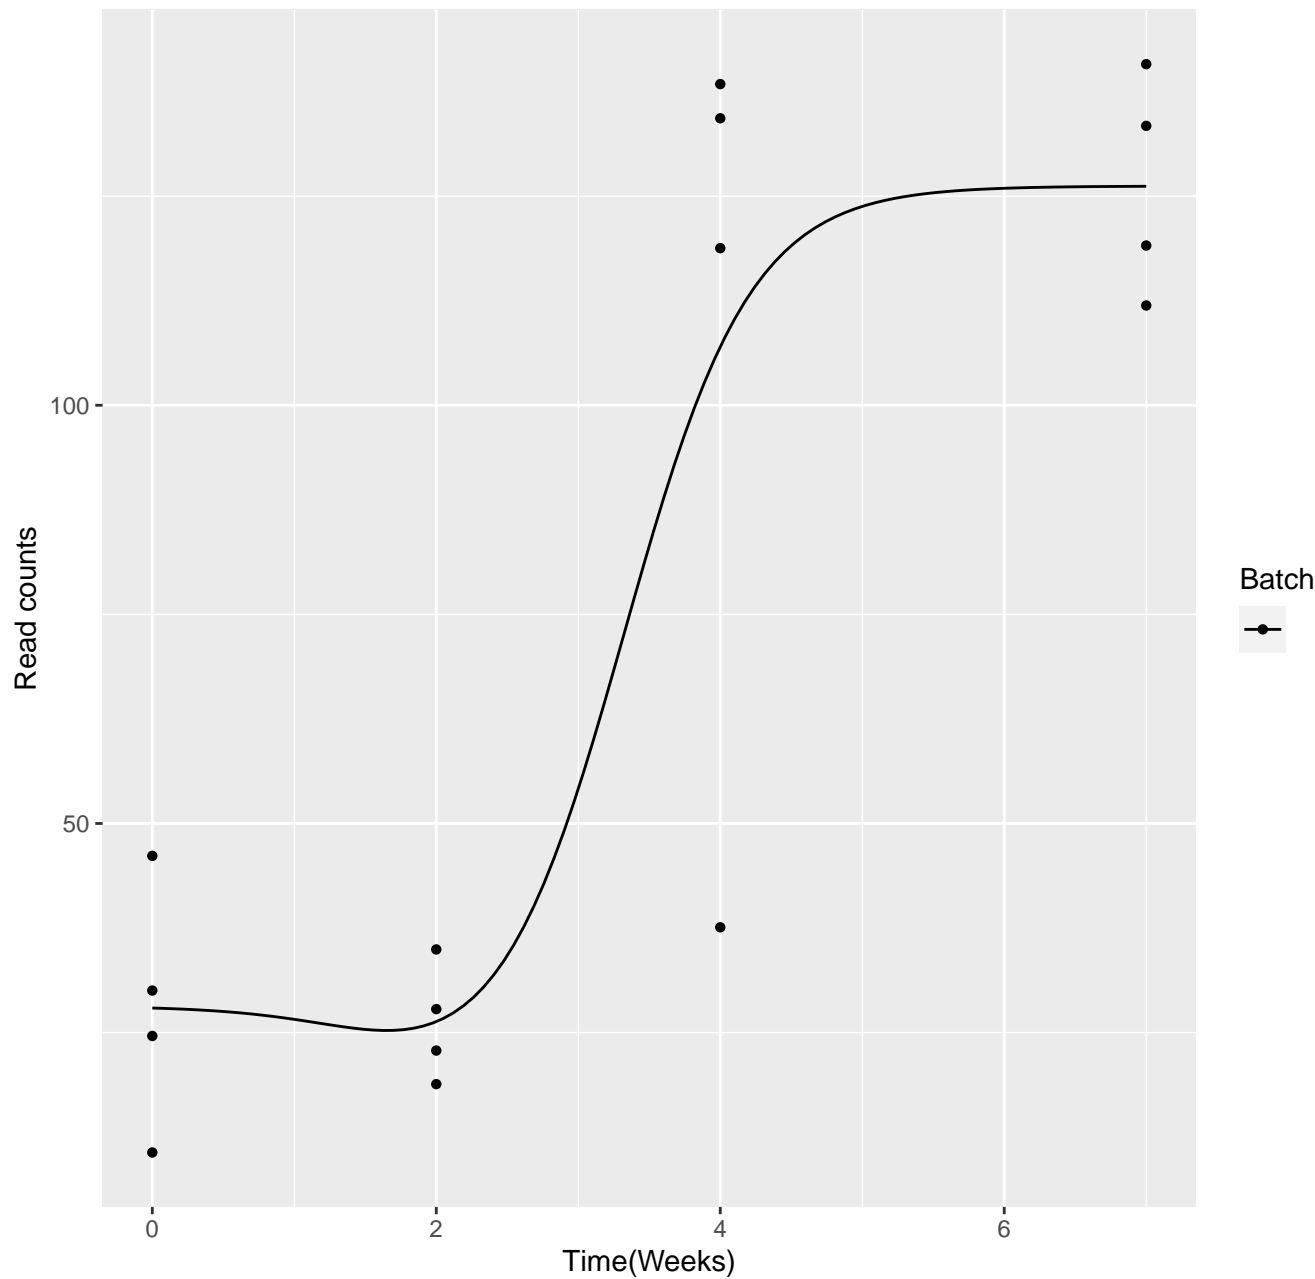

LOC103346857:  $\log_{10} q = -6.79$

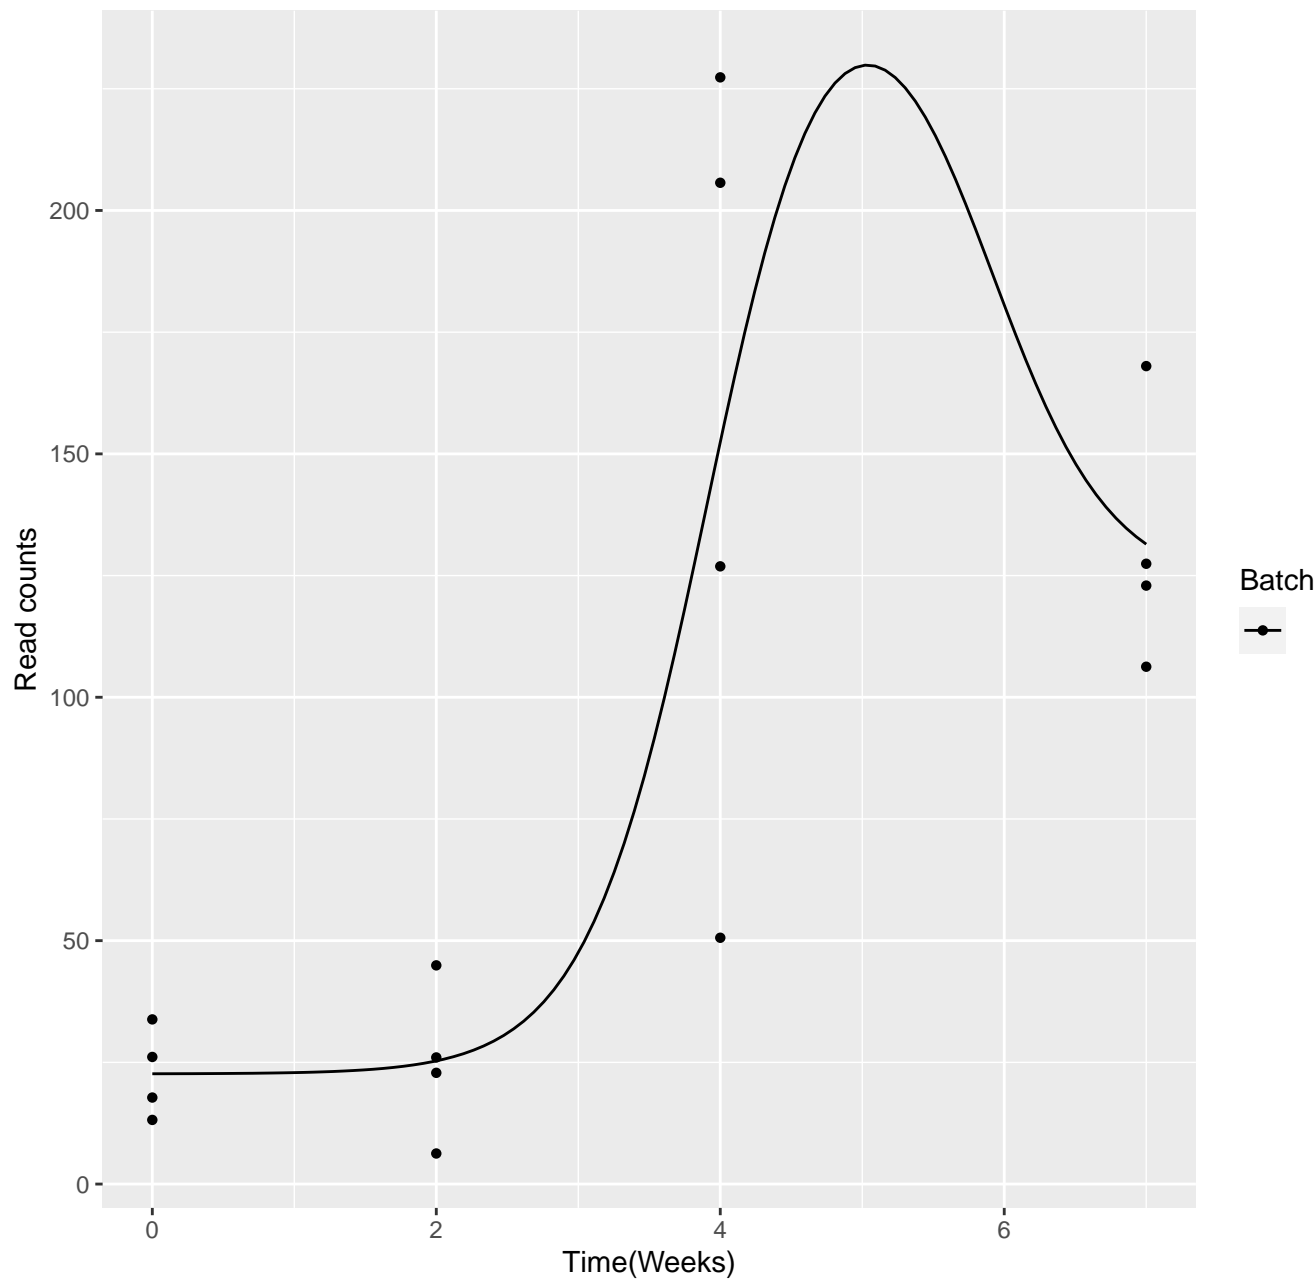

TMEM245:  $\log_{10} q = -6.79$

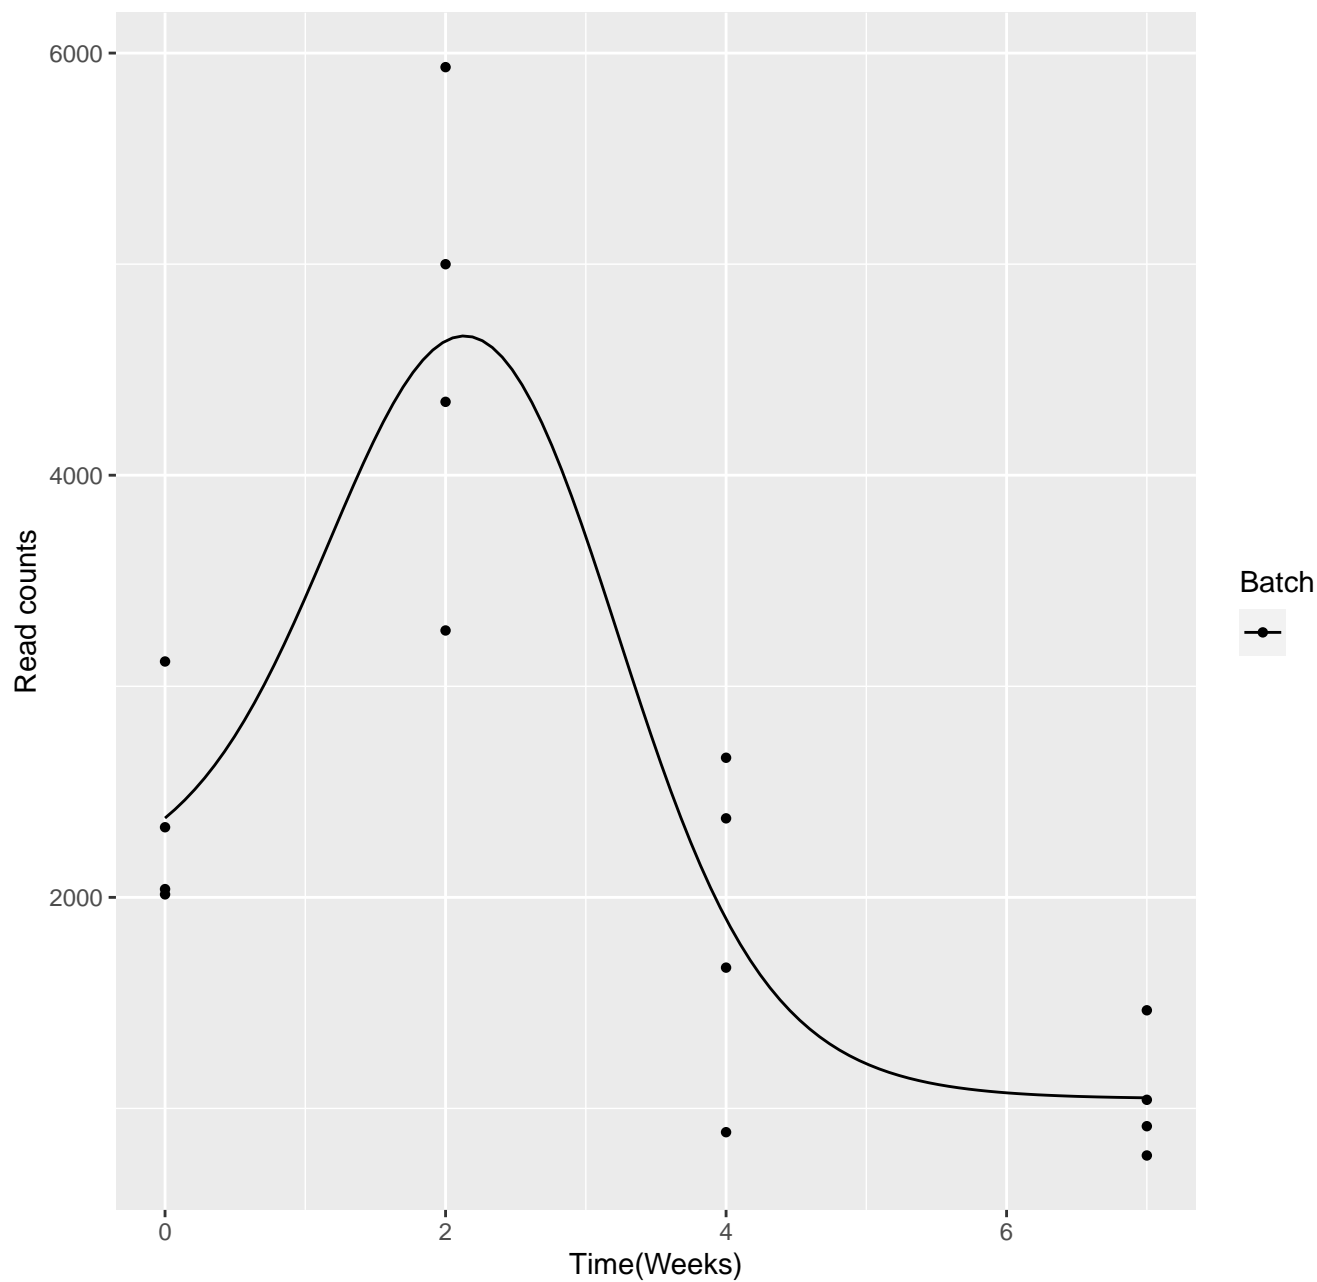

RLA-DRB1:  $\log_{10} q = -6.78$

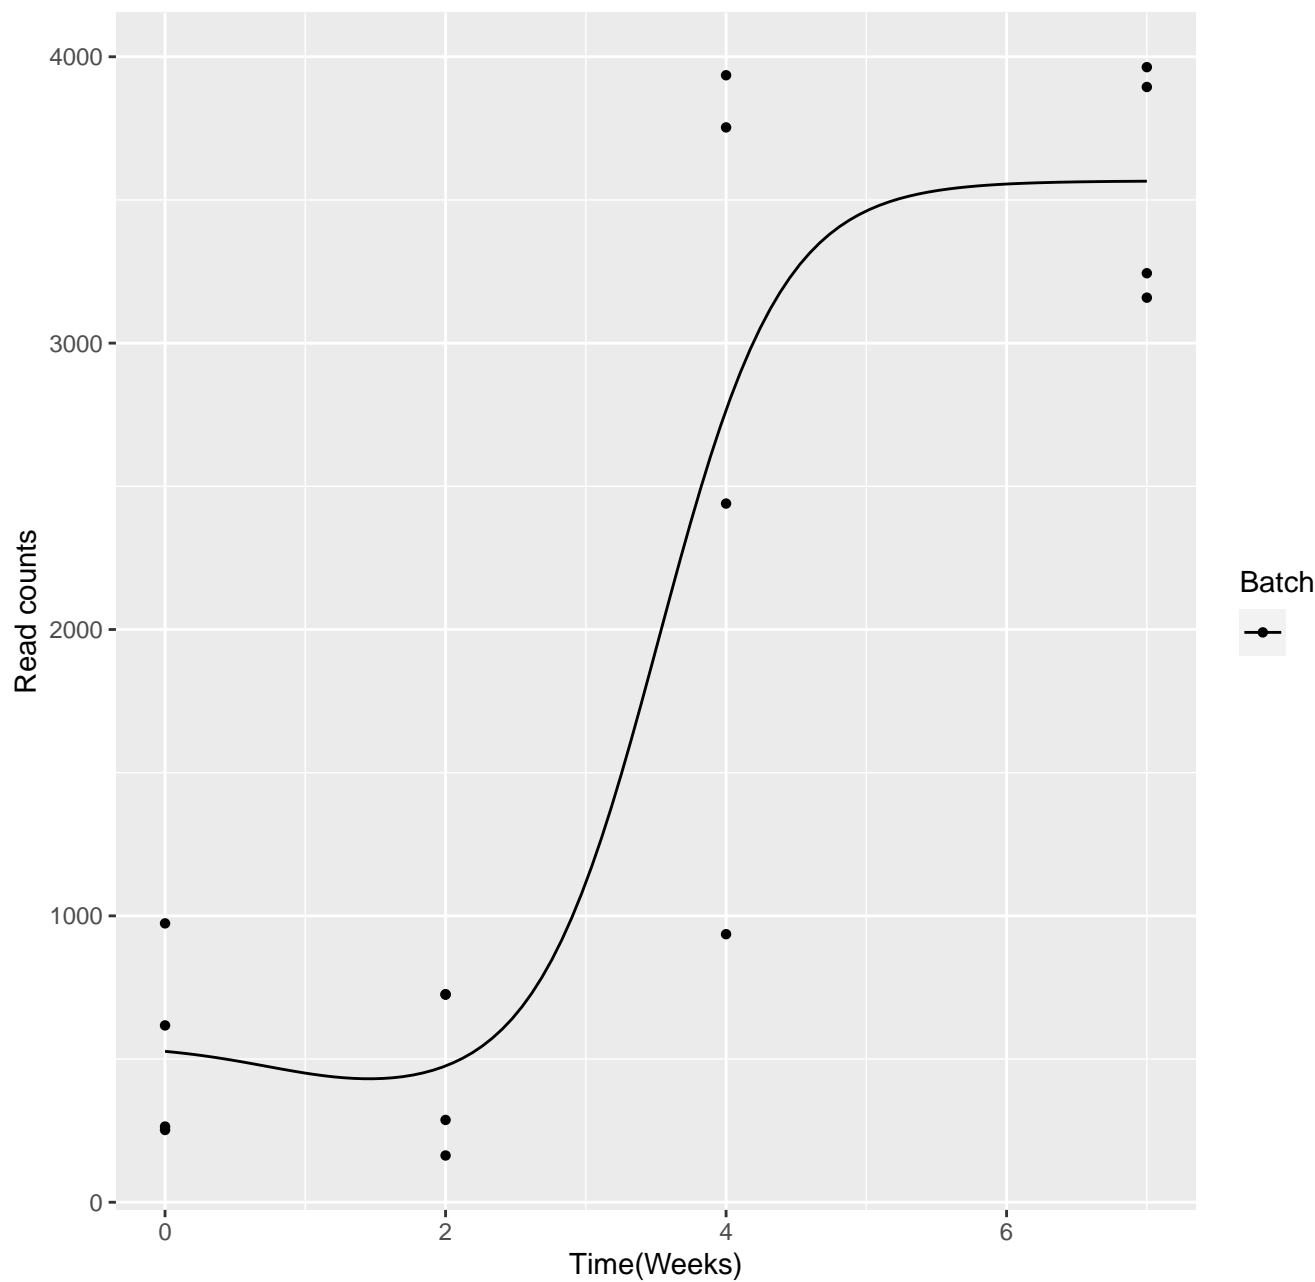

CD37:  $\log_{10} q = -6.76$

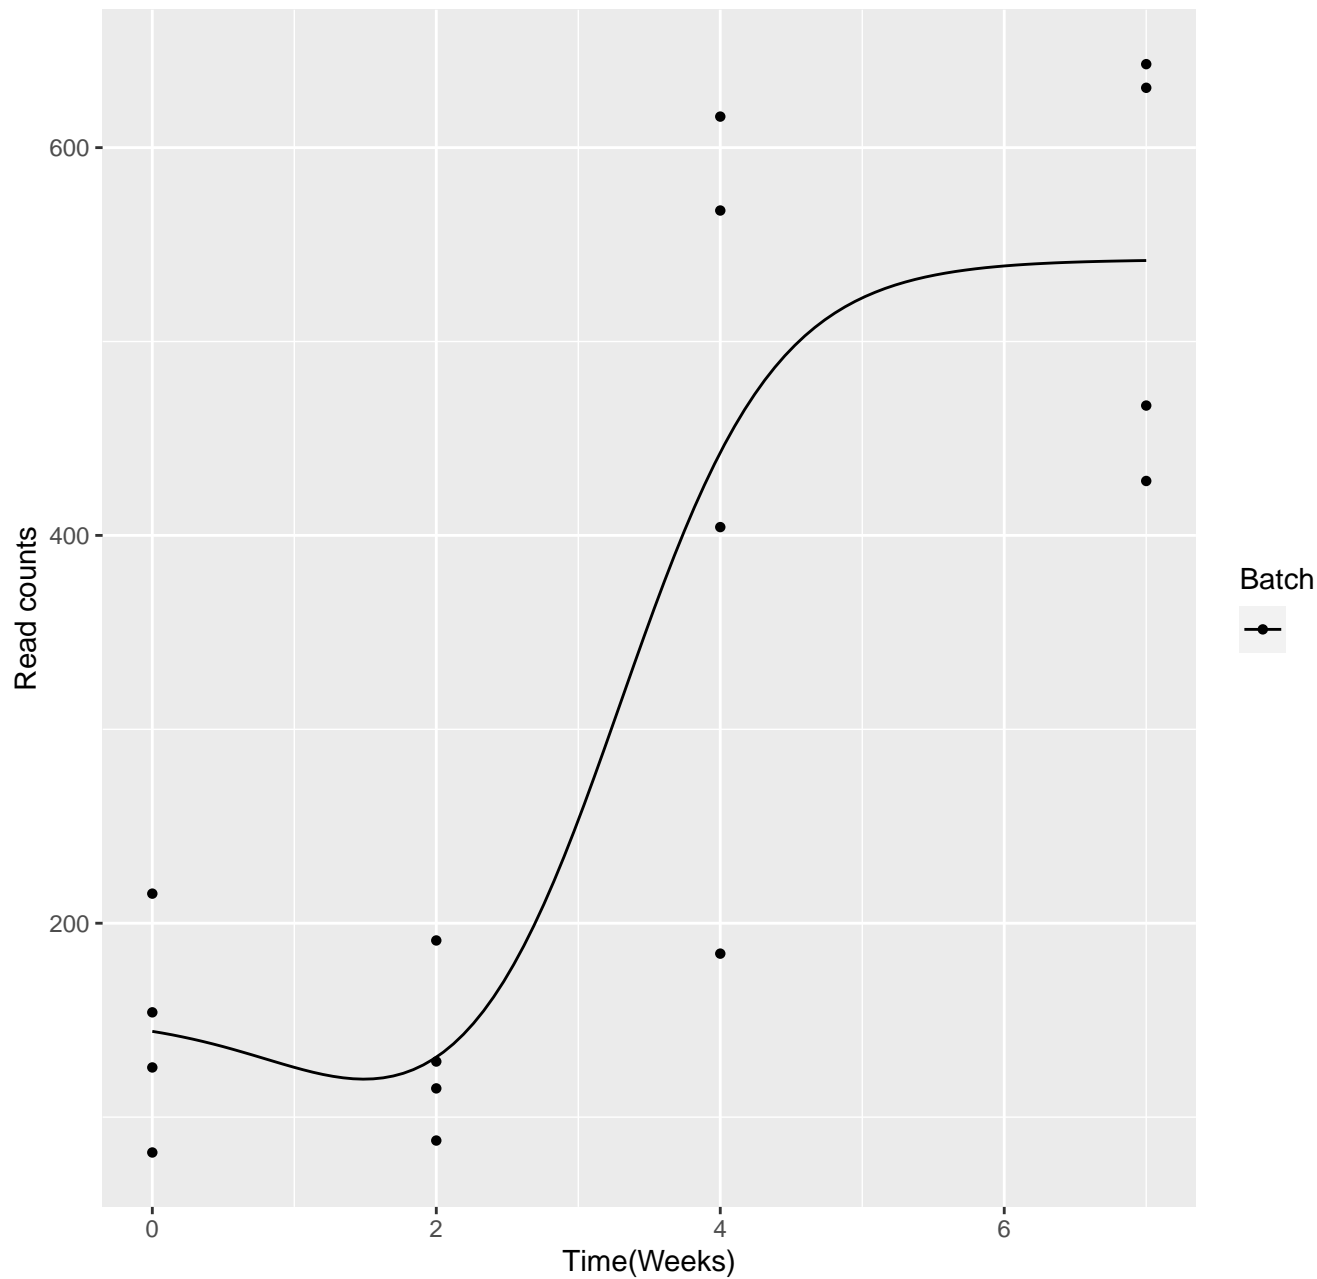

PARVG: log10 q = -6.74

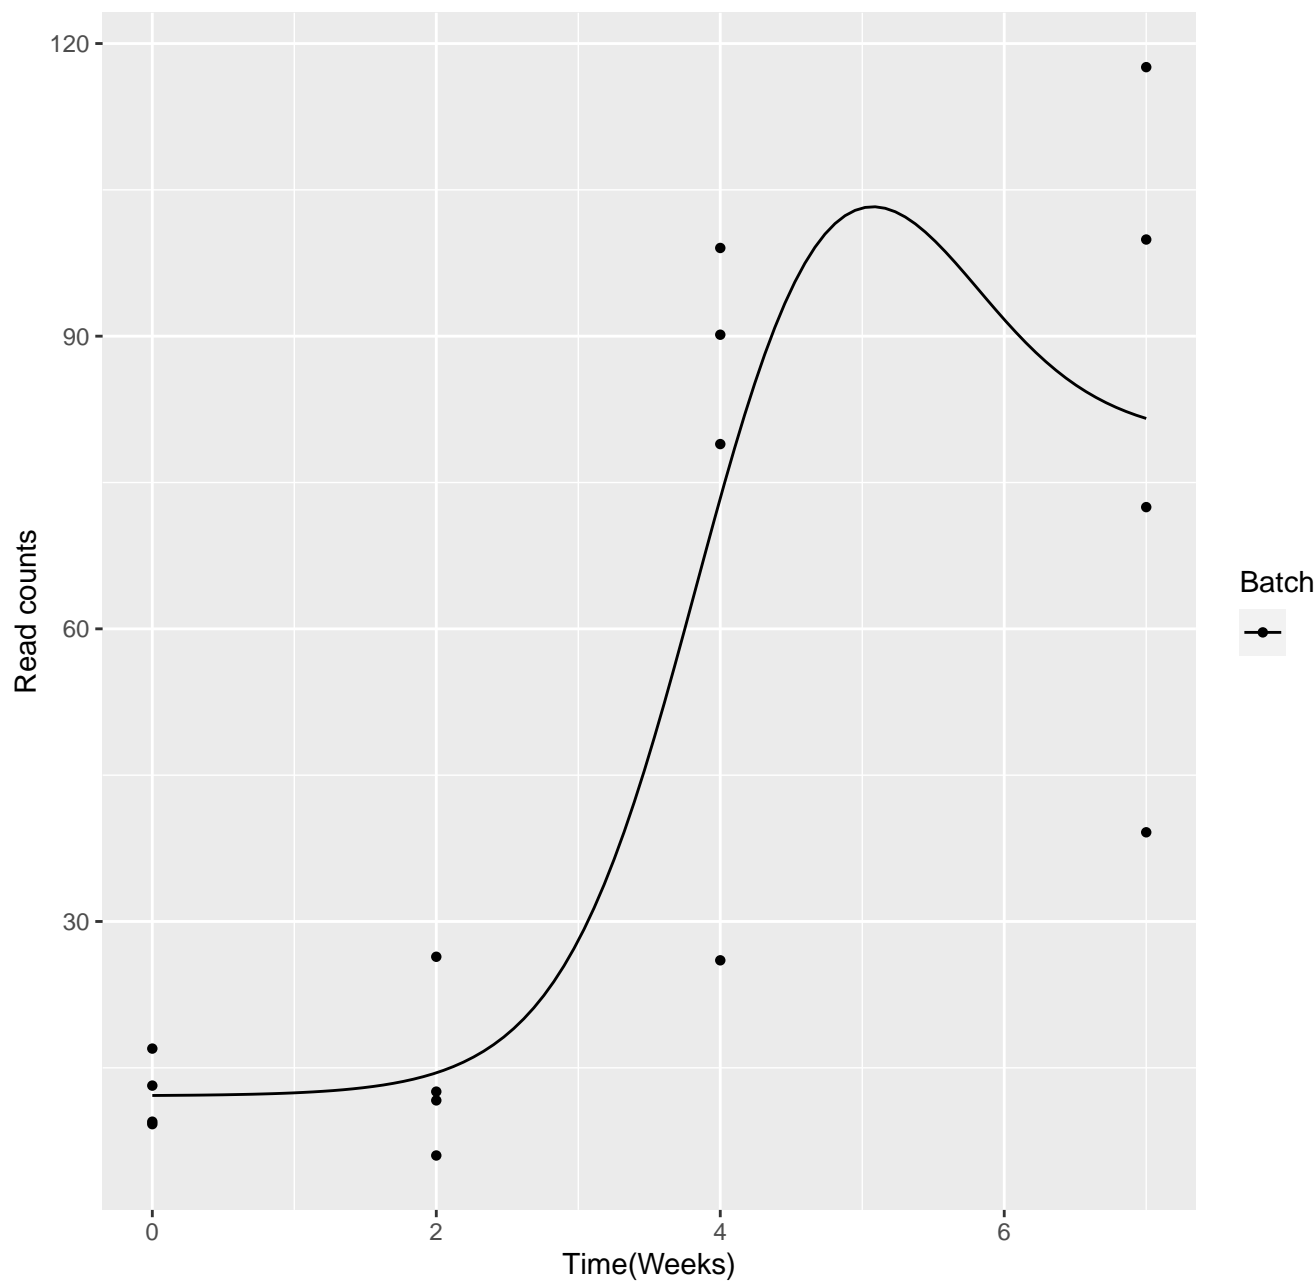

LOC127482726:  $\log_{10} q = -6.72$

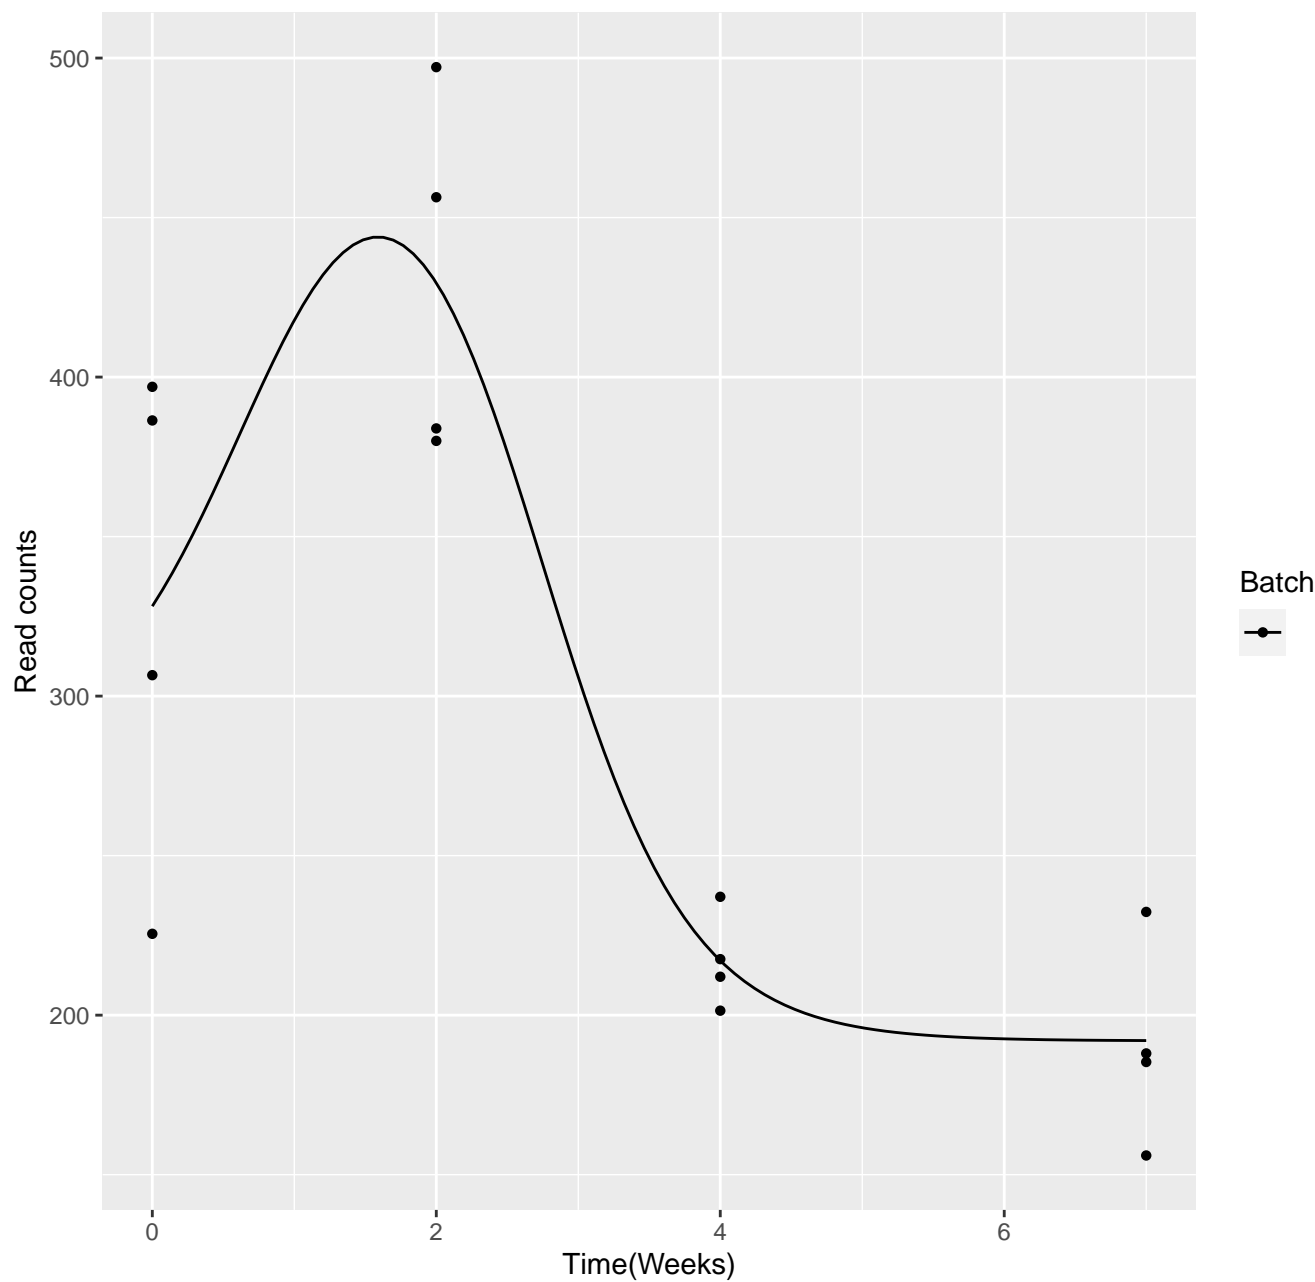

LOC103346838:  $\log_{10} q = -6.71$

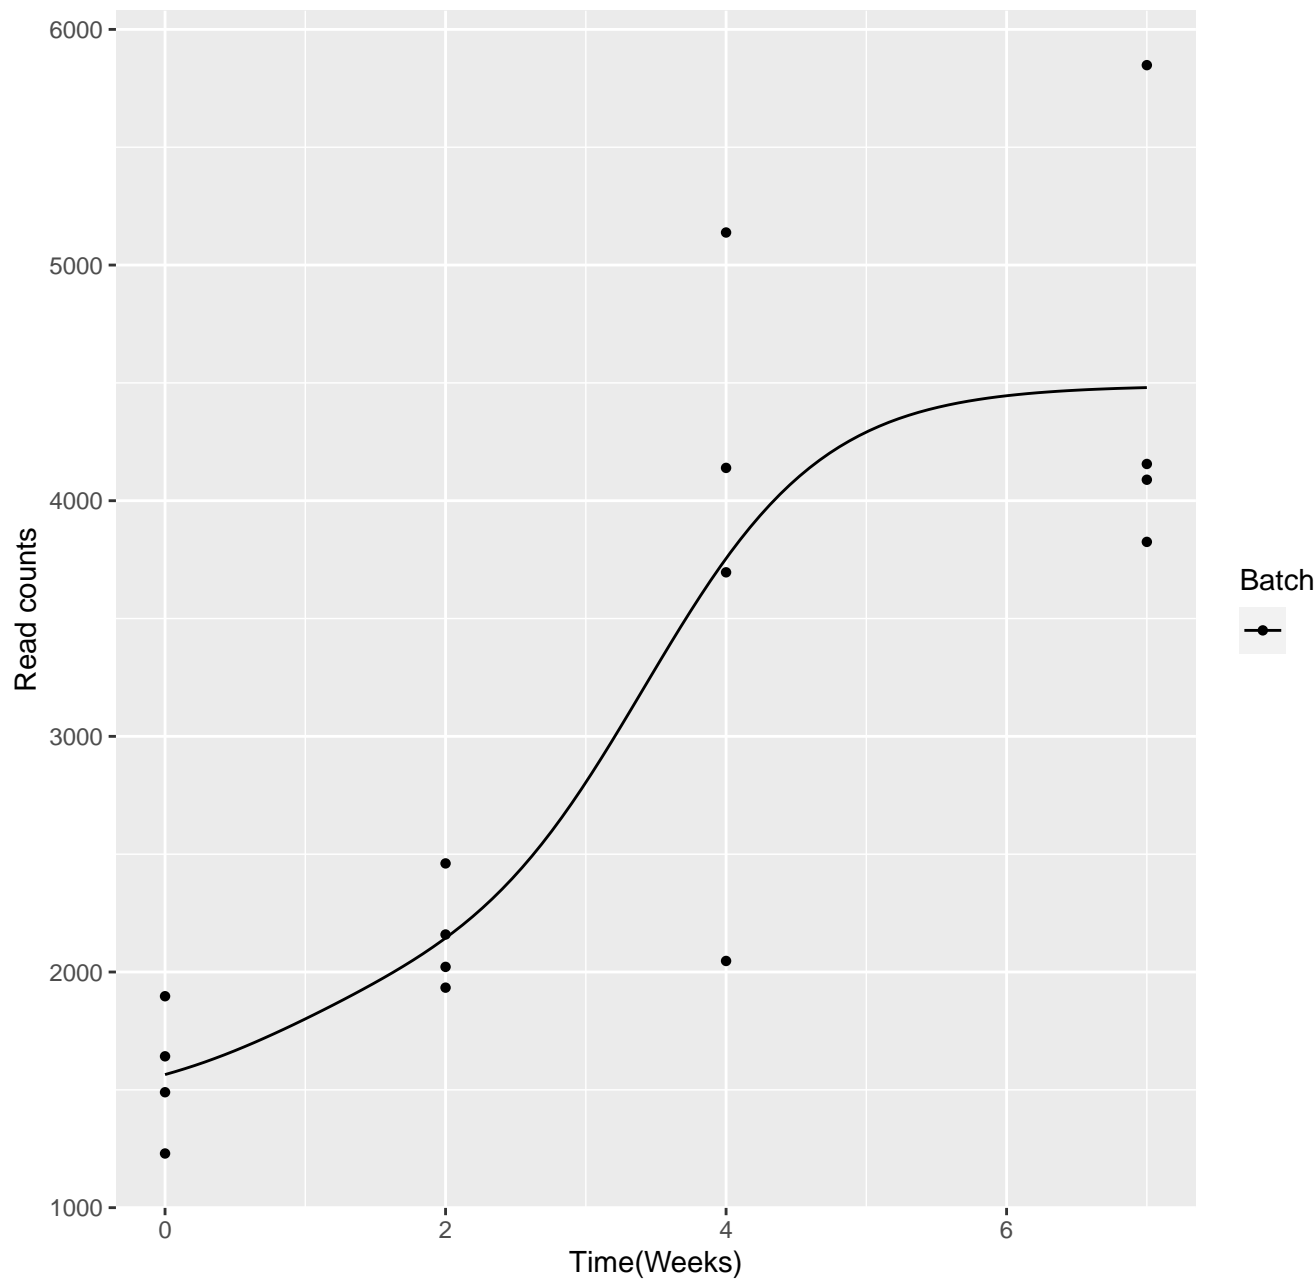



CR2:  $\log_{10} q = -6.68$

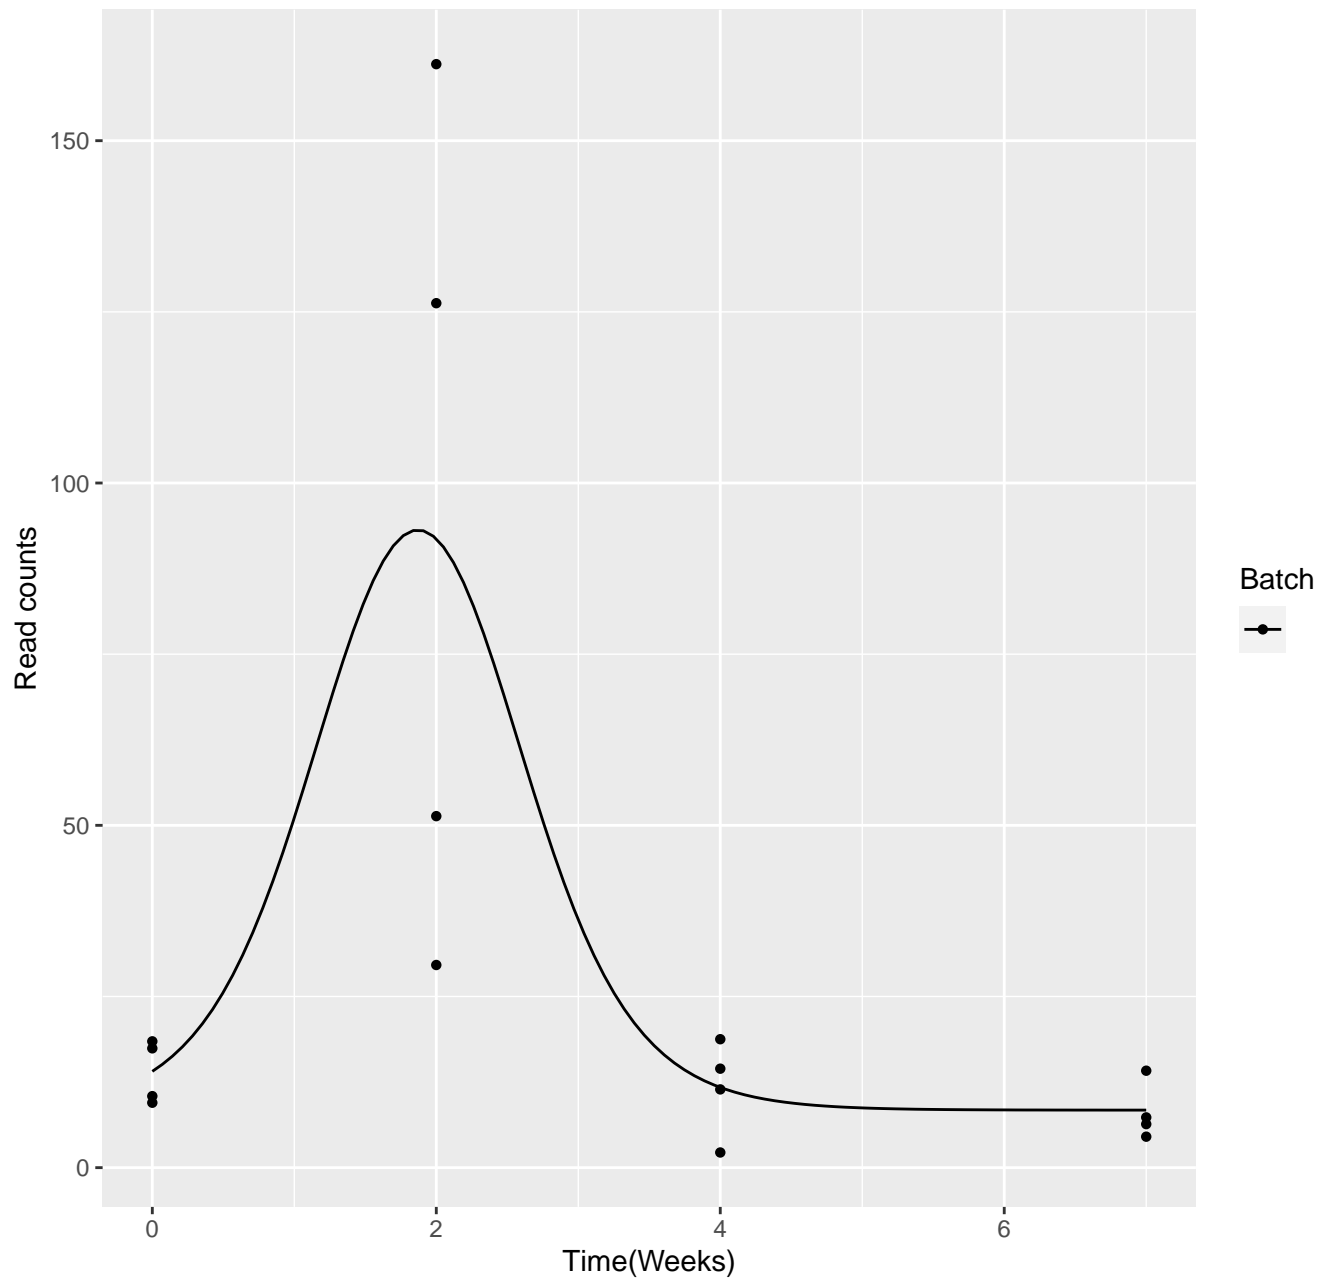

MFNG:  $\log_{10} q = -6.66$

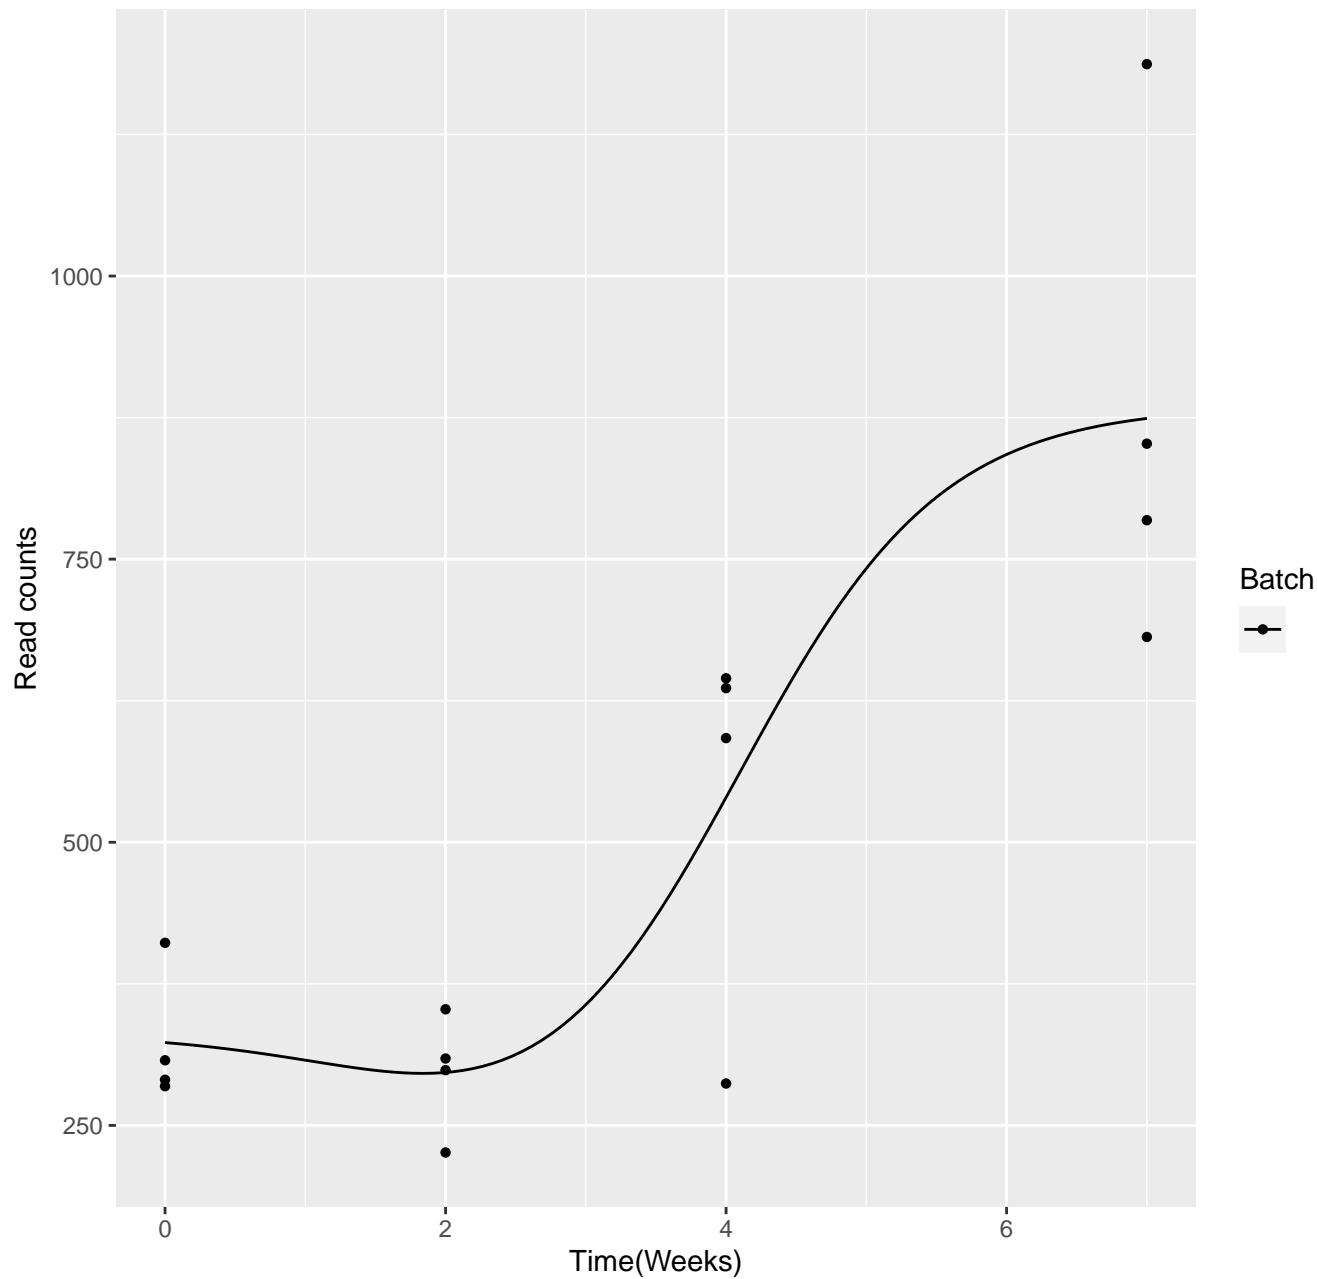

SPTSSA:  $\log_{10} q = -6.66$

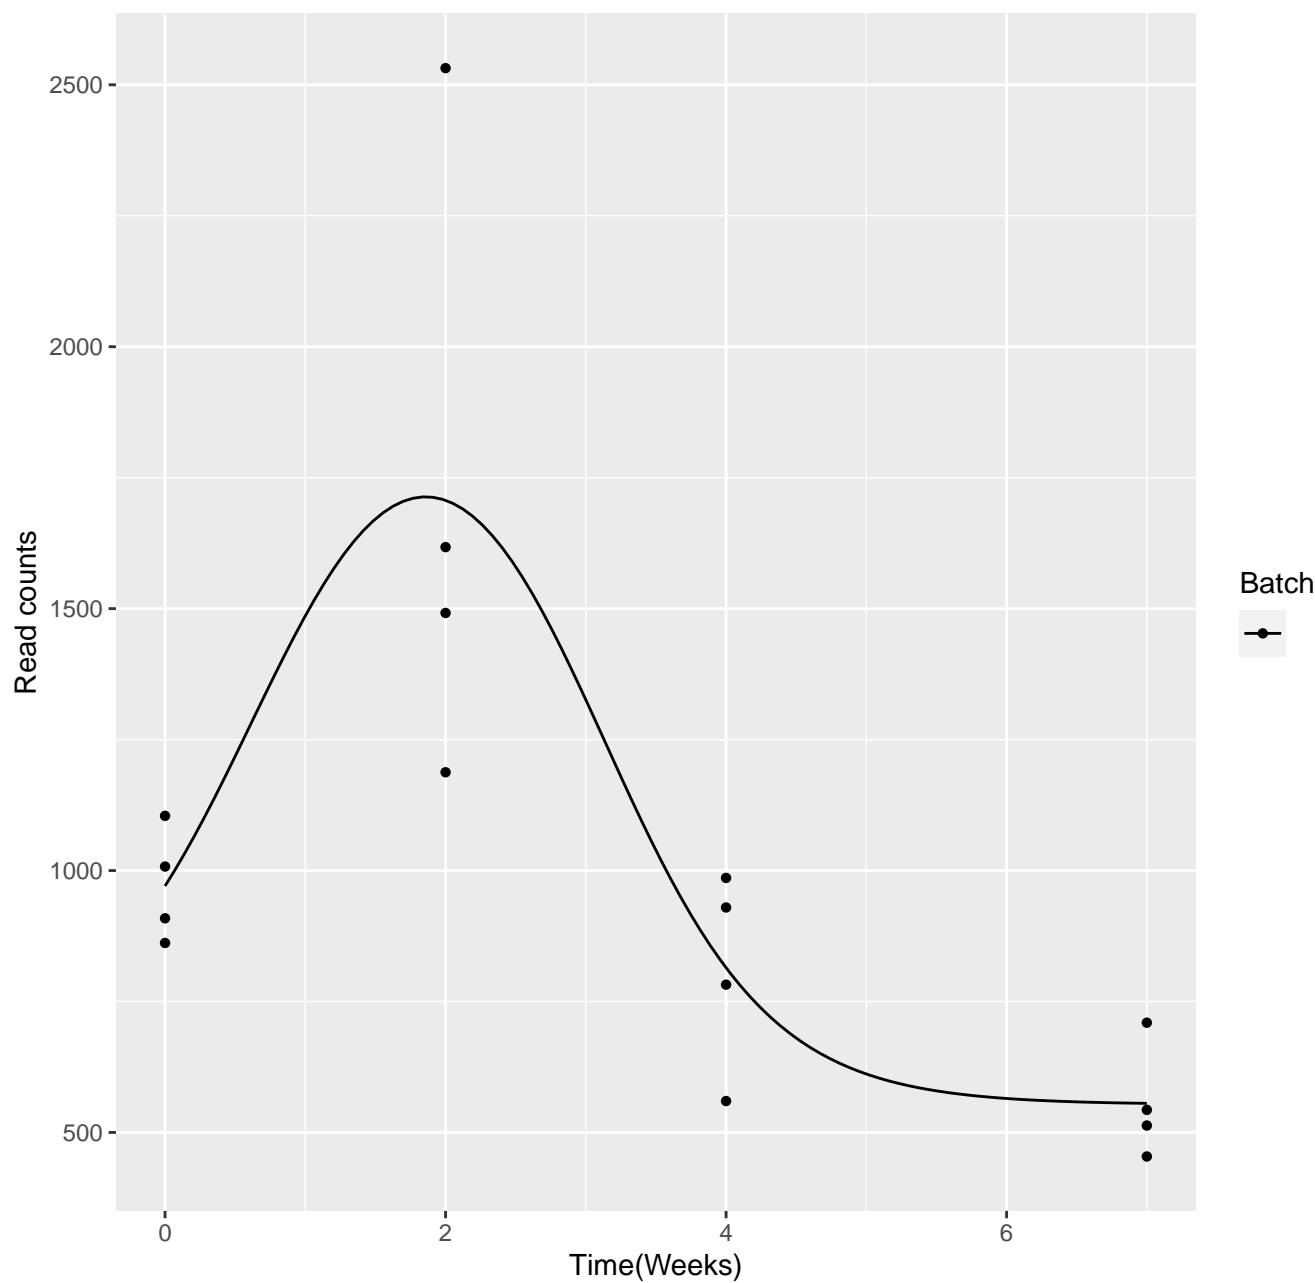

LOC127482571:  $\log_{10} q = -6.64$

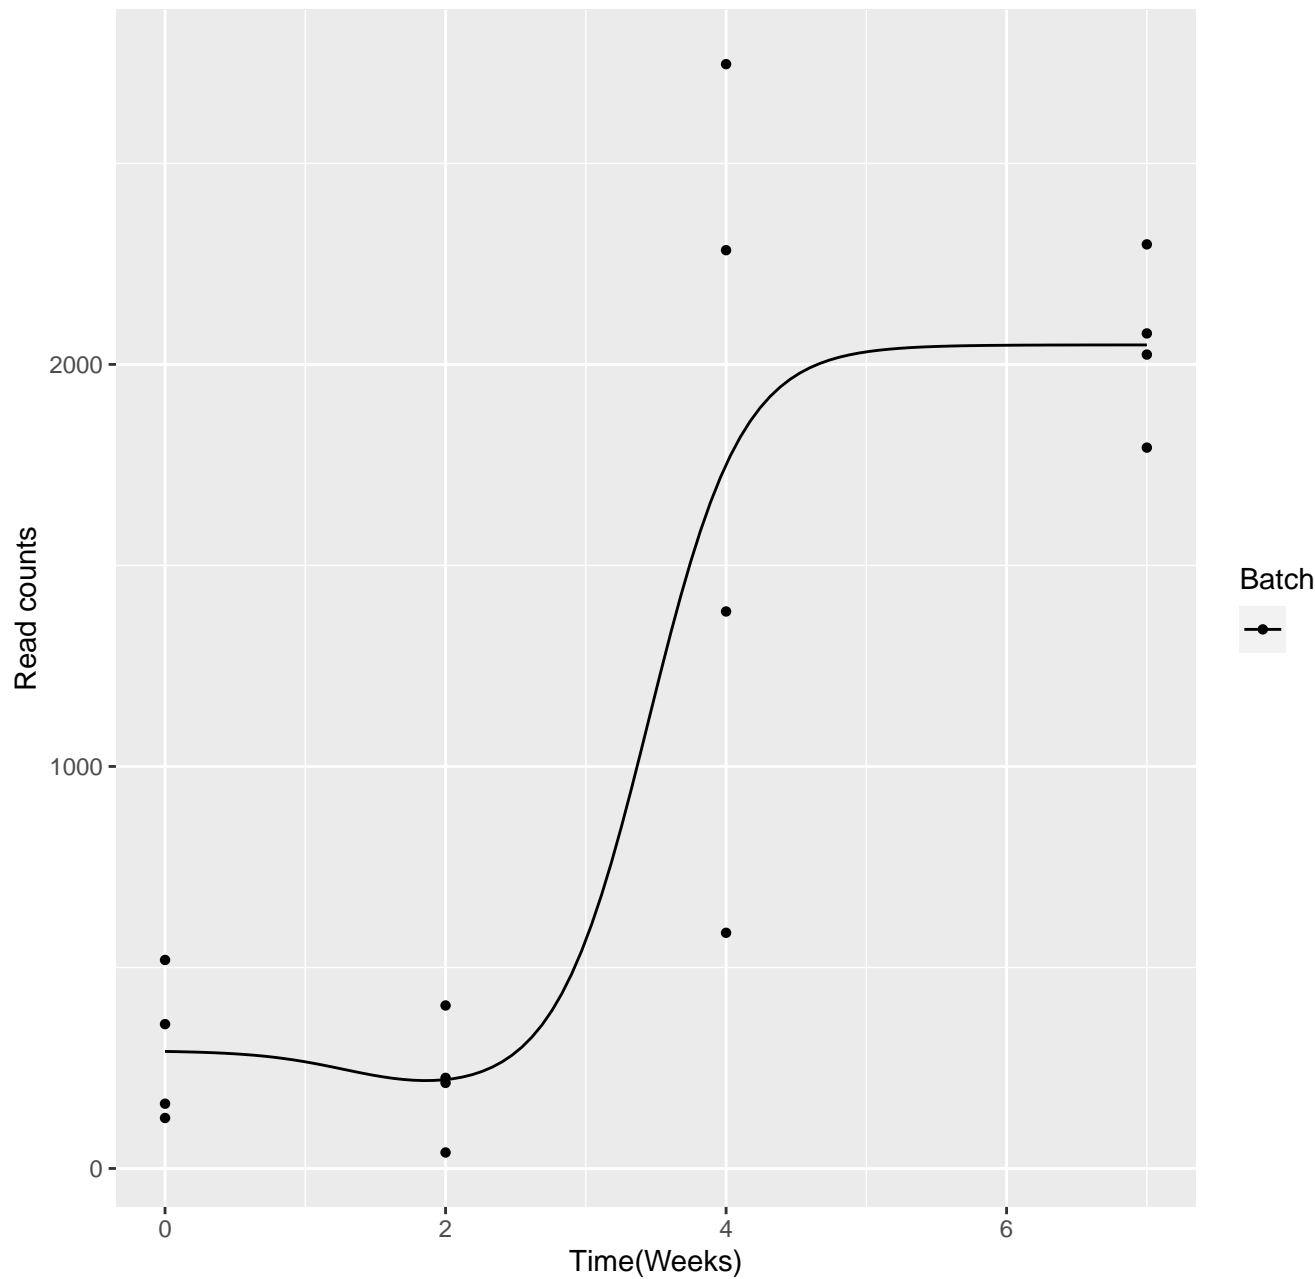

PTAFR:  $\log_{10} q = -6.64$

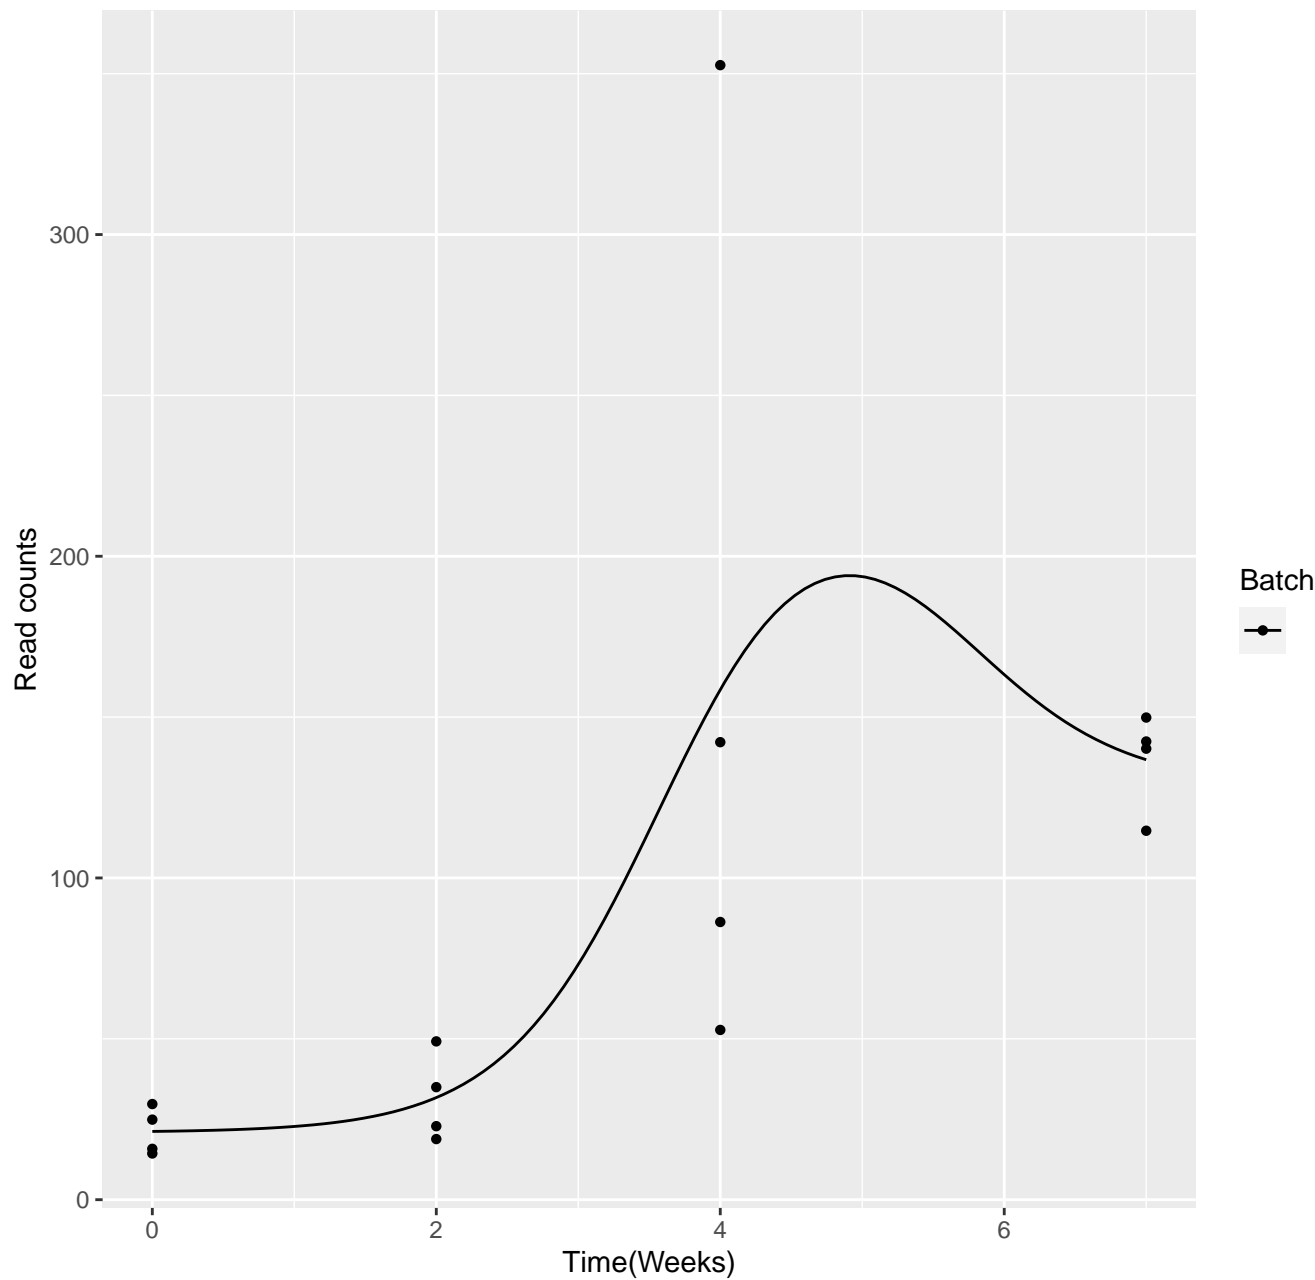

GPR183:  $\log_{10} q = -6.58$

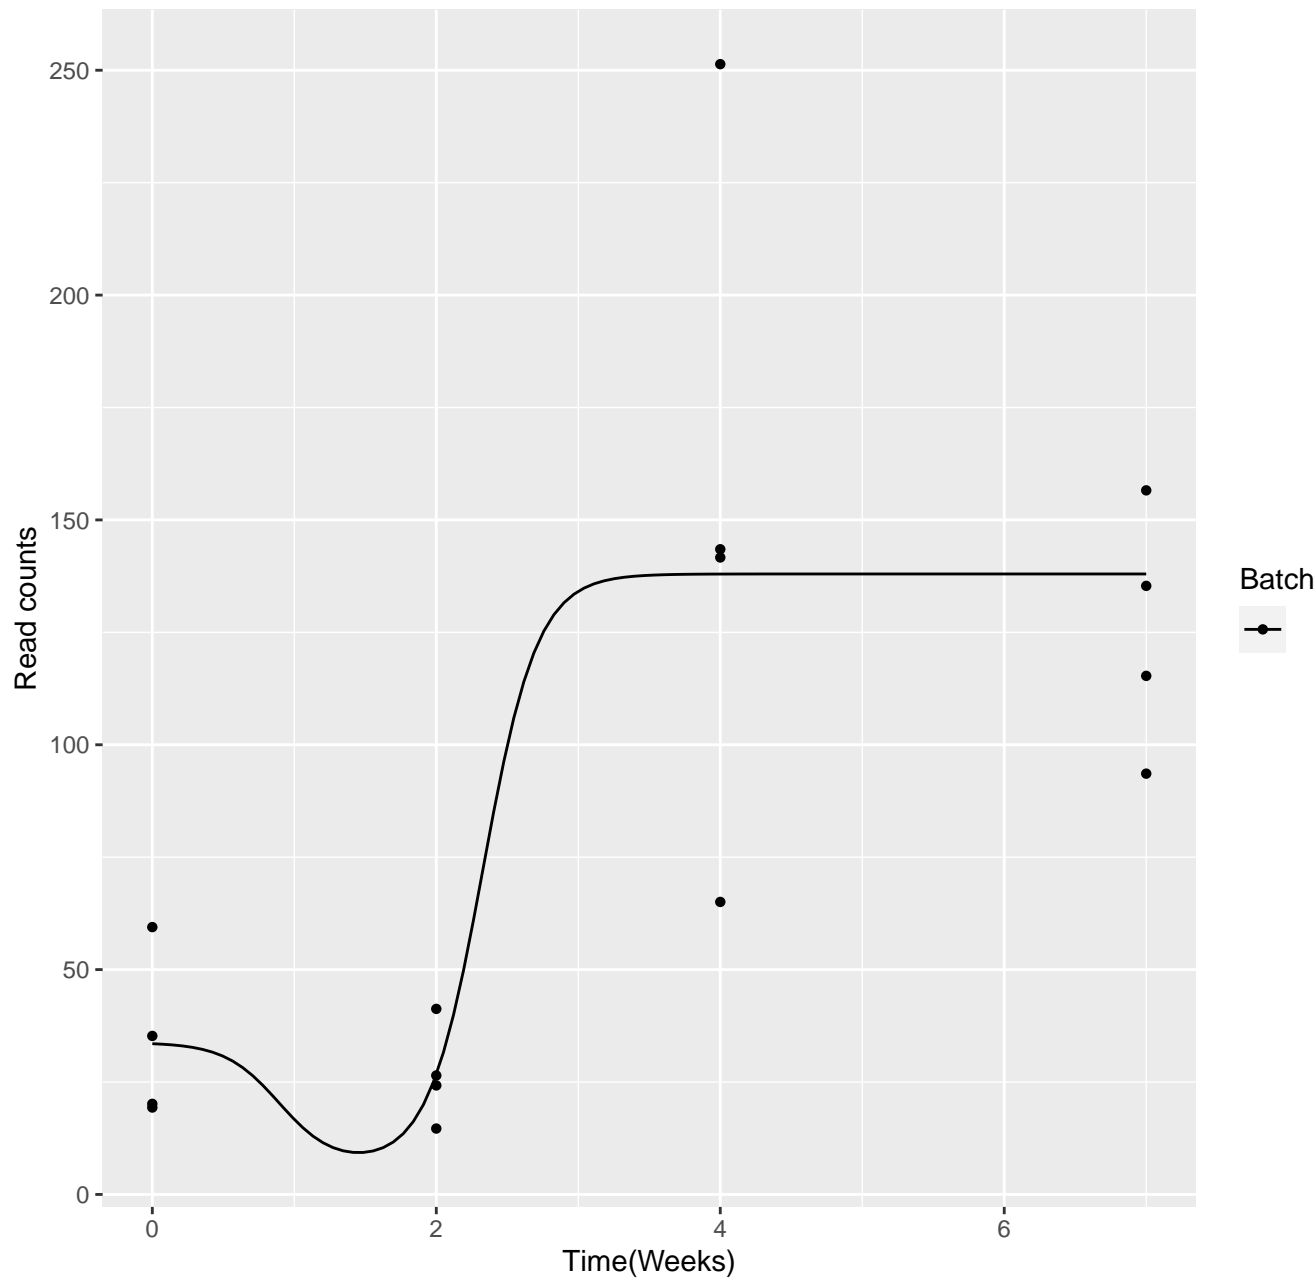

NCF4:  $\log_{10} q = -6.58$

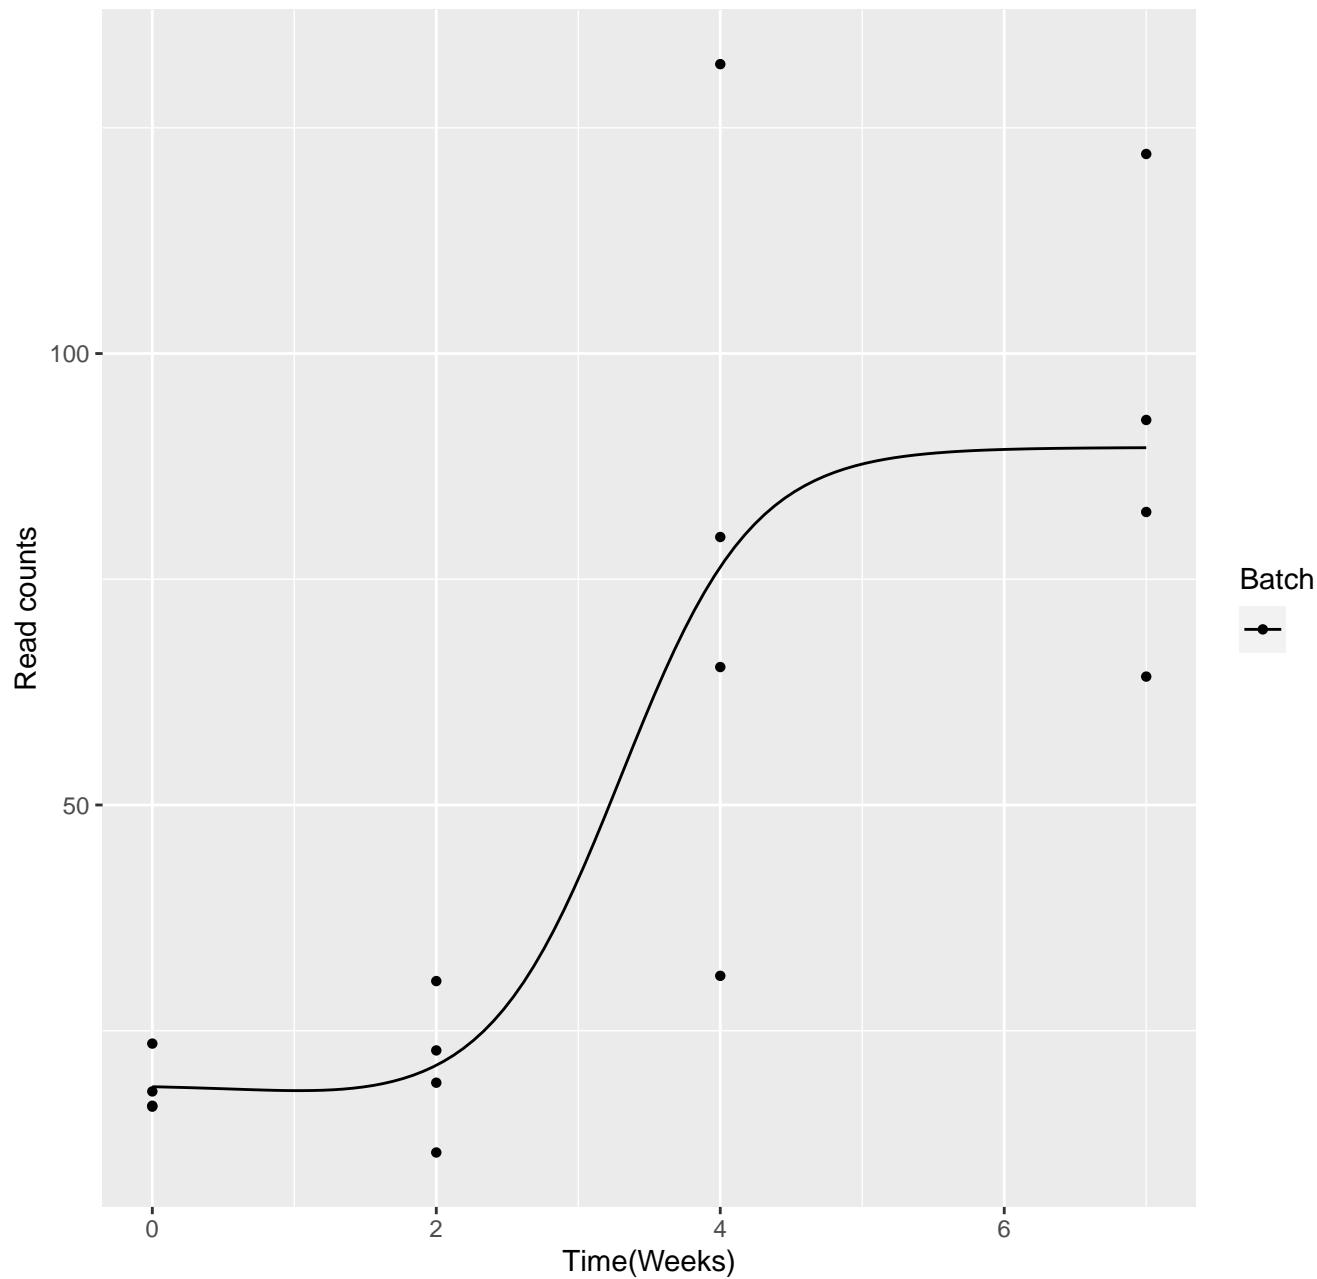

BAZ1A:  $\log_{10} q = -6.58$

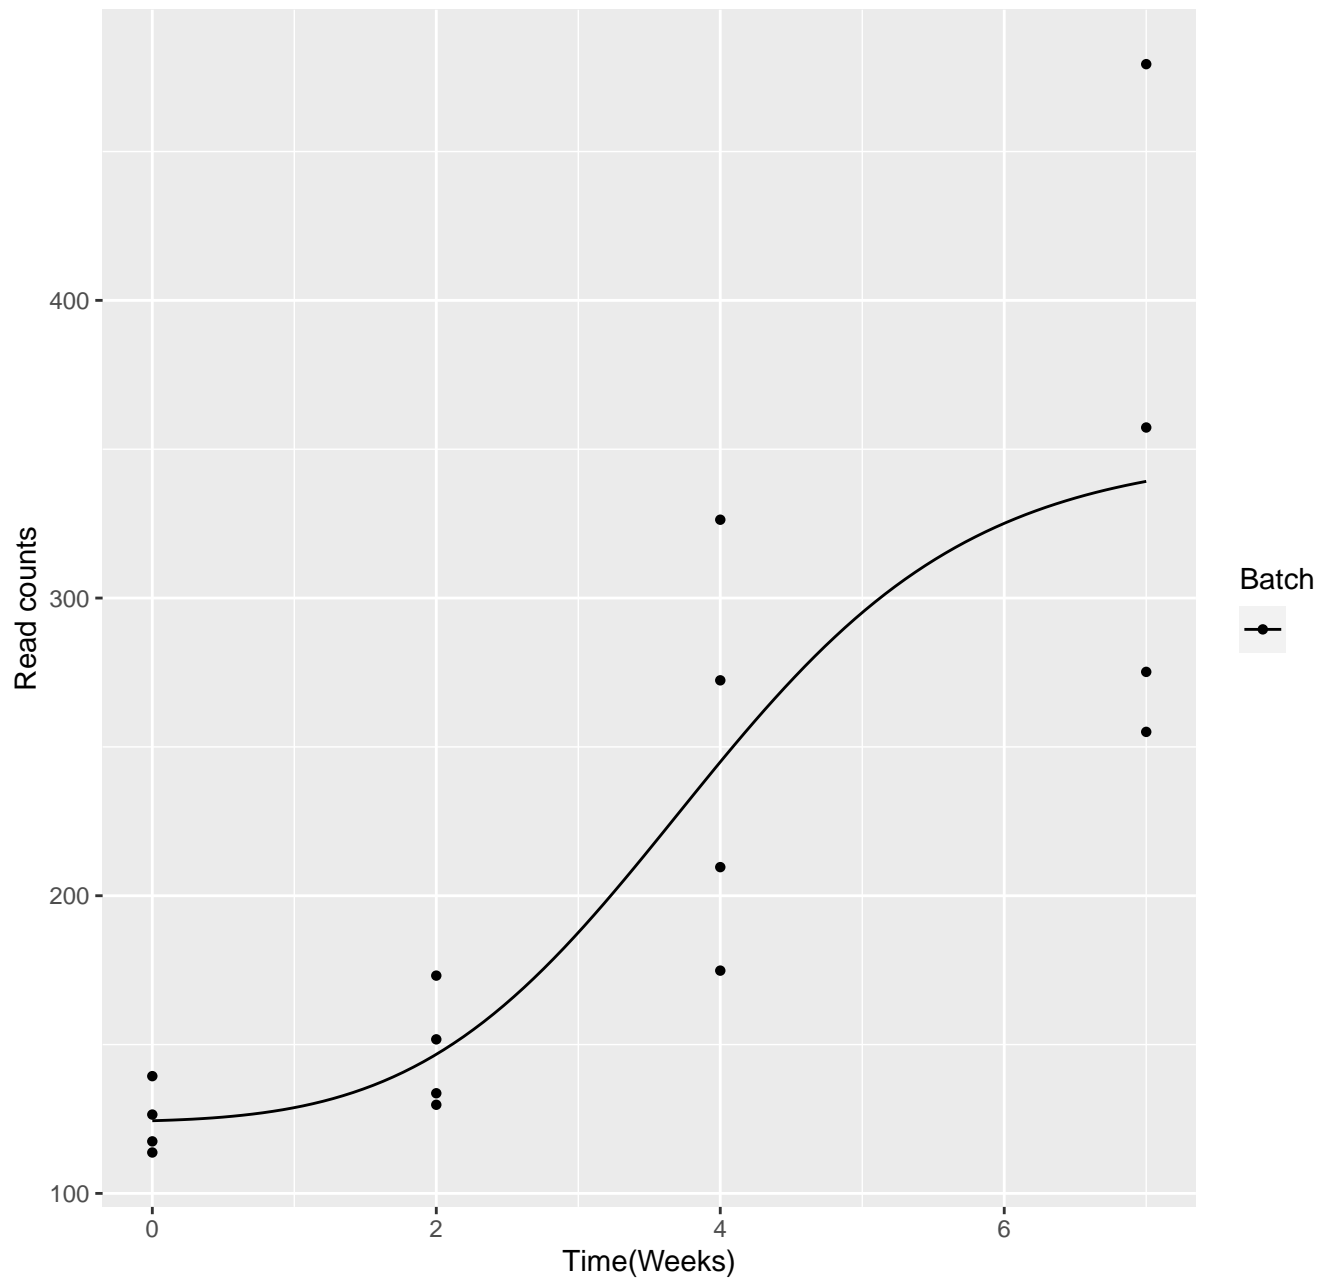



CCR6:  $\log_{10} q = -6.57$

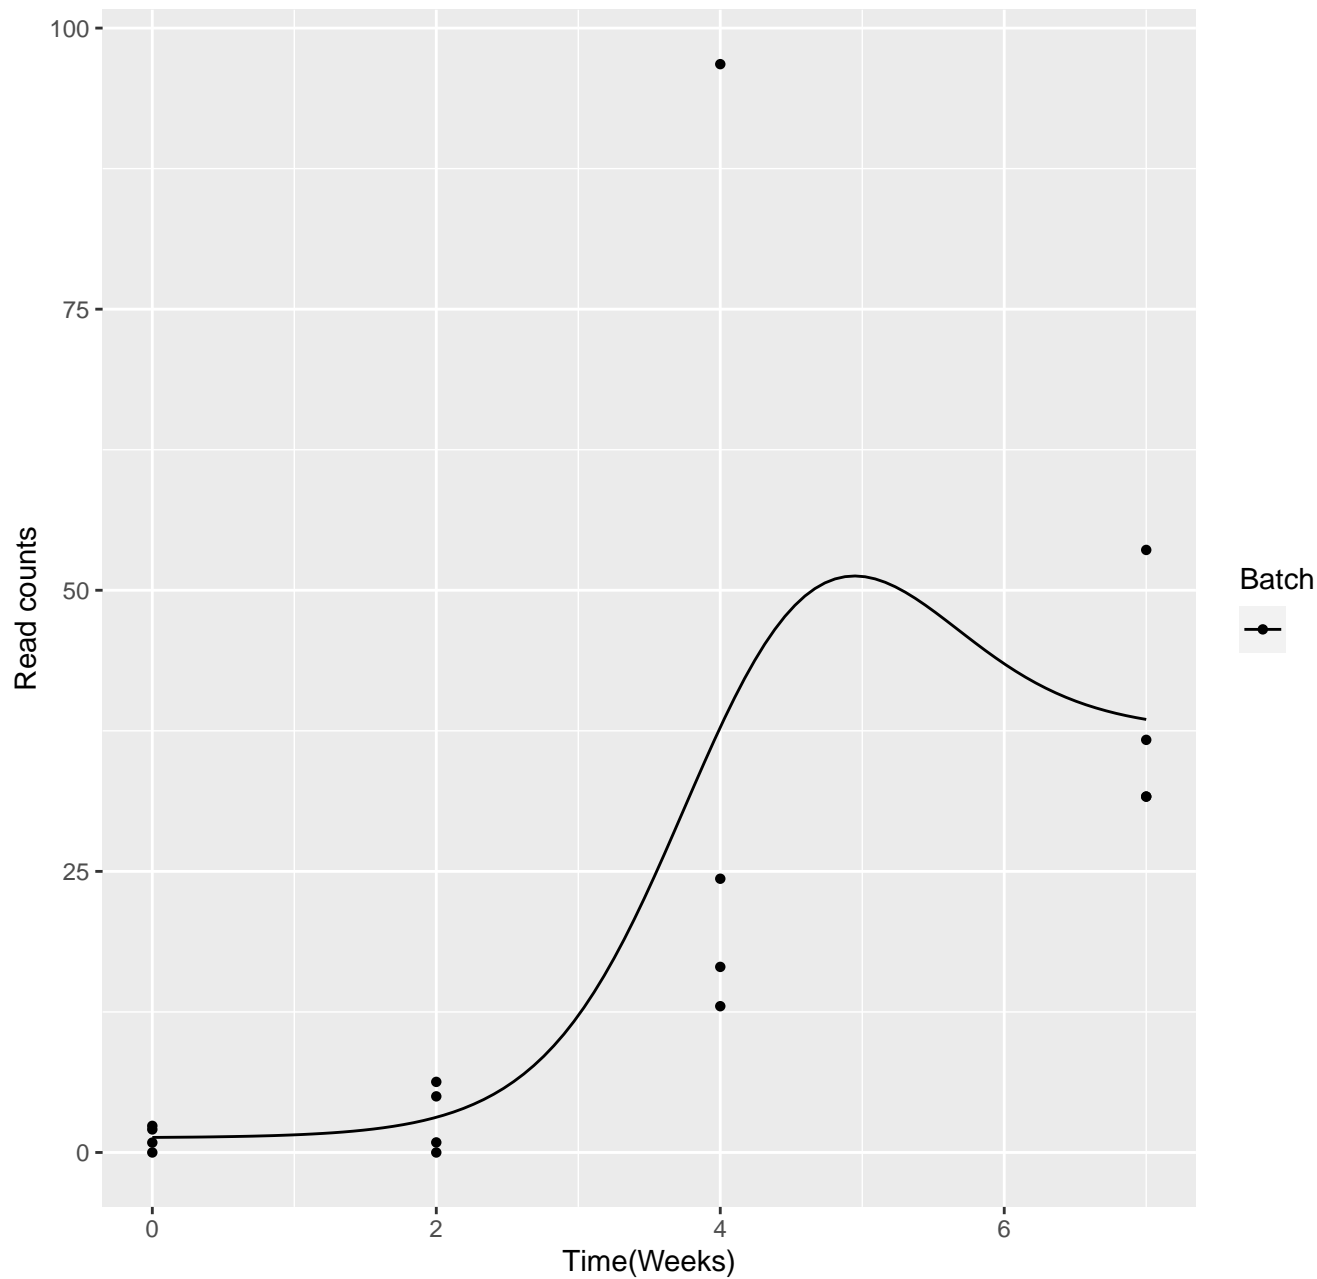

TK1:  $\log_{10} q = -6.57$

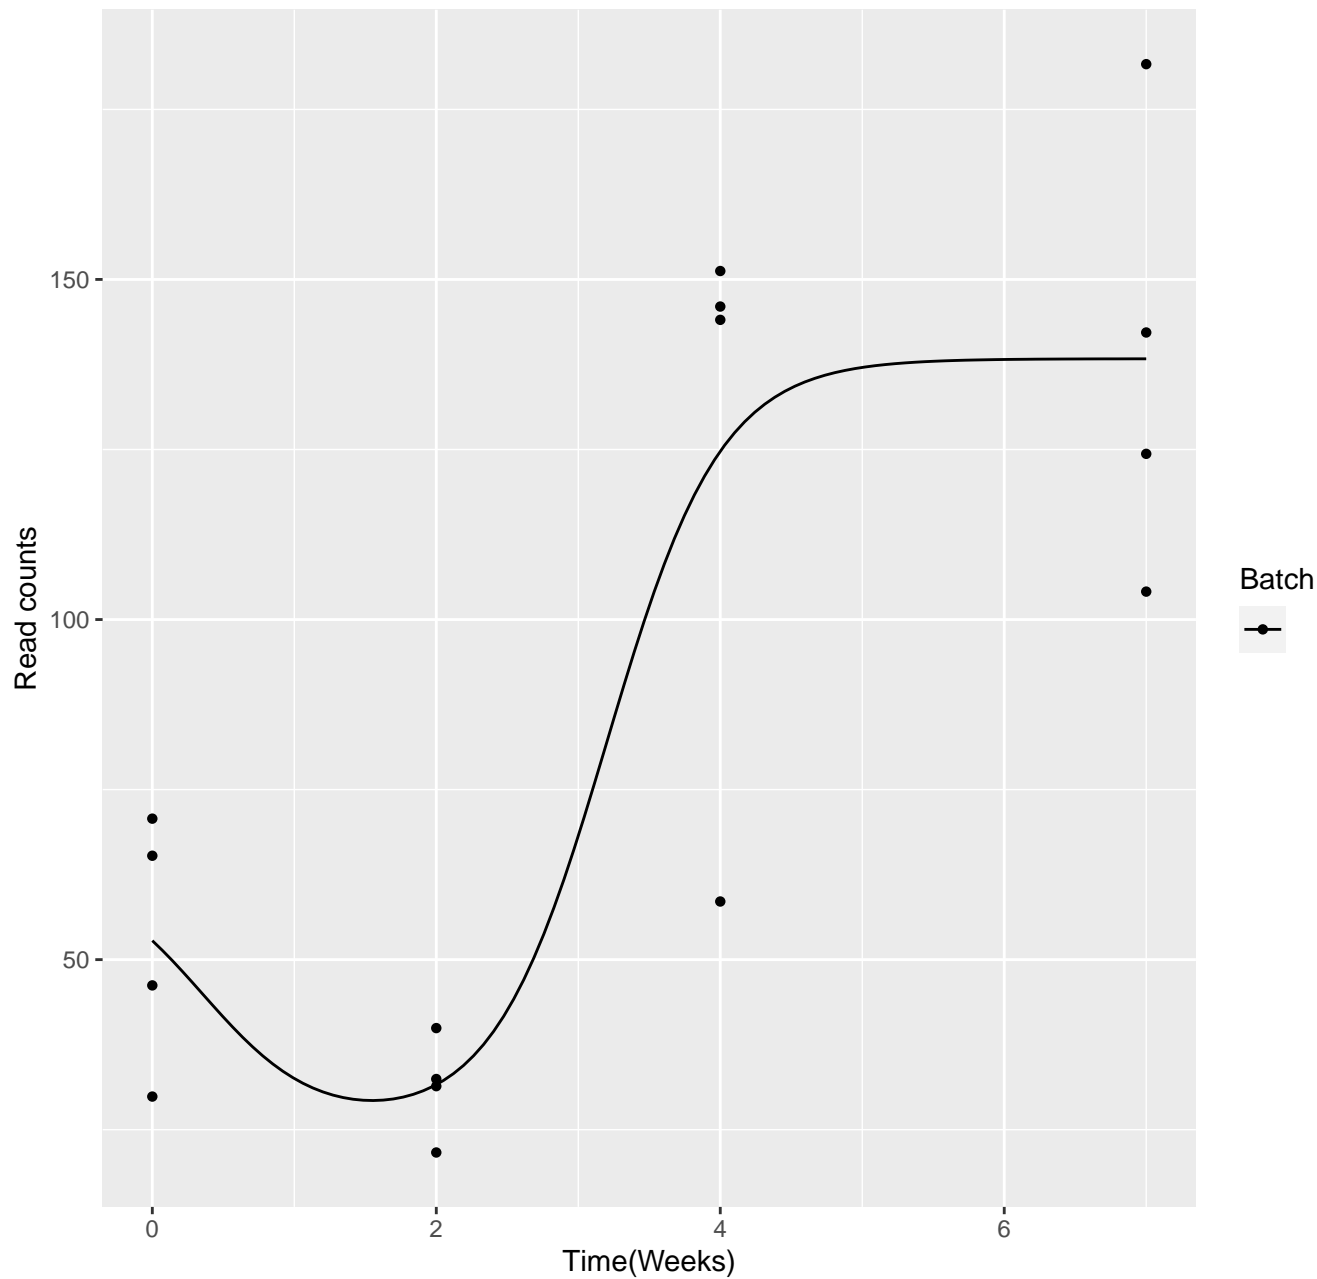

BUB1:  $\log_{10} q = -6.53$

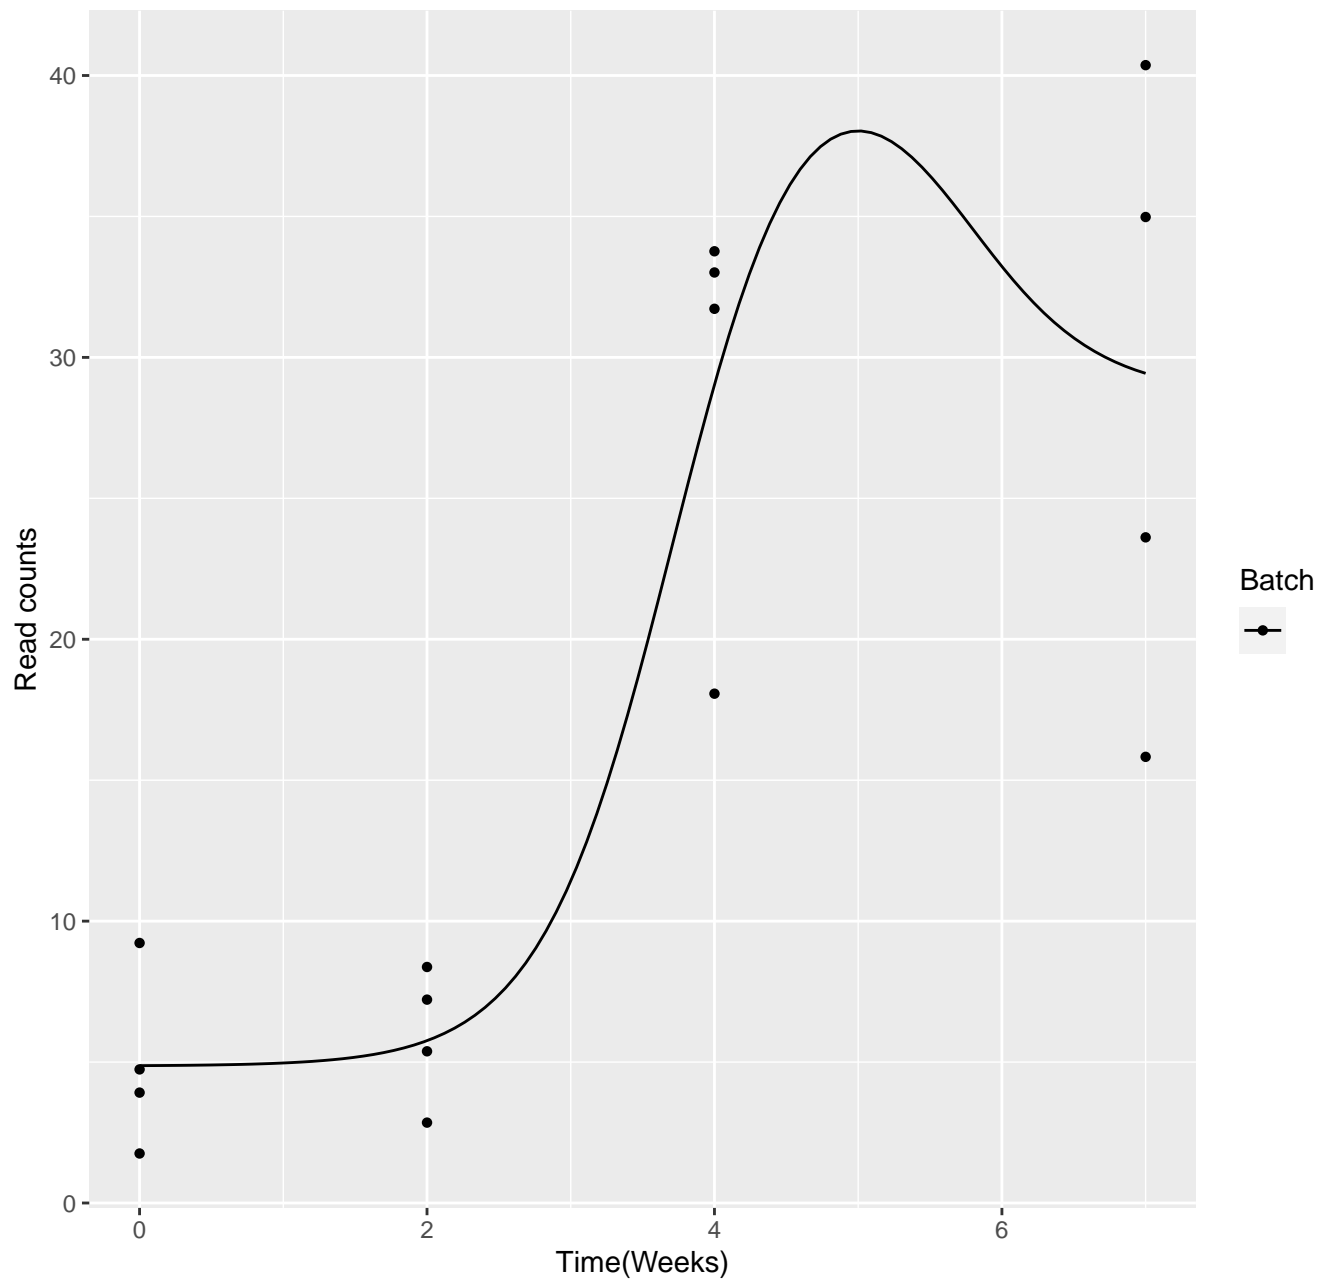

MMP9:  $\log_{10} q = -6.52$

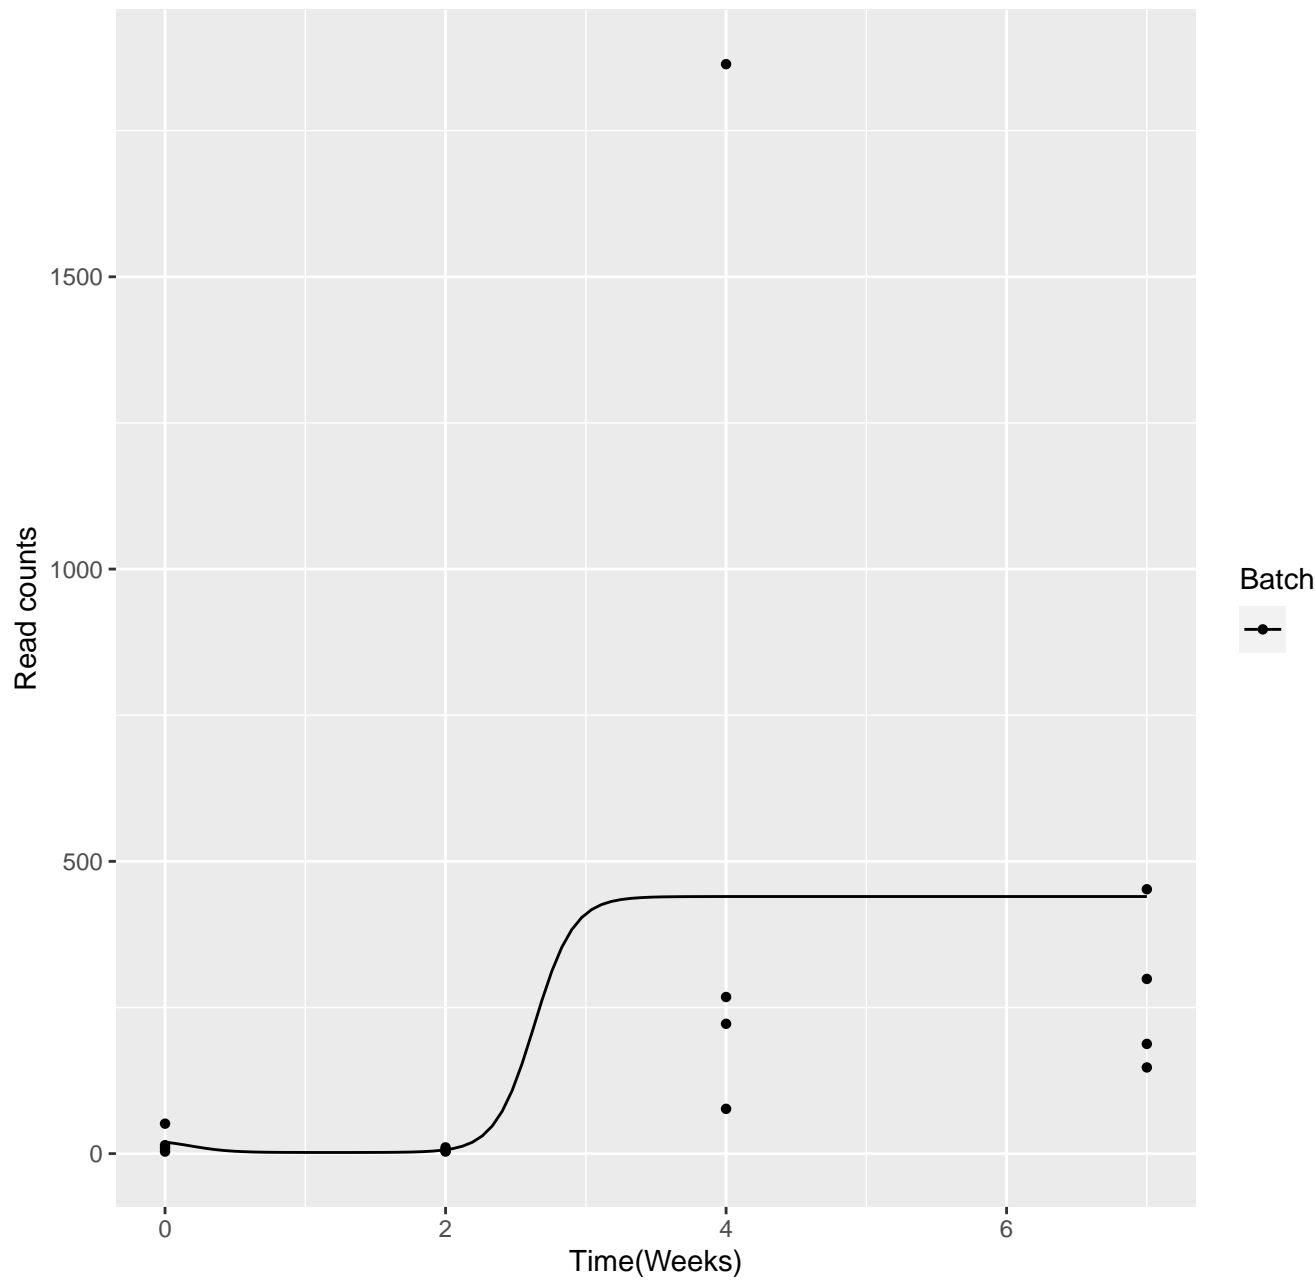

DDIT4:  $\log_{10} q = -6.51$

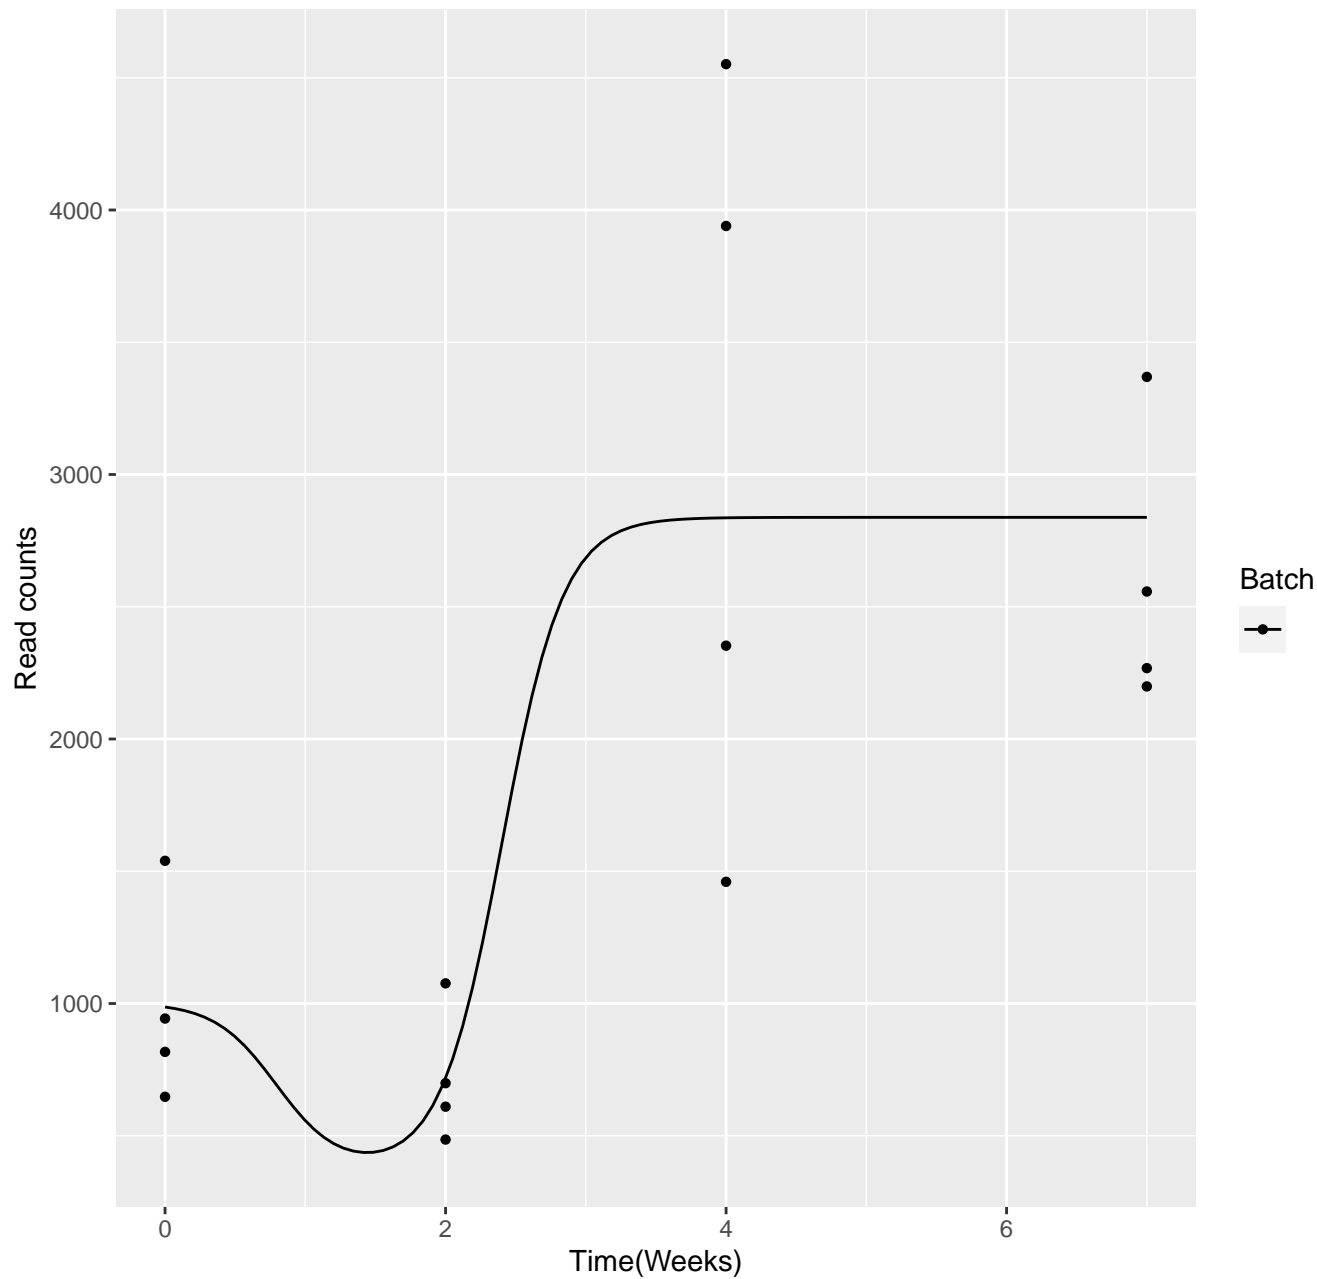

CYBB:  $\log_{10} q = -6.51$

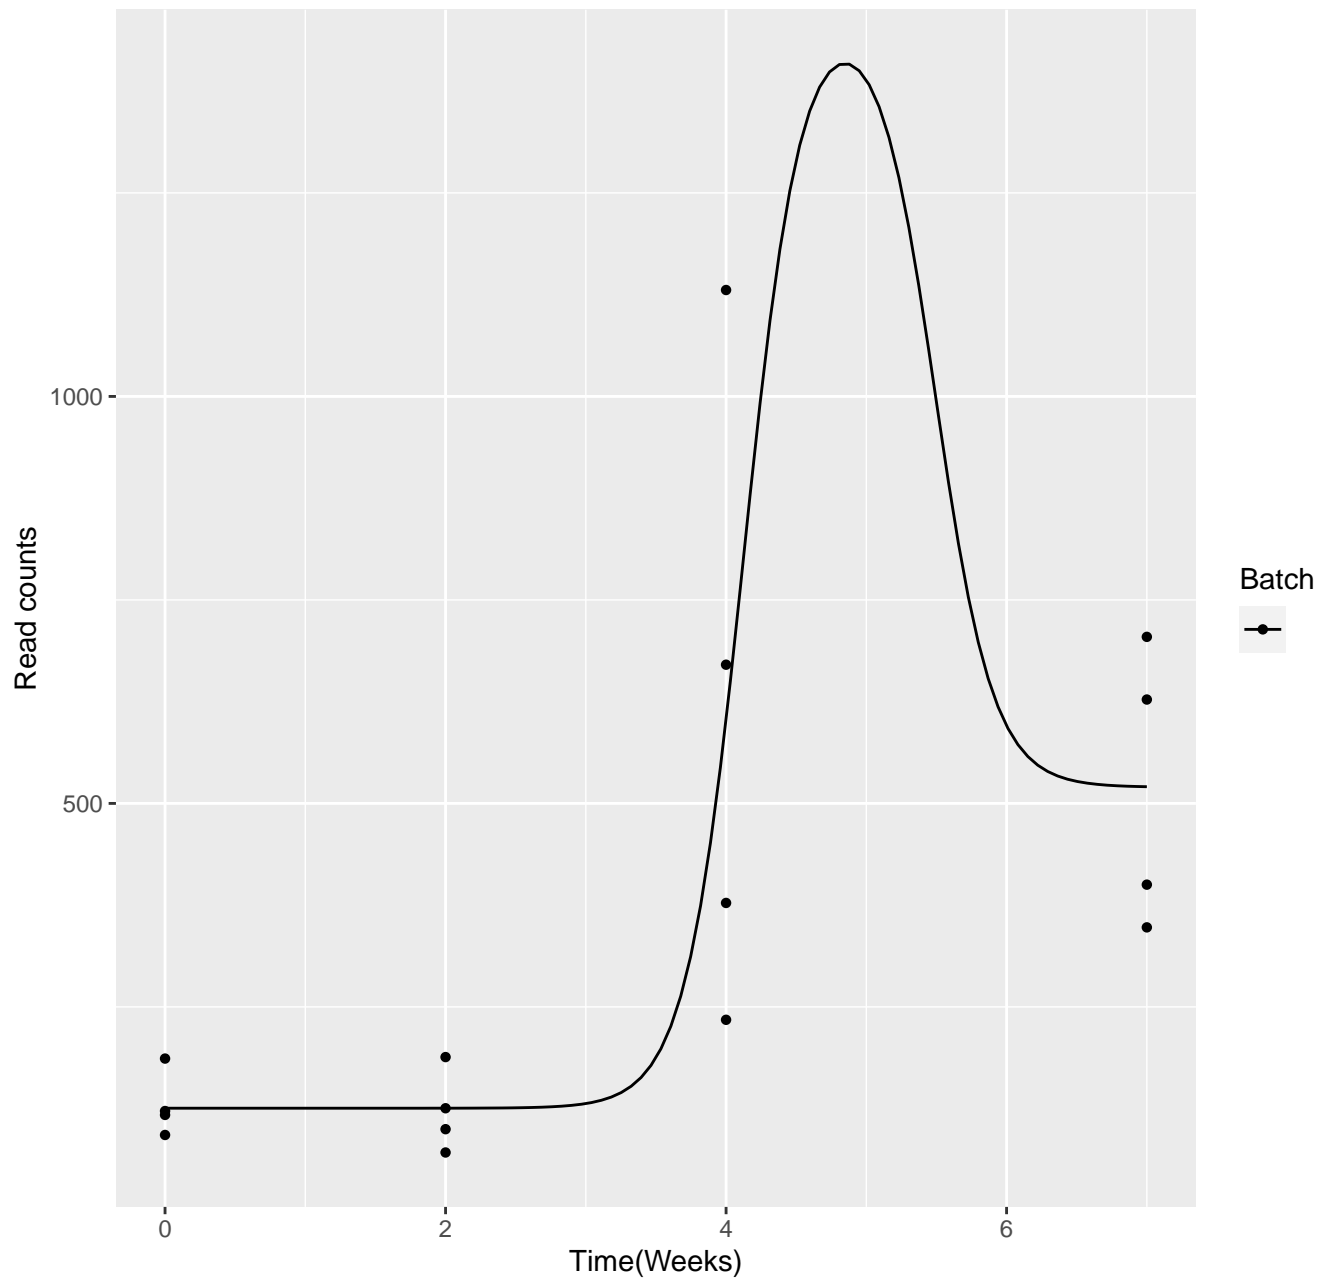

PLXNA3:  $\log_{10} q = -6.5$

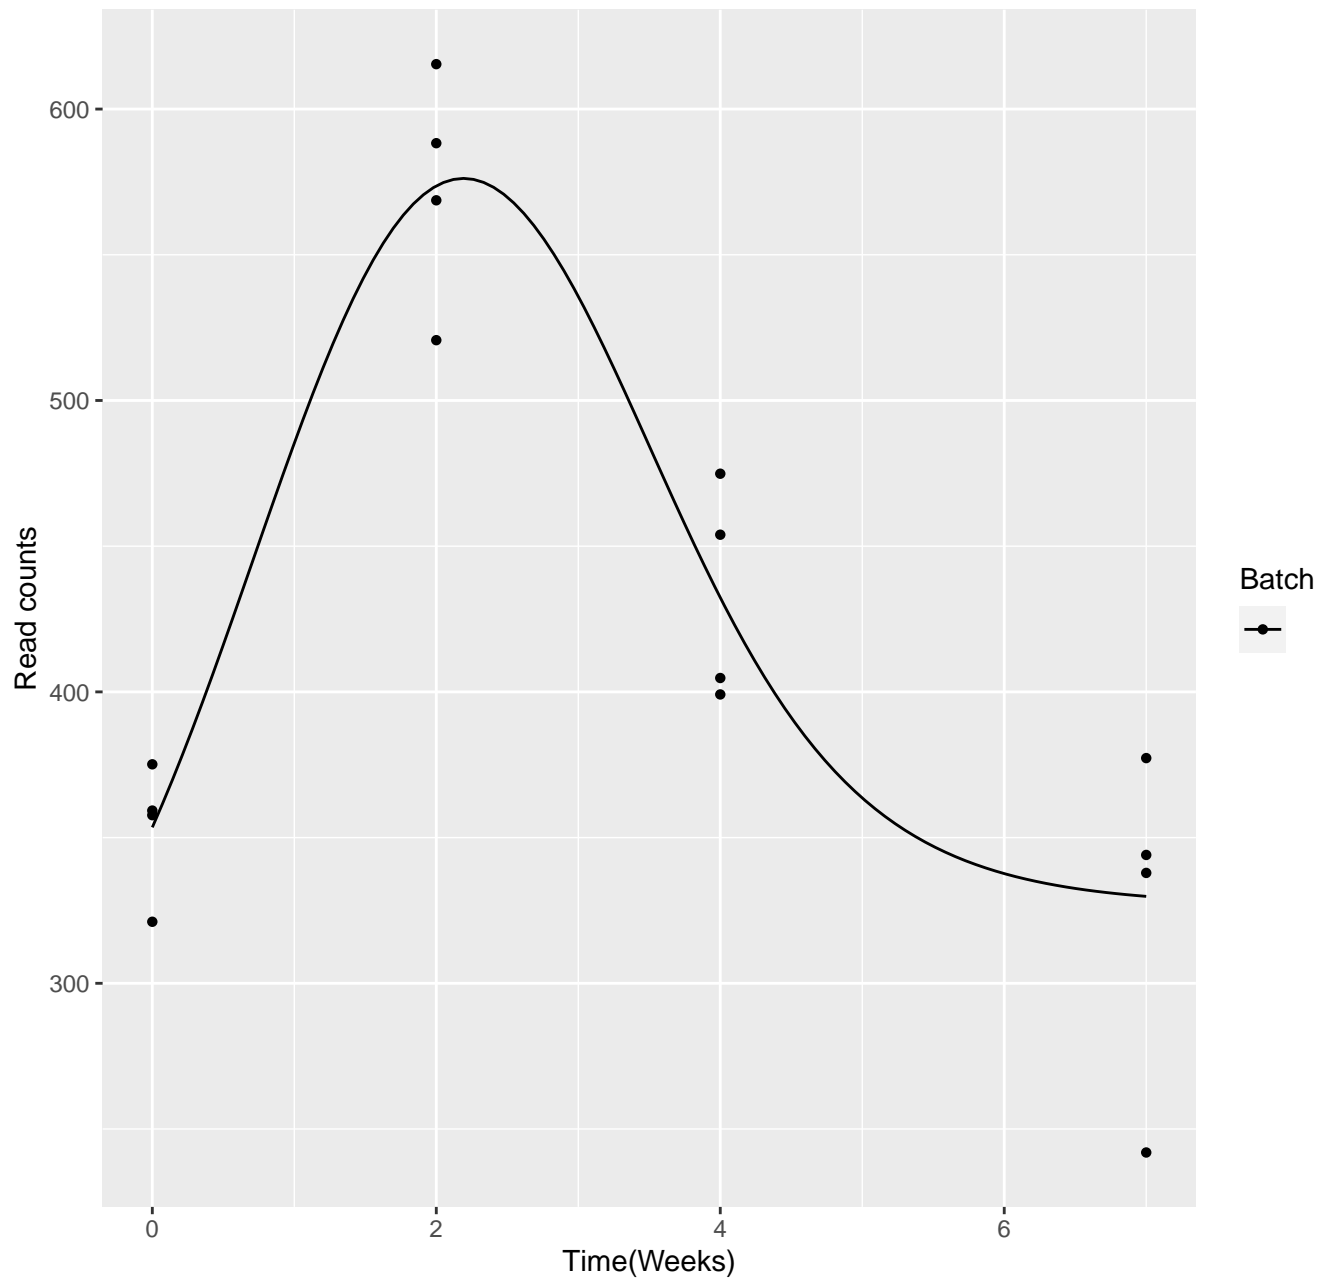

CD53:  $\log_{10} q = -6.46$

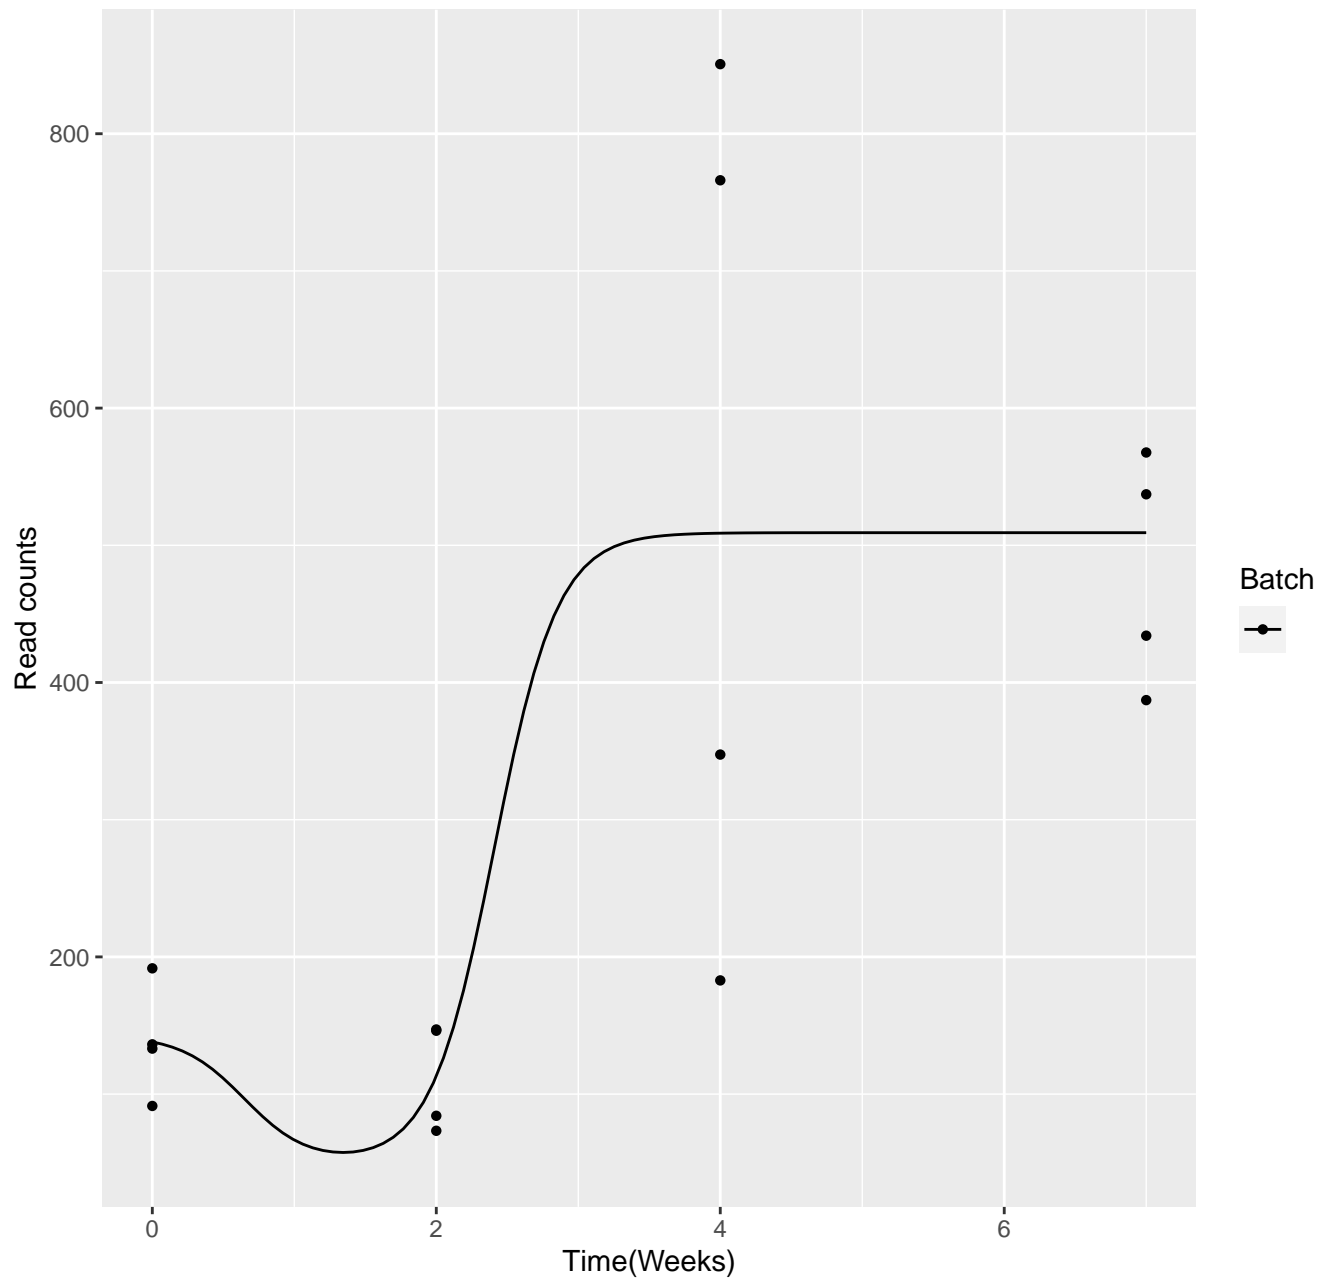



LOC100359306:  $\log_{10} q = -6.46$

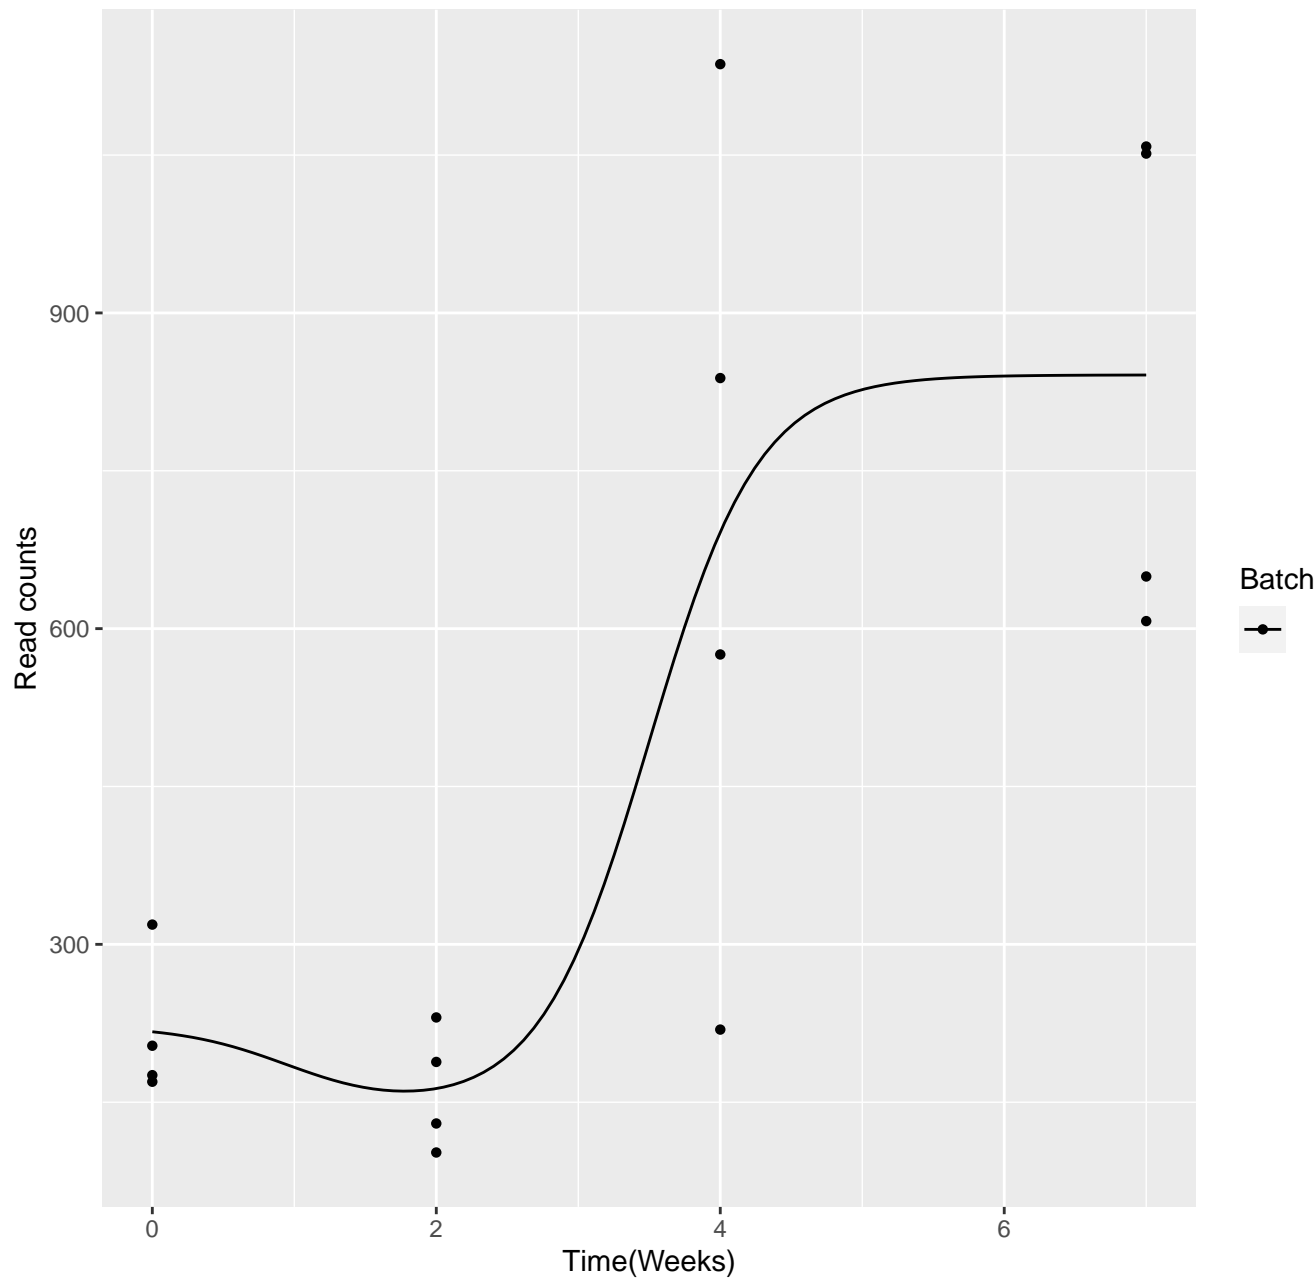

IL3RA:  $\log_{10} q = -6.45$

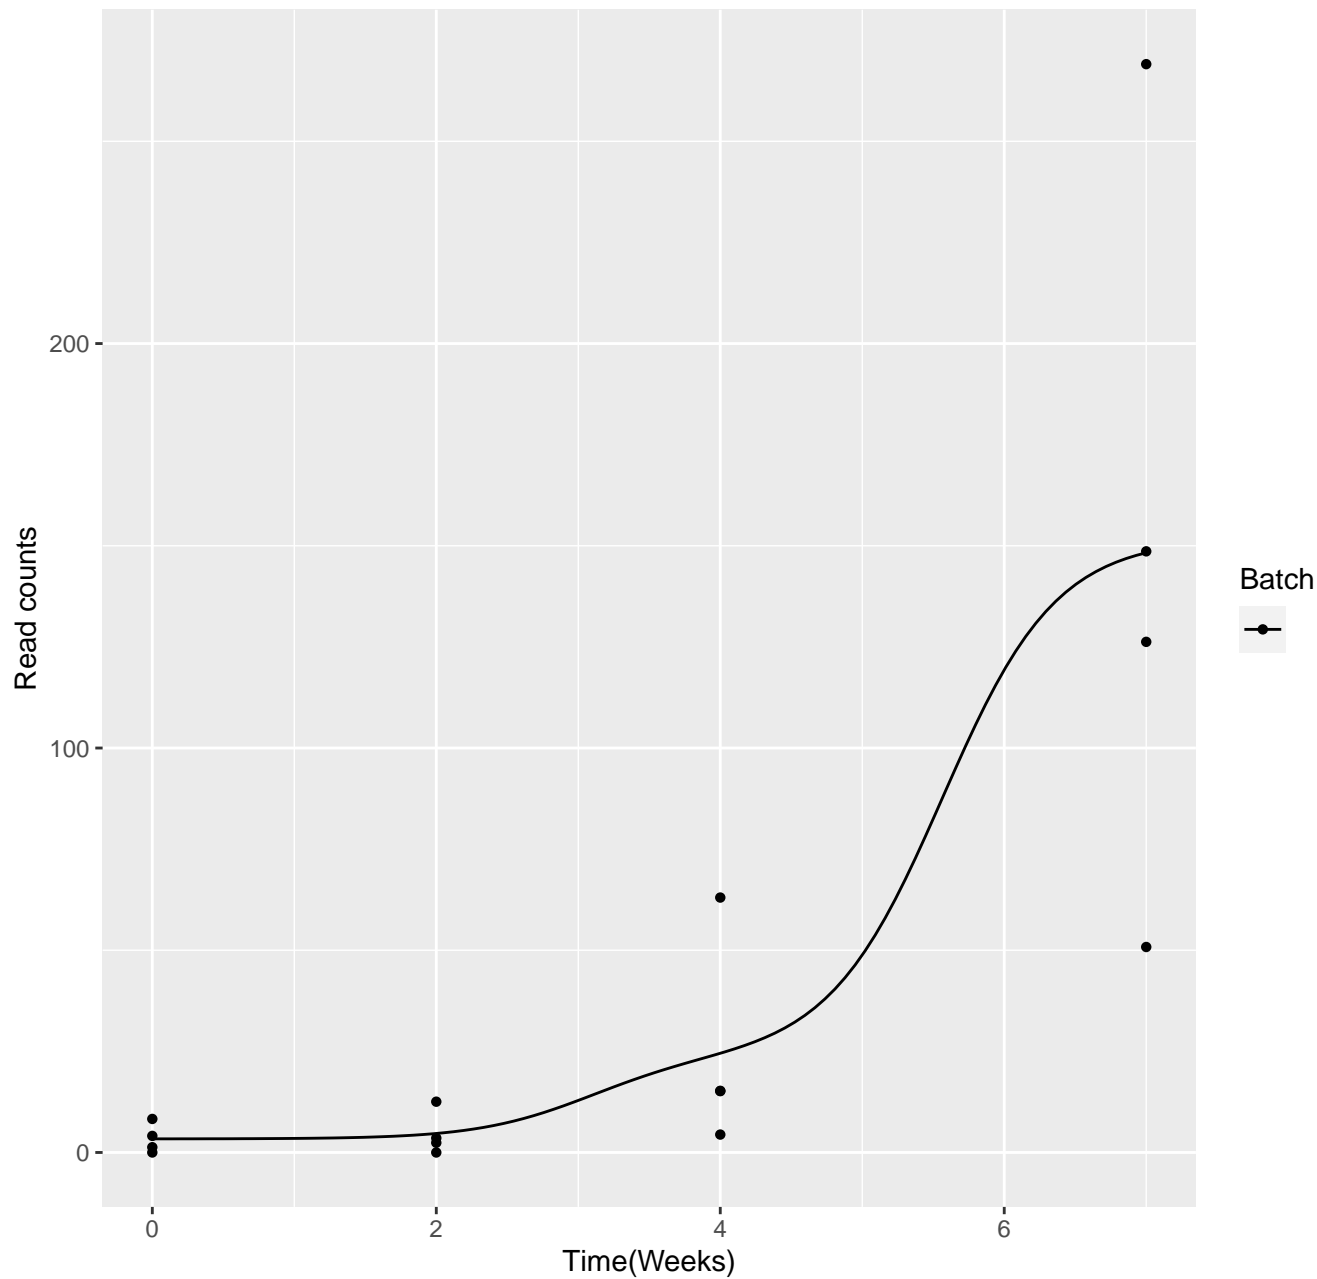

FTH1:  $\log_{10} q = -6.44$

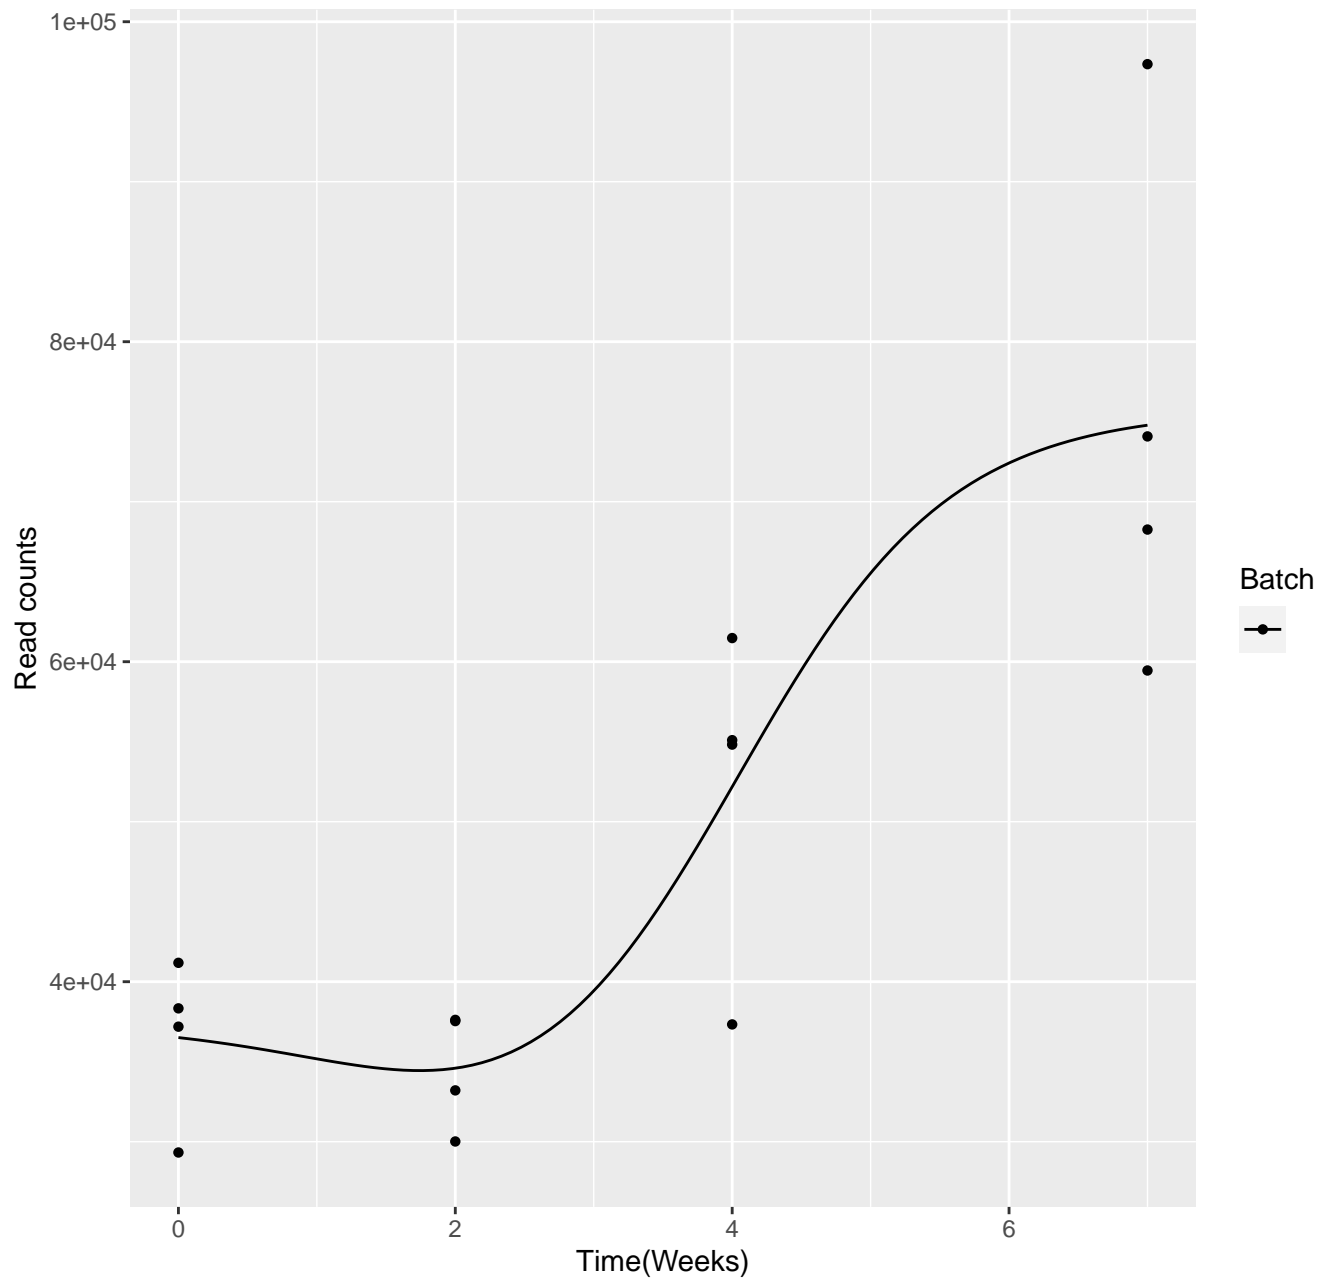

CHRD2:  $\log_{10} q = -6.44$

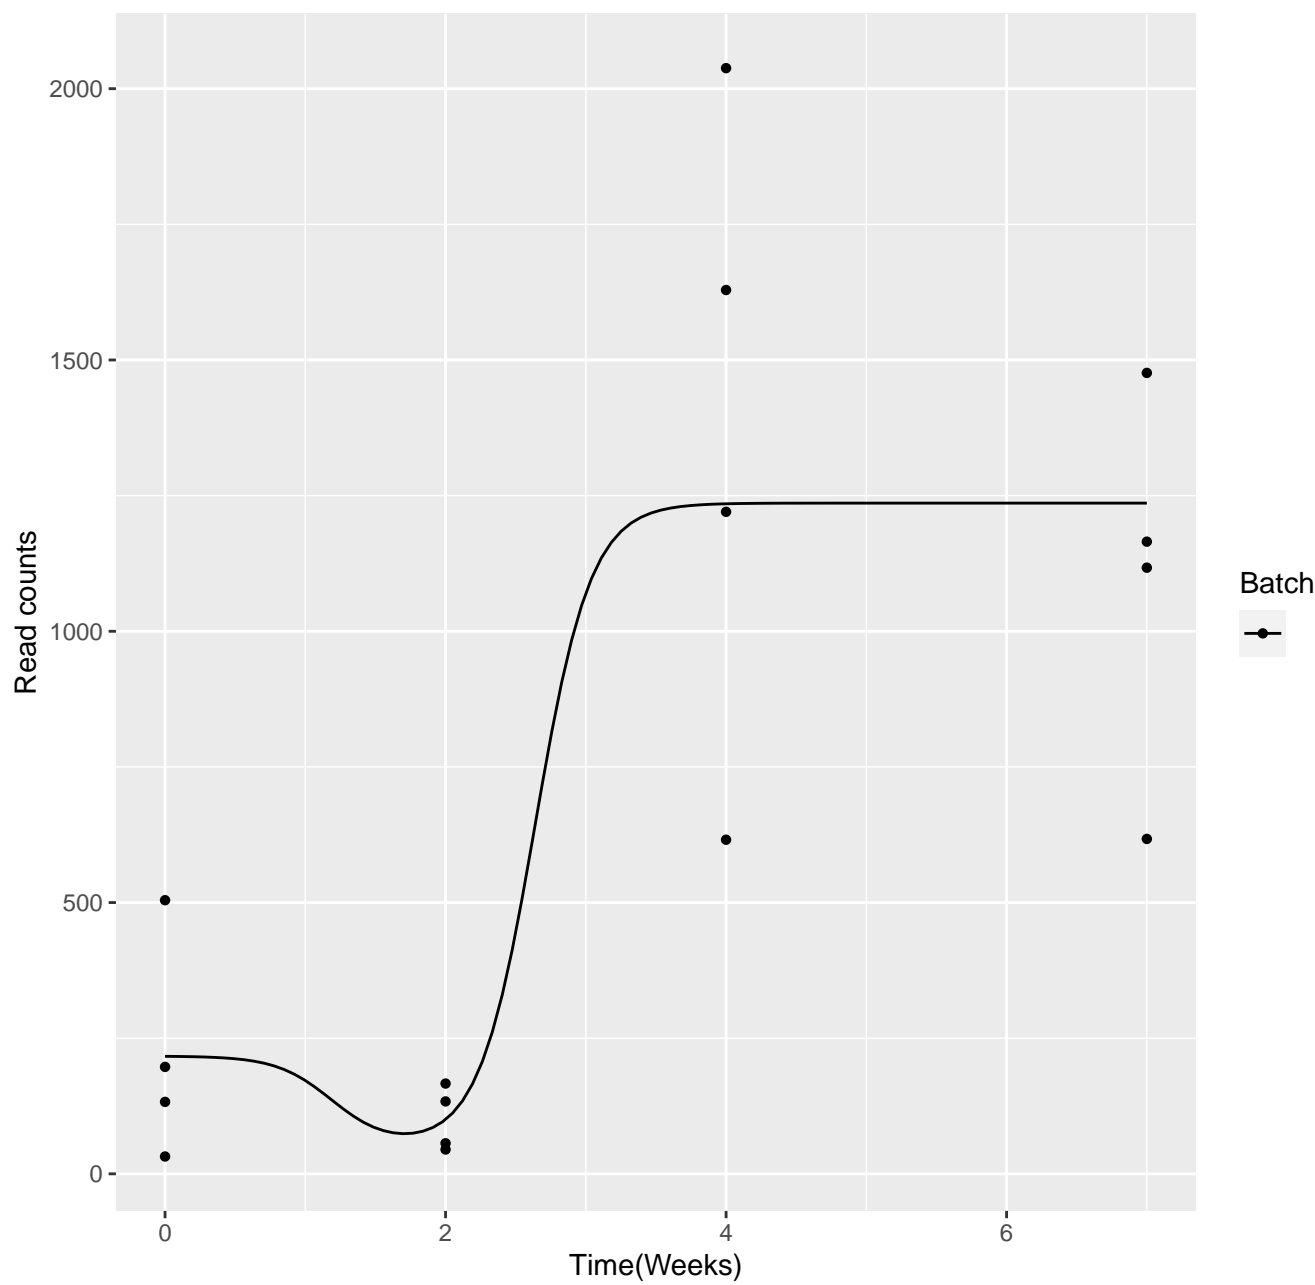

CD74:  $\log_{10} q = -6.42$

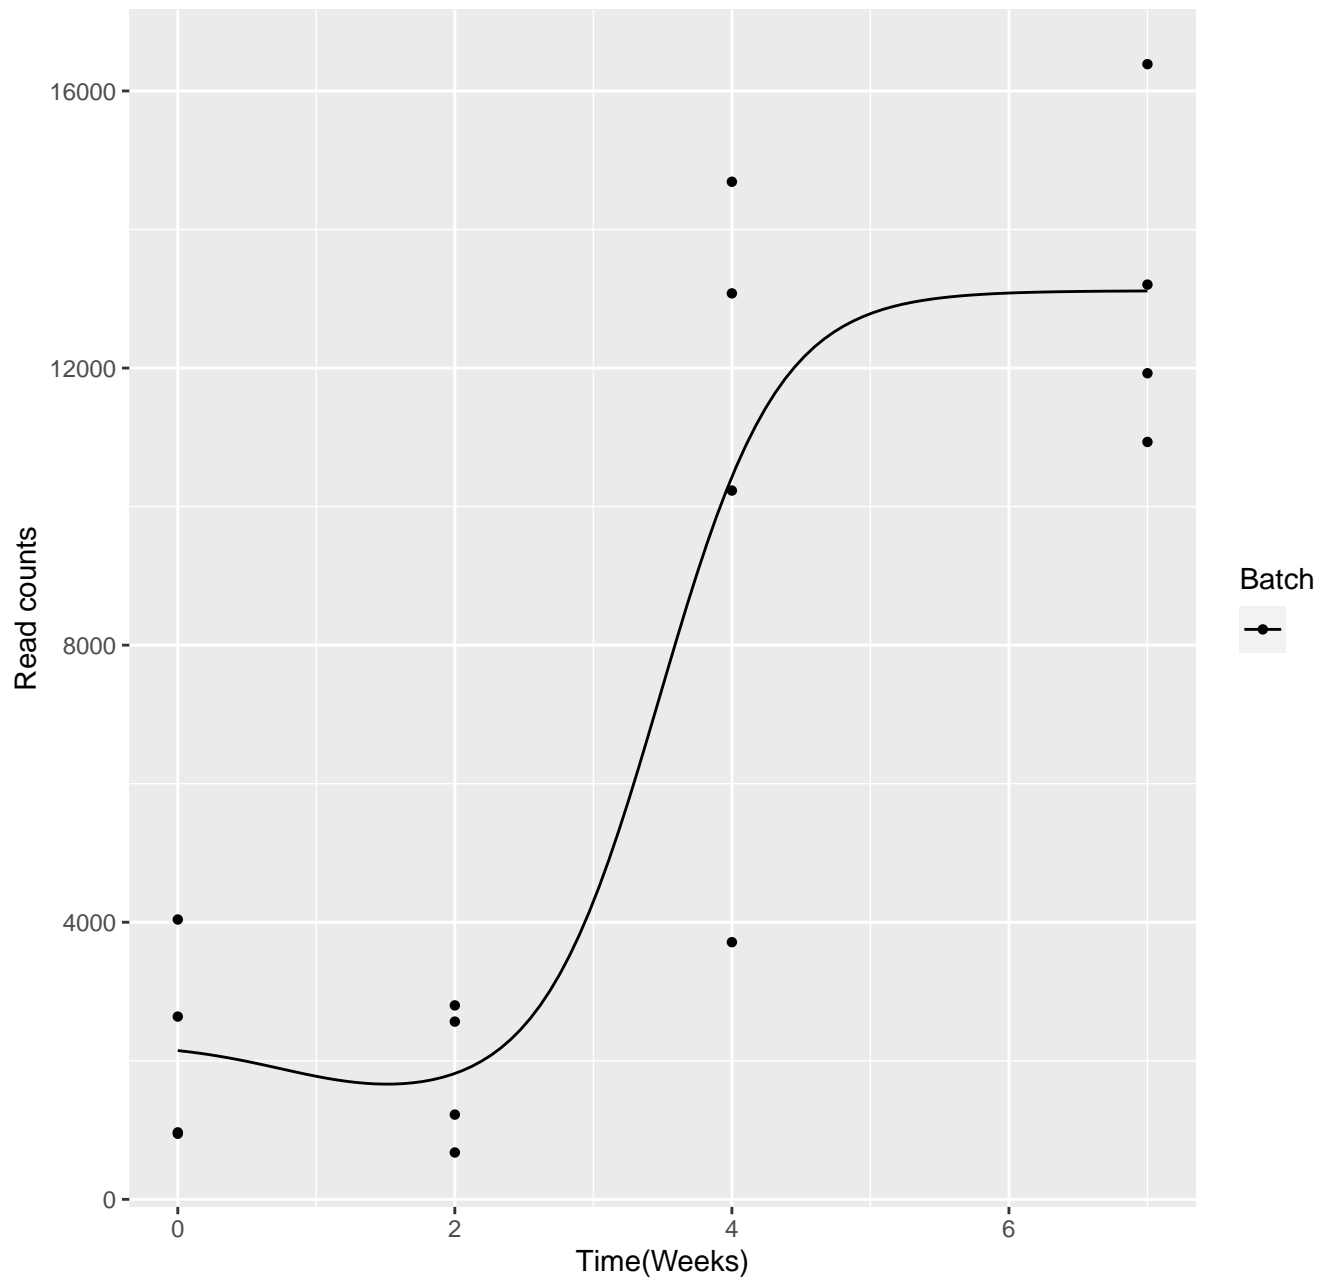

PRUNE2:  $\log_{10} q = -6.41$

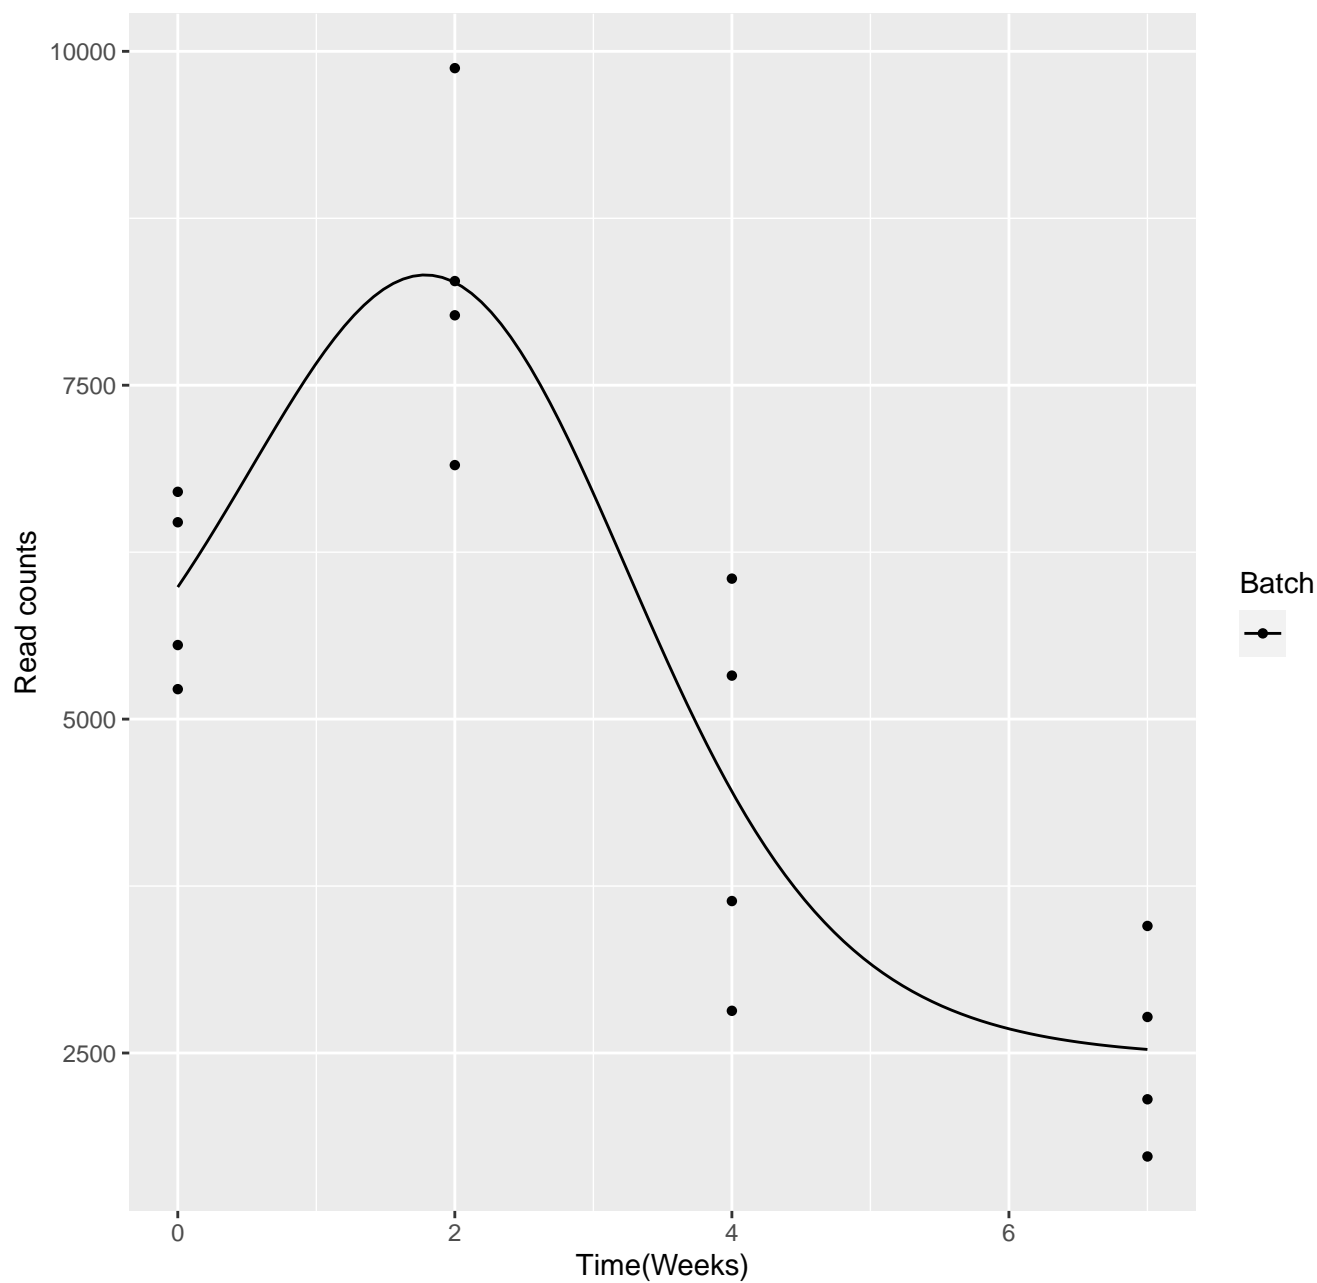

METTL24:  $\log_{10} q = -6.4$

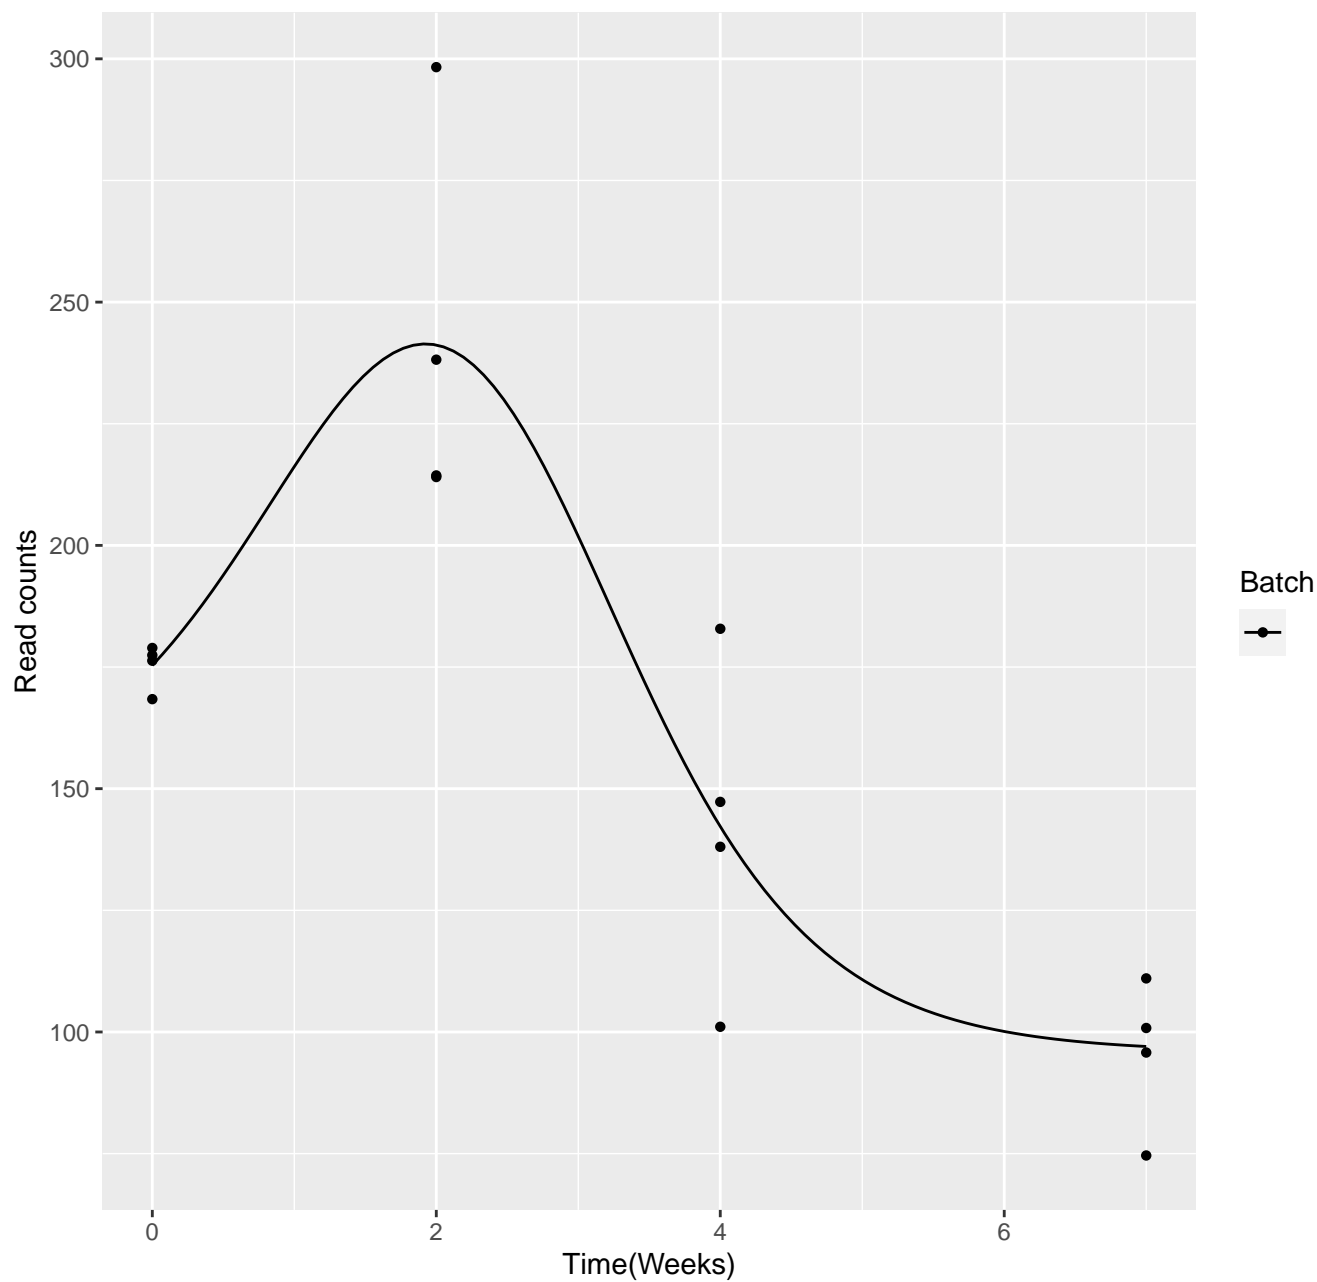

LOC100338677:  $\log_{10} q = -6.39$

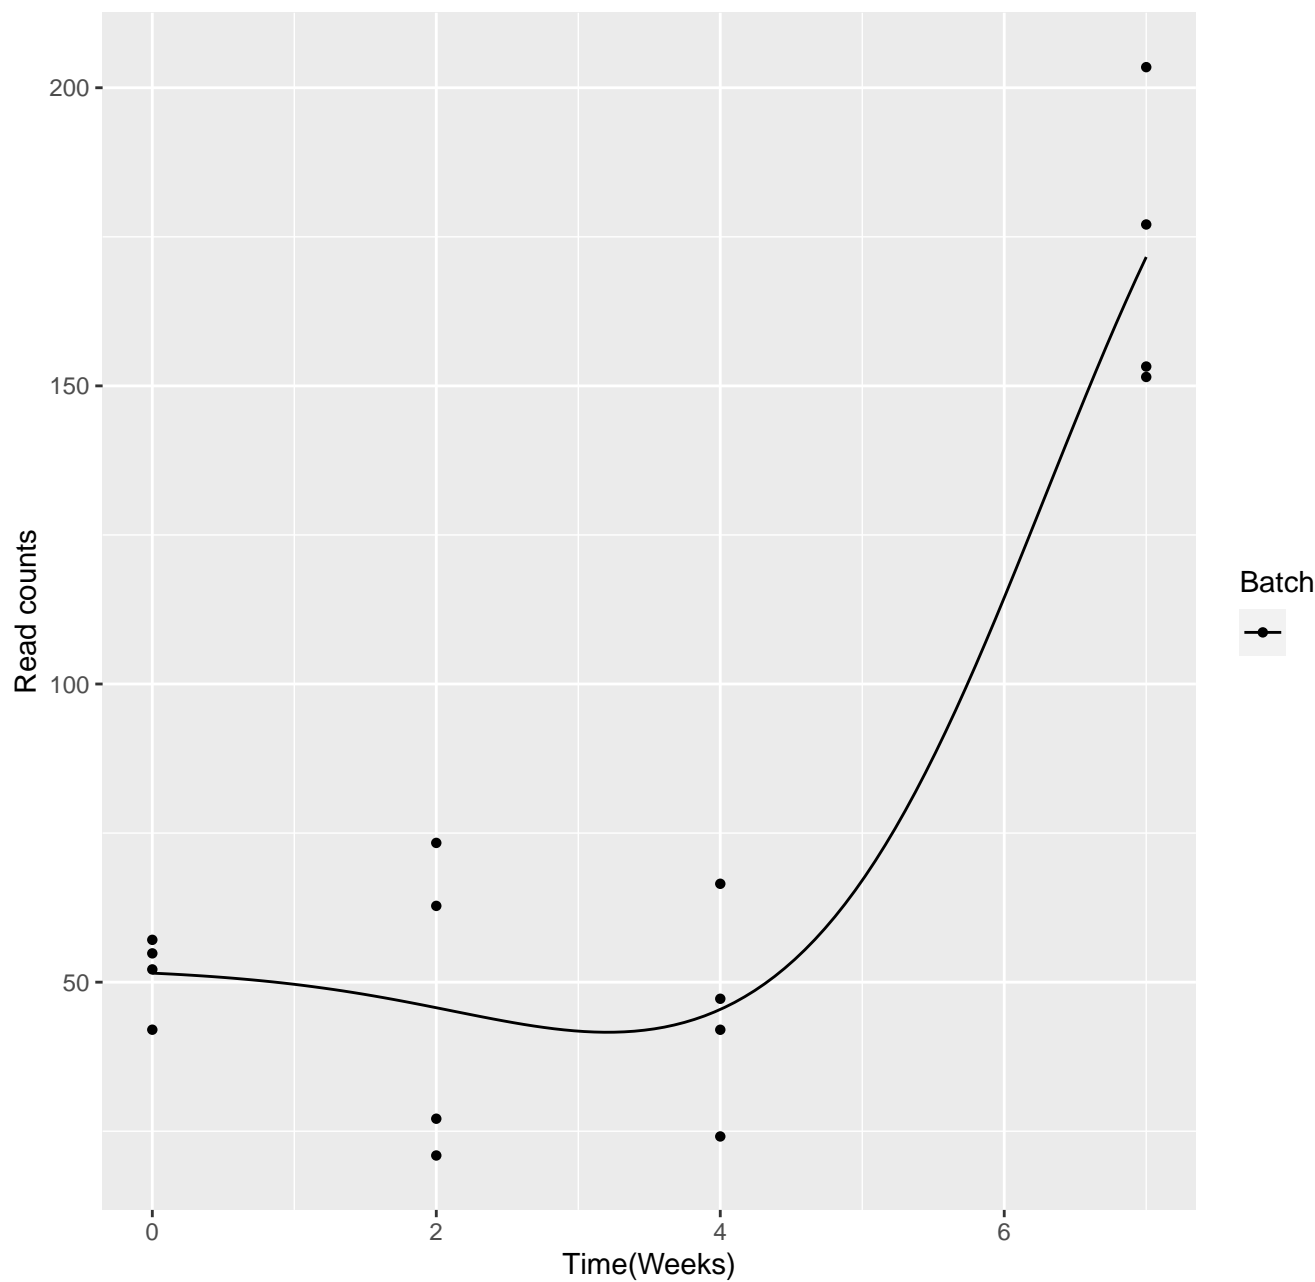



SYK:  $\log_{10} q = -6.39$

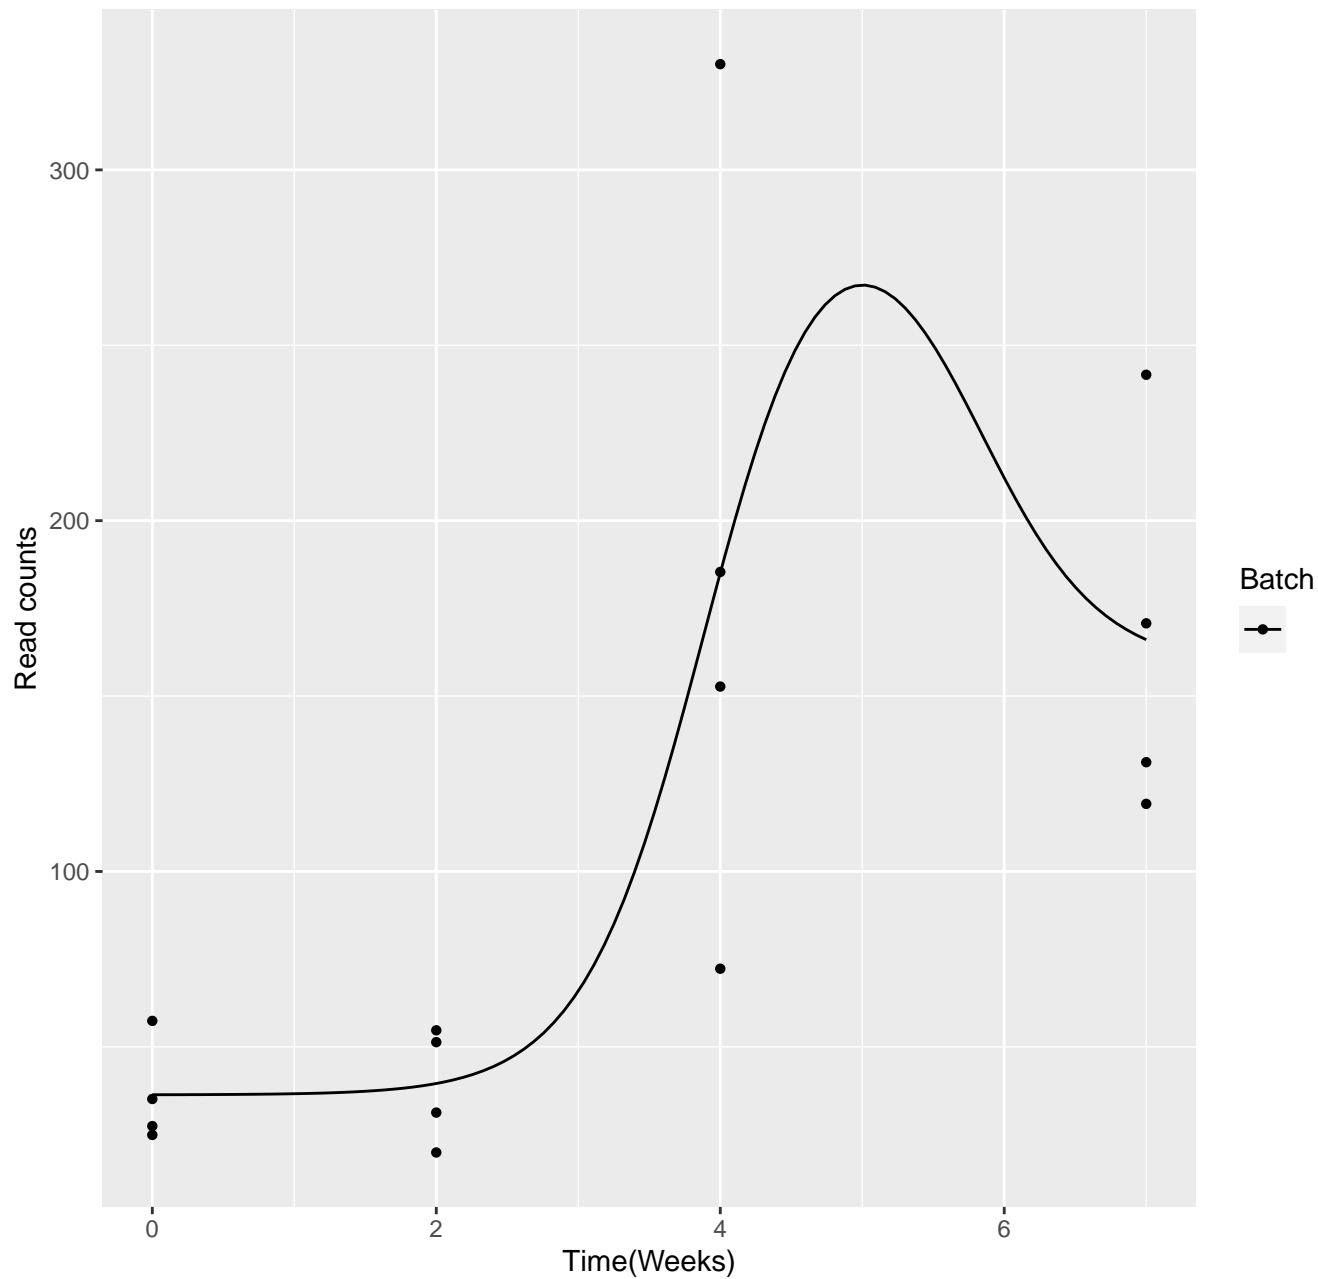

SMC4:  $\log_{10} q = -6.38$

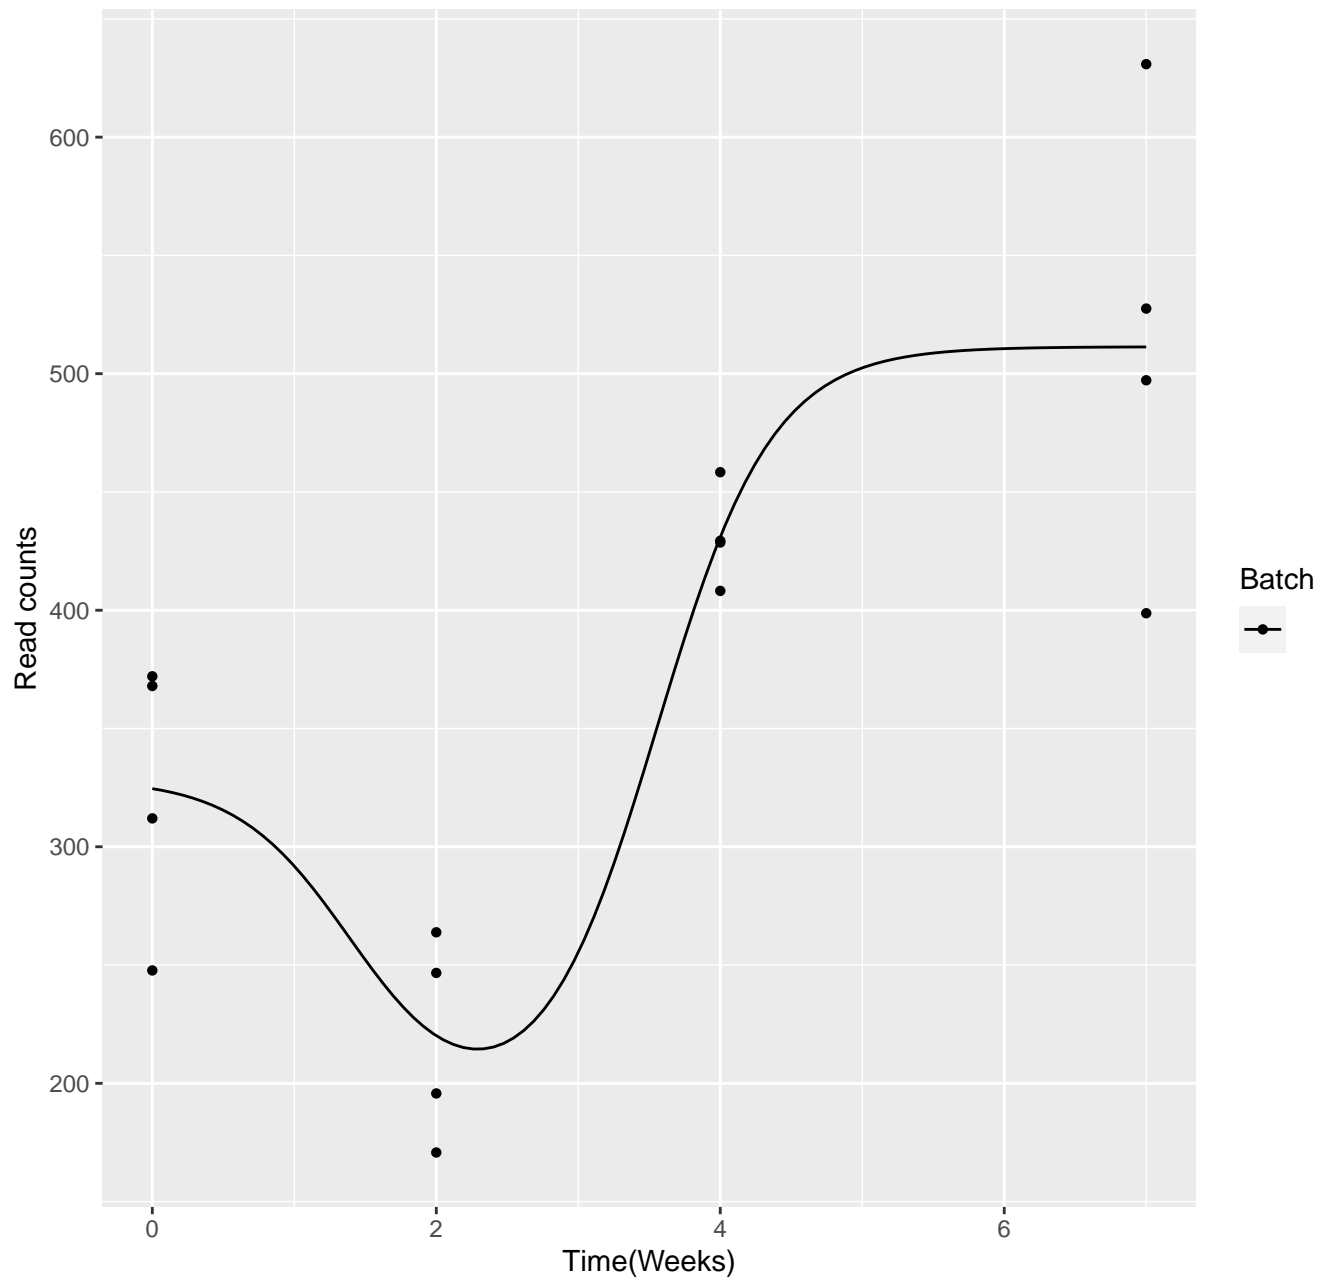

BIN2:  $\log_{10} q = -6.37$

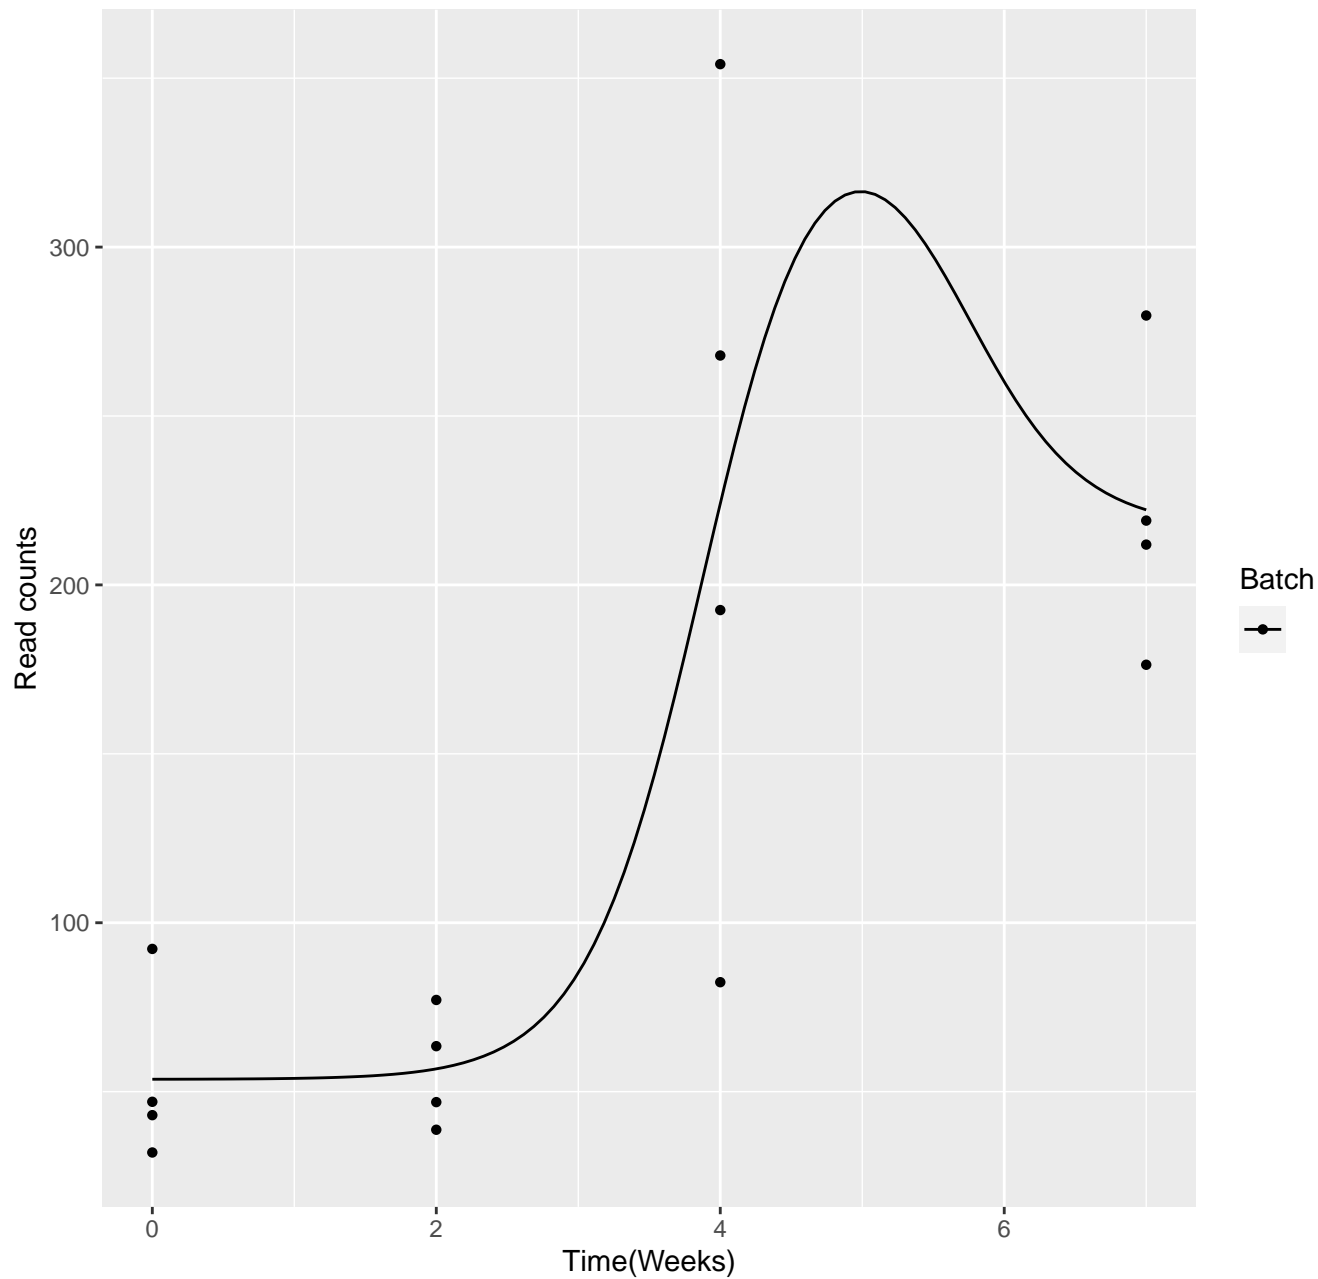

DEFB1:  $\log_{10} q = -6.37$

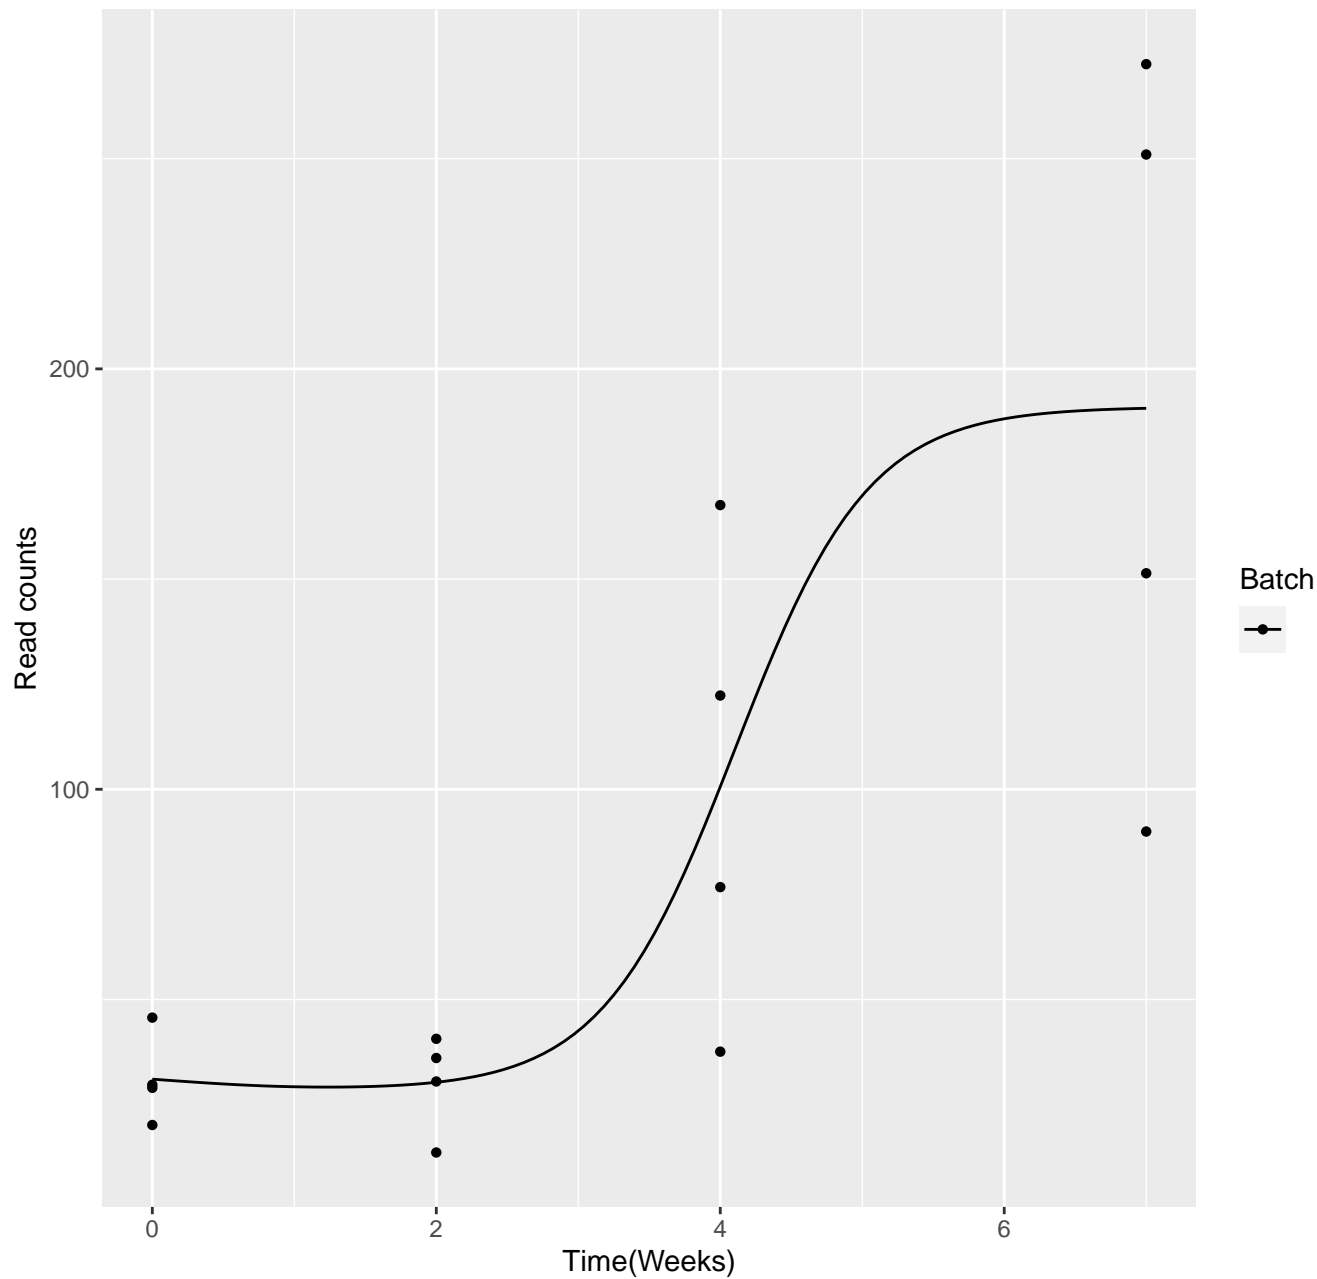

RASL12:  $\log_{10} q = -6.36$

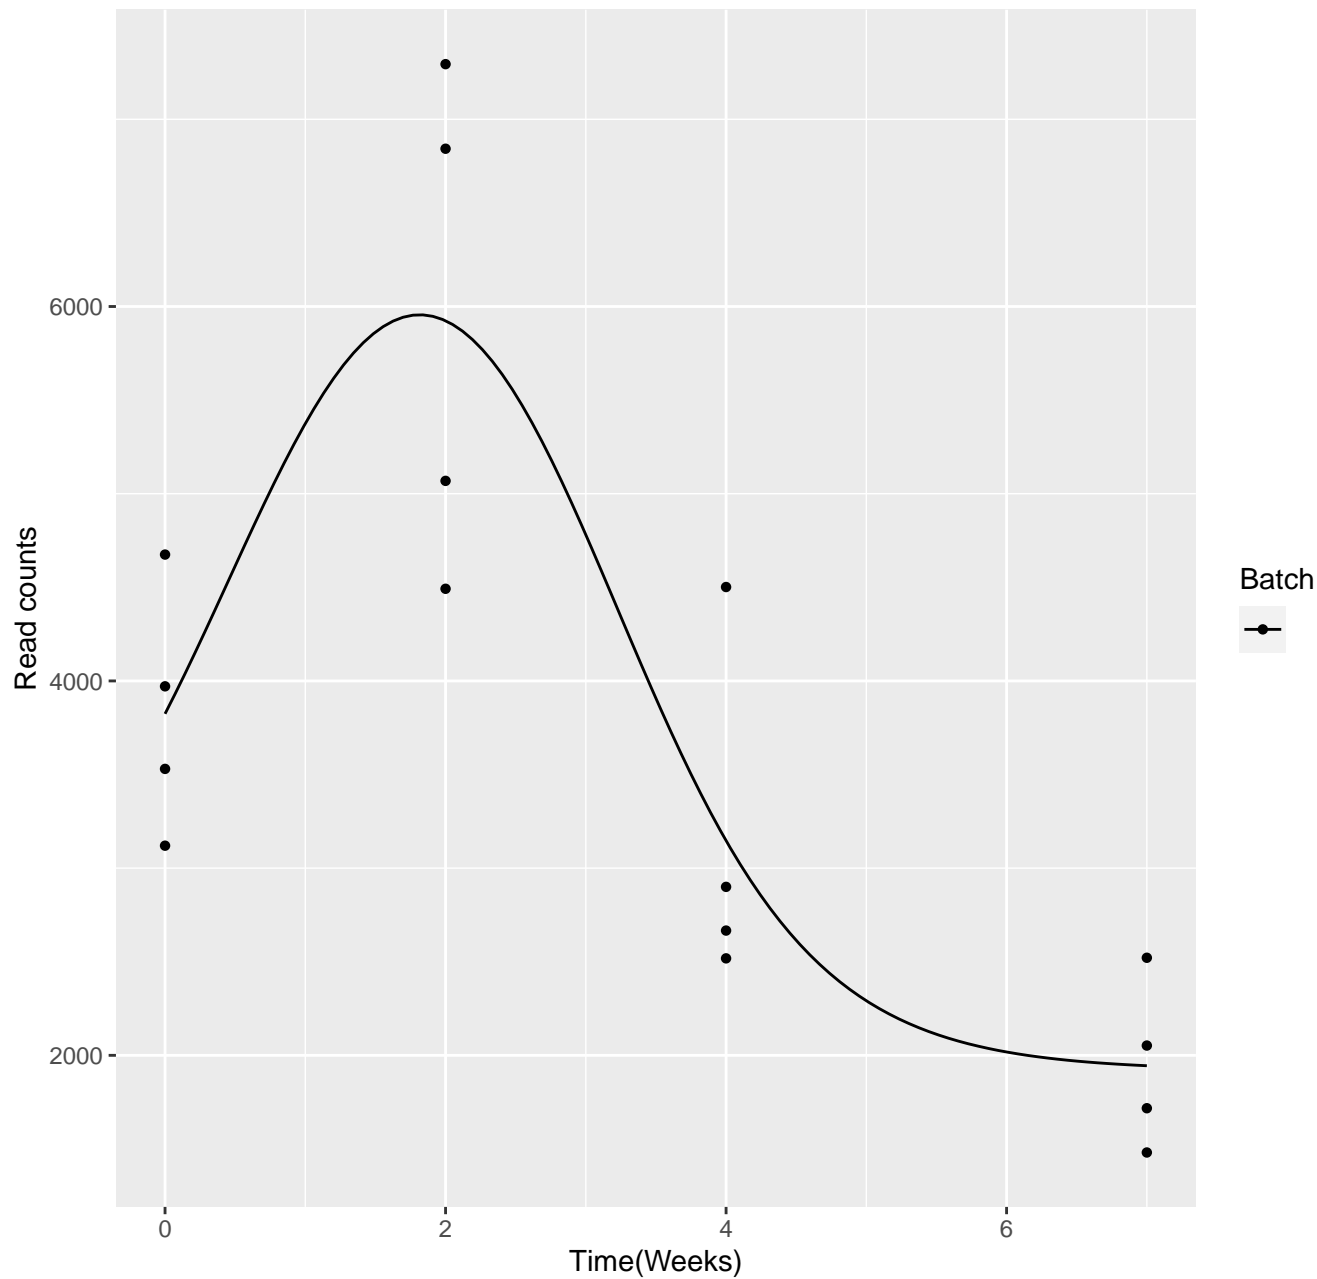

UNC45A:  $\log_{10} q = -6.36$

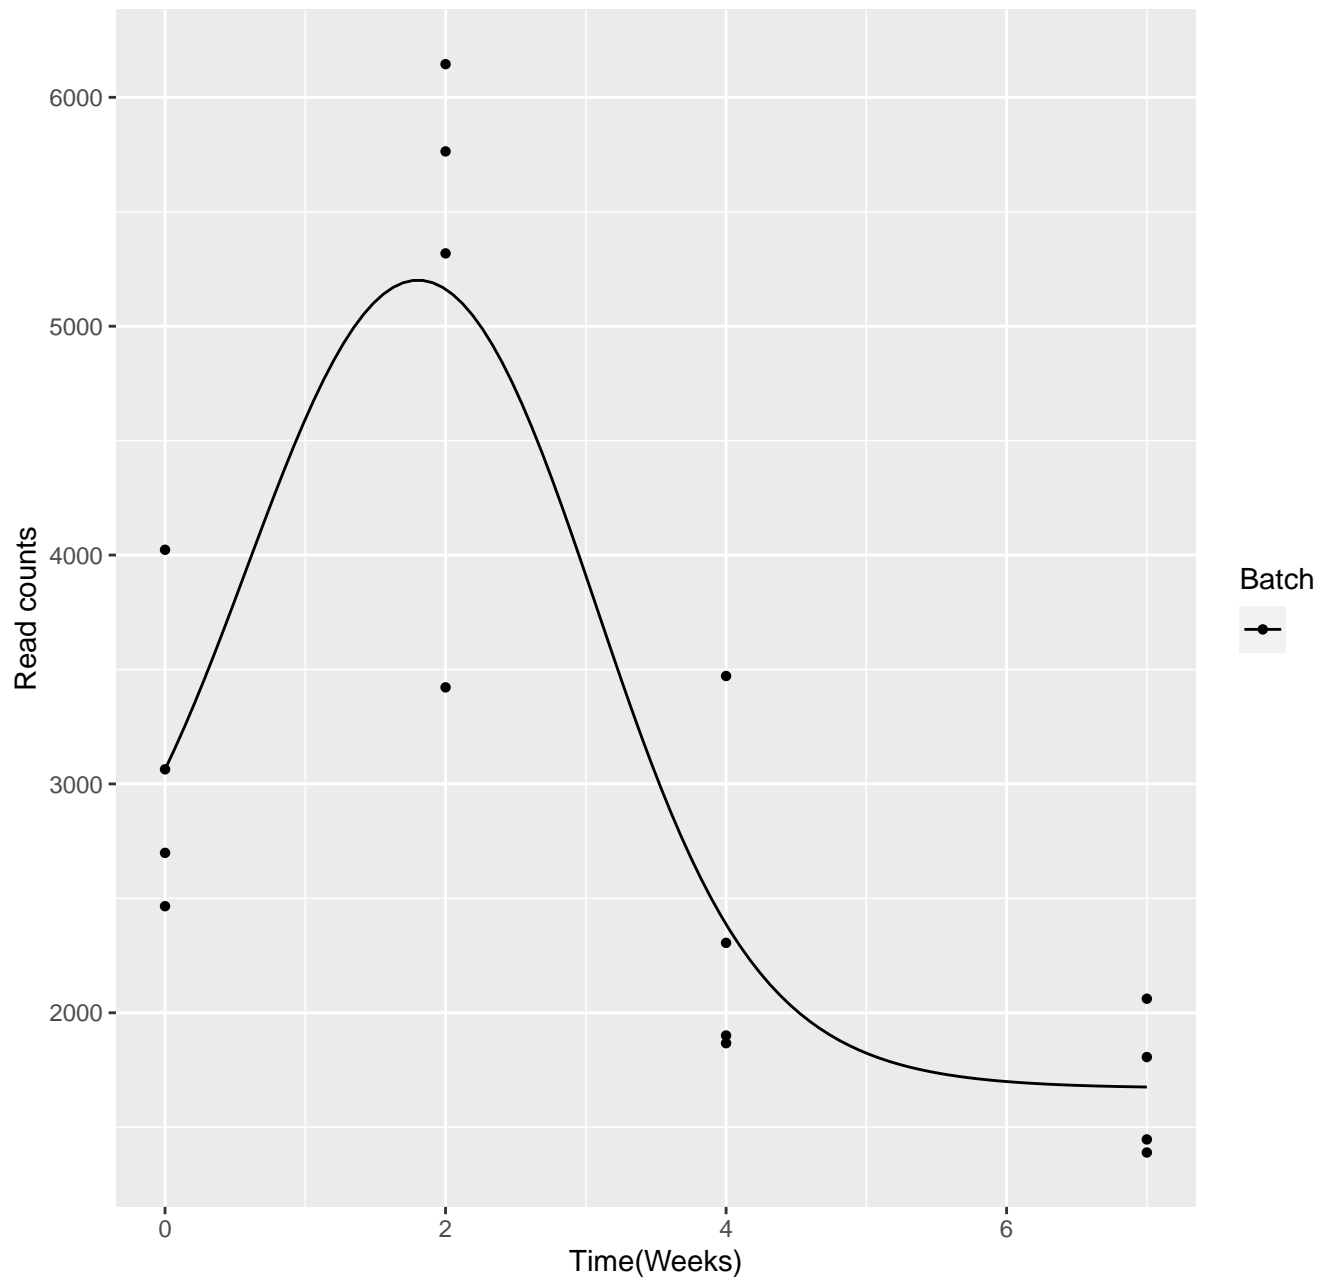

KCNE4:  $\log_{10} q = -6.36$

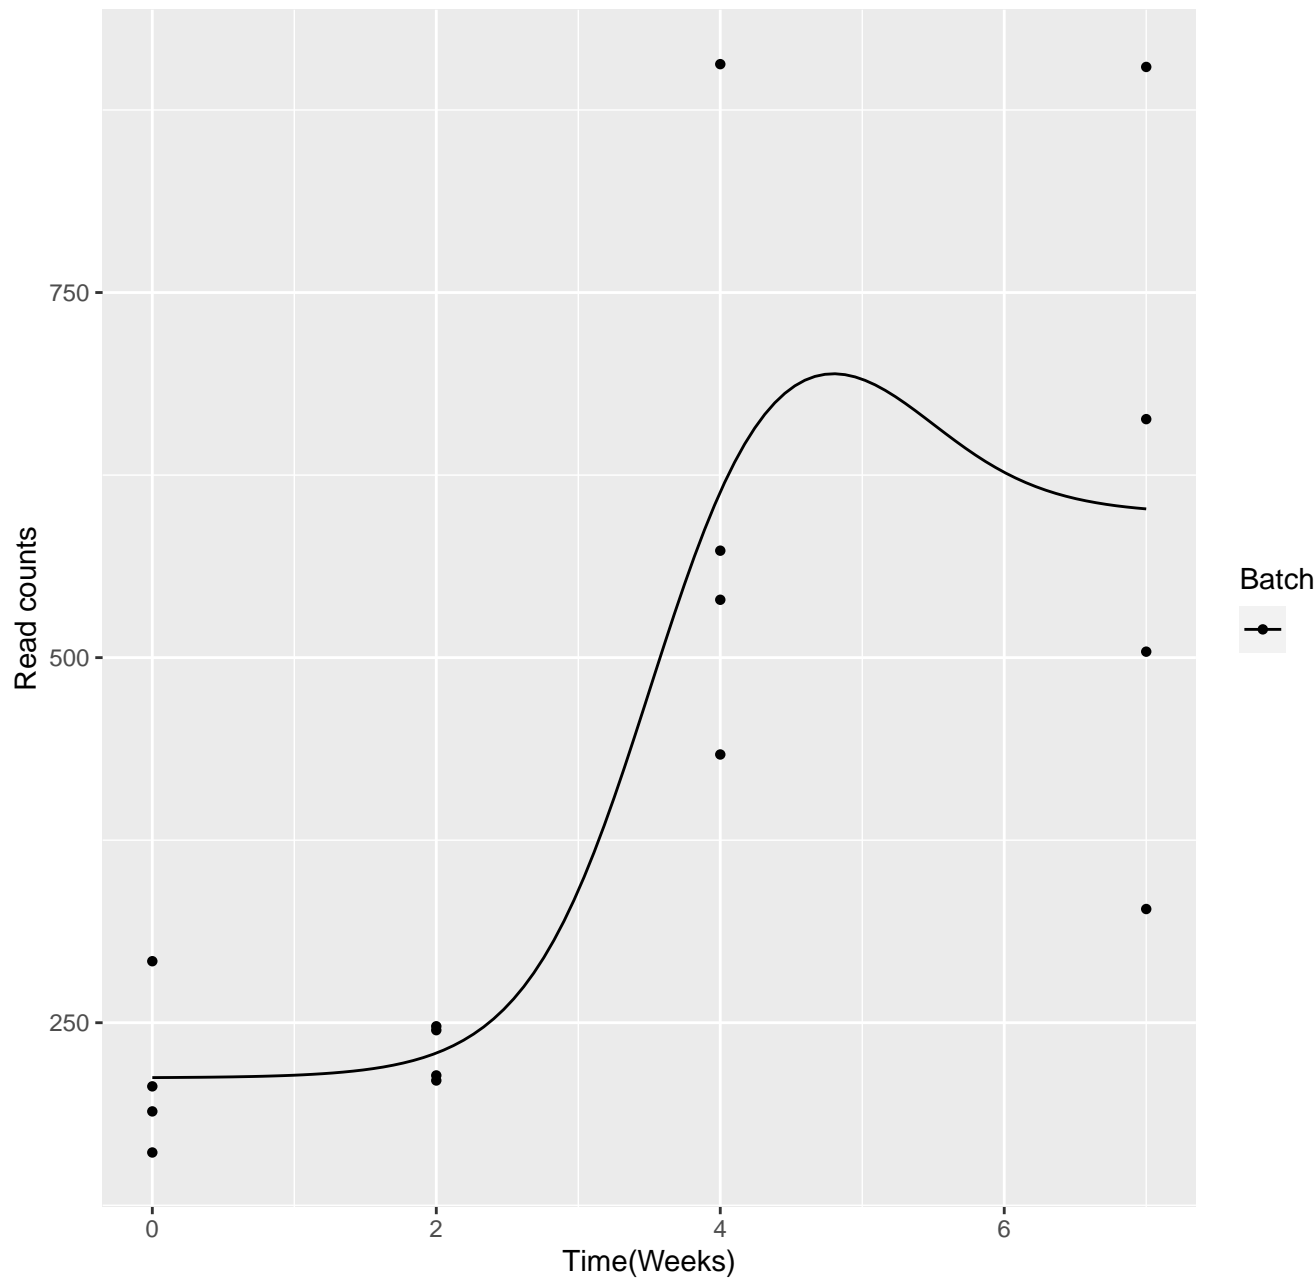

MAPK4:  $\log_{10} q = -6.36$

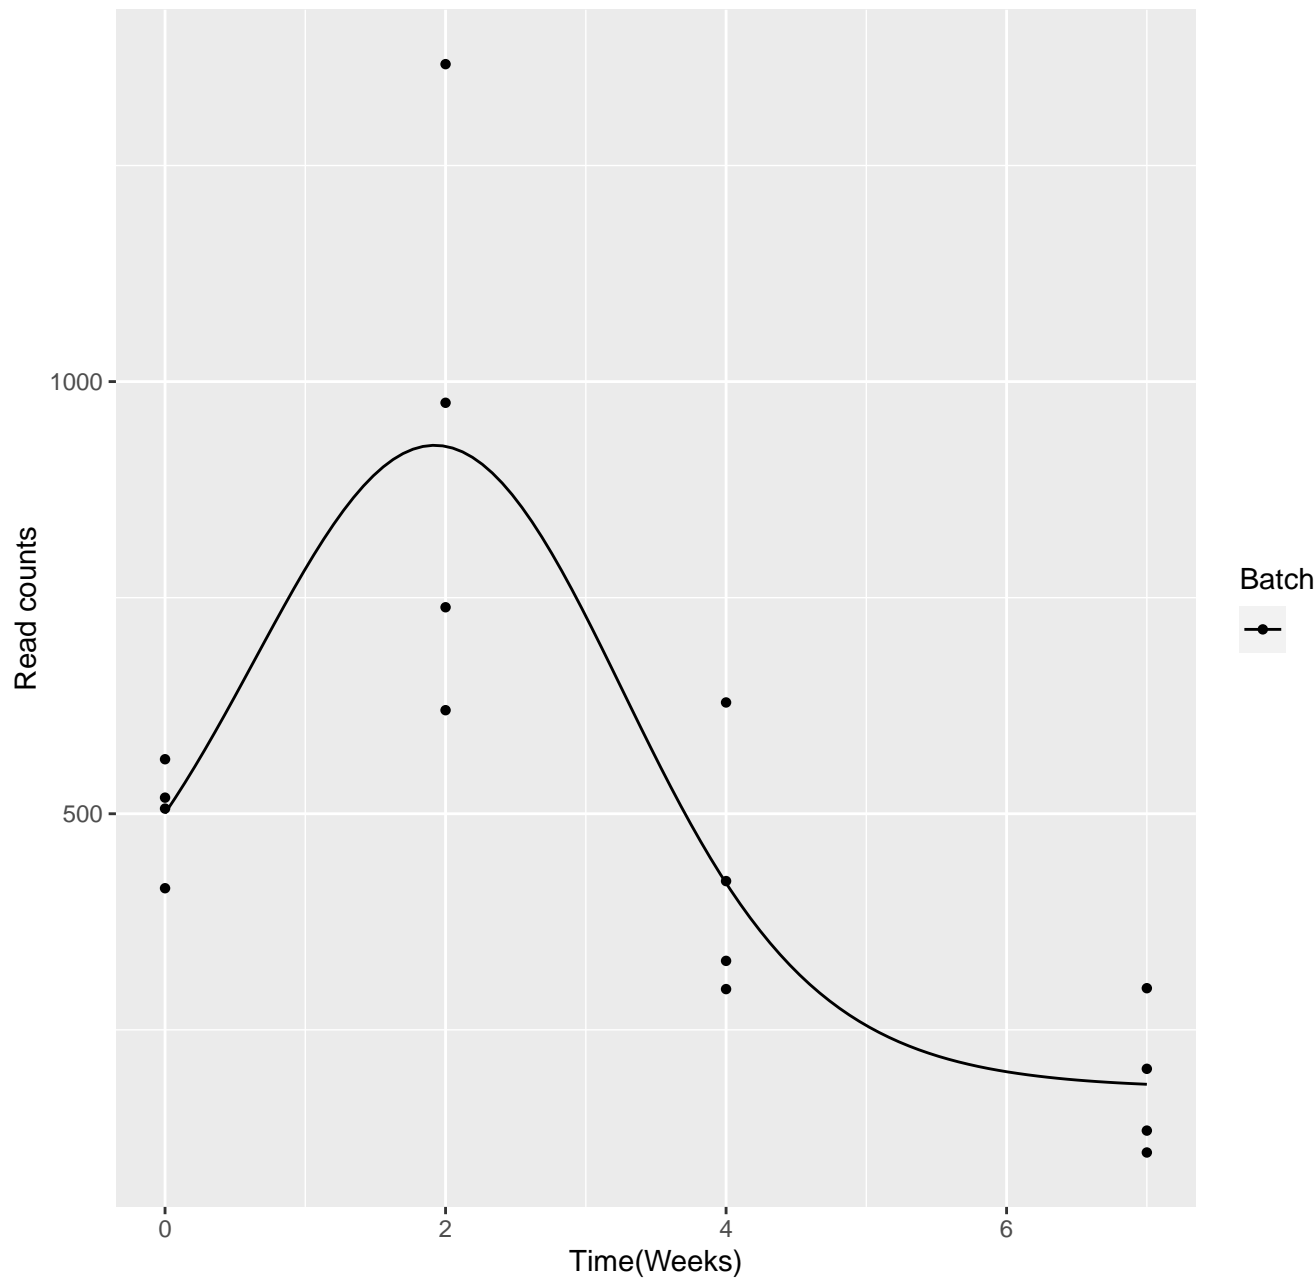



CCR5:  $\log_{10} q = -6.34$

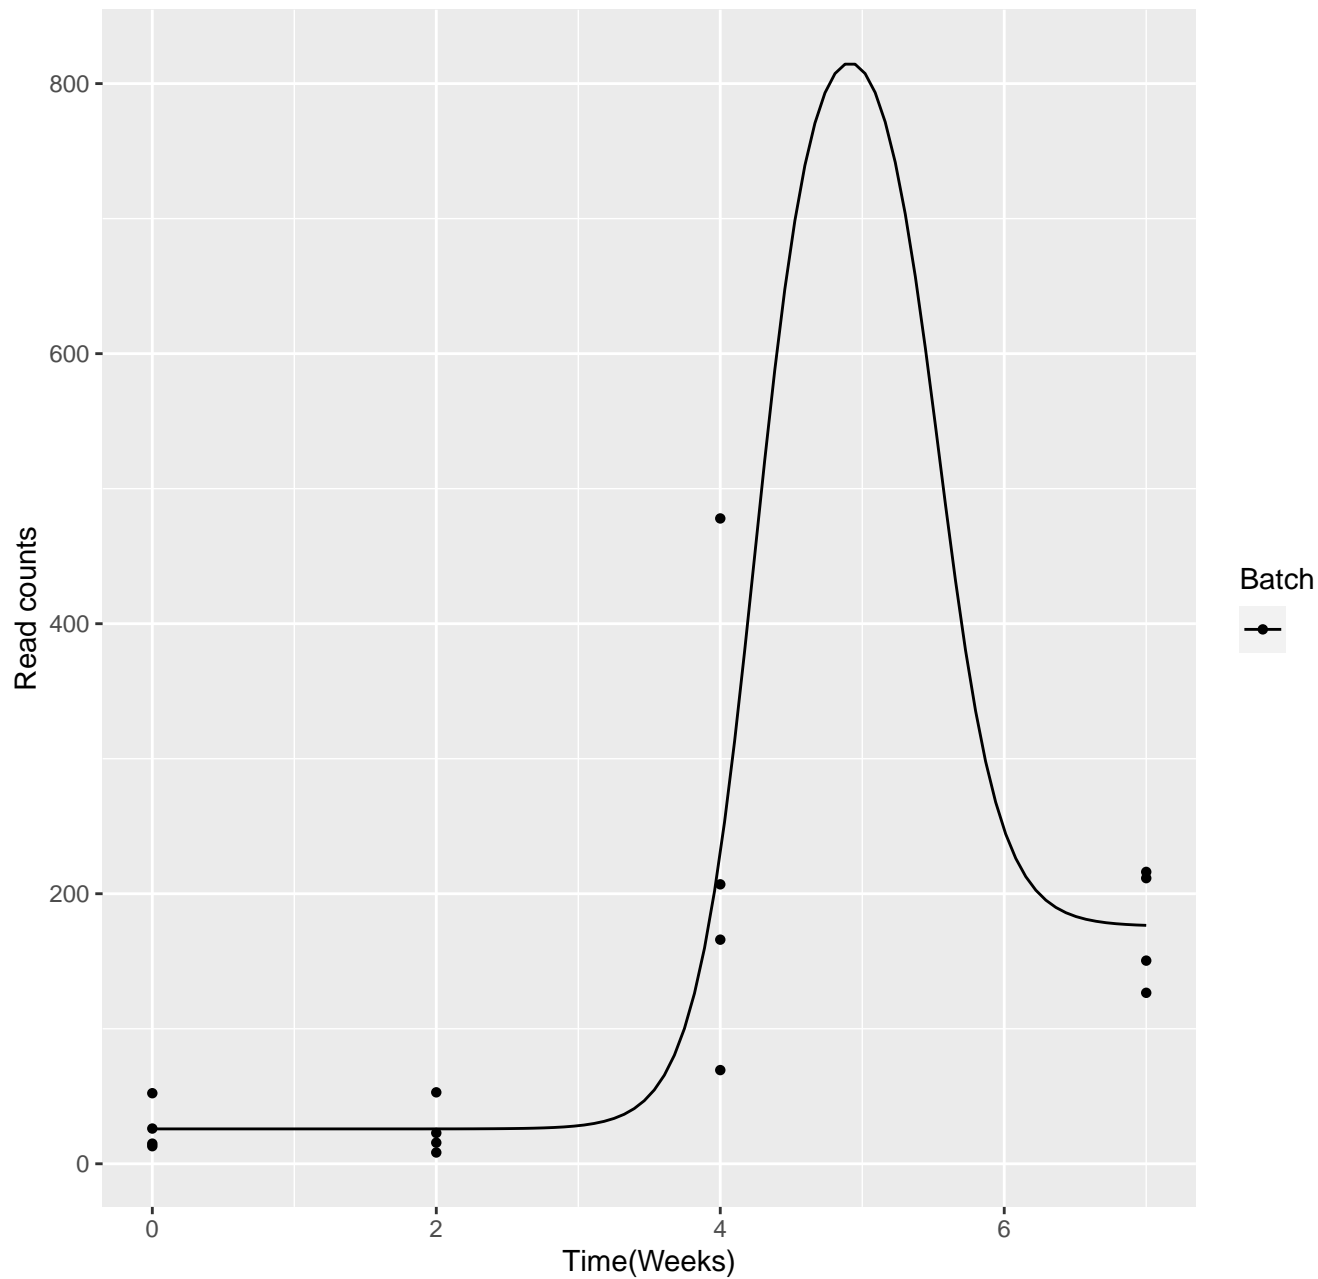

PTX3:  $\log_{10} q = -6.34$

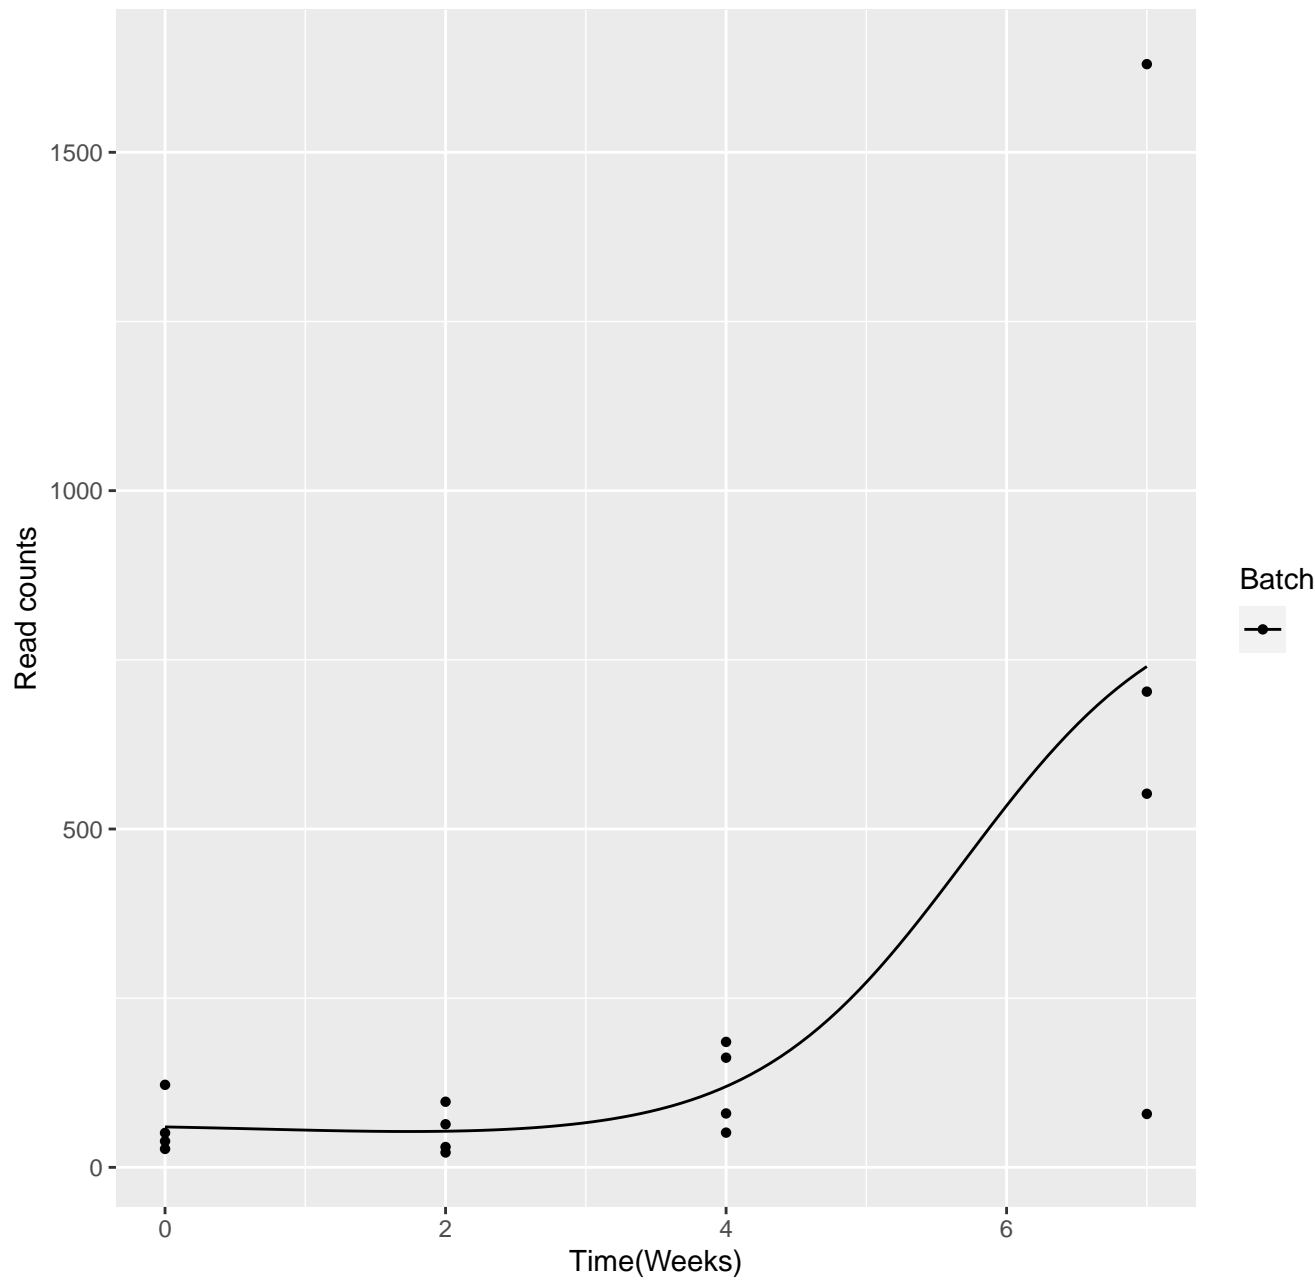

LOC100343607:  $\log_{10} q = -6.29$

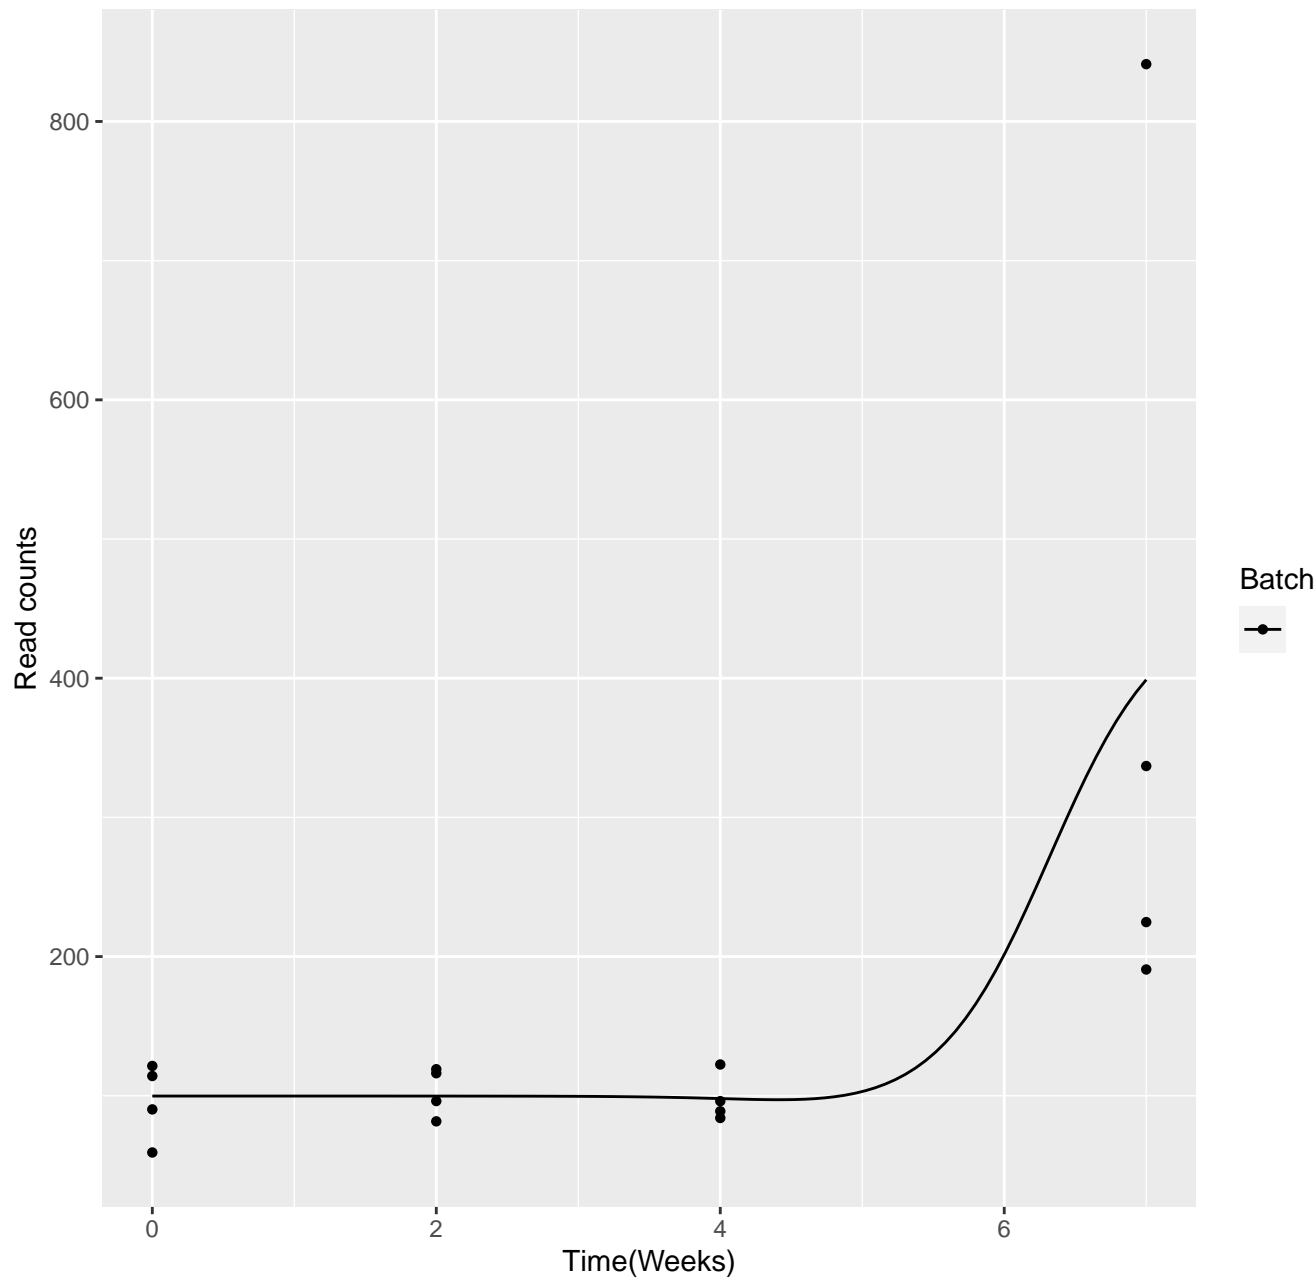

KL:  $\log_{10} q = -6.28$

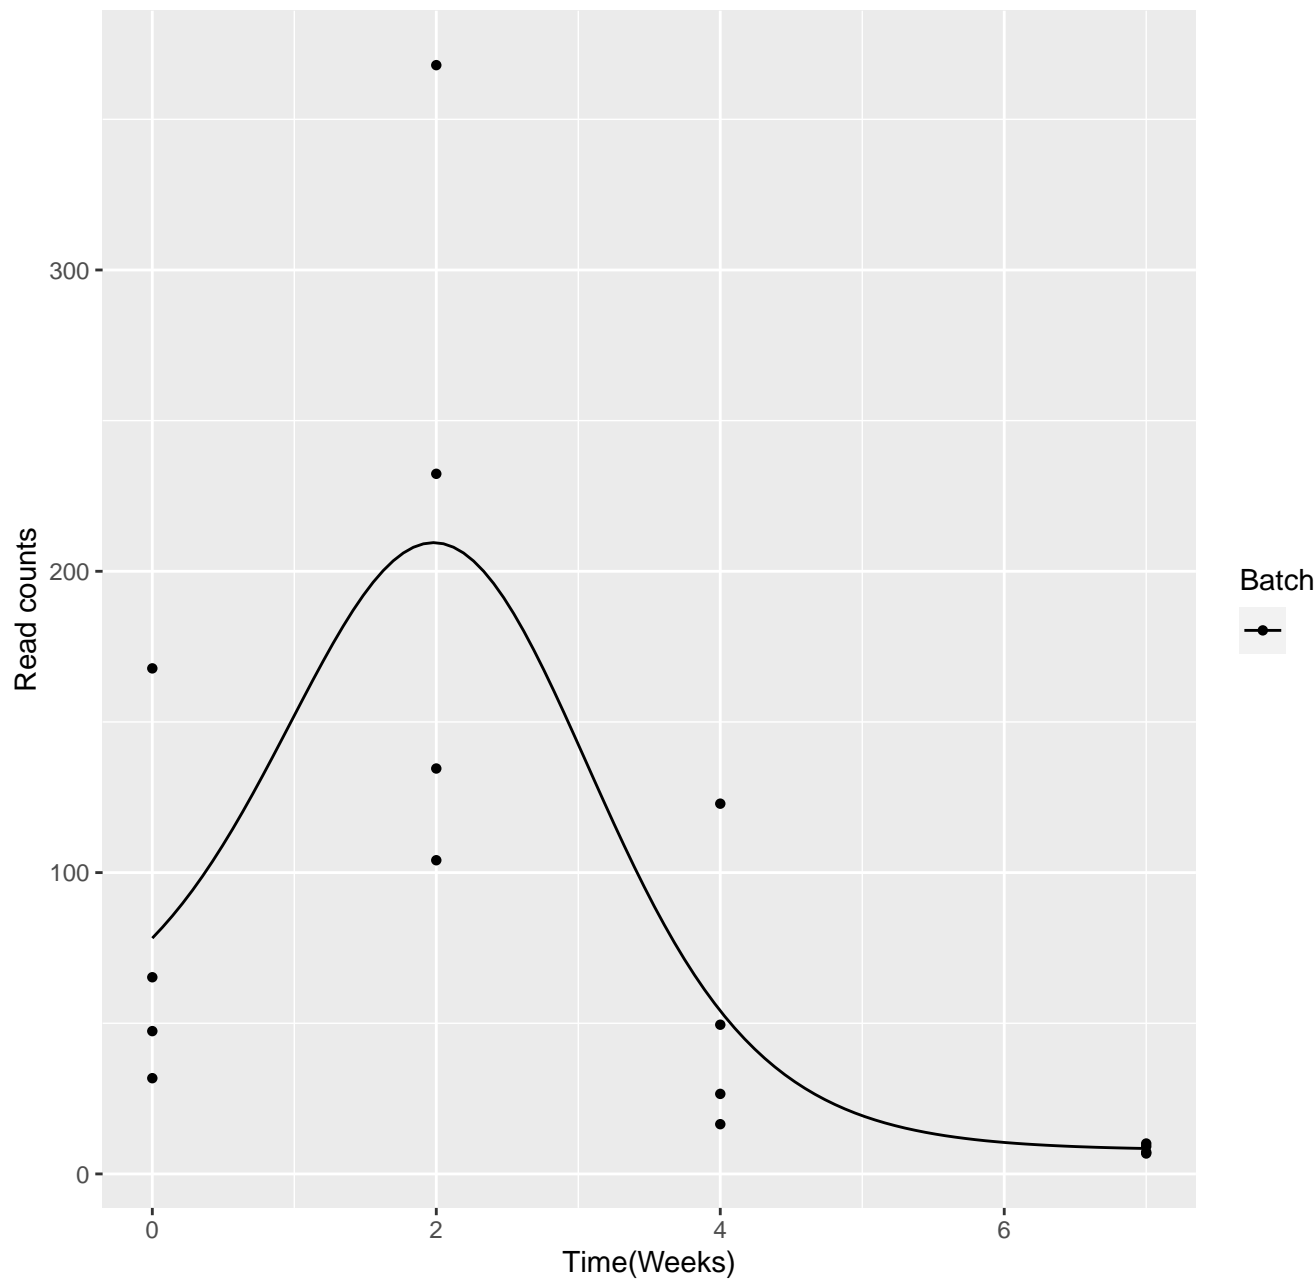

FIBIN:  $\log_{10} q = -6.28$

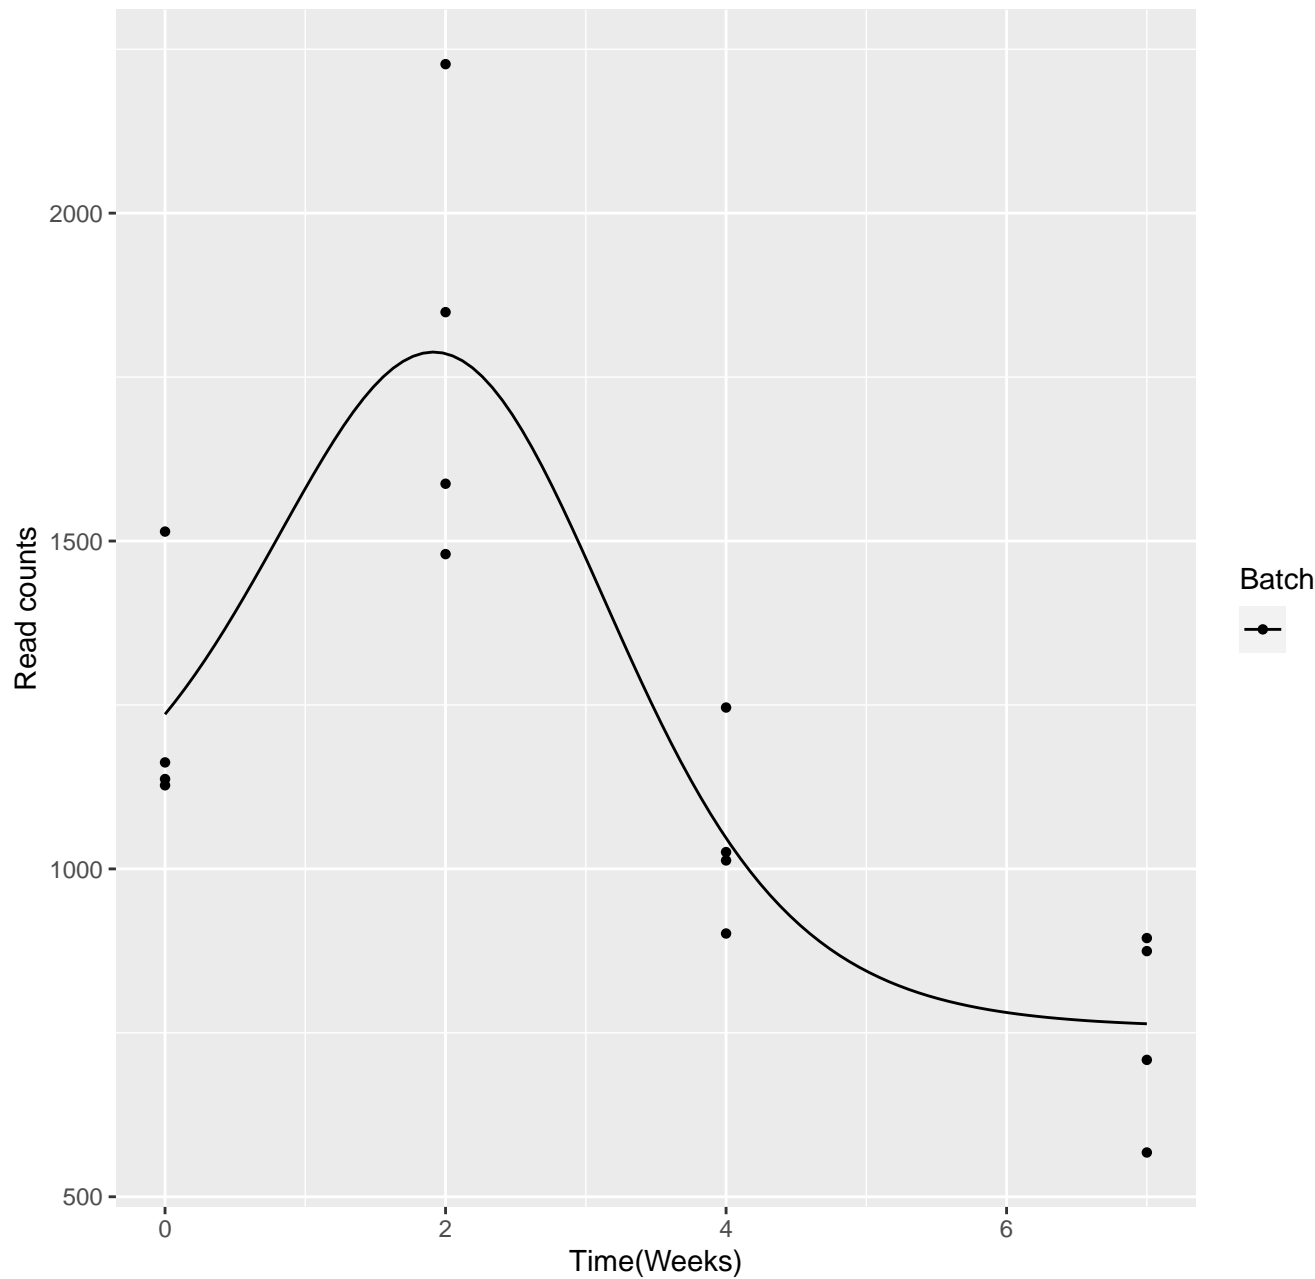

FAM111A:  $\log_{10} q = -6.27$

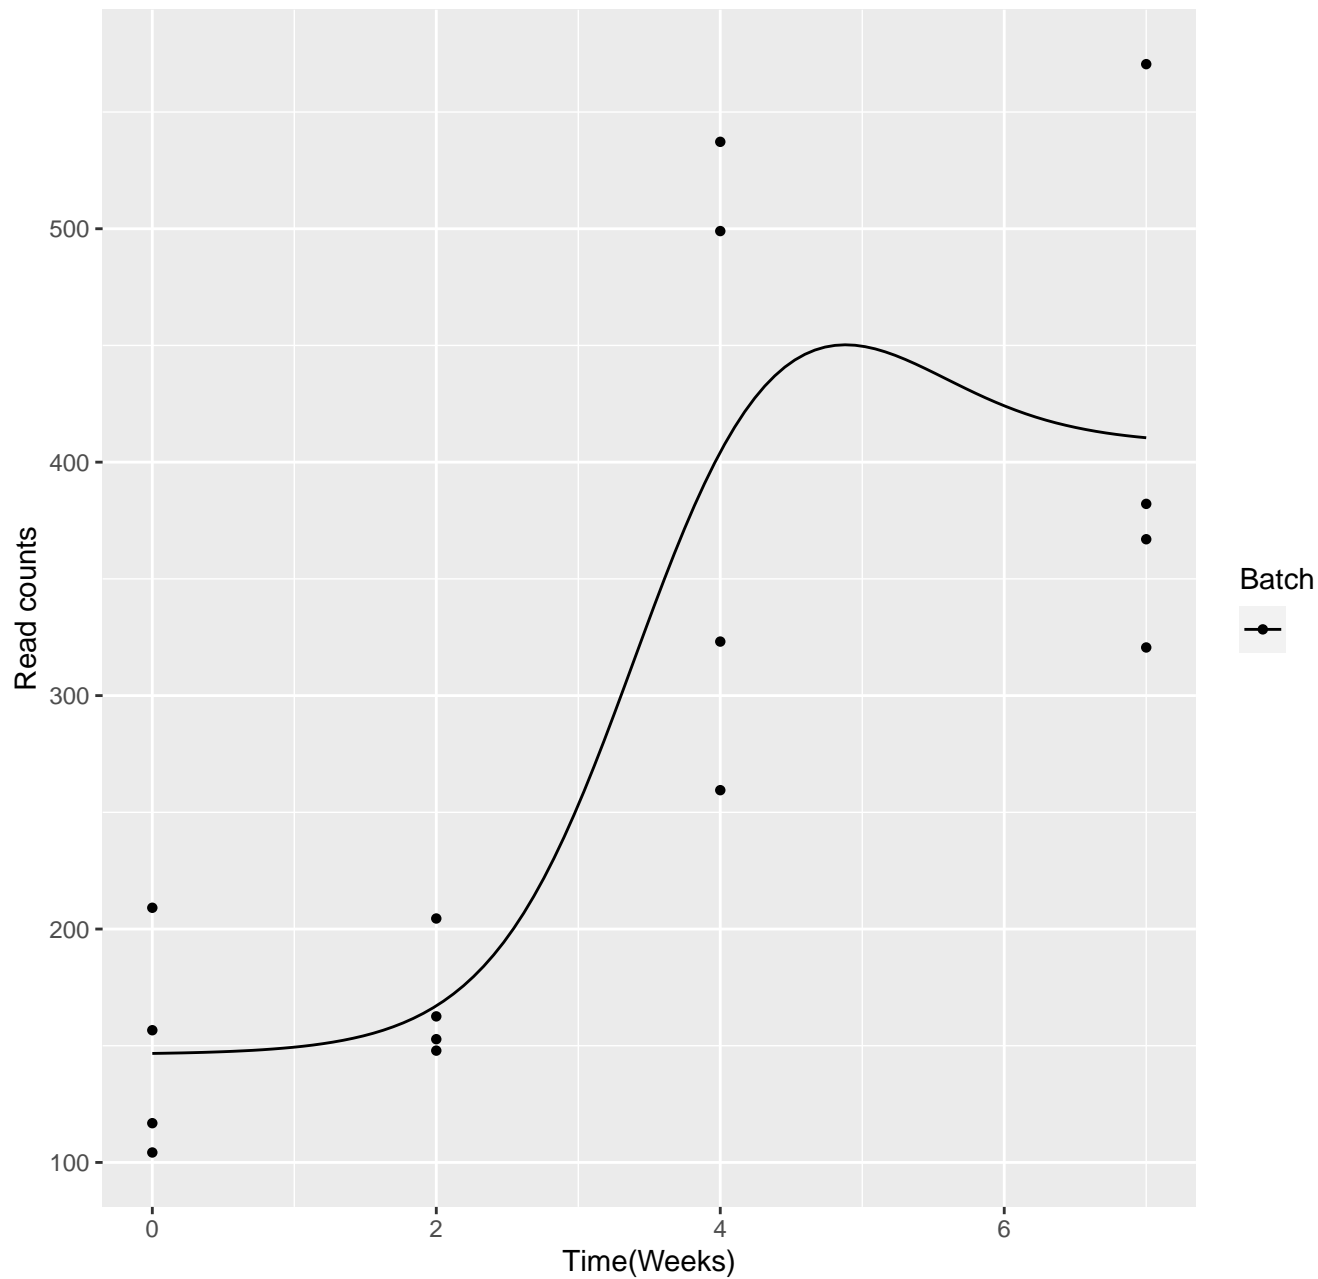

GJB3:  $\log_{10} q = -6.25$

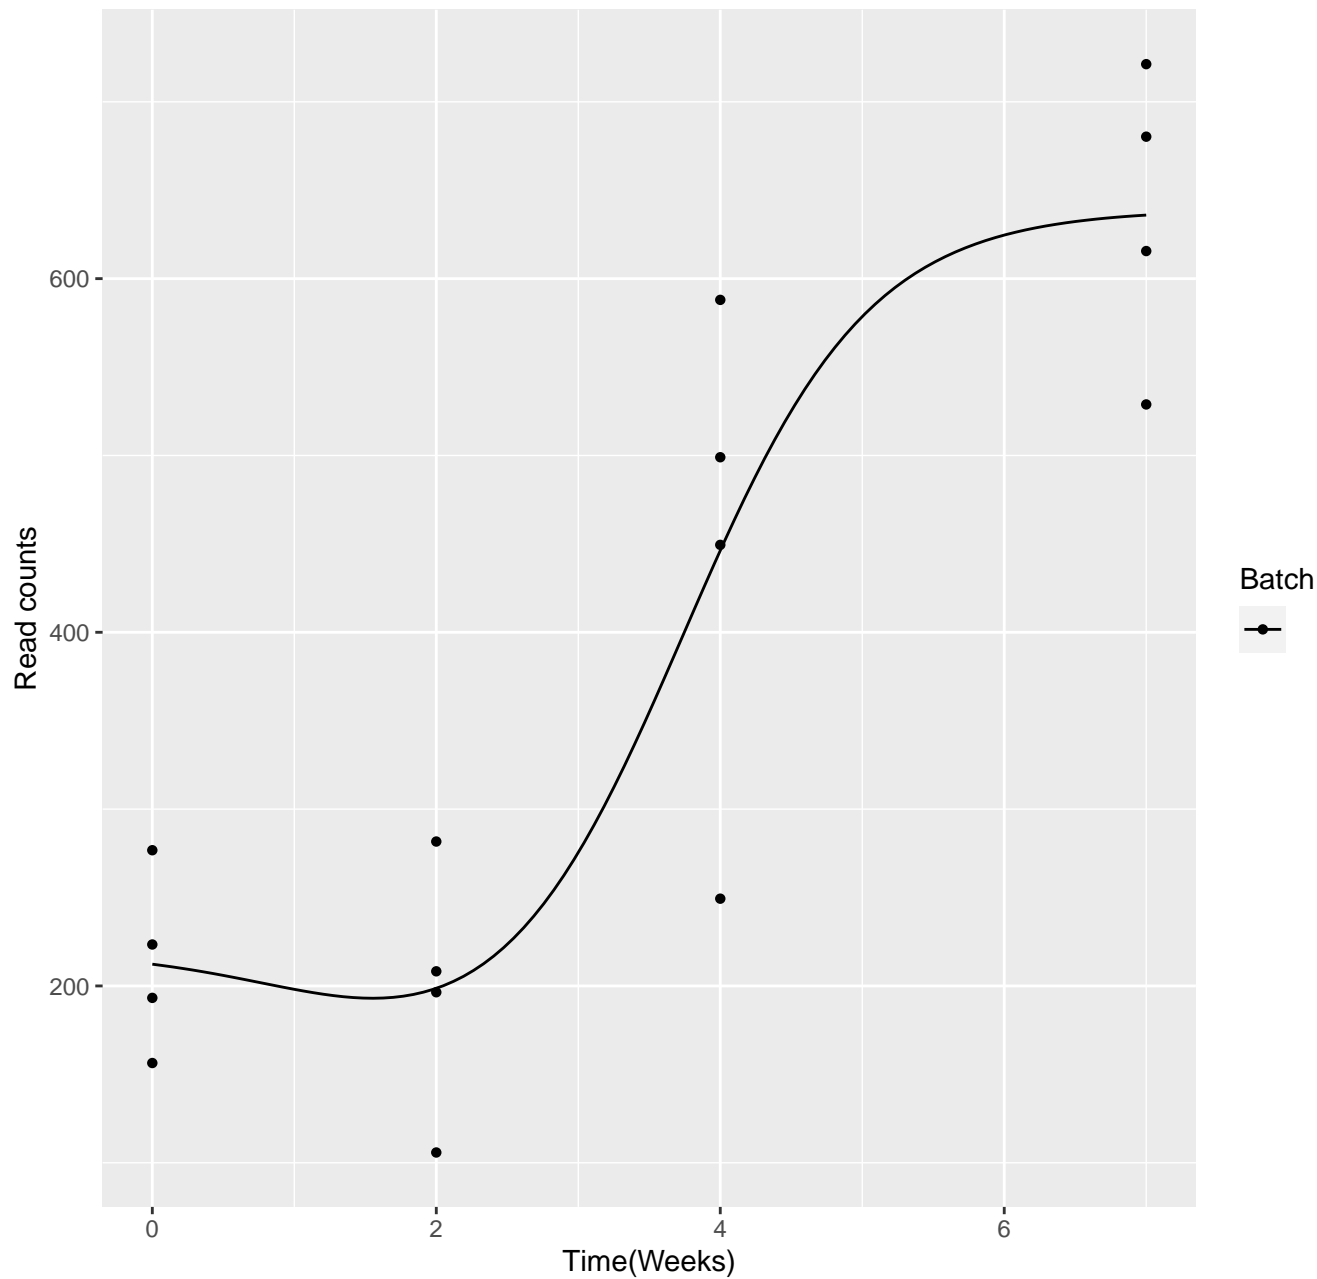

TES:  $\log_{10} q = -6.25$

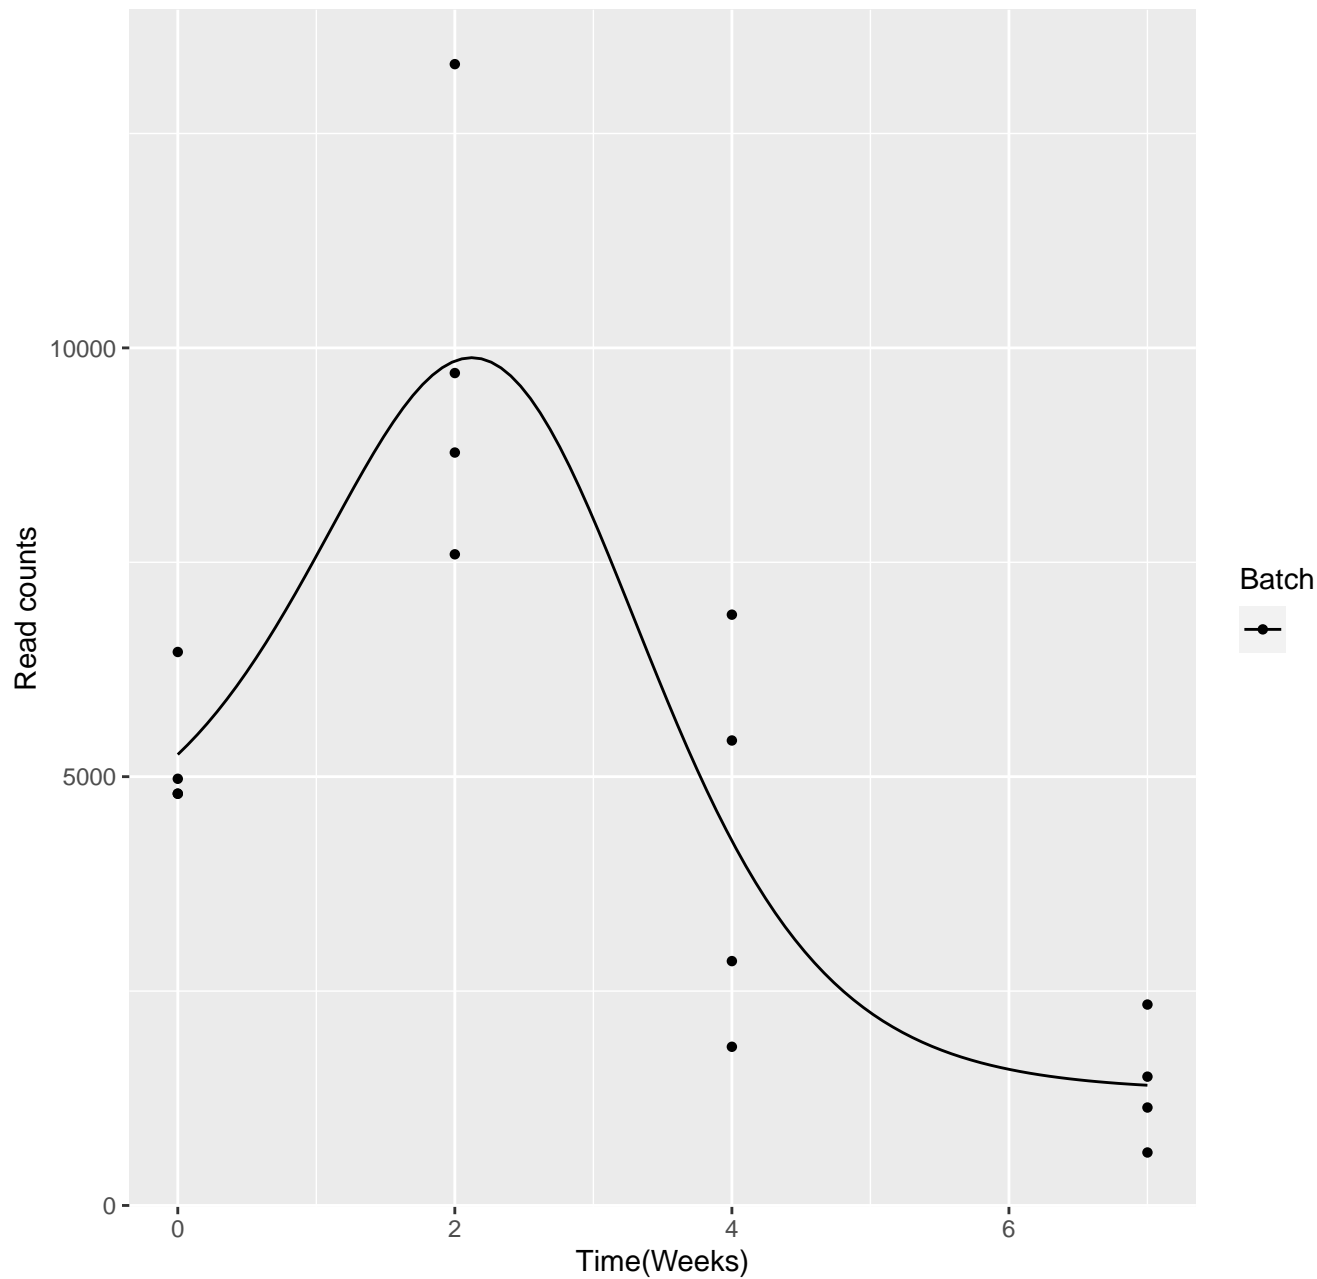



CDKN1A:  $\log_{10} q = -6.24$

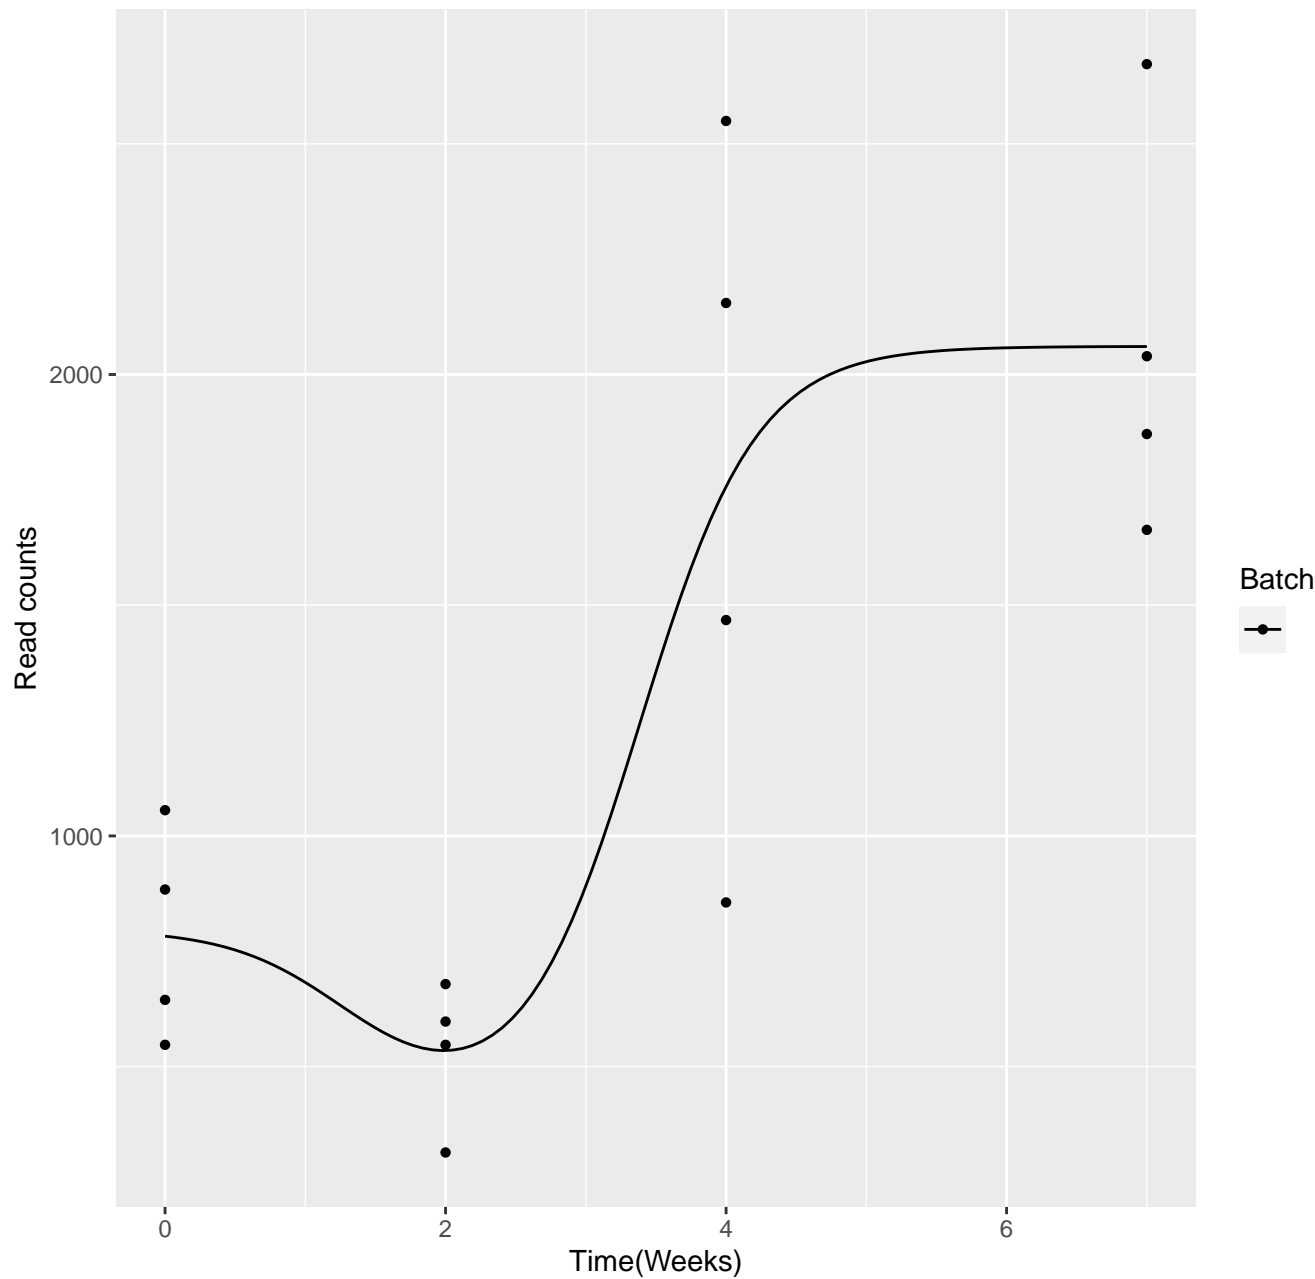

WEE1:  $\log_{10} q = -6.23$

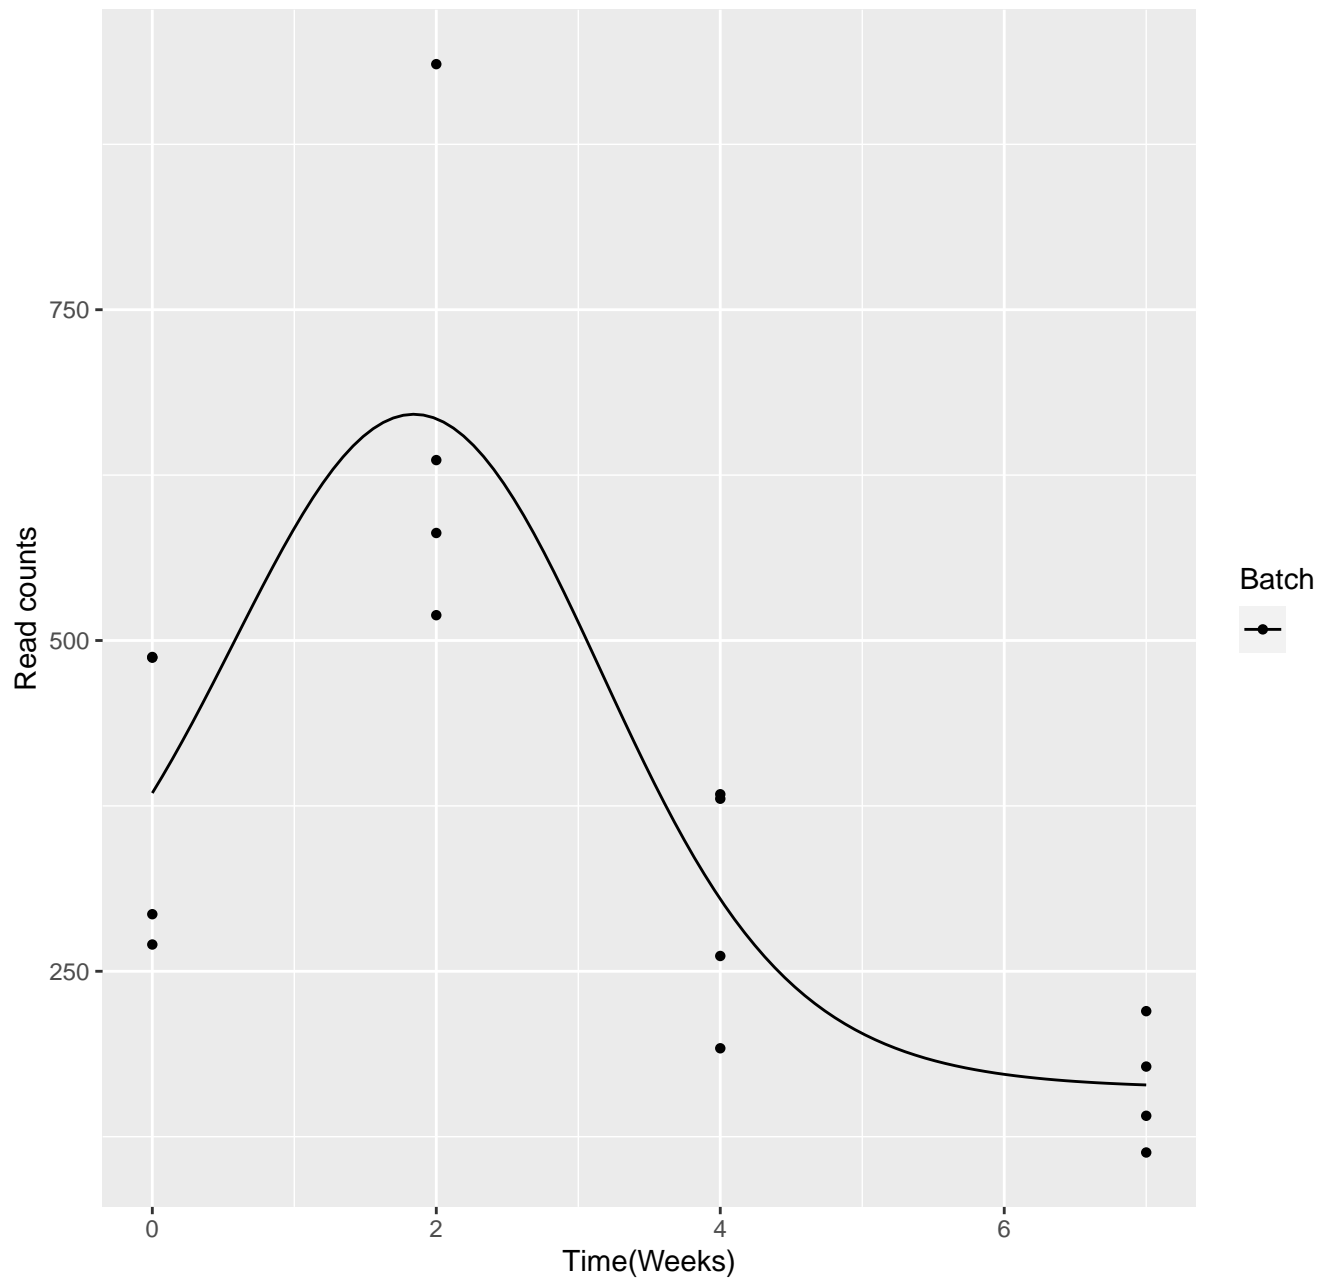

DIAPH2:  $\log_{10} q = -6.23$

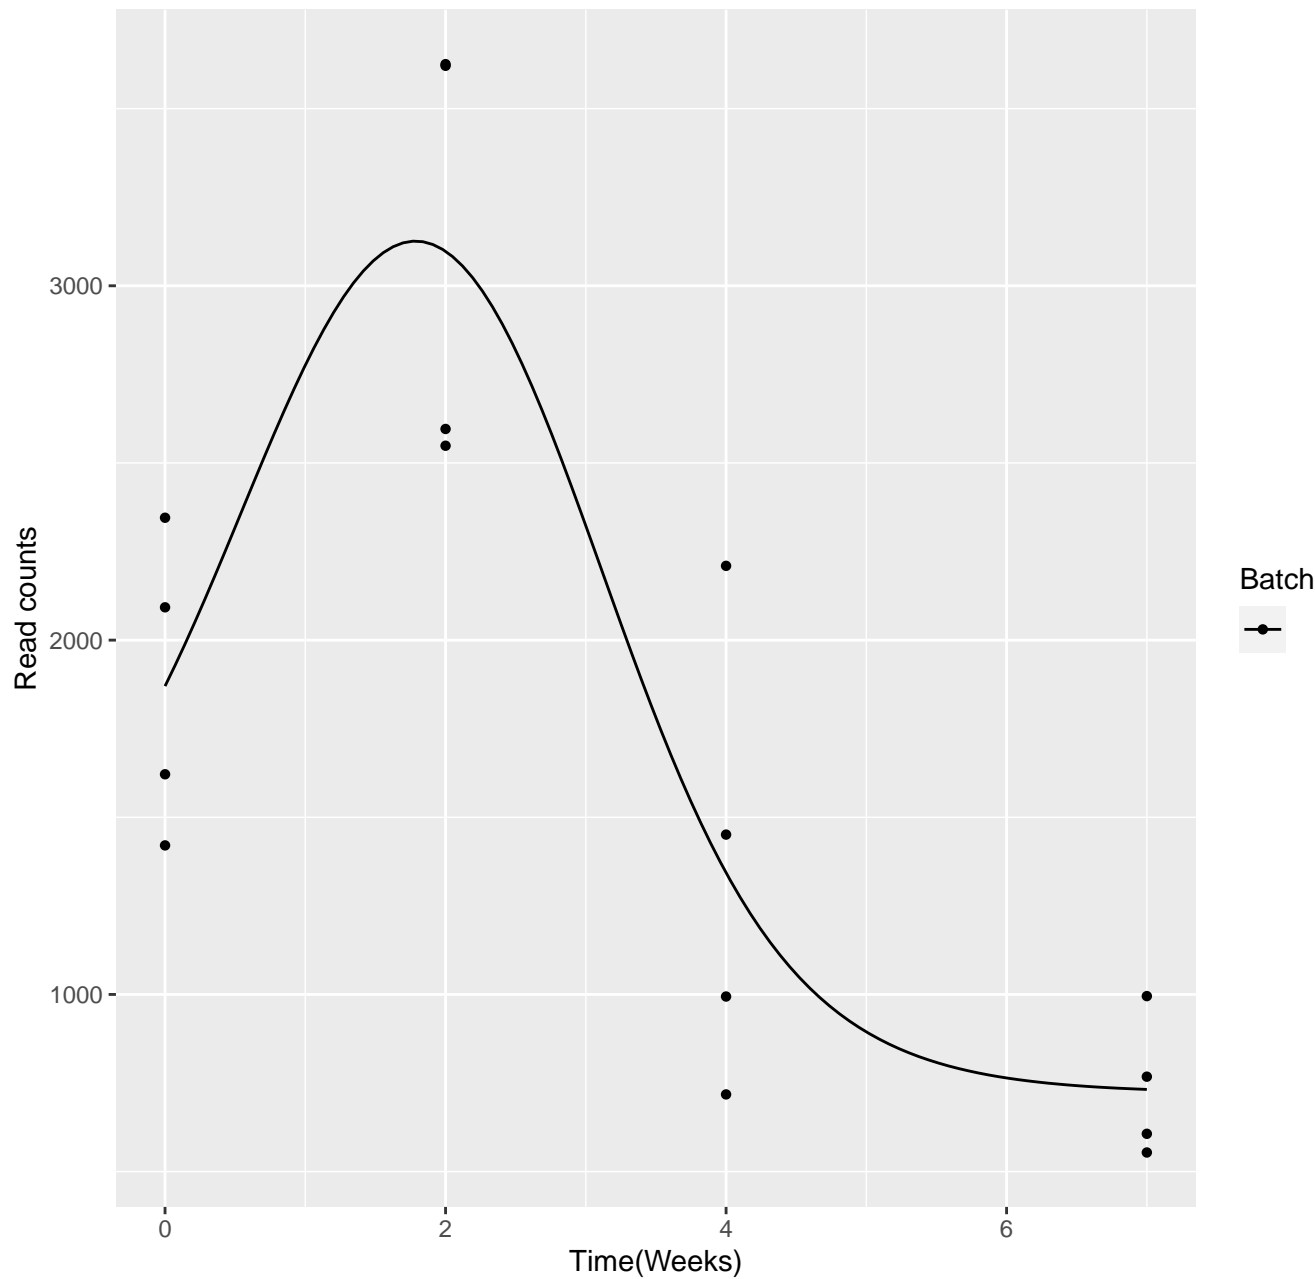

ALOX5AP:  $\log_{10} q = -6.22$

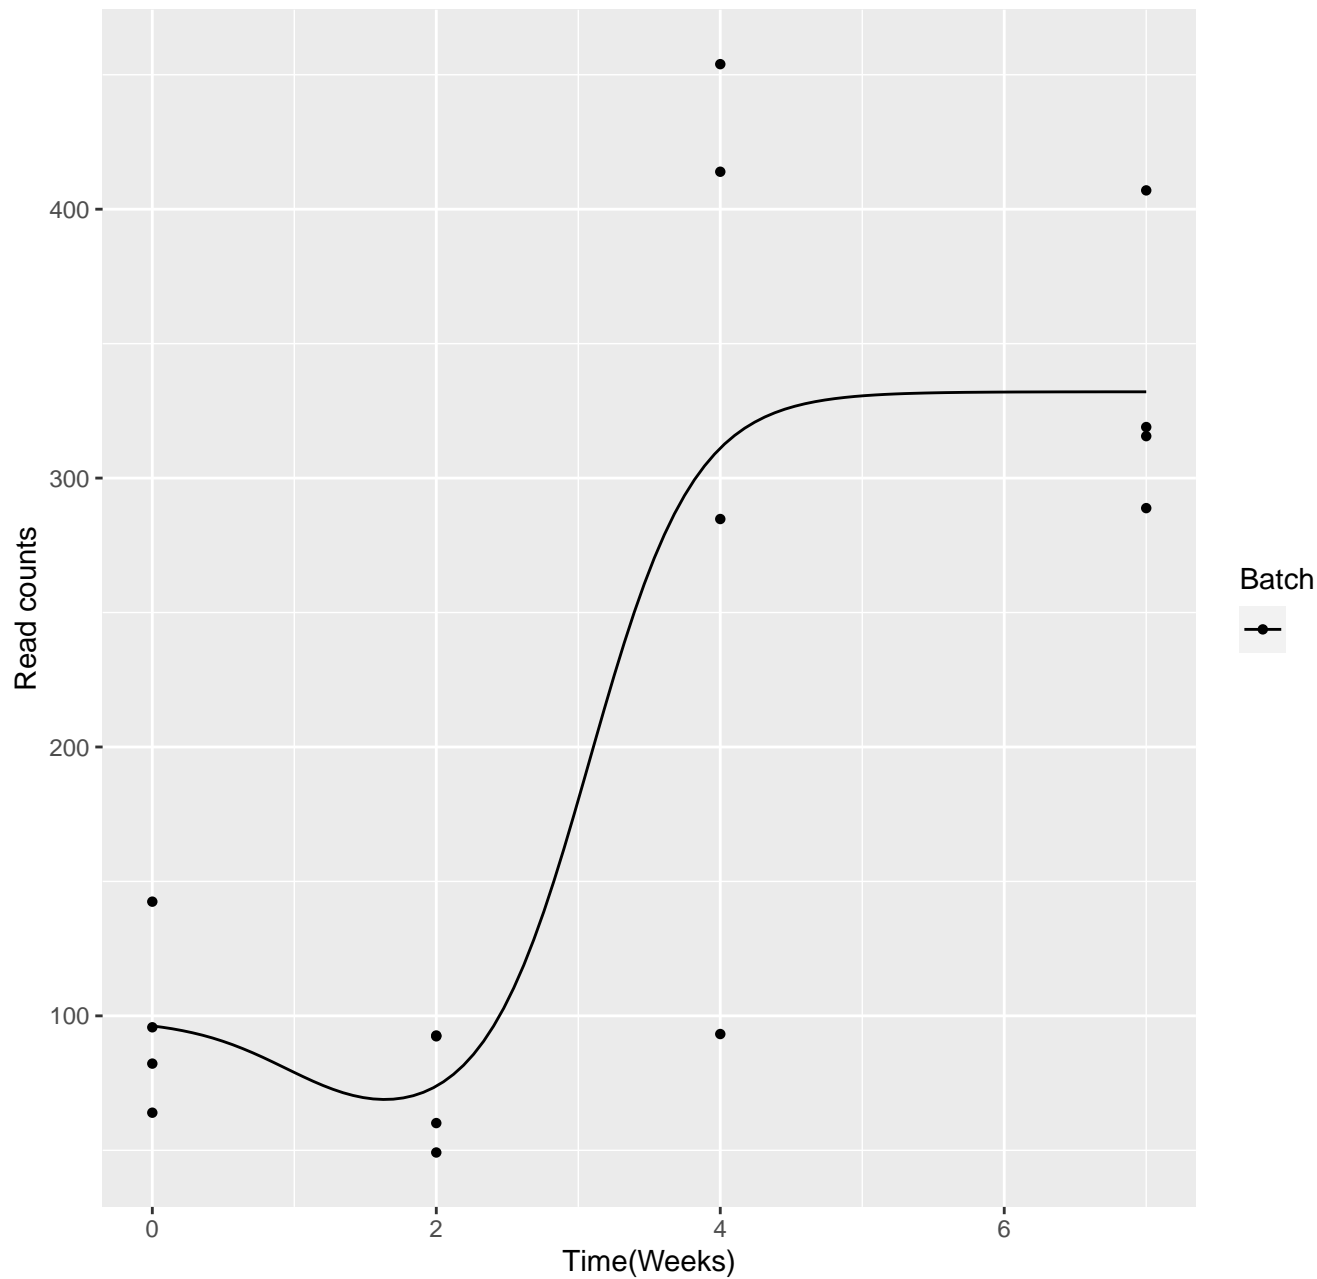

H1-2:  $\log_{10} q = -6.21$

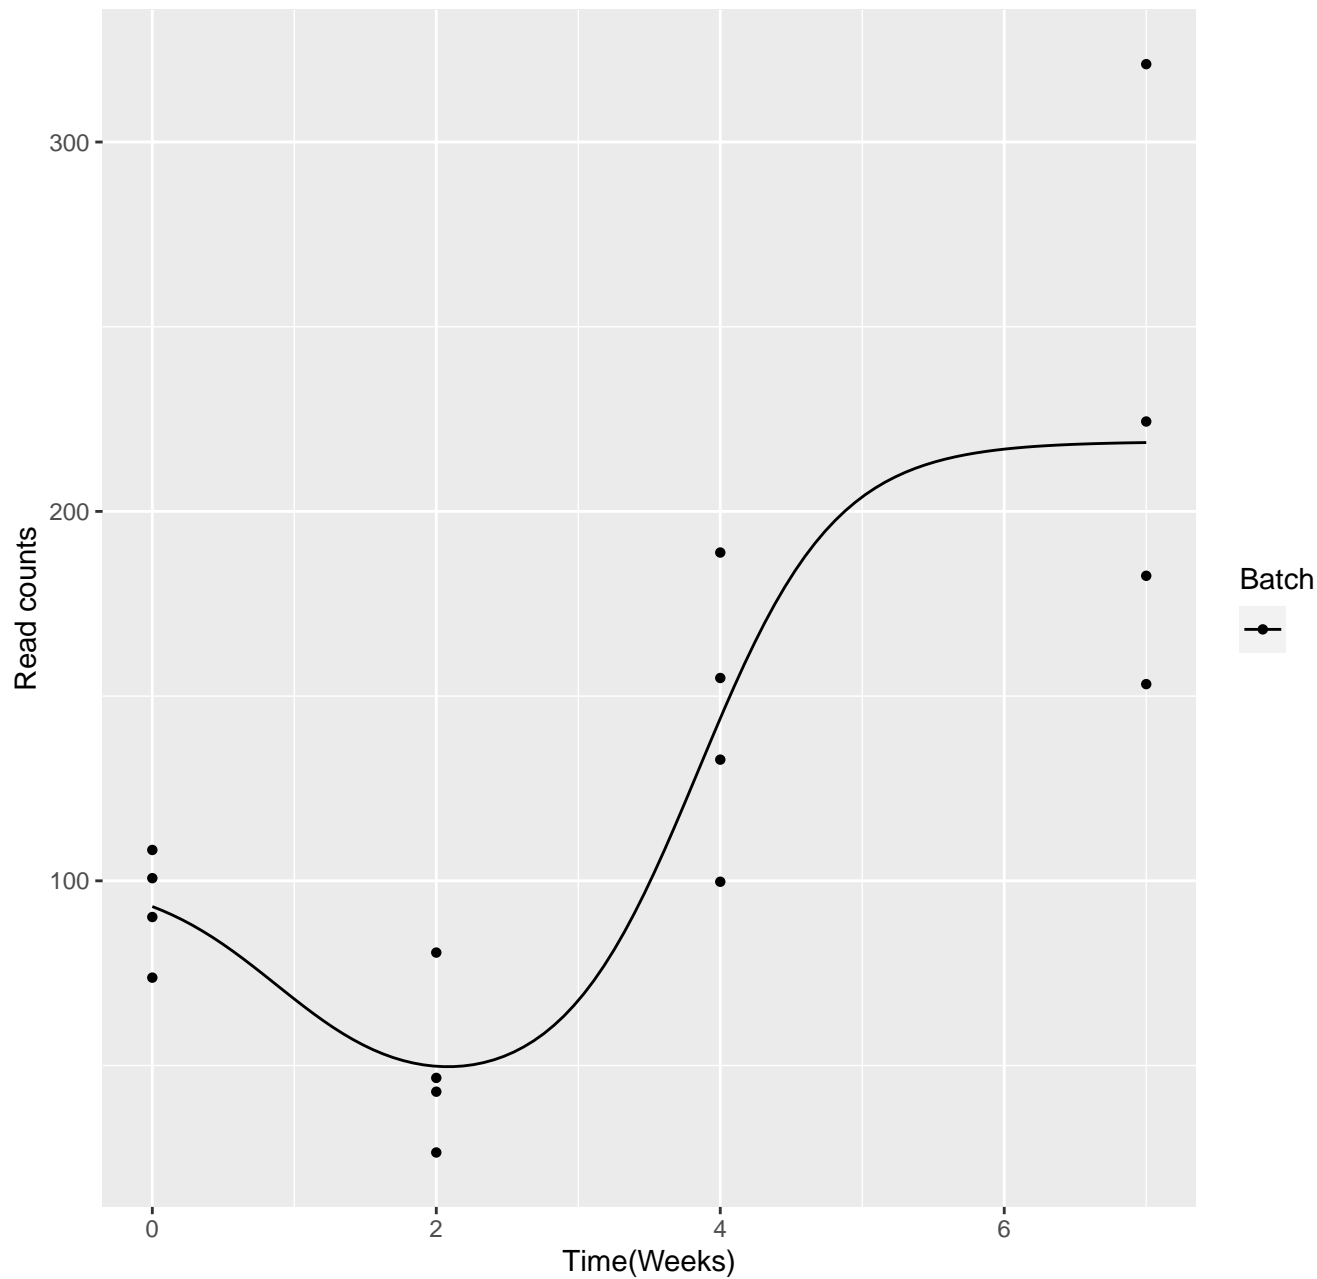

DCBLD2:  $\log_{10} q = -6.2$

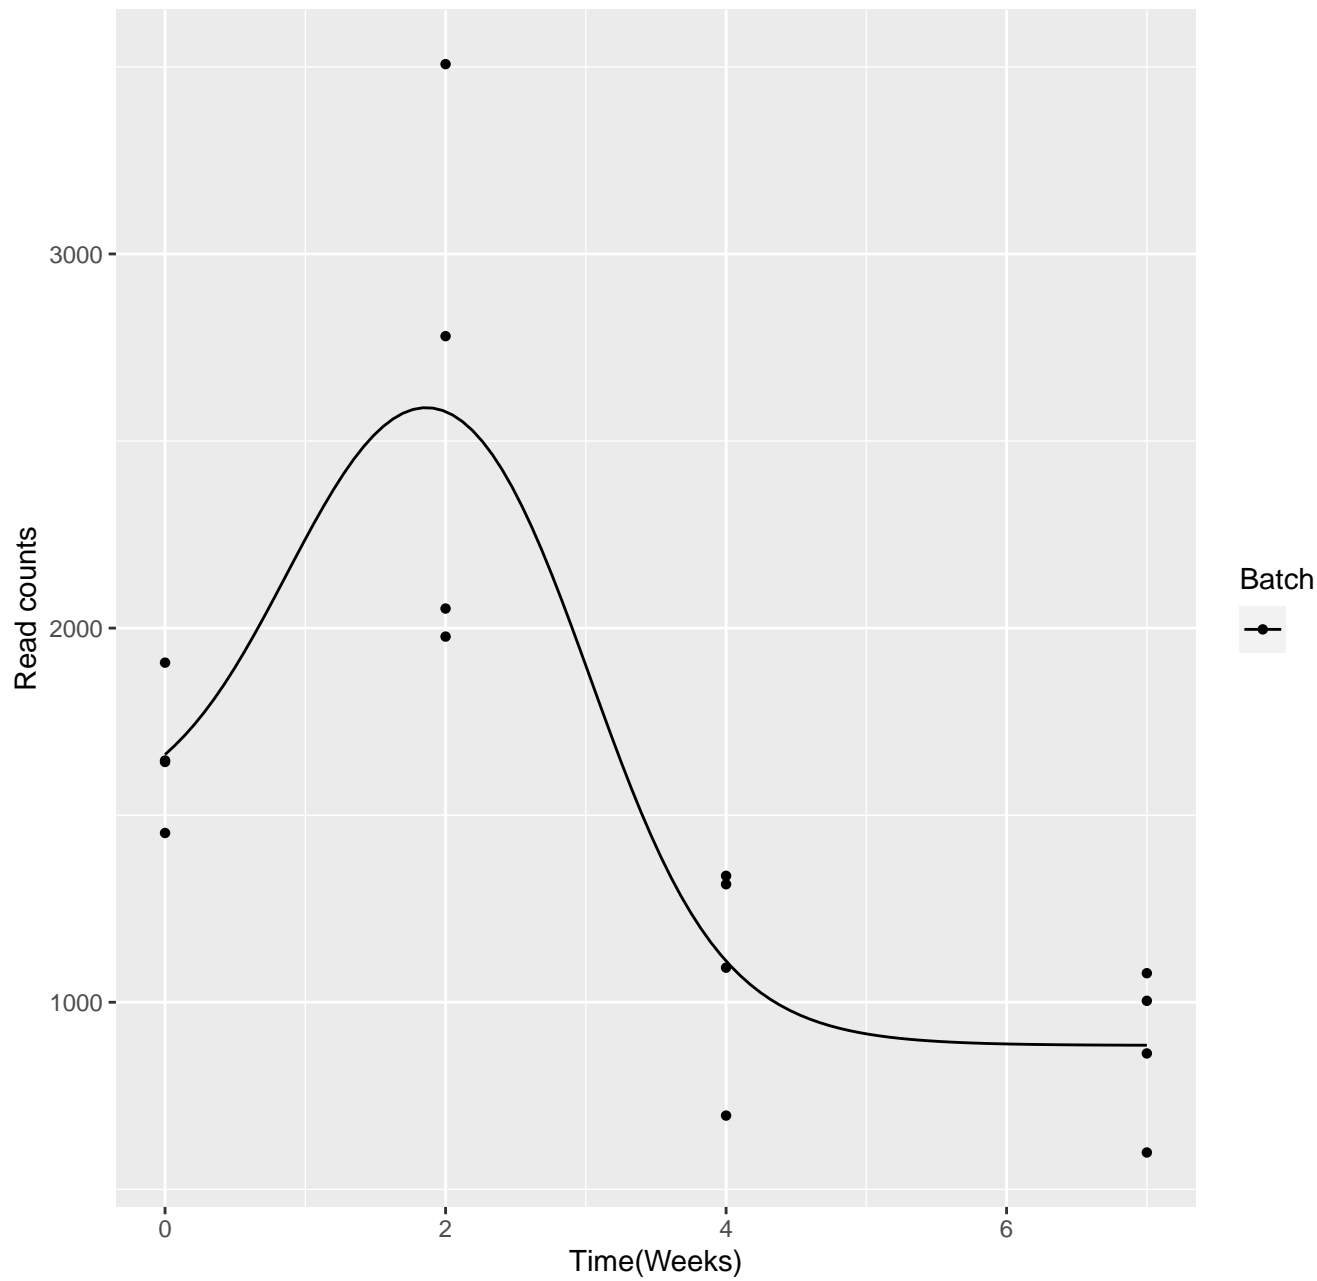

BAG2:  $\log_{10} q = -6.2$

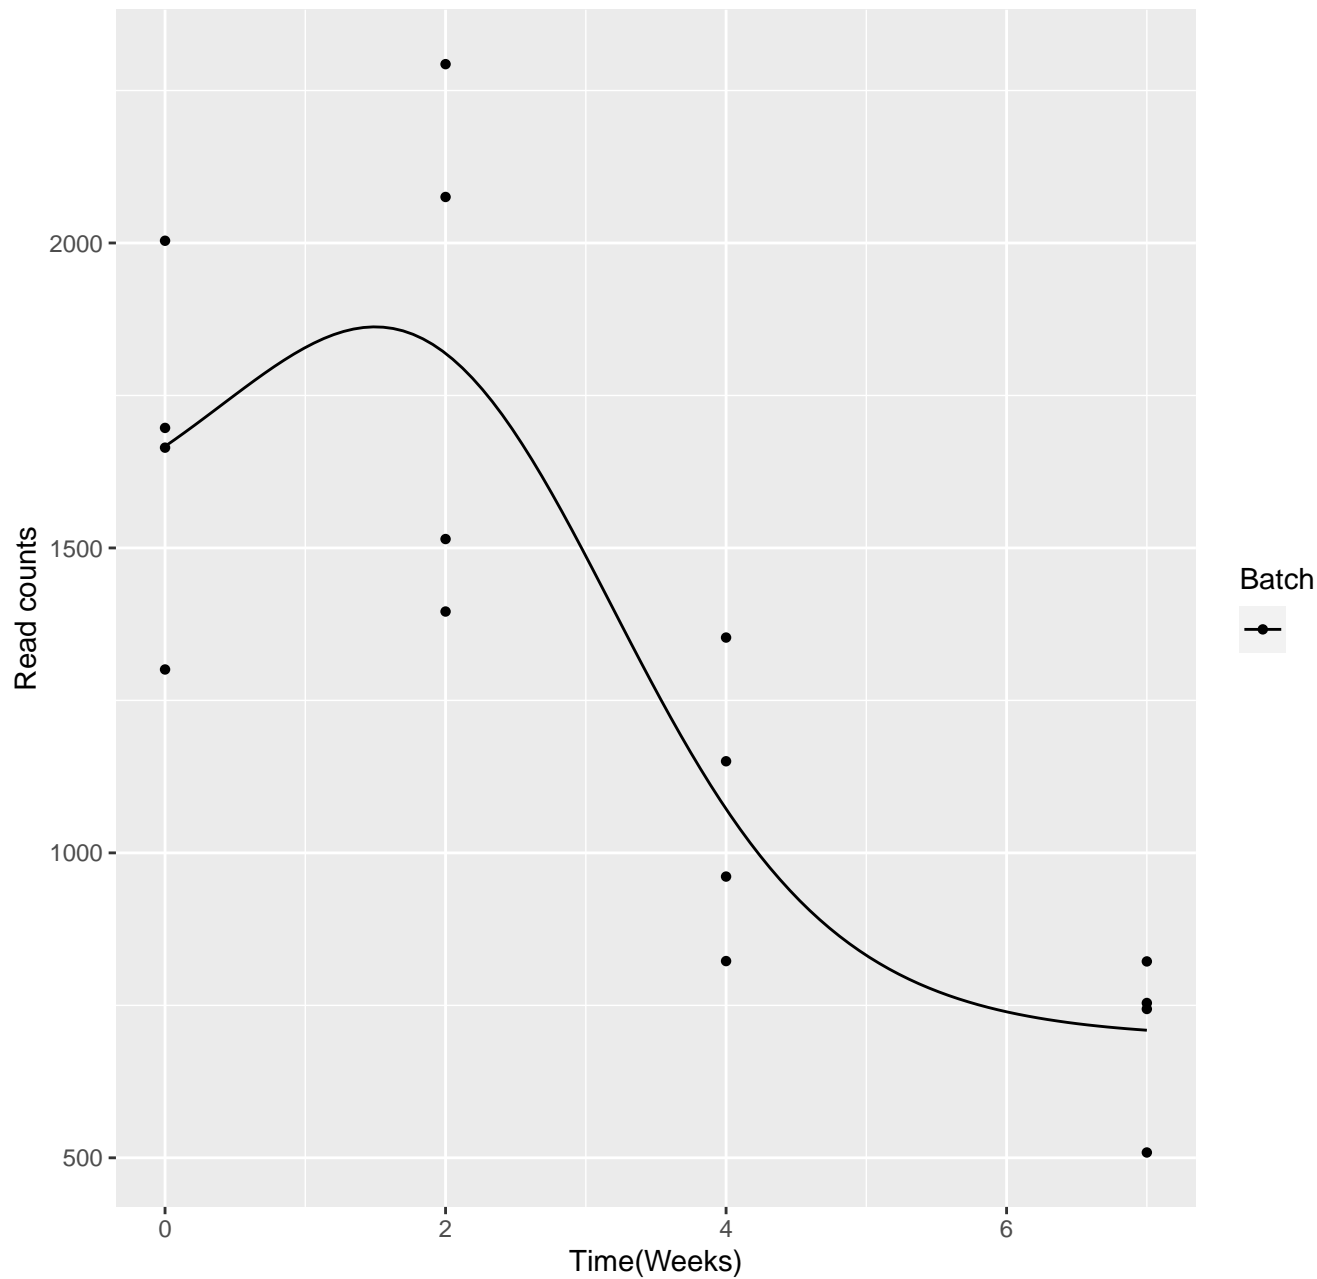

RLA-DMA:  $\log_{10} q = -6.2$

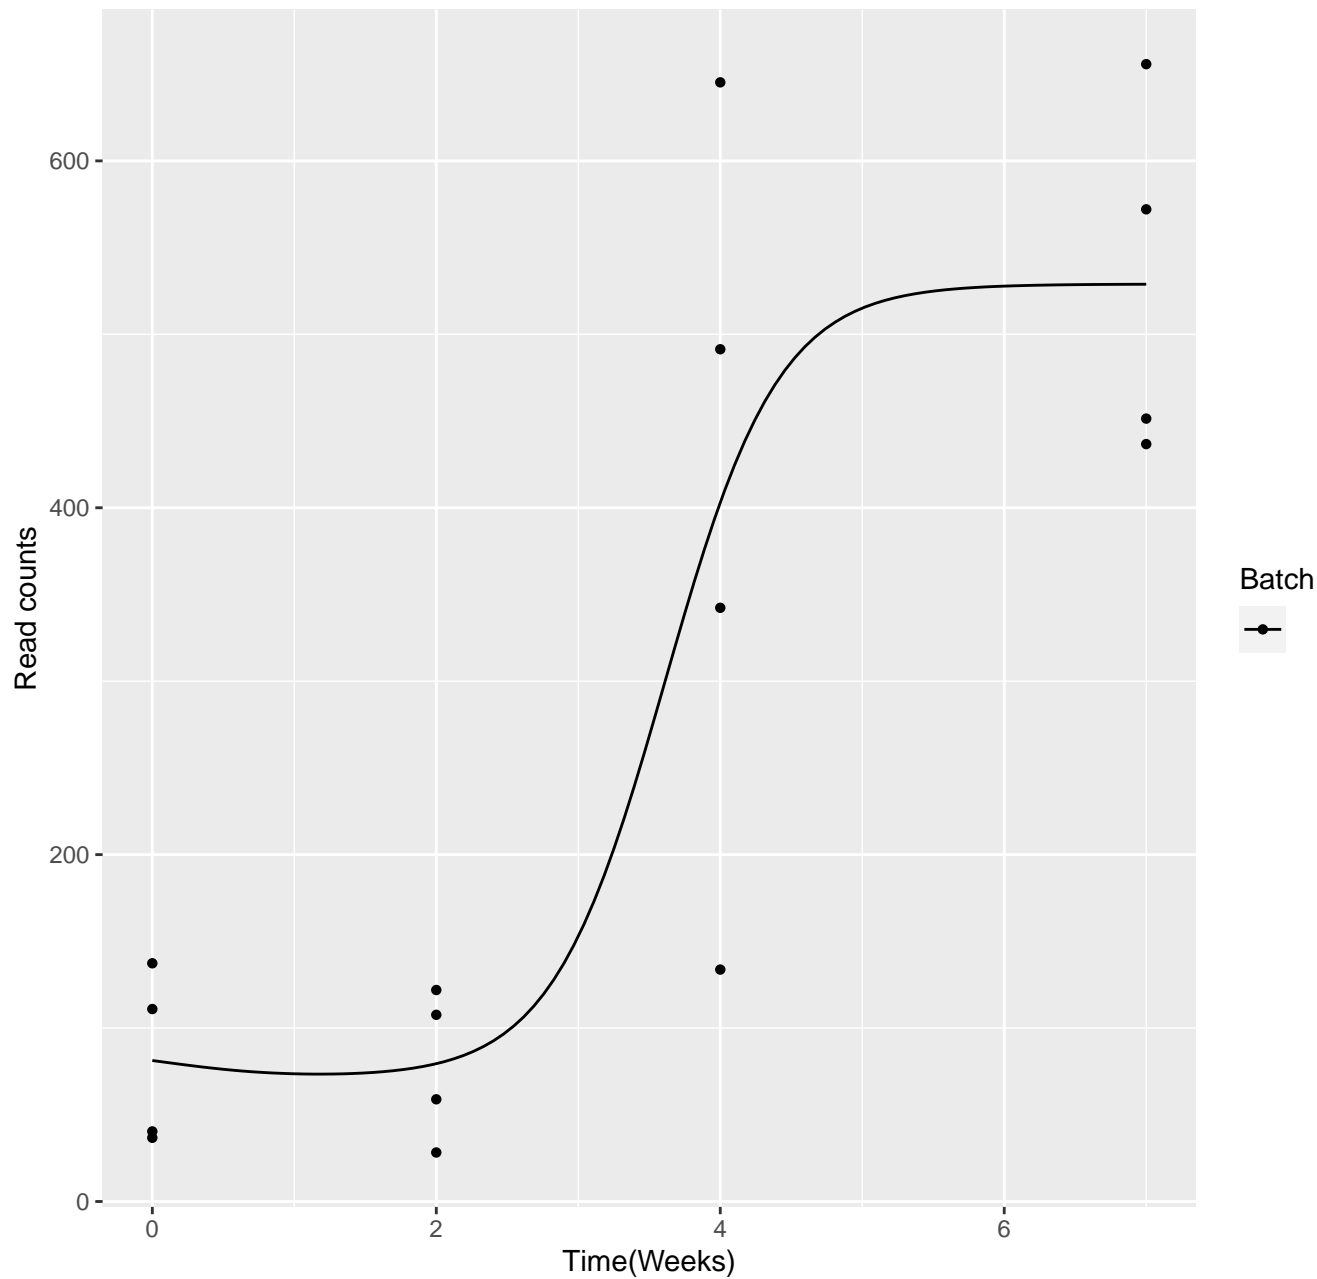



EPCAM:  $\log_{10} q = -6.18$

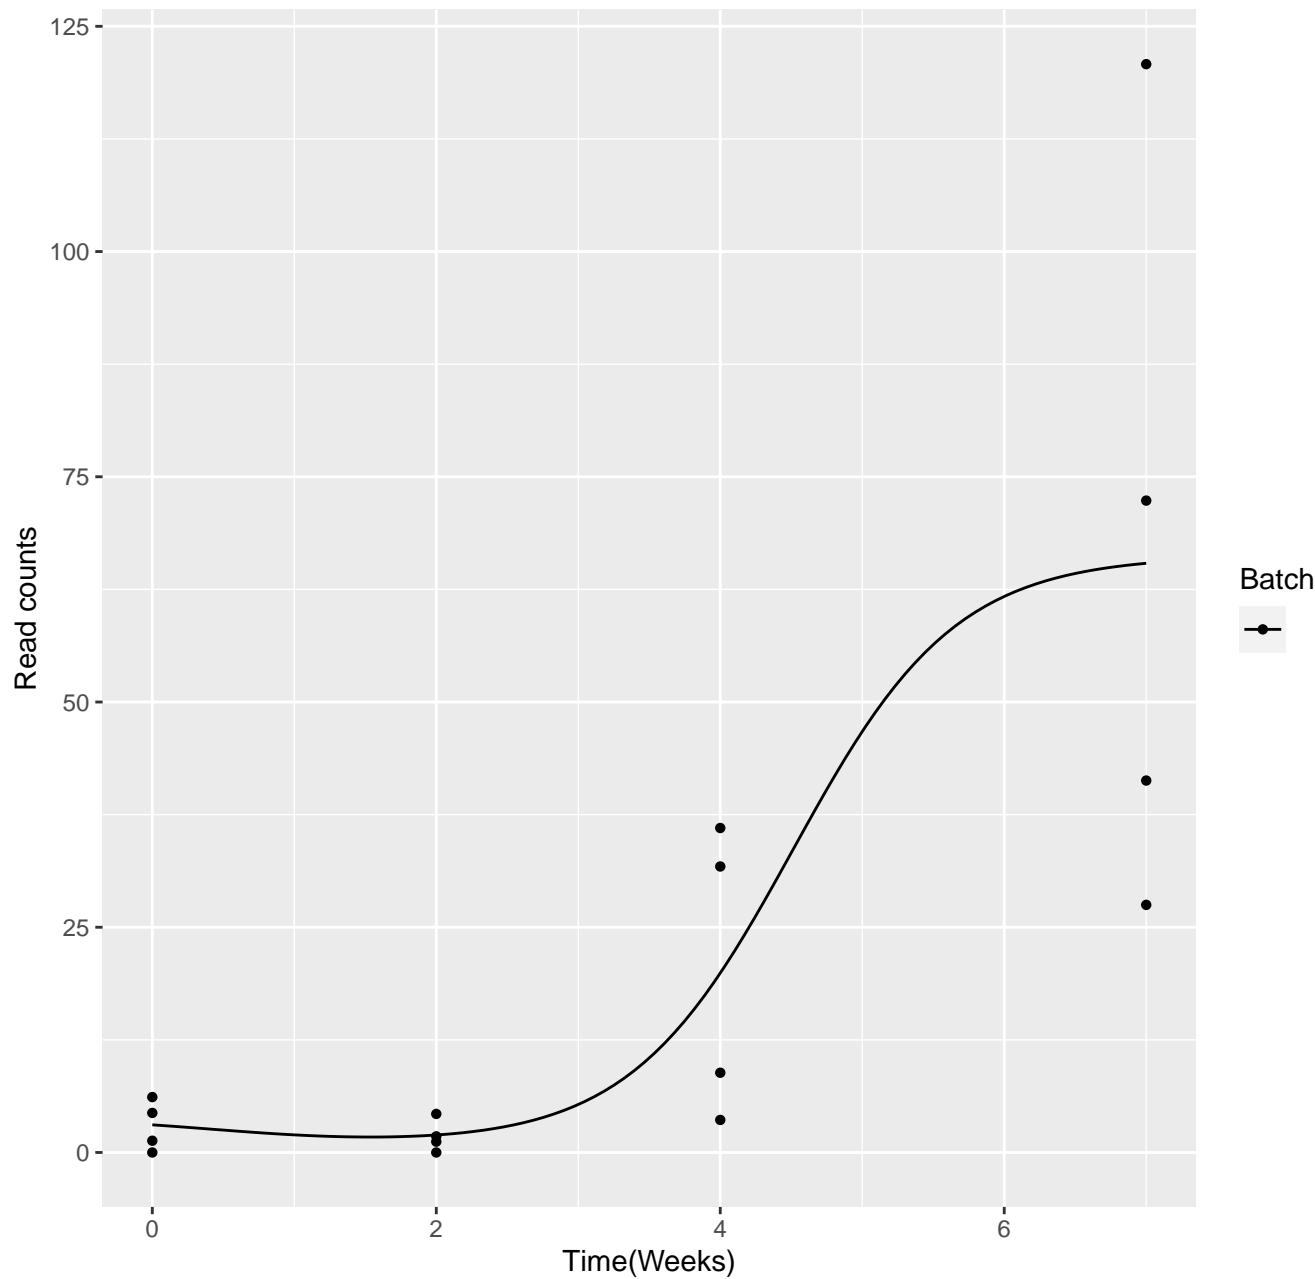

TBXAS1:  $\log_{10} q = -6.18$

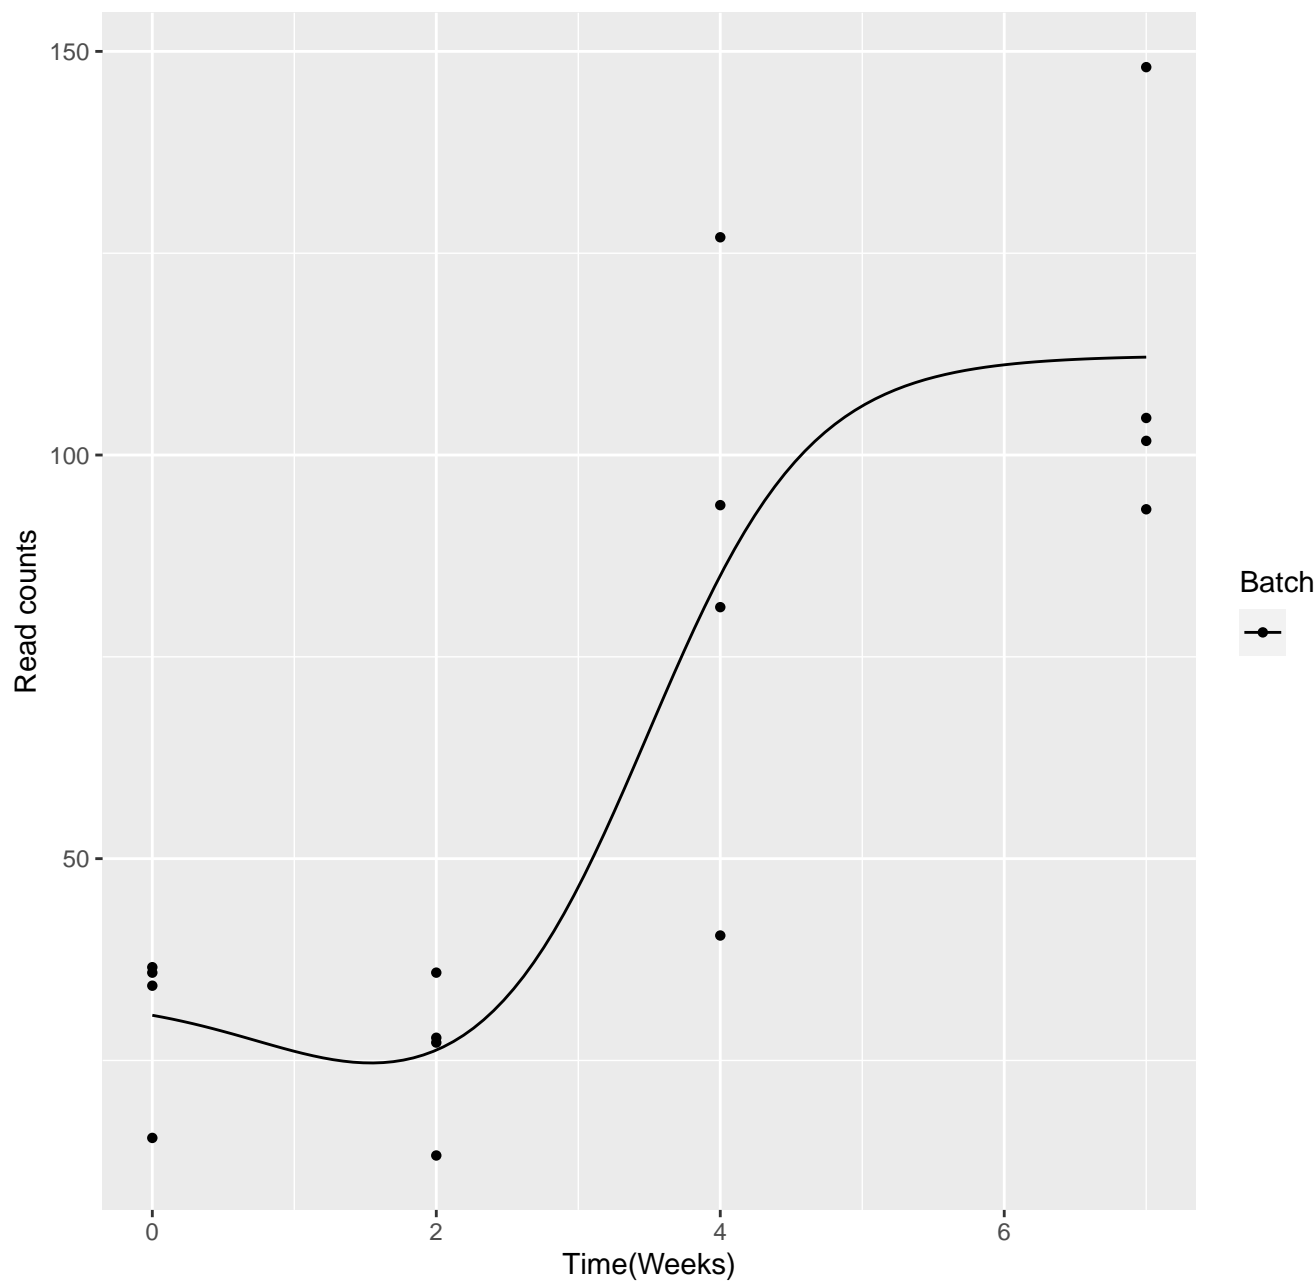

MYO1G:  $\log_{10} q = -6.15$

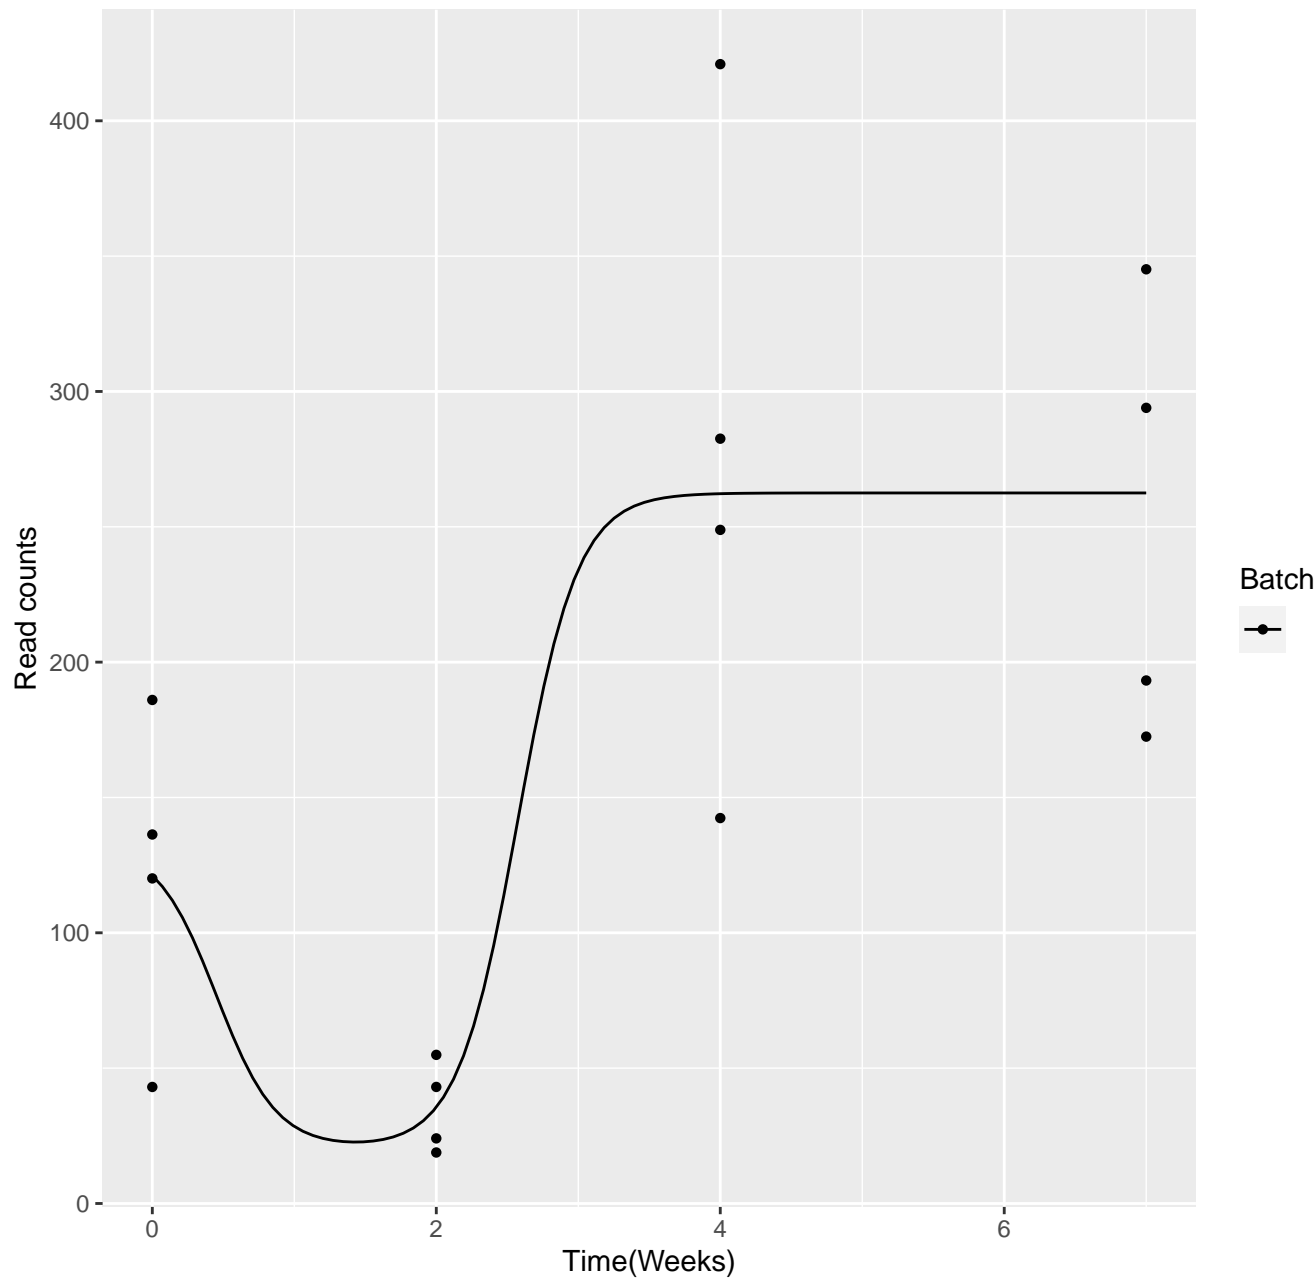

EVI2B:  $\log_{10} q = -6.14$

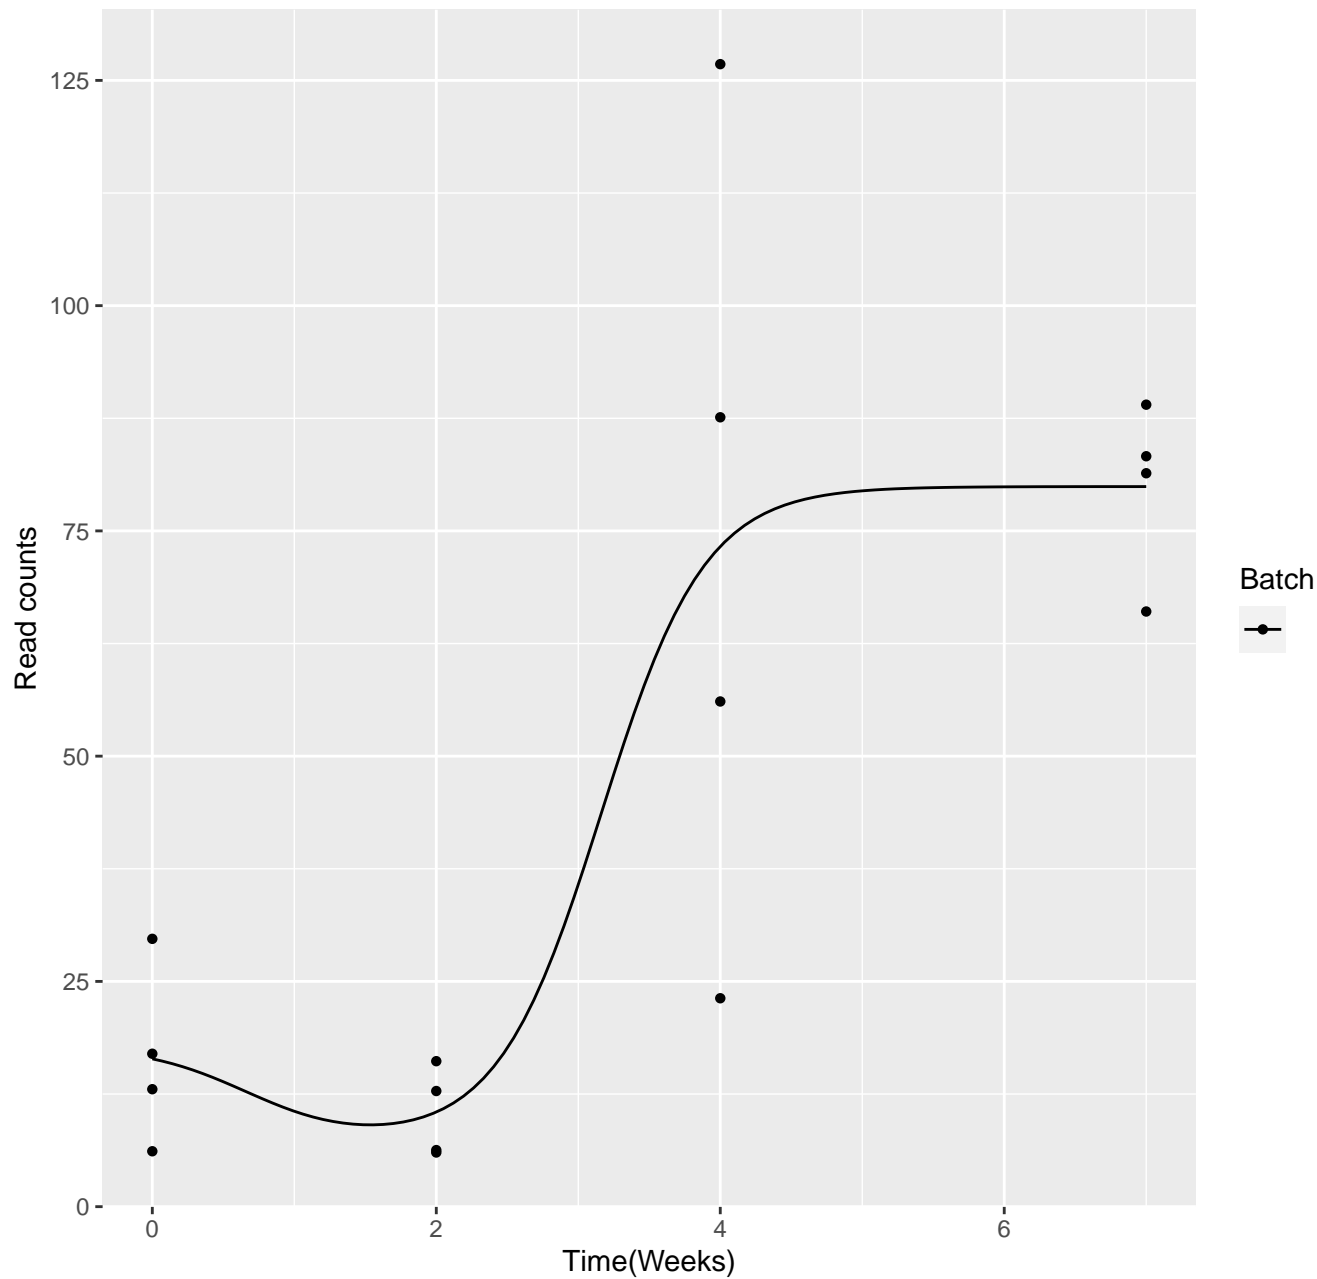

SLC16A3:  $\log_{10} q = -6.14$

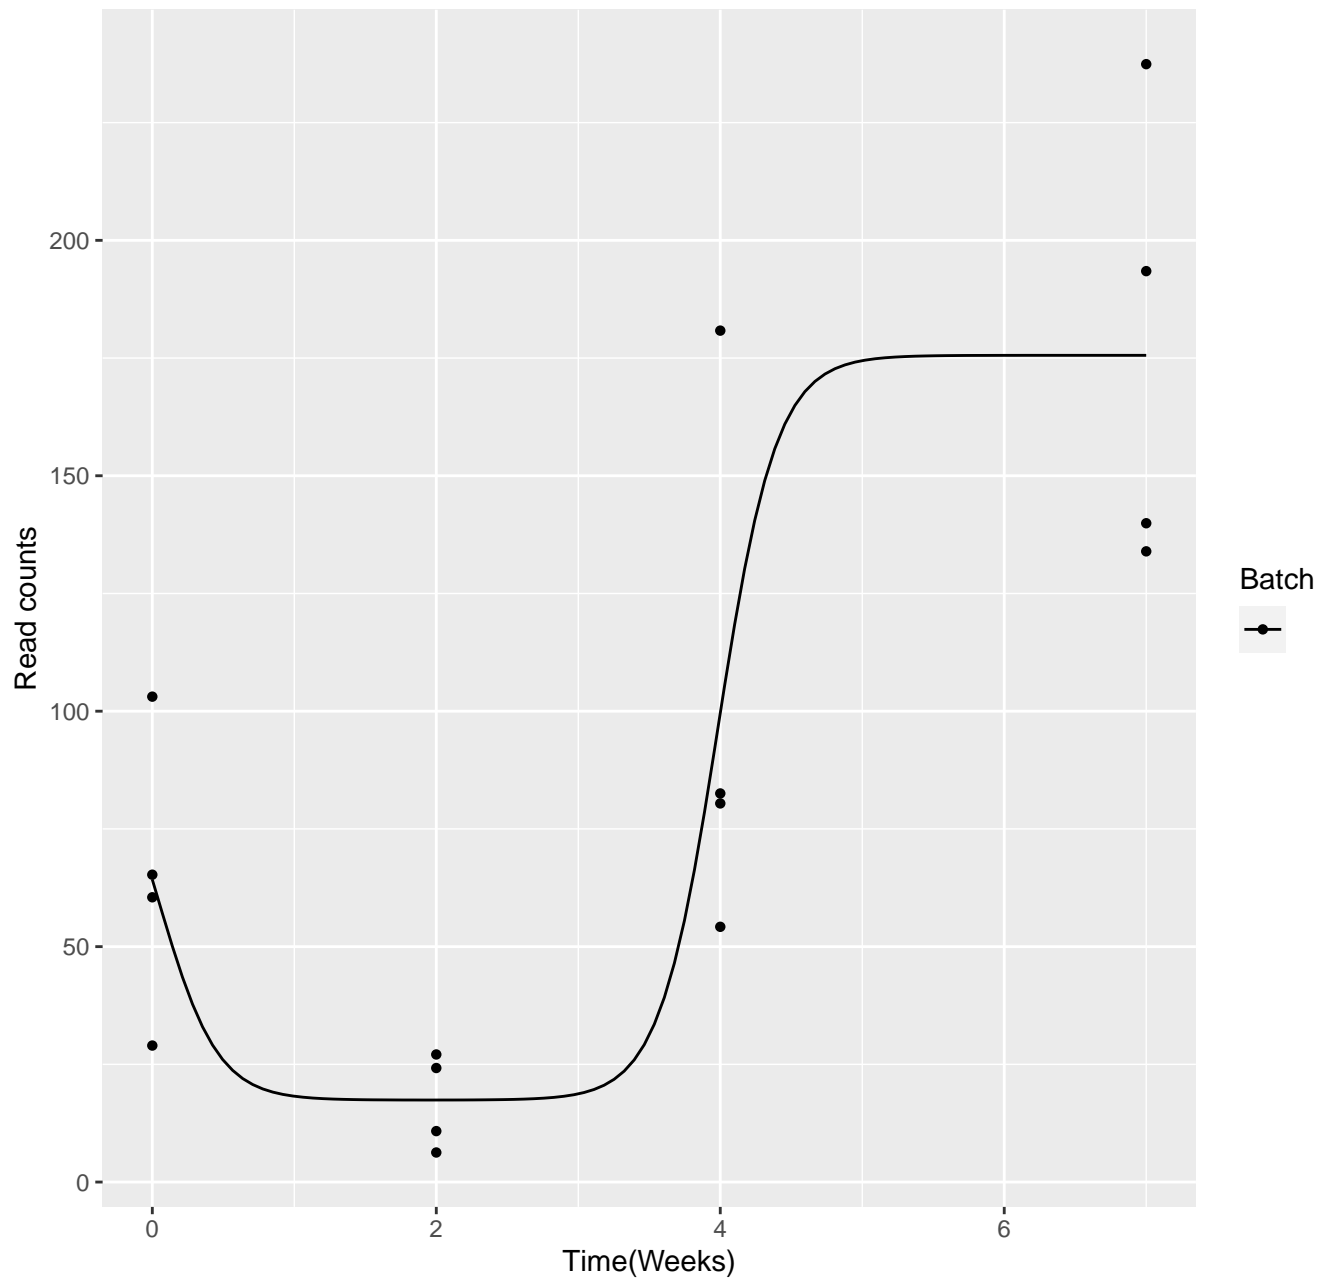

LOC100343557:  $\log_{10} q = -6.13$

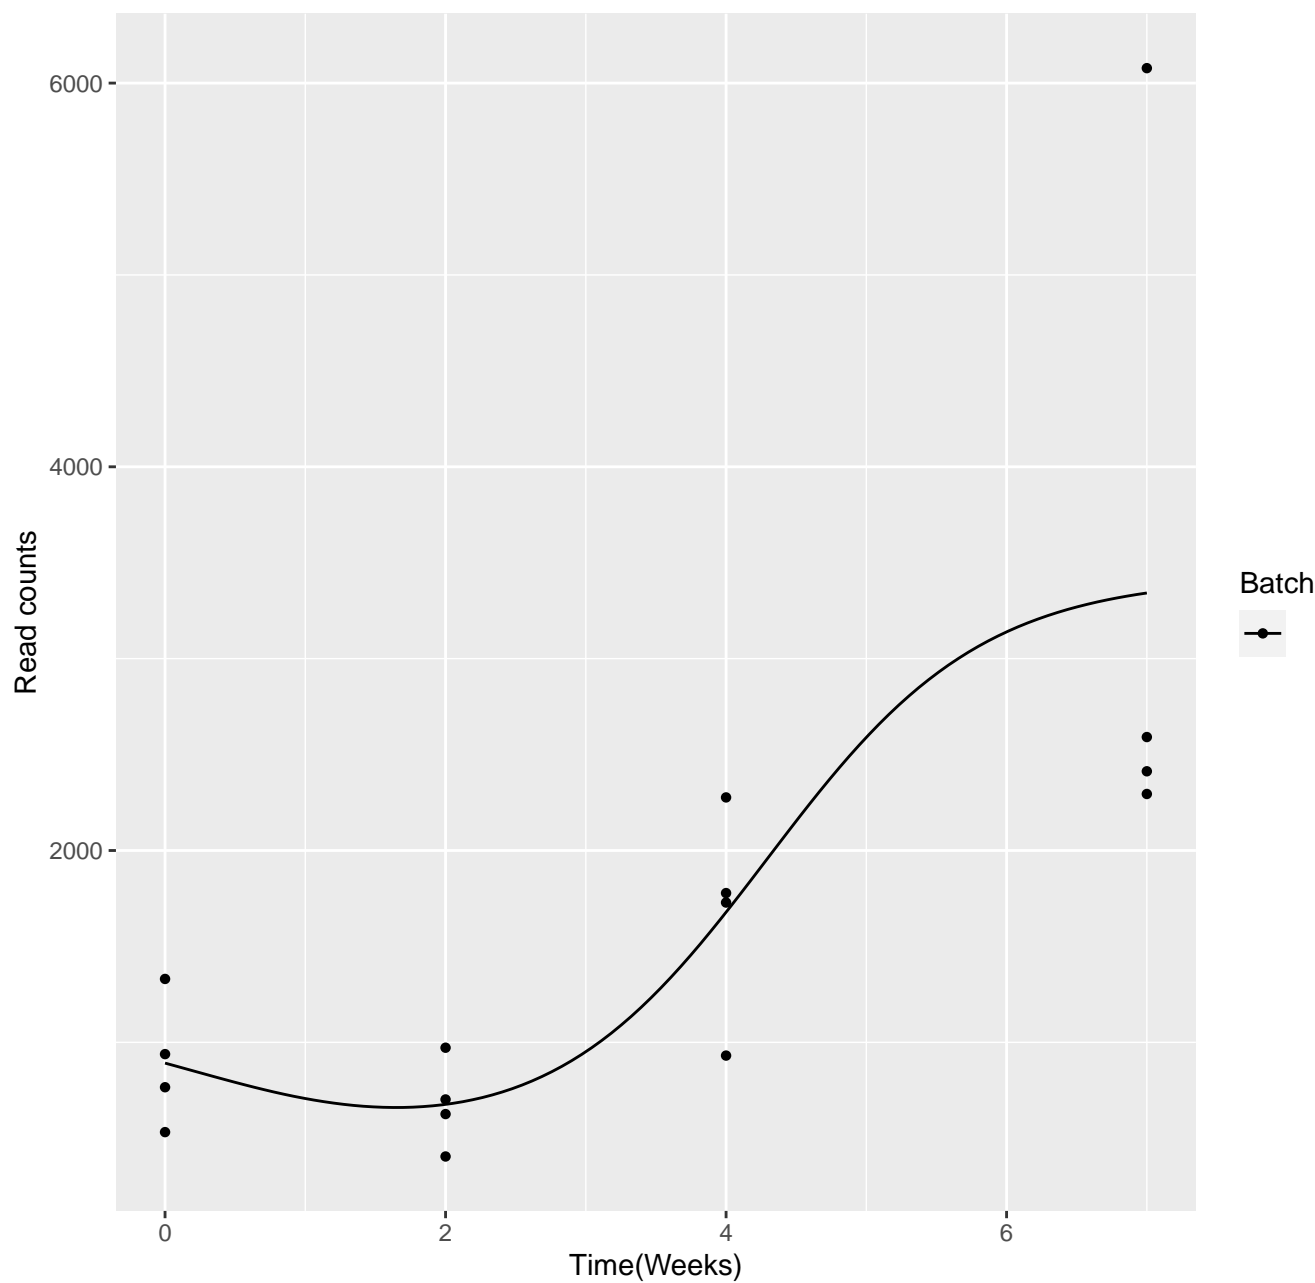

LOC108176497:  $\log_{10} q = -6.12$

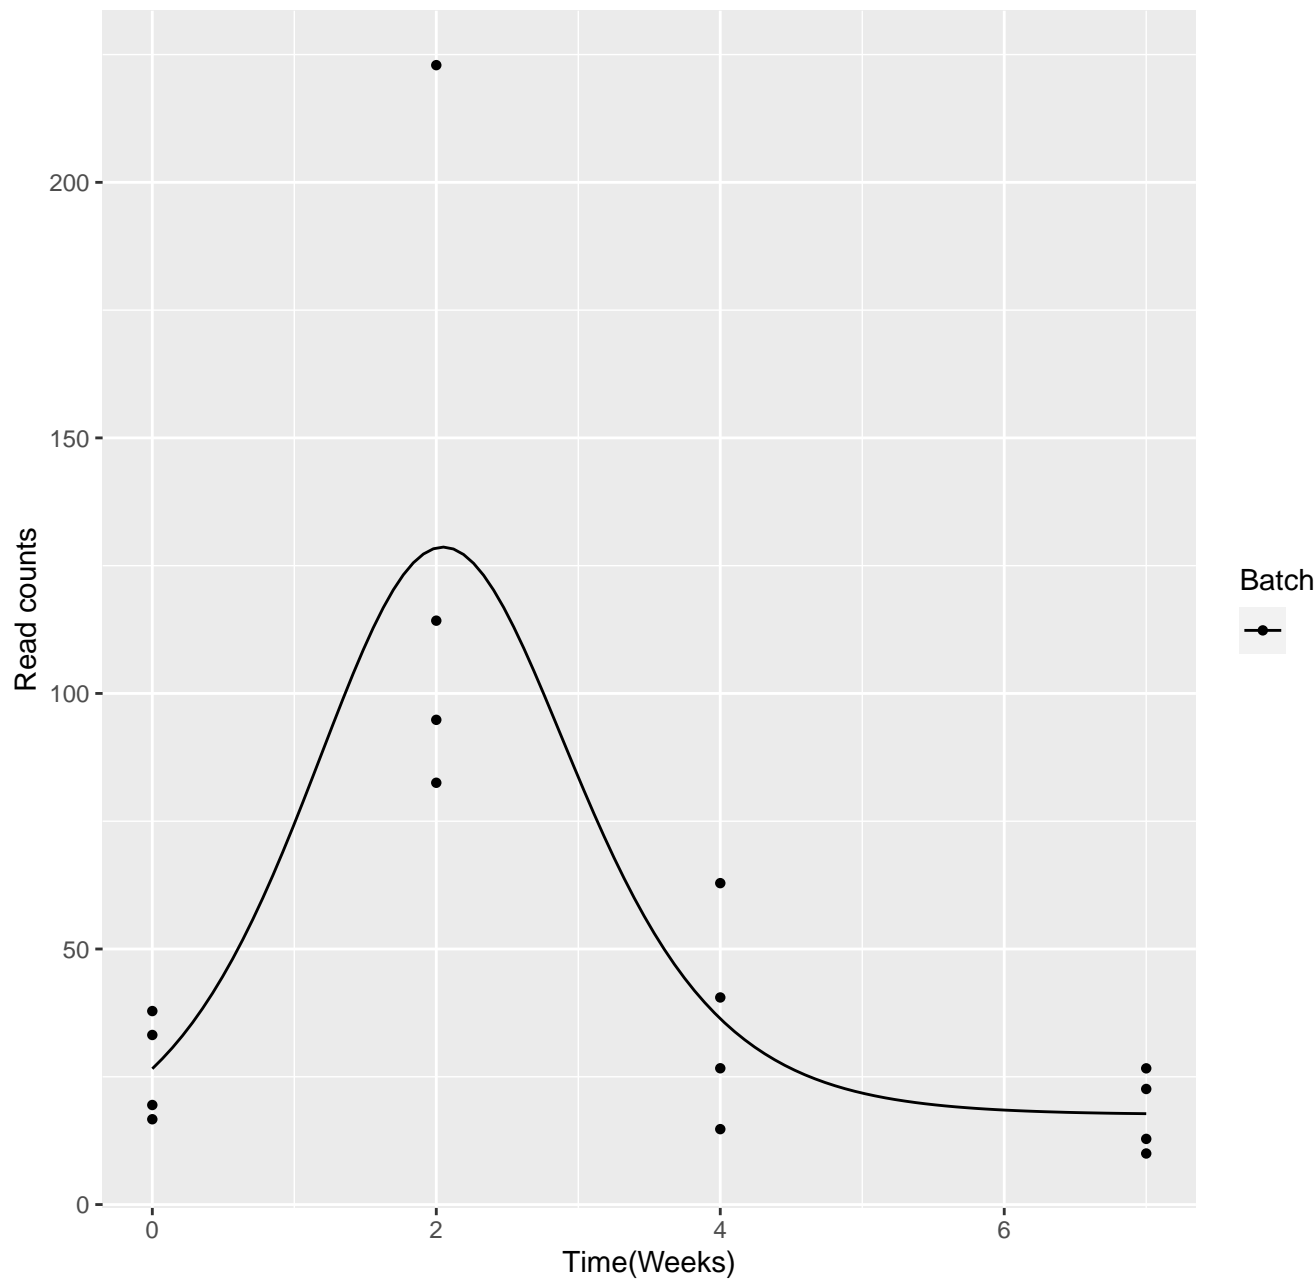

ARHGAP30:  $\log_{10} q = -6.12$

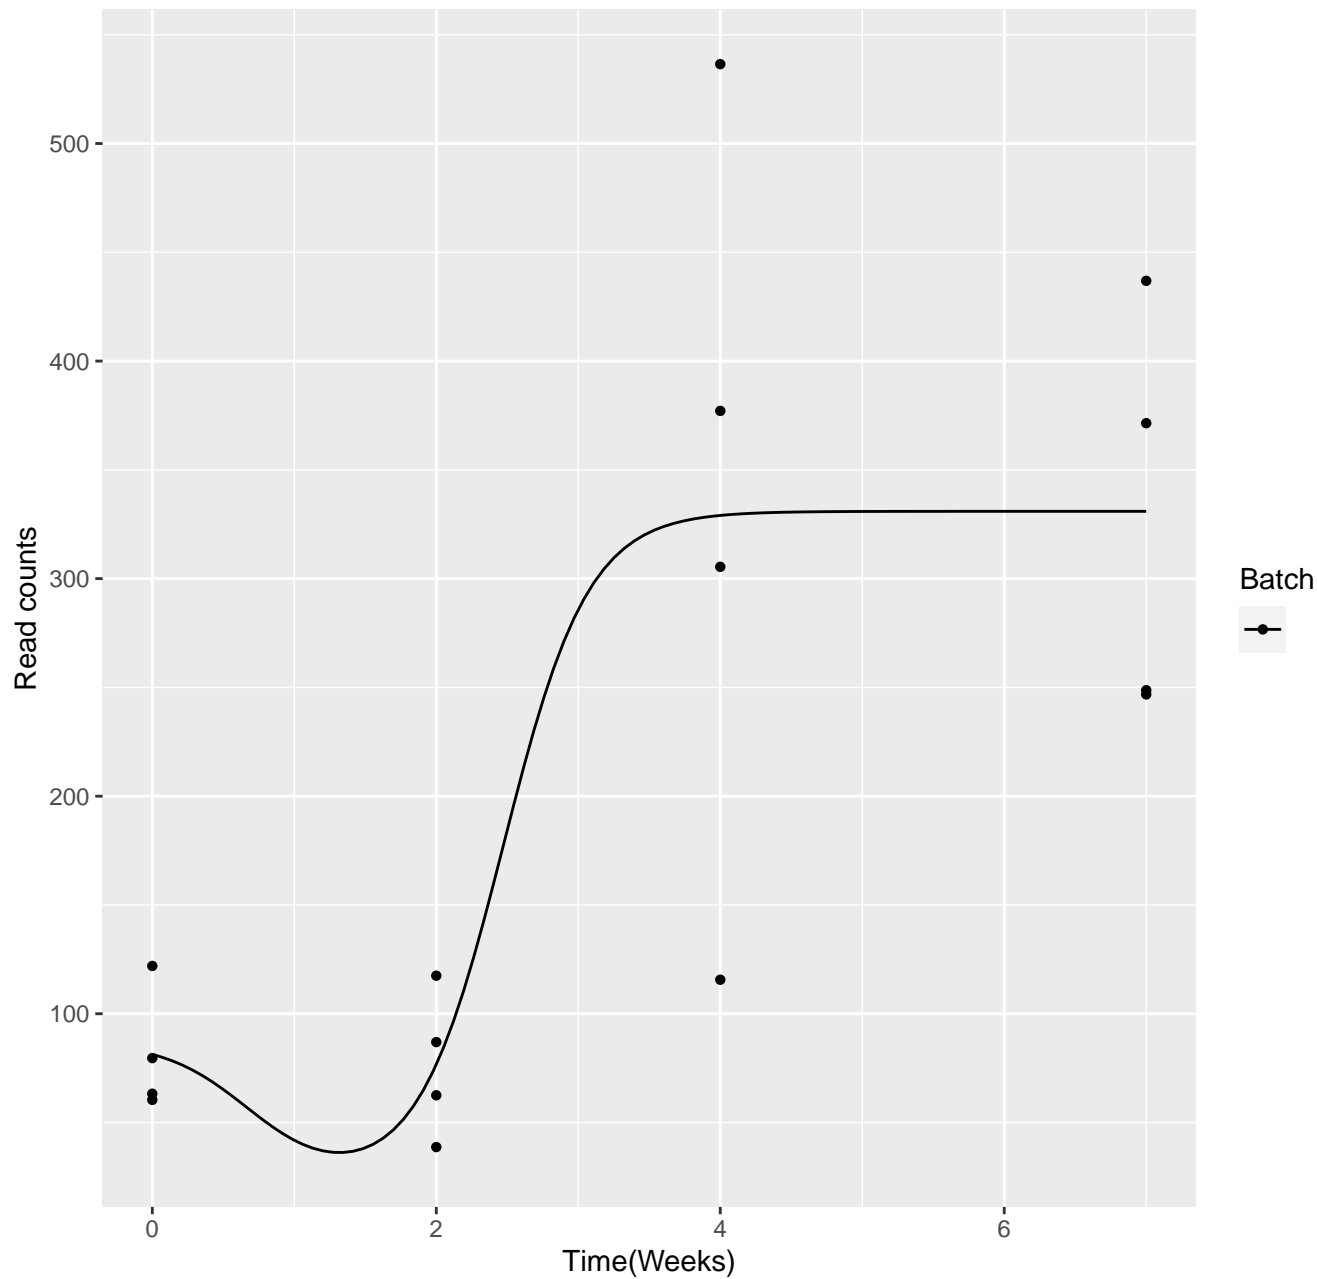



KCNAB1:  $\log_{10} q = -6.12$

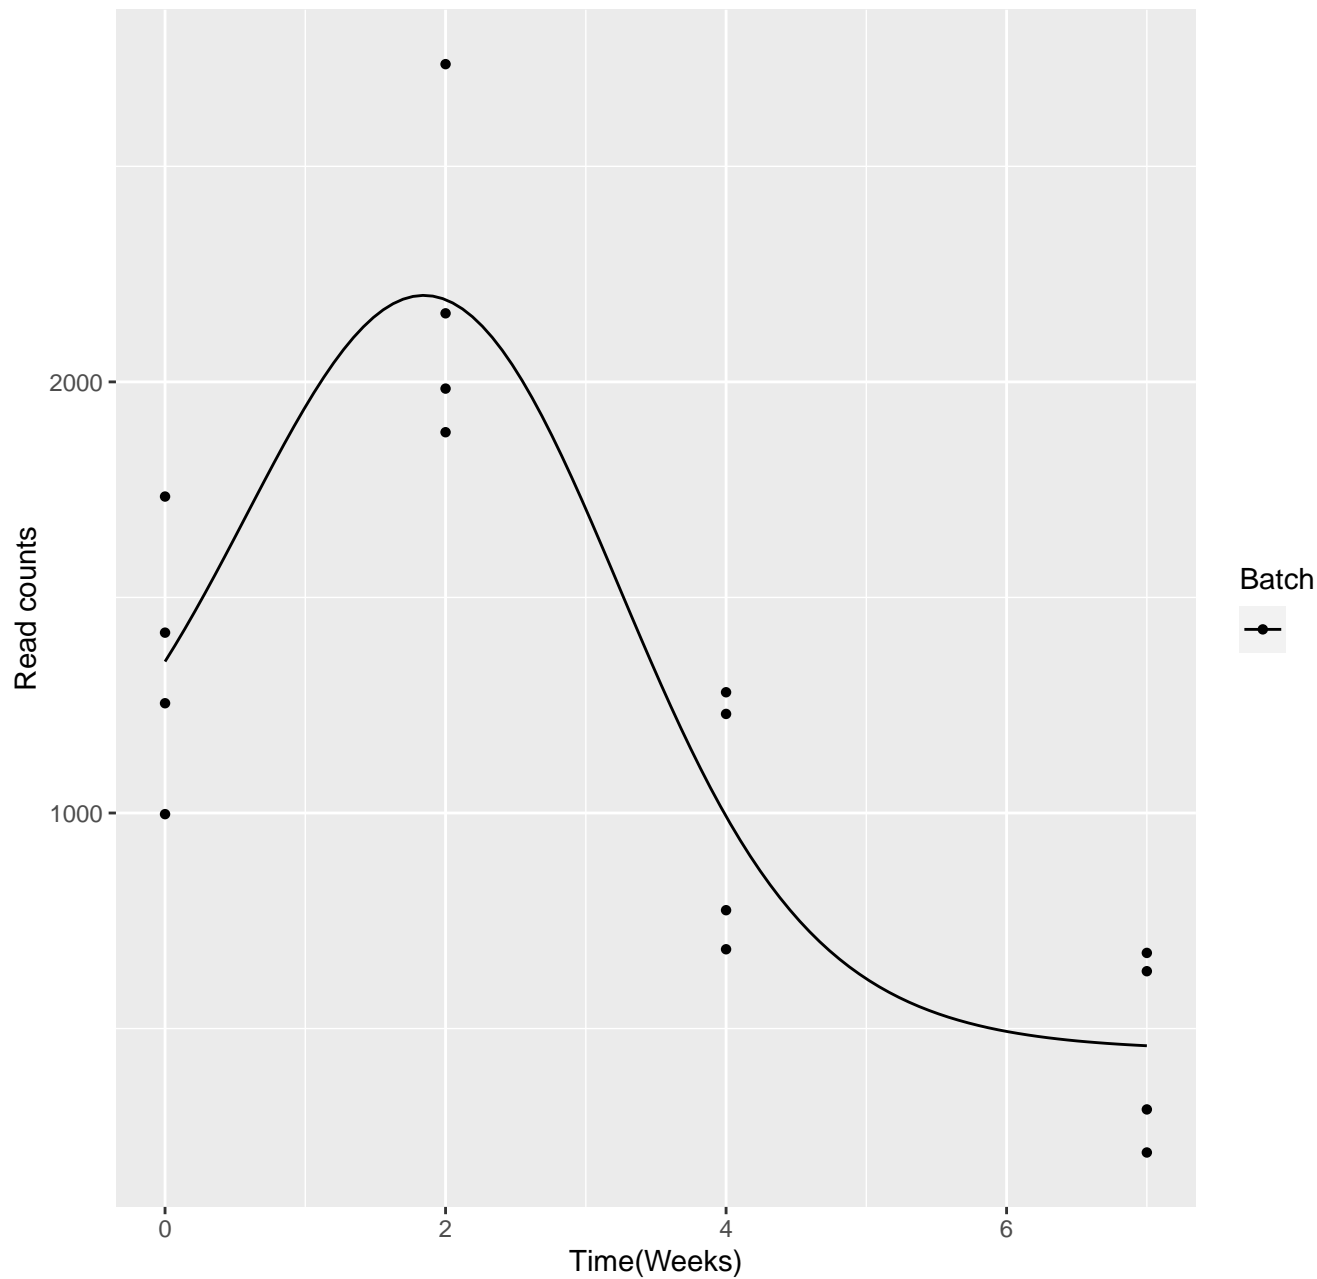

SKI:  $\log_{10} q = -6.1$

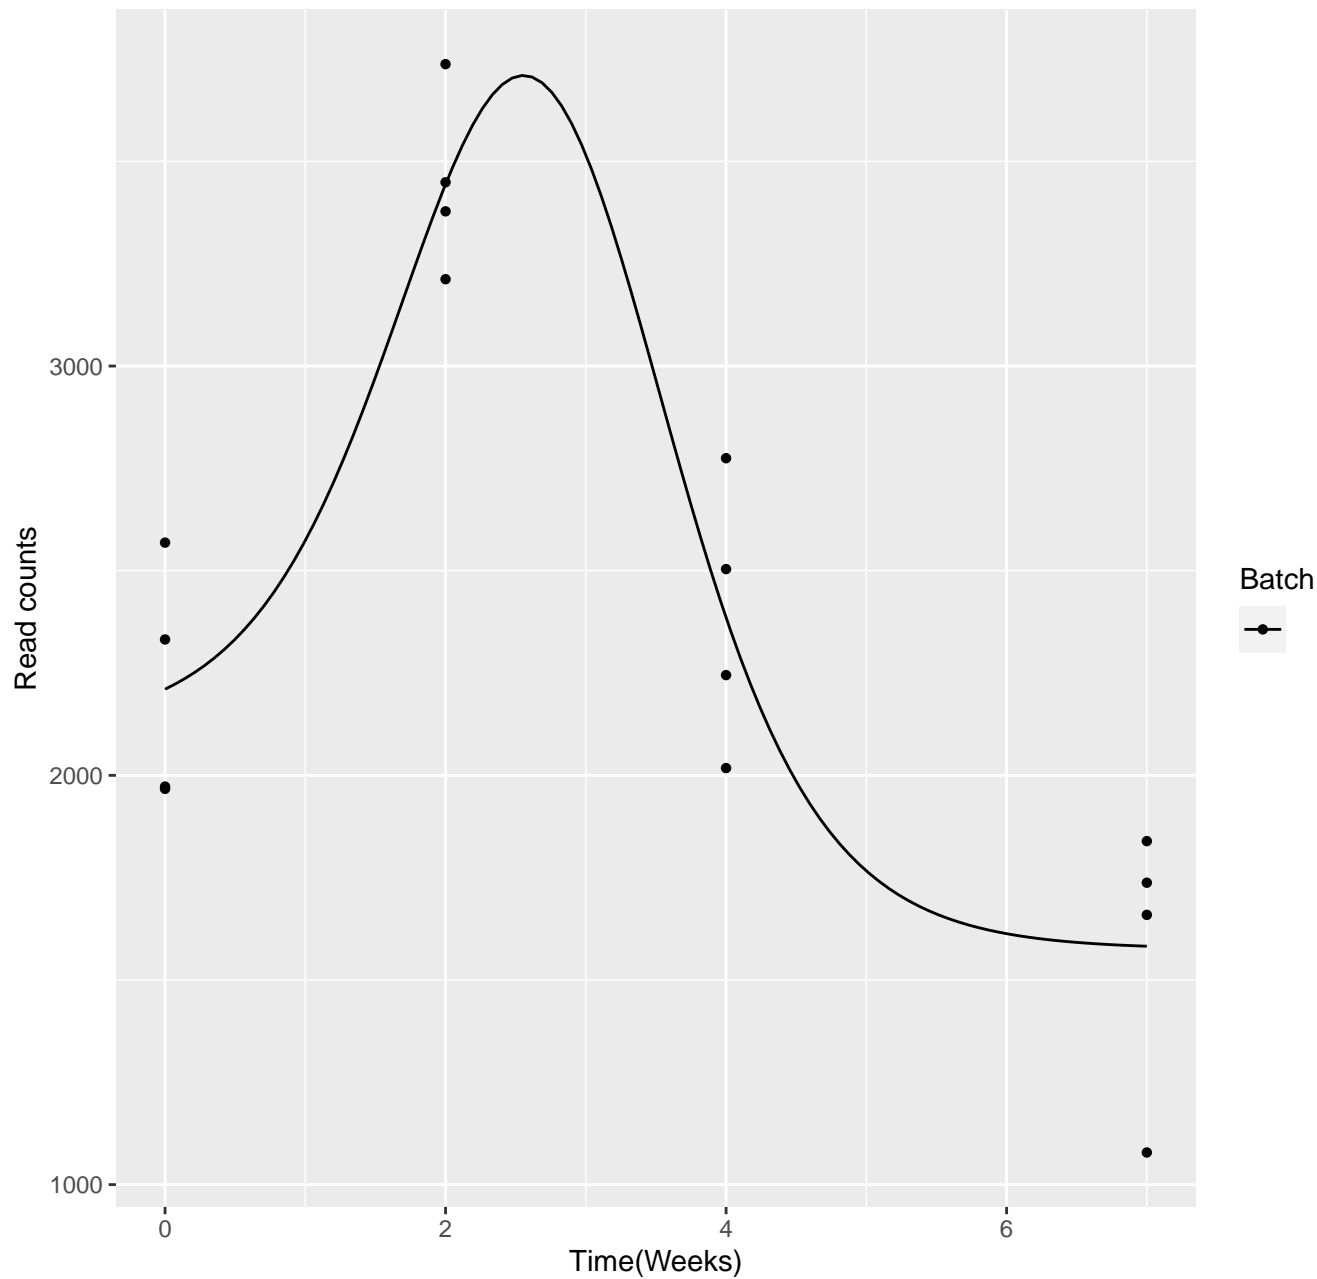

ACTA2: log10 q = -6.1

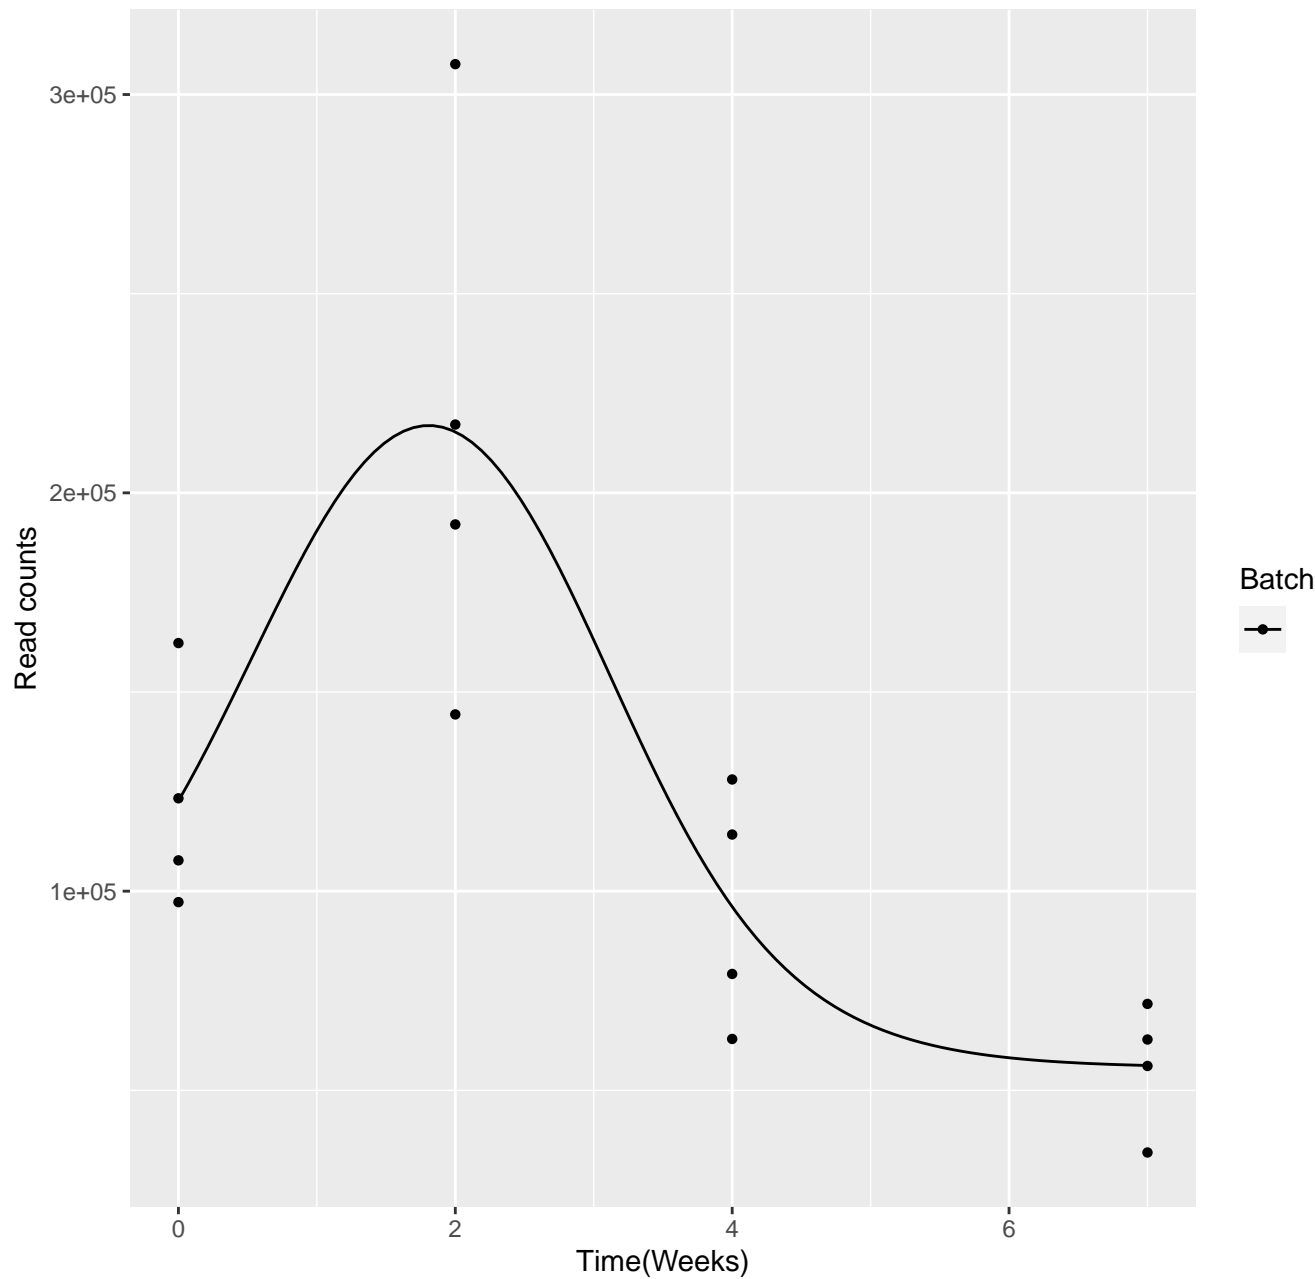

LOC100351416:  $\log_{10} q = -6.07$

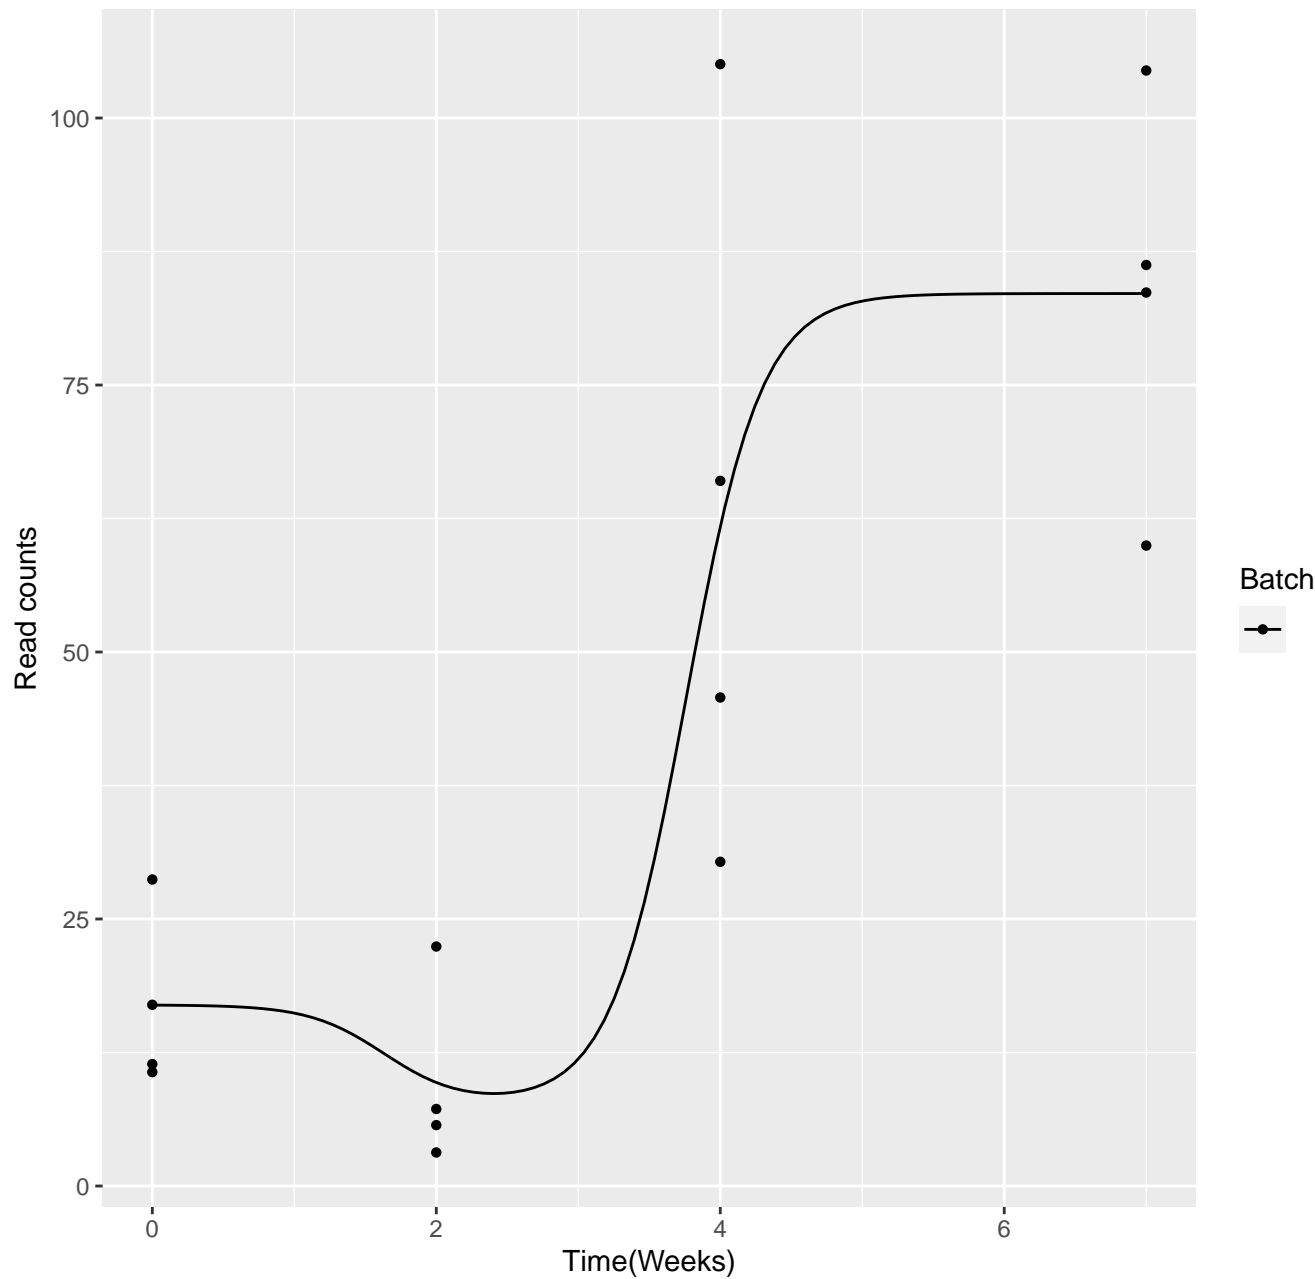

FERMT3:  $\log_{10} q = -6.06$

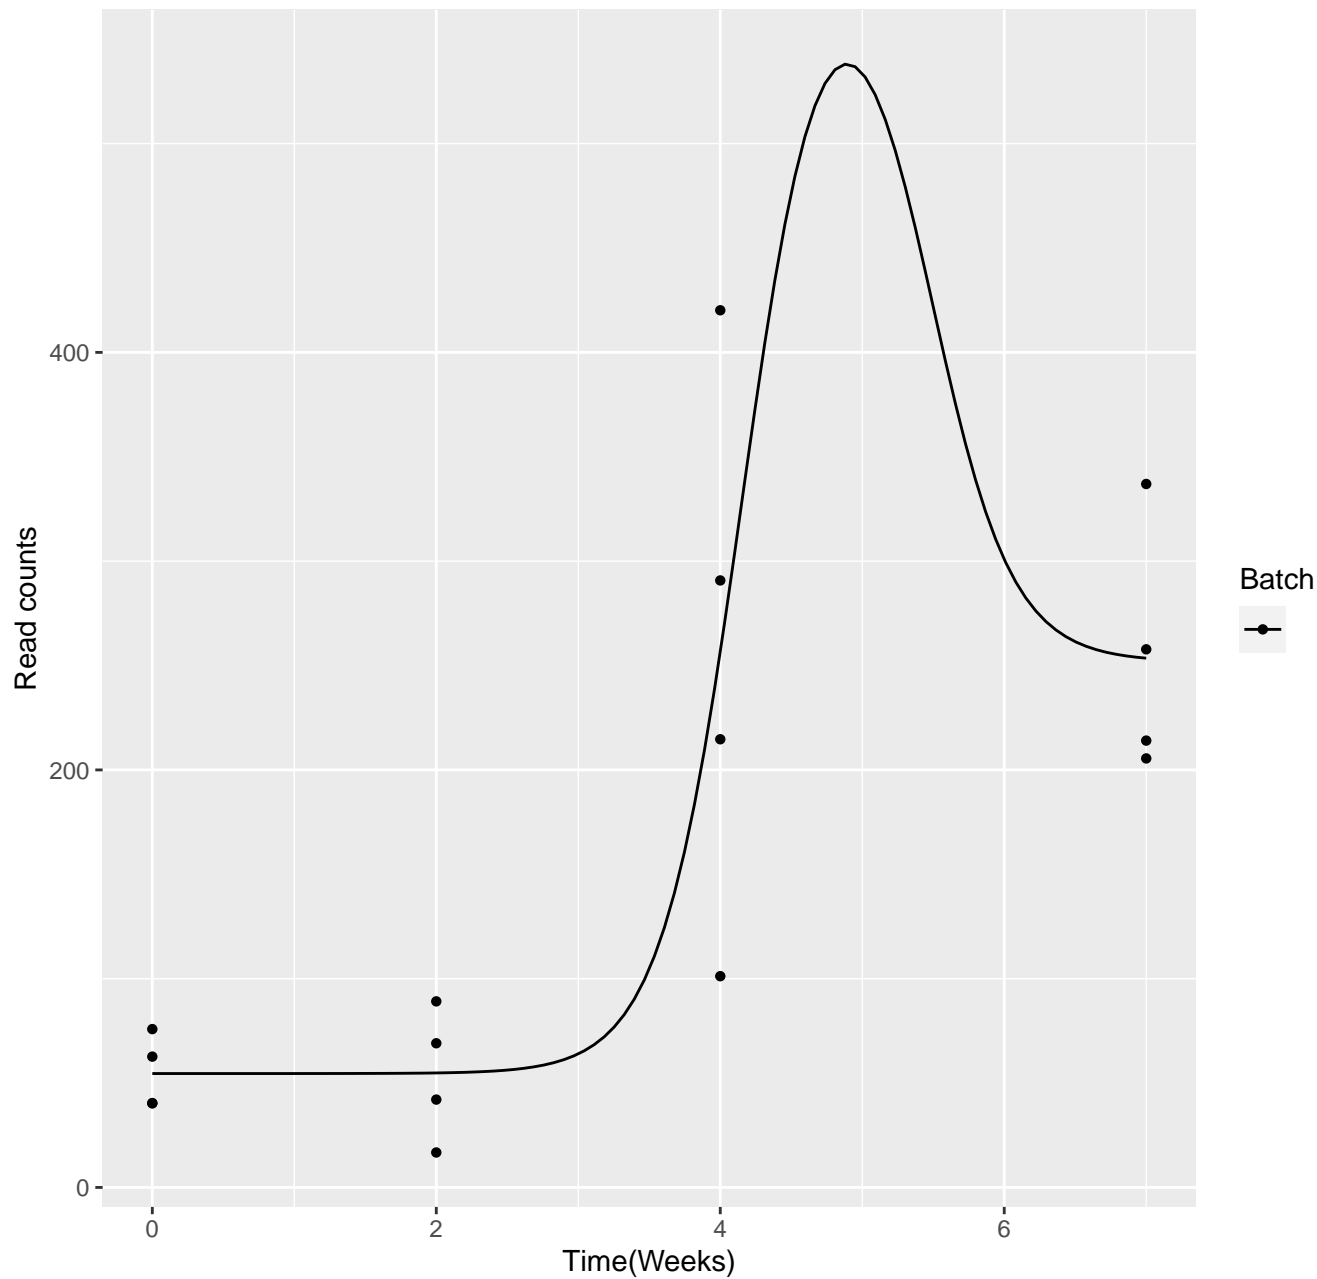

LOC100352673:  $\log_{10} q = -6.05$

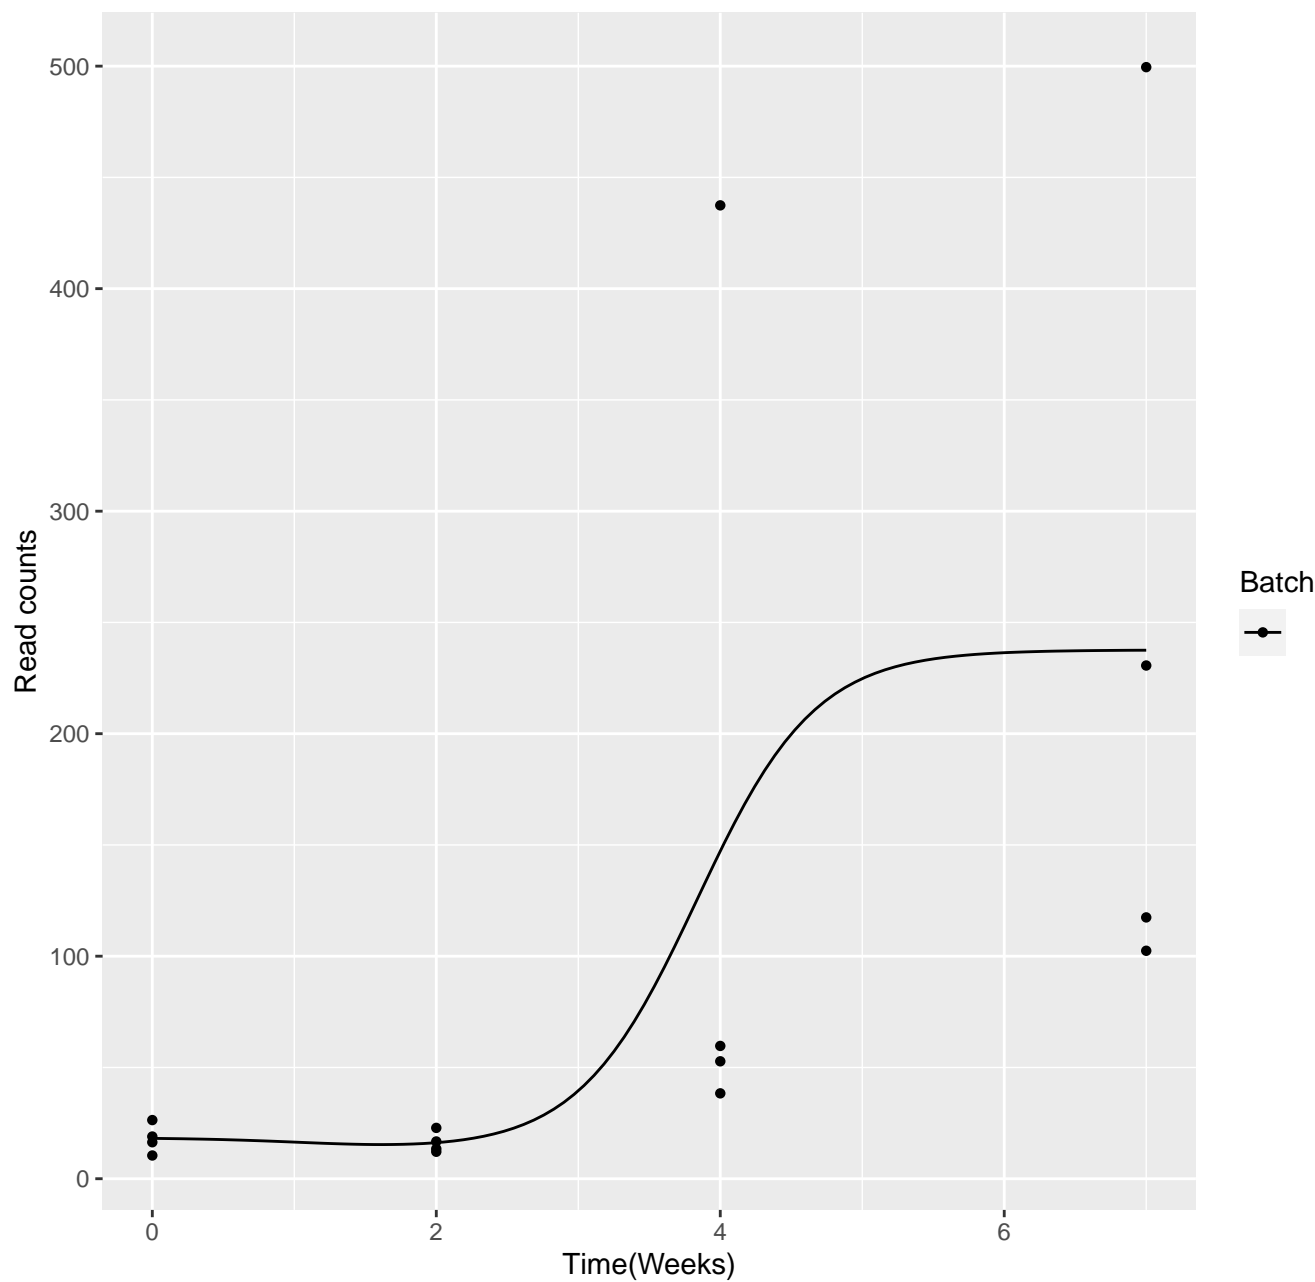

LOC127493194:  $\log_{10} q = -6.05$



SLA:  $\log_{10} q = -6.03$

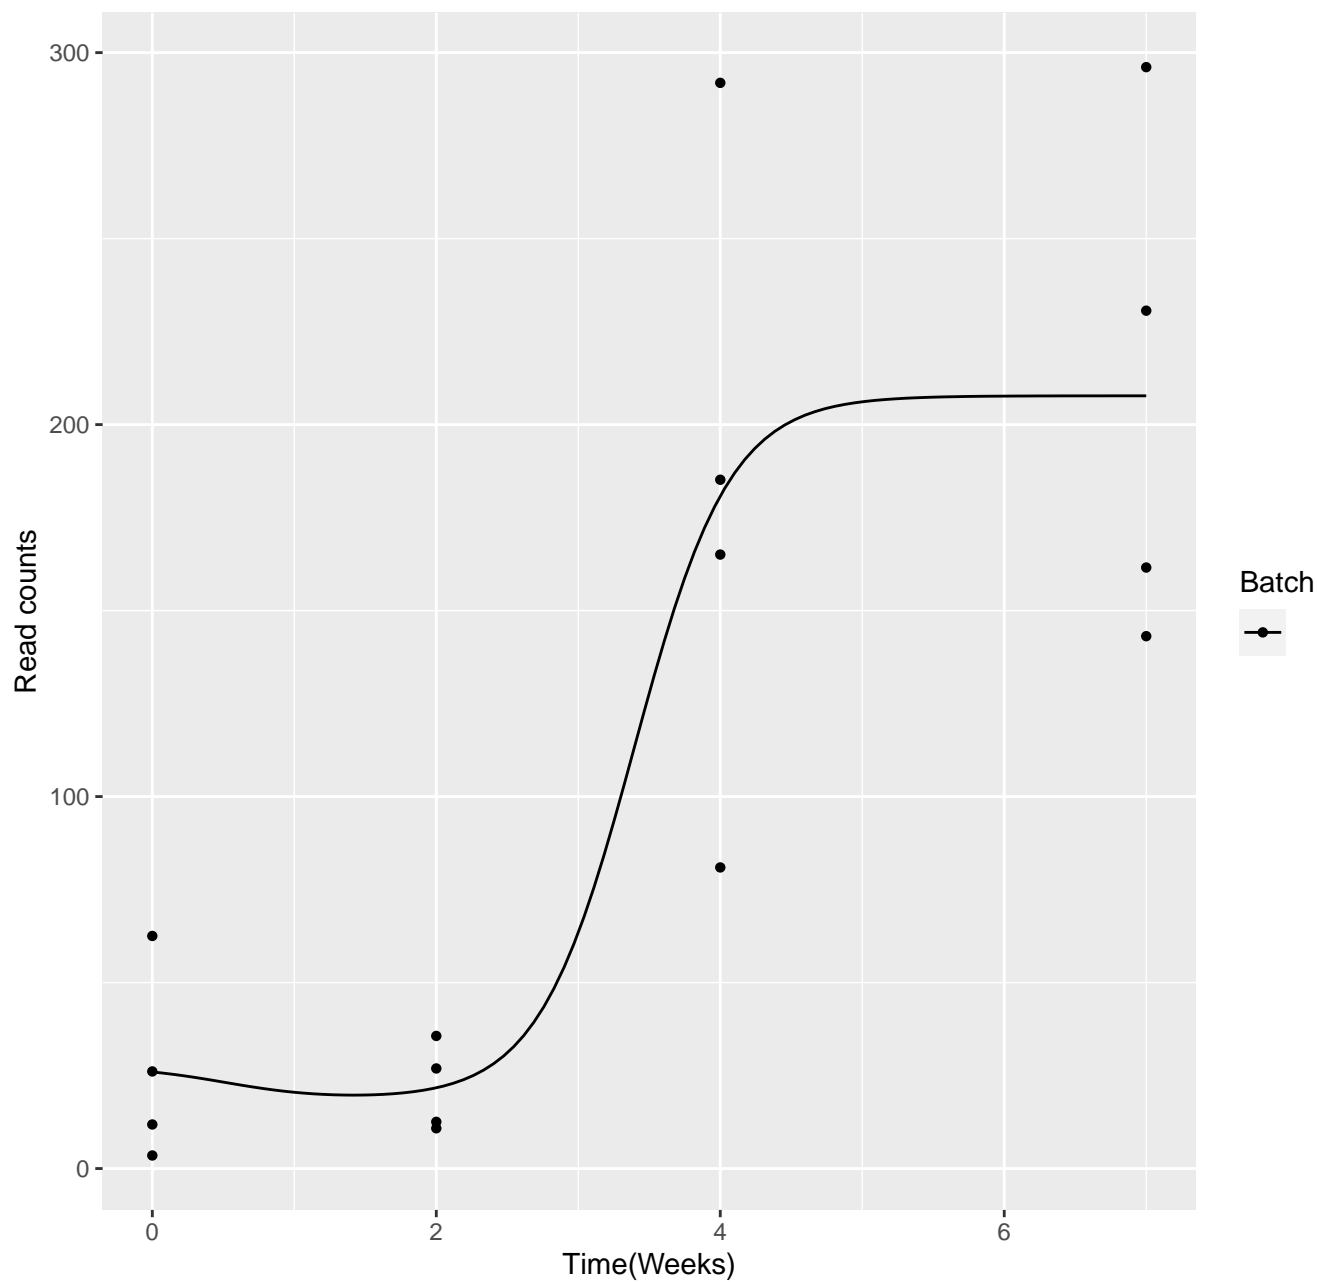



CENPA:  $\log_{10} q = -6$

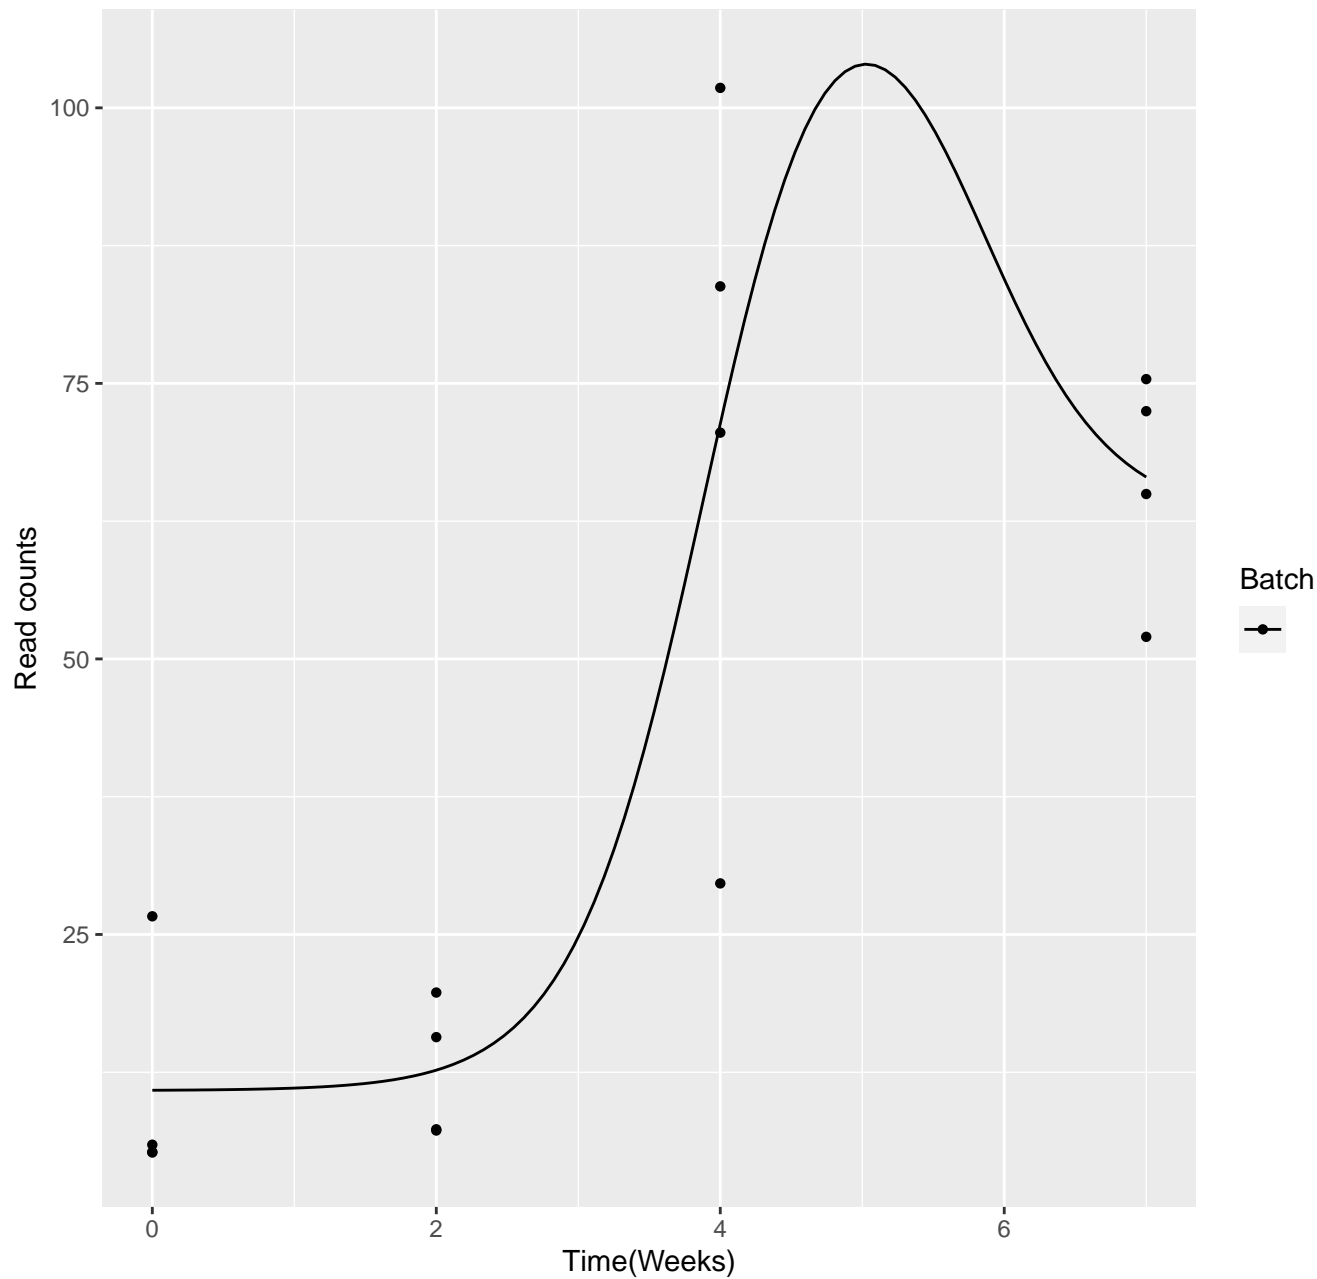

LOC100352318:  $\log_{10} q = -6$

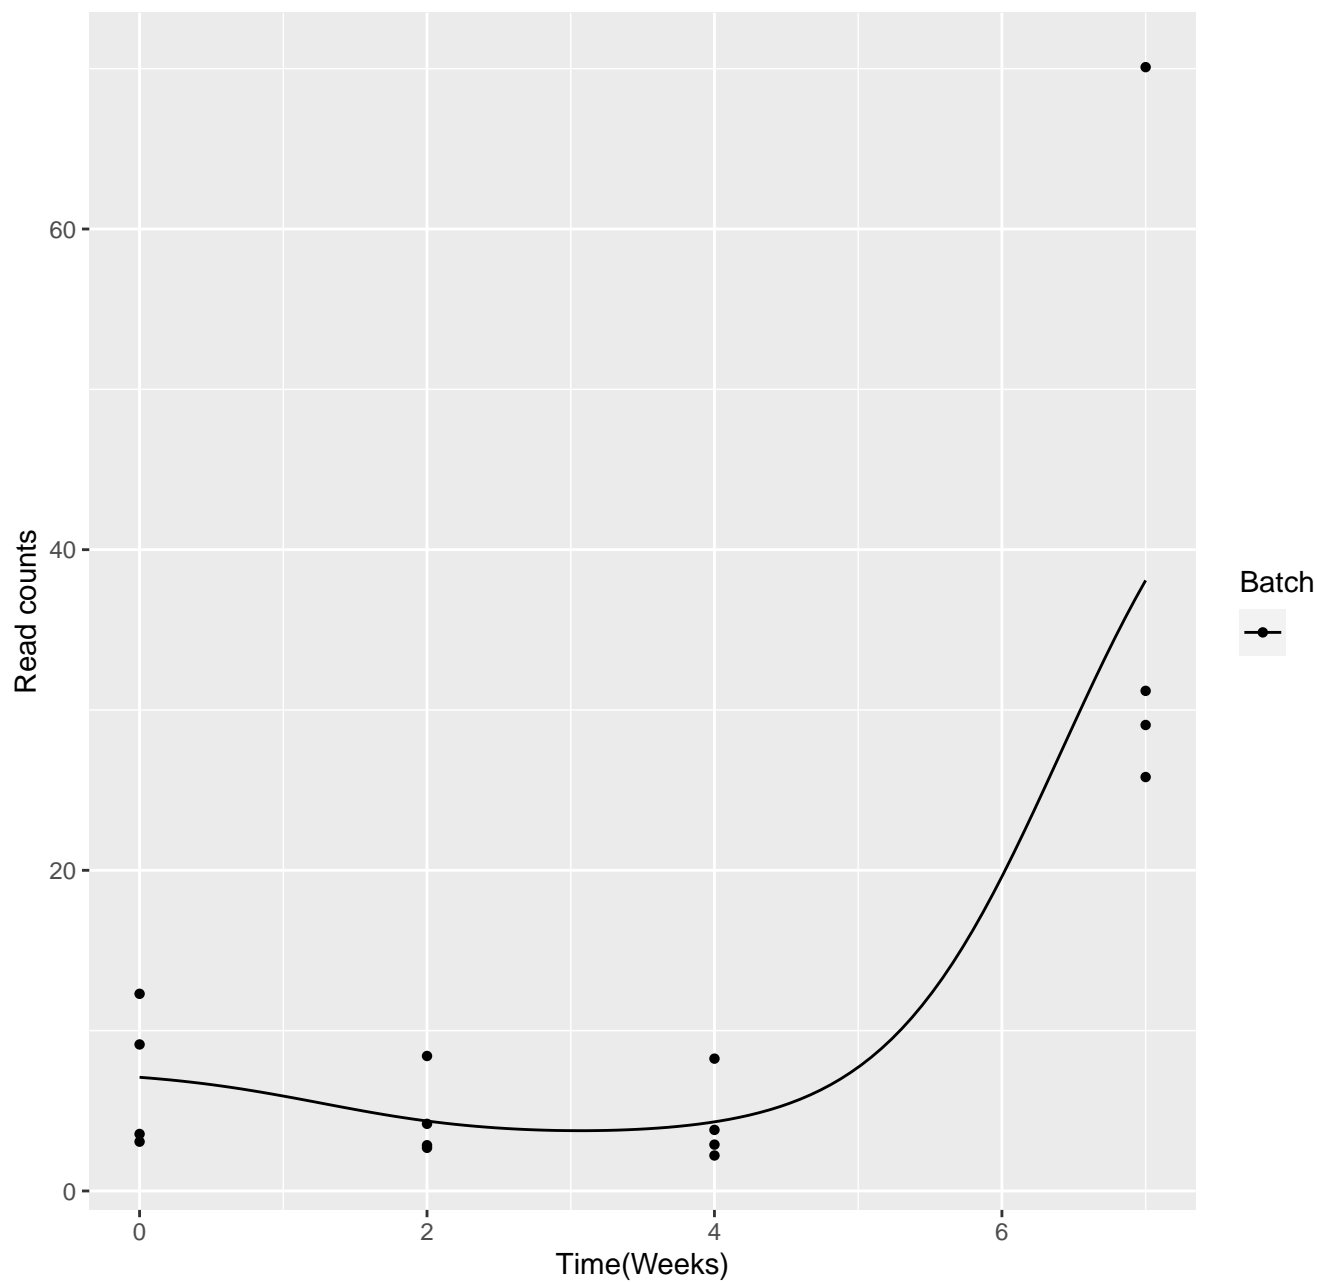

IFNGR2:  $\log_{10} q = -5.99$

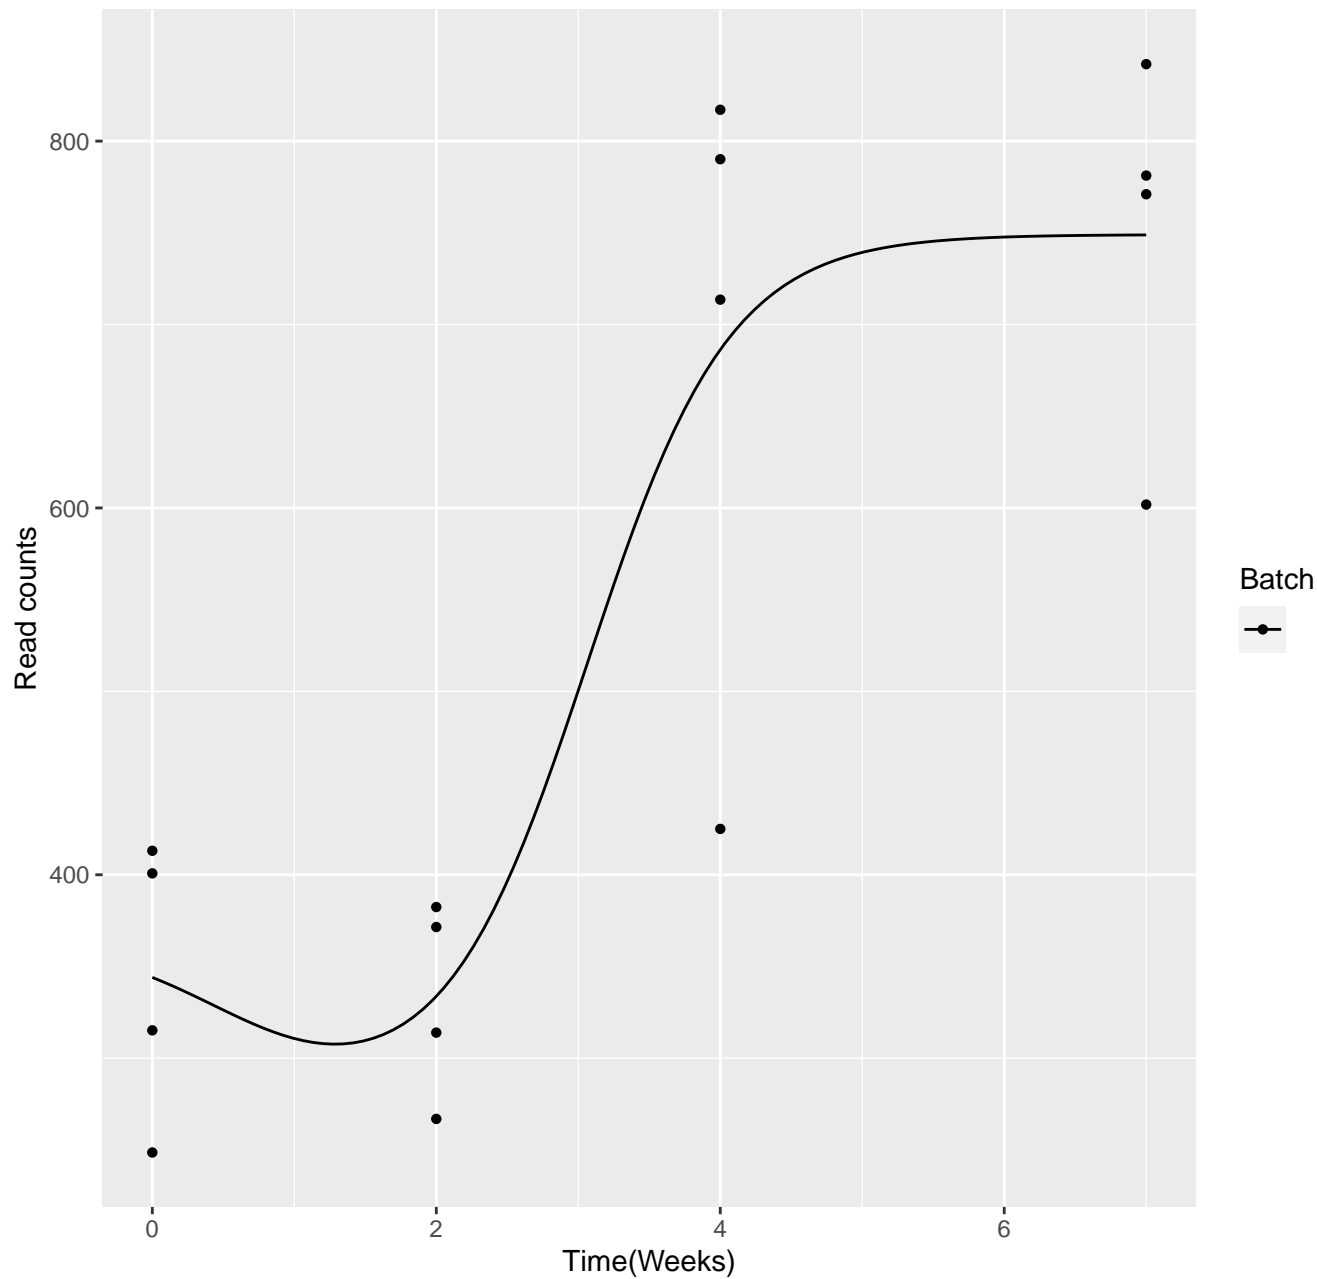

IGSF6:  $\log_{10} q = -5.98$

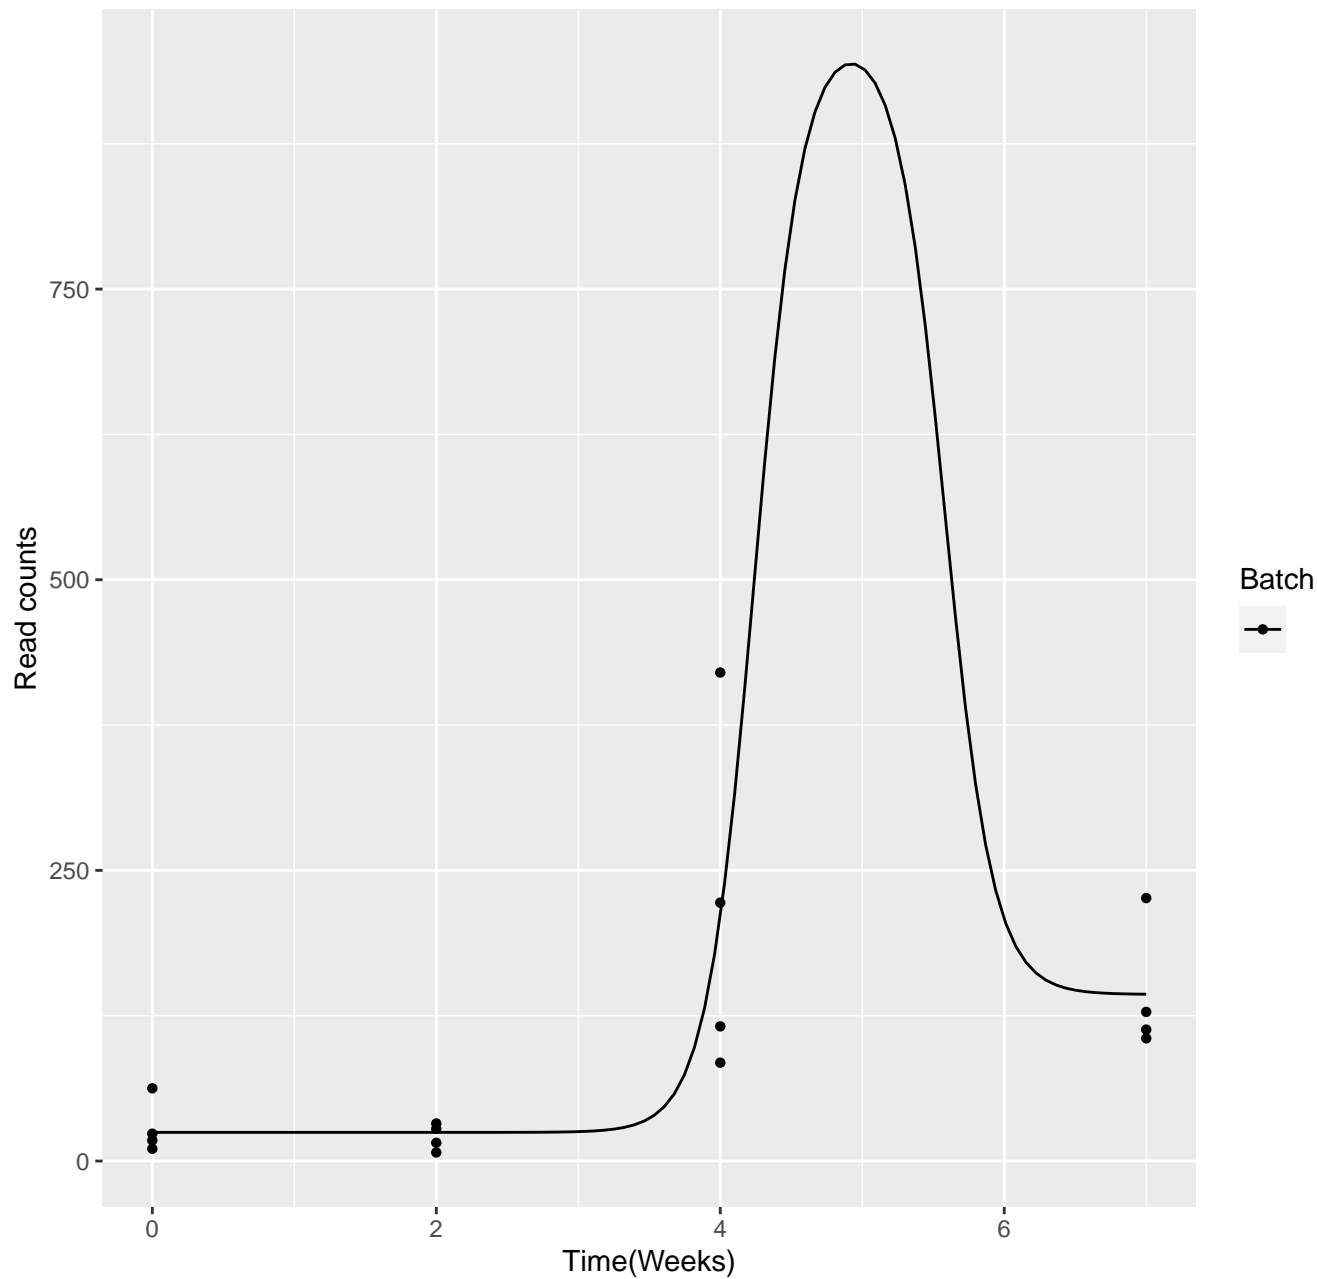

LGR6:  $\log_{10} q = -5.96$

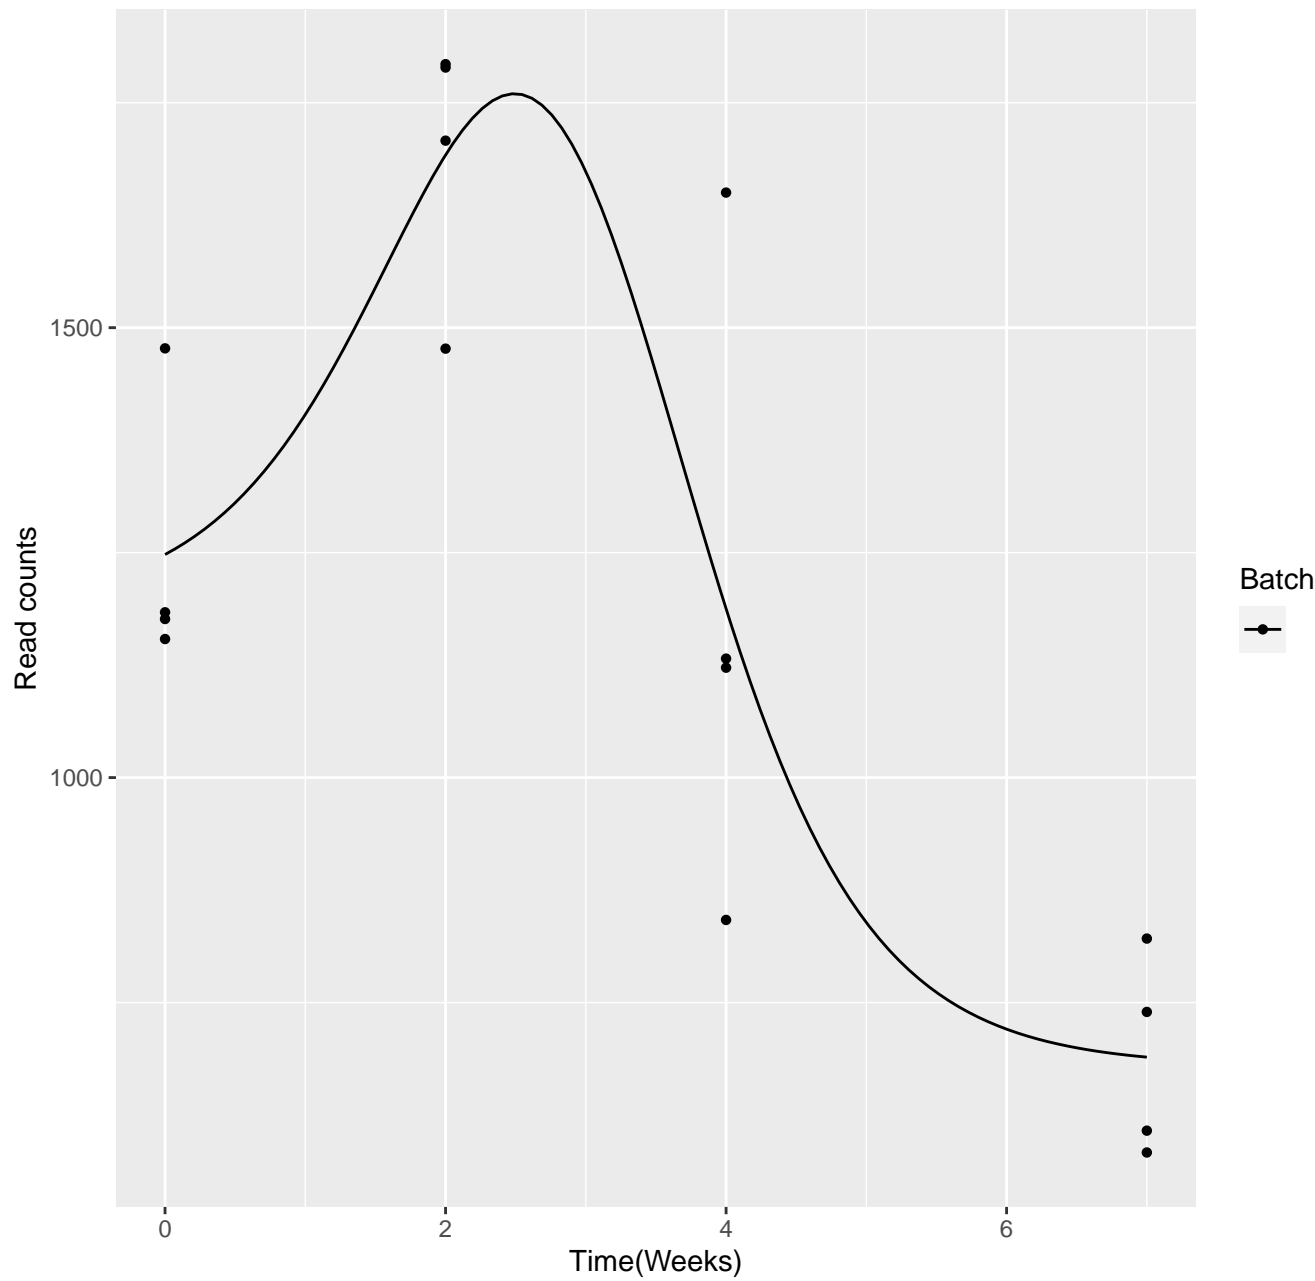

NAPSA:  $\log_{10} q = -5.95$

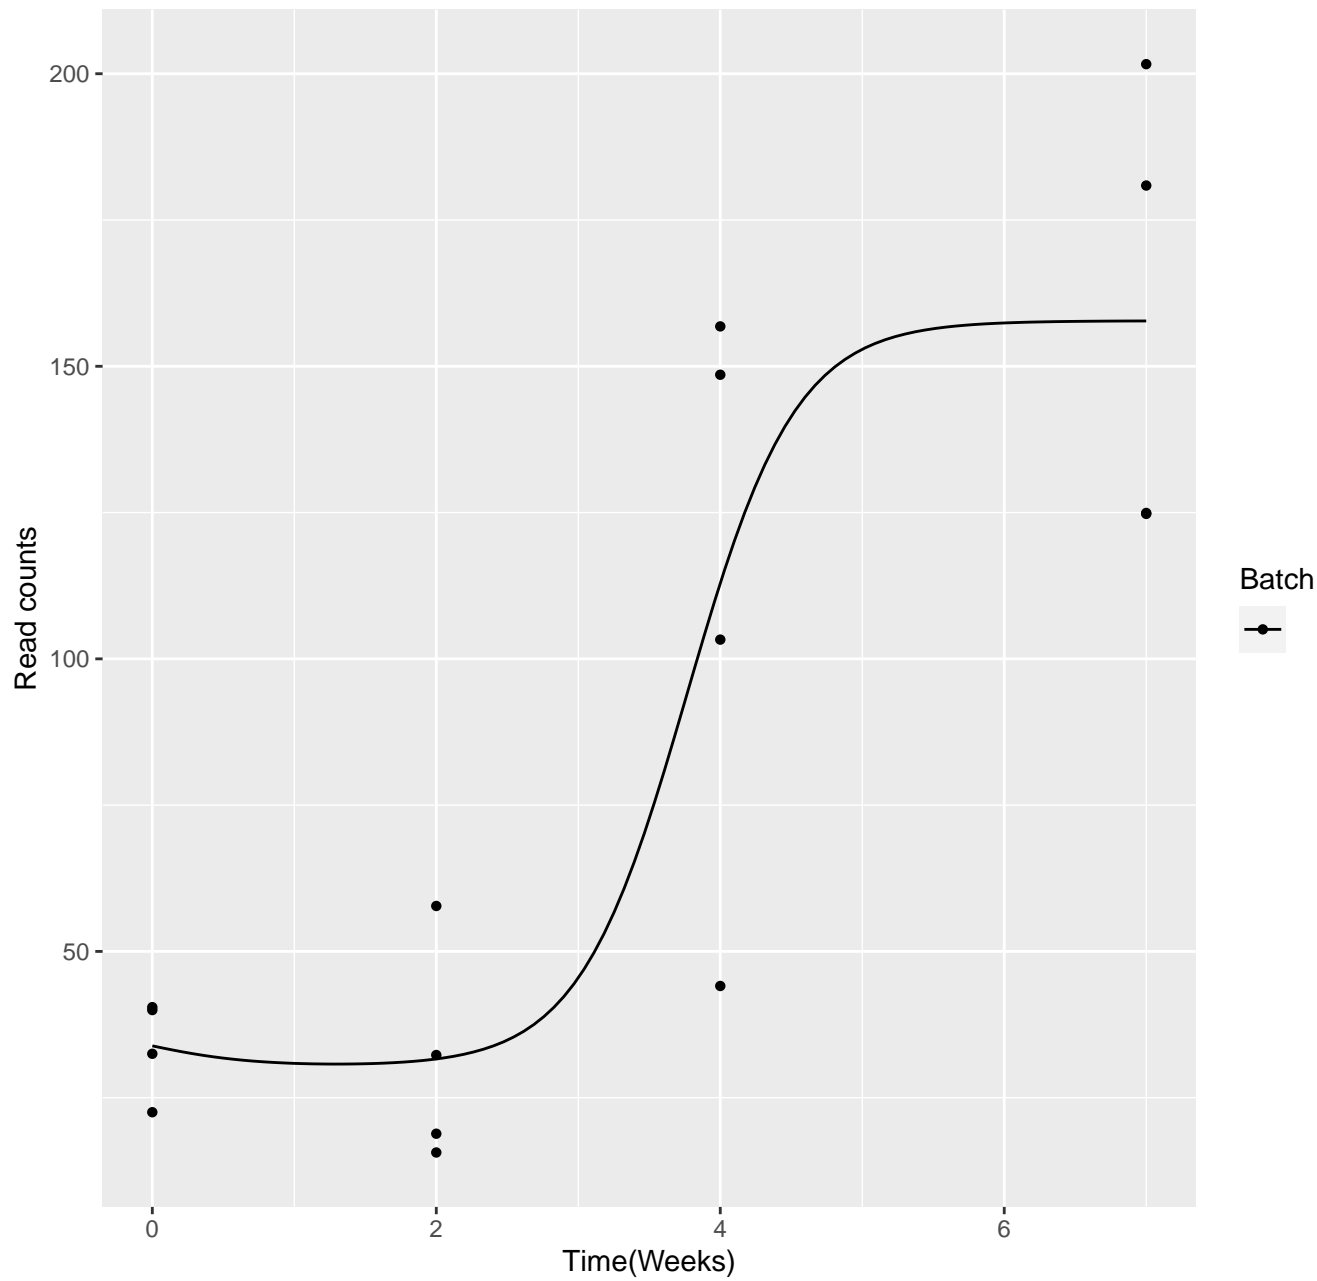

HAVCR1:  $\log_{10} q = -5.92$

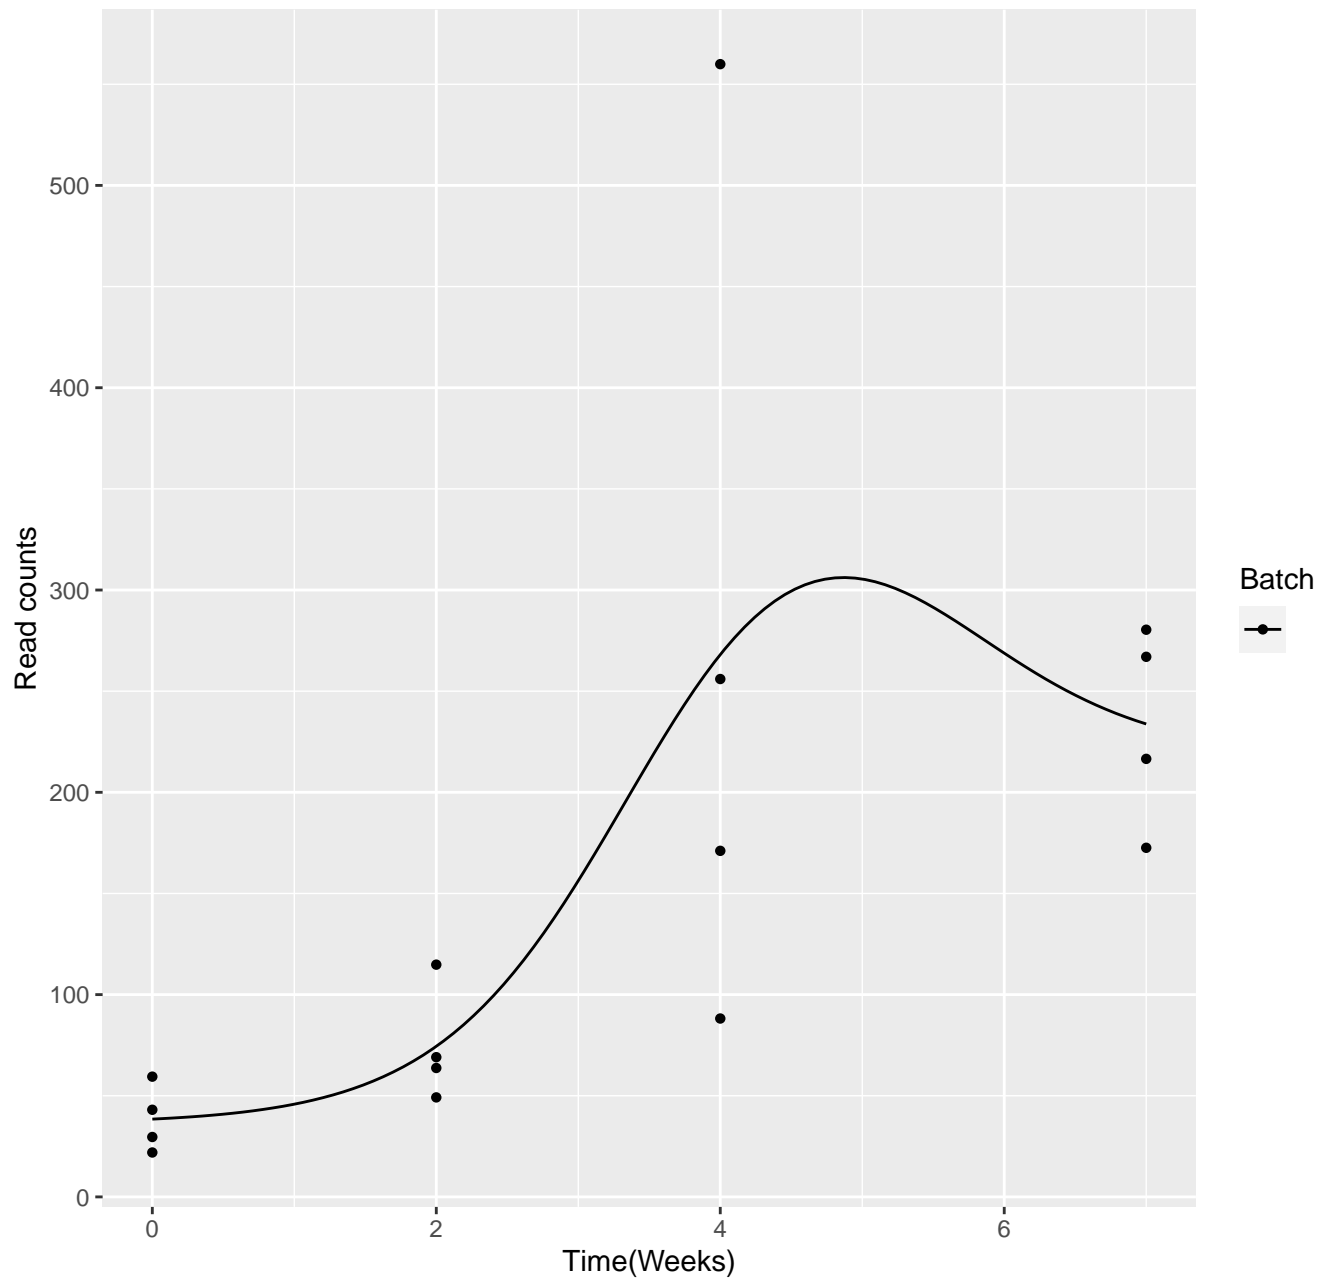

NEK2:  $\log_{10} q = -5.92$

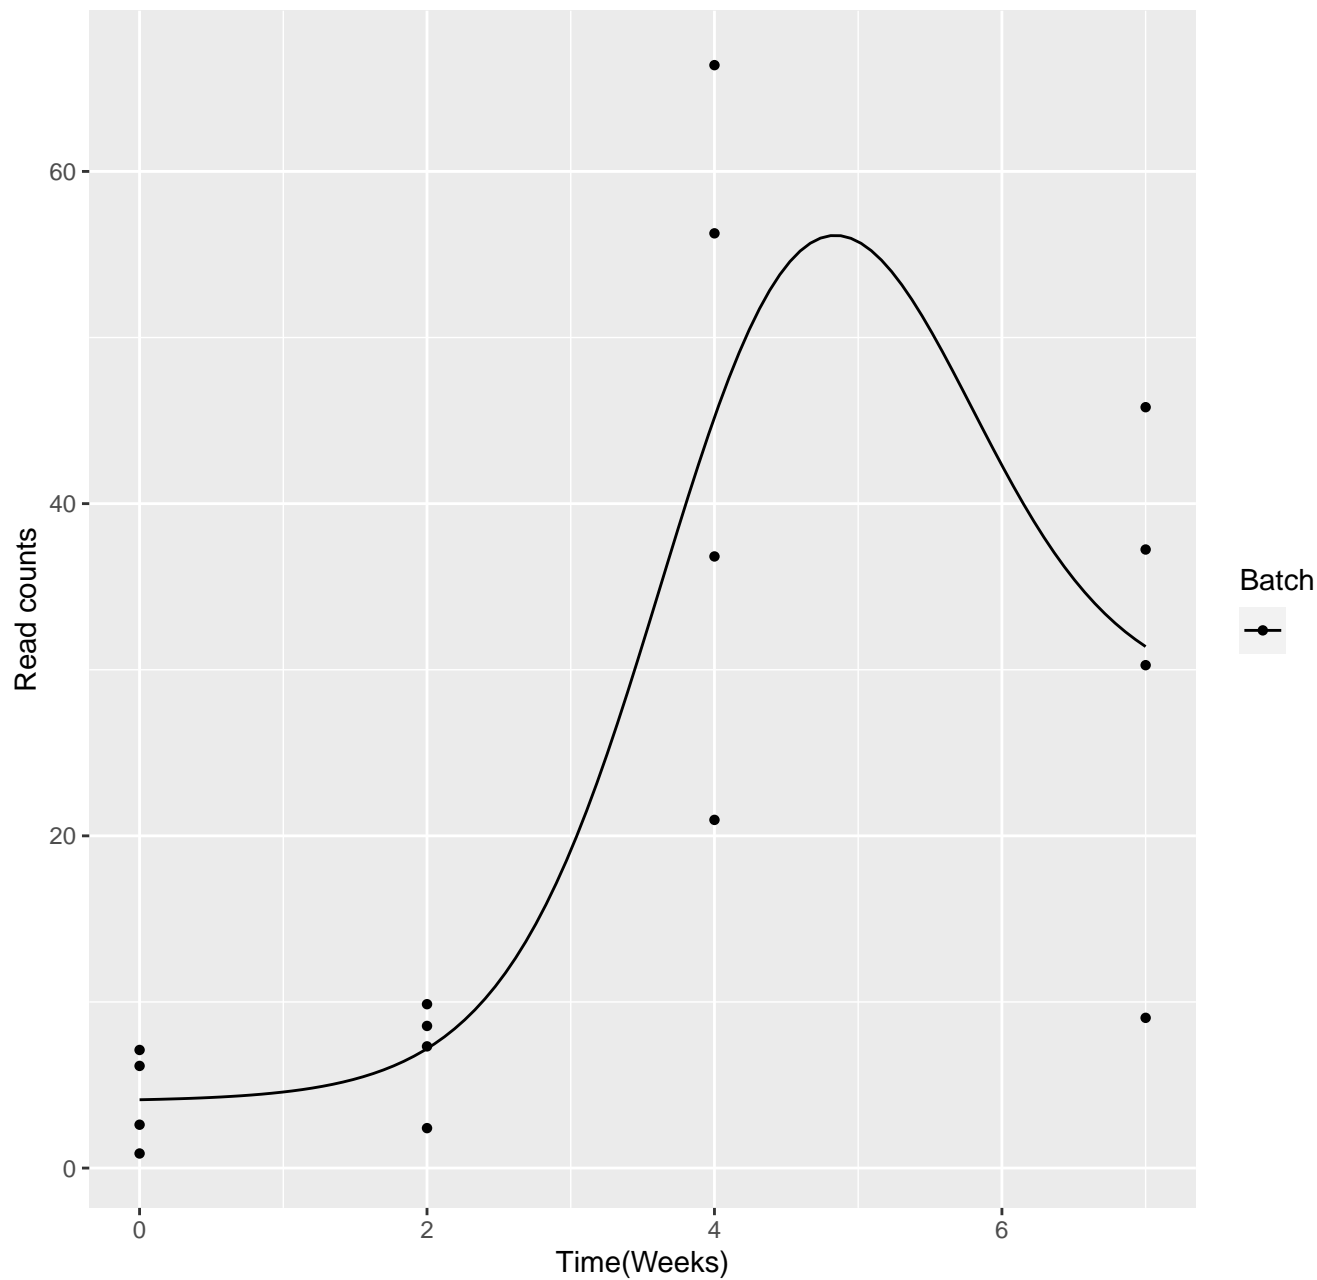



PRG4:  $\log_{10} q = -5.92$

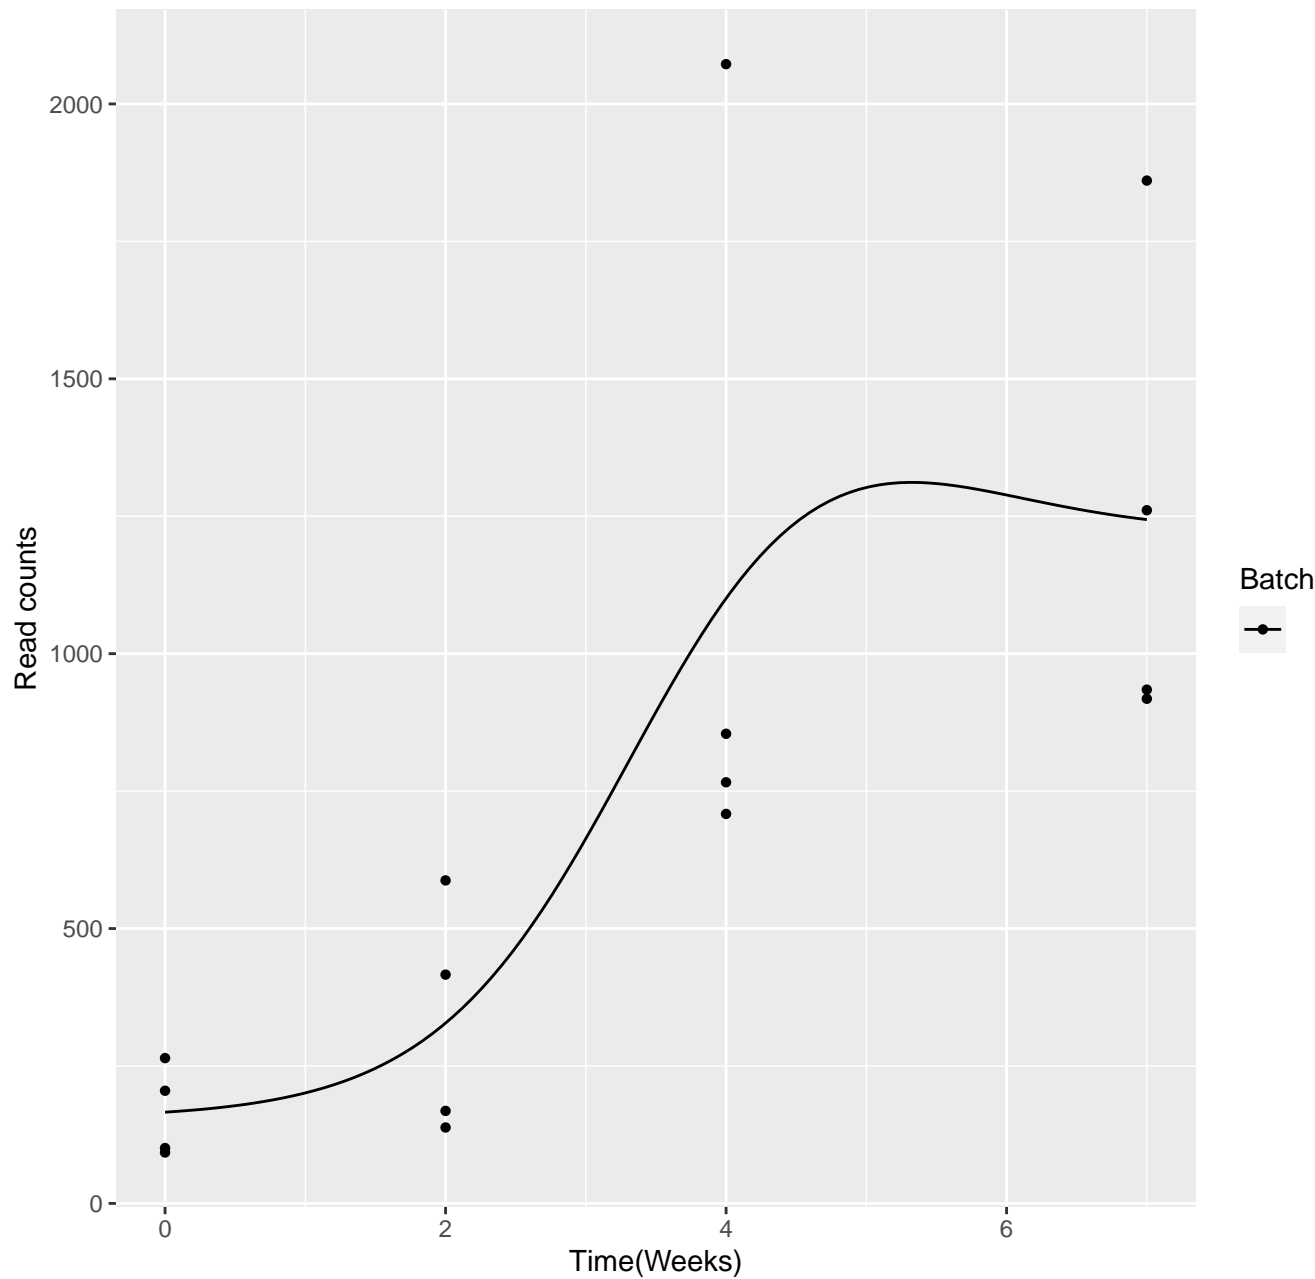

TIFAB:  $\log_{10} q = -5.91$

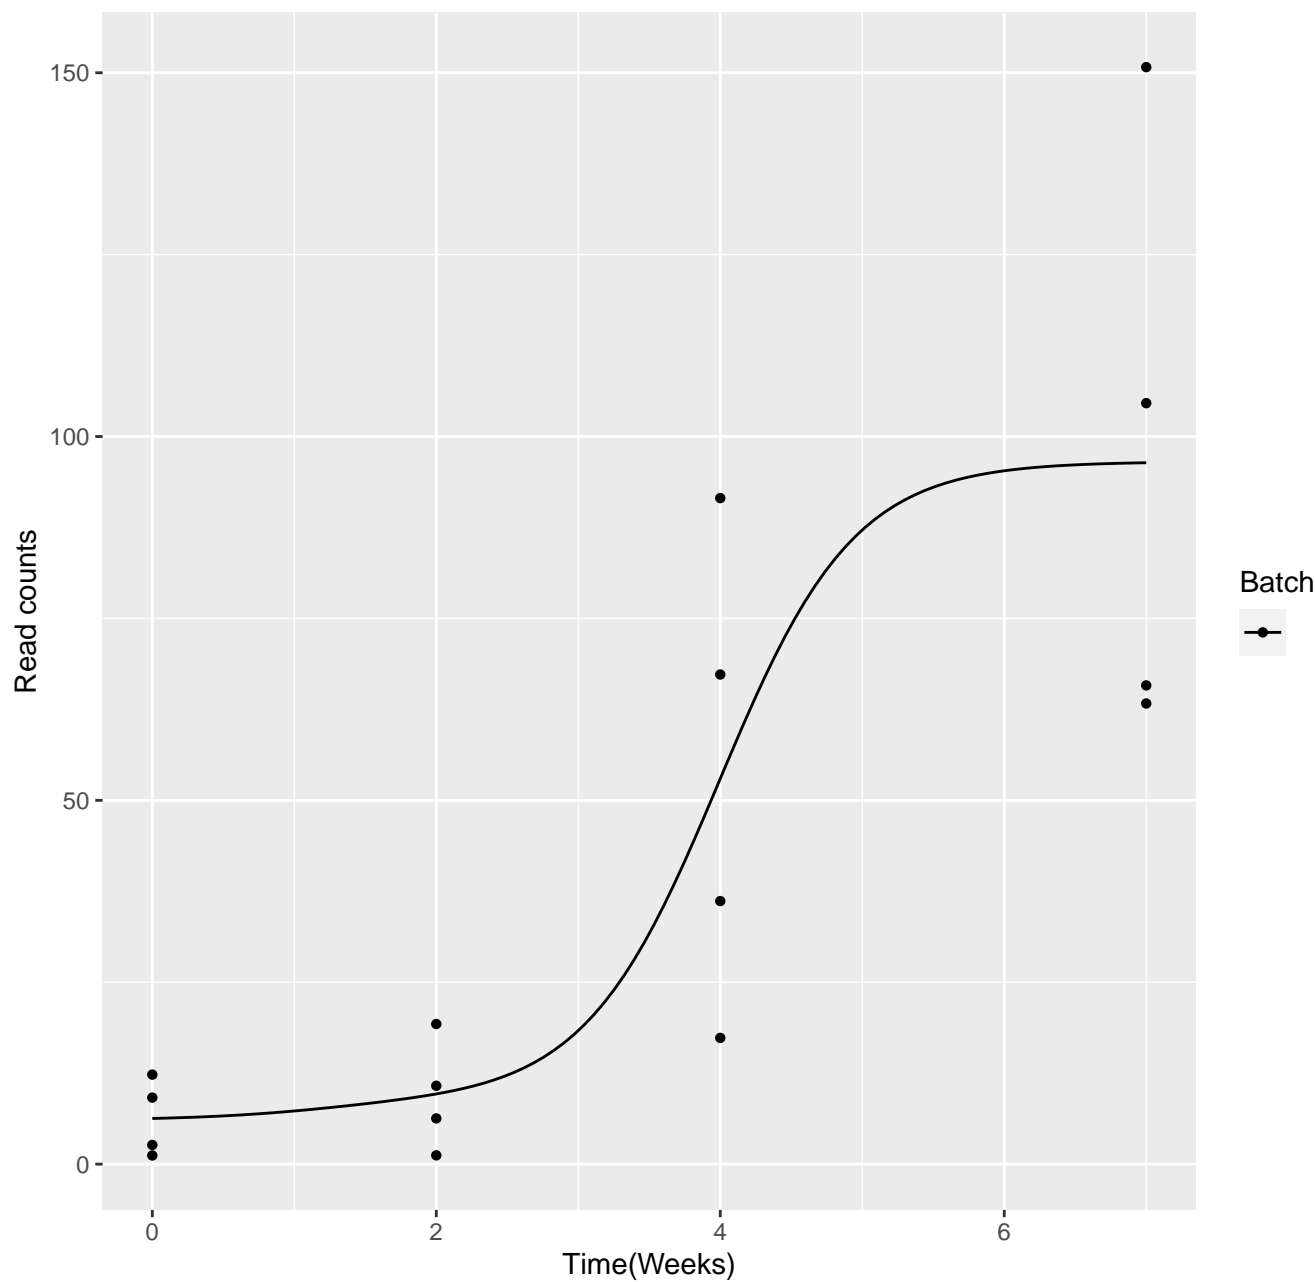

LOC127487418:  $\log_{10} q = -5.9$

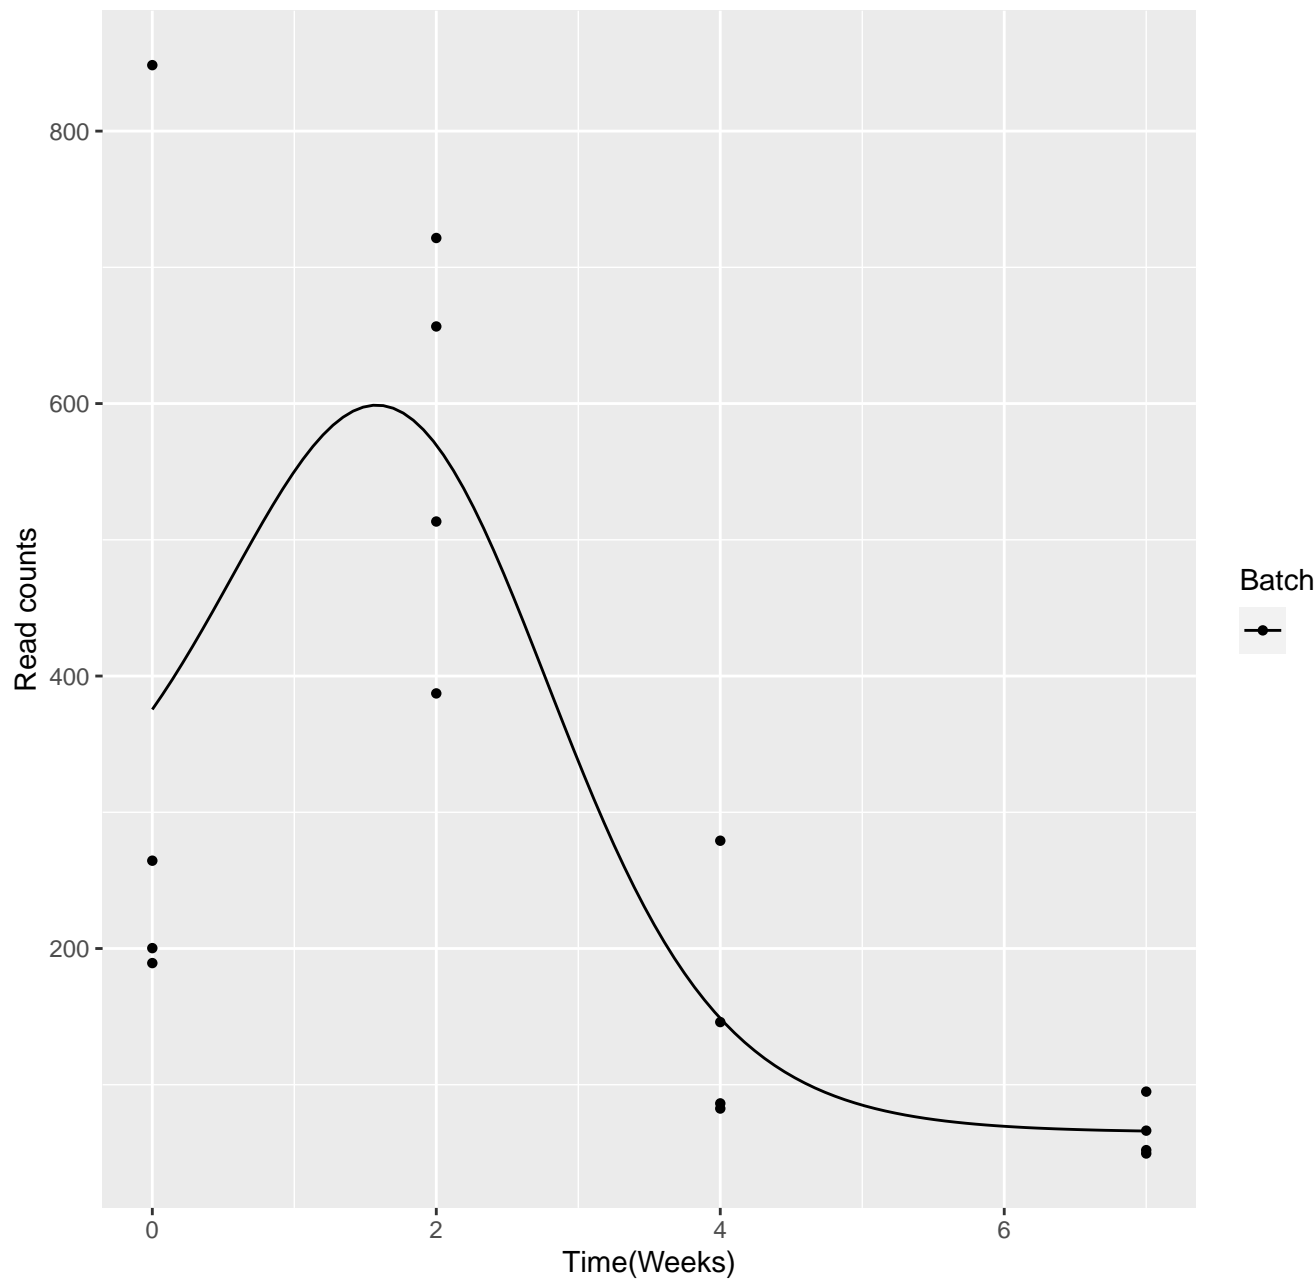

LOC103345057:  $\log_{10} q = -5.86$

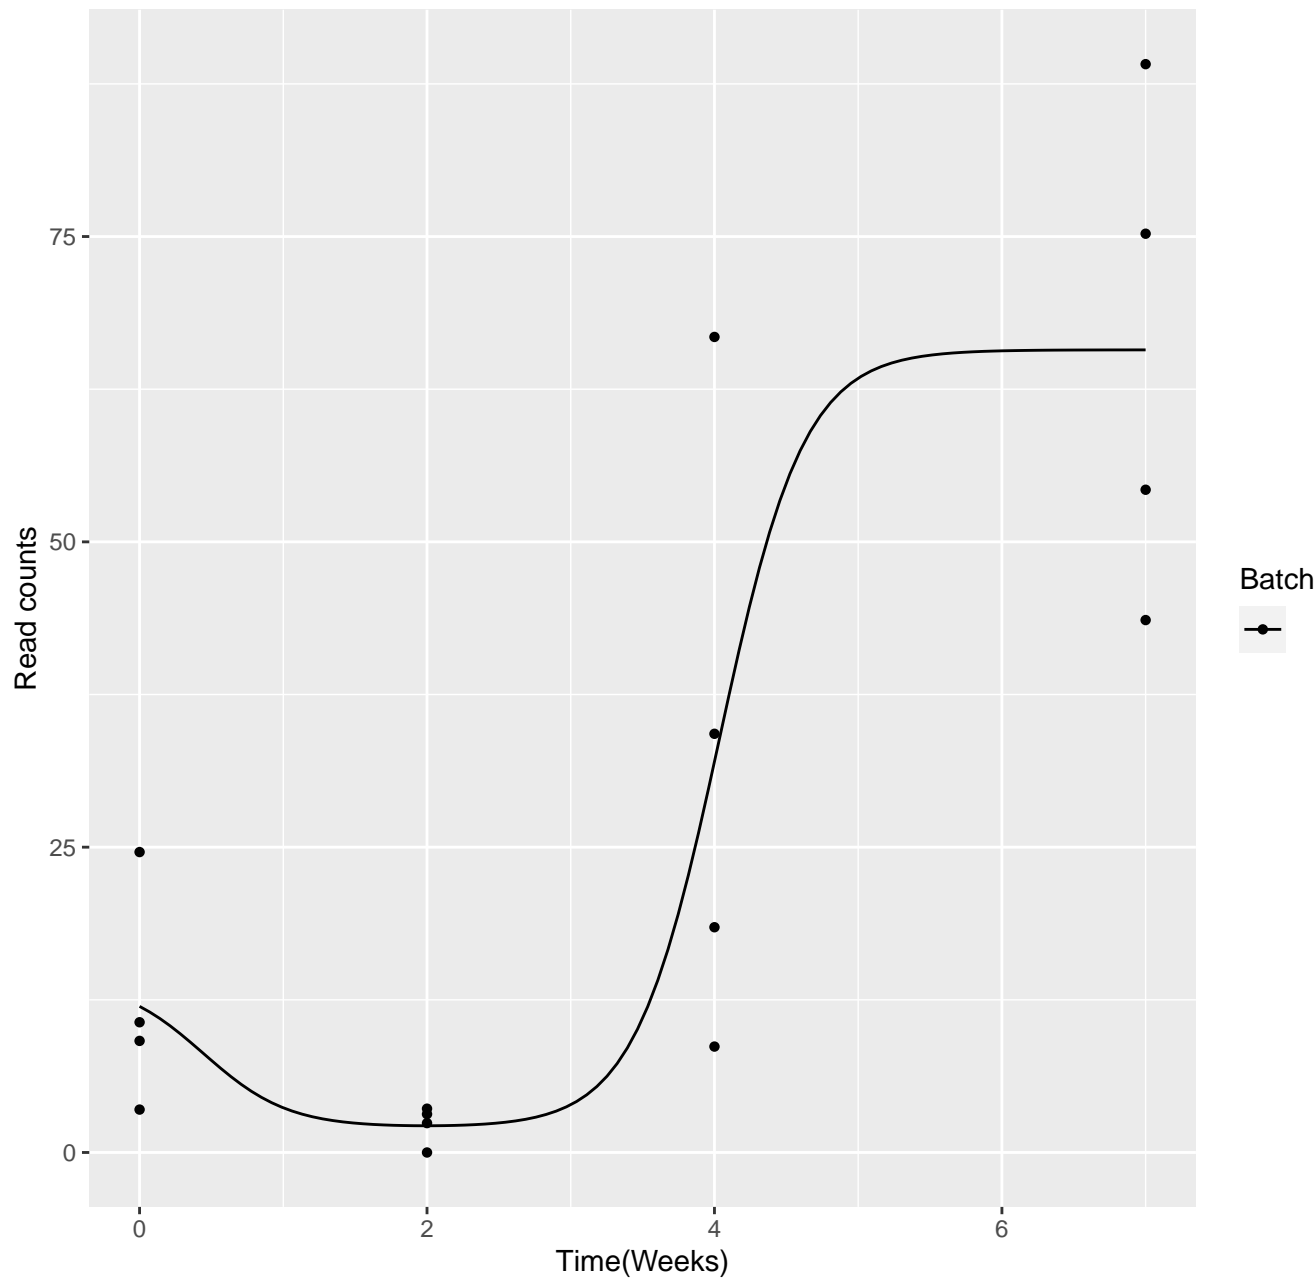

LOC100343268:  $\log_{10} q = -5.85$

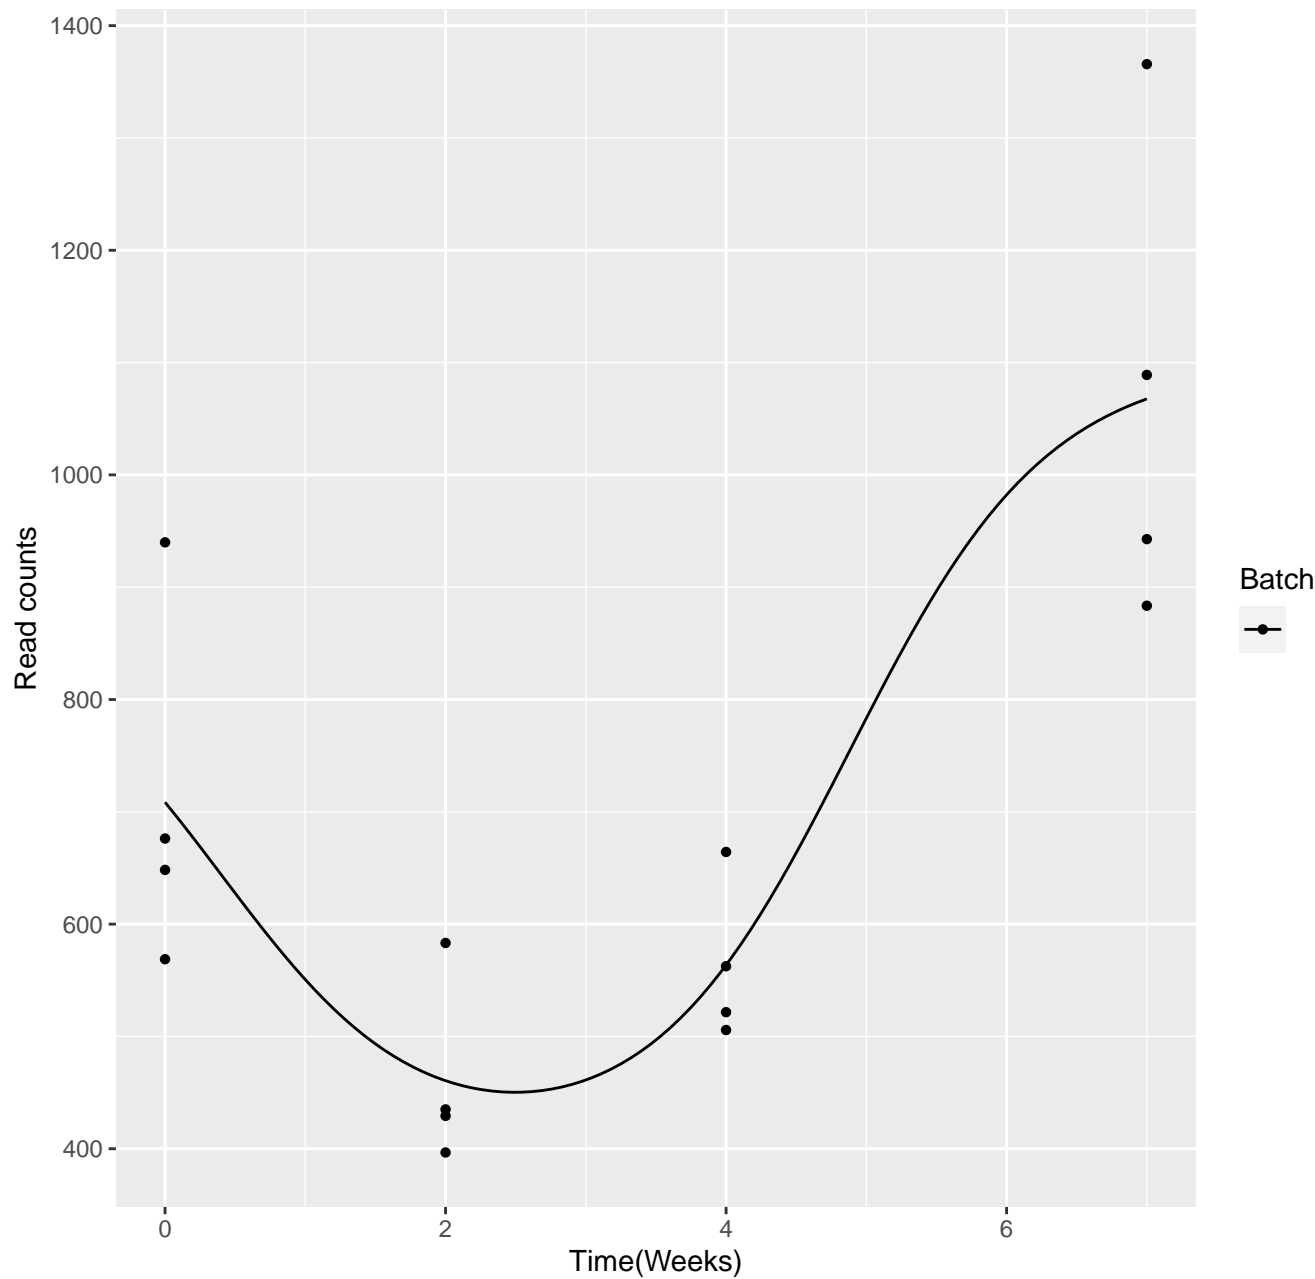

CKS2:  $\log_{10} q = -5.84$

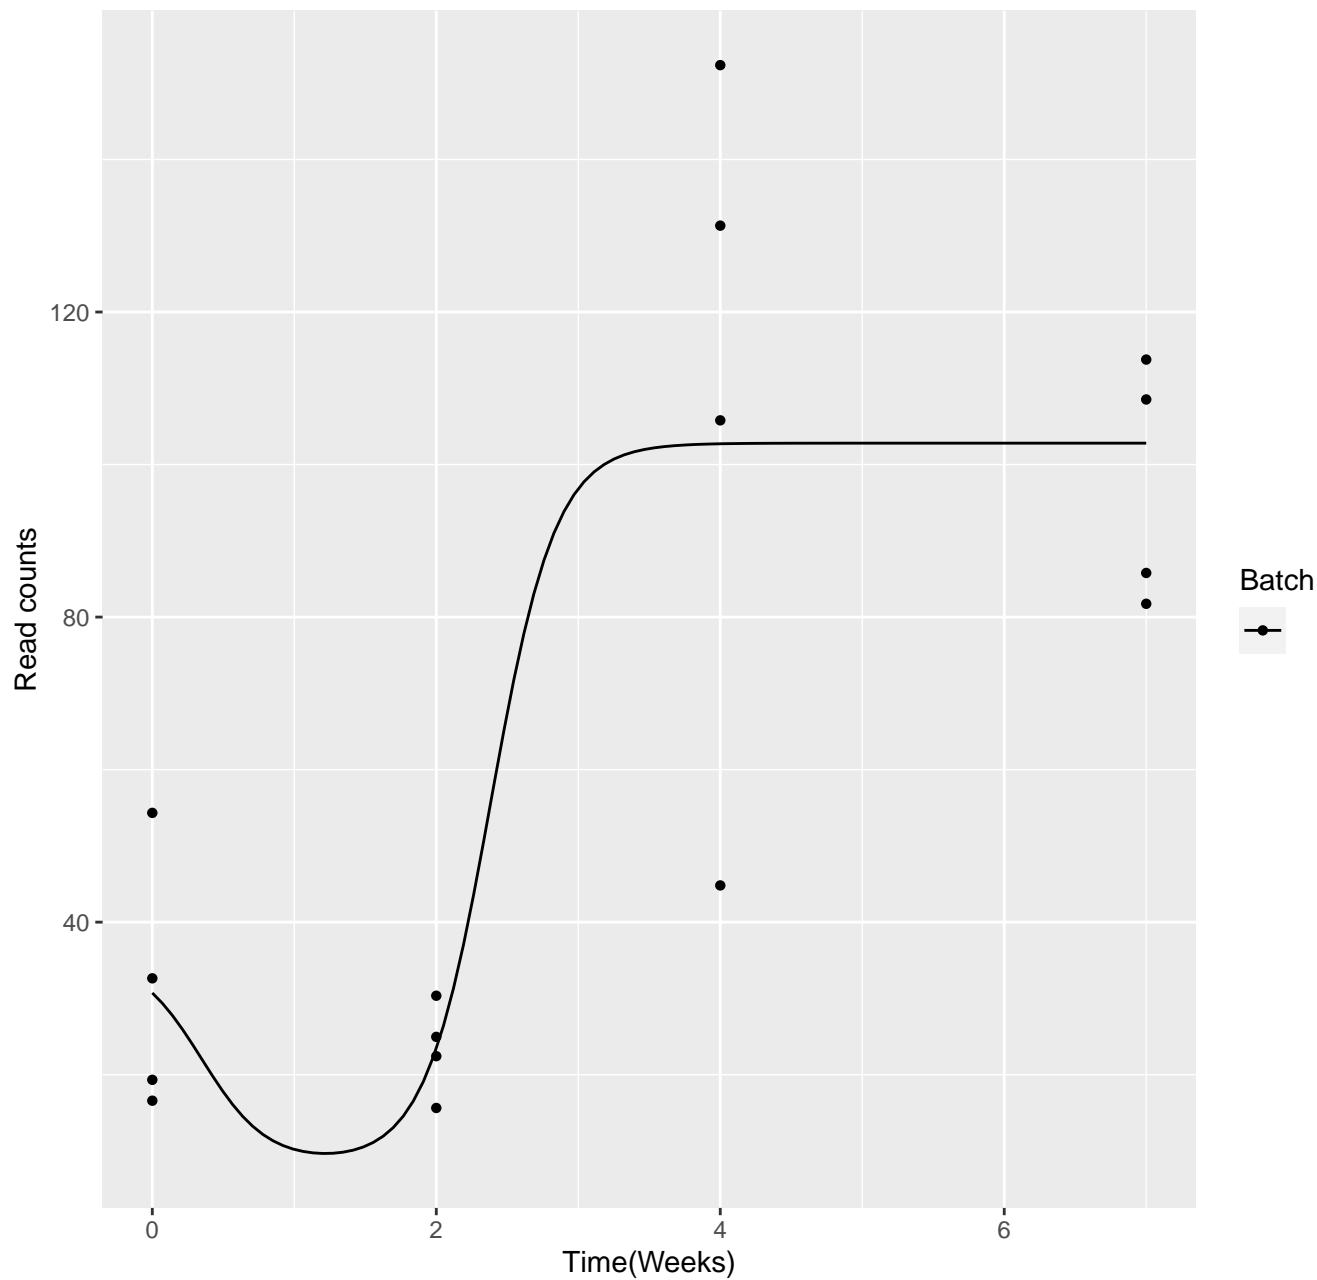

LOC100358478:  $\log_{10} q = -5.84$

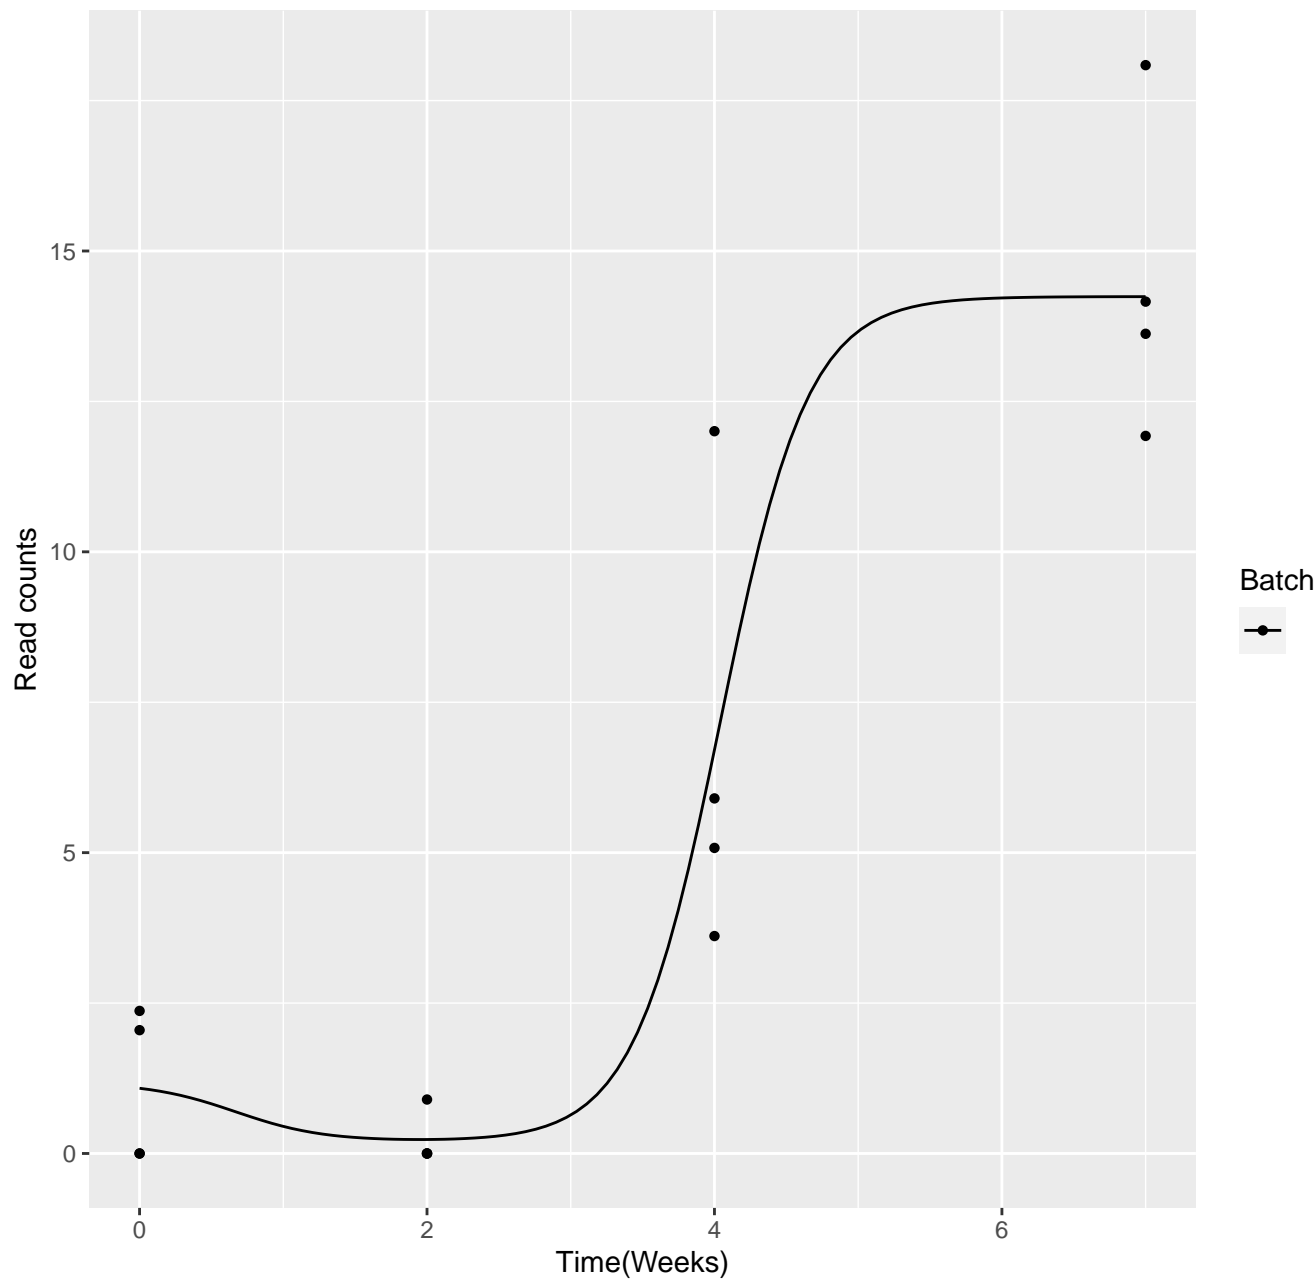

ELN:  $\log_{10} q = -5.82$

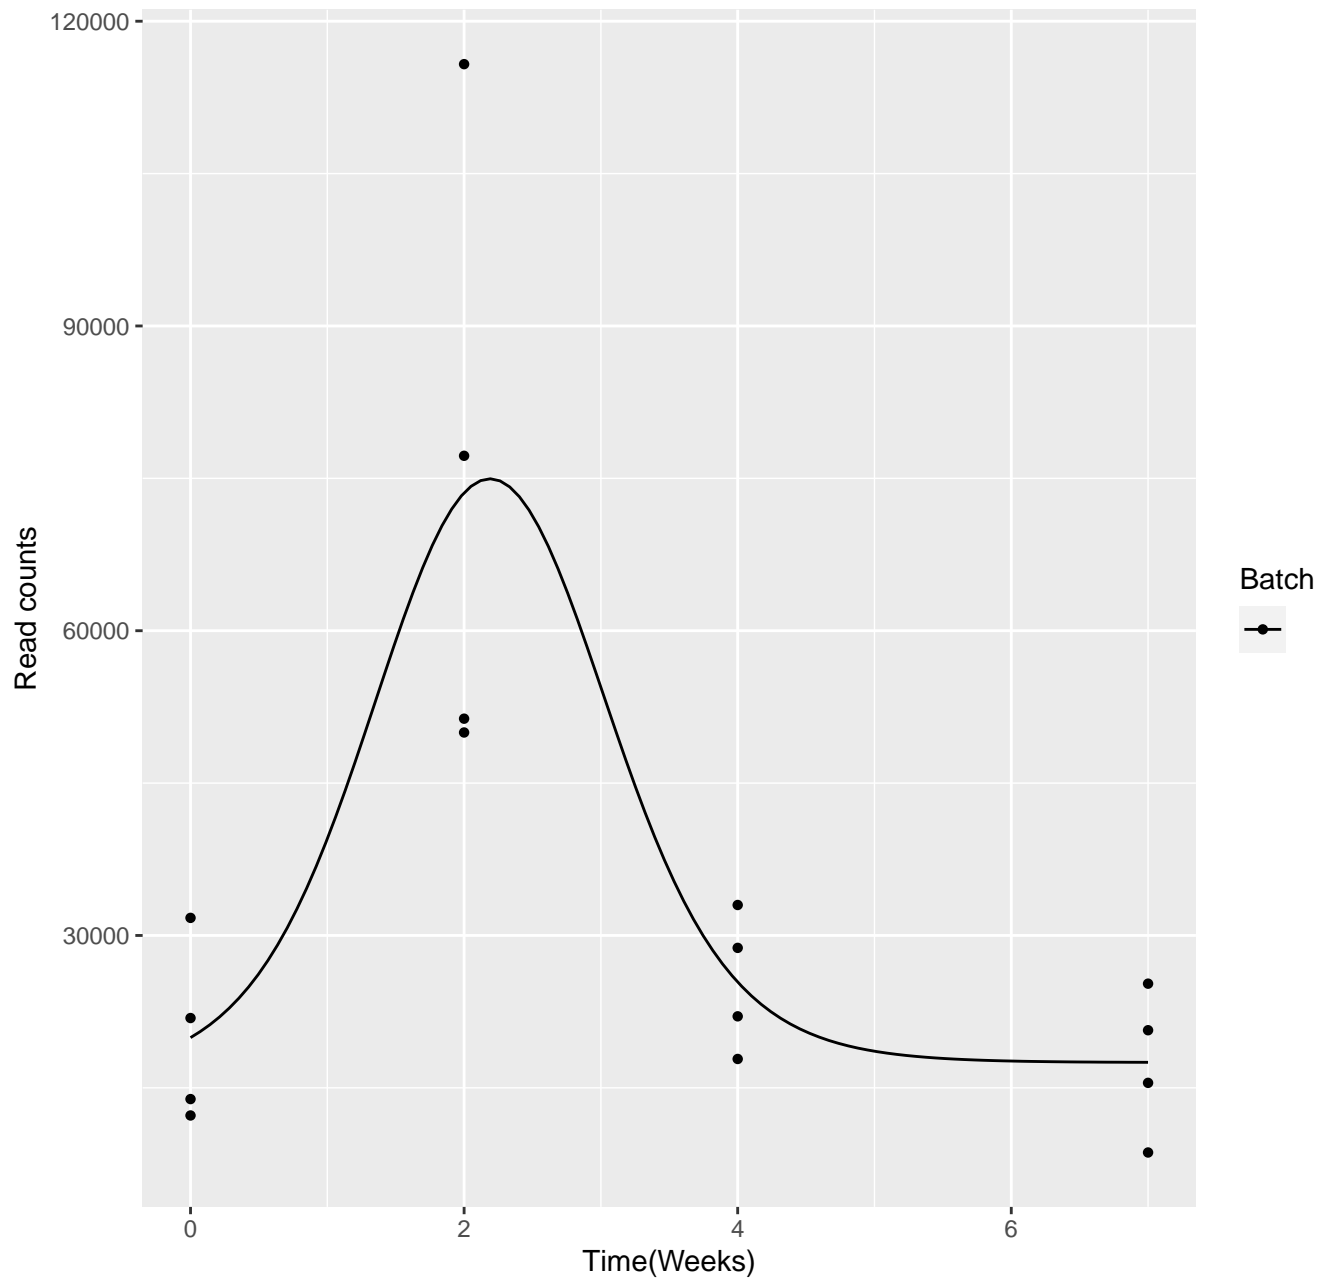



LOC100349504:  $\log_{10} q = -5.82$

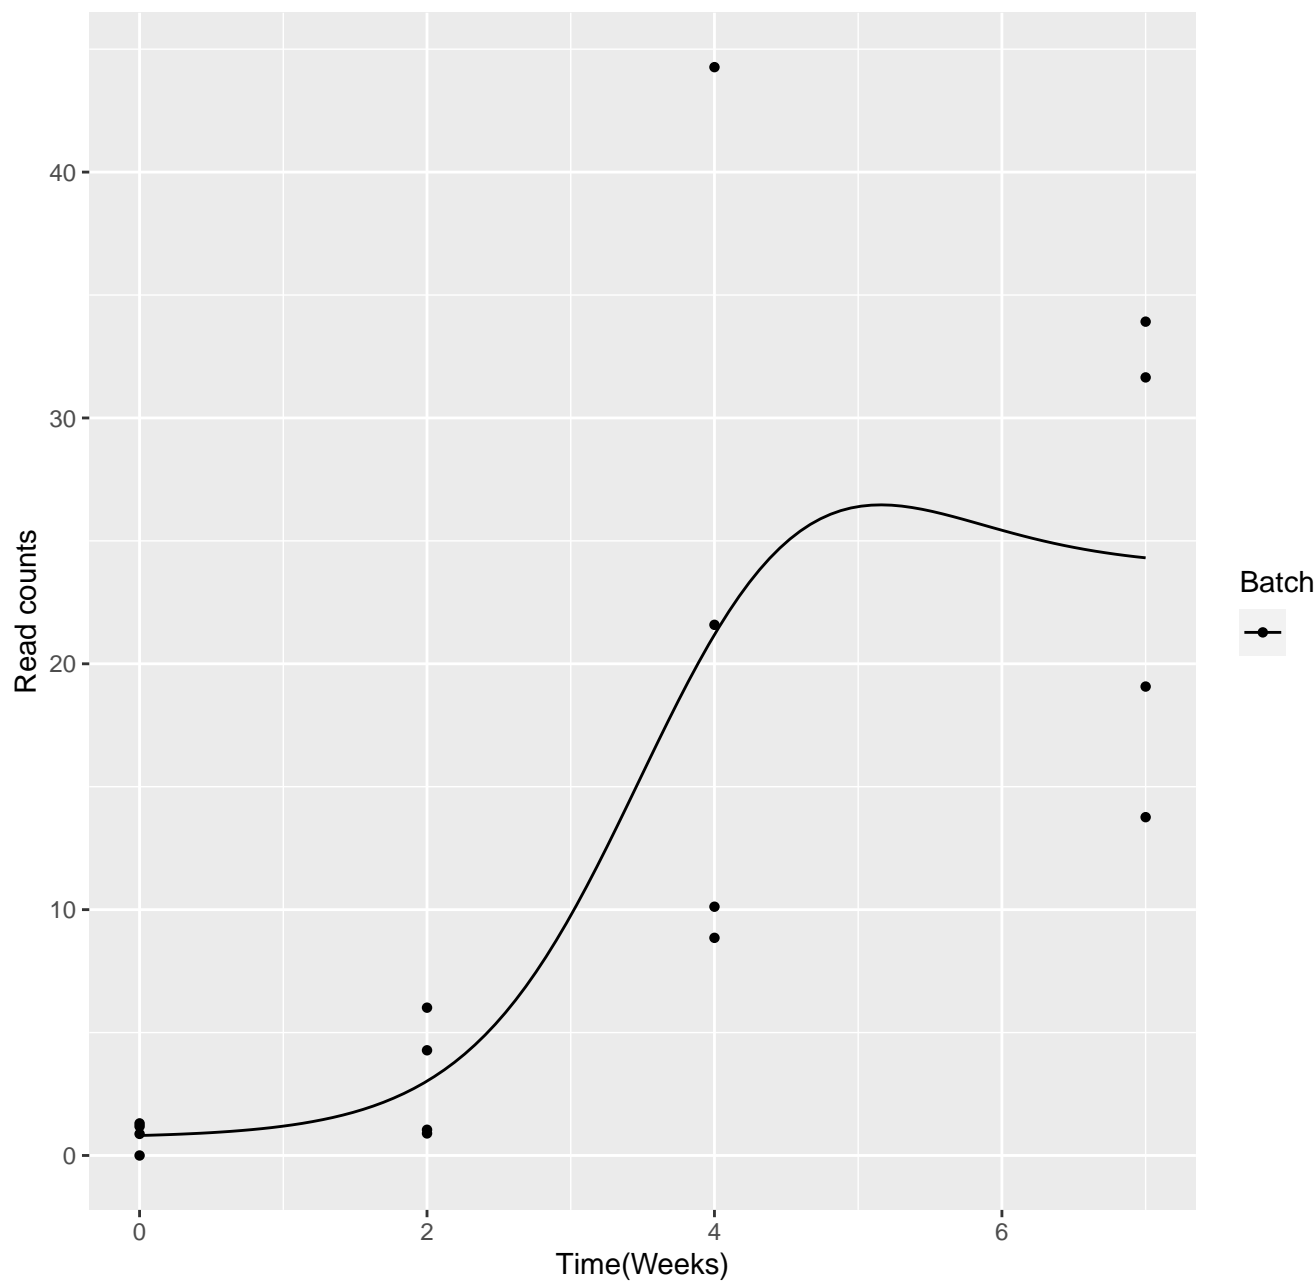

PDZRN4:  $\log_{10} q = -5.82$

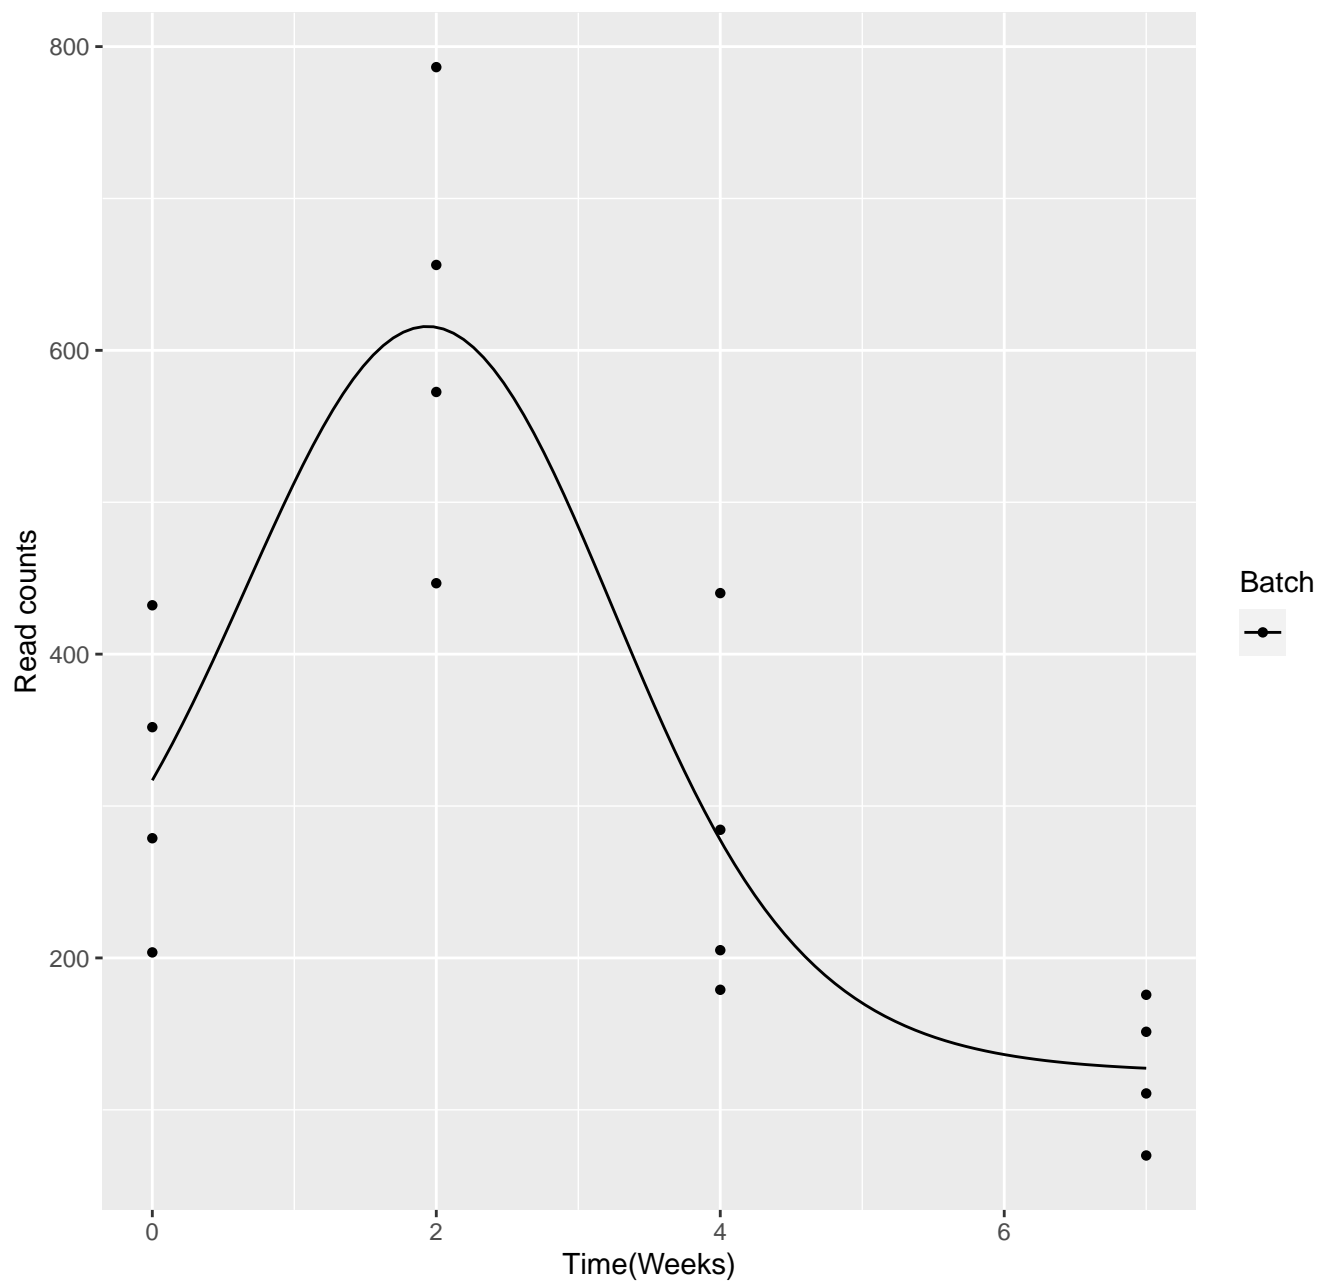

EVI2A:  $\log_{10} q = -5.81$

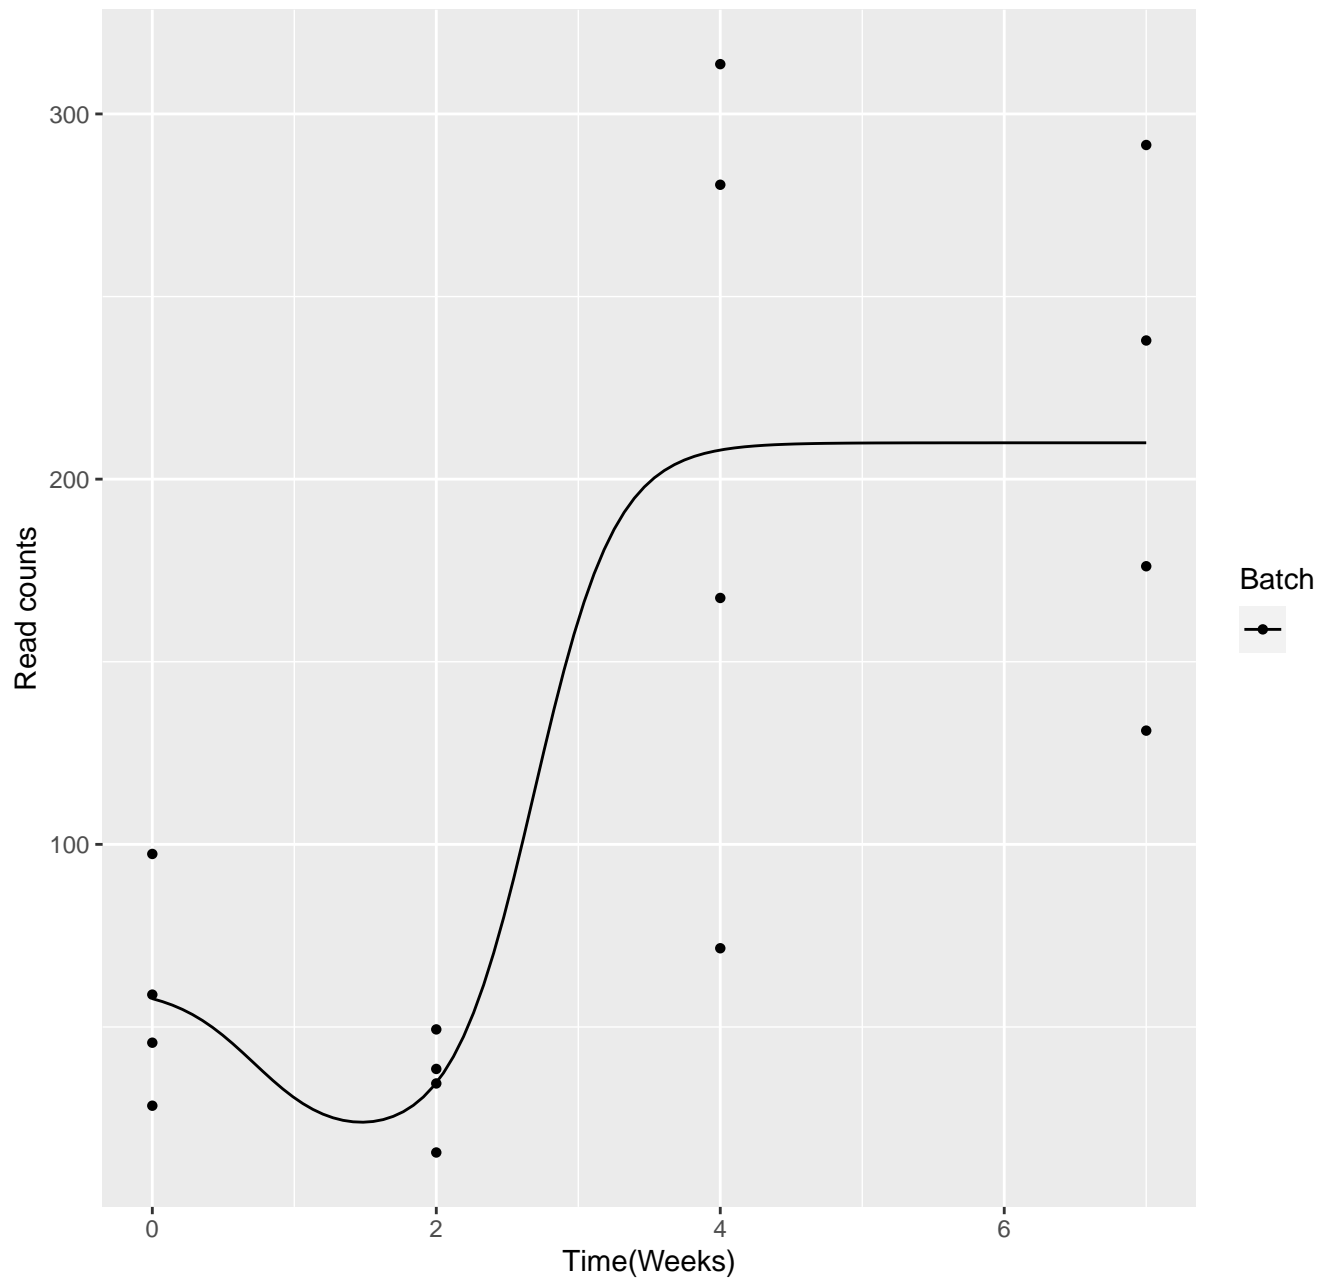

MCAM:  $\log_{10} q = -5.81$

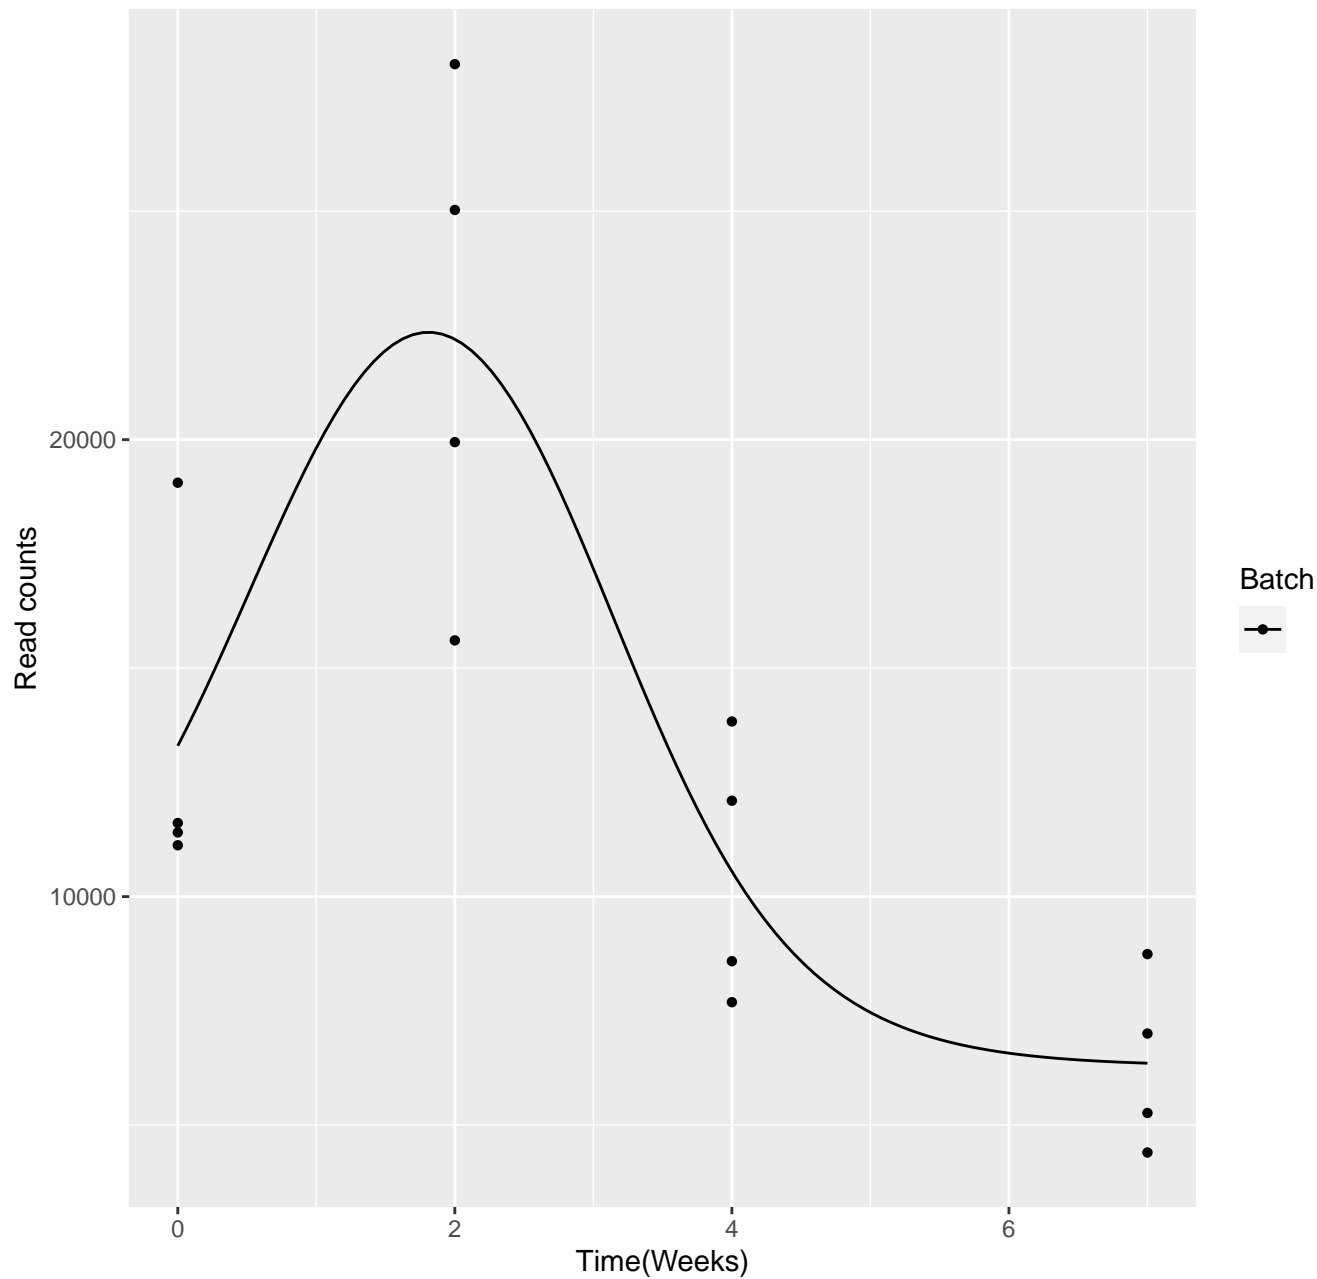

CCL19:  $\log_{10} q = -5.81$

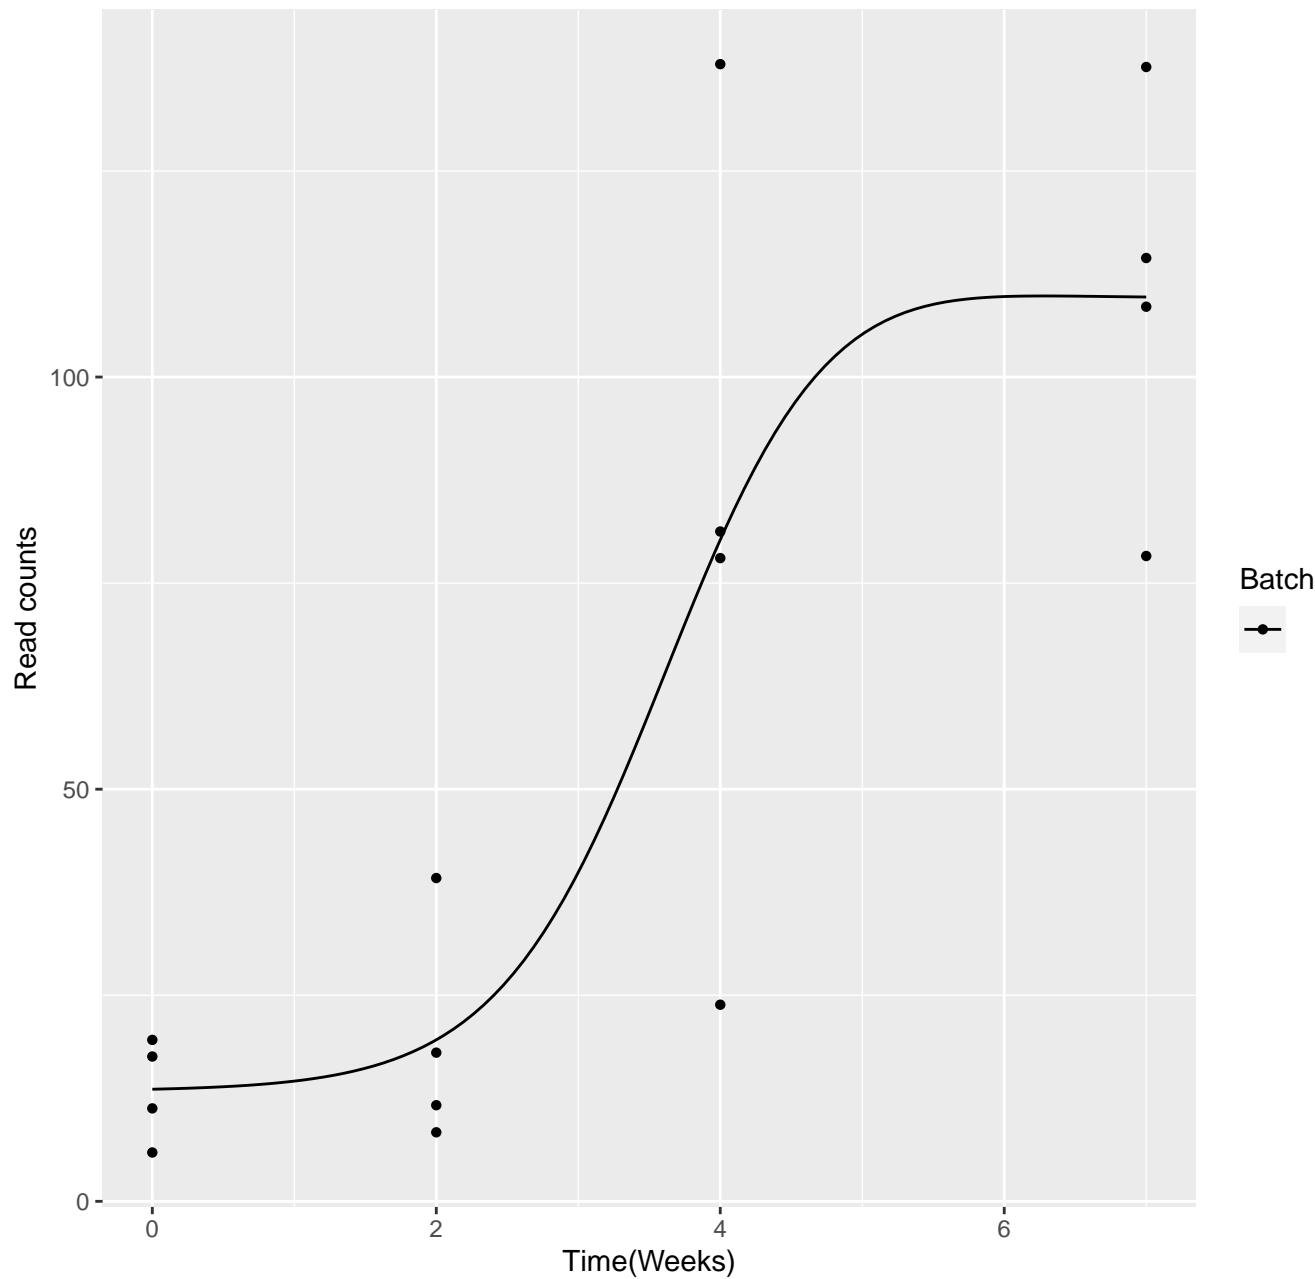

LOC100348124:  $\log_{10} q = -5.8$

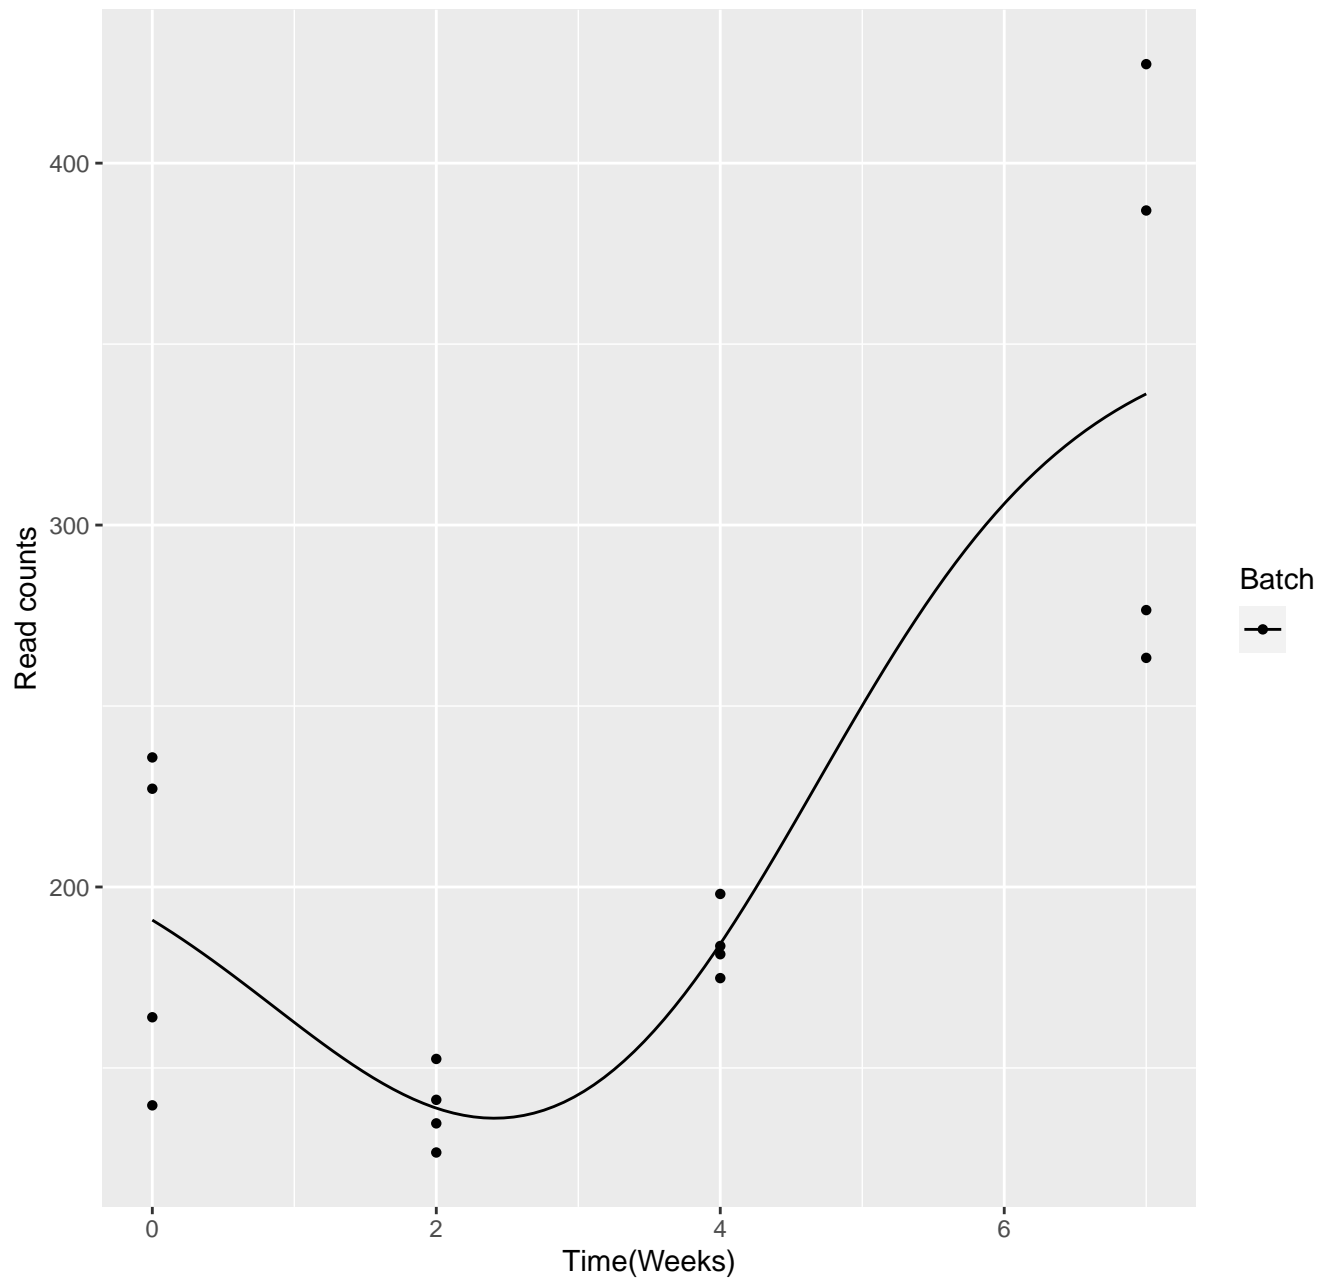

LOC100349996:  $\log_{10} q = -5.8$

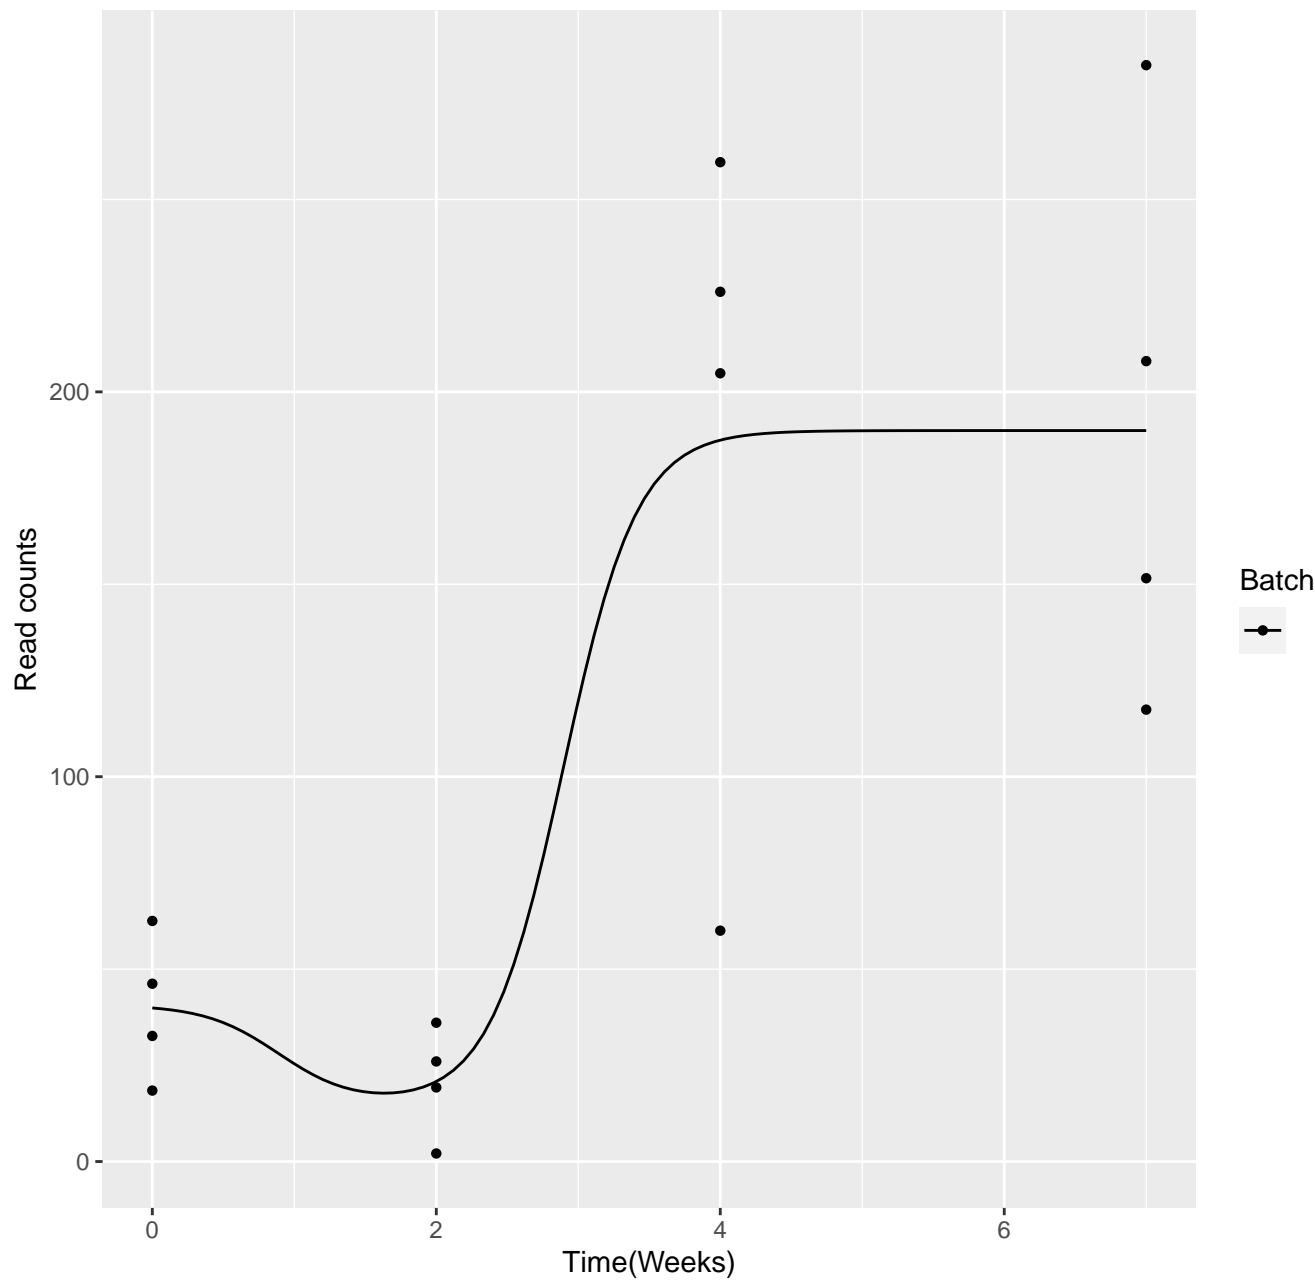

SLC12A4:  $\log_{10} q = -5.8$

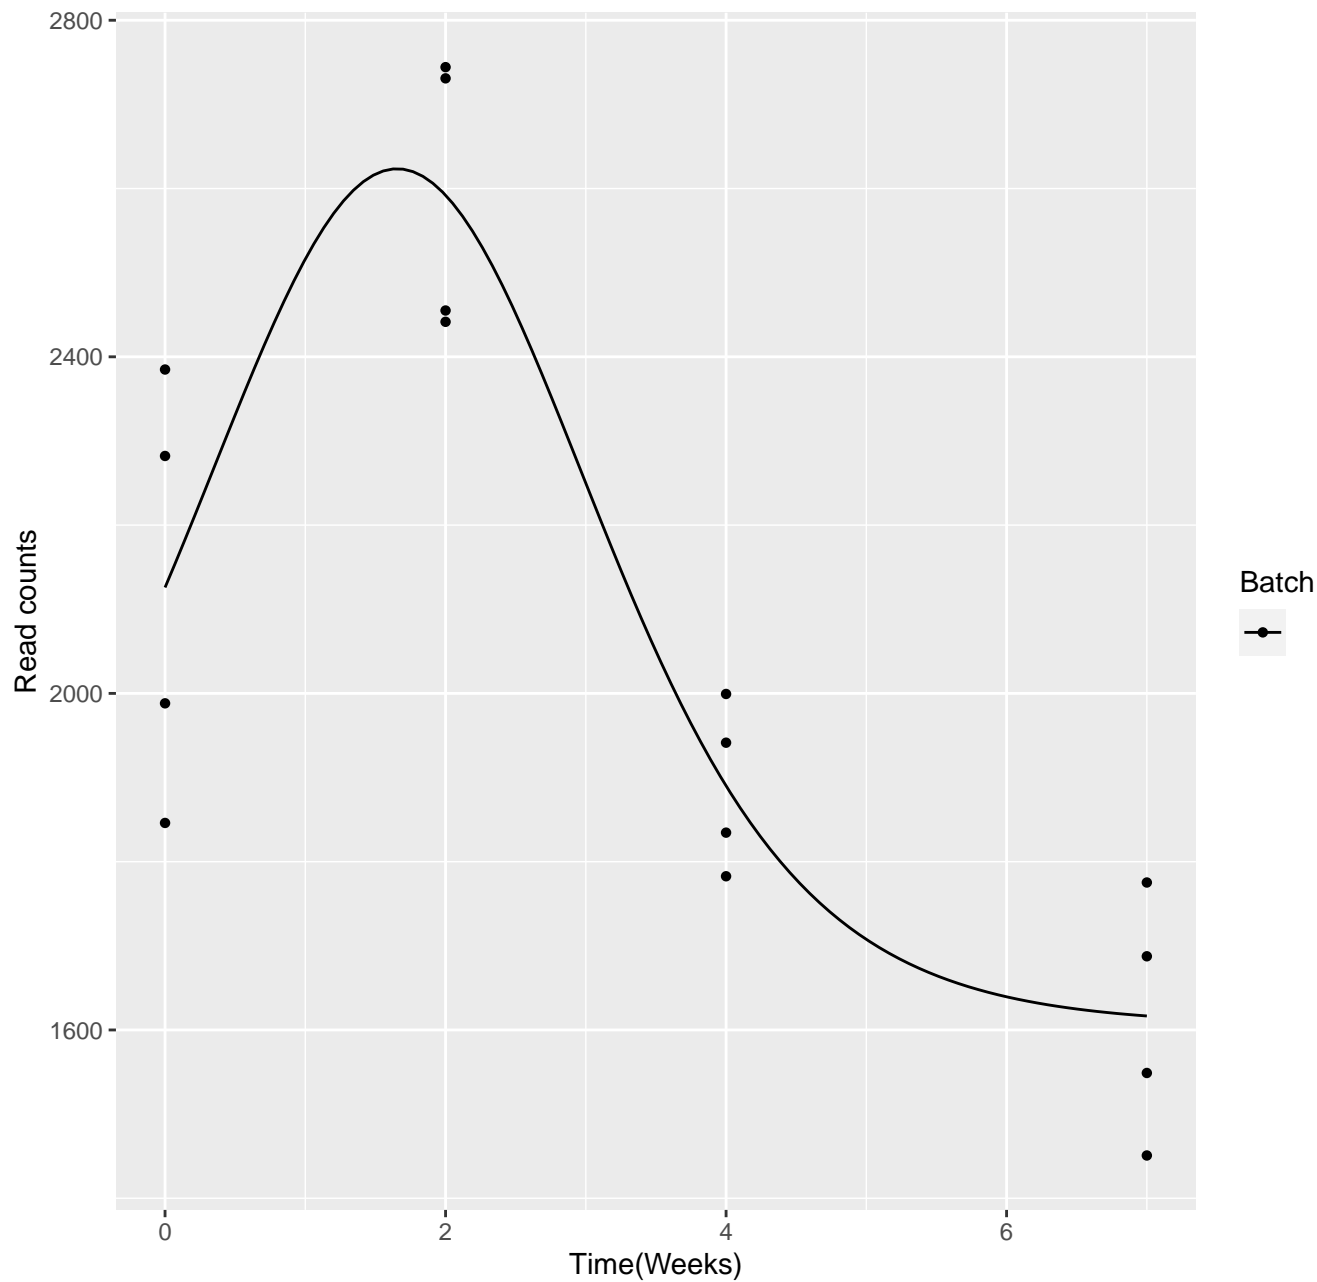



SLC5A1:  $\log_{10} q = -5.79$

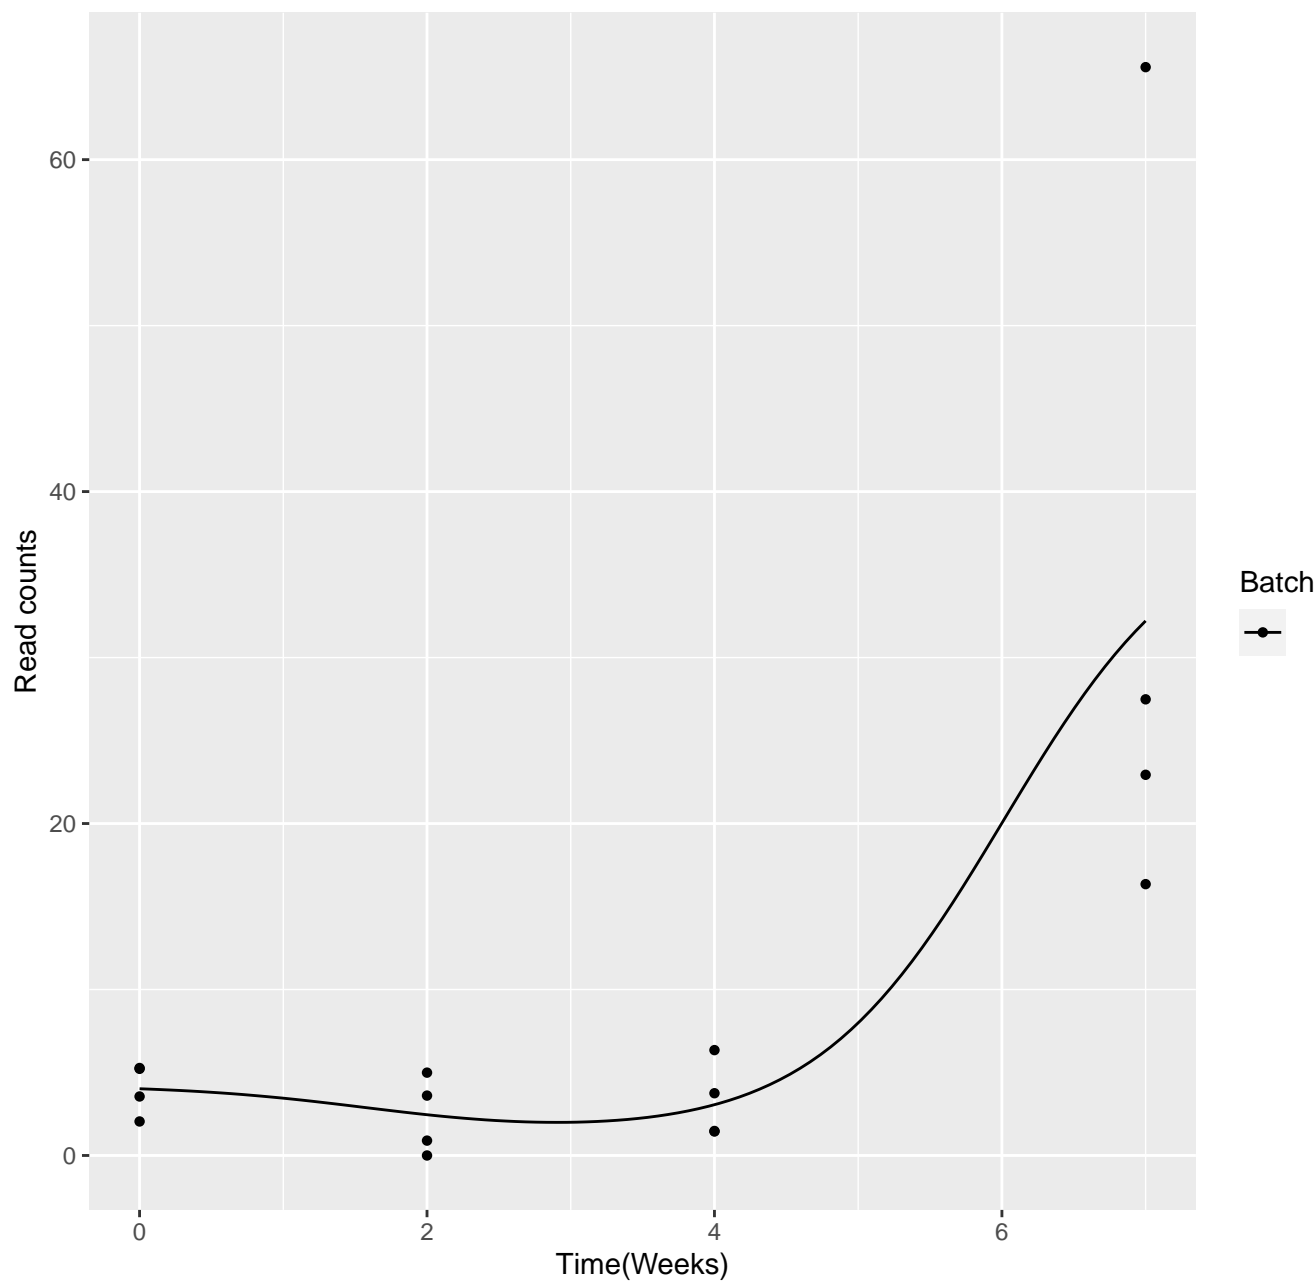

ADRA1B:  $\log_{10} q = -5.78$

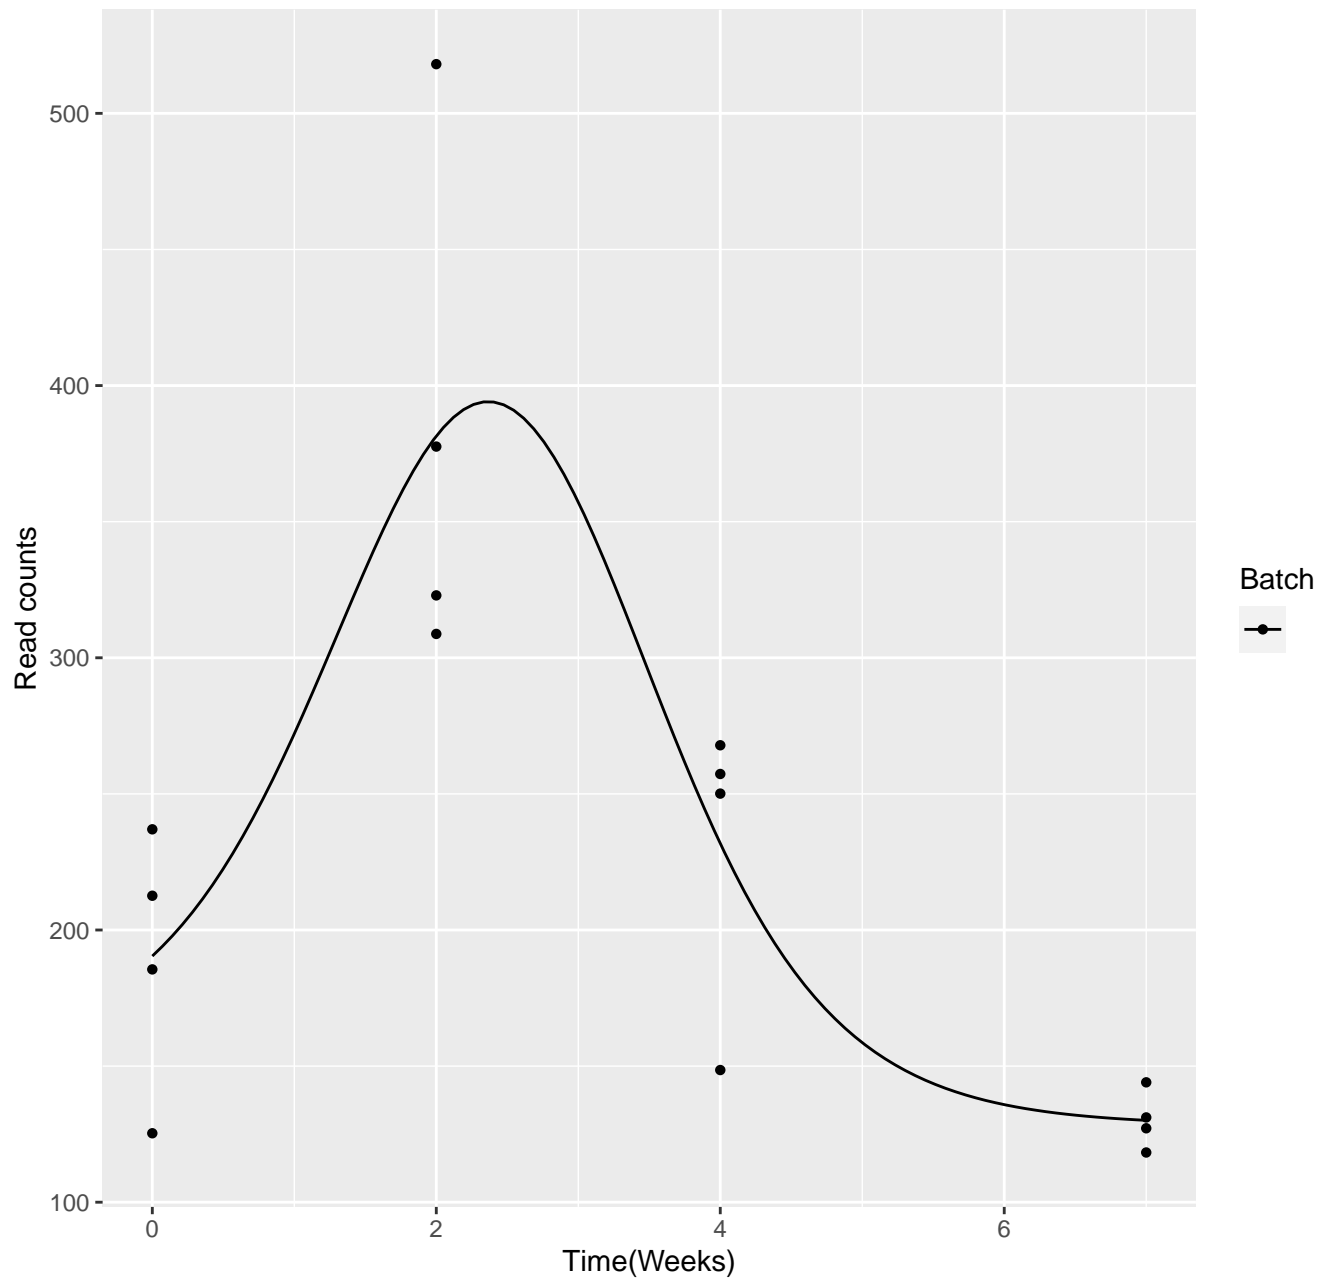

SASH3:  $\log_{10} q = -5.78$

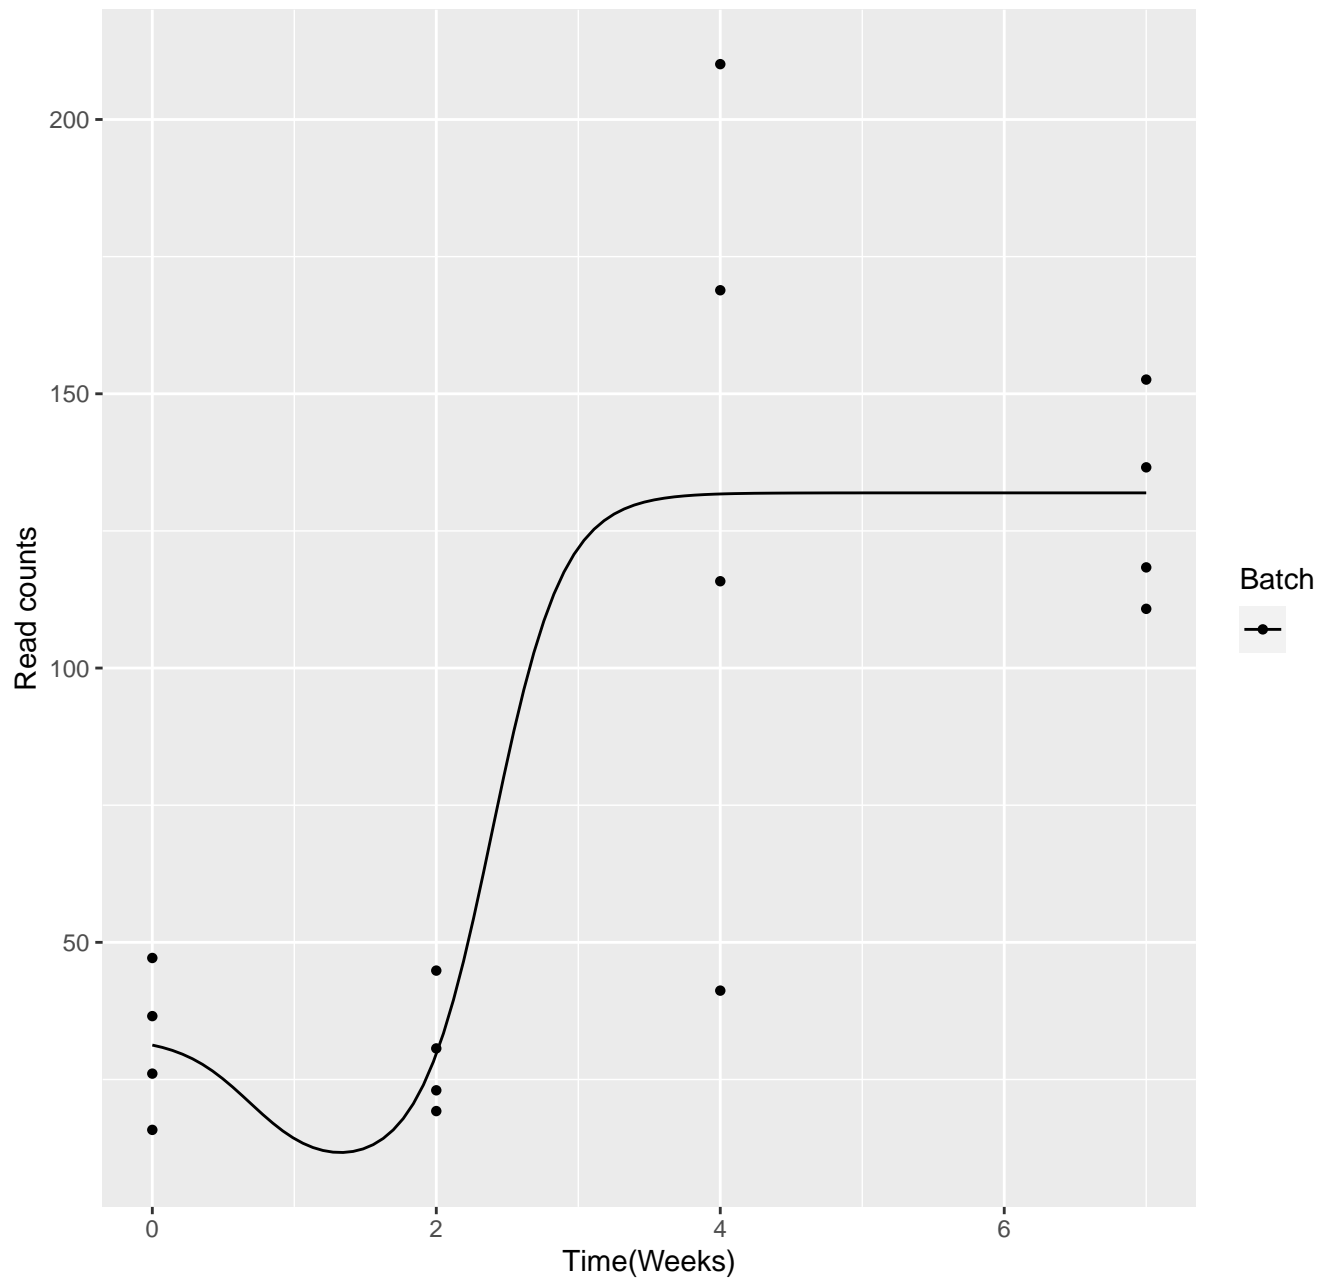

HMOX1:  $\log_{10} q = -5.77$

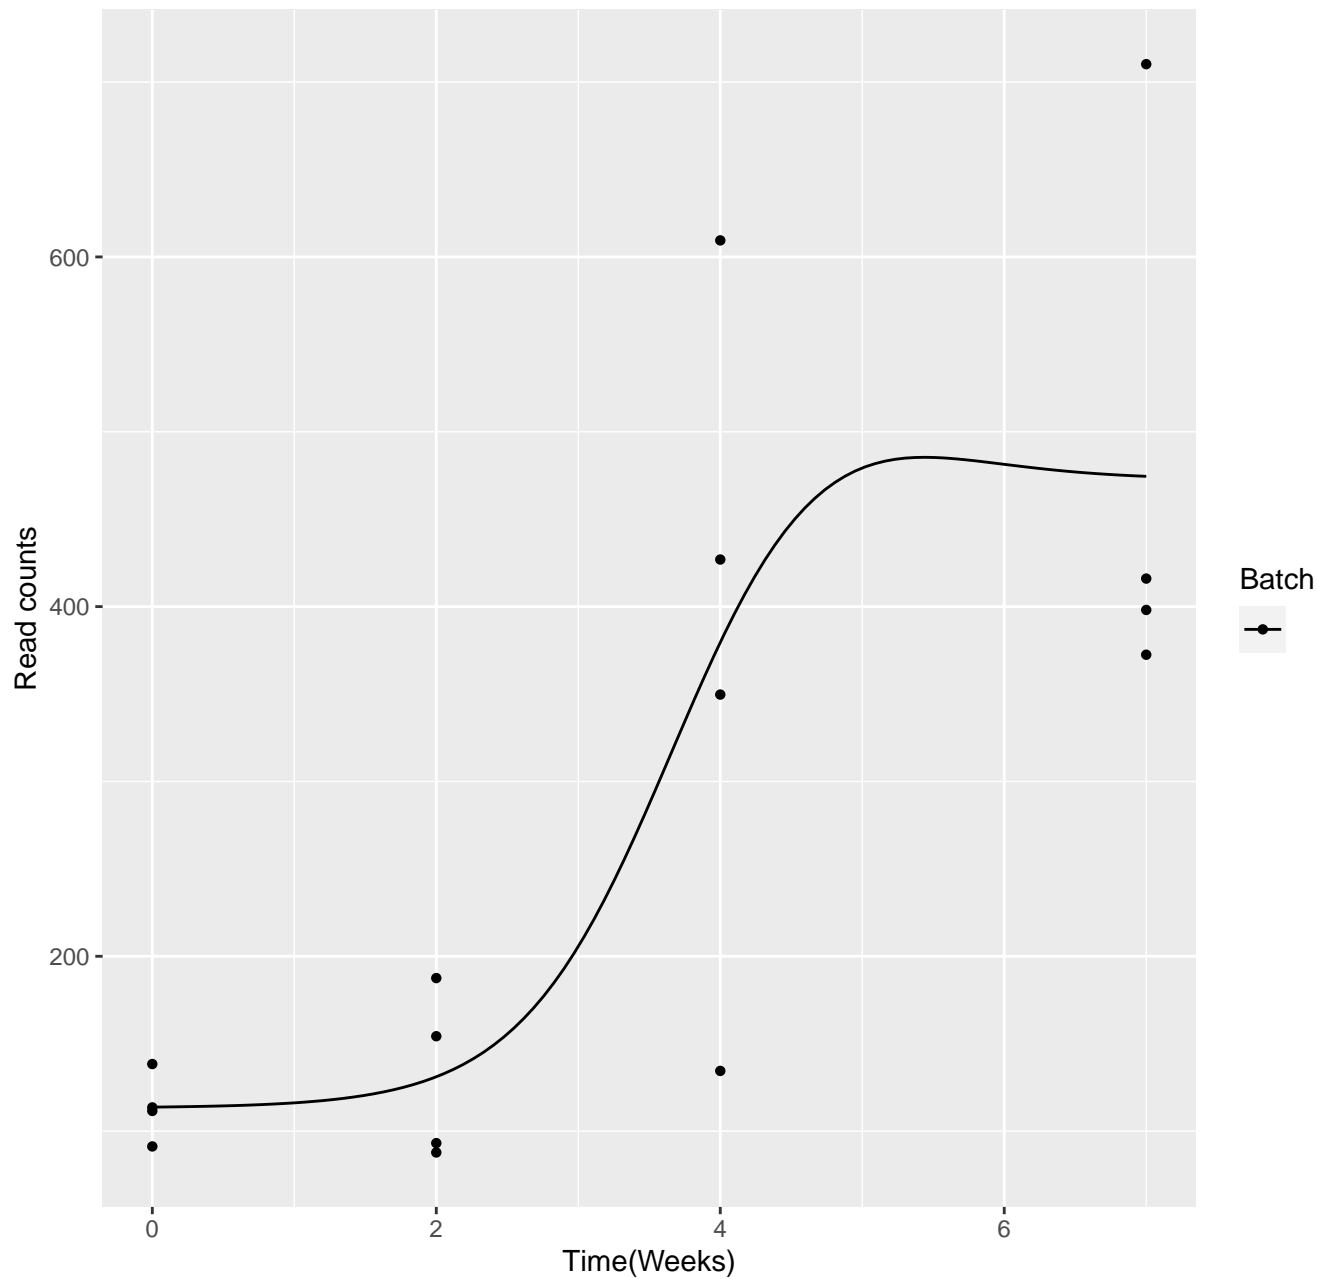

LOC100341142:  $\log_{10} q = -5.77$

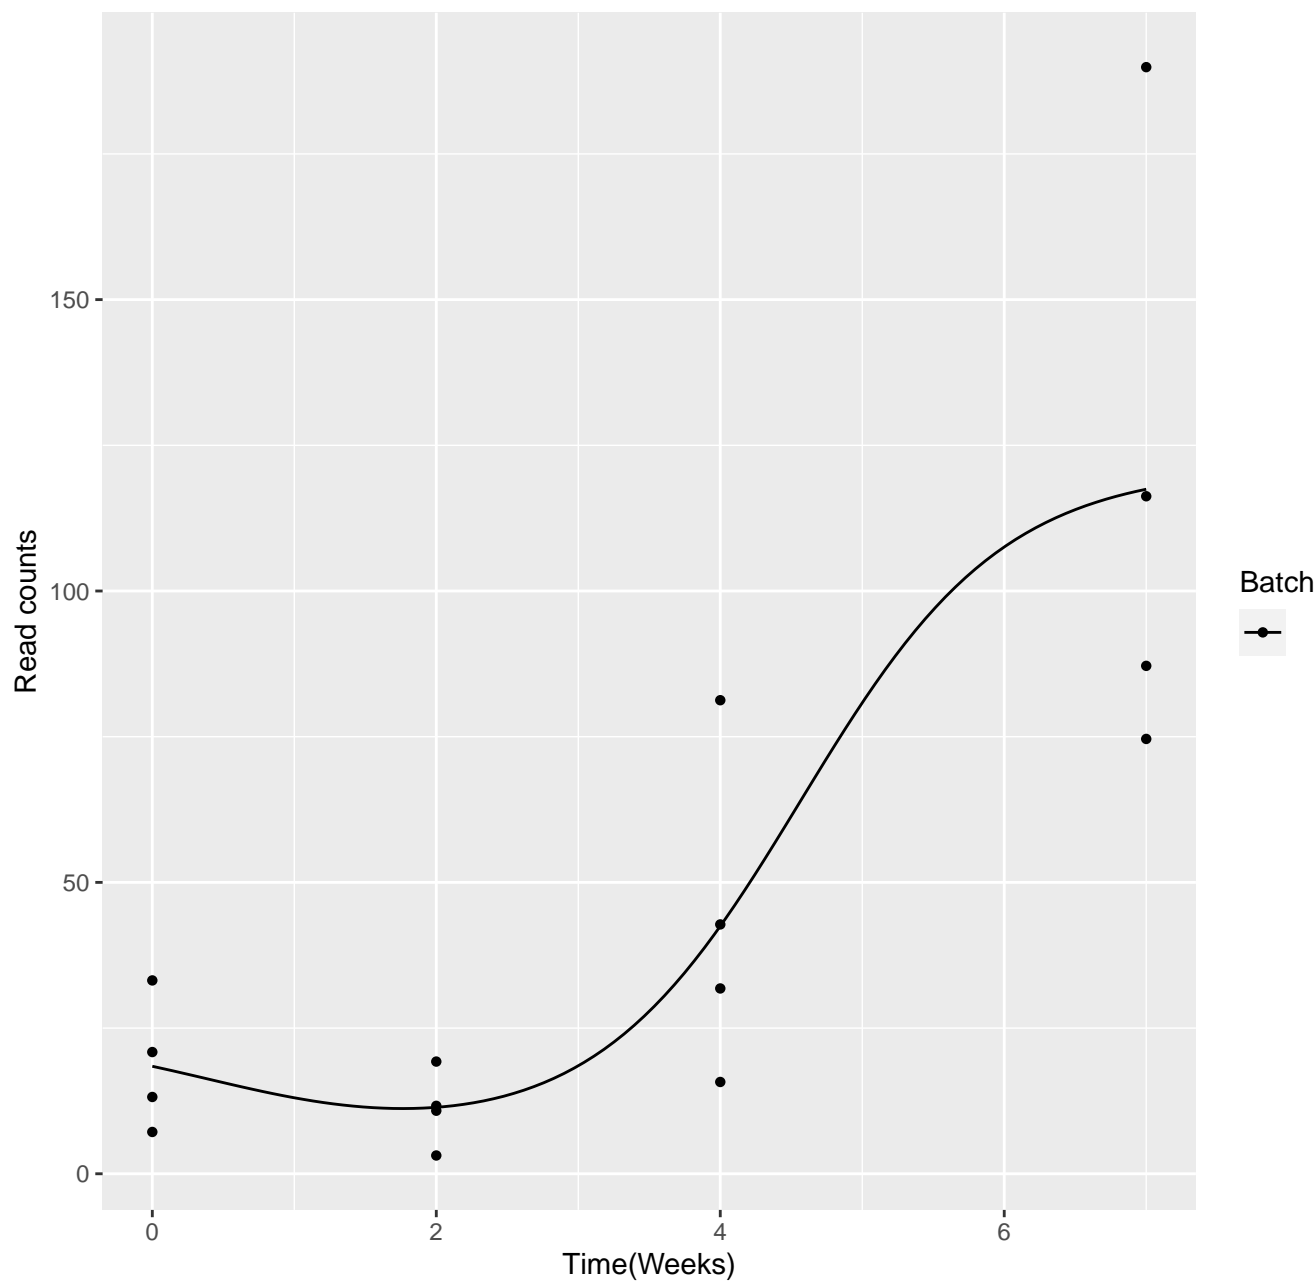

INHBB:  $\log_{10} q = -5.71$

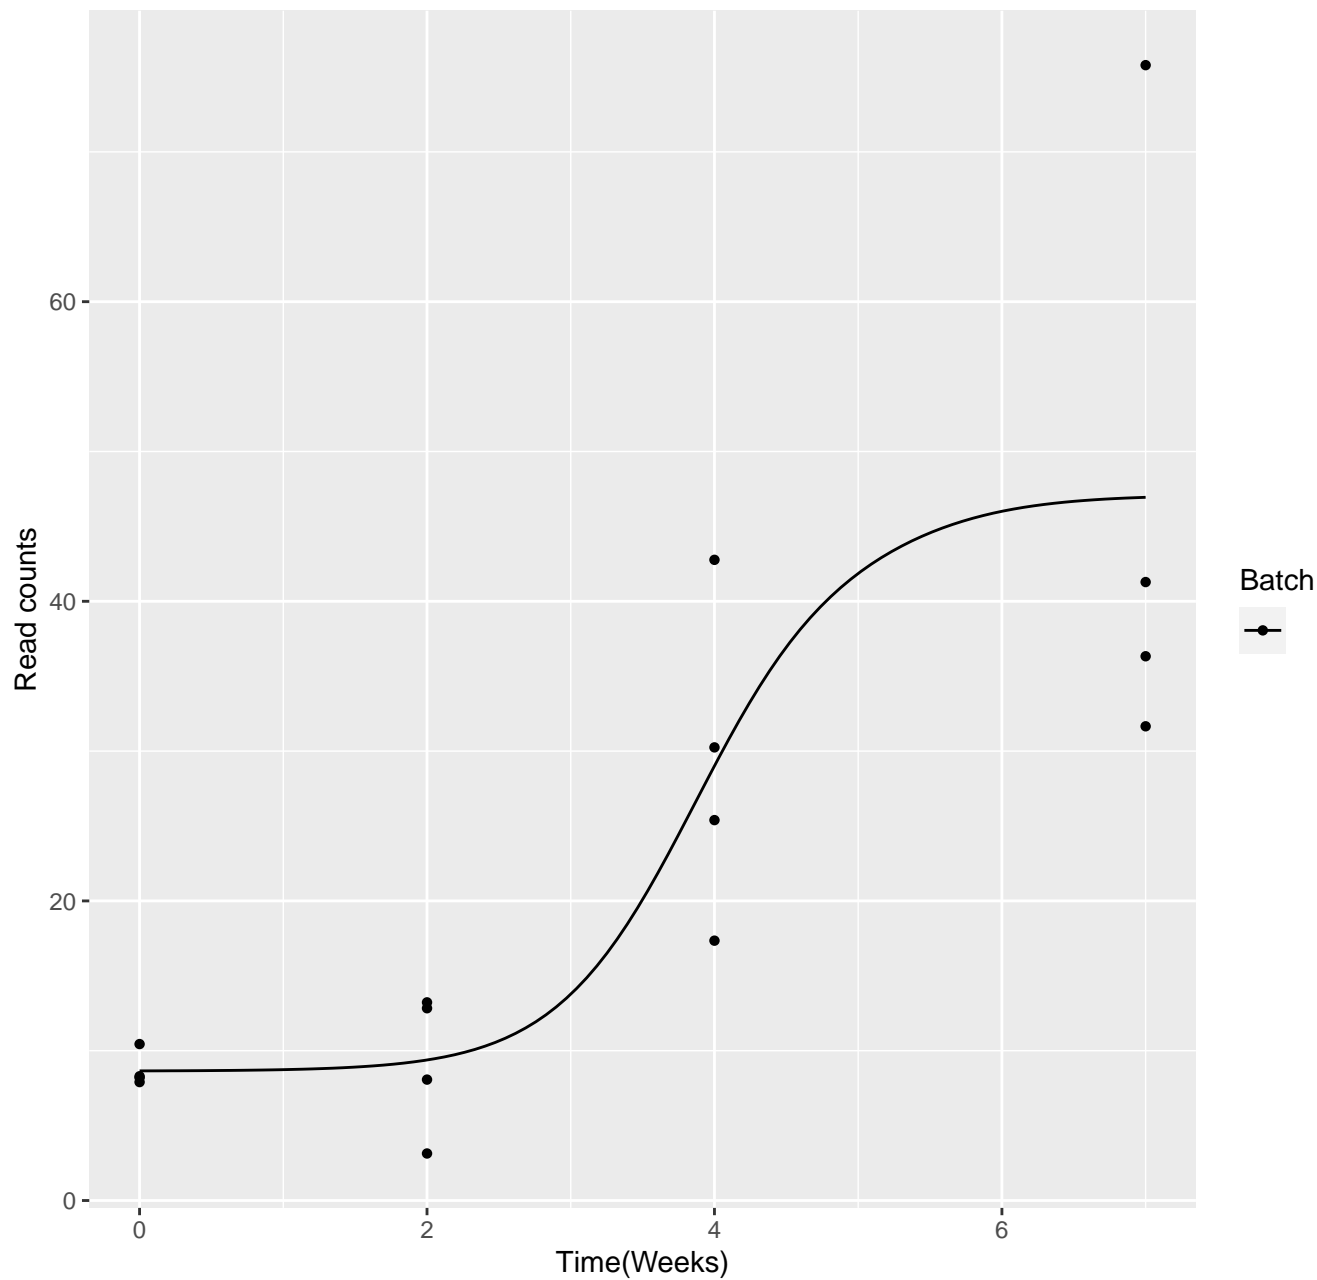

ARHGAP23:  $\log_{10} q = -5.71$

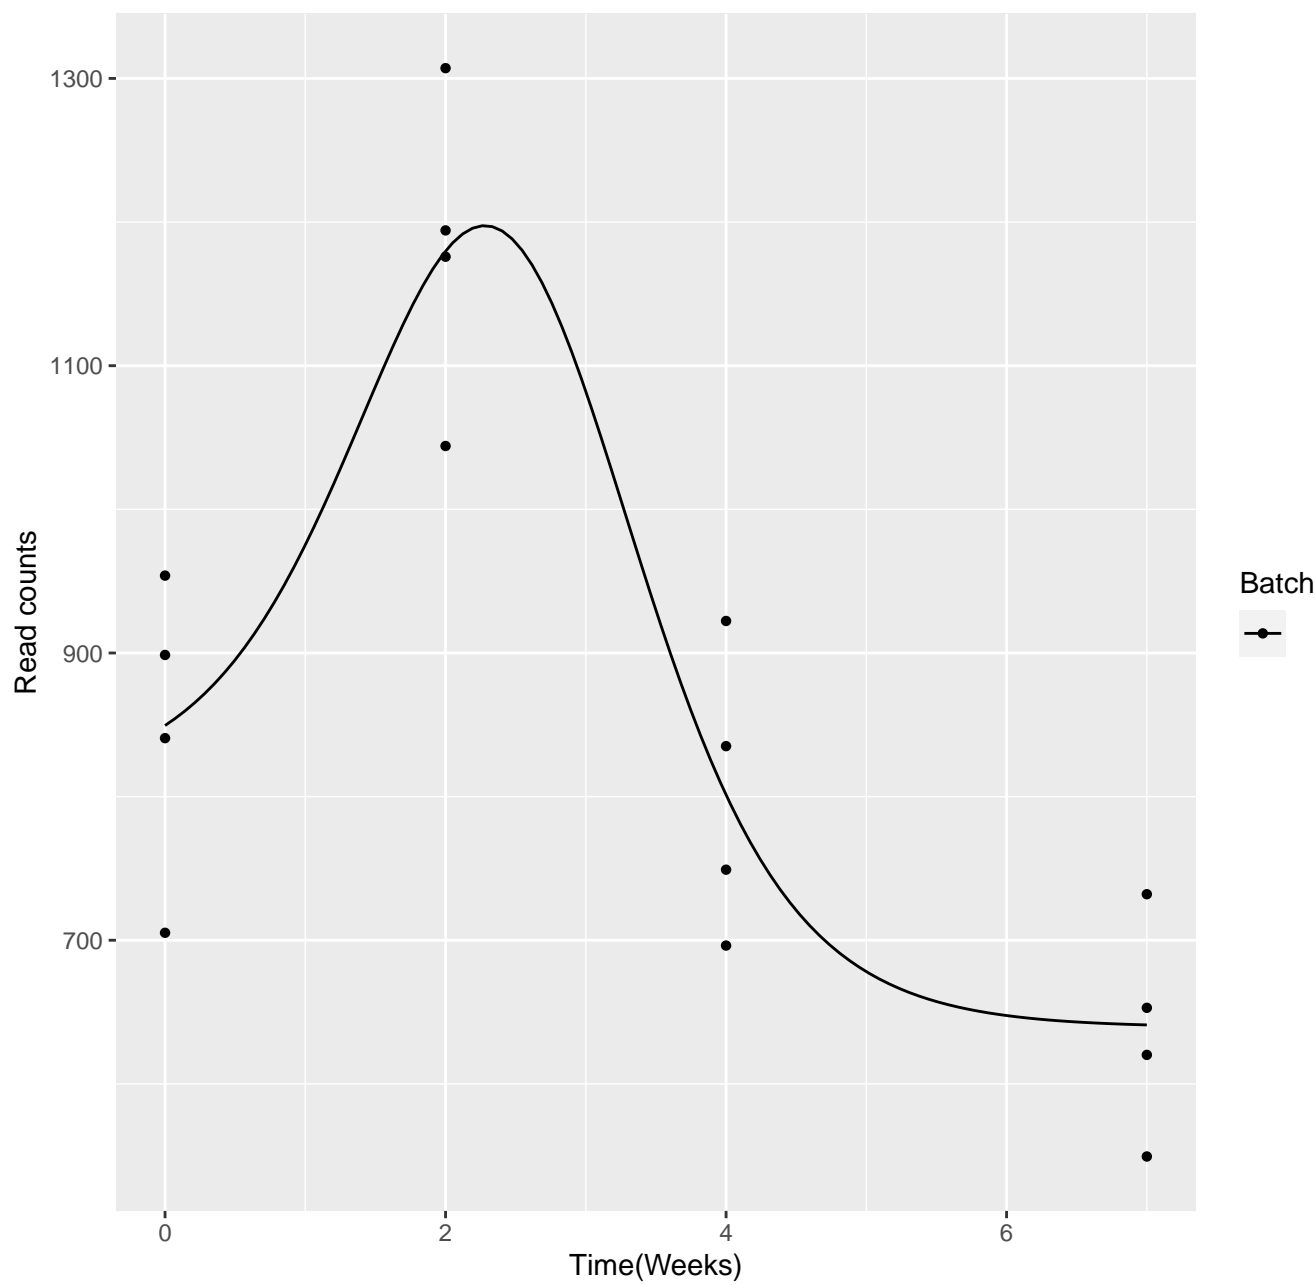

SCARA3:  $\log_{10} q = -5.7$

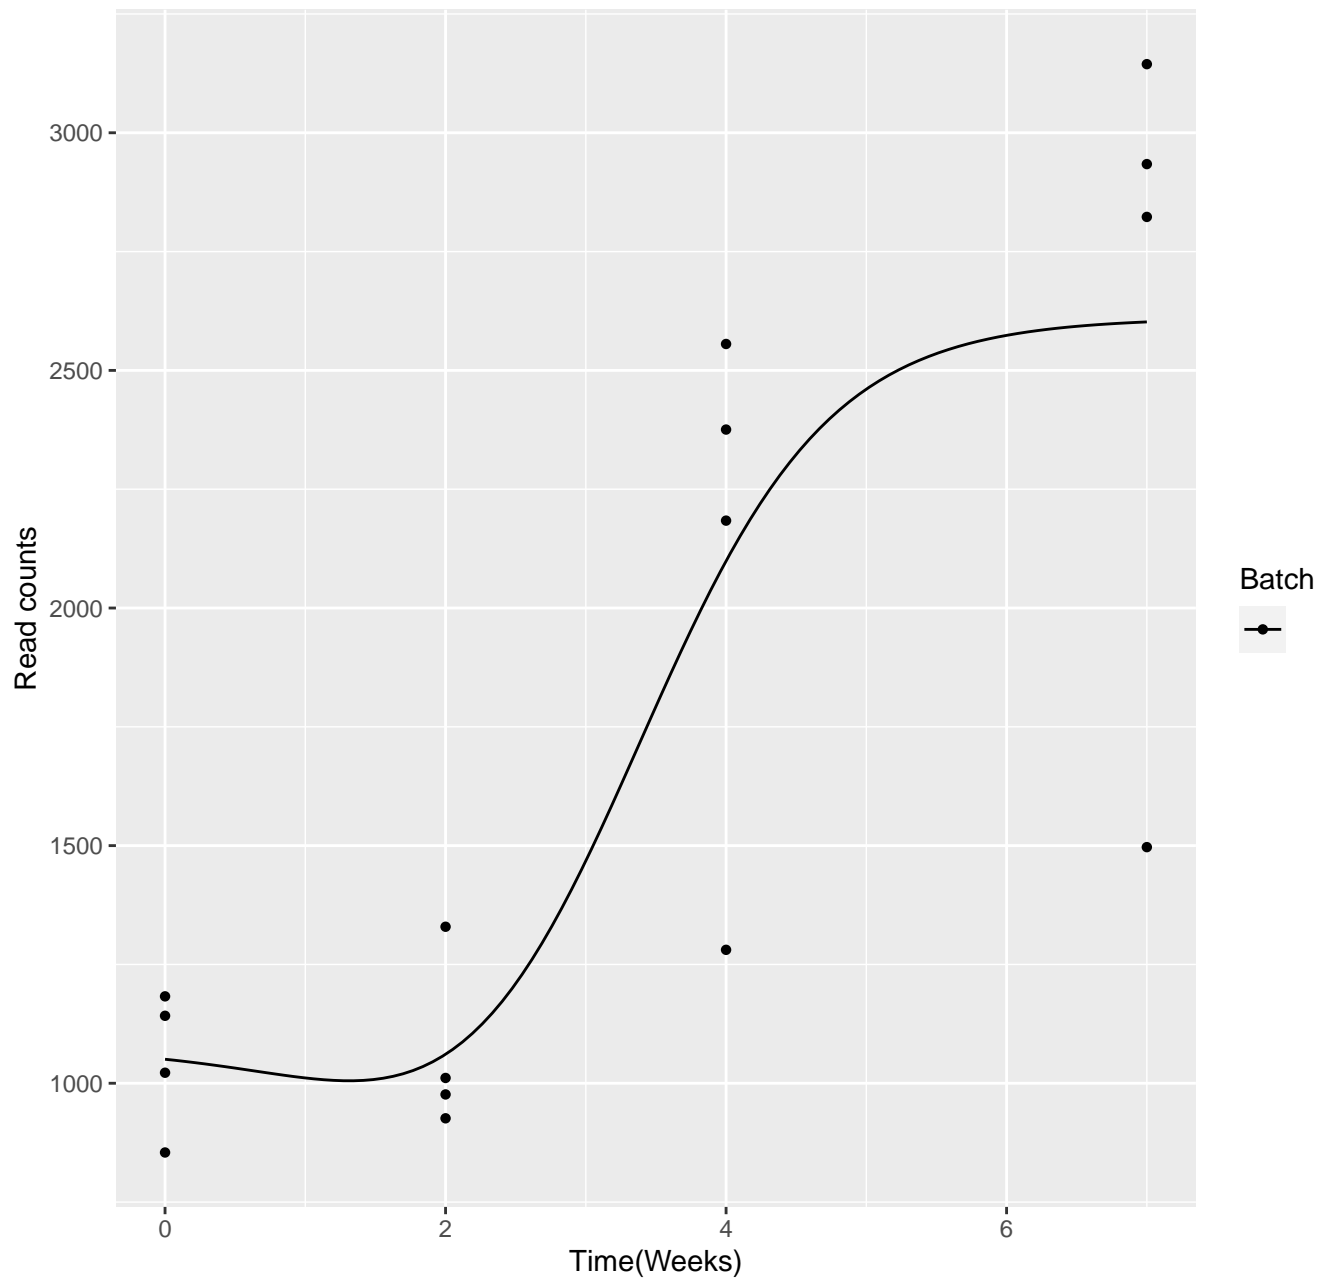



LAMA5:  $\log_{10} q = -5.7$

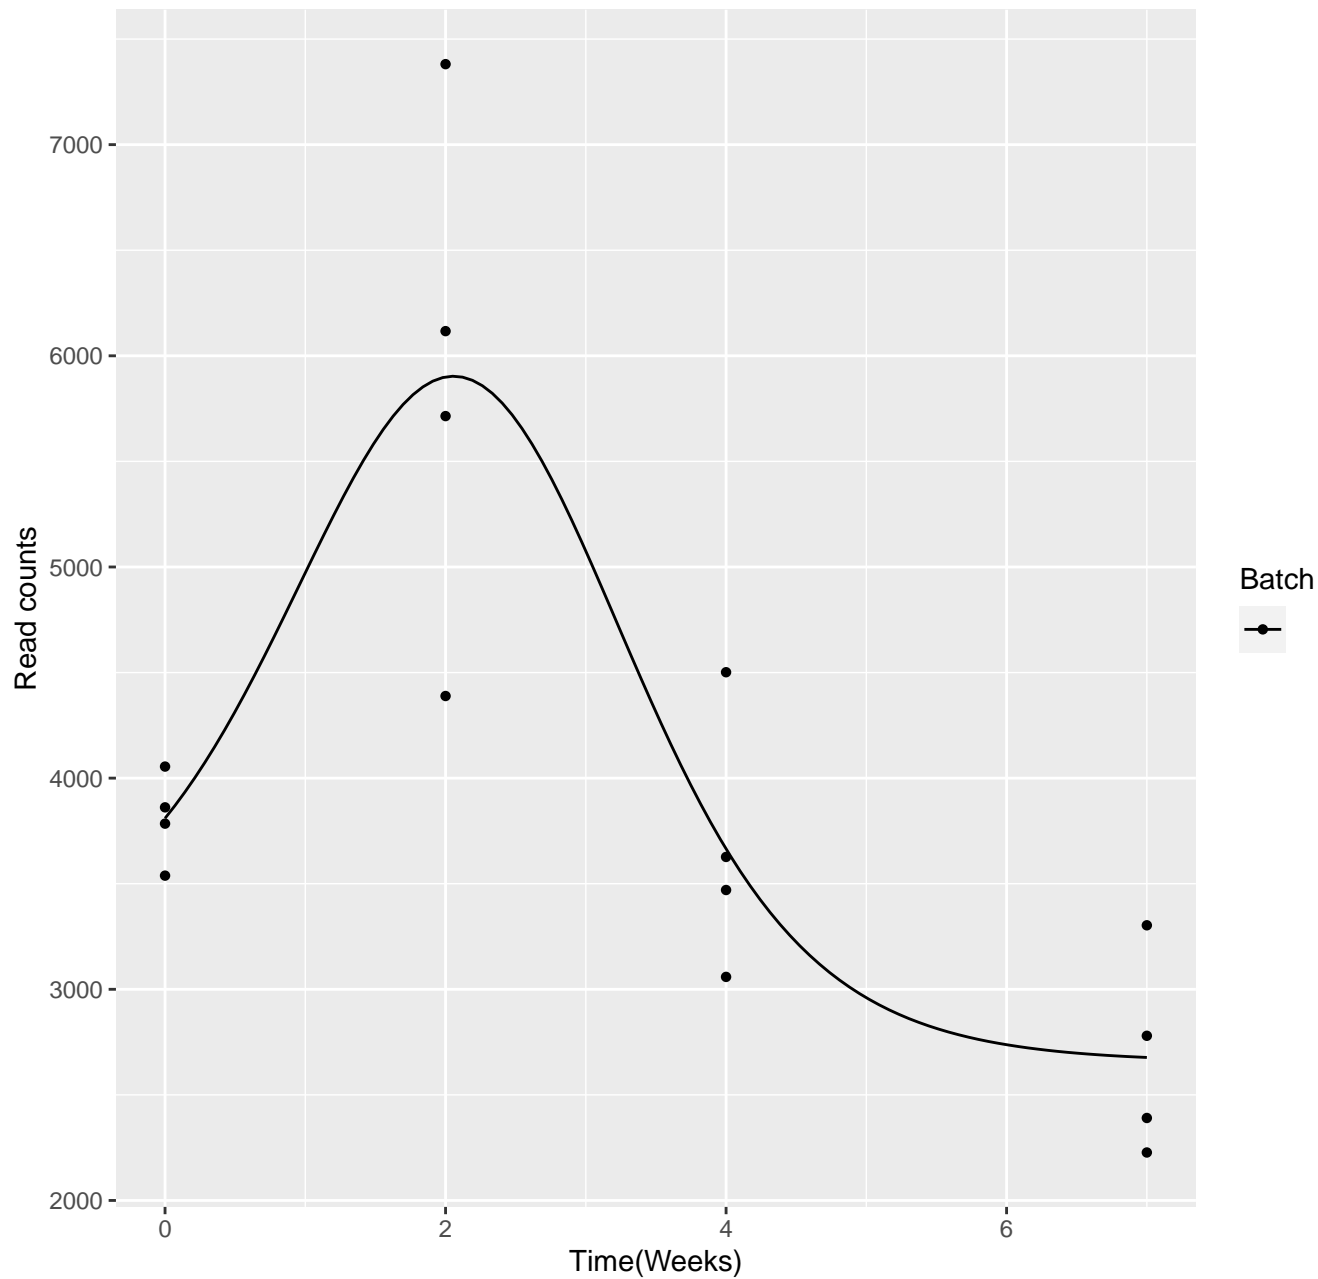

SEMA4A:  $\log_{10} q = -5.7$

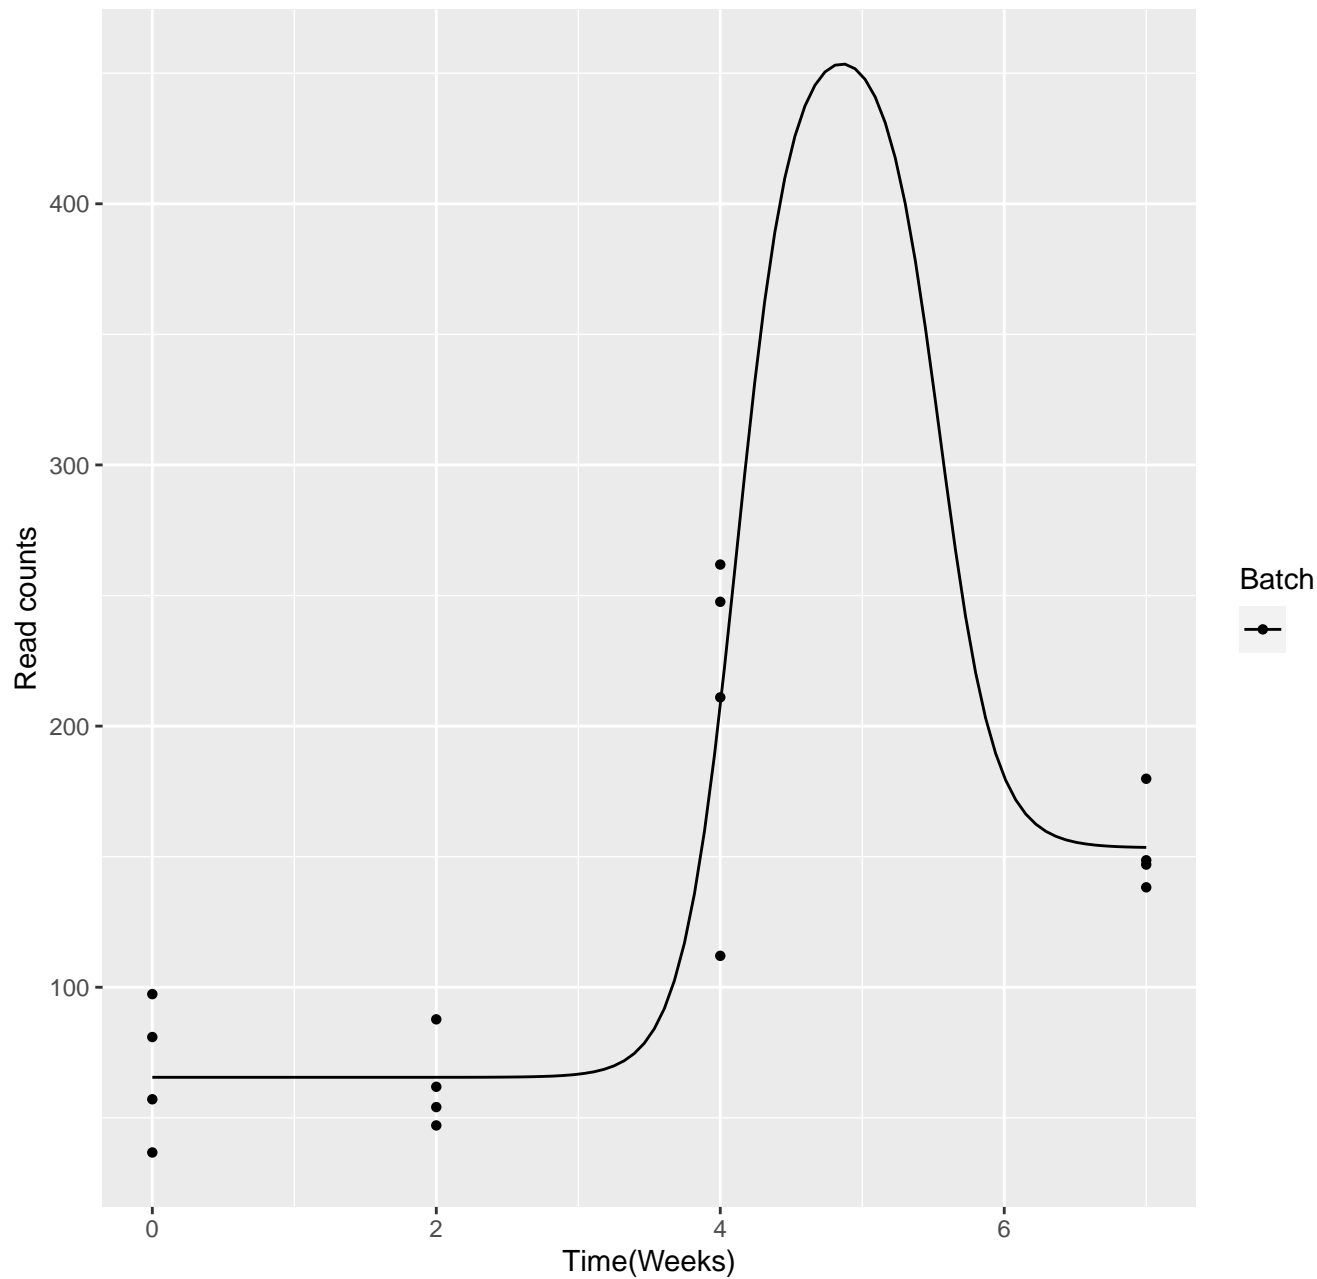

DLGAP4:  $\log_{10} q = -5.68$

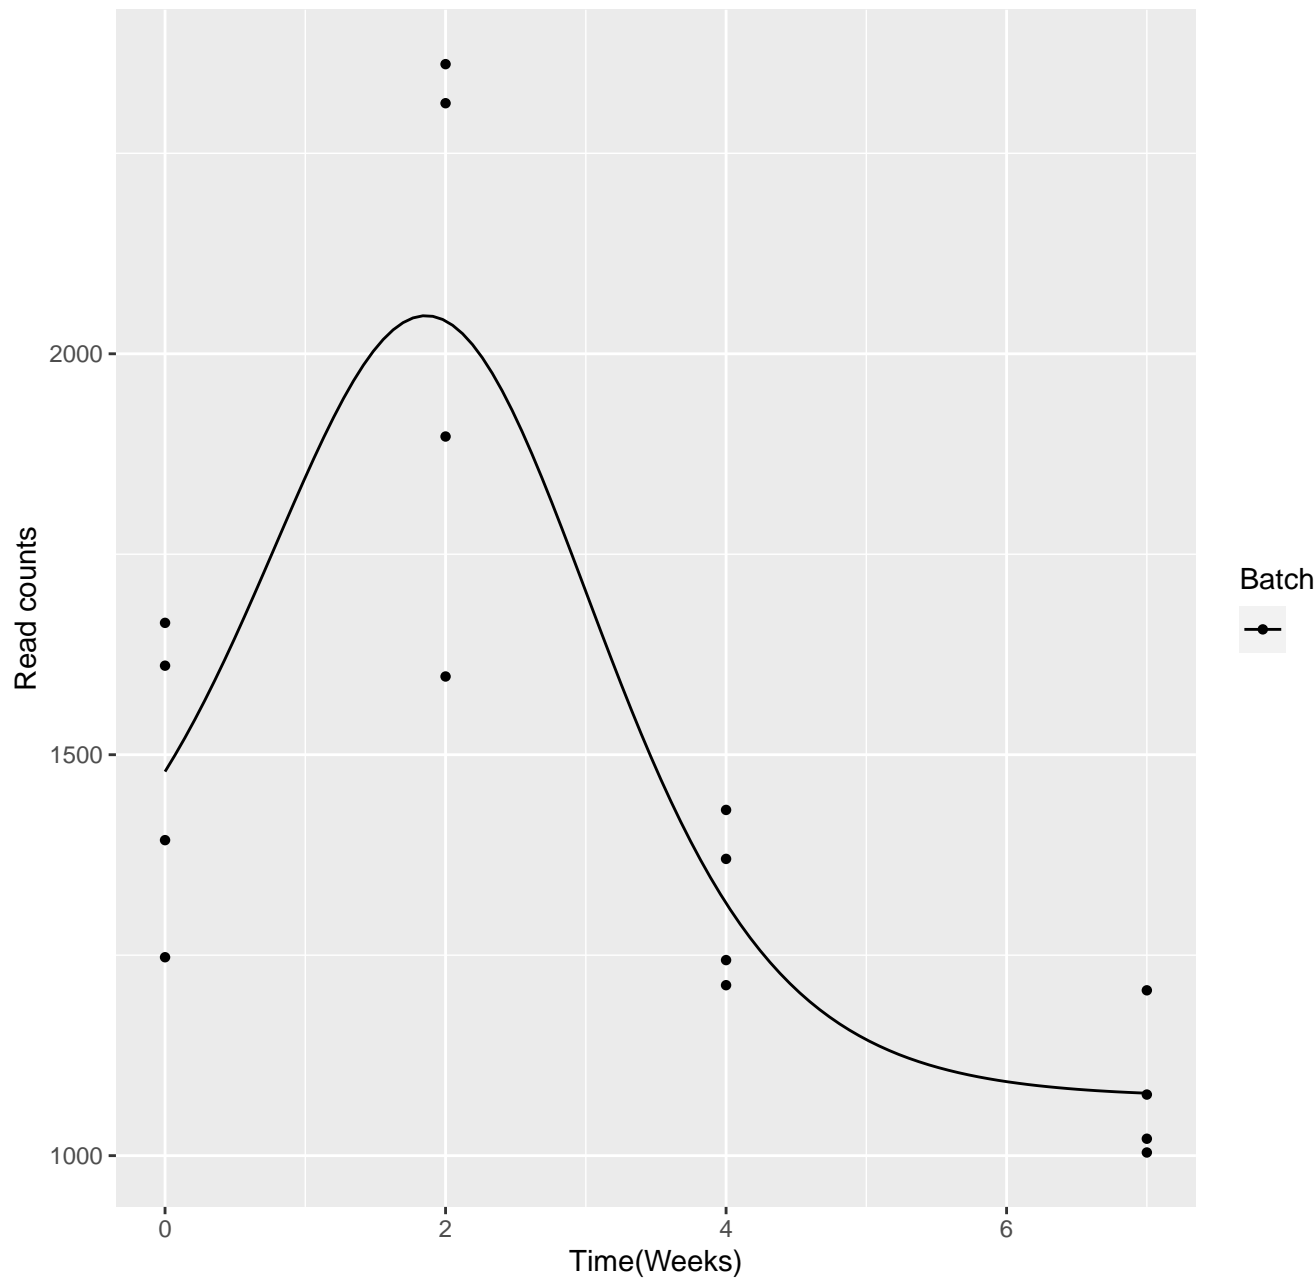

PALLD:  $\log_{10} q = -5.67$

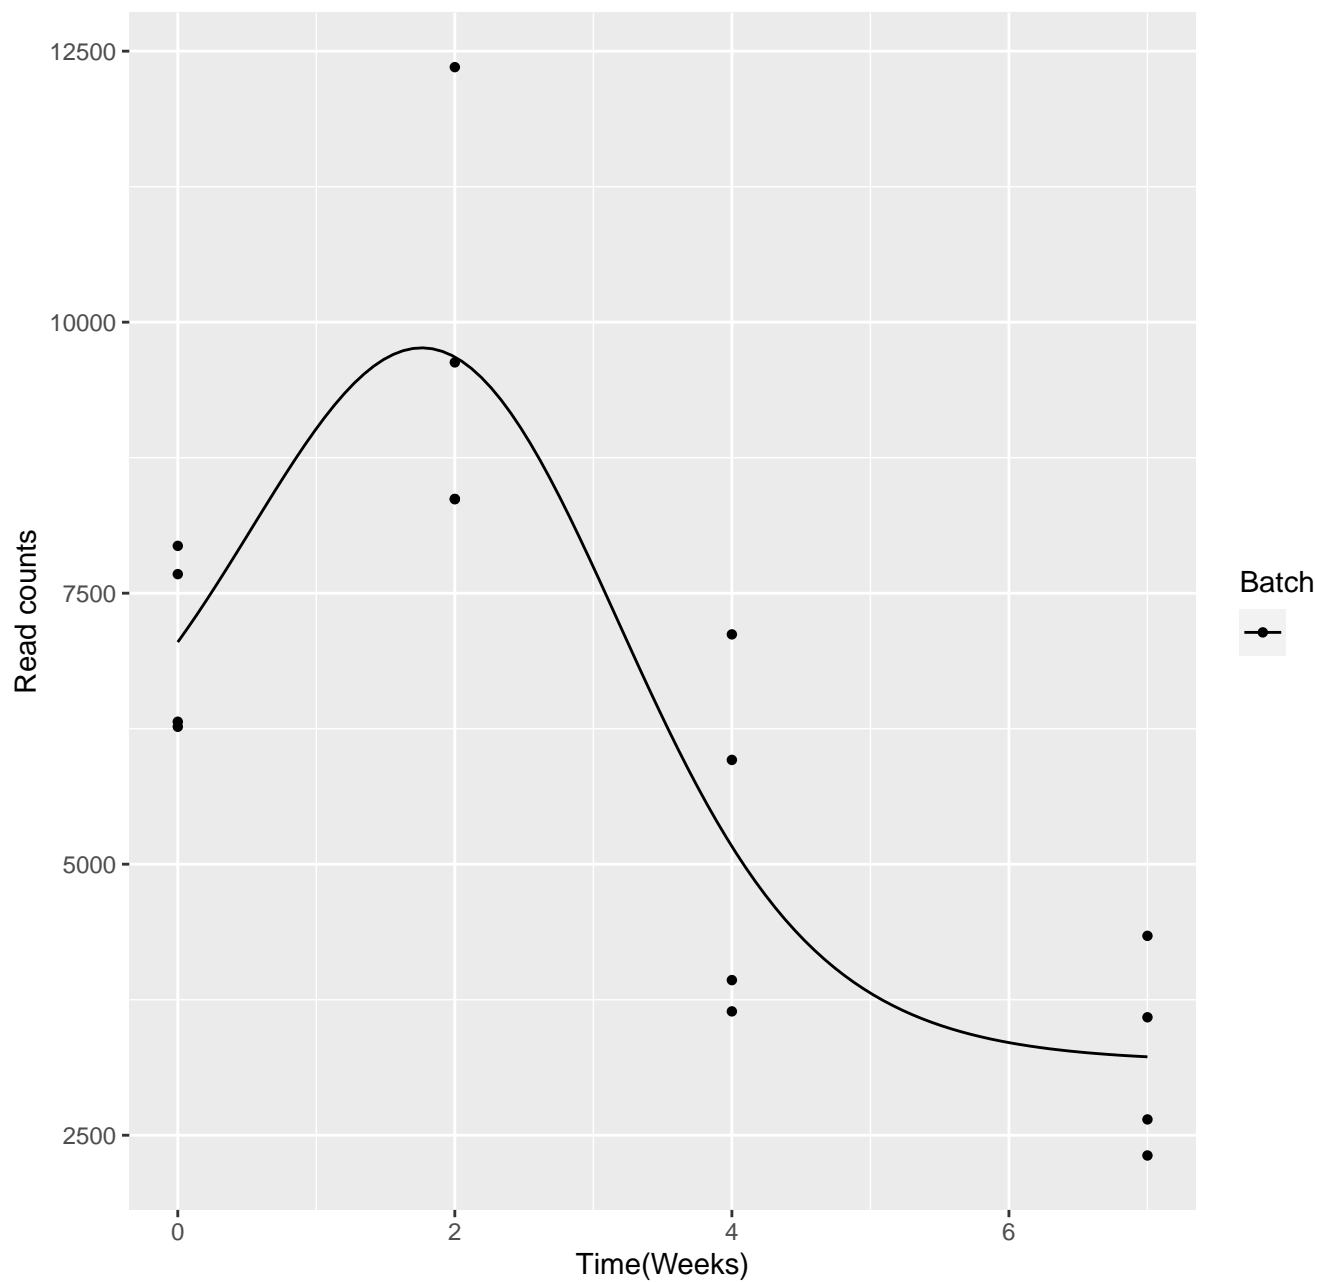

ACTN1:  $\log_{10} q = -5.66$

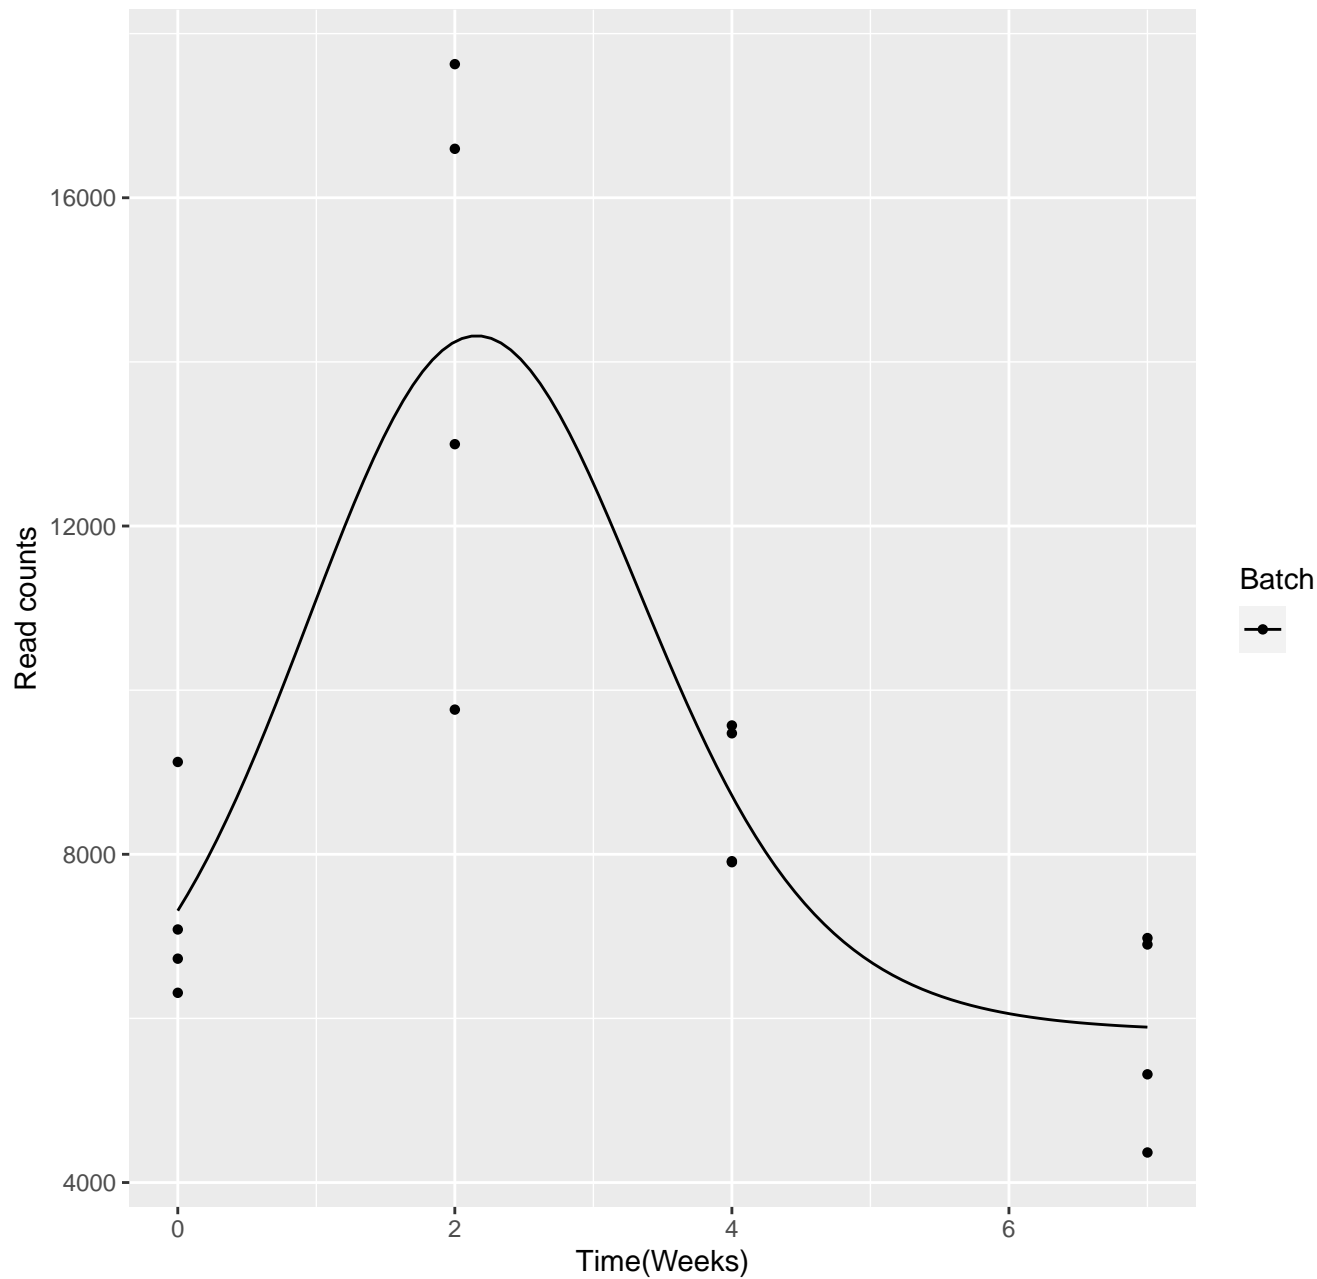

HBA:  $\log_{10} q = -5.65$

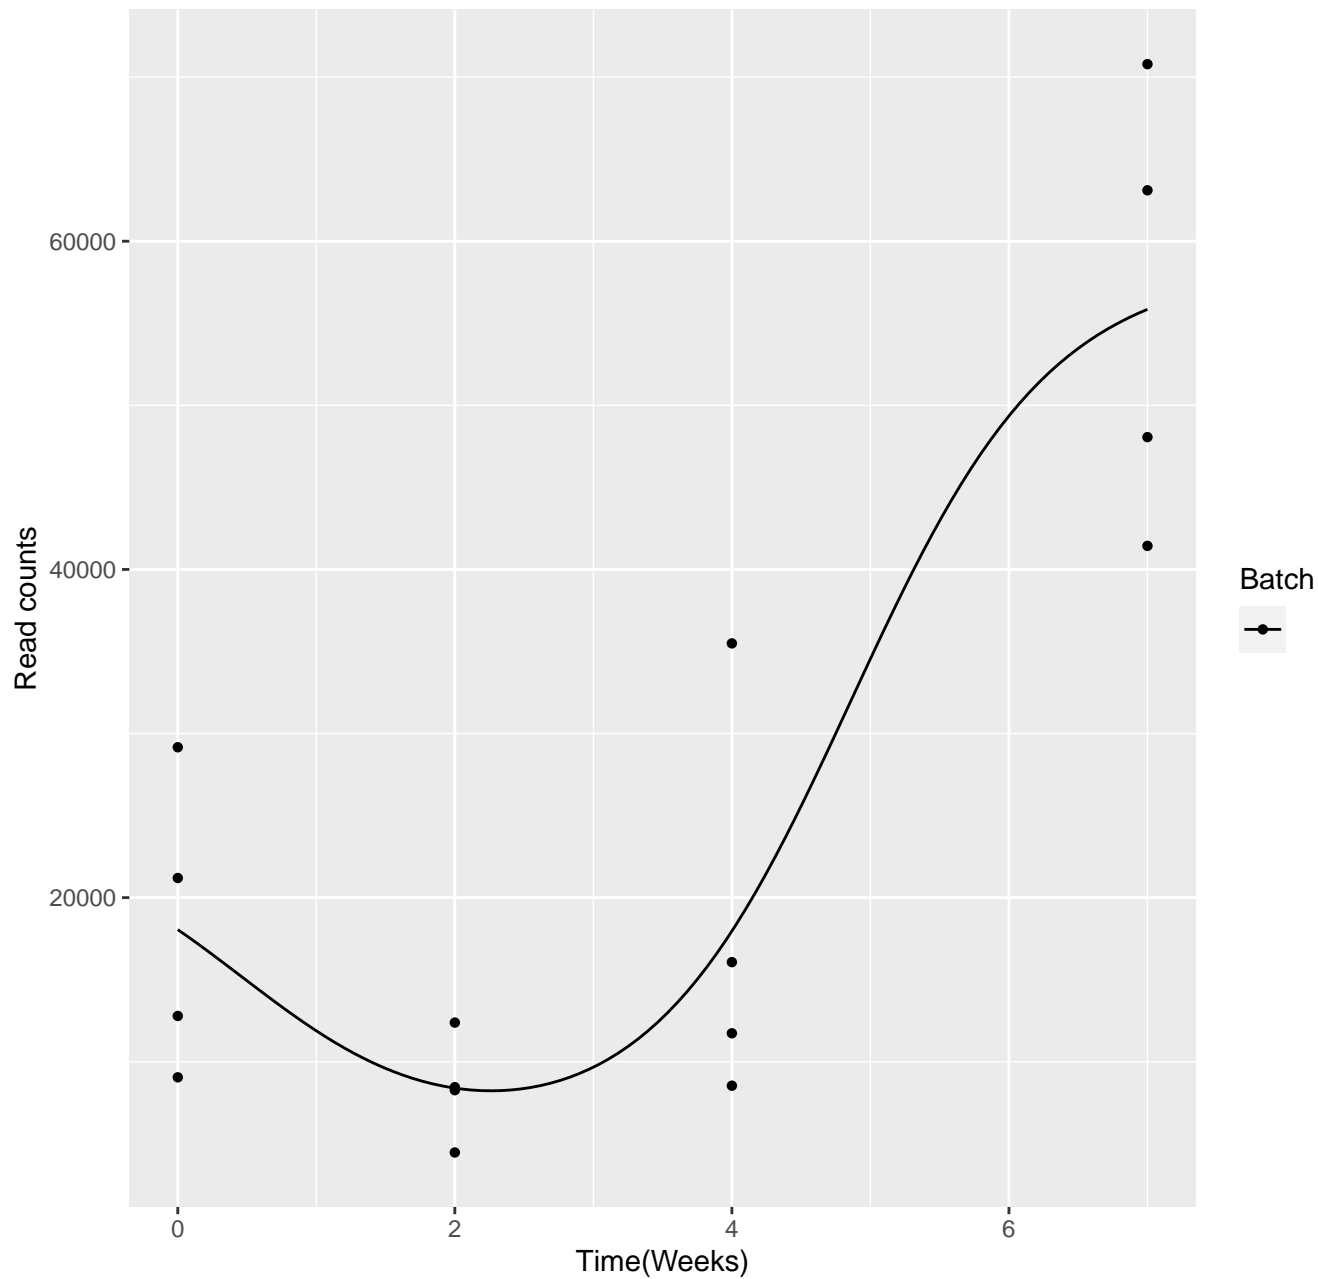

WIZ:  $\log_{10} q = -5.63$

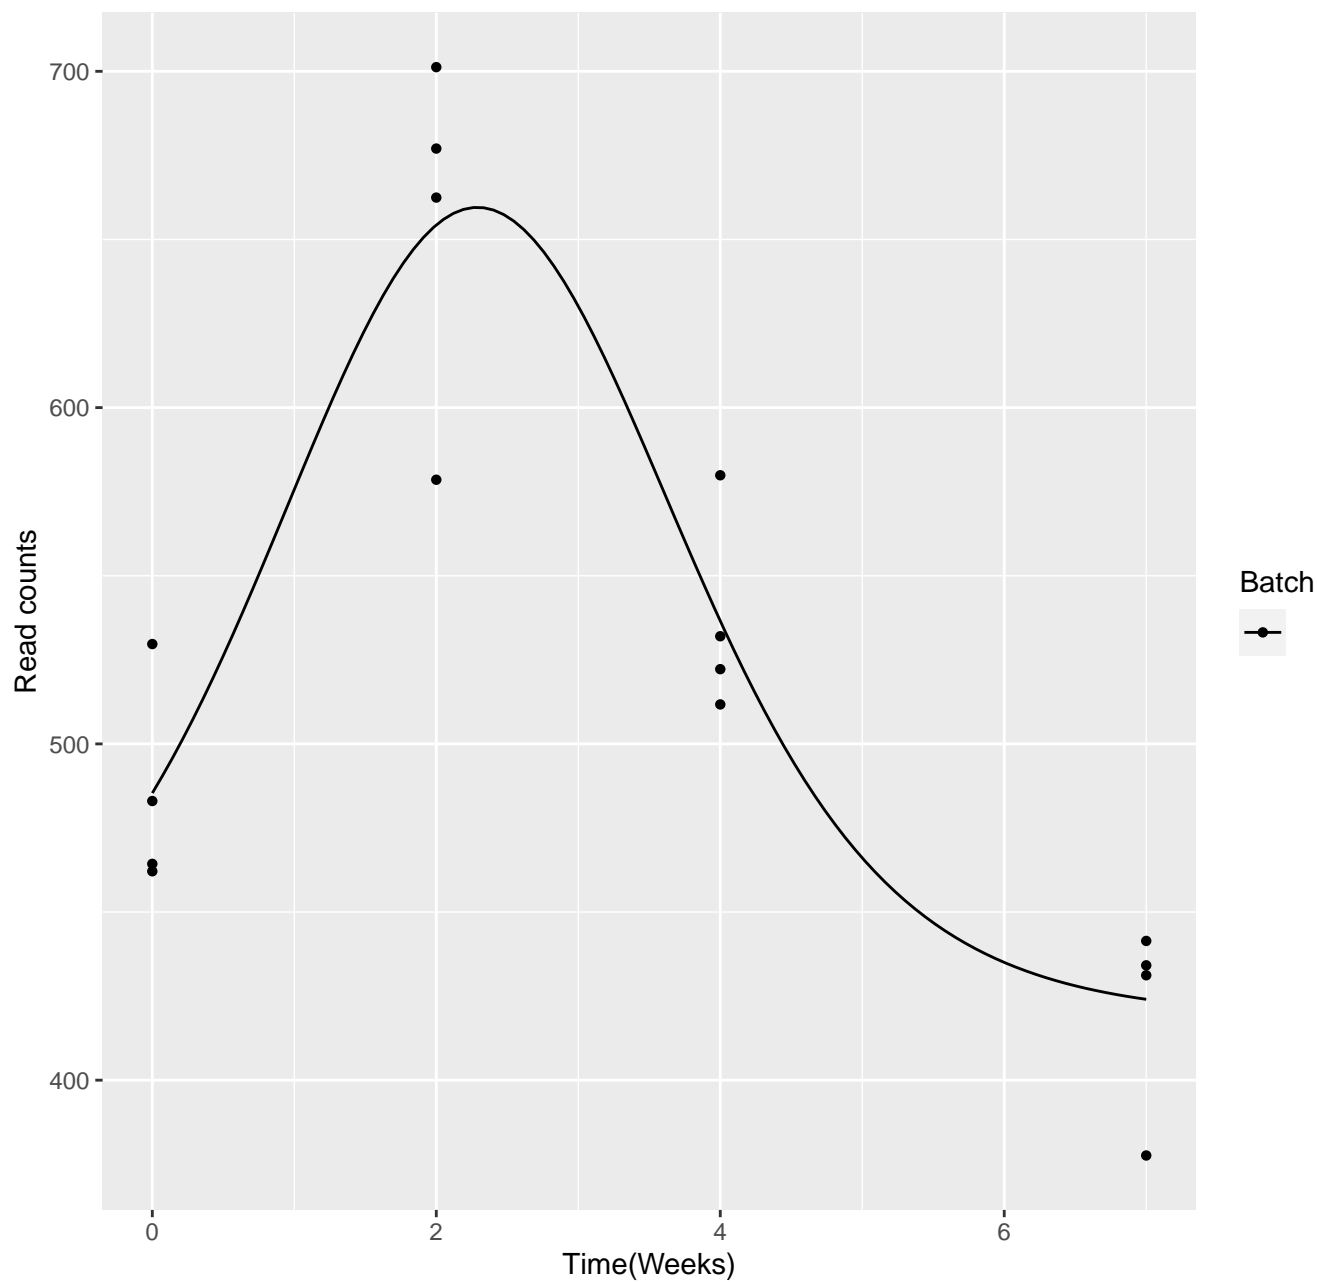

GALNT6:  $\log_{10} q = -5.63$

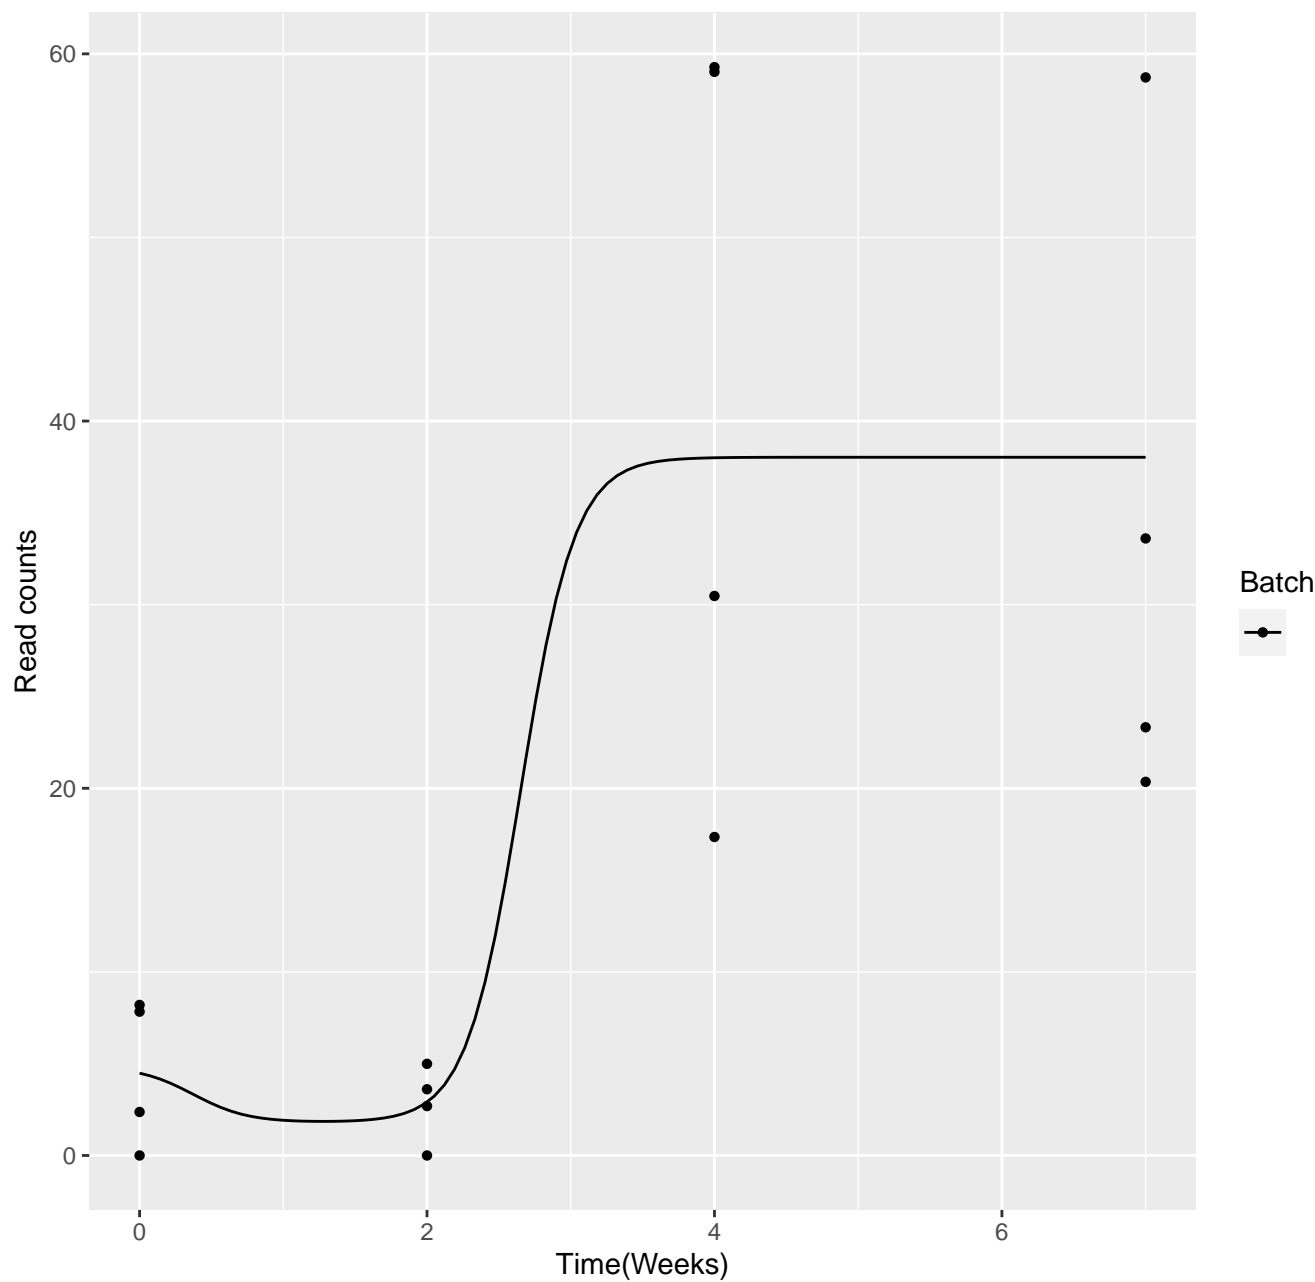



ABCG1:  $\log_{10} q = -5.63$

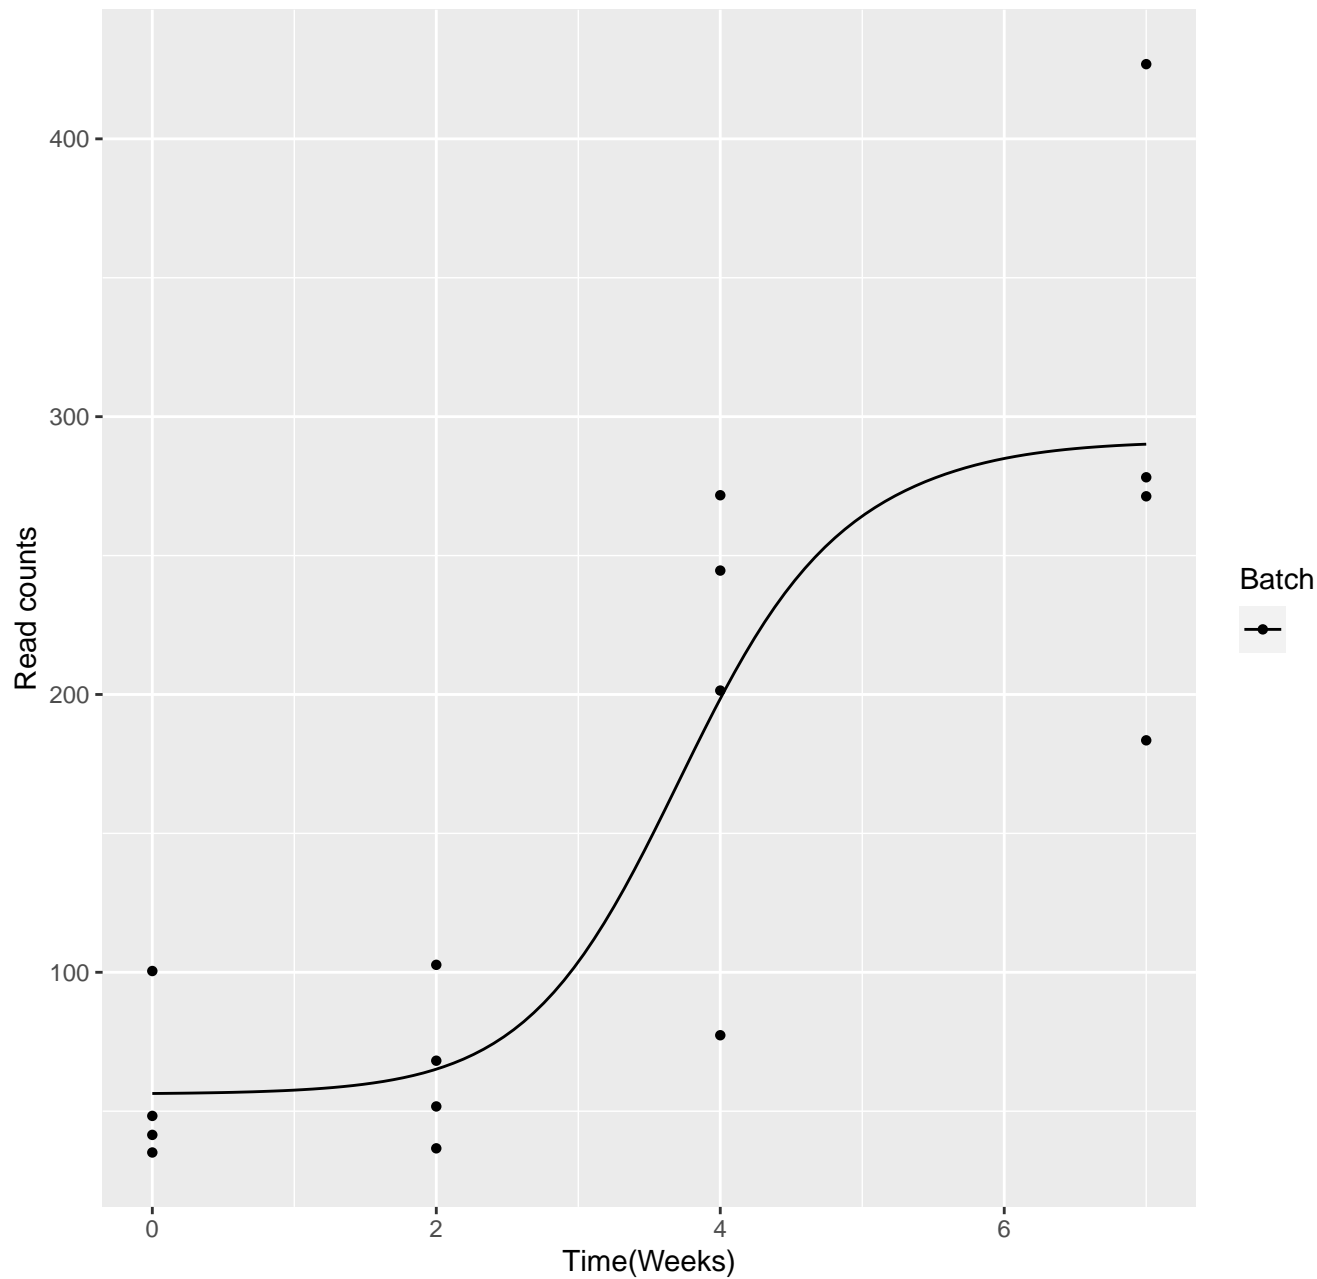

DNM1L:  $\log_{10} q = -5.63$

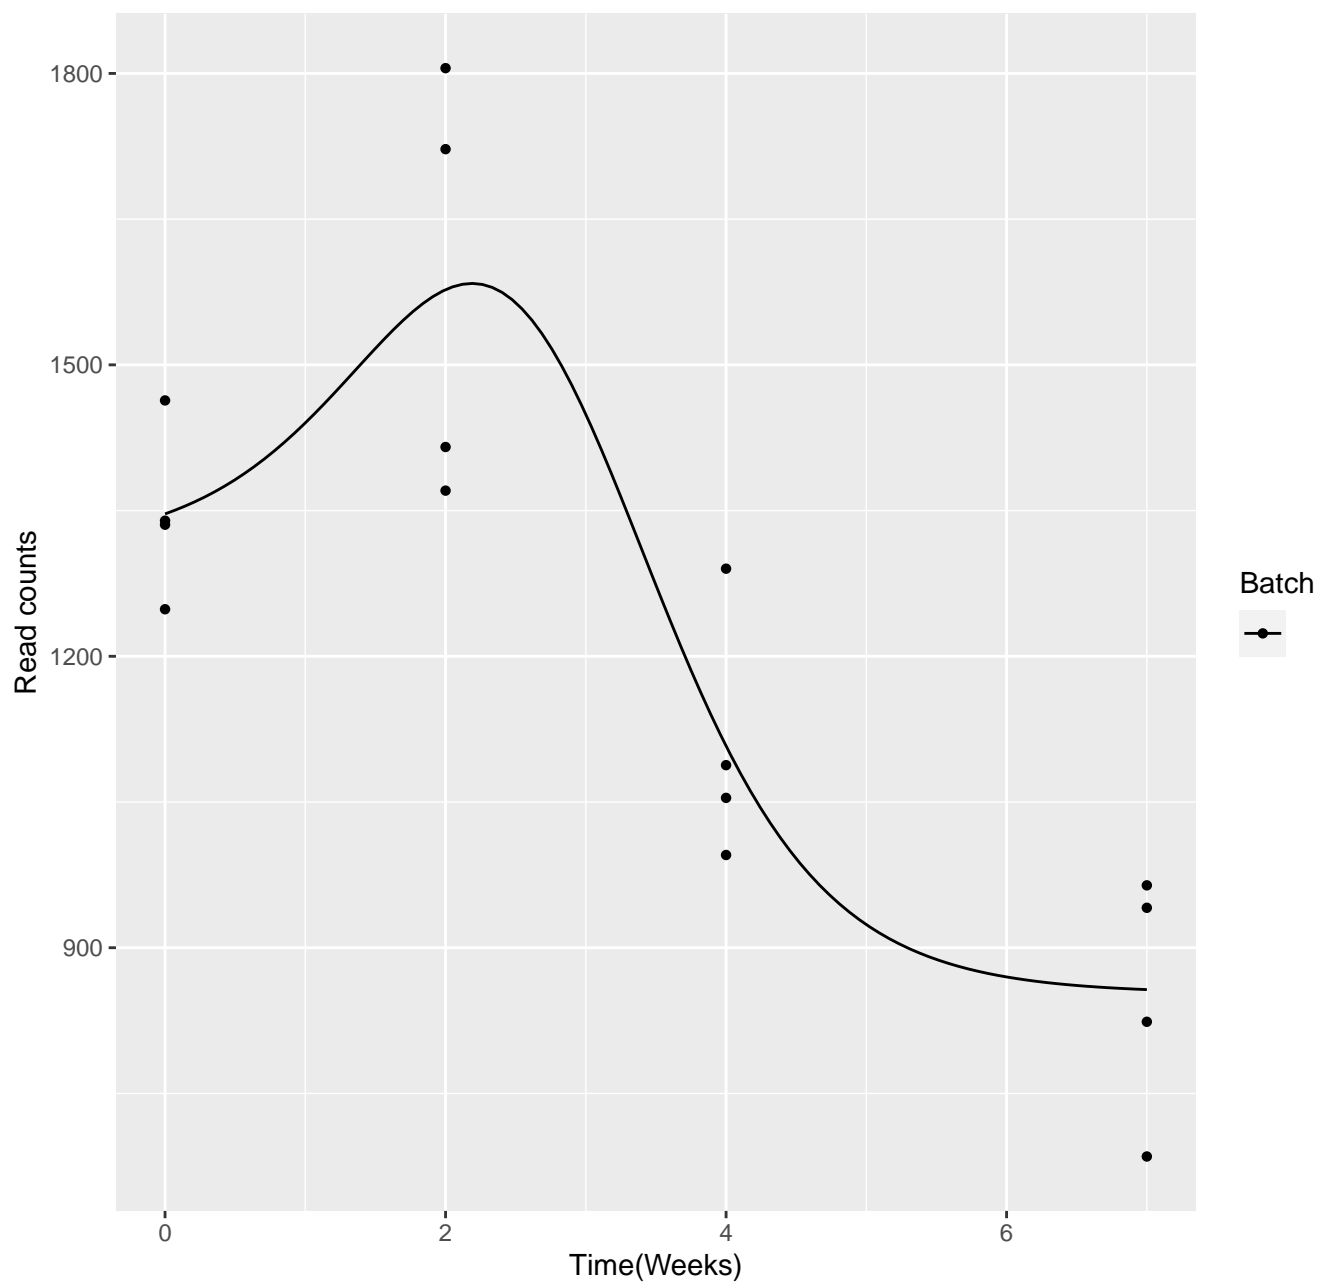

PDE5A:  $\log_{10} q = -5.62$

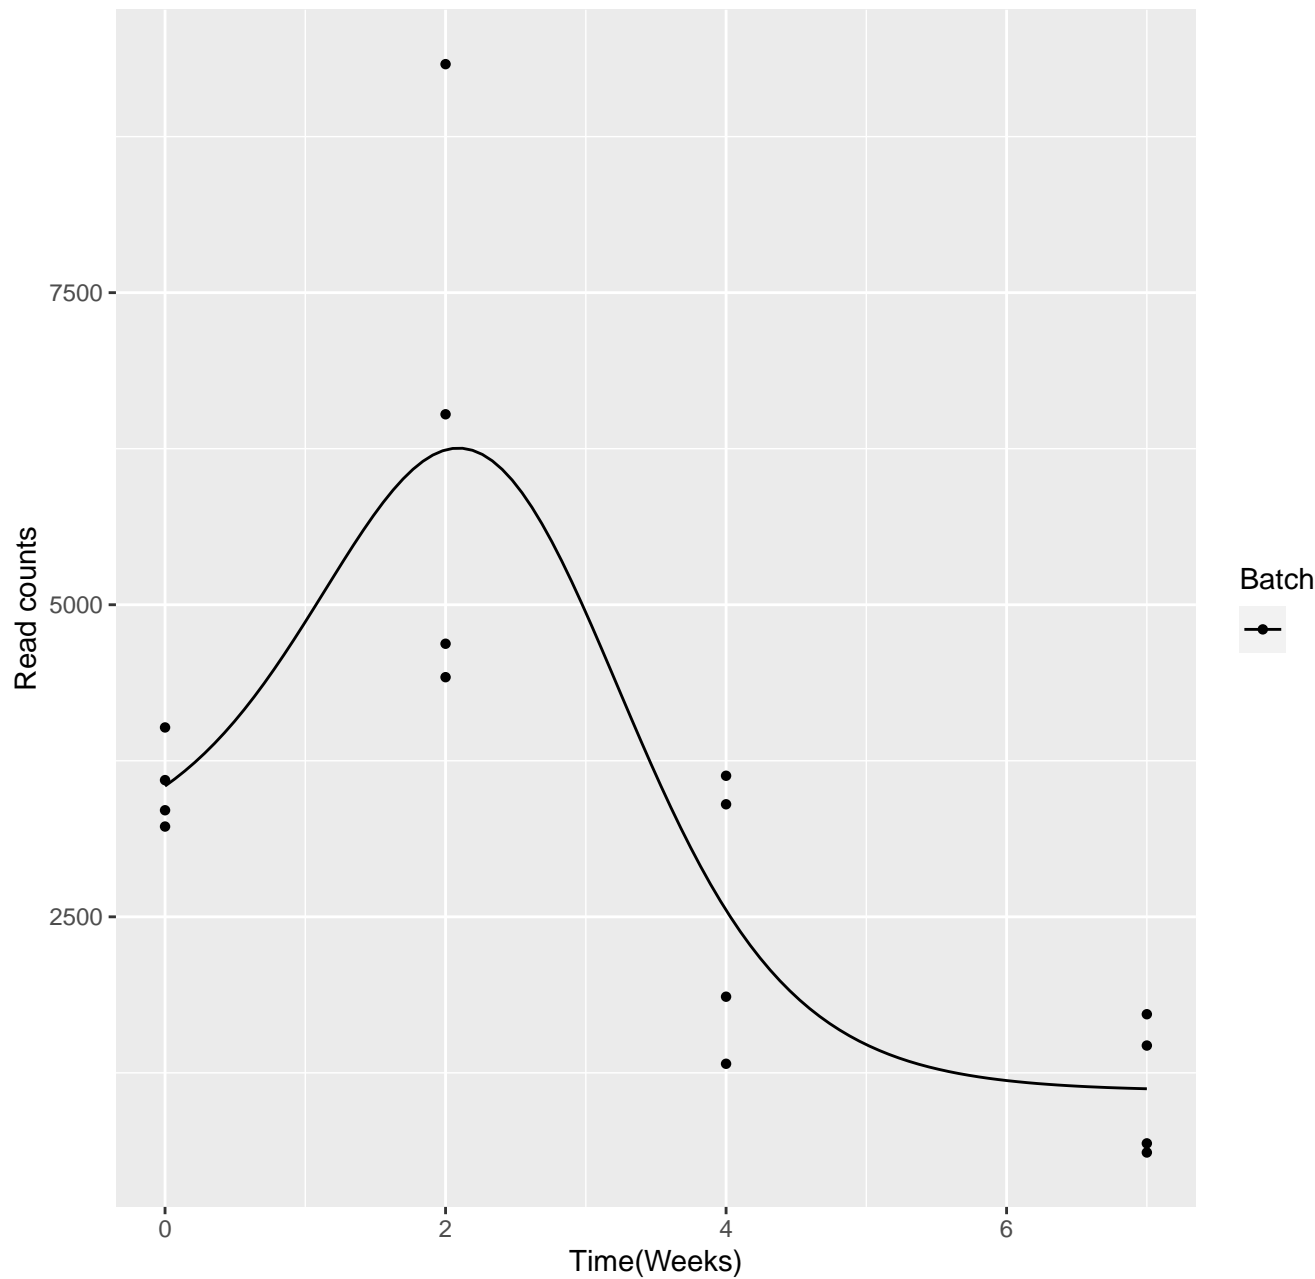

ANXA8:  $\log_{10} q = -5.62$

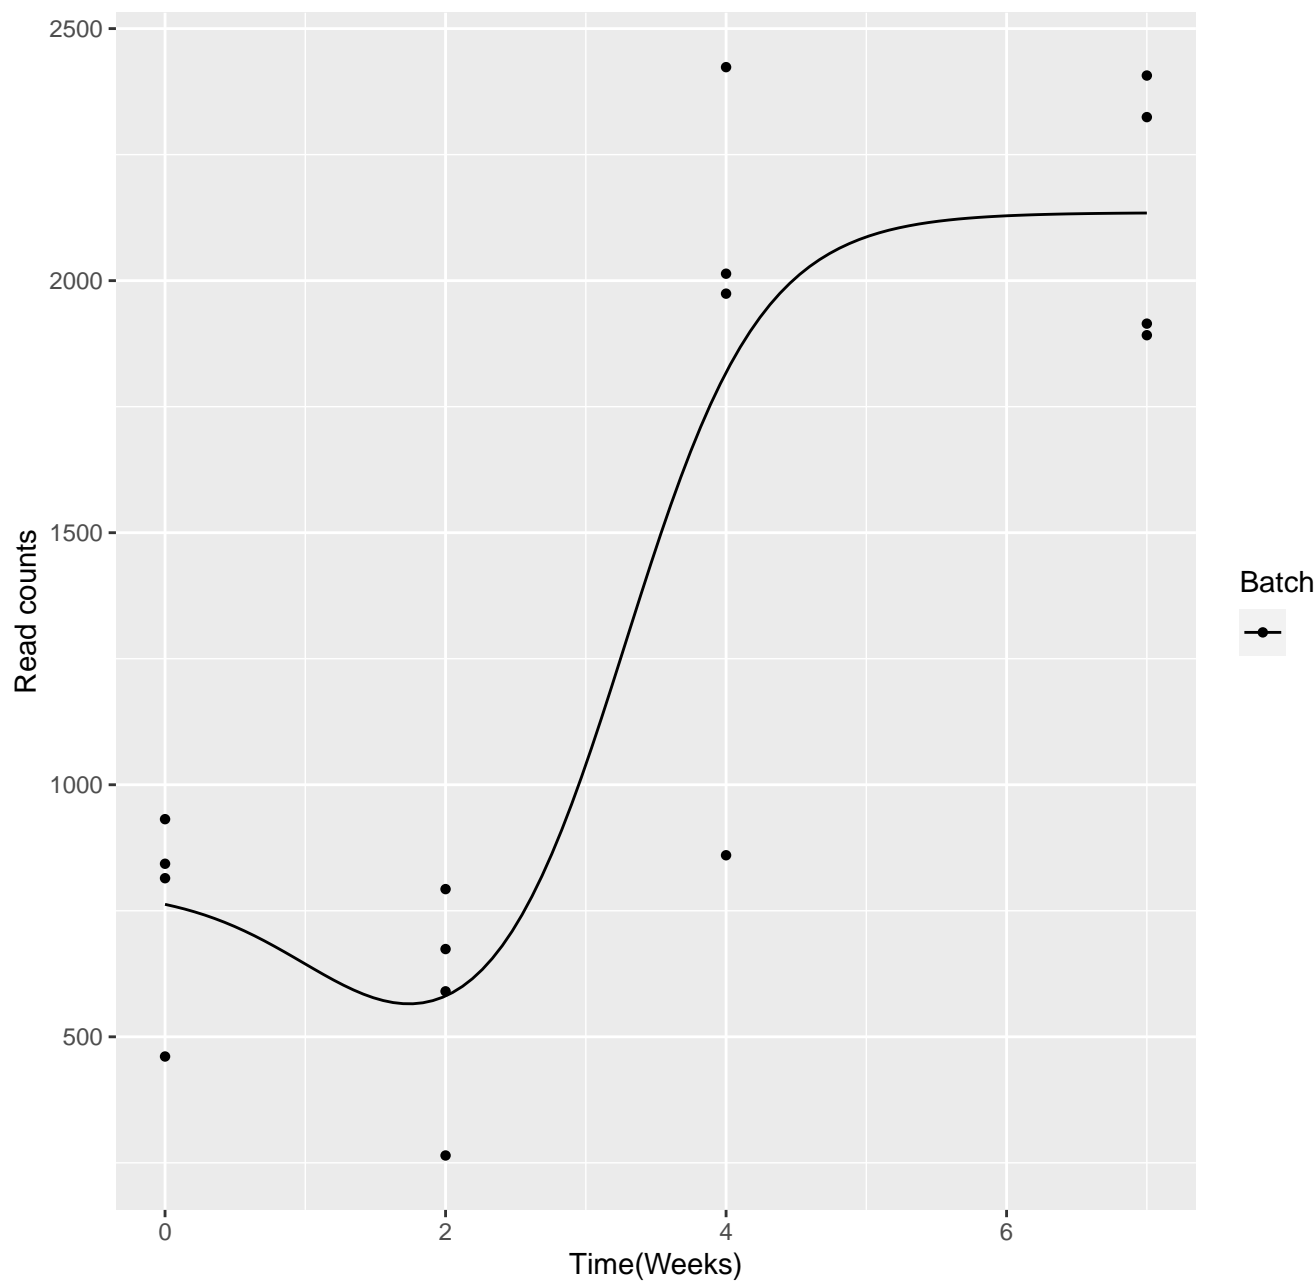

LOC100359112:  $\log_{10} q = -5.6$

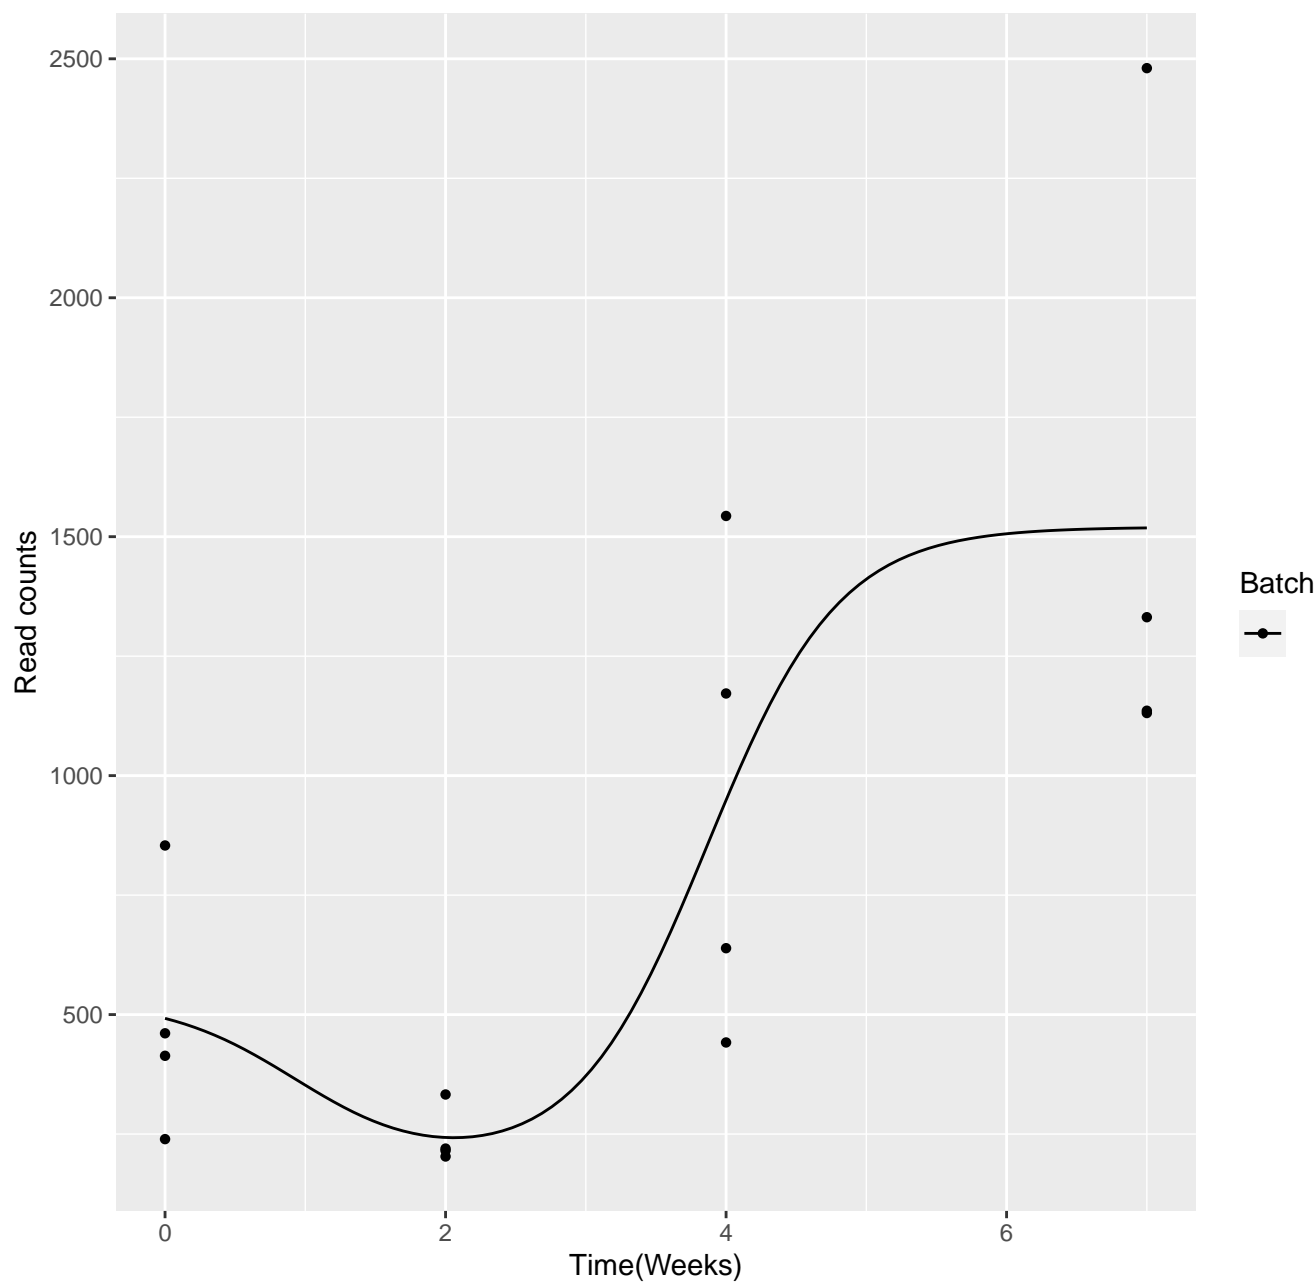

LOC100008803:  $\log_{10} q = -5.59$

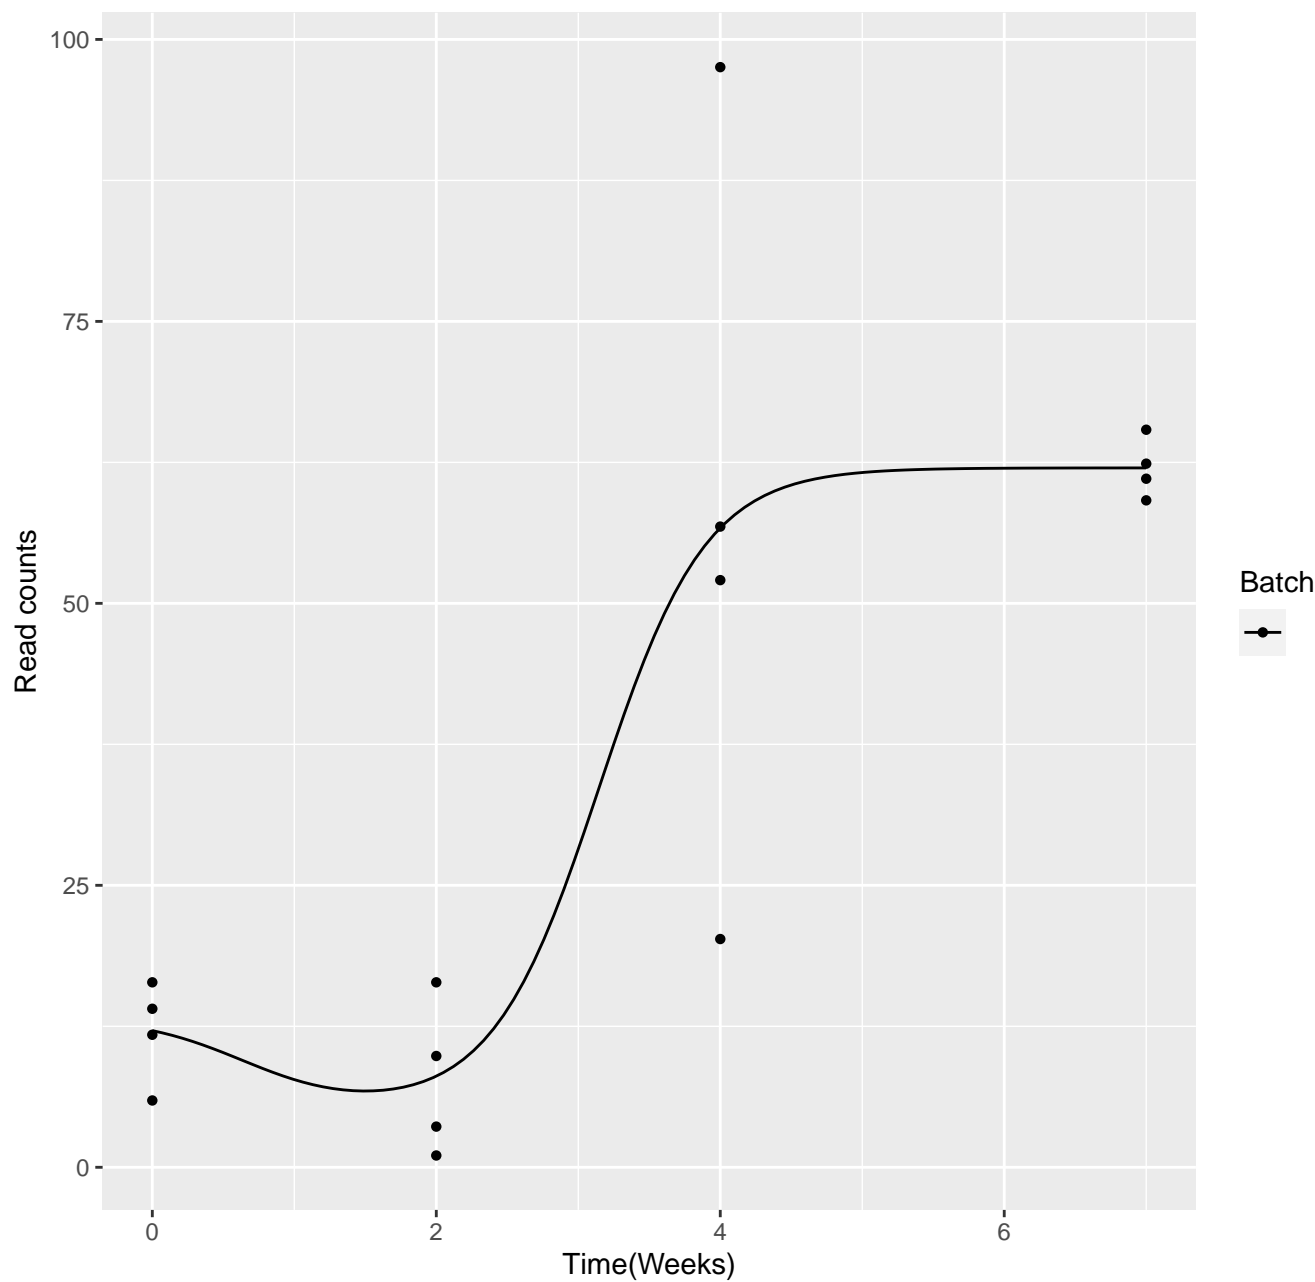

LOC127492111:  $\log_{10} q = -5.58$

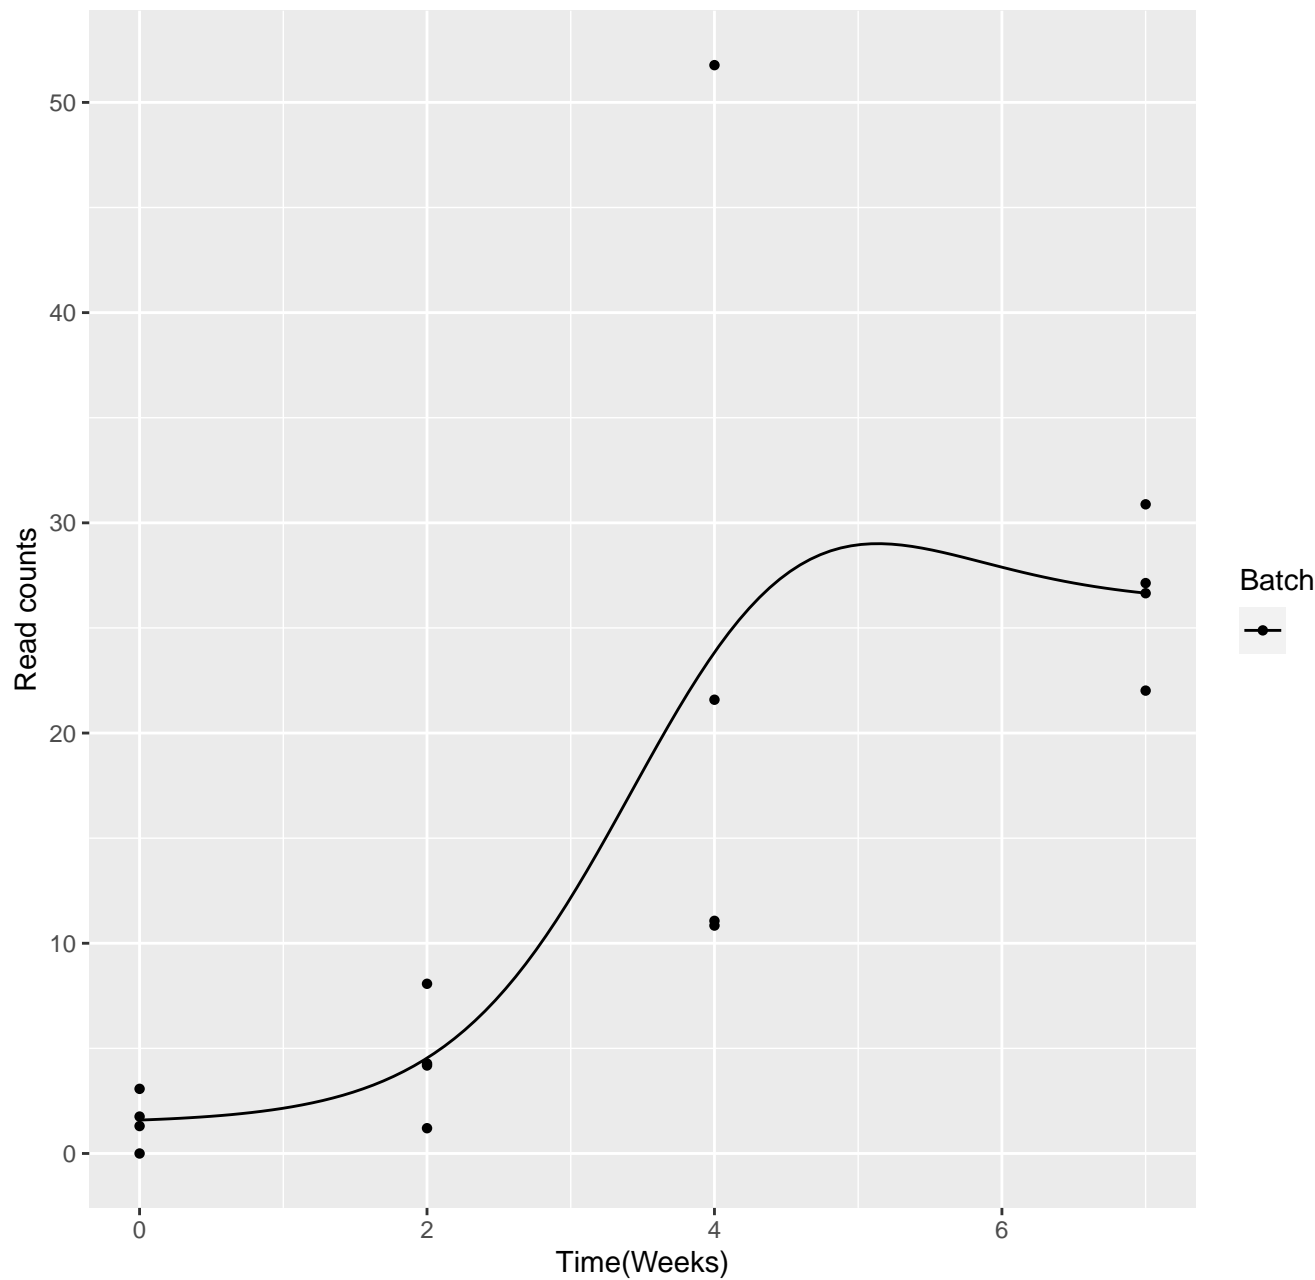

LOC100342572:  $\log_{10} q = -5.58$

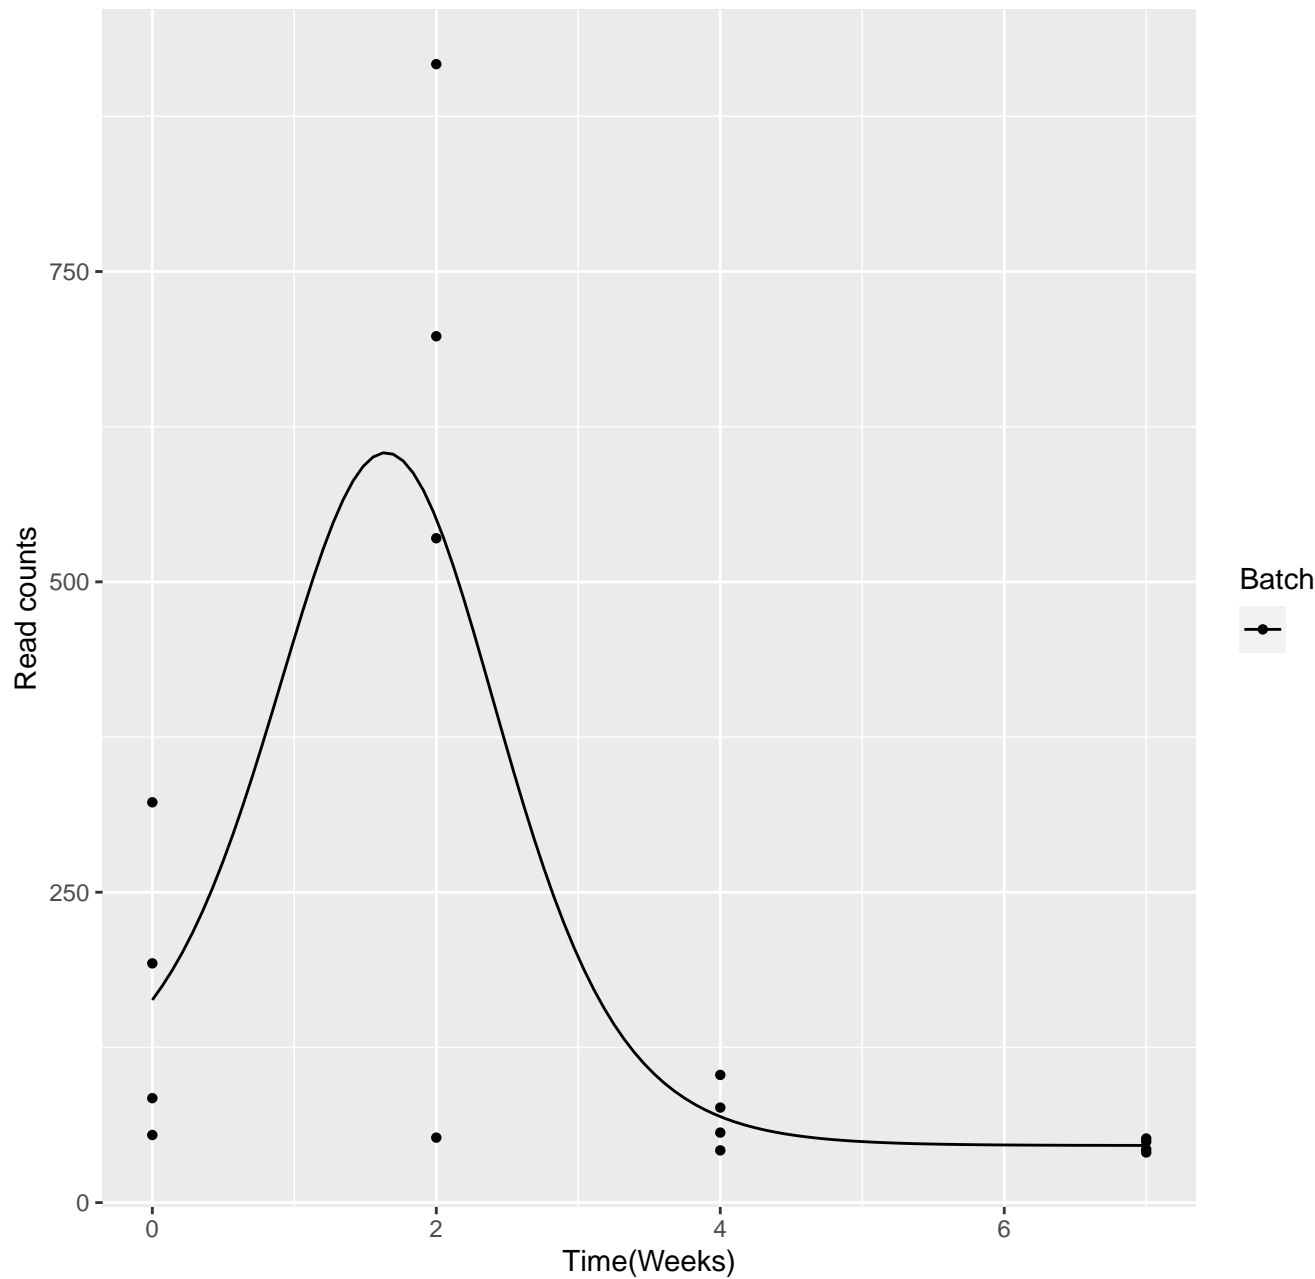



LOC100345907:  $\log_{10} q = -5.58$

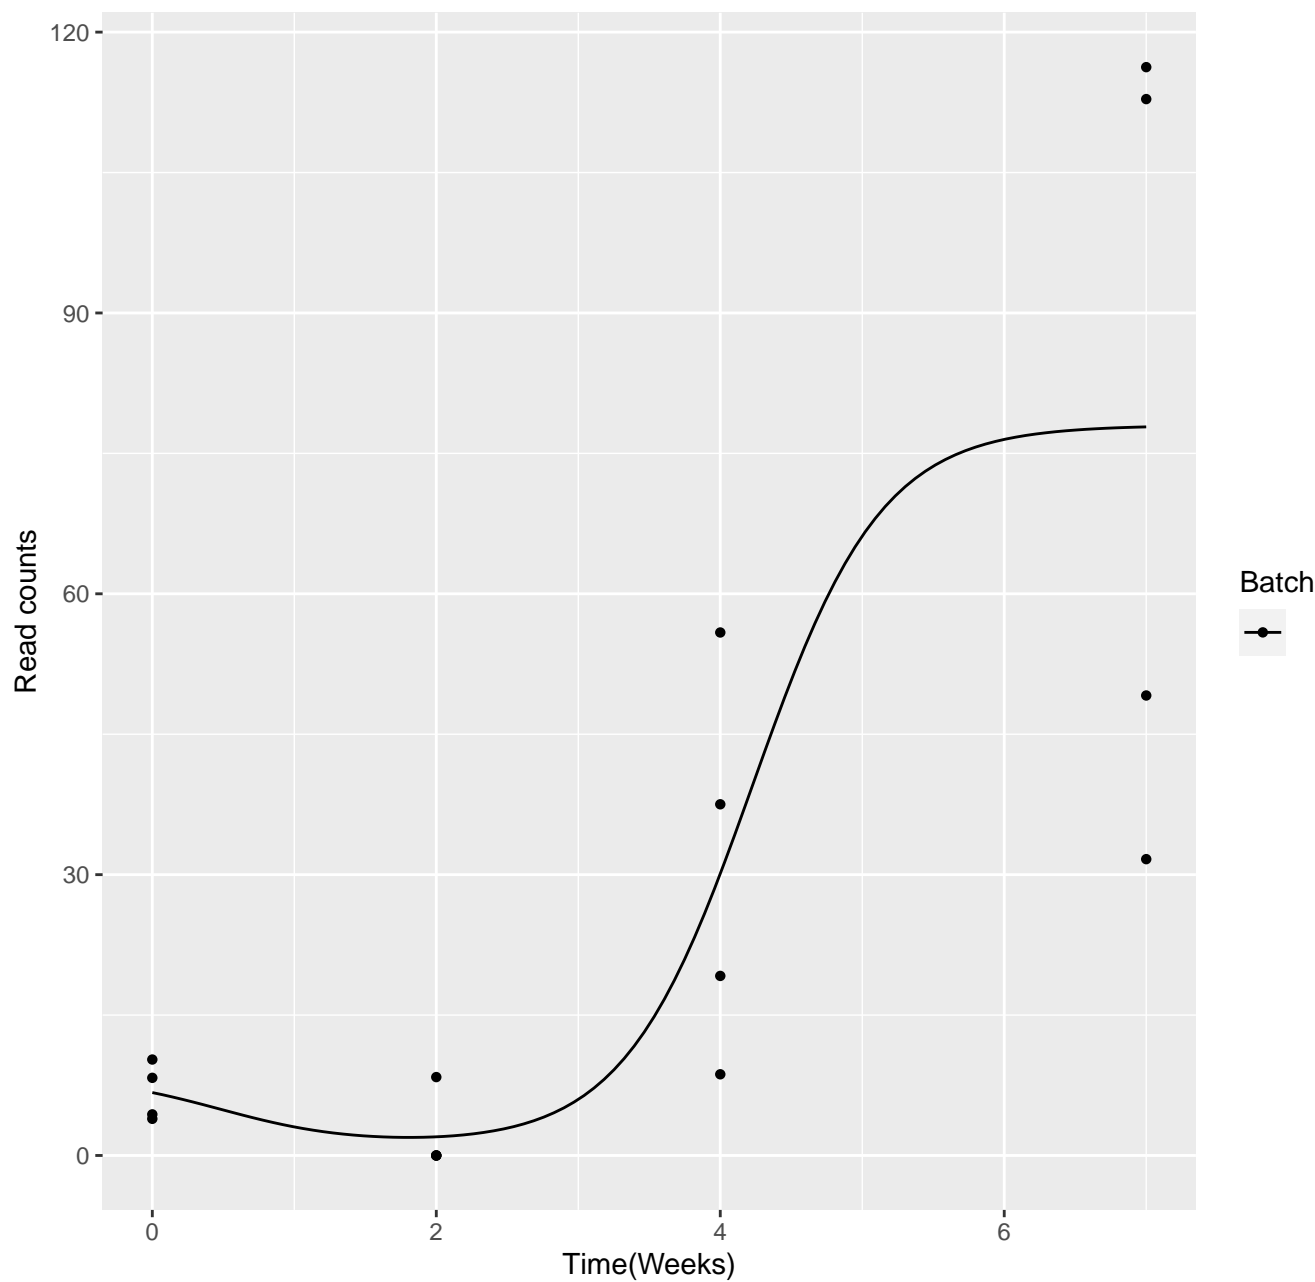

P2RY8:  $\log_{10} q = -5.58$

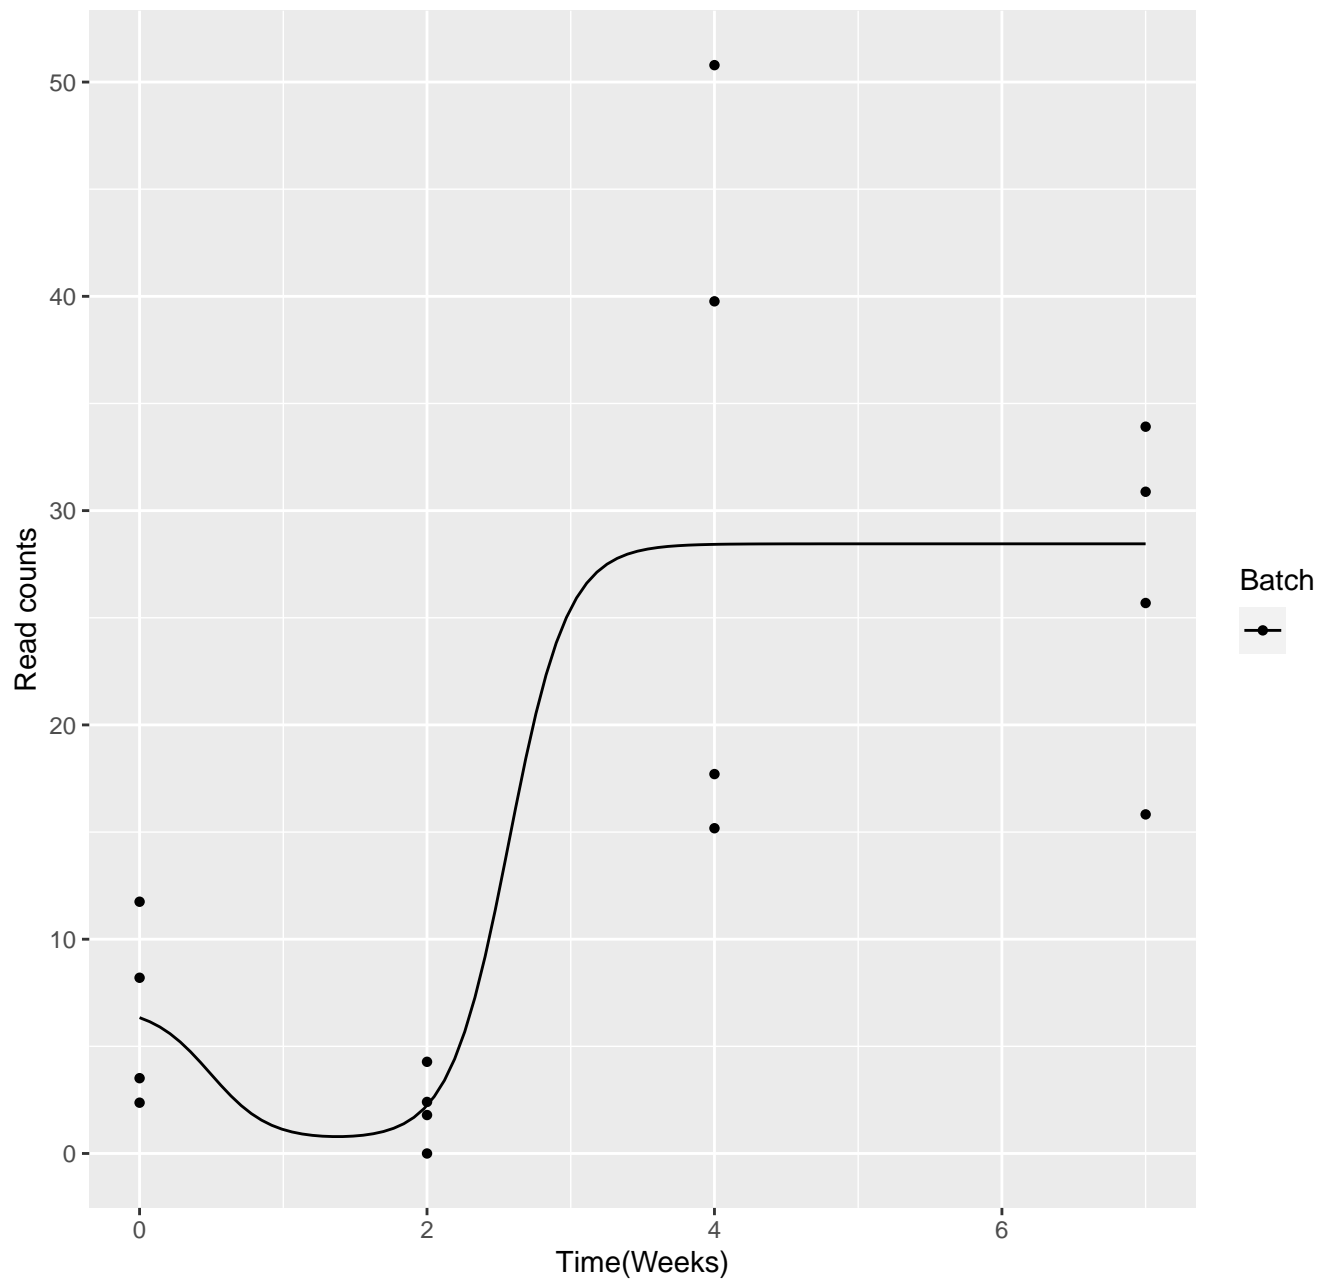

SYPL2:  $\log_{10} q = -5.58$

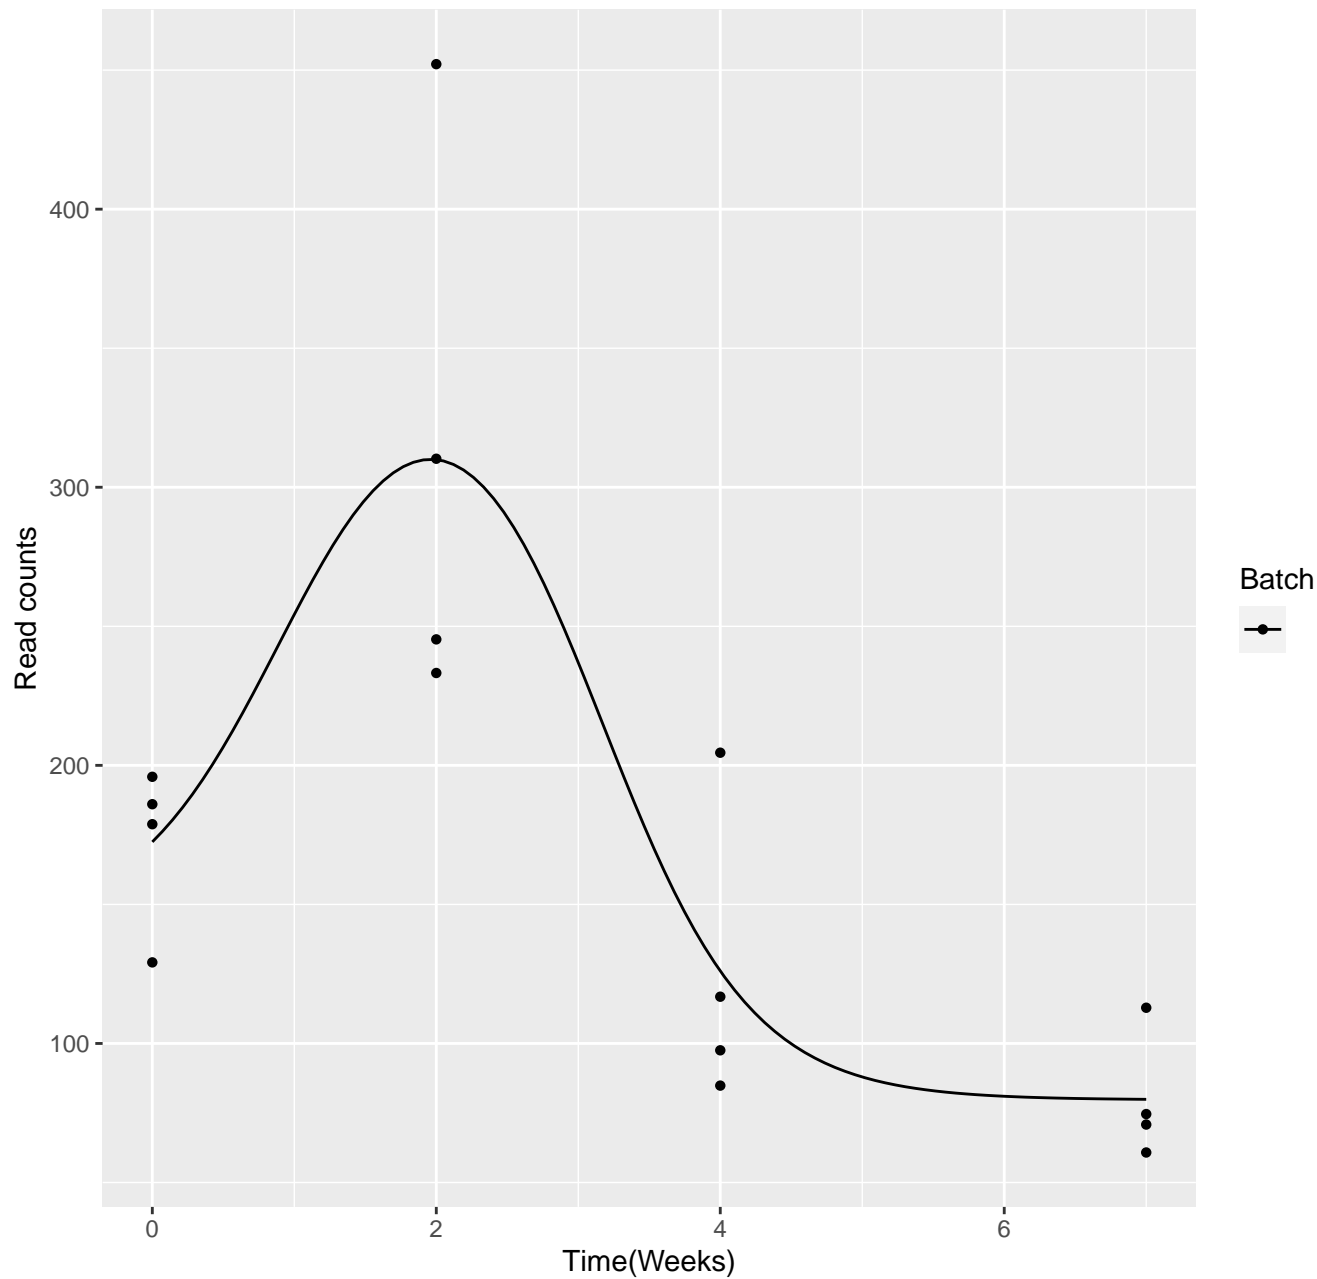

RASSF8:  $\log_{10} q = -5.58$

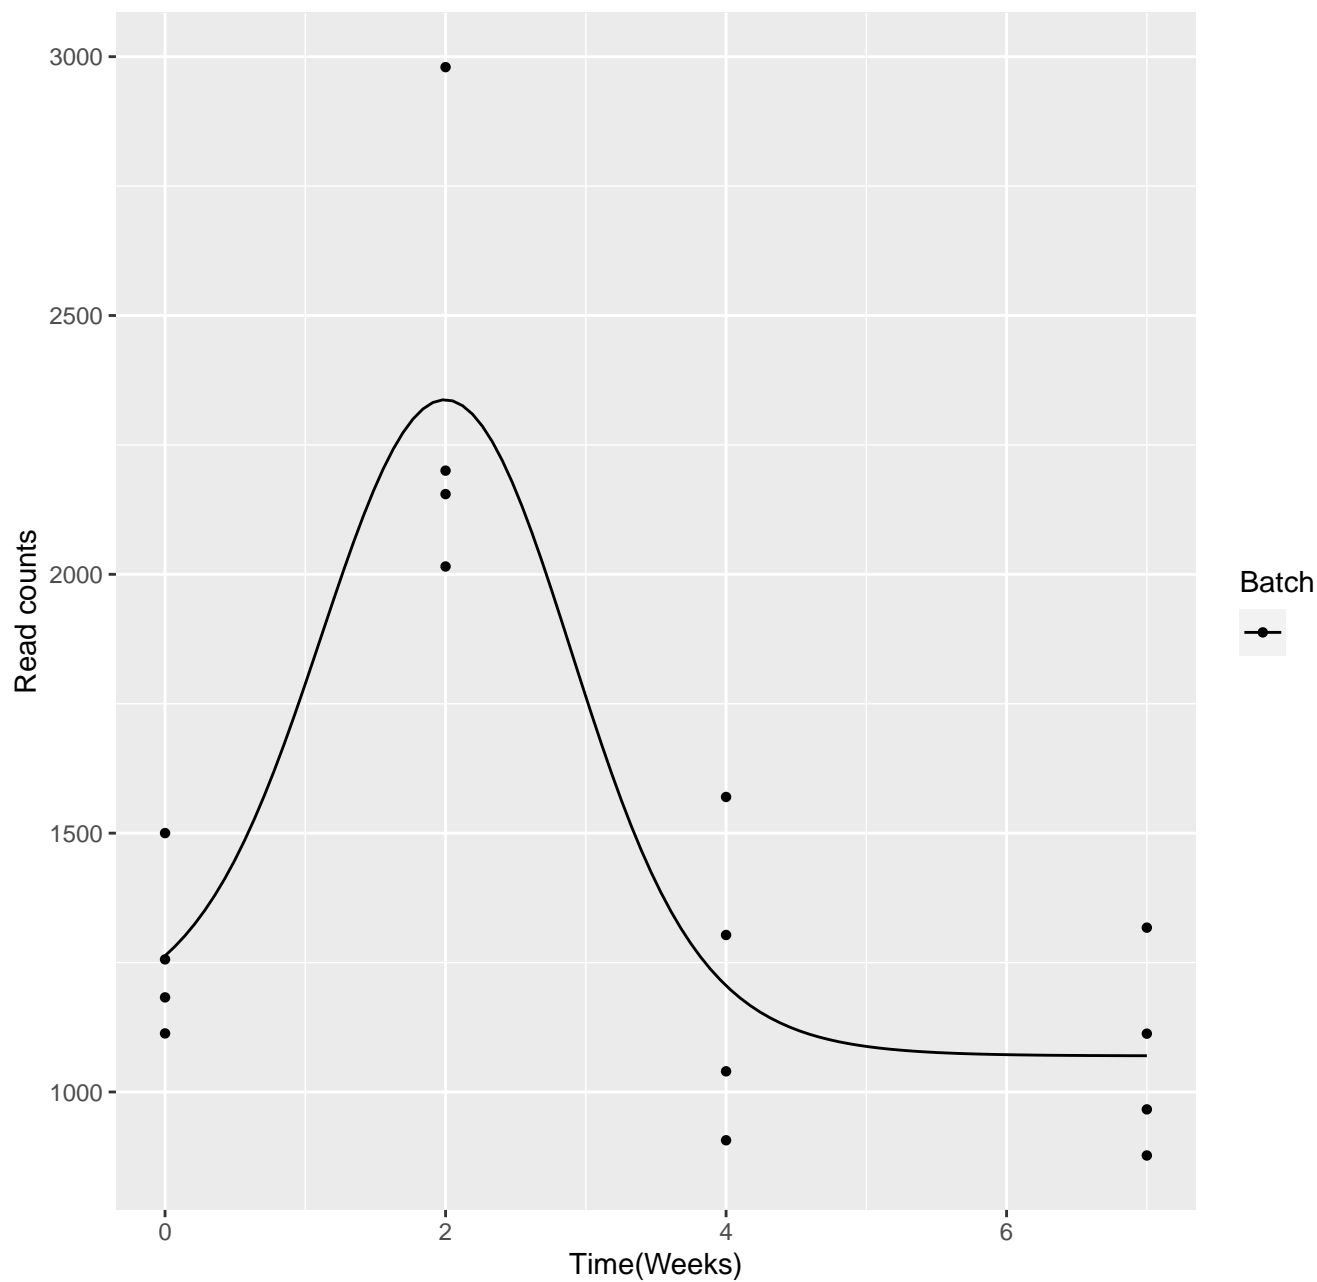

PNP:  $\log_{10} q = -5.57$

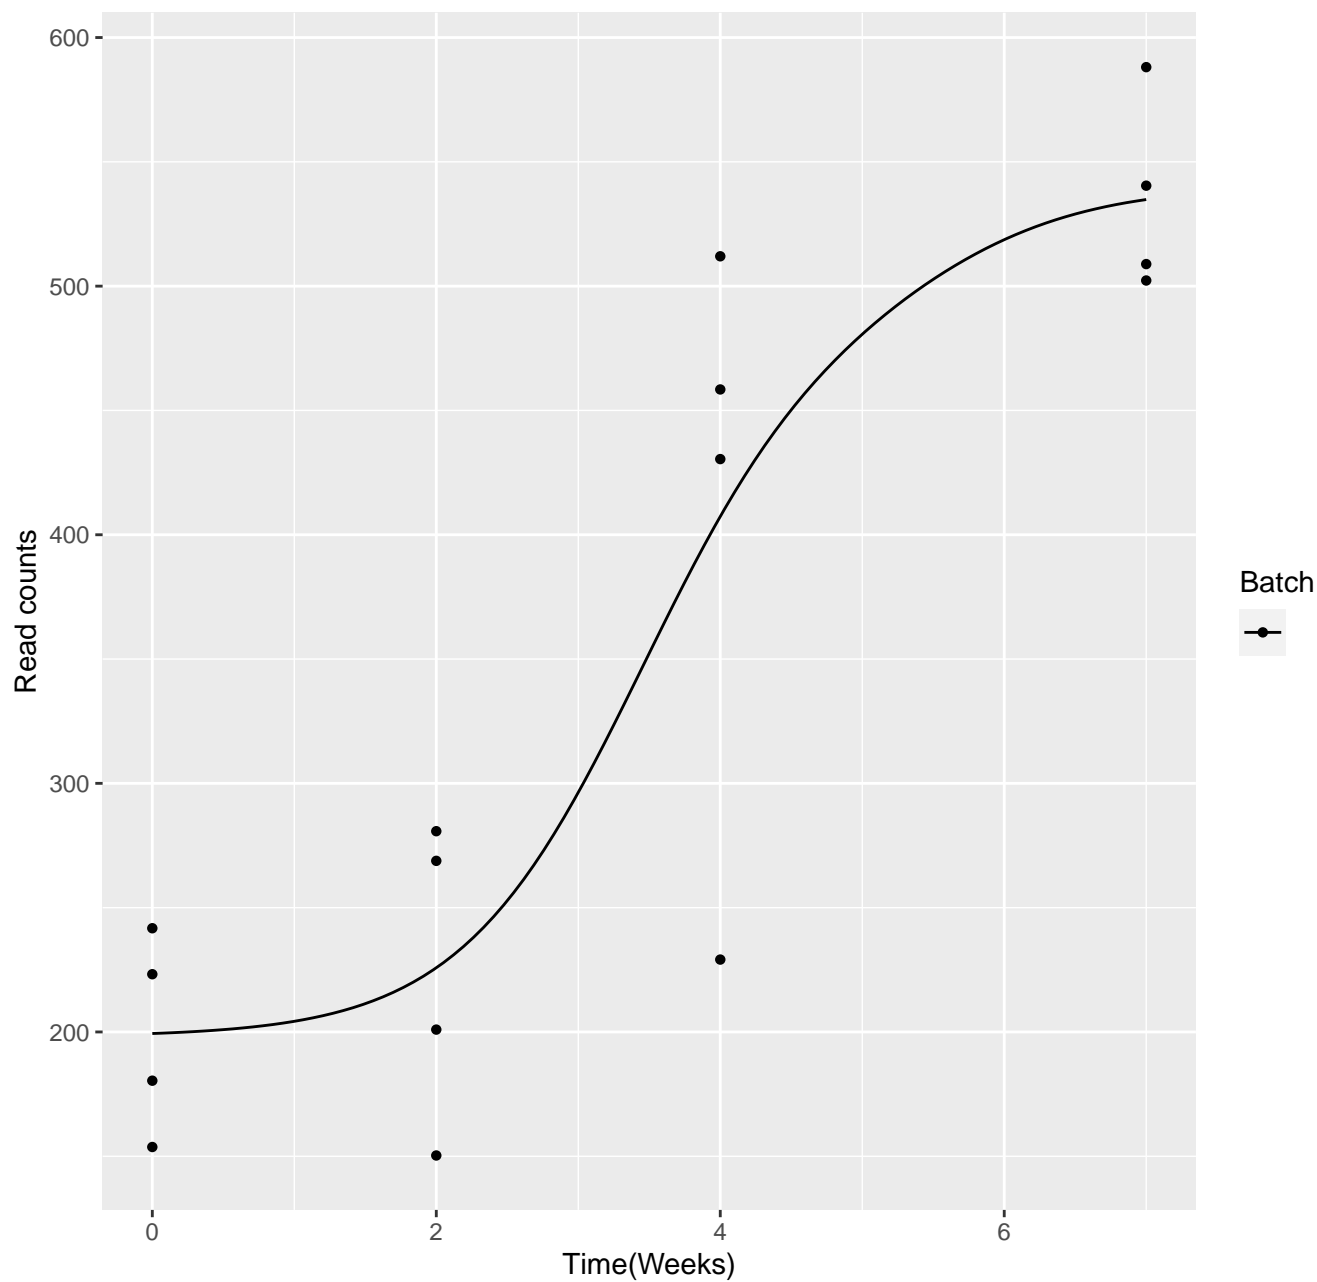

LY86:  $\log_{10} q = -5.56$

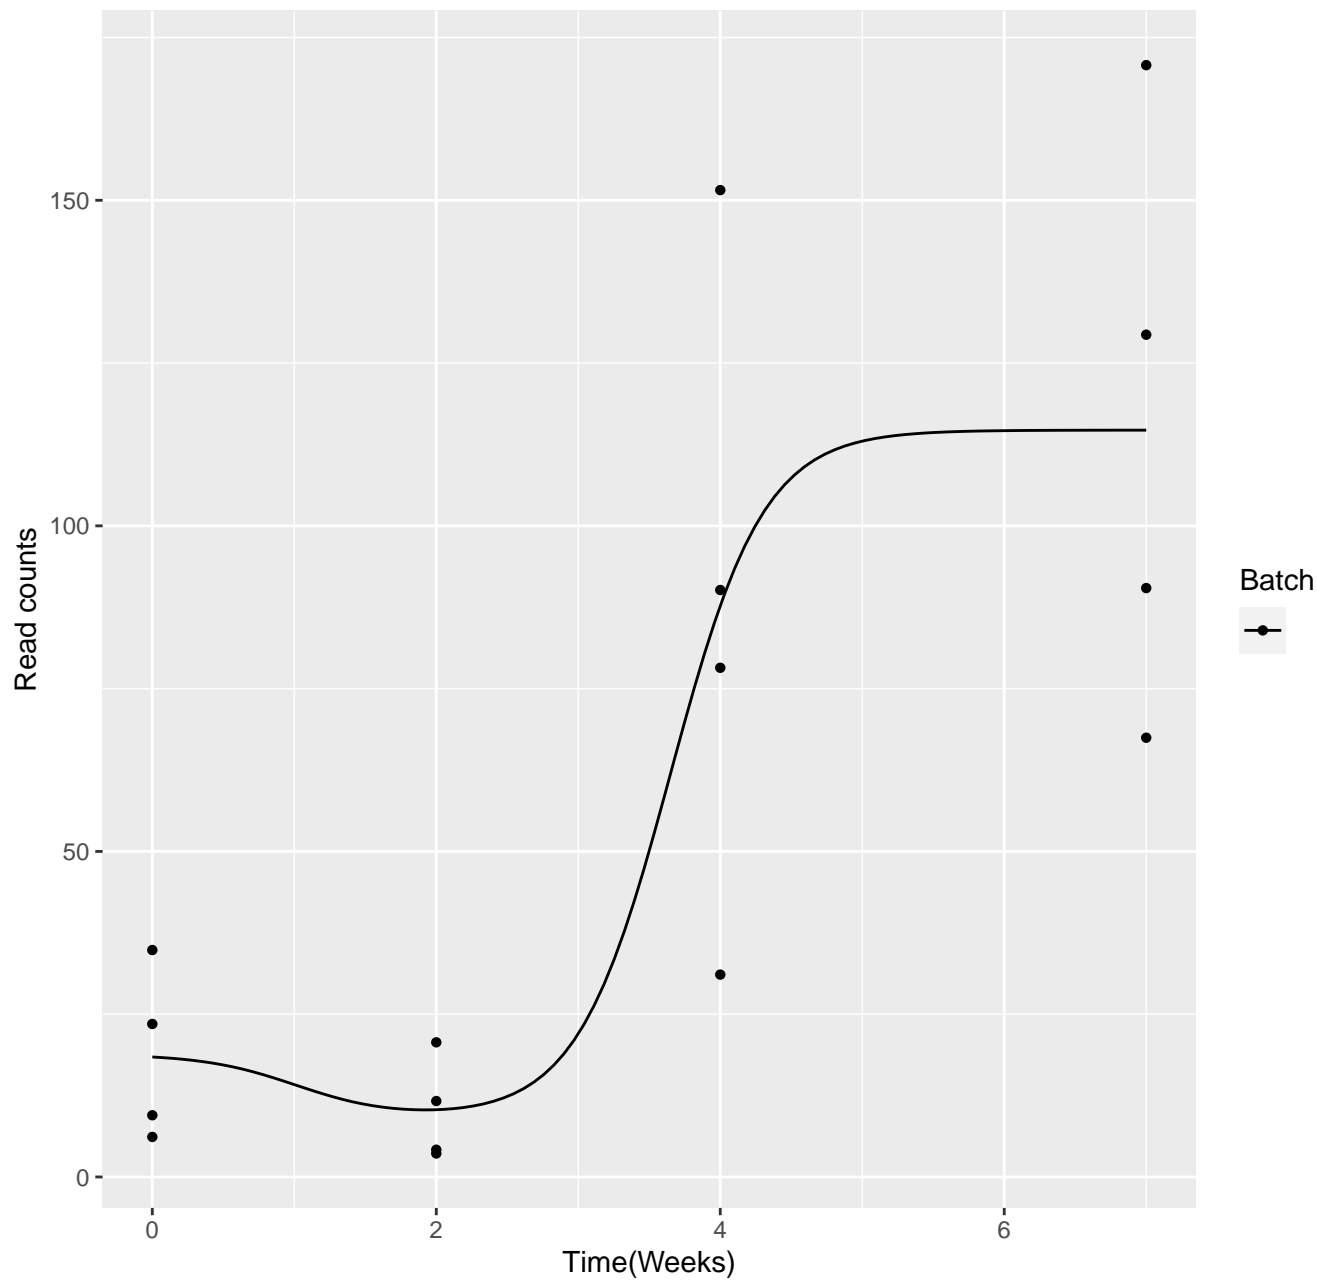

TNC:  $\log_{10} q = -5.55$

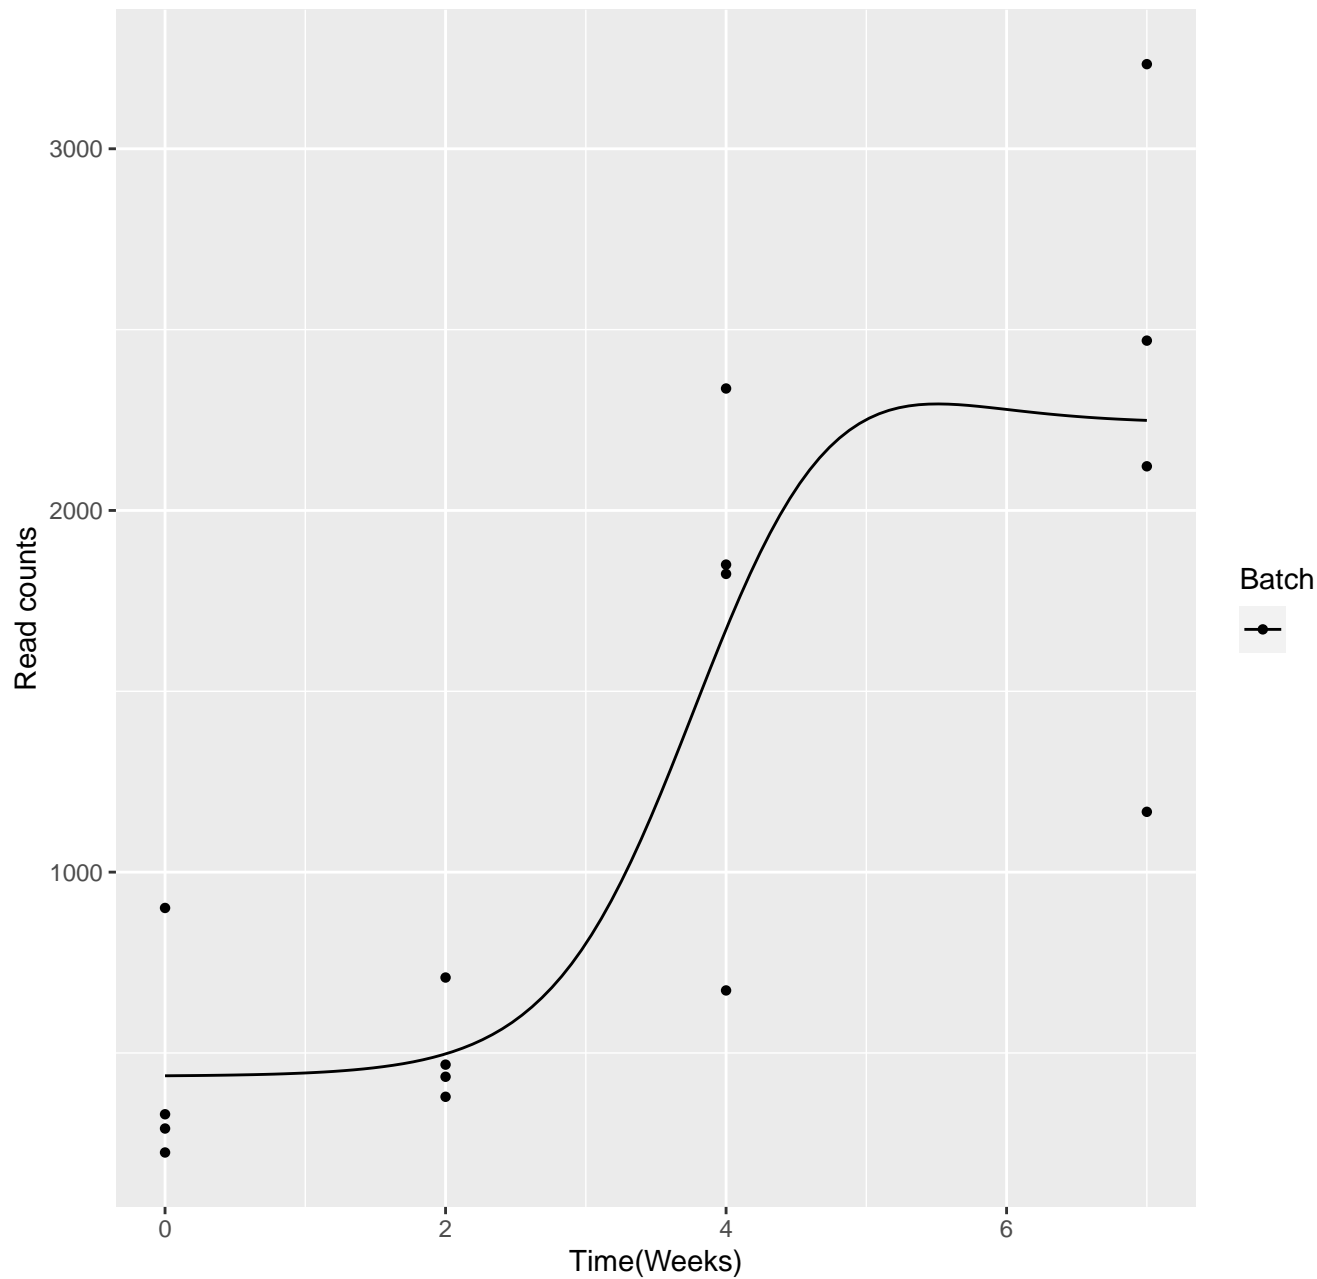

LMO2:  $\log_{10} q = -5.55$

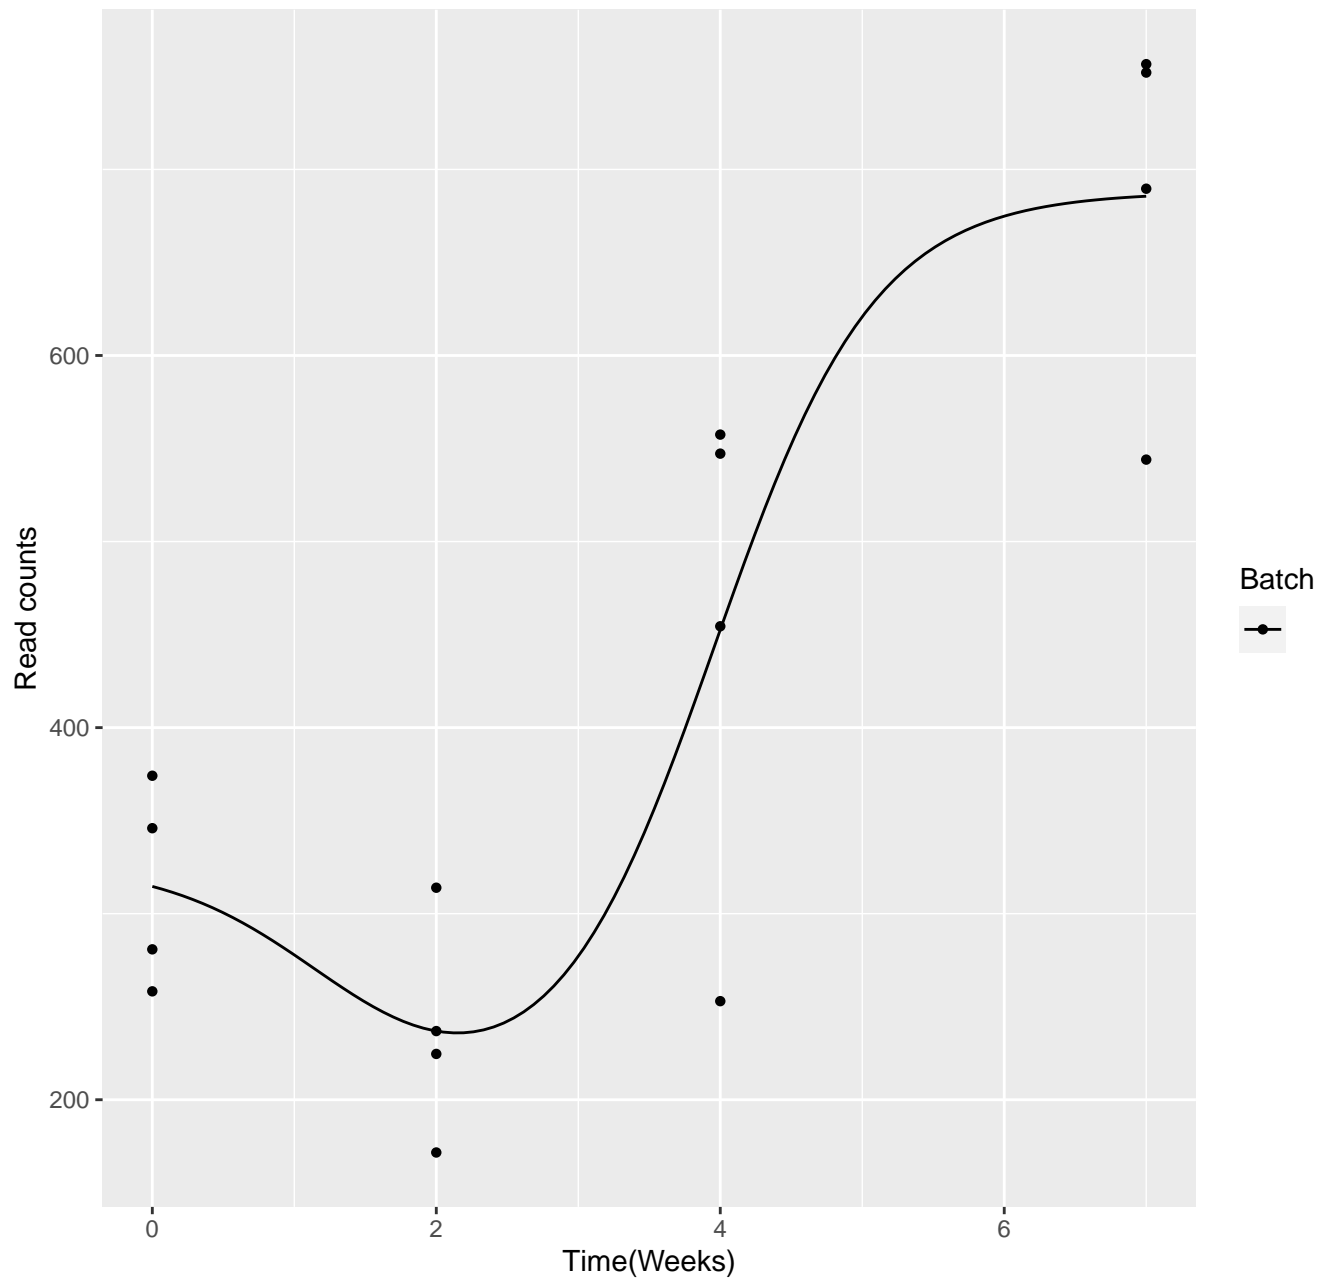



RLA-DR-ALPHA:  $\log_{10} q = -5.55$

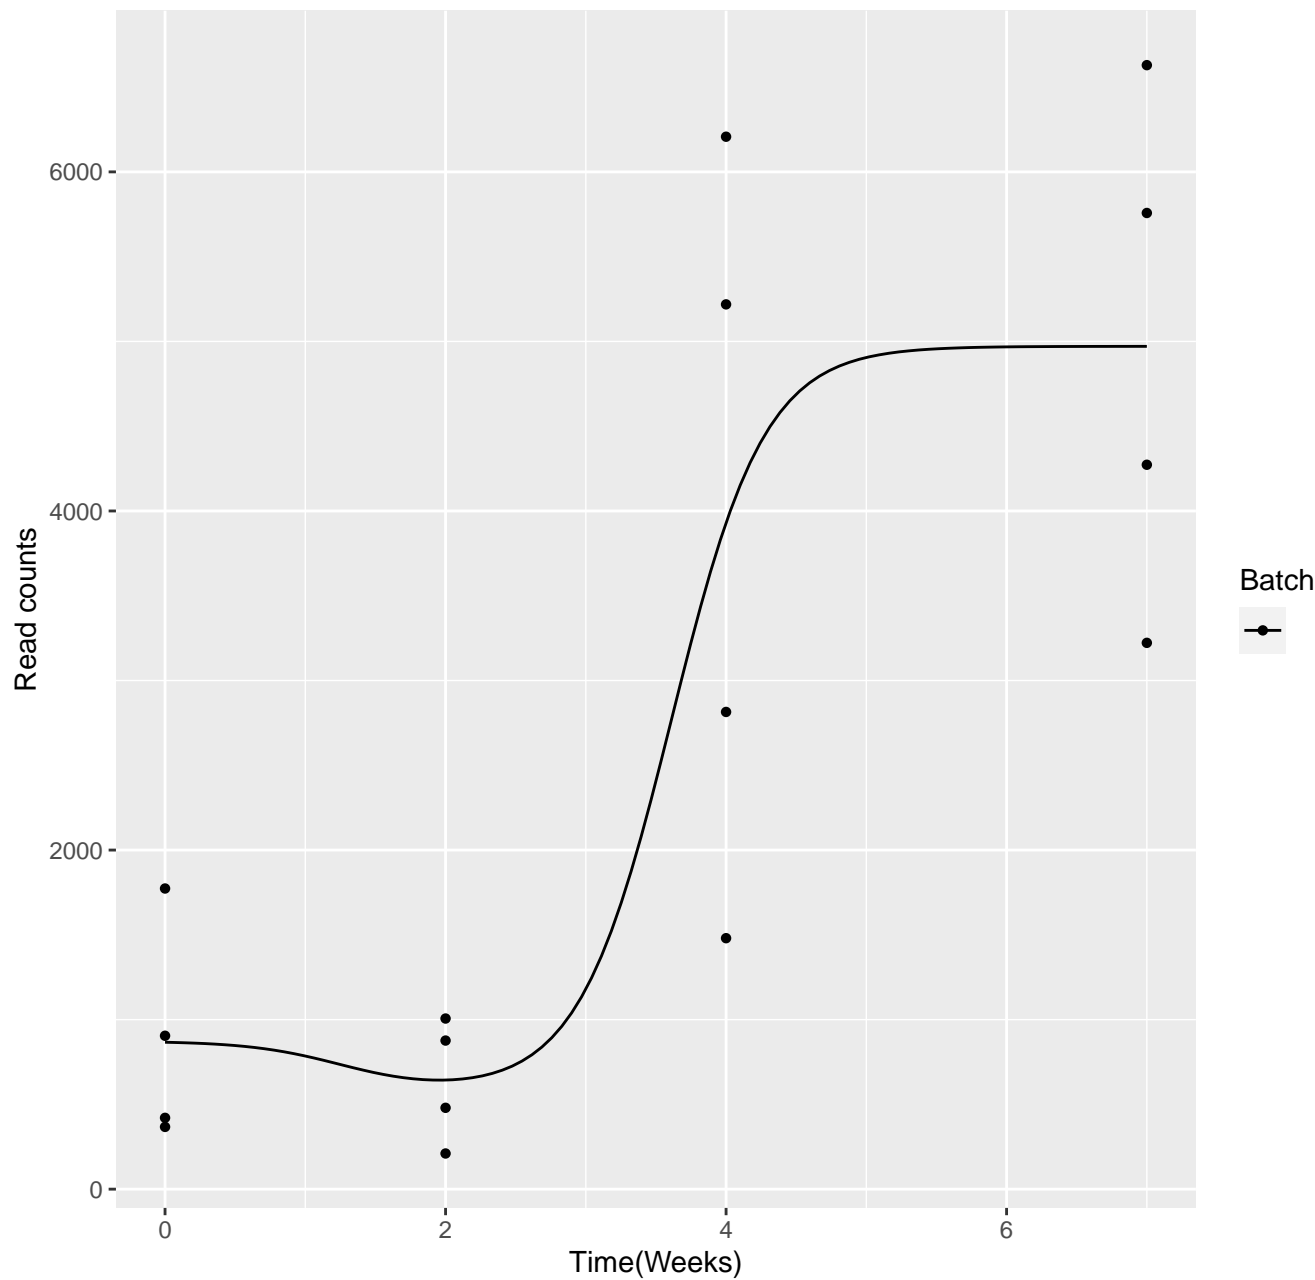

SLC47A1:  $\log_{10} q = -5.55$

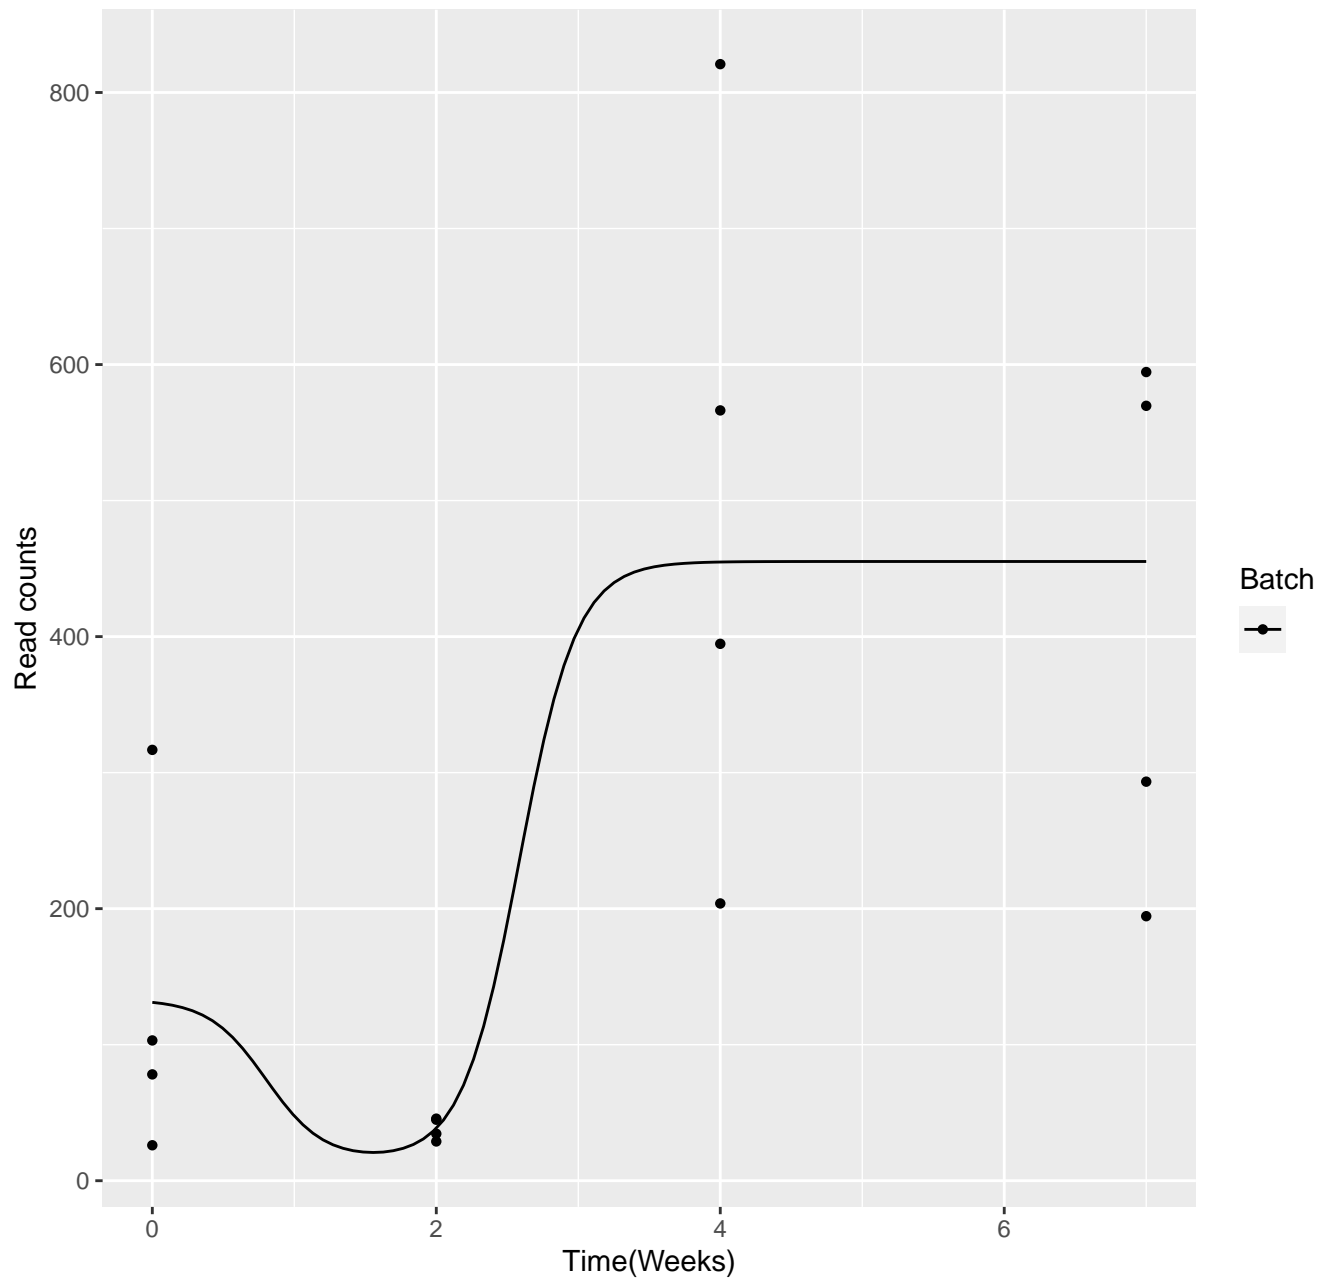

COL13A1:  $\log_{10} q = -5.53$

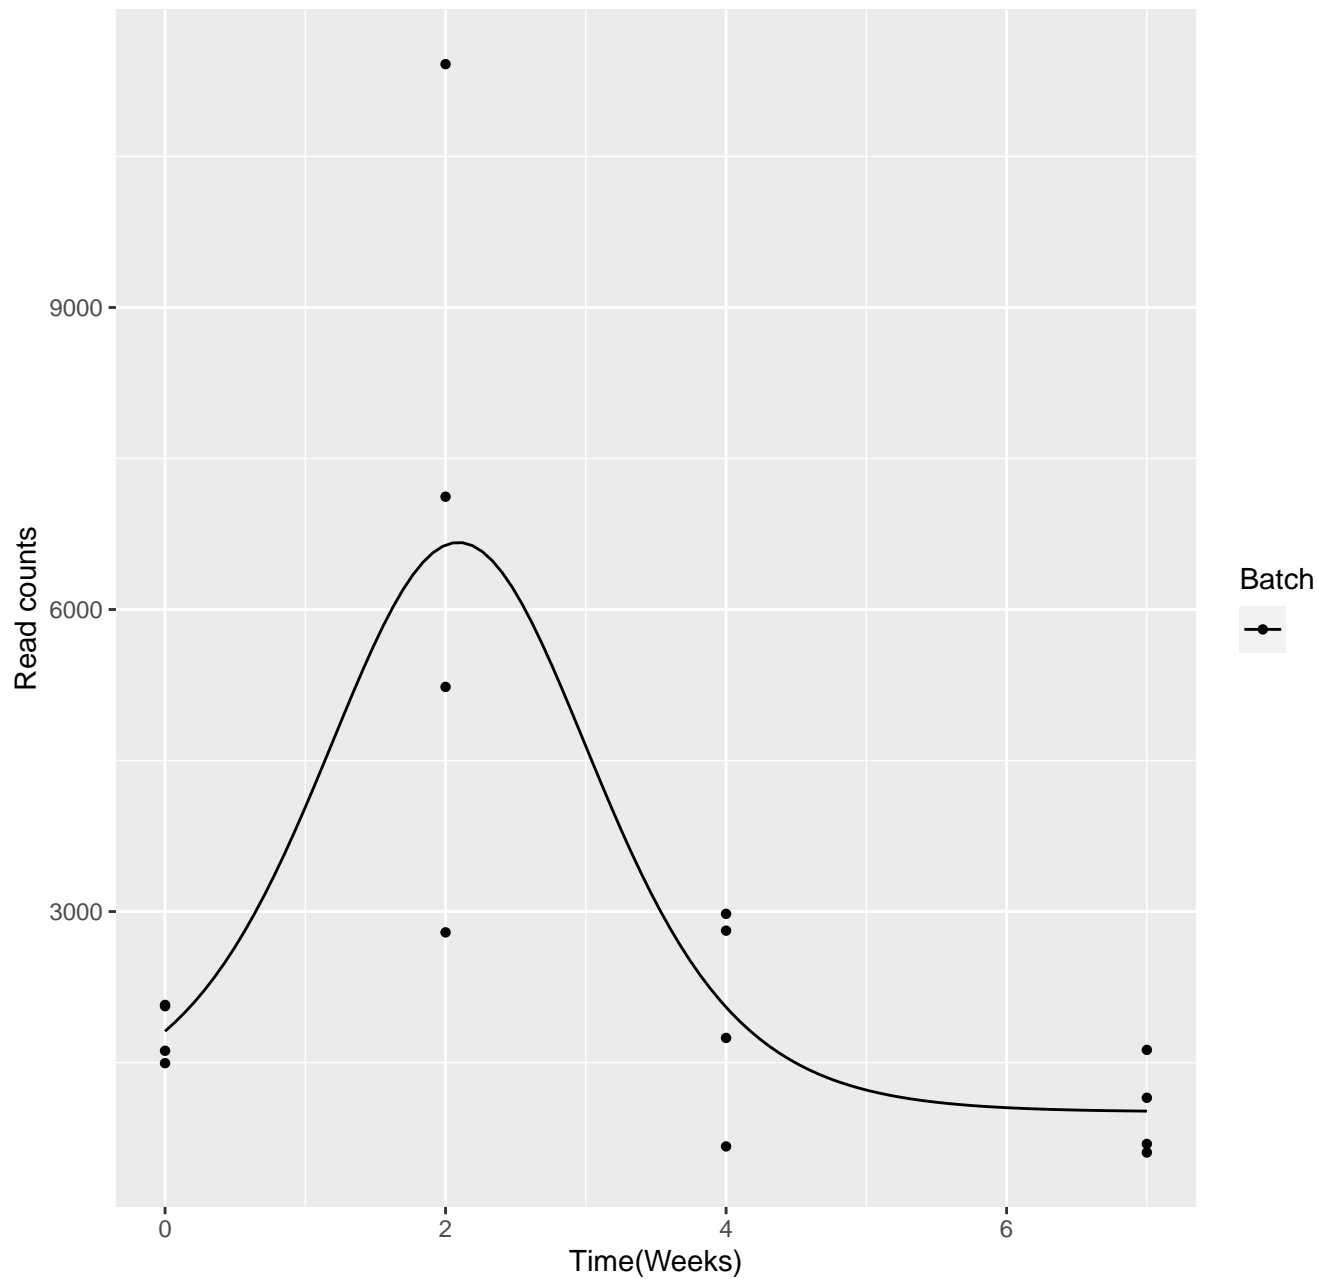

CX3CL1:  $\log_{10} q = -5.53$

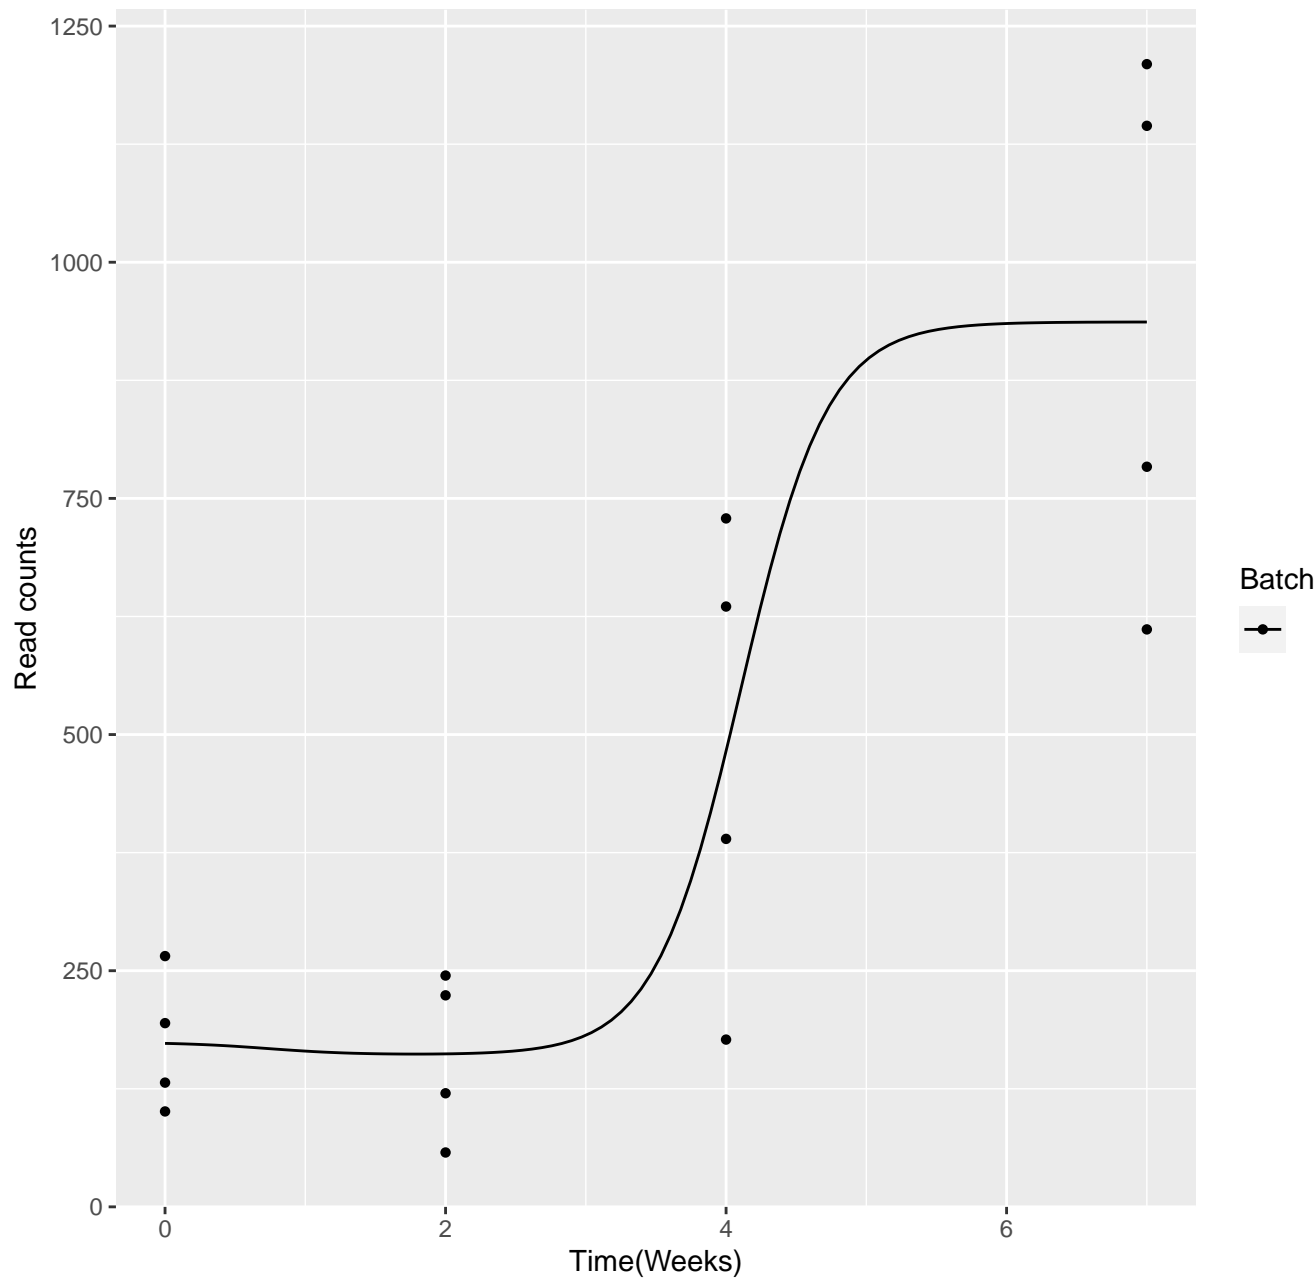

STAC2:  $\log_{10} q = -5.52$

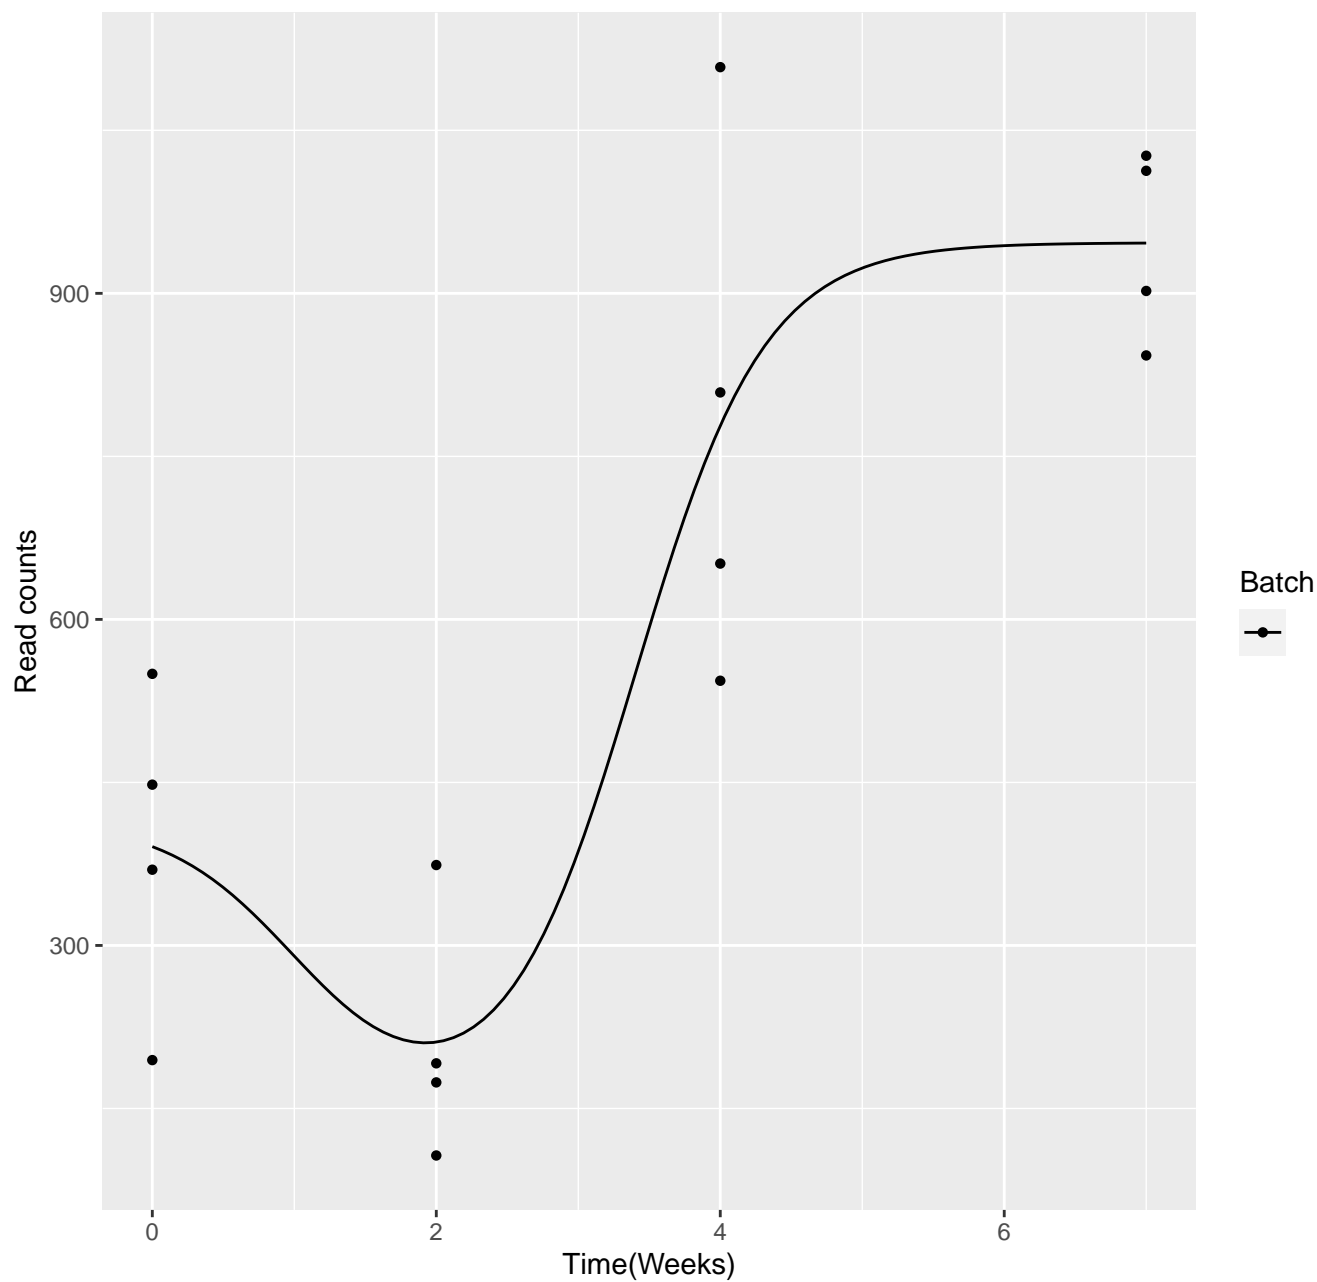

SPSB1:  $\log_{10} q = -5.49$

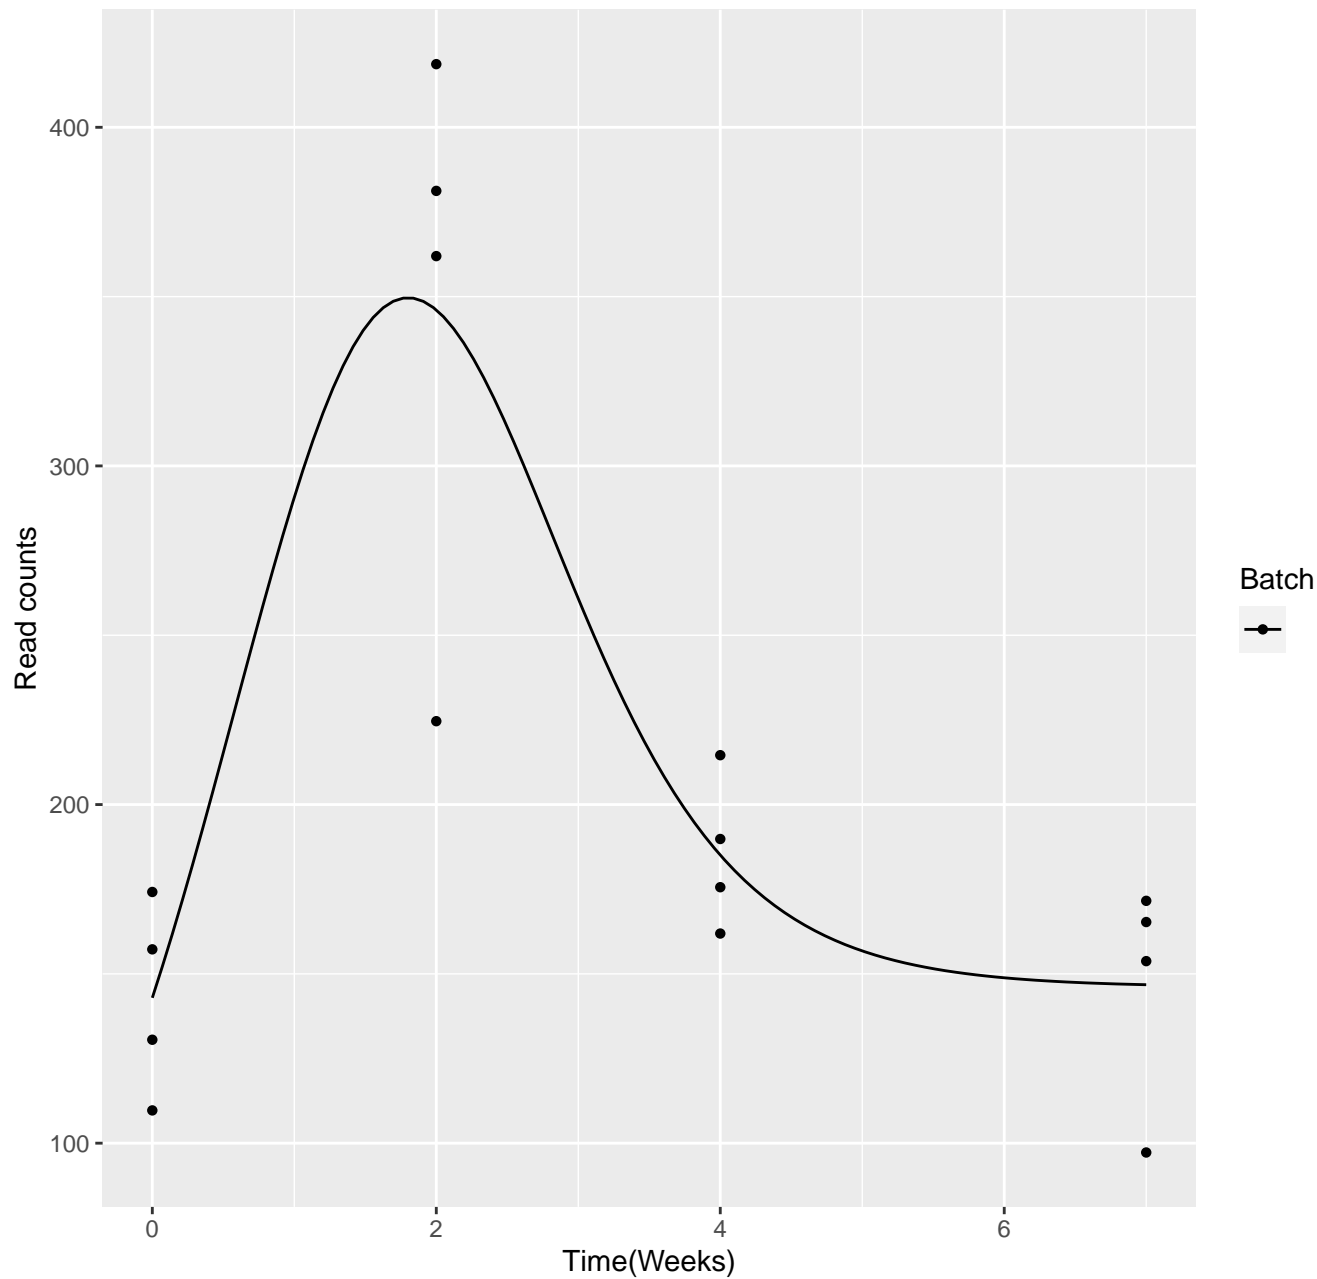

BTK:  $\log_{10} q = -5.46$

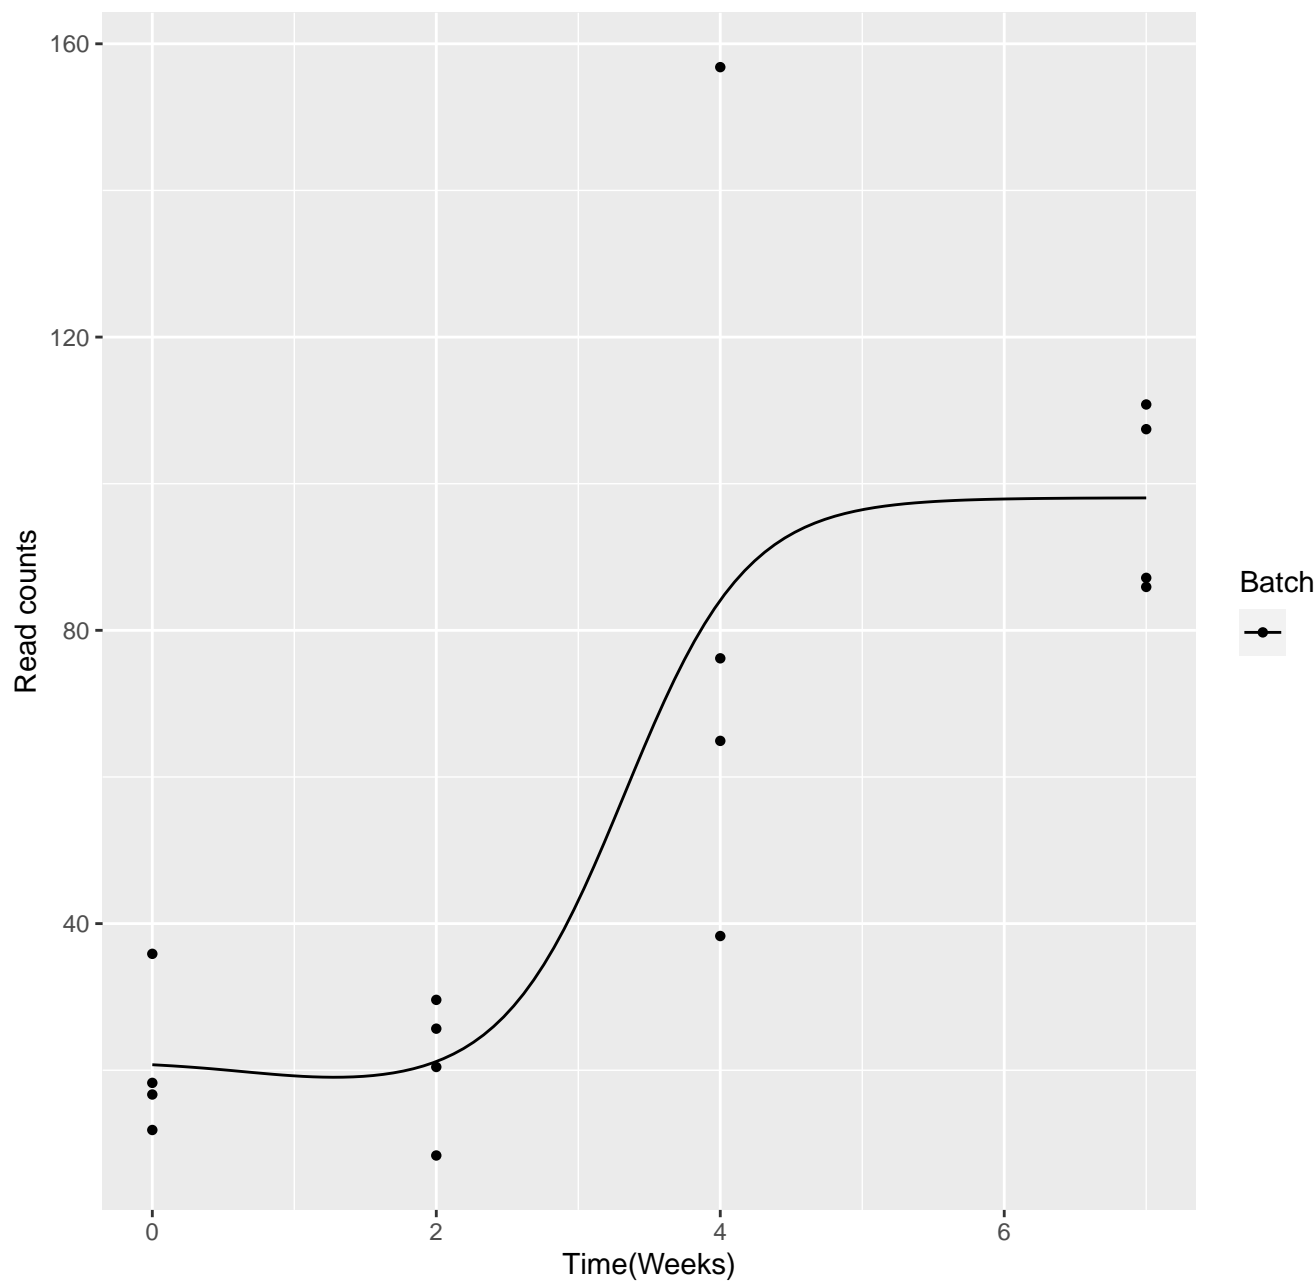

ALOX5:  $\log_{10} q = -5.46$

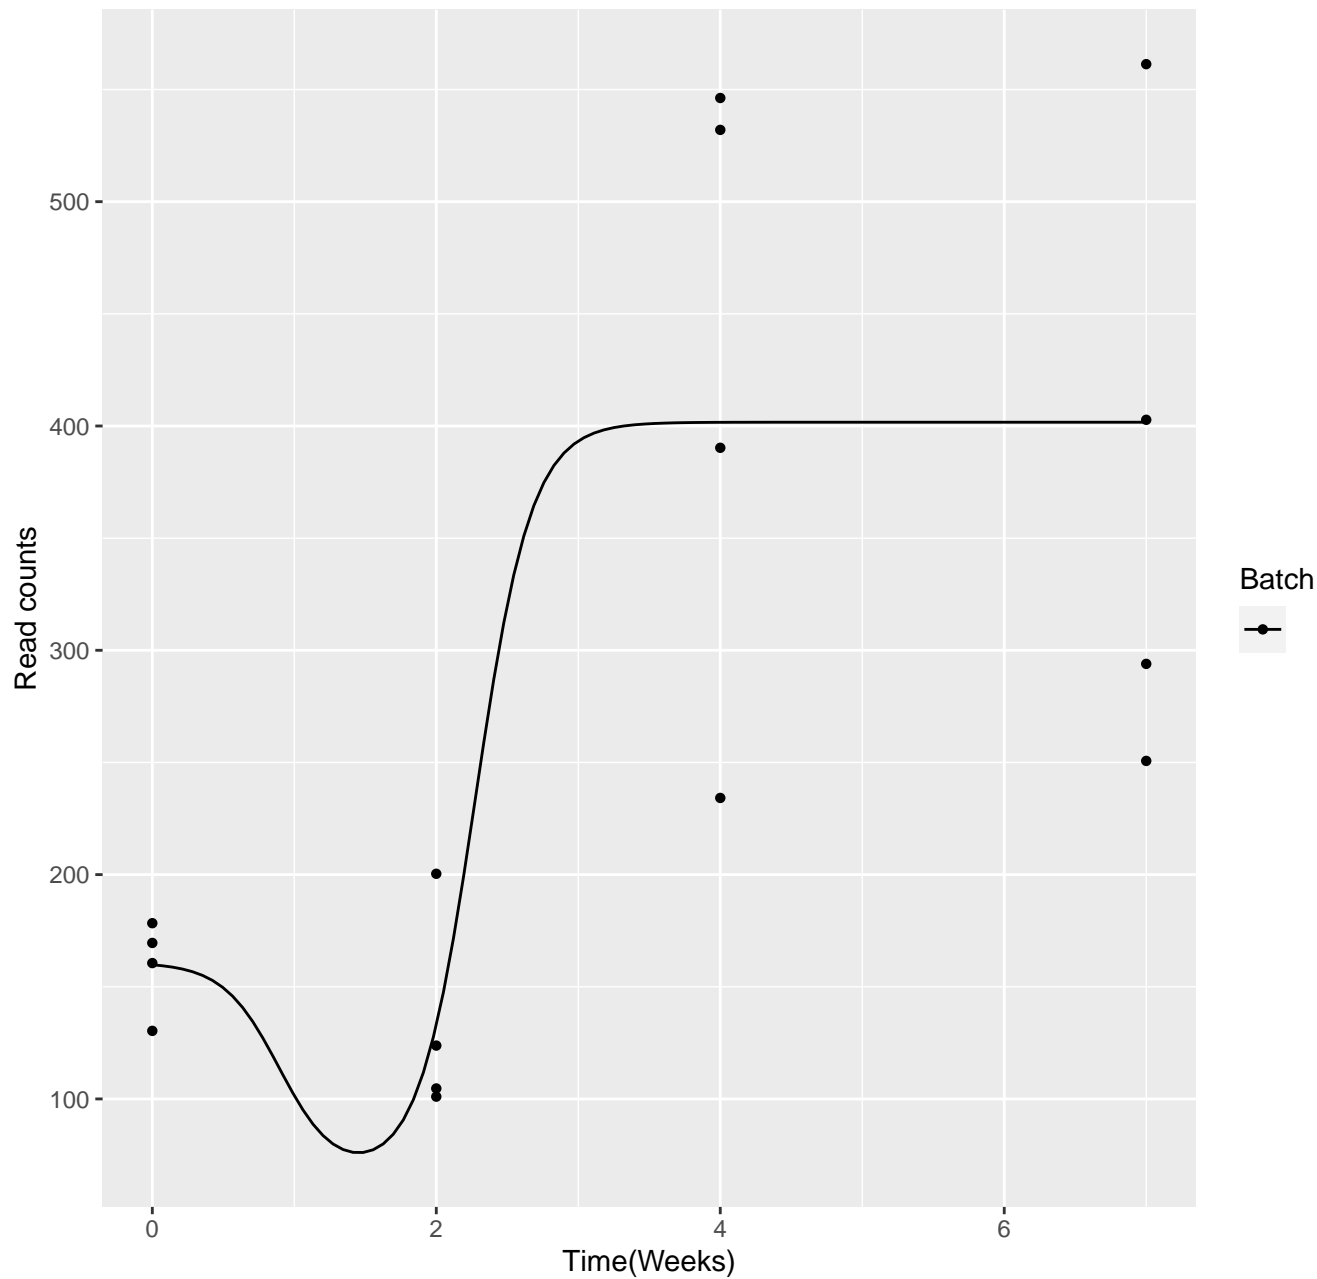



PIK3R5:  $\log_{10} q = -5.45$

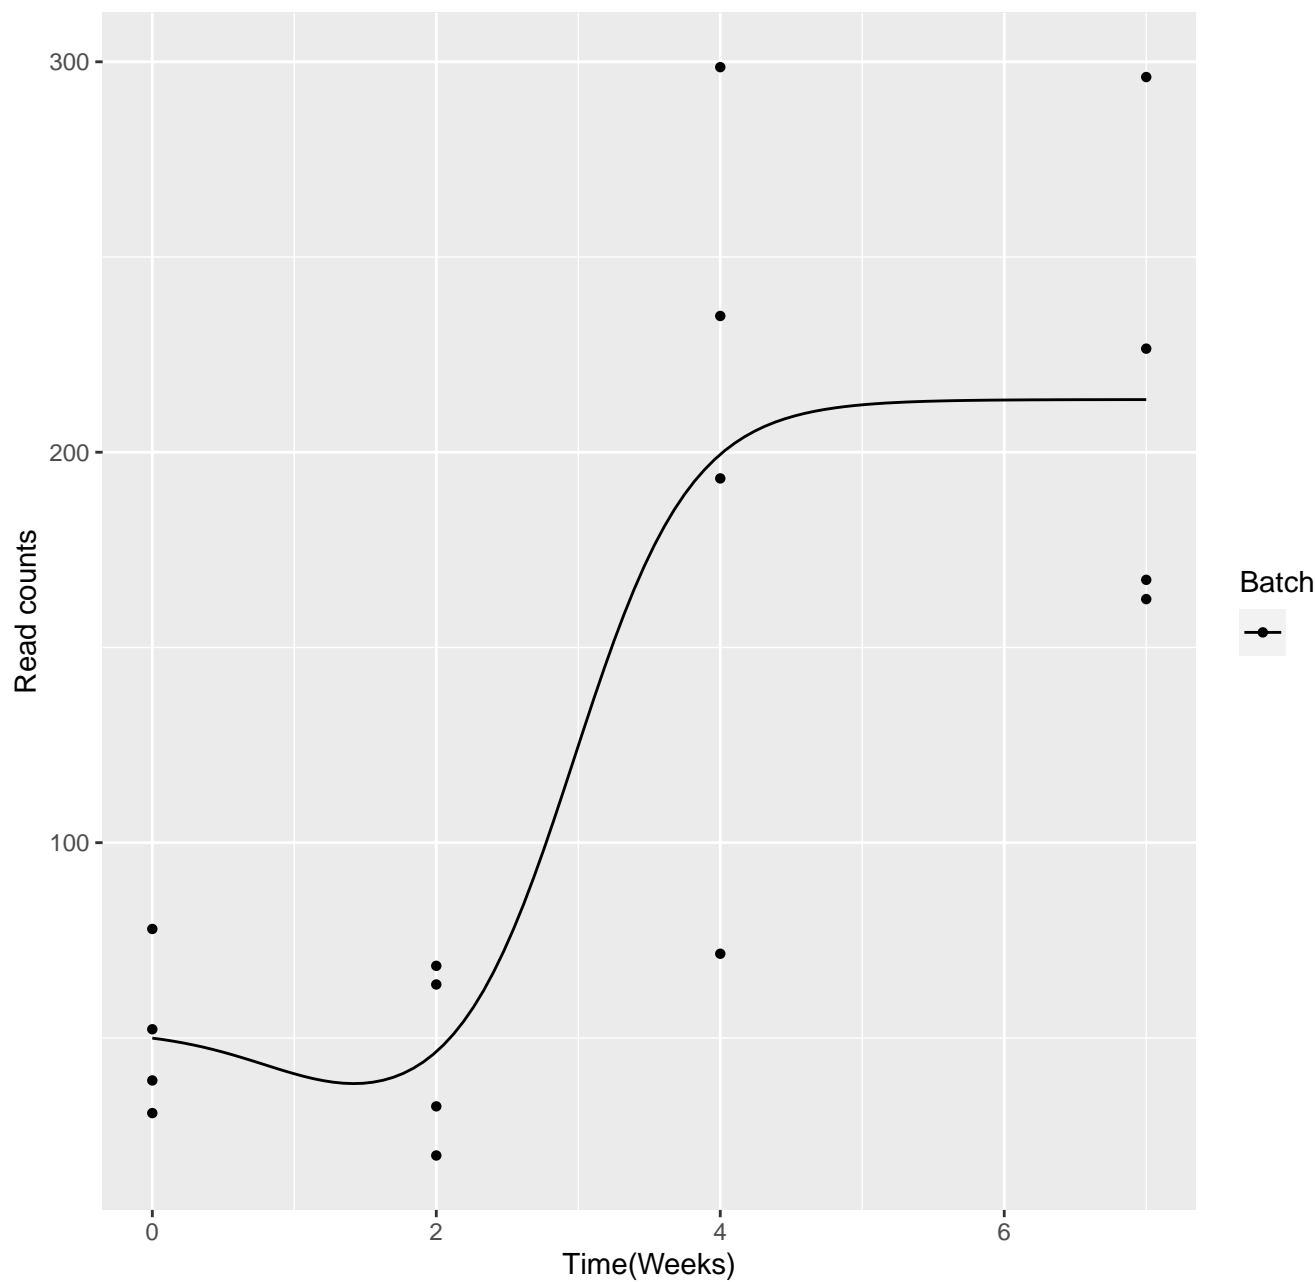

FOXM1:  $\log_{10} q = -5.44$

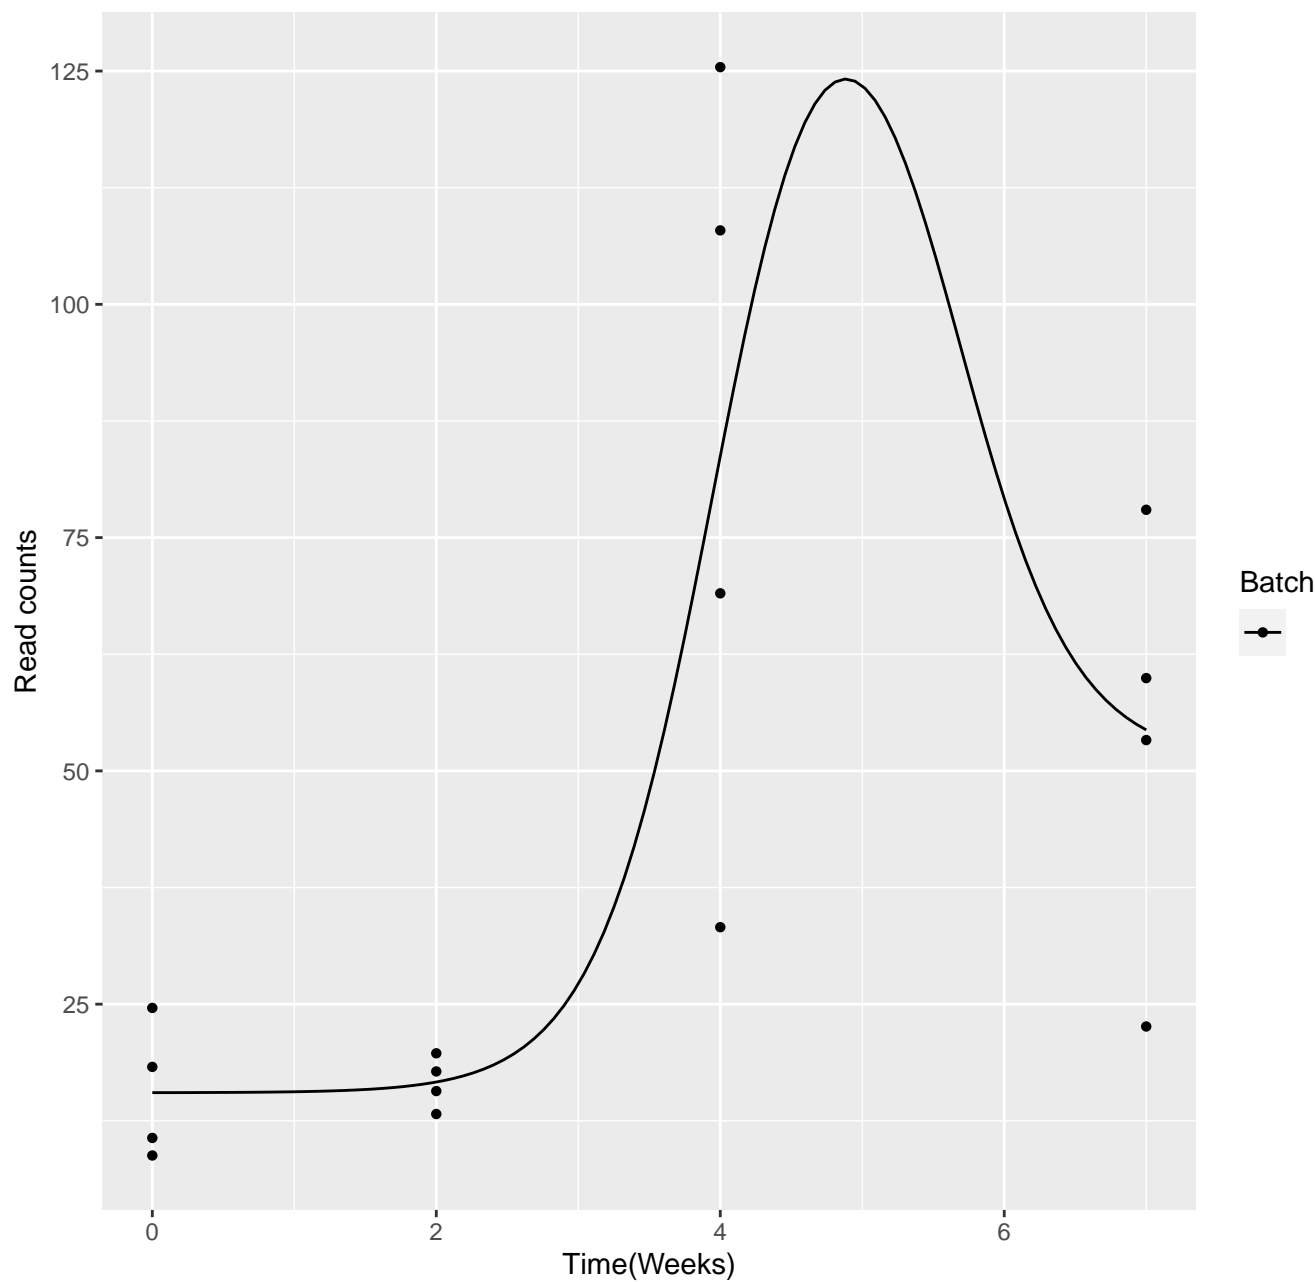

FAM131B:  $\log_{10} q = -5.43$

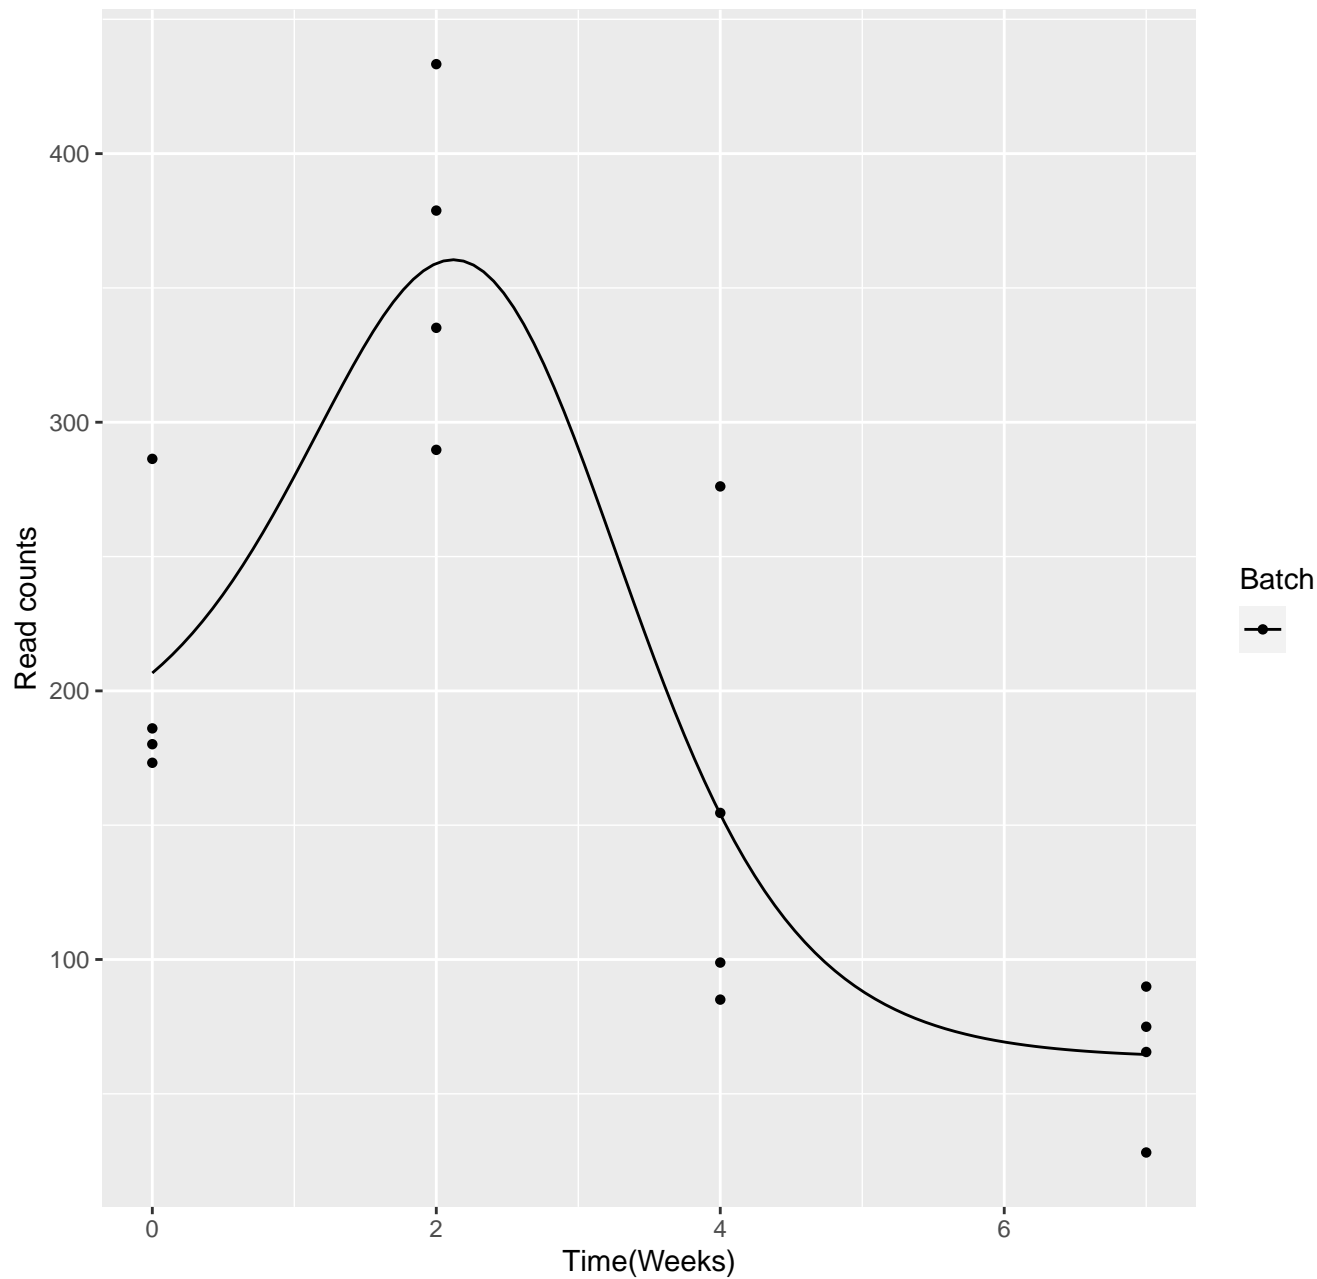

LOC100350907:  $\log_{10} q = -5.43$

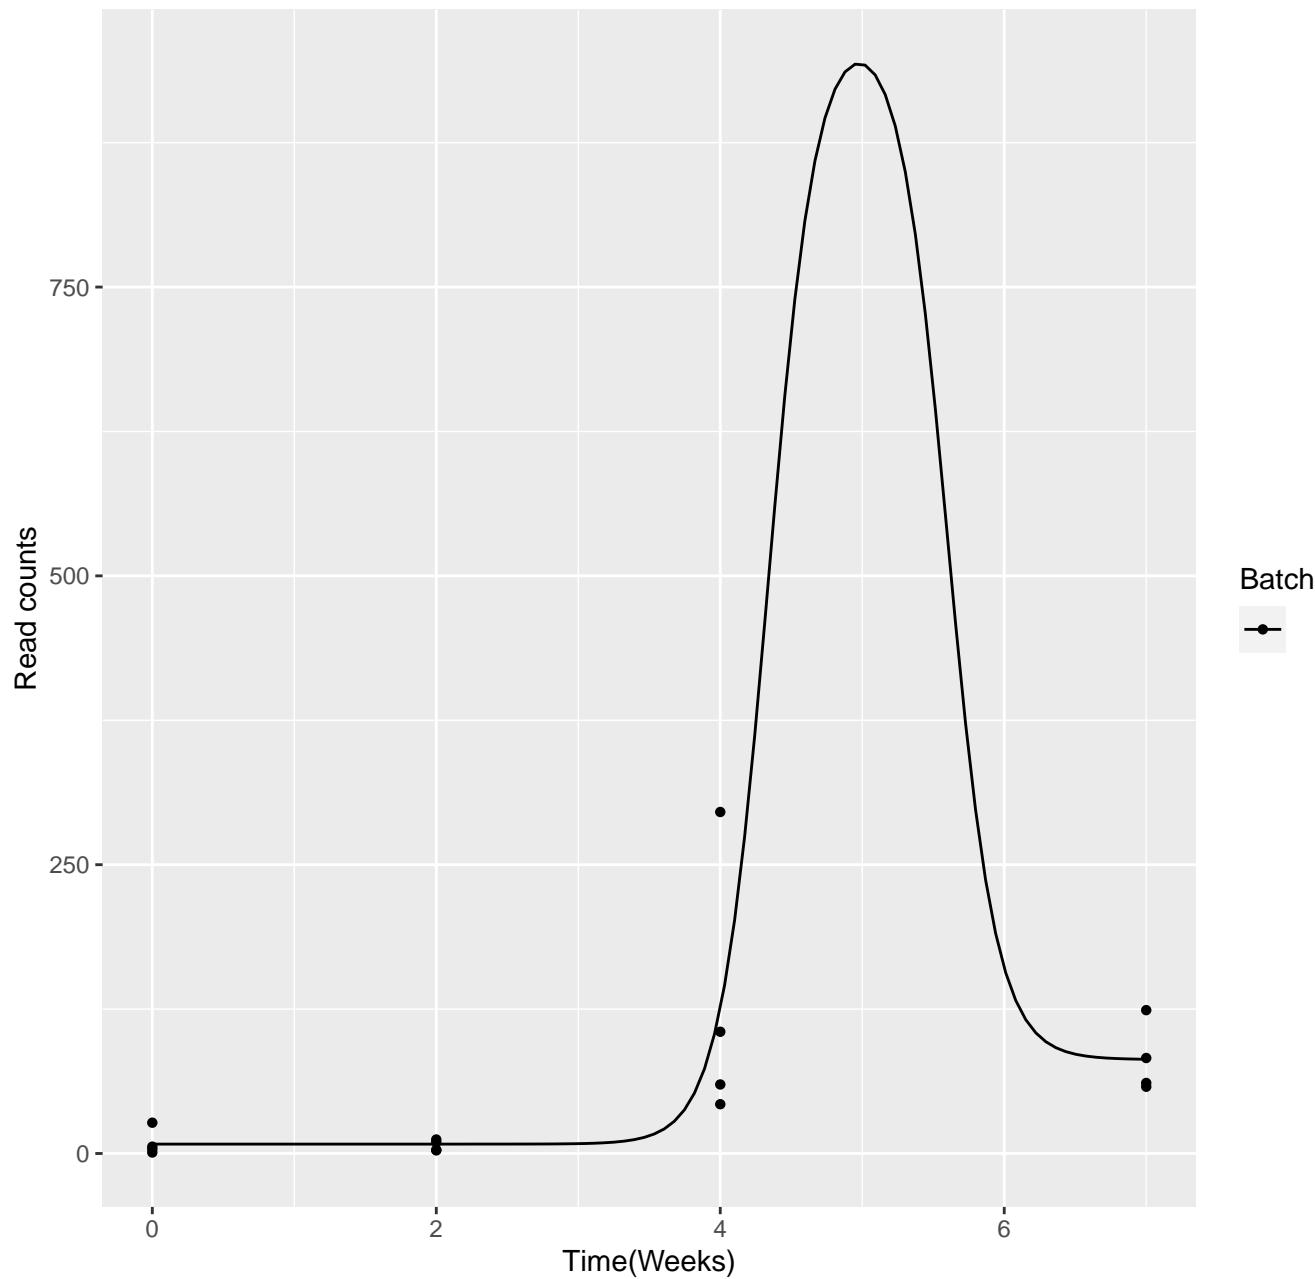

LIMS2:  $\log_{10} q = -5.43$

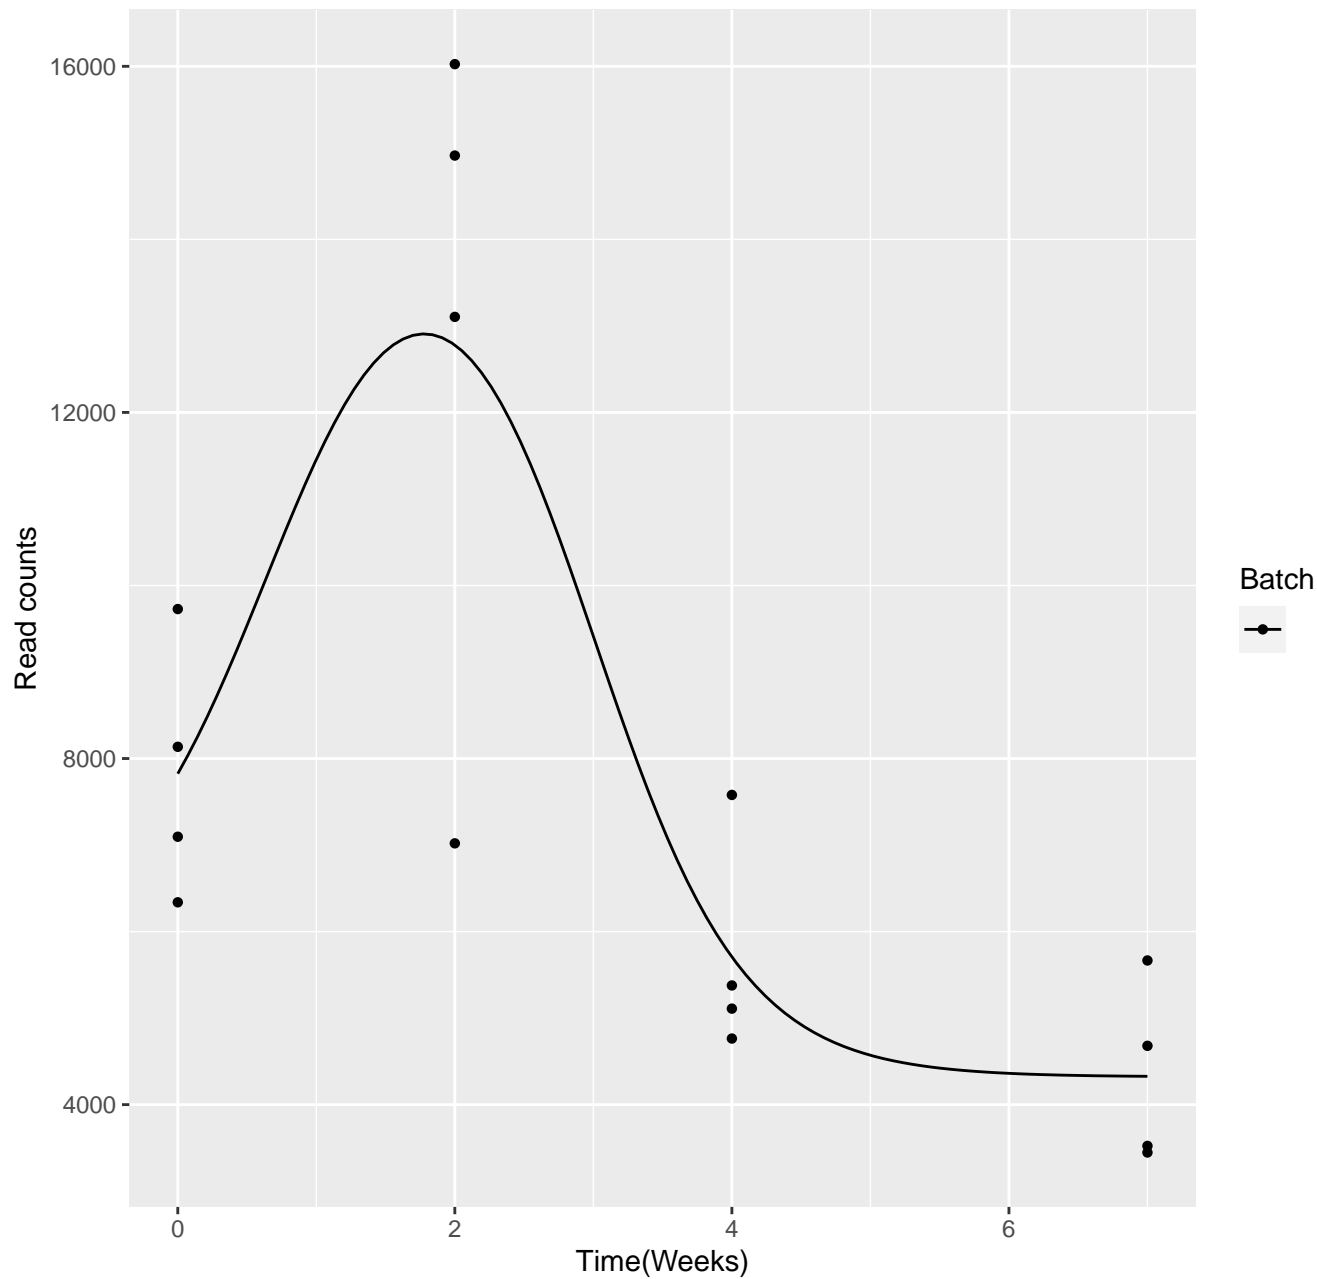

LOC100358185:  $\log_{10} q = -5.42$

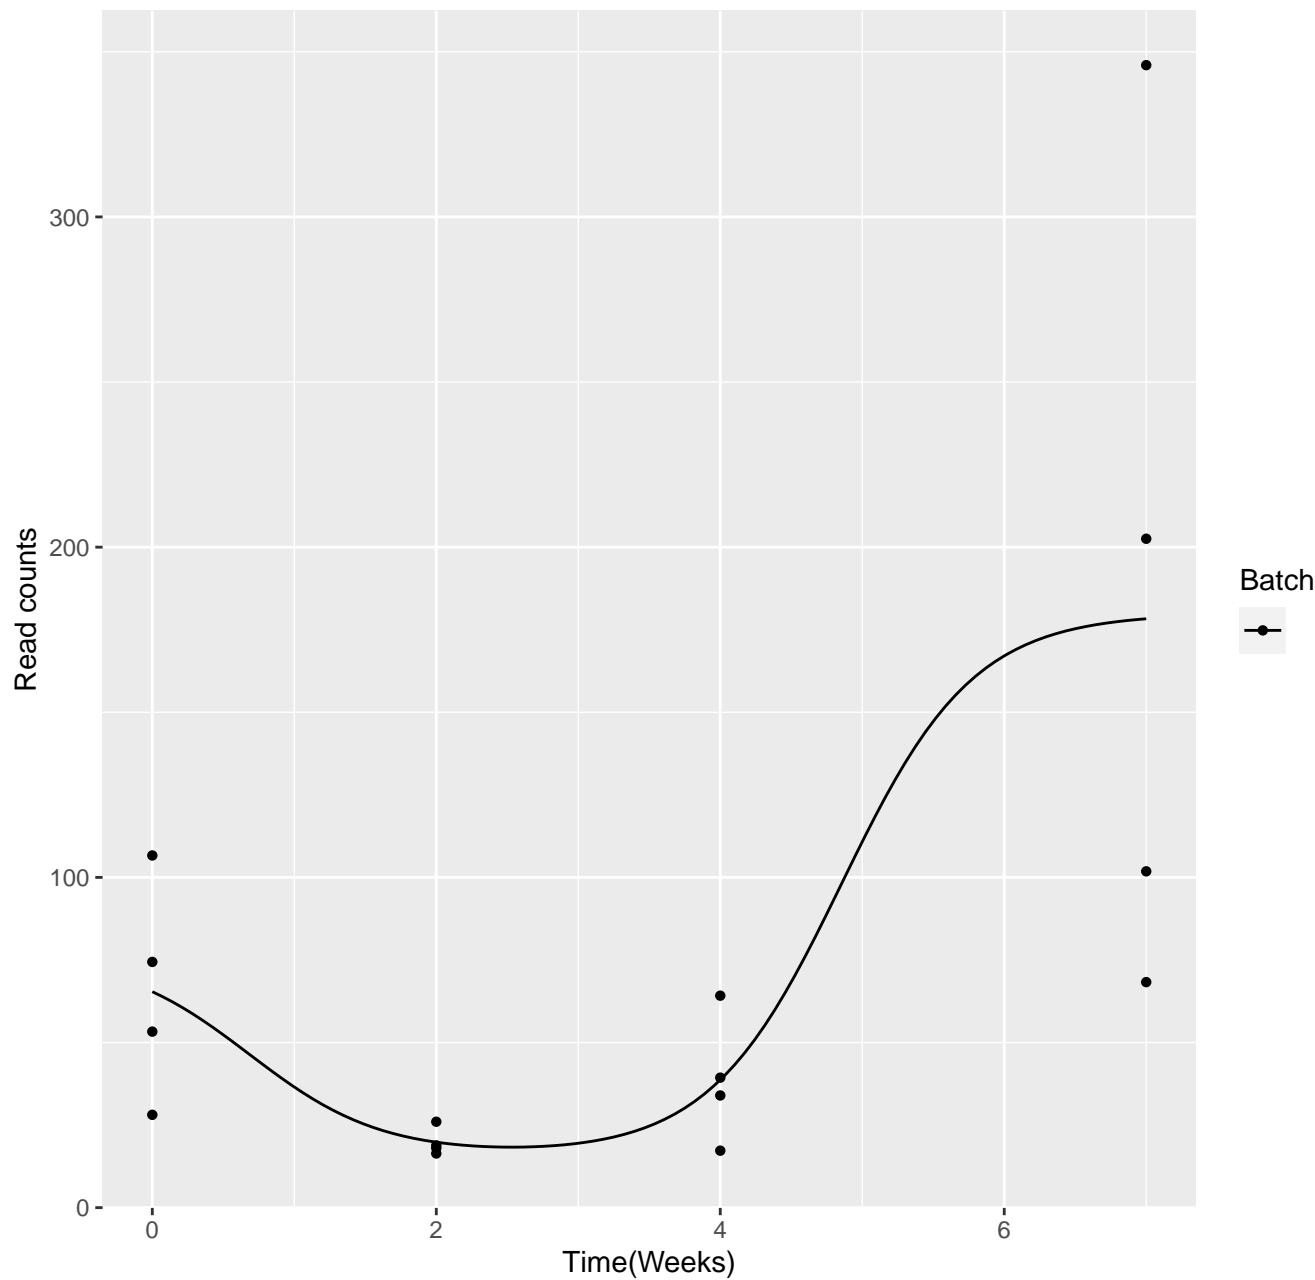

TPST2:  $\log_{10} q = -5.41$

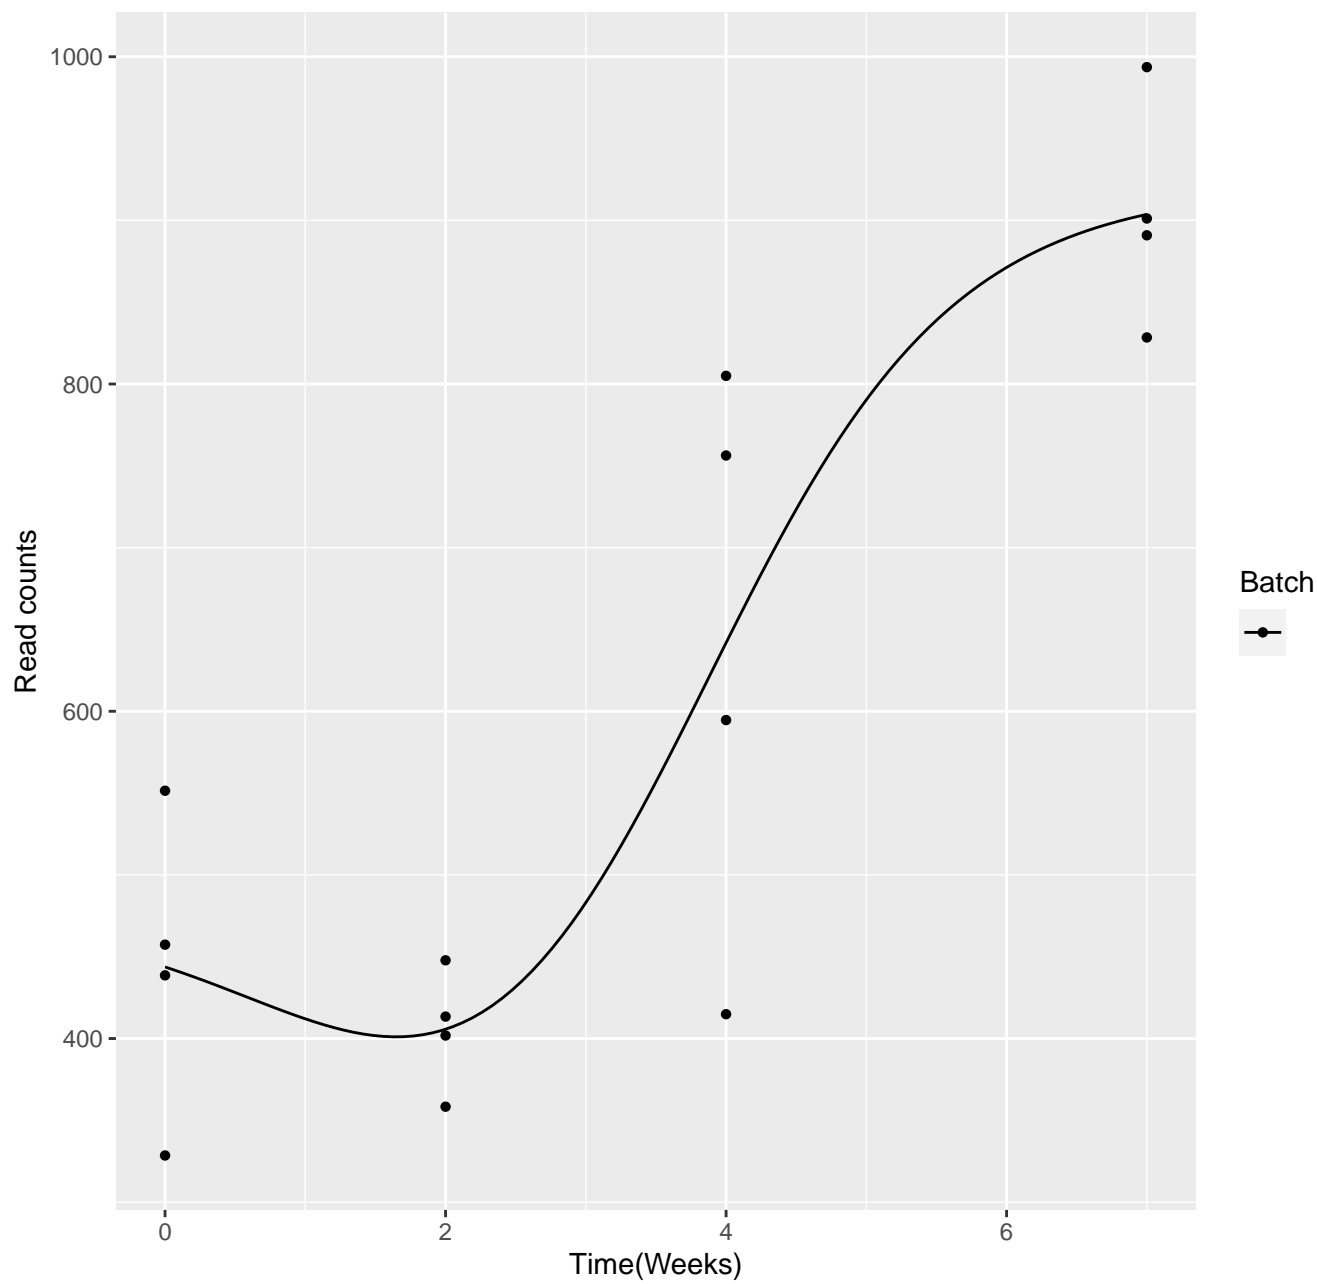

RASAL3:  $\log_{10} q = -5.4$

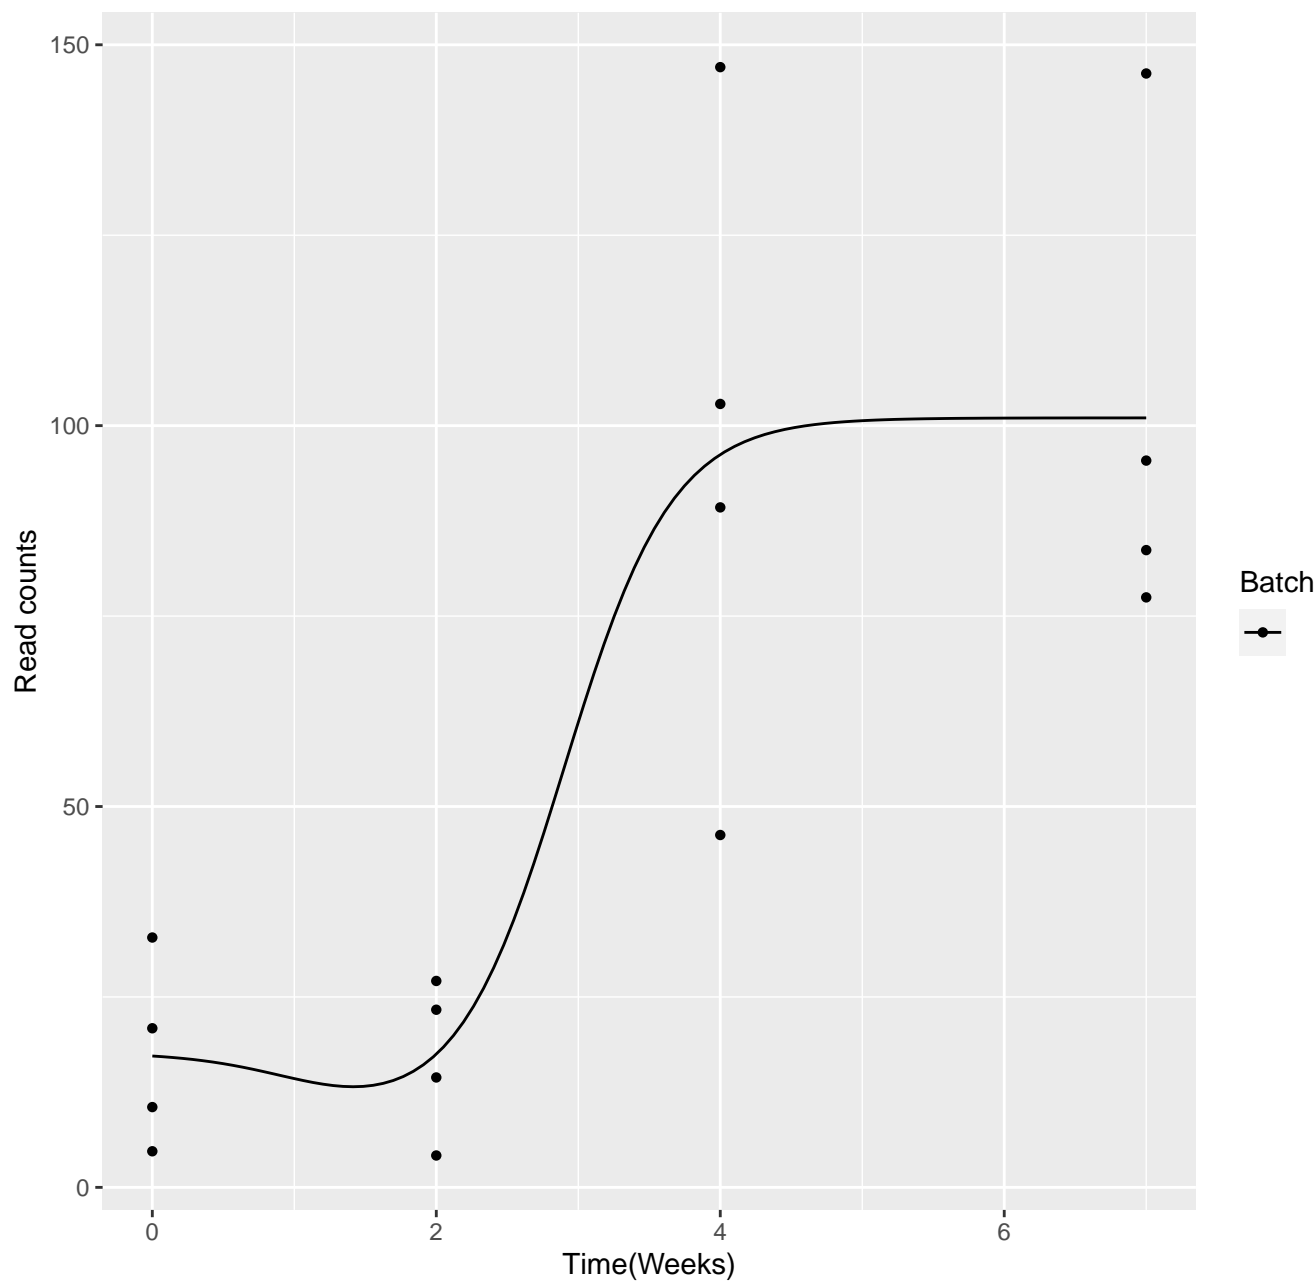



PLTP:  $\log_{10} q = -5.39$

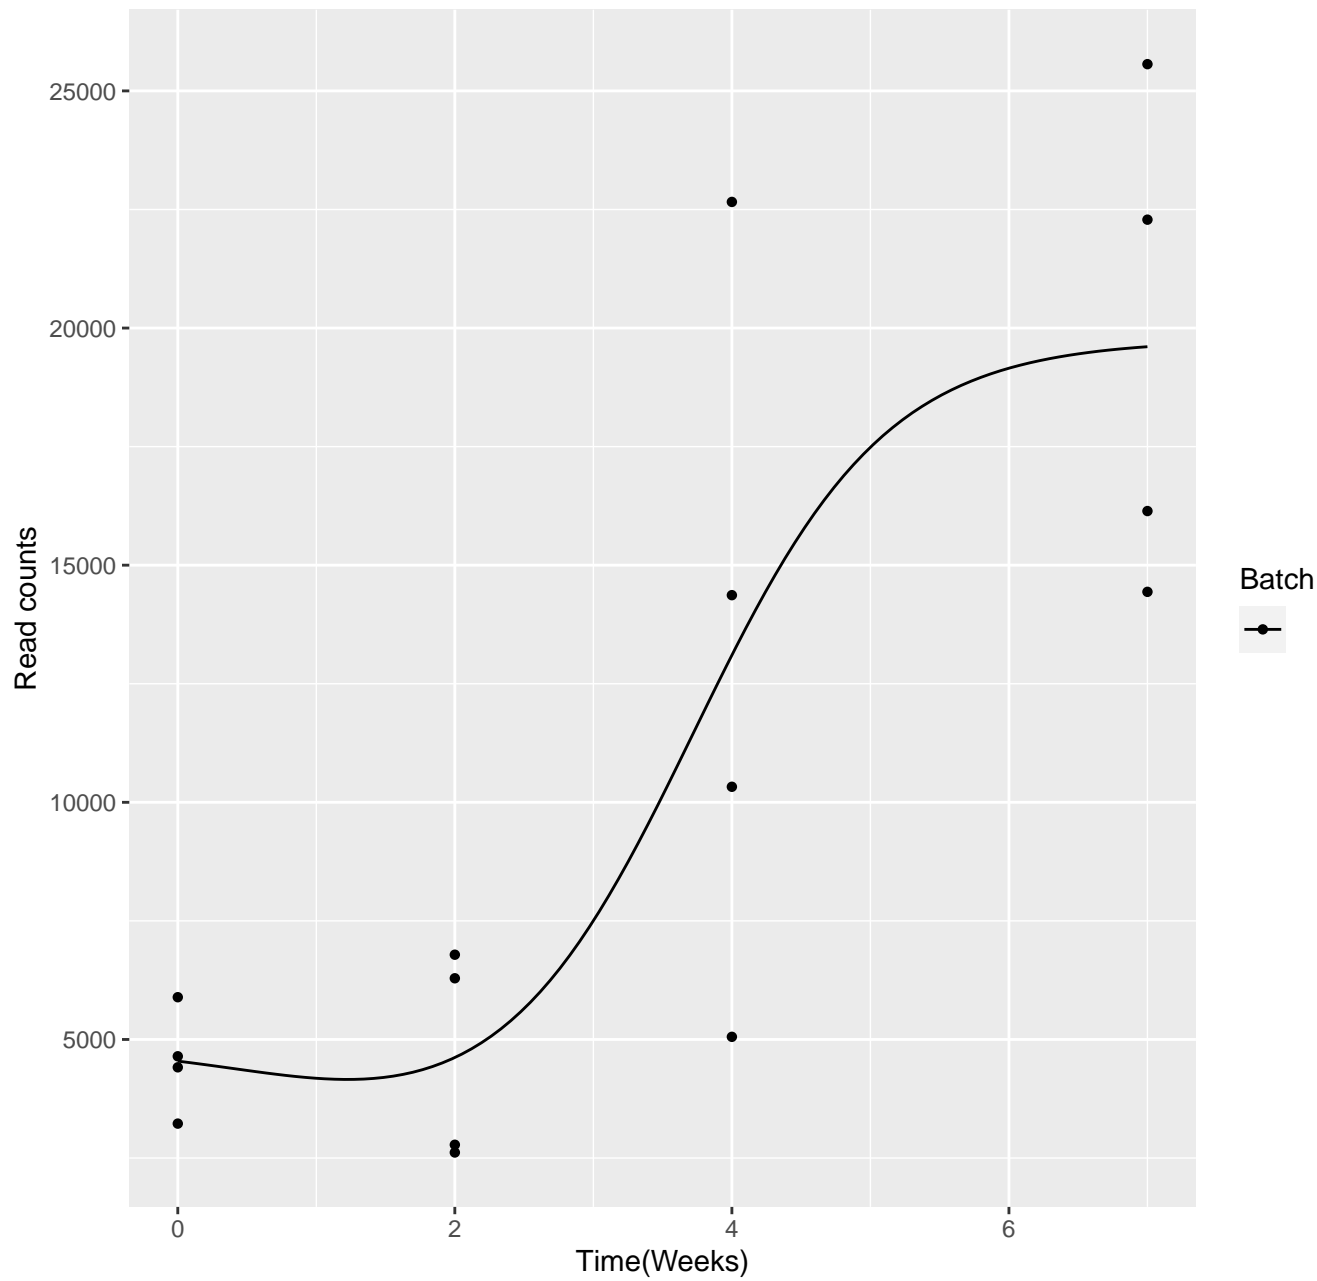

LOC108176040:  $\log_{10} q = -5.37$

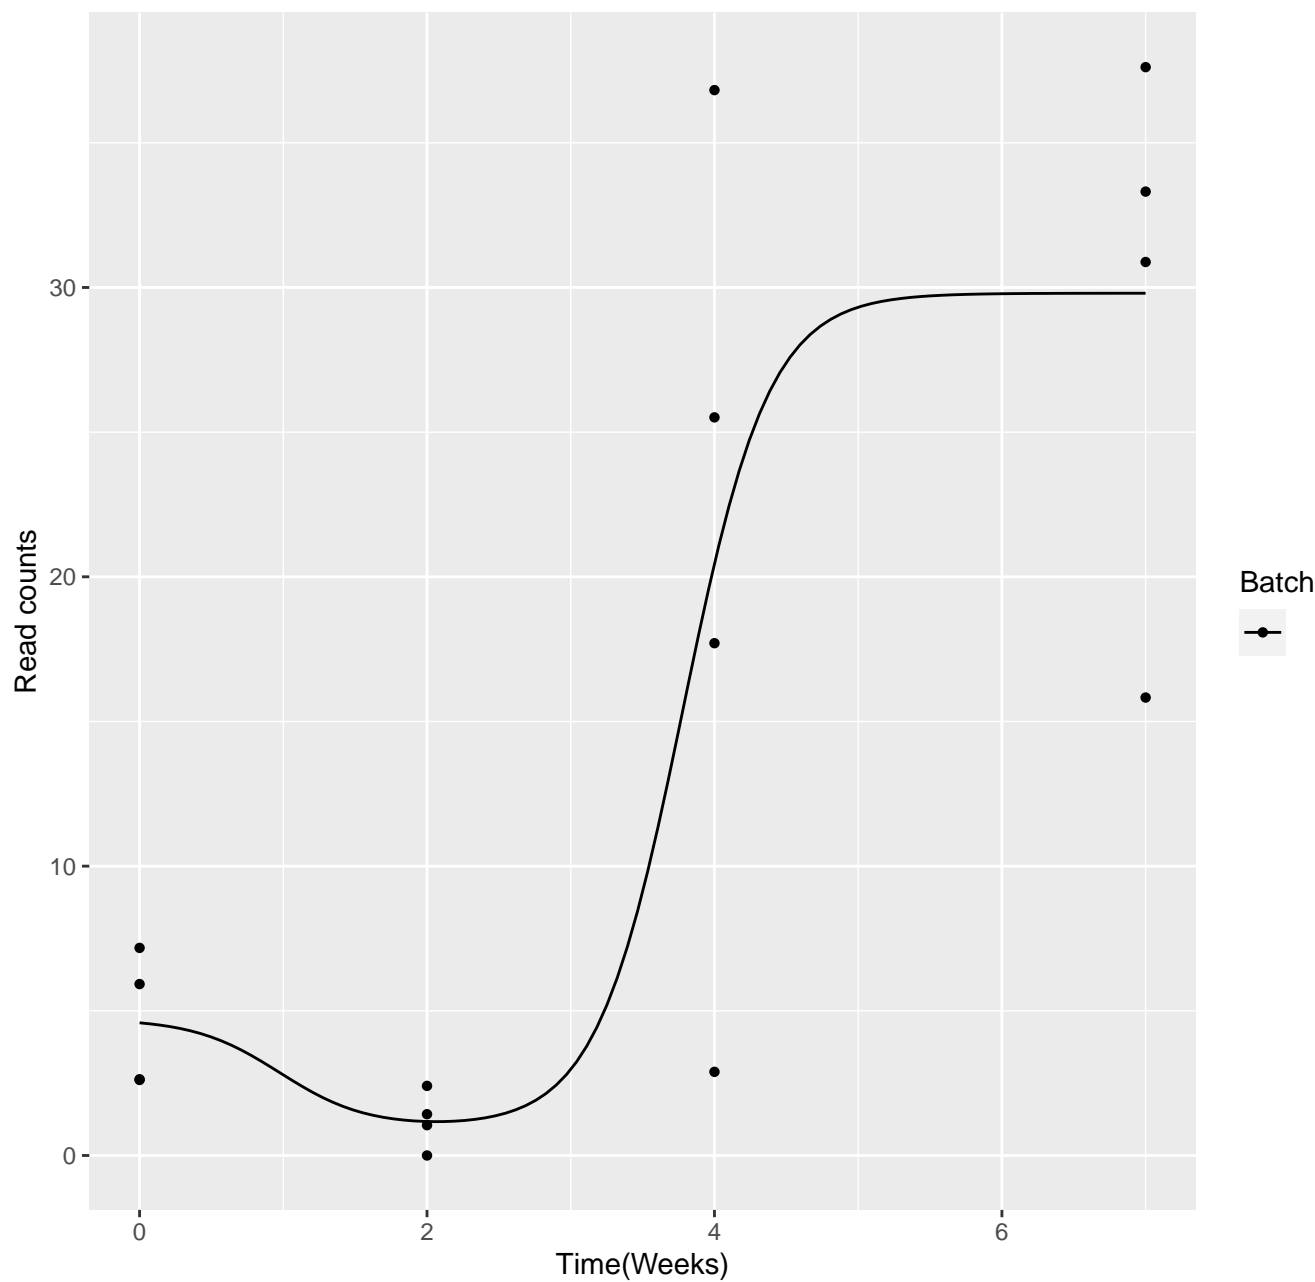

IL7R:  $\log_{10} q = -5.37$

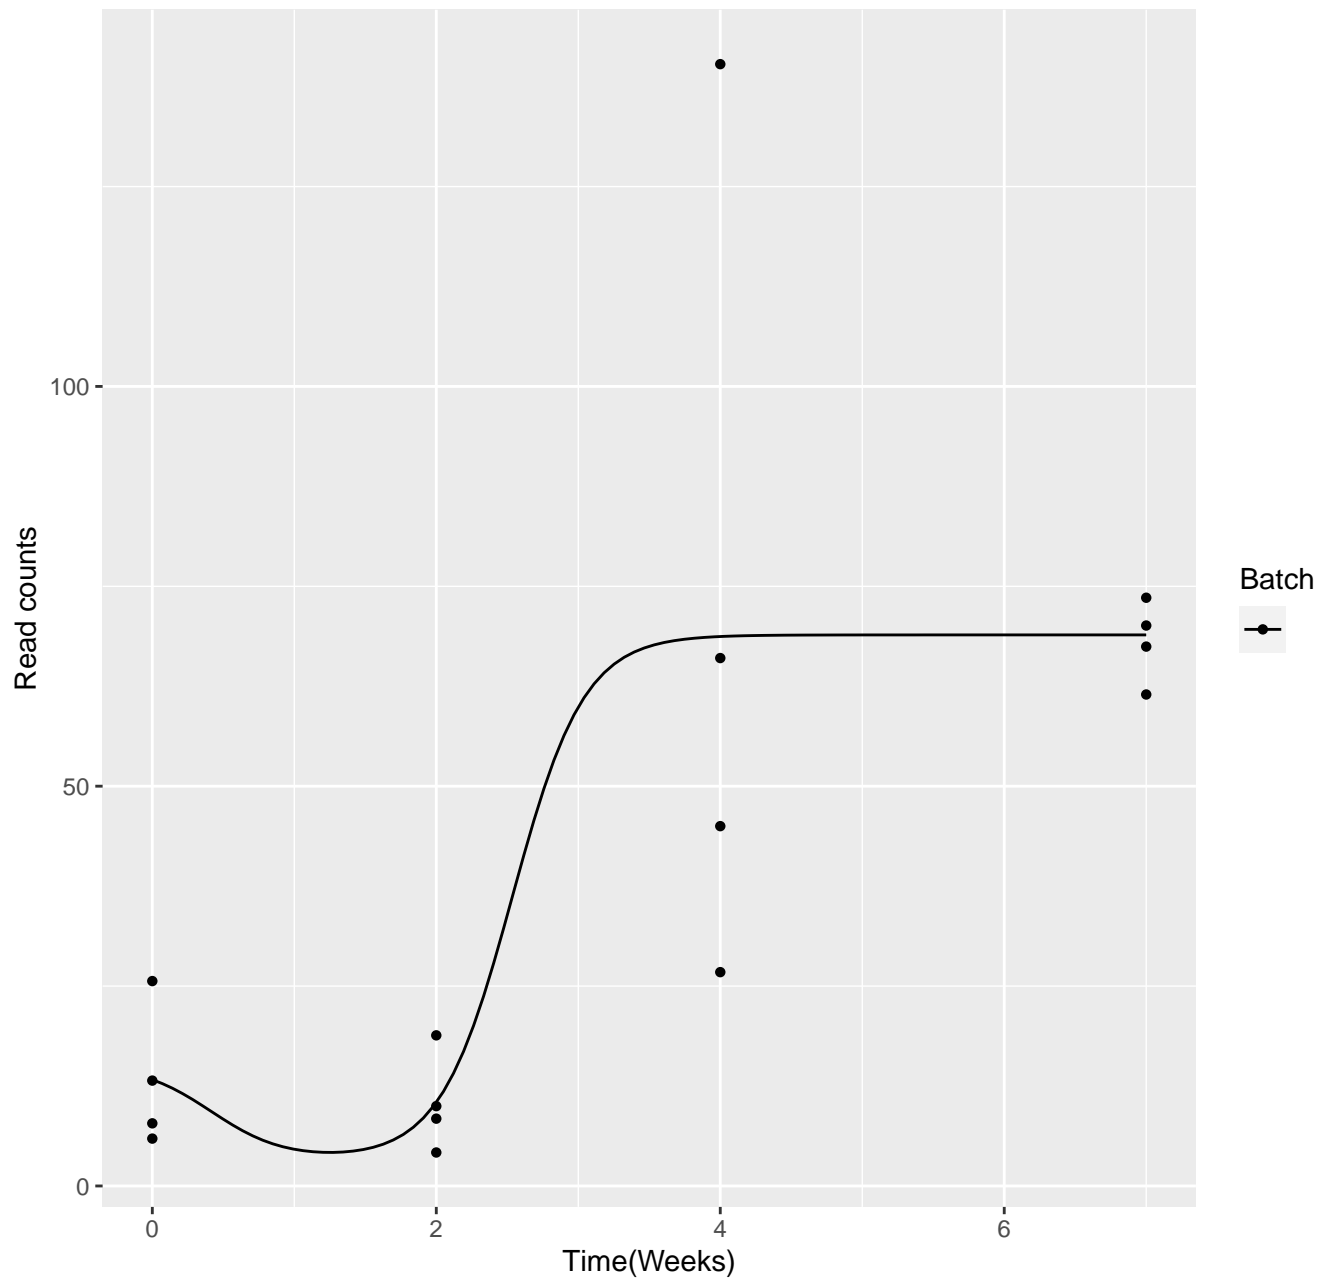

CD1C:  $\log_{10} q = -5.37$

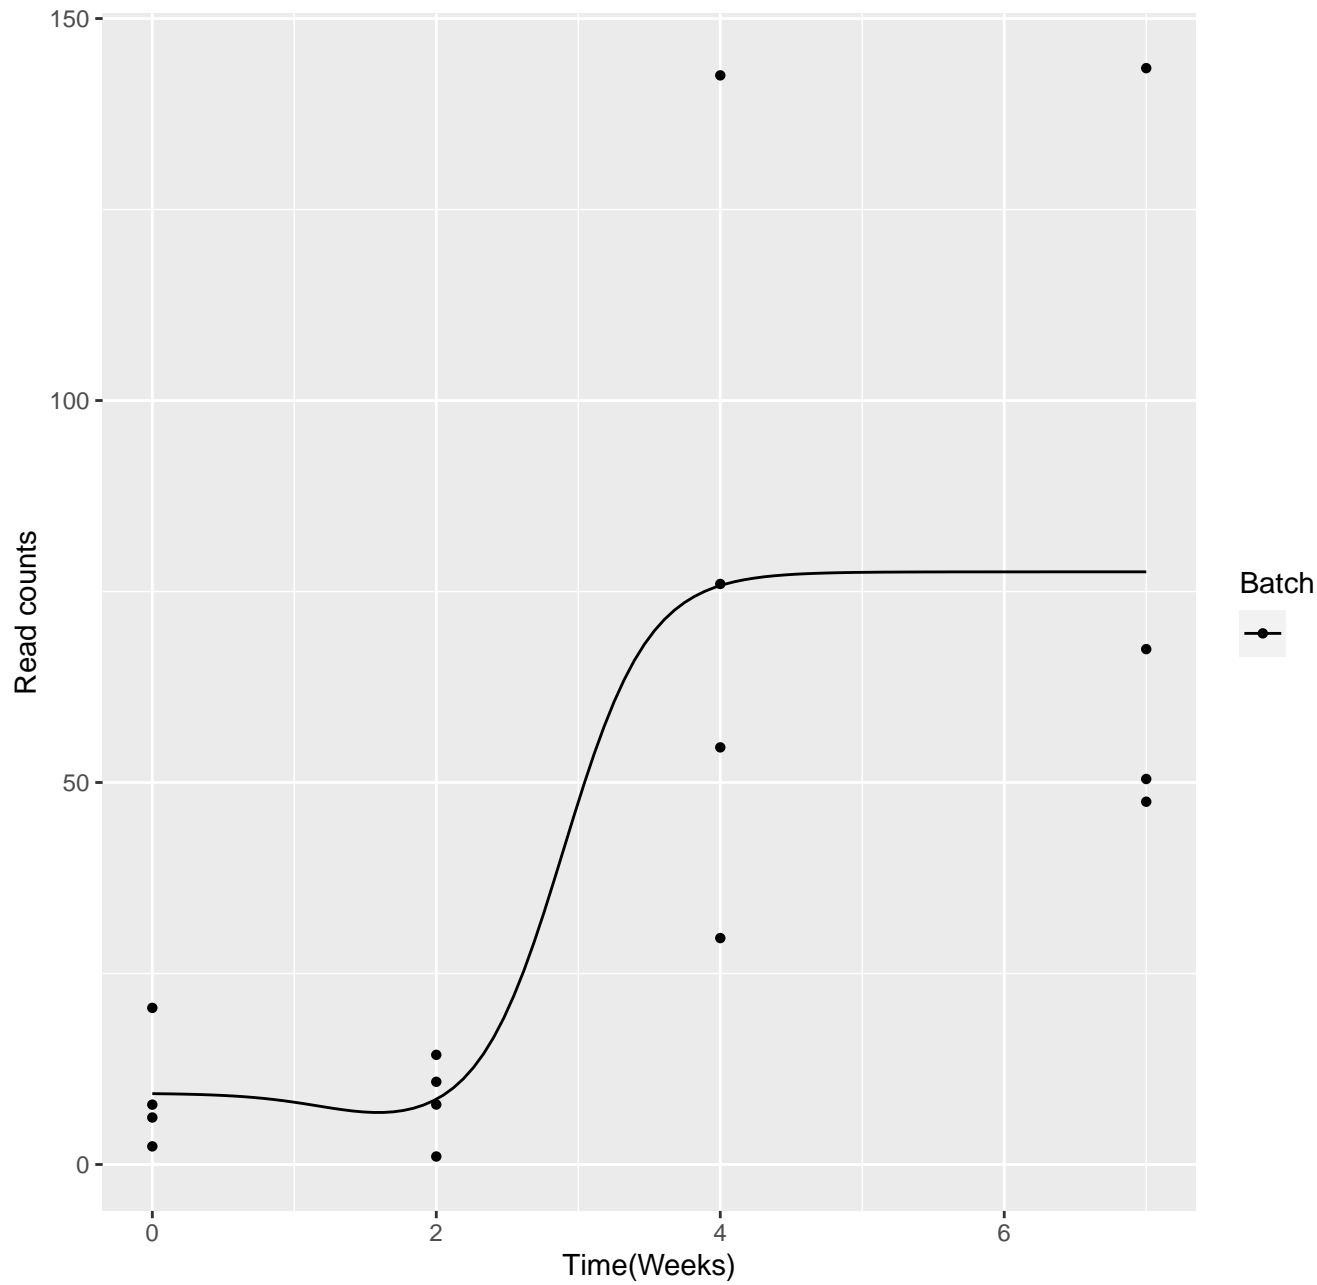

KRT5:  $\log_{10} q = -5.35$

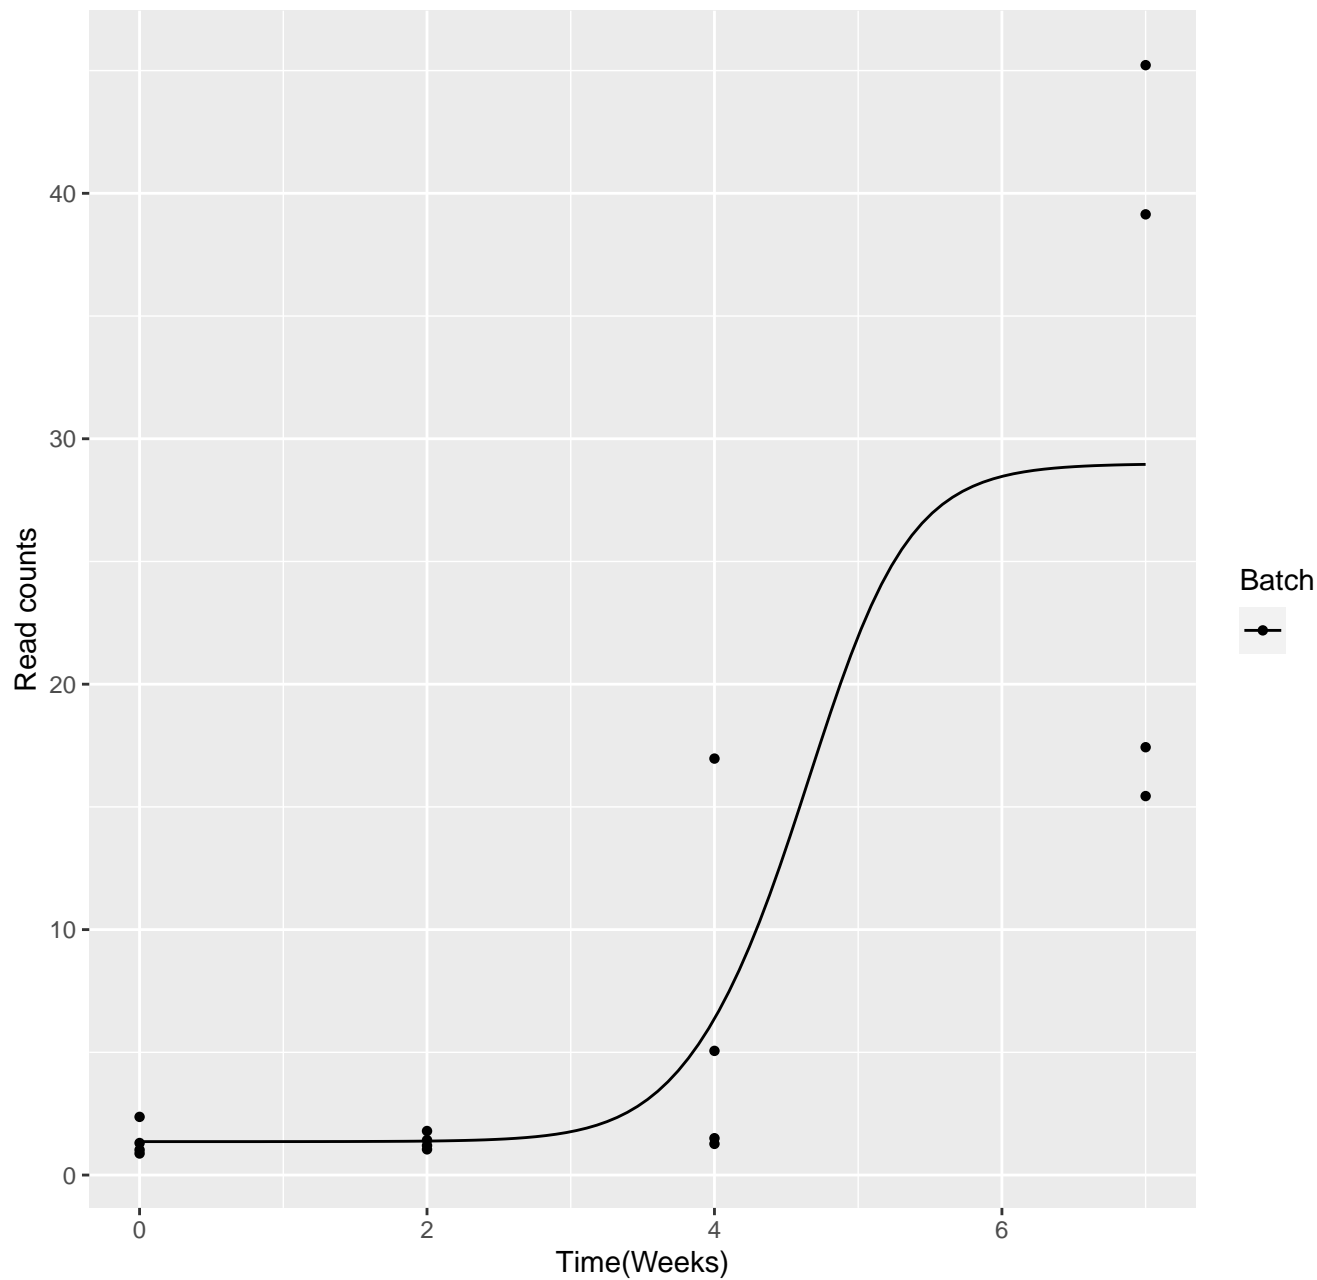

LOC100357005:  $\log_{10} q = -5.35$

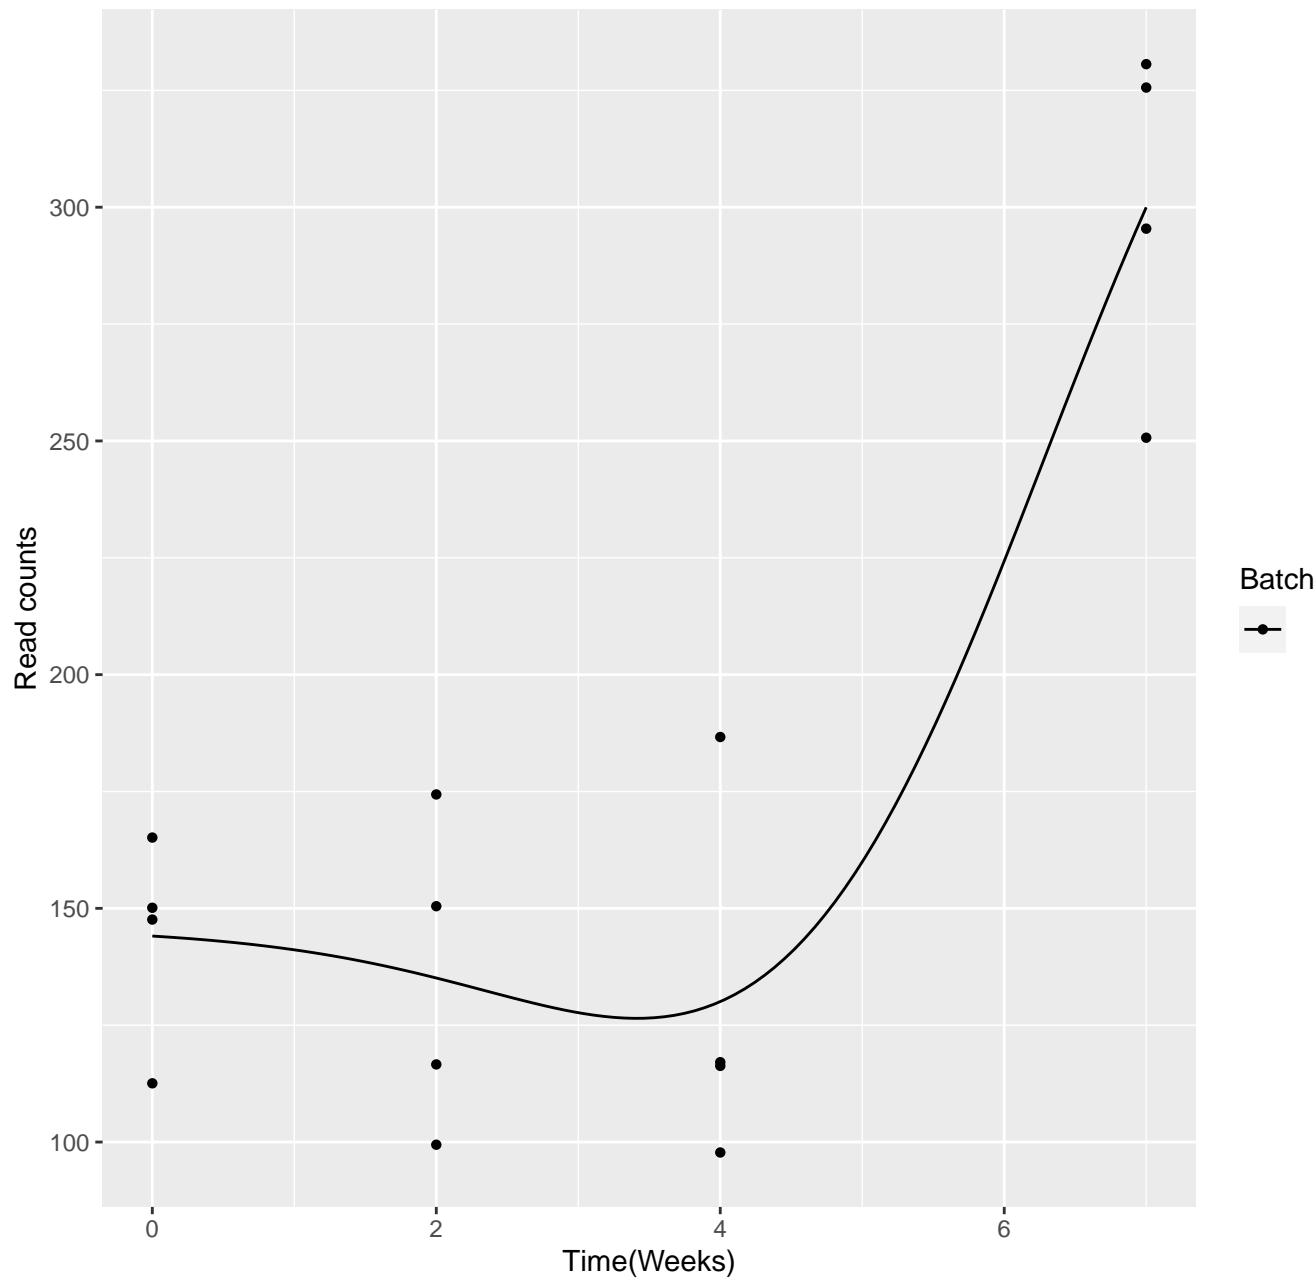

LOC100343809:  $\log_{10} q = -5.33$

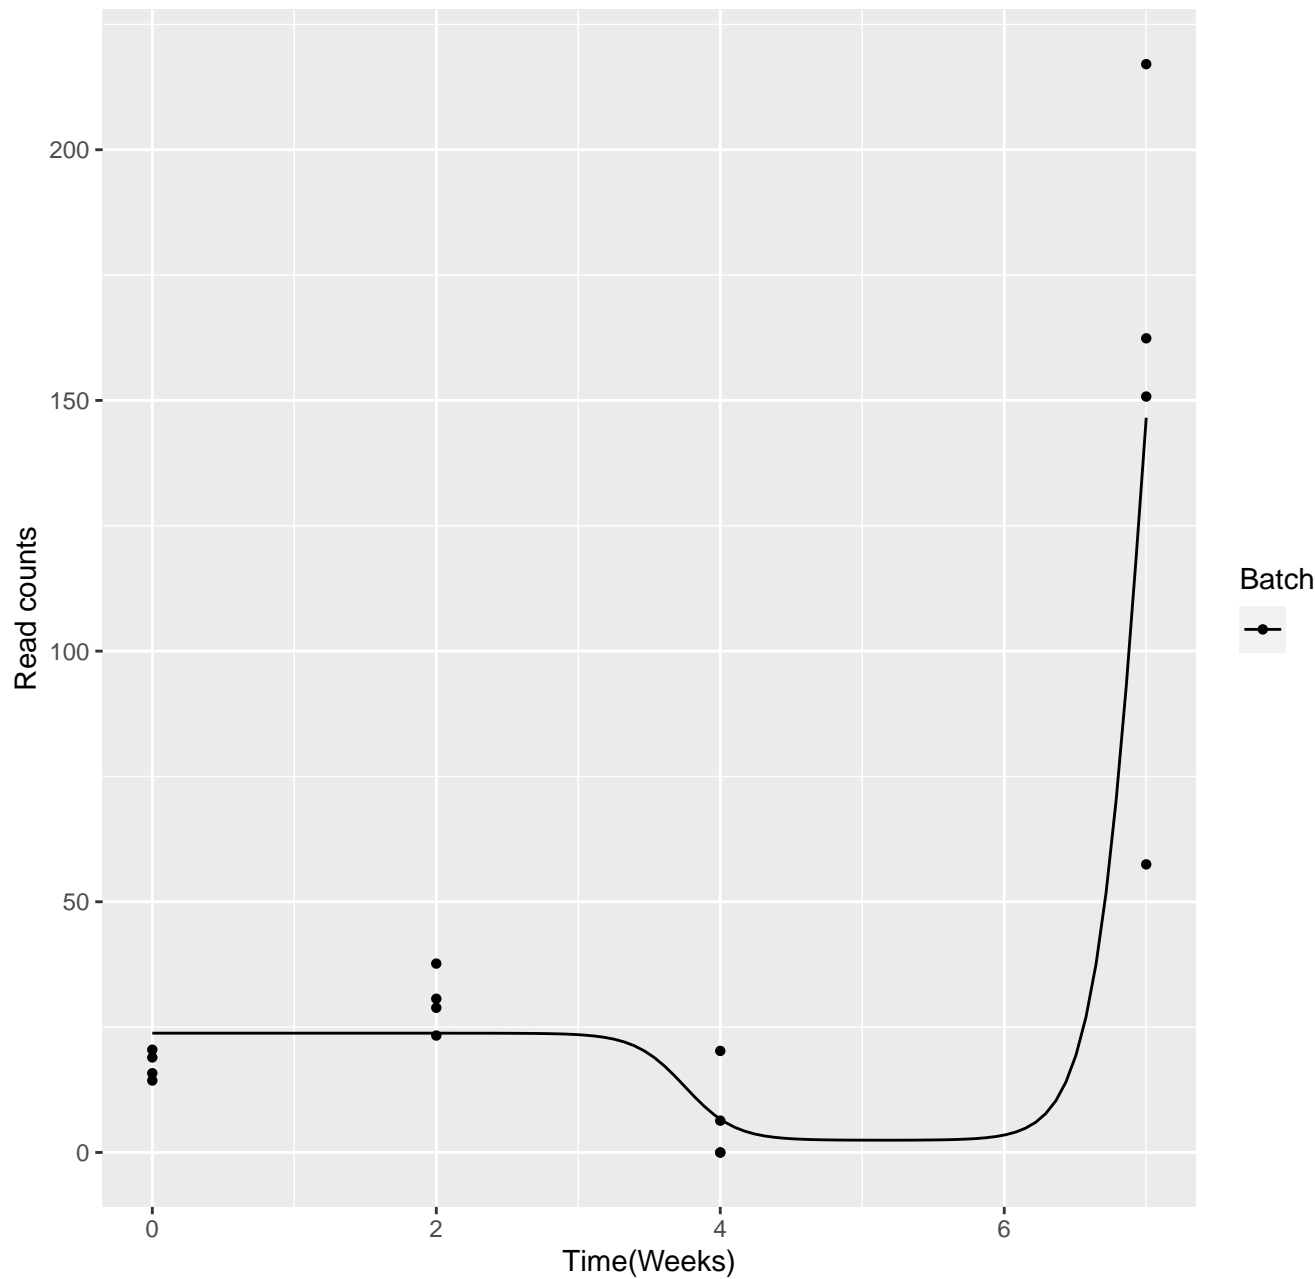

LOC127489325:  $\log_{10} q = -5.32$

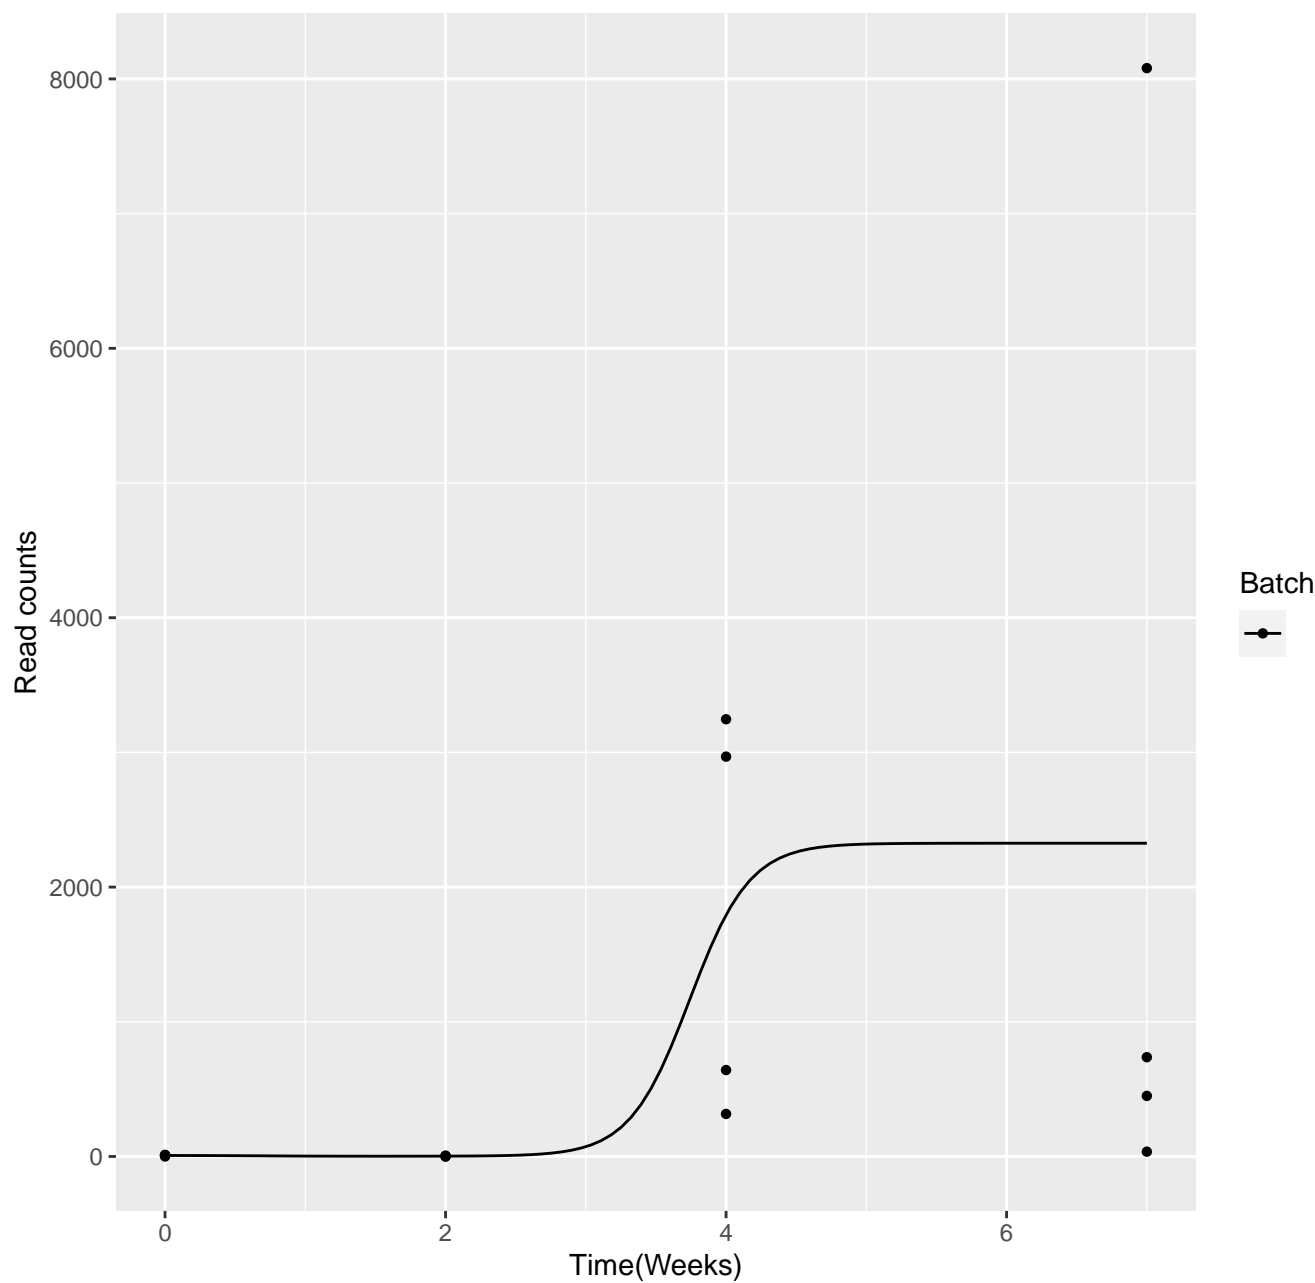



KCNA6:  $\log_{10} q = -5.32$

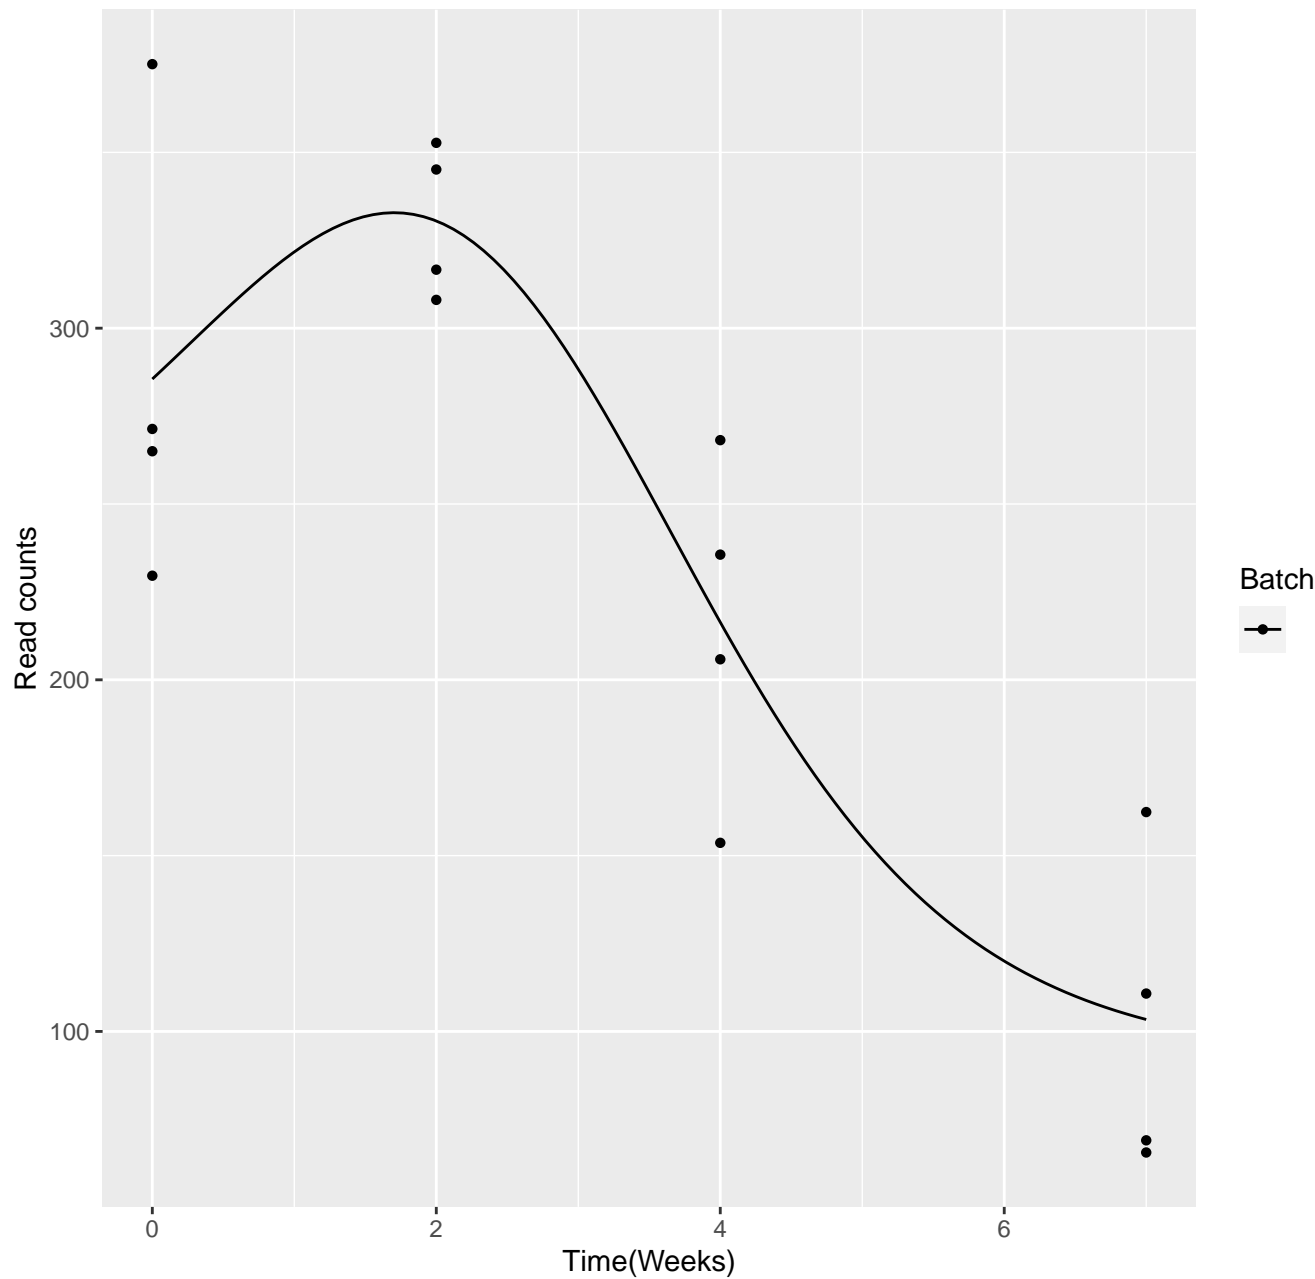

MARVELD1:  $\log_{10} q = -5.31$

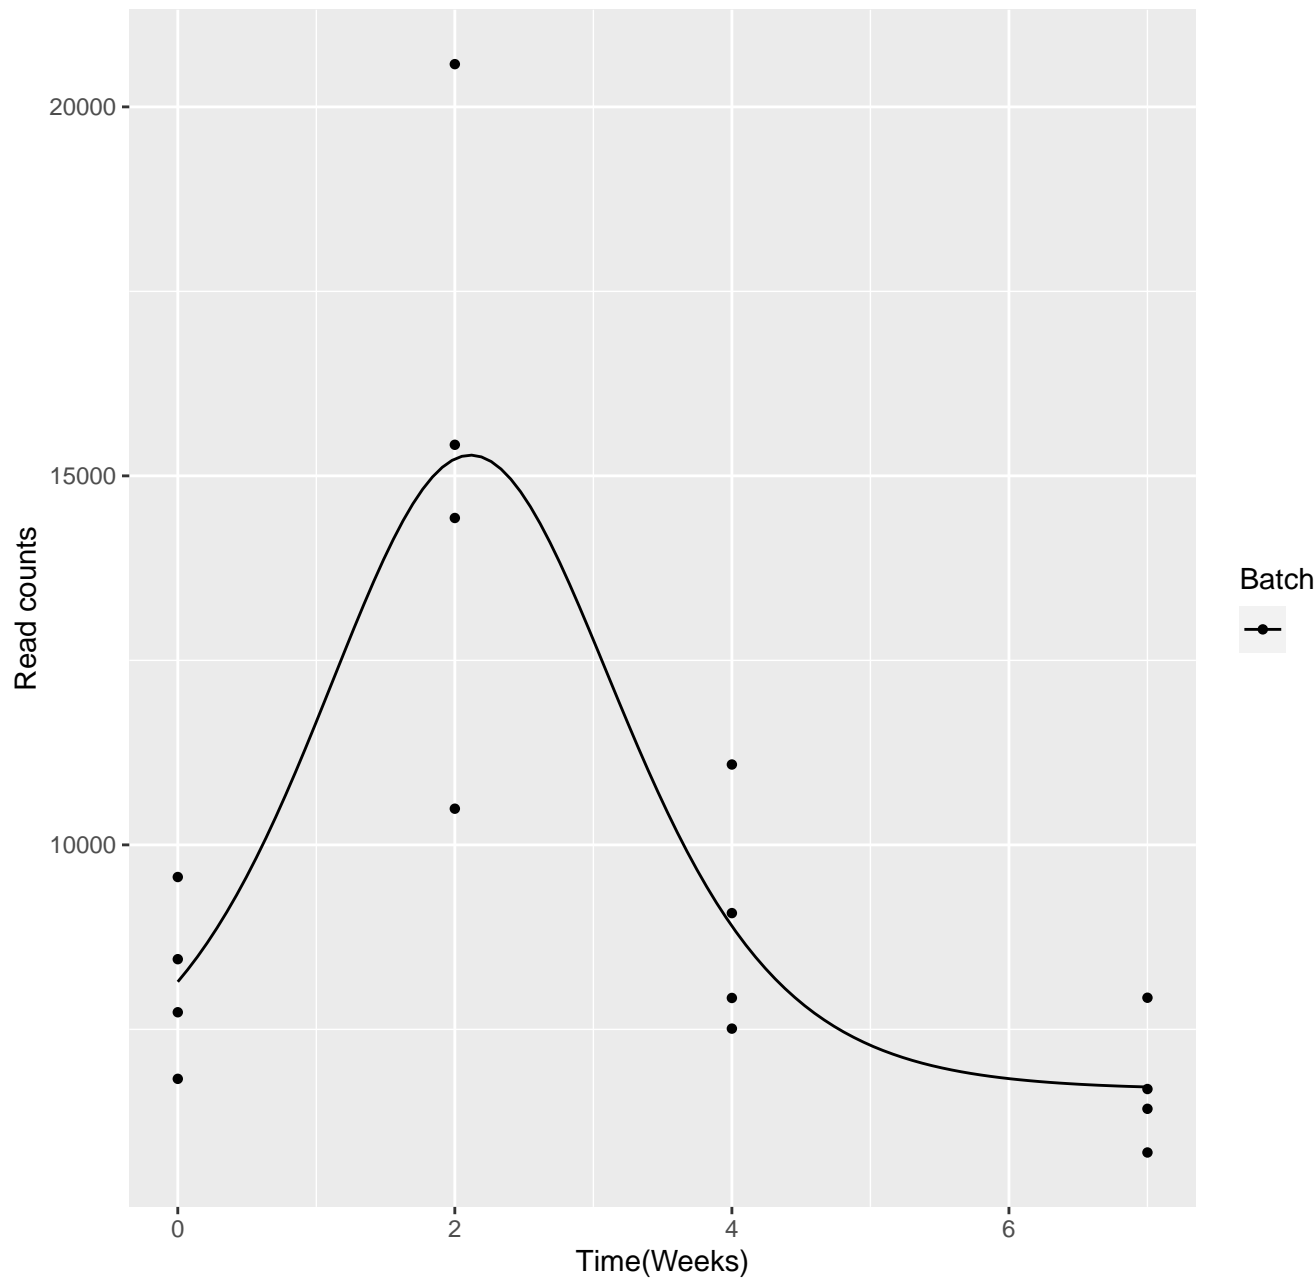

RAD51B:  $\log_{10} q = -5.31$

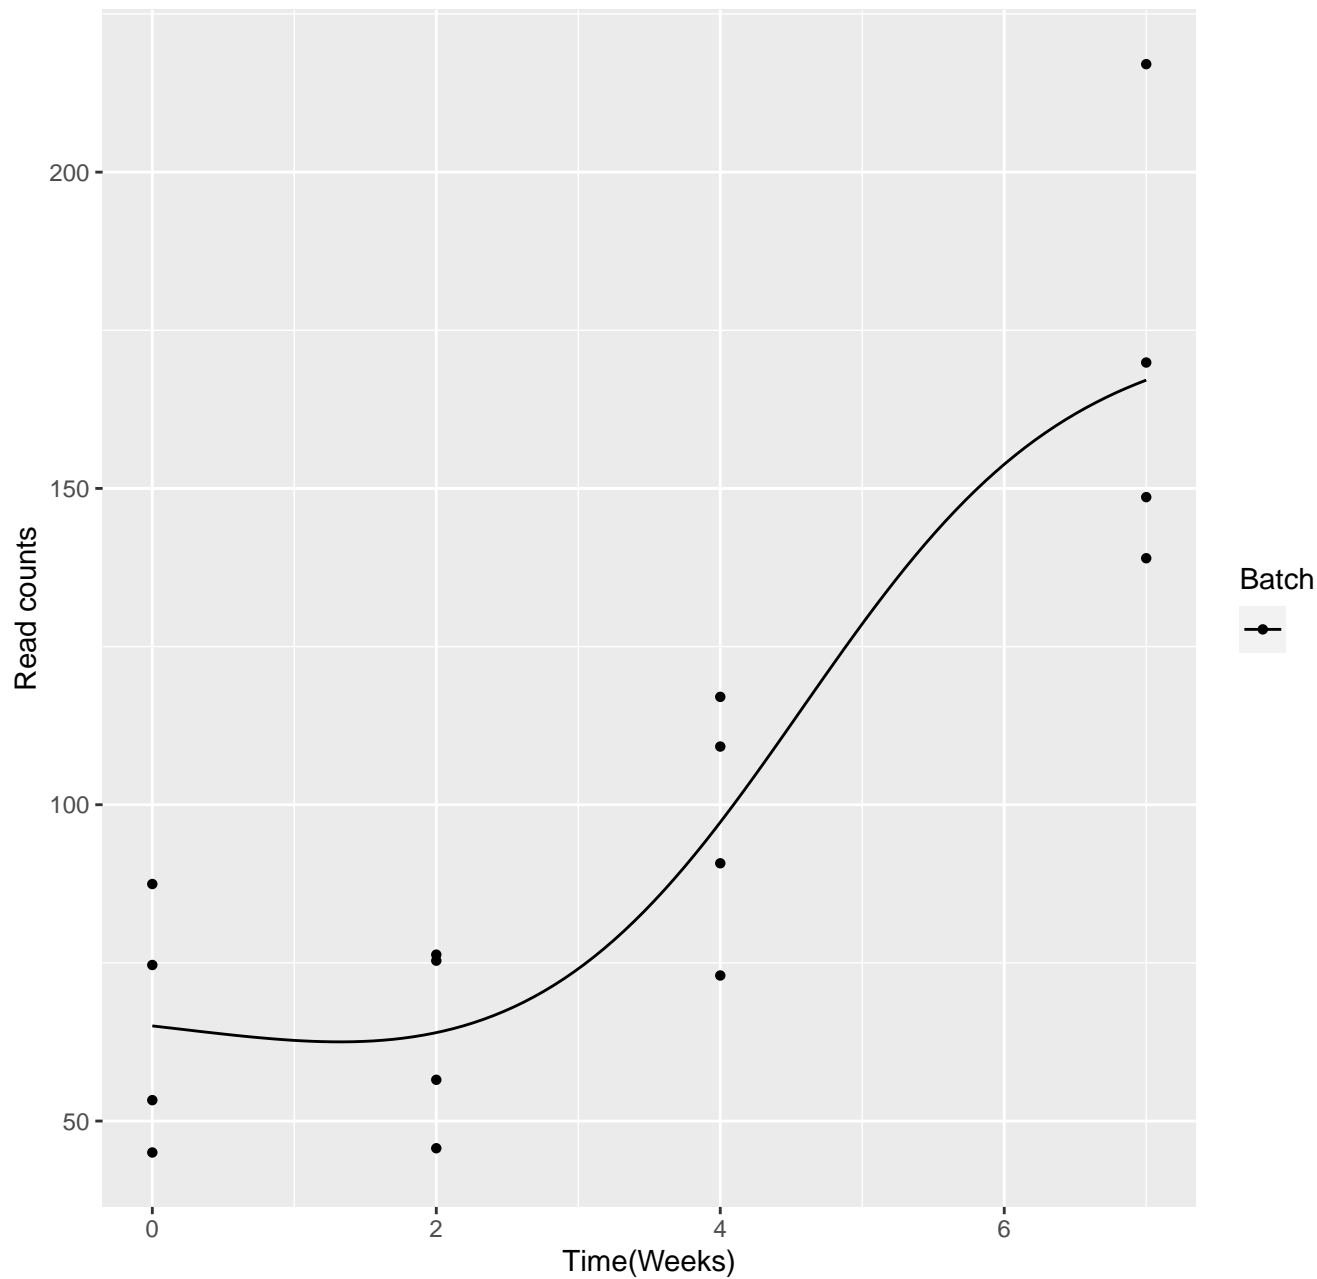

NPY1R:  $\log_{10} q = -5.31$

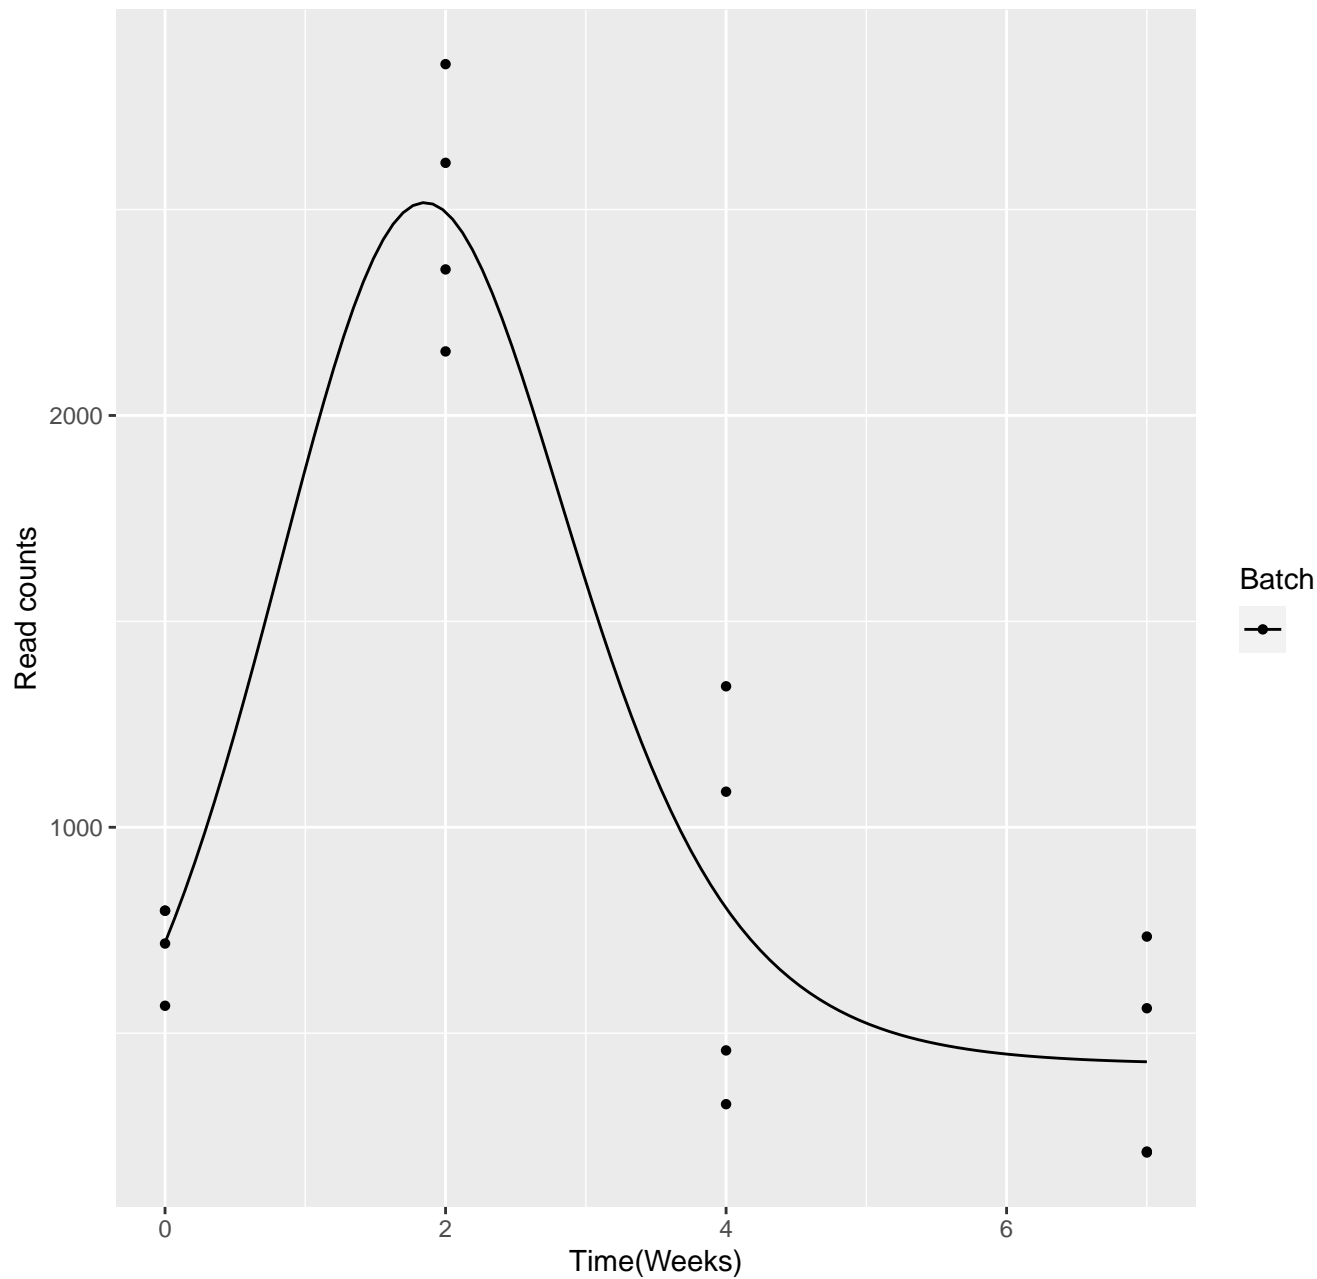

CAMKK1:  $\log_{10} q = -5.3$

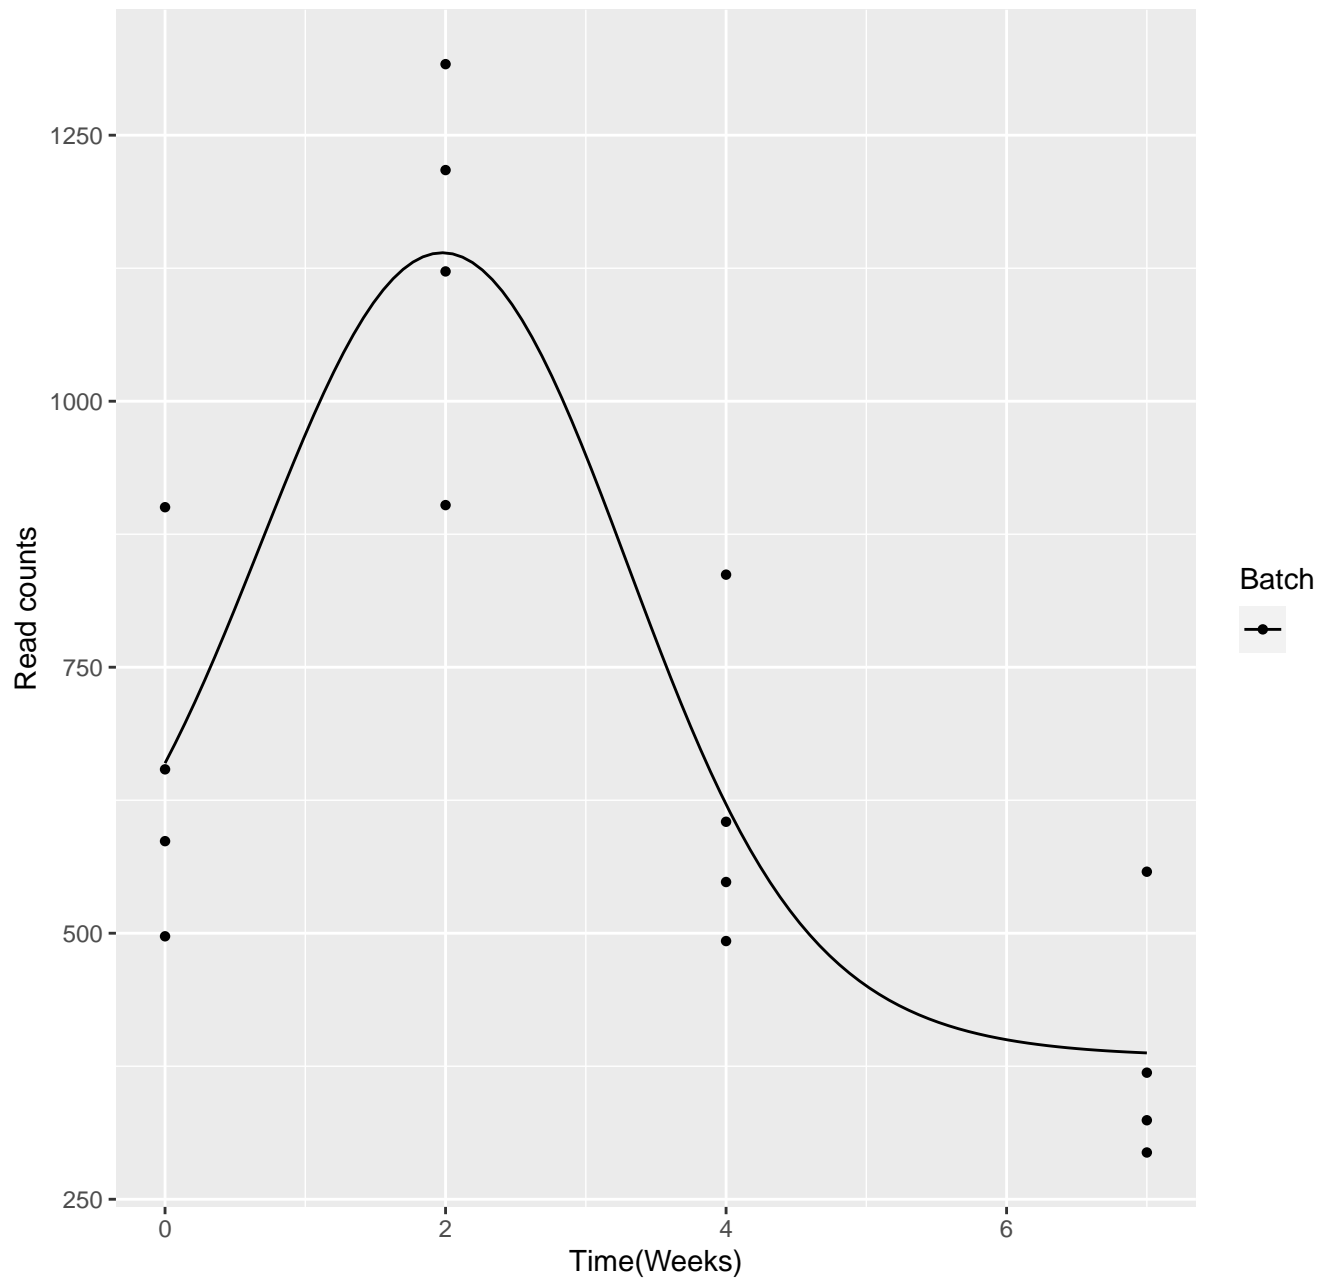

FERMT2:  $\log_{10} q = -5.29$

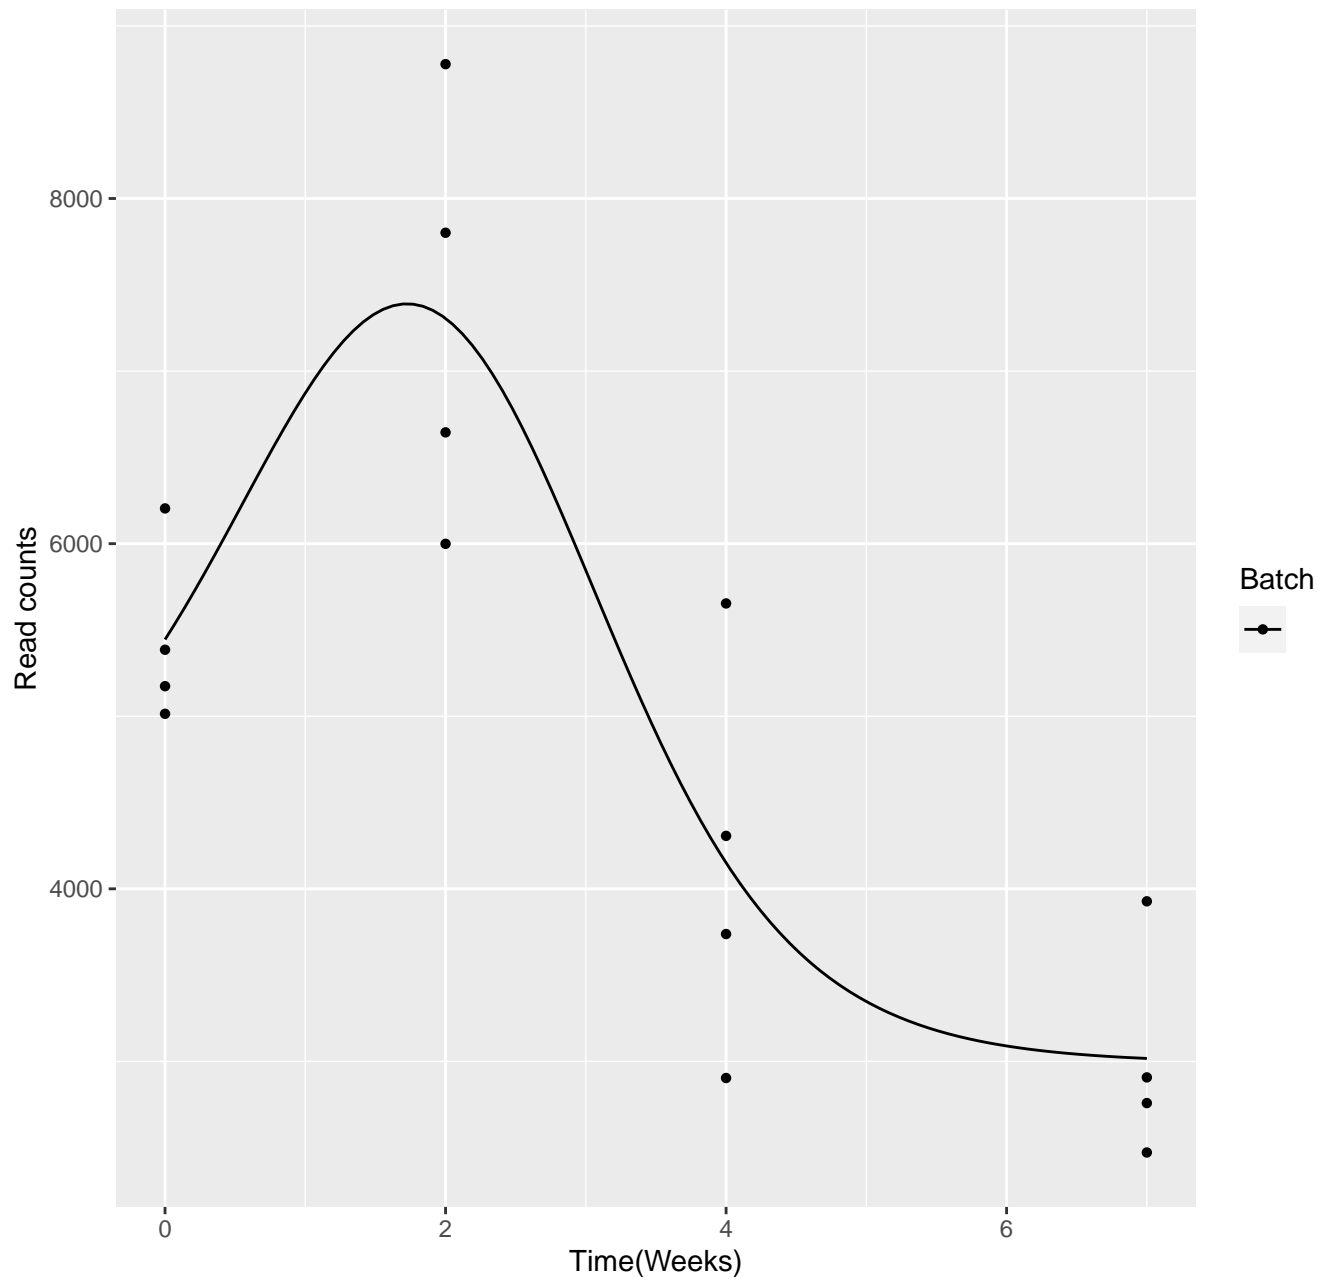

ARHGAP9:  $\log_{10} q = -5.29$

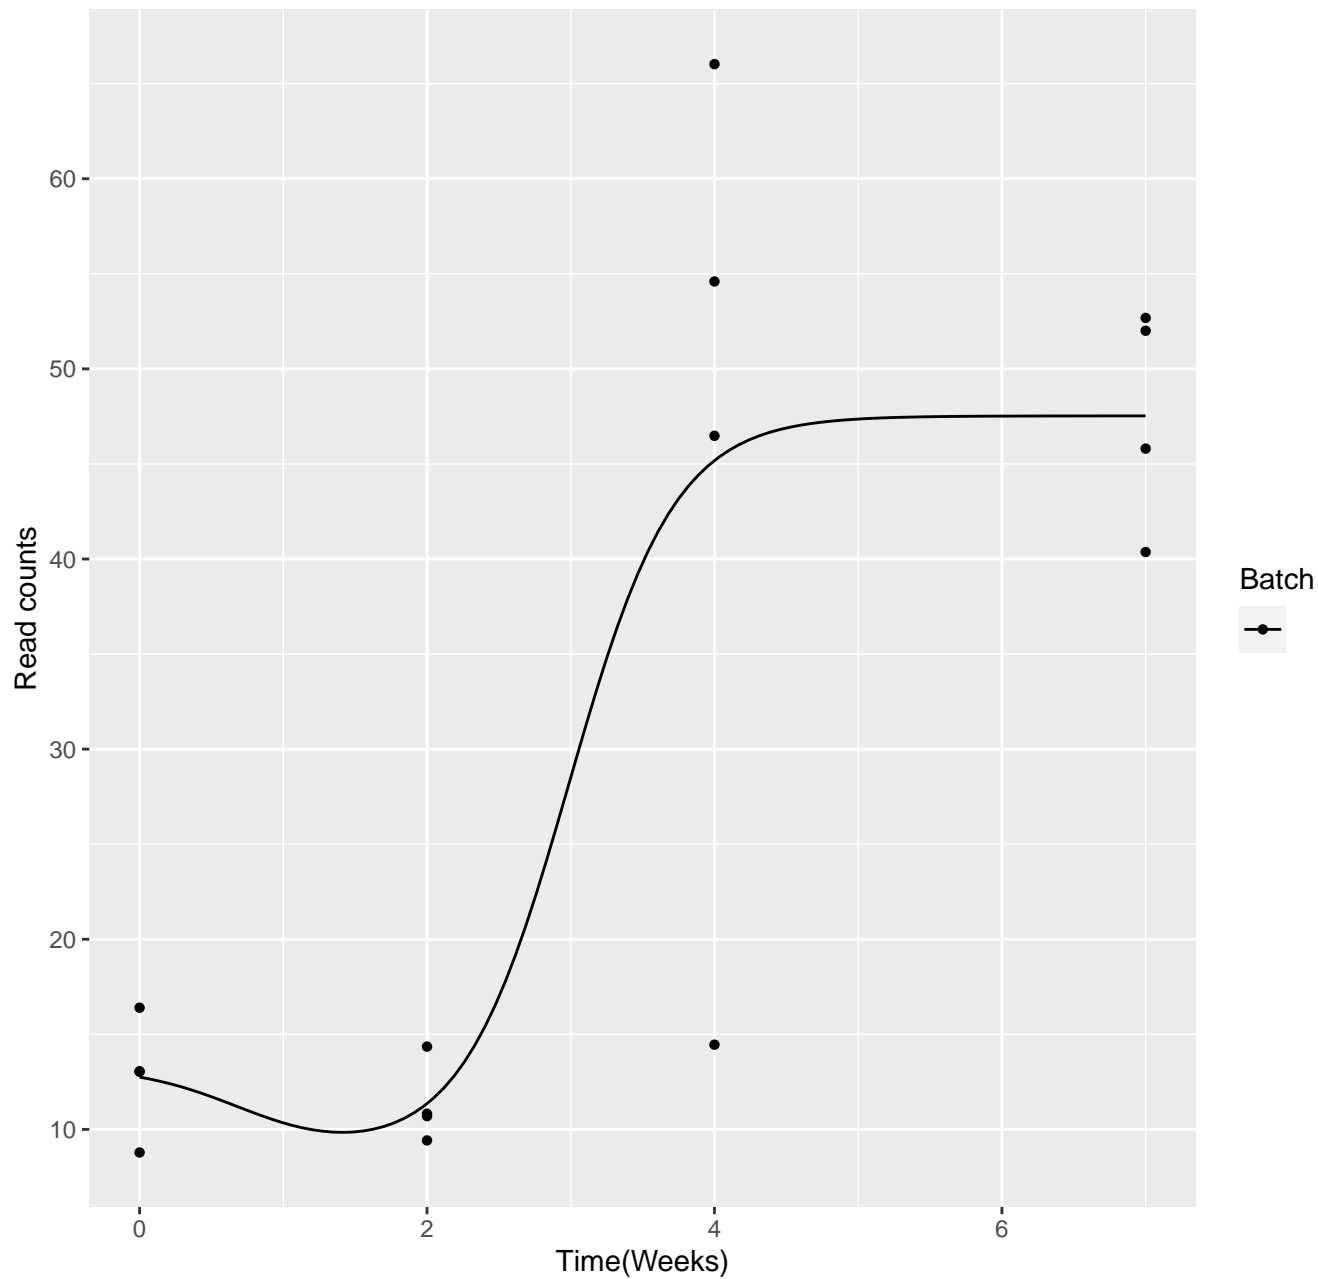

NIPAL4:  $\log_{10} q = -5.26$

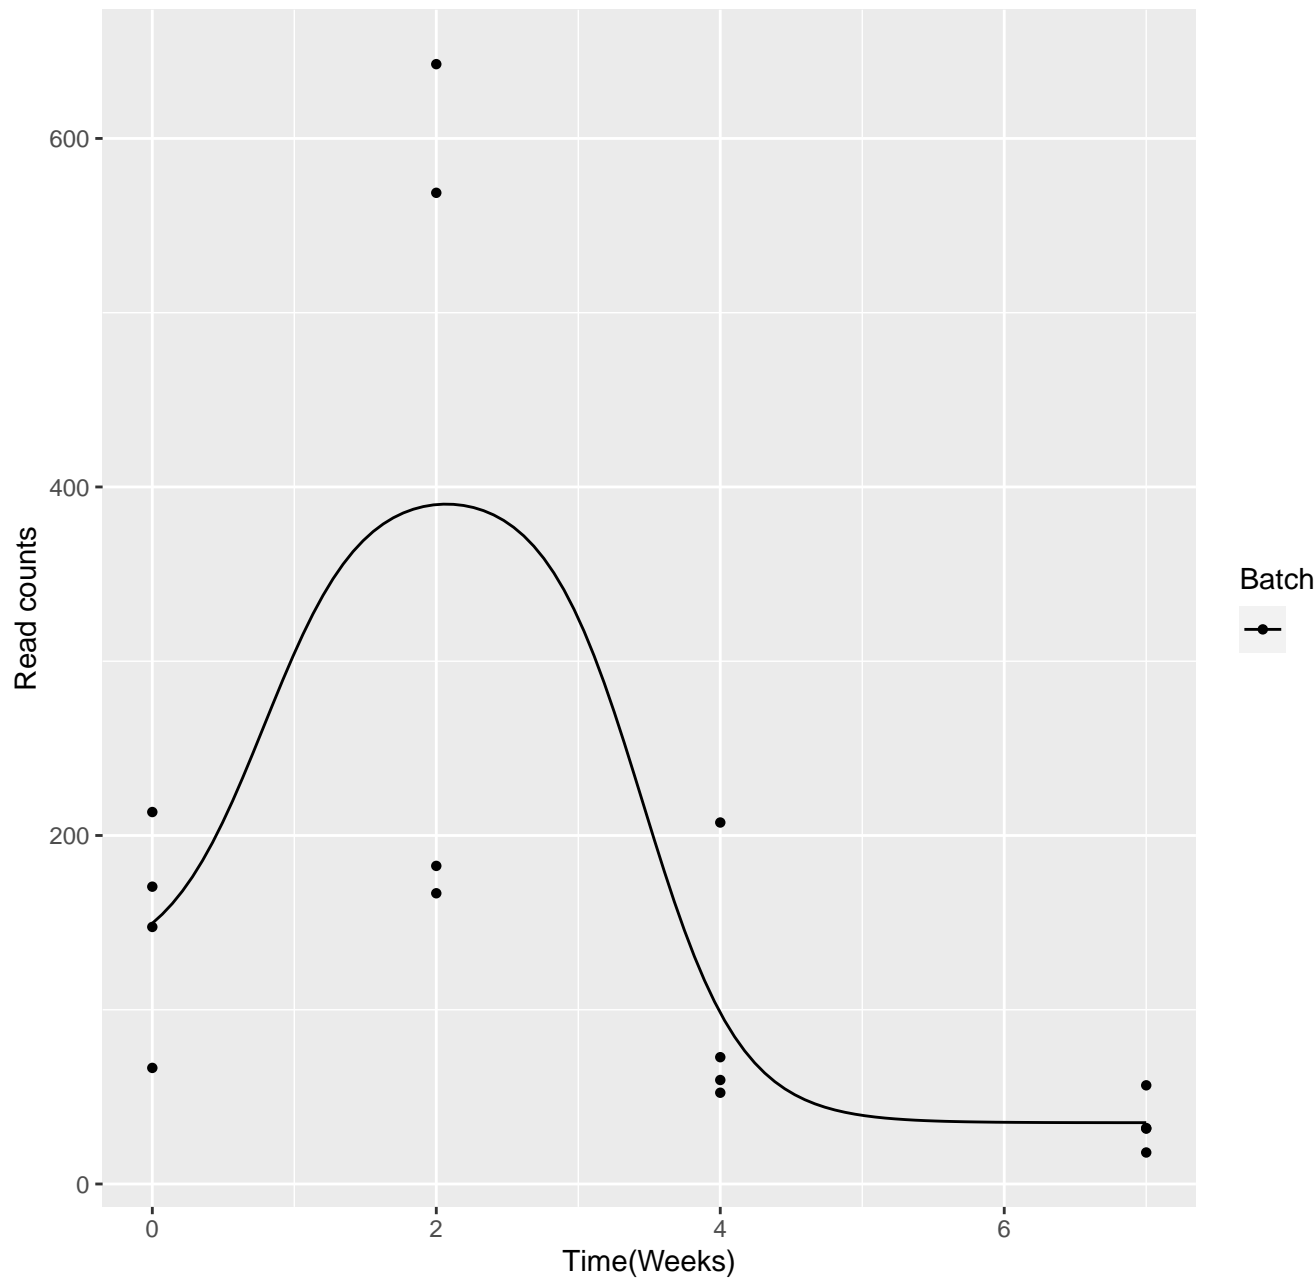



ITGB1:  $\log_{10} q = -5.25$

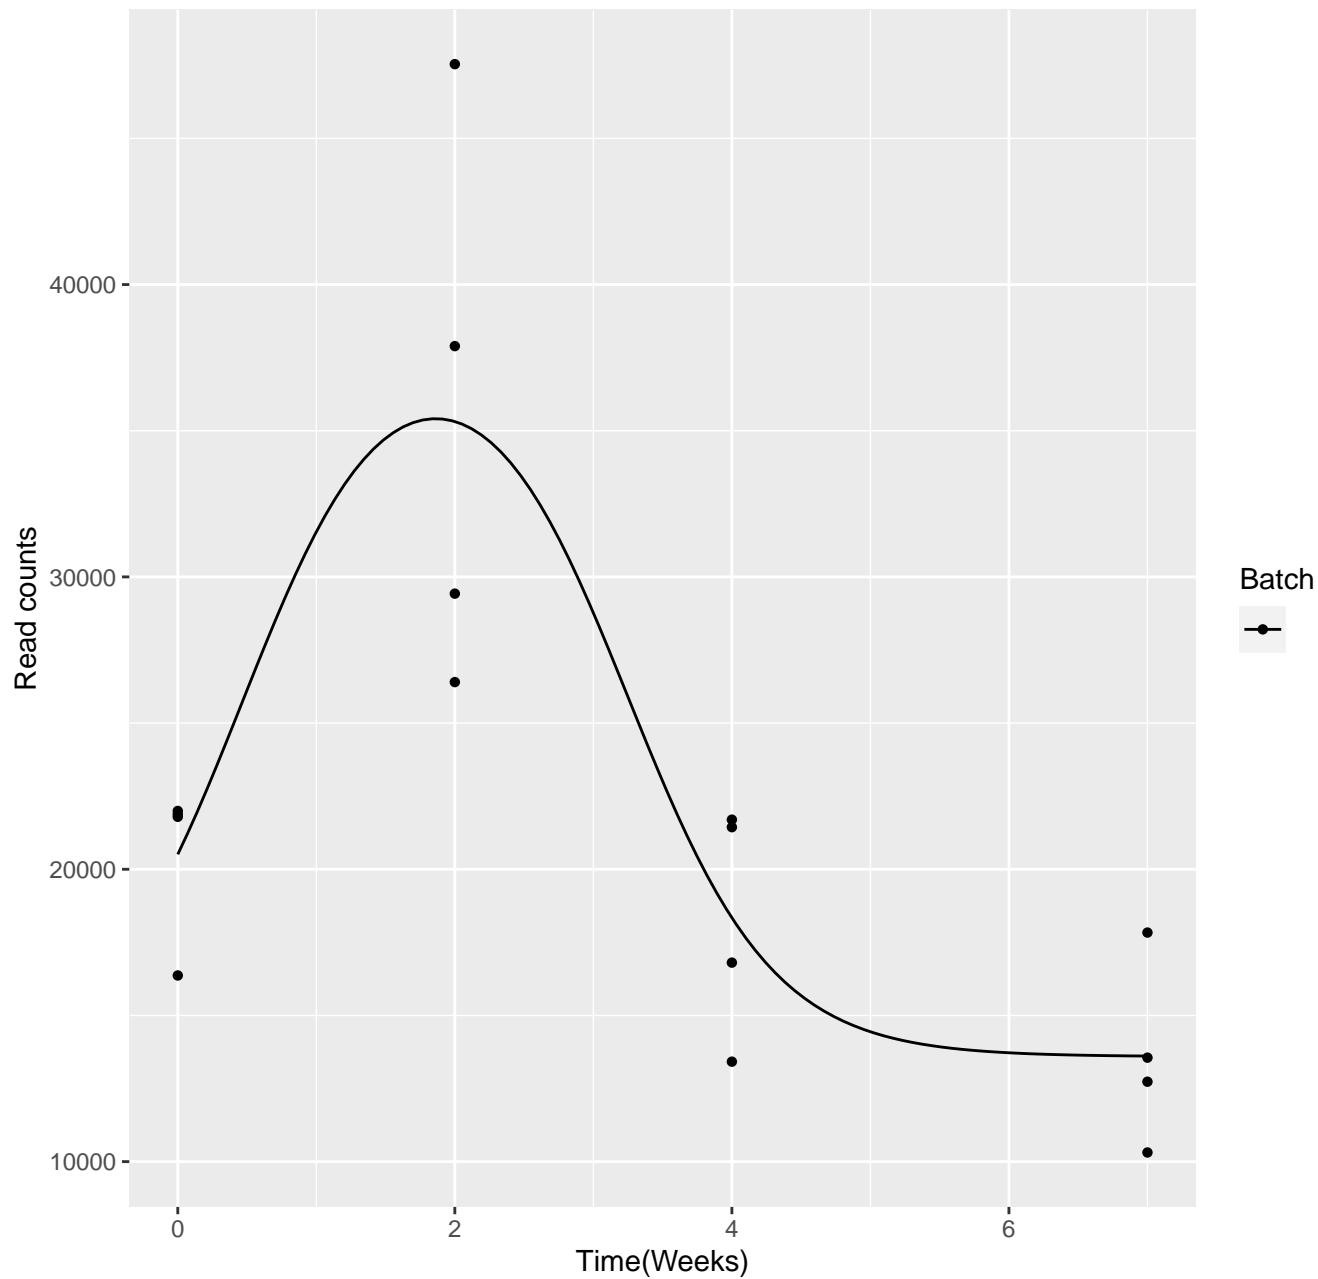

APLP2:  $\log_{10} q = -5.25$

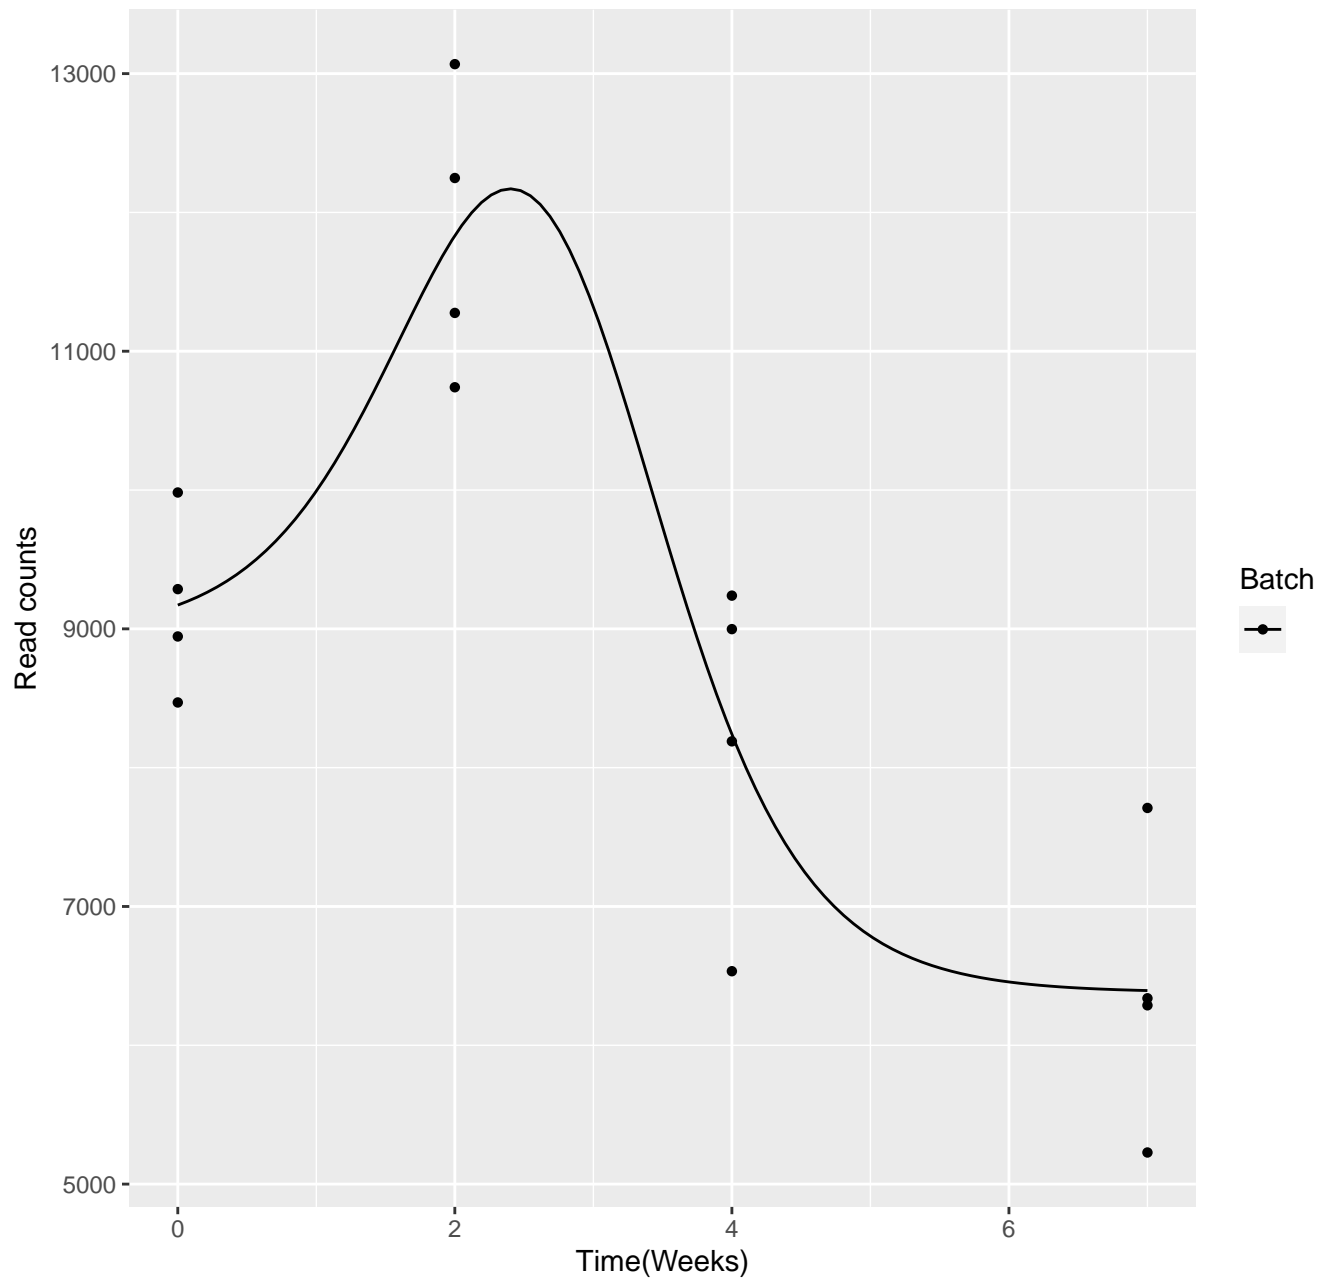

RLA-DMB:  $\log_{10} q = -5.25$

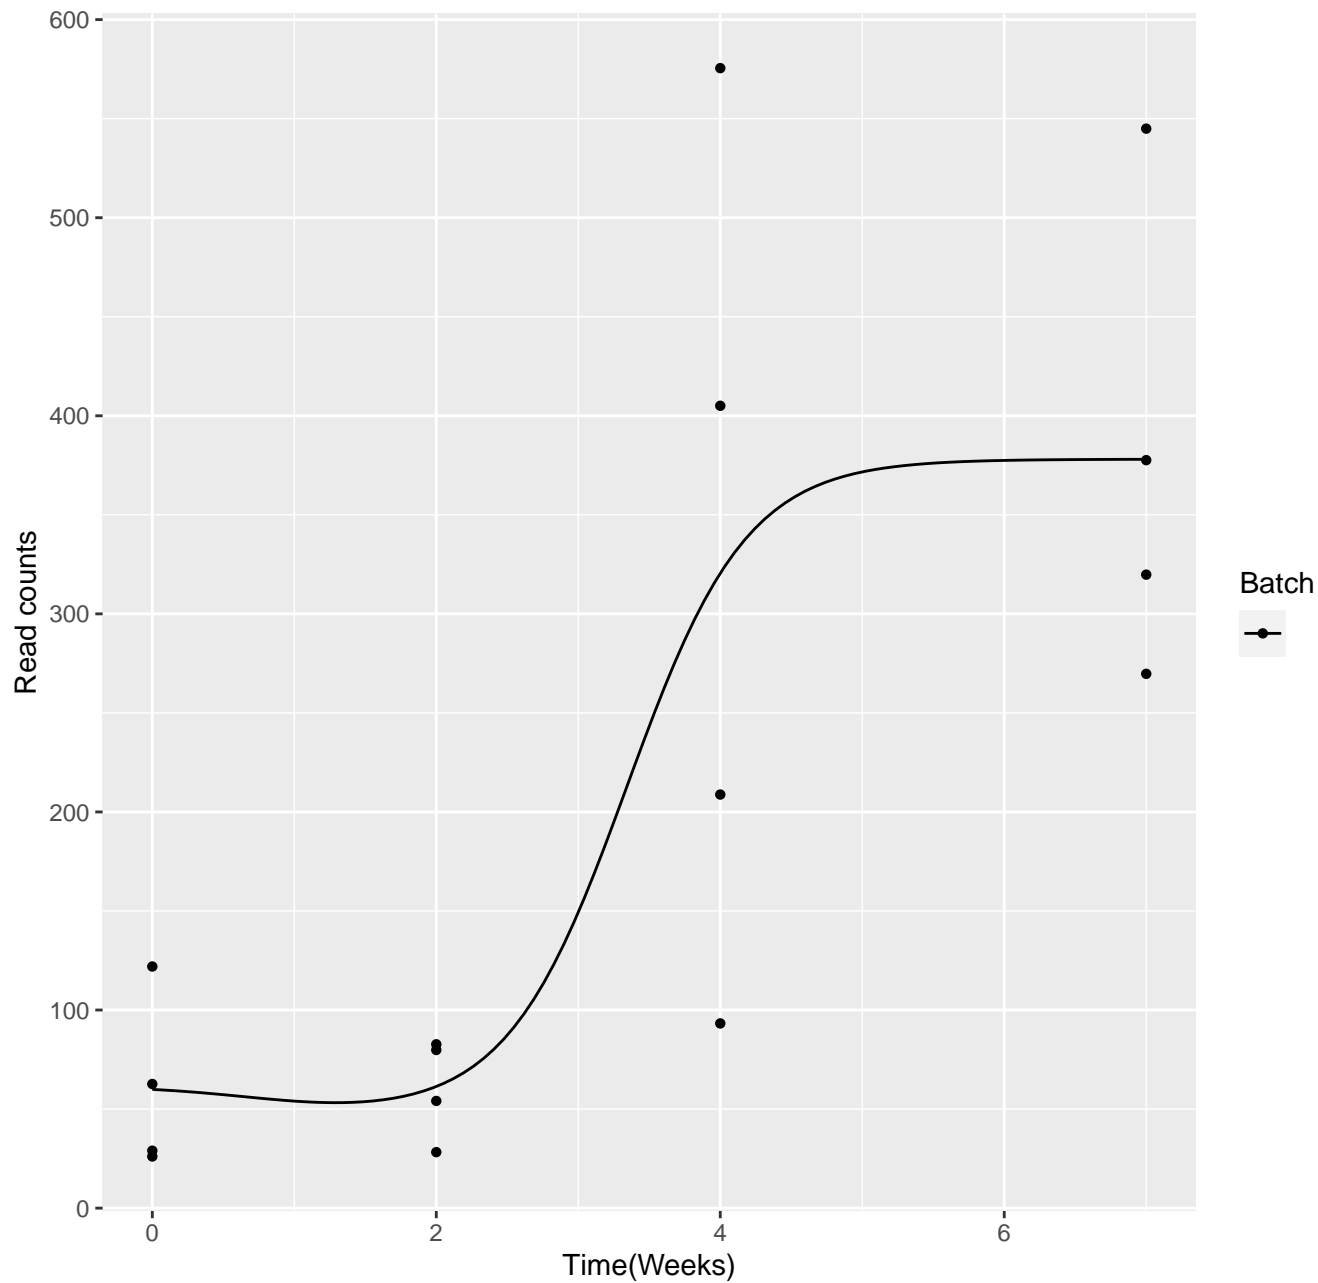

NEDD9:  $\log_{10} q = -5.25$

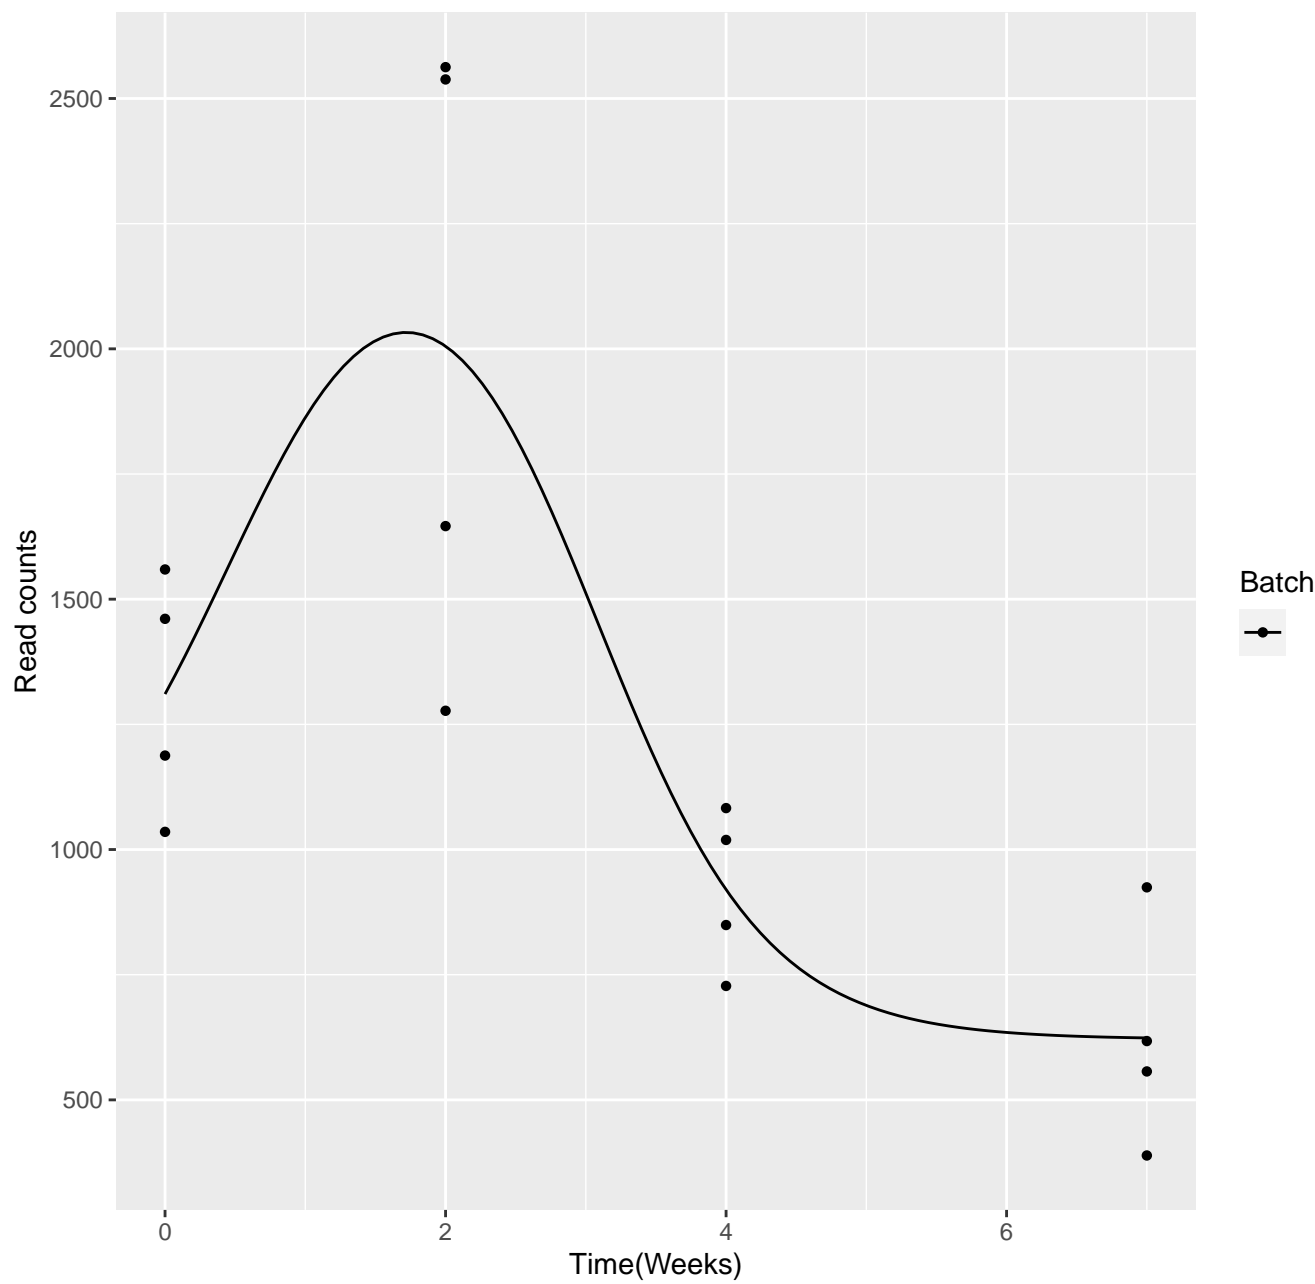

LOC100342906:  $\log_{10} q = -5.24$

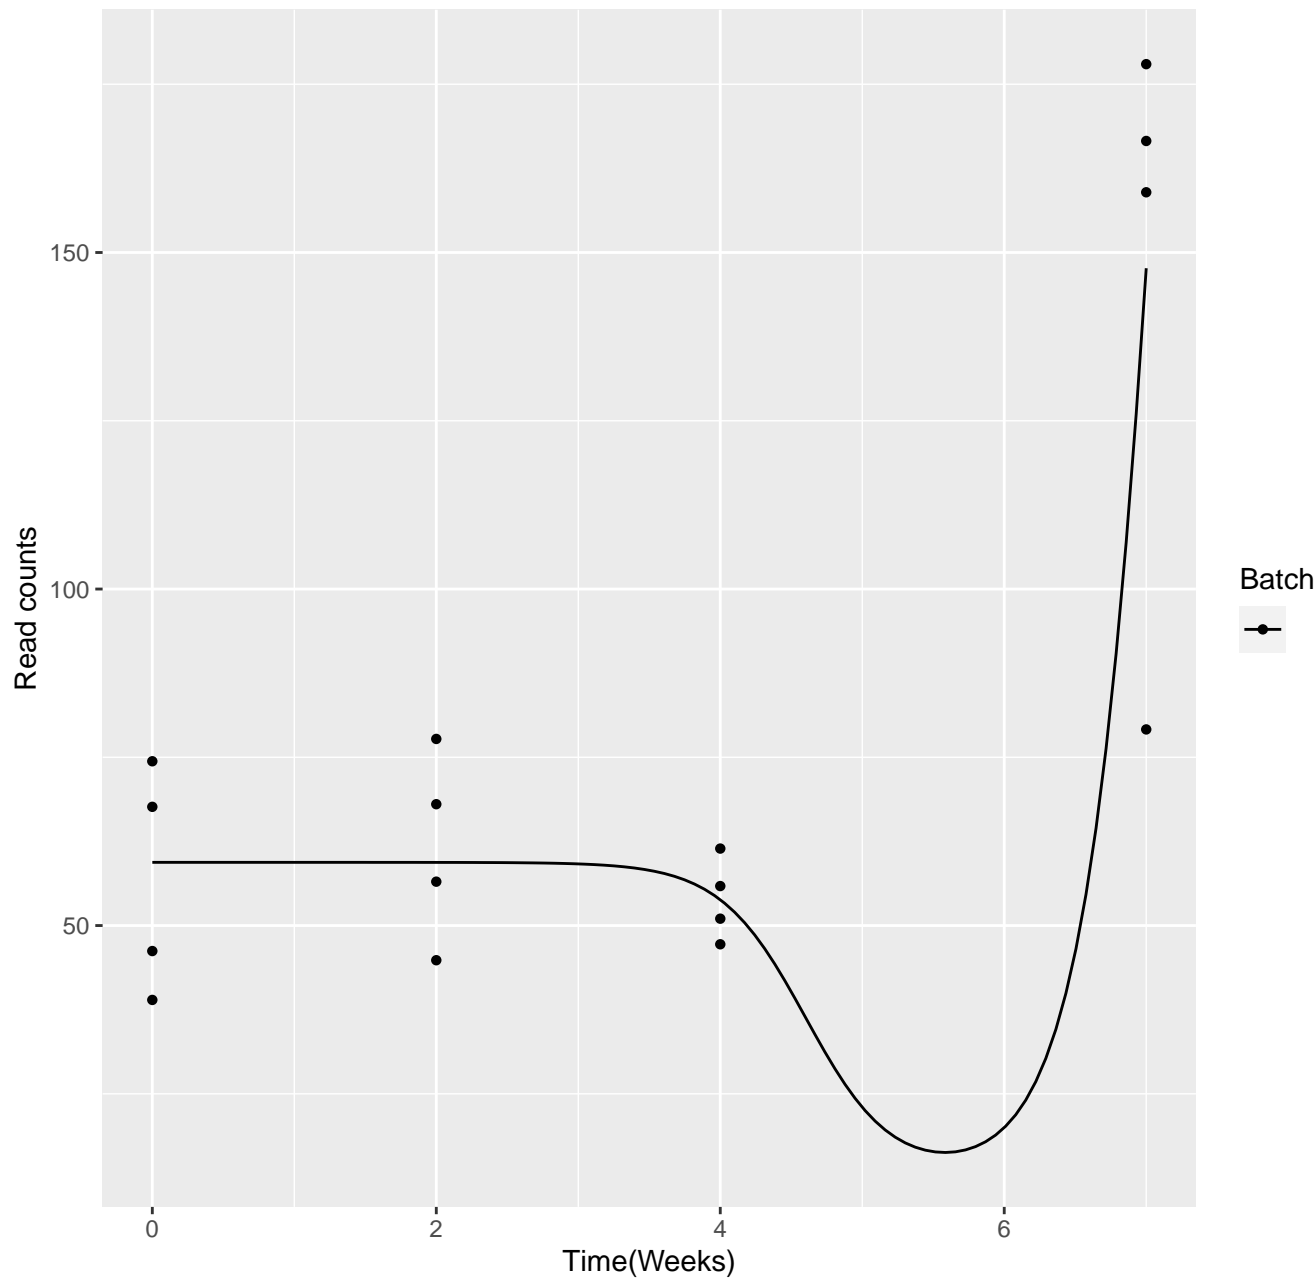

LOX:  $\log_{10} q = -5.24$

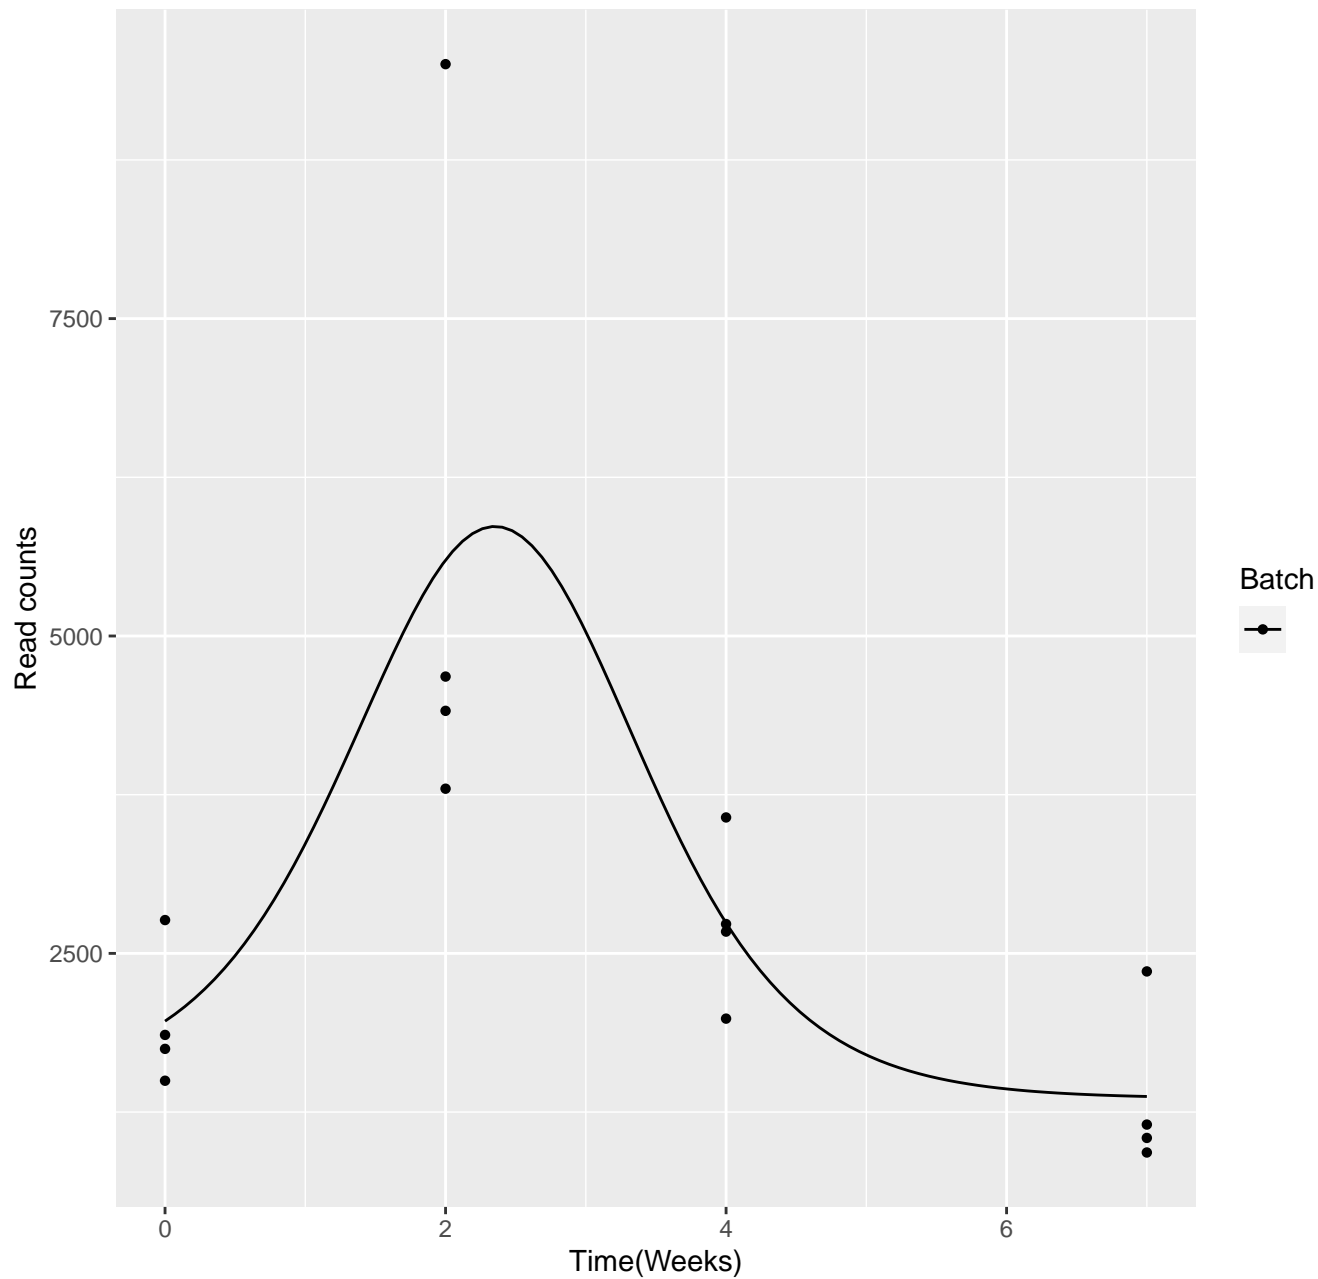

LOC103348951:  $\log_{10} q = -5.23$

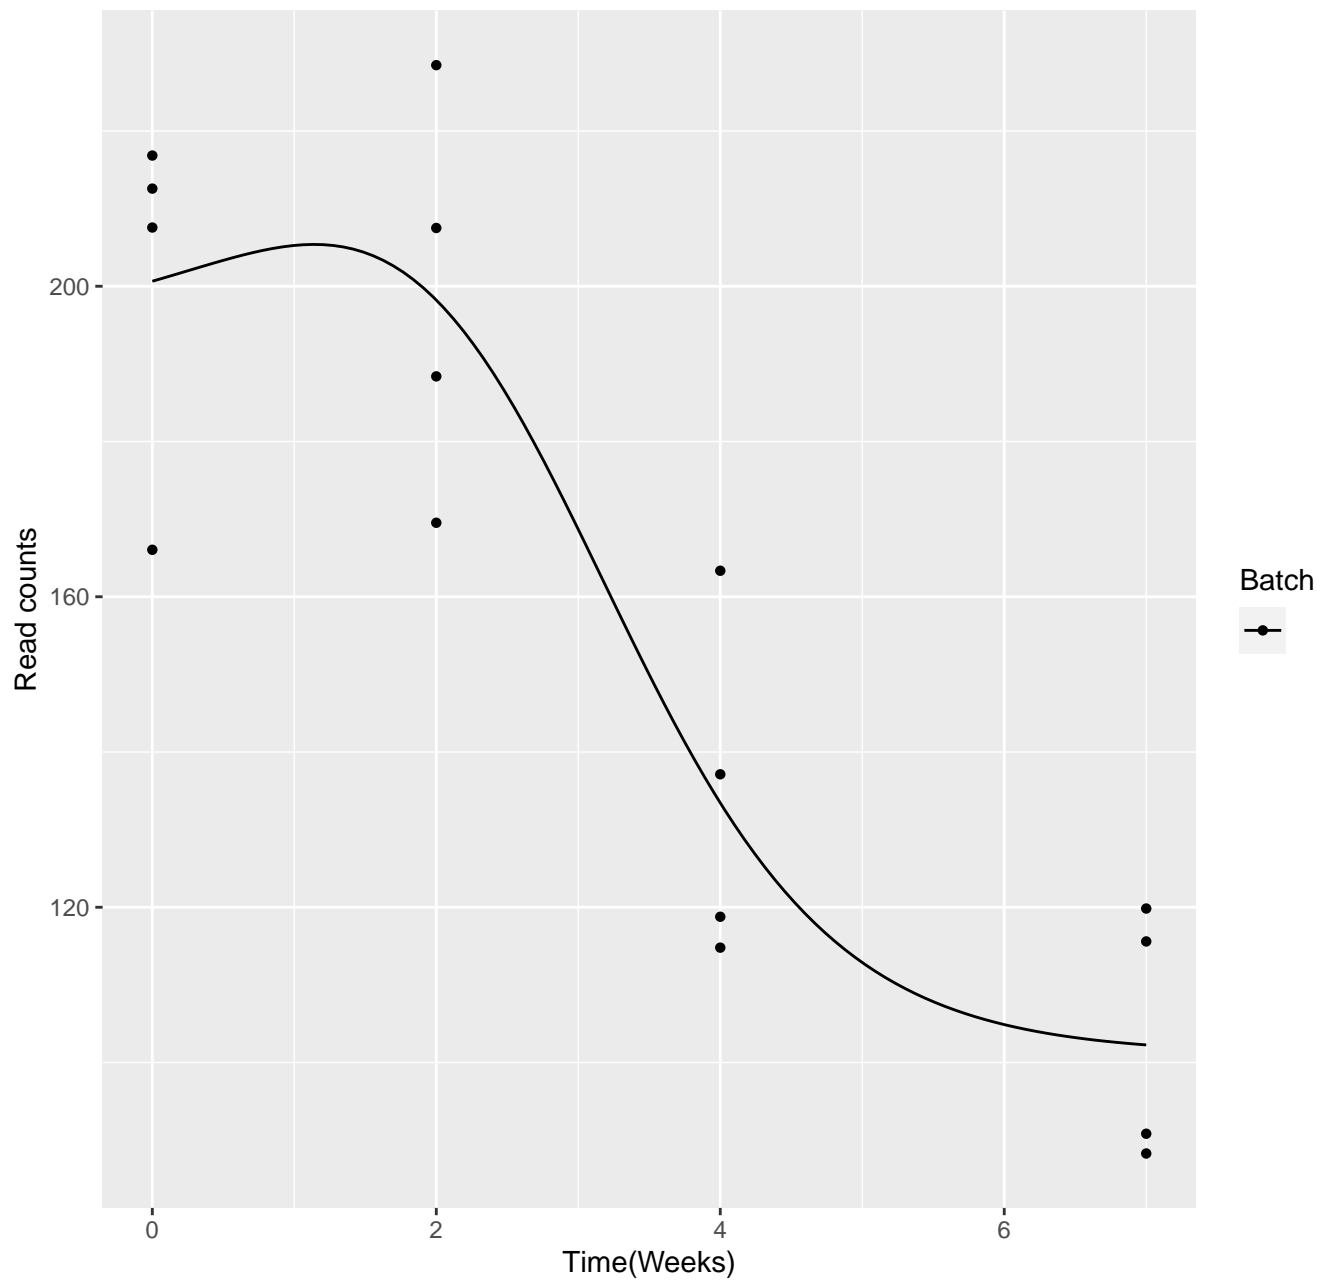

DAB2IP:  $\log_{10} q = -5.23$

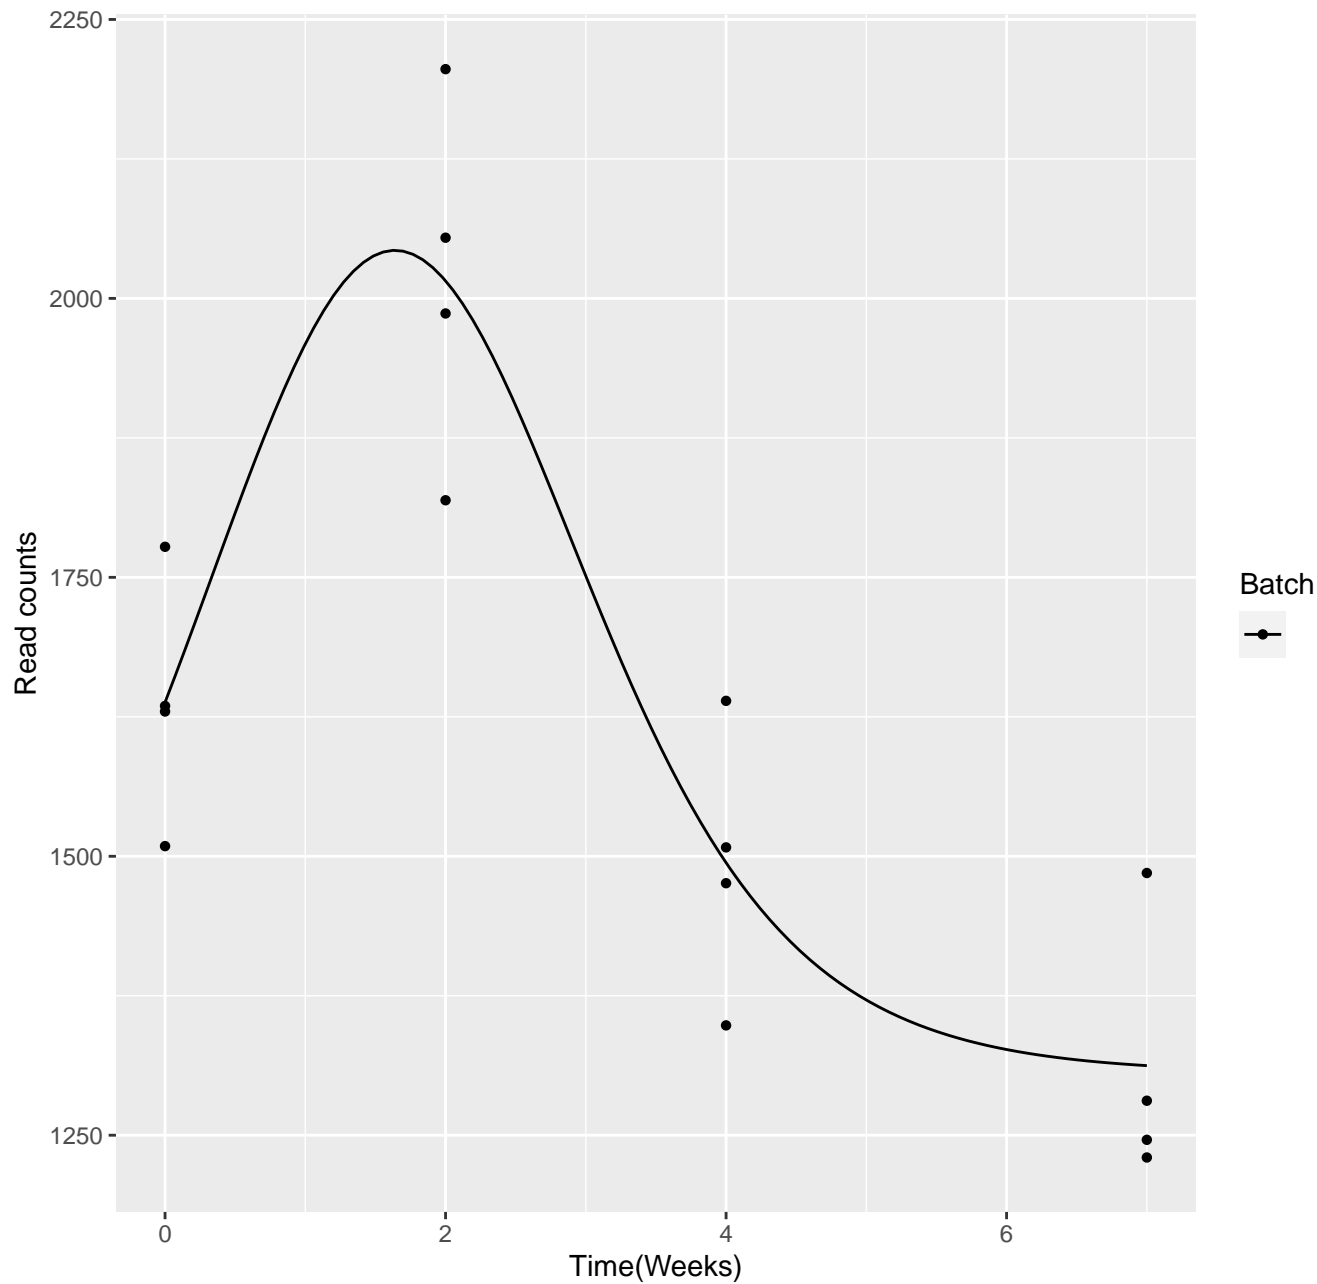



HBB2:  $\log_{10} q = -5.21$

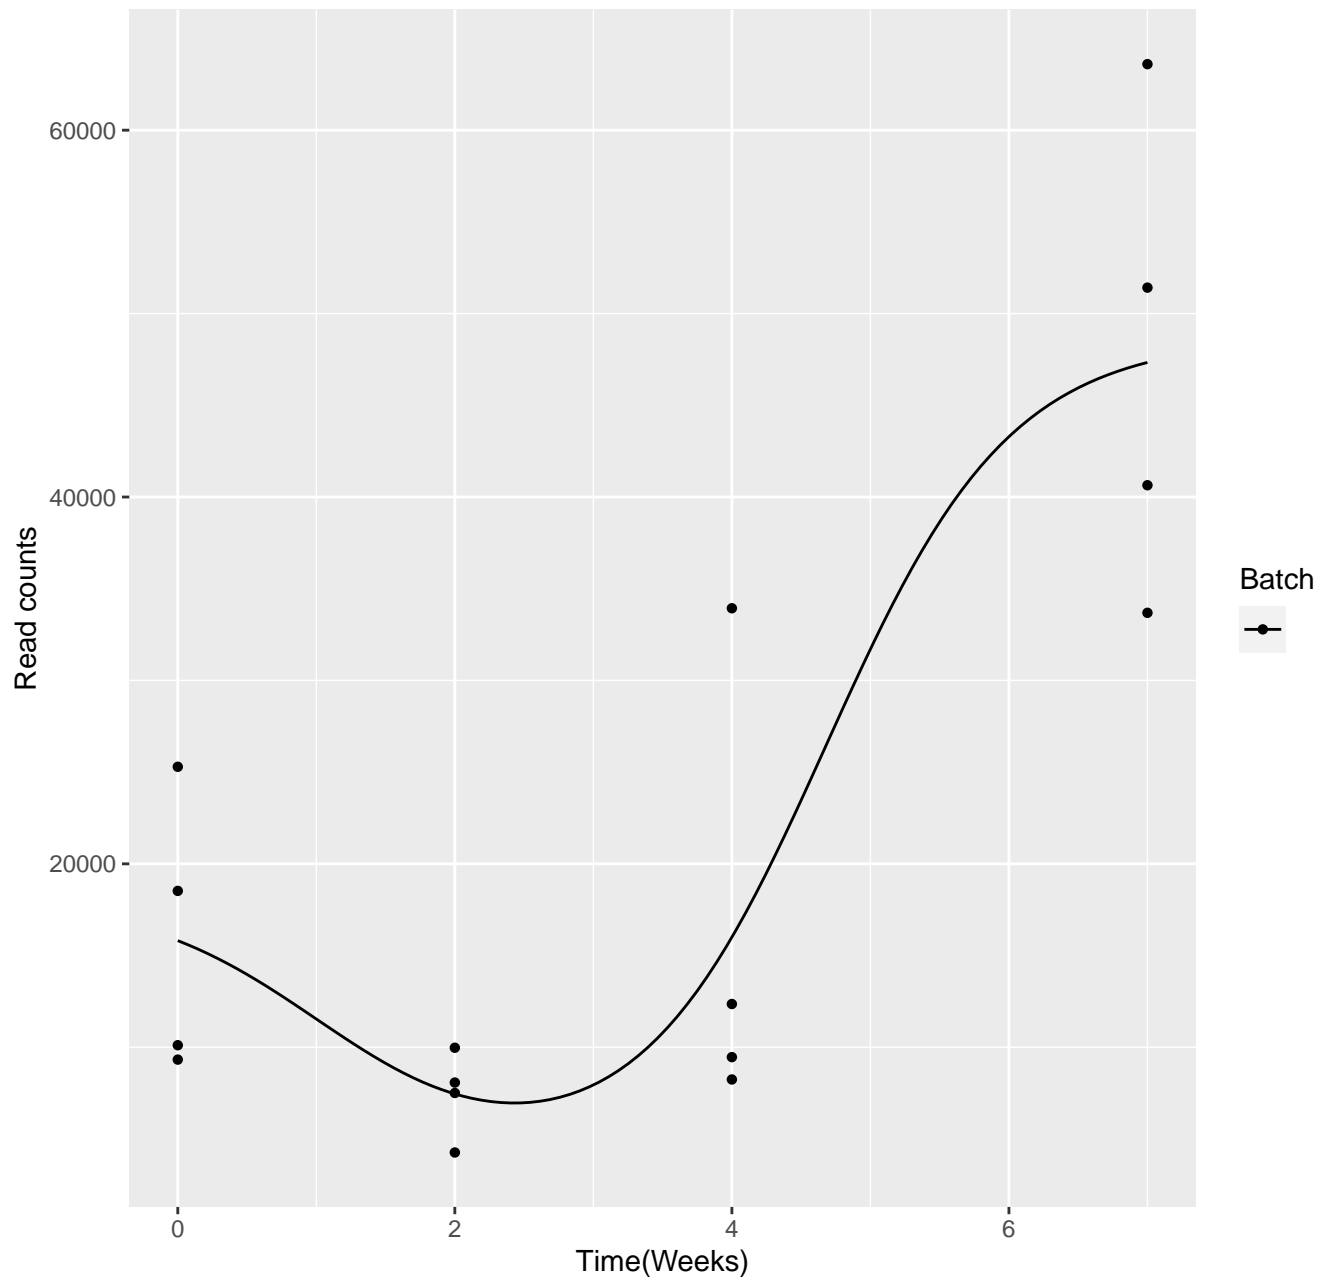

LOC108175363:  $\log_{10} q = -5.2$

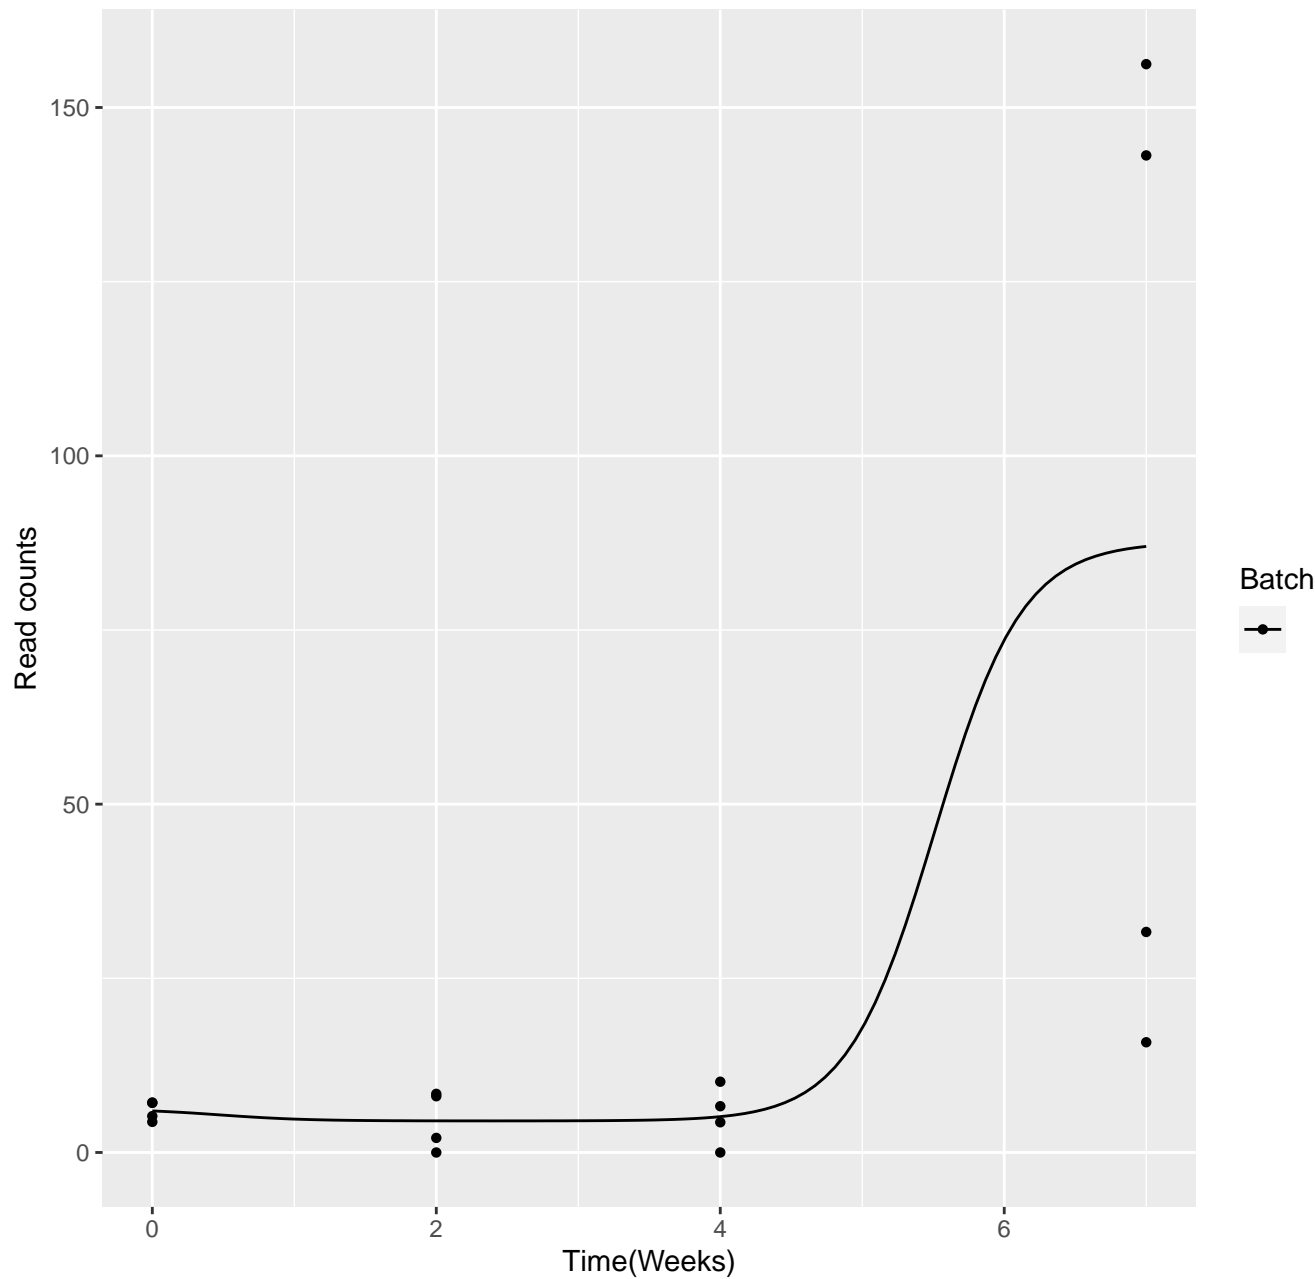

PGM5:  $\log_{10} q = -5.2$

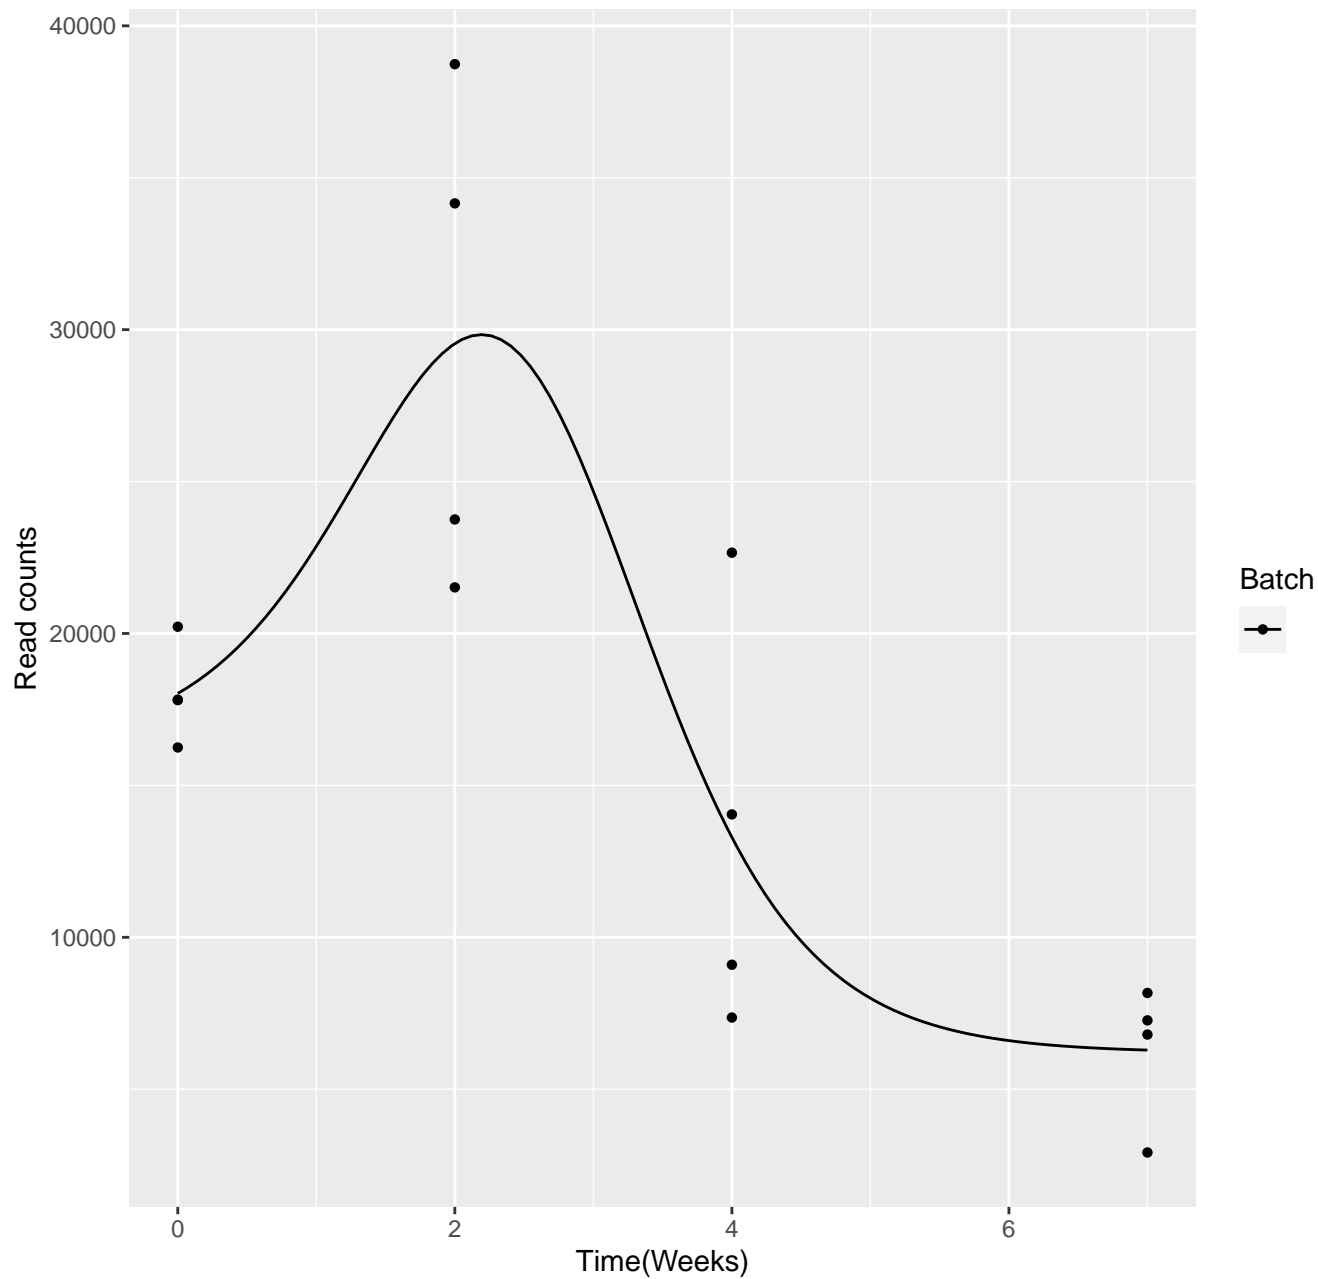

HLF:  $\log_{10} q = -5.2$

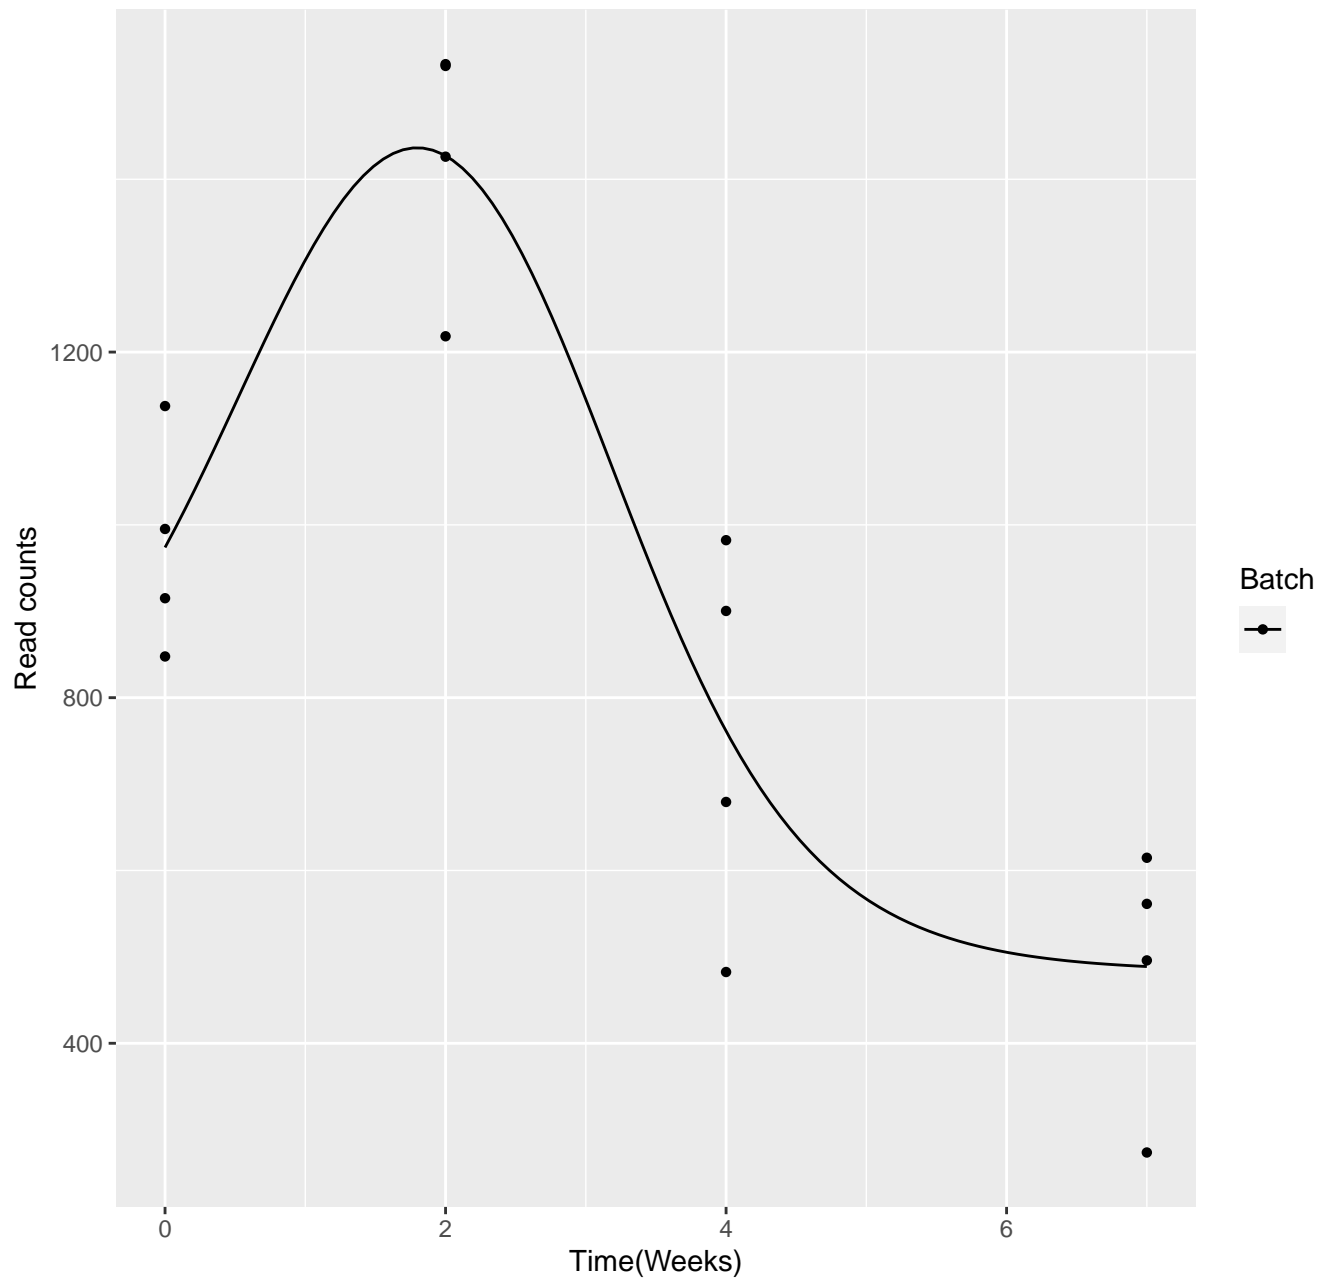

ARHGDIB:  $\log_{10} q = -5.17$

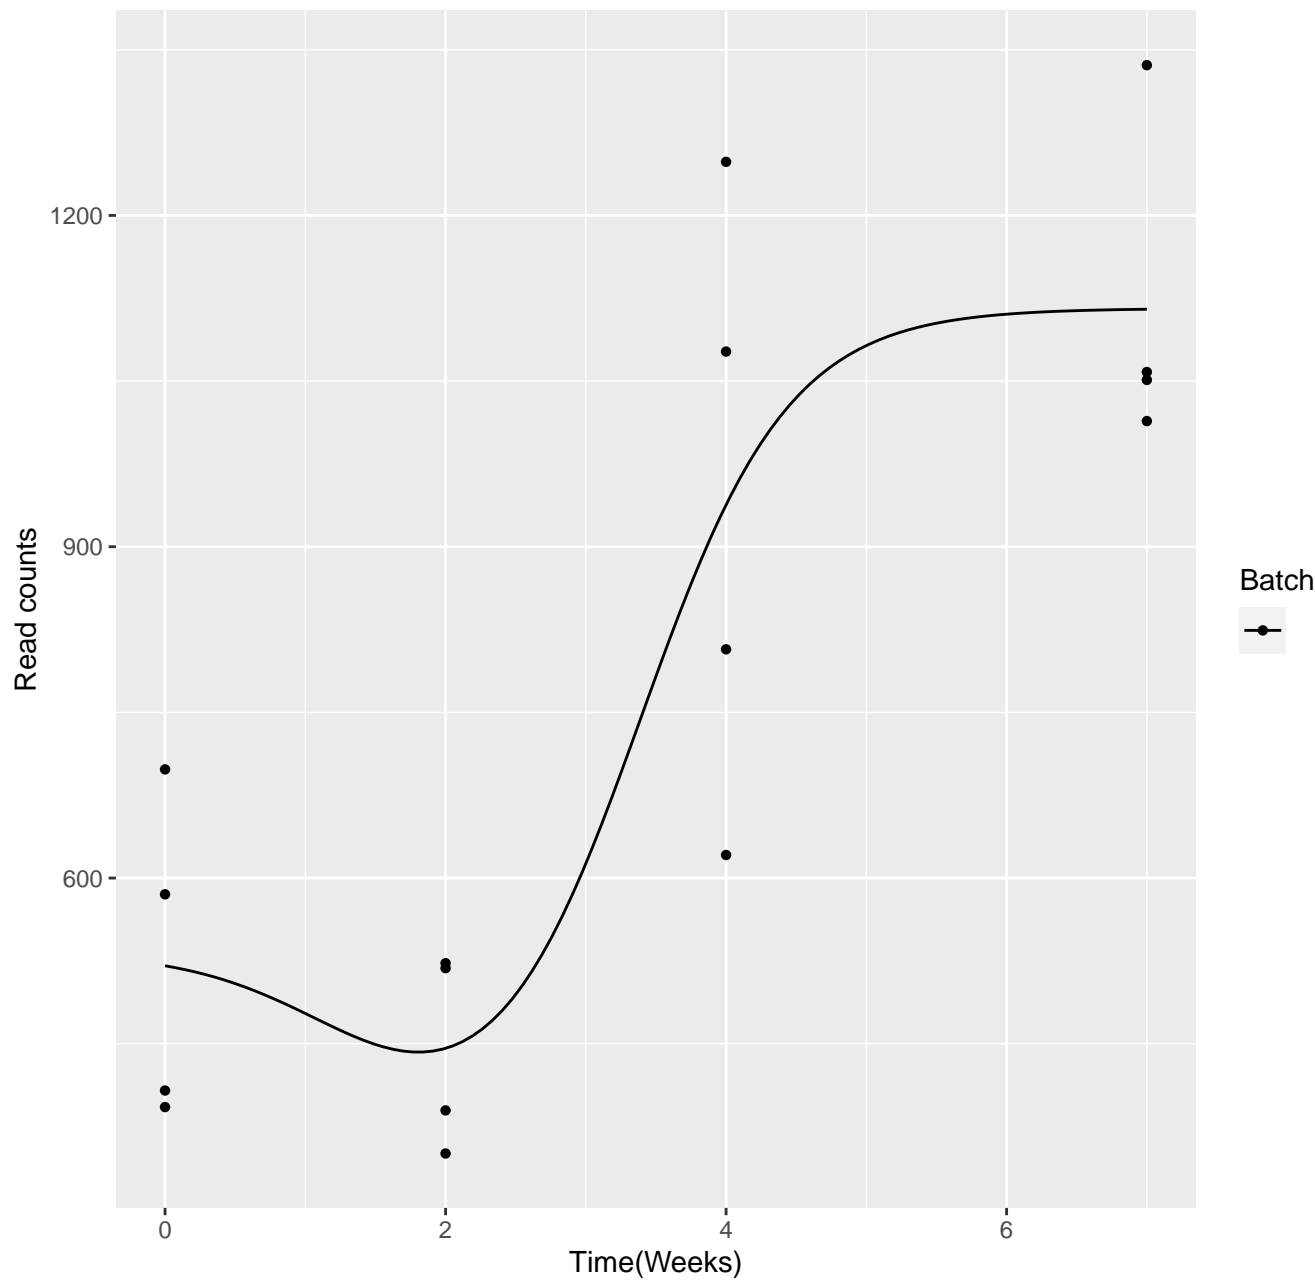

LOC103347295:  $\log_{10} q = -5.17$

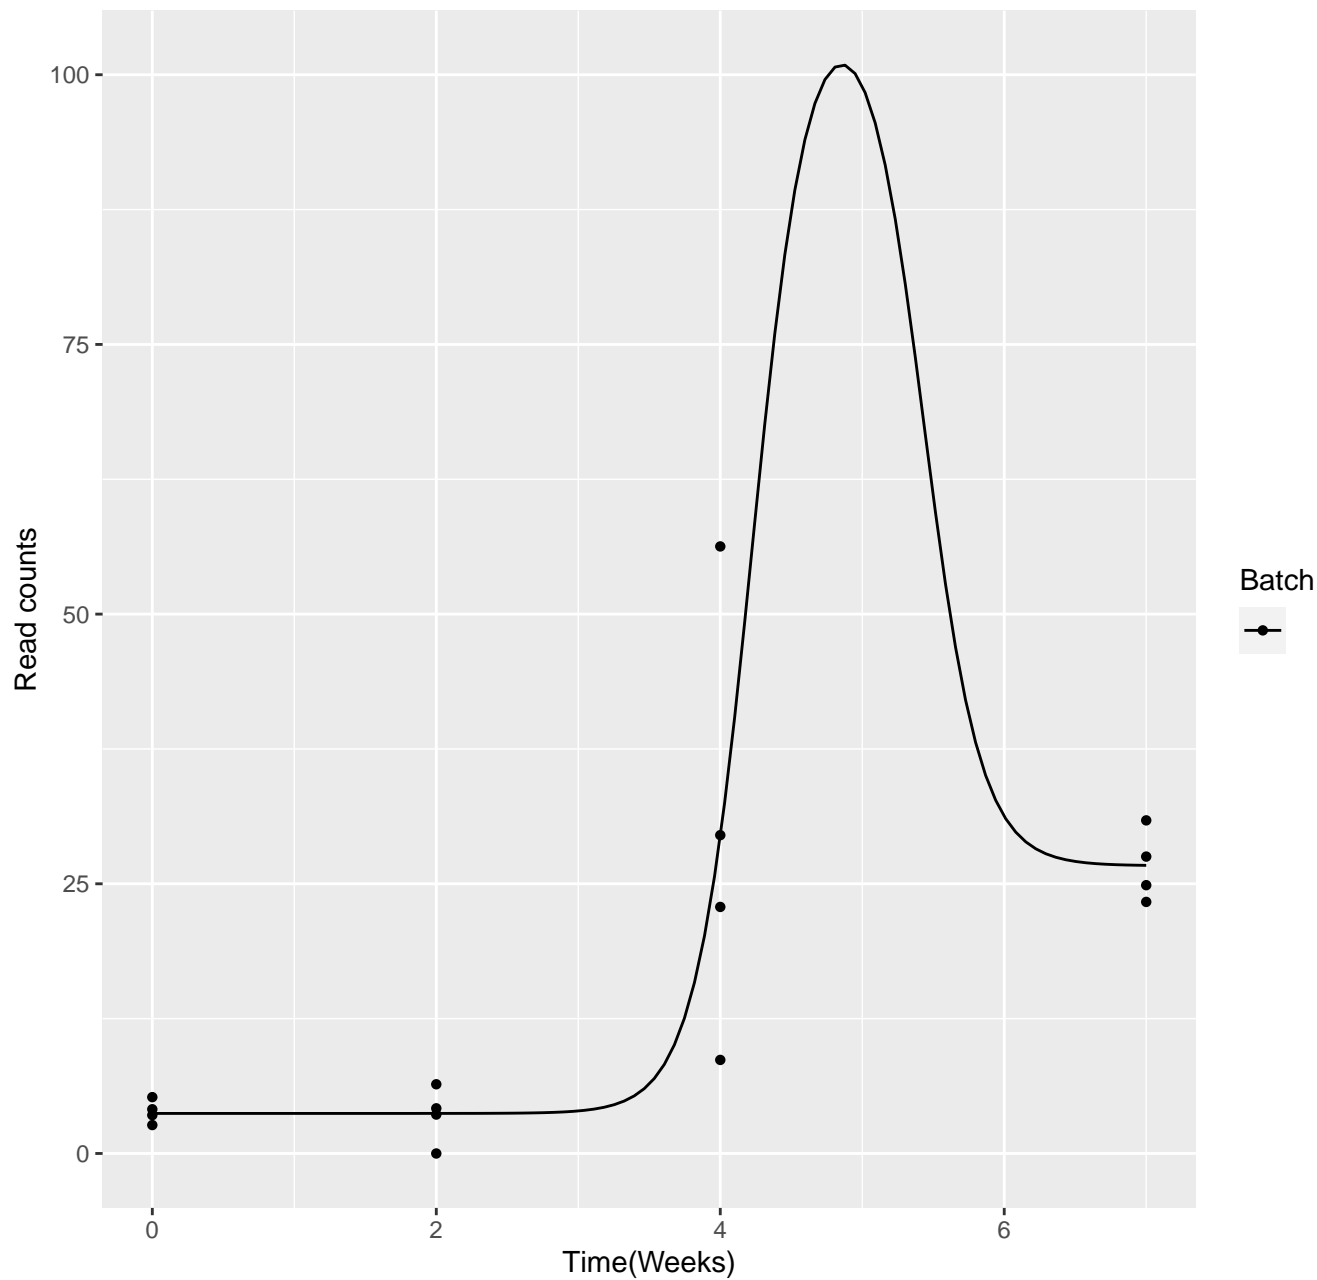

LOC100343802:  $\log_{10} q = -5.14$

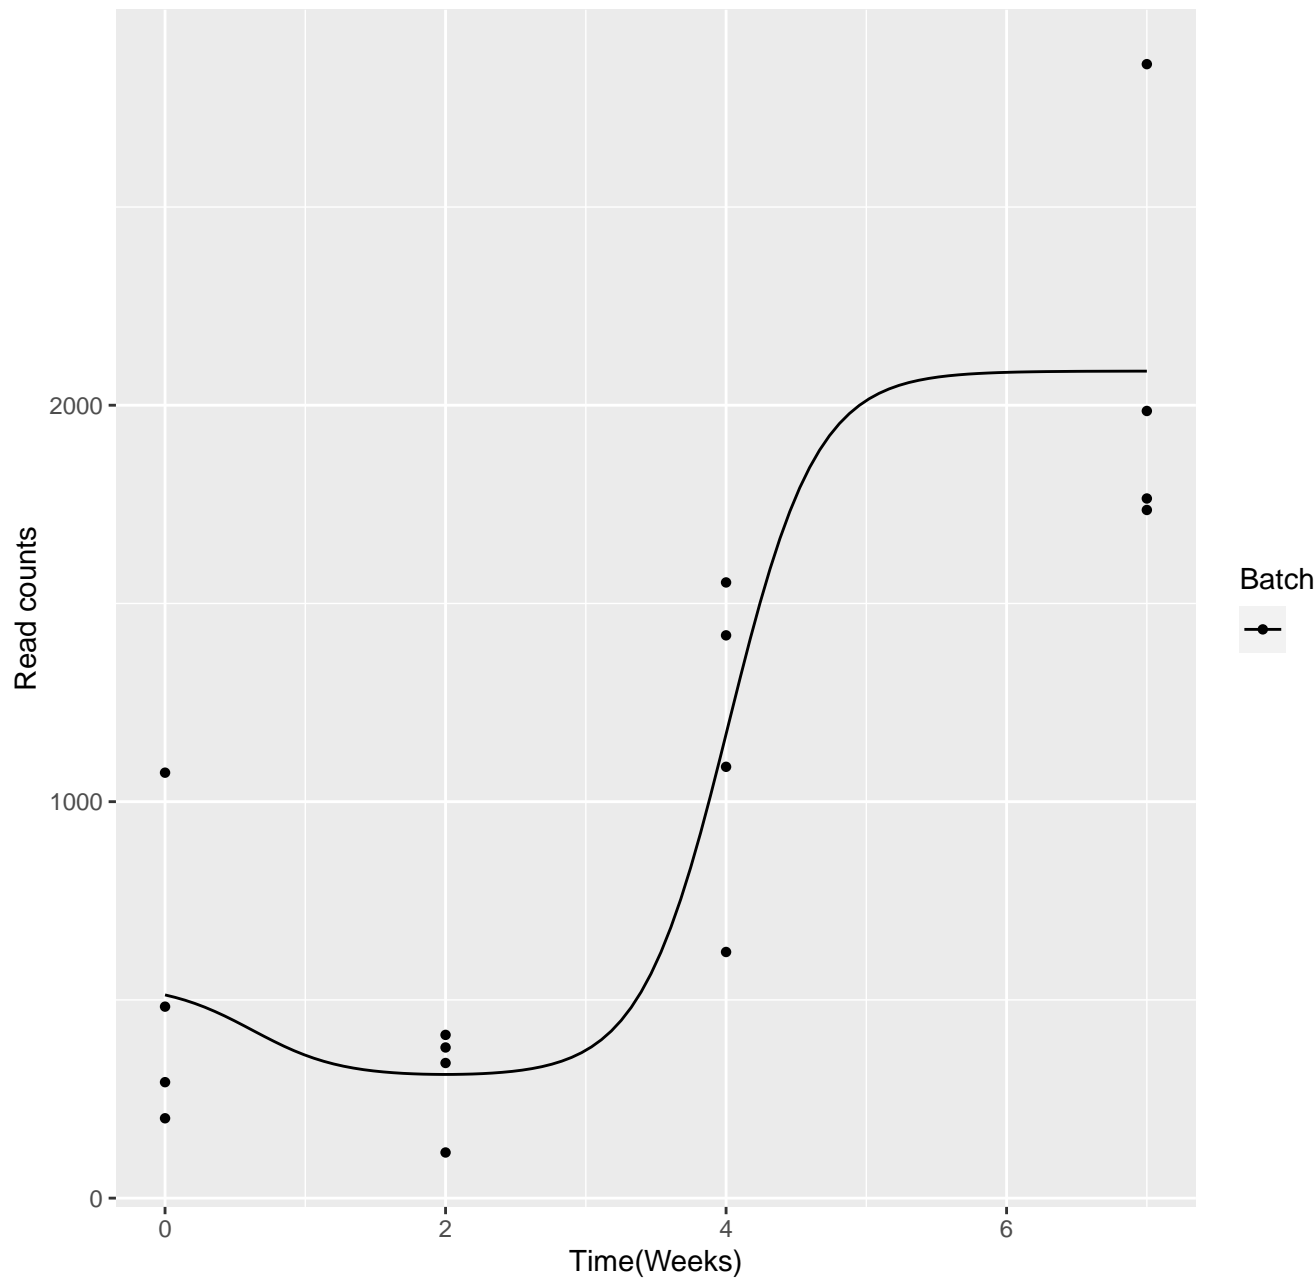

NPPA:  $\log_{10} q = -5.14$

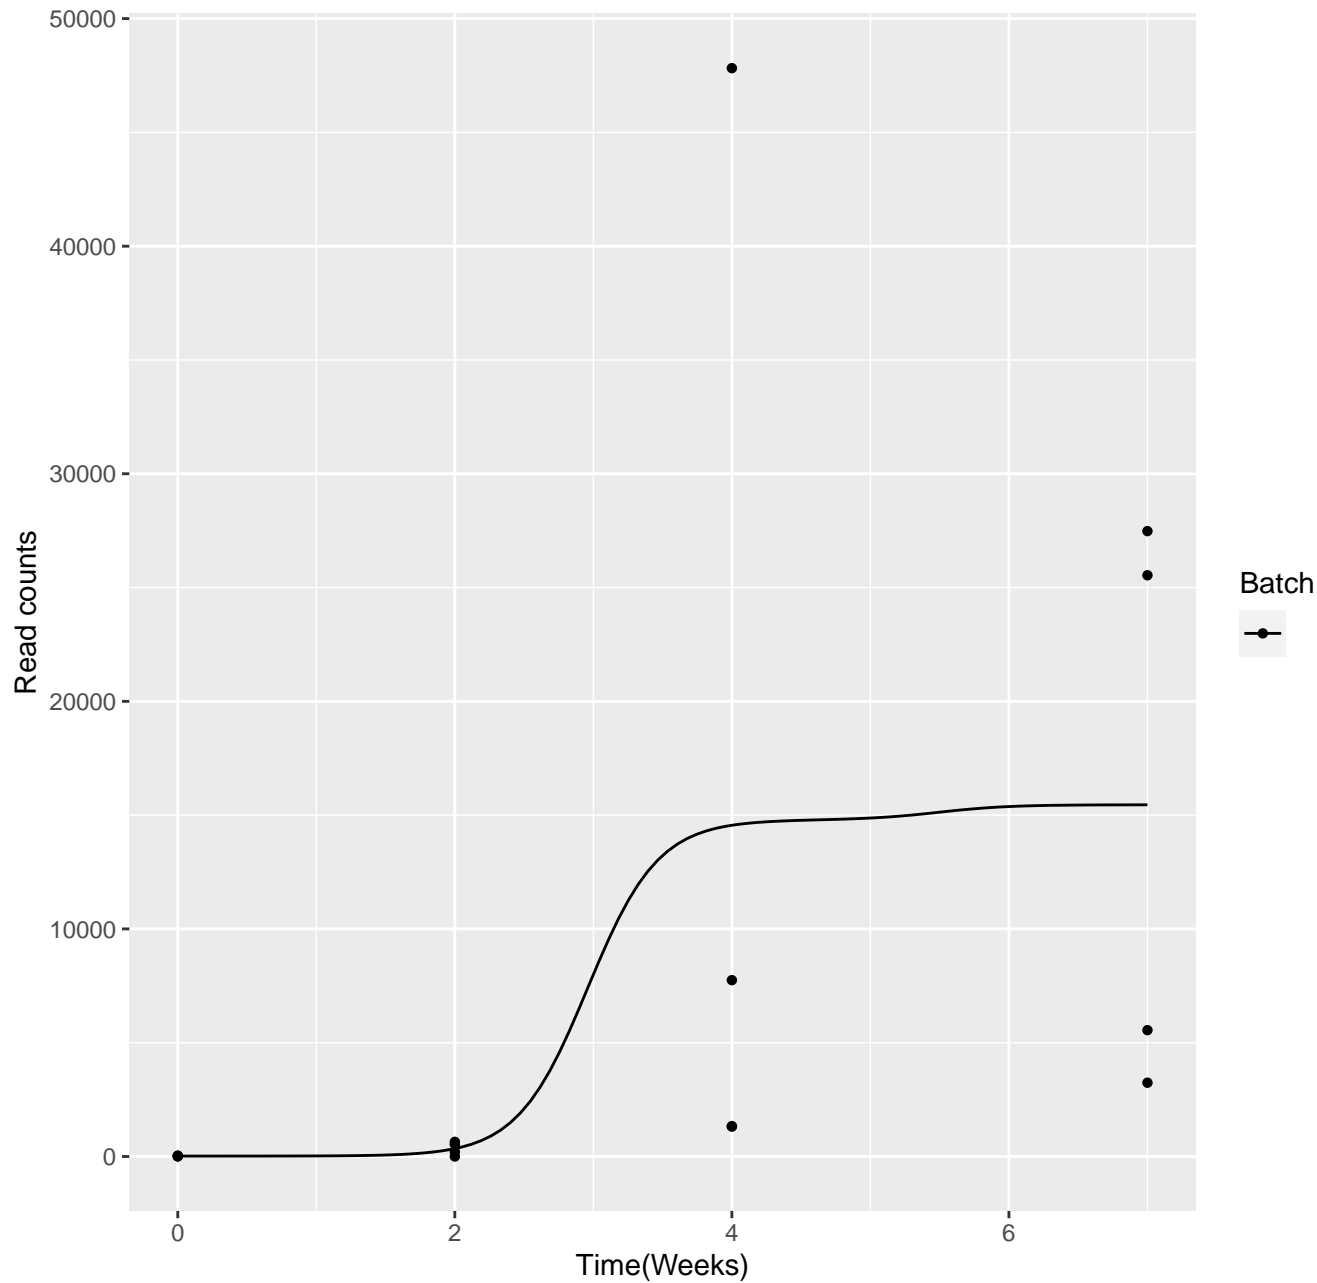



DLG2:  $\log_{10} q = -5.12$

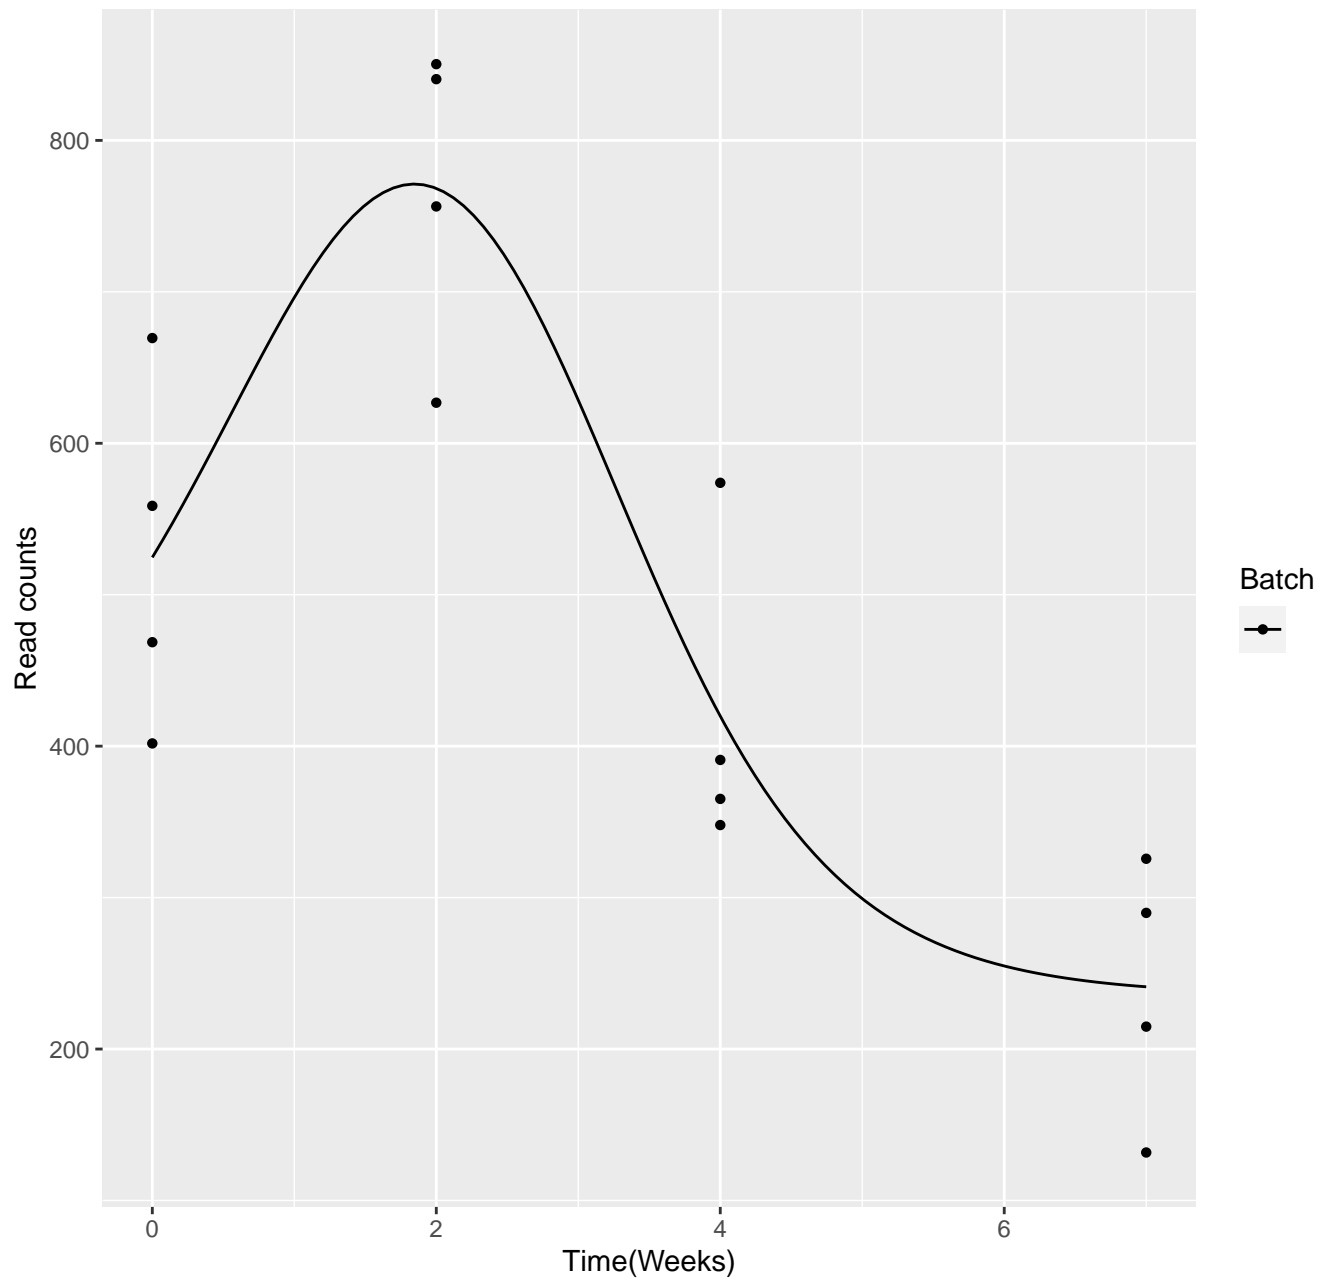

LOC100356891:  $\log_{10} q = -5.12$

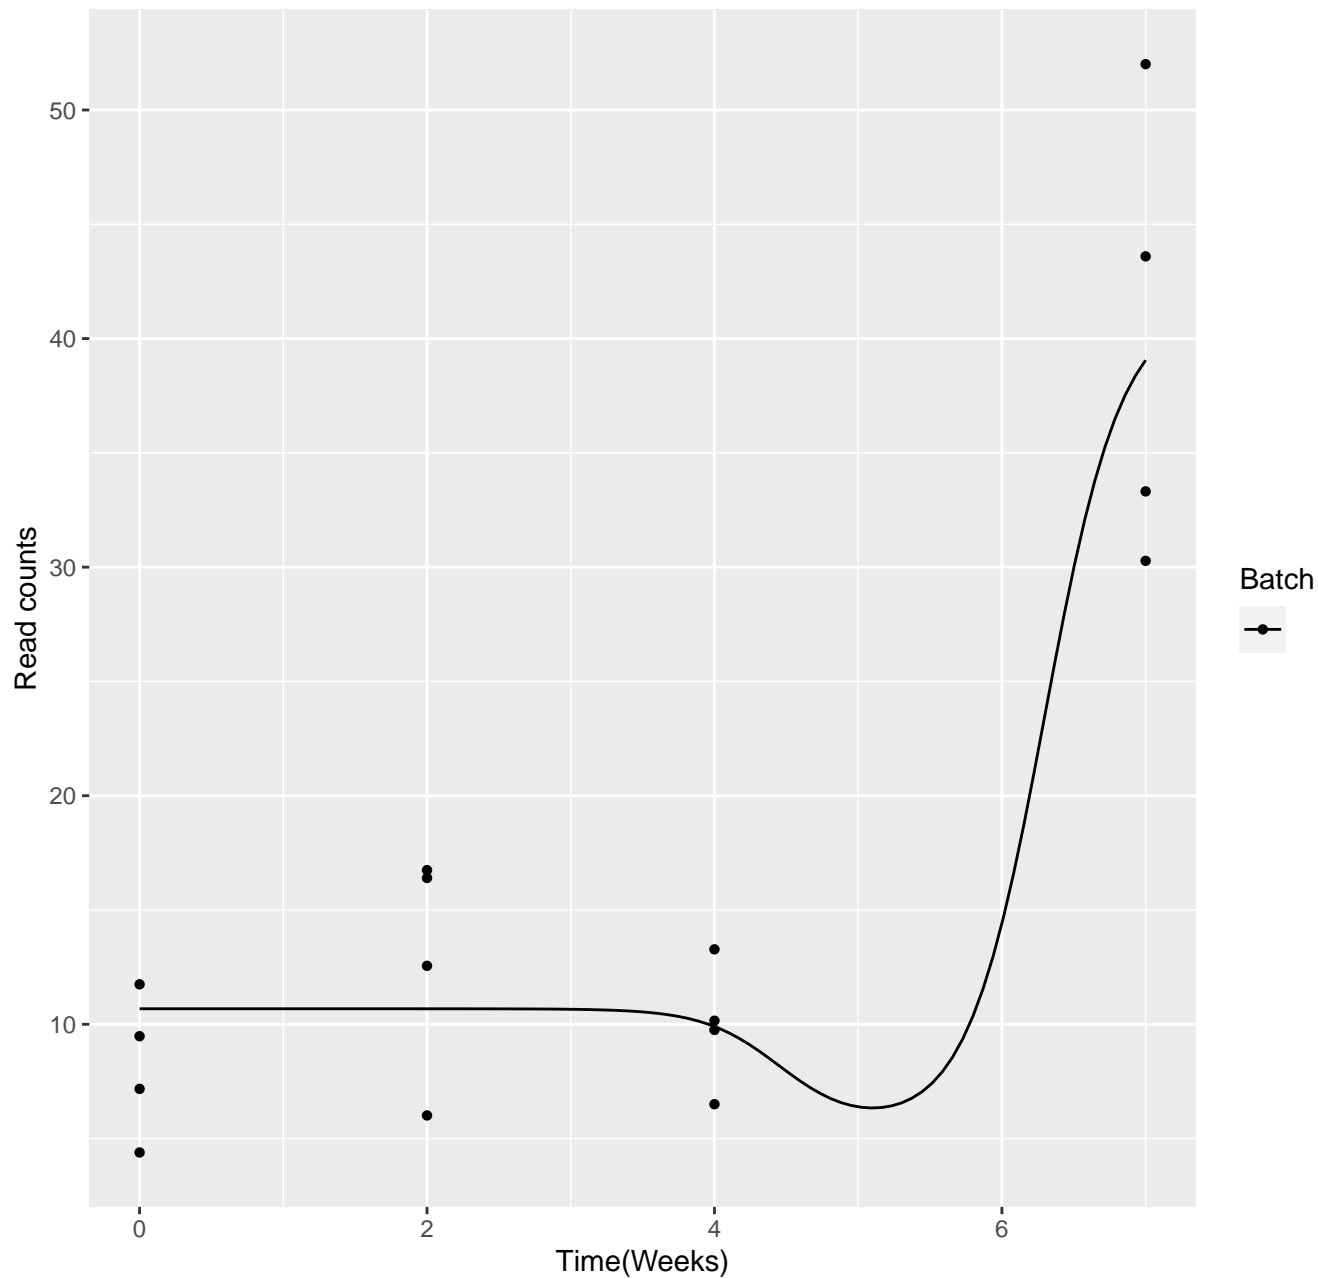

TENT5B:  $\log_{10} q = -5.12$

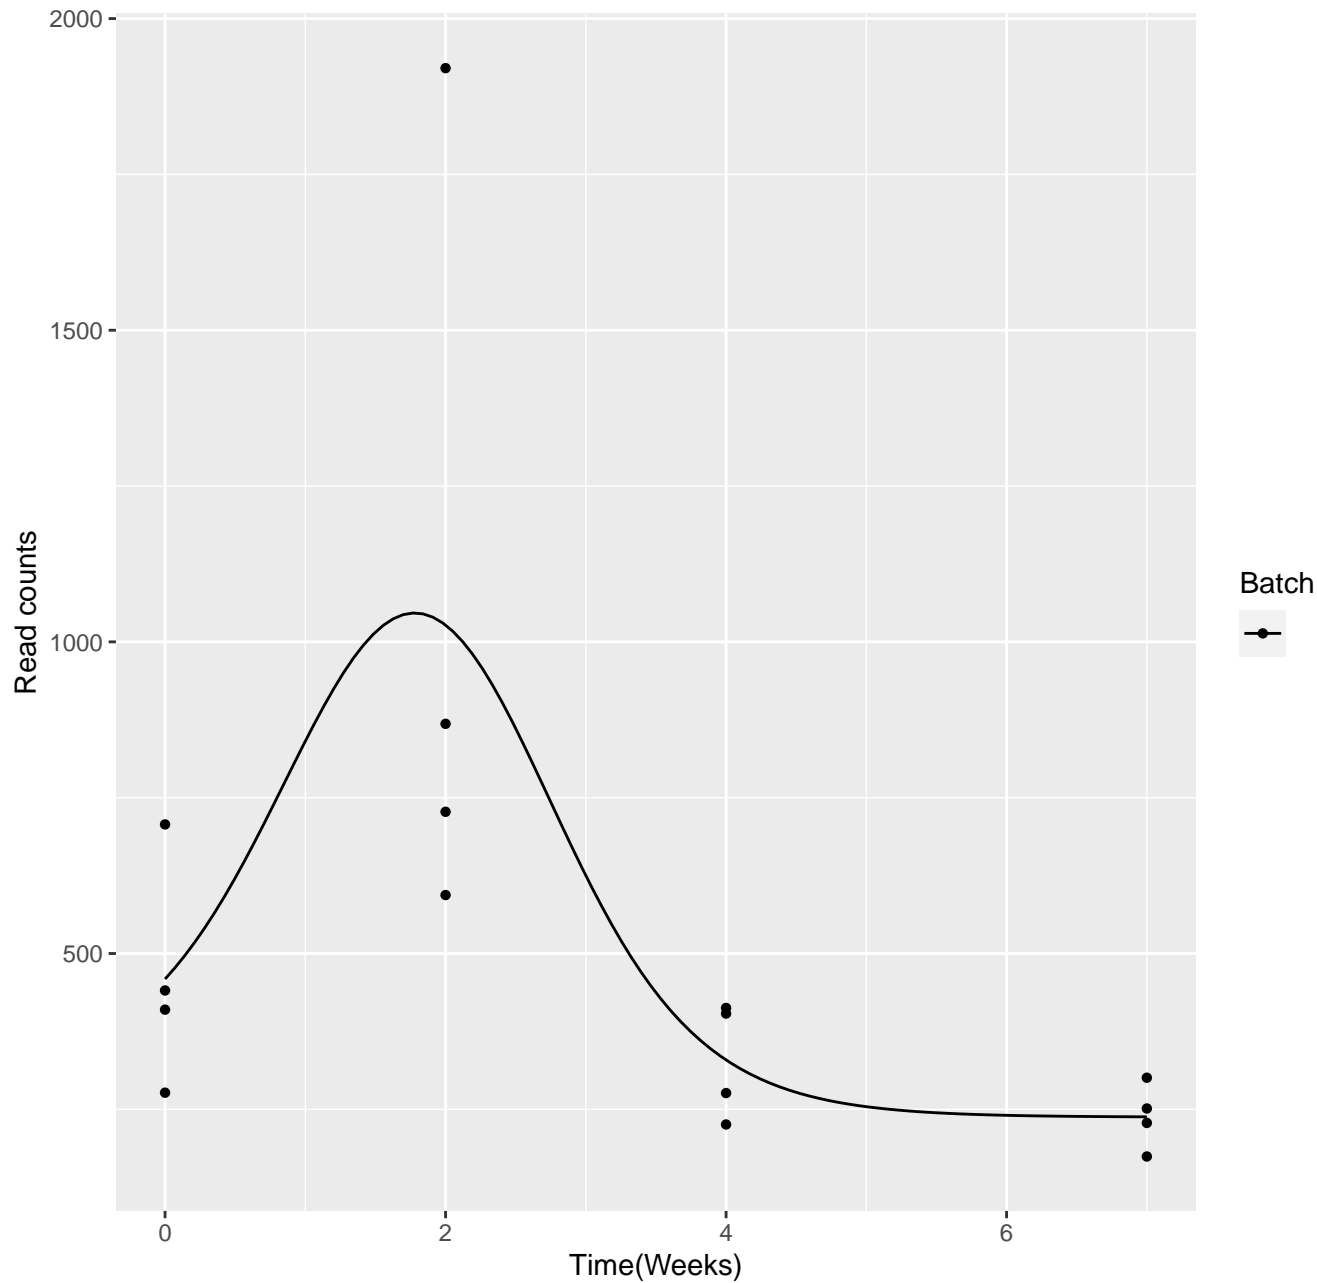

USP20:  $\log_{10} q = -5.11$

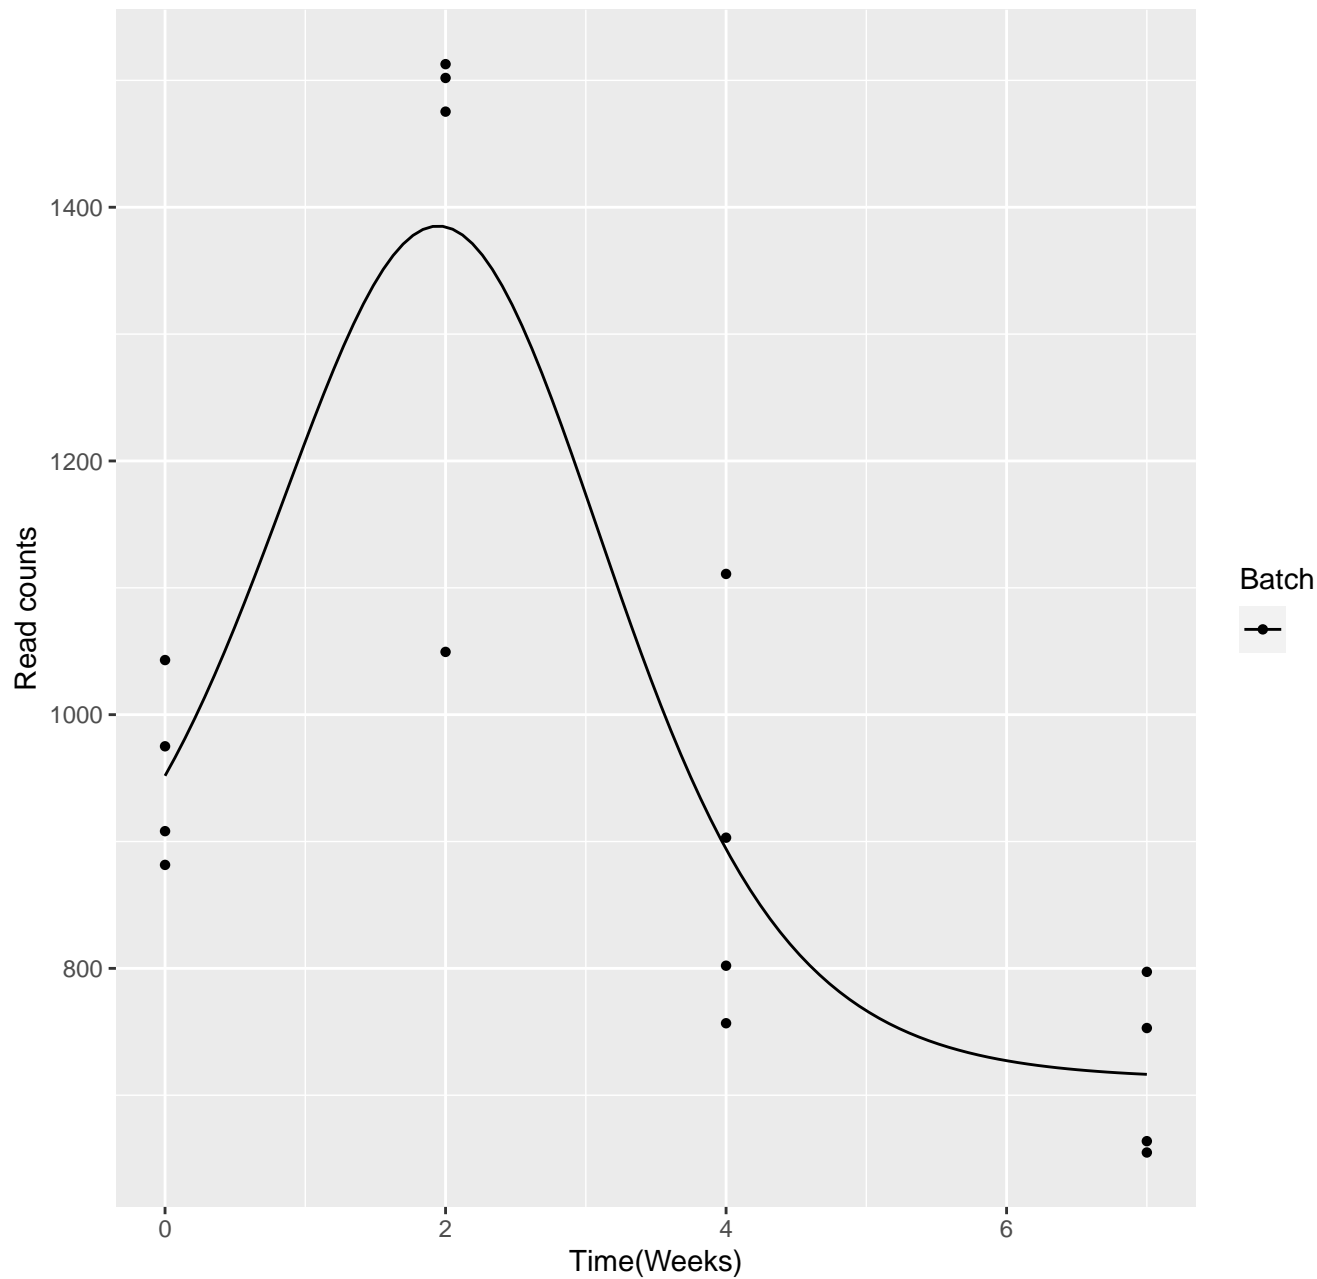

ANAPC1:  $\log_{10} q = -5.11$

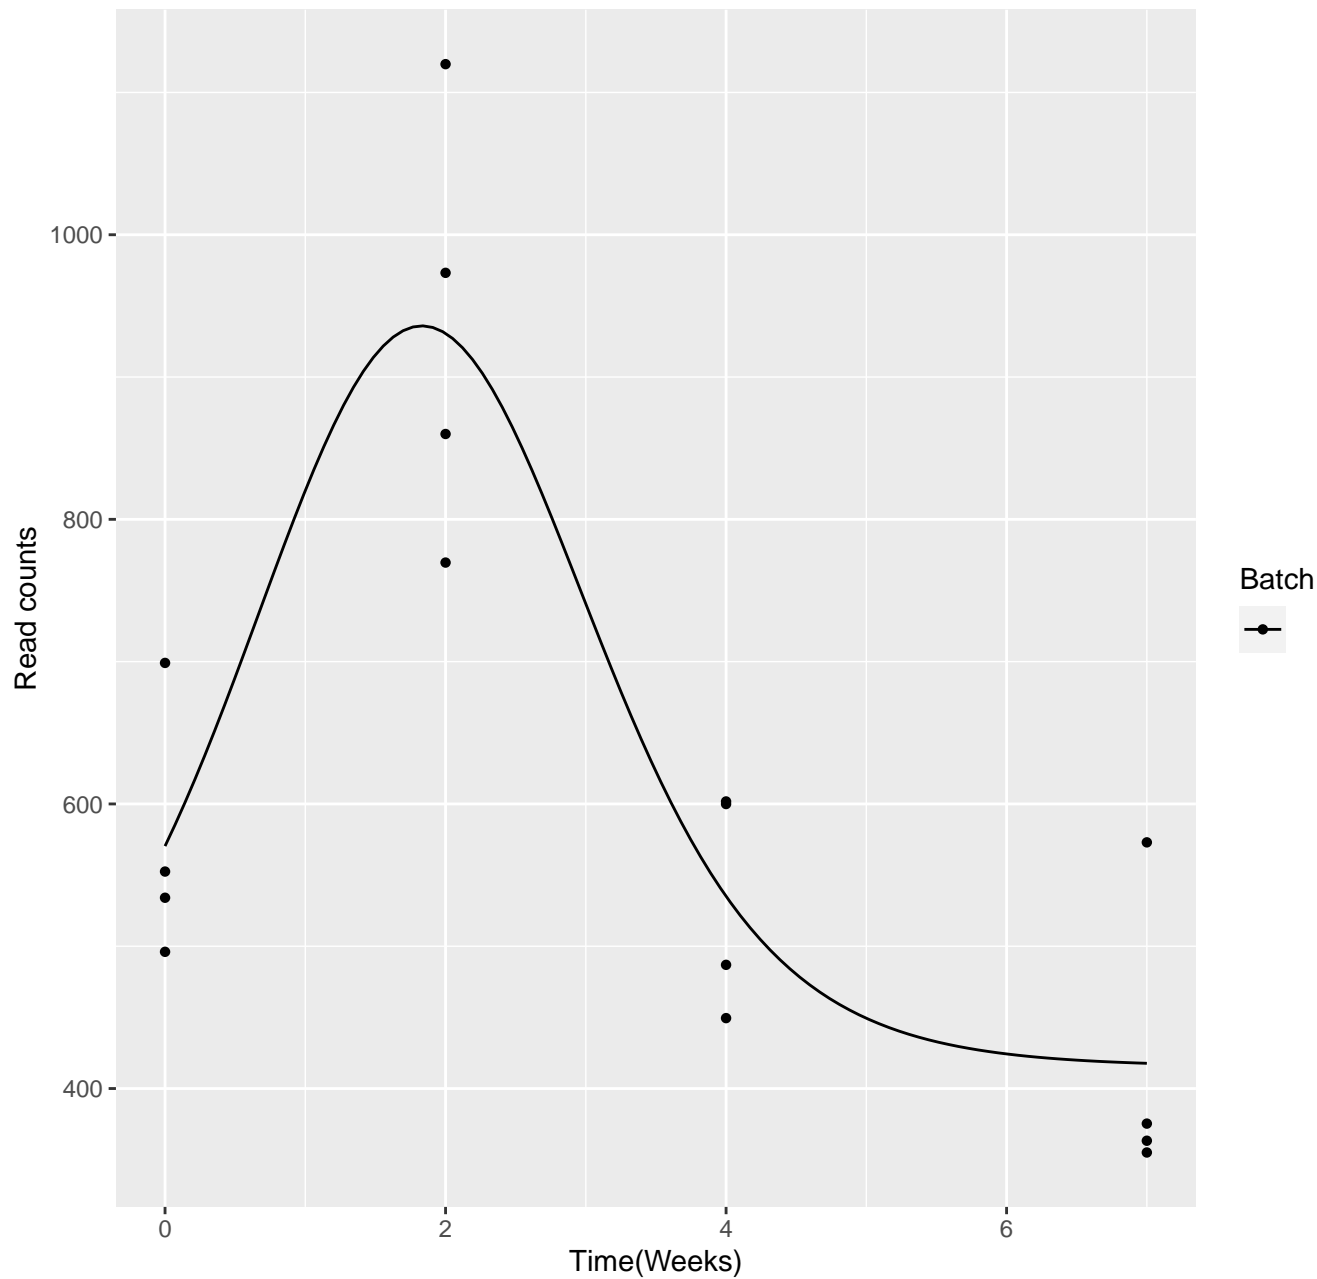

TLR1:  $\log_{10} q = -5.1$

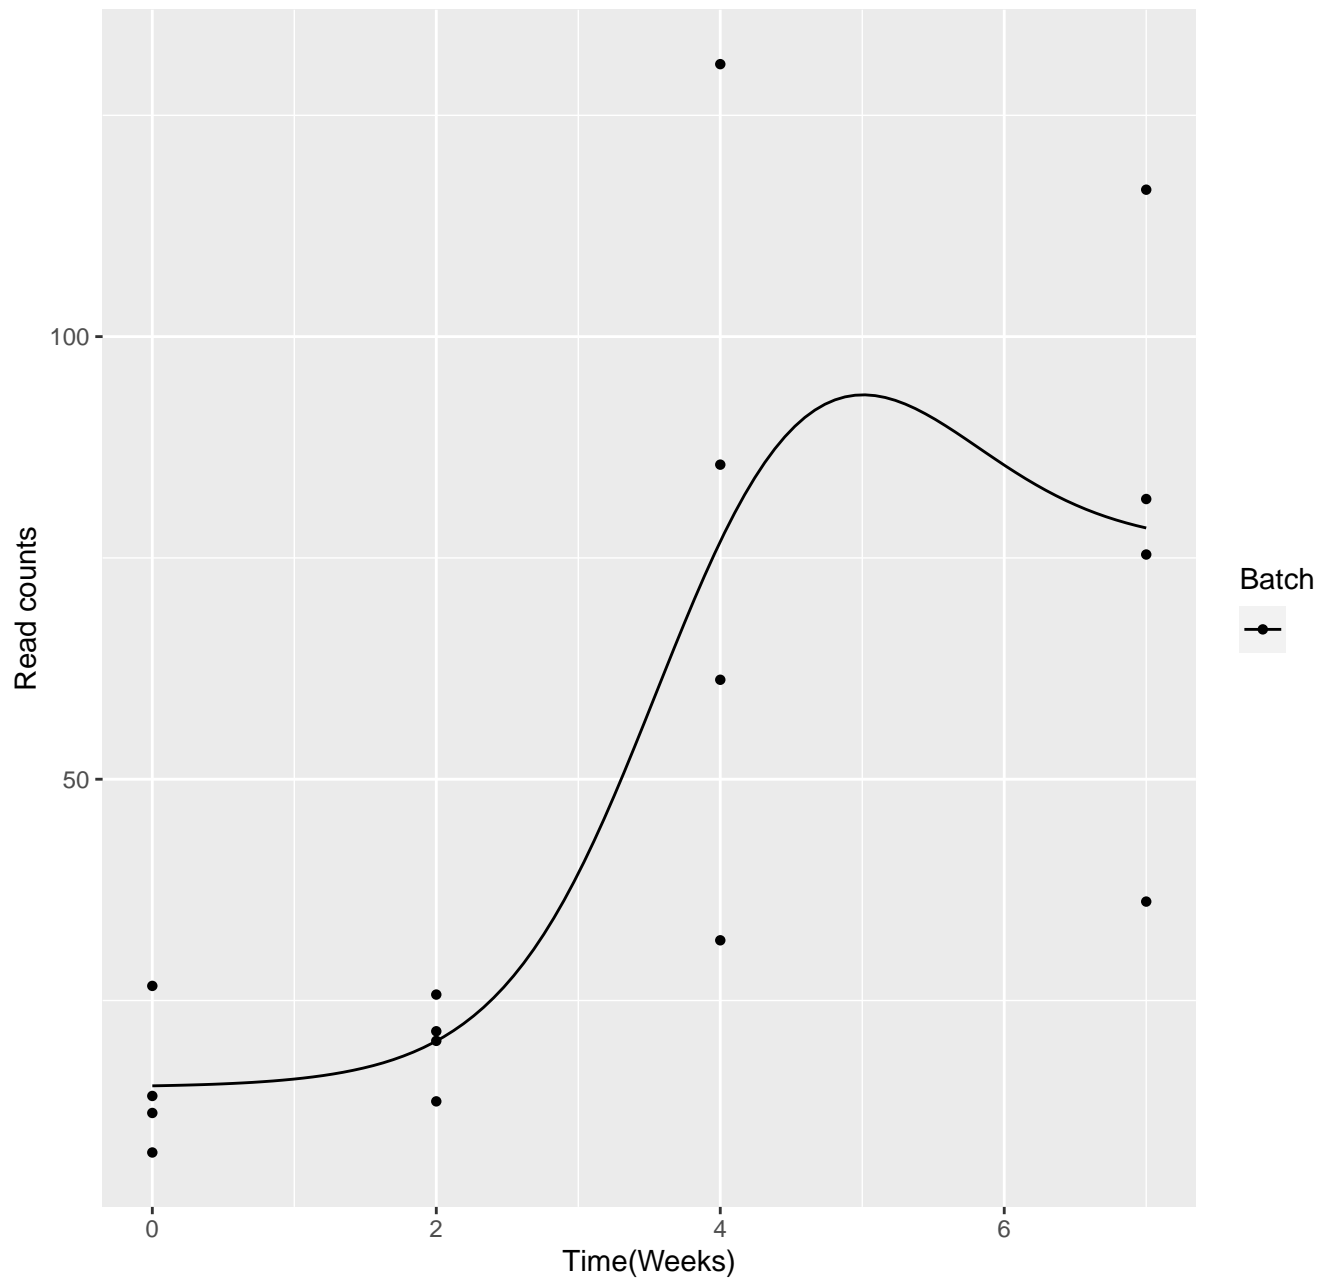

NFKBIE:  $\log_{10} q = -5.07$

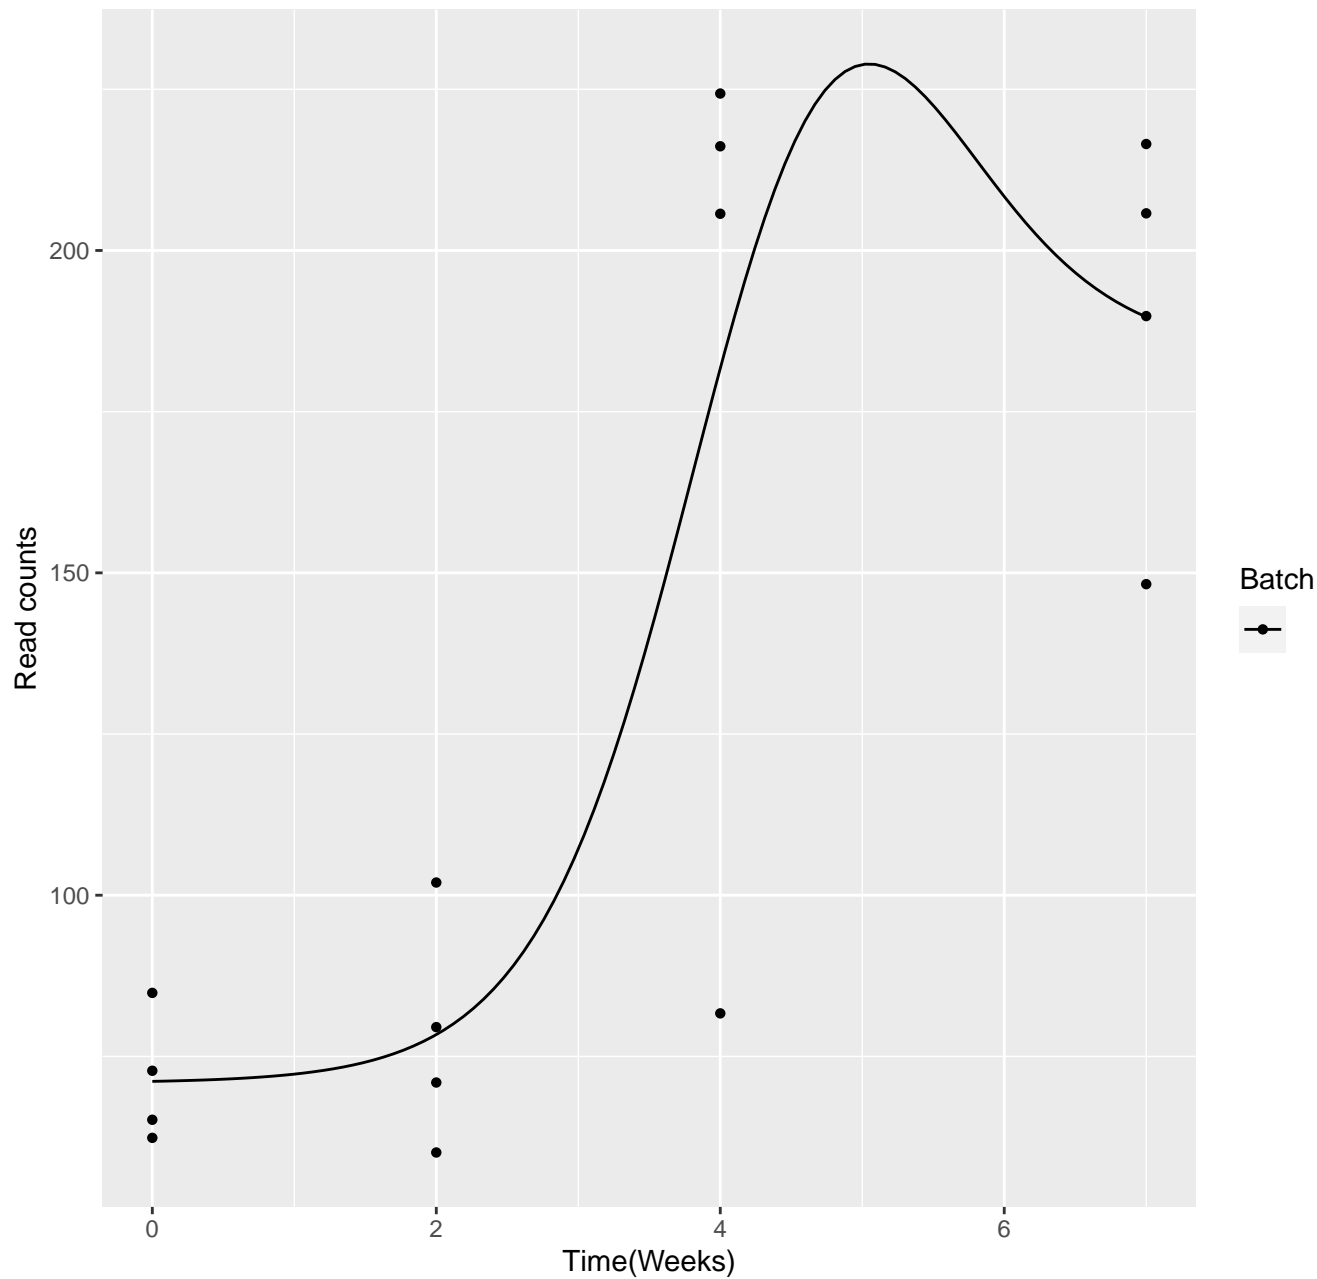

FOXJ2:  $\log_{10} q = -5.05$

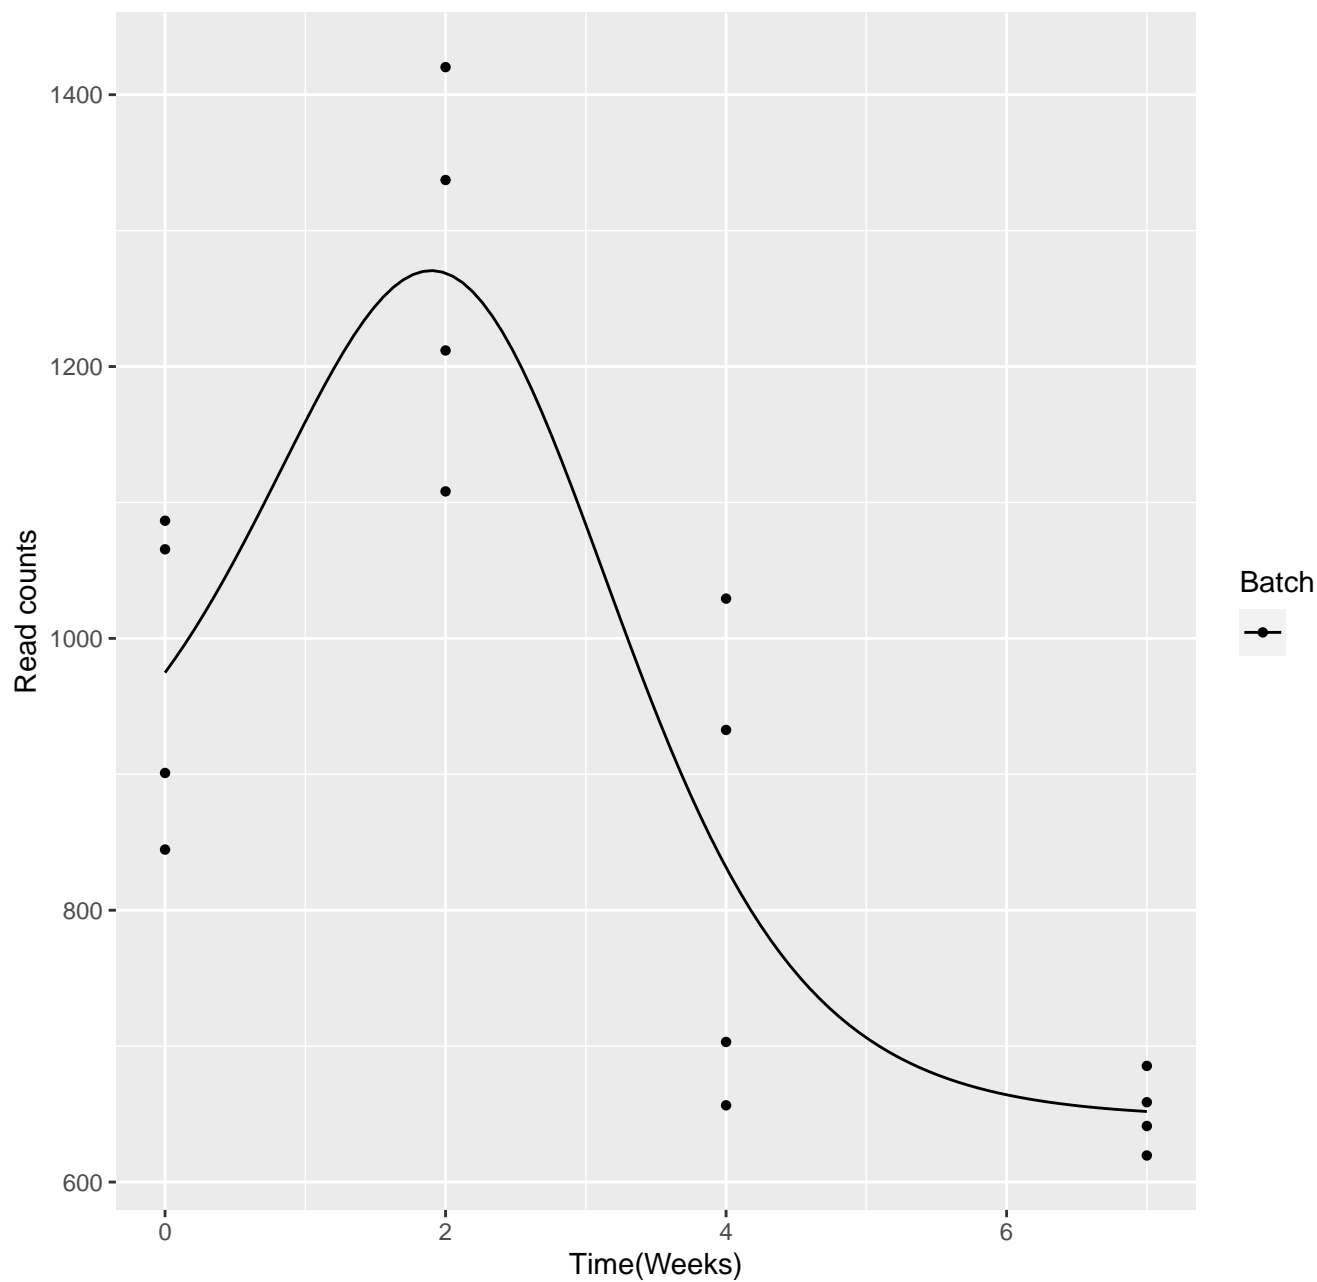



FYB1:  $\log_{10} q = -5.05$

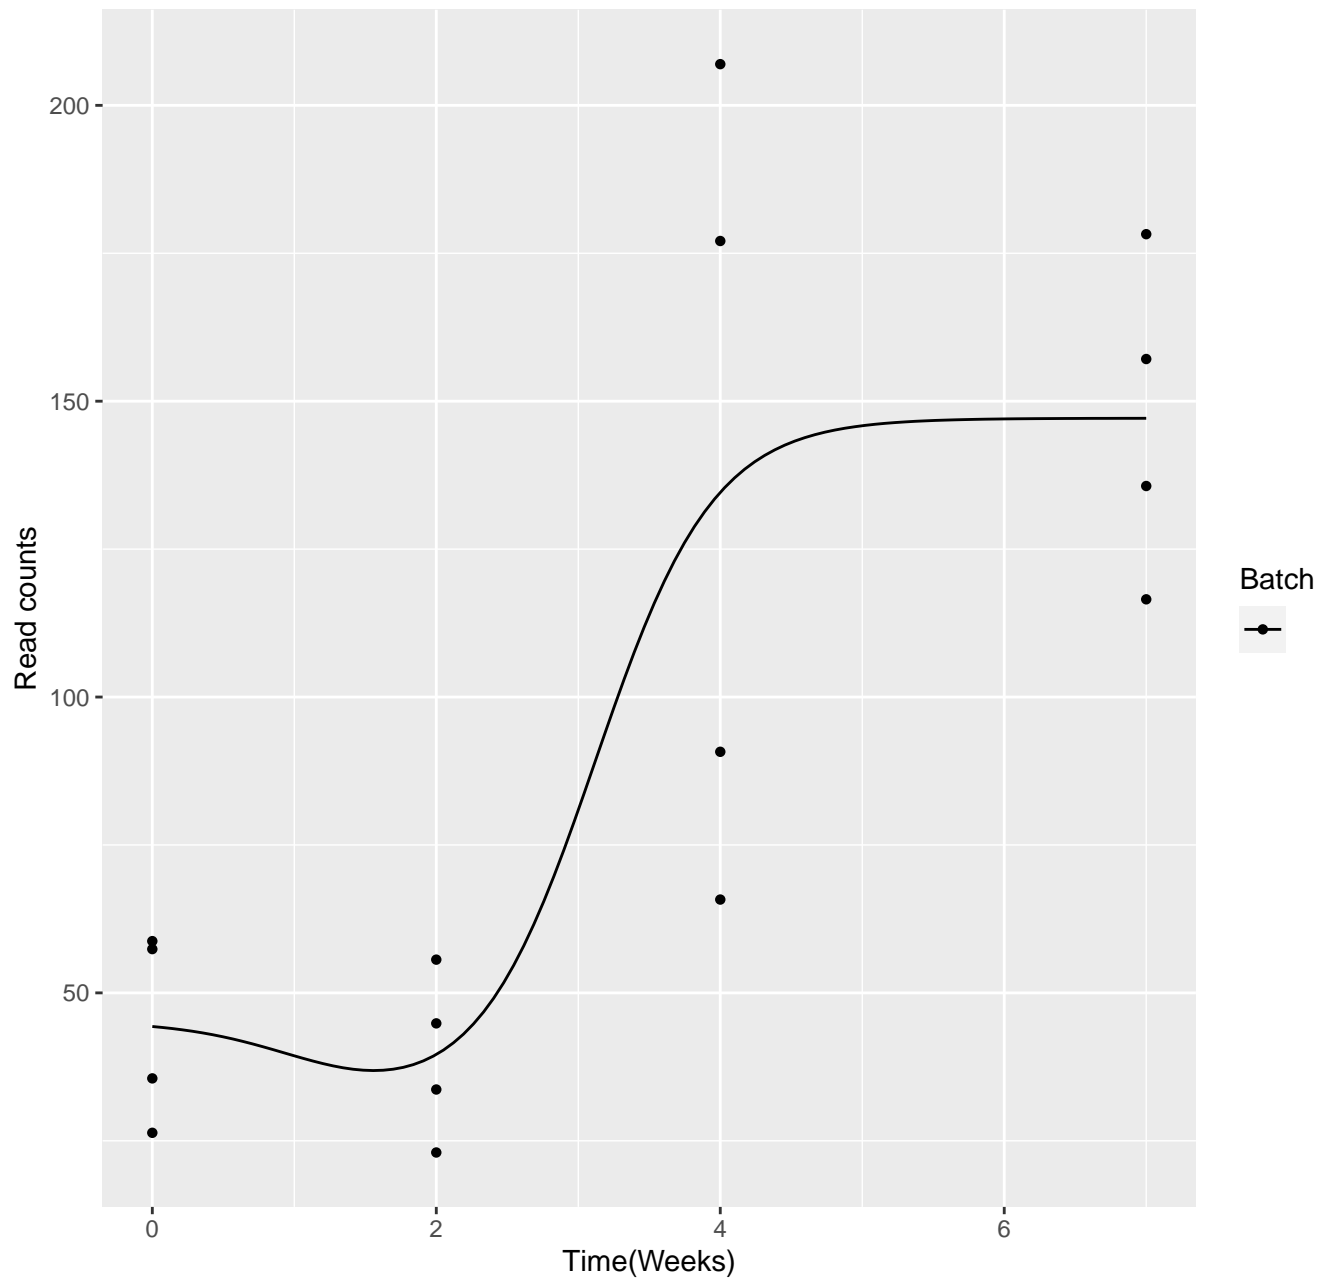

PPP1R3B:  $\log_{10} q = -5.05$

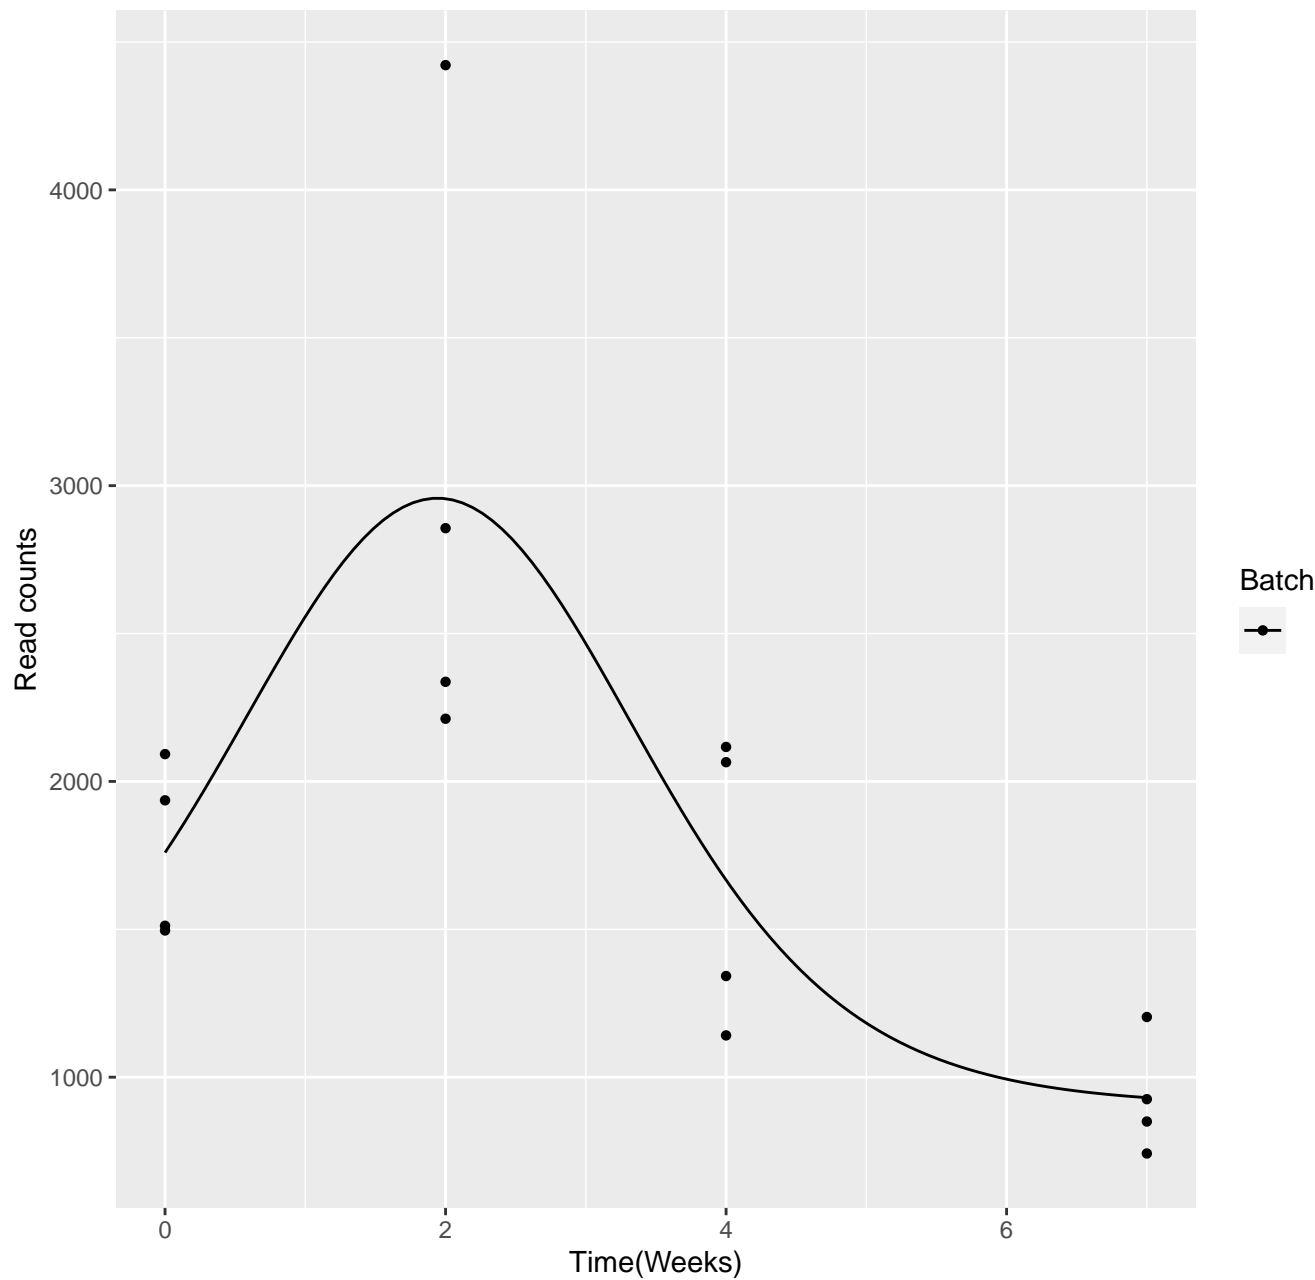

BCHE:  $\log_{10} q = -5.04$

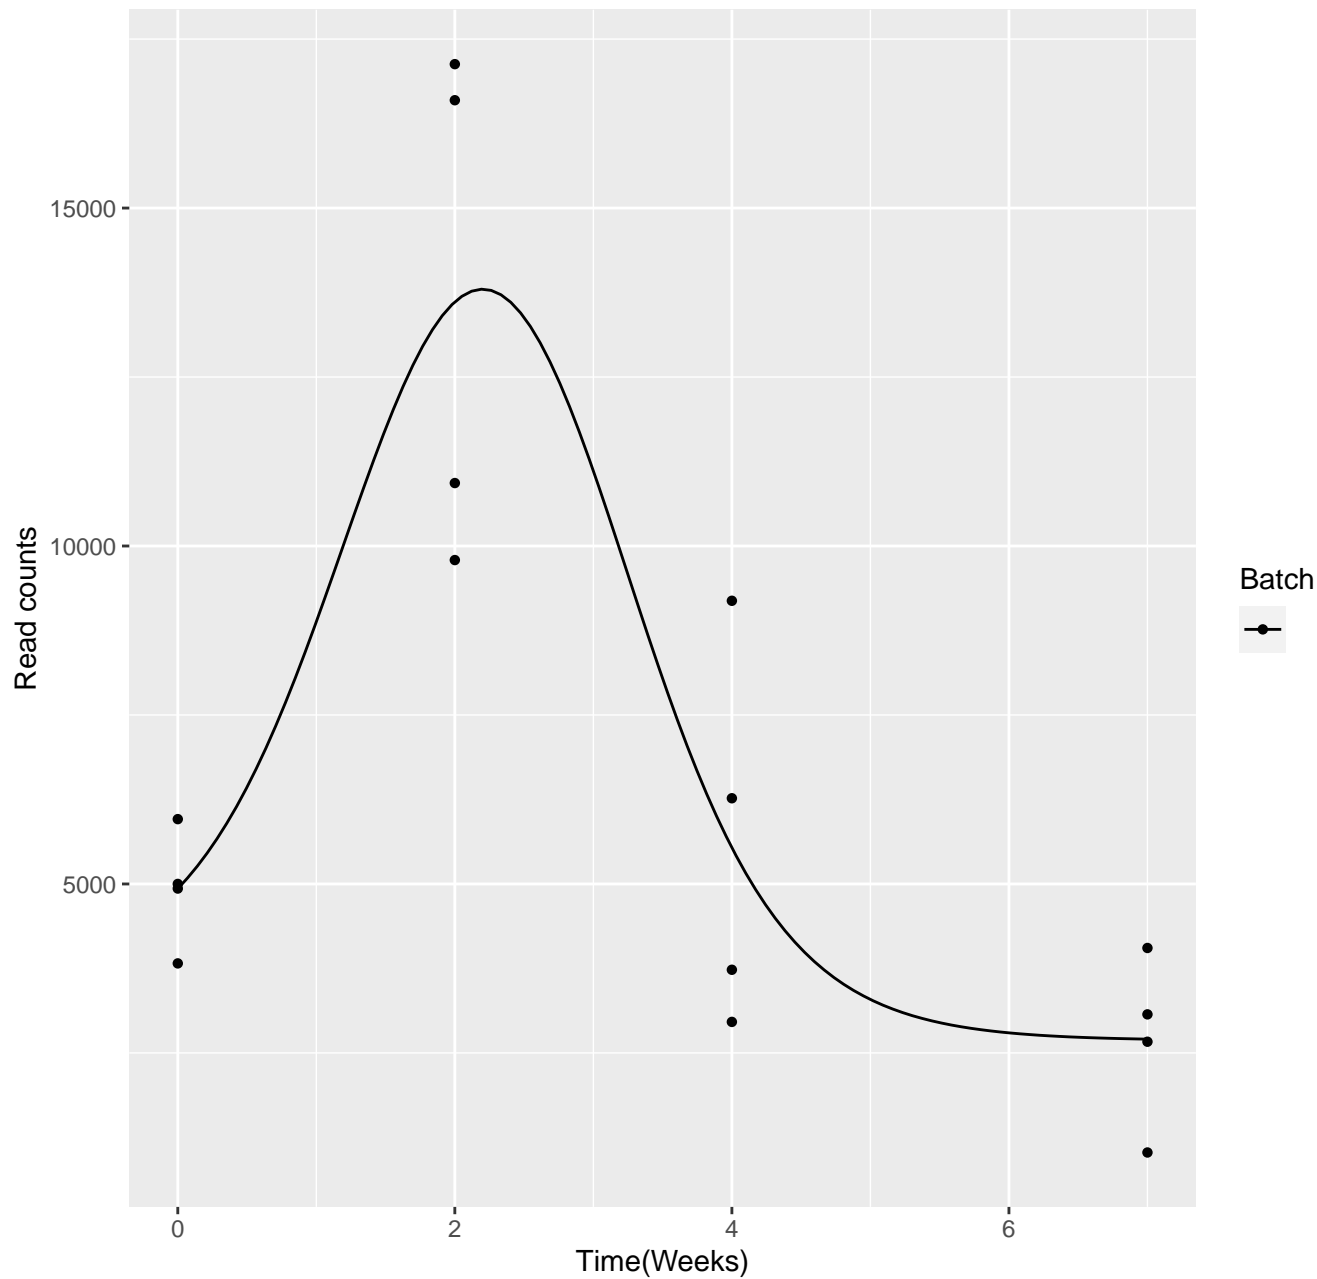

DRAM1:  $\log_{10} q = -5.03$

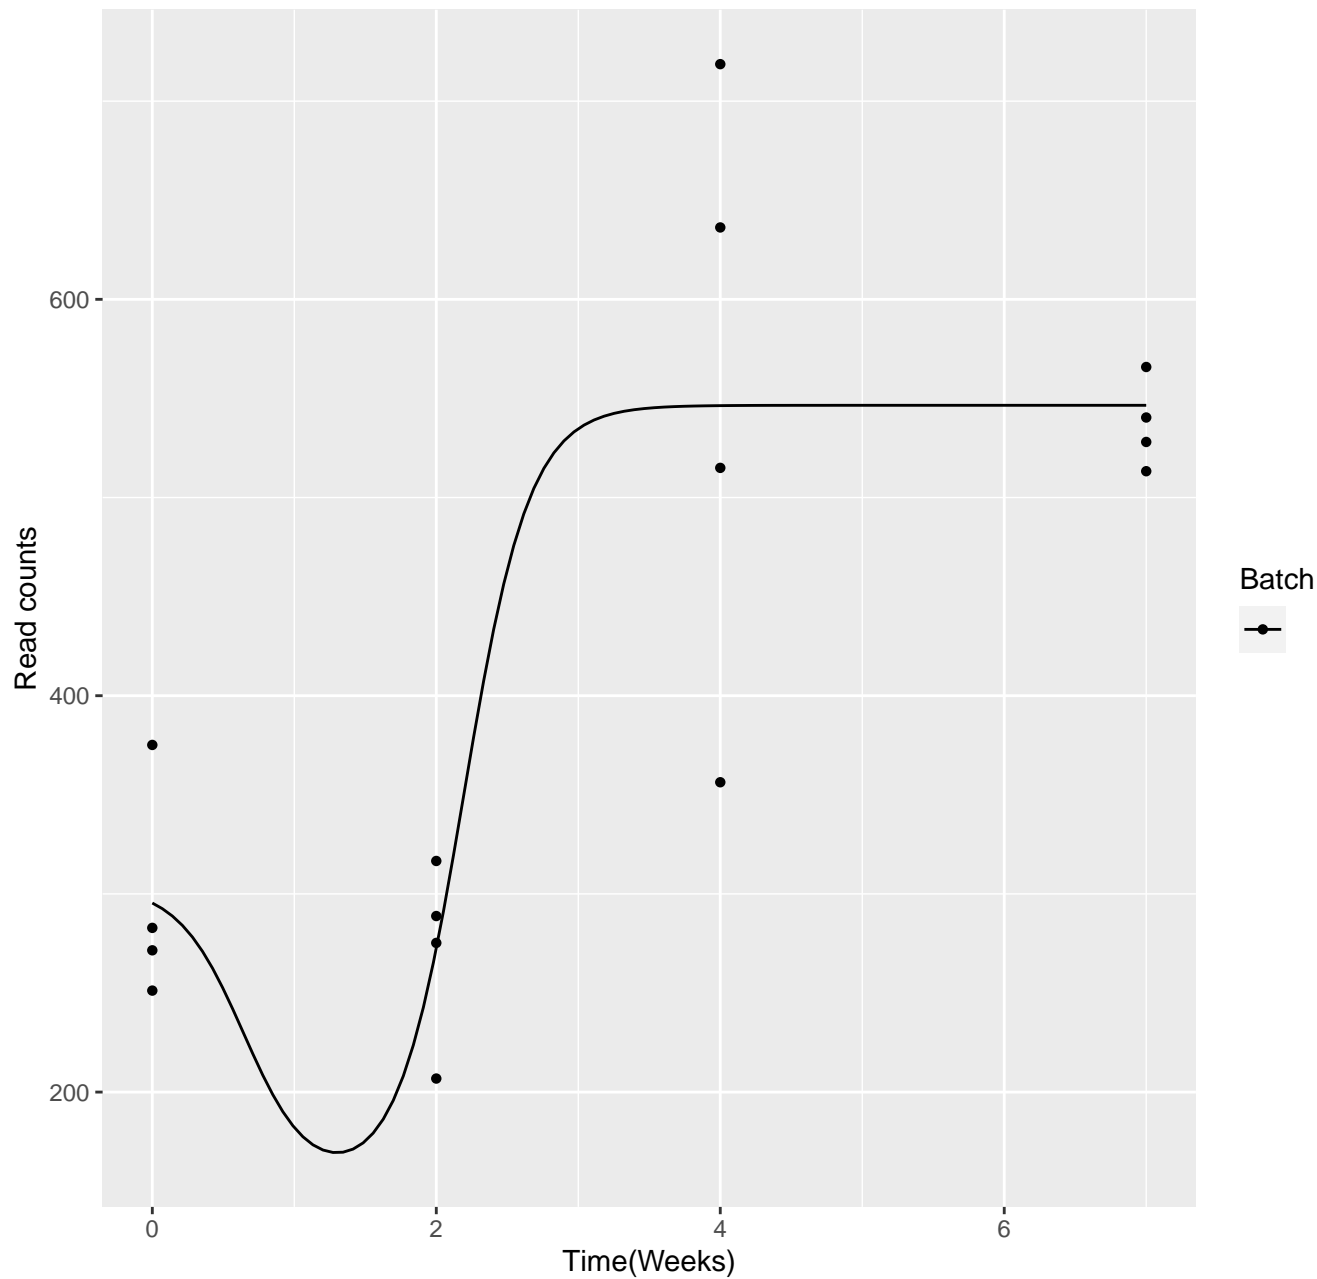

ATP1A2:  $\log_{10} q = -5.03$

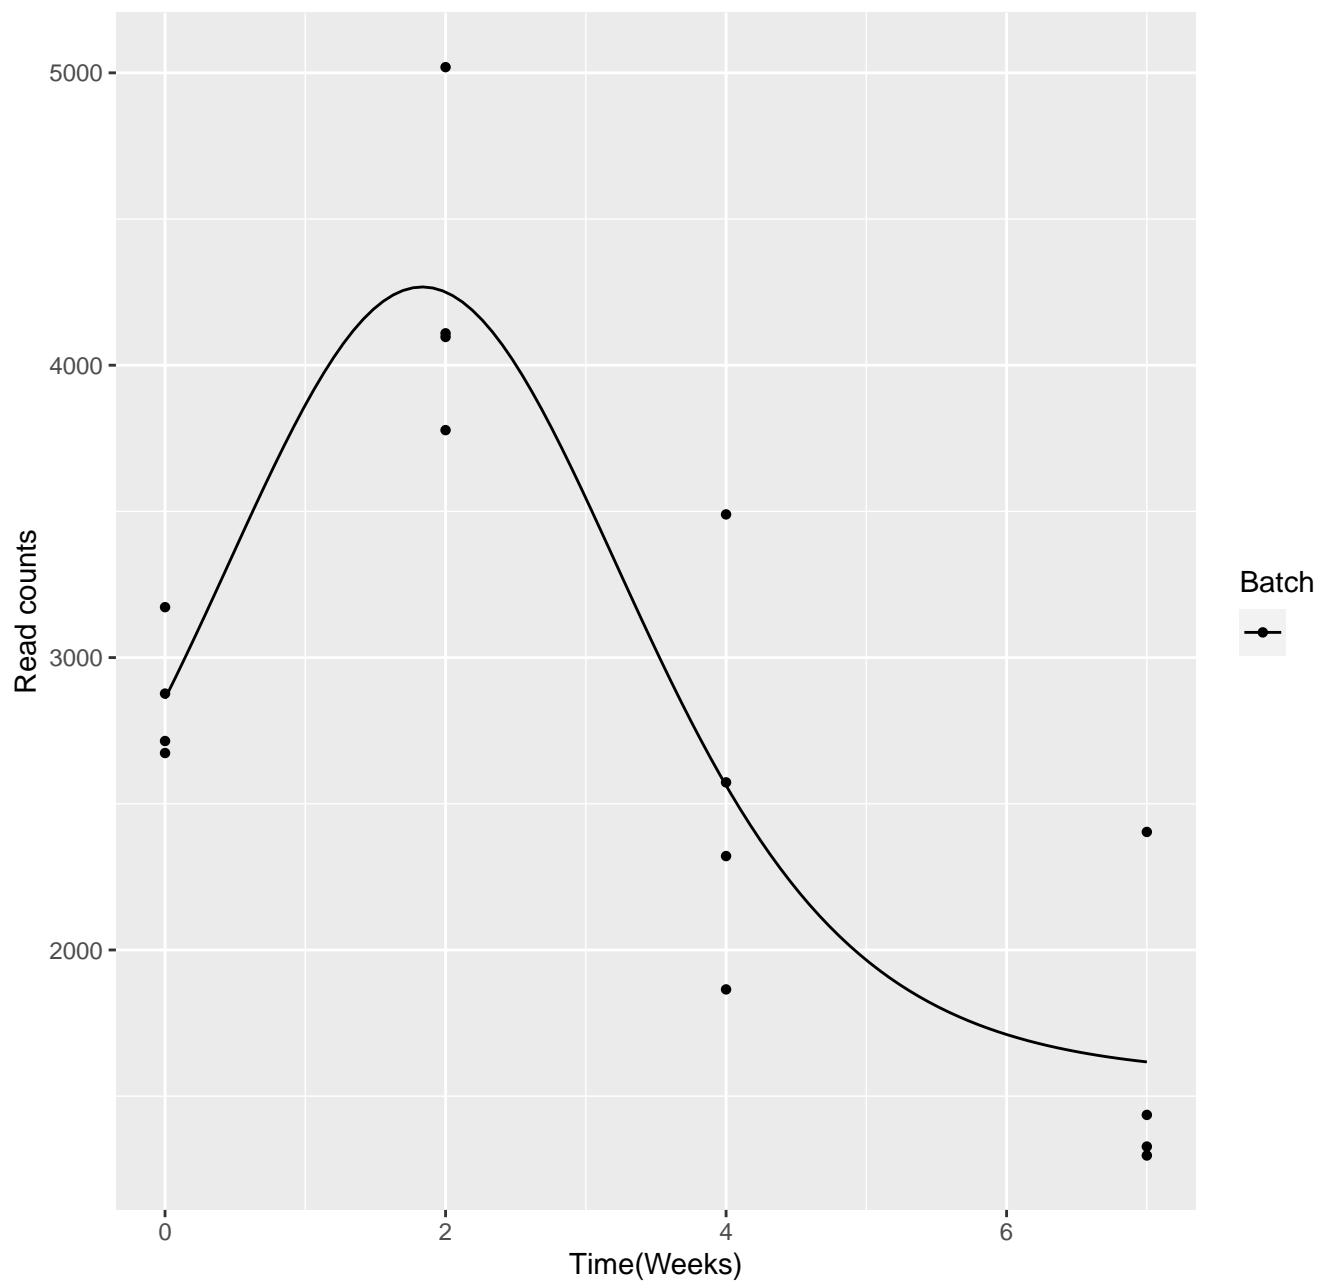

SSBP4:  $\log_{10} q = -5.03$

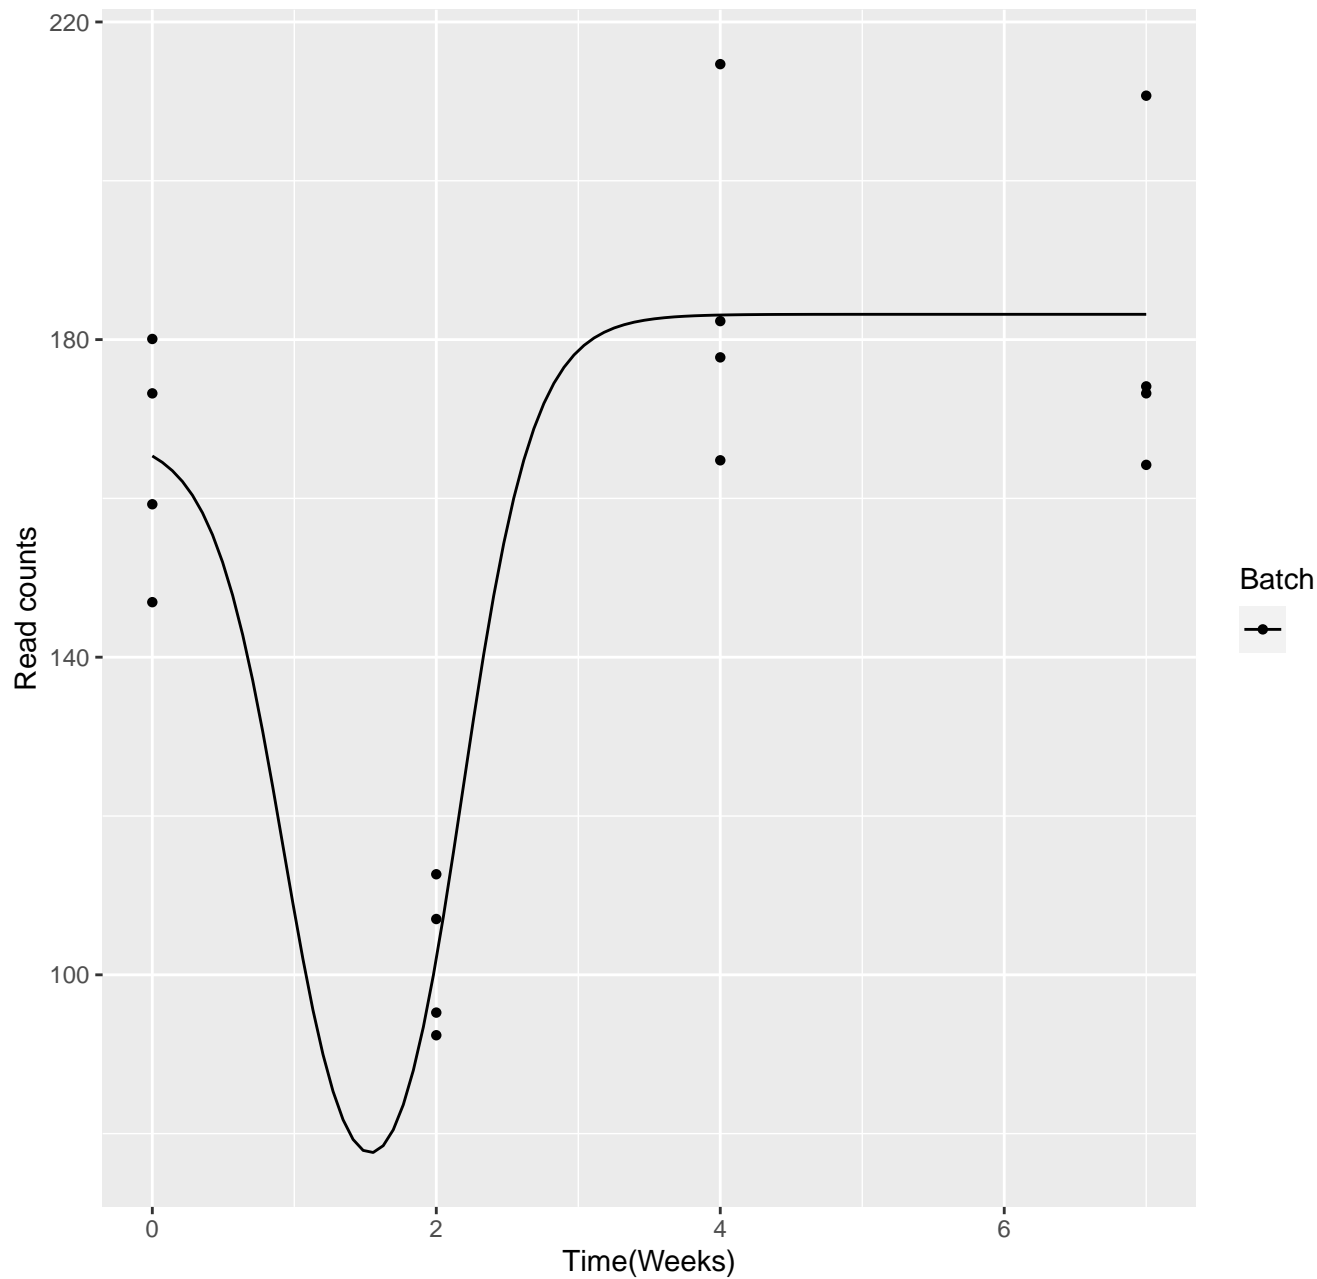

AXL:  $\log_{10} q = -5.02$

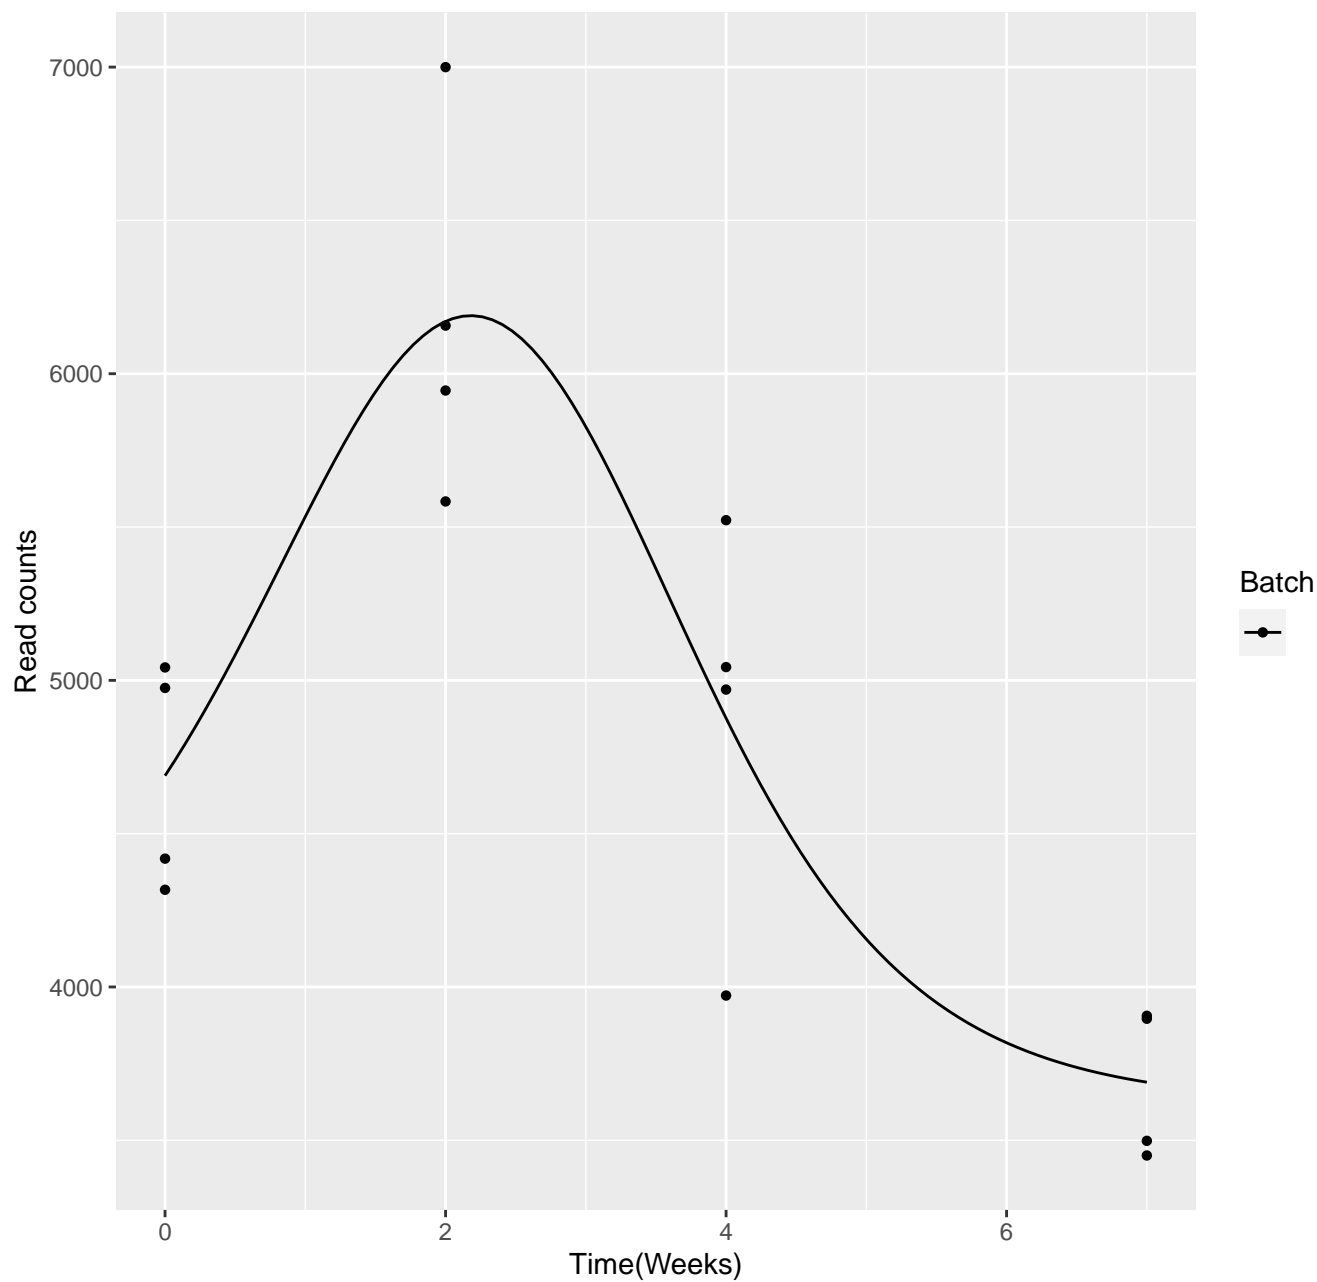

CRLF2:  $\log_{10} q = -5.02$

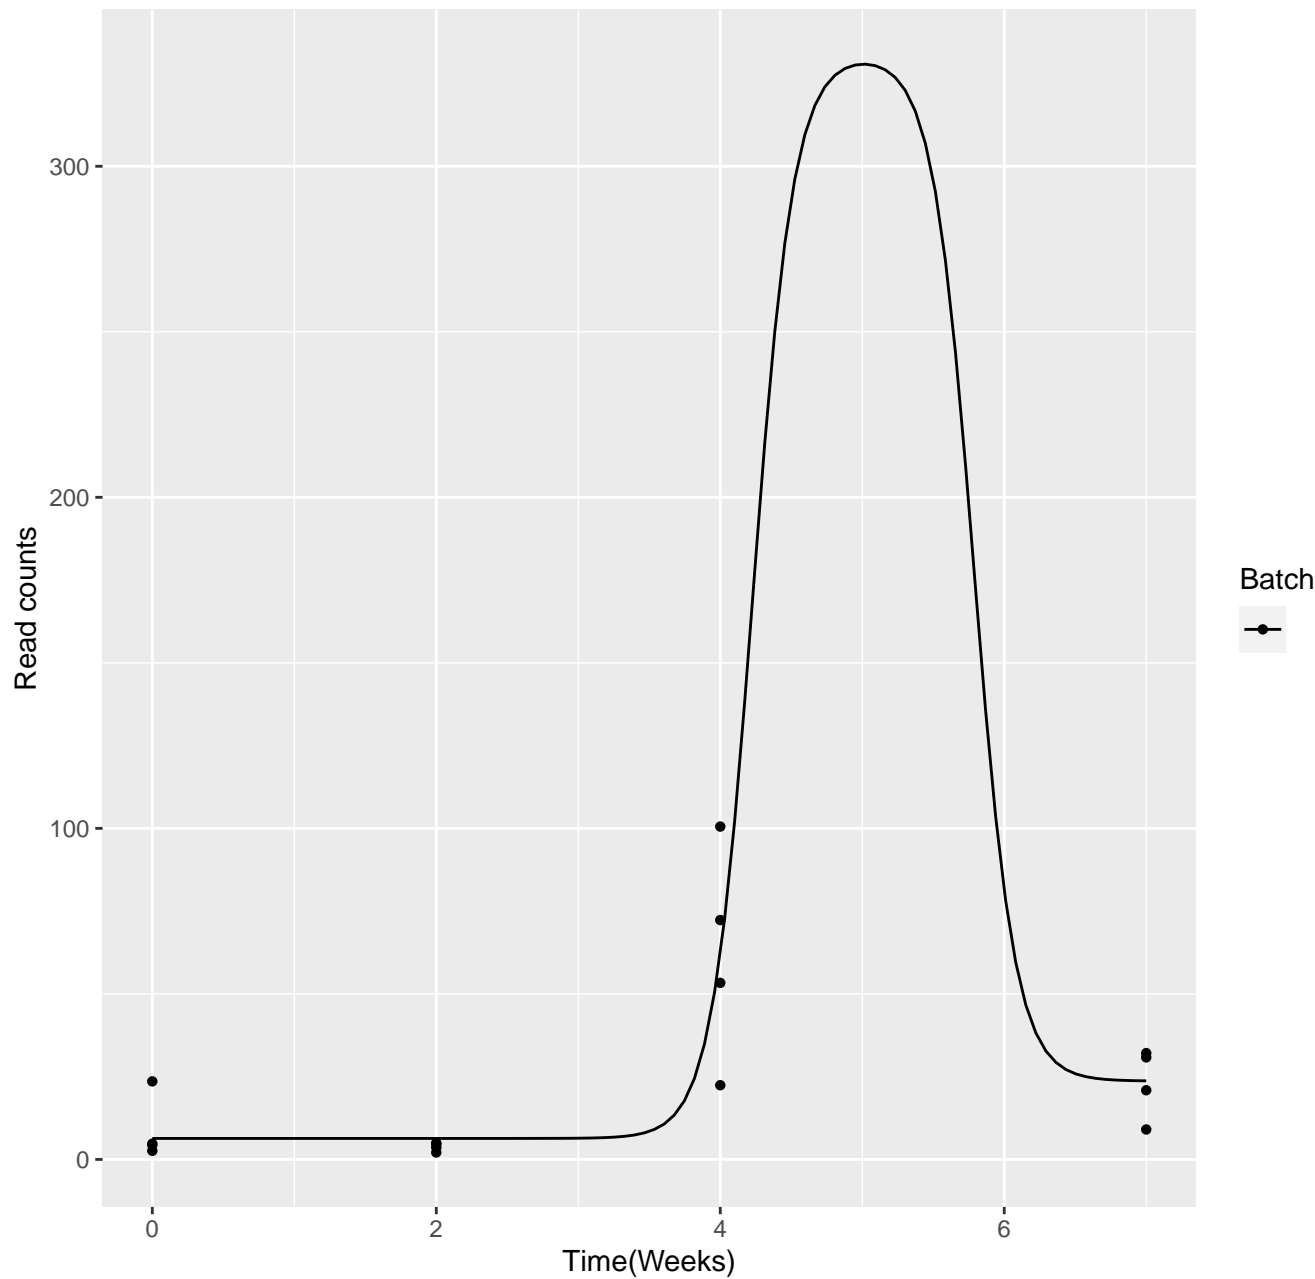



GADD45A:  $\log_{10} q = -5.02$

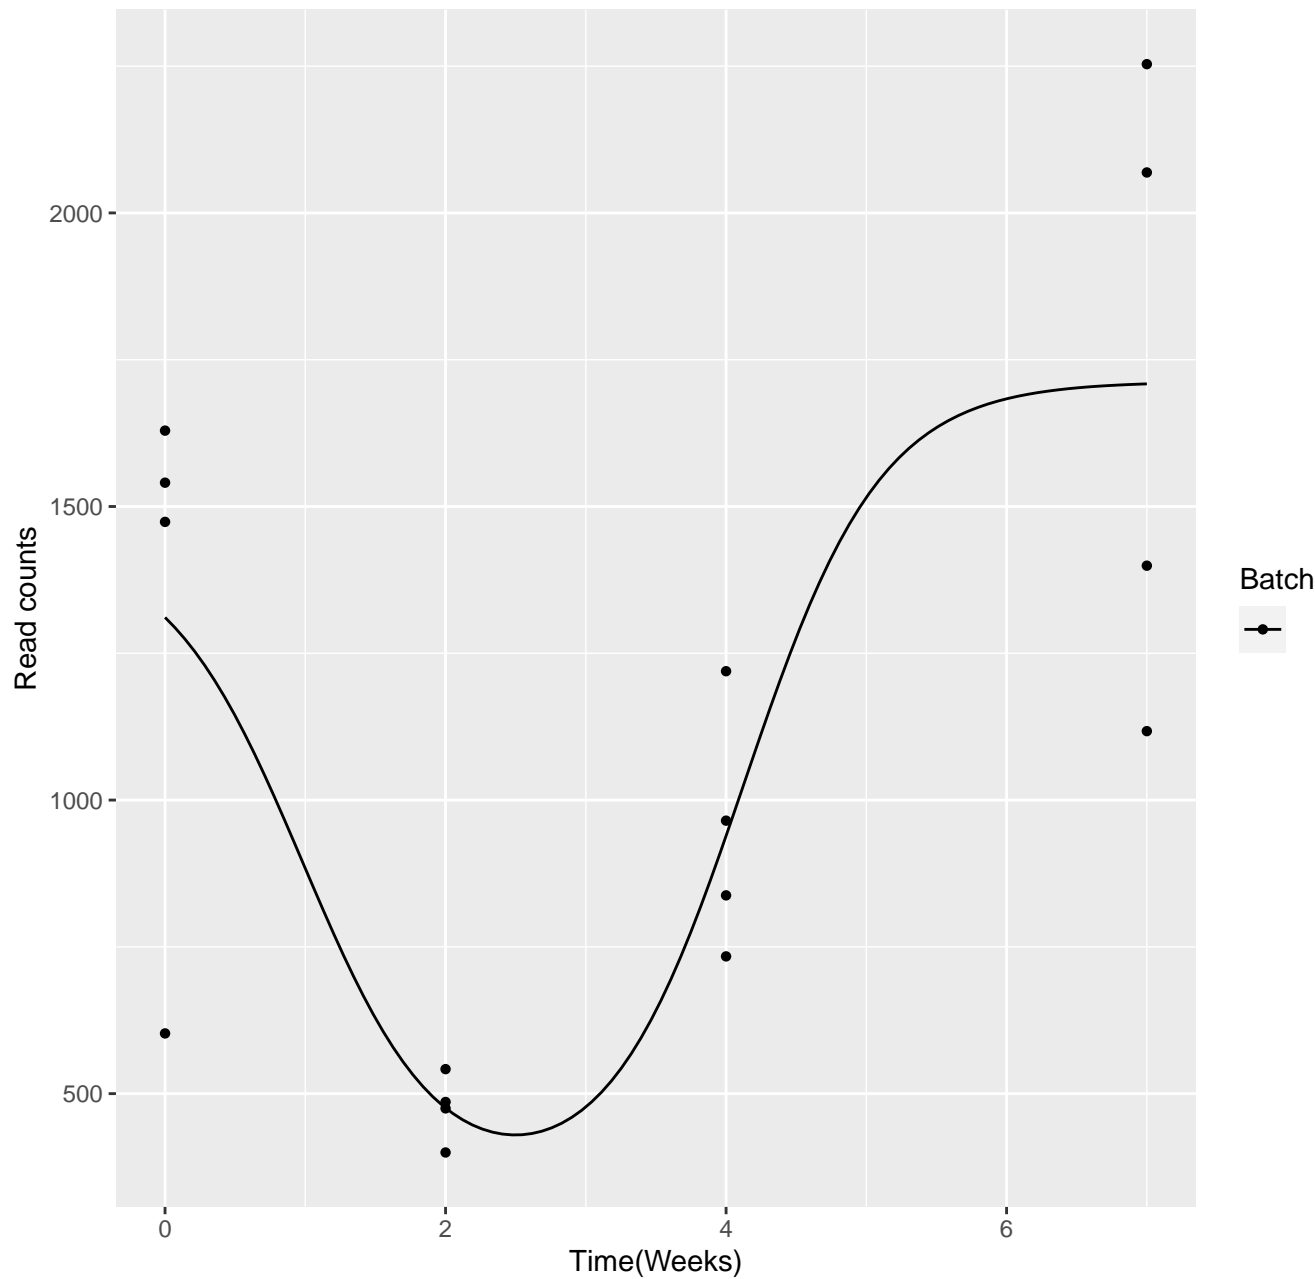

SYT11:  $\log_{10} q = -5.02$

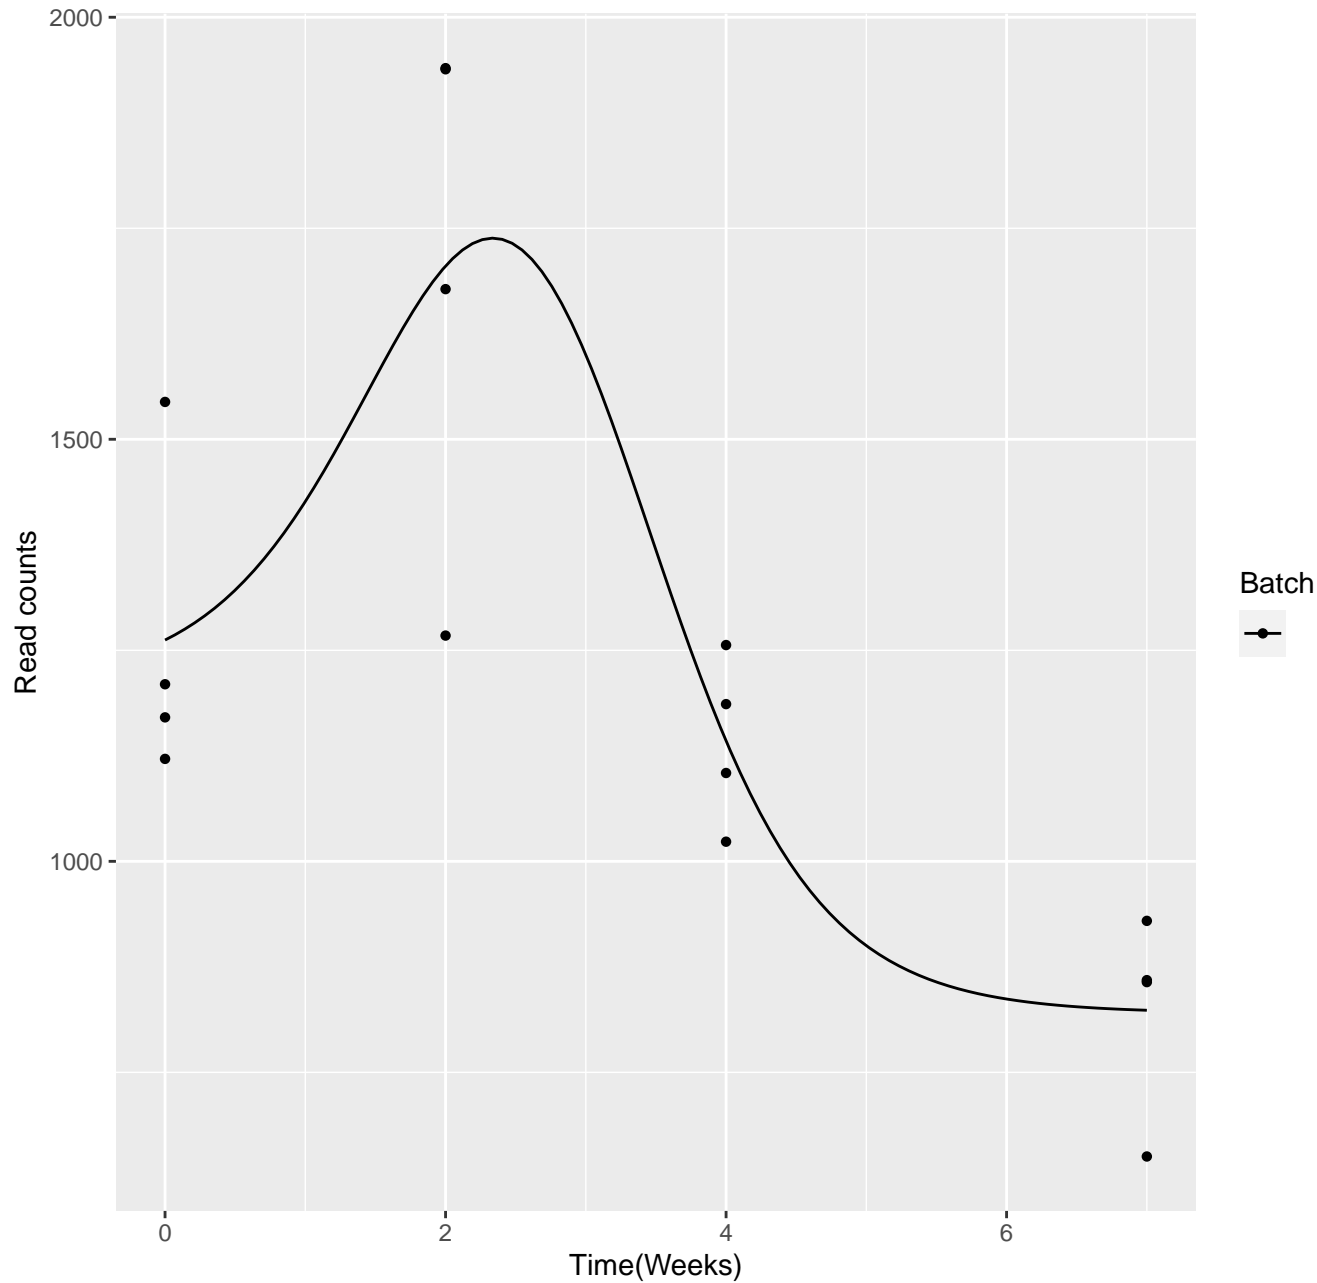

ARL11:  $\log_{10} q = -5.01$

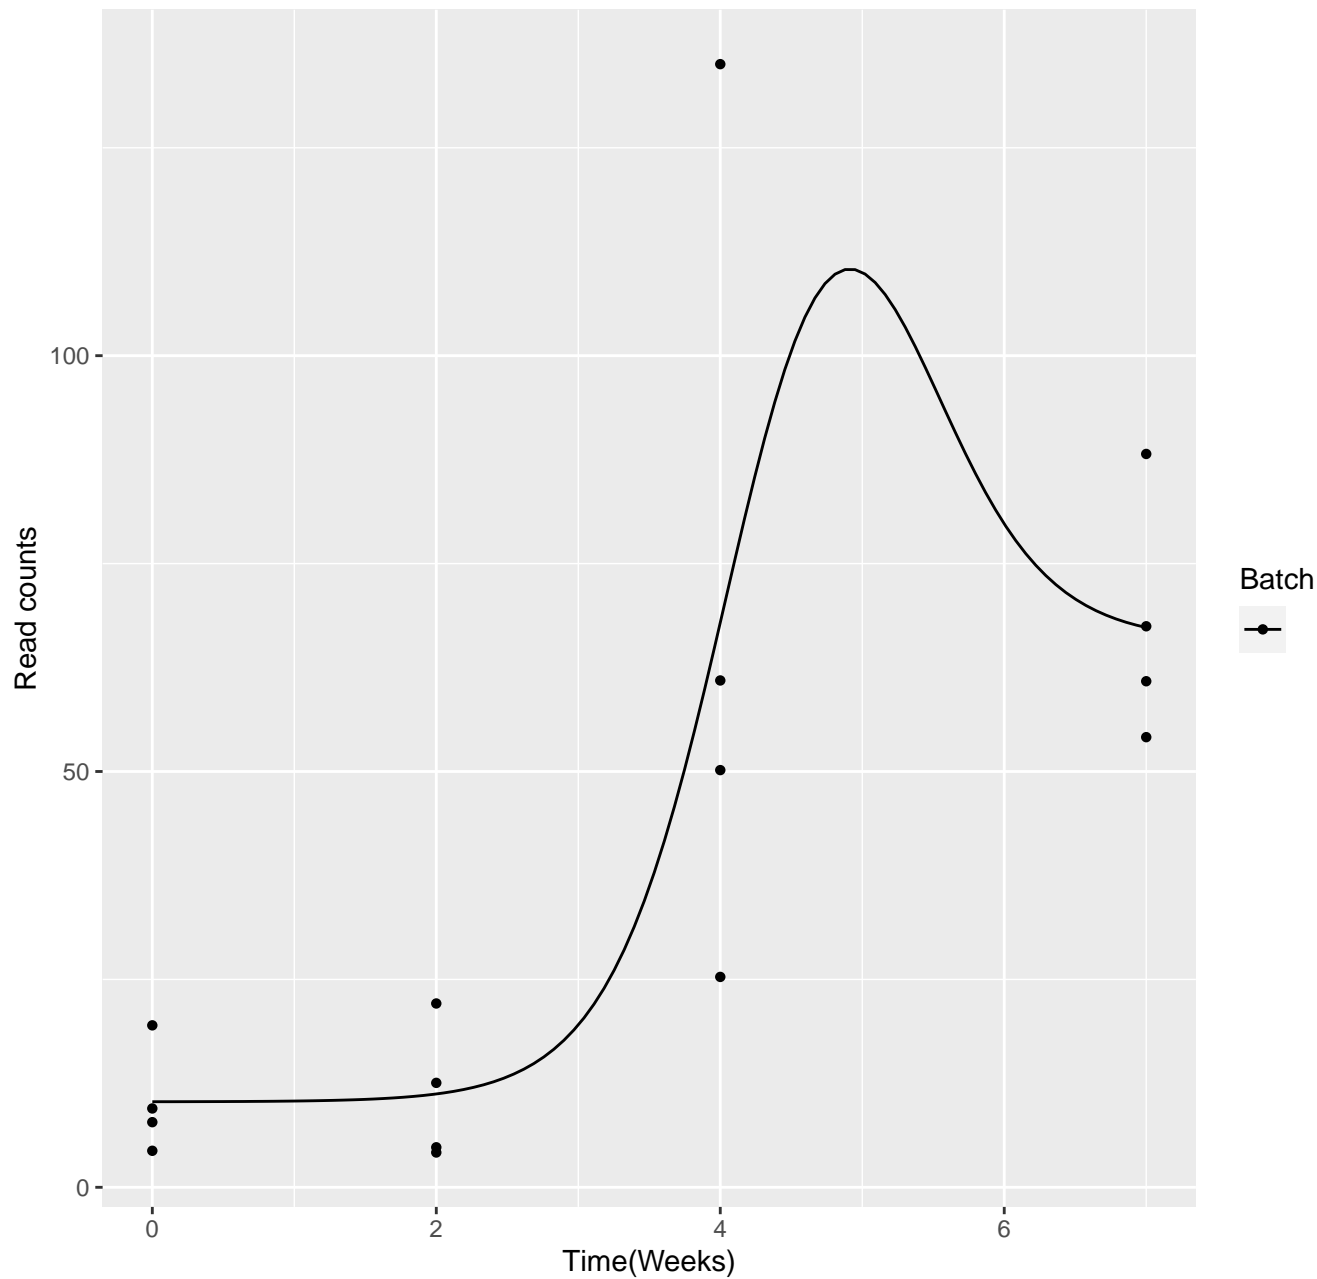

CRIM1:  $\log_{10} q = -5.01$

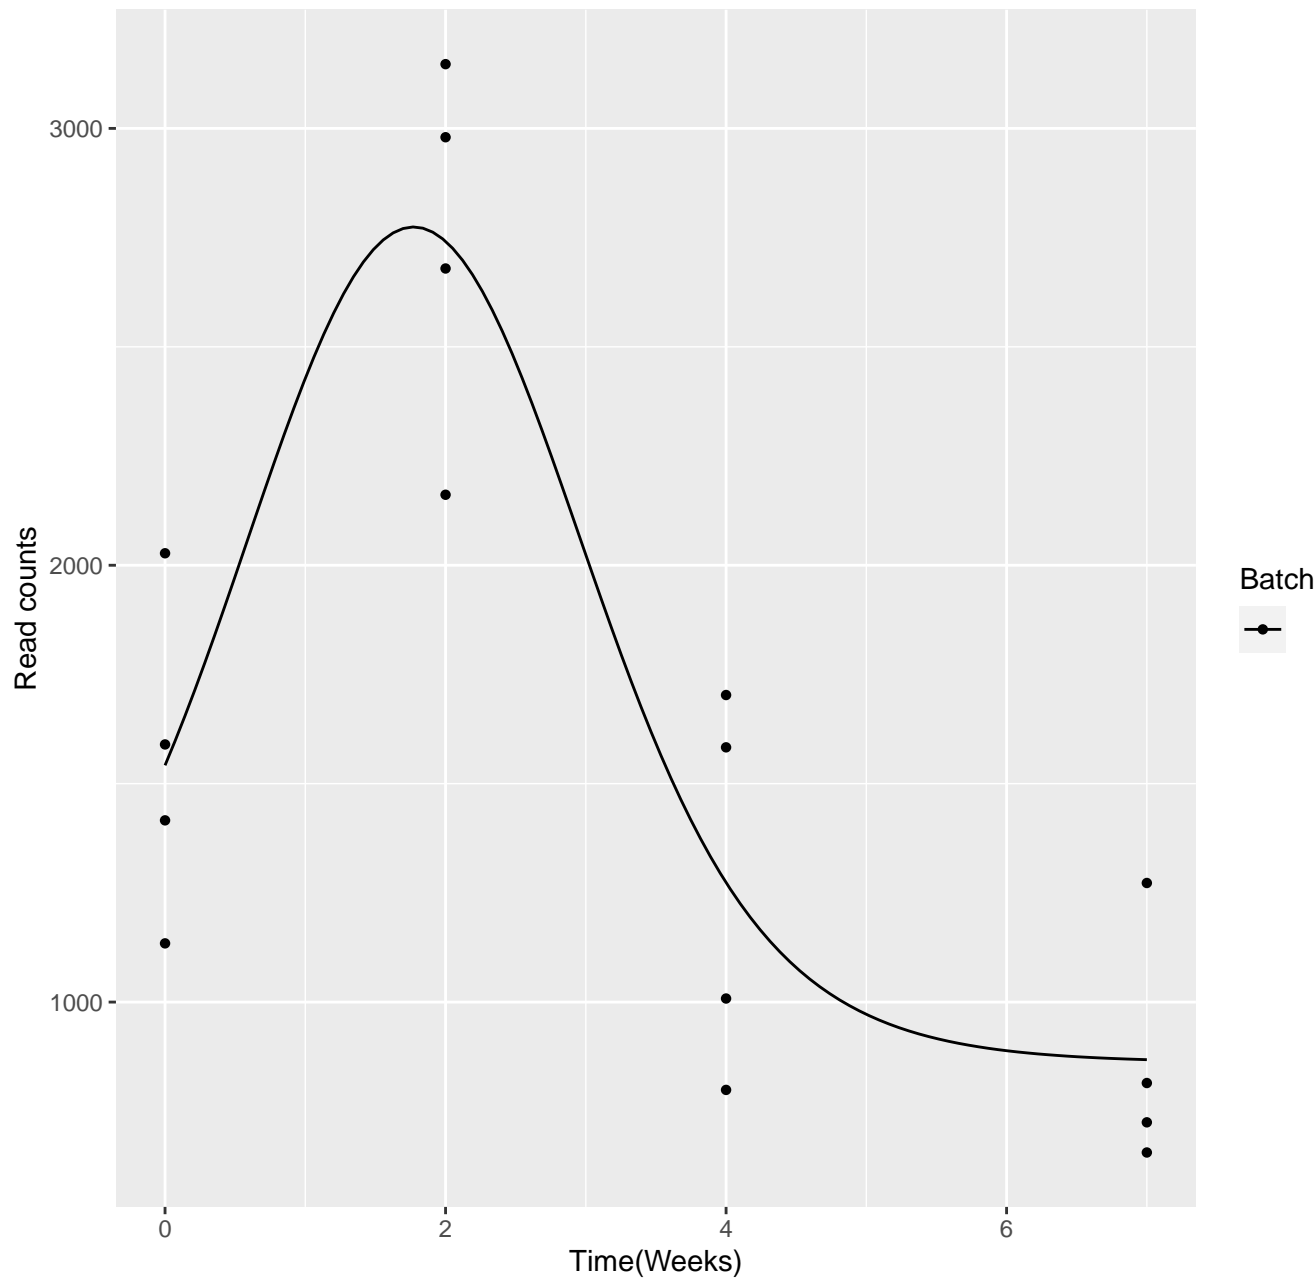

EDA:  $\log_{10} q = -5$

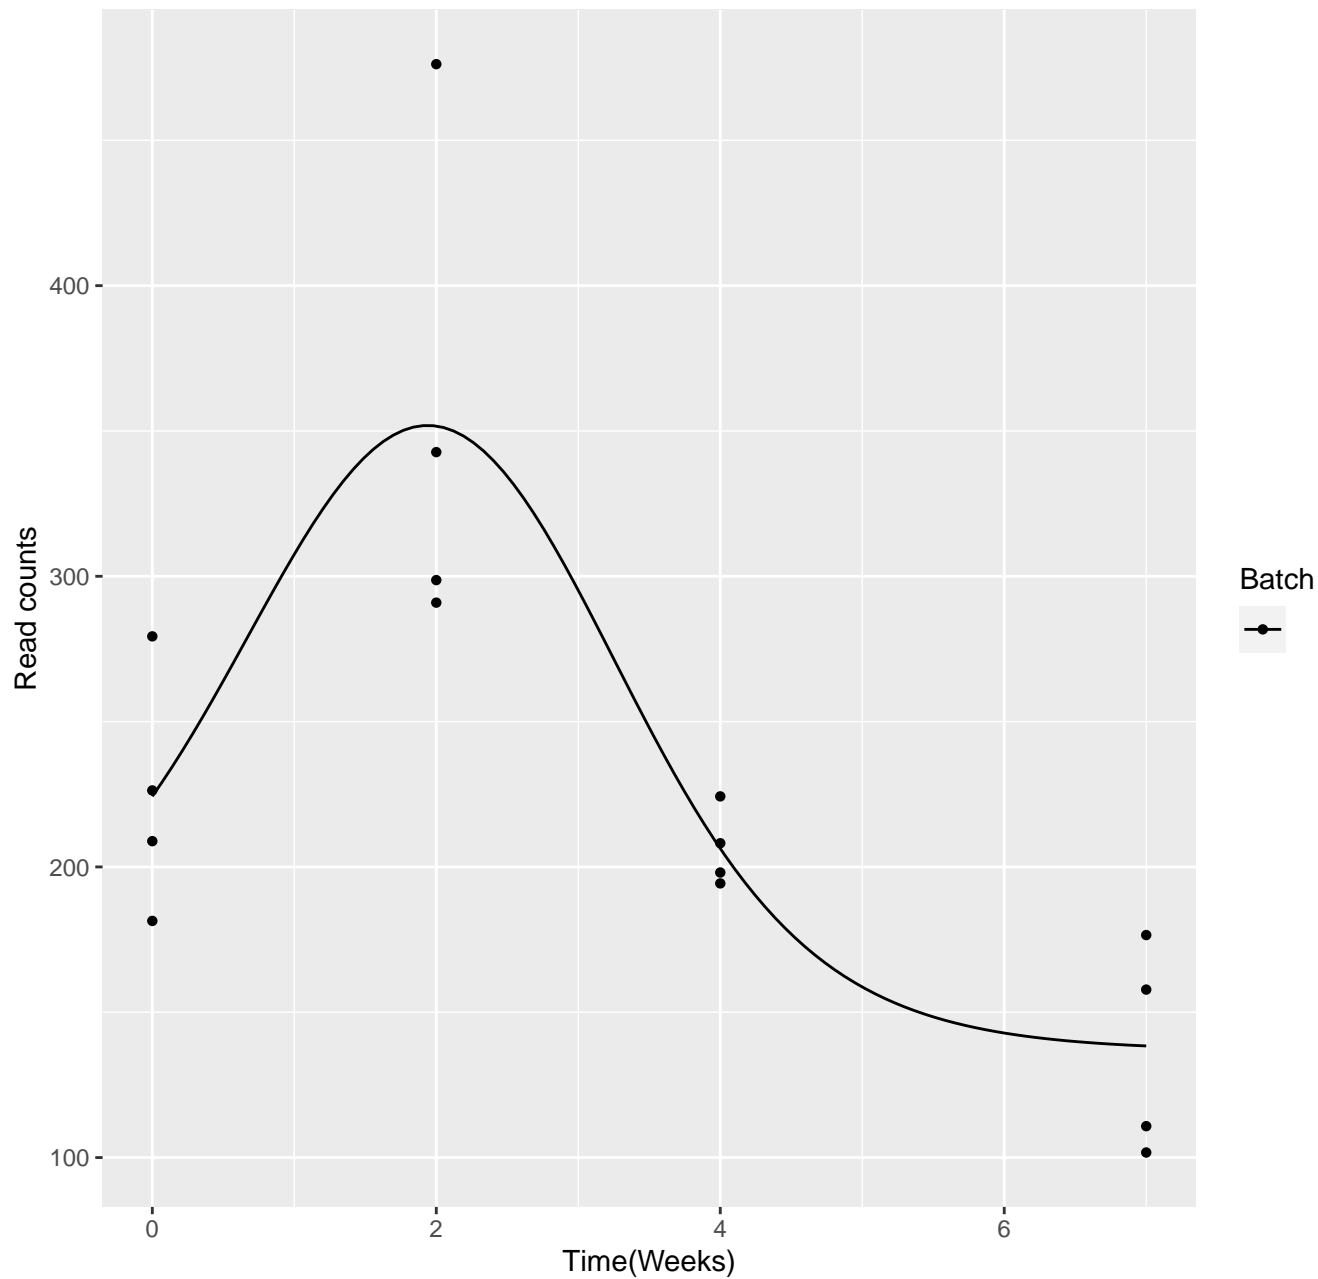

RAB7A:  $\log_{10} q = -4.99$

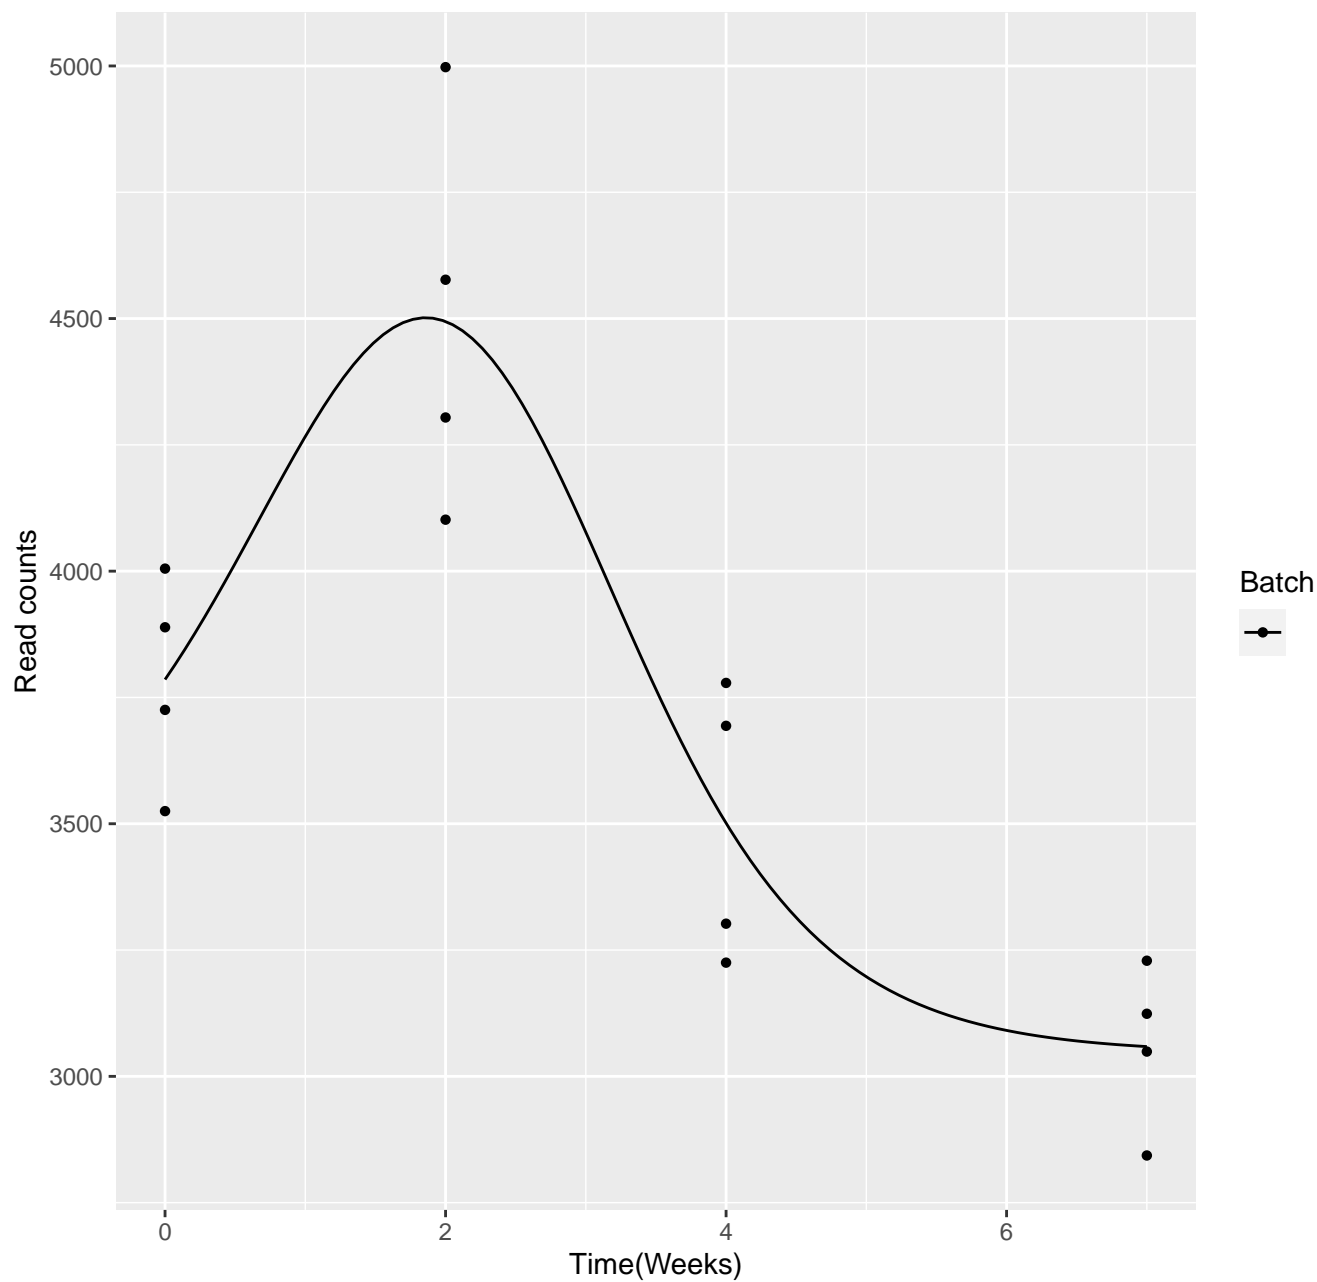

TLR6:  $\log_{10} q = -4.99$

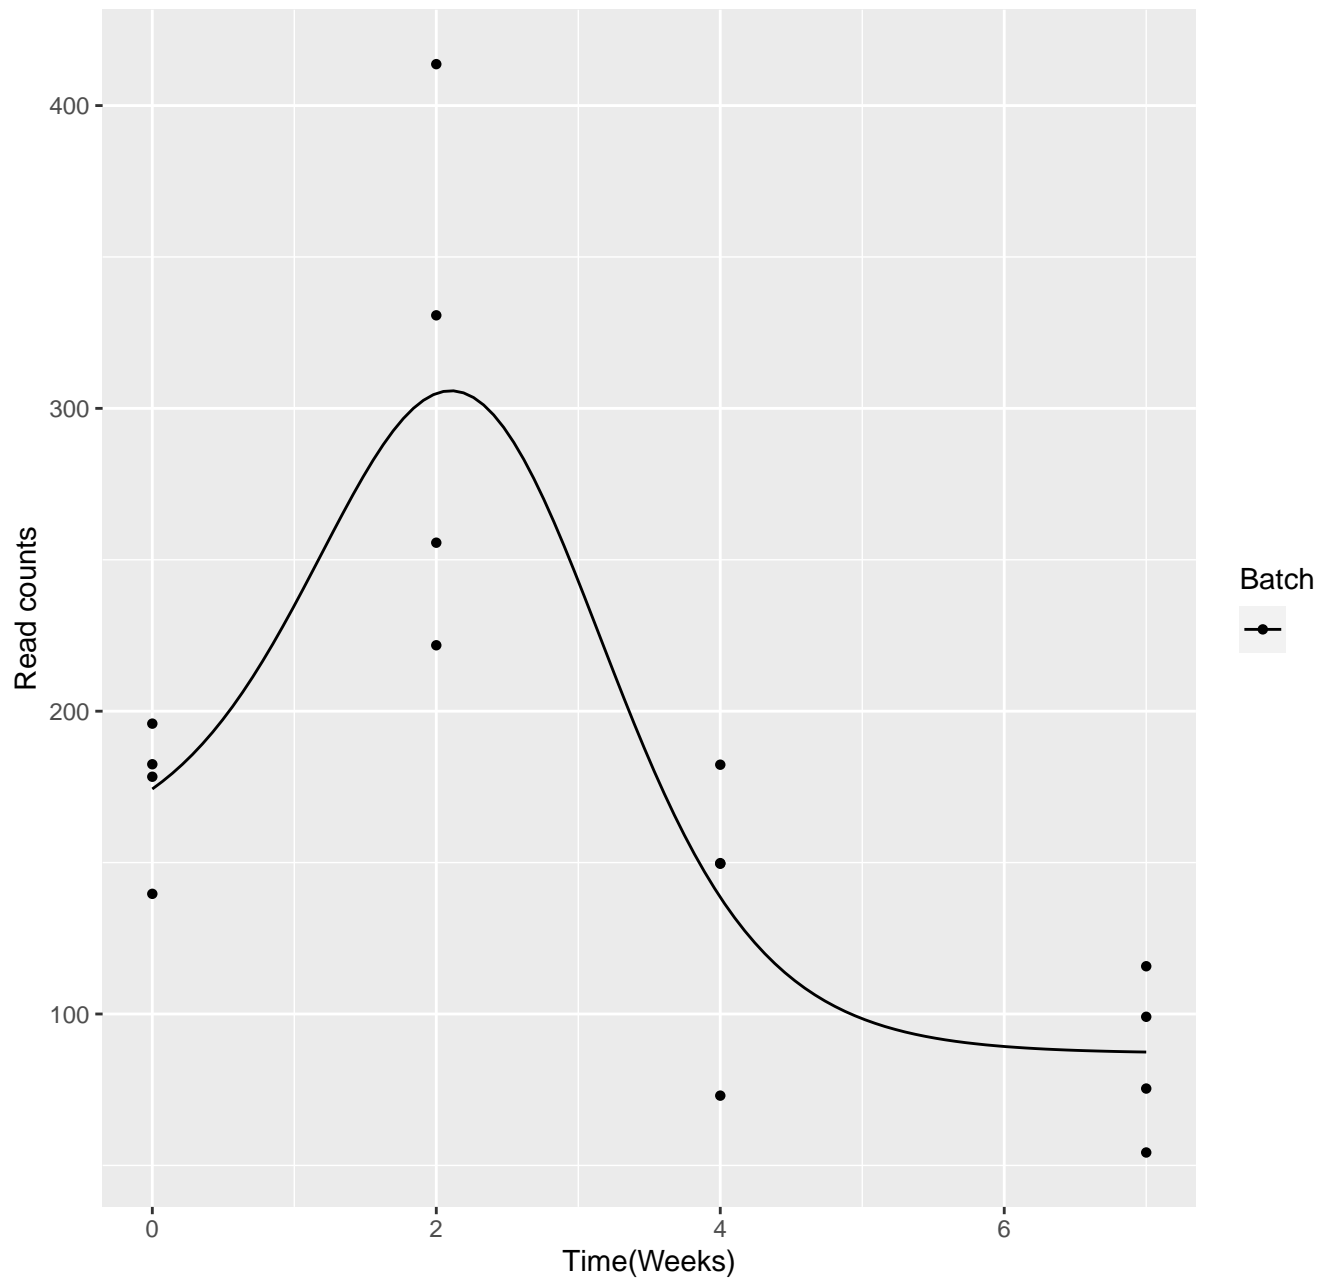

ZNF365:  $\log_{10} q = -4.99$

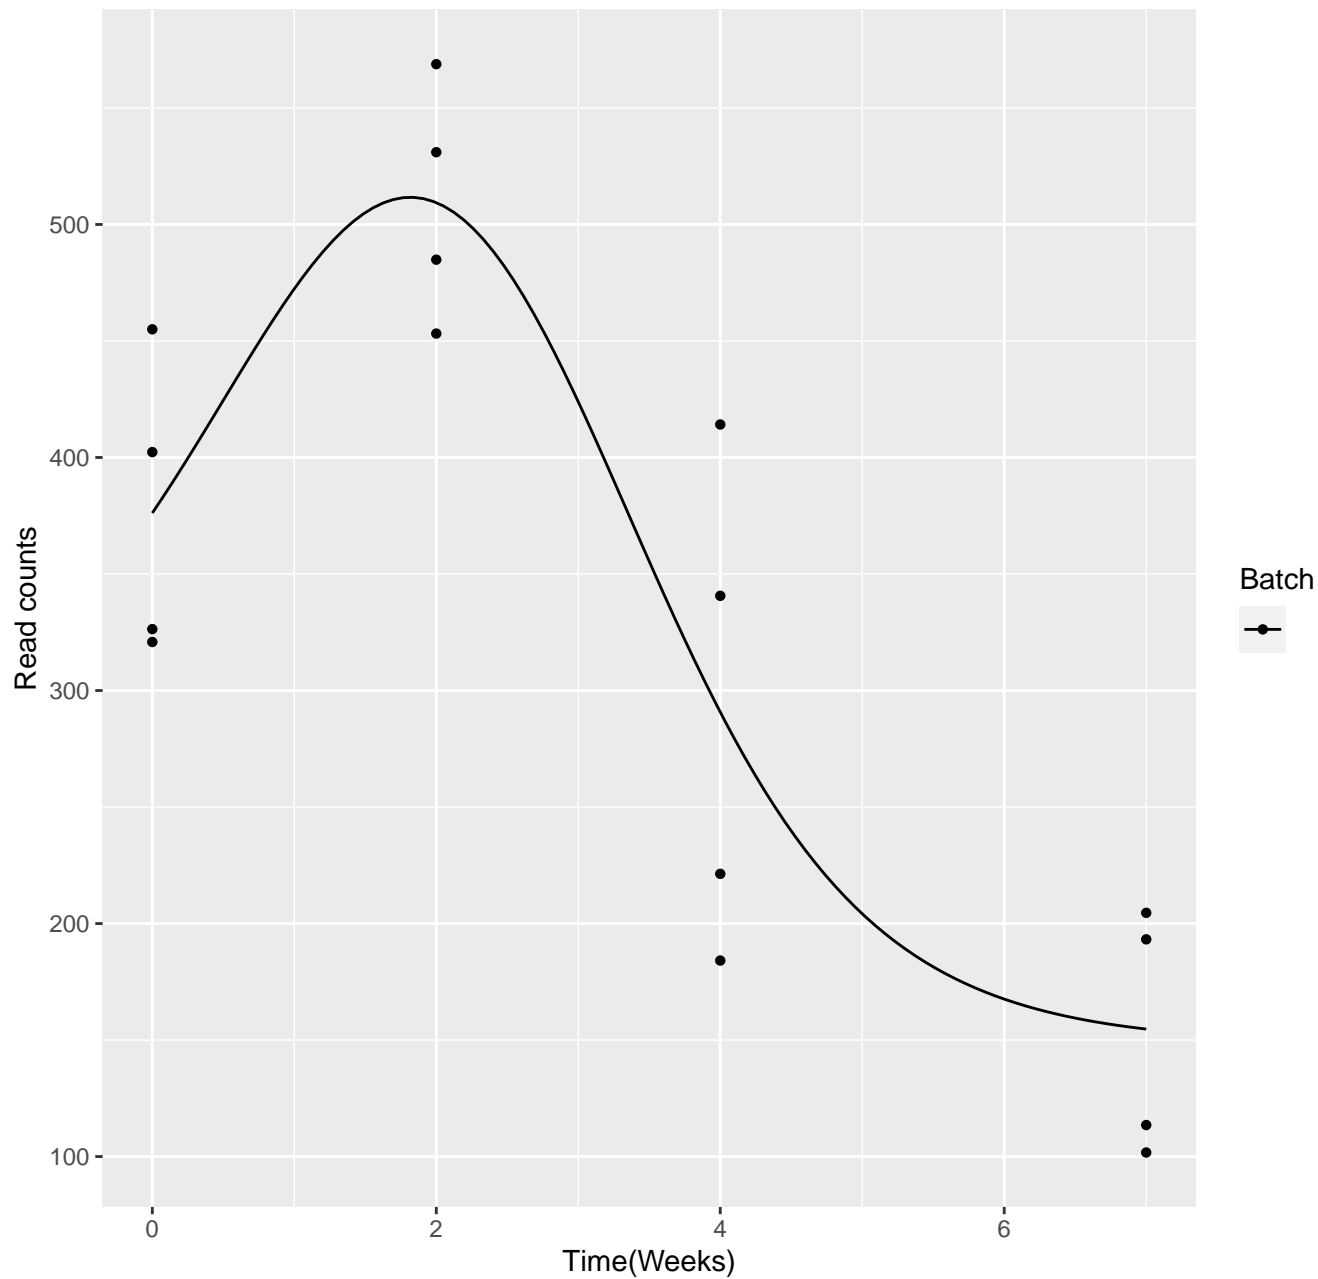



ARID3A:  $\log_{10} q = -4.98$

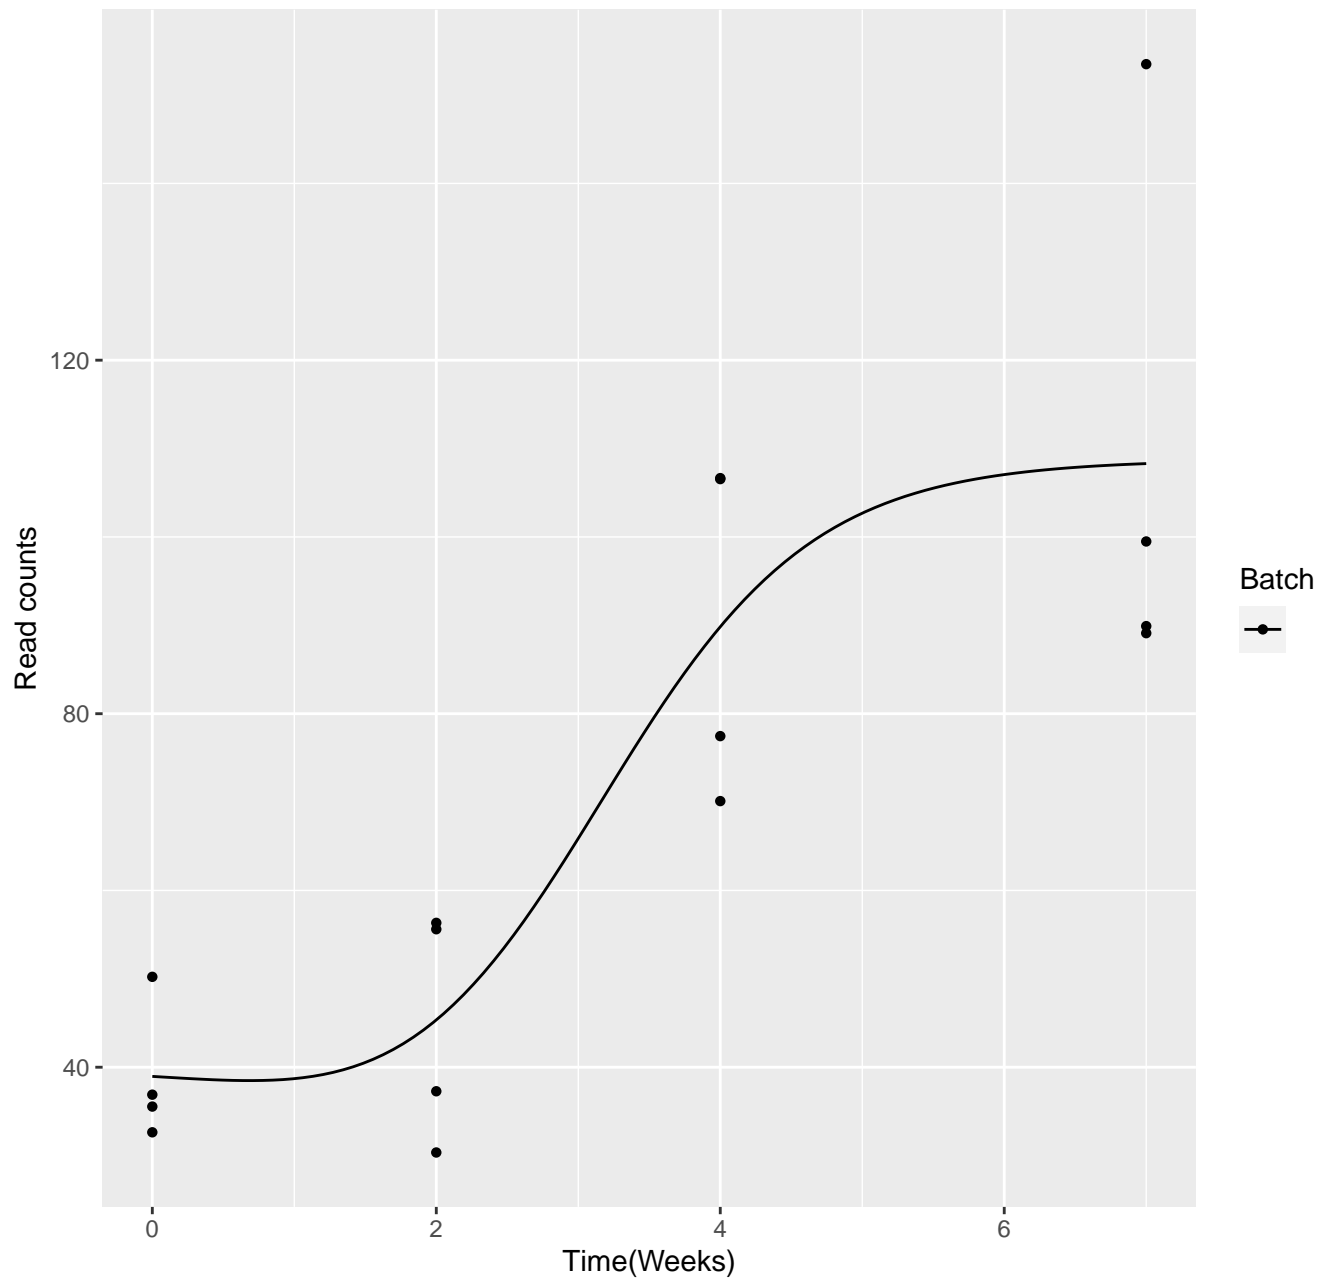

LOC100341160:  $\log_{10} q = -4.98$

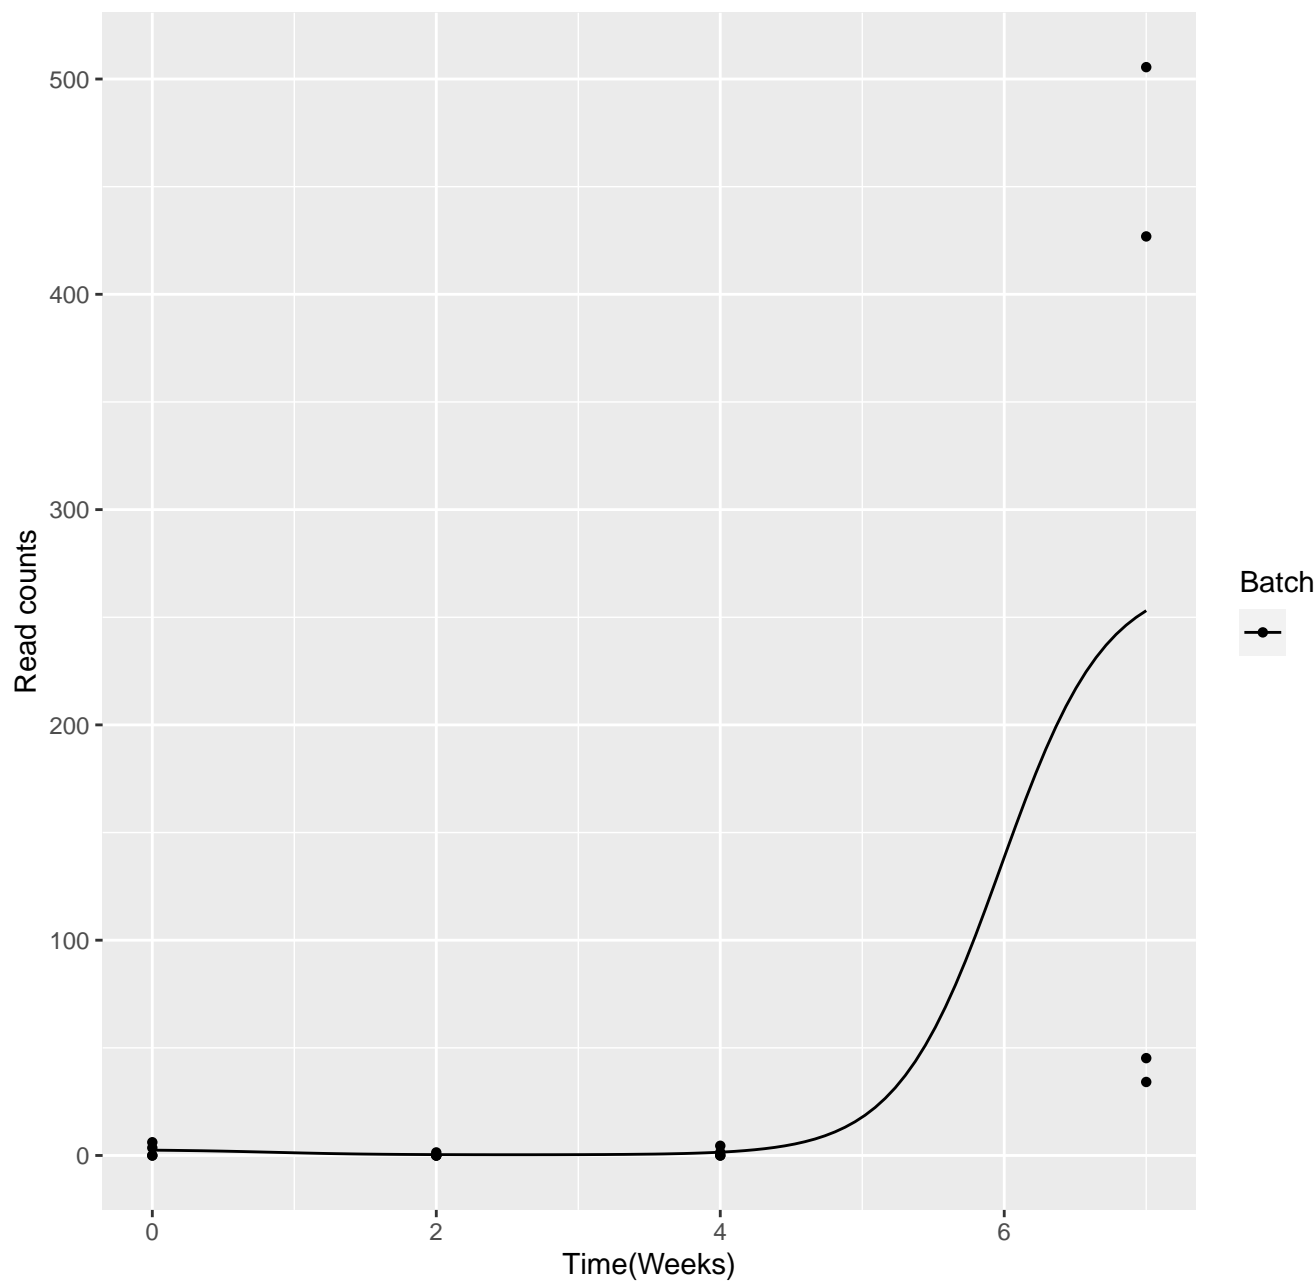

RENBP:  $\log_{10} q = -4.97$

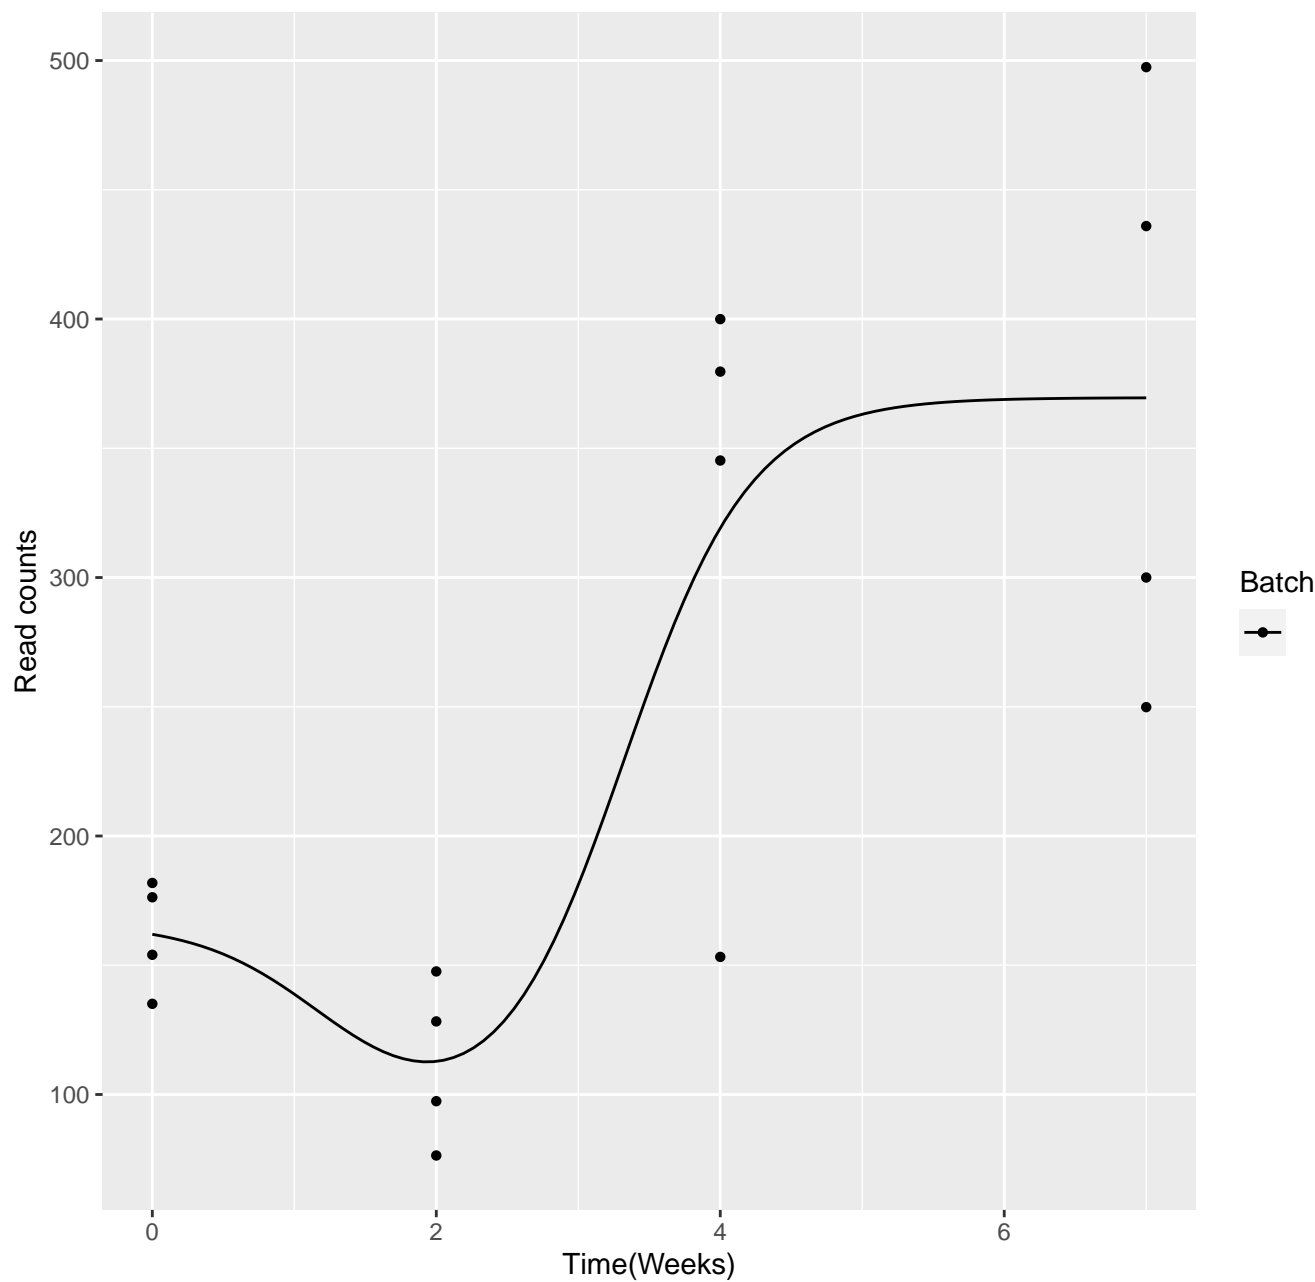

PDLIM7:  $\log_{10} q = -4.97$

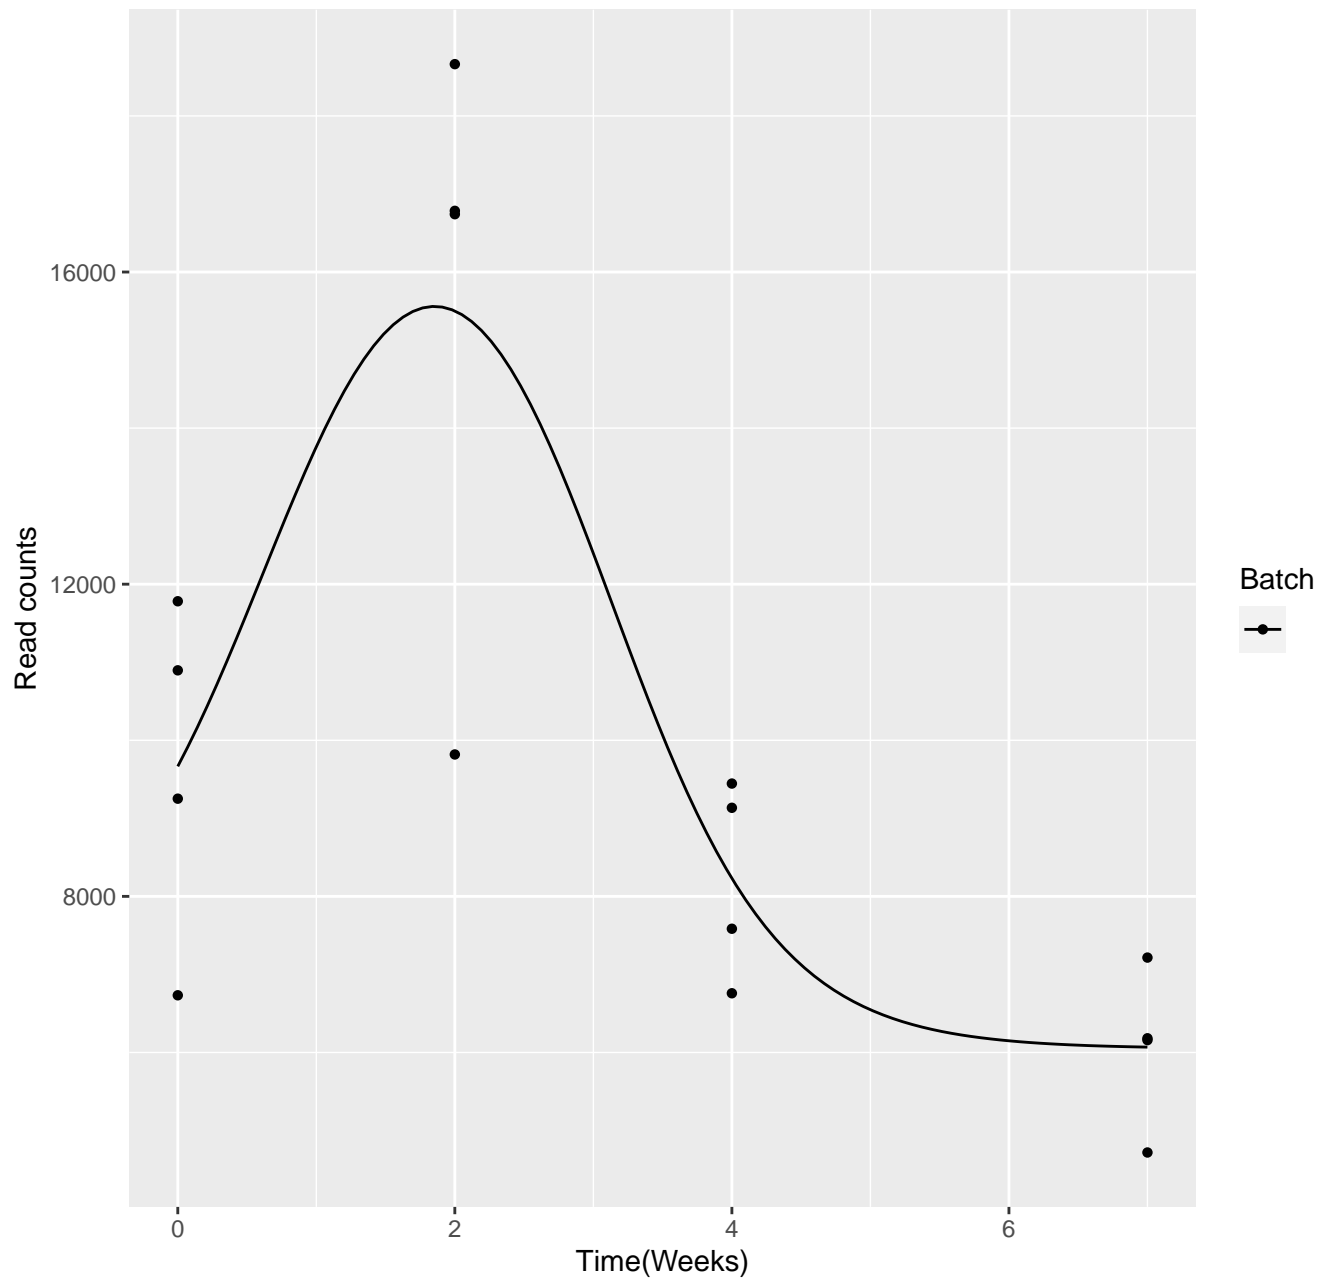

CSRP1:  $\log_{10} q = -4.95$

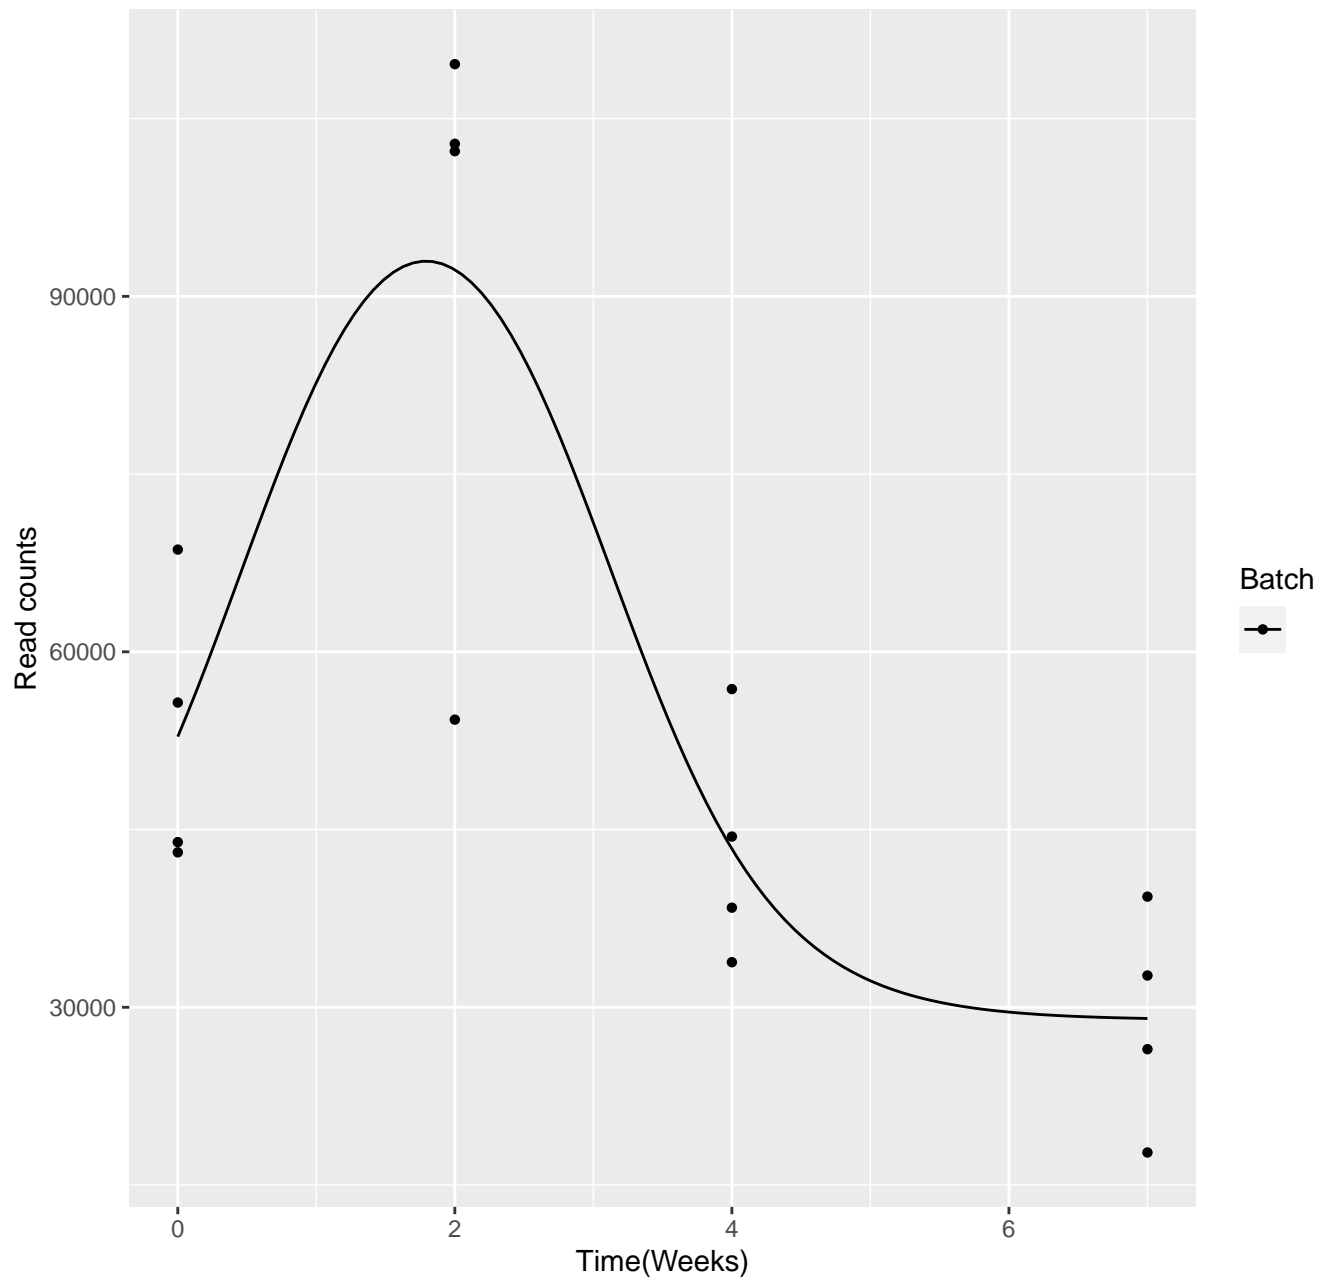

MS4A6A:  $\log_{10} q = -4.94$

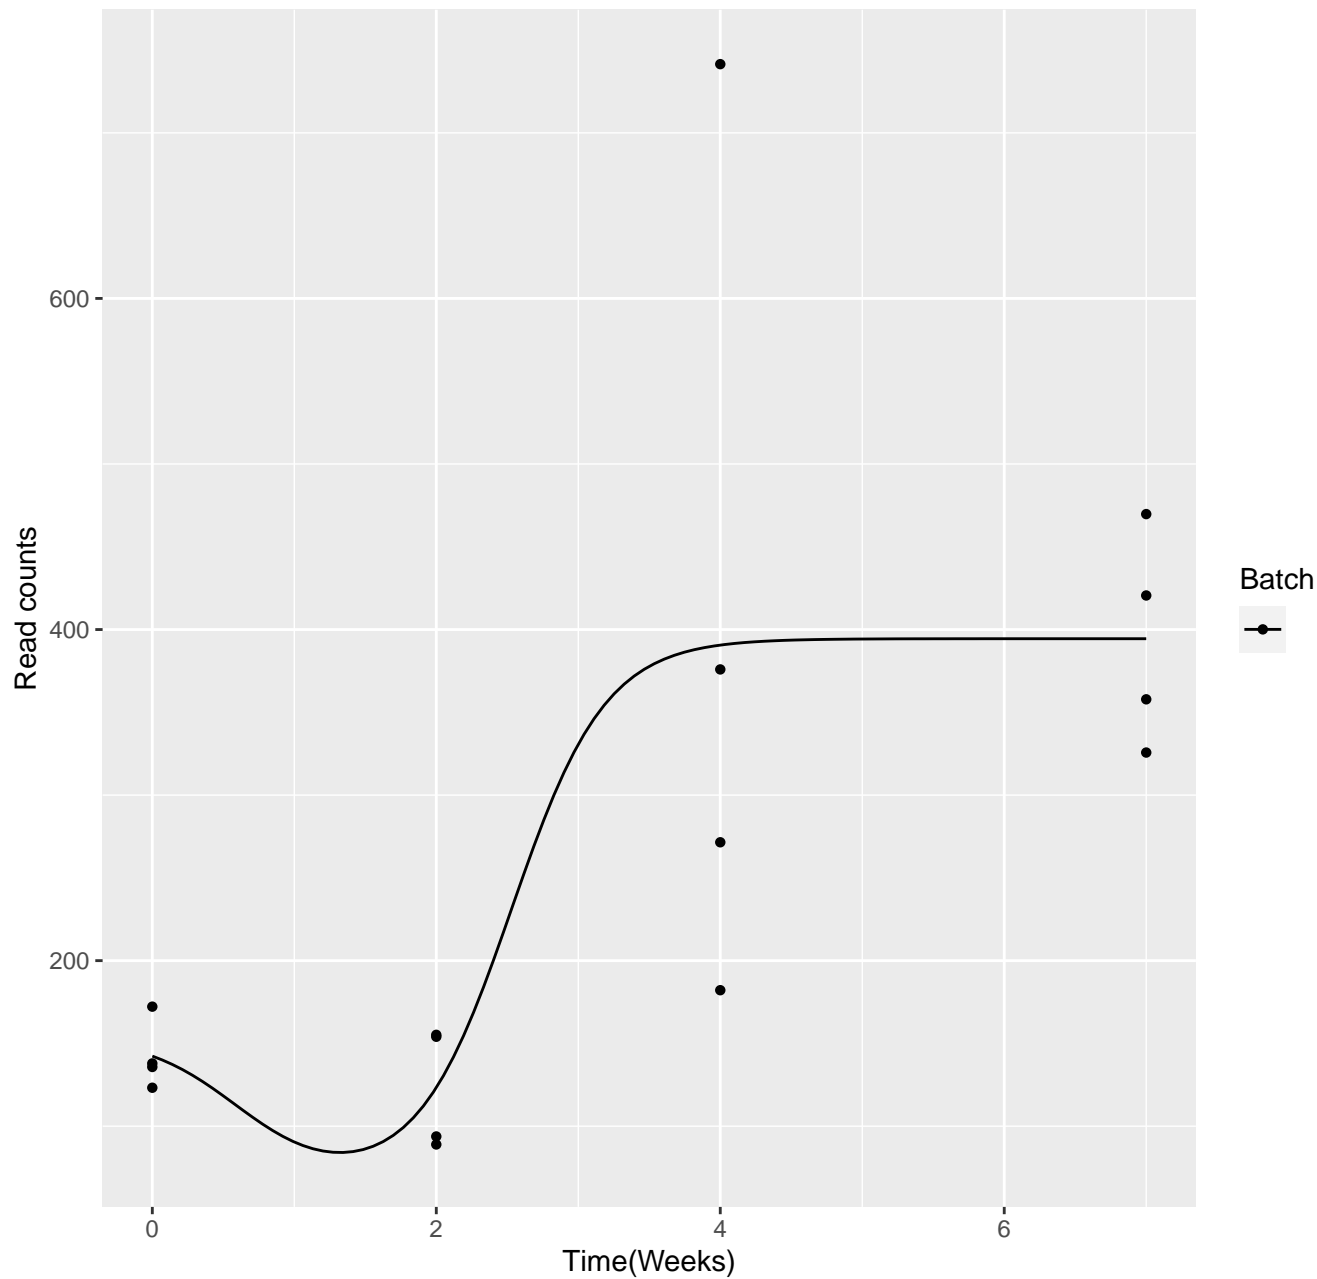

CSRP2:  $\log_{10} q = -4.94$

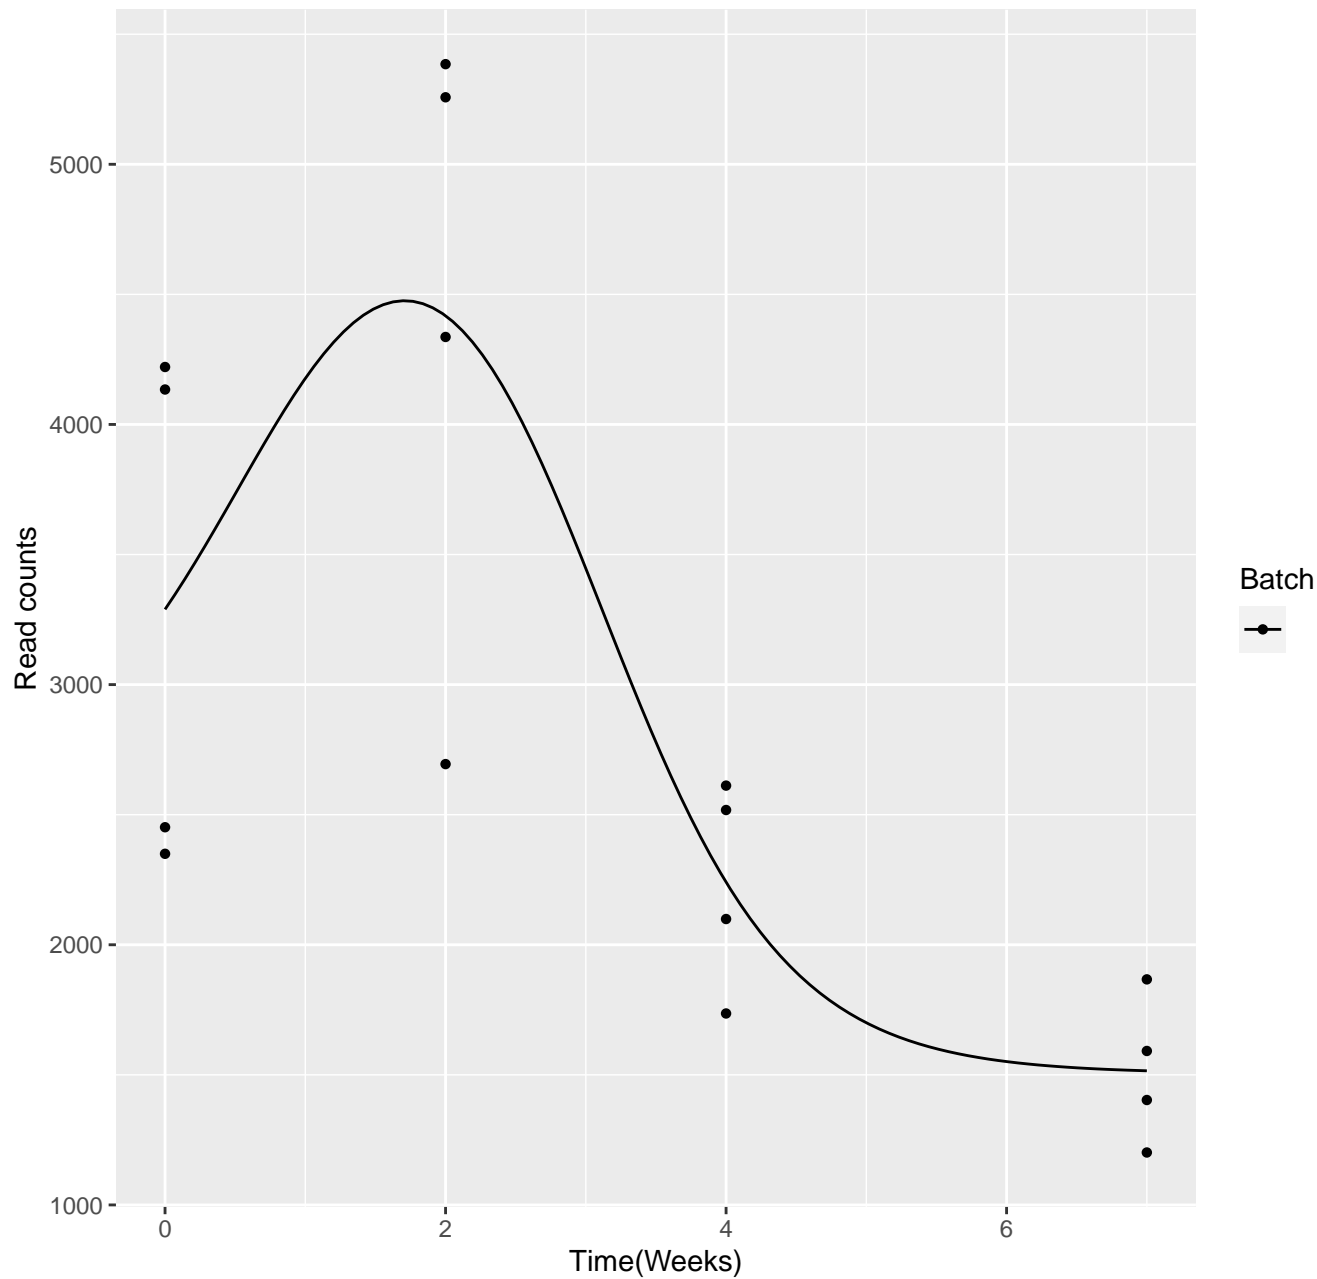

SAA3:  $\log_{10} q = -4.93$

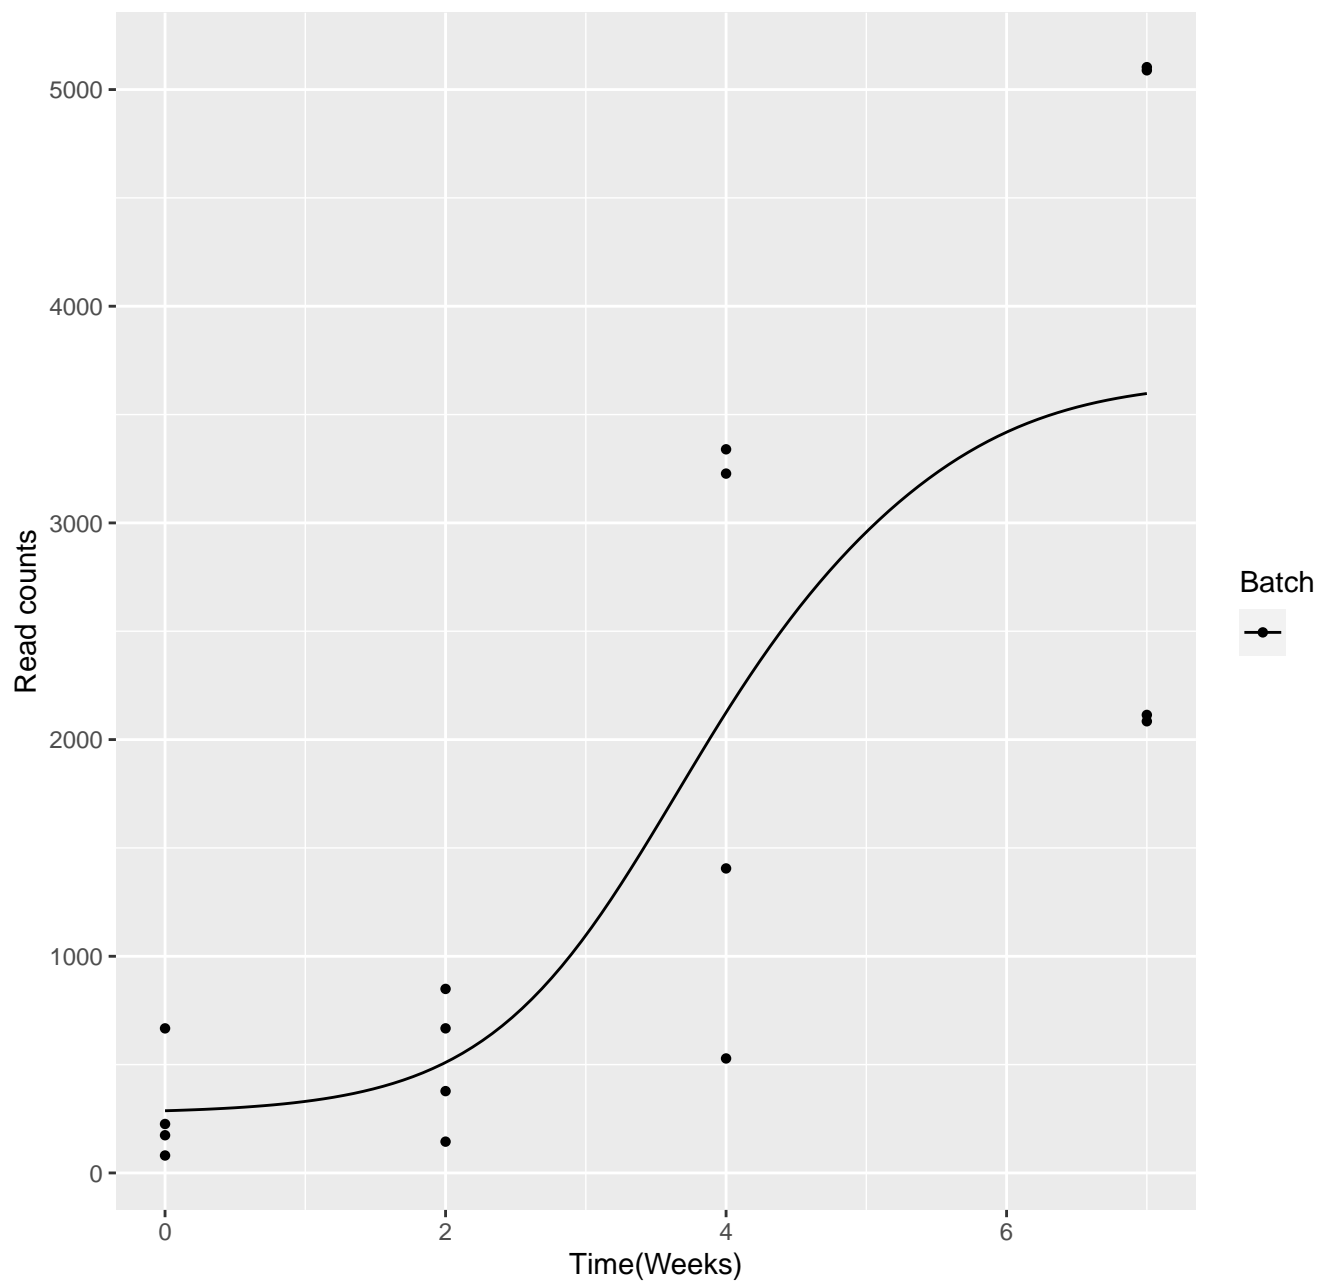



LOC100353865:  $\log_{10} q = -4.93$

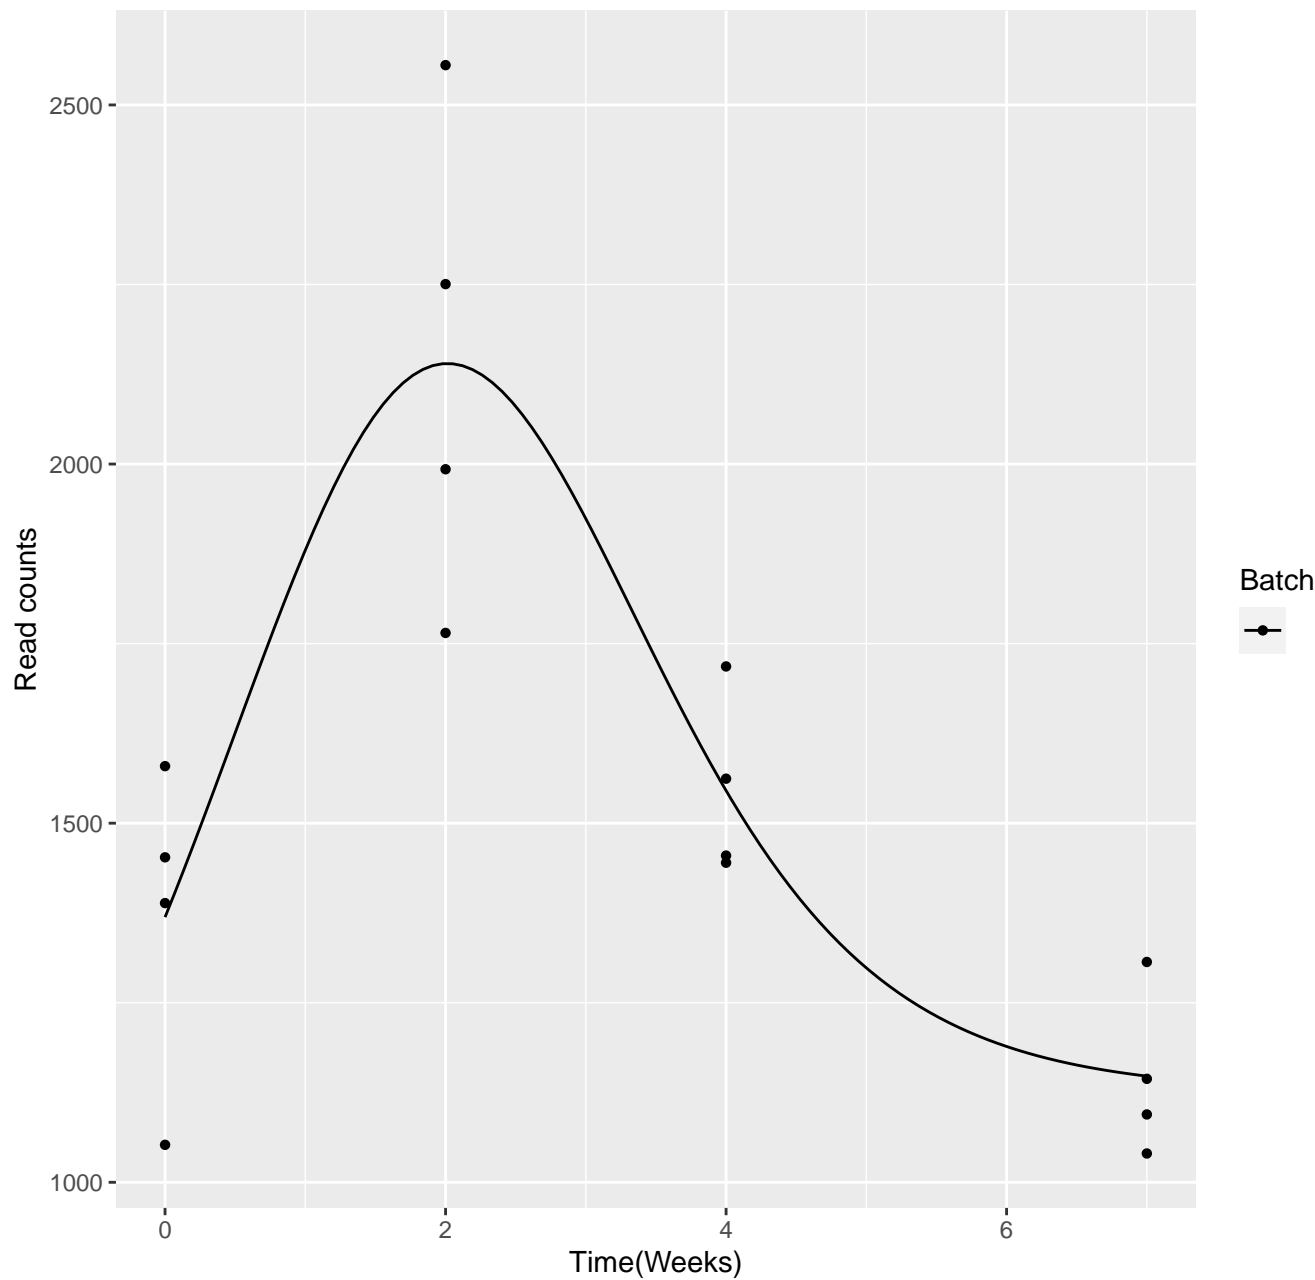

LOC100342098:  $\log_{10} q = -4.92$

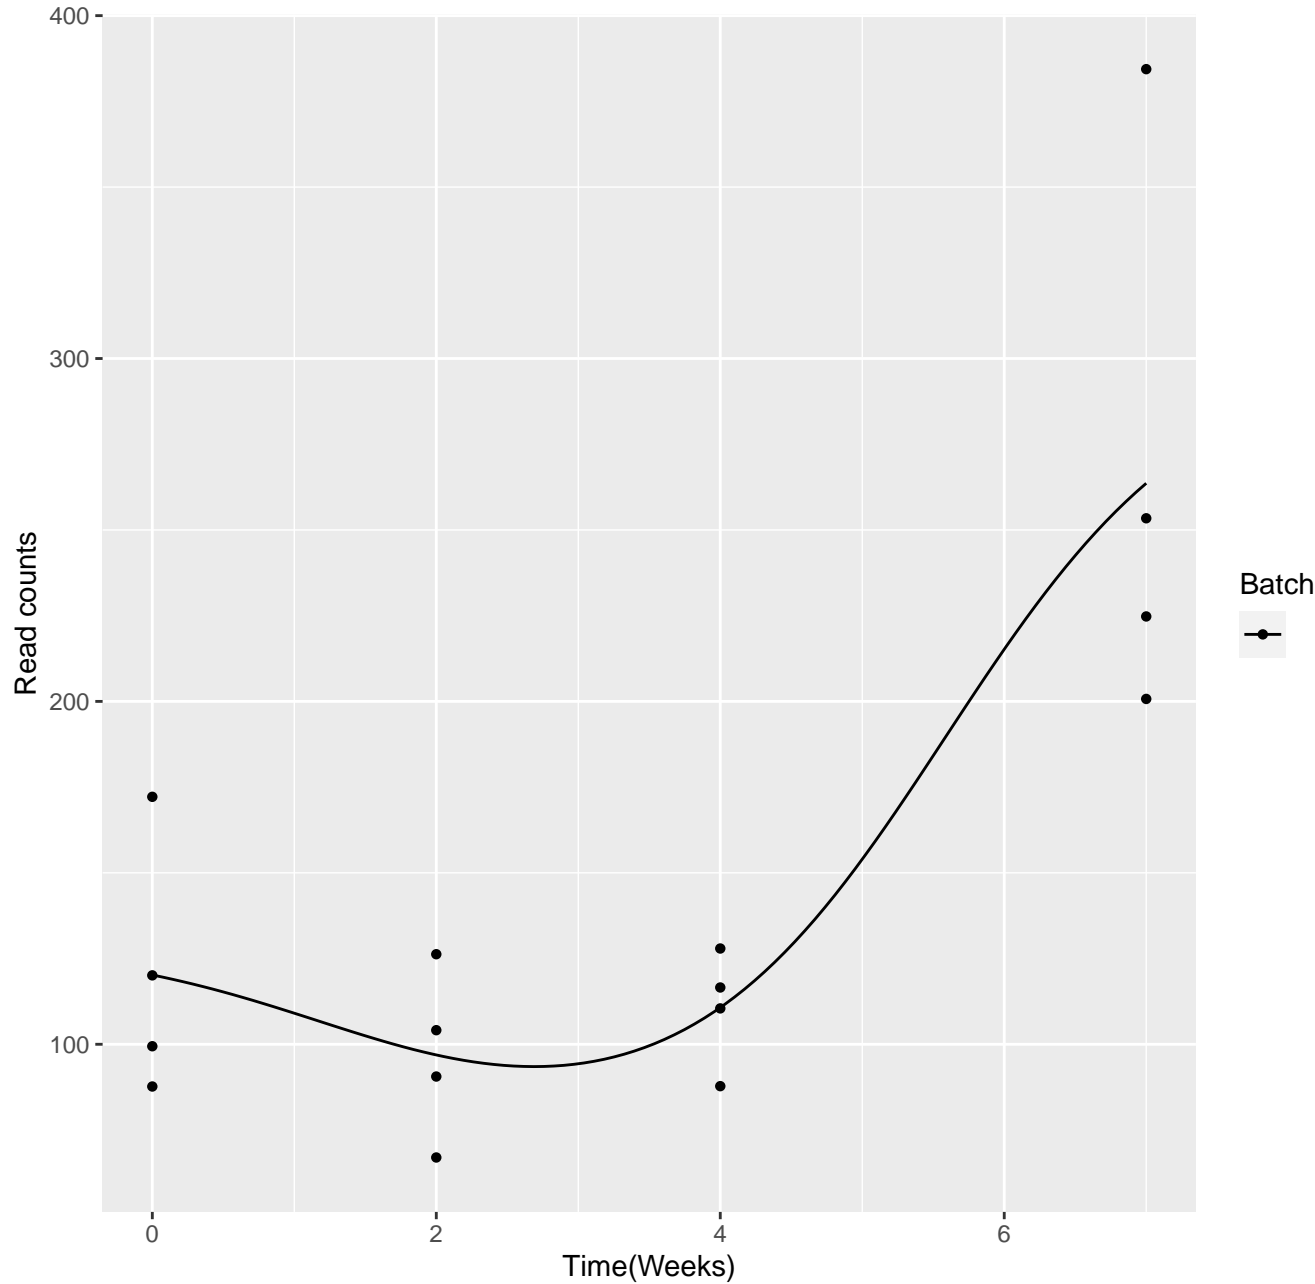

MAP4K1:  $\log_{10} q = -4.9$

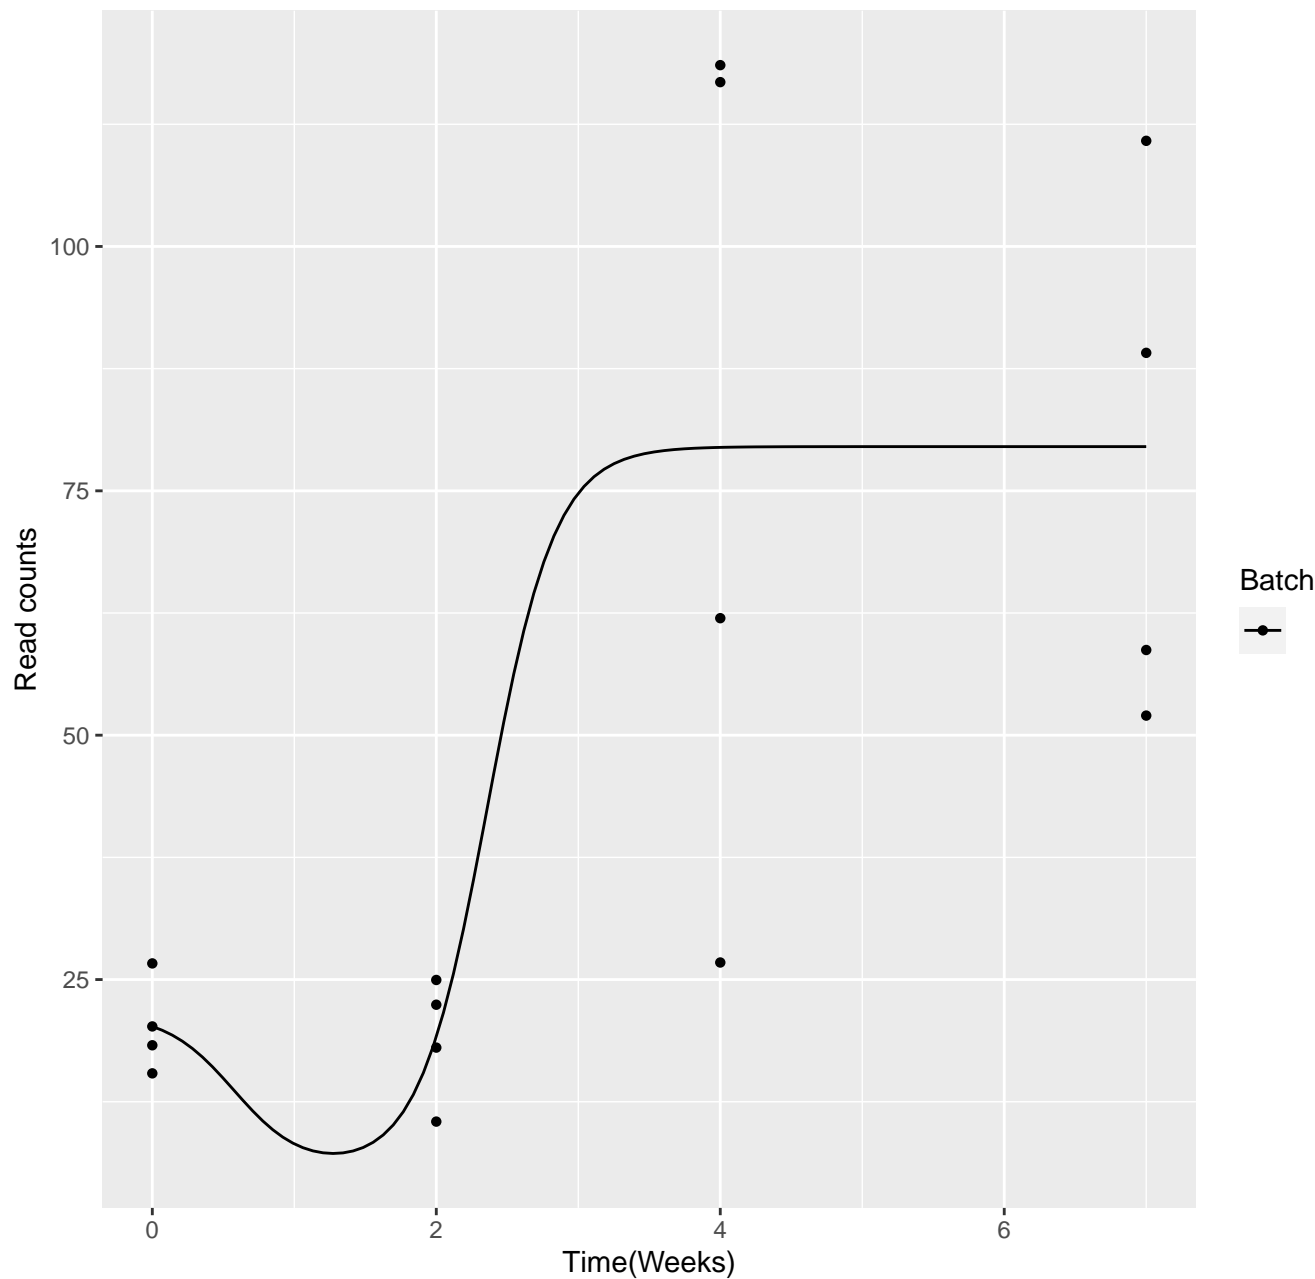

CCR2:  $\log_{10} q = -4.88$

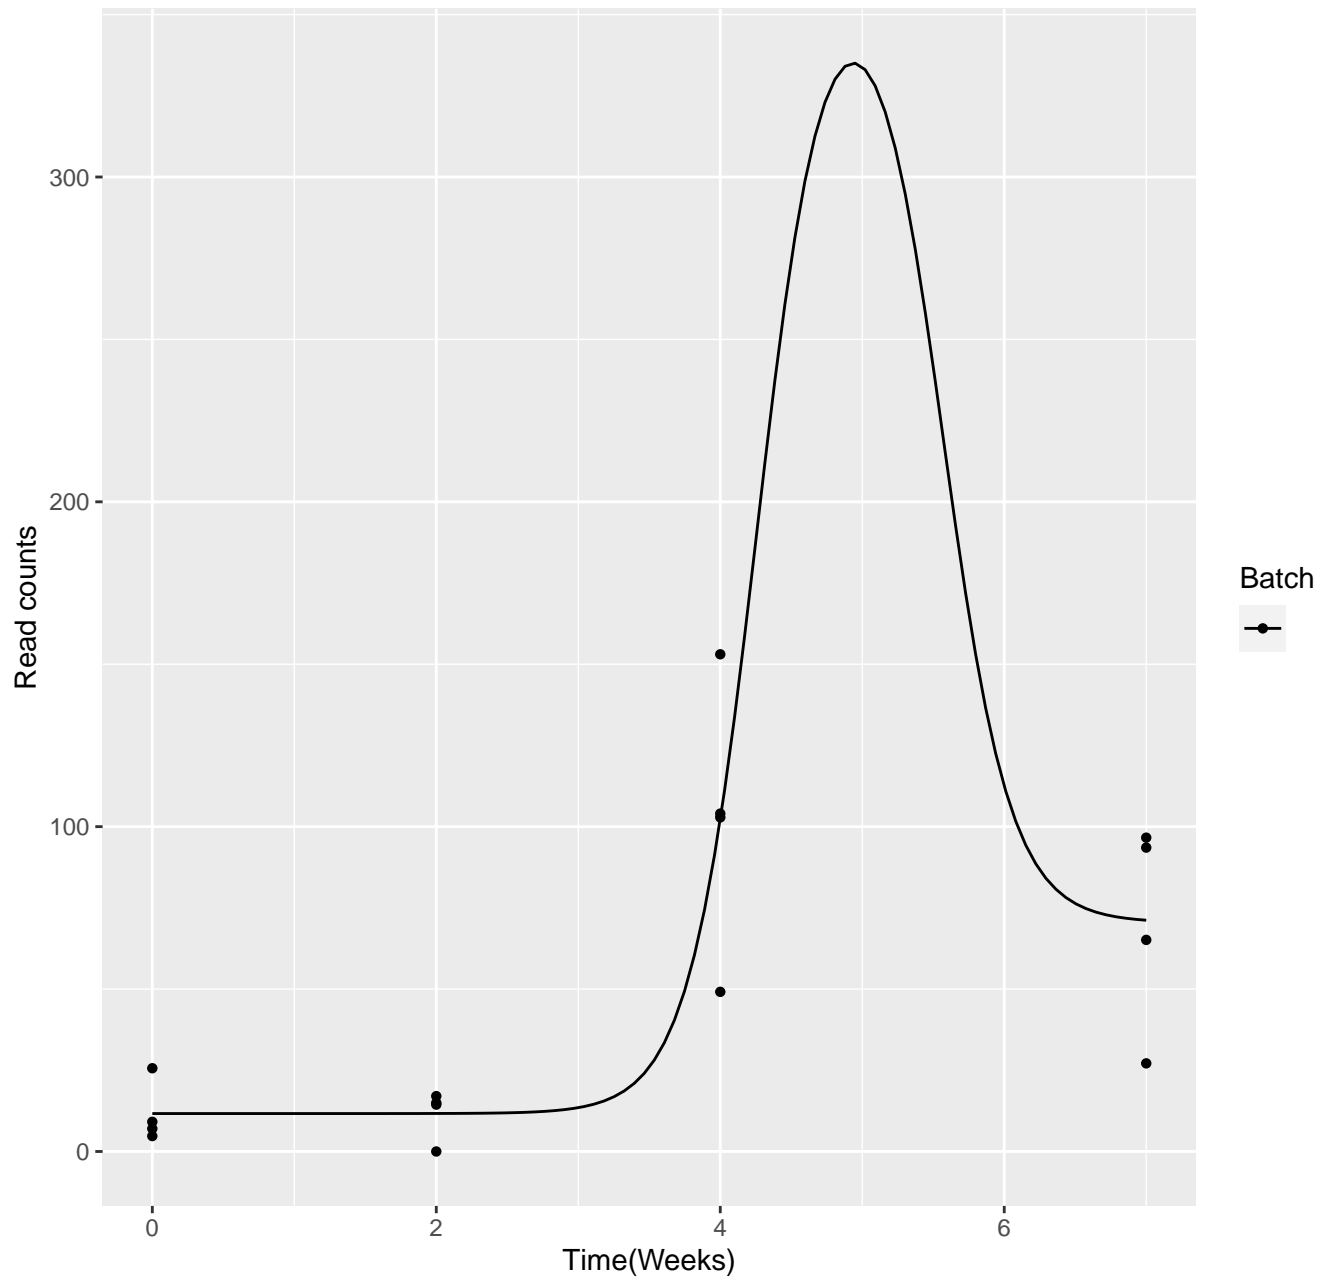

CRTC3:  $\log_{10} q = -4.88$

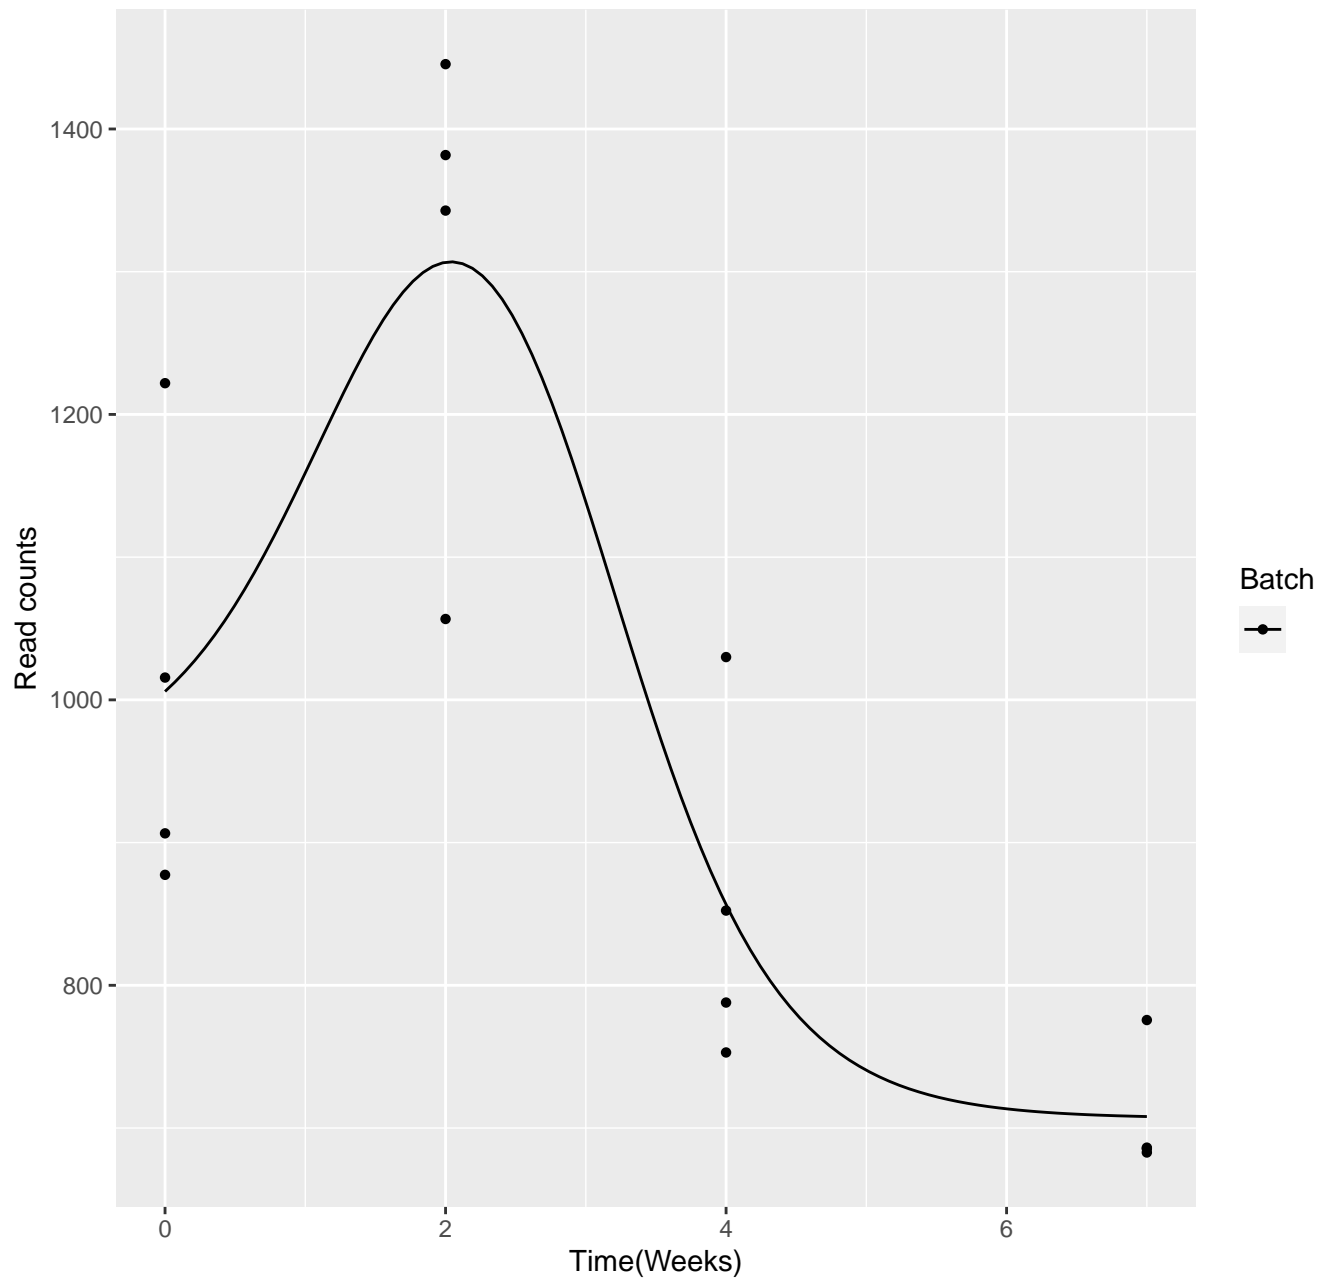

CNN1:  $\log_{10} q = -4.87$

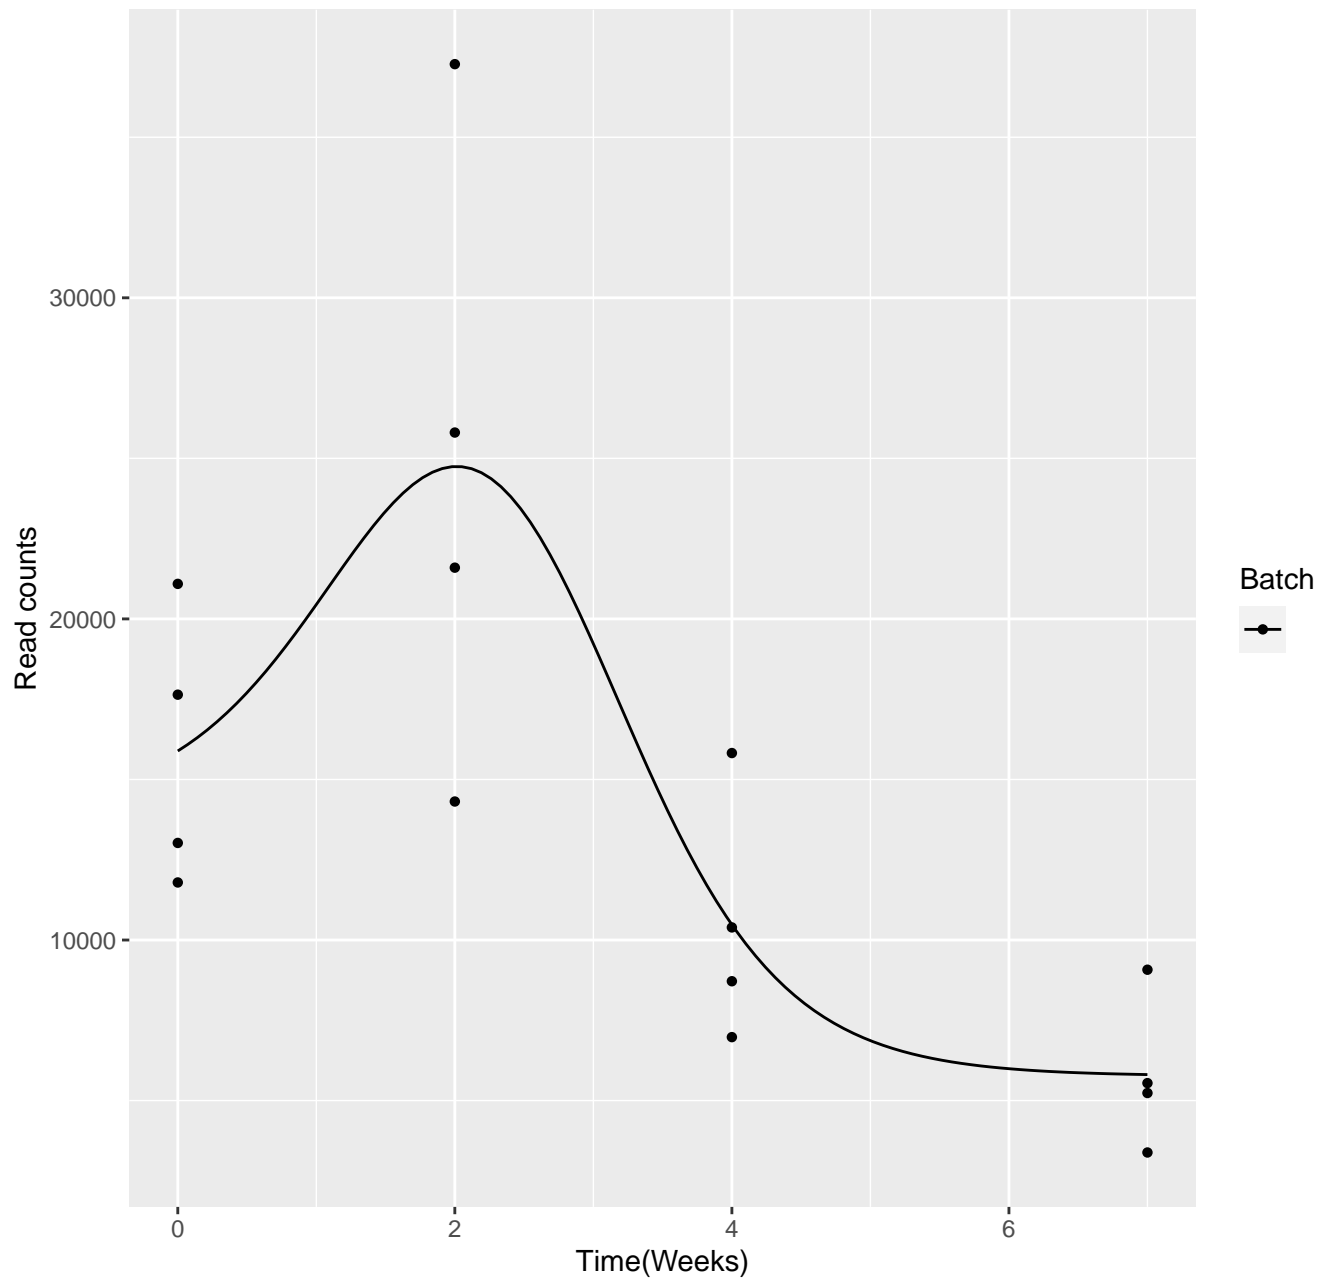

RAC2:  $\log_{10} q = -4.87$

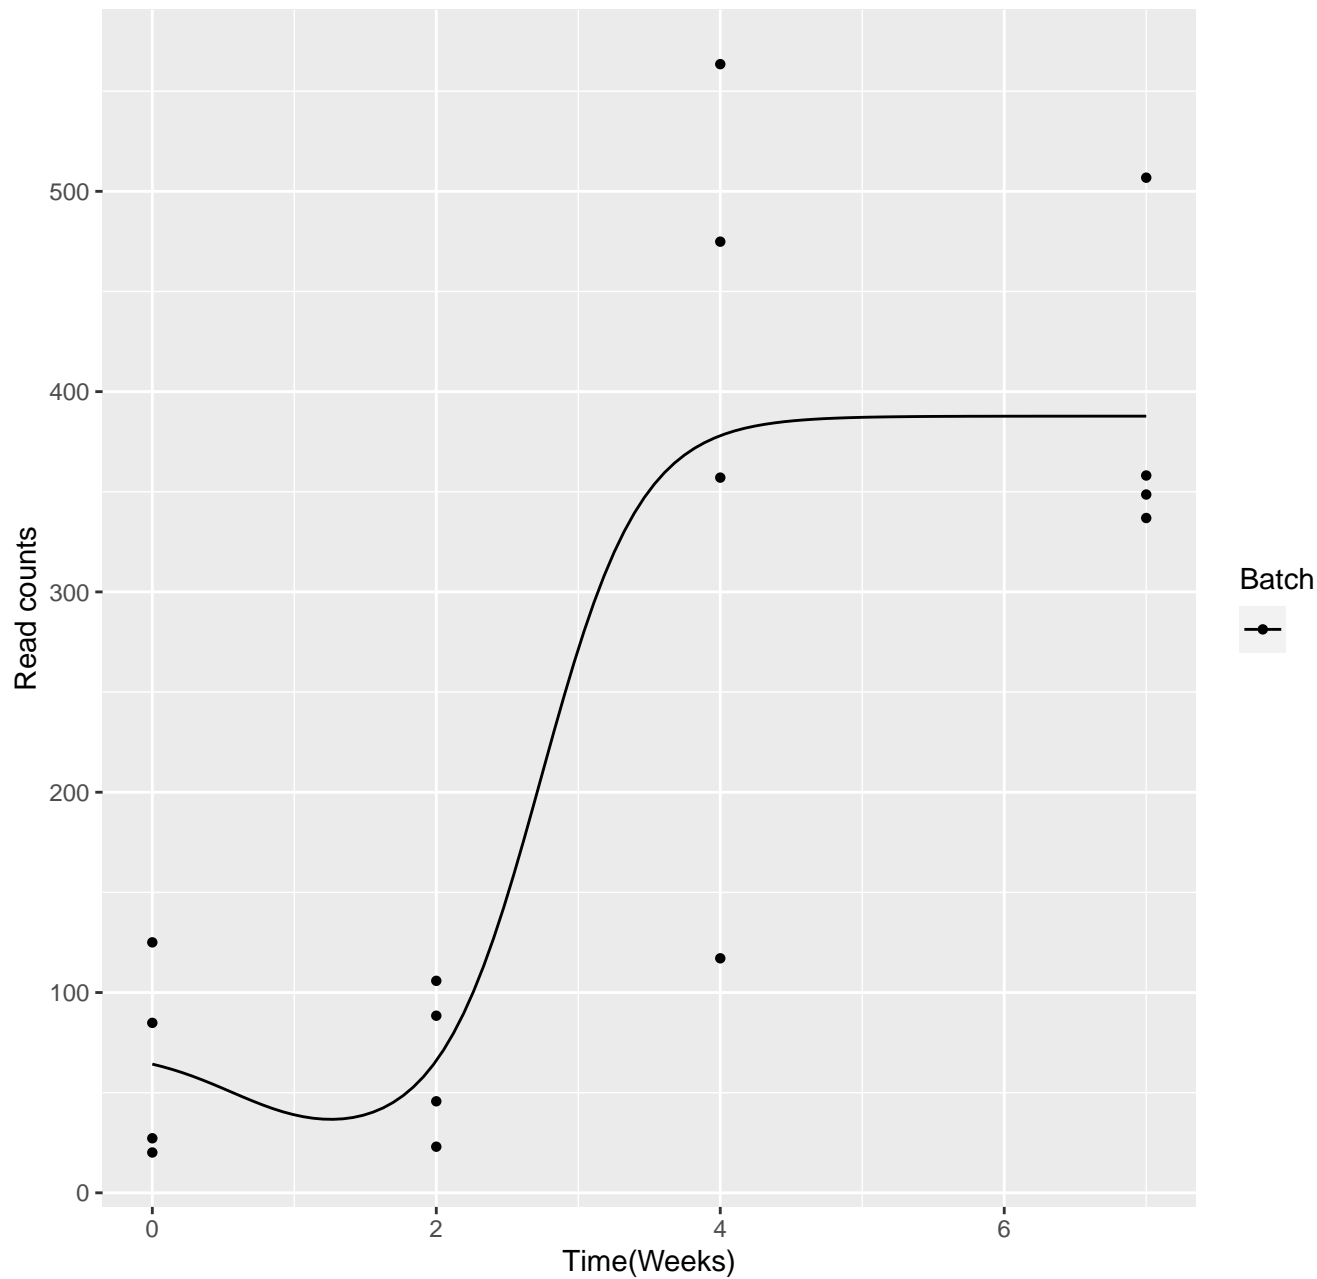

SBNO2:  $\log_{10} q = -4.87$

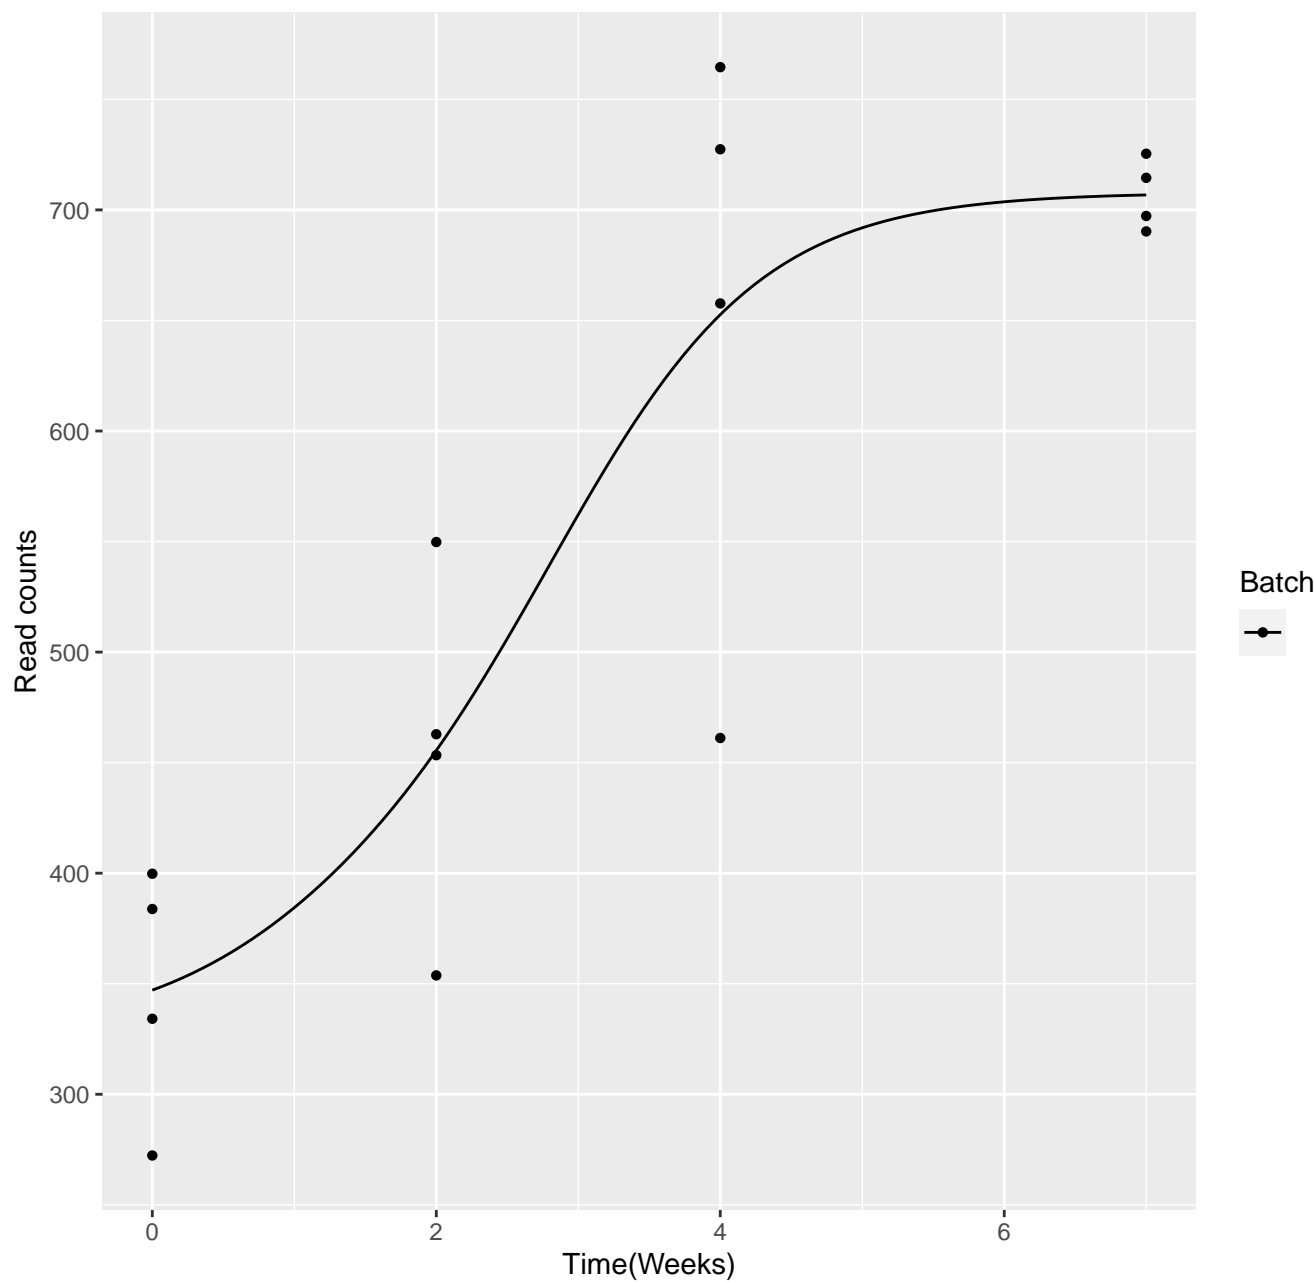



ABCA6:  $\log_{10} q = -4.86$

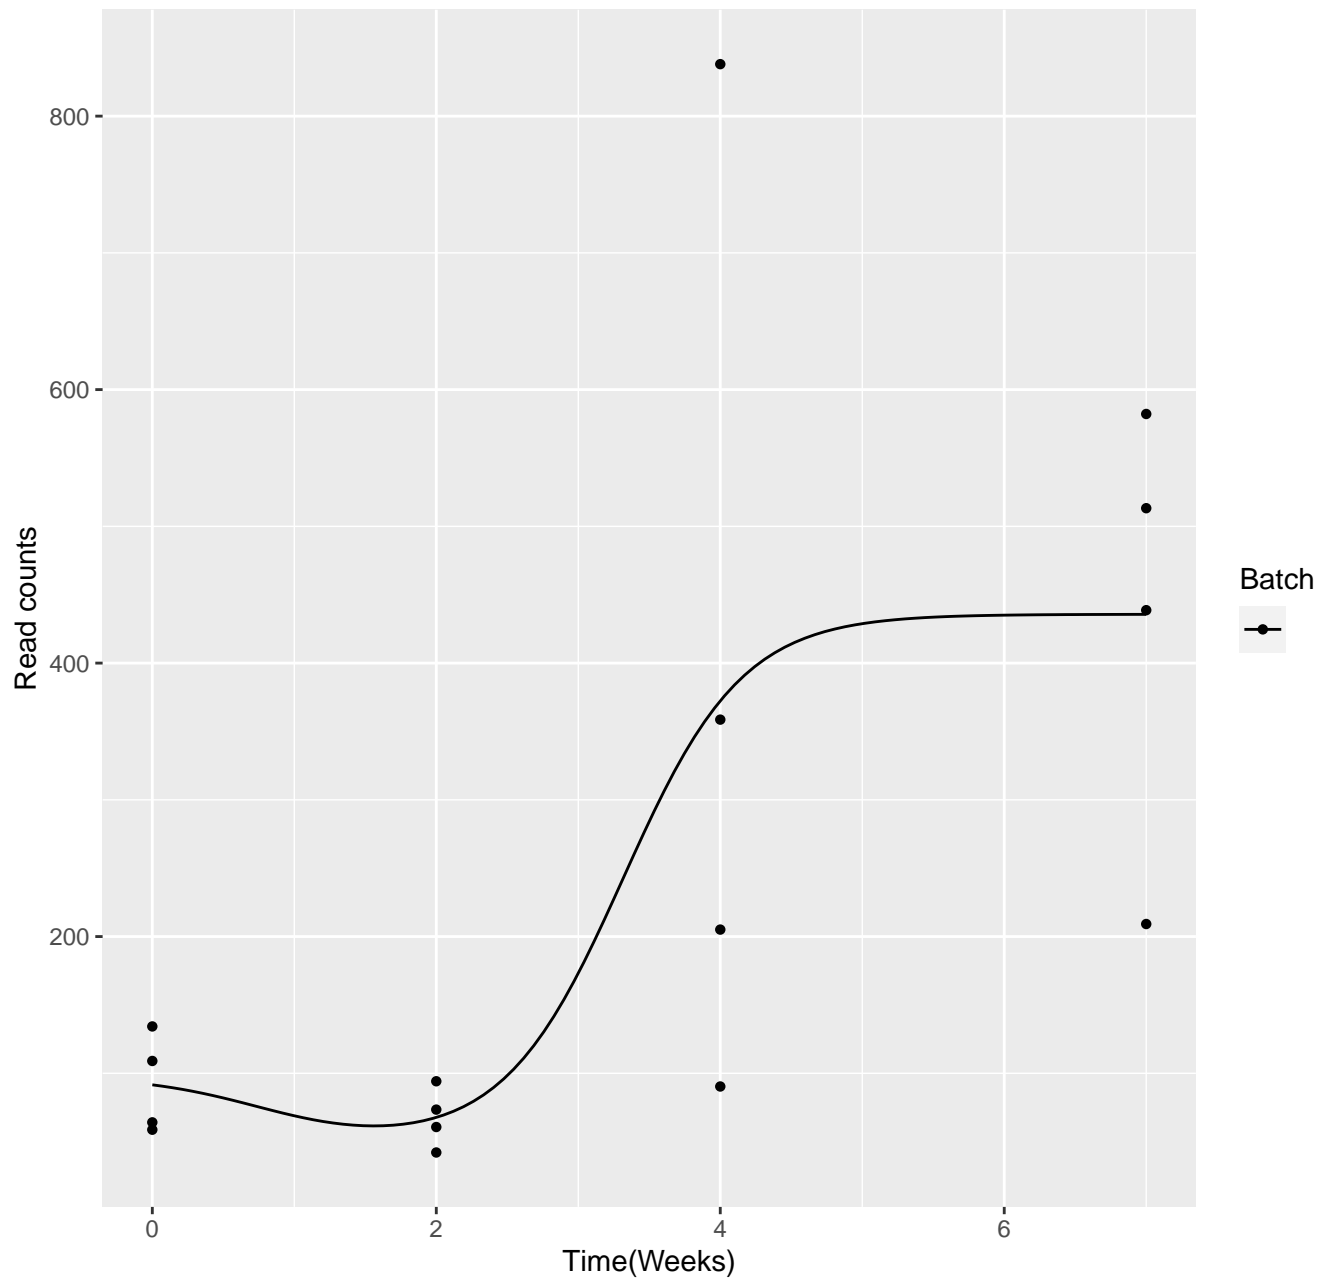

ABCC3:  $\log_{10} q = -4.86$

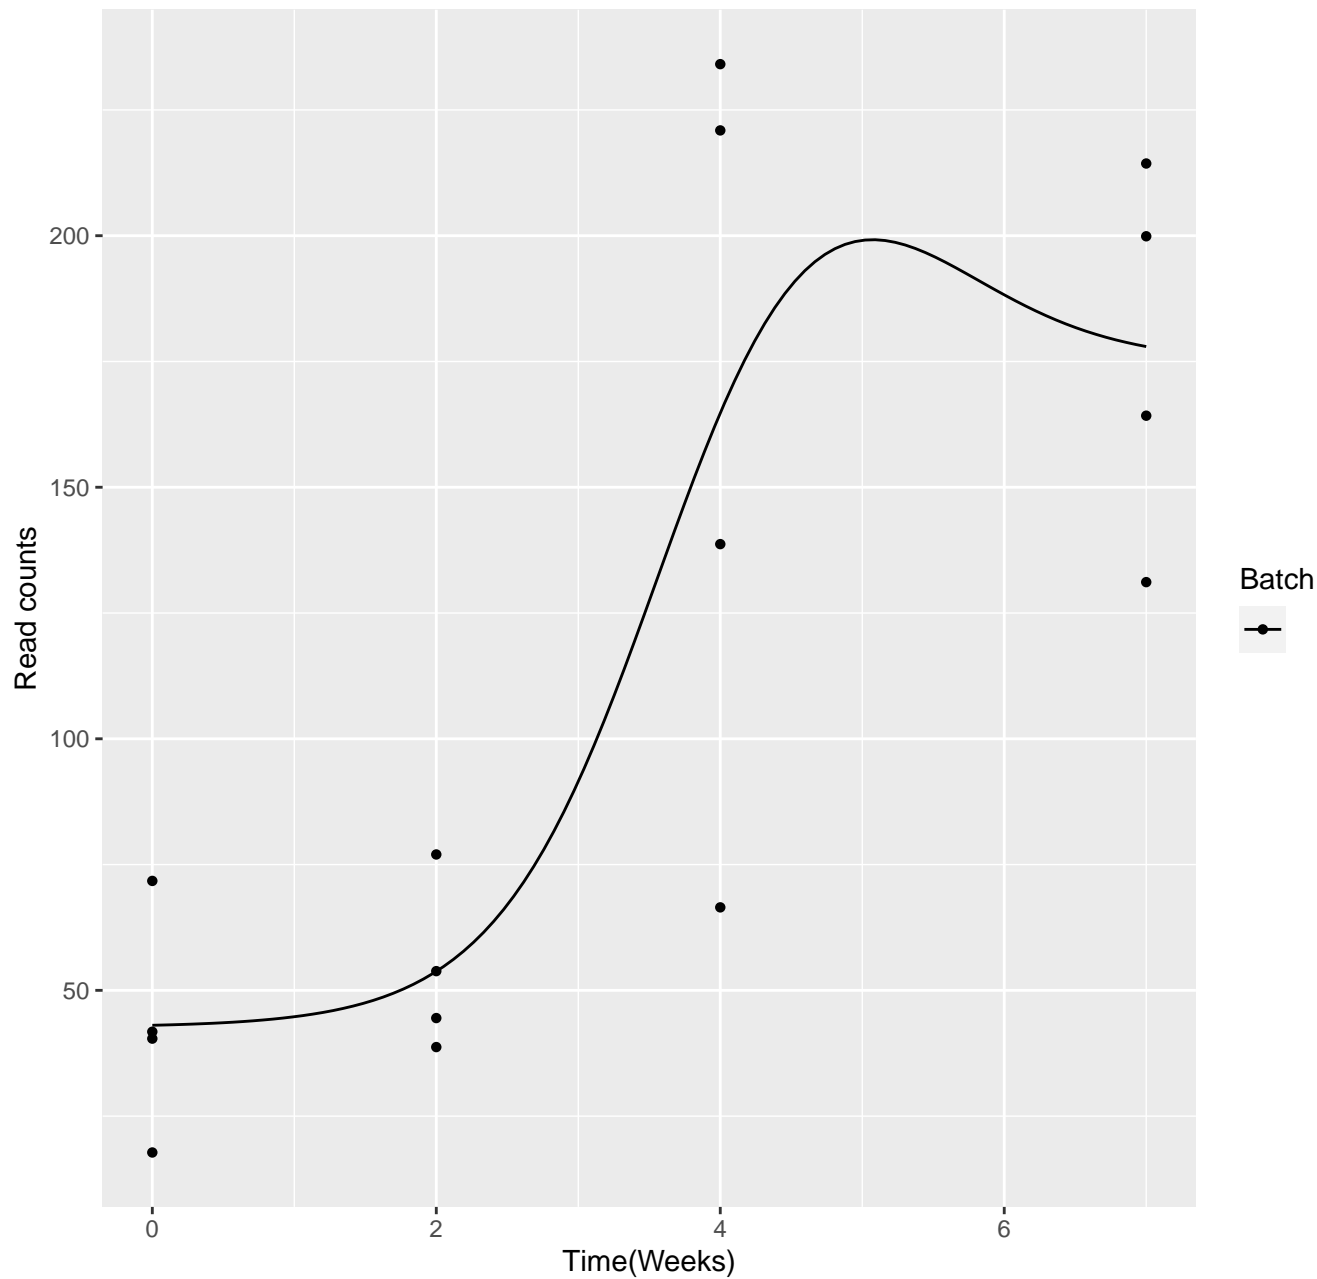

LIMD2:  $\log_{10} q = -4.86$

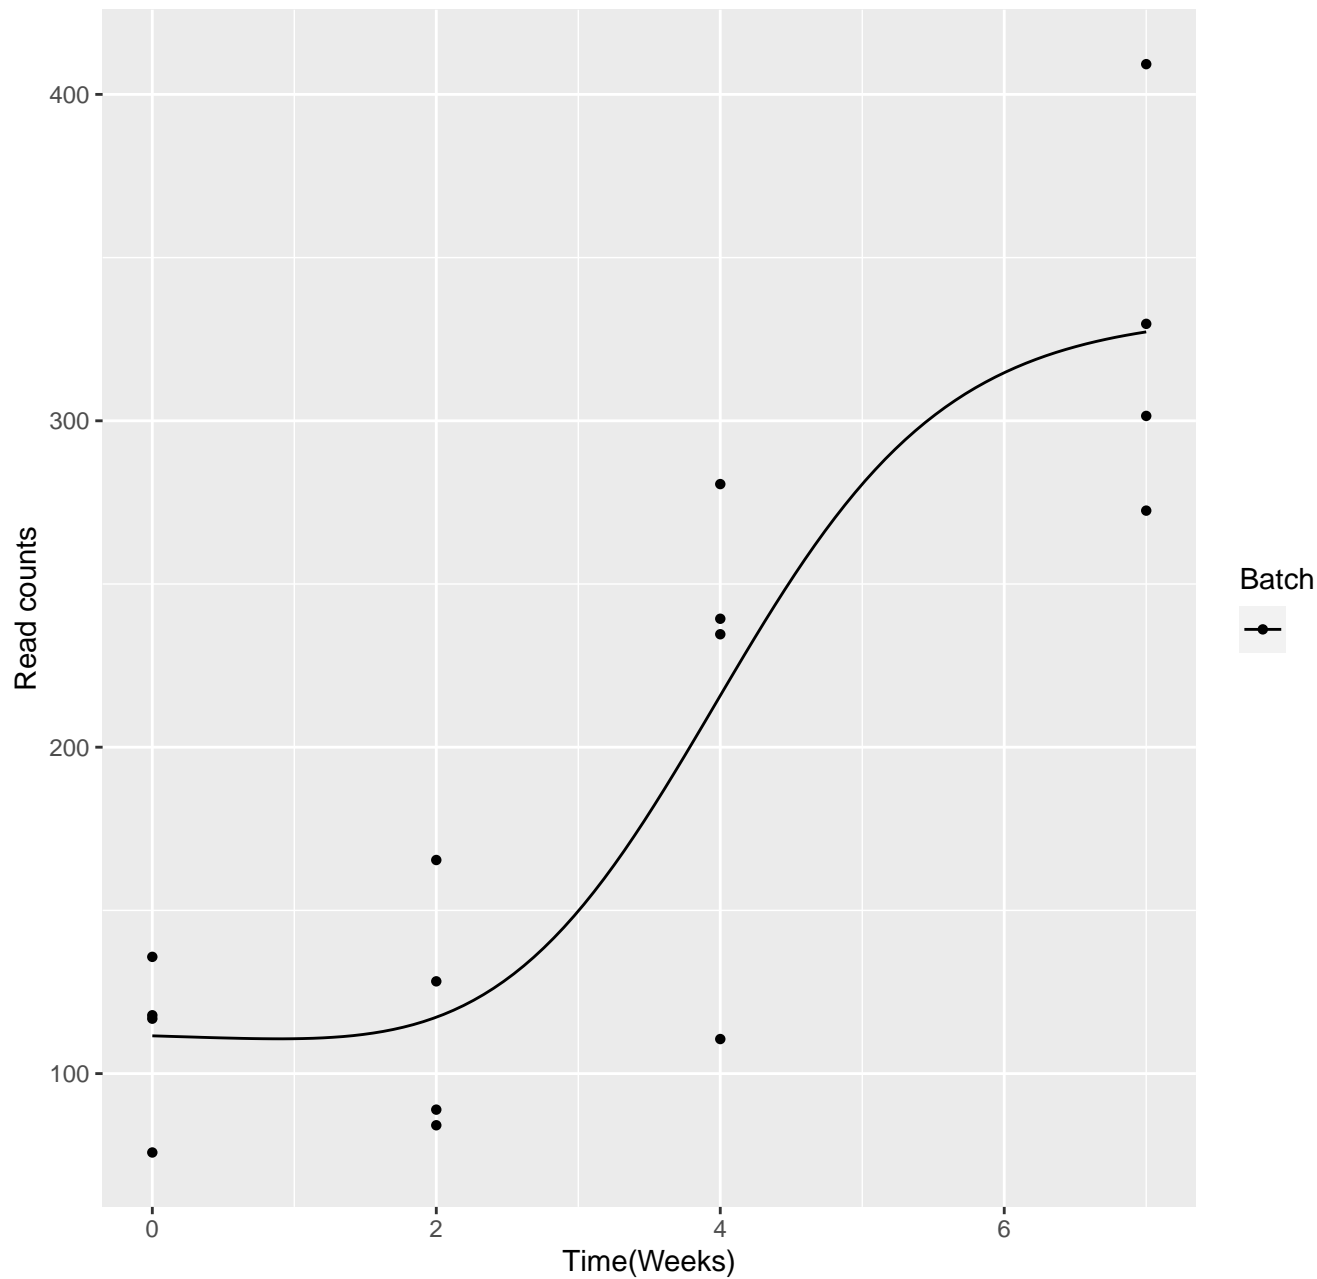

LOC100338413:  $\log_{10} q = -4.86$

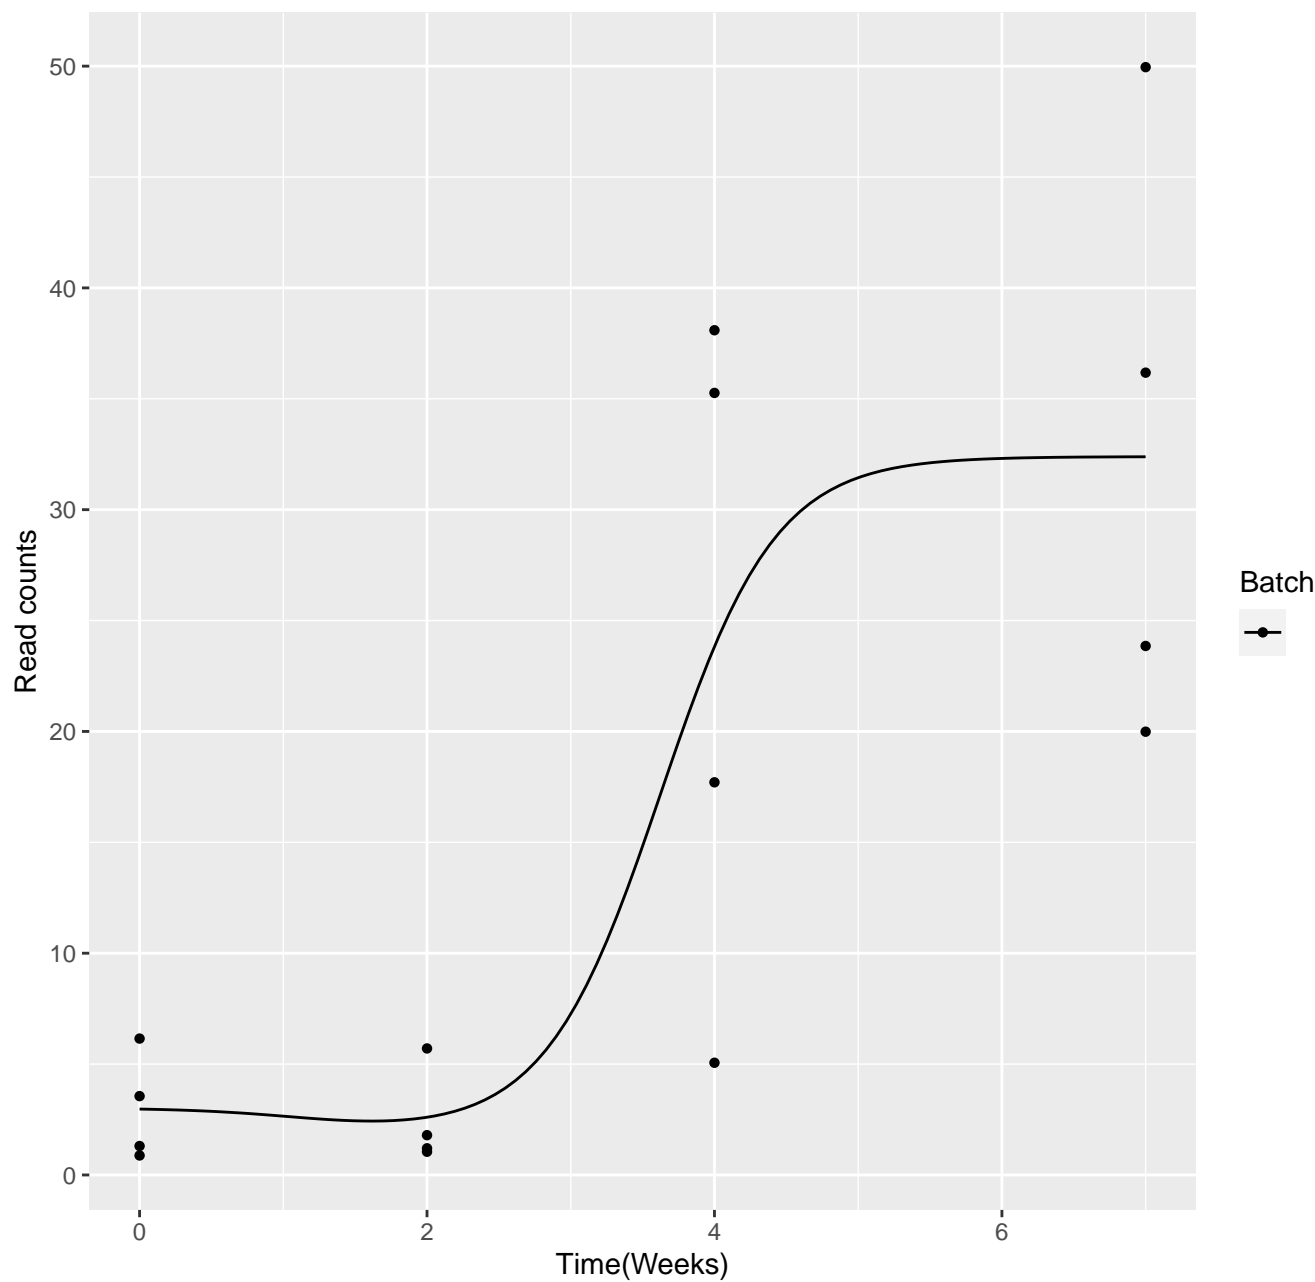

LOC127488159:  $\log_{10} q = -4.86$

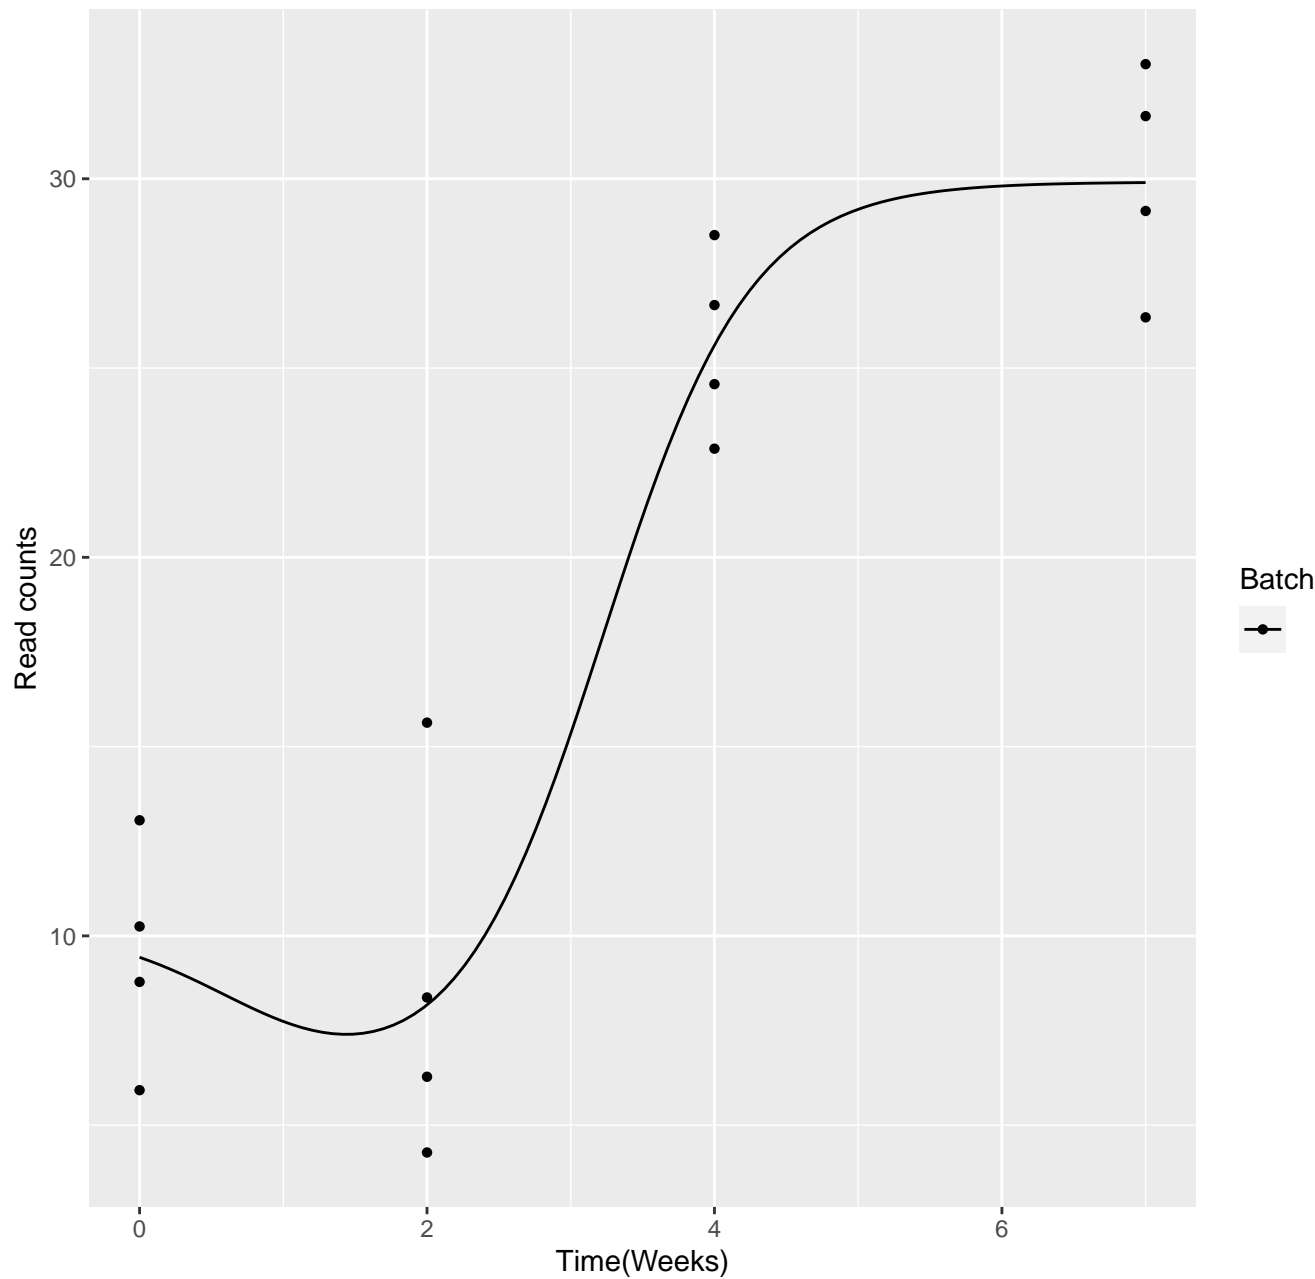

BUB1B:  $\log_{10} q = -4.84$

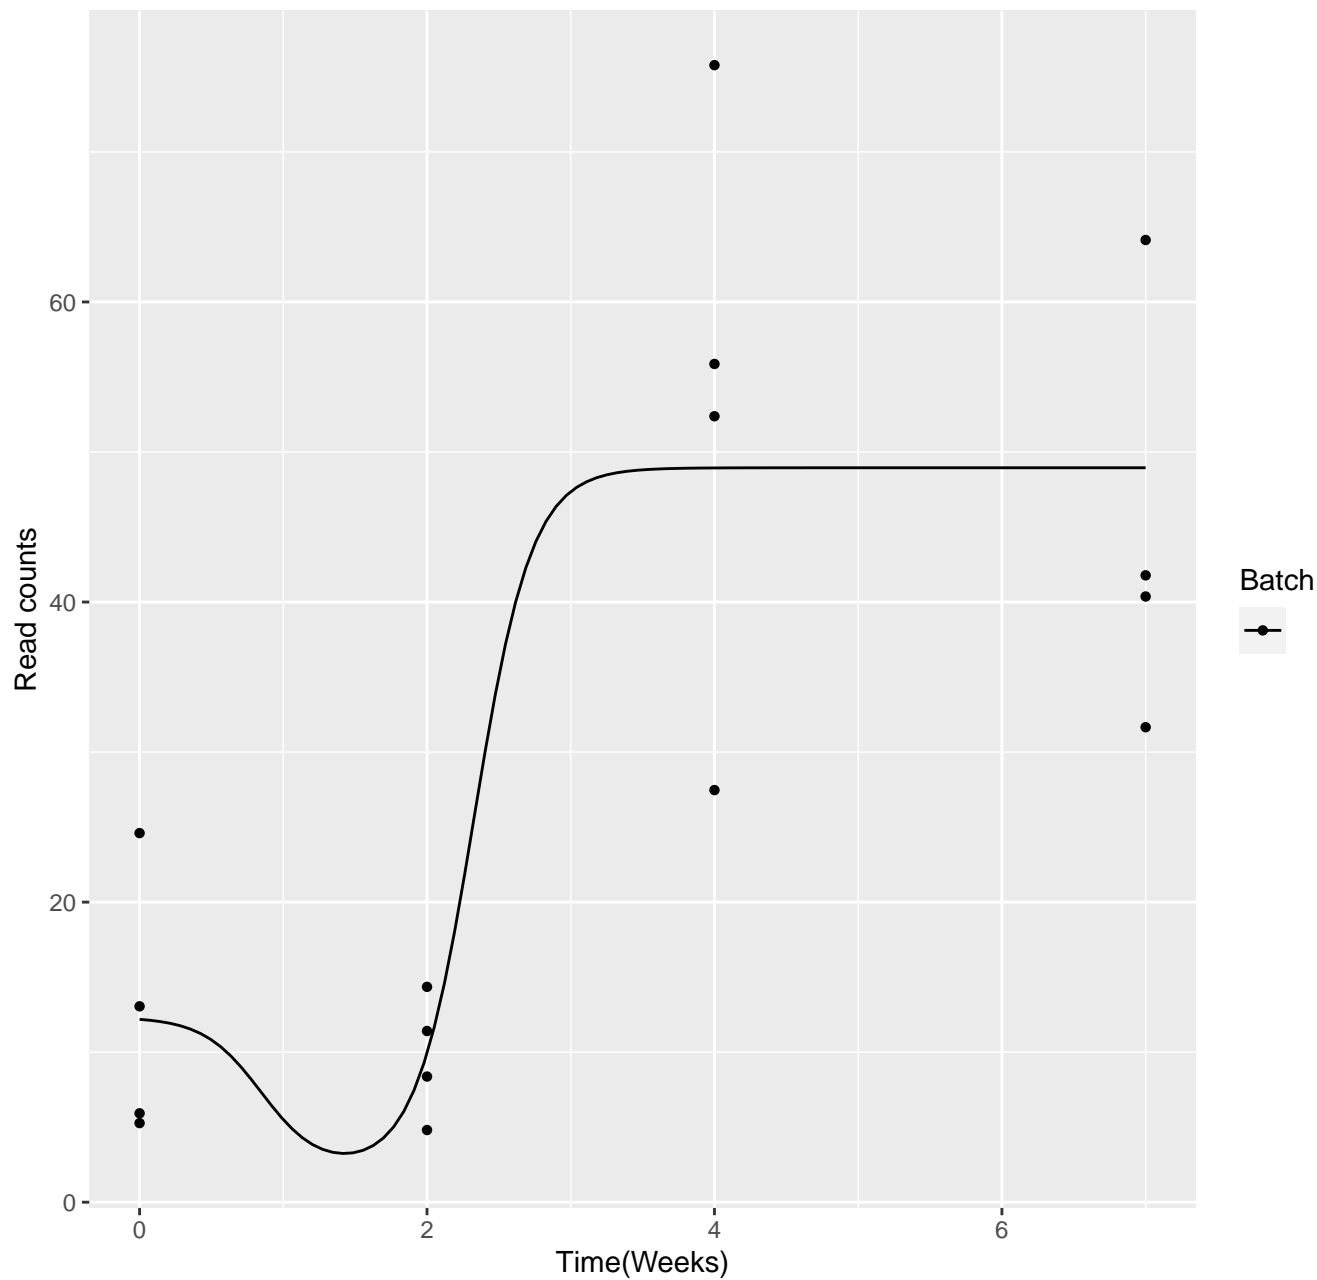

DENND1C:  $\log_{10} q = -4.84$

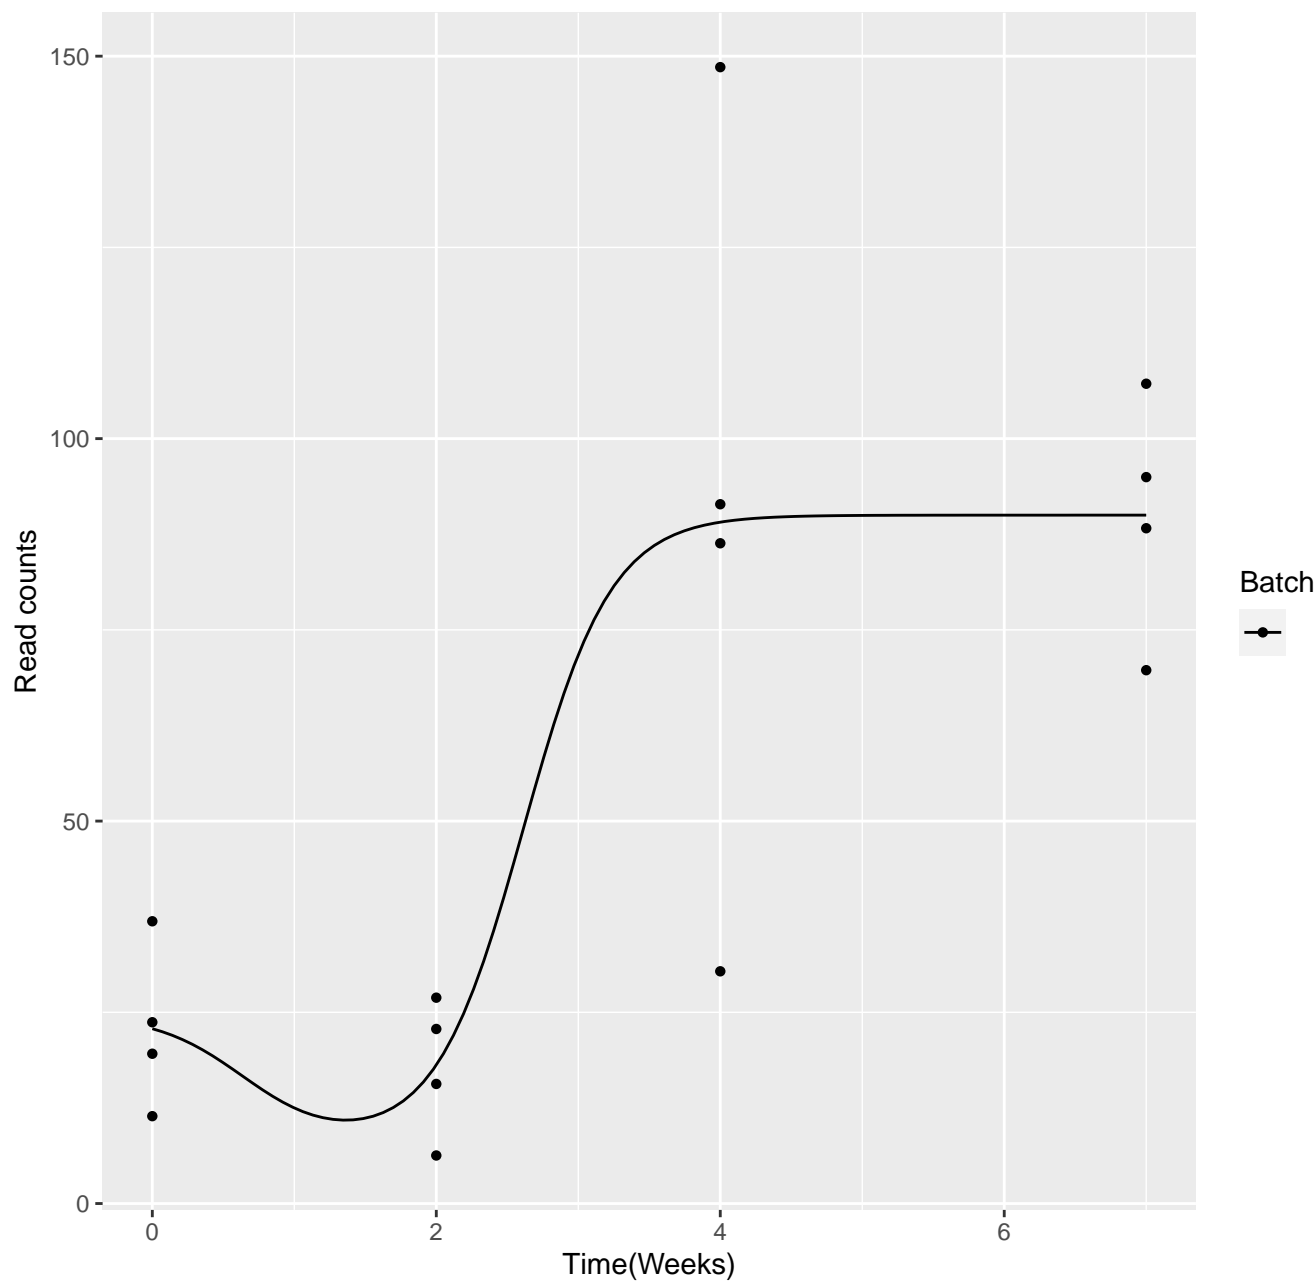

TACSTD2:  $\log_{10} q = -4.84$

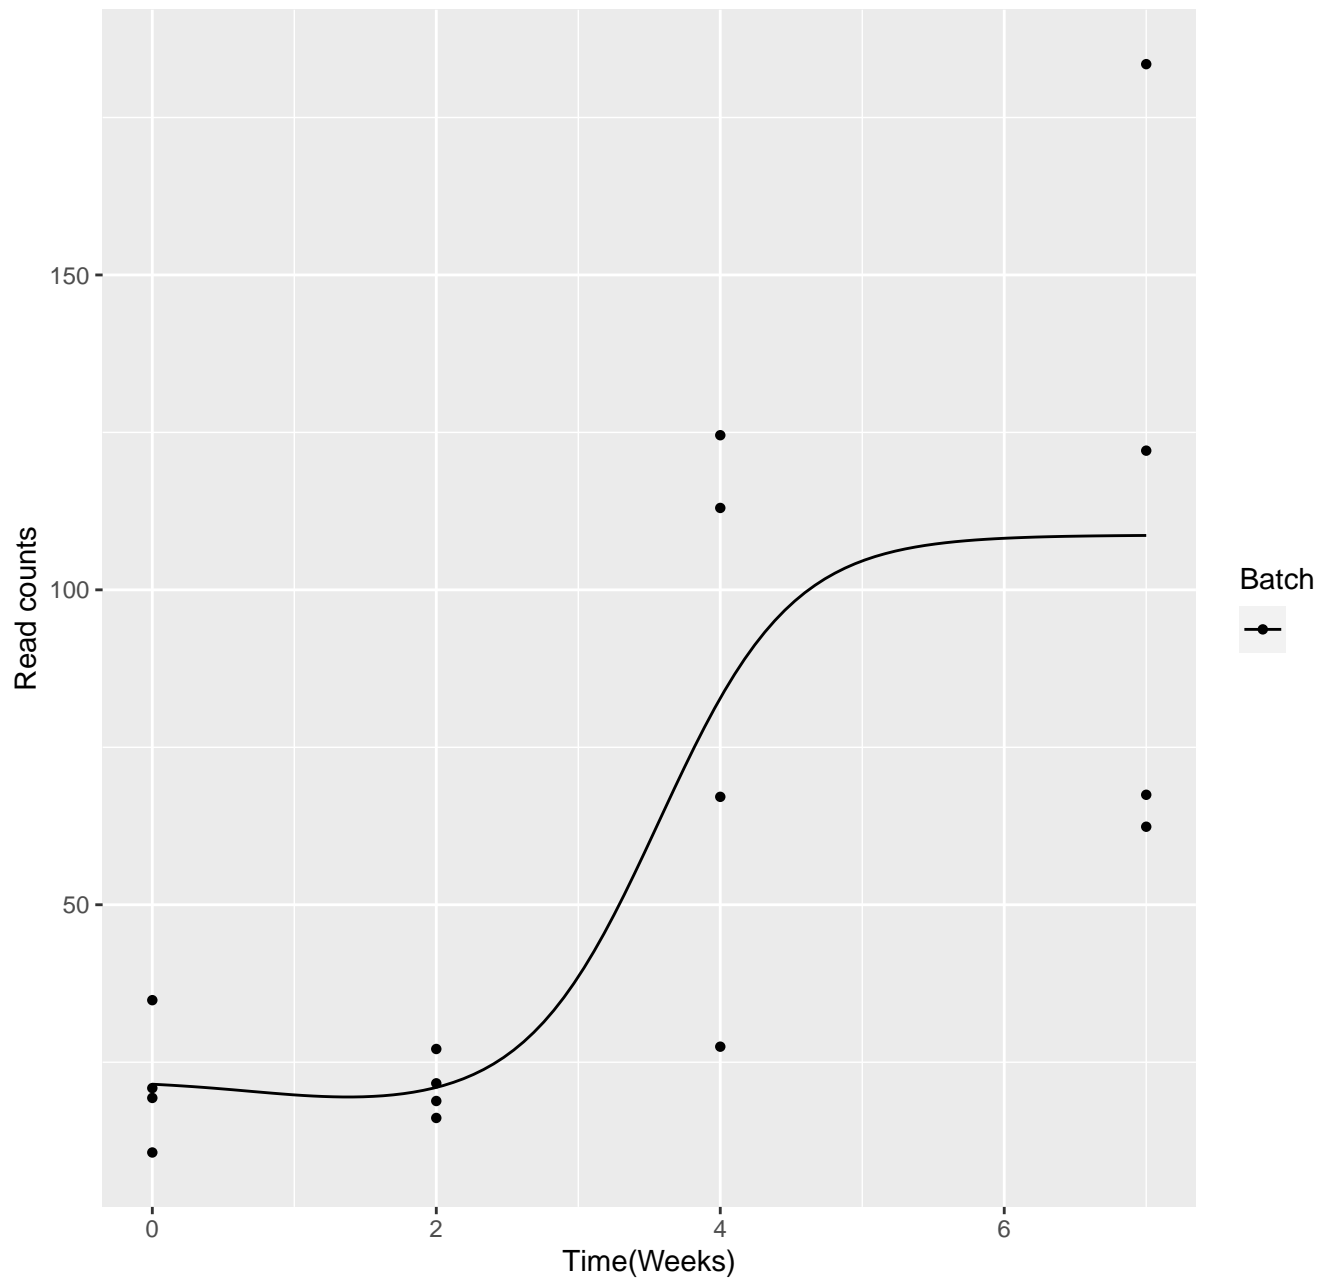



NPR1:  $\log_{10} q = -4.83$

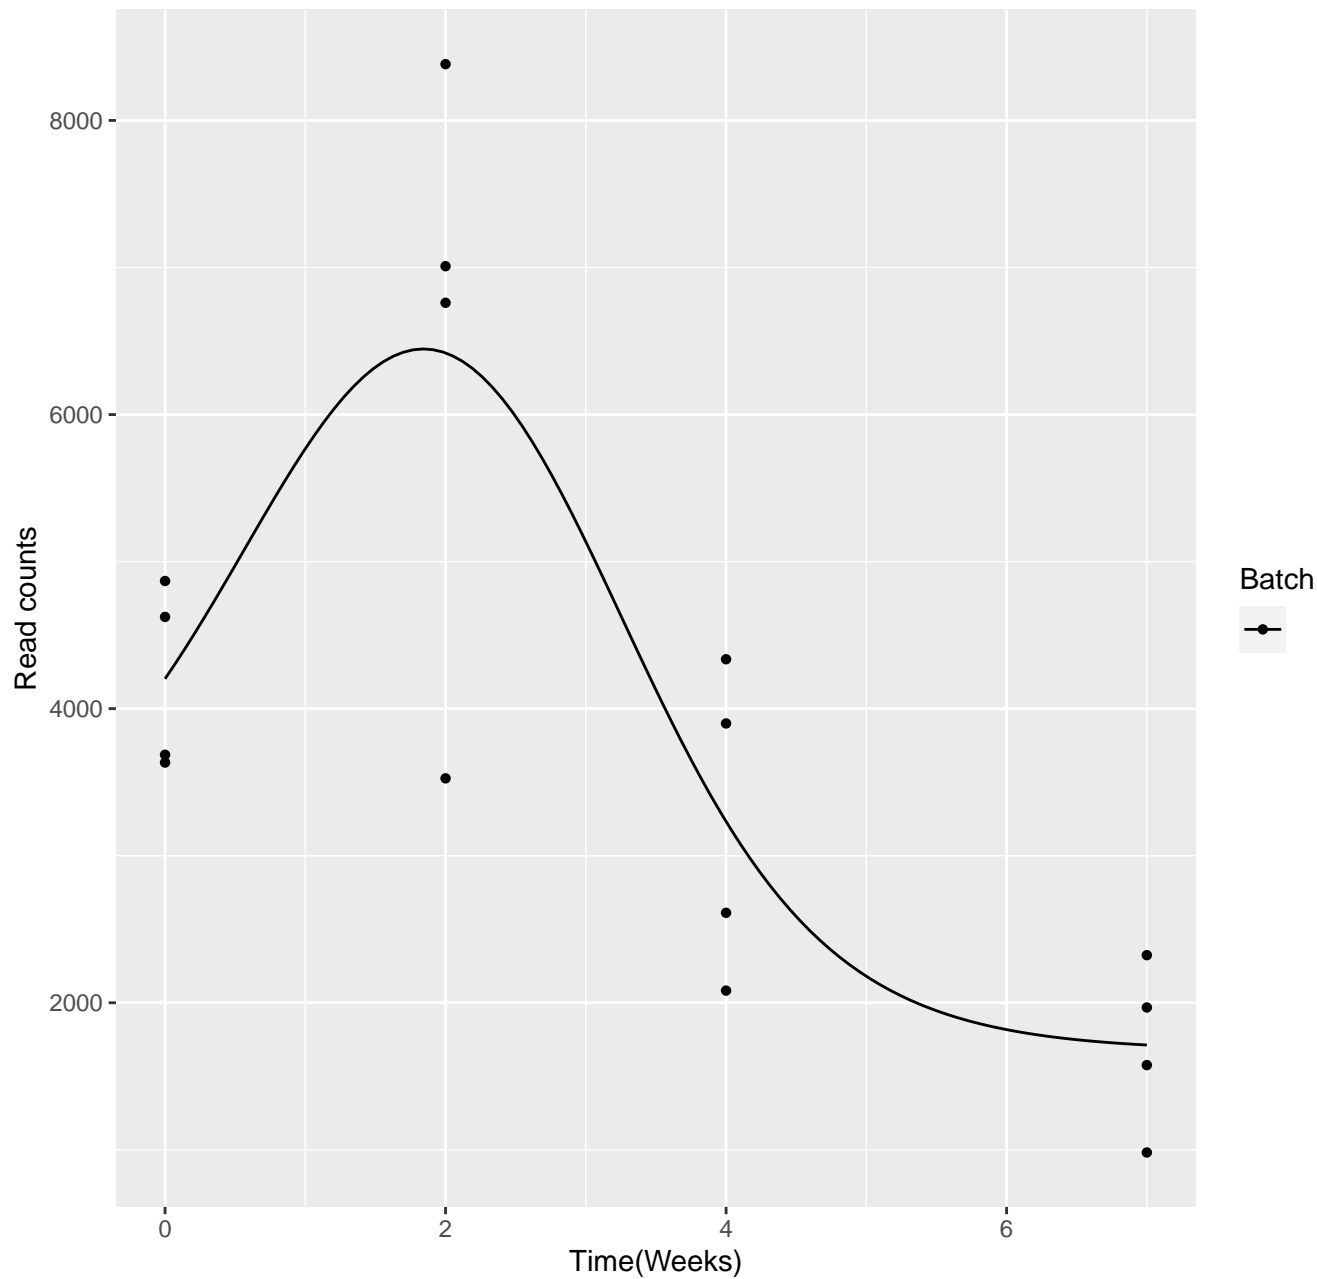

FBXL2:  $\log_{10} q = -4.82$

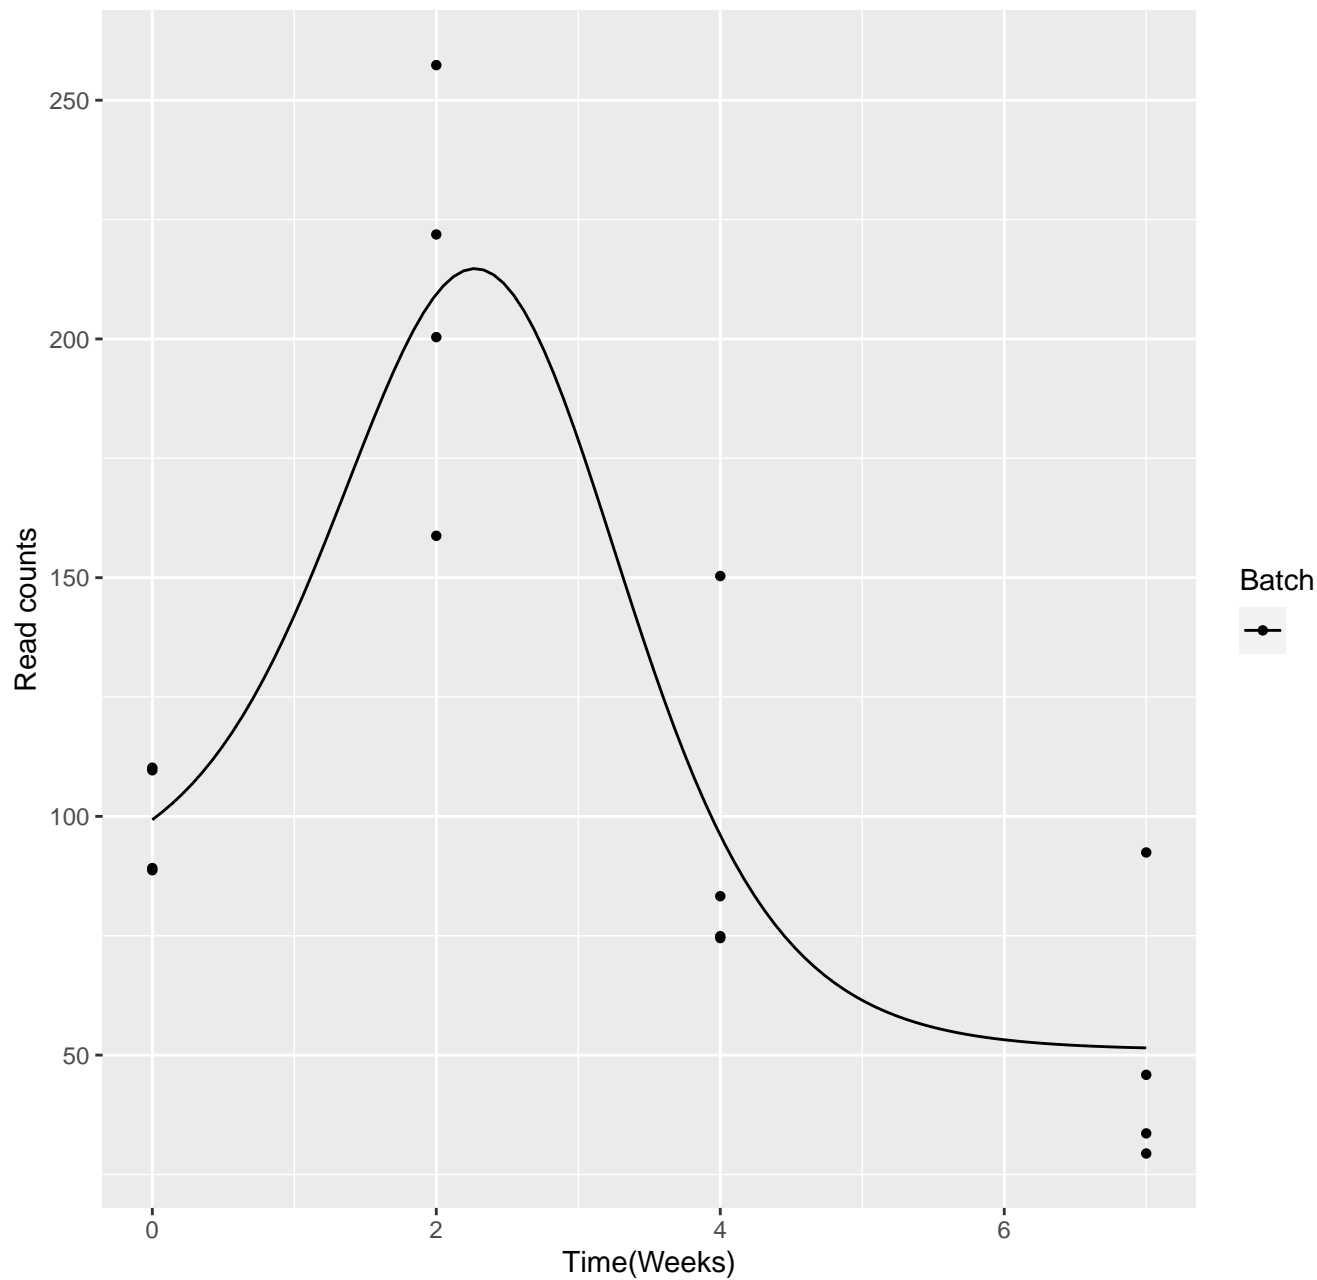

GIMAP1:  $\log_{10} q = -4.81$

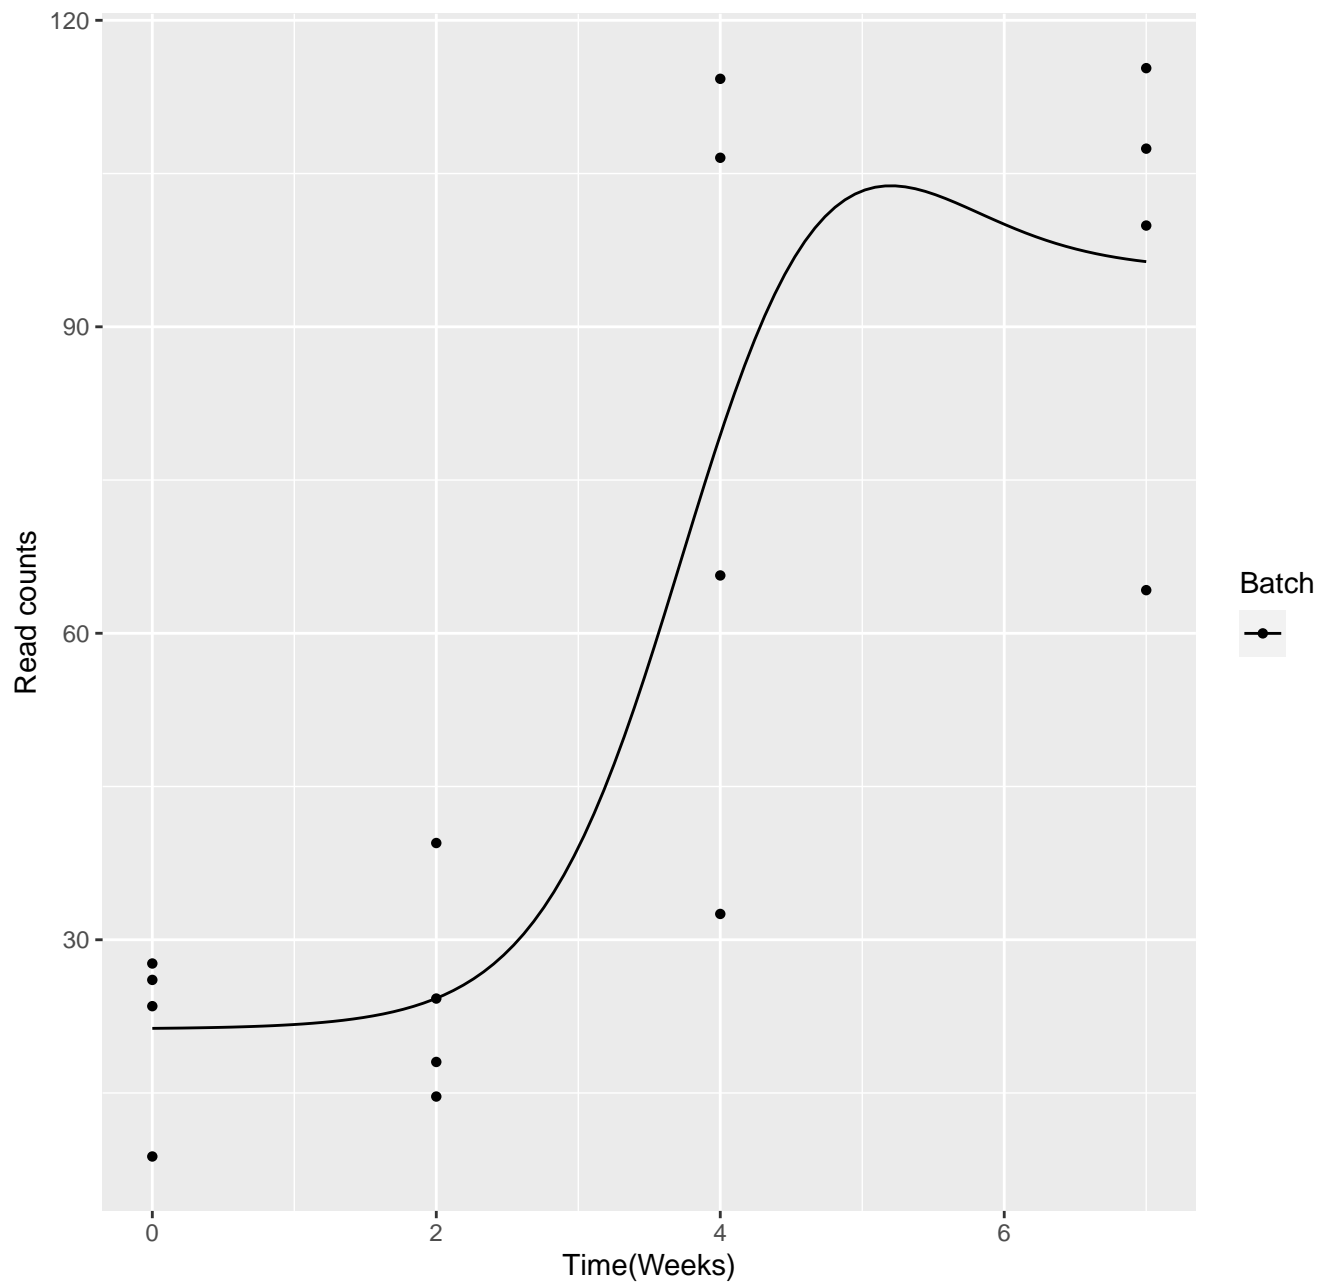

HPSE2:  $\log_{10} q = -4.81$

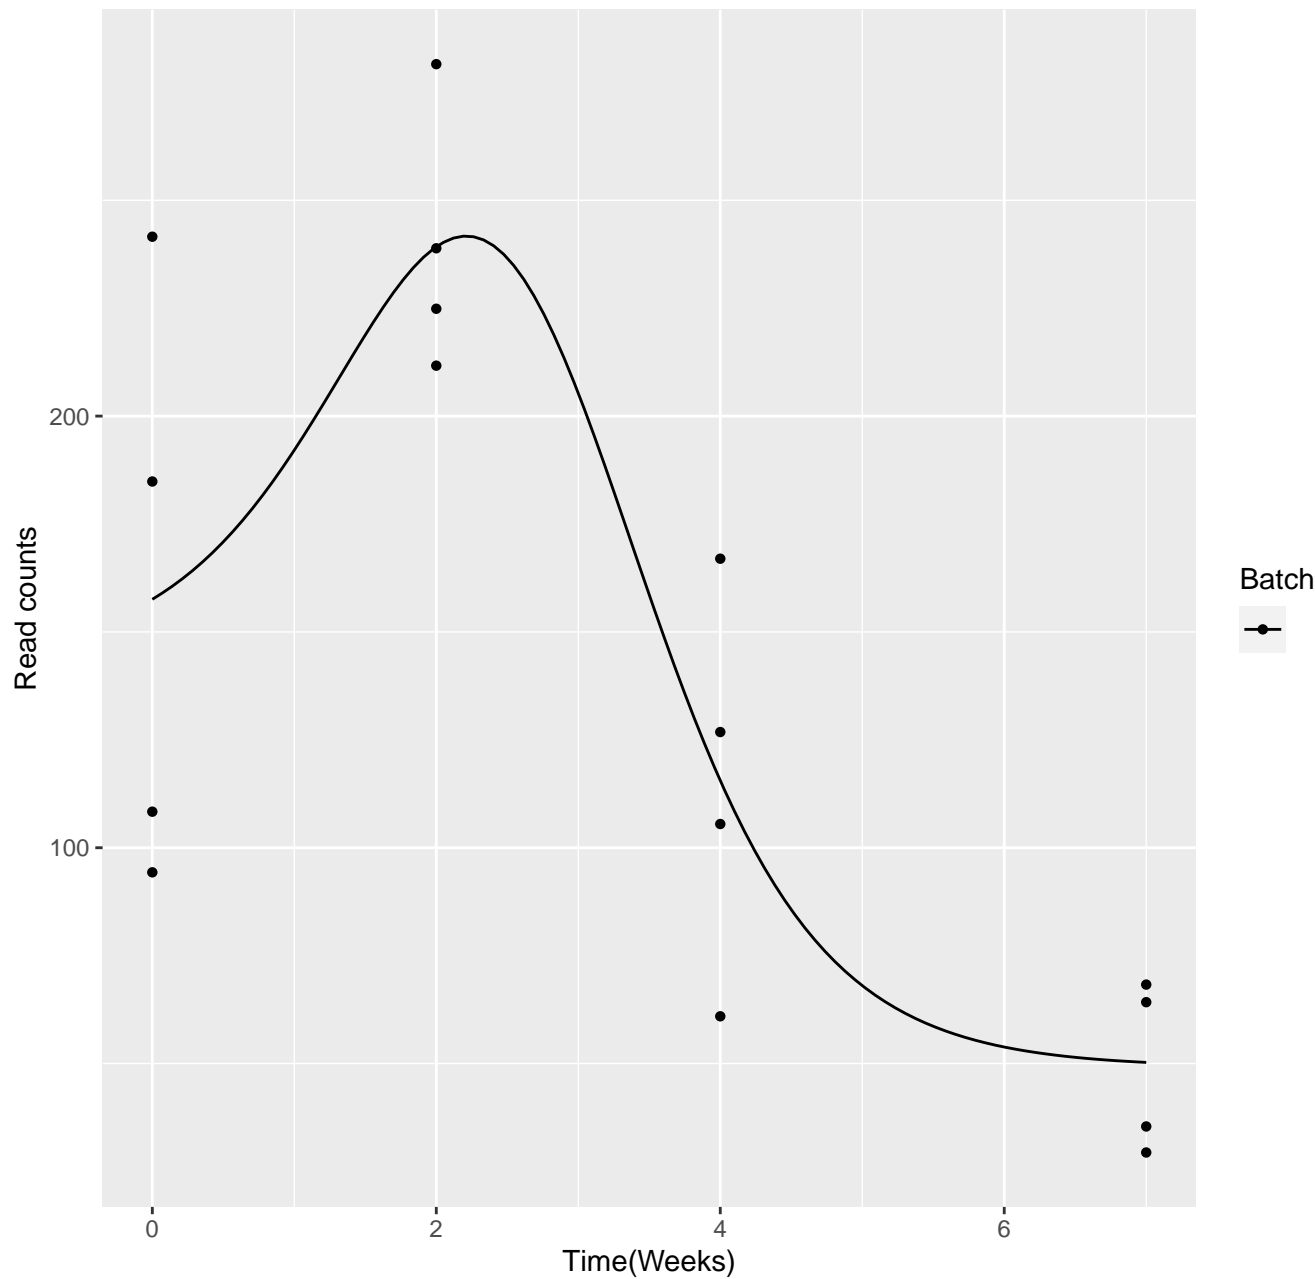

LYN:  $\log_{10} q = -4.8$

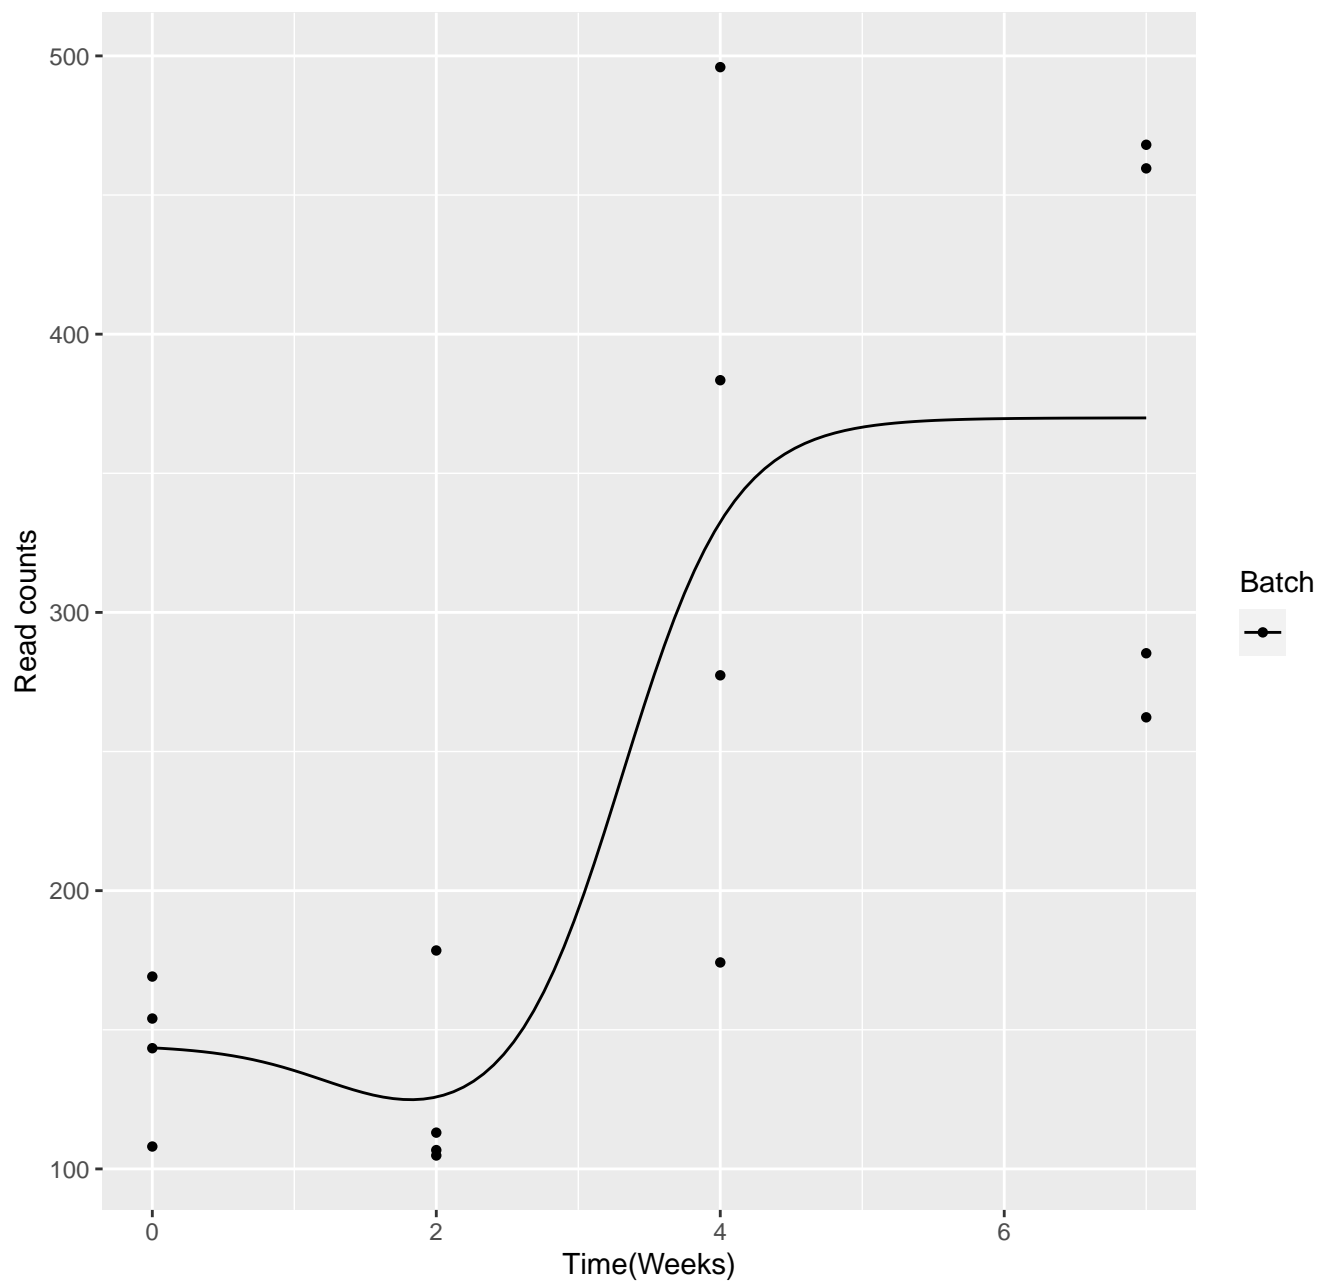

LOC108177670:  $\log_{10} q = -4.8$

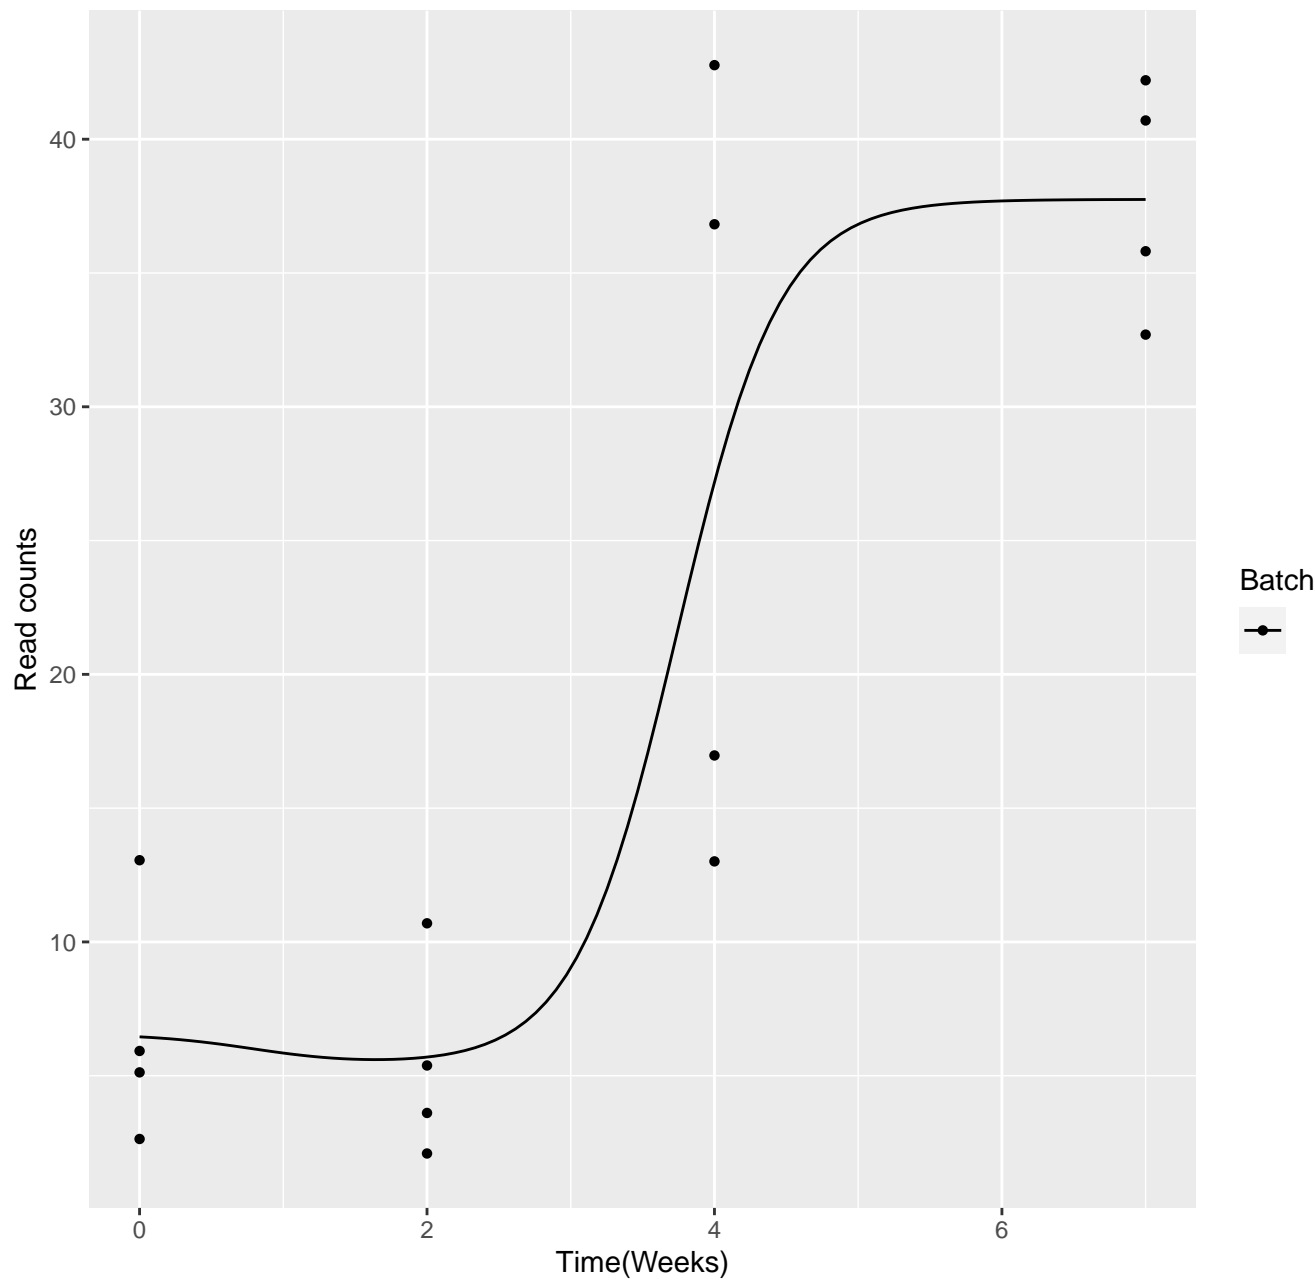

FGL1:  $\log_{10} q = -4.79$

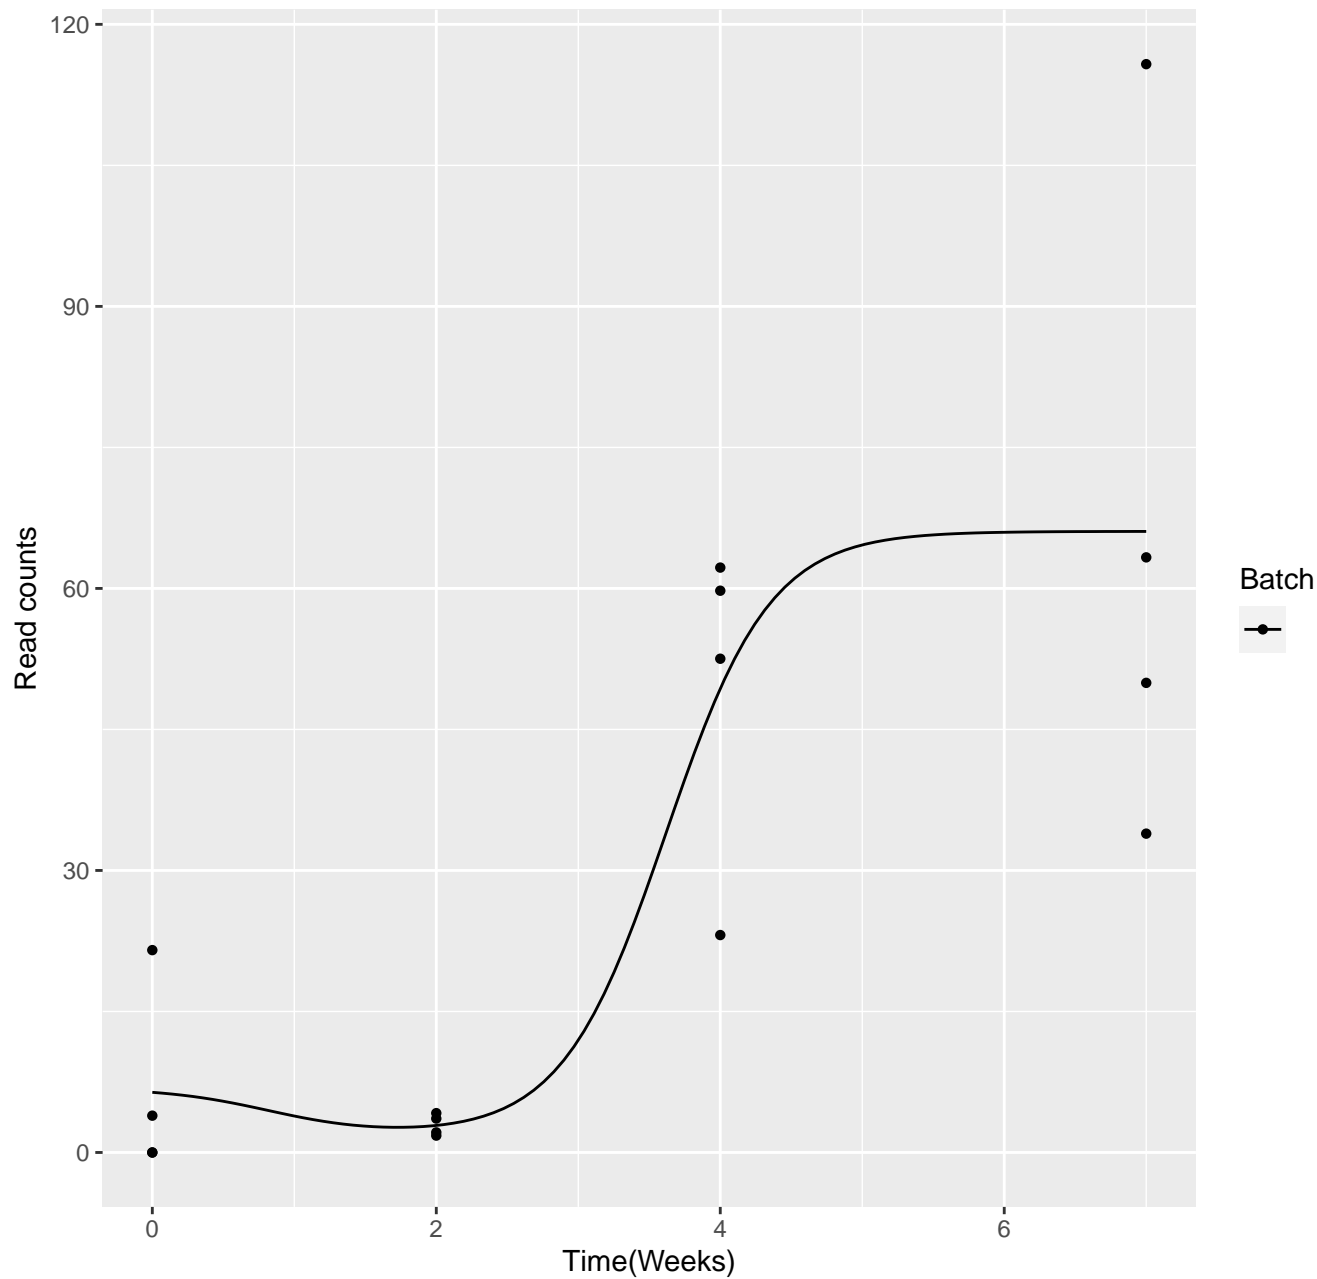

LOC127482788:  $\log_{10} q = -4.78$

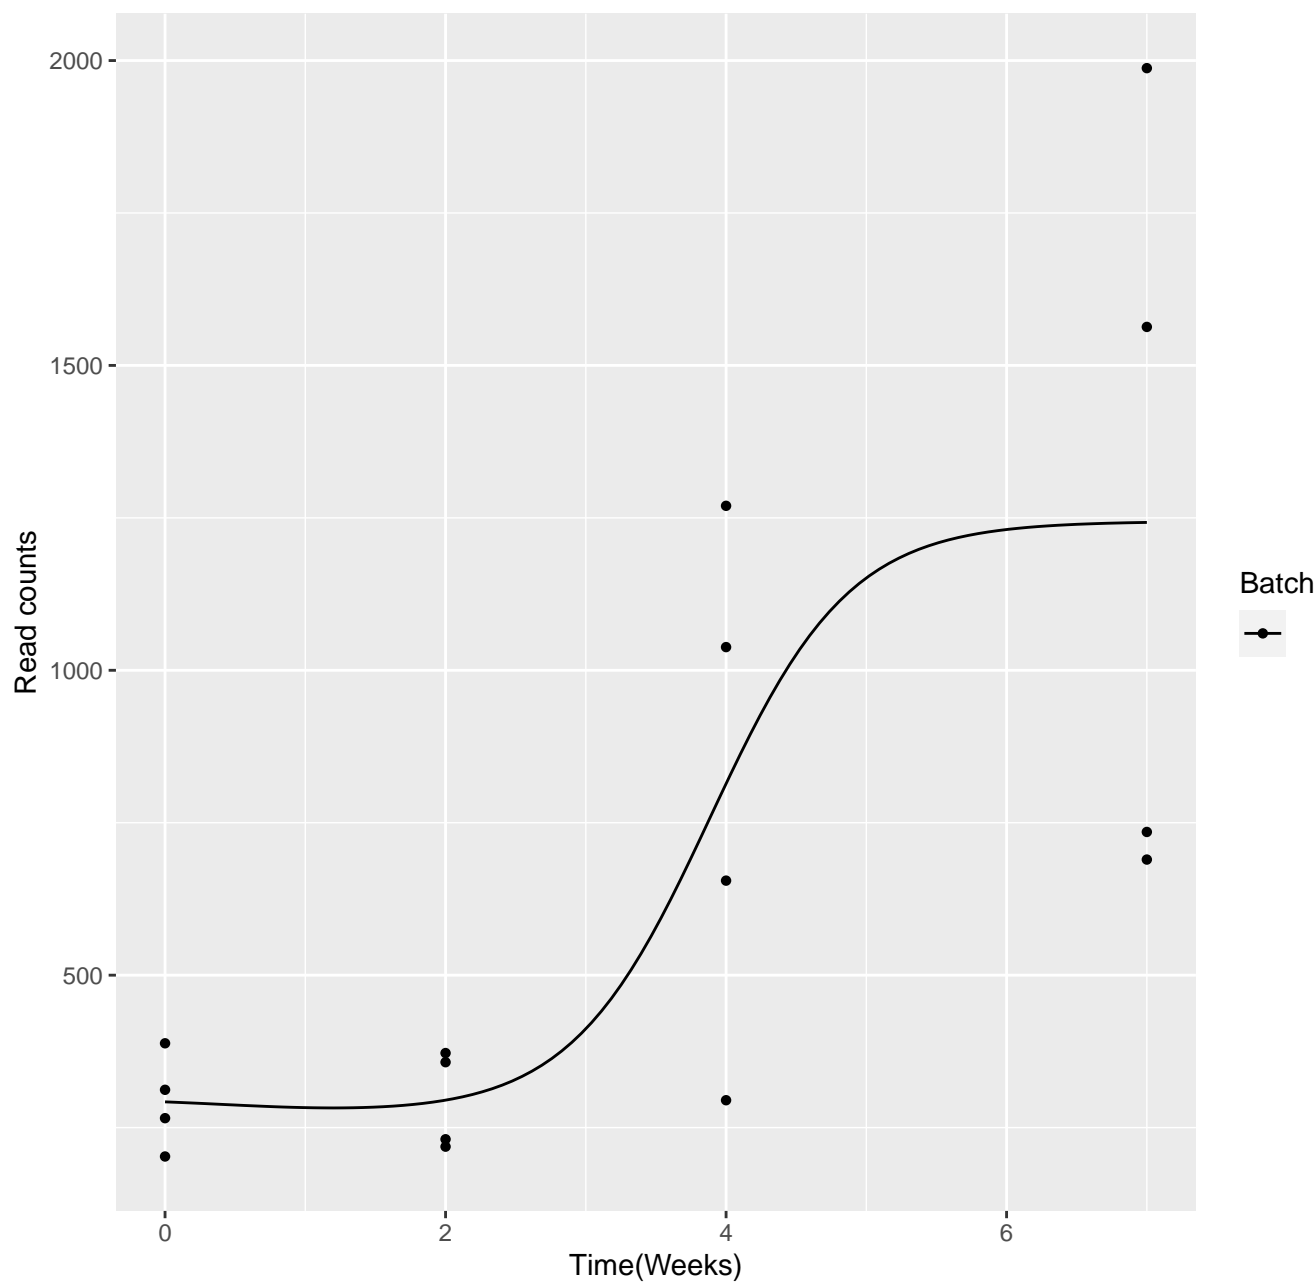



WDFY4:  $\log_{10} q = -4.78$

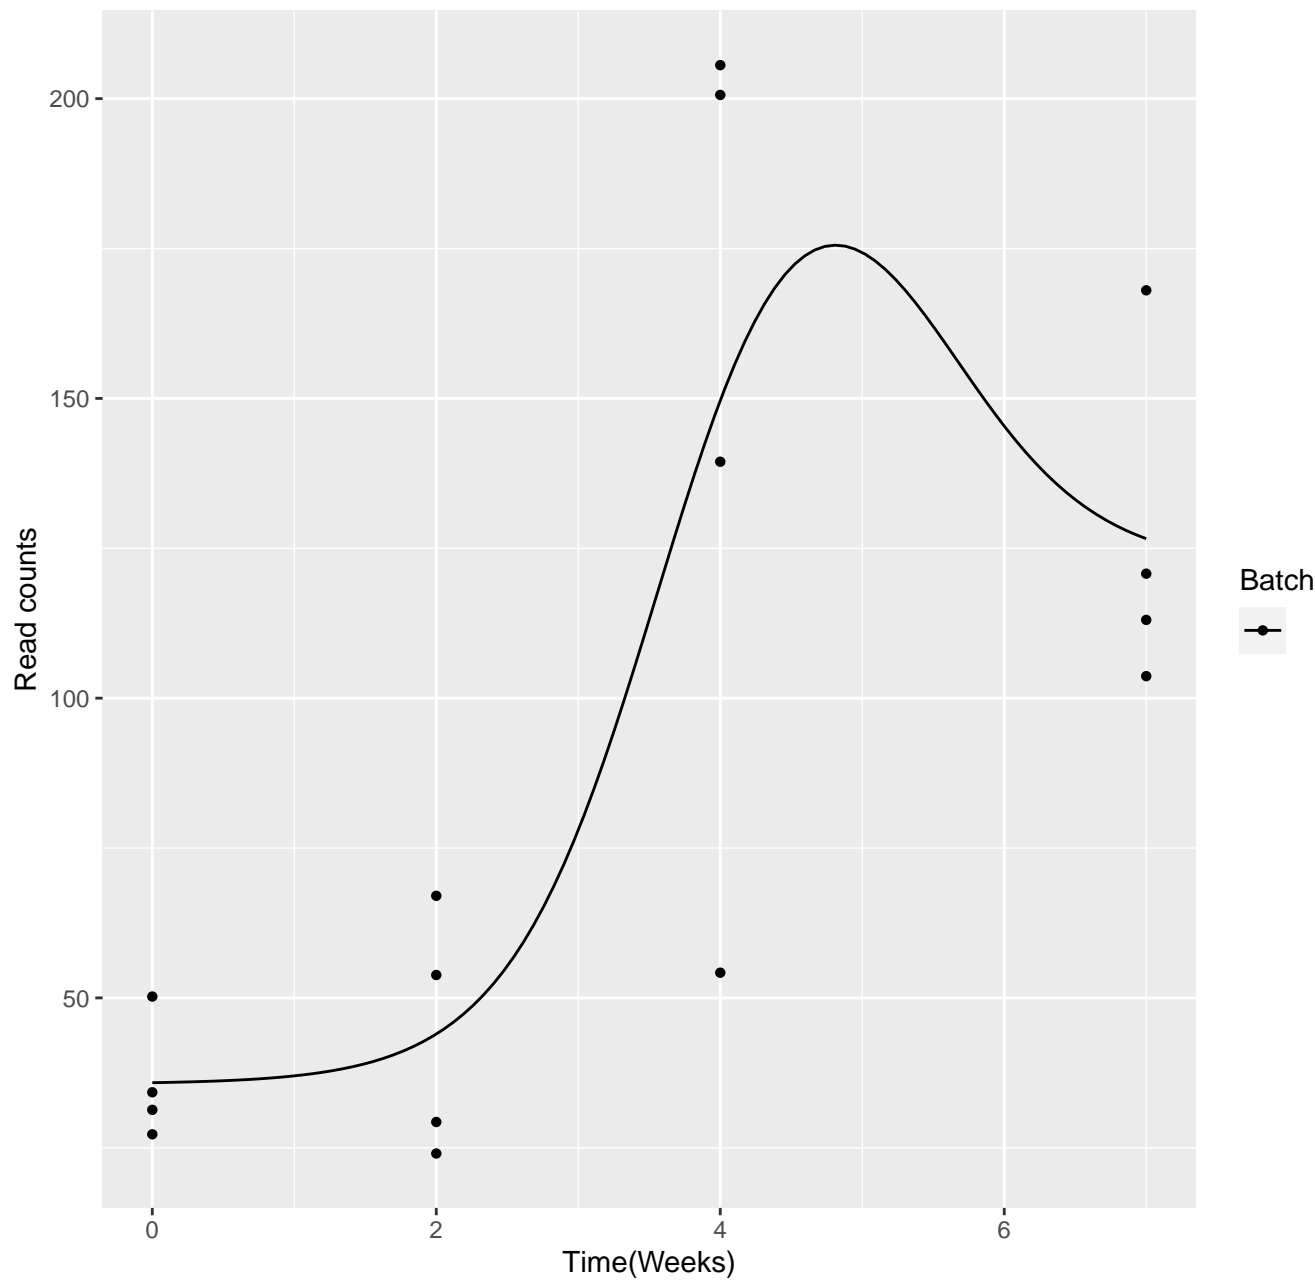

CCL22:  $\log_{10} q = -4.78$

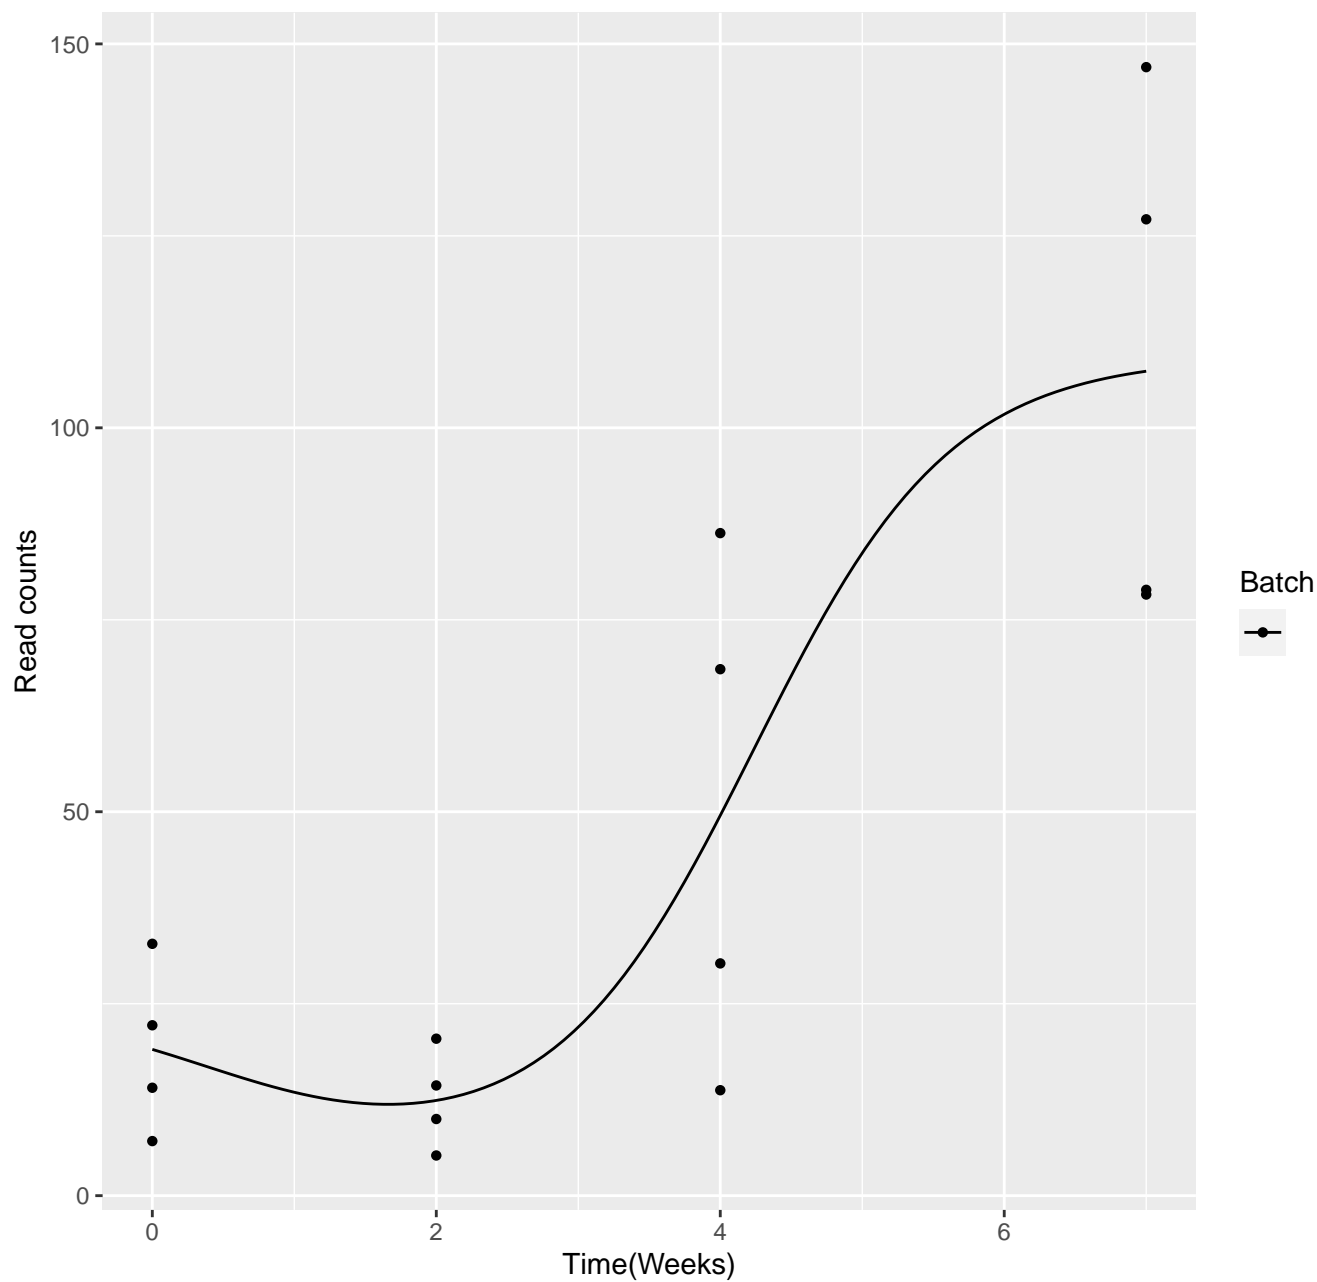

LOC100348711:  $\log_{10} q = -4.77$

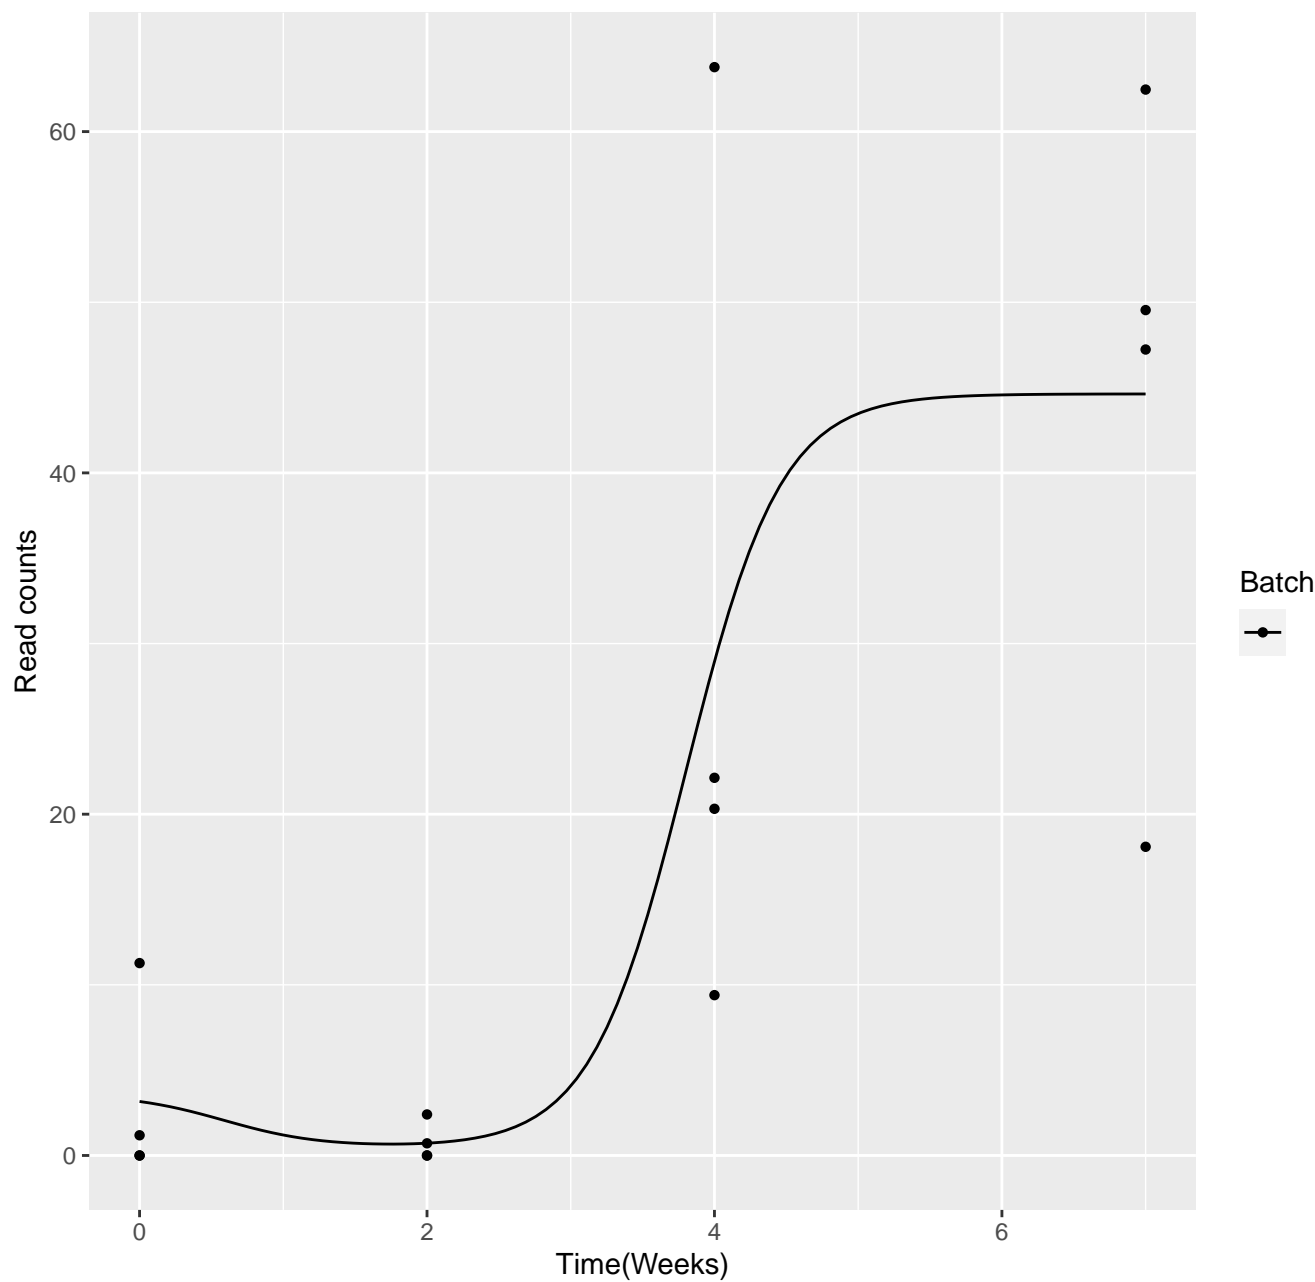

PER2:  $\log_{10} q = -4.76$

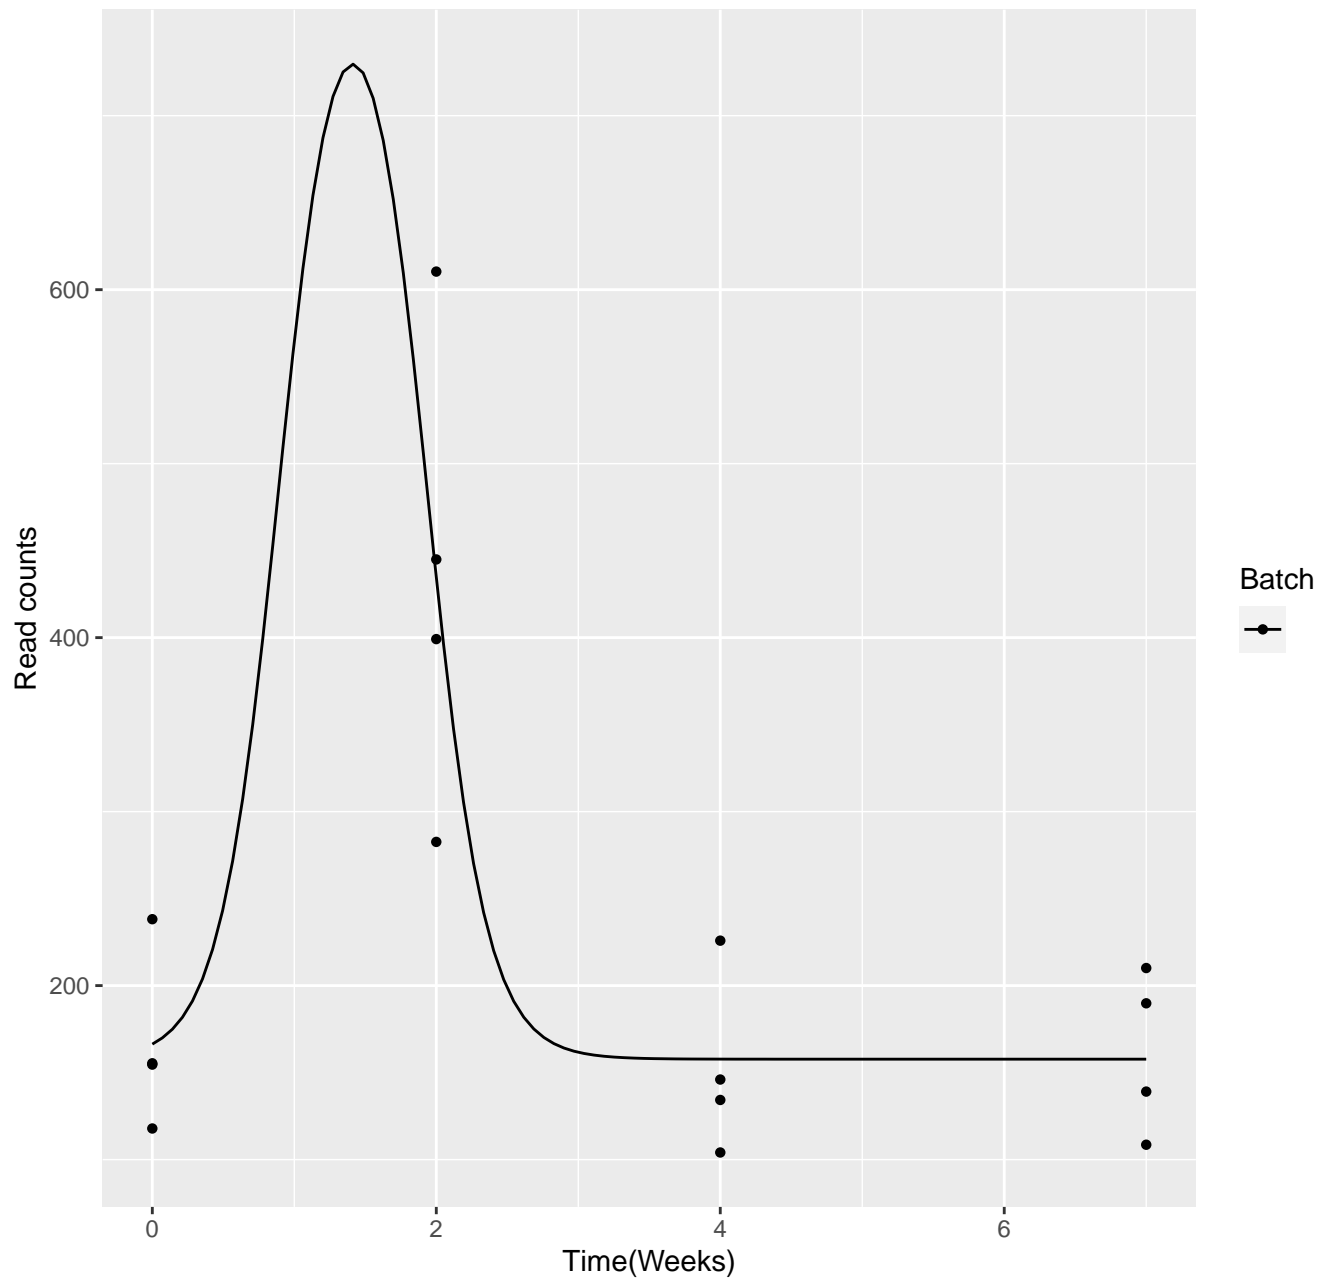

TRPM1:  $\log_{10} q = -4.76$

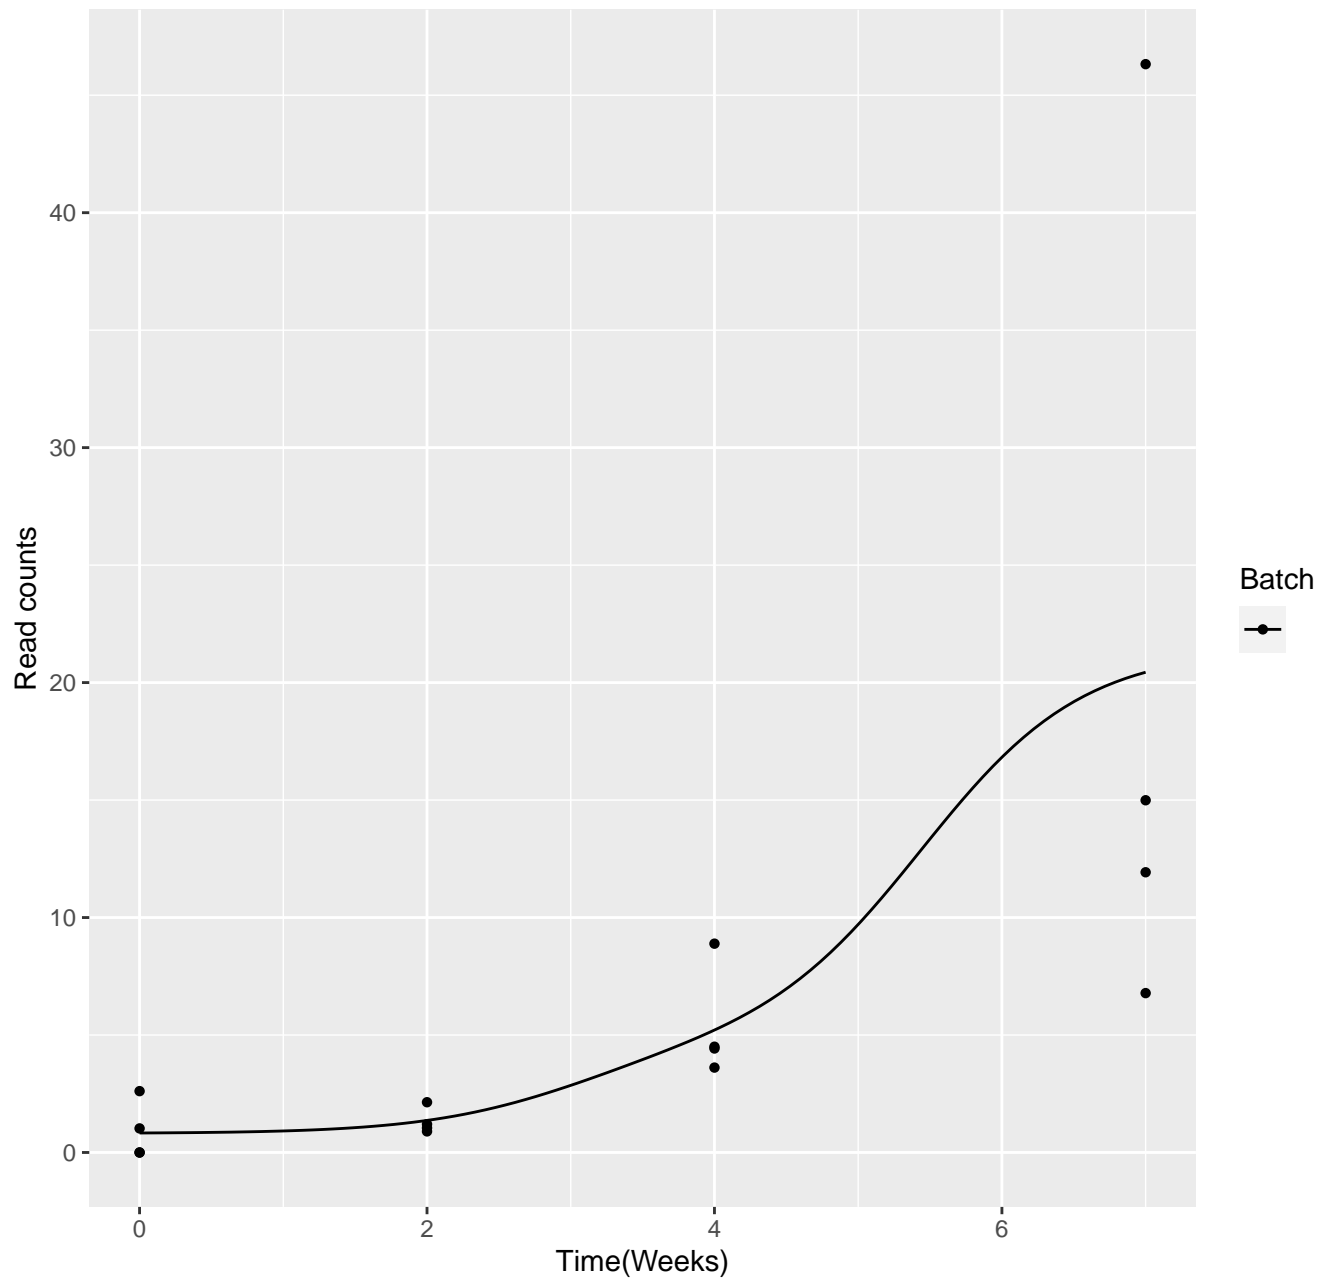

ALAS2:  $\log_{10} q = -4.76$

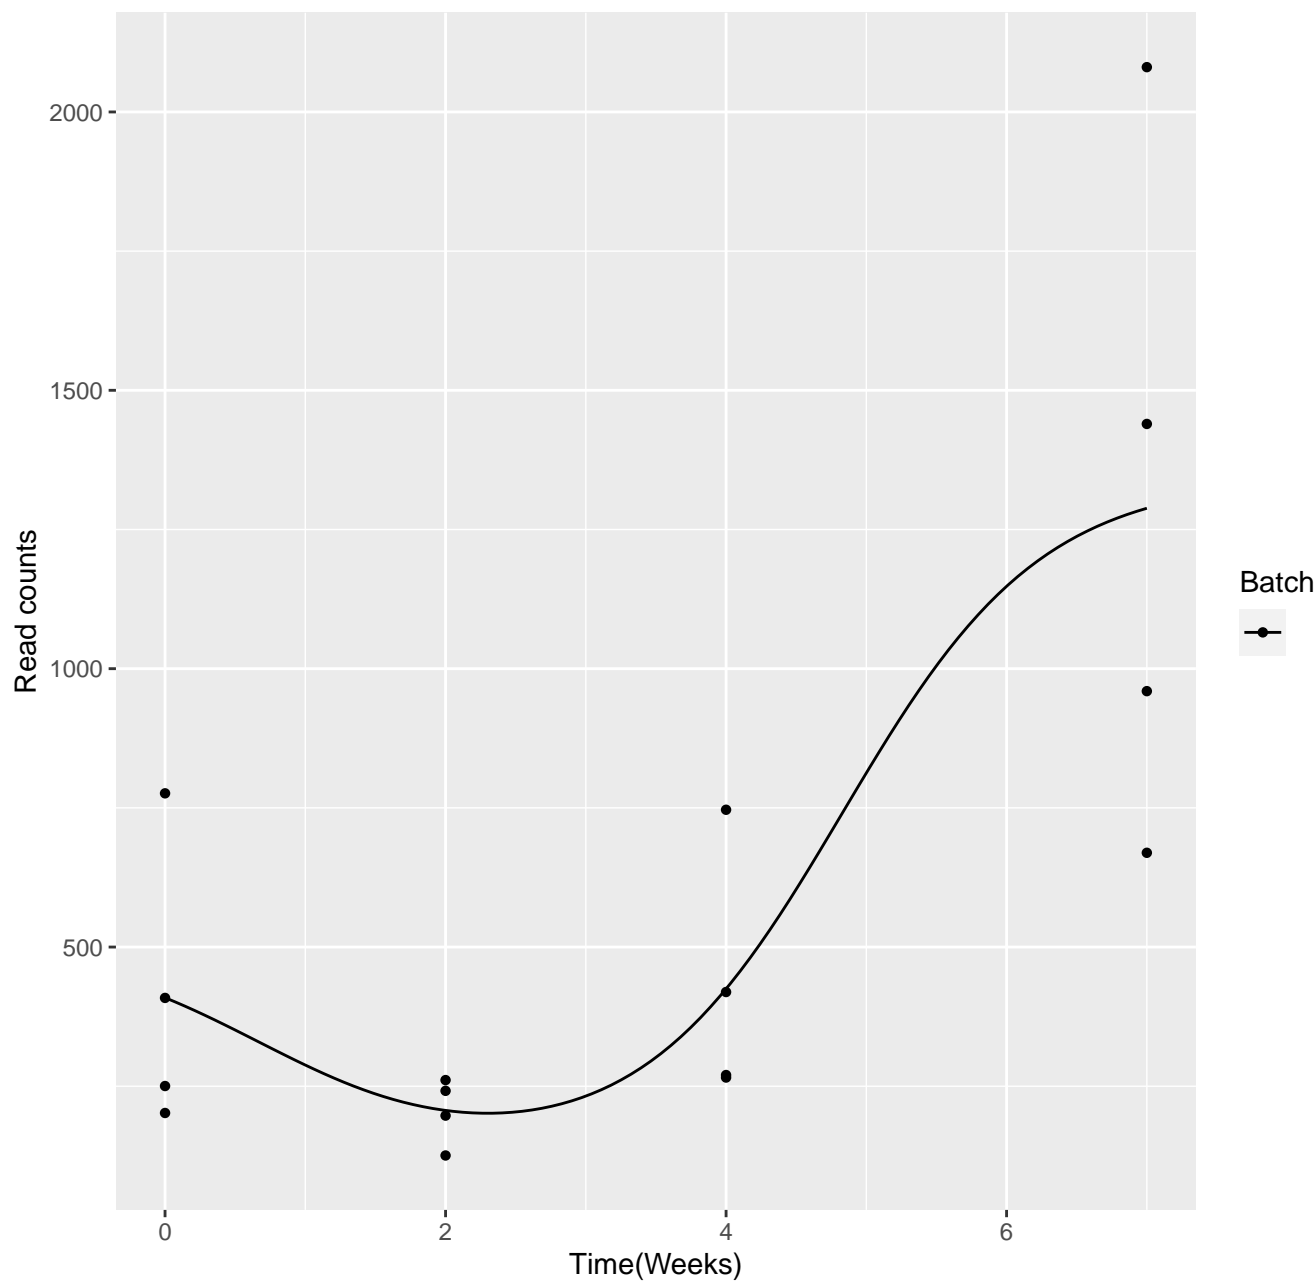

SERPINE1:  $\log_{10} q = -4.76$

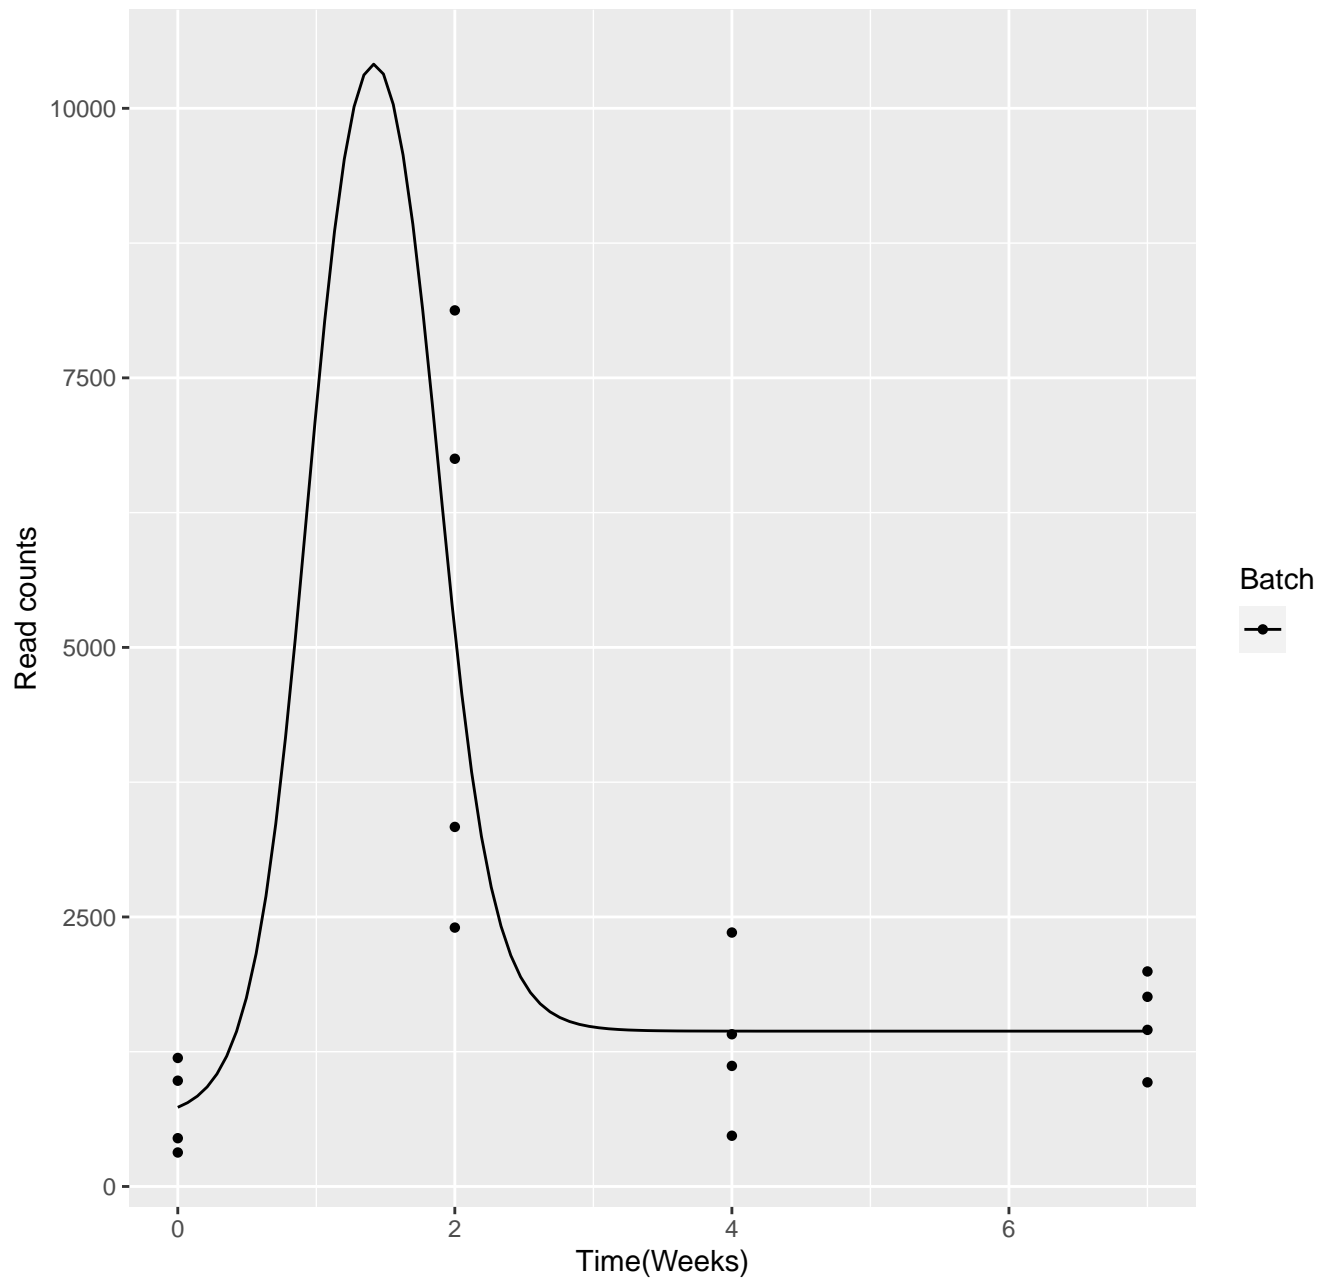

GLS:  $\log_{10} q = -4.75$

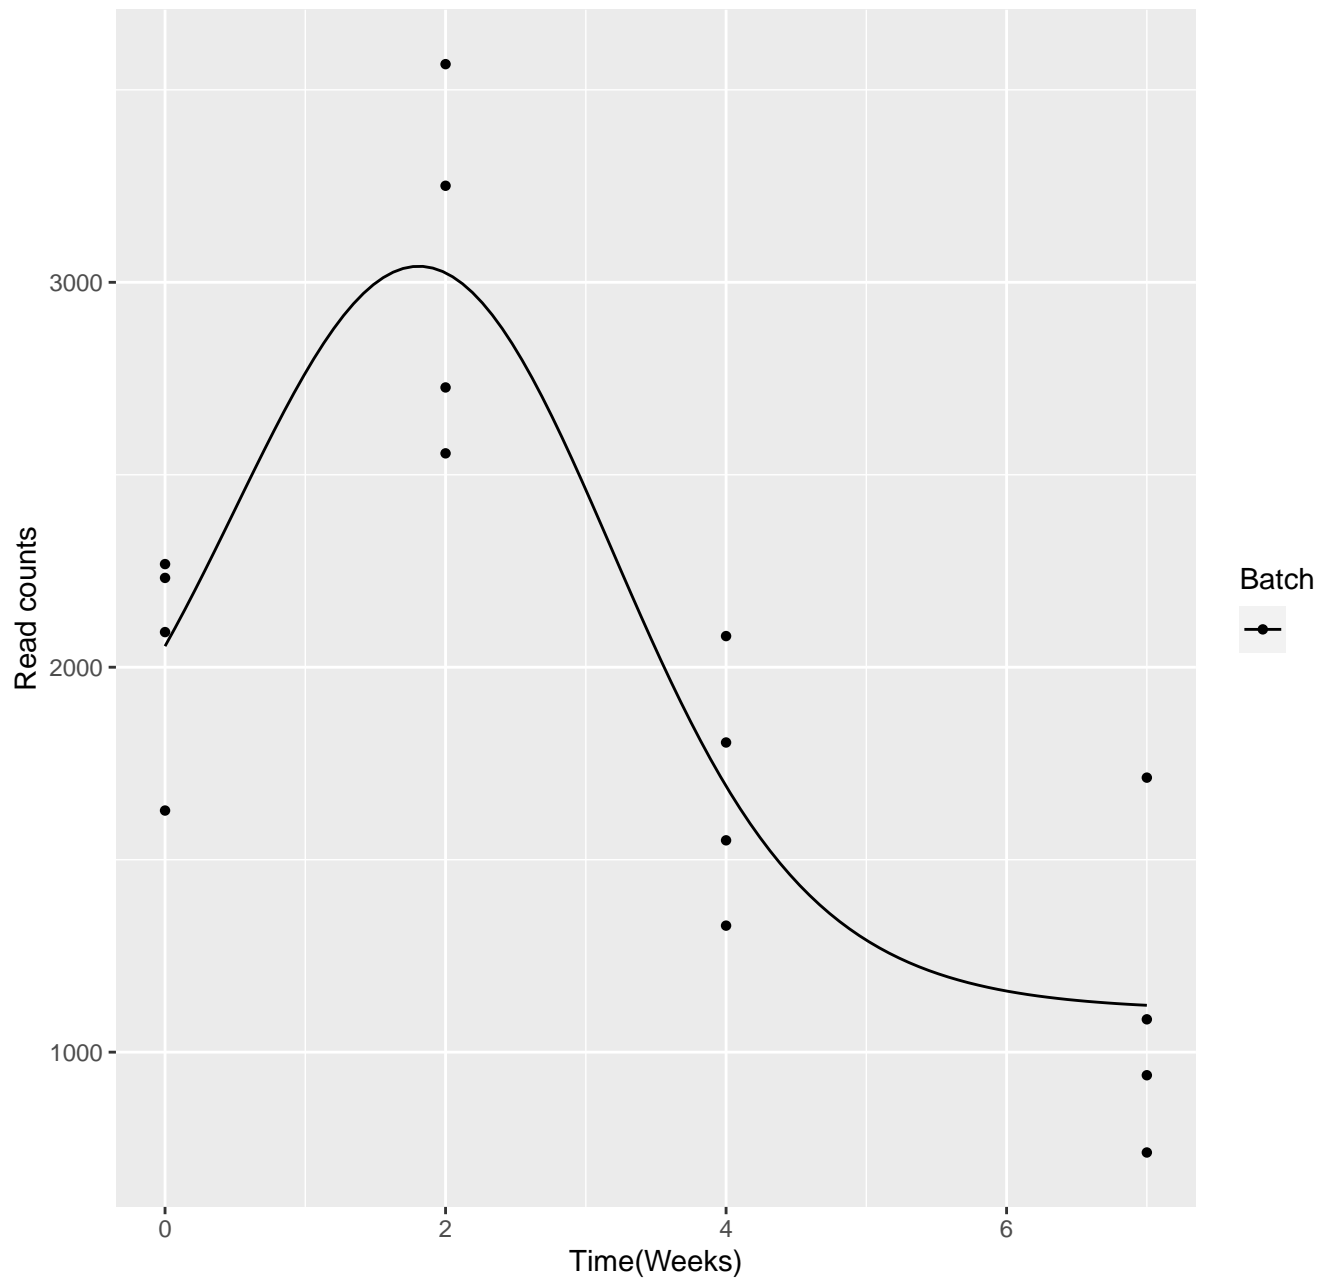



TRIM14:  $\log_{10} q = -4.75$

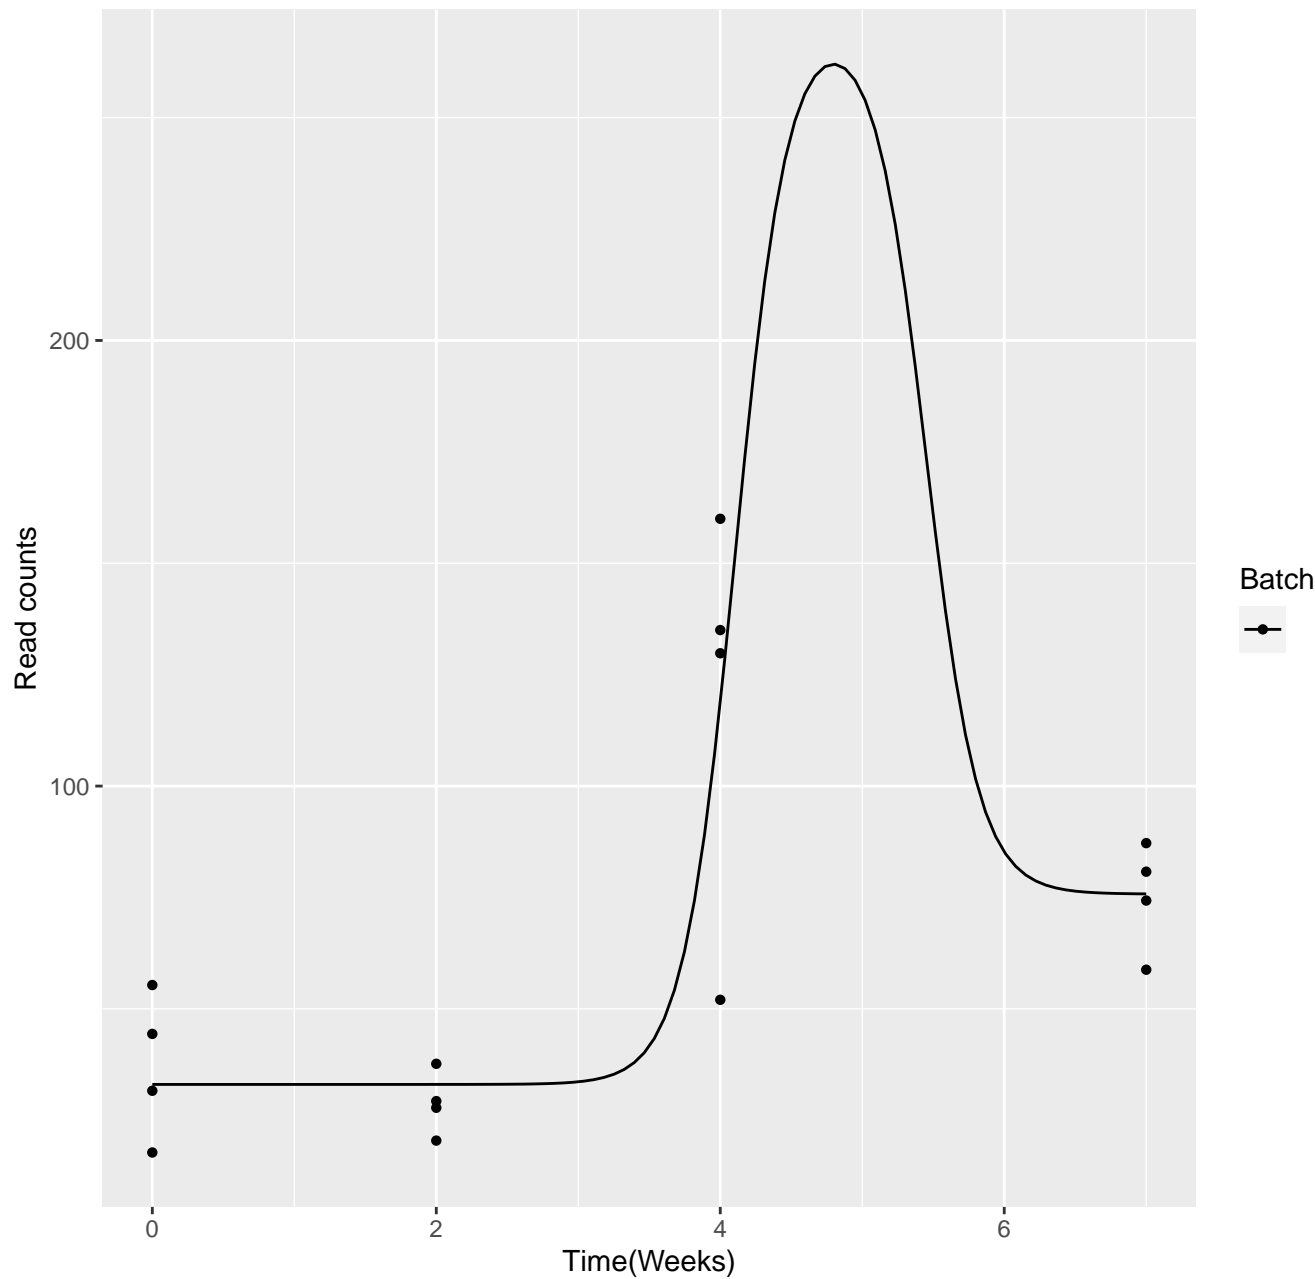

APOBR:  $\log_{10} q = -4.75$

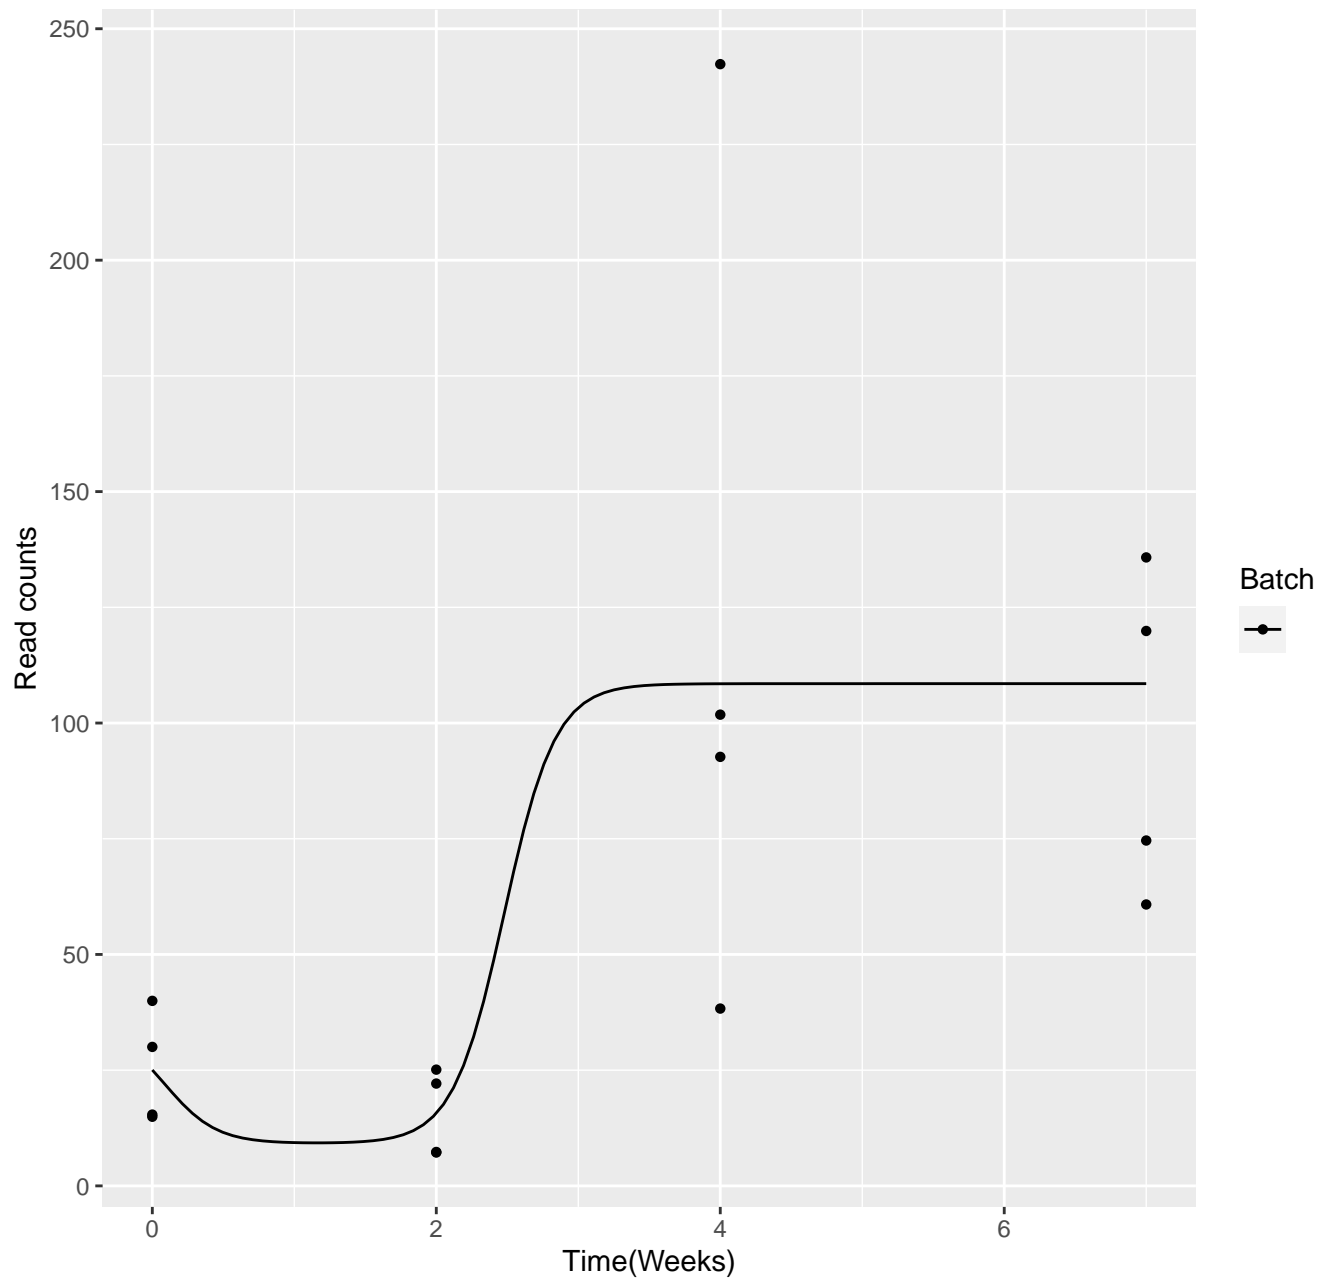

DSTN:  $\log_{10} q = -4.75$

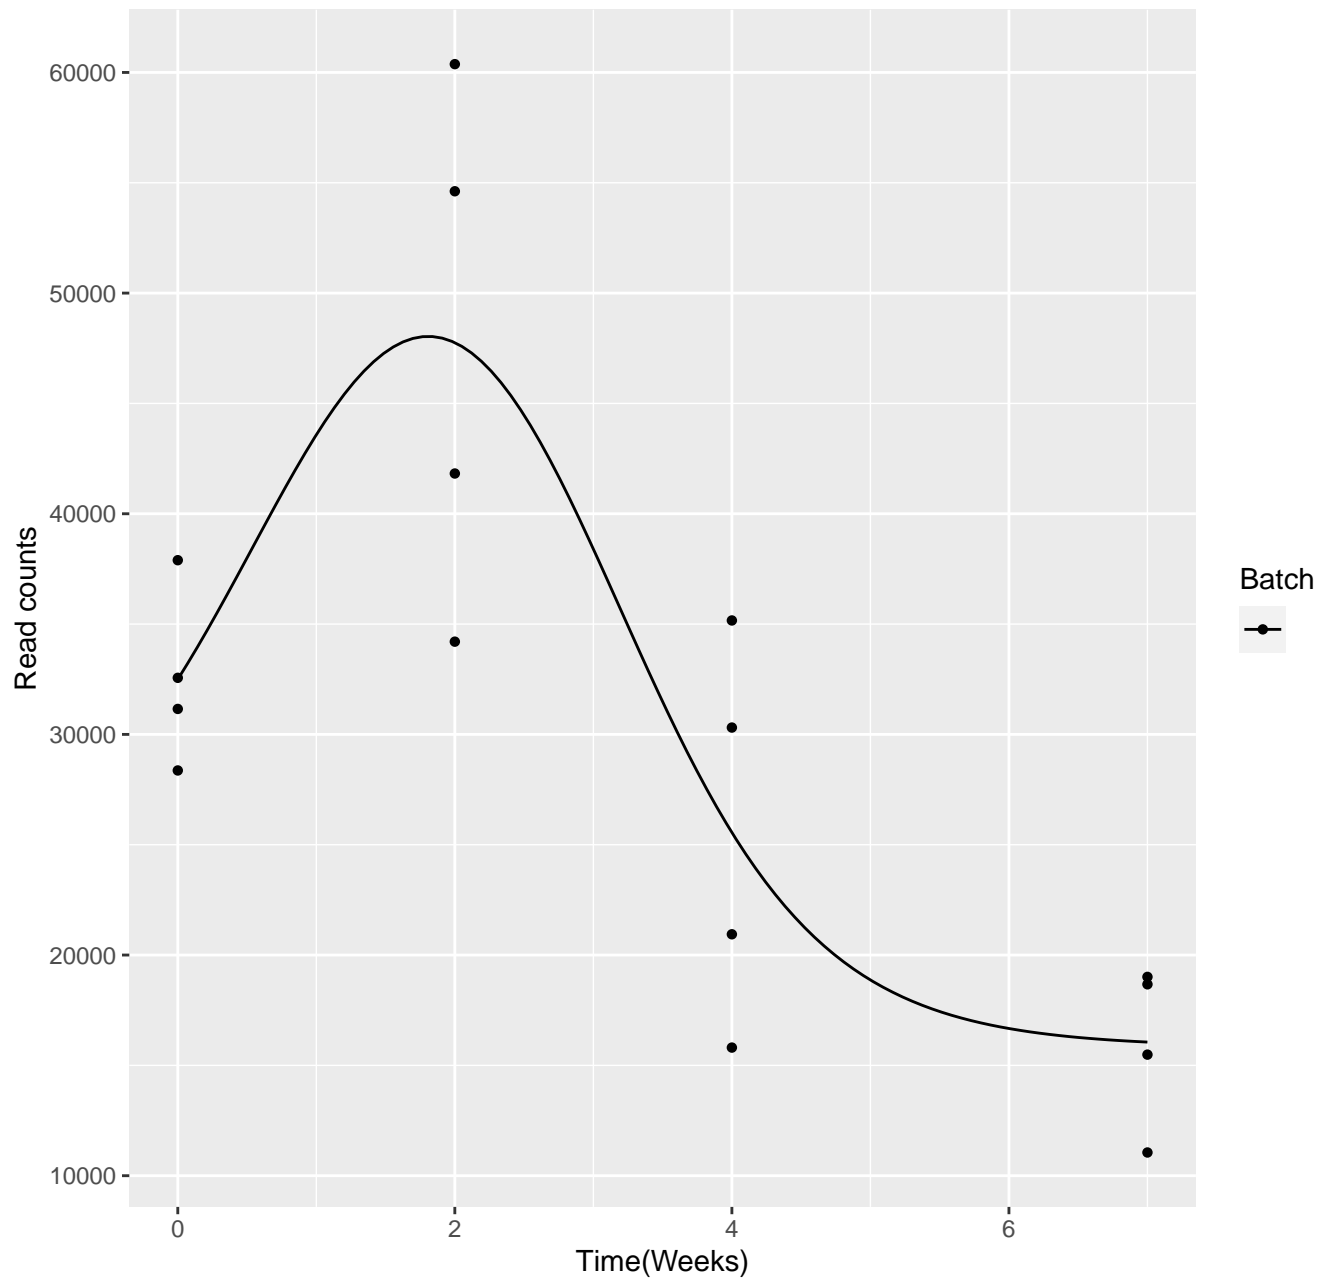

CHN2:  $\log_{10} q = -4.74$

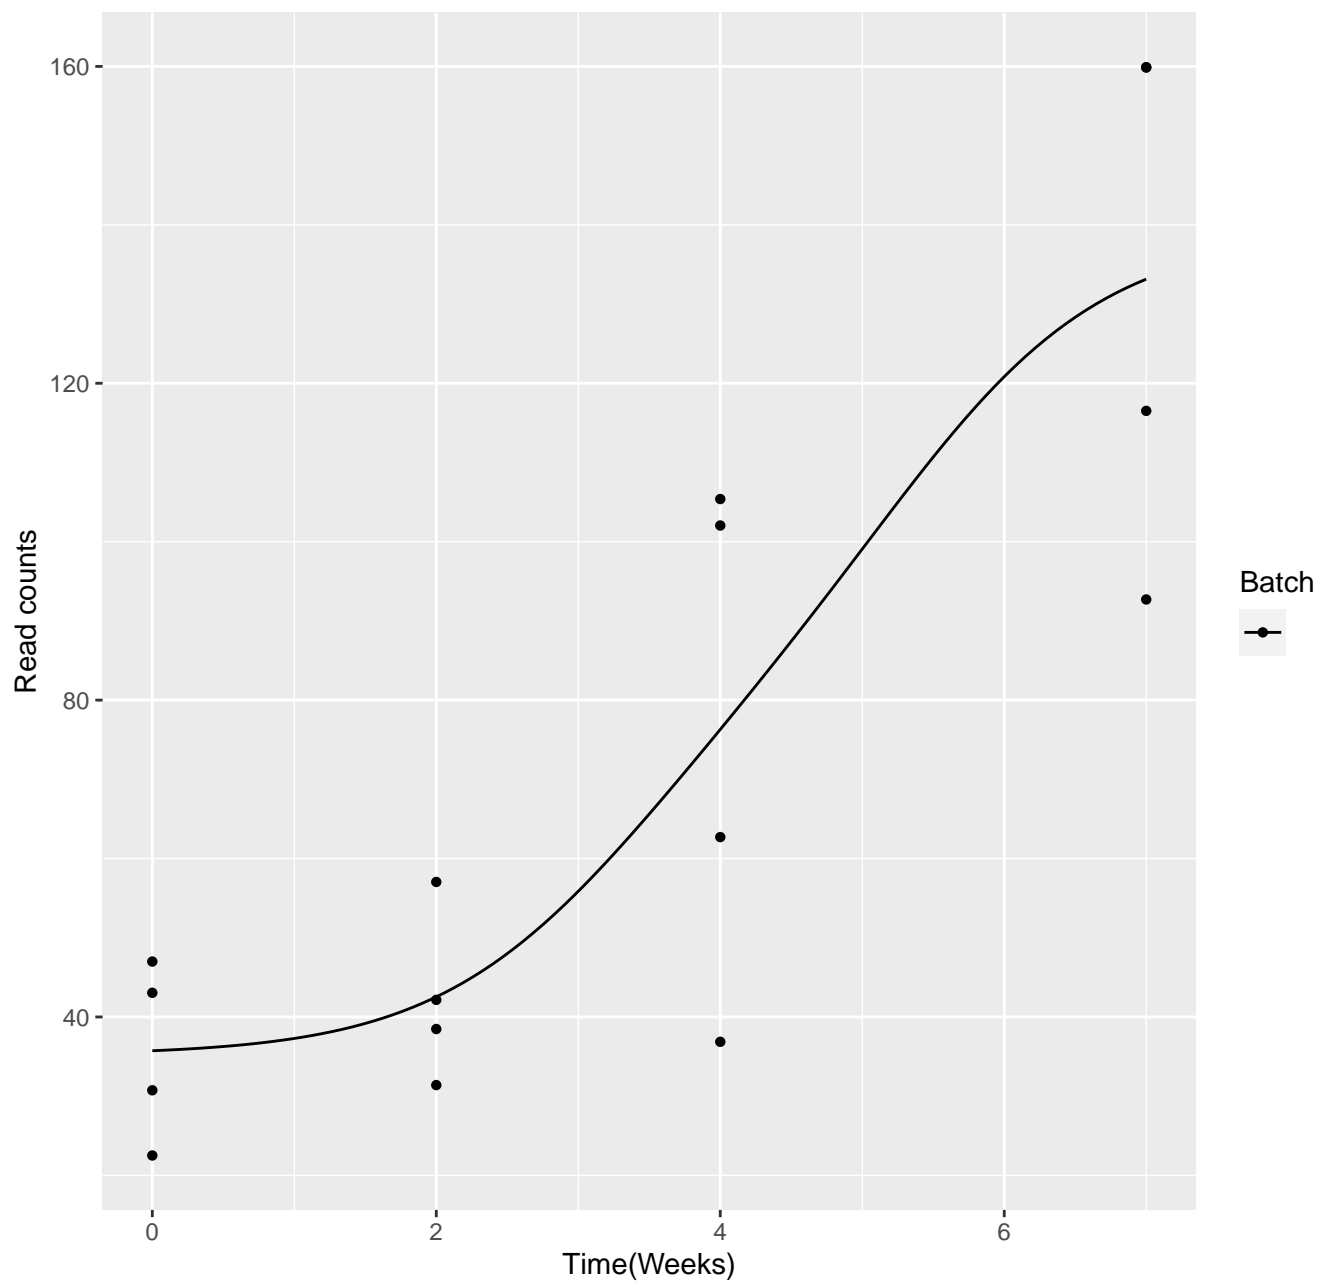

COL21A1:  $\log_{10} q = -4.74$

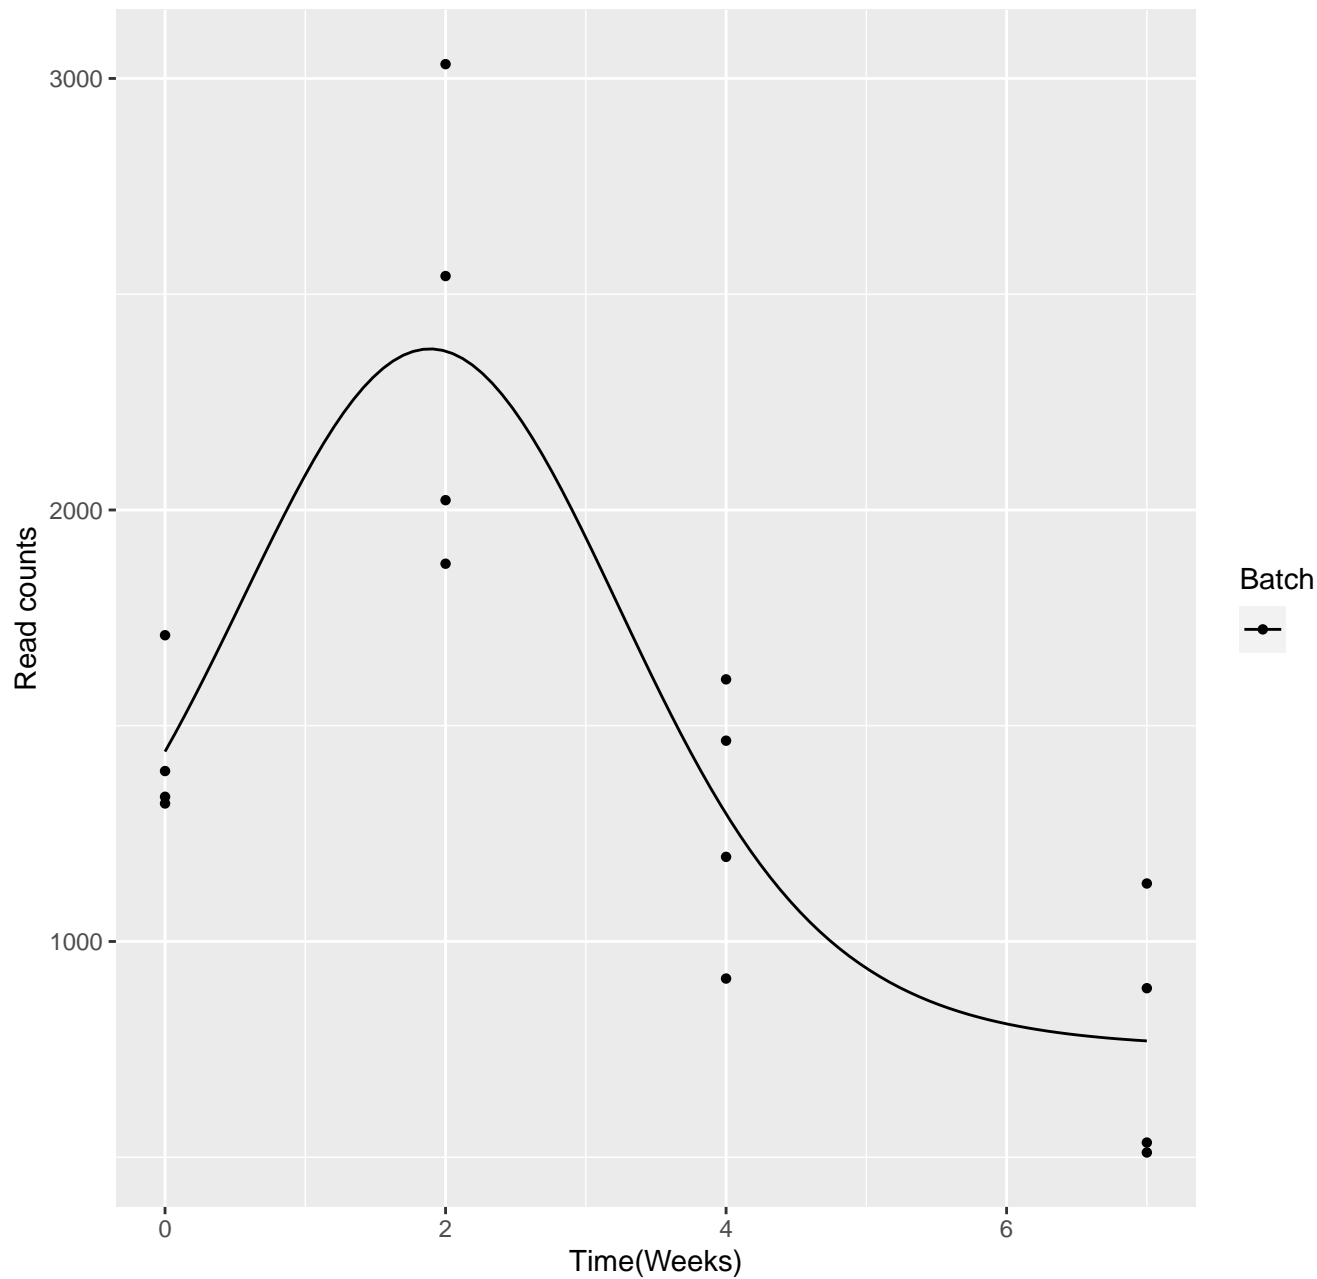

PRSS35:  $\log_{10} q = -4.73$

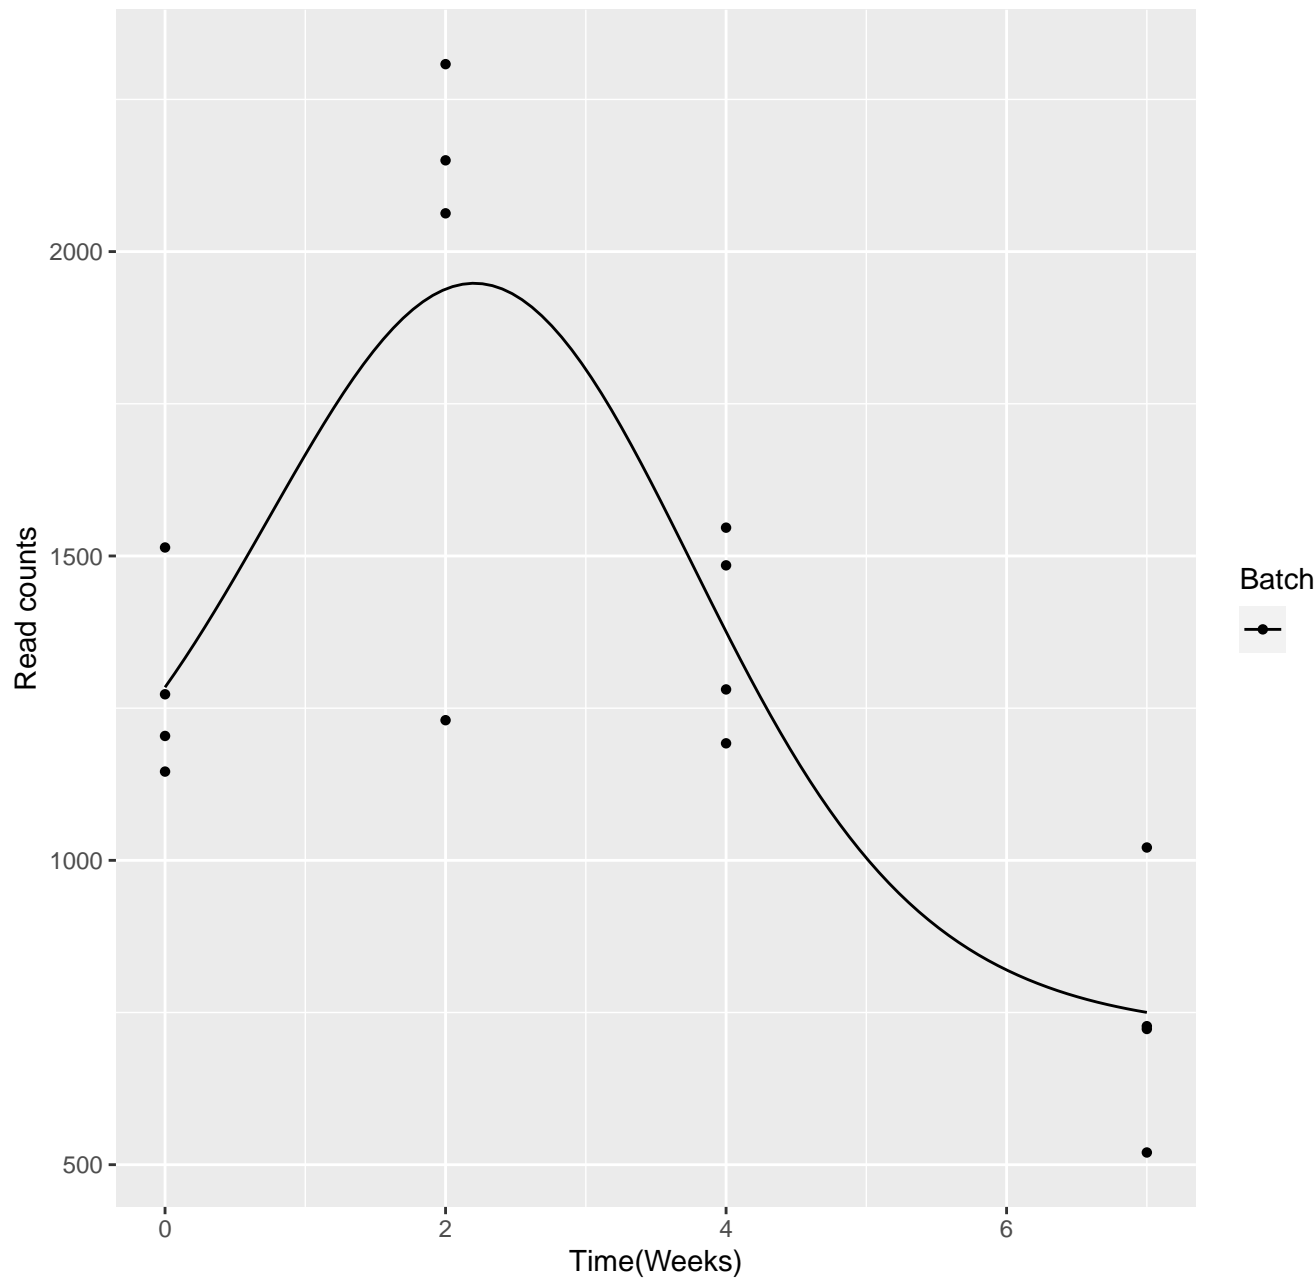

LOC100338913:  $\log_{10} q = -4.72$

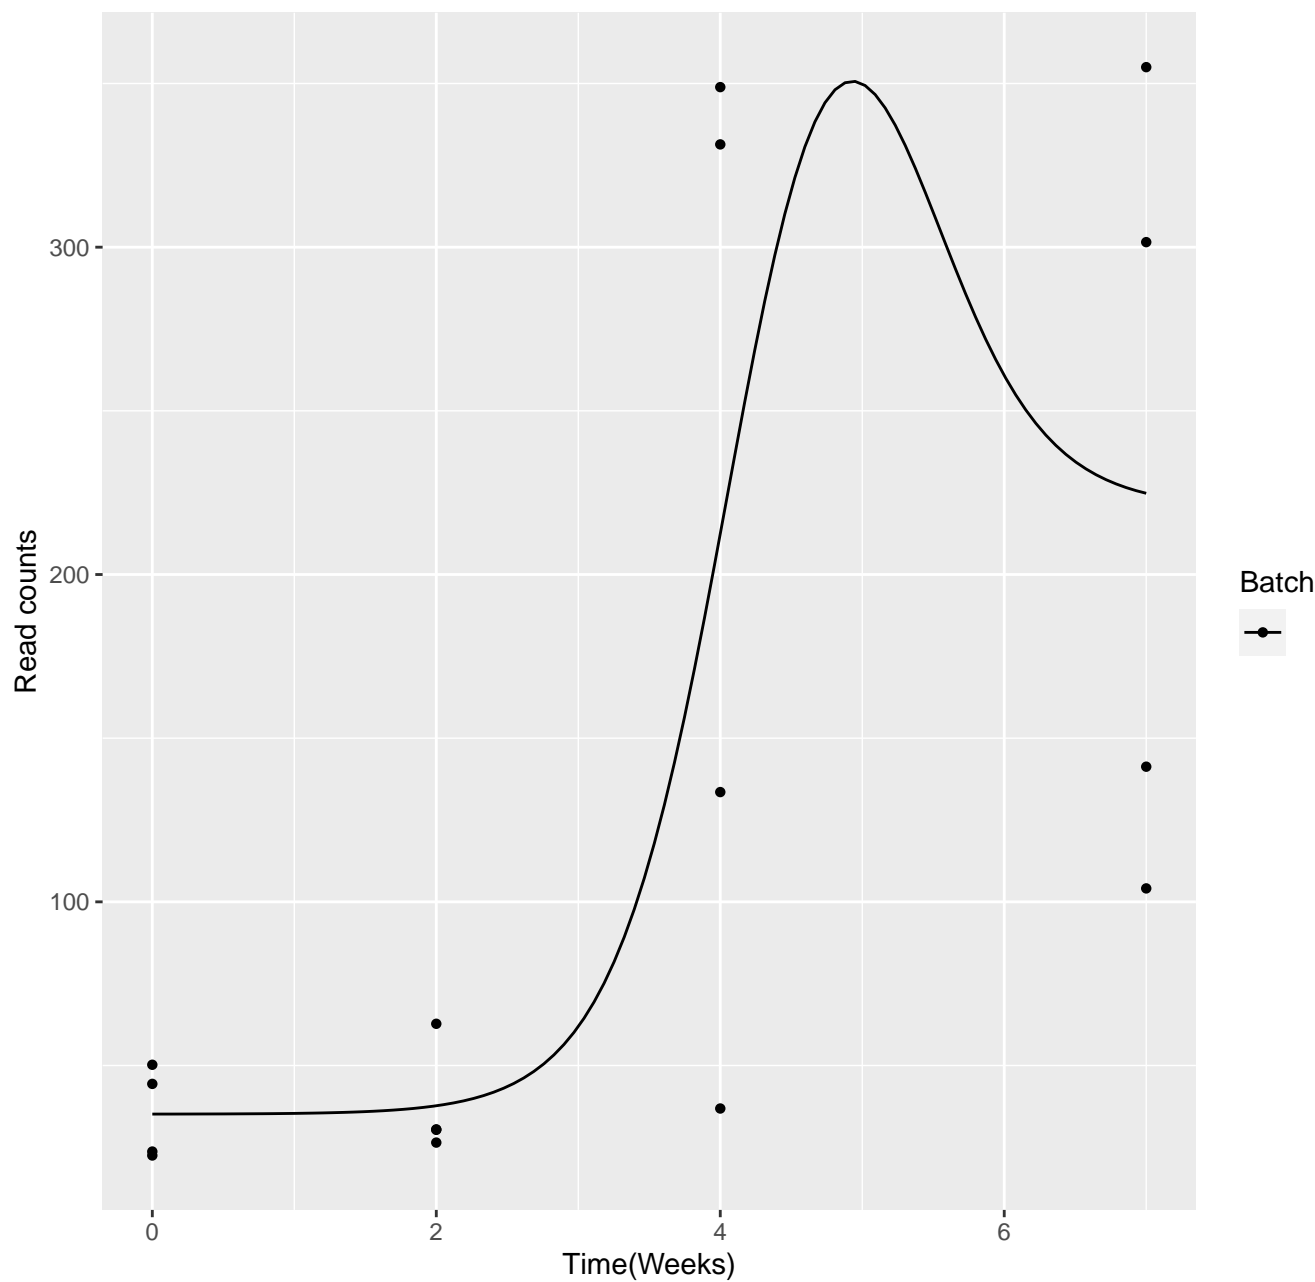

SLC38A5:  $\log_{10} q = -4.72$

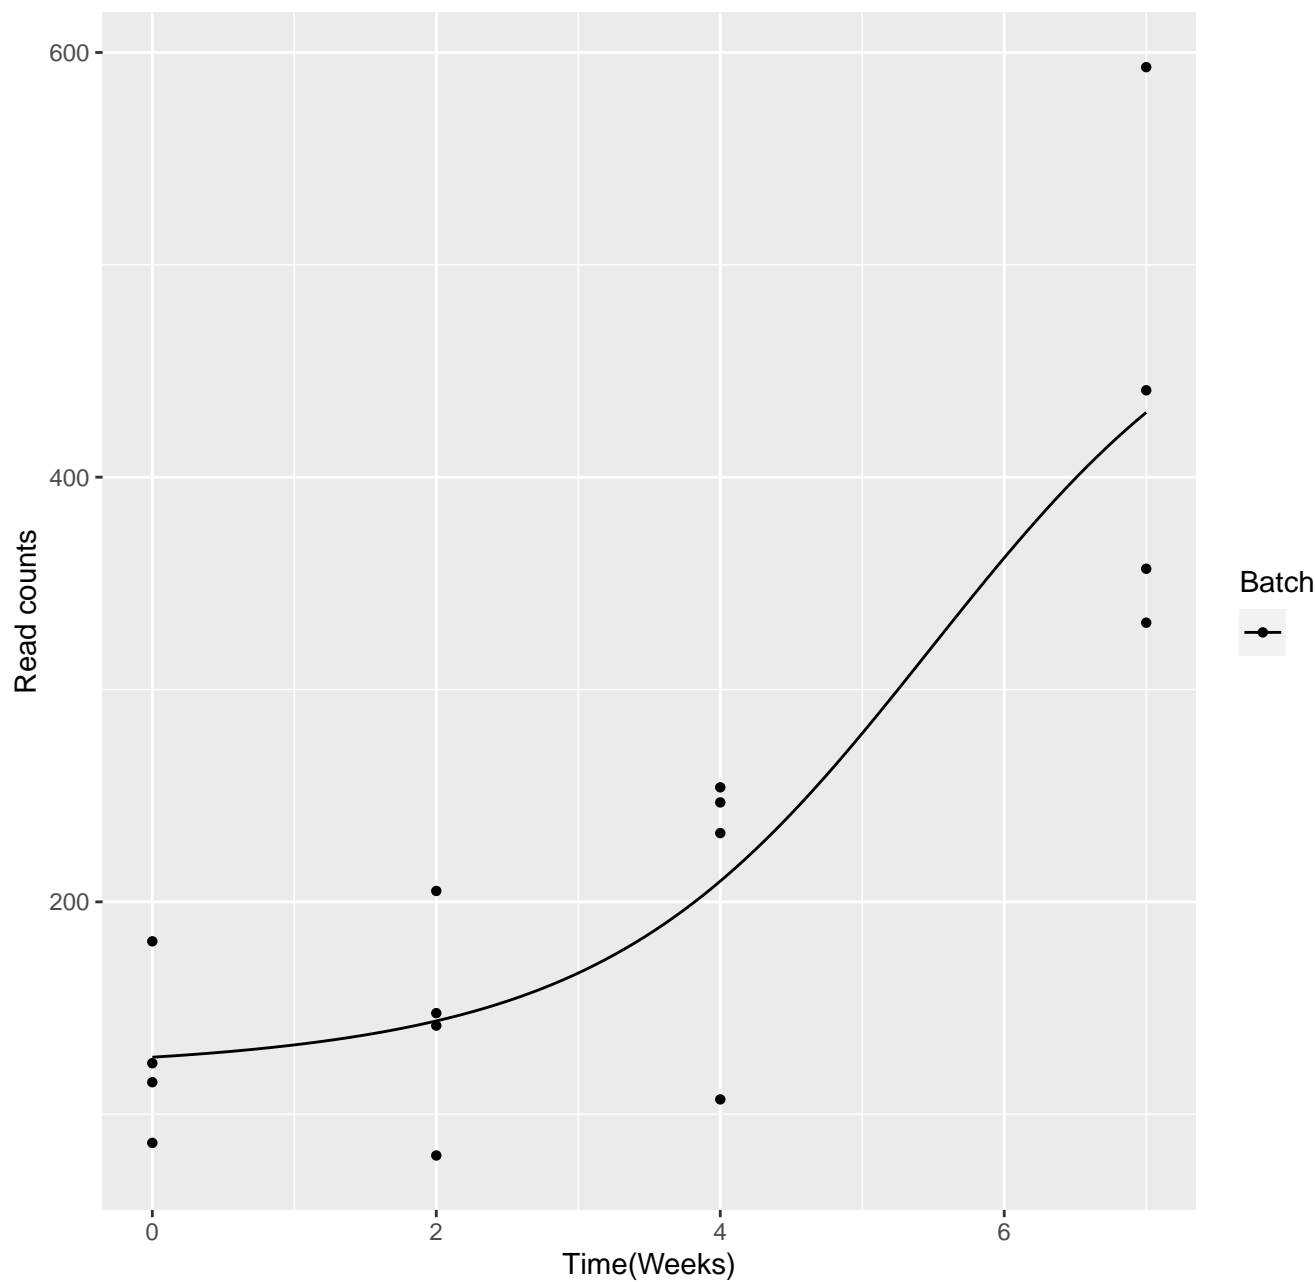



STS:  $\log_{10} q = -4.72$

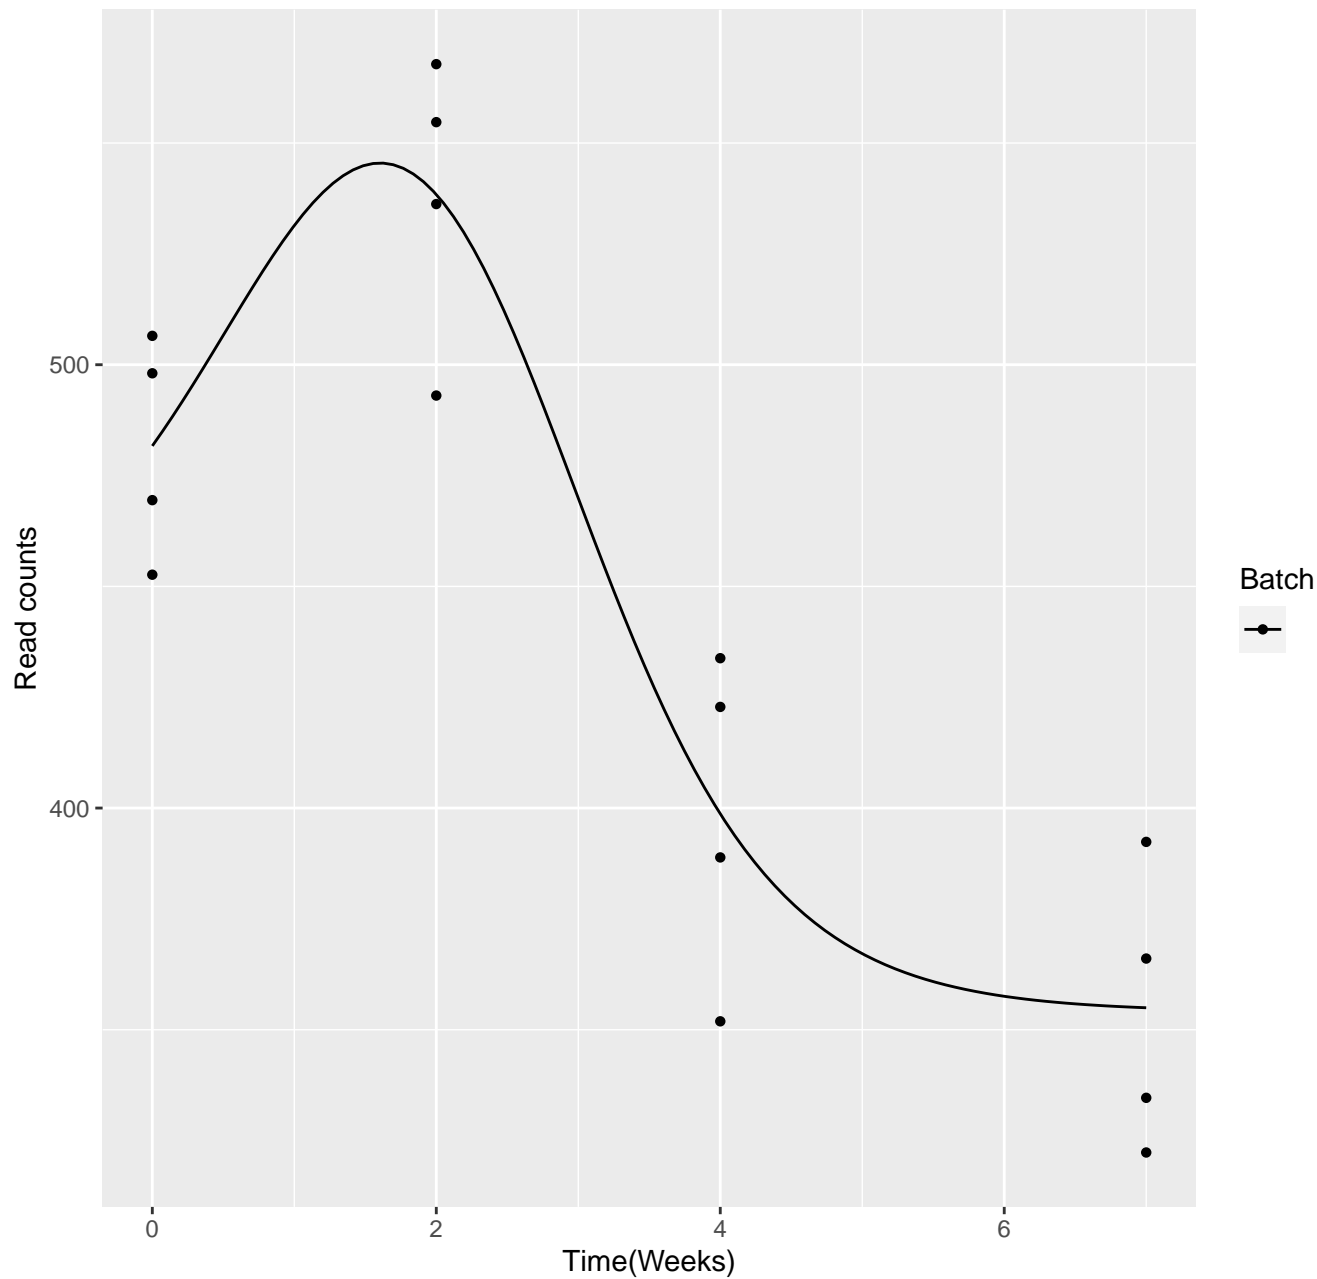

LOC100347711:  $\log_{10} q = -4.71$

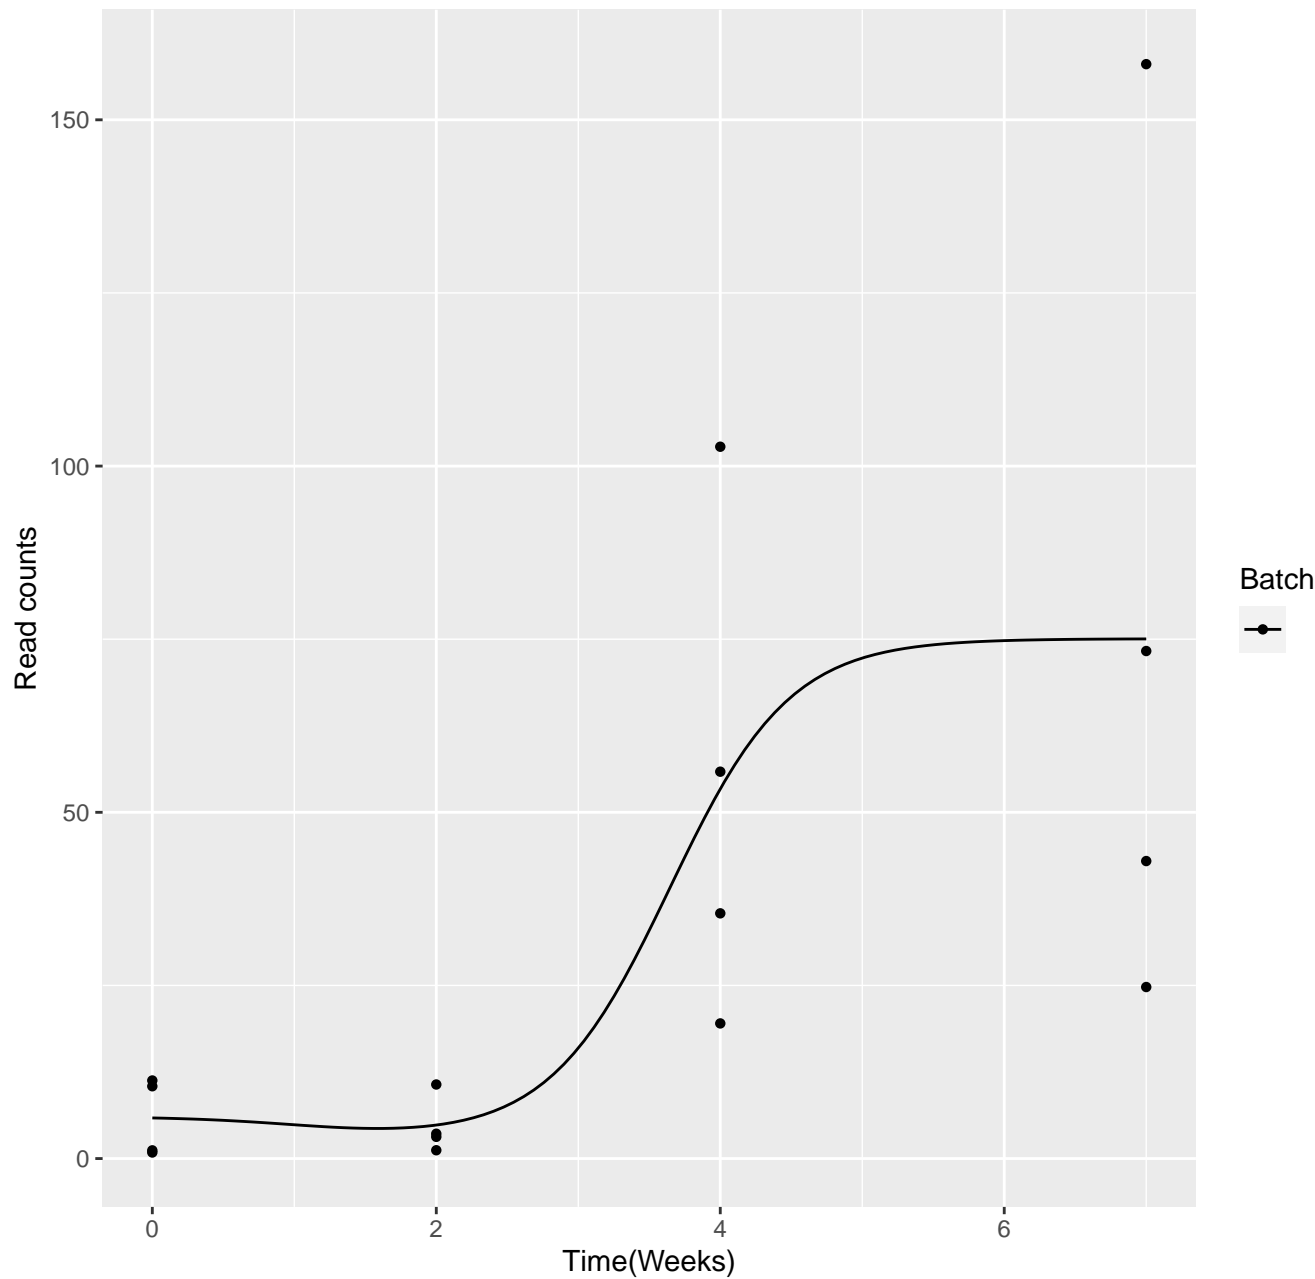

RARB:  $\log_{10} q = -4.71$

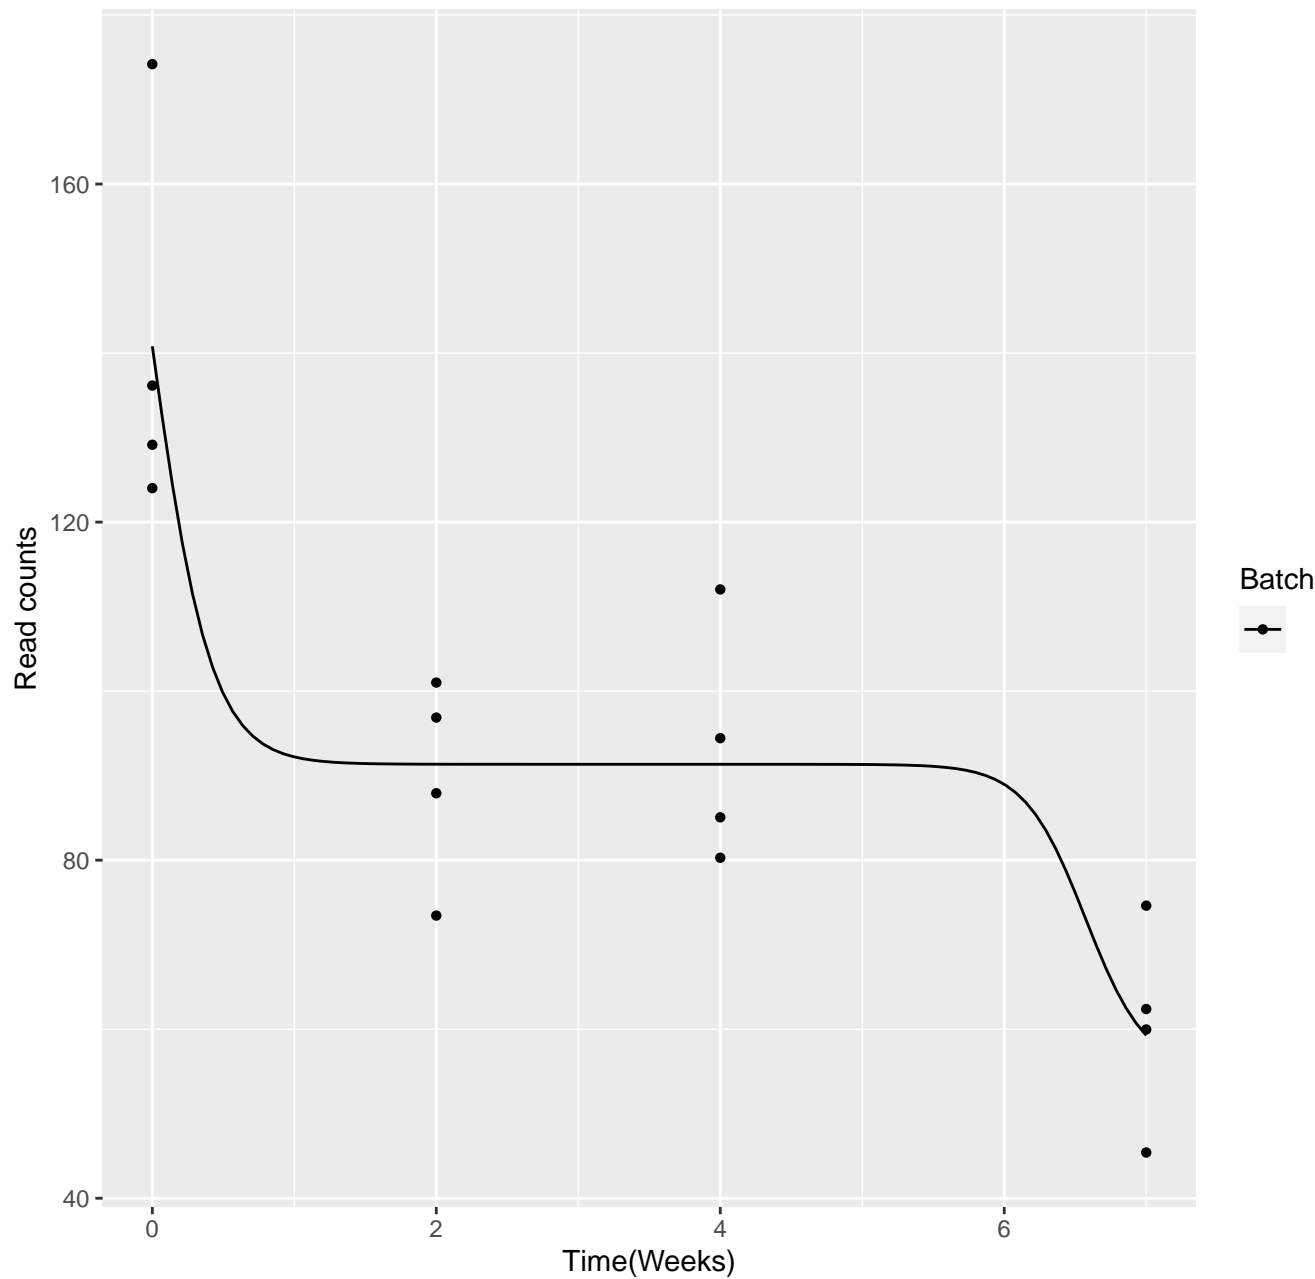

SLC4A1:  $\log_{10} q = -4.71$

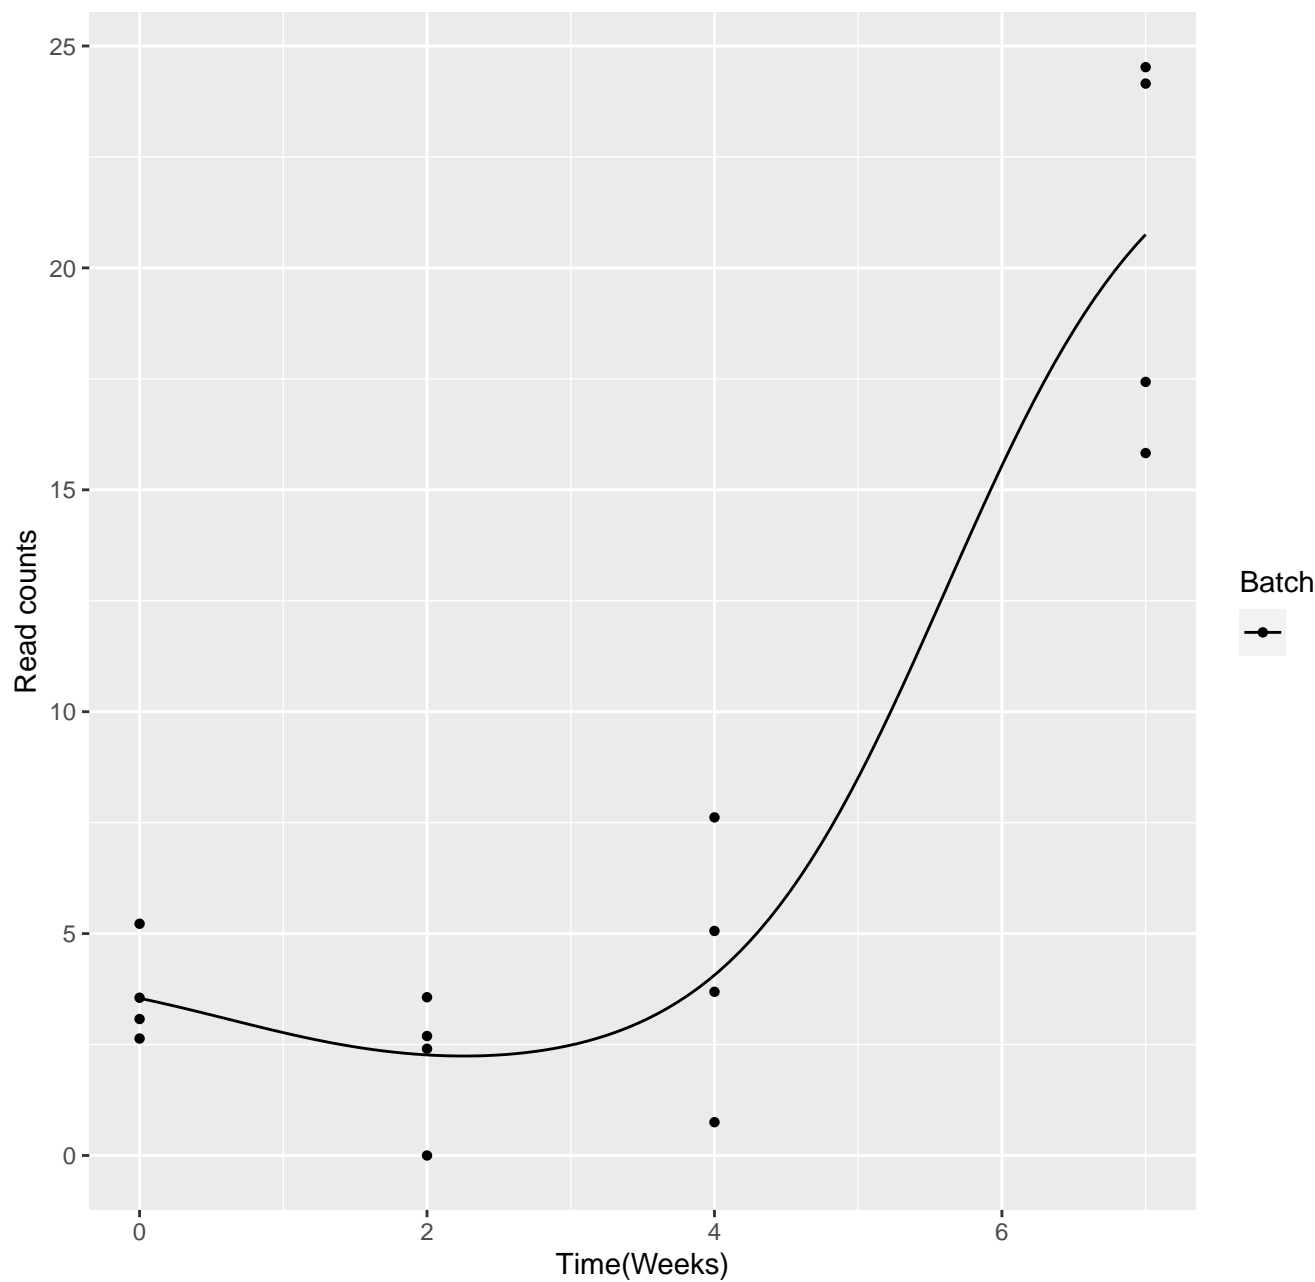

FMNL1:  $\log_{10} q = -4.68$

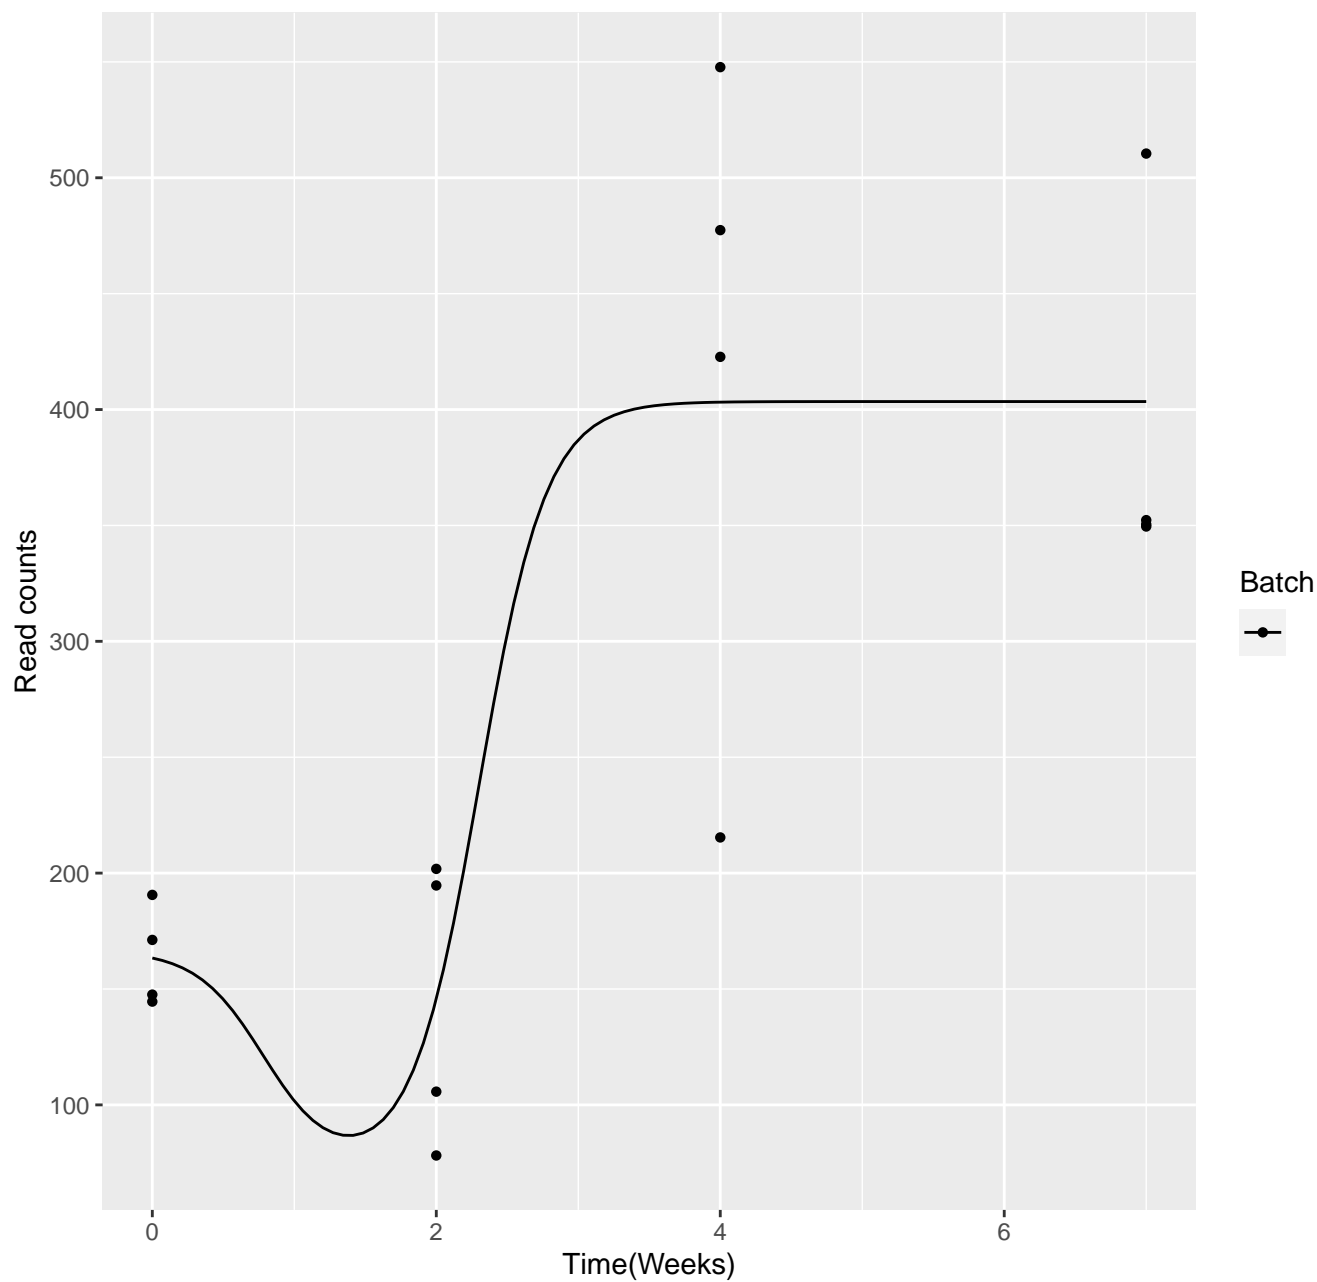

CD72:  $\log_{10} q = -4.68$

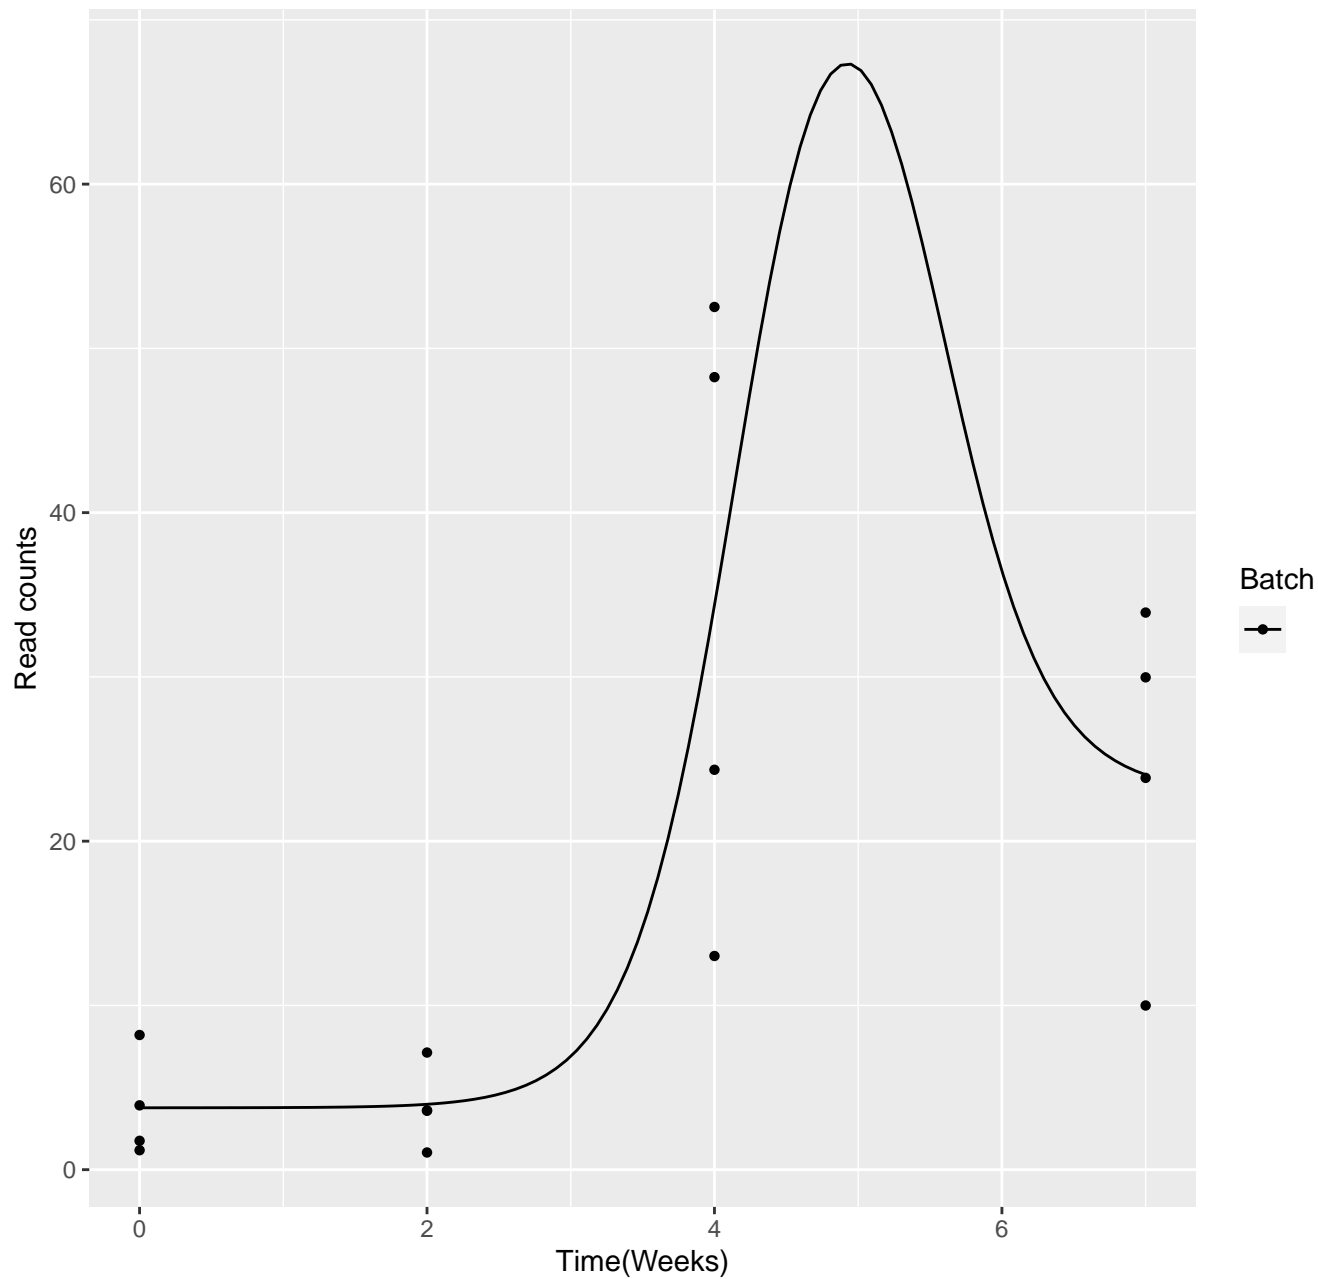

TNFSF11:  $\log_{10} q = -4.68$

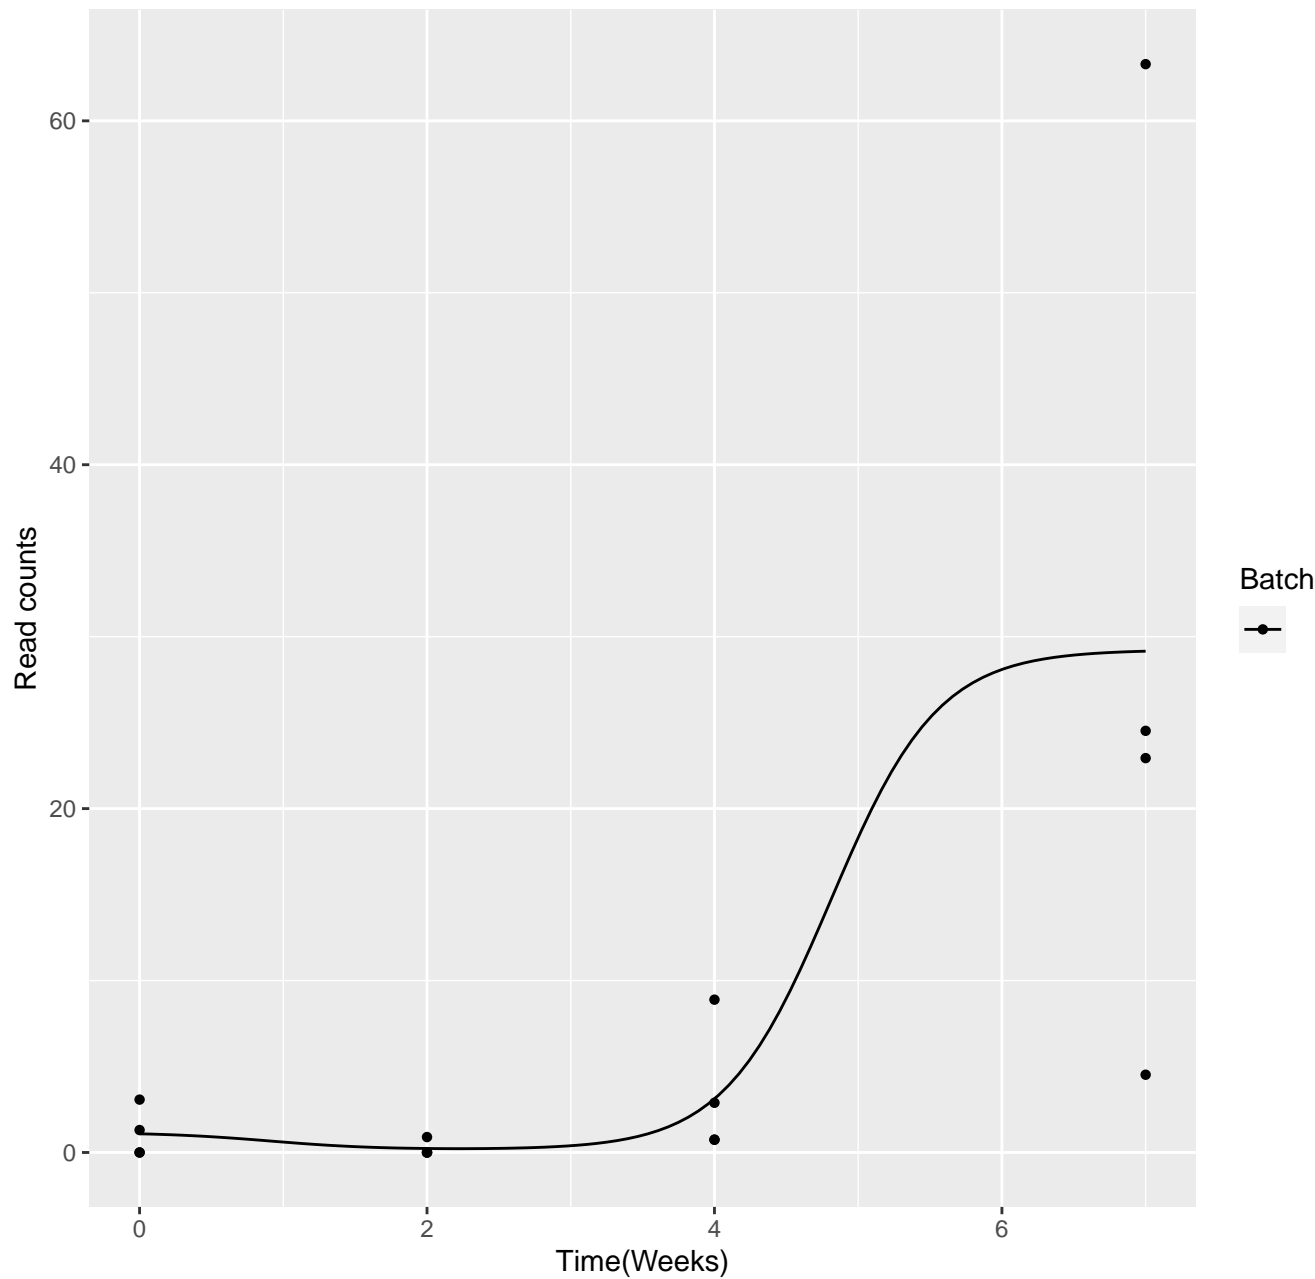

IL4R:  $\log_{10} q = -4.67$

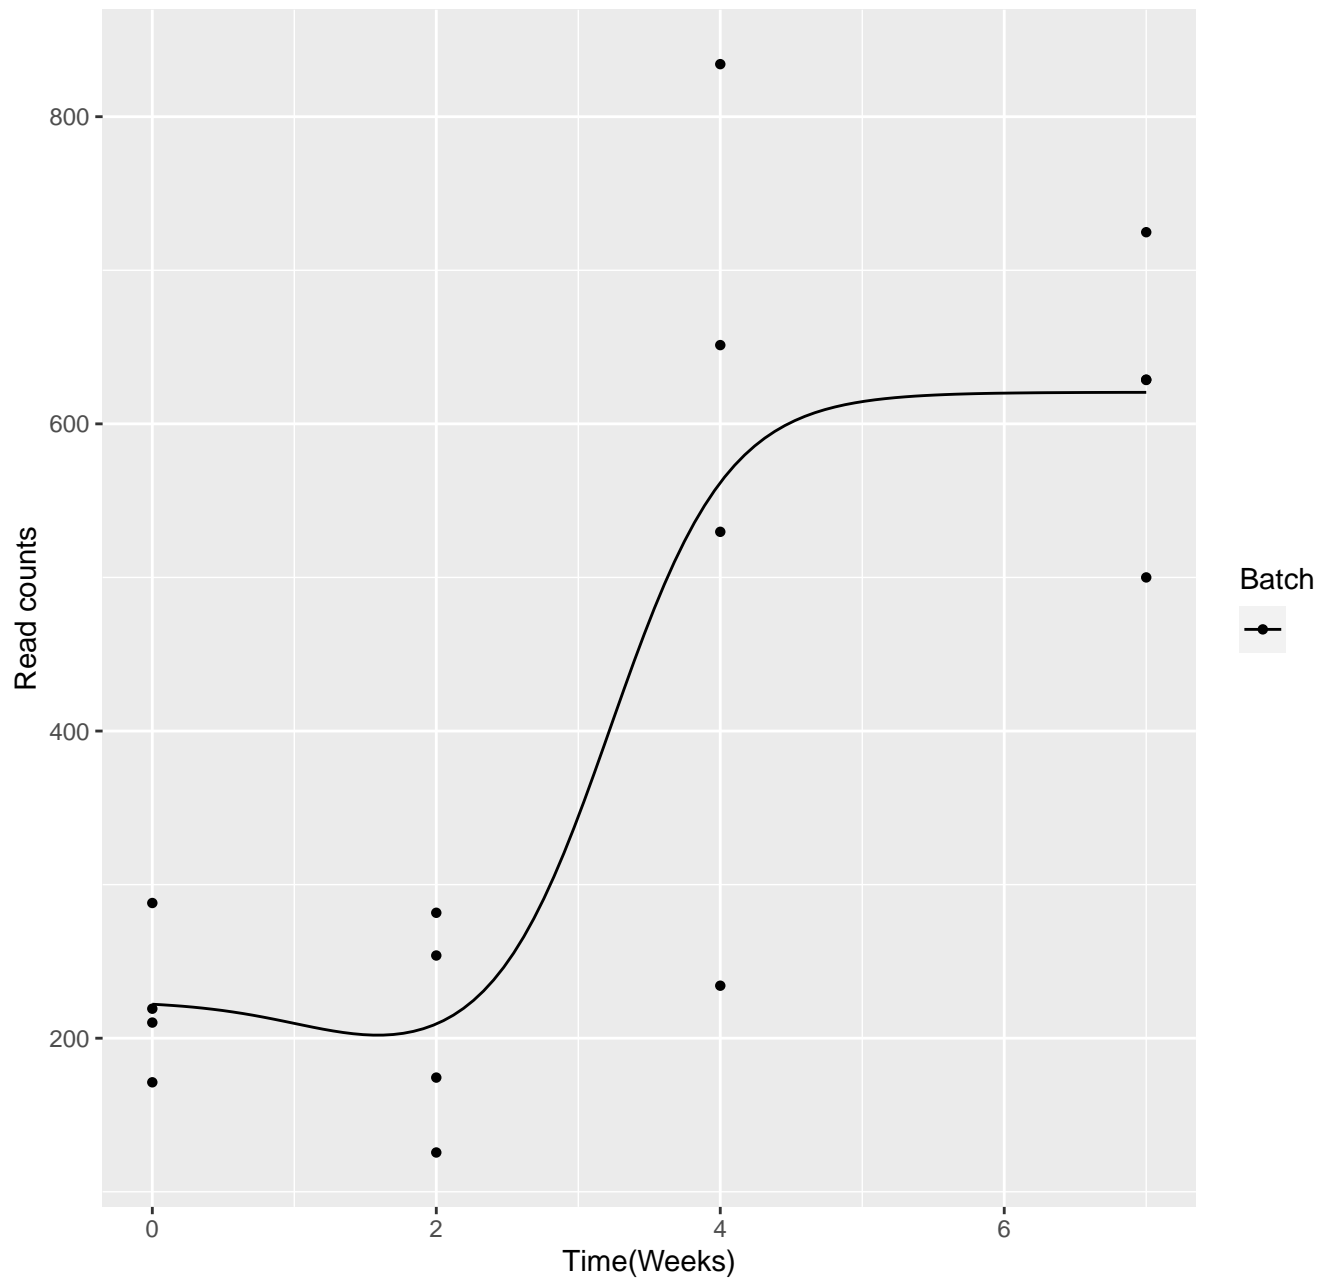



SLC29A1:  $\log_{10} q = -4.67$

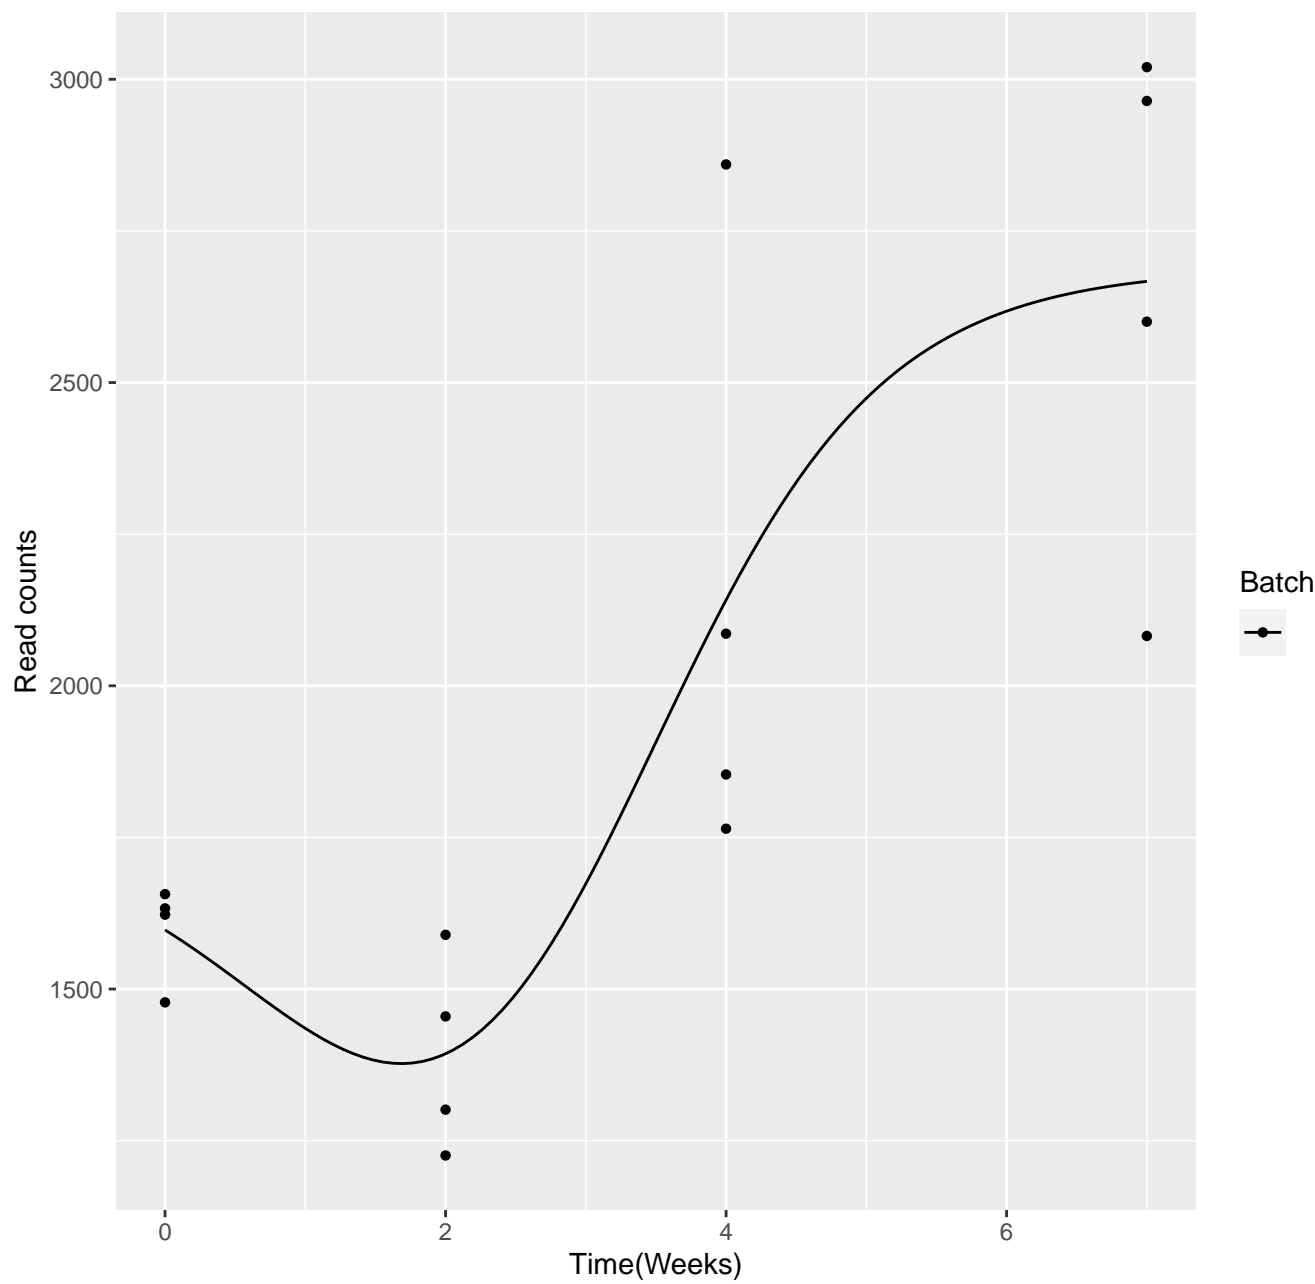

SIGLEC5:  $\log_{10} q = -4.67$

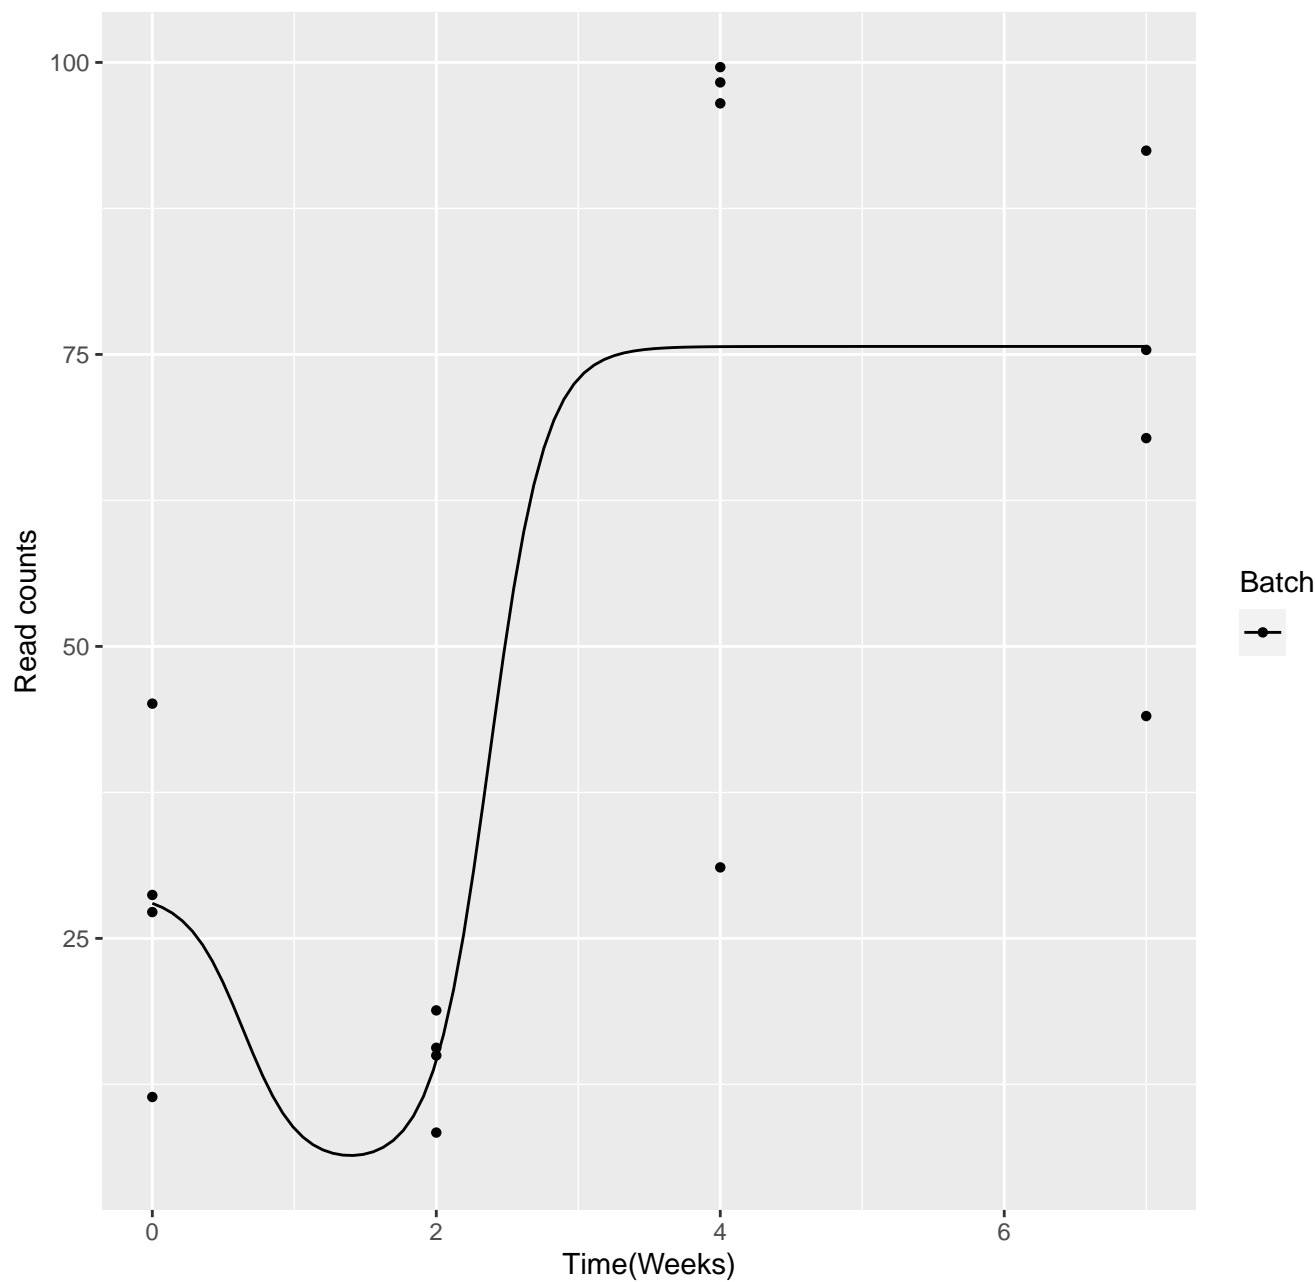

BASP1:  $\log_{10} q = -4.66$

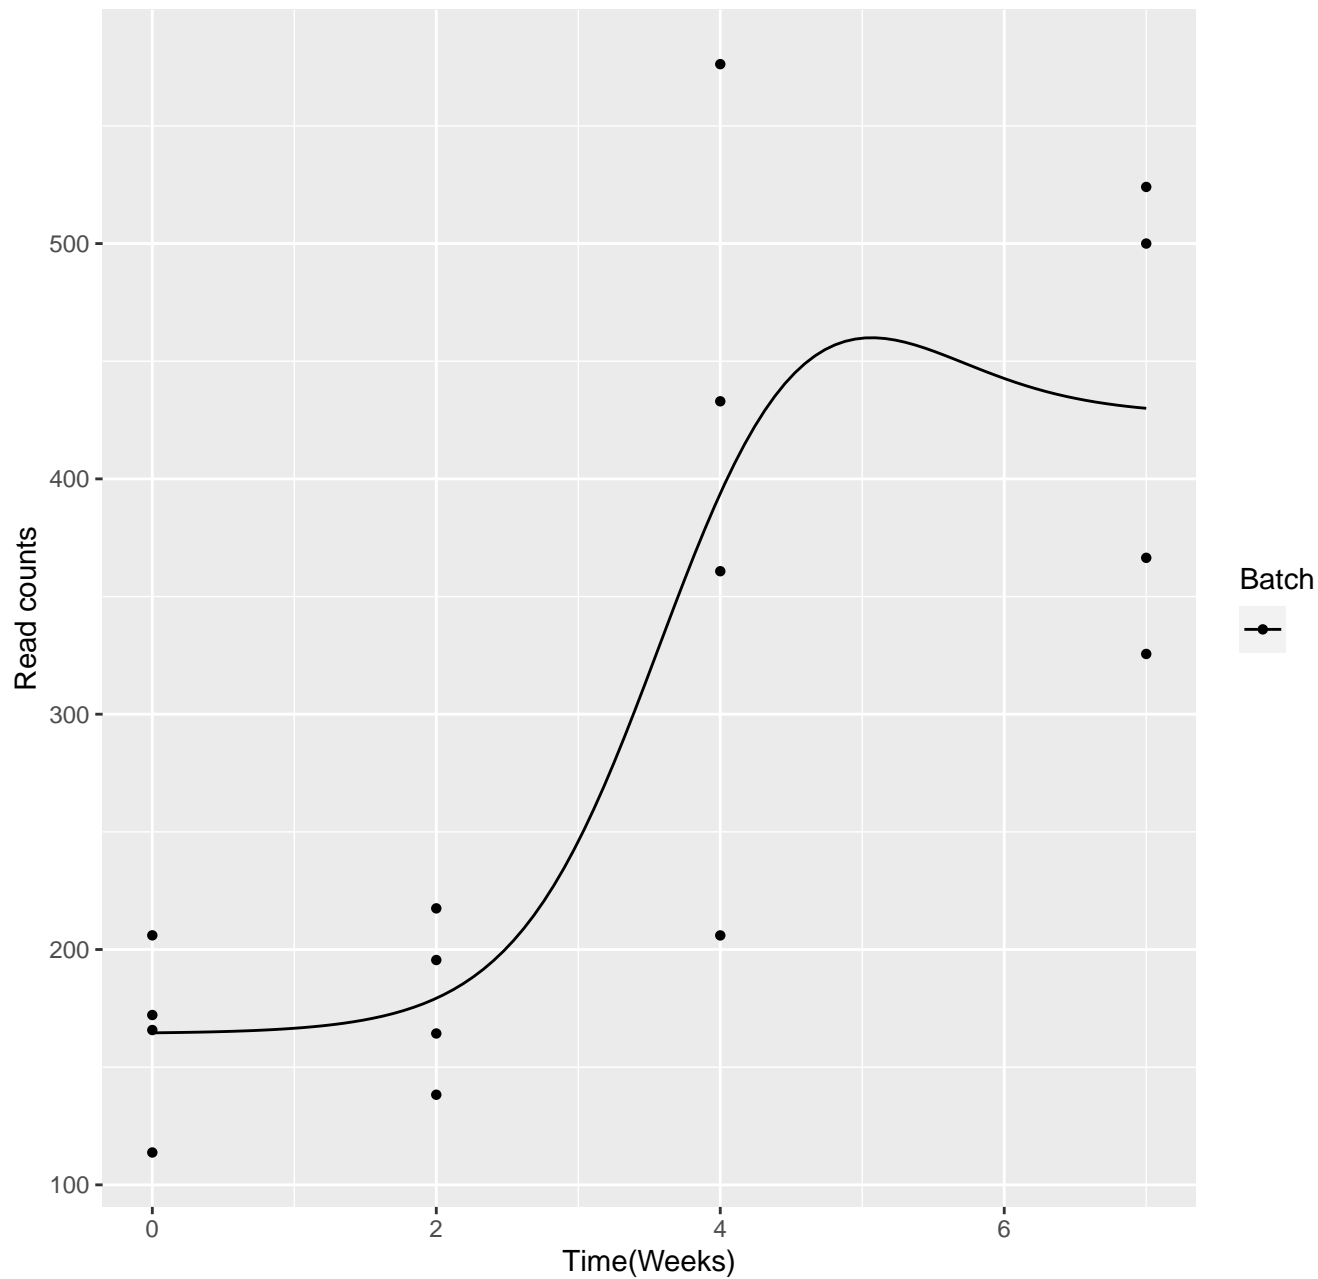

GTF2E2:  $\log_{10} q = -4.66$

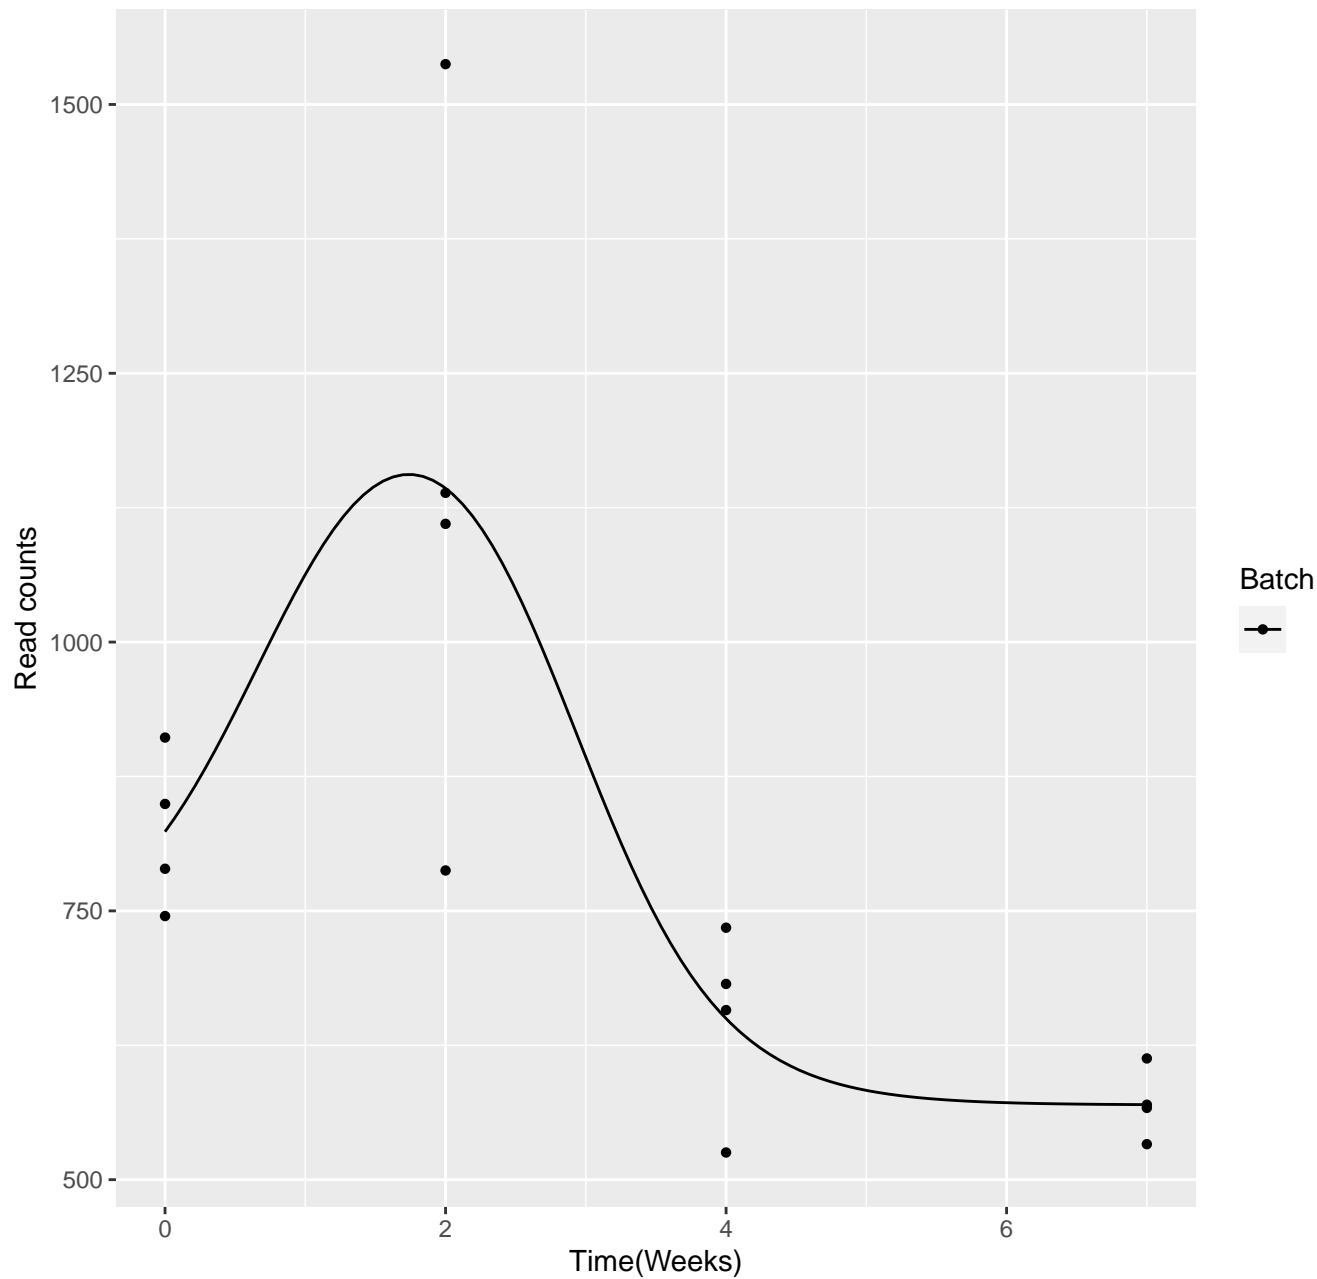

LOC103351517:  $\log_{10} q = -4.66$

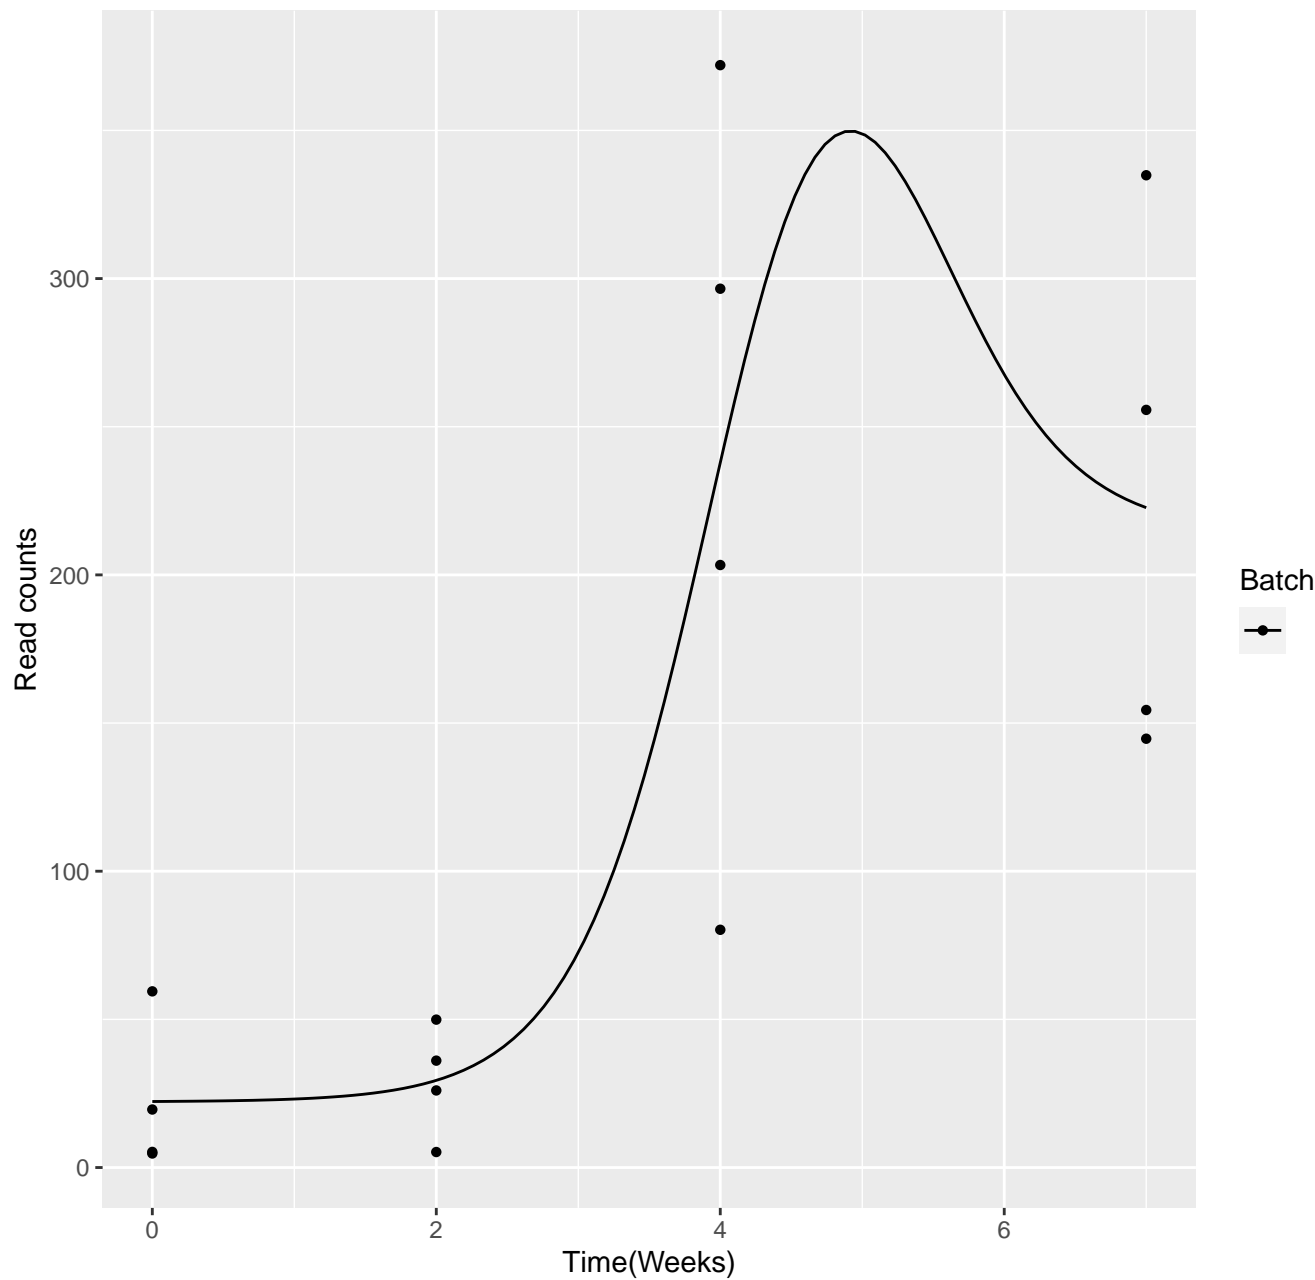

FOLR2:  $\log_{10} q = -4.66$

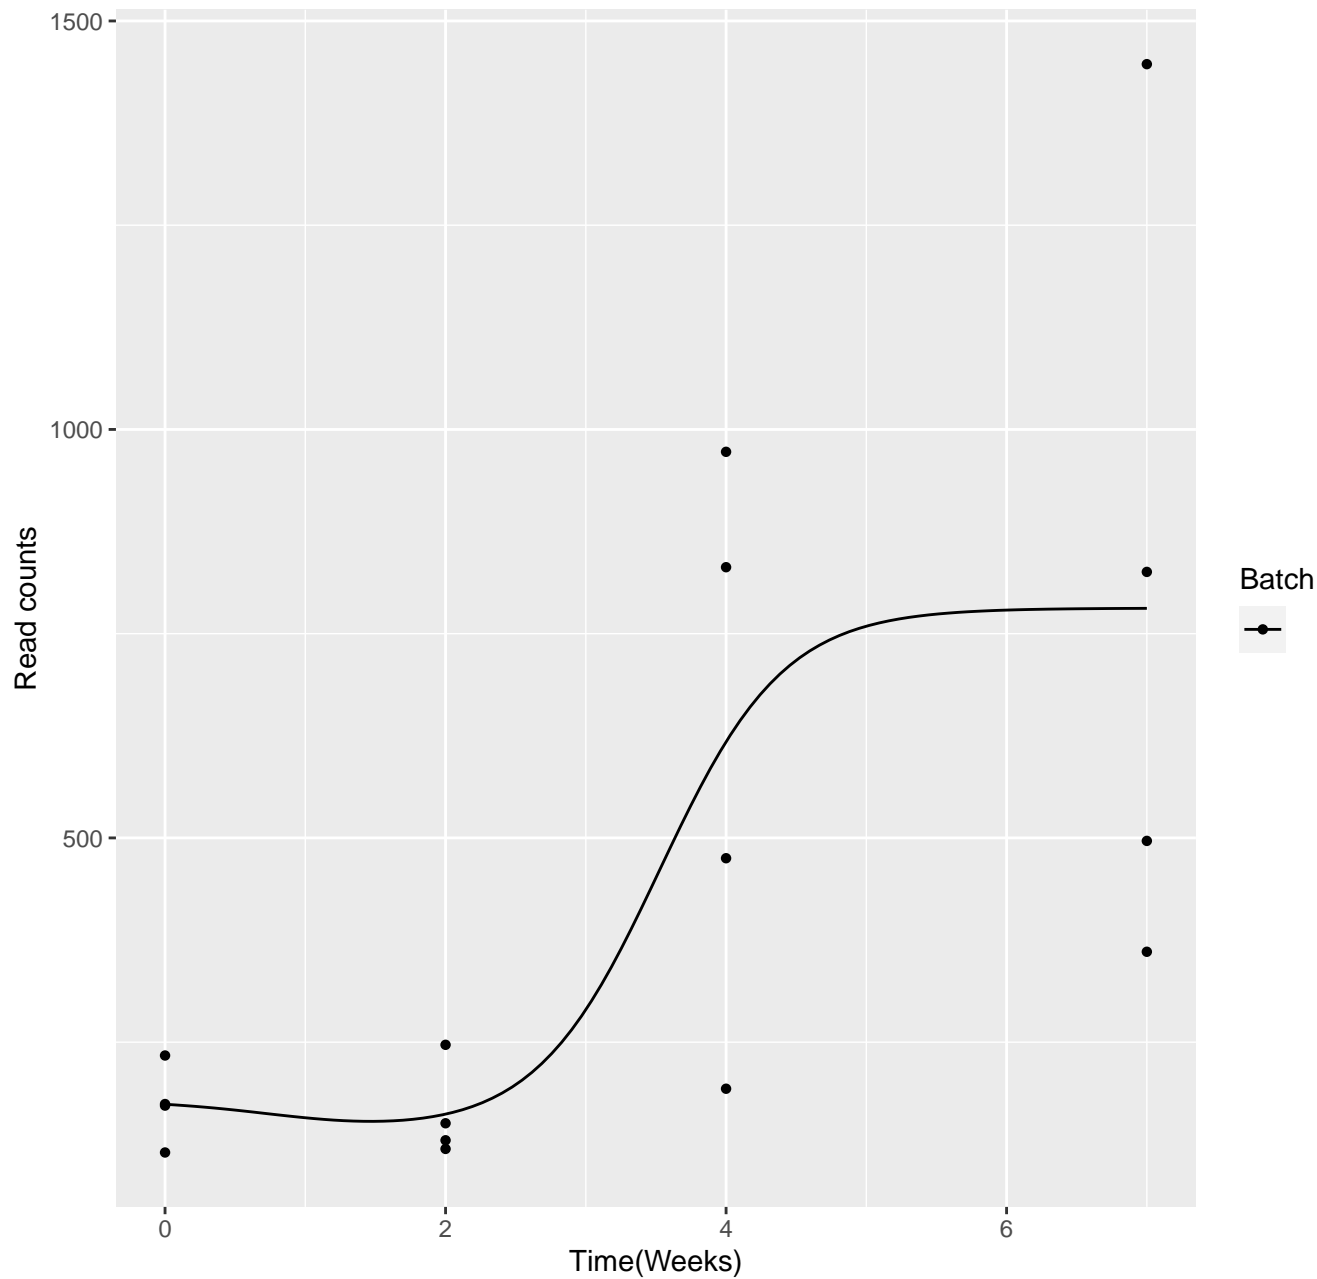

CIART:  $\log_{10} q = -4.65$

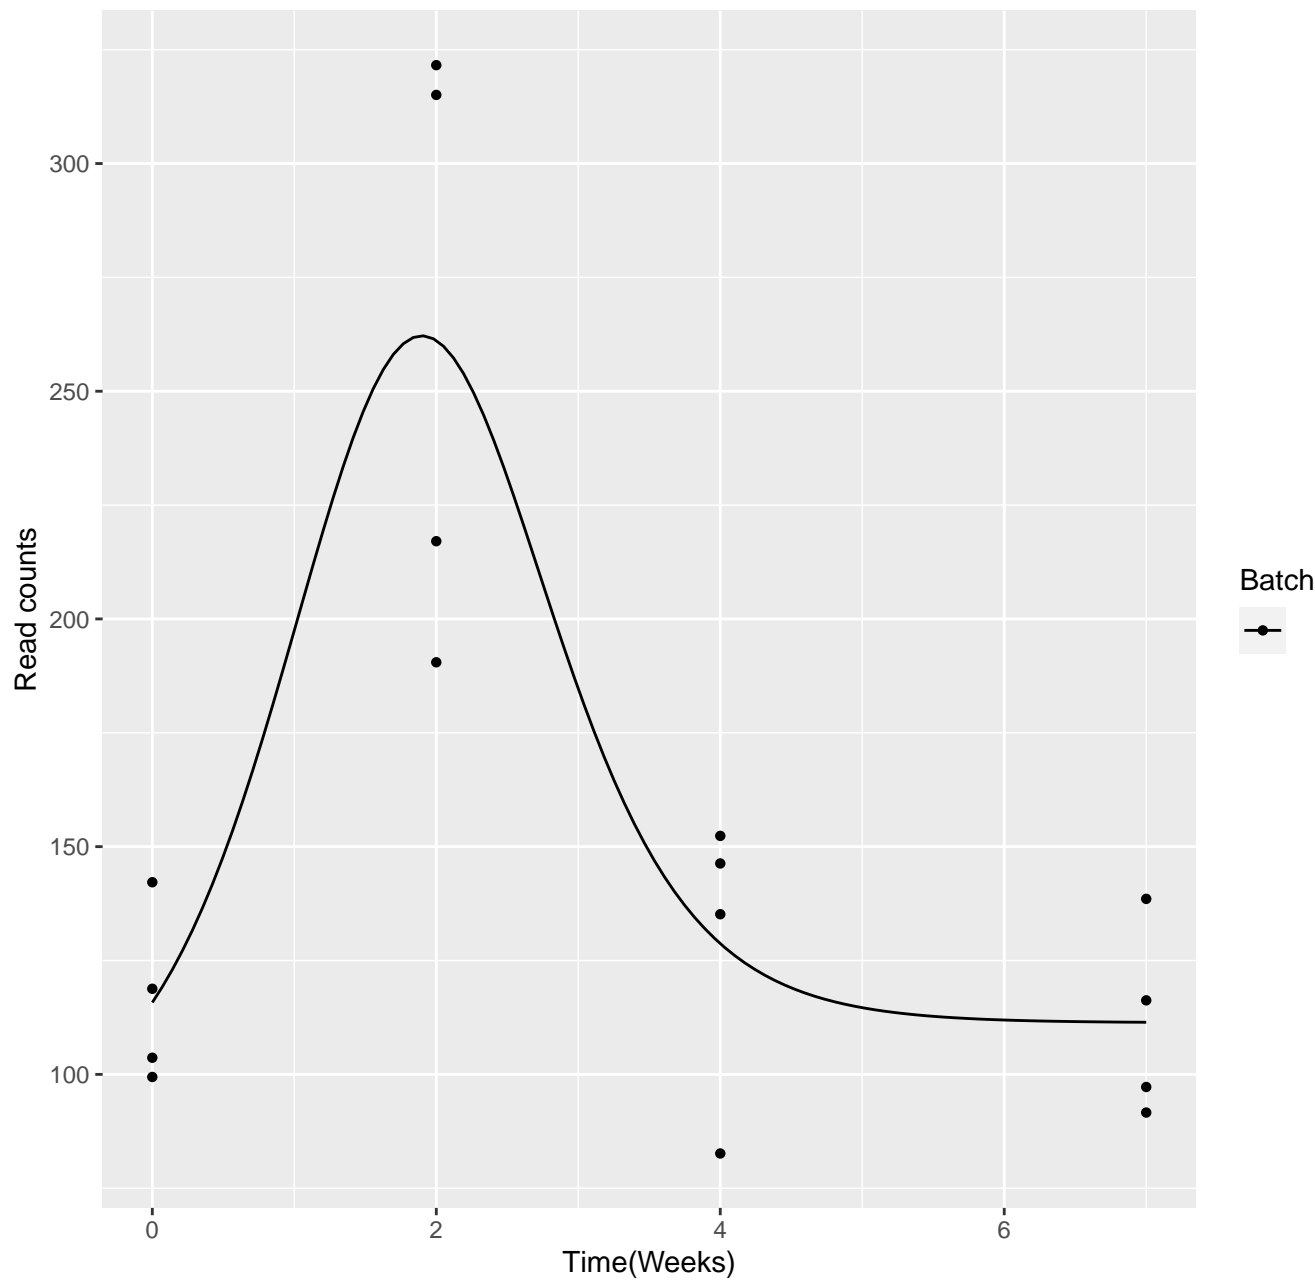

RGS10:  $\log_{10} q = -4.64$

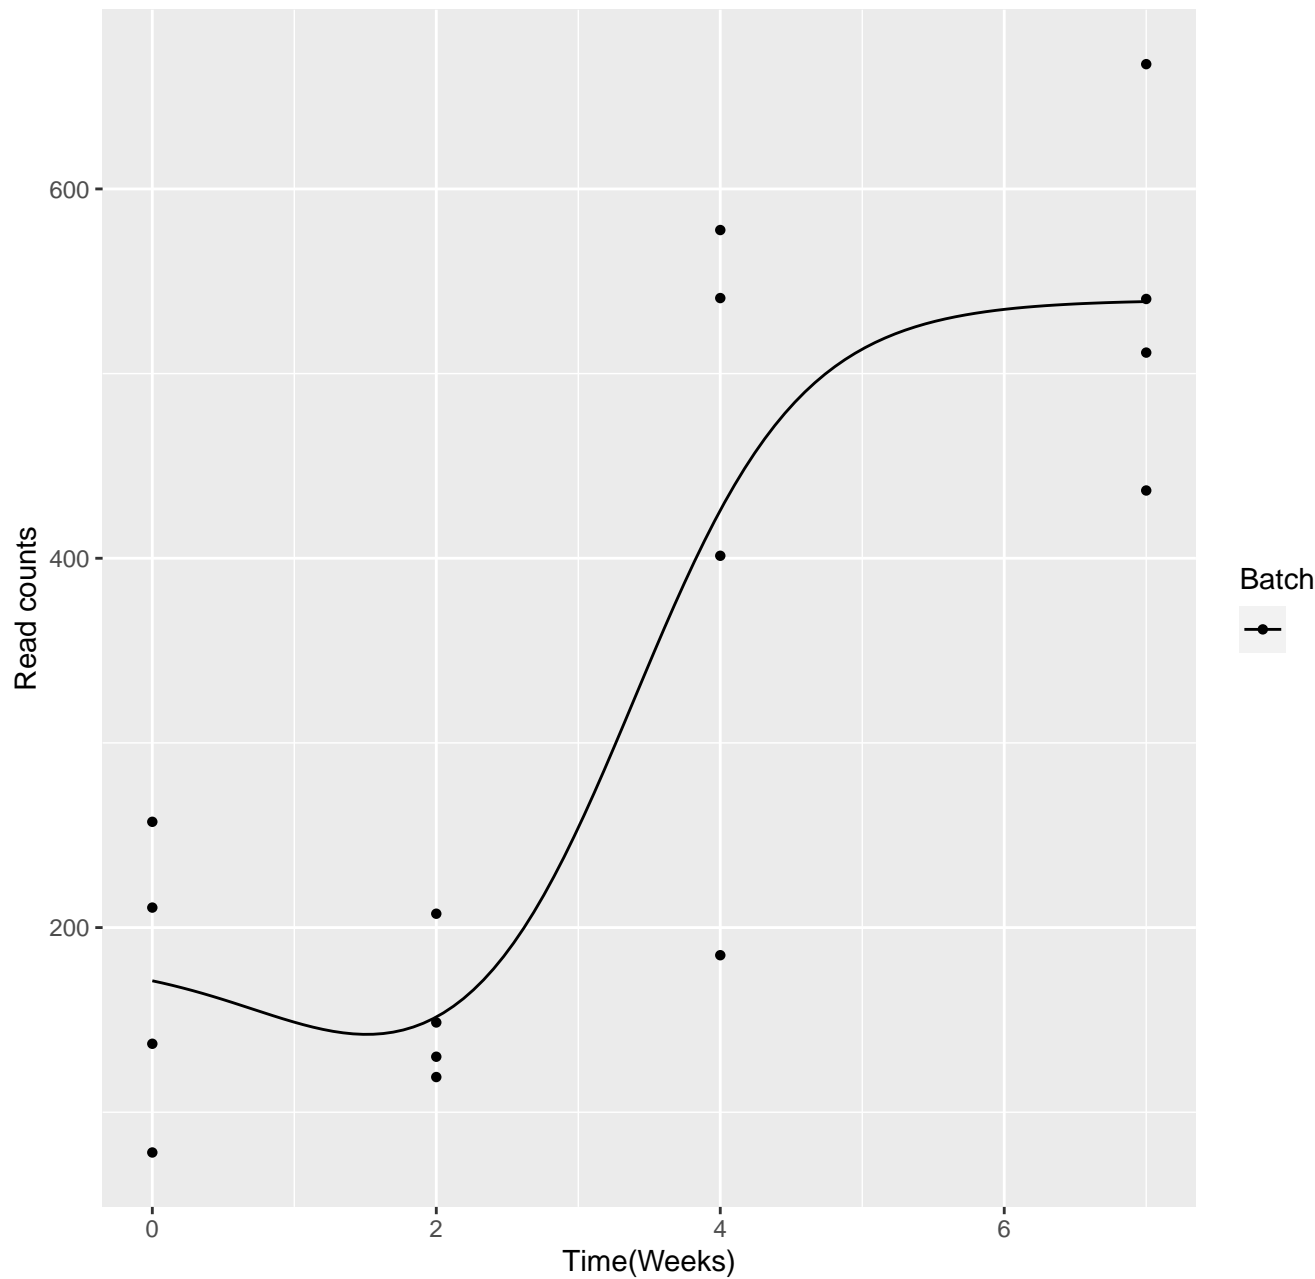



RACGAP1:  $\log_{10} q = -4.64$

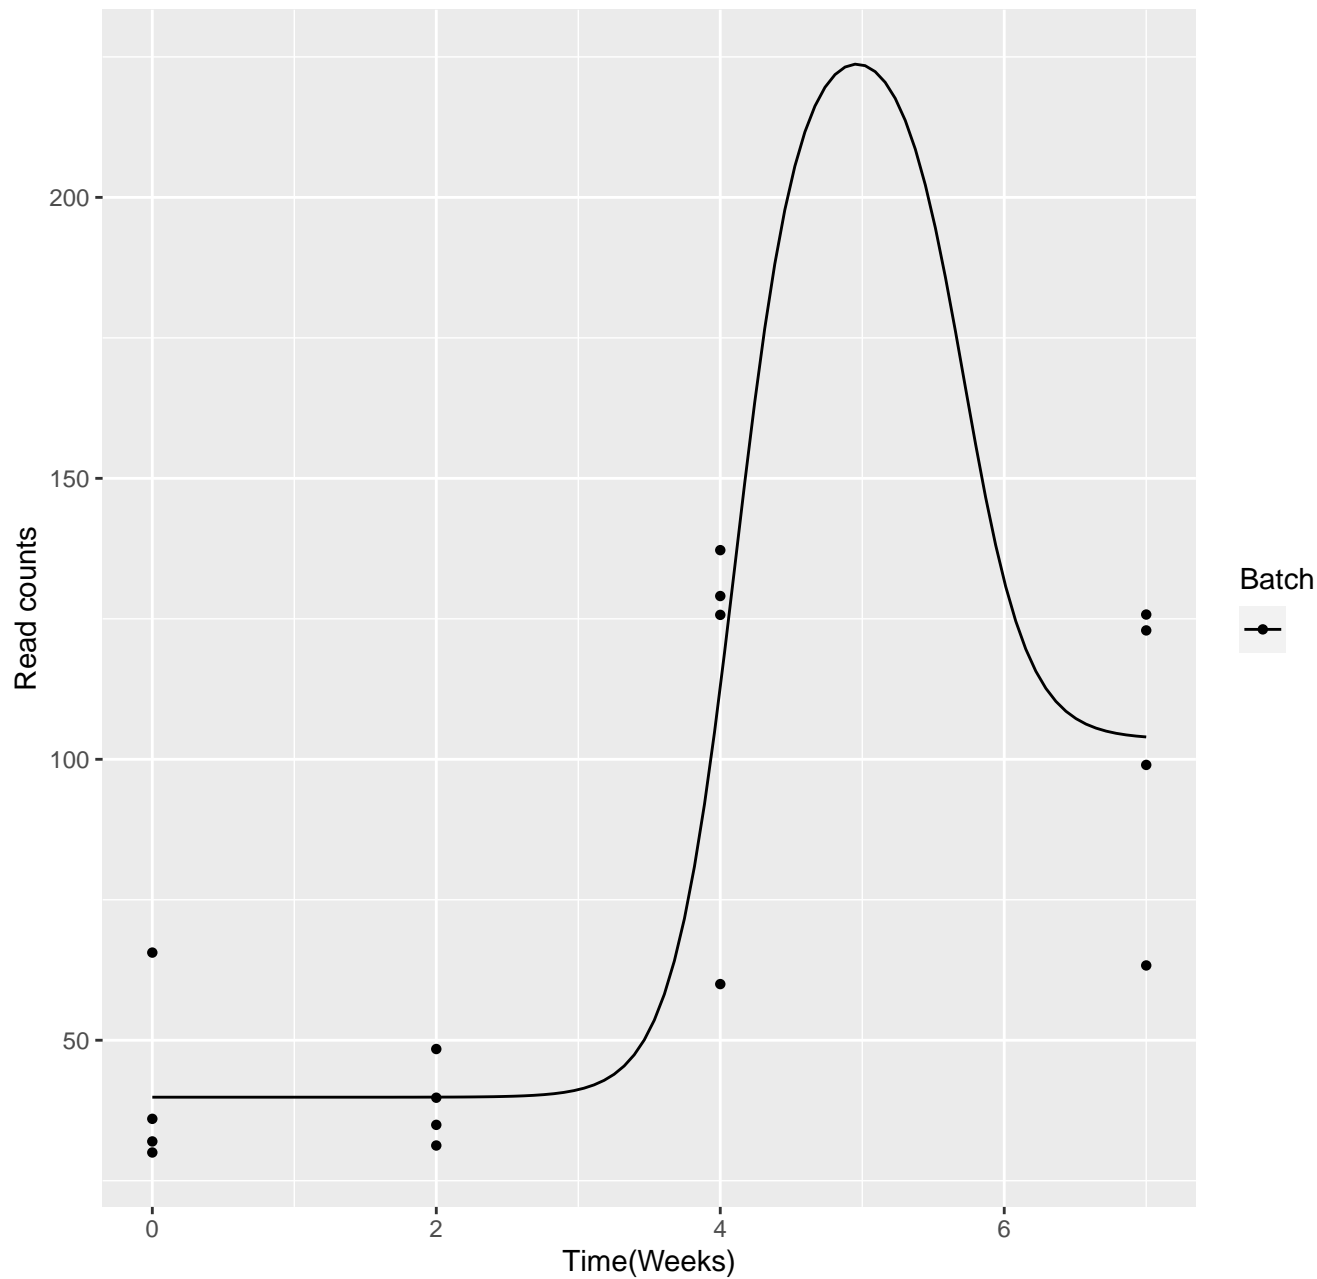

KCTD10:  $\log_{10} q = -4.63$

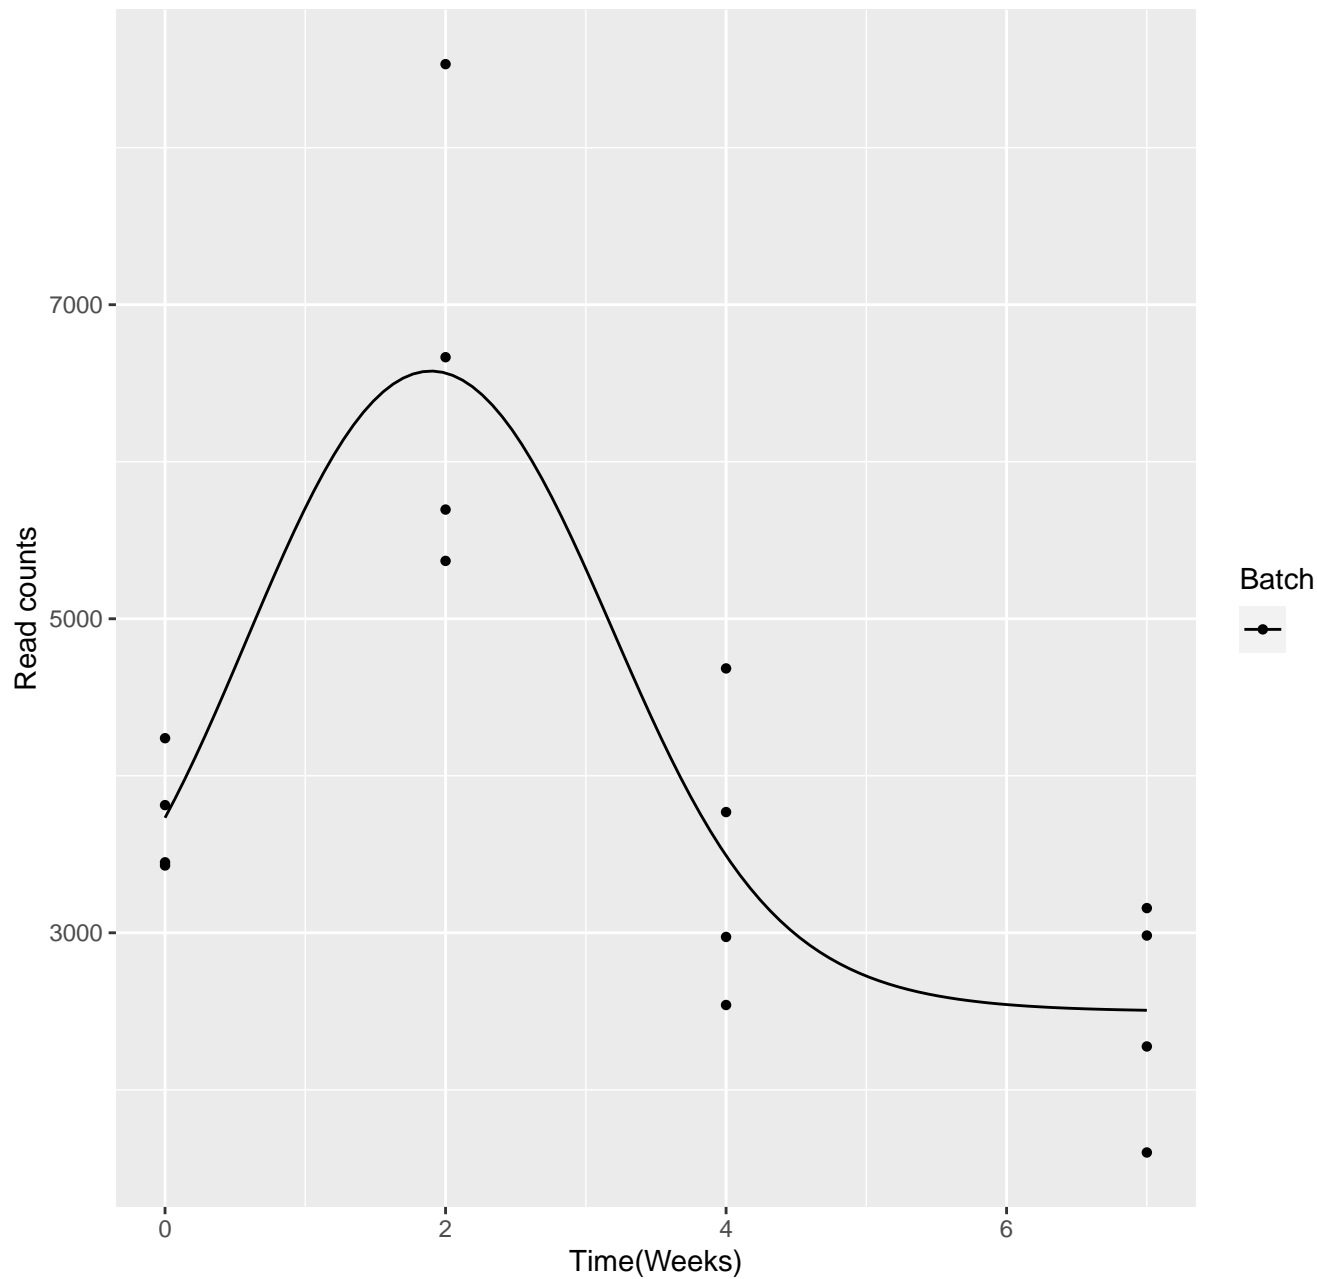

NDST1:  $\log_{10} q = -4.63$

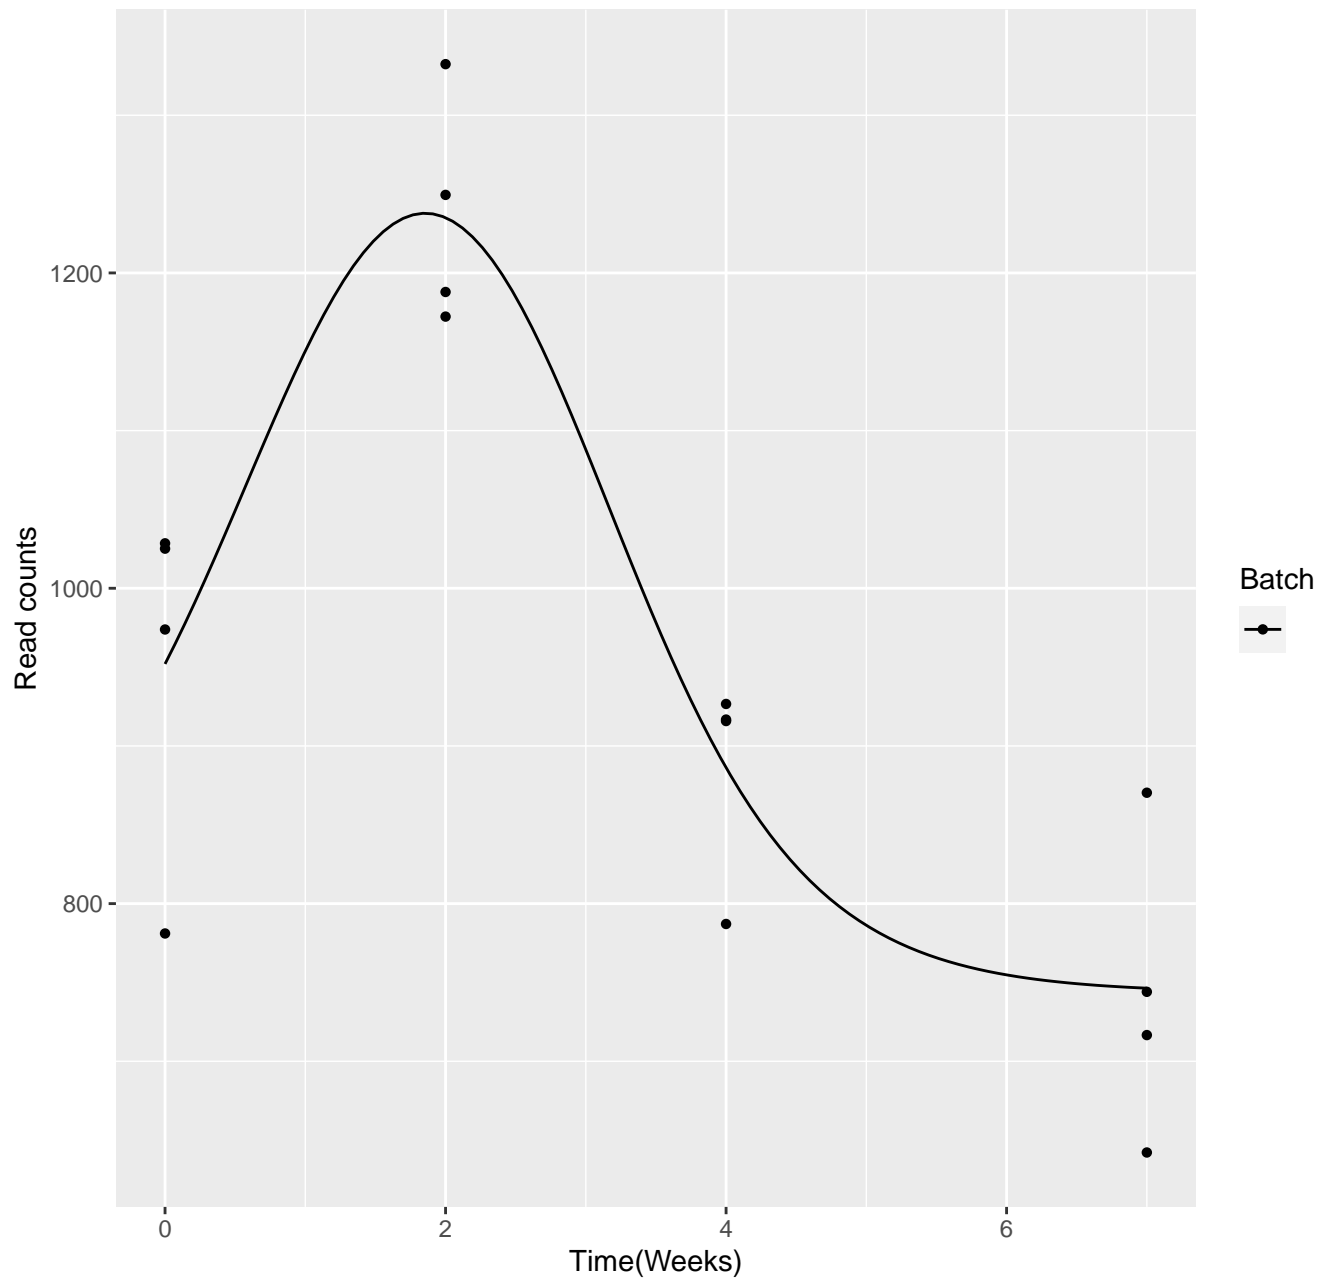

TMEM200B:  $\log_{10} q = -4.63$

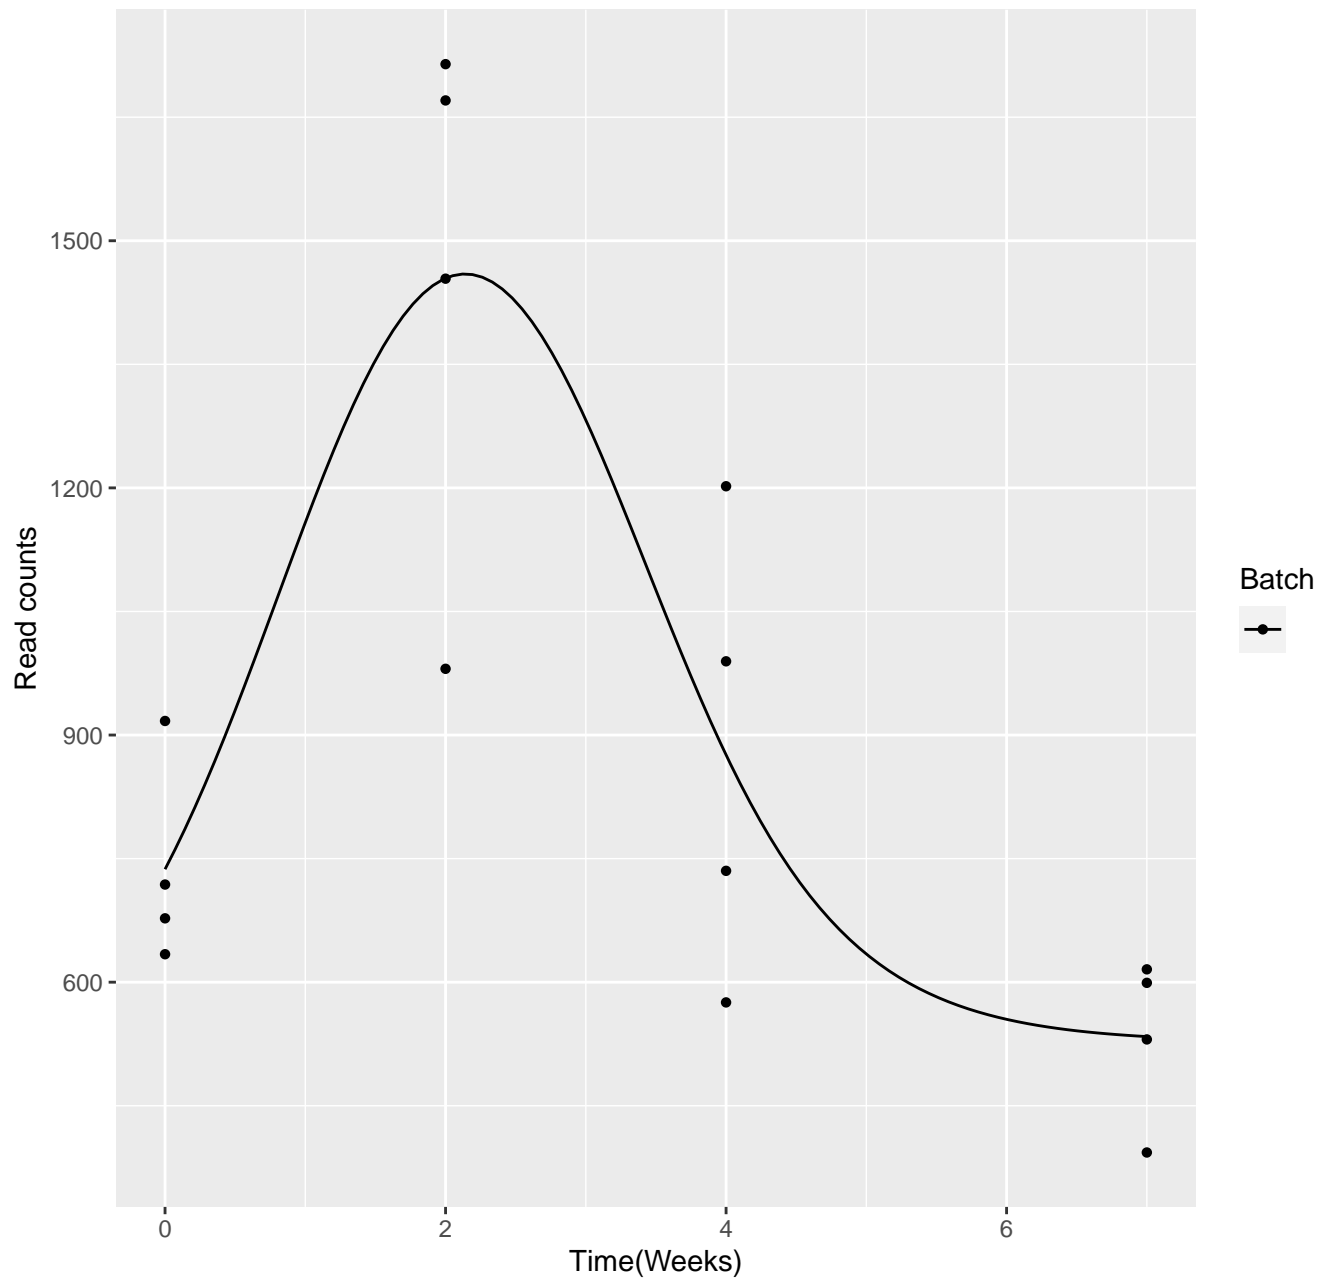

SRGN:  $\log_{10} q = -4.62$

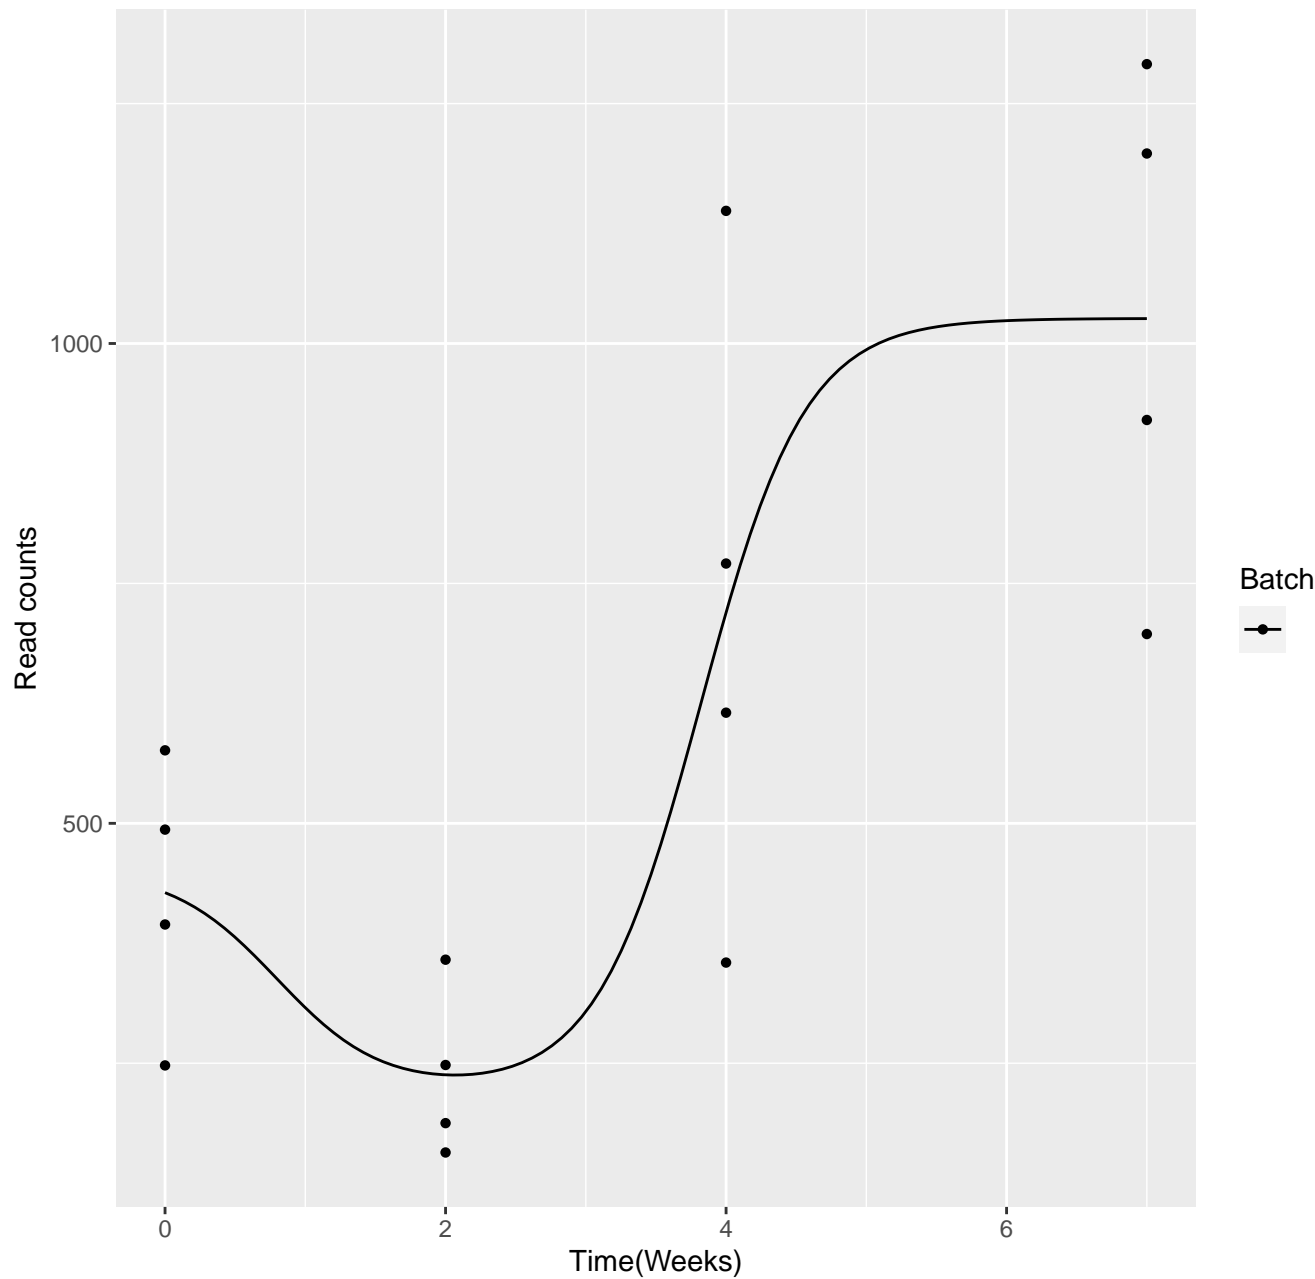

ITI12:  $\log_{10} q = -4.62$

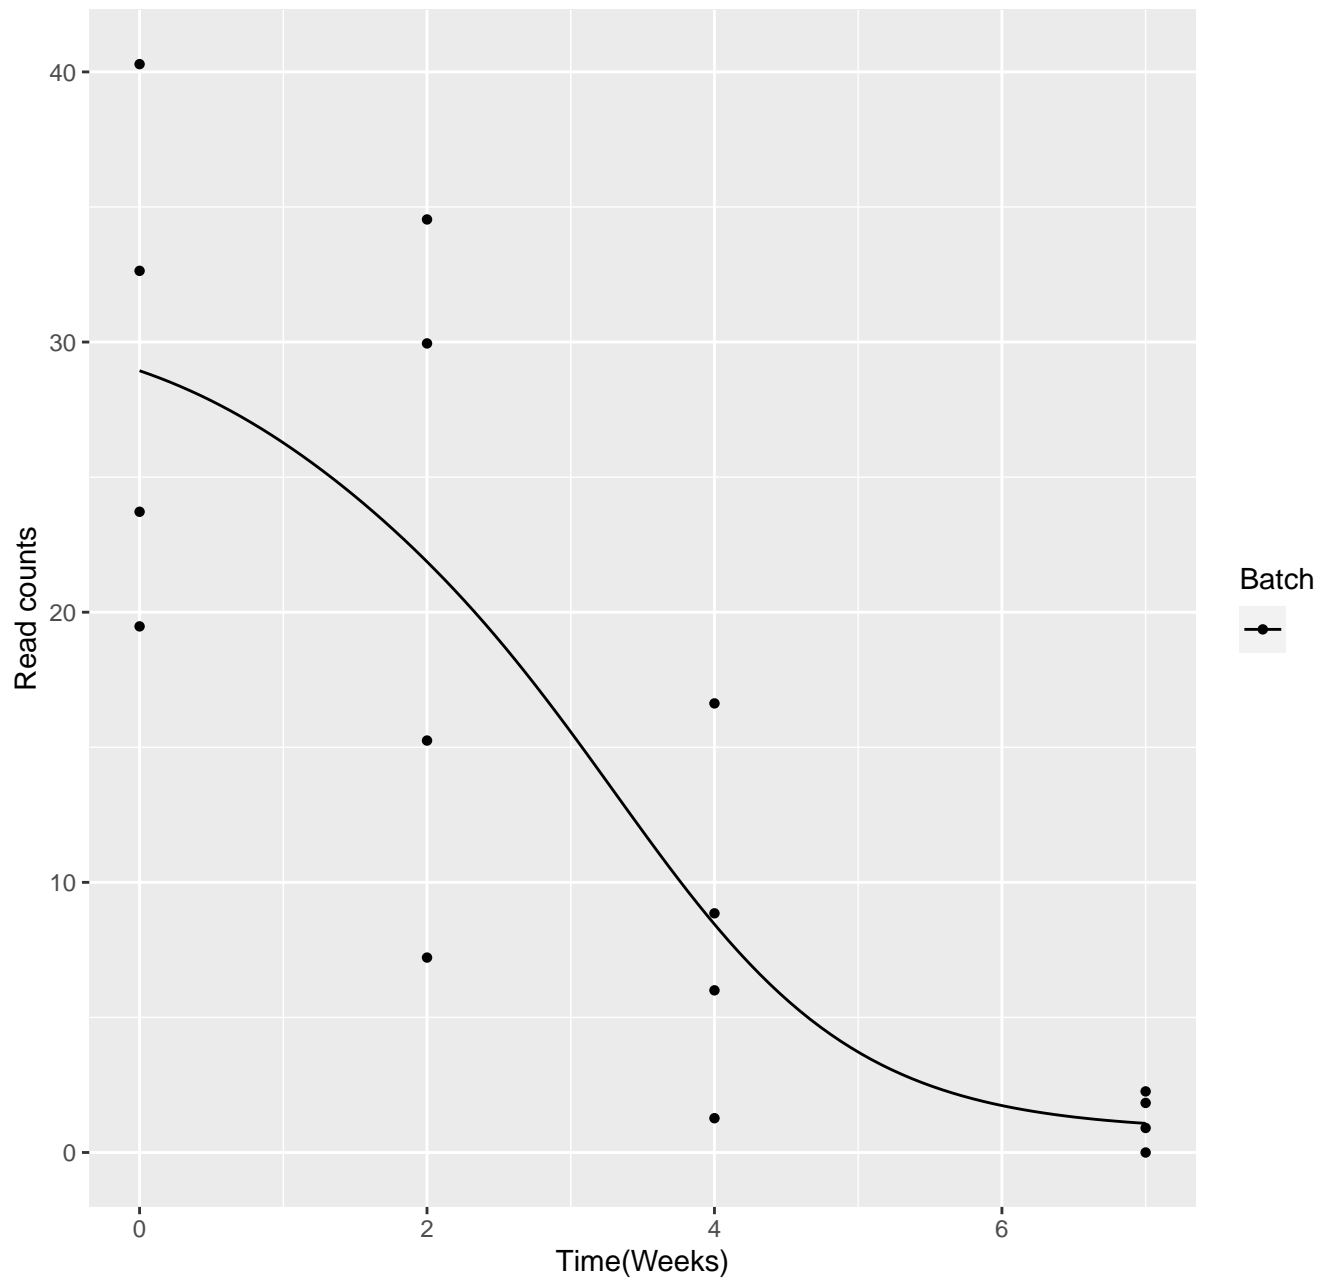

TMEM229B:  $\log_{10} q = -4.61$

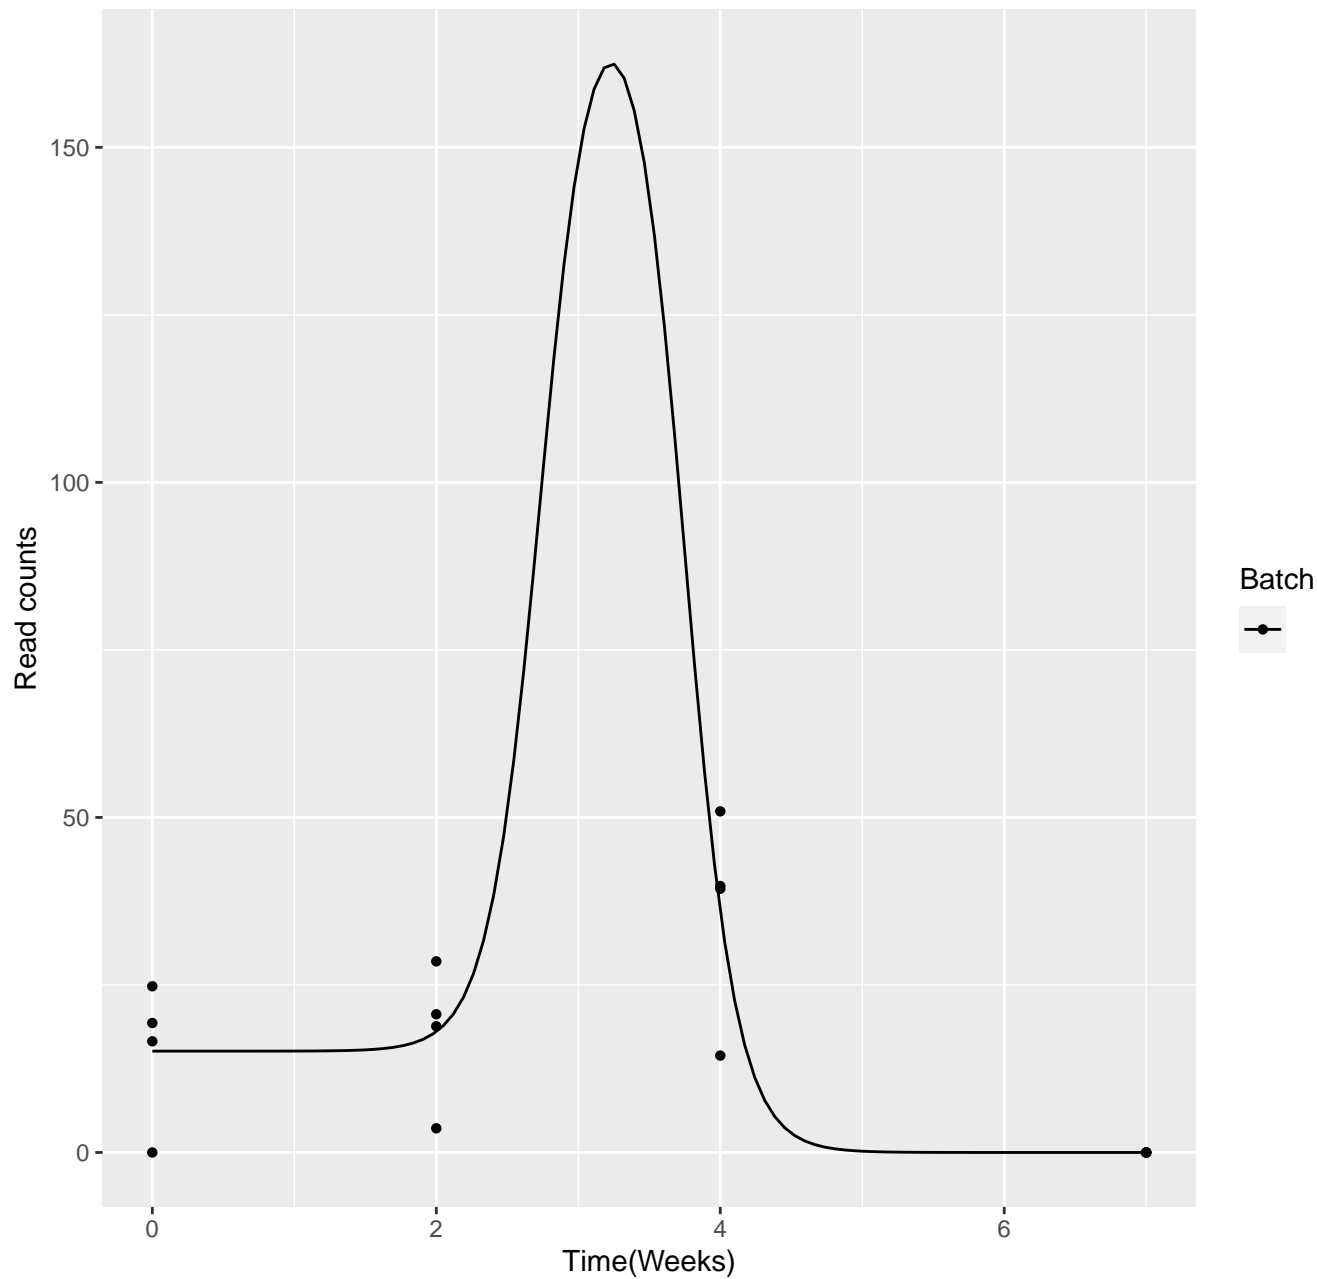

LOC127482783:  $\log_{10} q = -4.61$

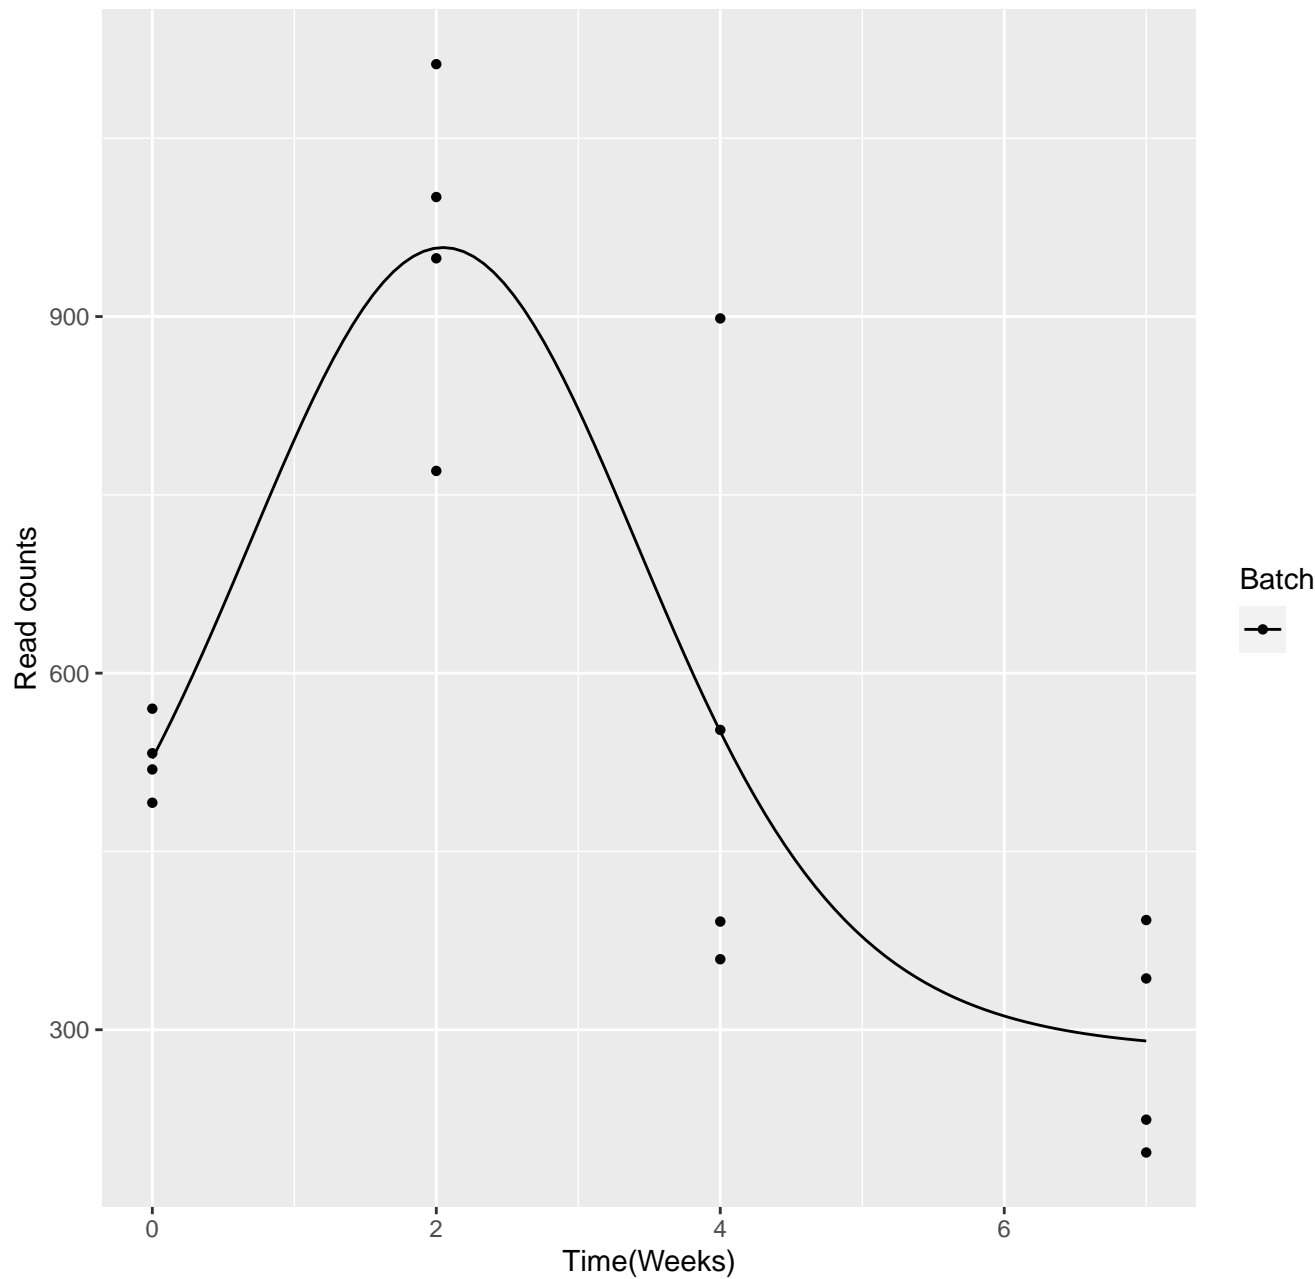



TLN1:  $\log_{10} q = -4.6$

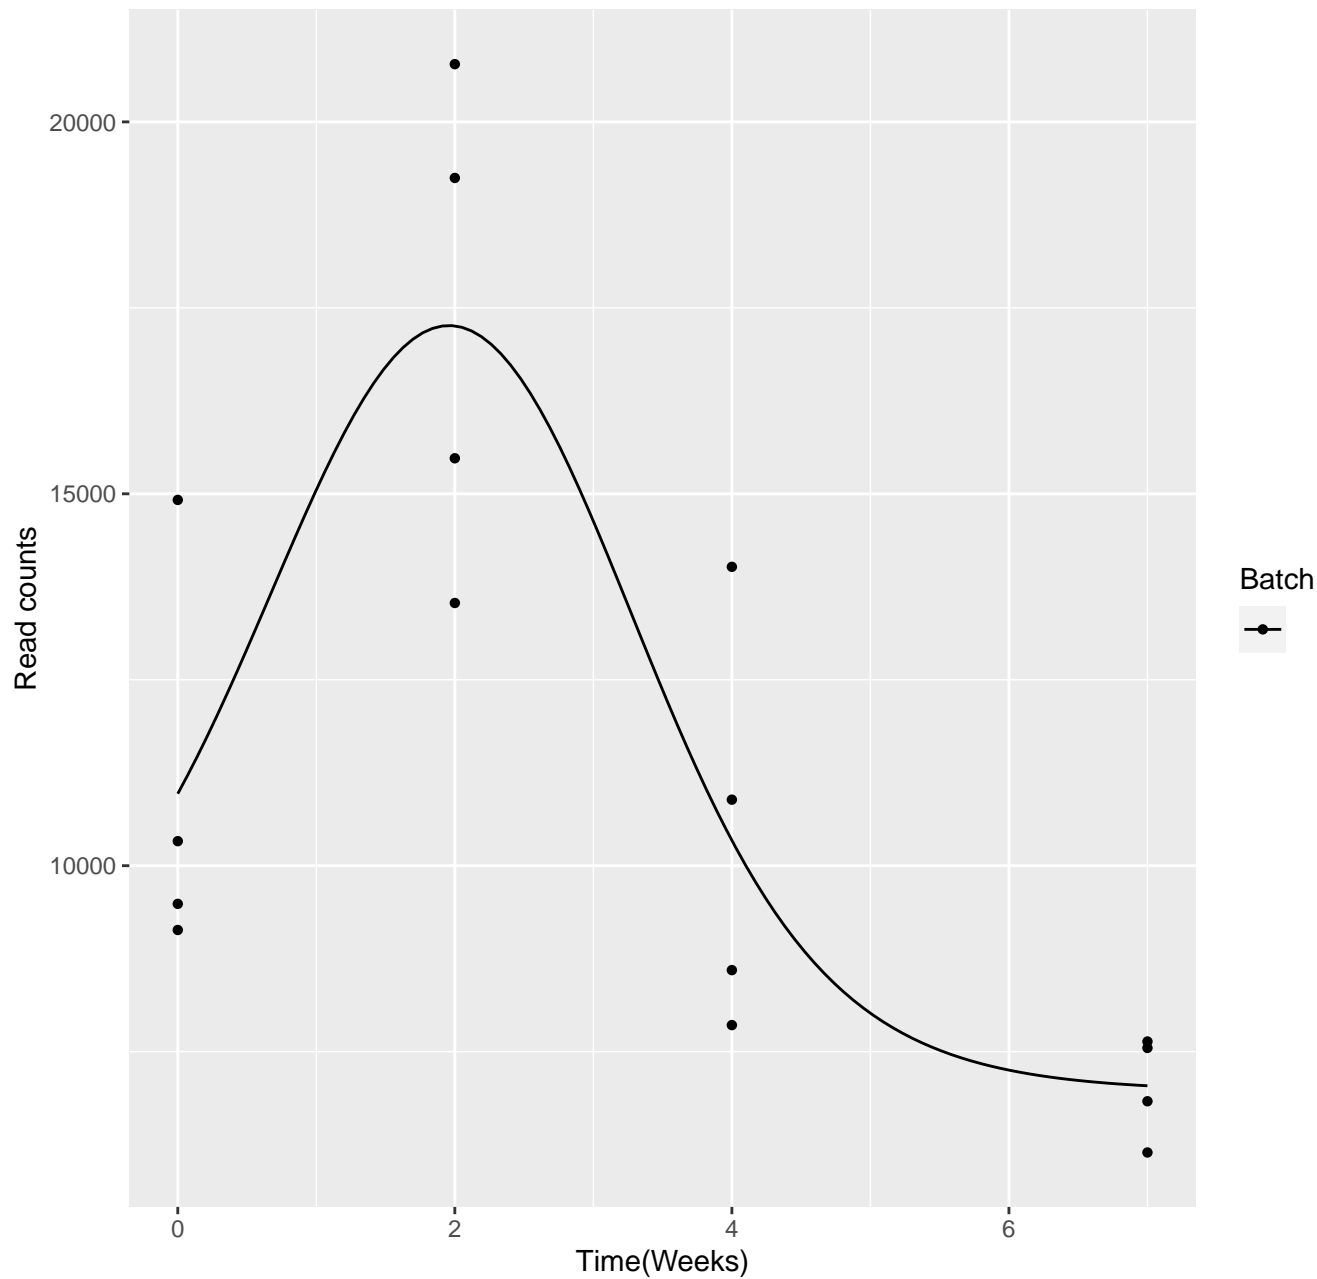

WDFY3:  $\log_{10} q = -4.6$

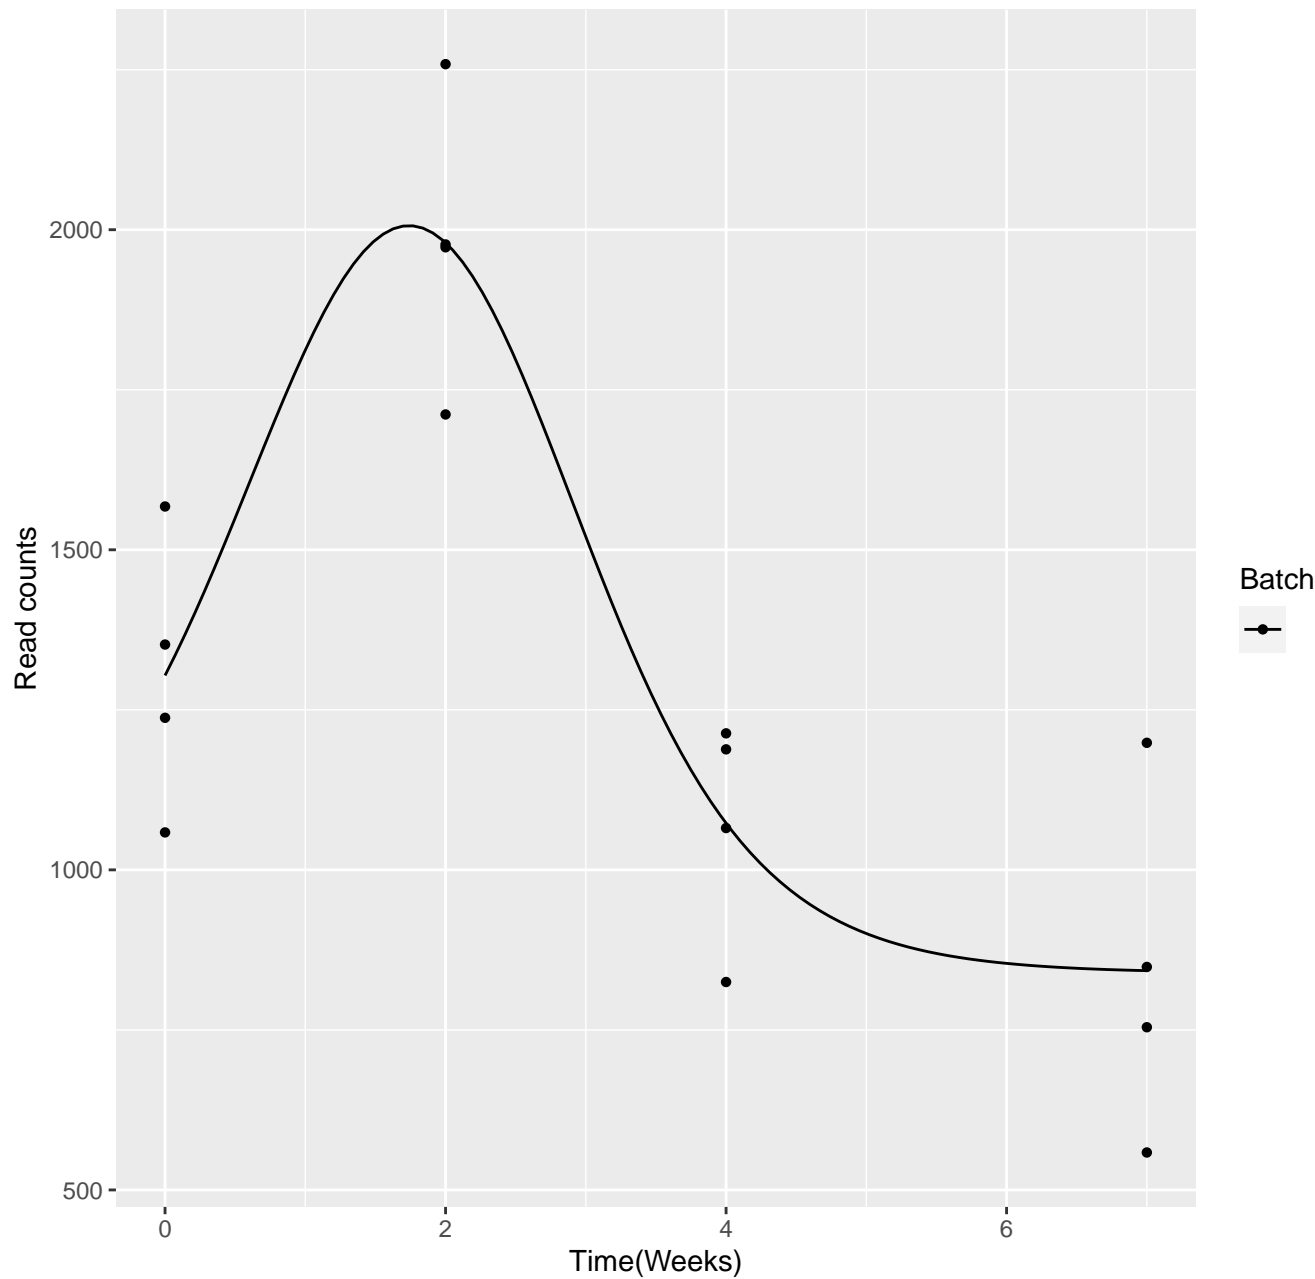

ASB13:  $\log_{10} q = -4.59$

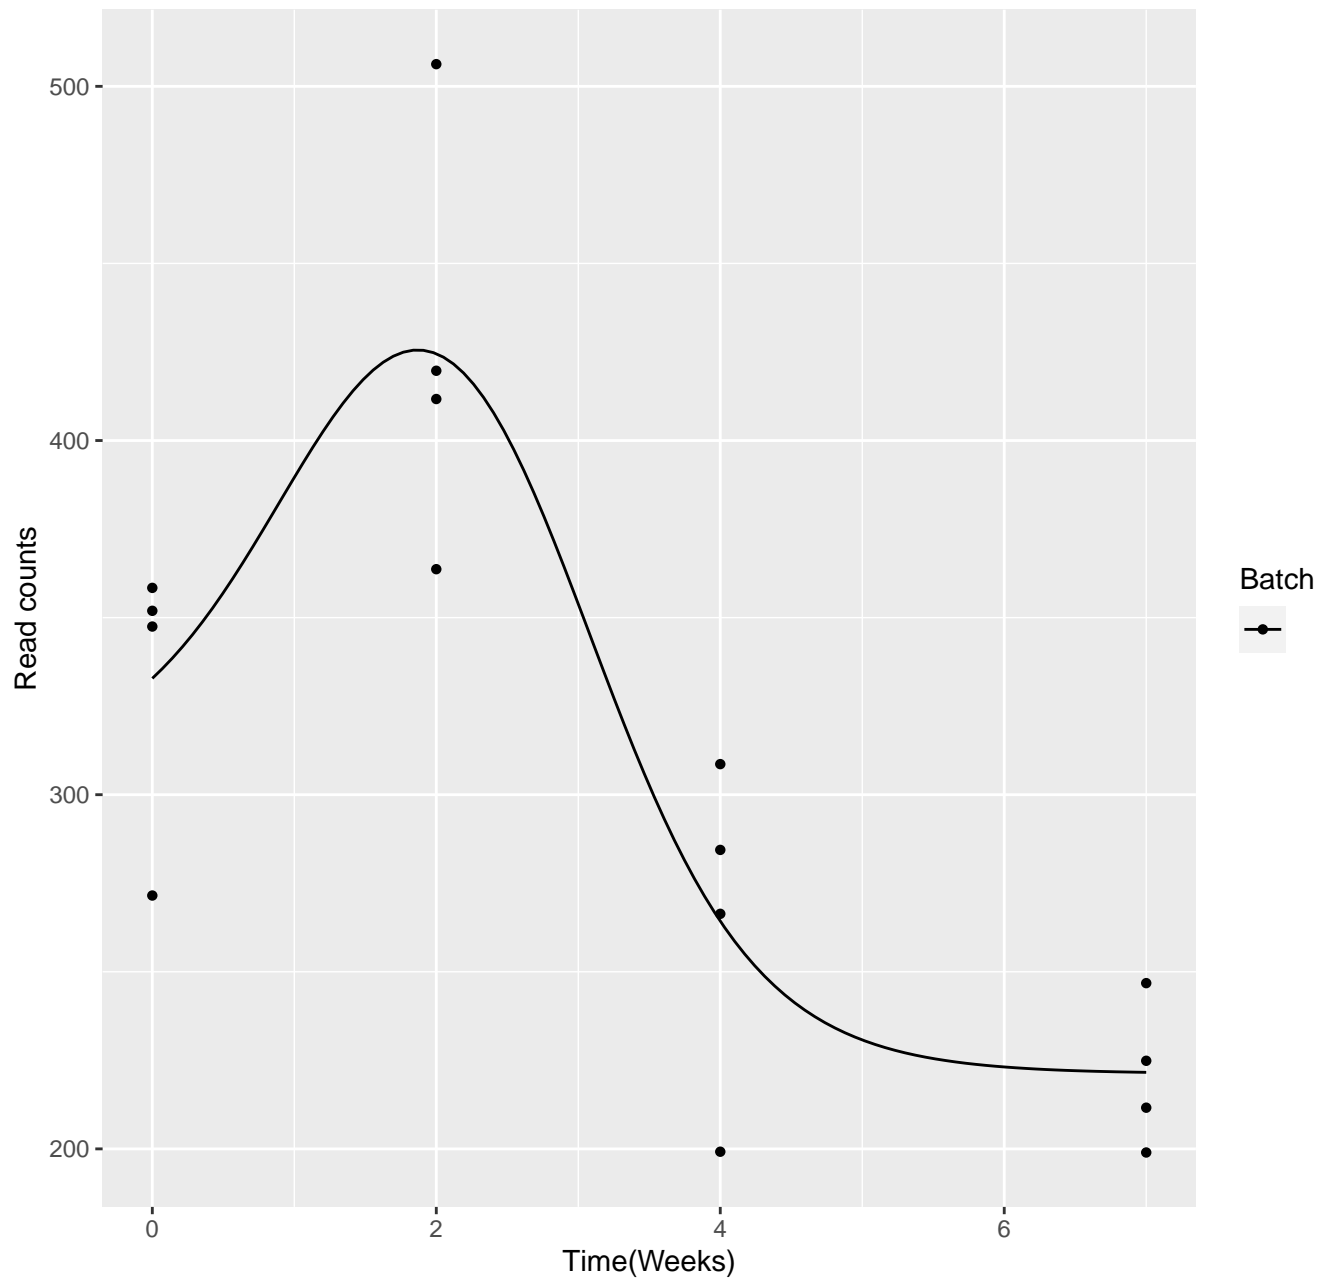

LOC127483137:  $\log_{10} q = -4.59$

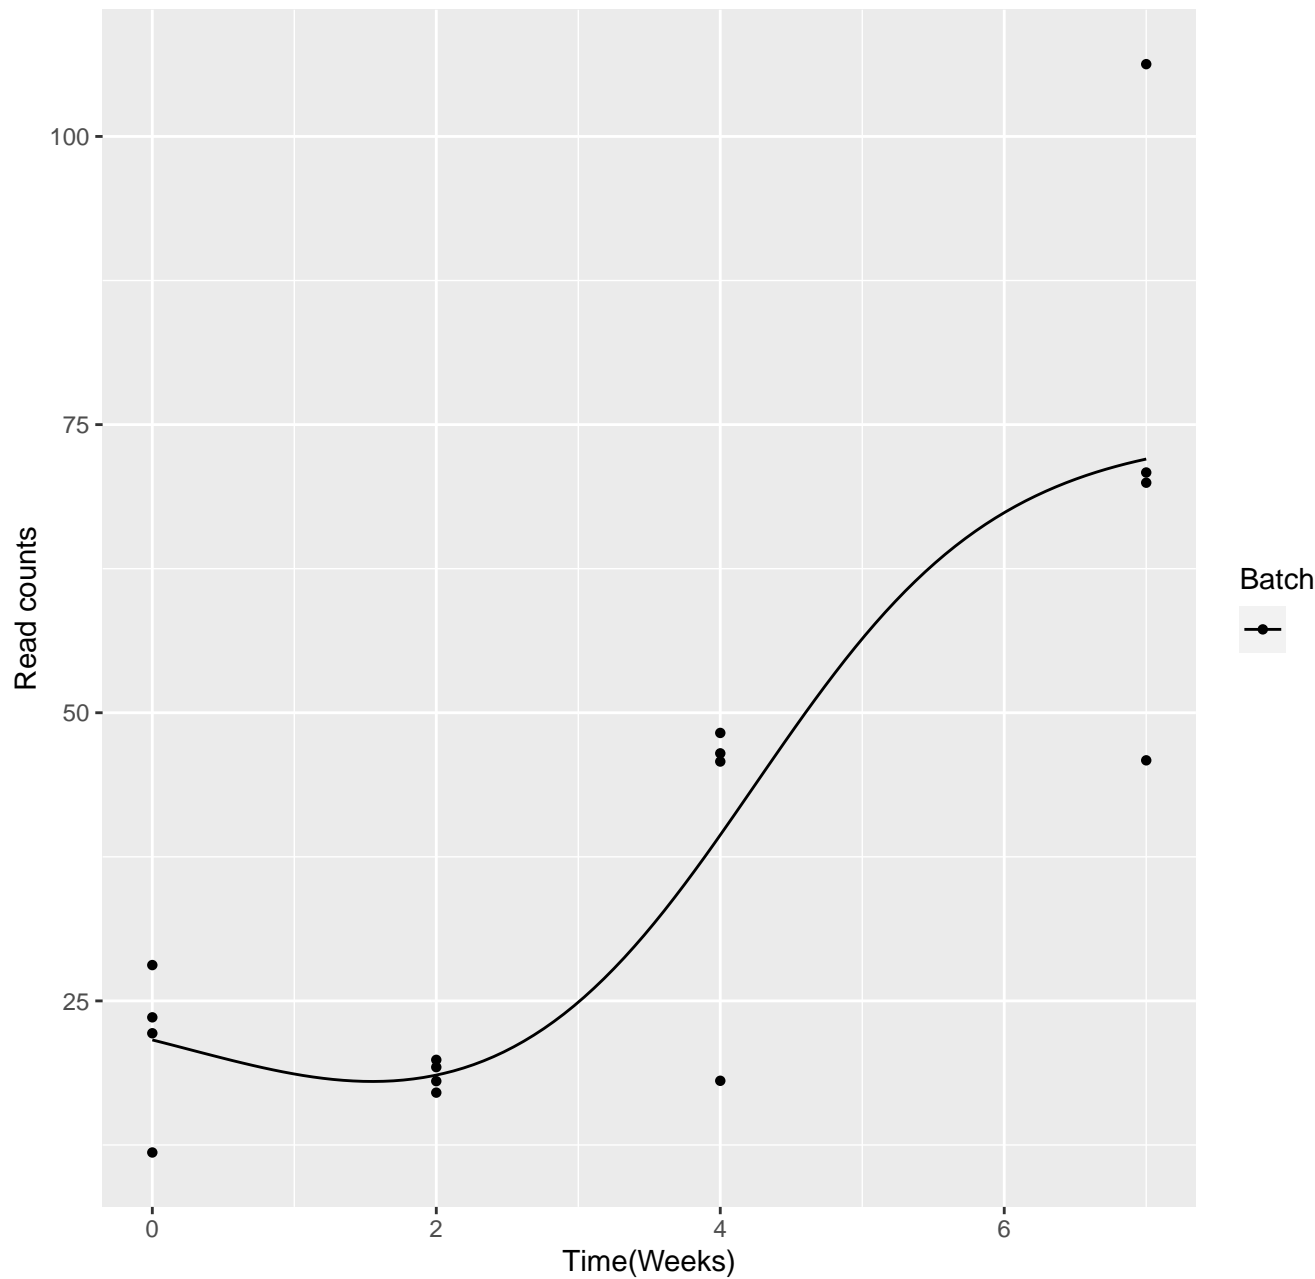

LCP2:  $\log_{10} q = -4.58$

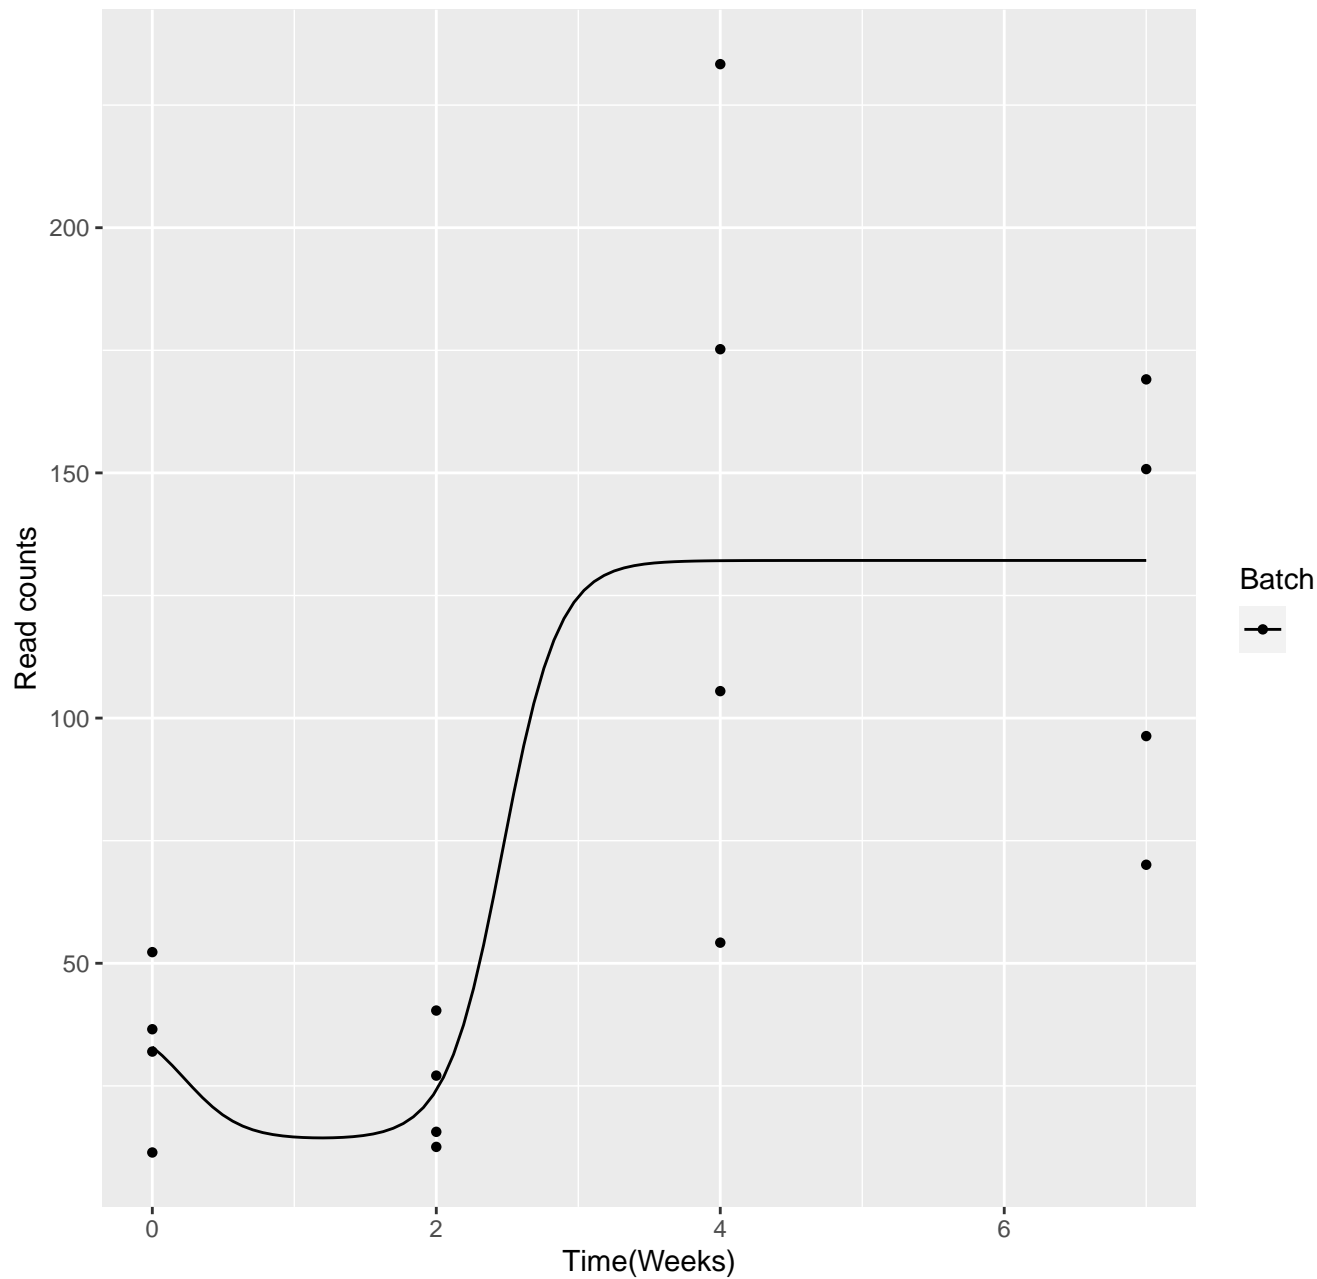

ALKAL2:  $\log_{10} q = -4.57$

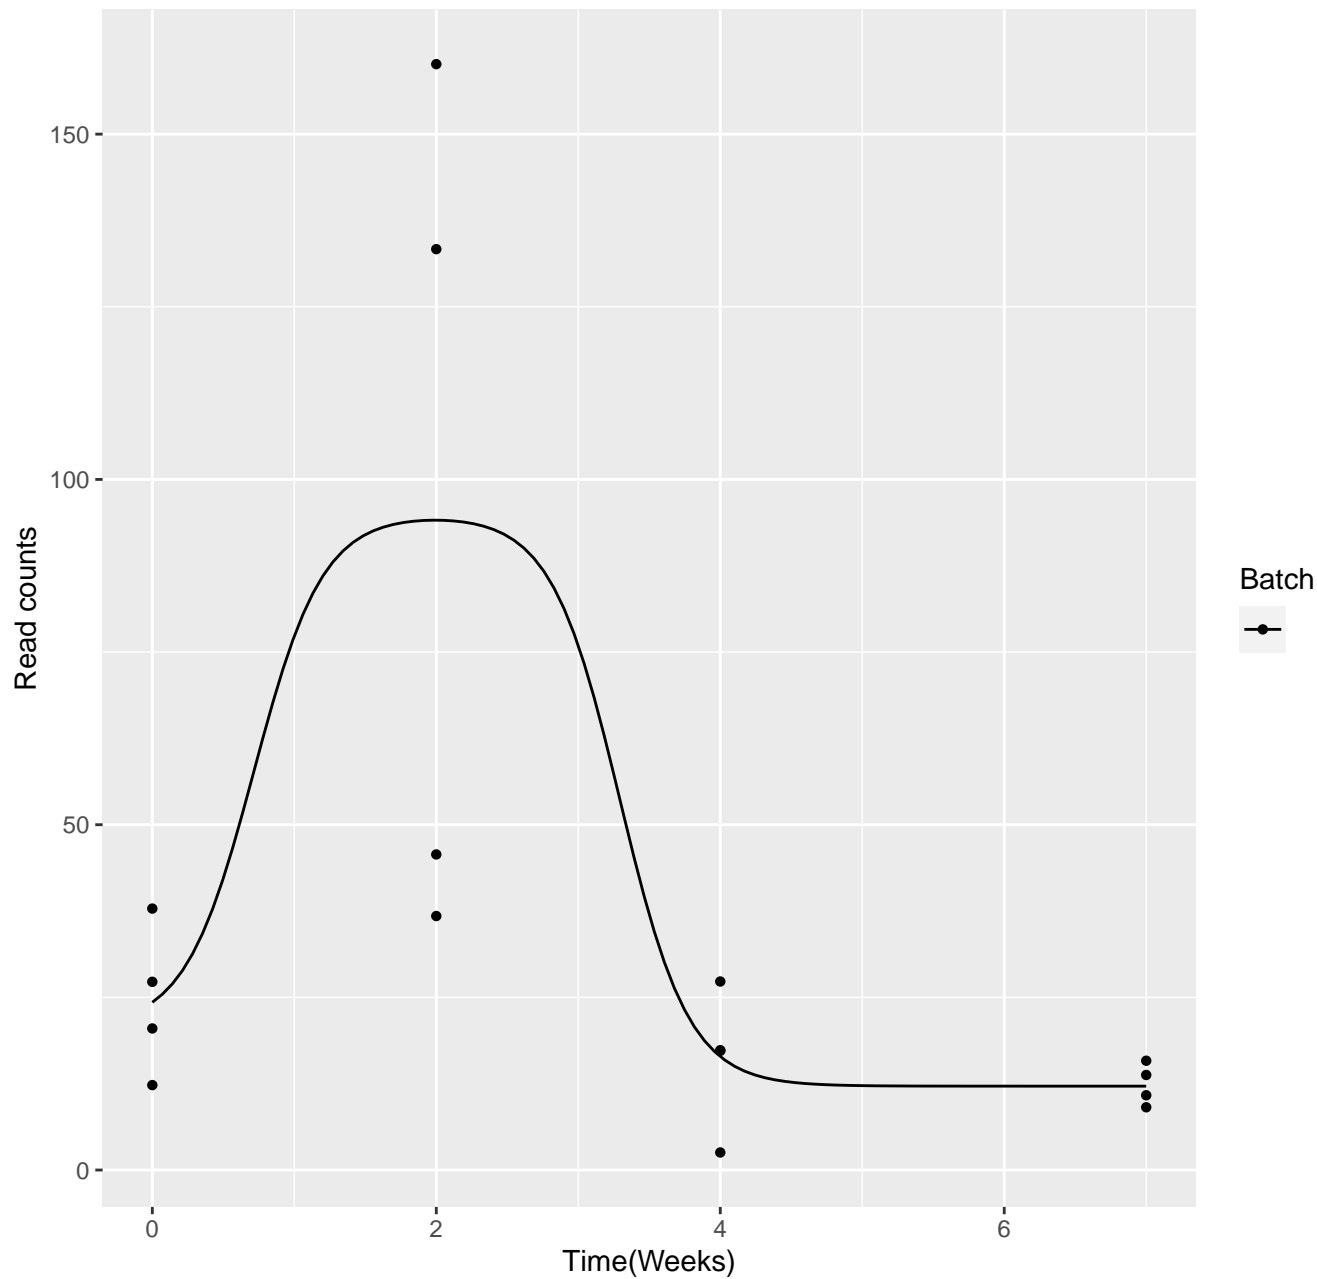

BLVRA:  $\log_{10} q = -4.57$

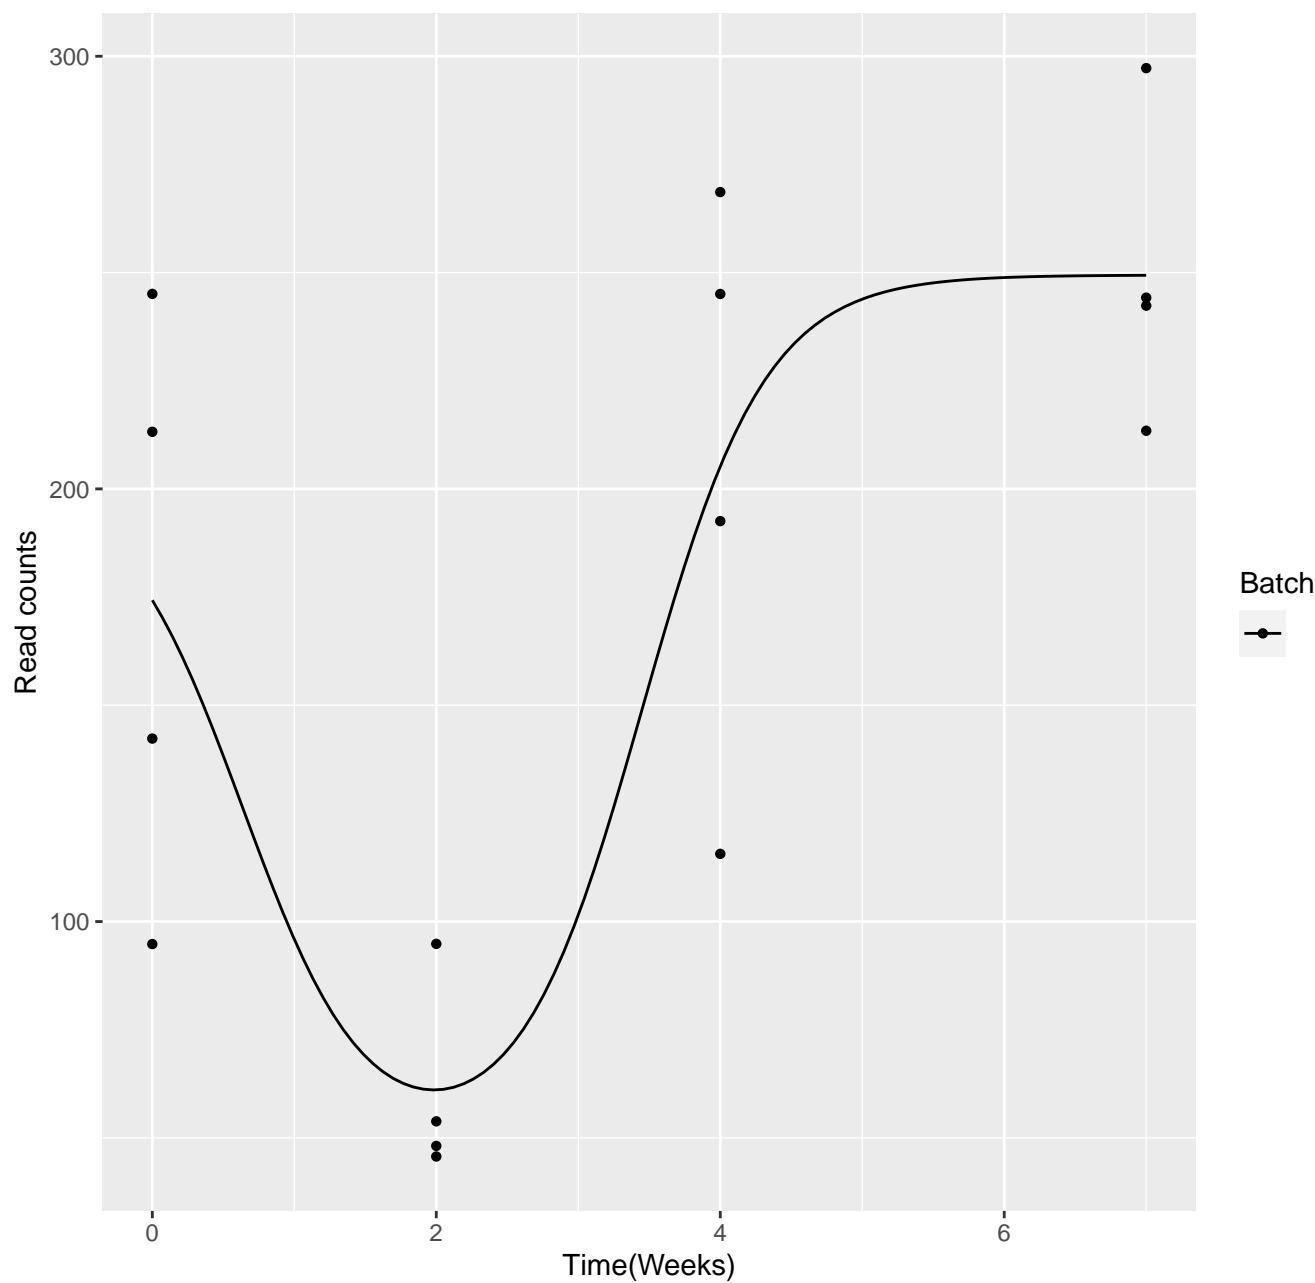

SPN:  $\log_{10} q = -4.57$

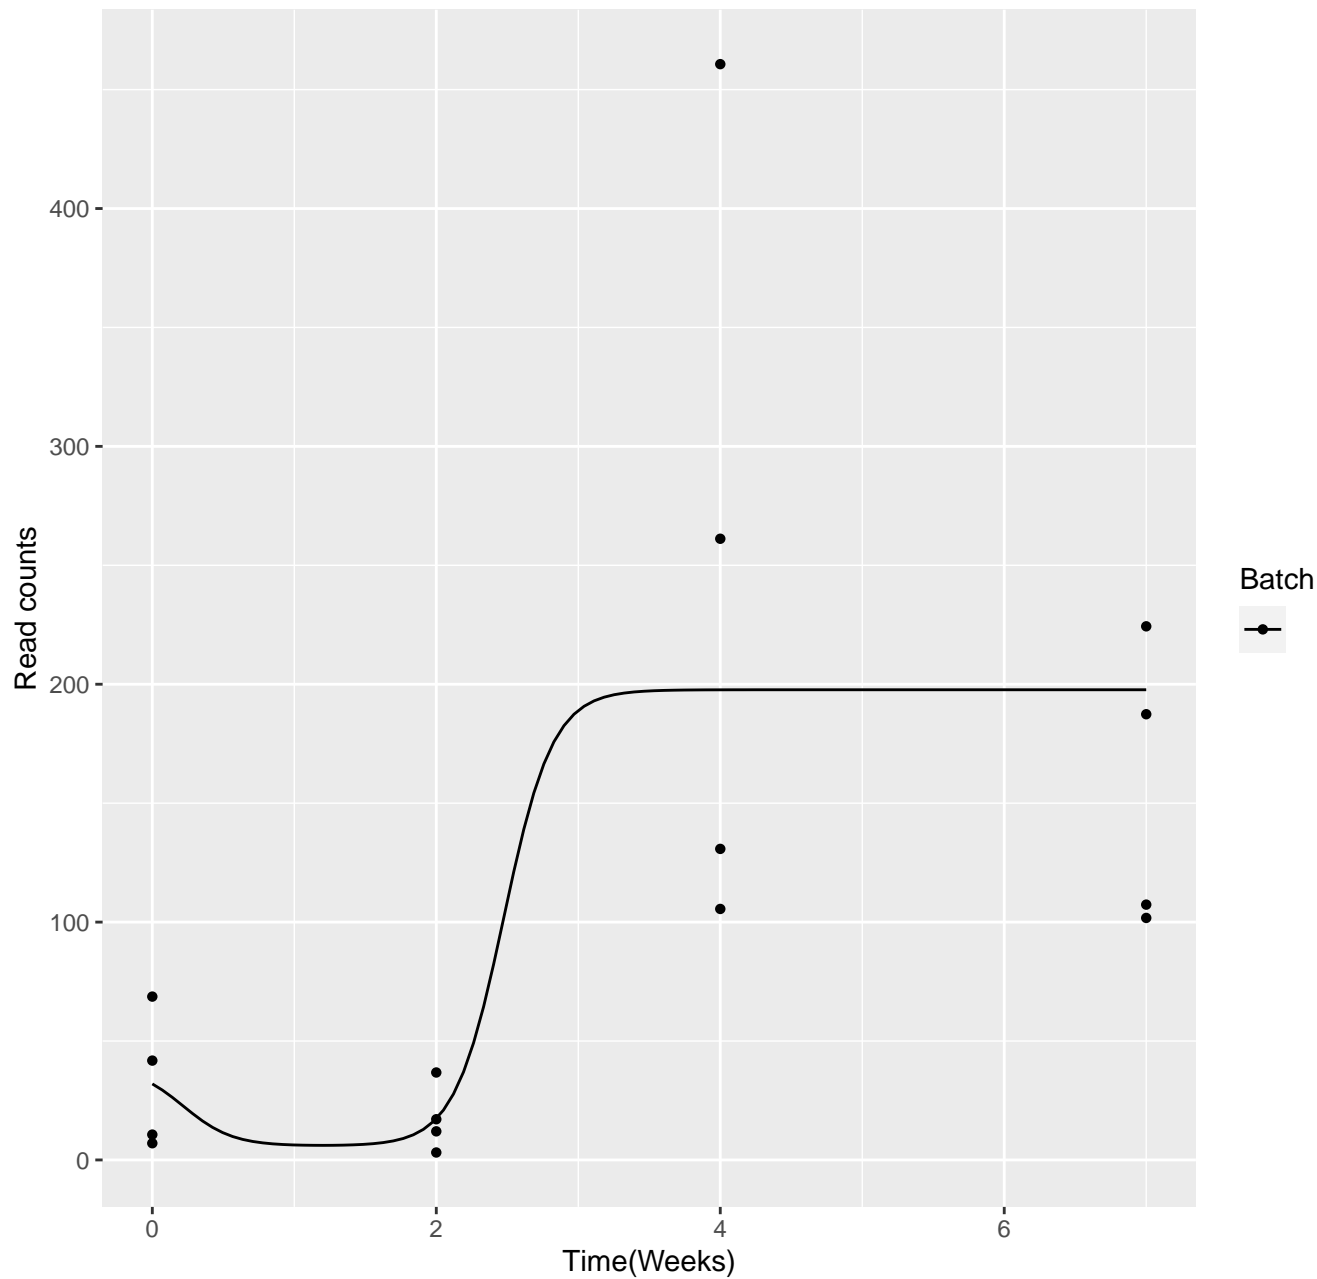



PLXDC2:  $\log_{10} q = -4.57$

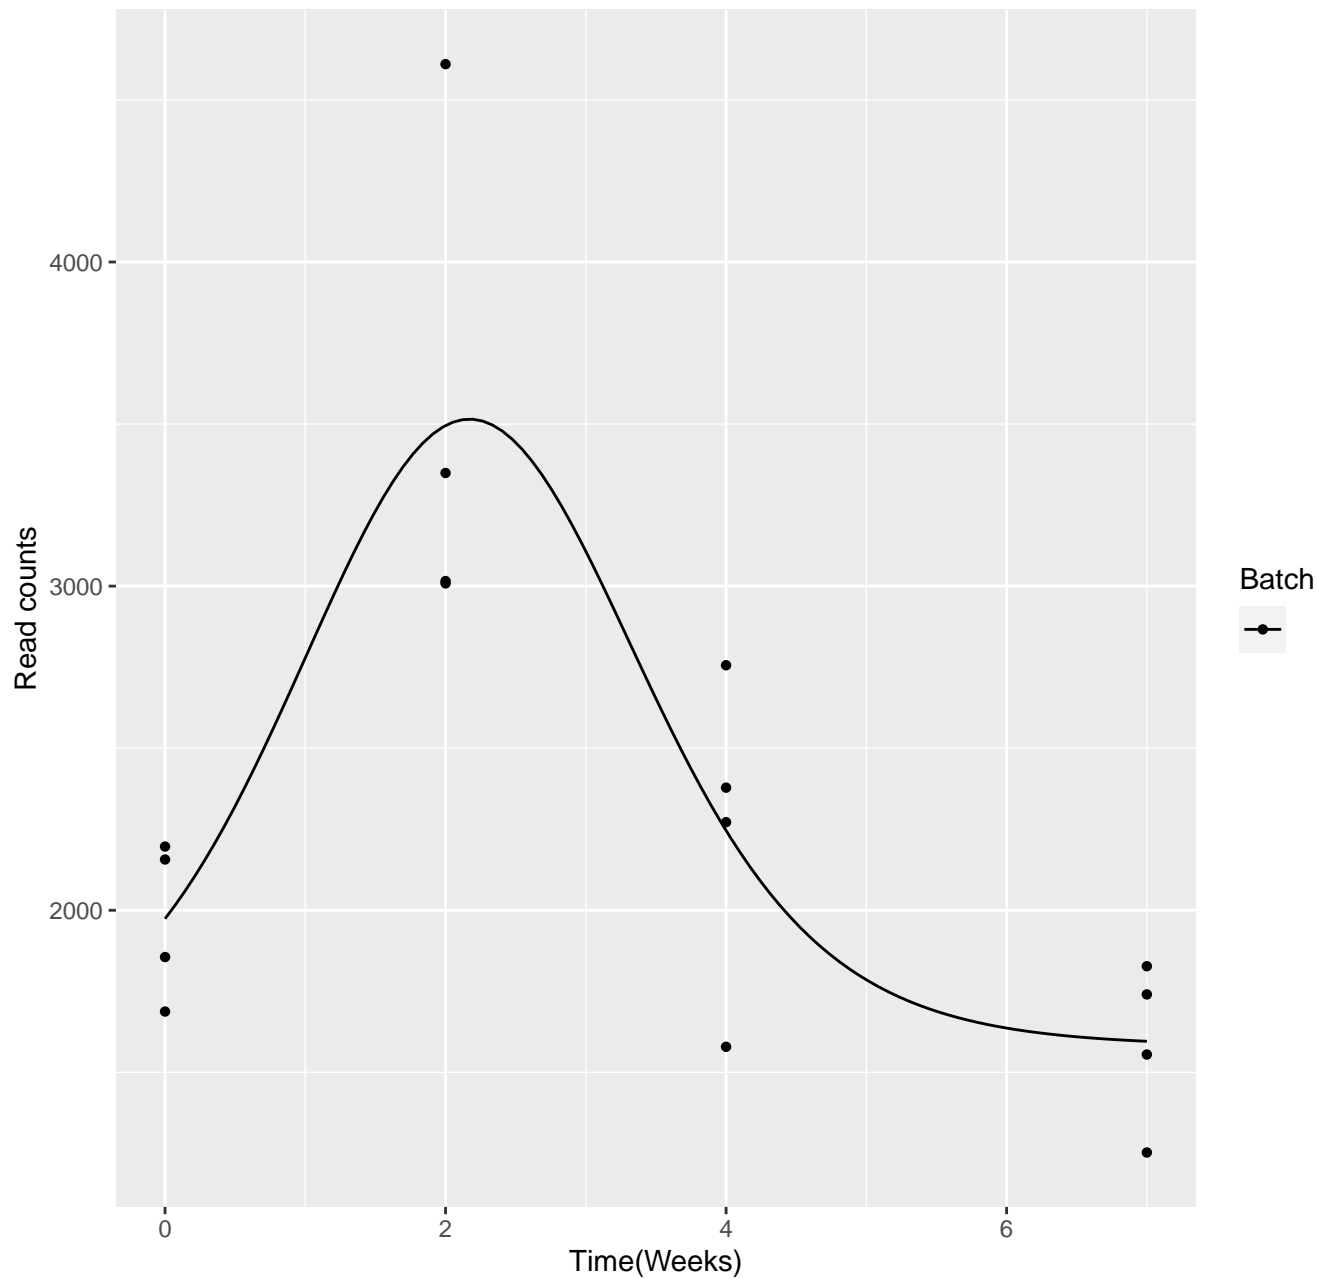

ITGAM:  $\log_{10} q = -4.56$

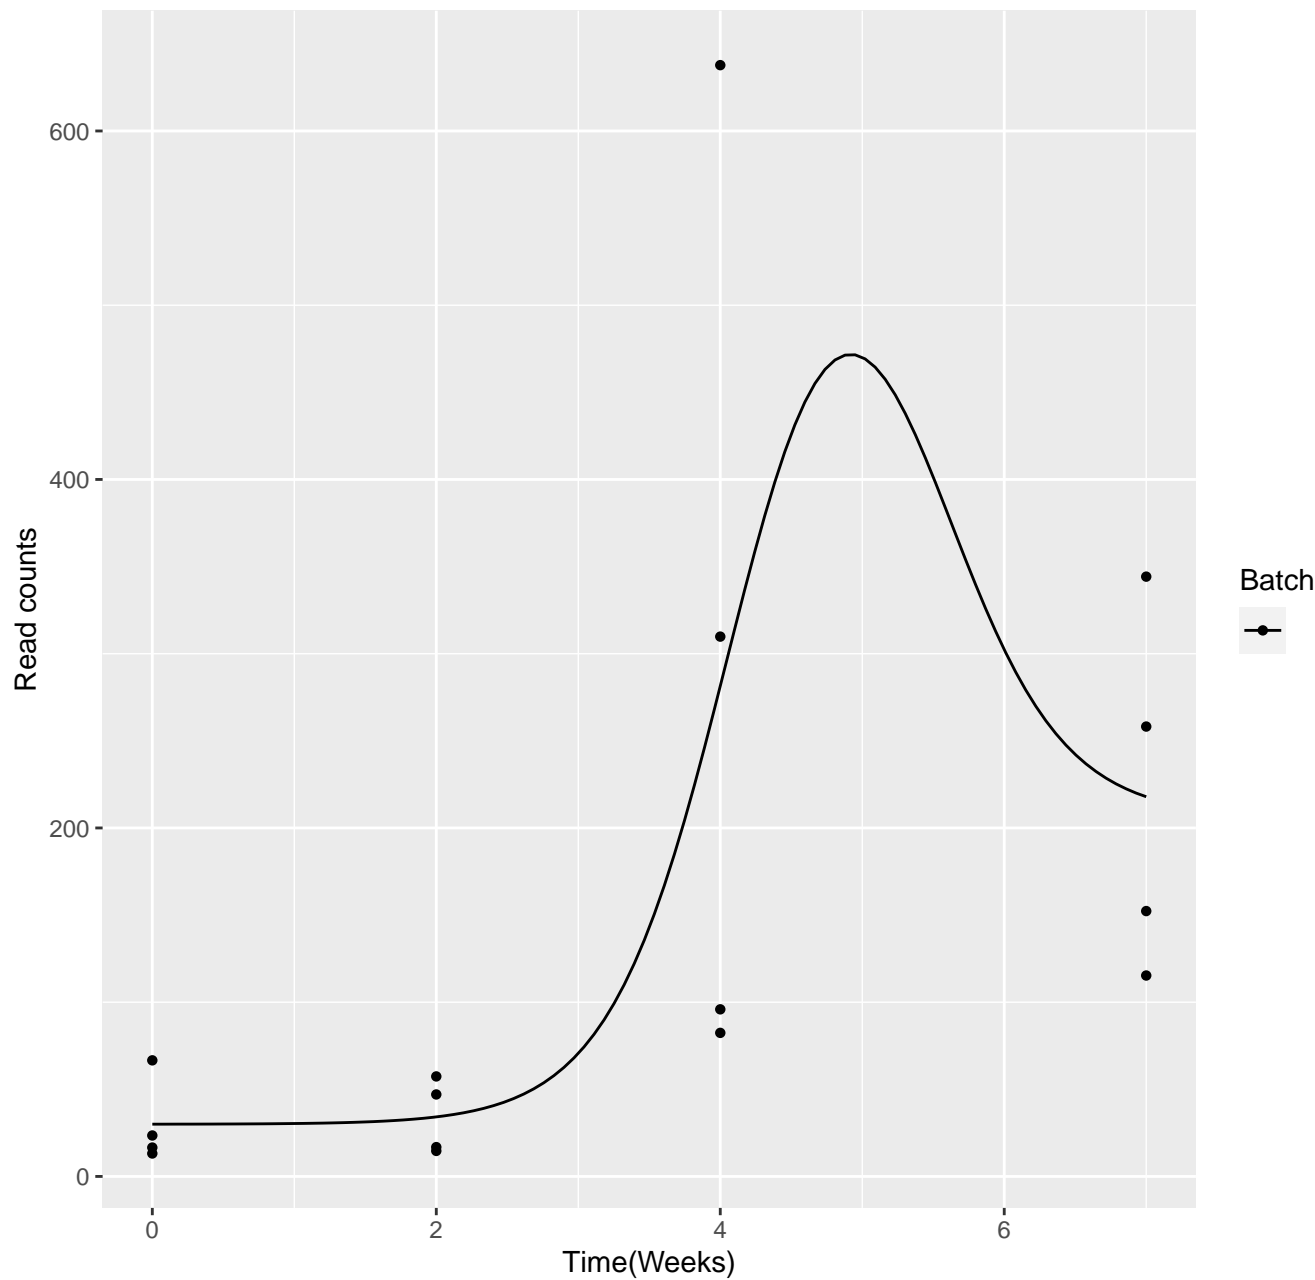

RNF122:  $\log_{10} q = -4.56$

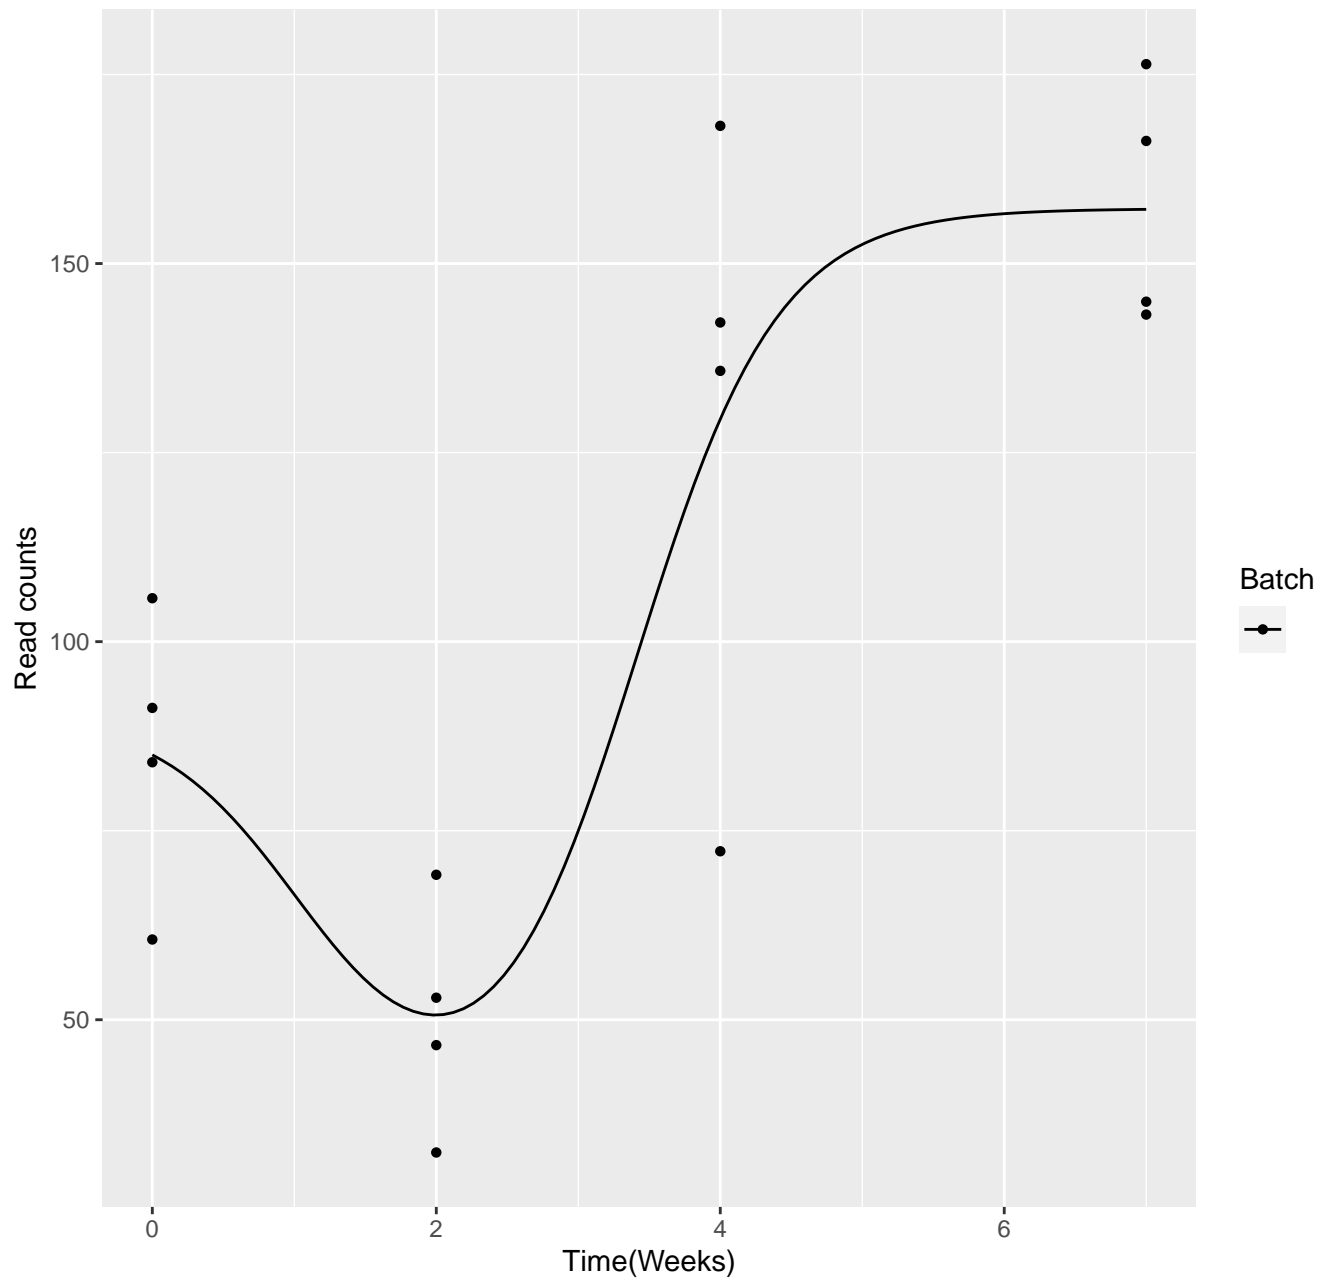

SMTN:  $\log_{10} q = -4.56$

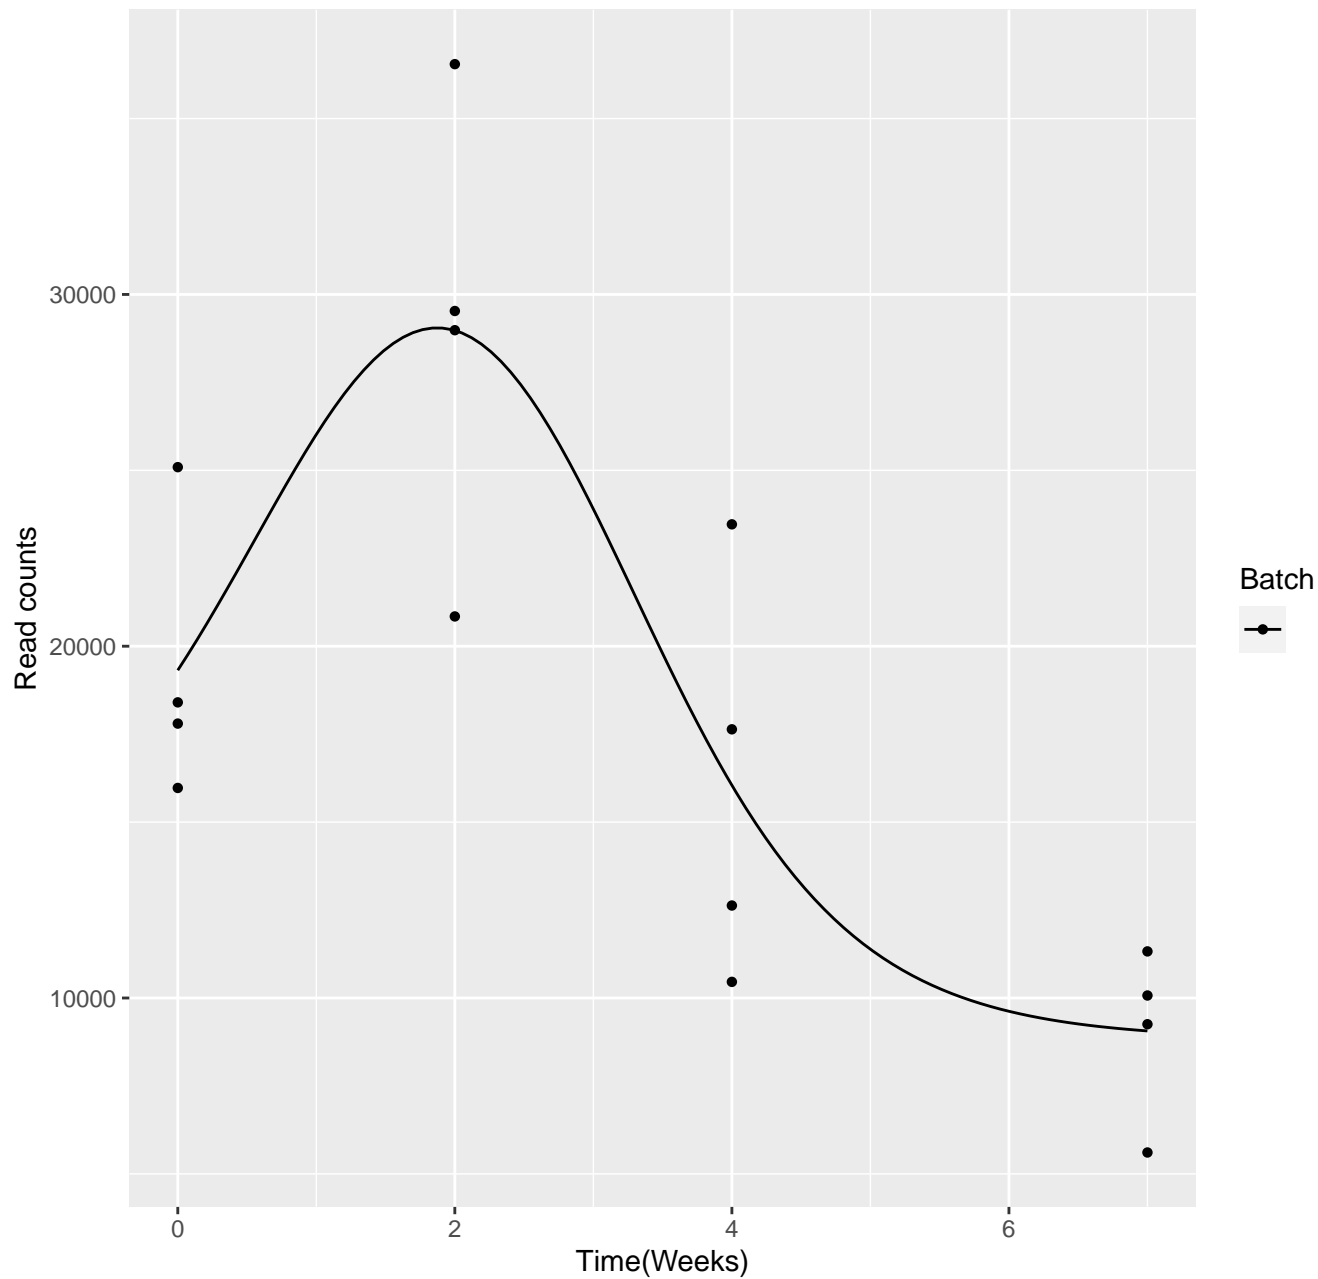

PYCR3:  $\log_{10} q = -4.56$

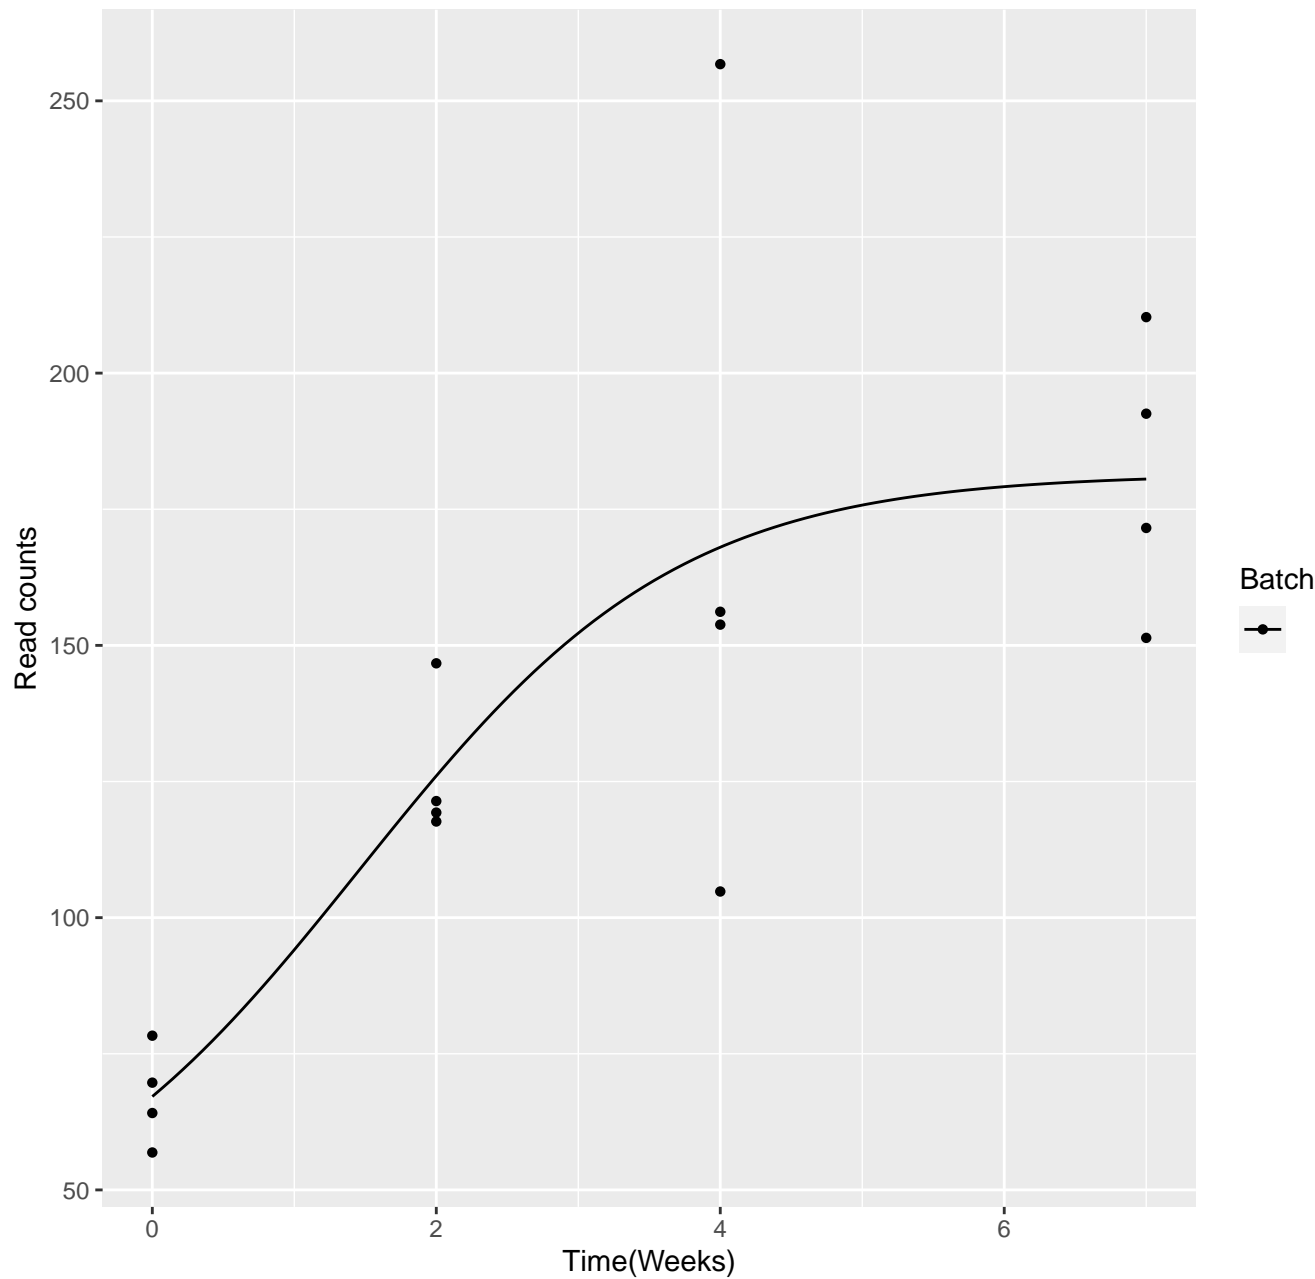

CNKSR3:  $\log_{10} q = -4.56$

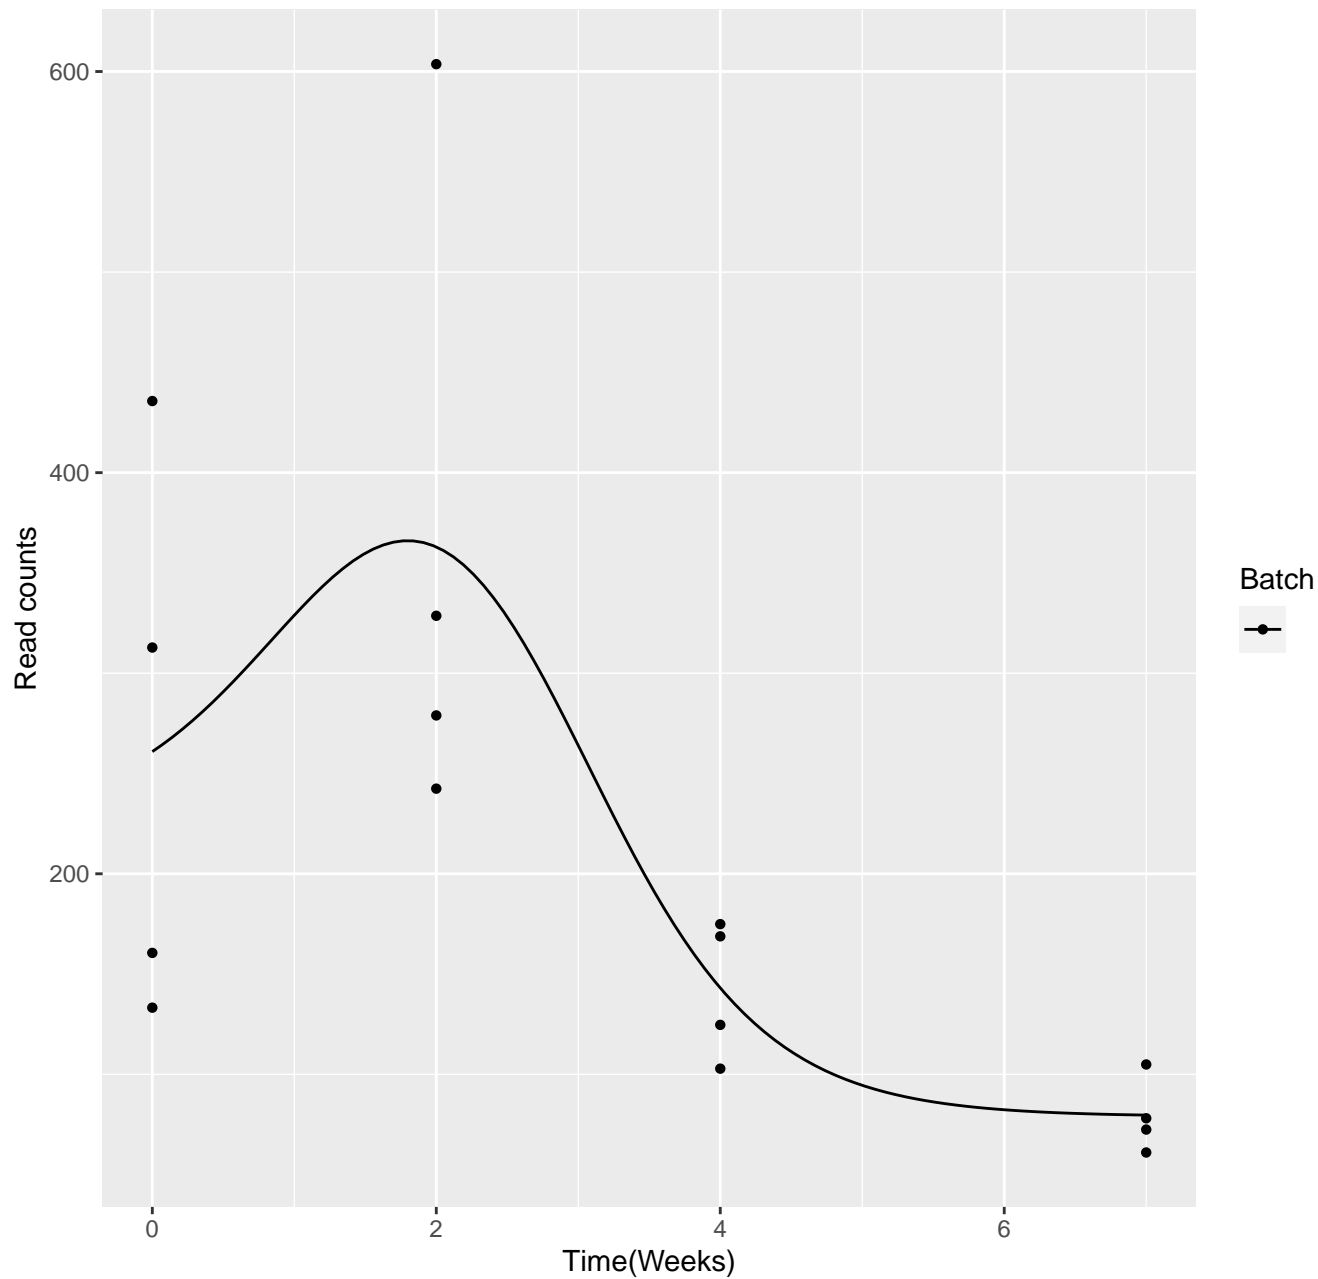

IGFBPL1:  $\log_{10} q = -4.56$

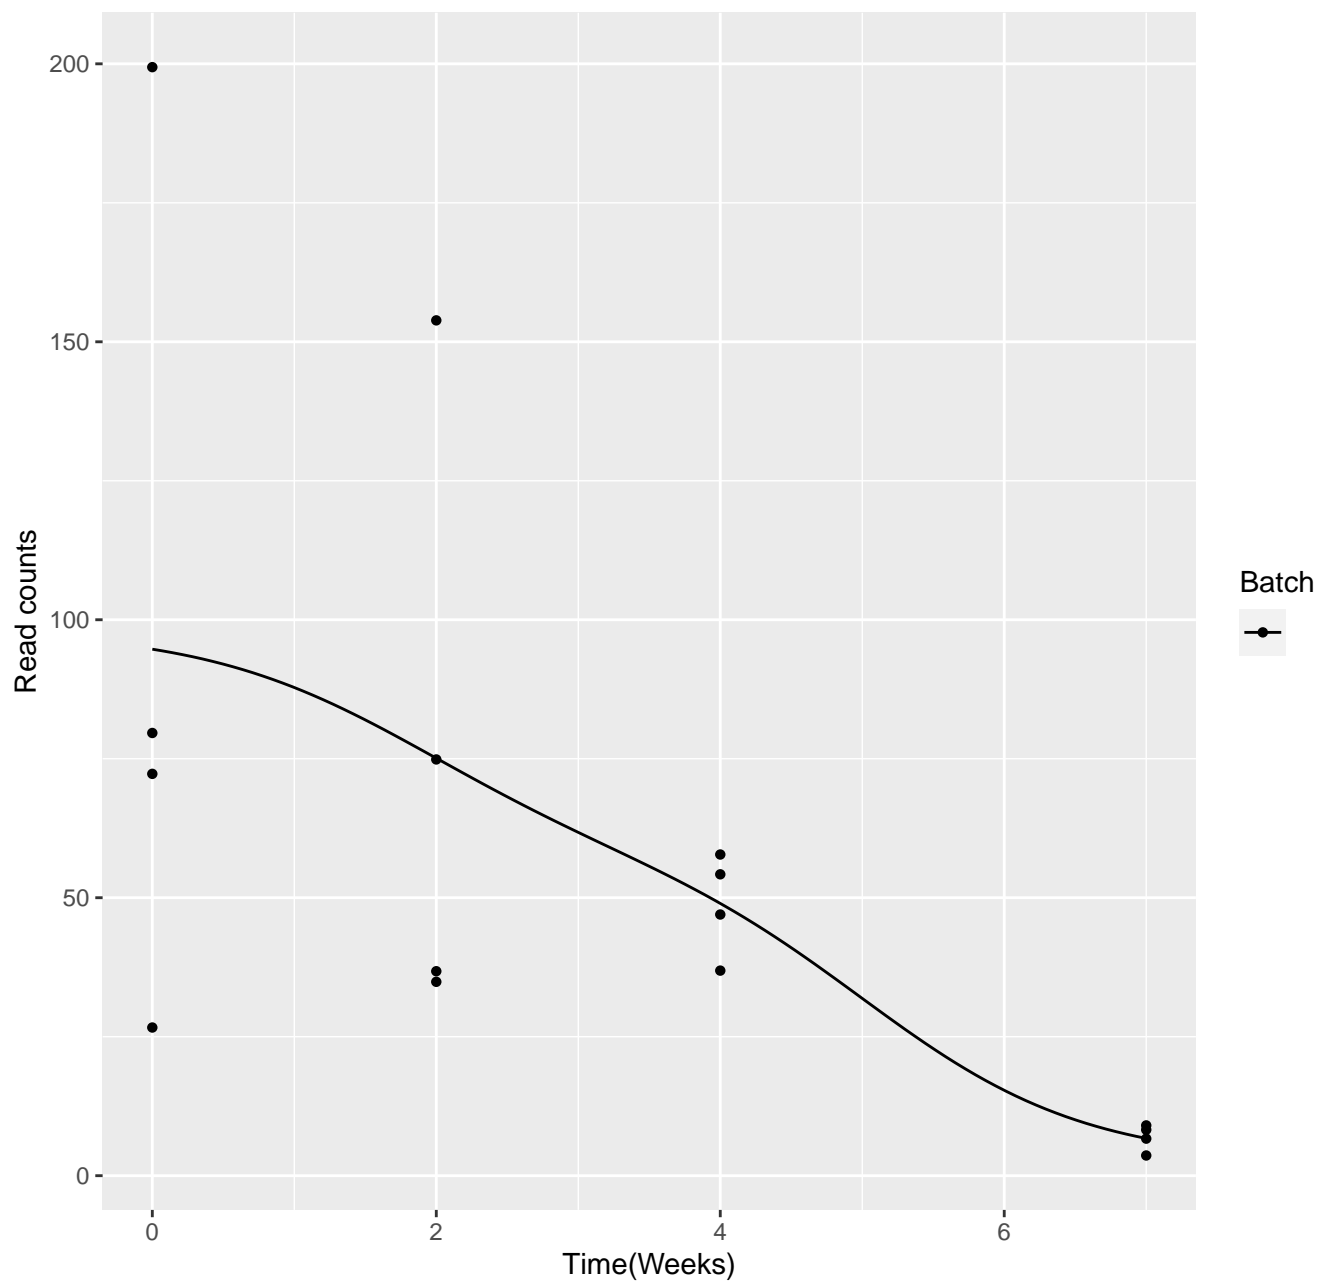

GDF10:  $\log_{10} q = -4.55$

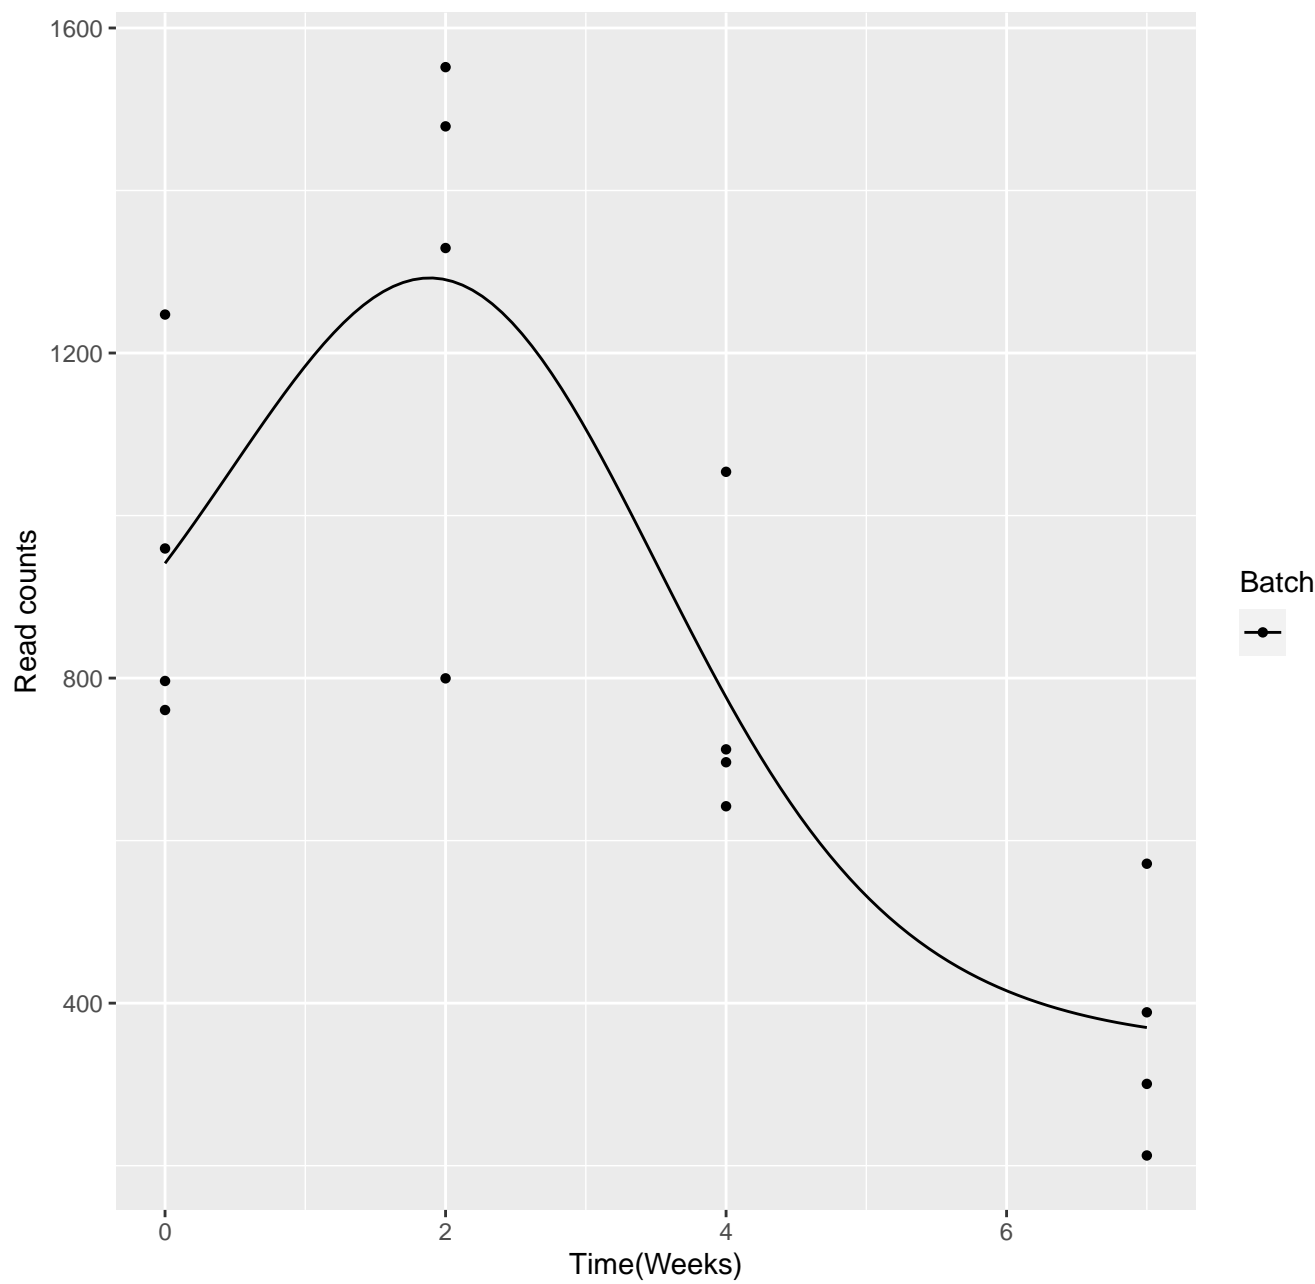



STAB1:  $\log_{10} q = -4.54$

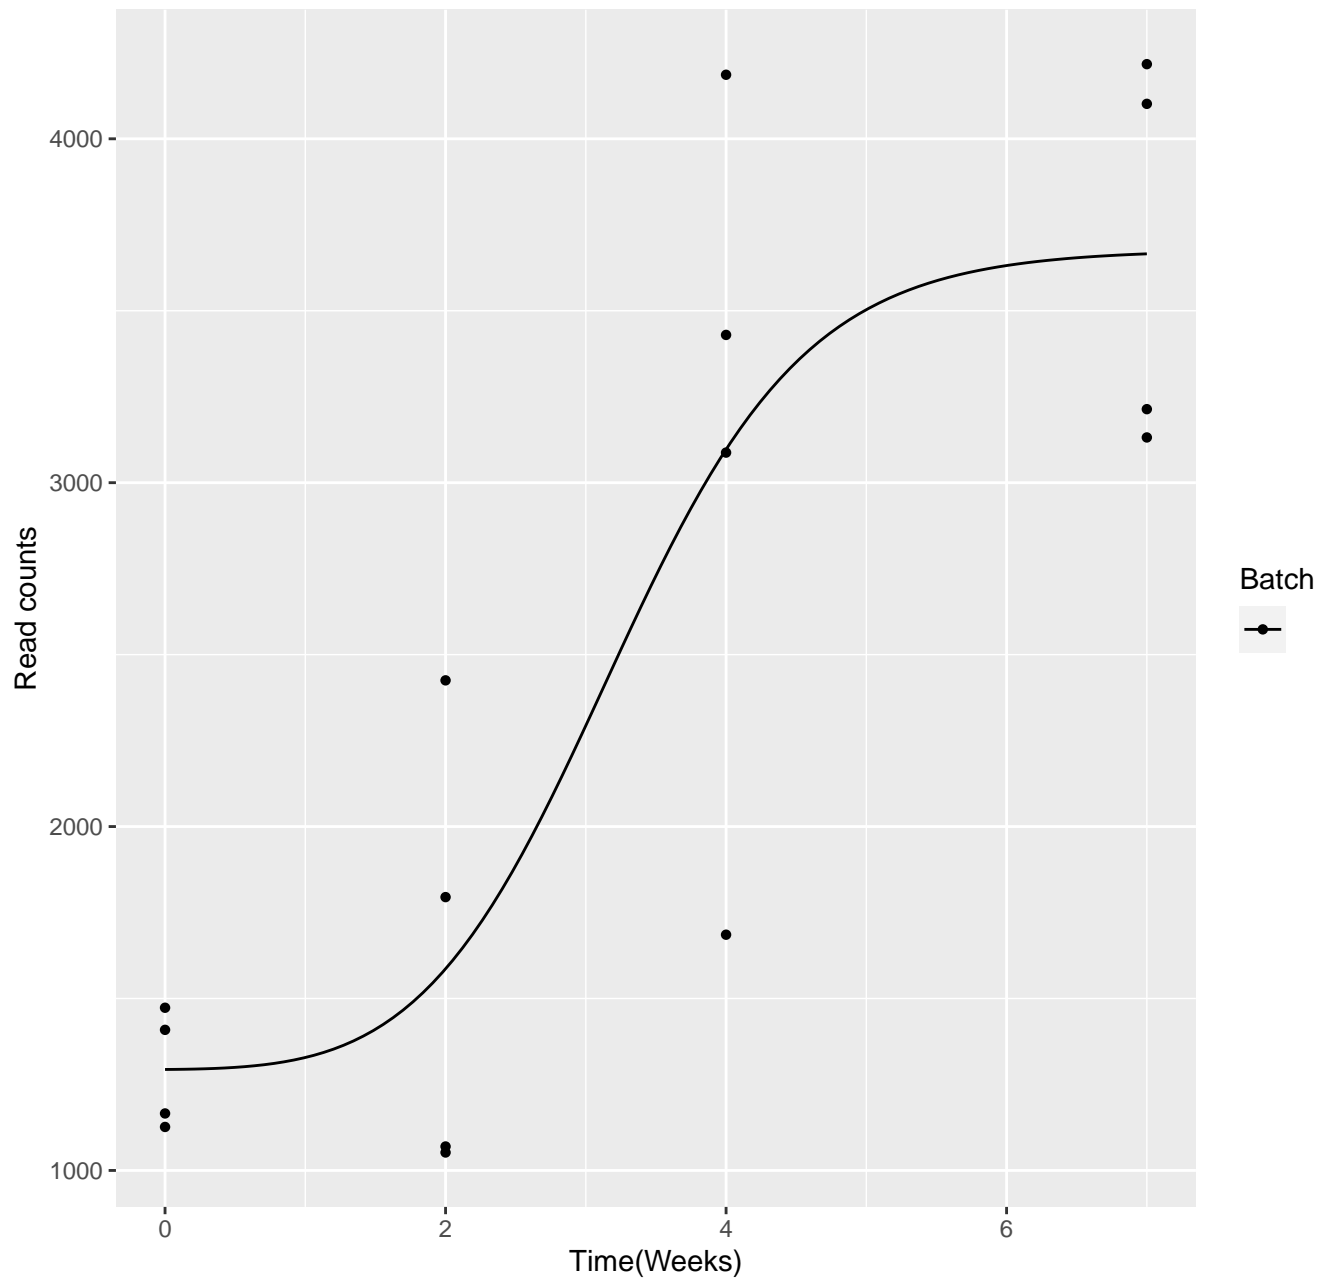

POGK:  $\log_{10} q = -4.54$

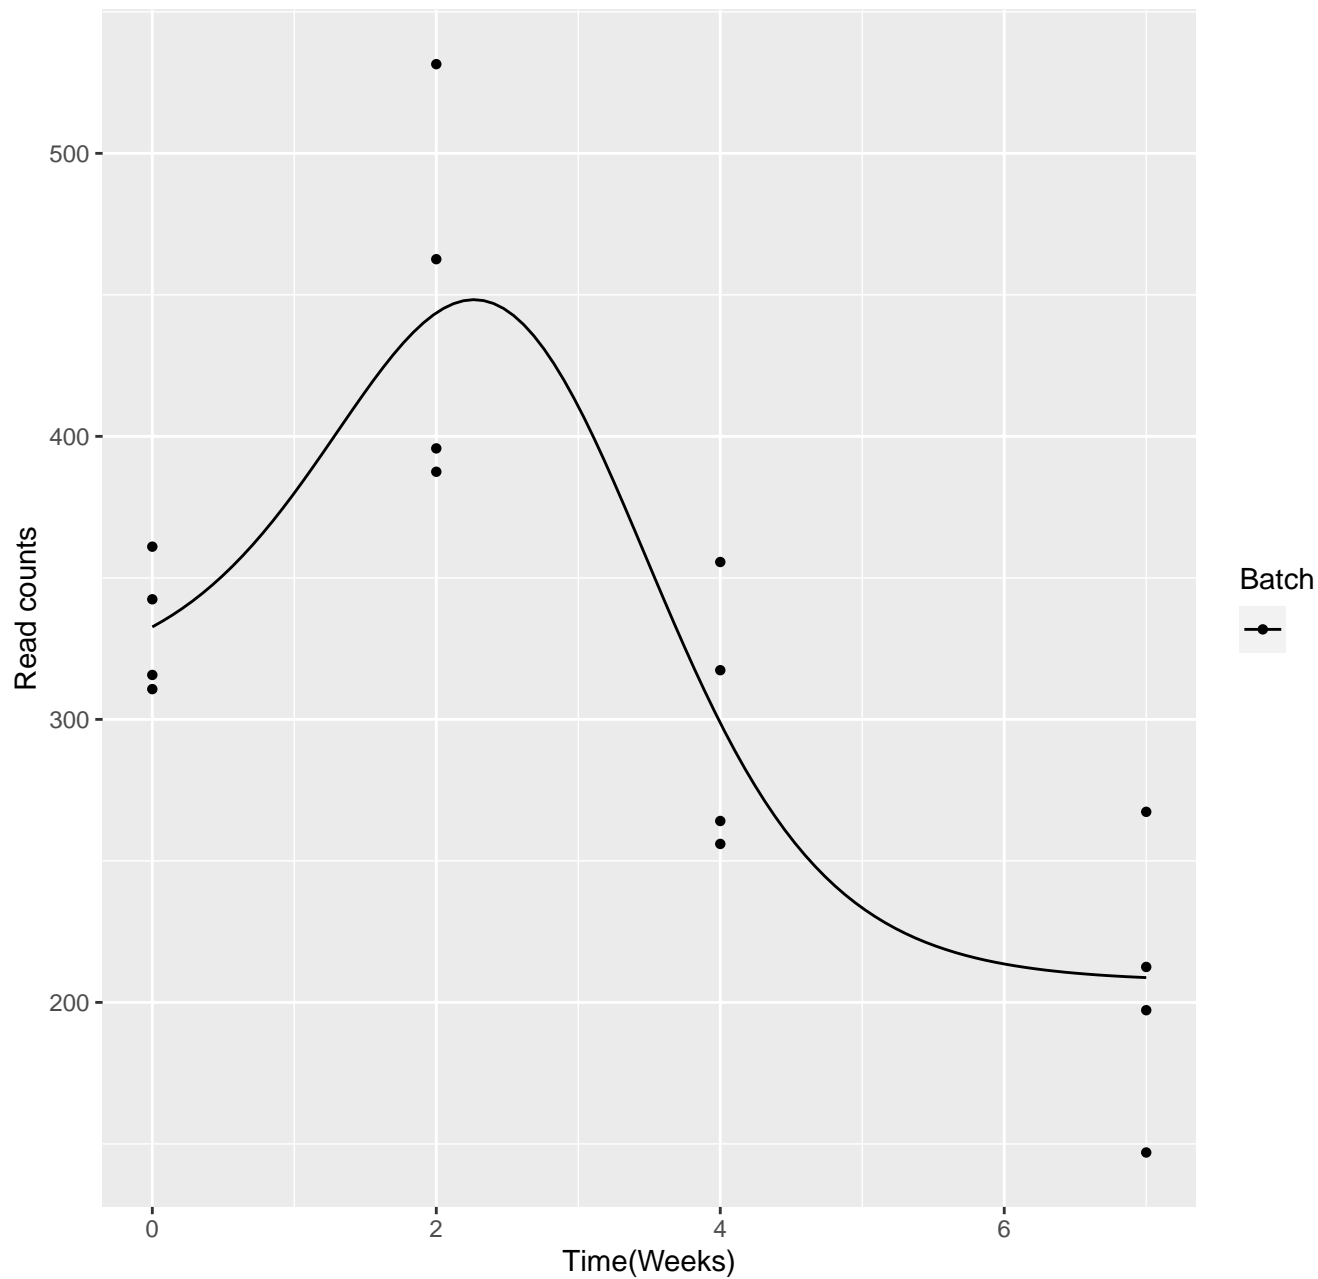

SH2B3:  $\log_{10} q = -4.54$

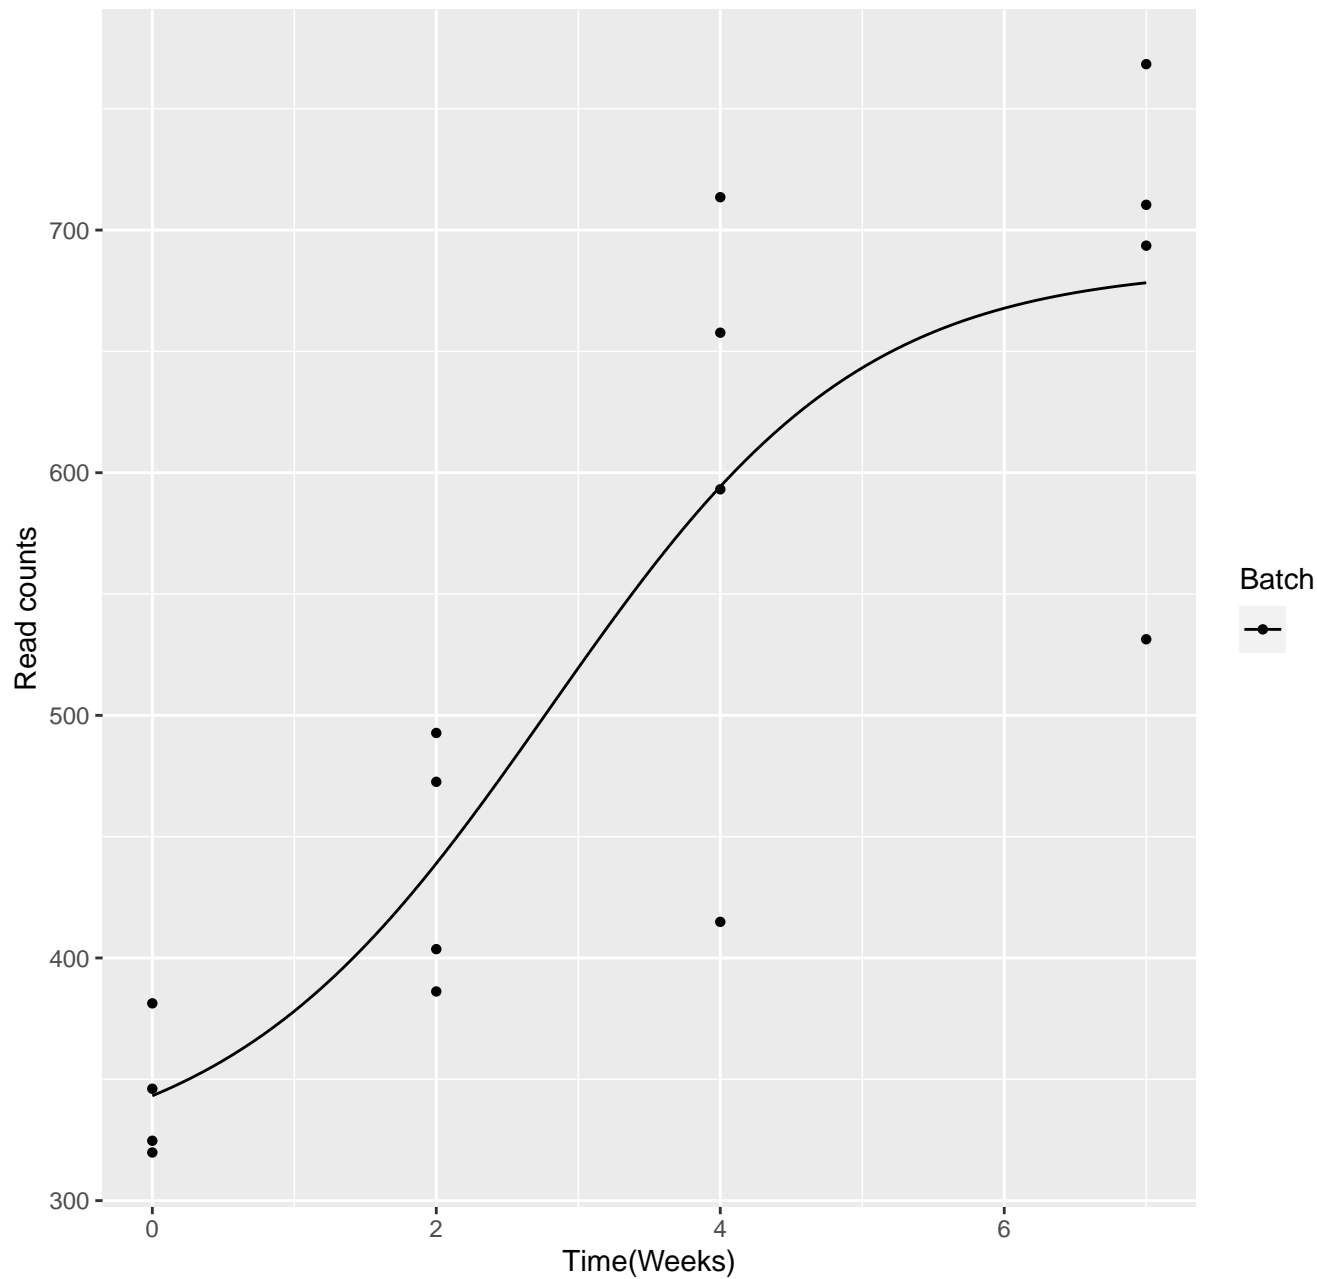

LOC100340939:  $\log_{10} q = -4.53$

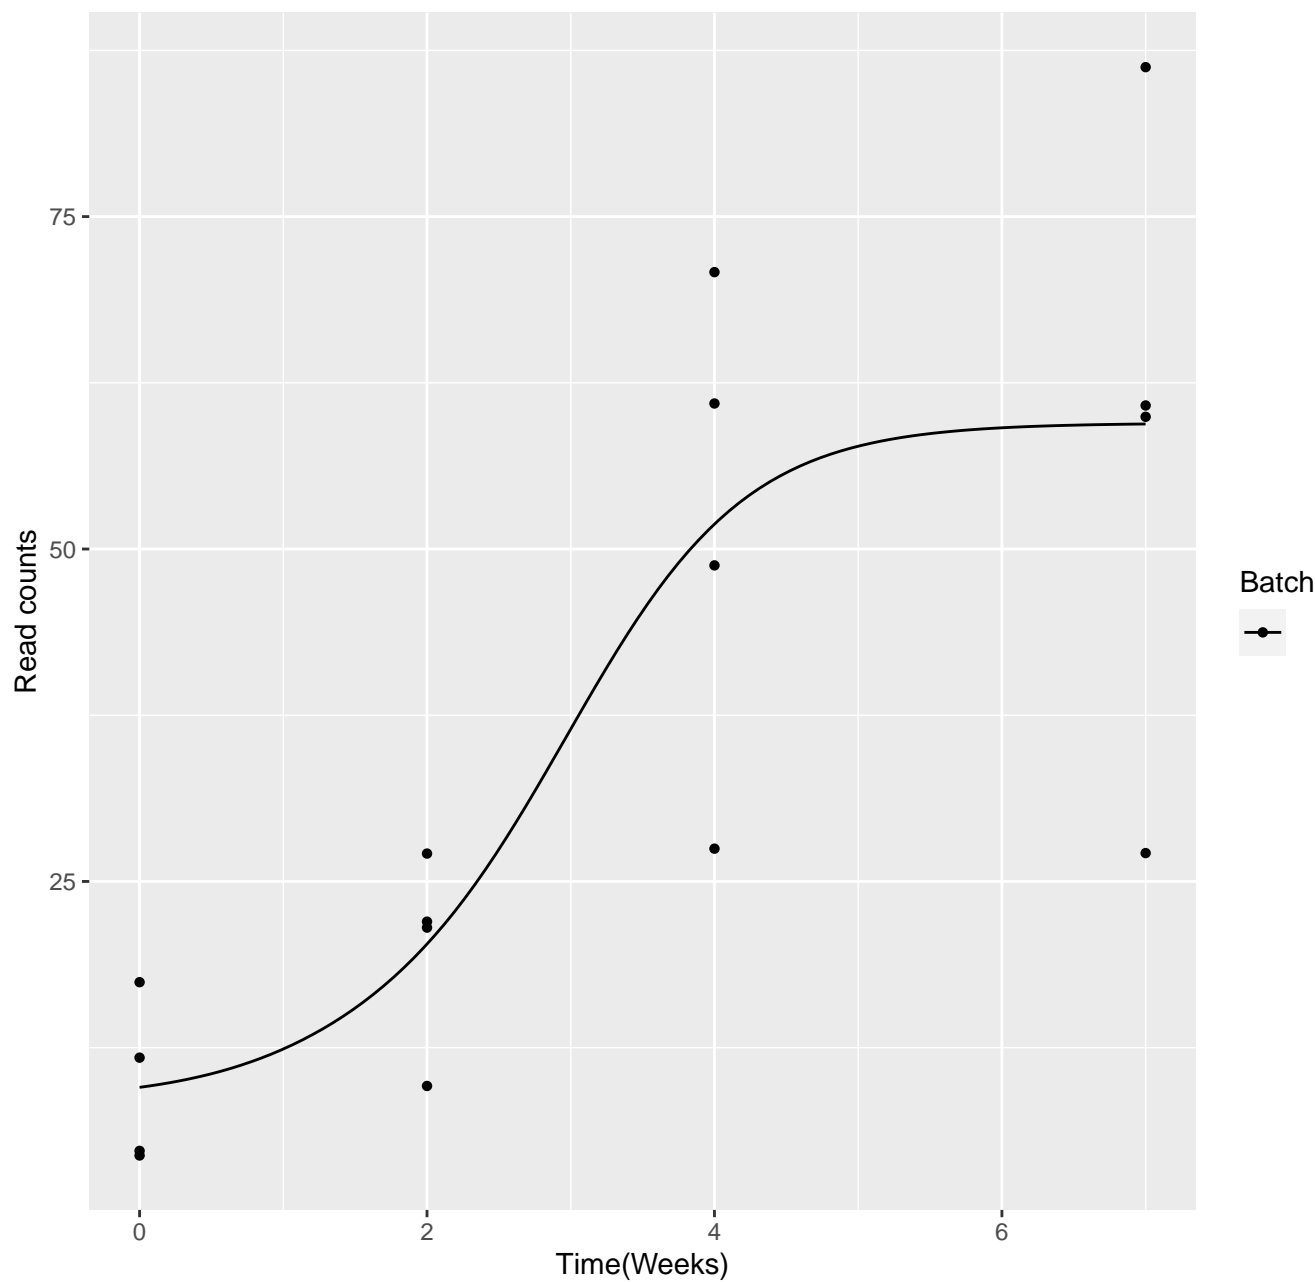

SESN2:  $\log_{10} q = -4.53$

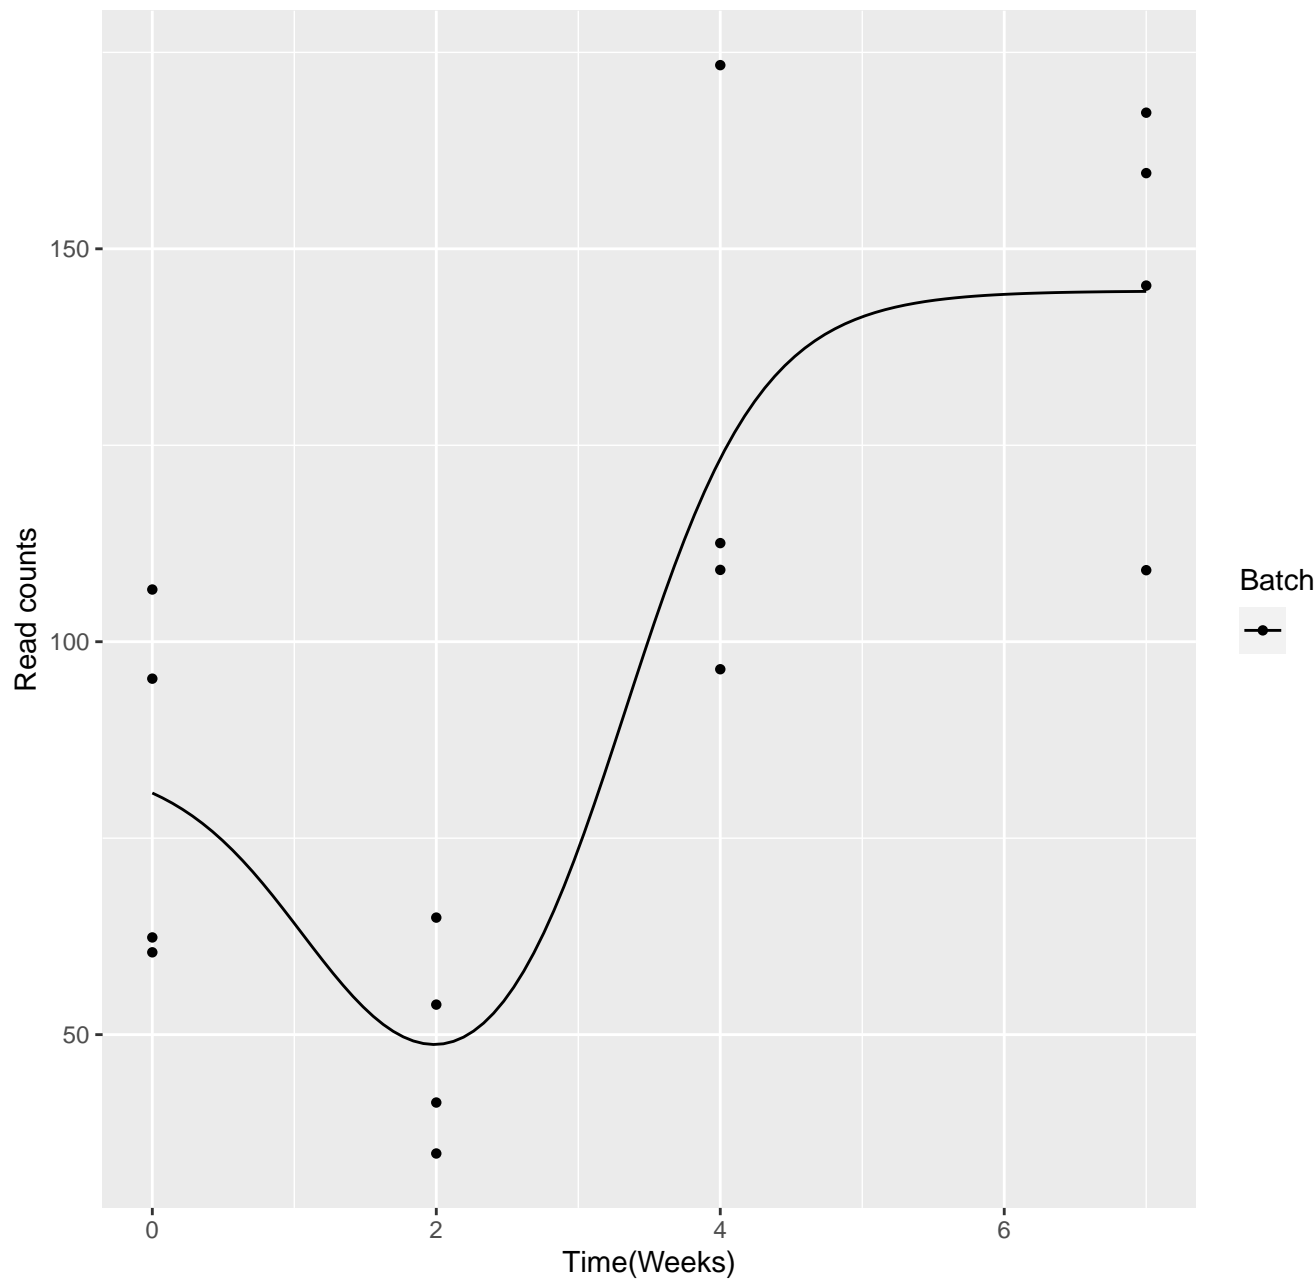

NPPB:  $\log_{10} q = -4.52$

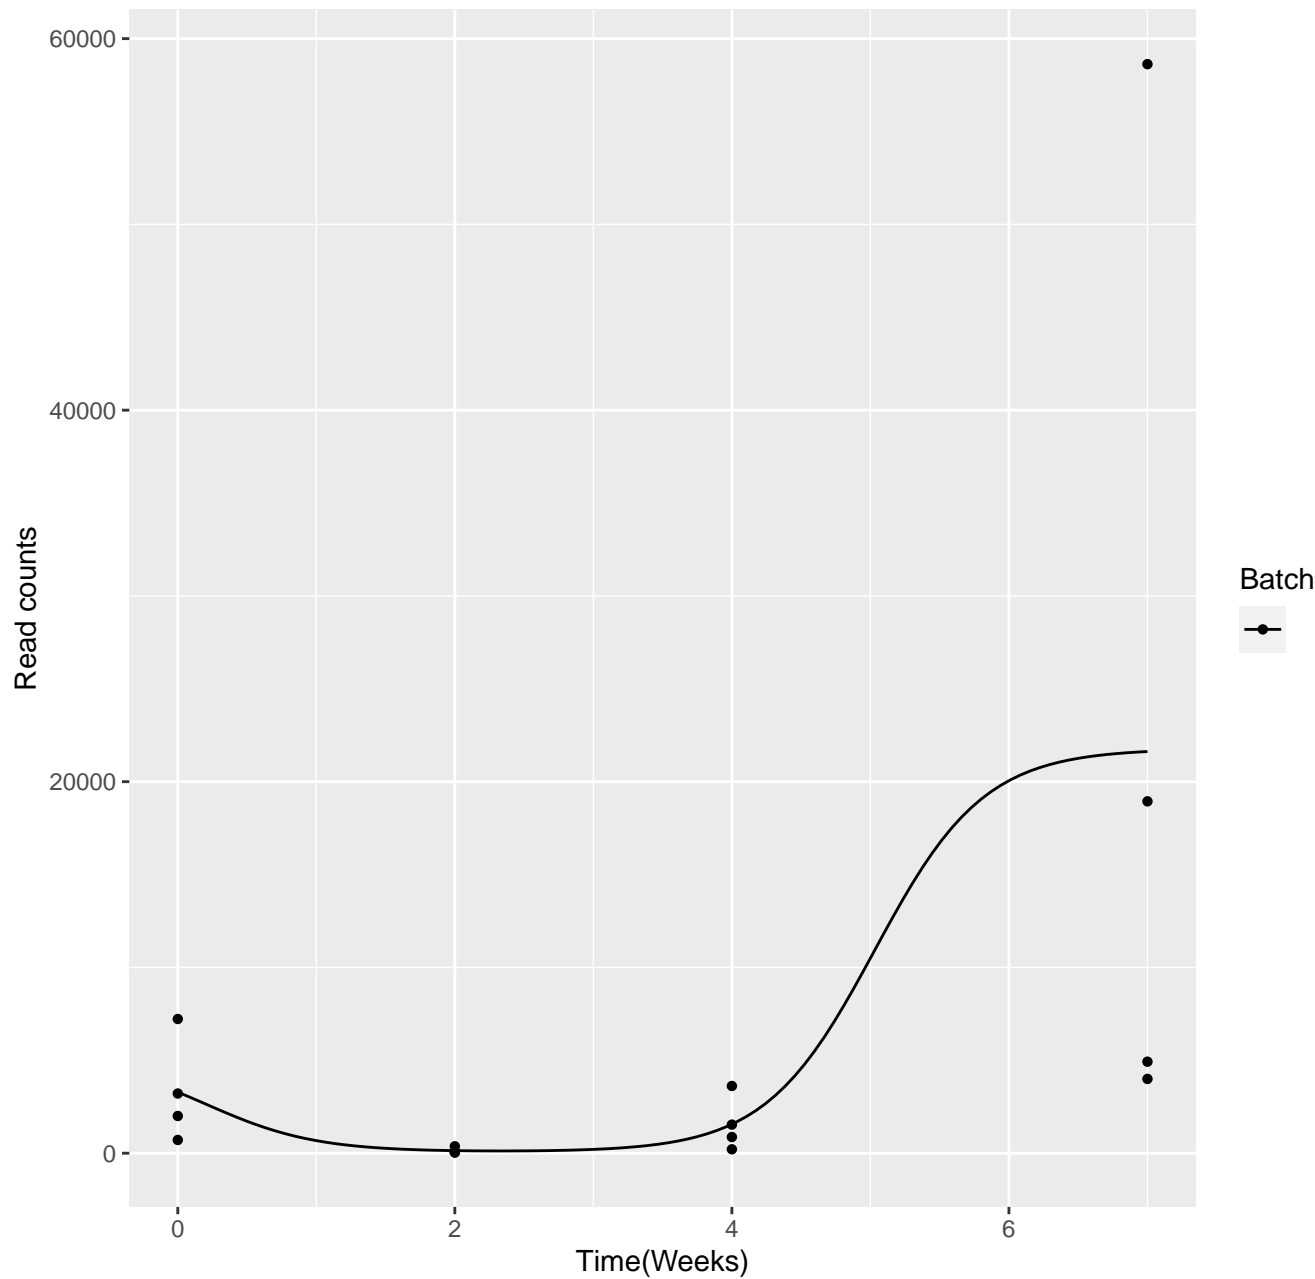

LOC108177633:  $\log_{10} q = -4.52$

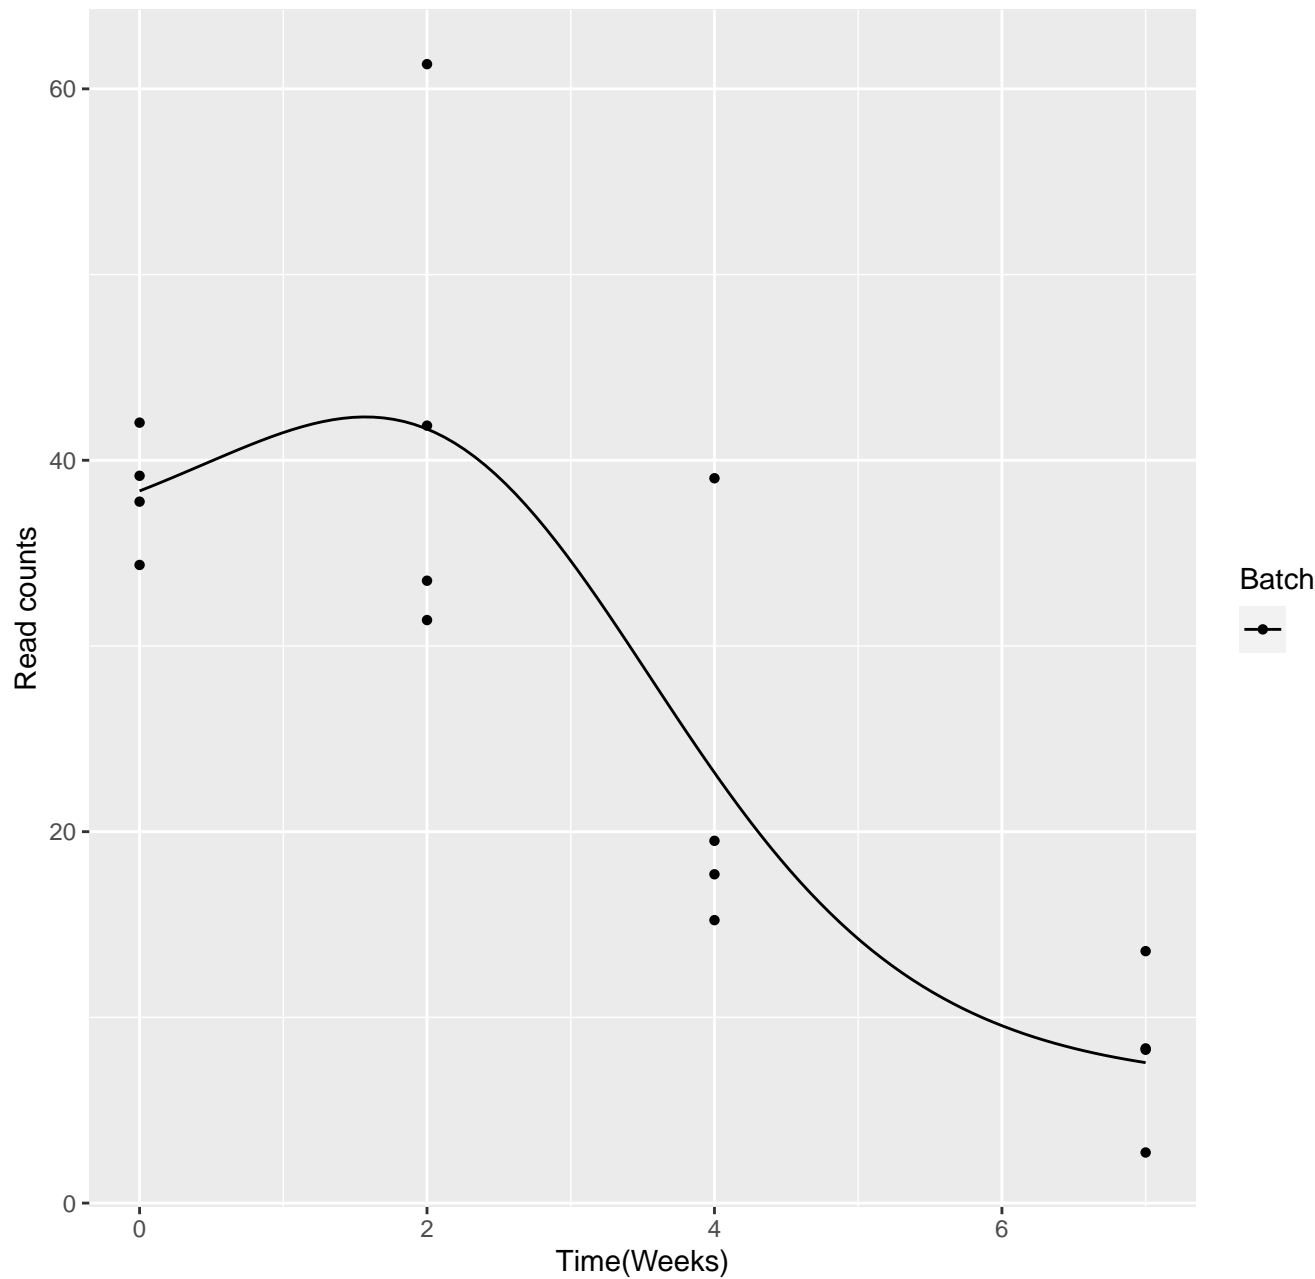

BIRC5:  $\log_{10} q = -4.51$

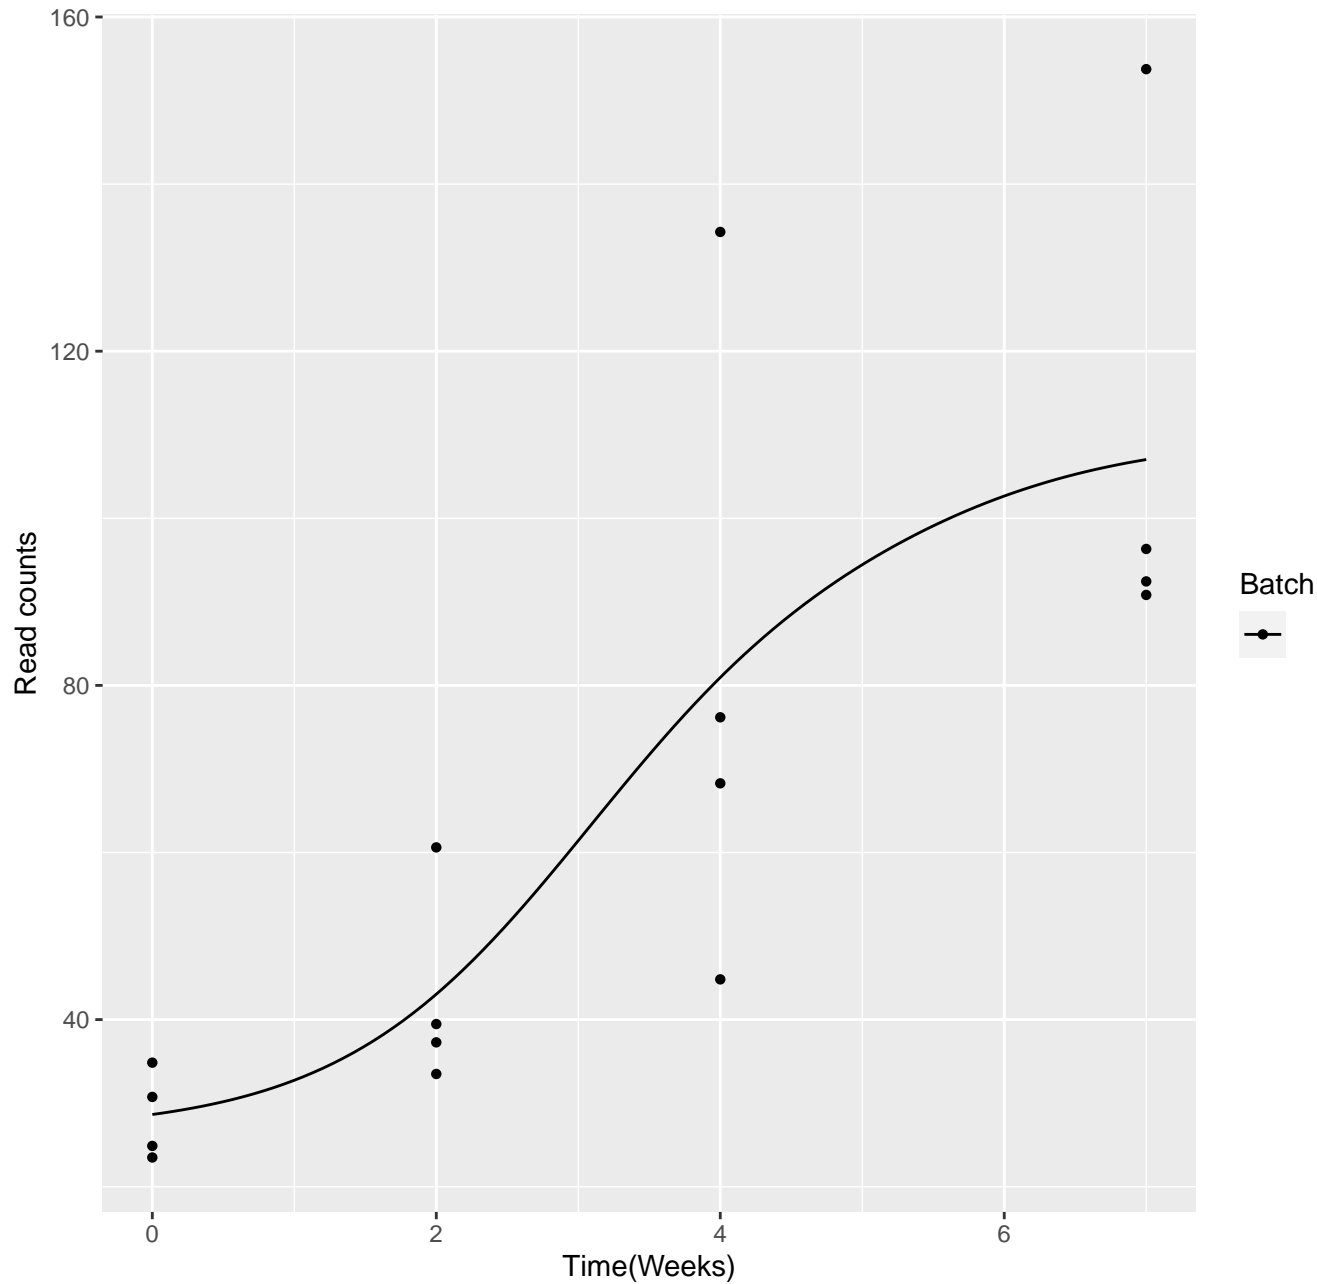



GOLIM4:  $\log_{10} q = -4.5$

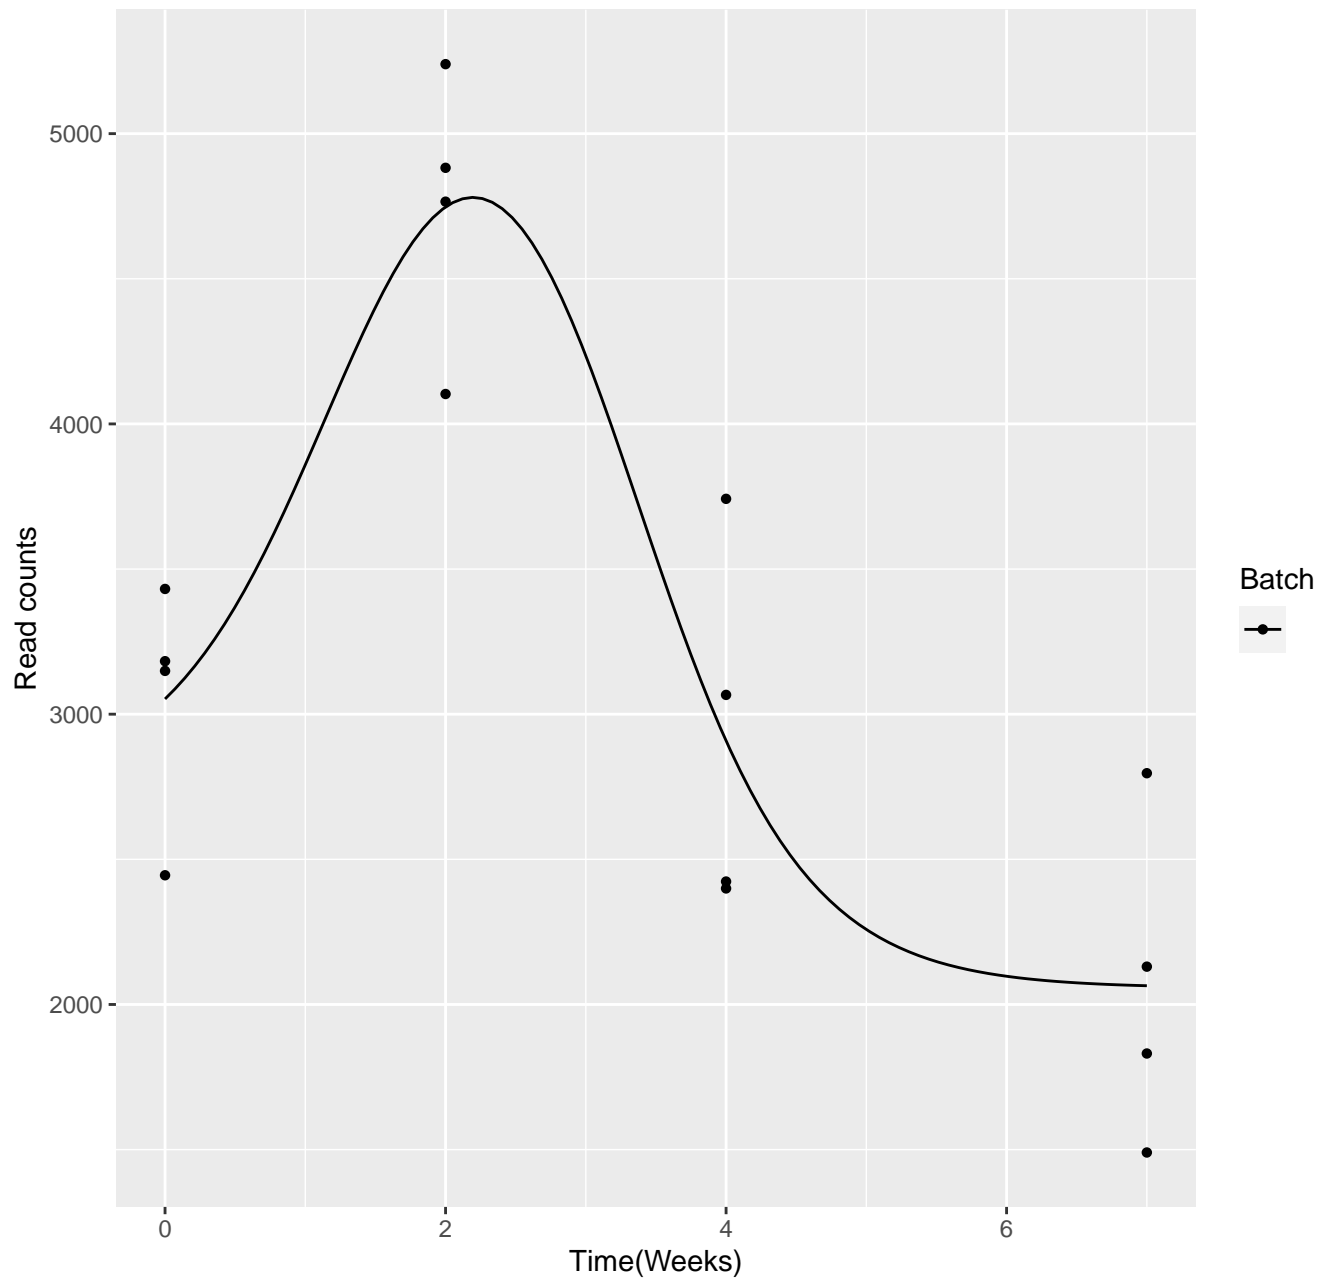

KIF20A:  $\log_{10} q = -4.48$

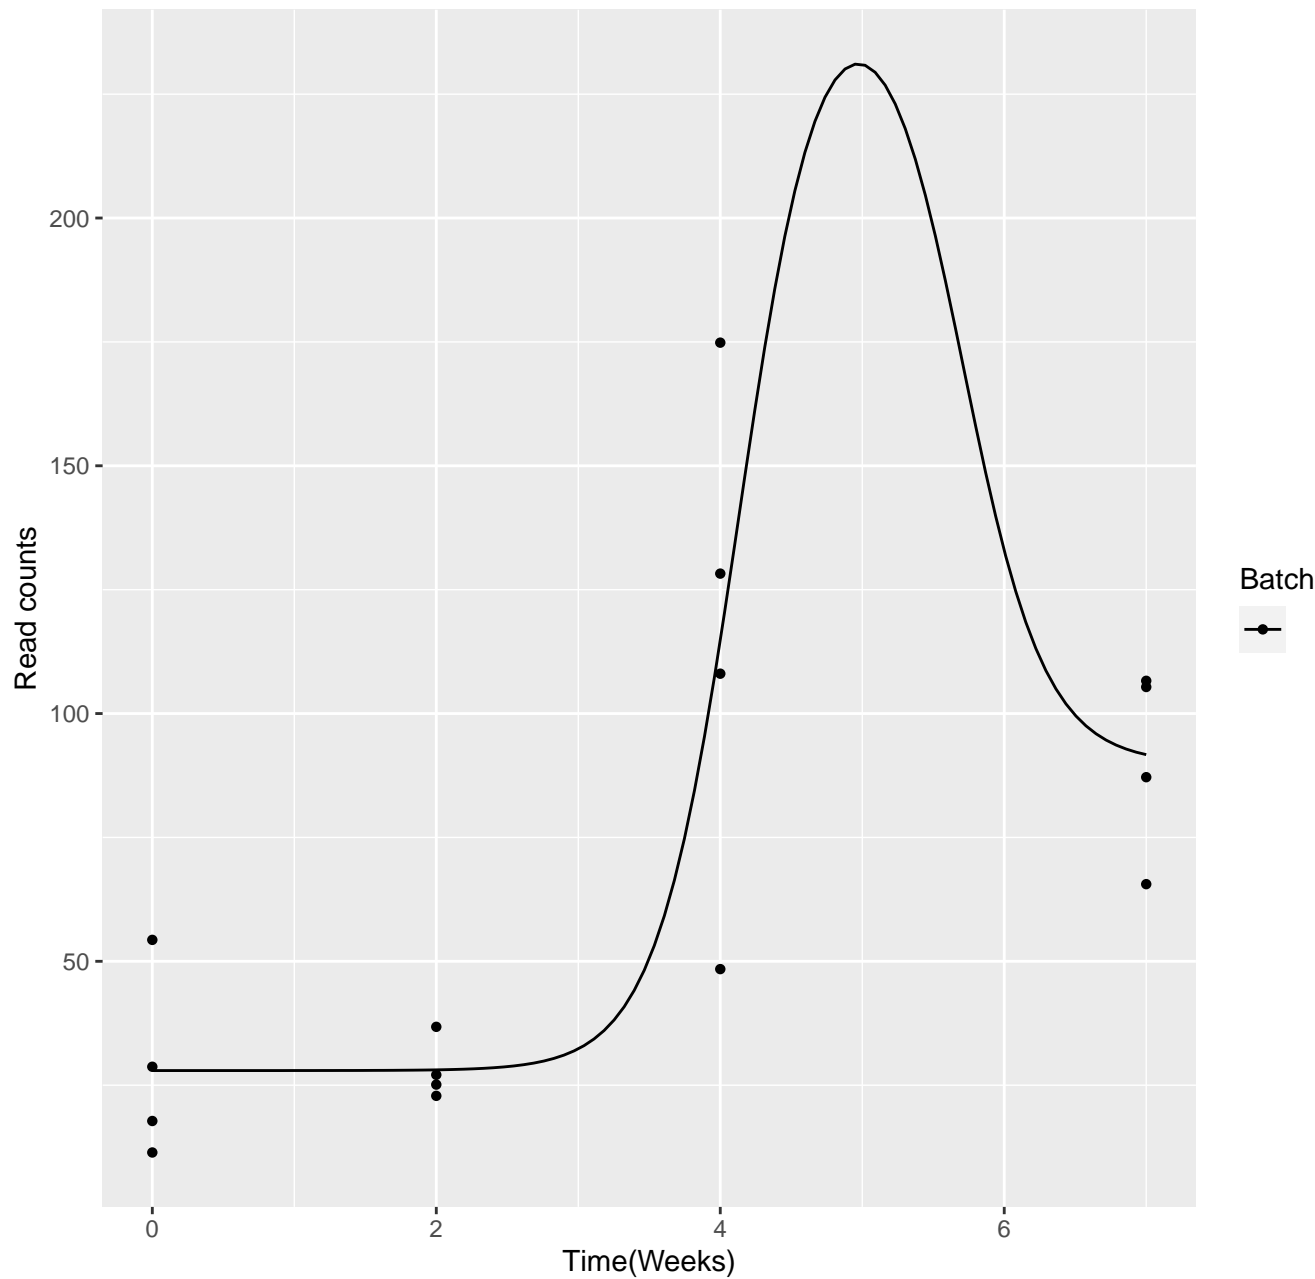

ZNF532:  $\log_{10} q = -4.48$

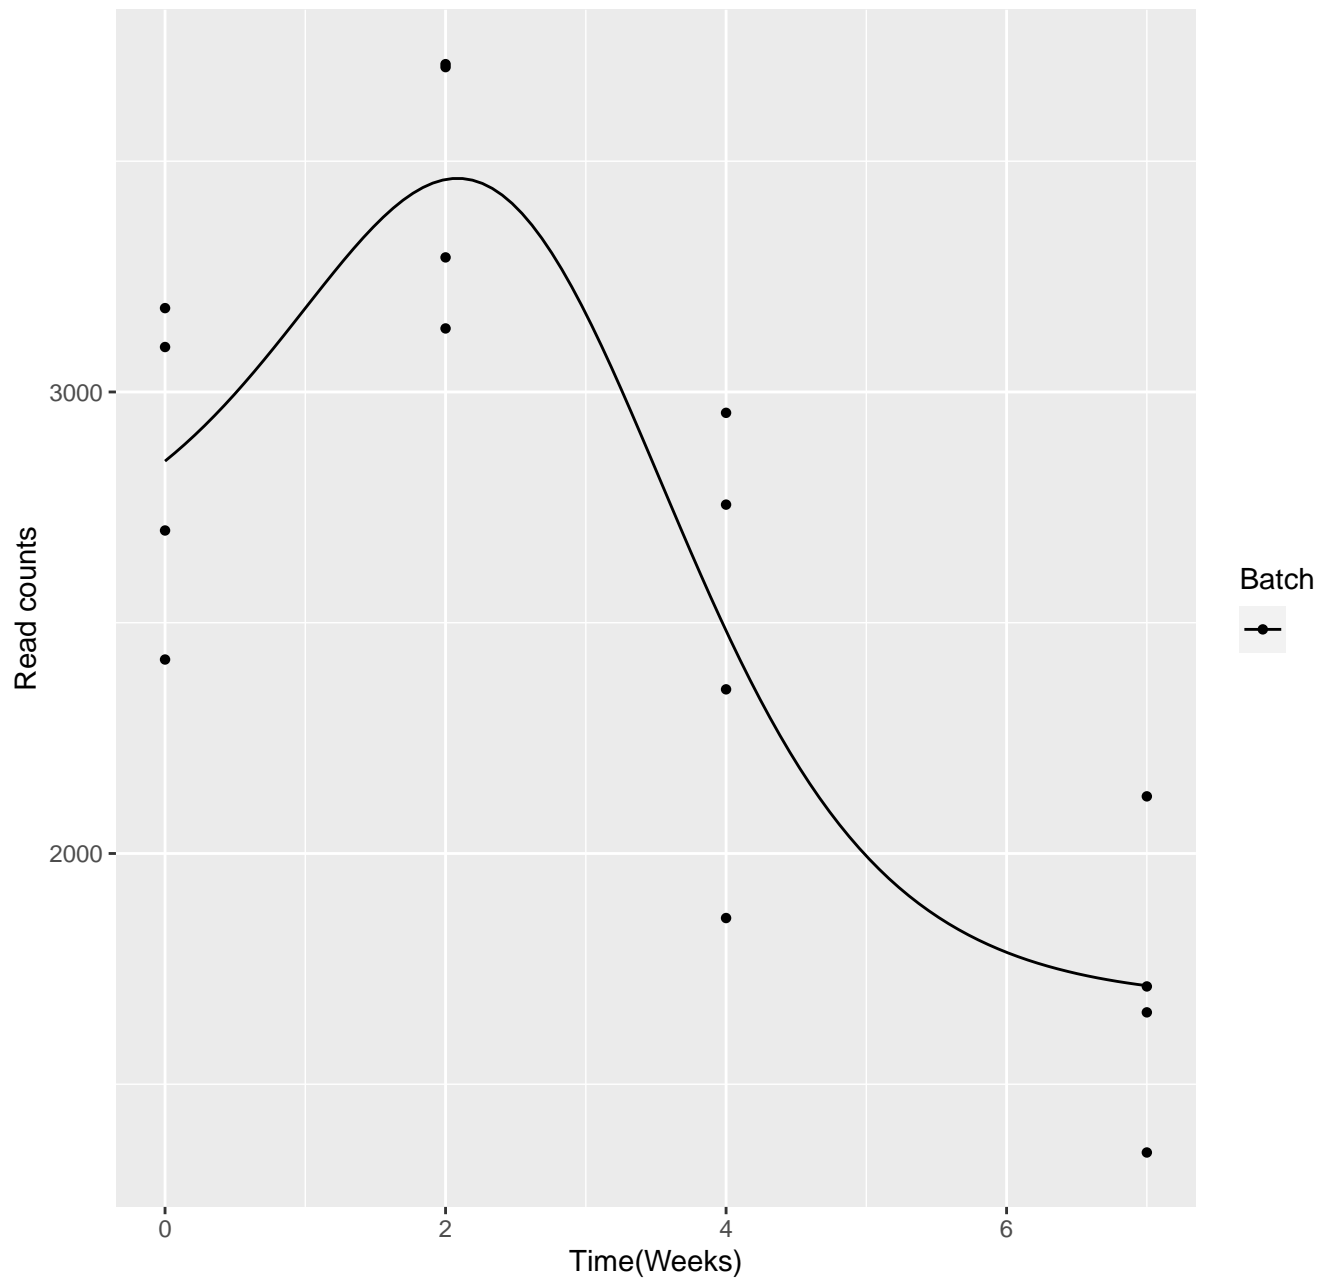

IL10RB:  $\log_{10} q = -4.47$

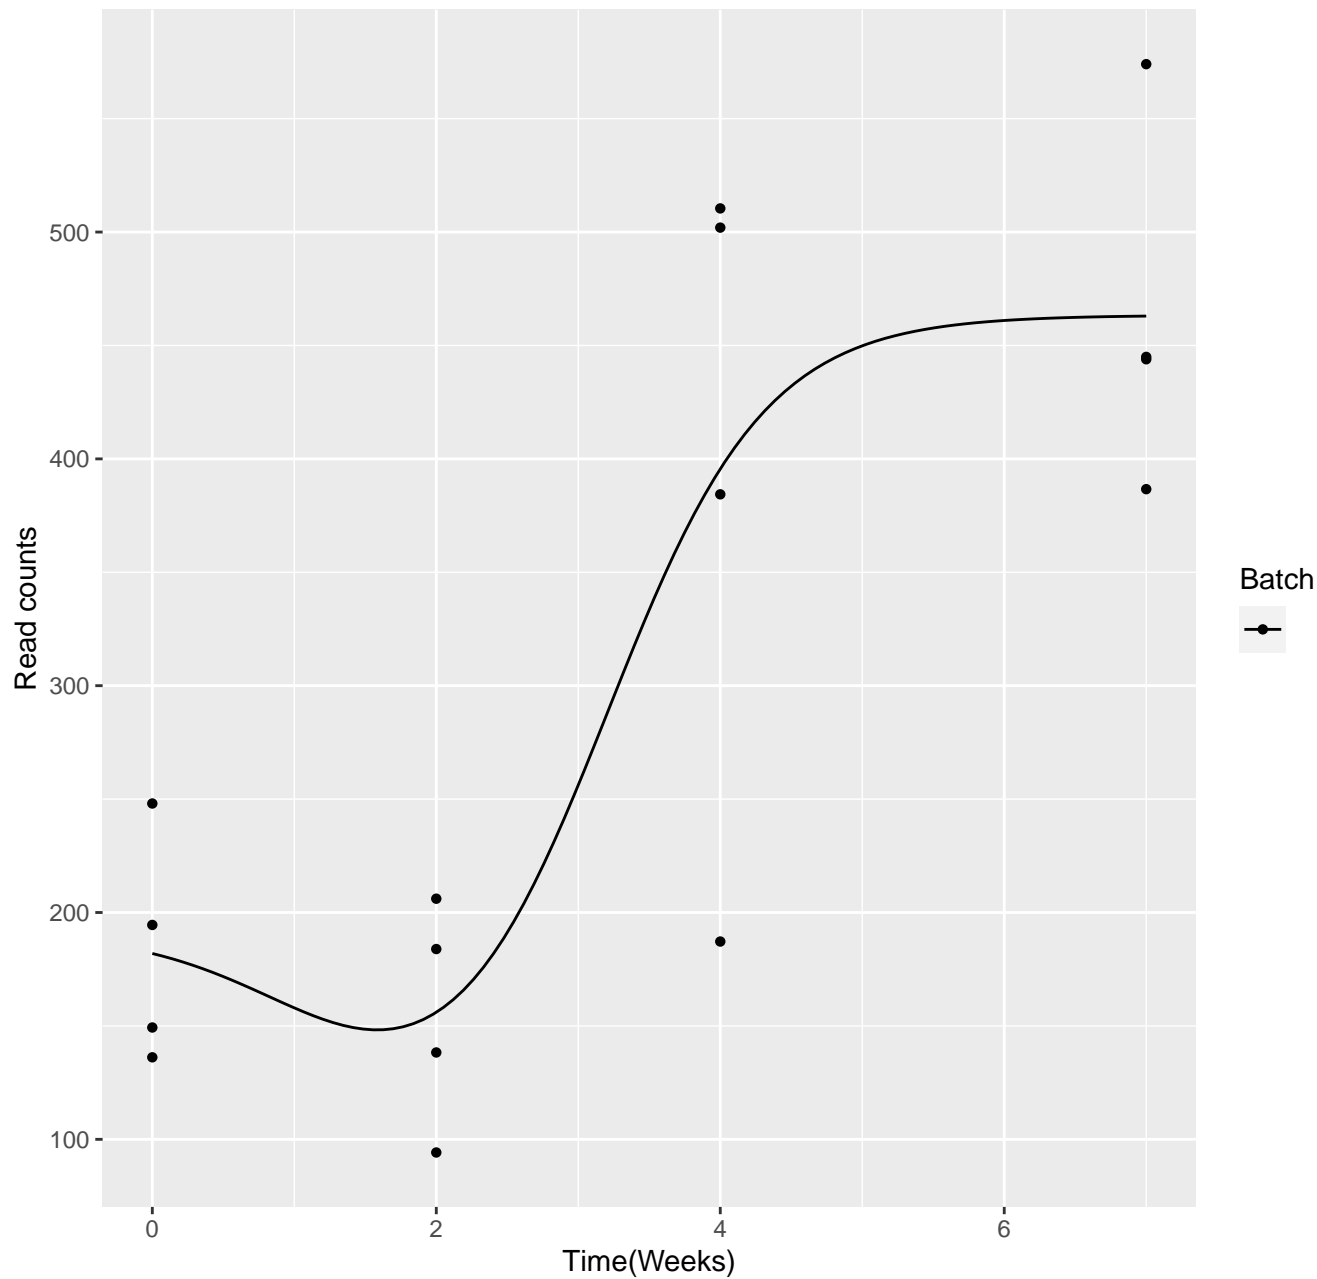

BMP3:  $\log_{10} q = -4.46$

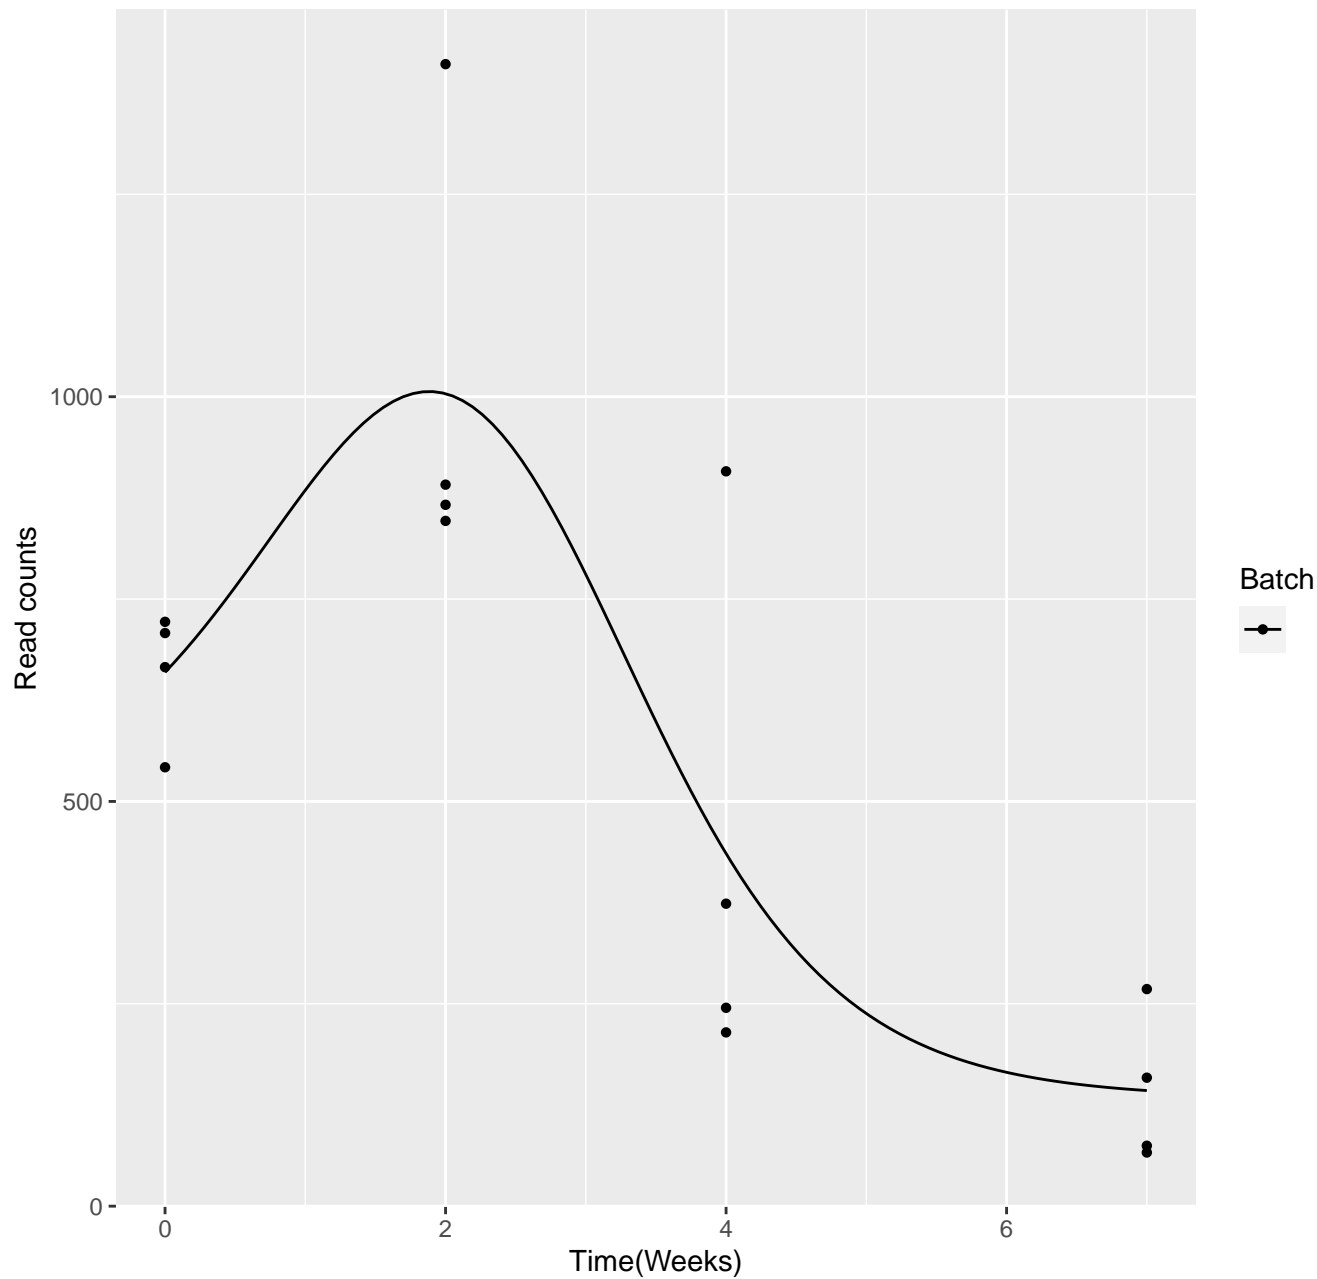

DCHS1:  $\log_{10} q = -4.45$

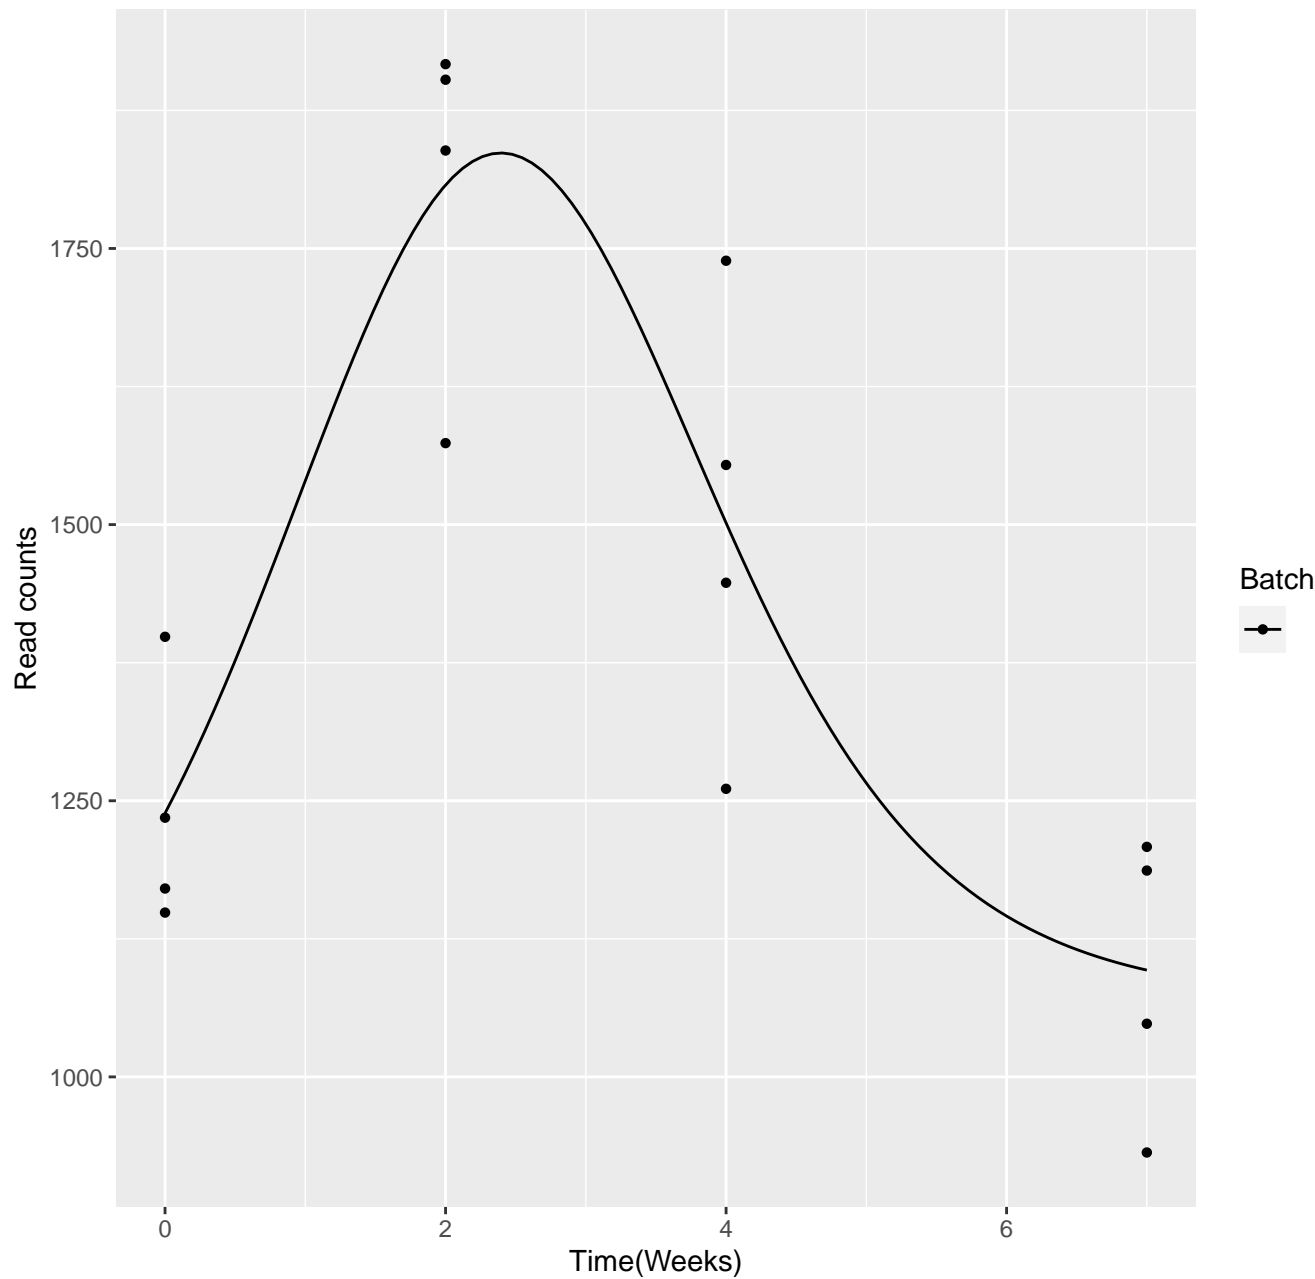

CCR1:  $\log_{10} q = -4.43$

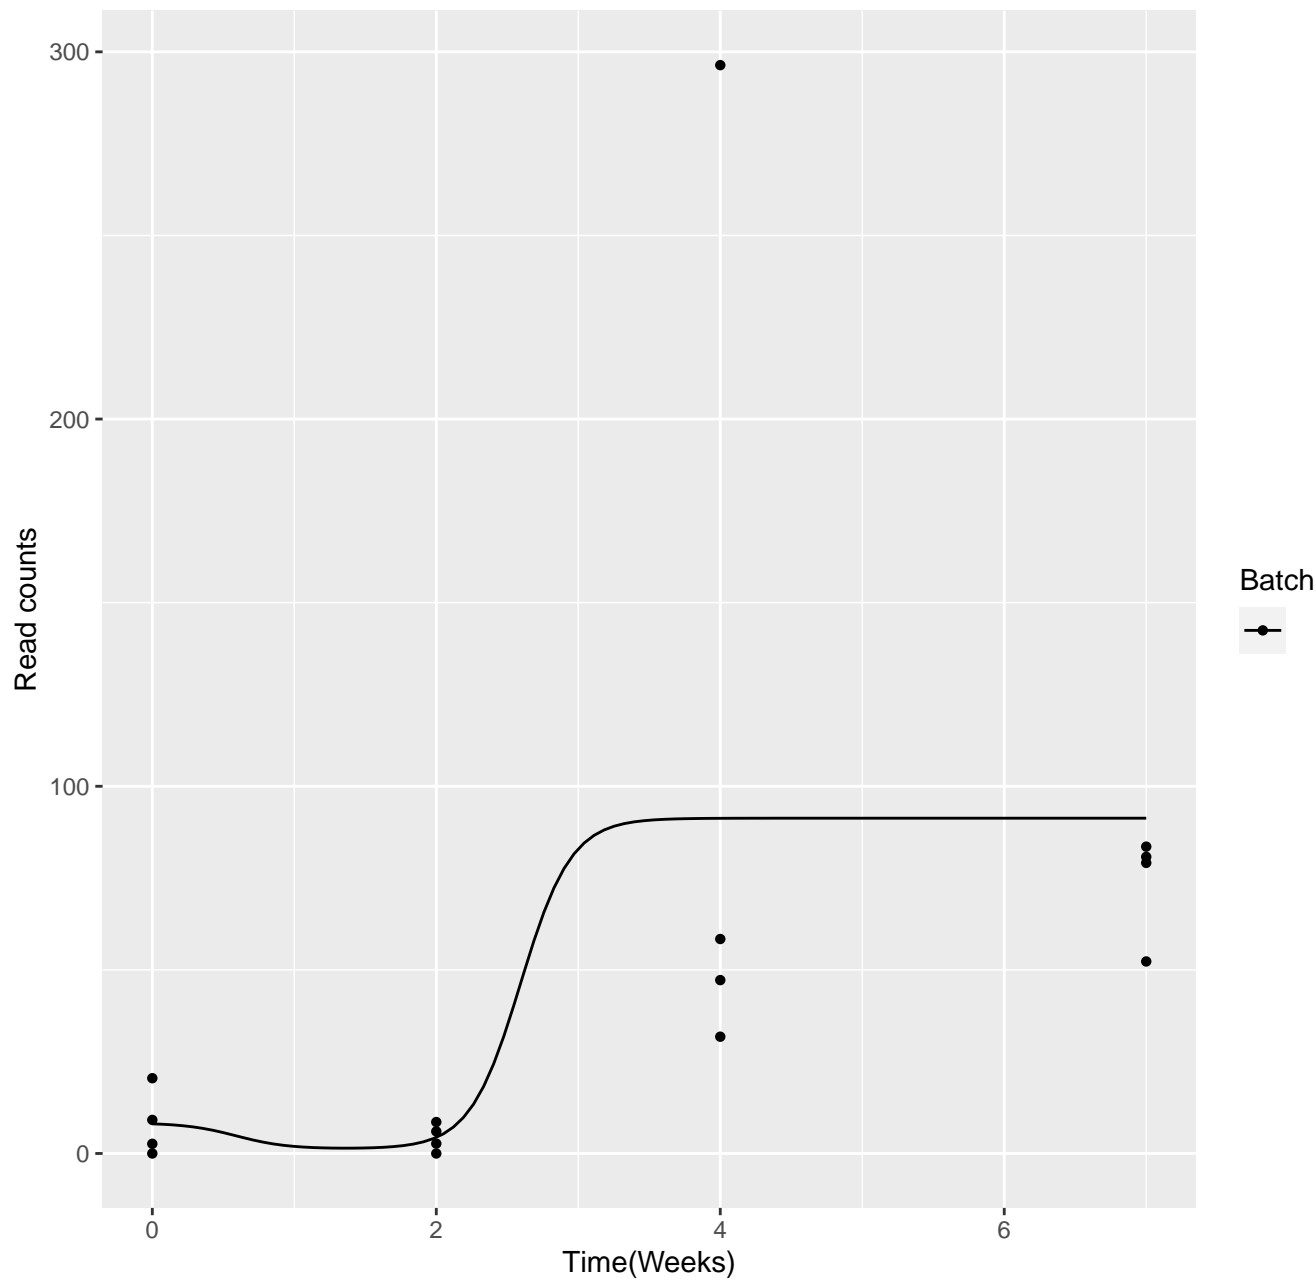

CAPG:  $\log_{10} q = -4.43$

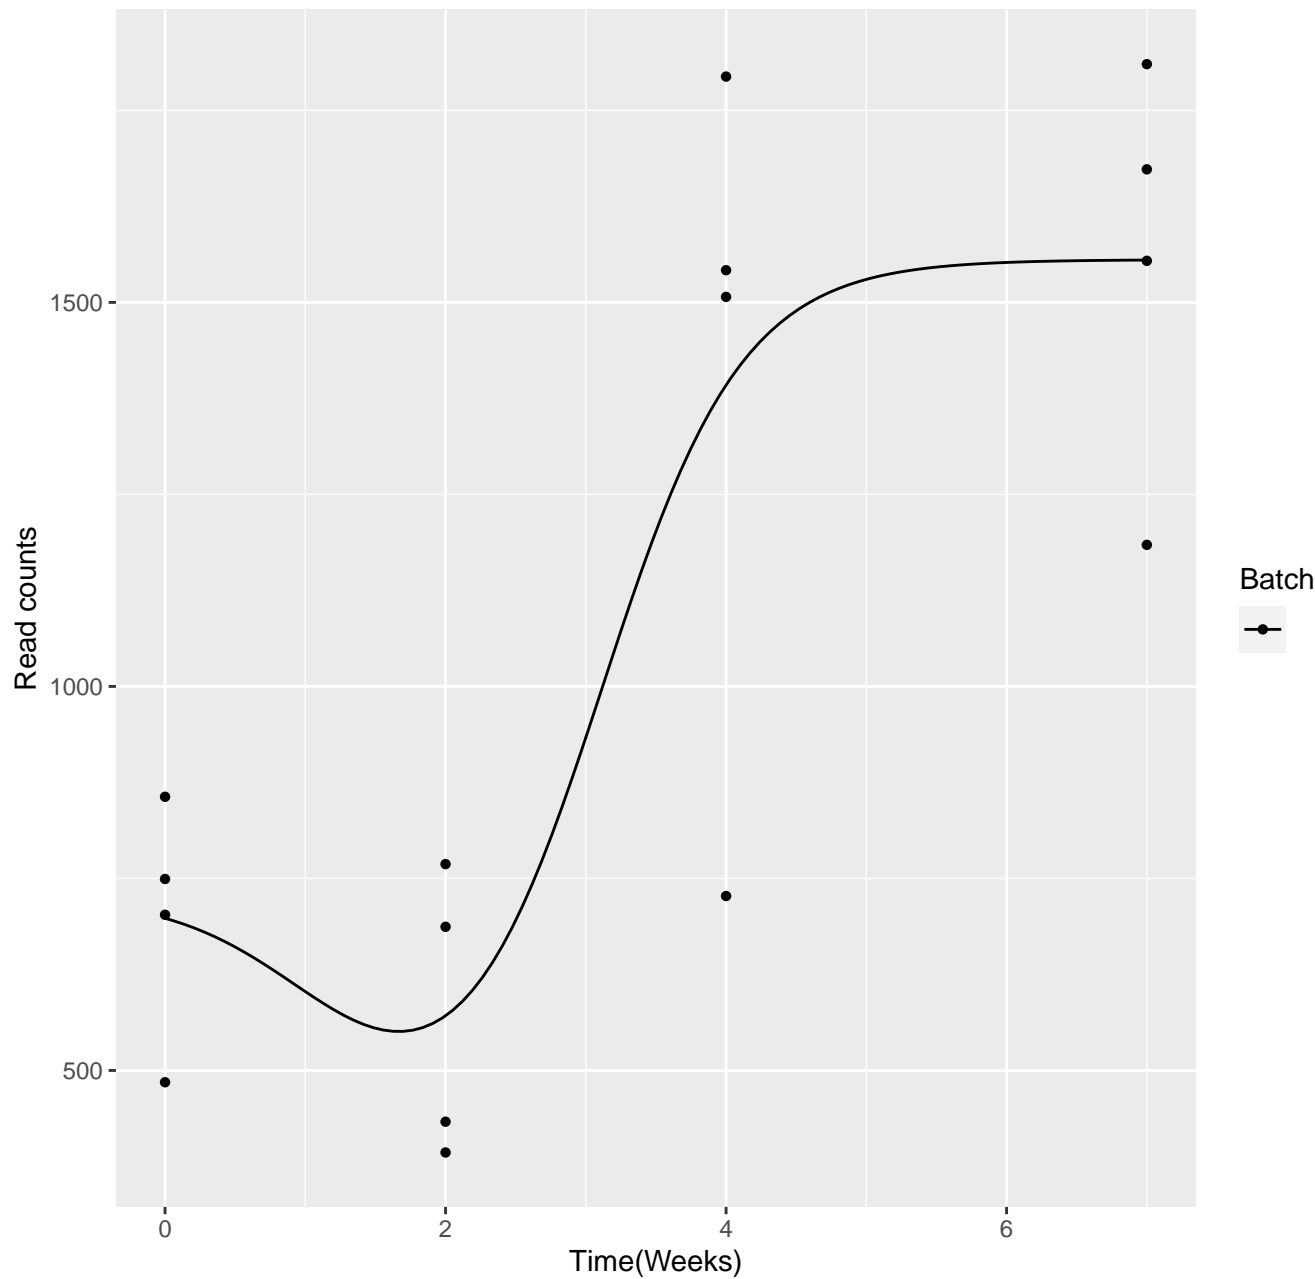



H1-4:  $\log_{10} q = -4.43$

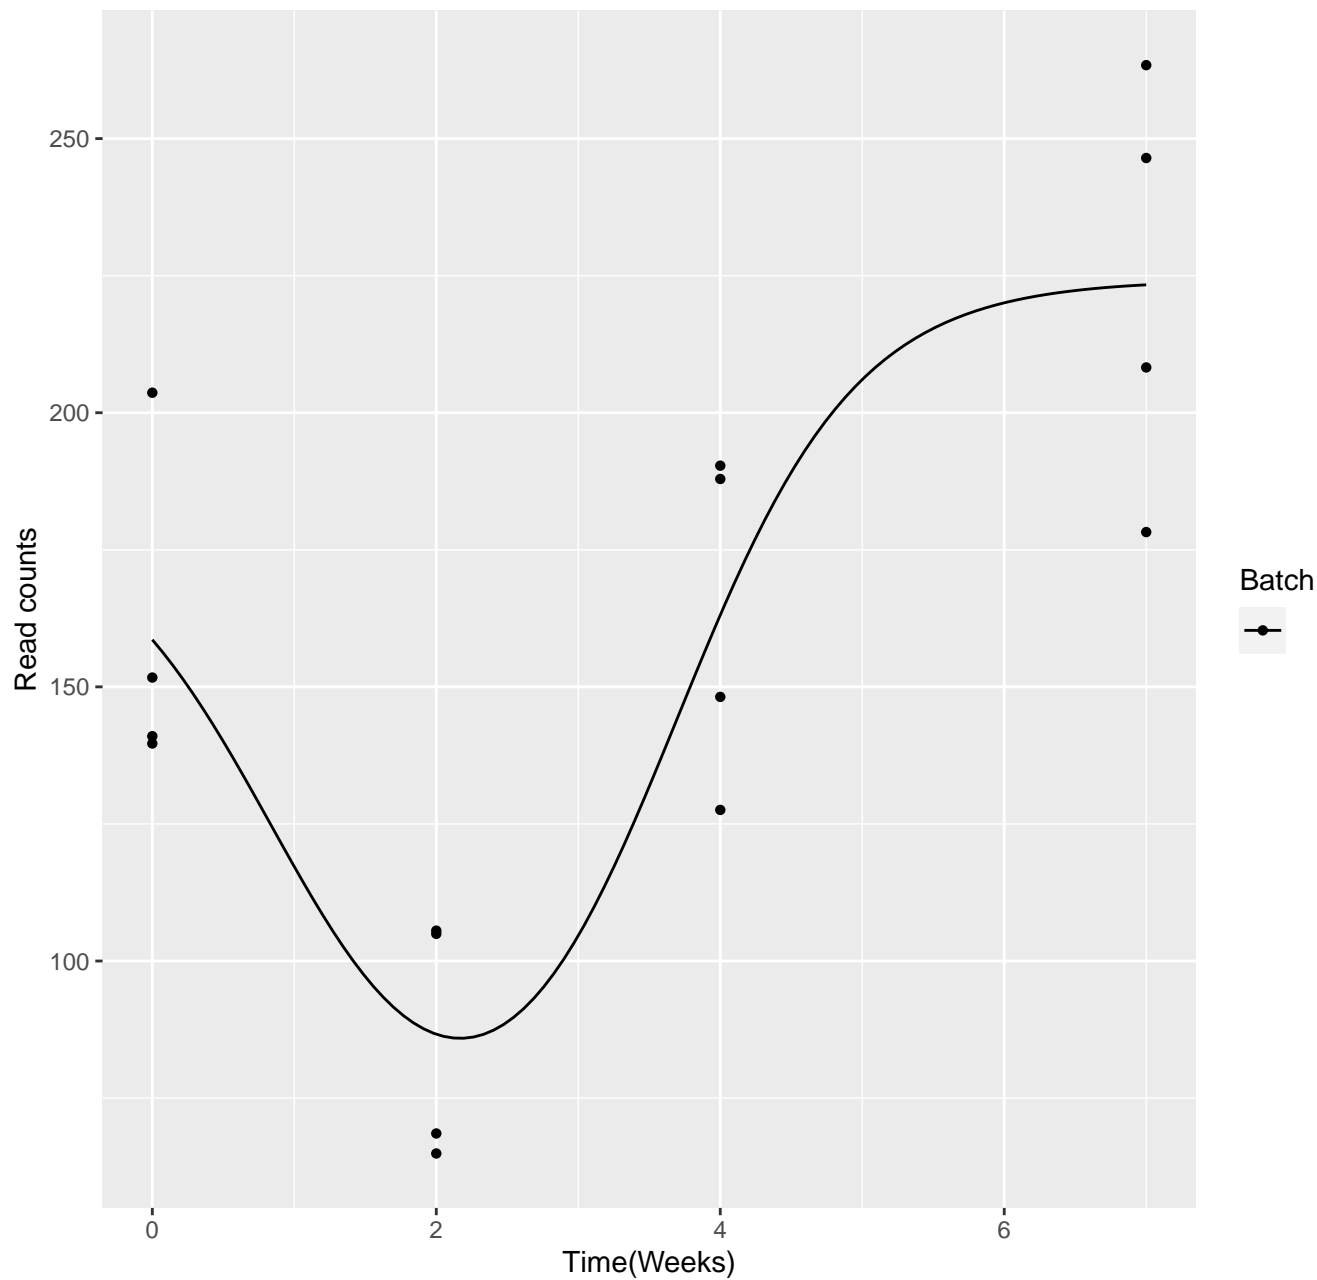

MCP2:  $\log_{10} q = -4.41$

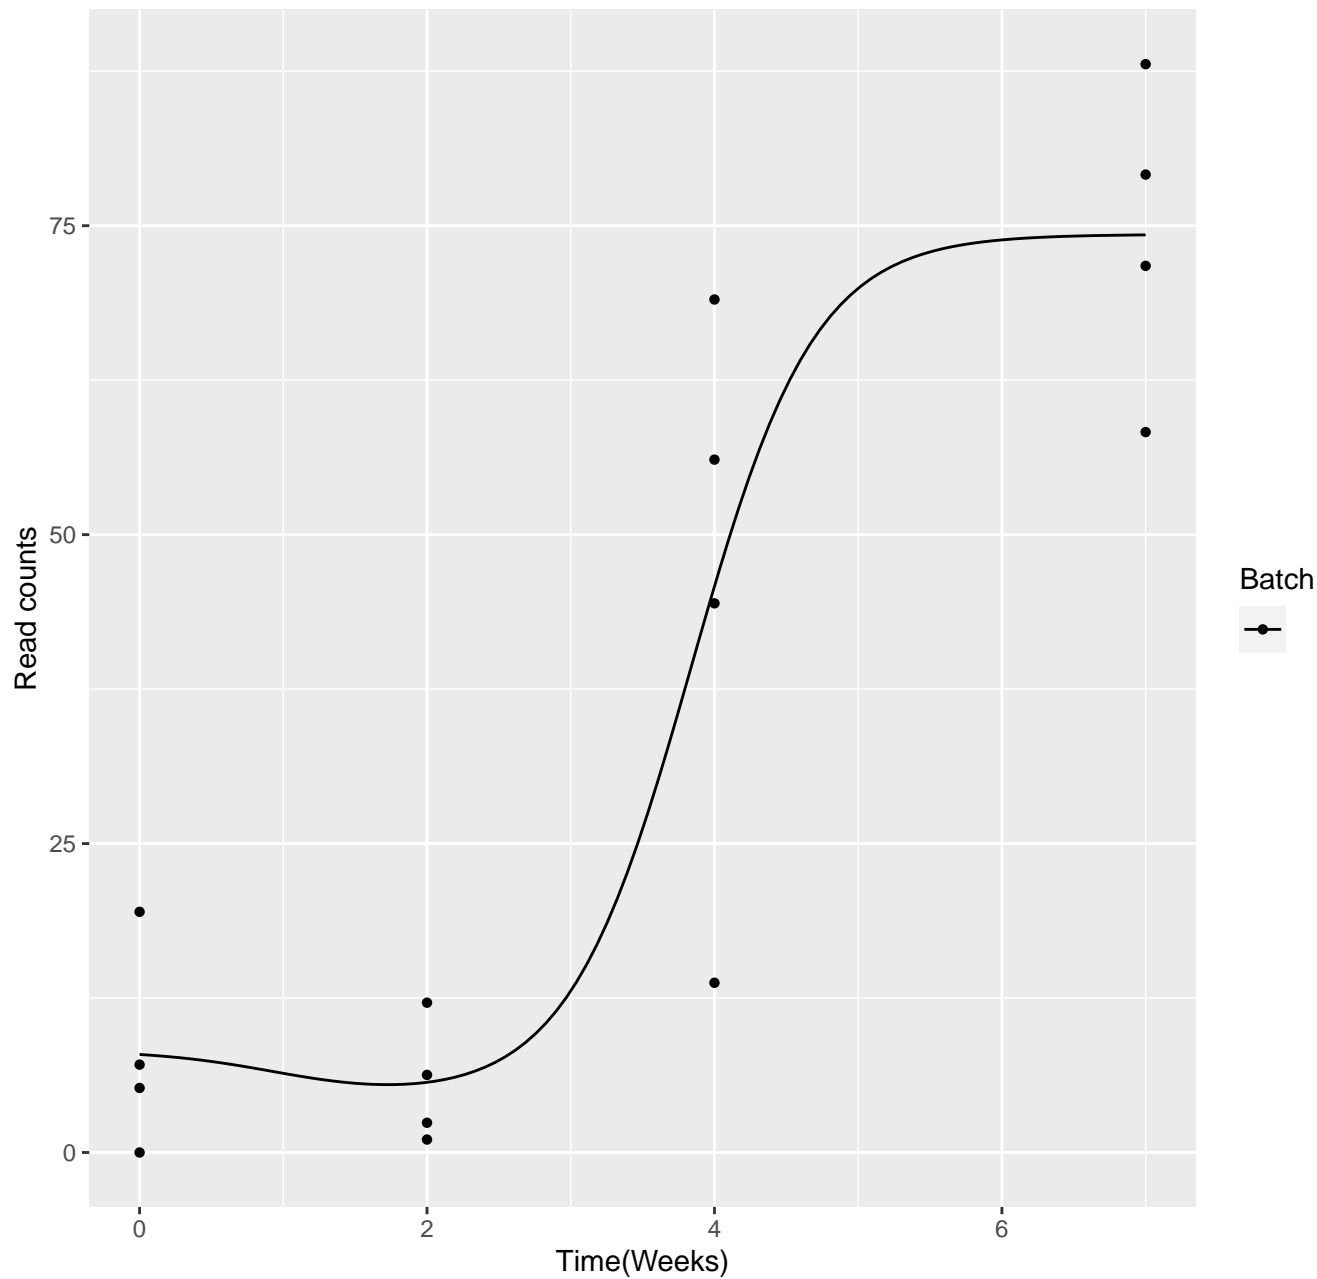

IL34:  $\log_{10} q = -4.41$

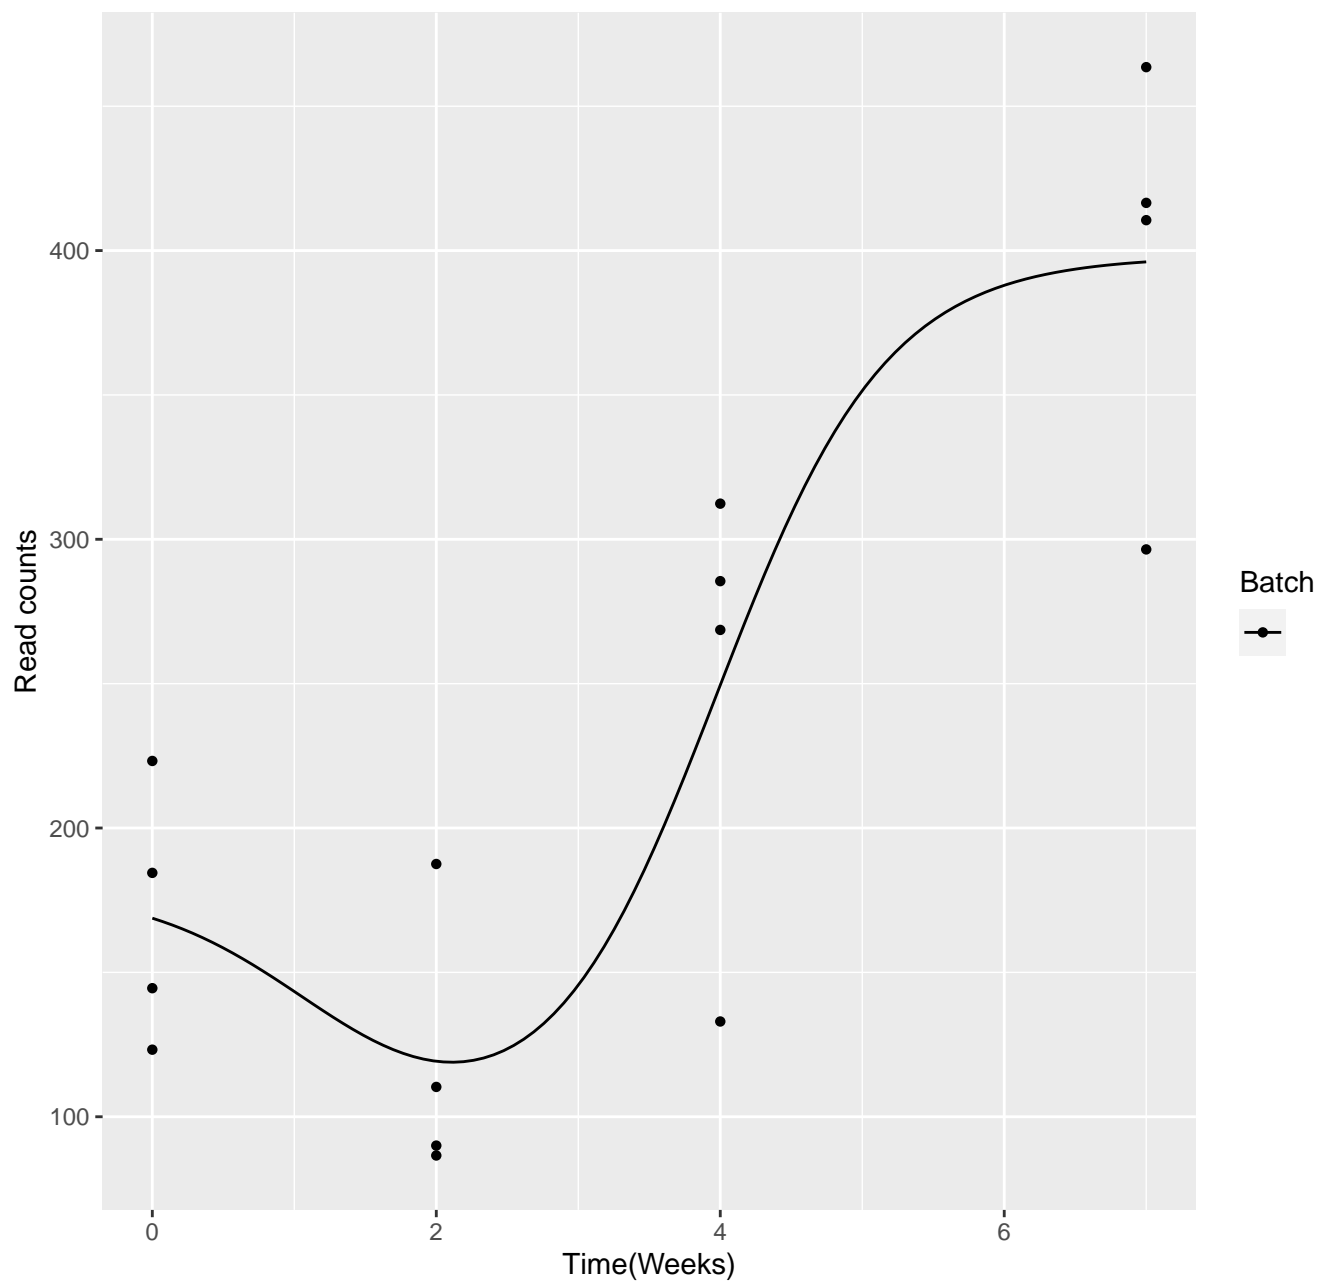

ROCK1:  $\log_{10} q = -4.41$

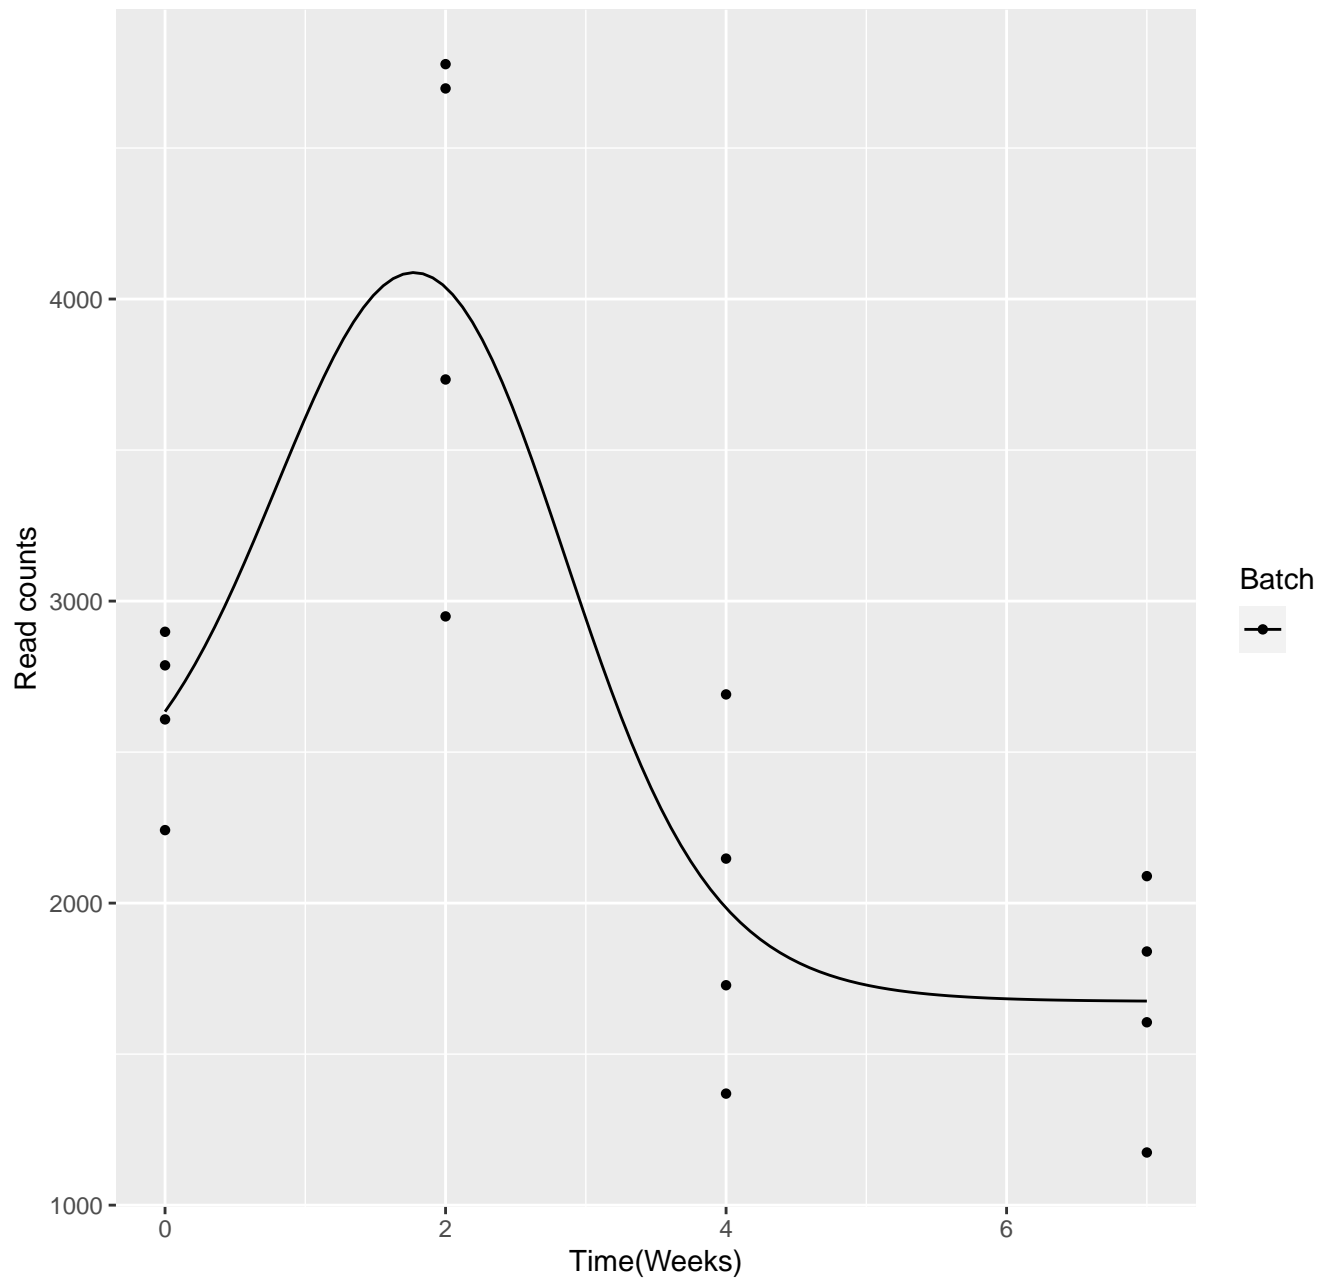

GPR34:  $\log_{10} q = -4.38$

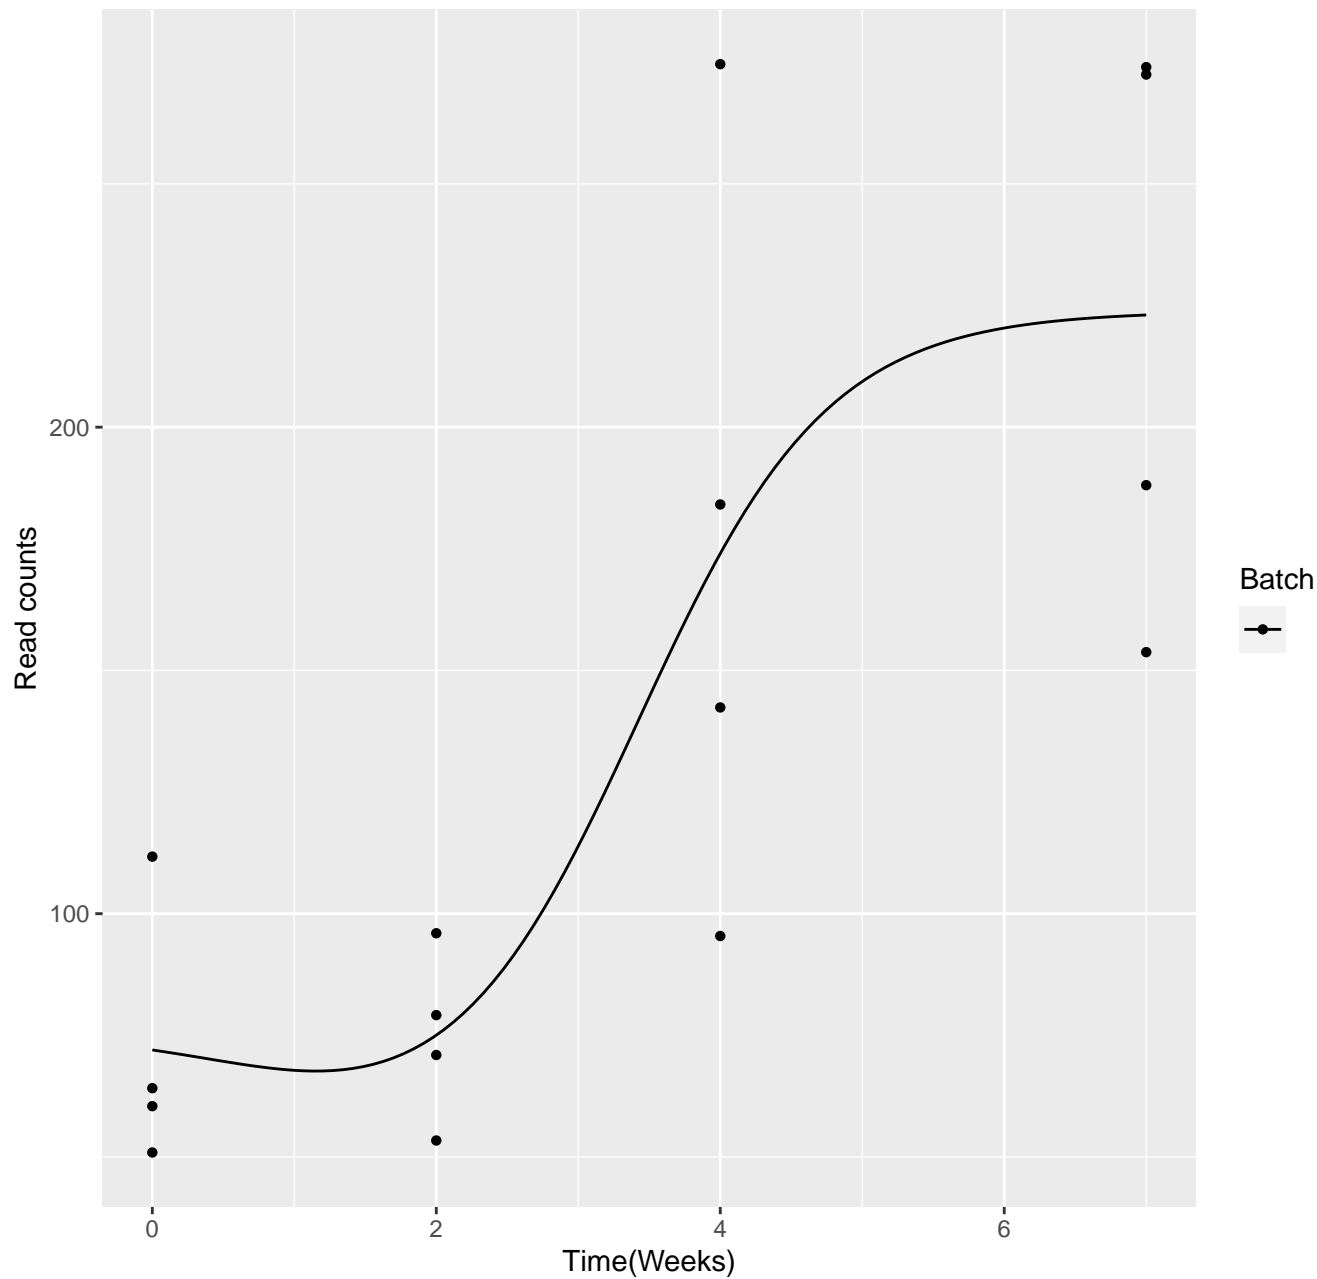

ERCC6L:  $\log_{10} q = -4.38$

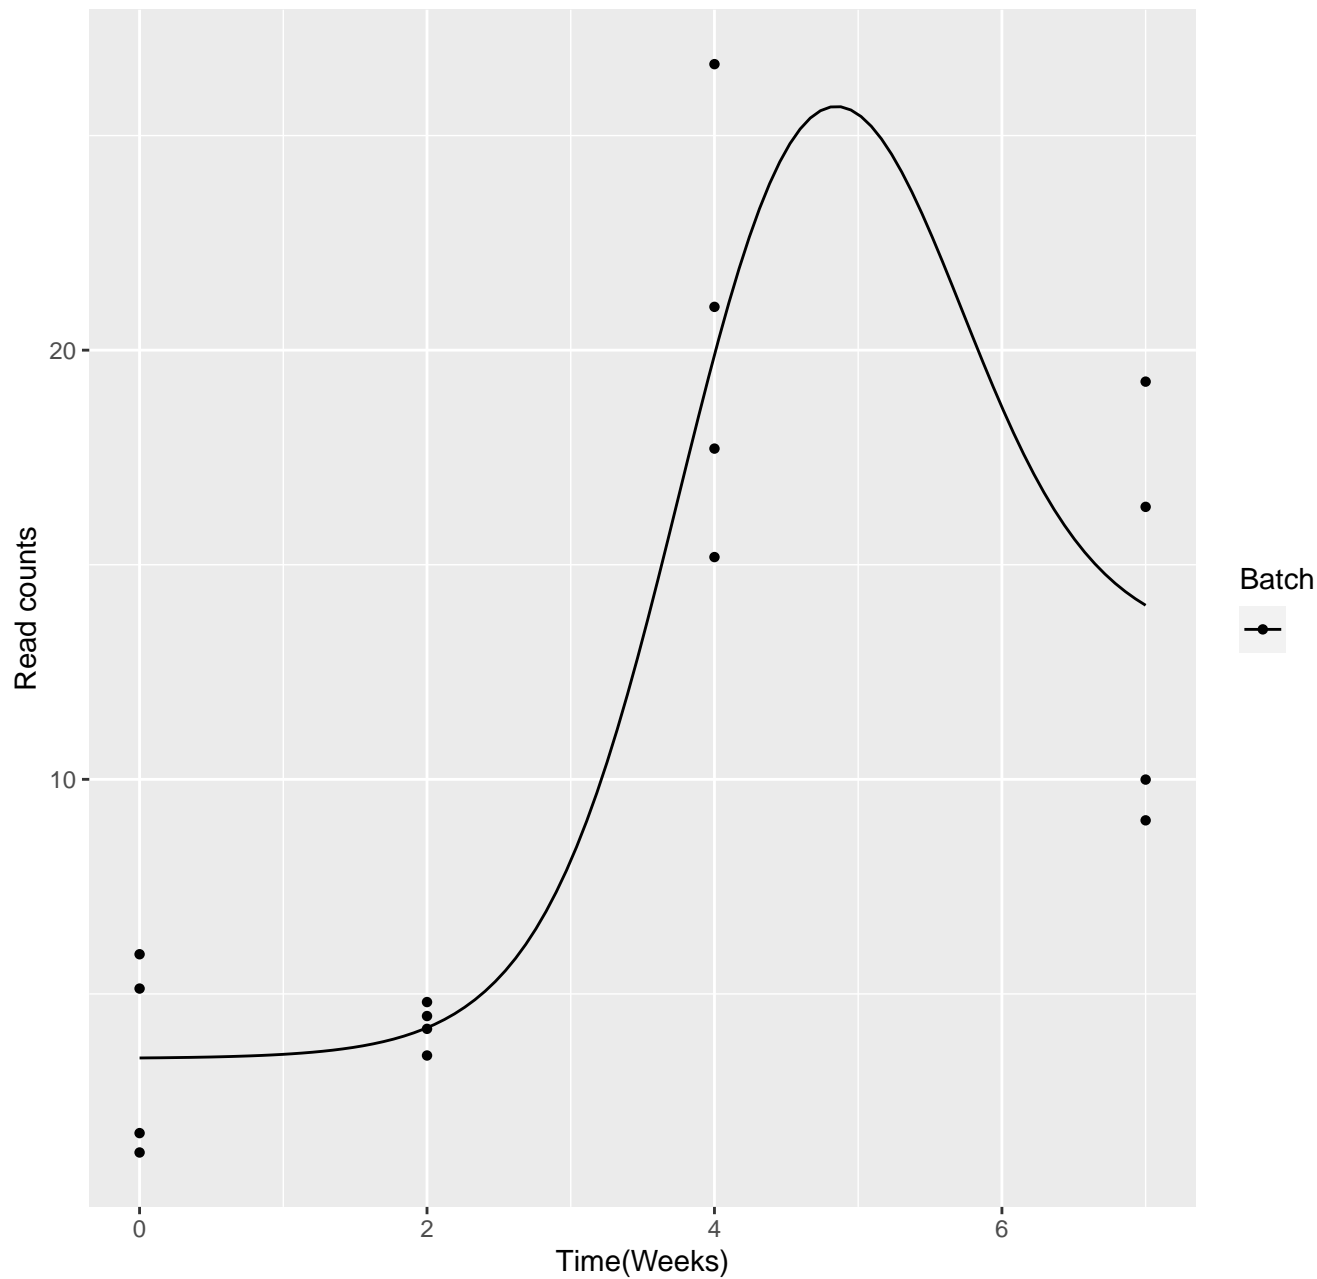

CIITA:  $\log_{10} q = -4.38$

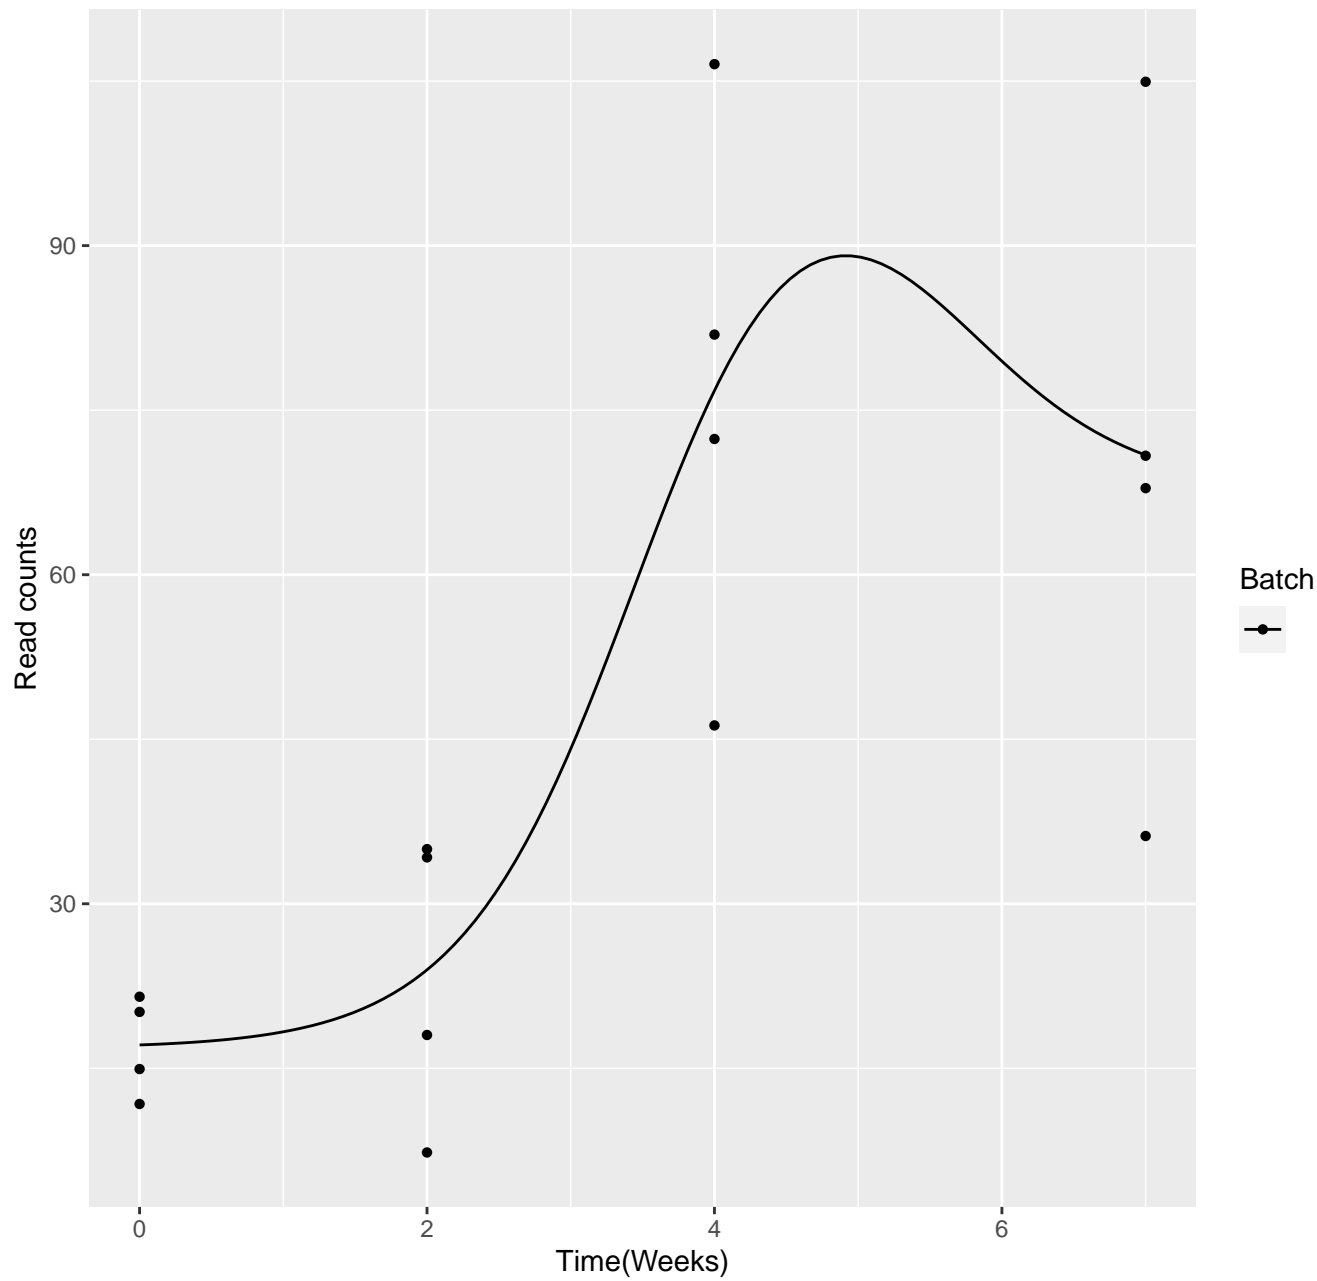

UTRN:  $\log_{10} q = -4.38$

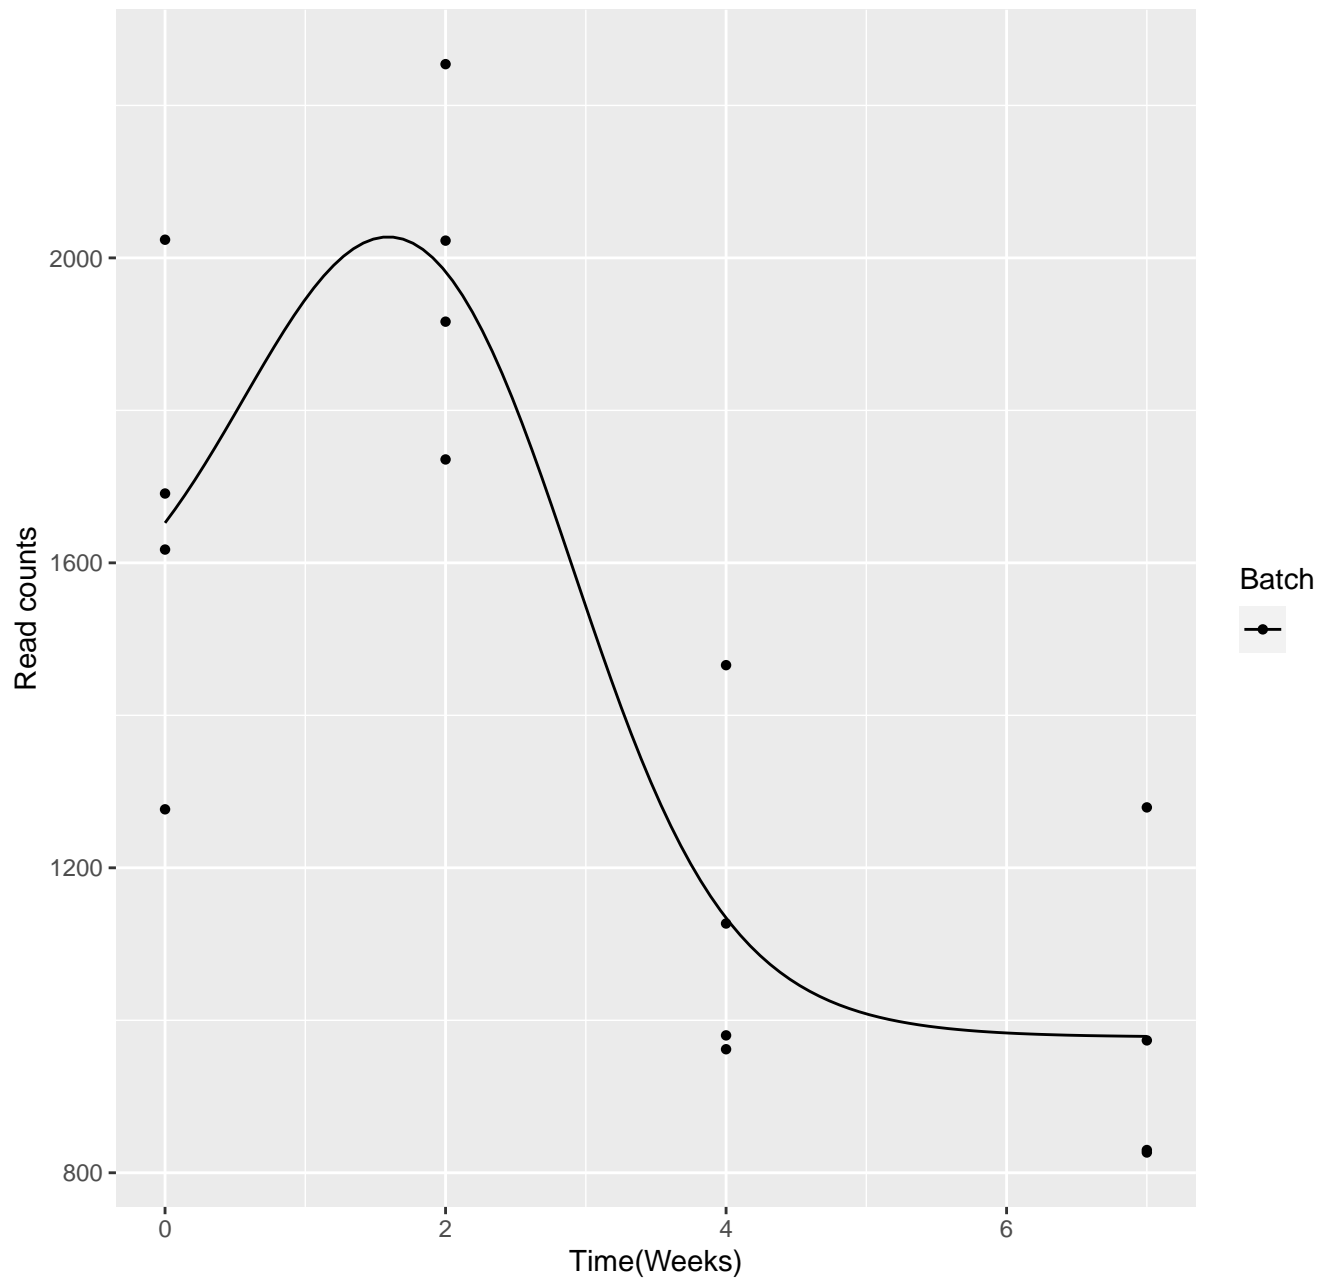



CTNNAL1:  $\log_{10} q = -4.38$

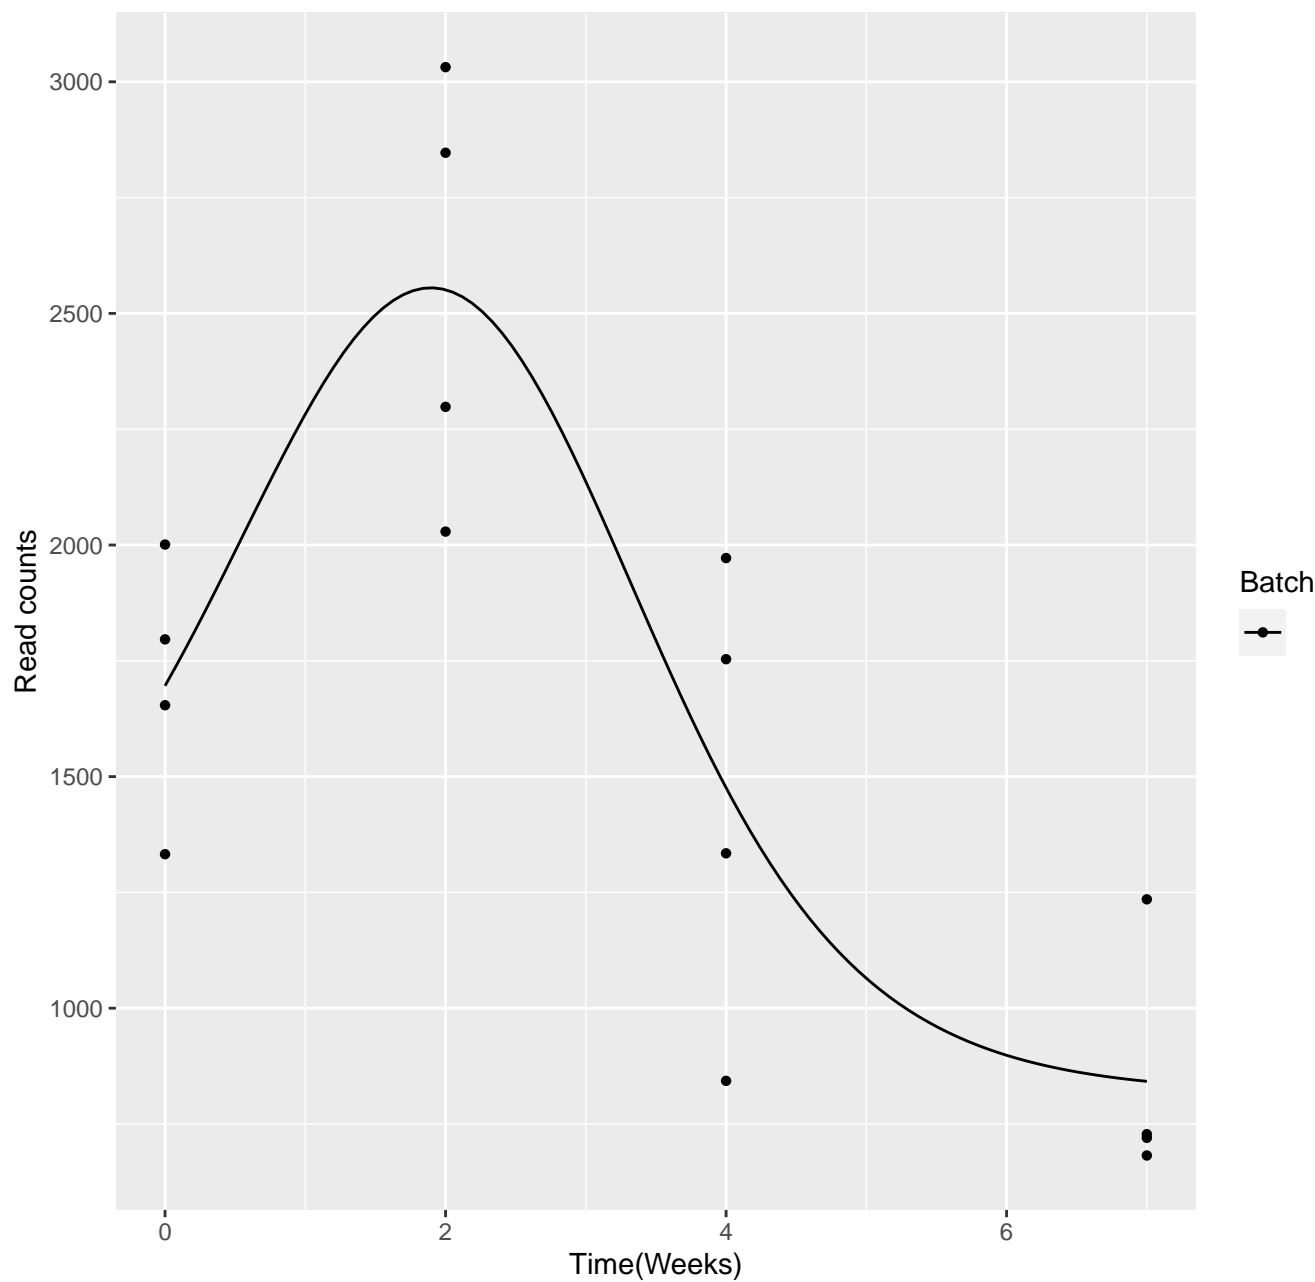

PCLAF:  $\log_{10} q = -4.36$

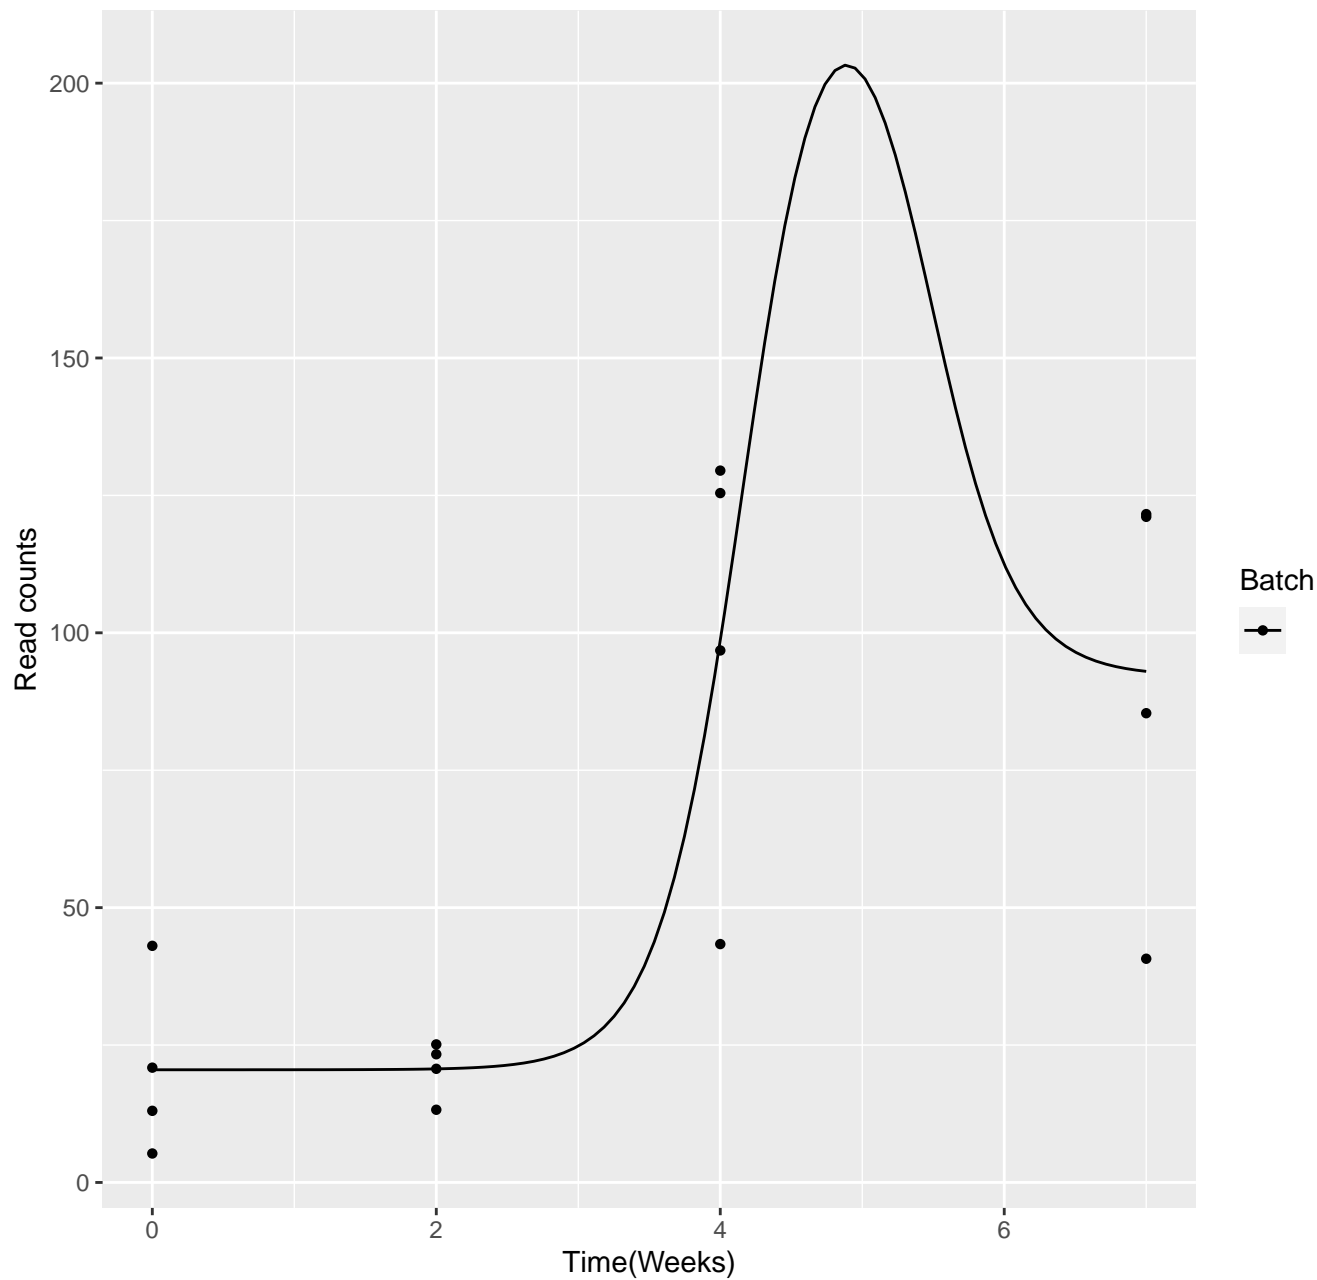

JAZF1:  $\log_{10} q = -4.36$

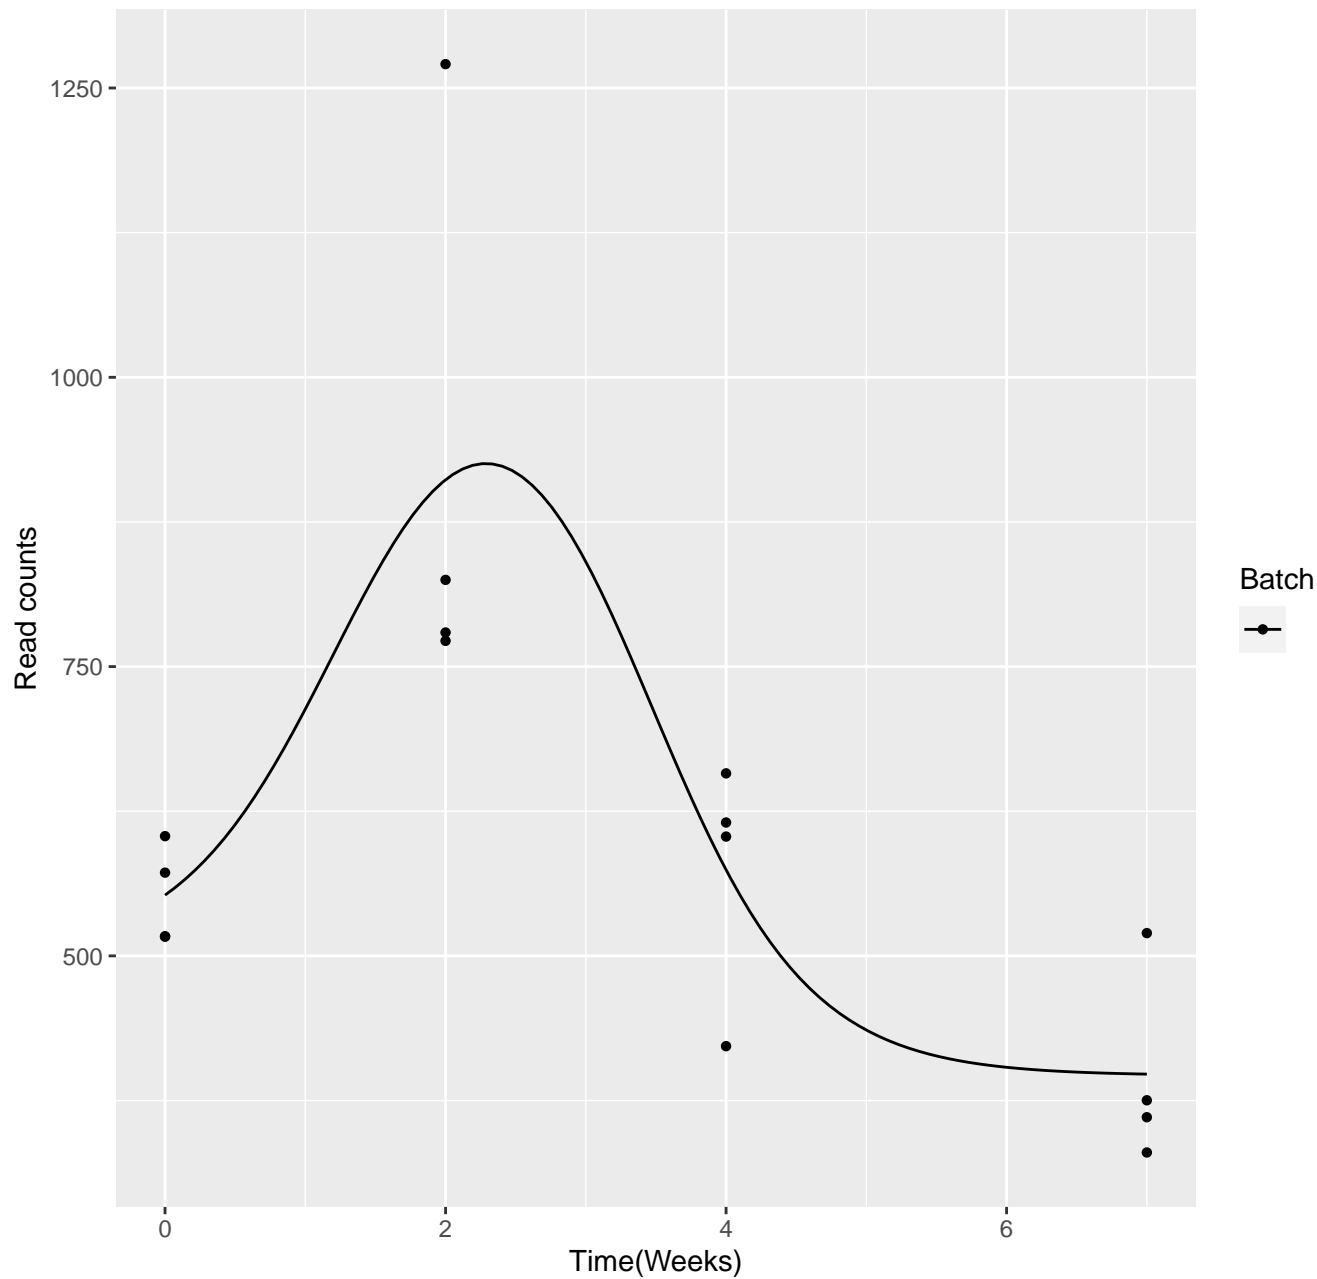

ARRB2:  $\log_{10} q = -4.36$

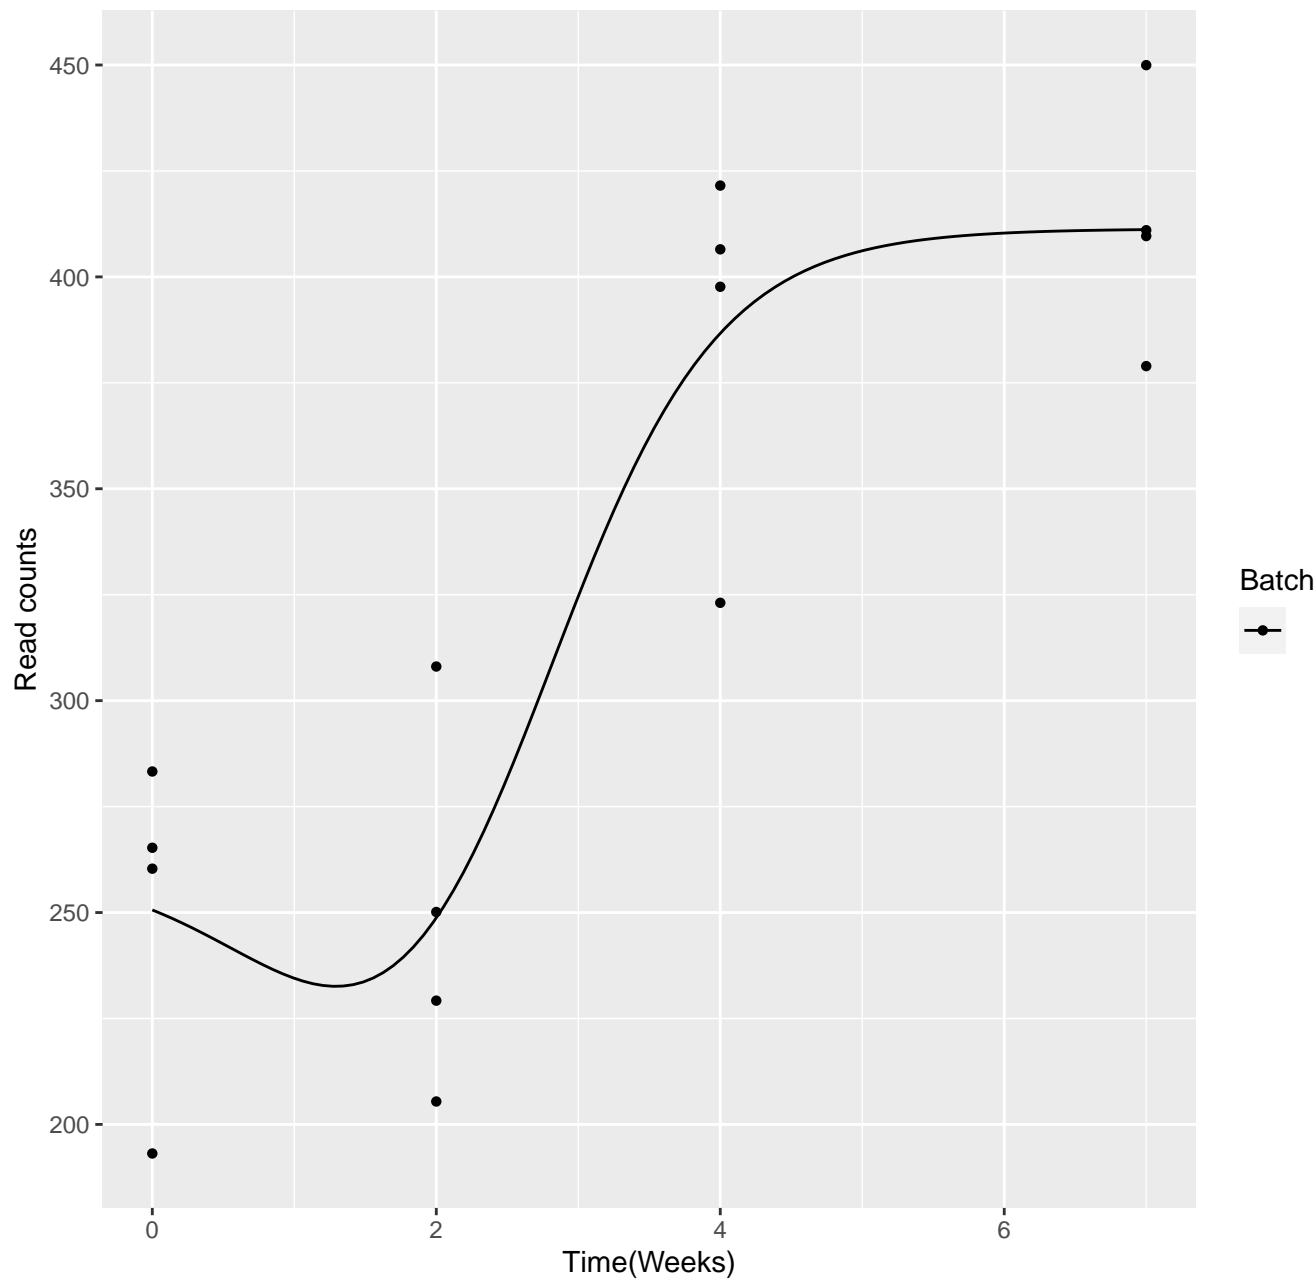

FZD7:  $\log_{10} q = -4.35$

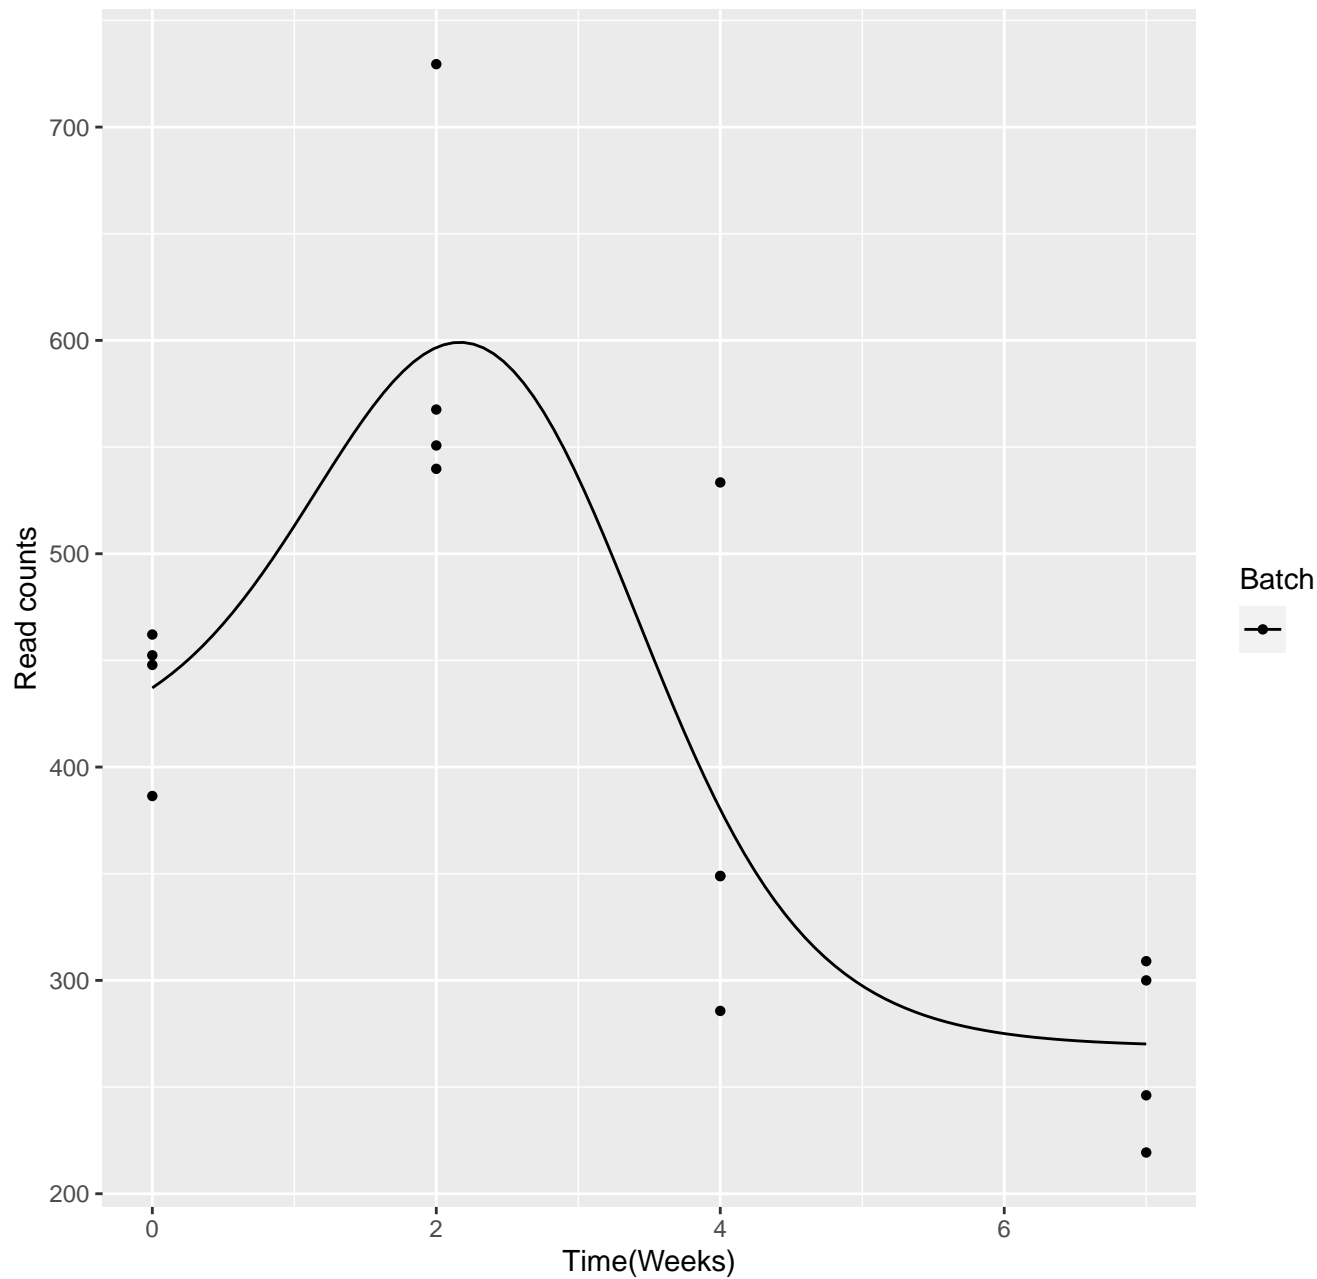

HK3:  $\log_{10} q = -4.35$

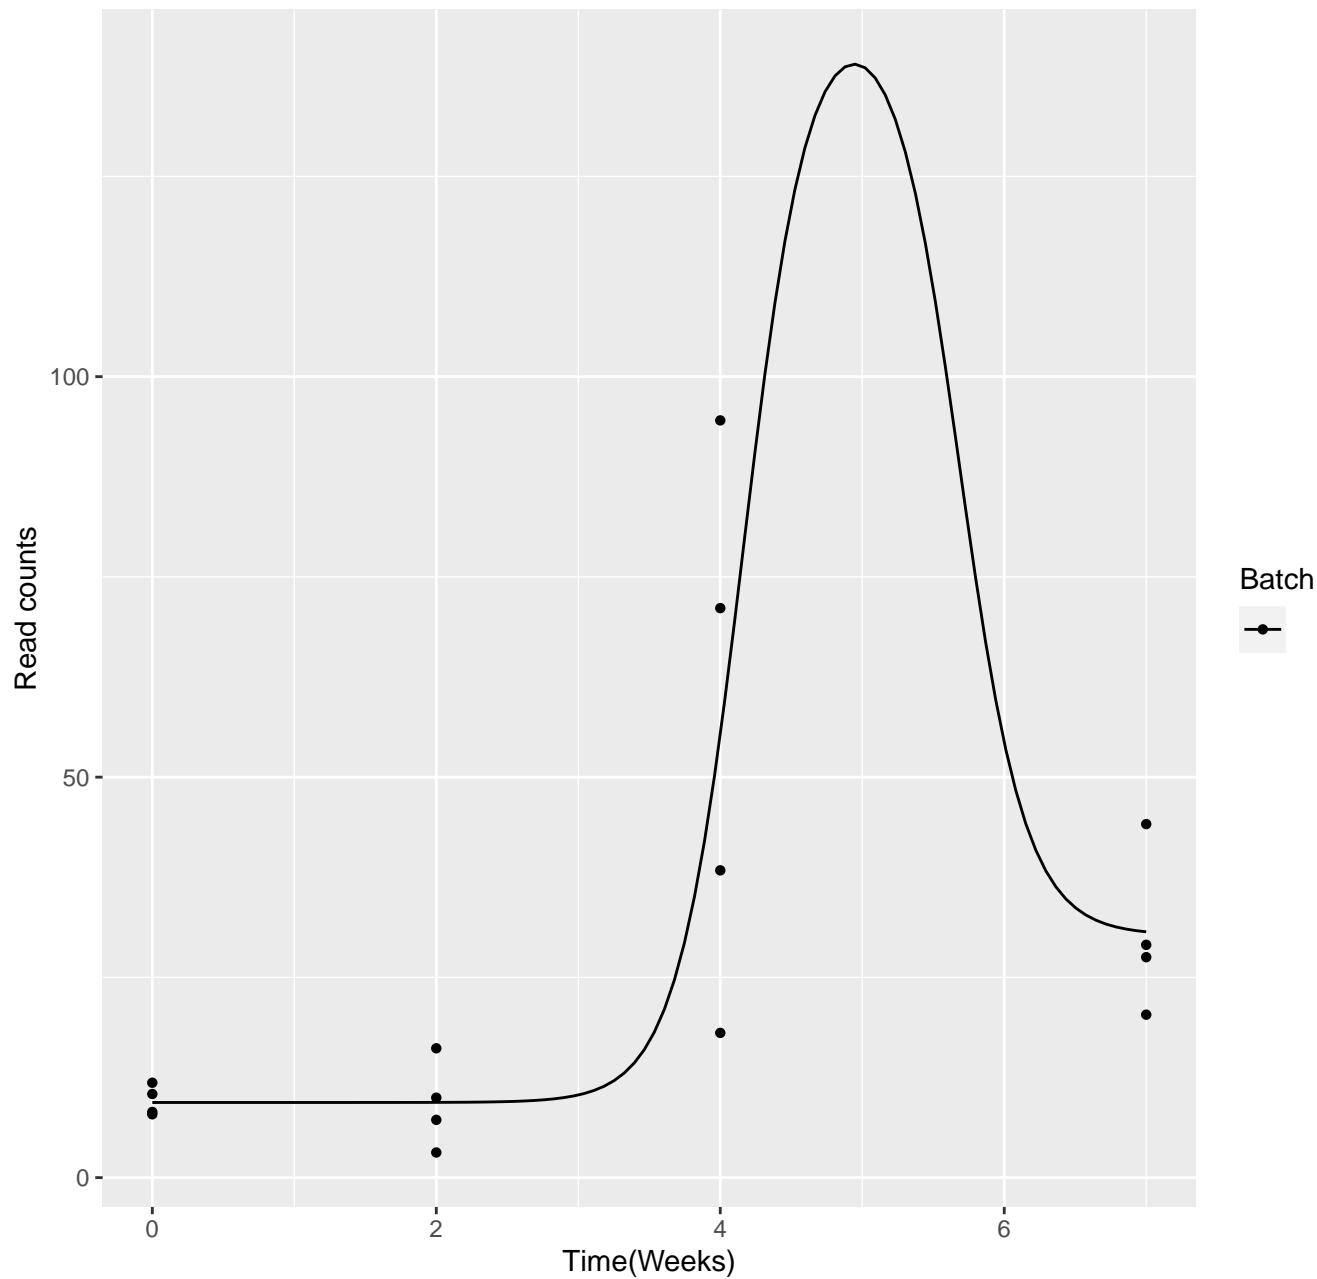

LOC100352880:  $\log_{10} q = -4.34$

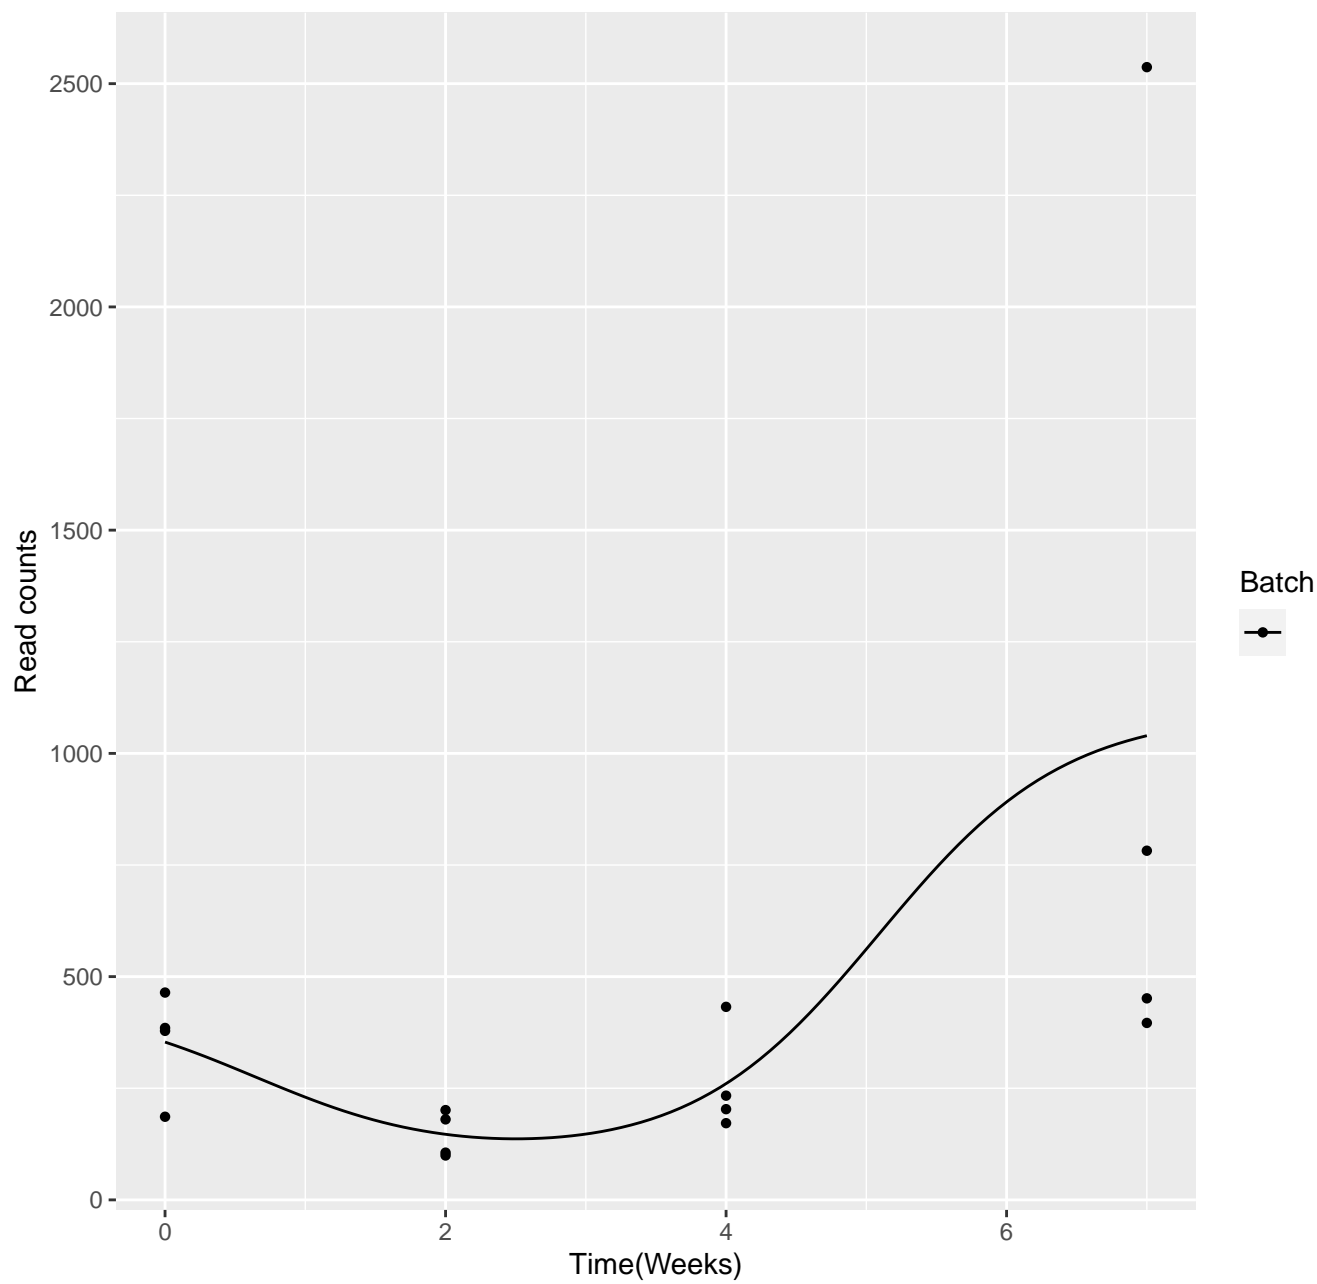

MAGI2:  $\log_{10} q = -4.34$

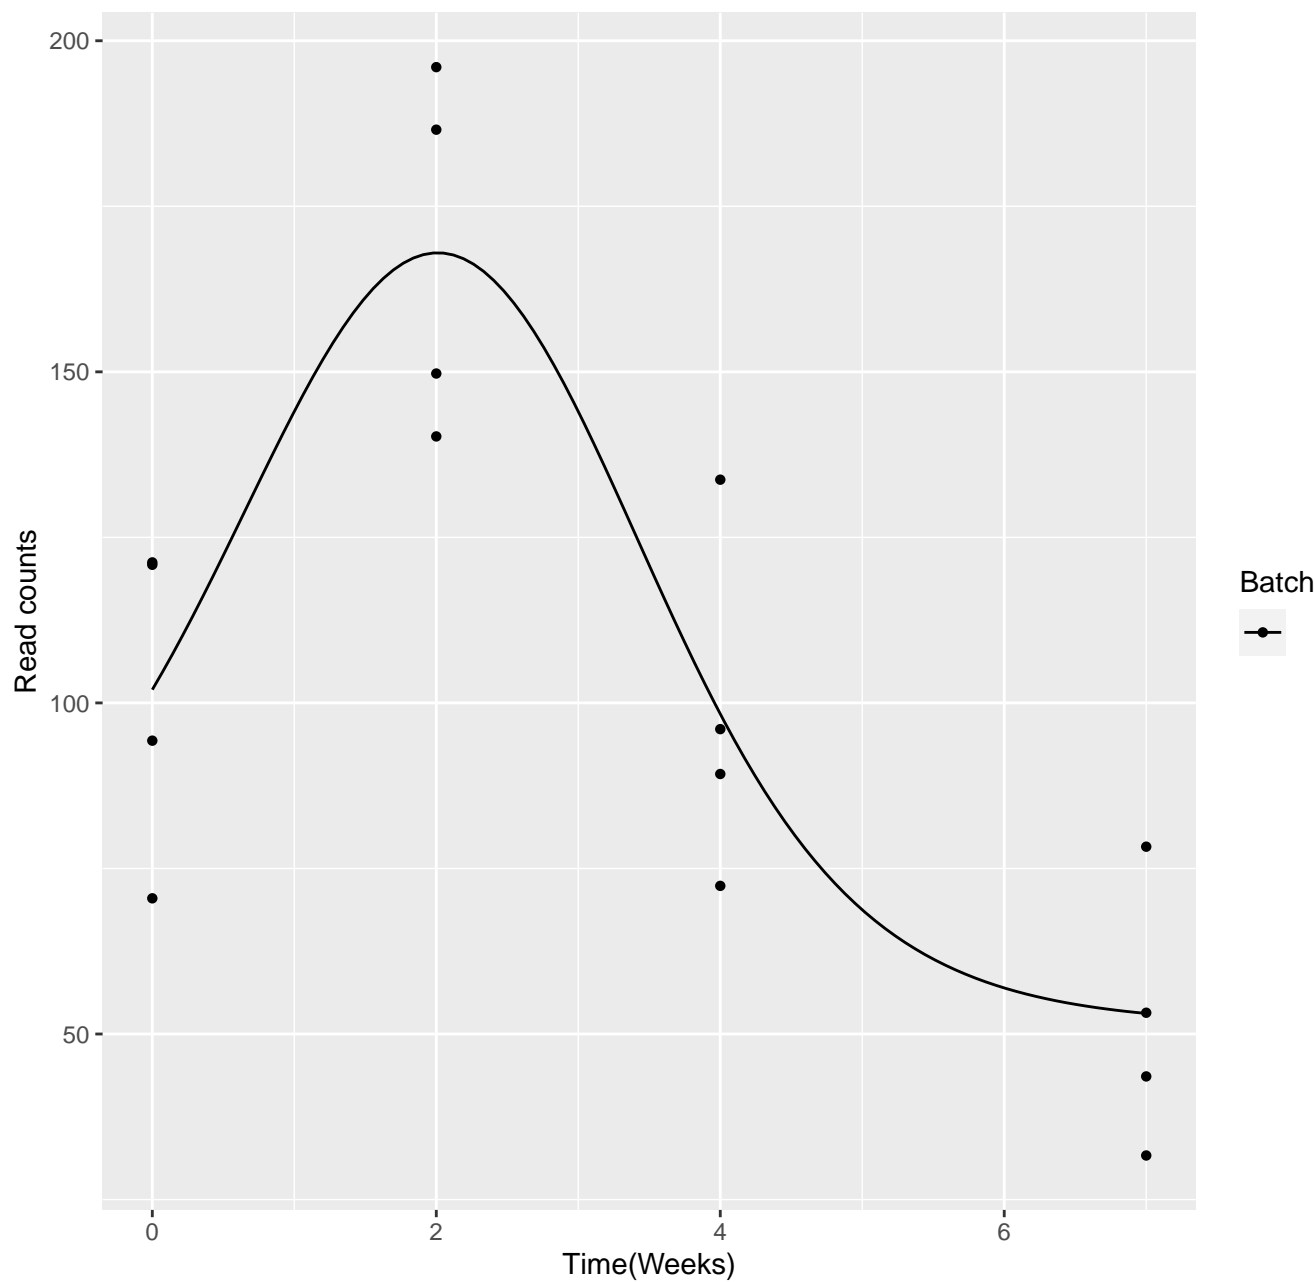



LOC108178648:  $\log_{10} q = -4.33$

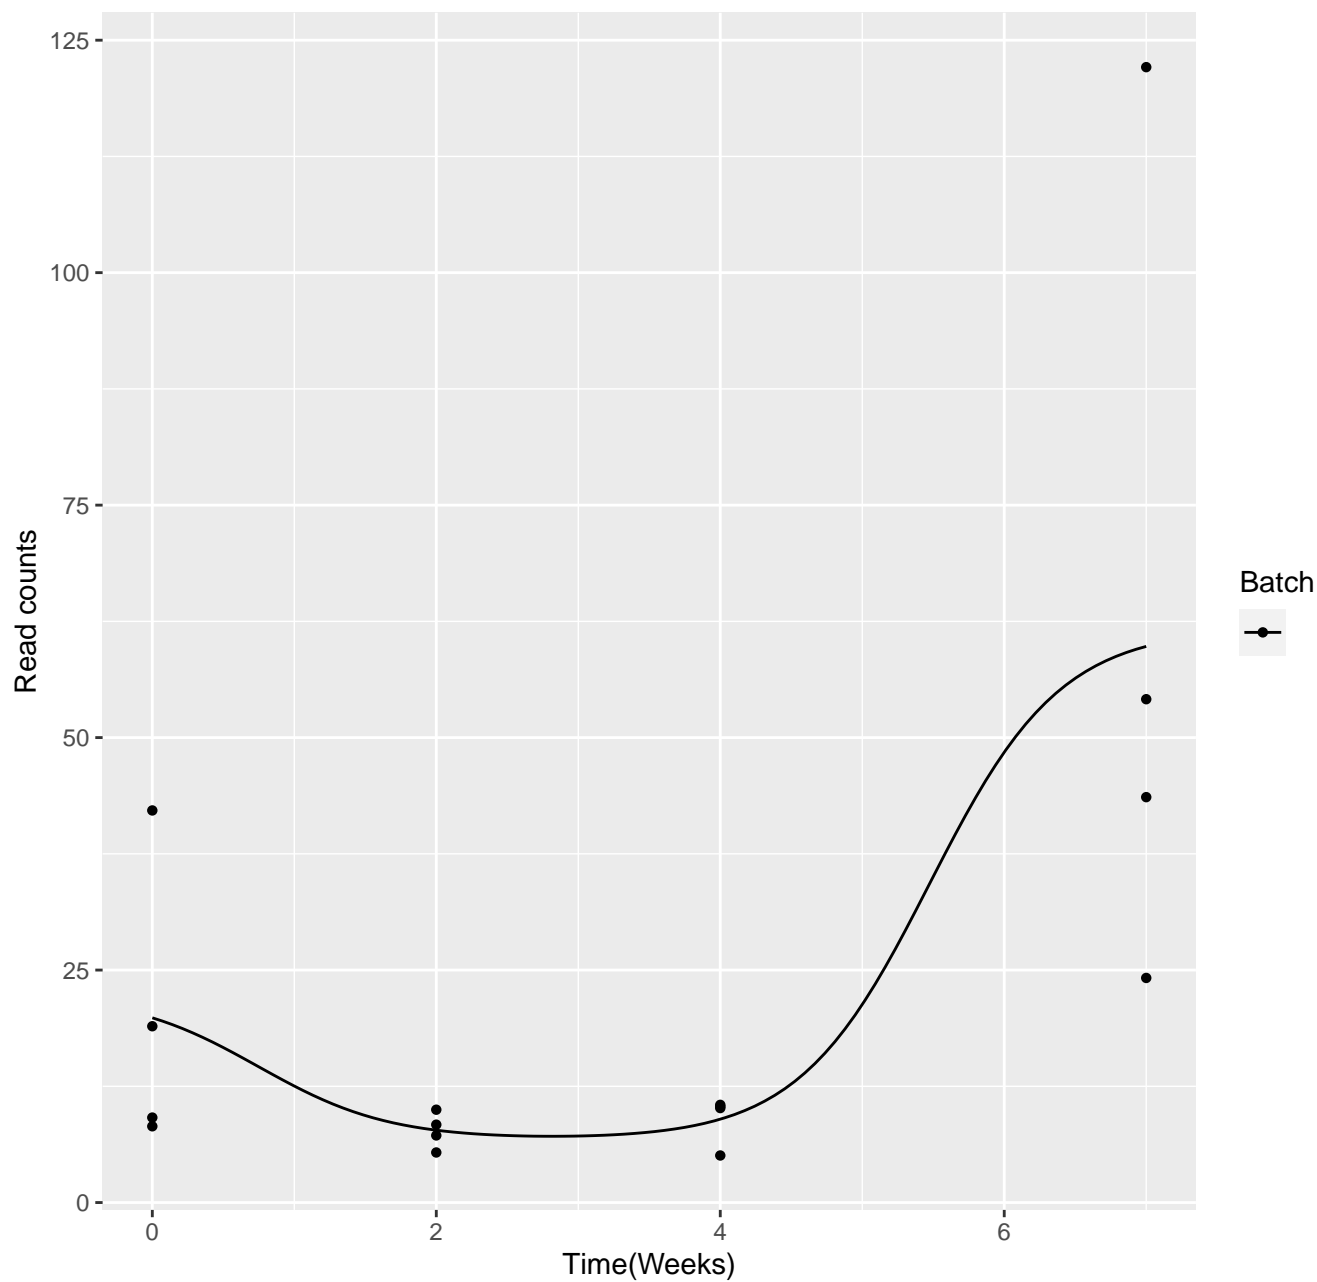

EPN2:  $\log_{10} q = -4.33$

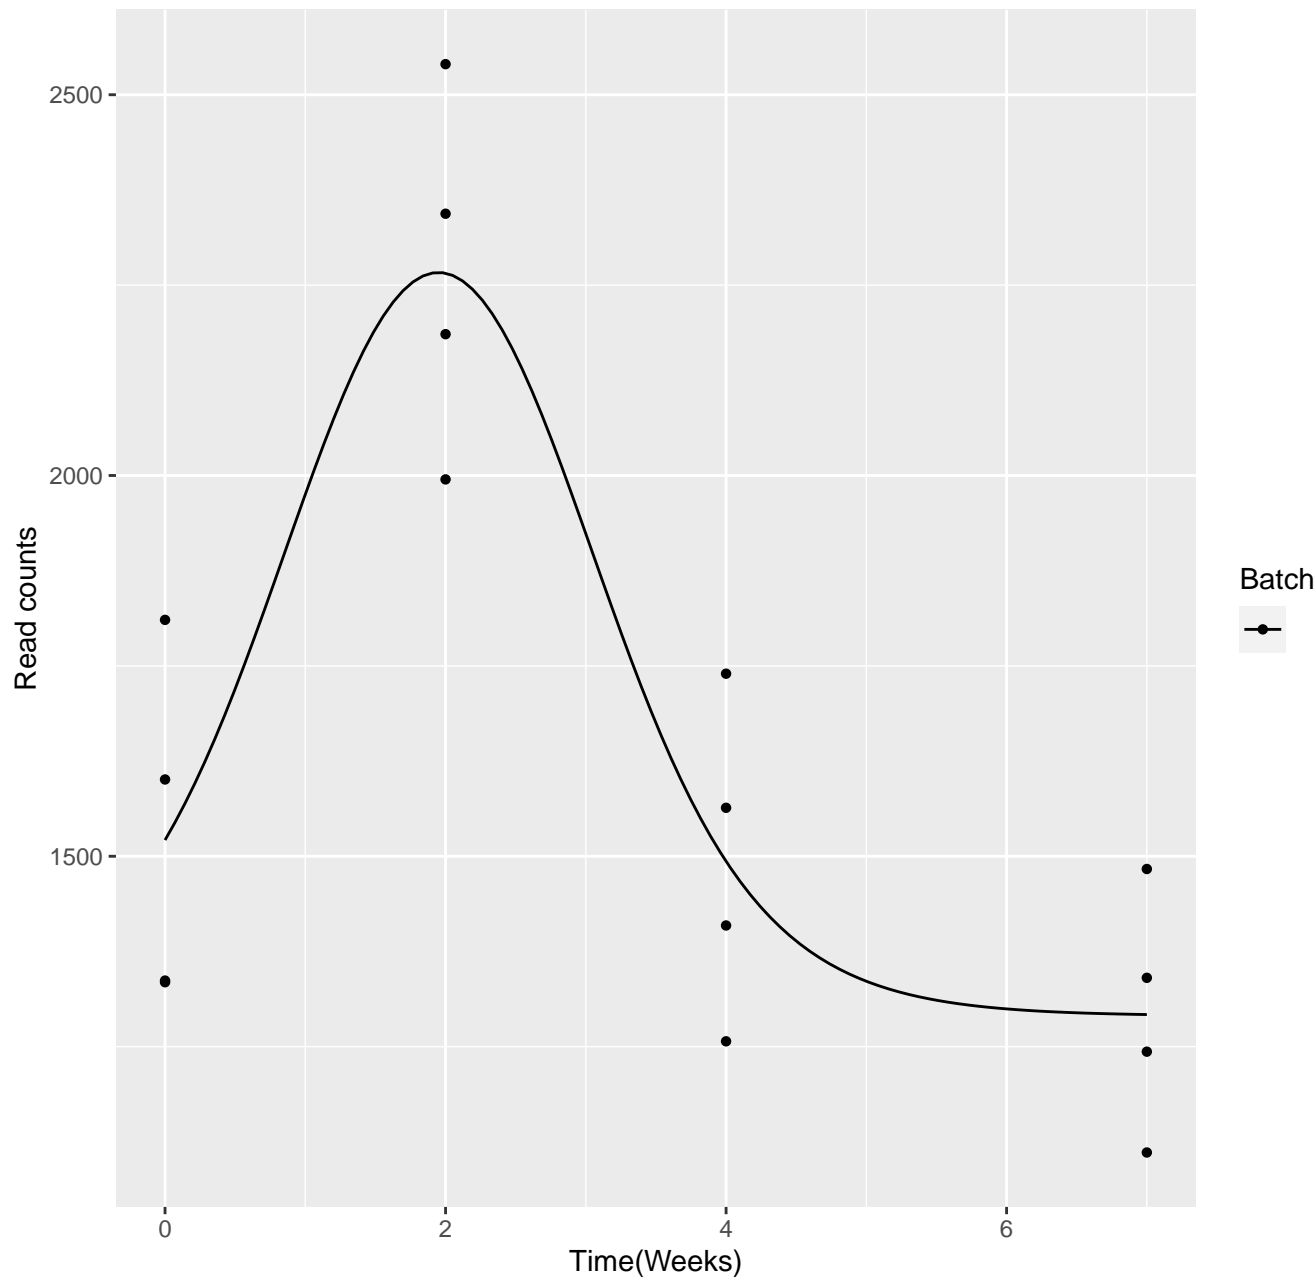

FSTL3:  $\log_{10} q = -4.33$

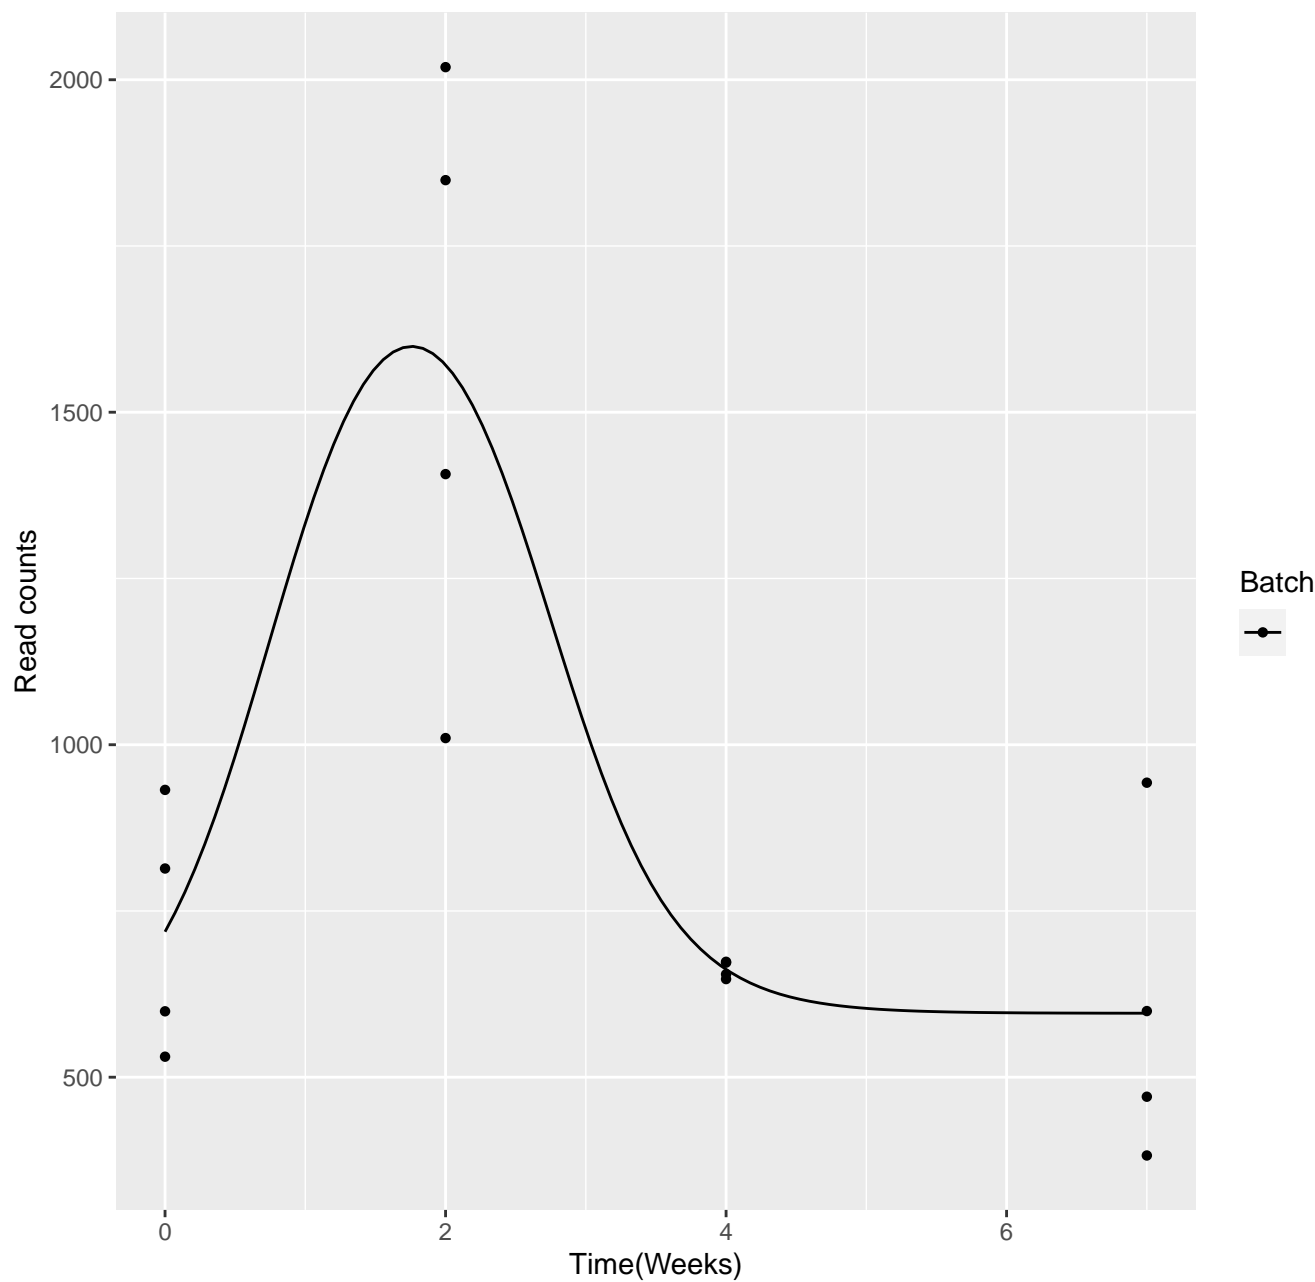

EPHB3:  $\log_{10} q = -4.33$

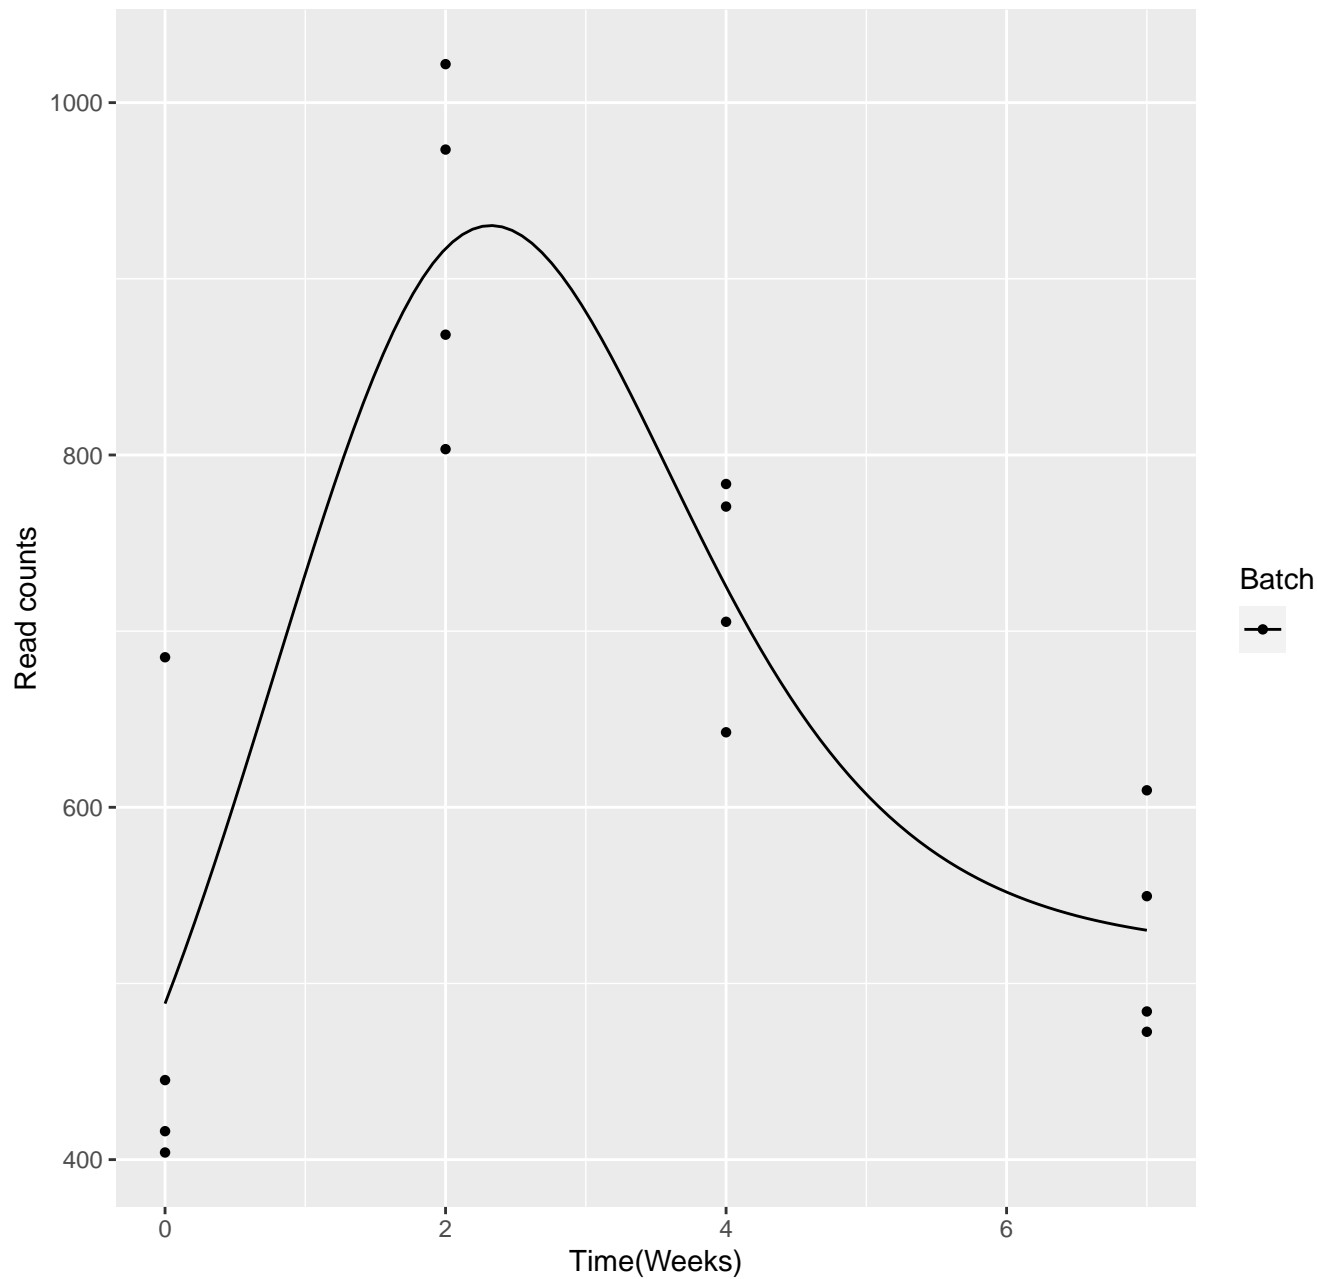

TNS1:  $\log_{10} q = -4.31$

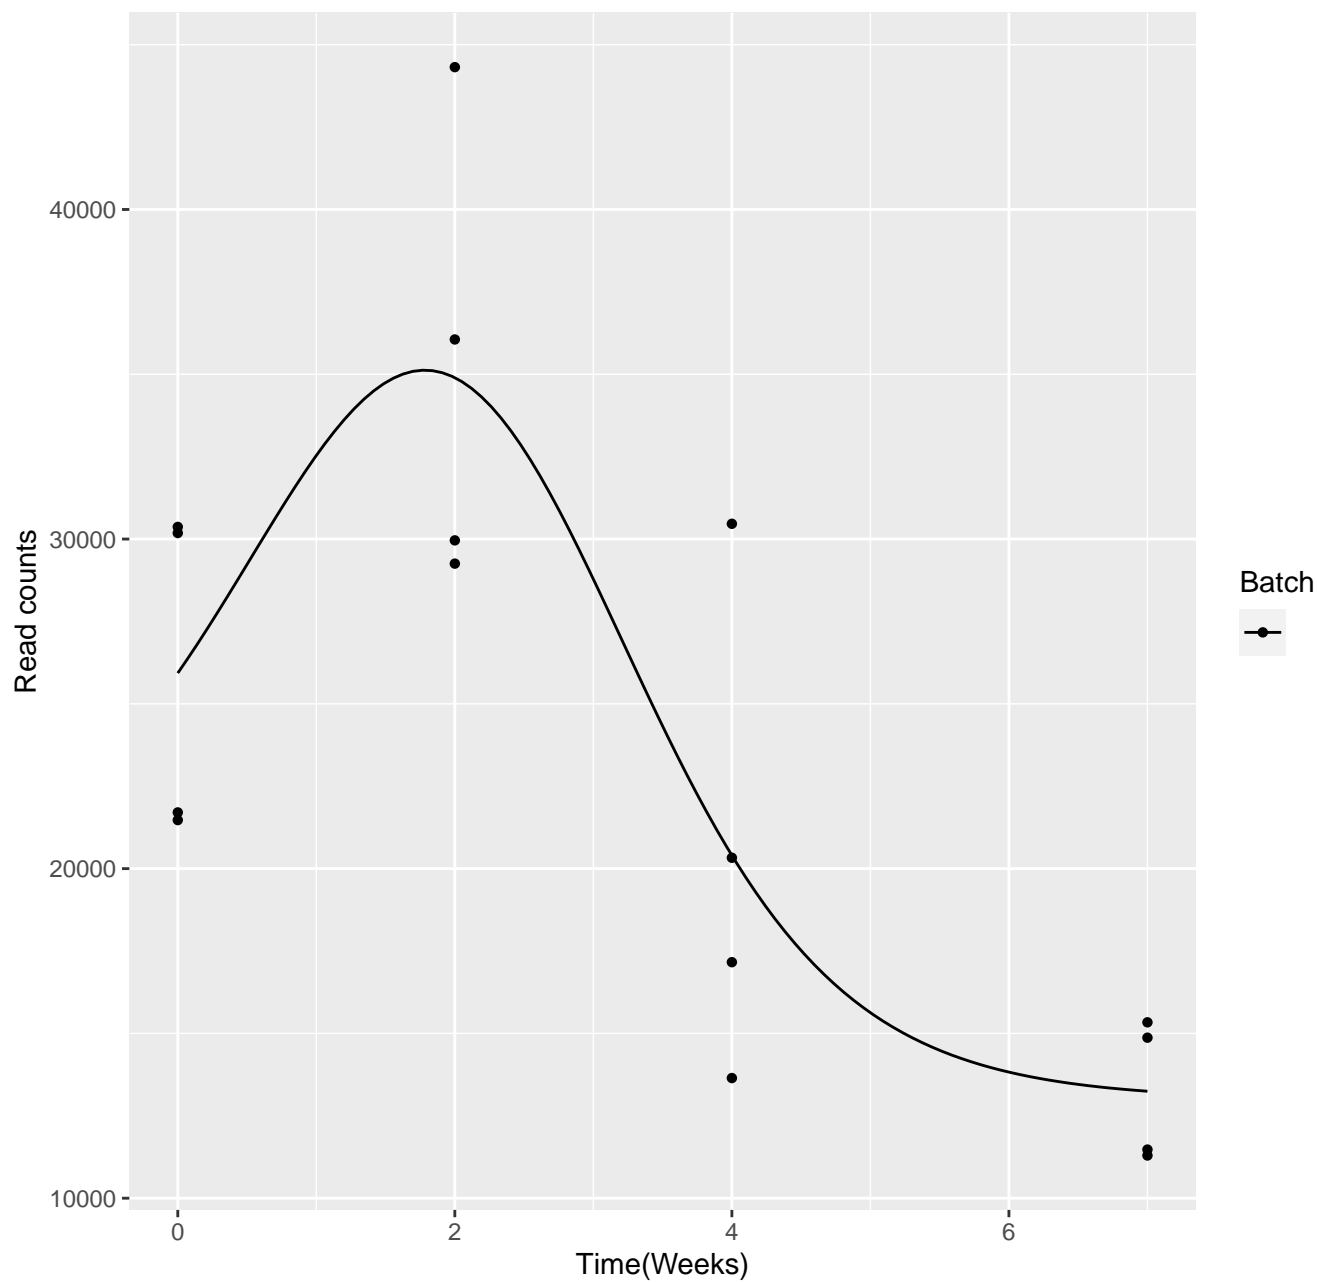

ZNRF3:  $\log_{10} q = -4.31$

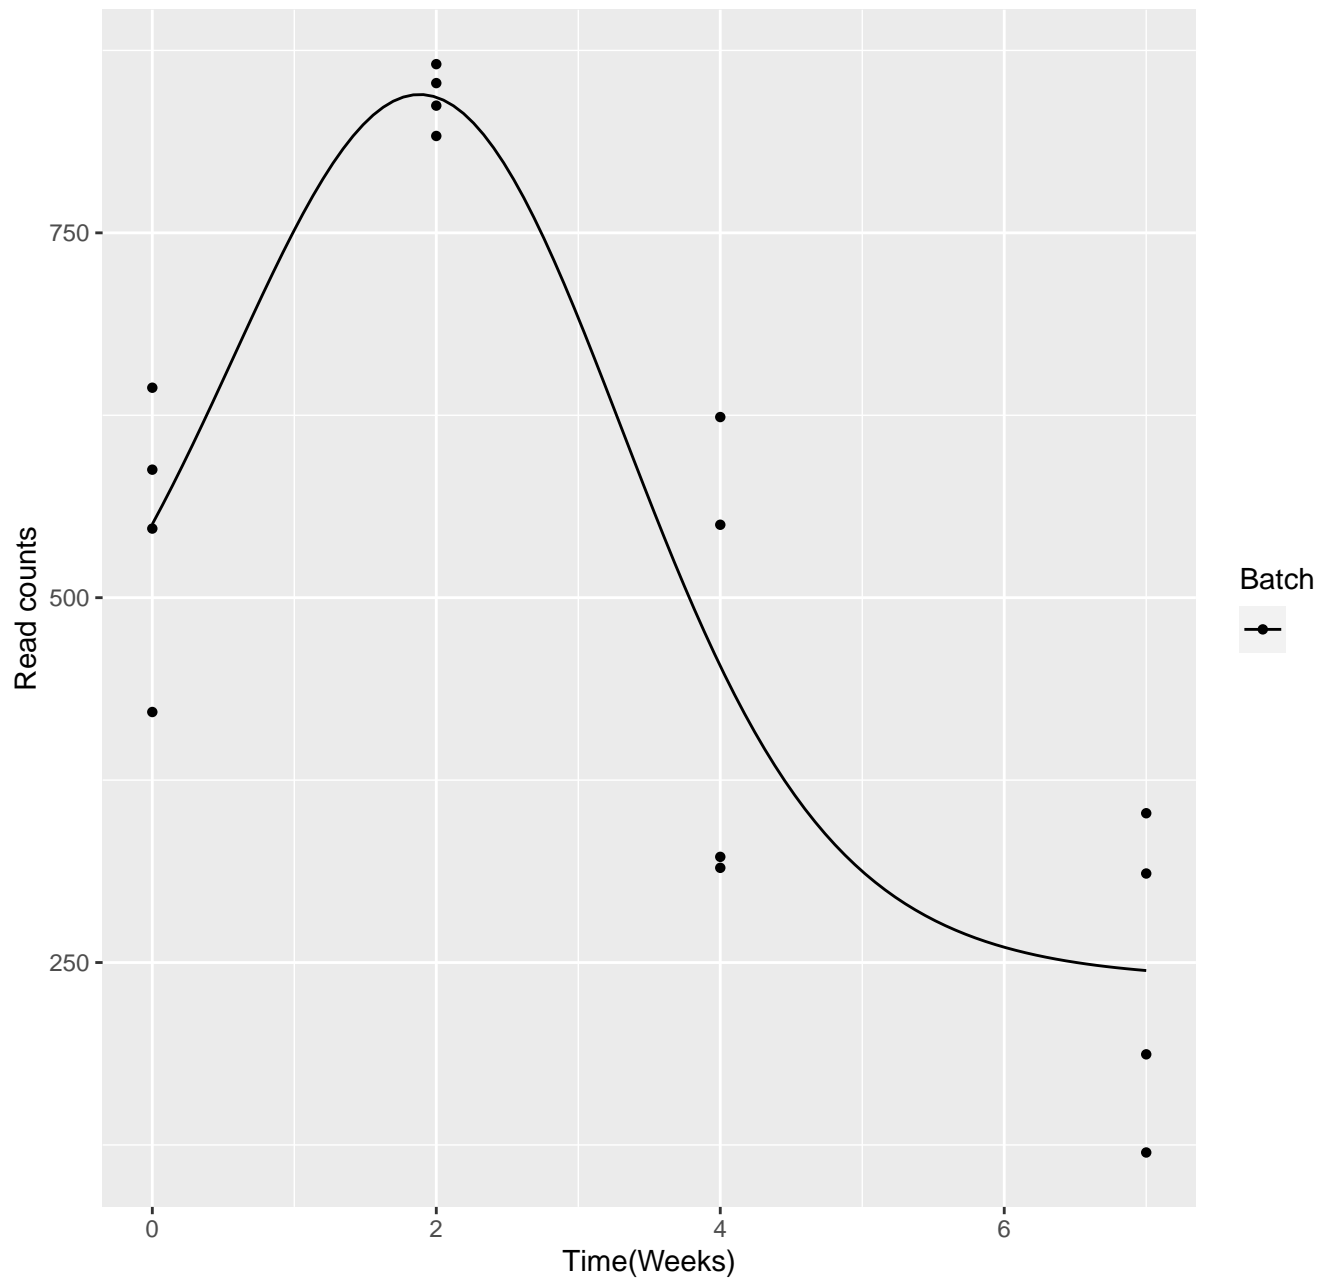

MLANA:  $\log_{10} q = -4.31$

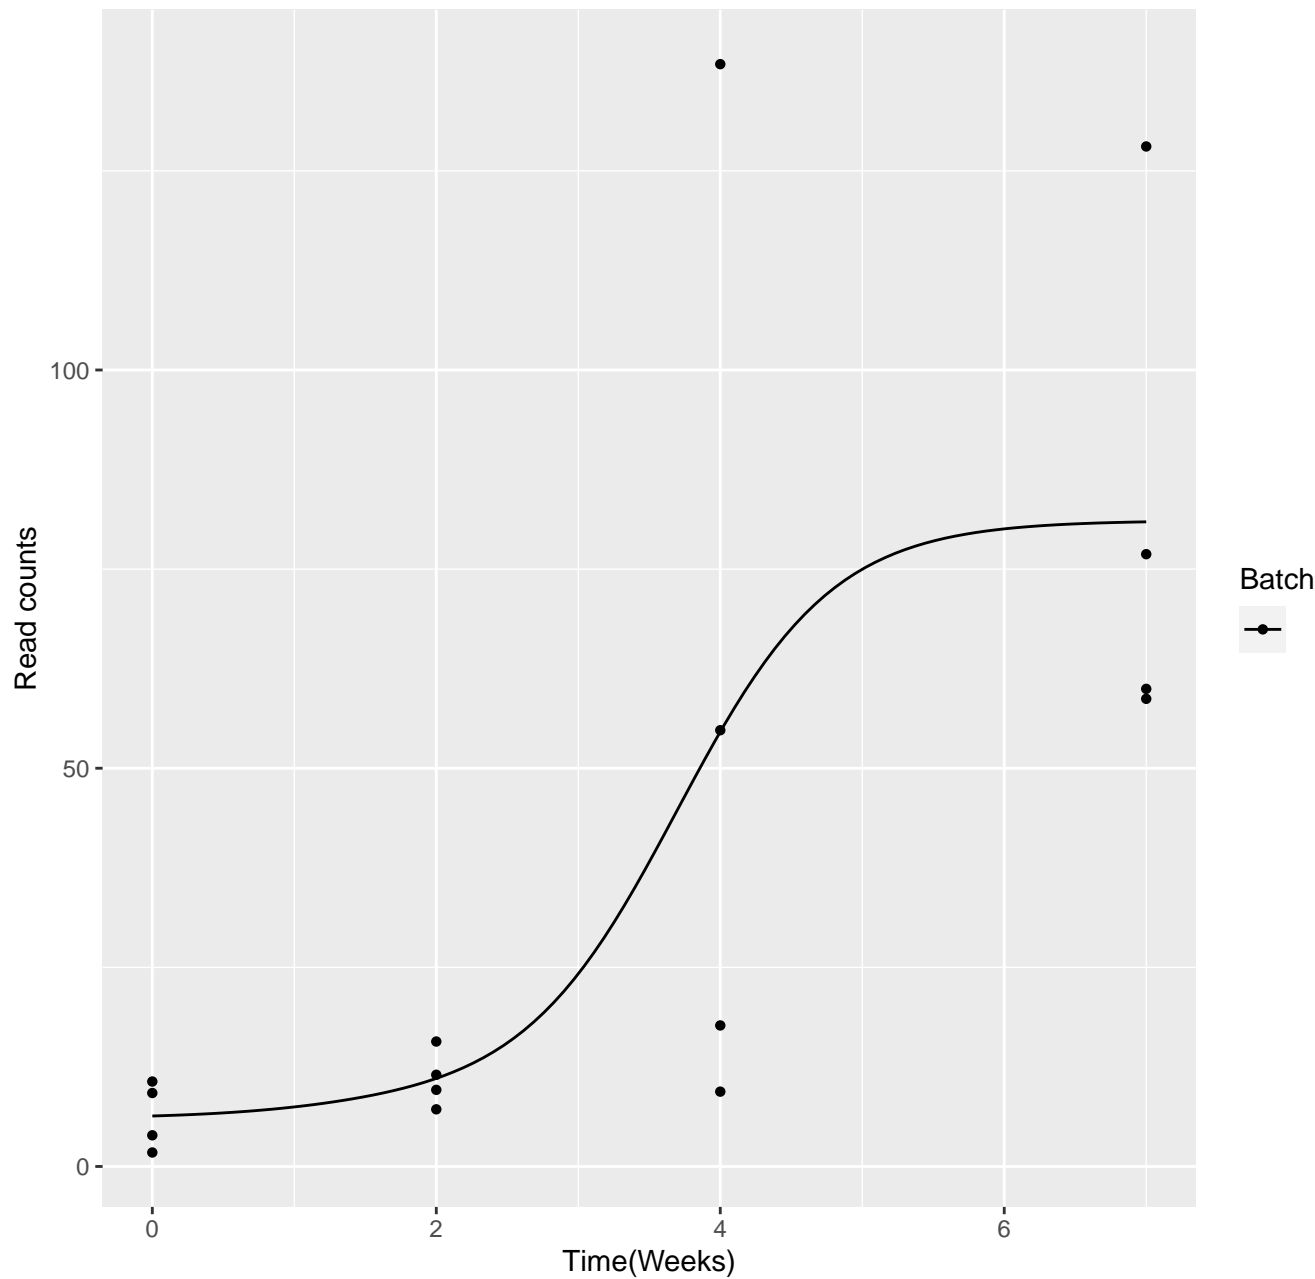

E2F2:  $\log_{10} q = -4.3$

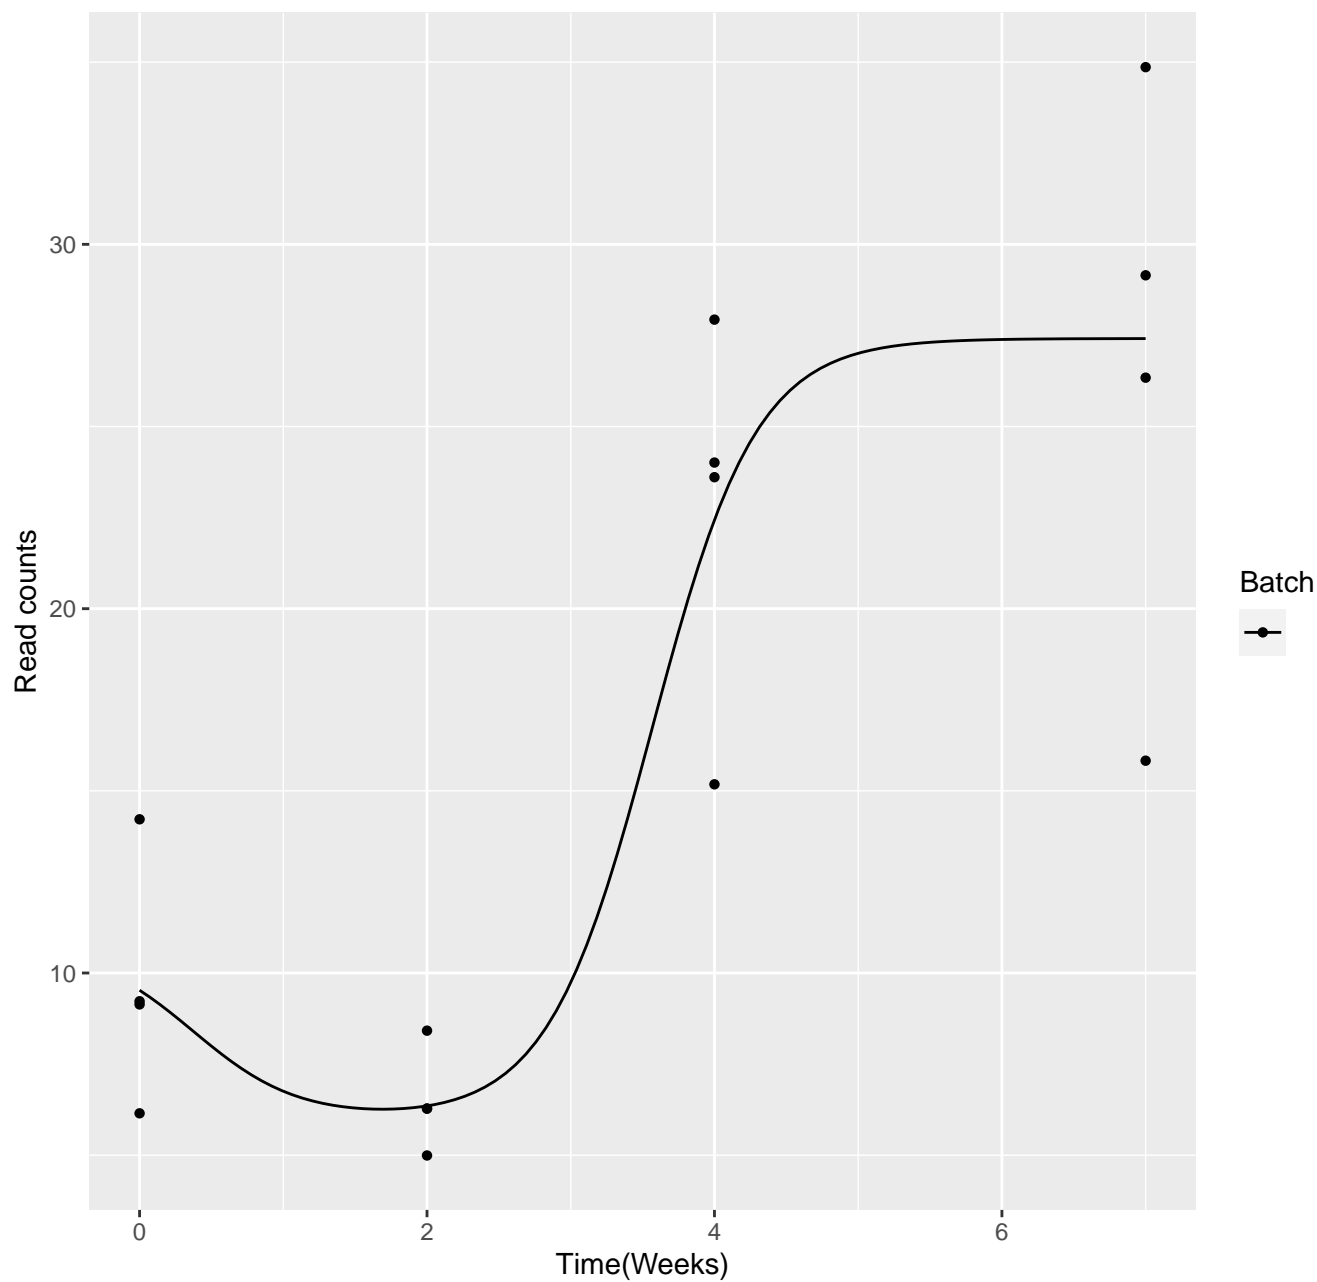



SLC7A7:  $\log_{10} q = -4.3$

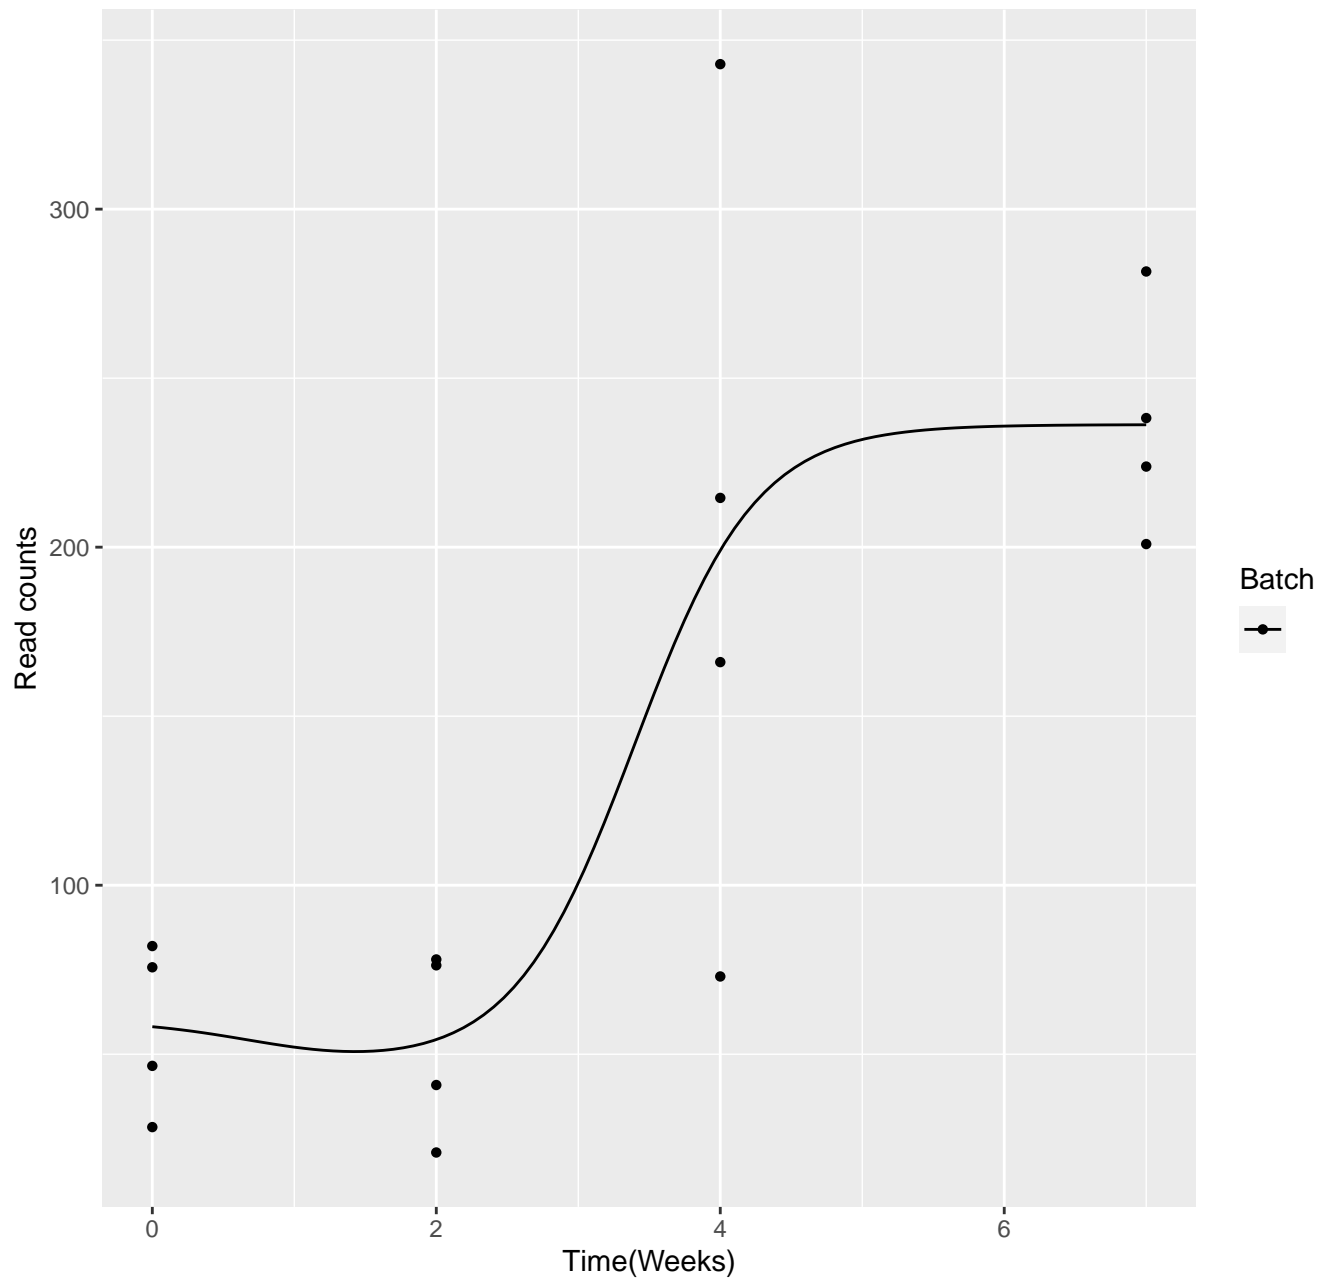

LOC127492398:  $\log_{10} q = -4.3$

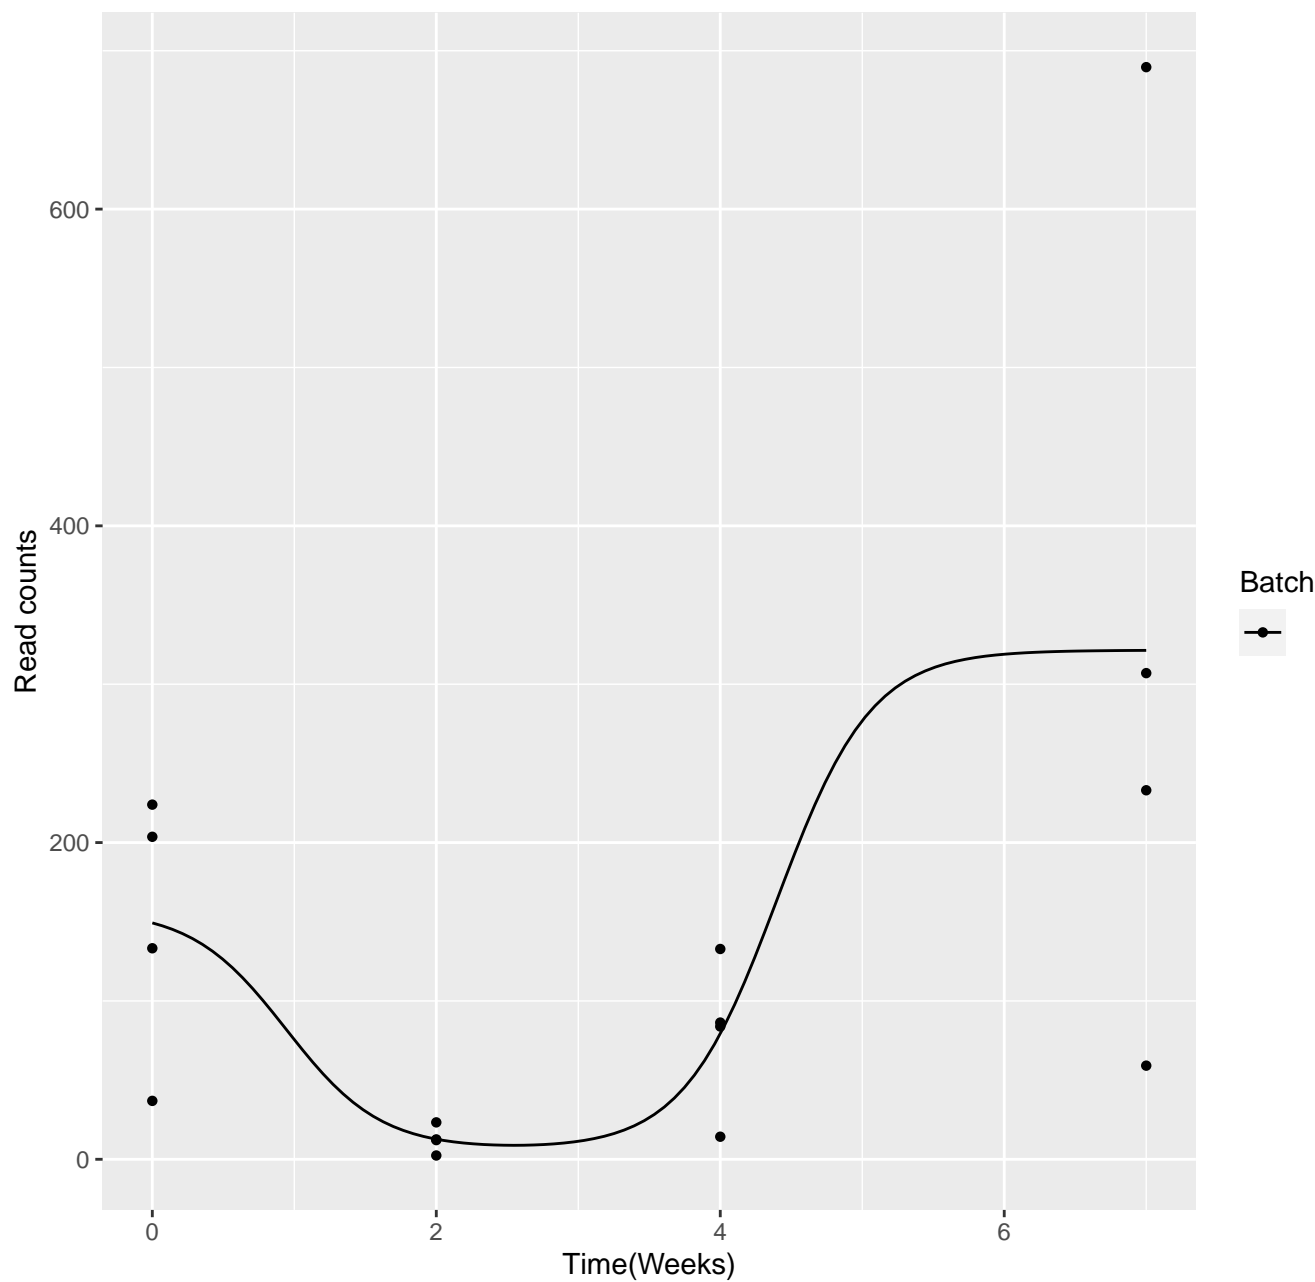

L3MBTL1:  $\log_{10} q = -4.28$

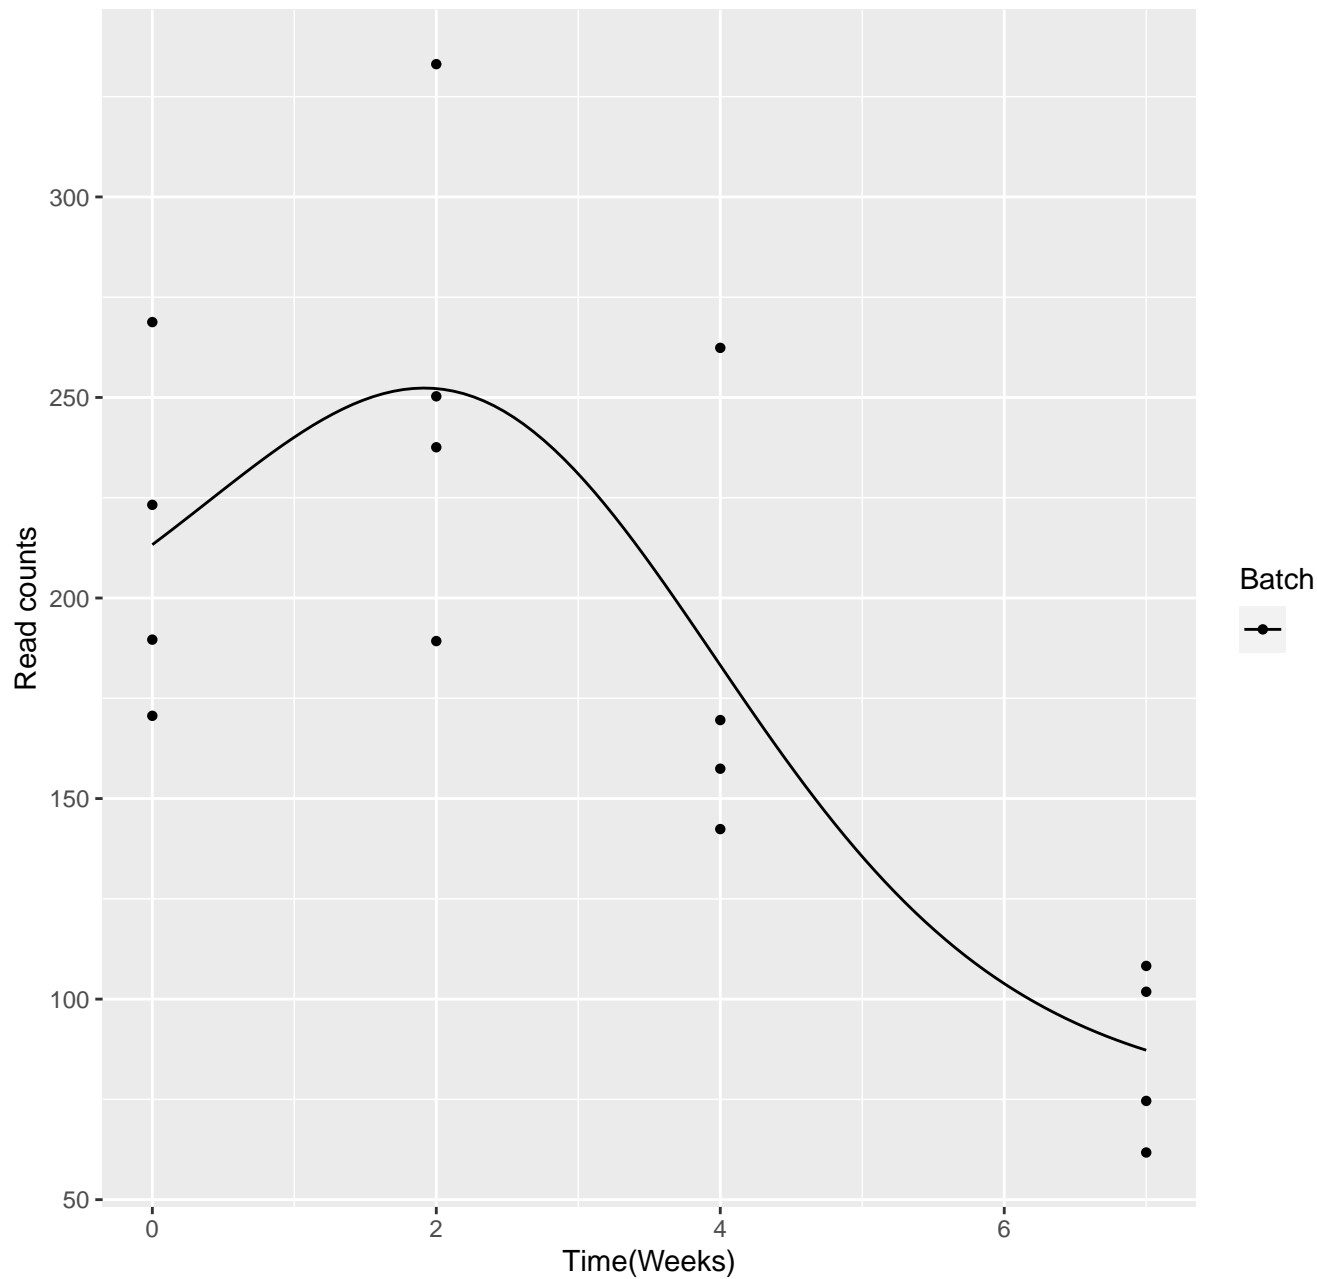

NCF2:  $\log_{10} q = -4.28$

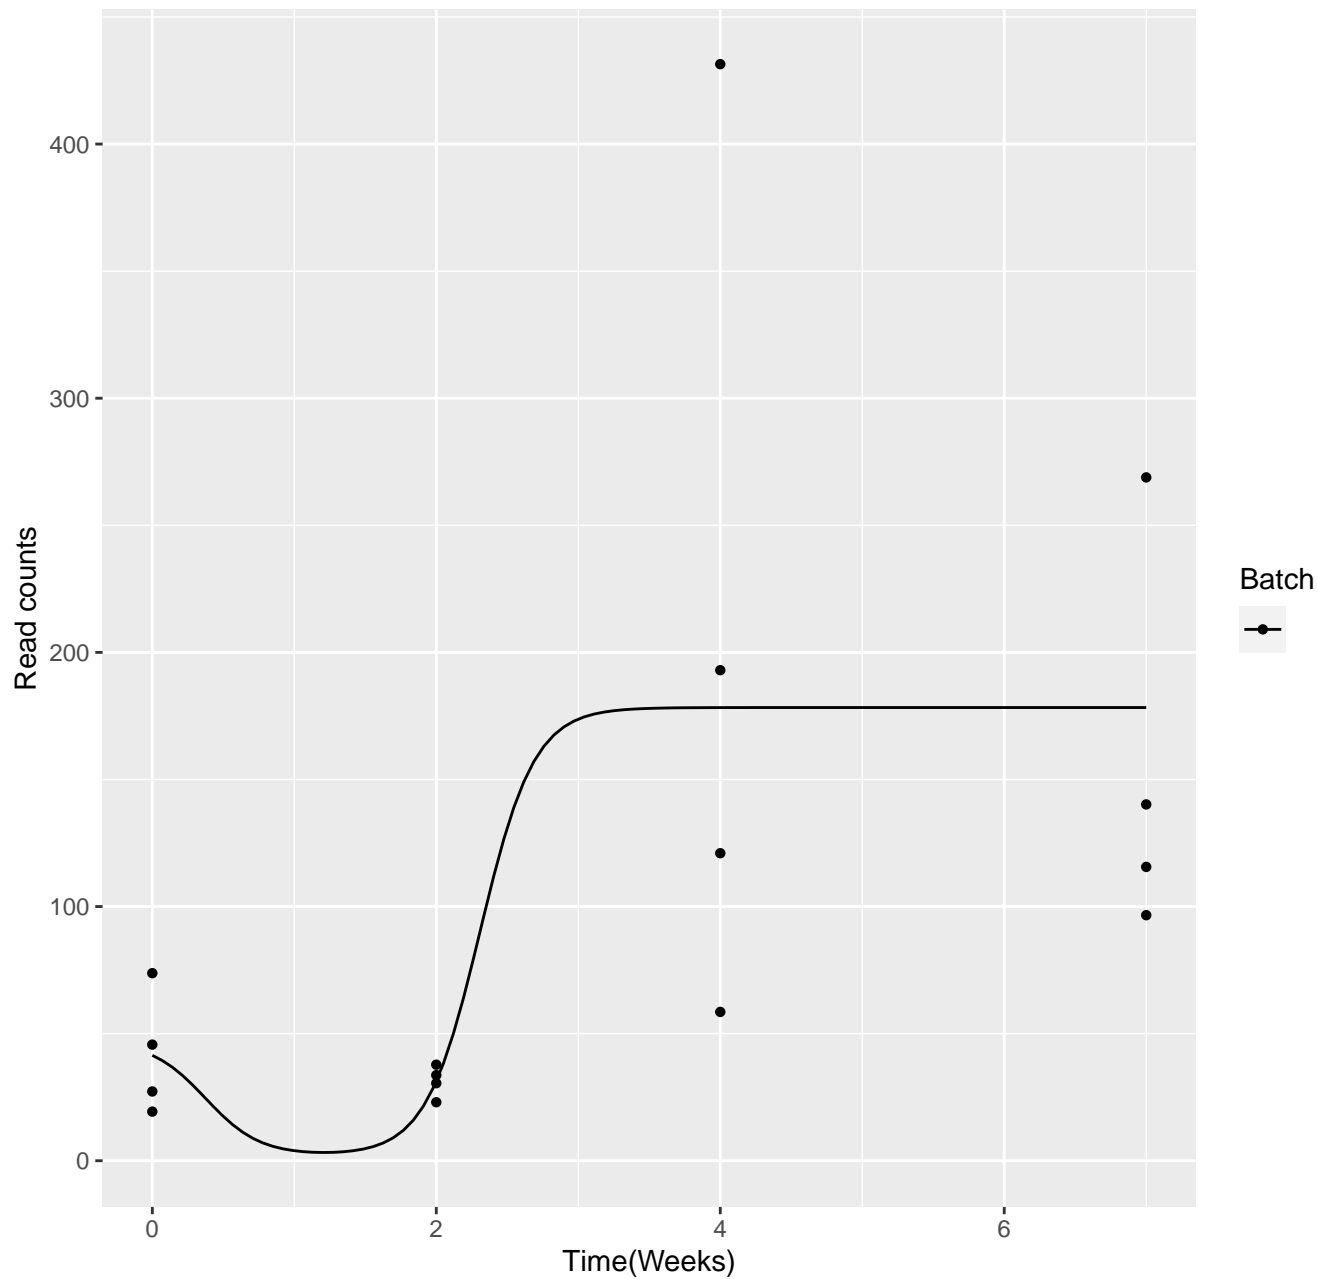

C1RL:  $\log_{10} q = -4.27$

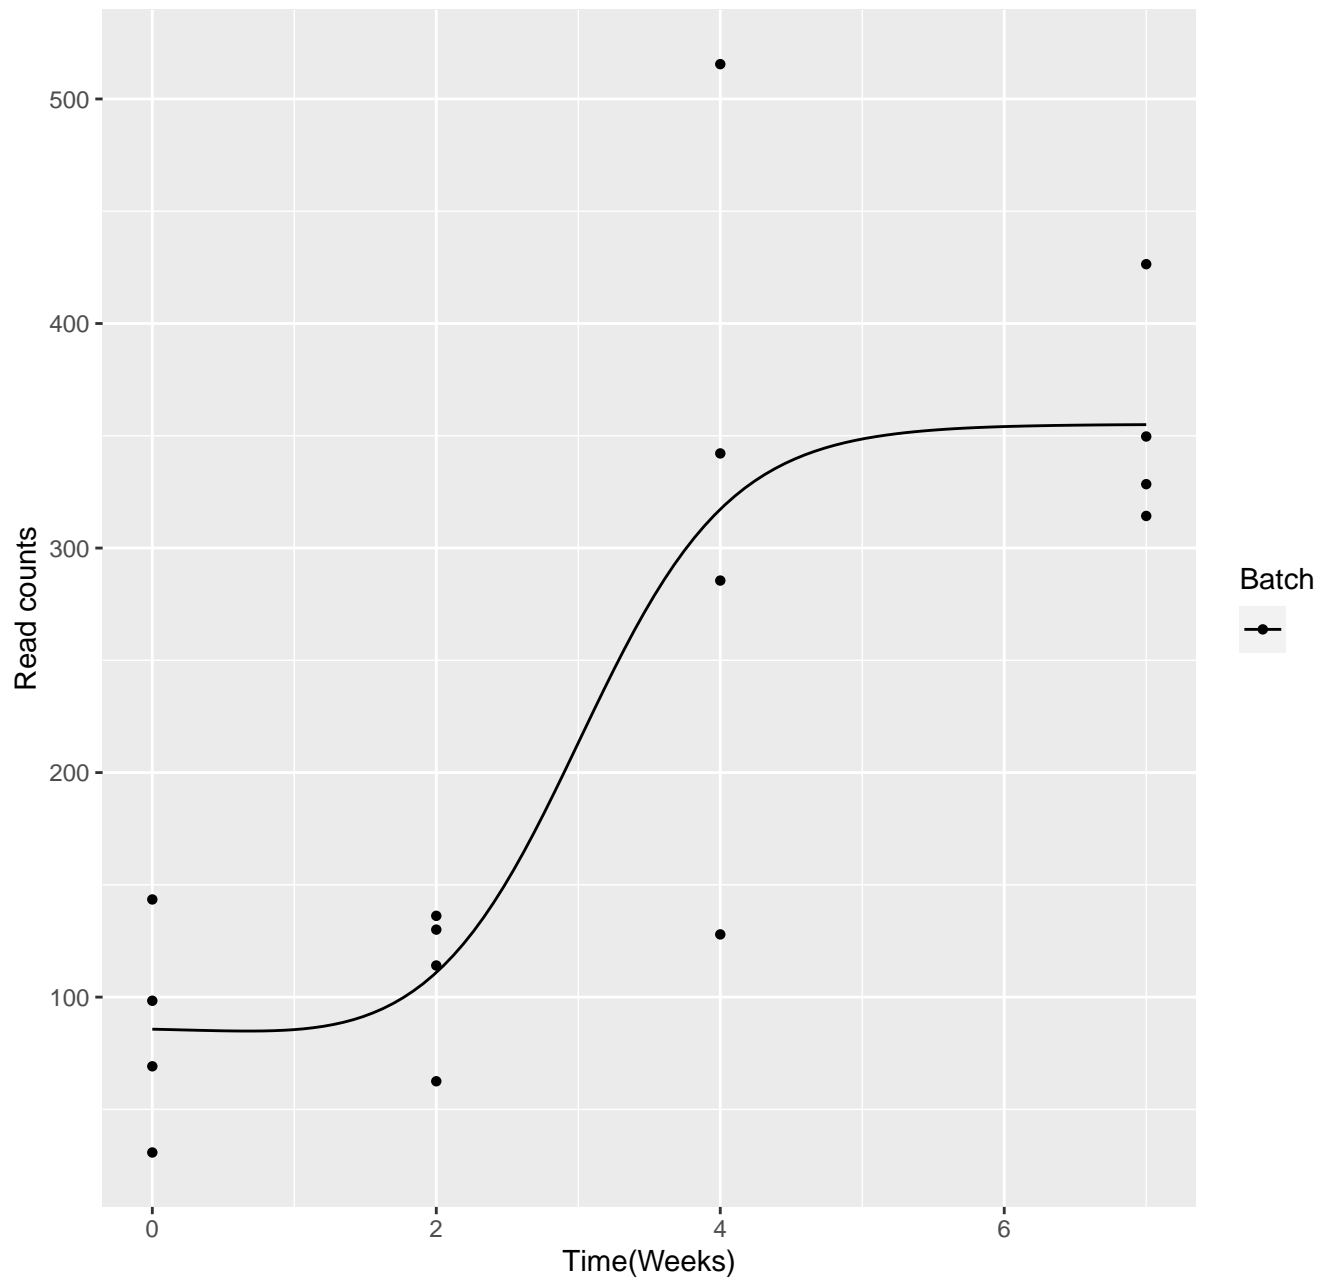

LOC108176480:  $\log_{10} q = -4.27$

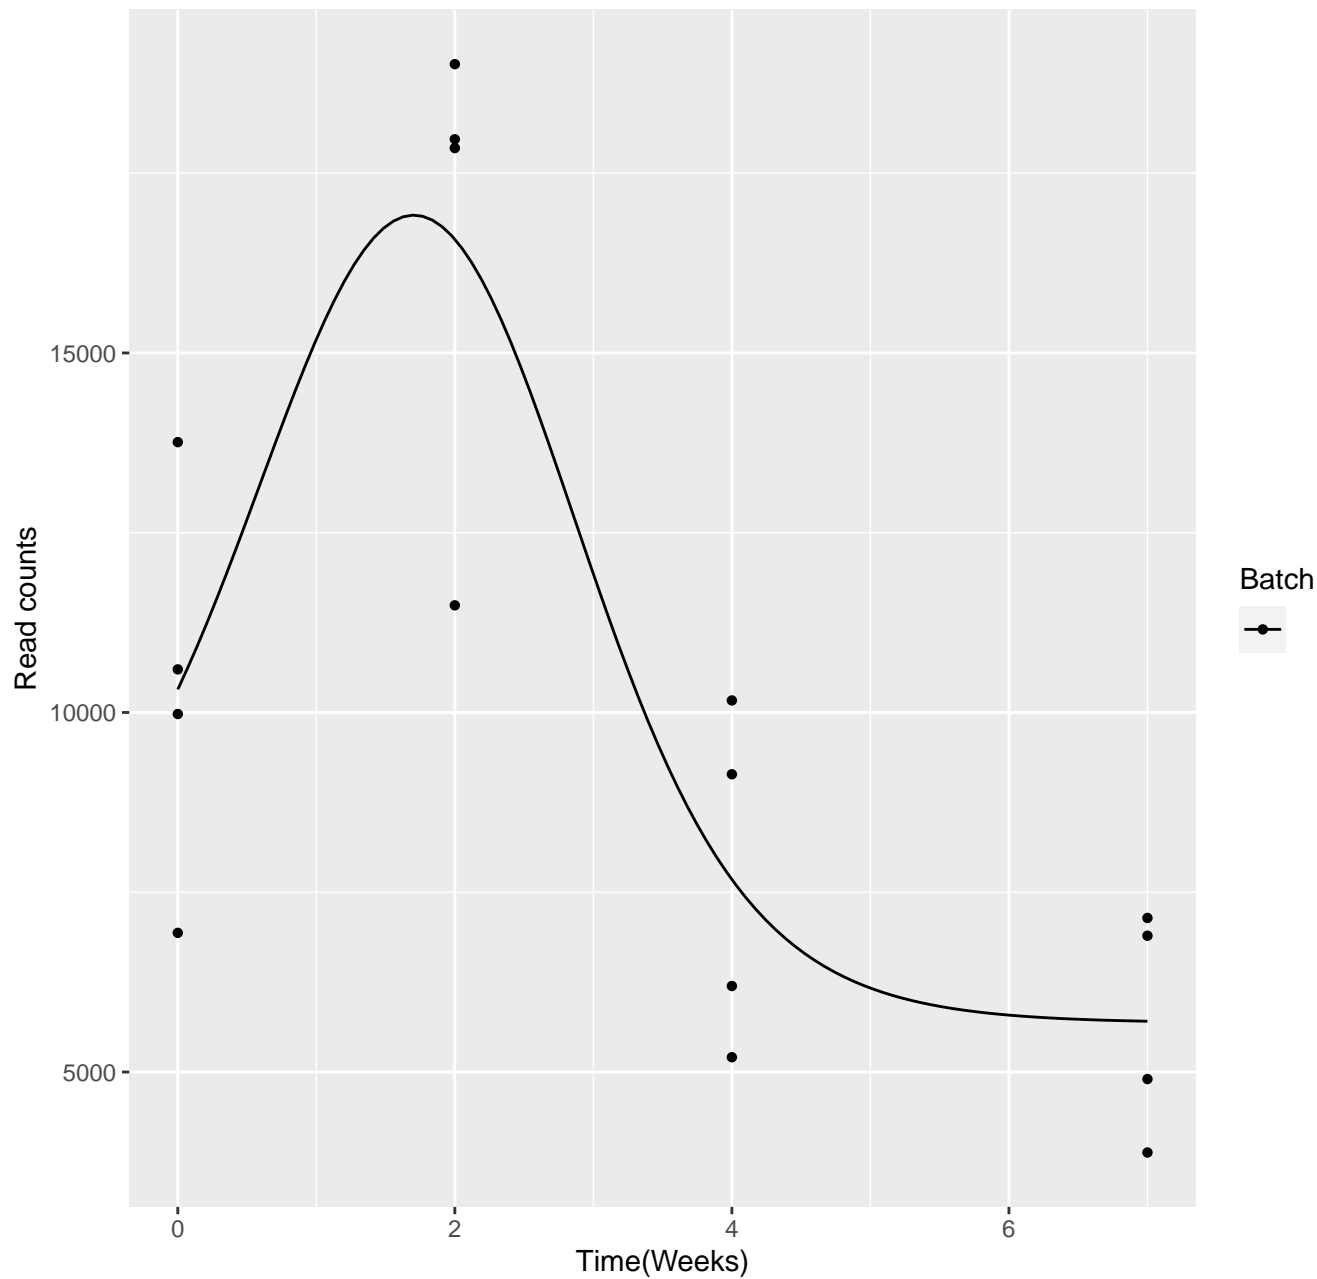

RNASE6:  $\log_{10} q = -4.27$

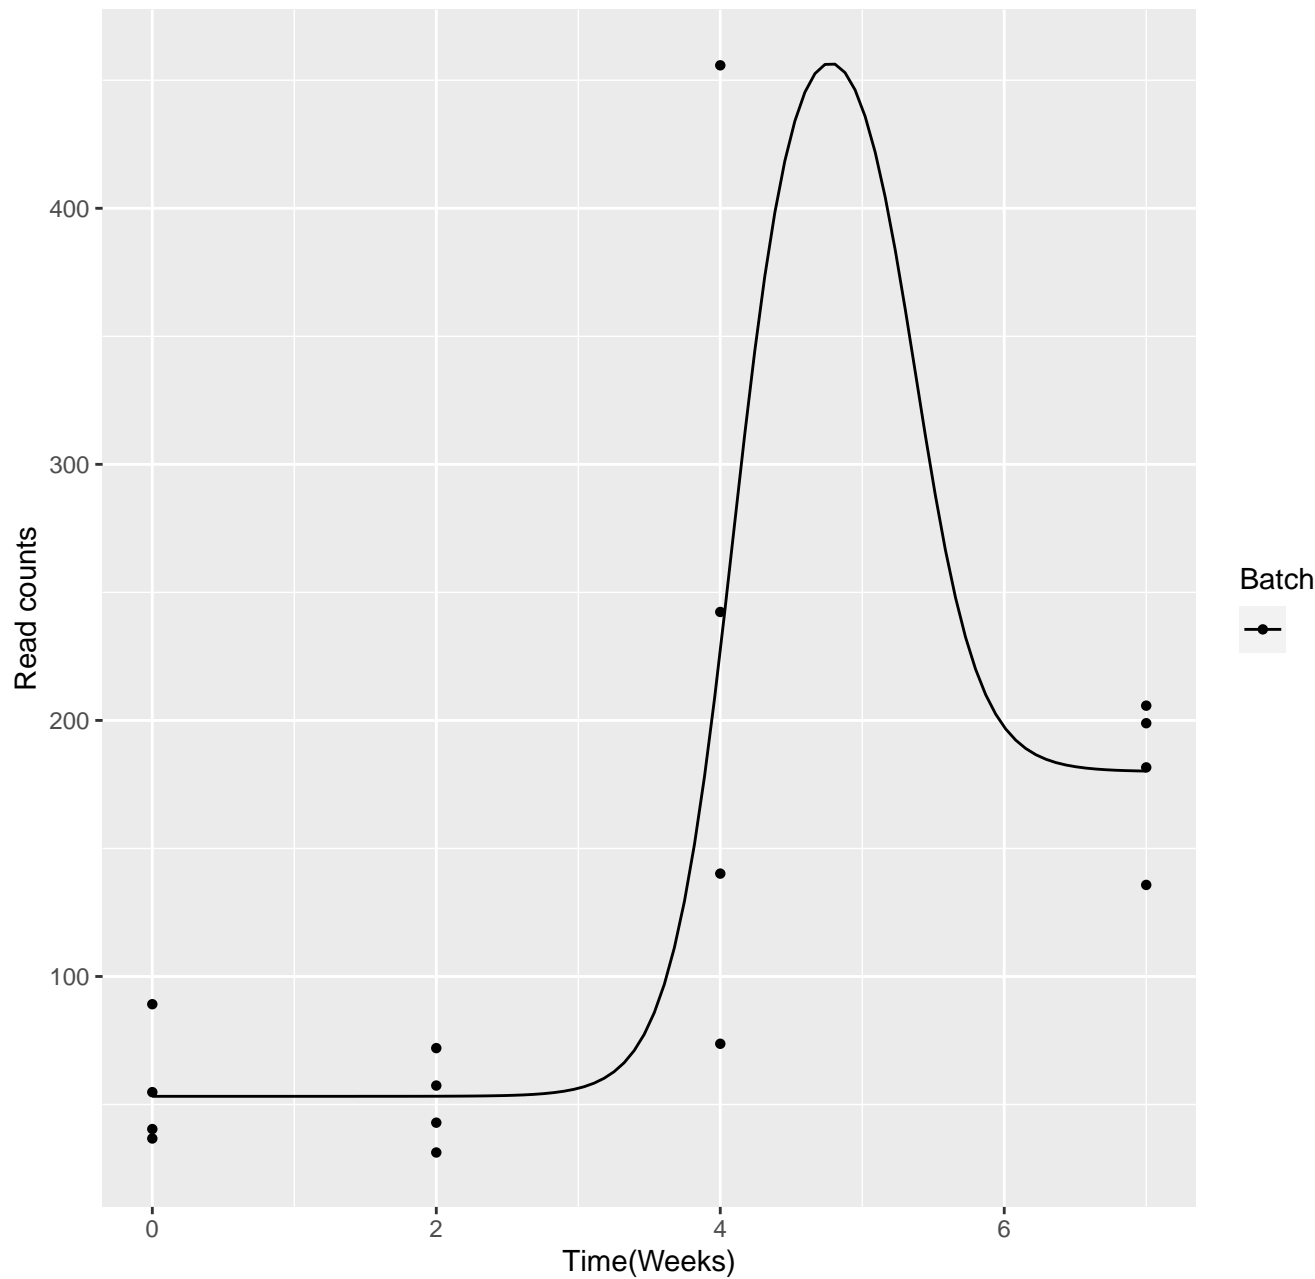

TSPAN2:  $\log_{10} q = -4.27$

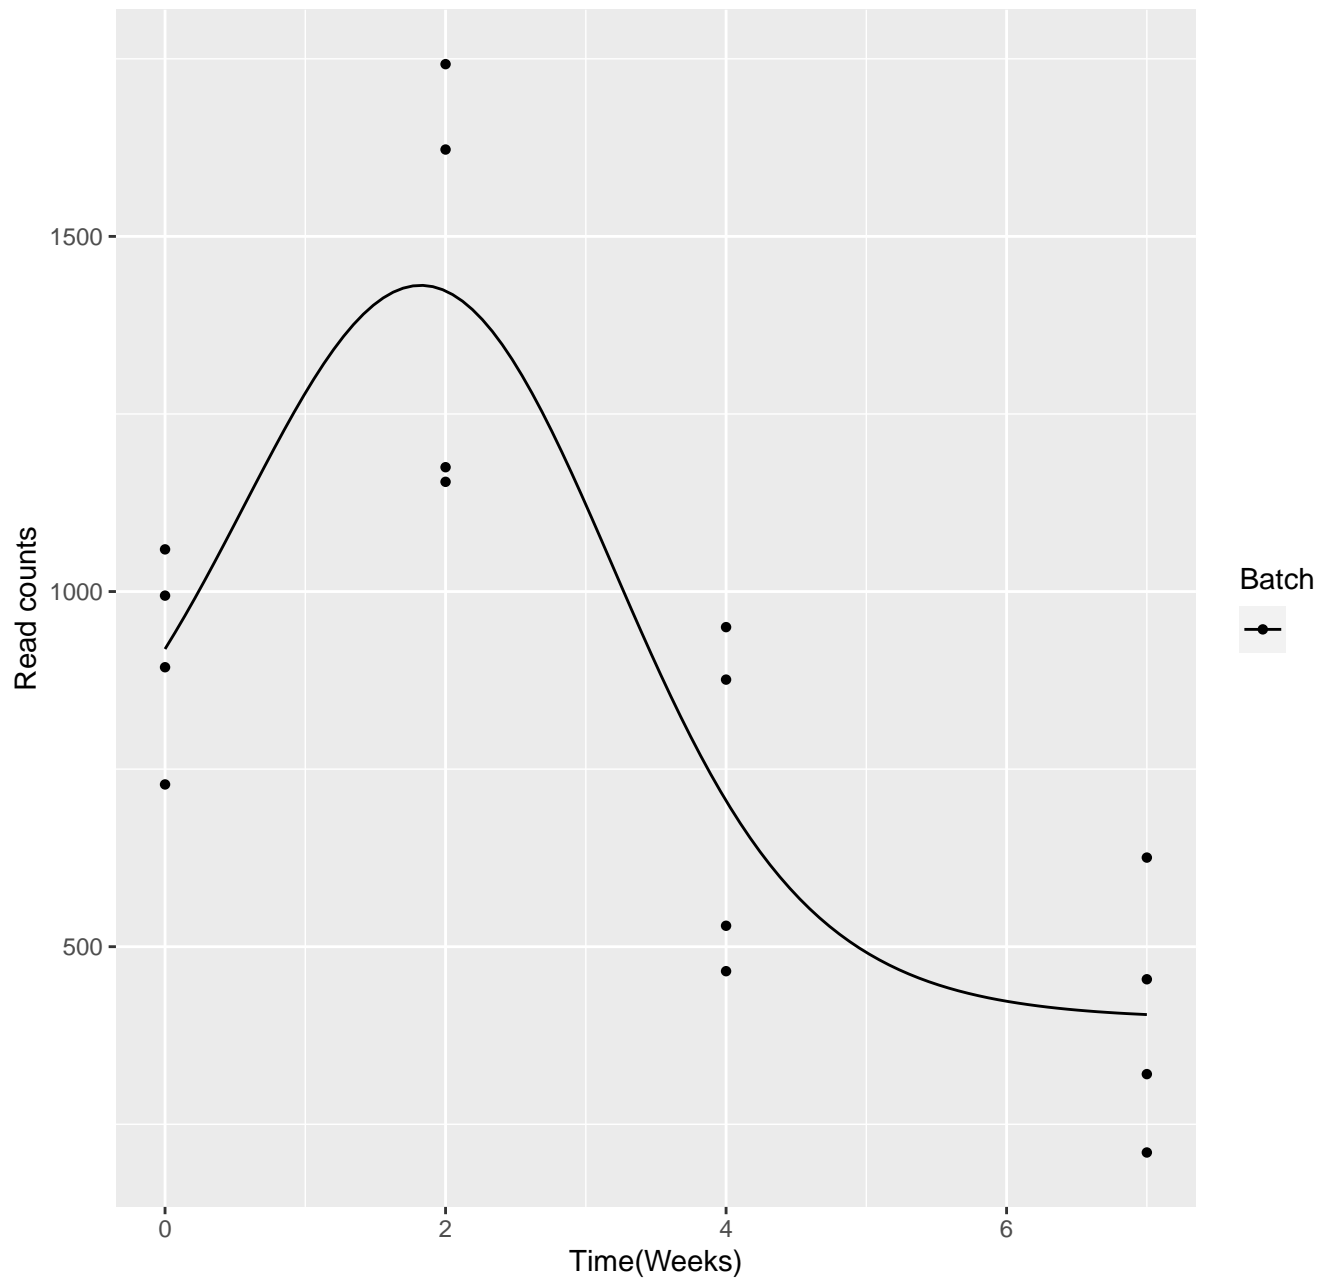



MS4A4A:  $\log_{10} q = -4.26$

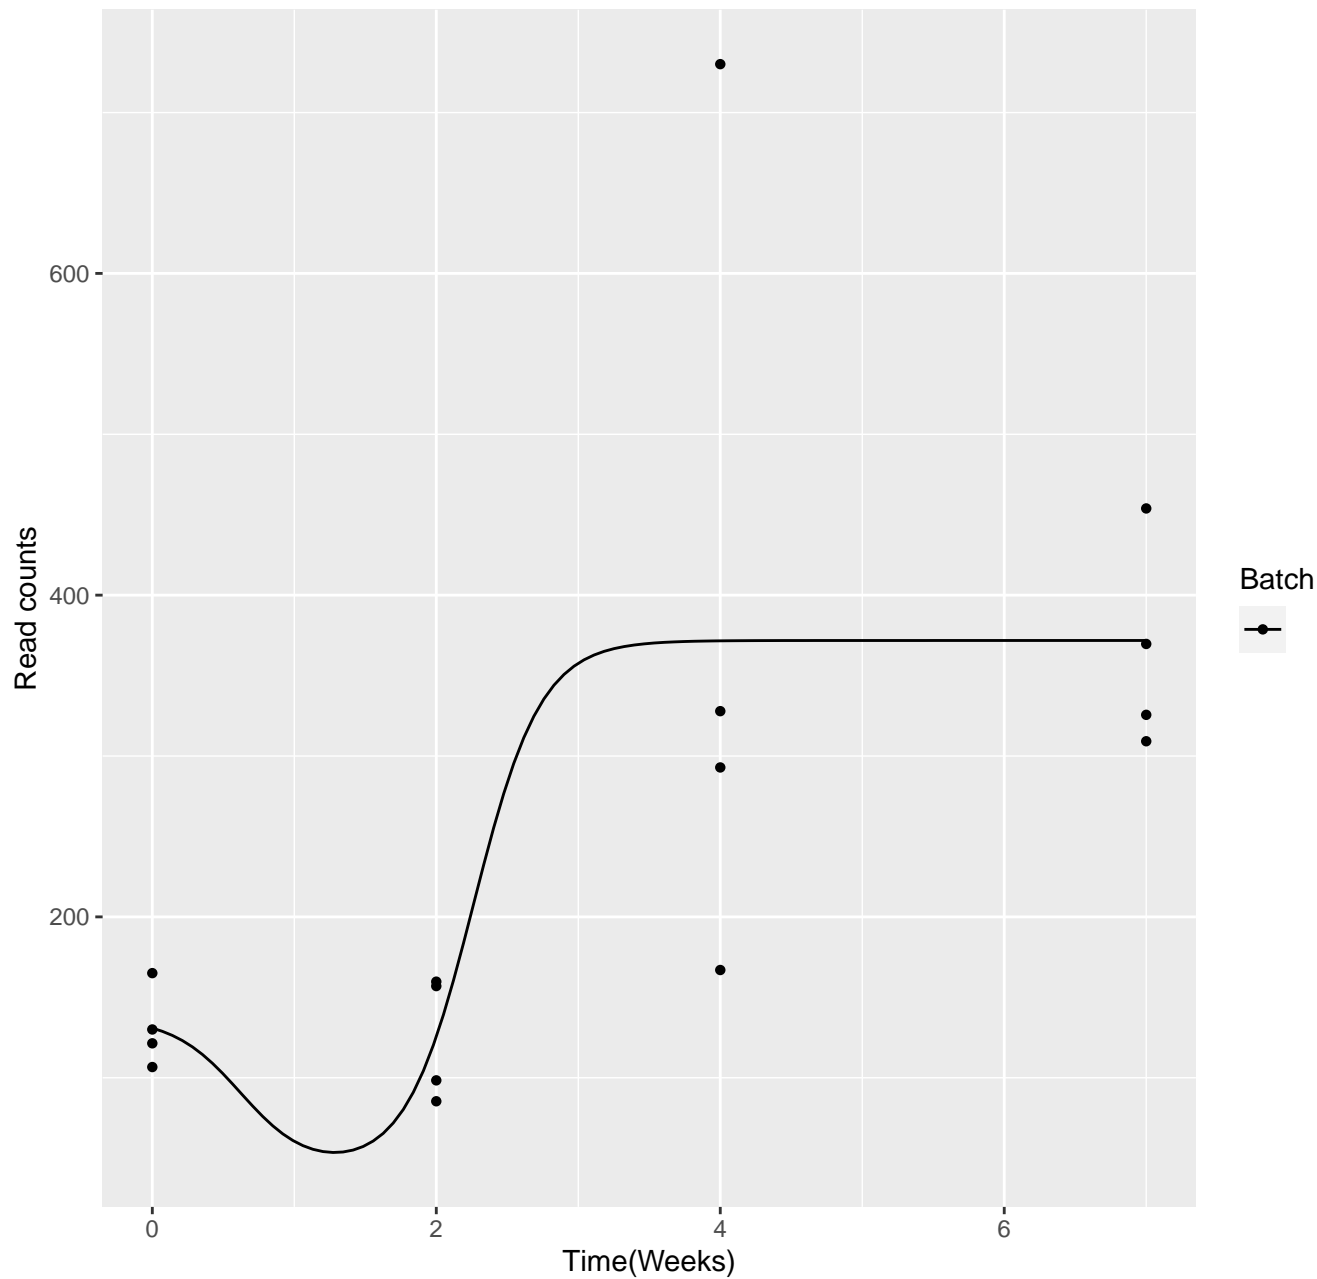

PRKAG3:  $\log_{10} q = -4.26$

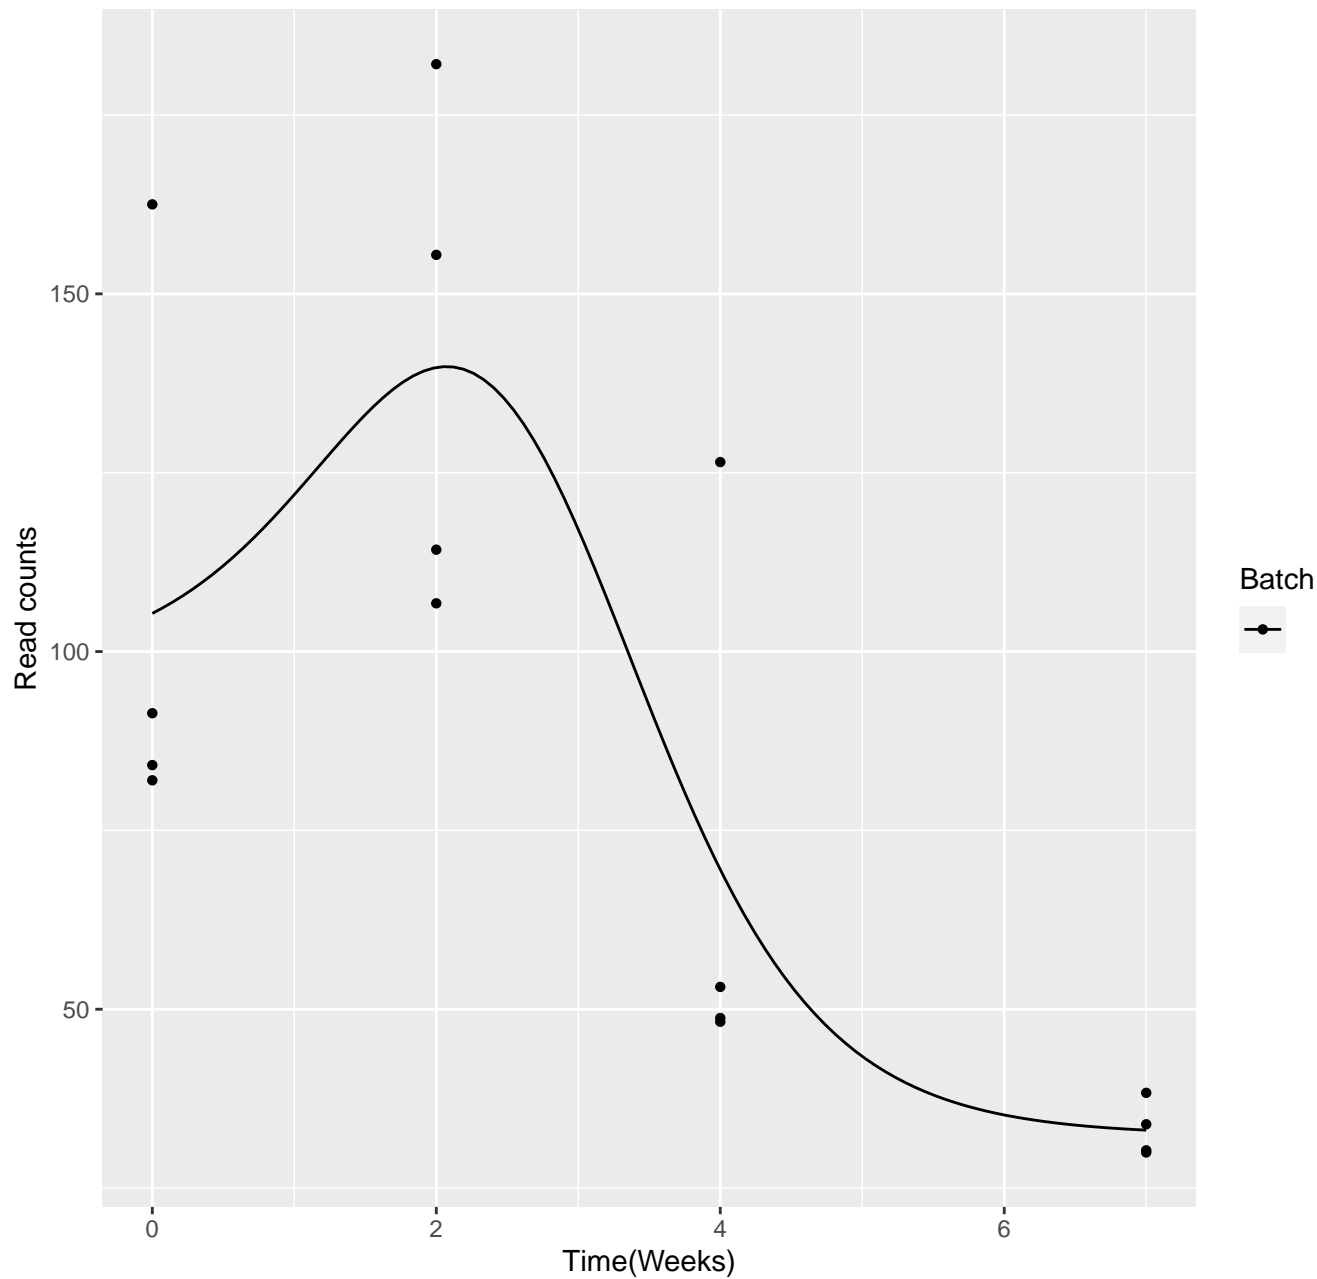

RADIL:  $\log_{10} q = -4.26$

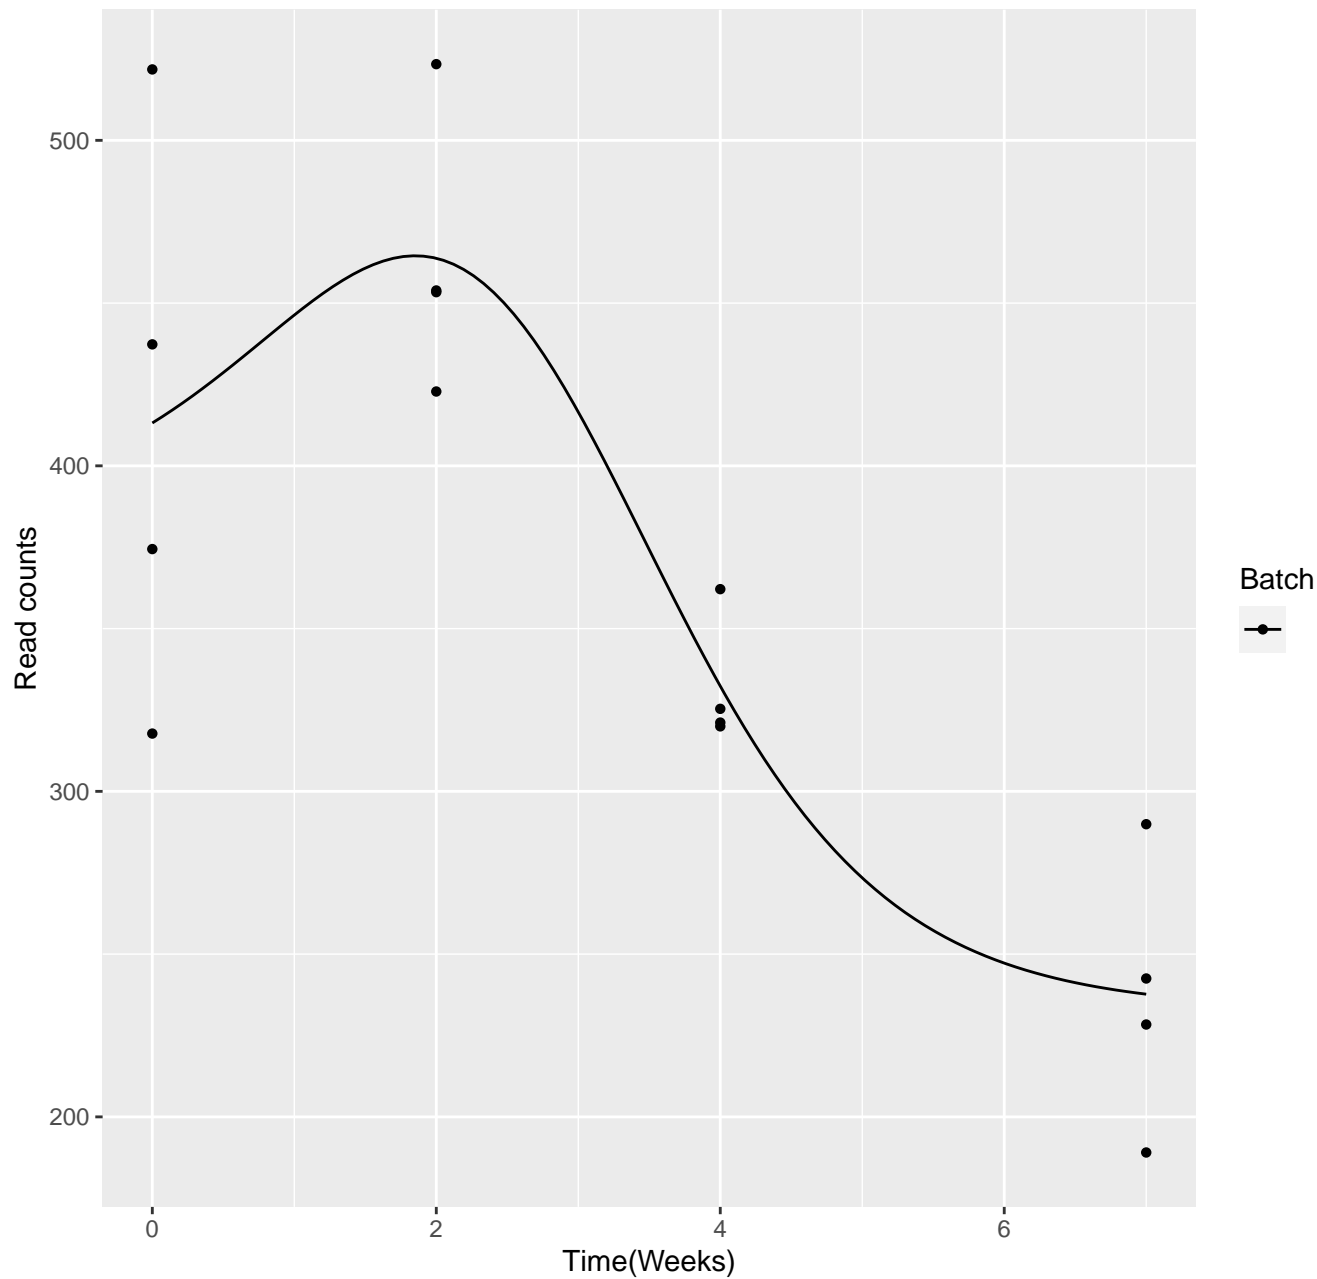

MFAP3L:  $\log_{10} q = -4.26$

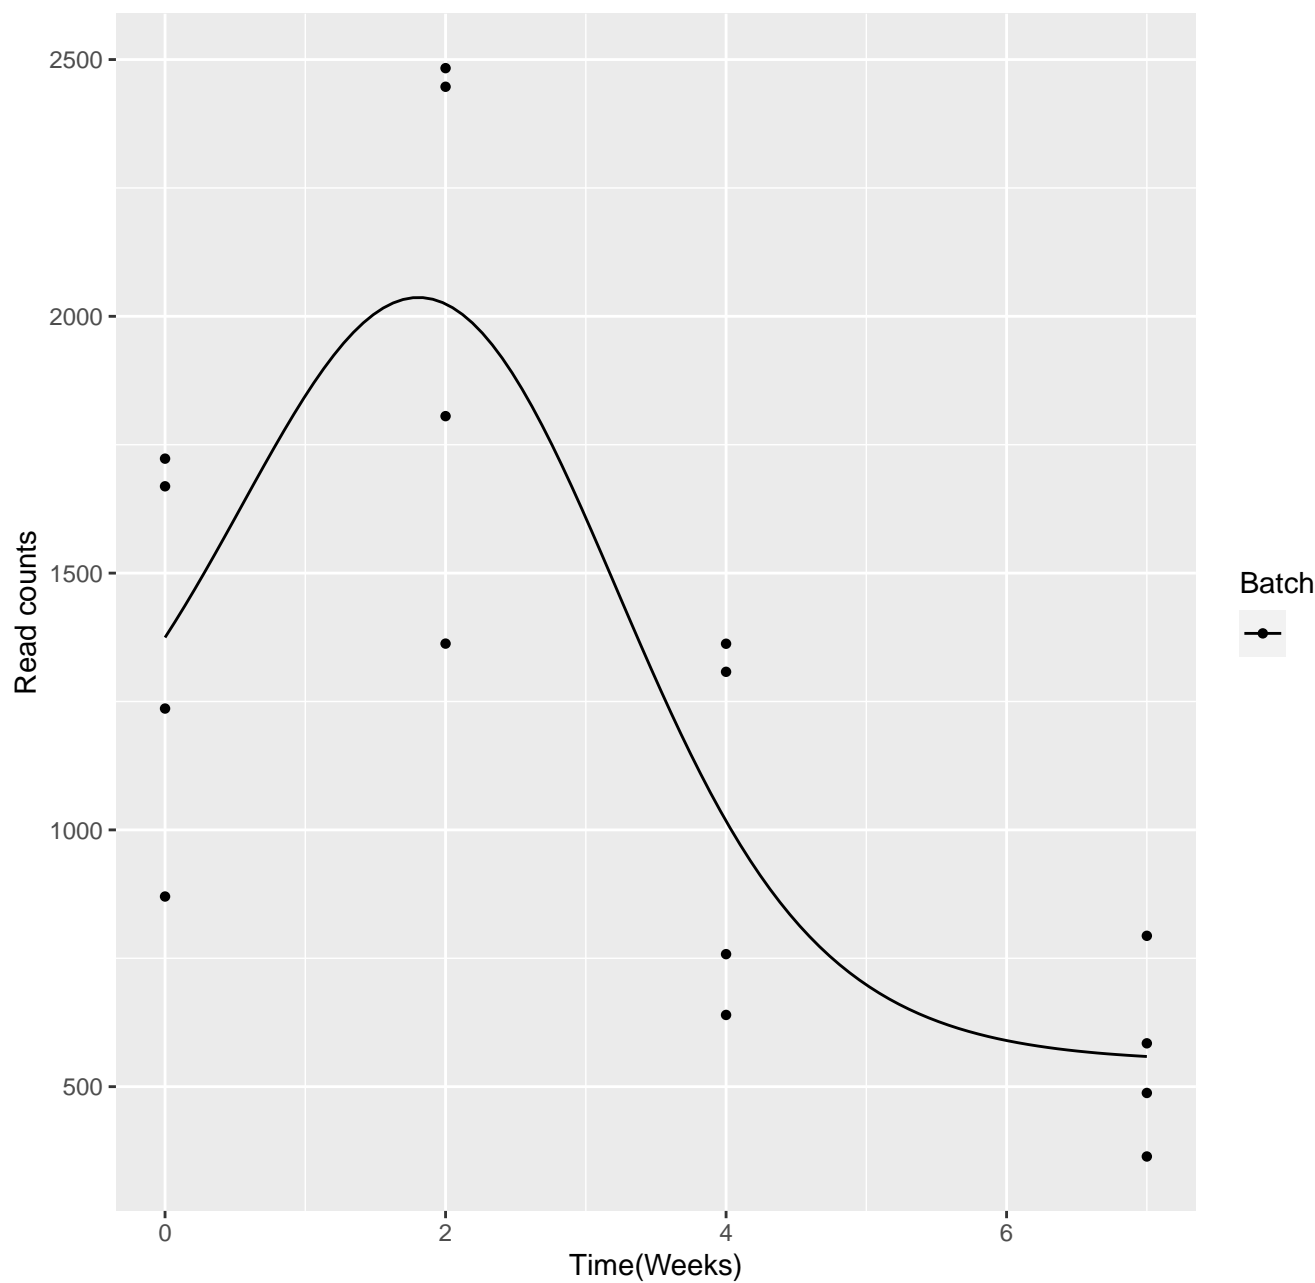

ZNF710:  $\log_{10} q = -4.26$

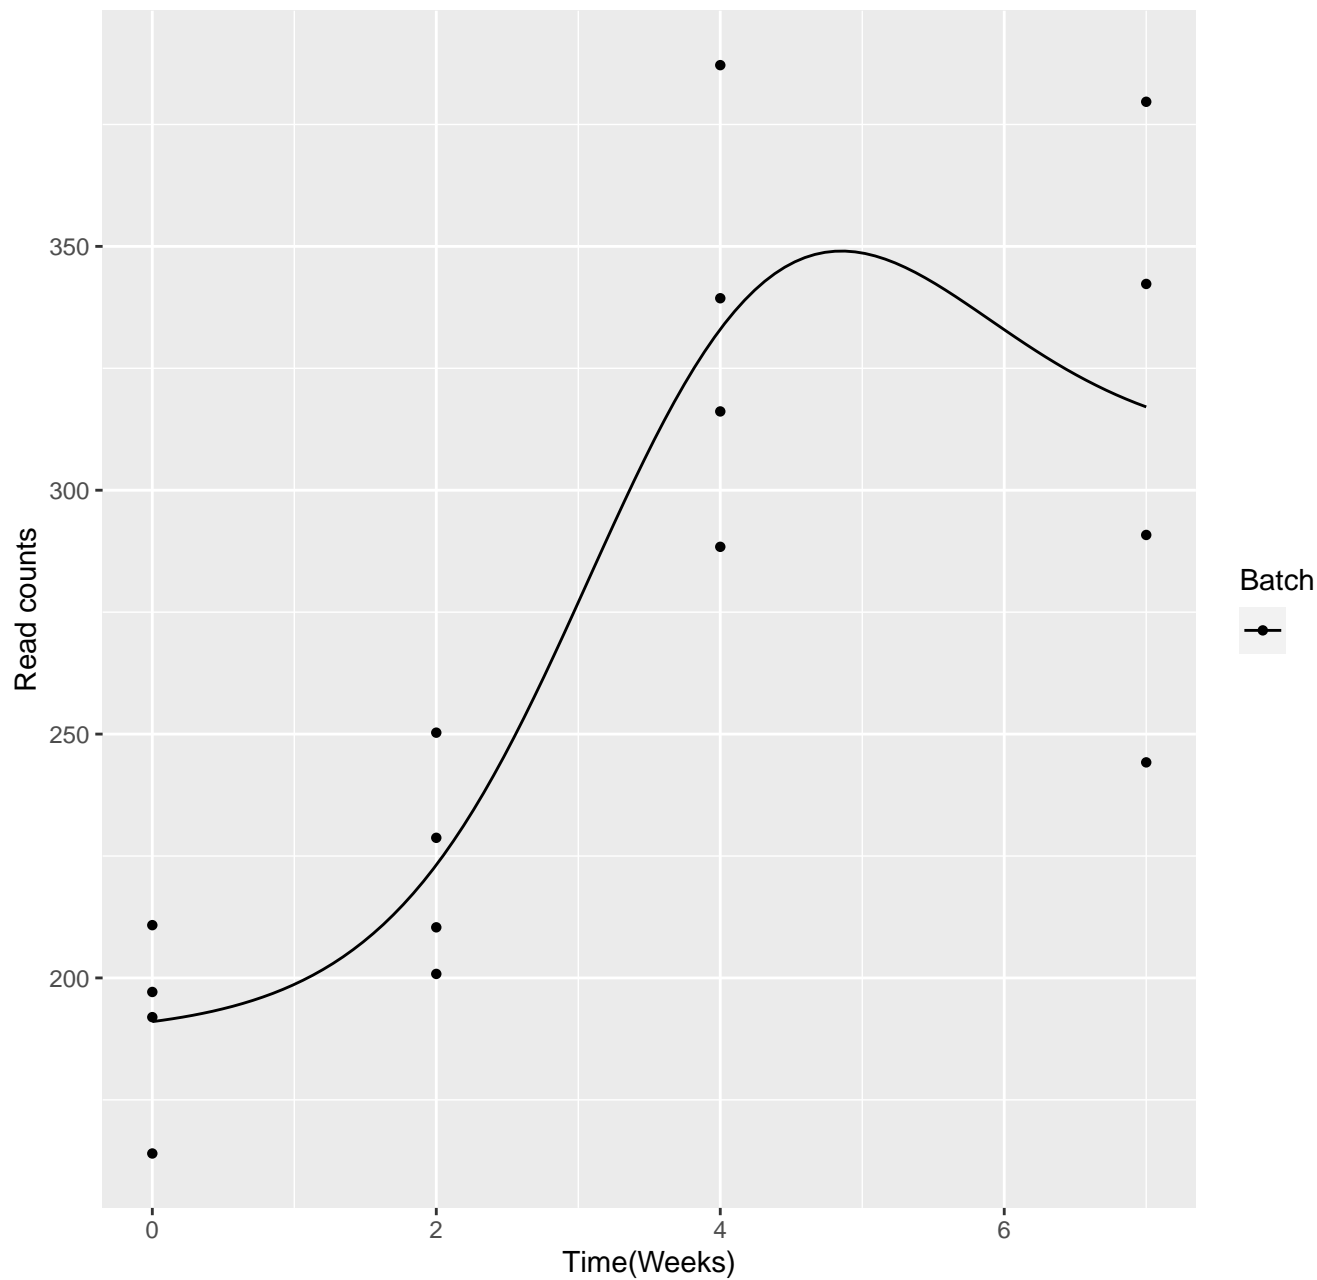

MYH11:  $\log_{10} q = -4.26$

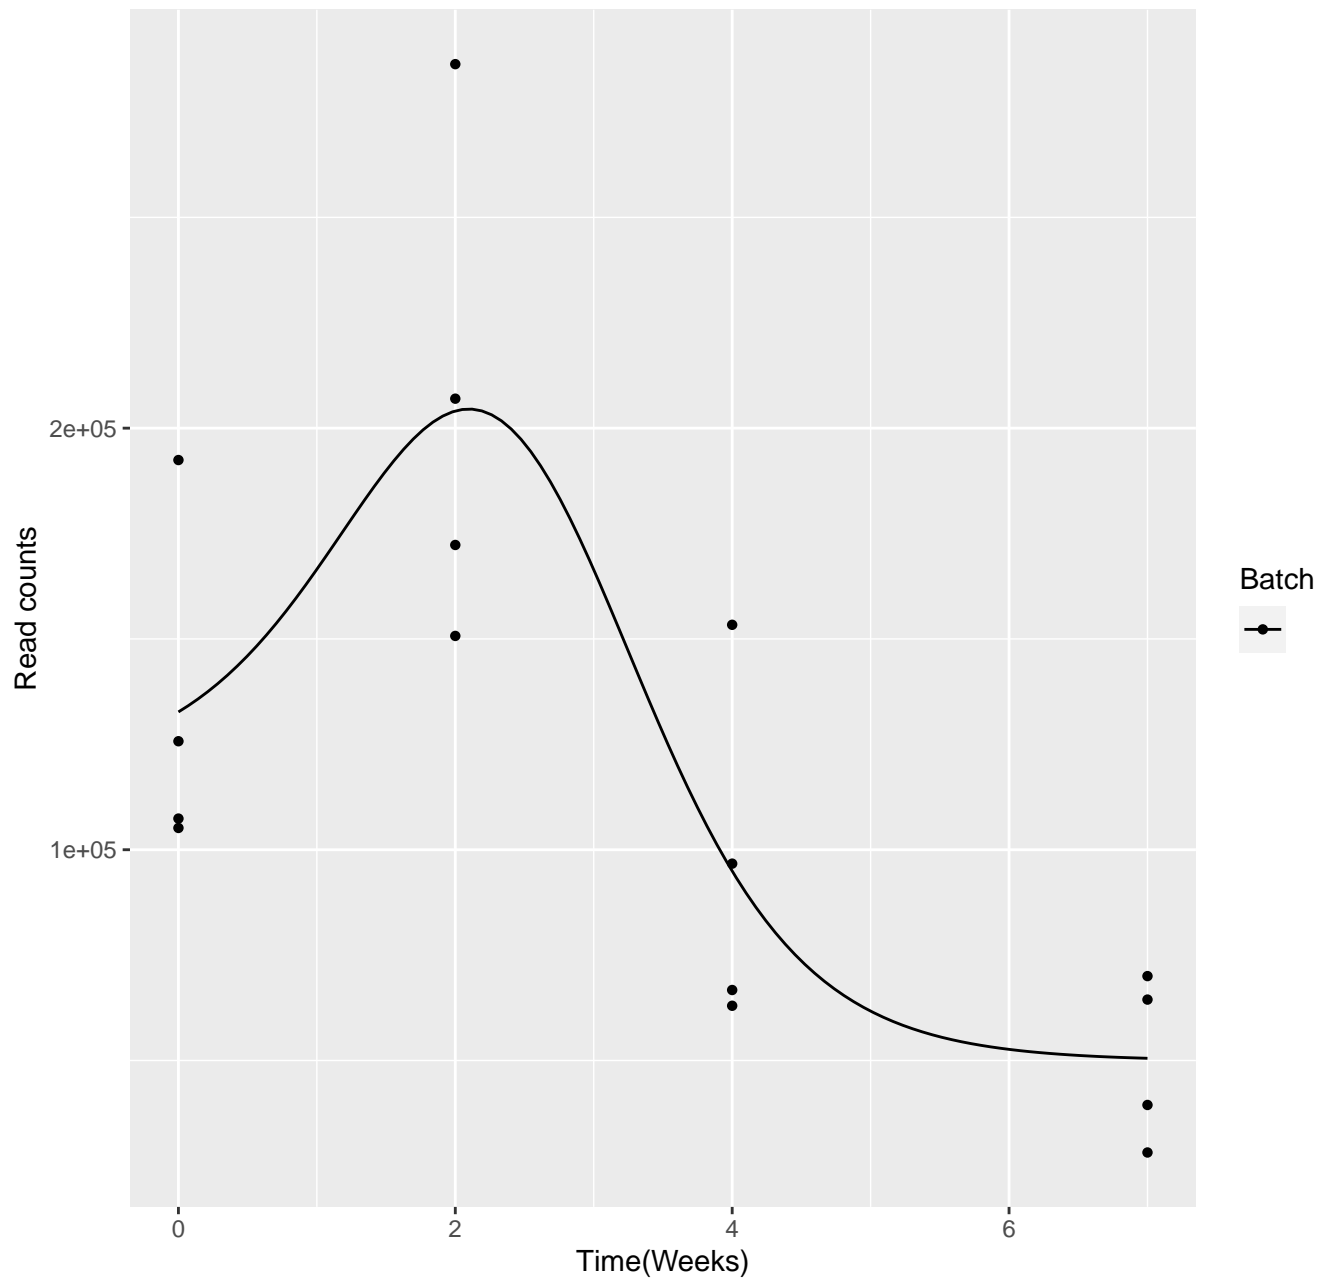

TRABD2A:  $\log_{10} q = -4.26$

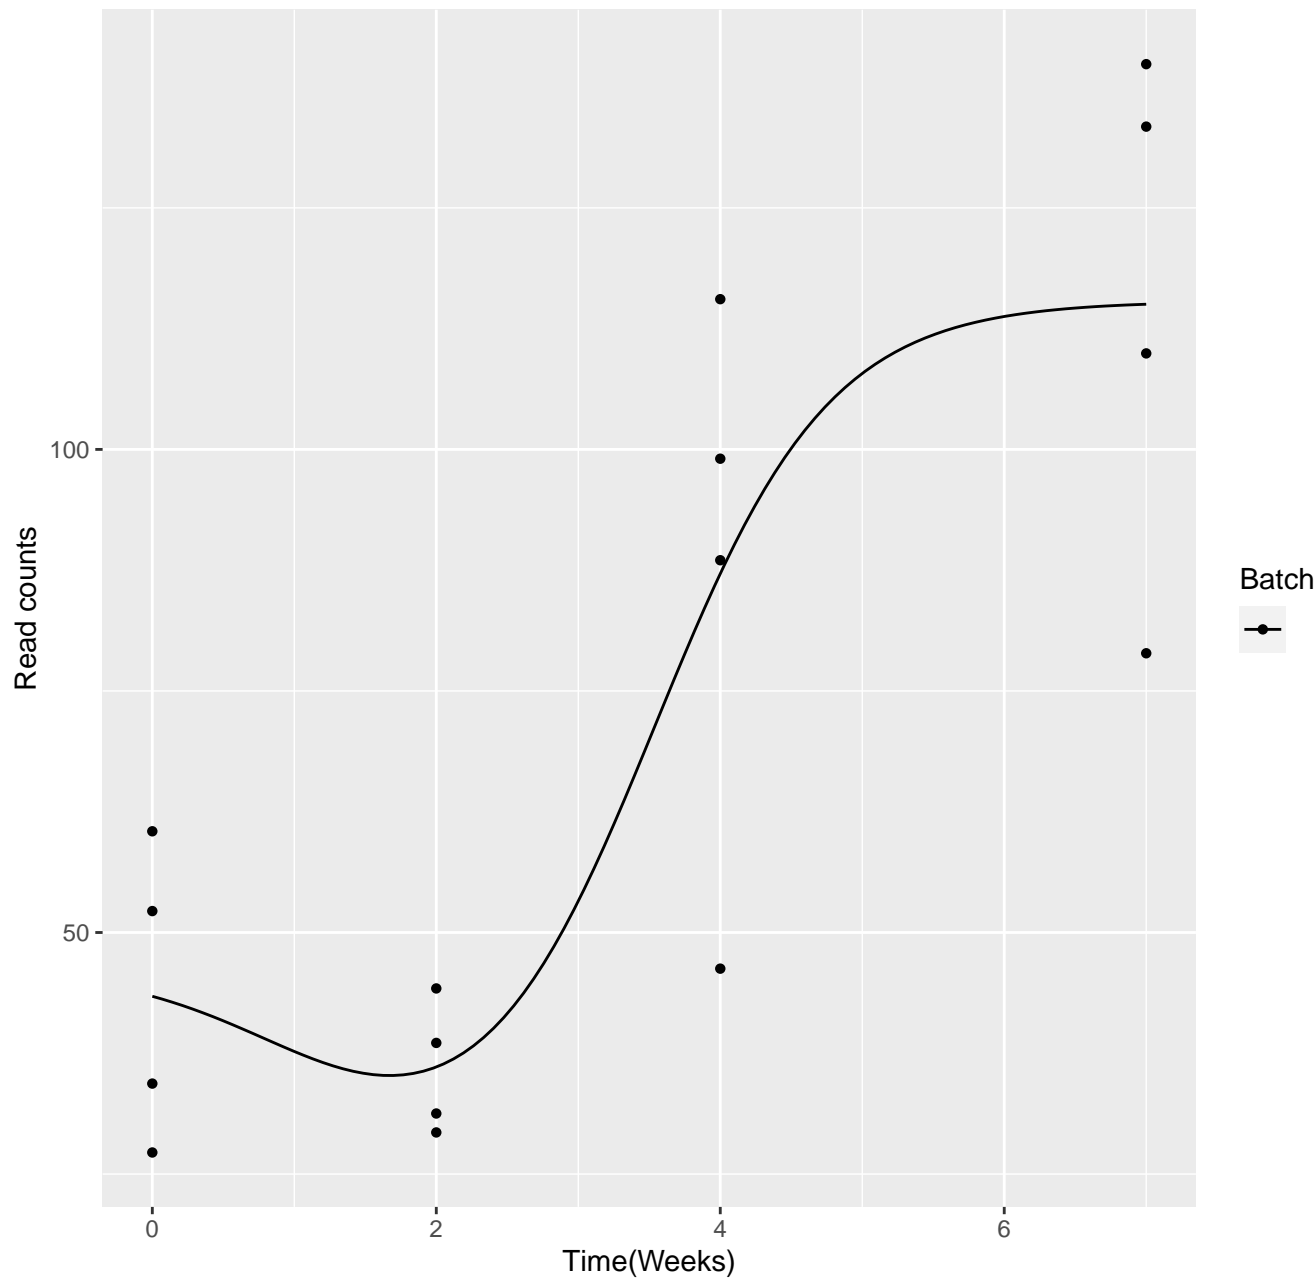

LGALS9:  $\log_{10} q = -4.25$

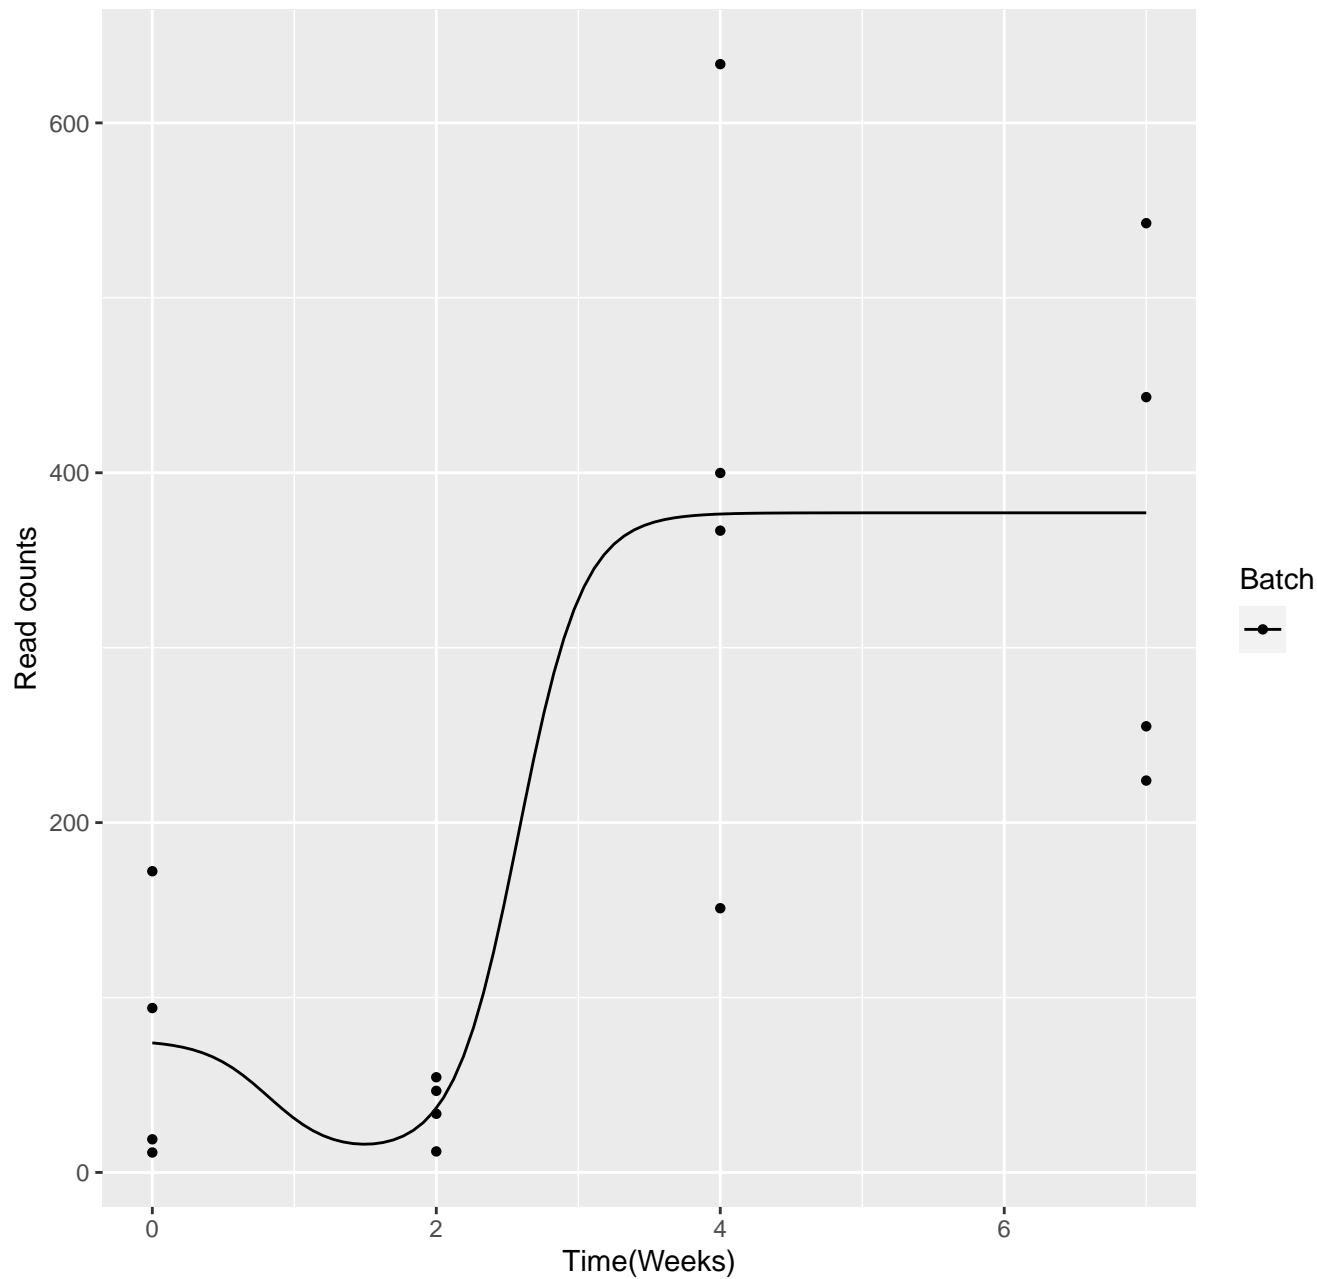



DERA:  $\log_{10} q = -4.24$

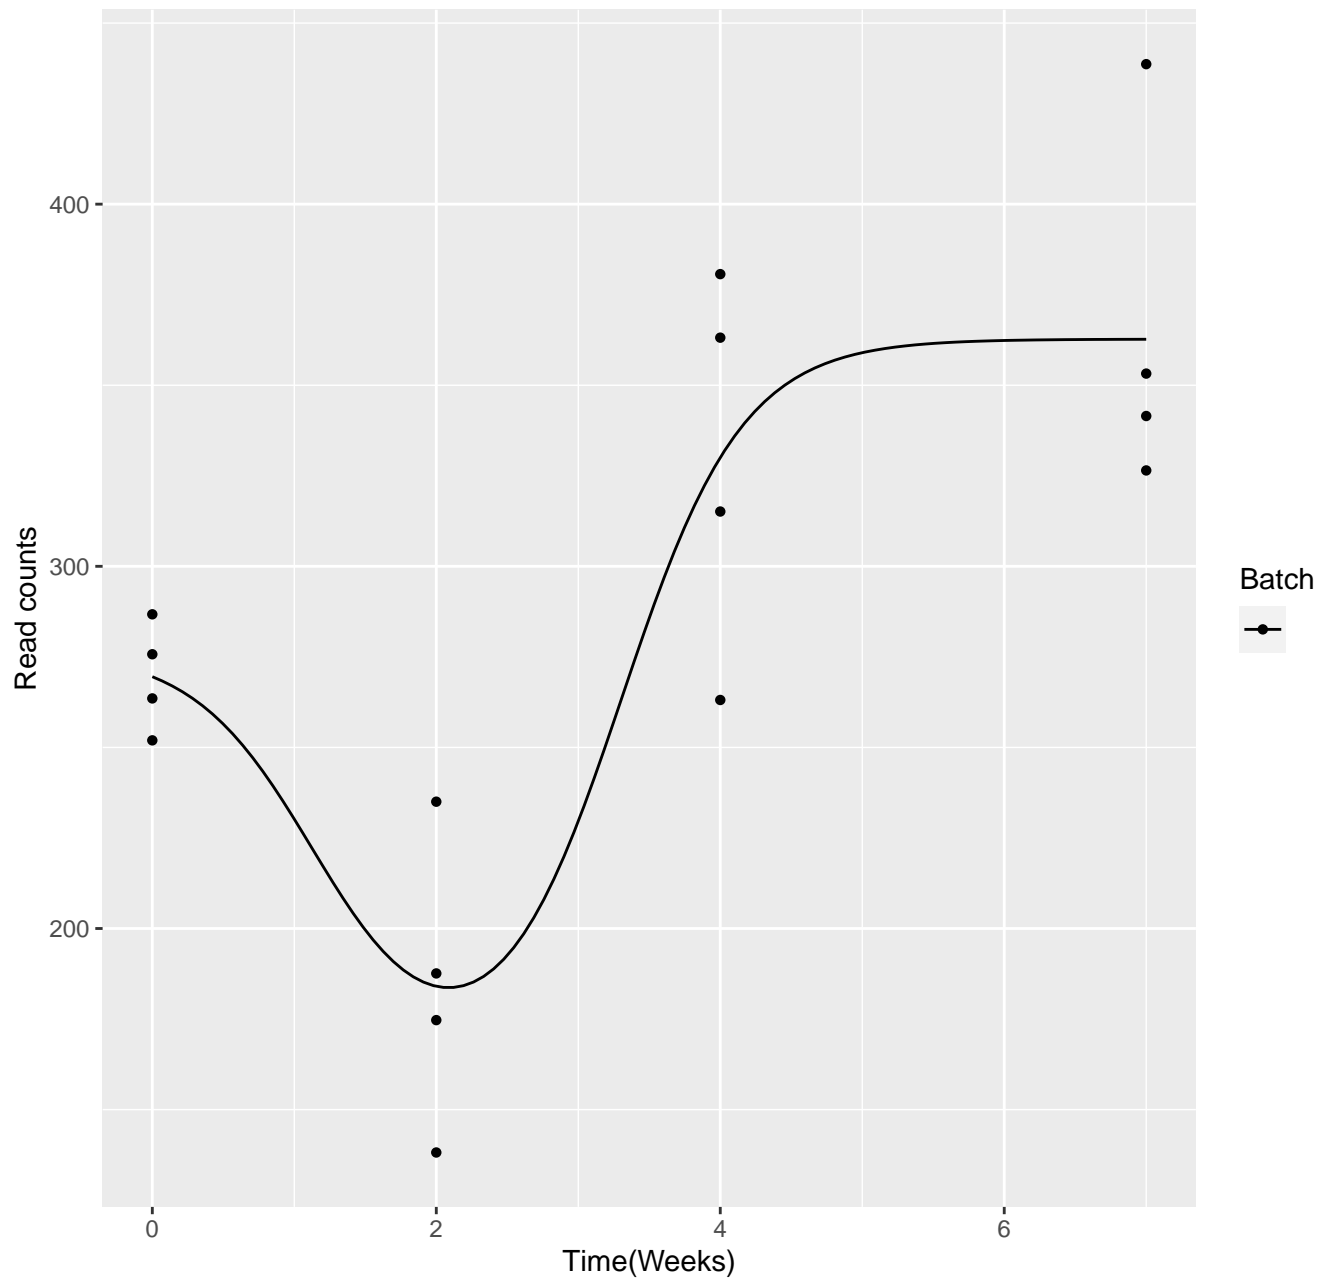

TENT4A:  $\log_{10} q = -4.23$

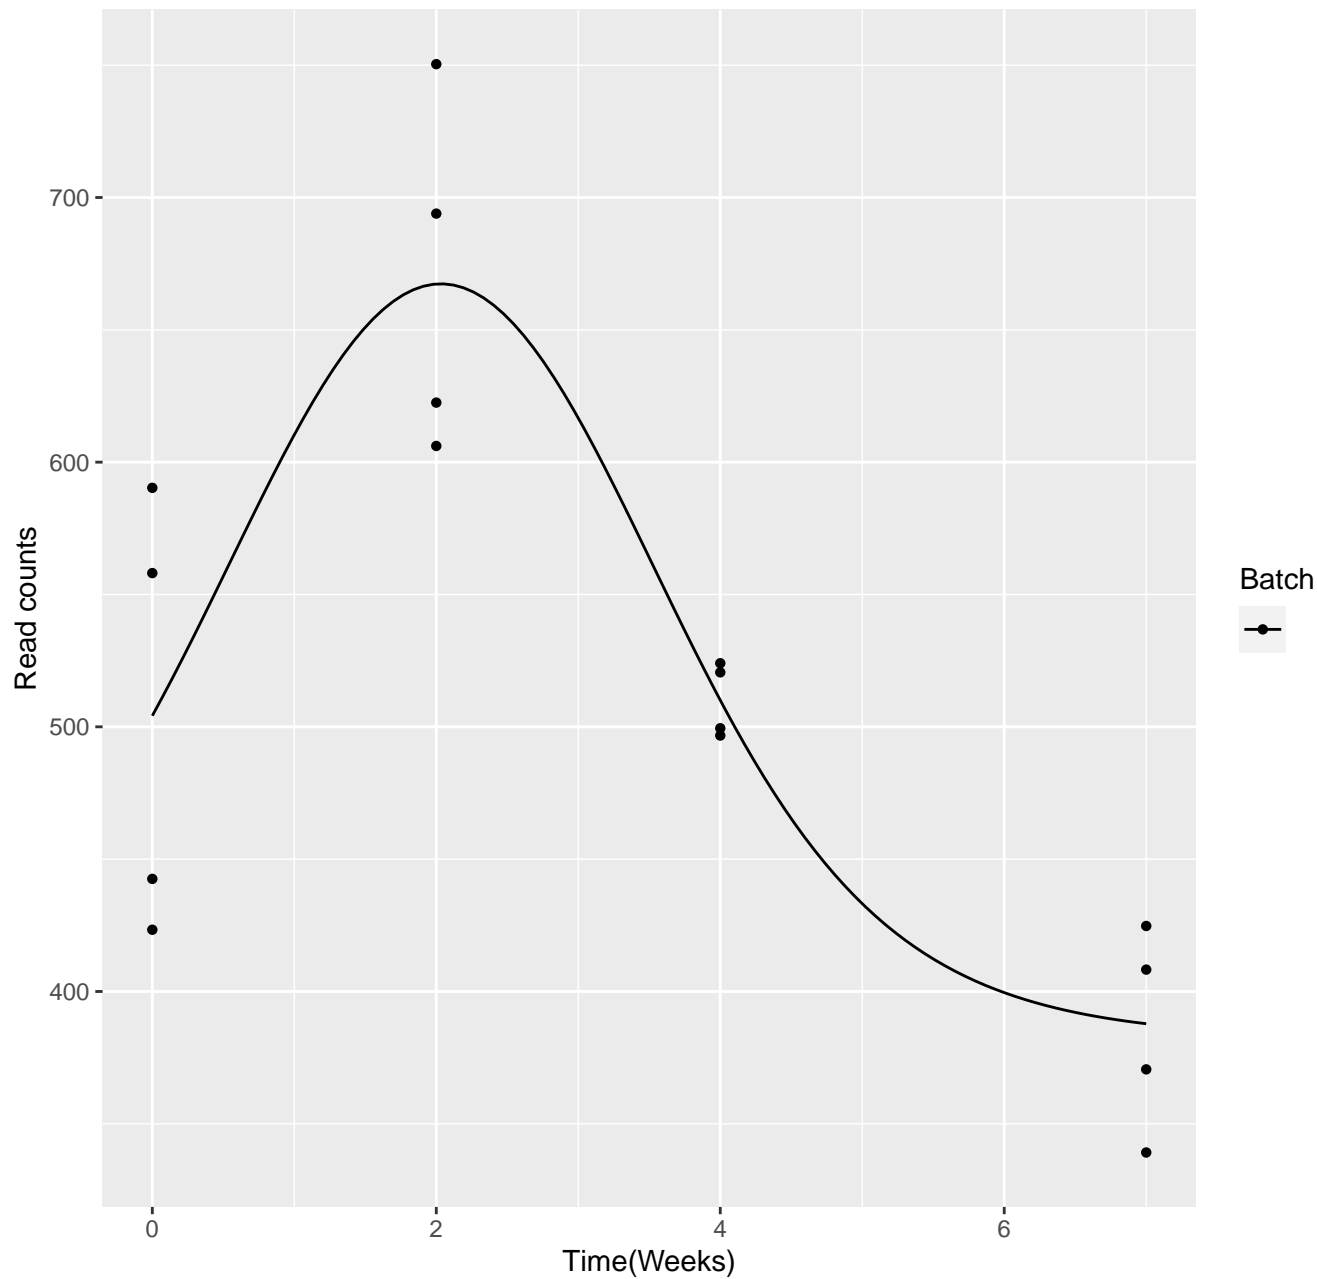

LOC100359168:  $\log_{10} q = -4.23$

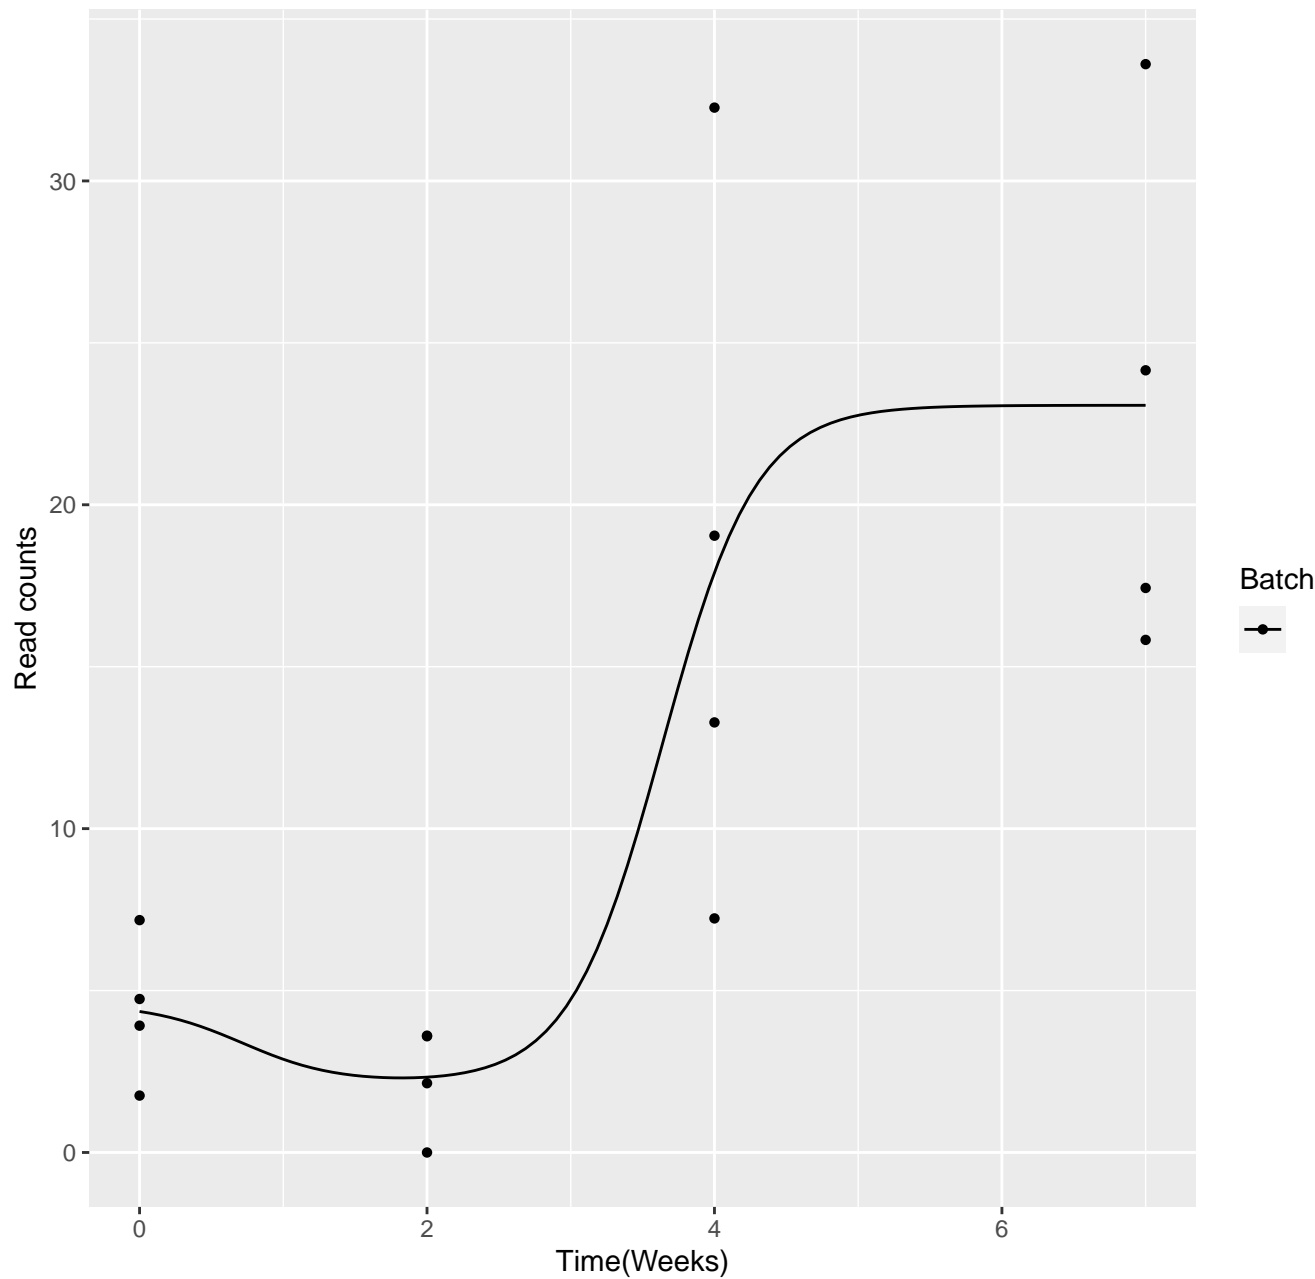

CEMIP:  $\log_{10} q = -4.22$

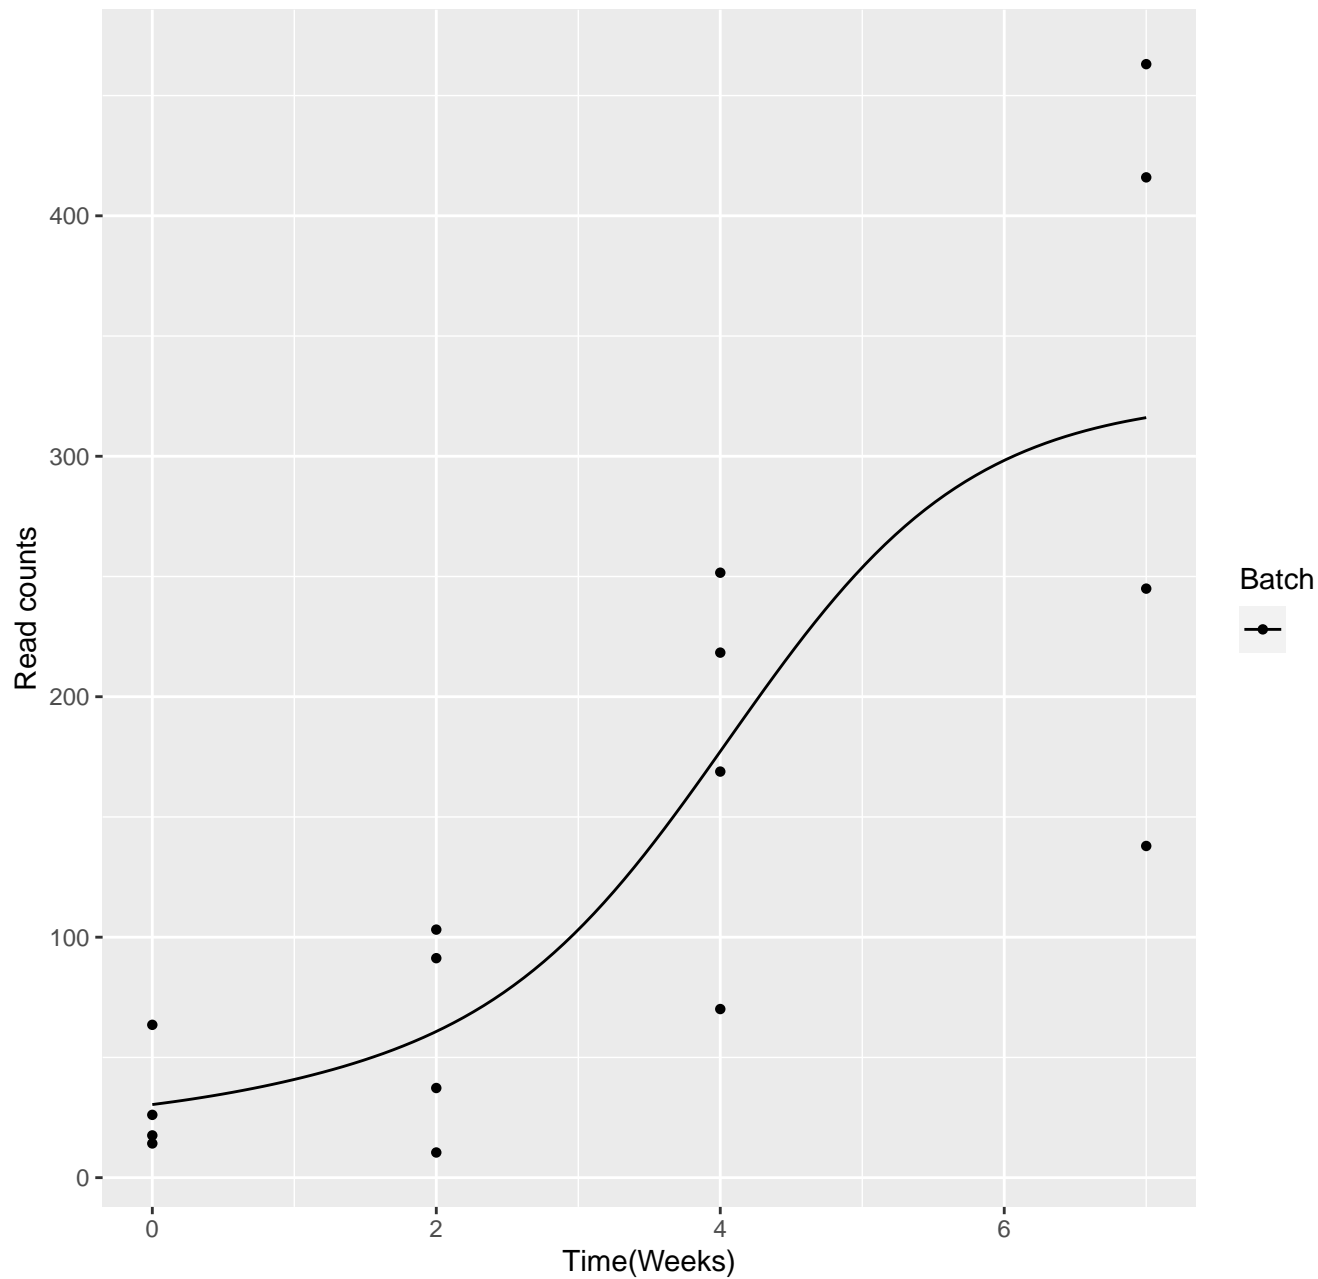

GUCY1B1:  $\log_{10} q = -4.22$

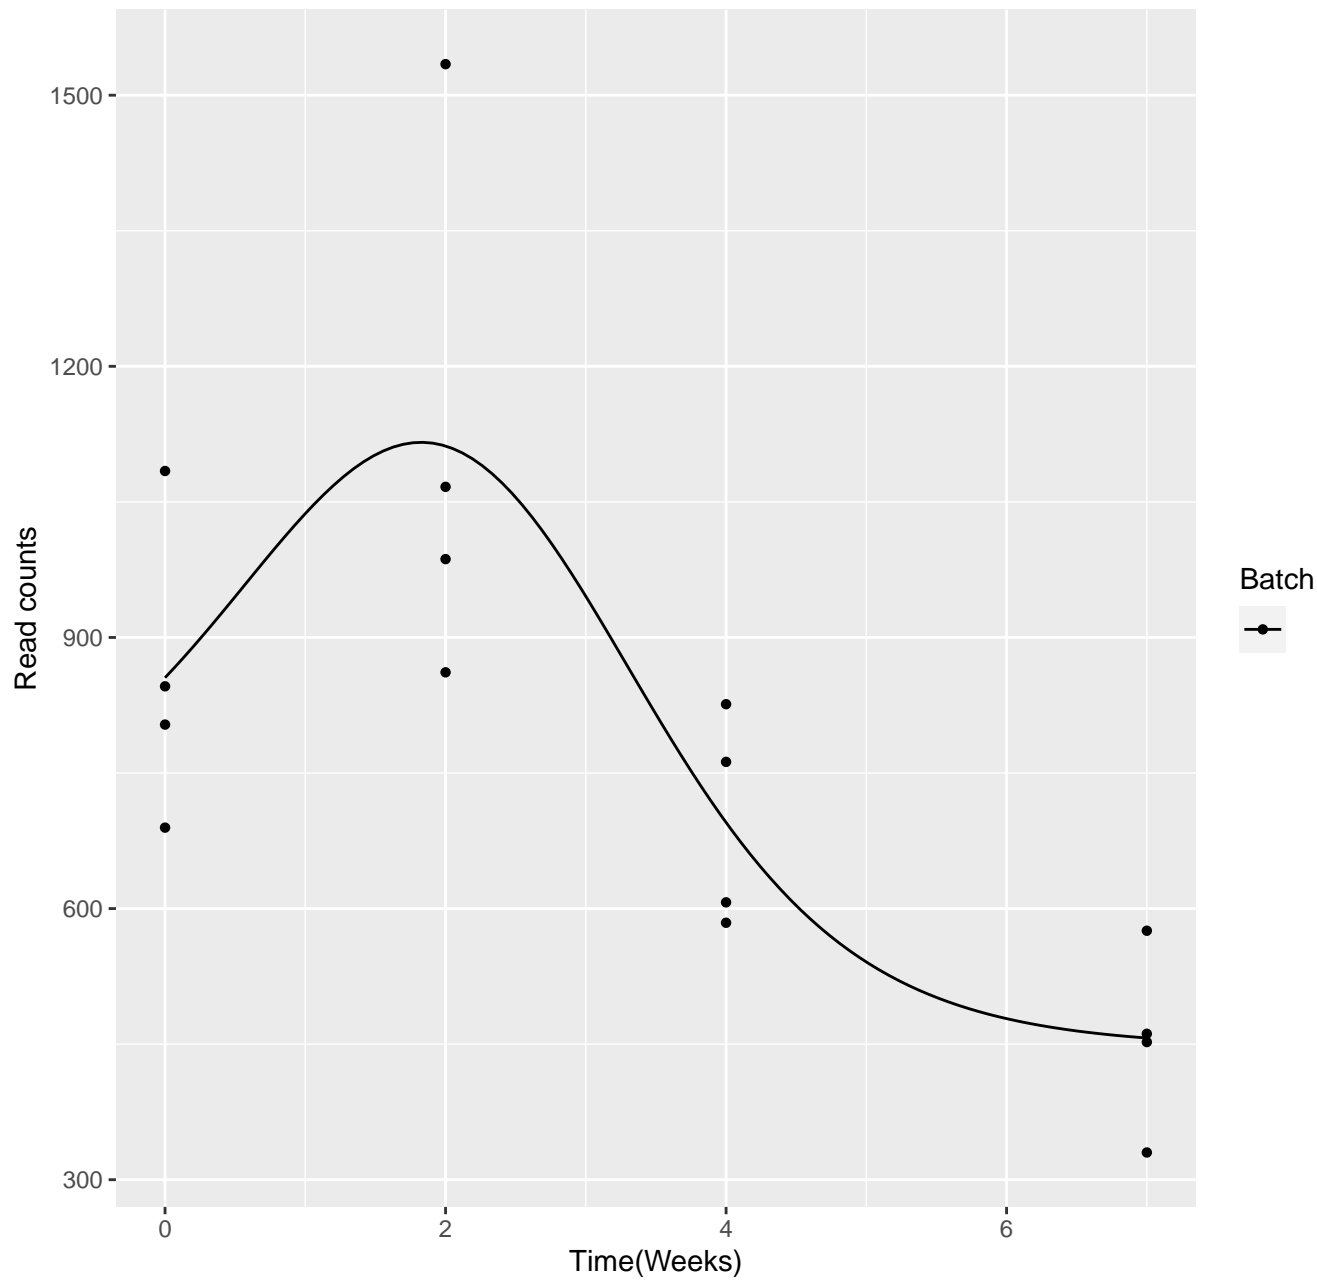

LOC100348666:  $\log_{10} q = -4.21$

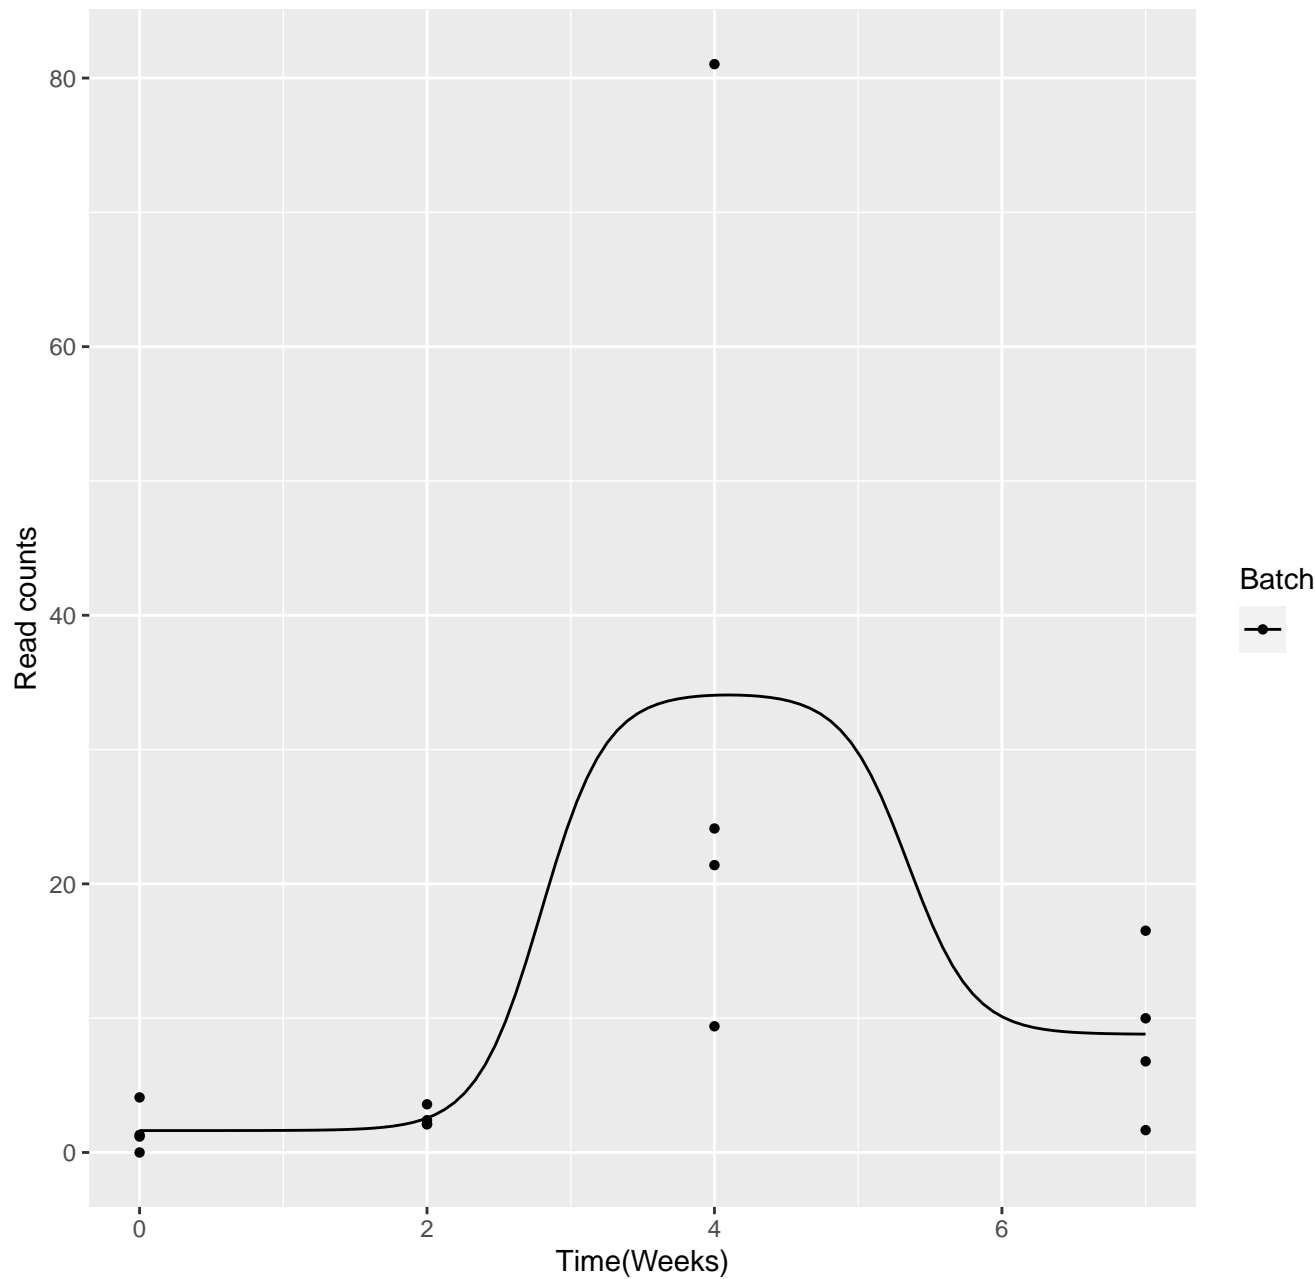

RBM47:  $\log_{10} q = -4.2$

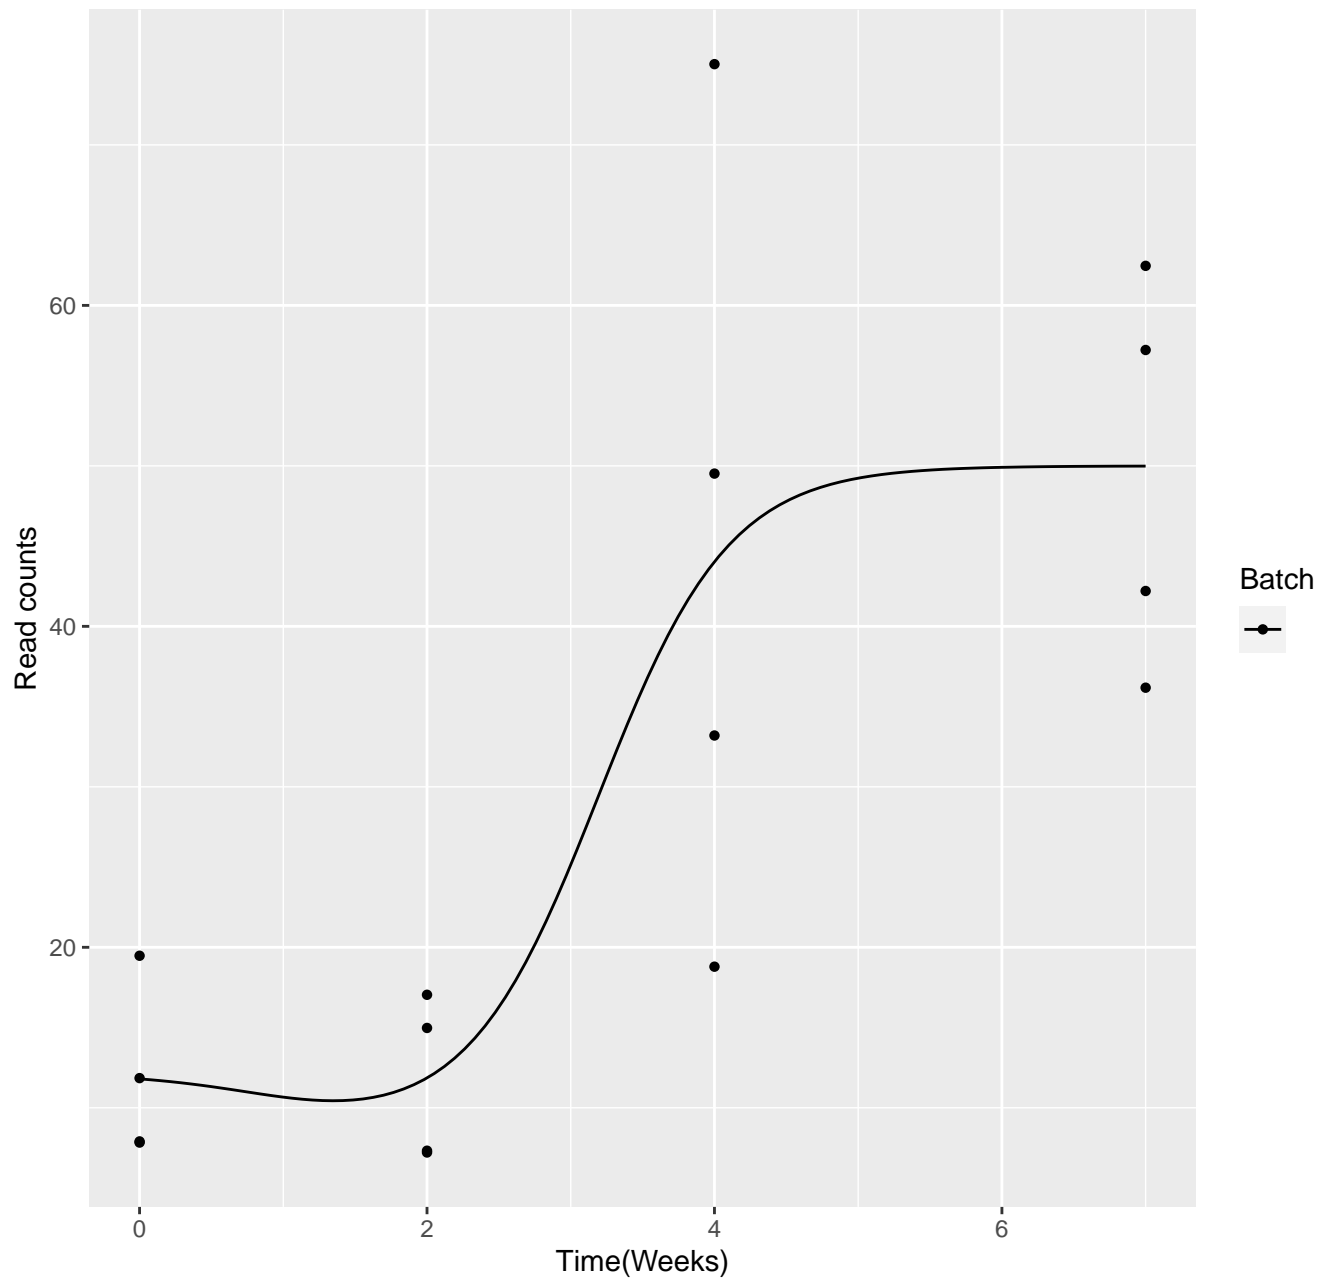

GBE1:  $\log_{10} q = -4.19$

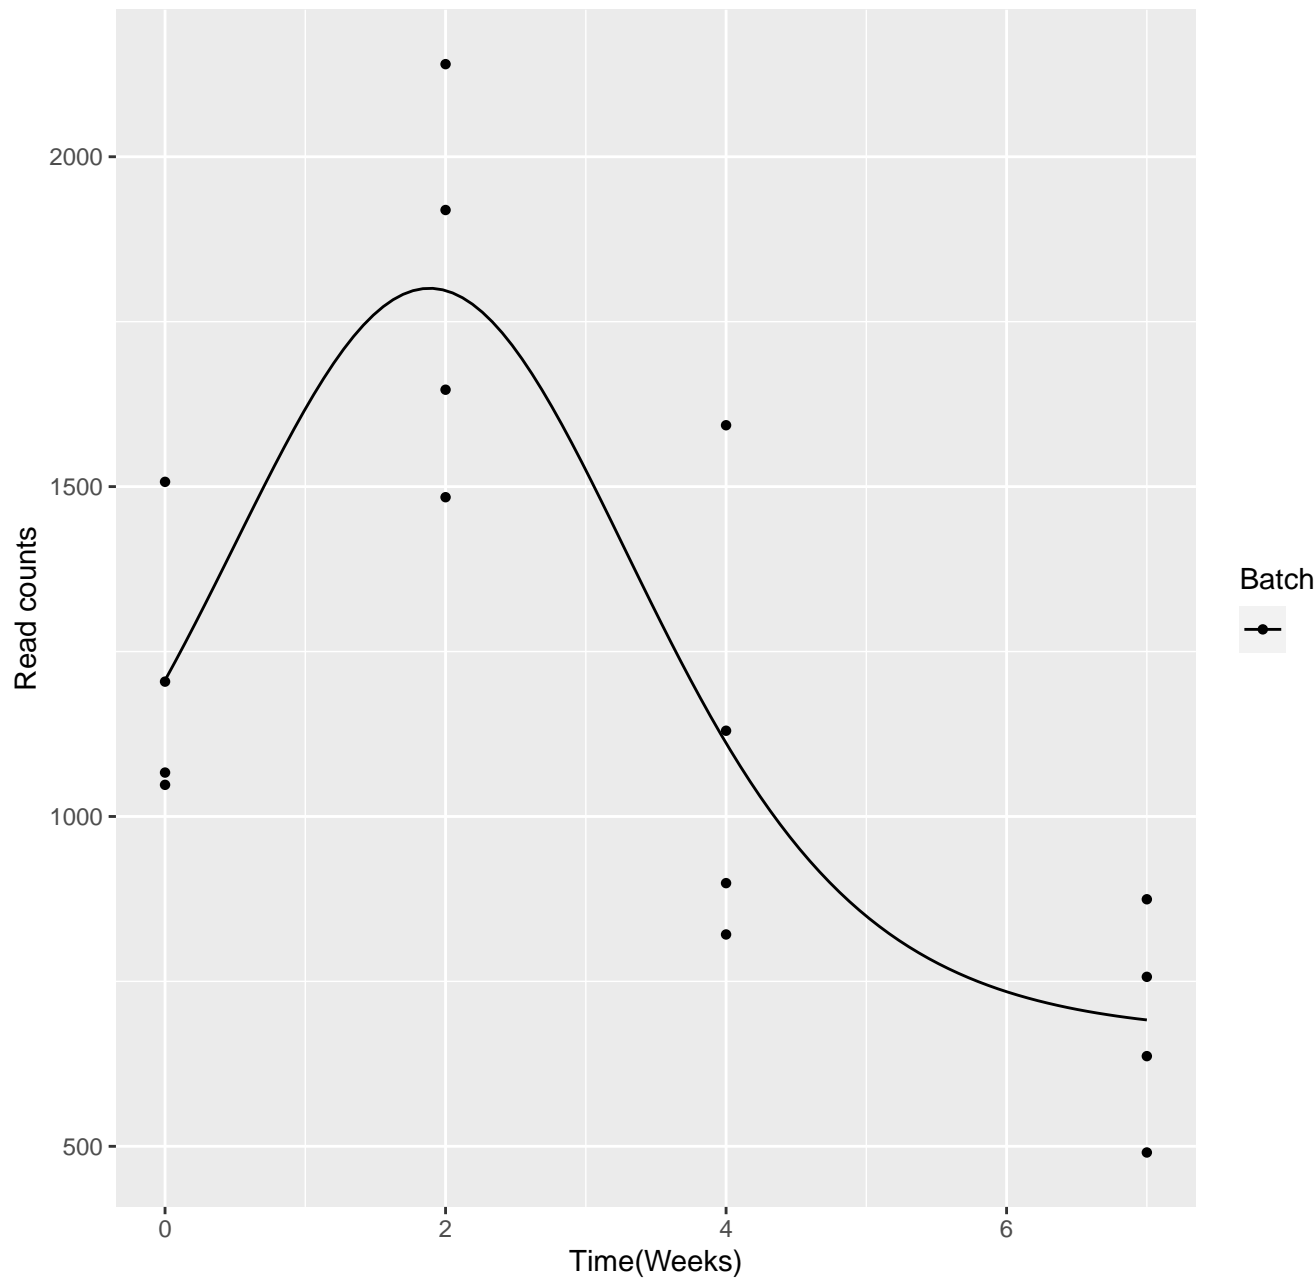



LOC100341181:  $\log_{10} q = -4.18$

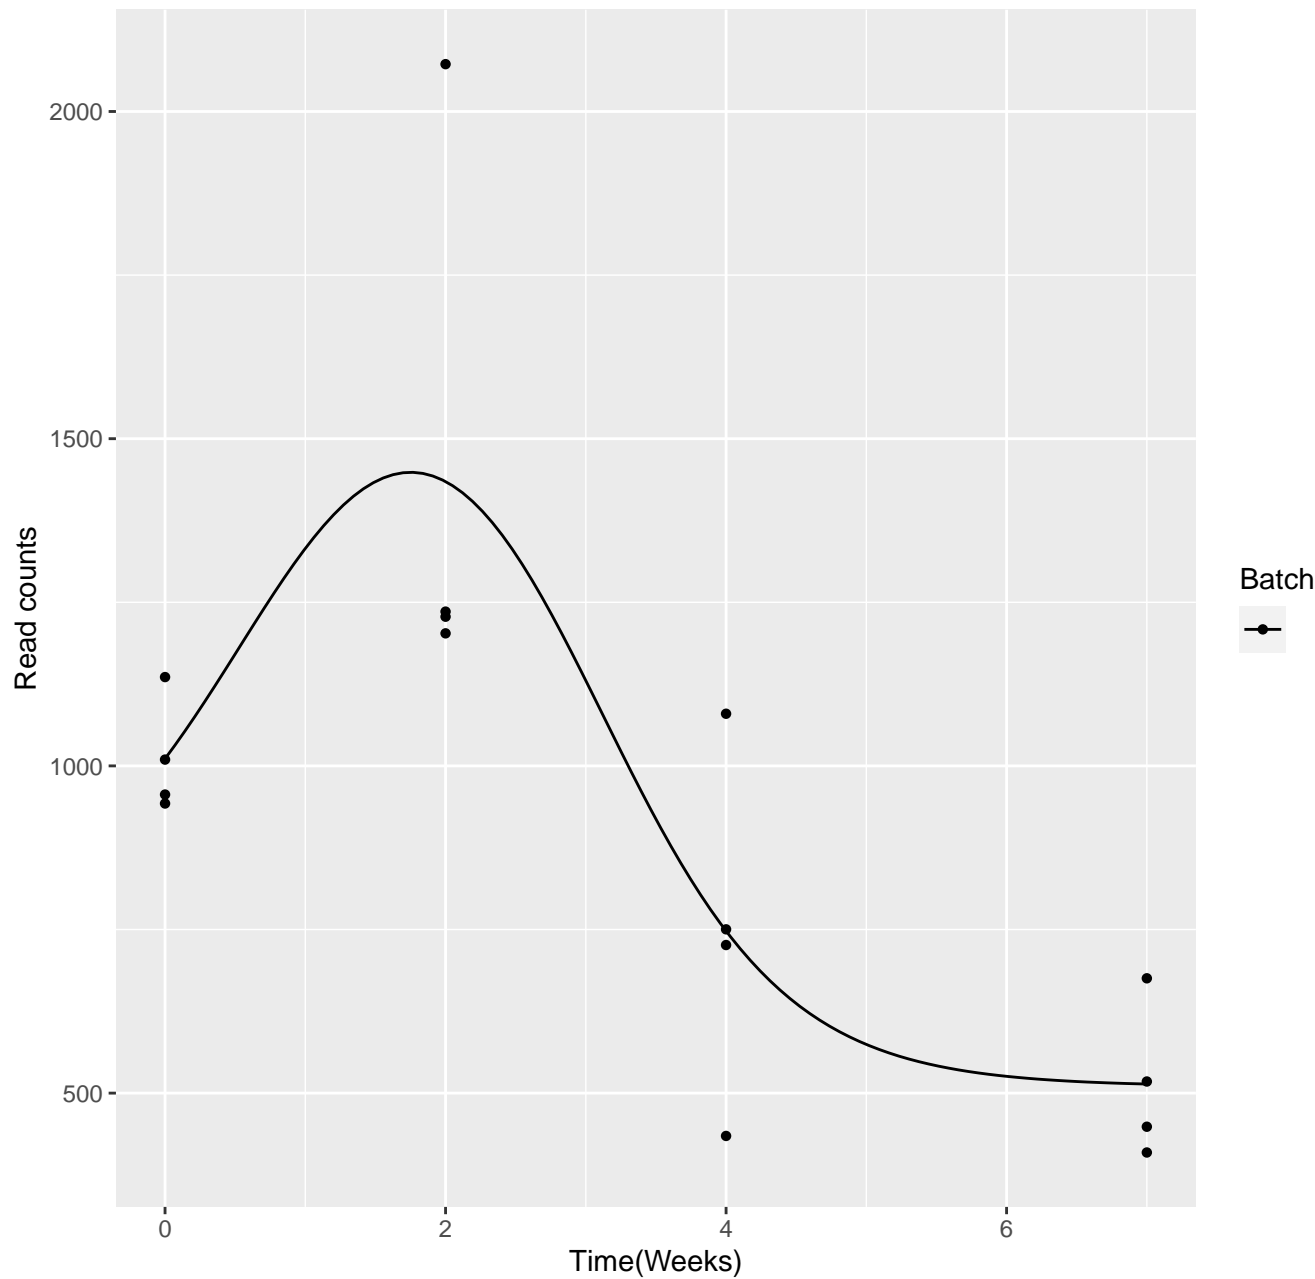

ACTA1:  $\log_{10} q = -4.17$

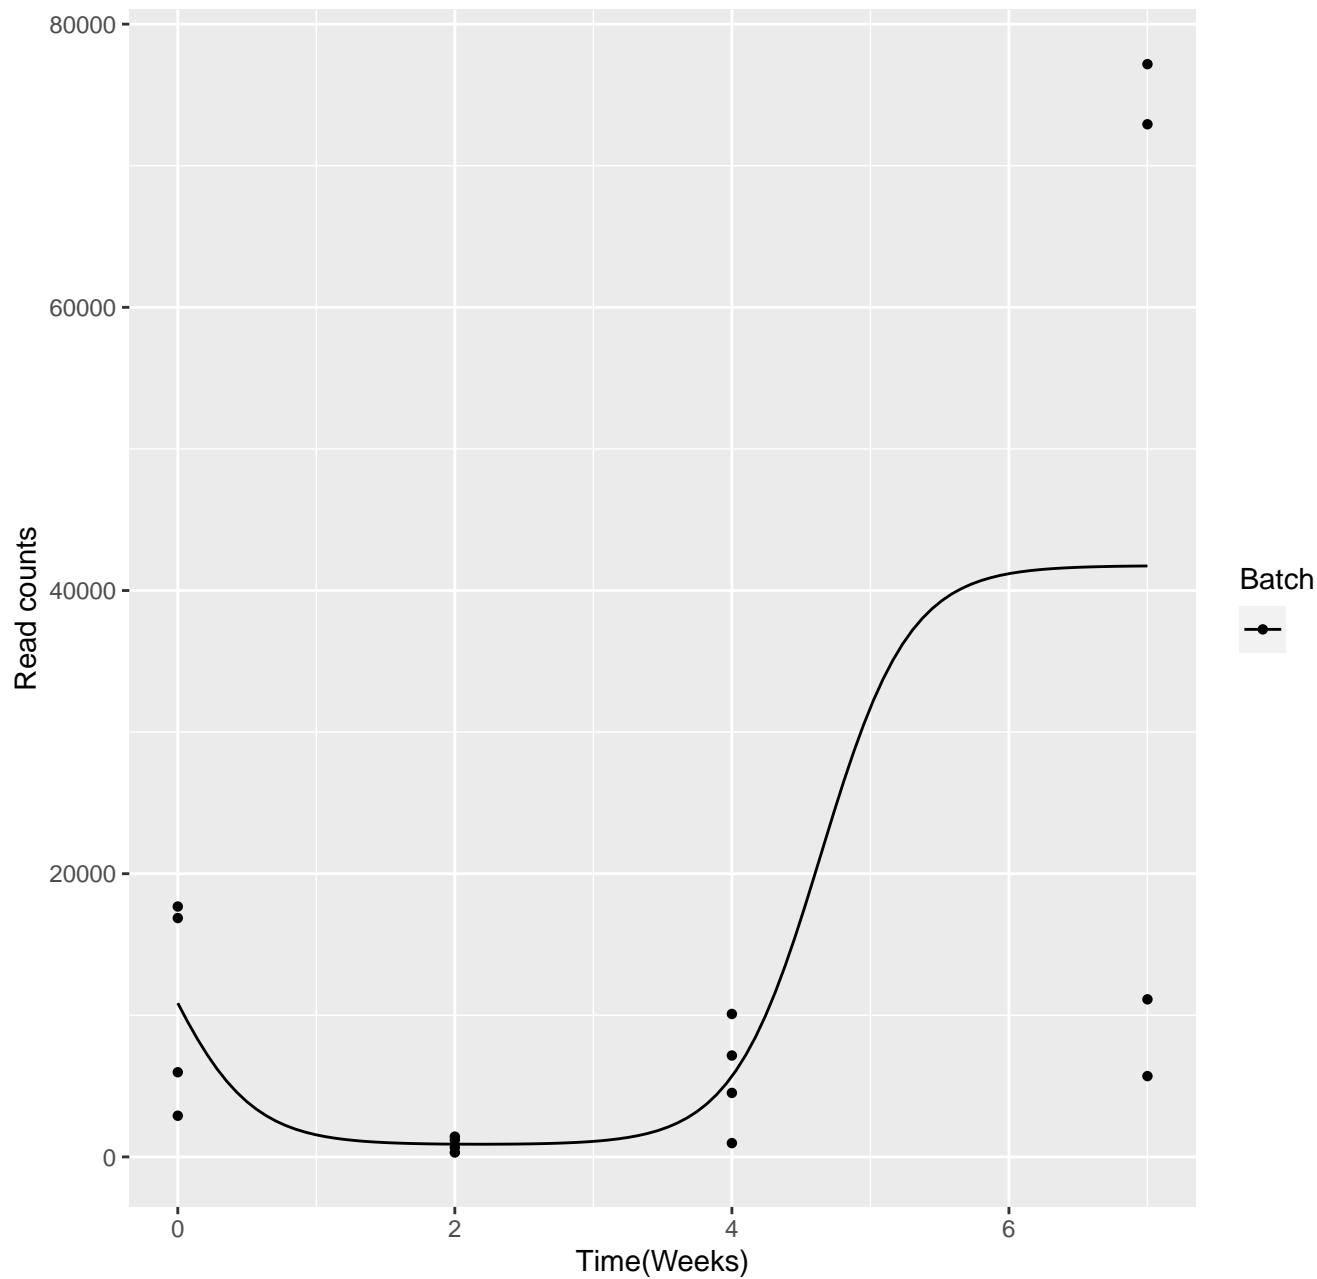

KLF13:  $\log_{10} q = -4.17$

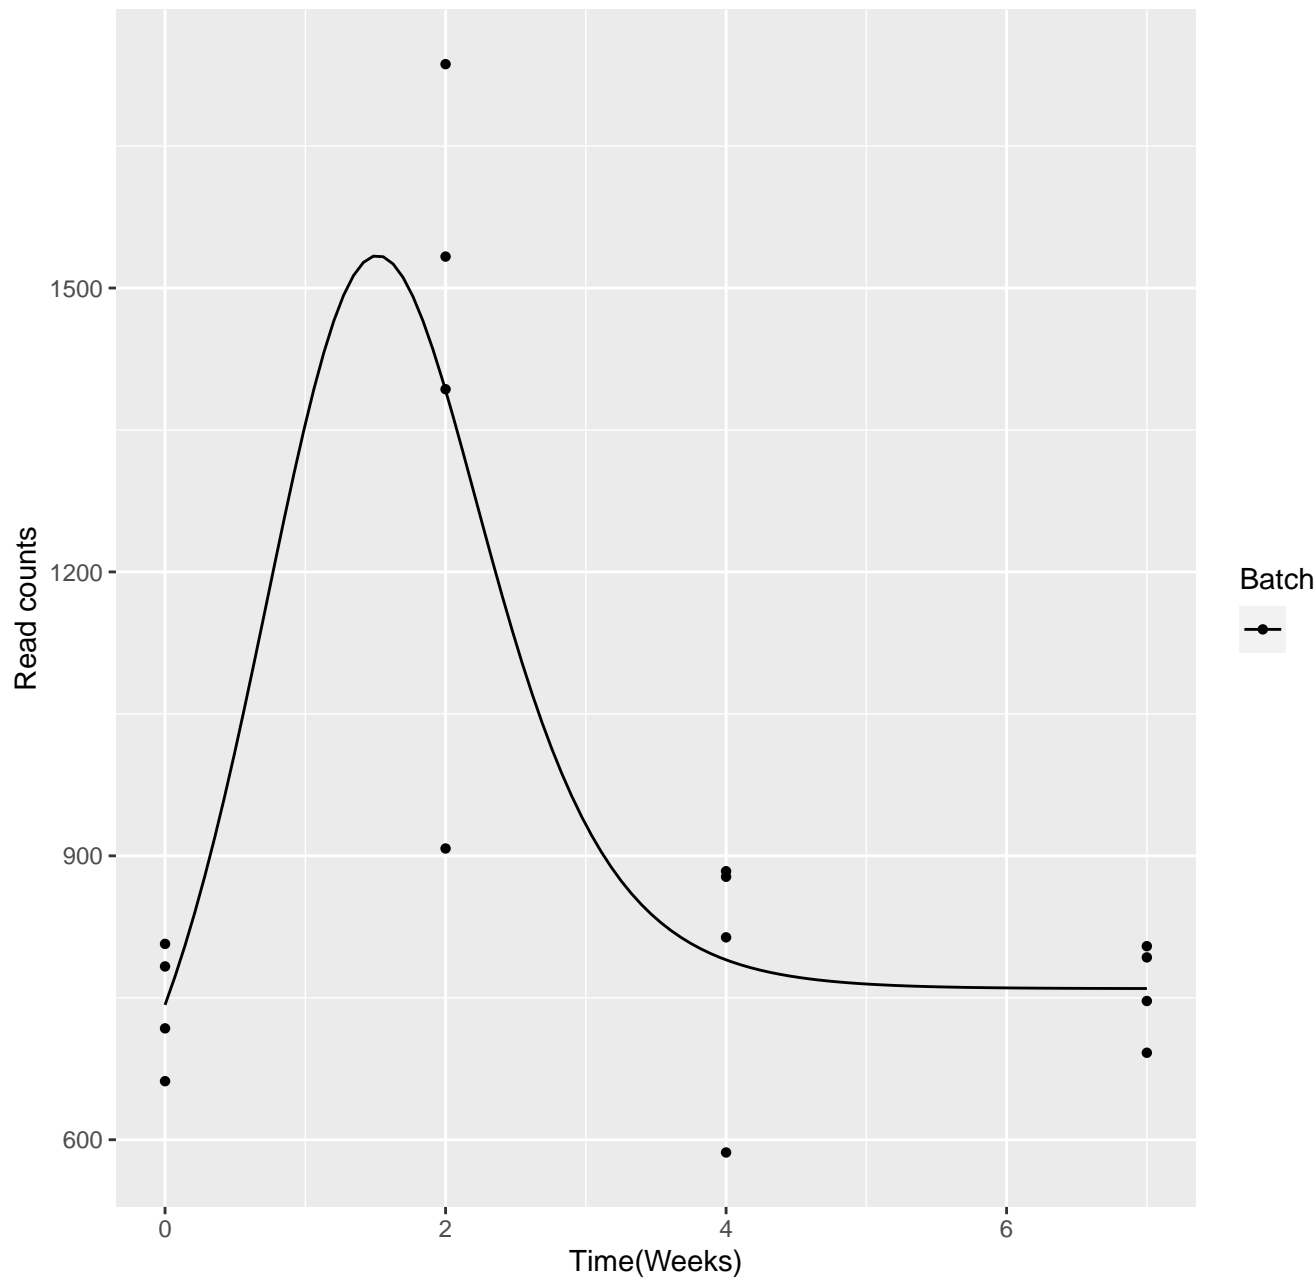

DUSP13:  $\log_{10} q = -4.16$

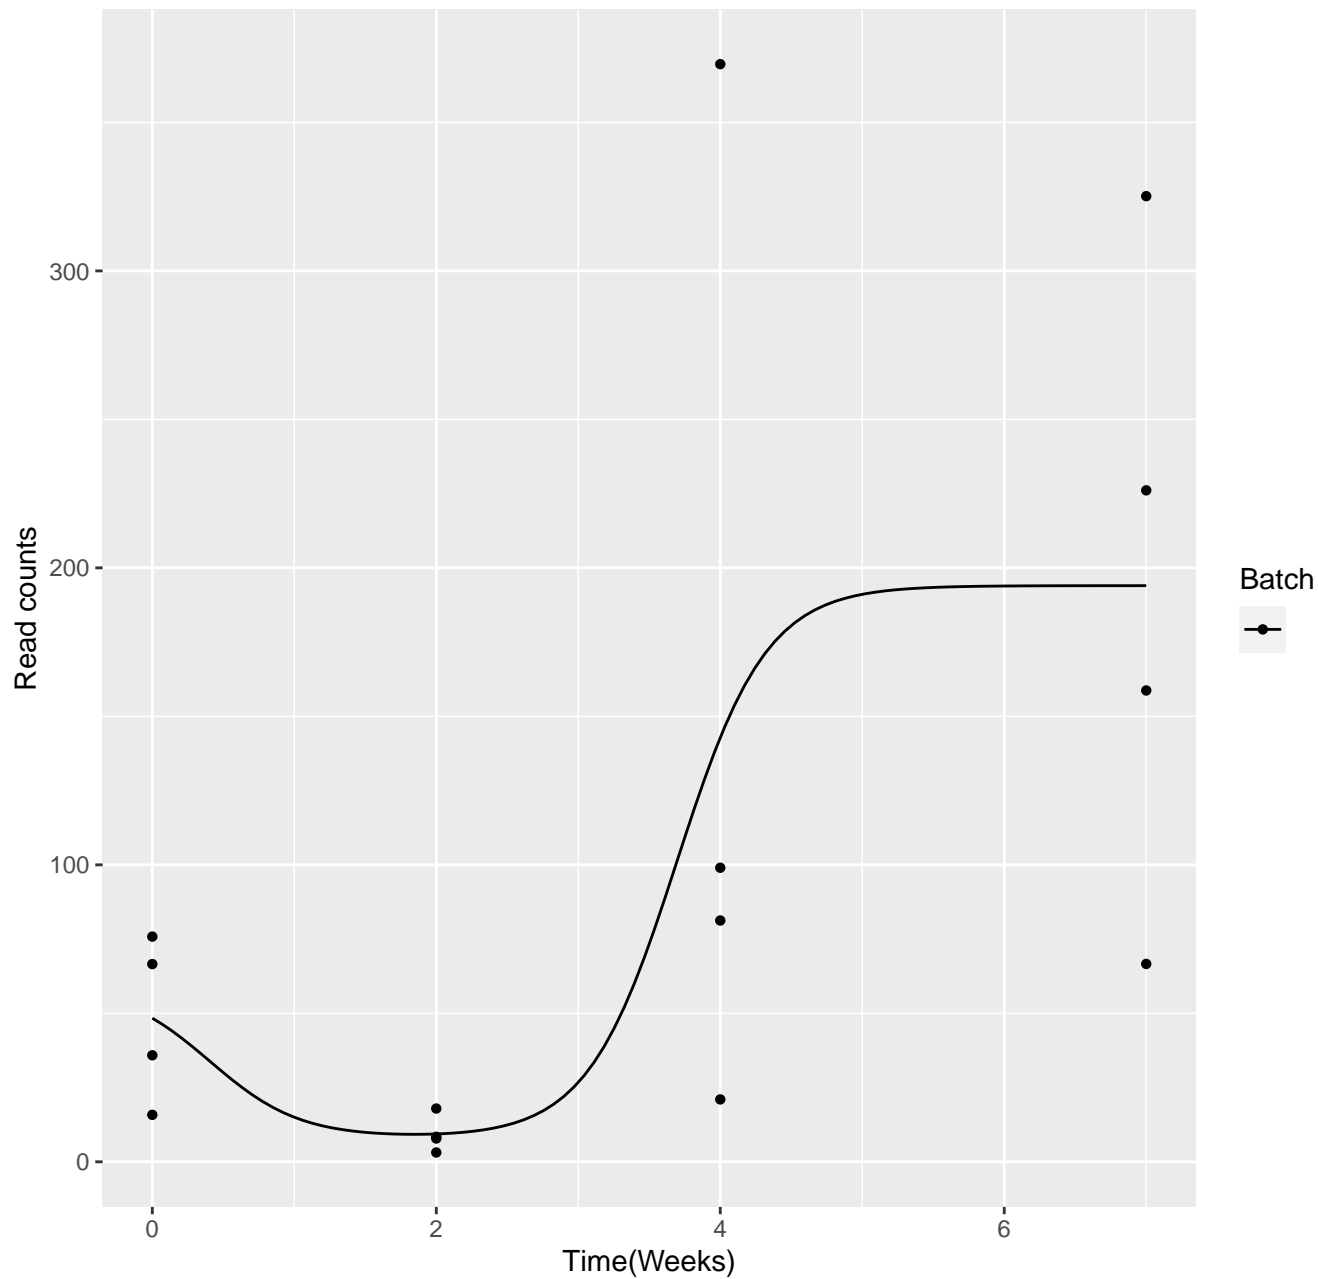

EHD2:  $\log_{10} q = -4.15$

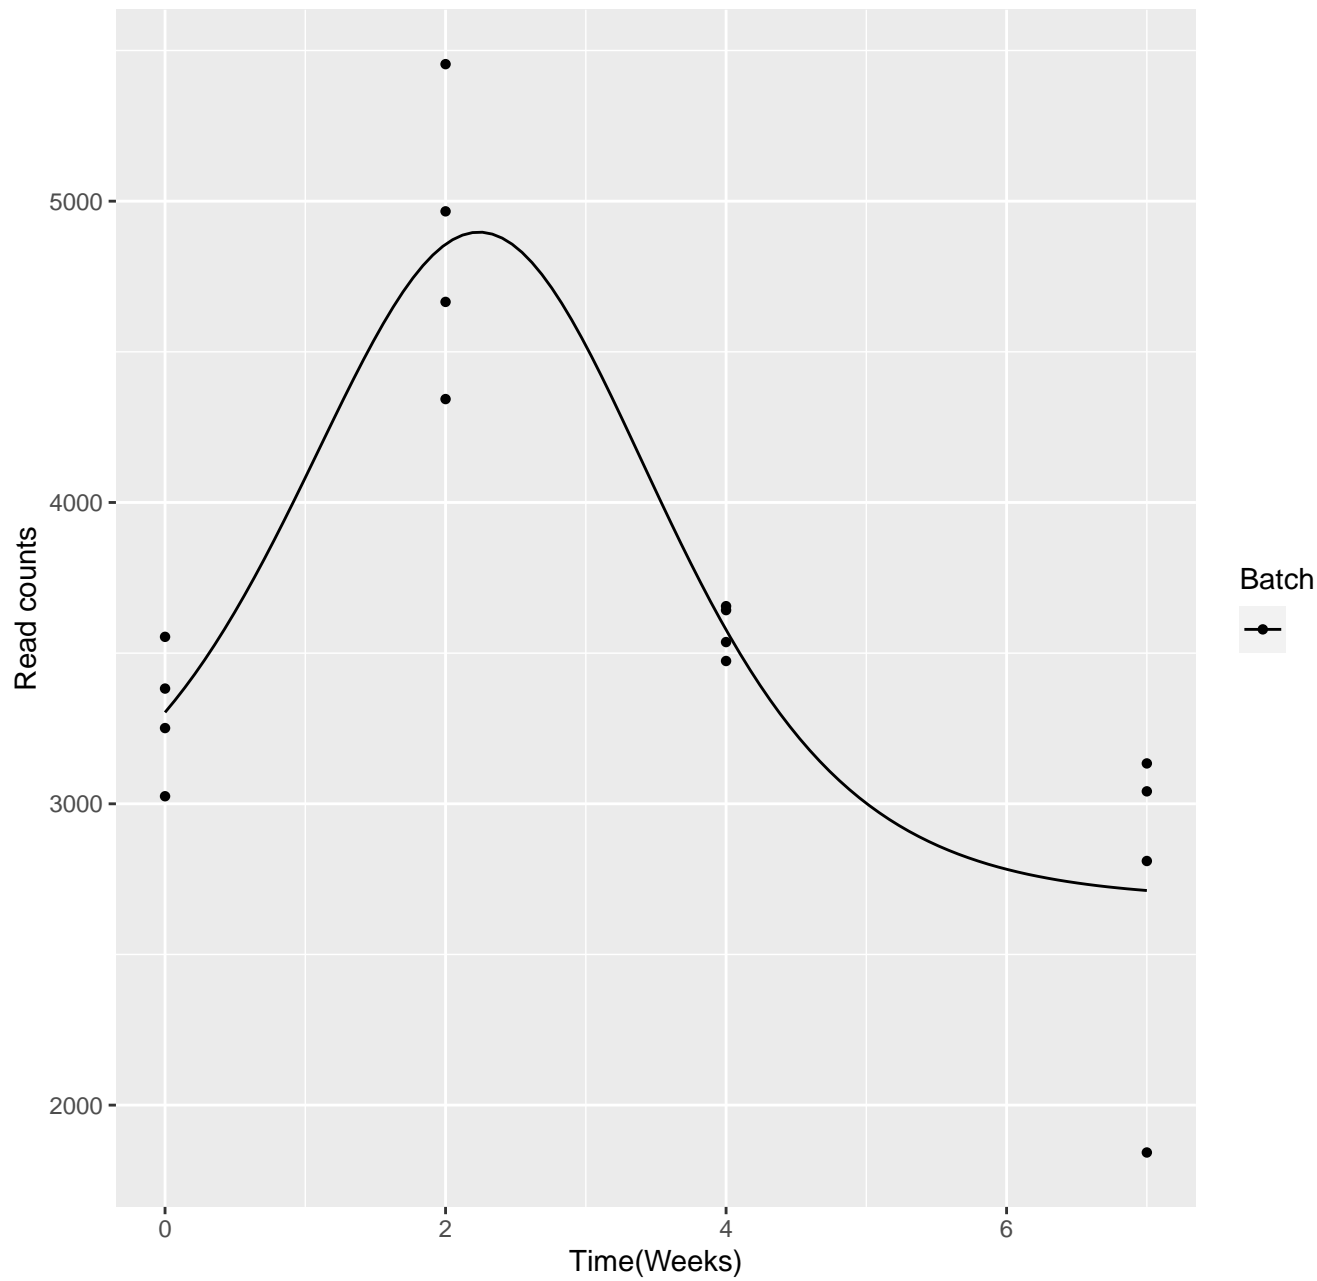

DAPP1:  $\log_{10} q = -4.15$

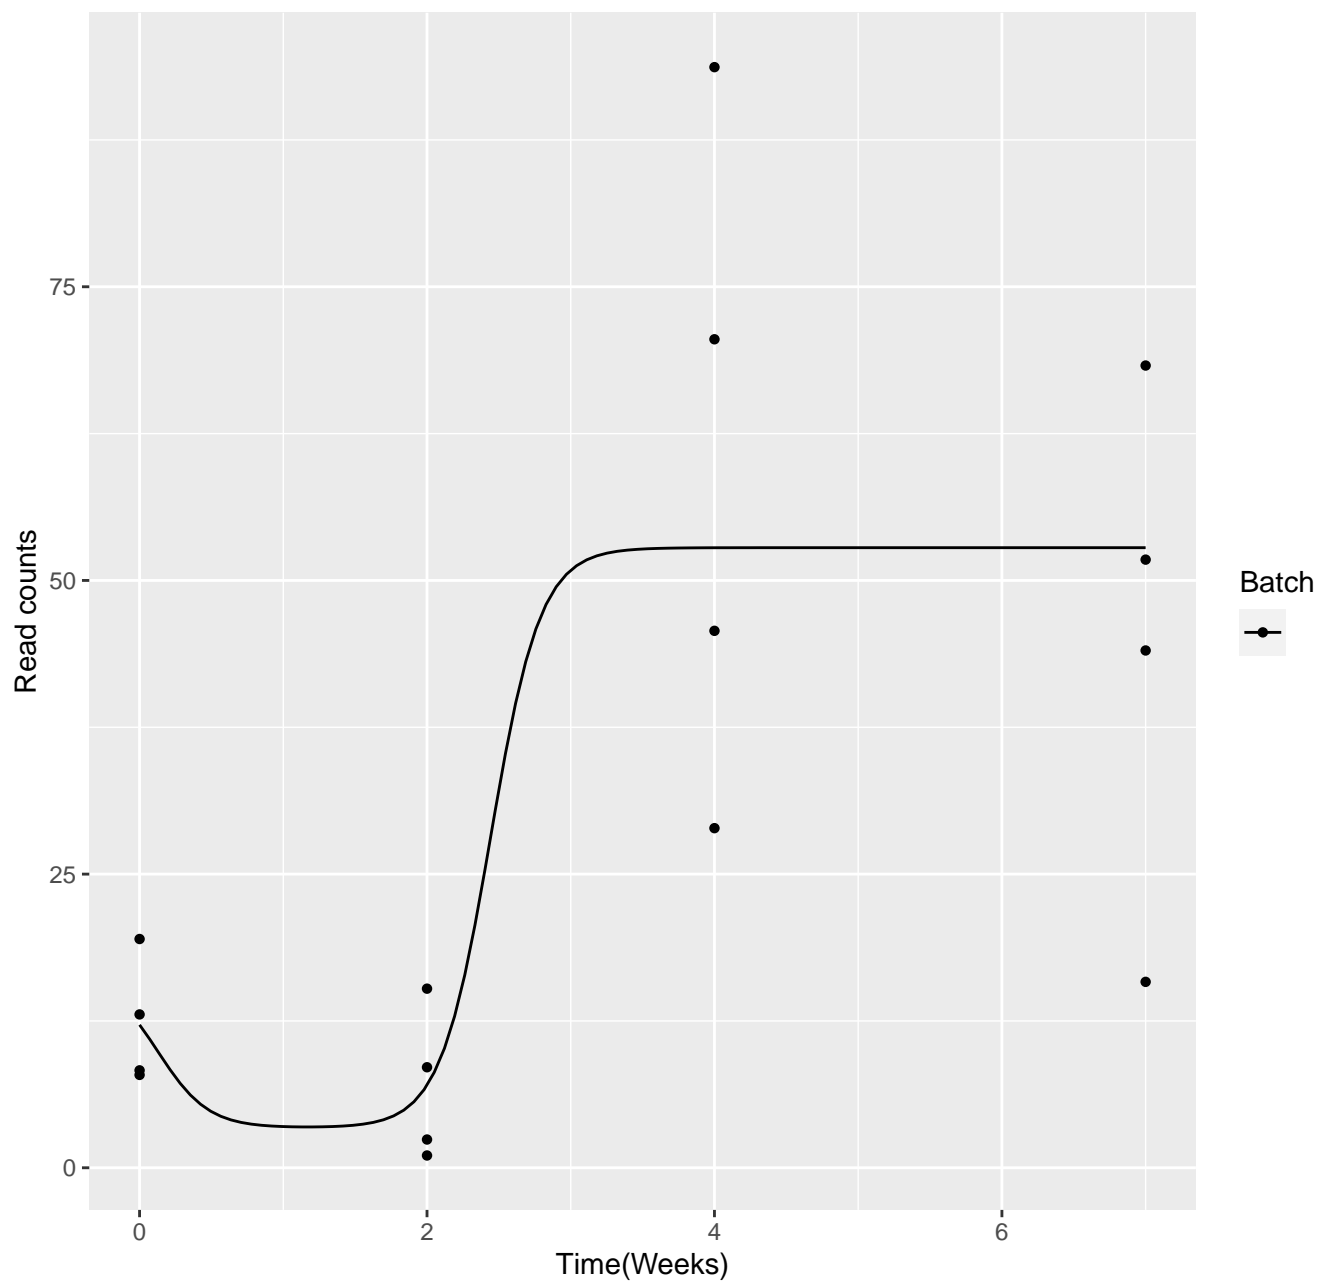

IQGAP1:  $\log_{10} q = -4.13$

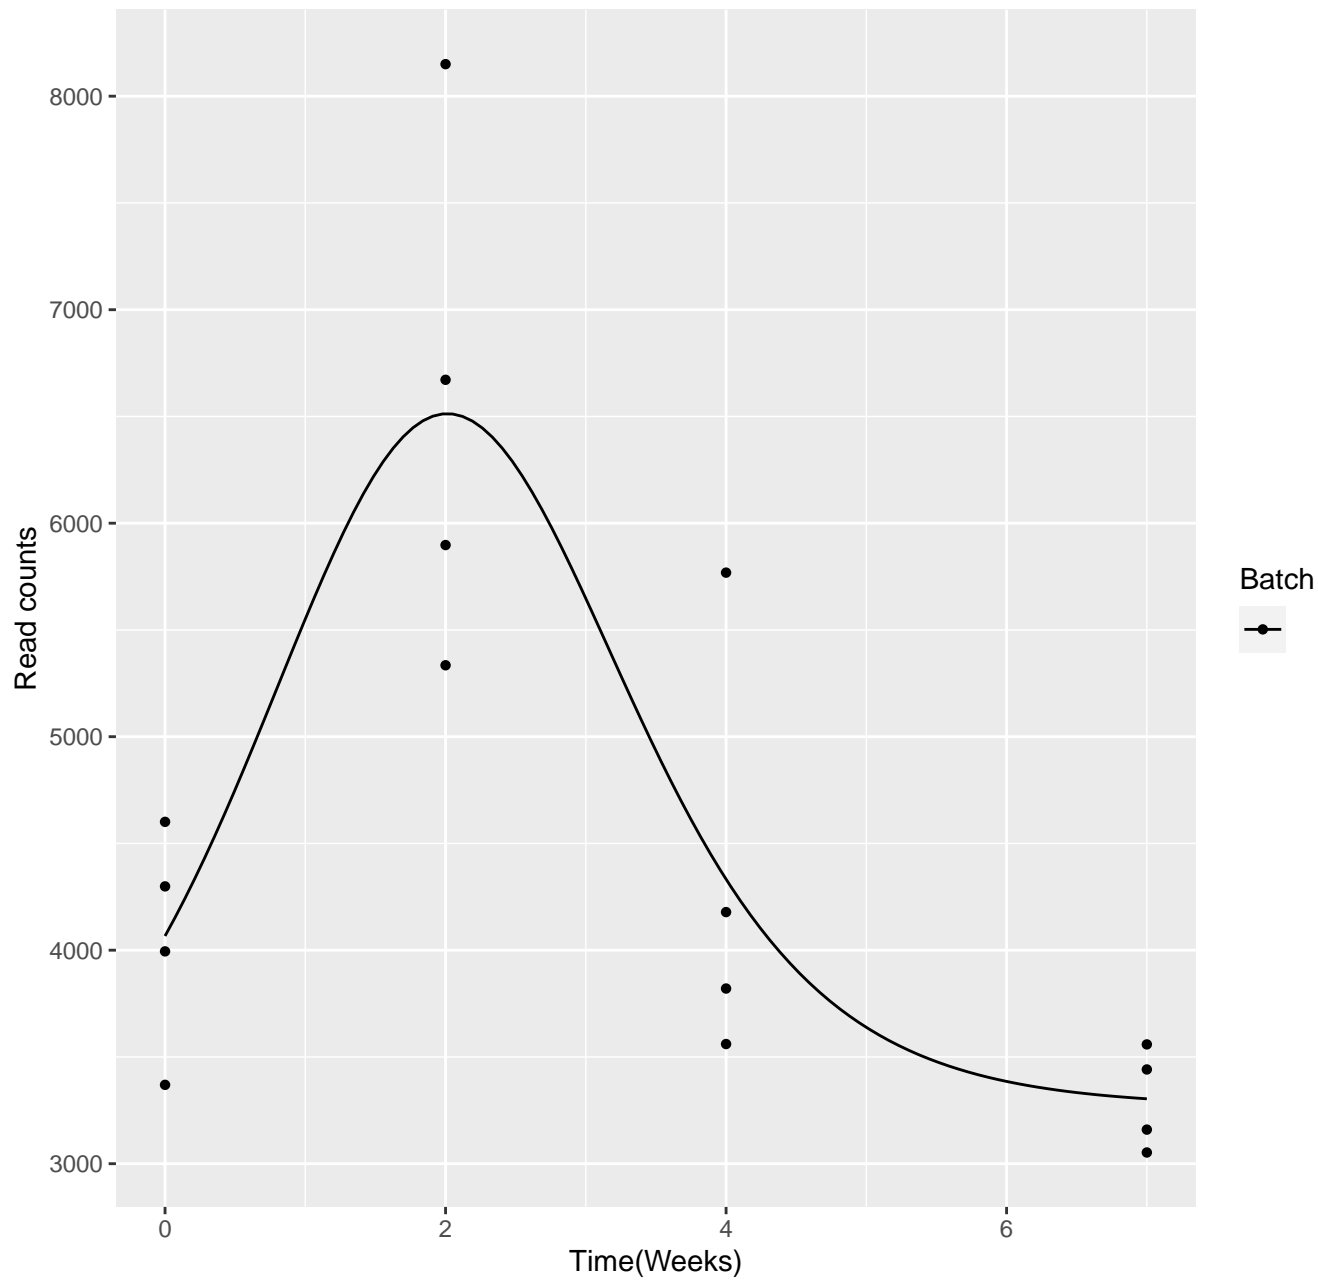

ANKRD1:  $\log_{10} q = -4.12$

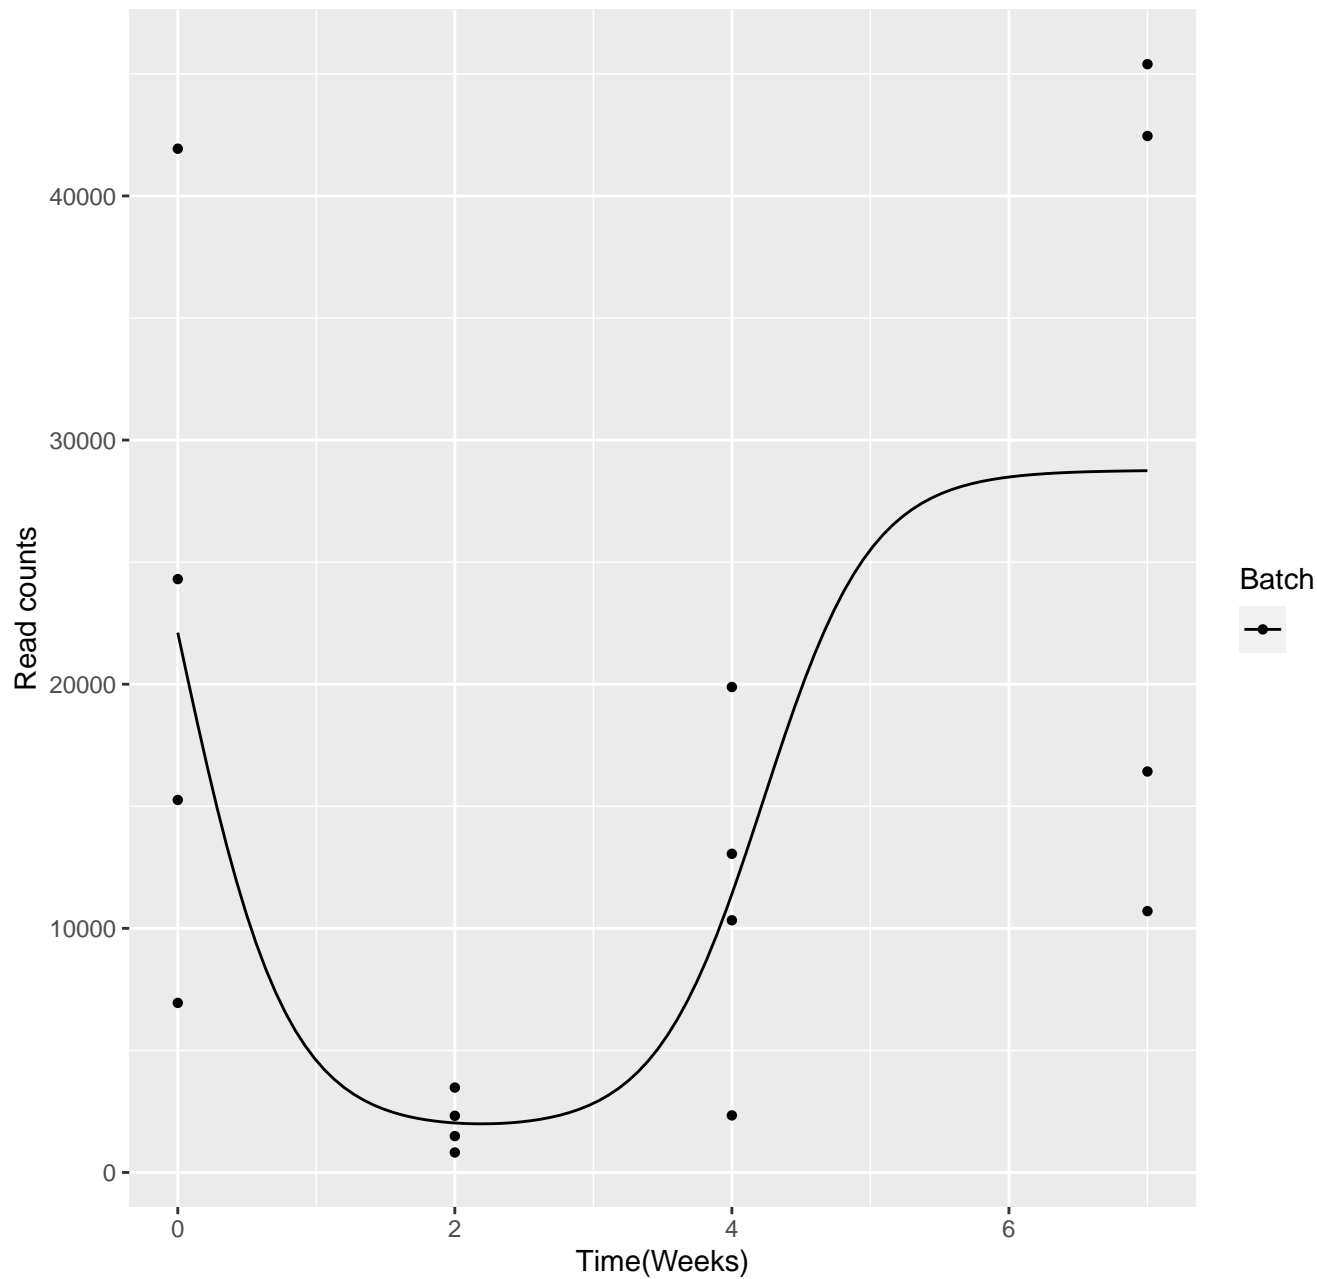



FLT3:  $\log_{10} q = -4.11$

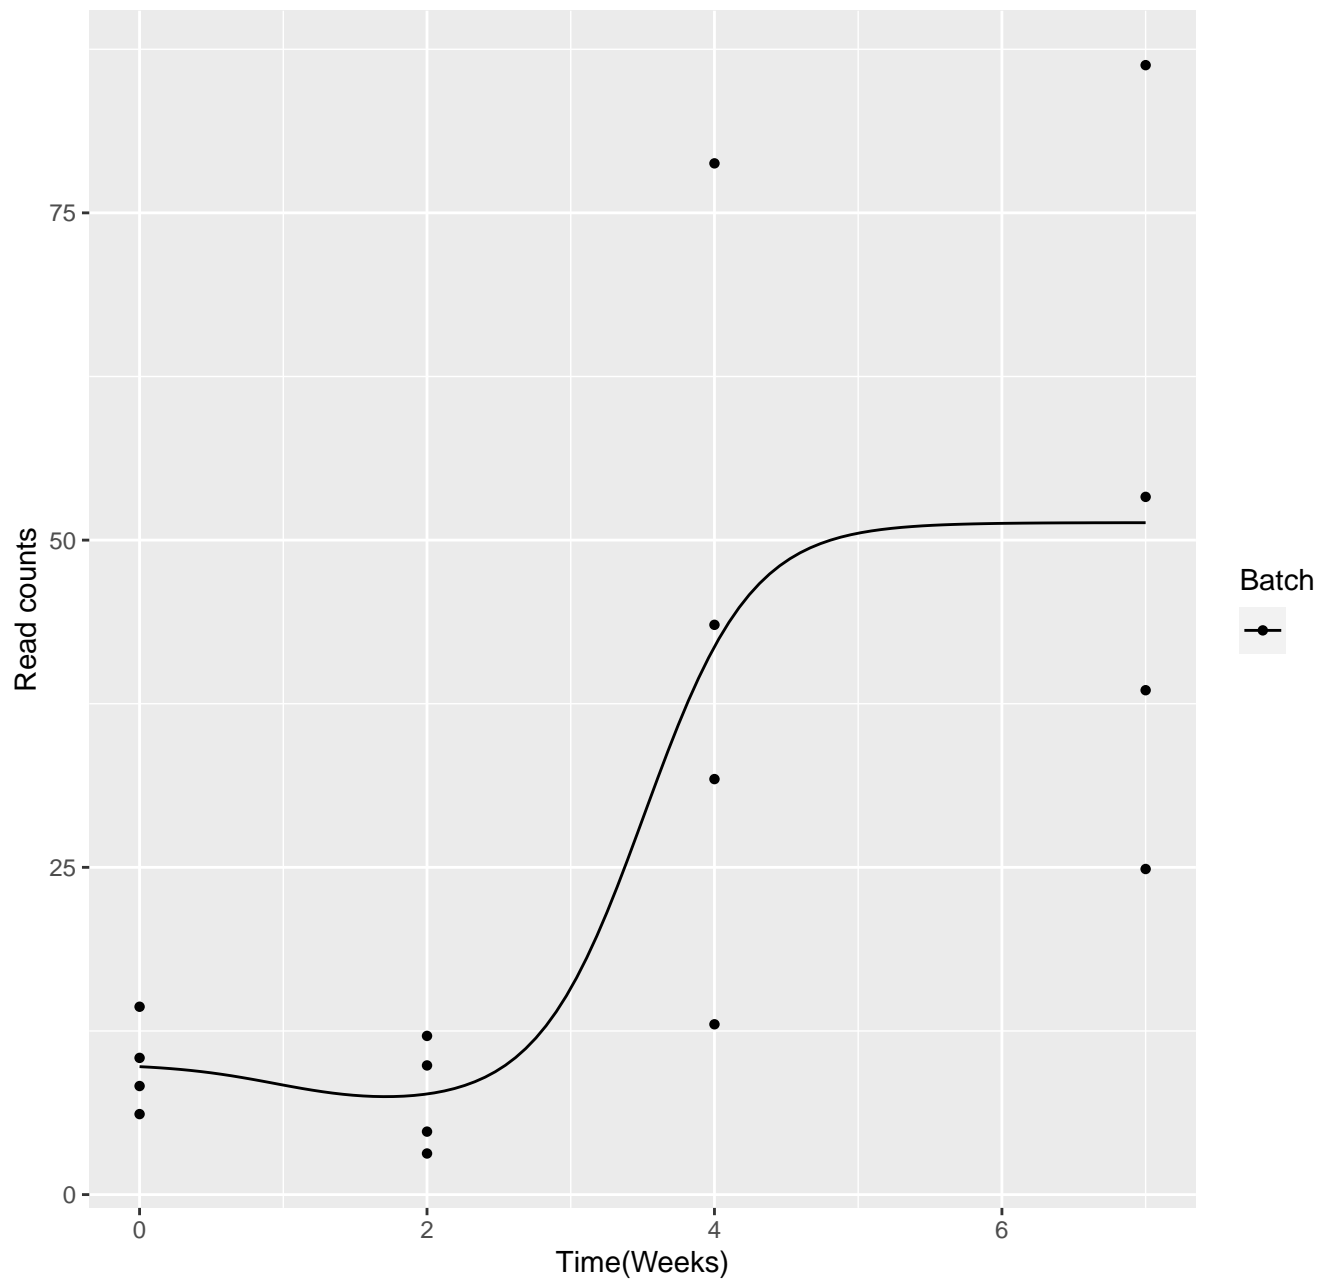

PELI2:  $\log_{10} q = -4.11$

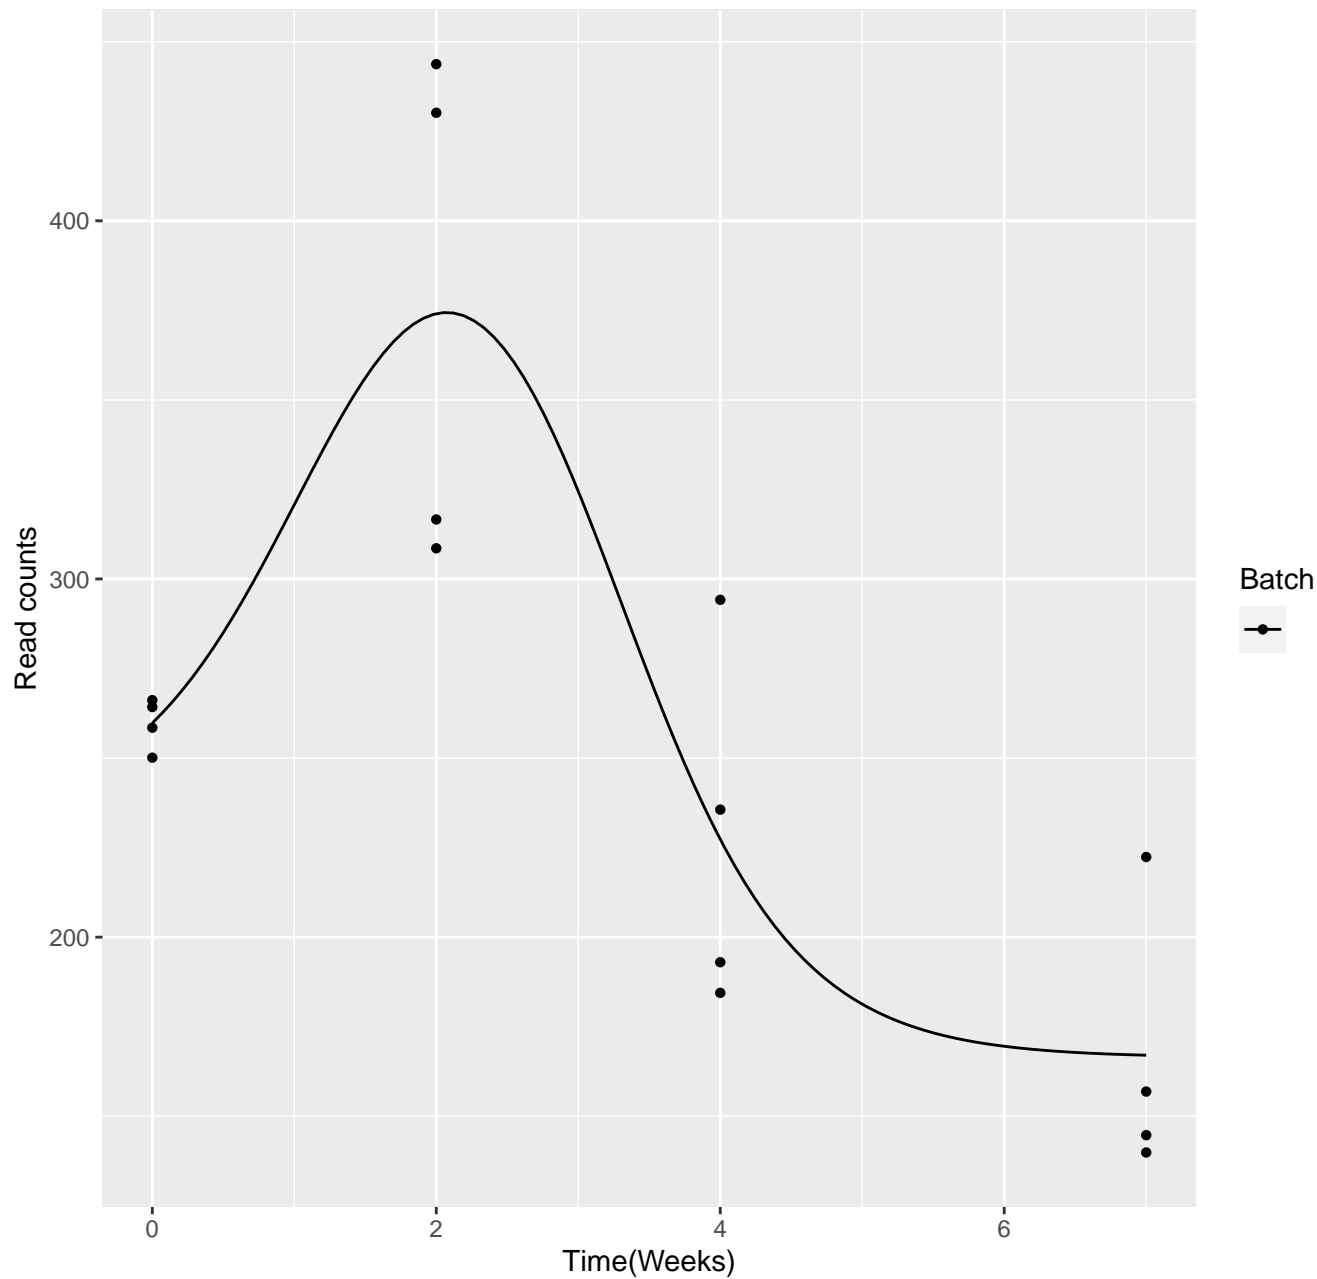

LOC127484209:  $\log_{10} q = -4.1$

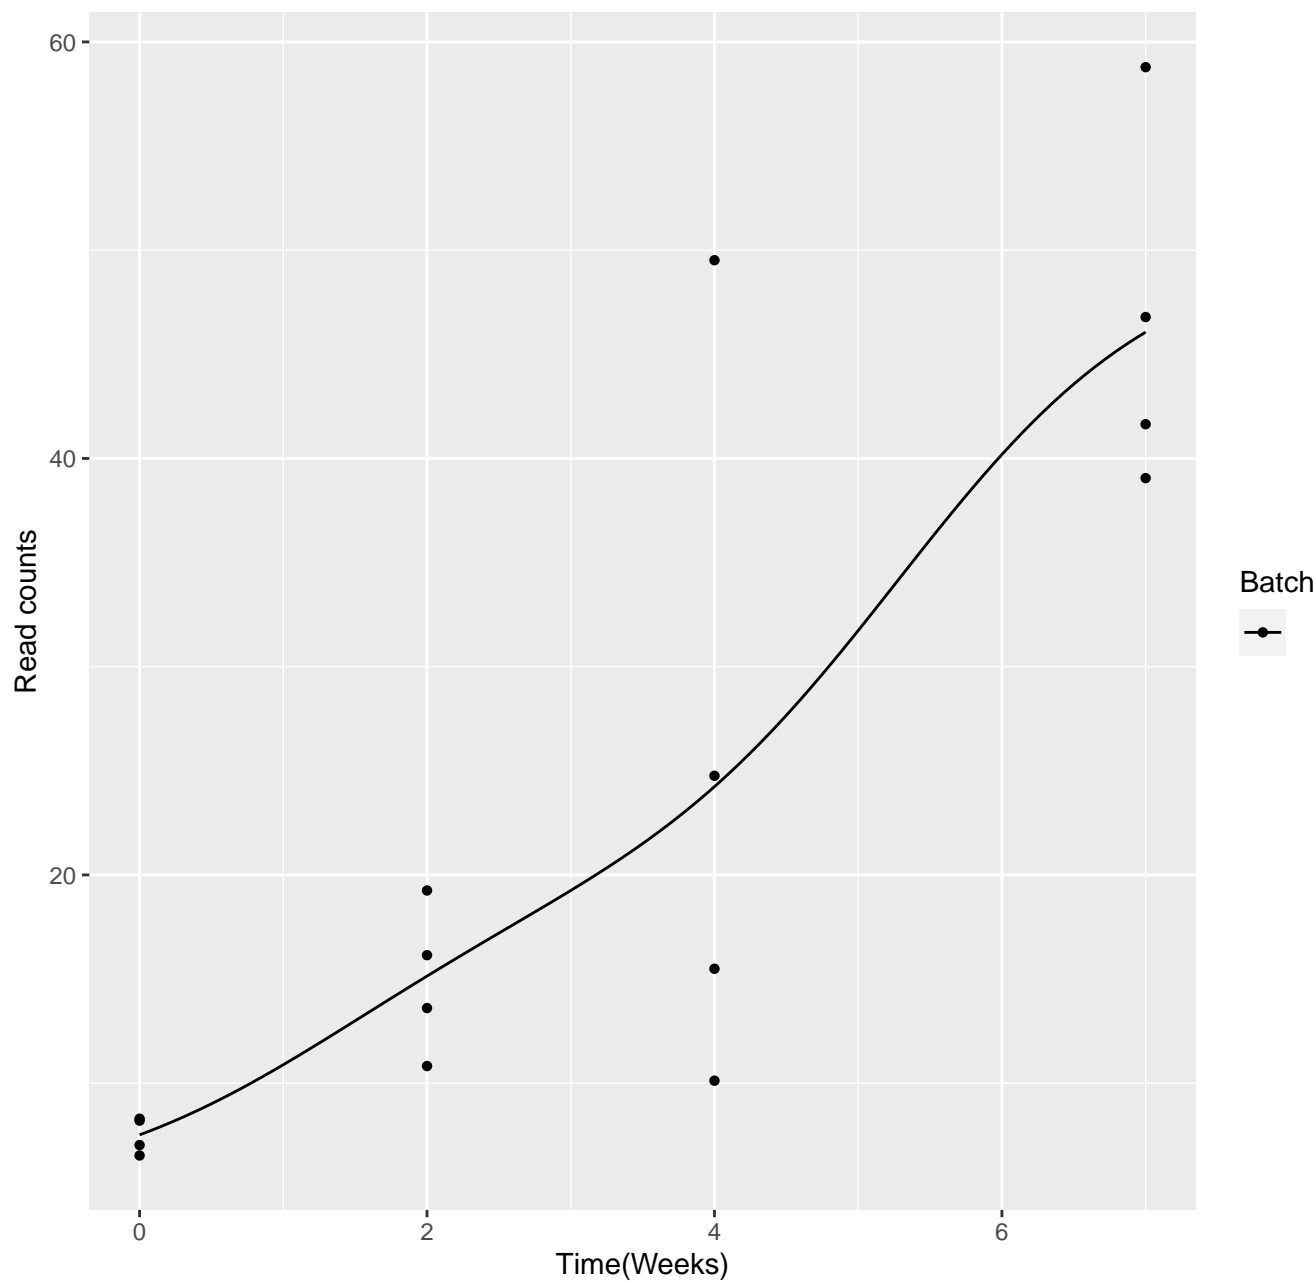

MFGE8:  $\log_{10} q = -4.1$

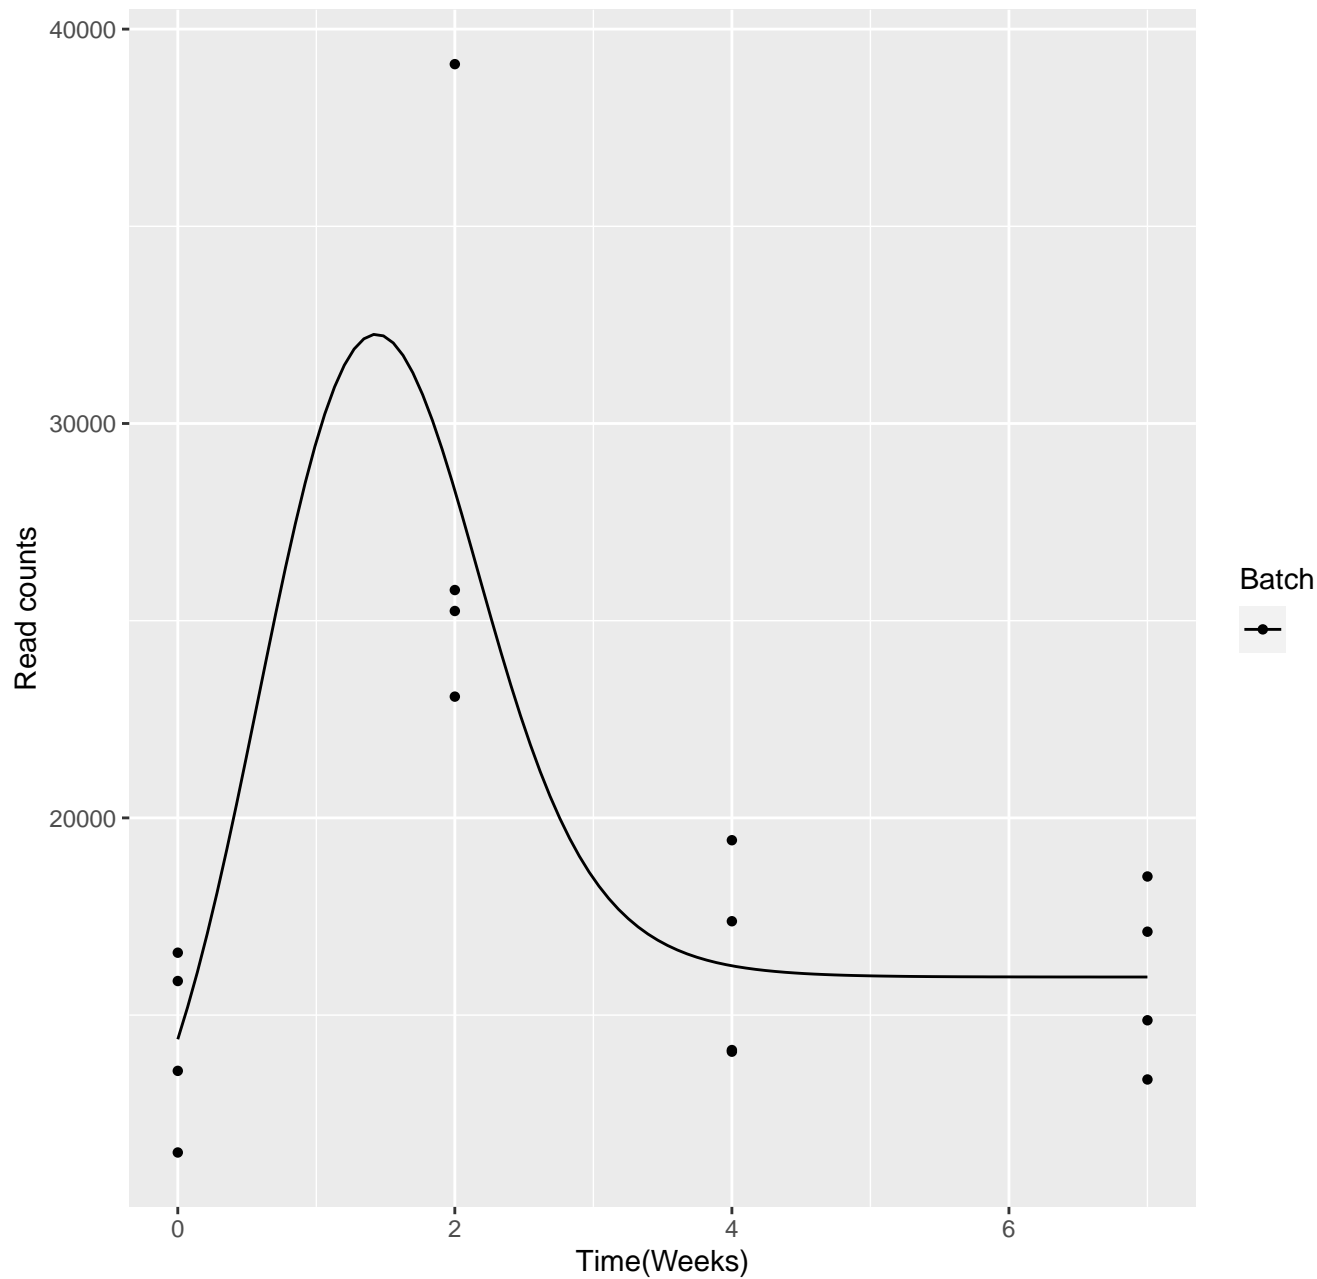

DEF6:  $\log_{10} q = -4.06$

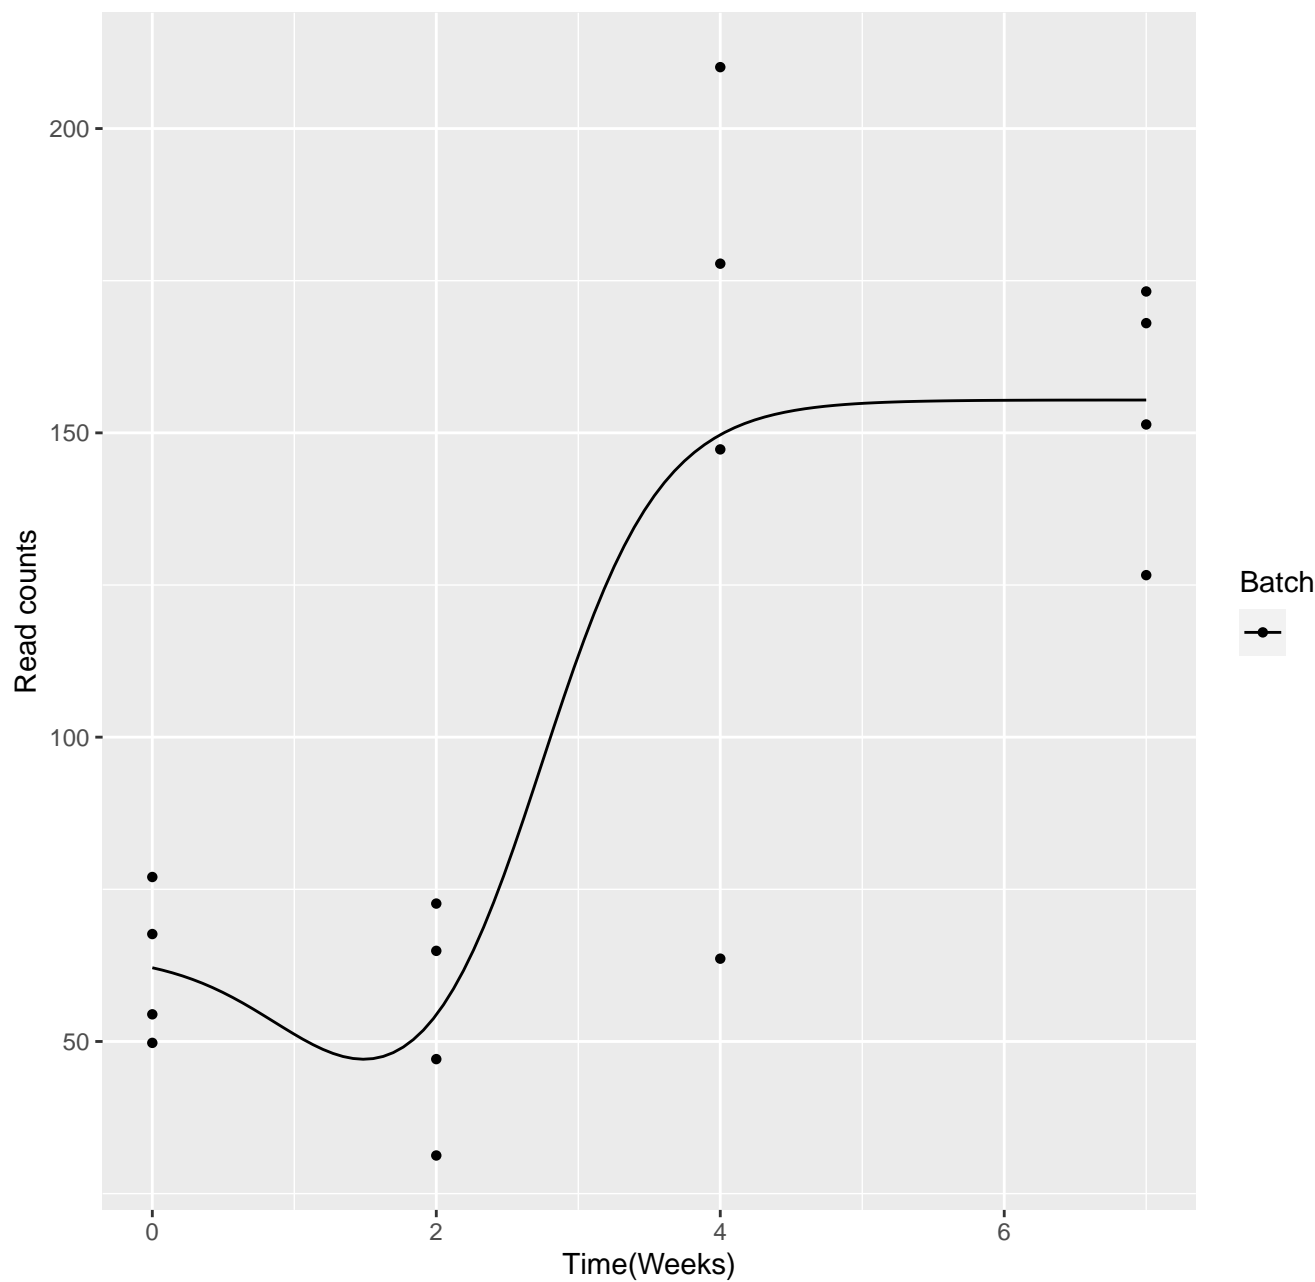

FAM98A:  $\log_{10} q = -4.05$

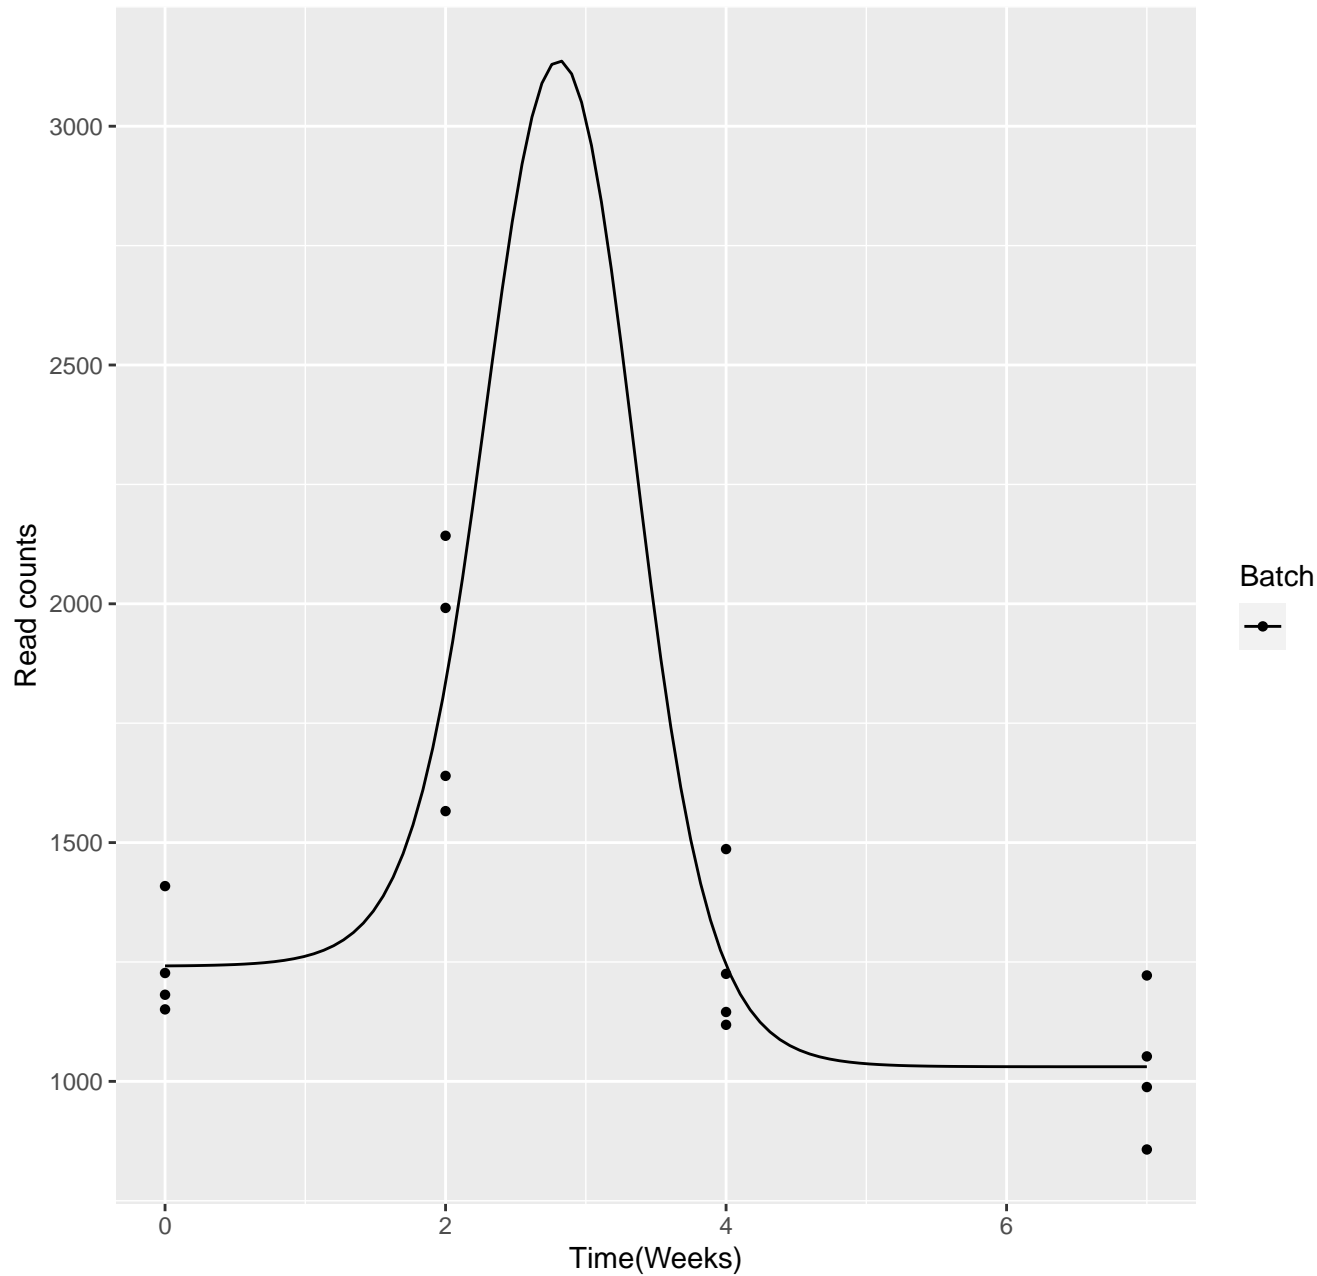

DDR2:  $\log_{10} q = -4.05$

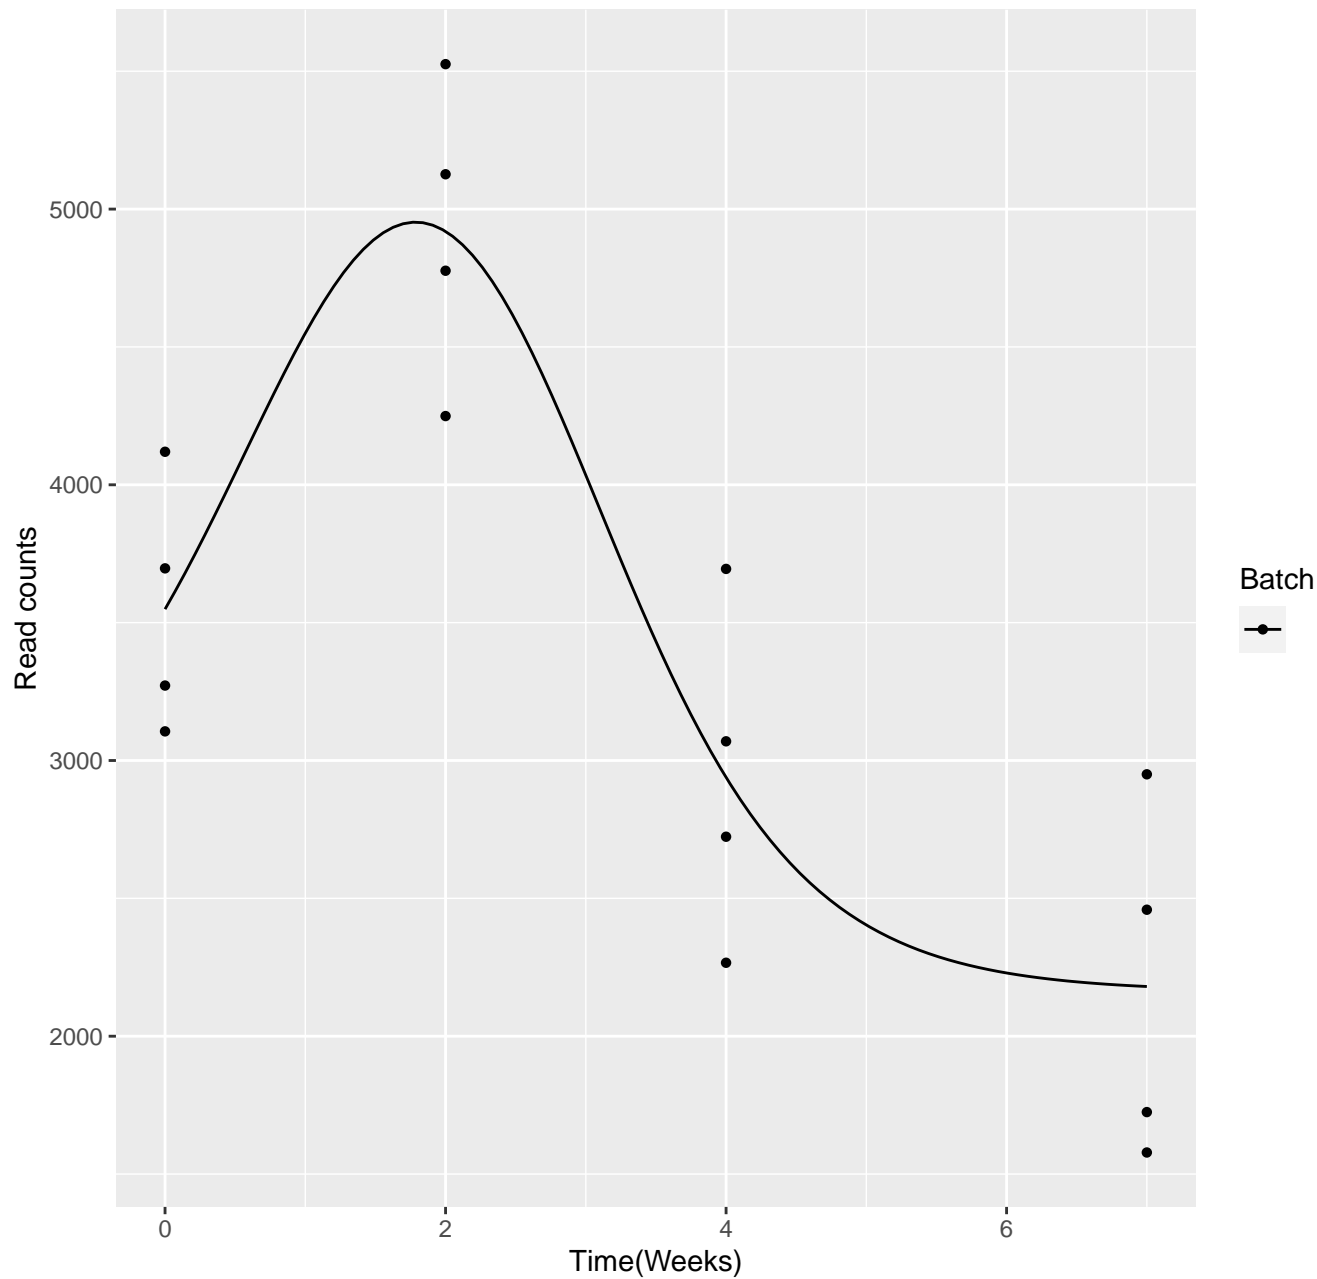

MYEF2:  $\log_{10} q = -4.05$

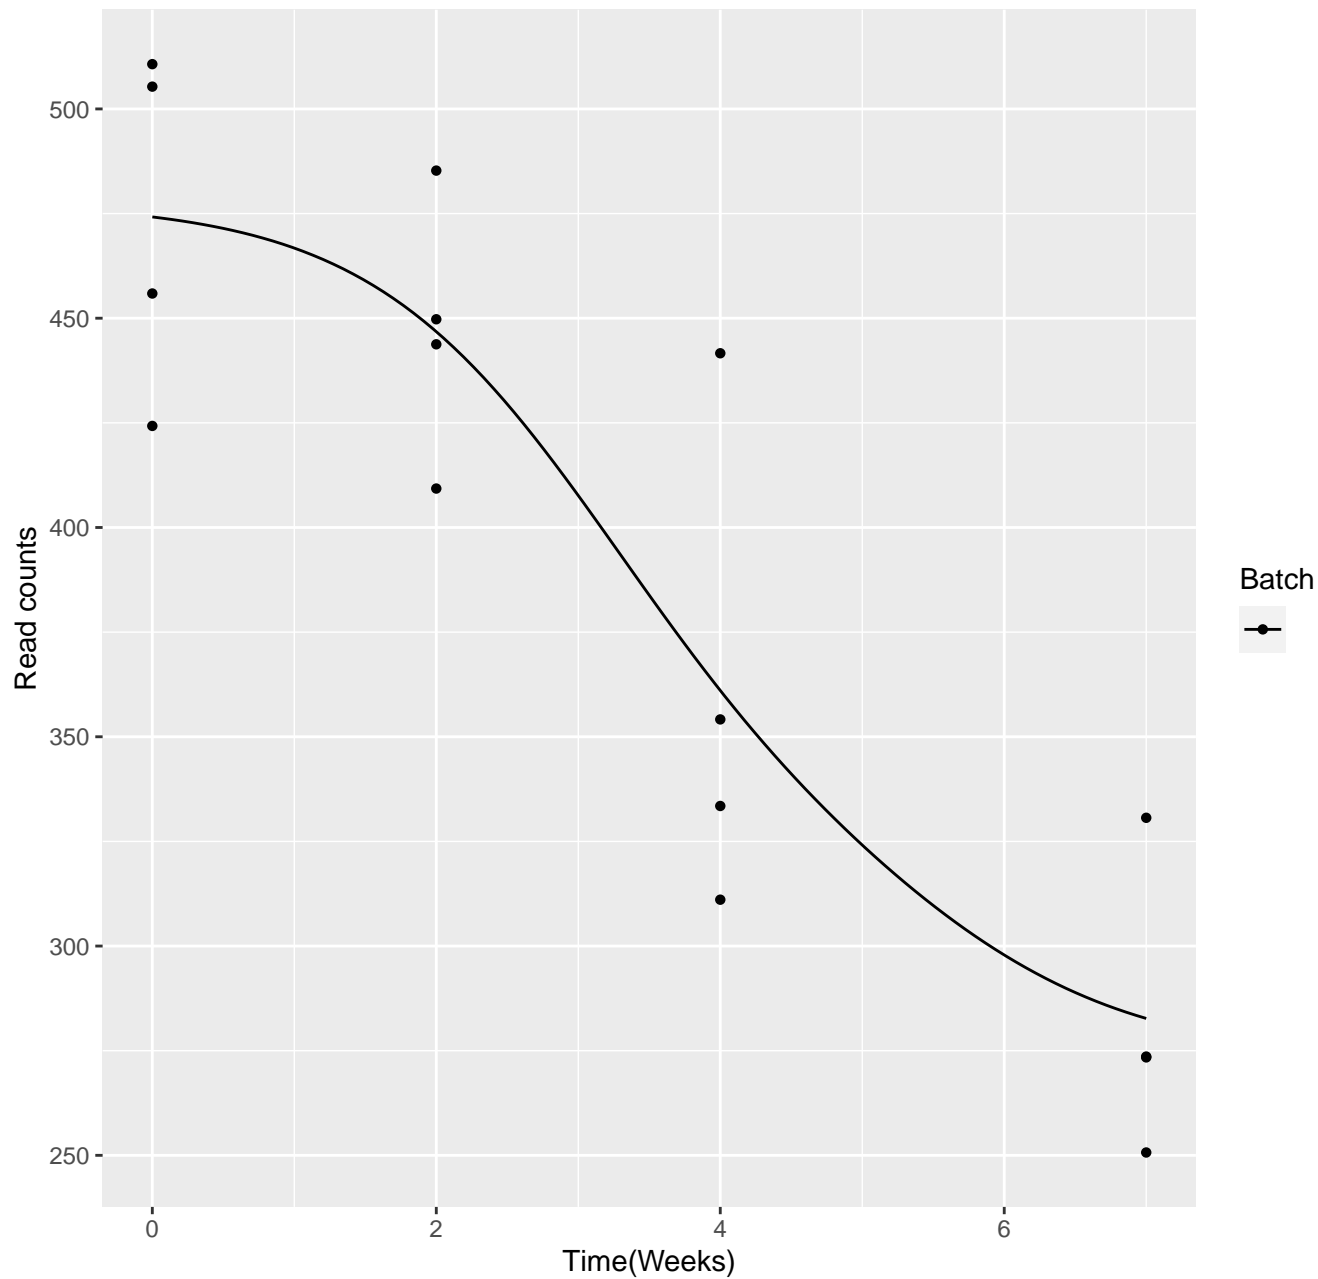



KANK1:  $\log_{10} q = -4.04$

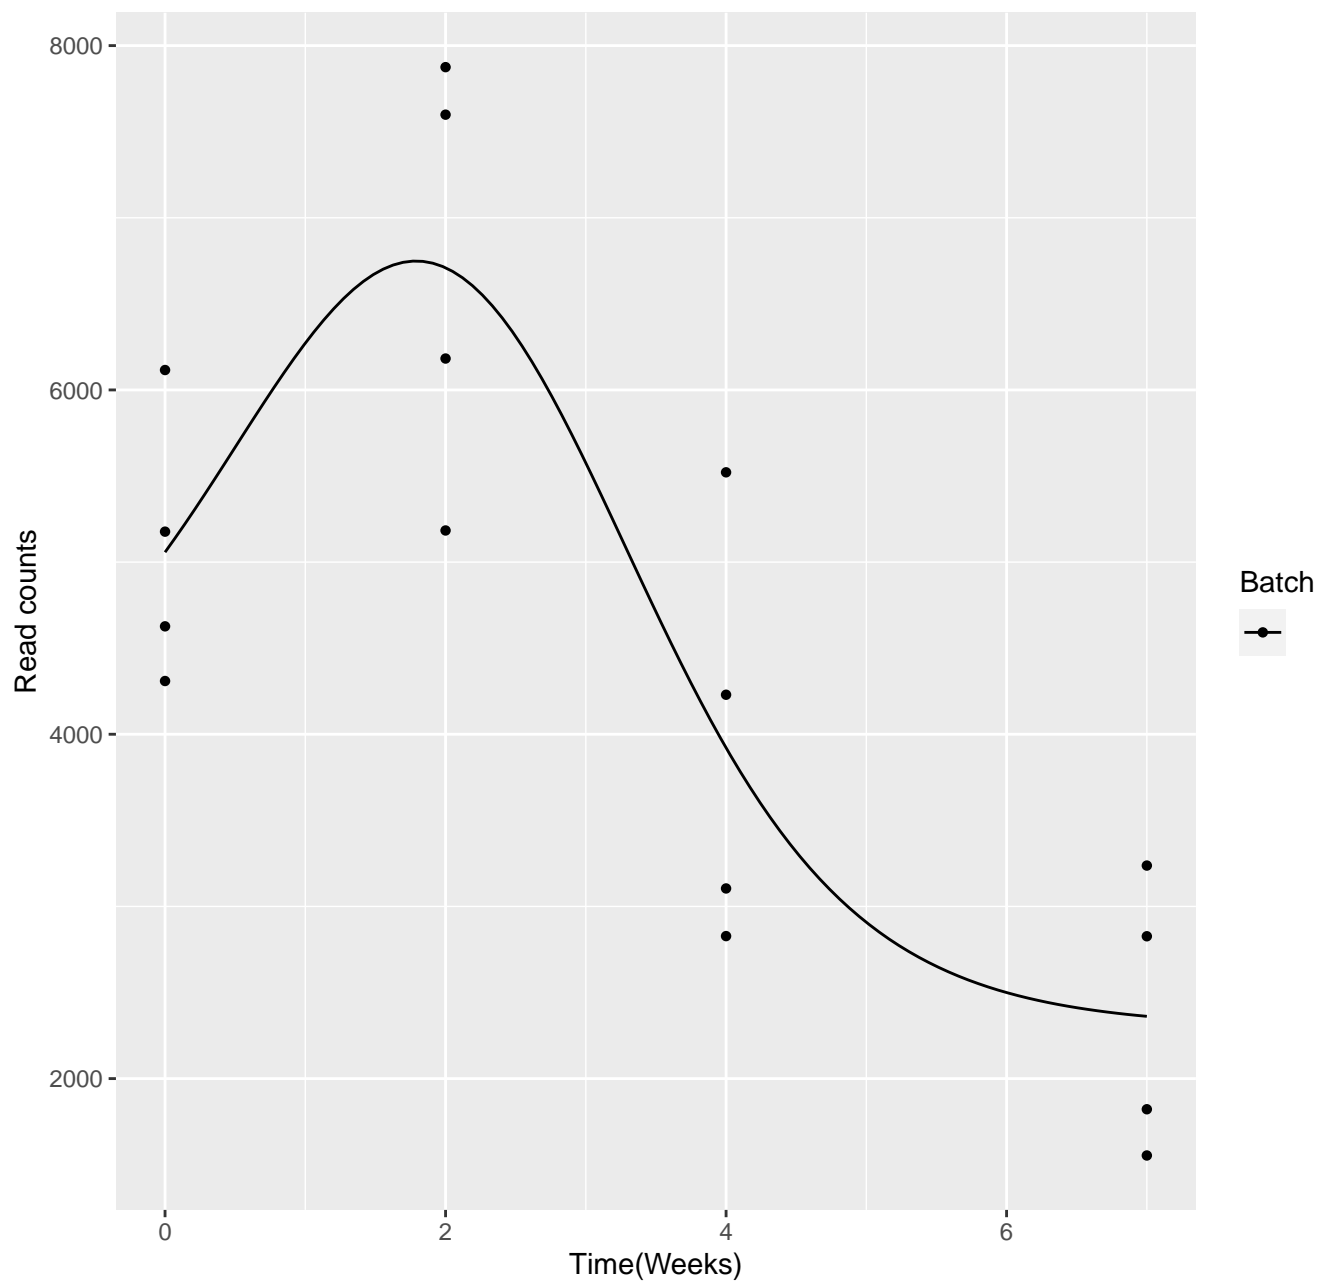

FER:  $\log_{10} q = -4.04$

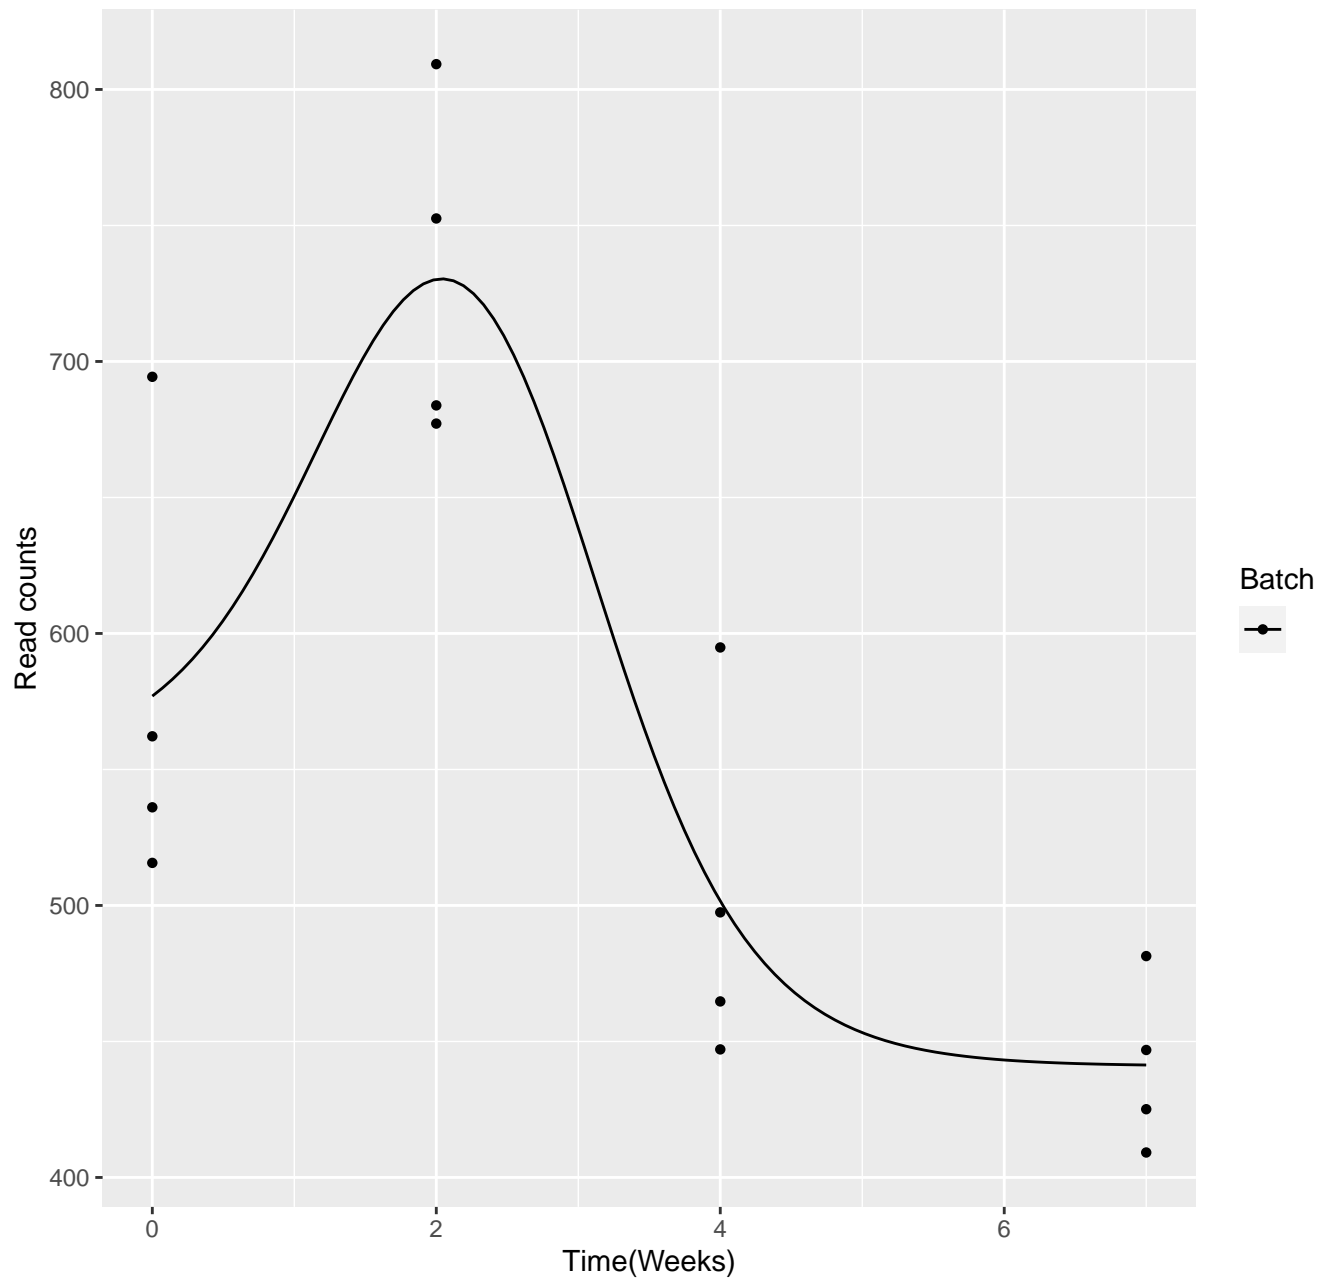

IL20RB:  $\log_{10} q = -4.03$

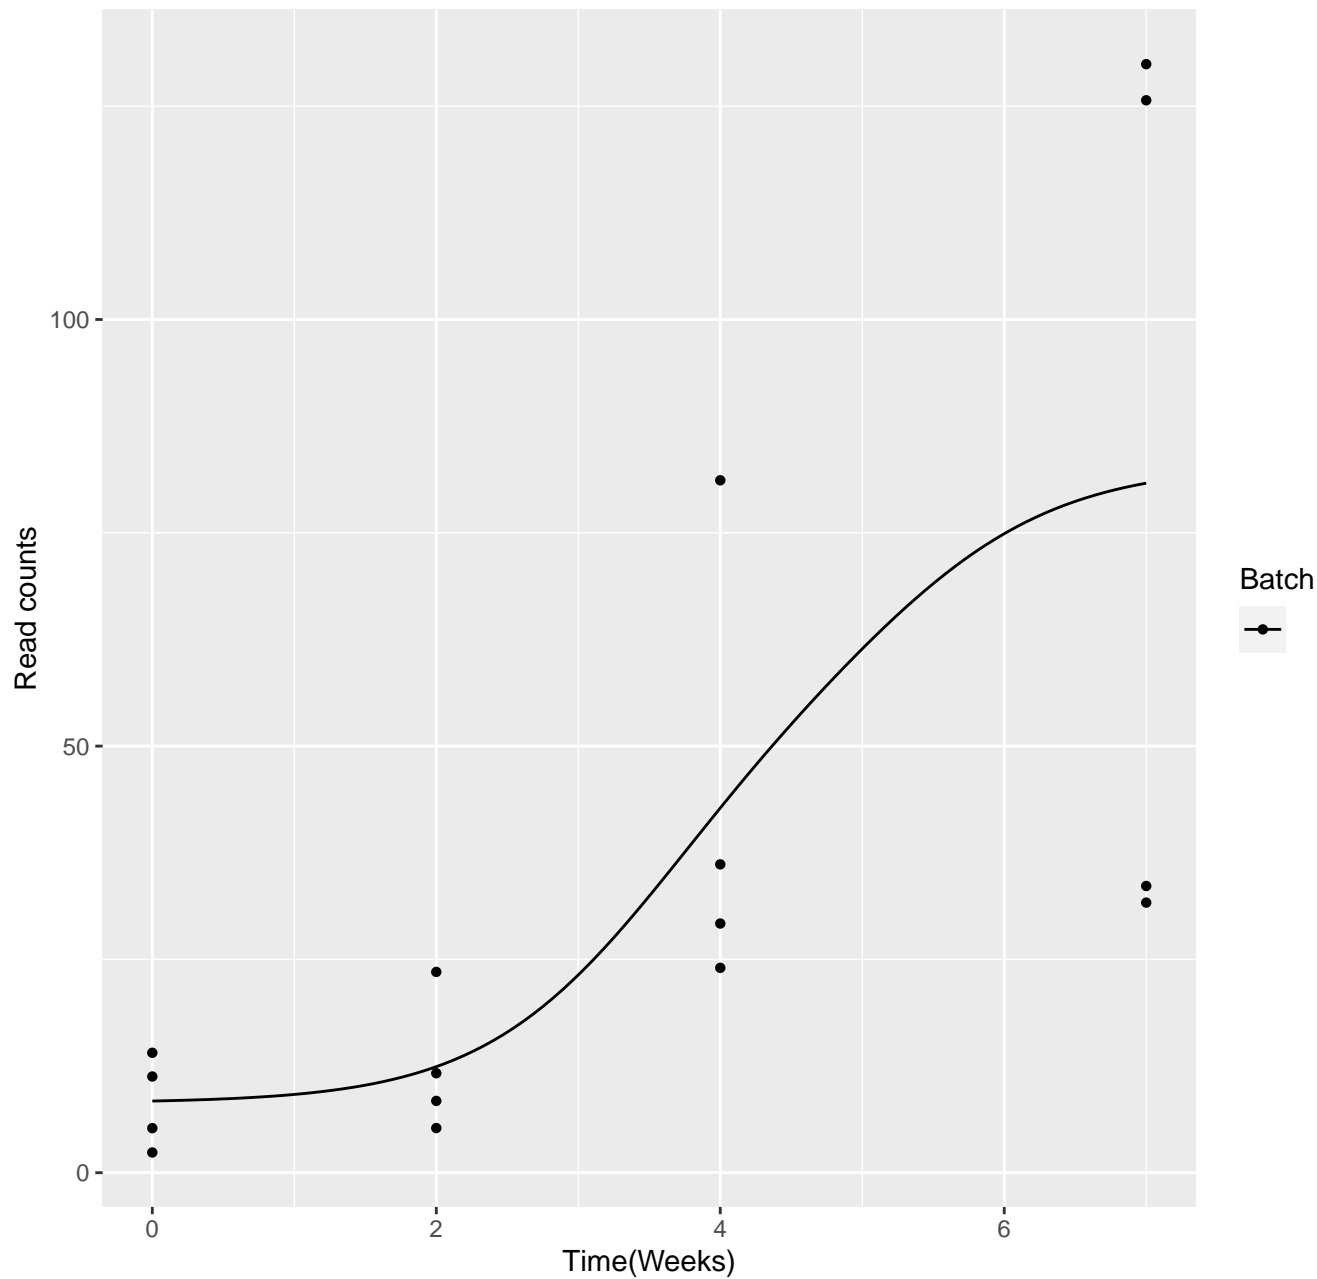

TUBA1C:  $\log_{10} q = -4.03$

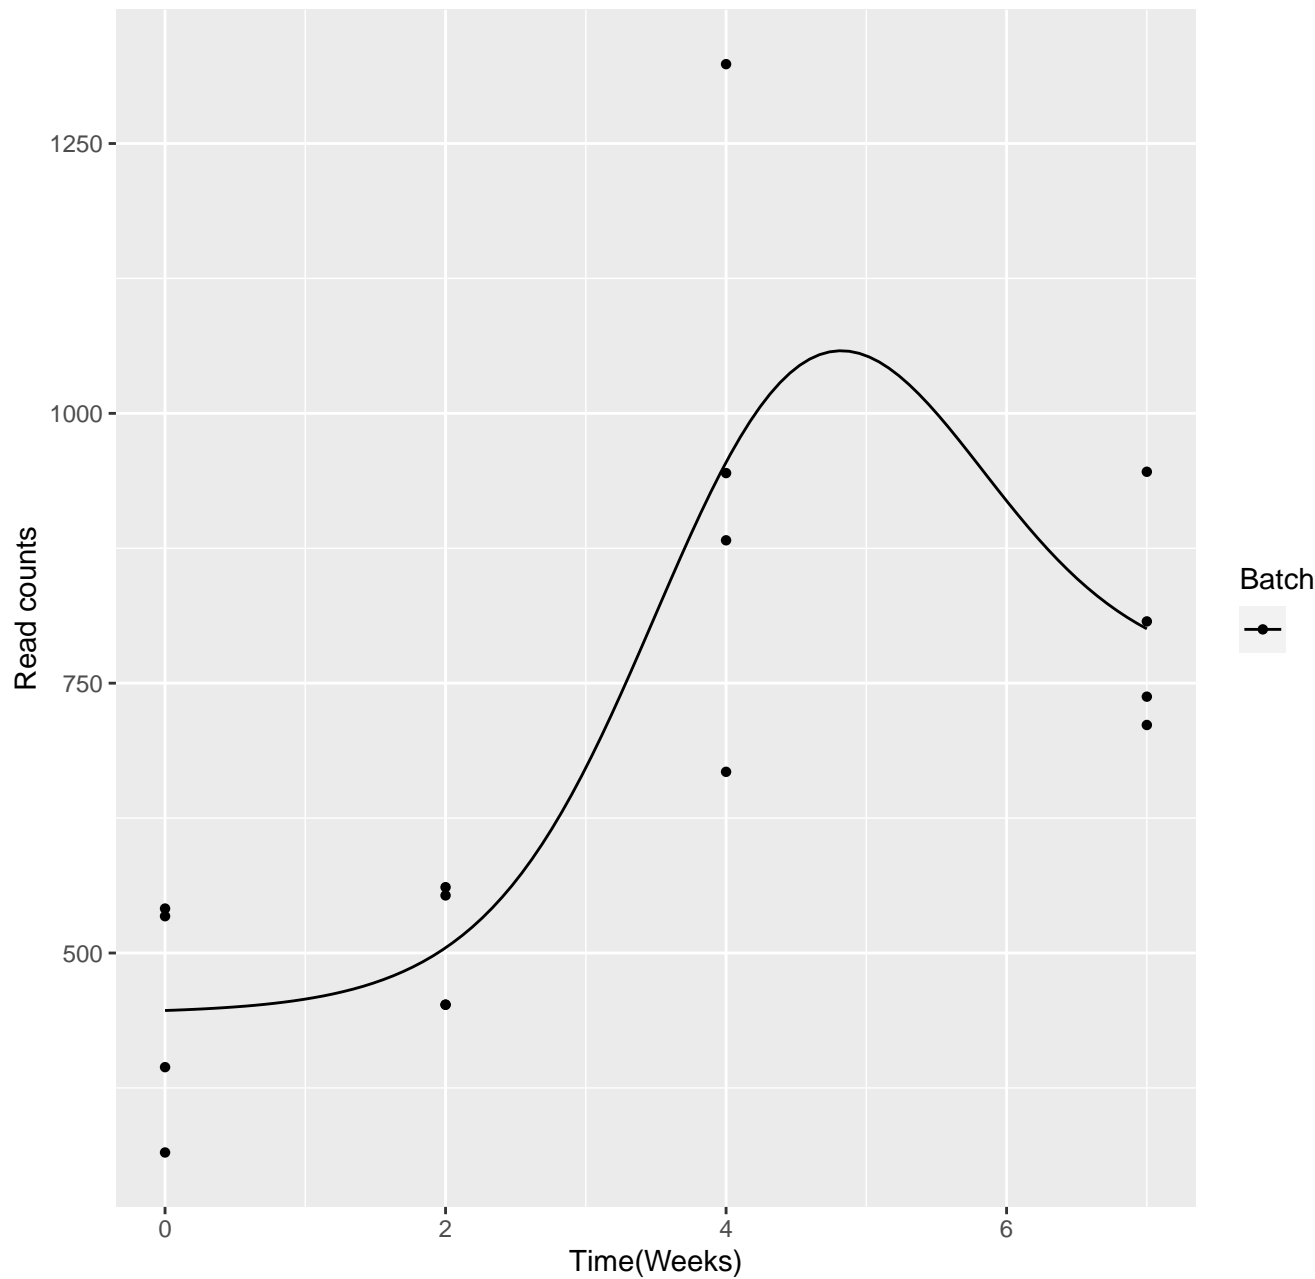

INPP5F:  $\log_{10} q = -4.02$

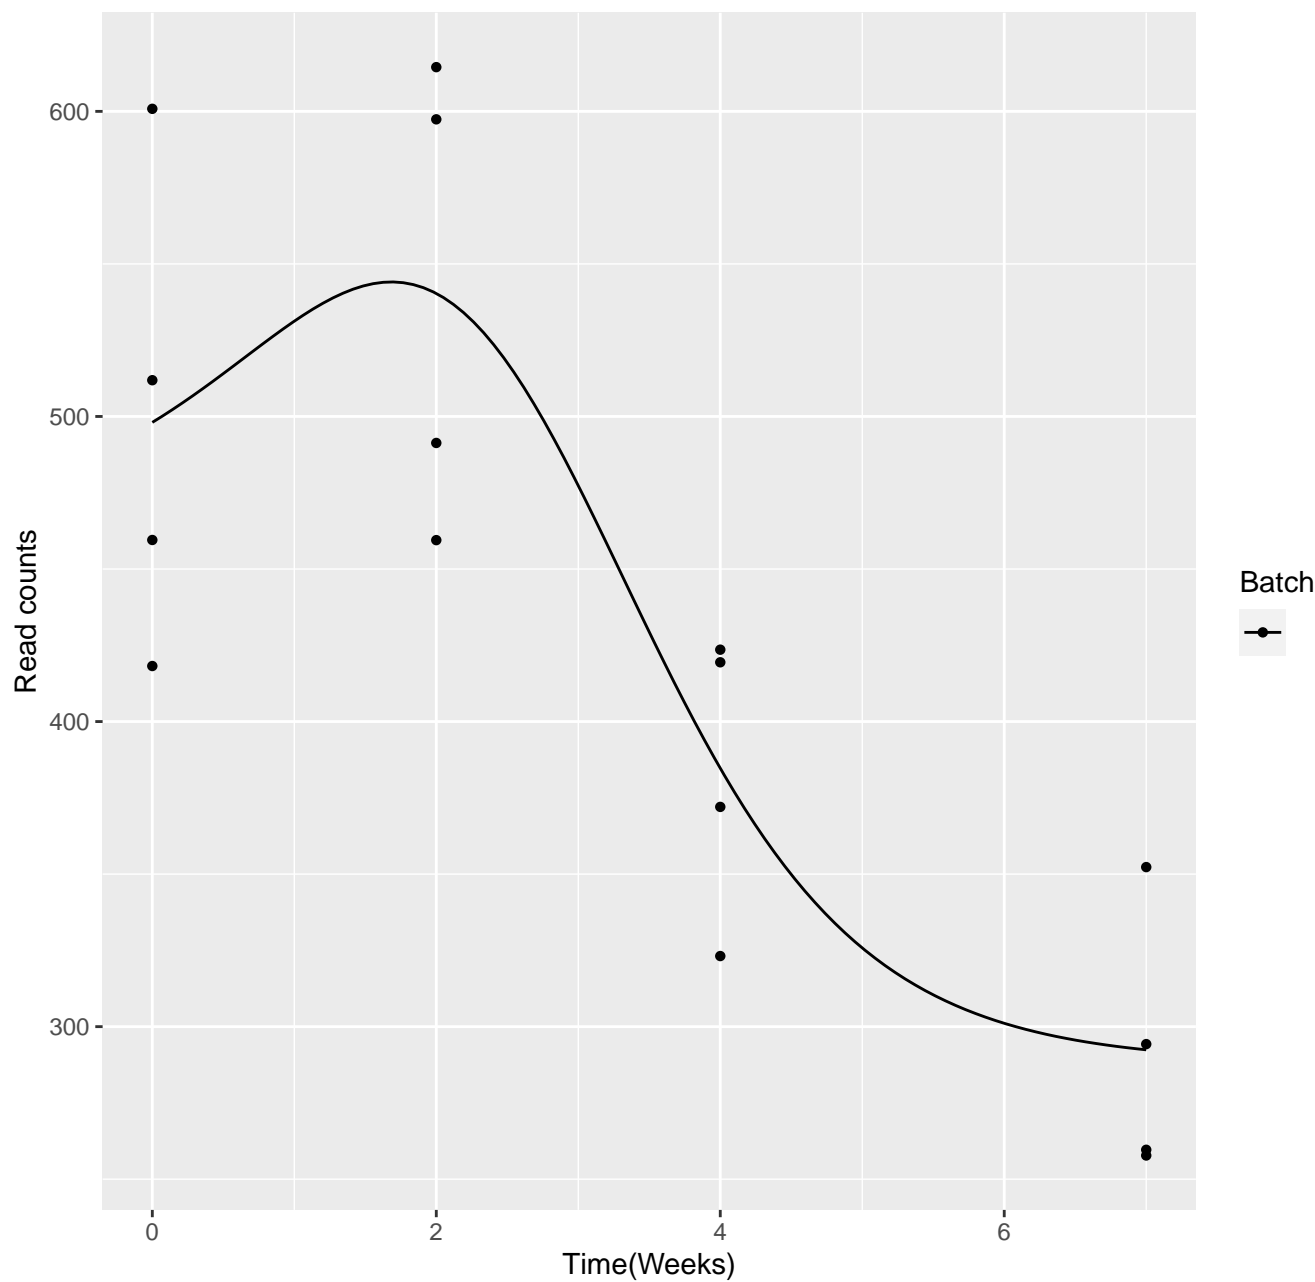

CCL2:  $\log_{10} q = -4.02$

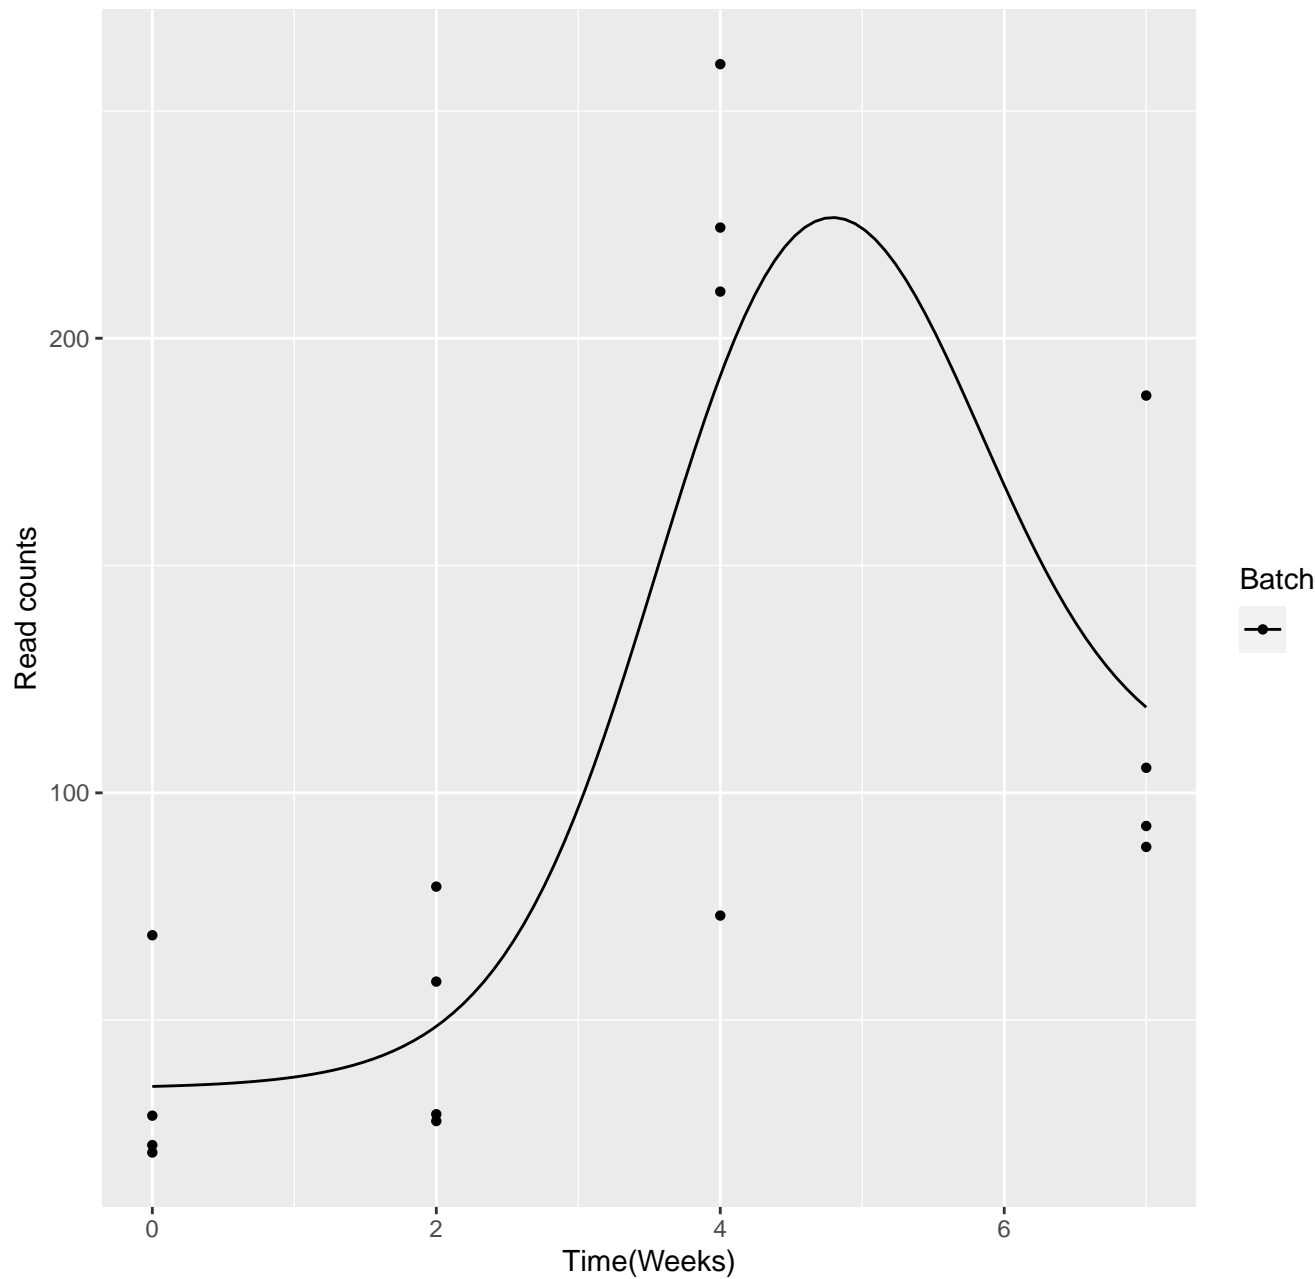

TESK1:  $\log_{10} q = -4.02$

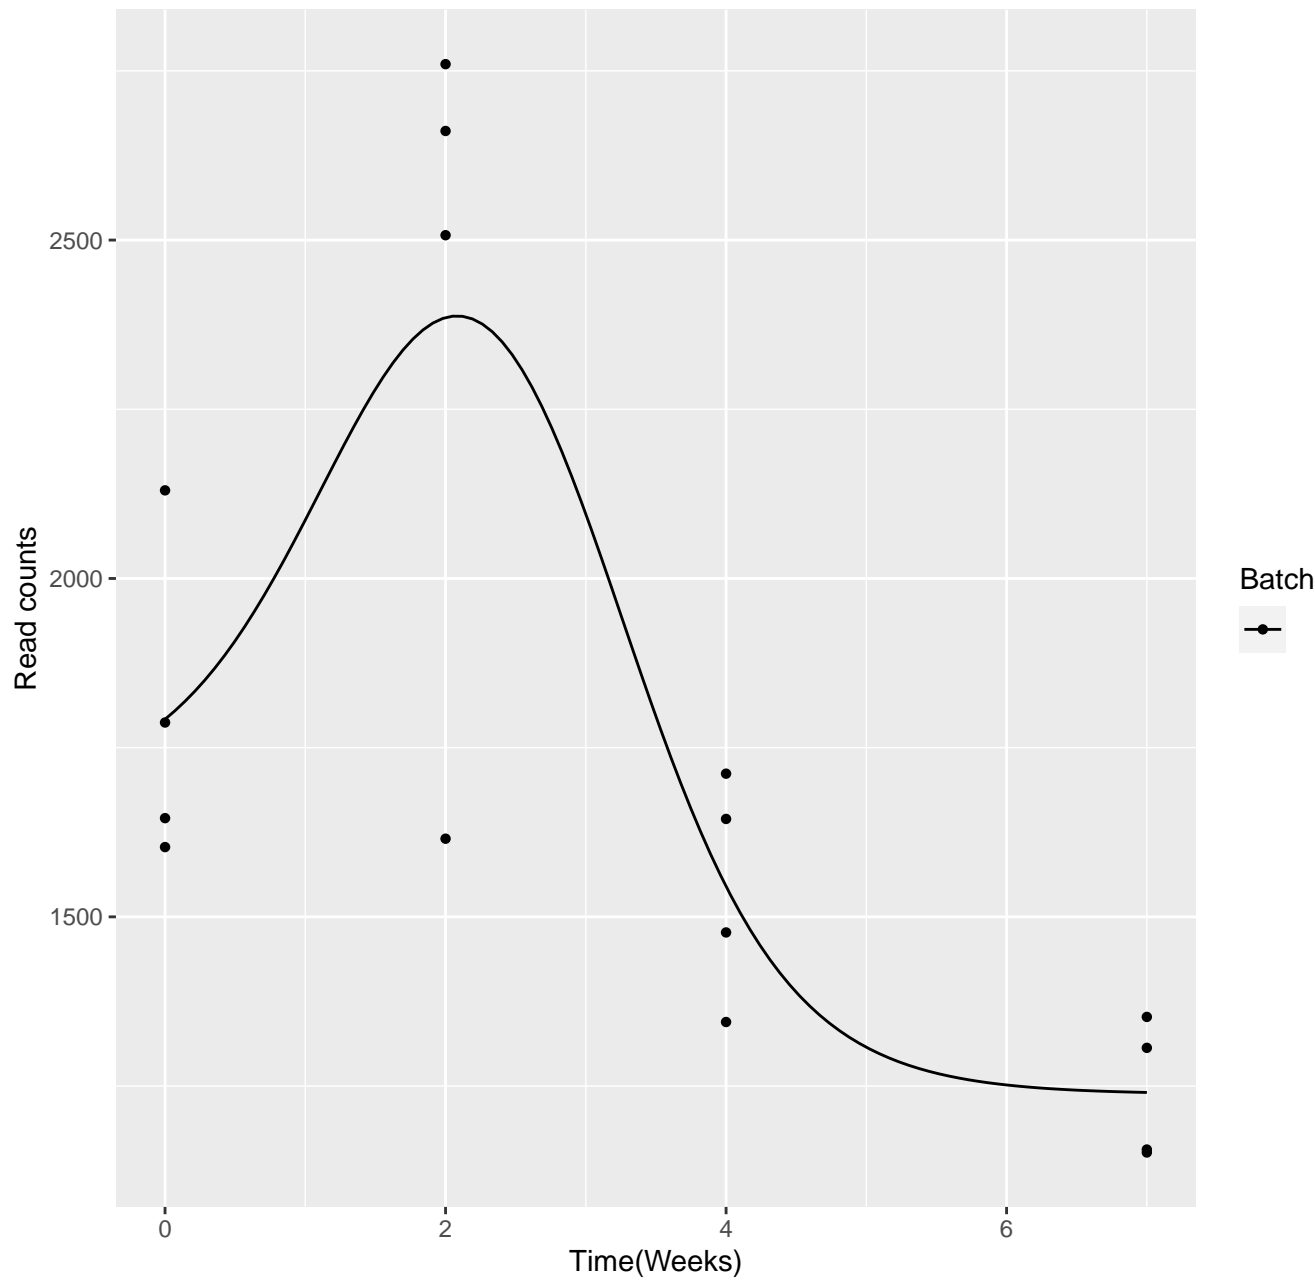

SEMA3B:  $\log_{10} q = -4.01$

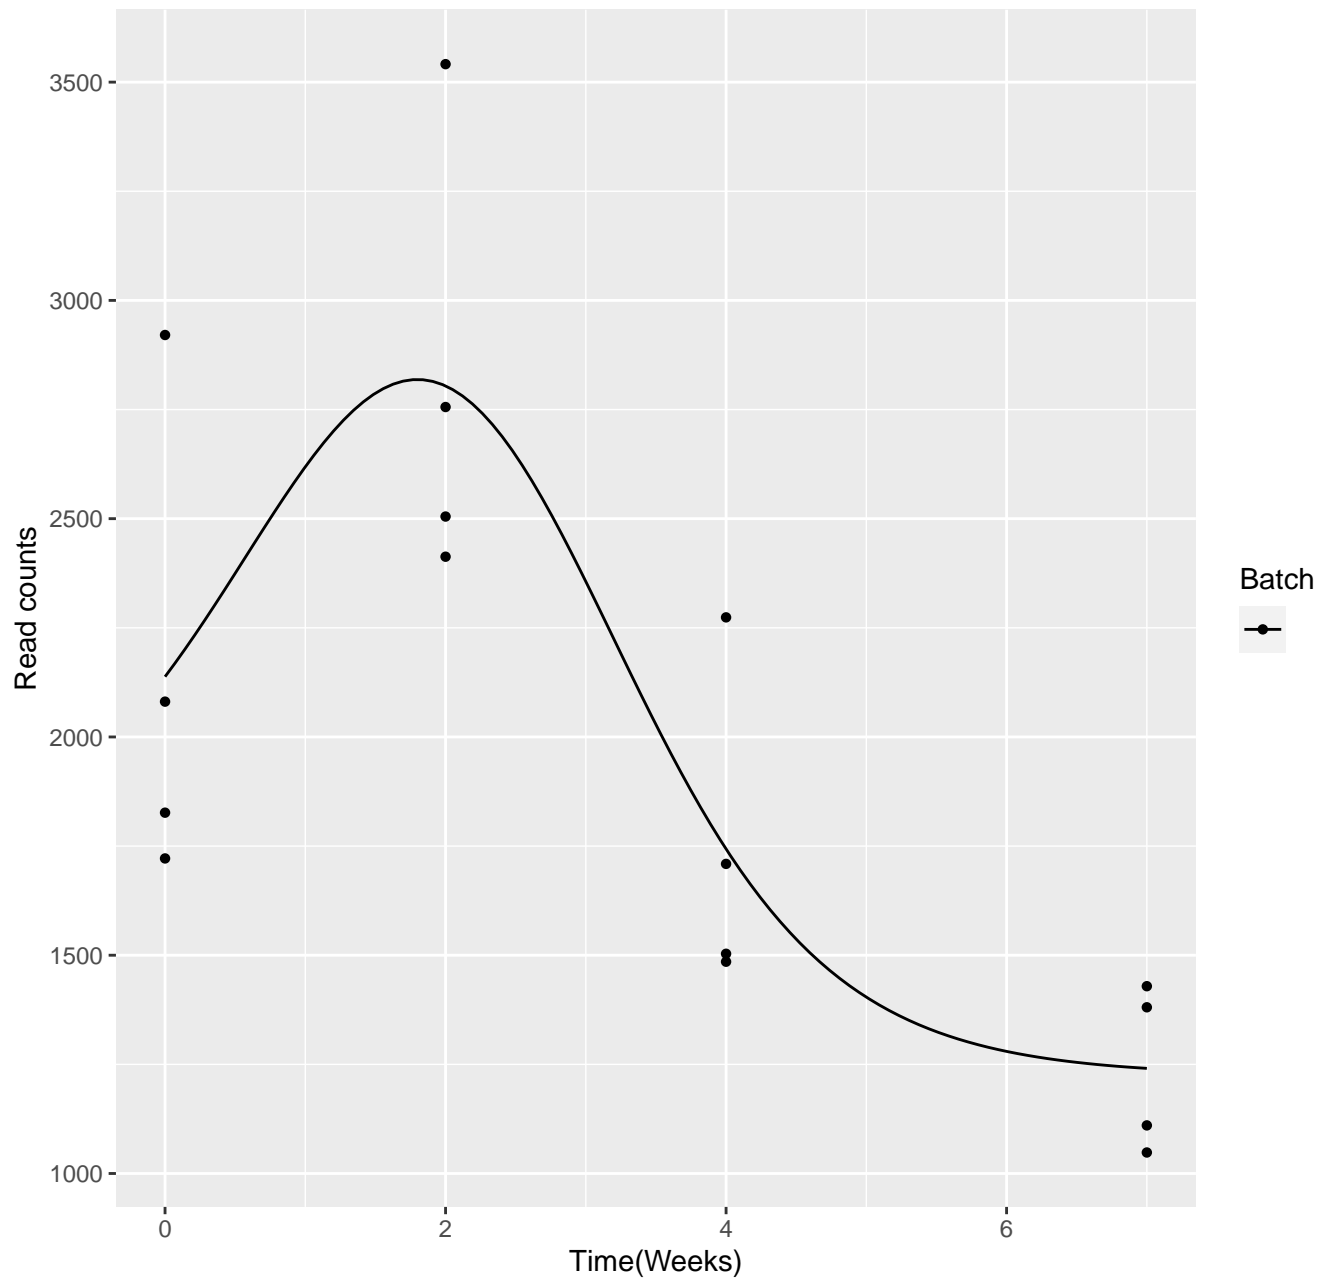



LRRC25:  $\log_{10} q = -4.01$

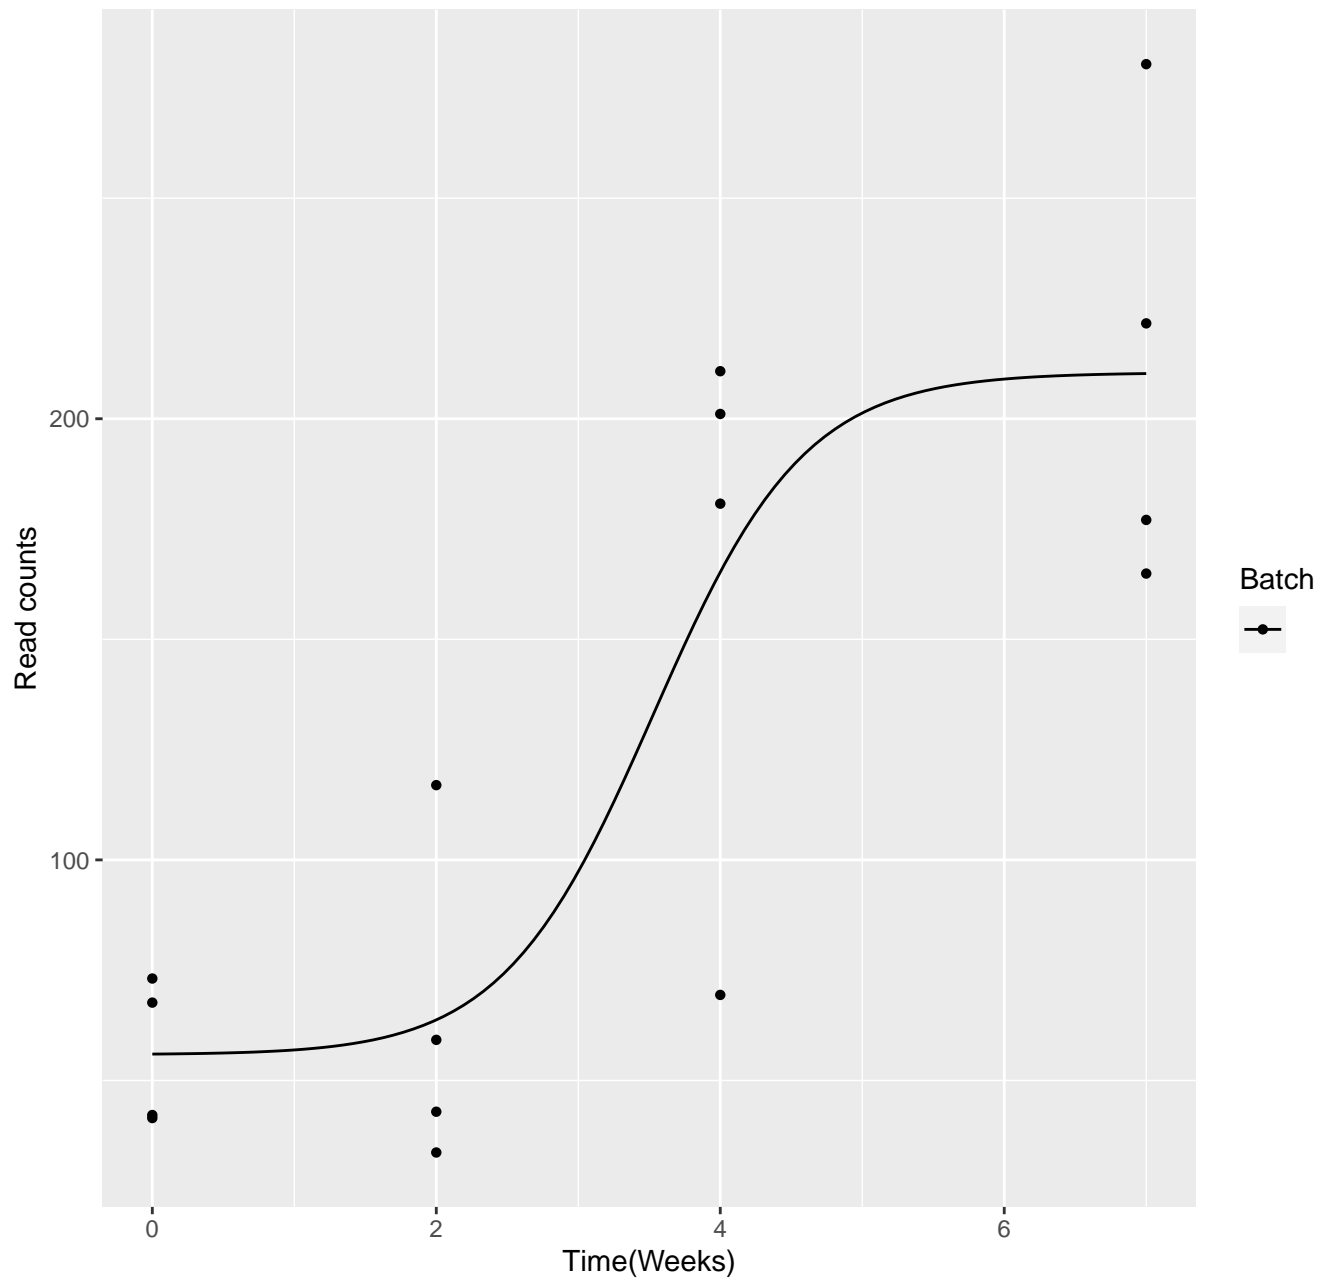

CDV3:  $\log_{10} q = -4.01$

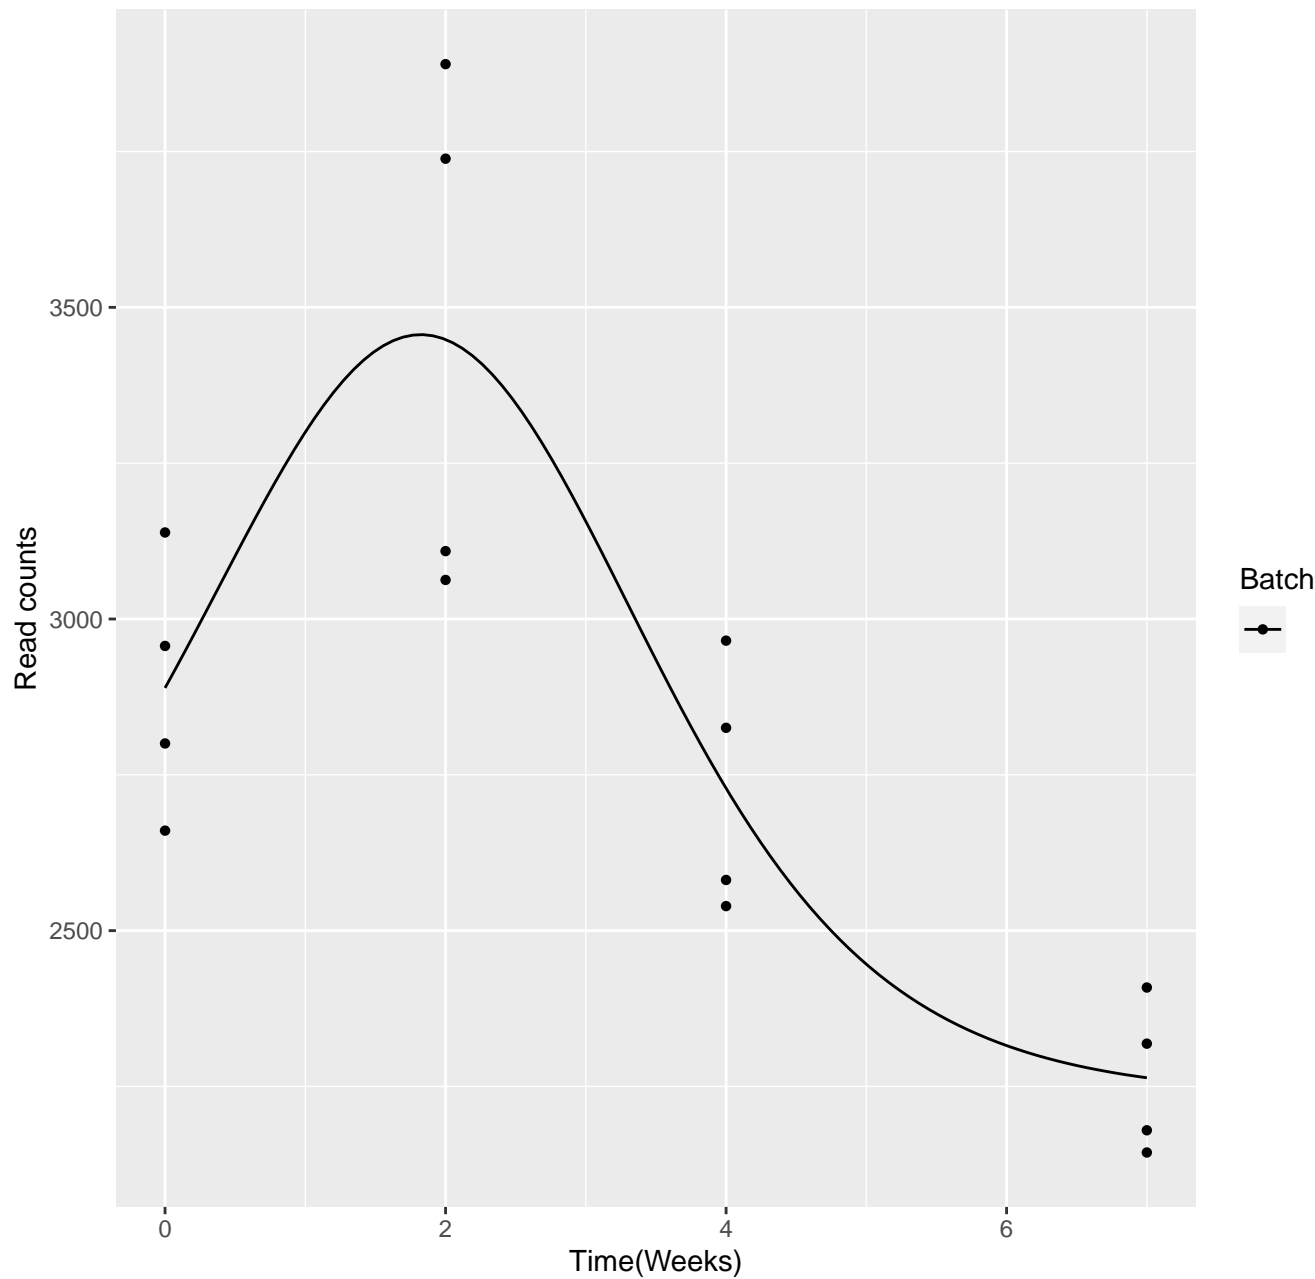

JAK3:  $\log_{10} q = -4.01$

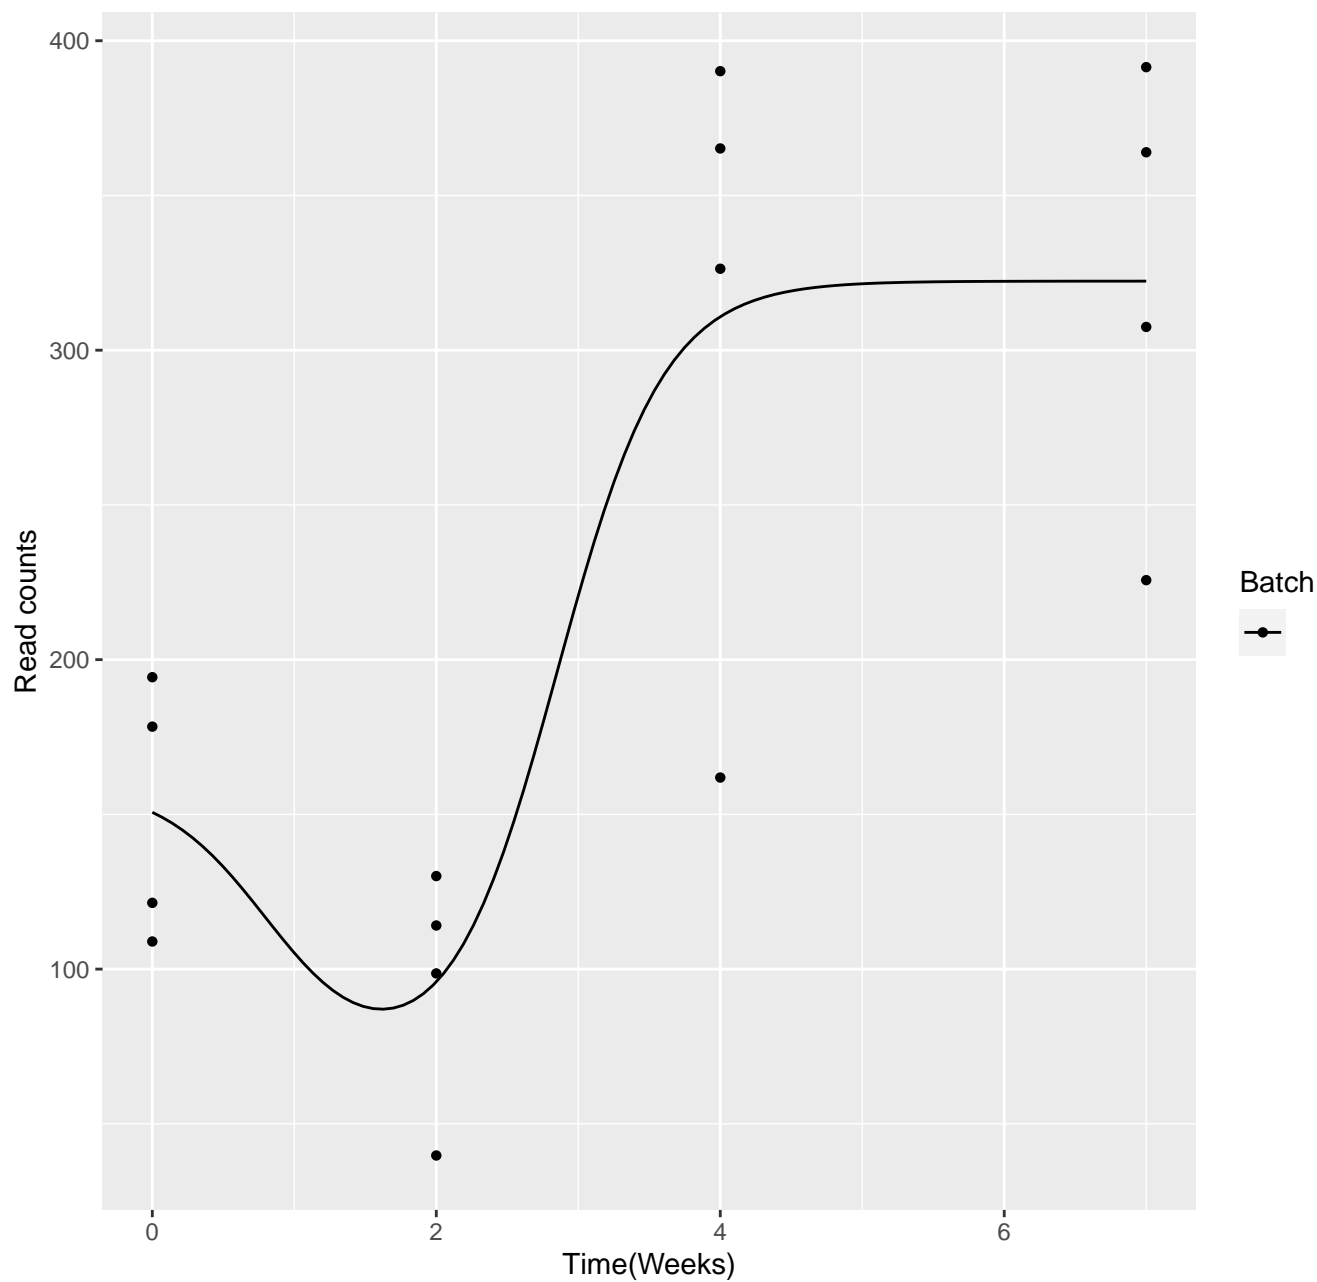

B3GLCT:  $\log_{10} q = -4$

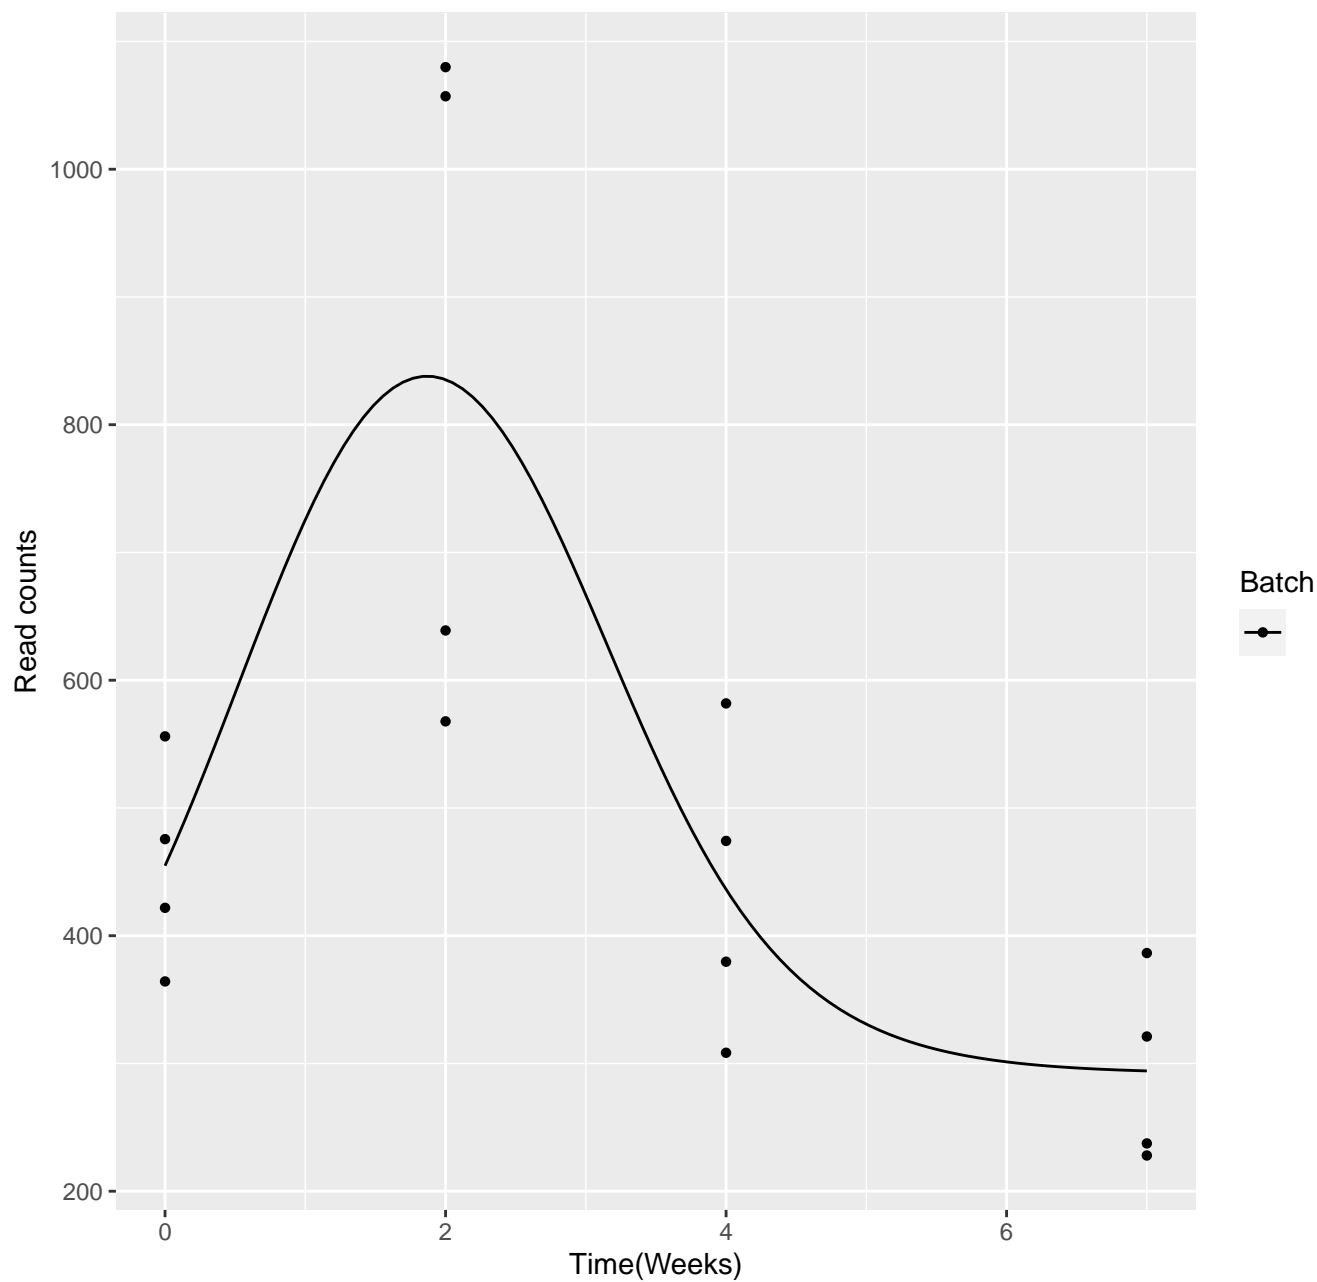

FCHO1:  $\log_{10} q = -4$

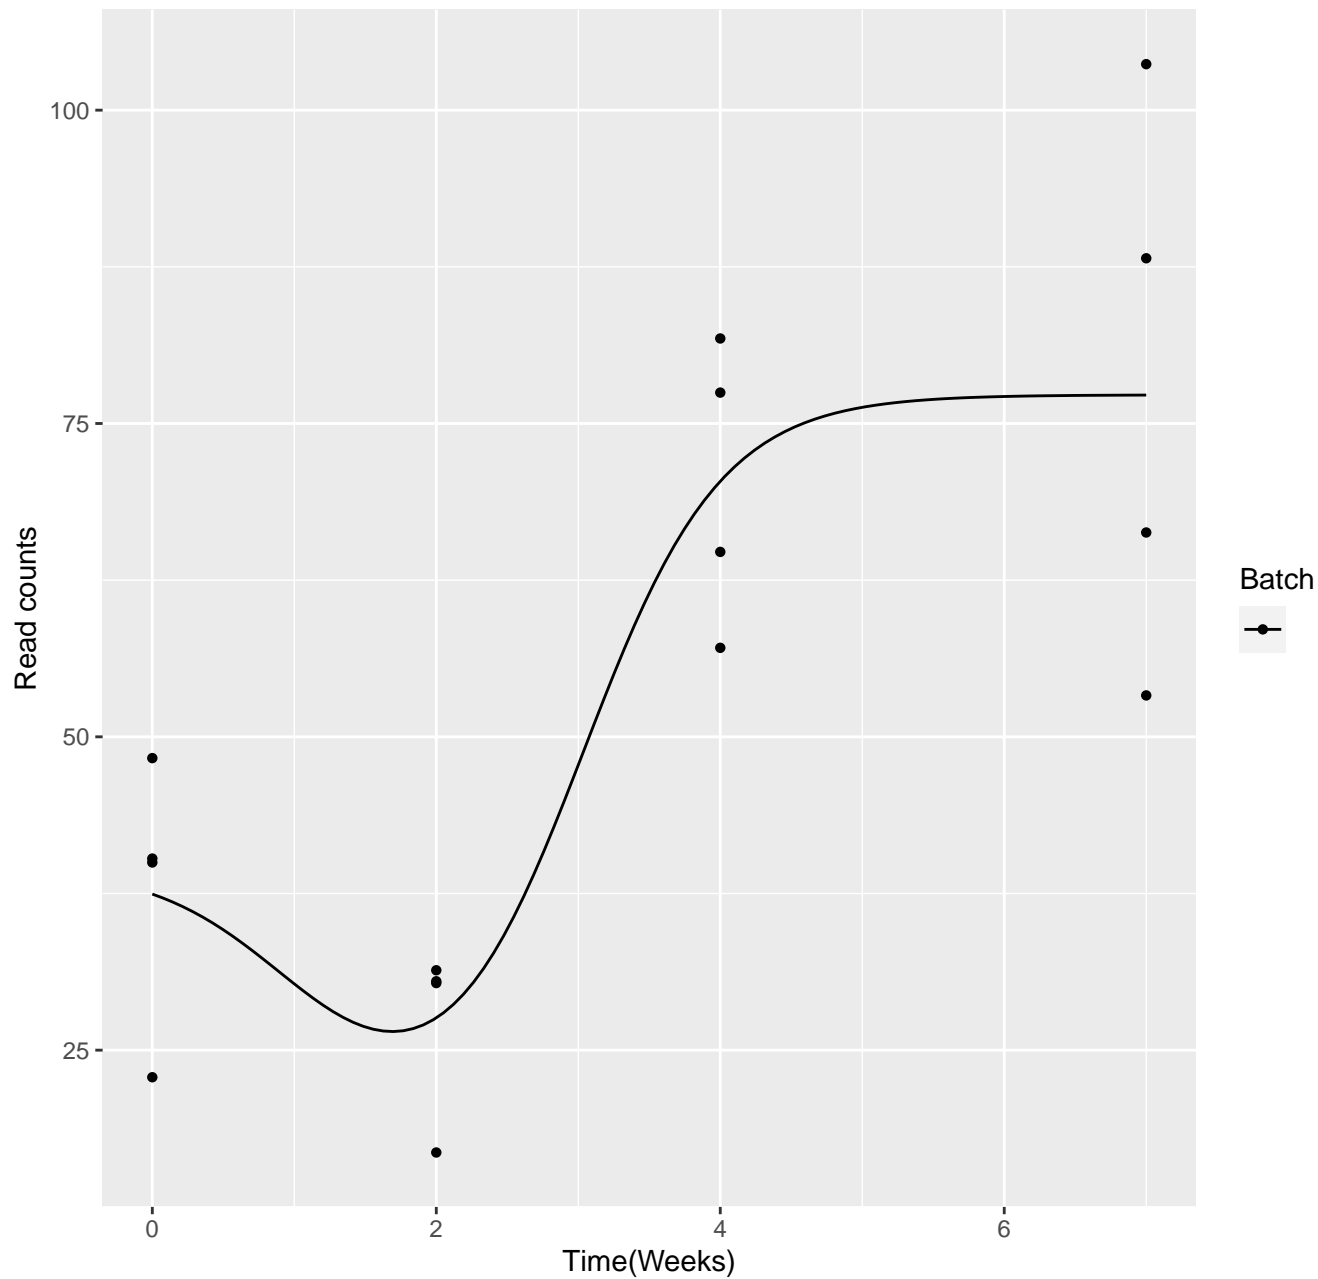

MAFB:  $\log_{10} q = -4$

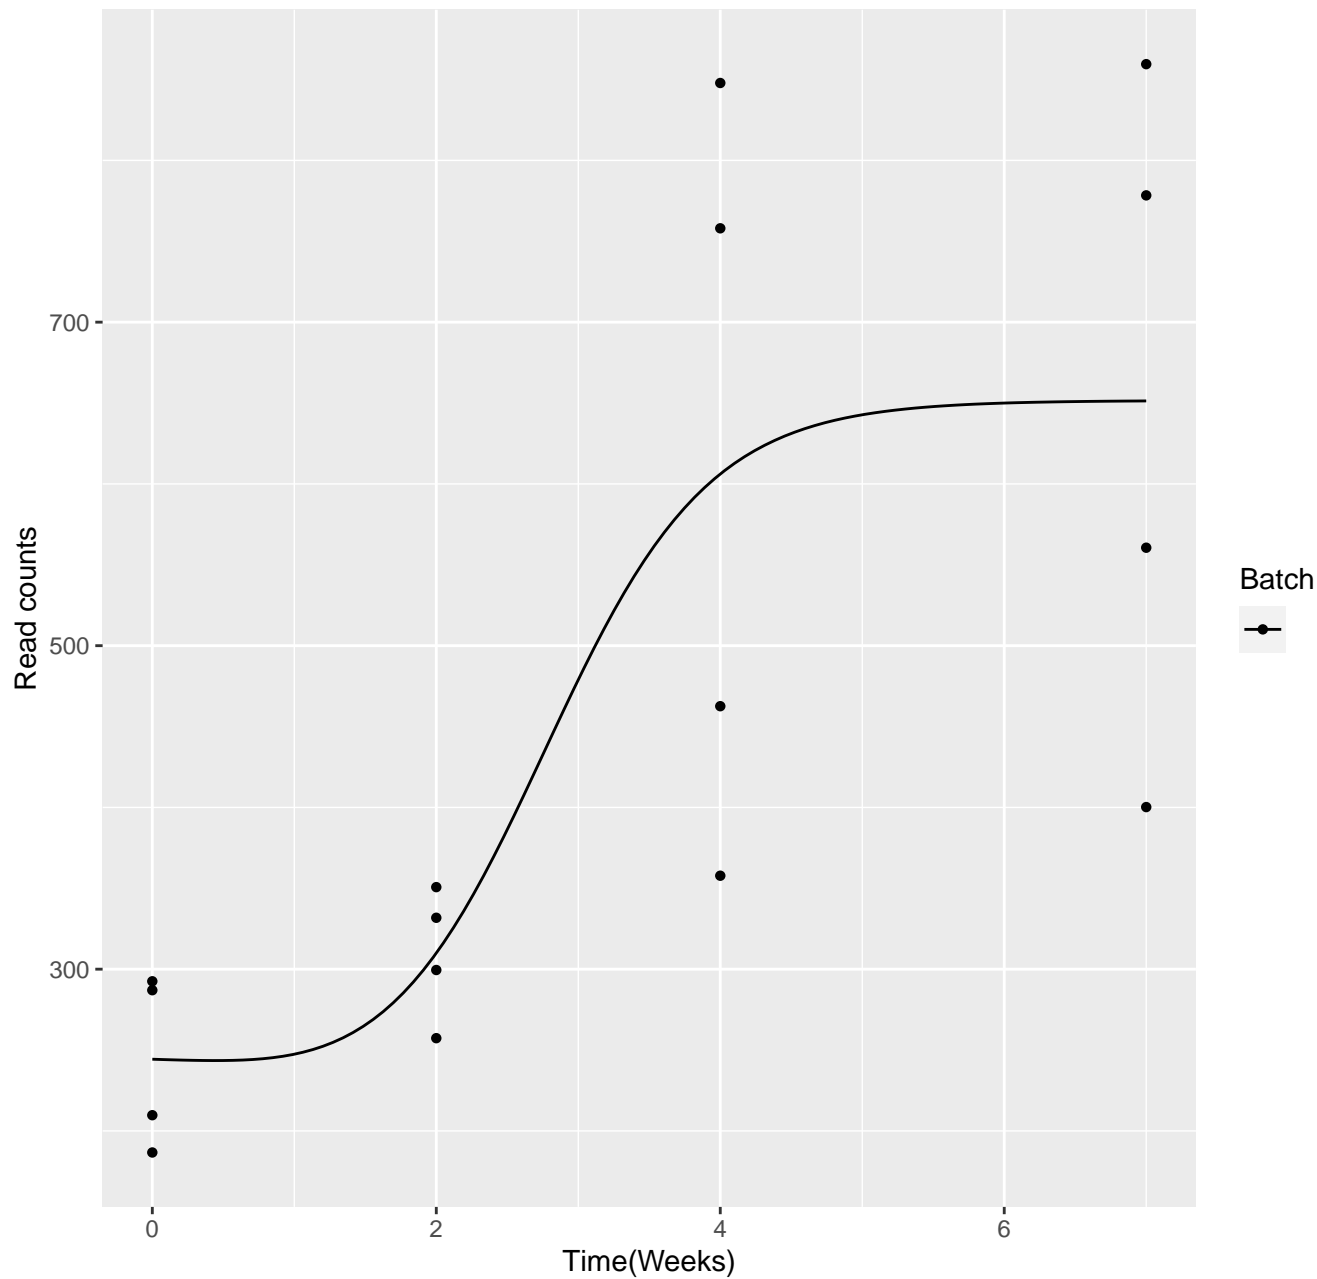

TRIM56:  $\log_{10} q = -4$

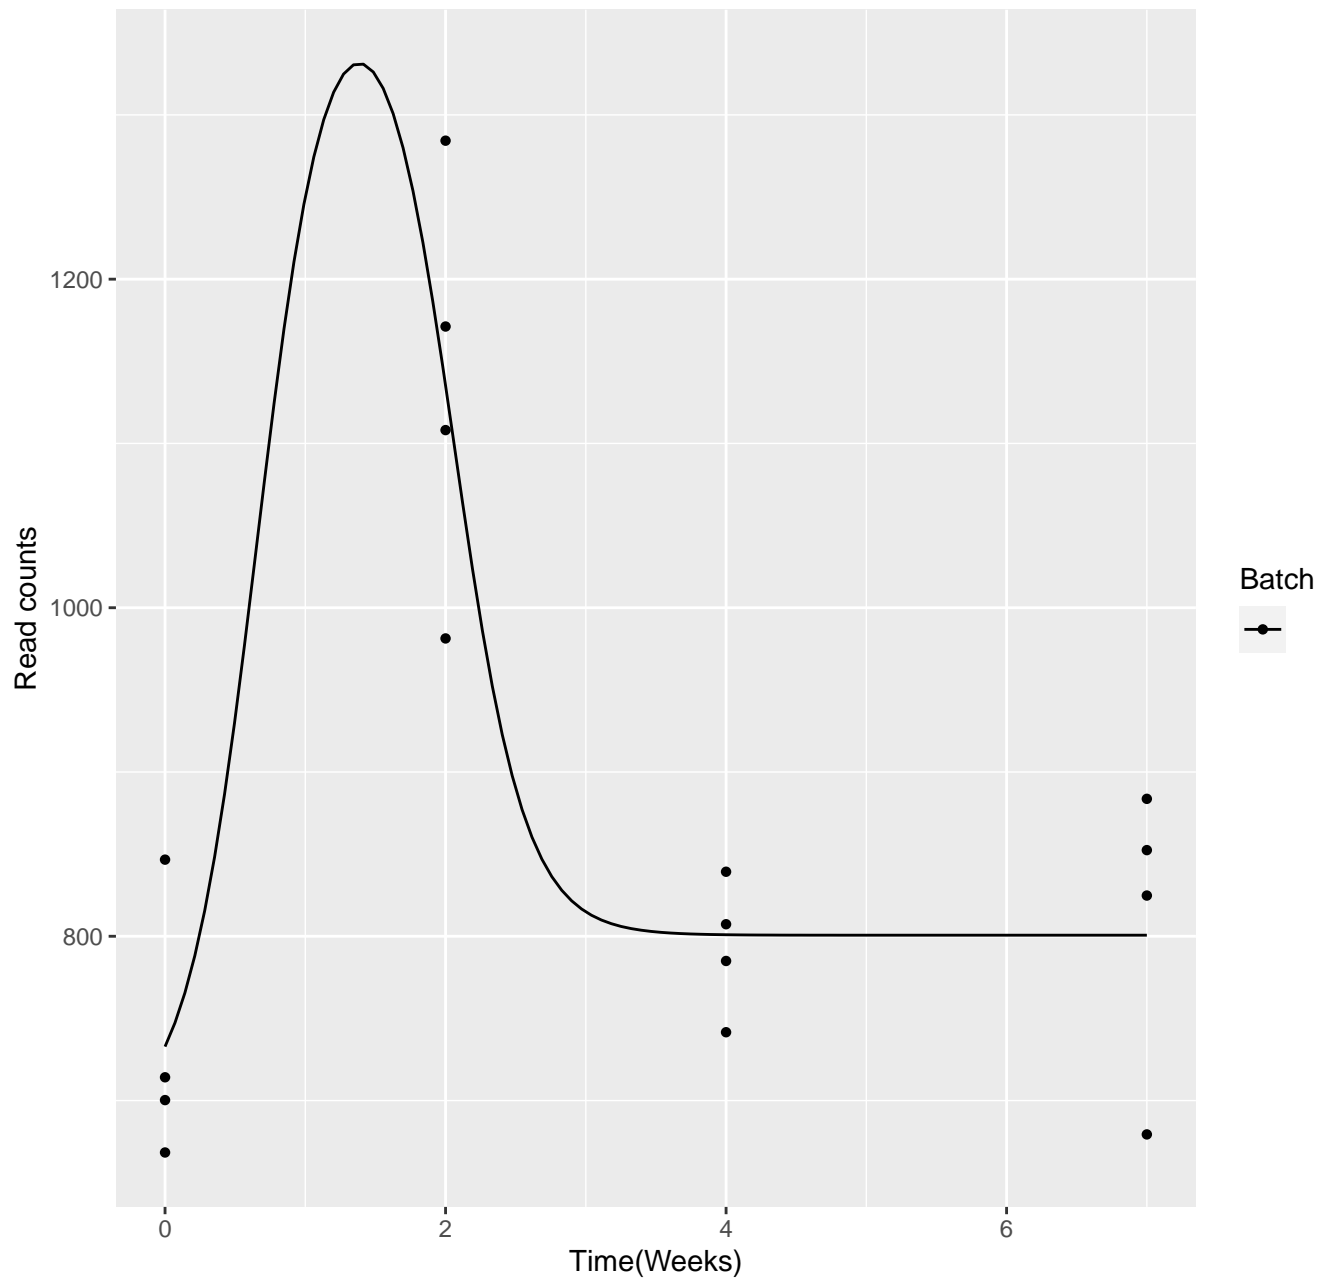

SLC15A3:  $\log_{10} q = -4$

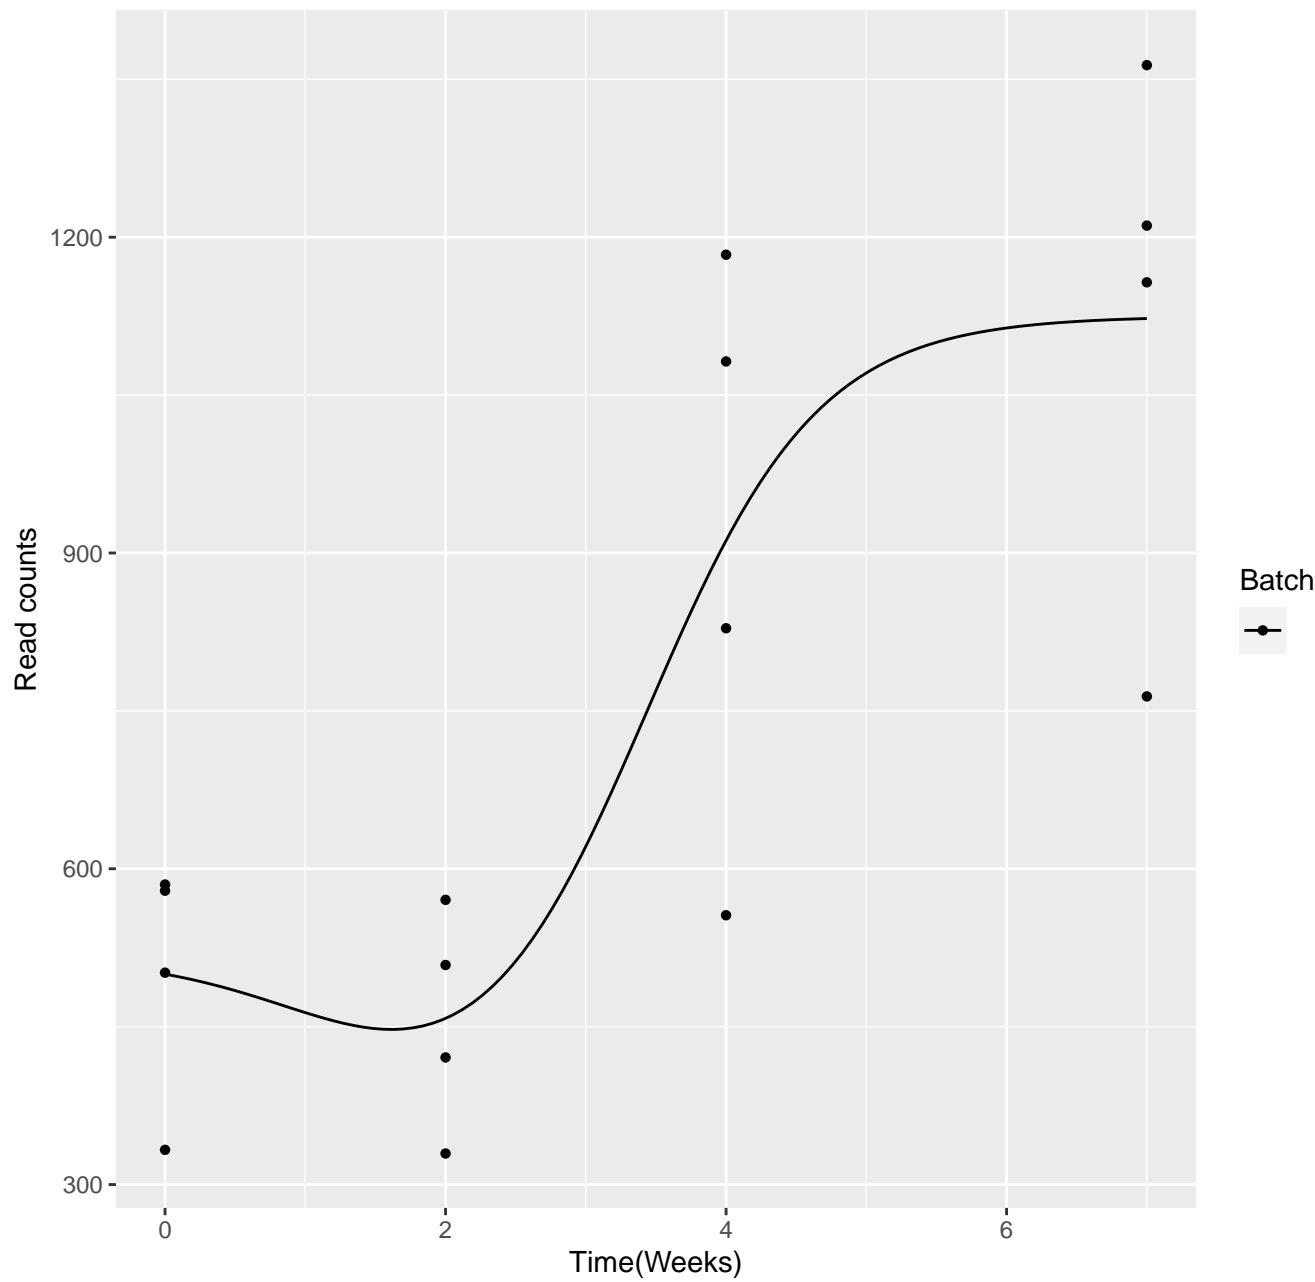



CTXN1:  $\log_{10} q = -4$

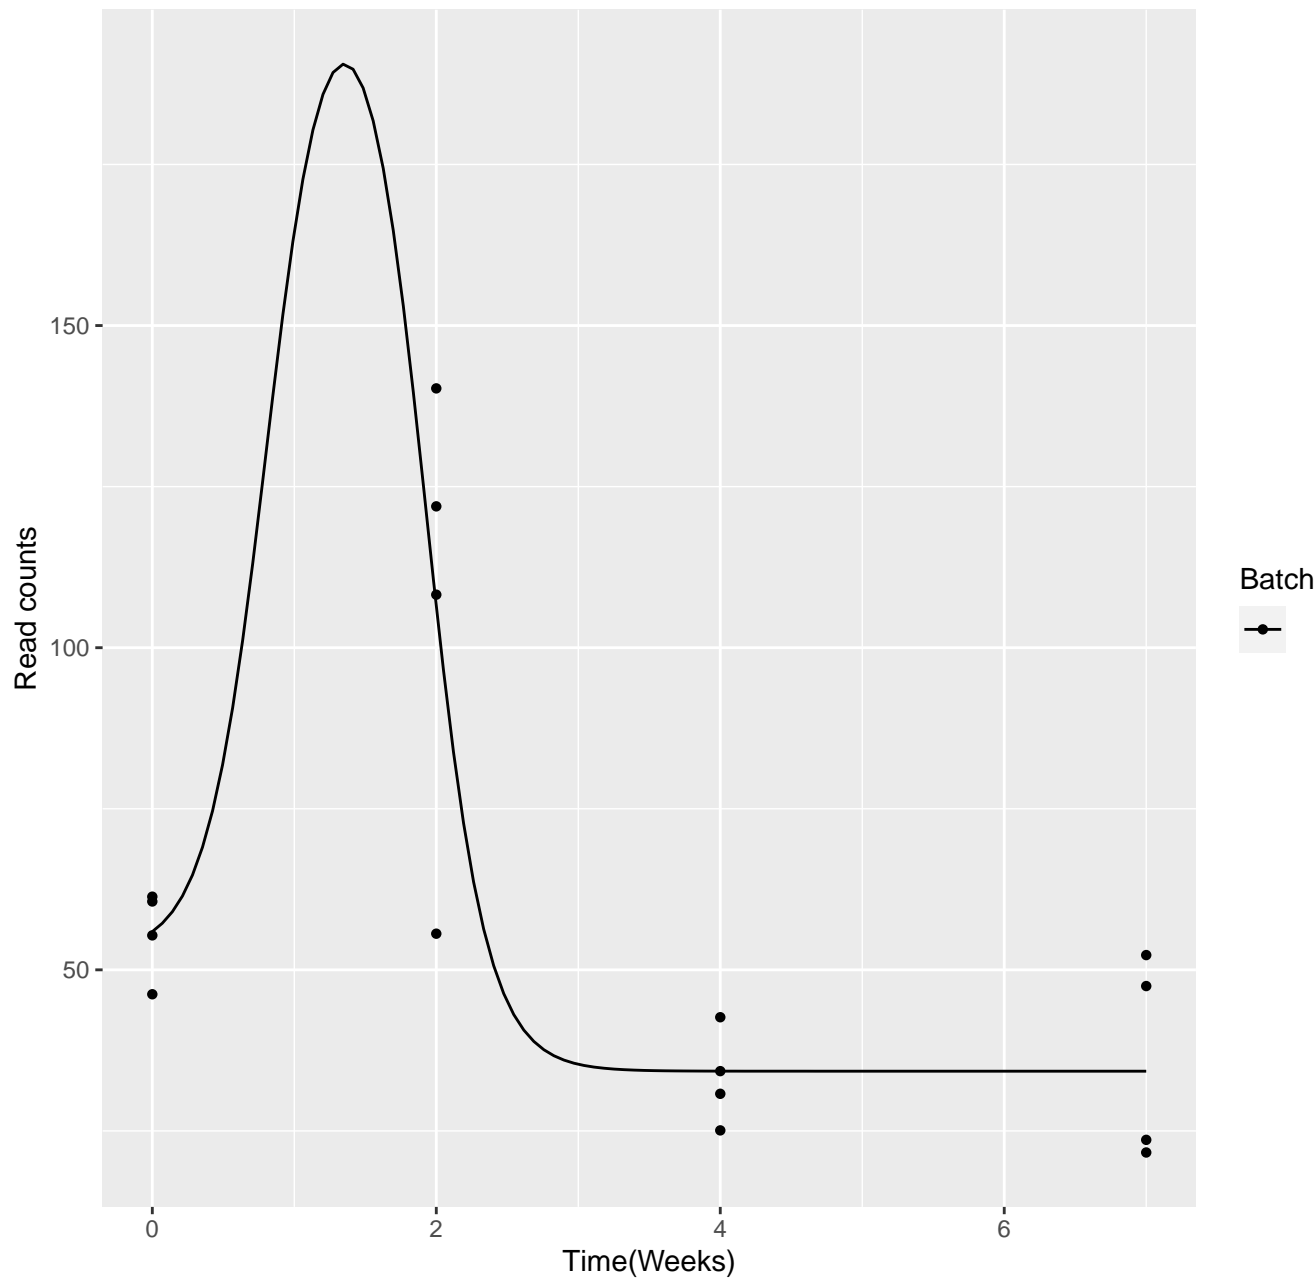

FHL3:  $\log_{10} q = -3.99$

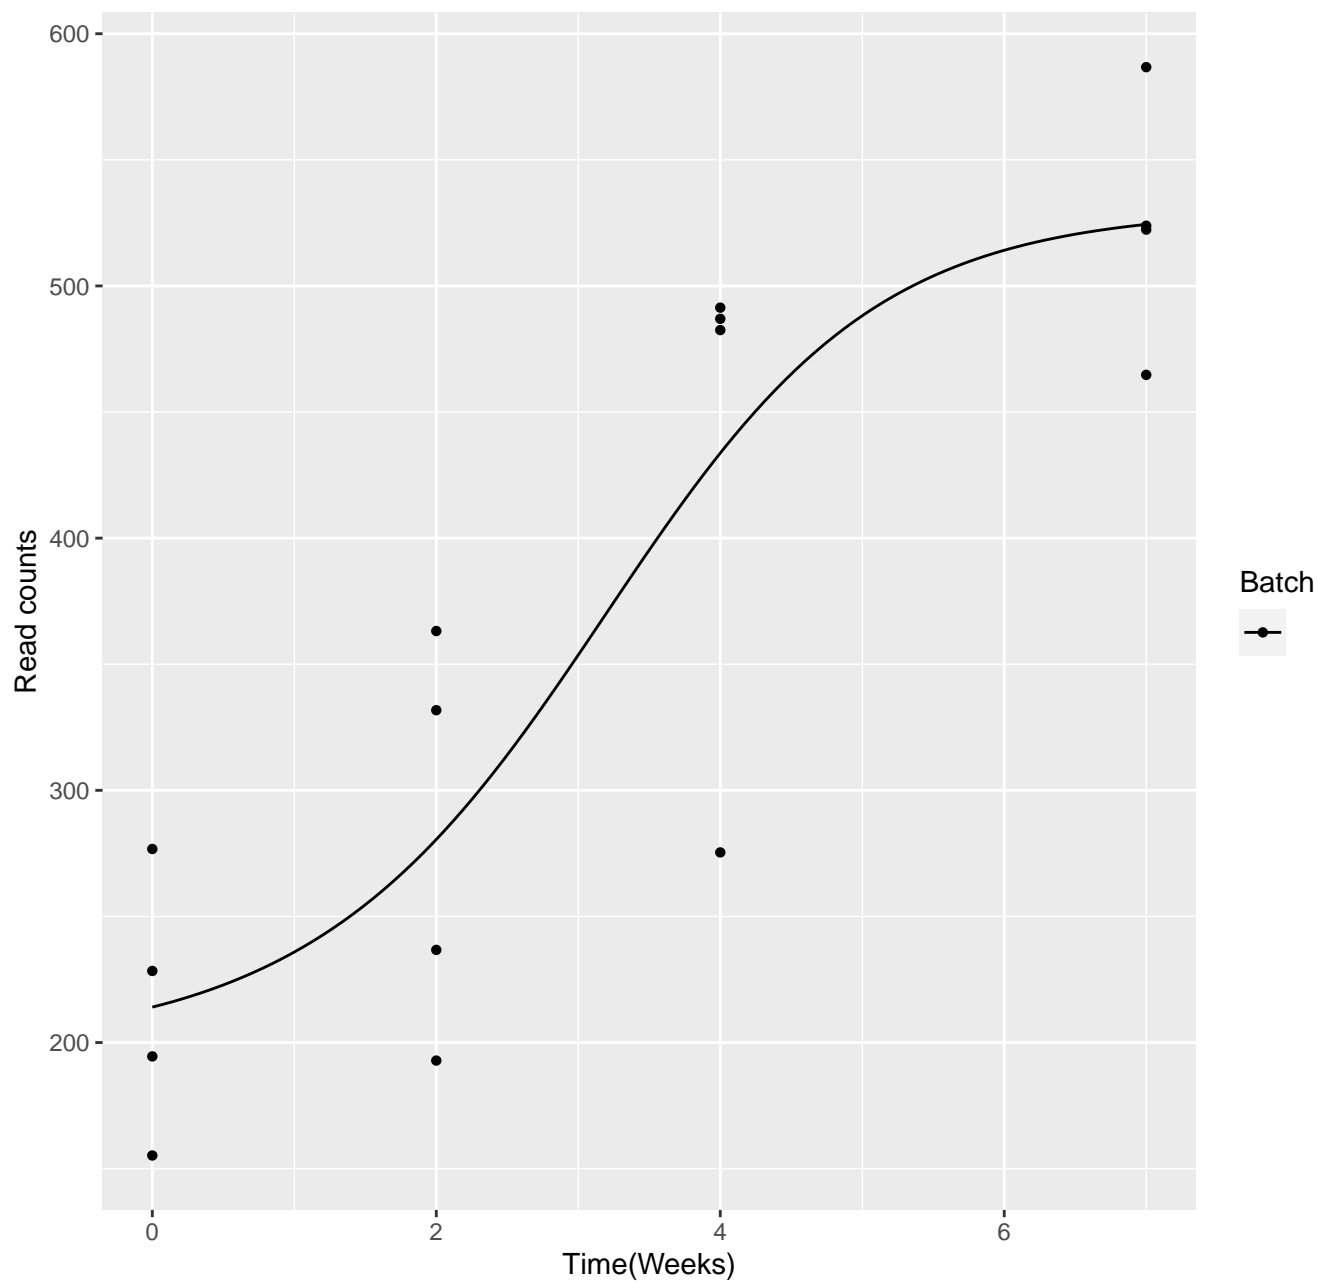

LOC100343299:  $\log_{10} q = -3.98$

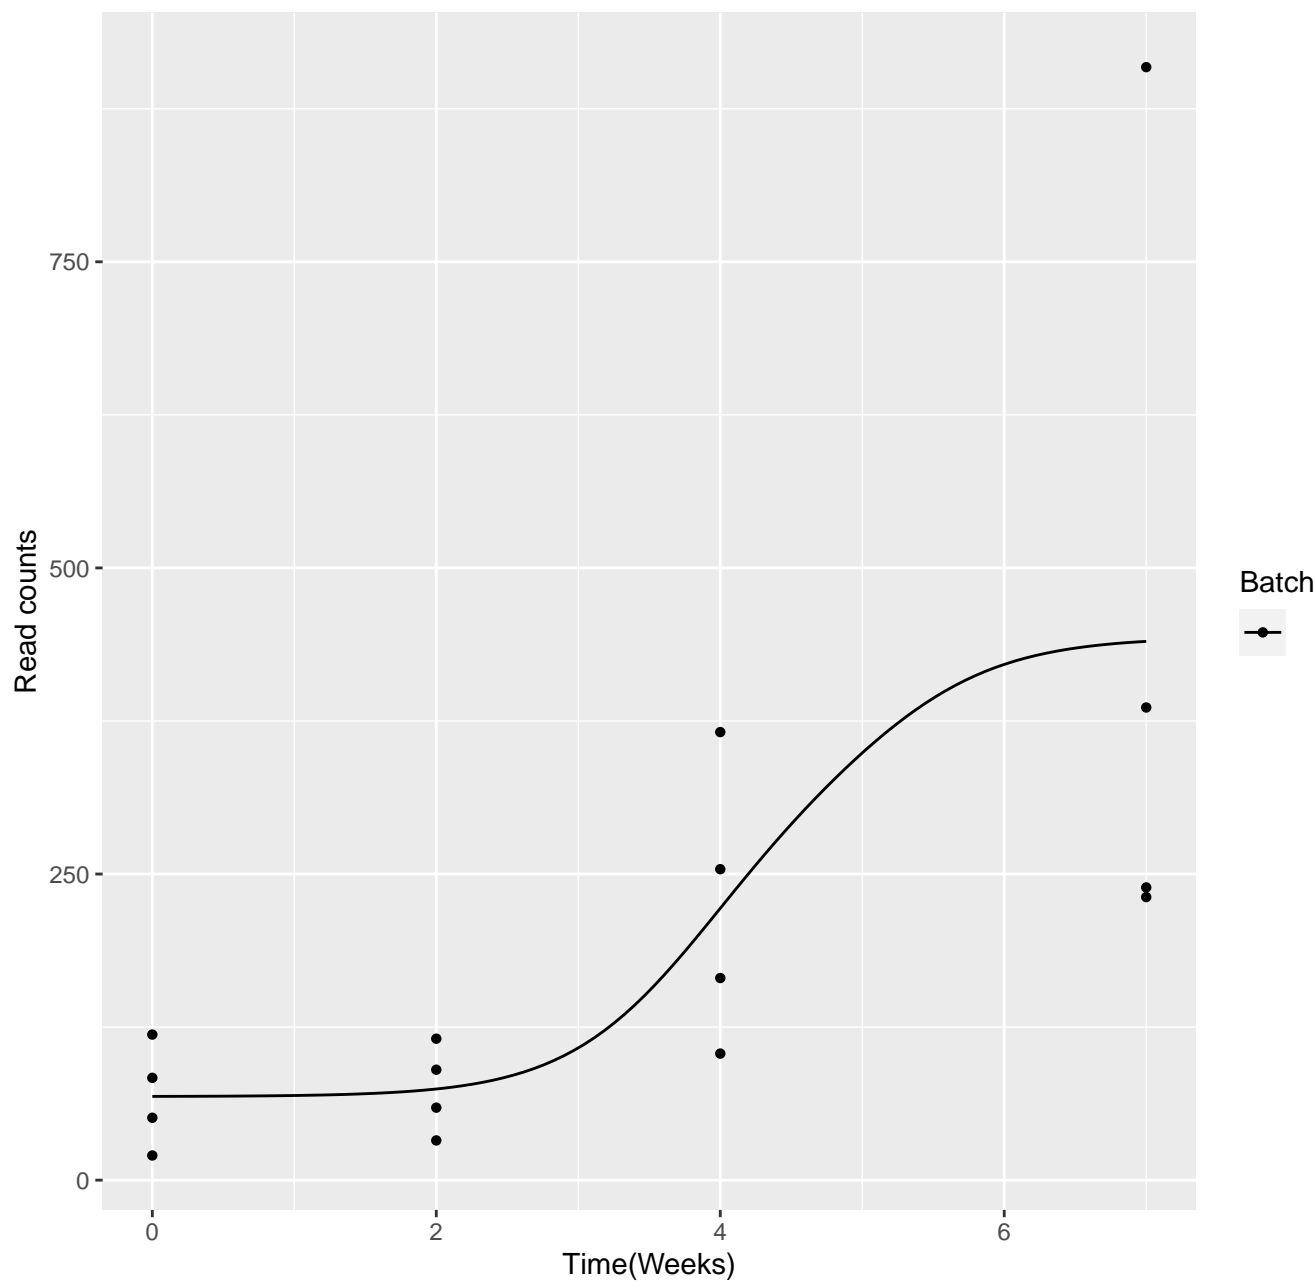

KNL1:  $\log_{10} q = -3.98$

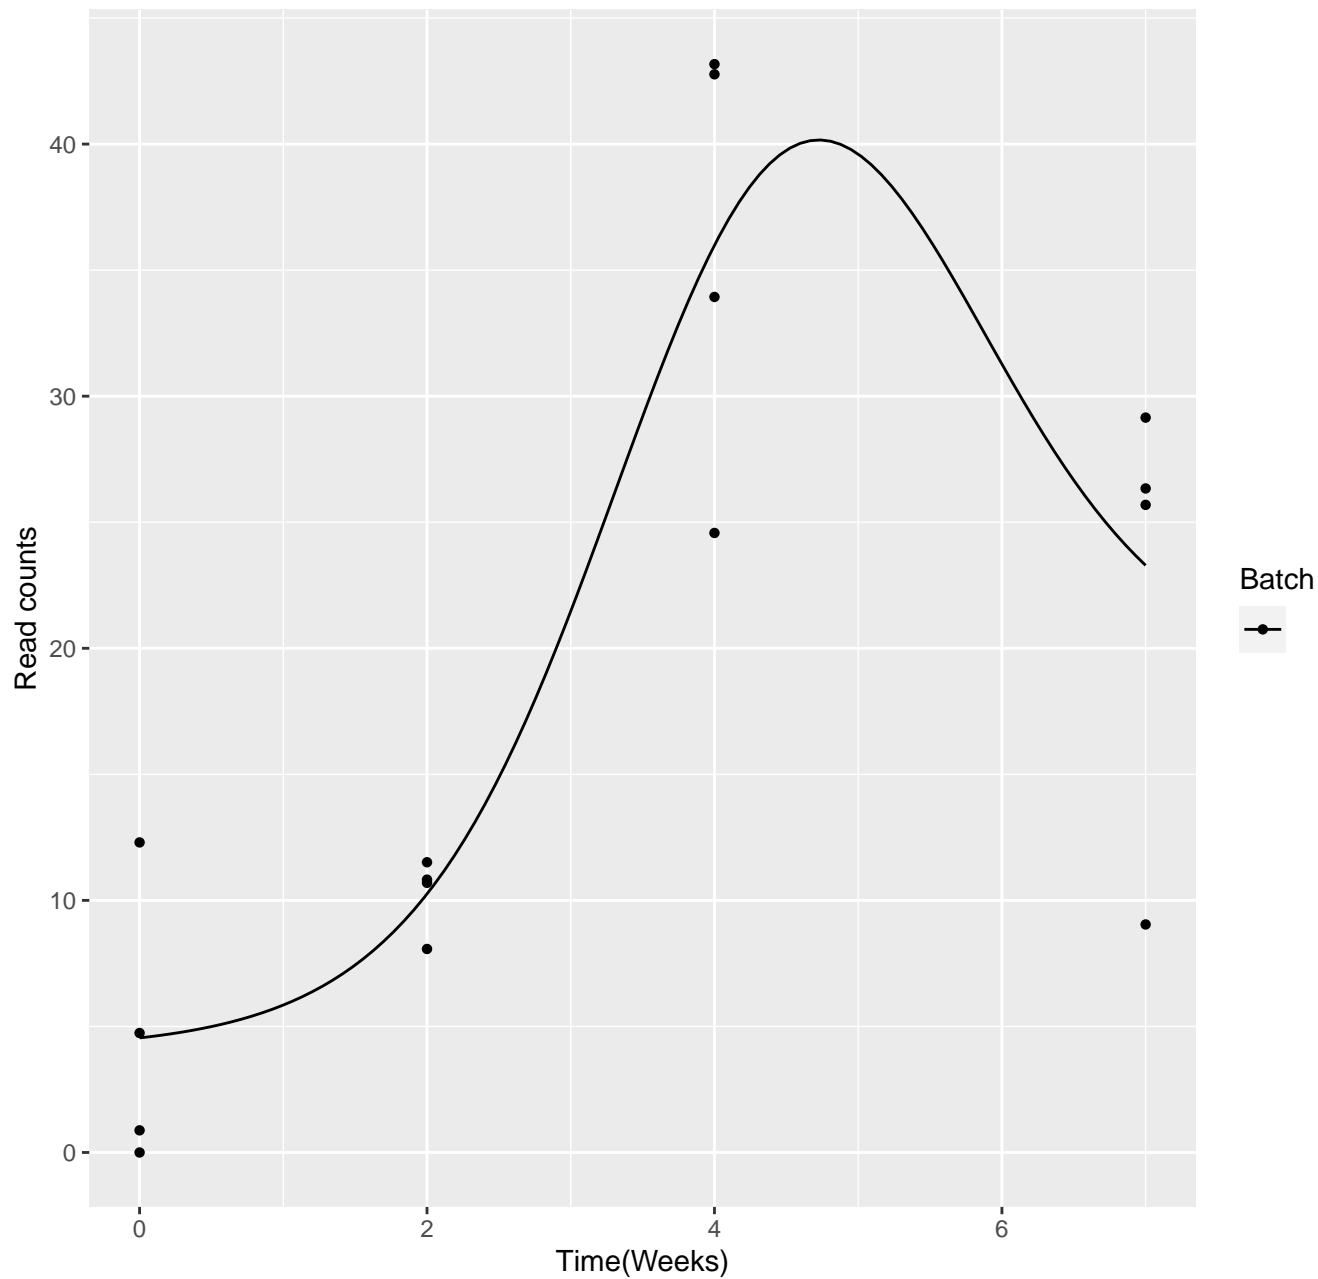

PTPN7:  $\log_{10} q = -3.98$

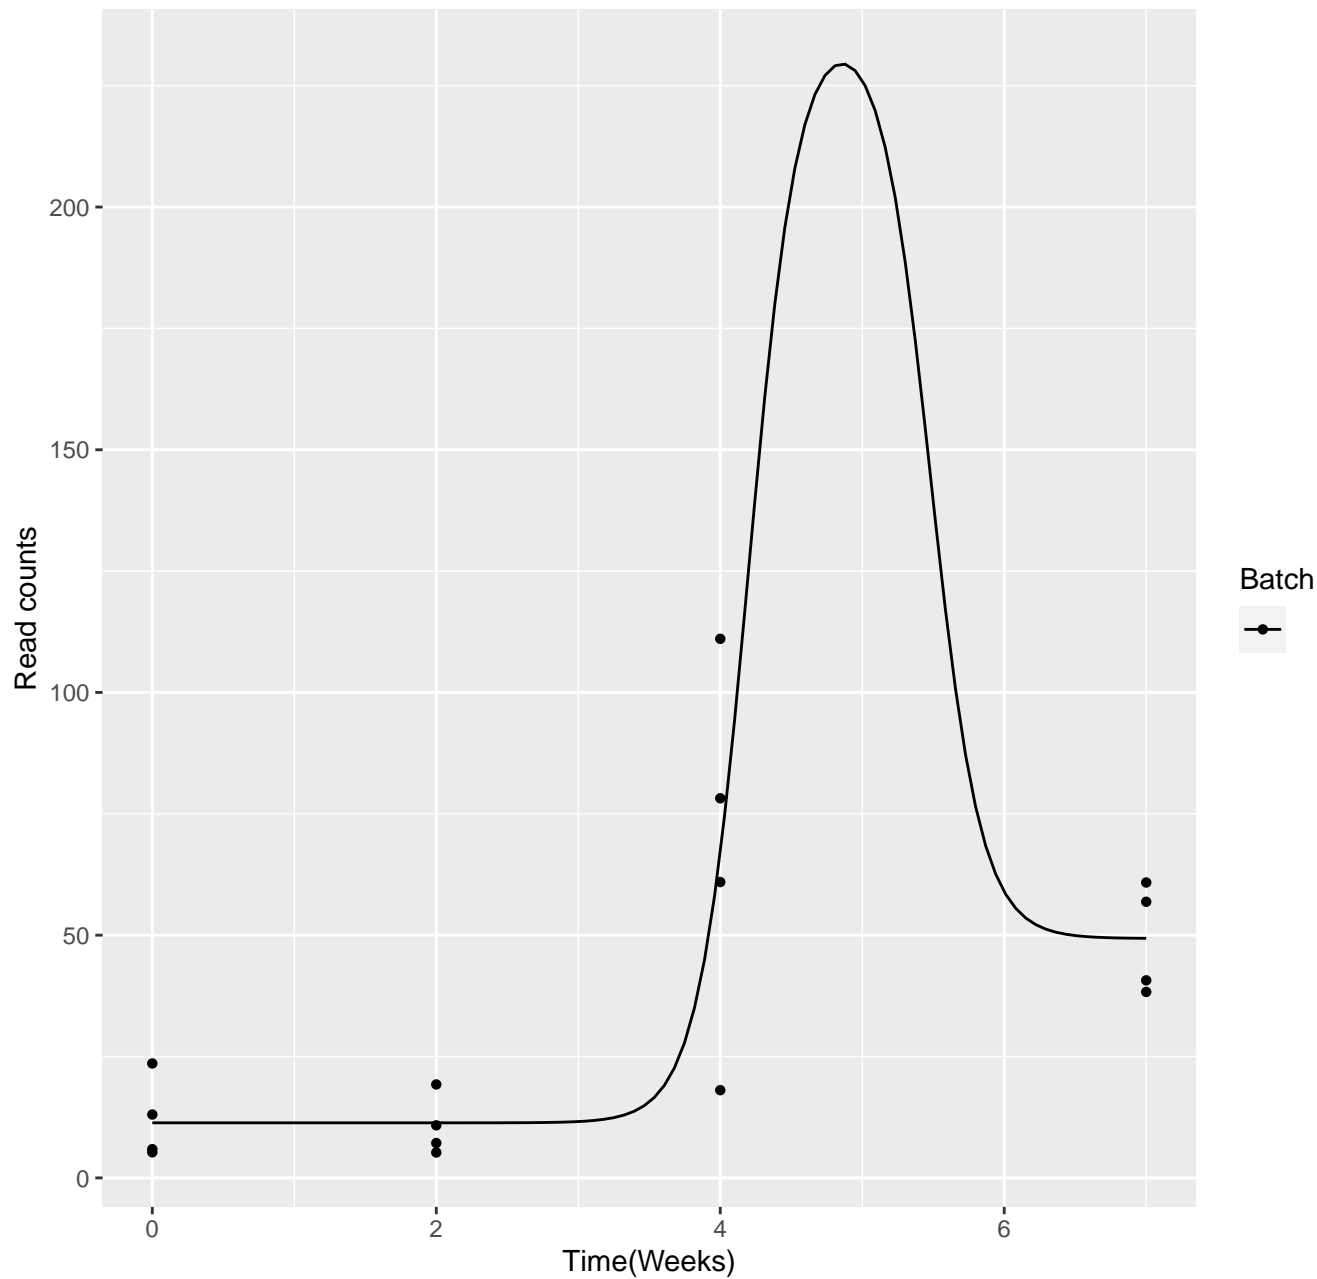

LOC100344565:  $\log_{10} q = -3.97$

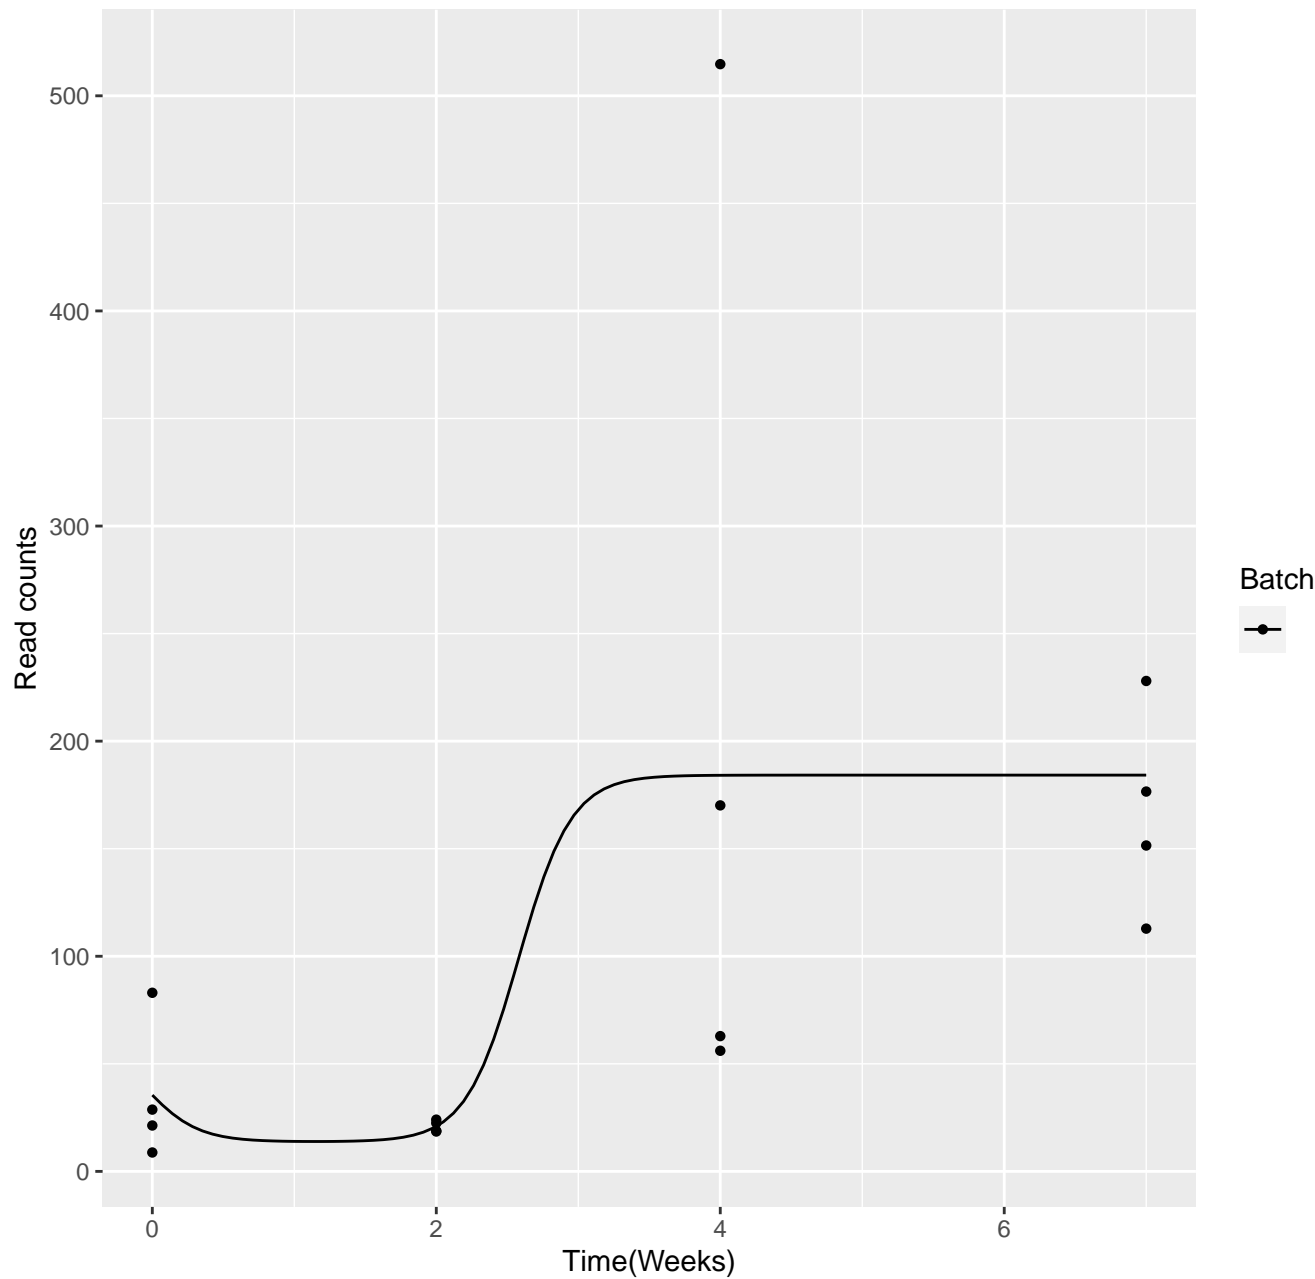

PPP1R9A:  $\log_{10} q = -3.96$

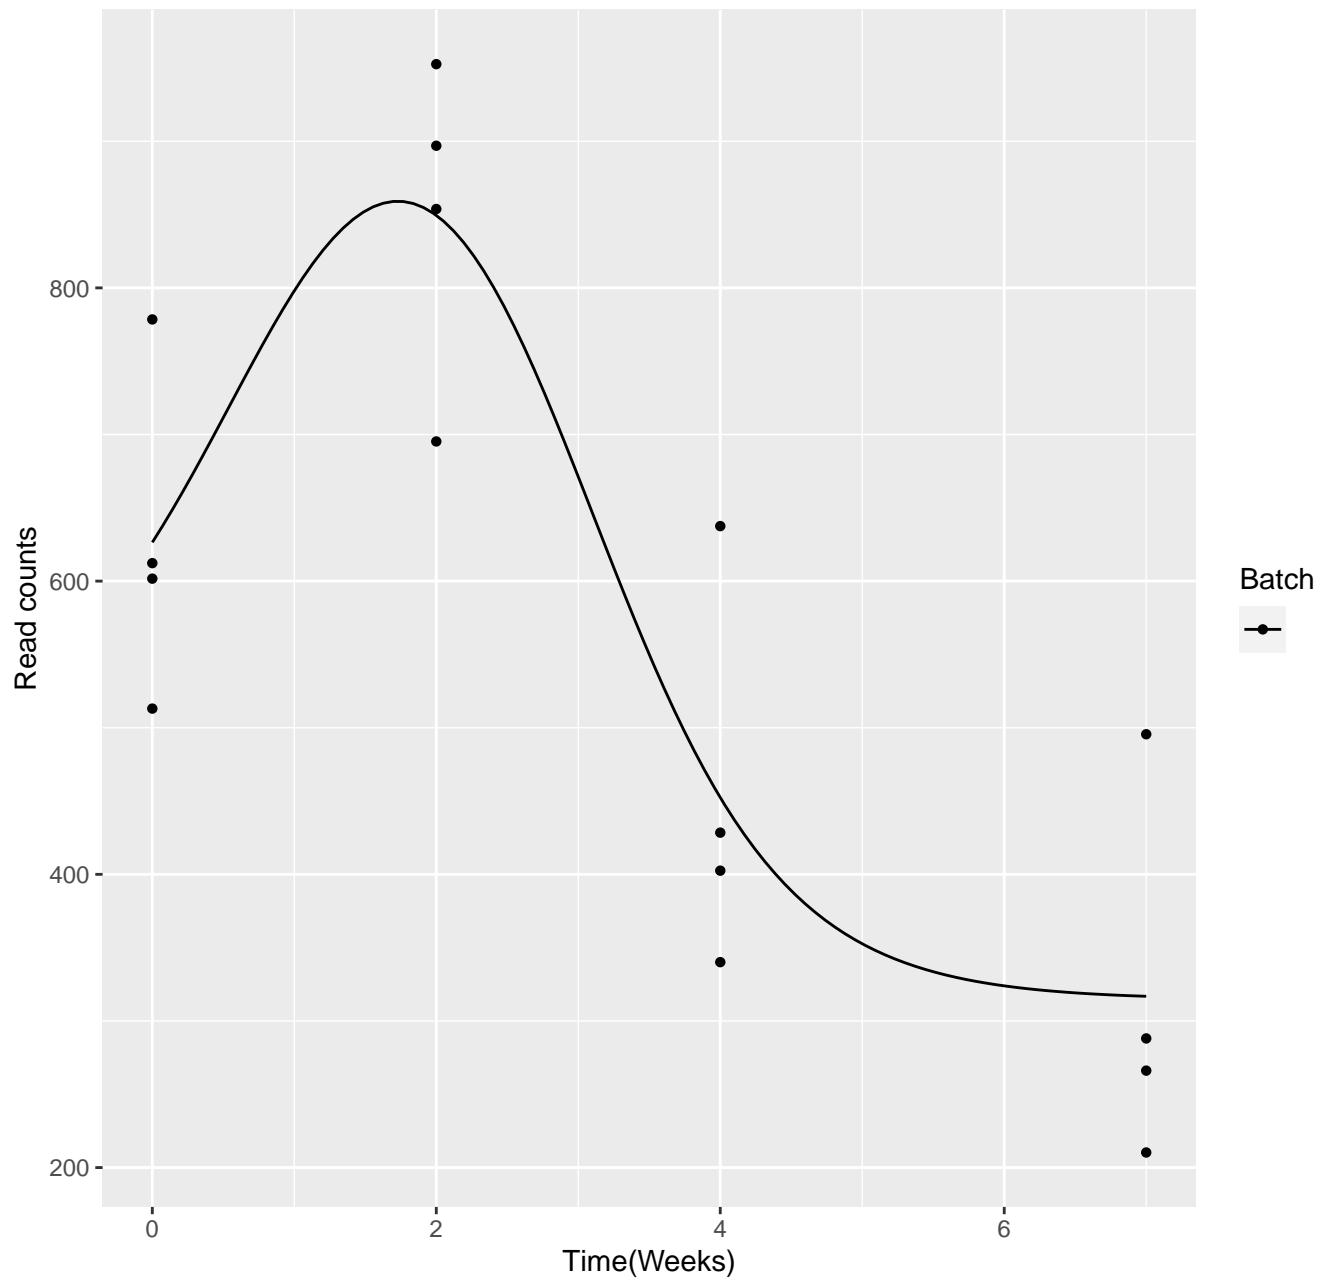

FTL:  $\log_{10} q = -3.96$

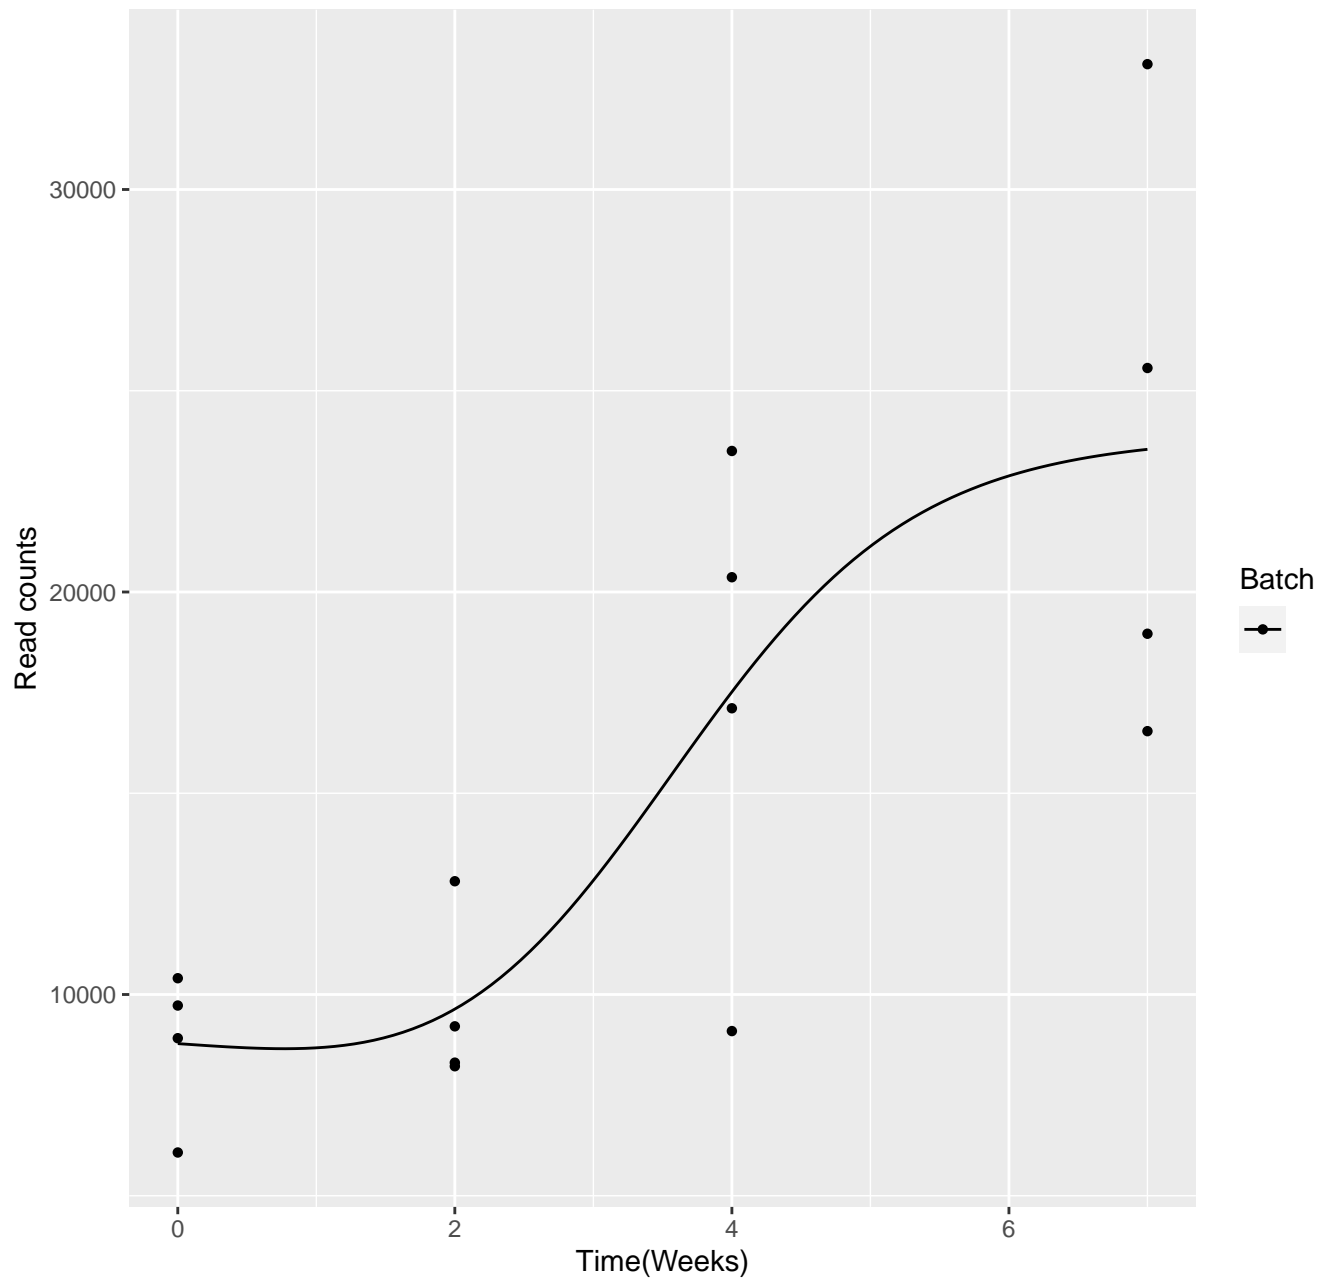



PLD3:  $\log_{10} q = -3.95$

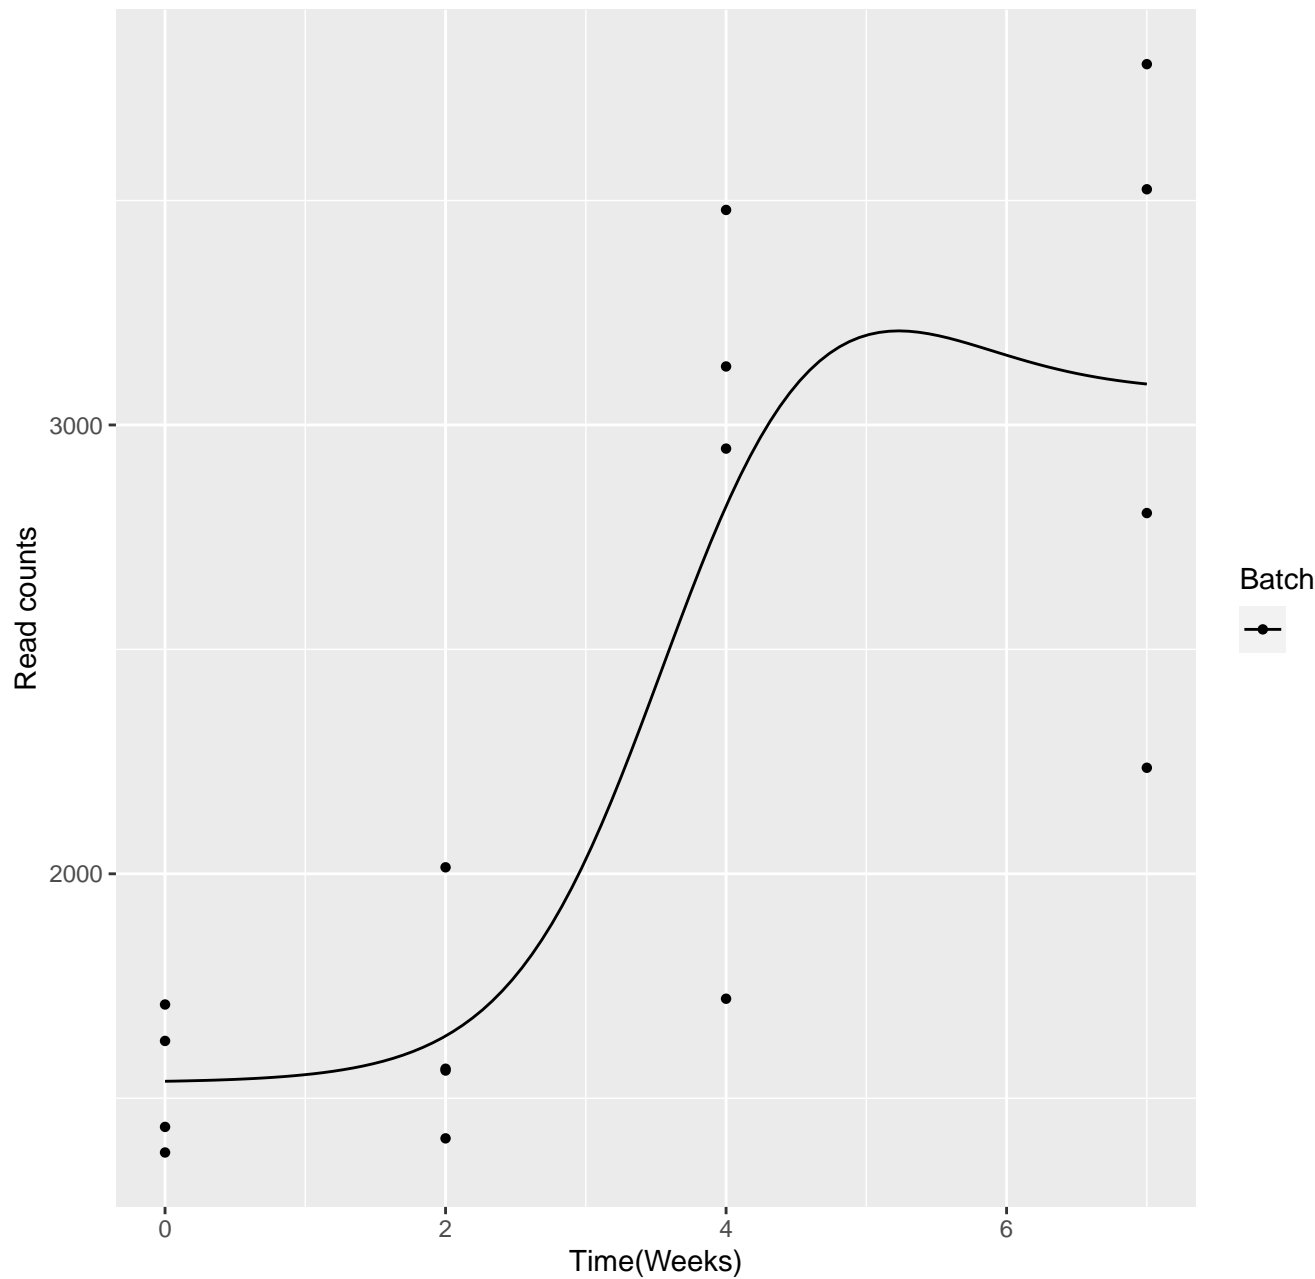

FRZB:  $\log_{10} q = -3.95$

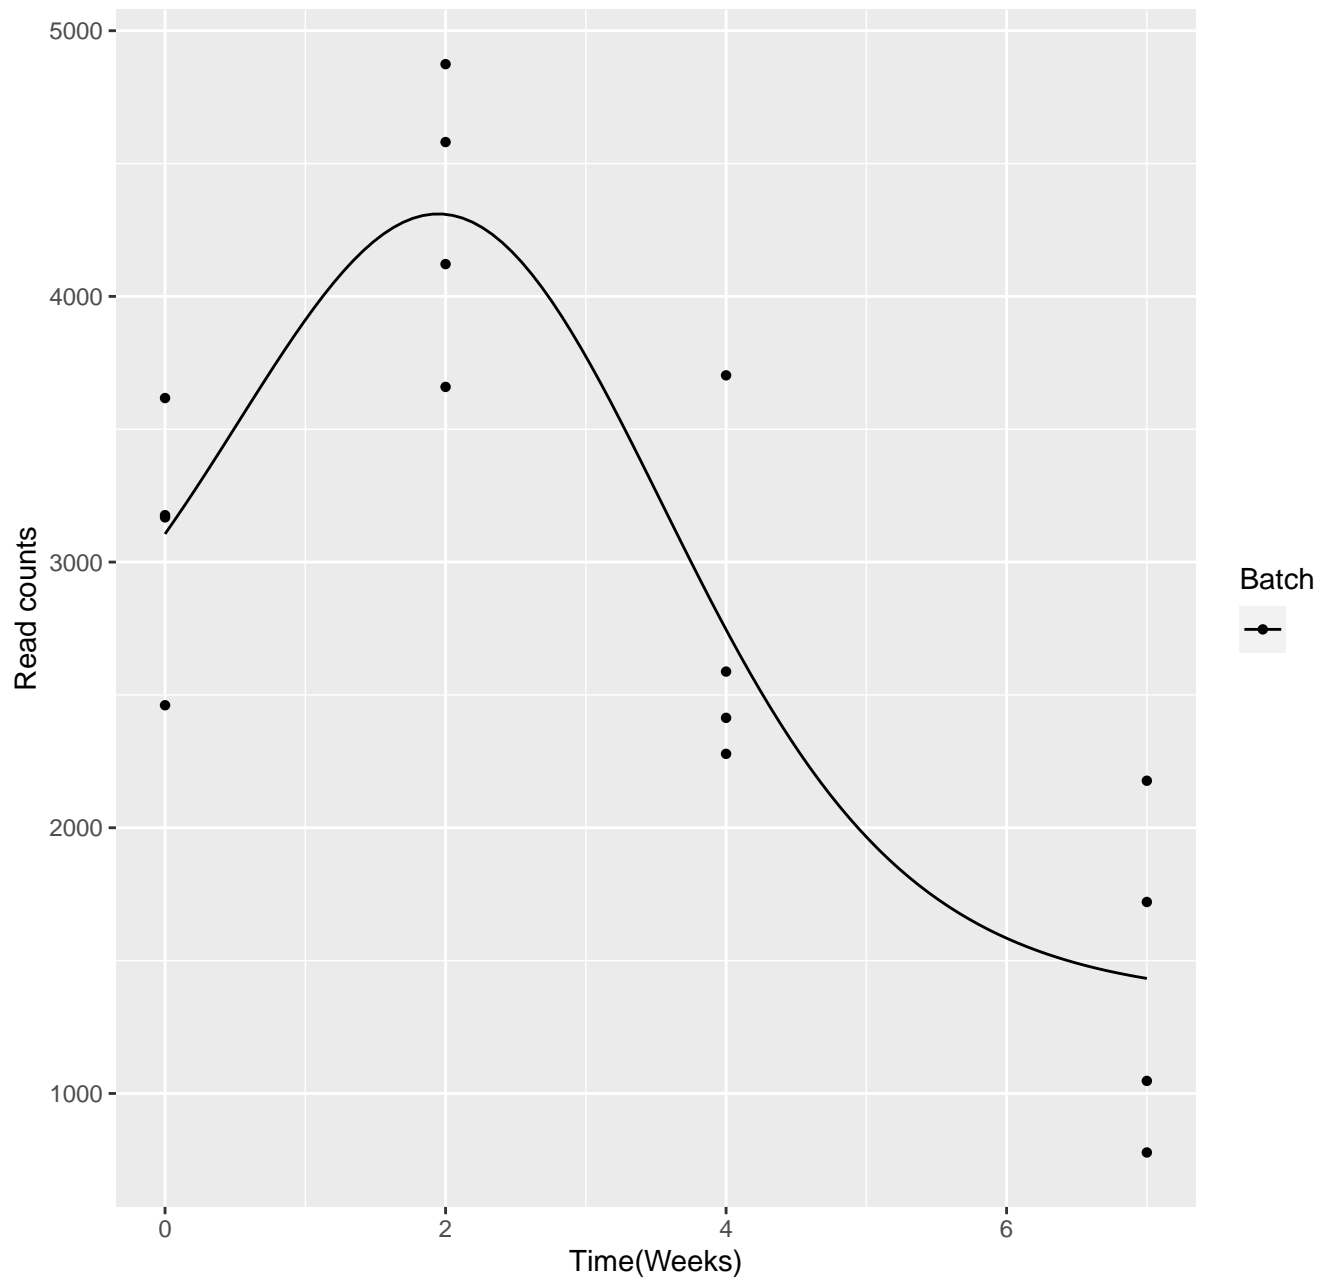

ST3GAL5:  $\log_{10} q = -3.95$

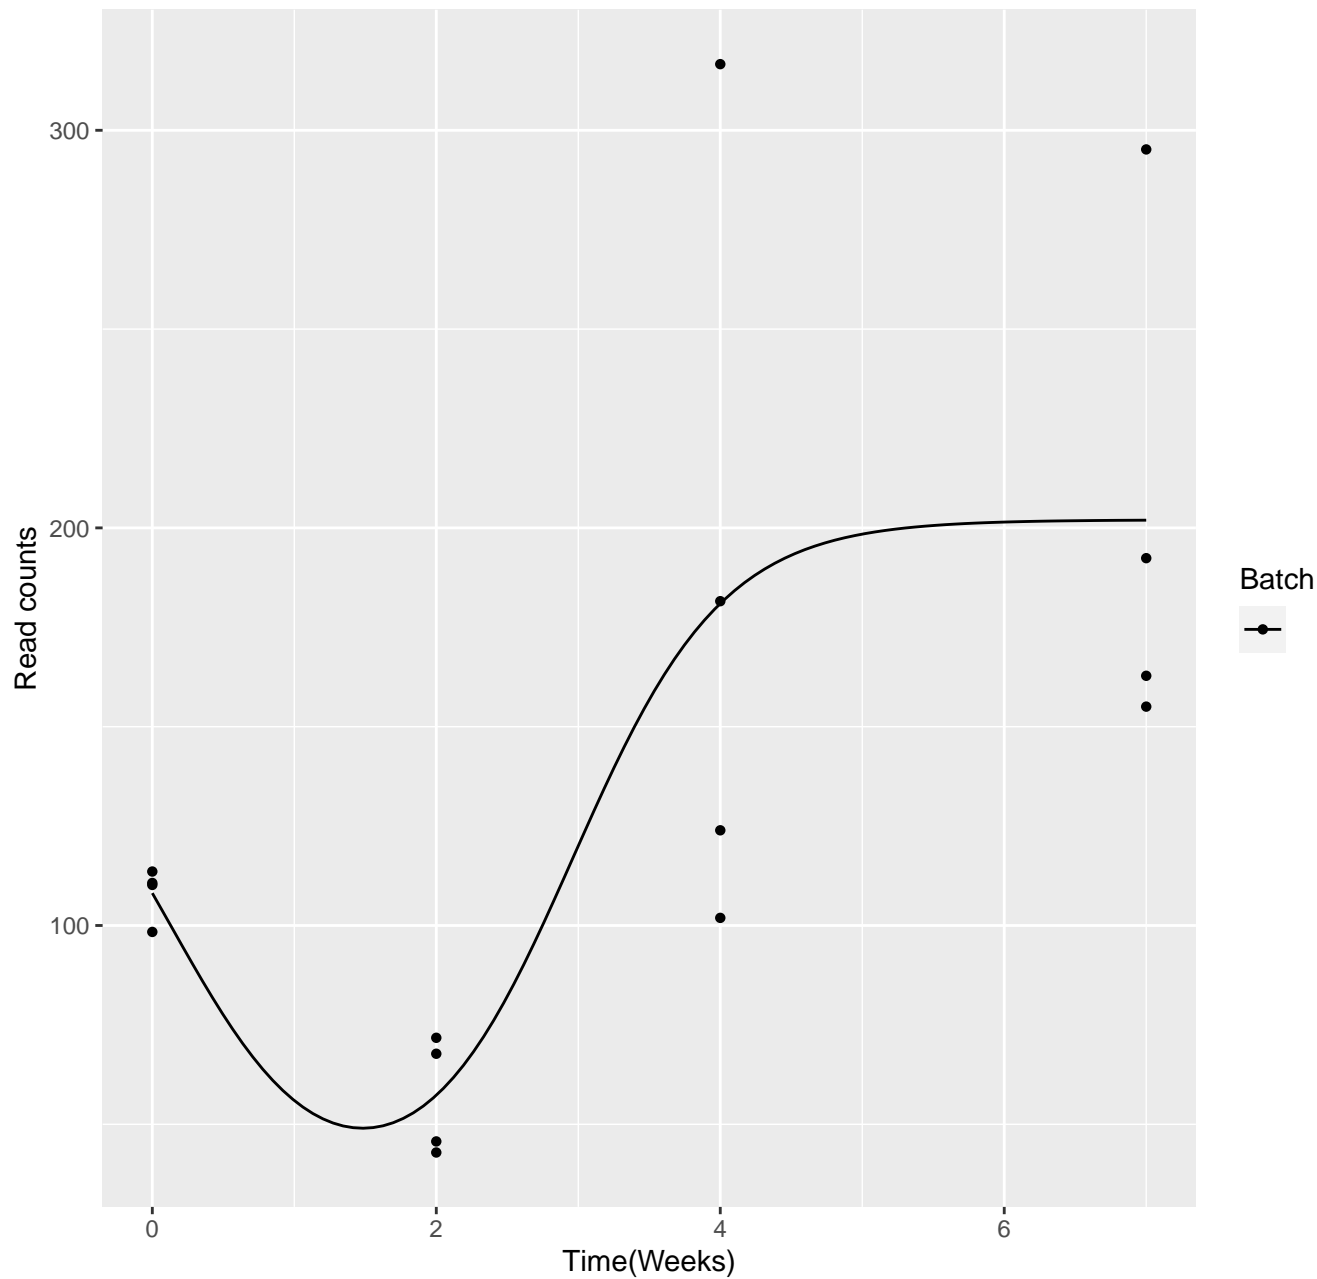

TROAP:  $\log_{10} q = -3.93$

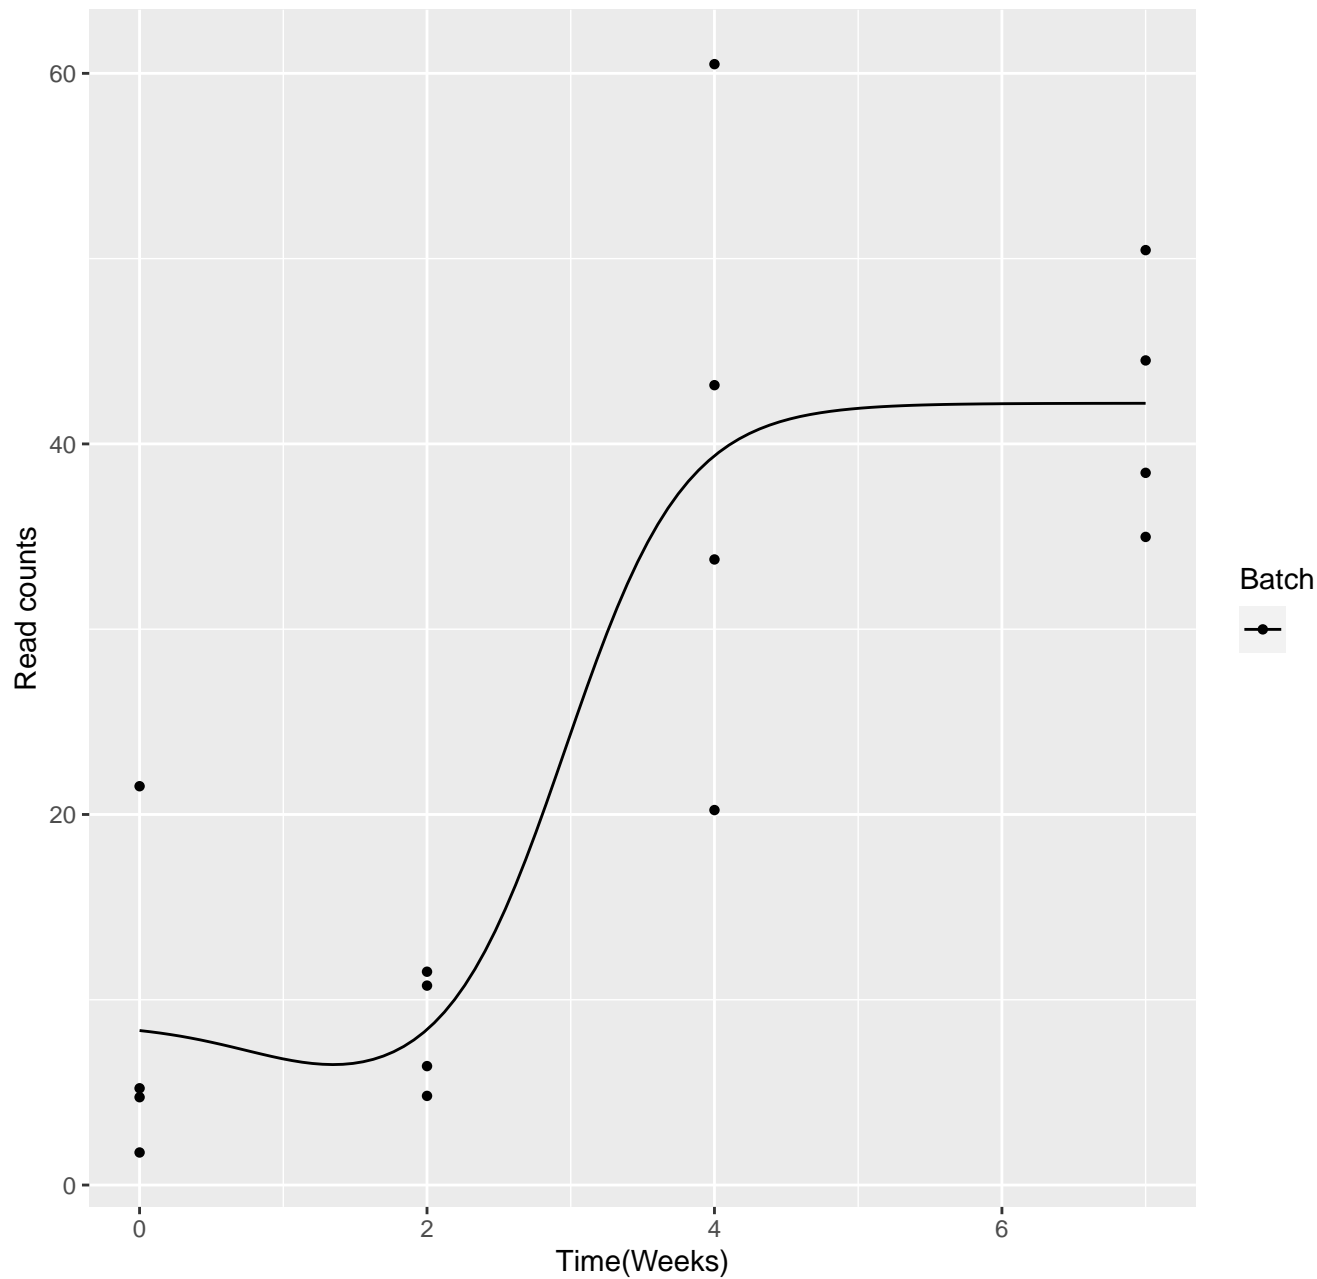

CD163:  $\log_{10} q = -3.92$

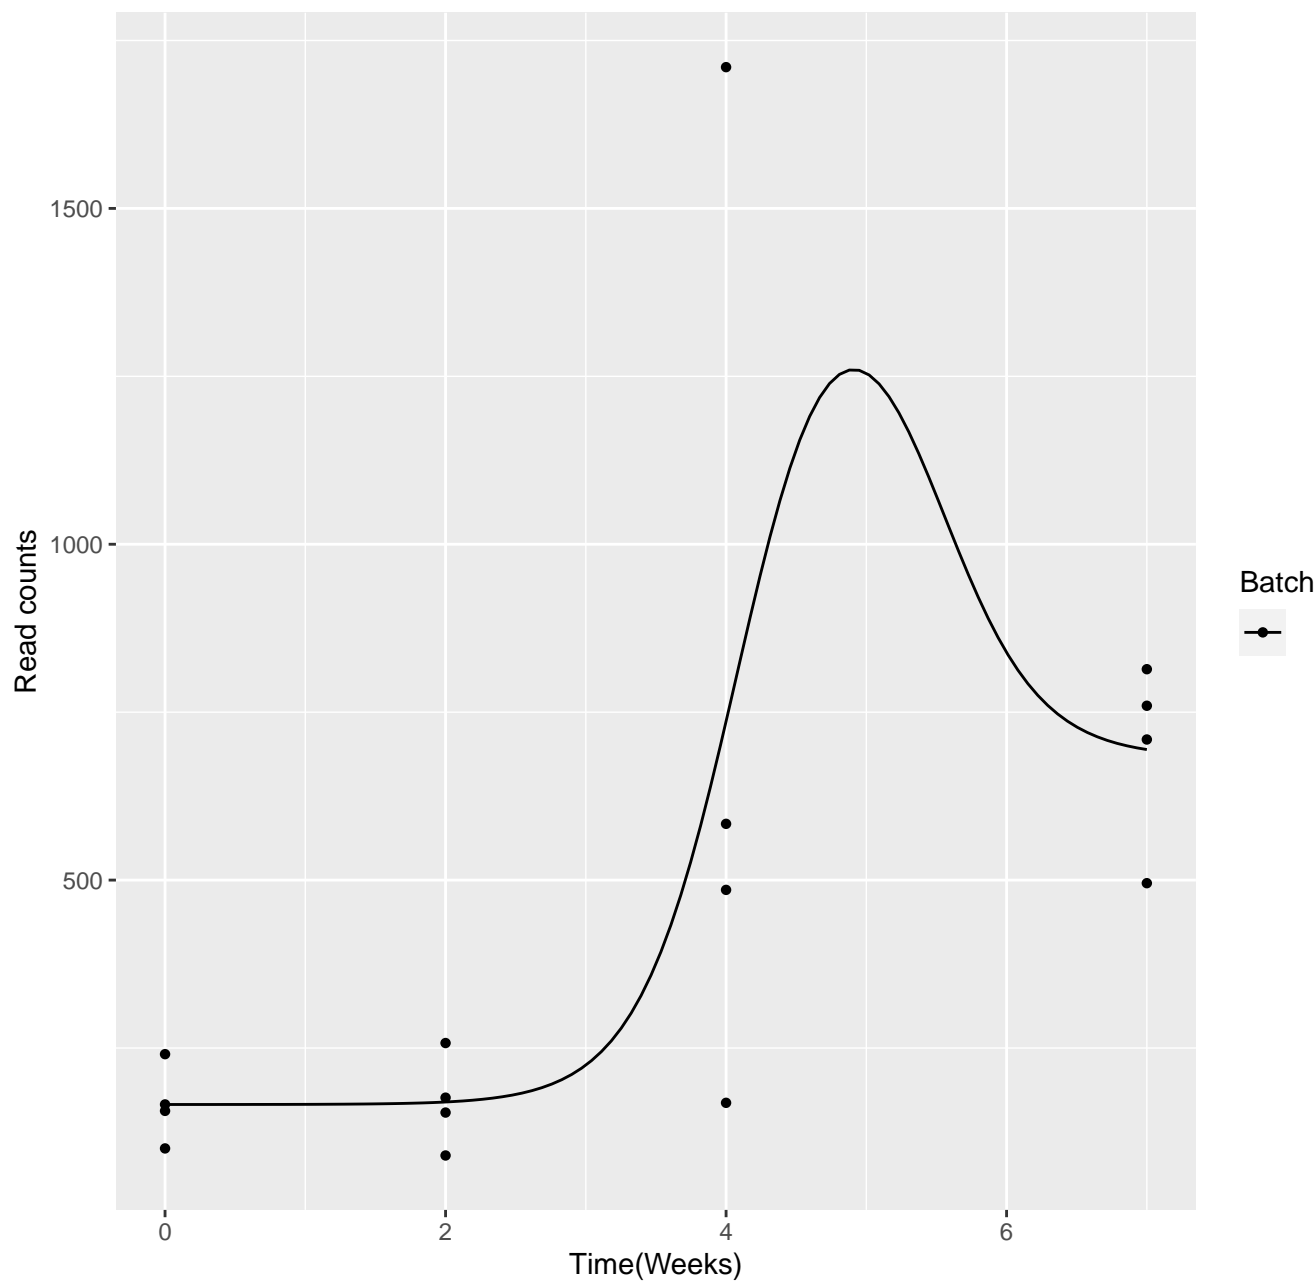

LOC103349936:  $\log_{10} q = -3.92$

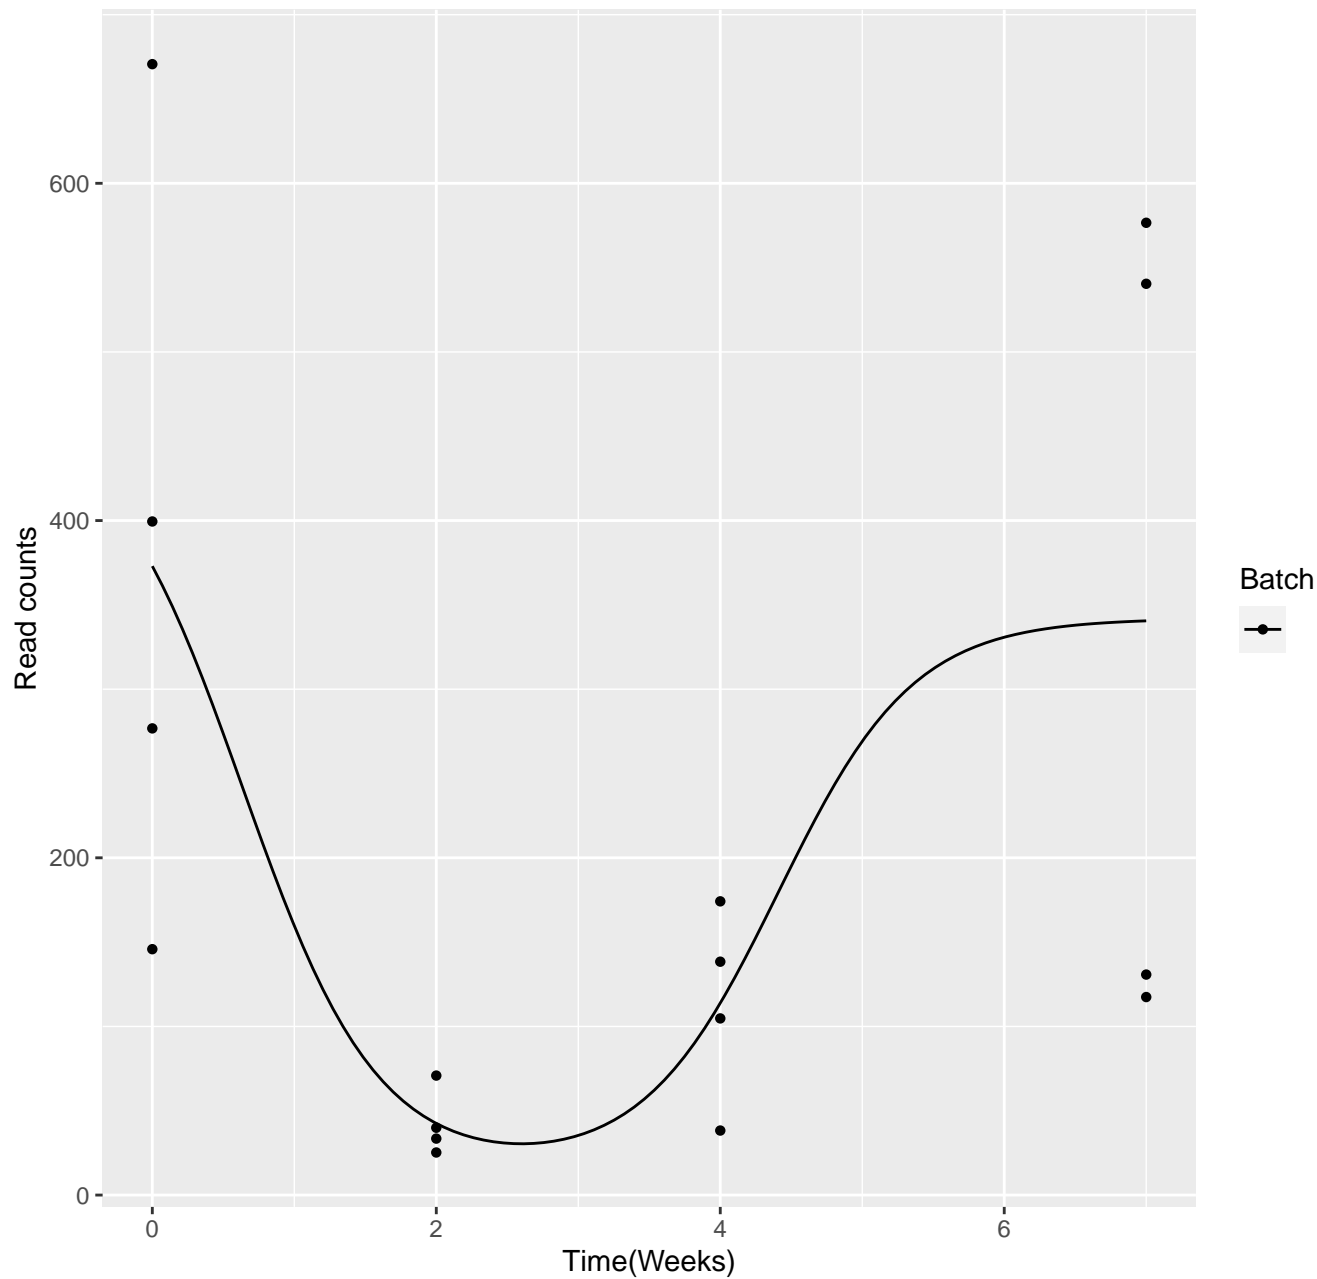

SMAD7:  $\log_{10} q = -3.92$

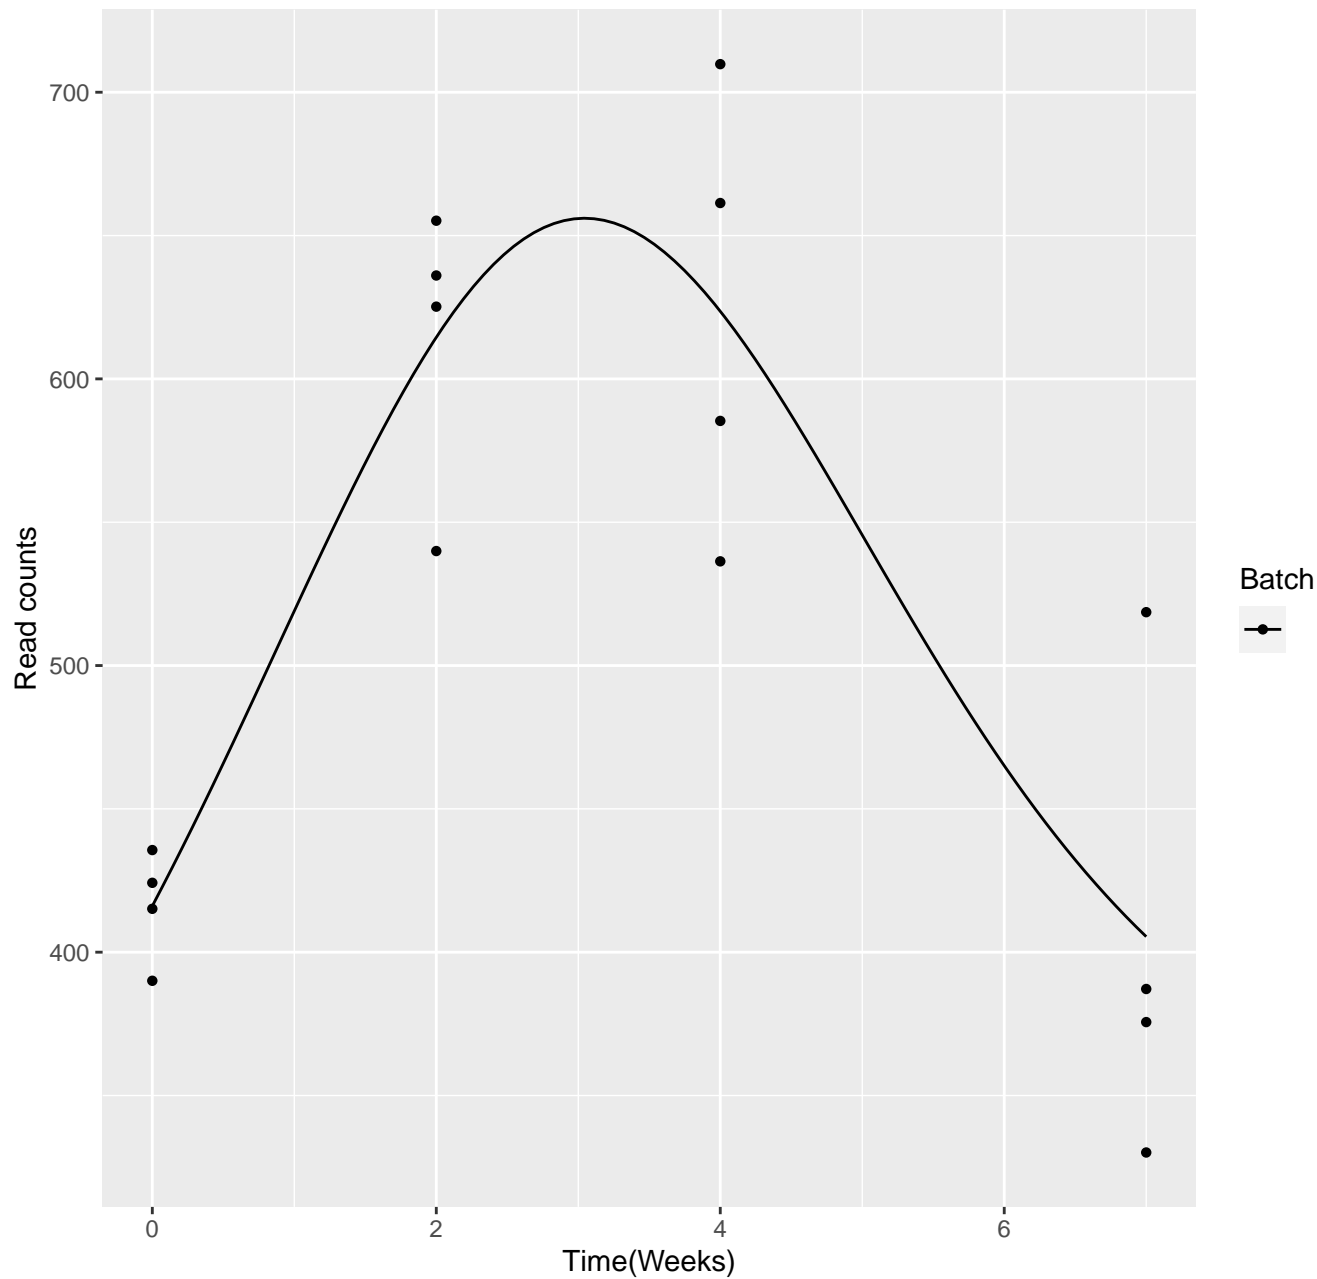

CALCOCO1:  $\log_{10} q = -3.91$

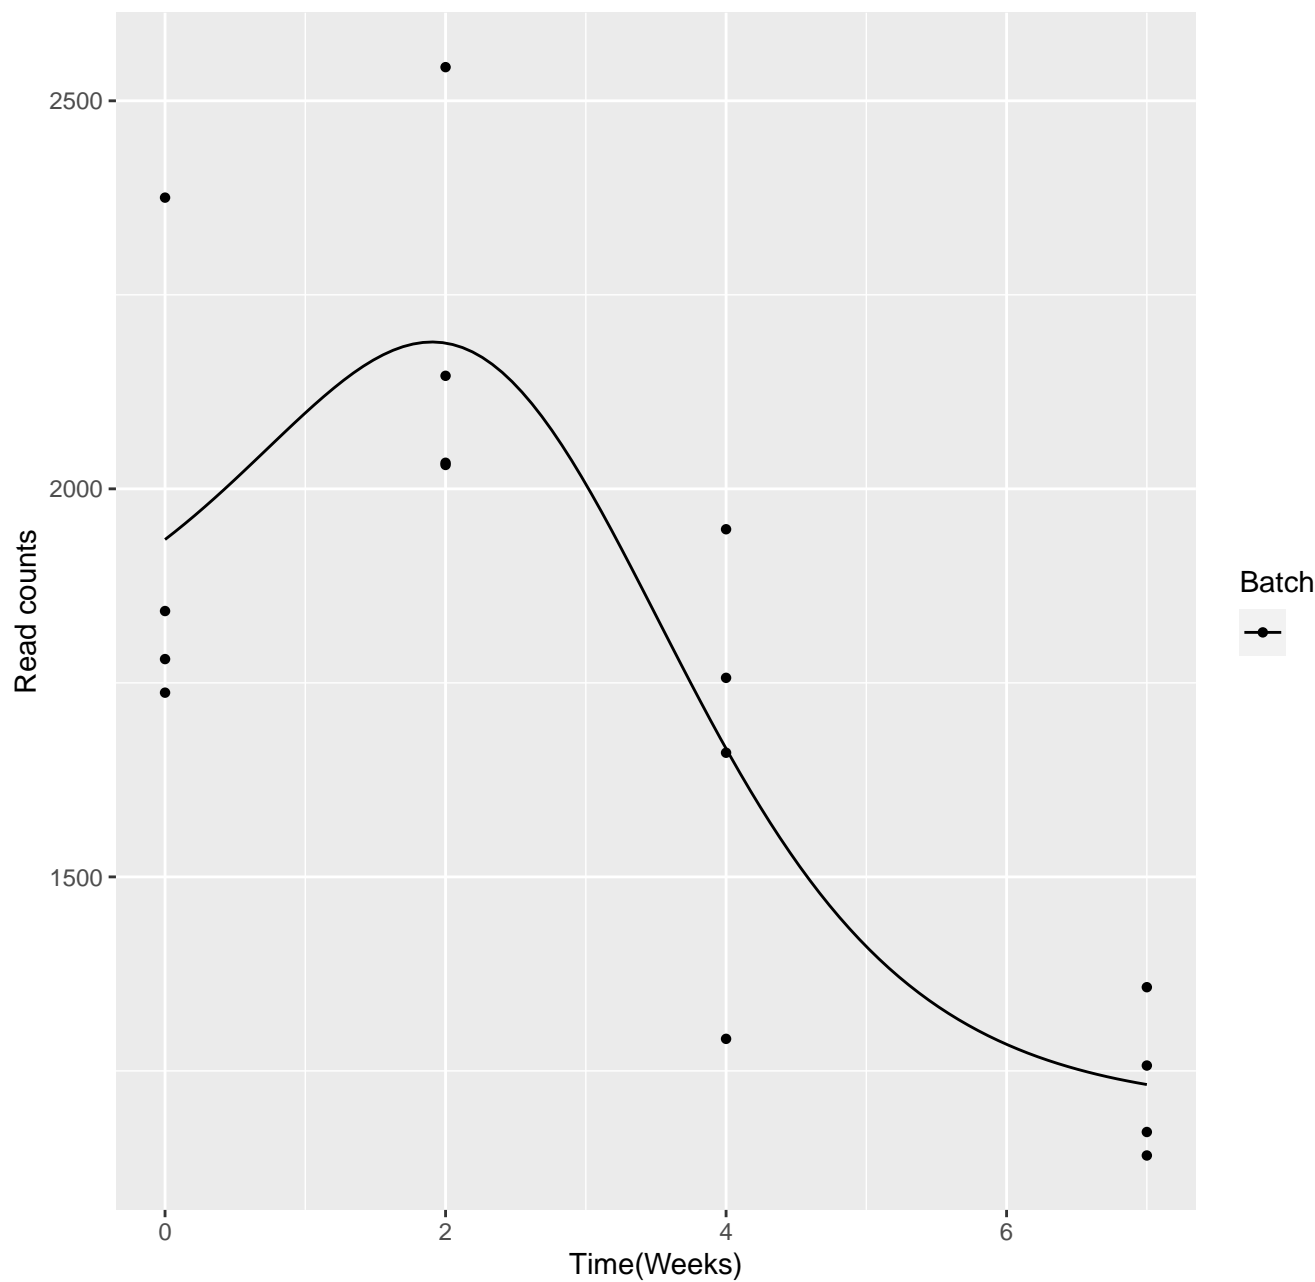



DZIP1:  $\log_{10} q = -3.91$

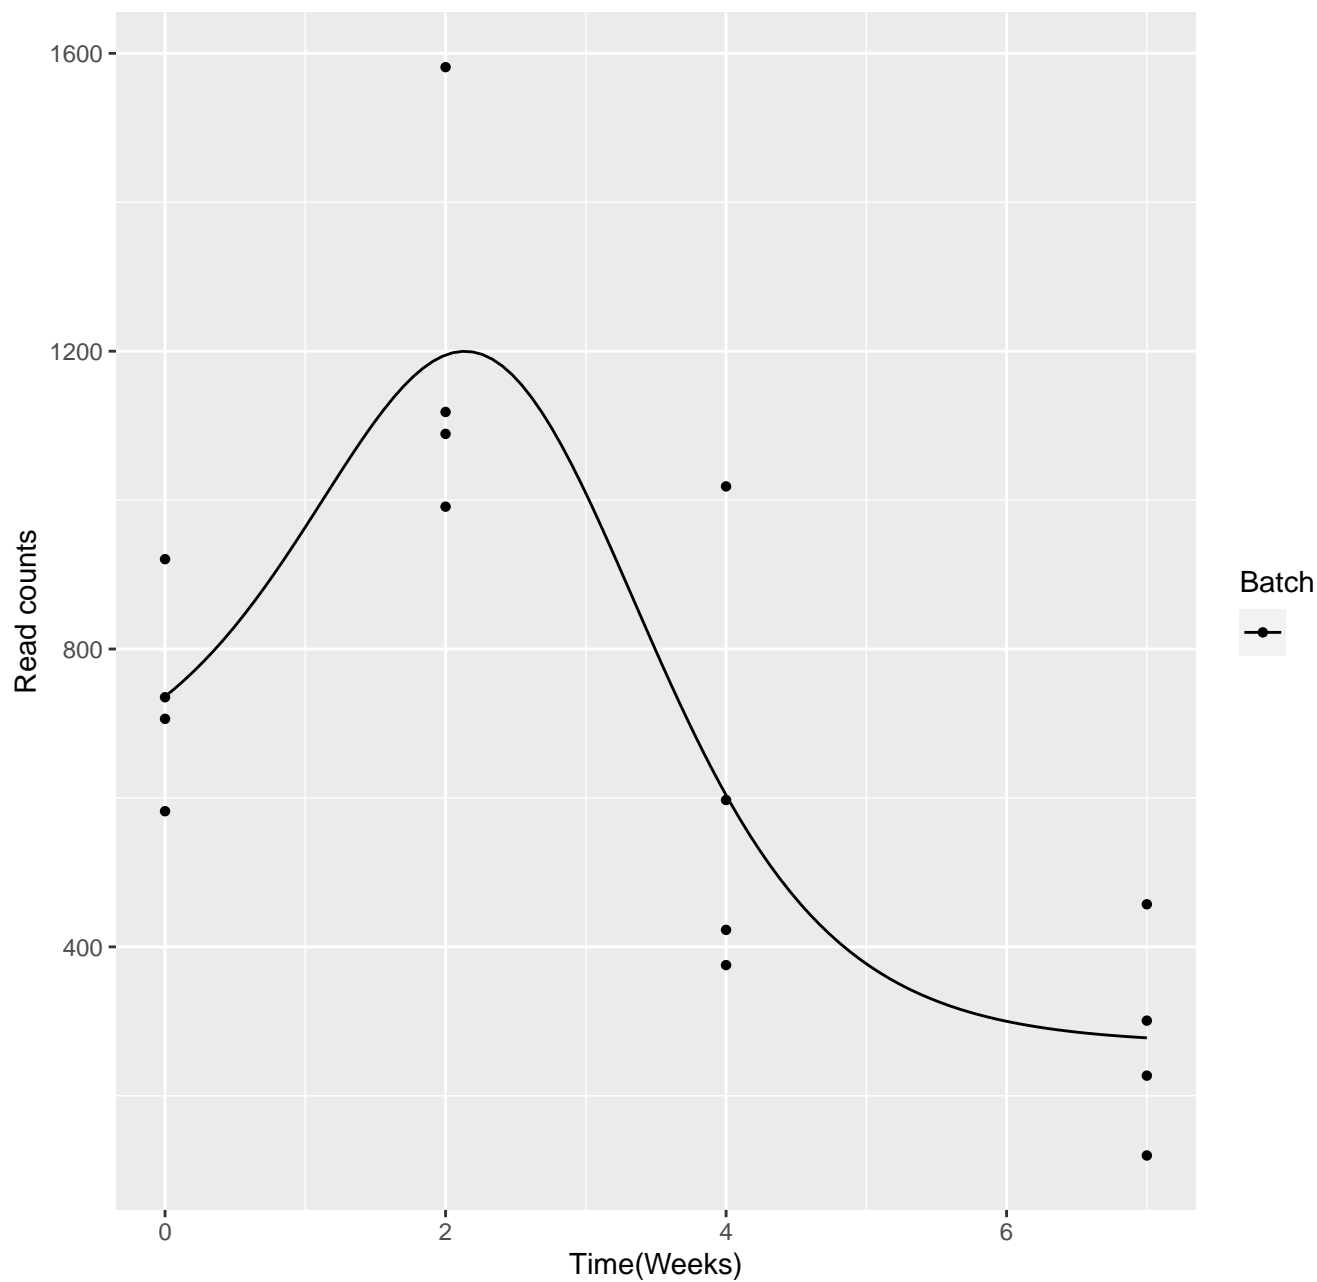

ITPR1:  $\log_{10} q = -3.91$

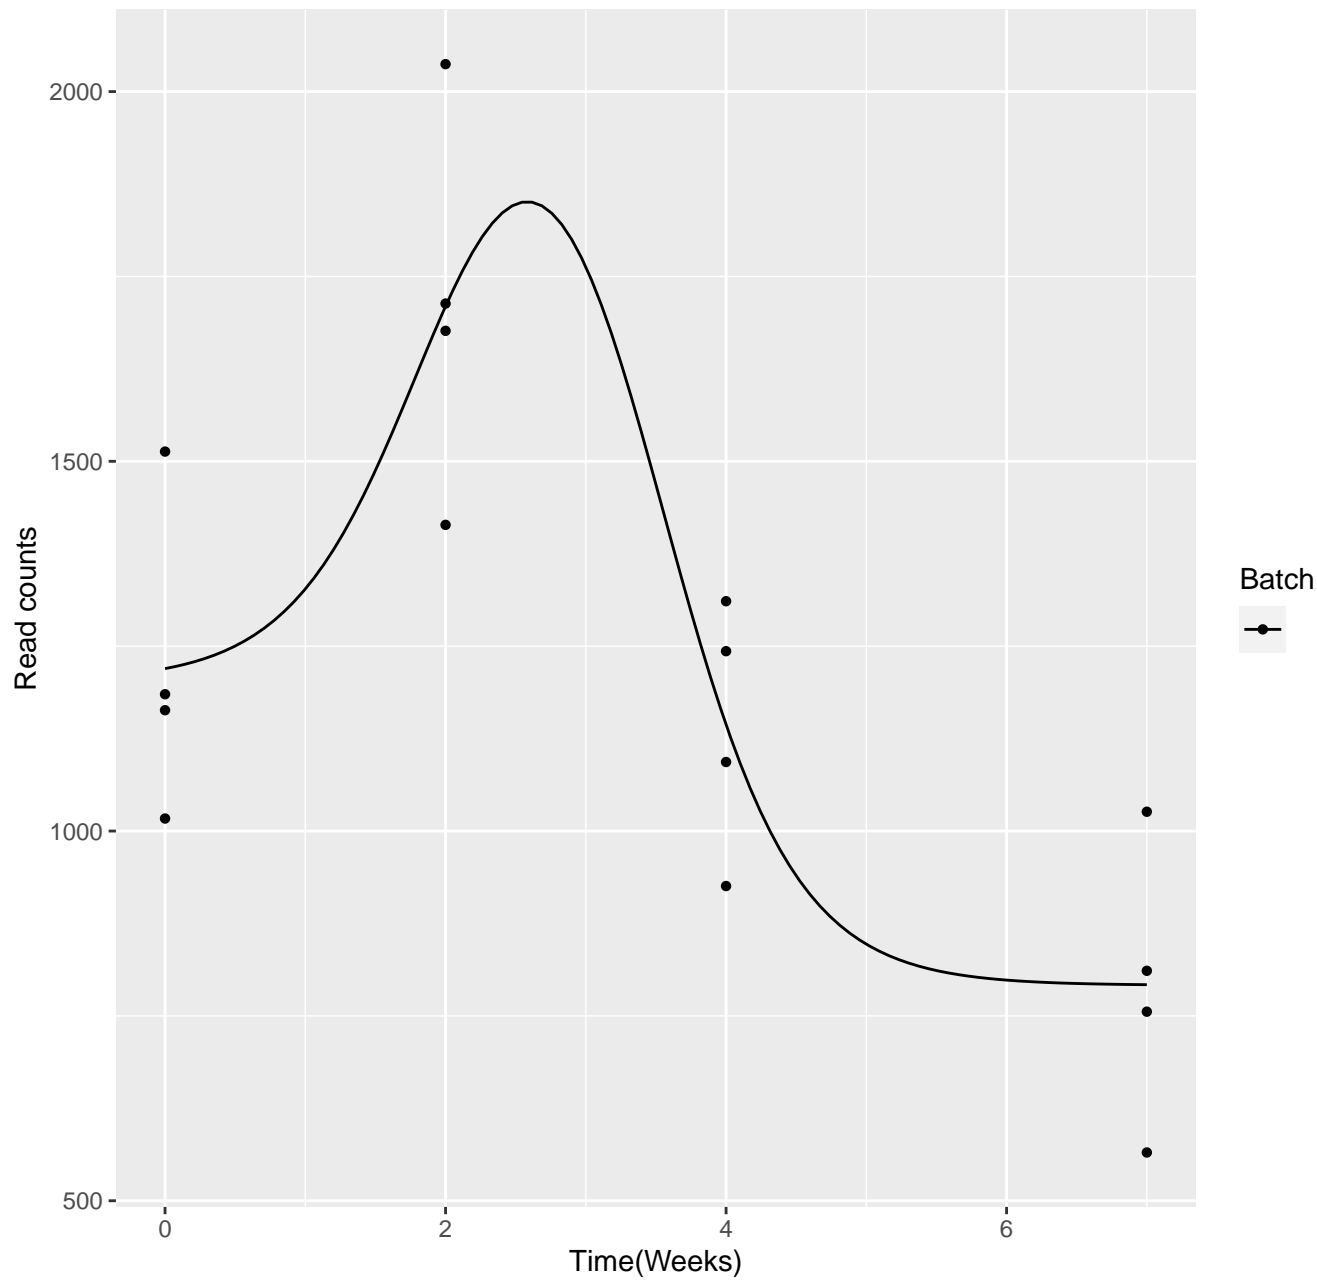

TBC1D16:  $\log_{10} q = -3.91$

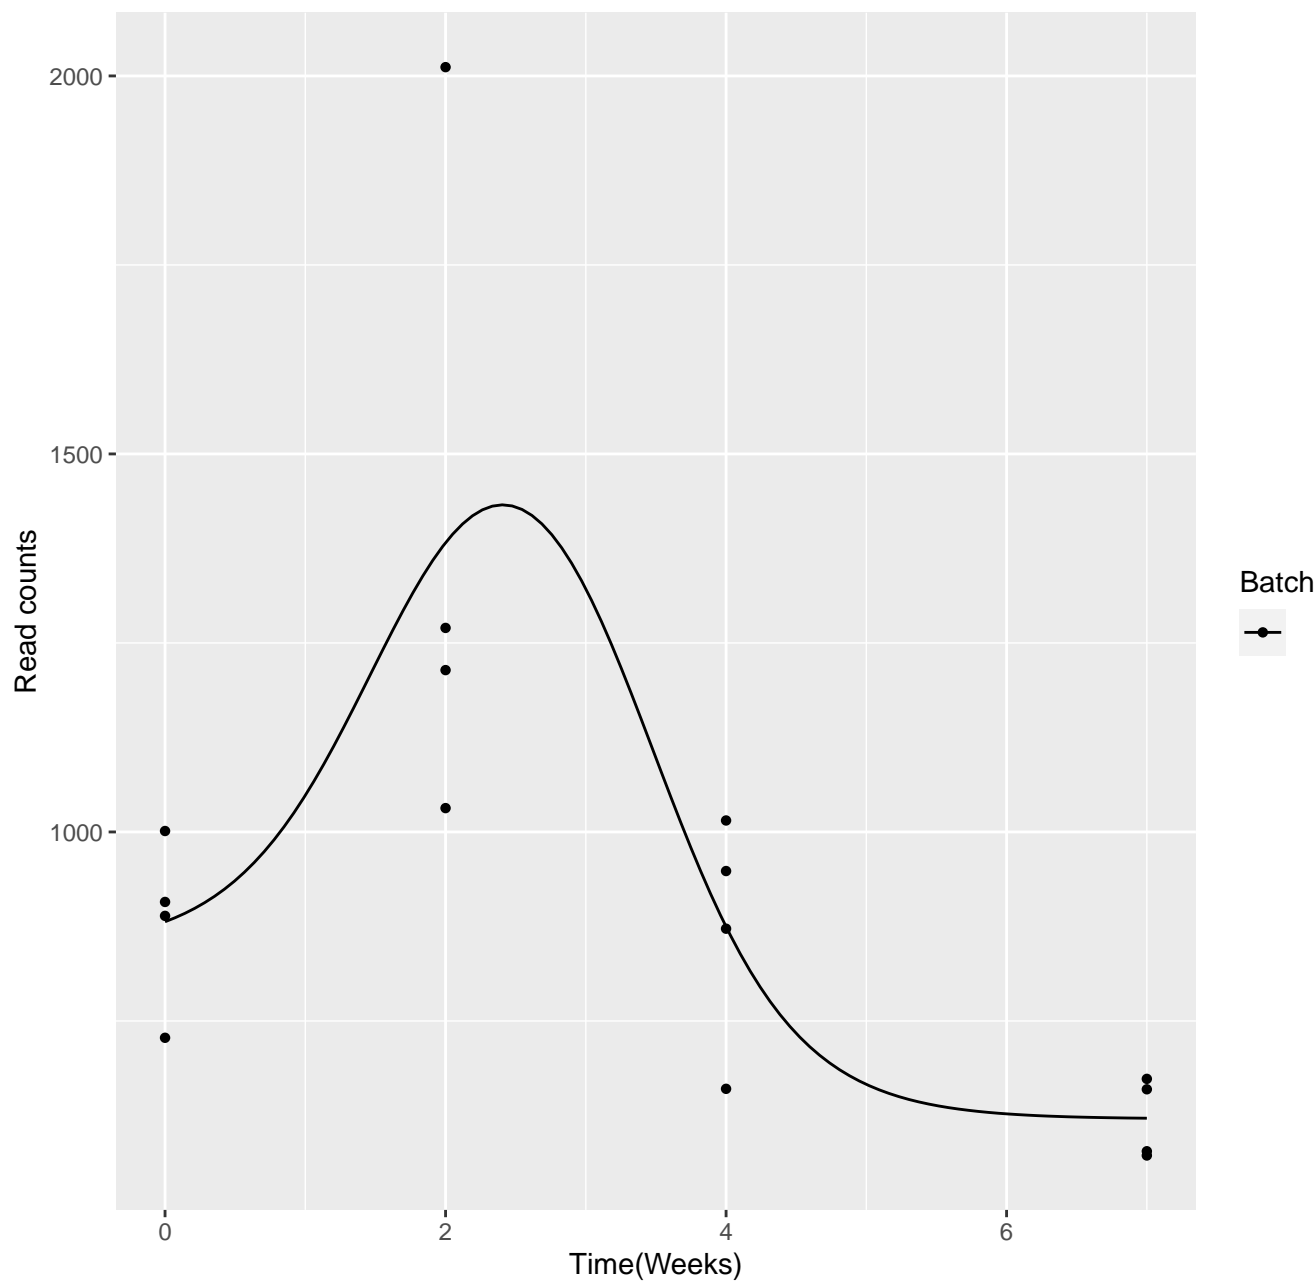

VIM:  $\log_{10} q = -3.91$

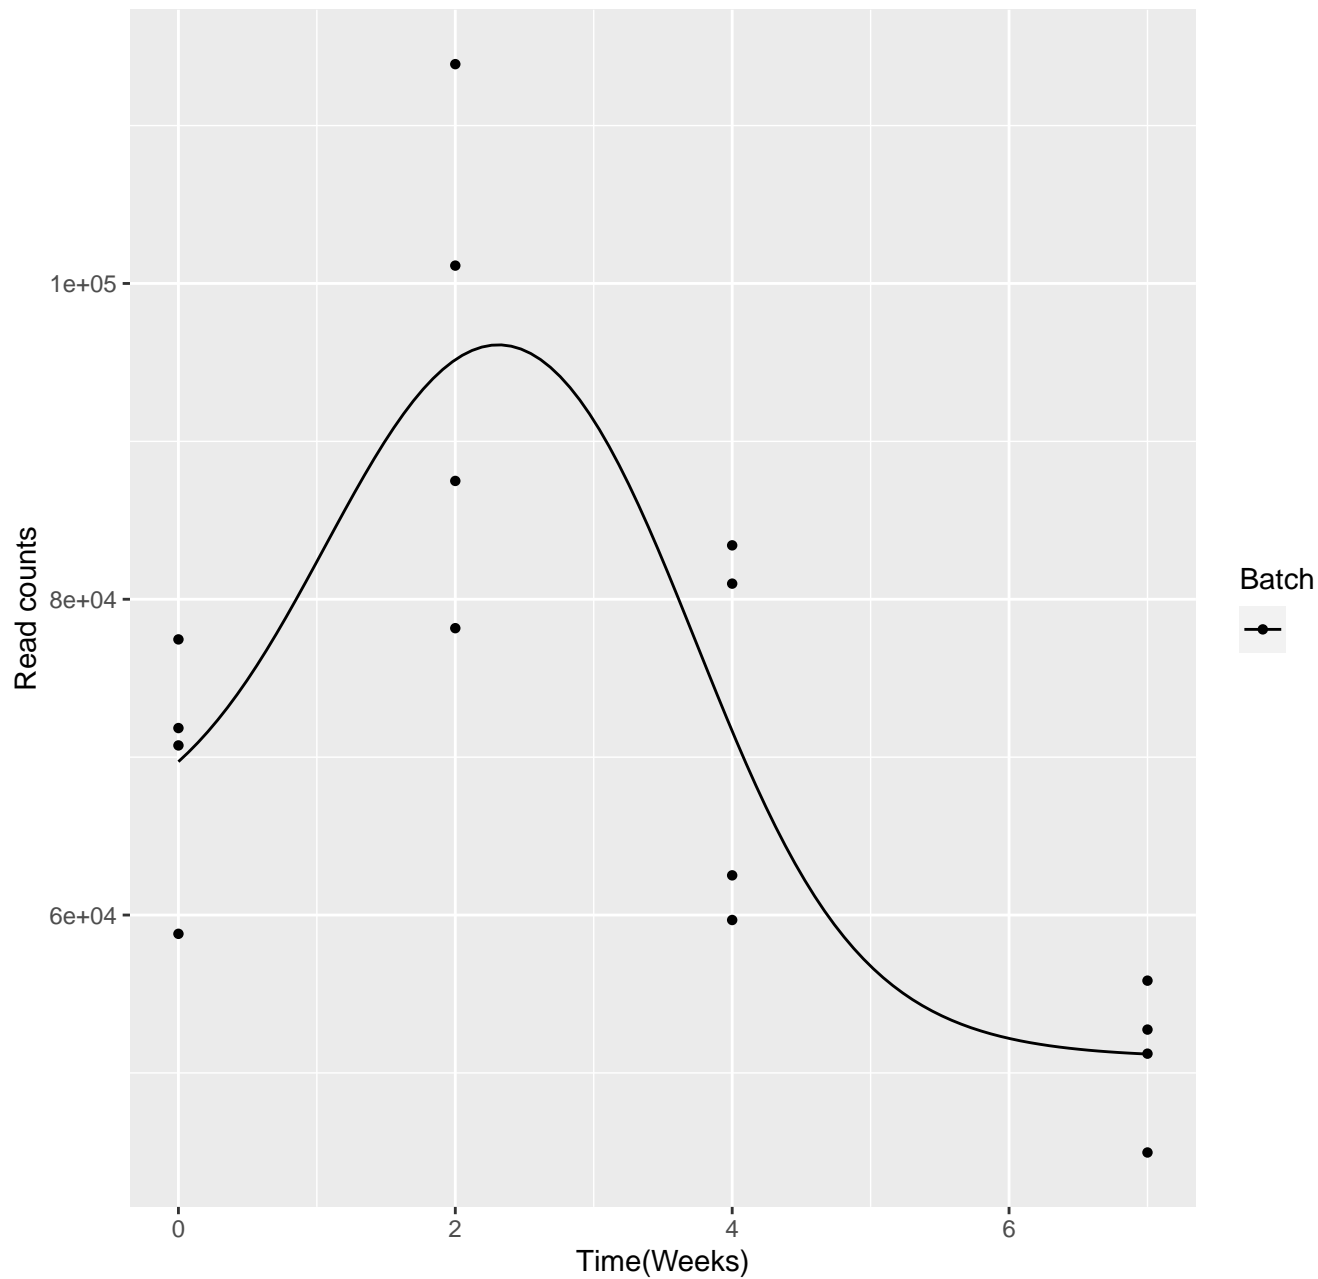

RARA:  $\log_{10} q = -3.91$

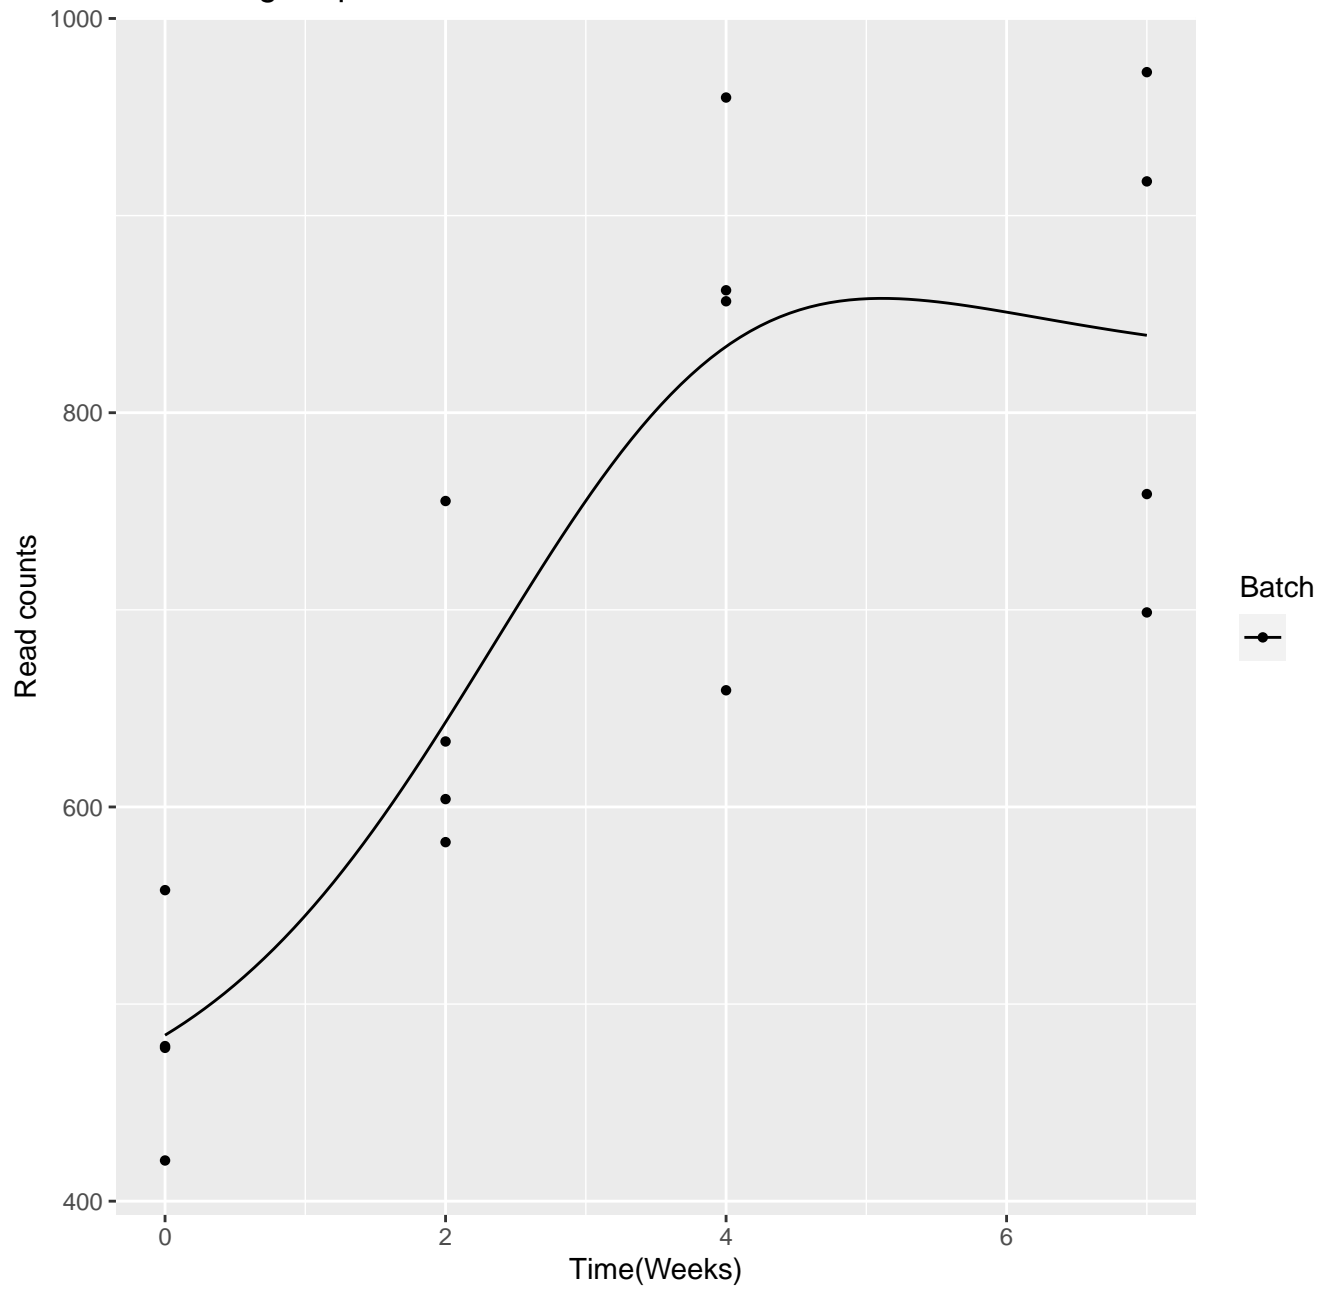

TNFAIP6:  $\log_{10} q = -3.9$

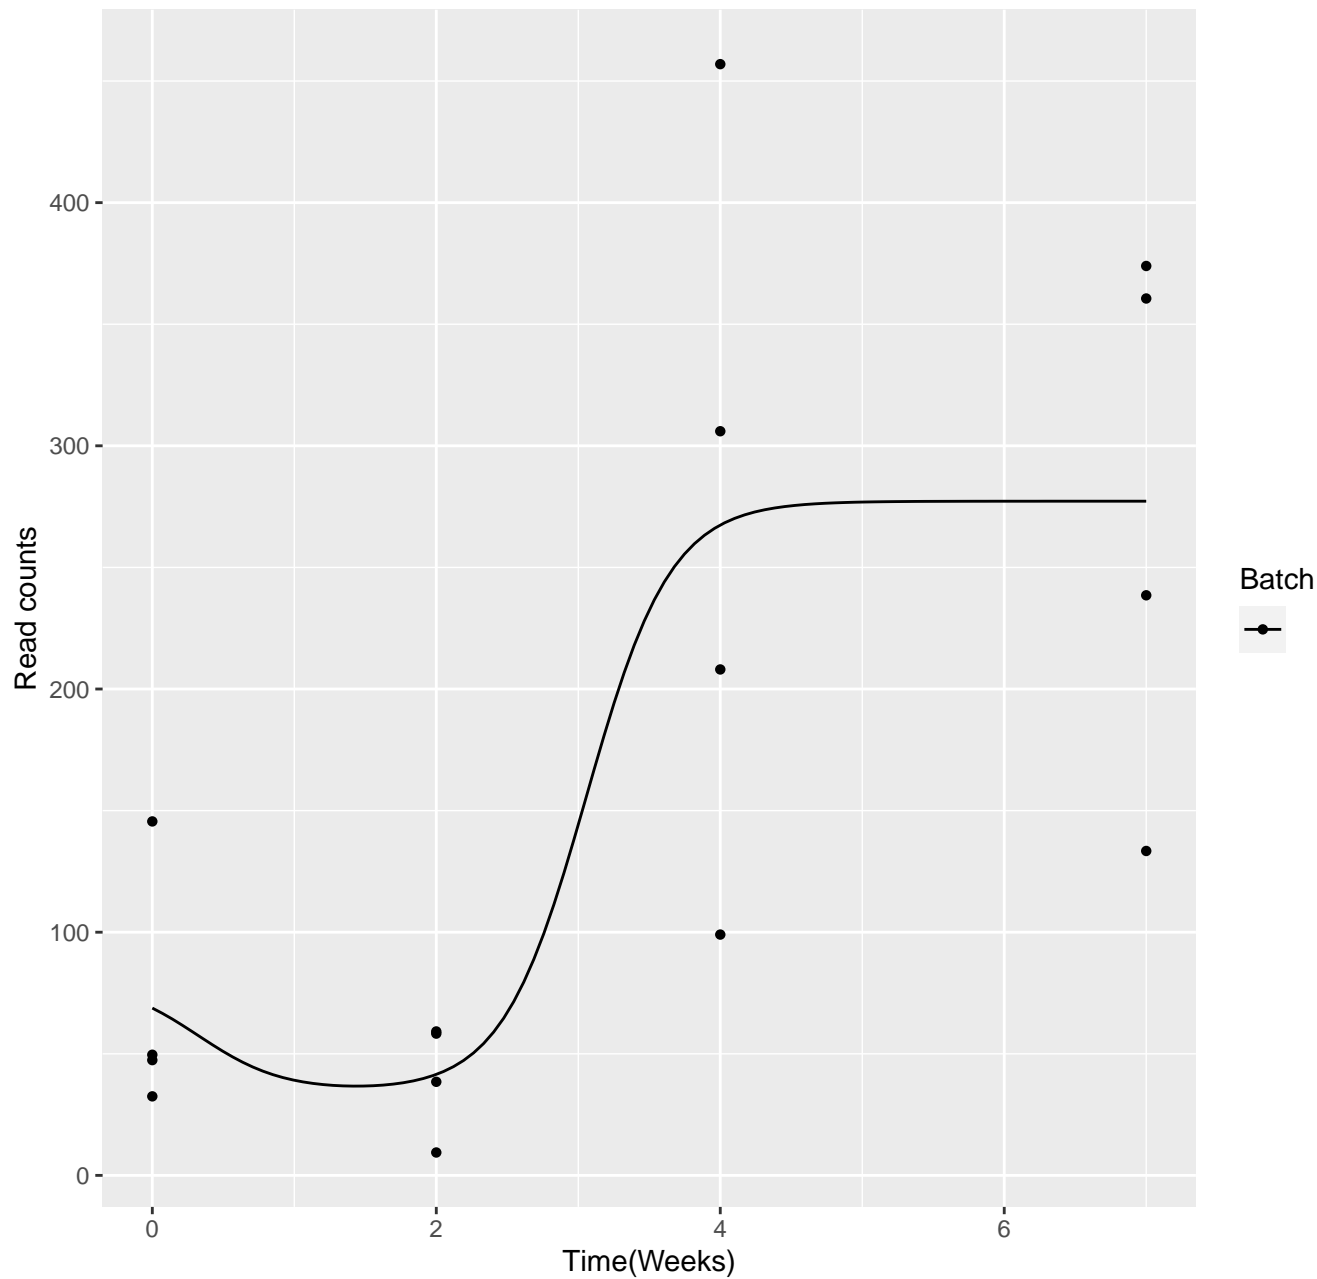

KIF18B:  $\log_{10} q = -3.89$

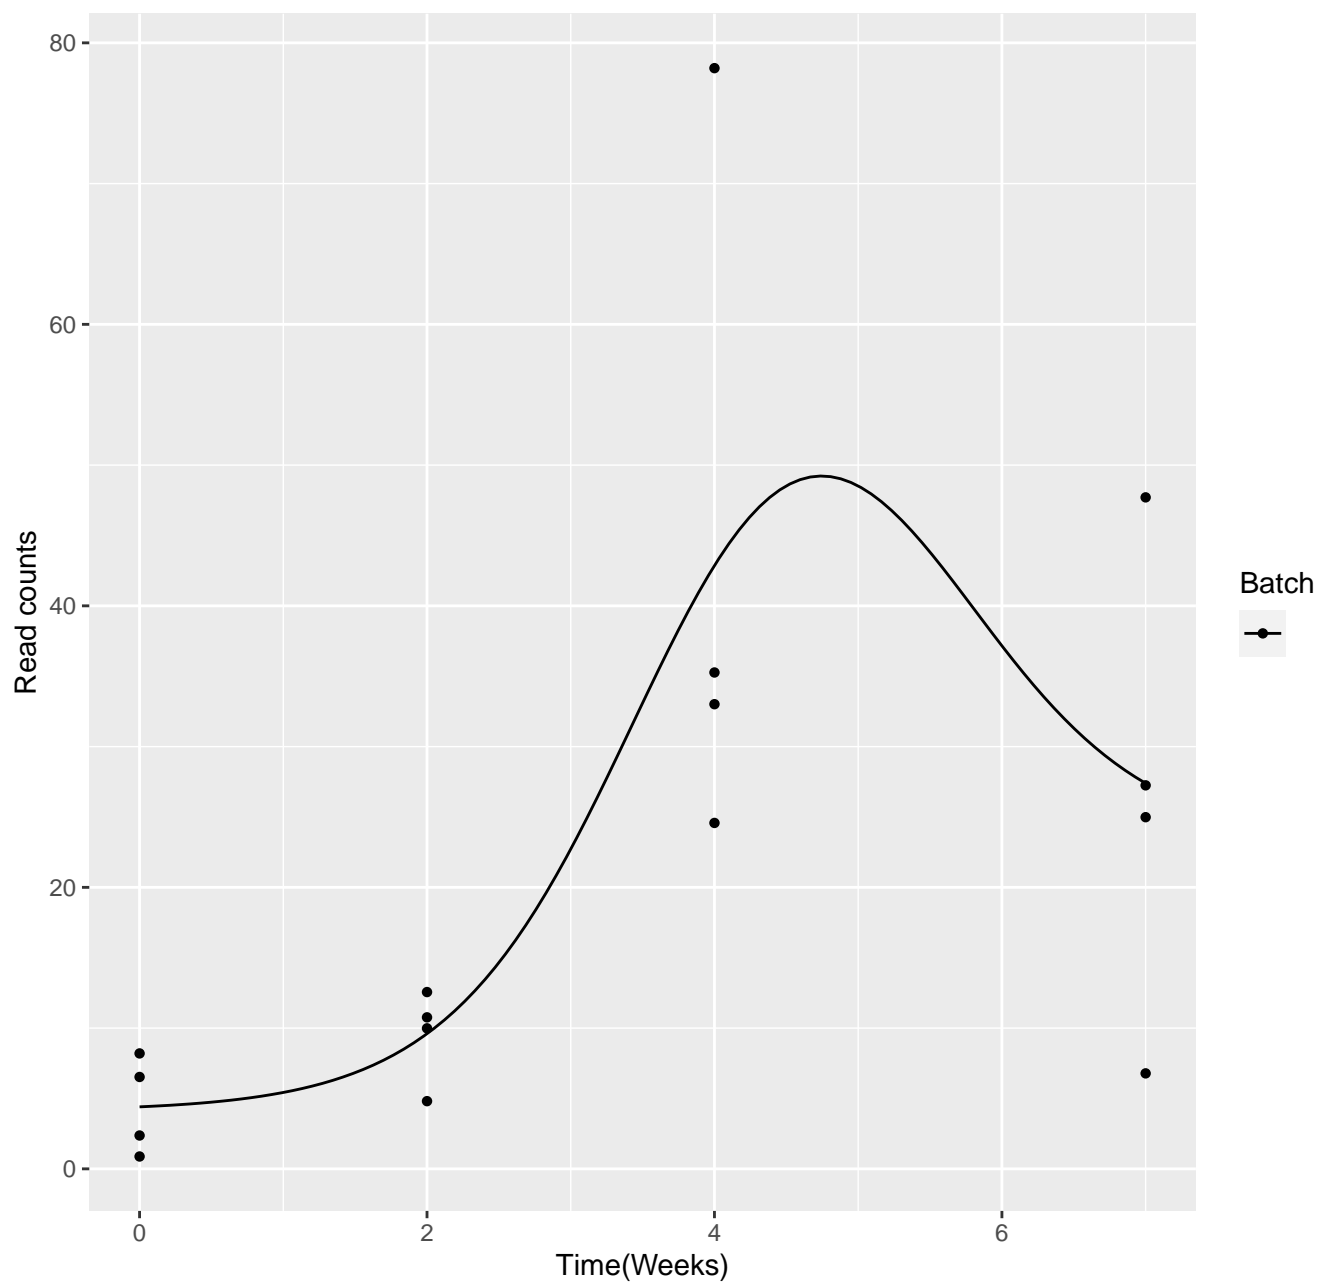

CGAS:  $\log_{10} q = -3.89$

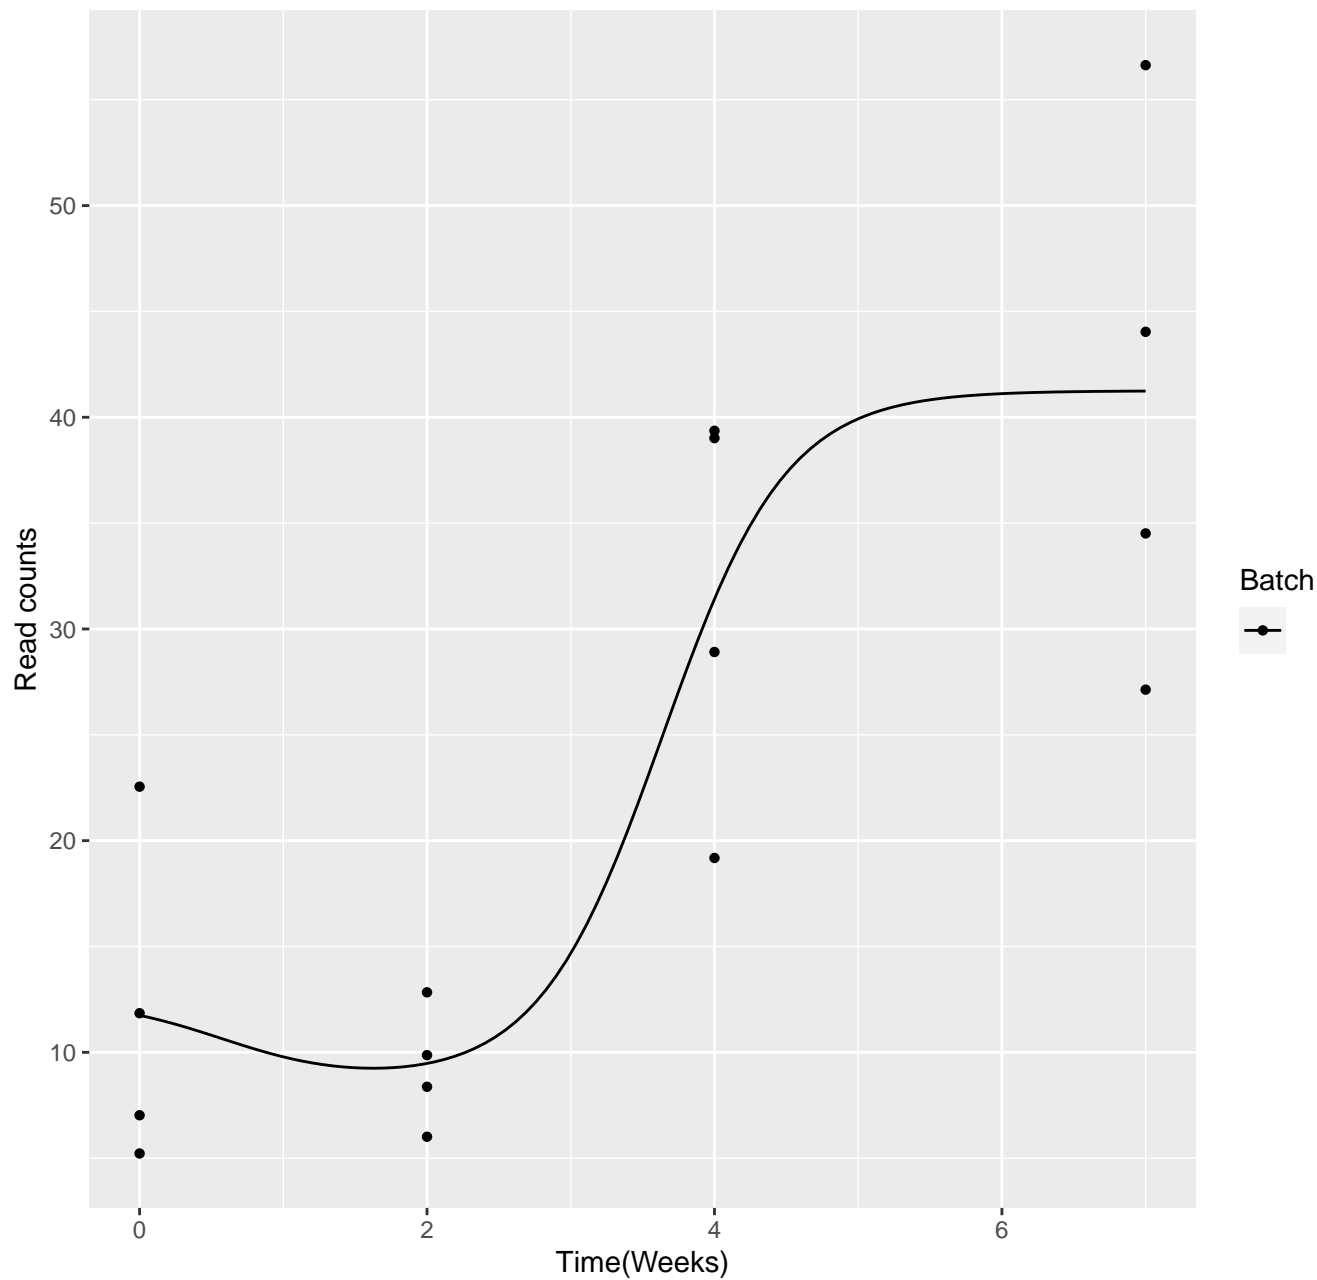



JAML:  $\log_{10} q = -3.89$

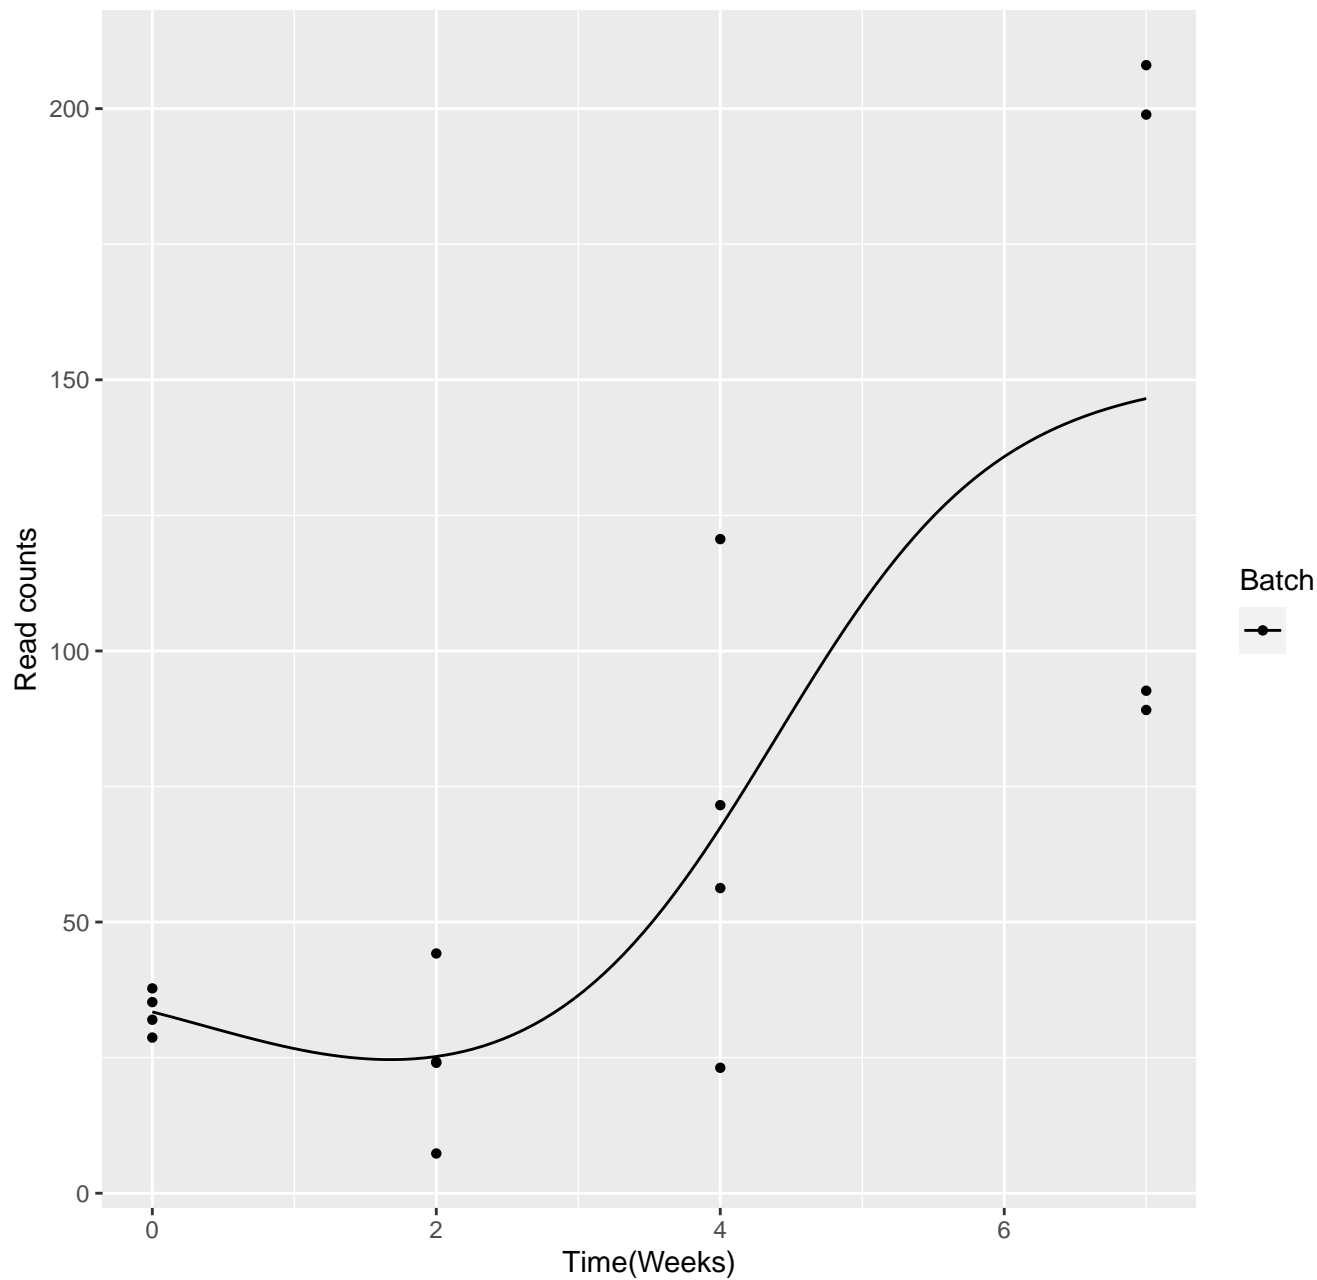

ANXA4:  $\log_{10} q = -3.88$

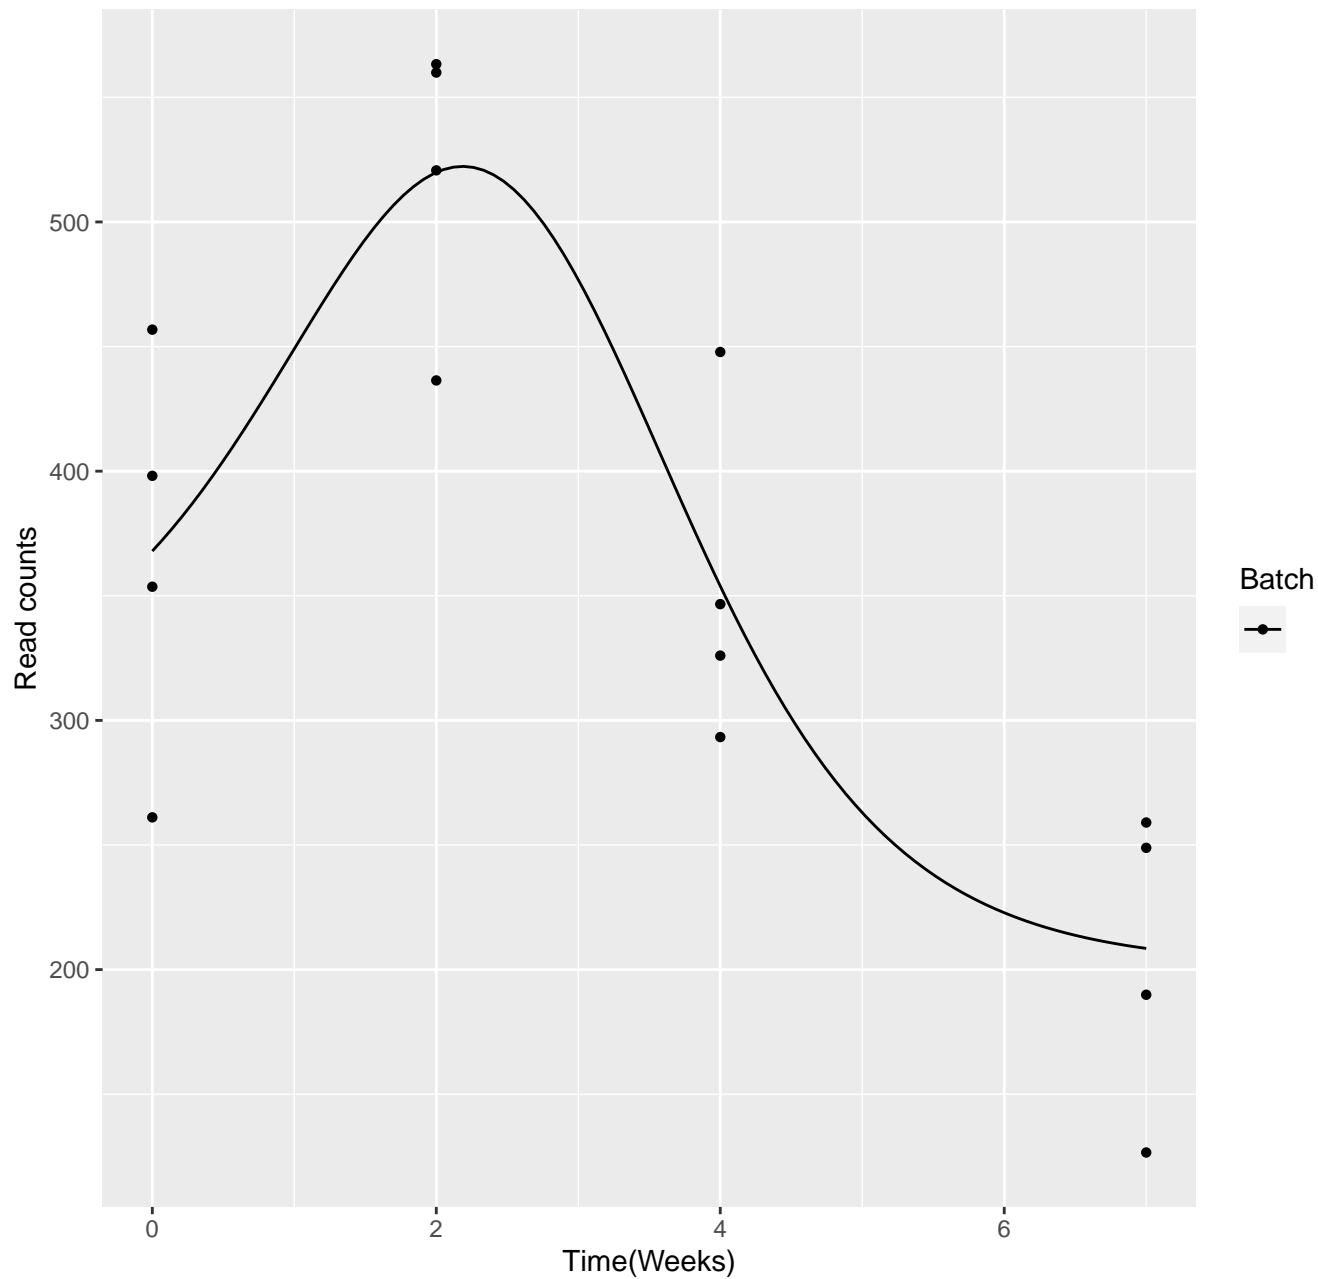

LMOD1:  $\log_{10} q = -3.88$

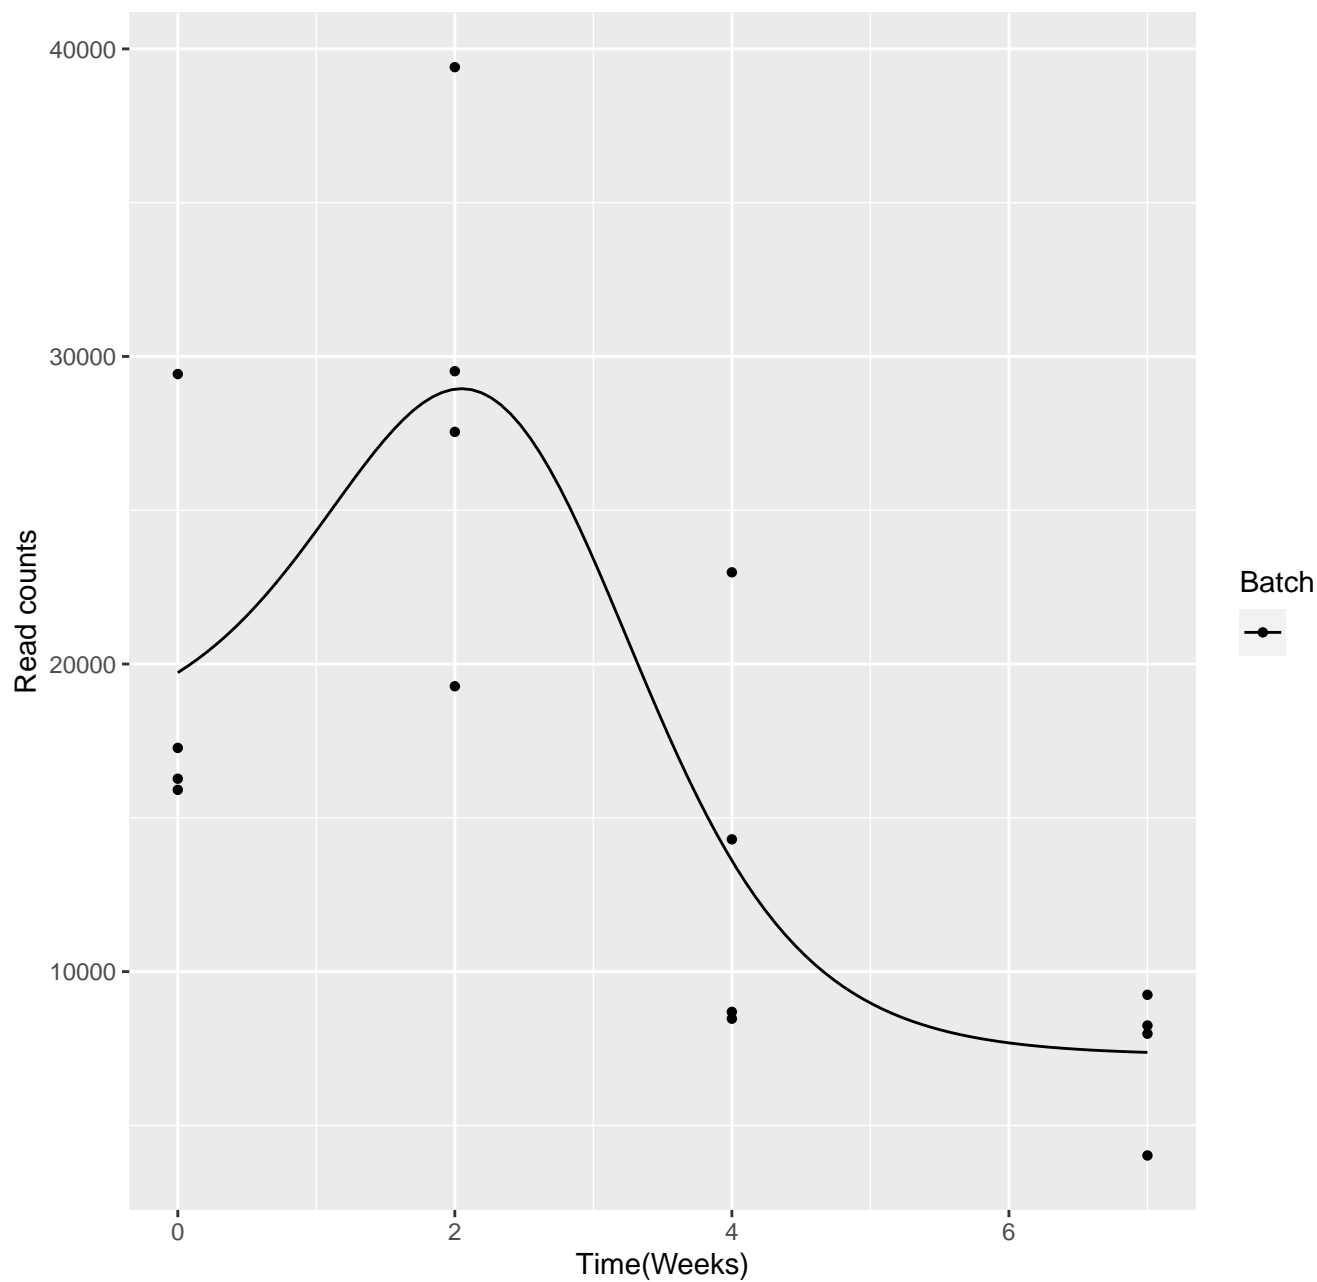

HMGA1:  $\log_{10} q = -3.88$

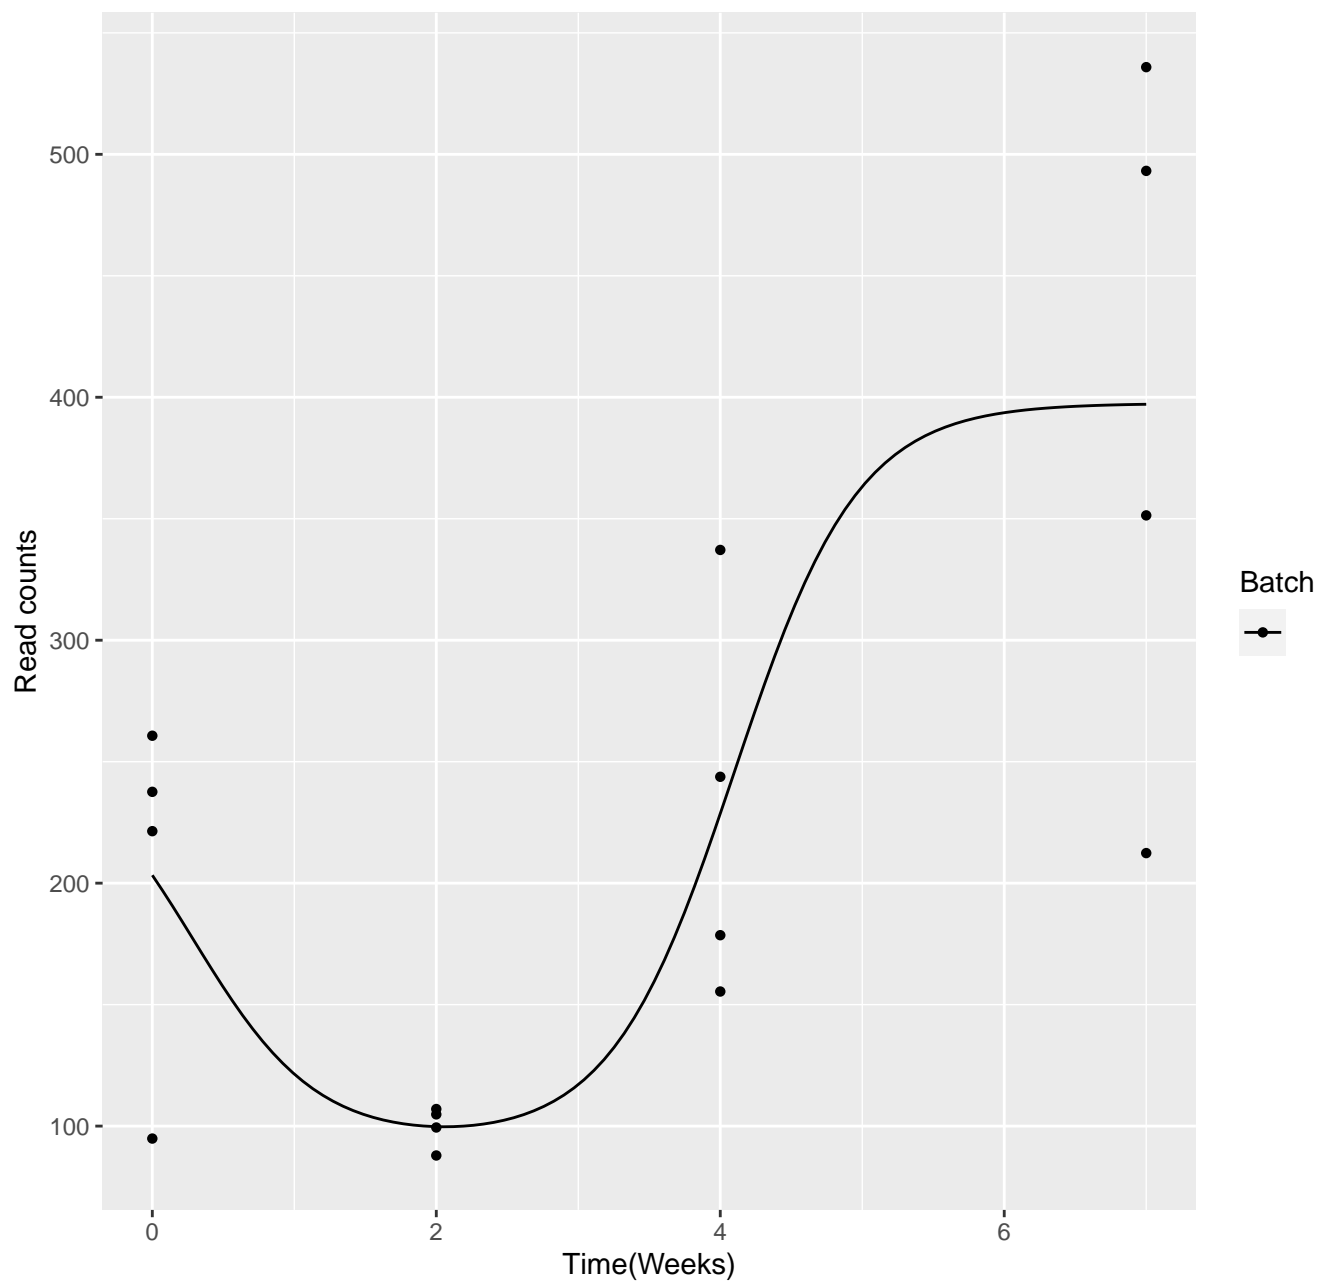

INPP5D:  $\log_{10} q = -3.88$

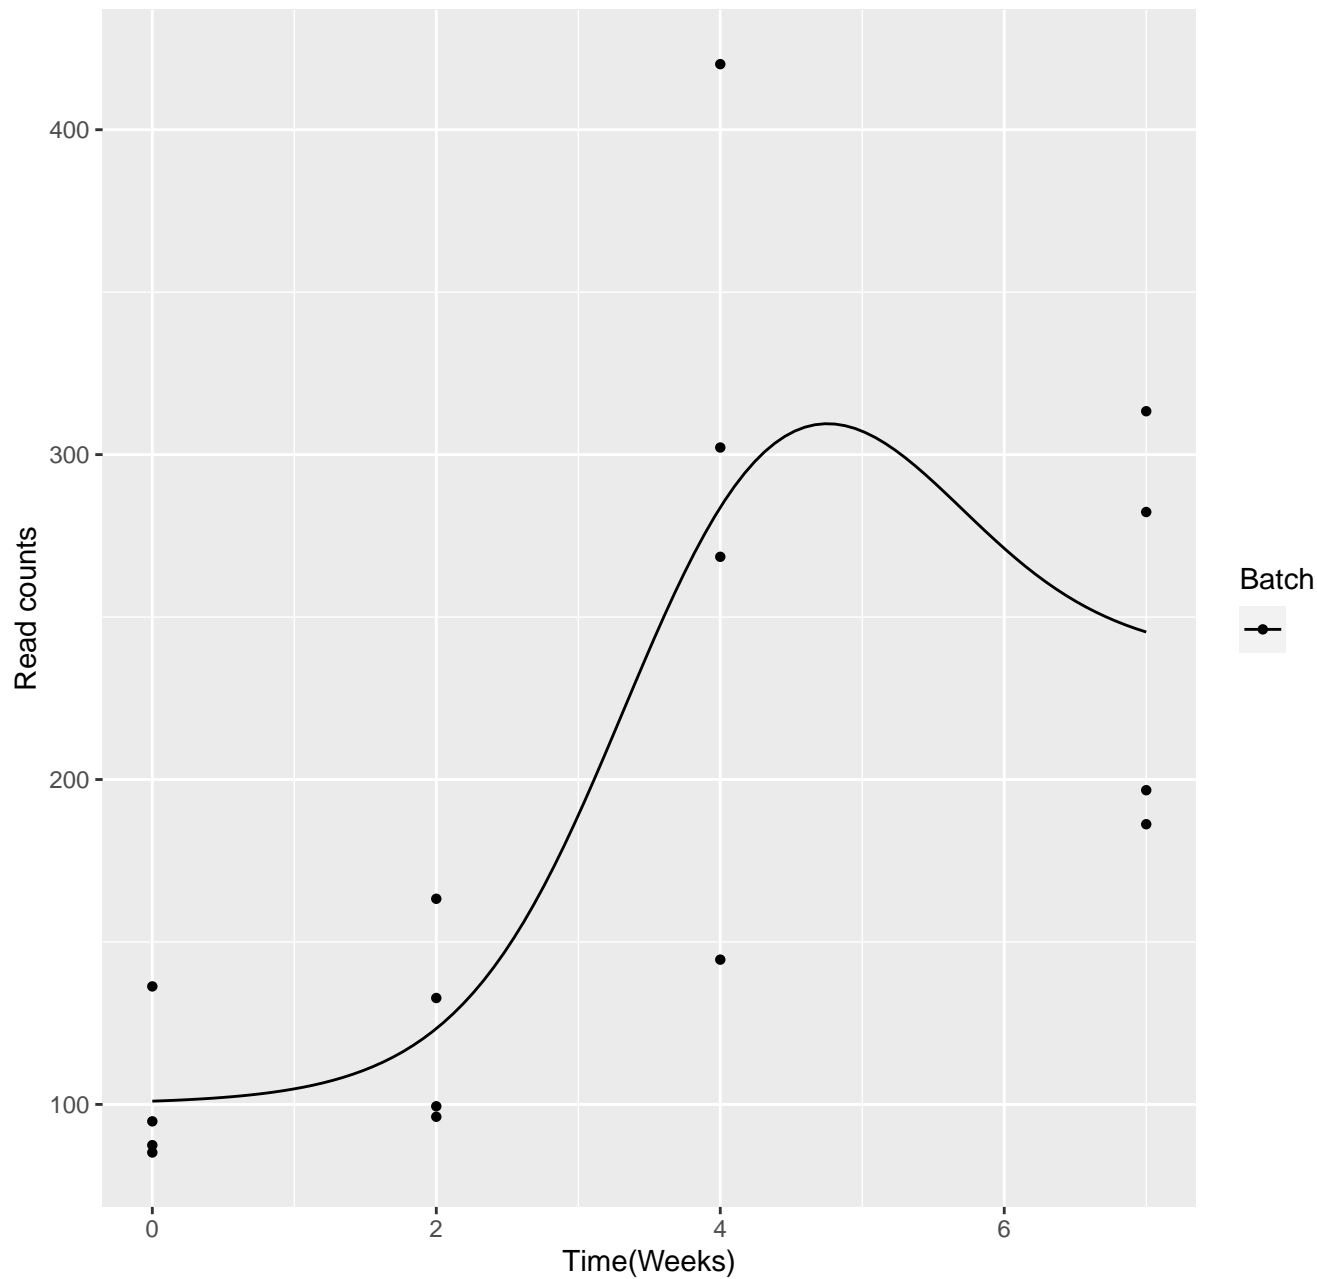

ITGAL:  $\log_{10} q = -3.88$

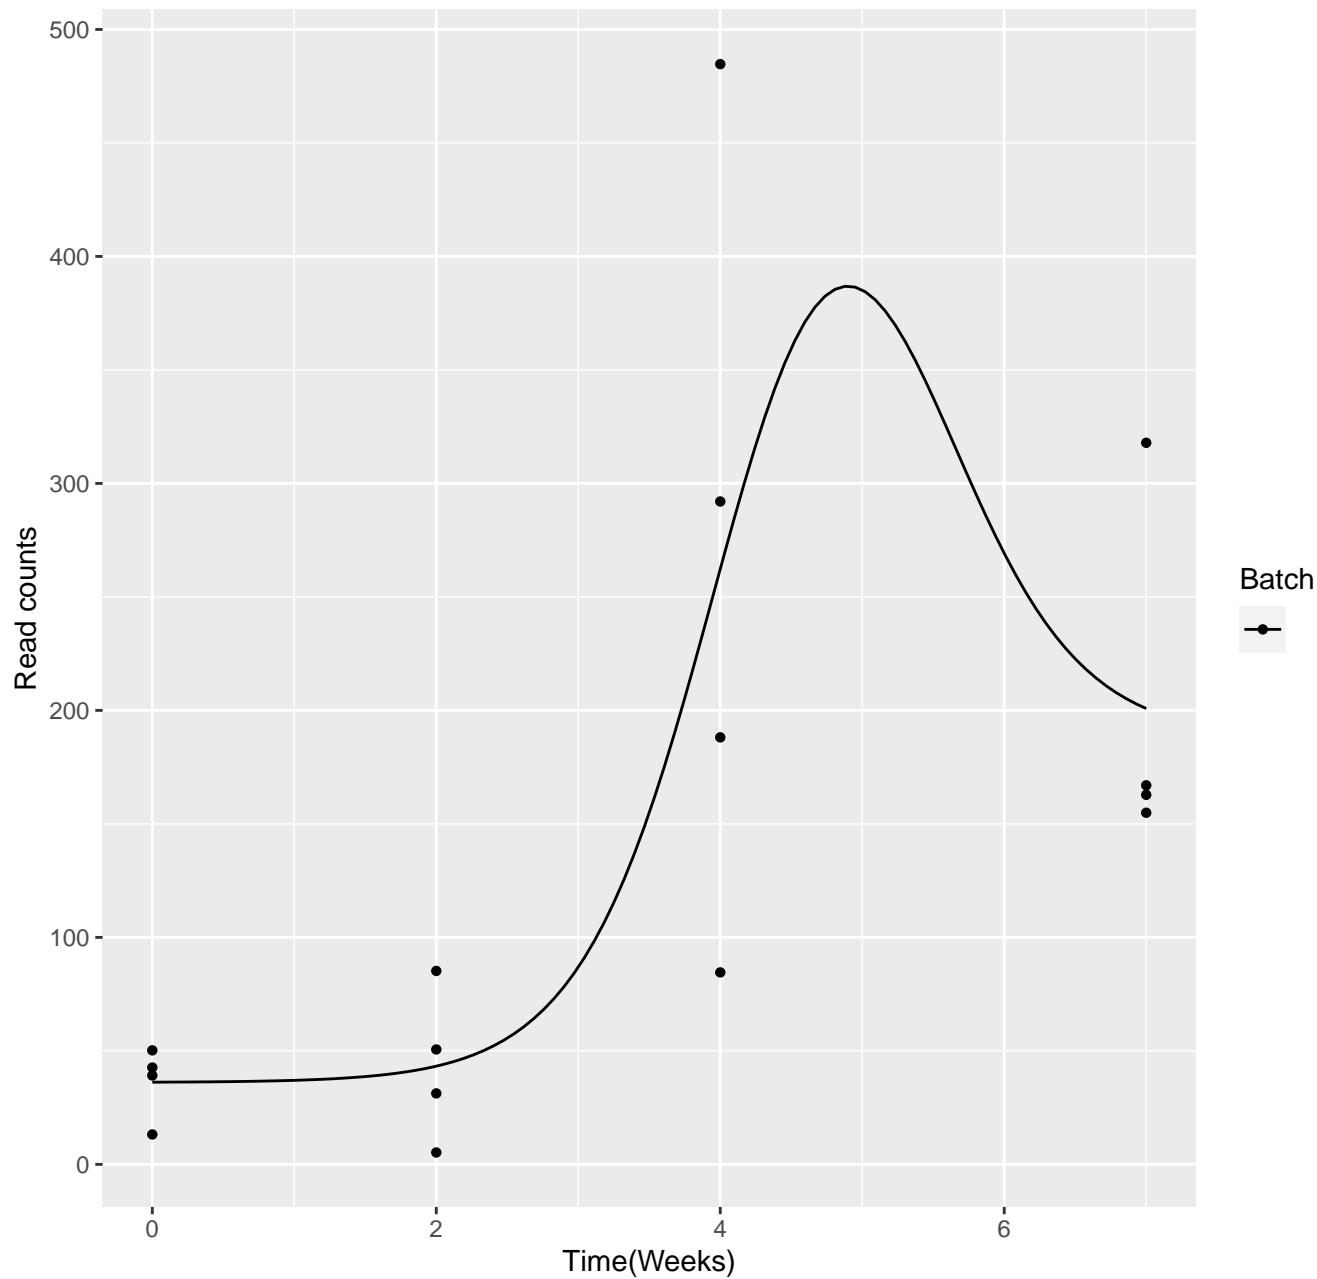

CARD6:  $\log_{10} q = -3.88$

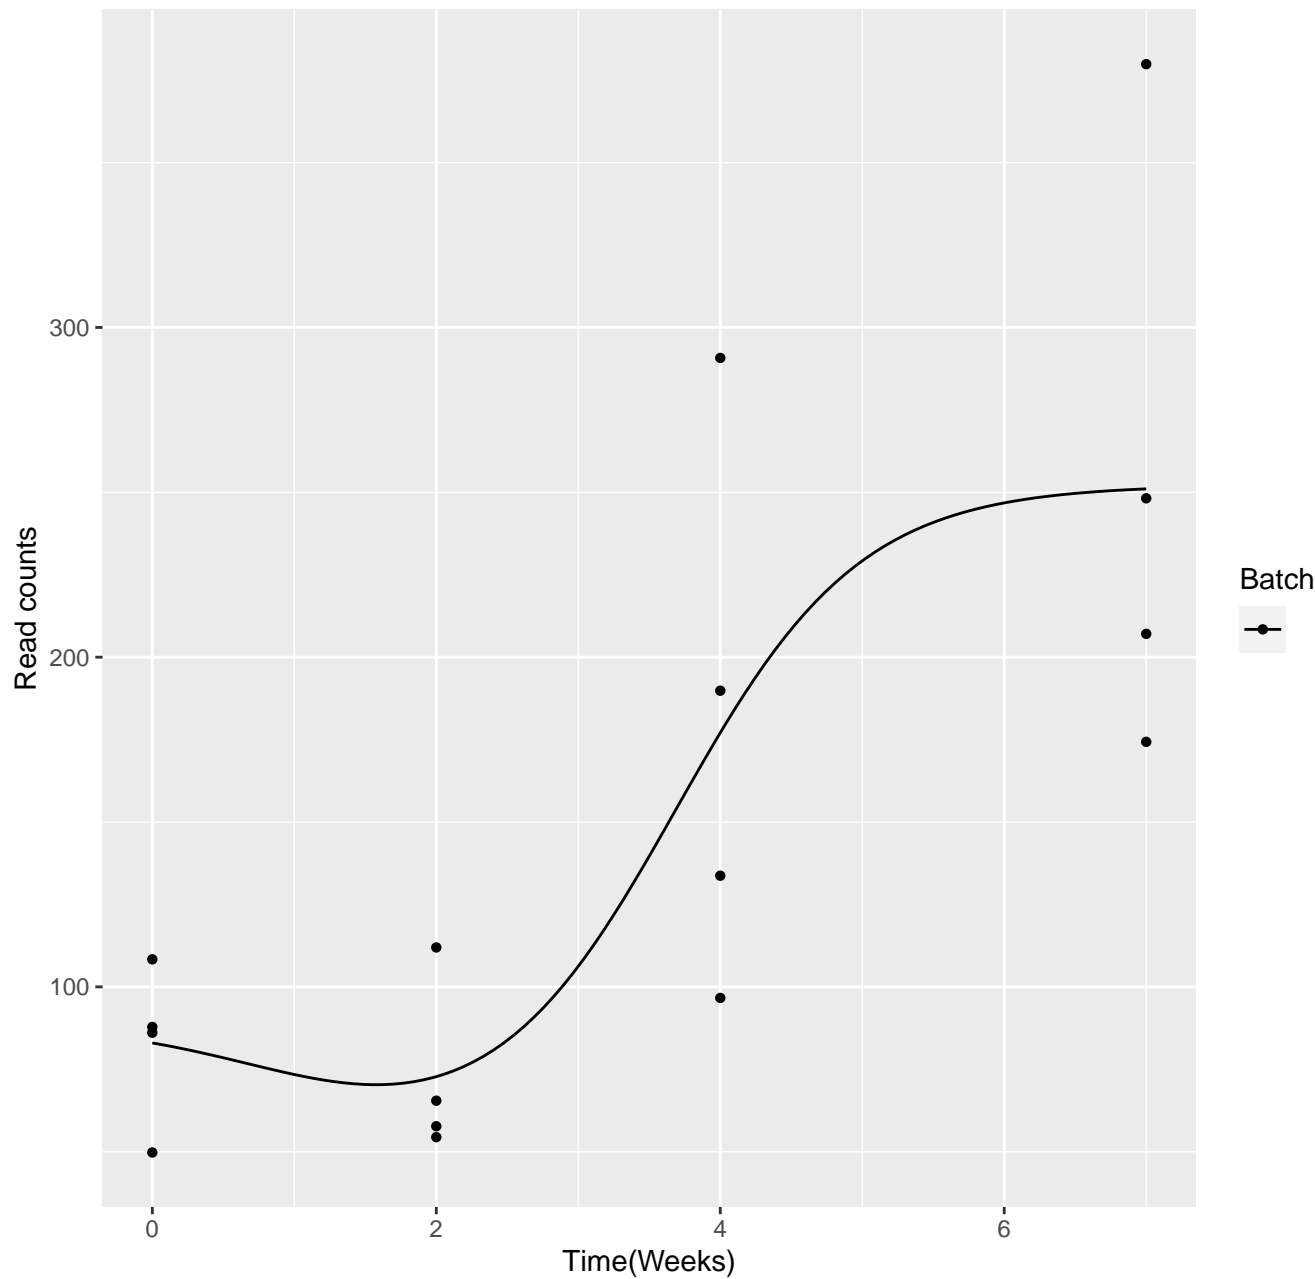

LOC127488927:  $\log_{10} q = -3.88$

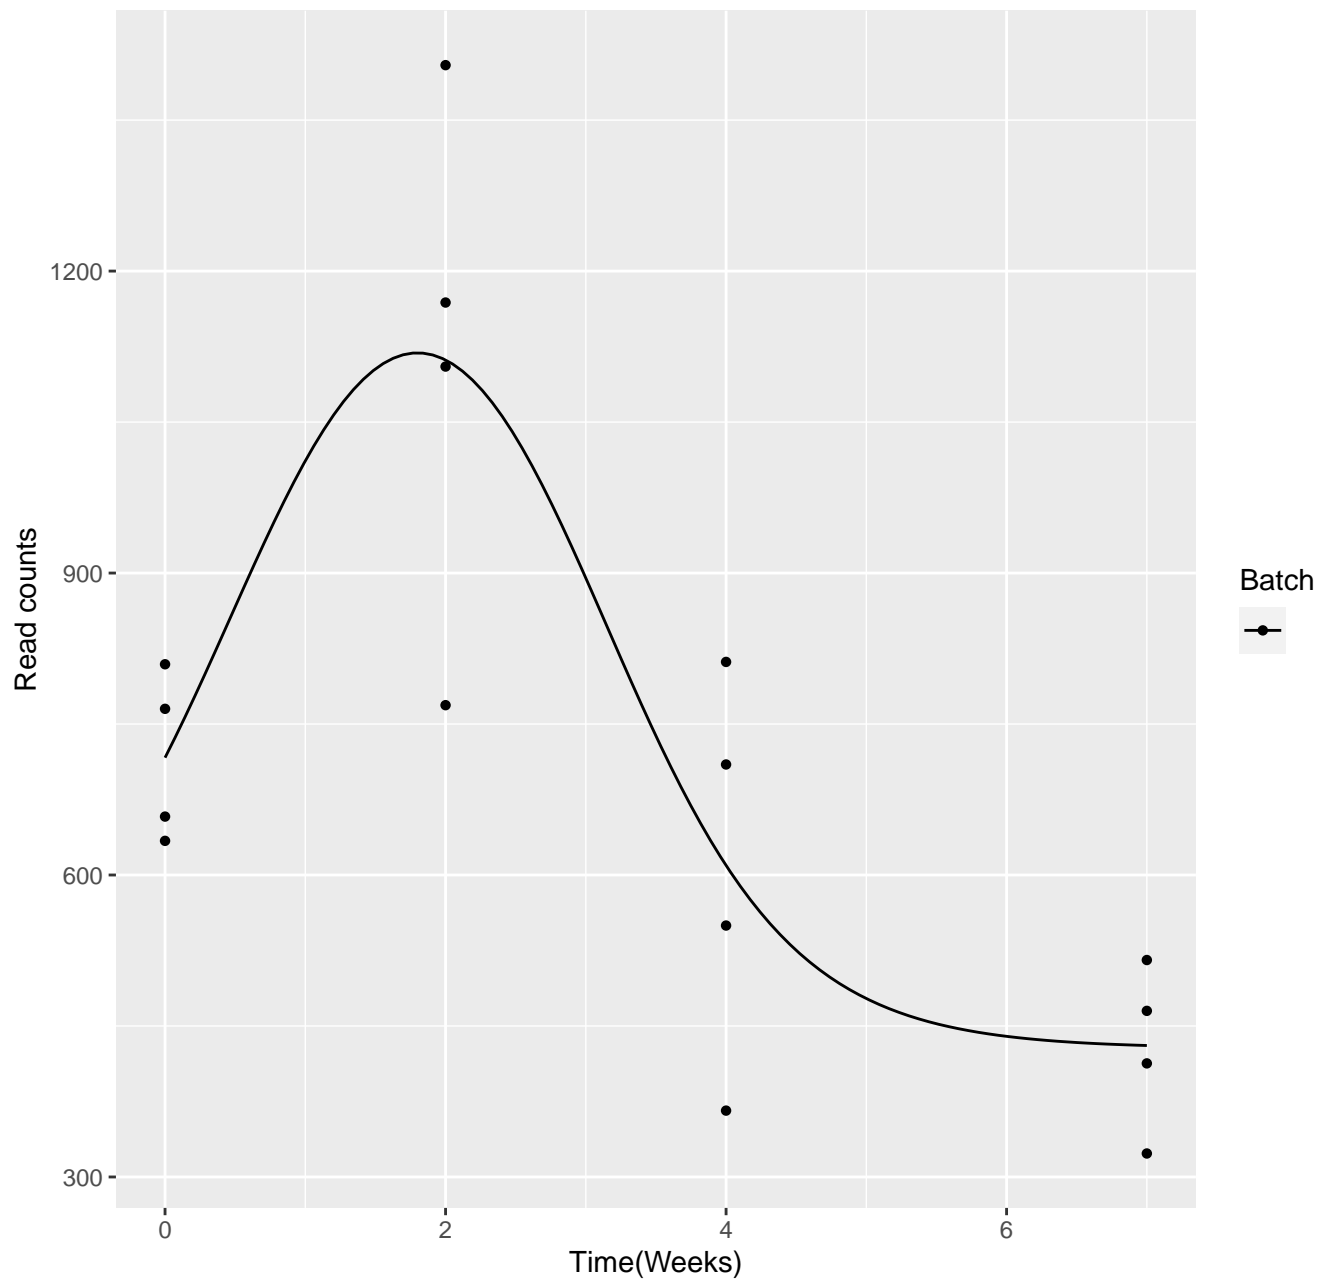



ATP2A3:  $\log_{10} q = -3.88$

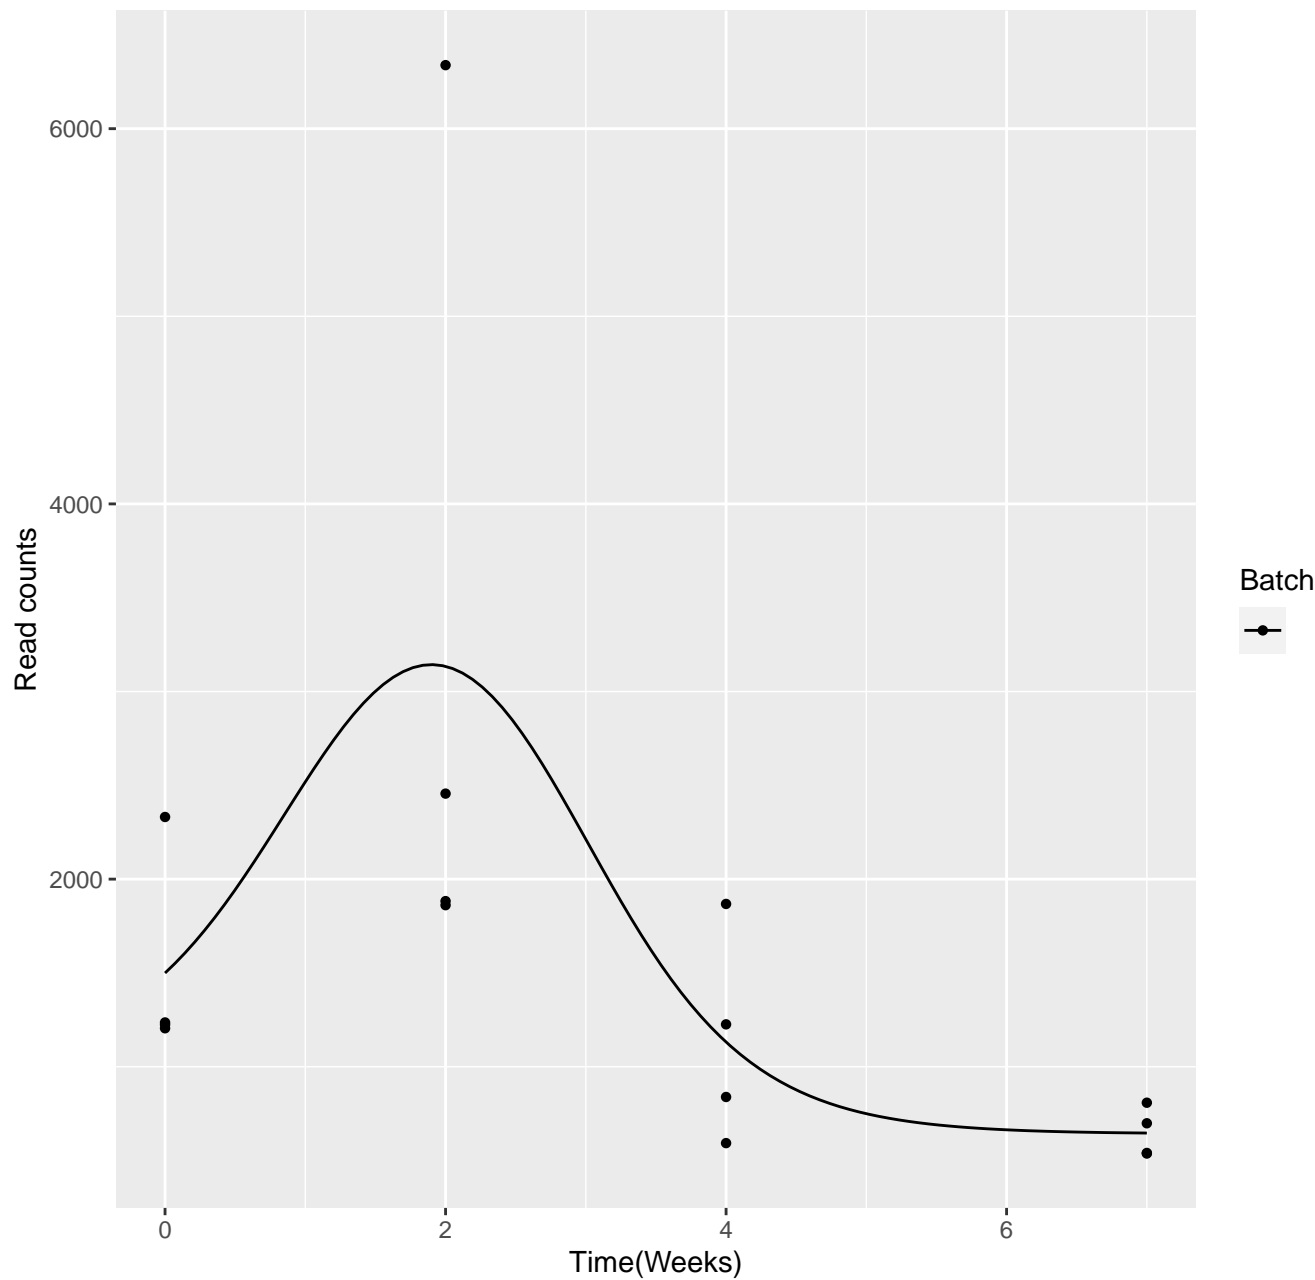

FFAR4:  $\log_{10} q = -3.88$

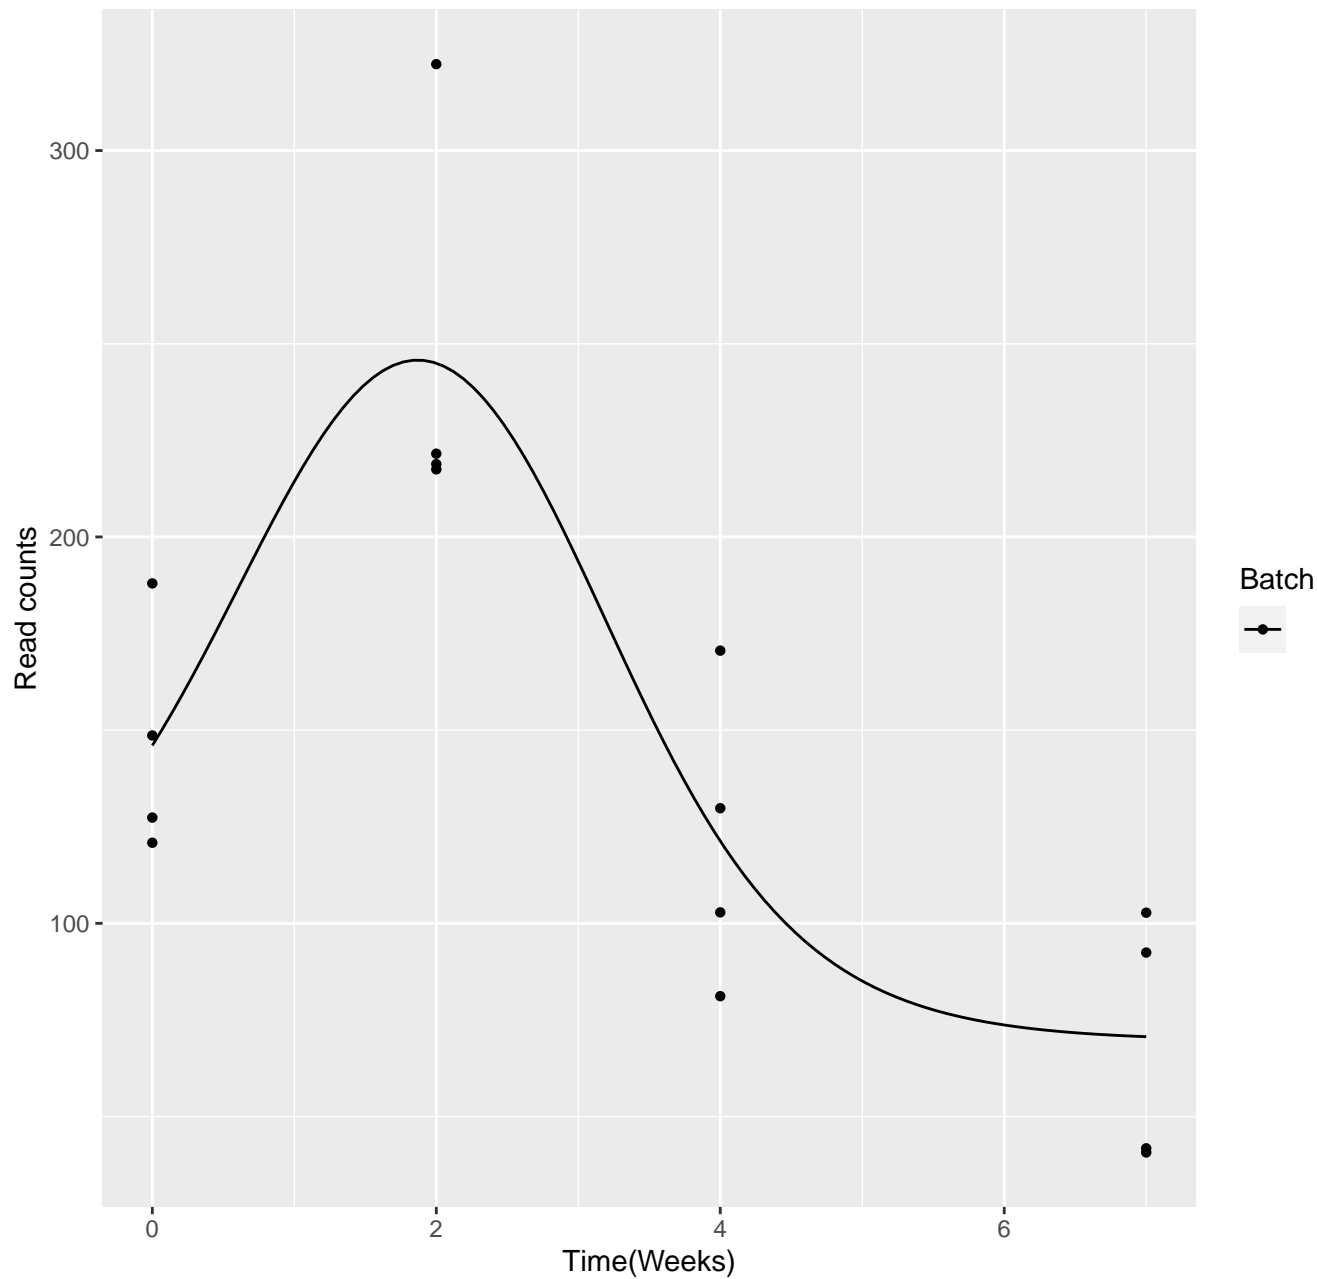

SGO1:  $\log_{10} q = -3.88$

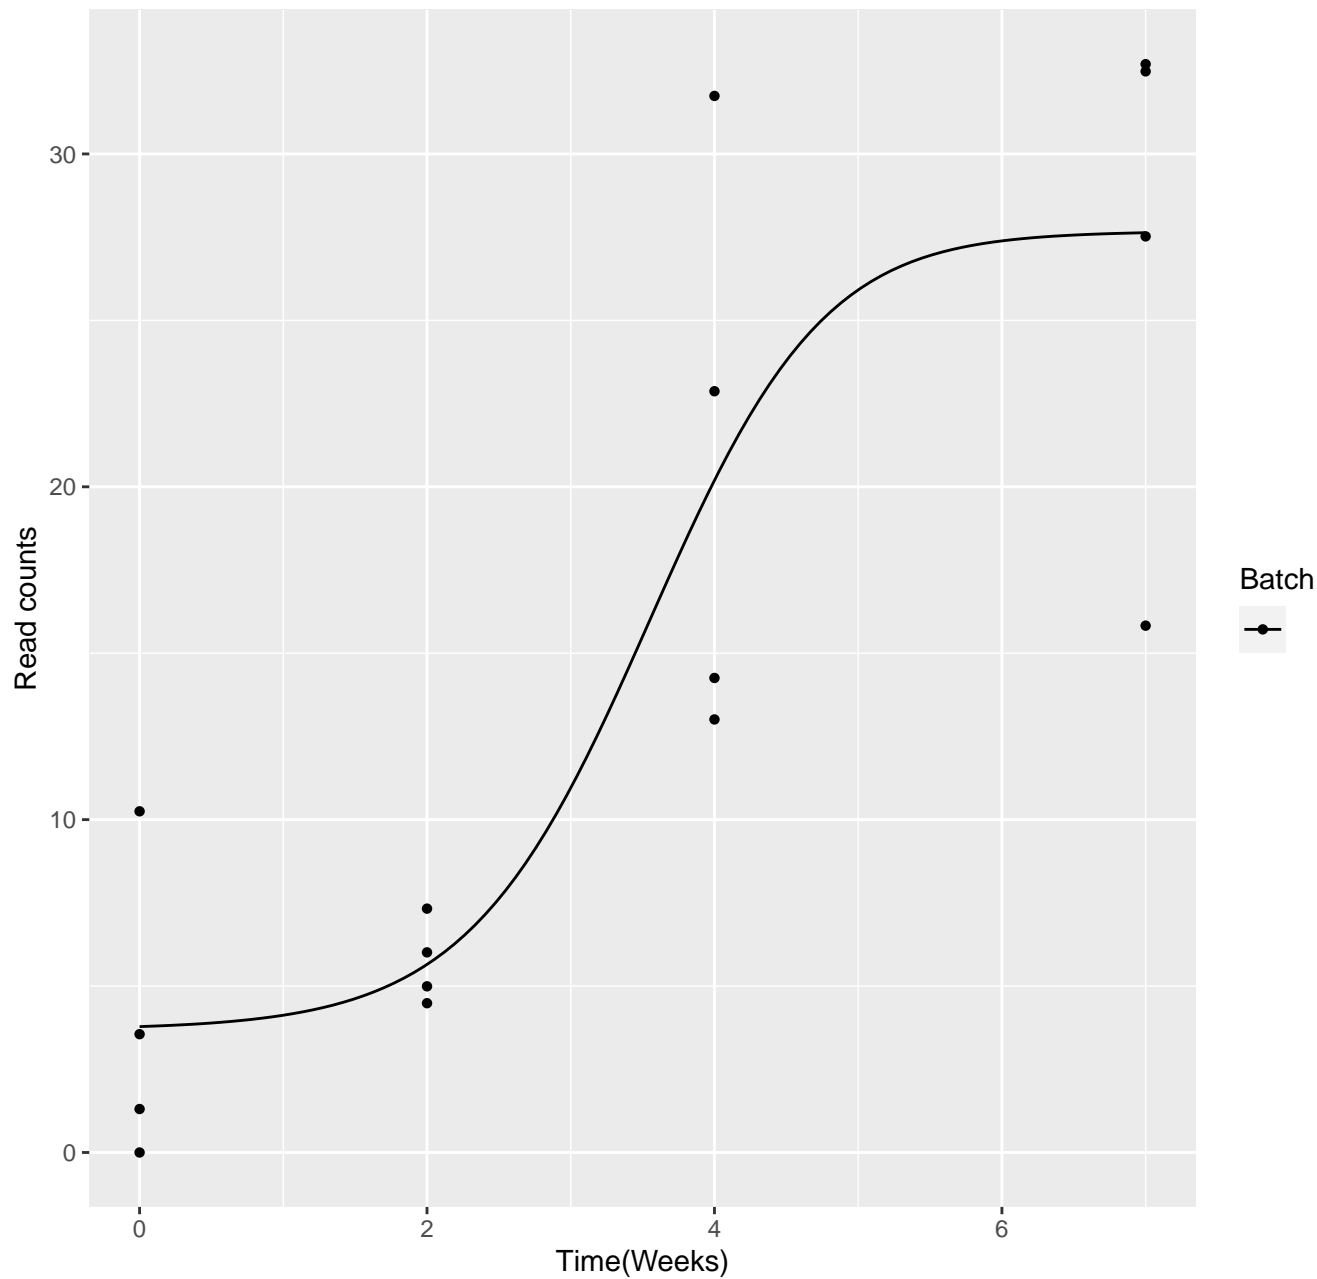

RECK:  $\log_{10} q = -3.87$

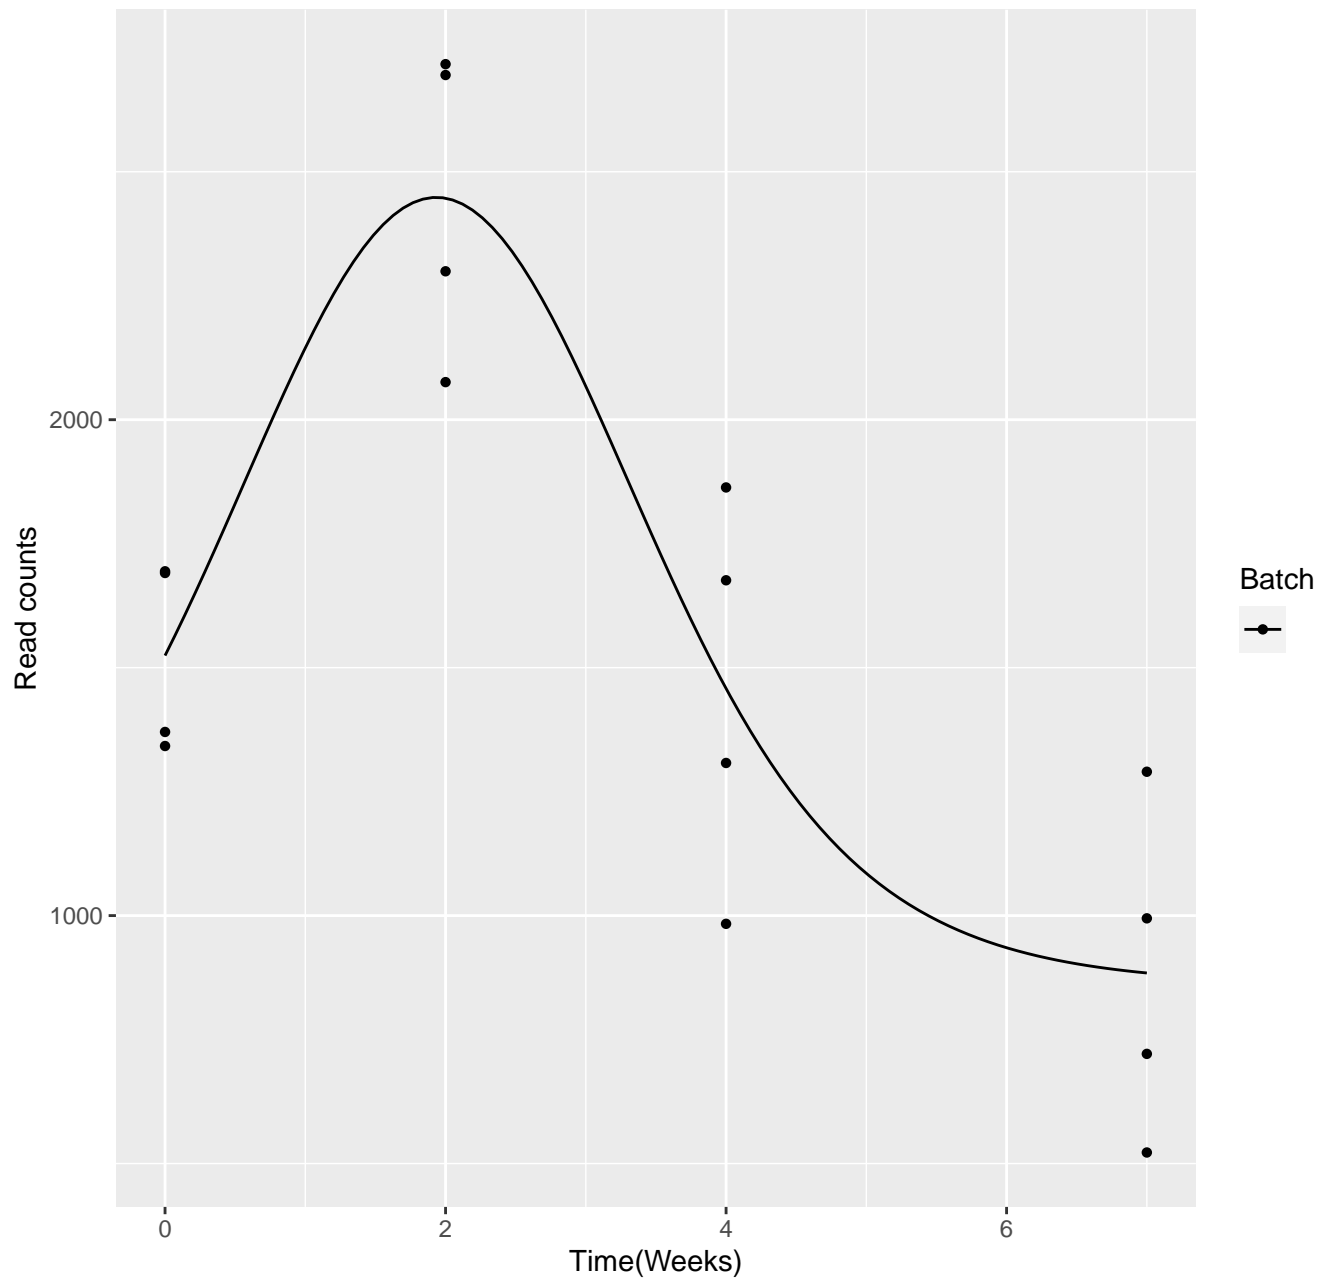

BRMS1L:  $\log_{10} q = -3.87$

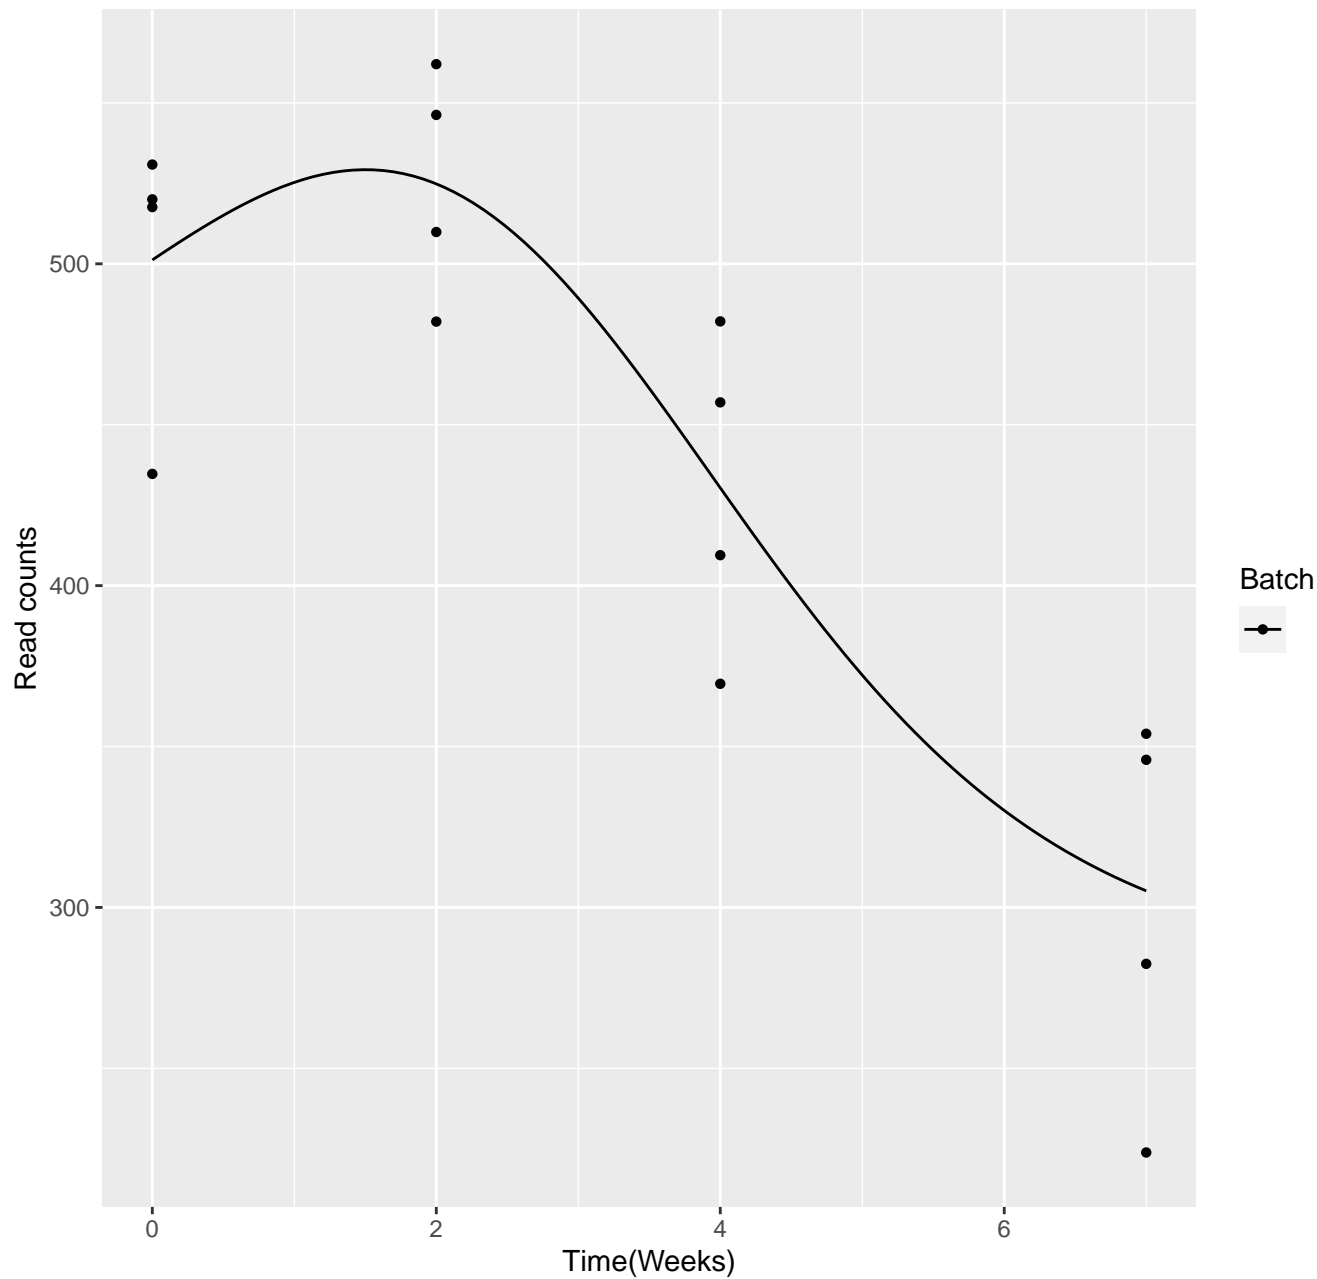

FXYD5:  $\log_{10} q = -3.87$

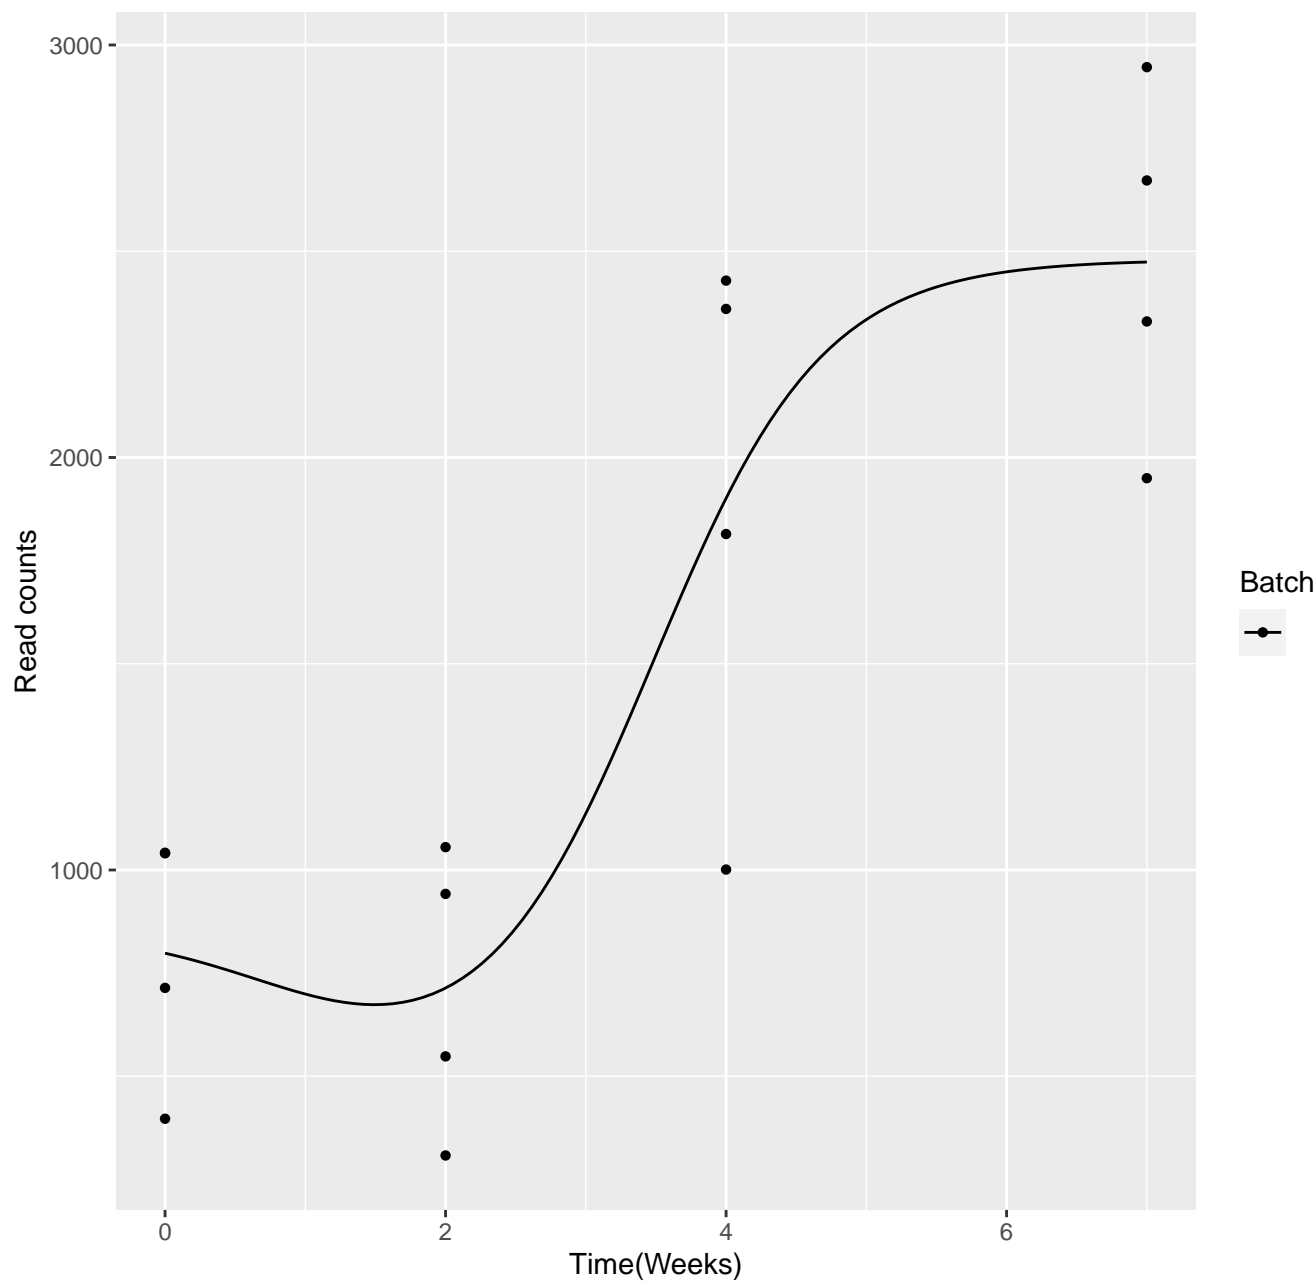

PBXIP1:  $\log_{10} q = -3.86$

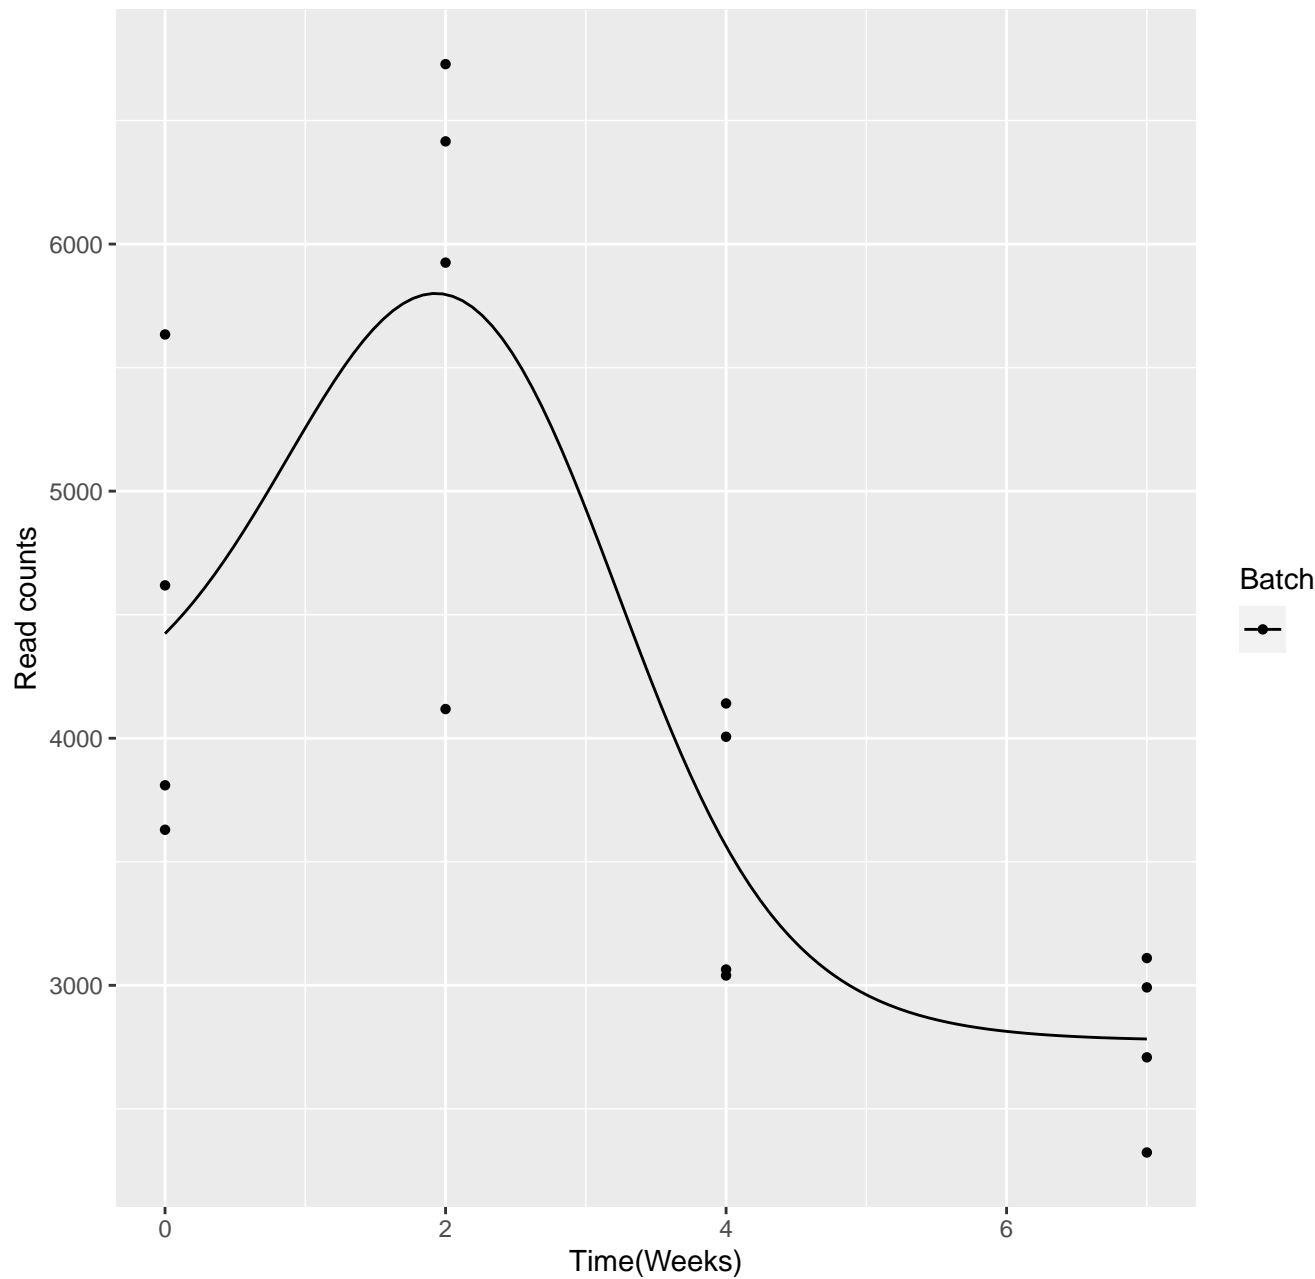

SQOR:  $\log_{10} q = -3.86$

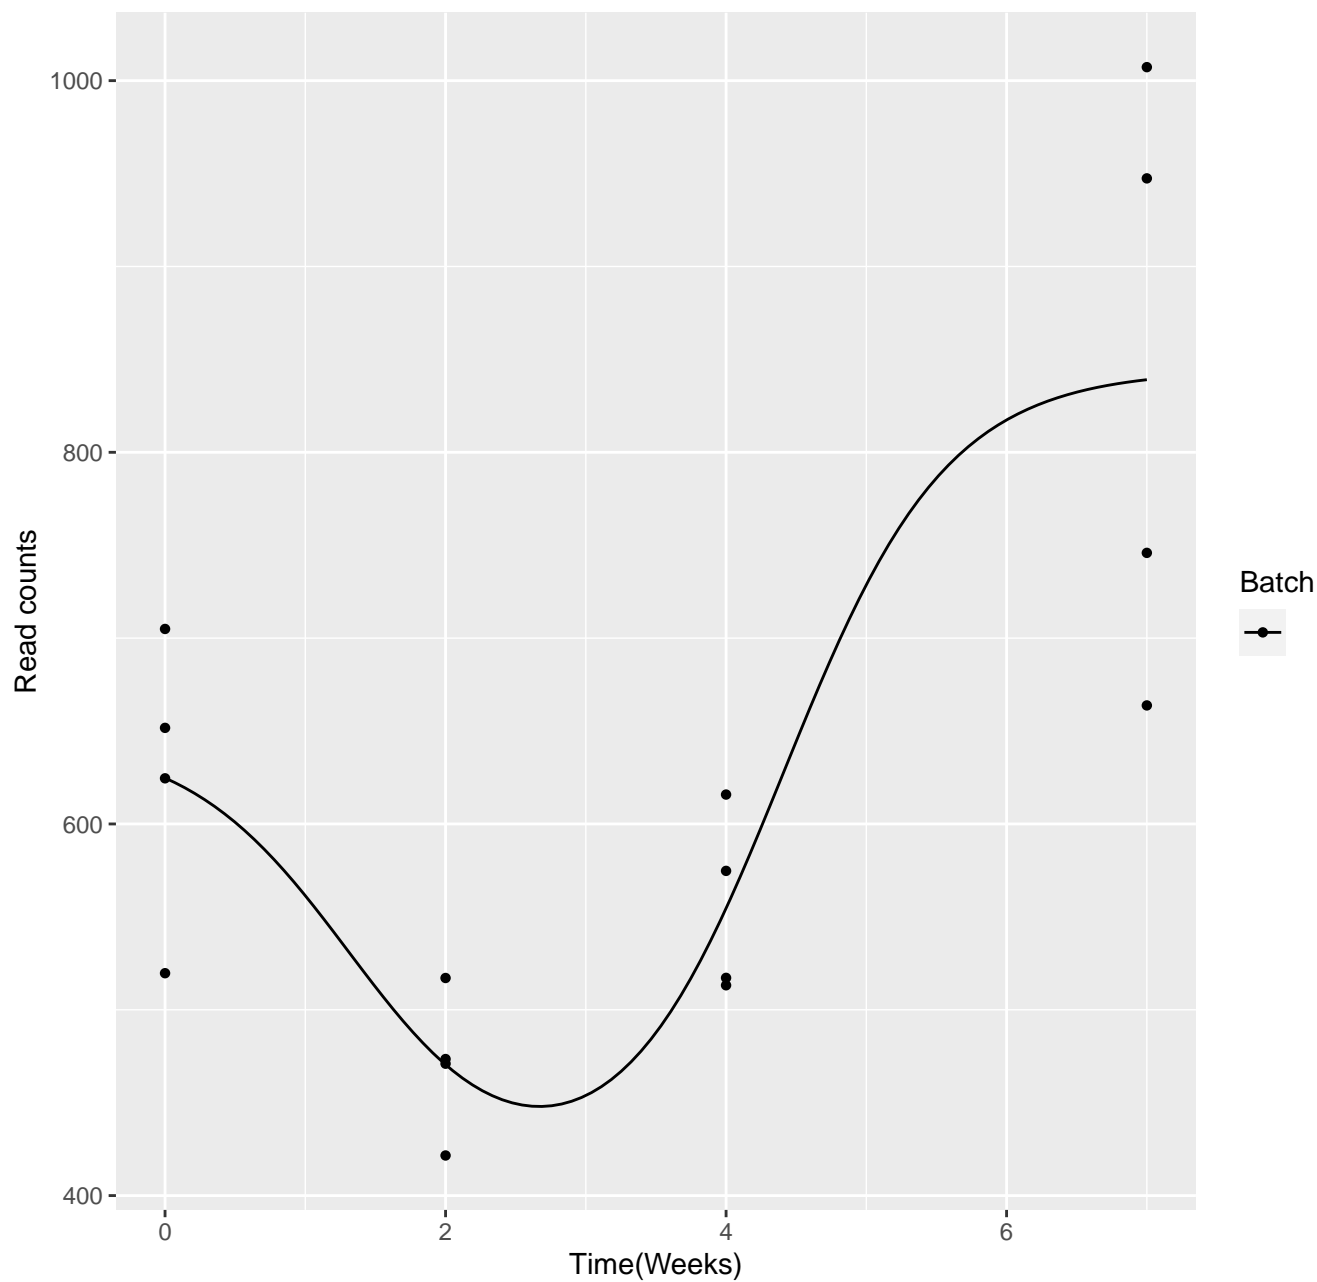



IL411:  $\log_{10} q = -3.86$

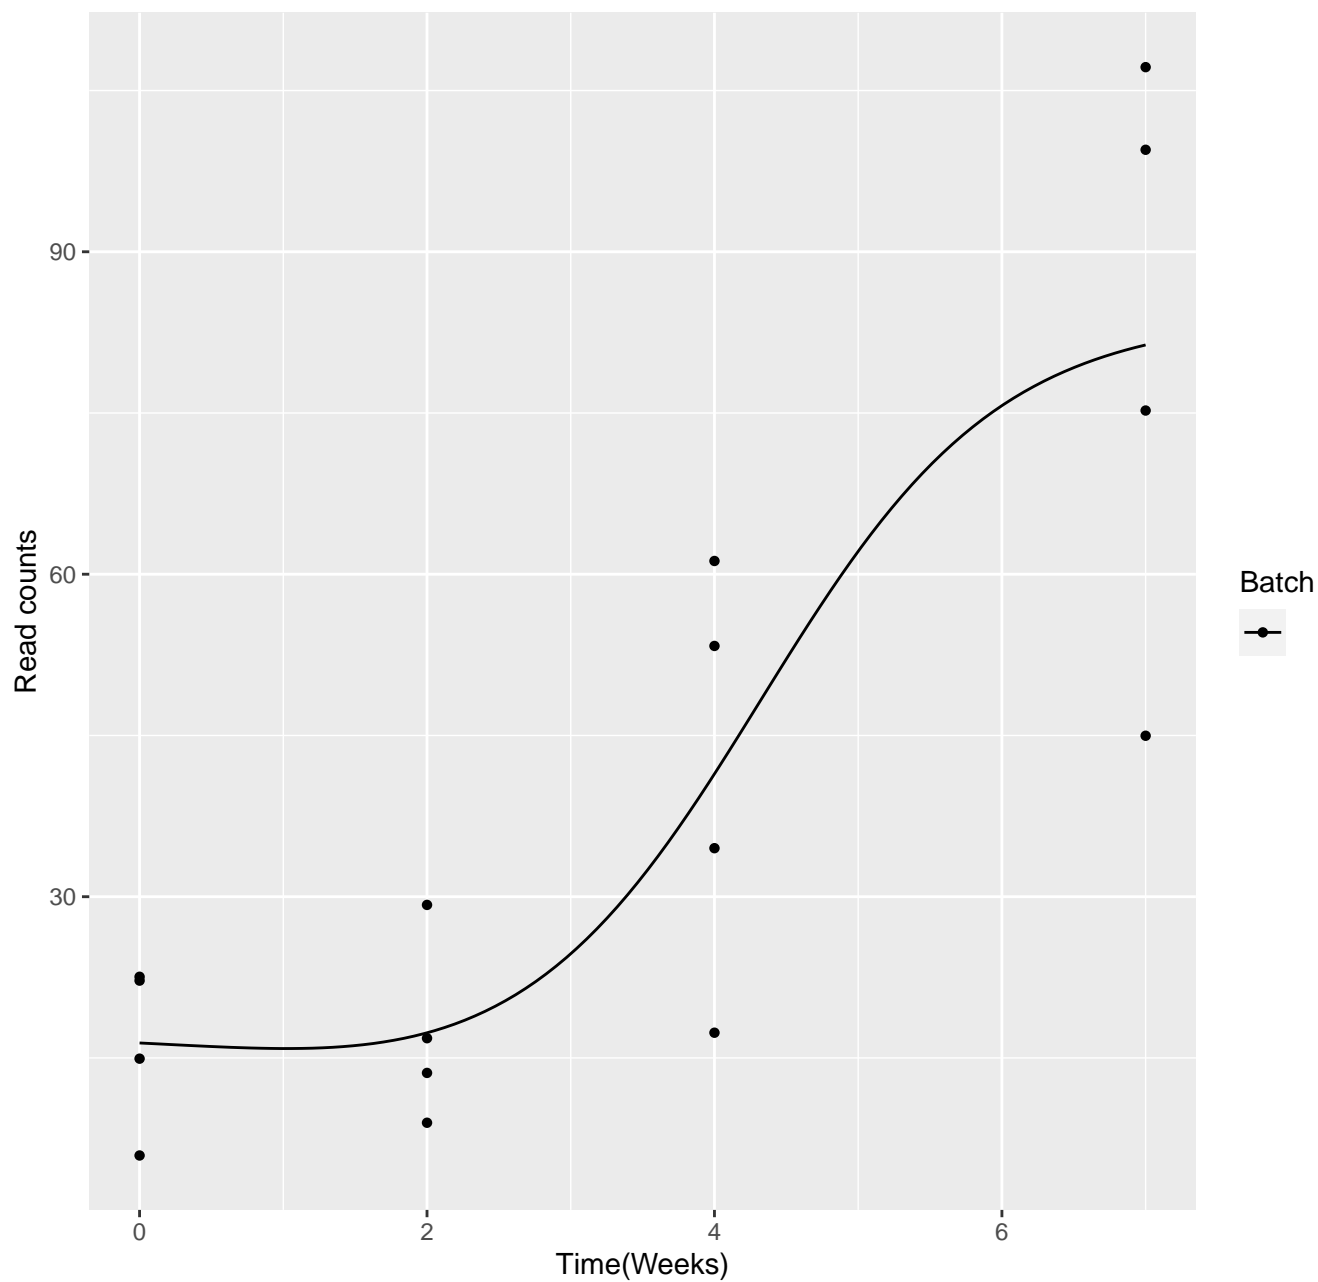

CDC42BPB:  $\log_{10} q = -3.85$

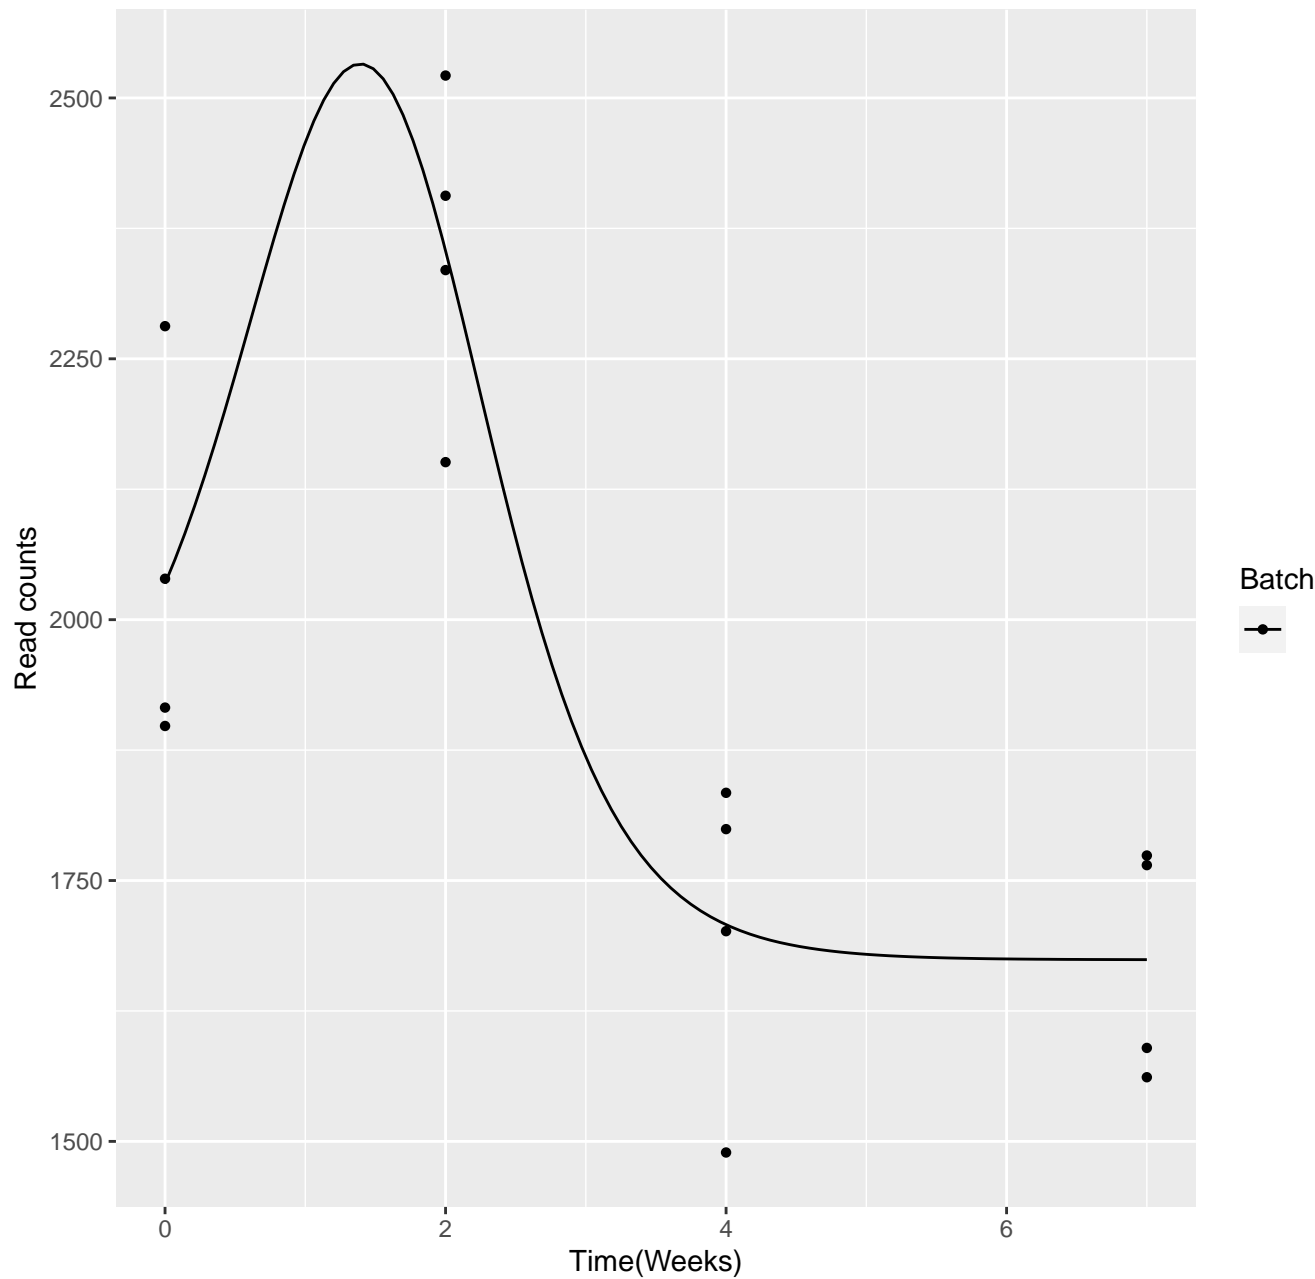

CORO1C:  $\log_{10} q = -3.85$

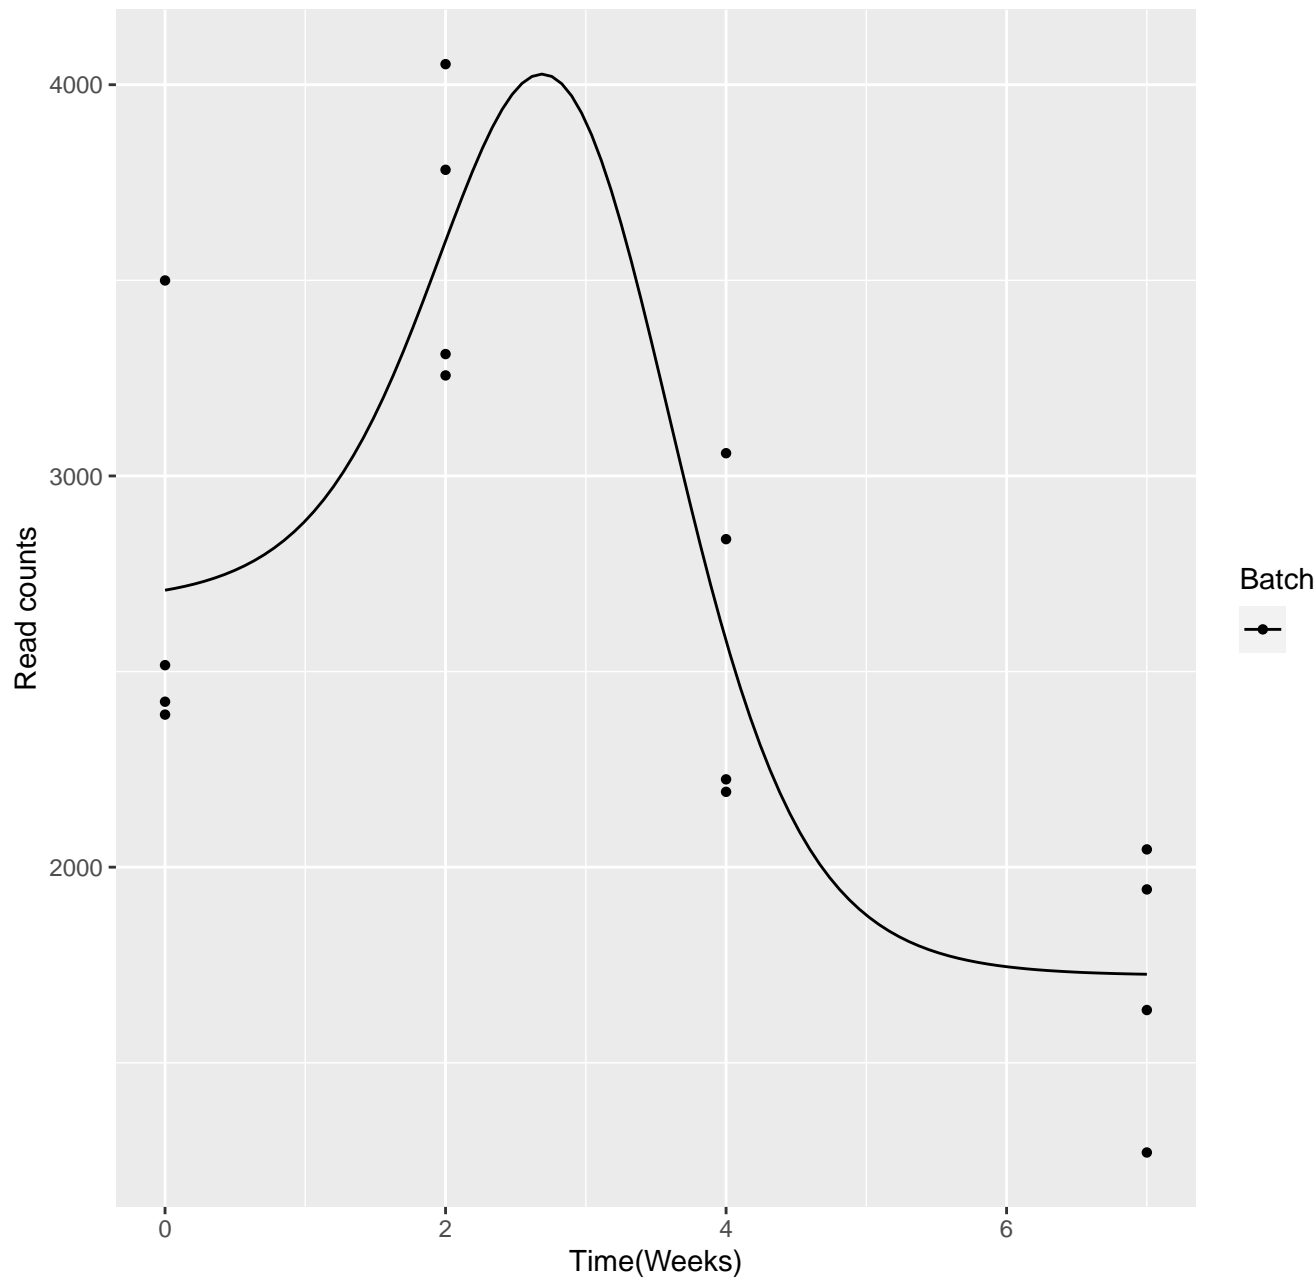

LOC103352415:  $\log_{10} q = -3.85$

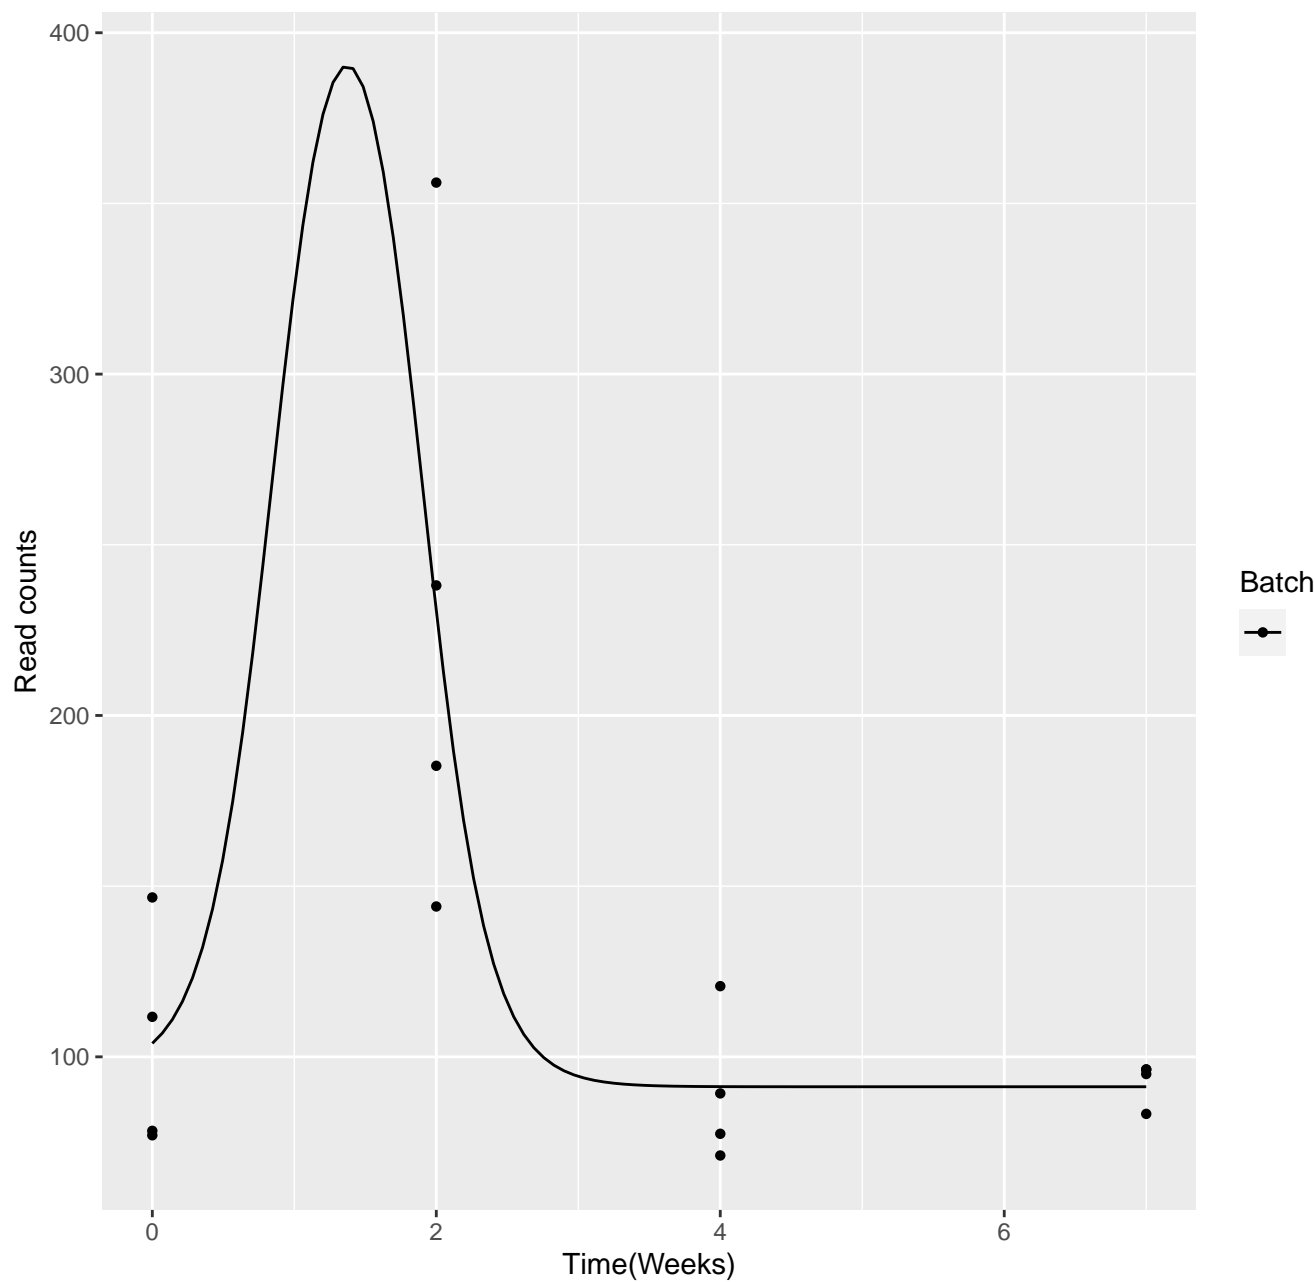

TAGAP:  $\log_{10} q = -3.85$

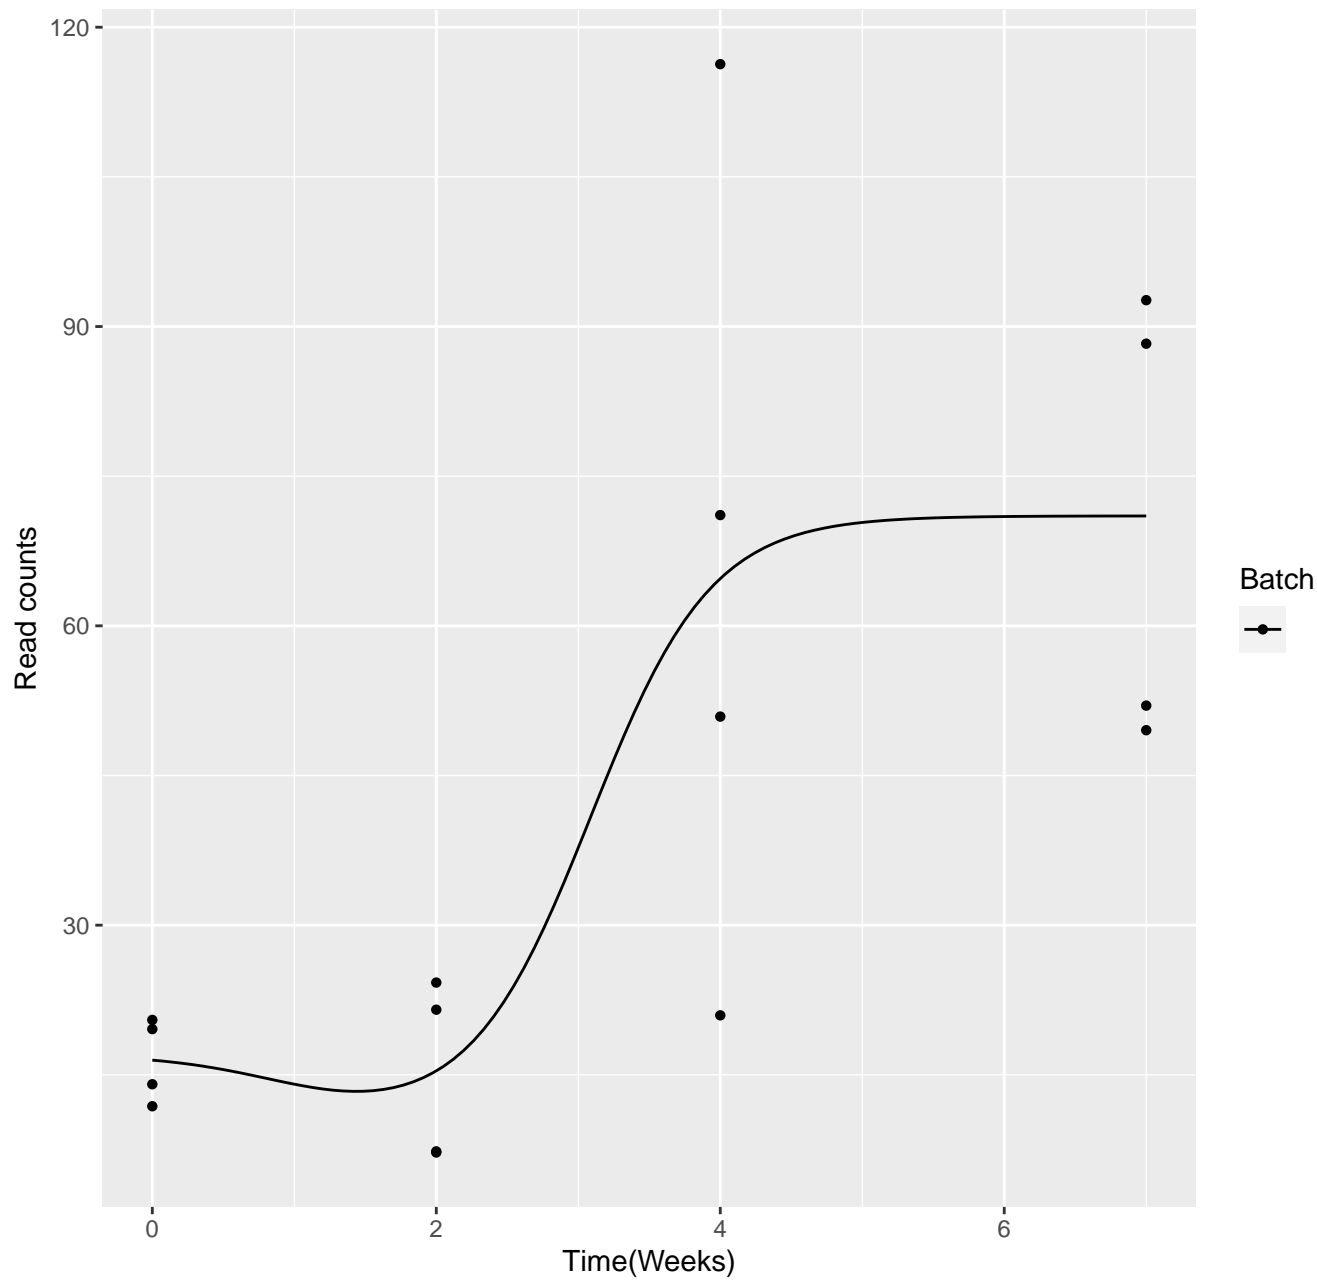

LOC103347344:  $\log_{10} q = -3.85$

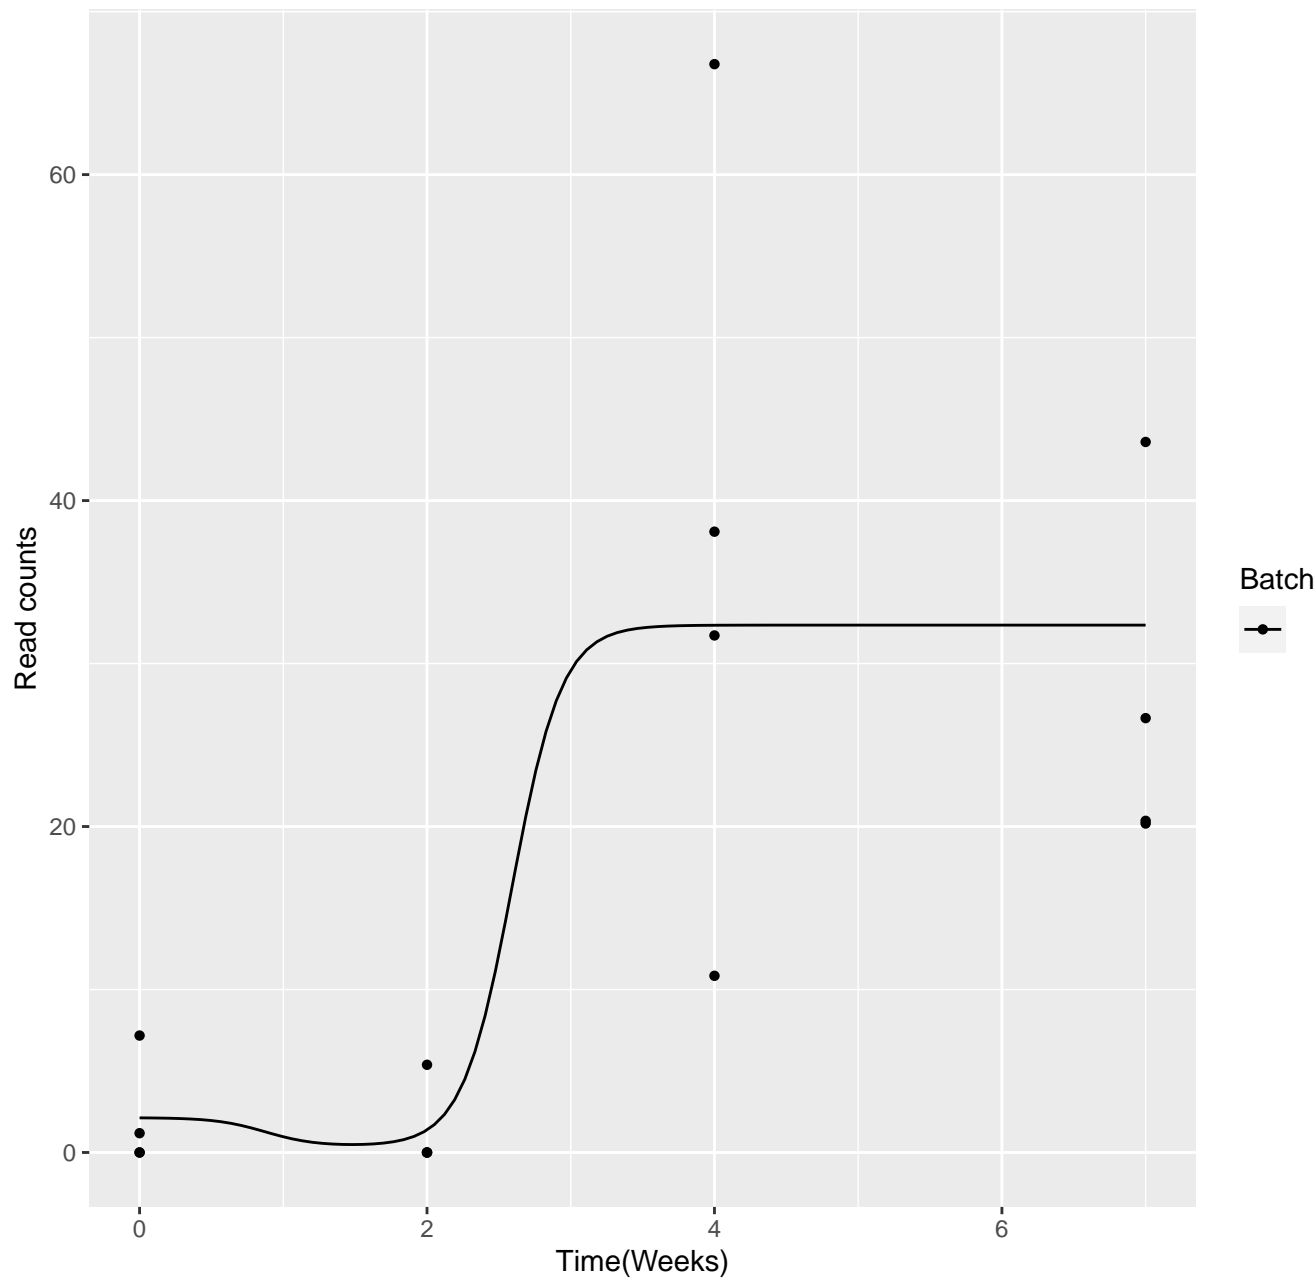

APOA4:  $\log_{10} q = -3.85$

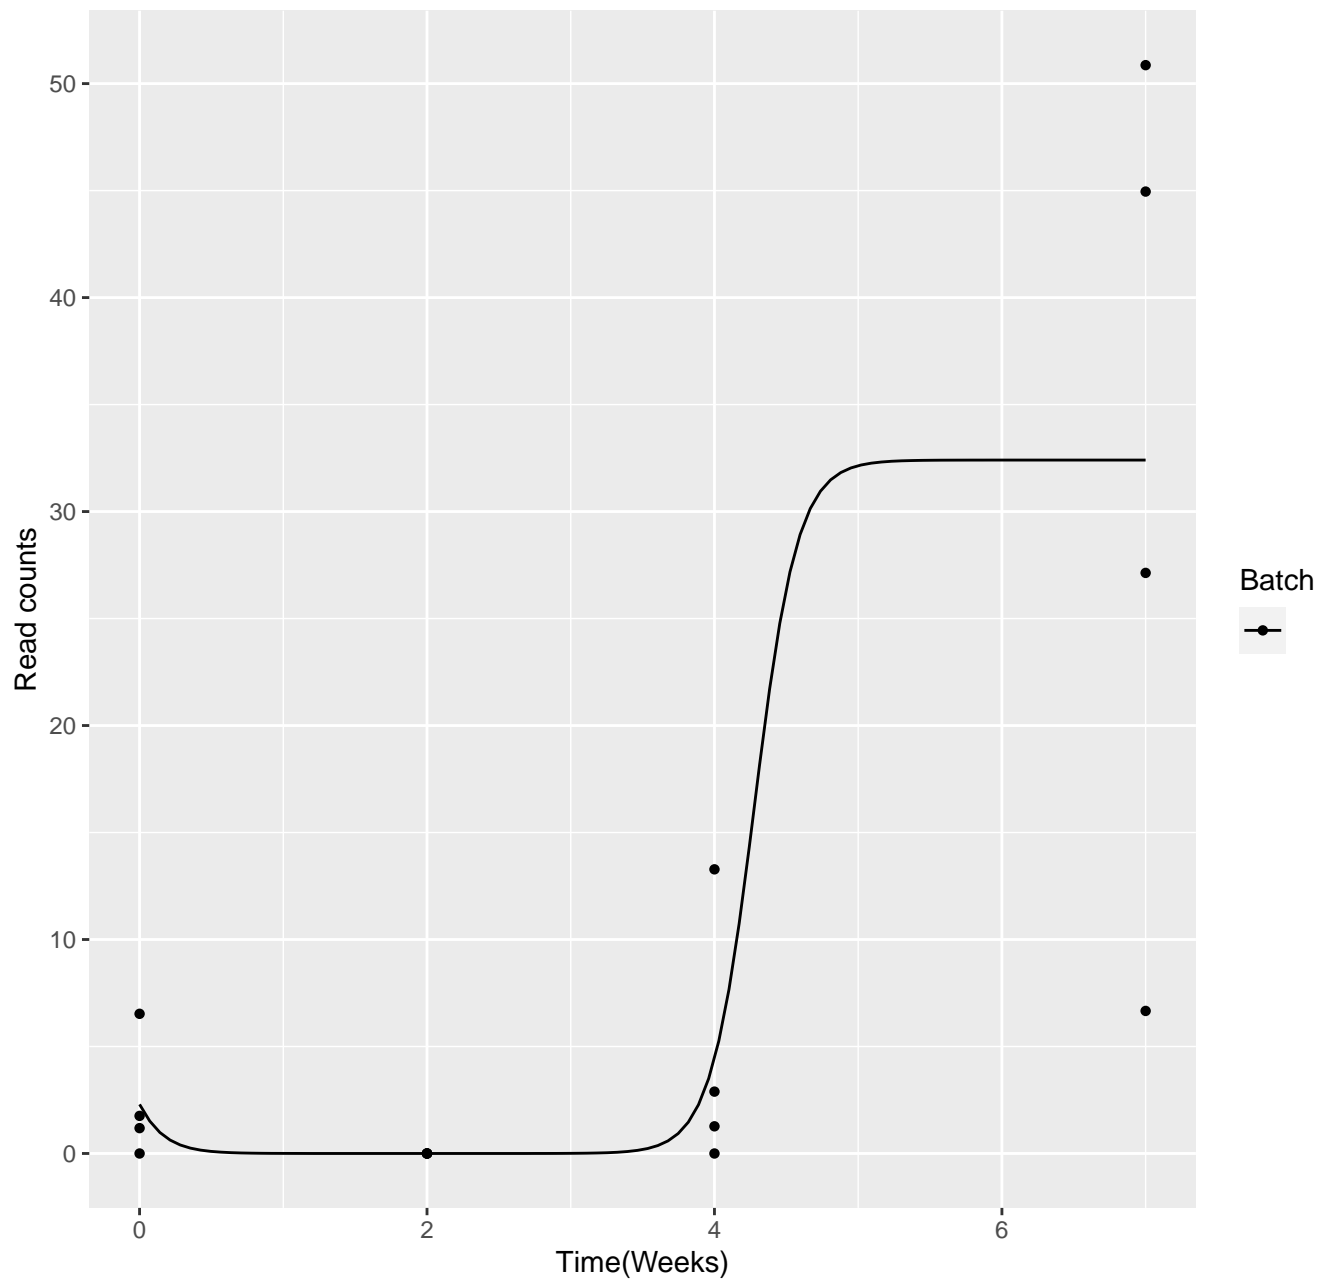

PAQR6:  $\log_{10} q = -3.85$

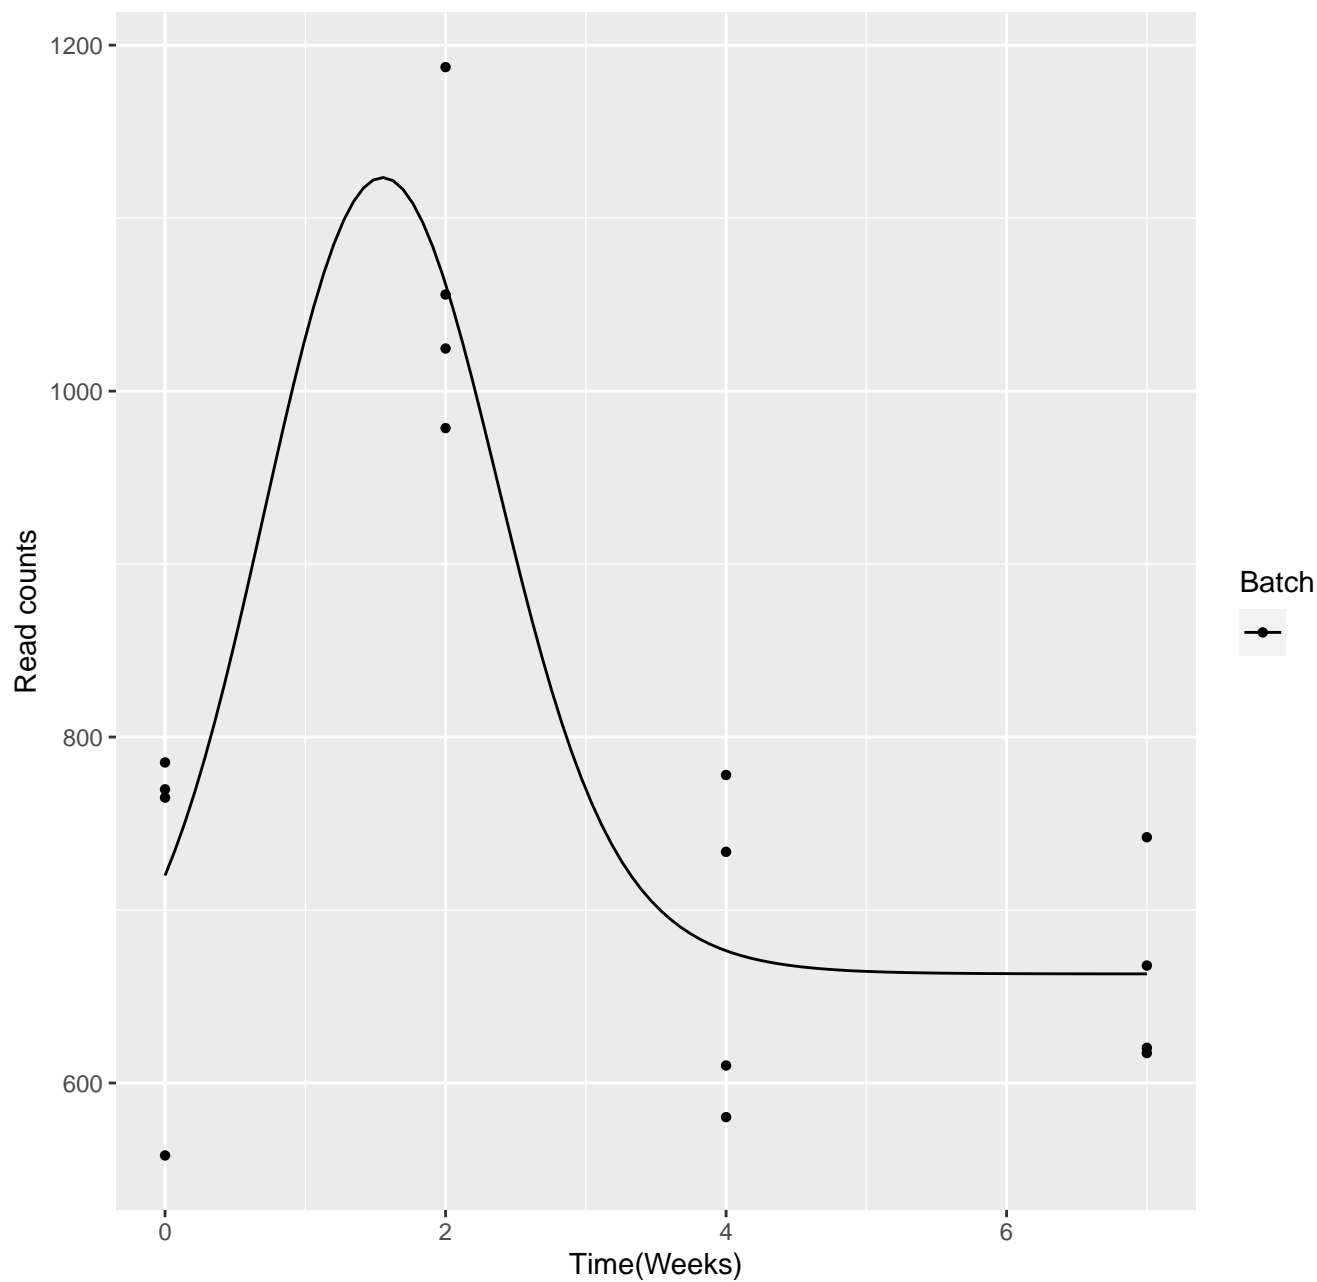



LOC100348415:  $\log_{10} q = -3.84$

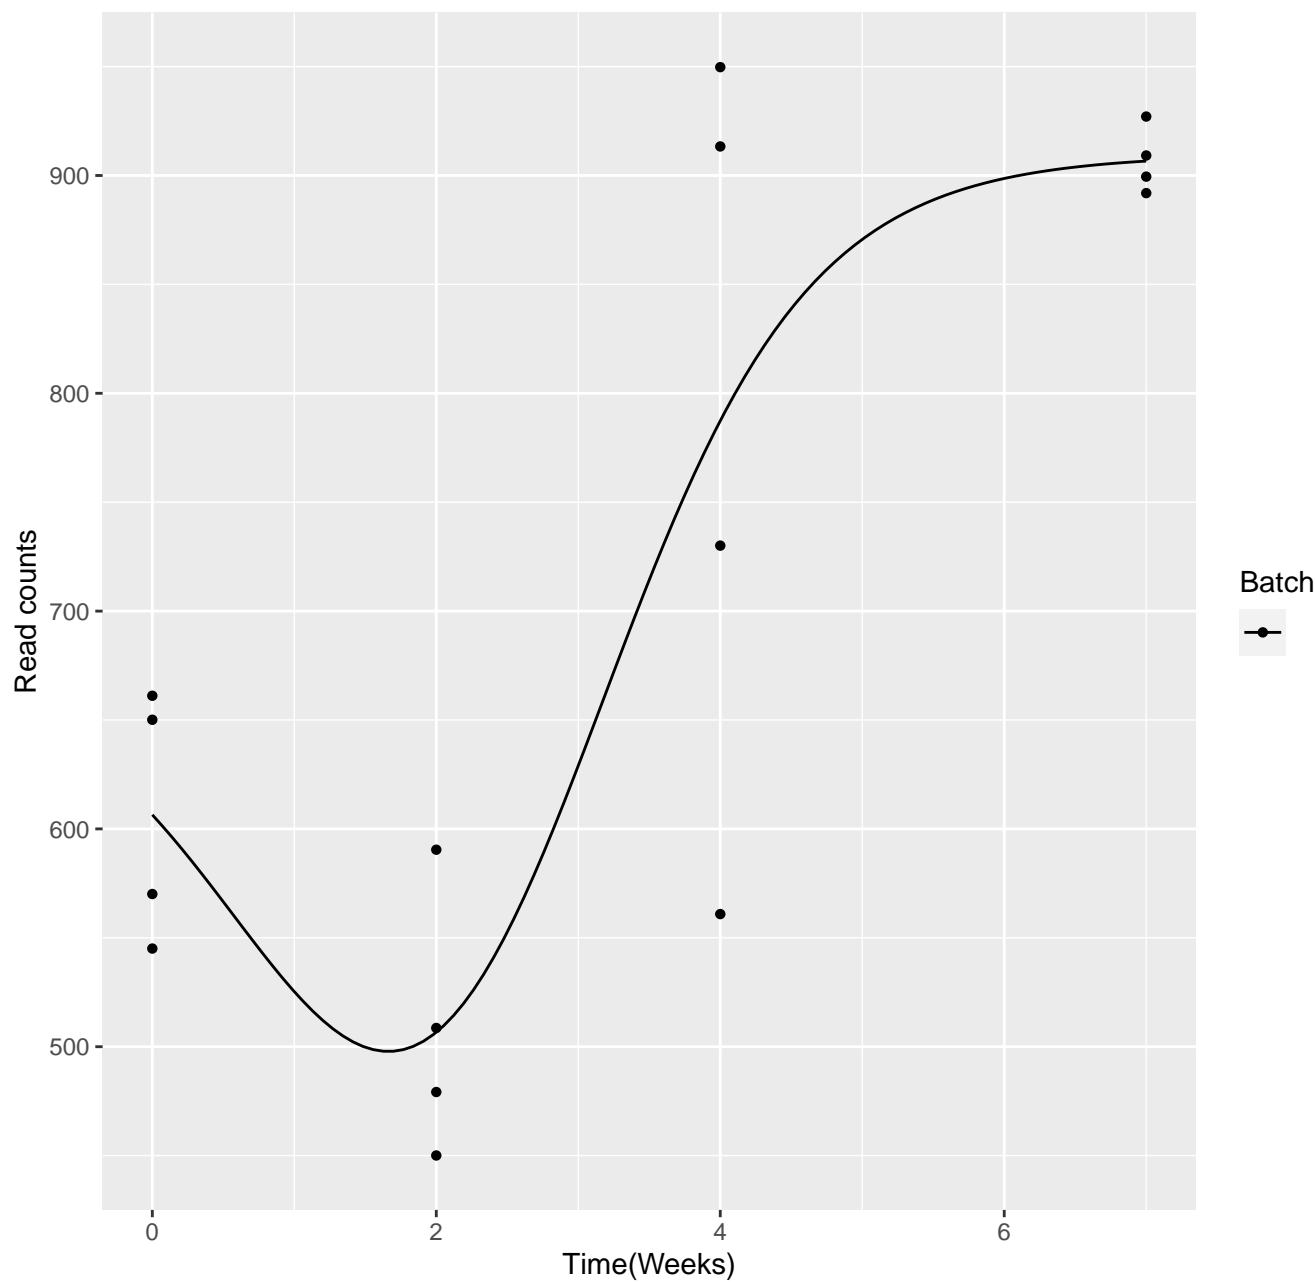

GYPA:  $\log_{10} q = -3.84$

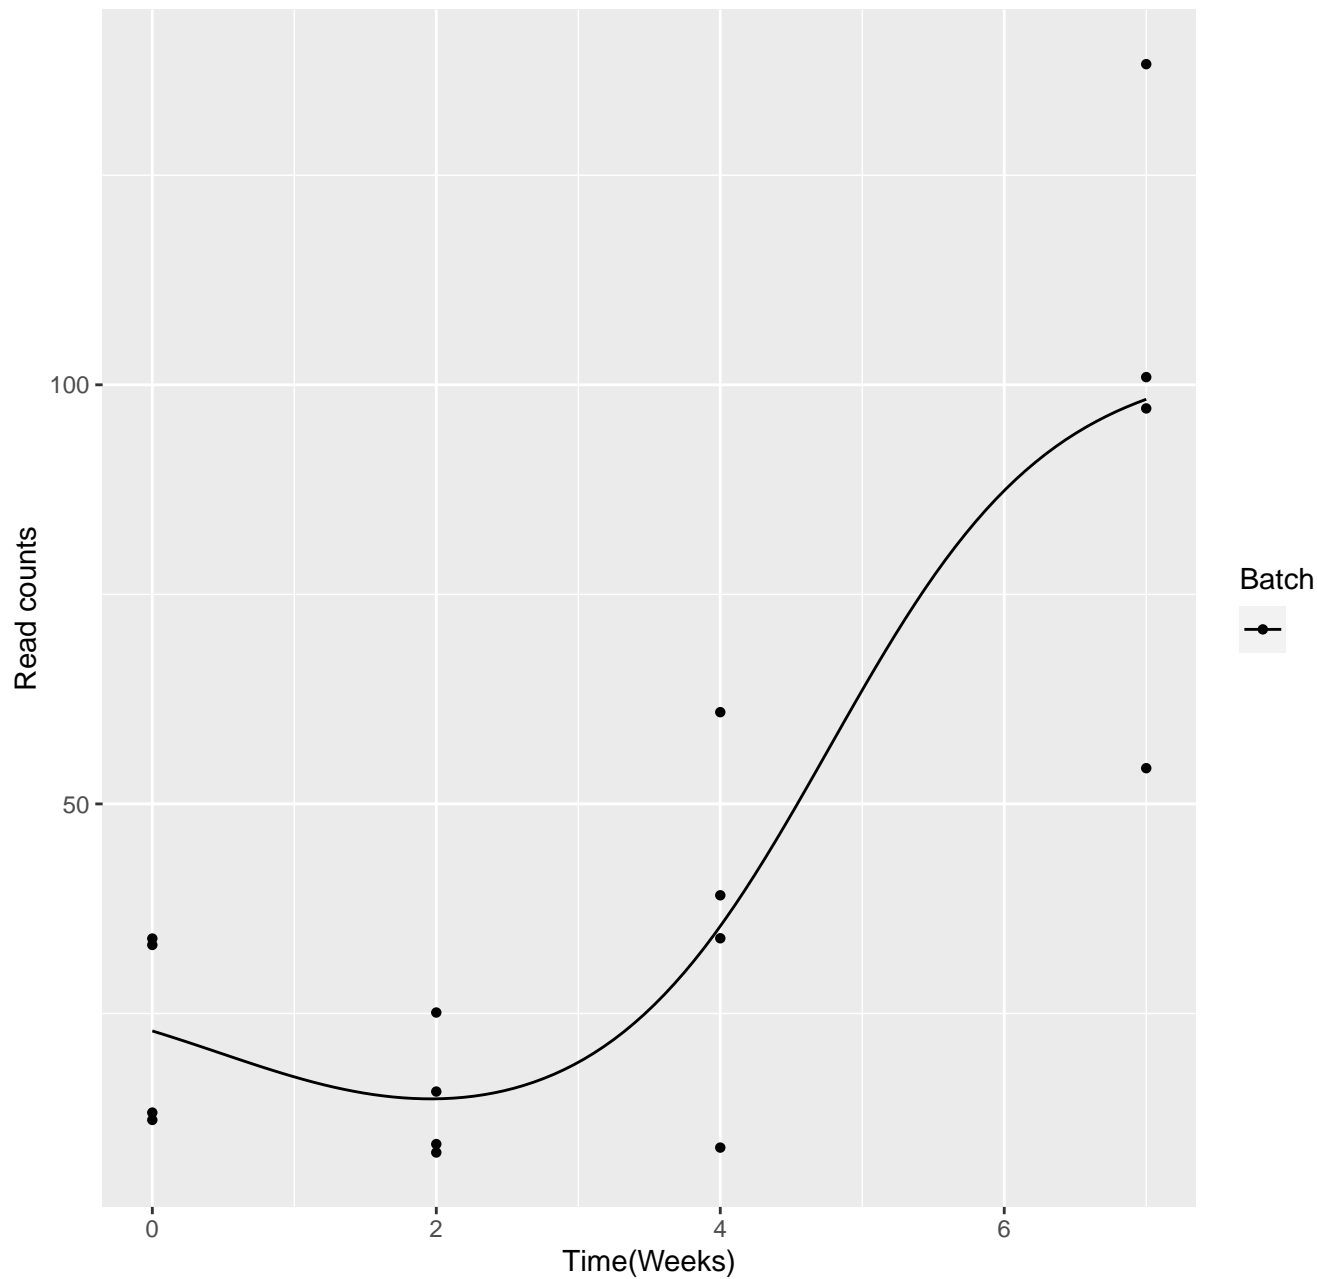

BCL2:  $\log_{10} q = -3.84$

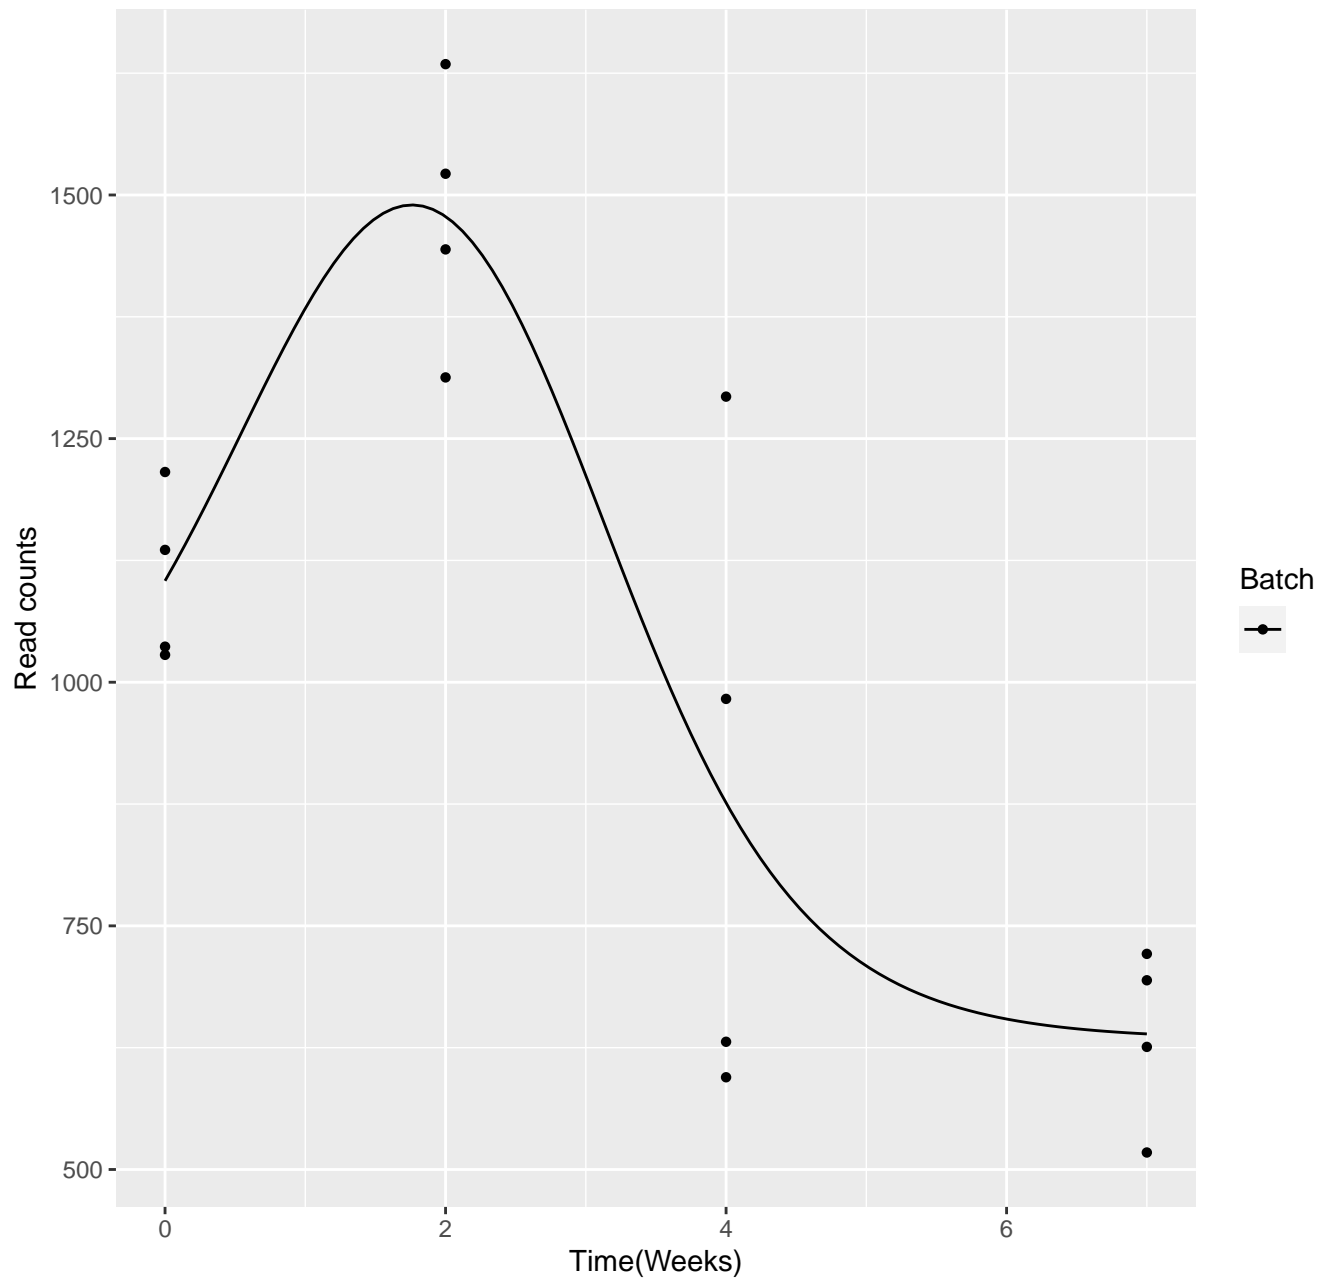

LOC127486885:  $\log_{10} q = -3.84$

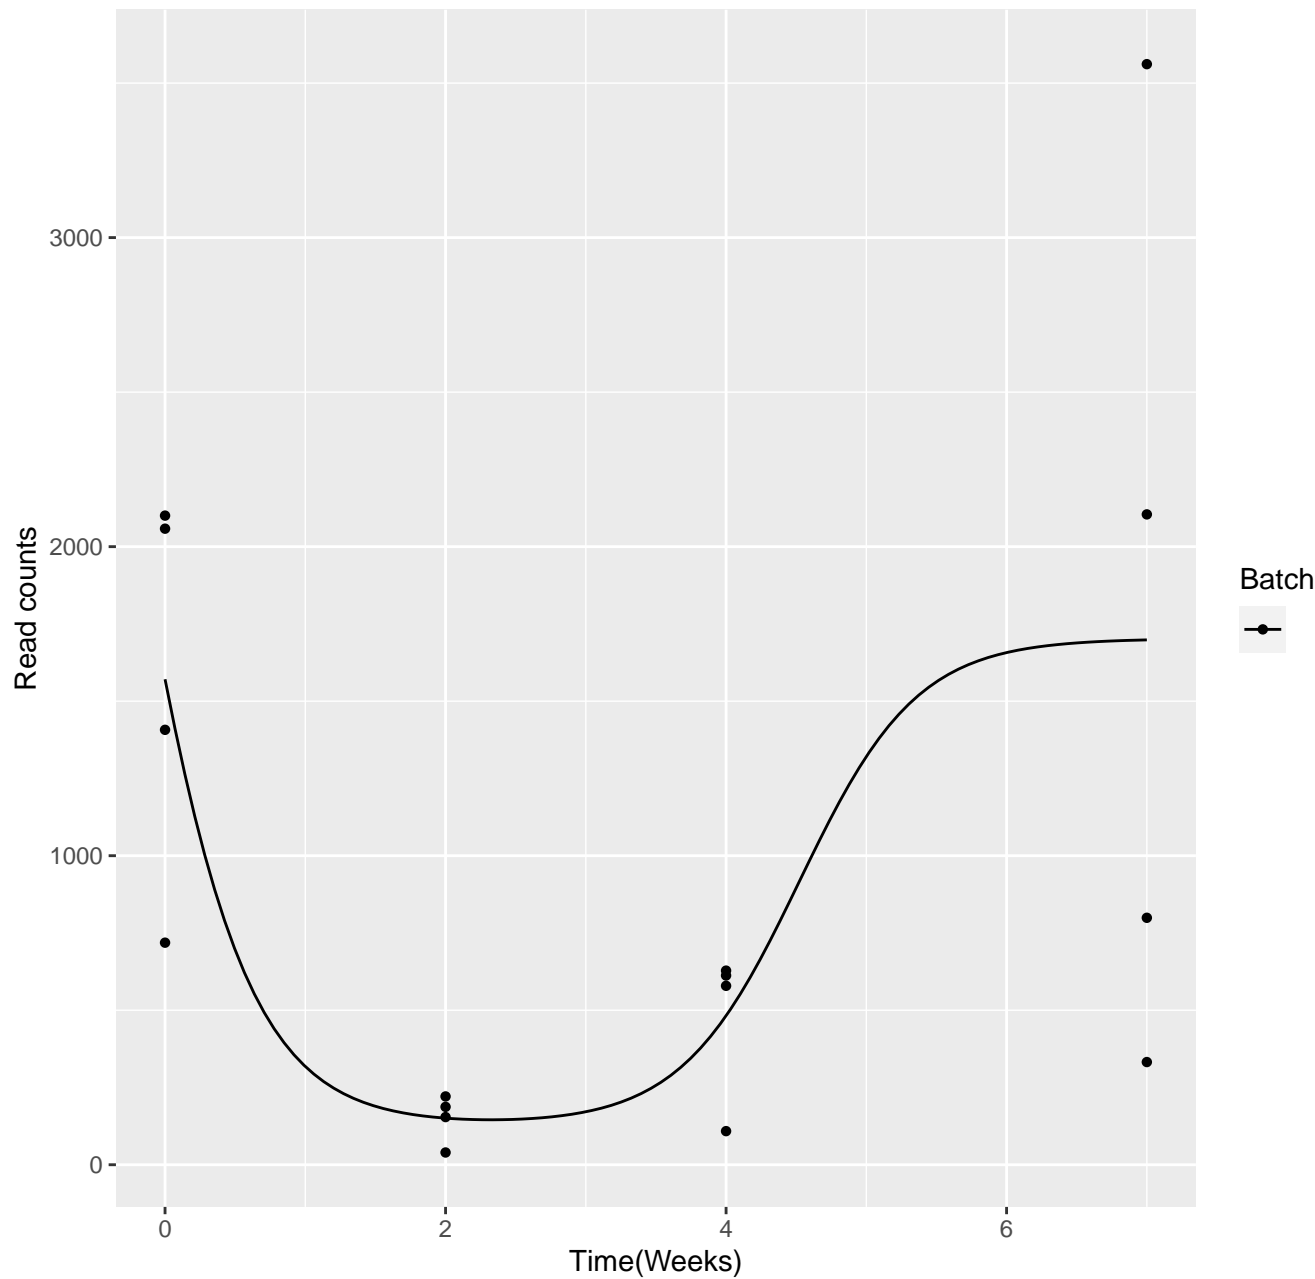

CDC20:  $\log_{10} q = -3.83$

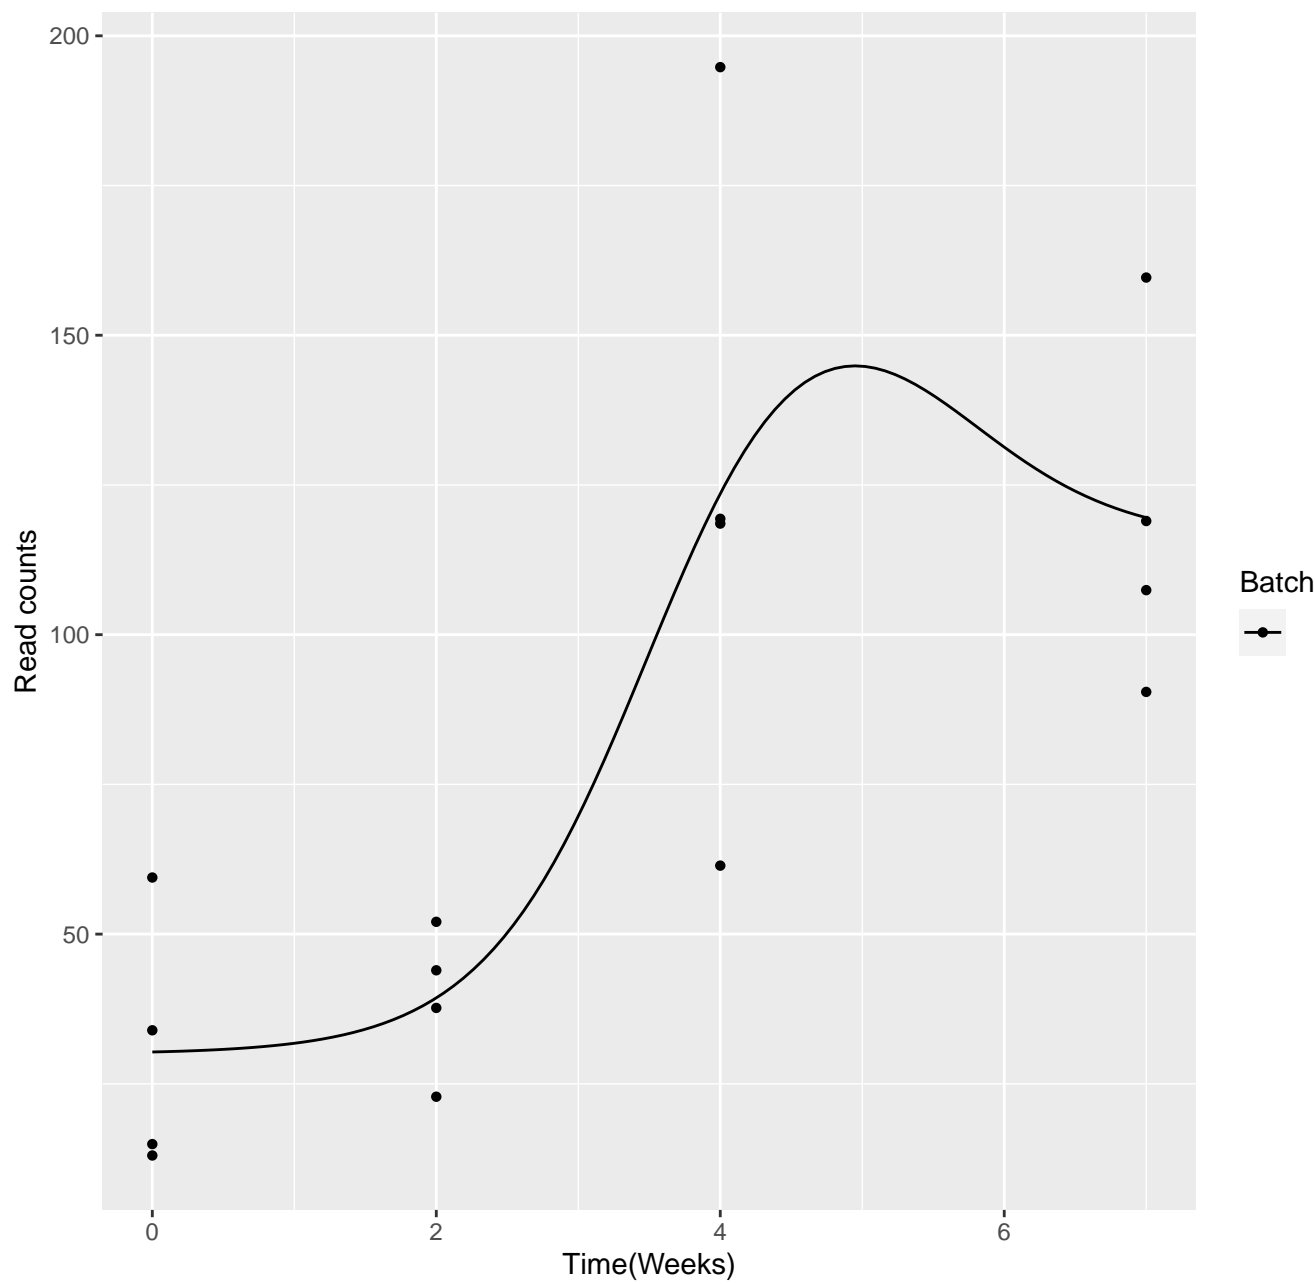

TPPP:  $\log_{10} q = -3.83$

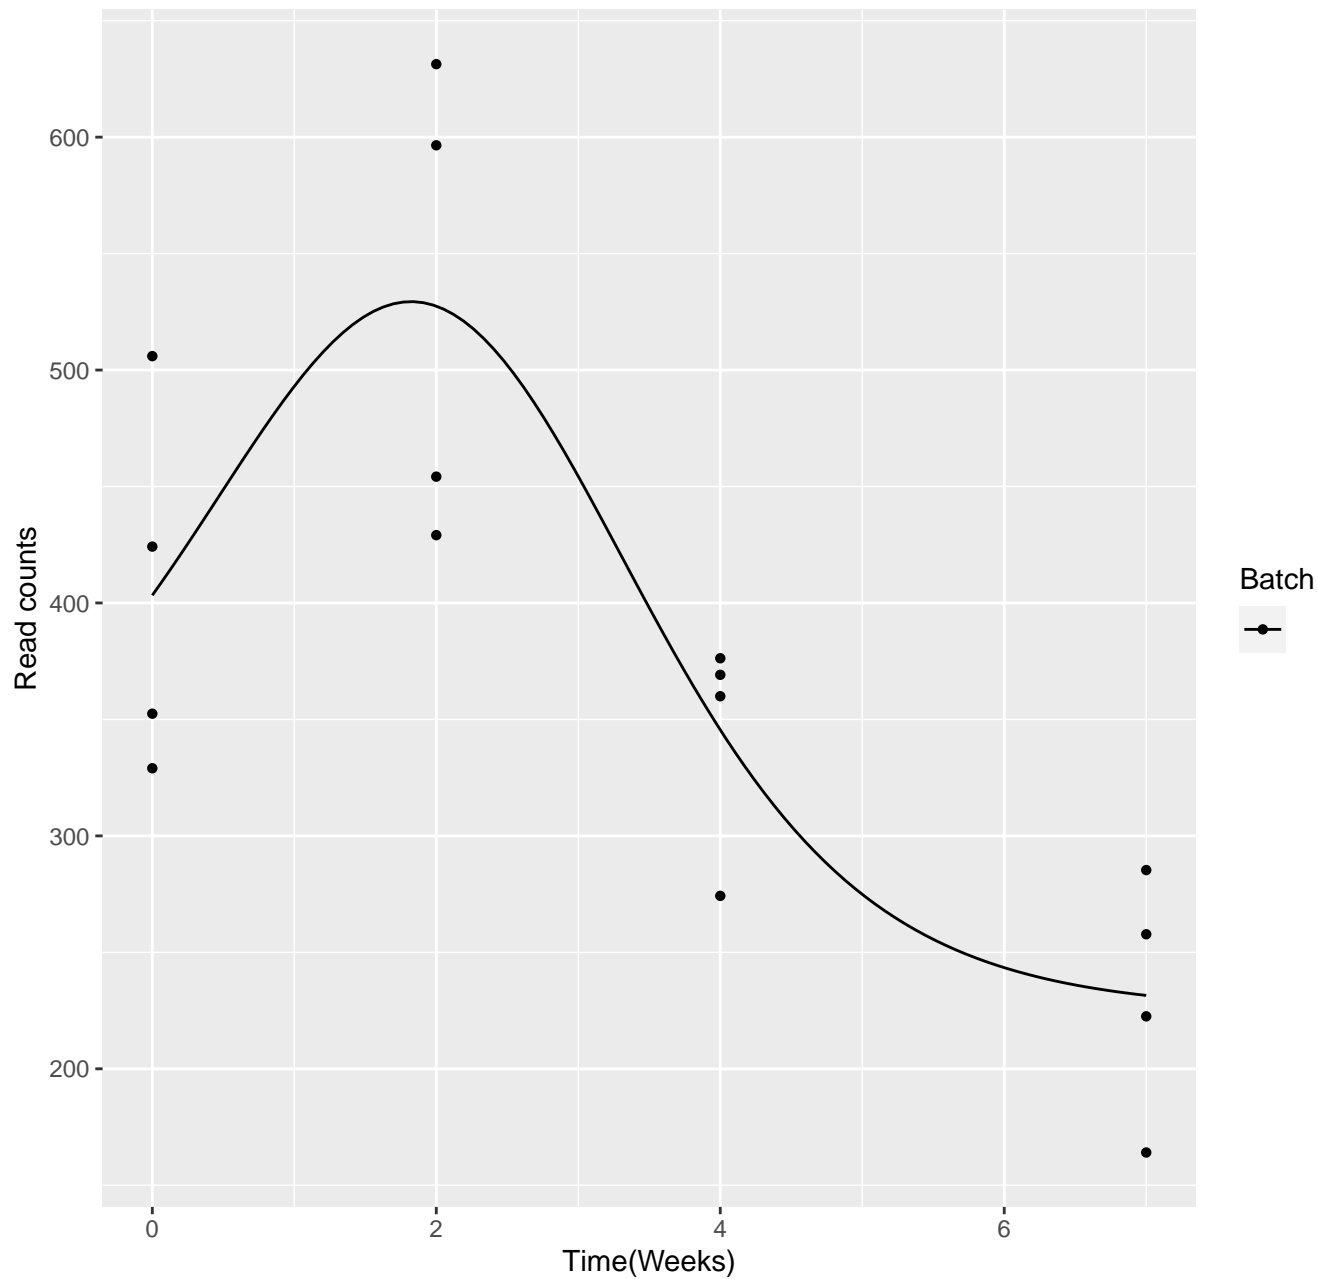

ZBTB4:  $\log_{10} q = -3.82$

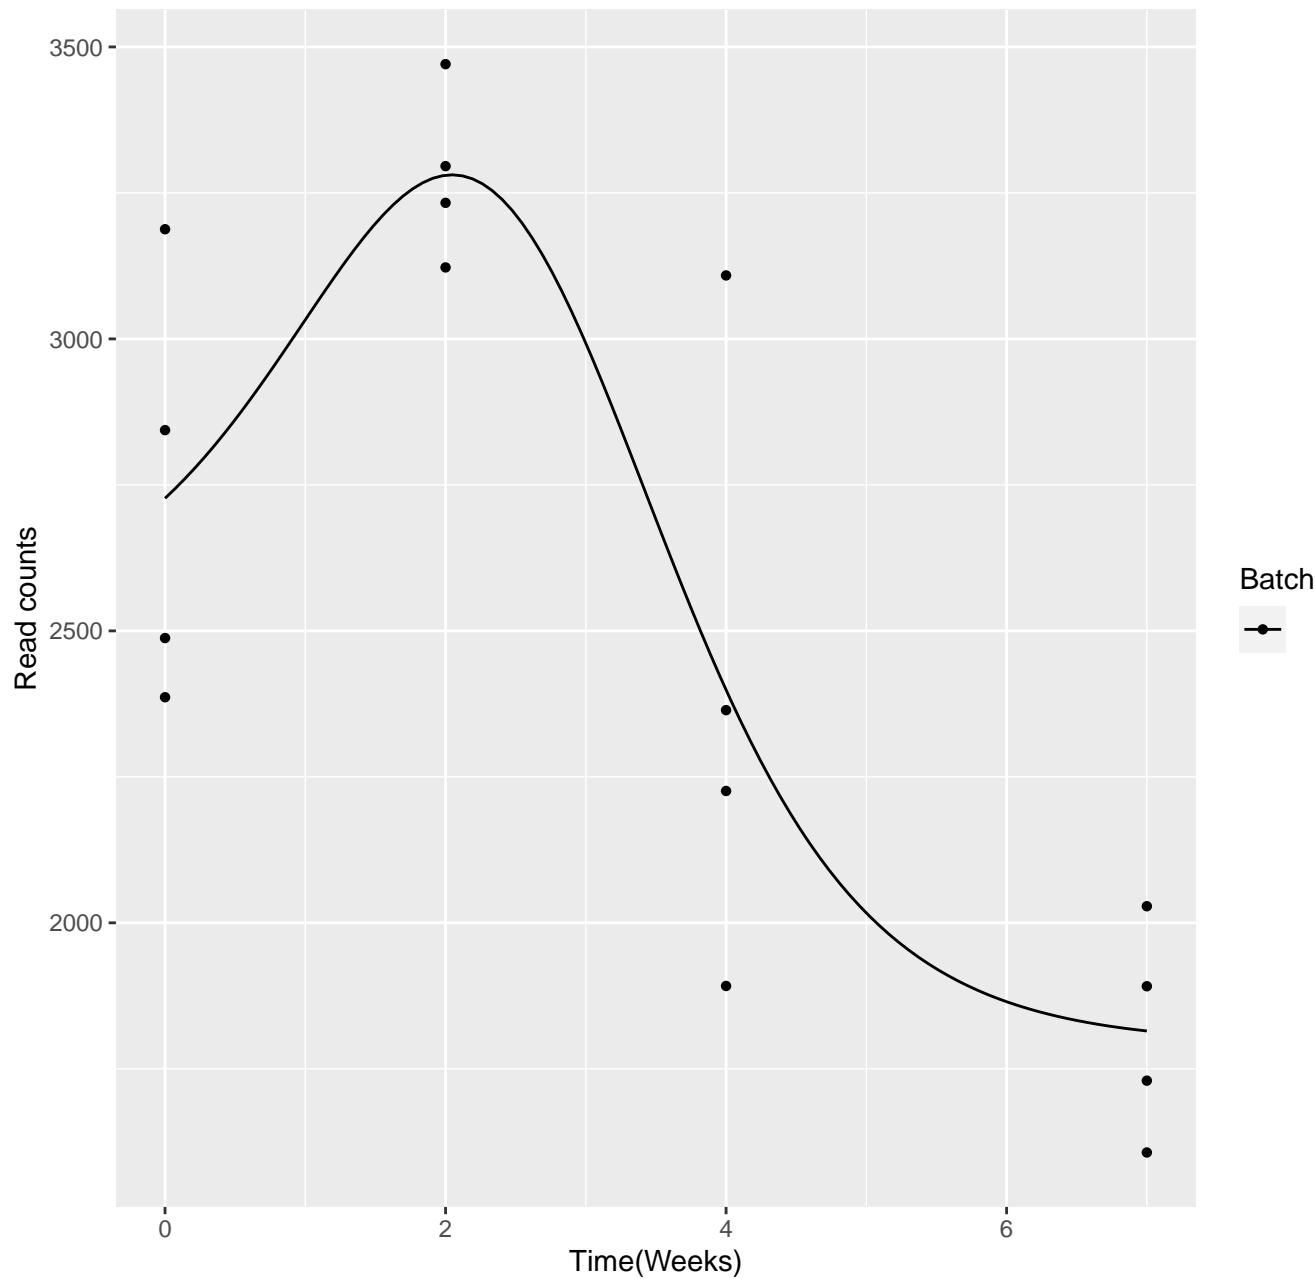

AKT3:  $\log_{10} q = -3.82$

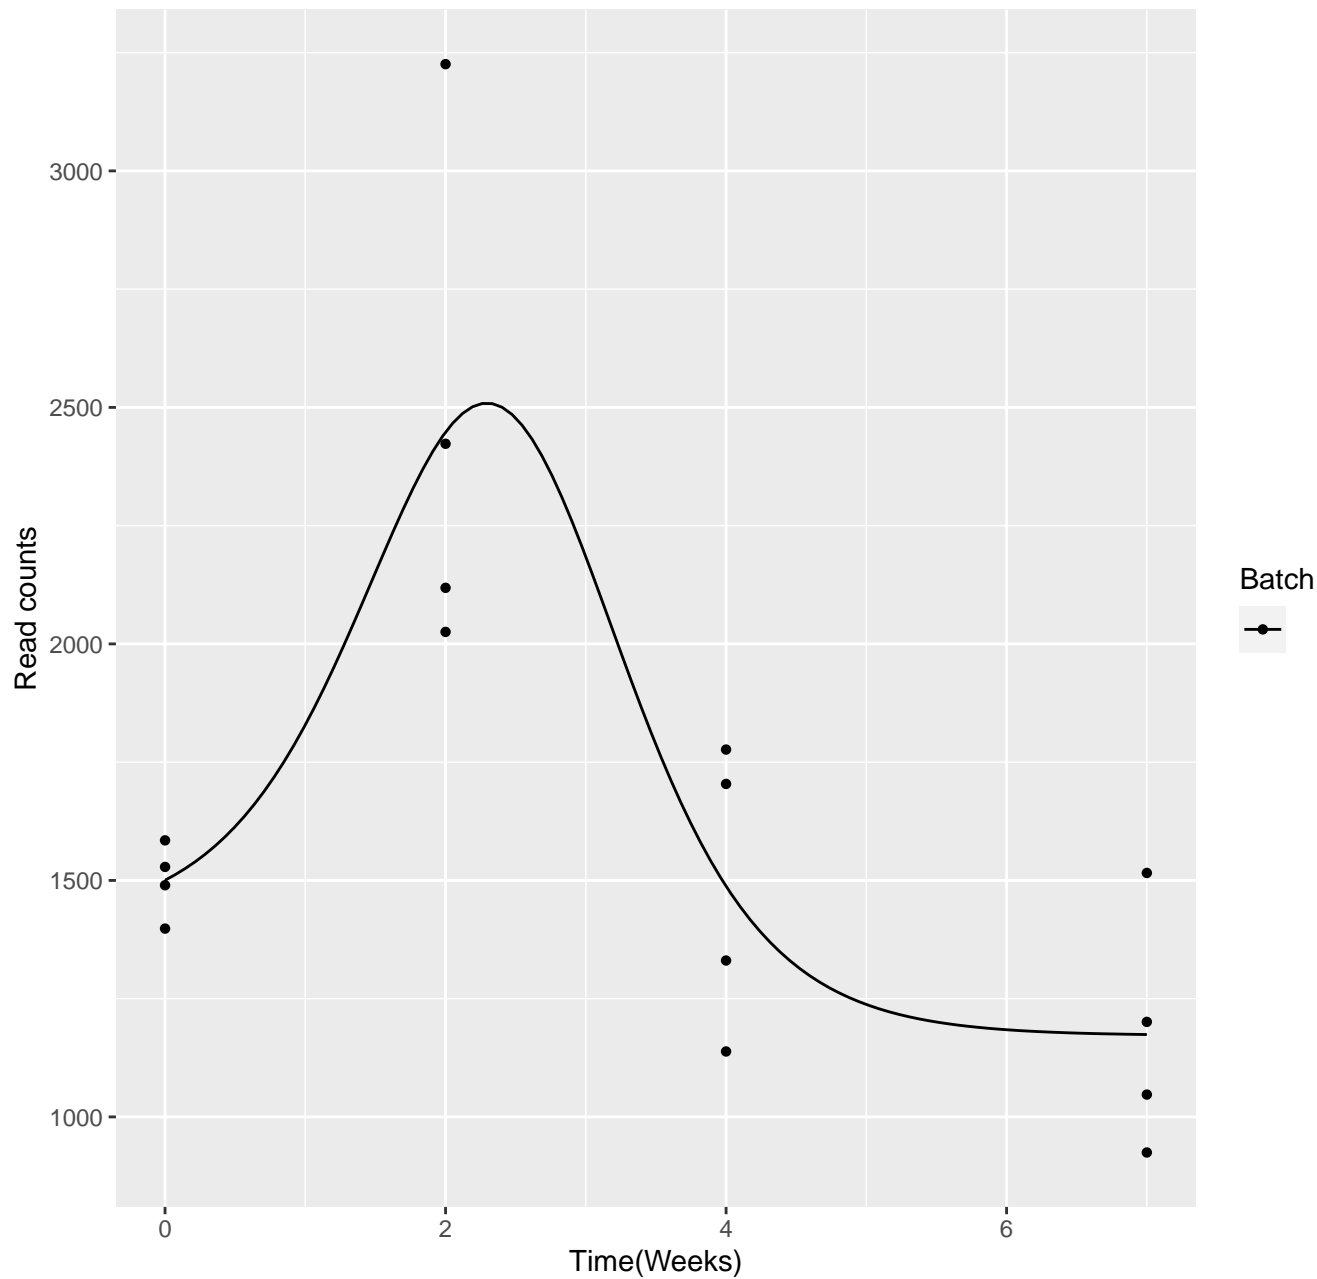



CD1D:  $\log_{10} q = -3.81$

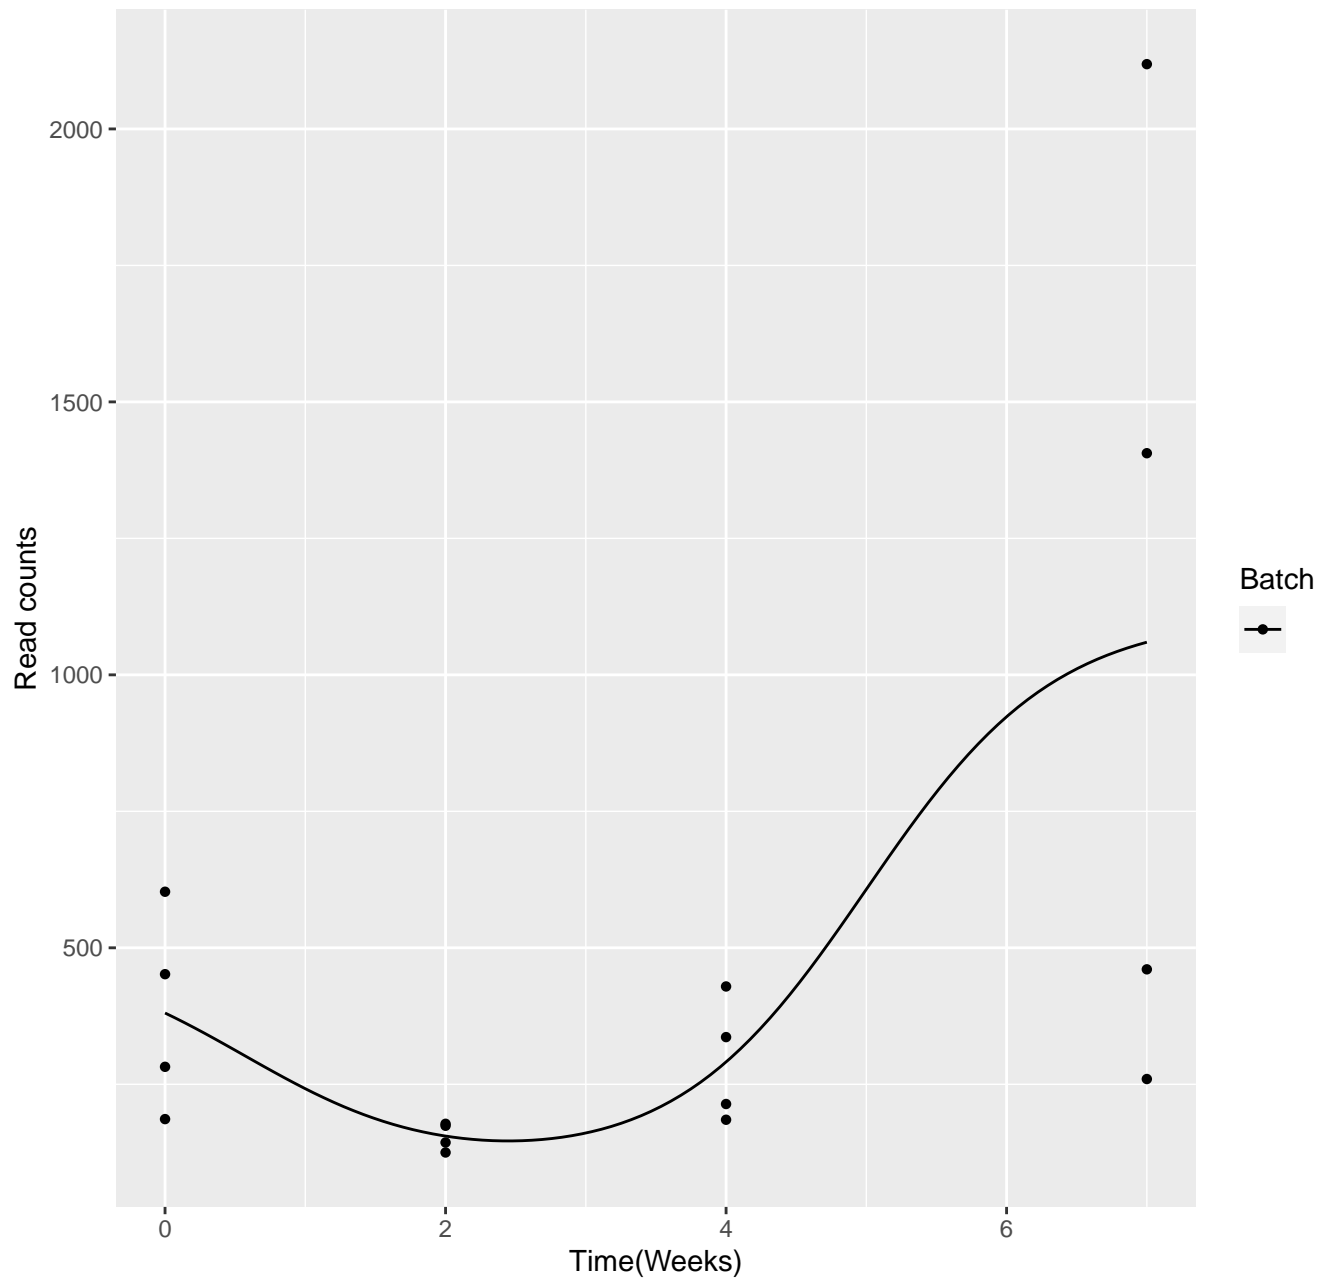

GPR158:  $\log_{10} q = -3.81$

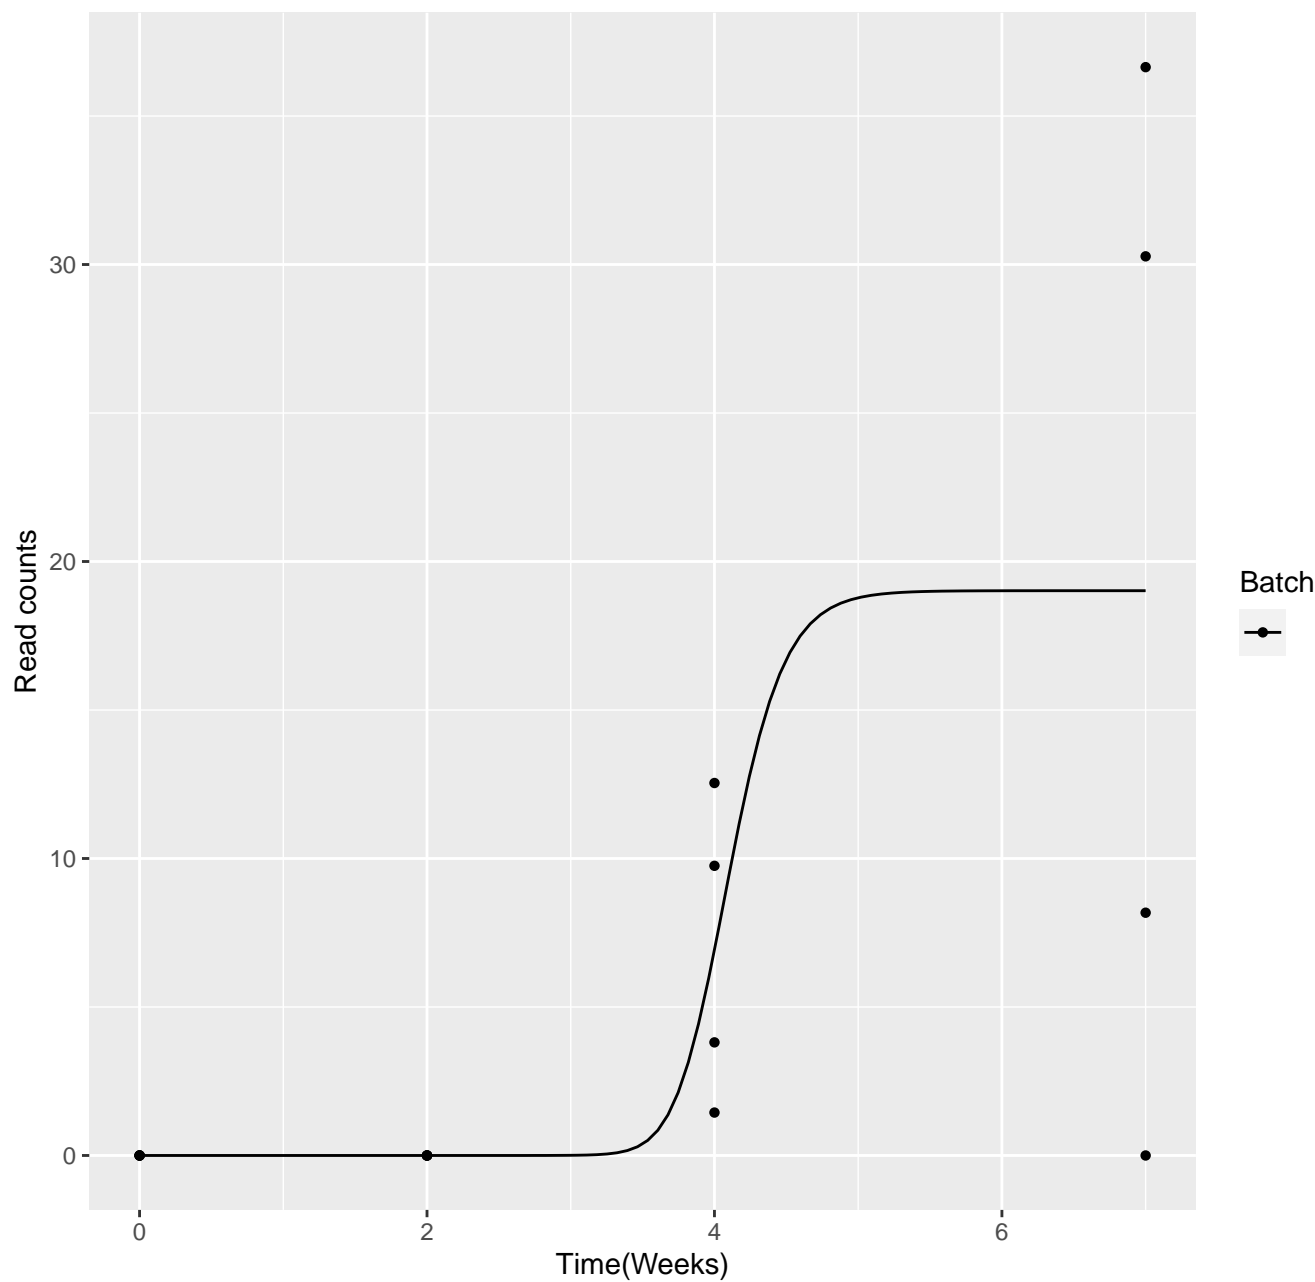

PLET1:  $\log_{10} q = -3.81$

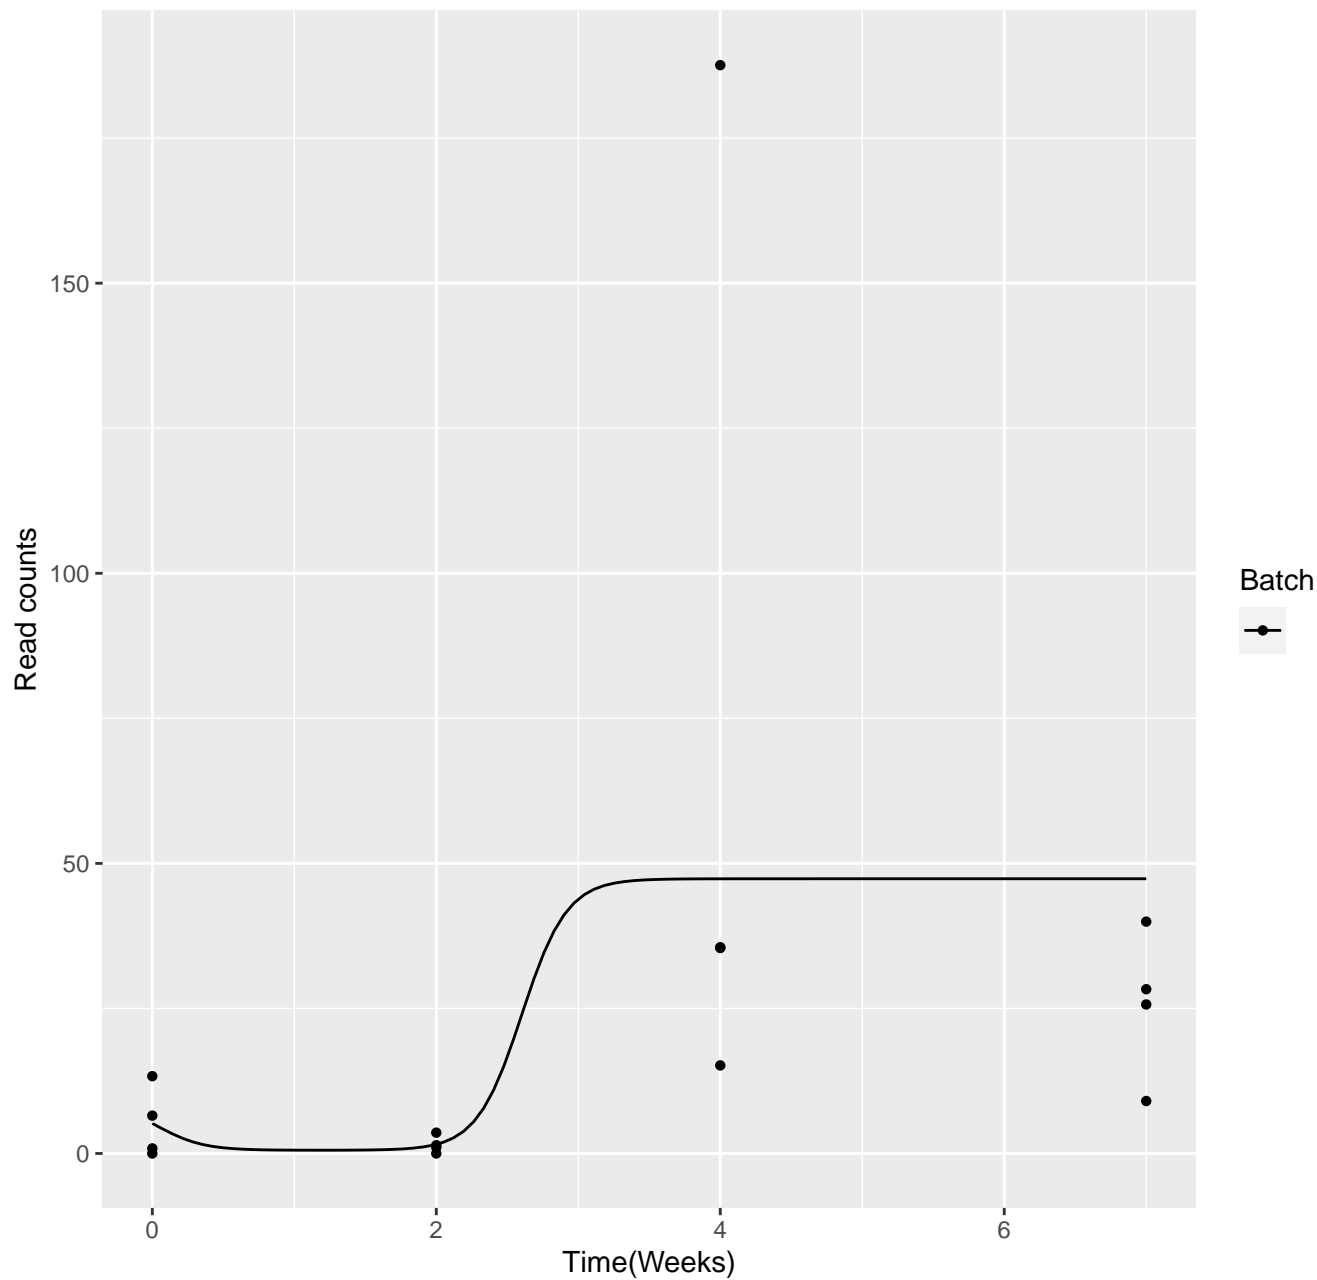

SERPINA3:  $\log_{10} q = -3.81$

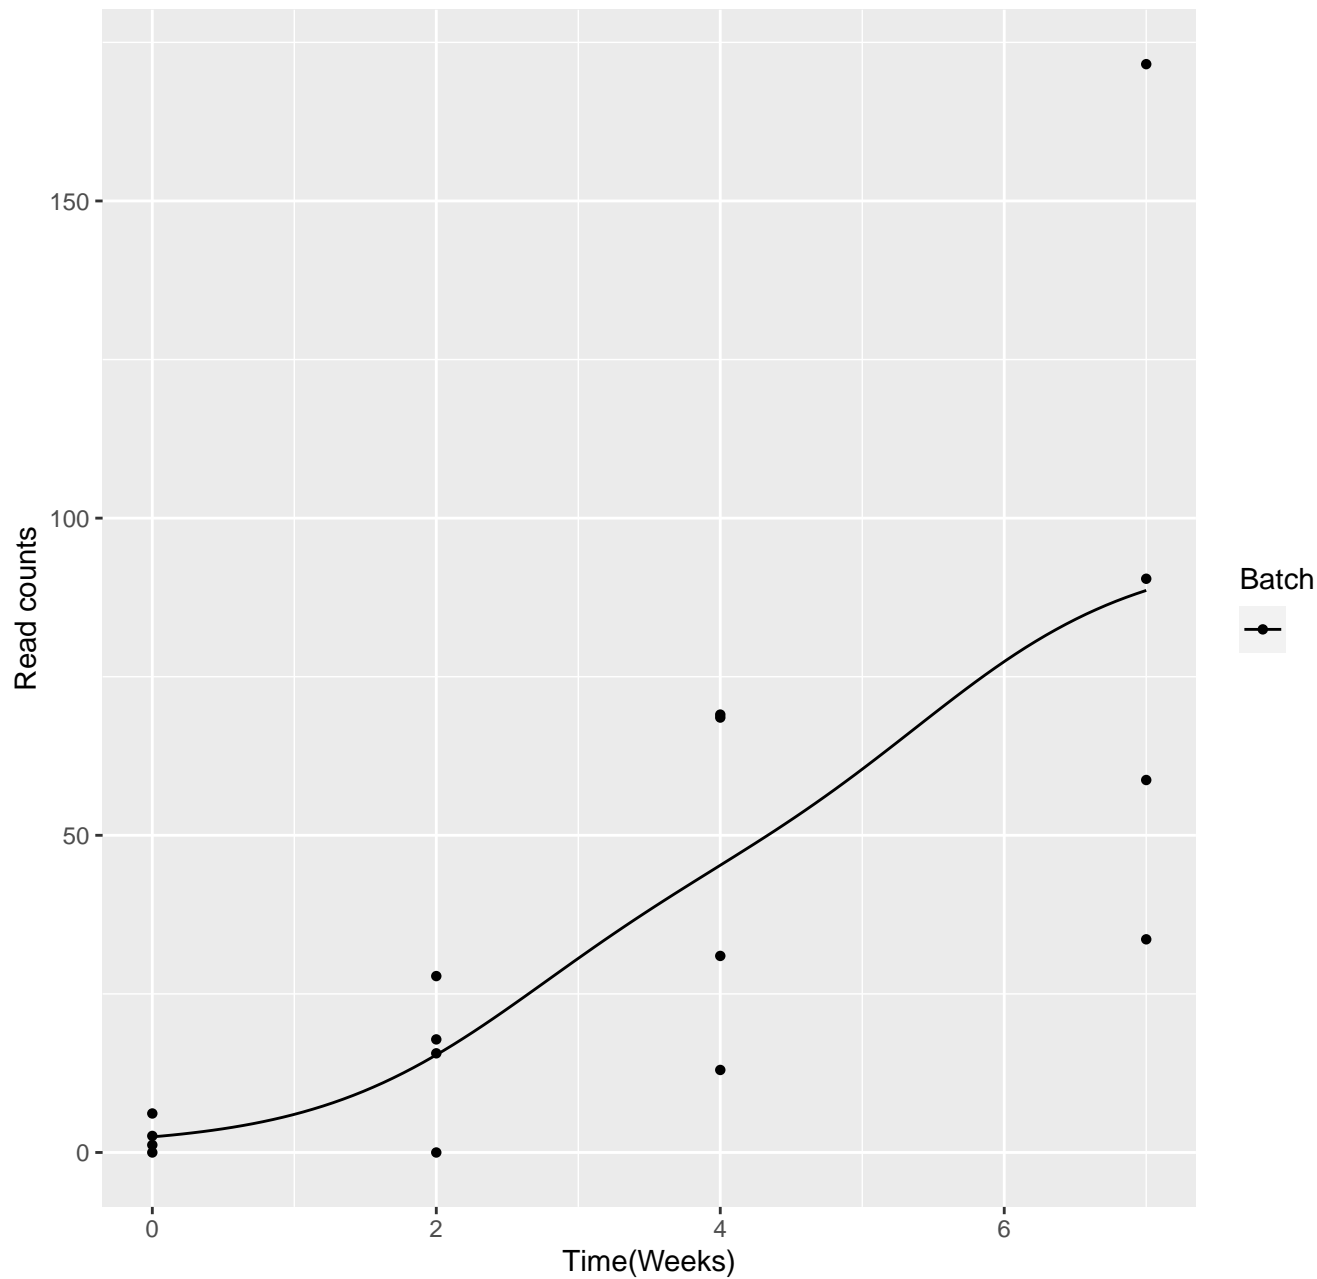

SGCB:  $\log_{10} q = -3.81$

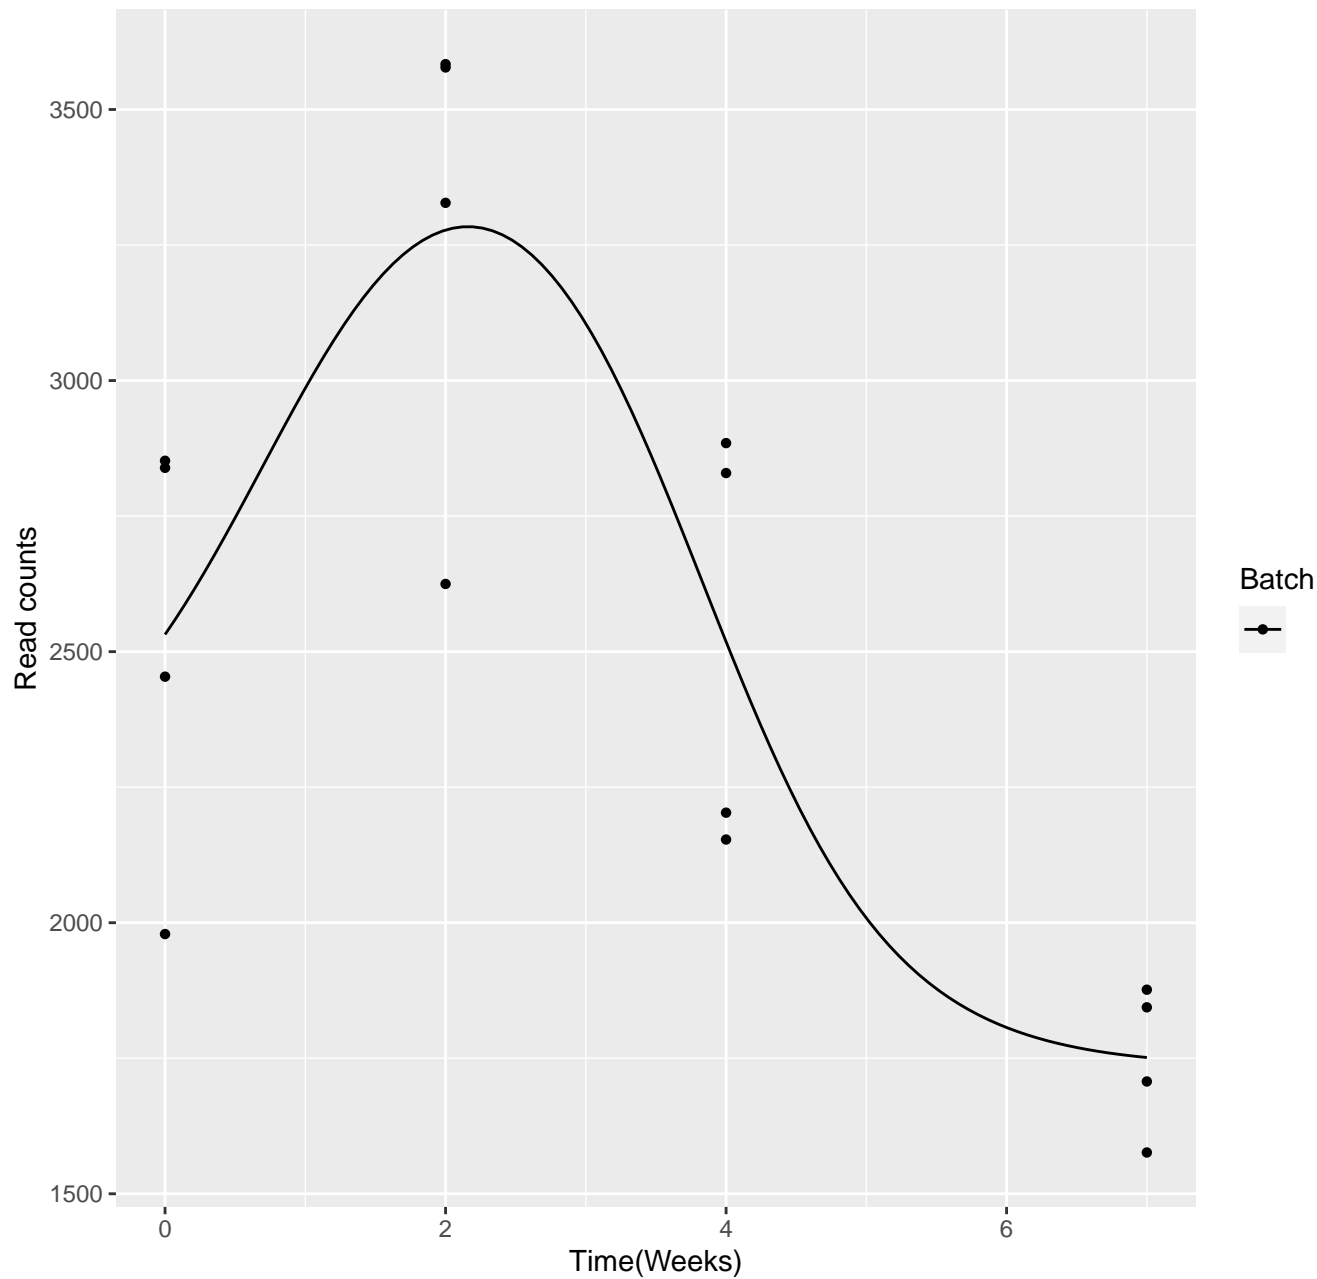

ILK:  $\log_{10} q = -3.81$

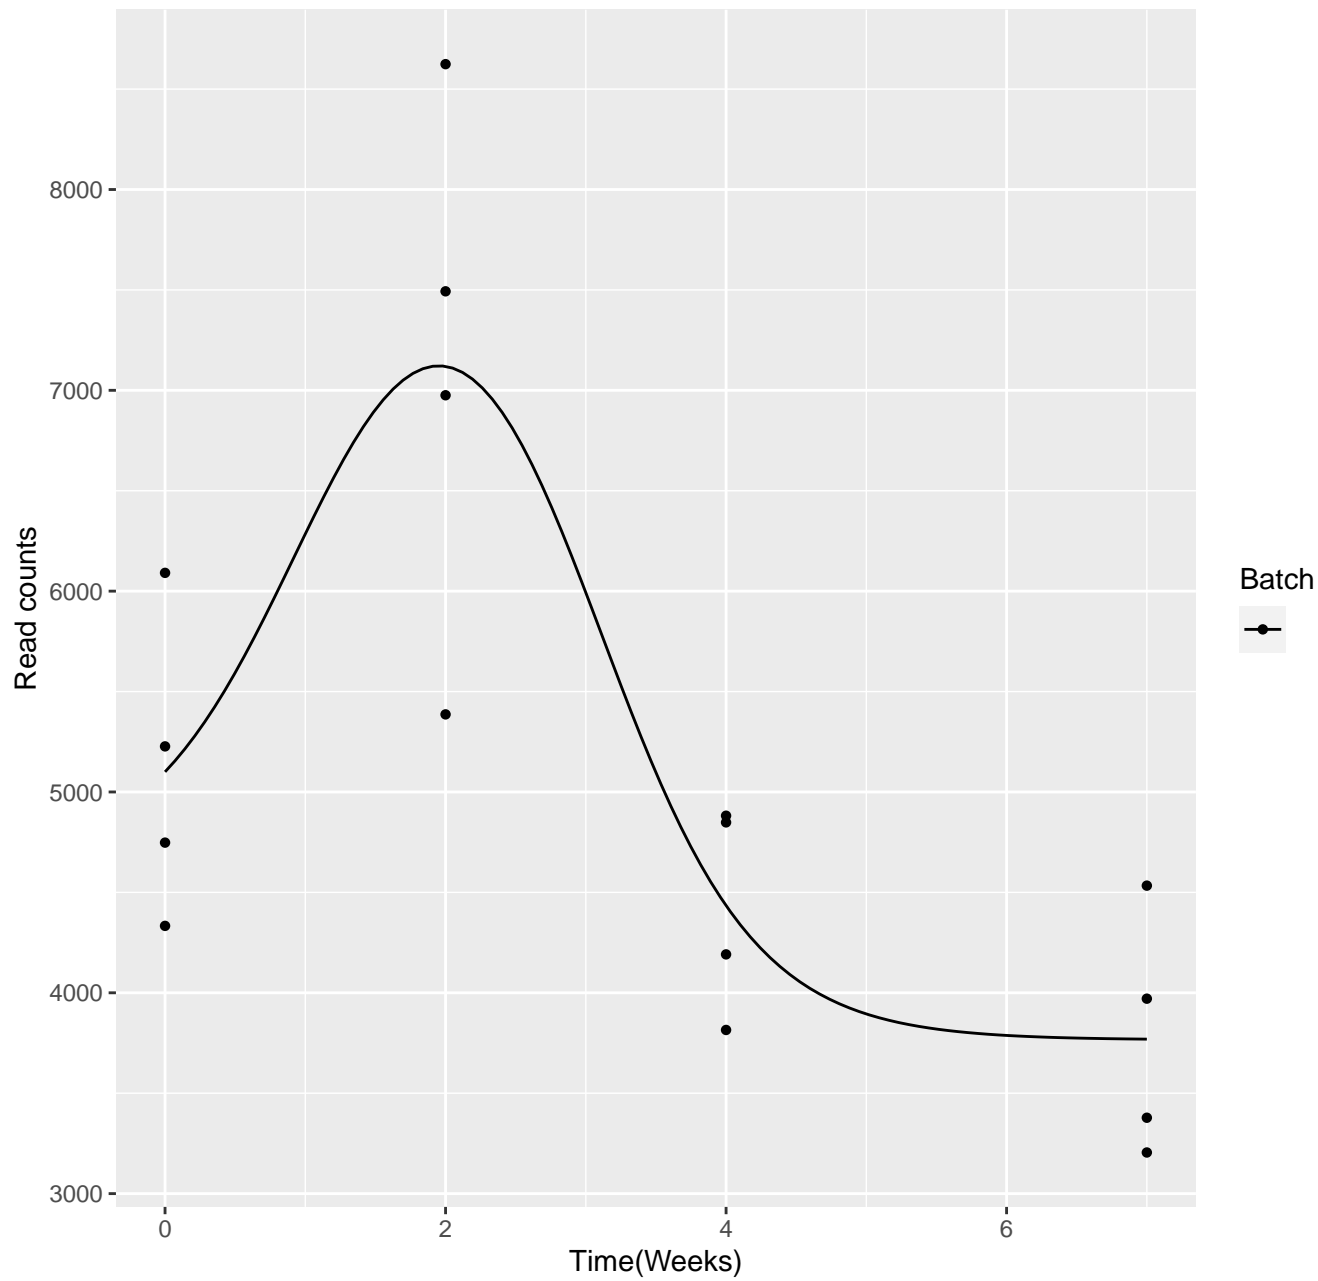

C1QTNF6:  $\log_{10} q = -3.81$

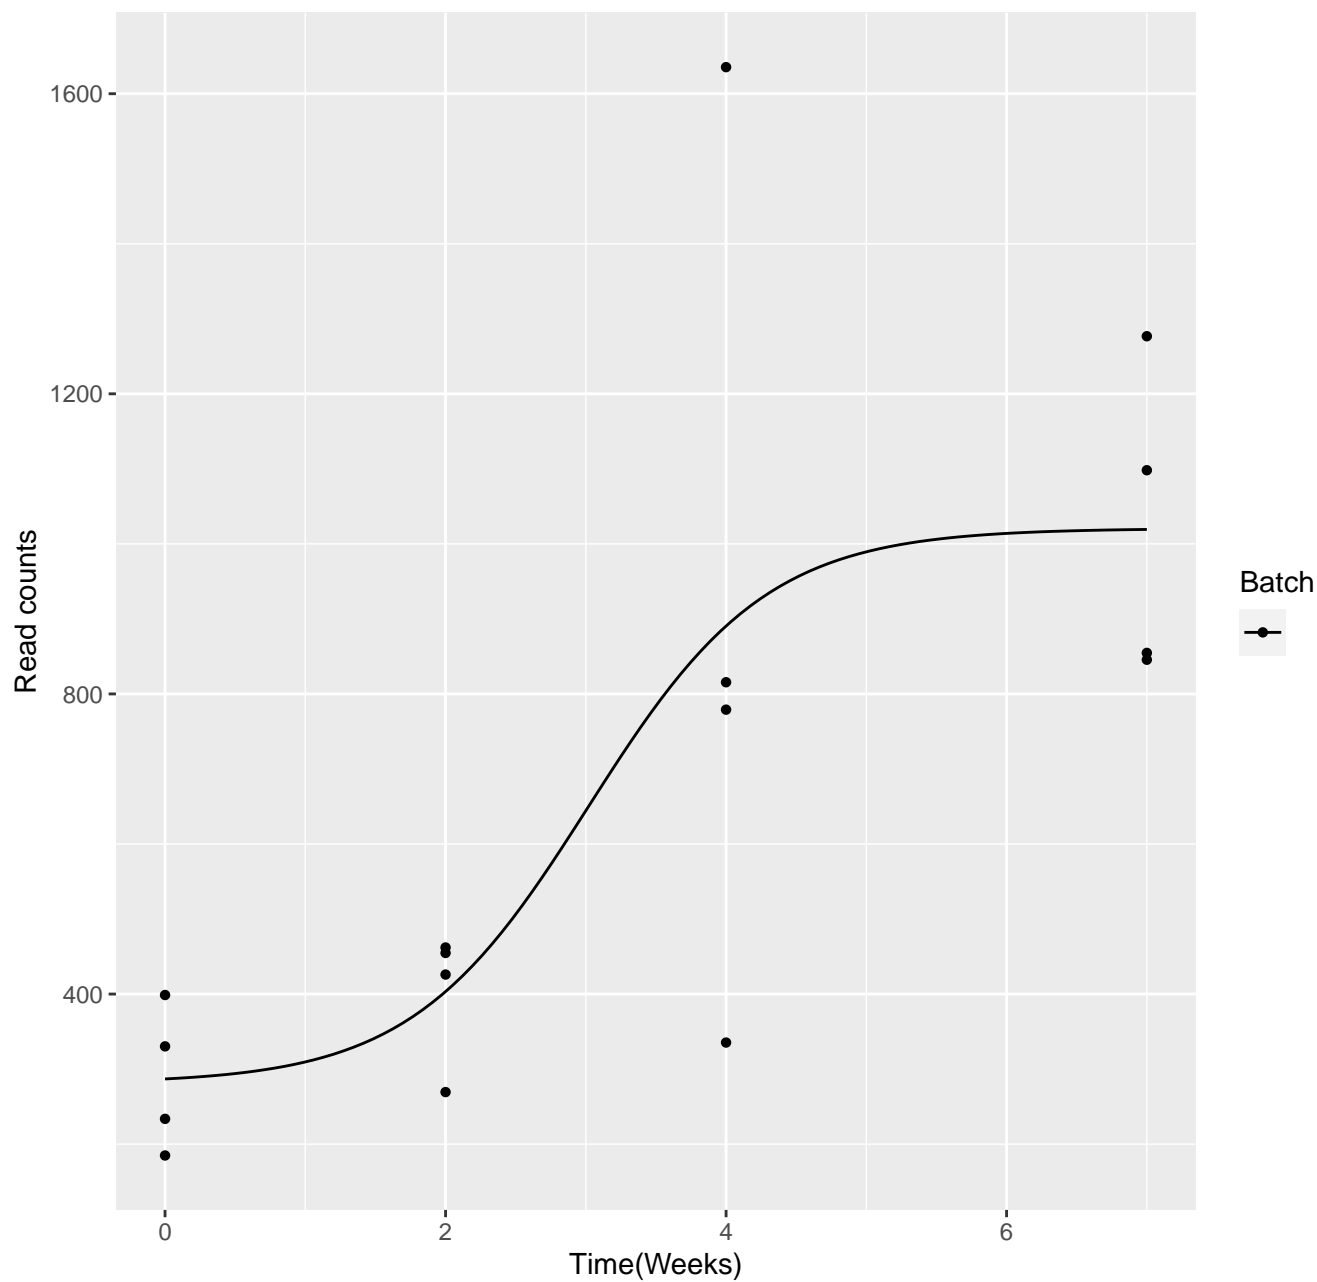

KCNAB2:  $\log_{10} q = -3.8$

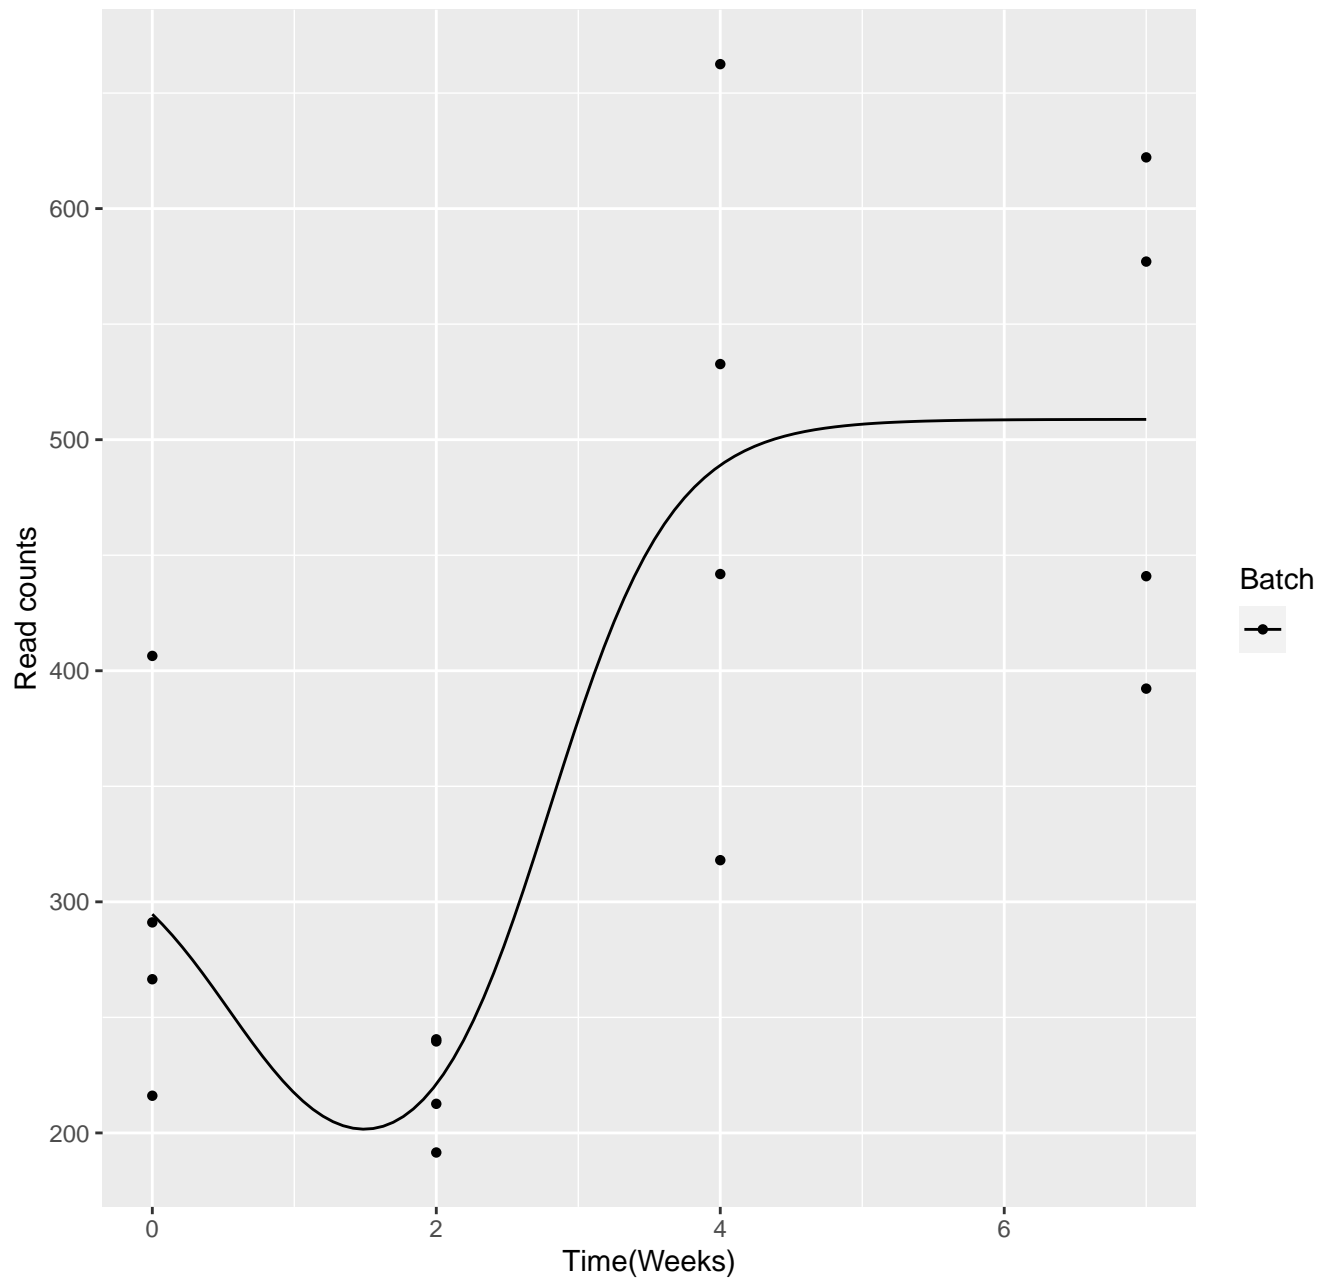



THRA:  $\log_{10} q = -3.8$

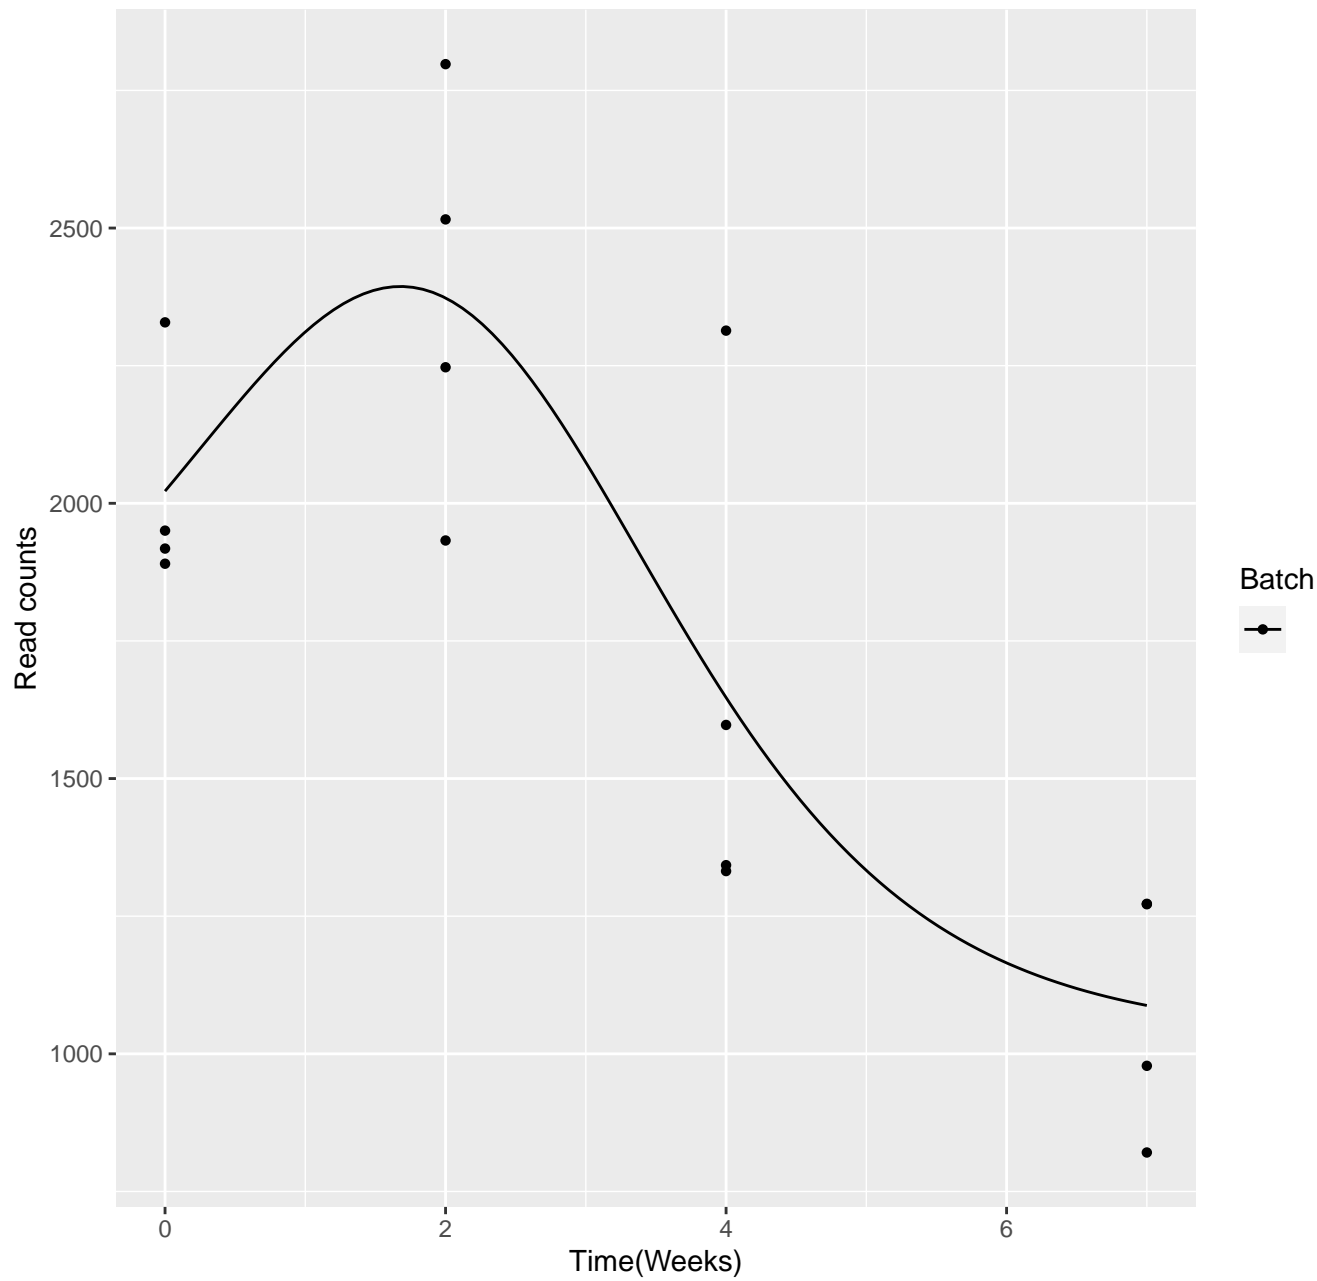

LOC127482743:  $\log_{10} q = -3.78$

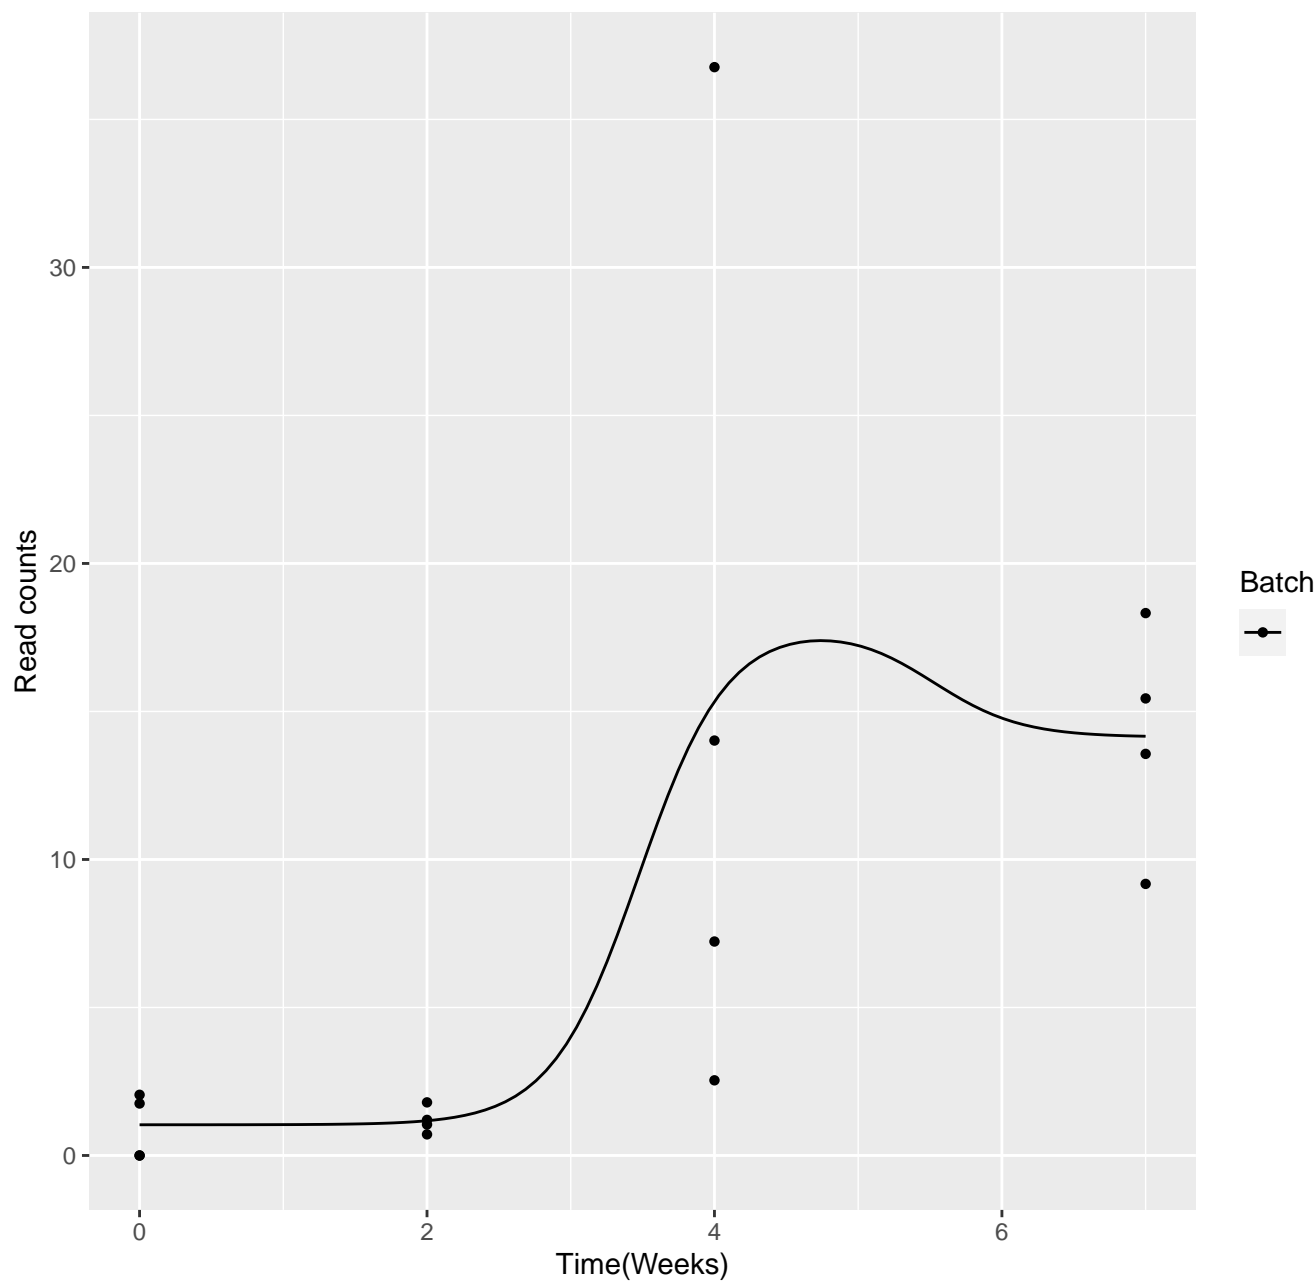

NEK7:  $\log_{10} q = -3.78$

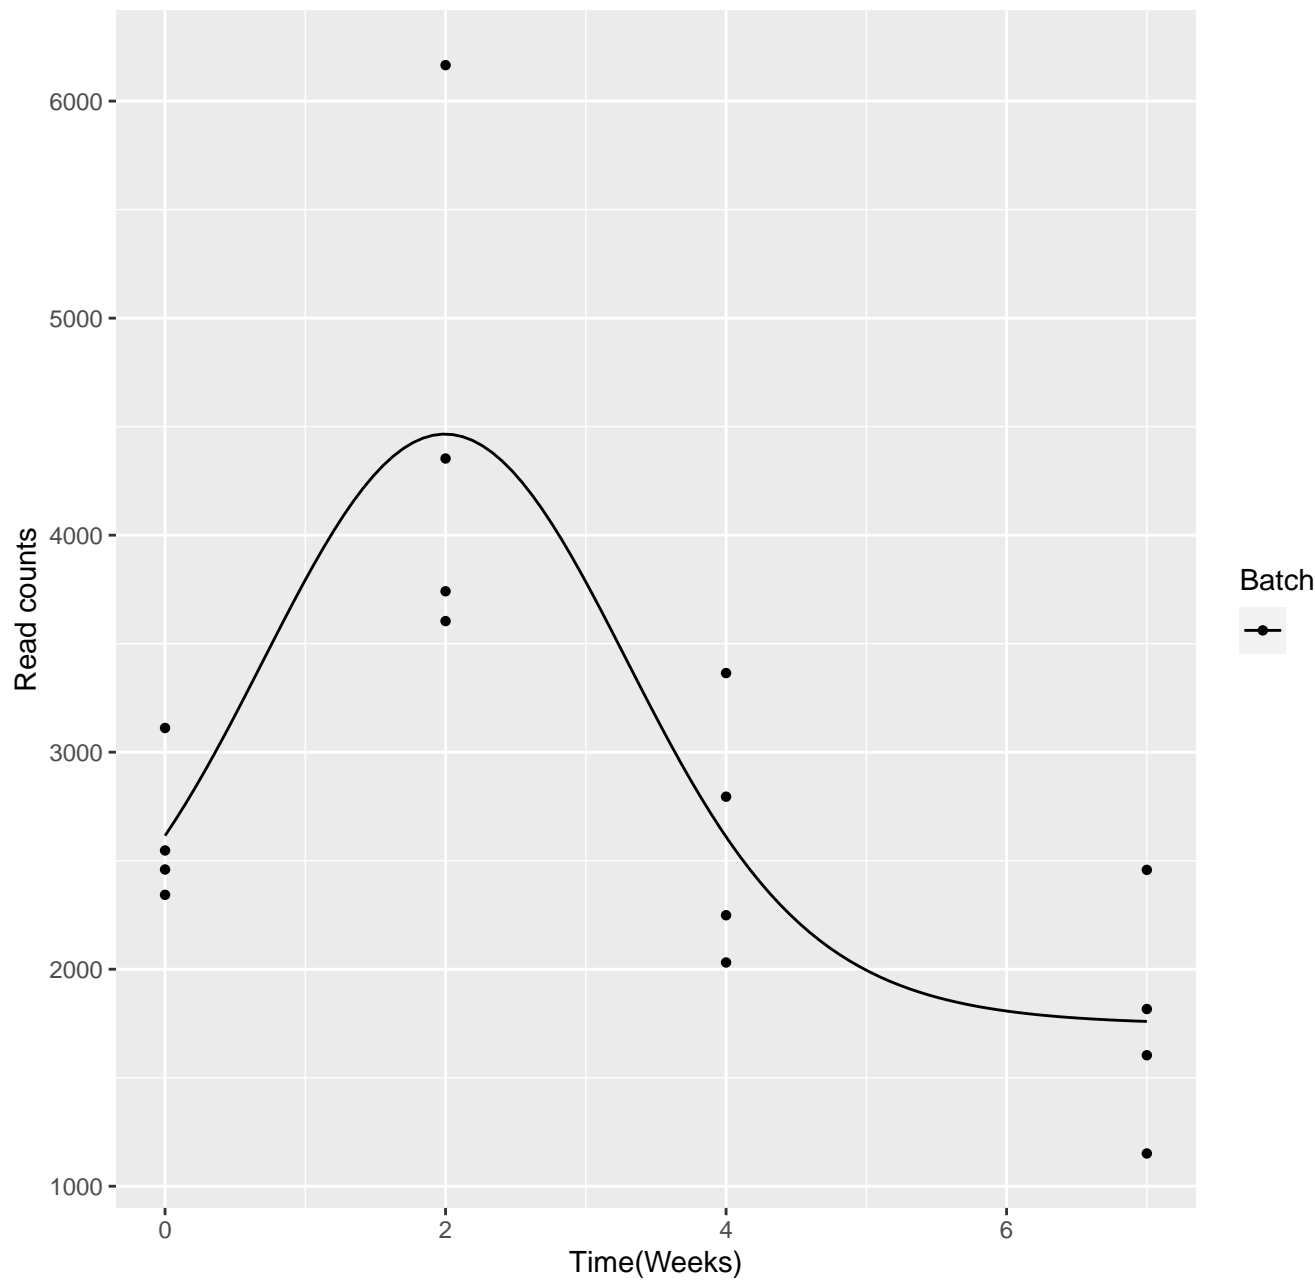

GGH:  $\log_{10} q = -3.77$

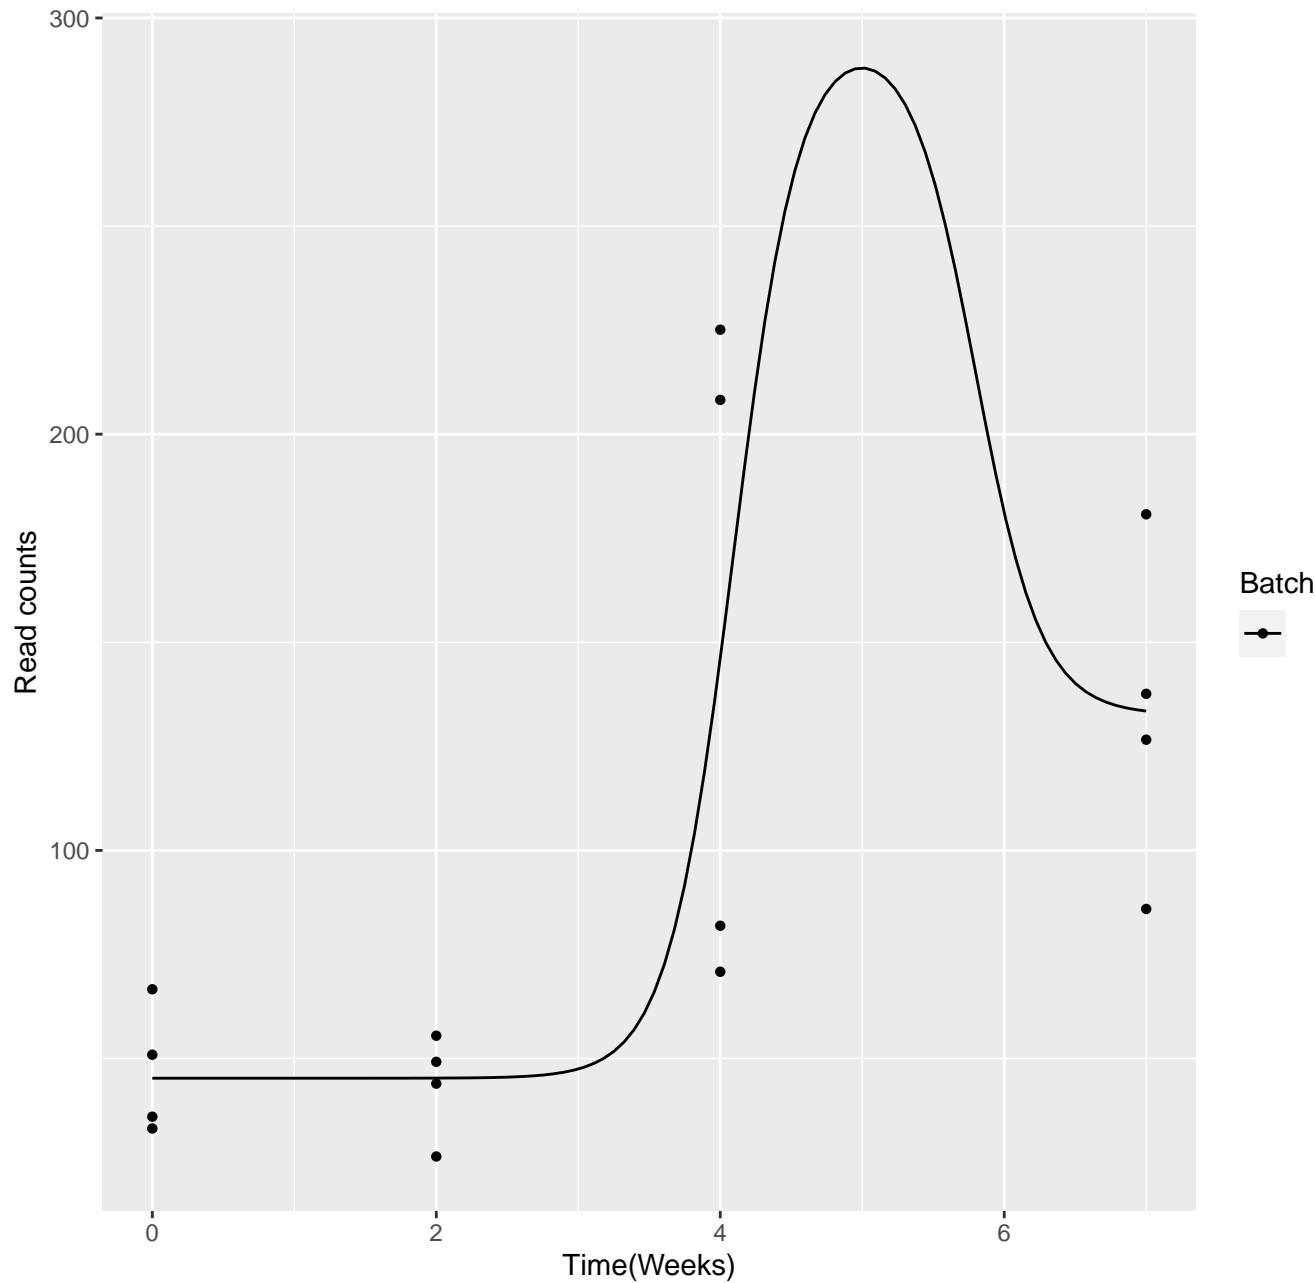

KCNA5:  $\log_{10} q = -3.77$

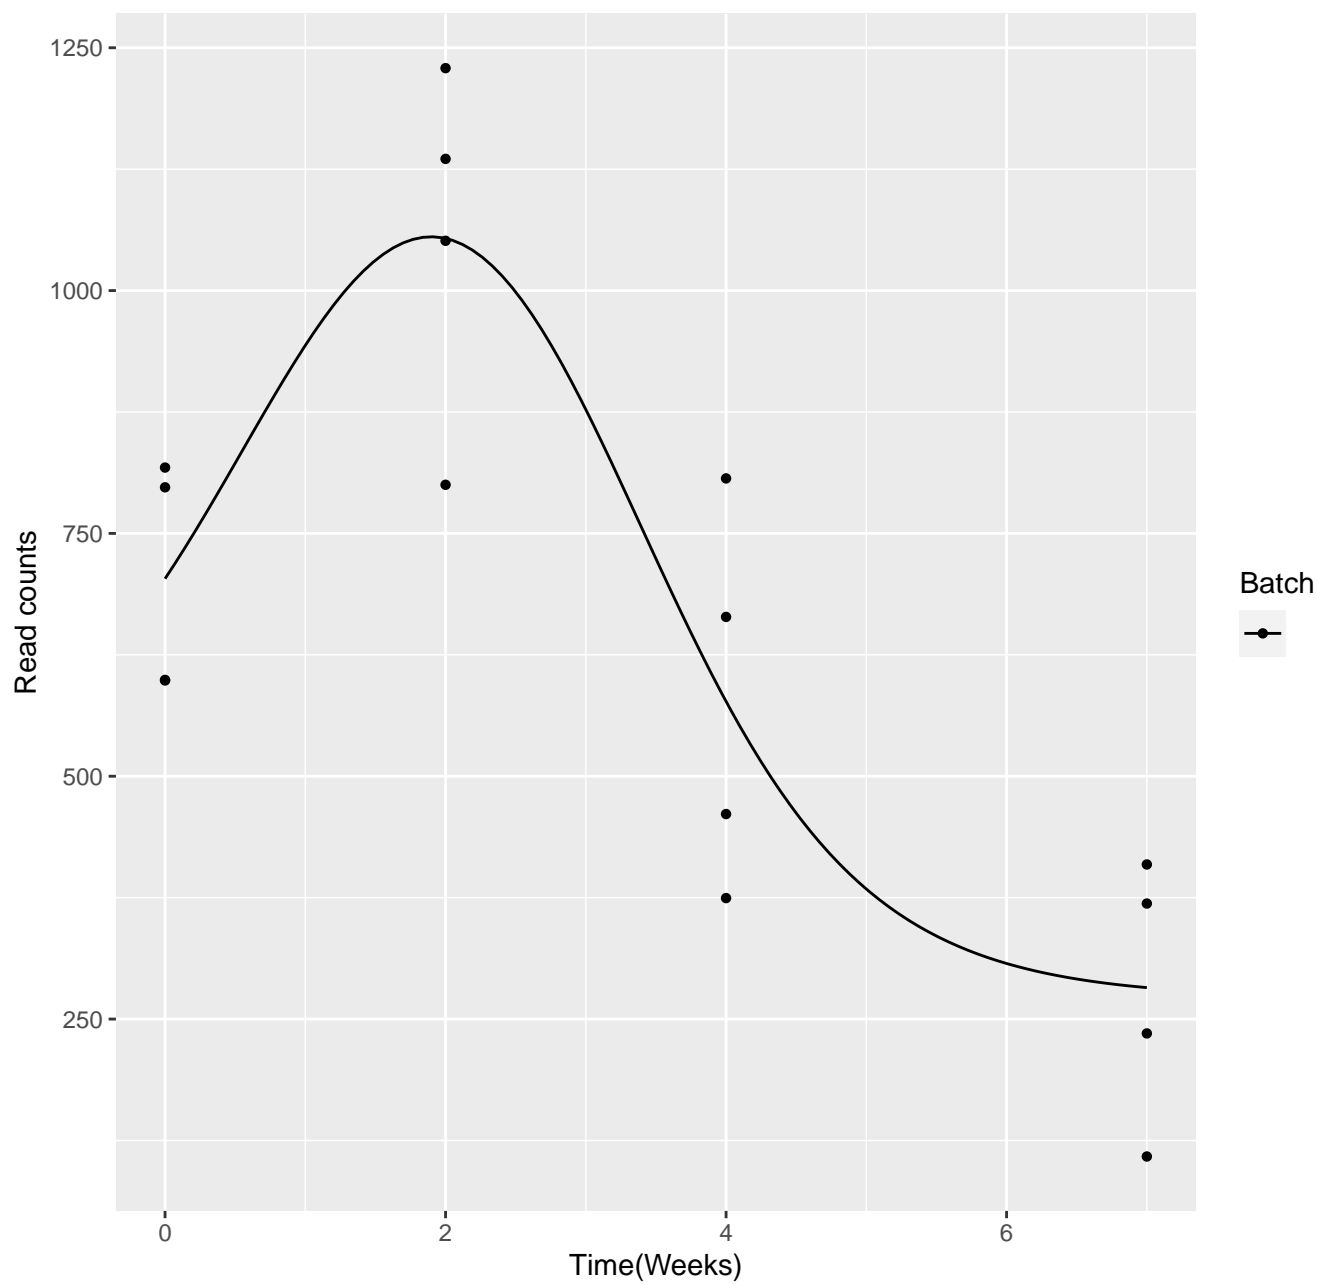

JPT1:  $\log_{10} q = -3.77$

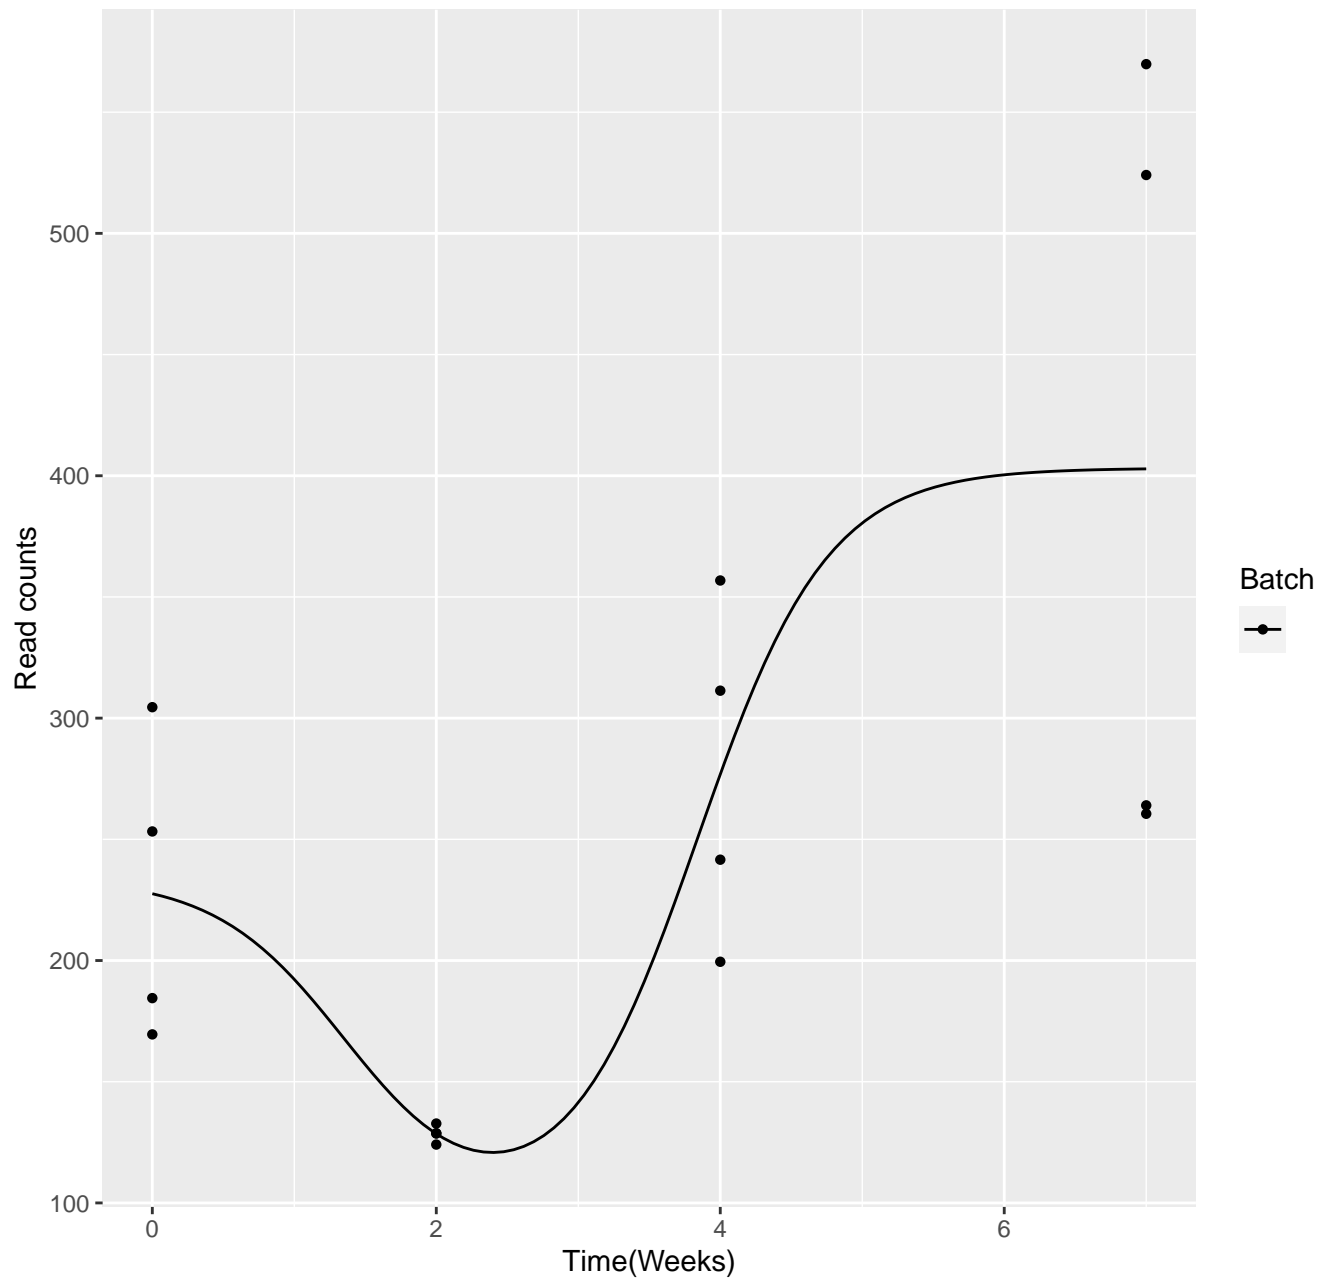

CENPF:  $\log_{10} q = -3.76$

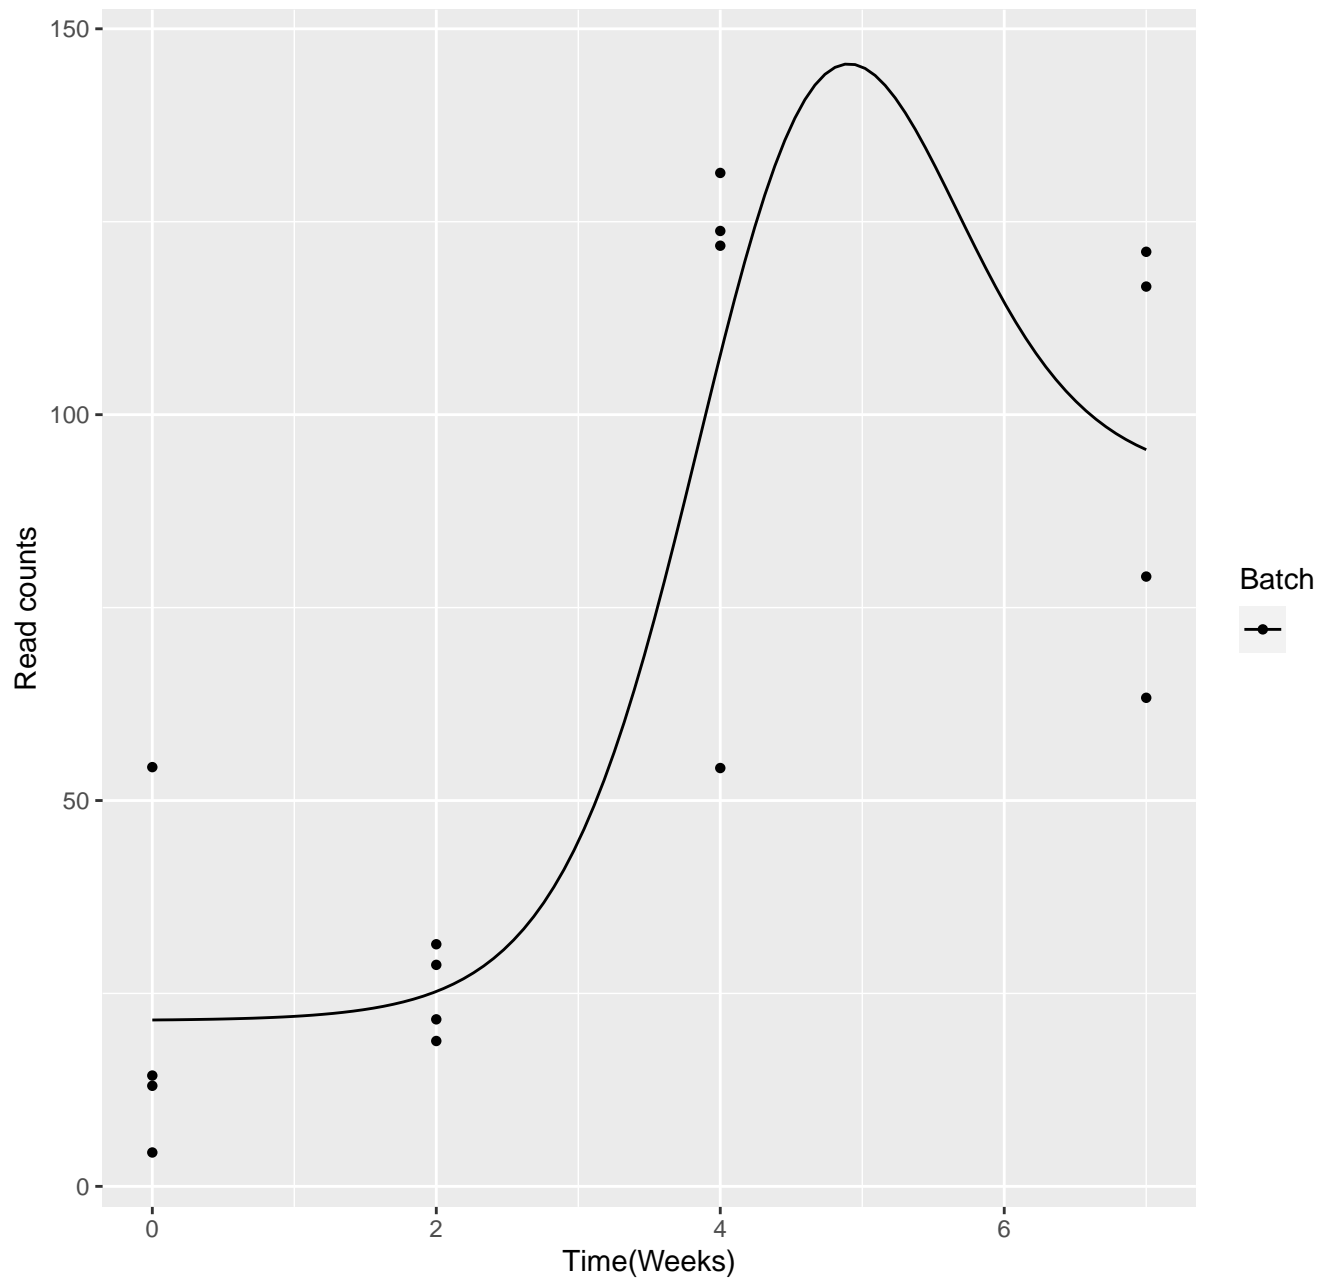

DTX2:  $\log_{10} q = -3.75$

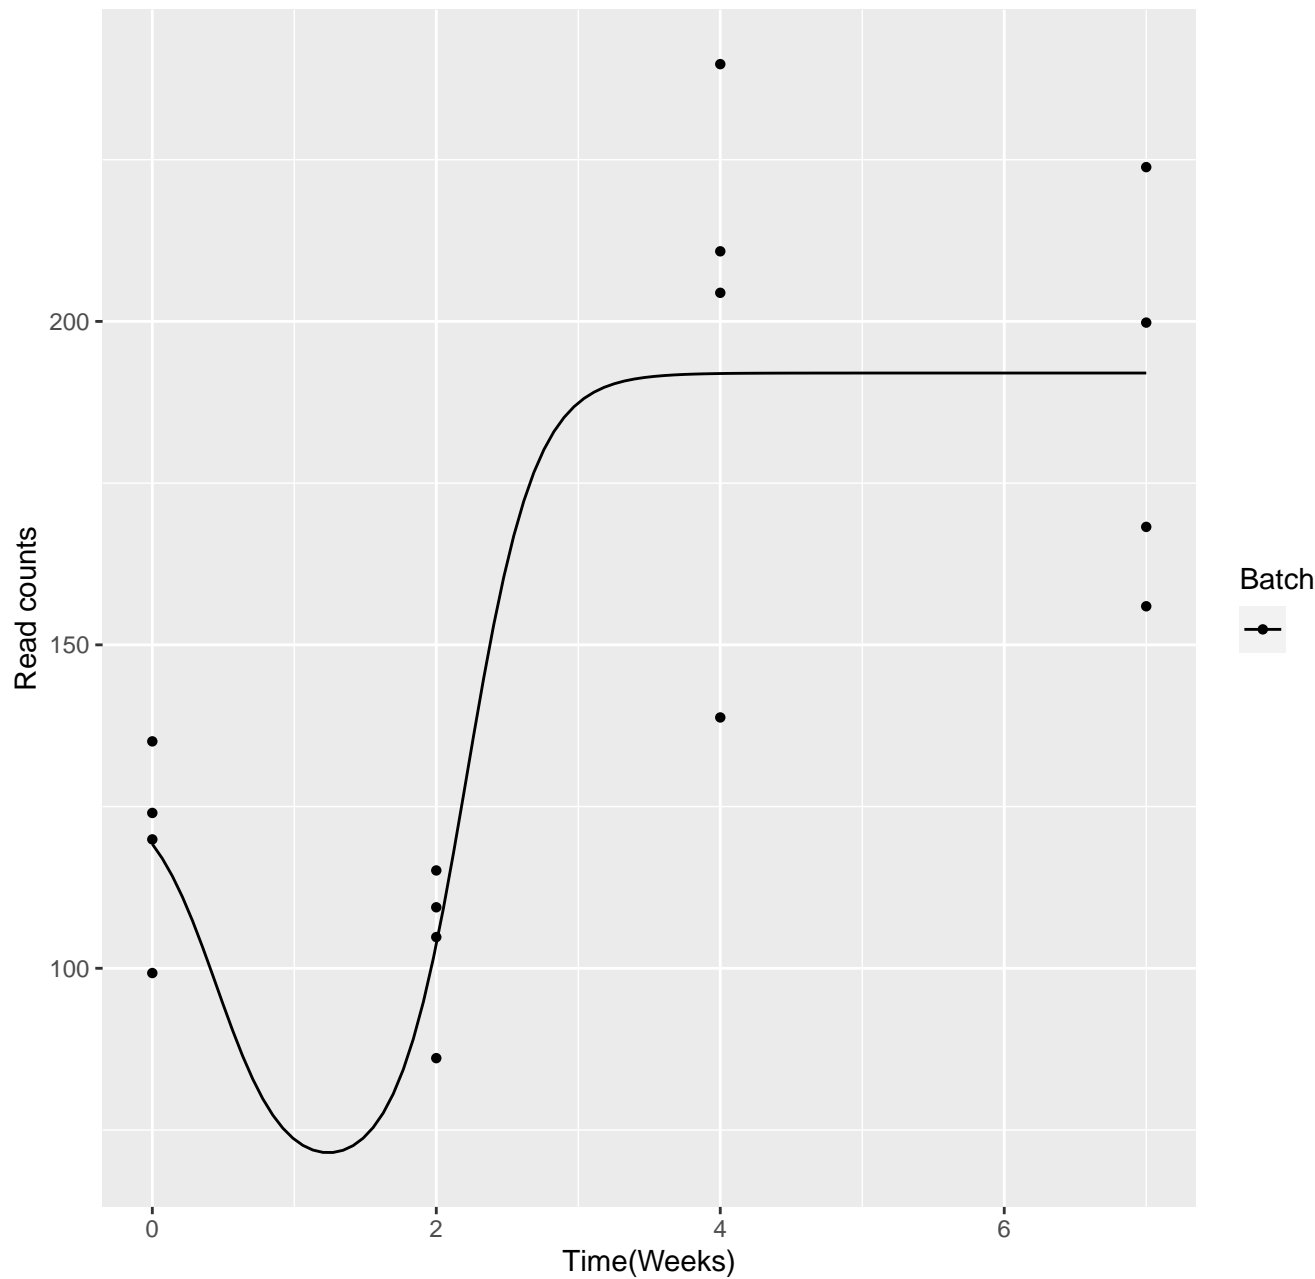



CTDSP2:  $\log_{10} q = -3.74$

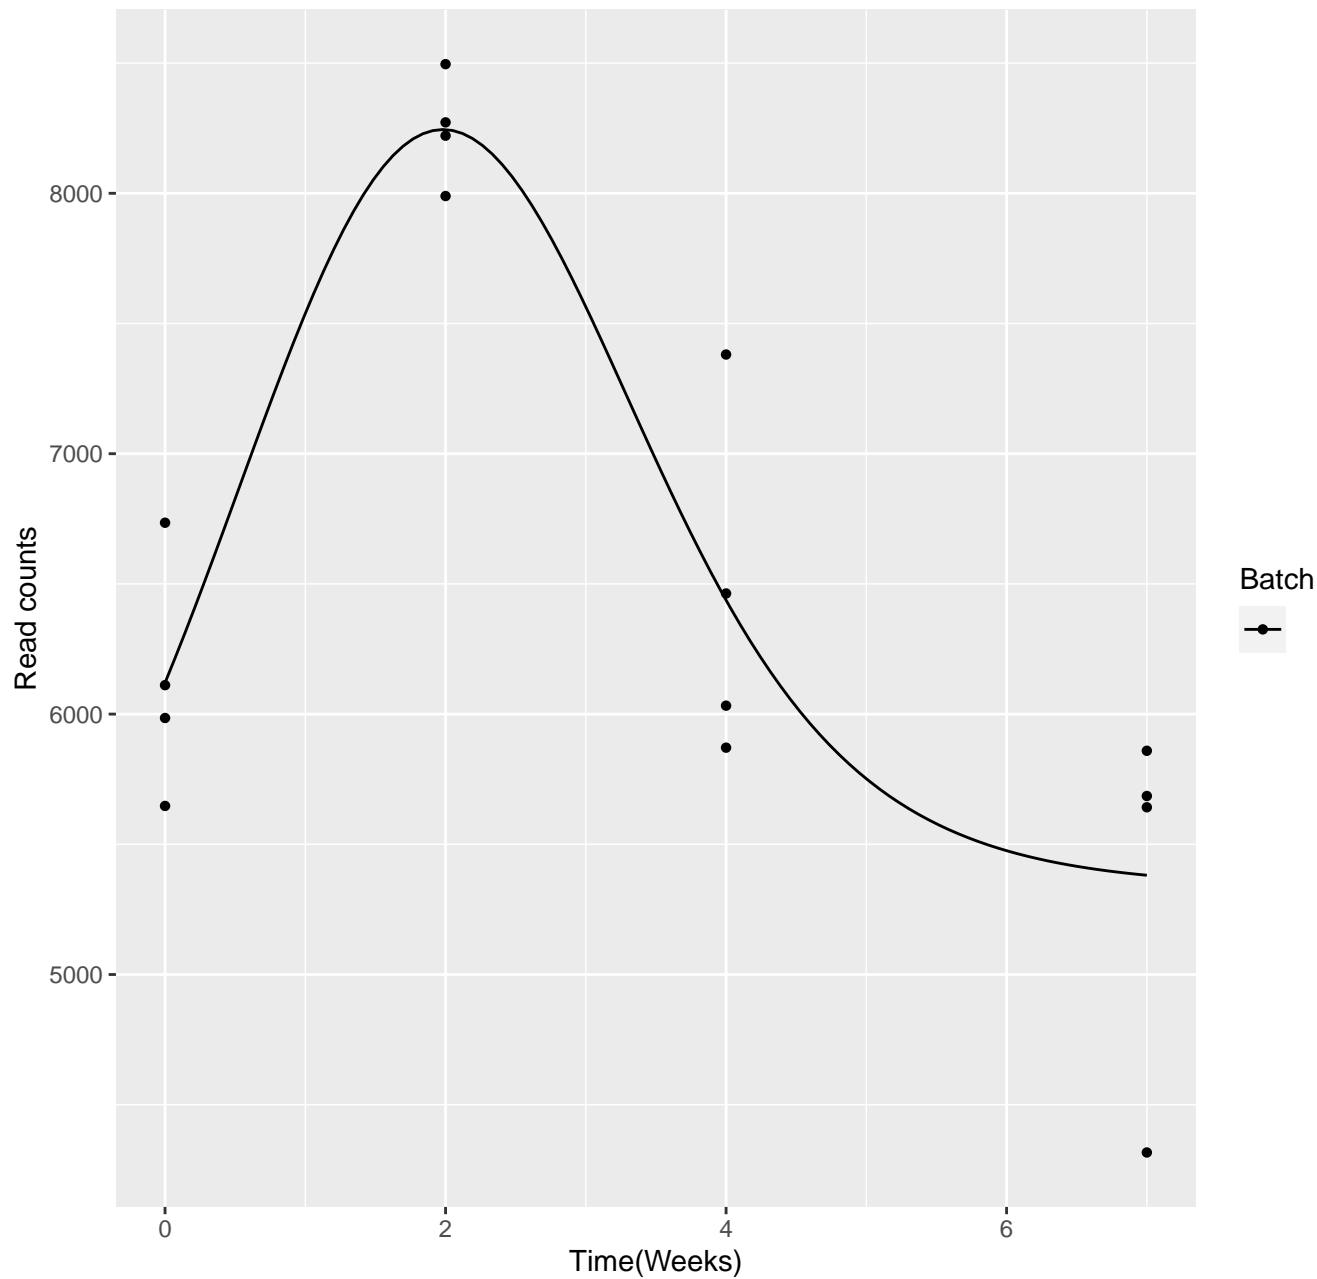

FAM83D:  $\log_{10} q = -3.74$

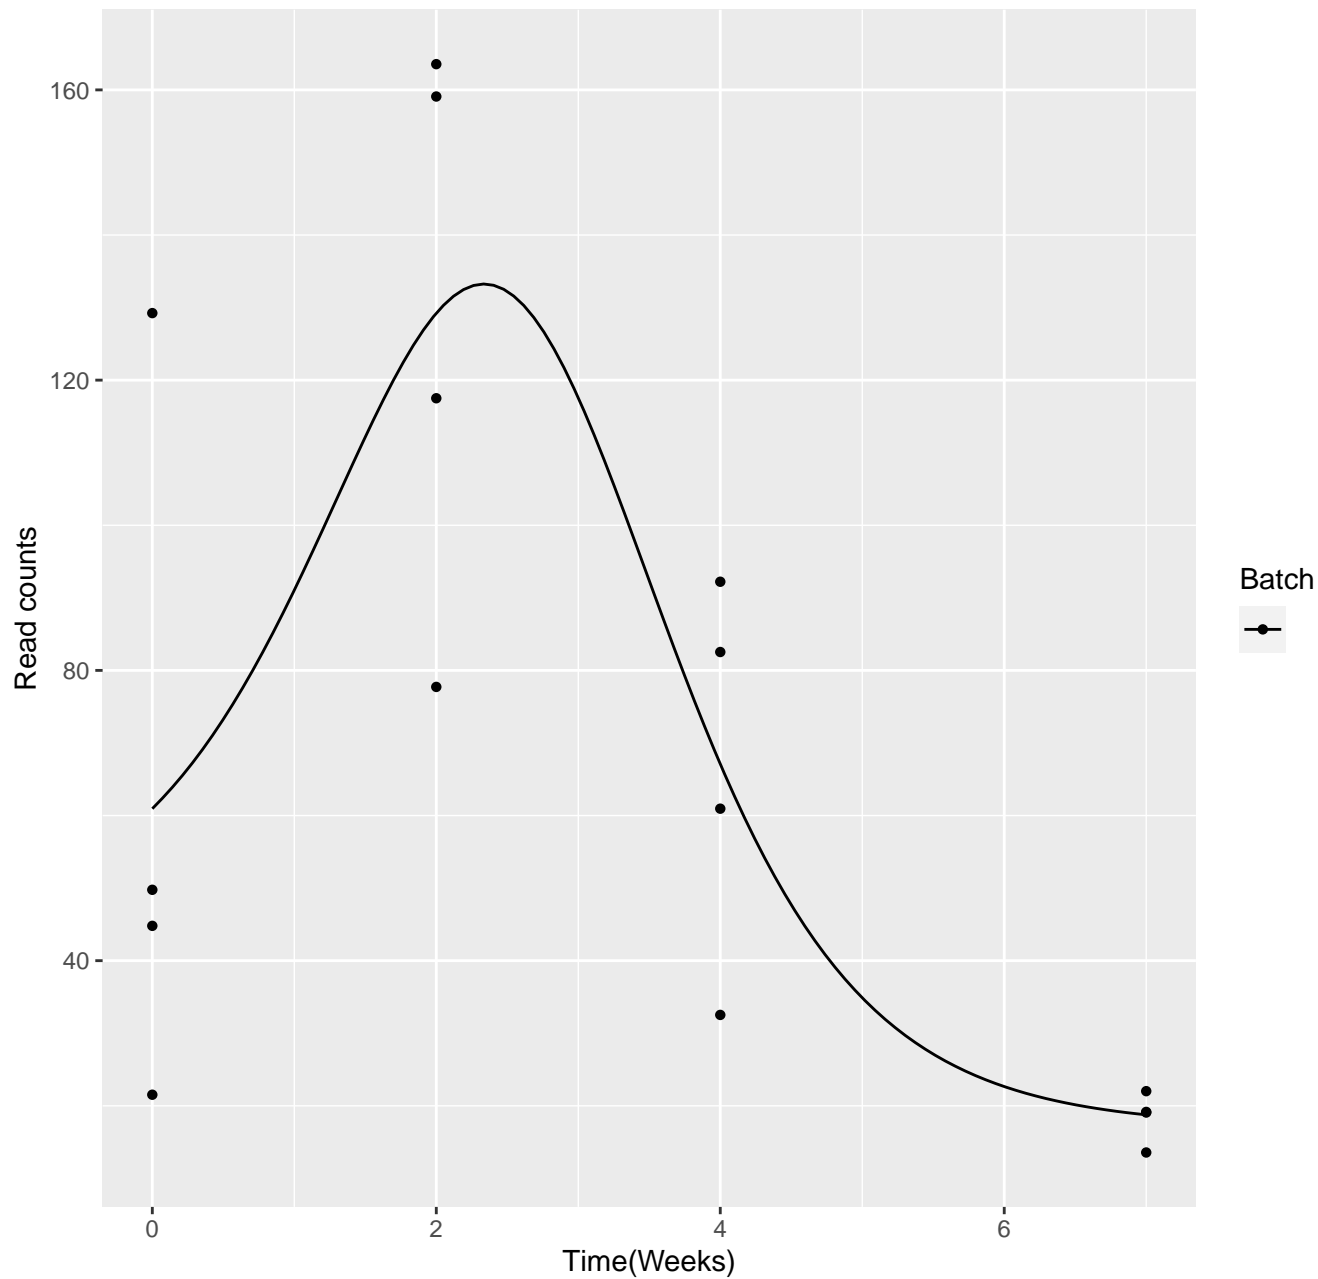

MYBL2:  $\log_{10} q = -3.73$

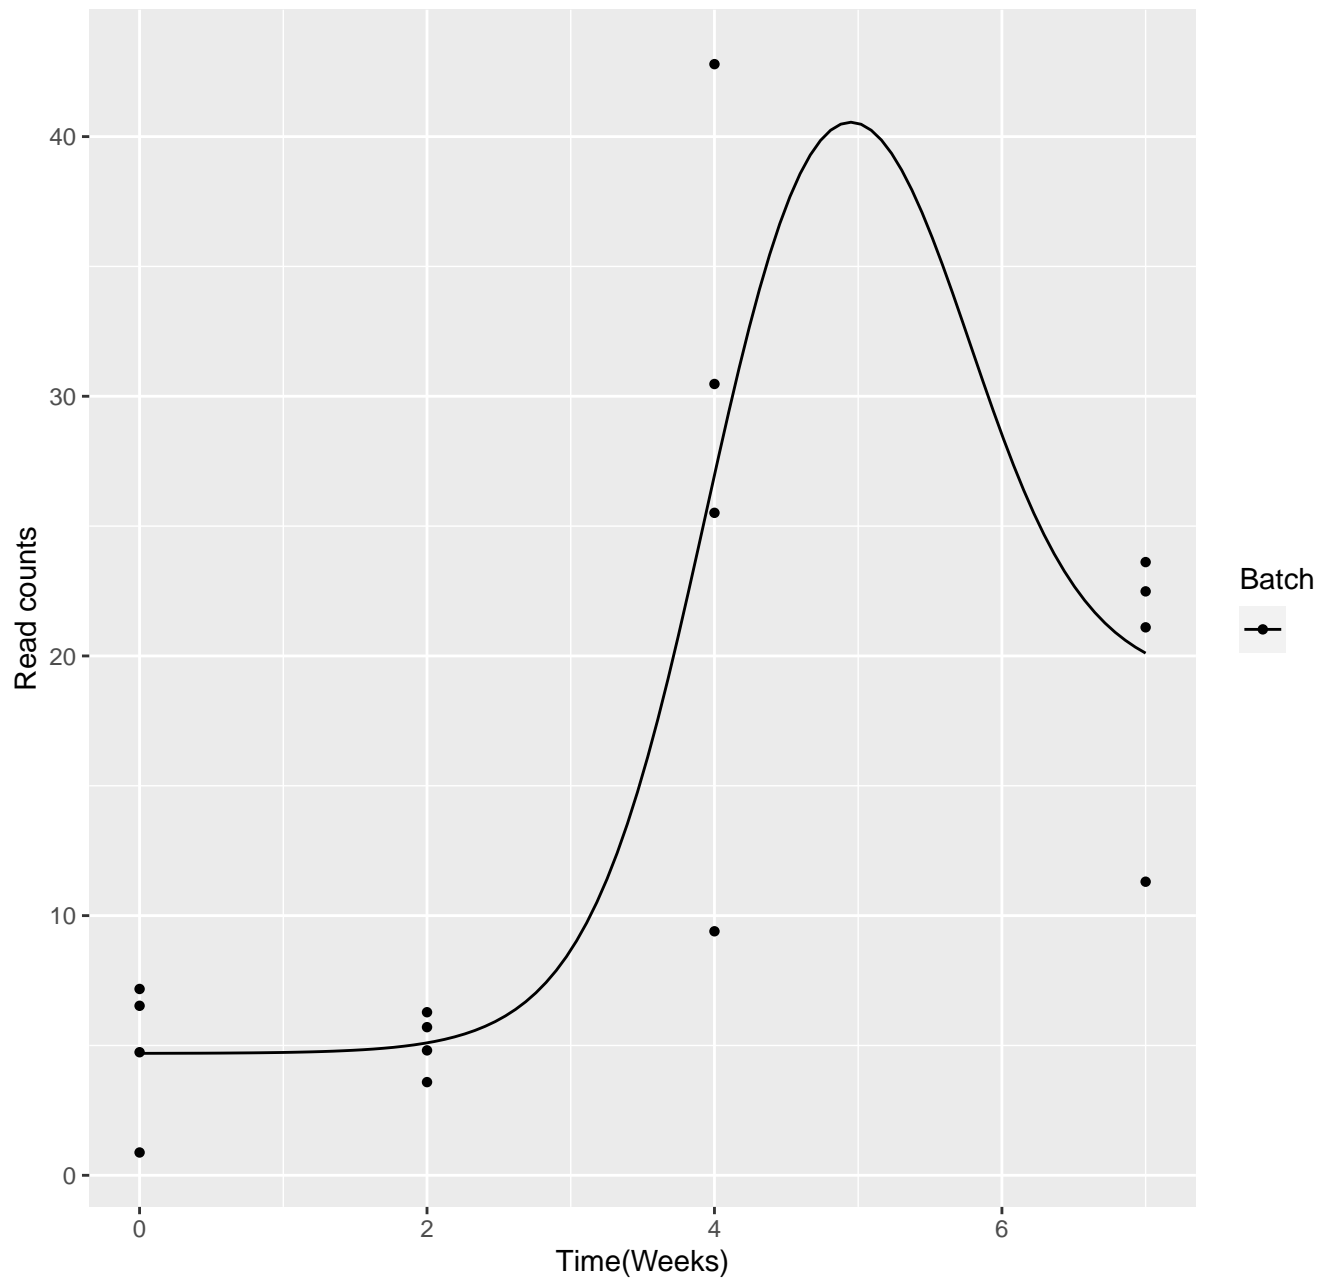

PRDM11:  $\log_{10} q = -3.73$

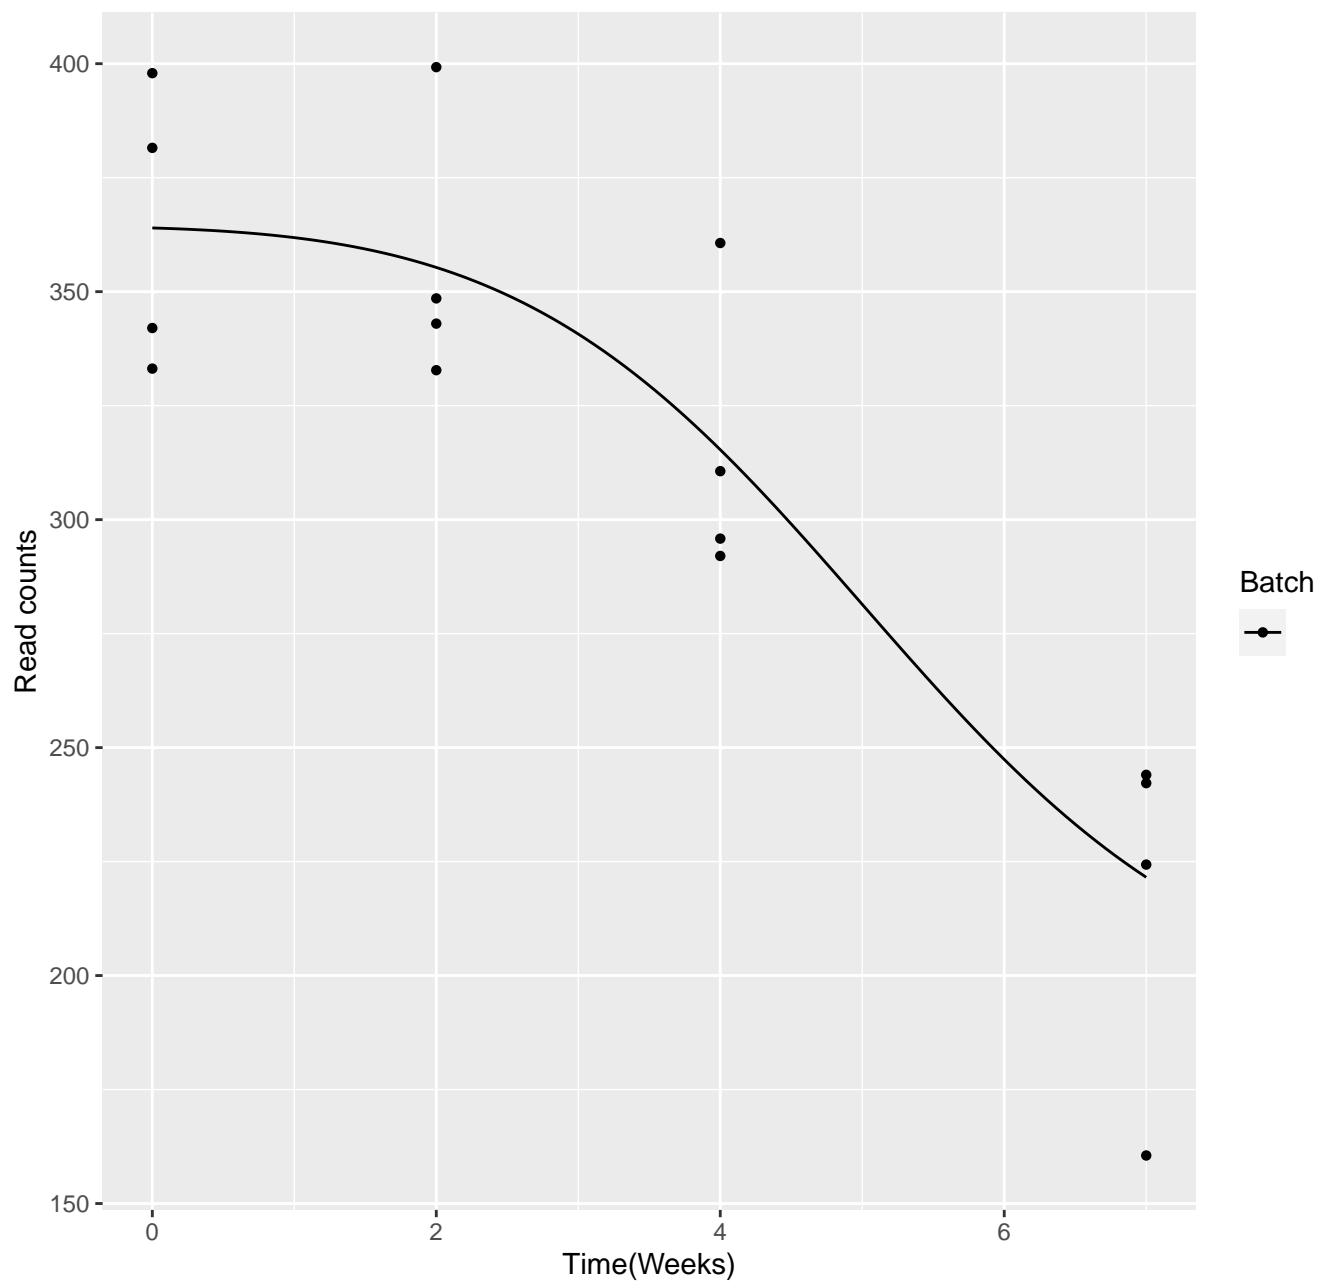

LOC108178979:  $\log_{10} q = -3.73$

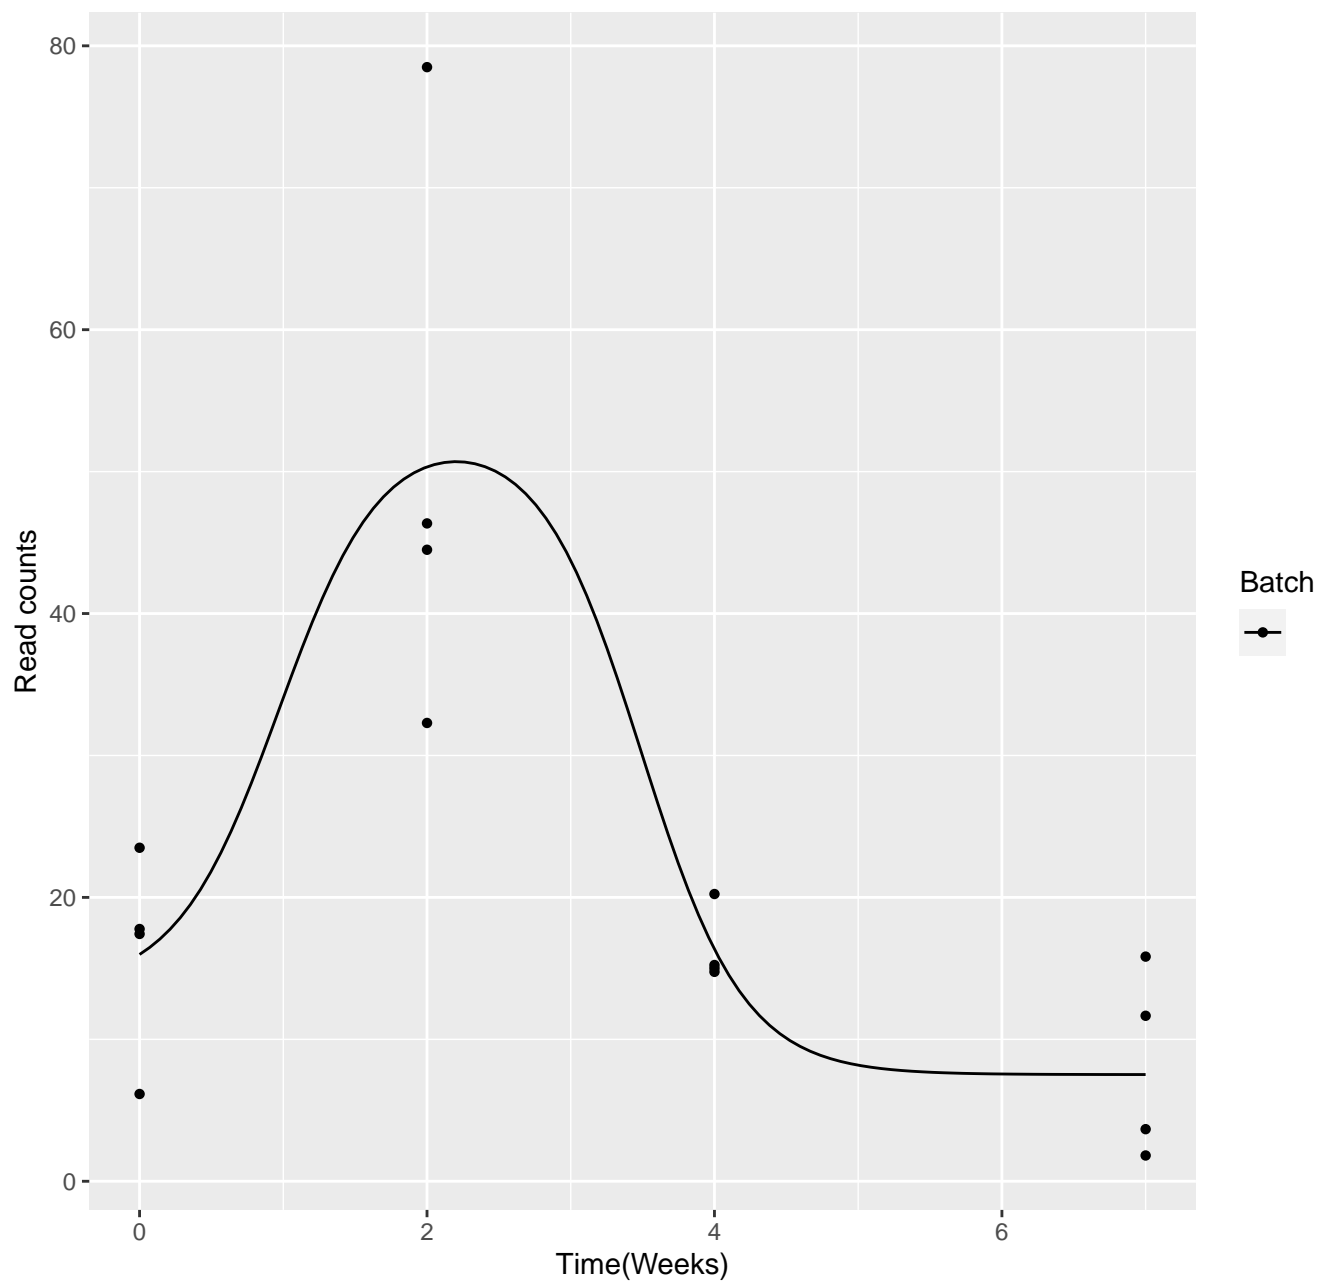

CXCL16:  $\log_{10} q = -3.72$

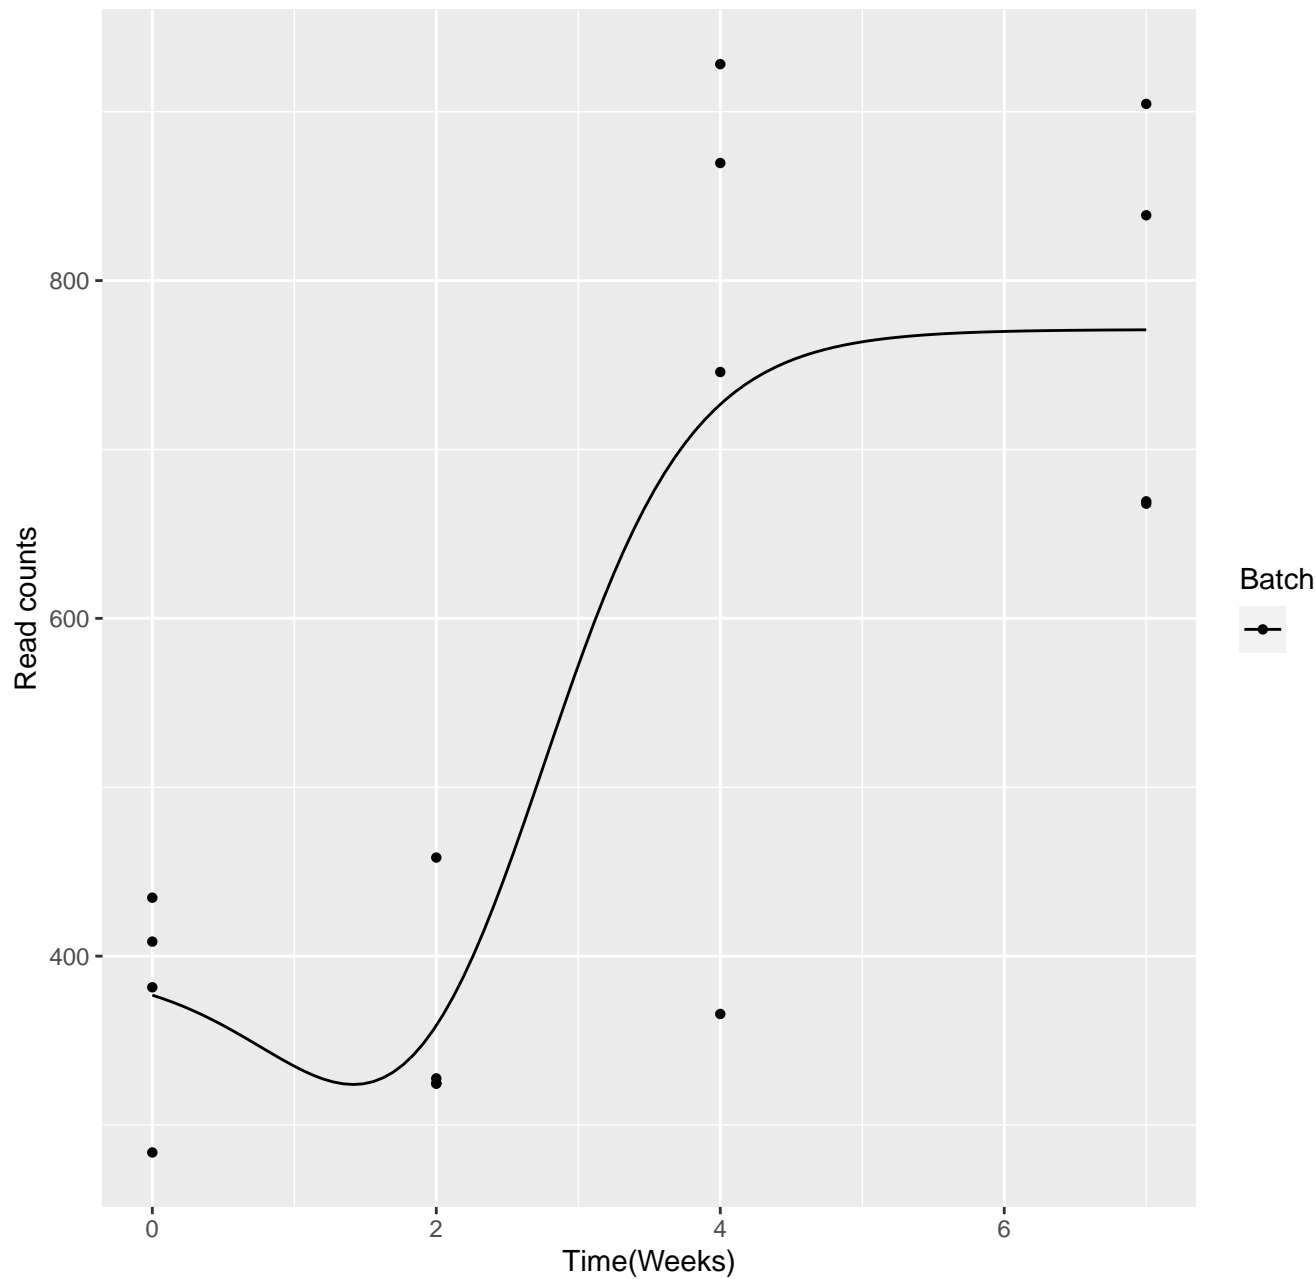

DEPP1:  $\log_{10} q = -3.72$

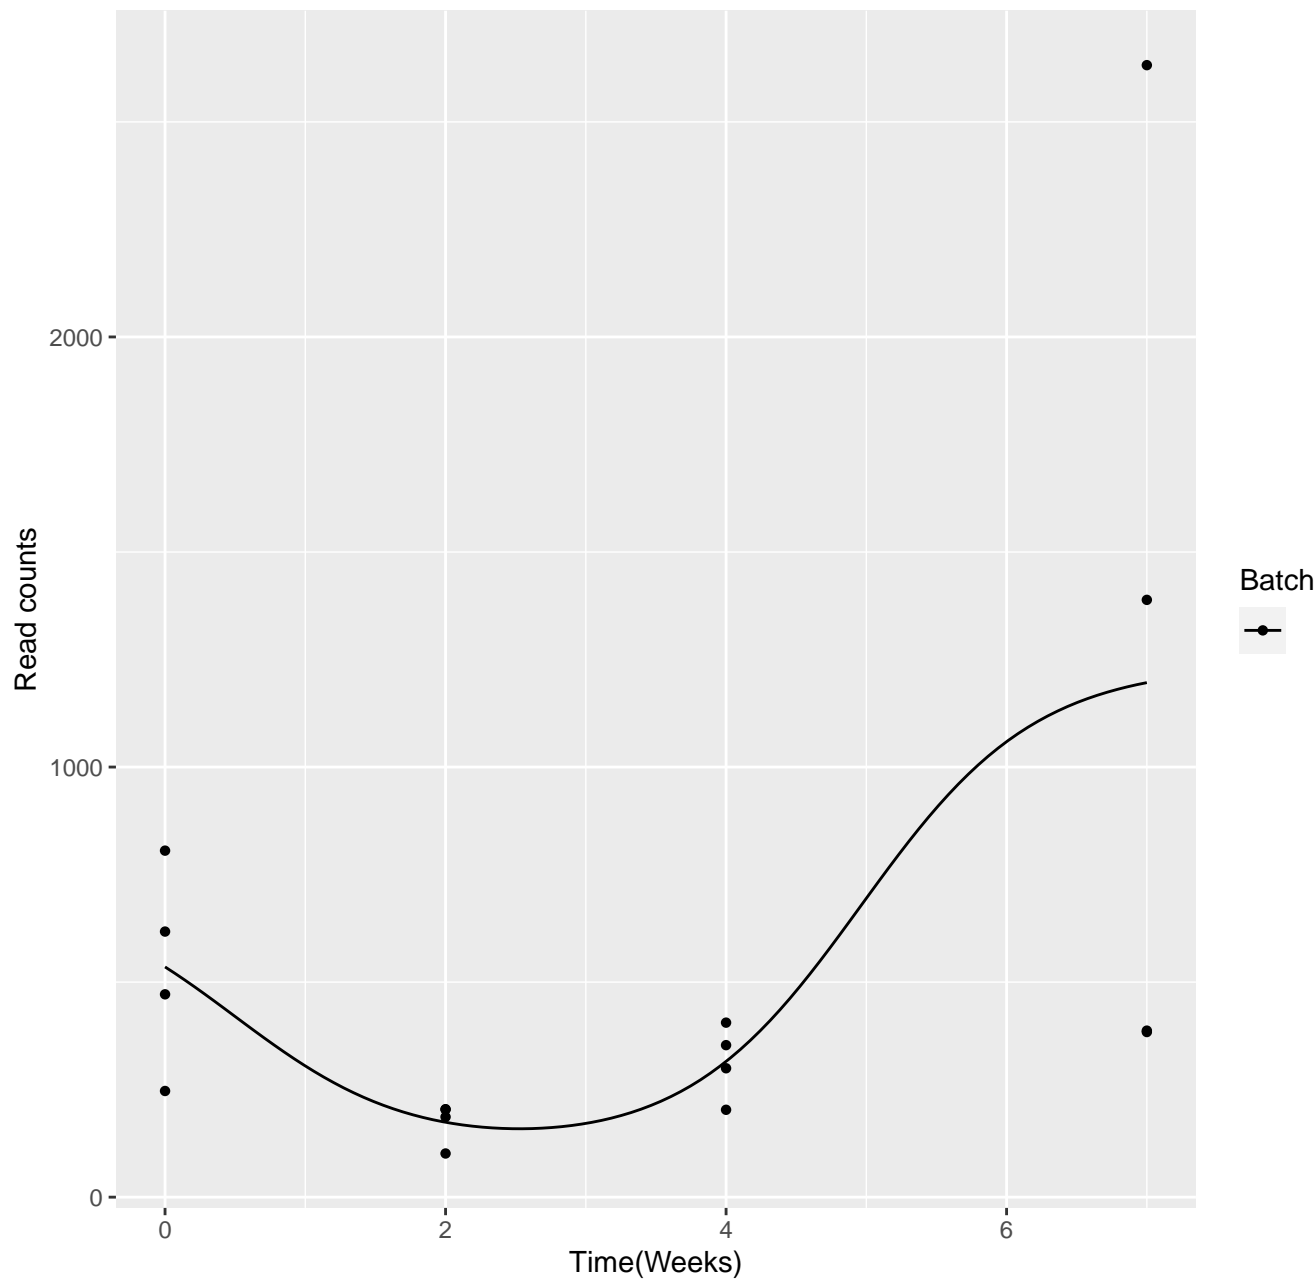

SH2D4B:  $\log_{10} q = -3.72$

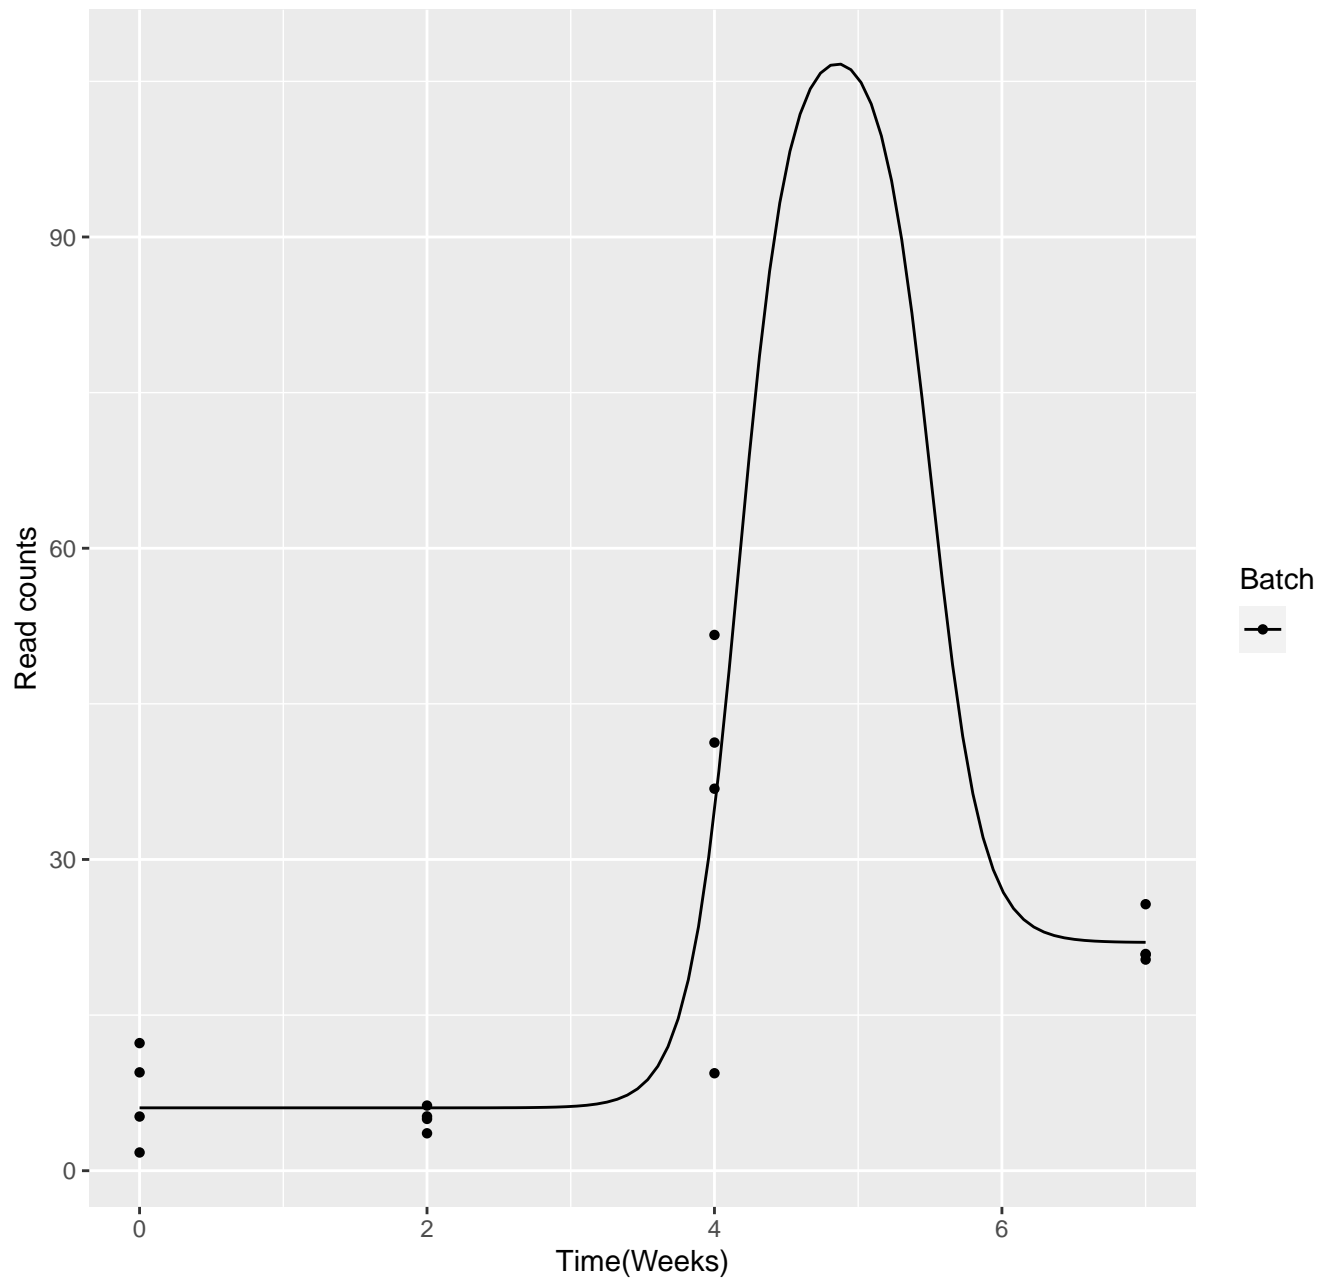



SLC15A2:  $\log_{10} q = -3.7$

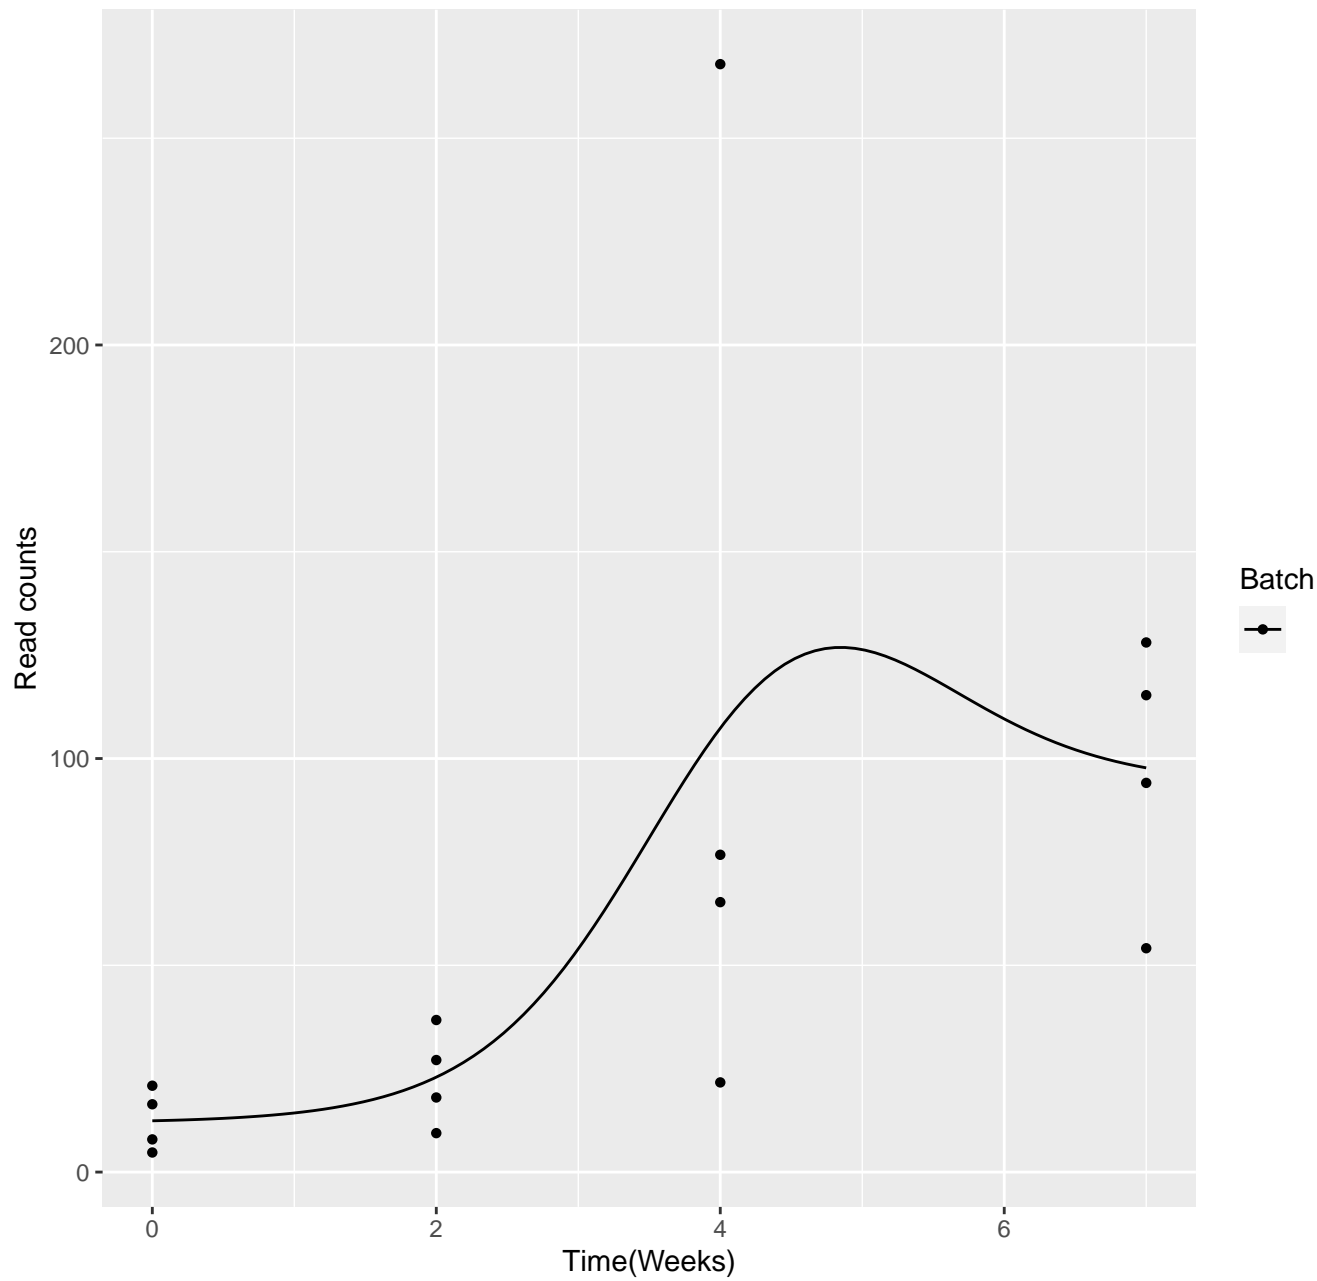

MTHFR:  $\log_{10} q = -3.69$

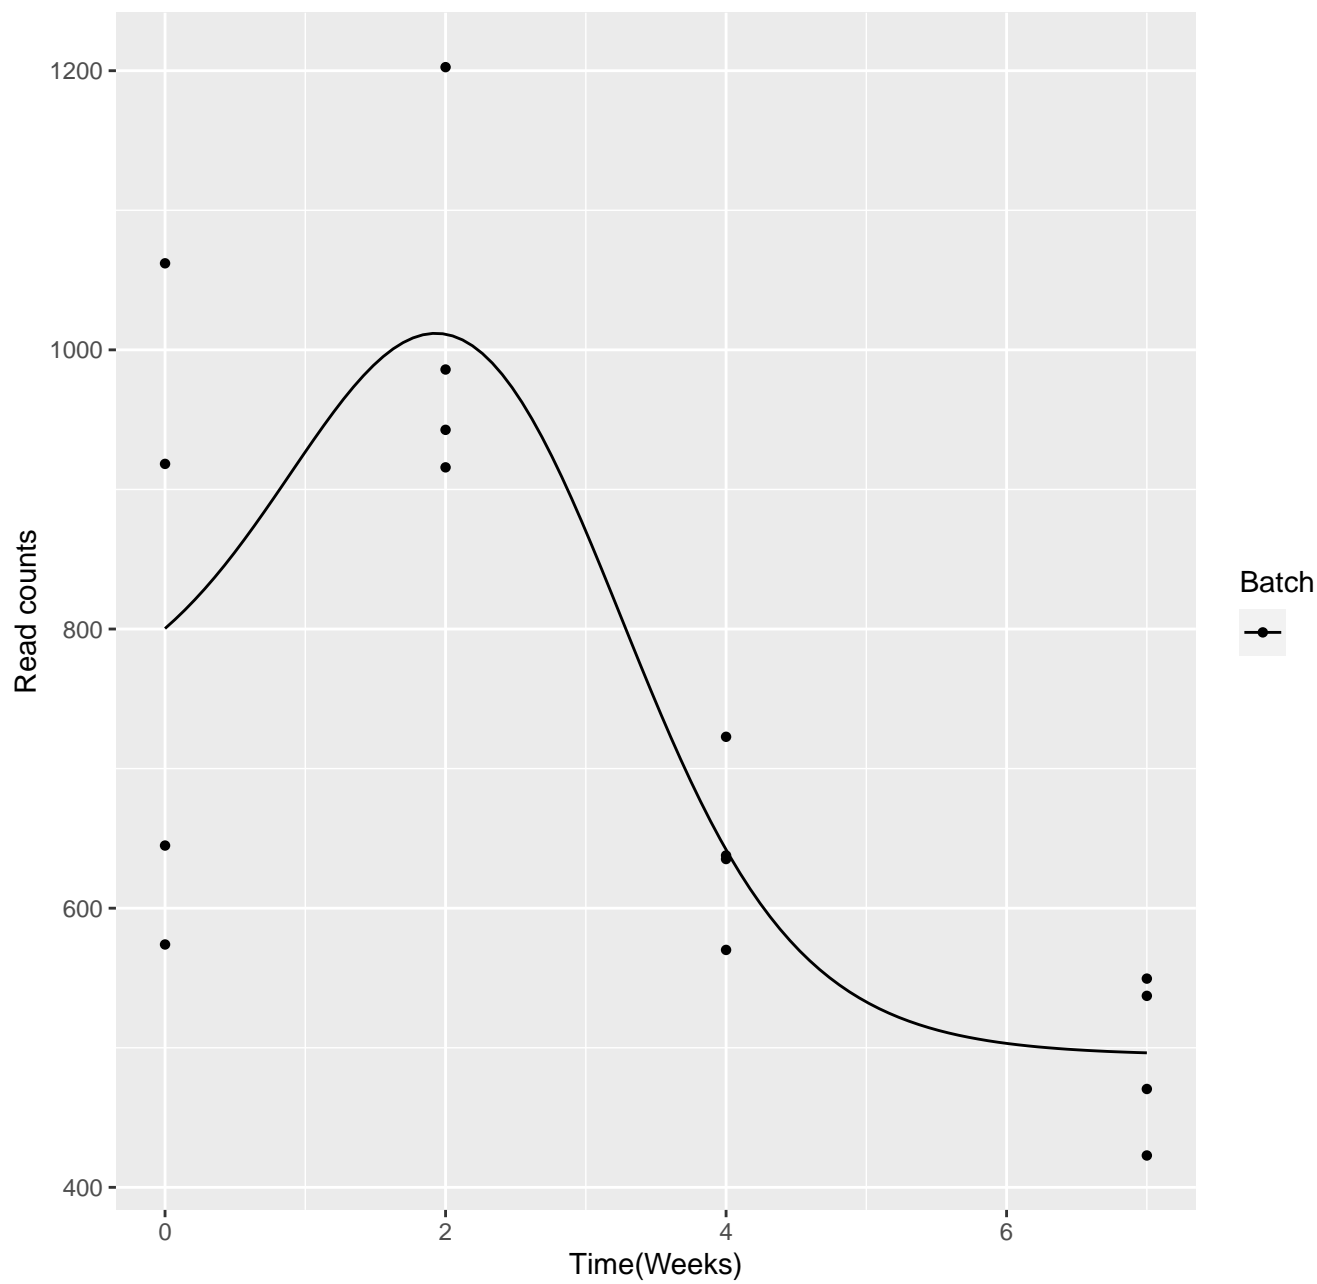

LOC103349307:  $\log_{10} q = -3.69$

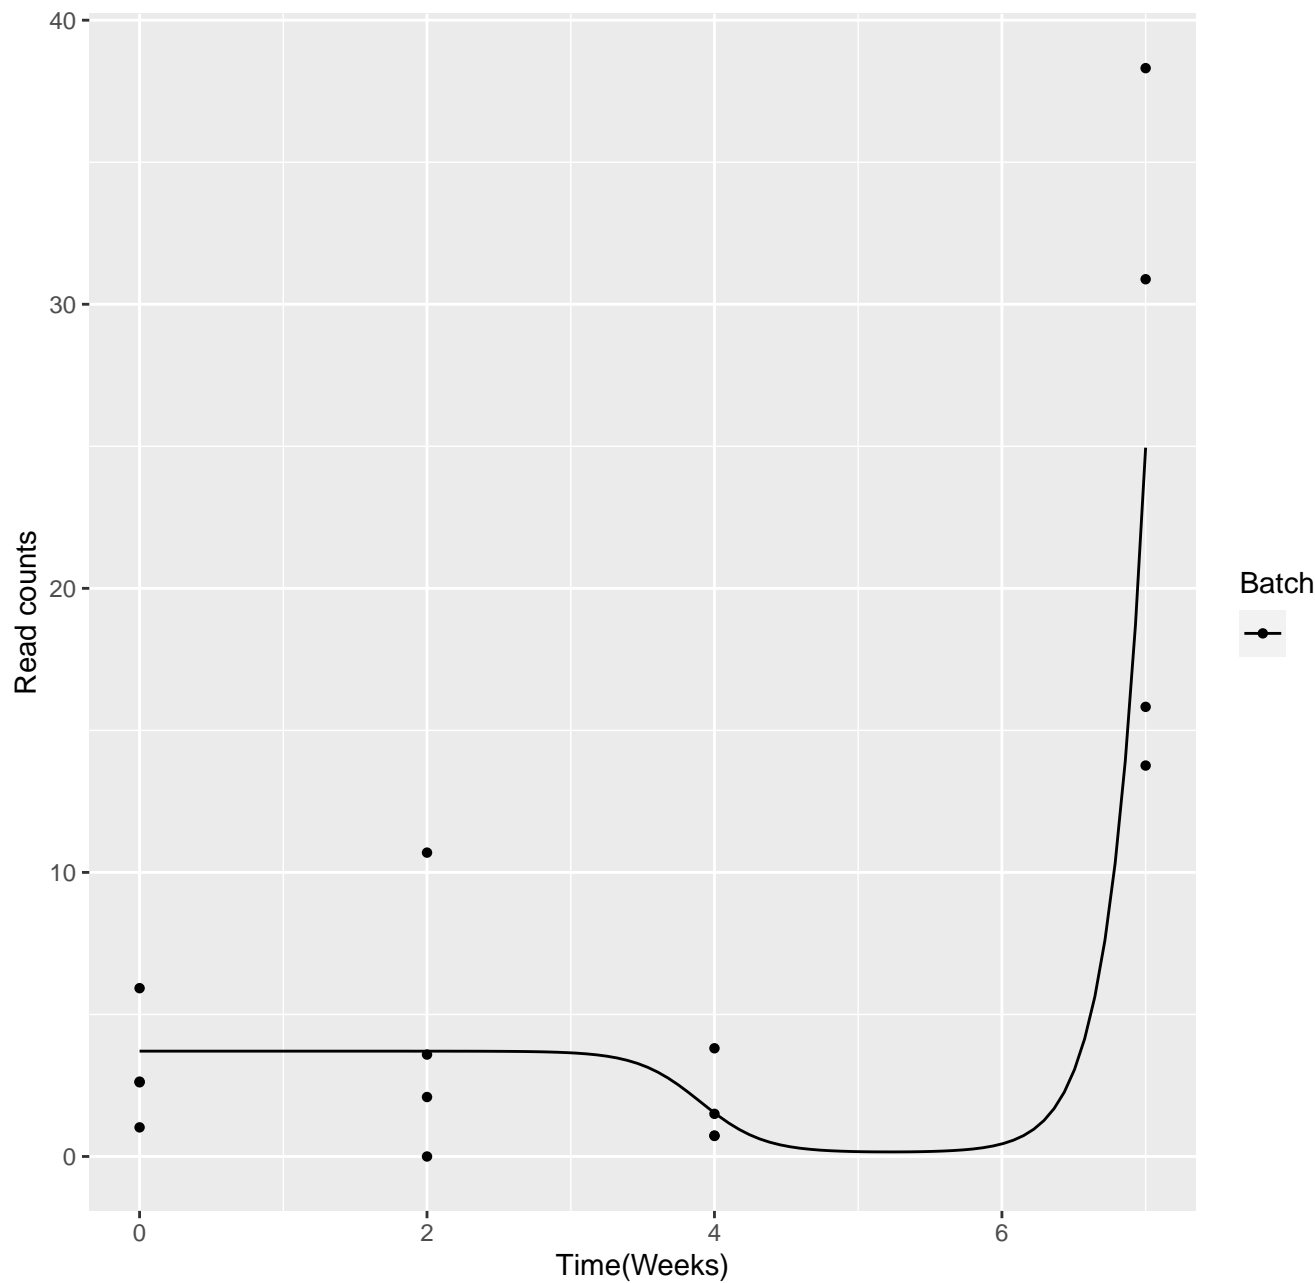

RHBDF2:  $\log_{10} q = -3.68$

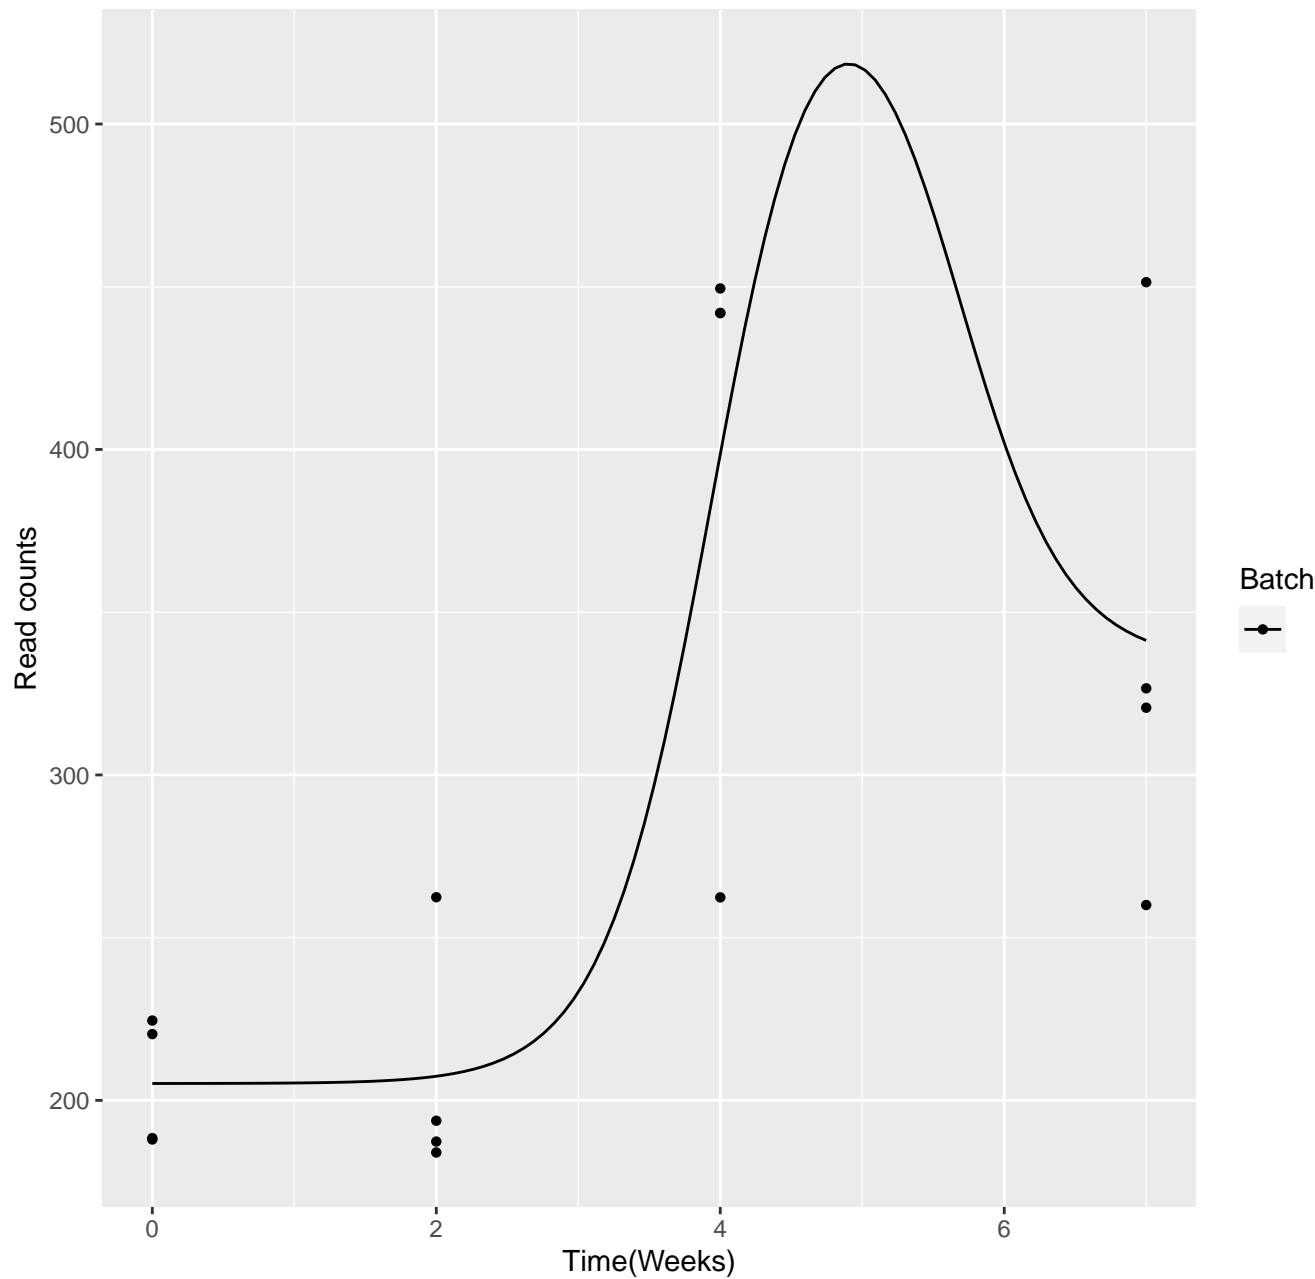

HEY2:  $\log_{10} q = -3.67$

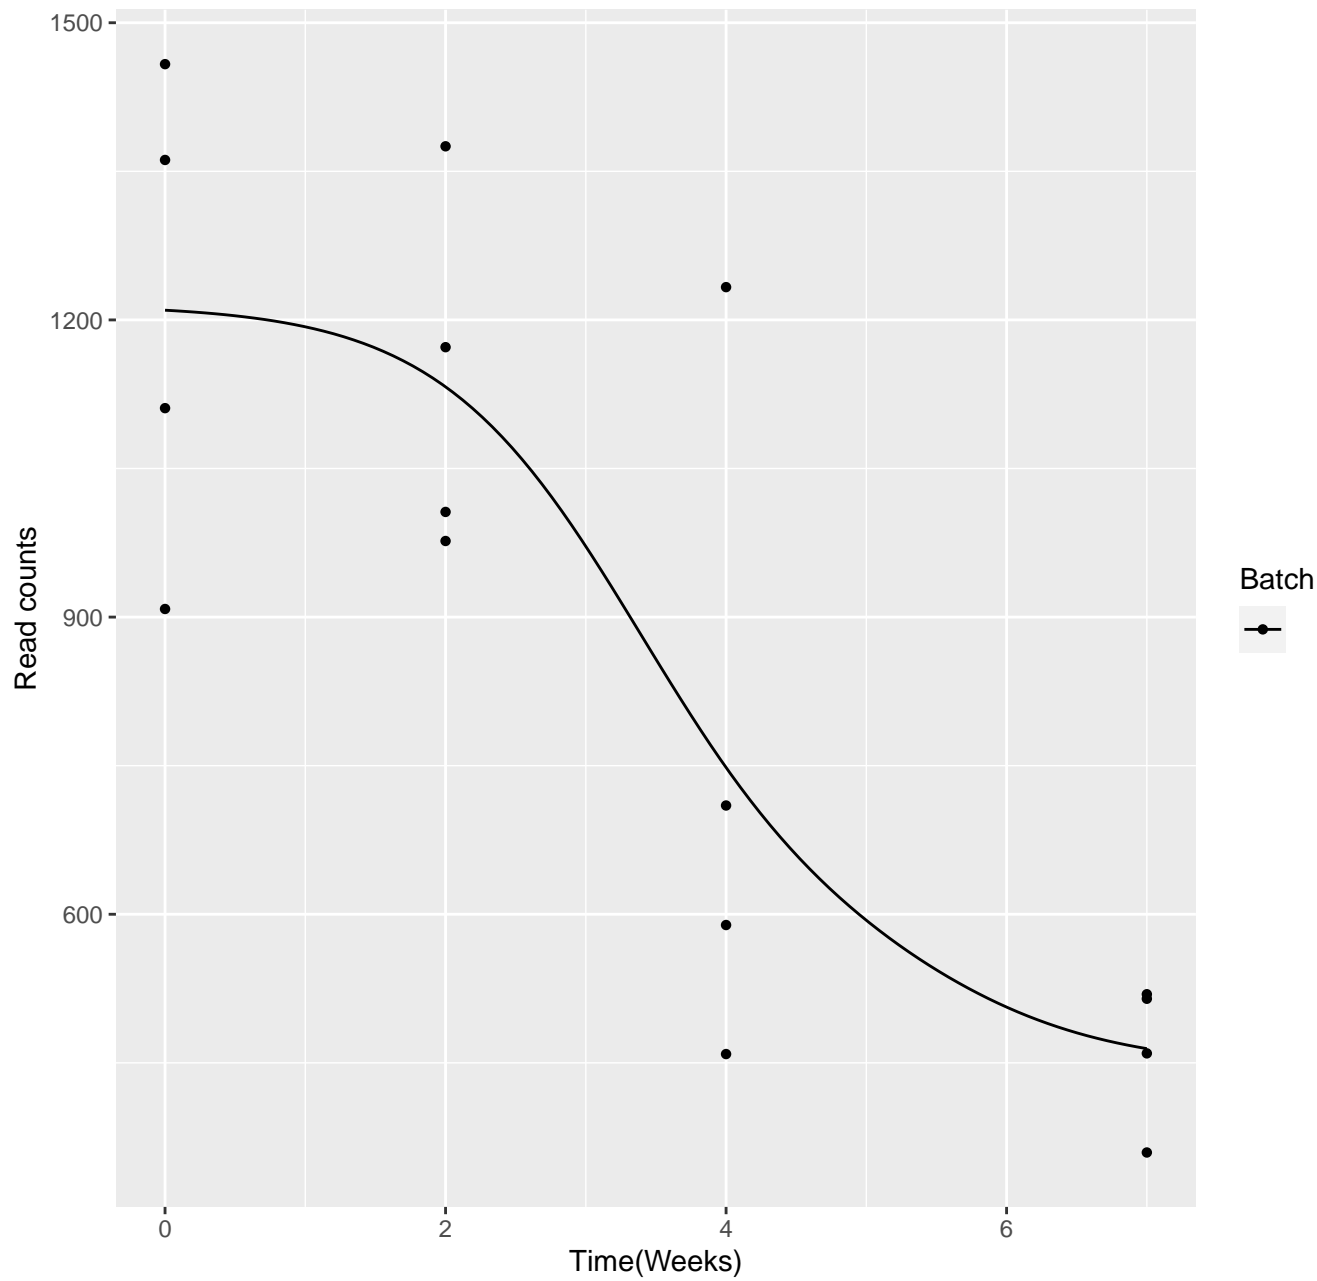

FCHSD2:  $\log_{10} q = -3.67$

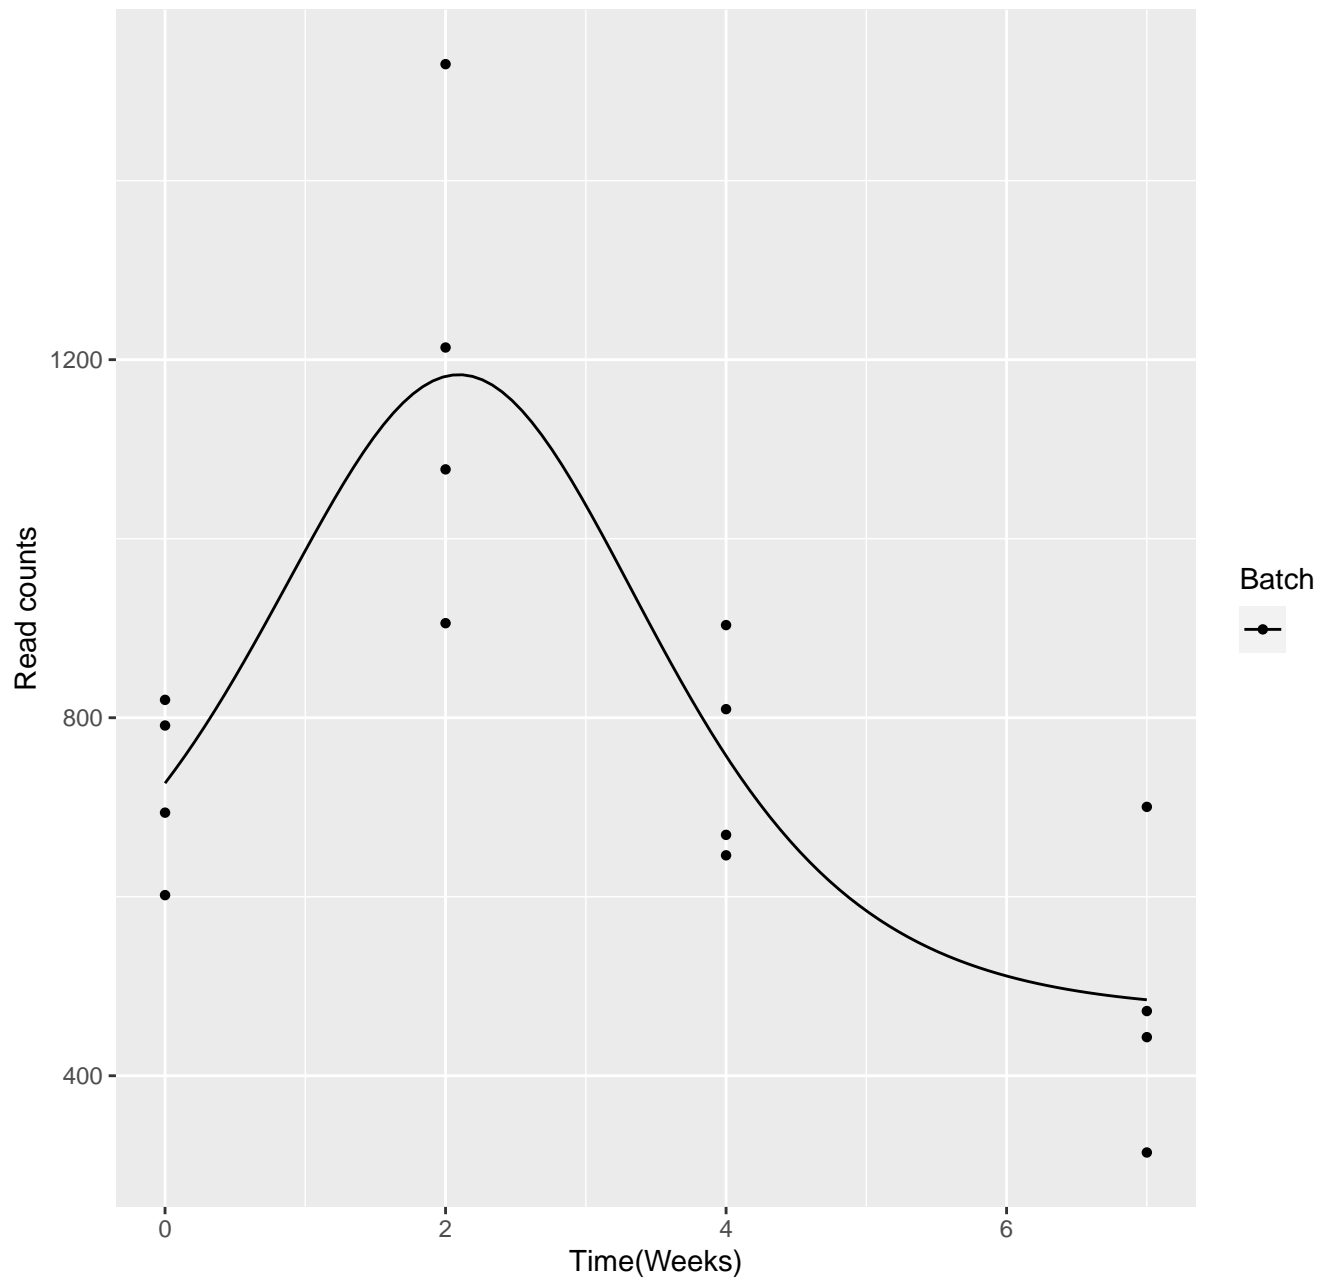

FHL2:  $\log_{10} q = -3.67$

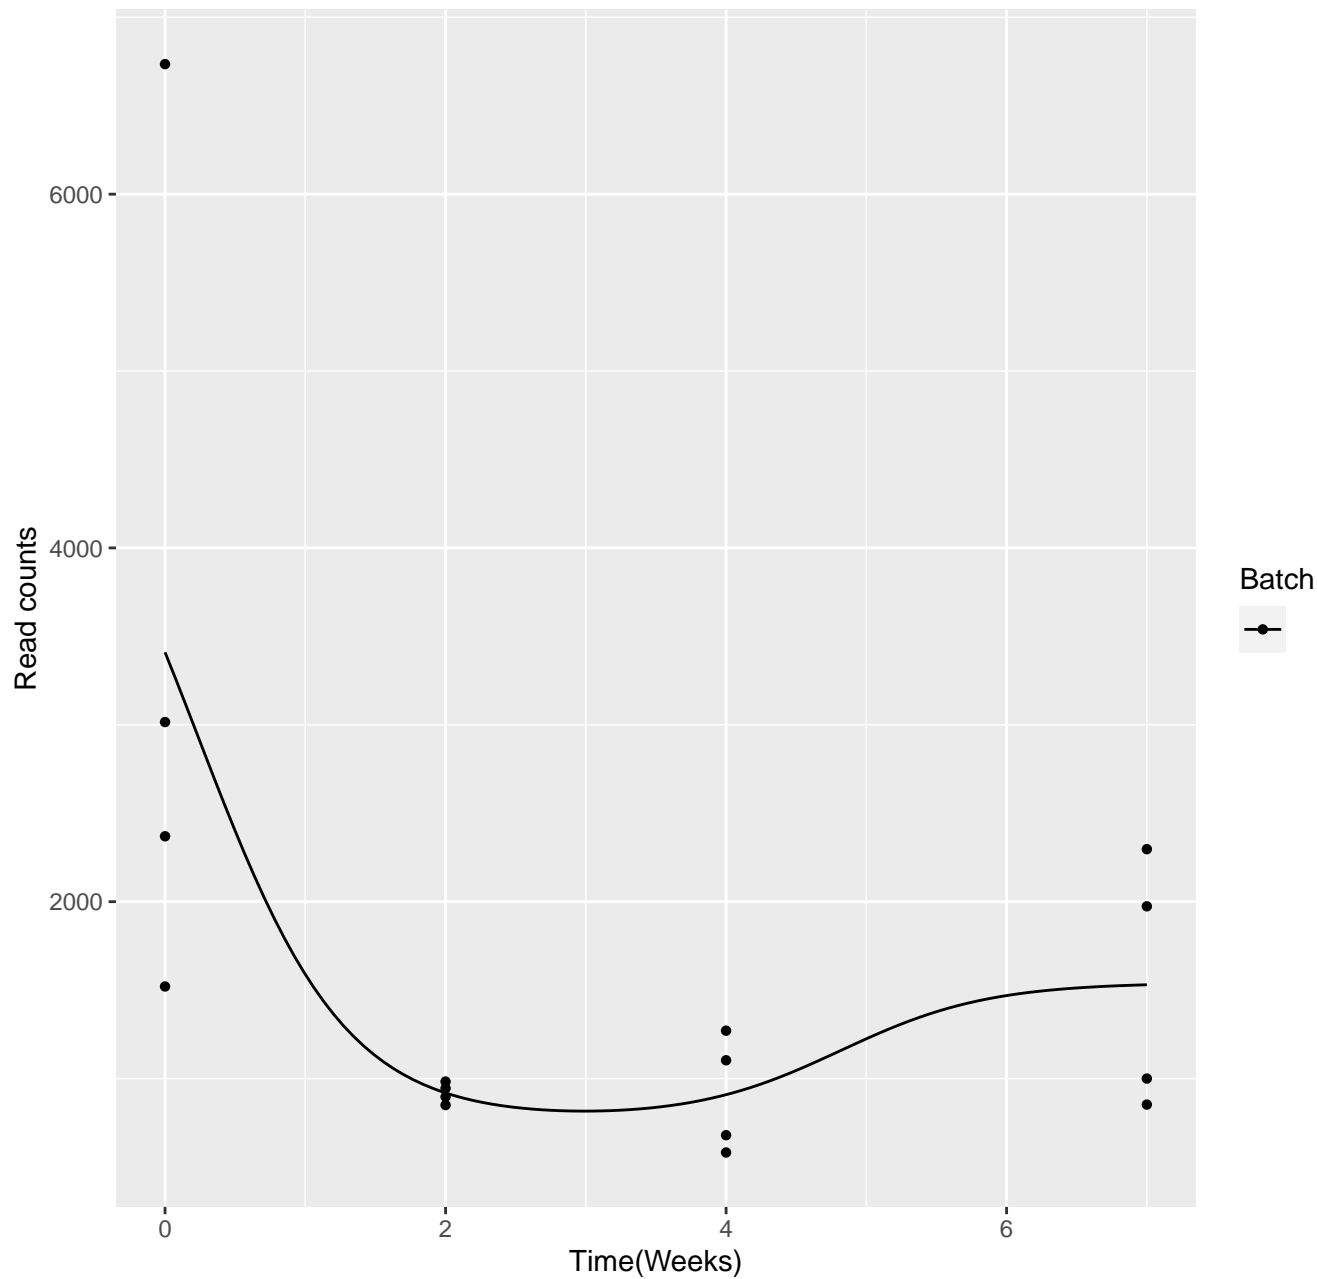

CASS4:  $\log_{10} q = -3.67$

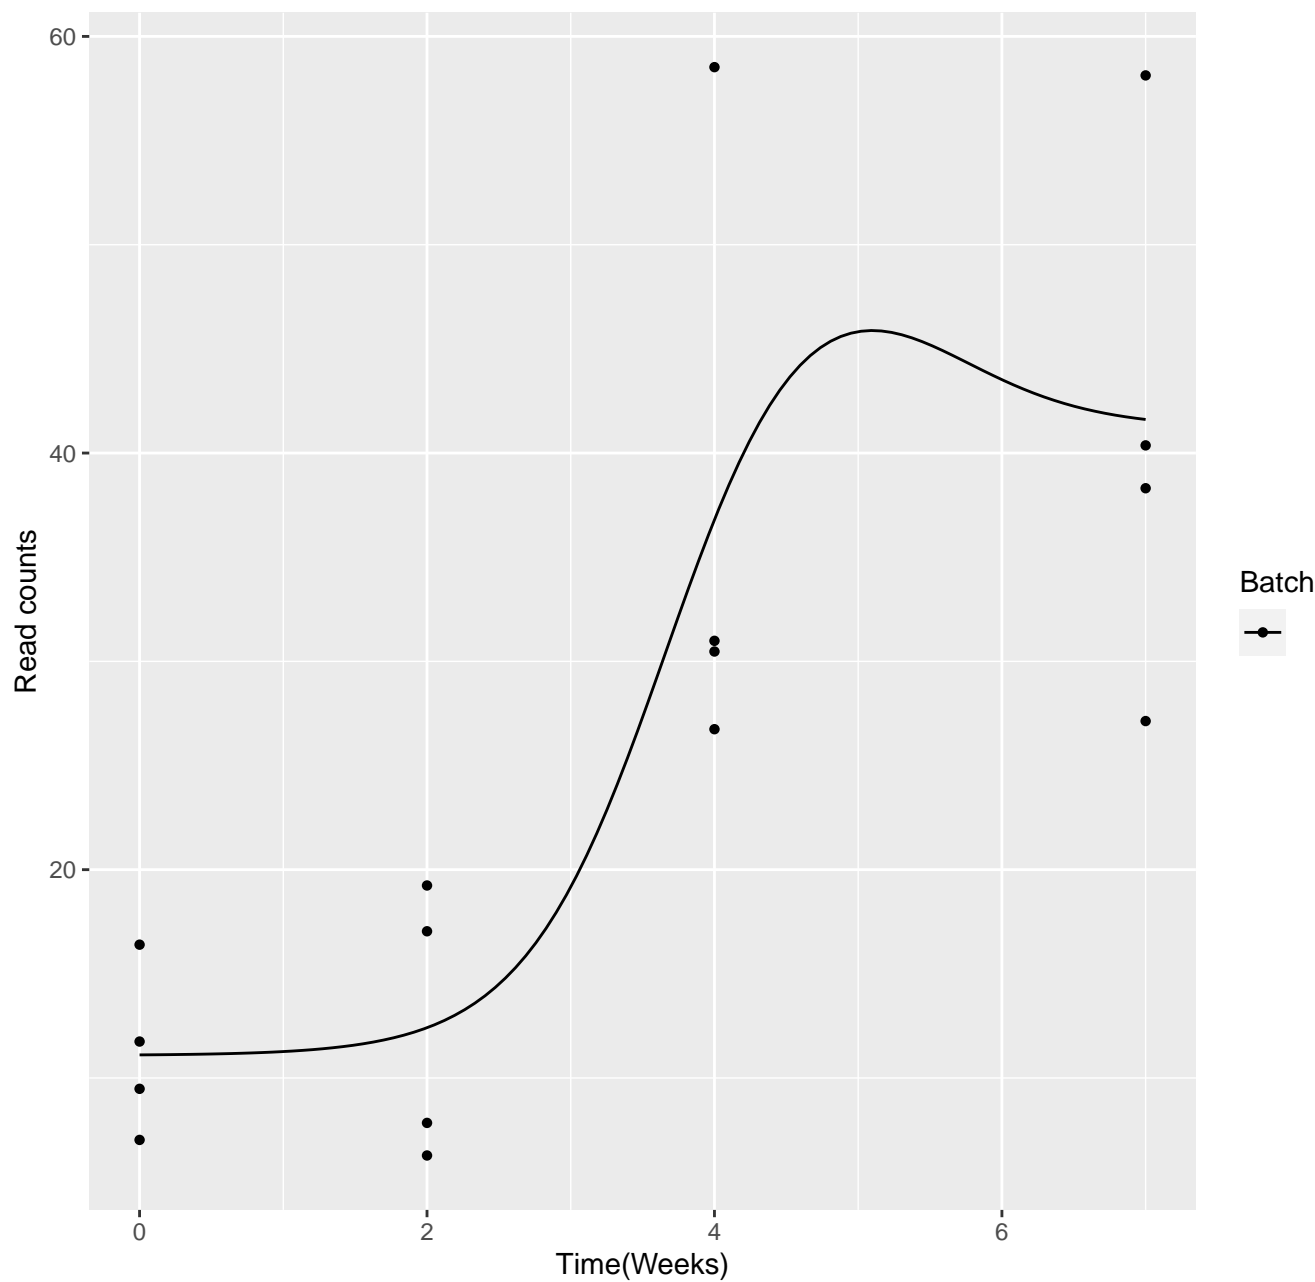



PLEK2:  $\log_{10} q = -3.67$

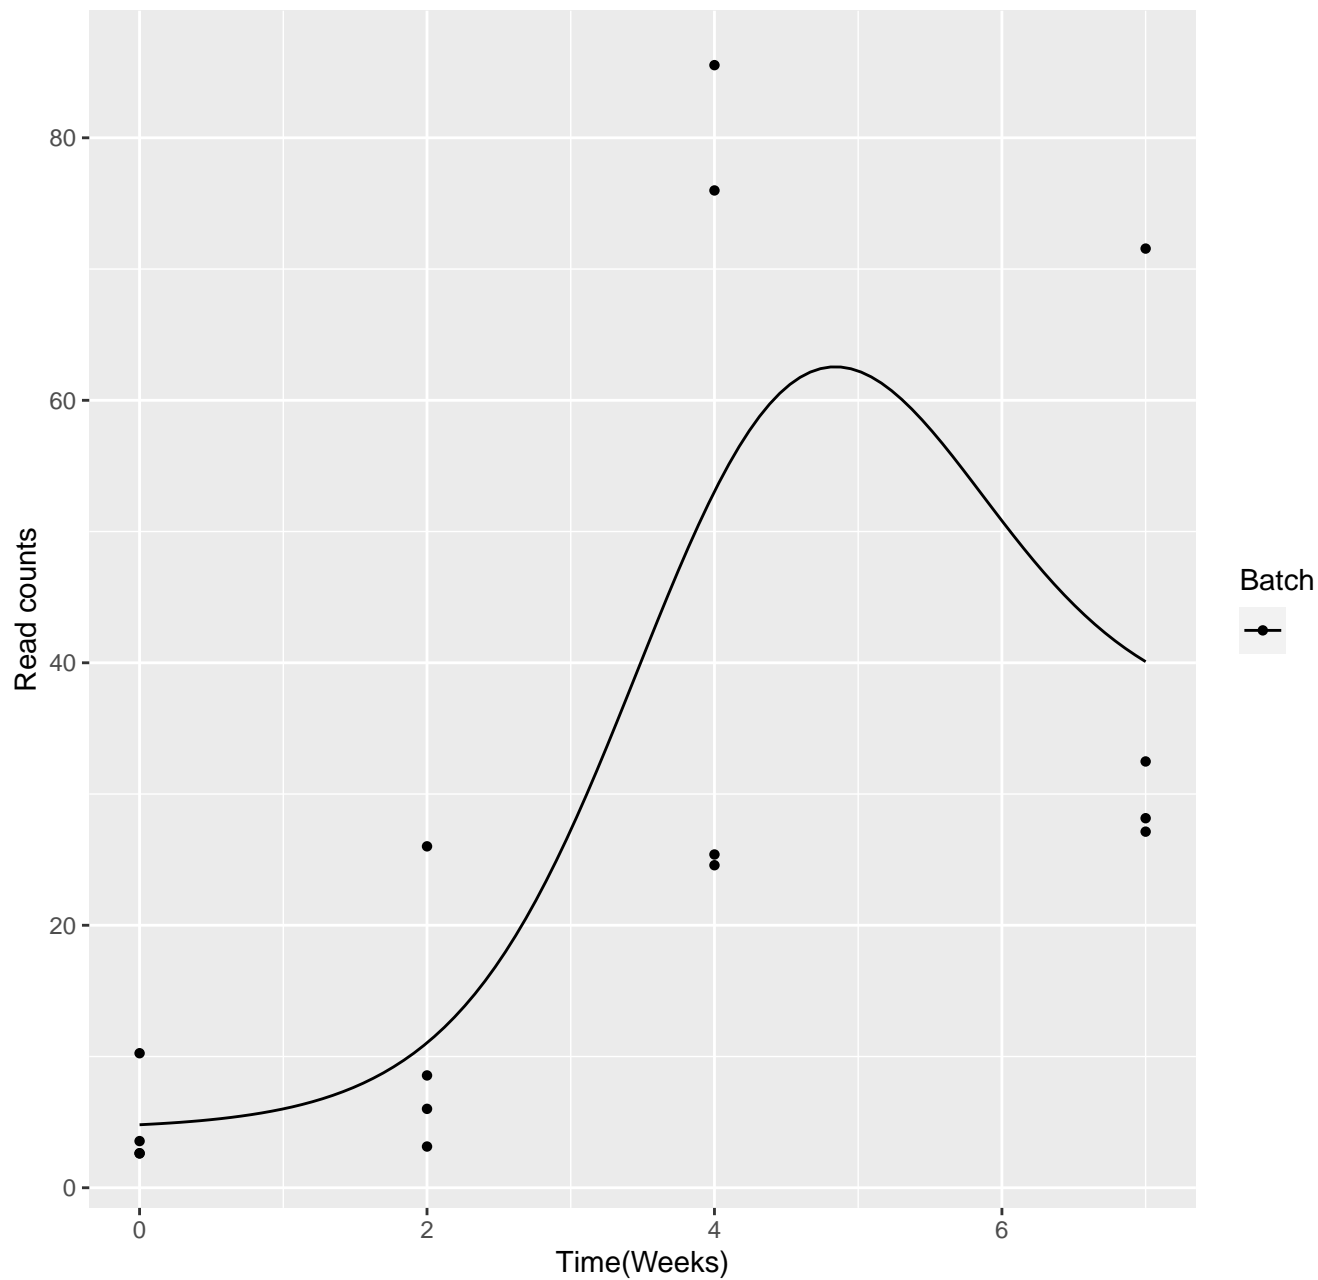

PARVA:  $\log_{10} q = -3.67$

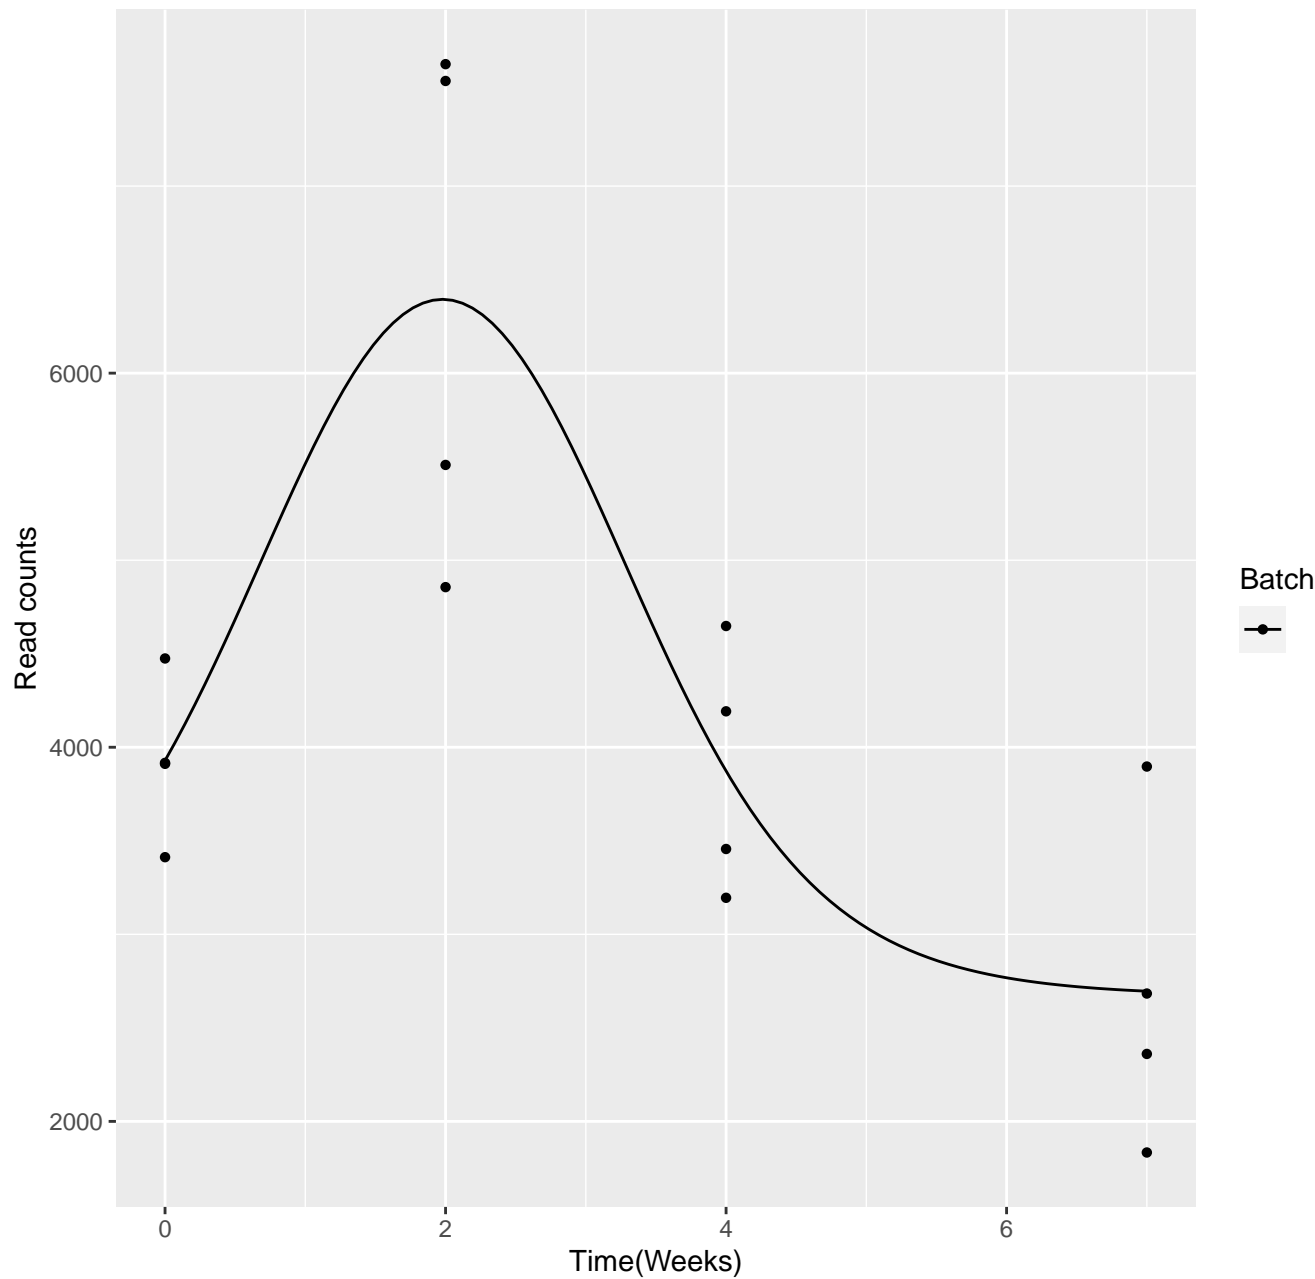

LZTS3:  $\log_{10} q = -3.66$

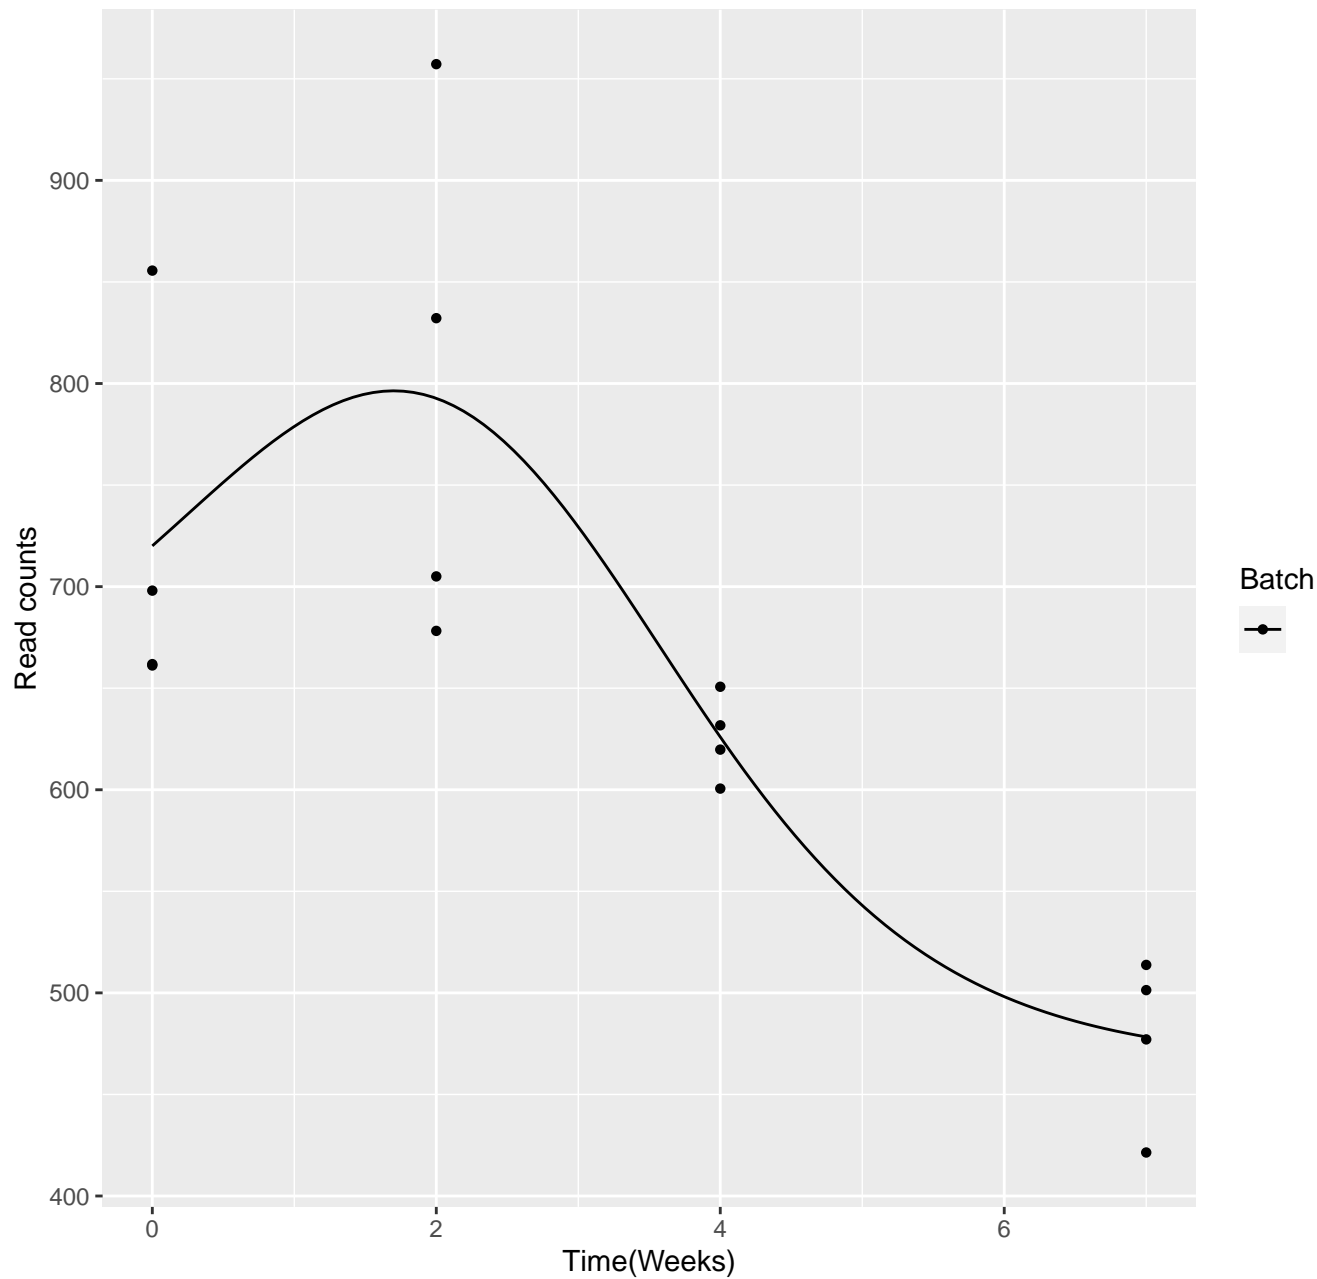

NFE2:  $\log_{10} q = -3.66$

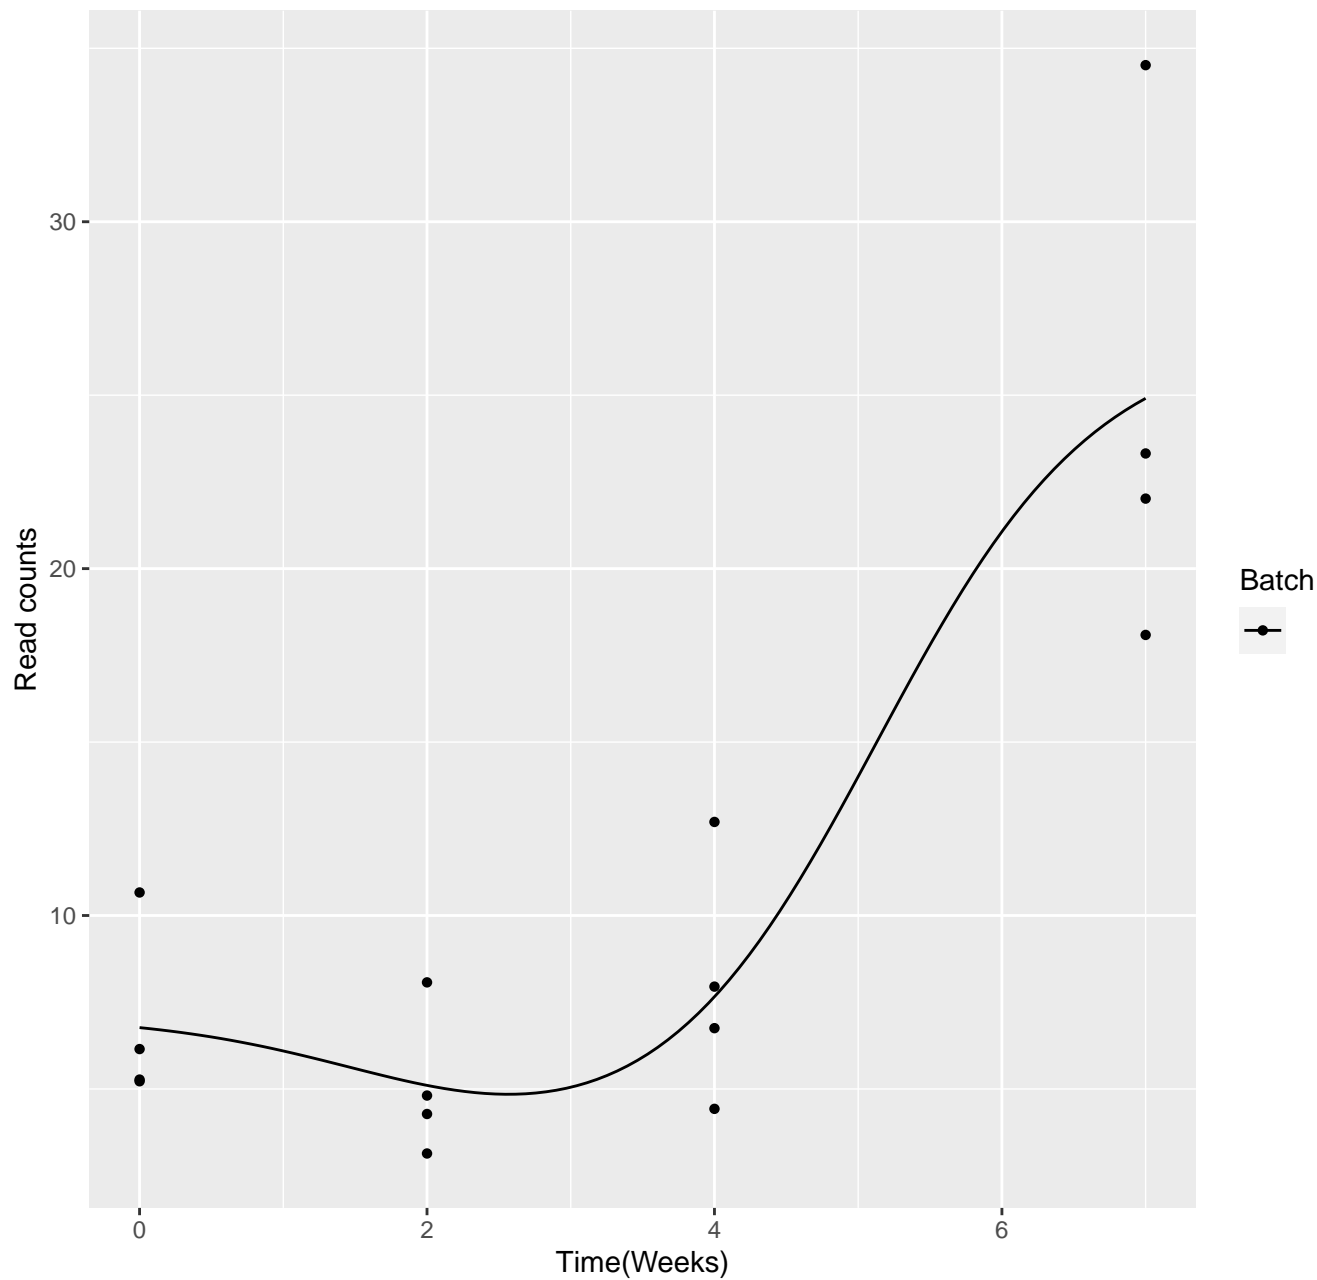

LAMC1:  $\log_{10} q = -3.65$

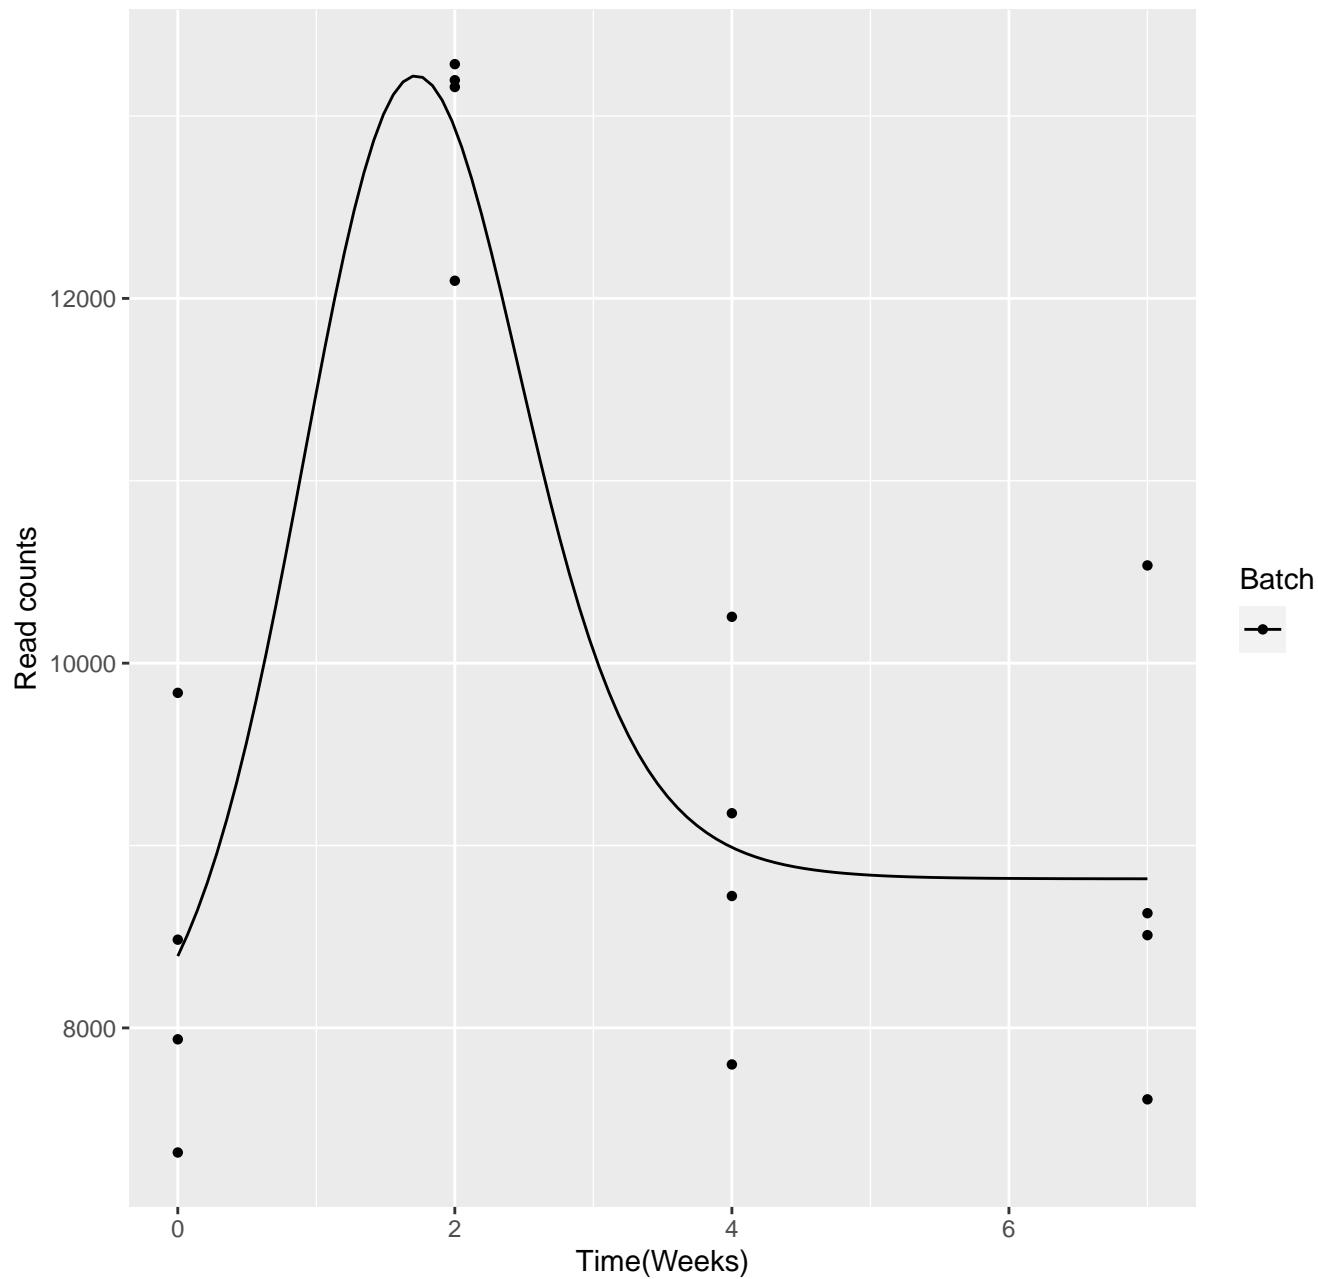

LOC108175419:  $\log_{10} q = -3.65$

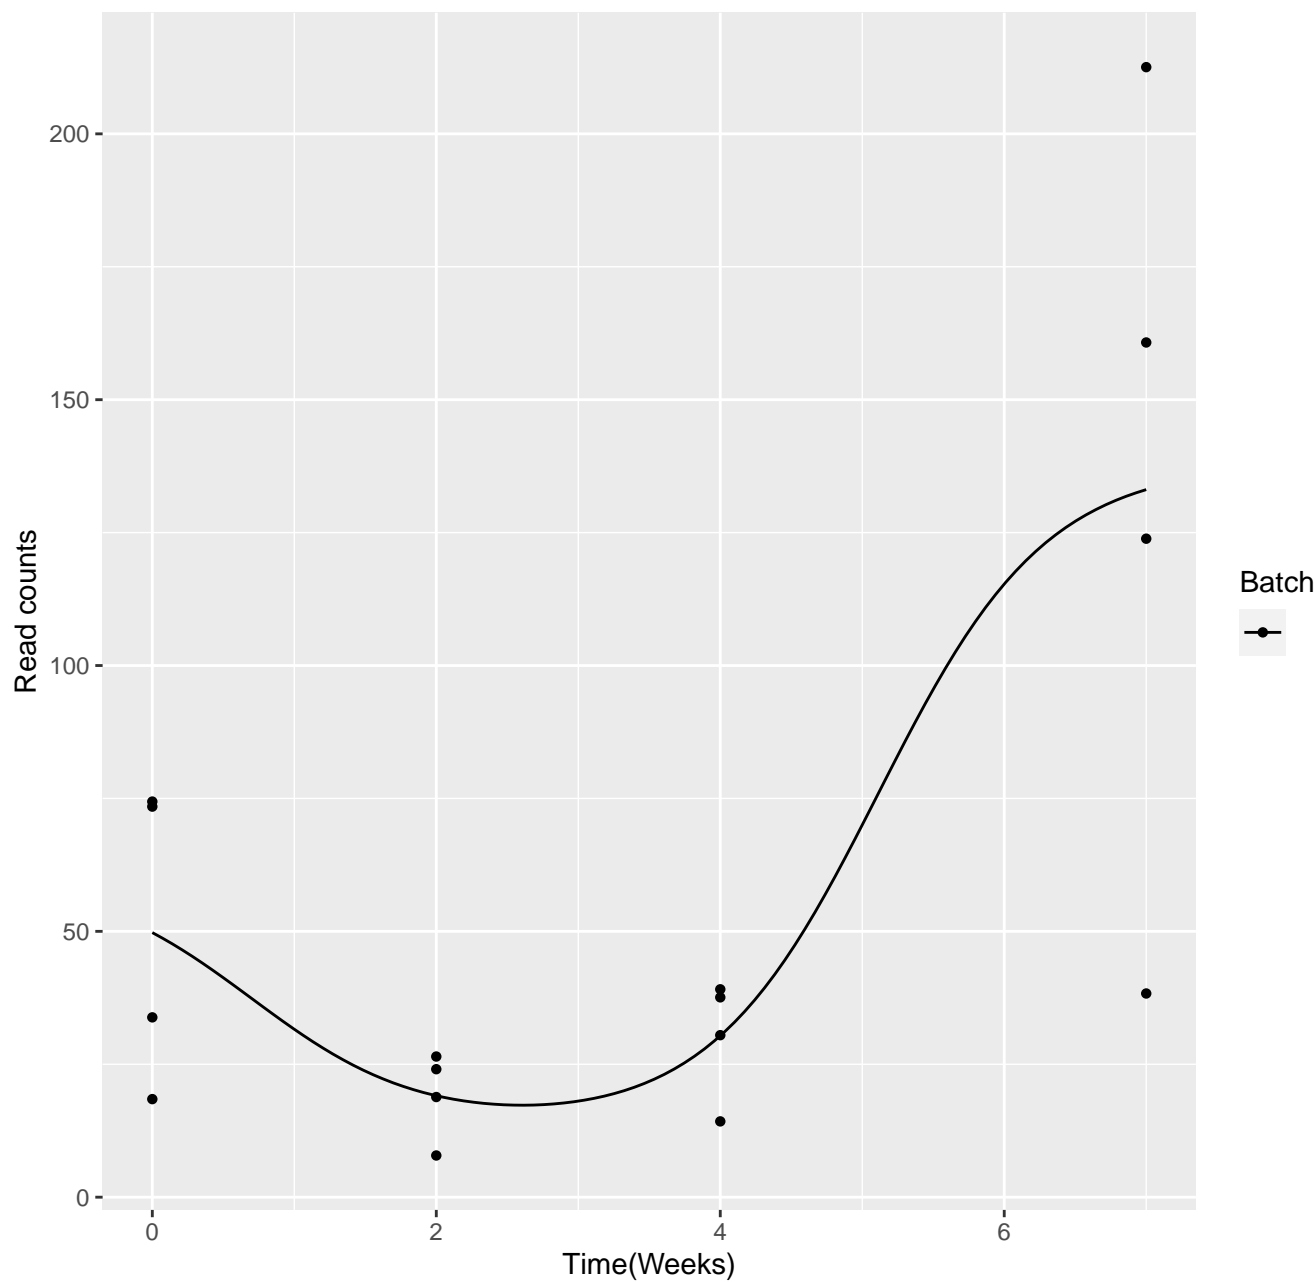

TFEC:  $\log_{10} q = -3.64$

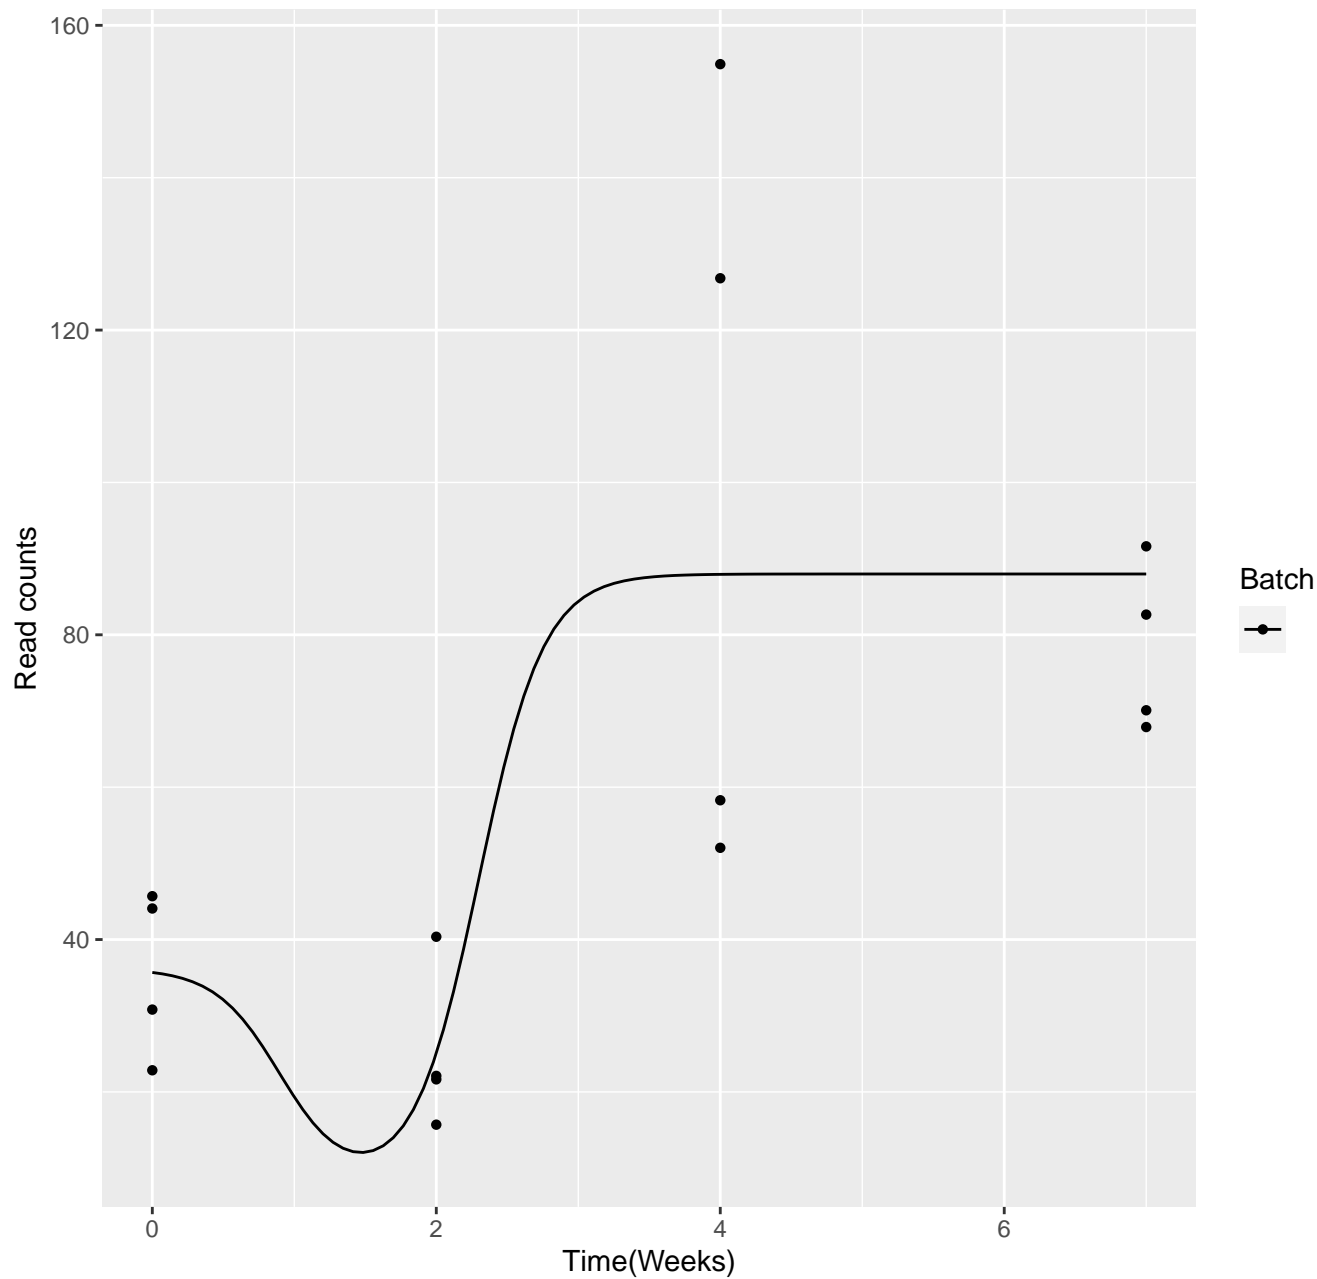

GCNT1:  $\log_{10} q = -3.63$

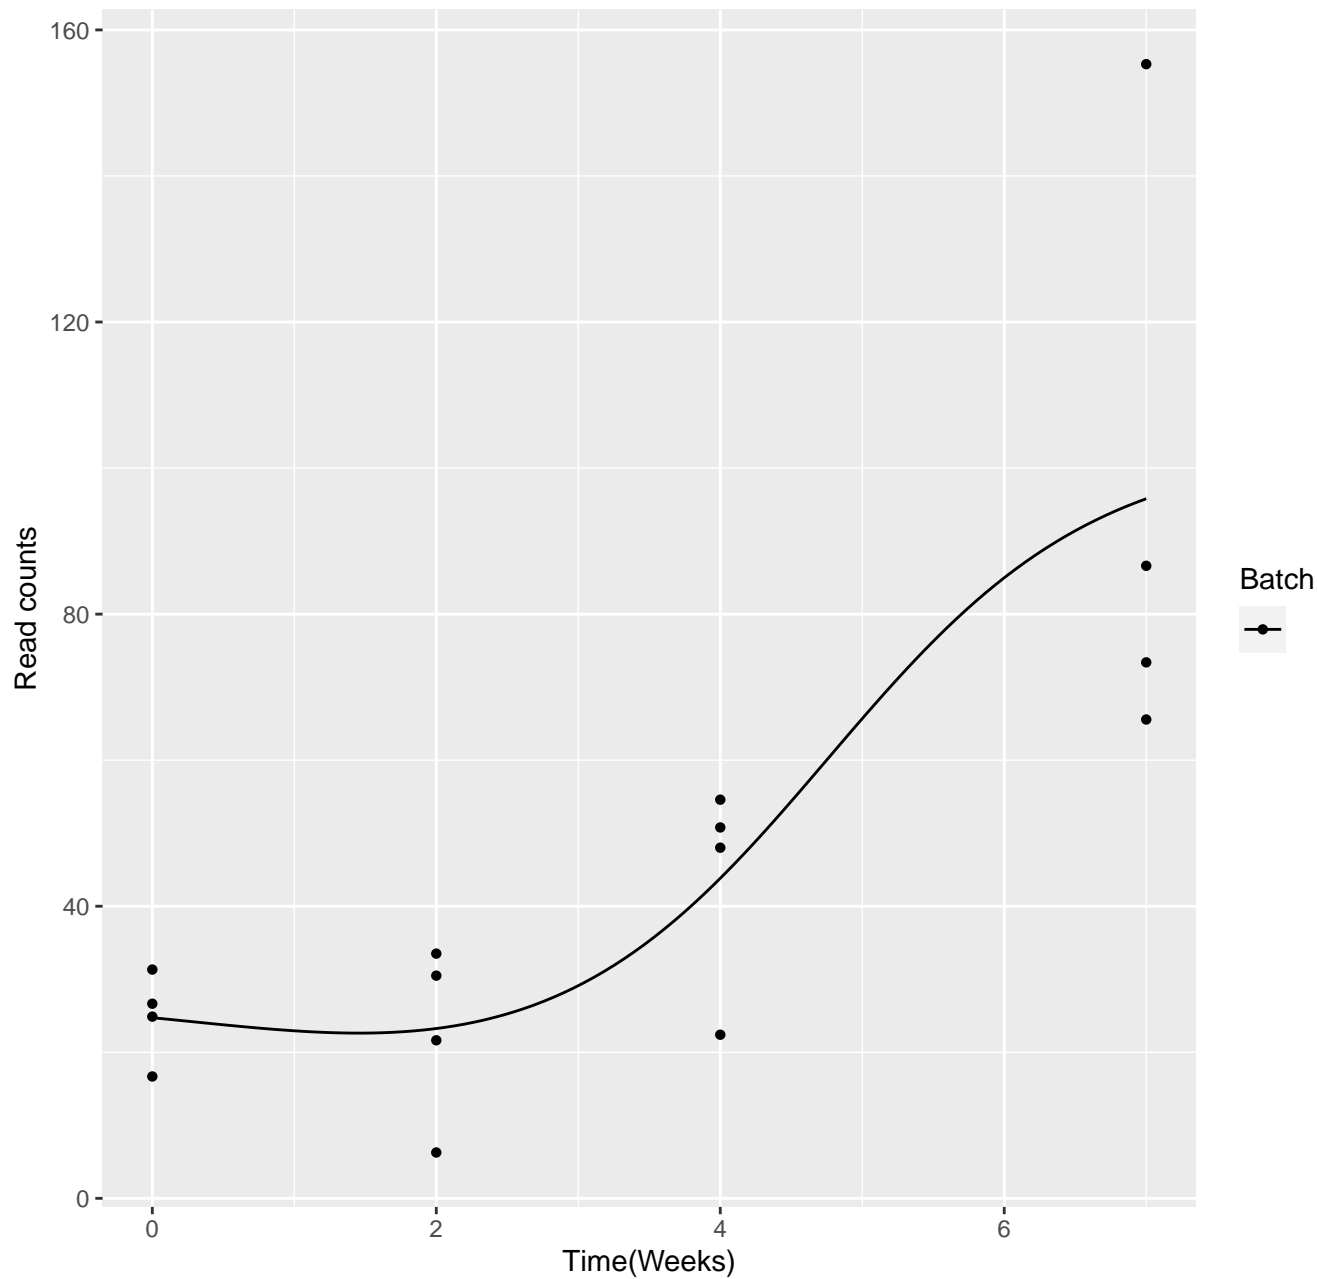



LYL1:  $\log_{10} q = -3.63$

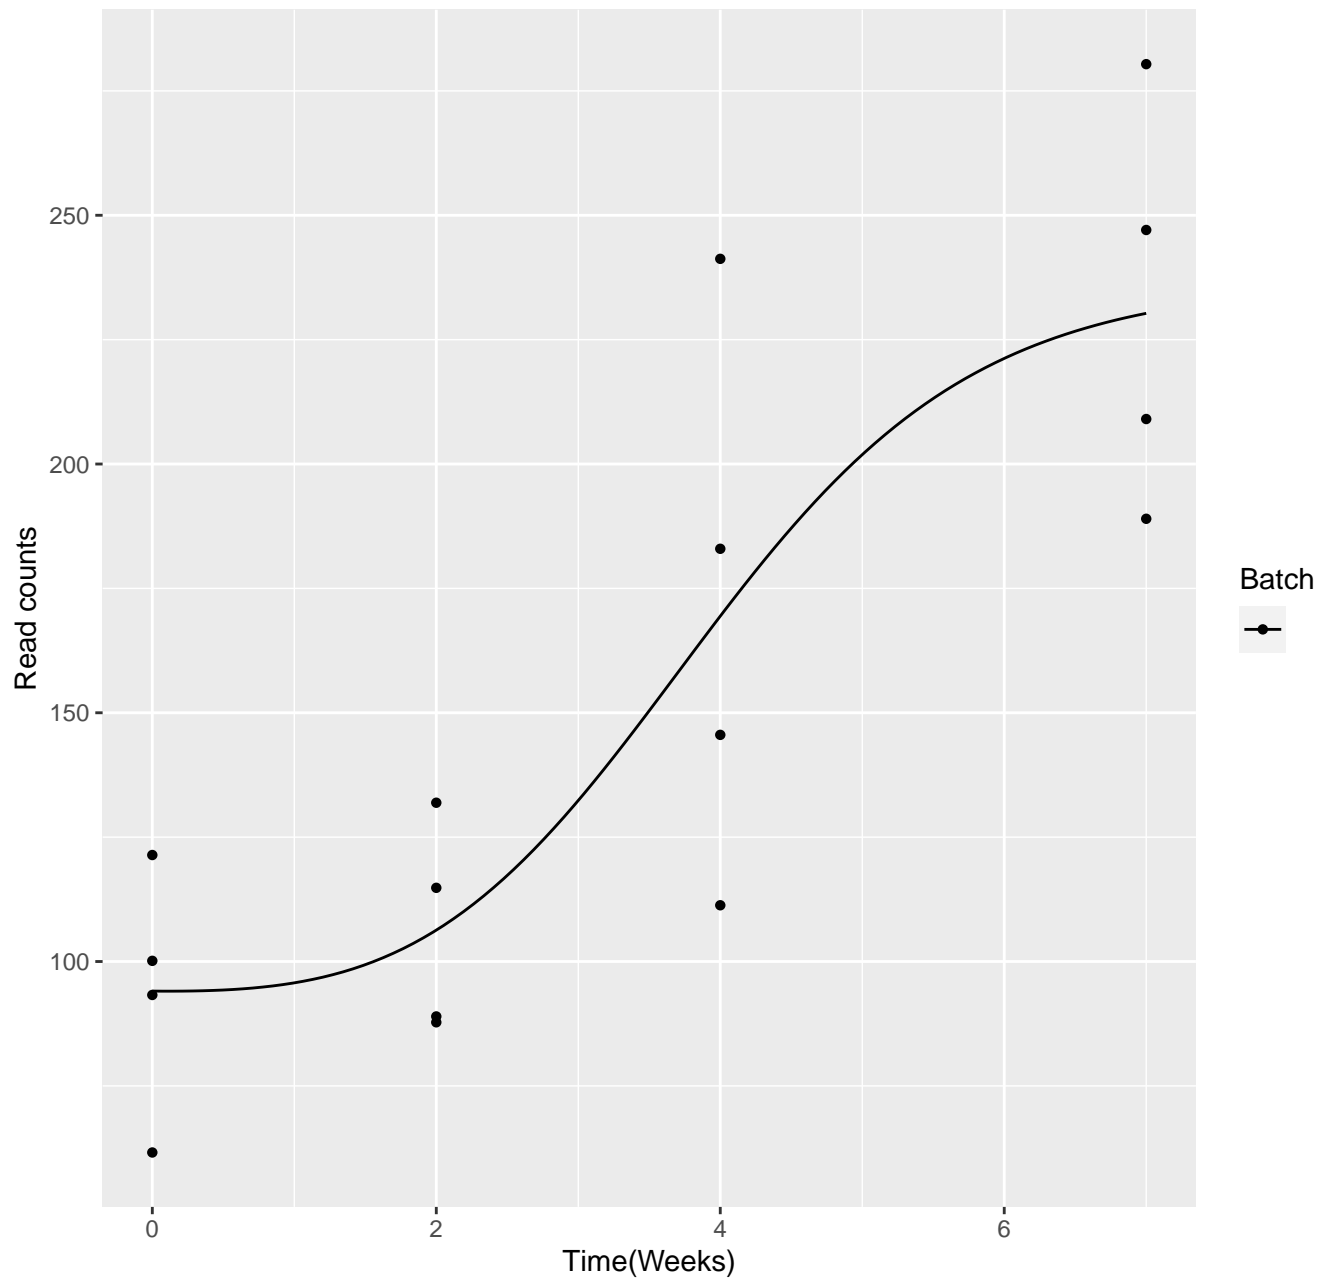

SPC25:  $\log_{10} q = -3.63$

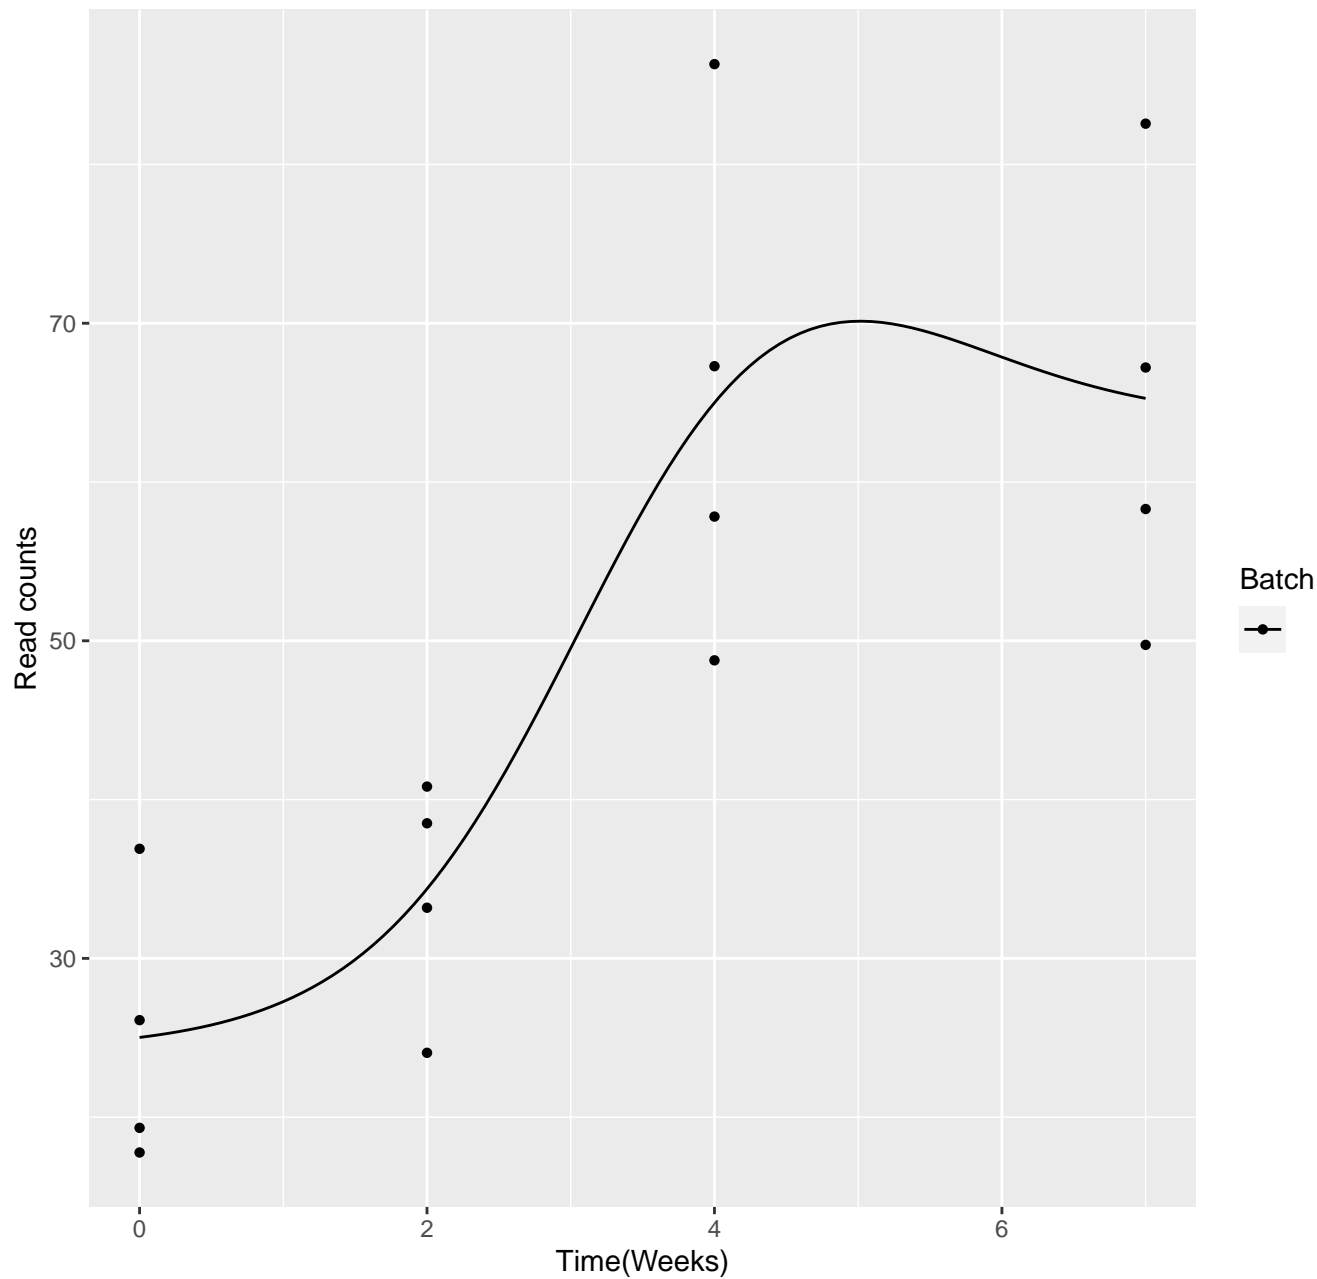

WFDC1:  $\log_{10} q = -3.62$

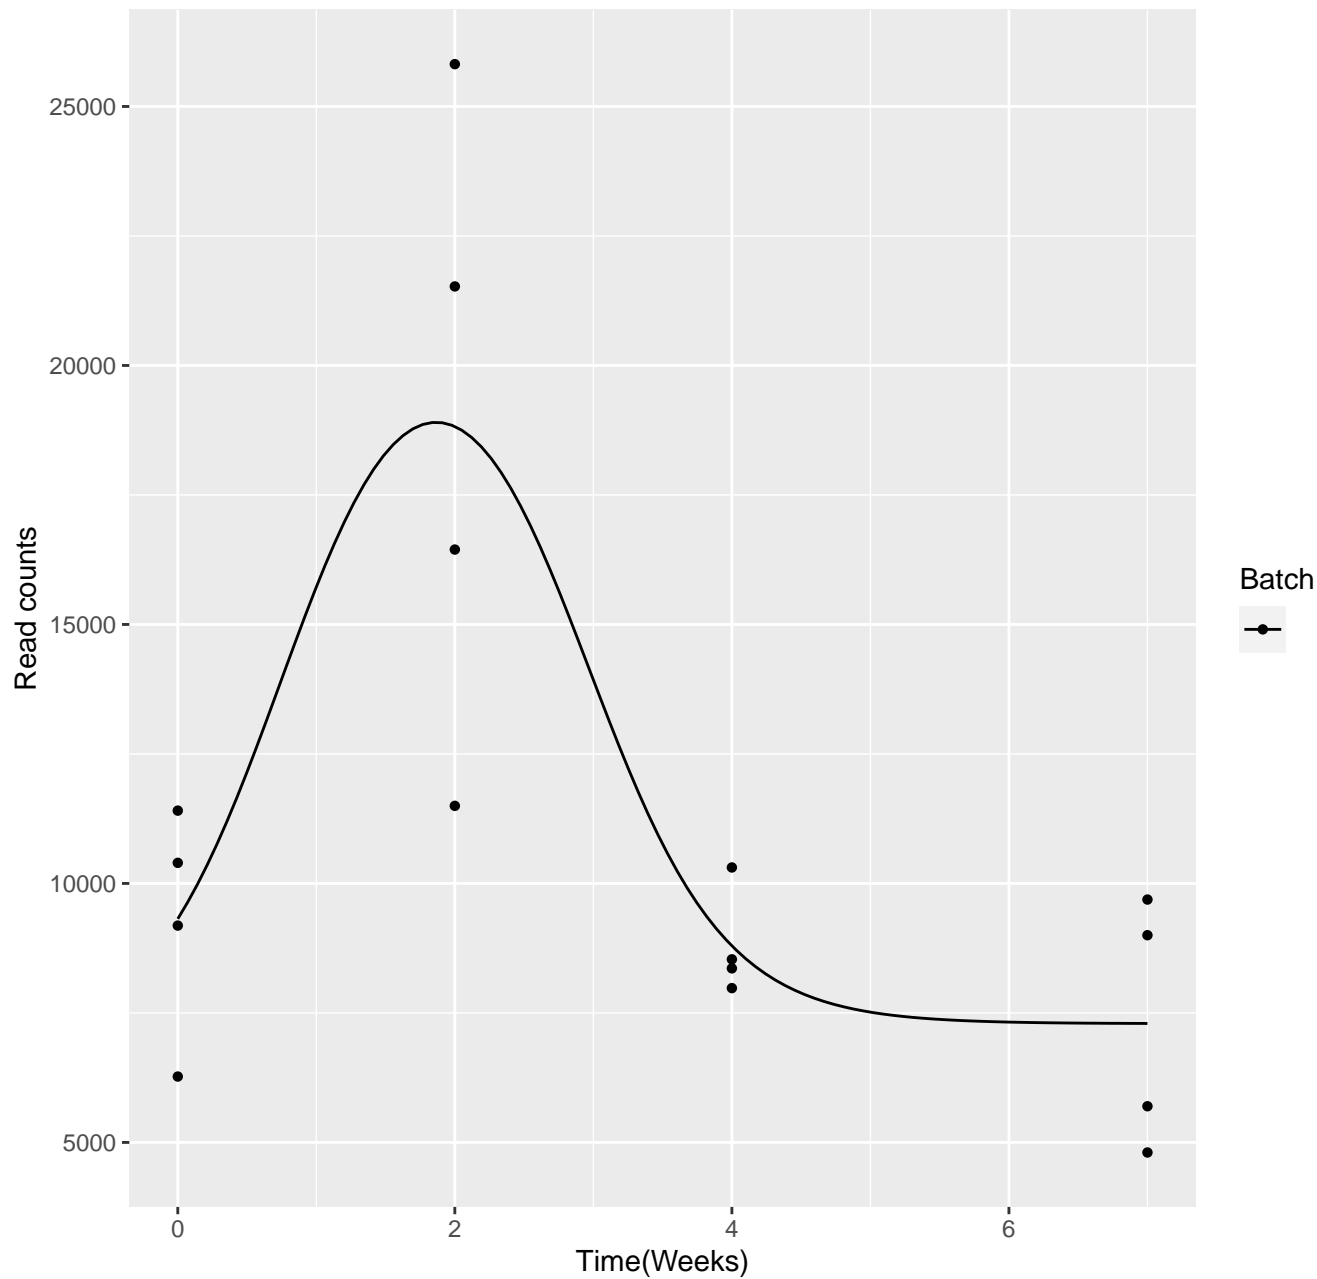

RTN4RL2:  $\log_{10} q = -3.62$

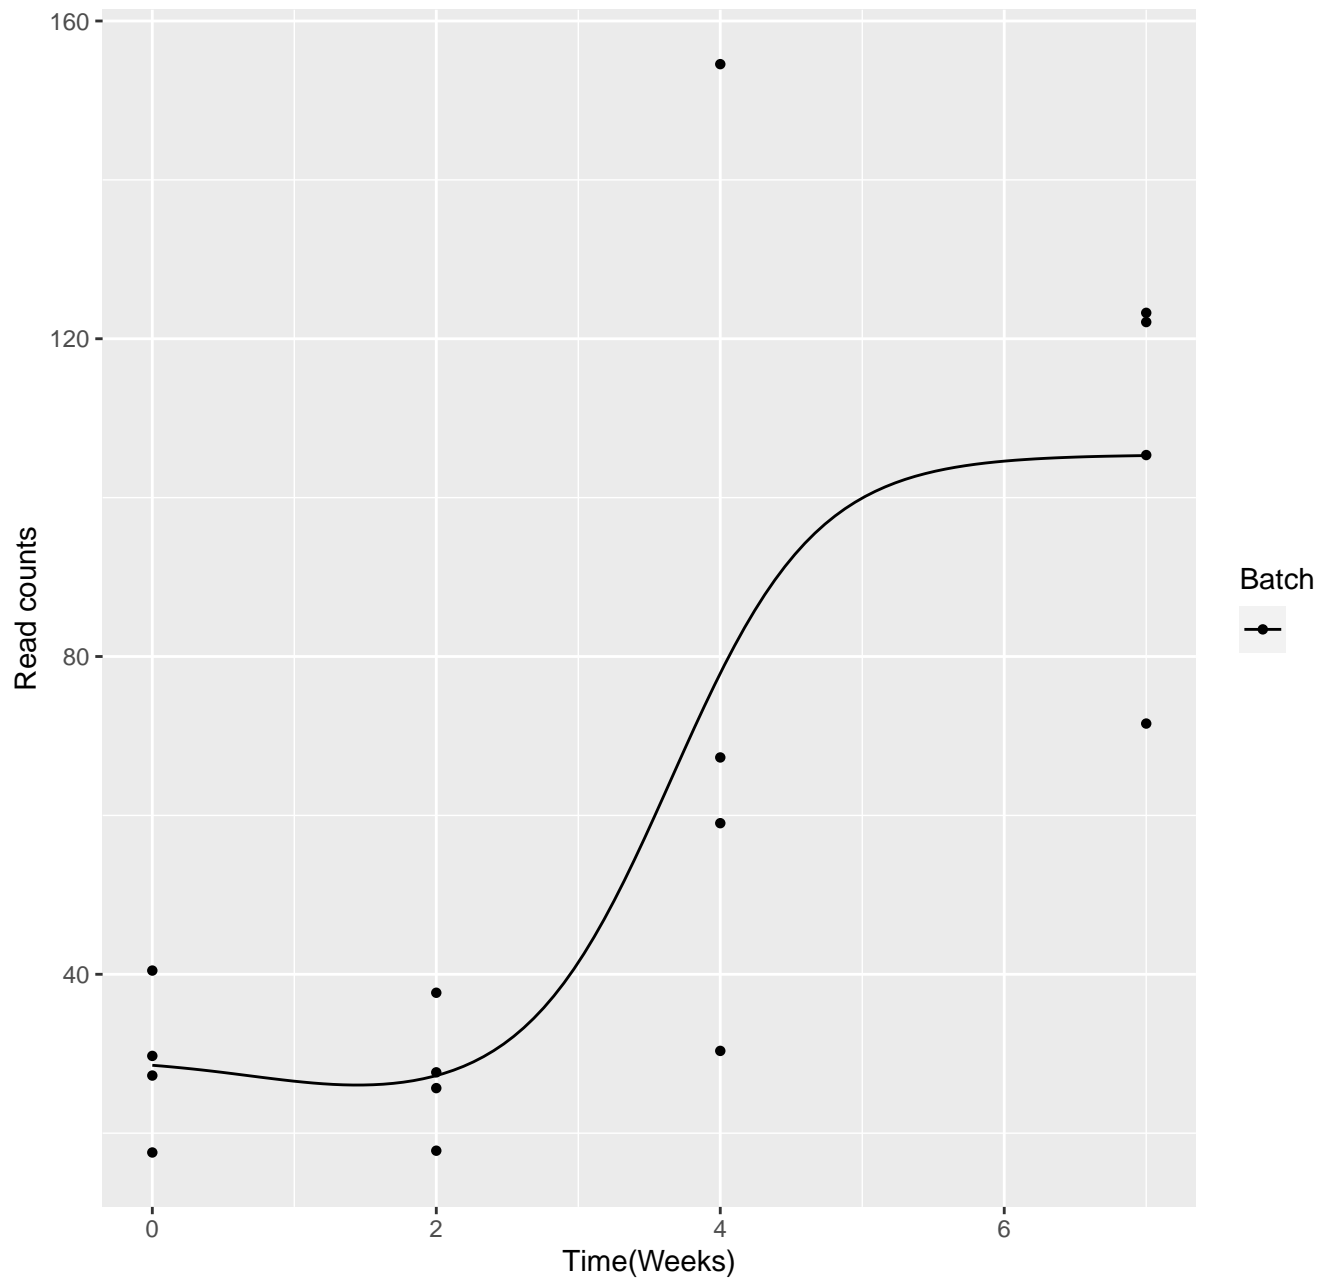

ASPM:  $\log_{10} q = -3.62$

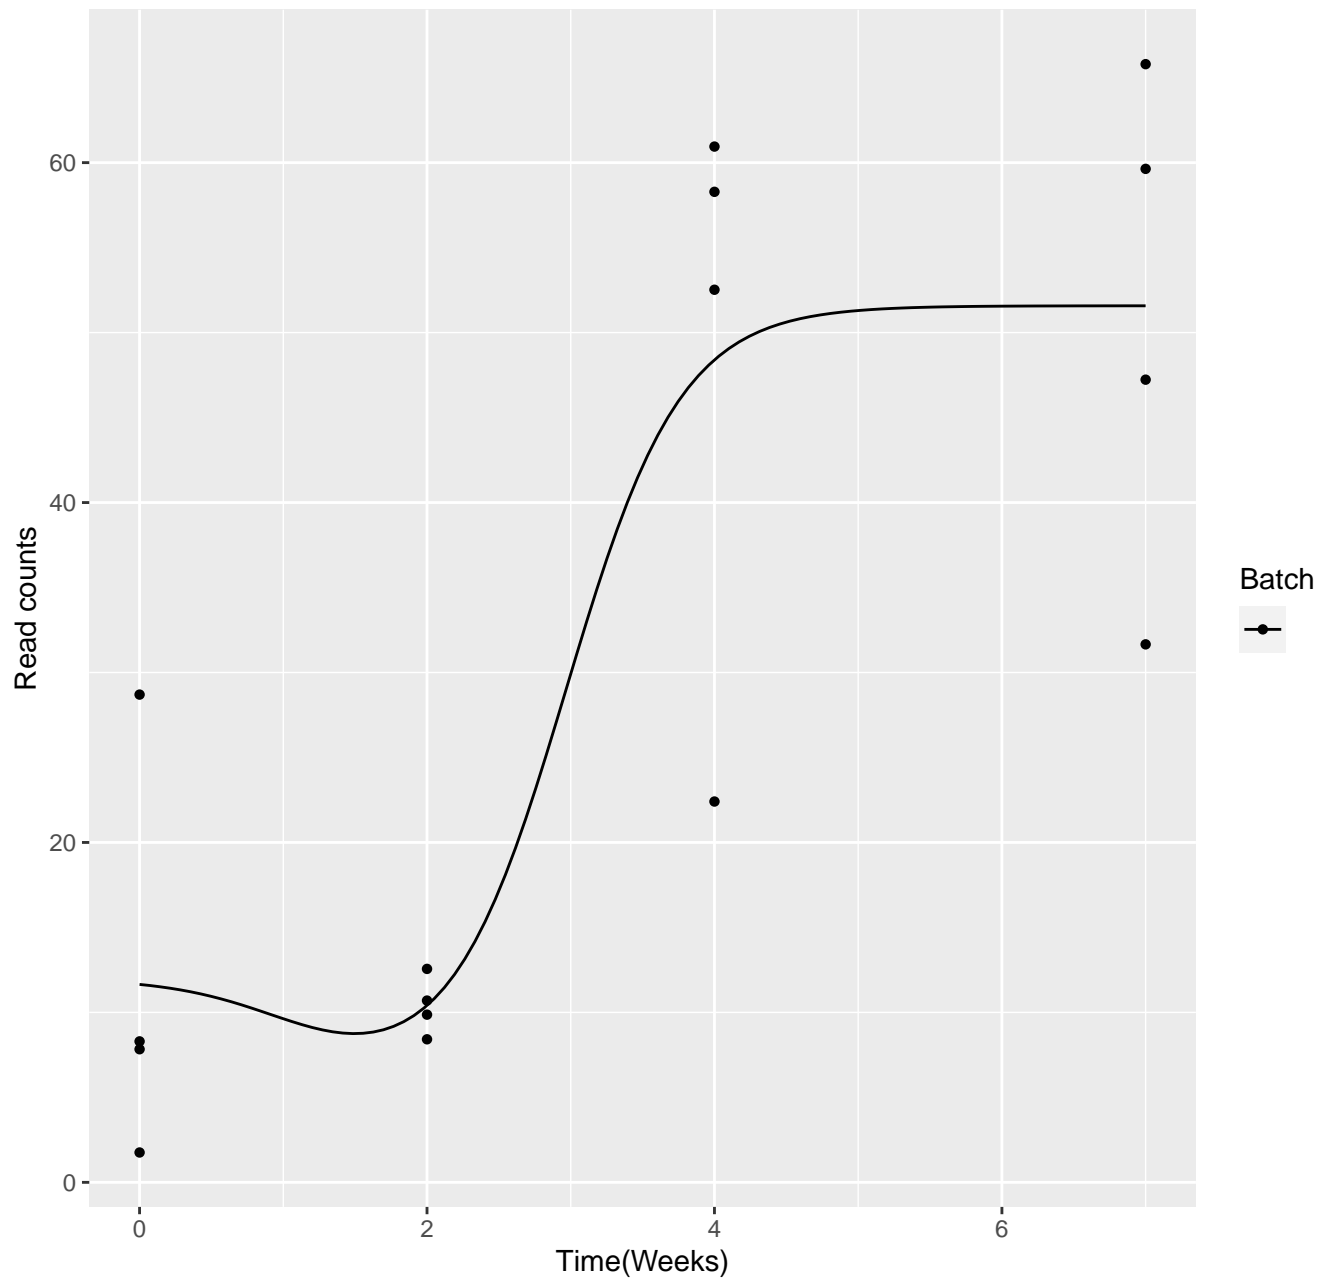

TBC1D8:  $\log_{10} q = -3.61$

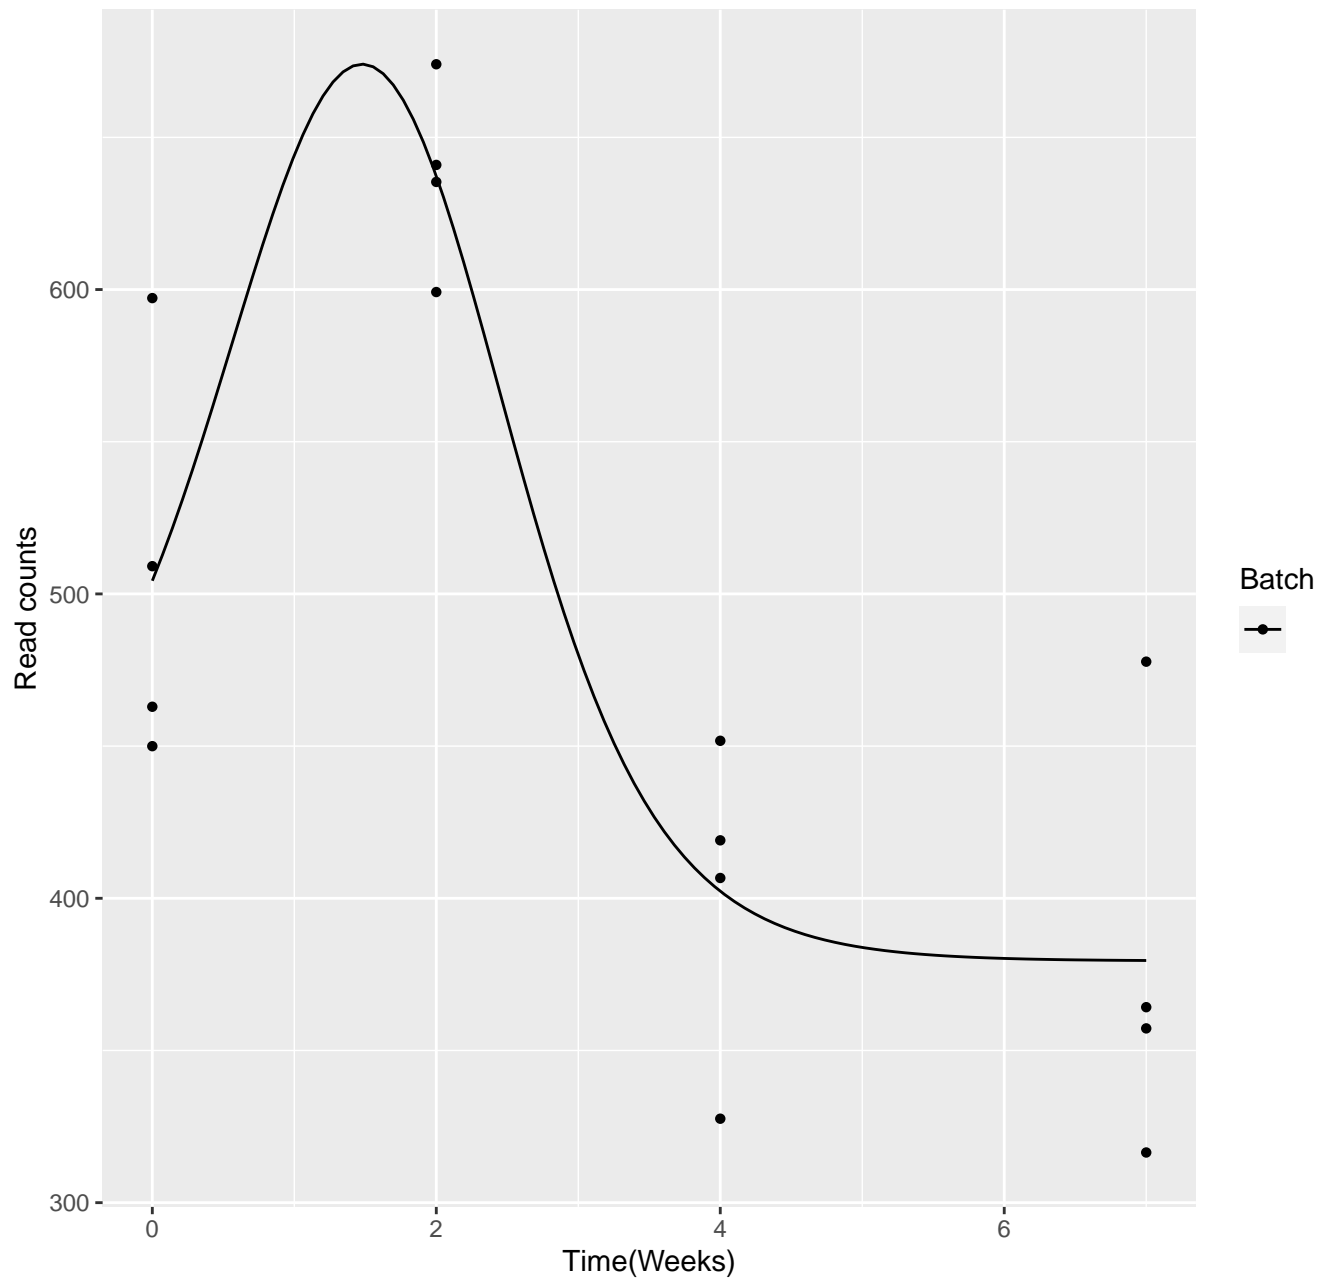

LURAP1:  $\log_{10} q = -3.61$

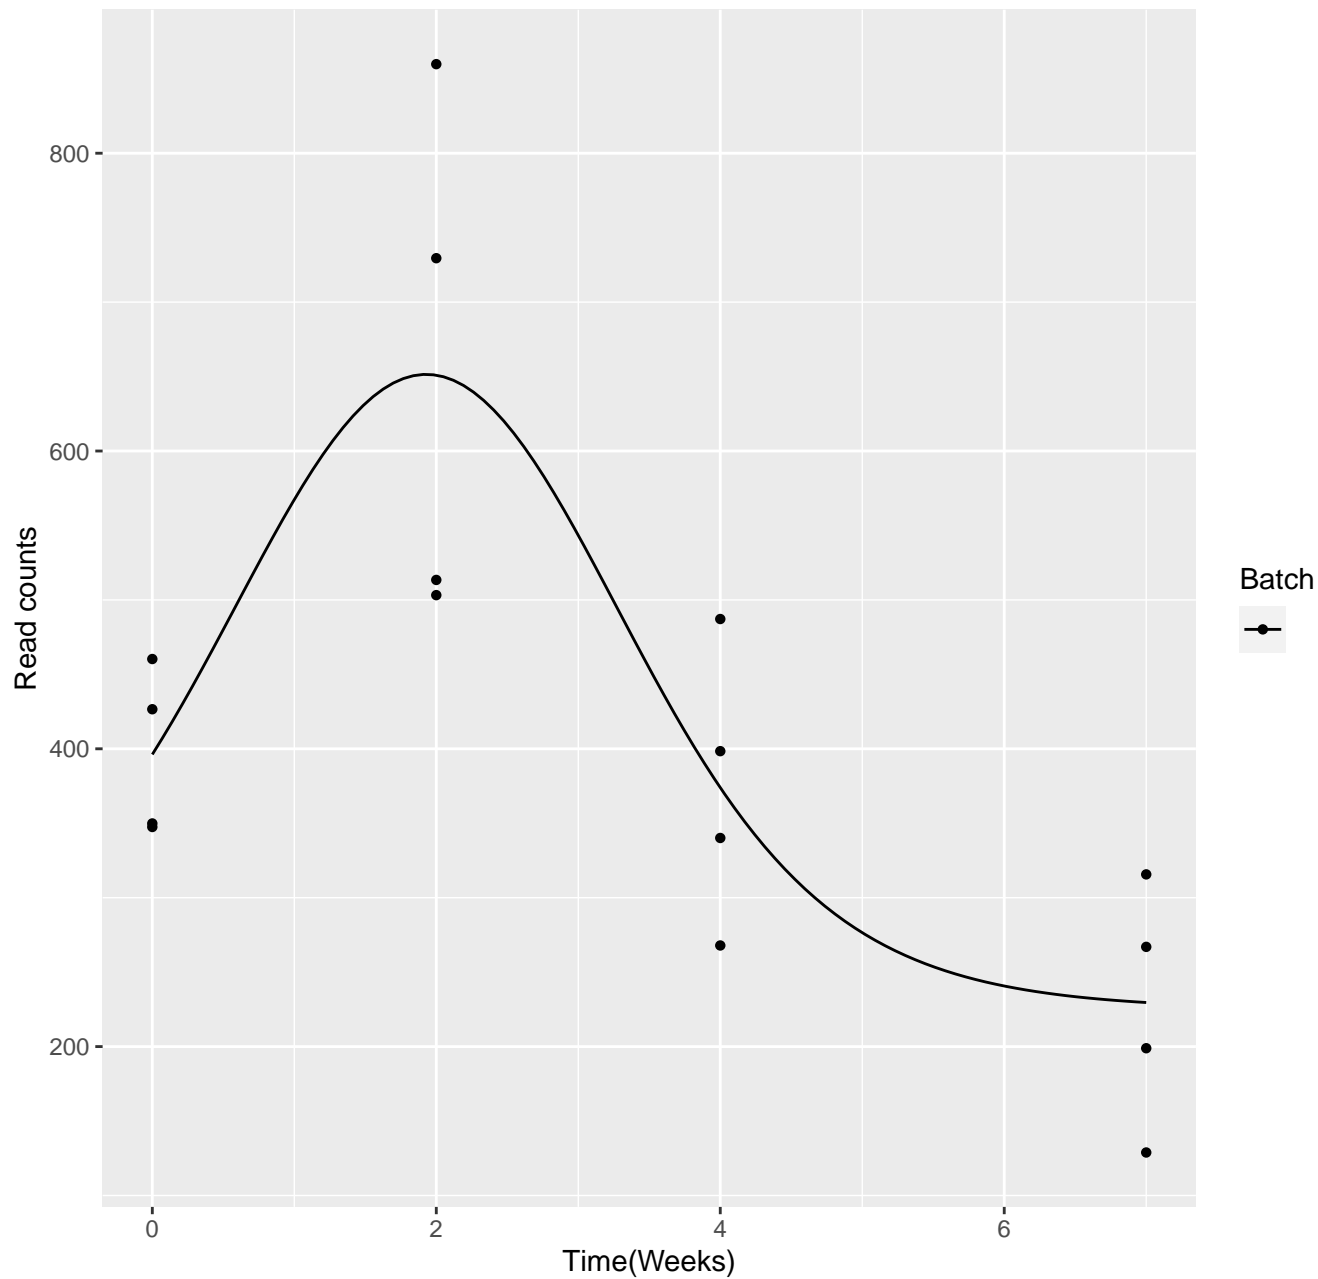

MCU:  $\log_{10} q = -3.61$

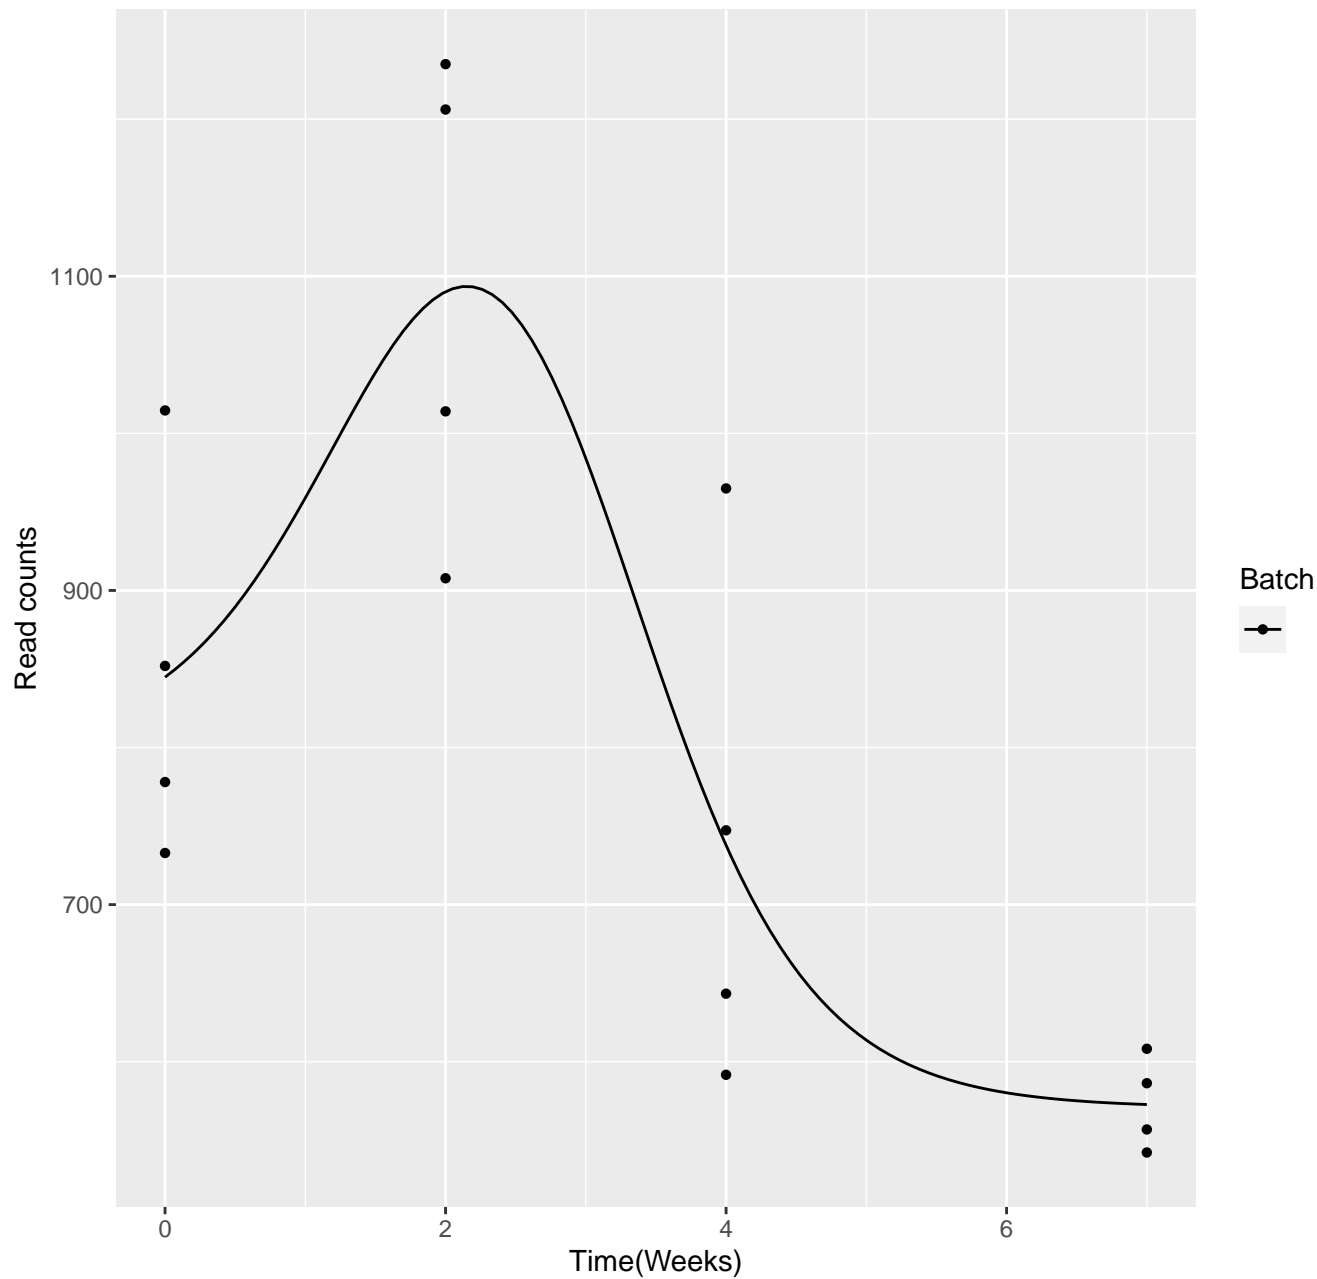



BID:  $\log_{10} q = -3.61$

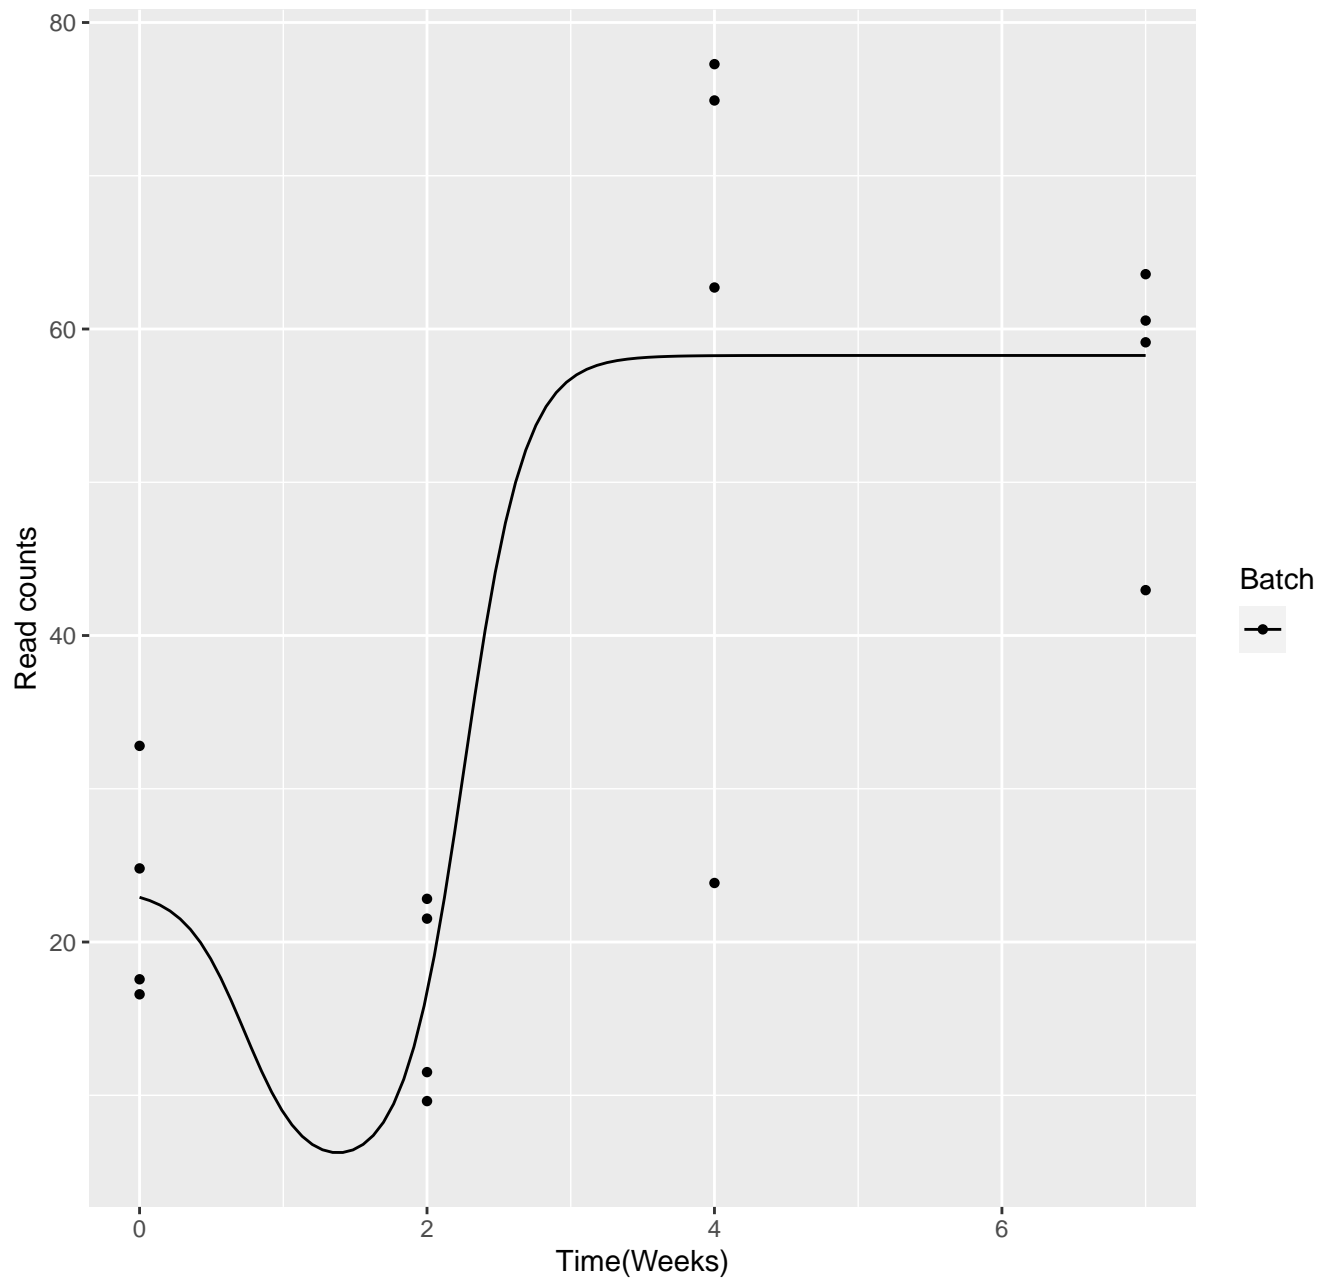

LPXN:  $\log_{10} q = -3.61$

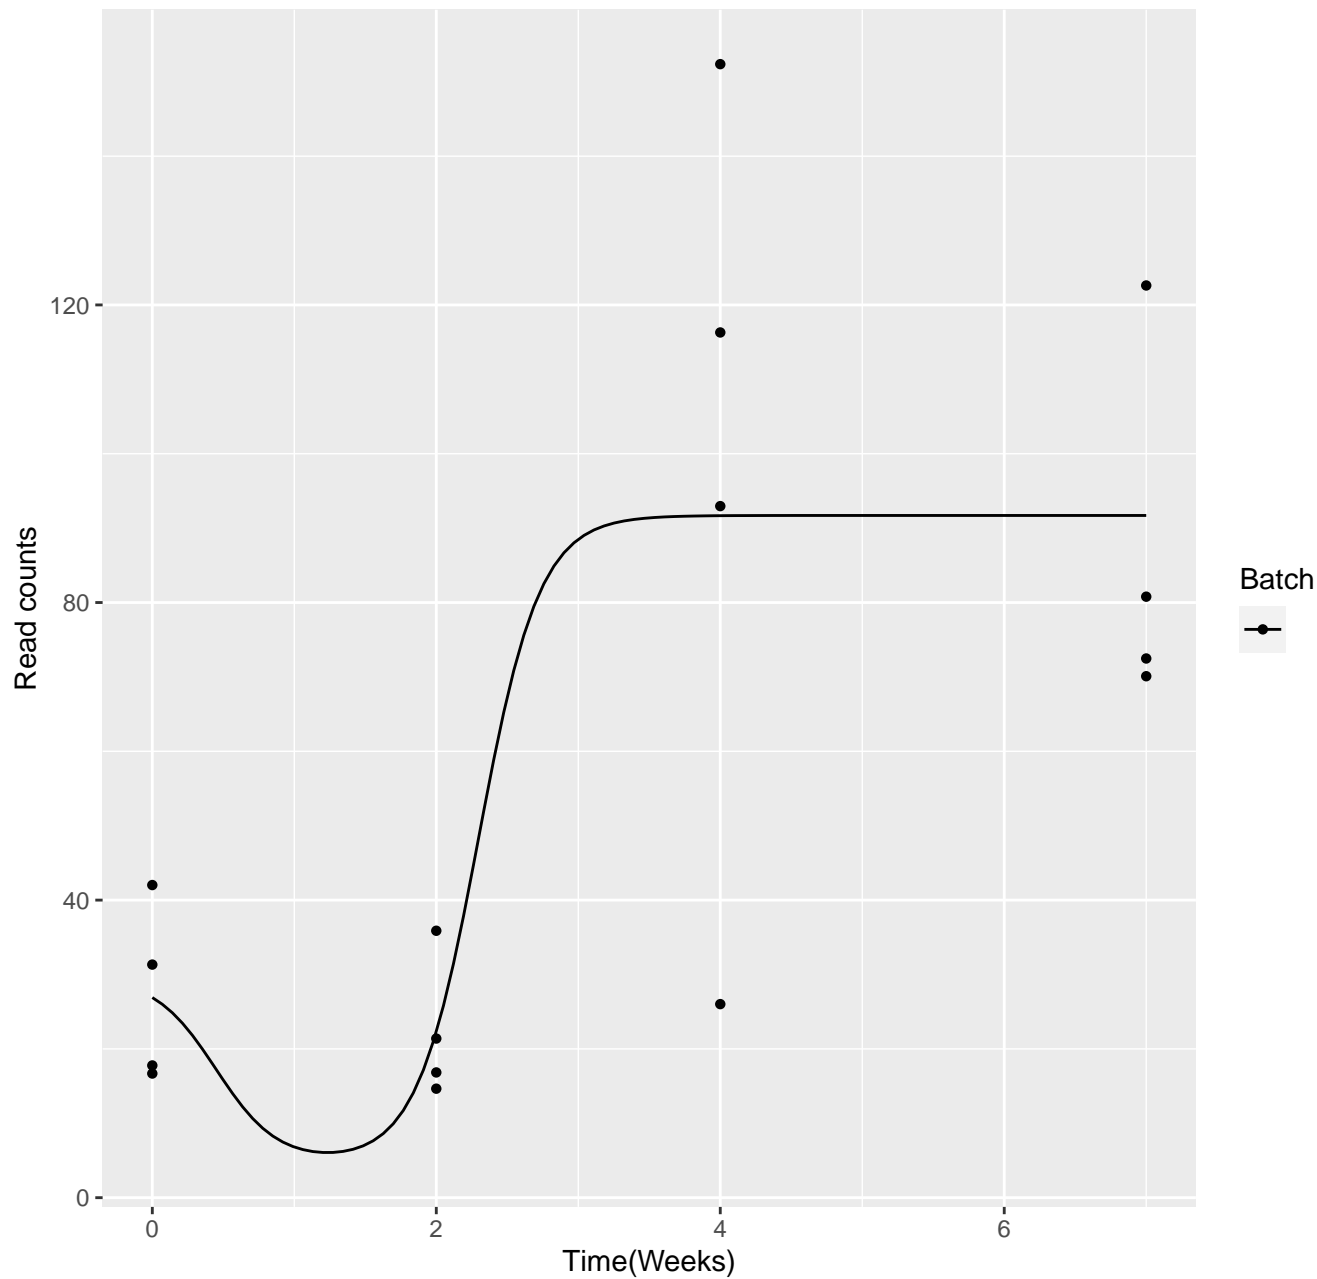

SNX10:  $\log_{10} q = -3.61$

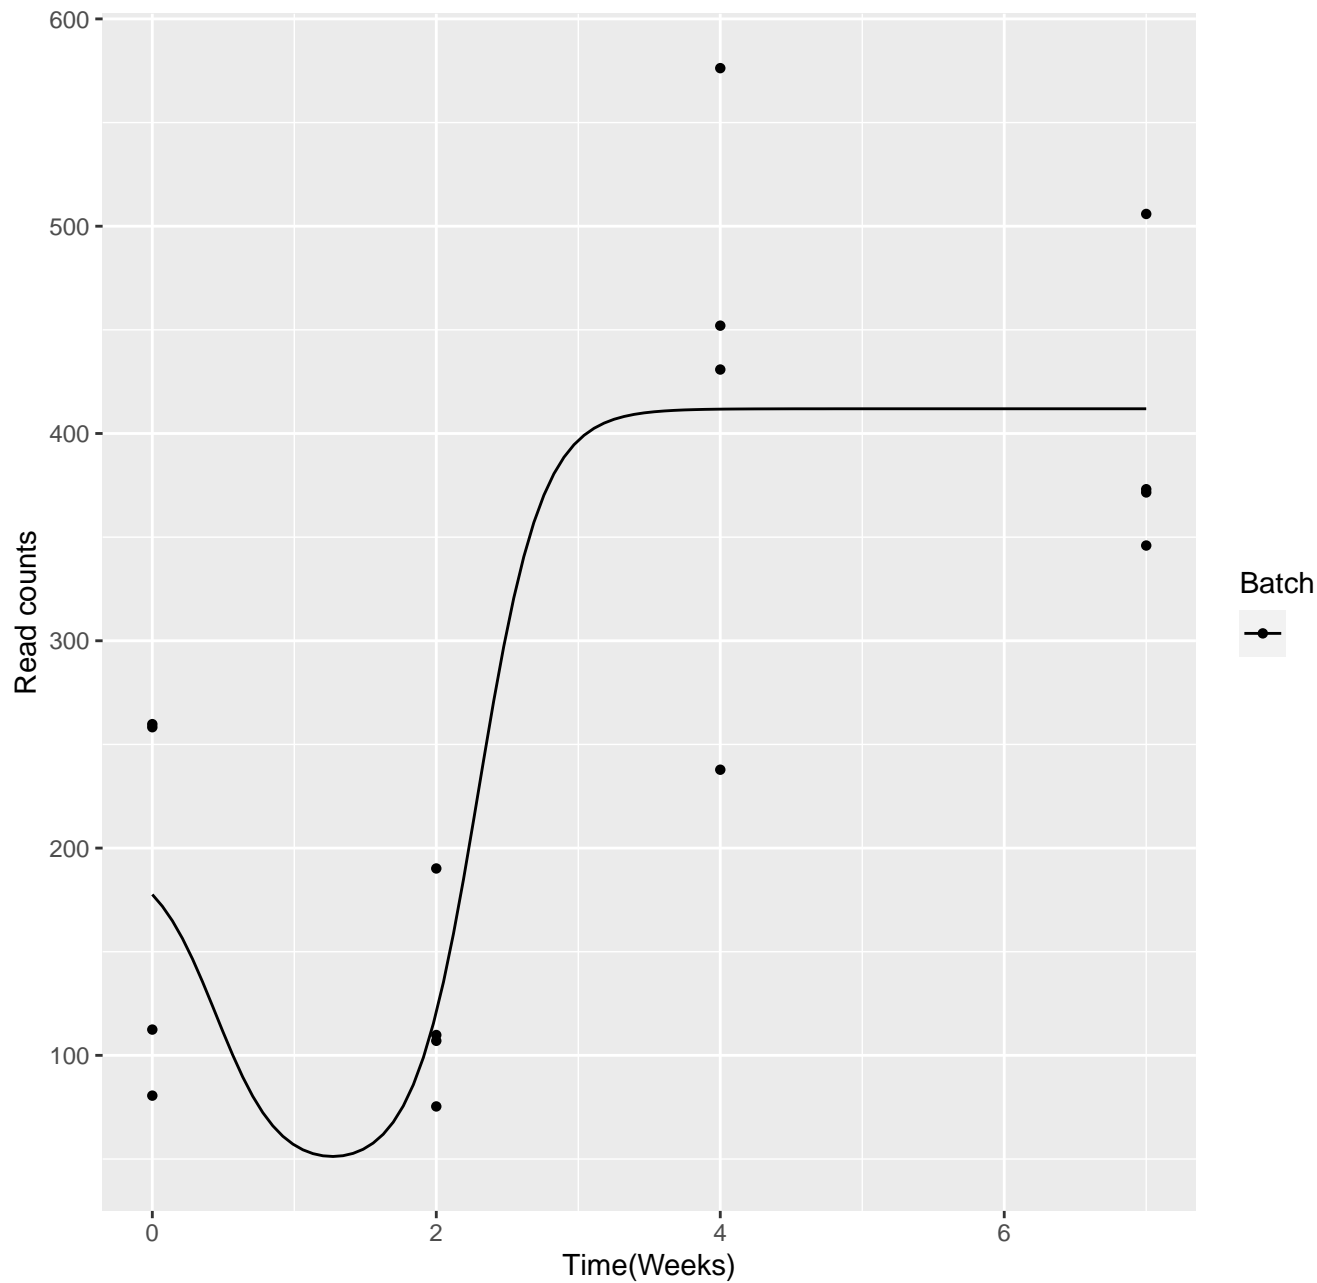

BLM:  $\log_{10} q = -3.6$

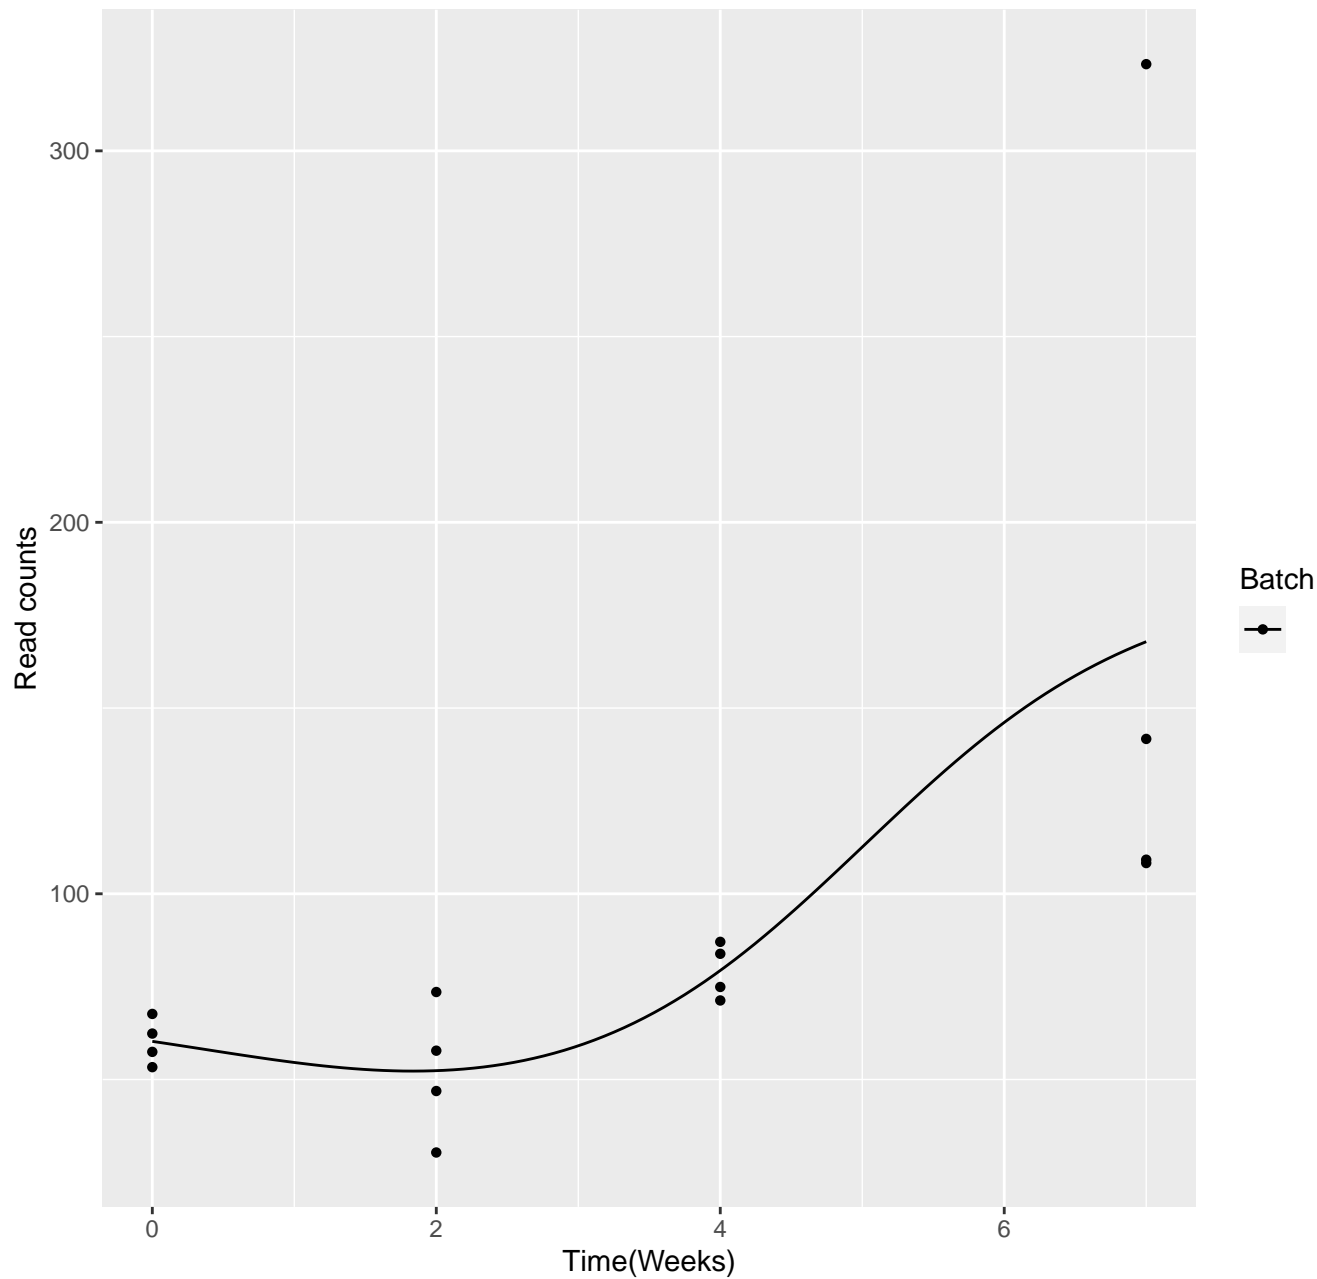

HAS1:  $\log_{10} q = -3.6$

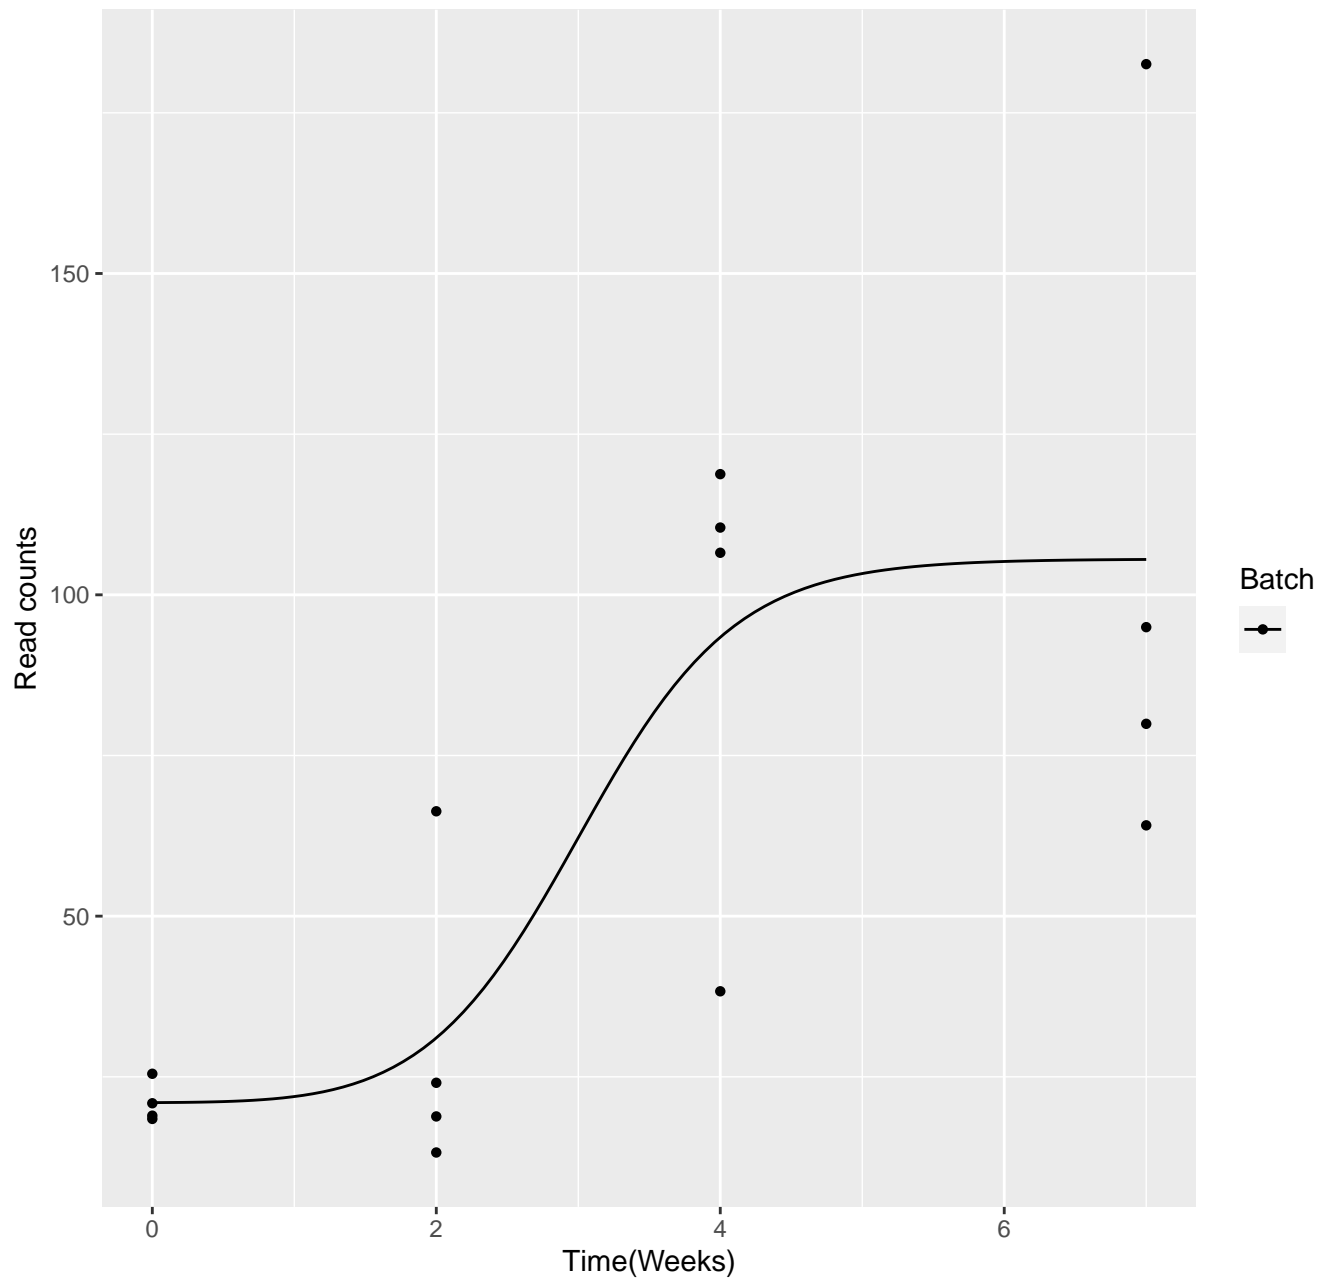

ANAPC7:  $\log_{10} q = -3.59$

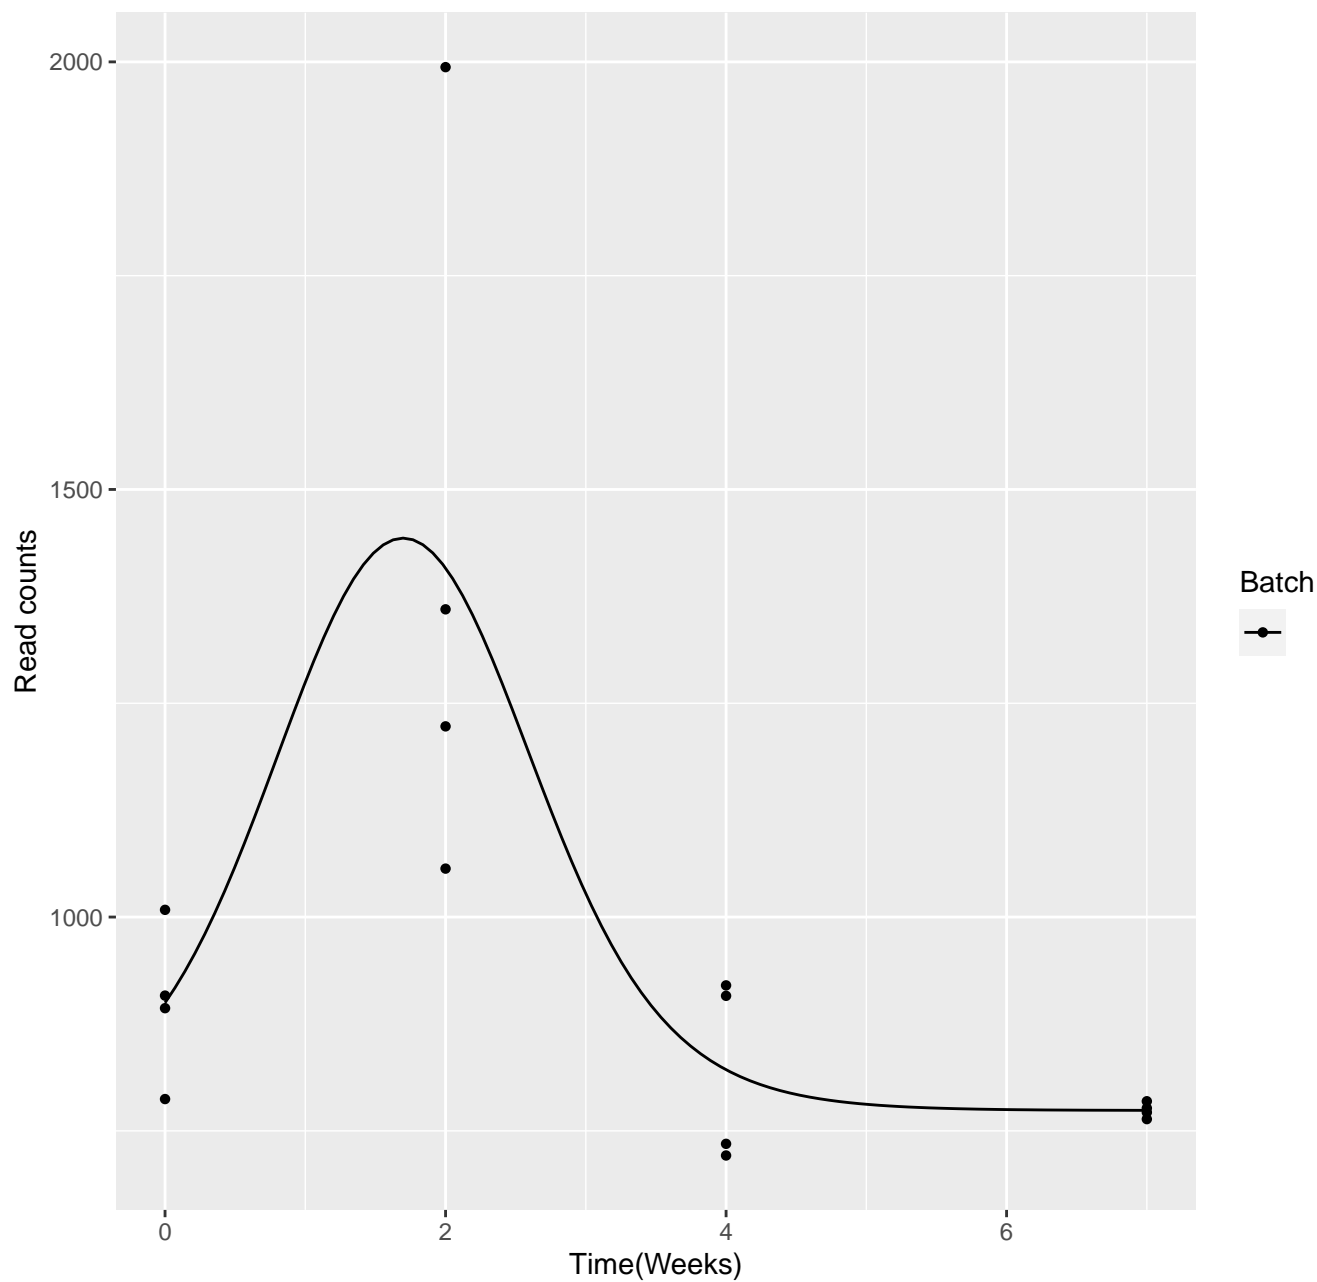

TCEAL4:  $\log_{10} q = -3.59$

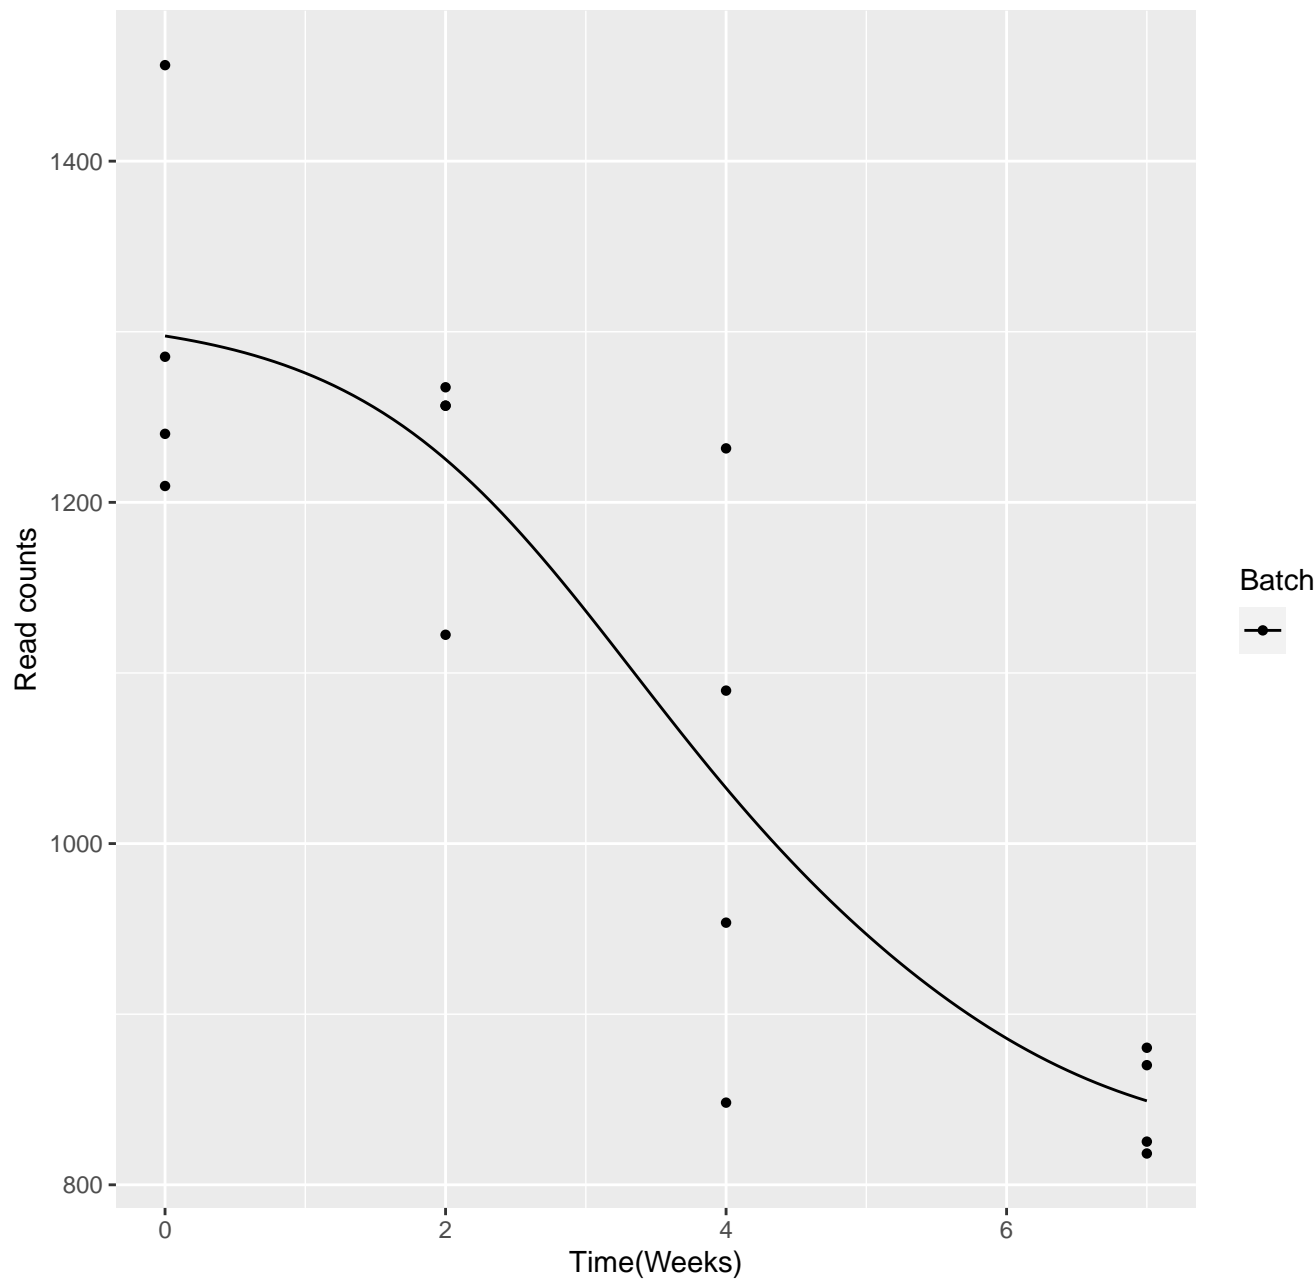

PAPOLB:  $\log_{10} q = -3.59$

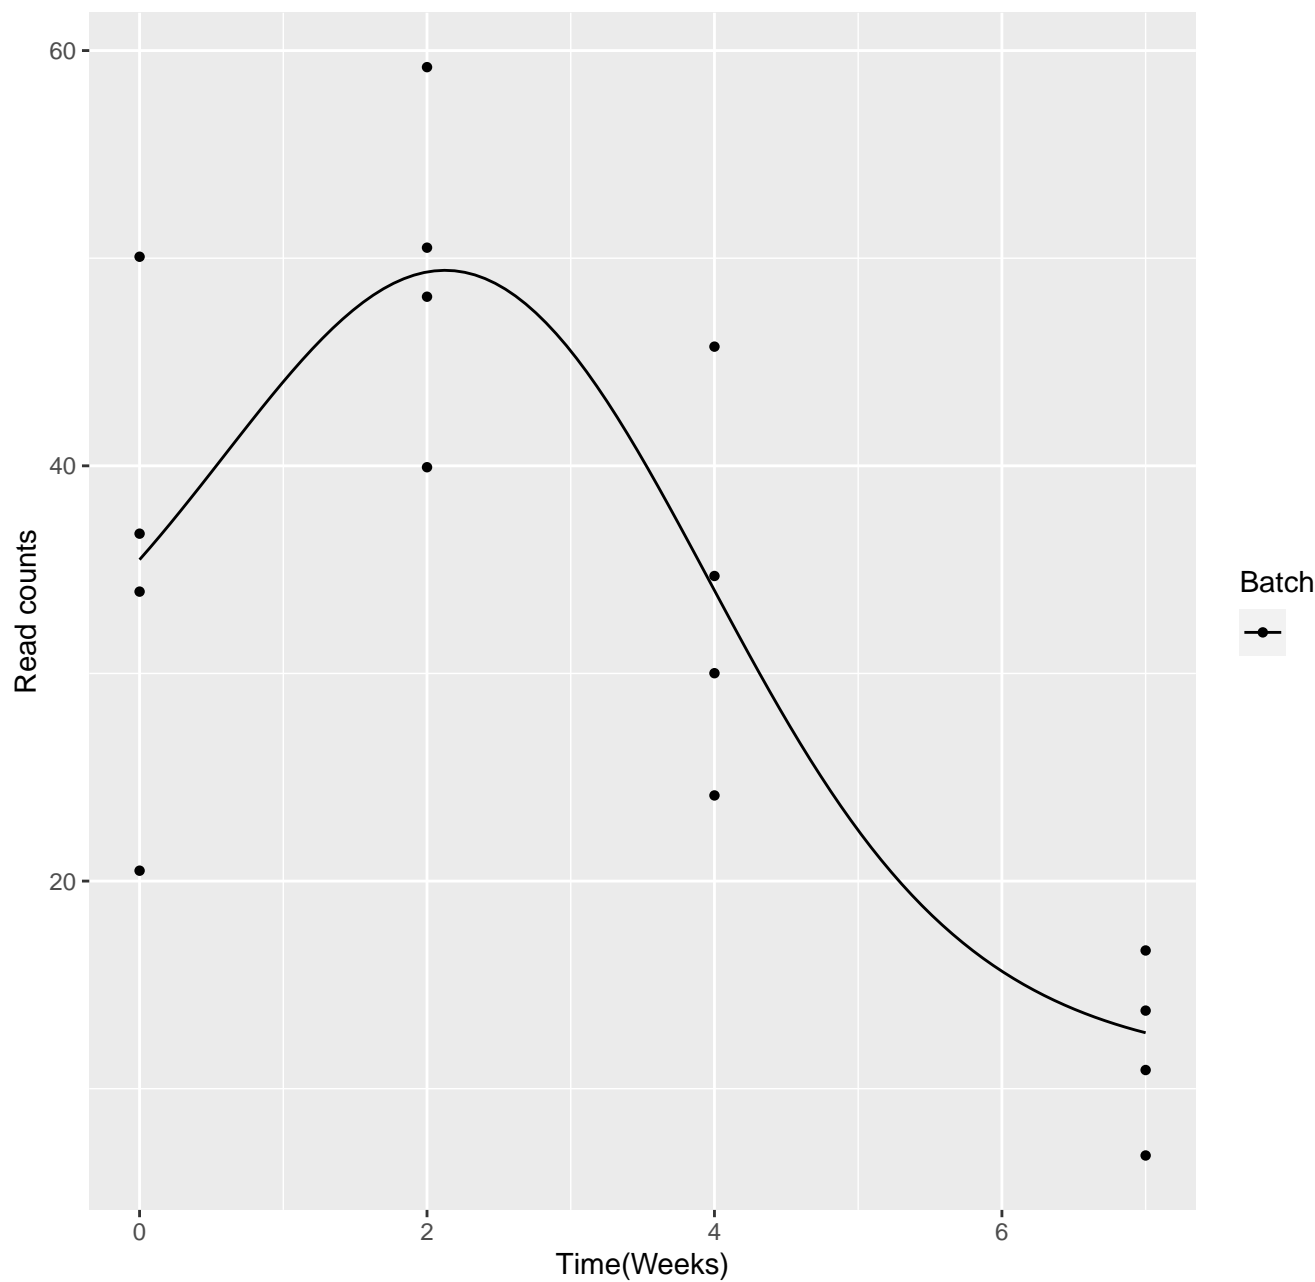



PLXNC1:  $\log_{10} q = -3.58$

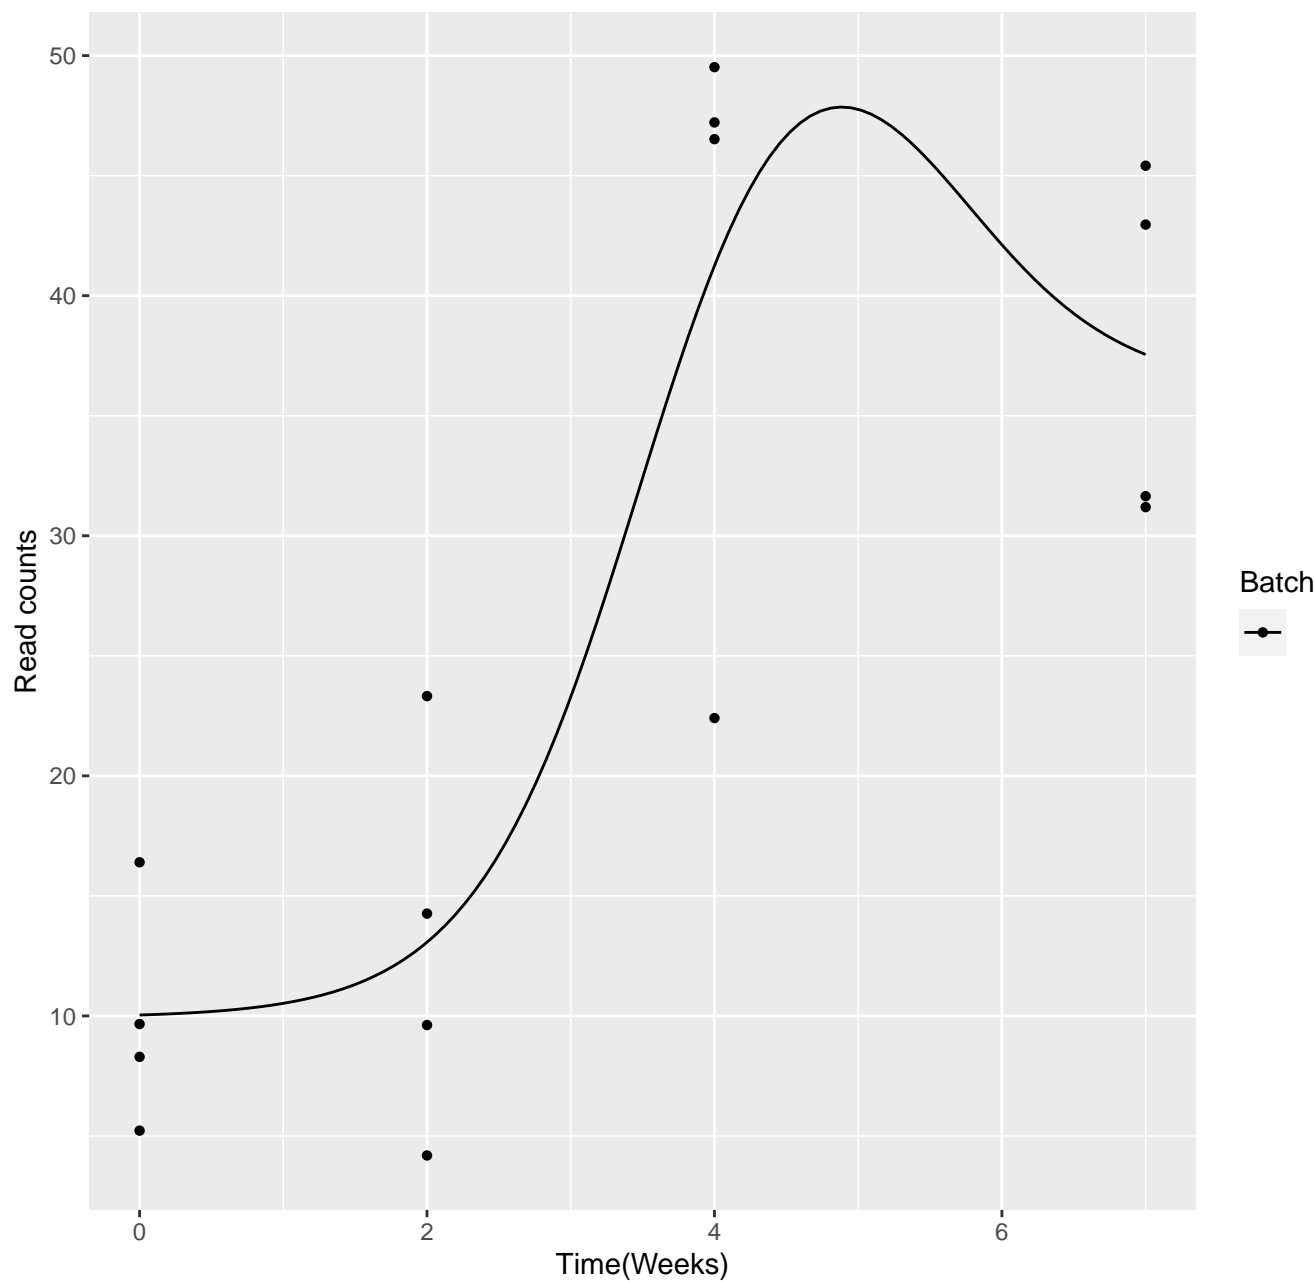

PLEK:  $\log_{10} q = -3.57$

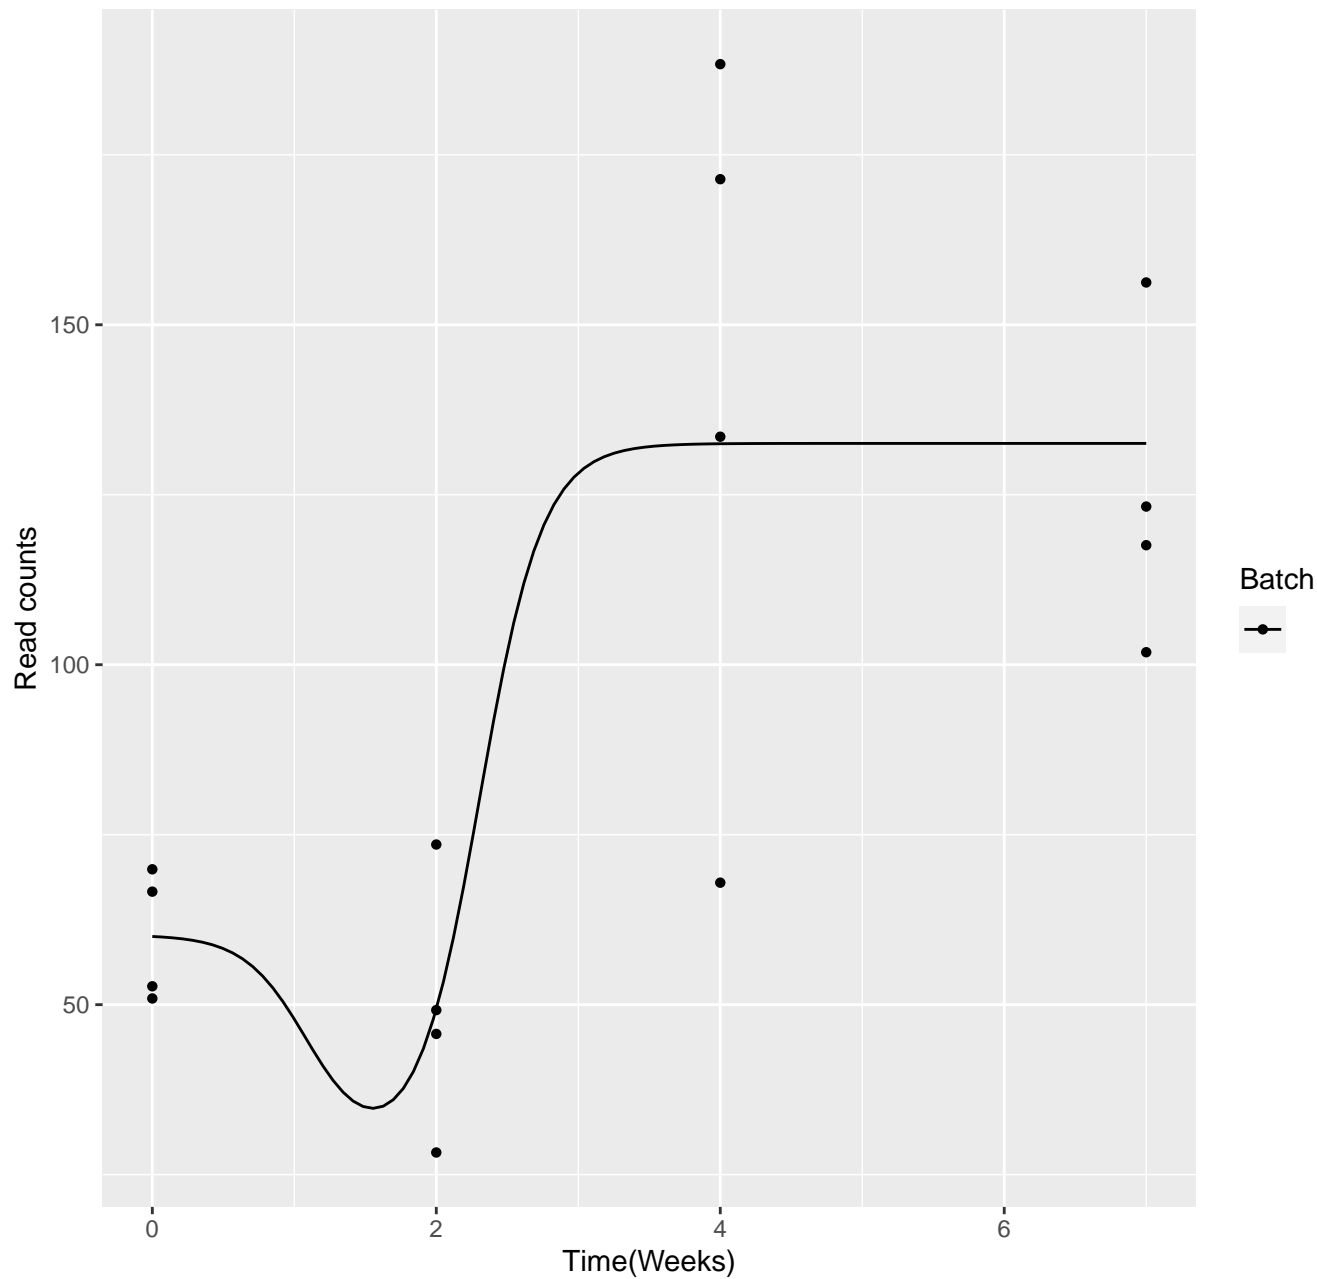

NR1D2:  $\log_{10} q = -3.56$

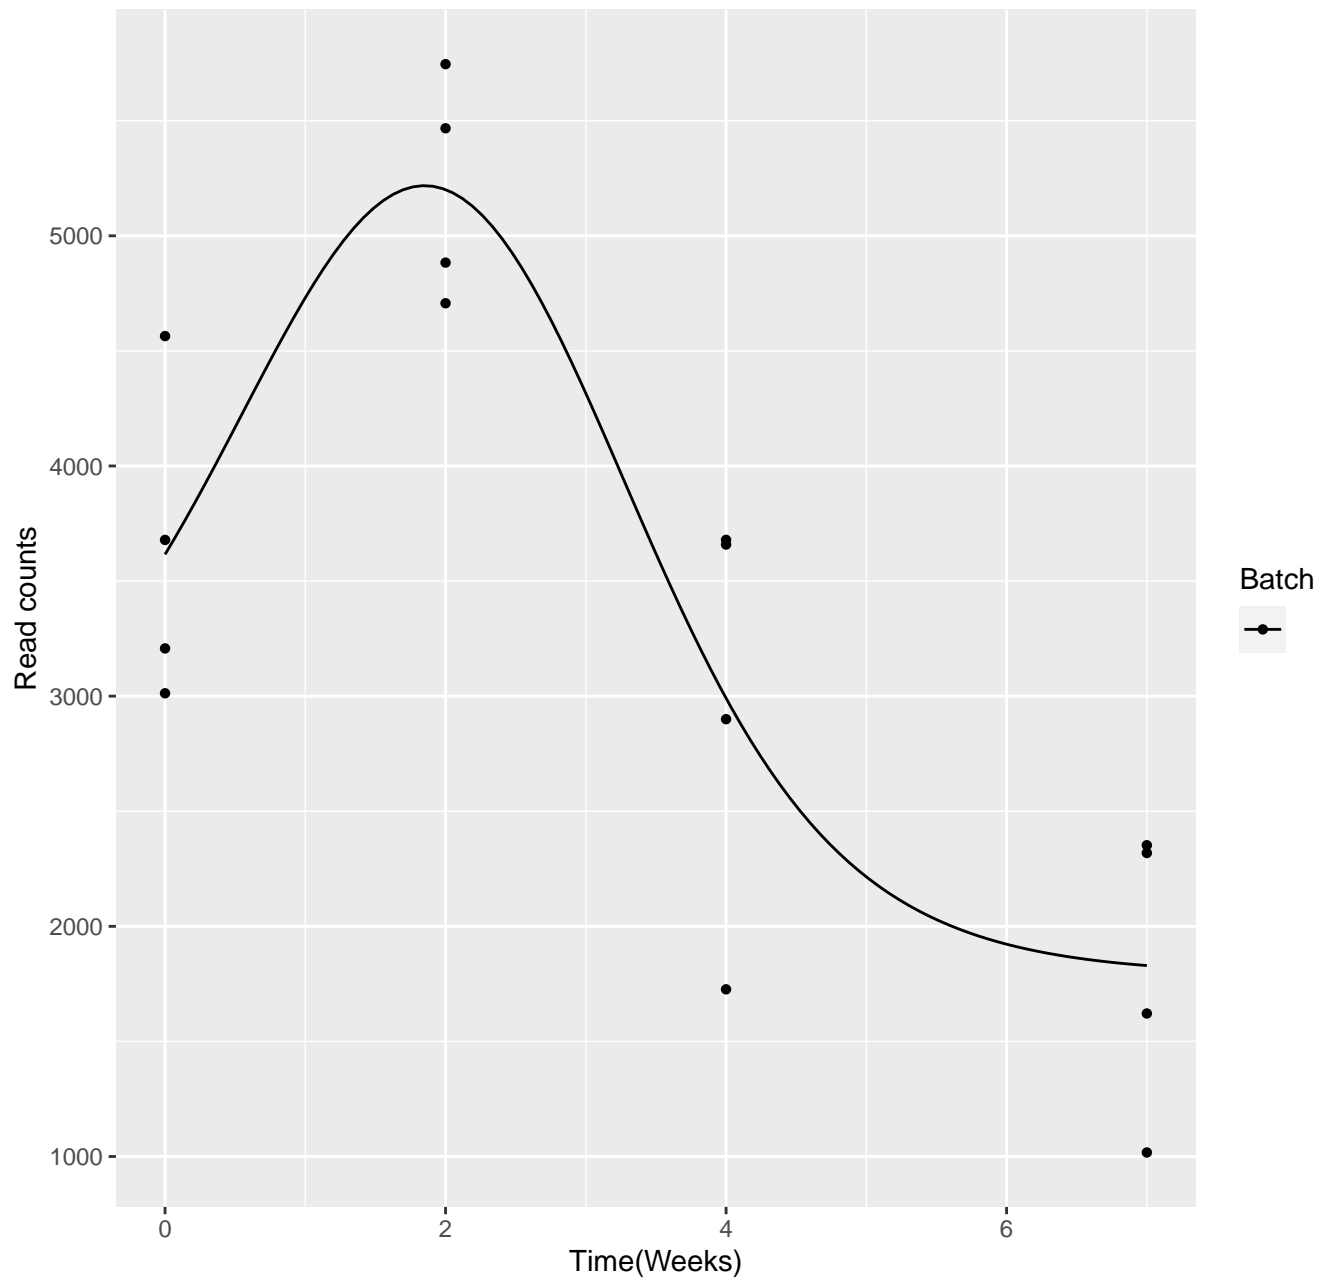

LOC100353356:  $\log_{10} q = -3.56$

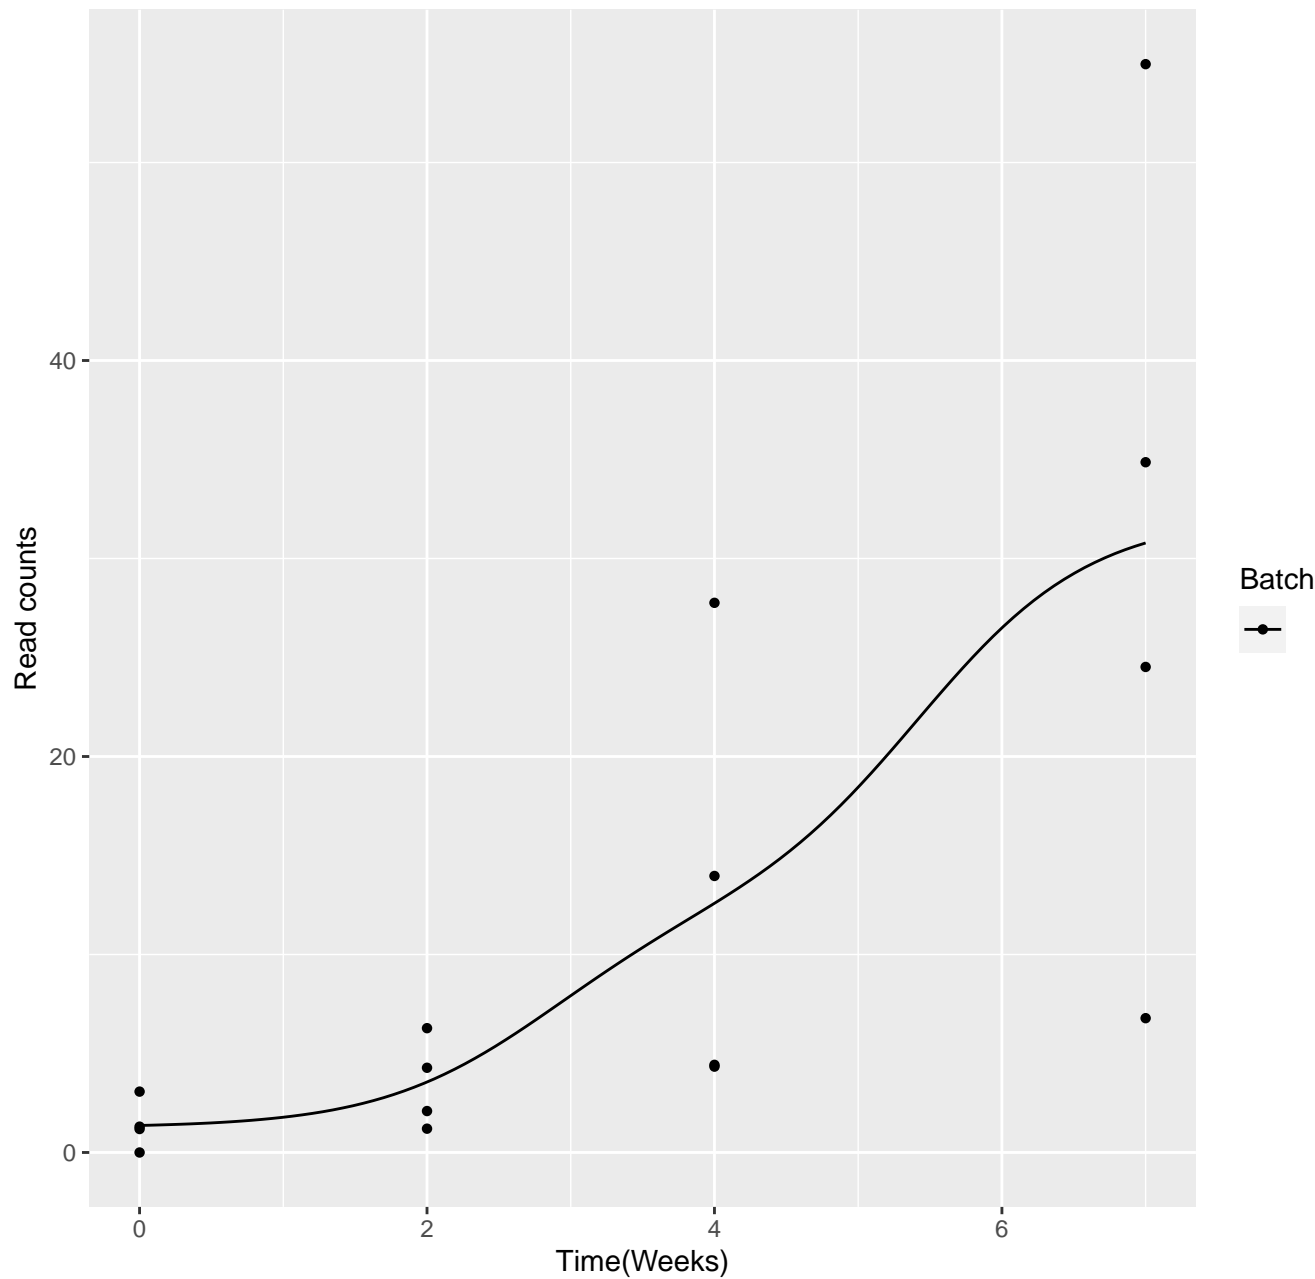

CCNF:  $\log_{10} q = -3.56$

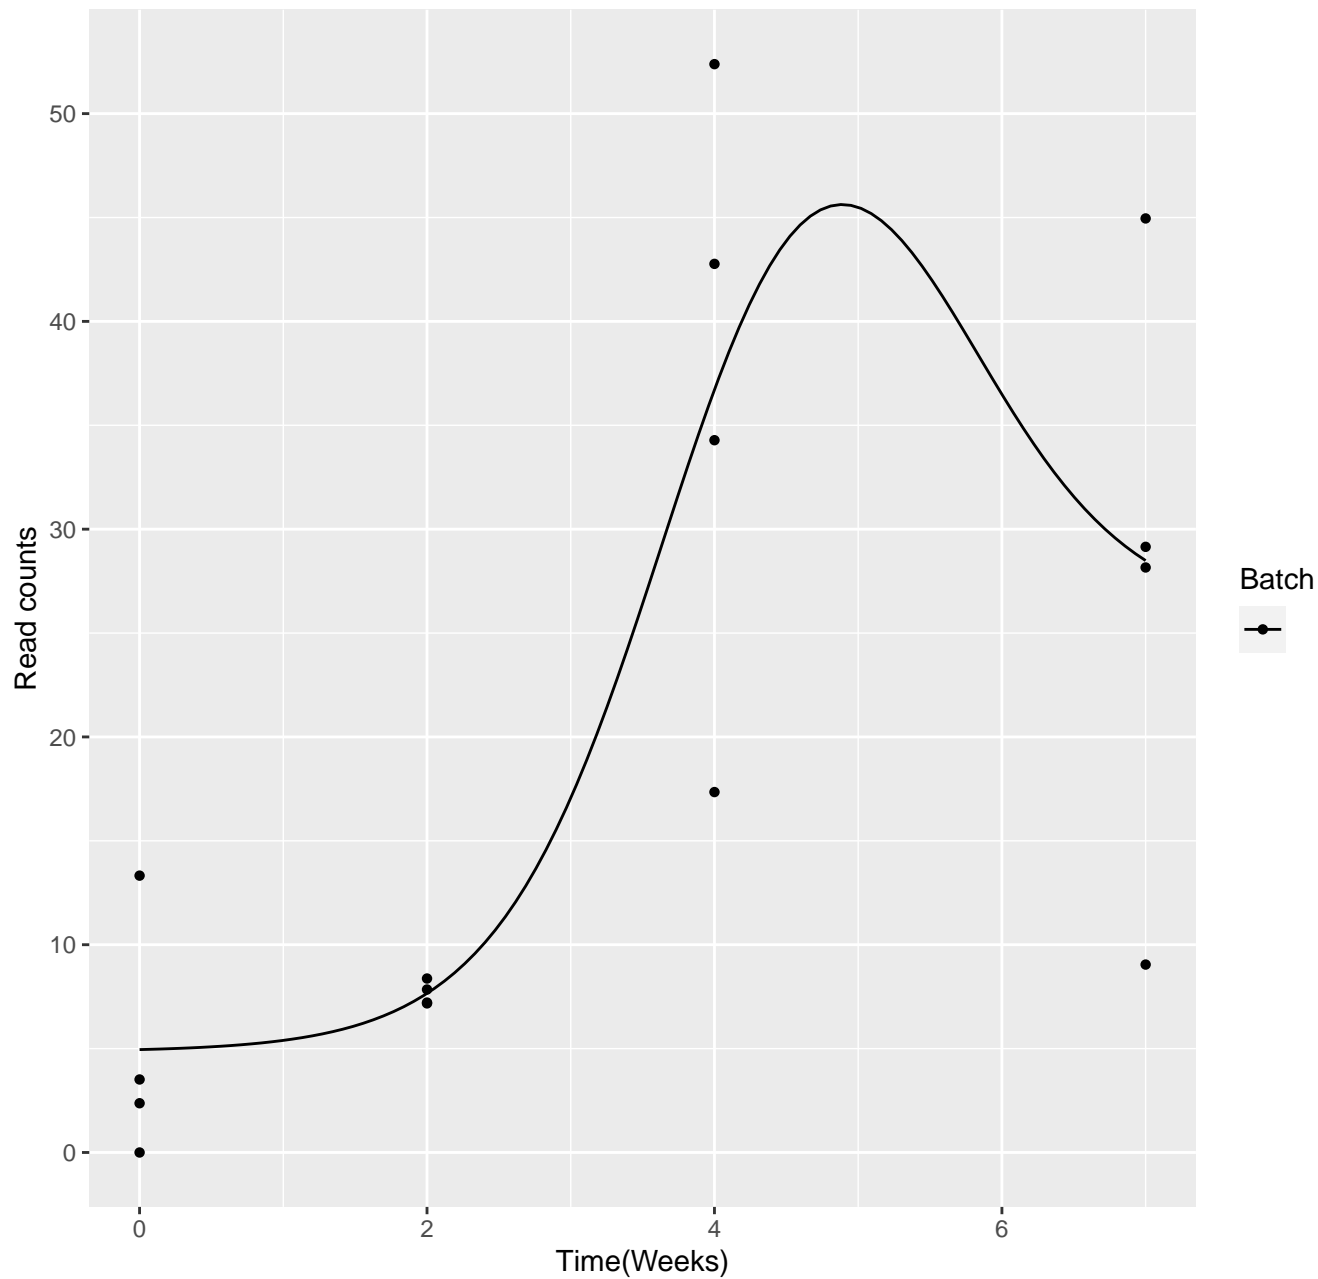

C1QTNF9:  $\log_{10} q = -3.55$

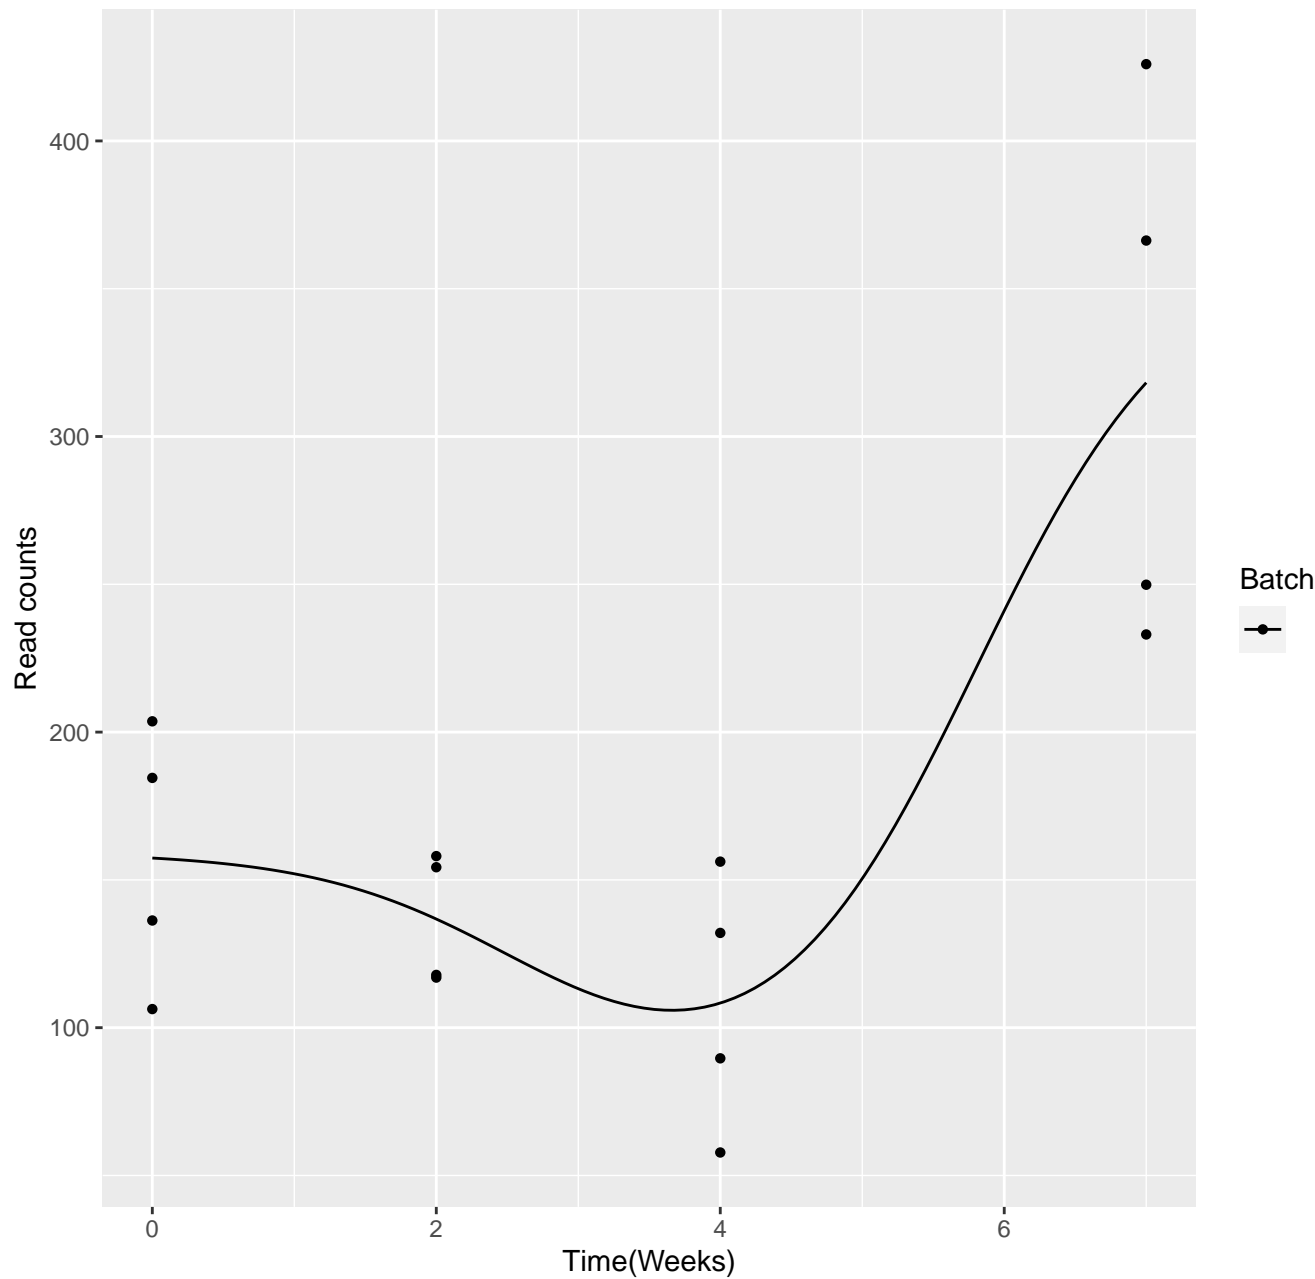

KIFC3:  $\log_{10} q = -3.55$

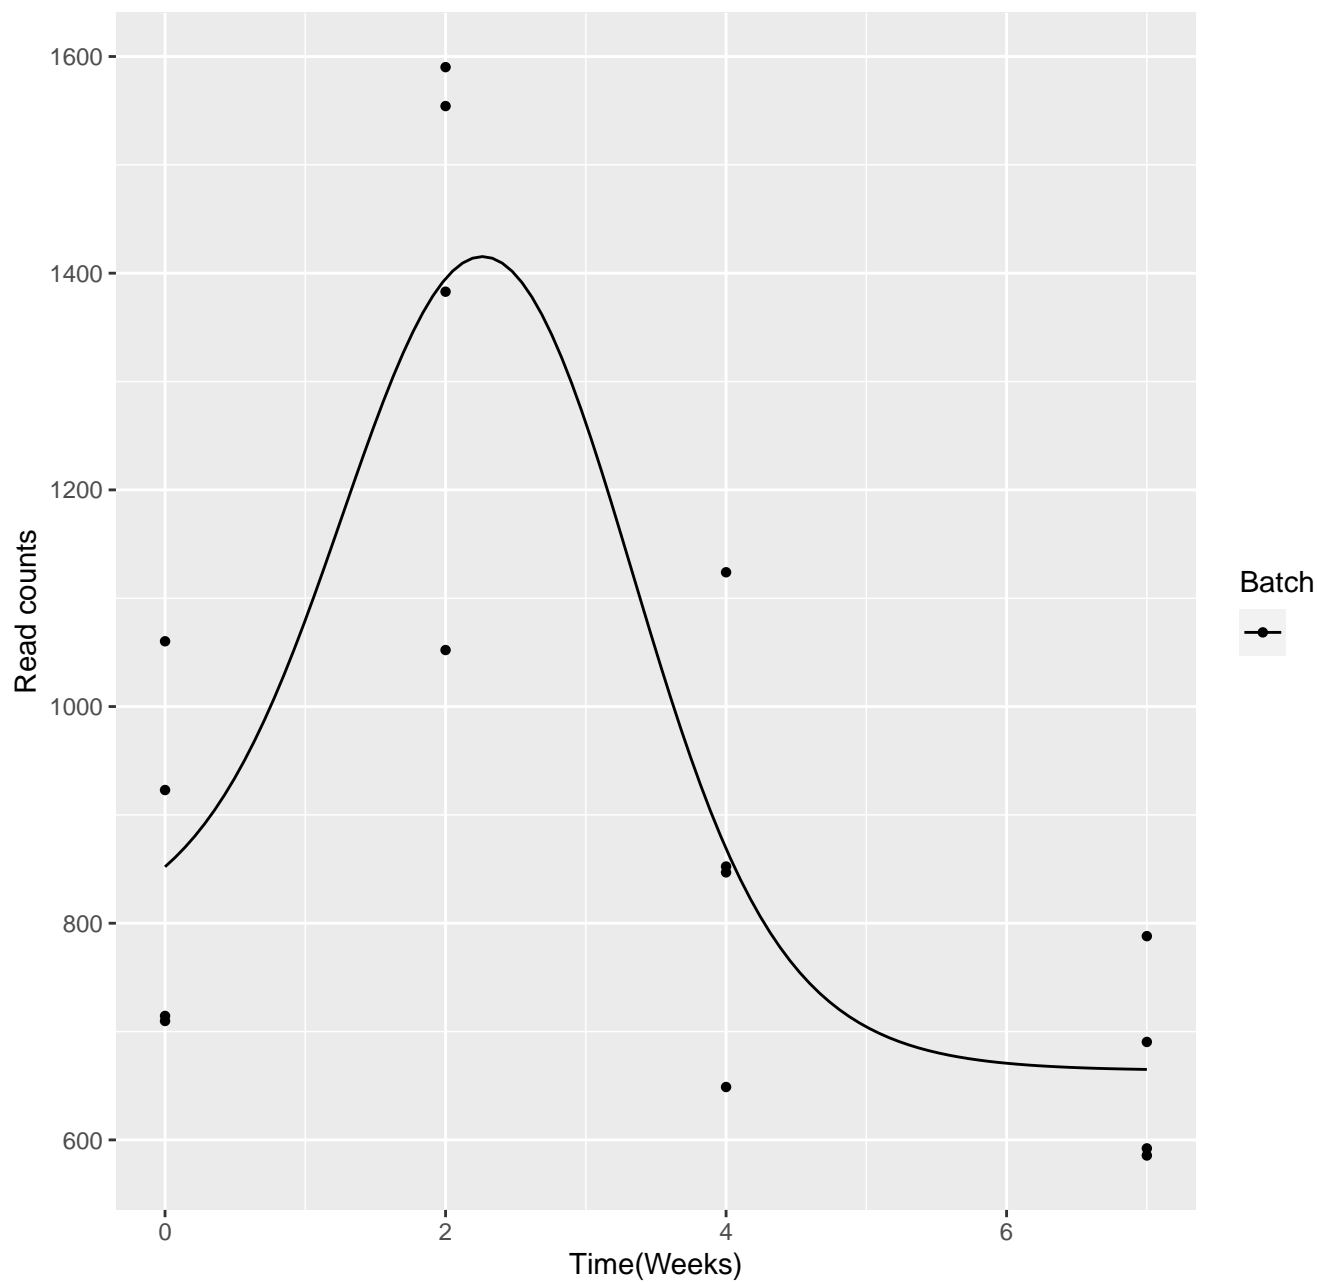

FRY:  $\log_{10} q = -3.55$

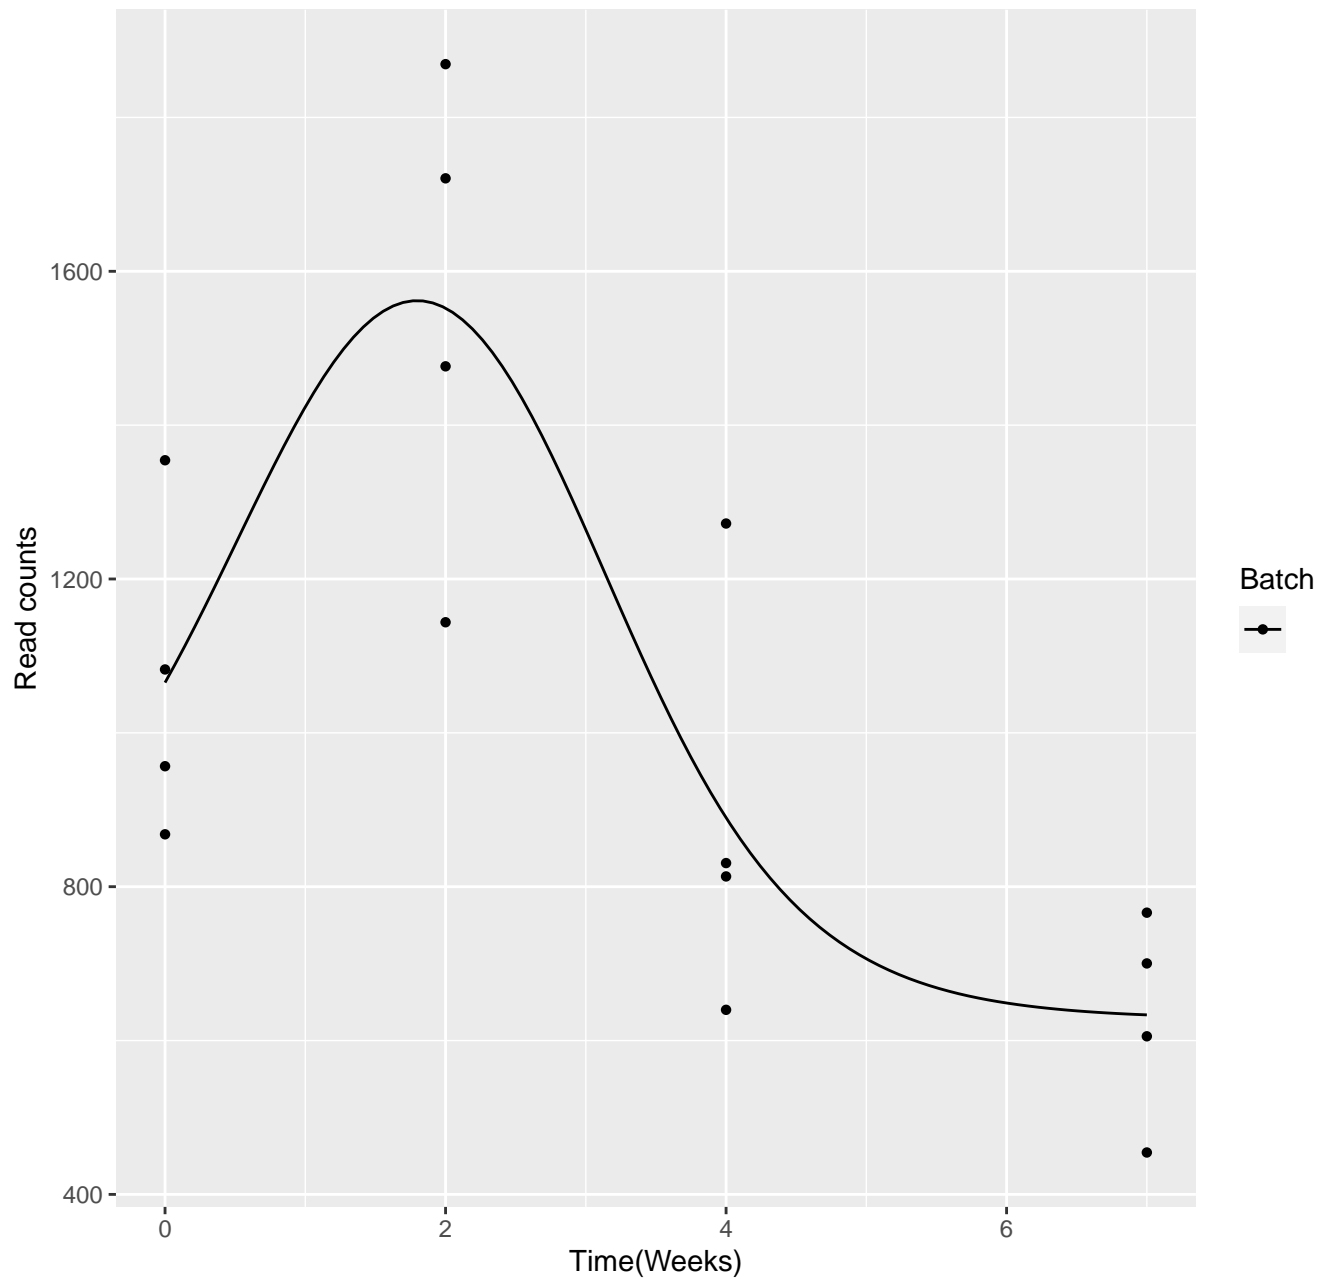



CD101:  $\log_{10} q = -3.55$

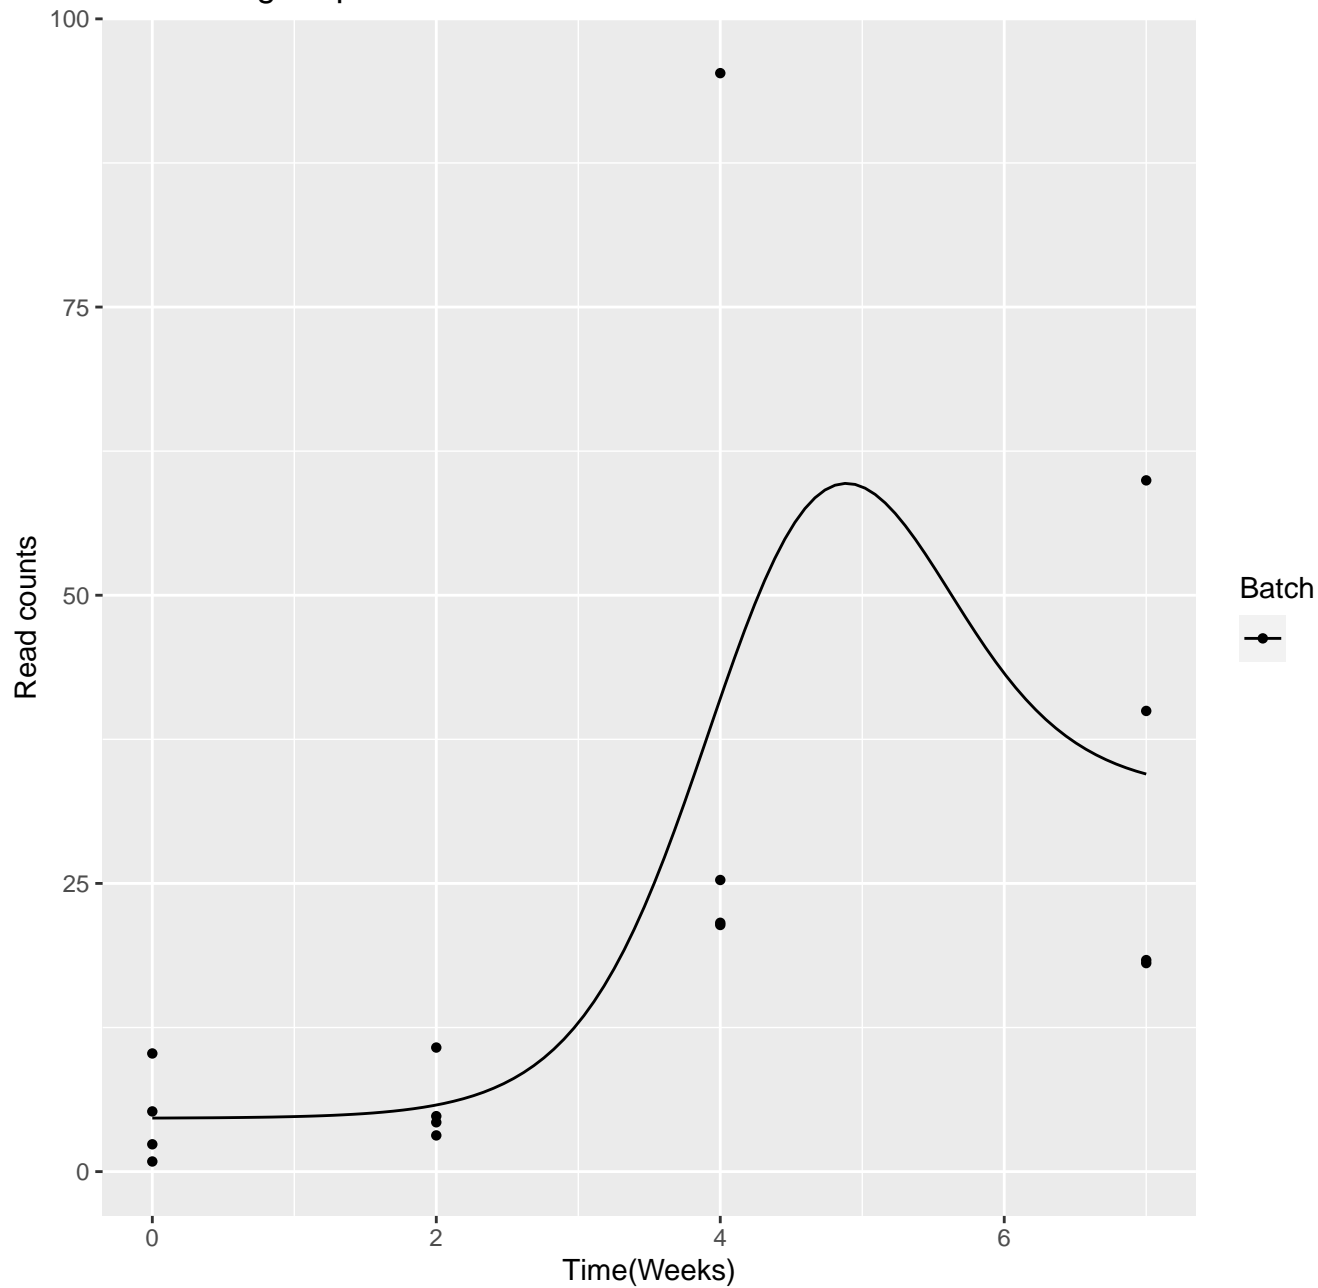

ADAM12:  $\log_{10} q = -3.54$

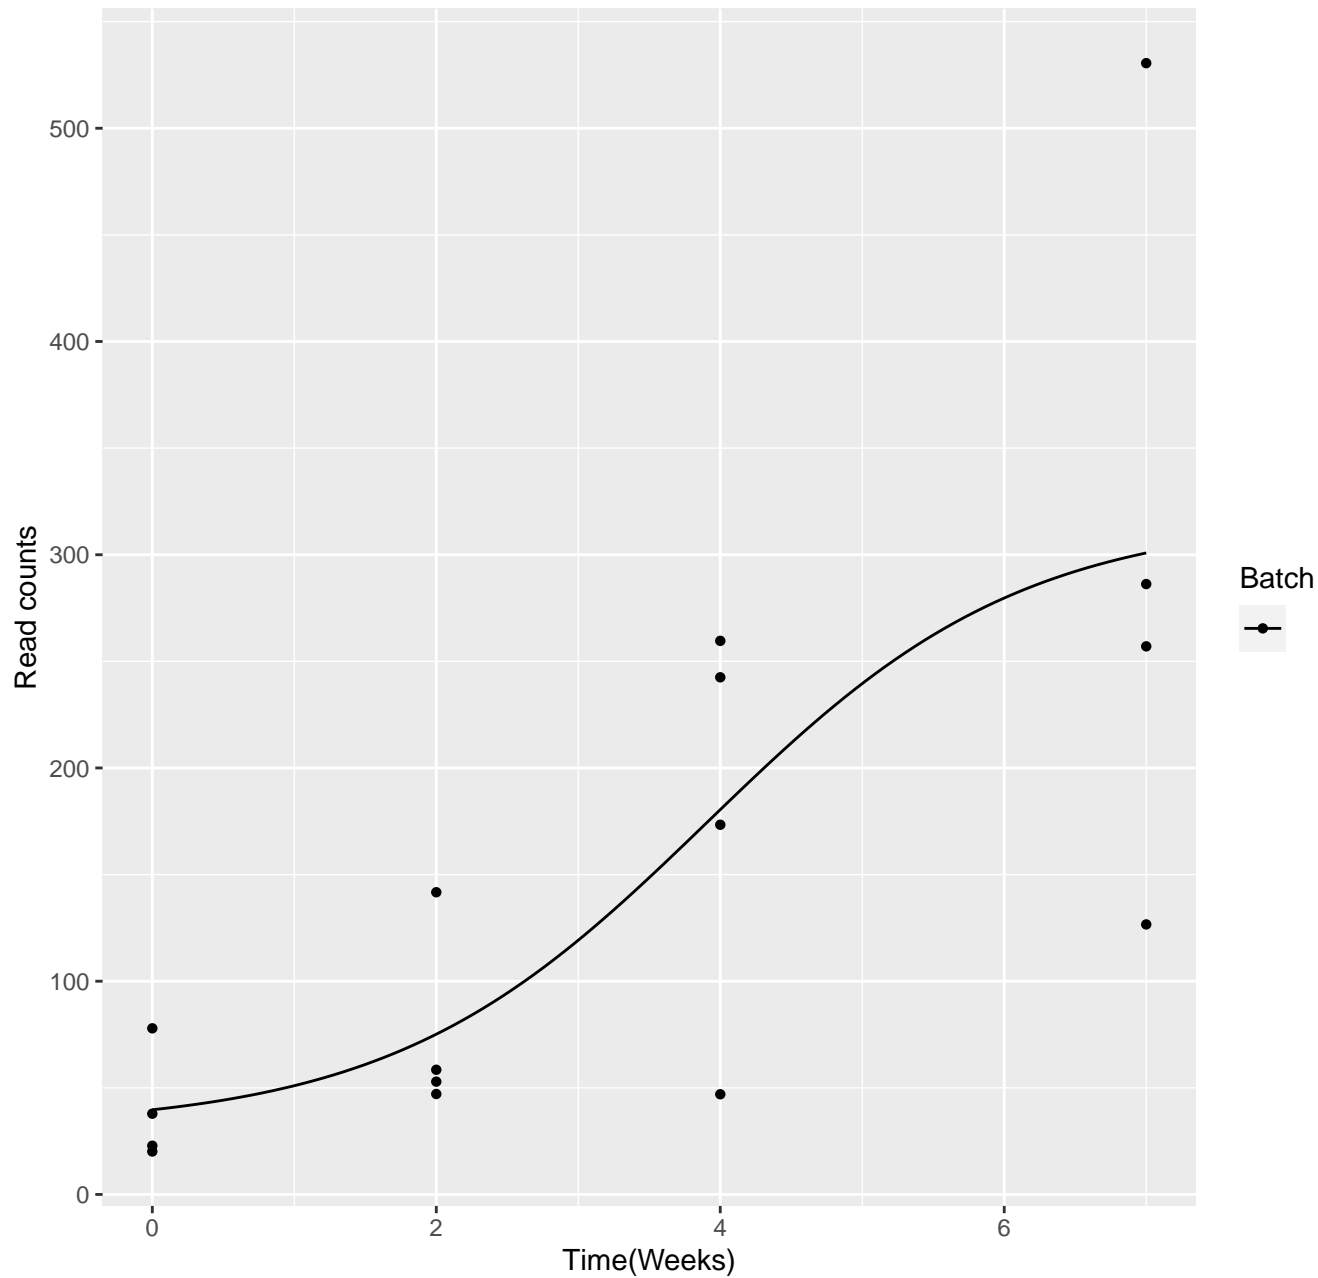

ADARB1:  $\log_{10} q = -3.54$

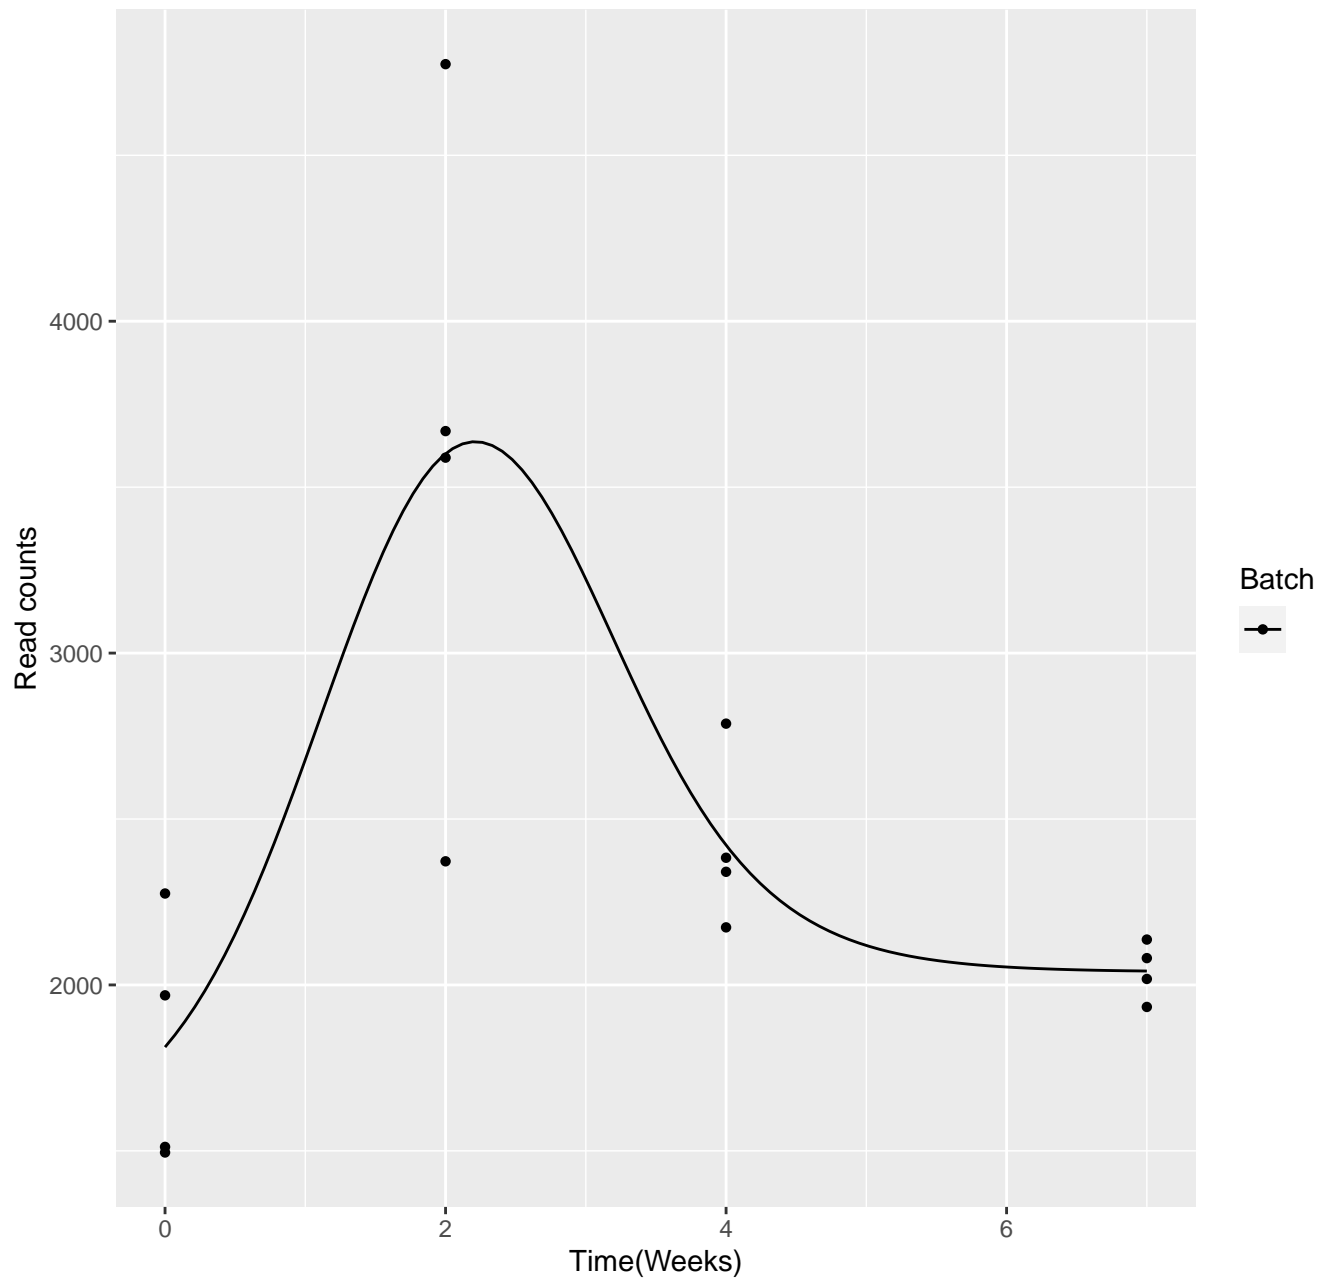

LOC100125981:  $\log_{10} q = -3.54$

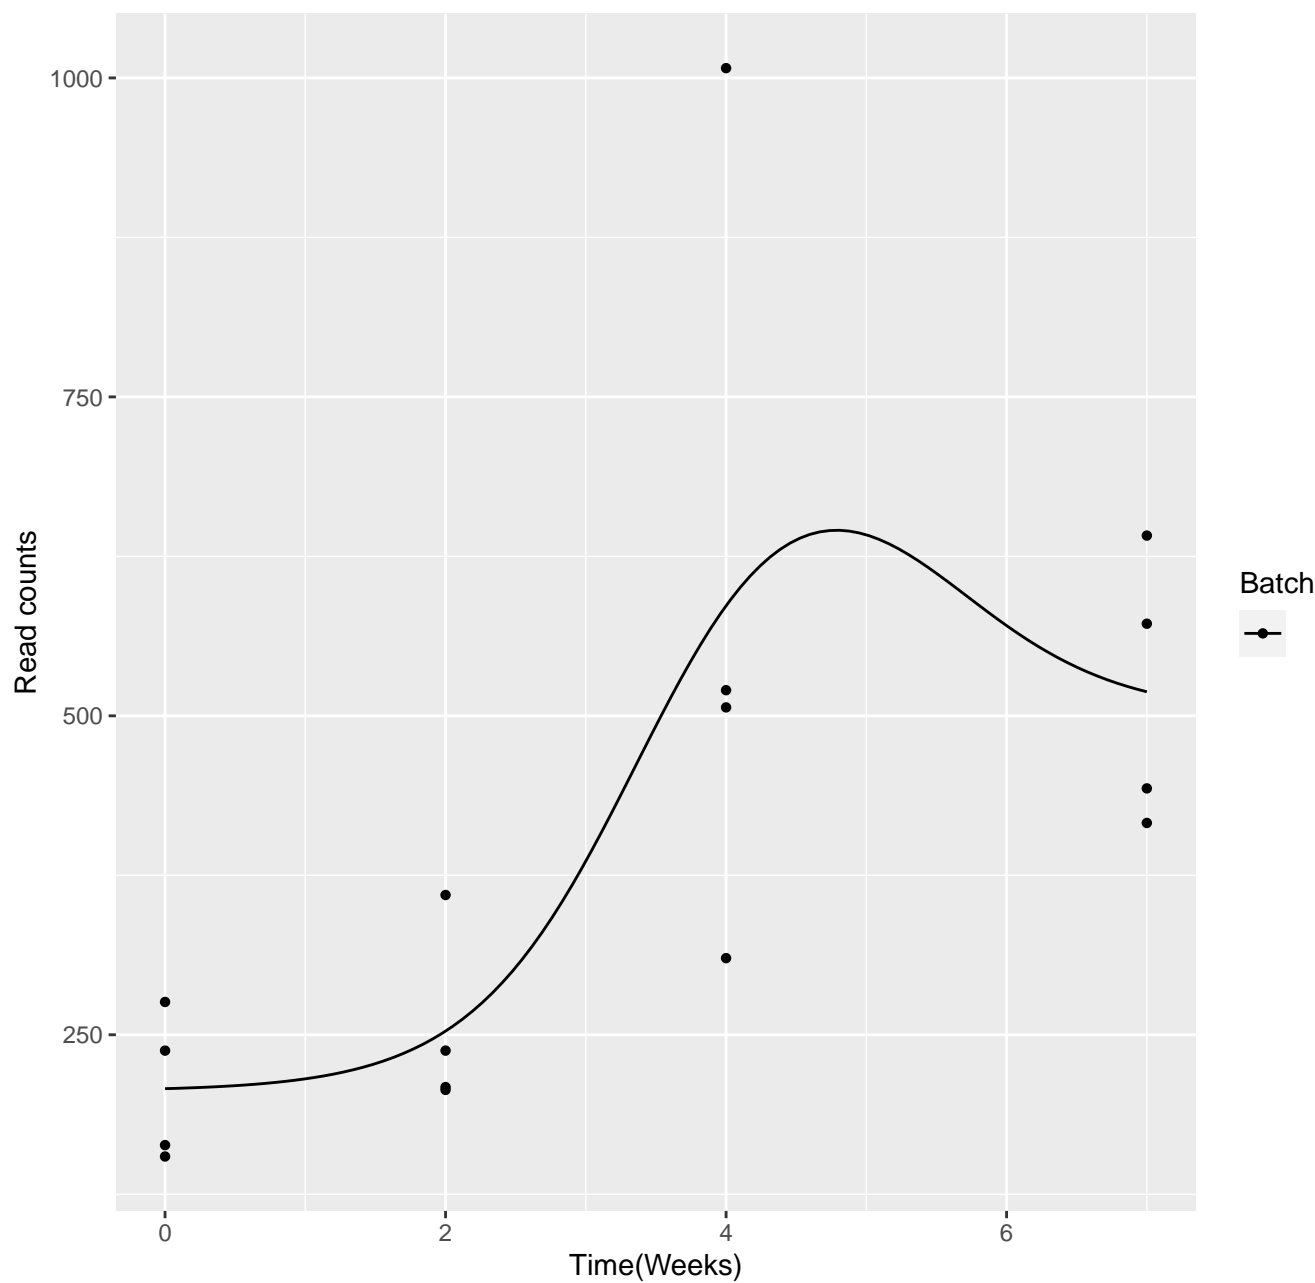

LOC100351163:  $\log_{10} q = -3.53$

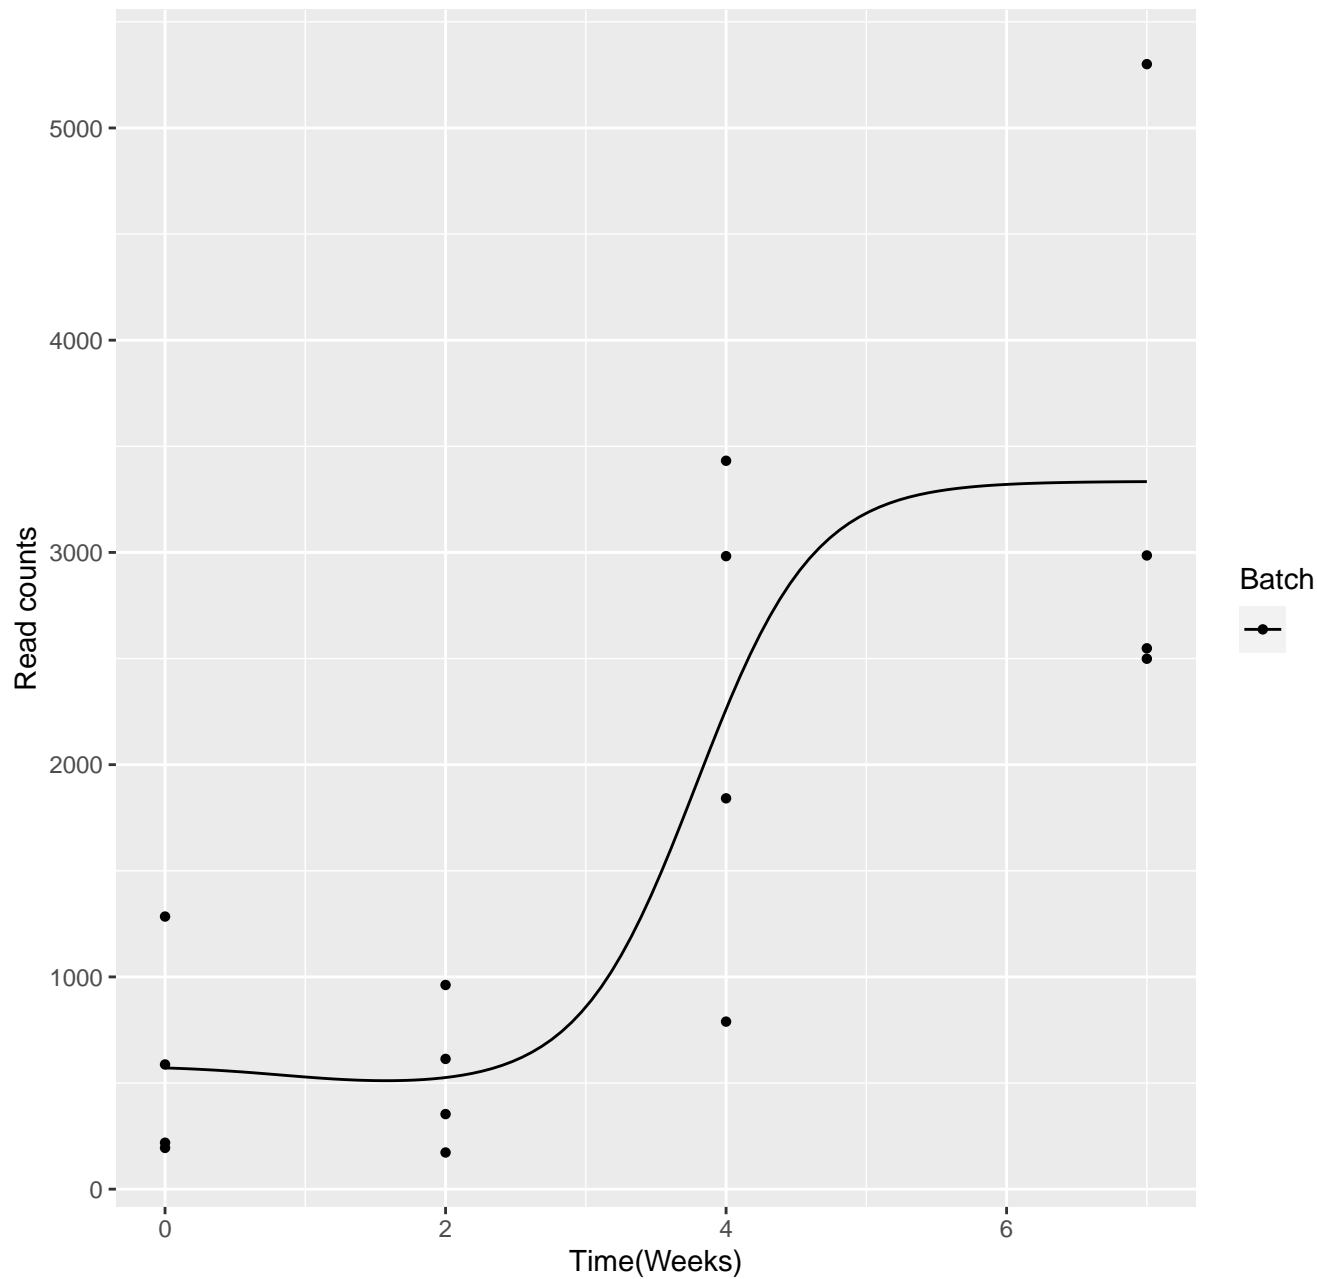

P2RX1:  $\log_{10} q = -3.53$

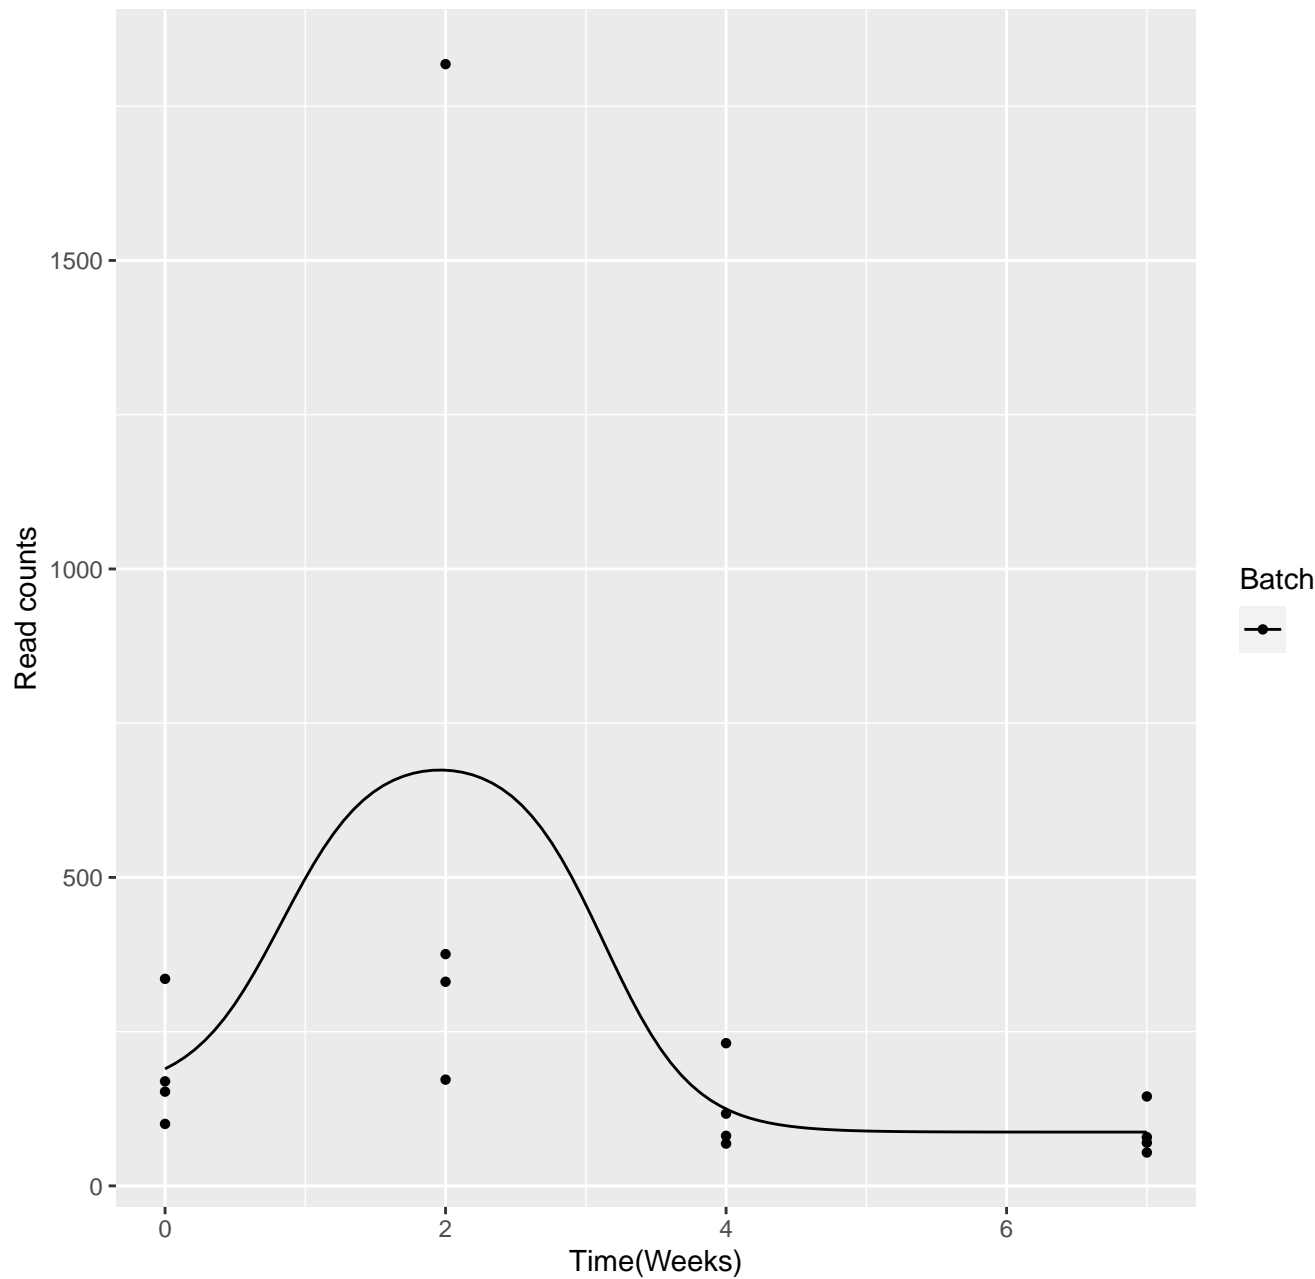

FGR:  $\log_{10} q = -3.52$

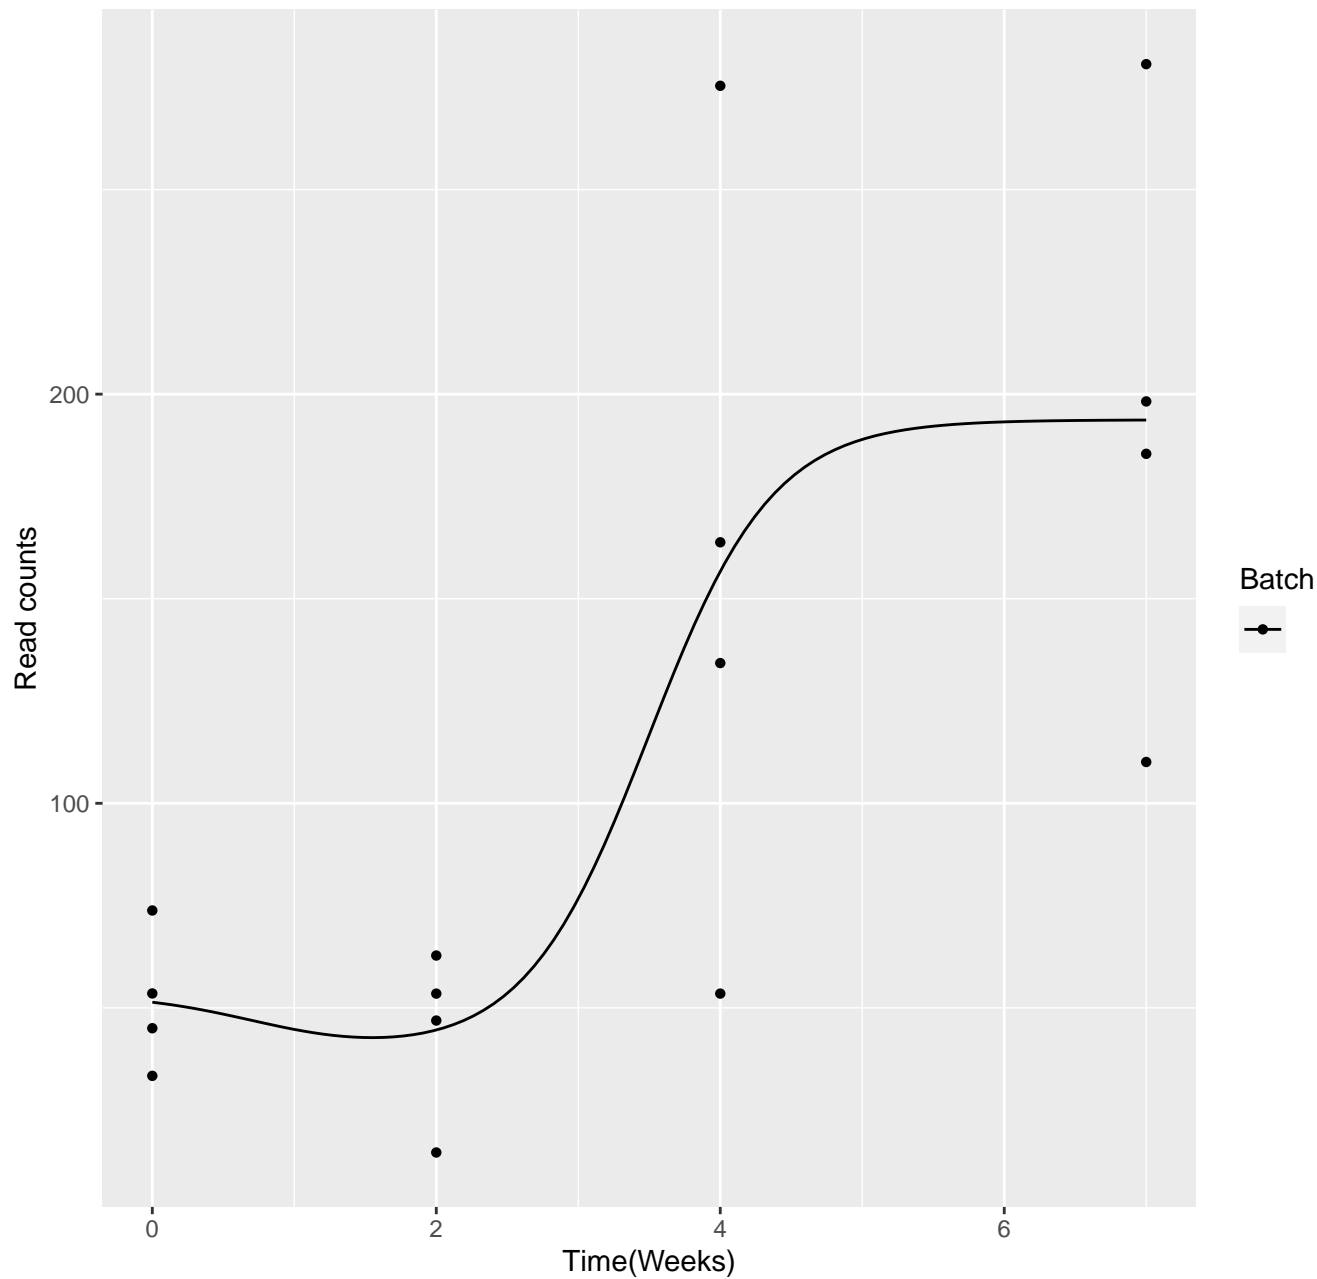

LOC100355379:  $\log_{10} q = -3.51$

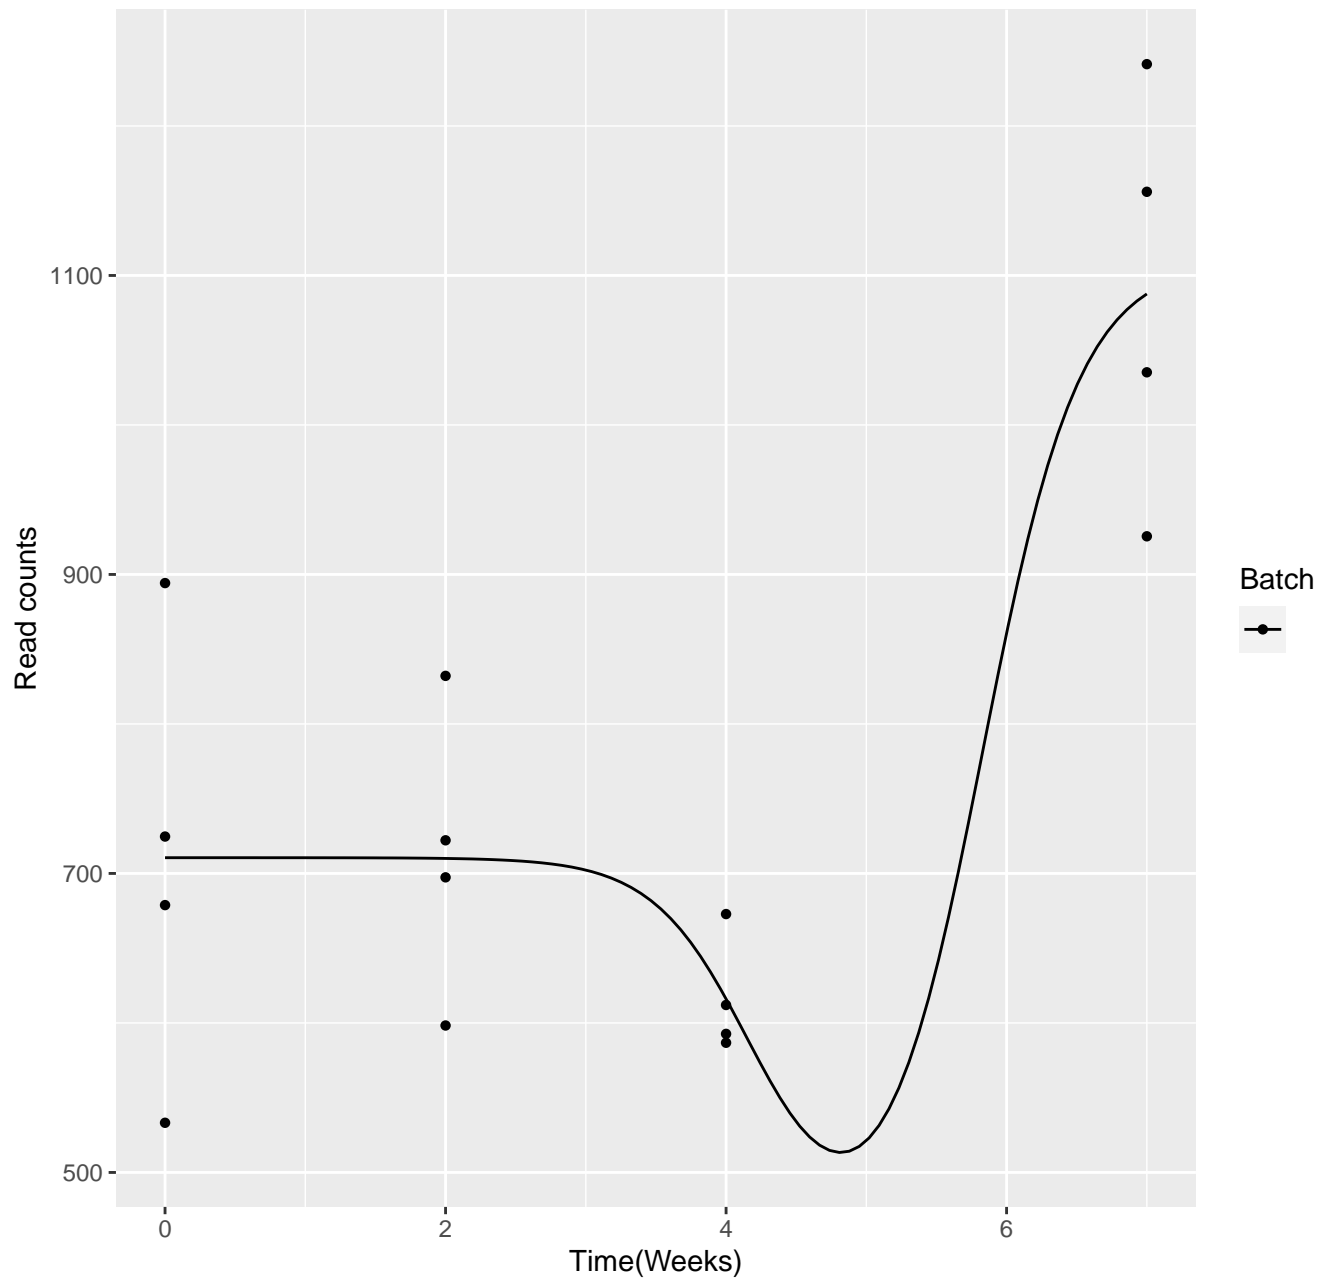



MCEMP1:  $\log_{10} q = -3.51$

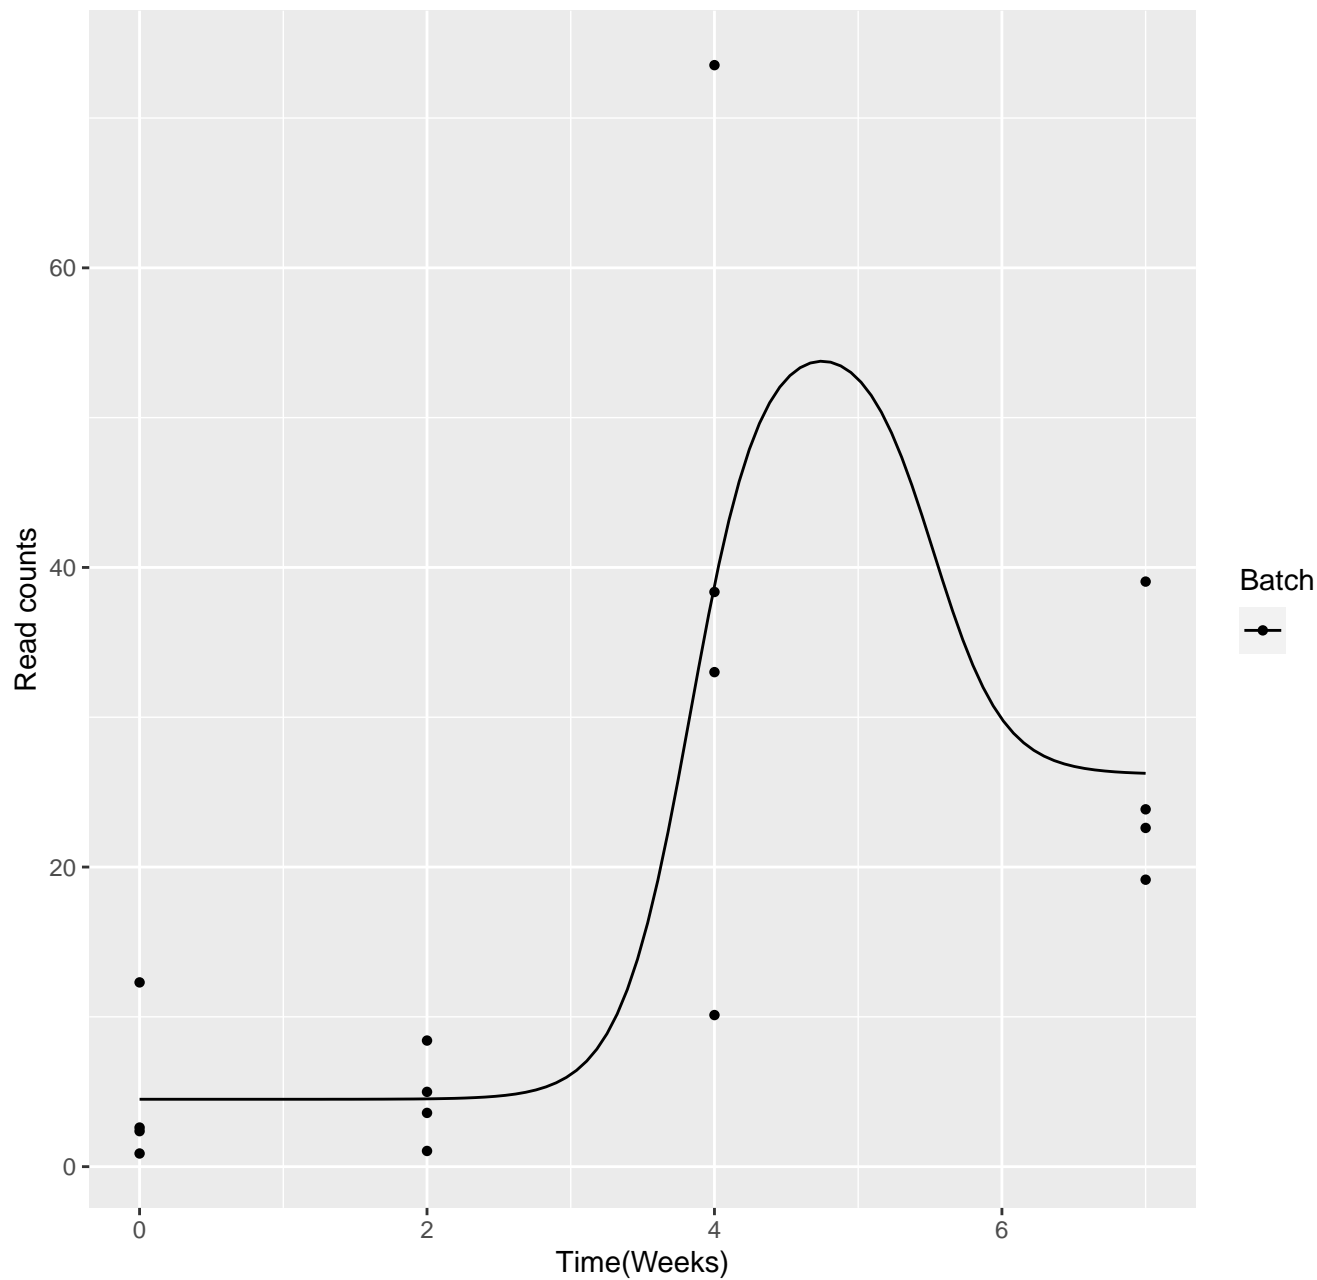

MYH7:  $\log_{10} q = -3.51$

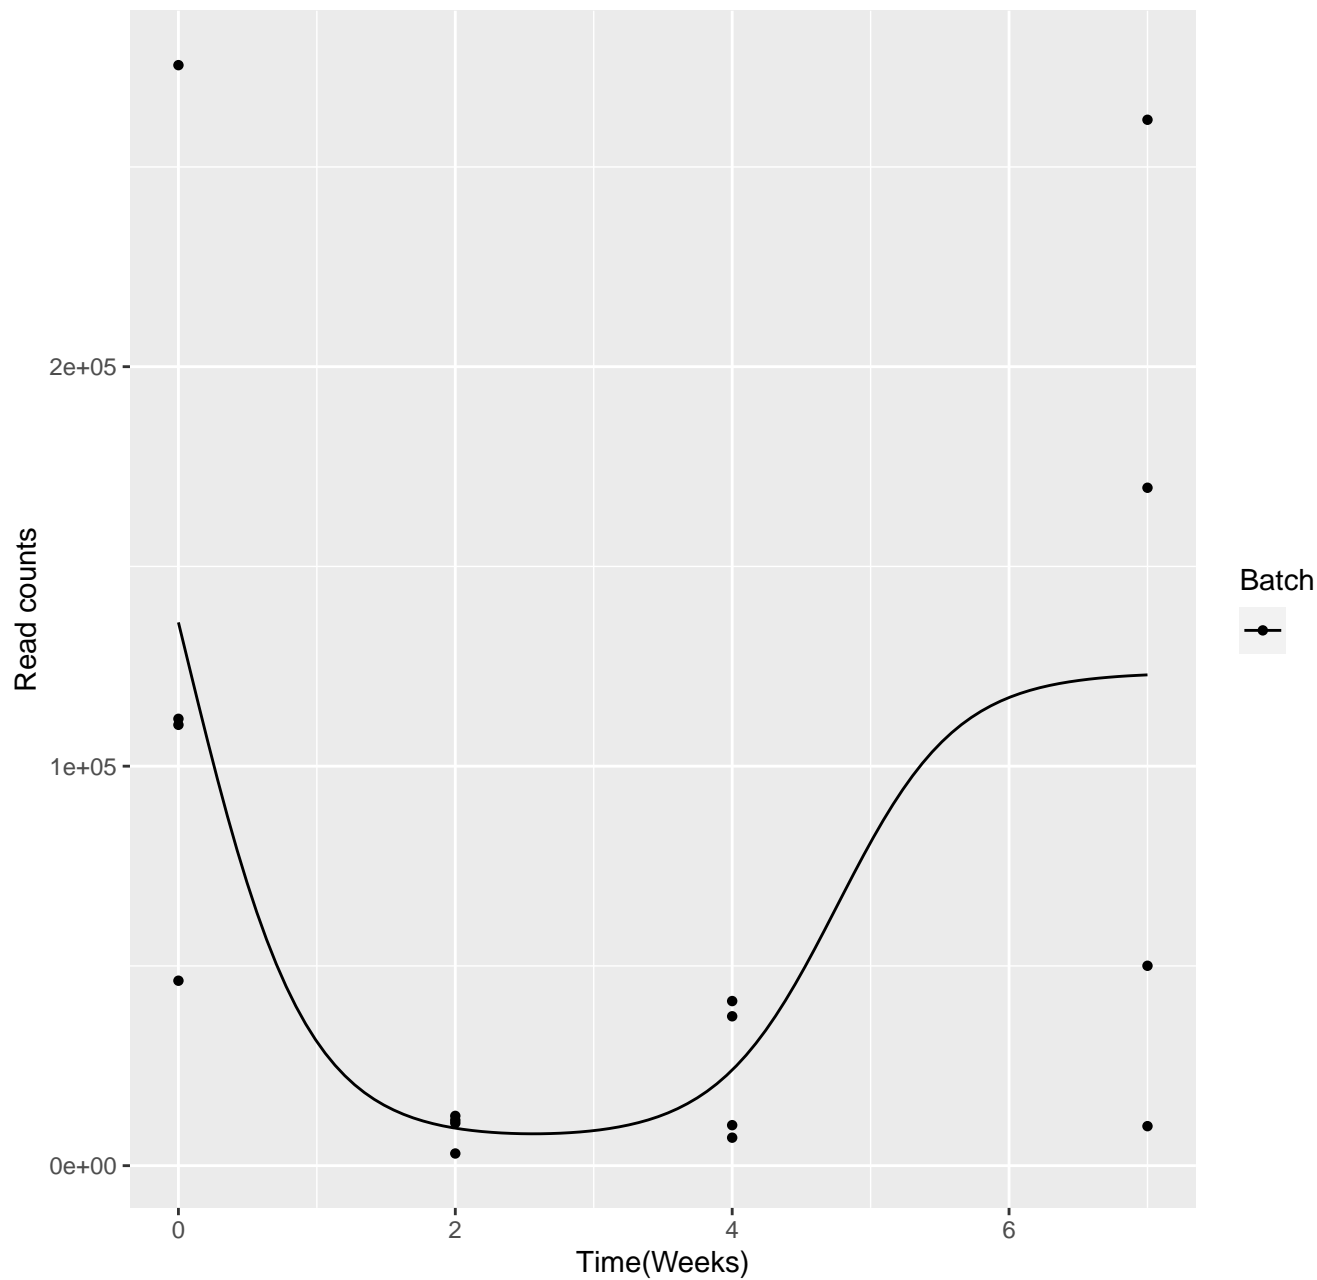

LTBP3:  $\log_{10} q = -3.51$

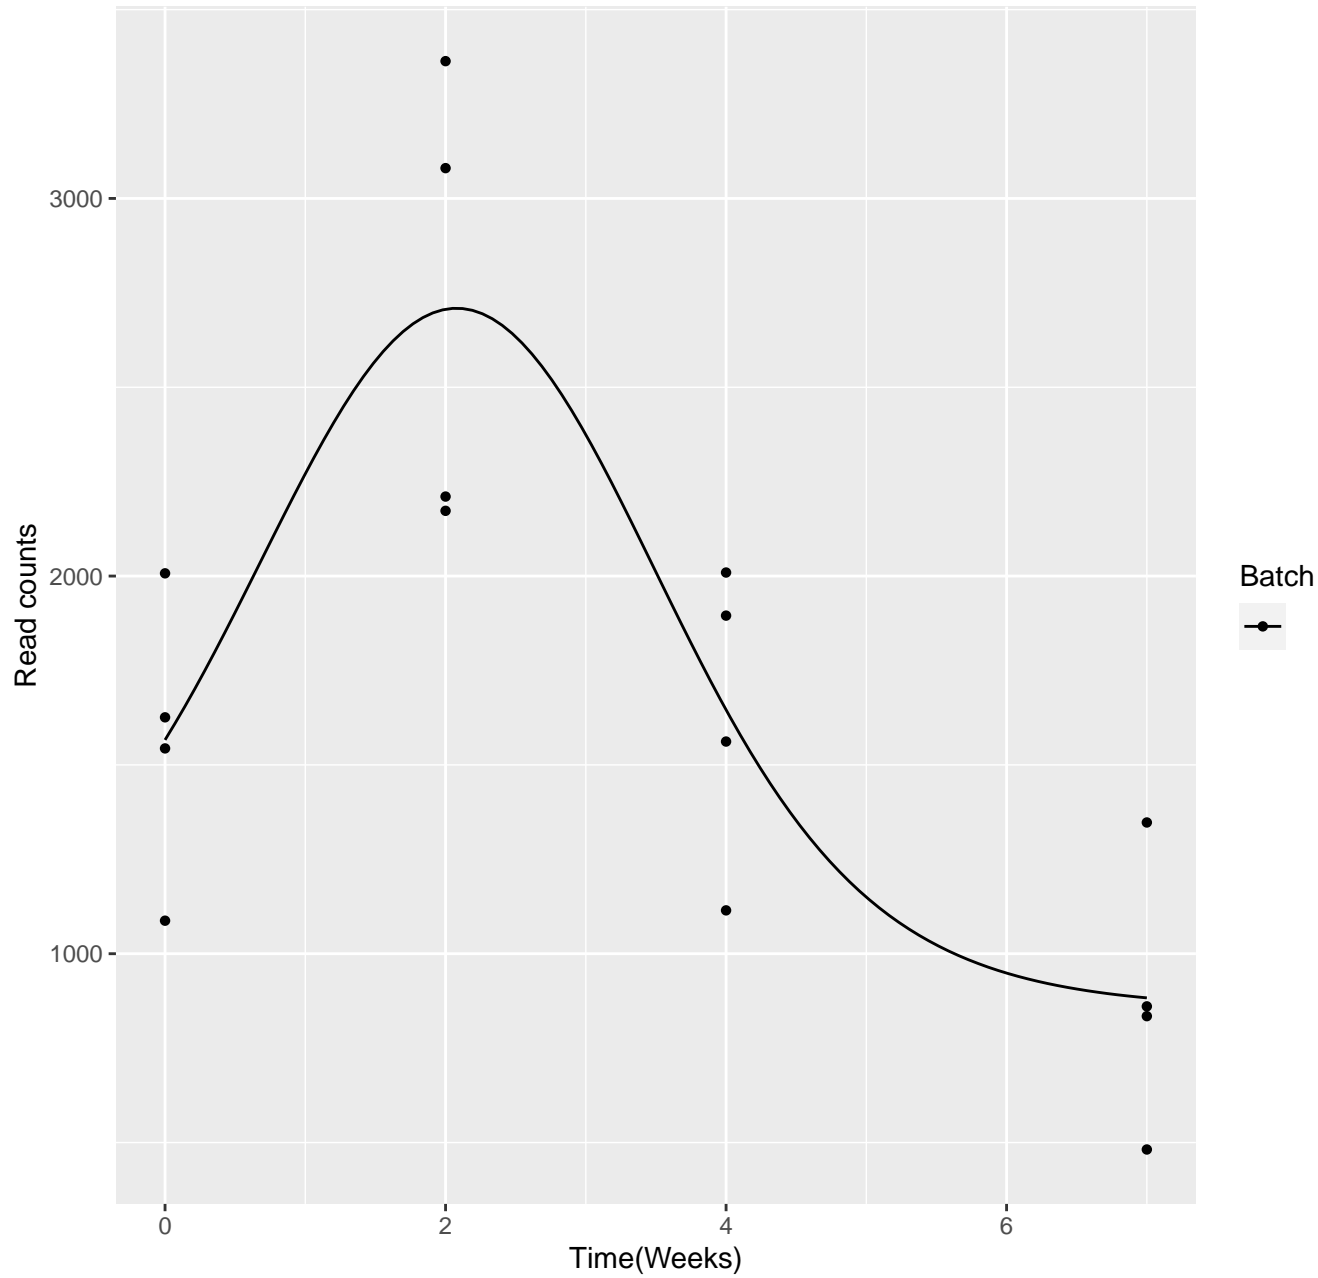

ARL10:  $\log_{10} q = -3.5$

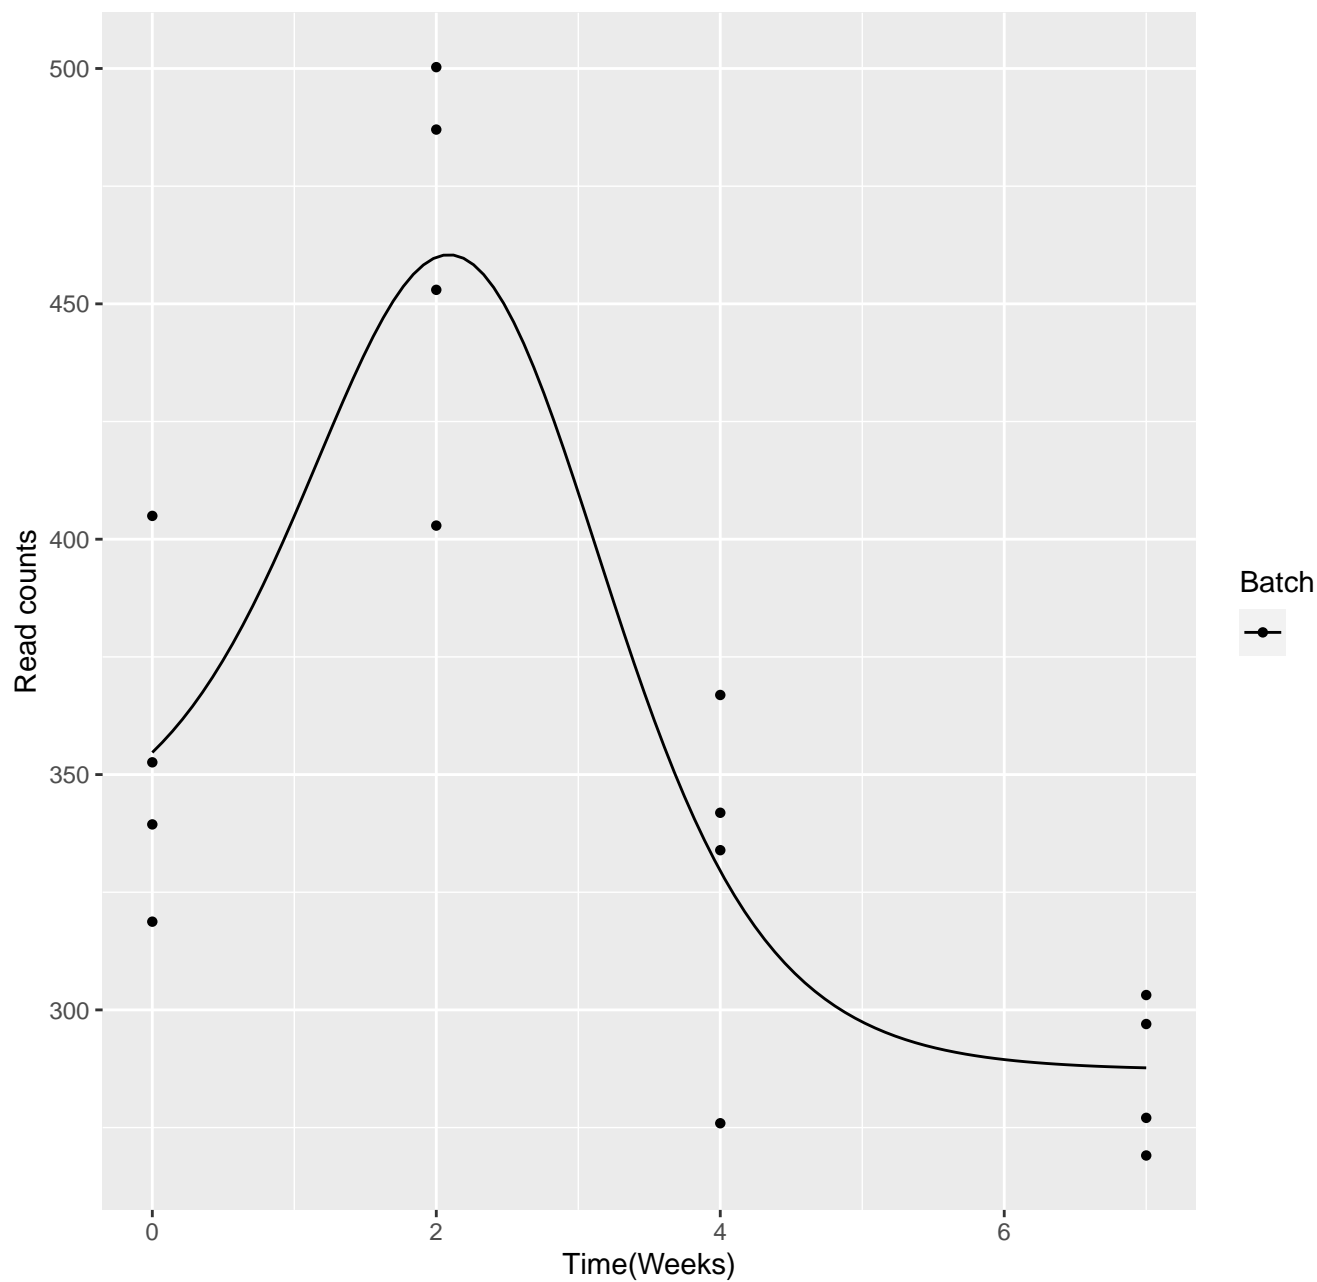

RNF144B:  $\log_{10} q = -3.5$

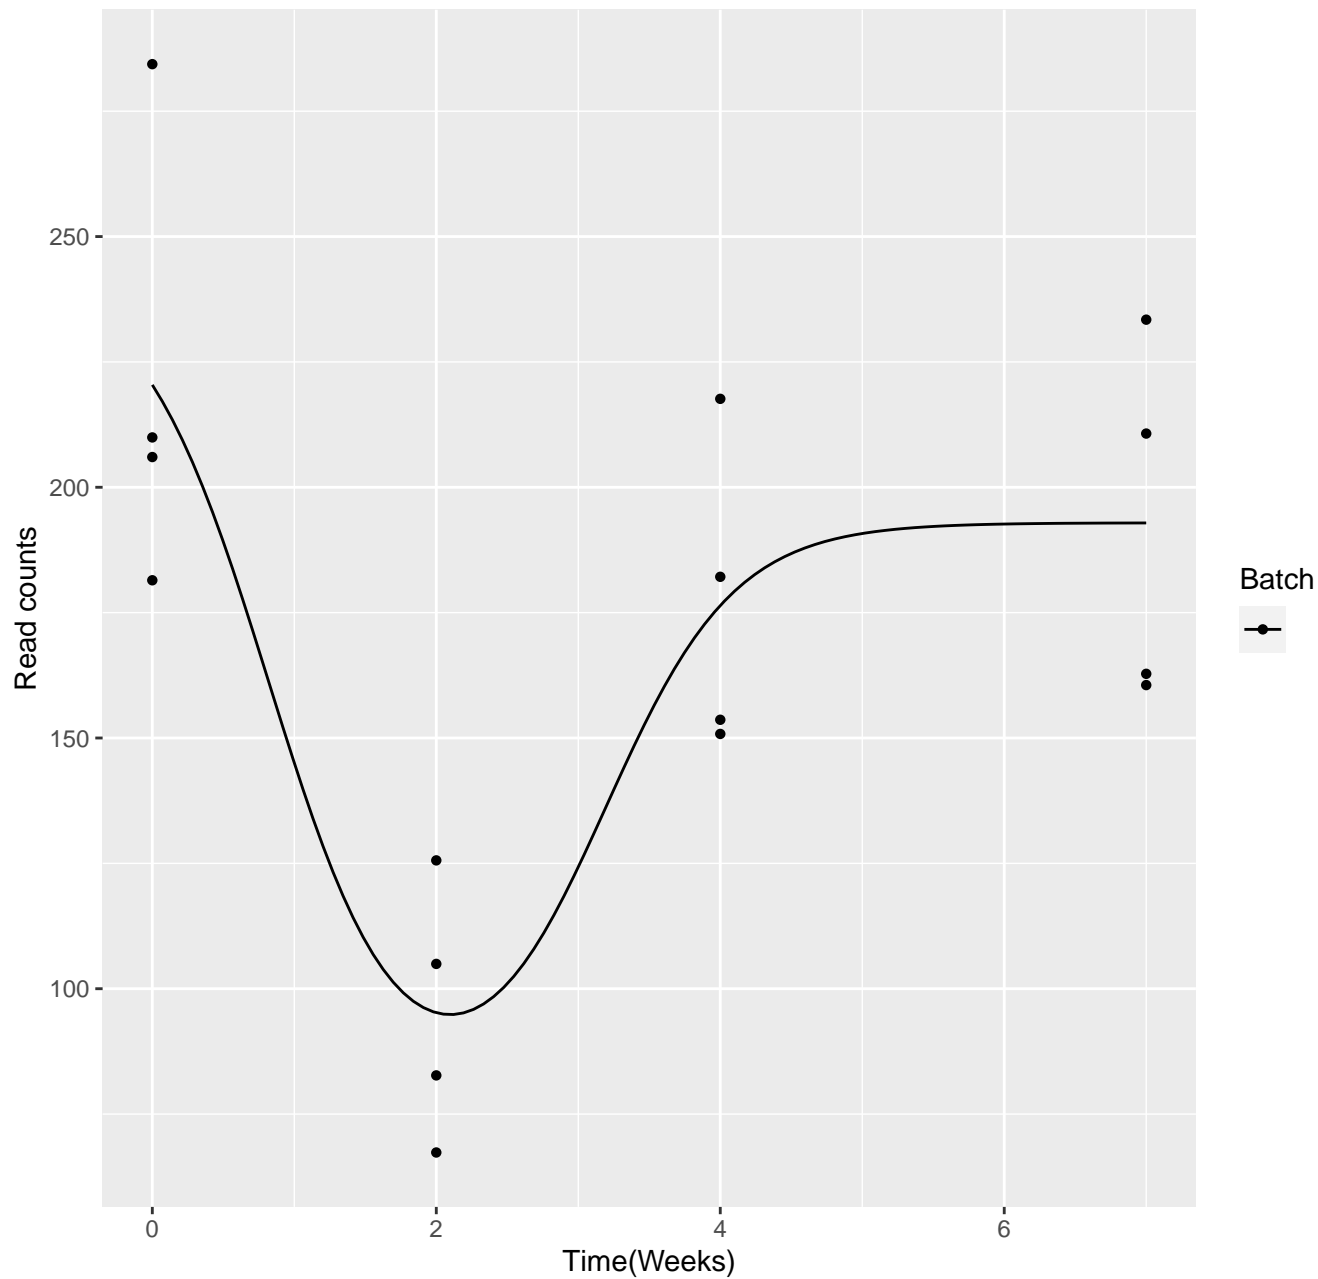

DACT1:  $\log_{10} q = -3.5$

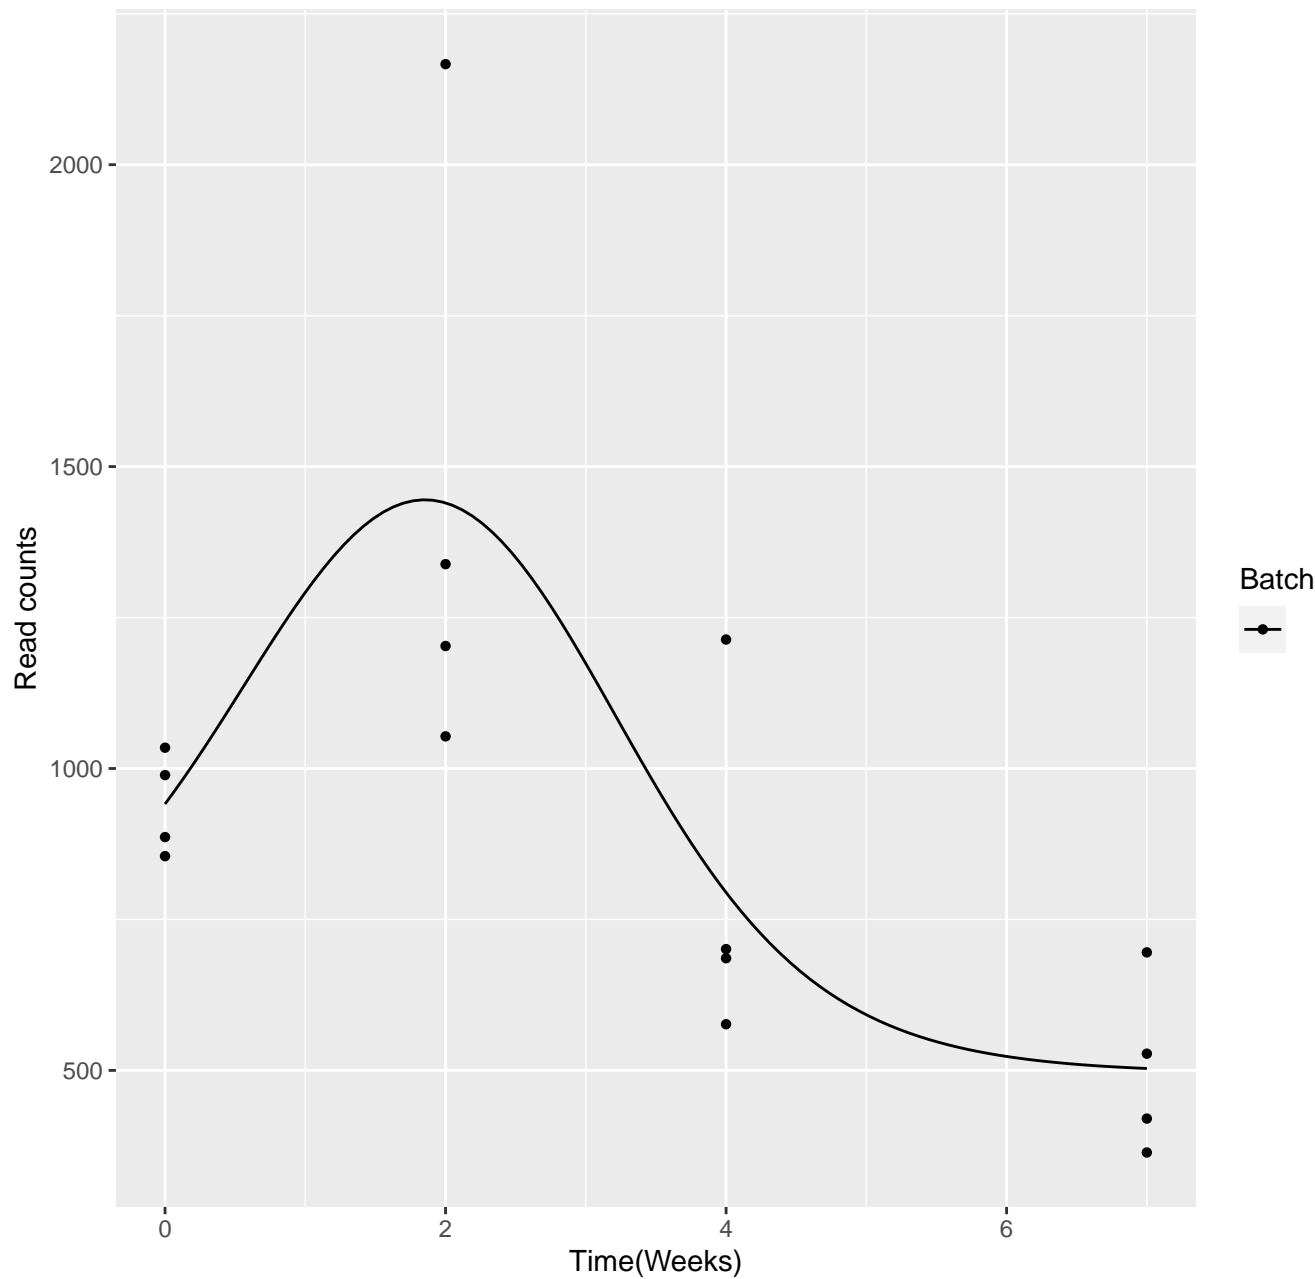

VCAM1:  $\log_{10} q = -3.5$

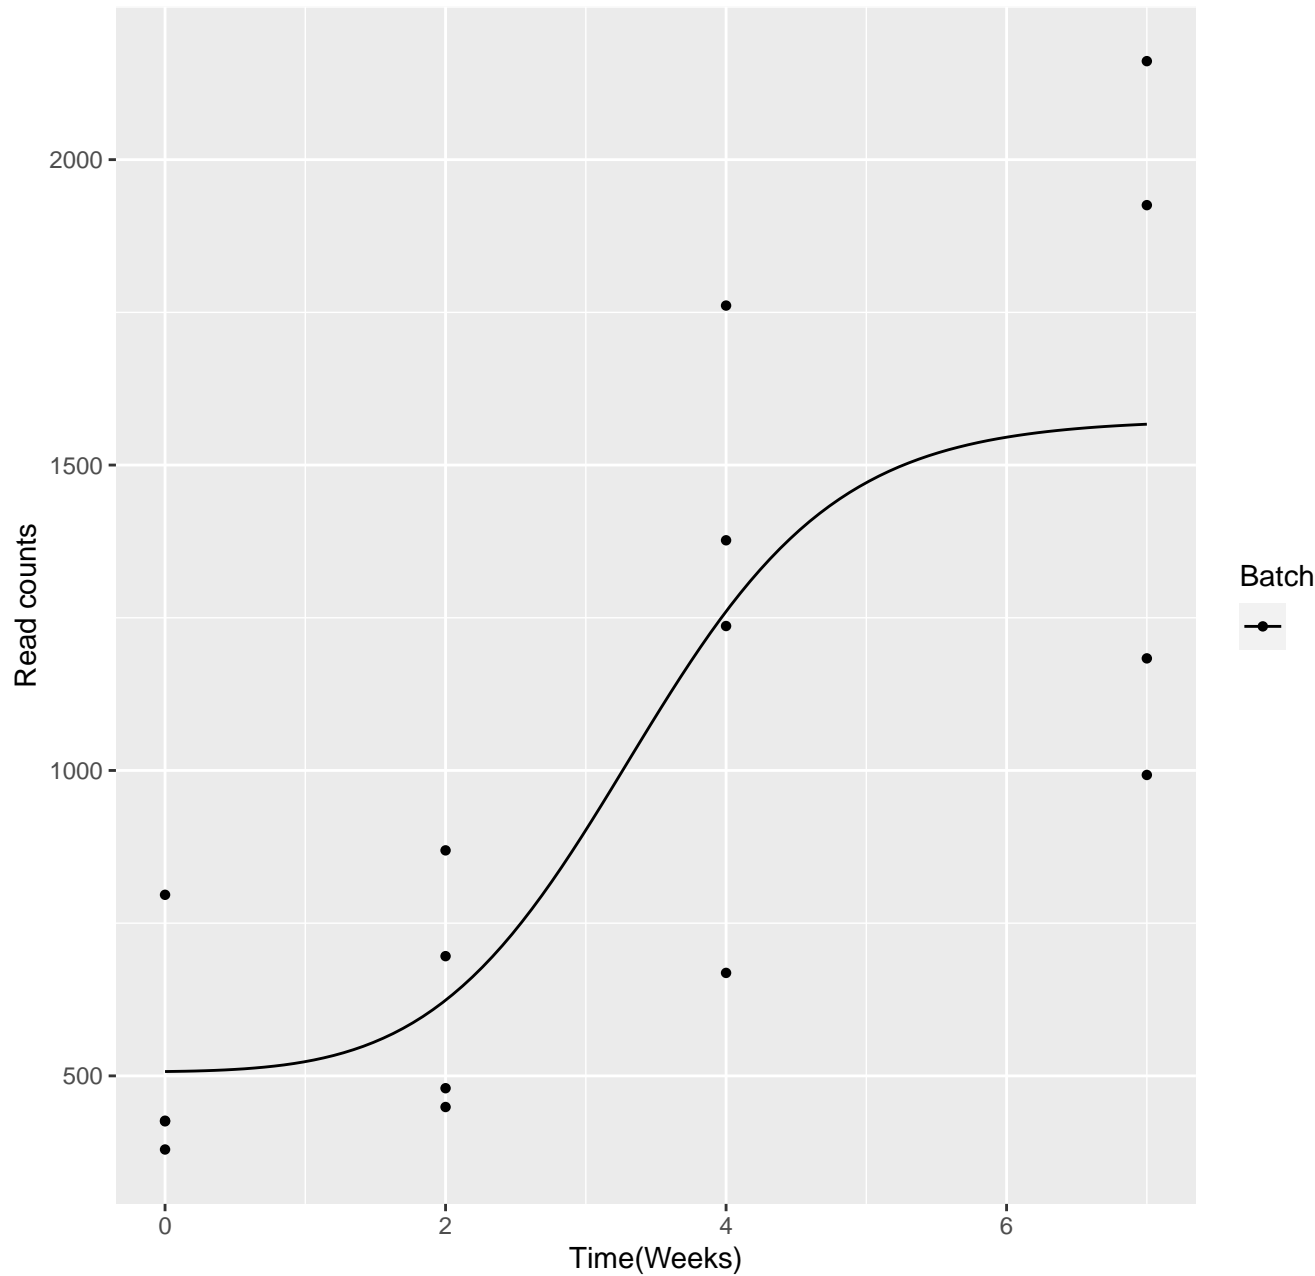

LOC100348203:  $\log_{10} q = -3.49$

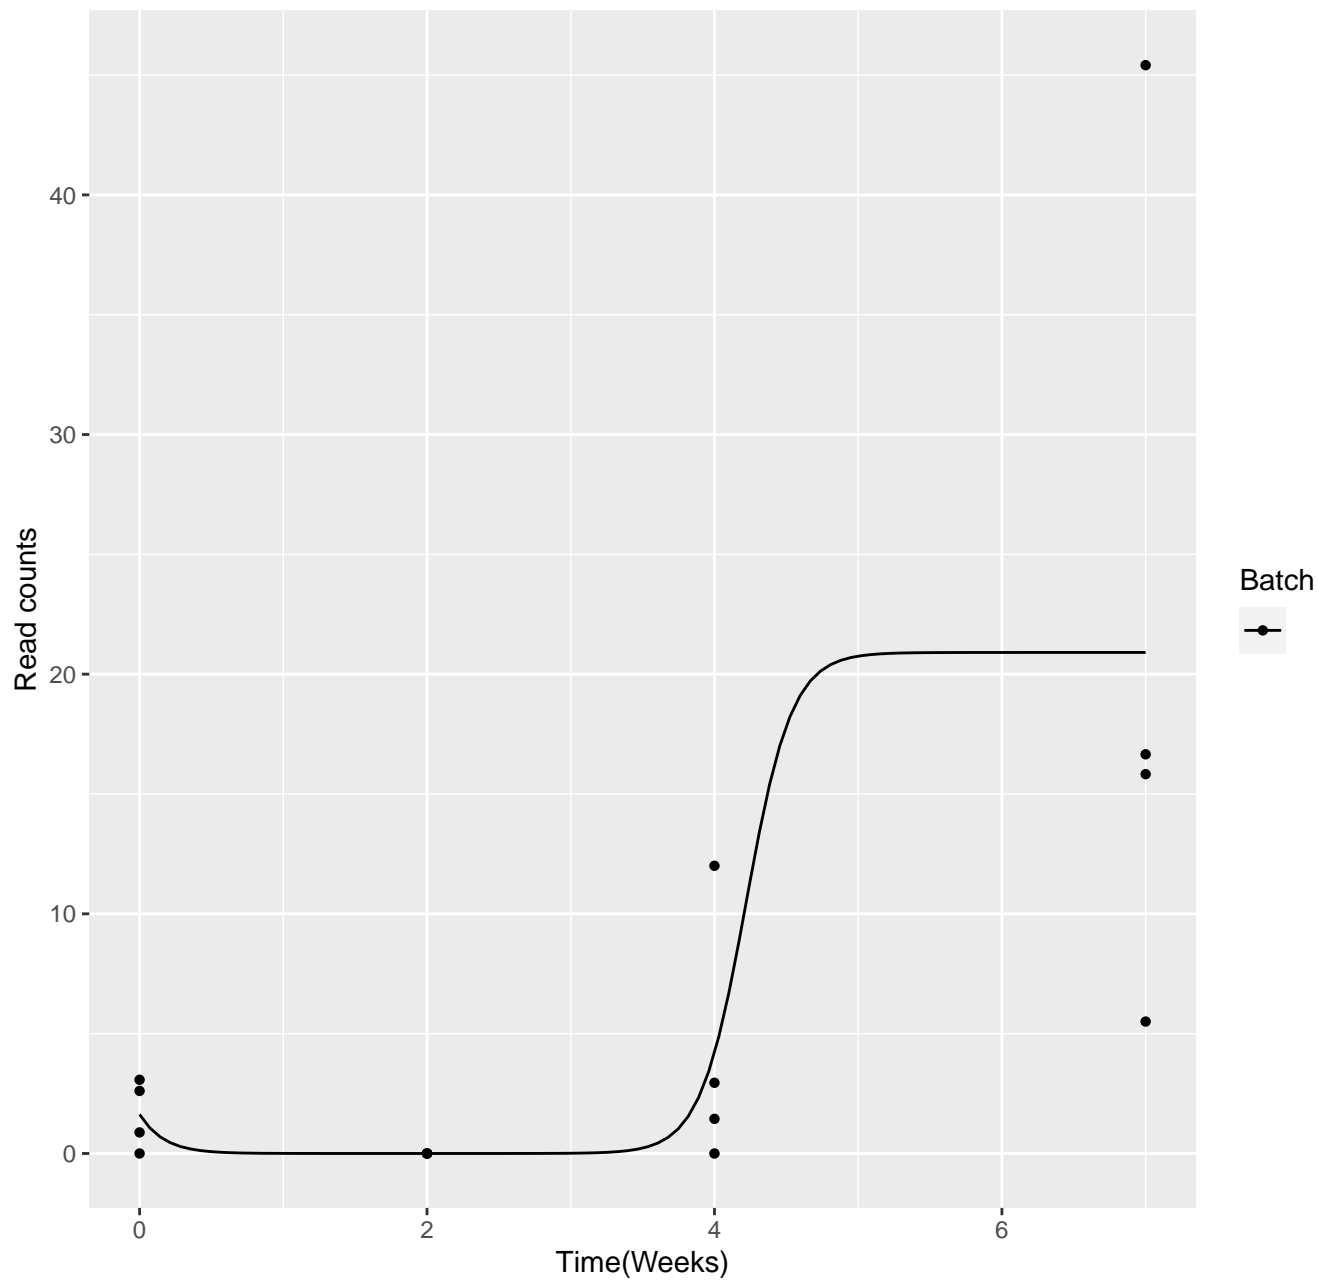



RGMA:  $\log_{10} q = -3.48$

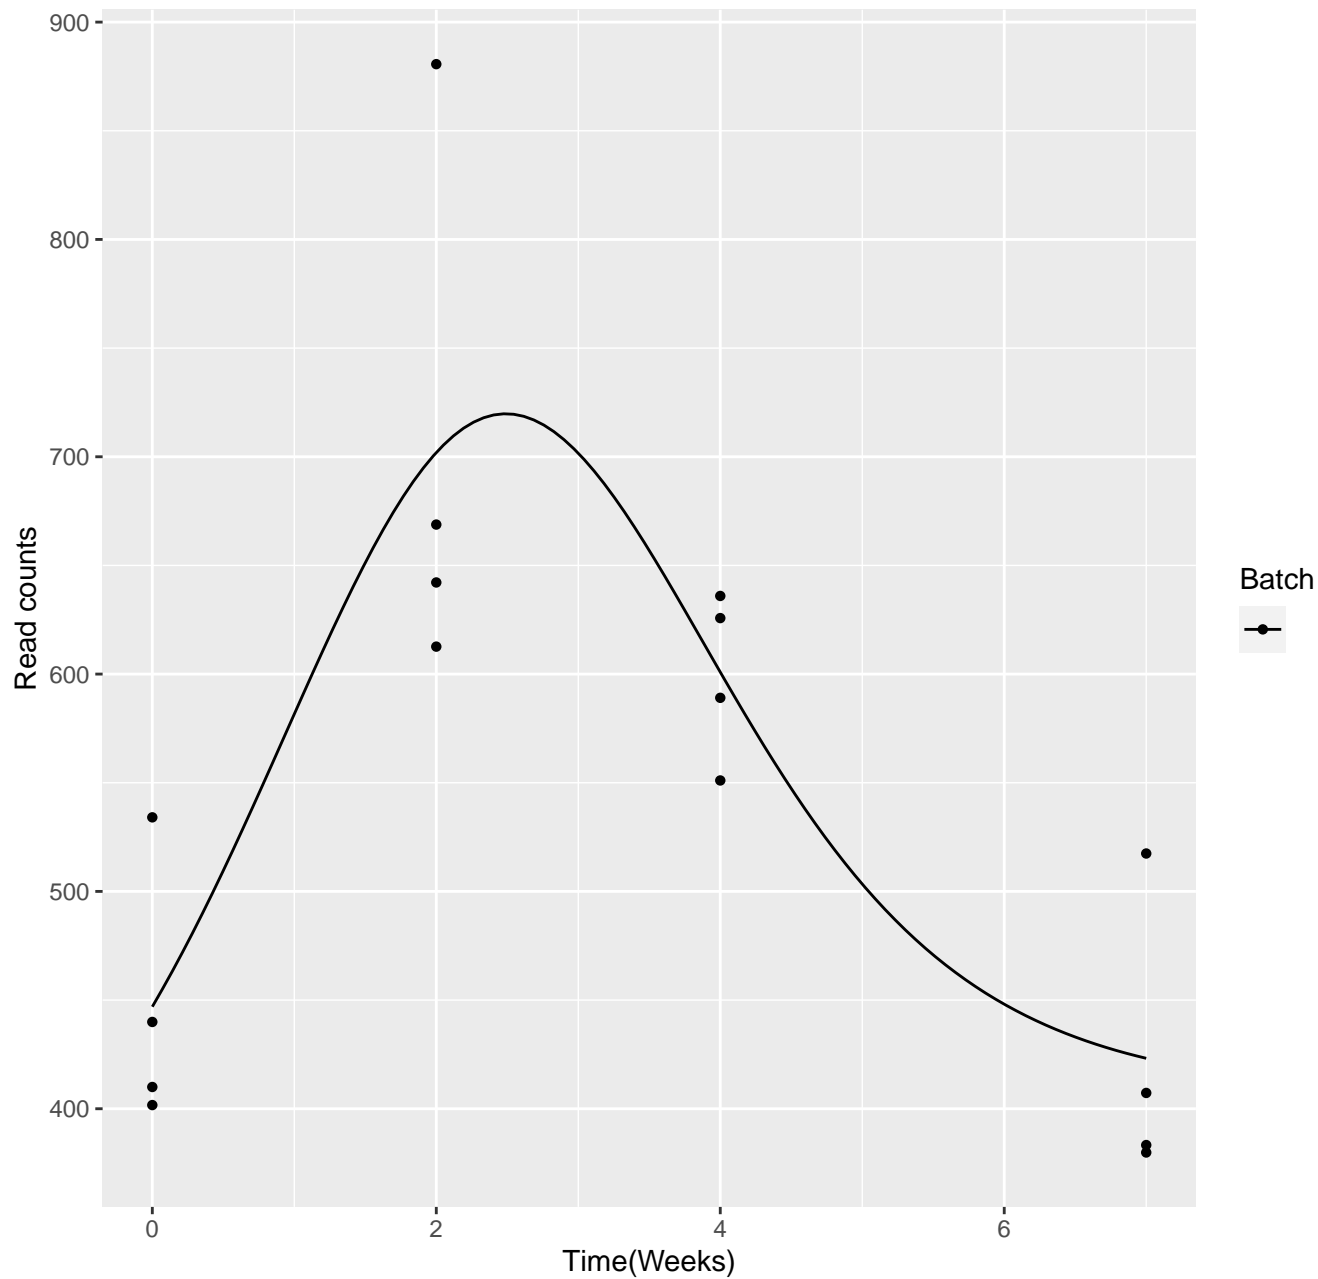

TRDN:  $\log_{10} q = -3.48$

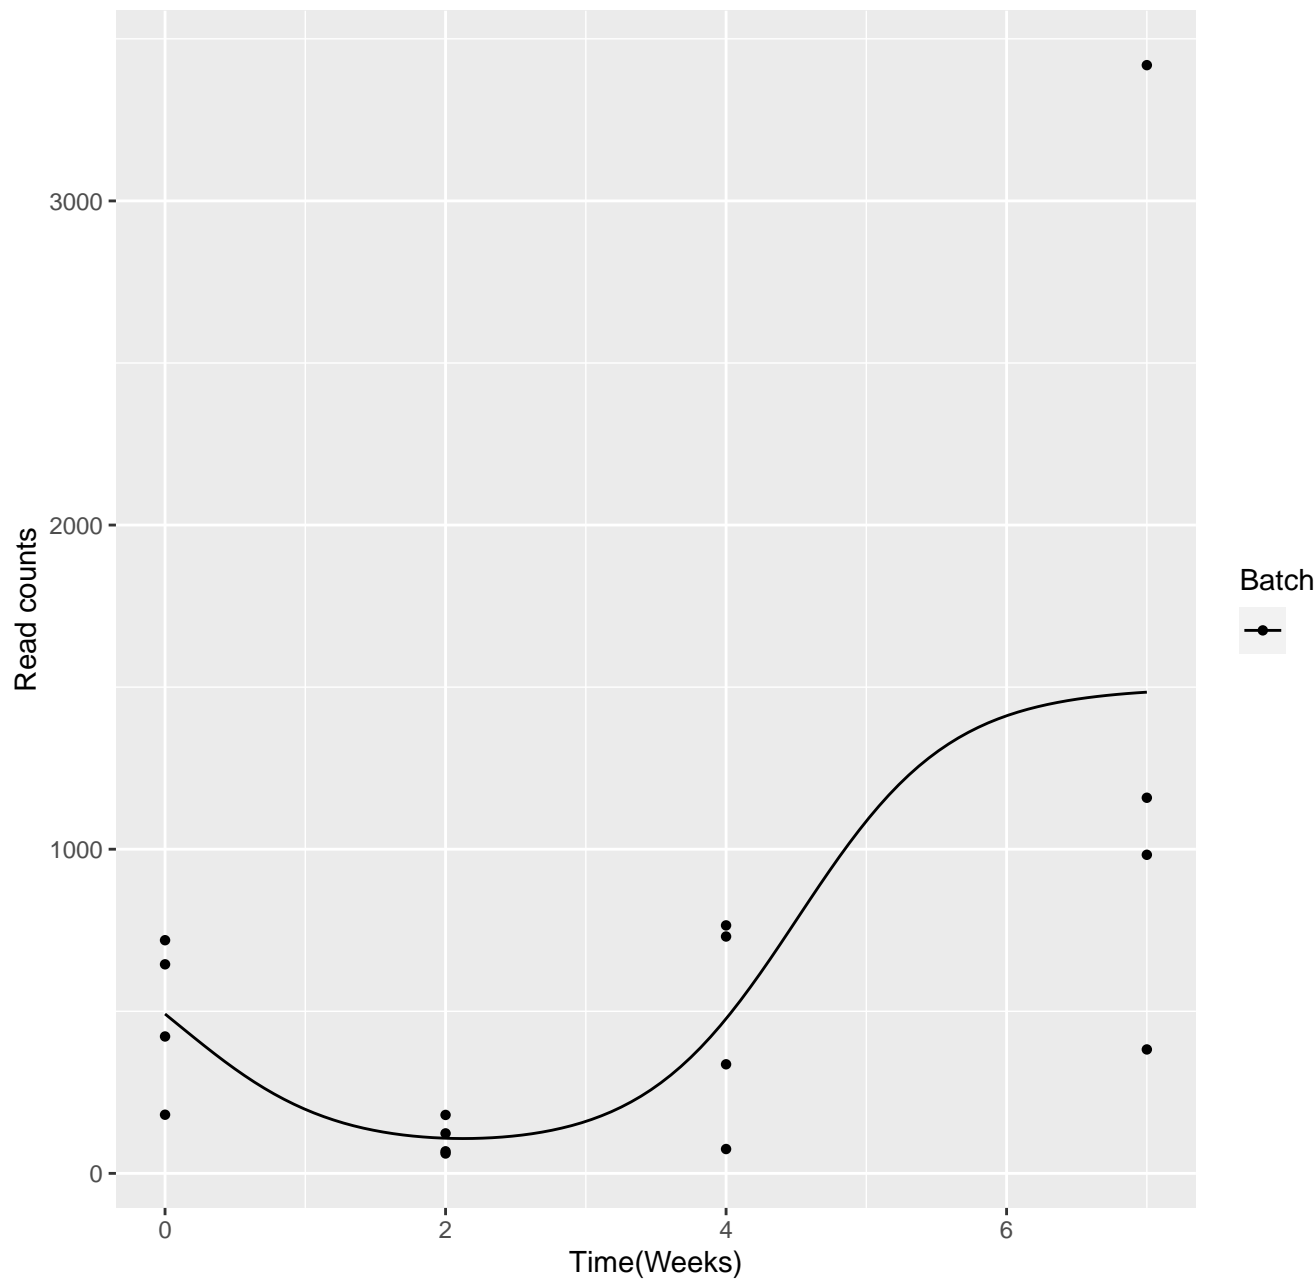

ABL1:  $\log_{10} q = -3.47$

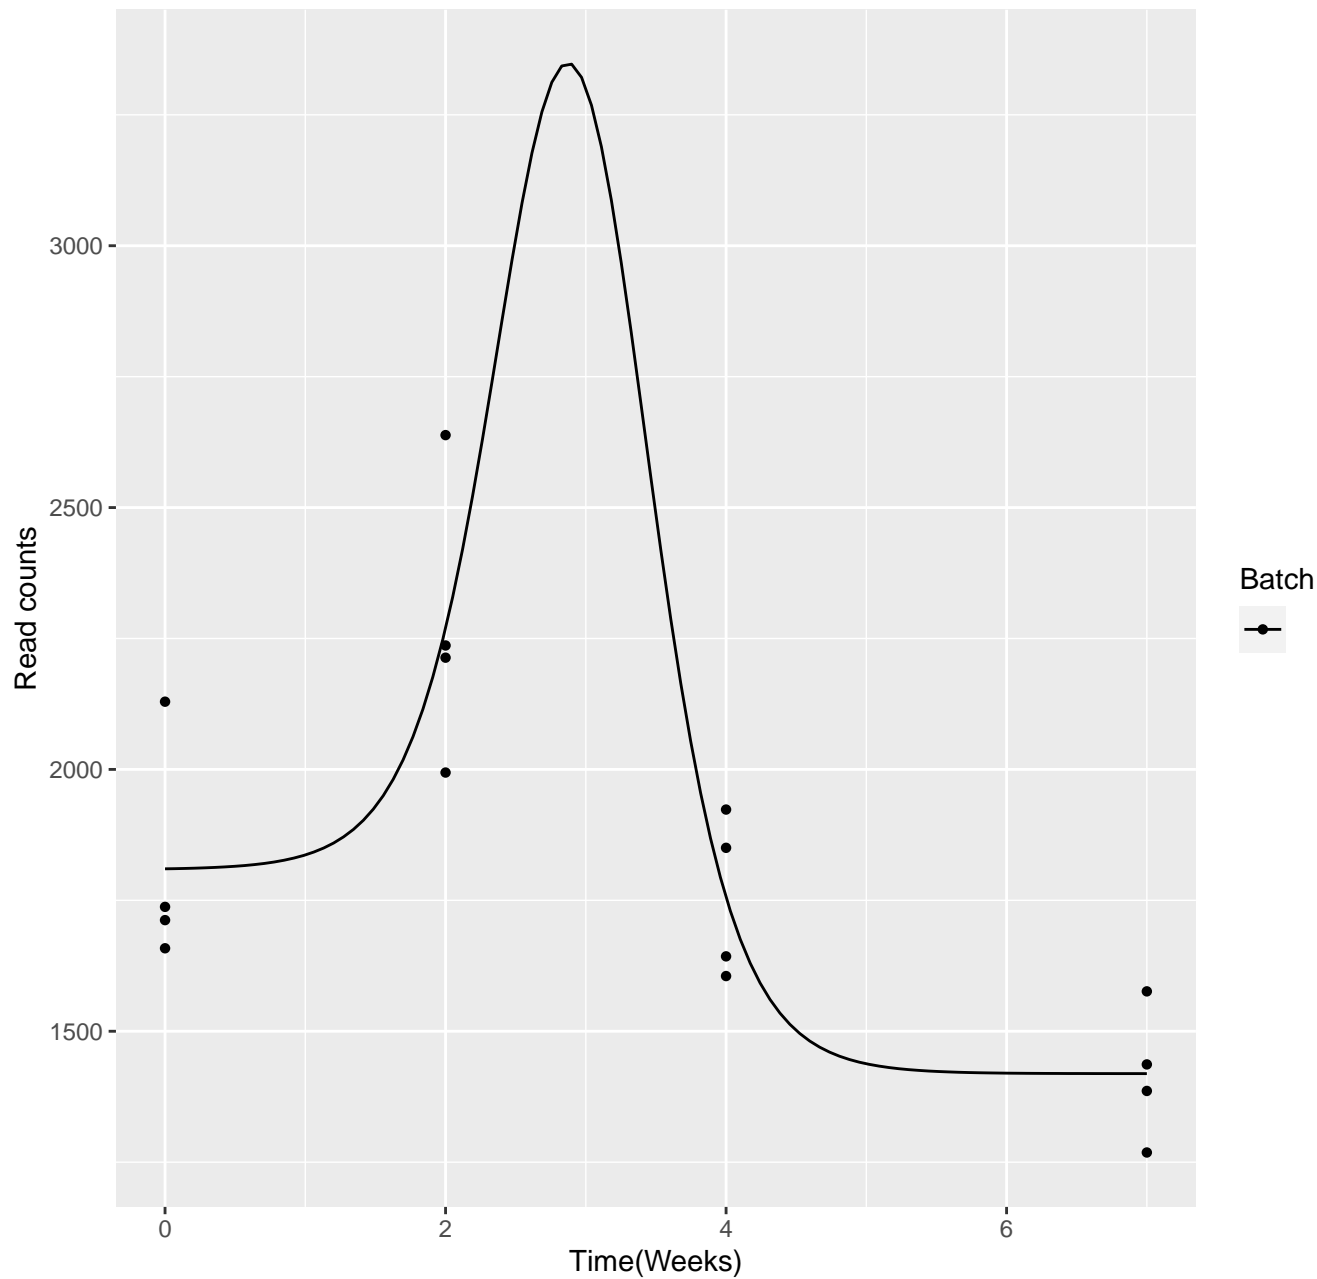

KIF4A:  $\log_{10} q = -3.47$

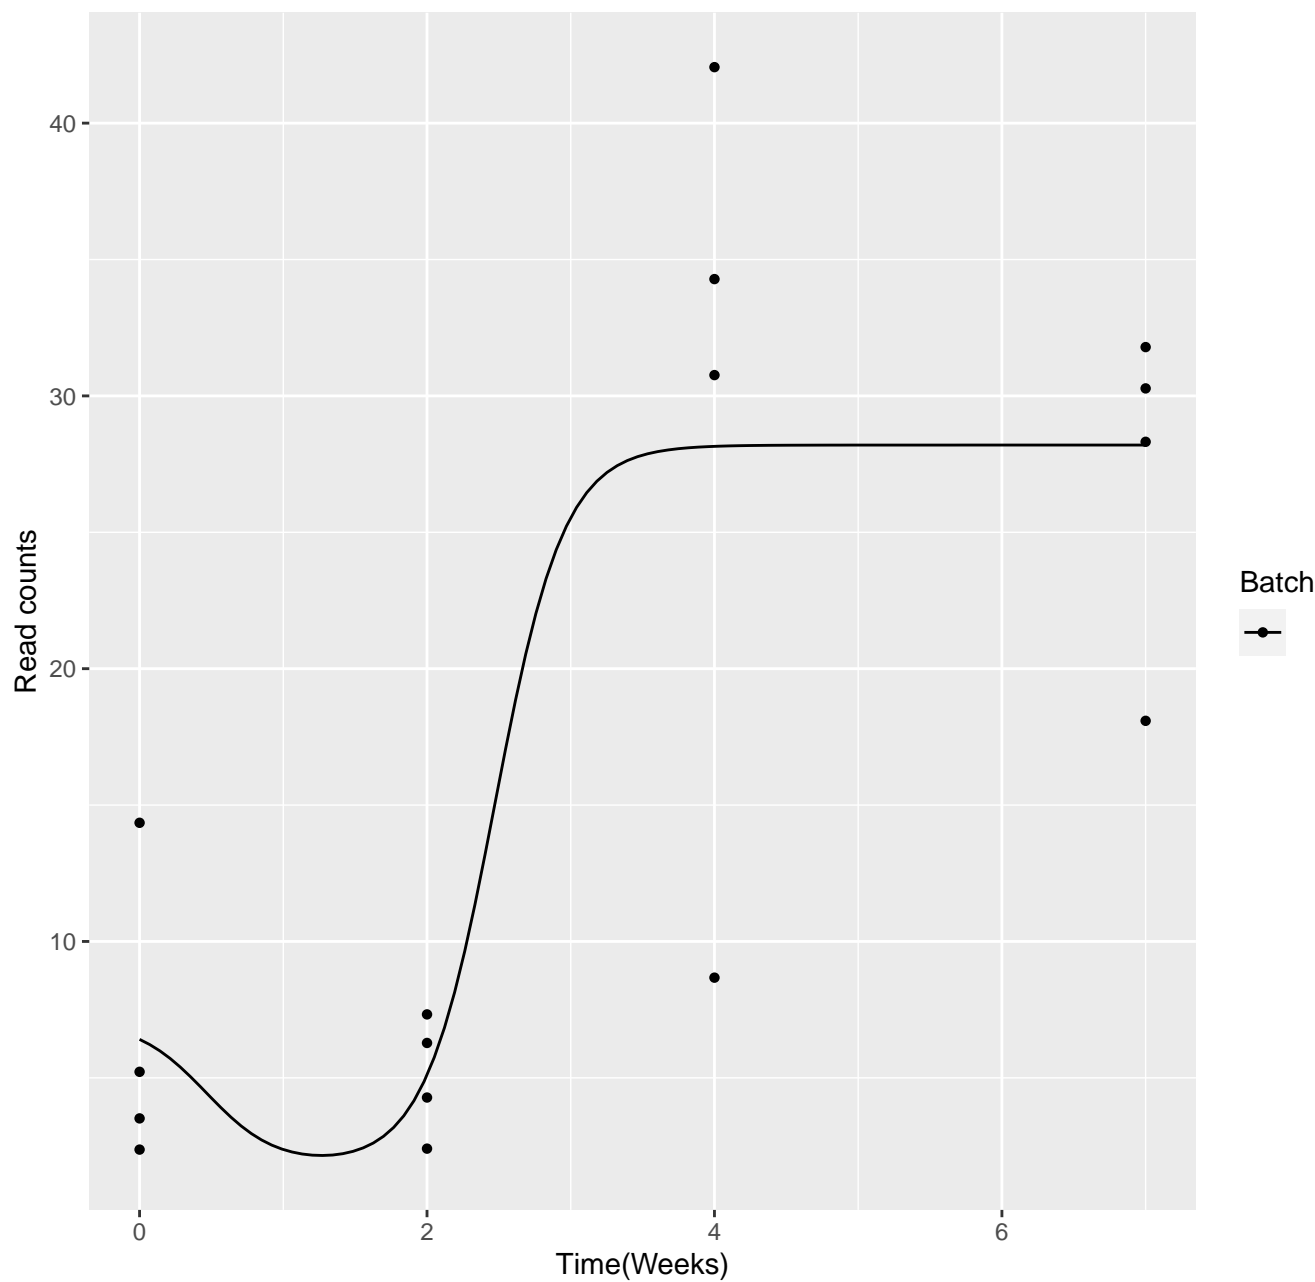

LOC103347271:  $\log_{10} q = -3.47$

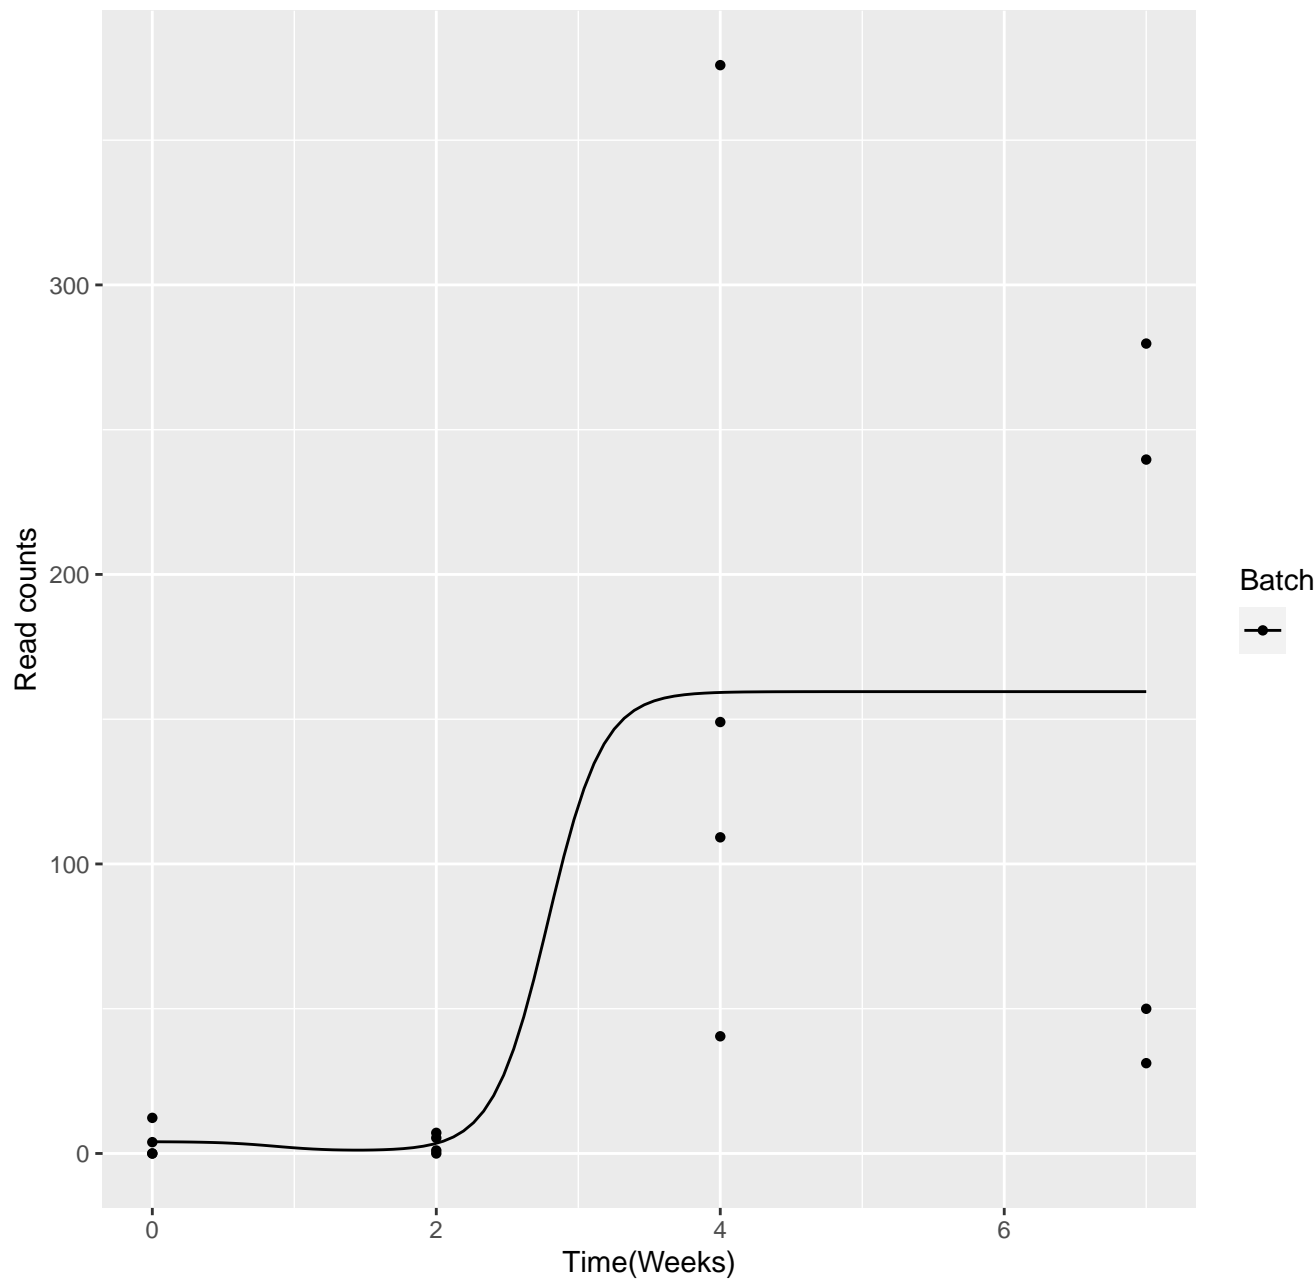

LOC100346996:  $\log_{10} q = -3.46$

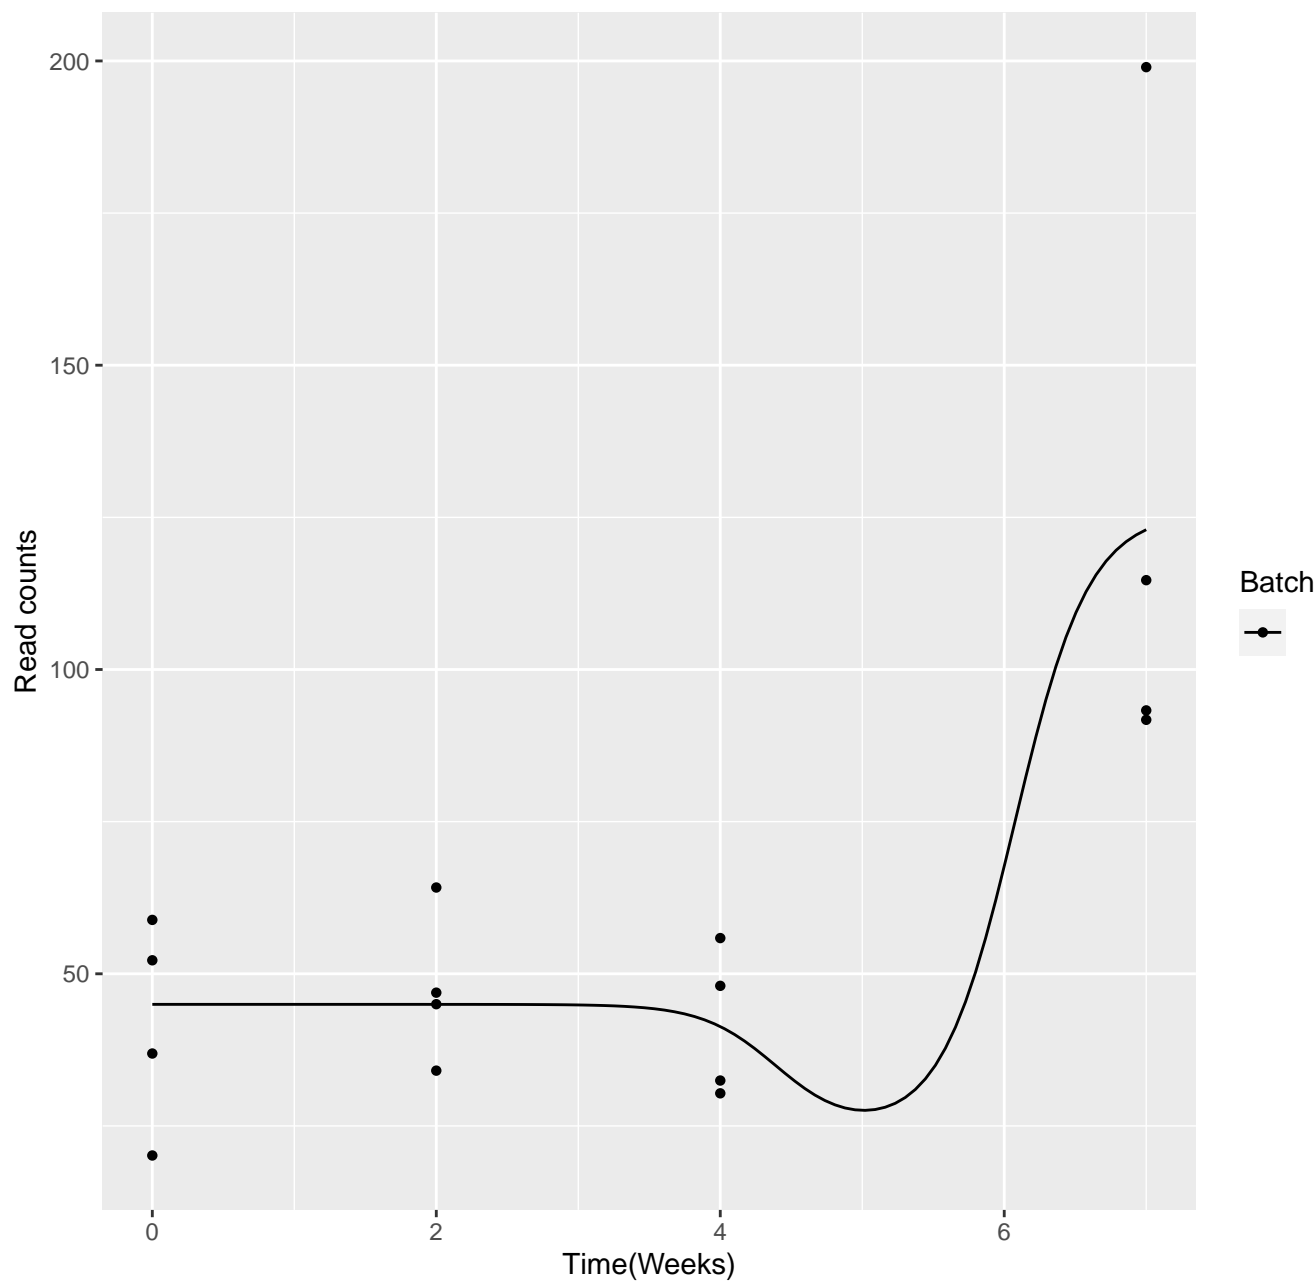

EZH2:  $\log_{10} q = -3.46$

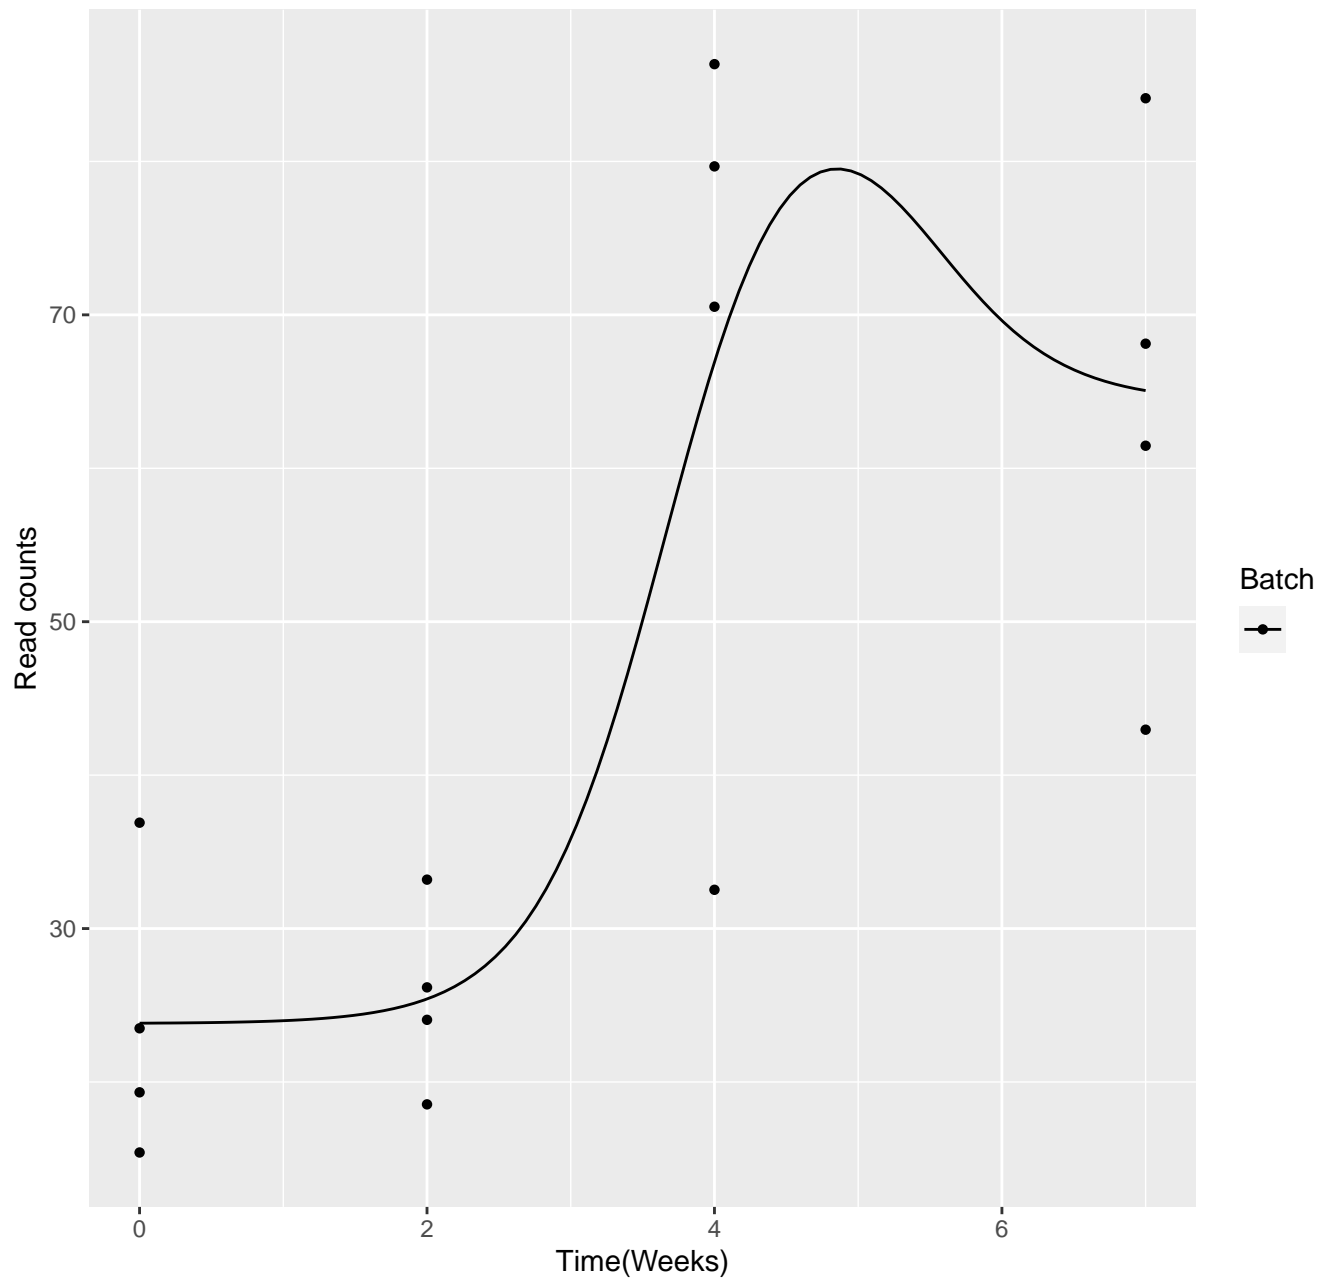

HIVEP1:  $\log_{10} q = -3.46$

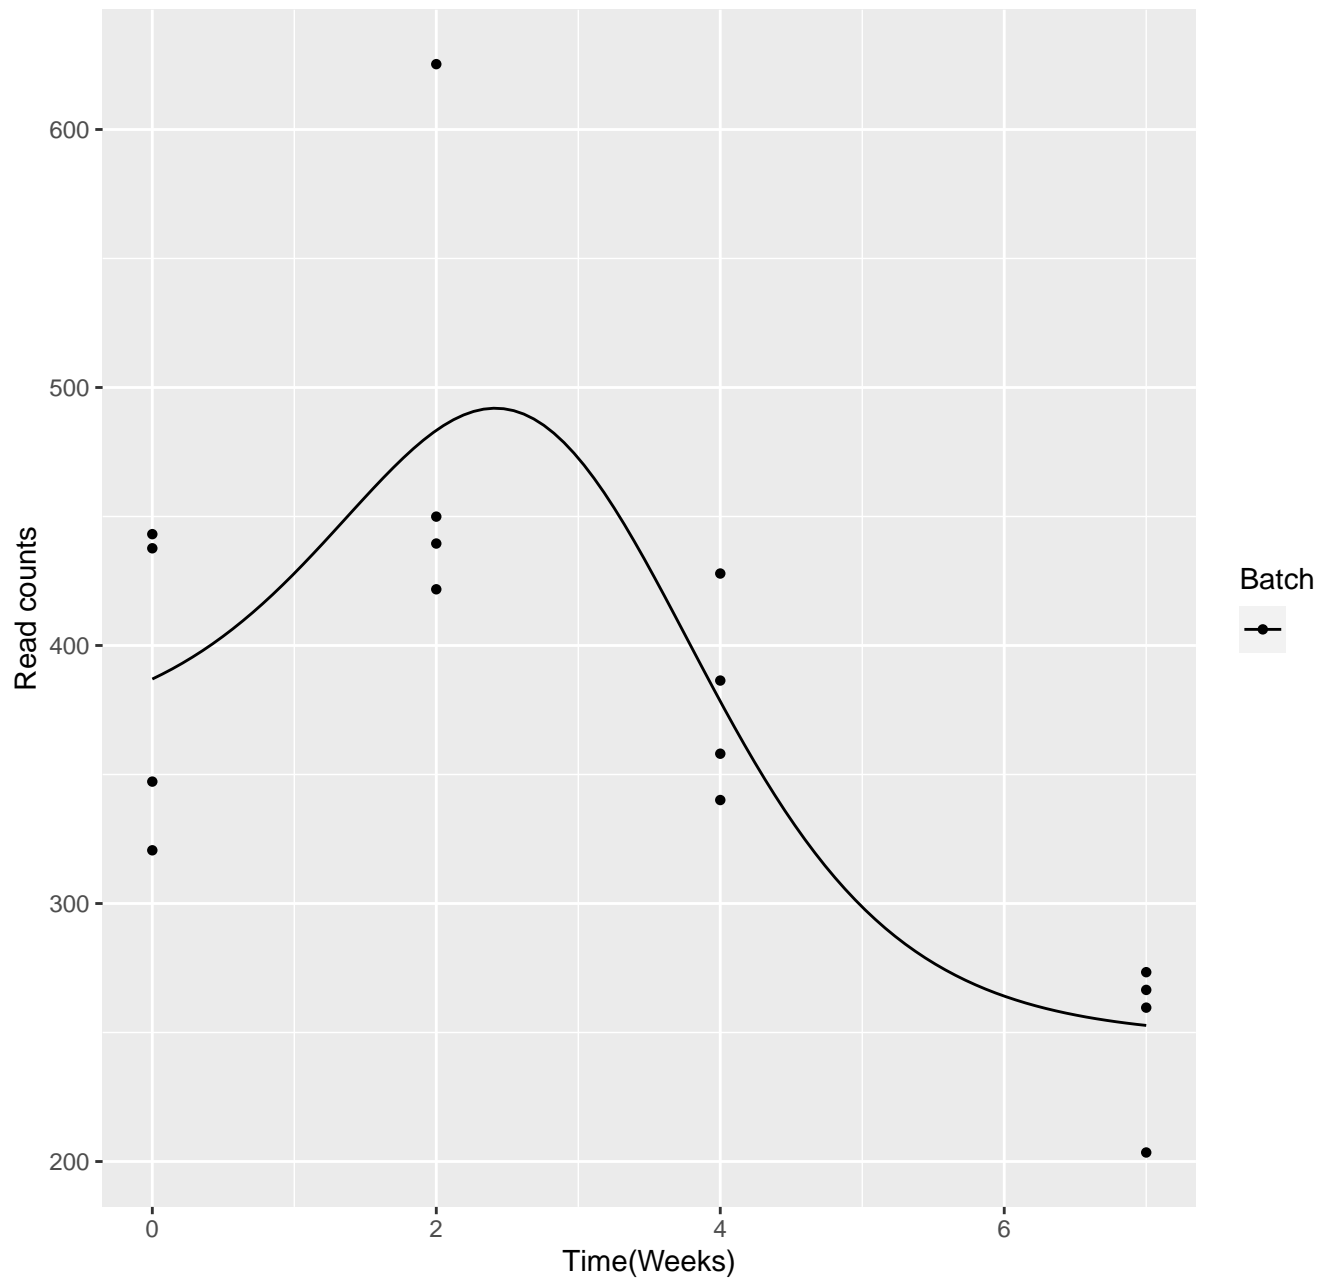



MYOCD:  $\log_{10} q = -3.46$

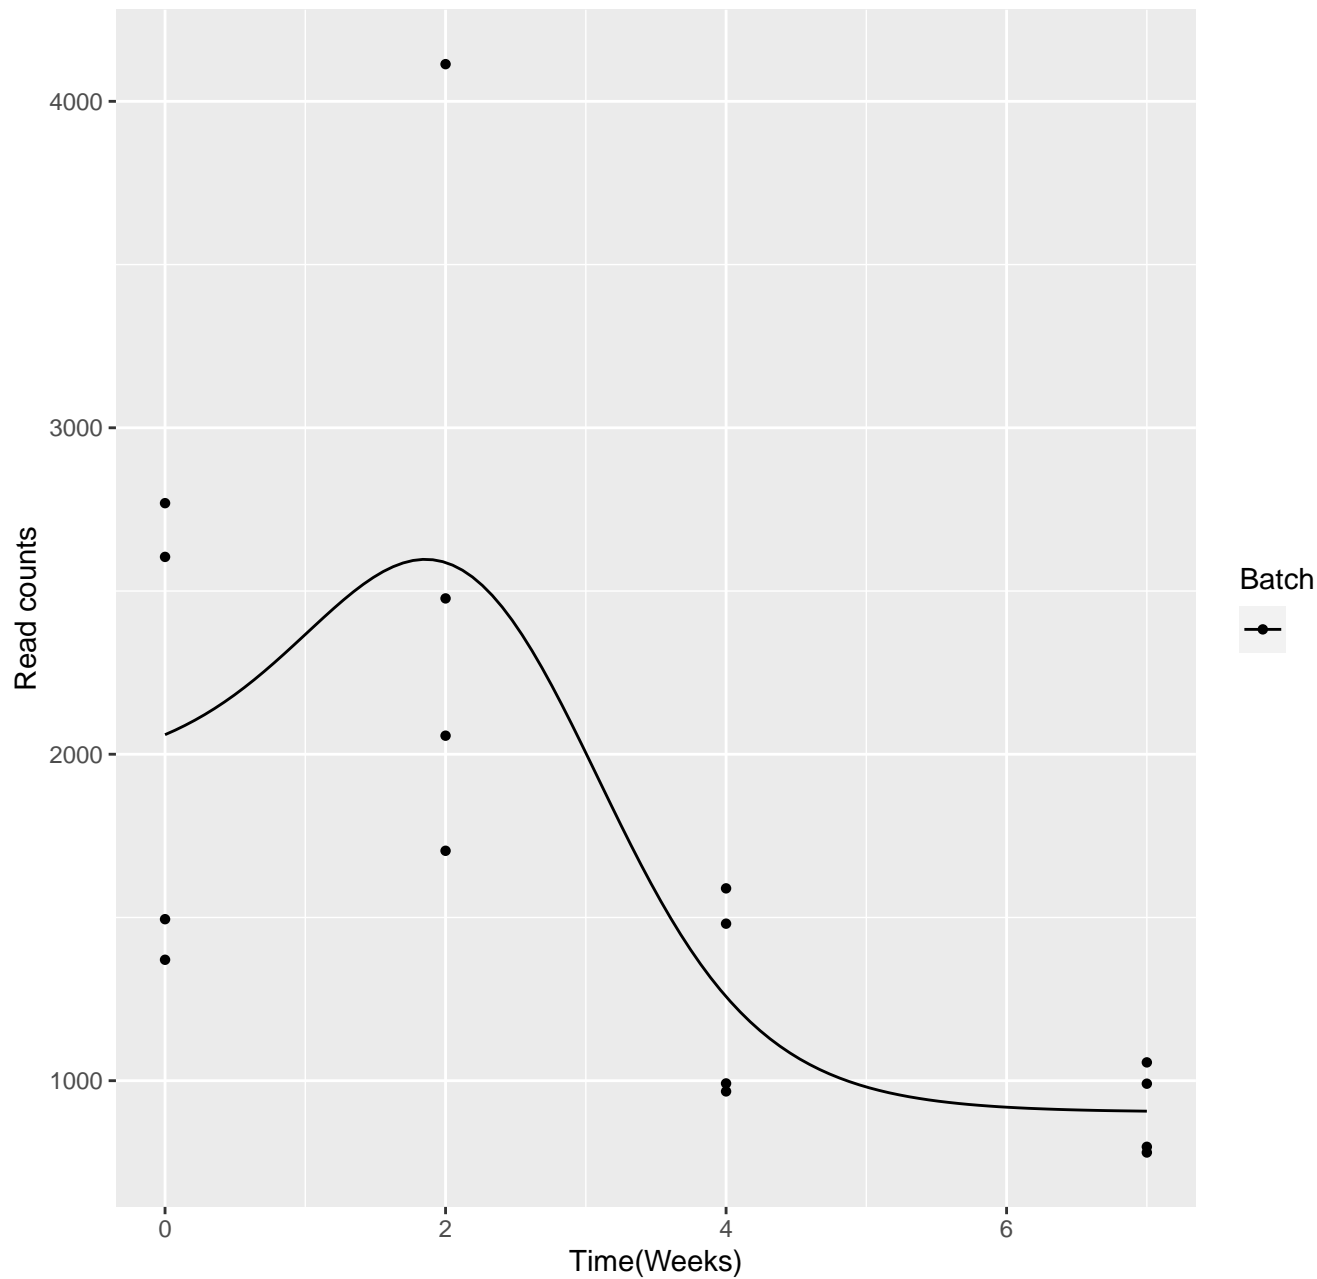

LOC127488889:  $\log_{10} q = -3.45$

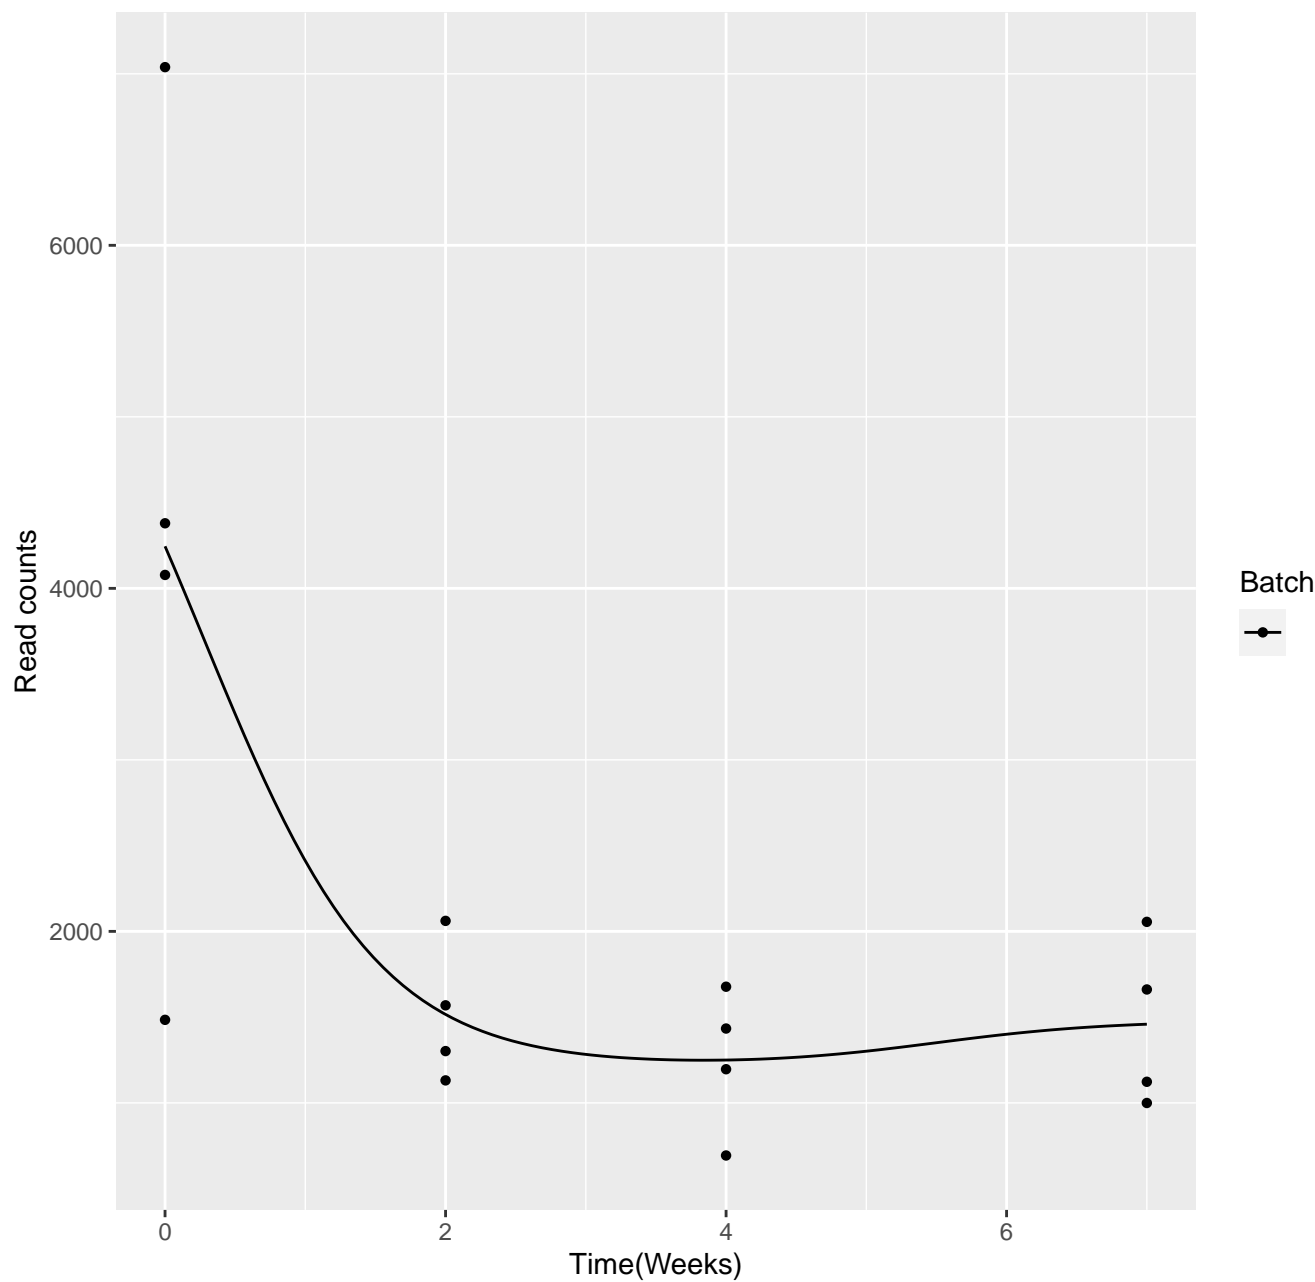

CLDN7:  $\log_{10} q = -3.45$

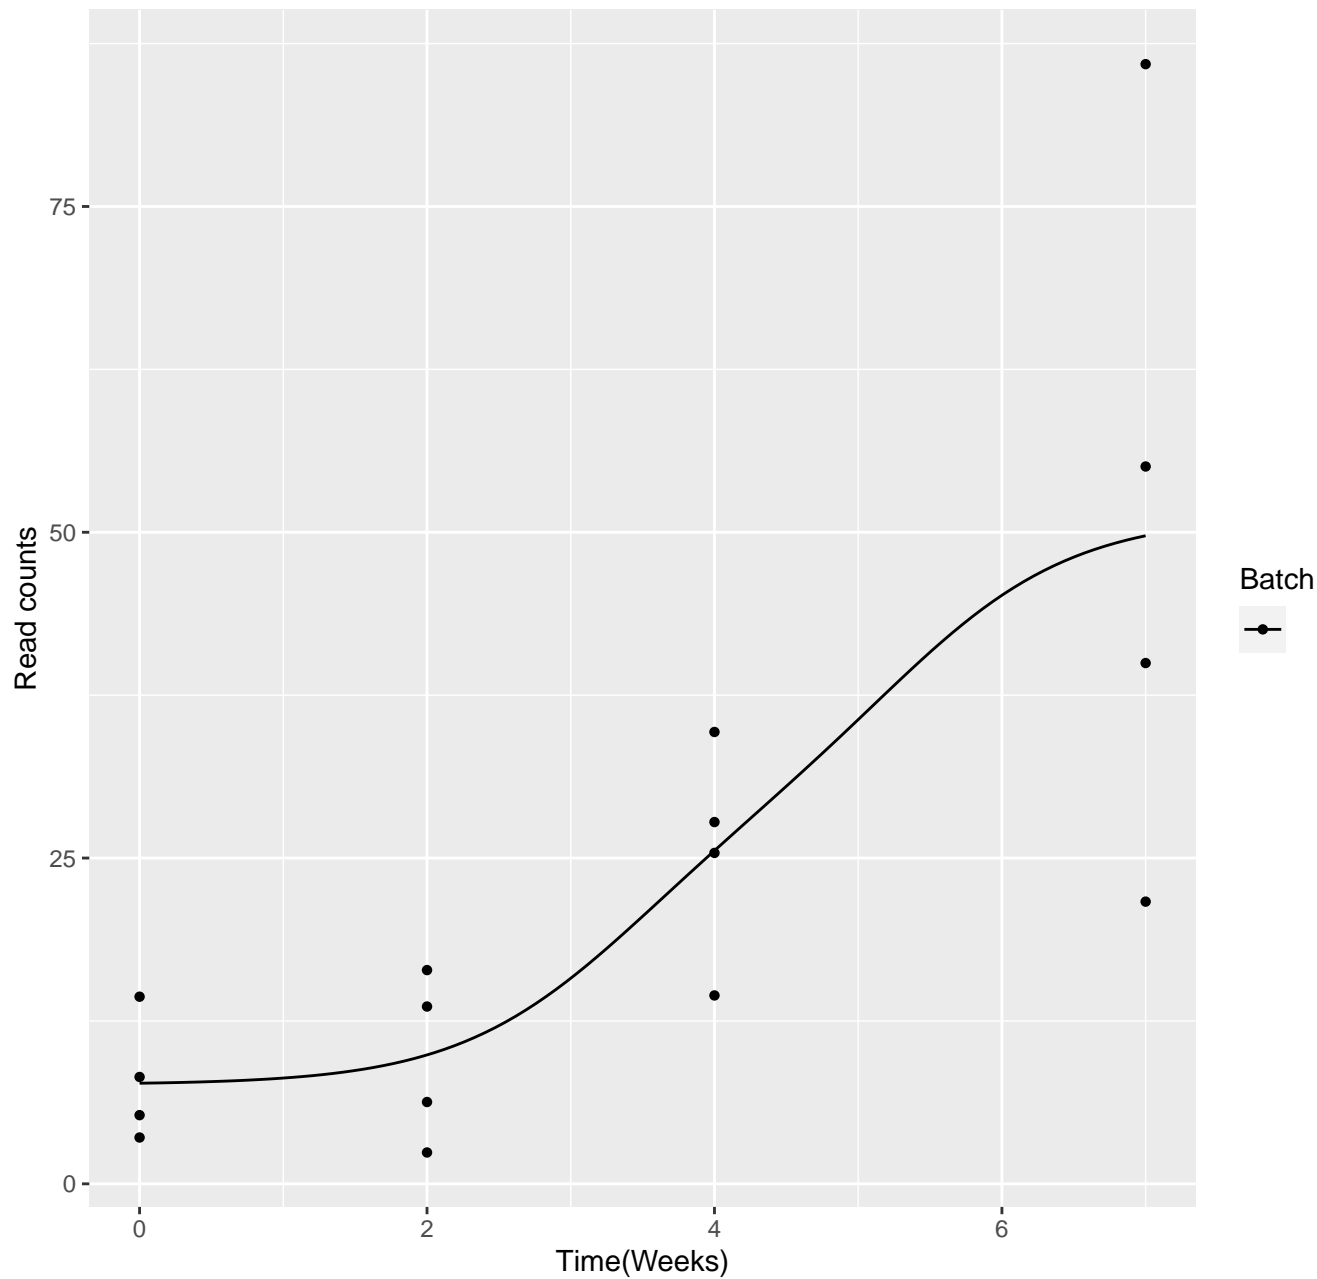

FAT4:  $\log_{10} q = -3.45$

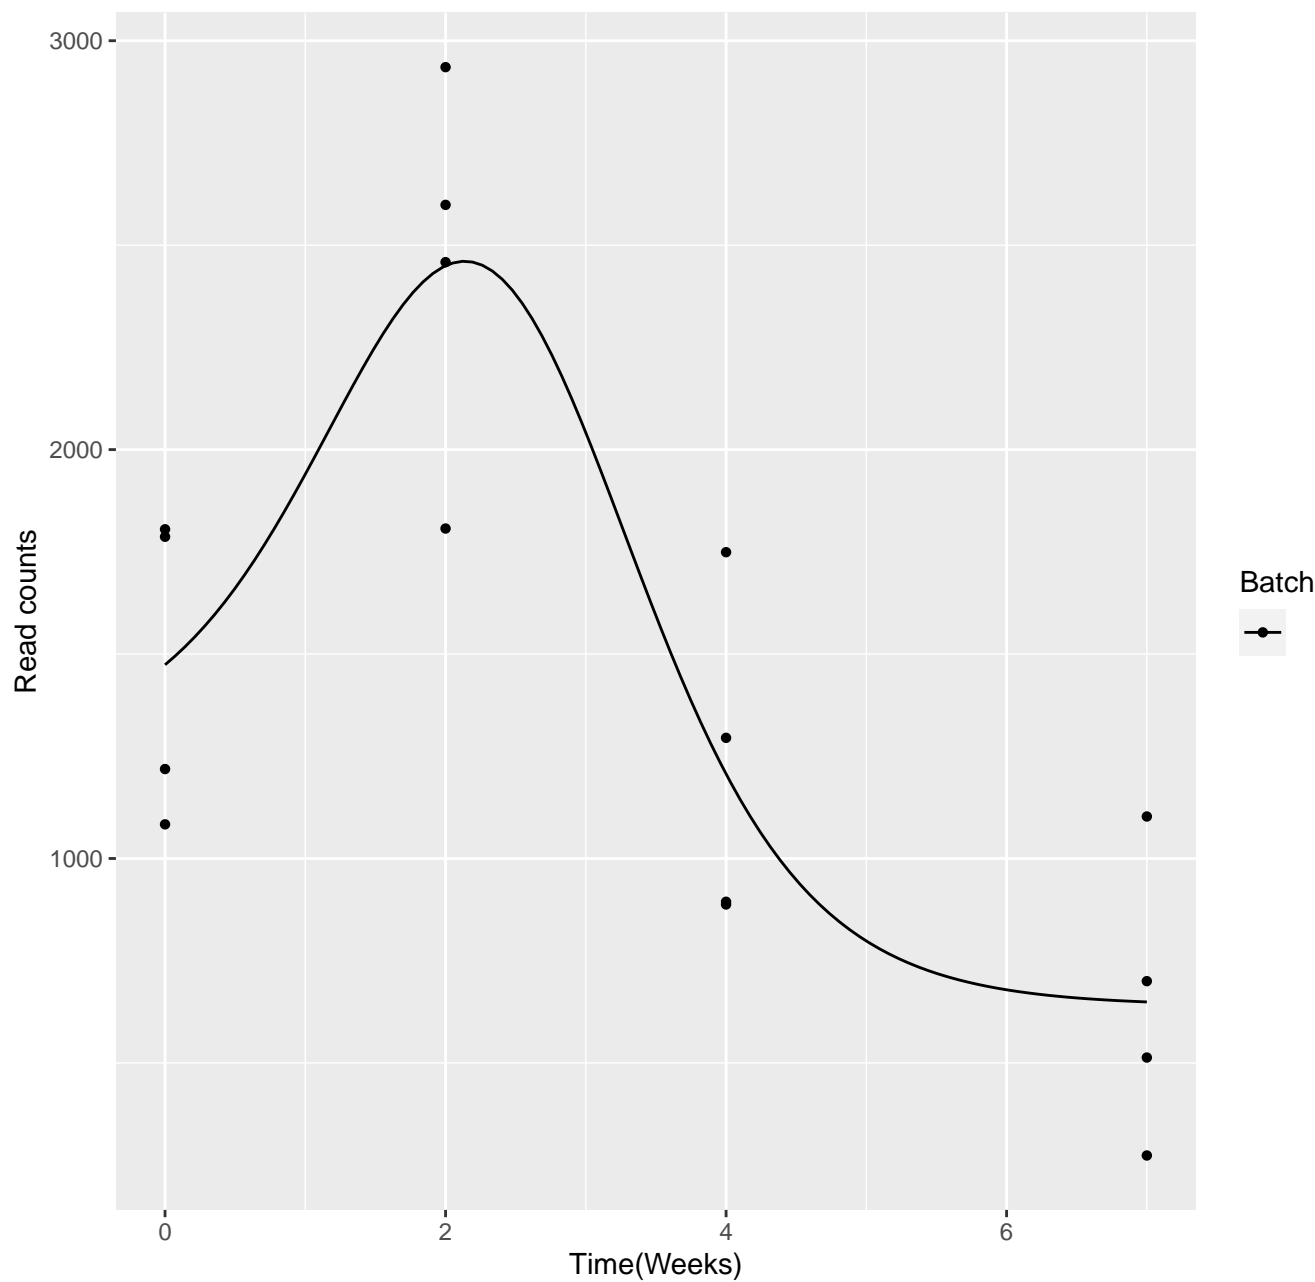

TICAM2:  $\log_{10} q = -3.45$

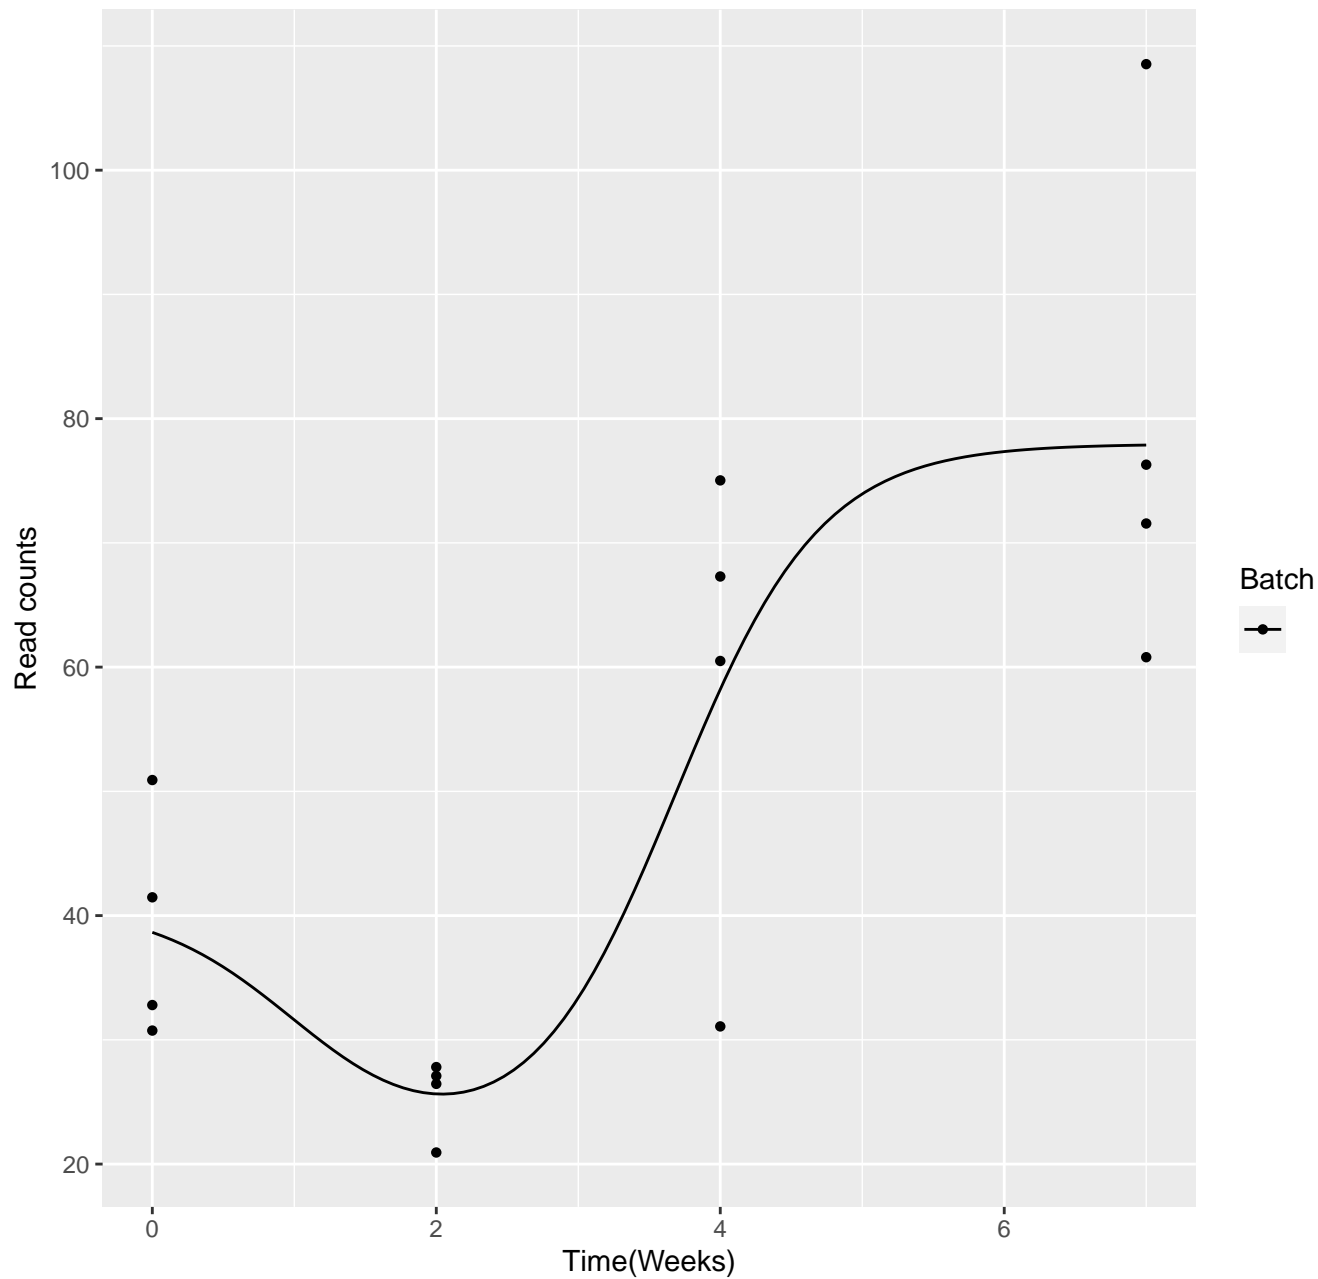

CSF1R:  $\log_{10} q = -3.44$

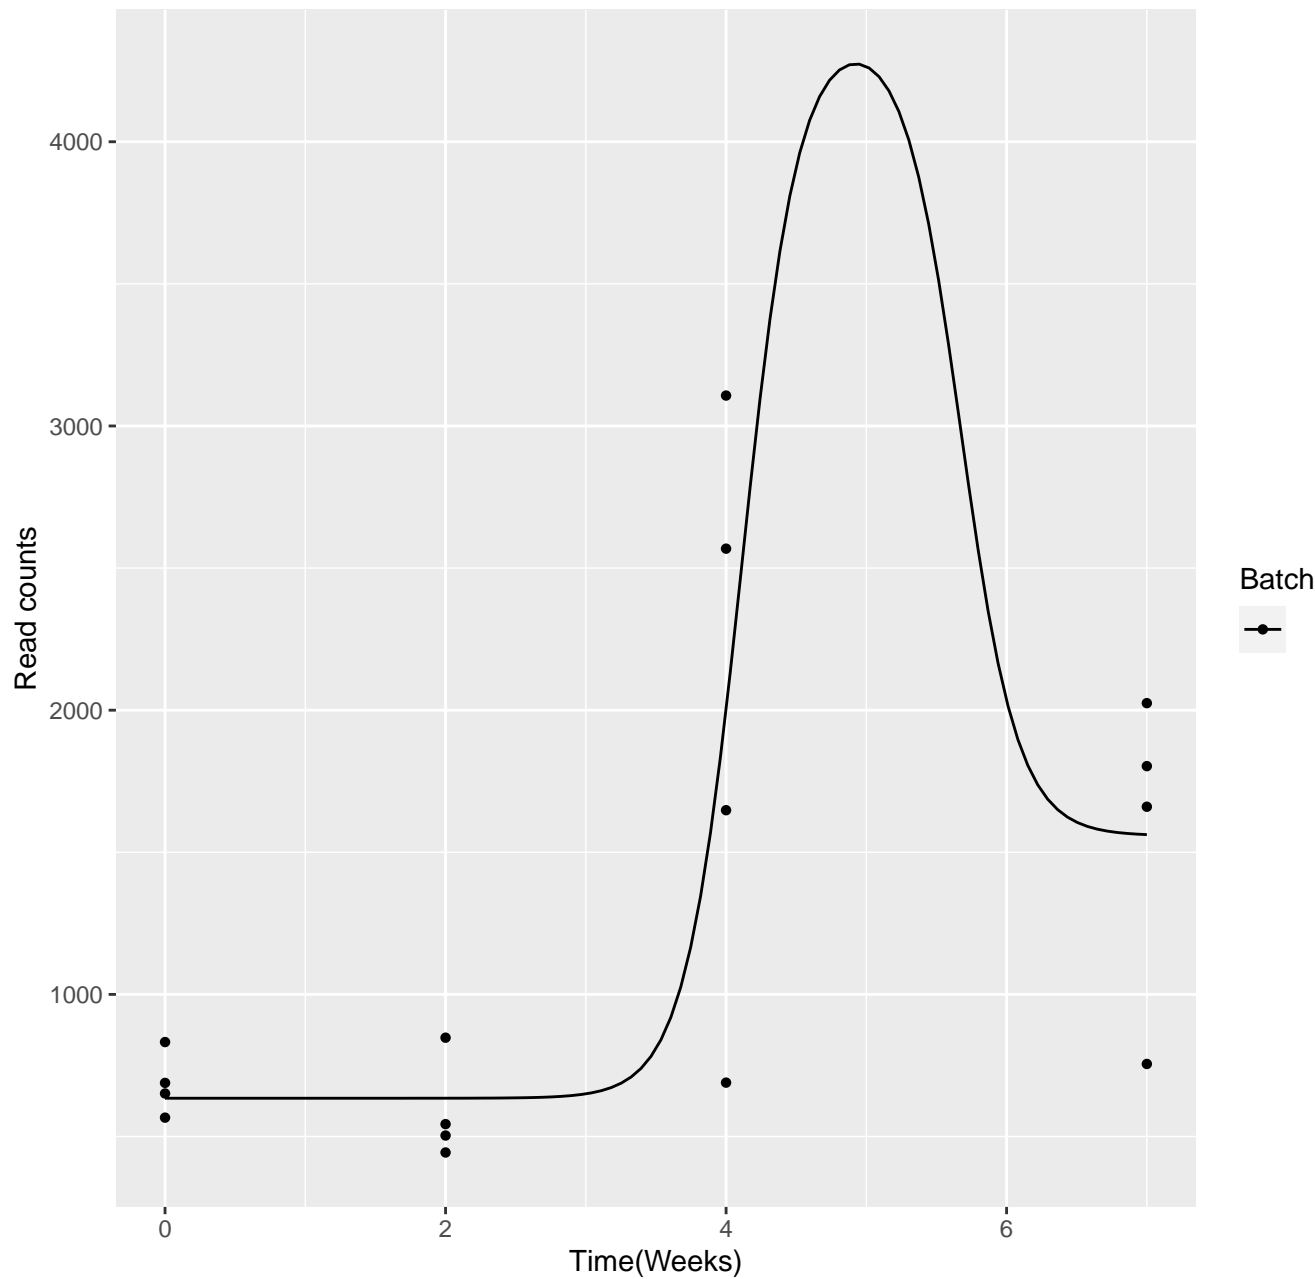

LOC127488898:  $\log_{10} q = -3.44$

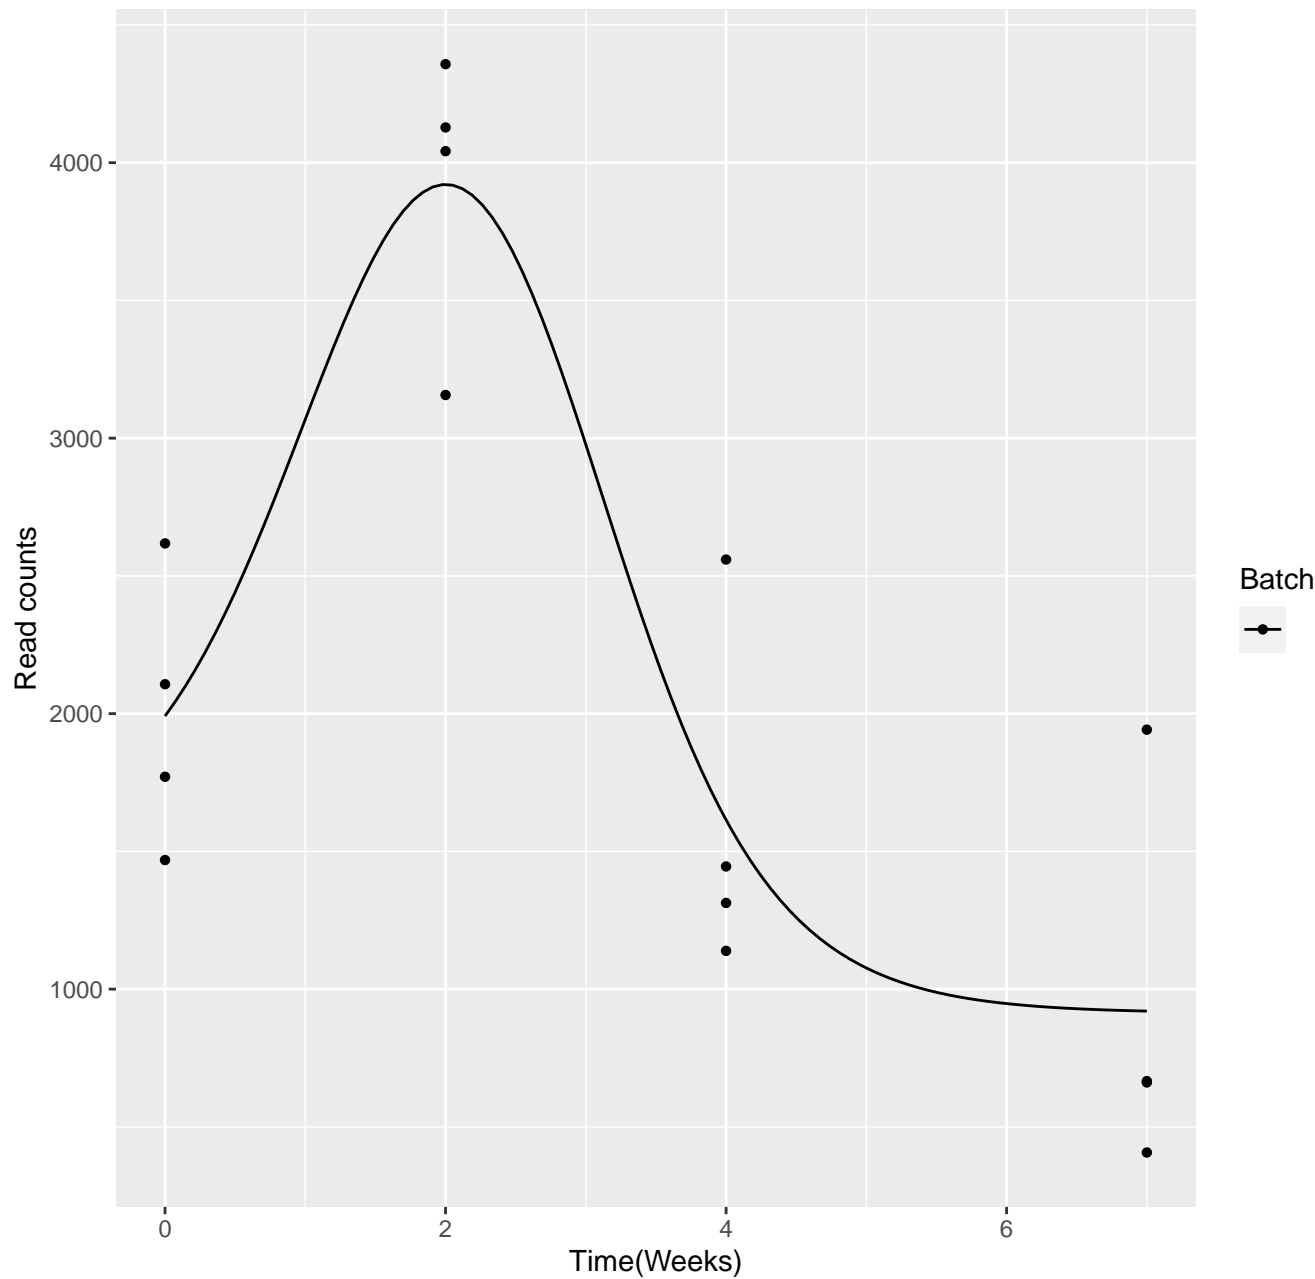

SHKBP1:  $\log_{10} q = -3.44$

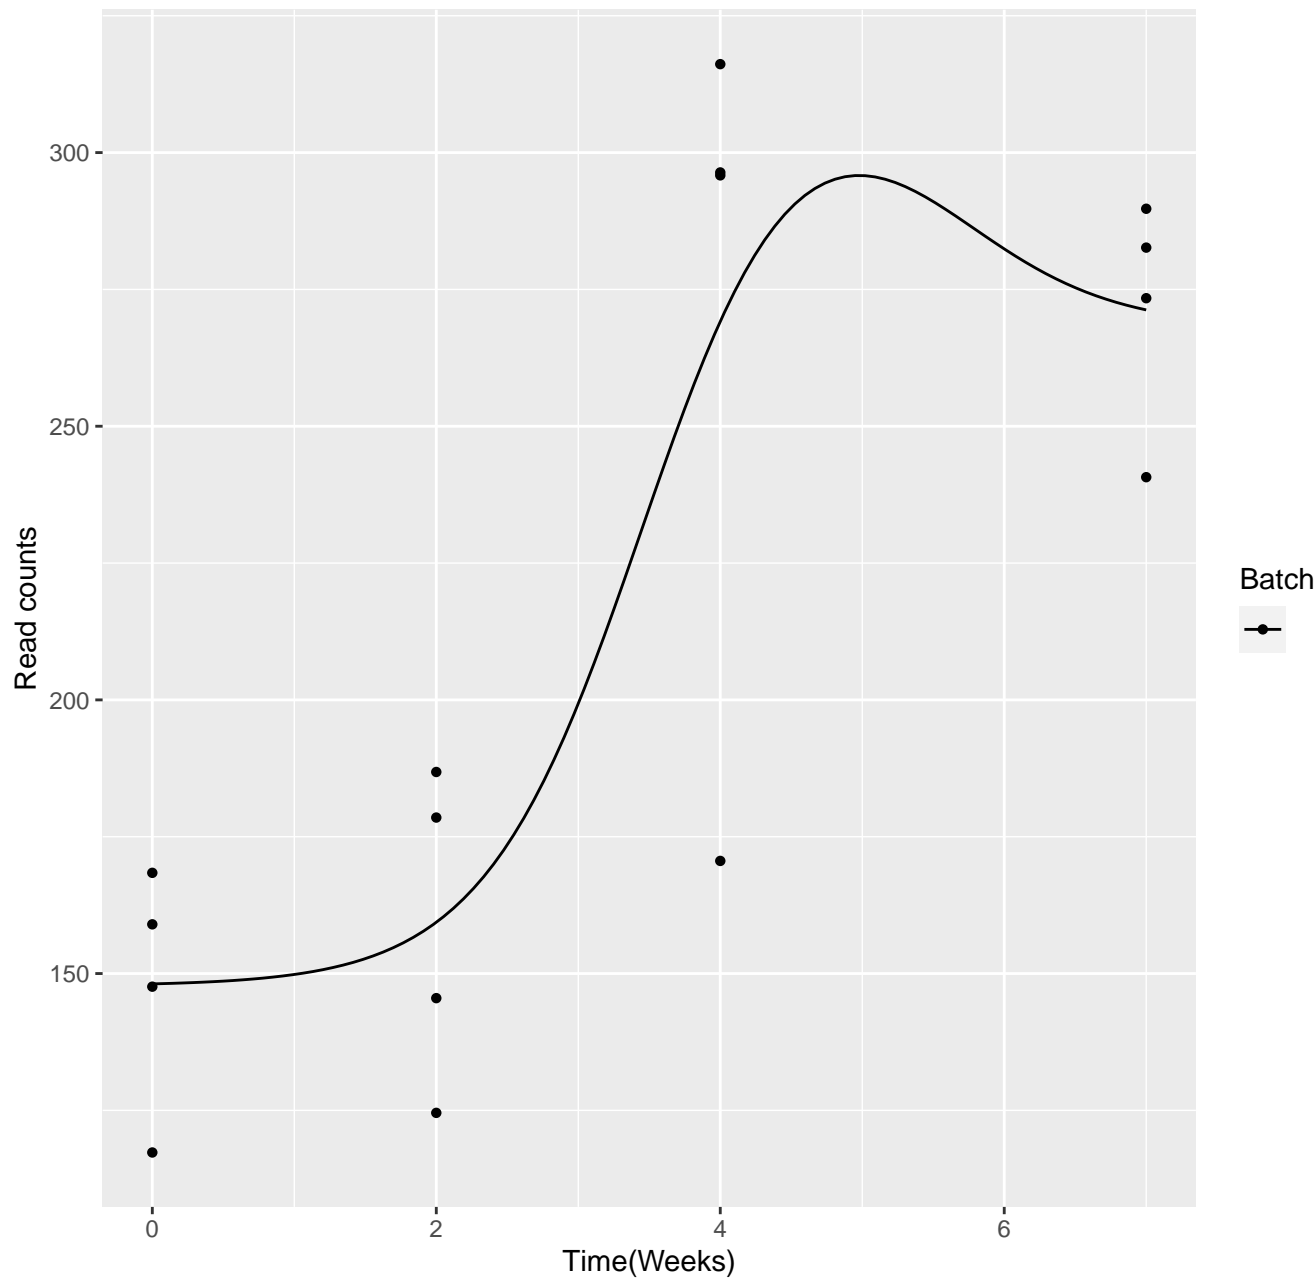



ENO3:  $\log_{10} q = -3.44$

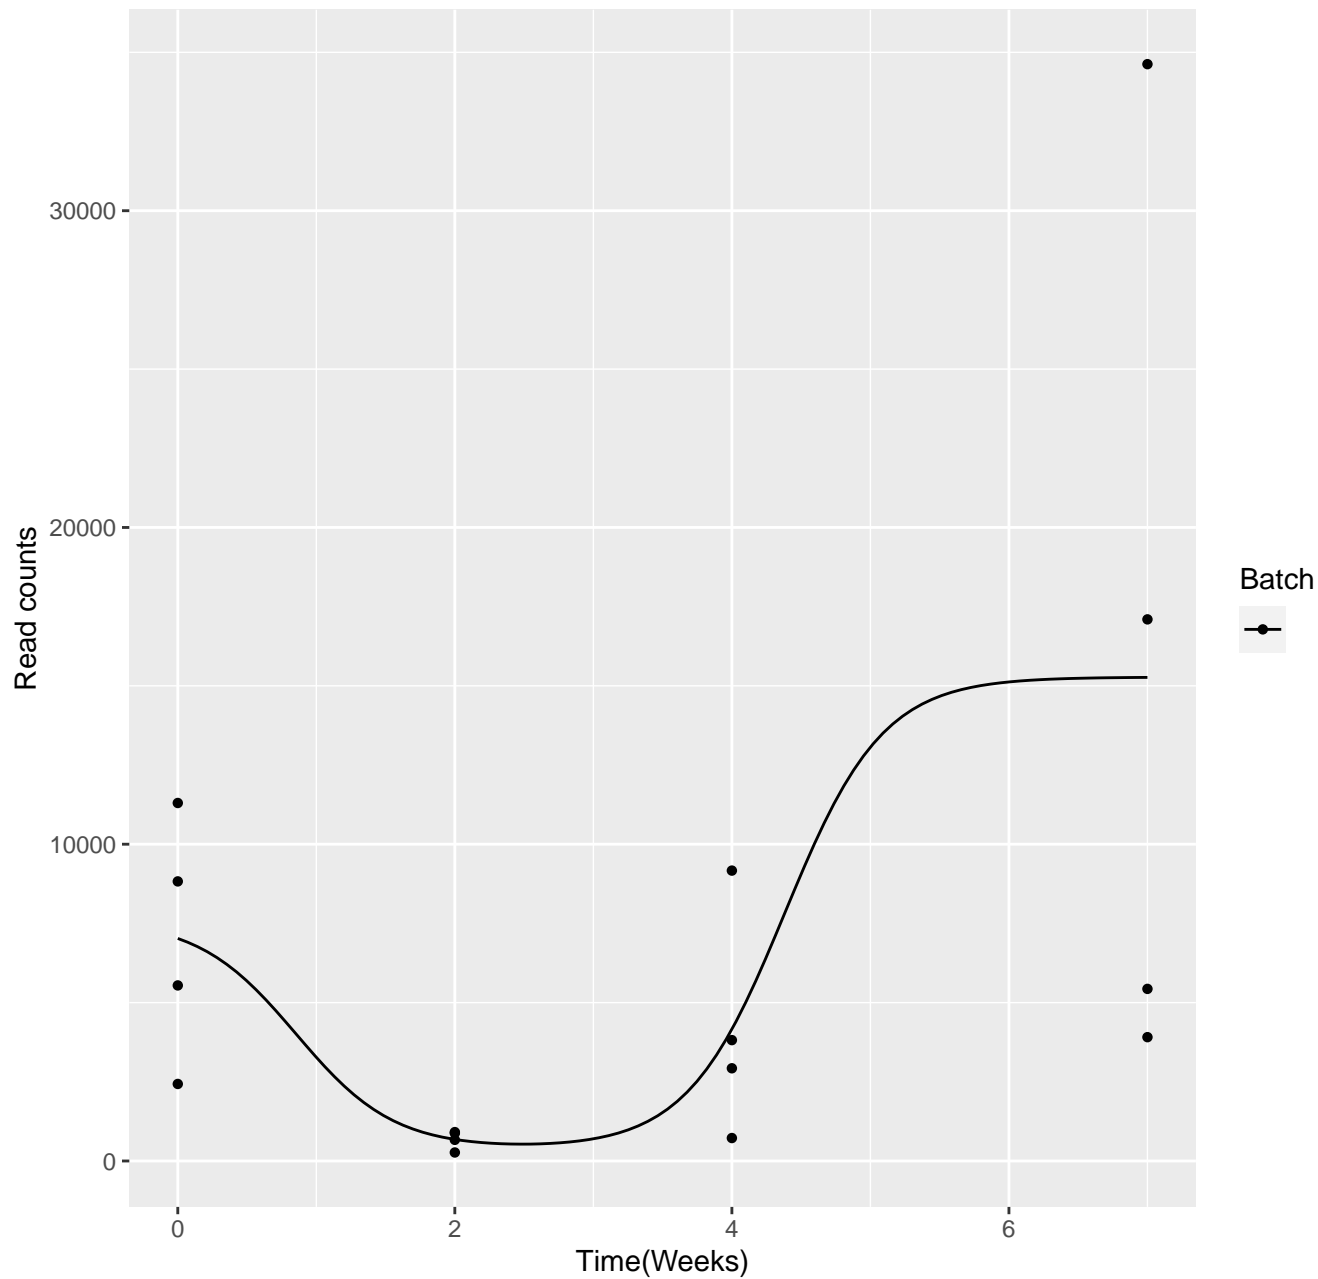

MTARC2:  $\log_{10} q = -3.44$

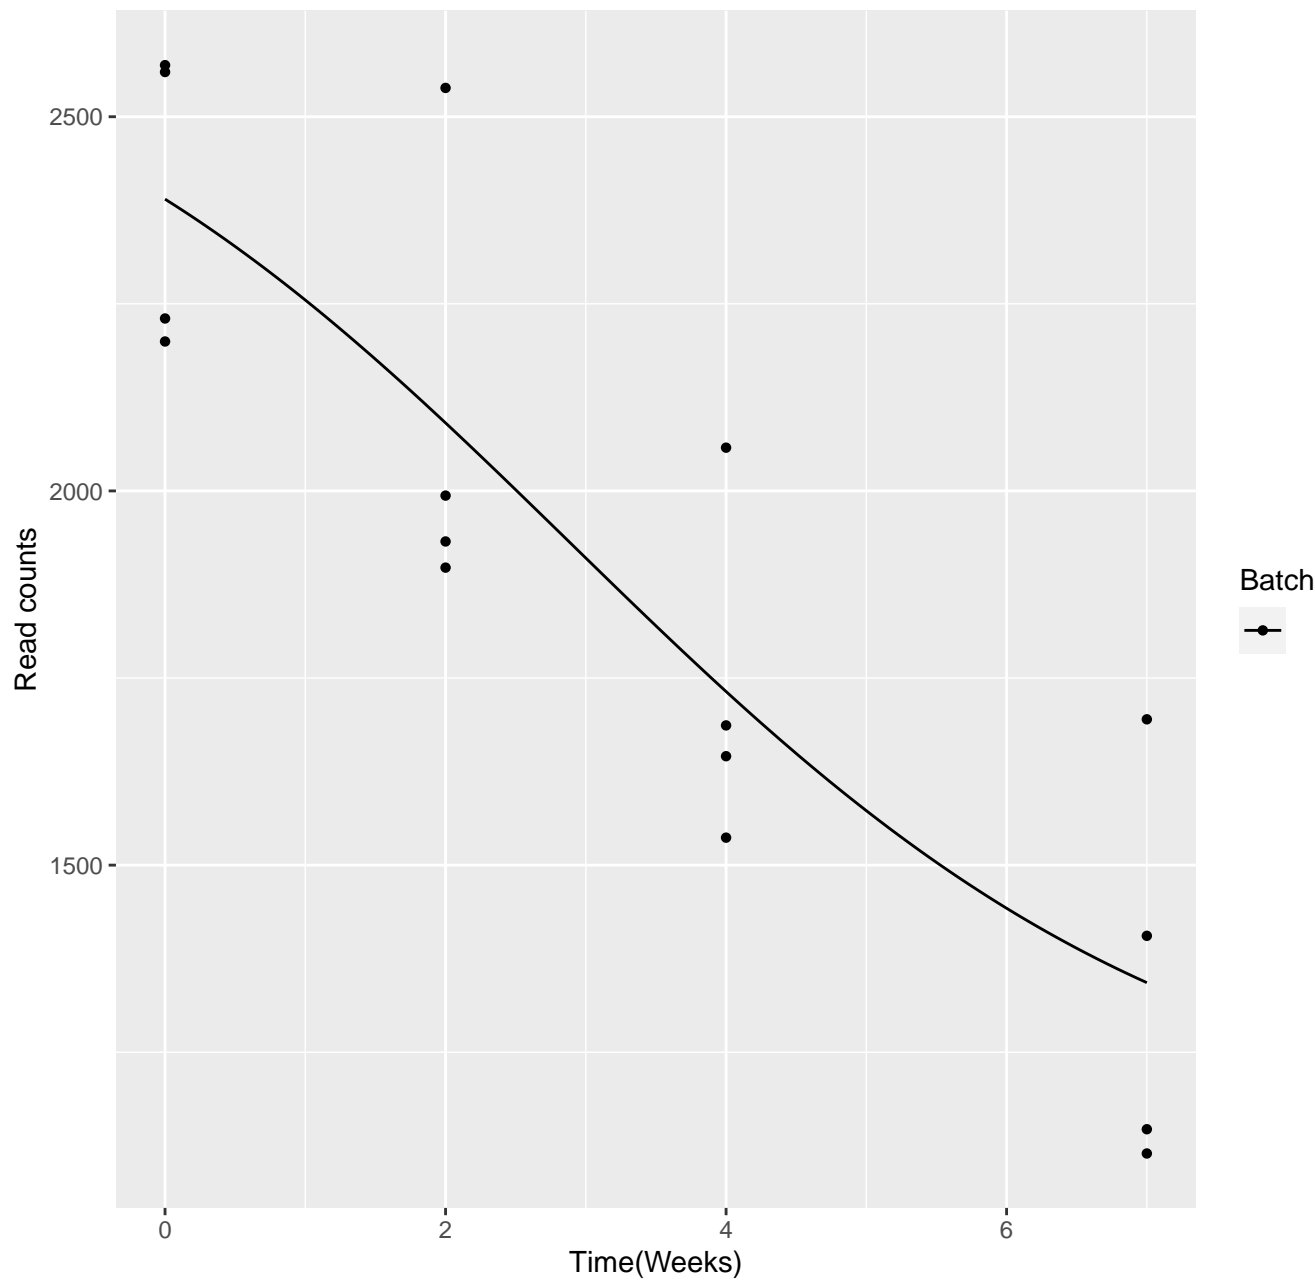

TGFB1I1:  $\log_{10} q = -3.43$

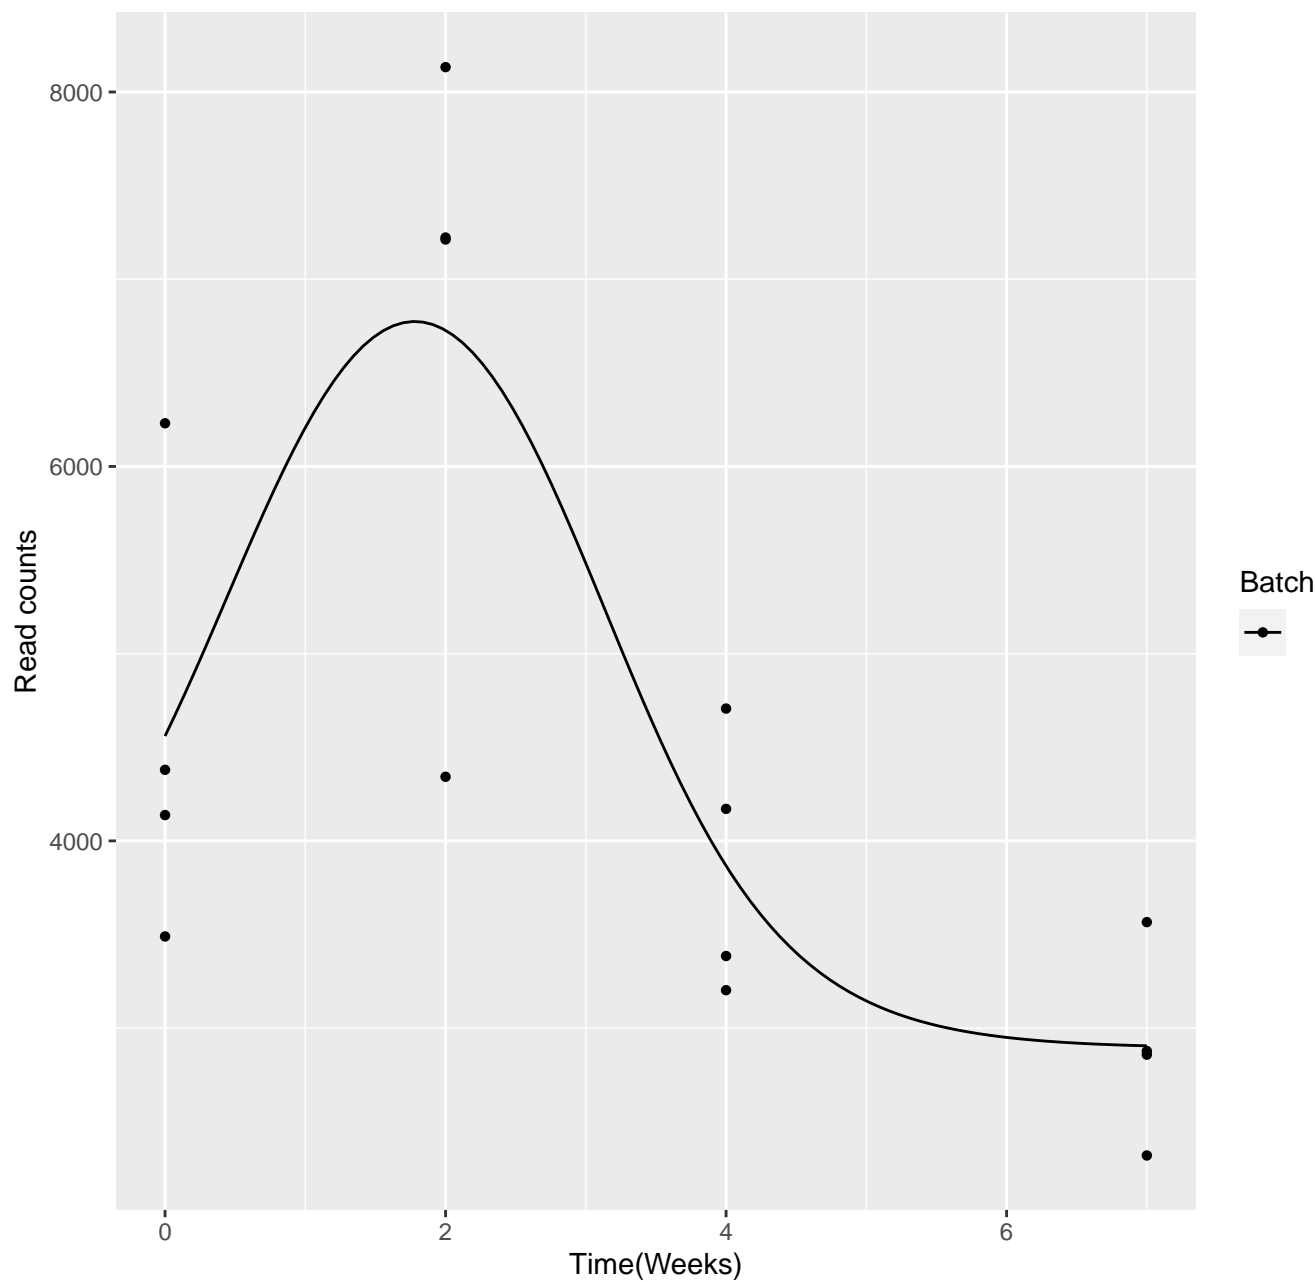

NR1D1:  $\log_{10} q = -3.43$

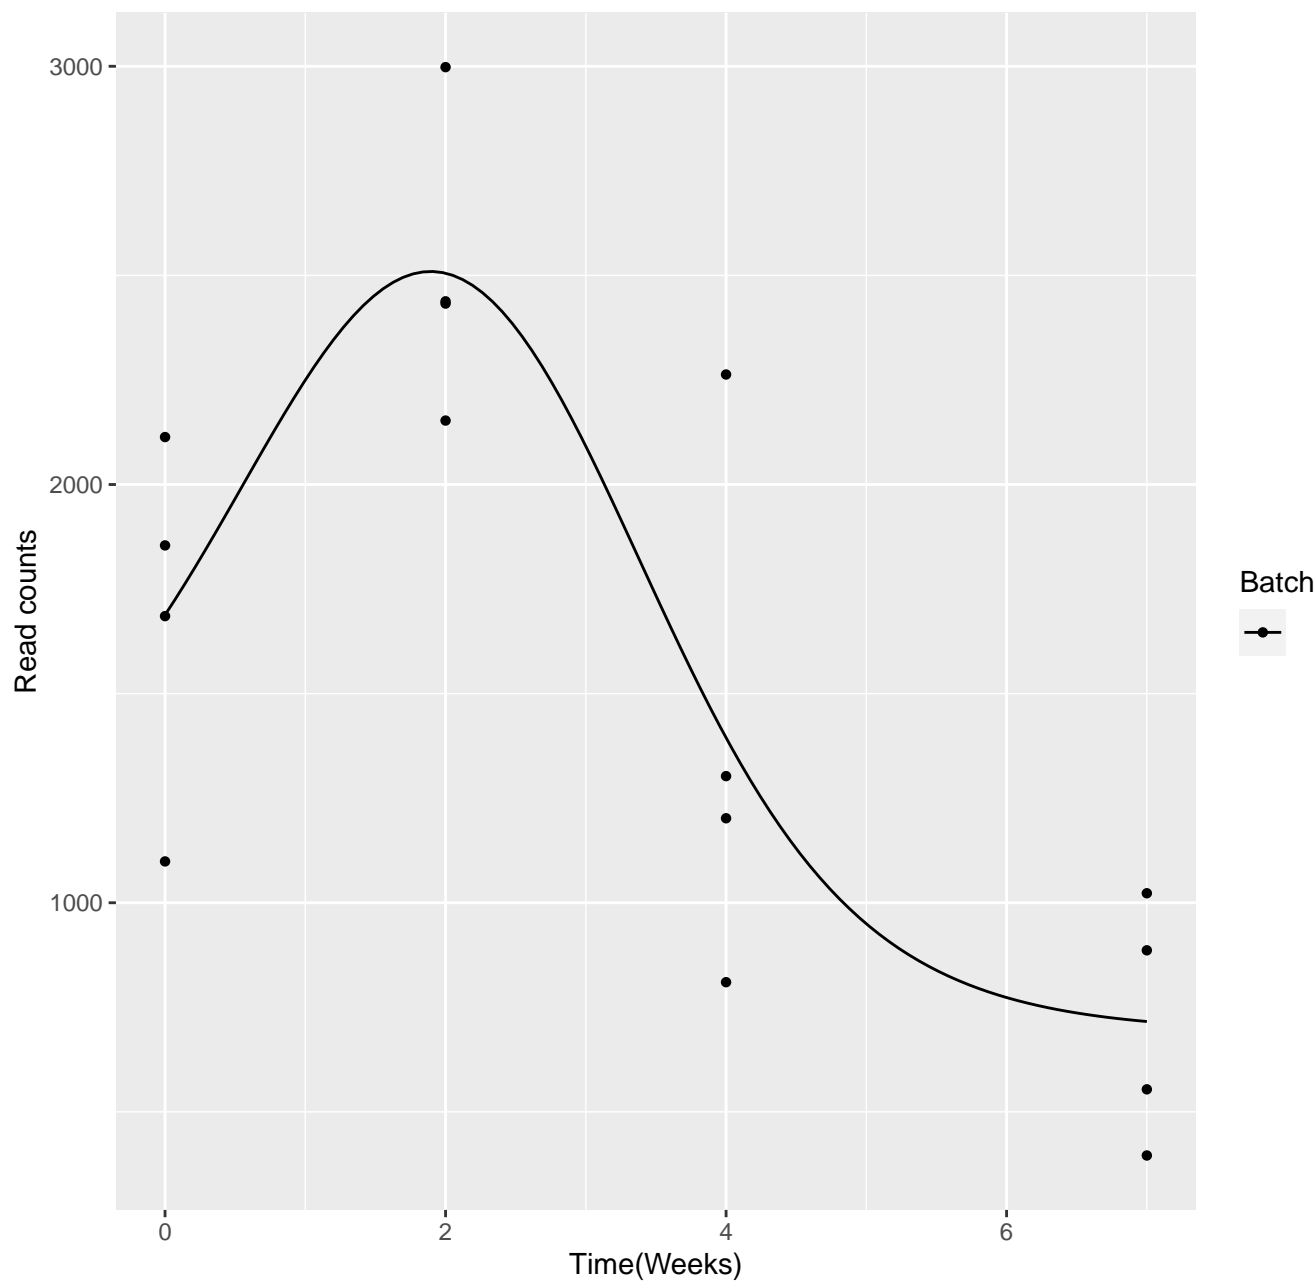

EGR1:  $\log_{10} q = -3.42$

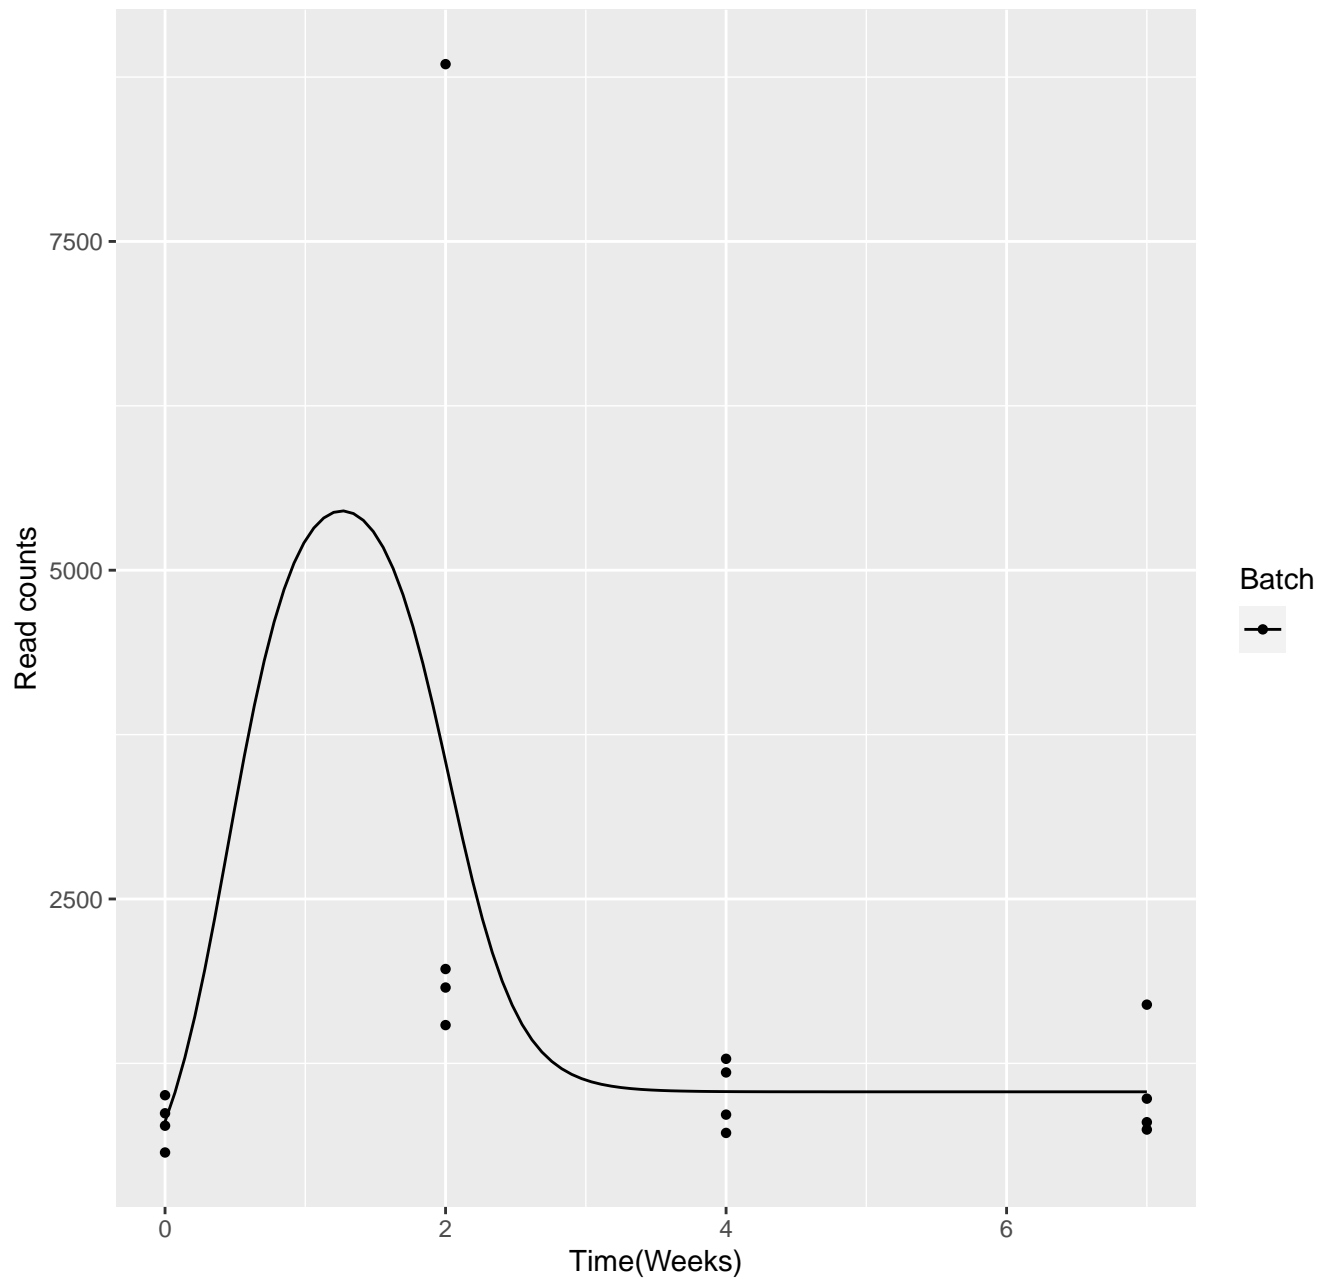

GNG11:  $\log_{10} q = -3.42$

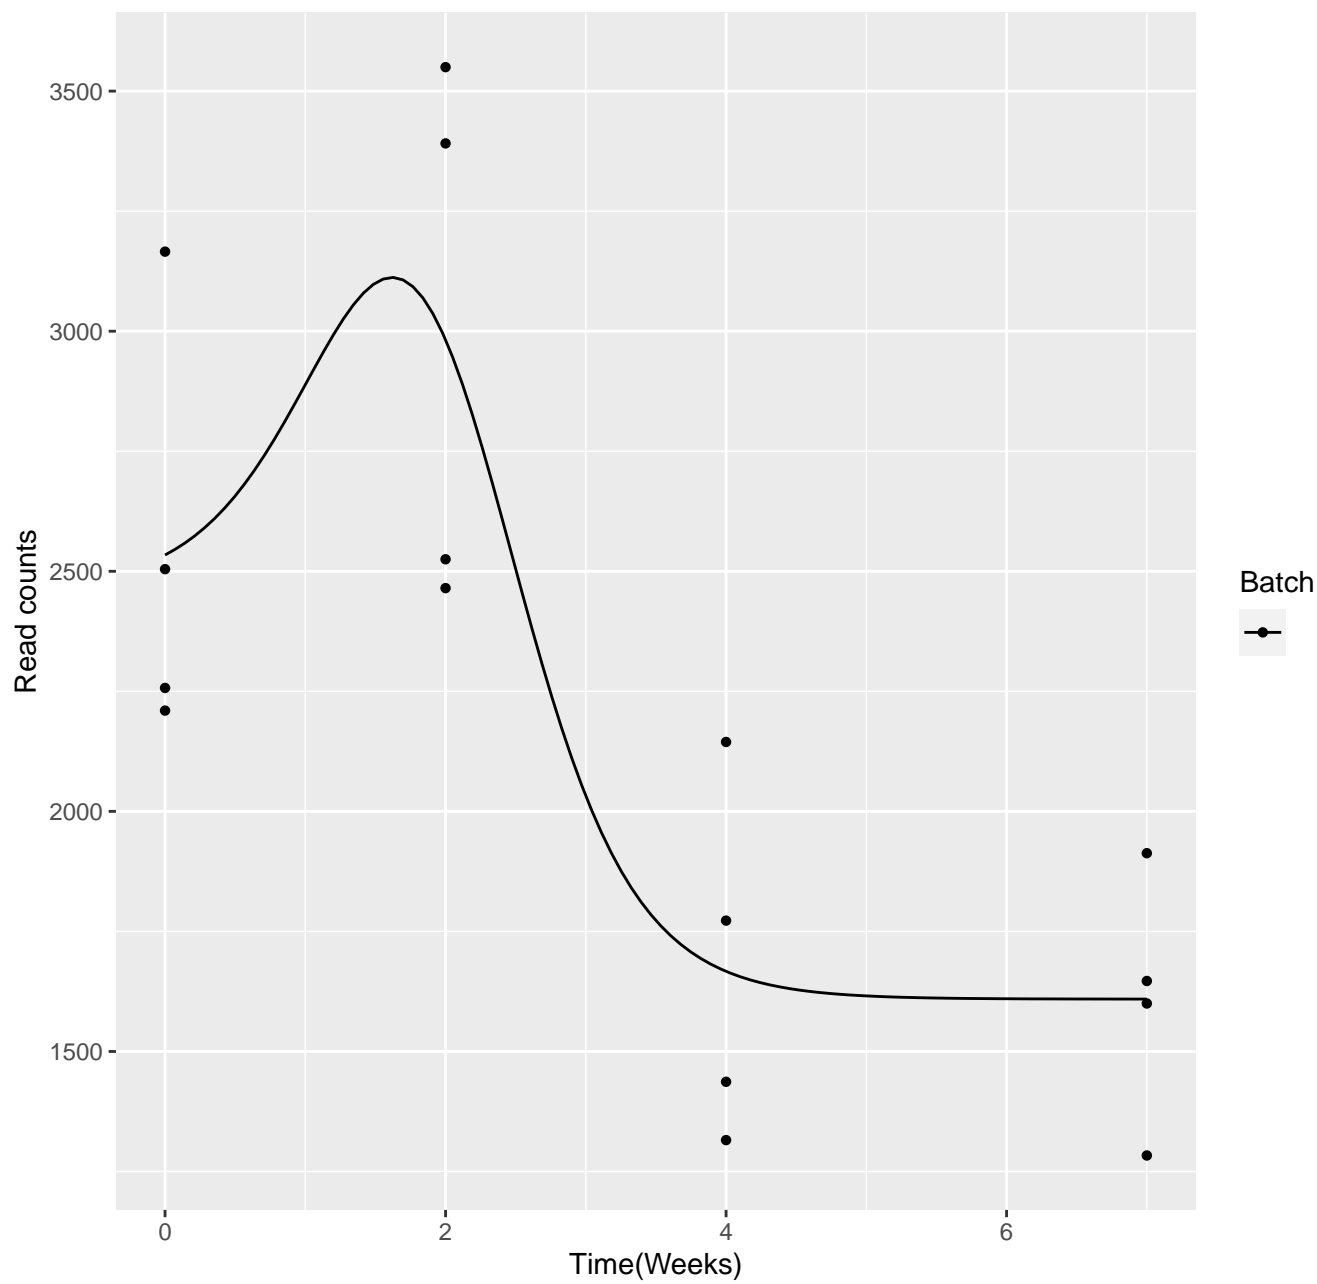

PANK1:  $\log_{10} q = -3.42$

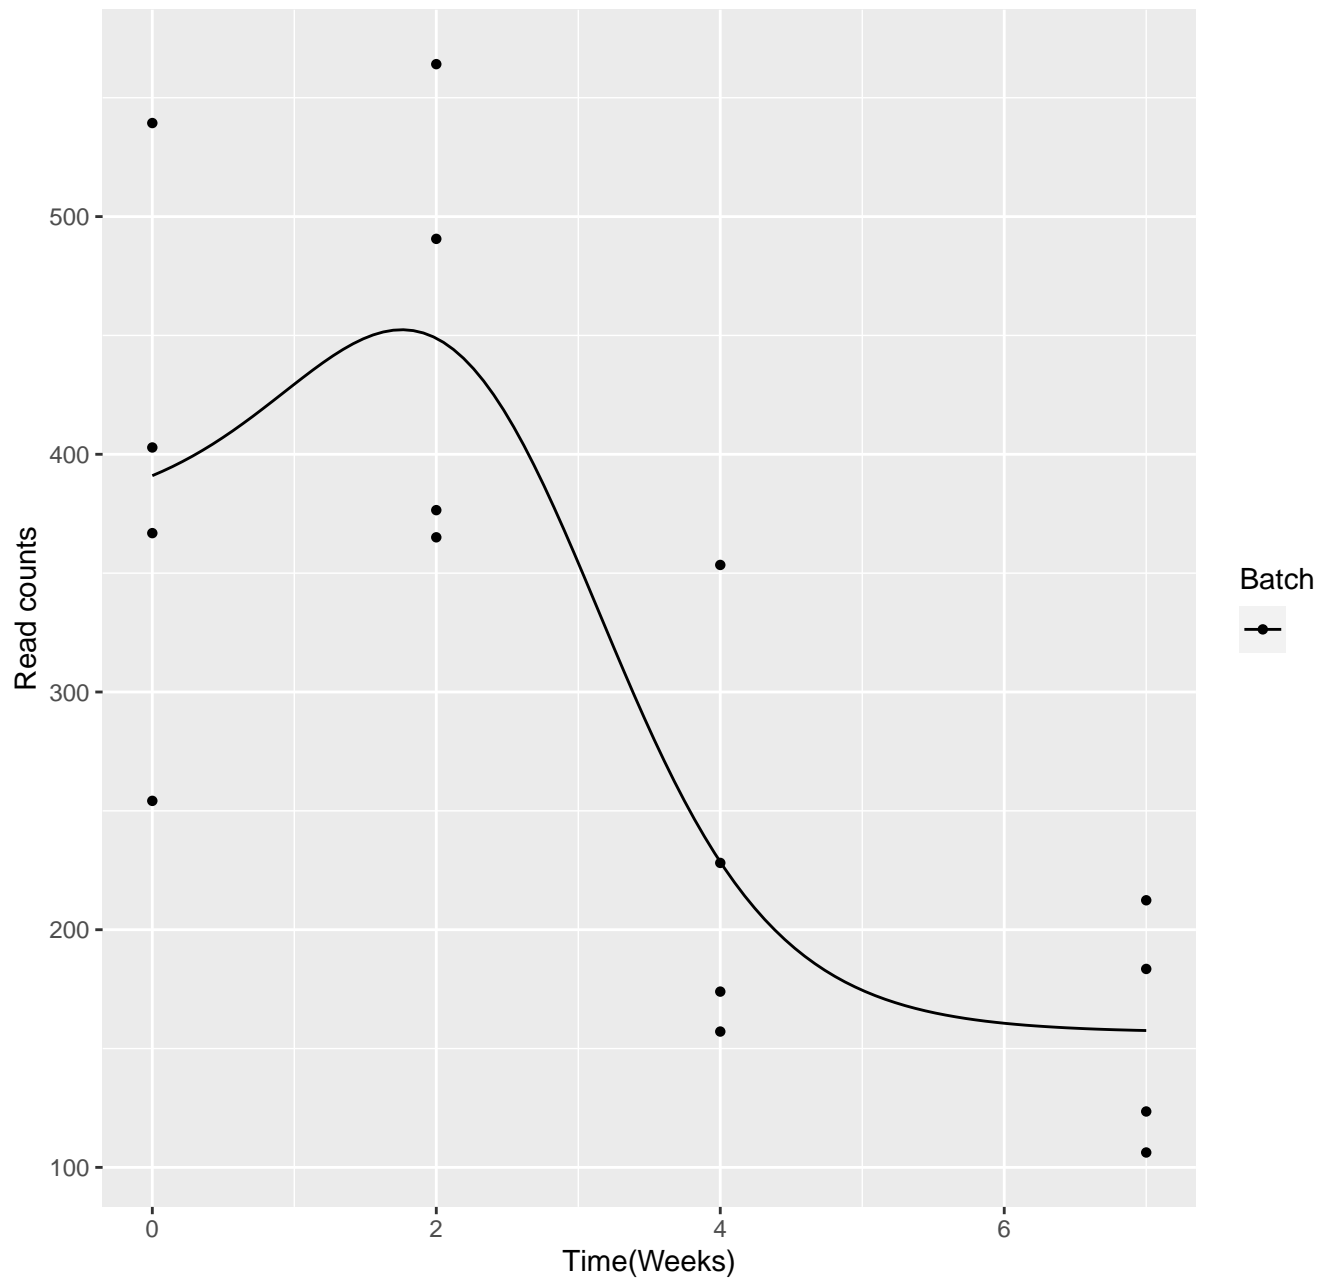

CCL7:  $\log_{10} q = -3.42$

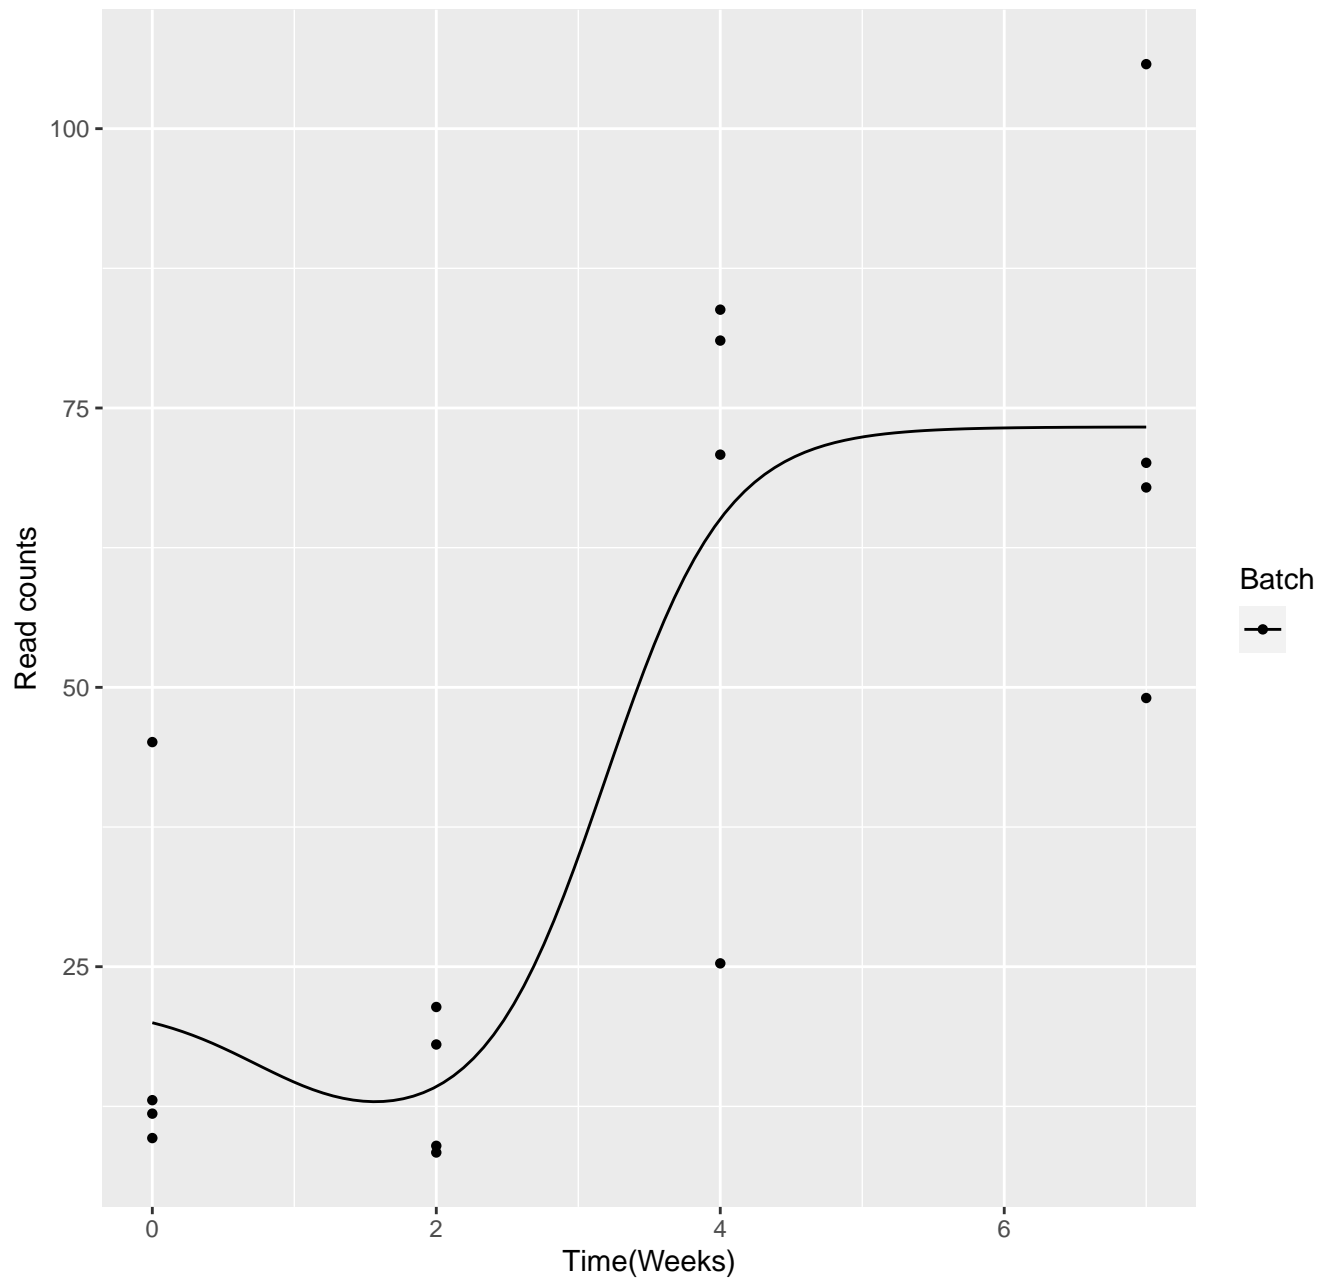



LOC100347327:  $\log_{10} q = -3.42$

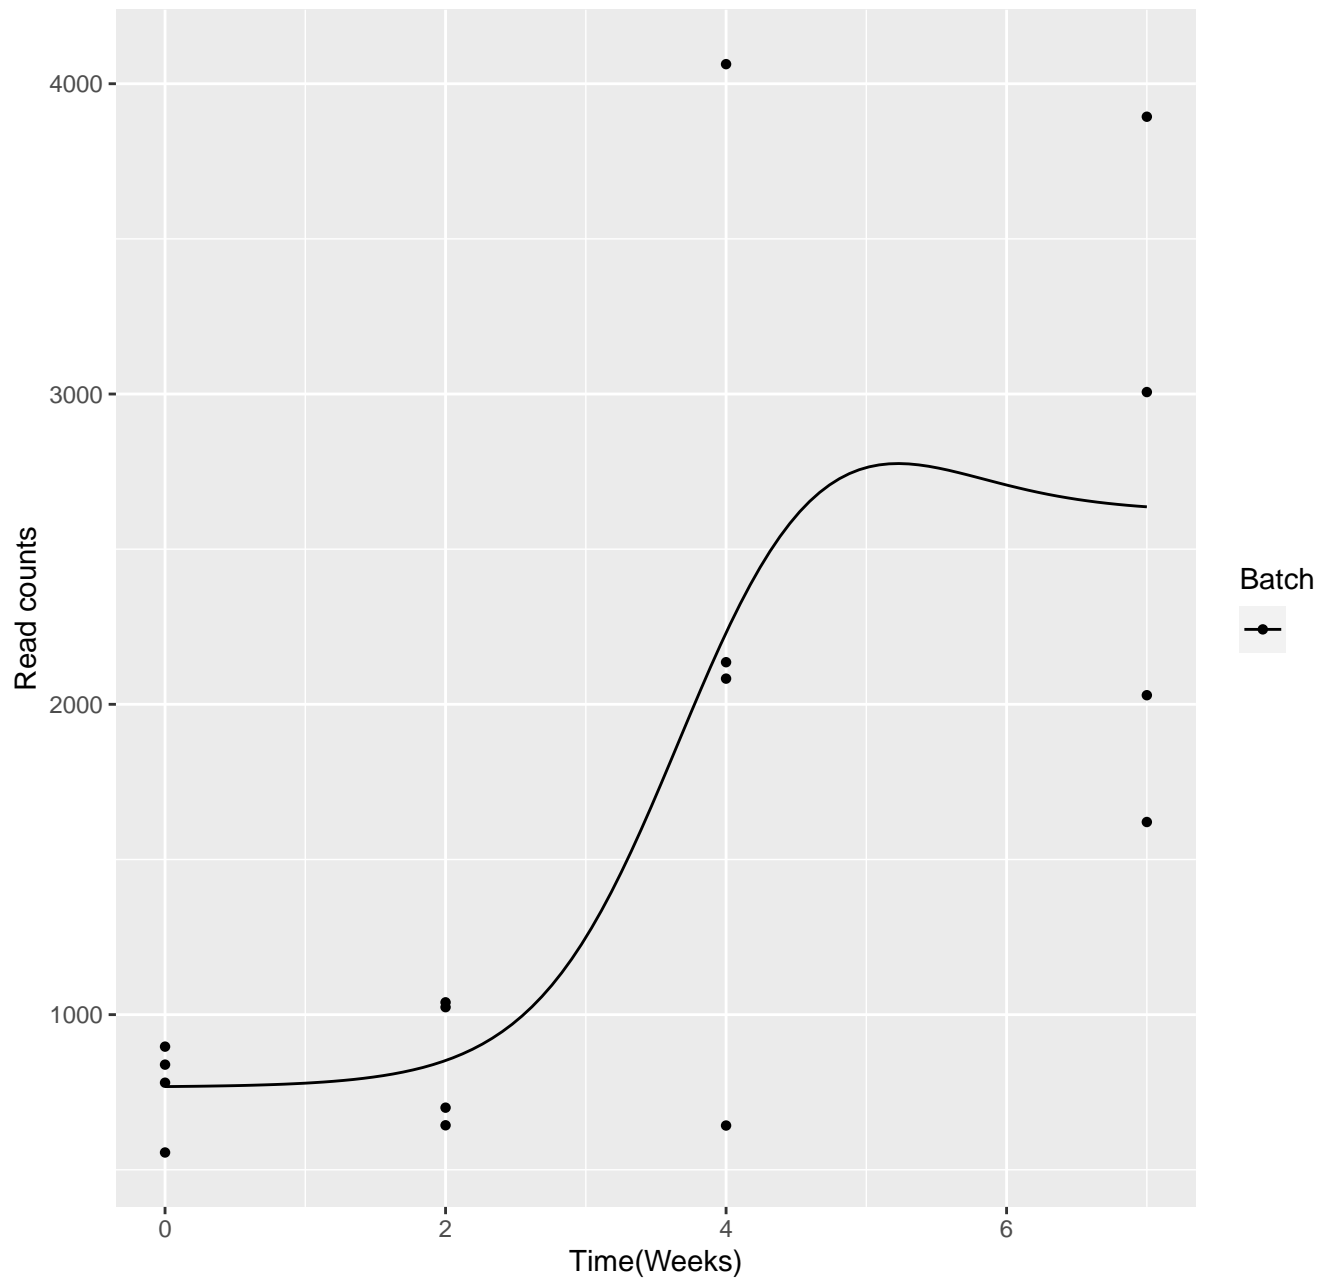

CSPG5:  $\log_{10} q = -3.4$

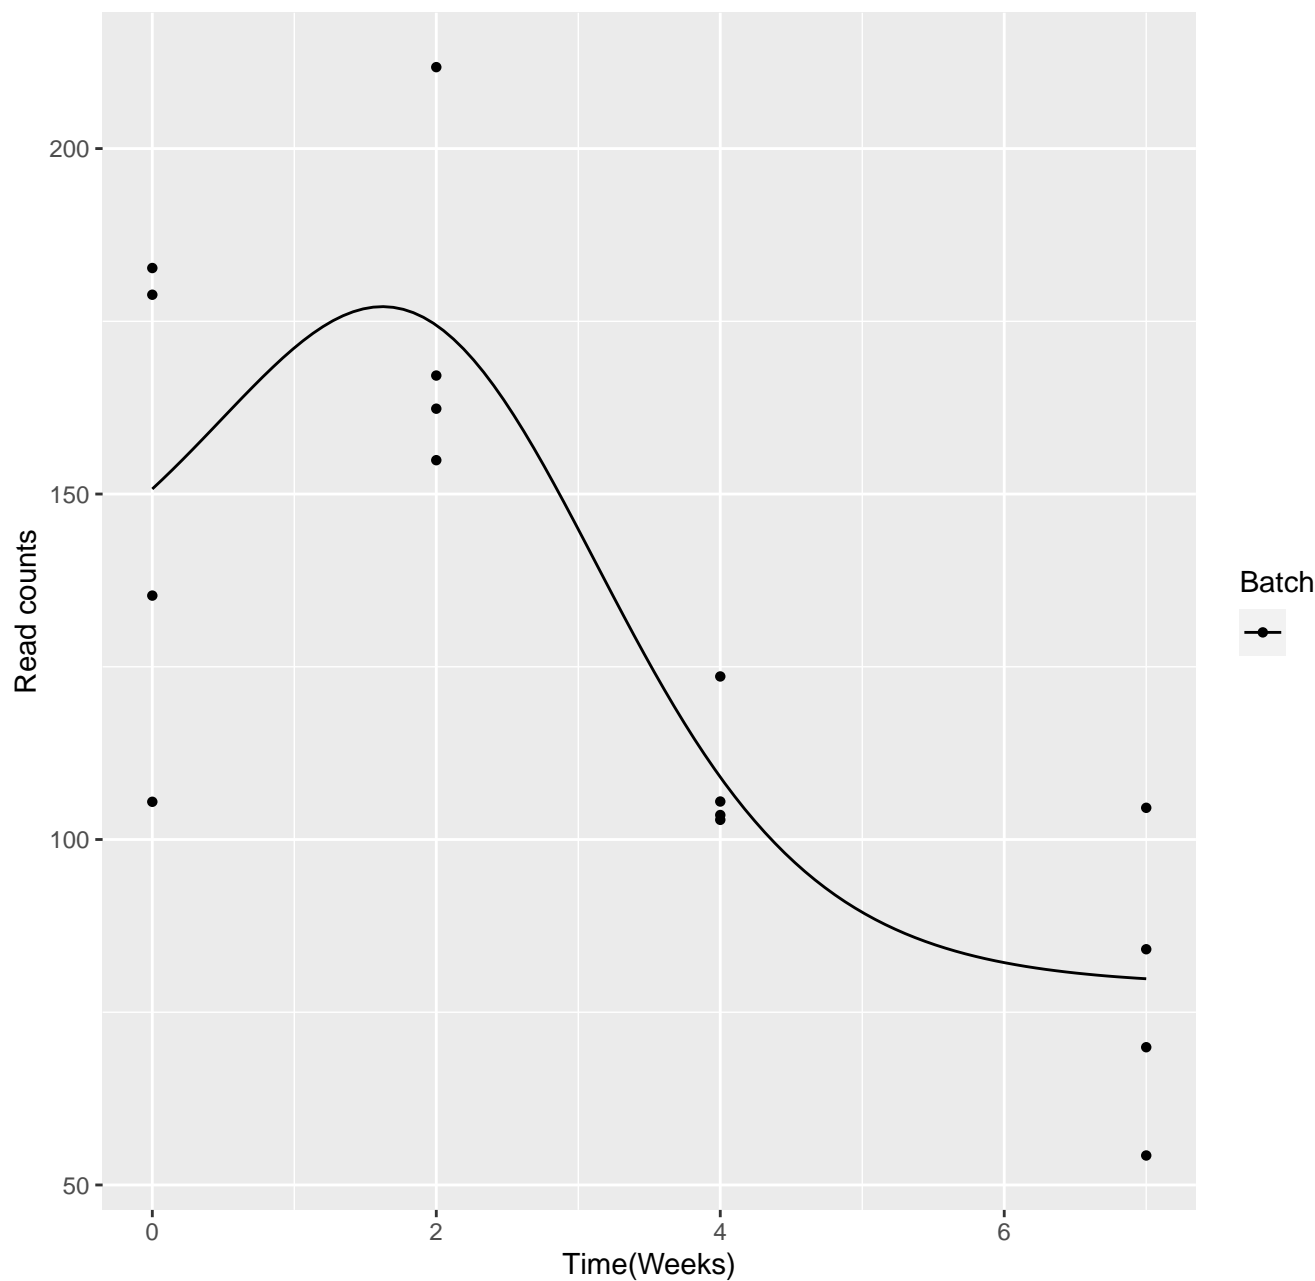

LOC100328693:  $\log_{10} q = -3.39$

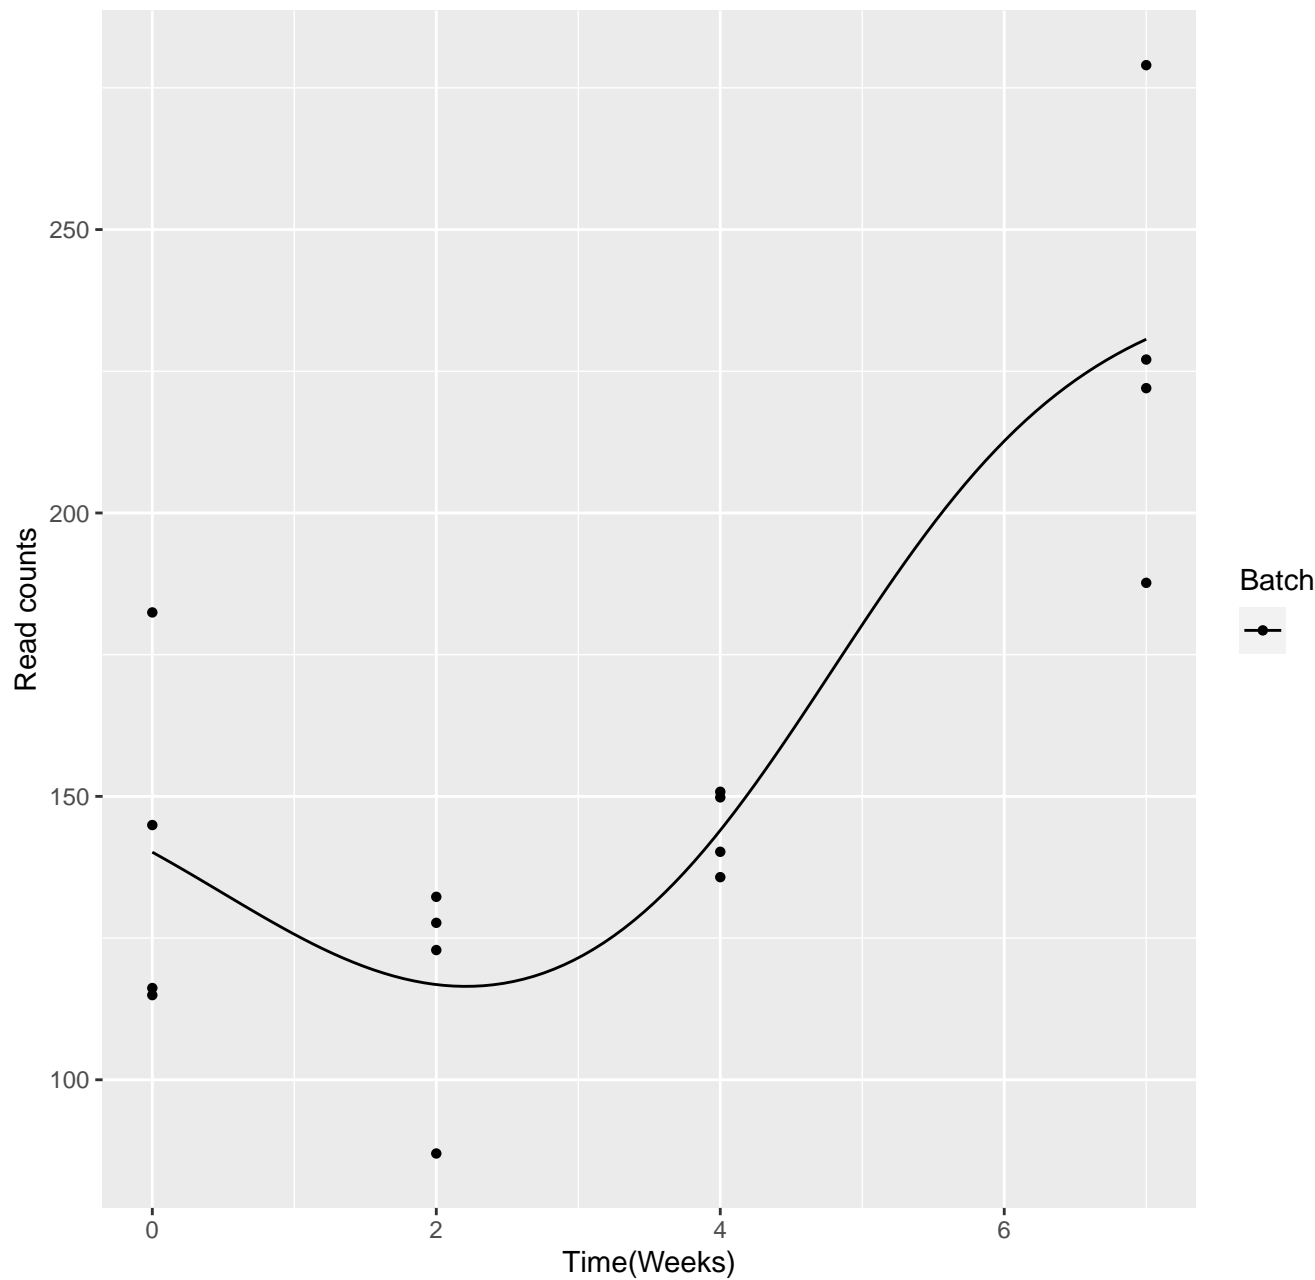

LOC127490290:  $\log_{10} q = -3.39$

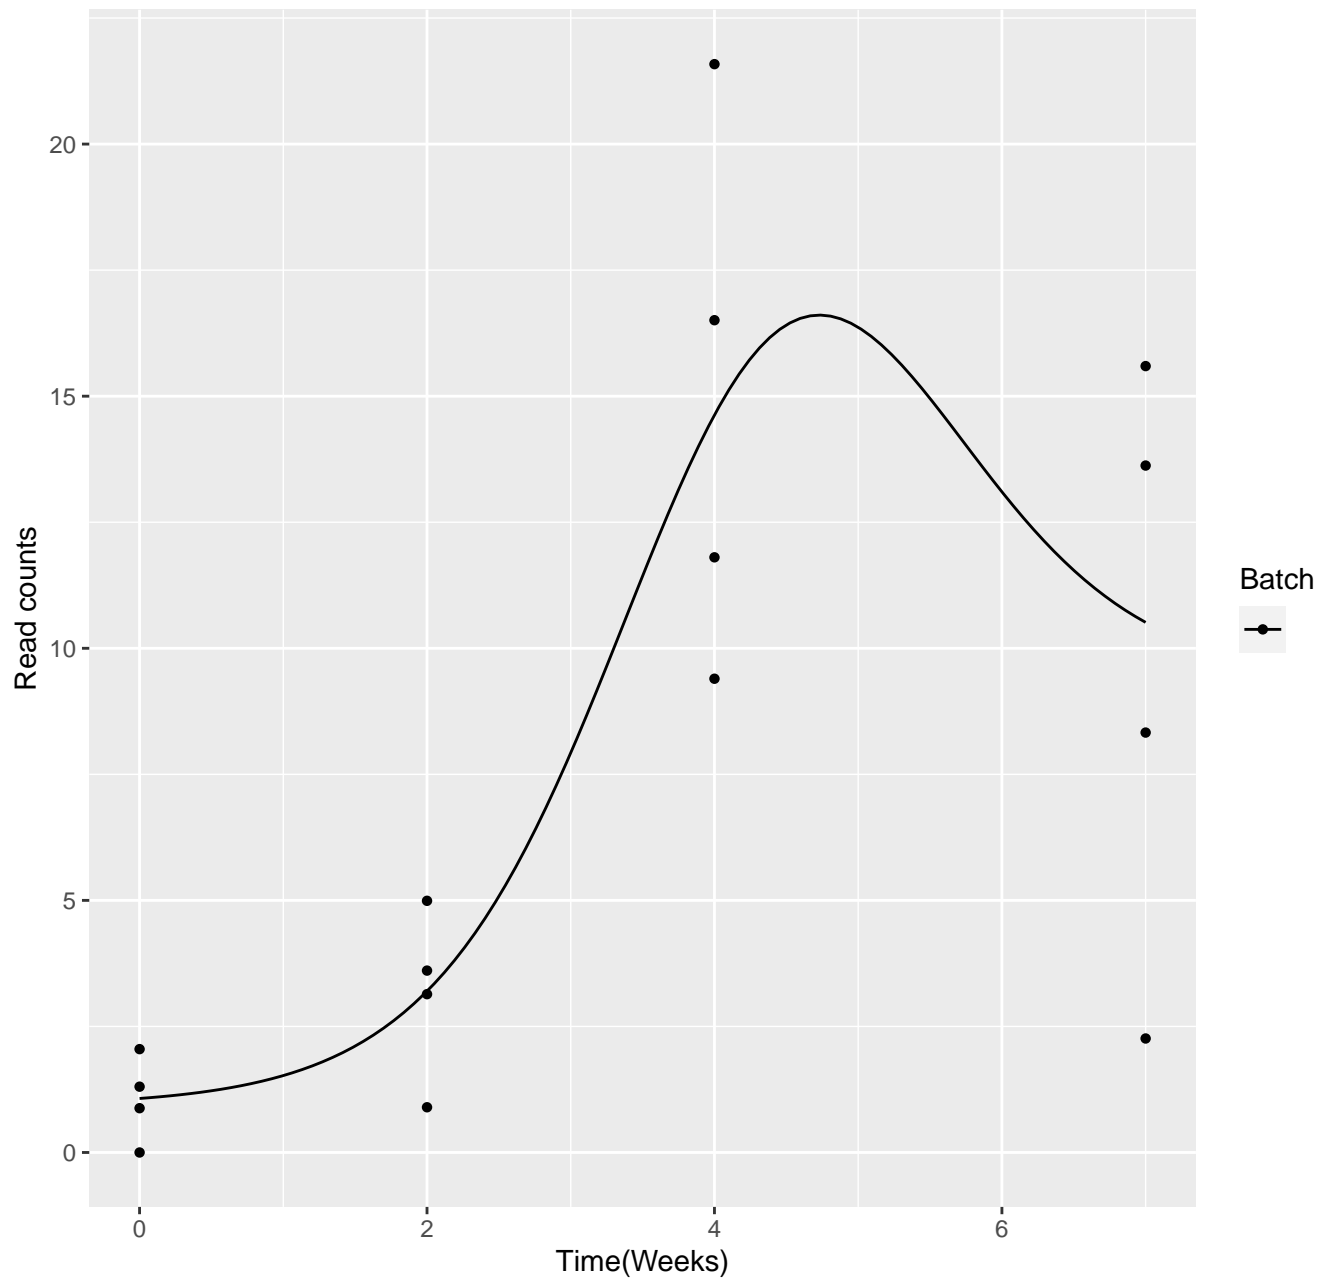

MCM6:  $\log_{10} q = -3.39$

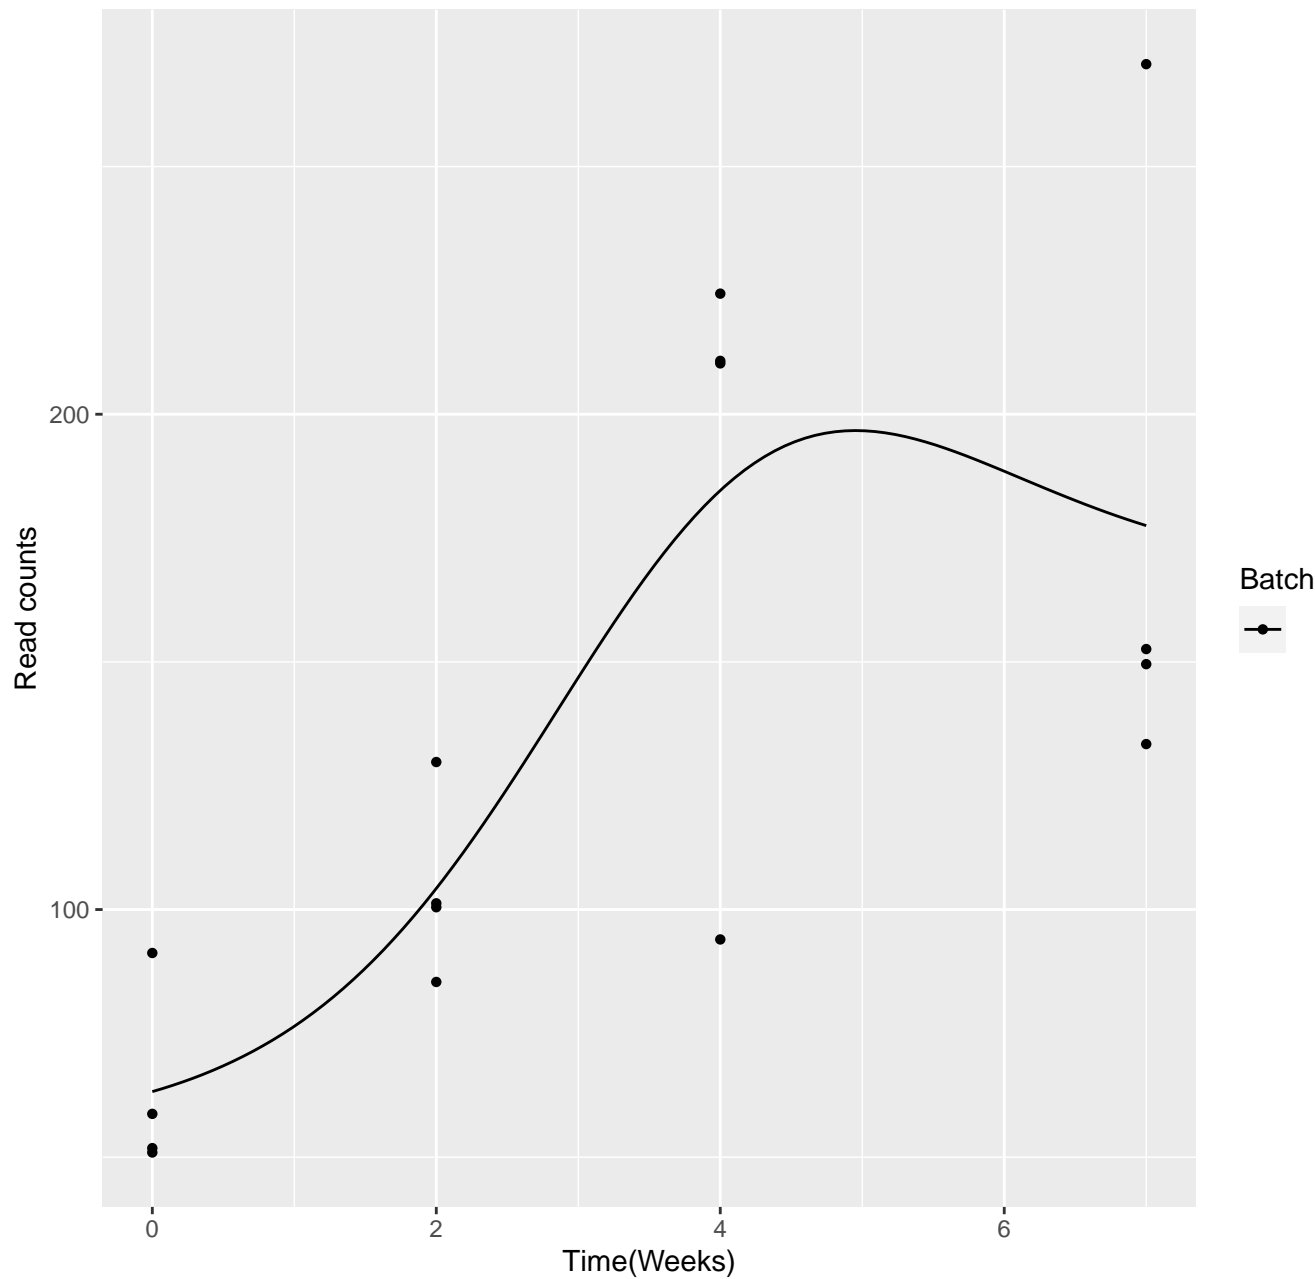

ANO6:  $\log_{10} q = -3.39$

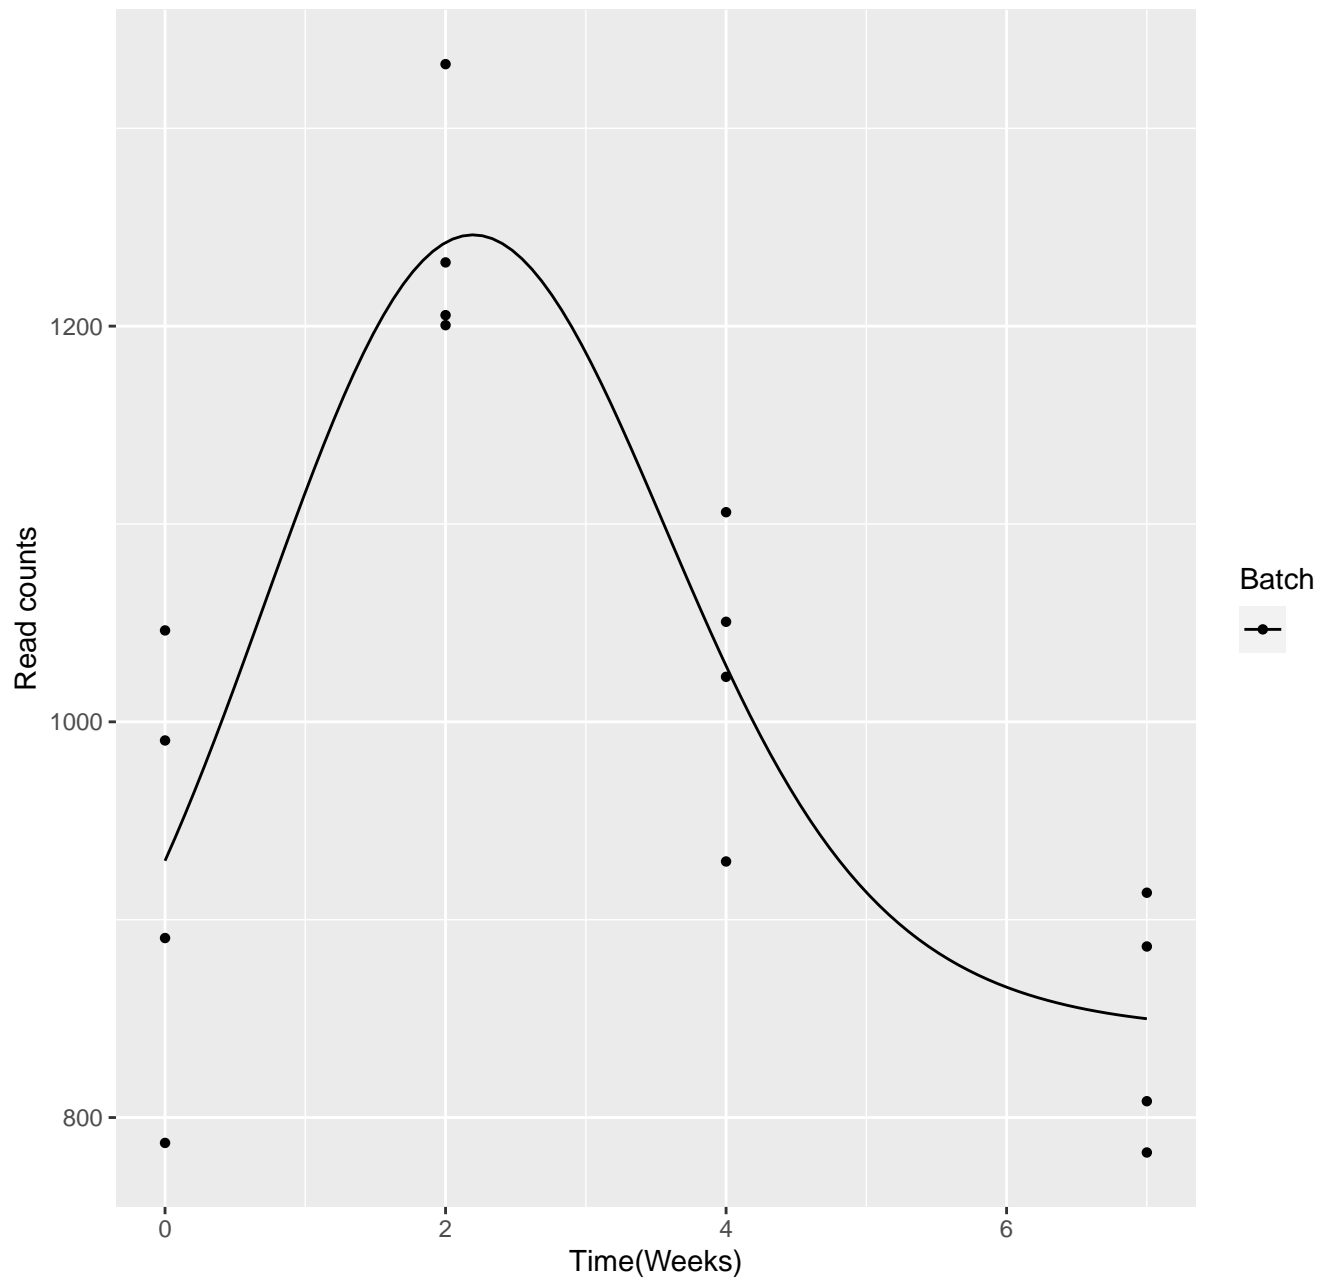

TEDC1:  $\log_{10} q = -3.39$

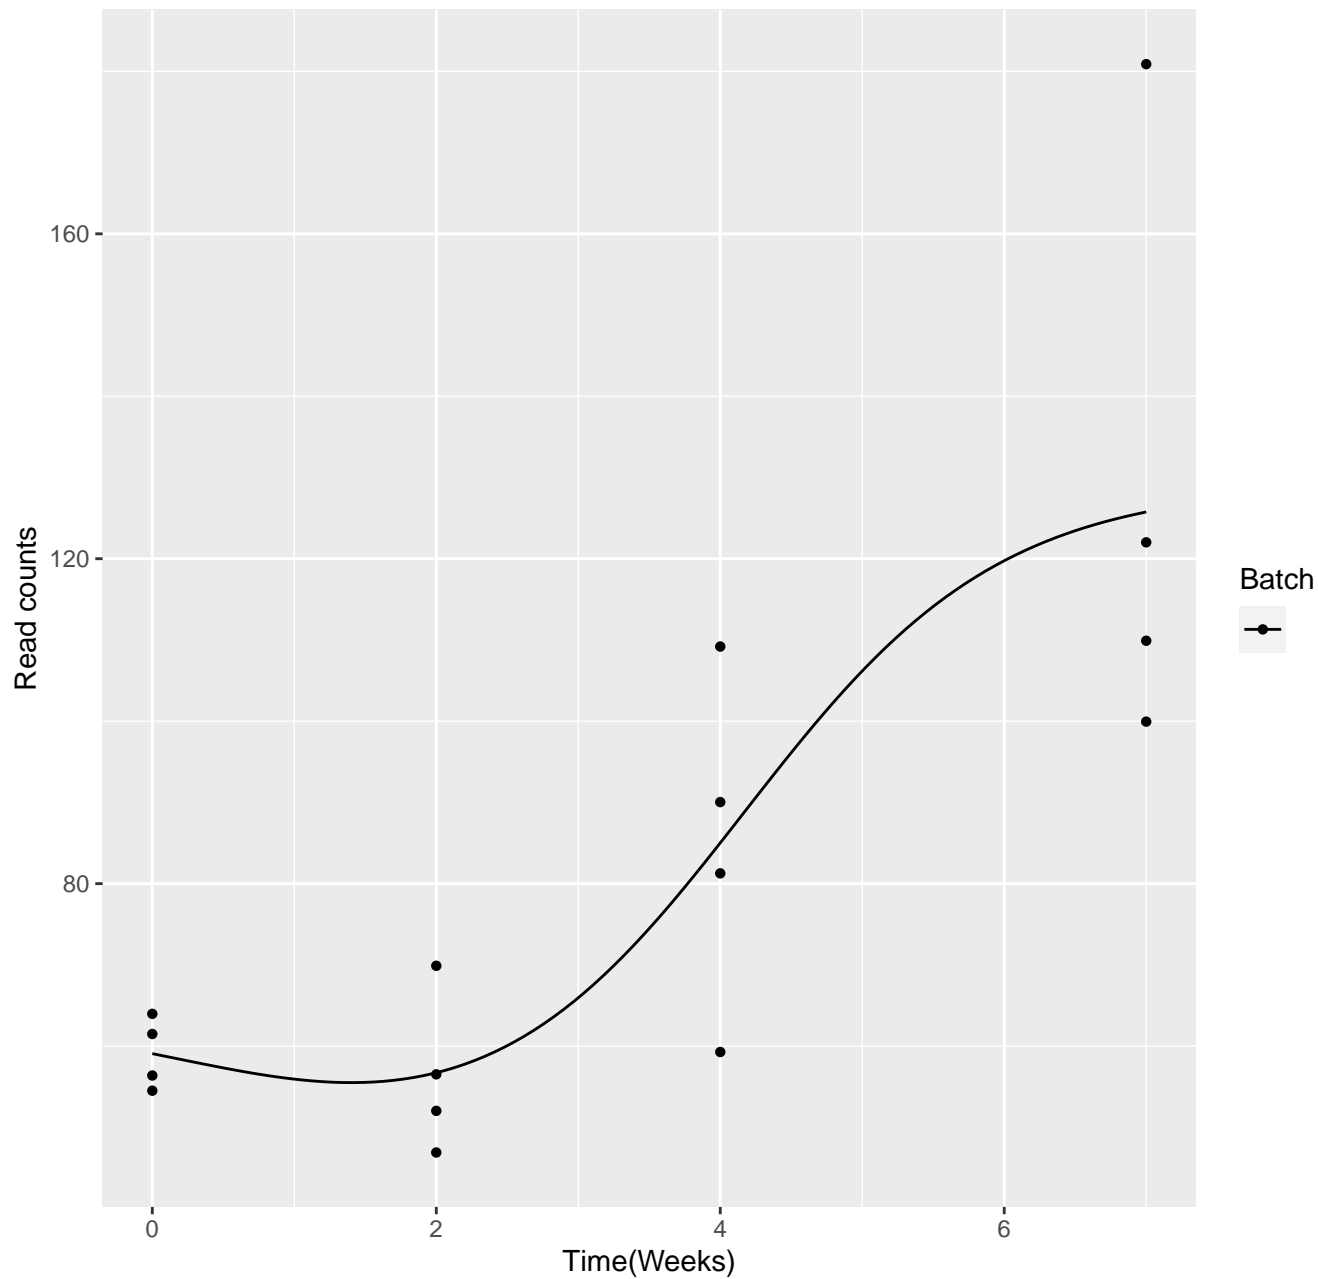

LOC100352672:  $\log_{10} q = -3.39$

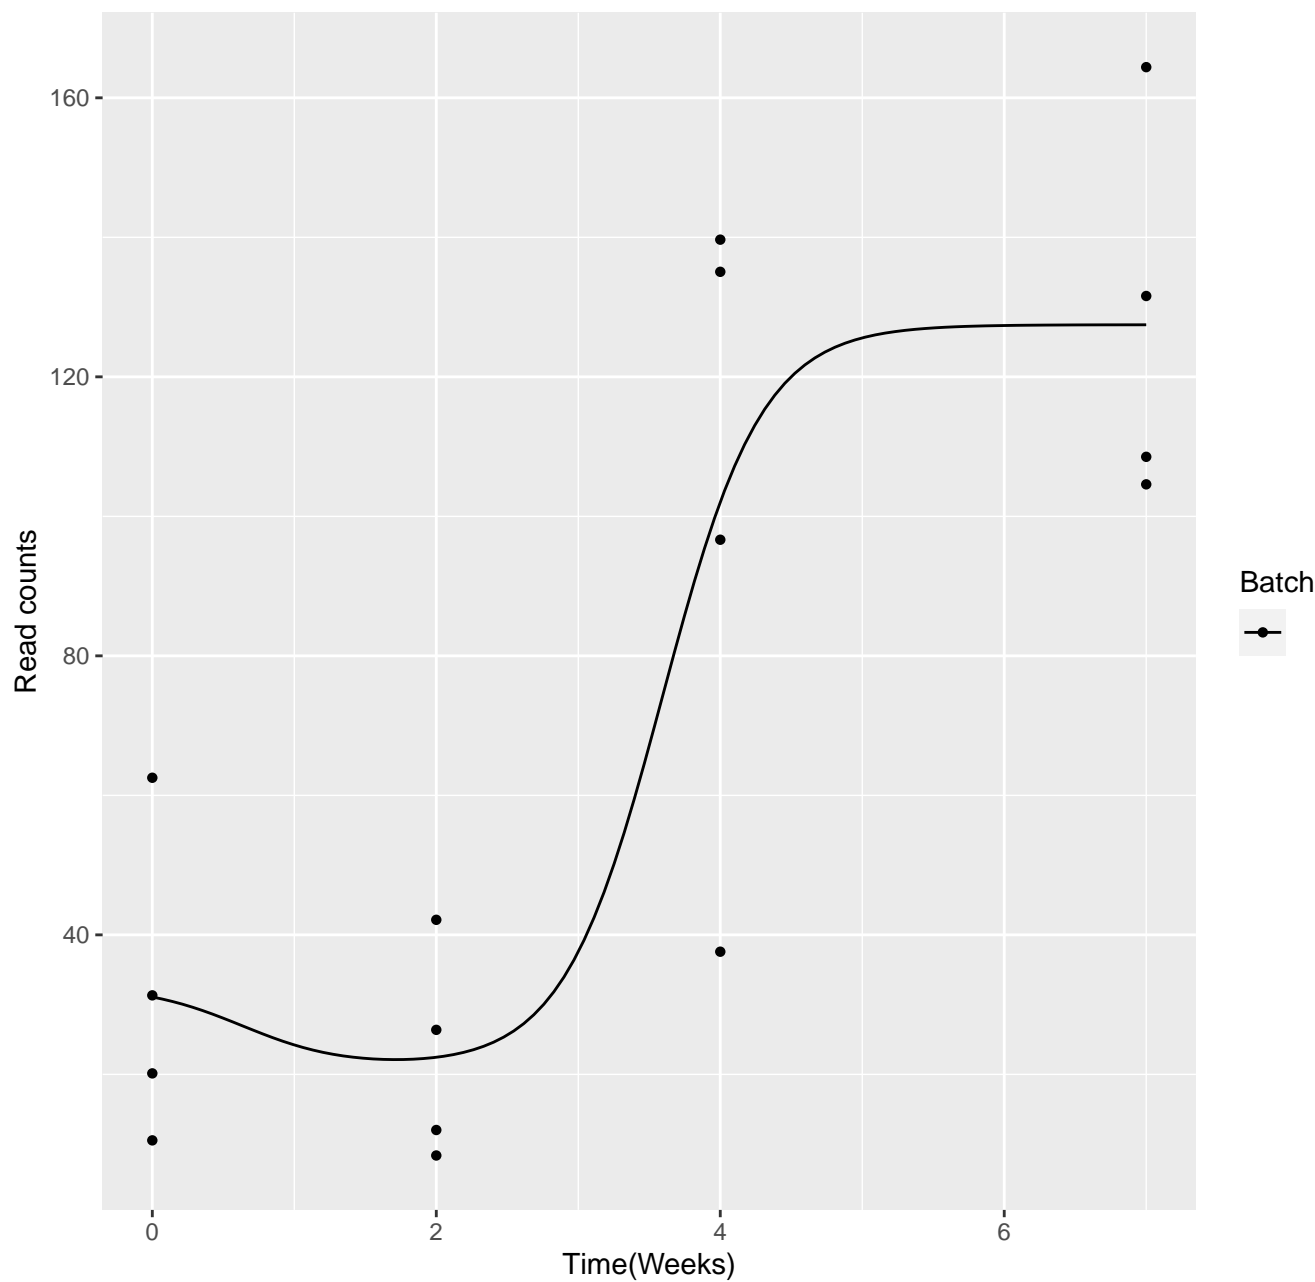



SGCD:  $\log_{10} q = -3.39$

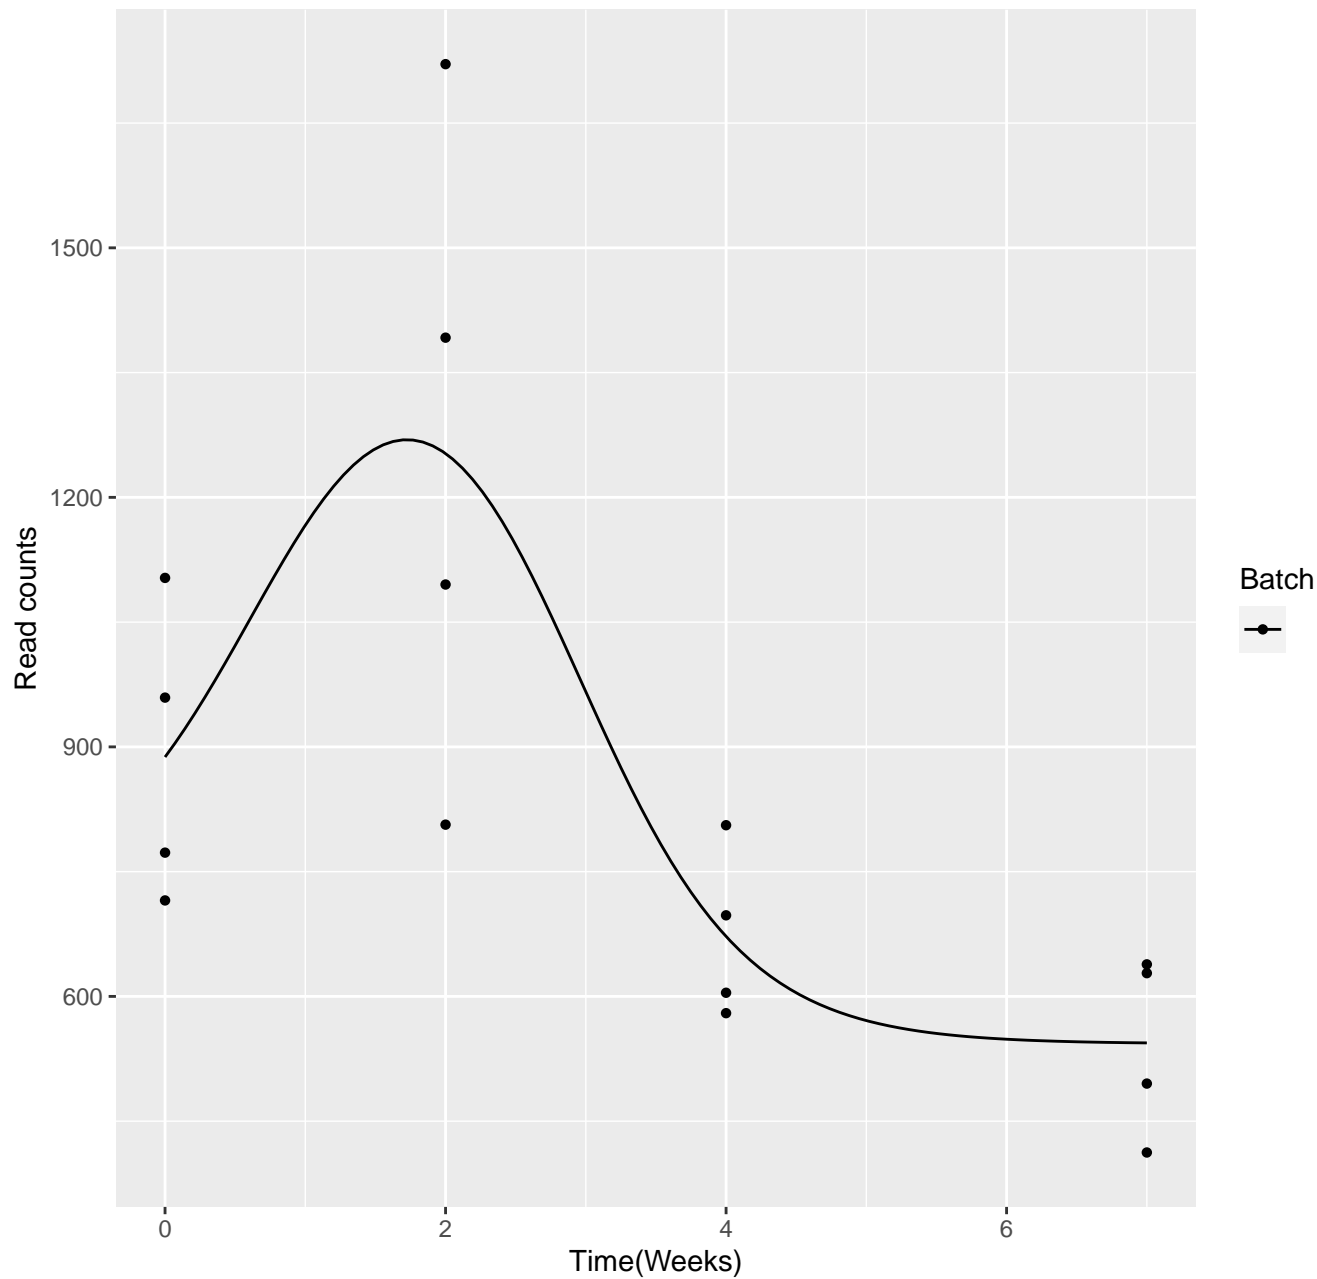

IL17RD:  $\log_{10} q = -3.39$

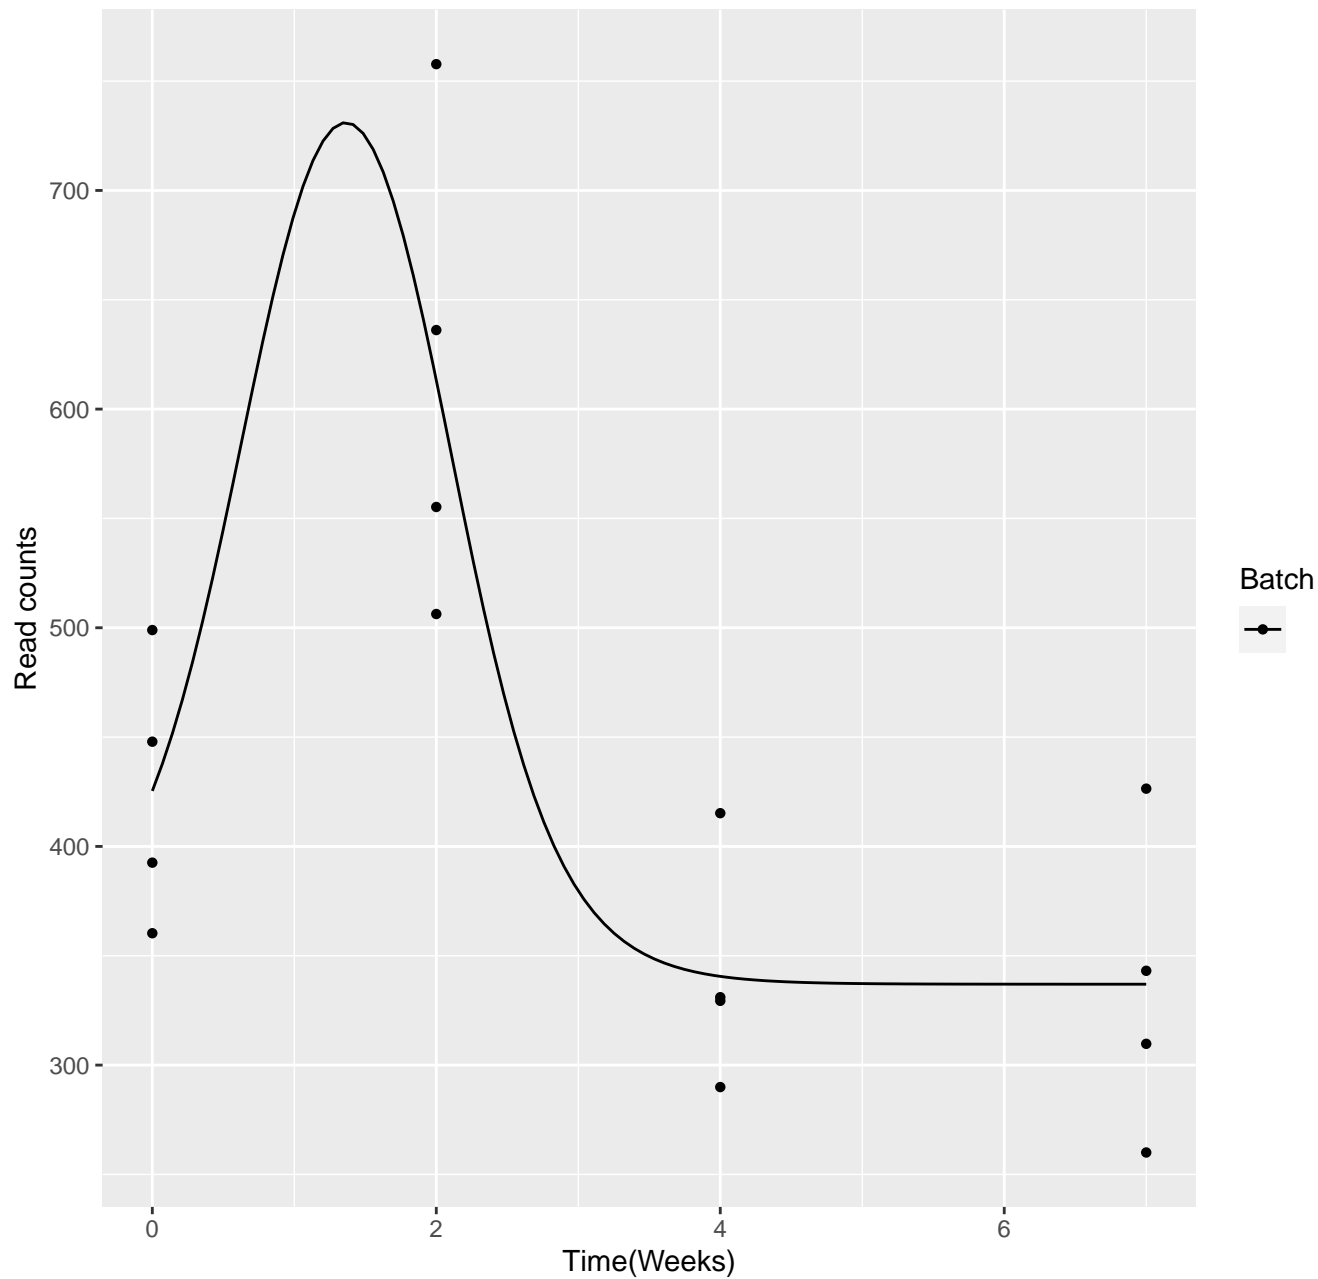

PTPRC:  $\log_{10} q = -3.39$

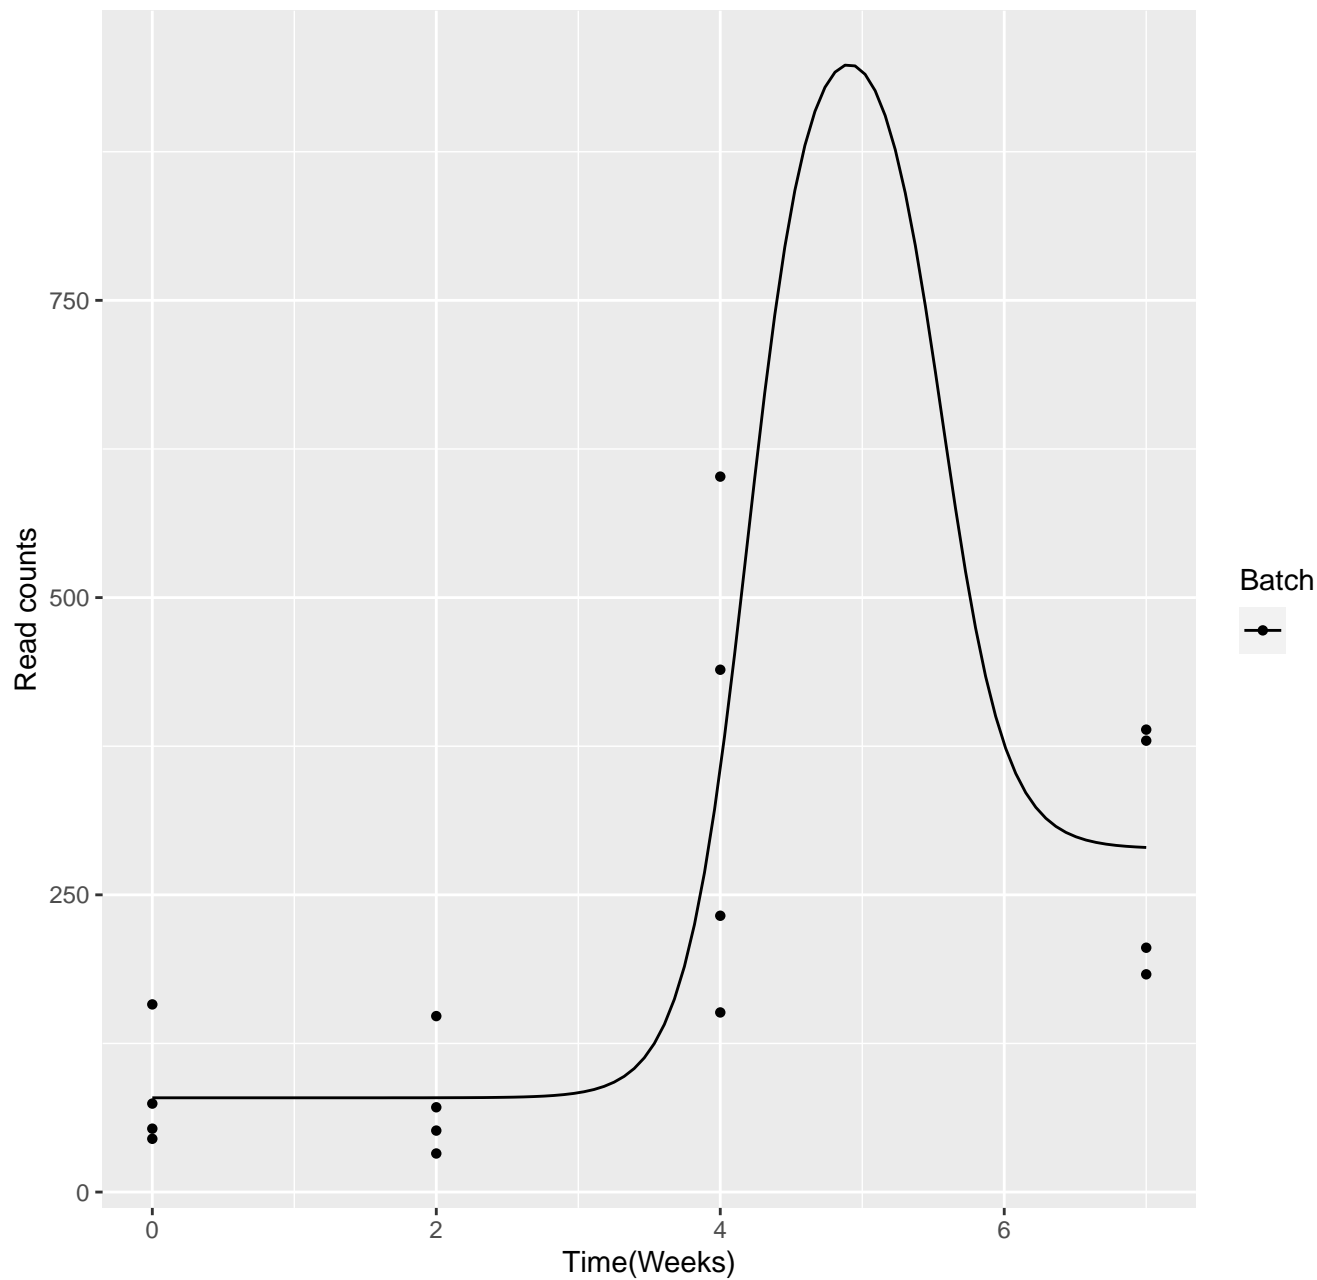

LZTS2:  $\log_{10} q = -3.37$

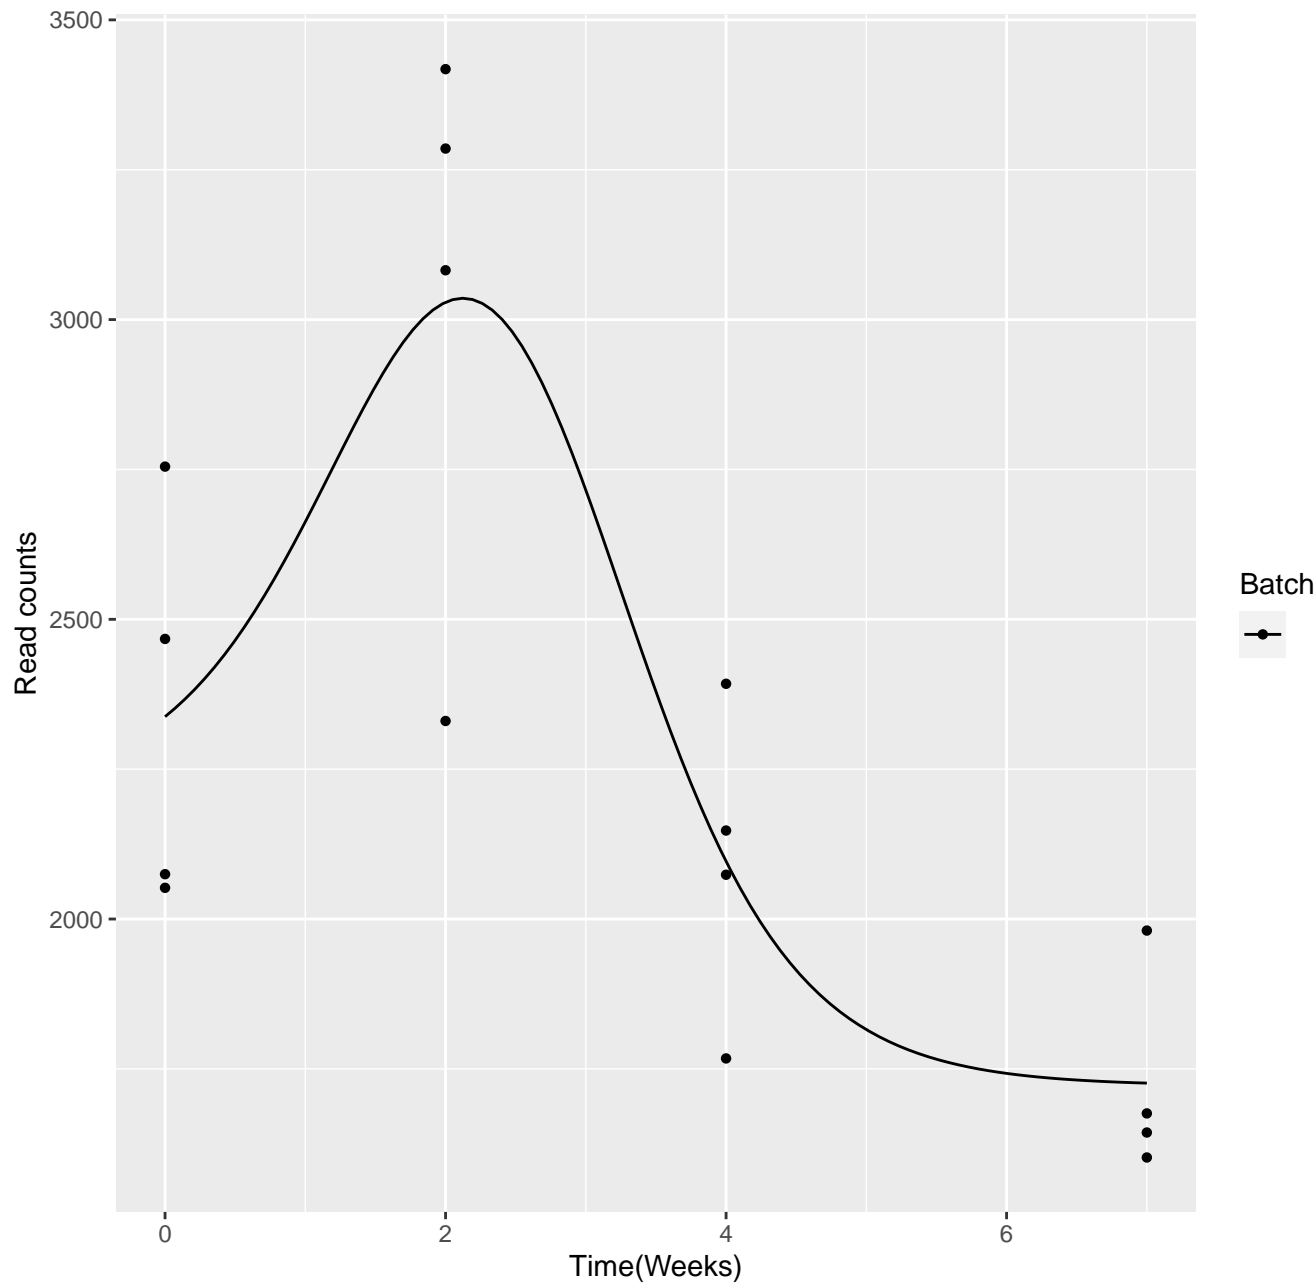

XDH:  $\log_{10} q = -3.37$

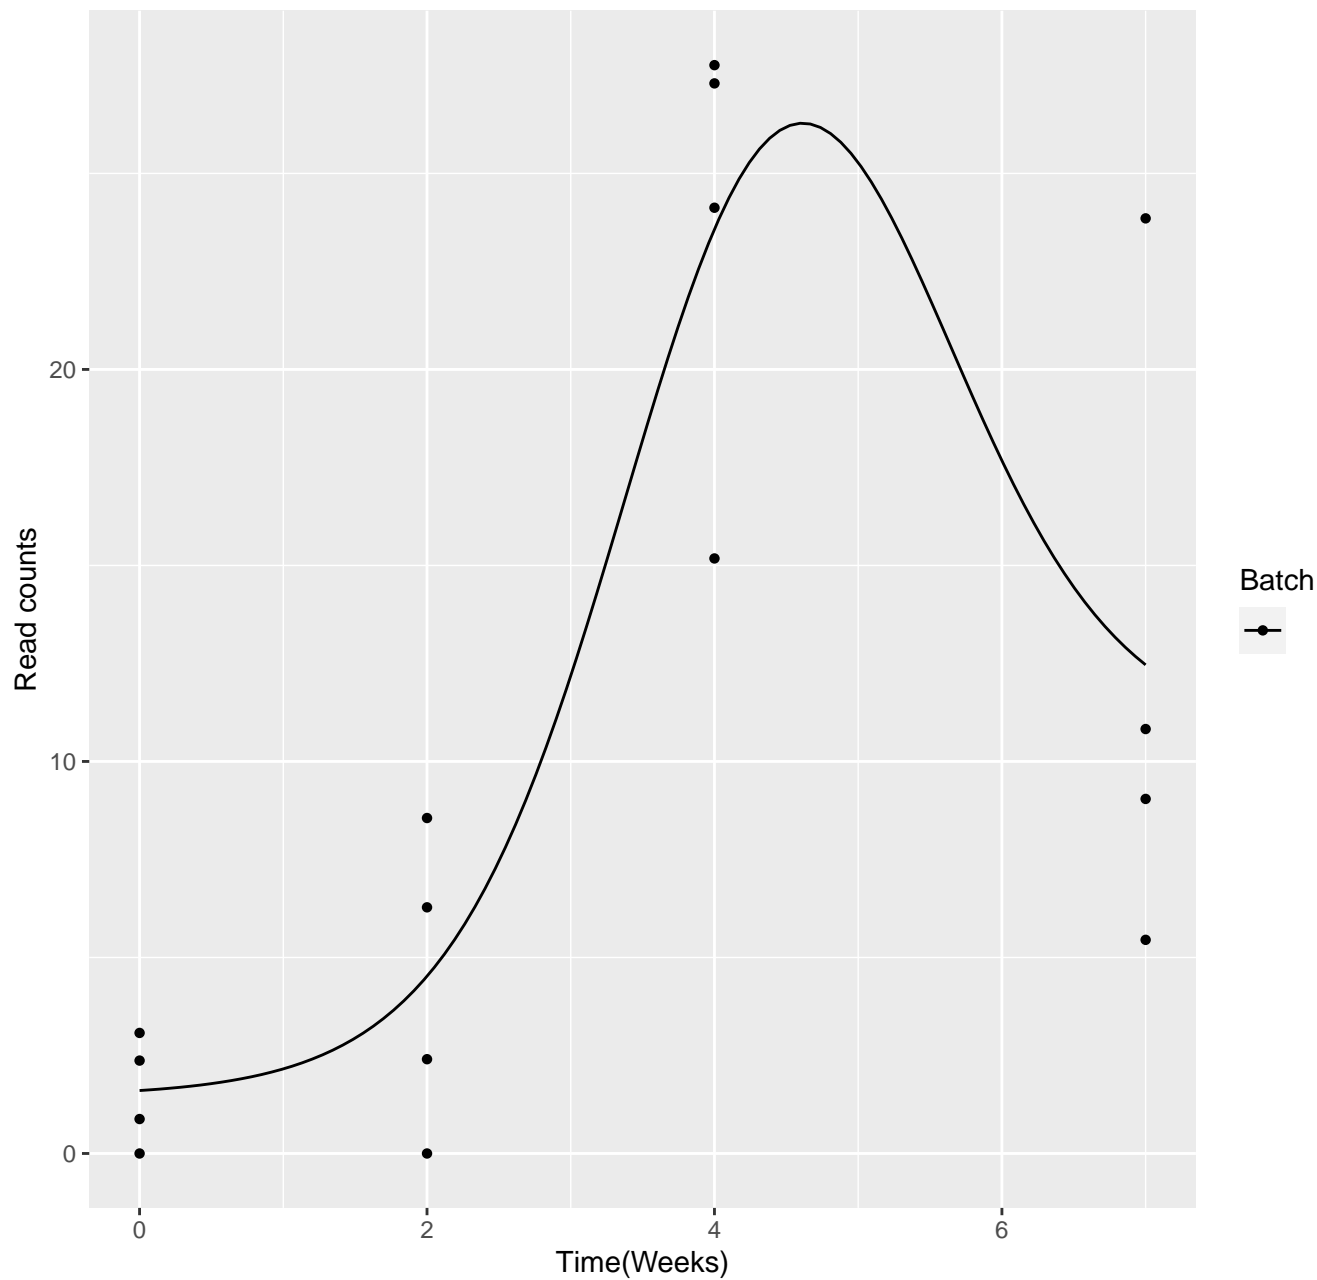

SORBS1:  $\log_{10} q = -3.37$

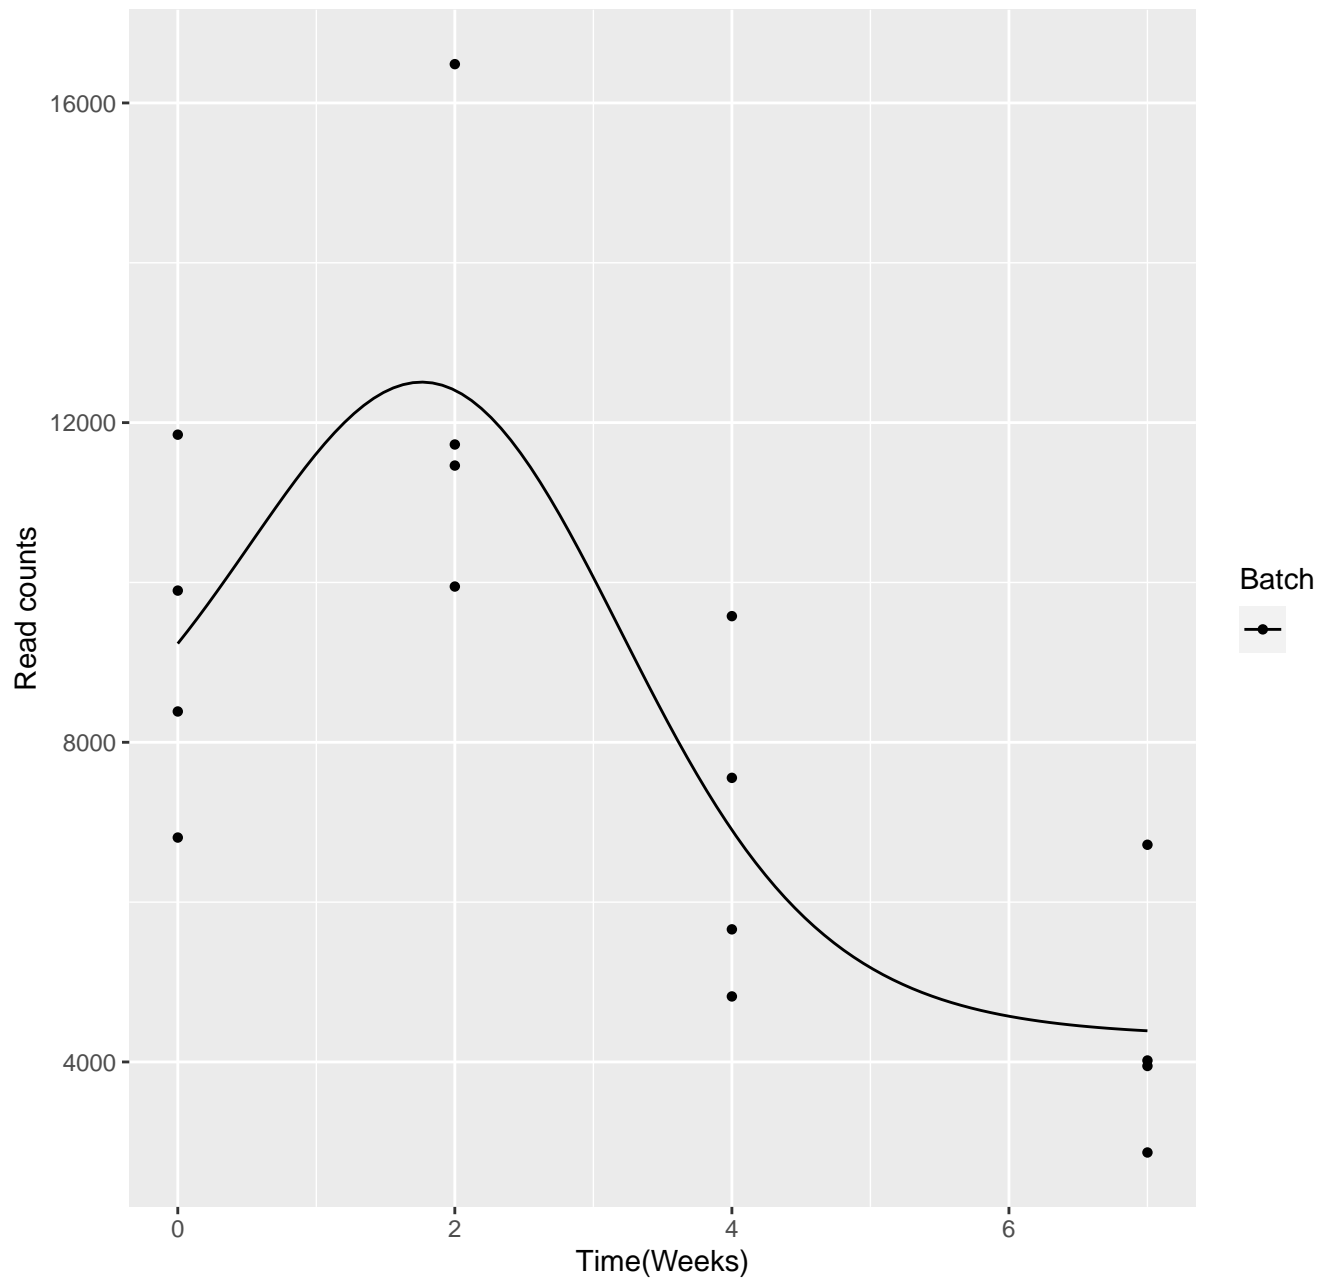

ARHGAP4:  $\log_{10} q = -3.37$

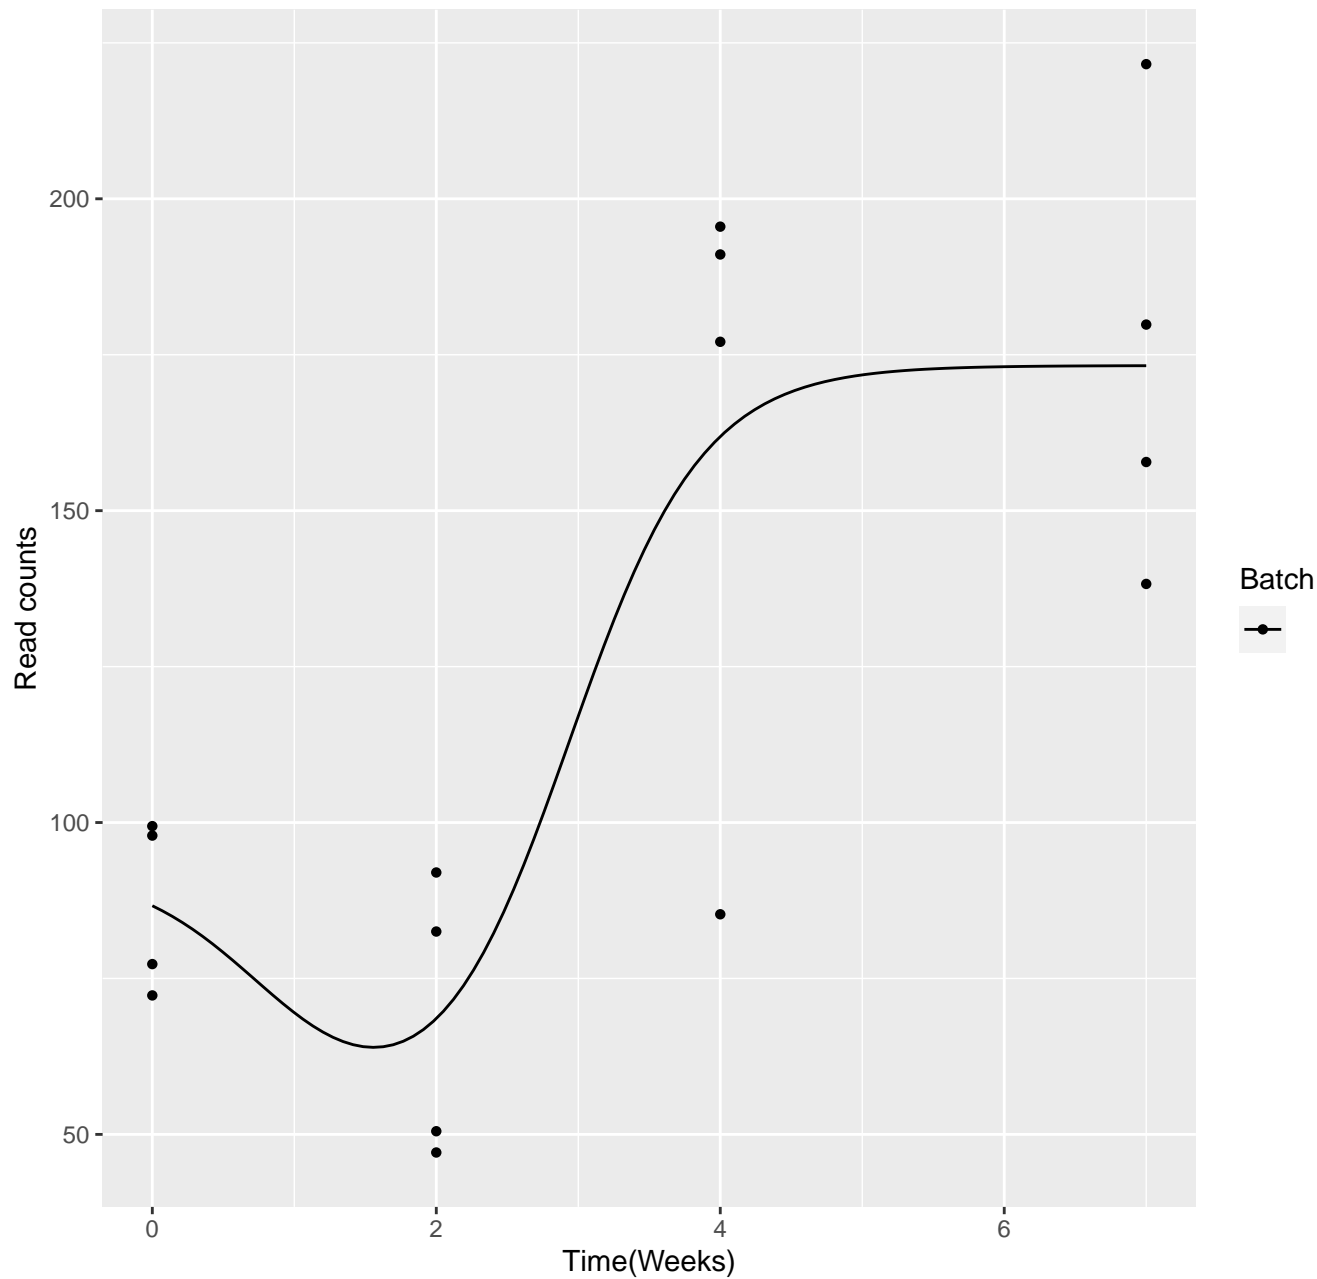

KCTD15:  $\log_{10} q = -3.37$

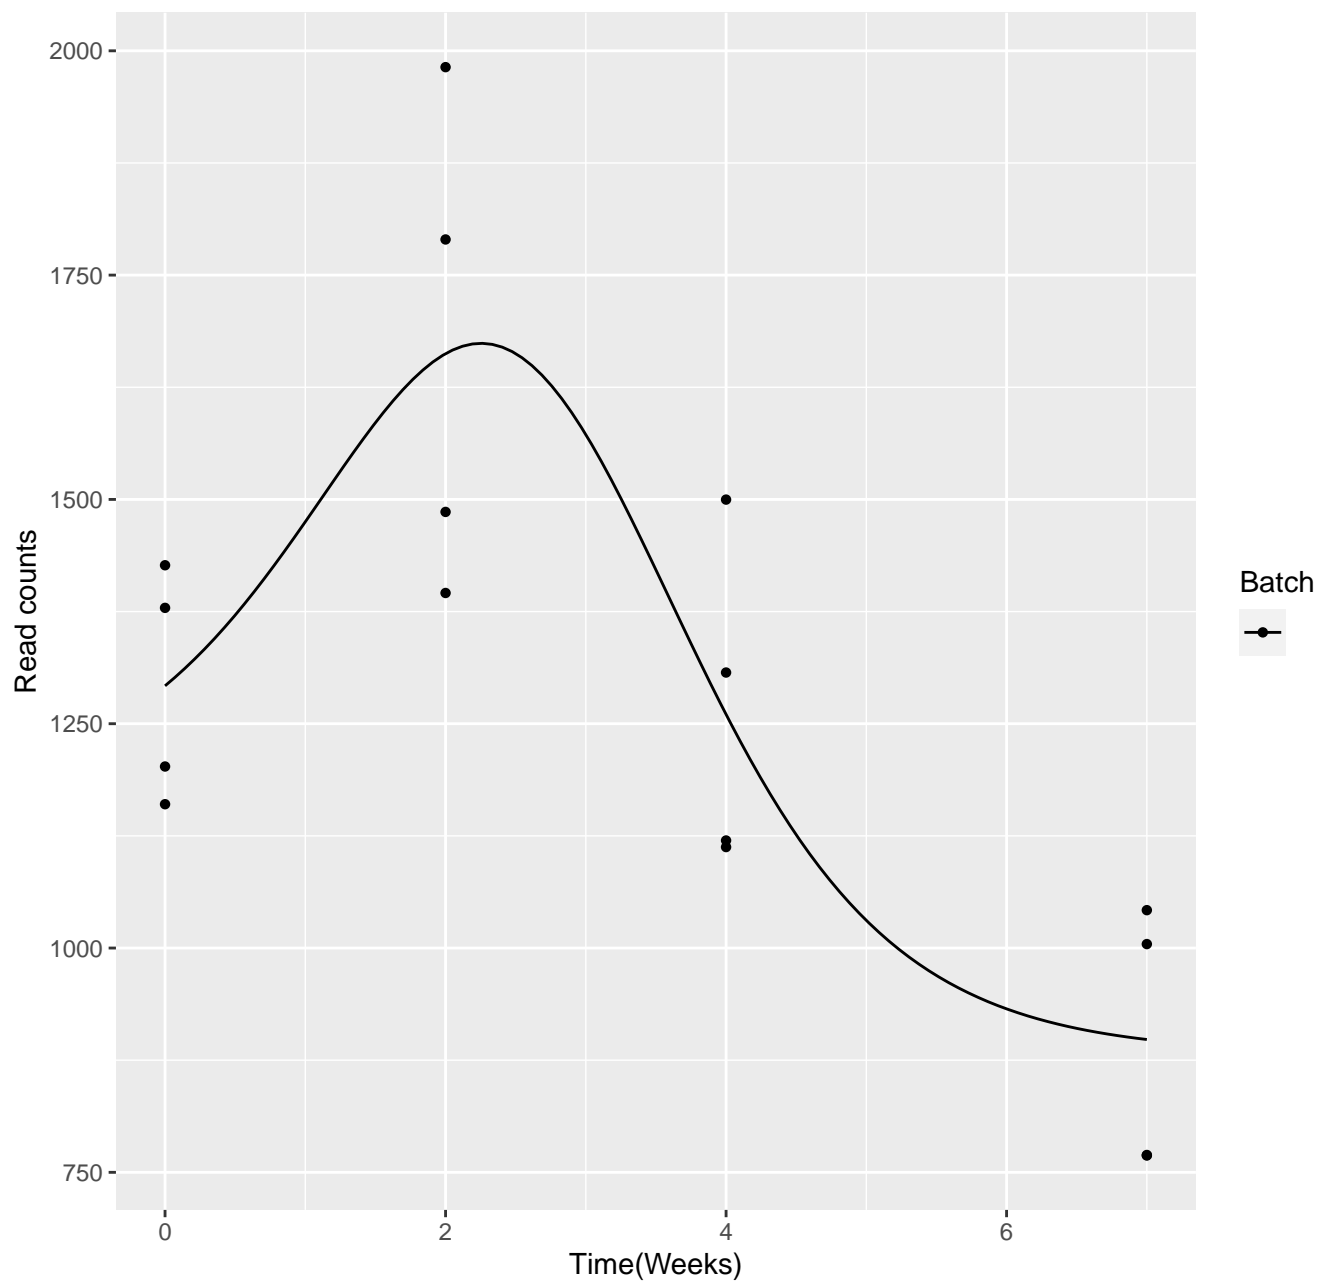



GLP2R:  $\log_{10} q = -3.36$

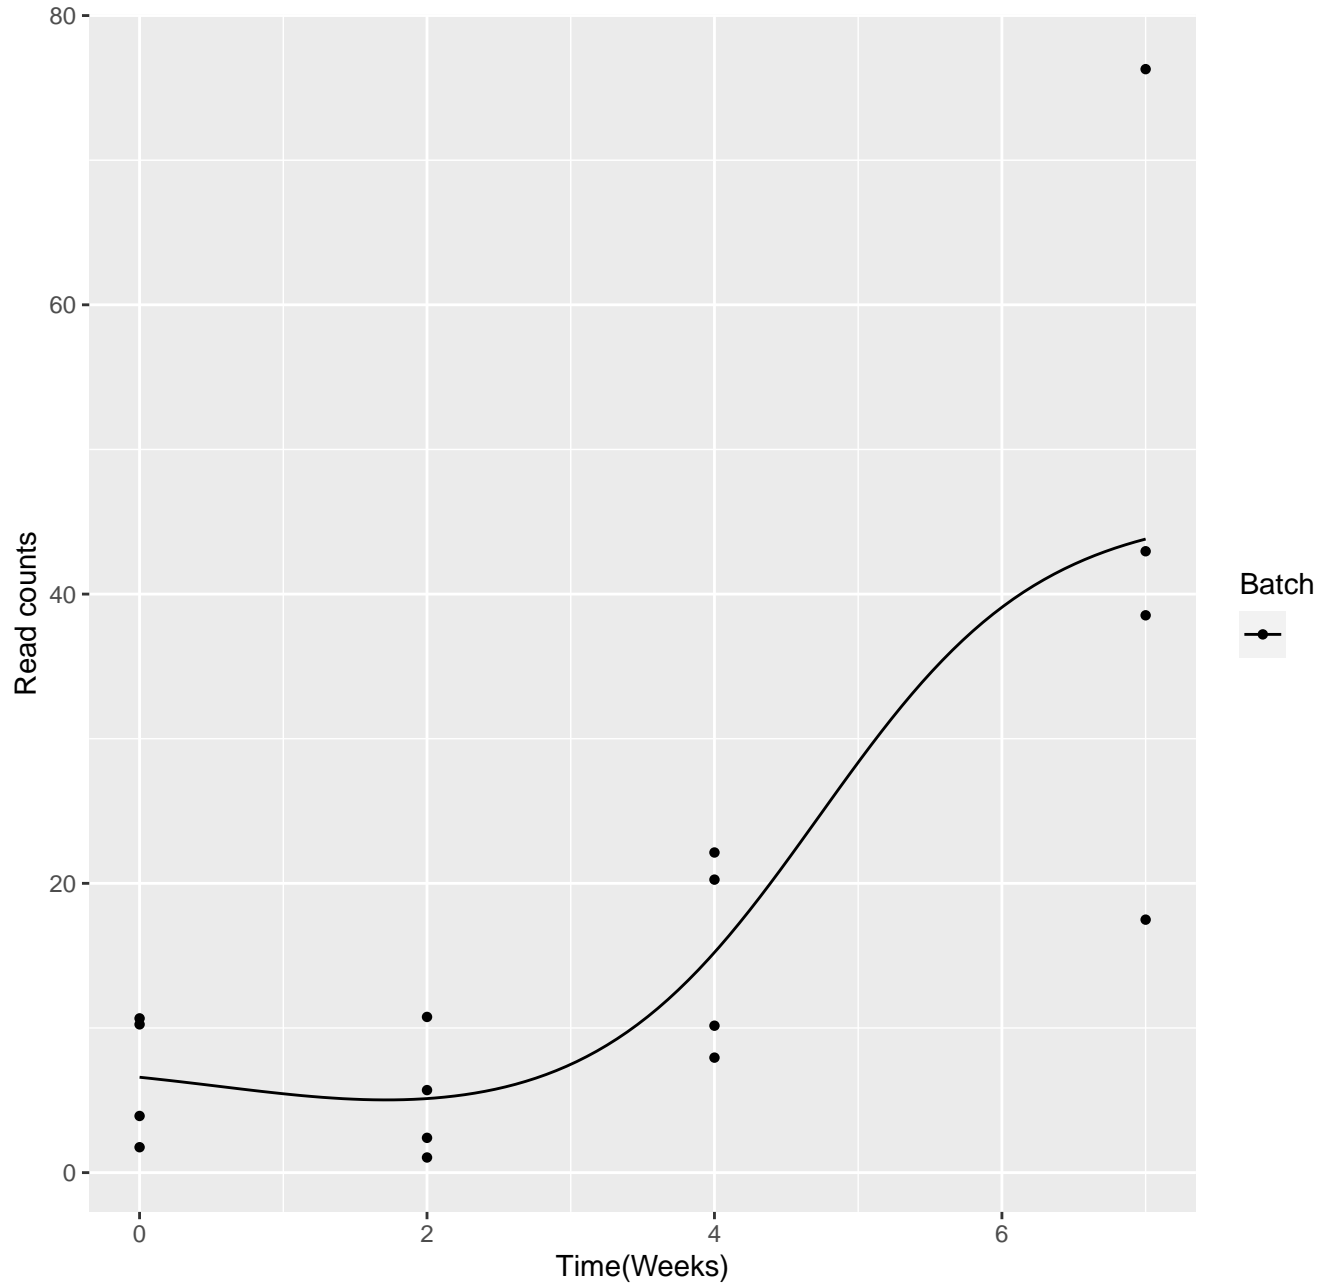

WTIP:  $\log_{10} q = -3.36$

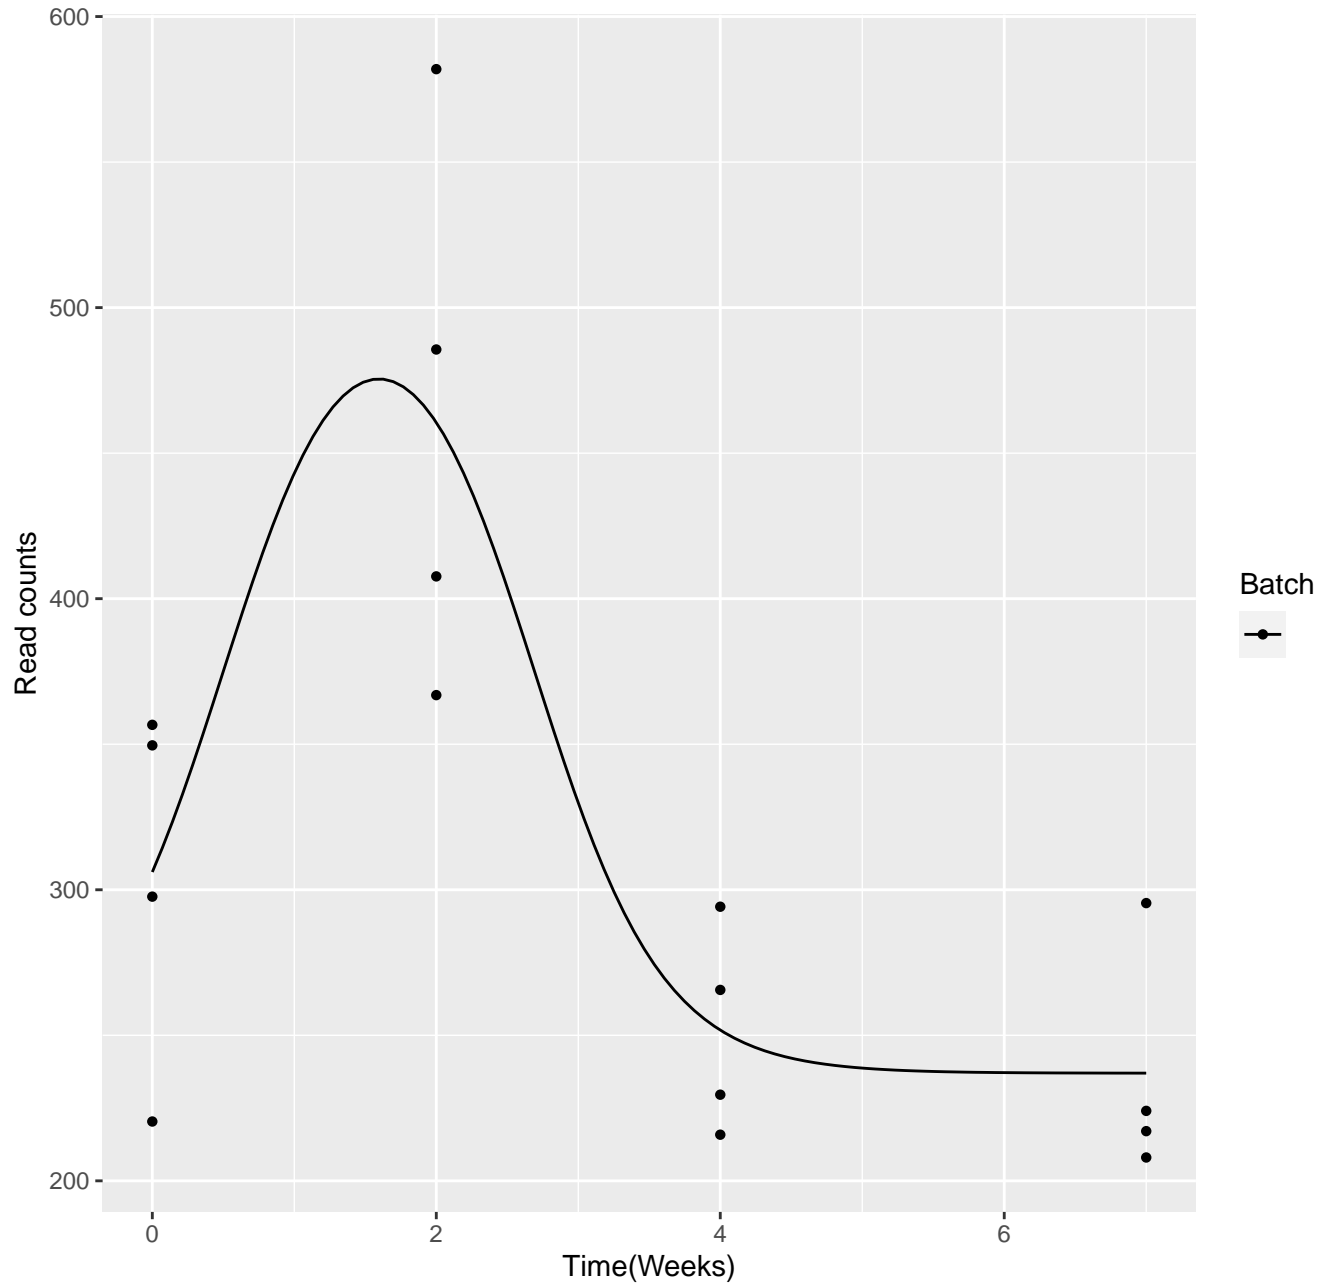

GSS:  $\log_{10} q = -3.36$

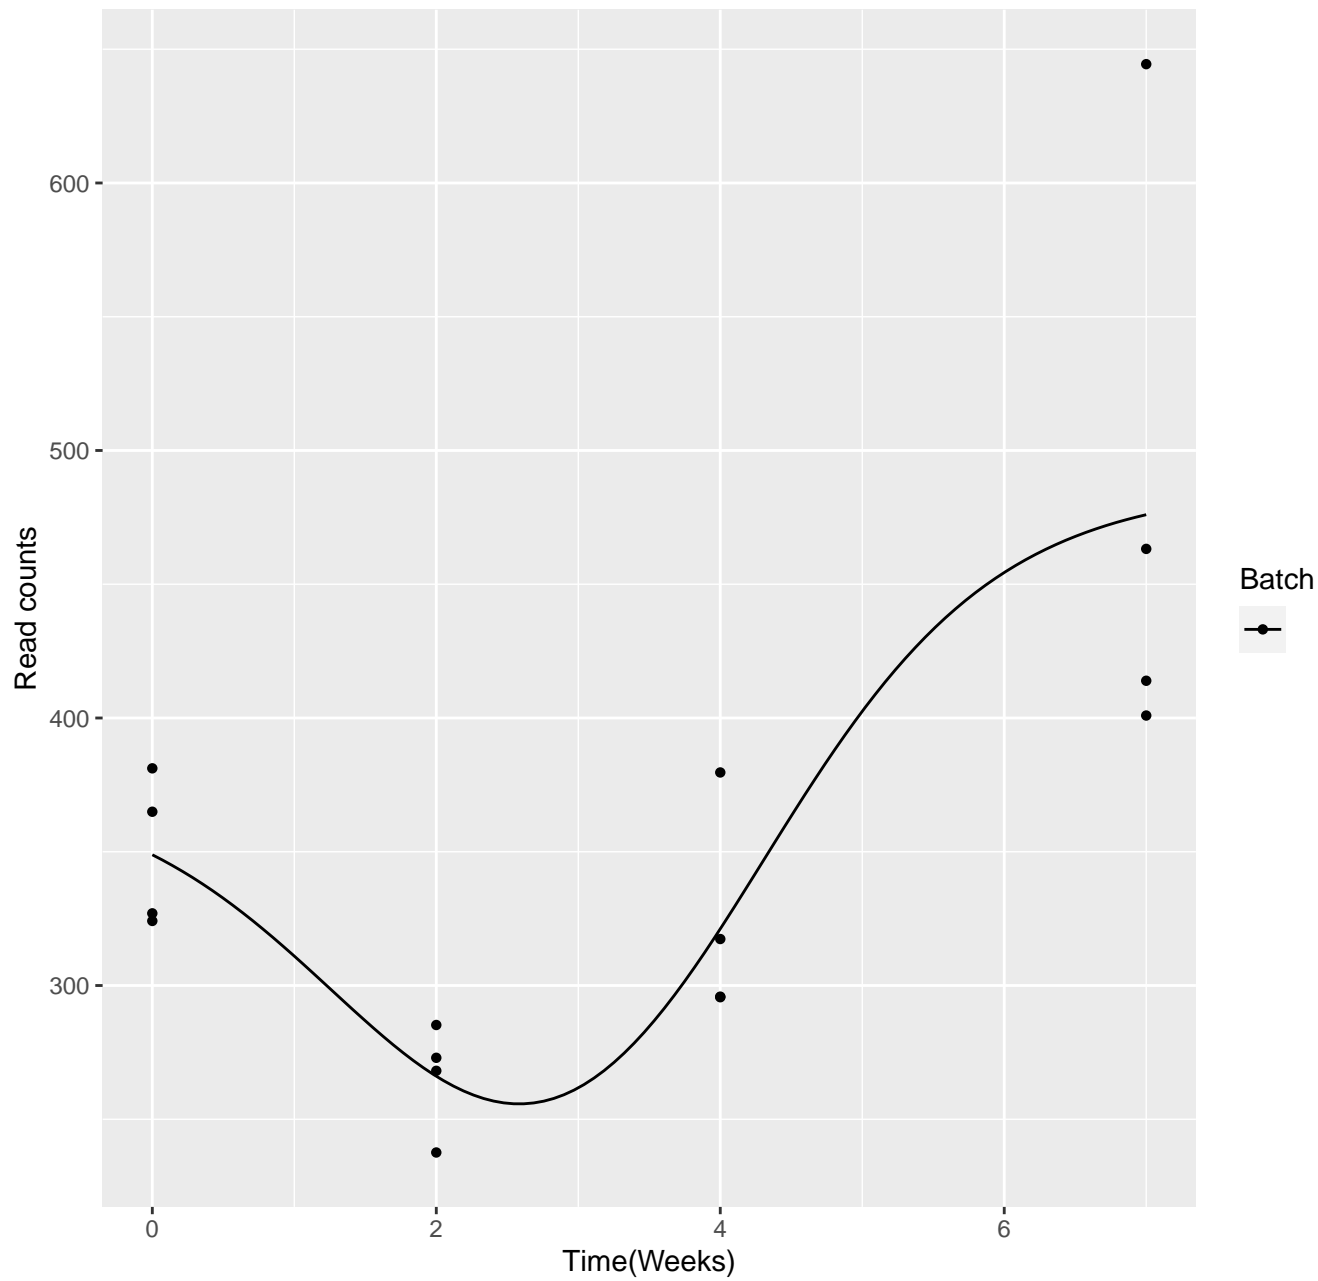

LOC100340175:  $\log_{10} q = -3.35$

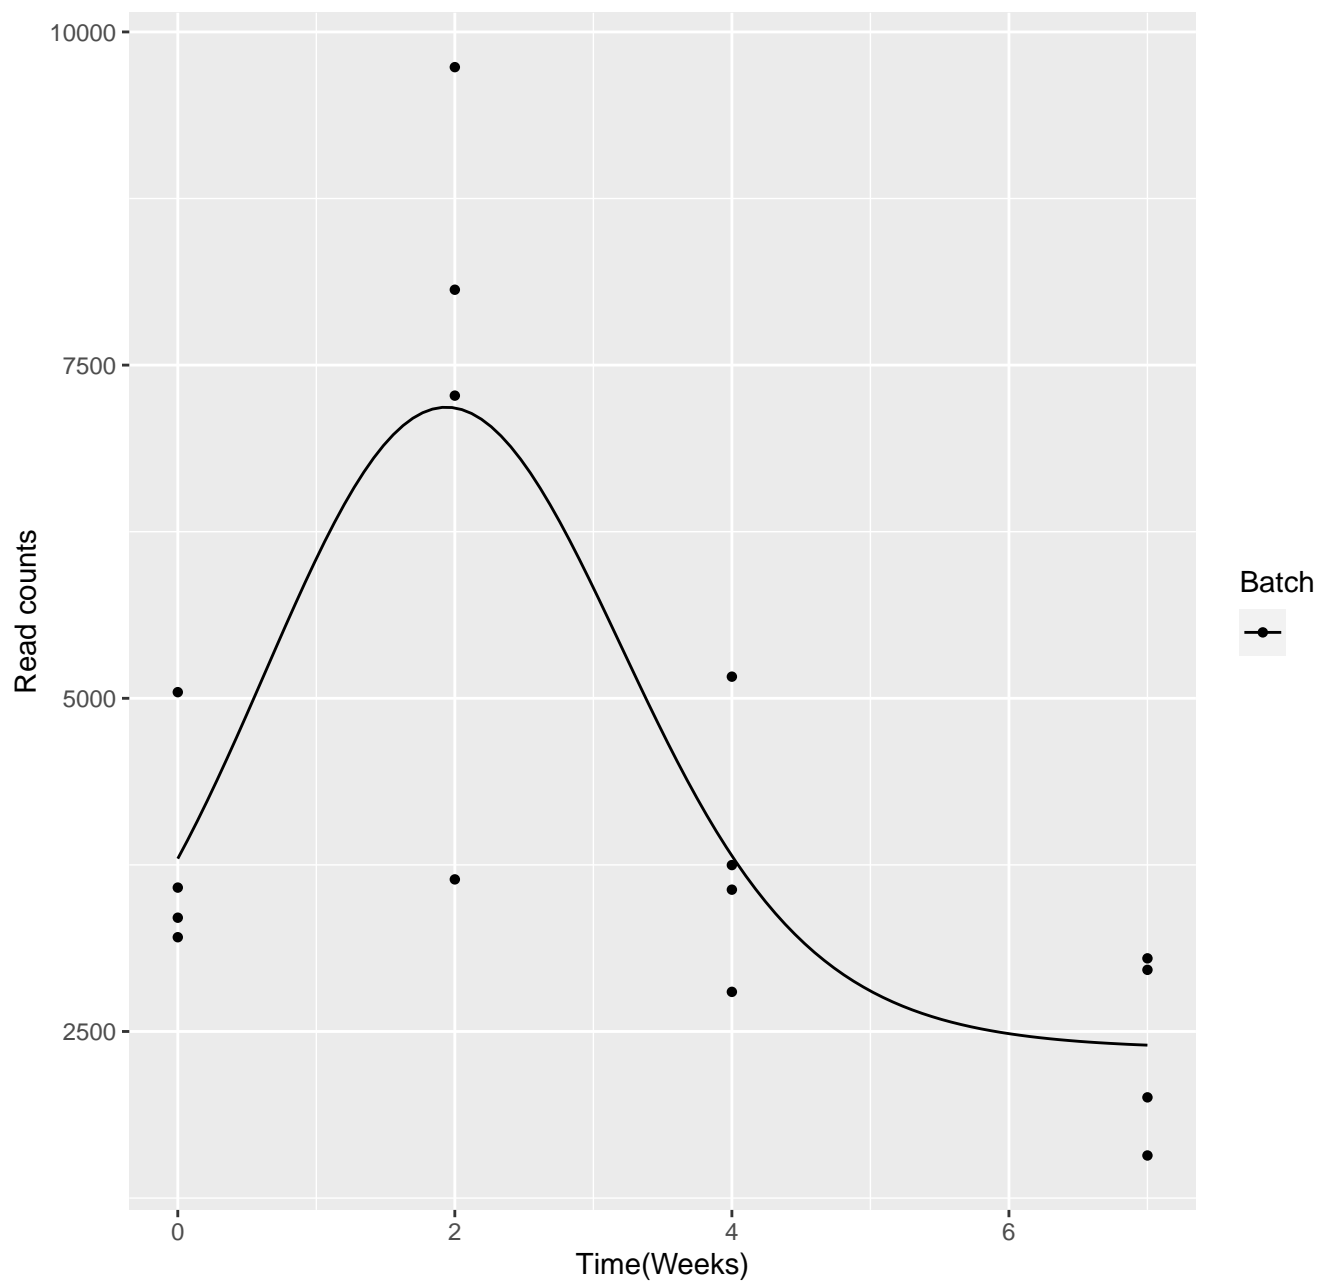

ANKFY1:  $\log_{10} q = -3.35$

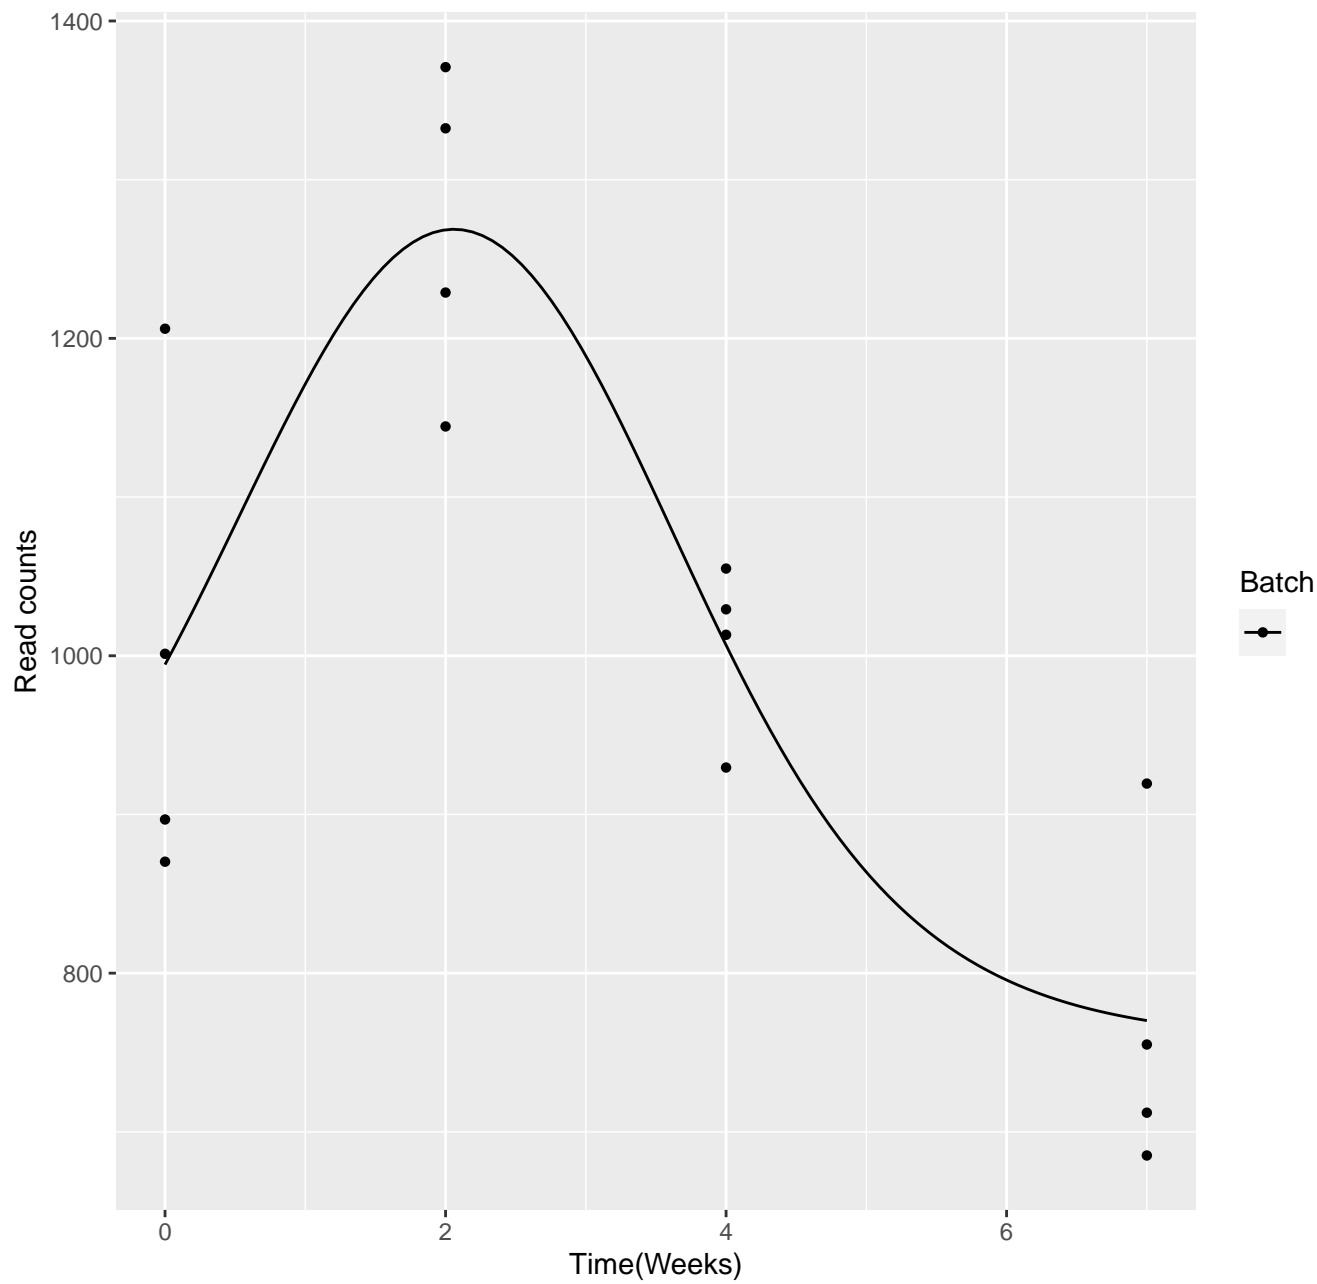

IPO9:  $\log_{10} q = -3.35$

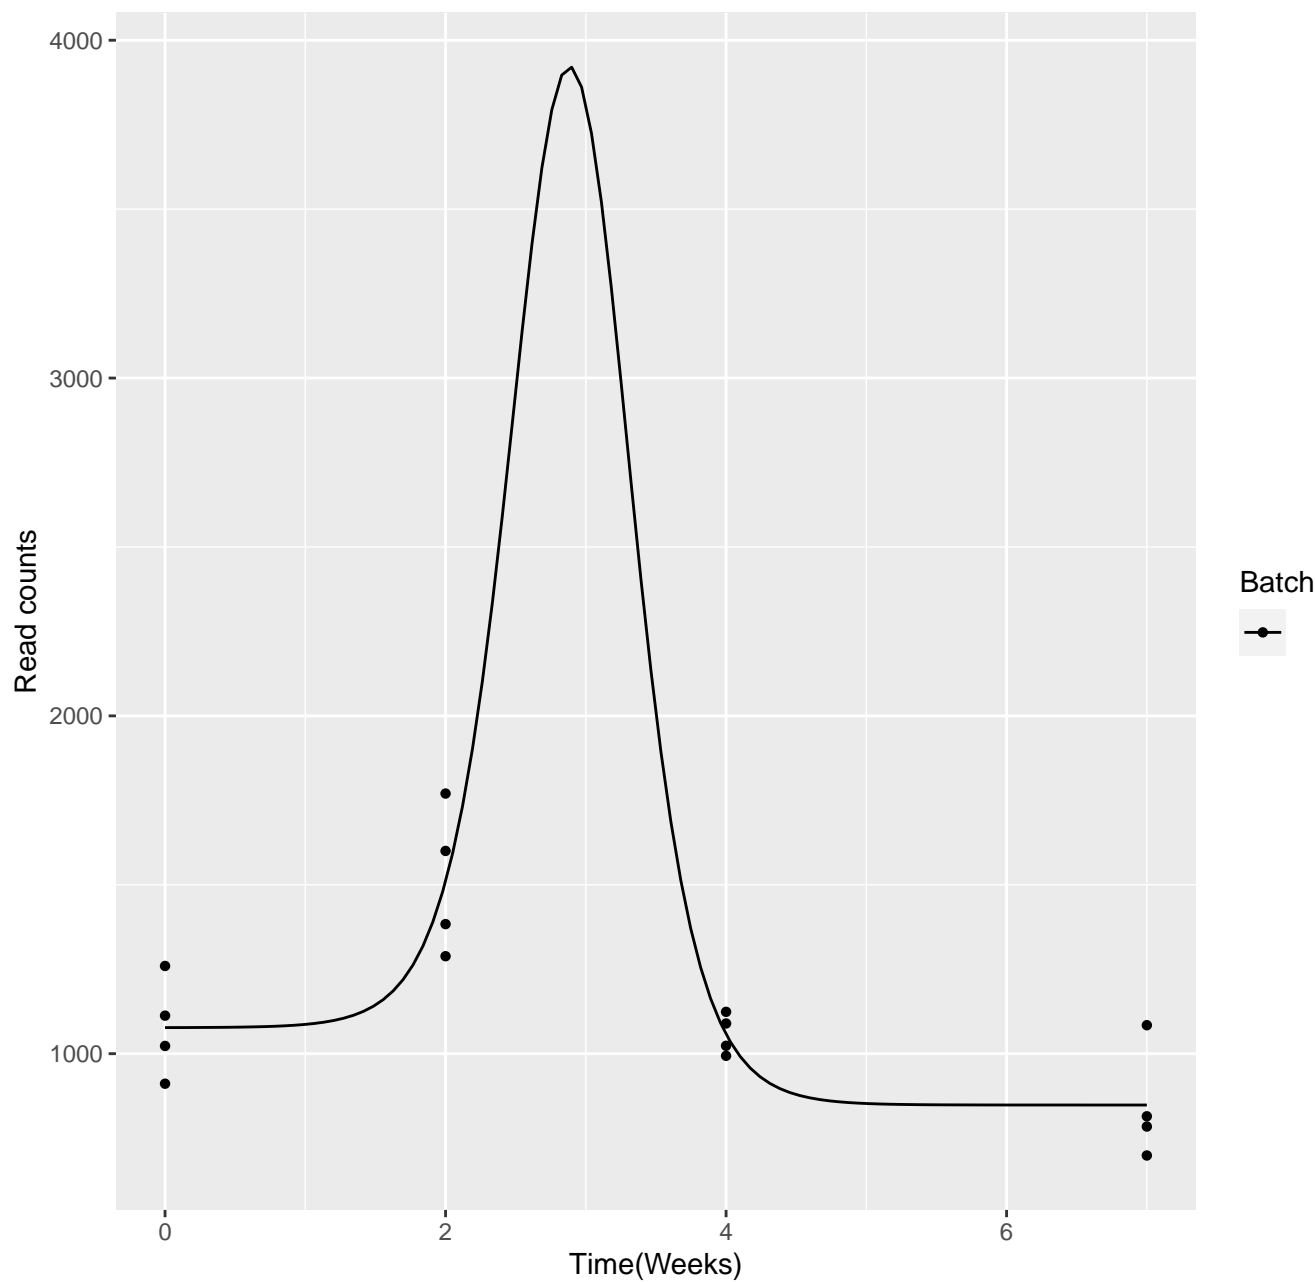

LOC103349585:  $\log_{10} q = -3.34$

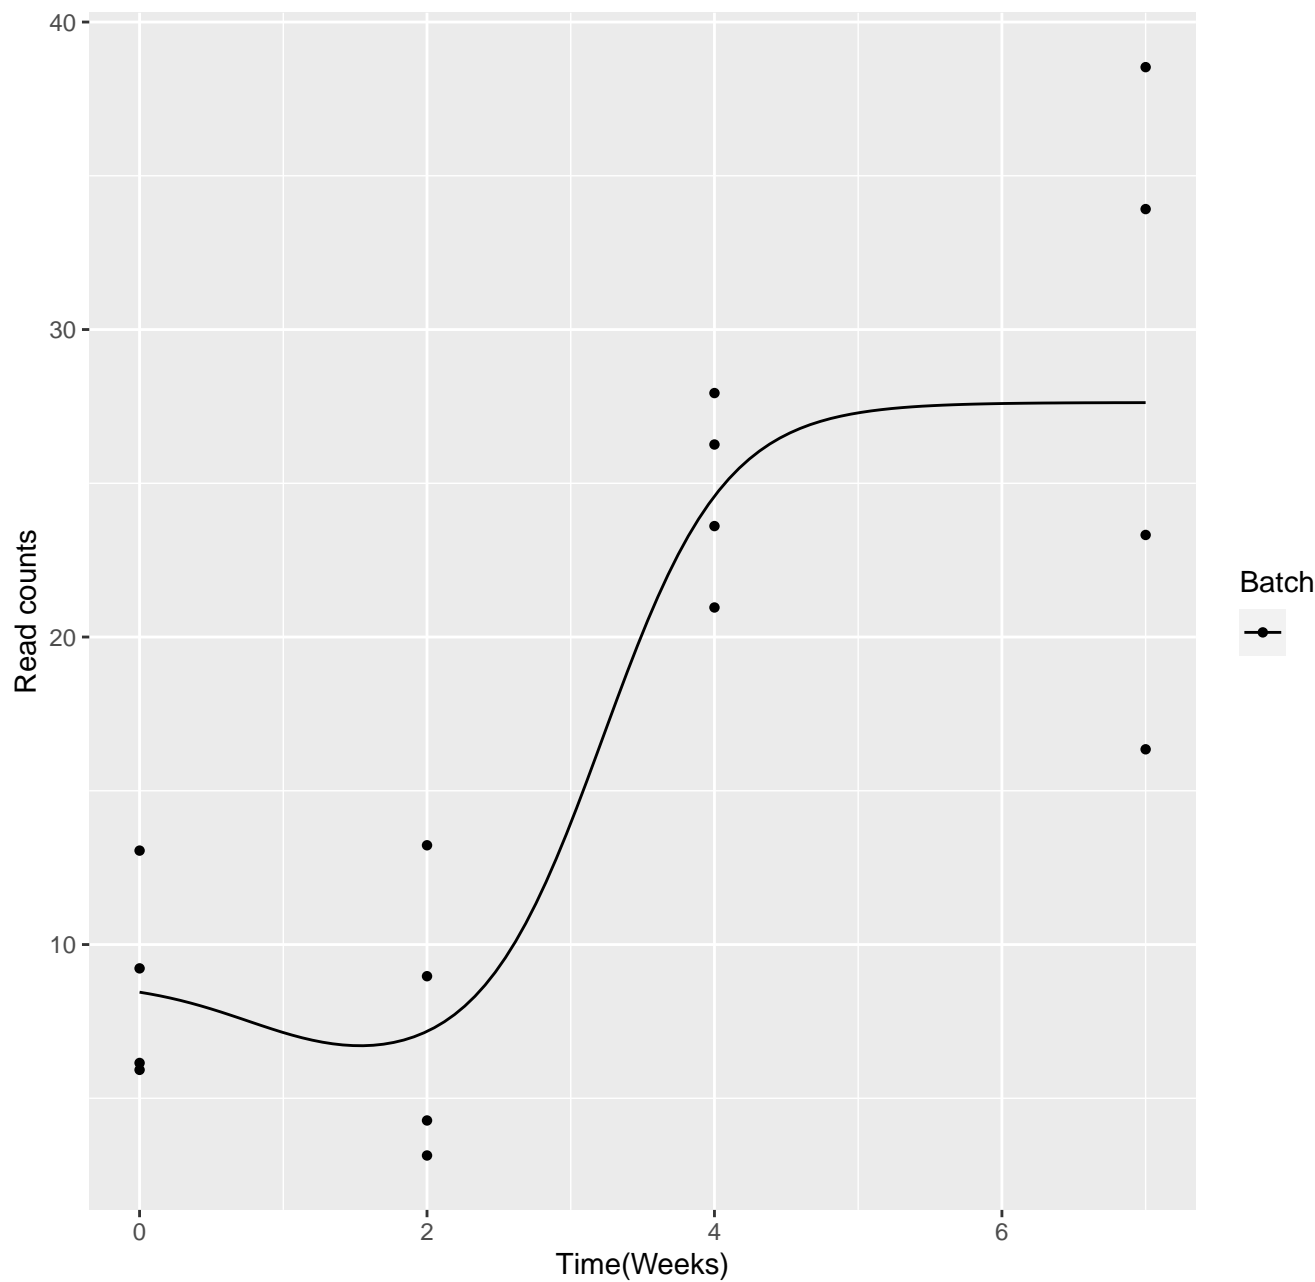

RPA3:  $\log_{10} q = -3.34$

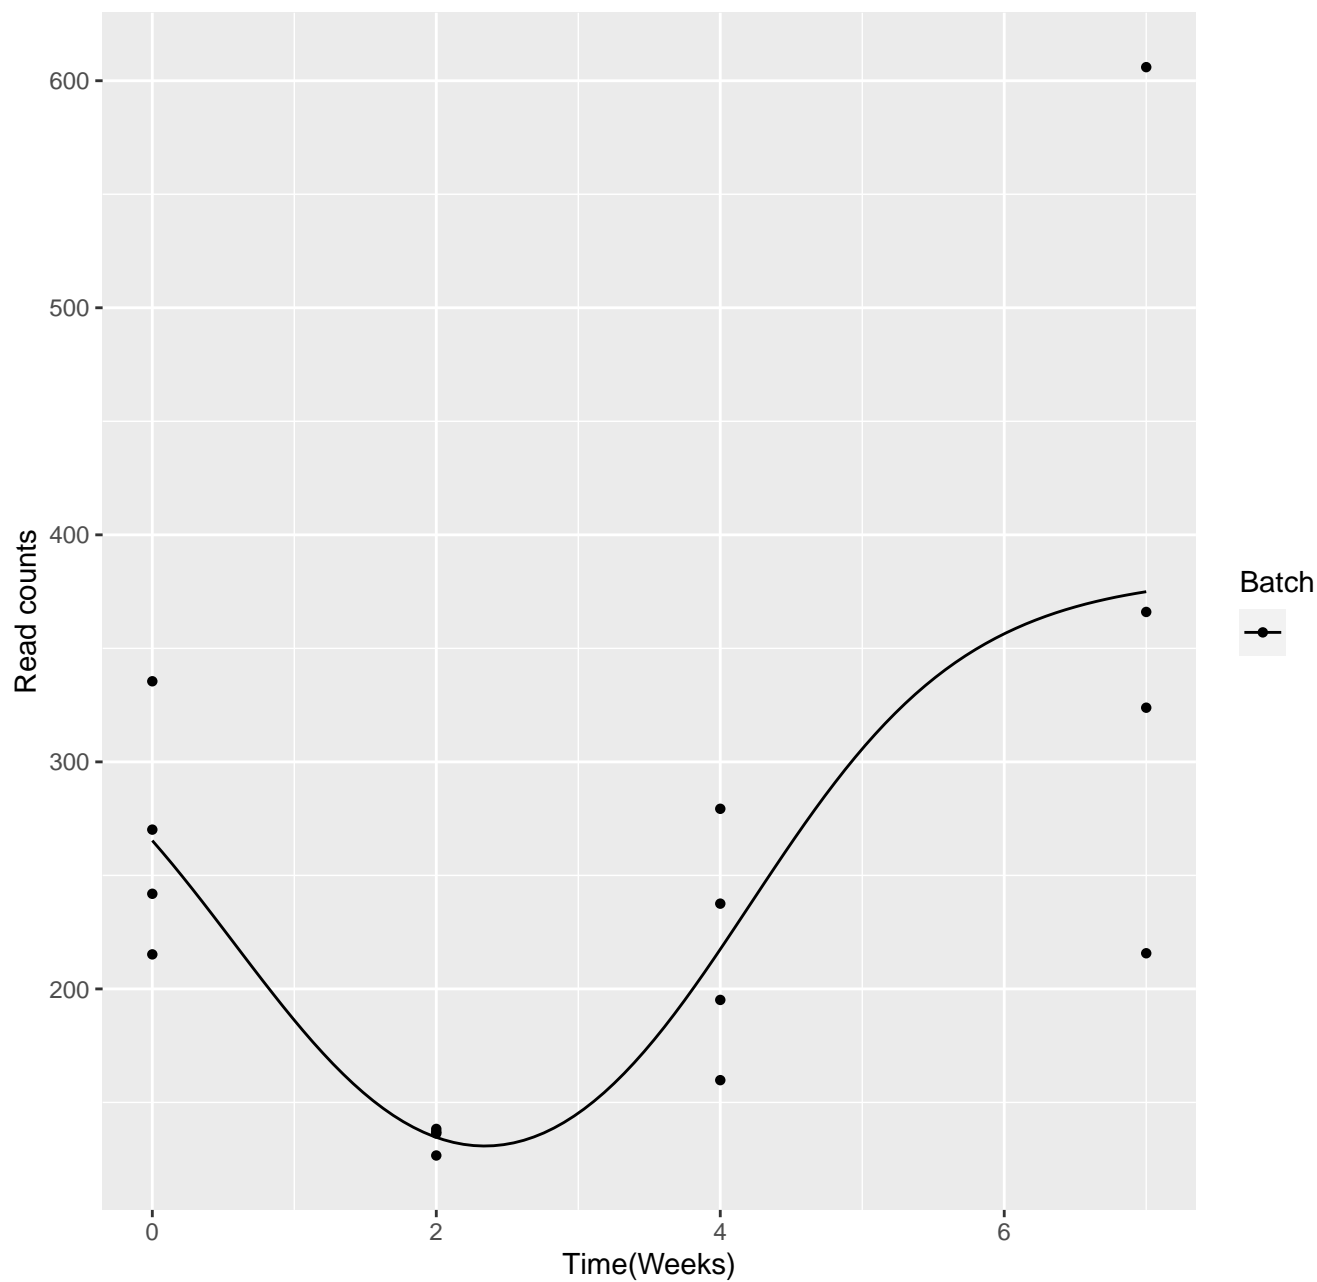



TFCP2L1:  $\log_{10} q = -3.34$

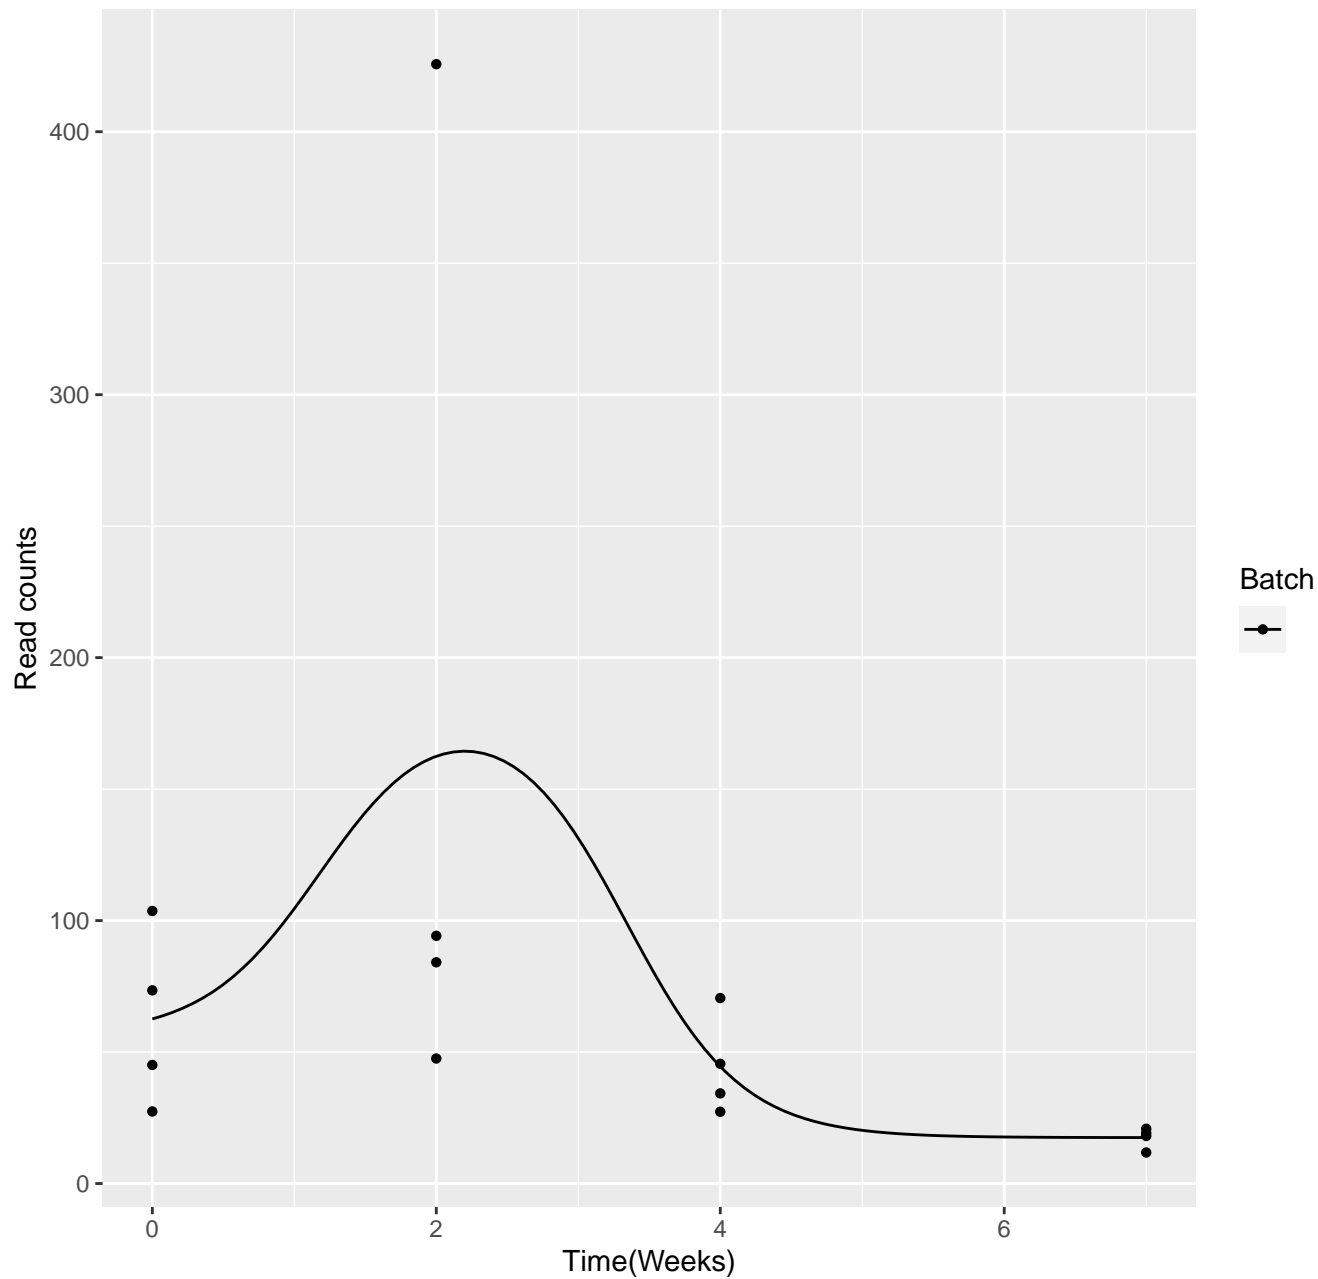

ESD:  $\log_{10} q = -3.34$

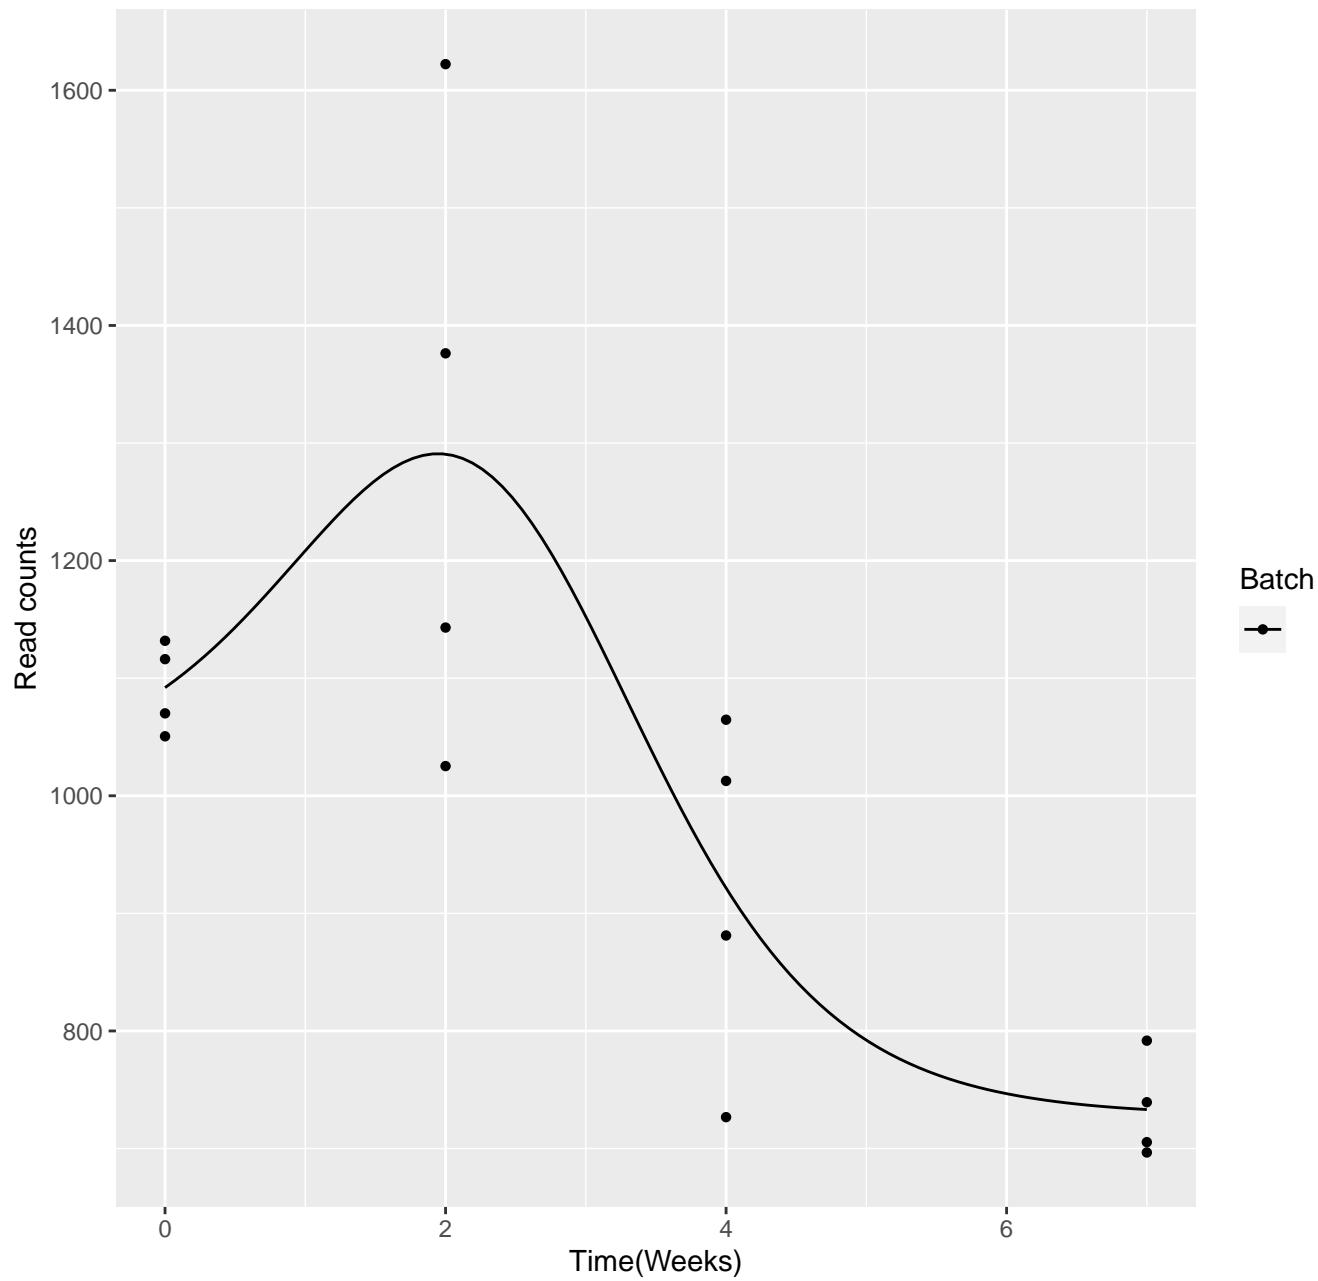

LRRK1:  $\log_{10} q = -3.34$

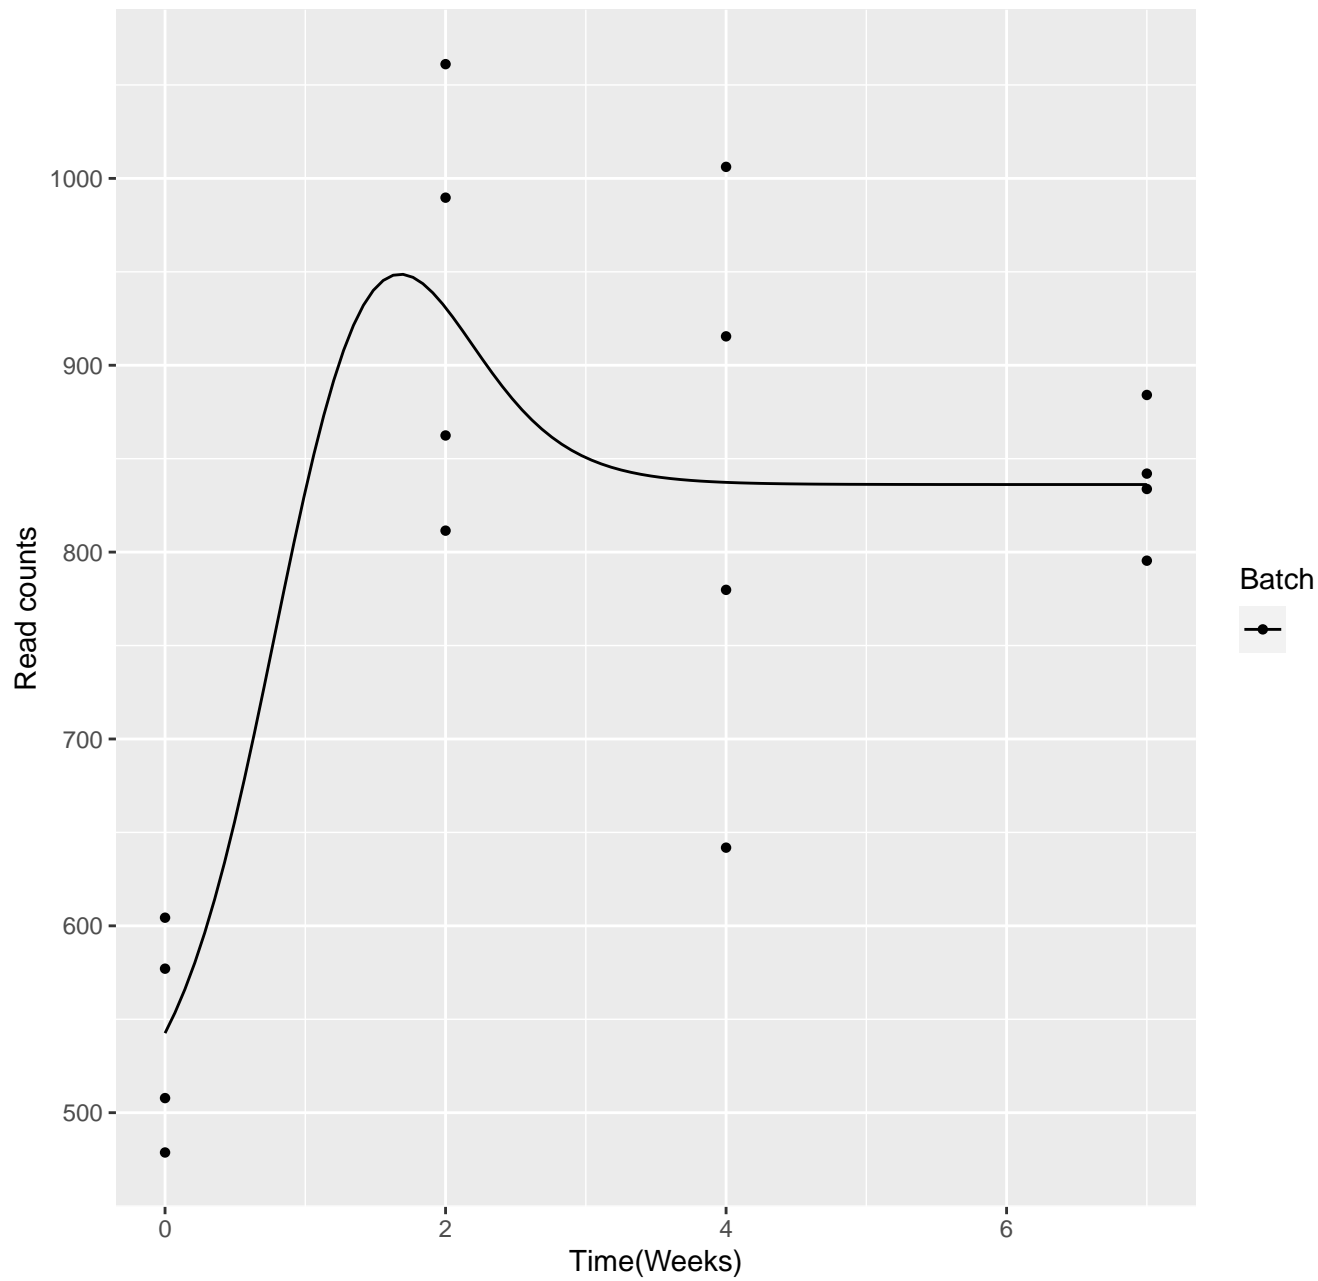

INAVA:  $\log_{10} q = -3.34$

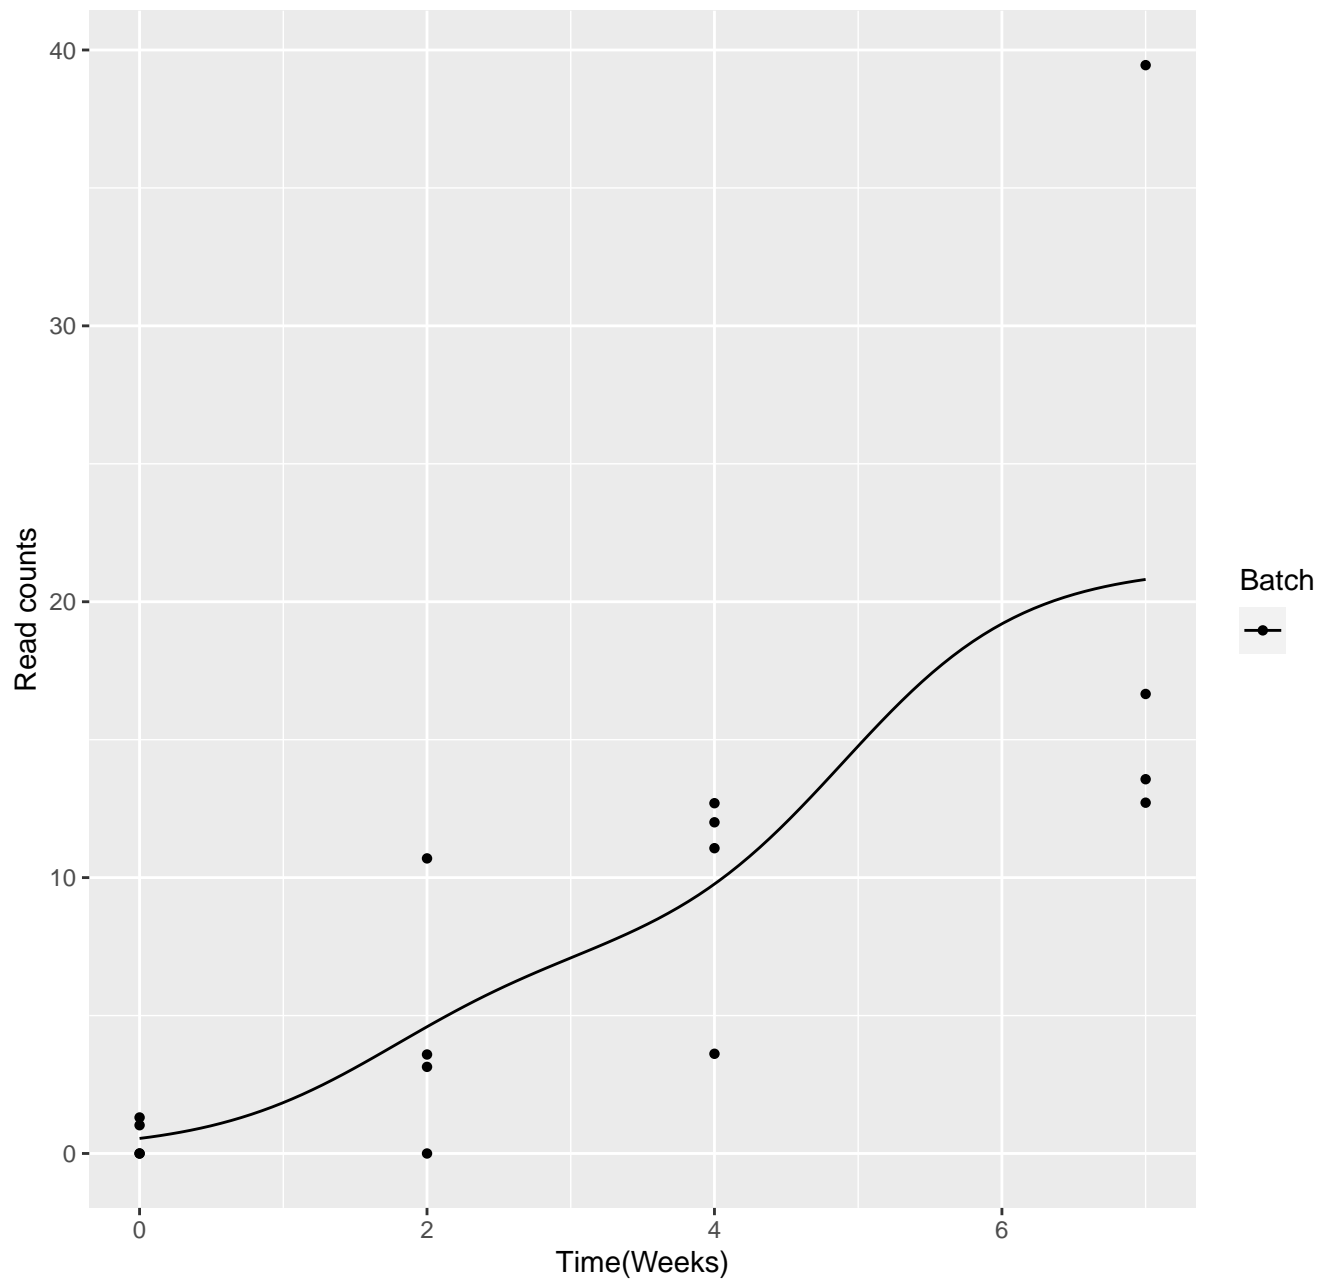

FAT1:  $\log_{10} q = -3.32$

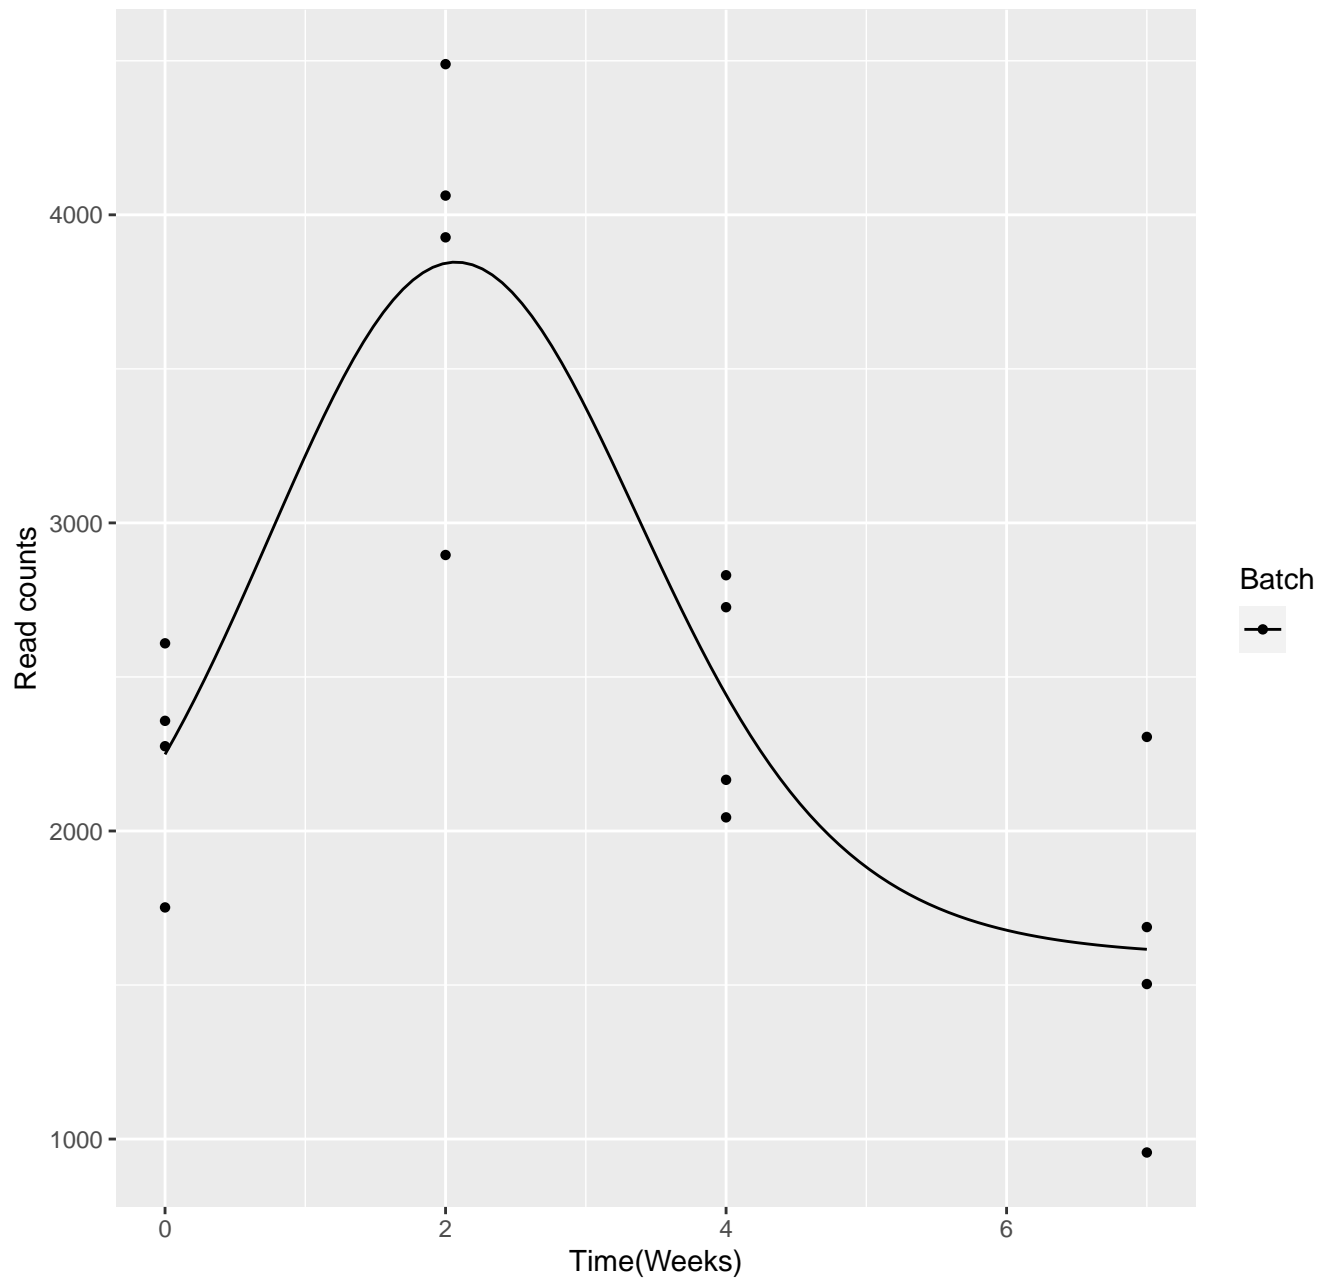

ADAMTS9:  $\log_{10} q = -3.32$

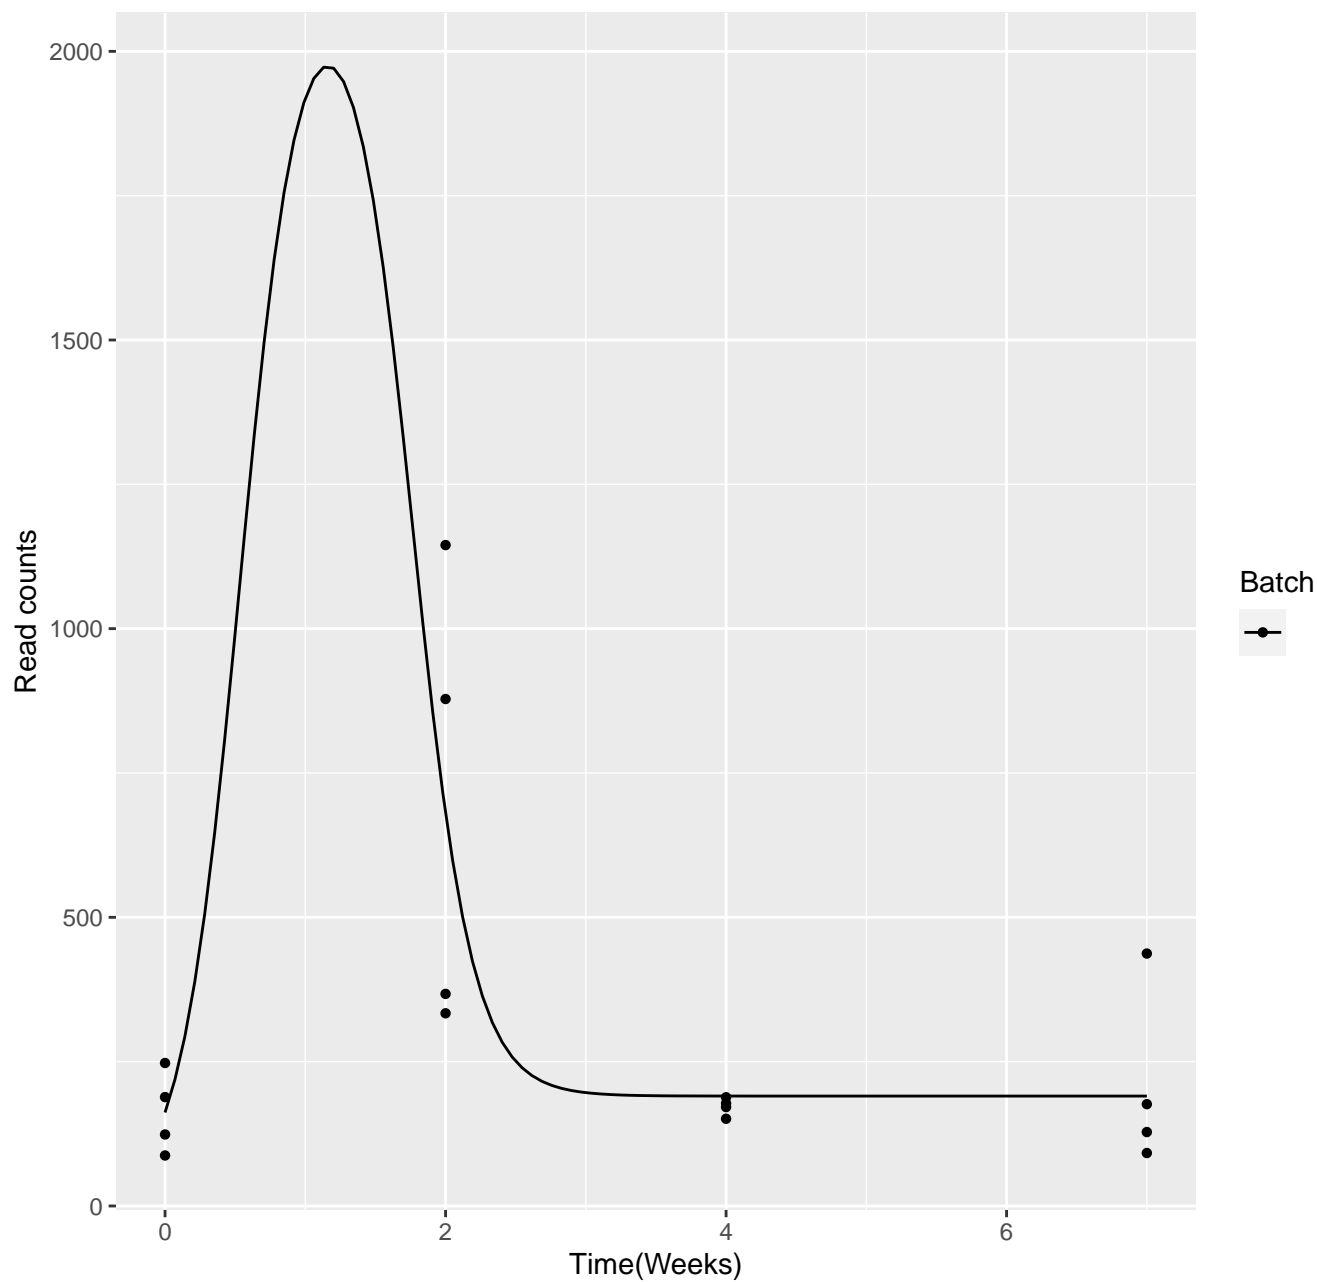

TMEM8B:  $\log_{10} q = -3.32$

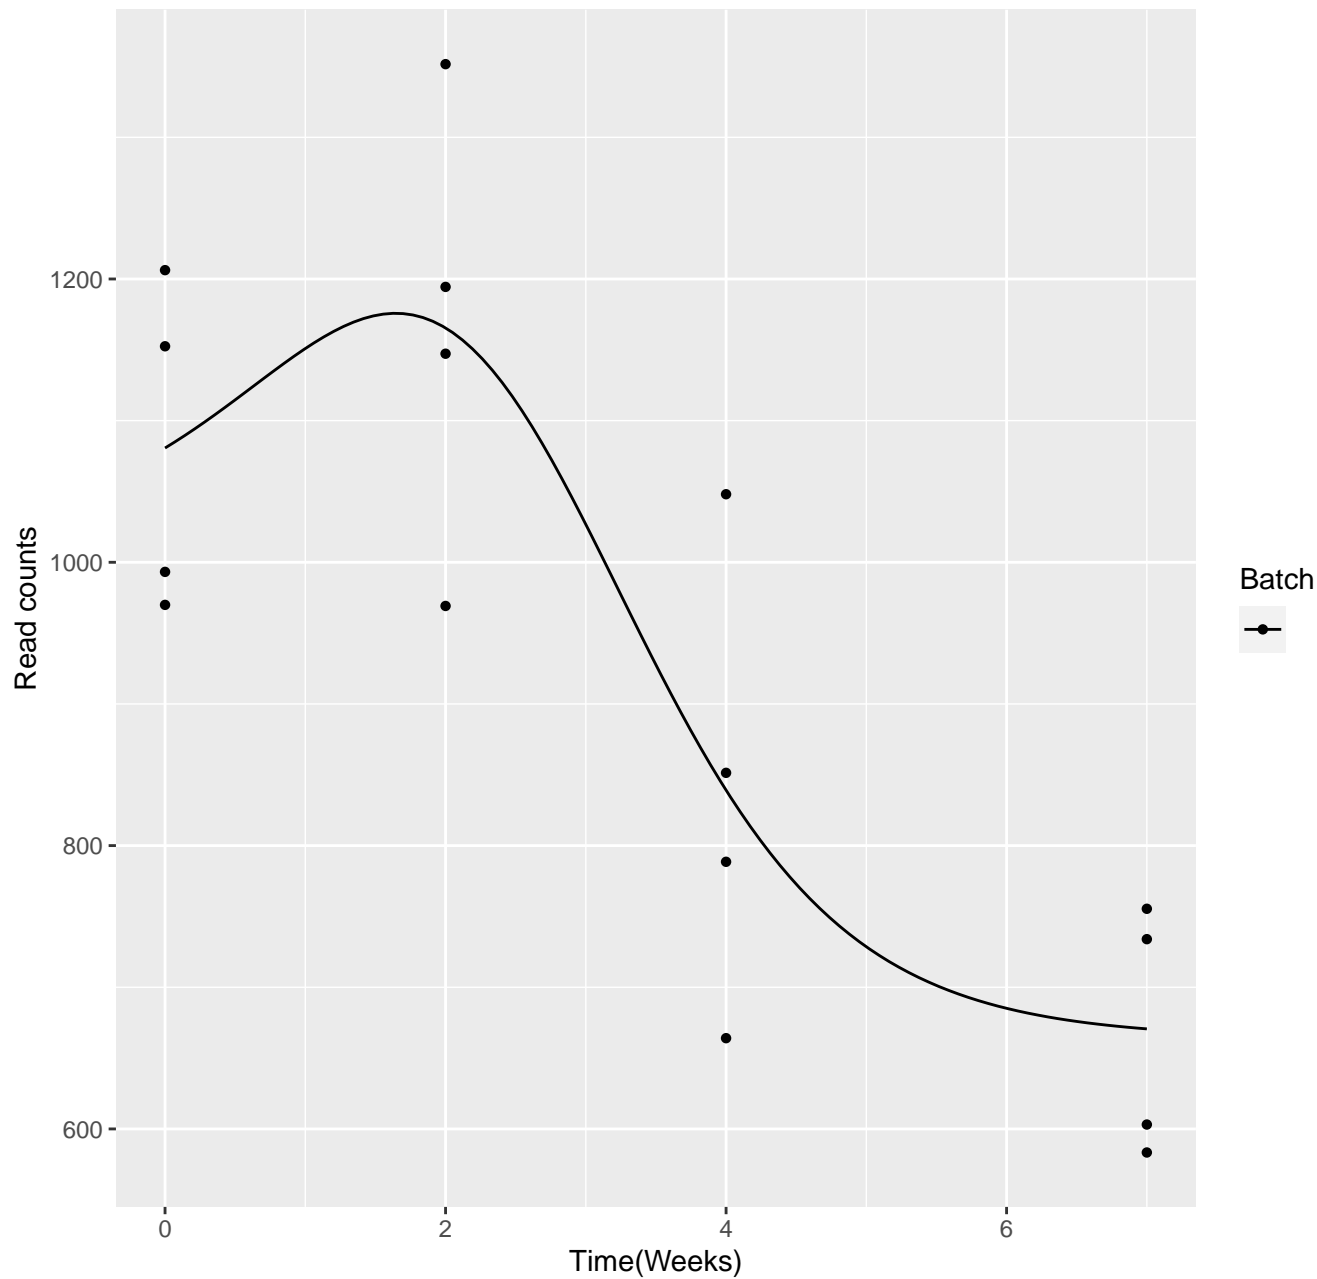

ZBTB38:  $\log_{10} q = -3.31$

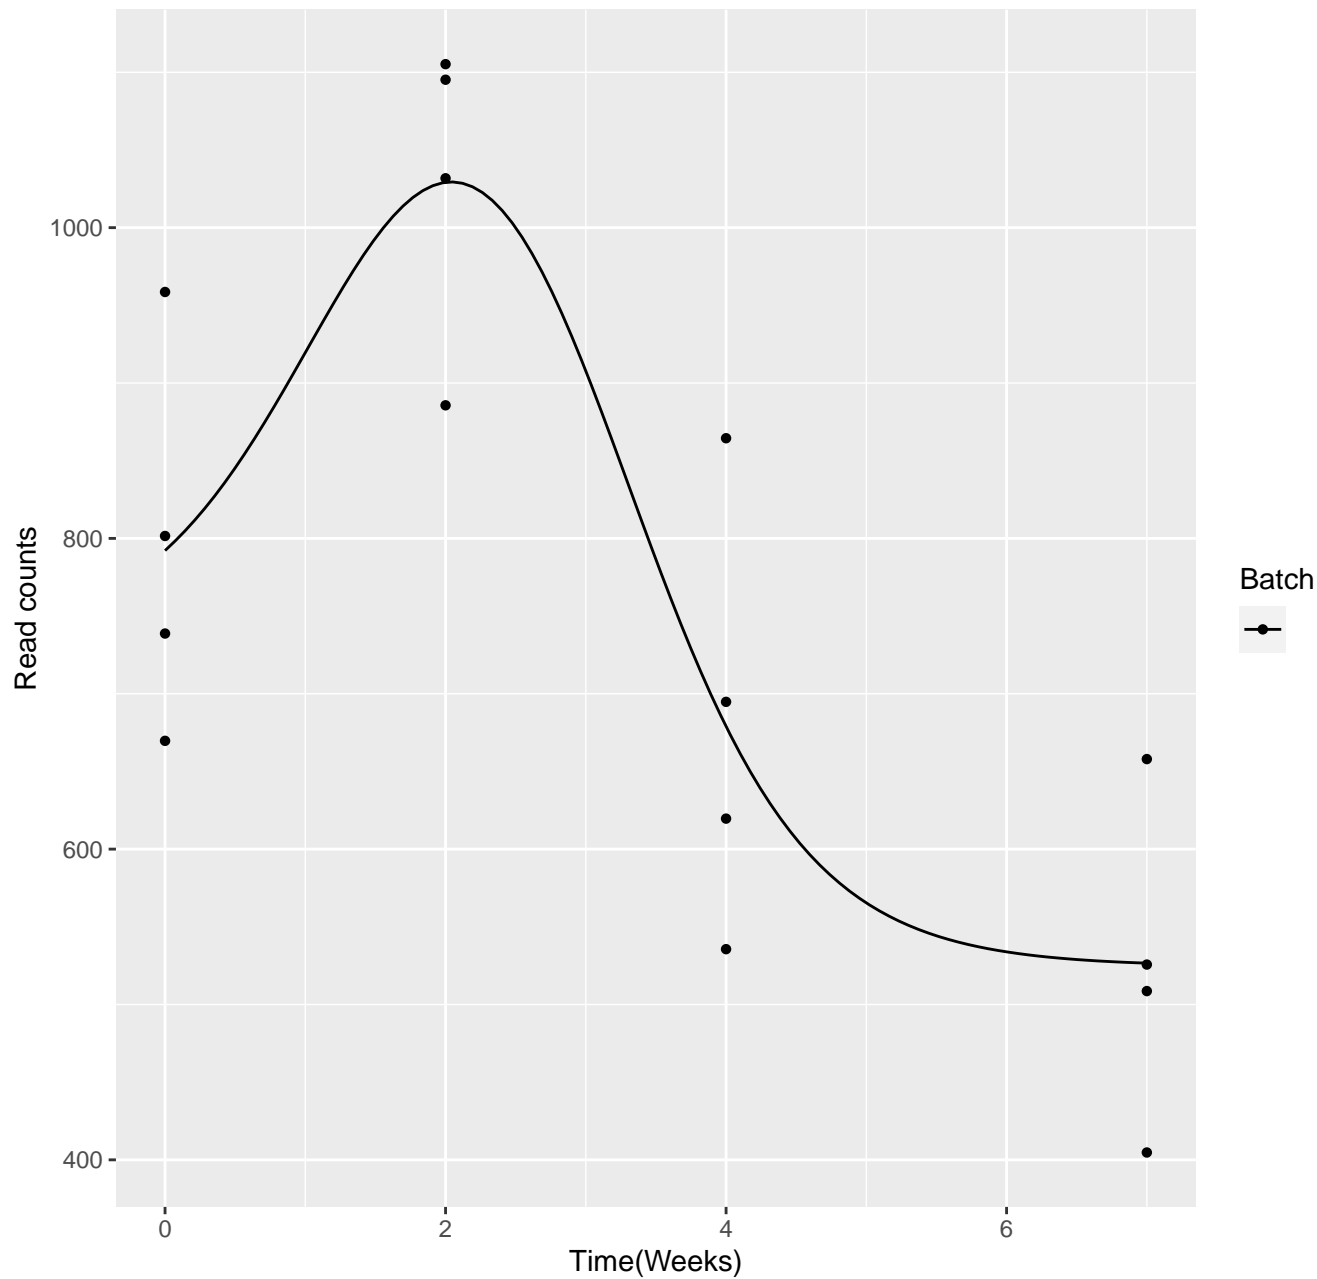



LOC100338527:  $\log_{10} q = -3.31$

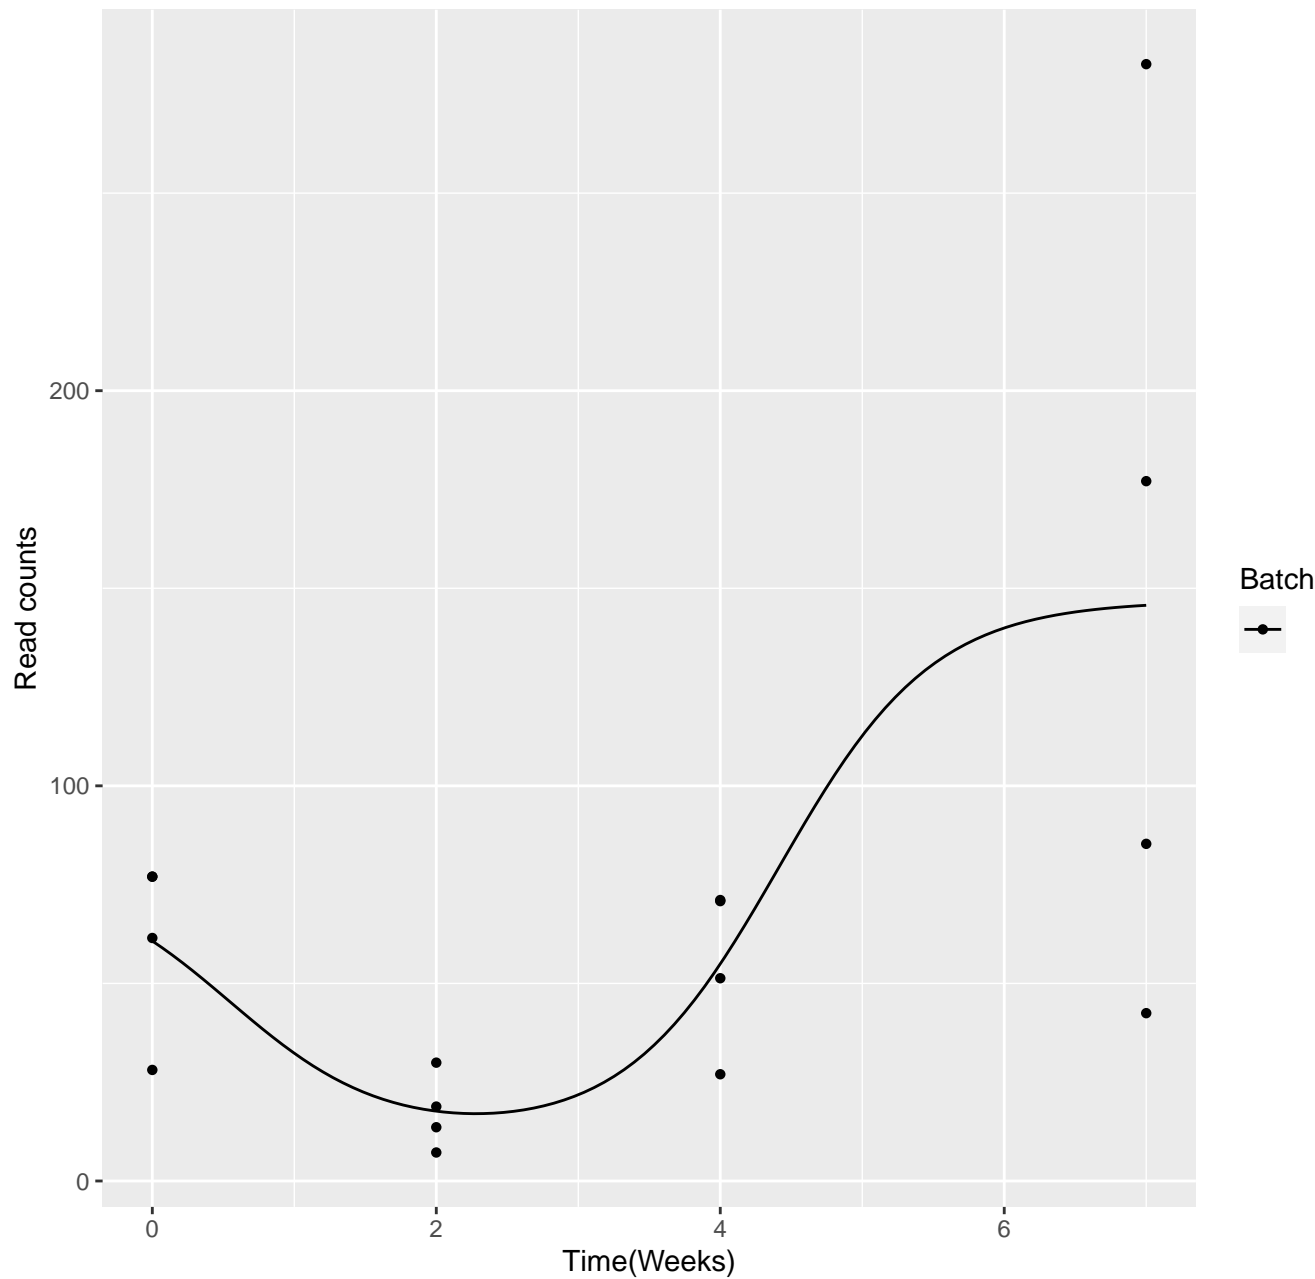

JUNB:  $\log_{10} q = -3.31$

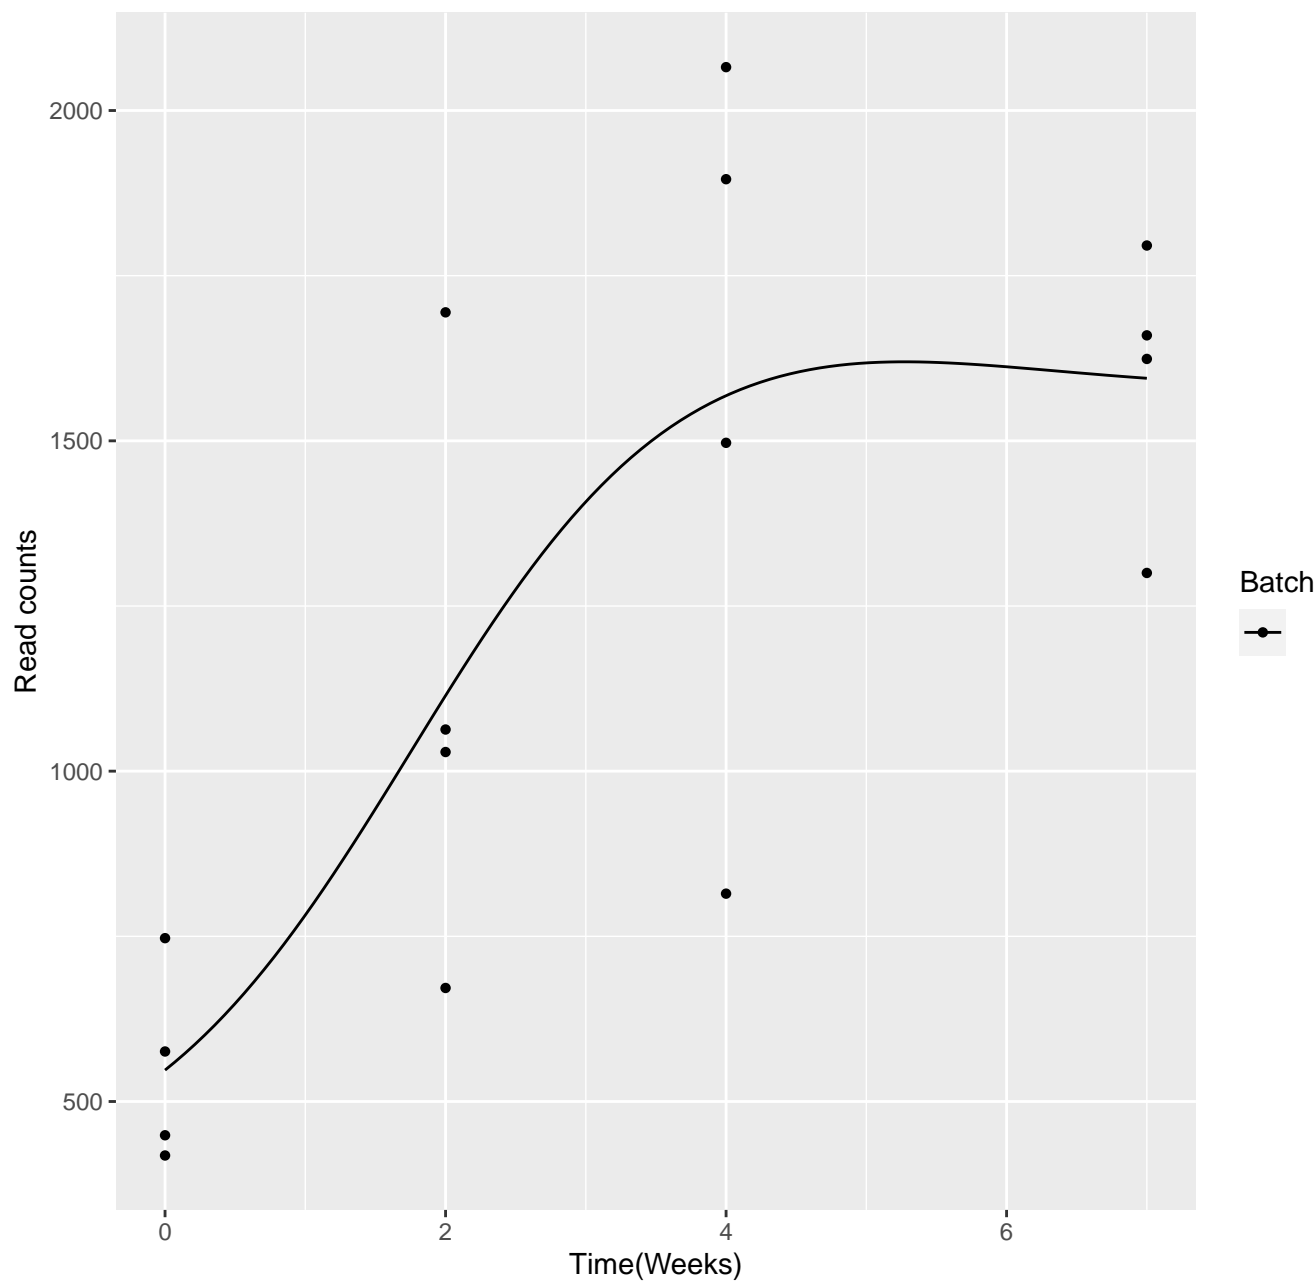

TRIM3:  $\log_{10} q = -3.31$

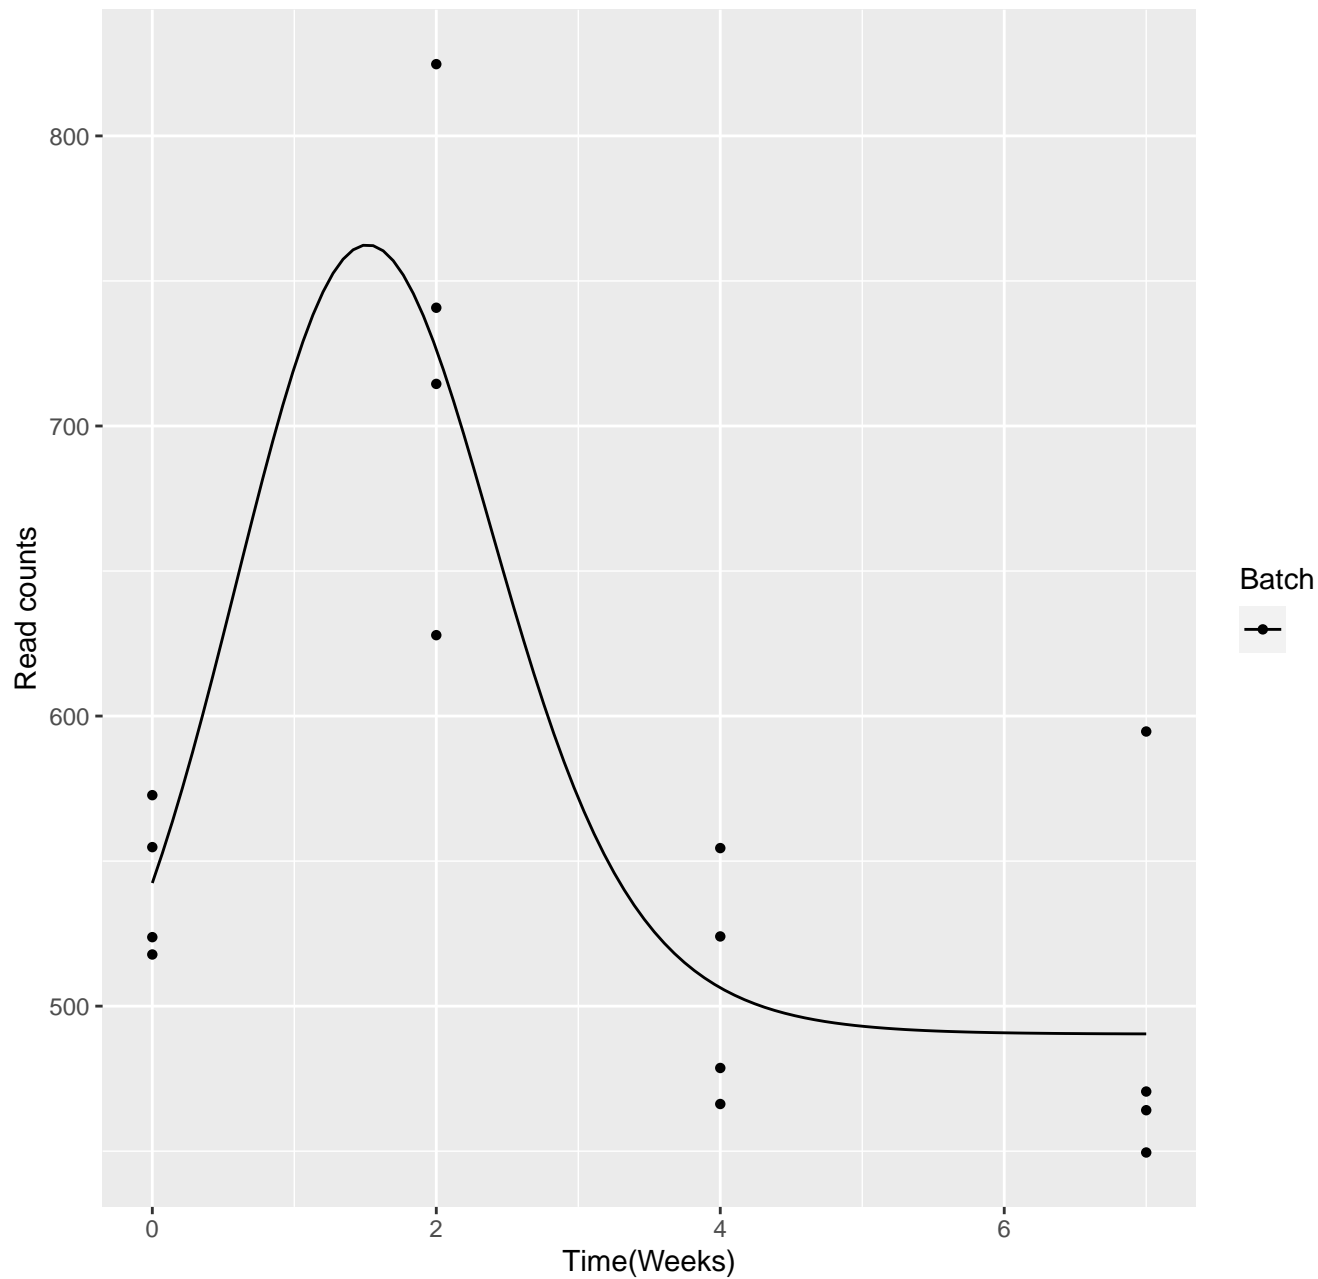

IKZF1:  $\log_{10} q = -3.3$

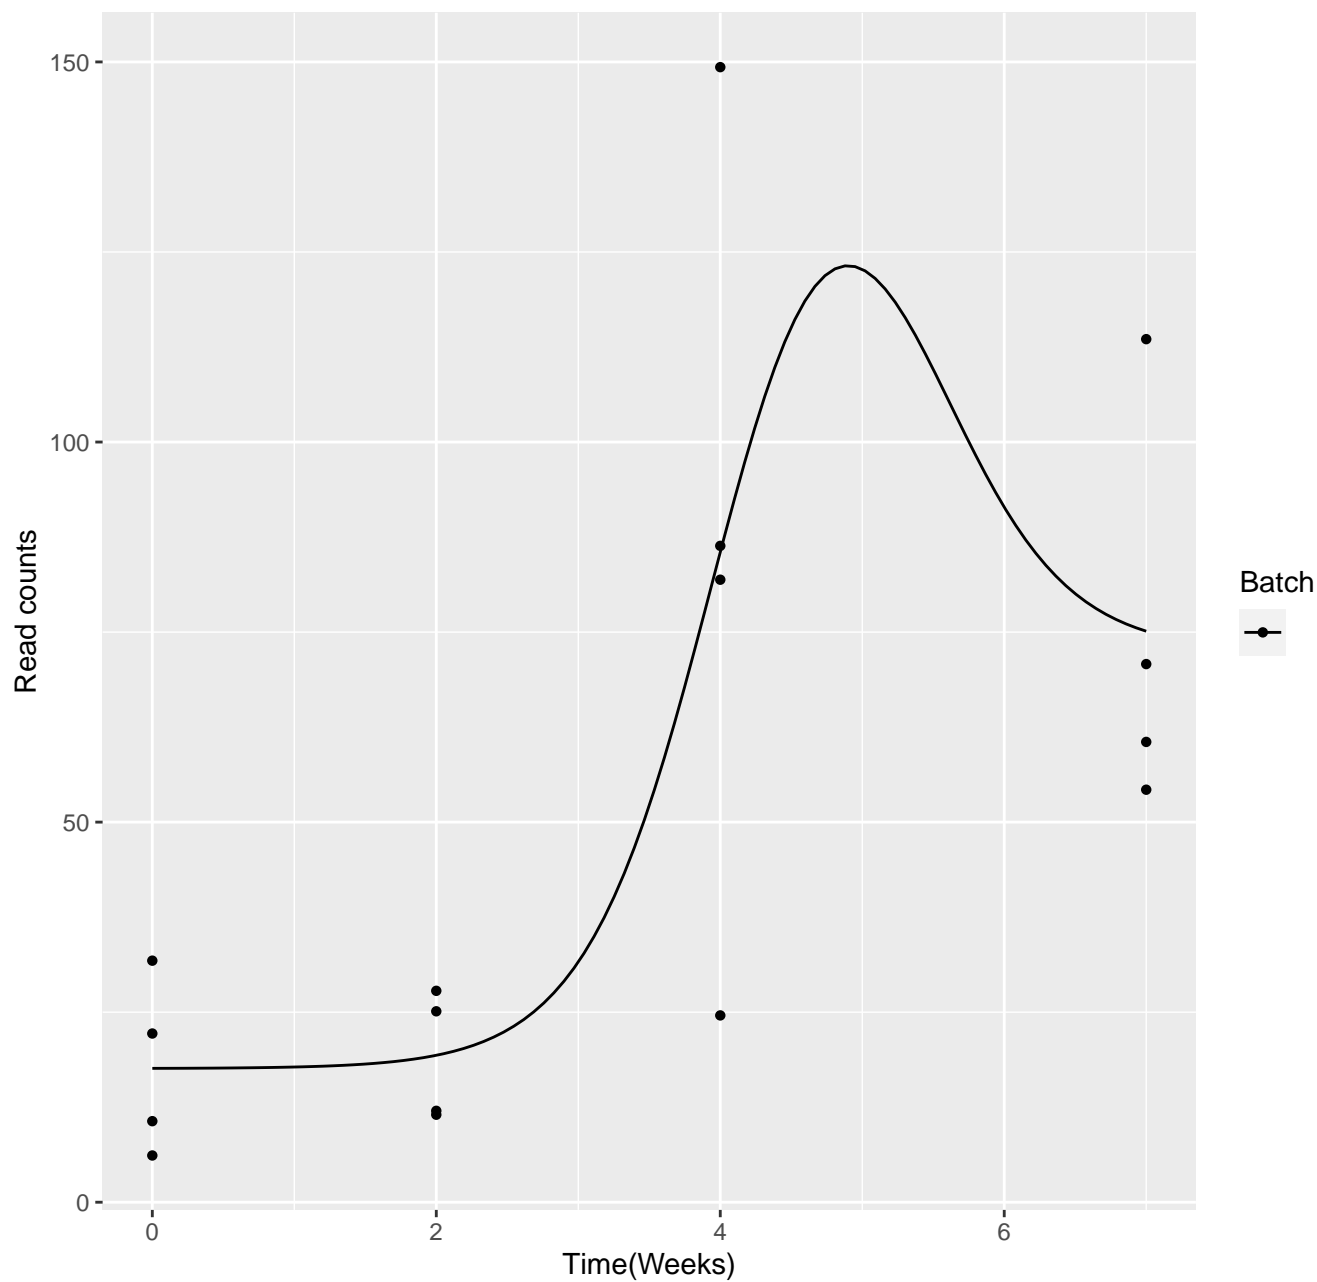

ABI3BP:  $\log_{10} q = -3.3$

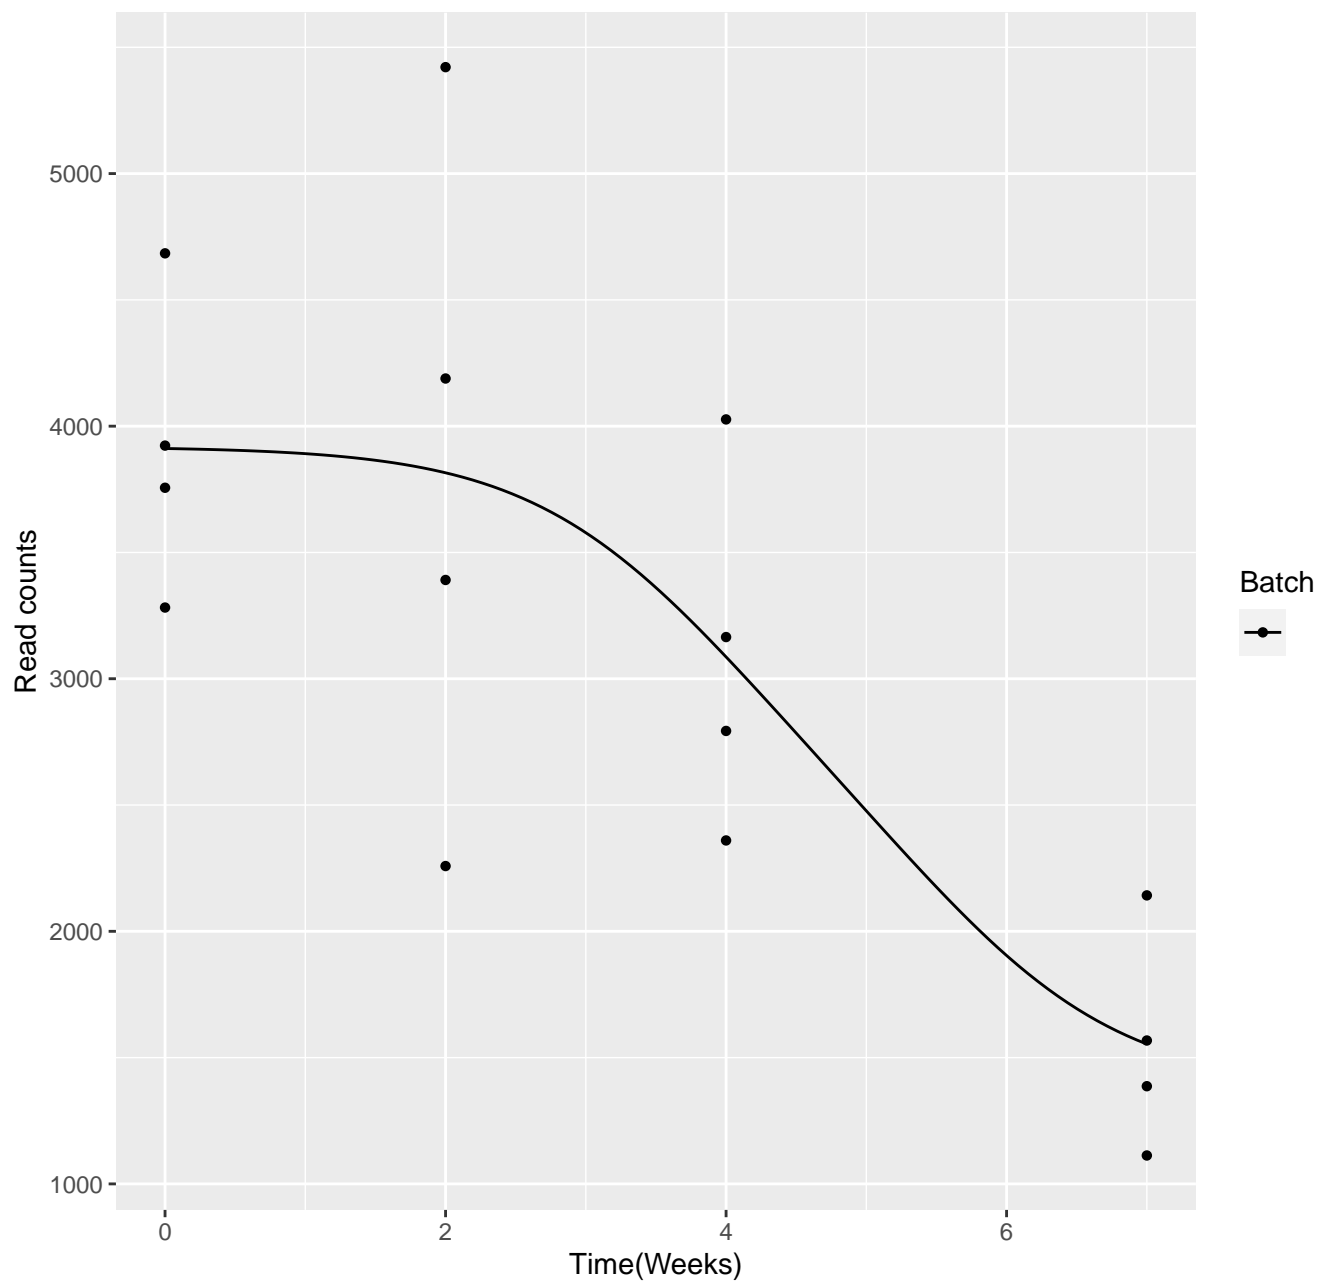

GPRC5B:  $\log_{10} q = -3.29$

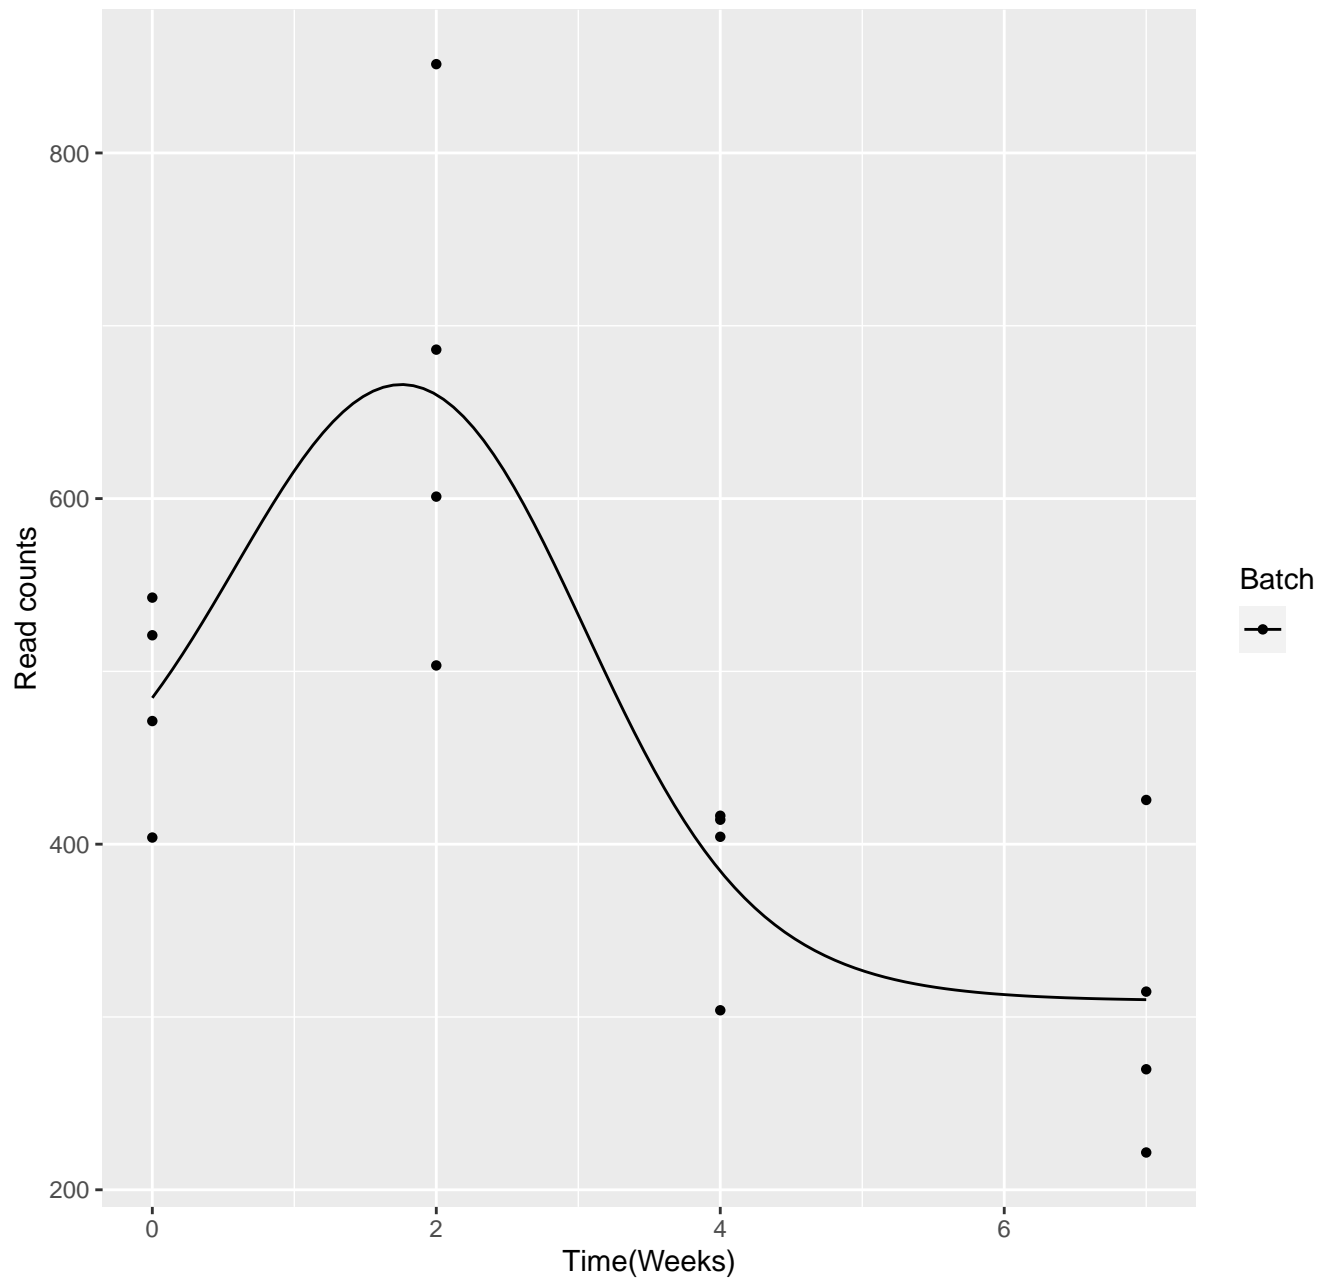

SH3KBP1:  $\log_{10} q = -3.29$

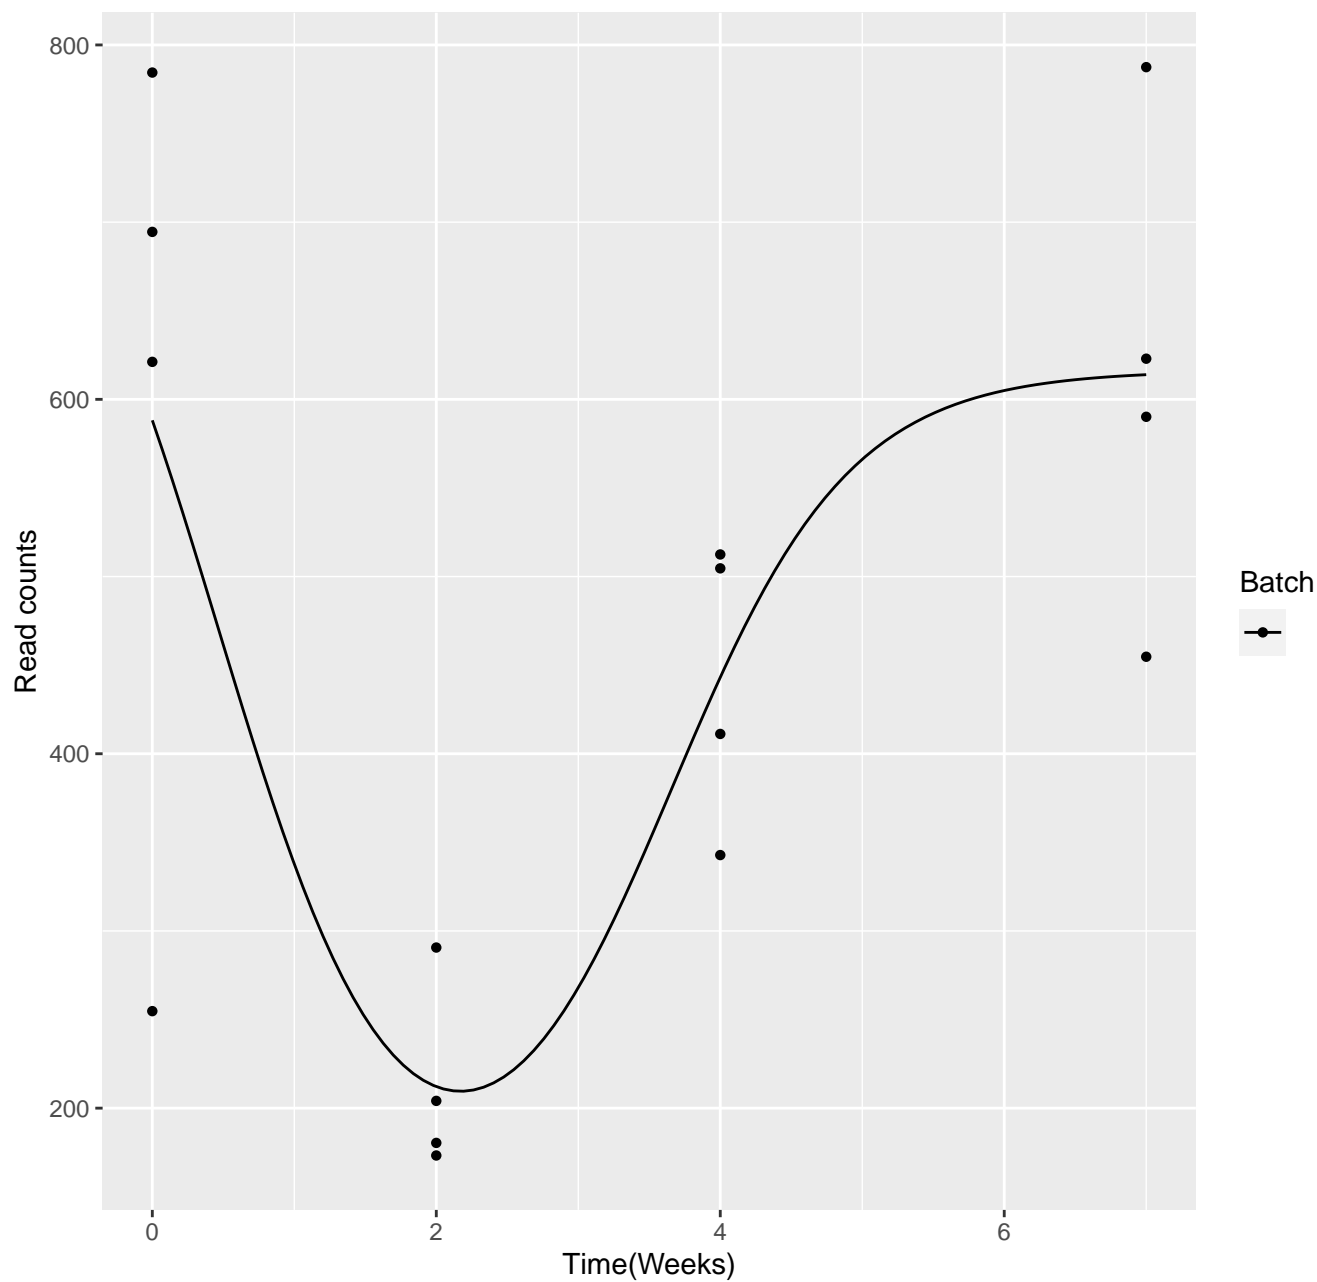

LOC103350039:  $\log_{10} q = -3.29$

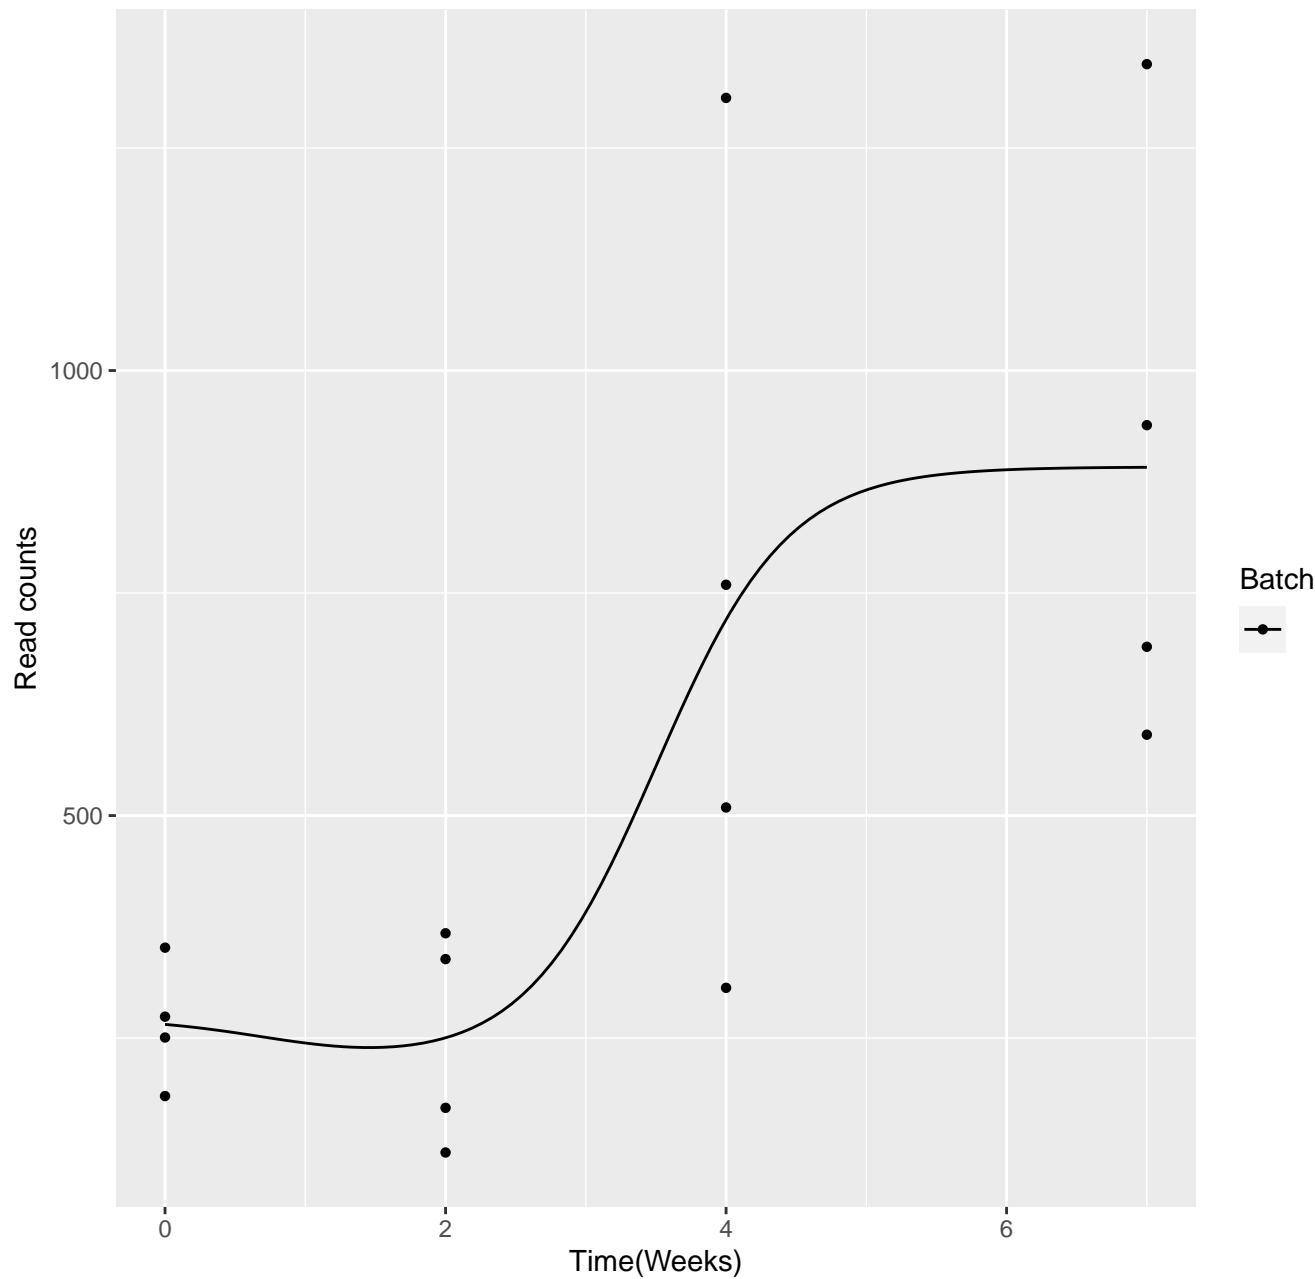



SUN2:  $\log_{10} q = -3.29$

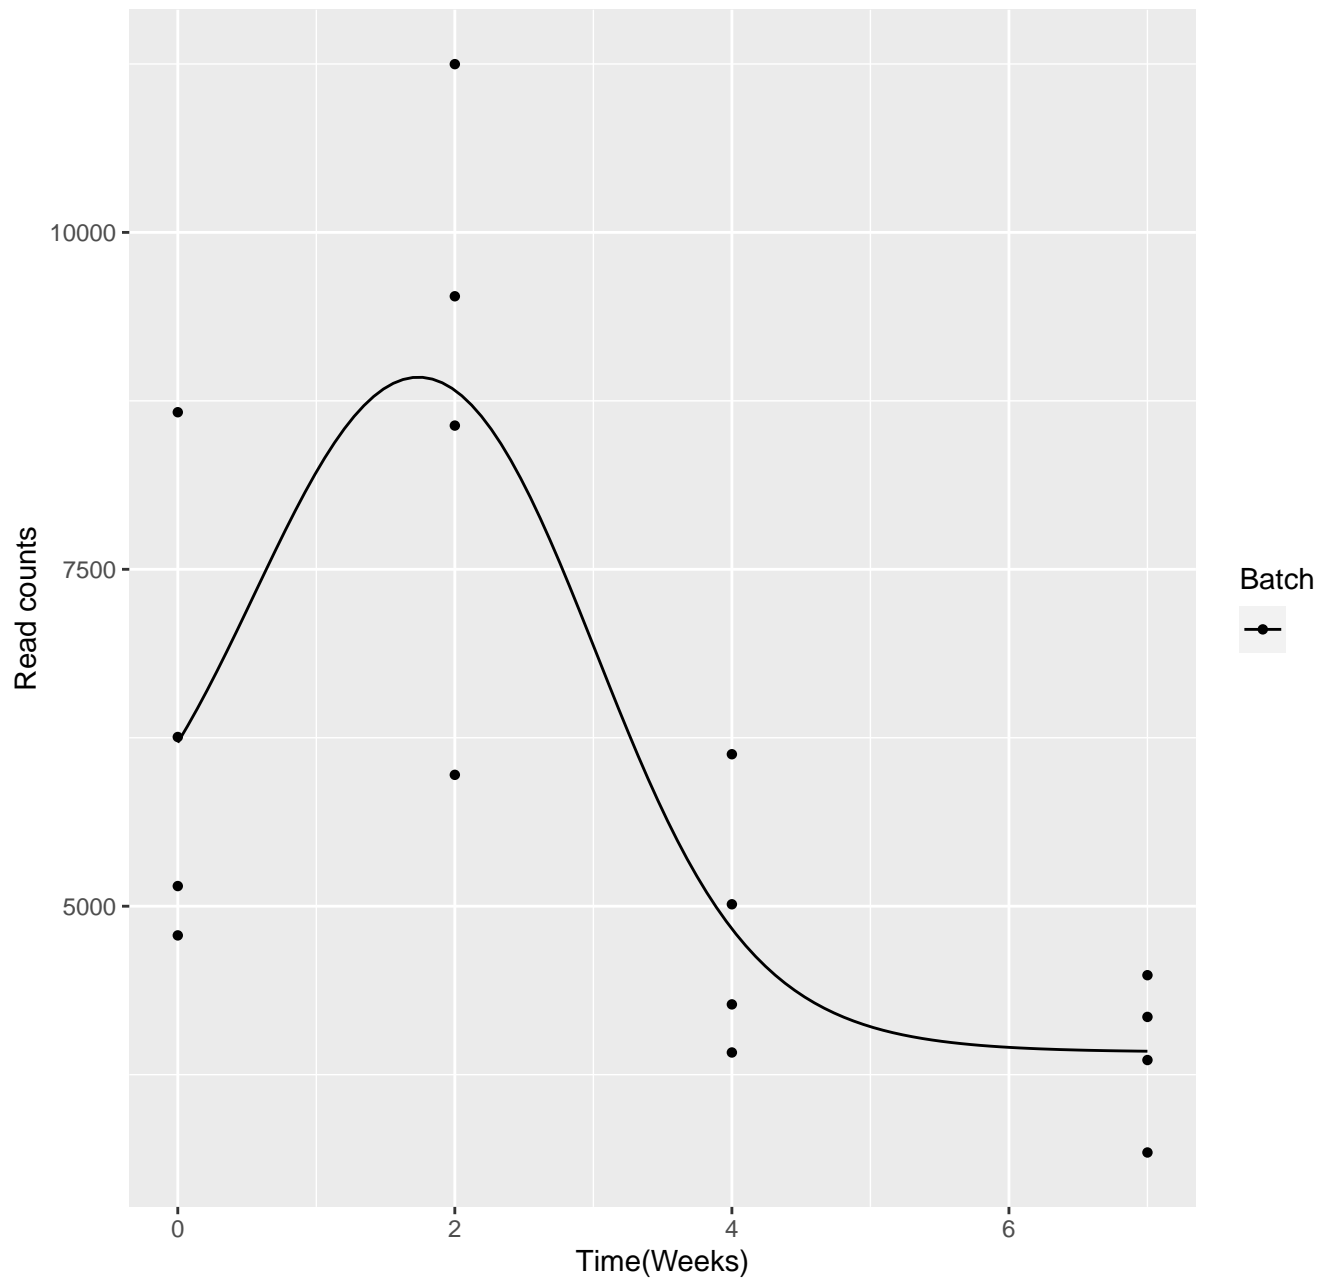

BGLAP:  $\log_{10} q = -3.29$

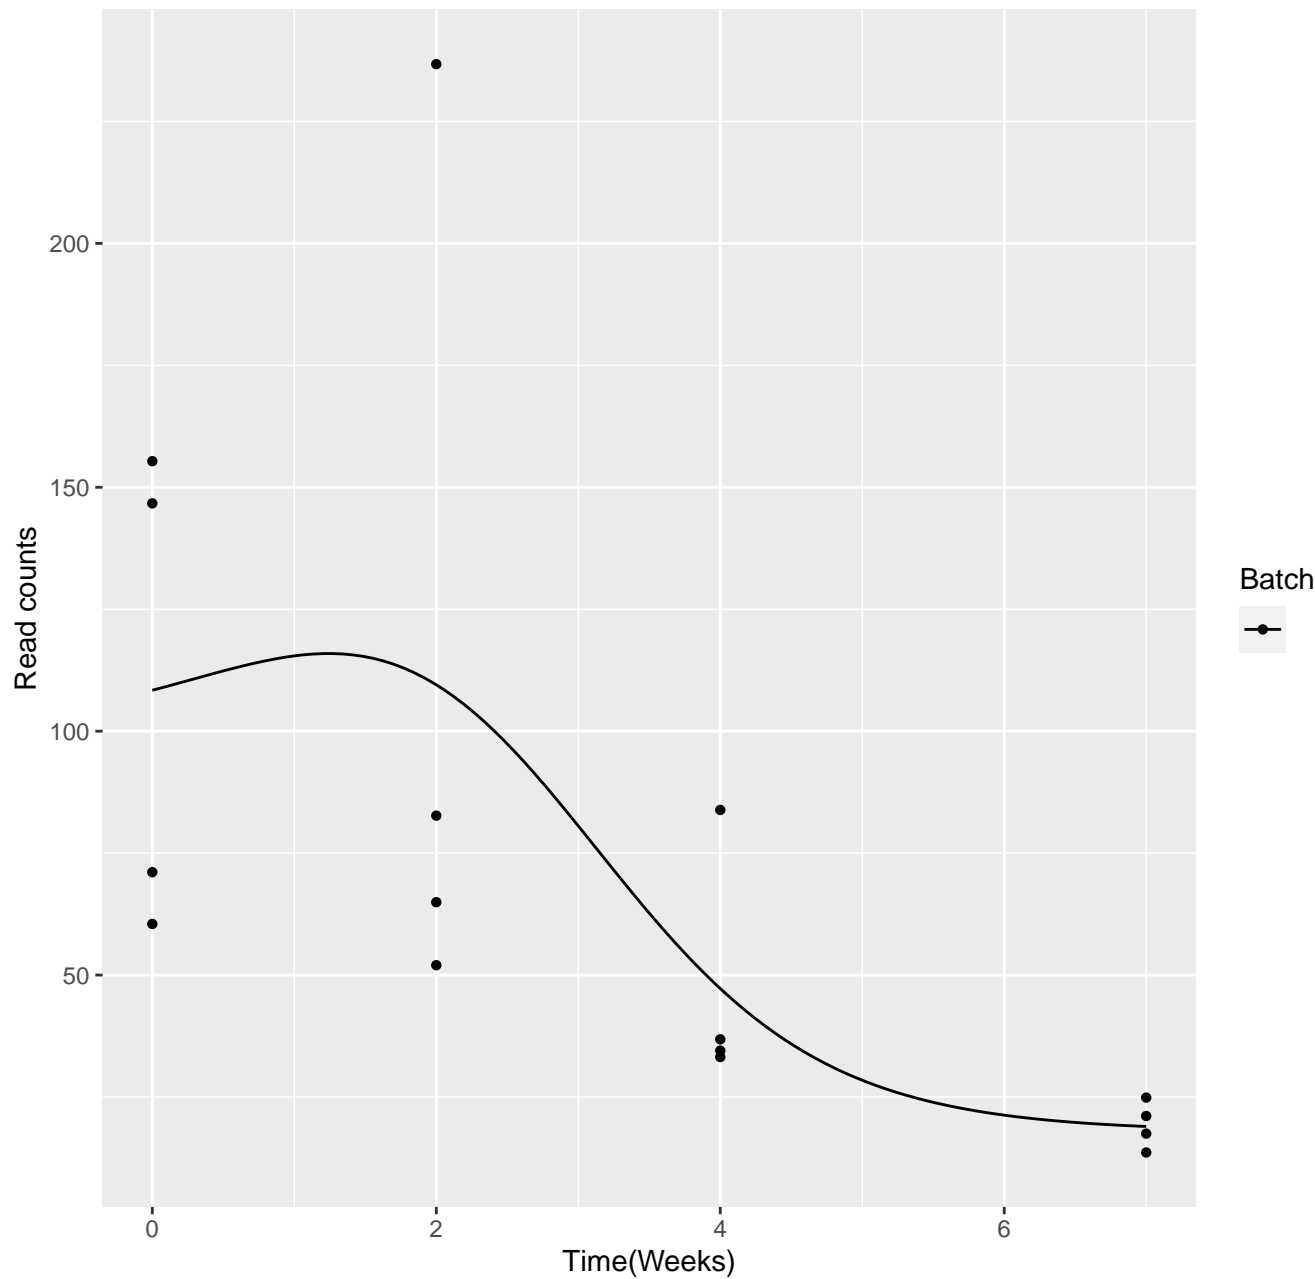

P2RY13:  $\log_{10} q = -3.29$

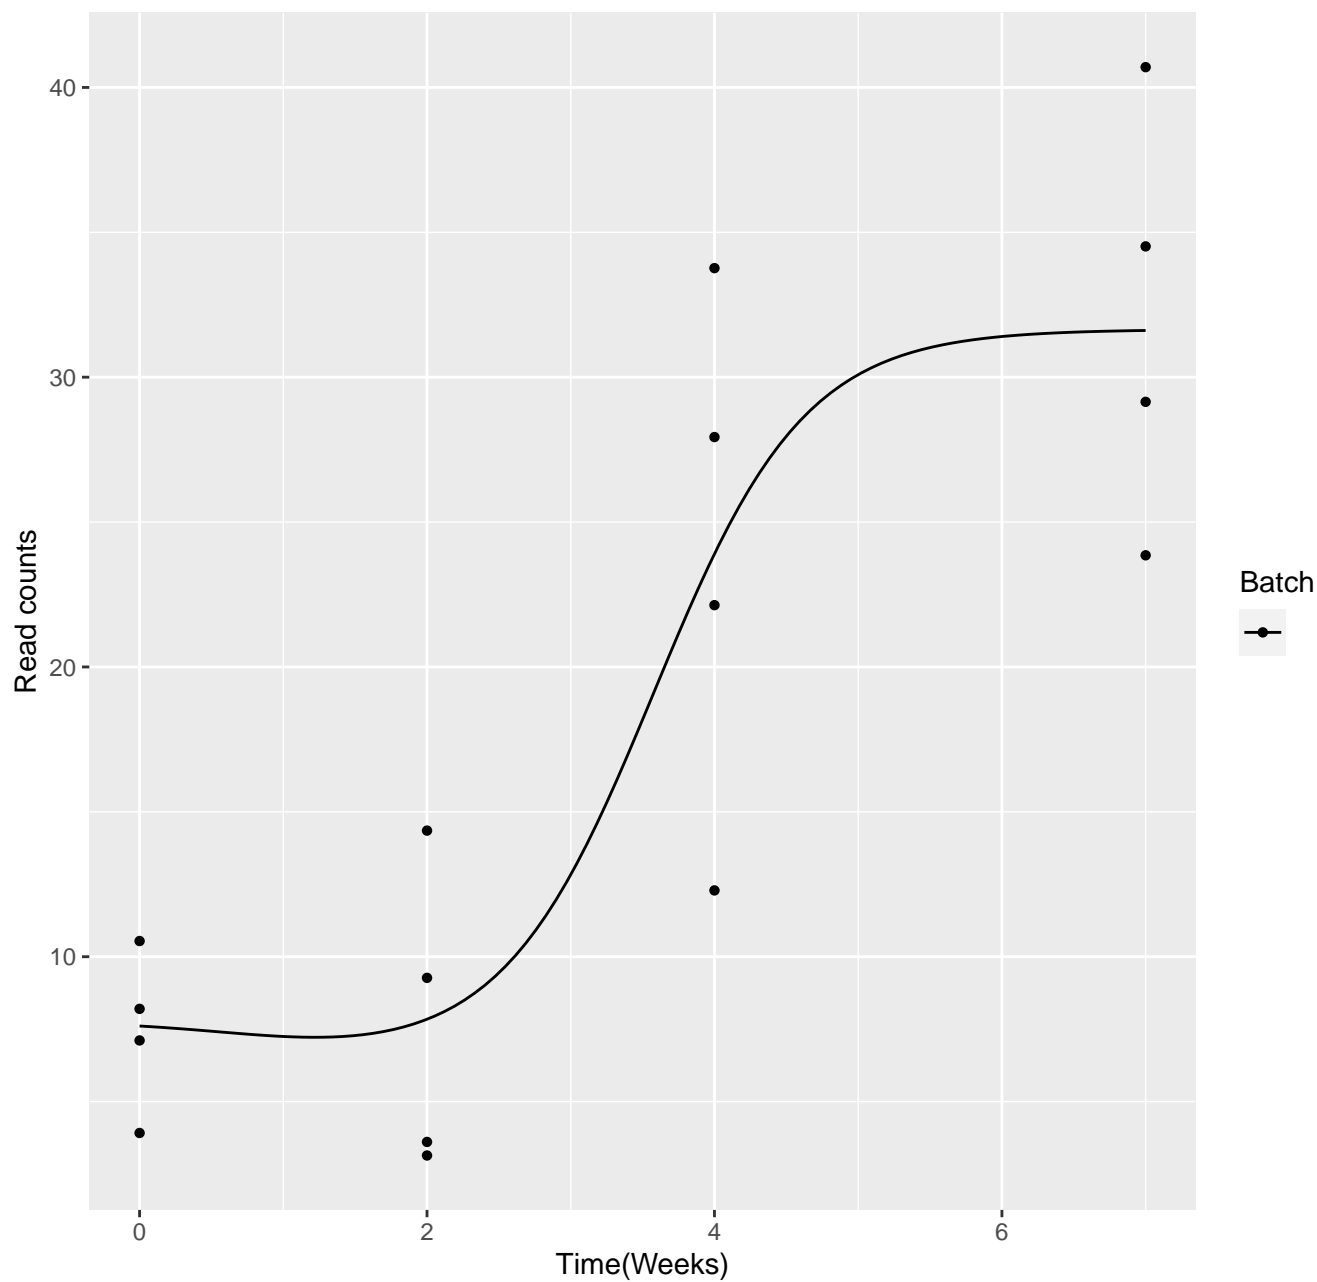

IL6R:  $\log_{10} q = -3.28$

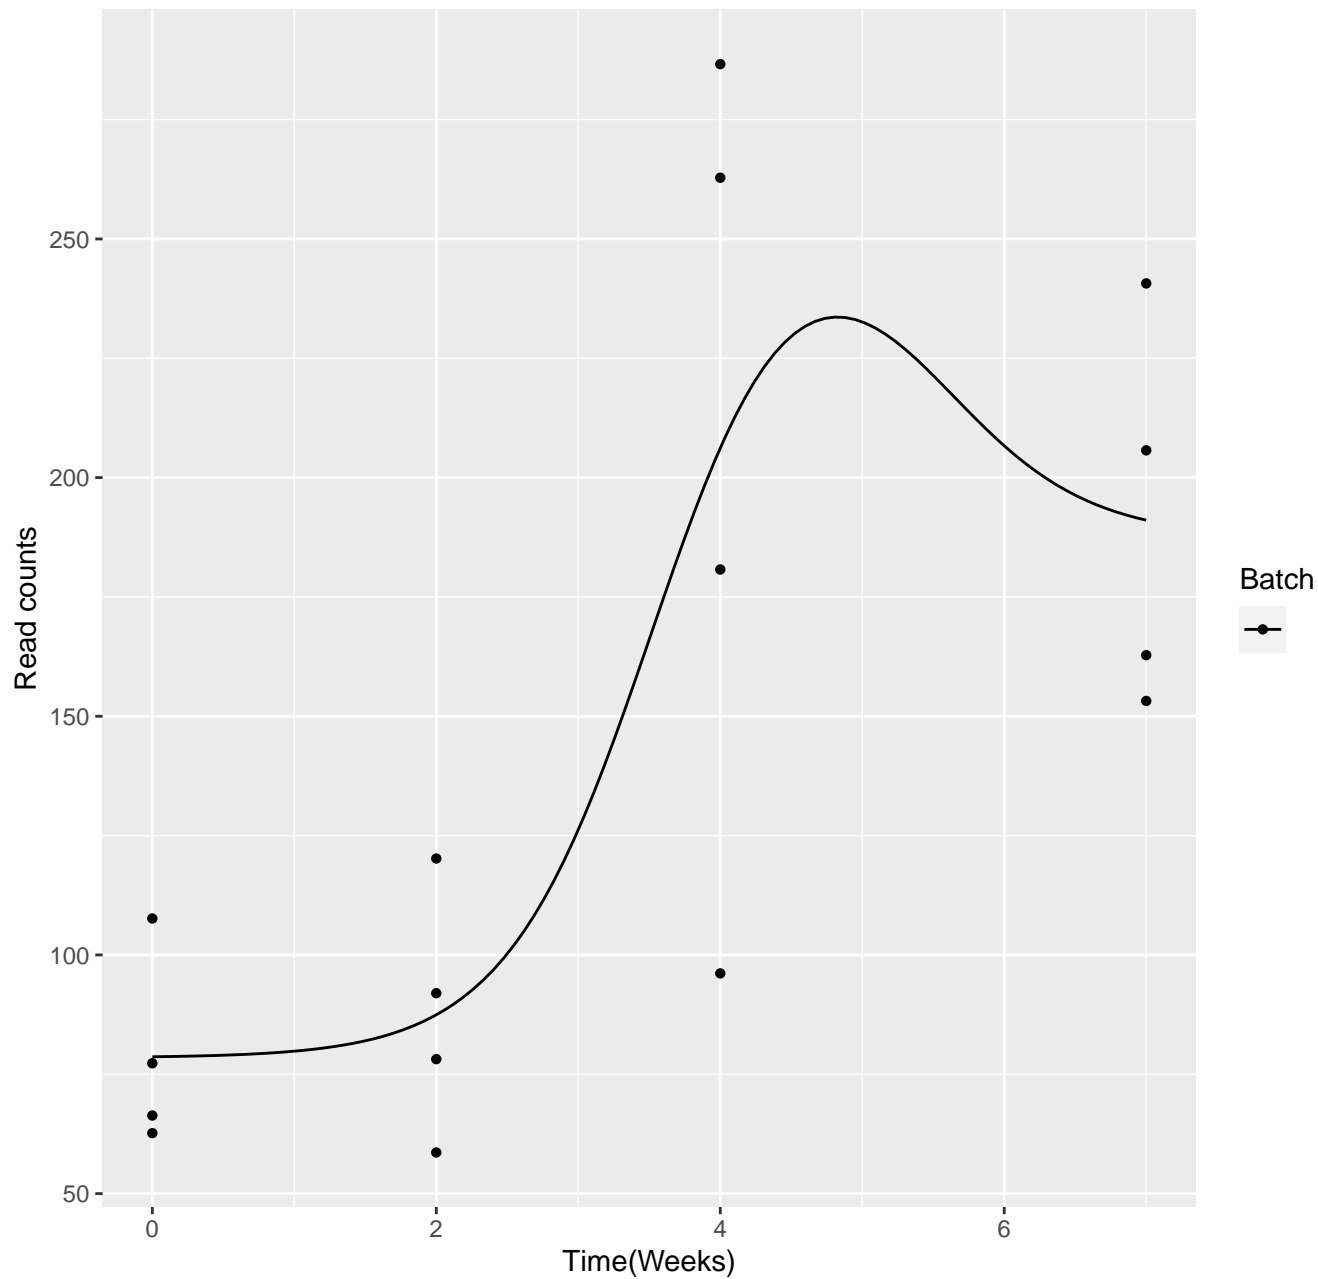

LOC103346273:  $\log_{10} q = -3.28$

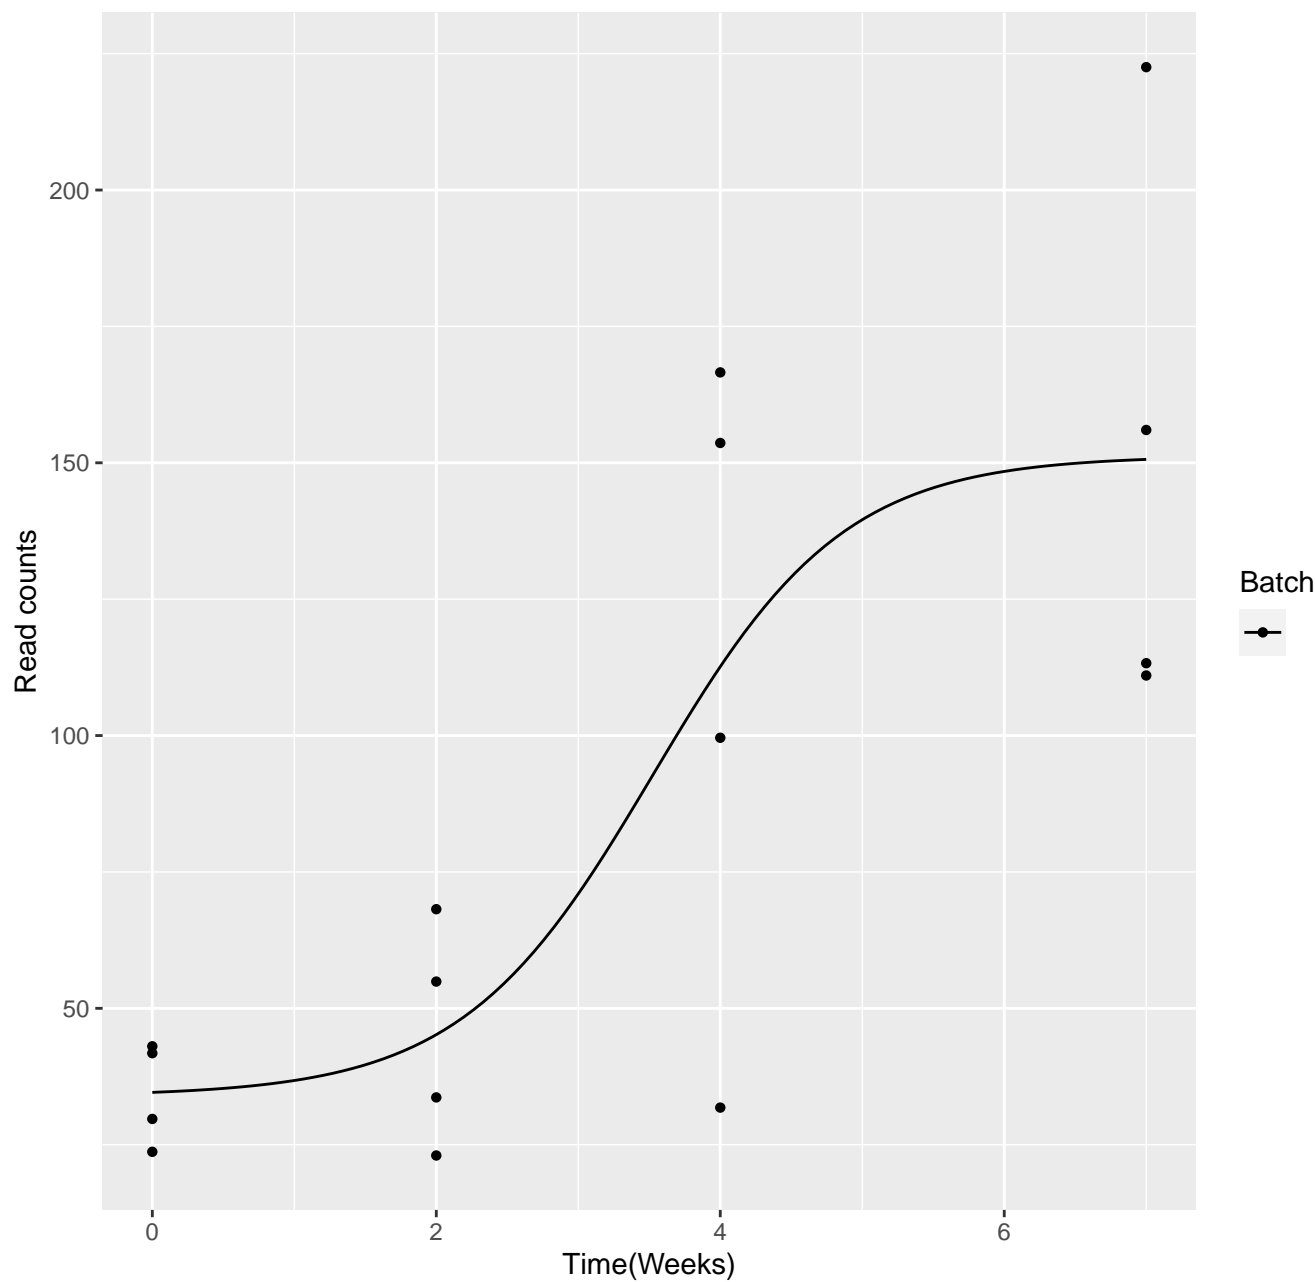

KDM1A:  $\log_{10} q = -3.28$

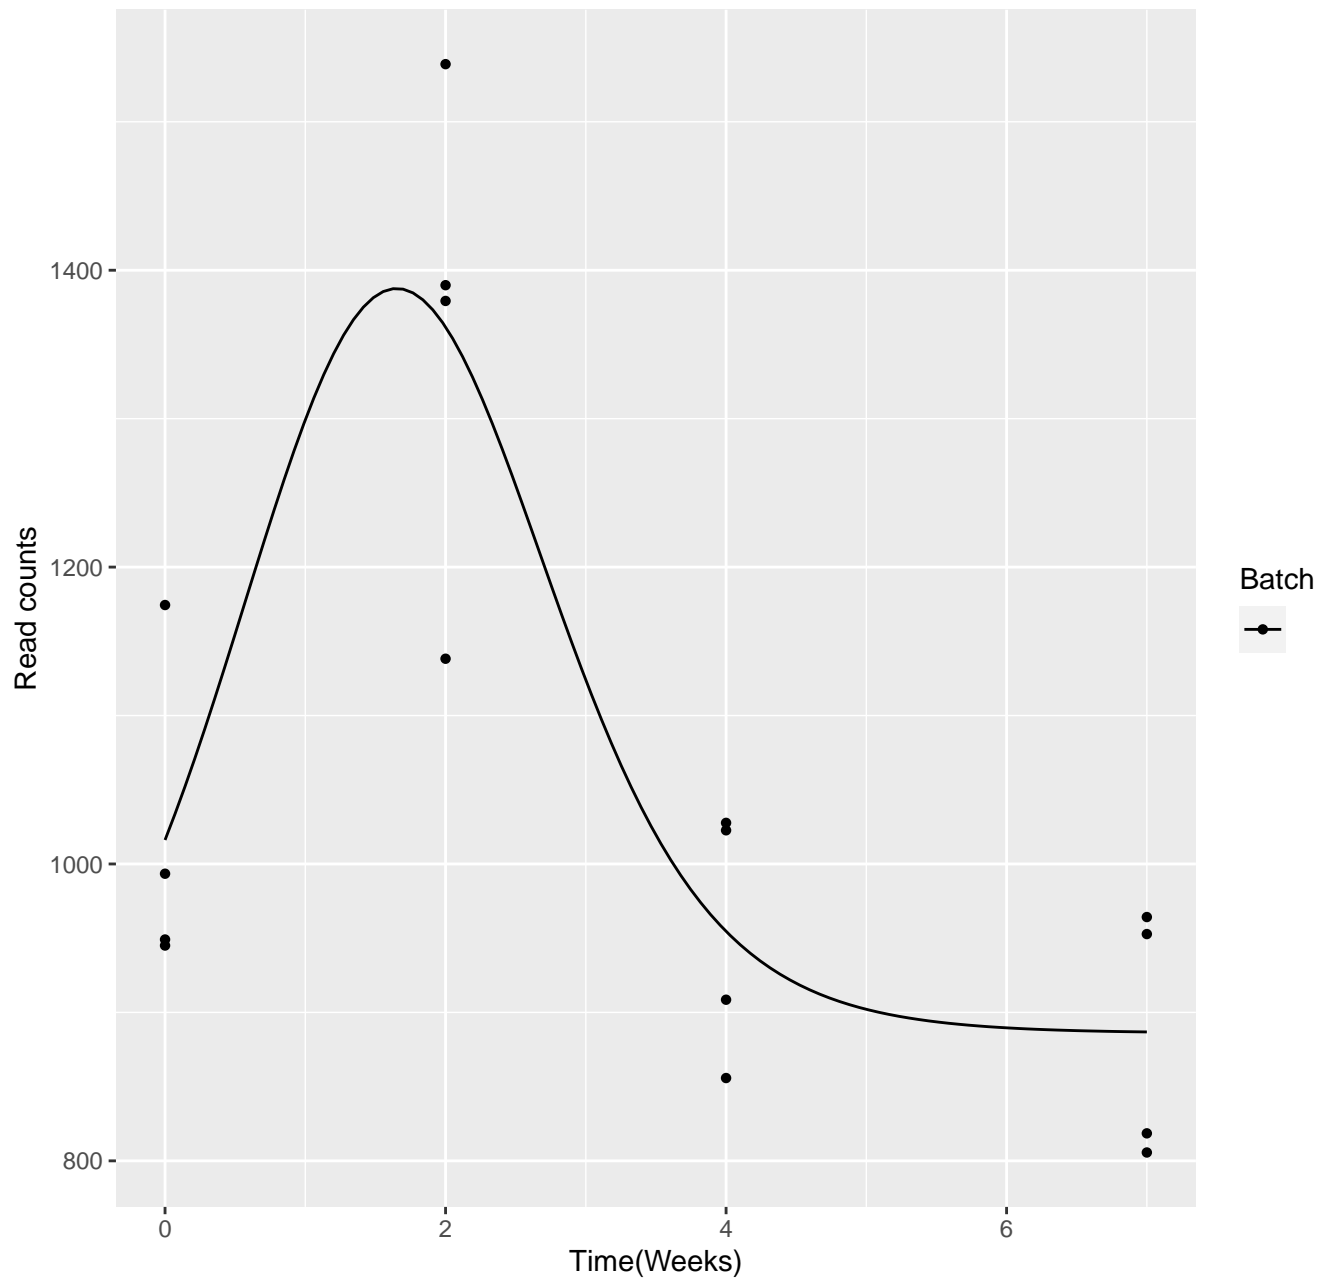

C1QTNF5:  $\log_{10} q = -3.27$

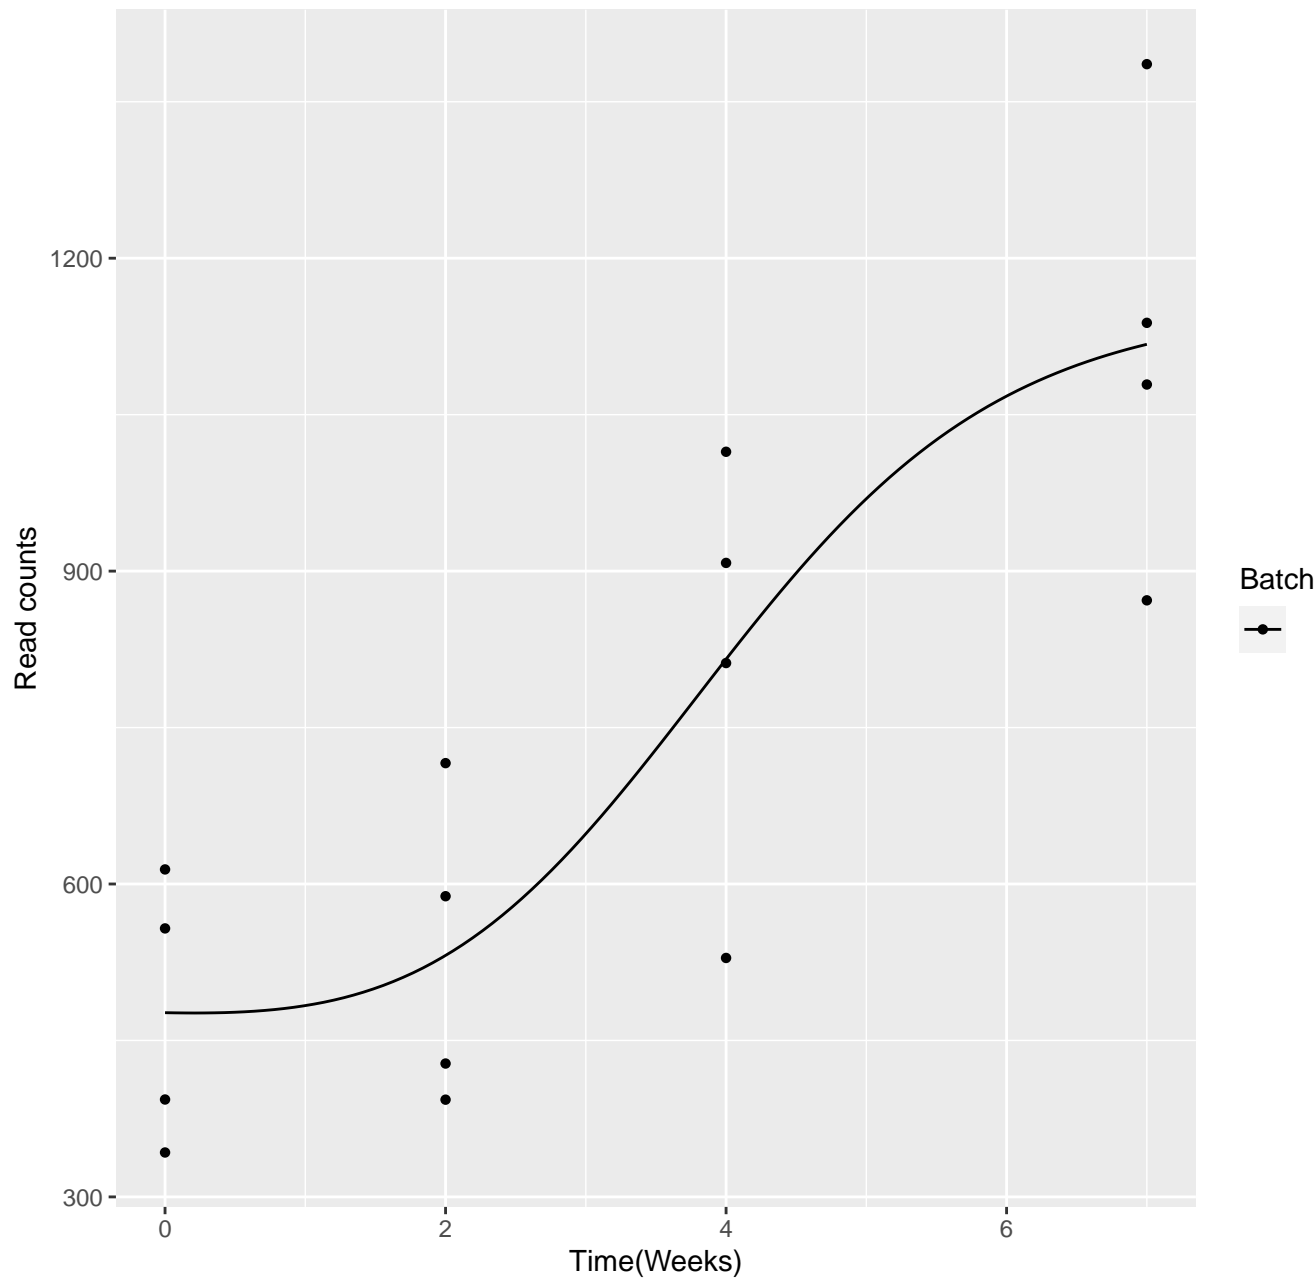

APOD:  $\log_{10} q = -3.27$

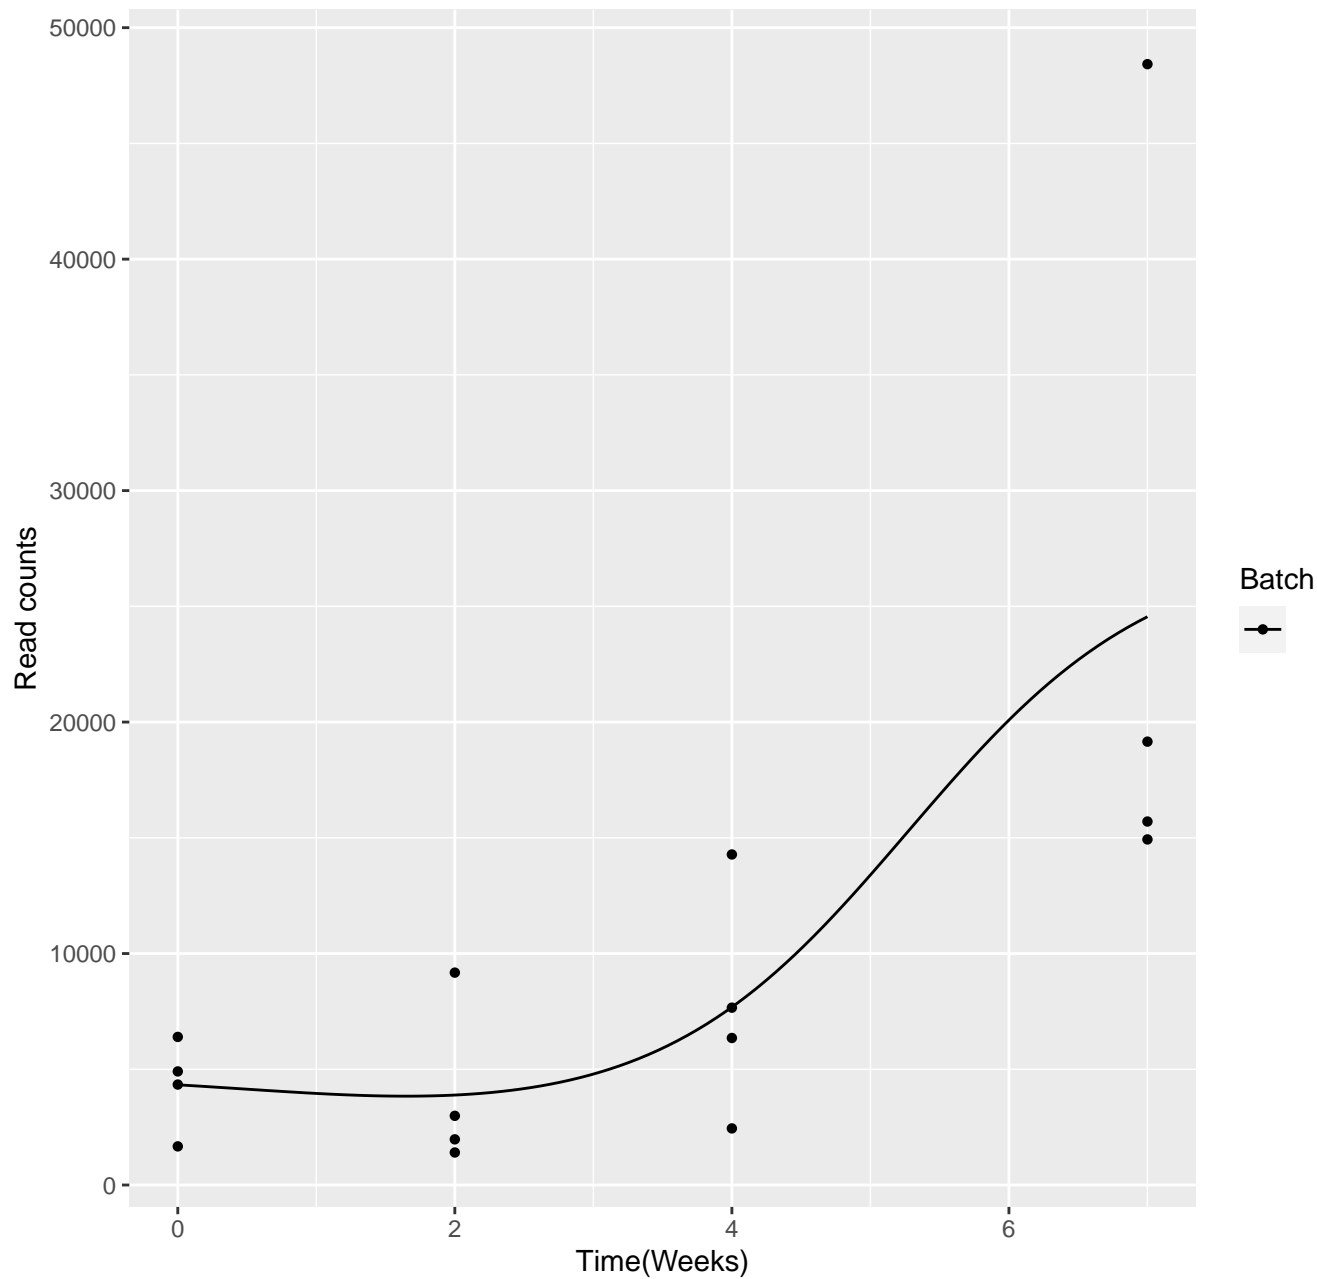



HAPLN1:  $\log_{10} q = -3.27$

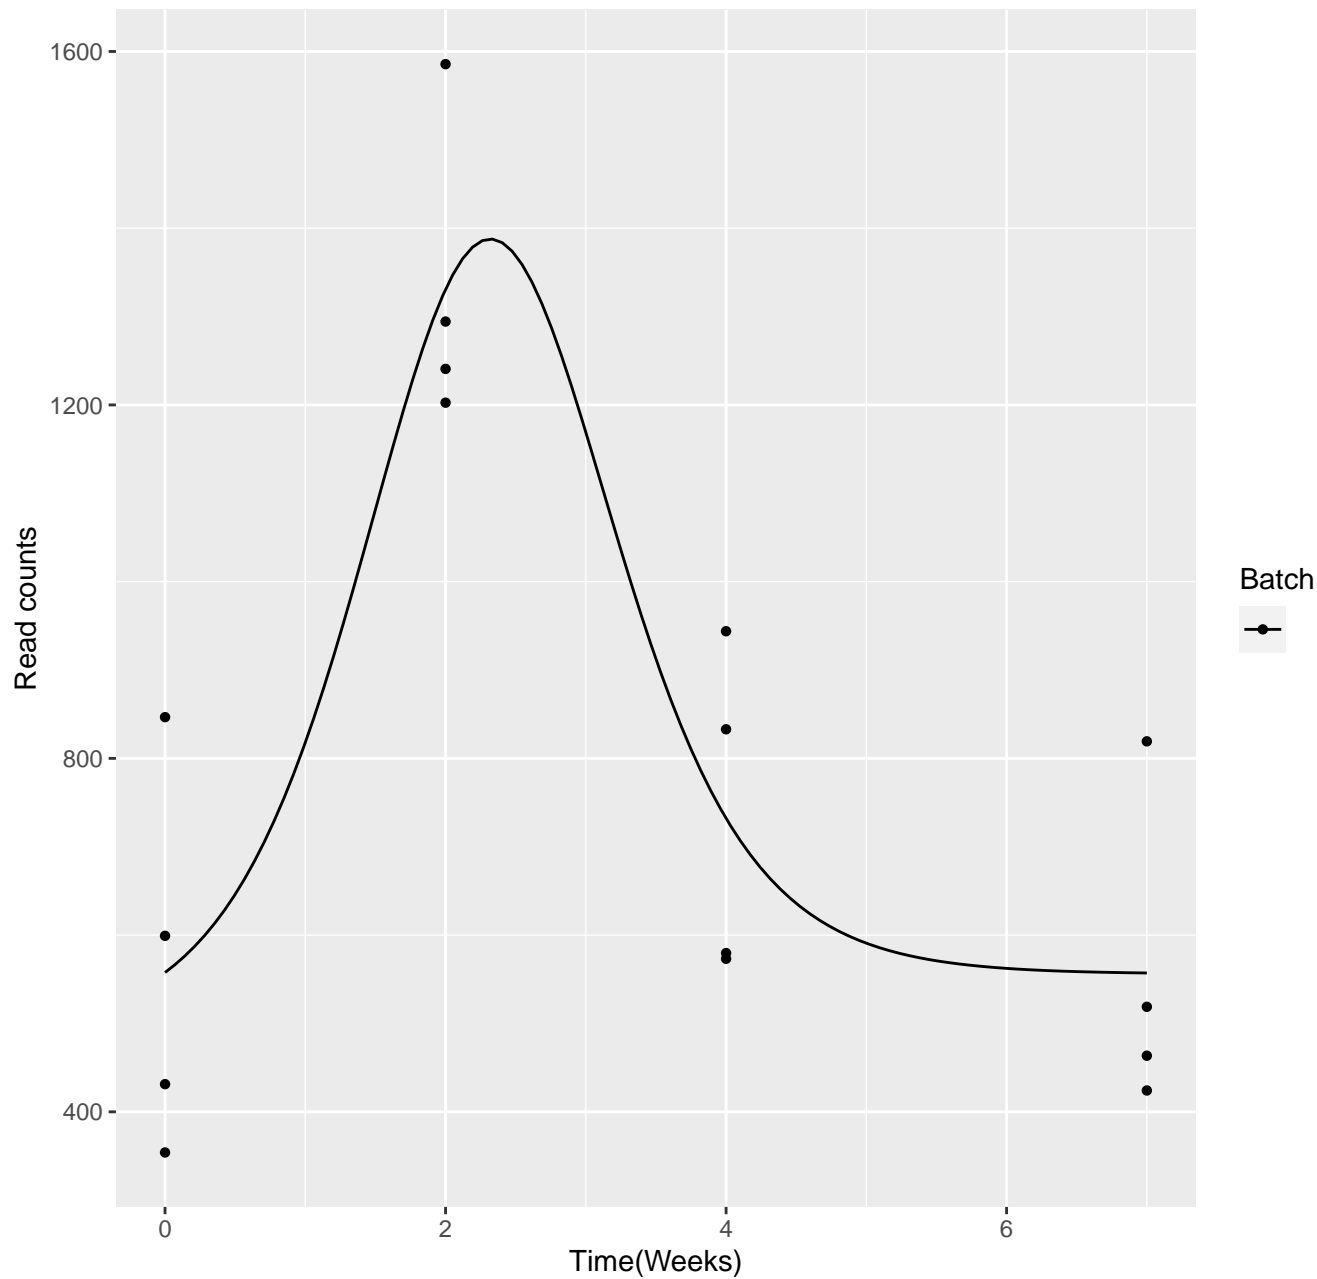

BCL9:  $\log_{10} q = -3.27$

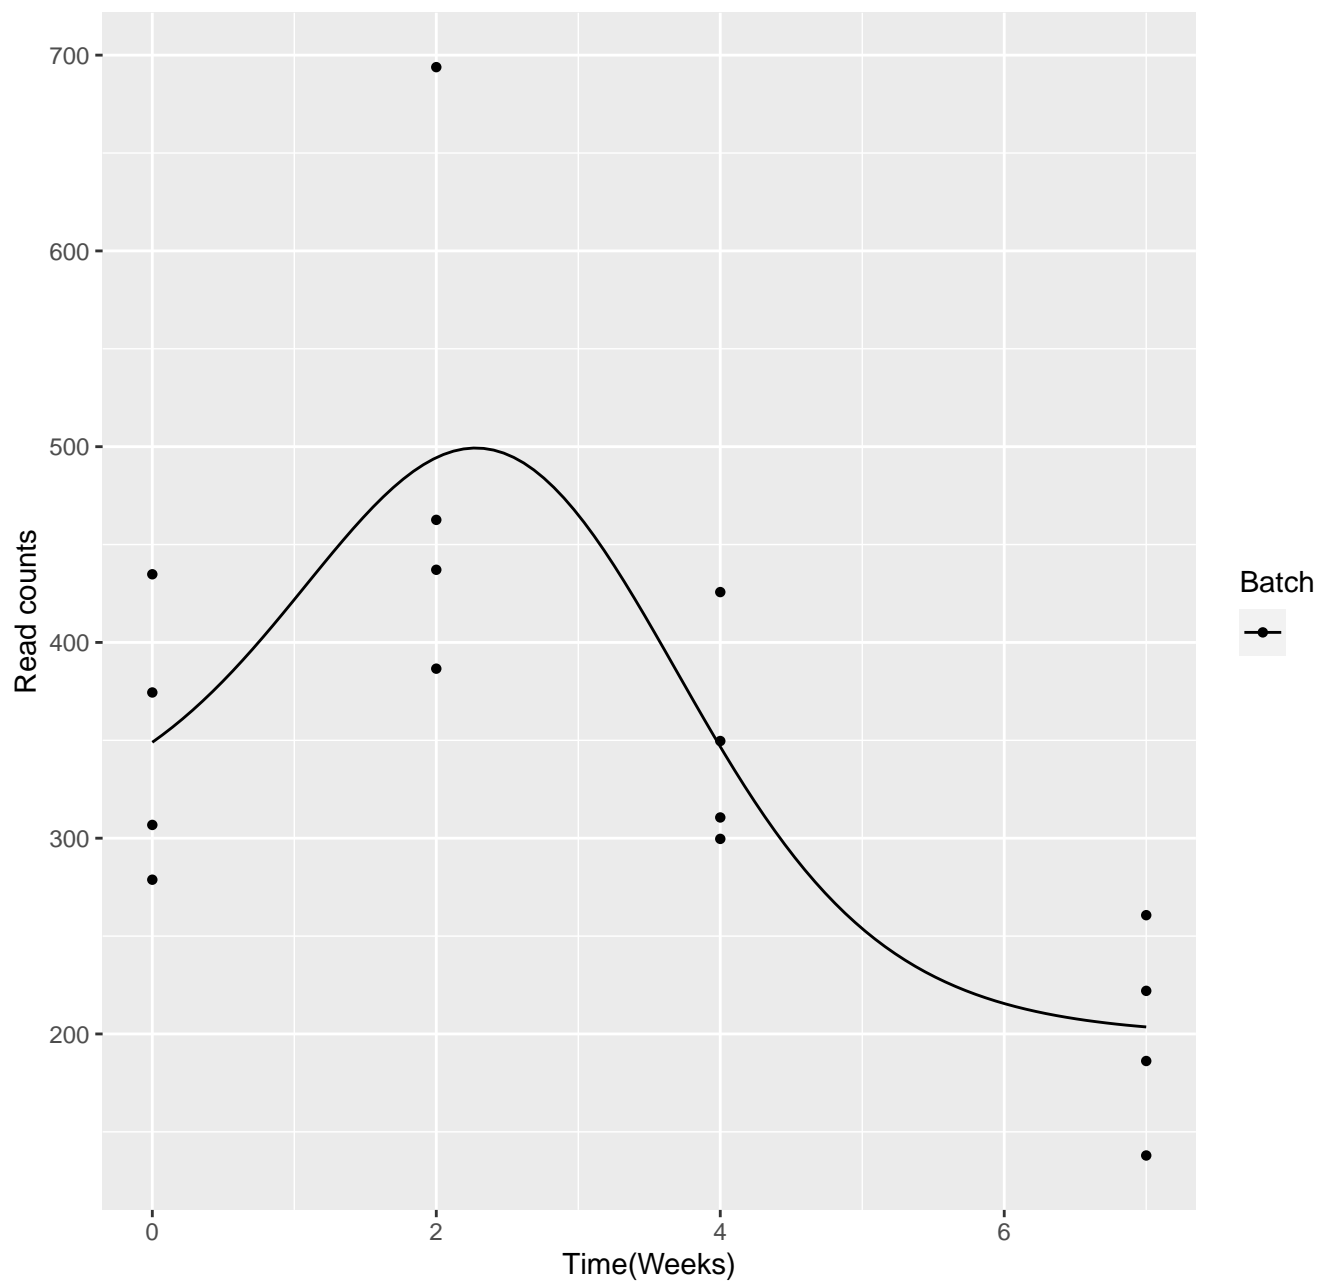

FMNL3:  $\log_{10} q = -3.27$

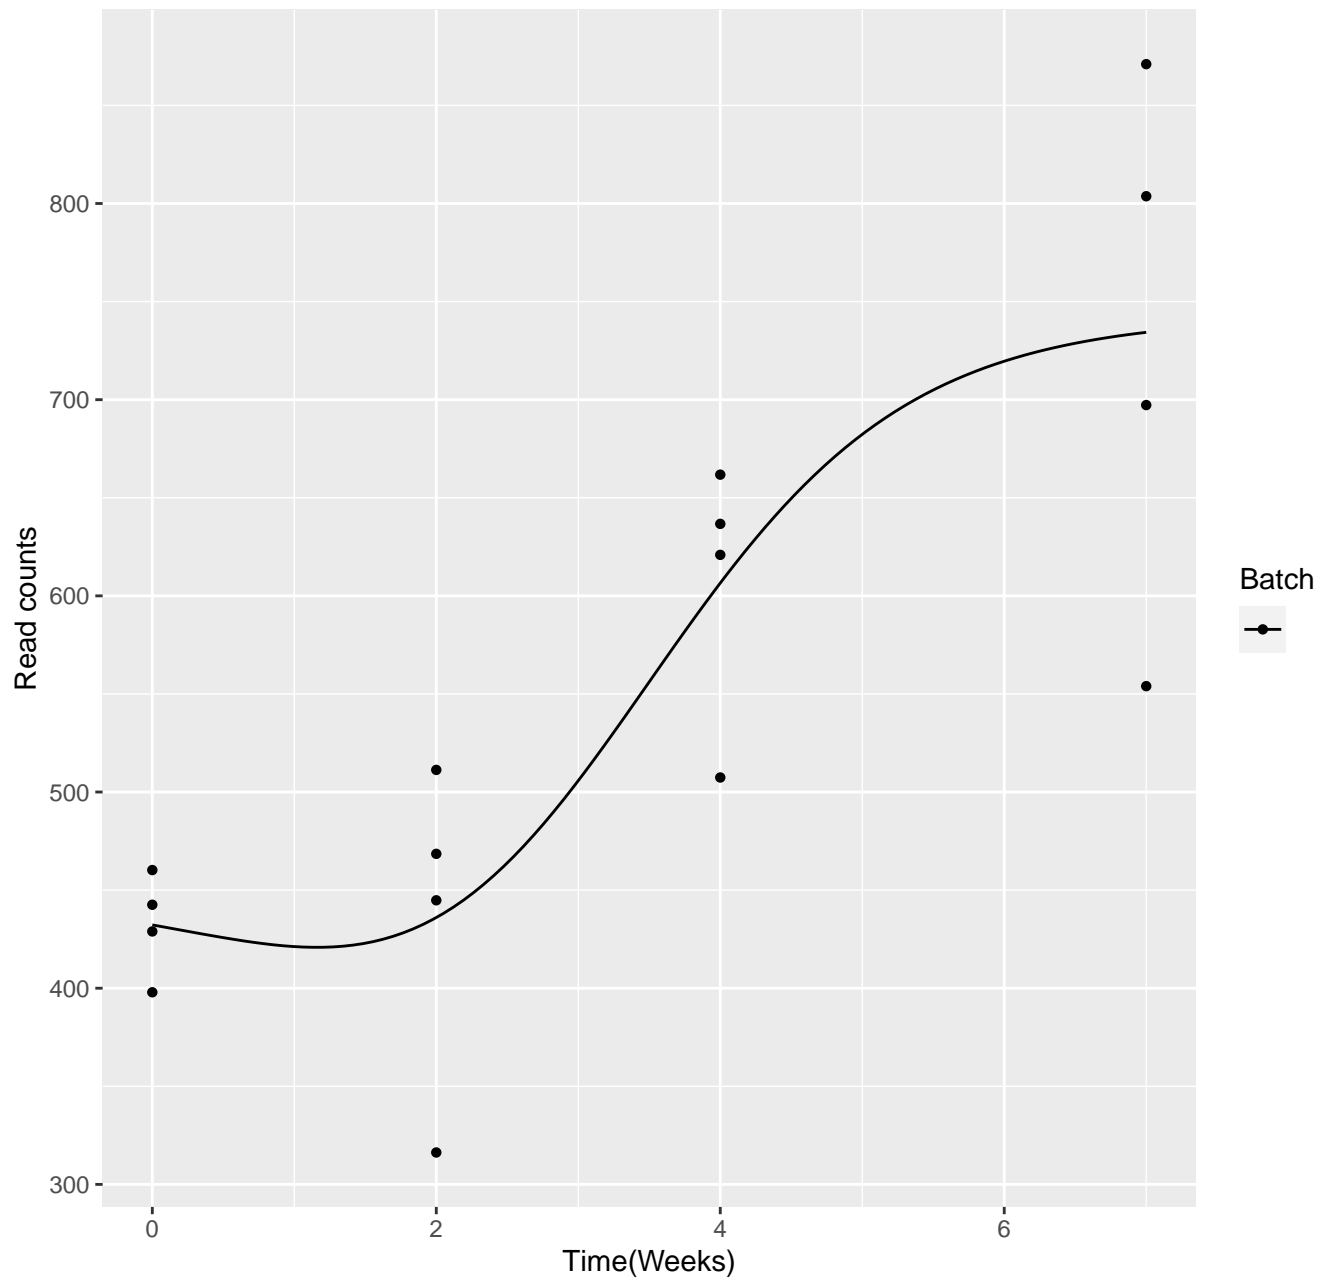

PRR16:  $\log_{10} q = -3.27$

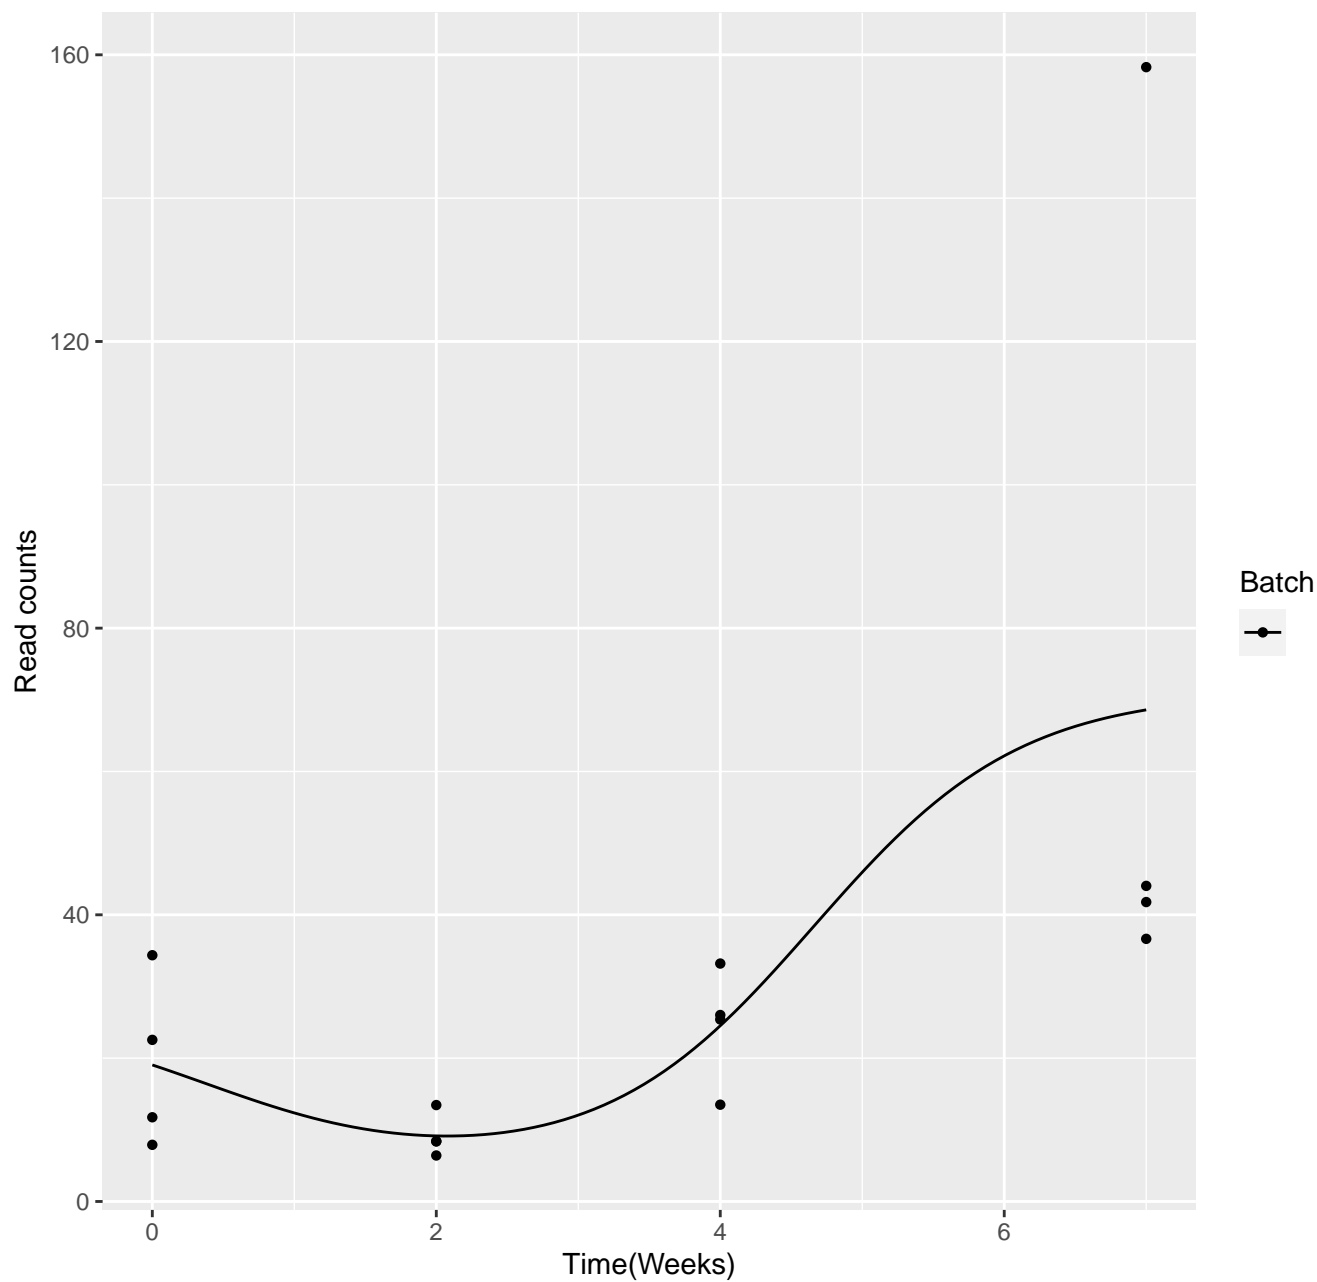

SVIL:  $\log_{10} q = -3.27$

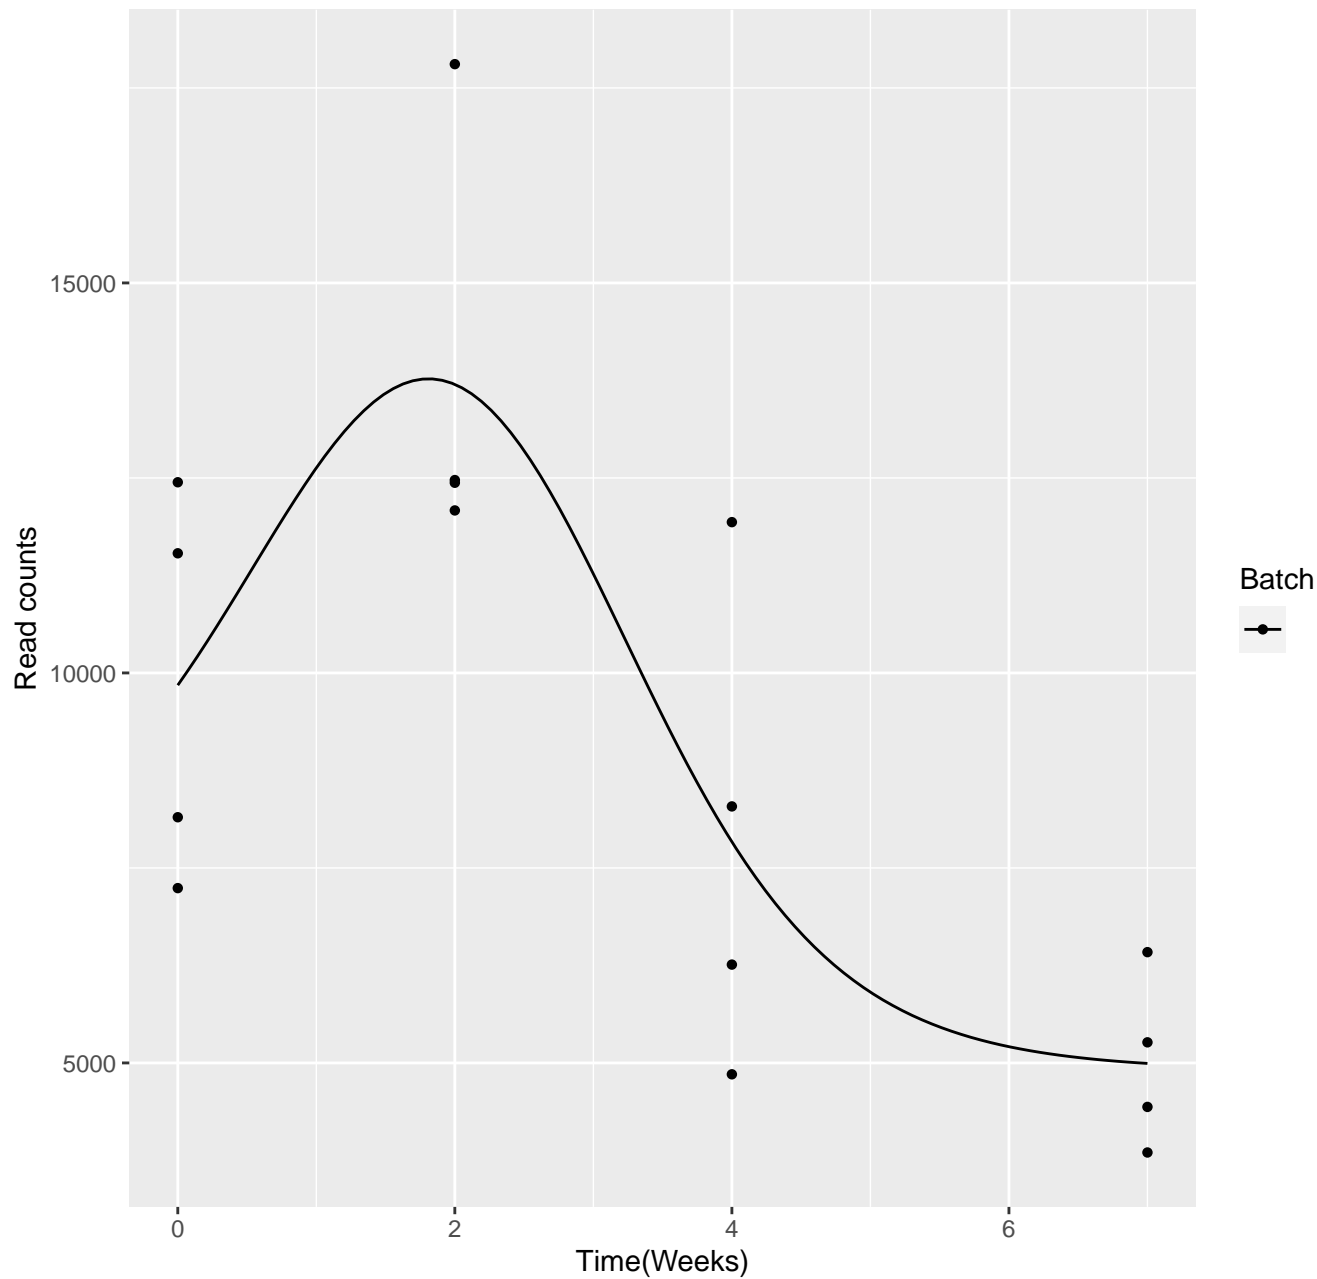

PADI2:  $\log_{10} q = -3.26$

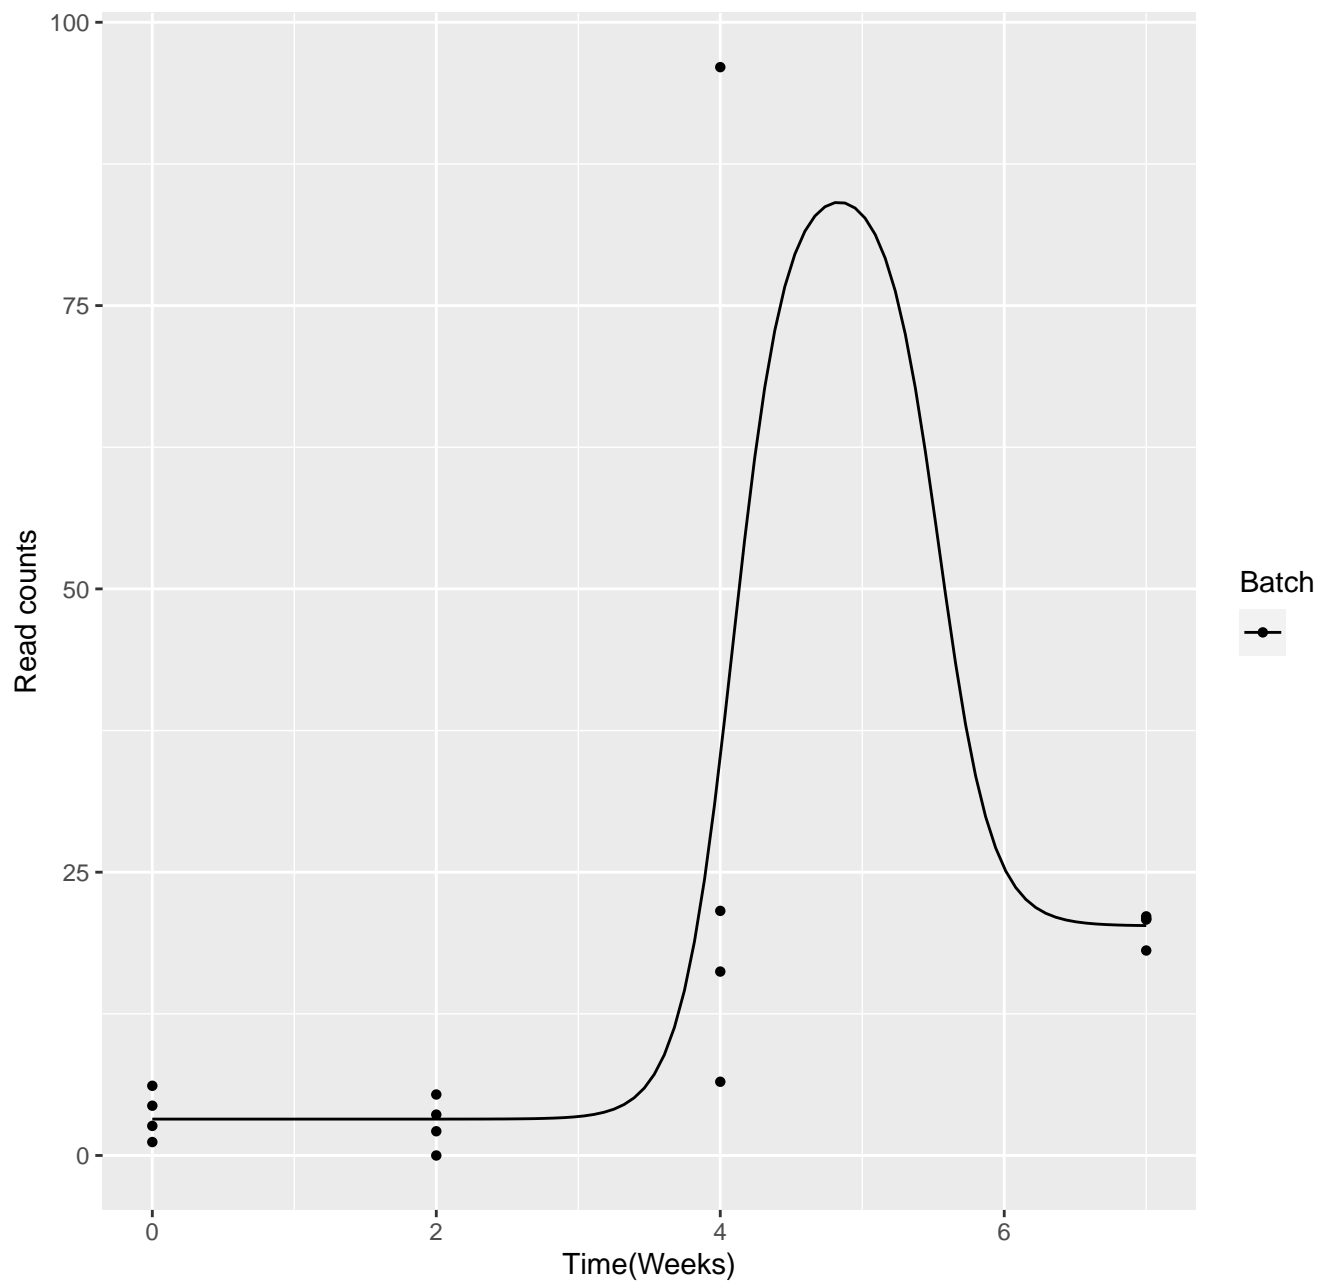

TOP2A:  $\log_{10} q = -3.26$

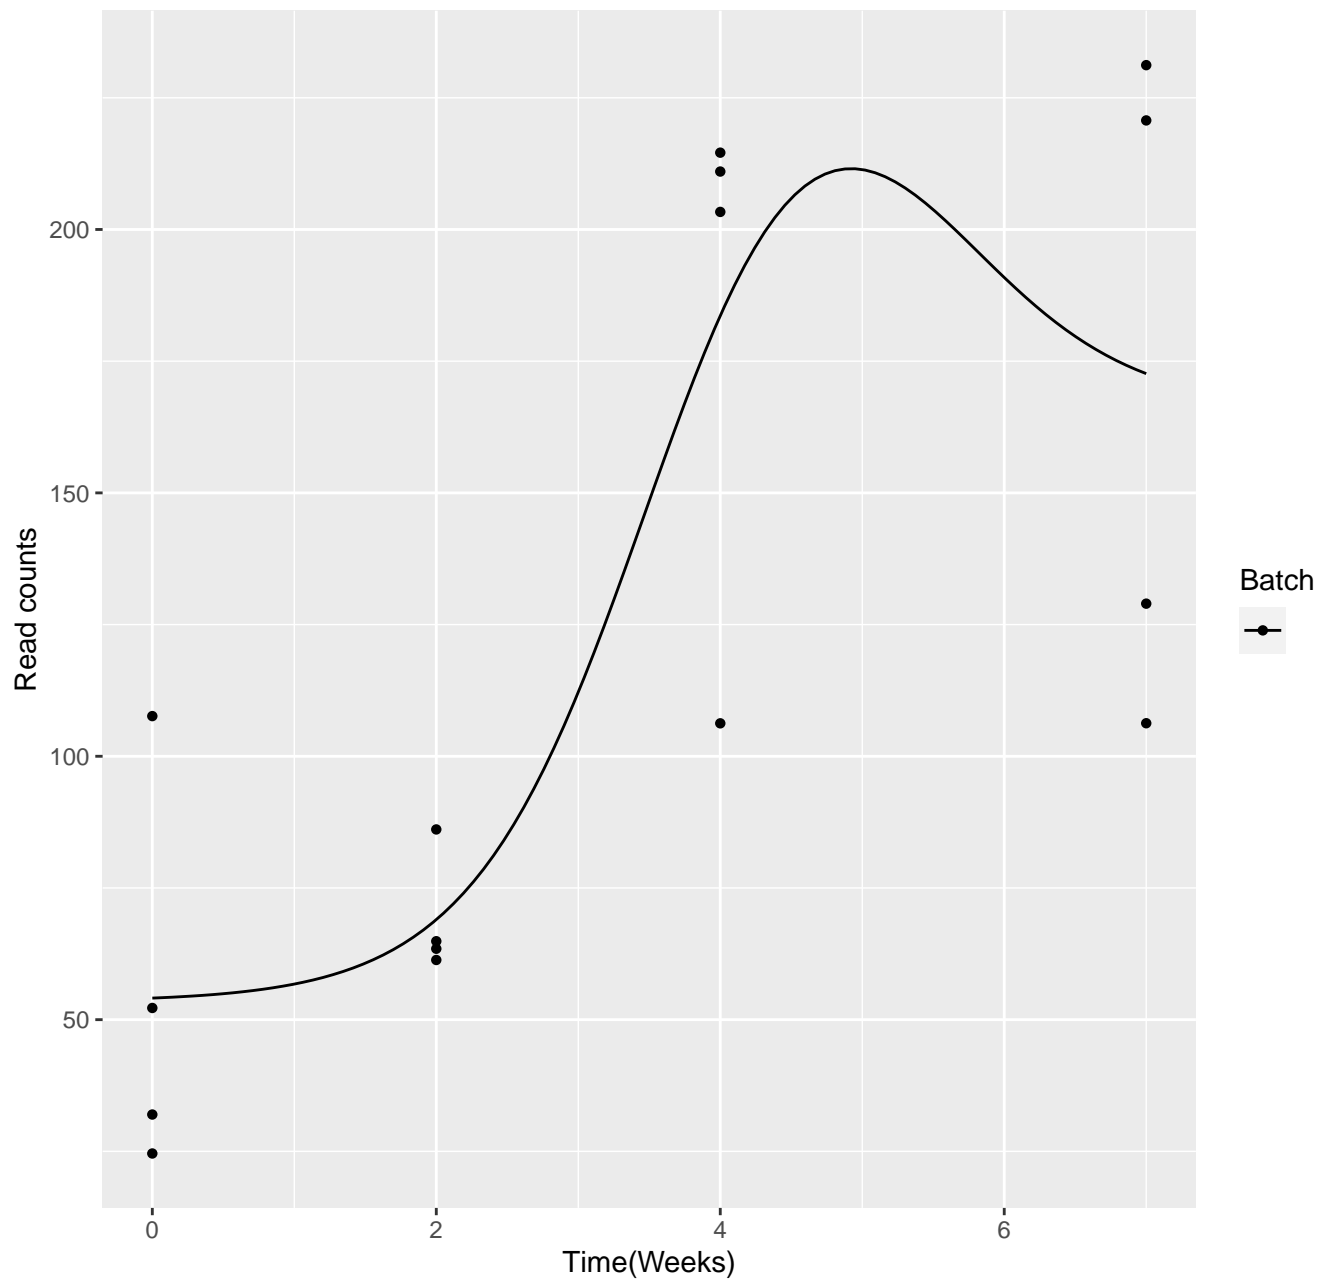

F5:  $\log_{10} q = -3.26$

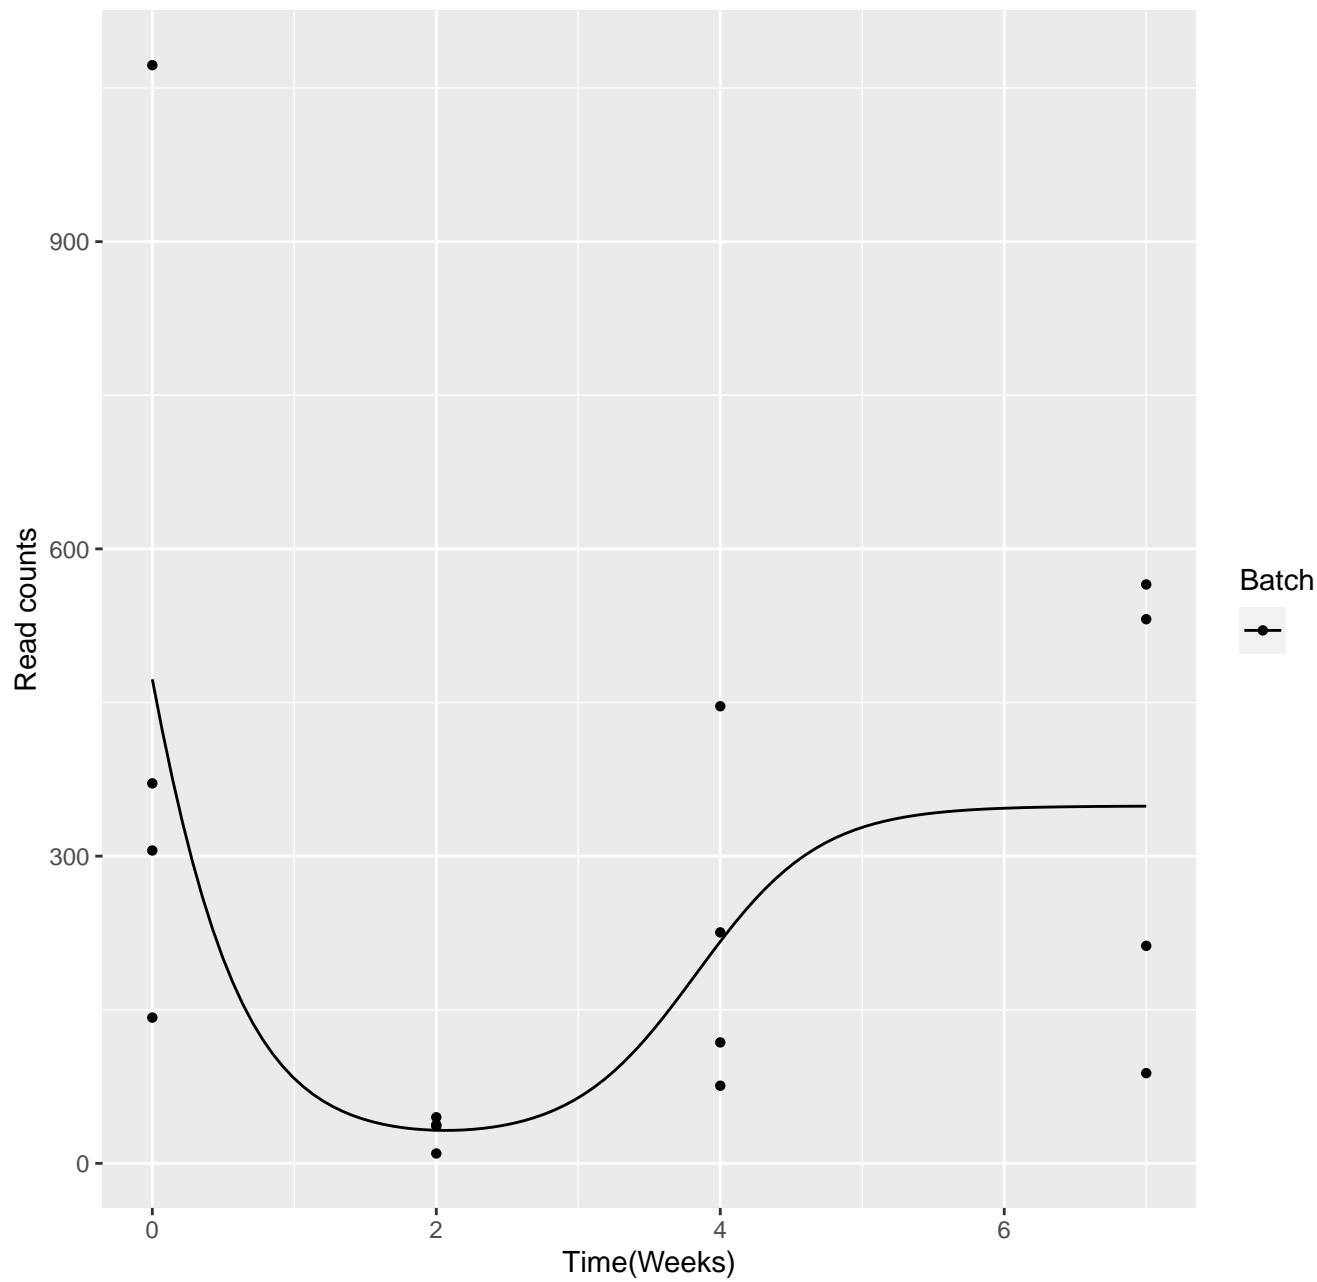



IKBKE:  $\log_{10} q = -3.26$

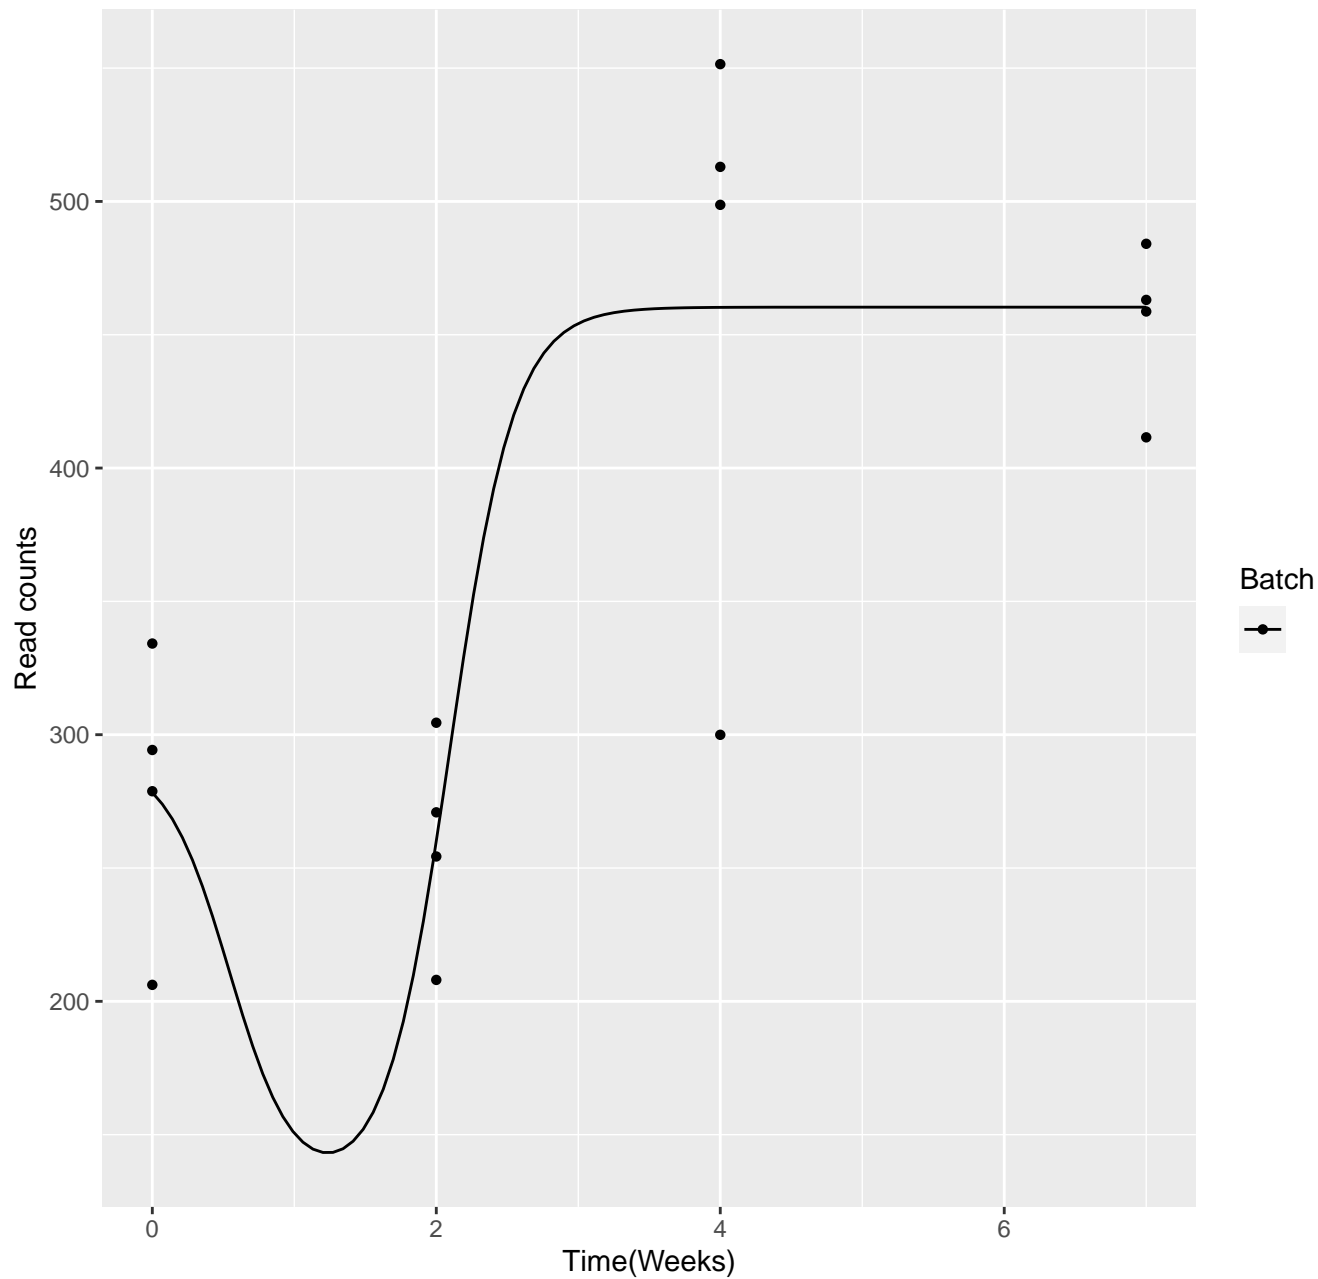

MAP1B:  $\log_{10} q = -3.25$

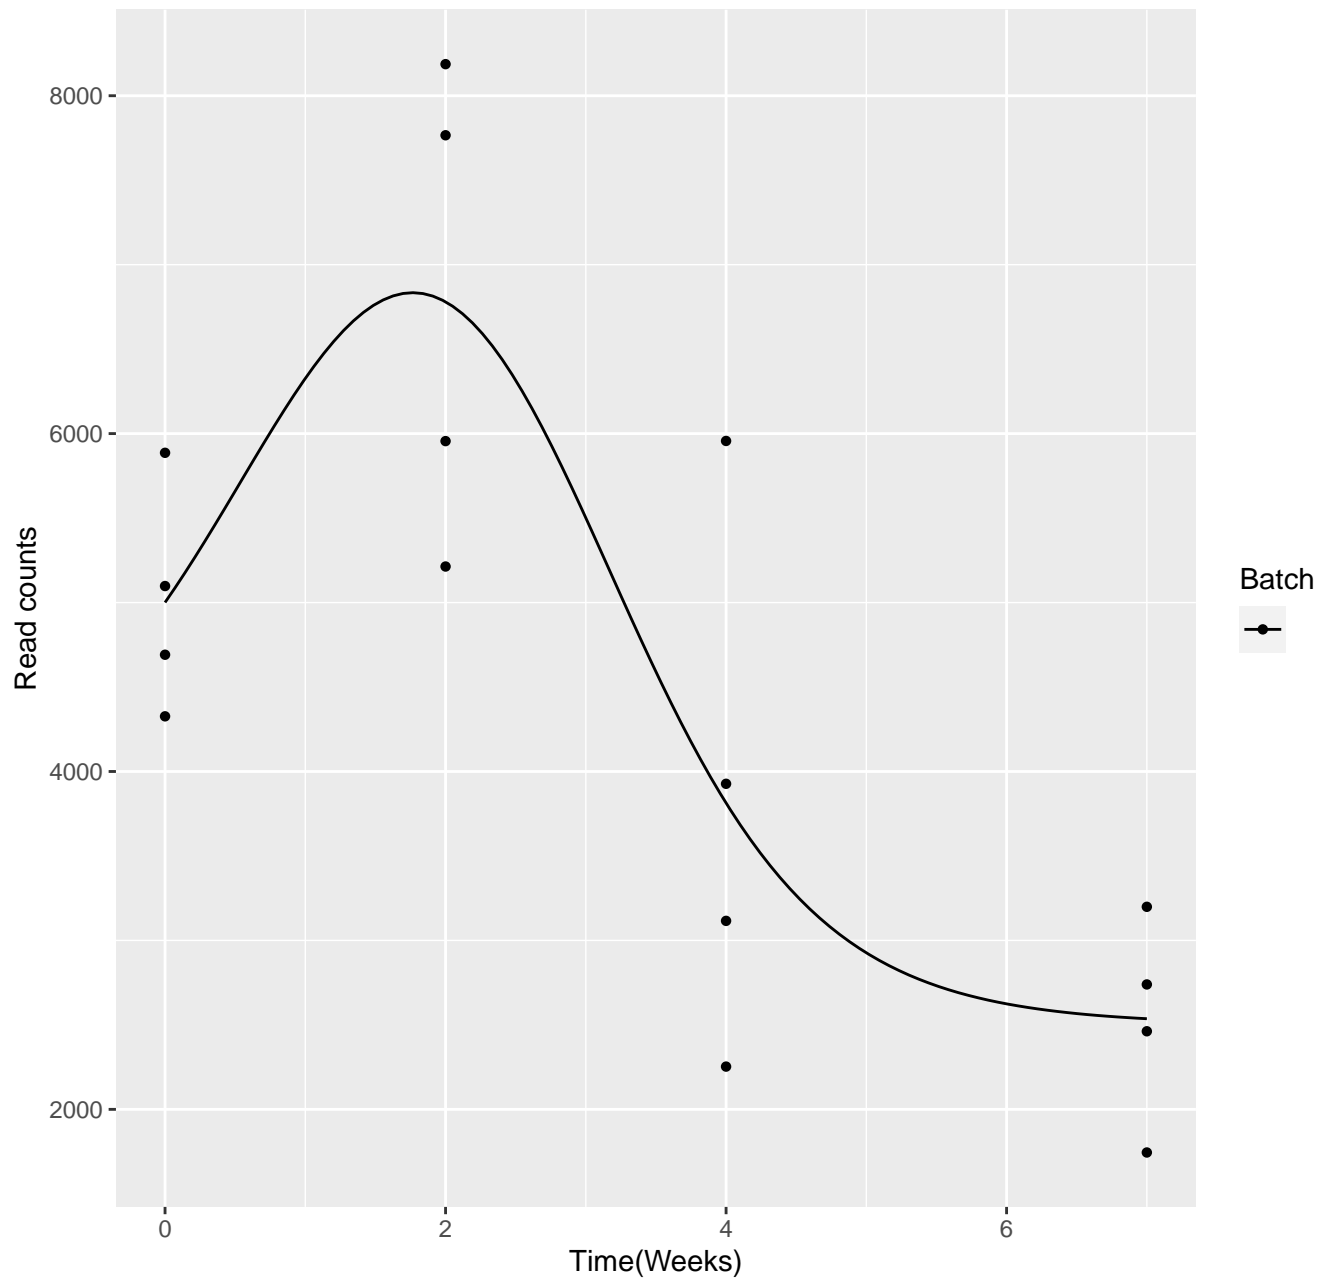

CYFIP2:  $\log_{10} q = -3.25$

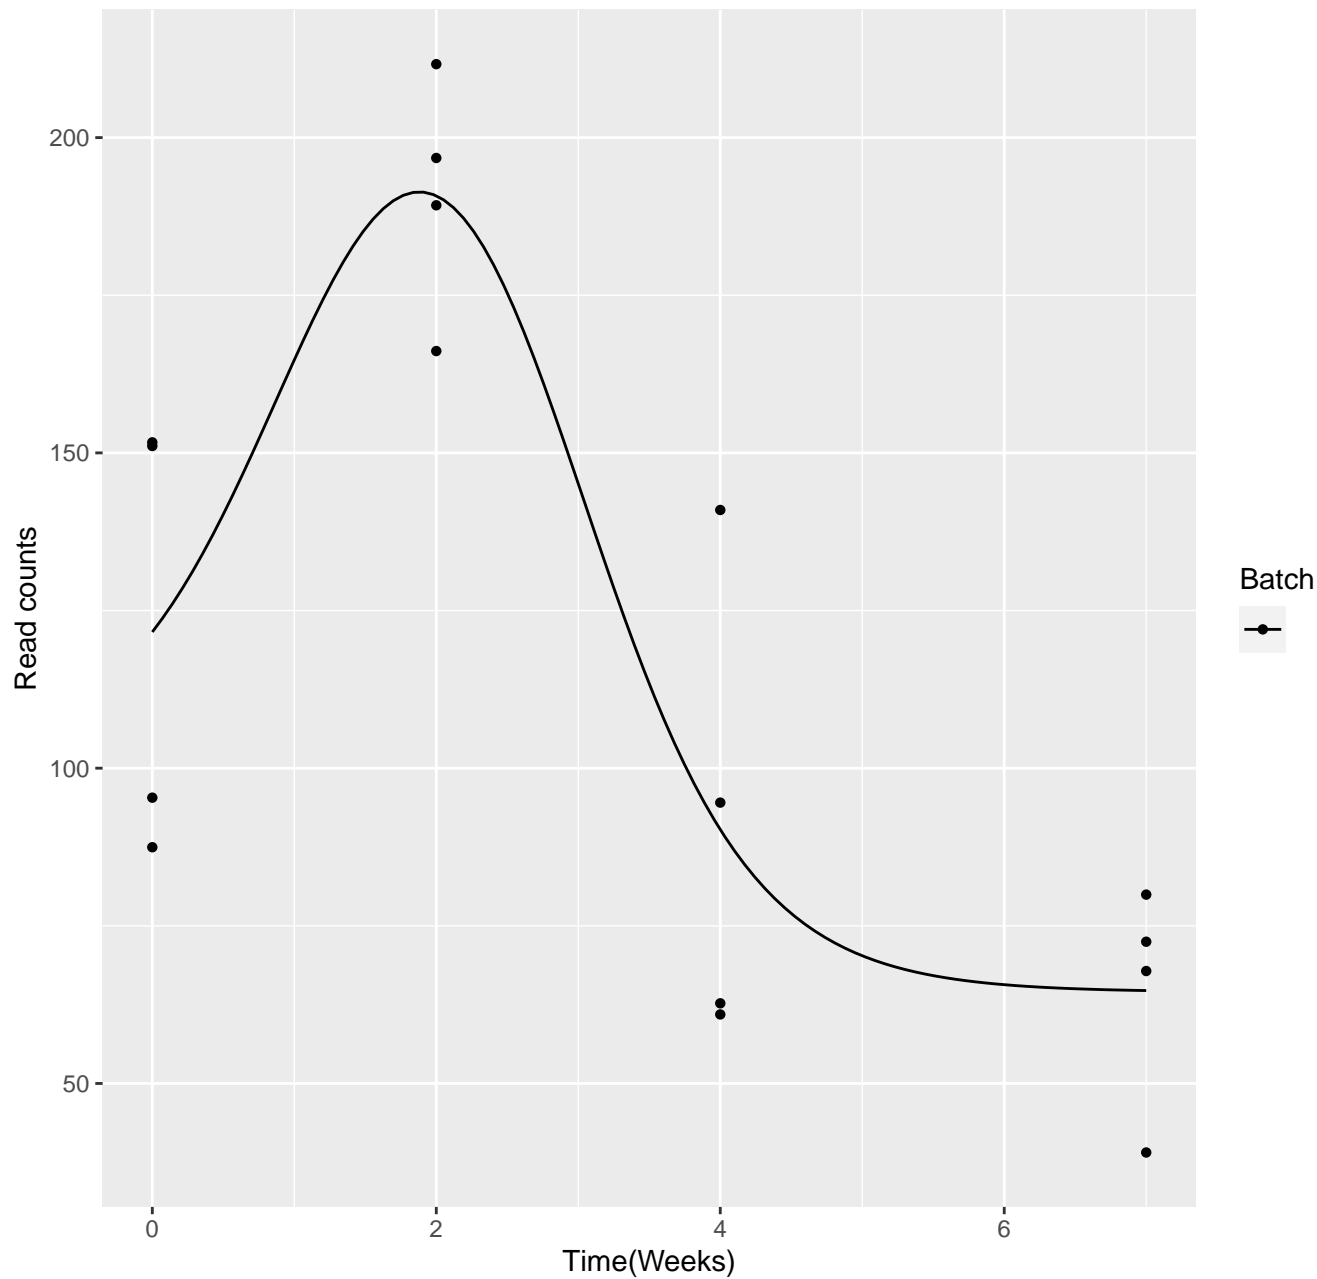

DUSP10:  $\log_{10} q = -3.25$

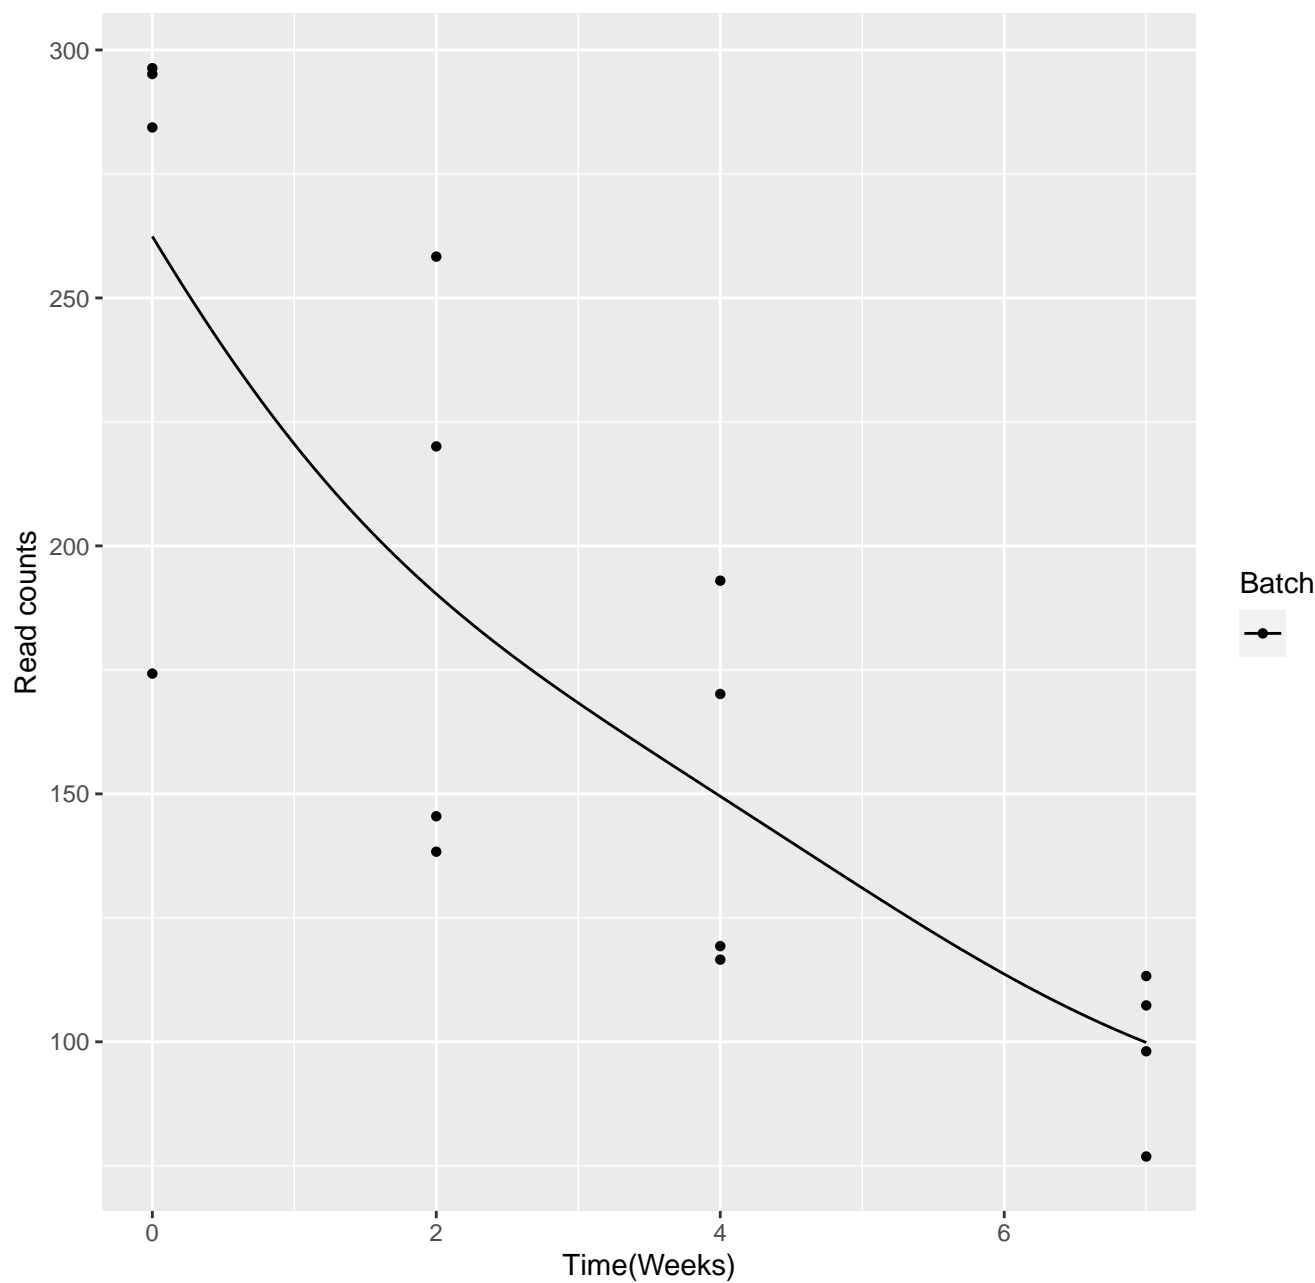

NAB2:  $\log_{10} q = -3.25$

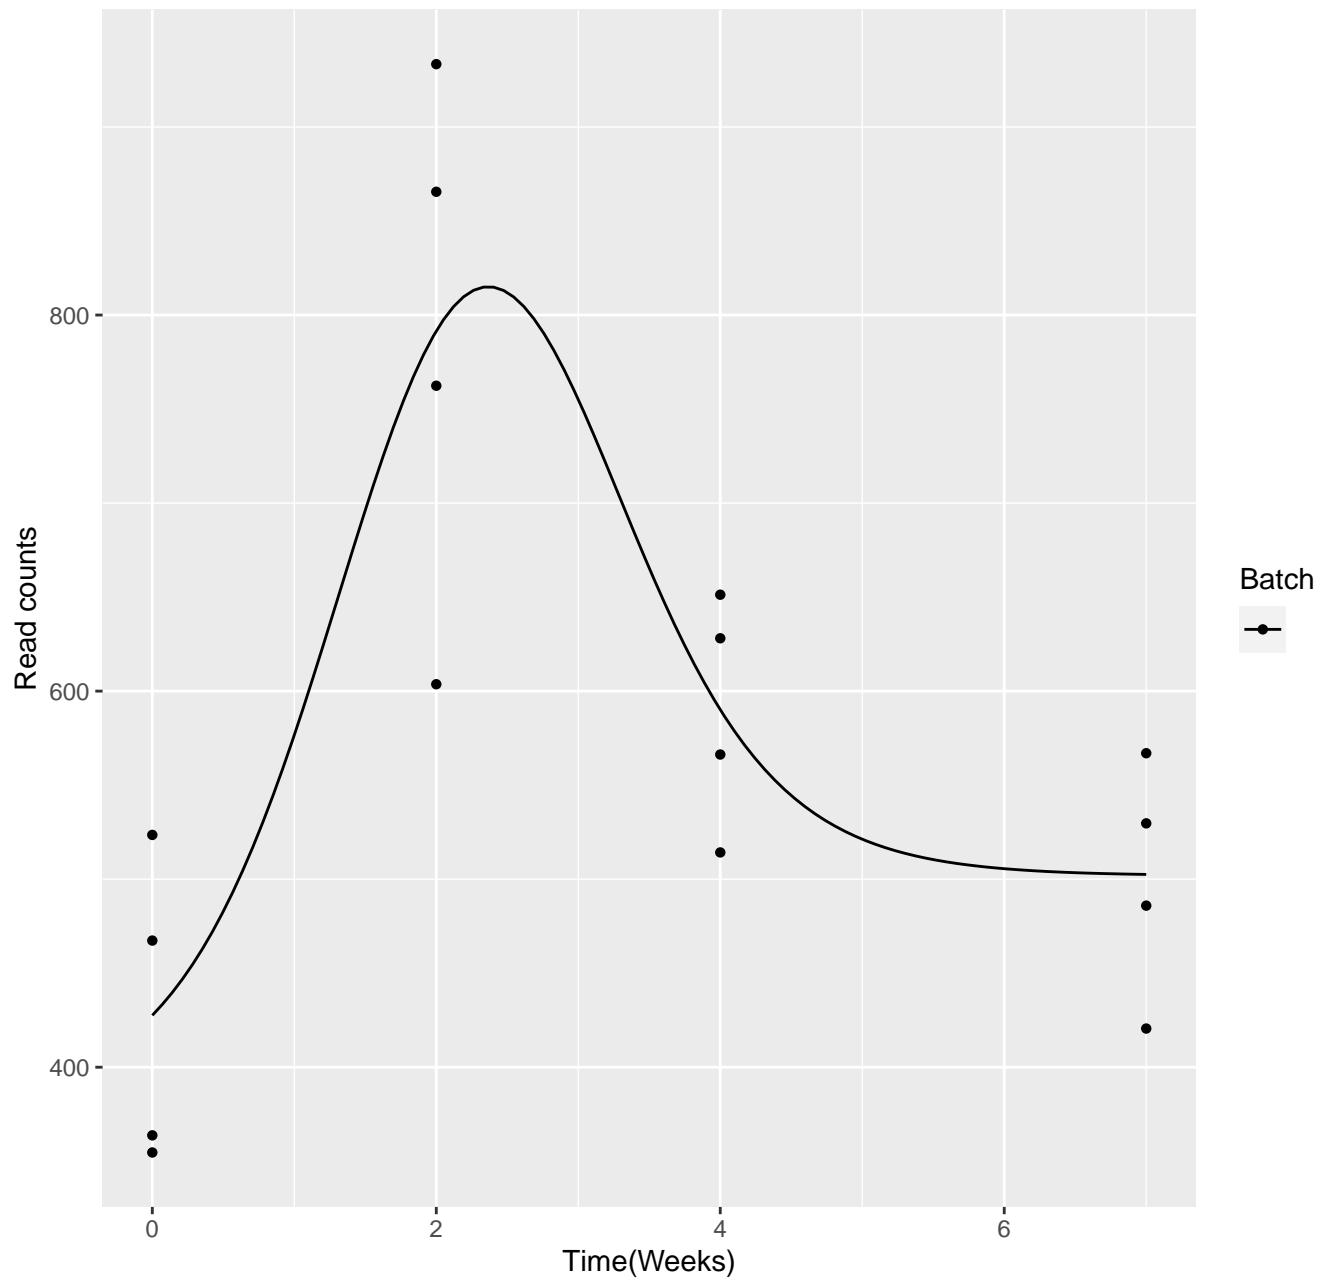

LOC100351957:  $\log_{10} q = -3.25$

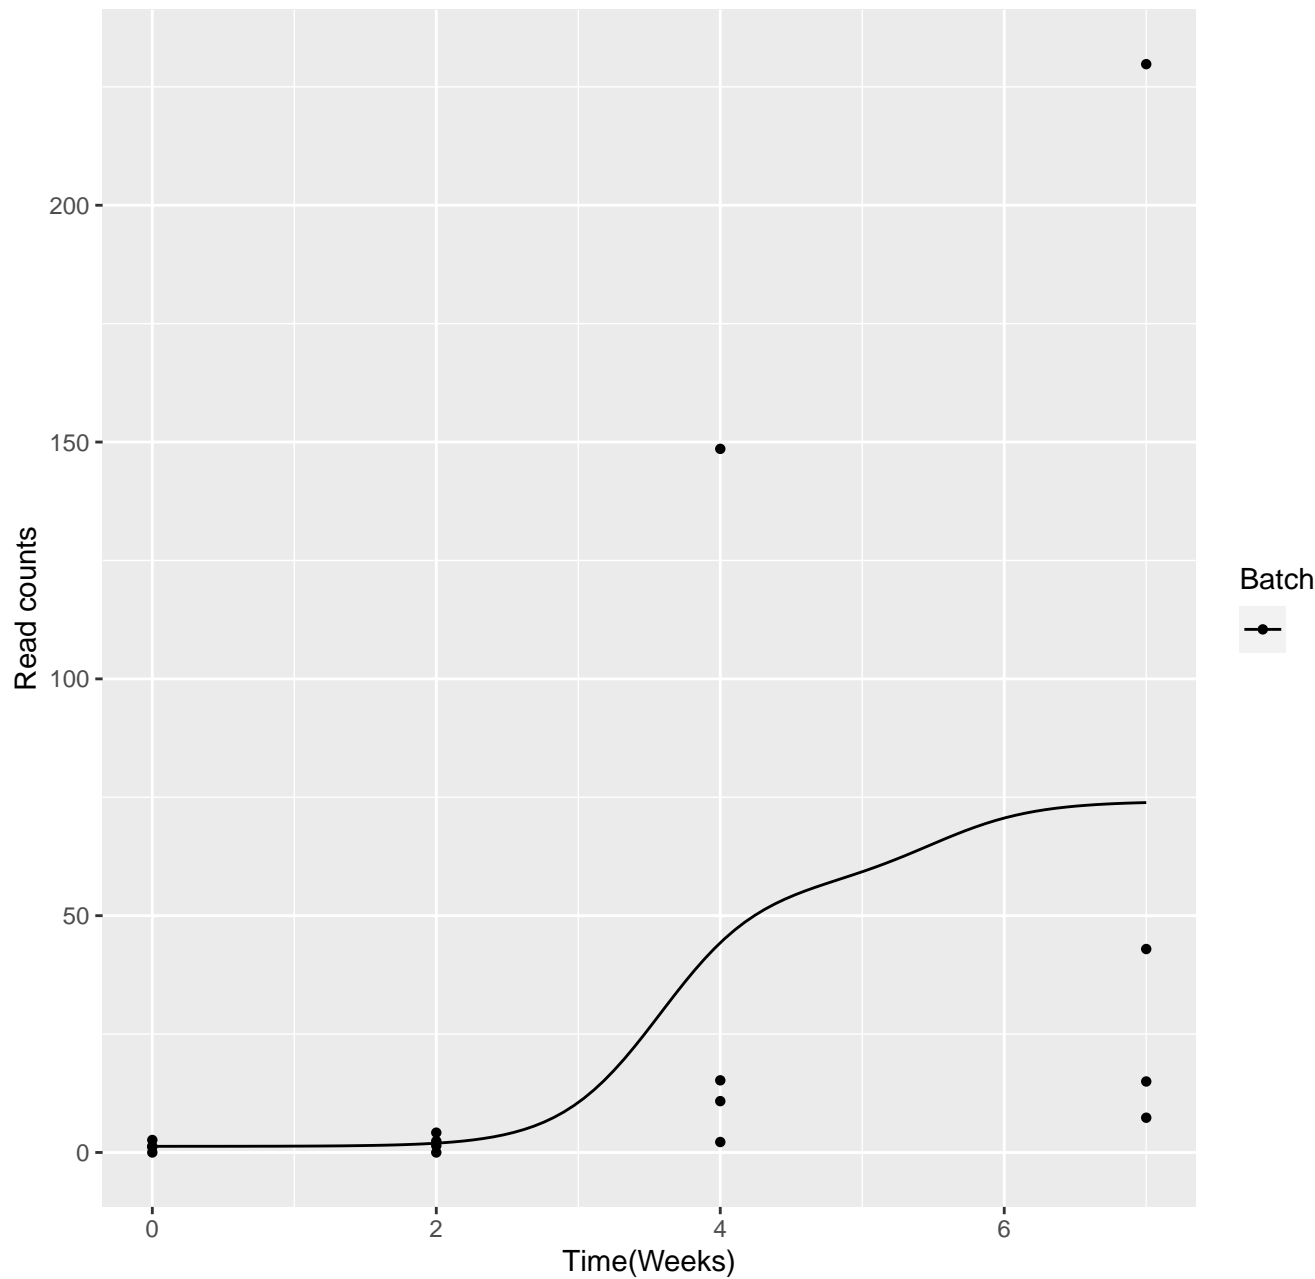

AURKA:  $\log_{10} q = -3.24$

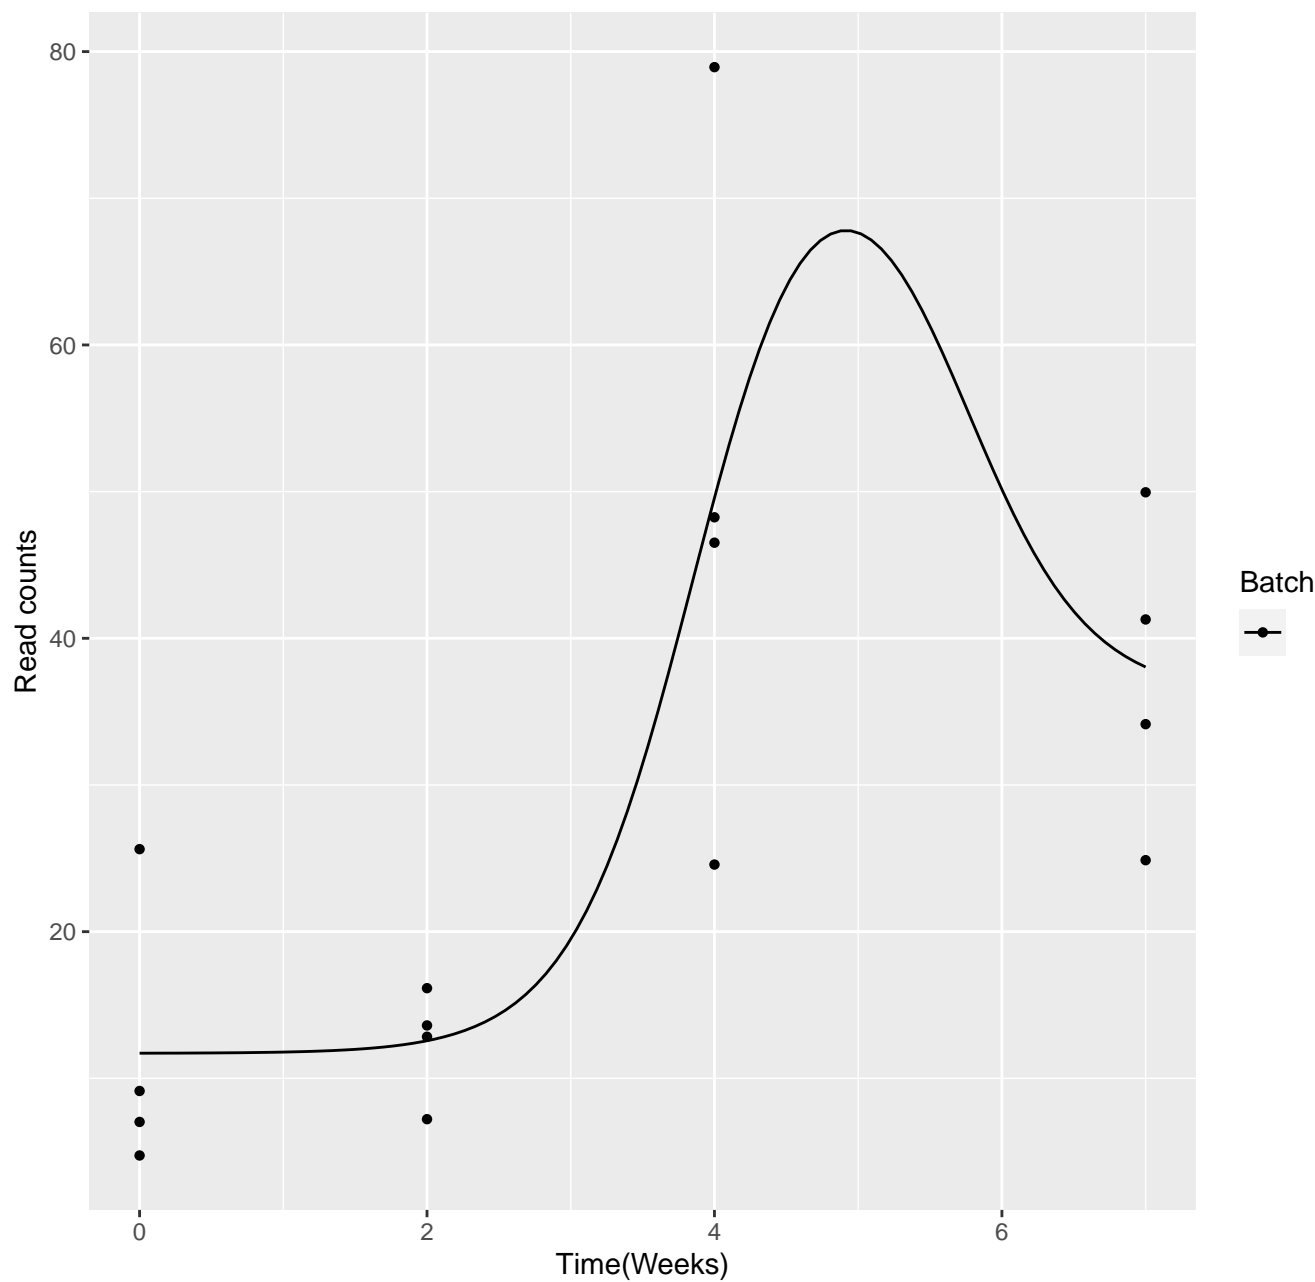

PHF1:  $\log_{10} q = -3.24$

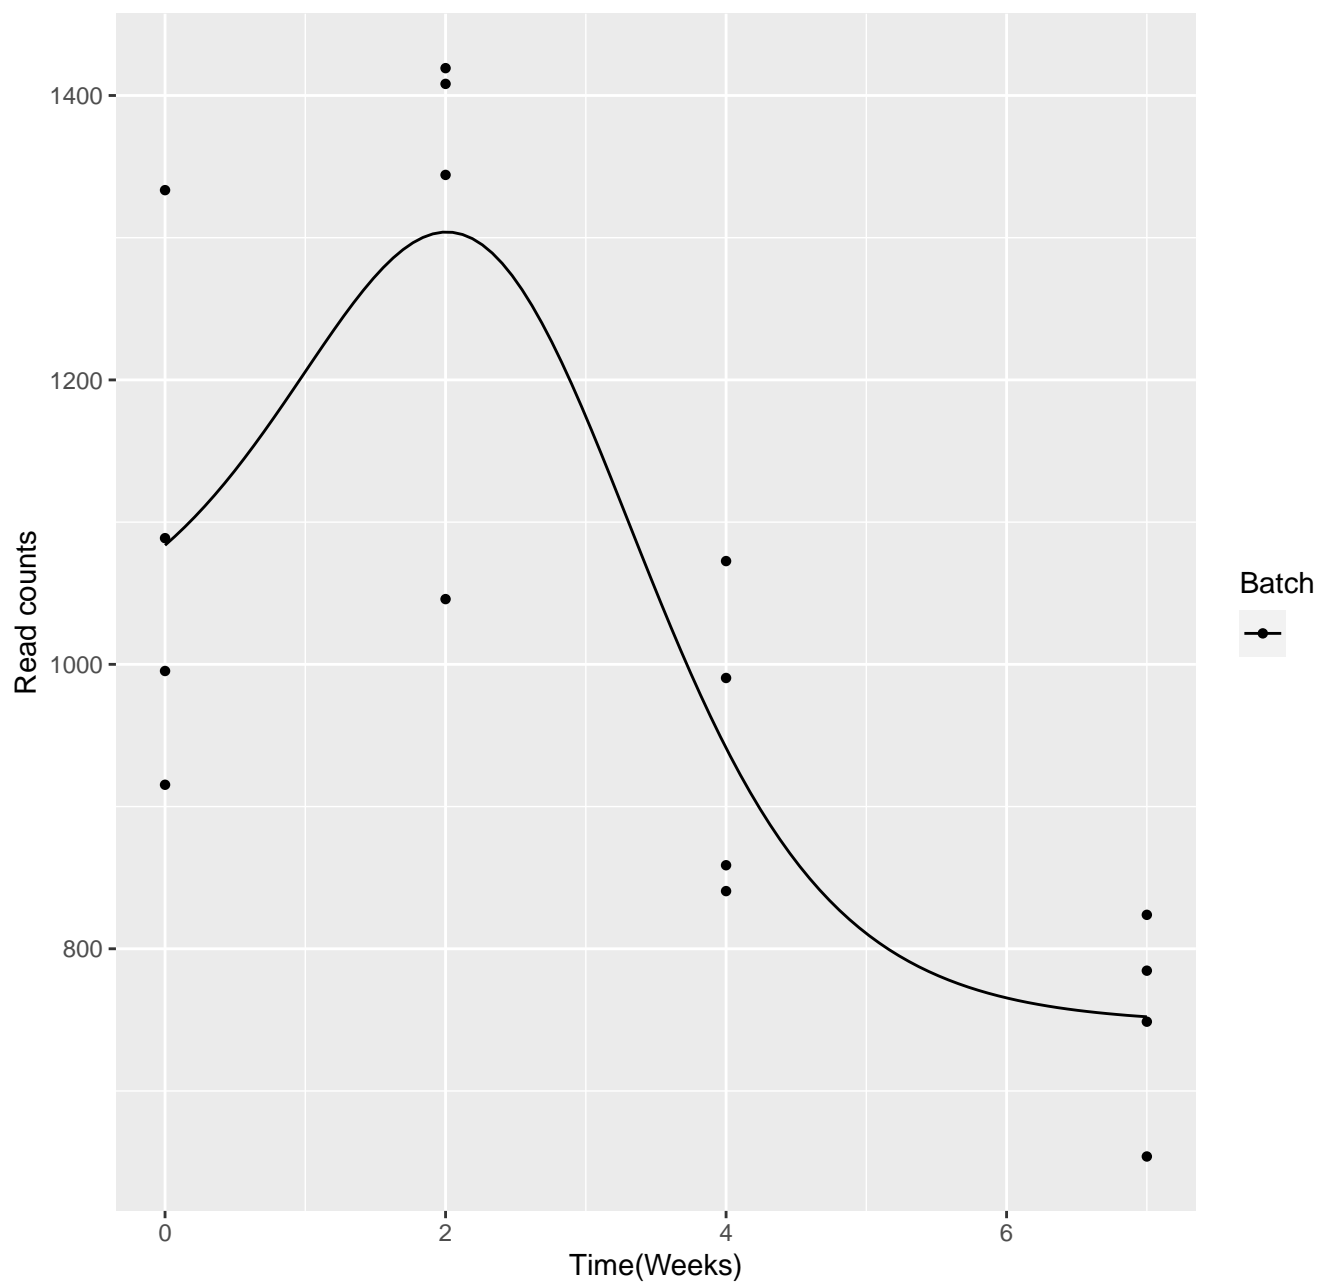



CALD1:  $\log_{10} q = -3.24$

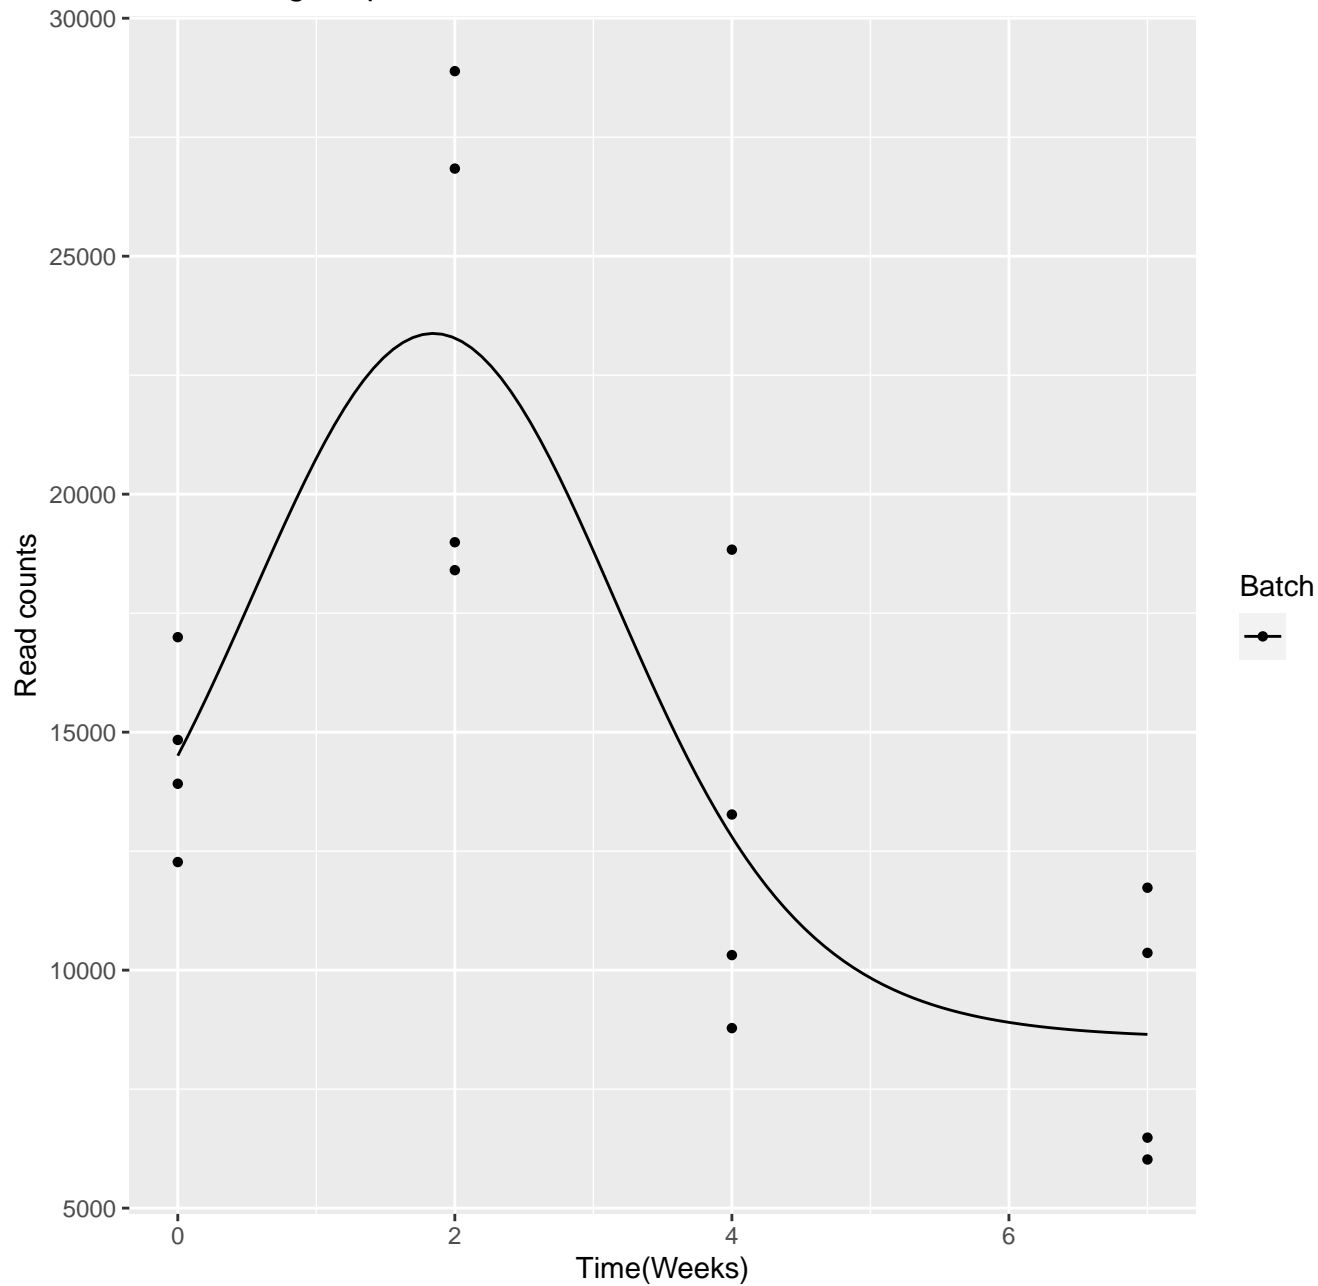

FLRT1:  $\log_{10} q = -3.23$

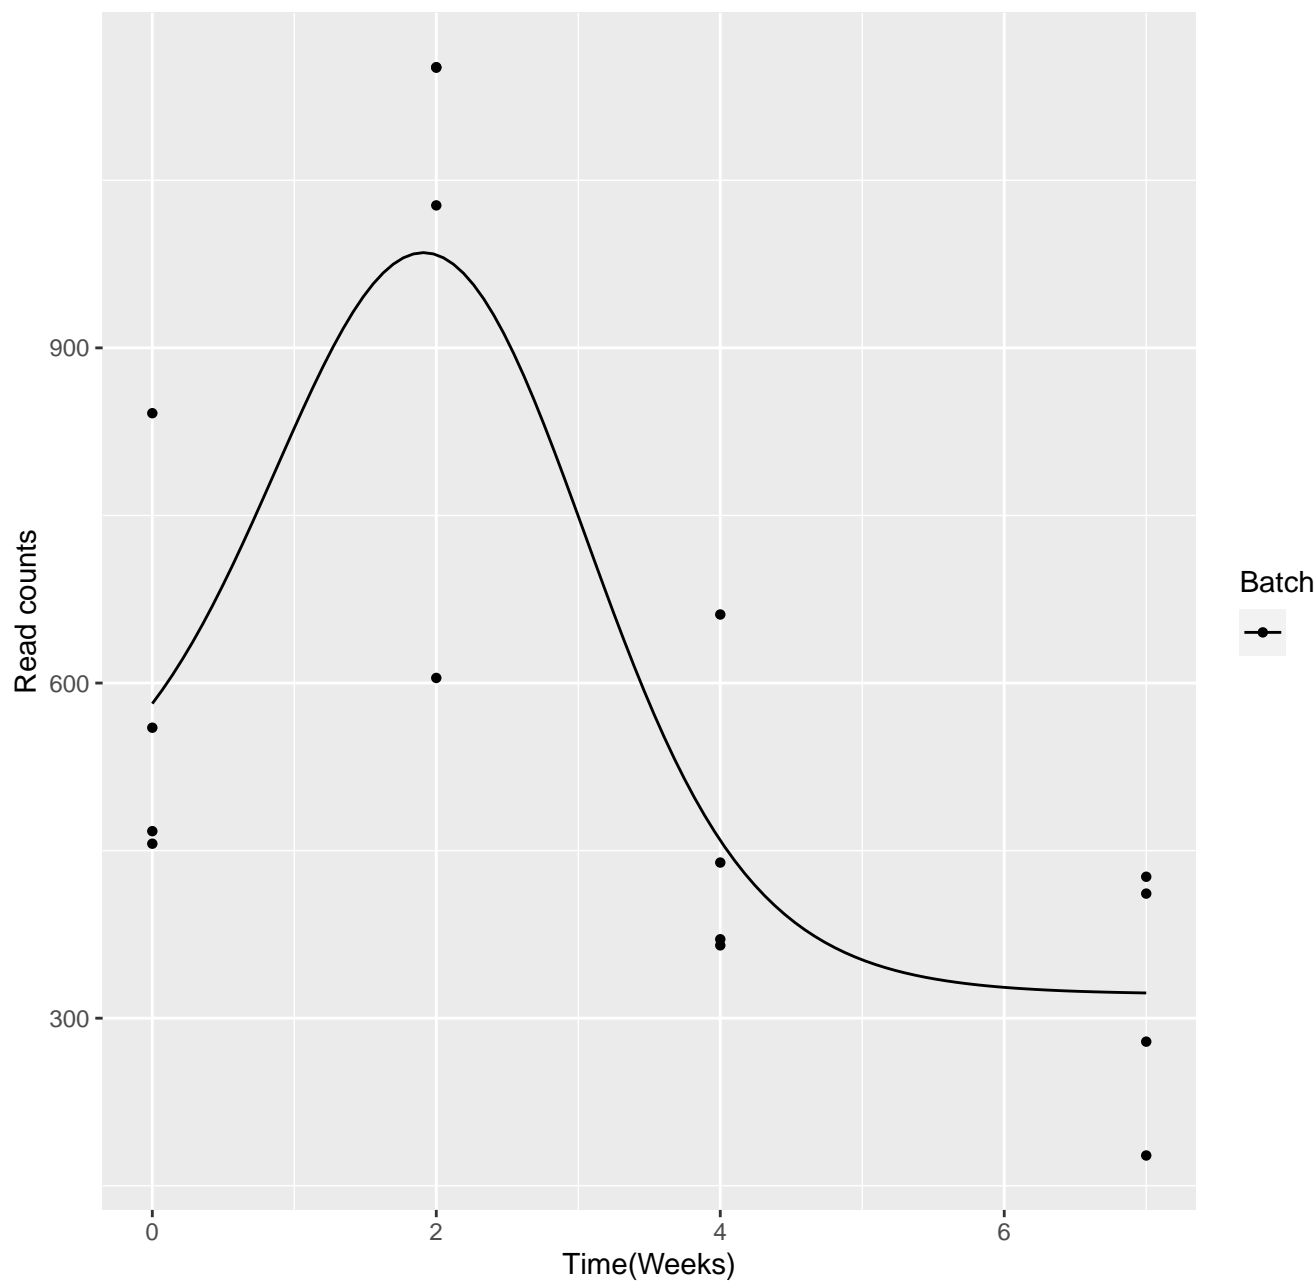

MAMDC2:  $\log_{10} q = -3.23$

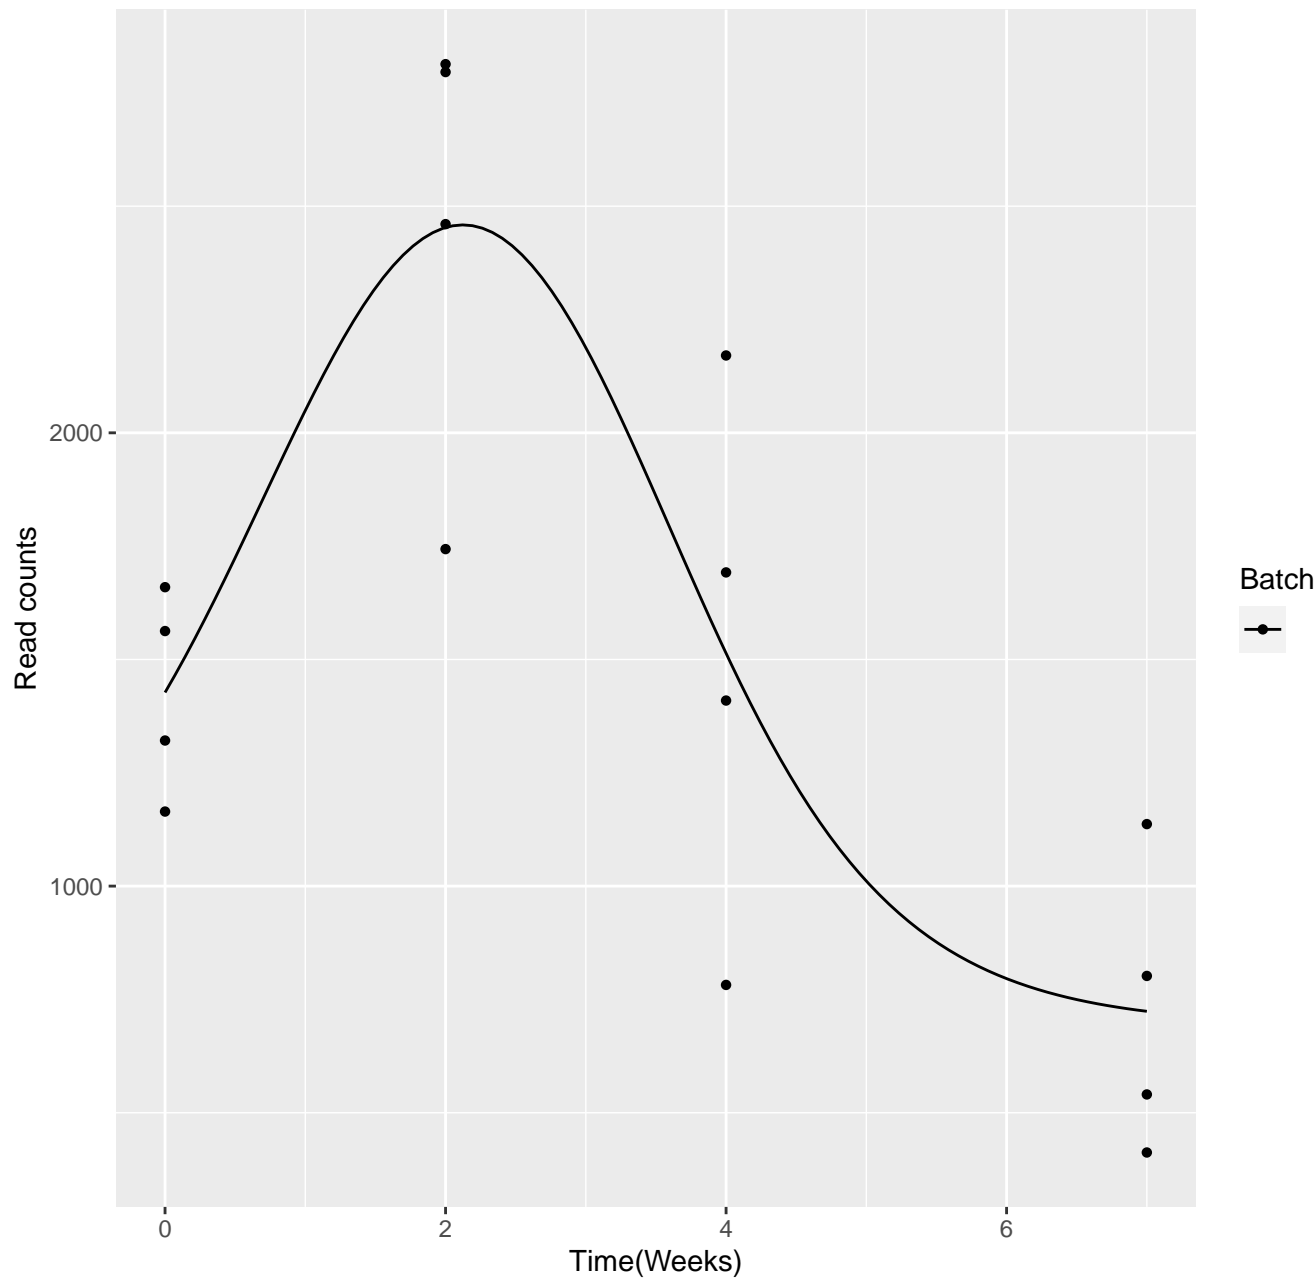

FOS:  $\log_{10} q = -3.23$

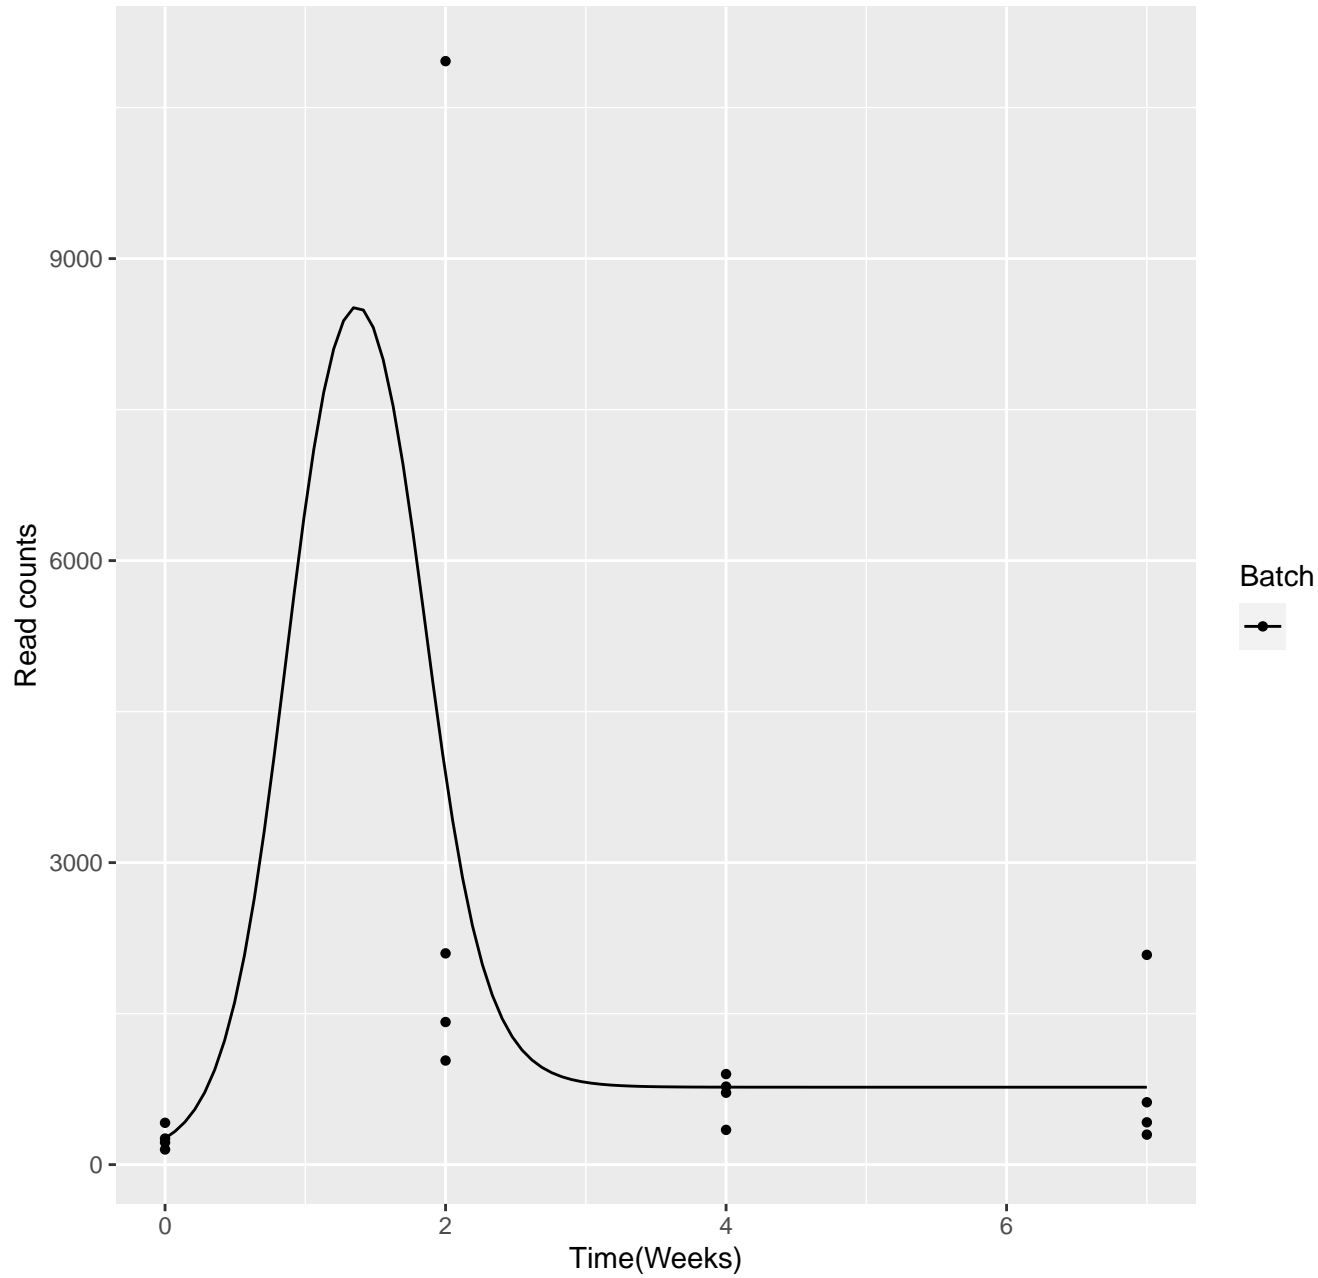

LOC127491115:  $\log_{10} q = -3.23$

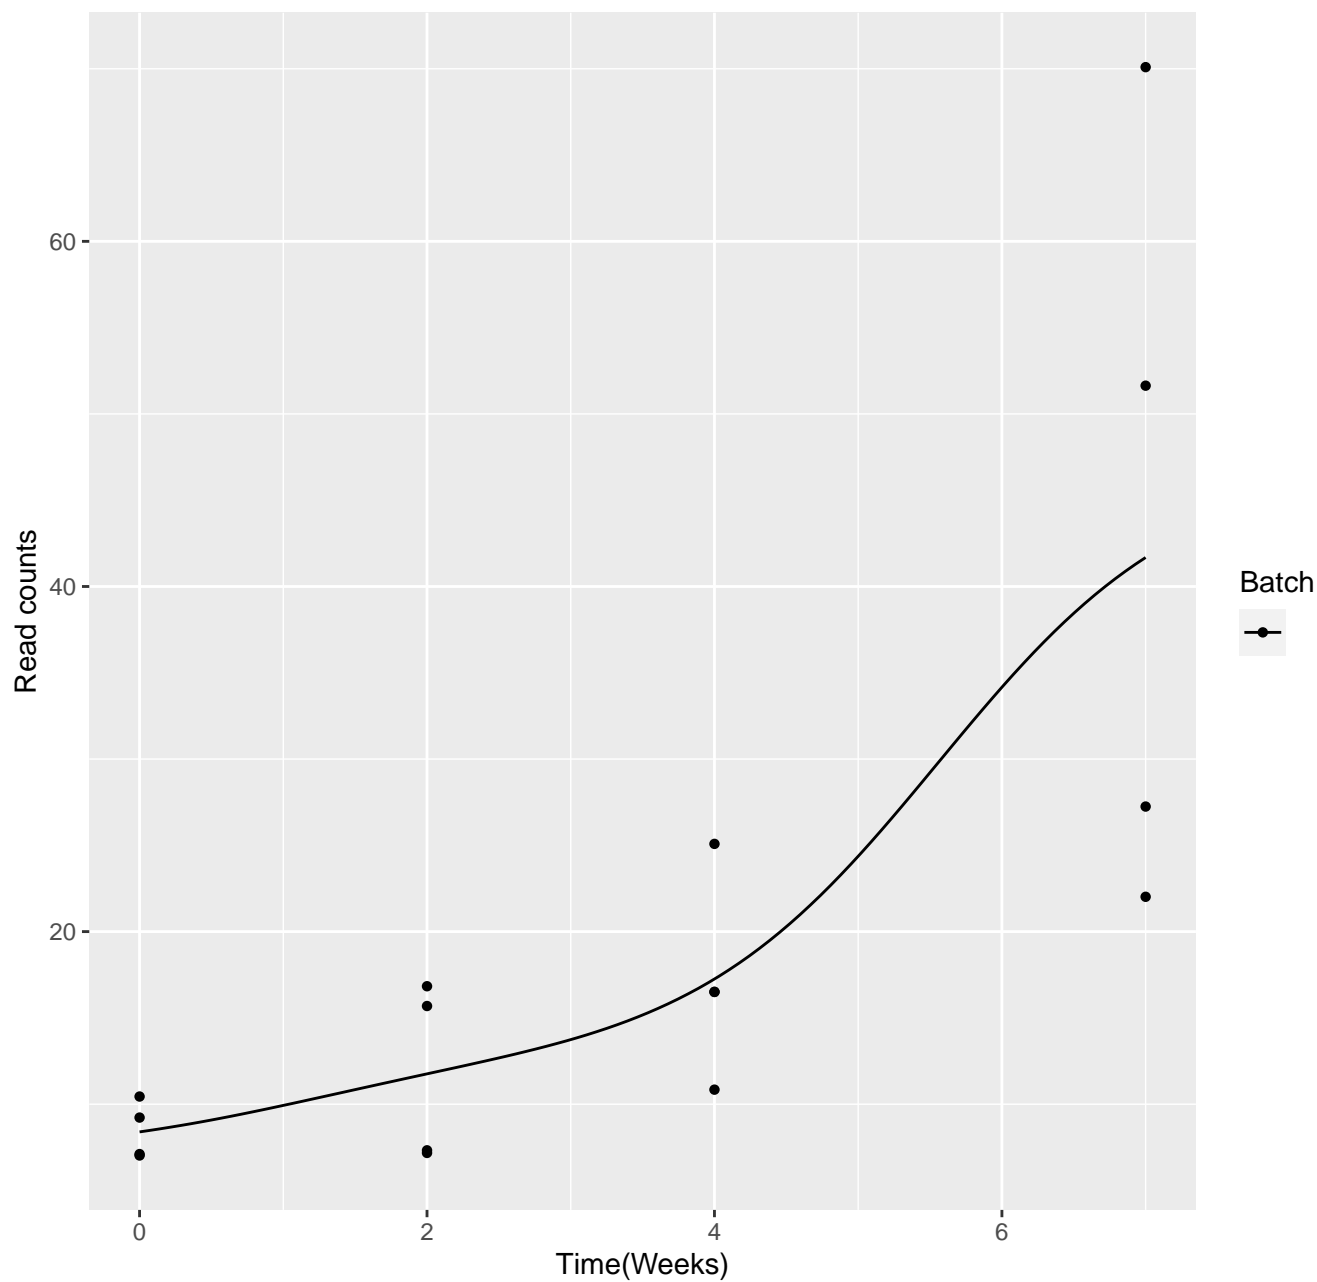

PTP4A3:  $\log_{10} q = -3.22$

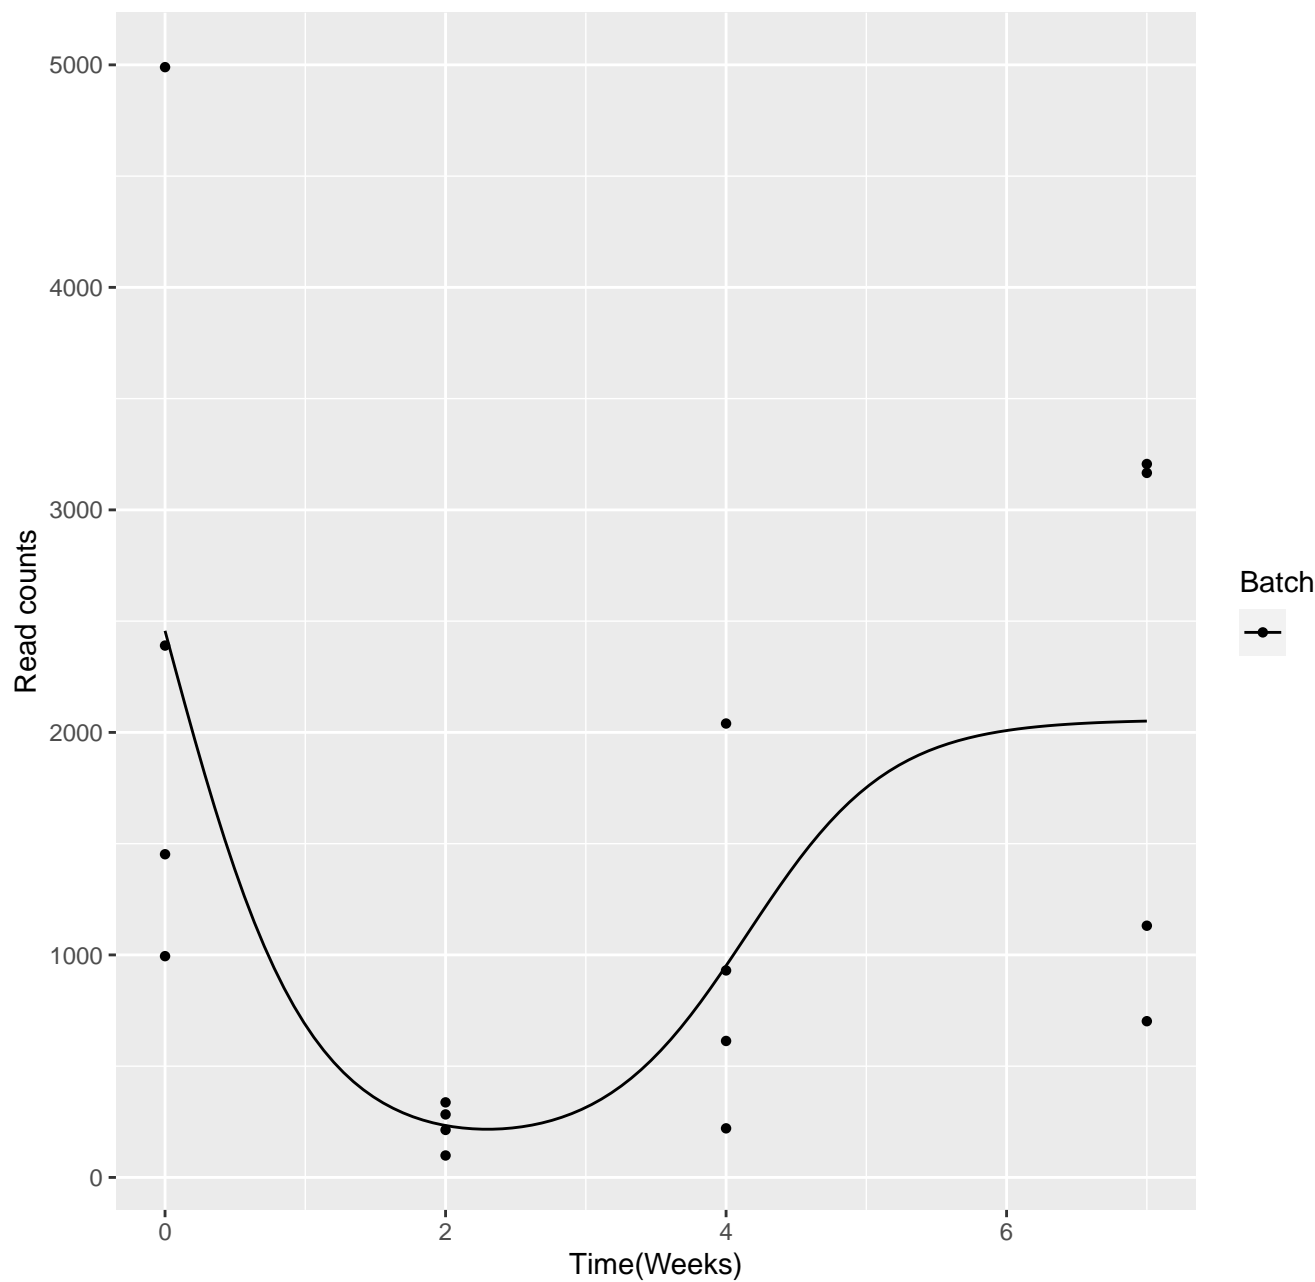

SLIT2:  $\log_{10} q = -3.22$

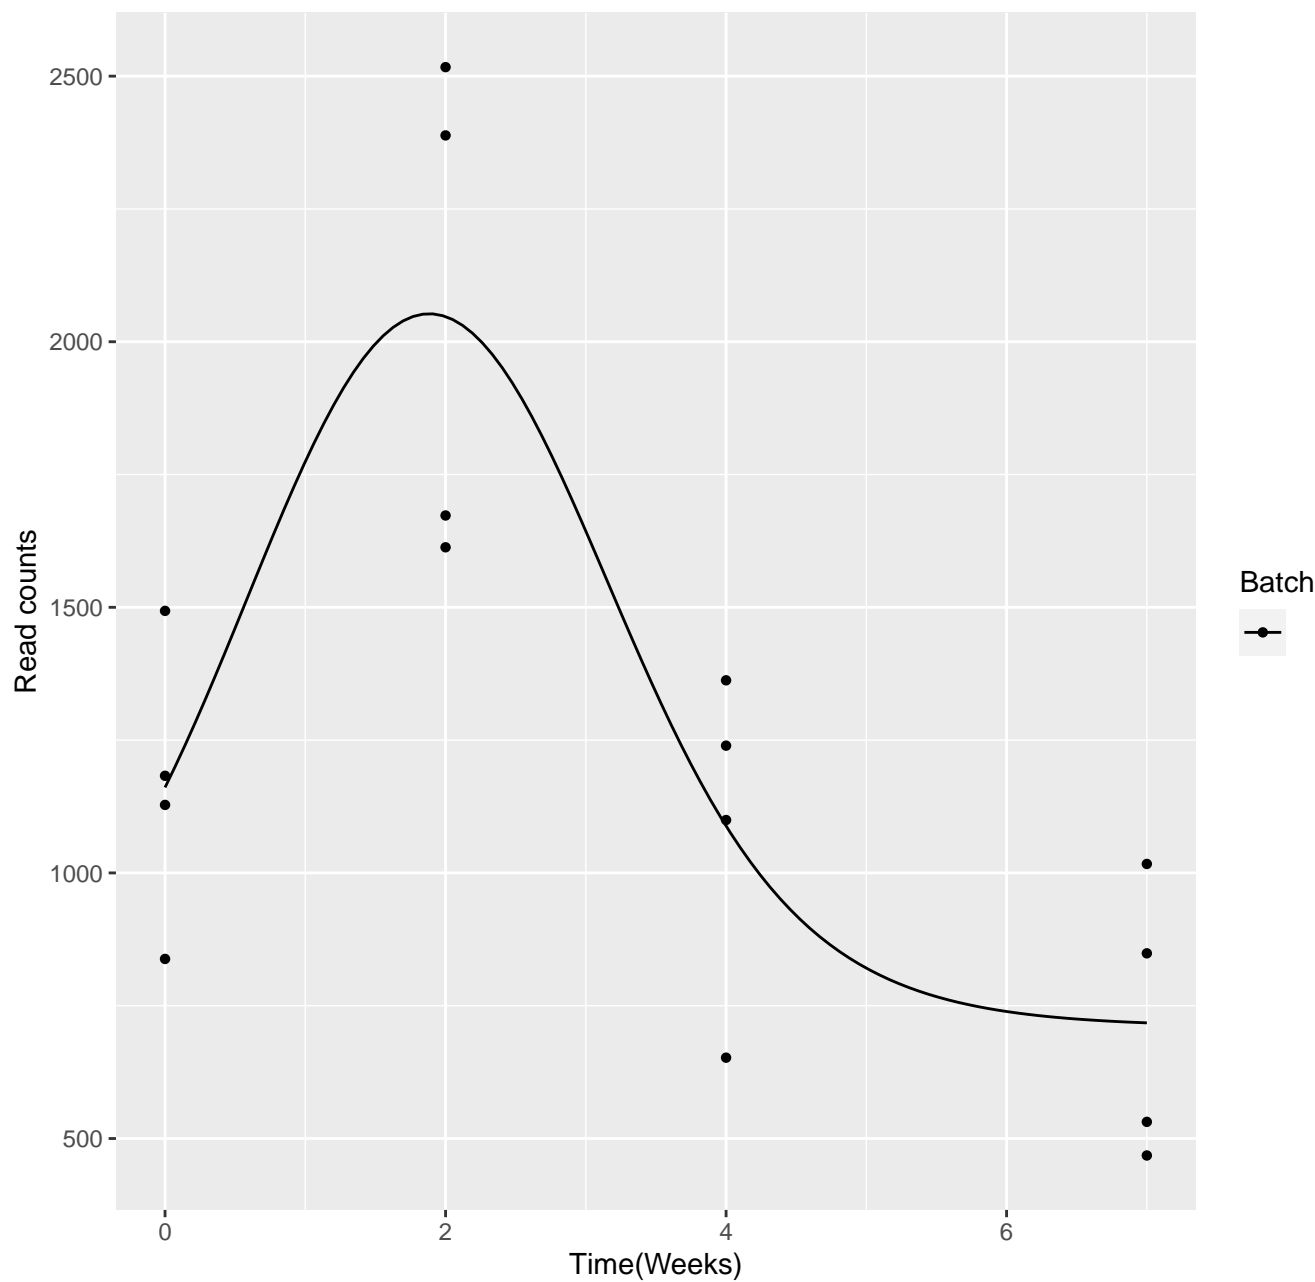

IL21R:  $\log_{10} q = -3.22$

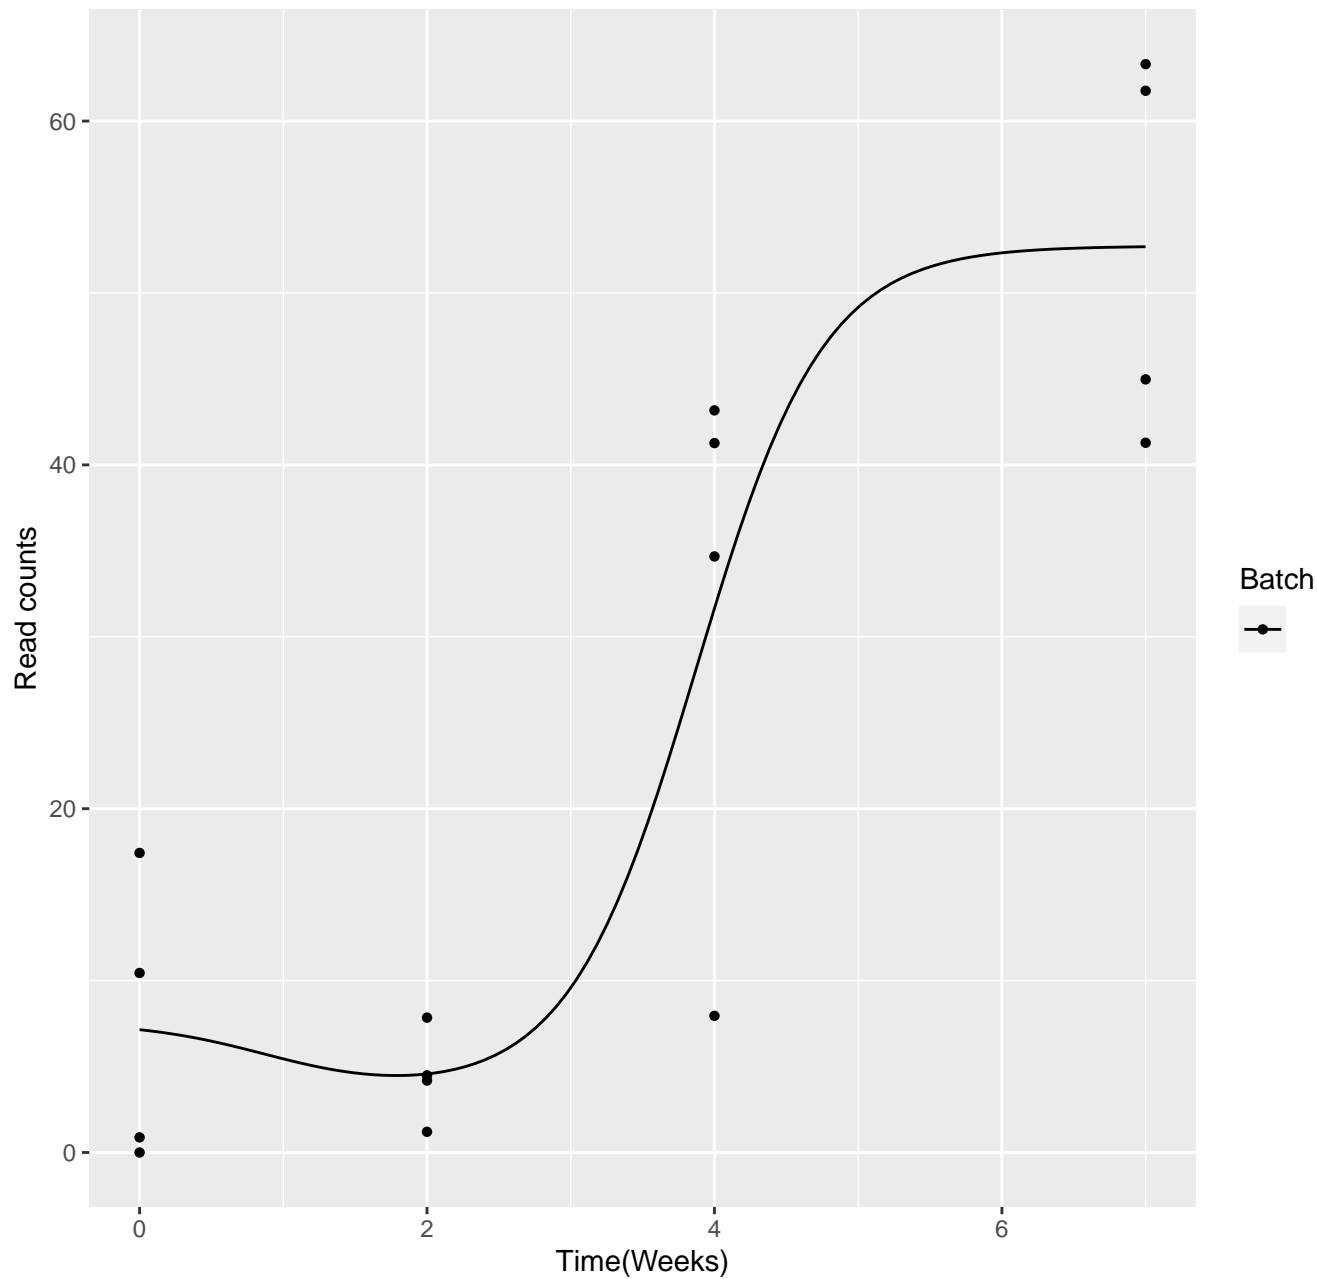



PRSS23:  $\log_{10} q = -3.22$

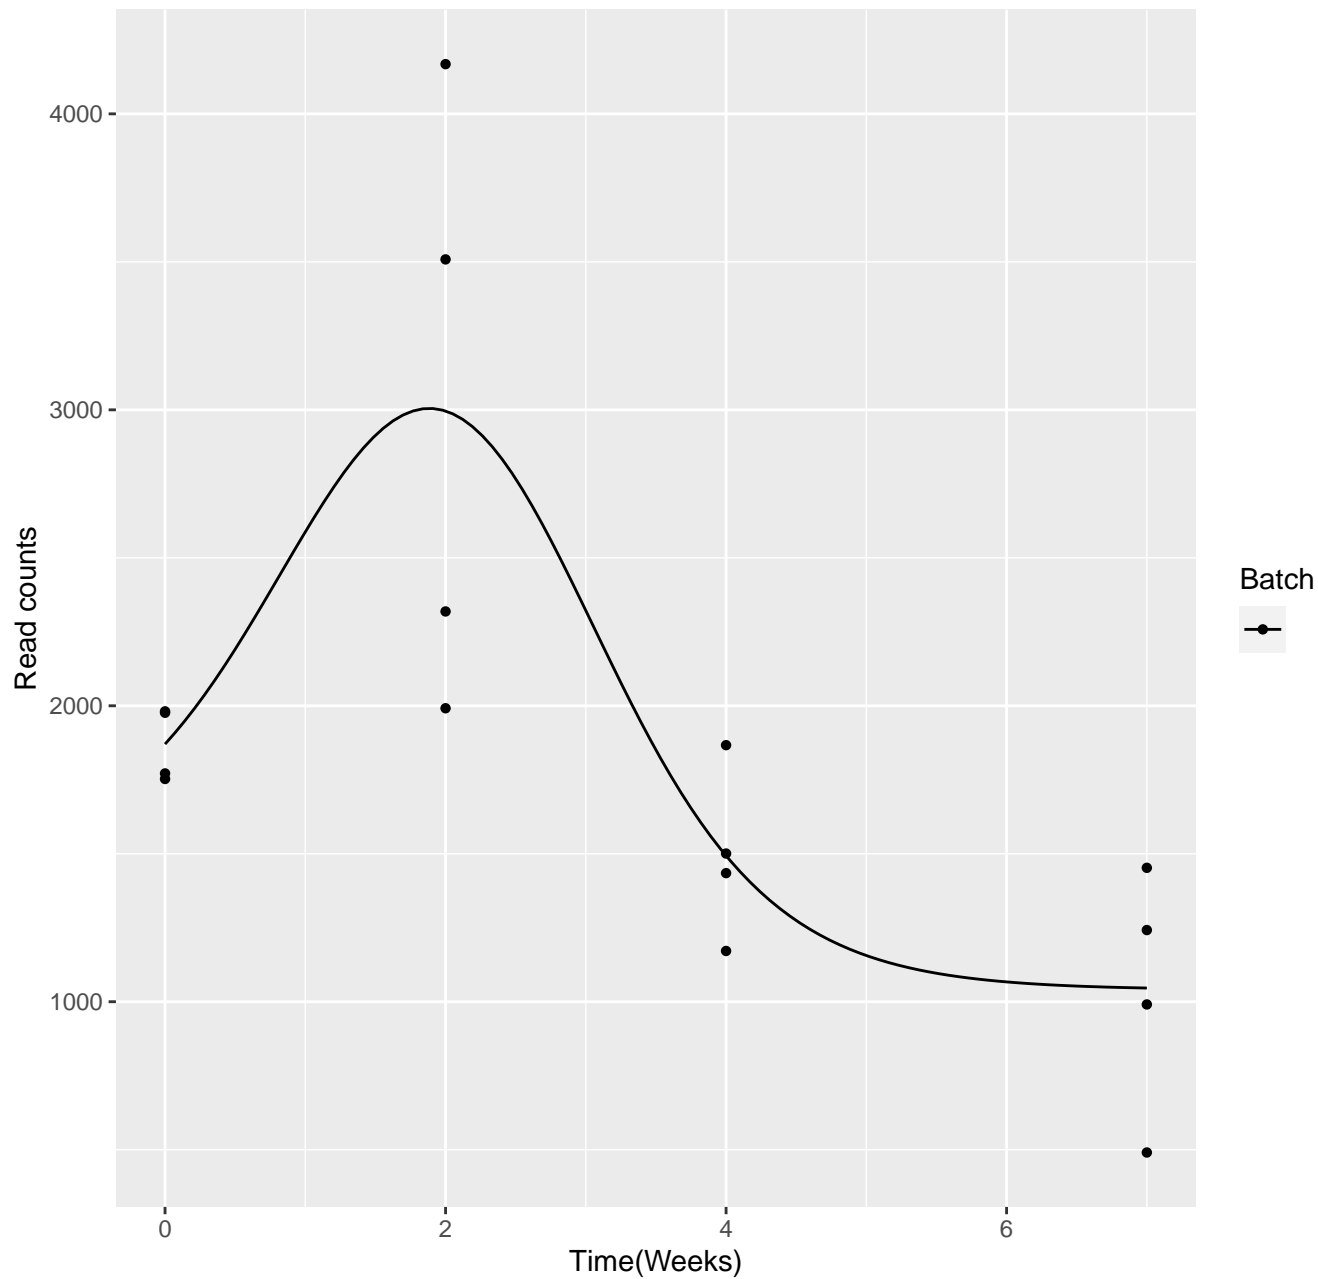

LOC100354088:  $\log_{10} q = -3.22$

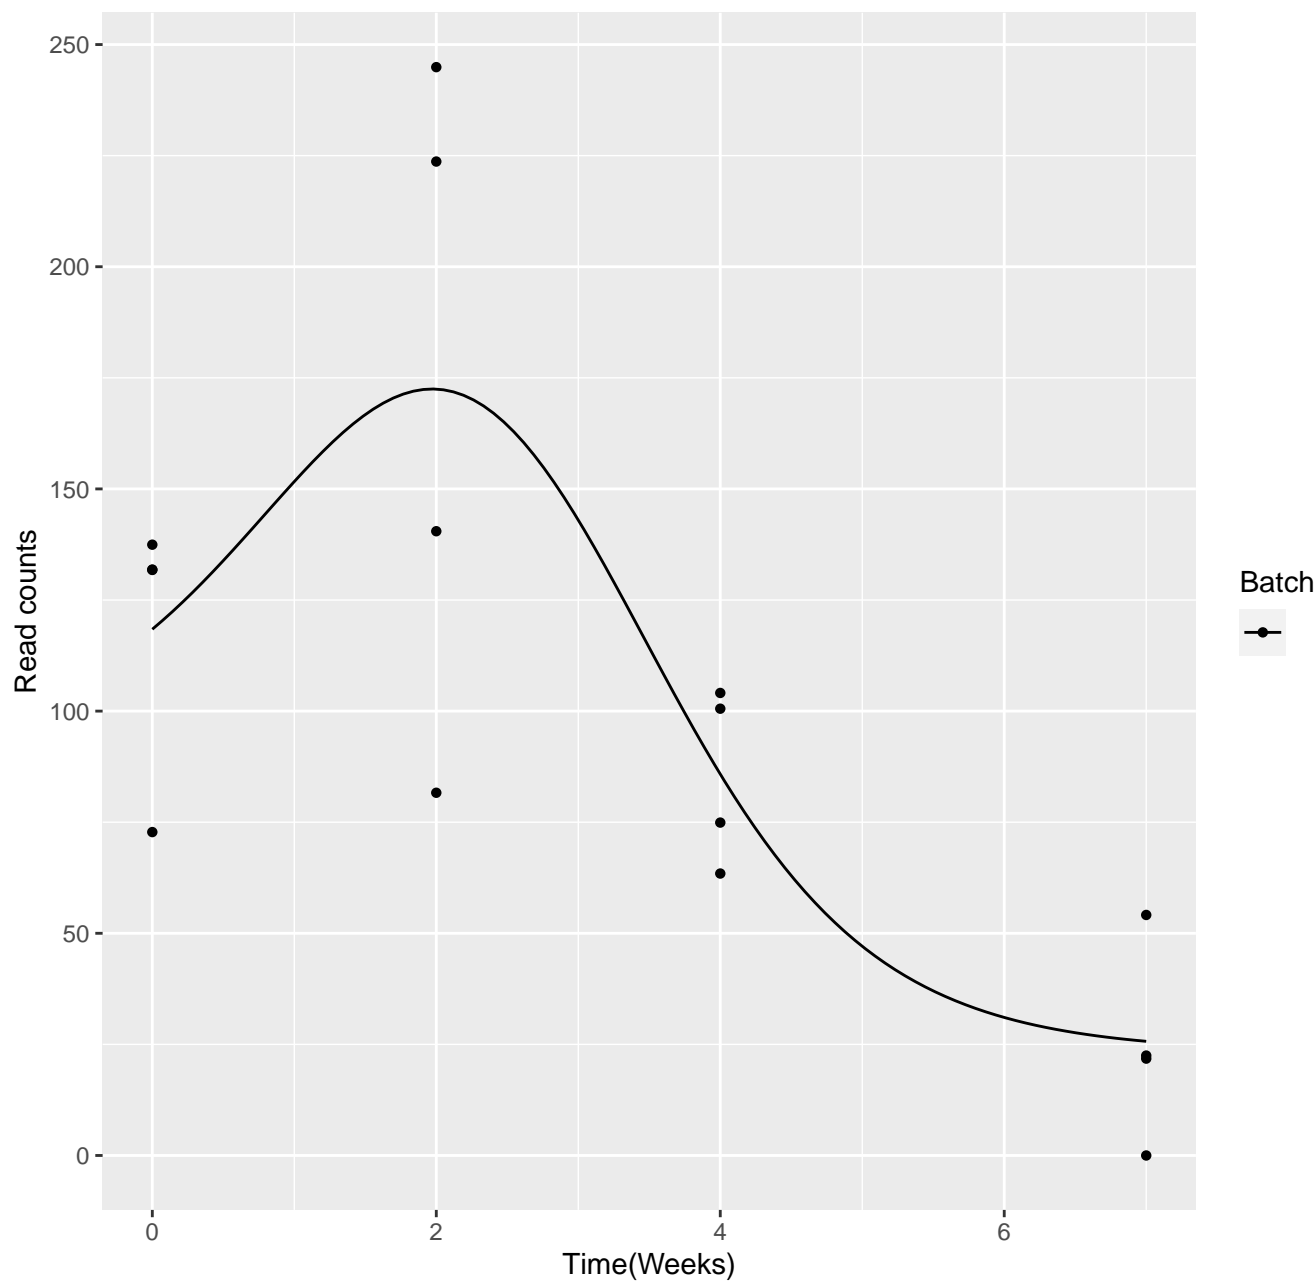

LEP:  $\log_{10} q = -3.22$

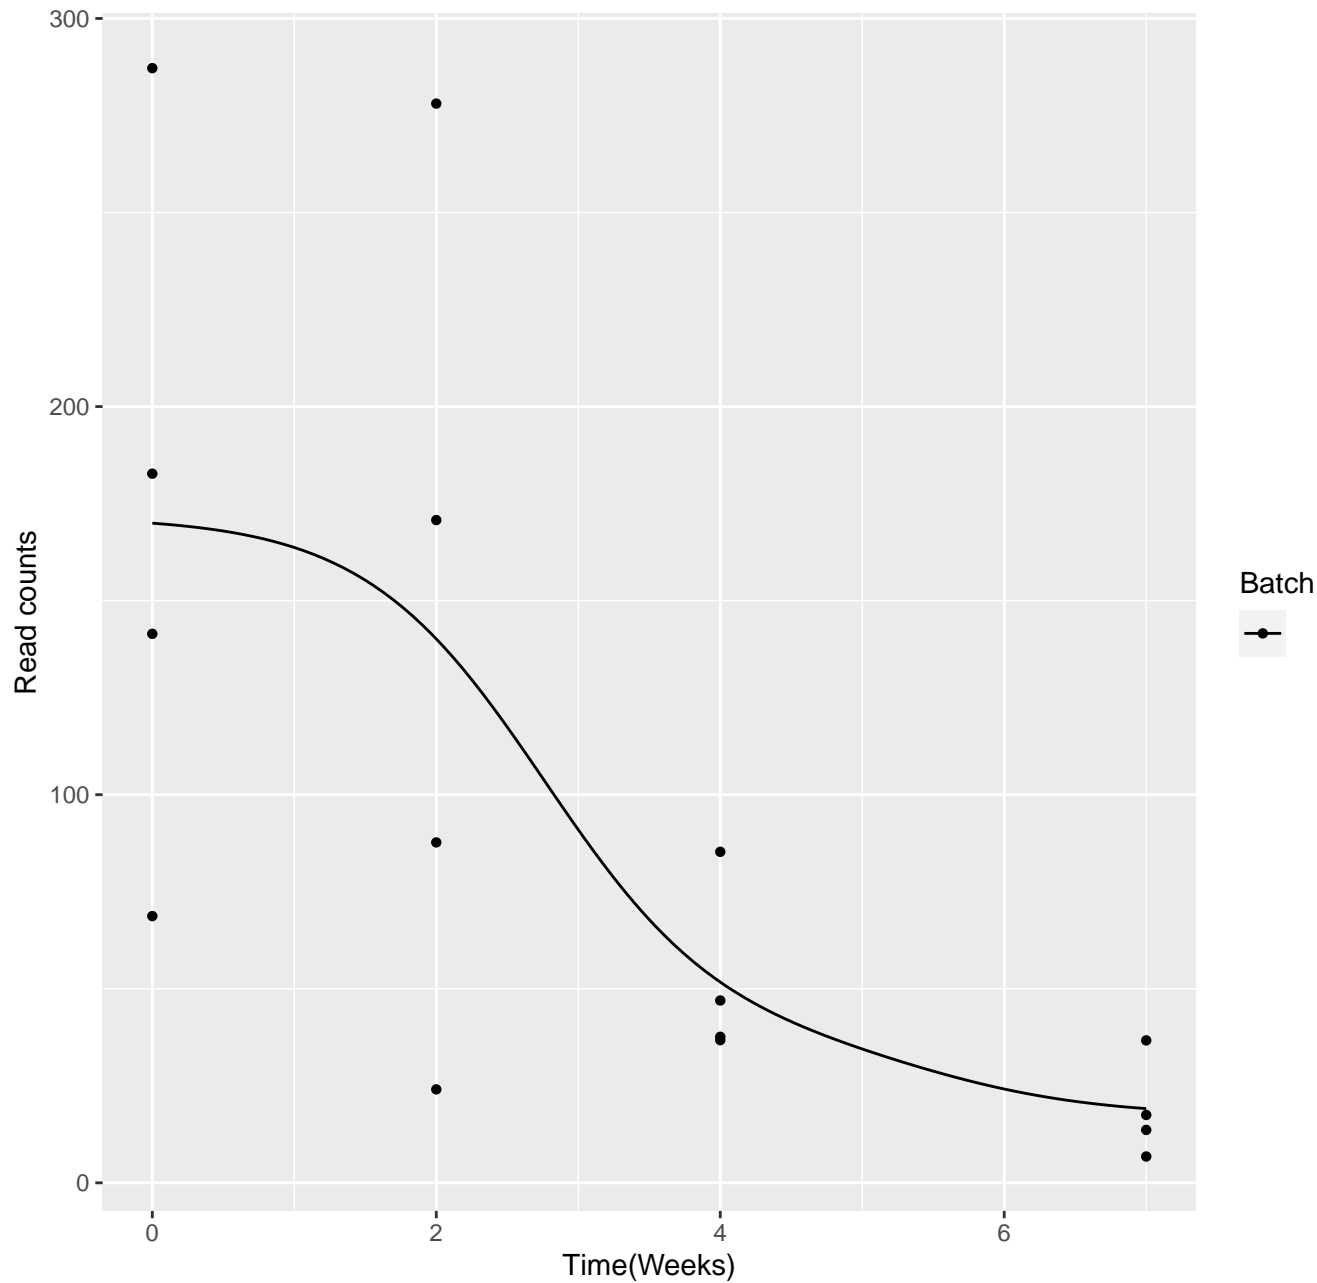

ZNF311:  $\log_{10} q = -3.21$

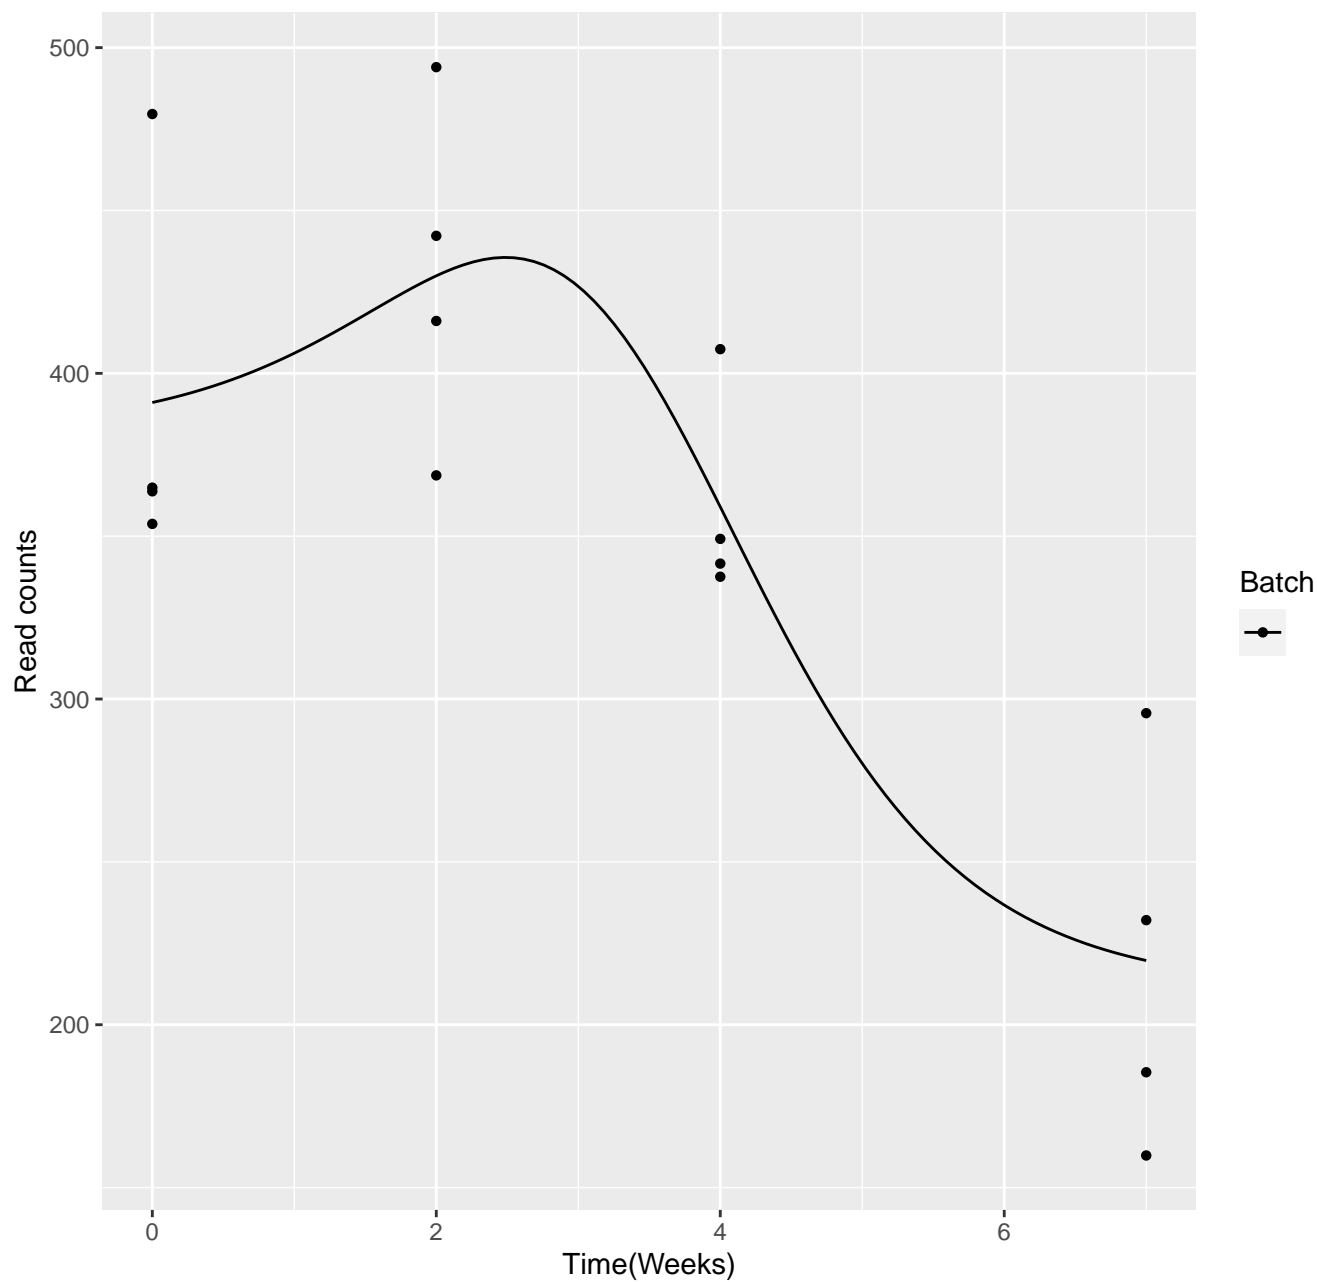

MSRB3:  $\log_{10} q = -3.21$

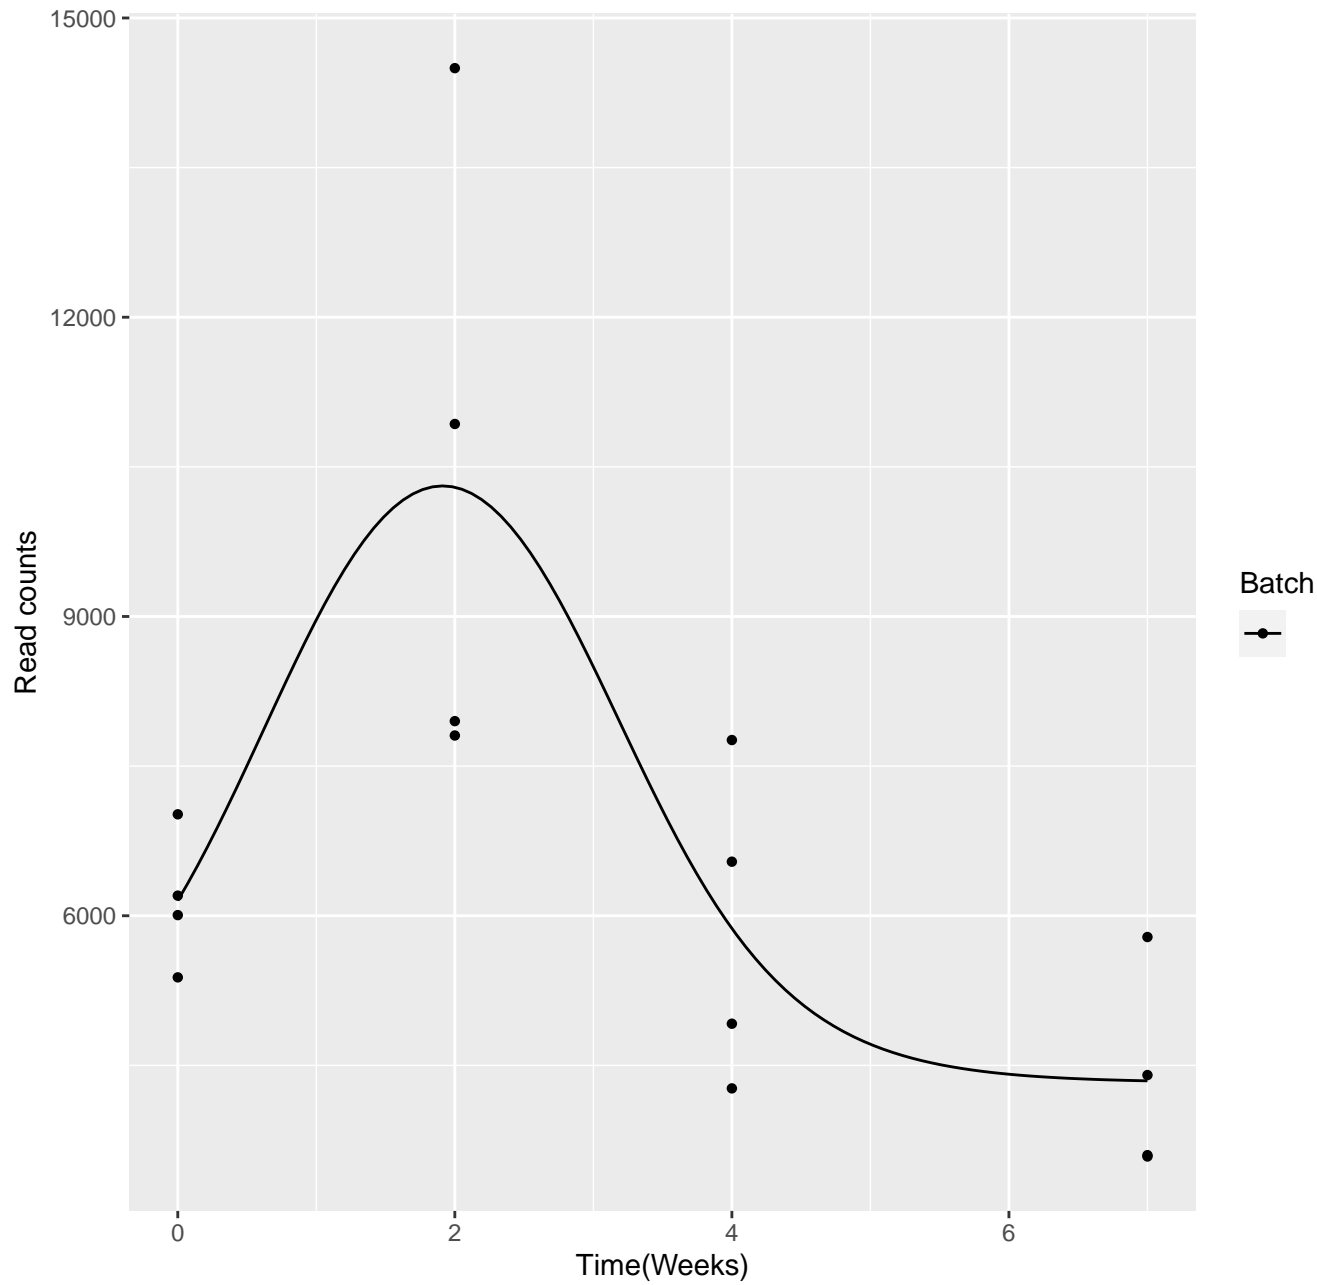

SV2A:  $\log_{10} q = -3.21$

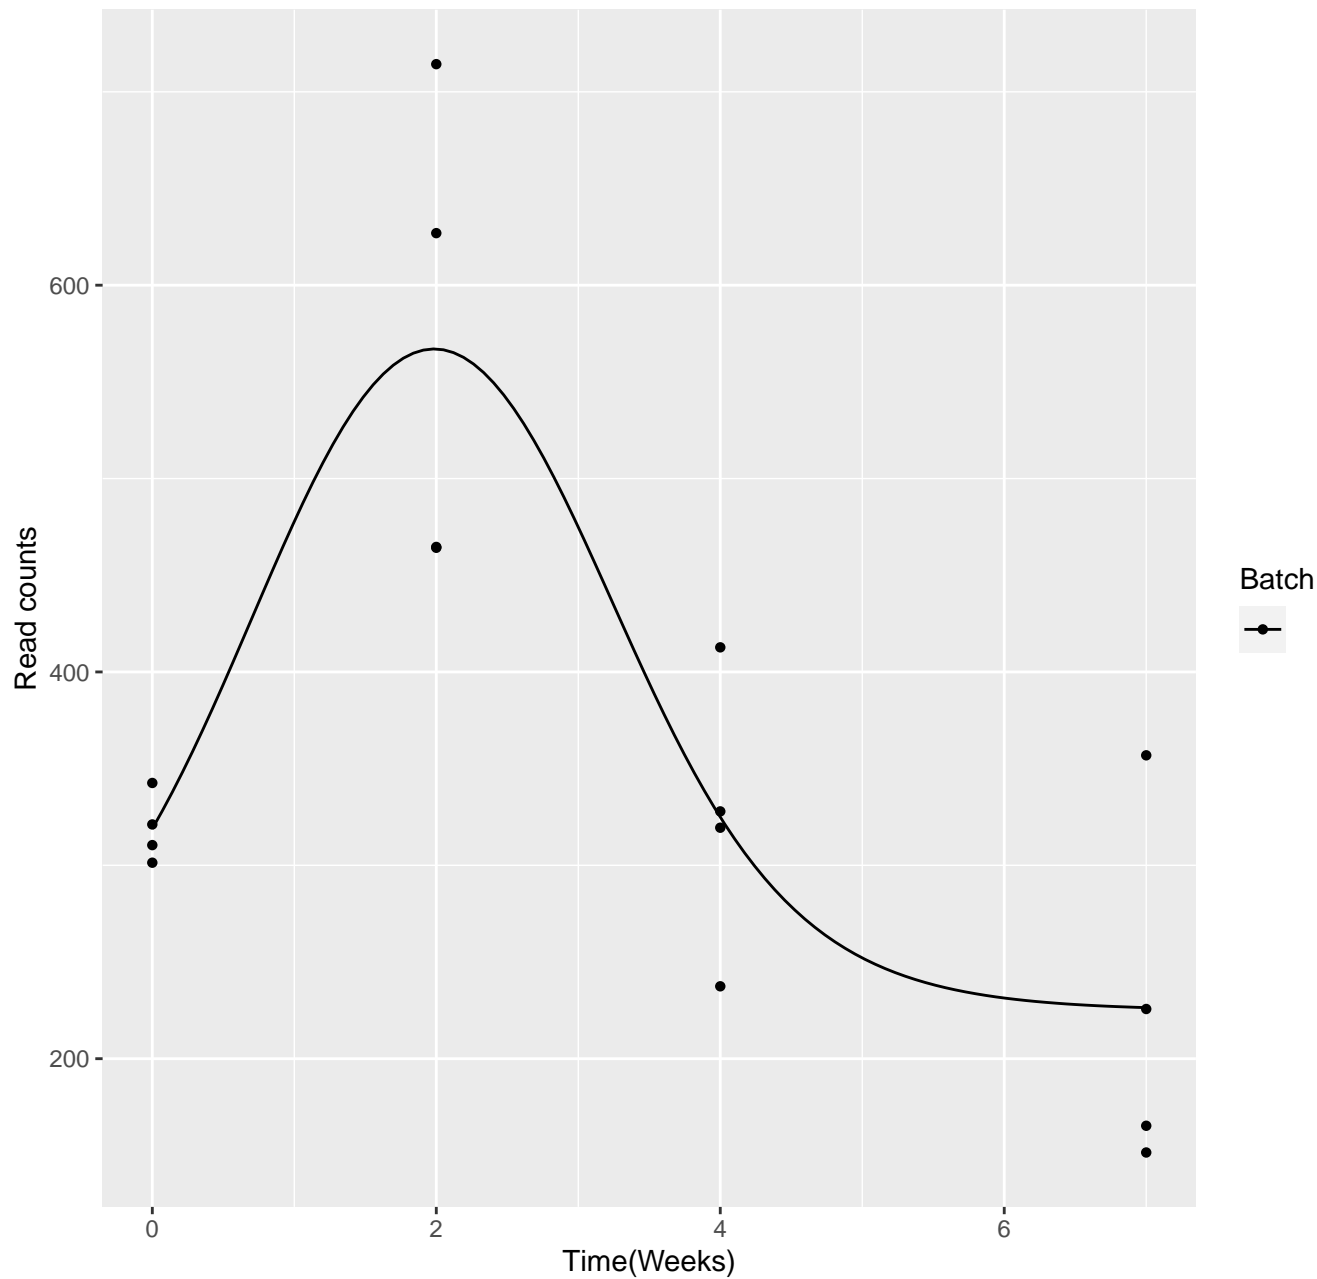

STON1:  $\log_{10} q = -3.21$

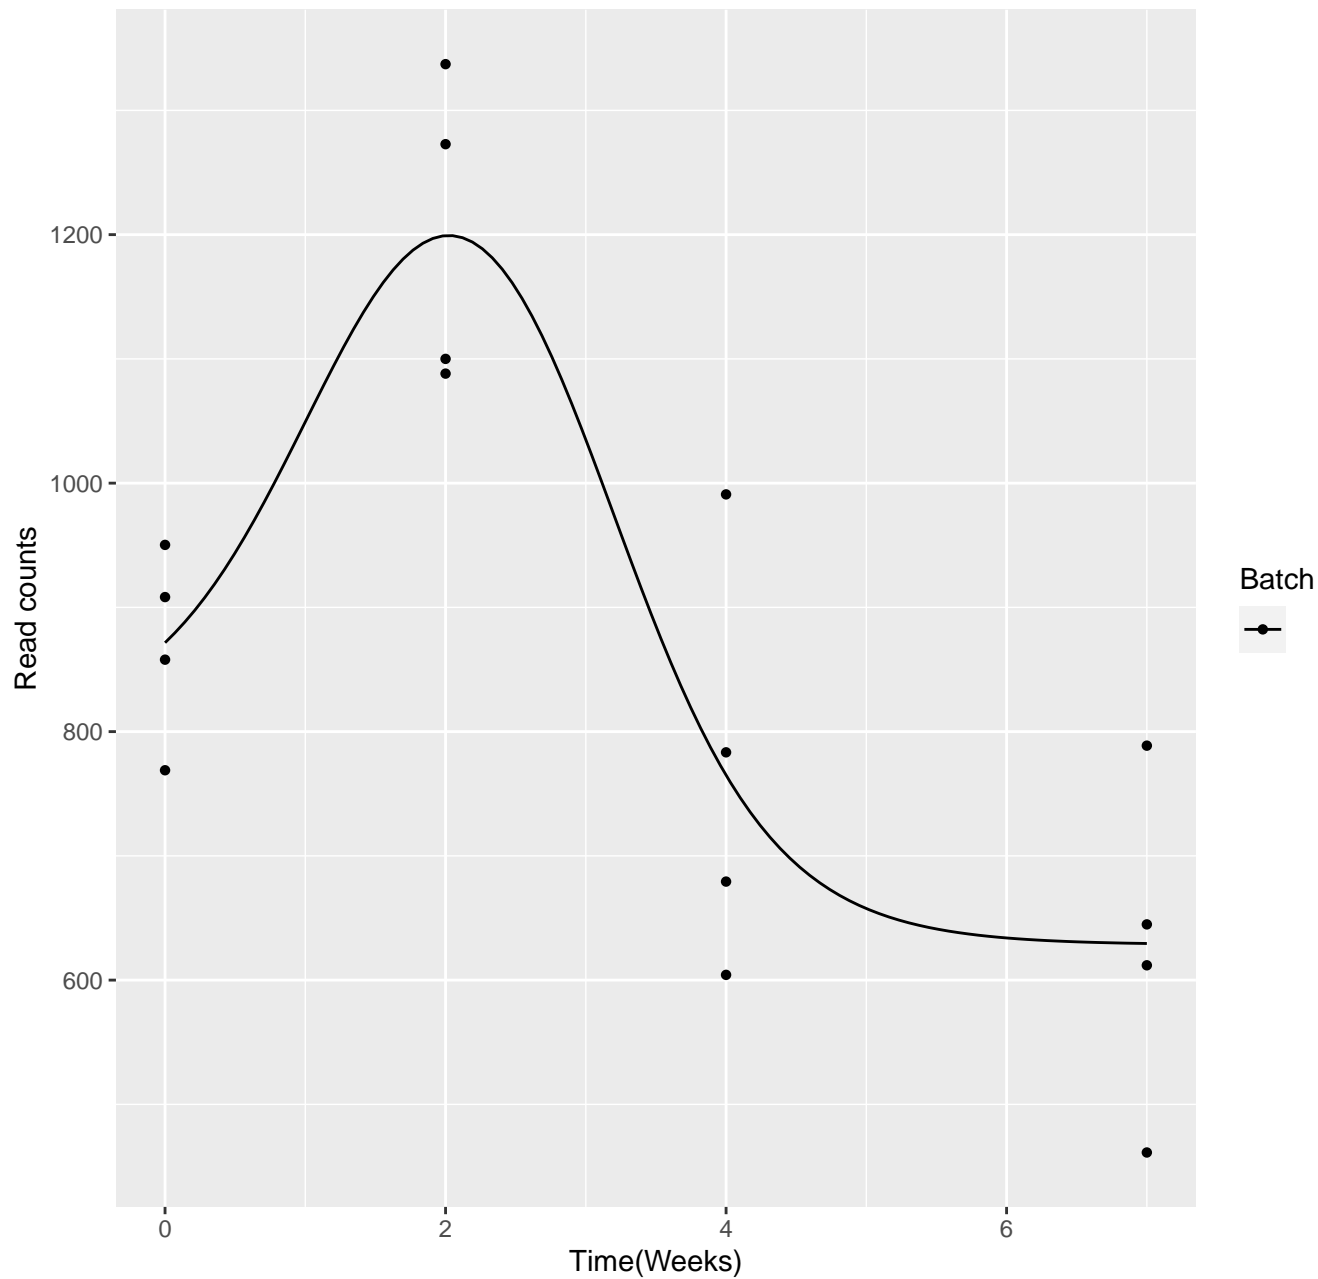

MAPK1:  $\log_{10} q = -3.21$

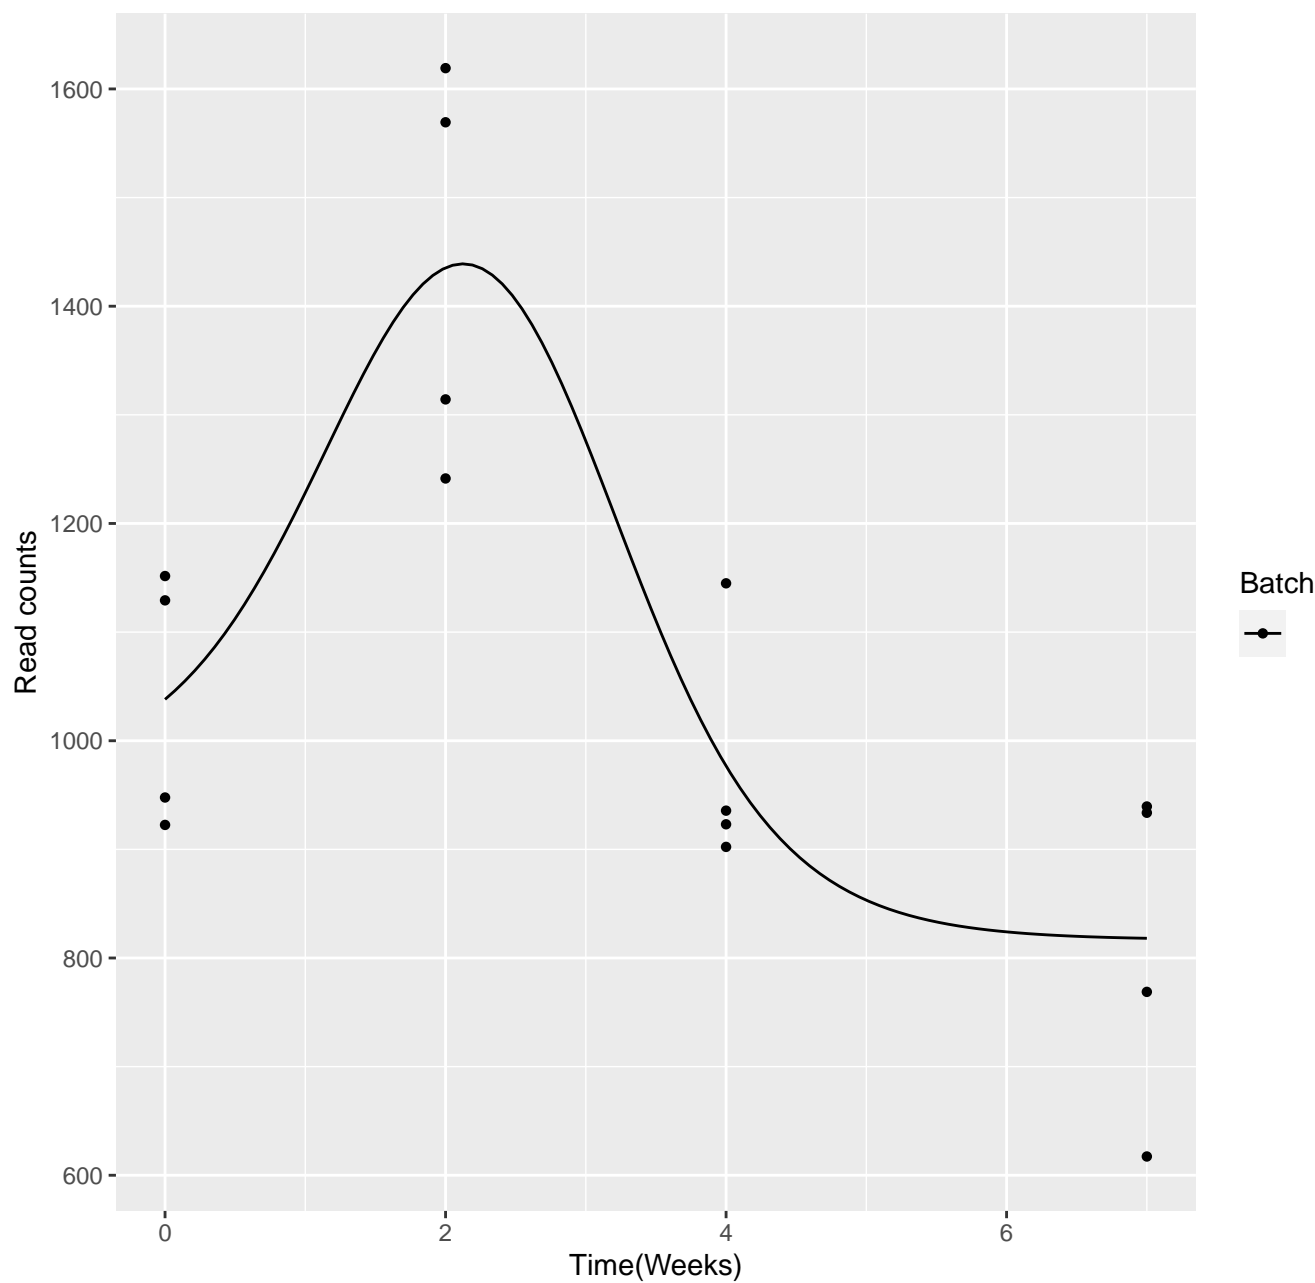



CXCR1:  $\log_{10} q = -3.2$

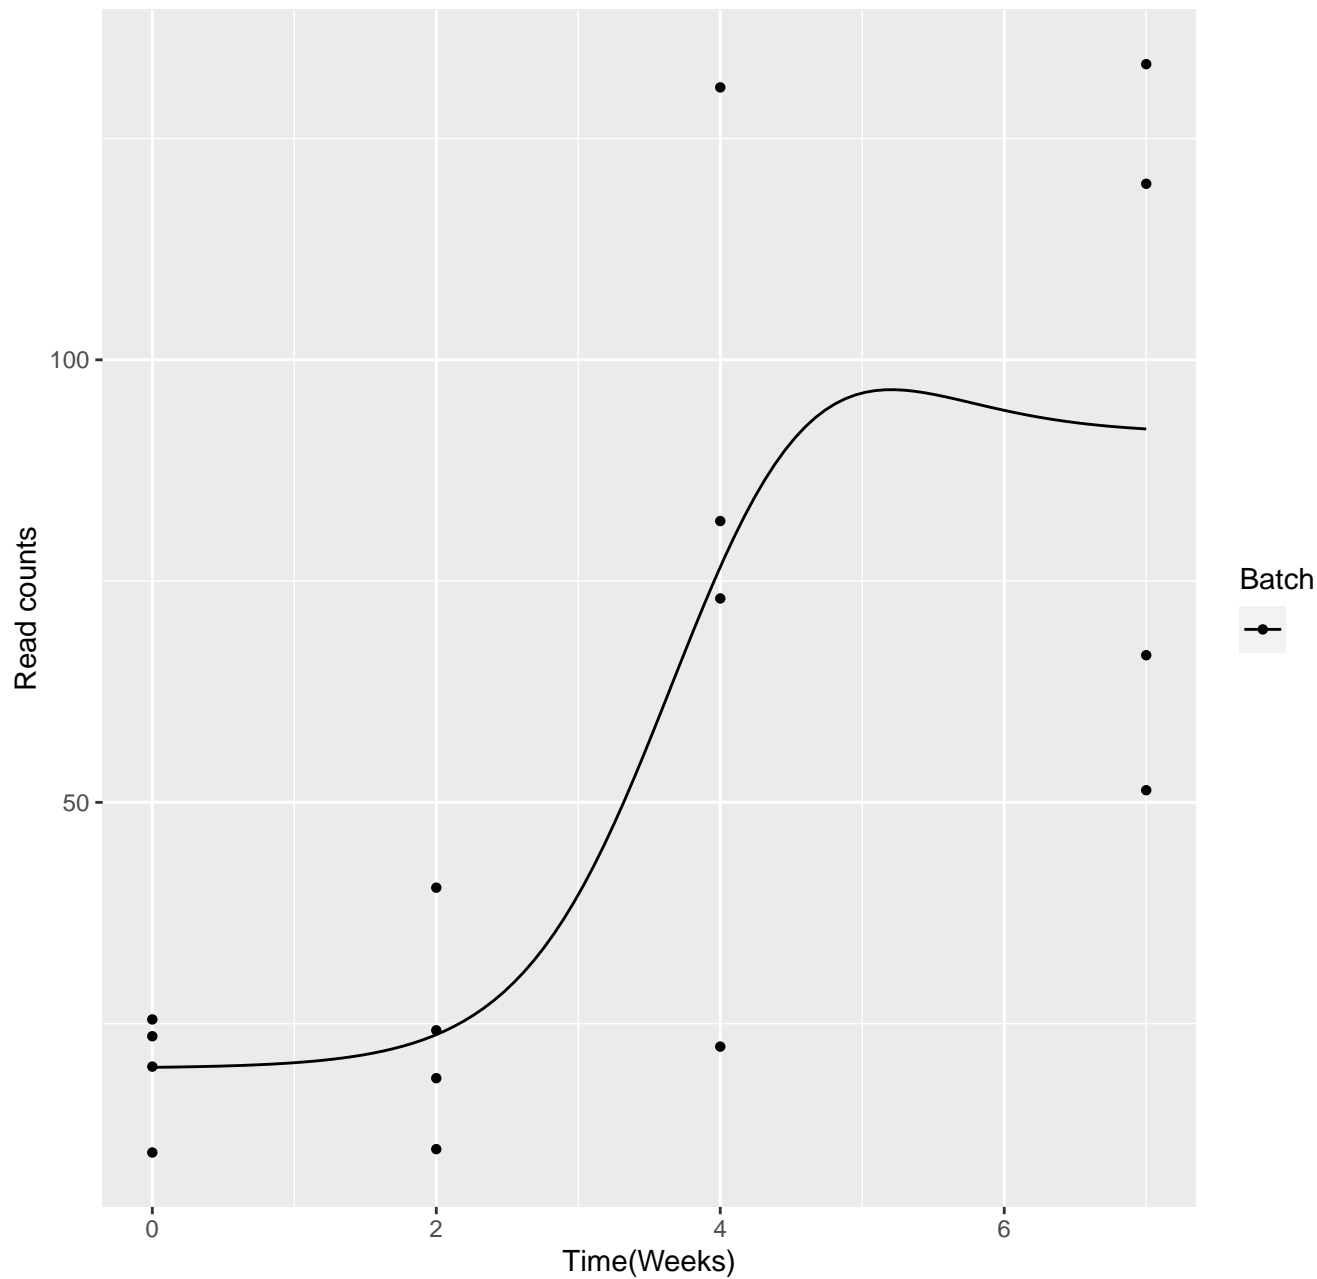

LOC127484192:  $\log_{10} q = -3.2$

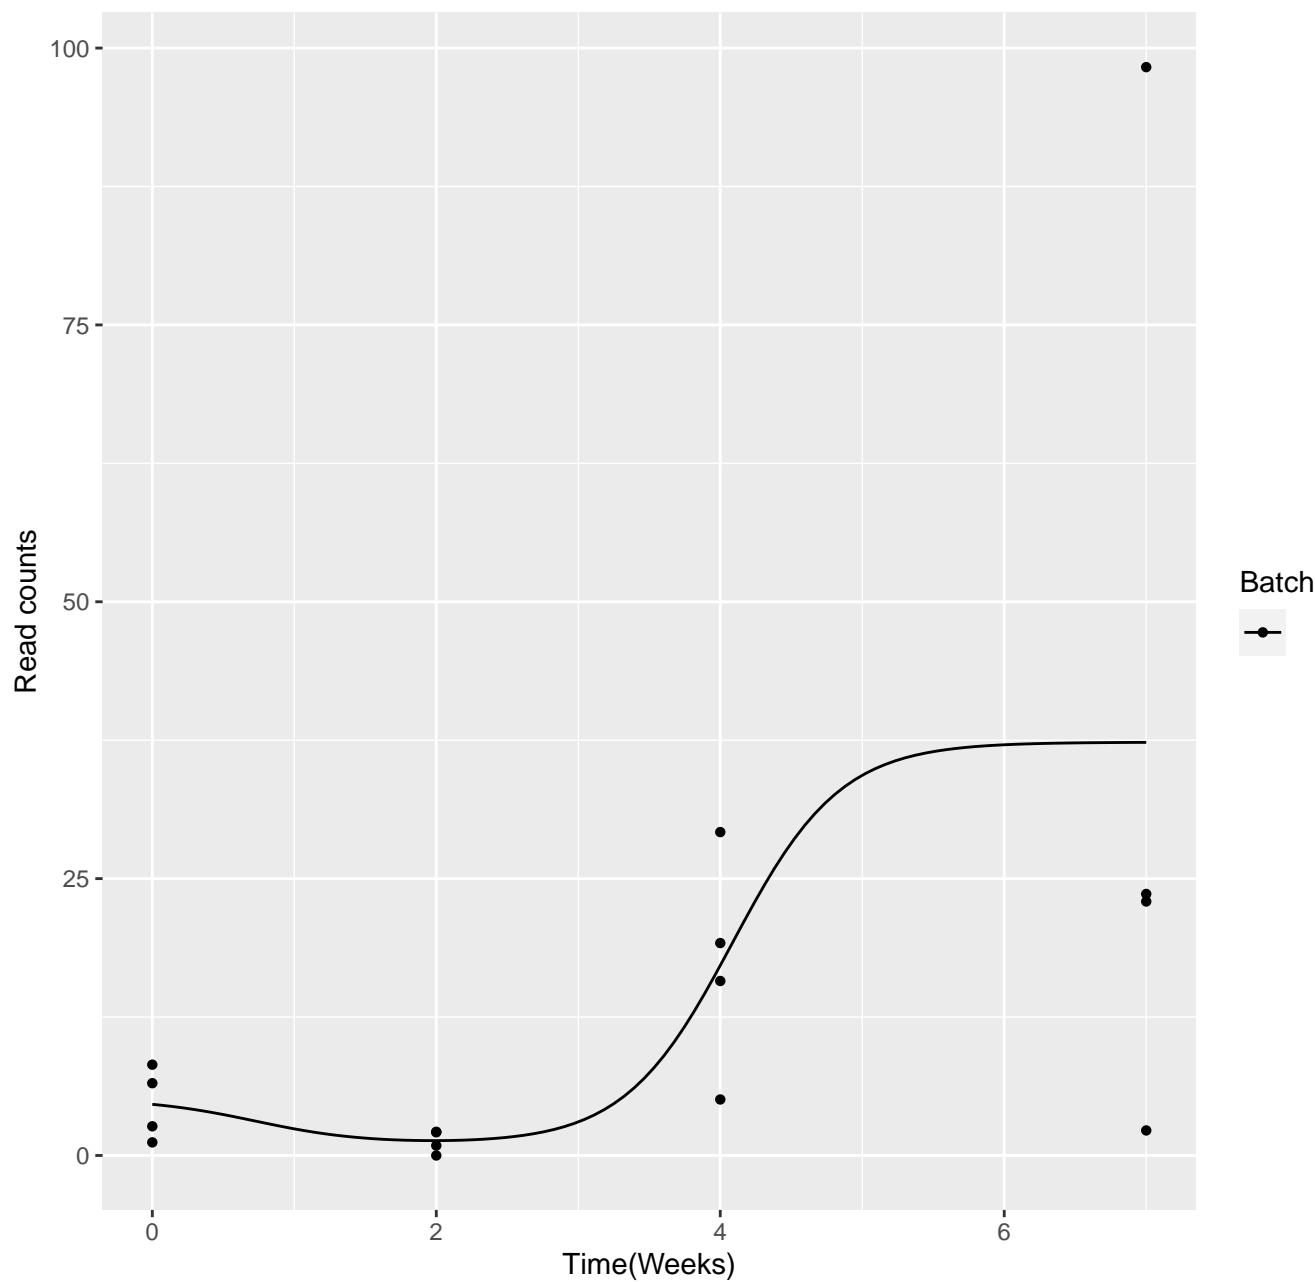

FMOD:  $\log_{10} q = -3.2$

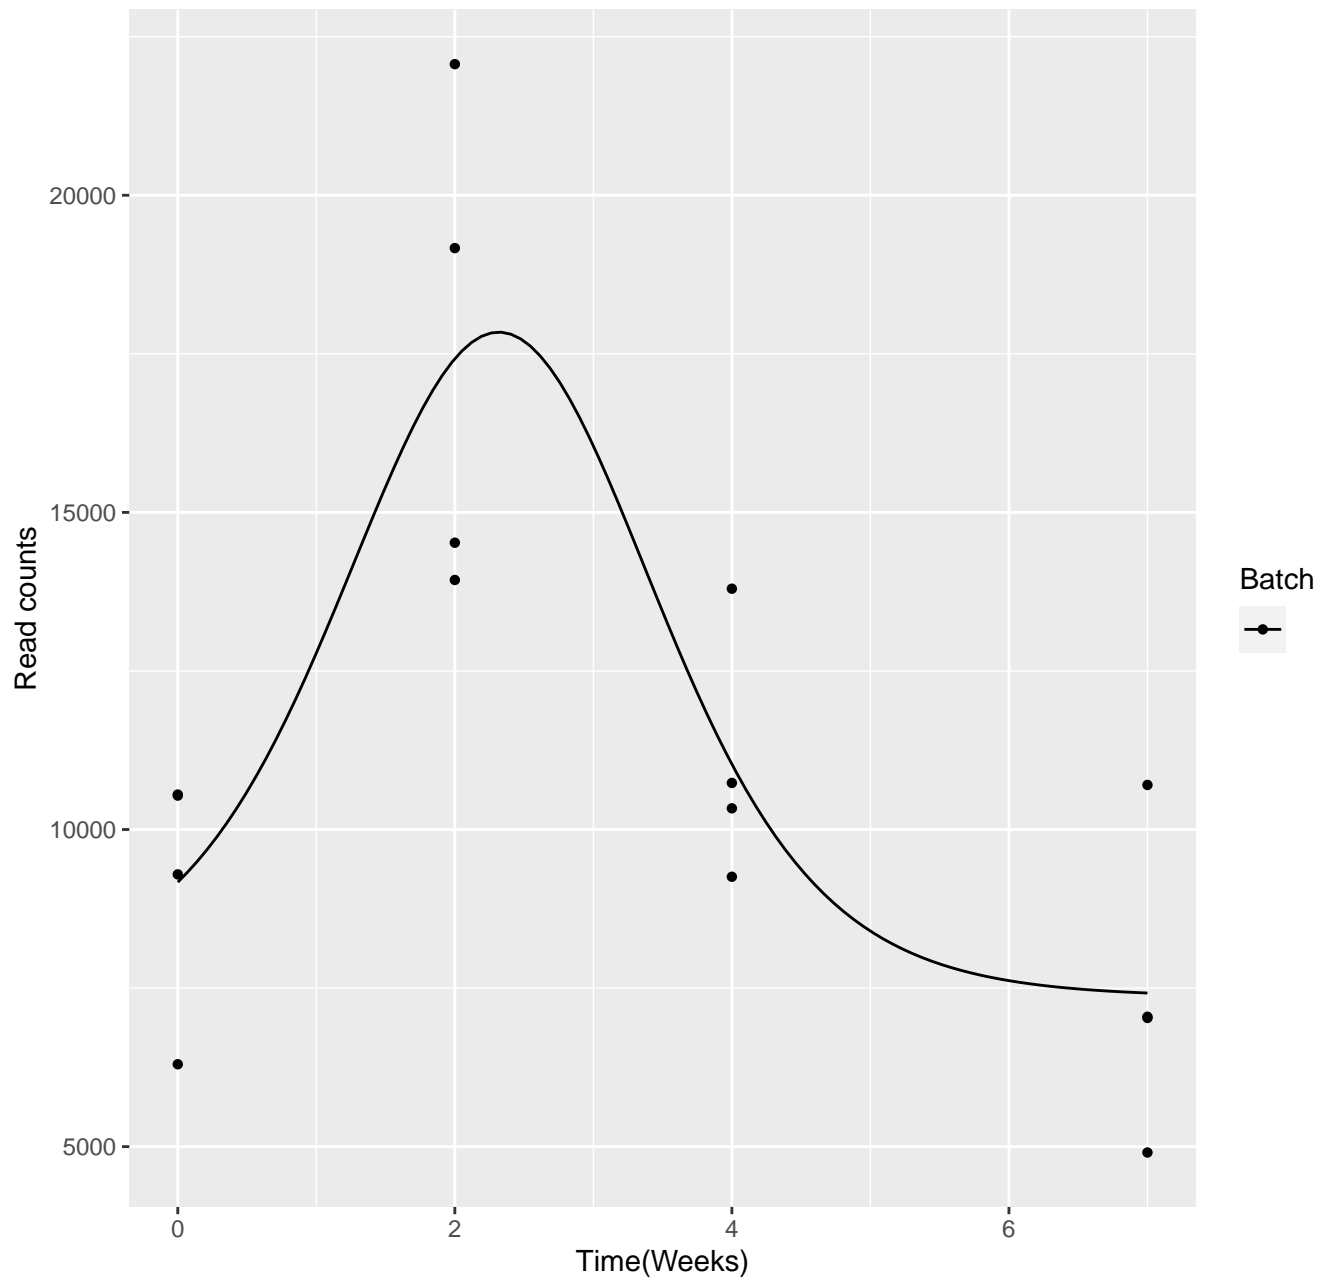

APBB1:  $\log_{10} q = -3.2$

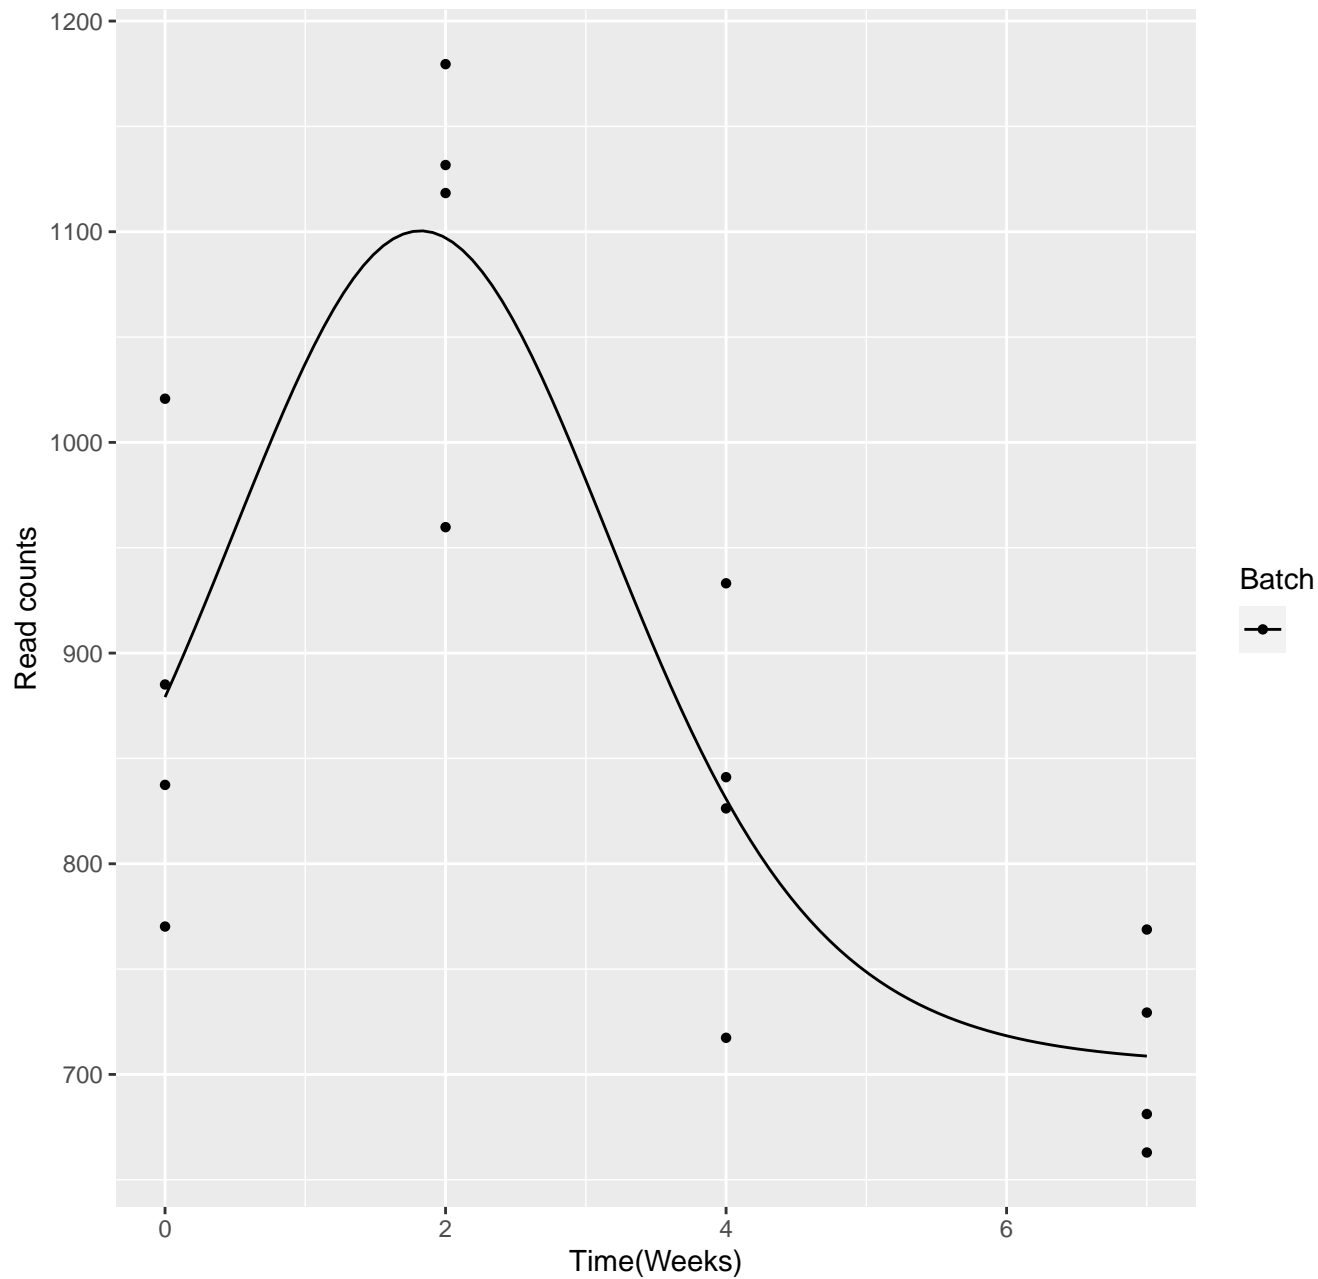

PARP3:  $\log_{10} q = -3.2$

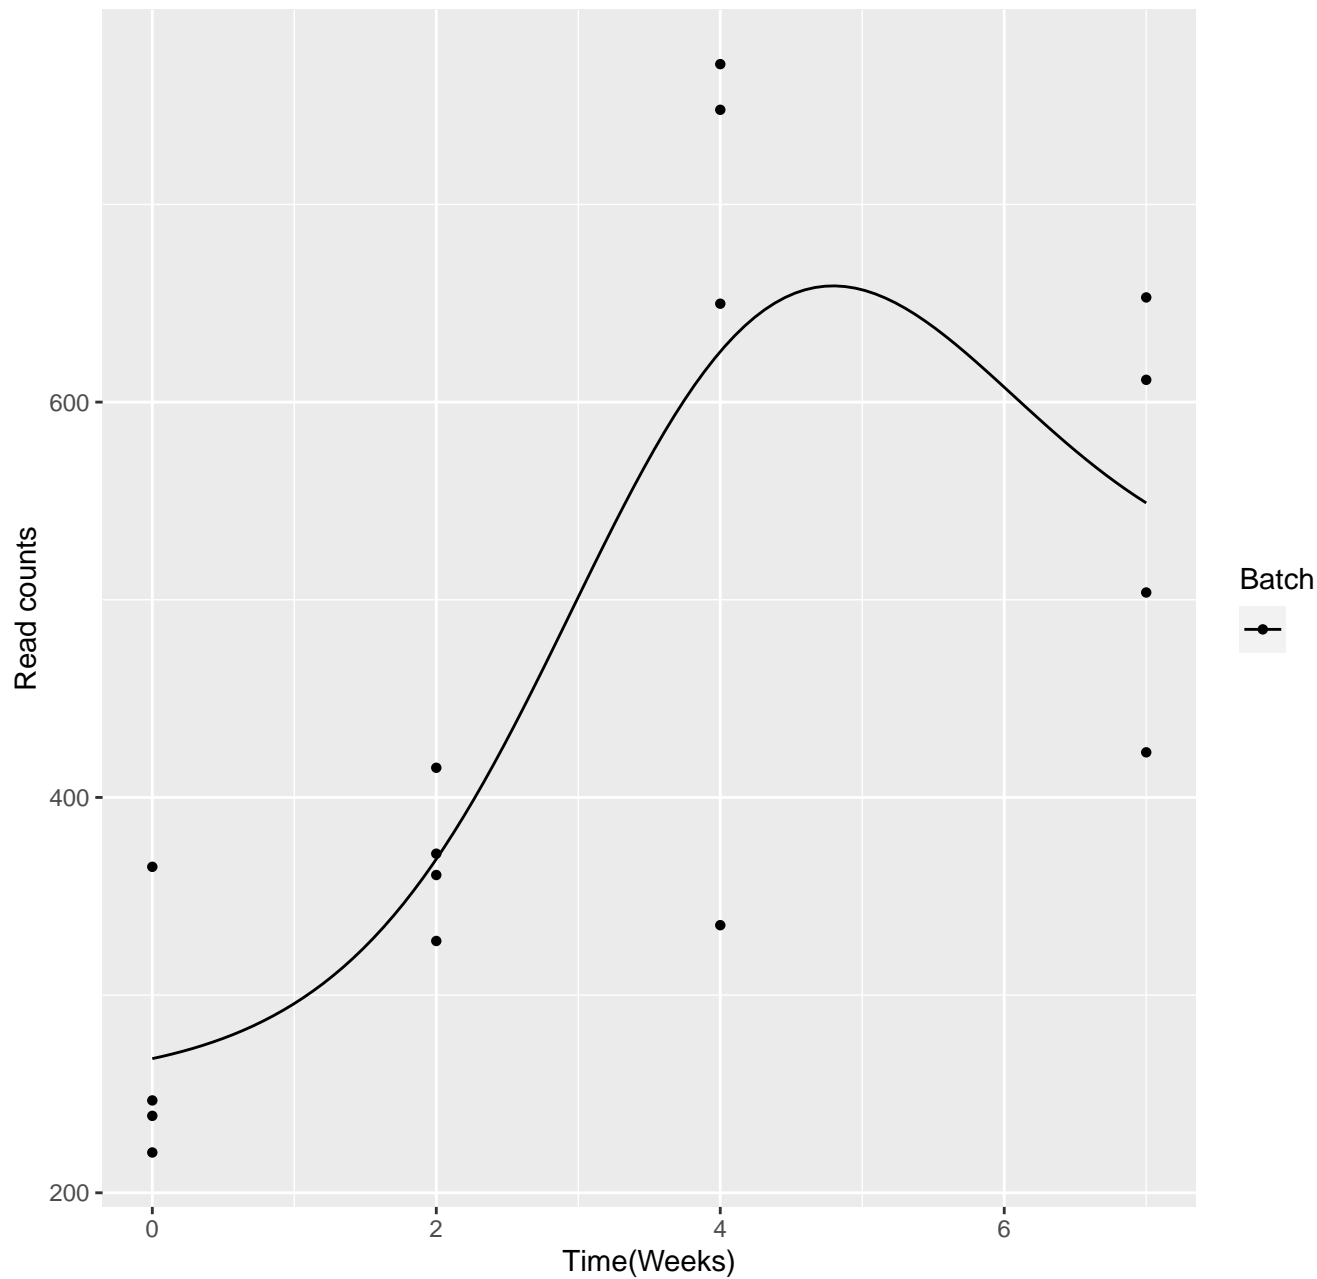

UGT1A7:  $\log_{10} q = -3.19$

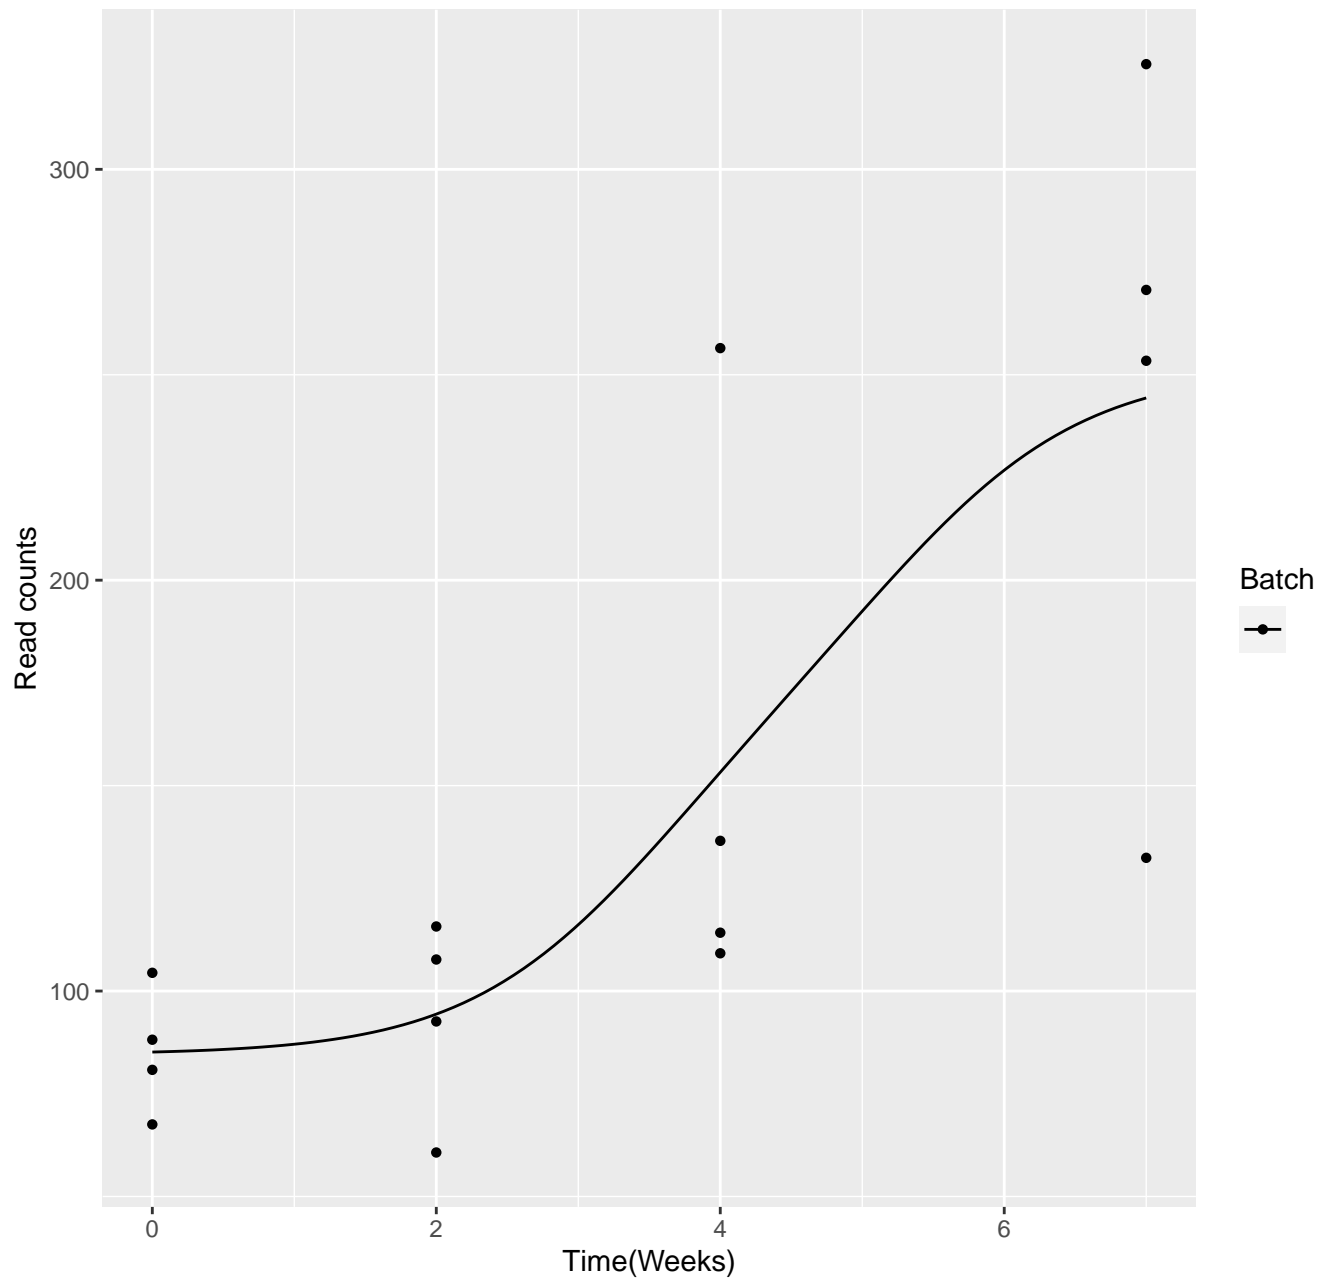

TMEM117:  $\log_{10} q = -3.19$

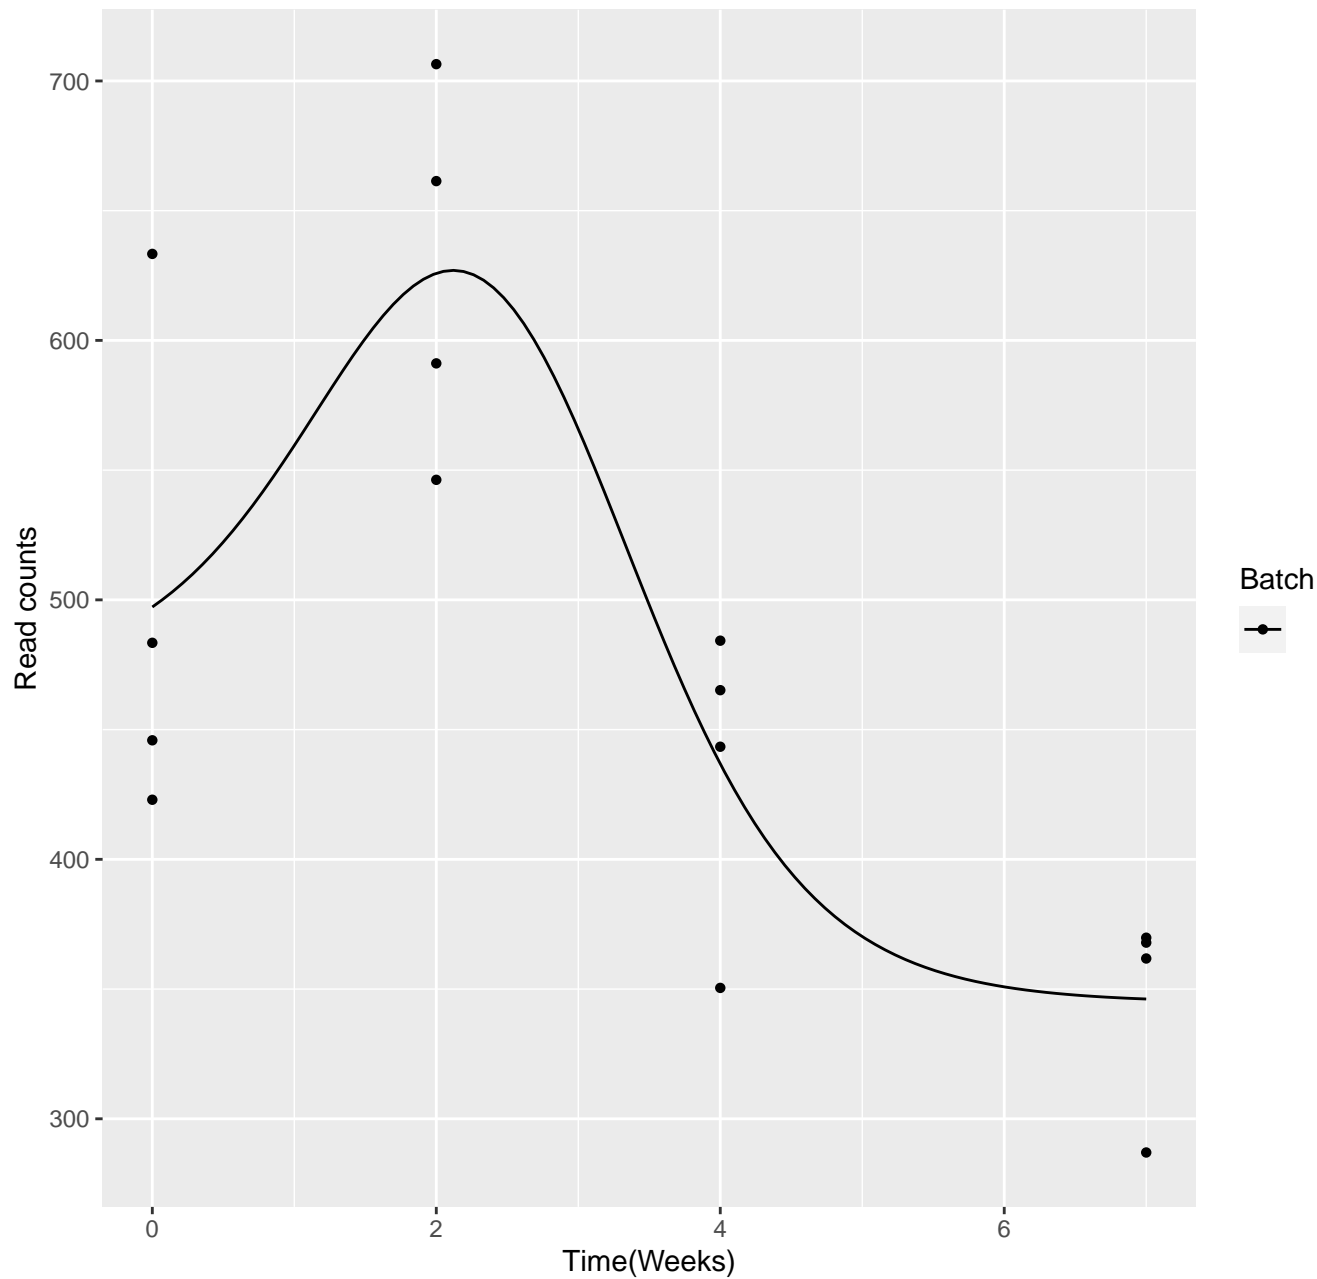

PIK3R6:  $\log_{10} q = -3.19$

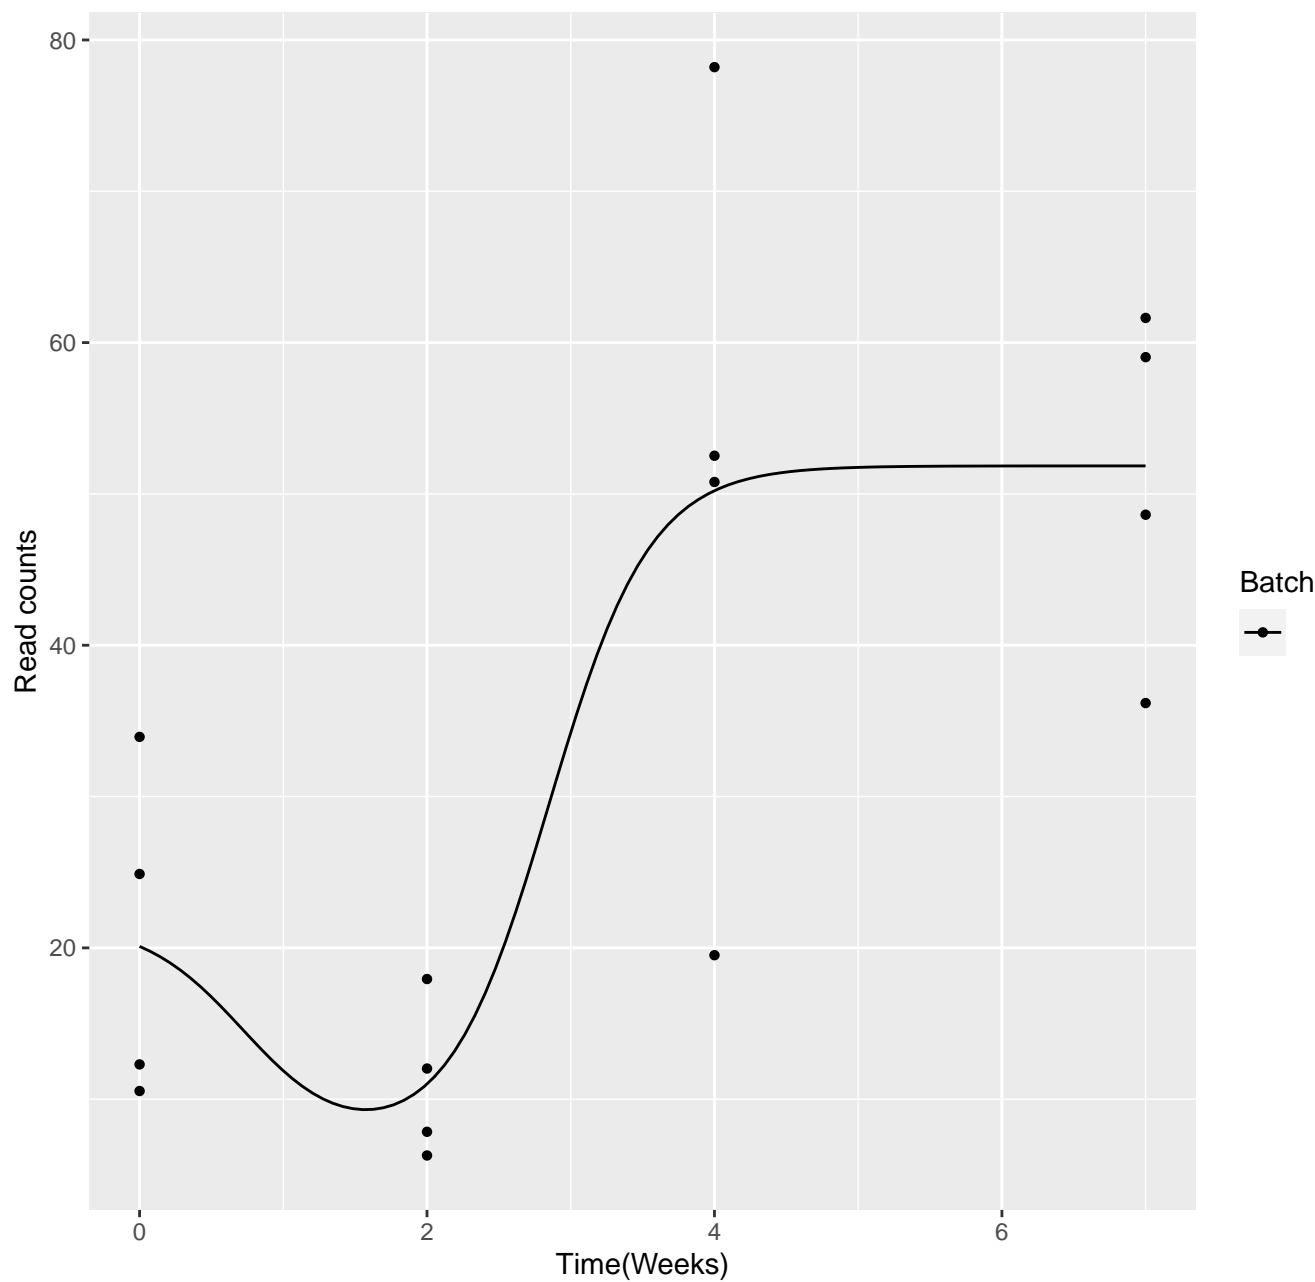



MYO7A:  $\log_{10} q = -3.19$

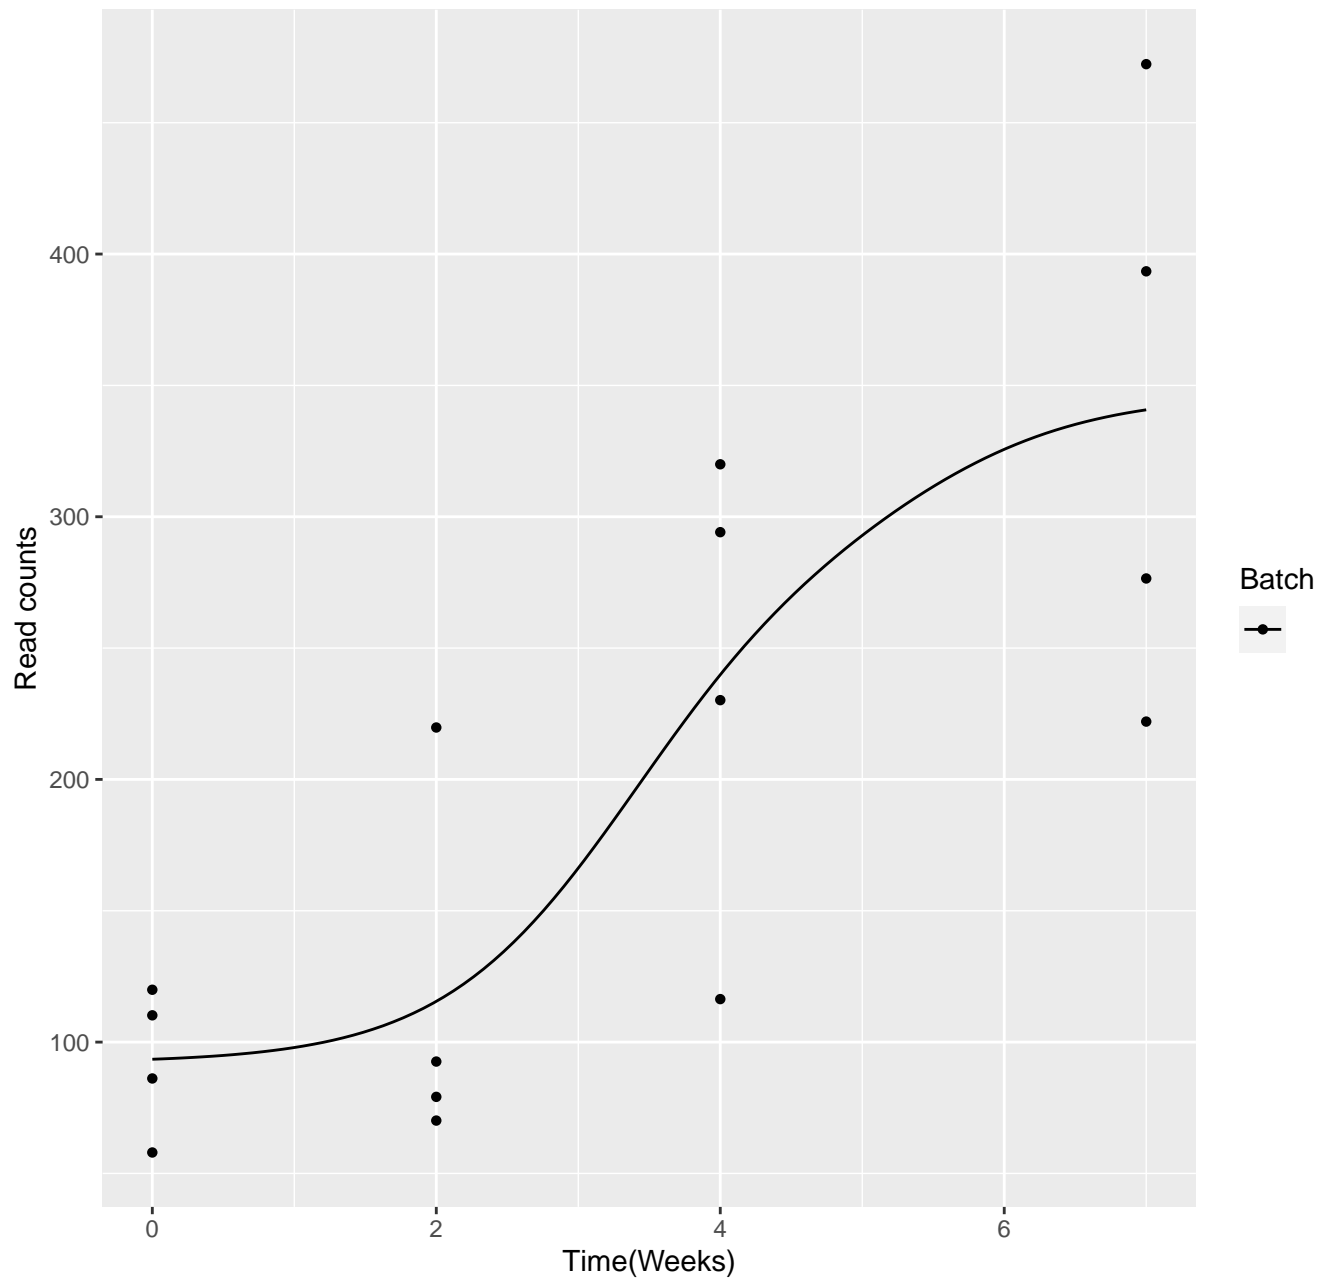

HIGD1B:  $\log_{10} q = -3.19$

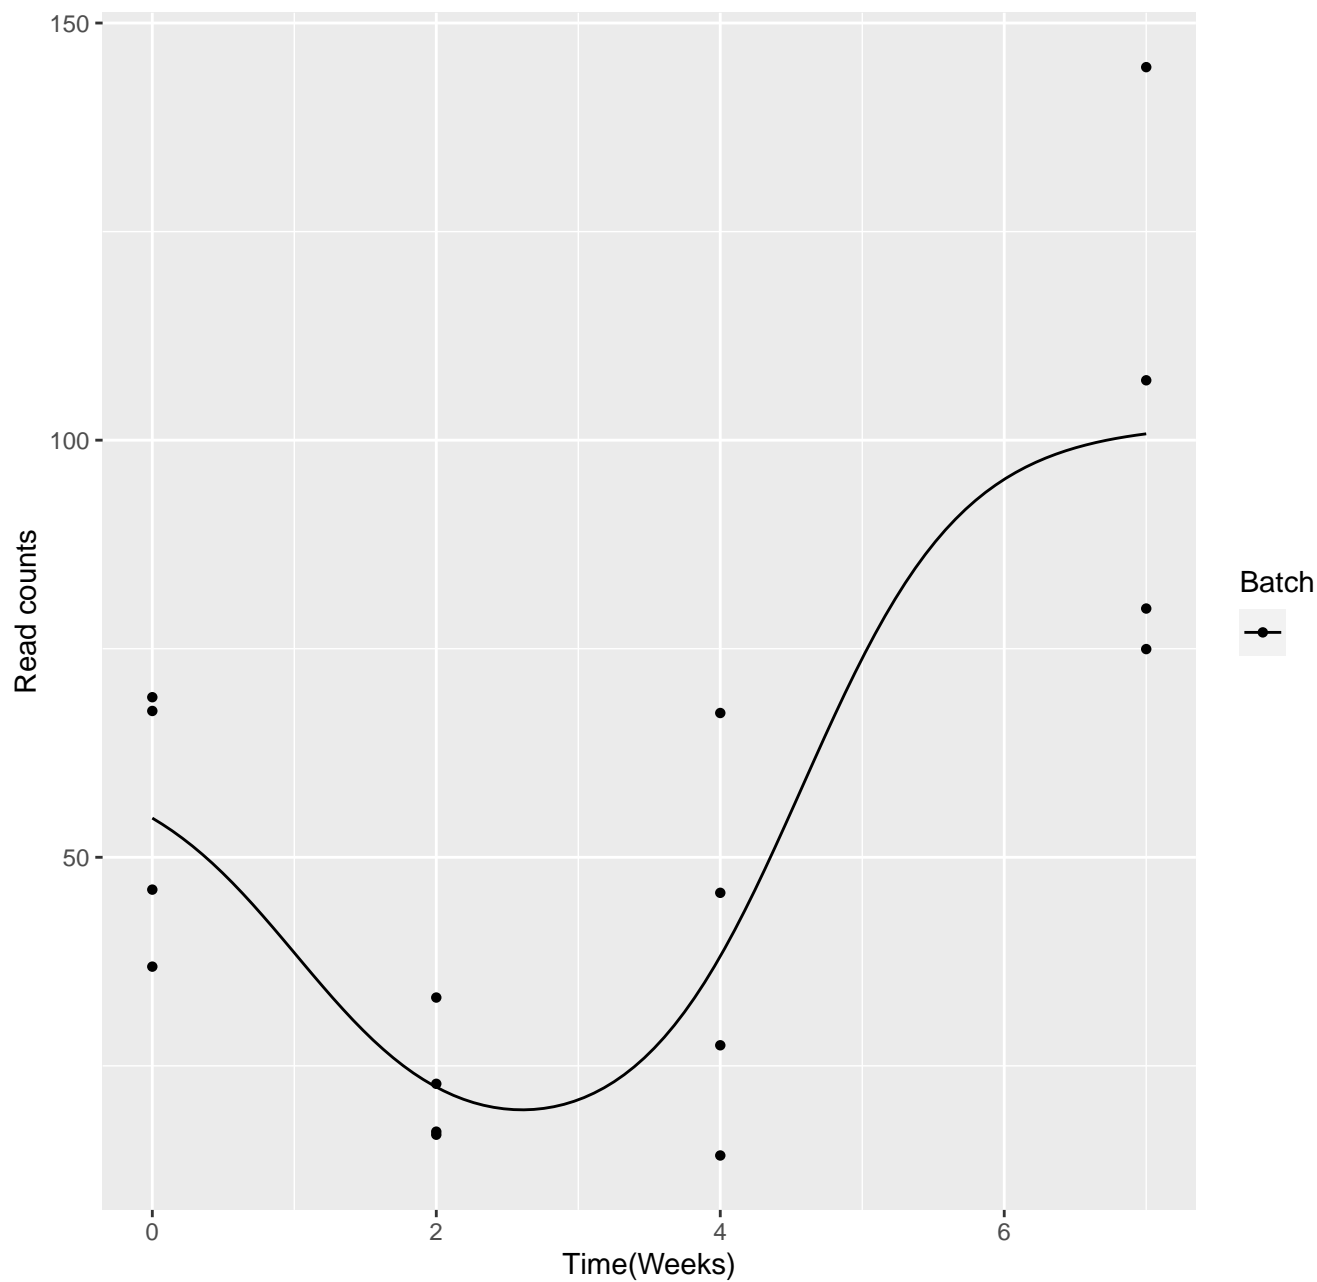

CDCA8:  $\log_{10} q = -3.18$

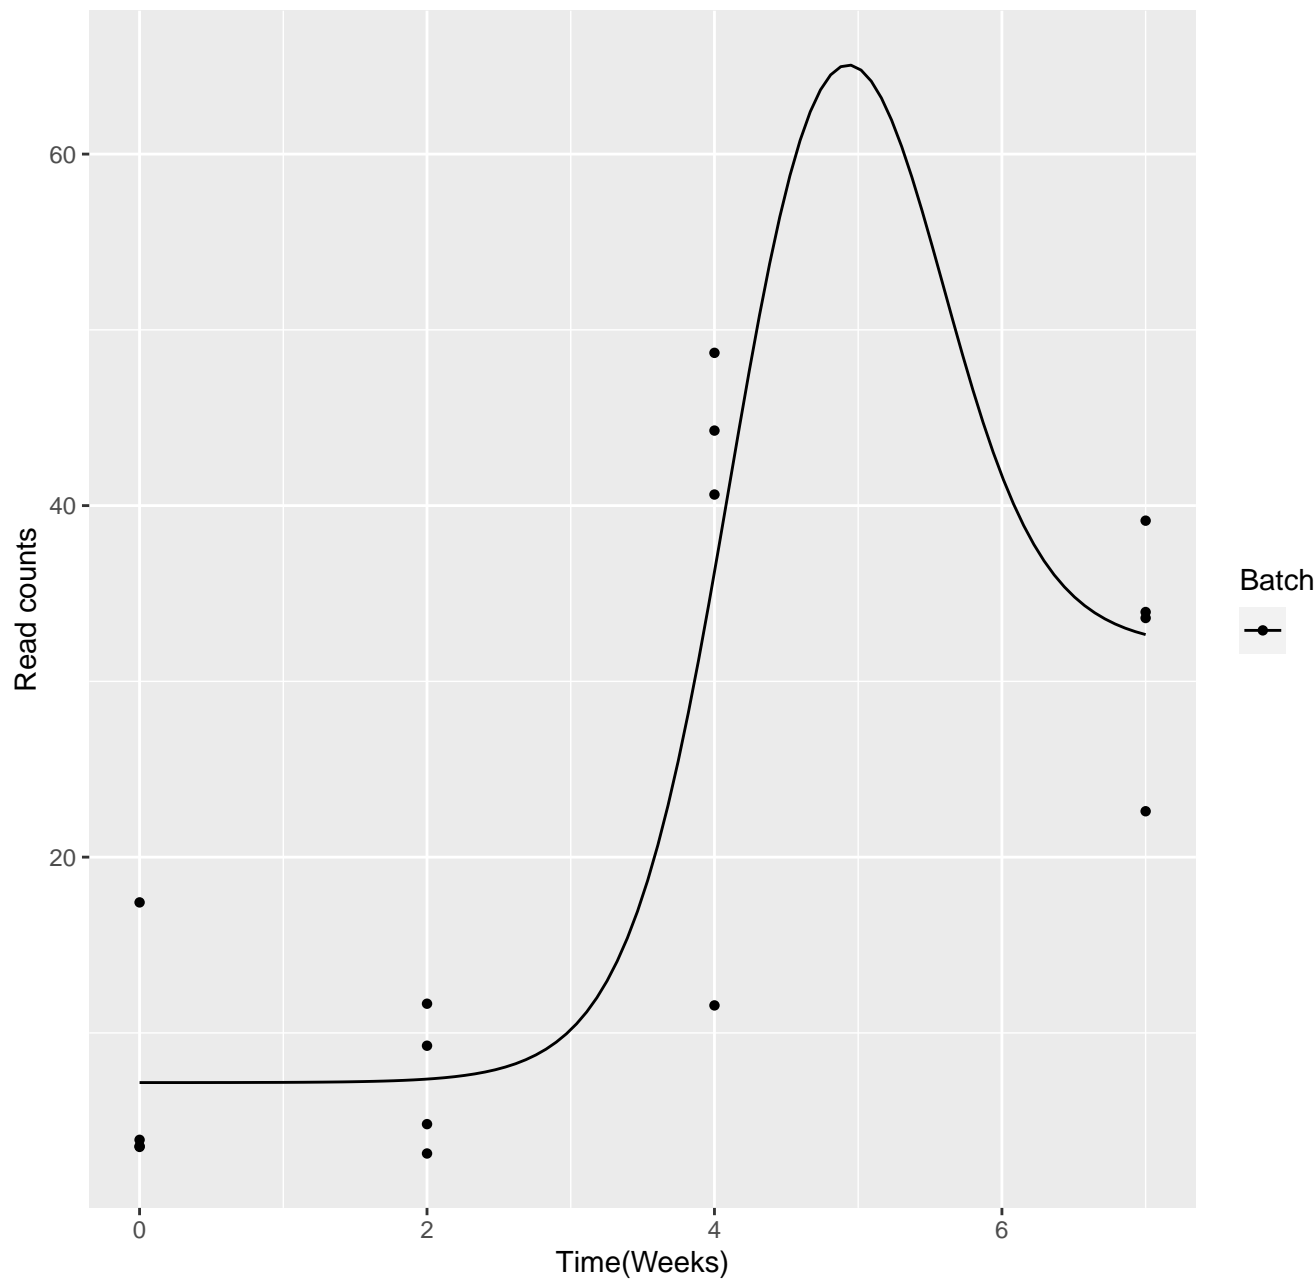

P2RY11:  $\log_{10} q = -3.18$

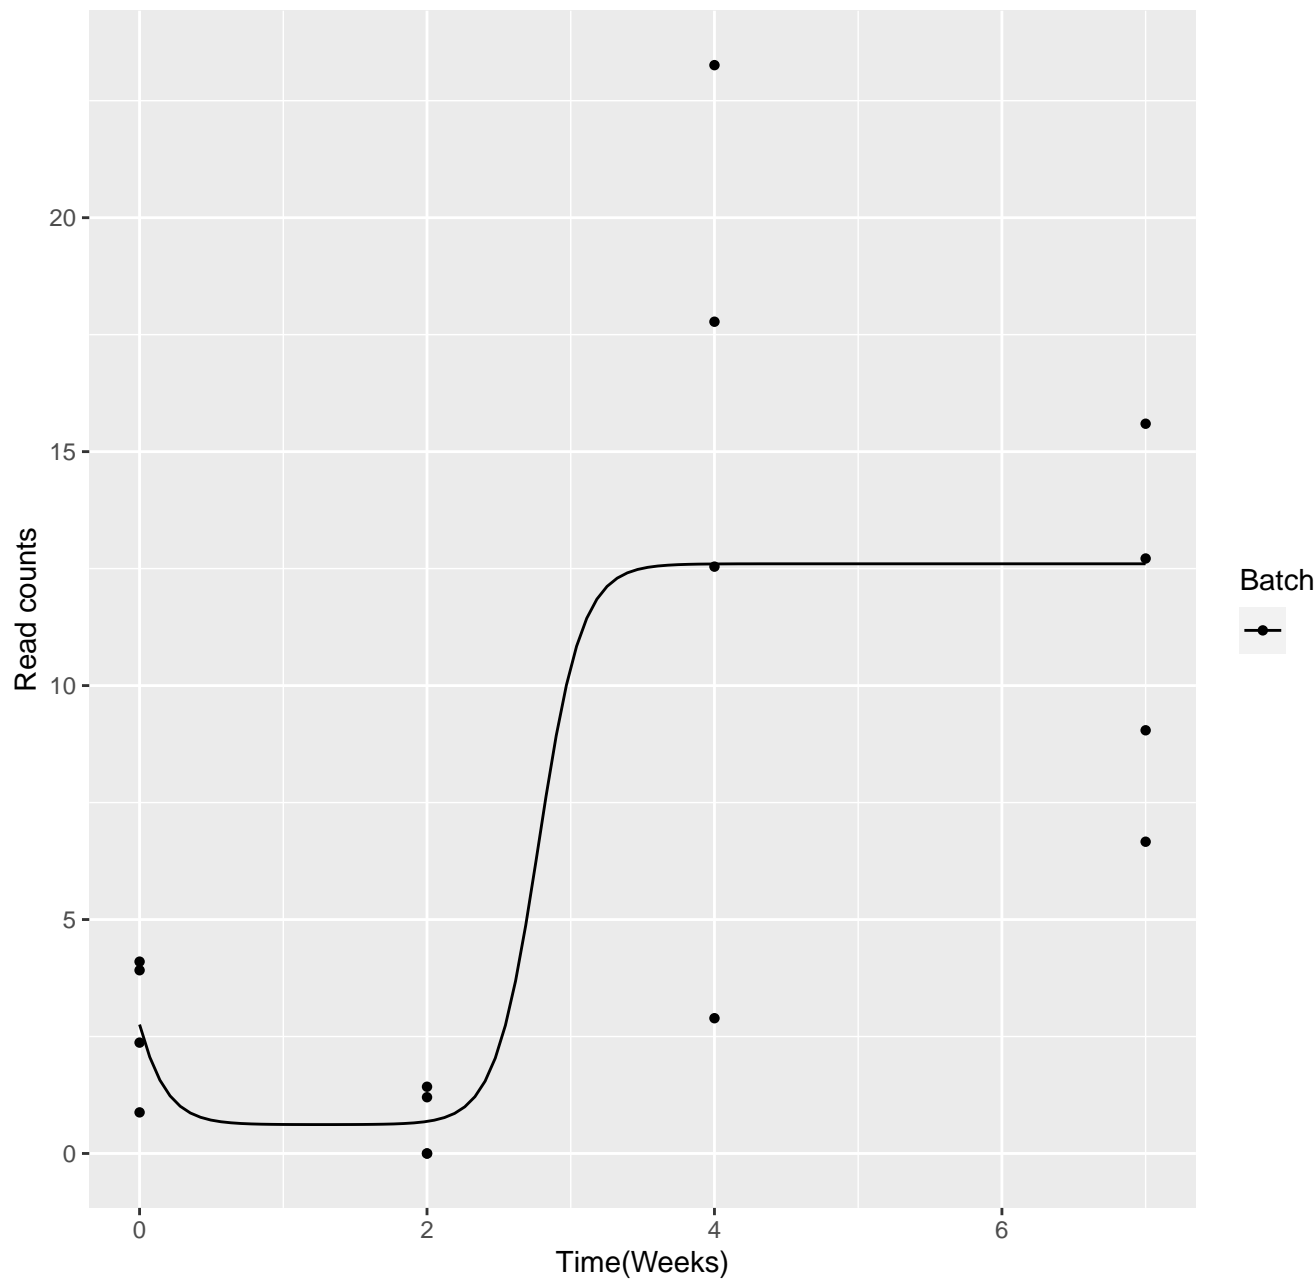

RGS5:  $\log_{10} q = -3.17$

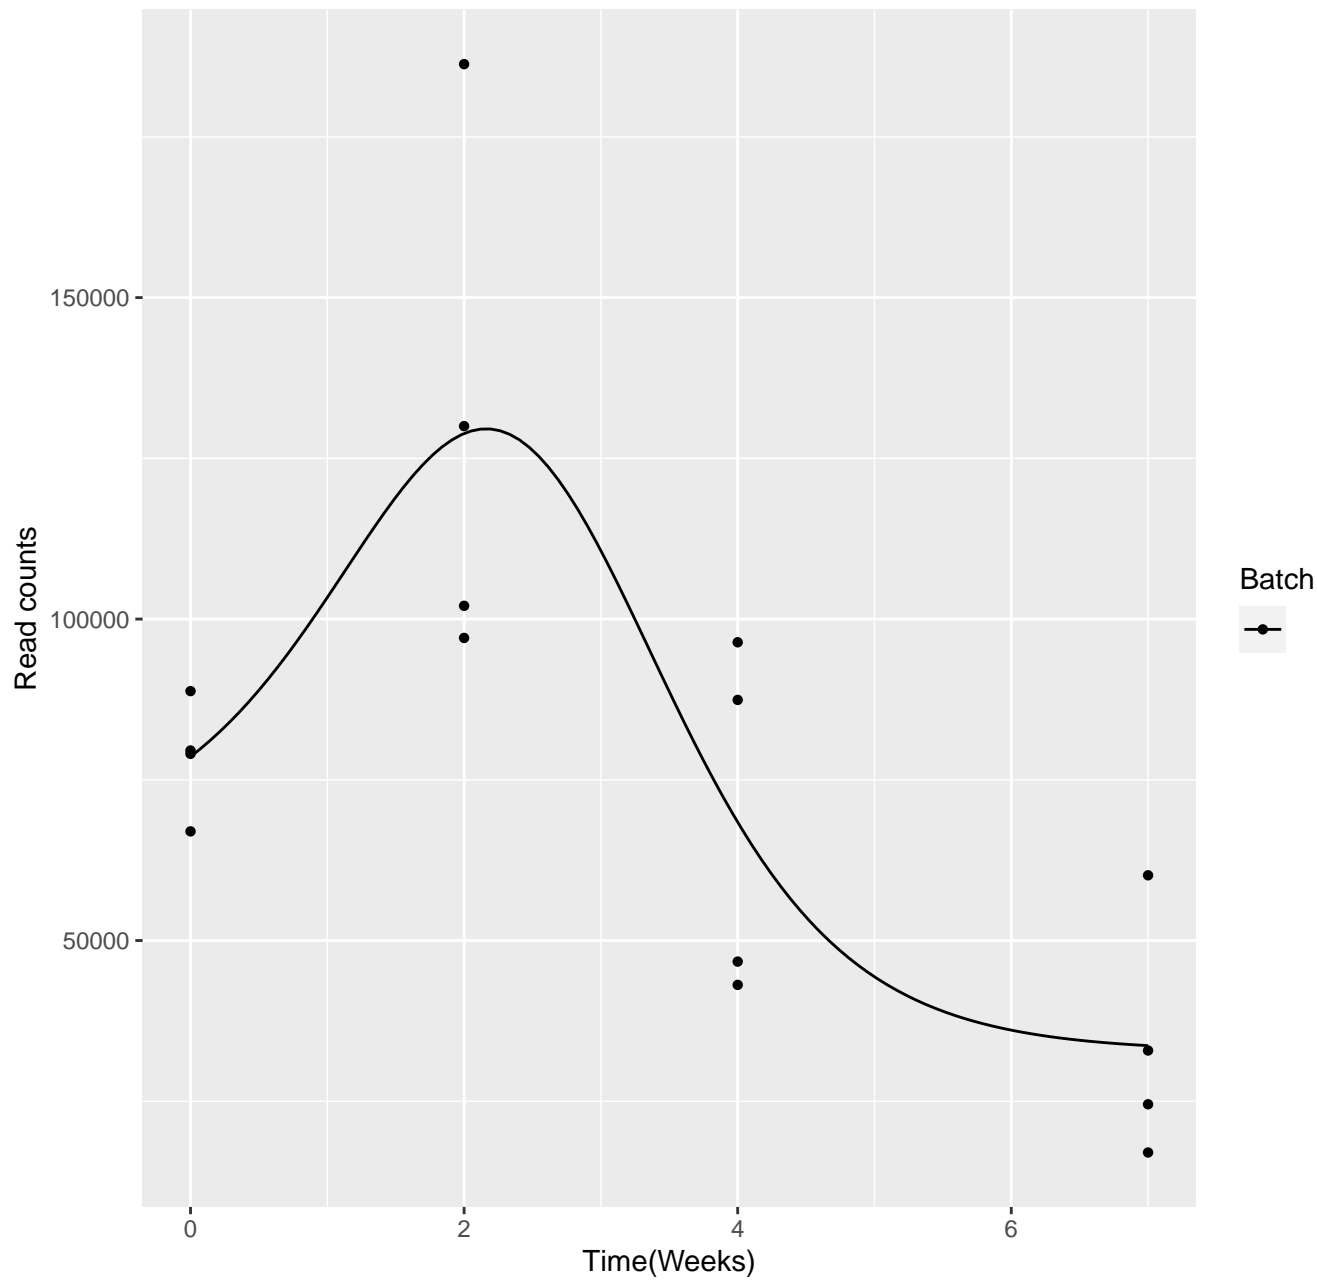

EXOSC5:  $\log_{10} q = -3.17$

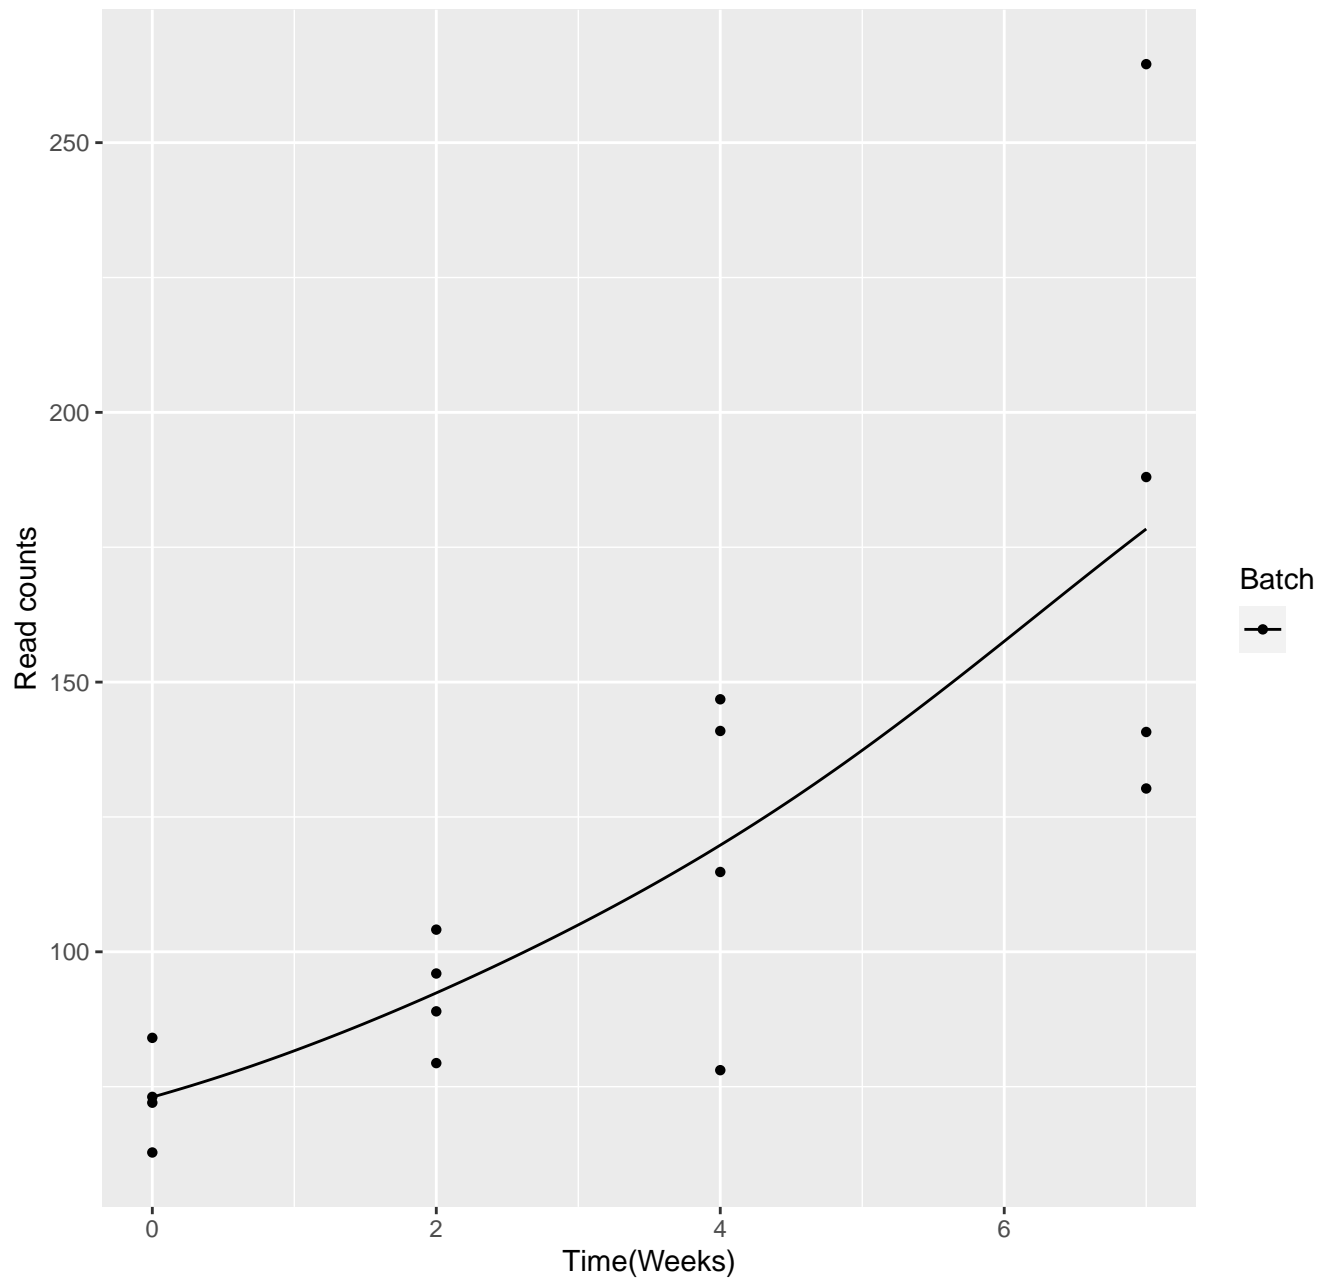

ALDH1A1:  $\log_{10} q = -3.16$

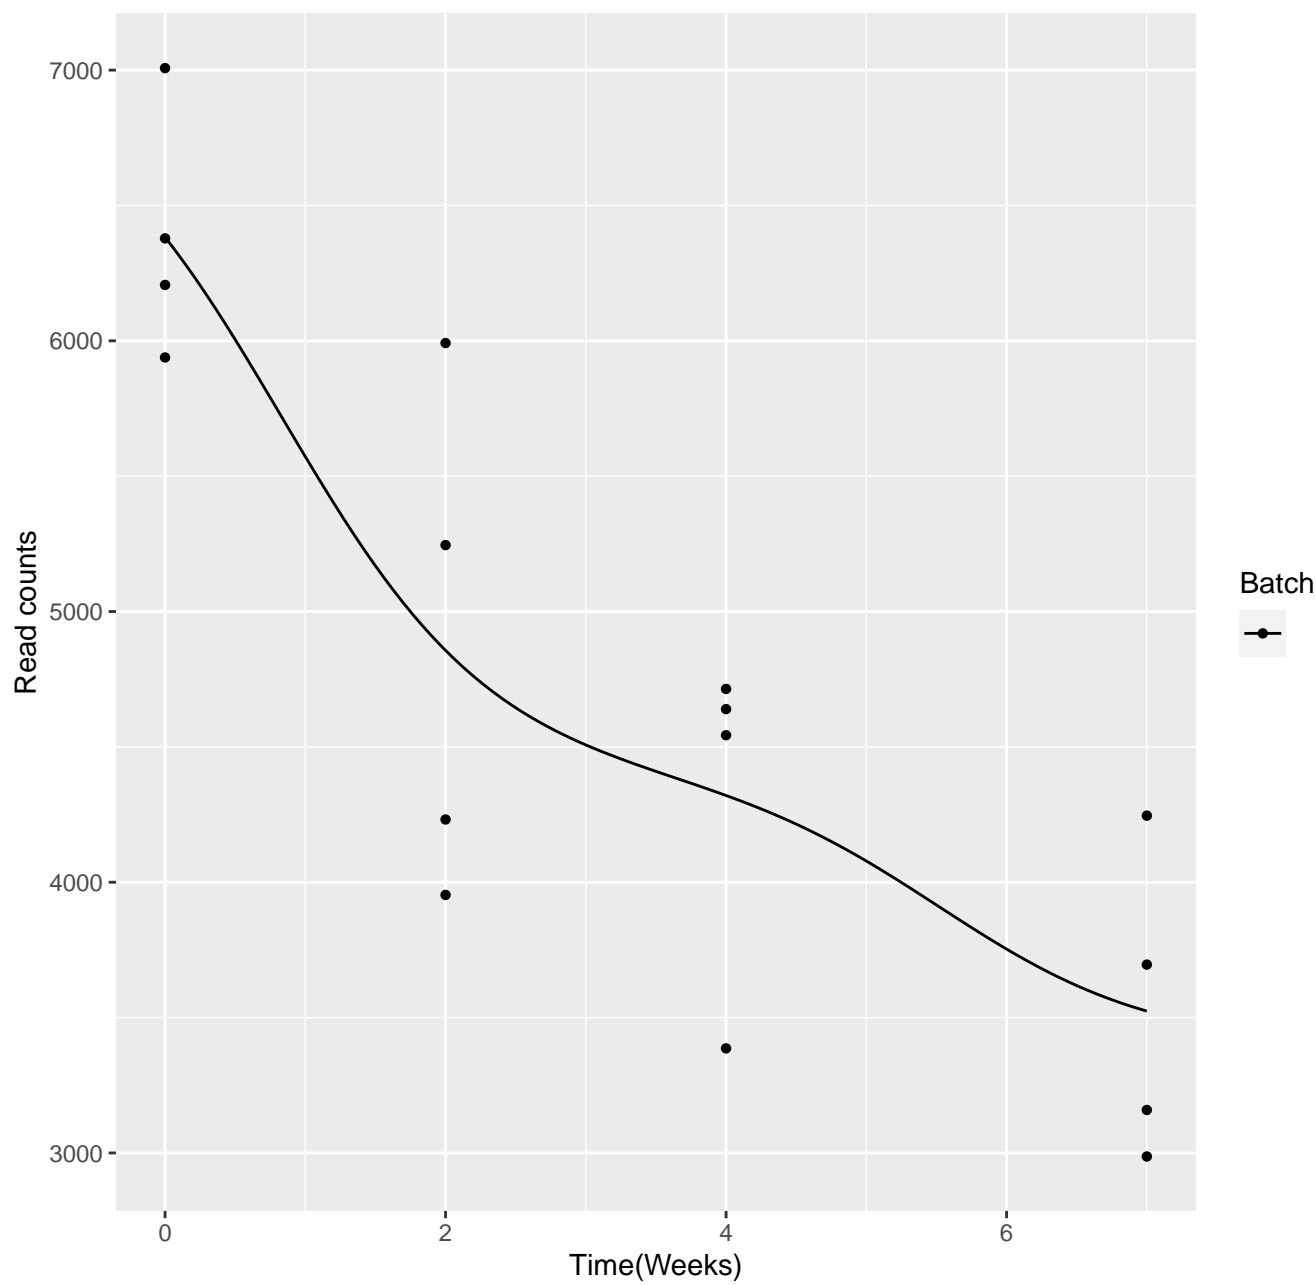

CDK5RAP1:  $\log_{10} q = -3.16$

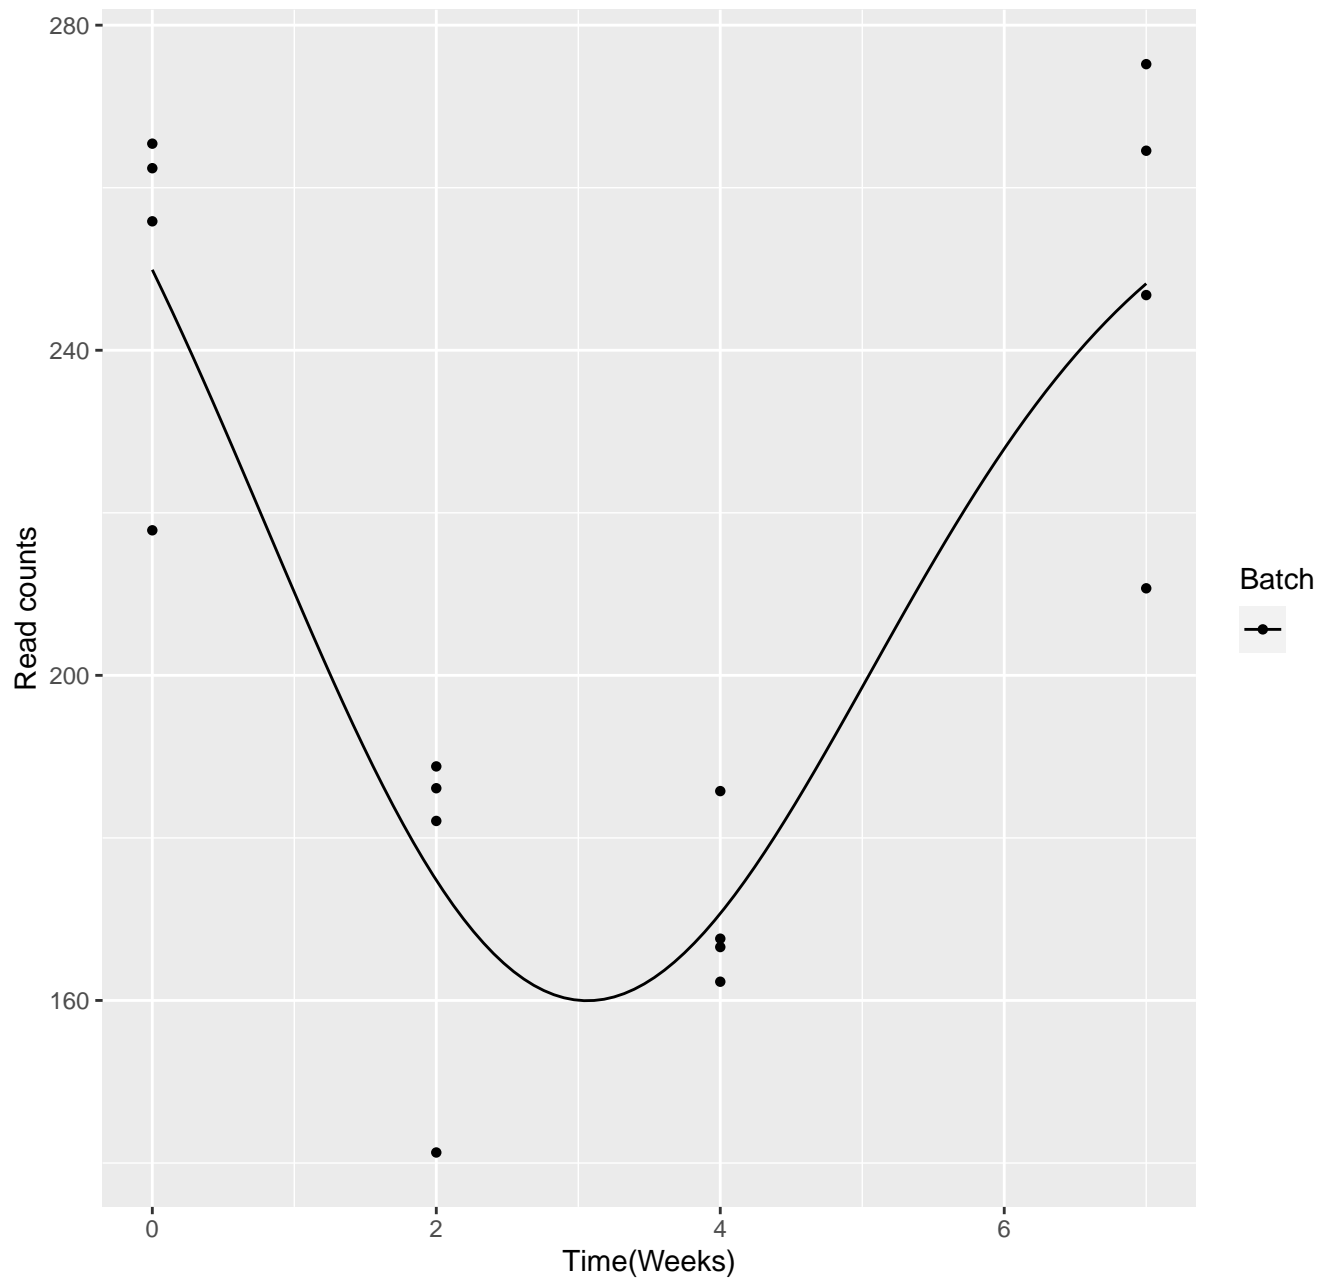



LOC103348576:  $\log_{10} q = -3.16$

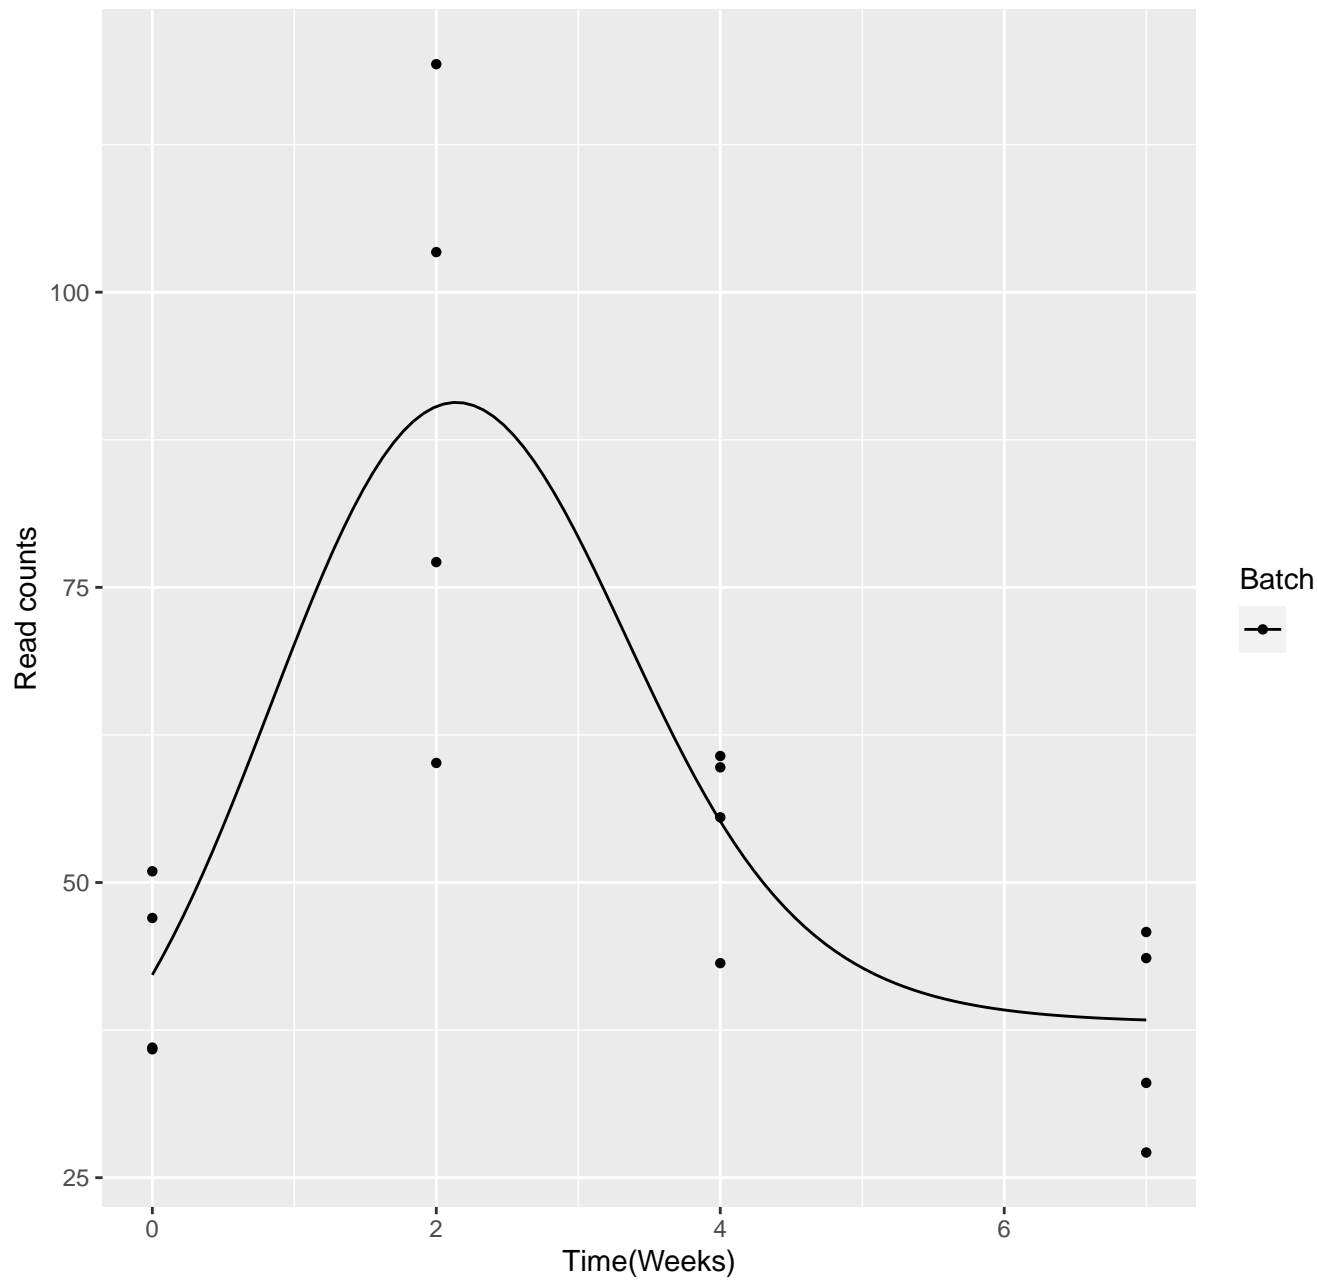

PKN2:  $\log_{10} q = -3.16$

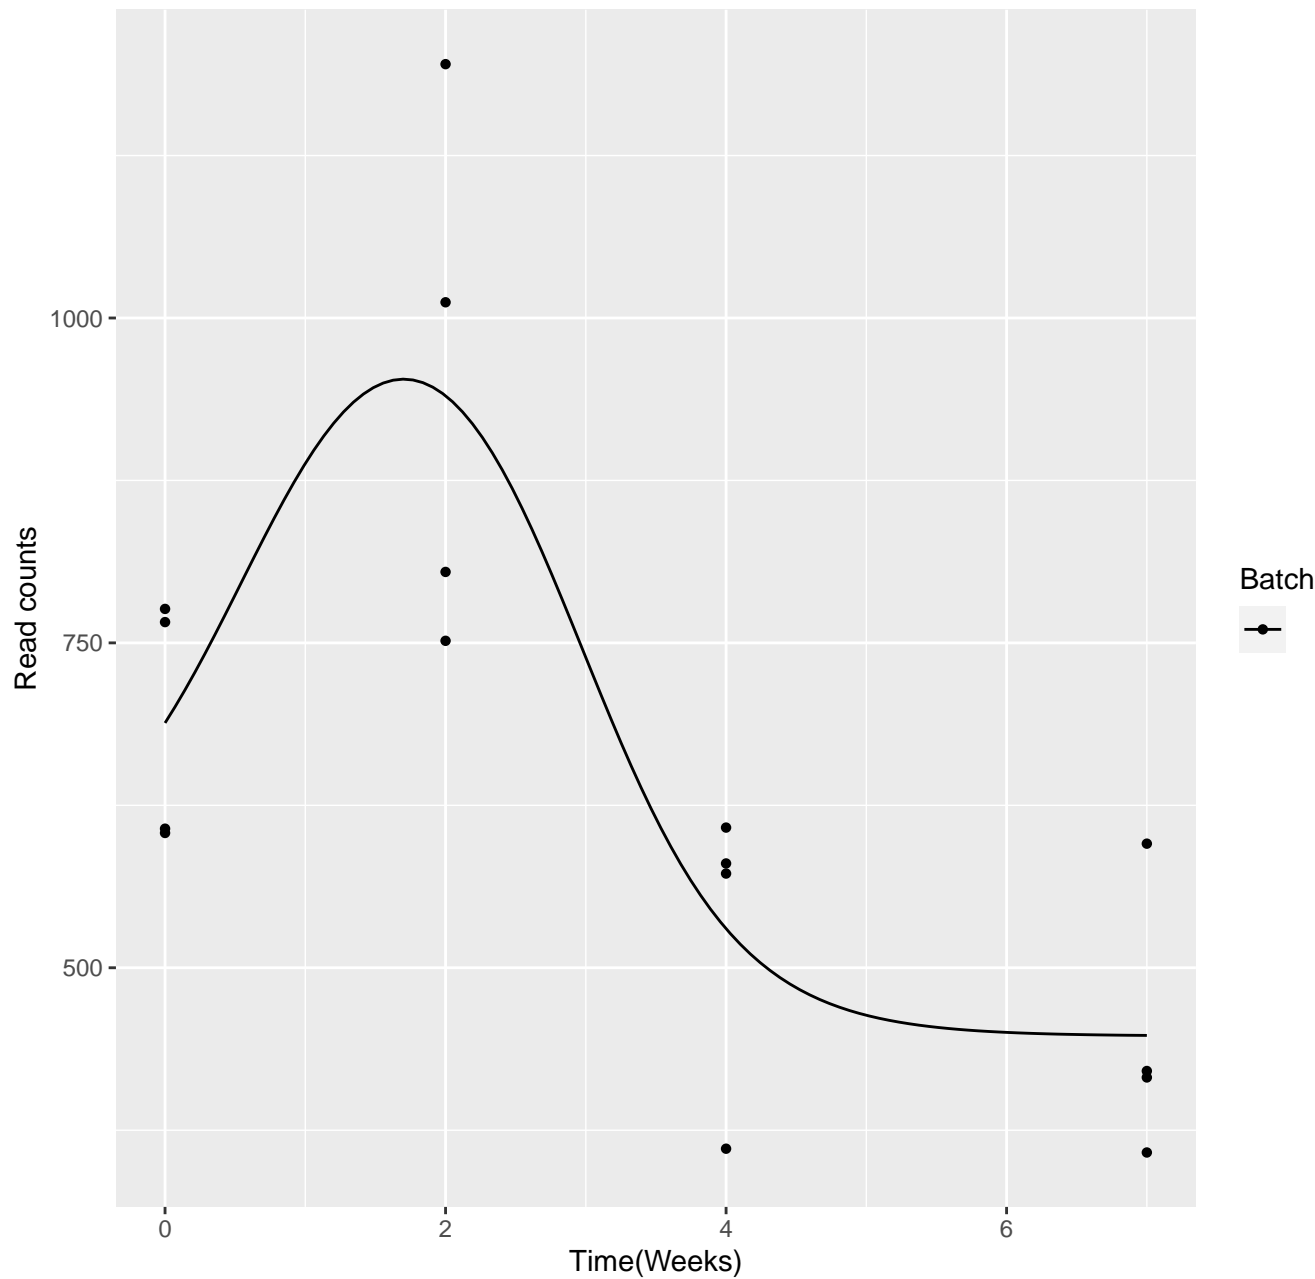

EIF4EBP2:  $\log_{10} q = -3.16$

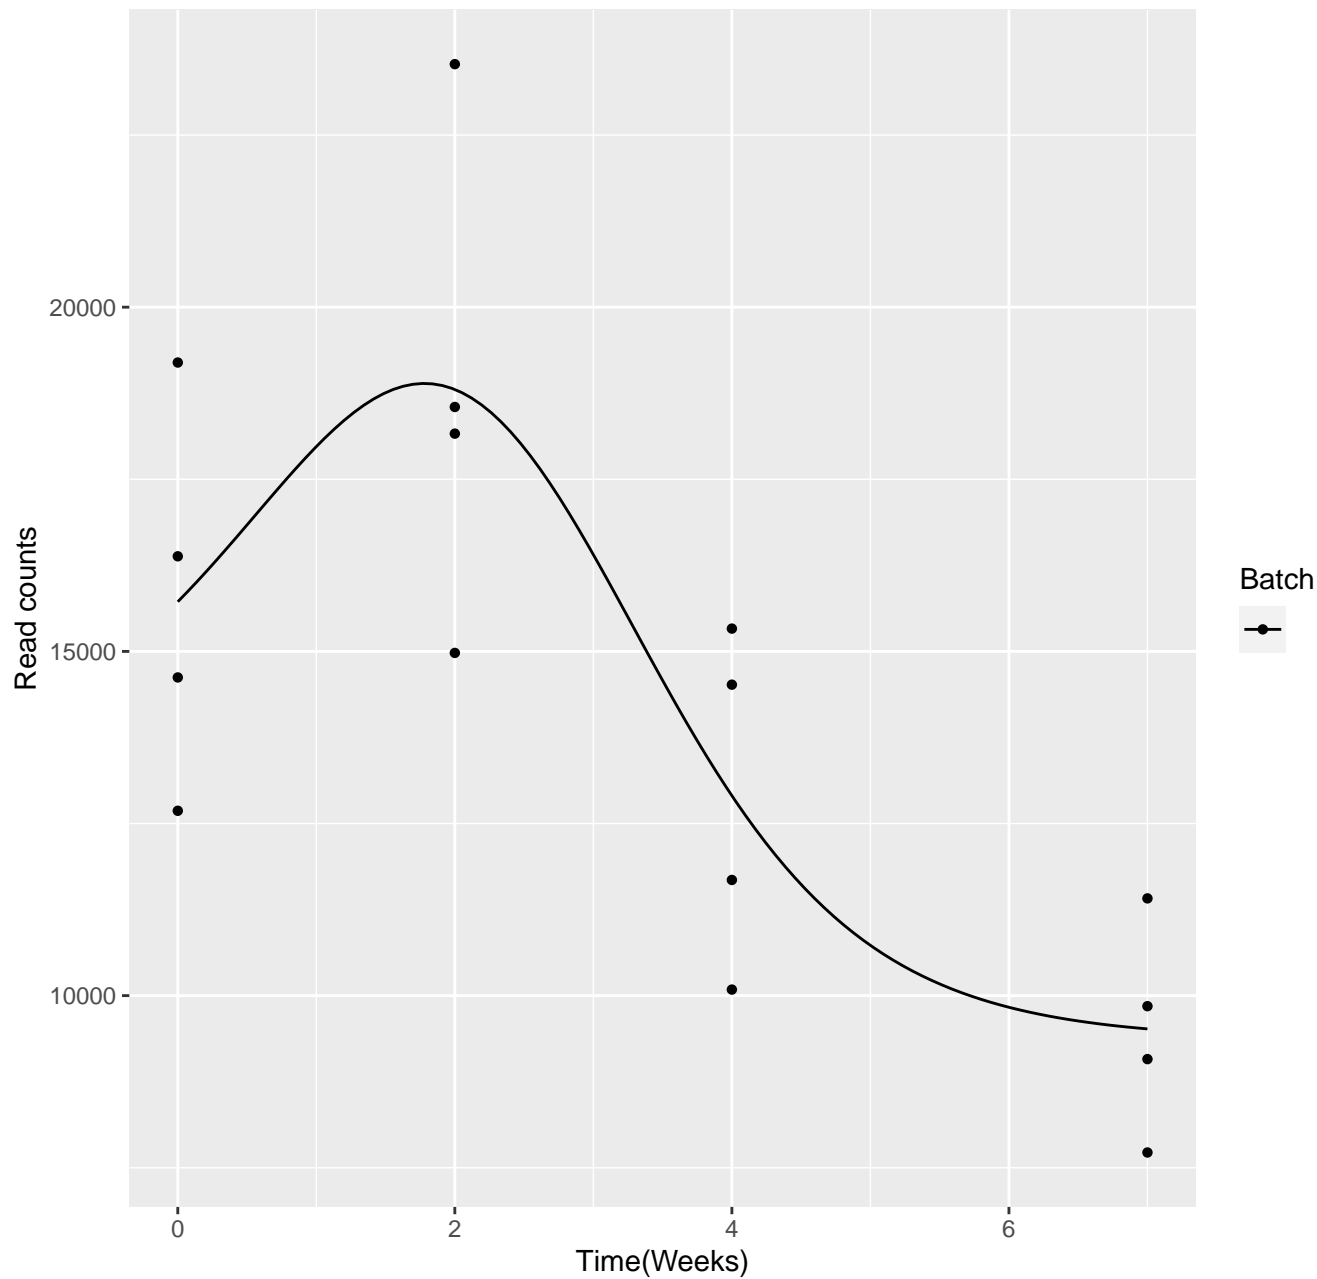

FAM181B:  $\log_{10} q = -3.15$

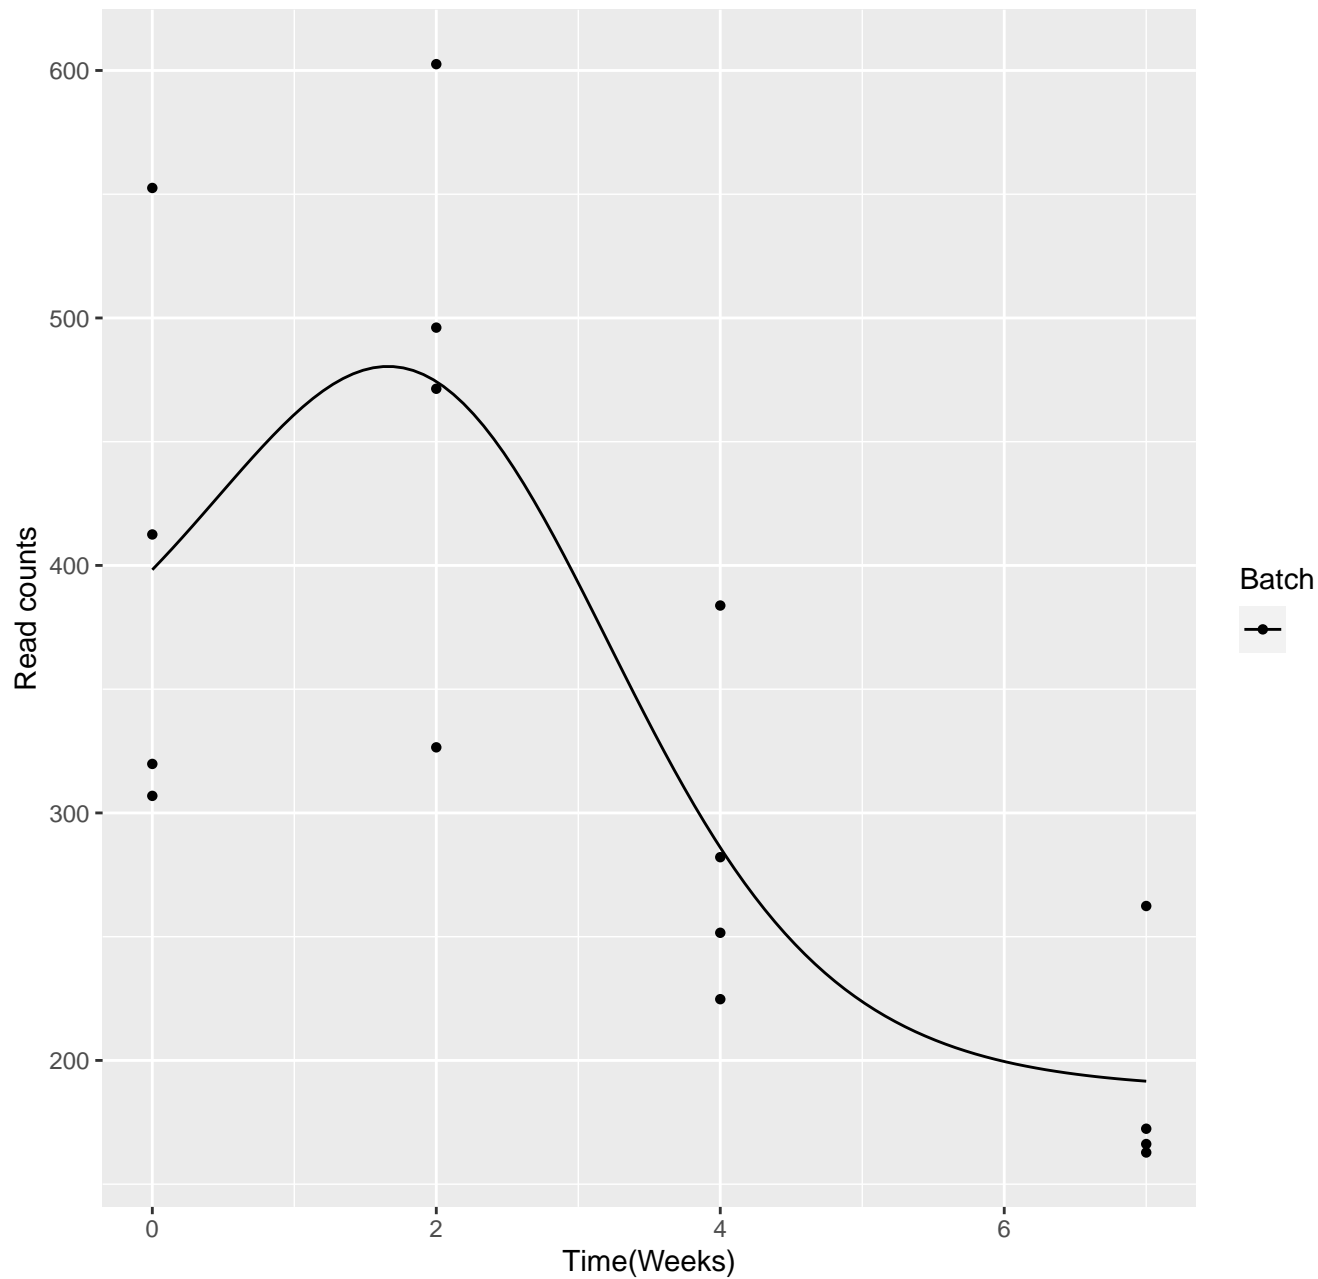

LOC127487713:  $\log_{10} q = -3.15$

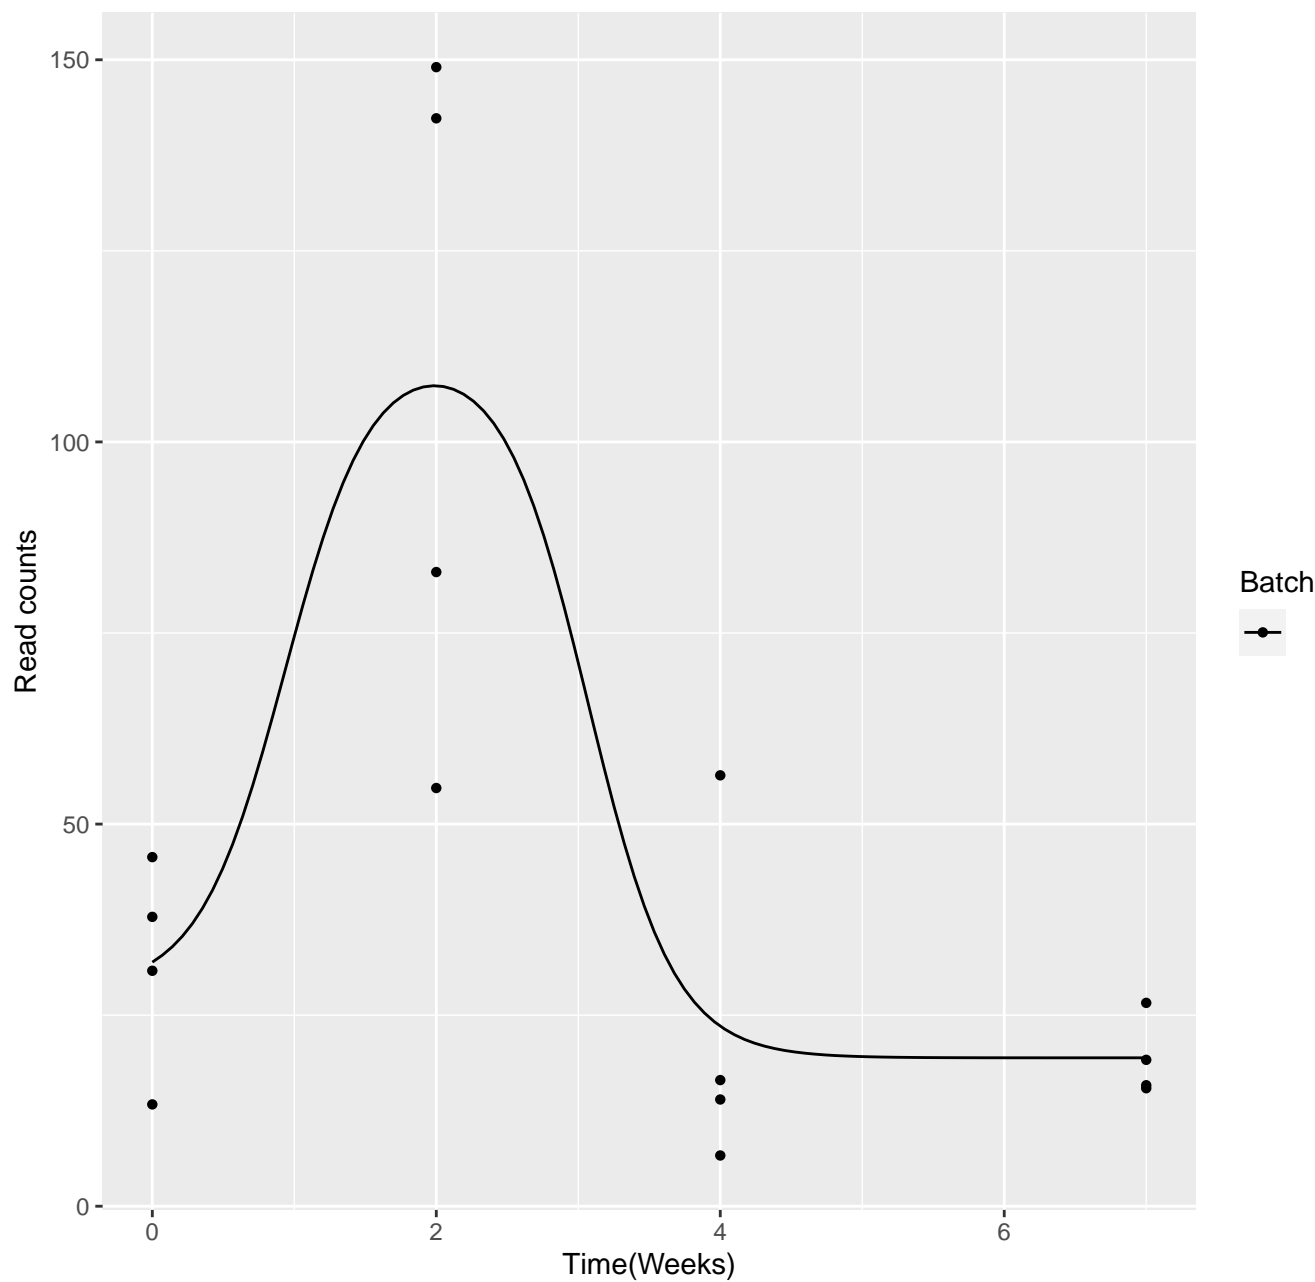

APLN:  $\log_{10} q = -3.15$

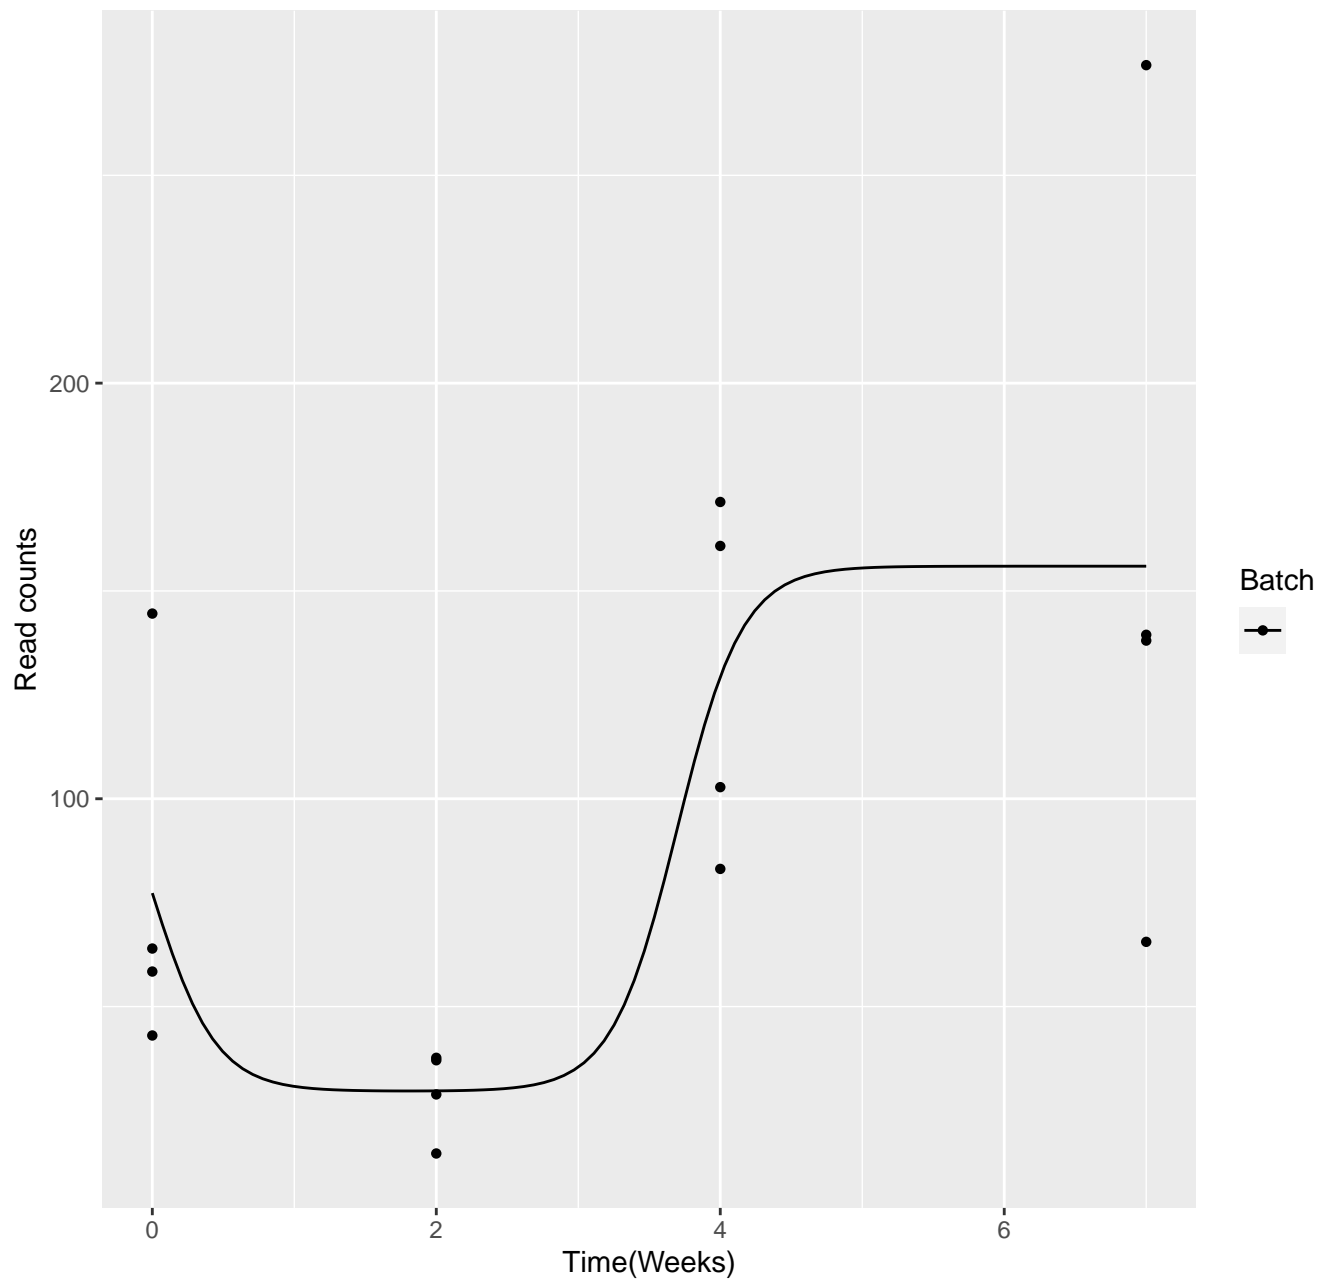

RAB33A:  $\log_{10} q = -3.15$

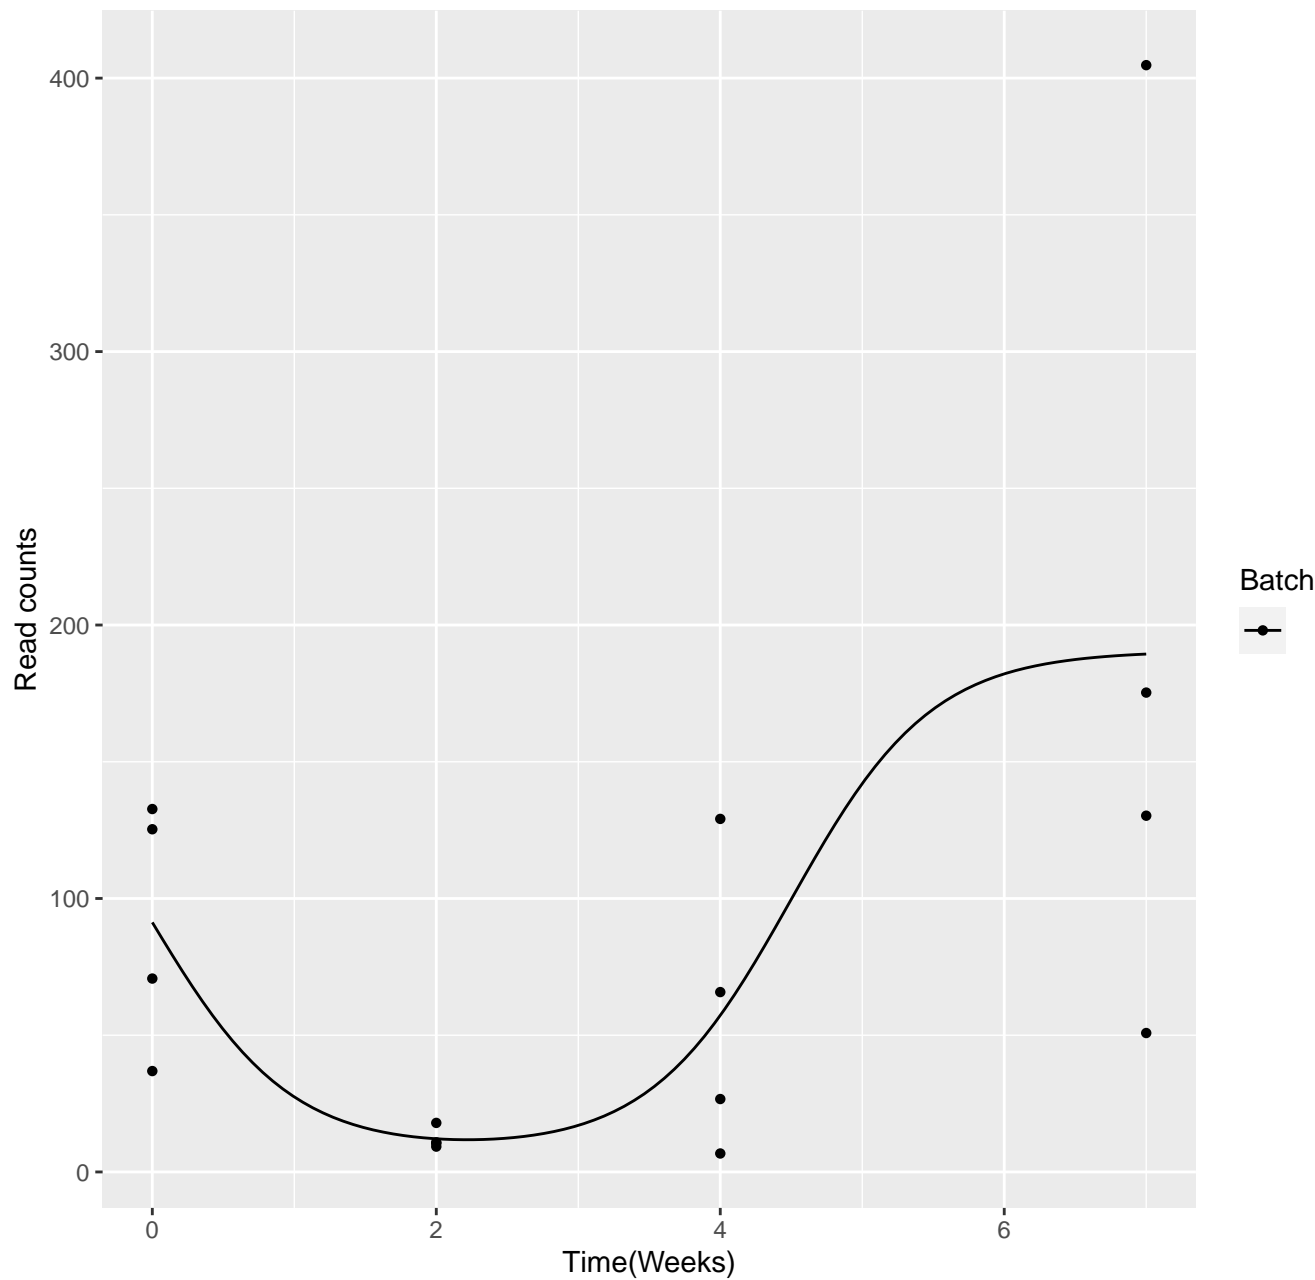

FLNA:  $\log_{10} q = -3.14$

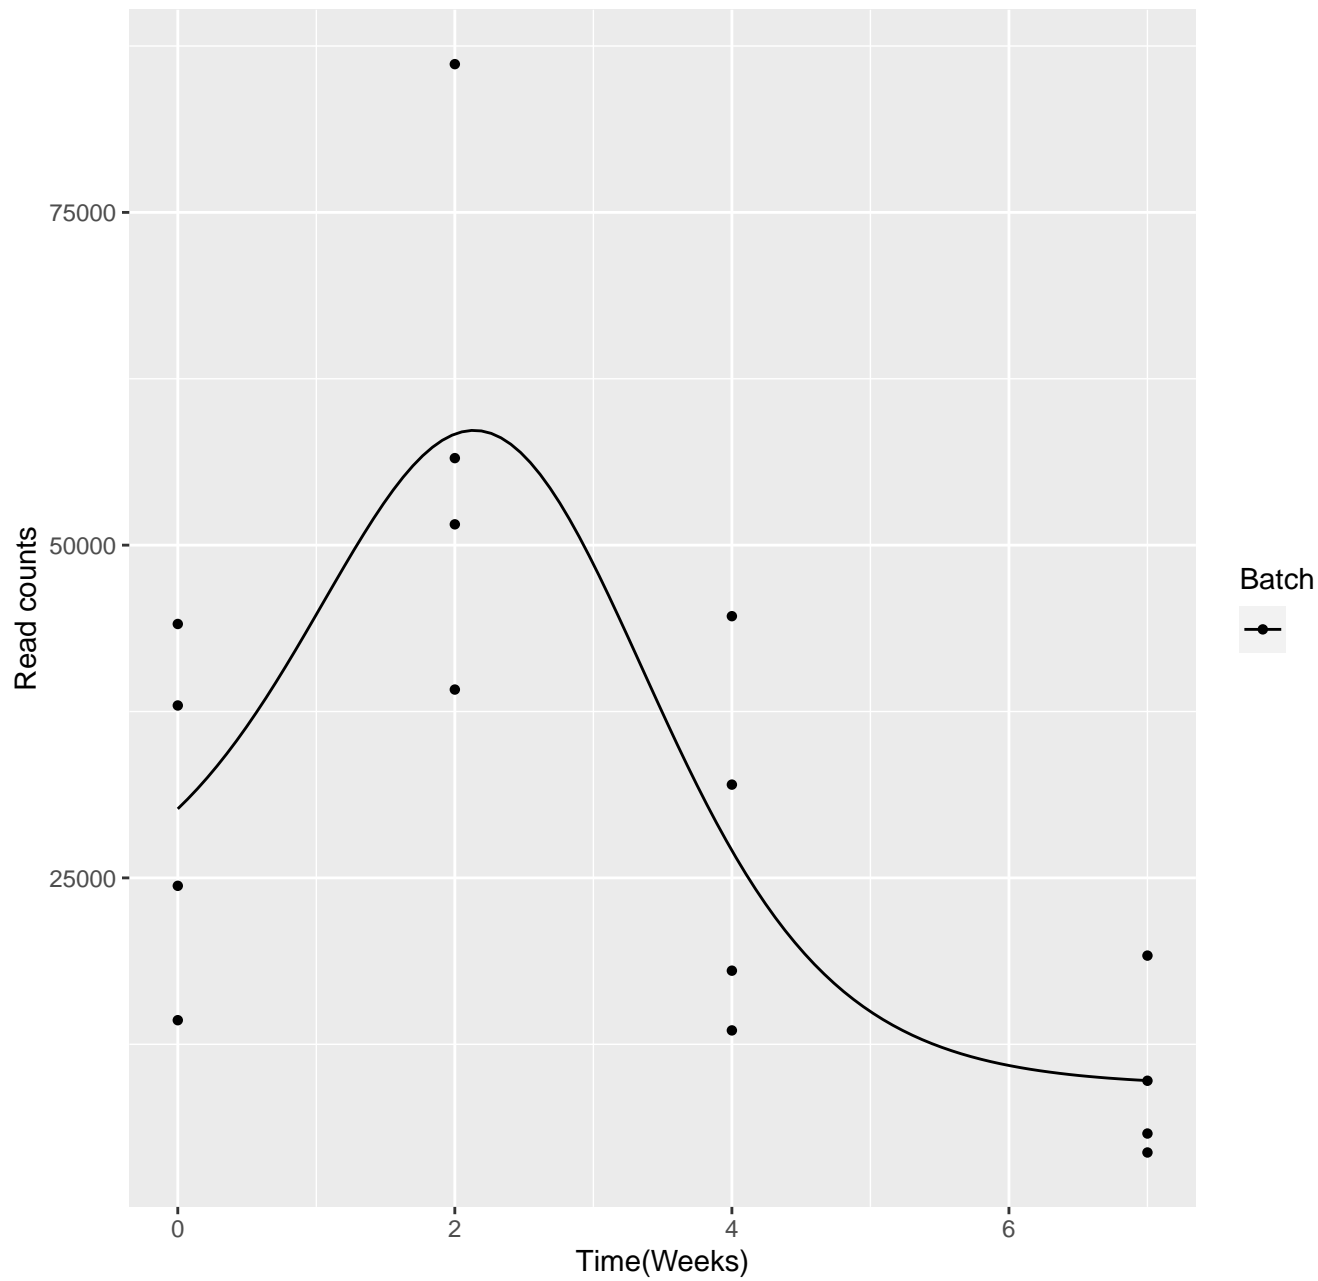



DUSP1:  $\log_{10} q = -3.14$

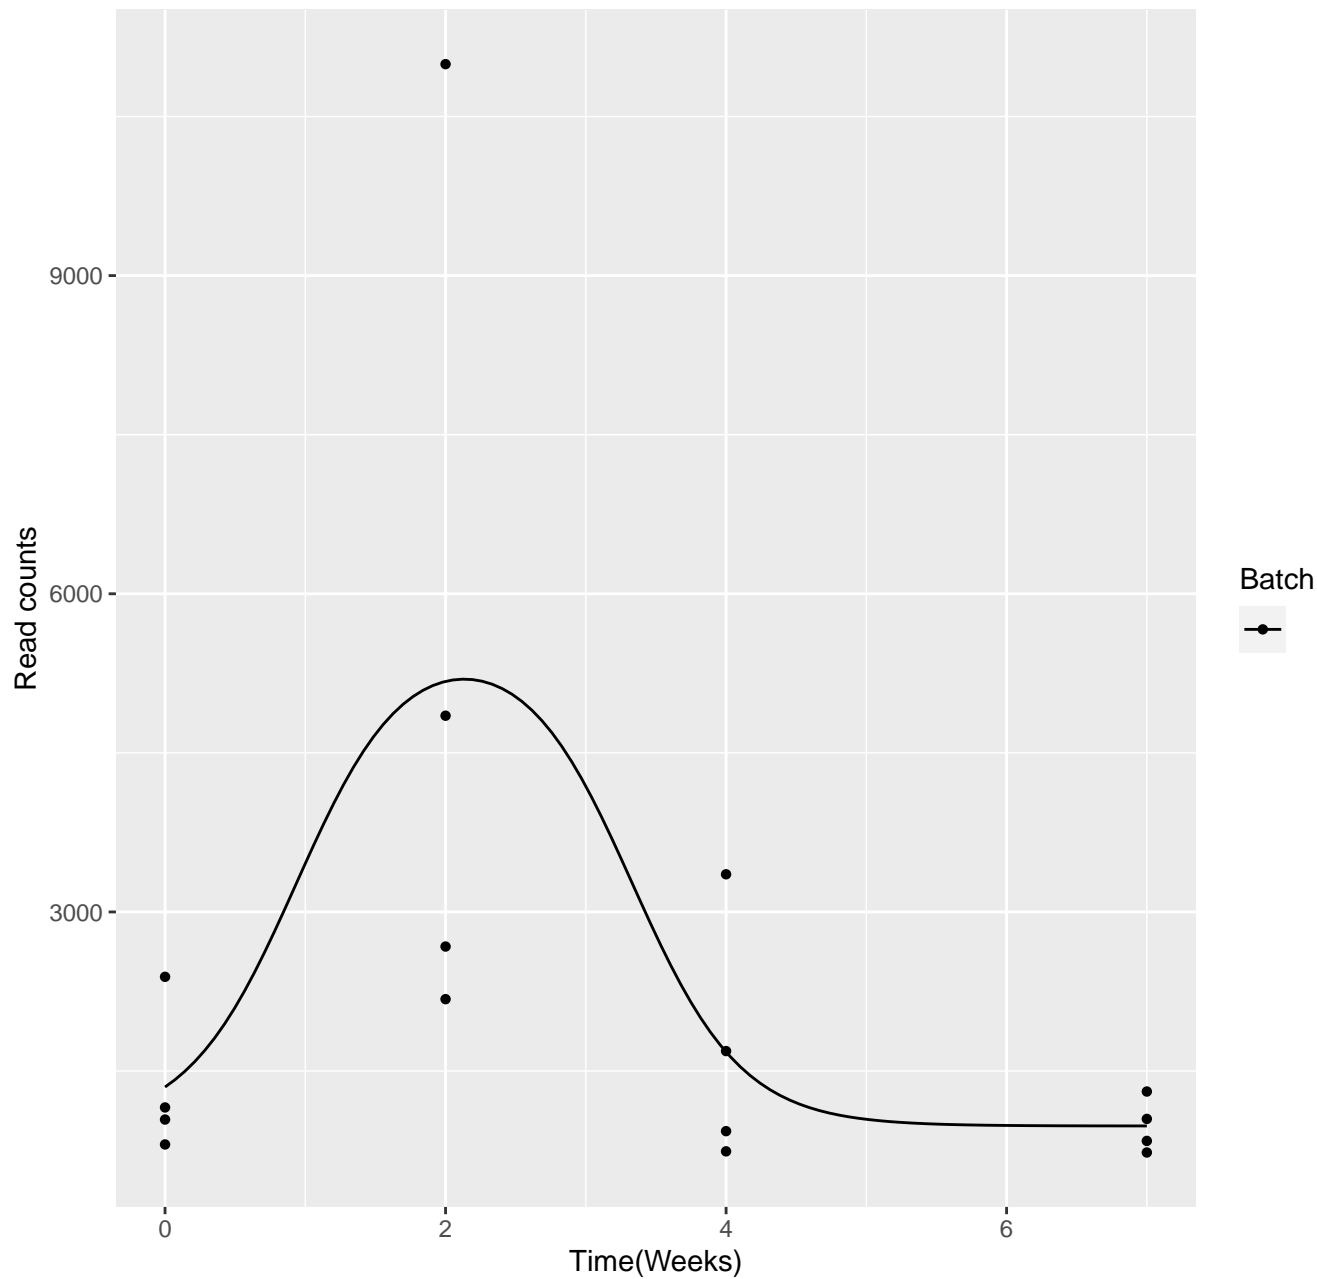

SLC9A5:  $\log_{10} q = -3.13$

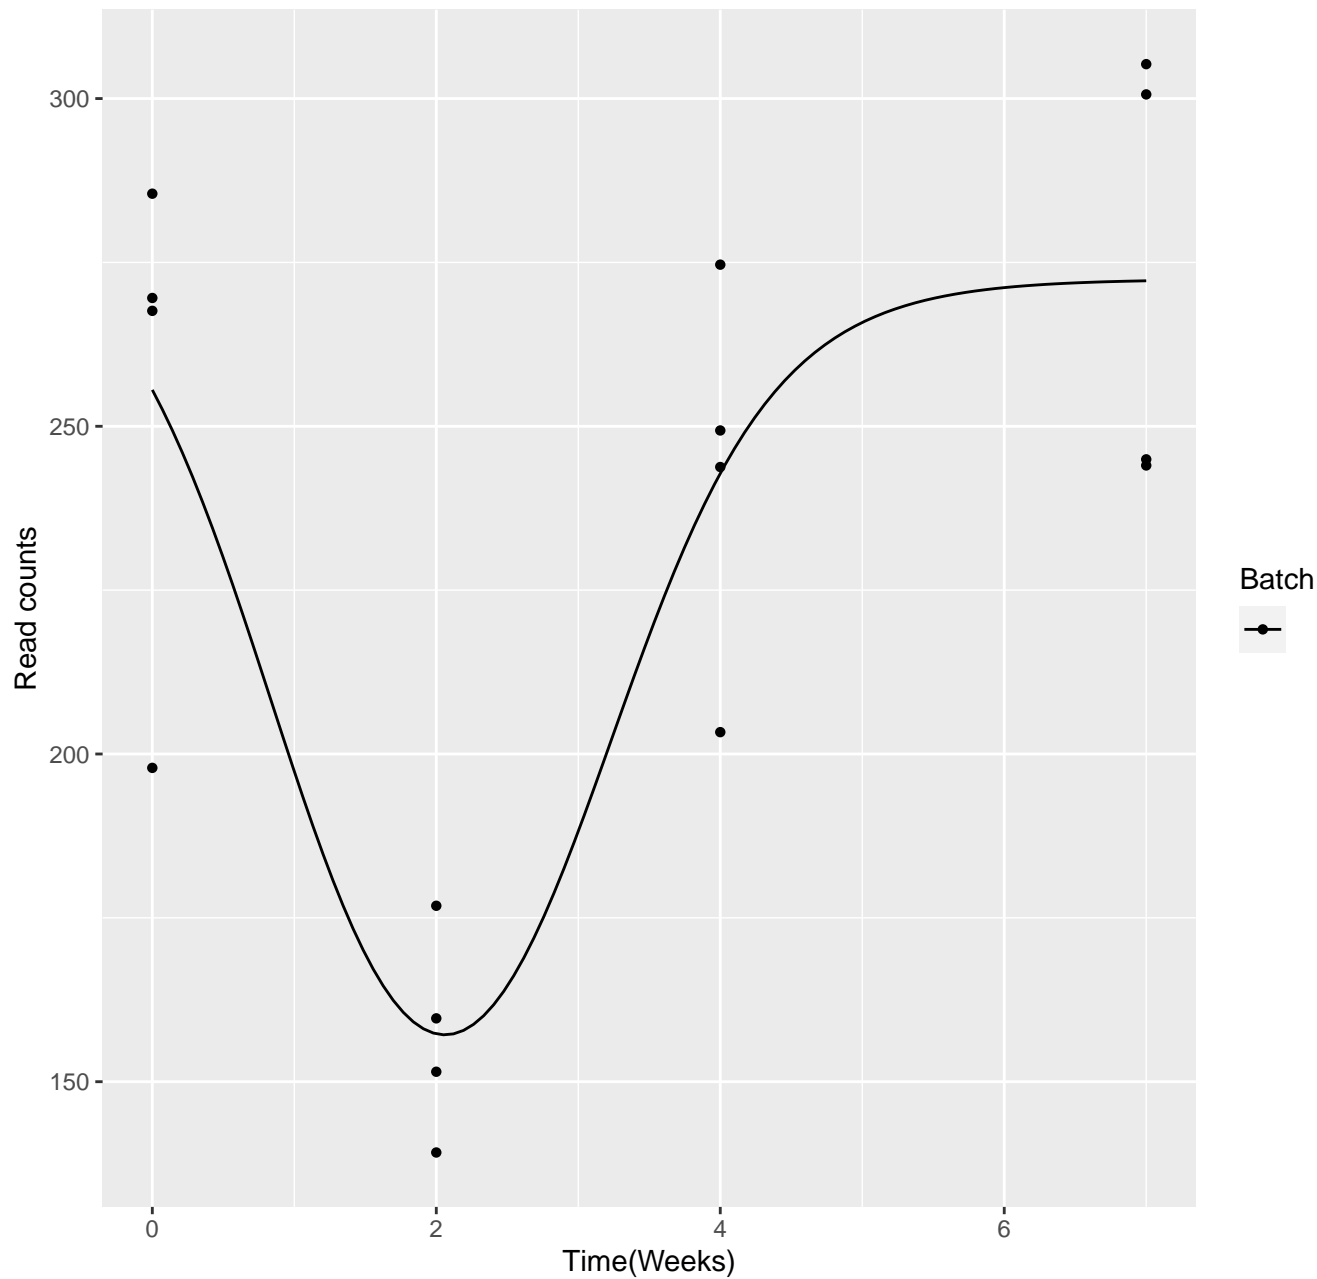

FRYL:  $\log_{10} q = -3.13$

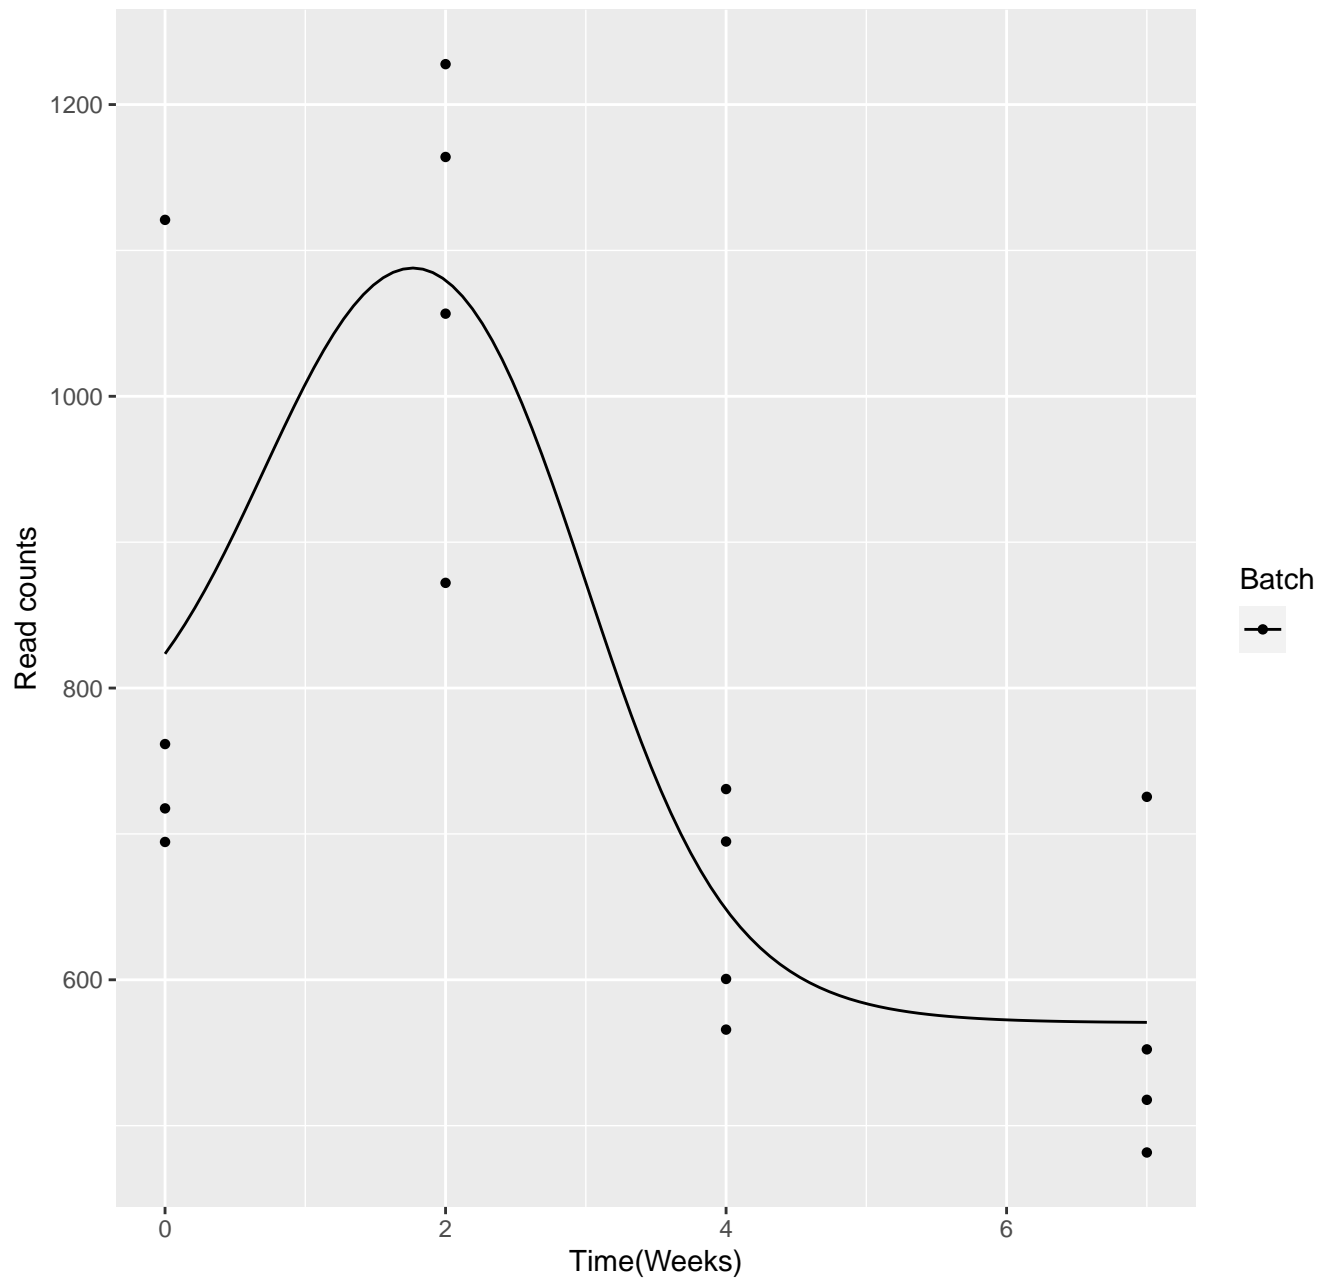

GALNT2:  $\log_{10} q = -3.13$

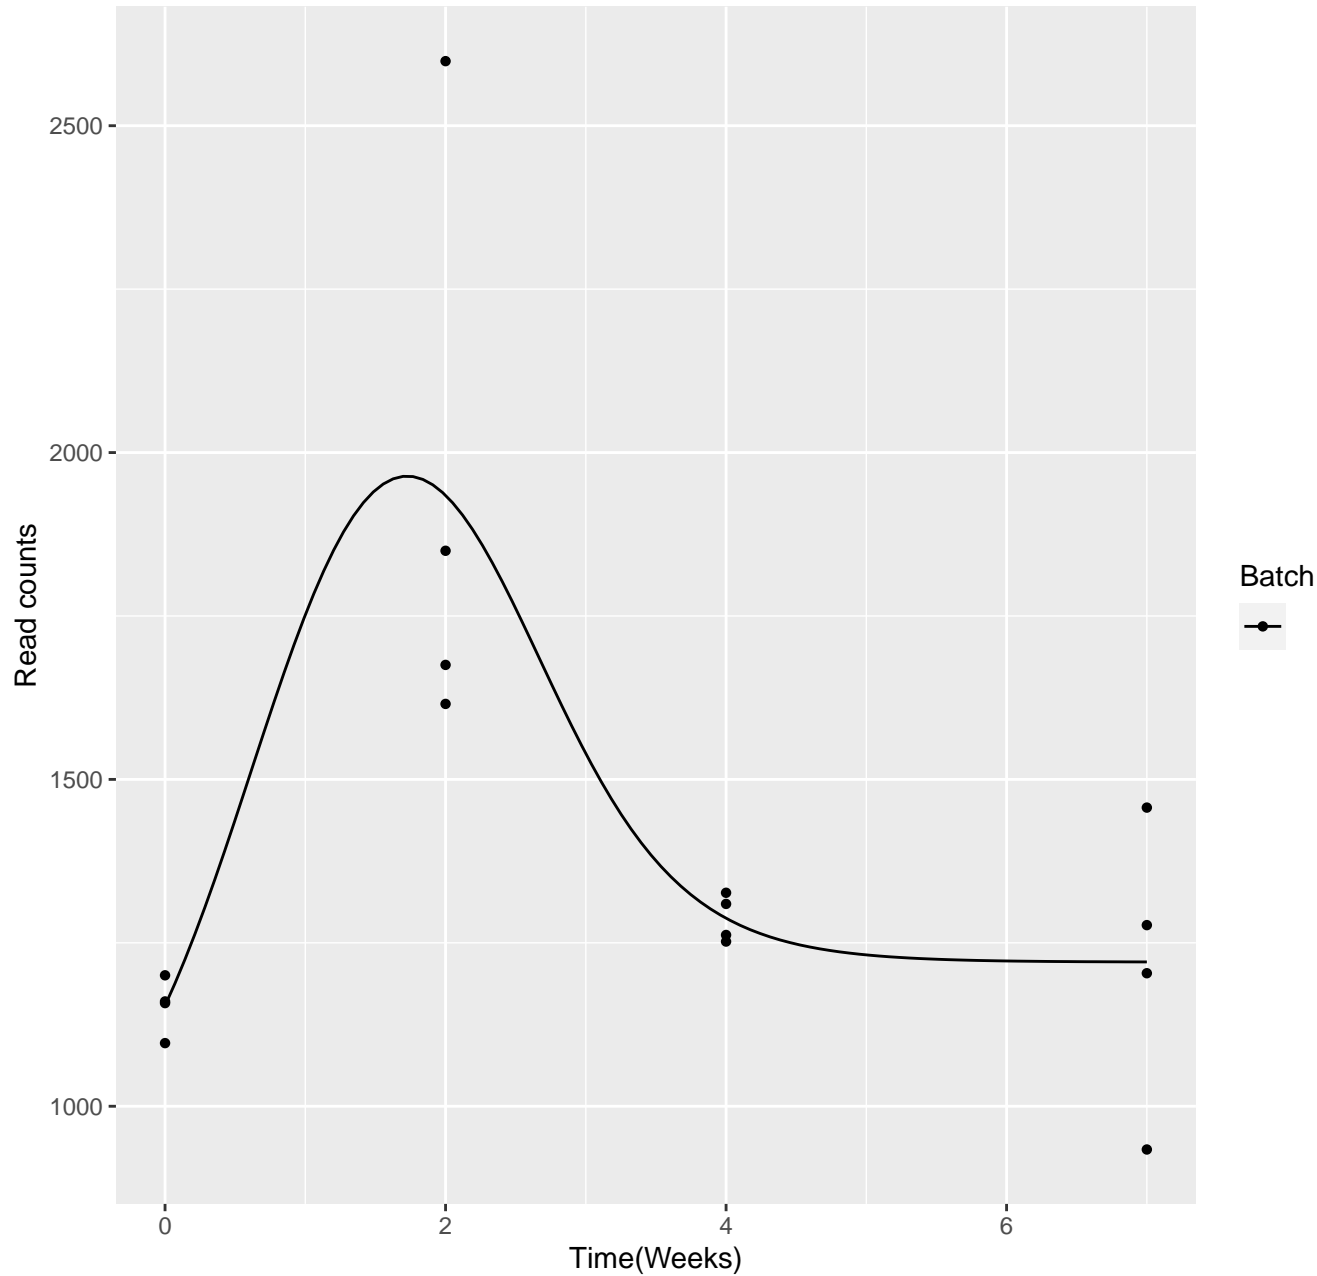

LOC100355766:  $\log_{10} q = -3.12$

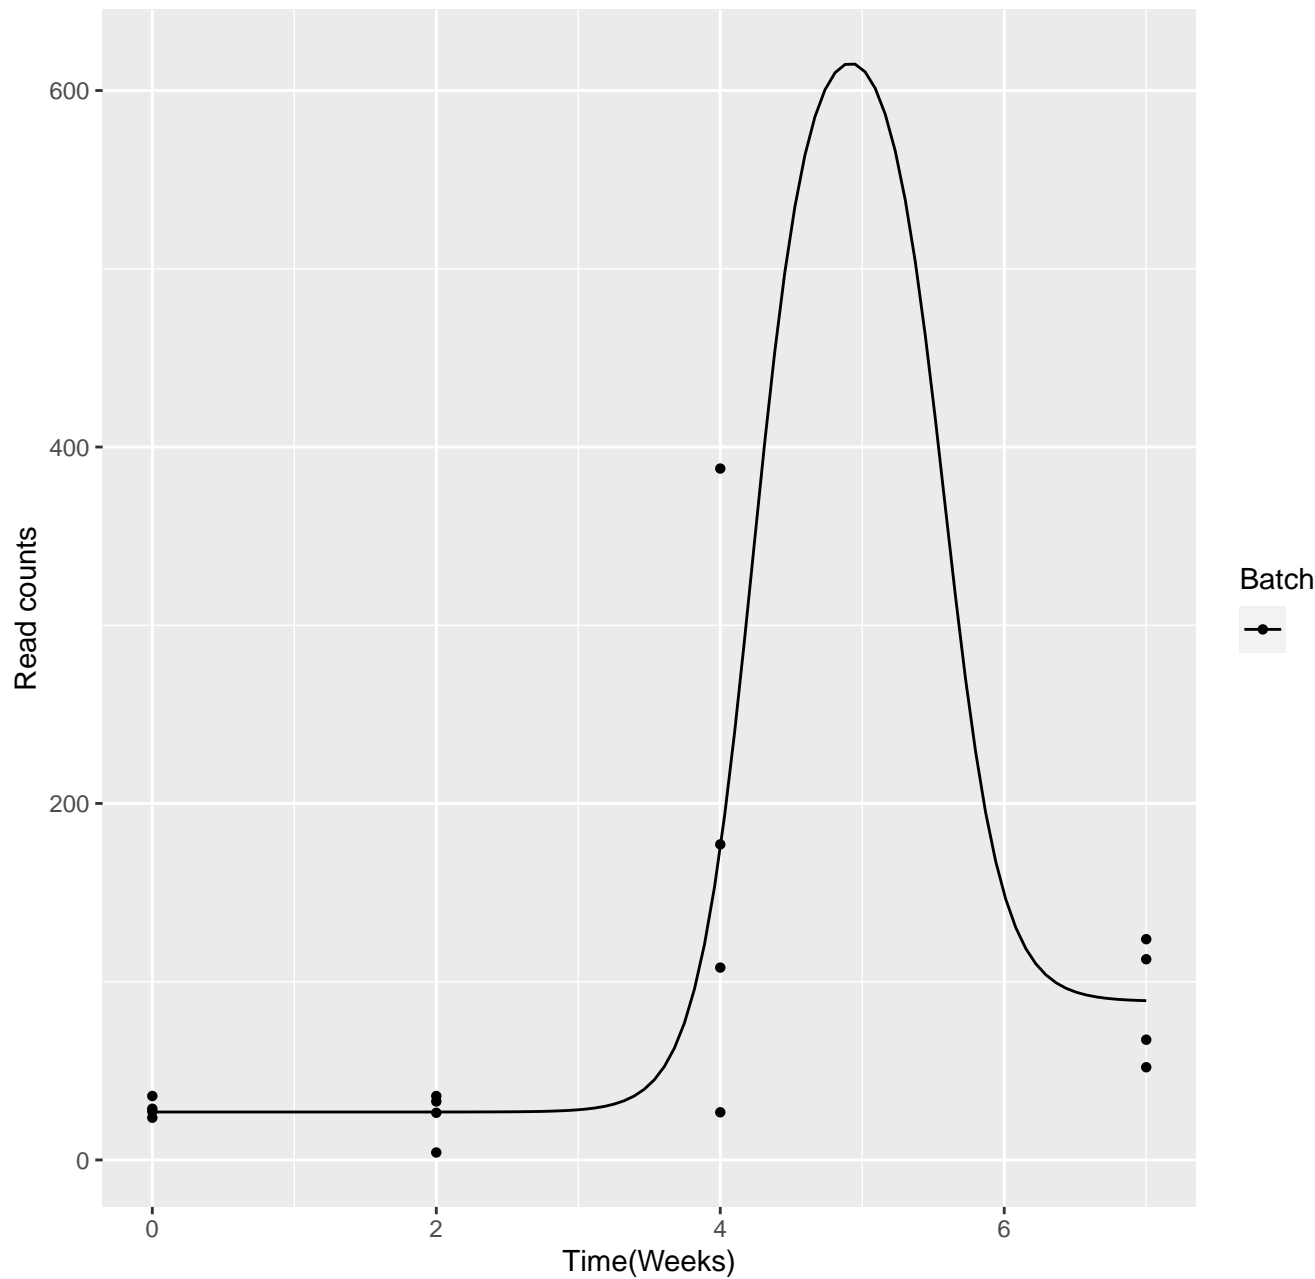

APOO:  $\log_{10} q = -3.12$

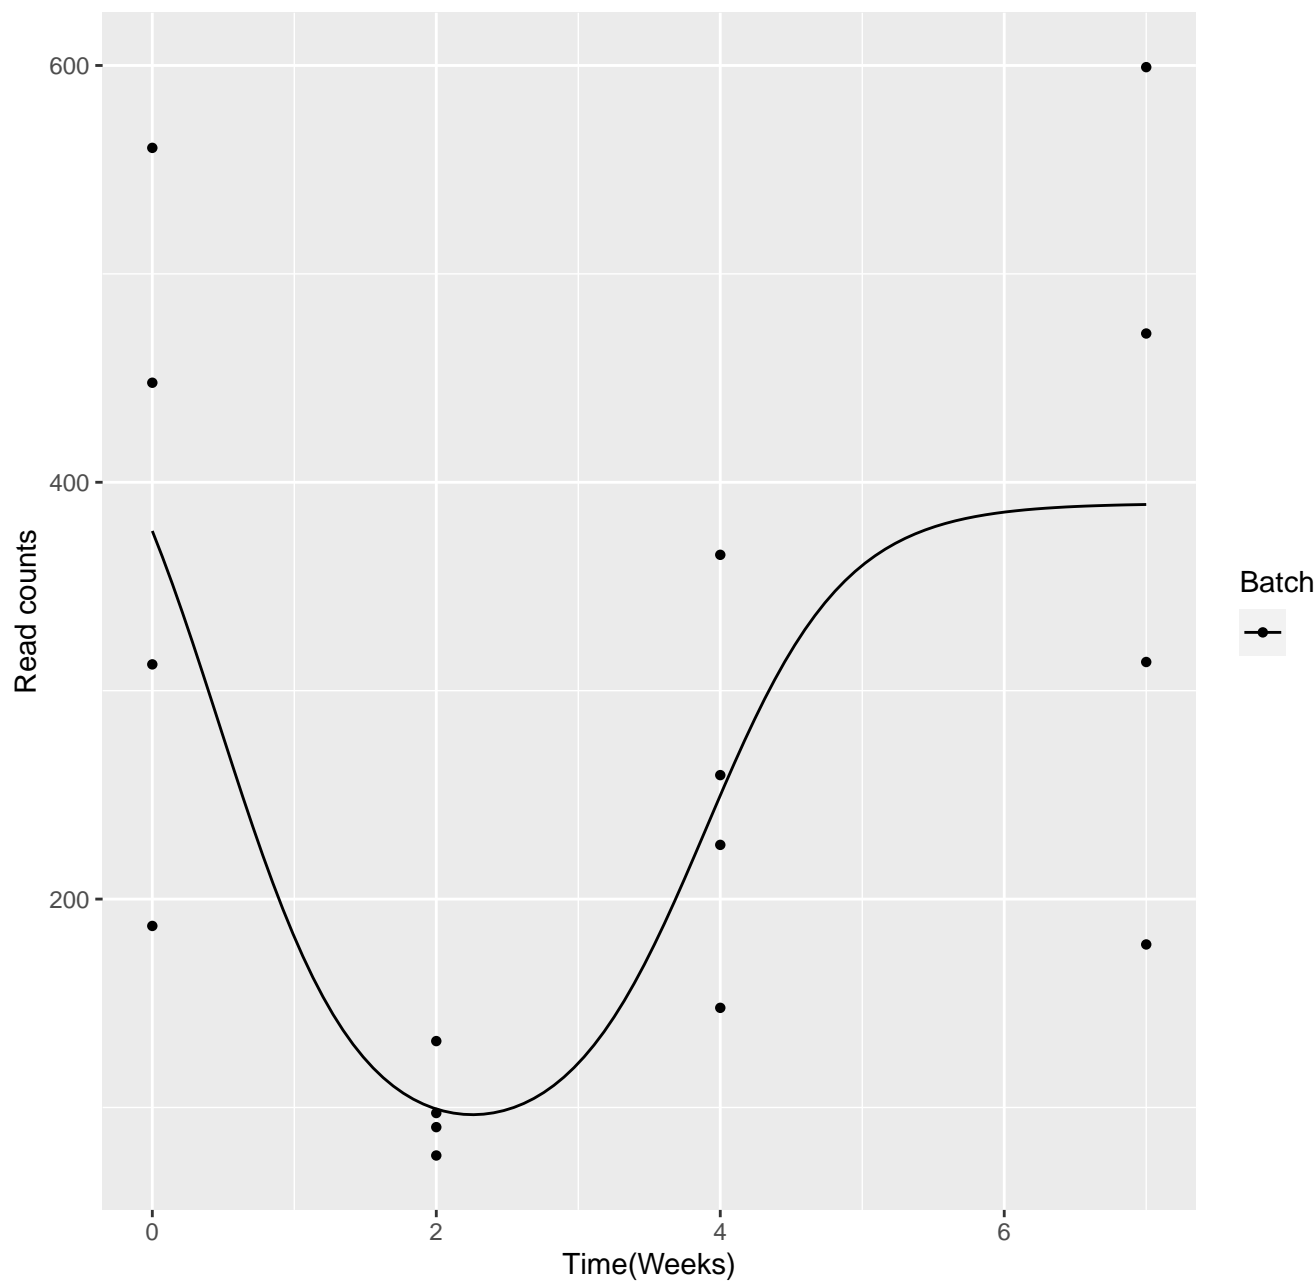

ACSM1:  $\log_{10} q = -3.12$

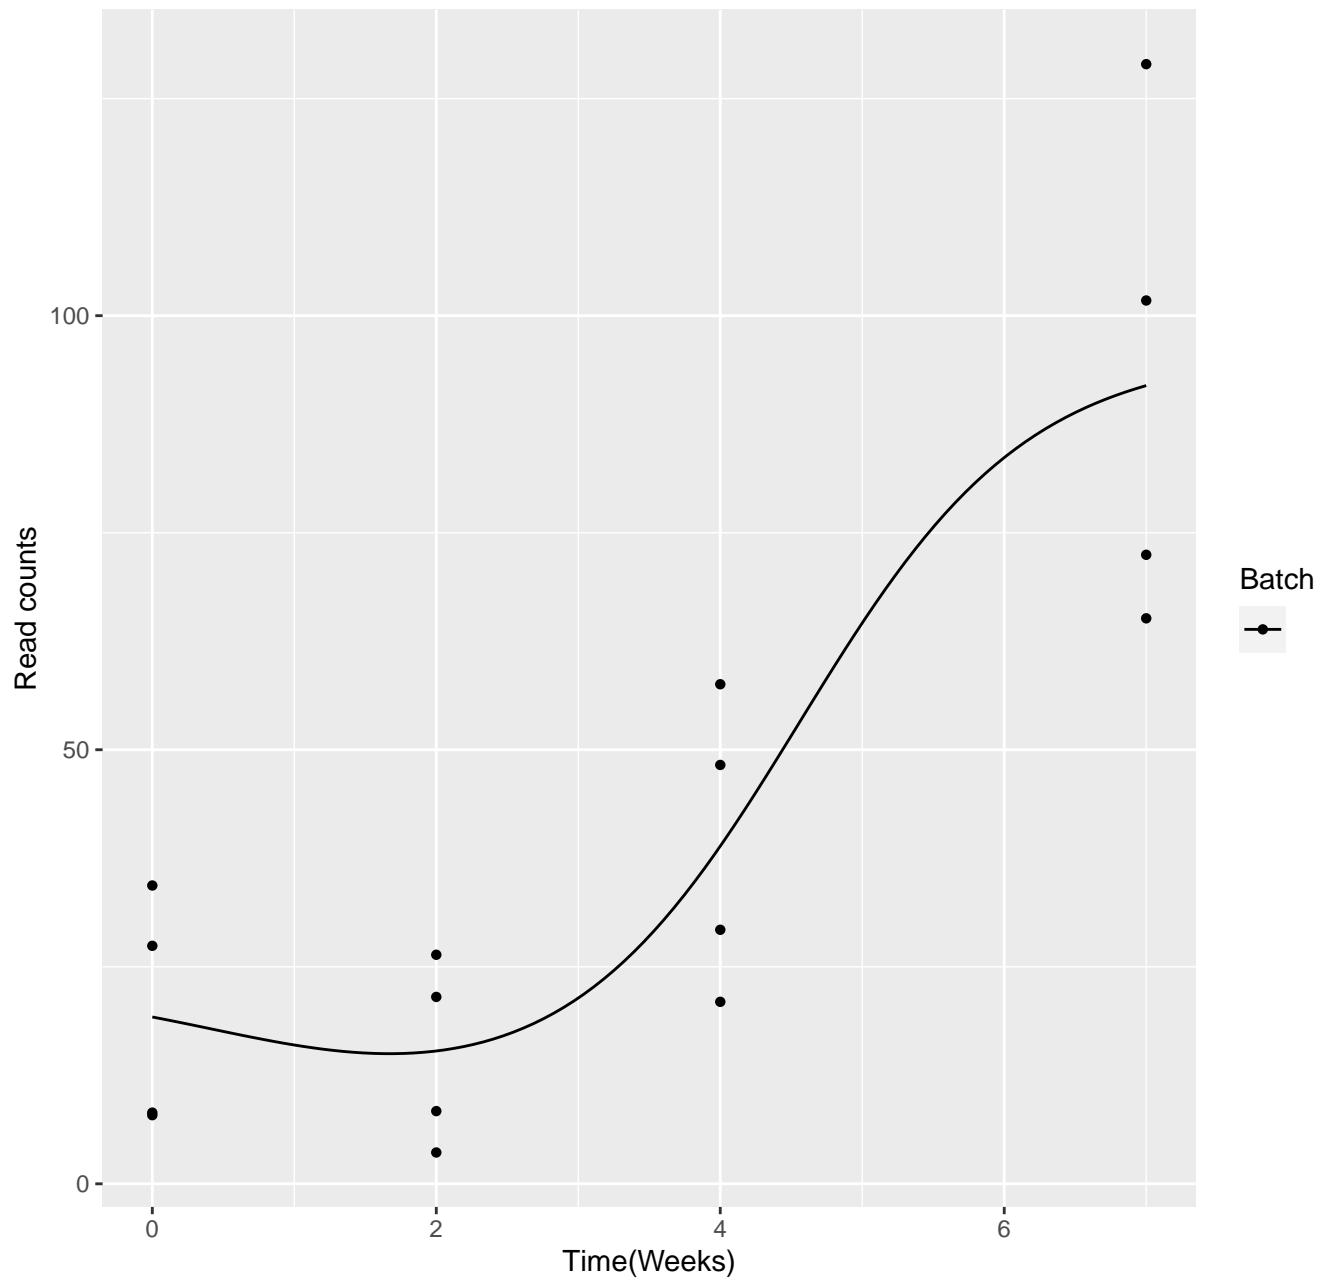

ITGB7:  $\log_{10} q = -3.11$

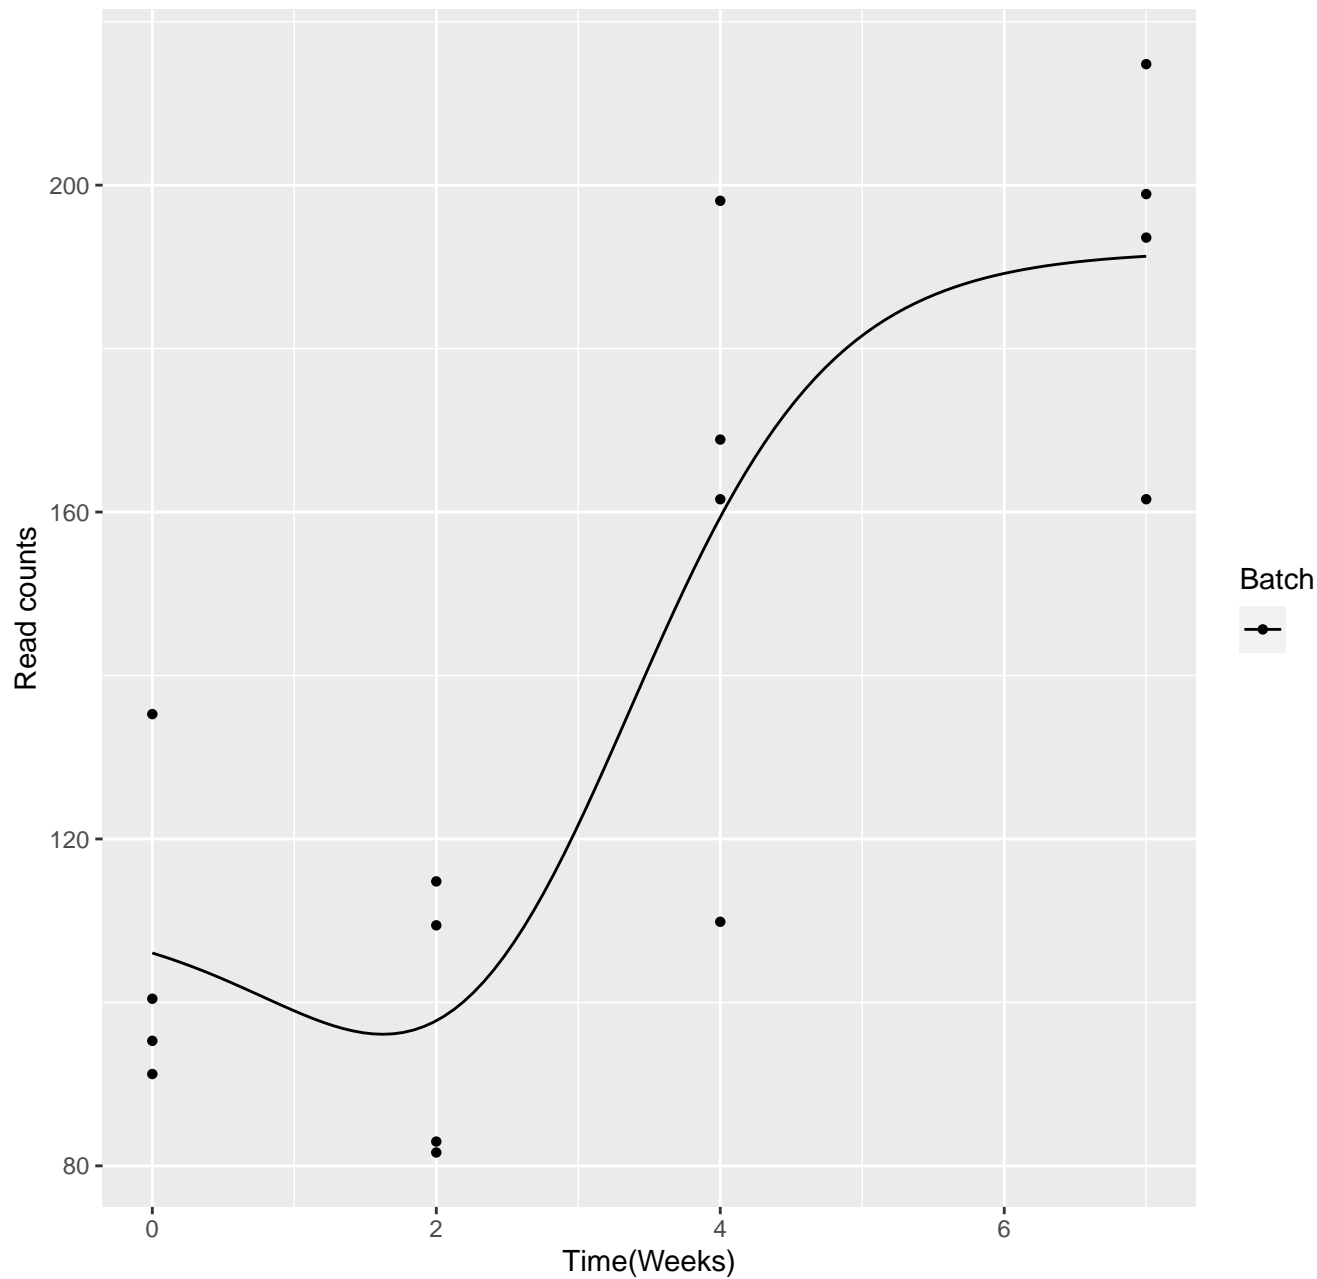



MTUS2:  $\log_{10} q = -3.1$

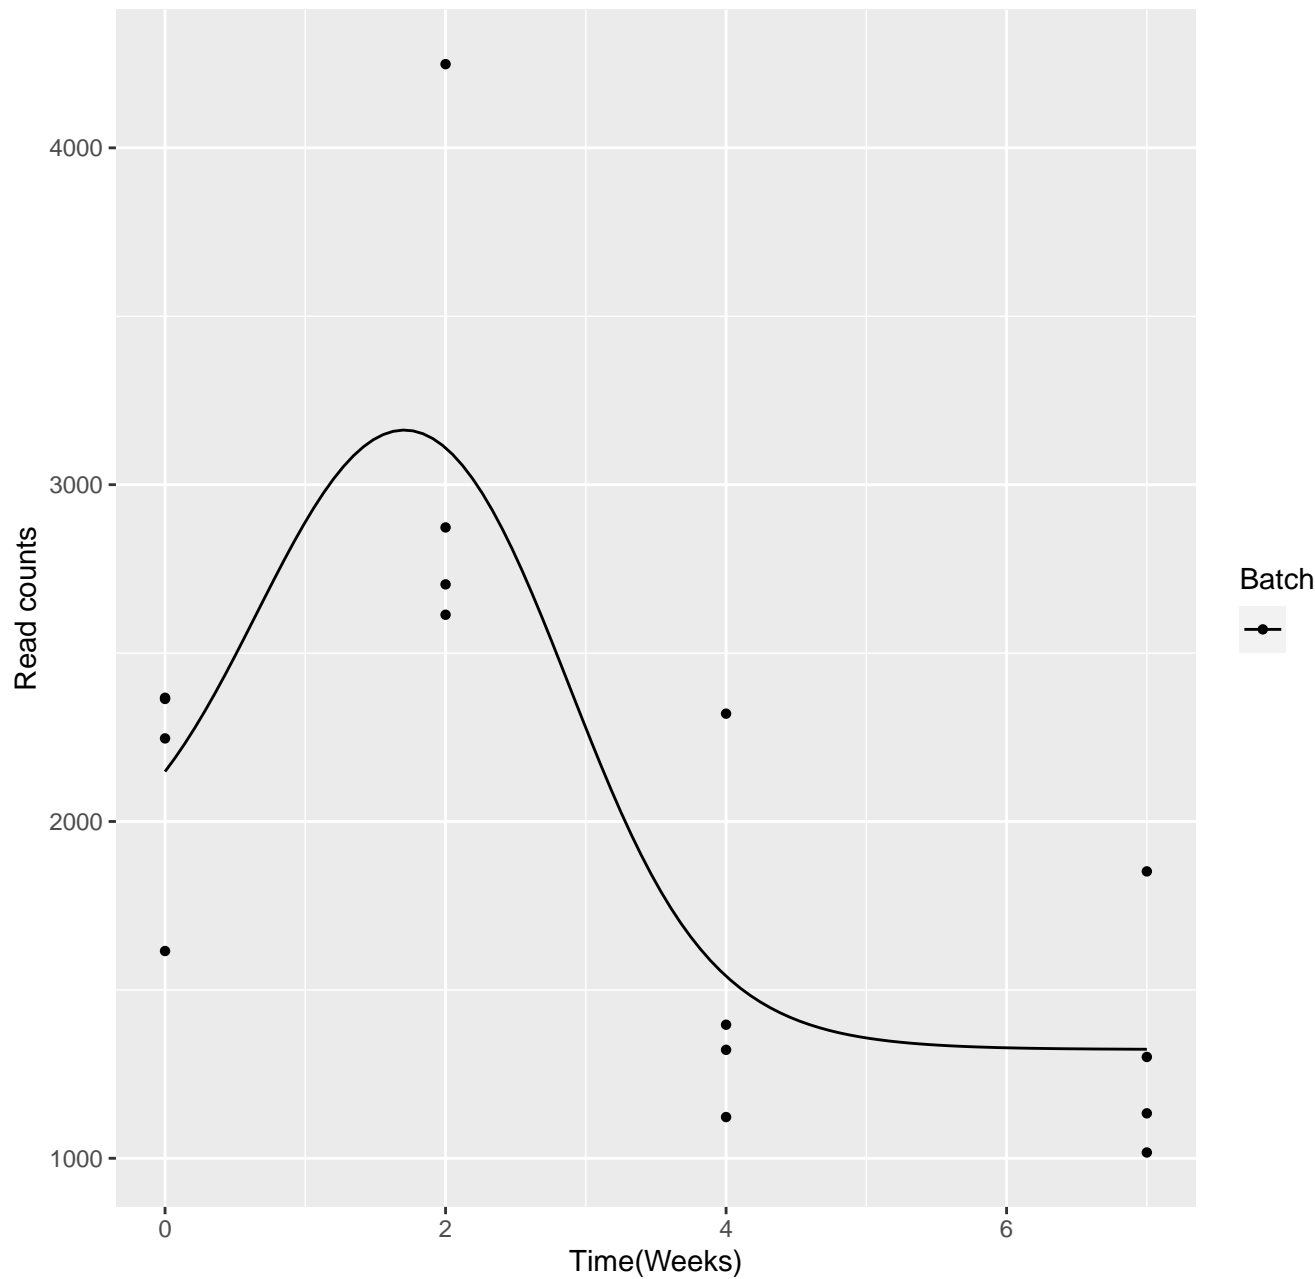

TRAF3IP3:  $\log_{10} q = -3.1$

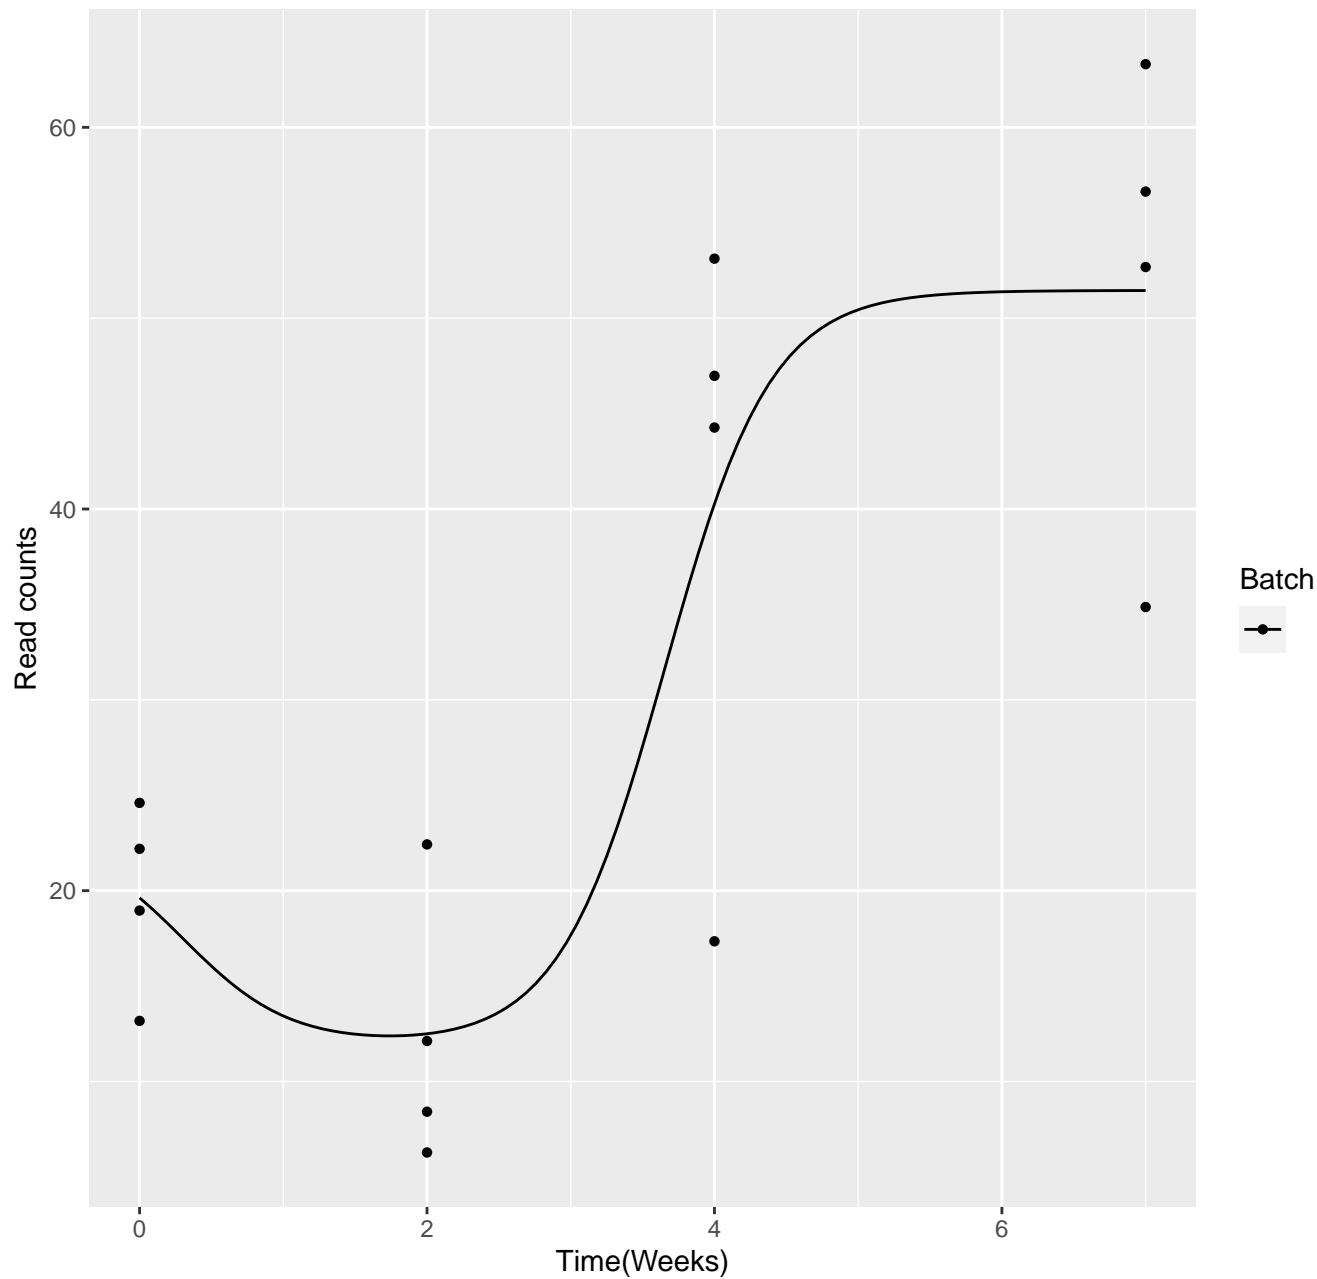

FOSL1:  $\log_{10} q = -3.1$

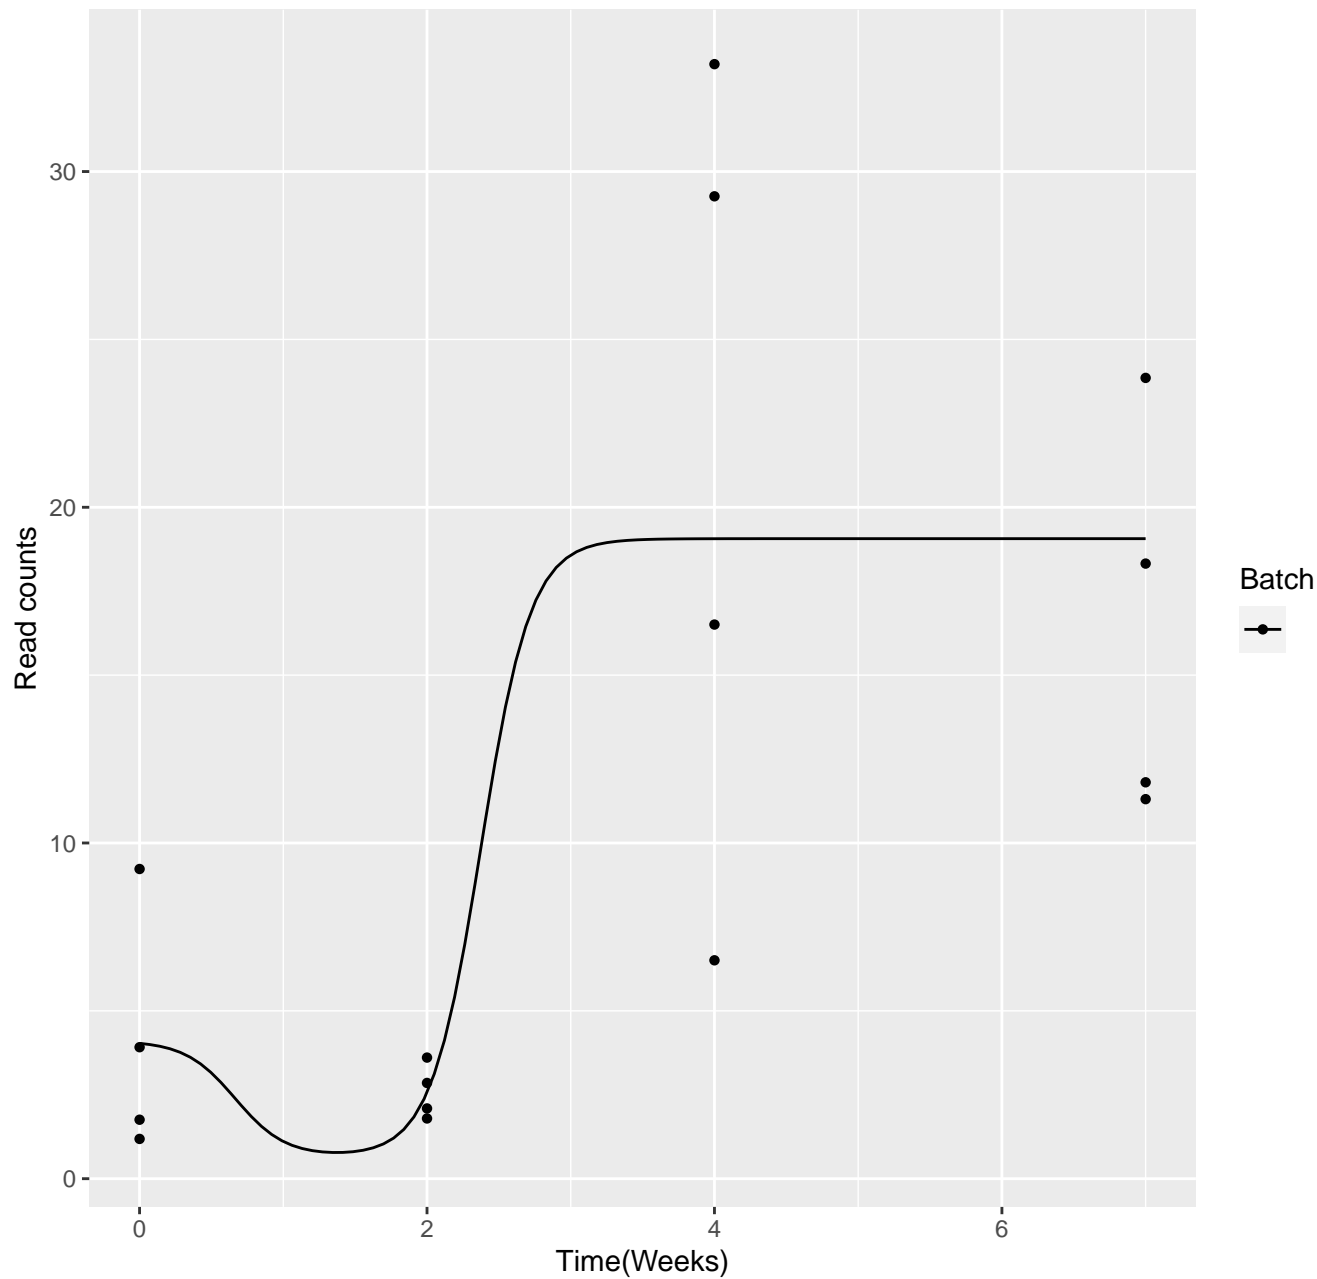

ICAM1:  $\log_{10} q = -3.1$

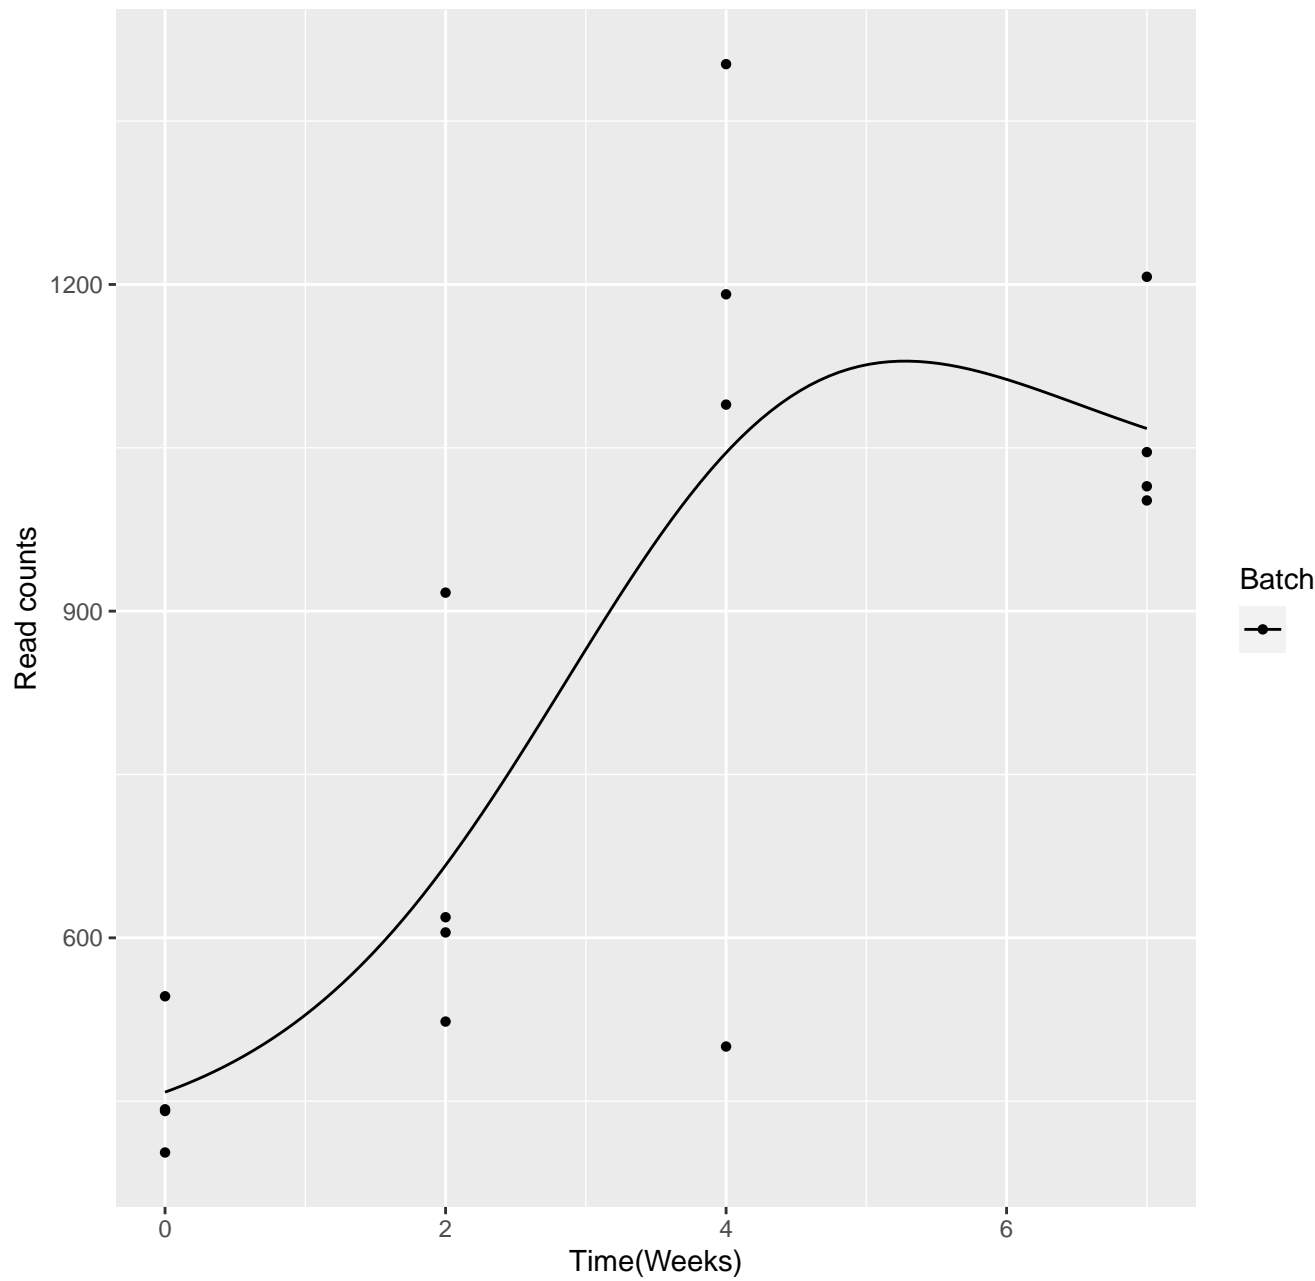

LRP5:  $\log_{10} q = -3.09$

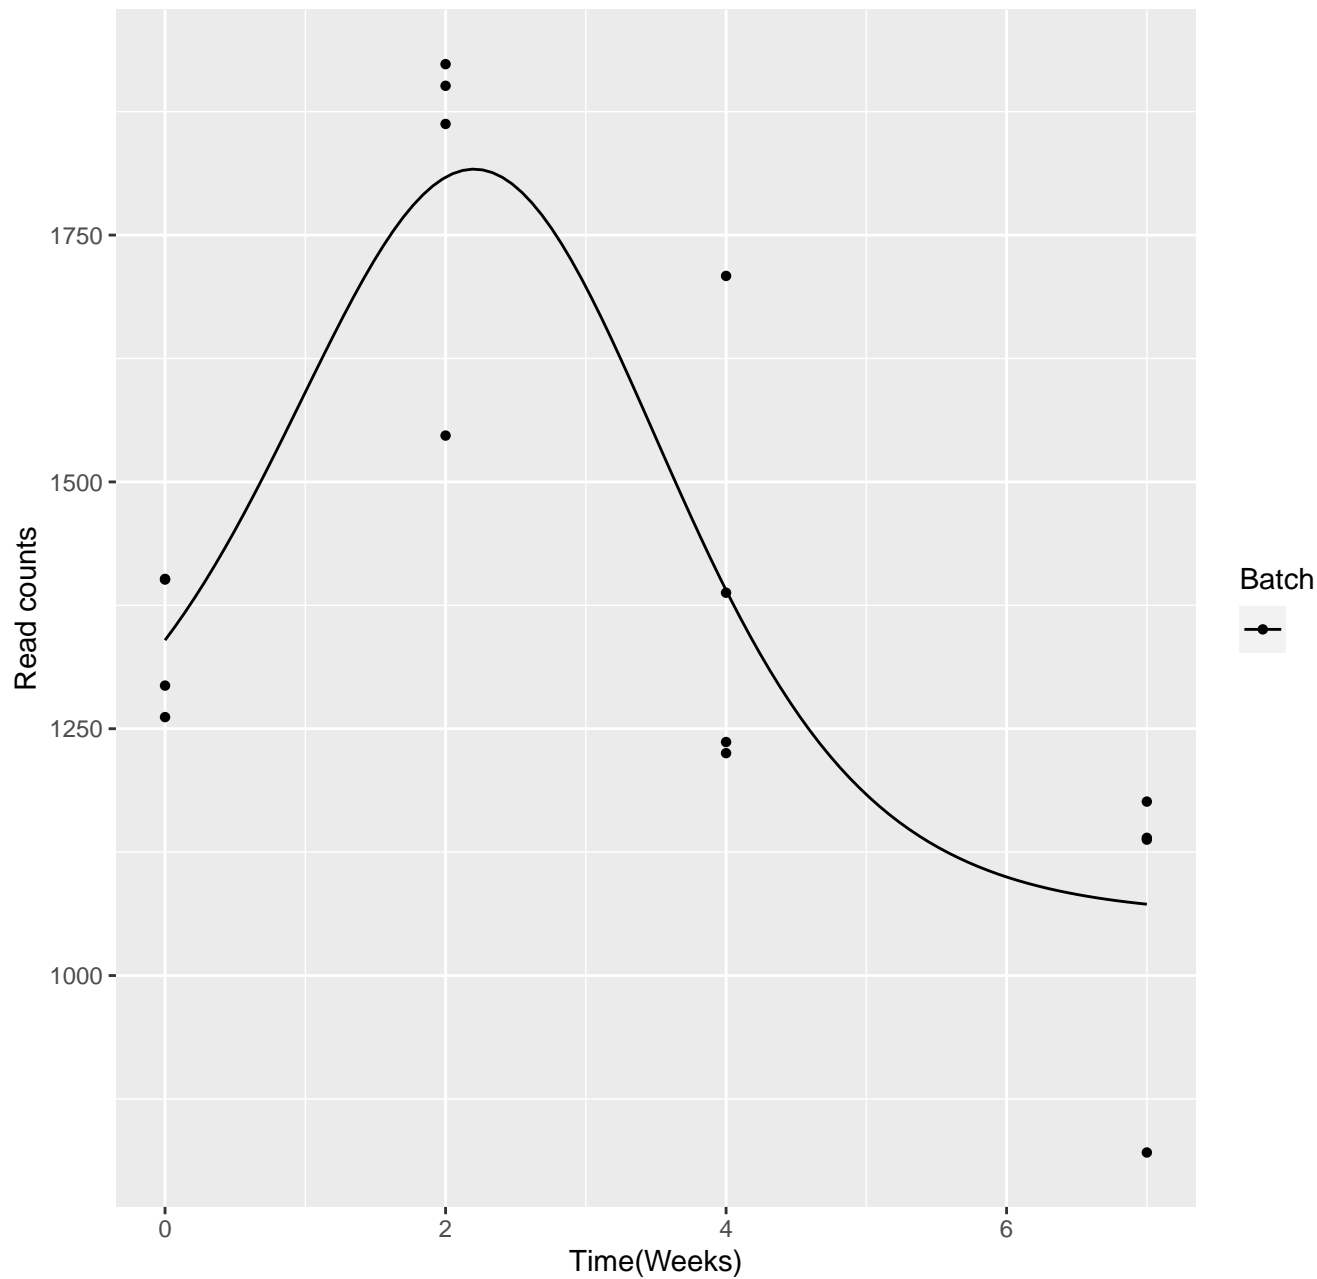

OSR2:  $\log_{10} q = -3.09$

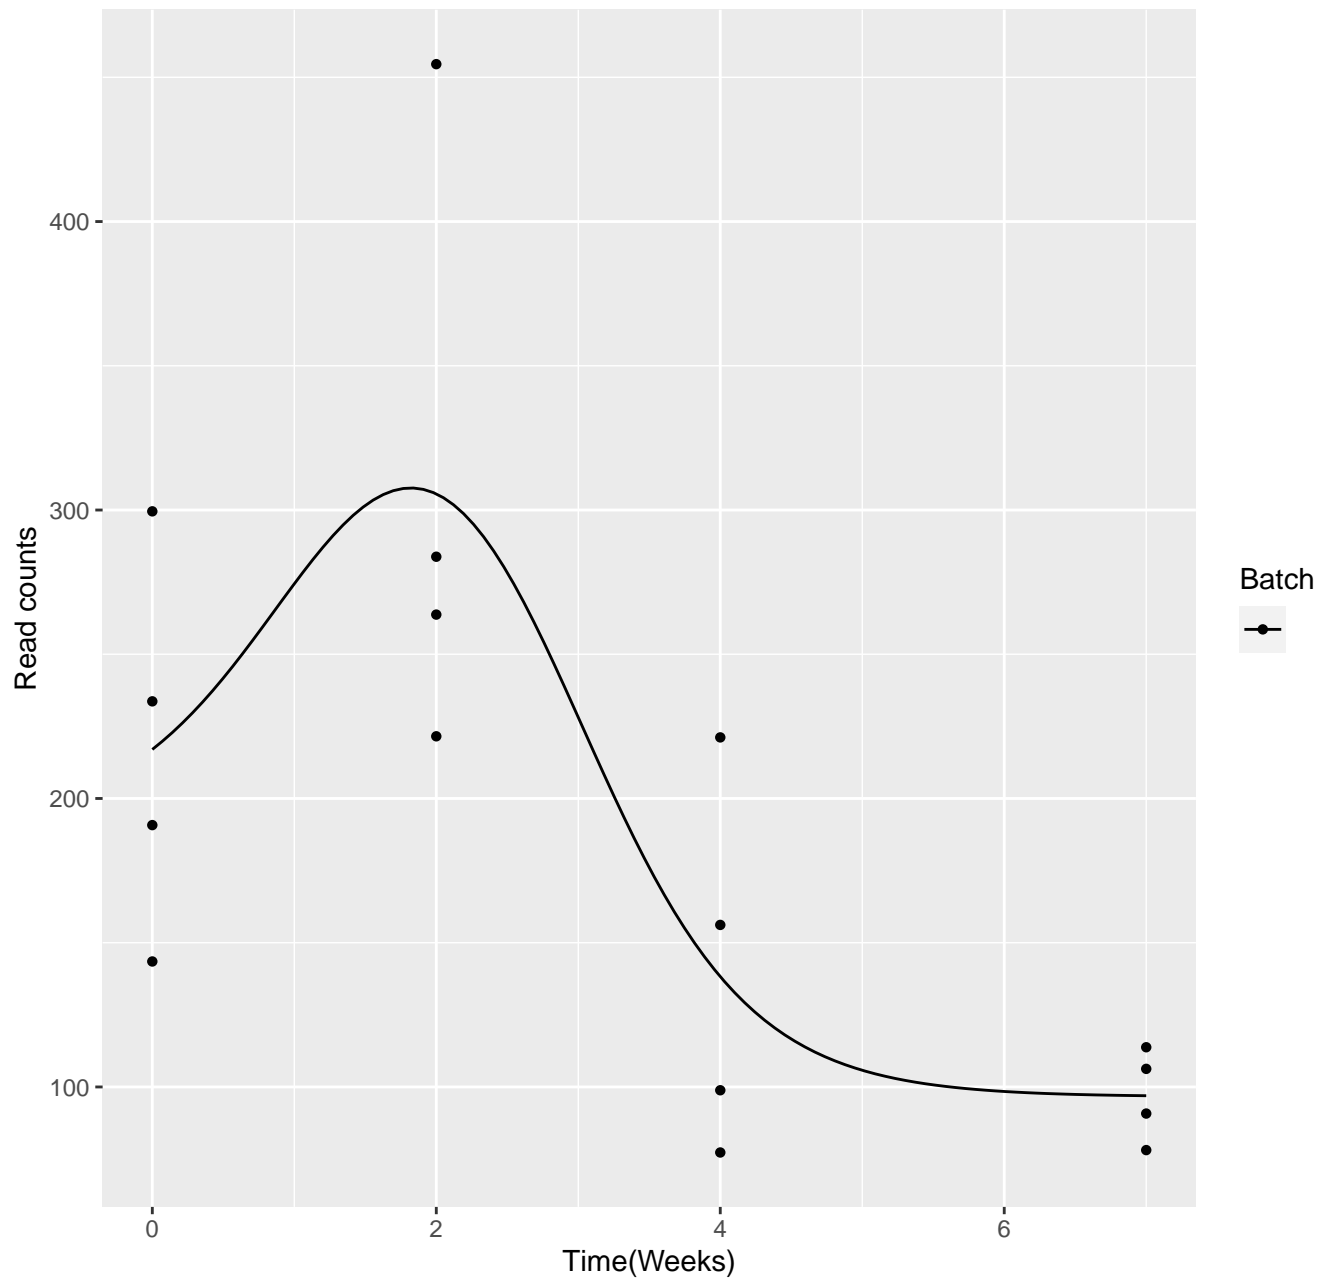

CREM:  $\log_{10} q = -3.09$

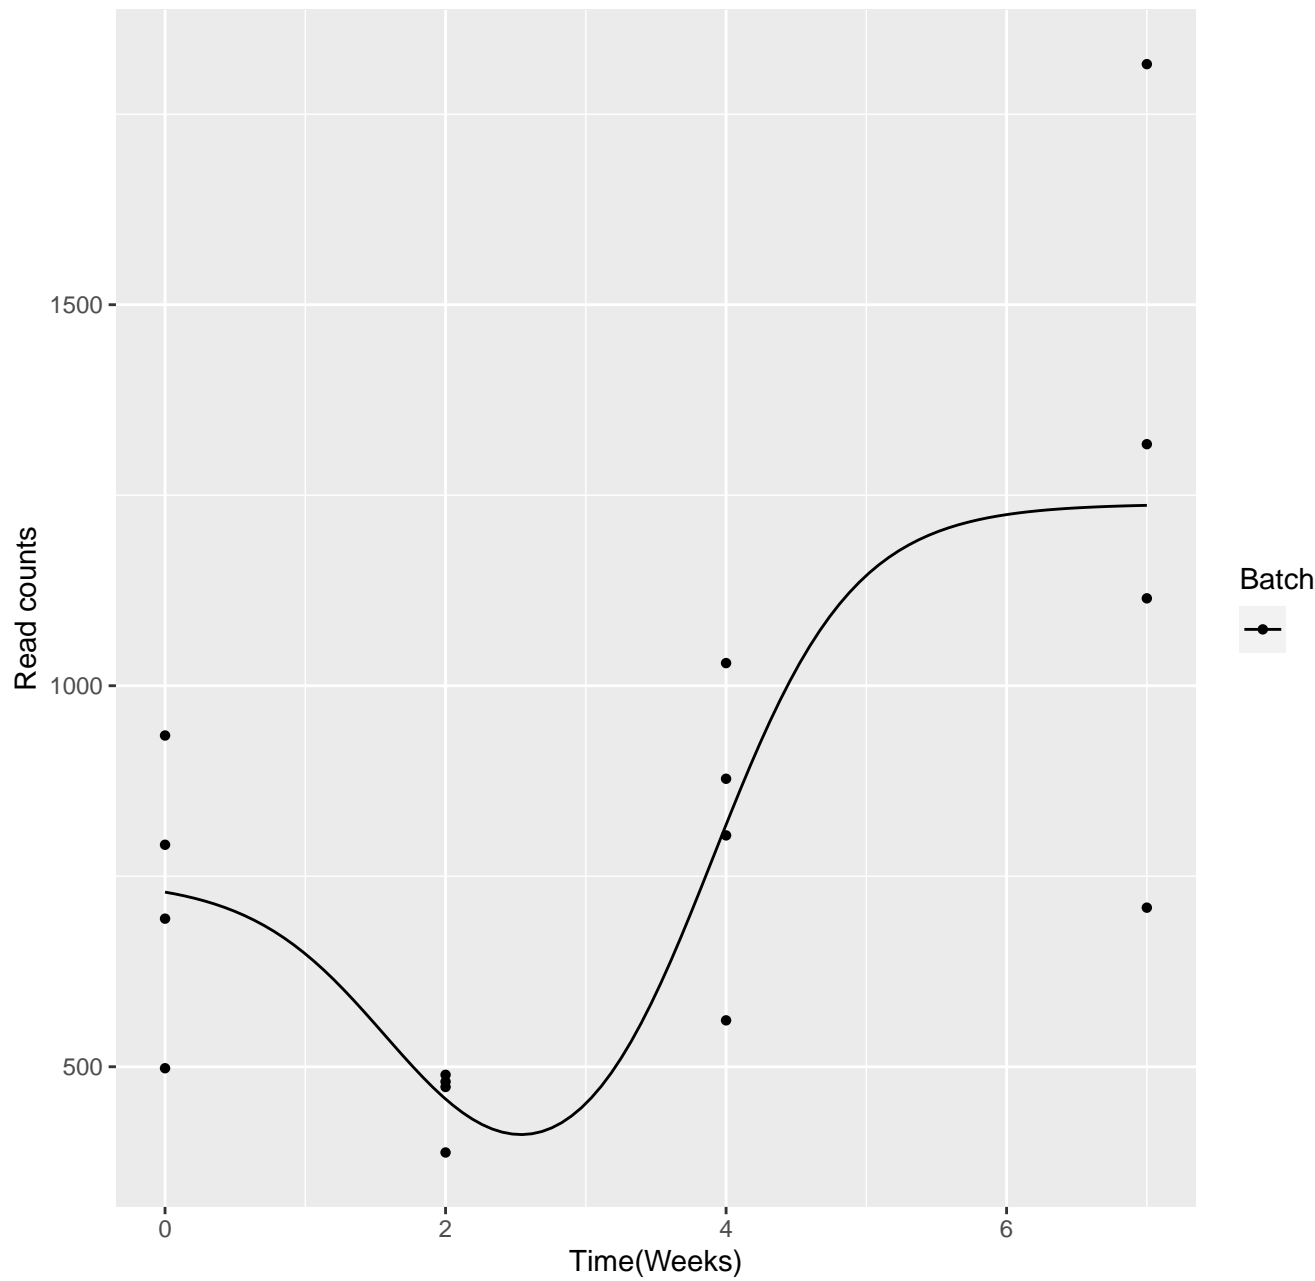

VCL:  $\log_{10} q = -3.09$

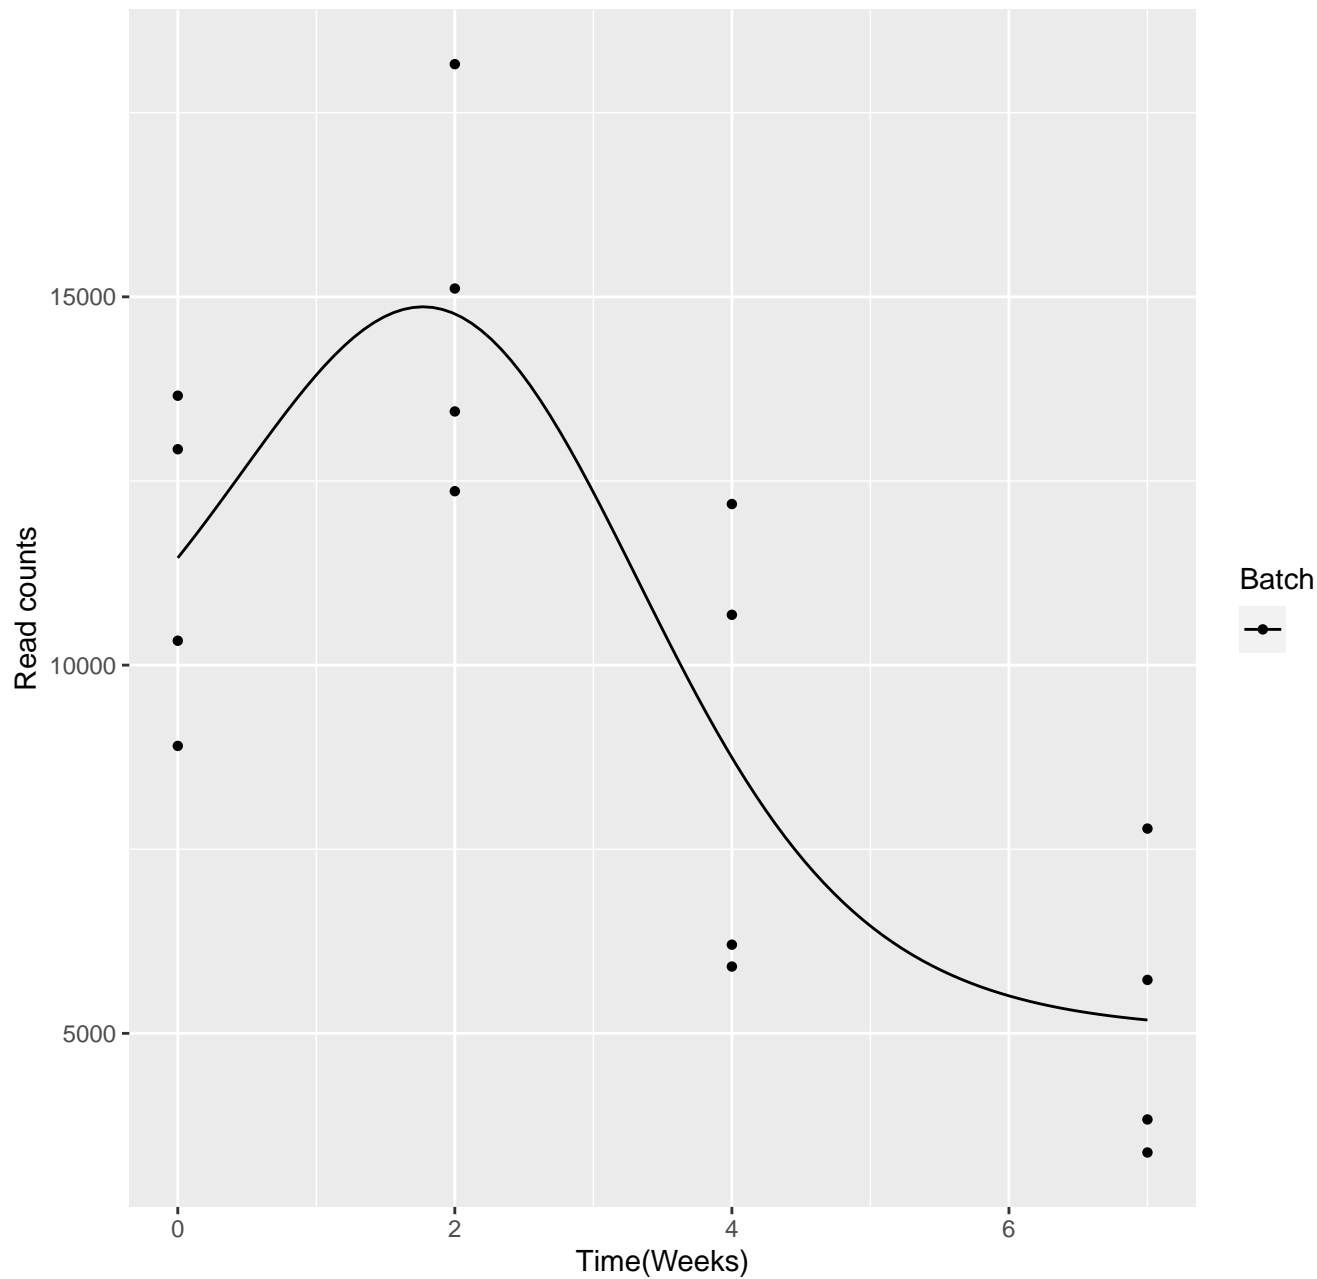



ITGB8:  $\log_{10} q = -3.09$

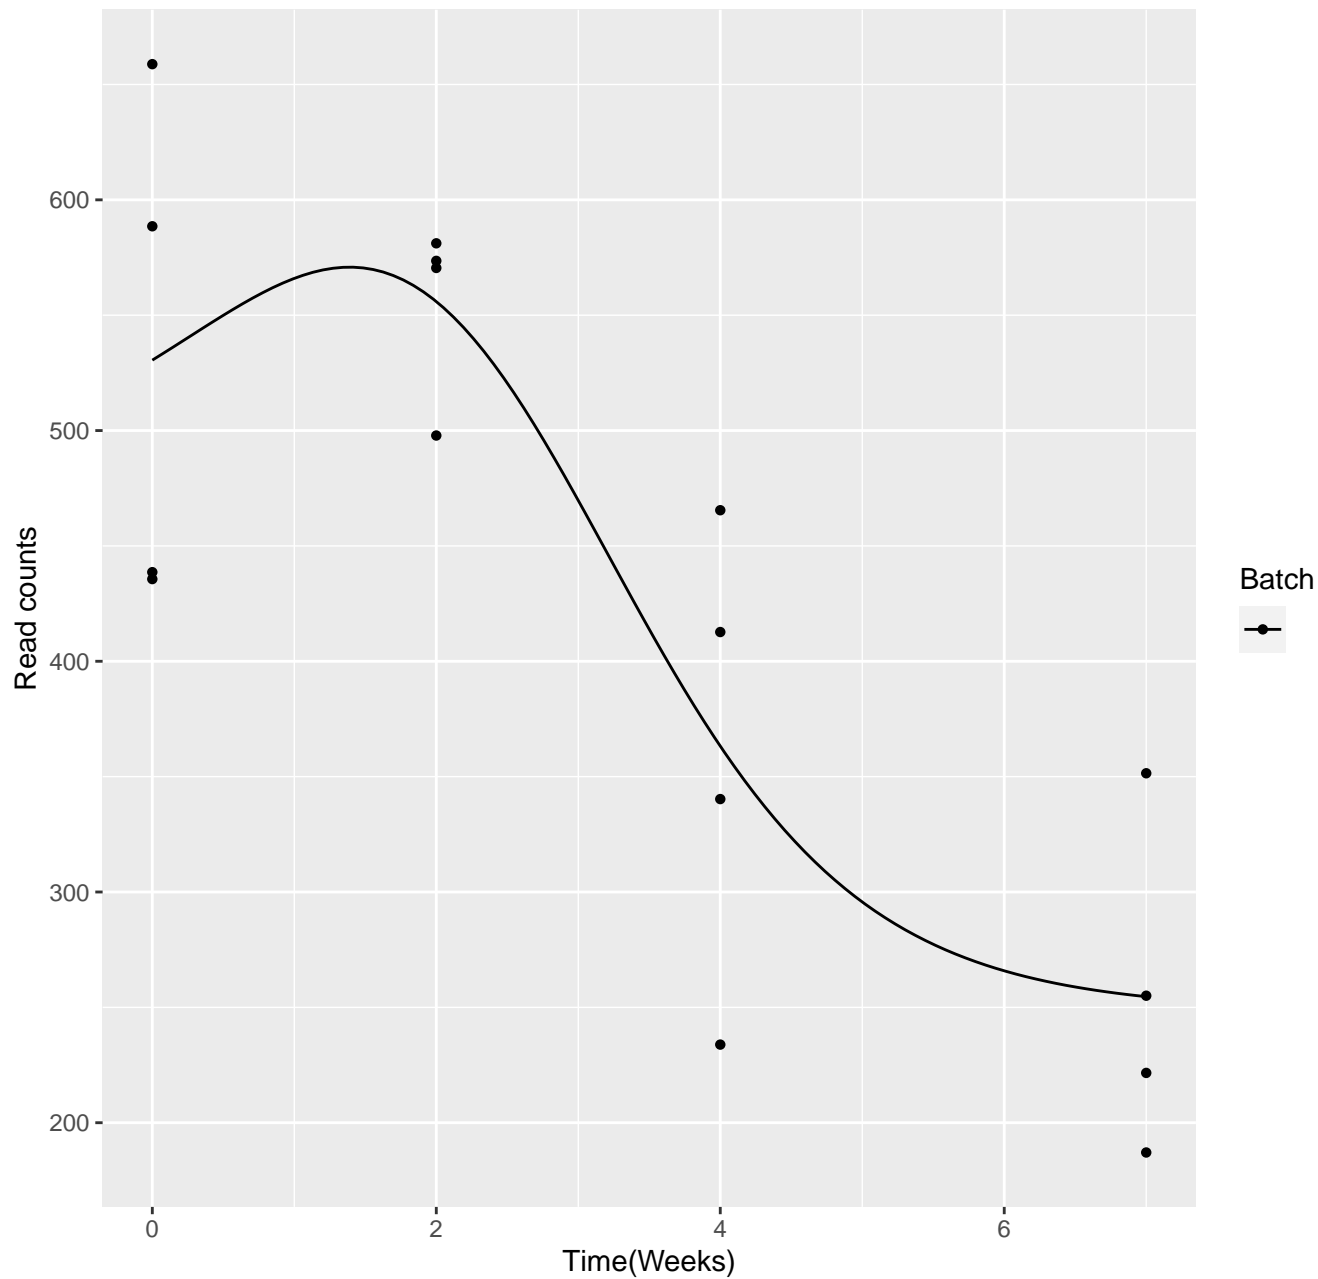

PTCHD1:  $\log_{10} q = -3.09$

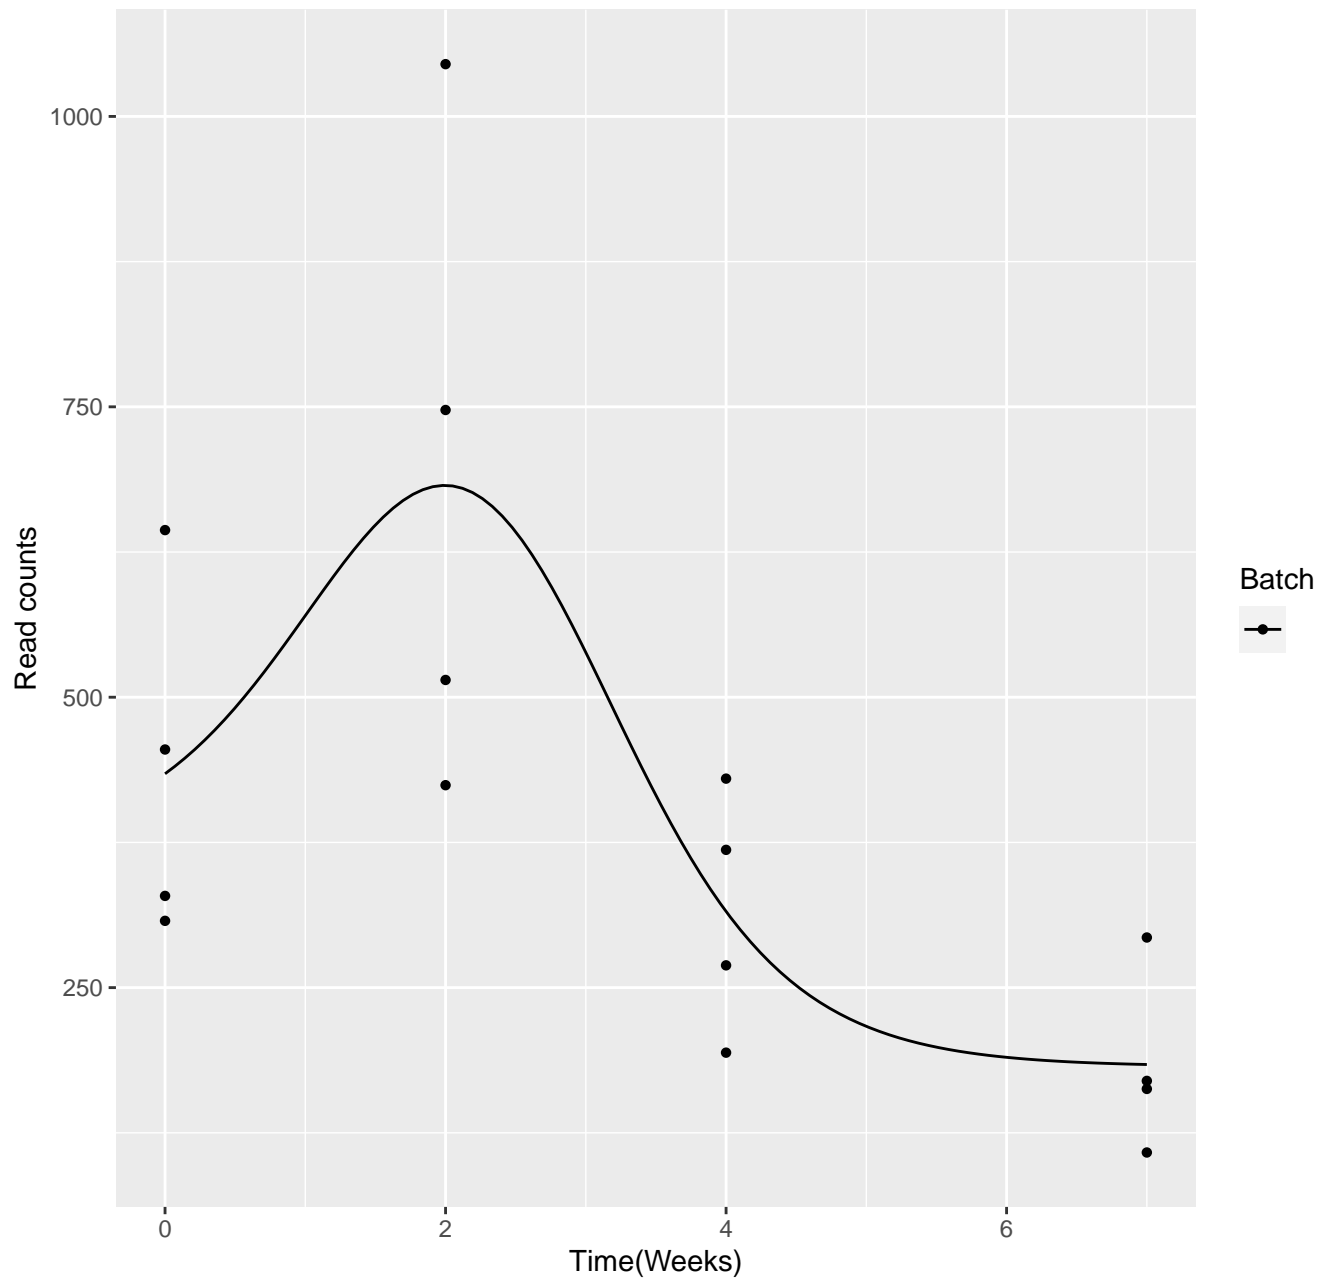

JCHAIN:  $\log_{10} q = -3.09$

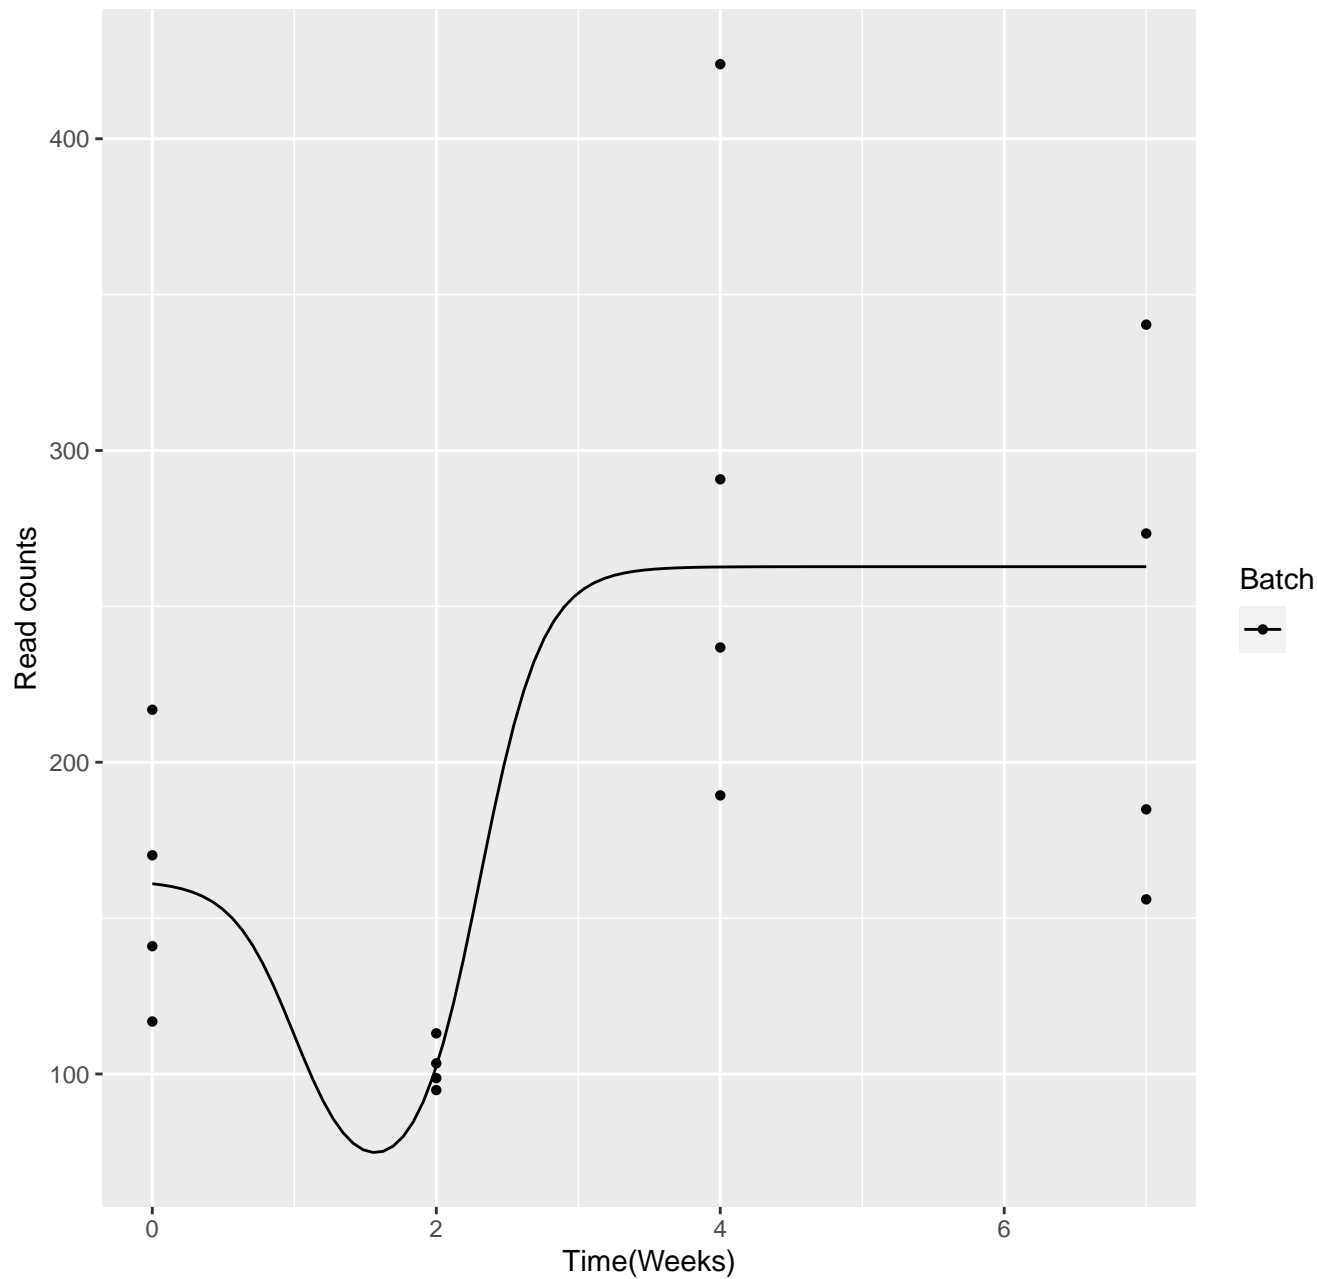

LOC127482561:  $\log_{10} q = -3.08$

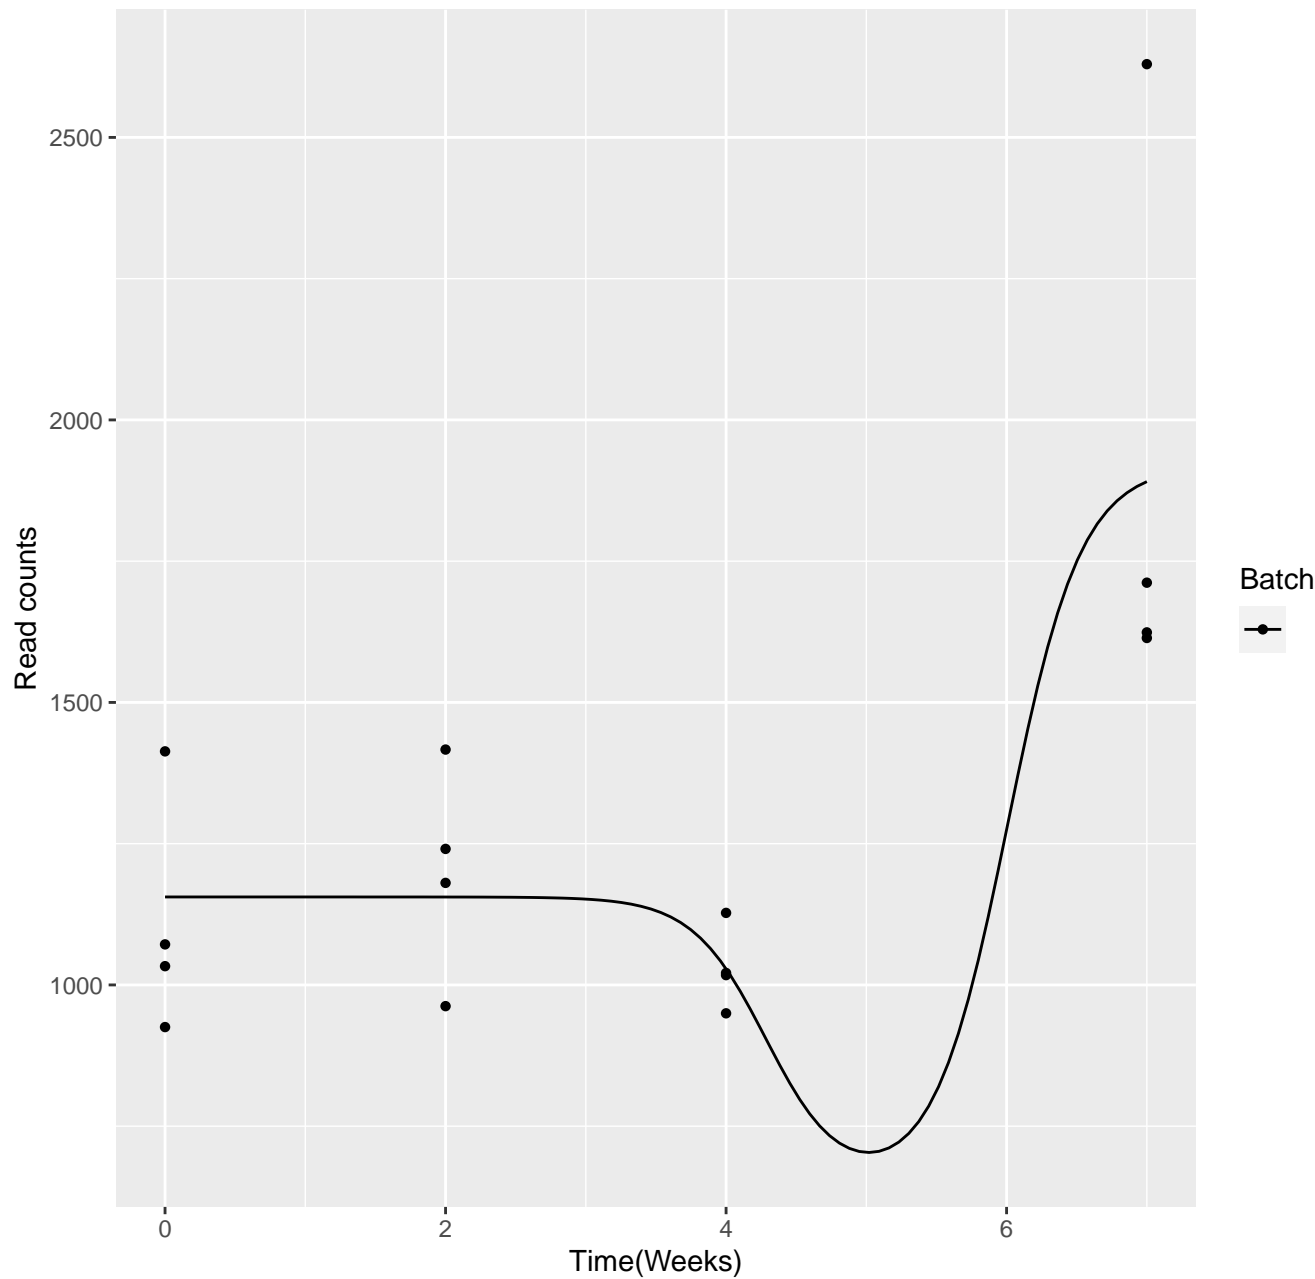

NOD1:  $\log_{10} q = -3.07$

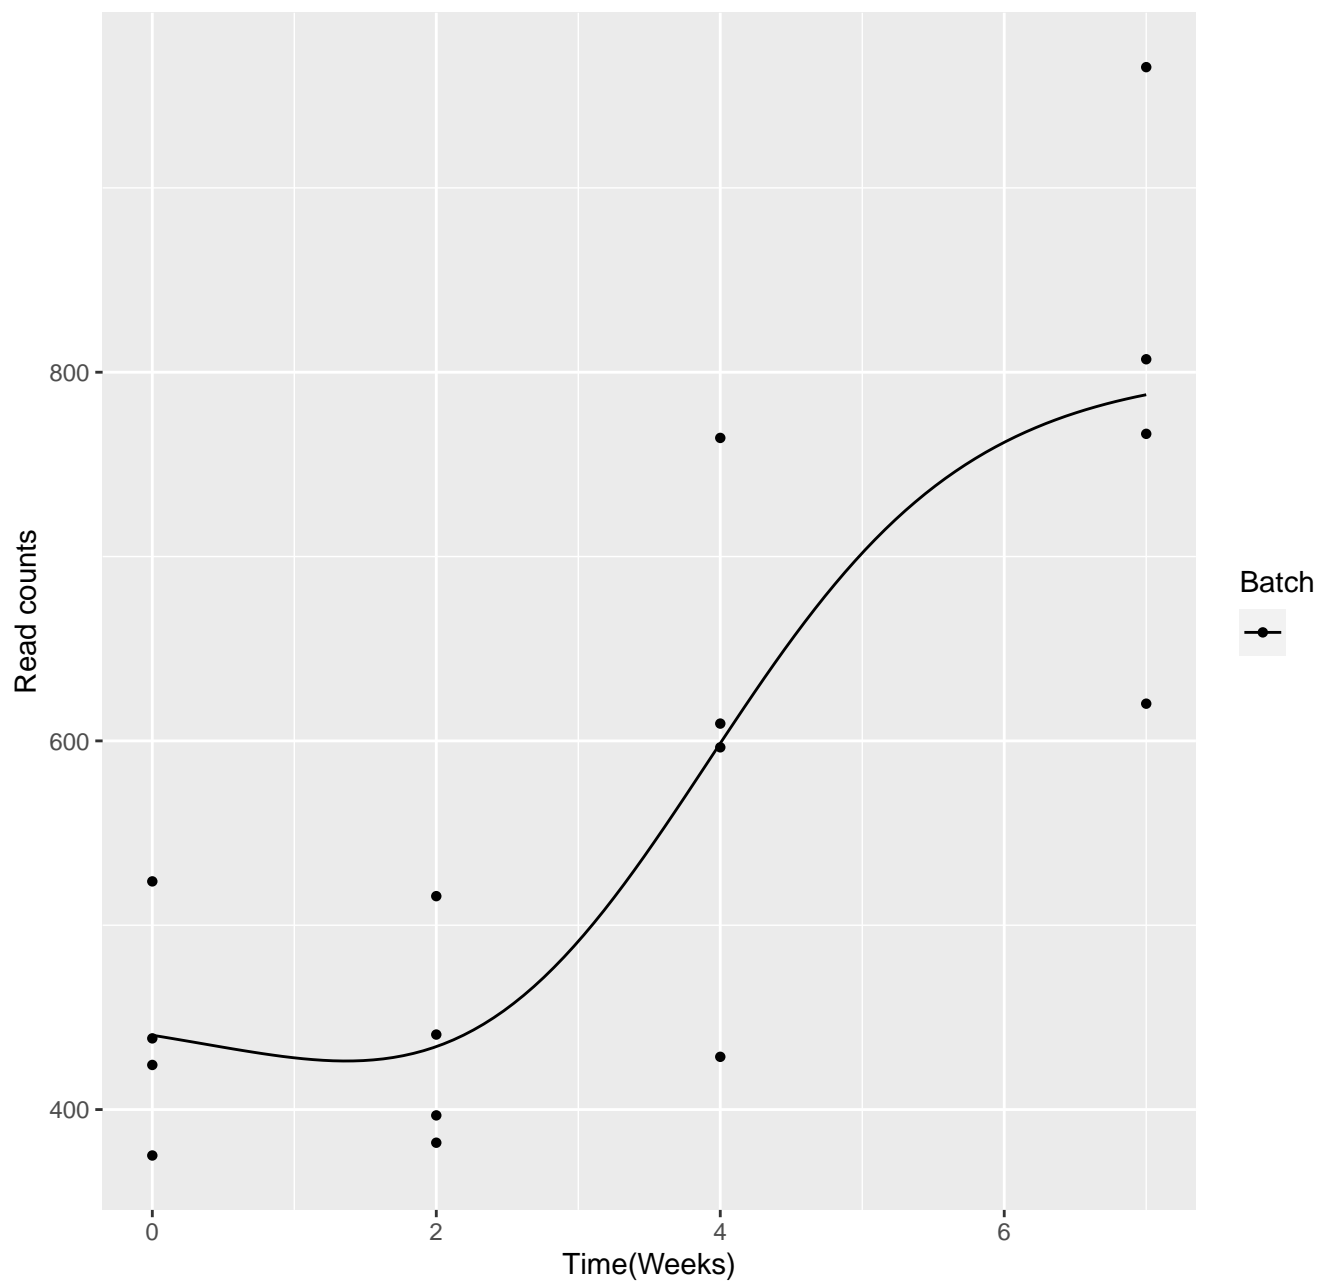

SHMT2:  $\log_{10} q = -3.07$

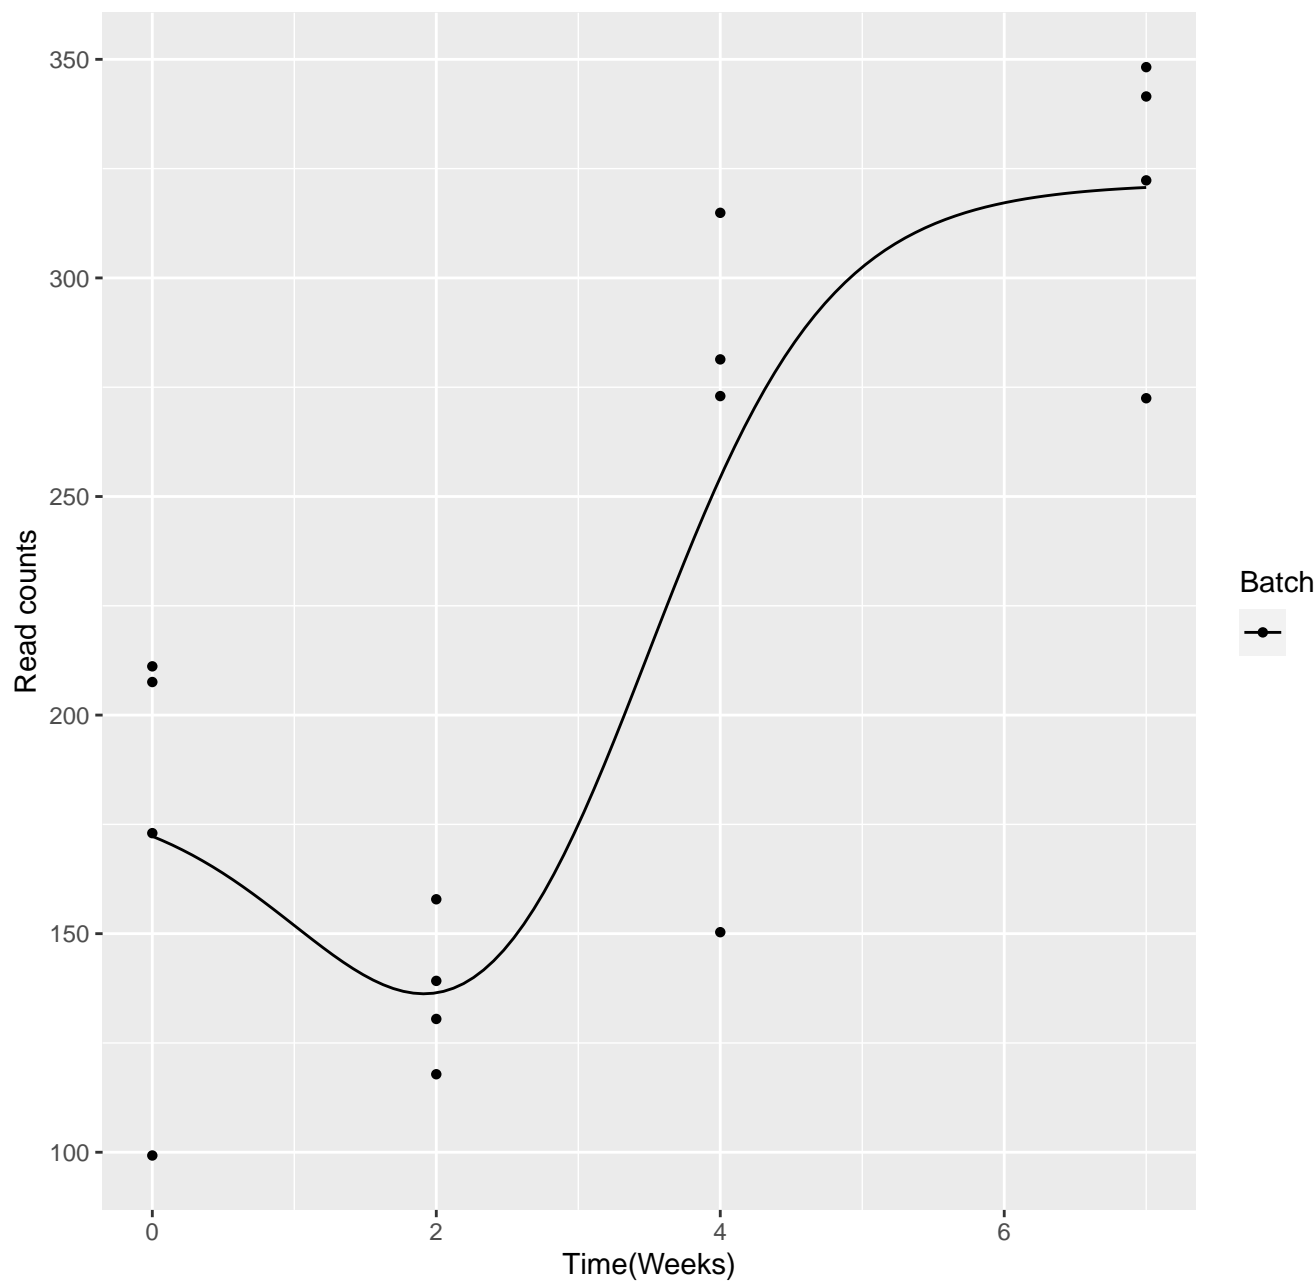

IGFBP3:  $\log_{10} q = -3.07$

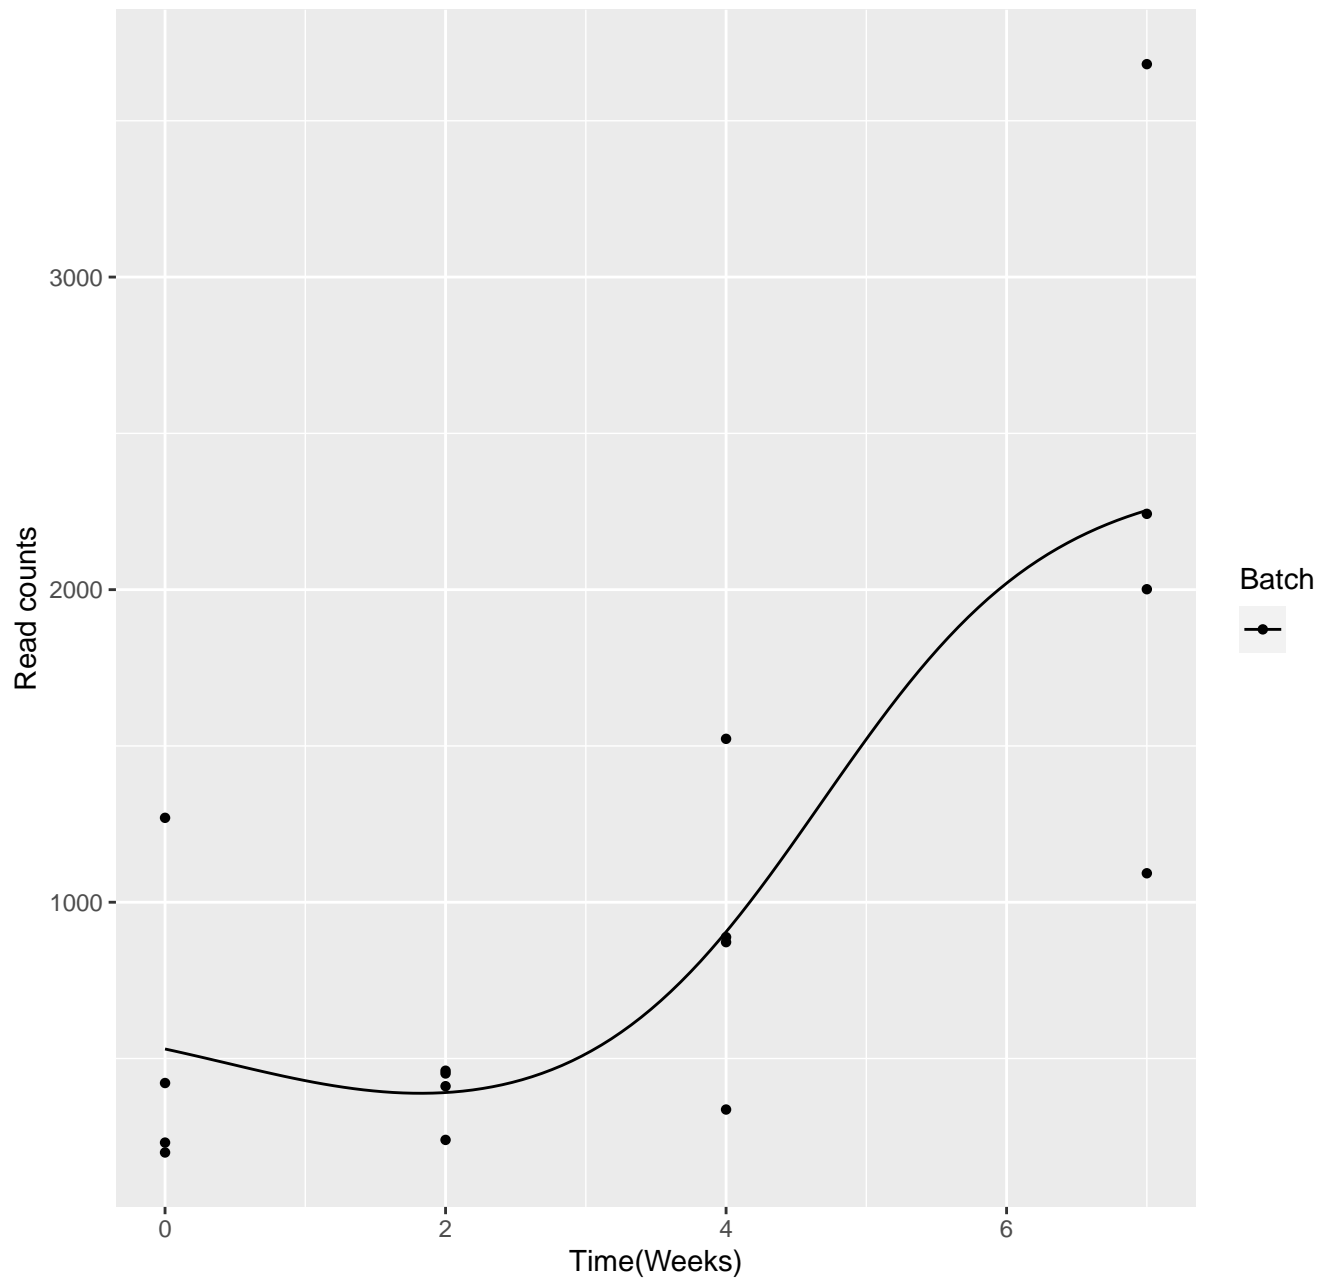

CLIC2:  $\log_{10} q = -3.07$

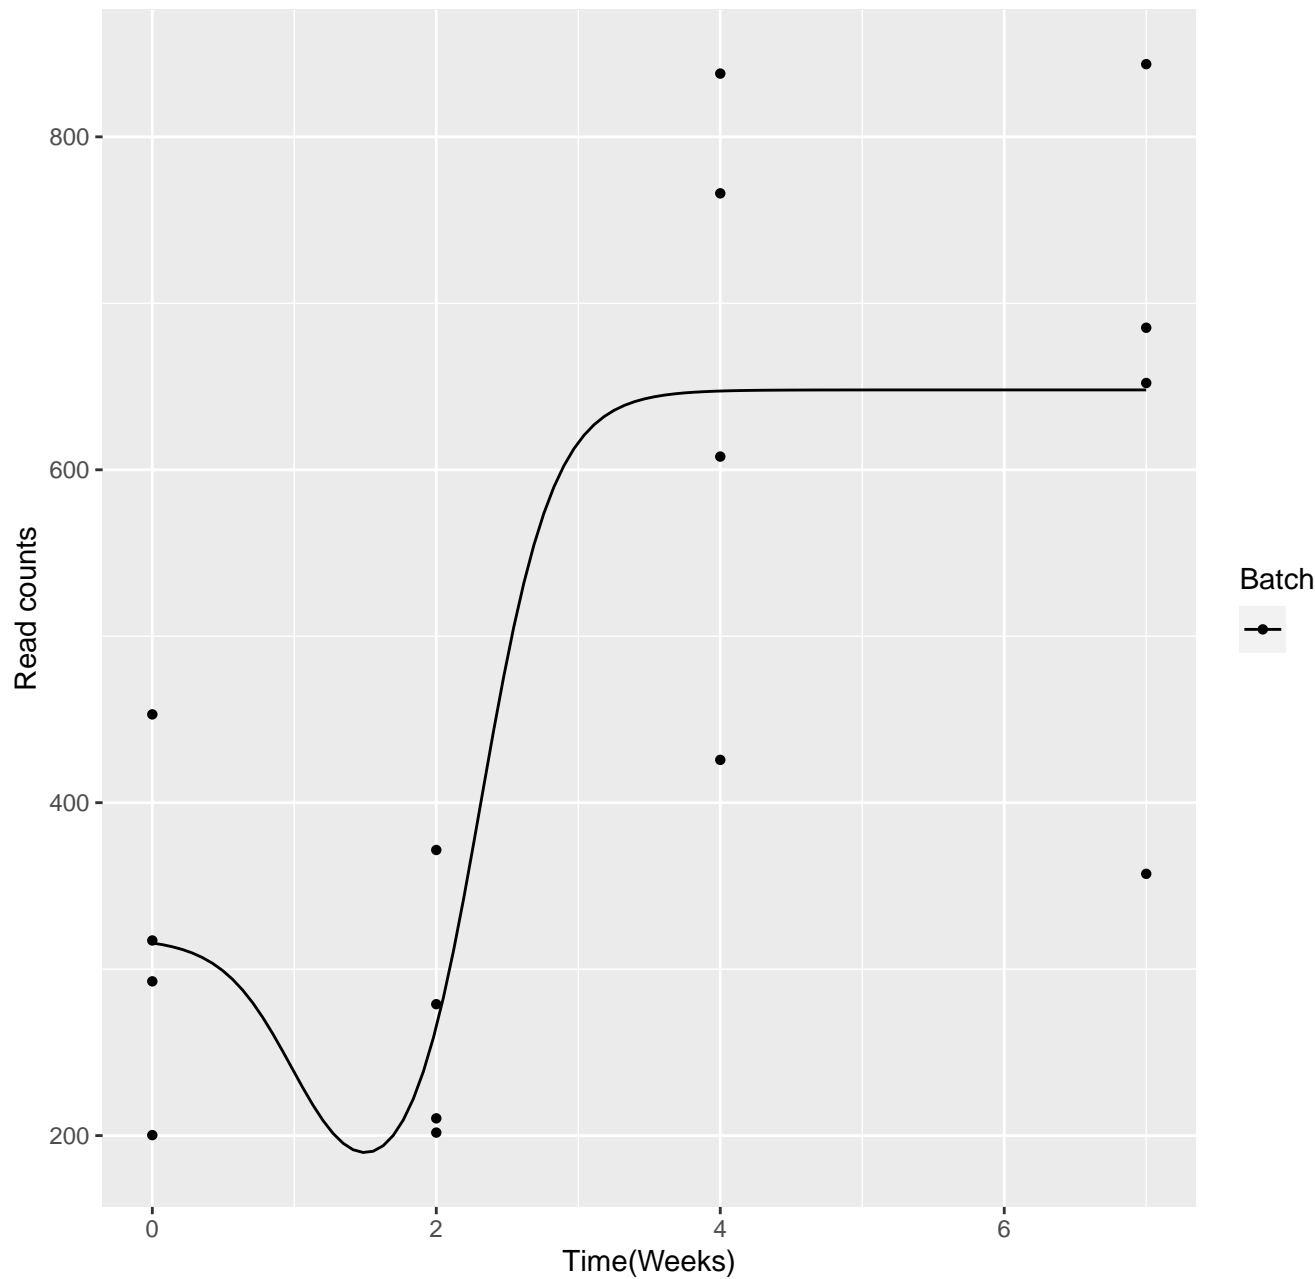



MANSC1:  $\log_{10} q = -3.07$

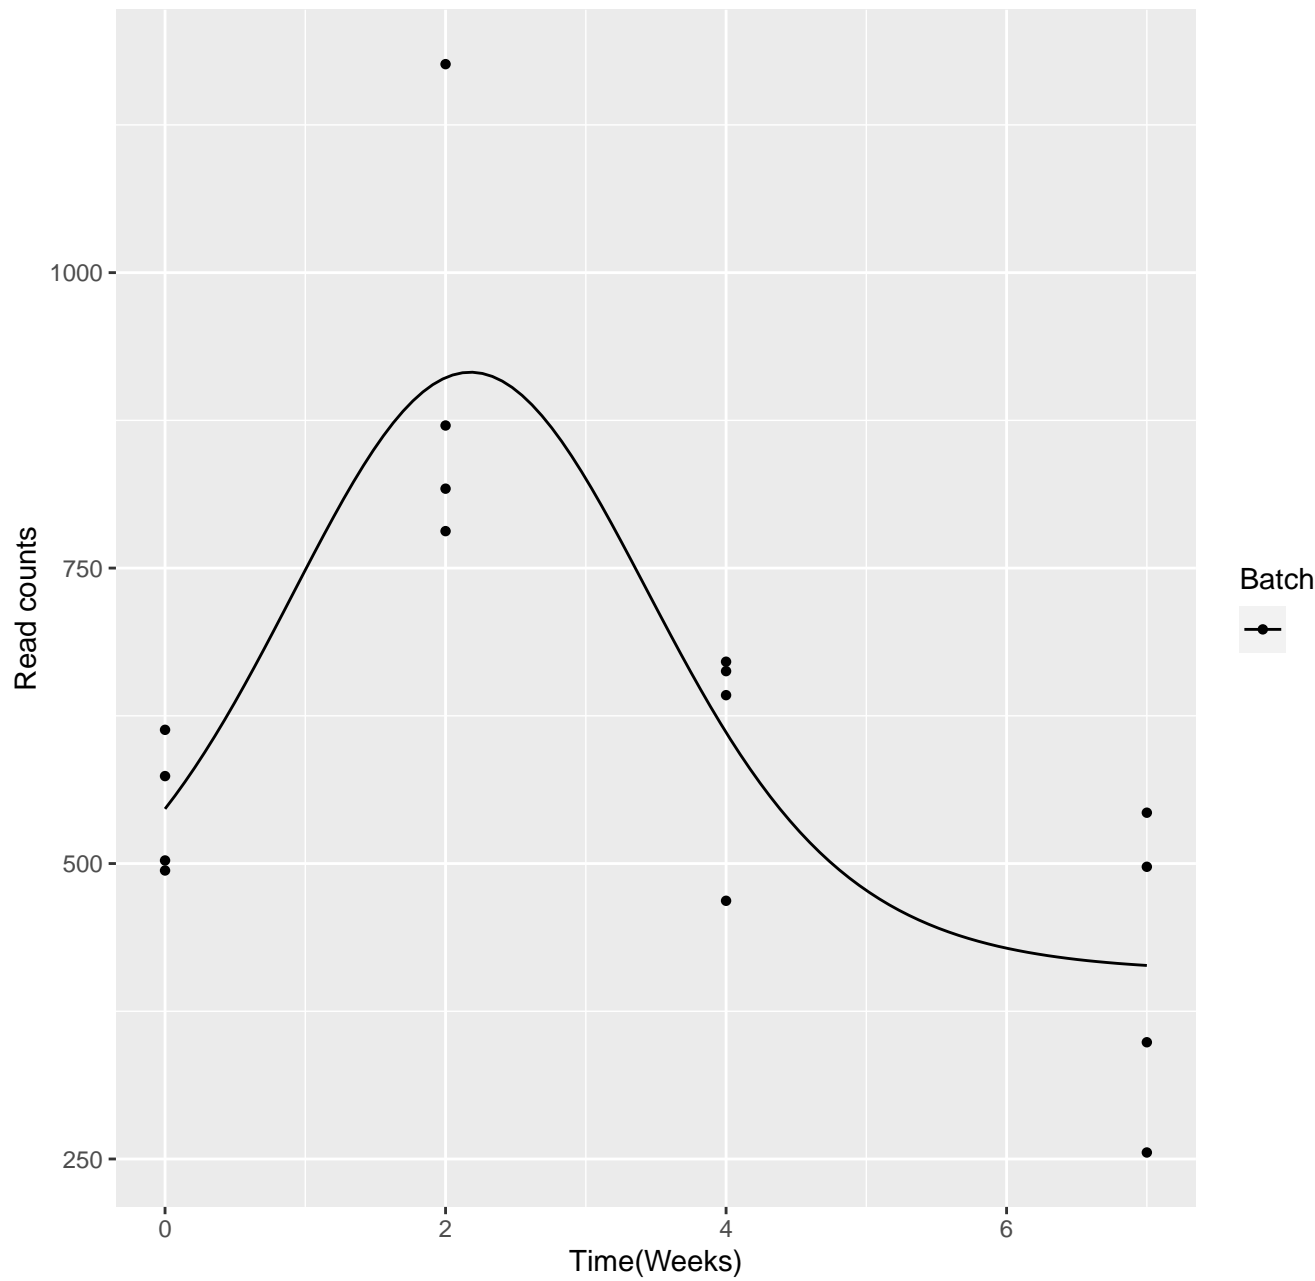

ZNF385D:  $\log_{10} q = -3.07$

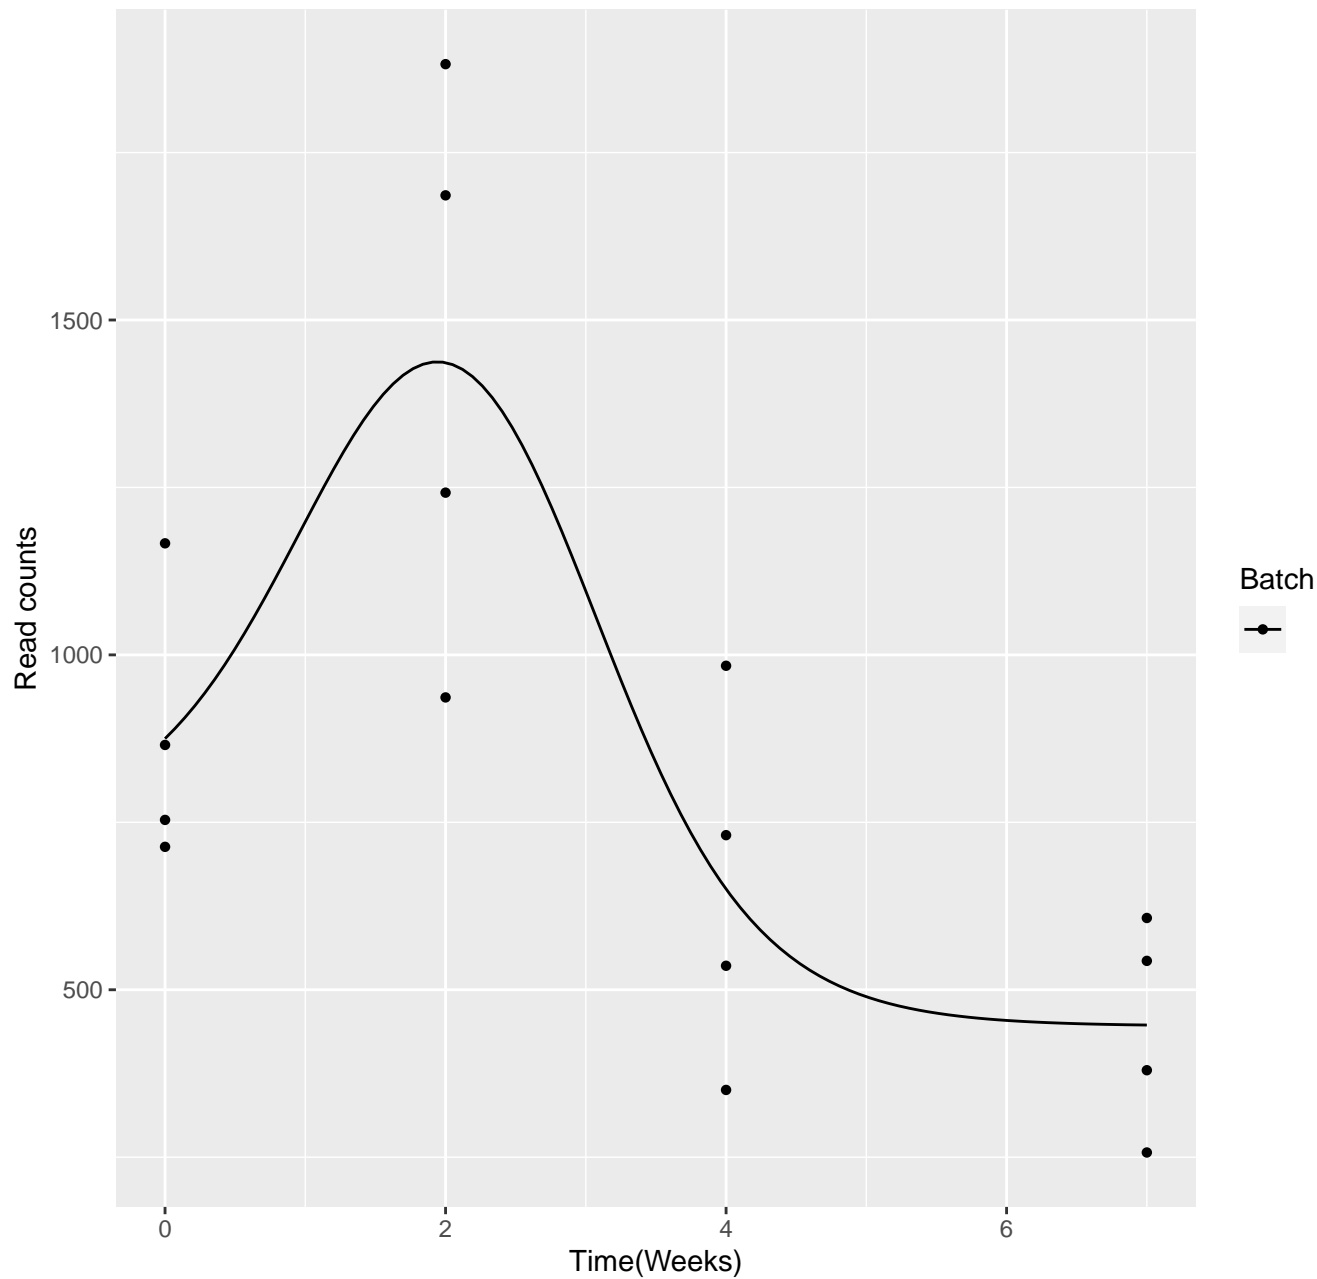

LOC100341926:  $\log_{10} q = -3.07$

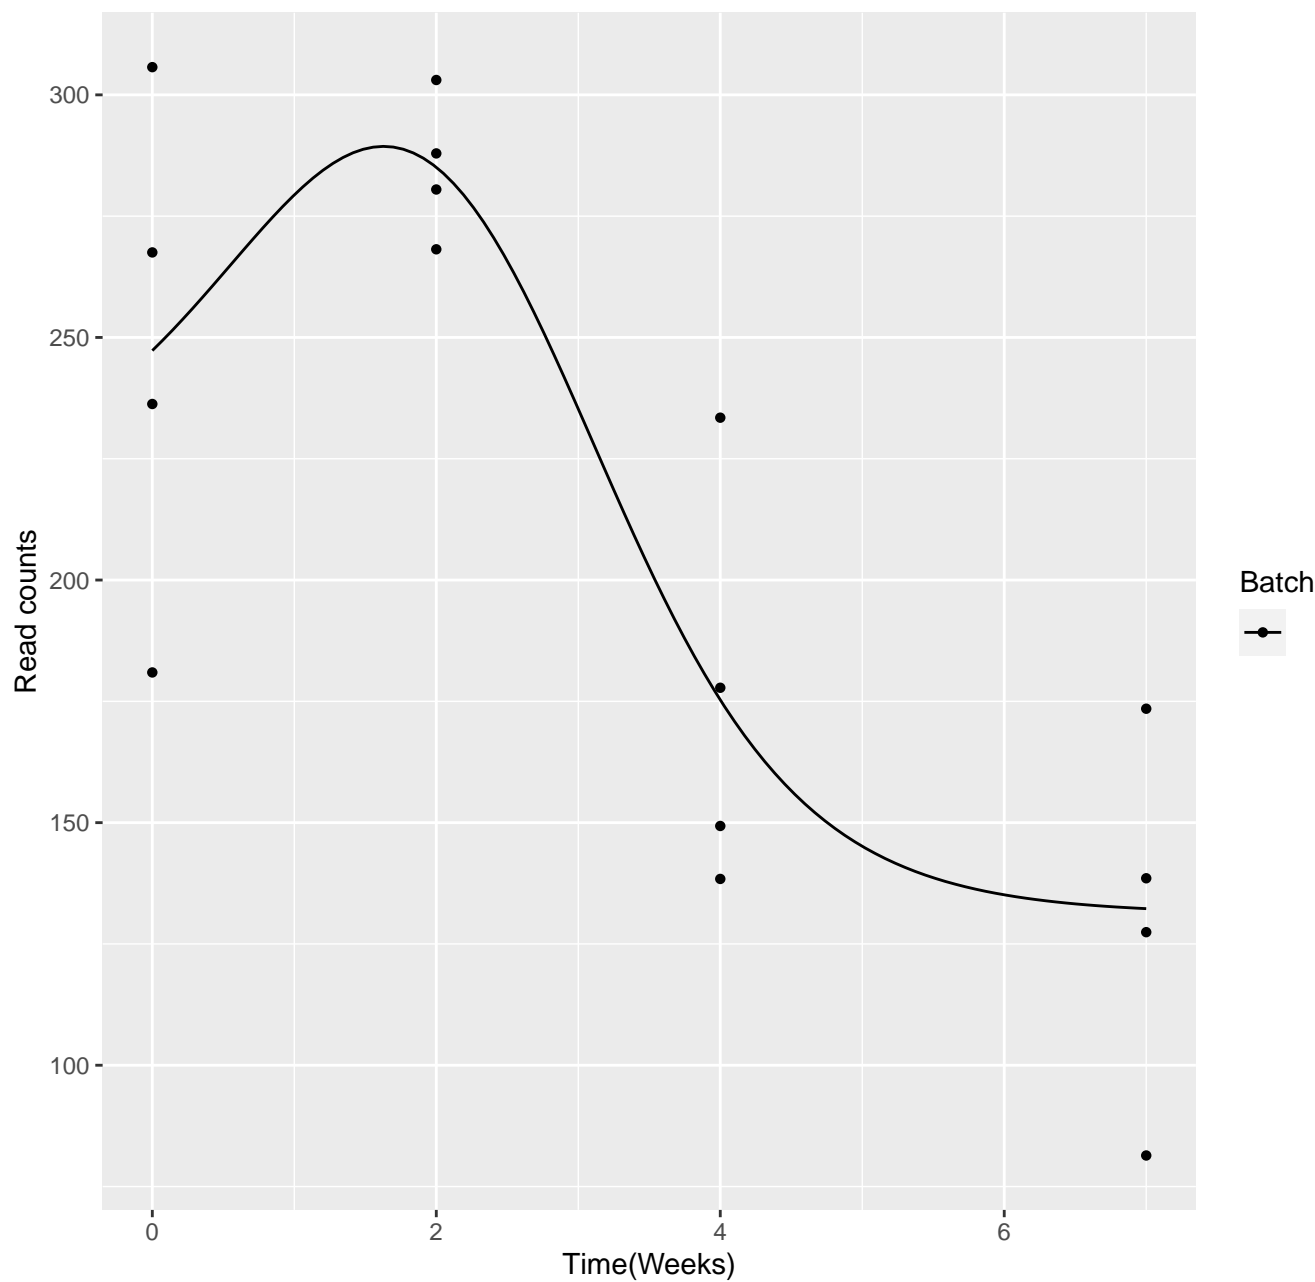

LOC127488213:  $\log_{10} q = -3.07$

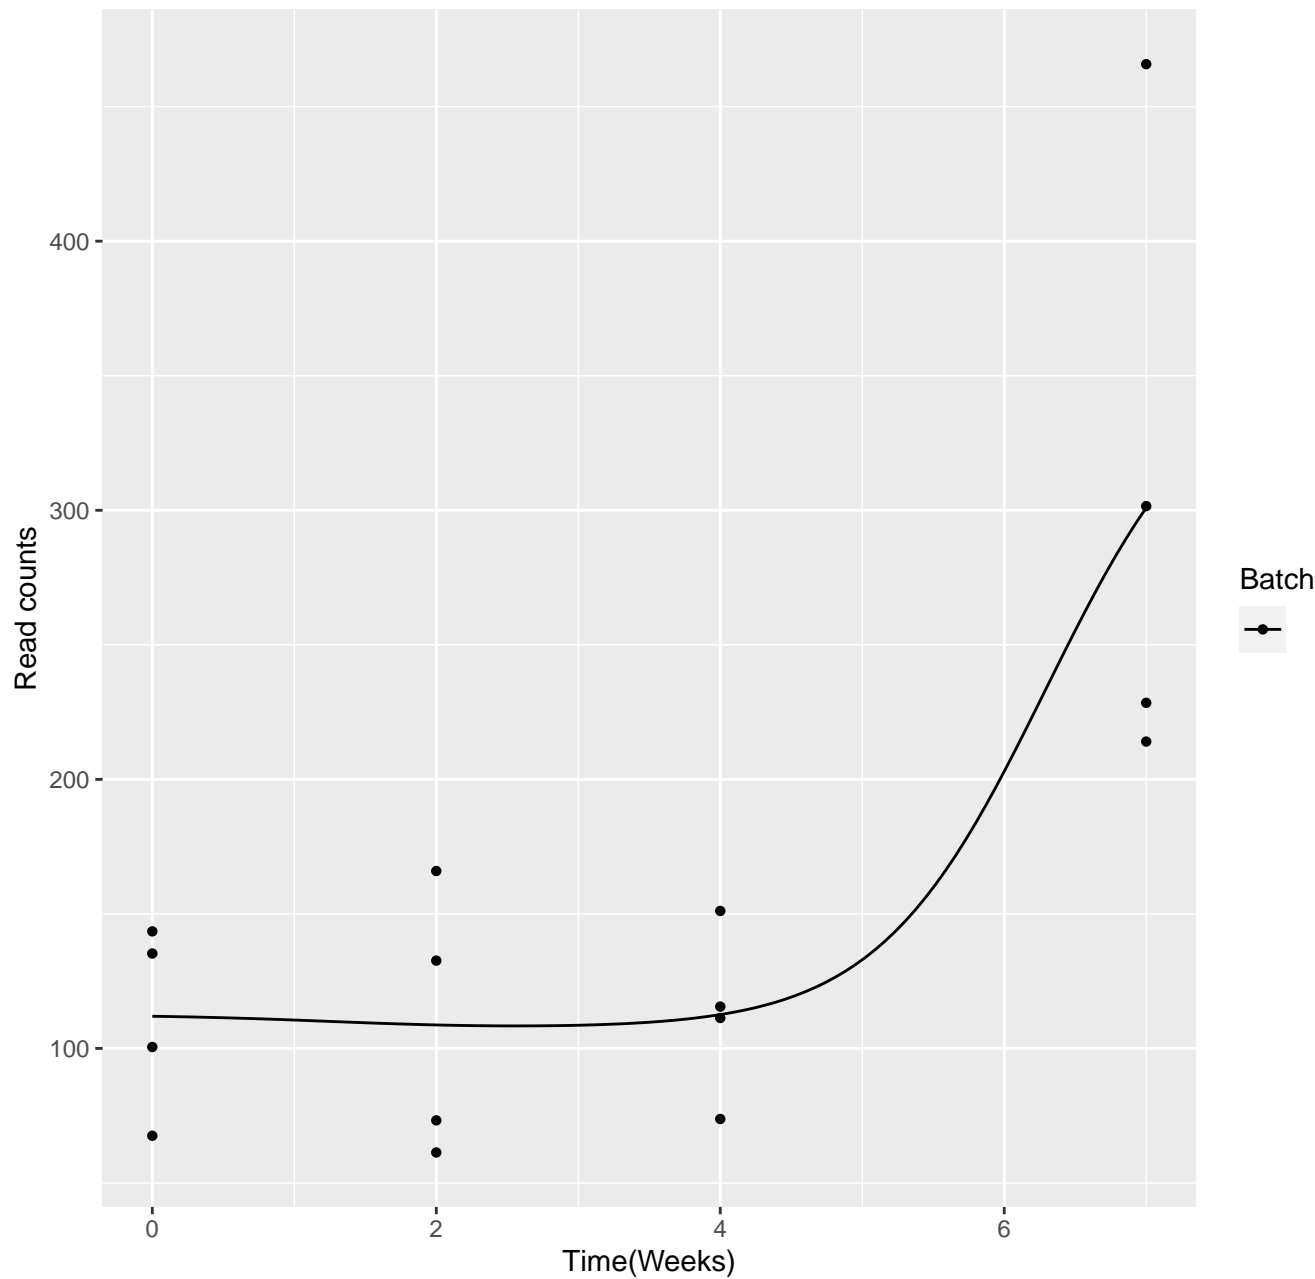

DPEP1:  $\log_{10} q = -3.07$

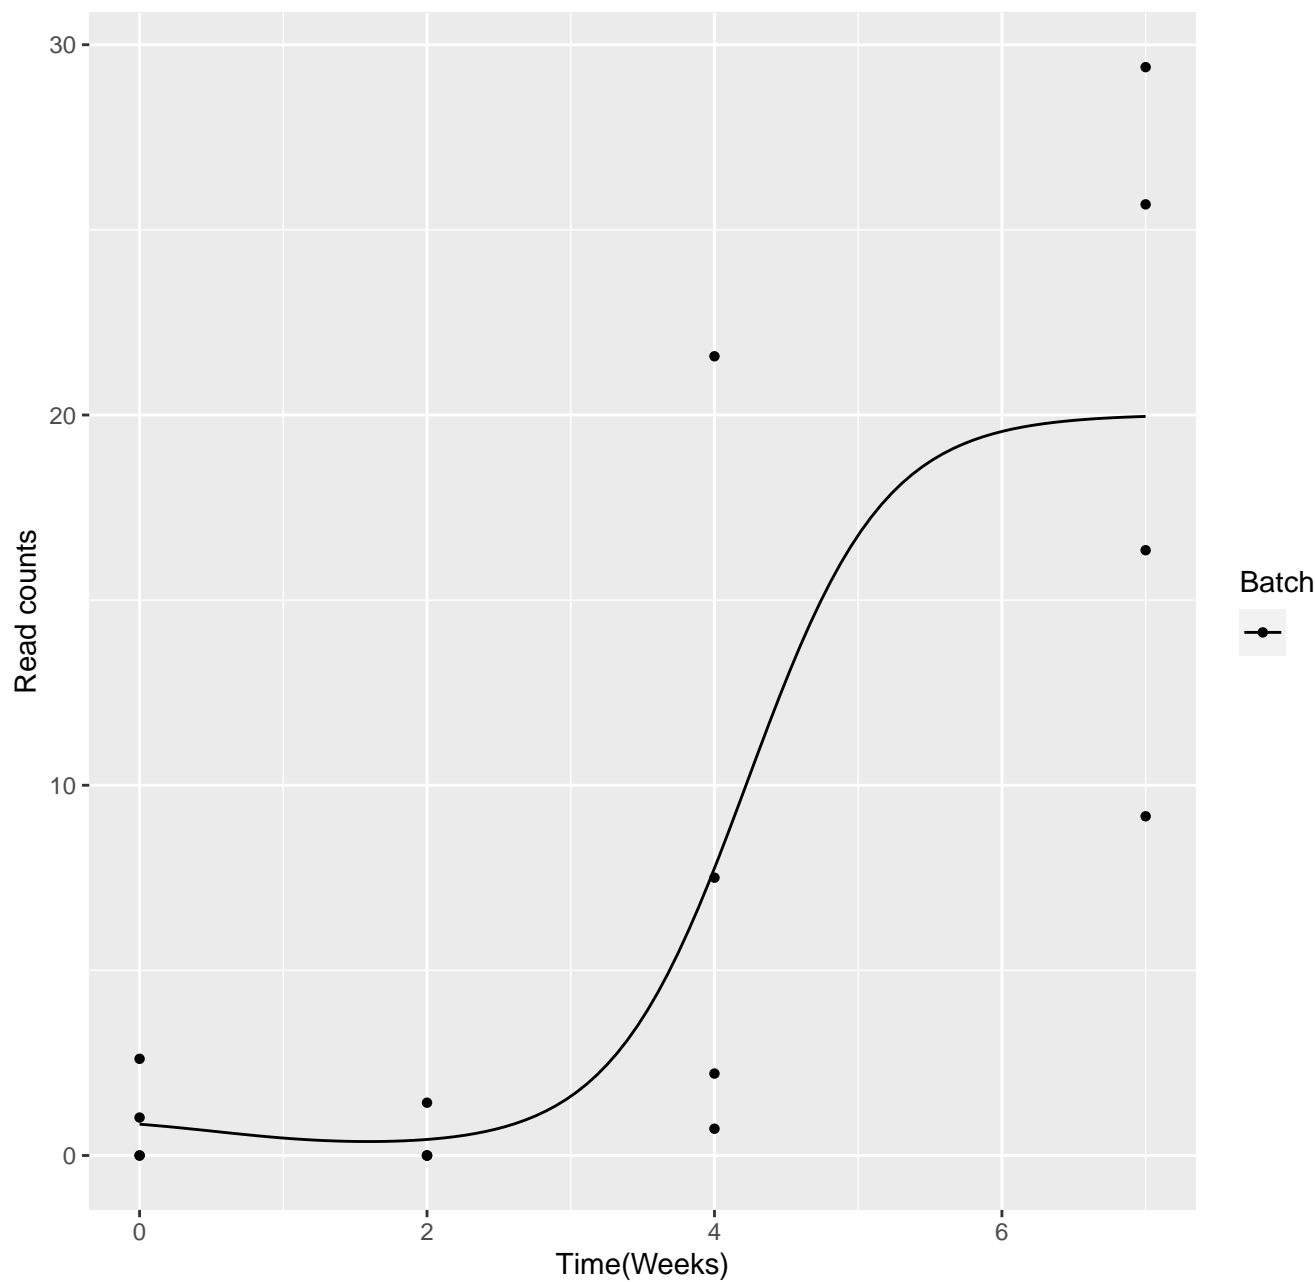

NET1:  $\log_{10} q = -3.06$

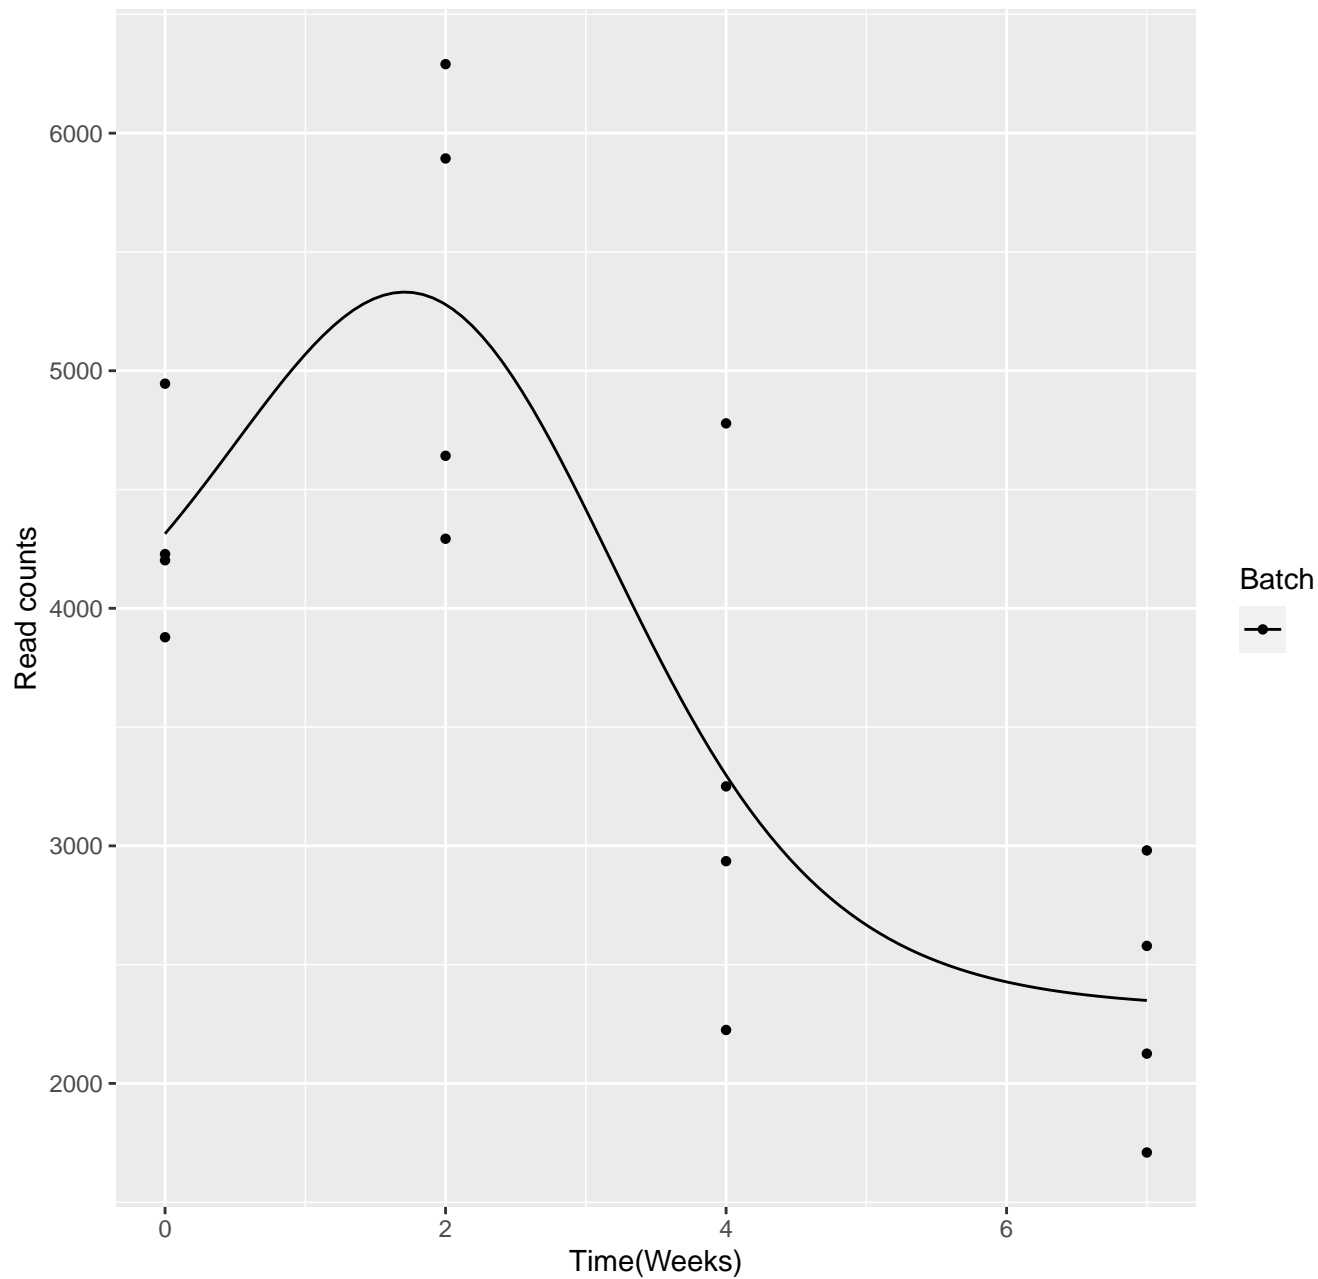

WRNIP1:  $\log_{10} q = -3.06$

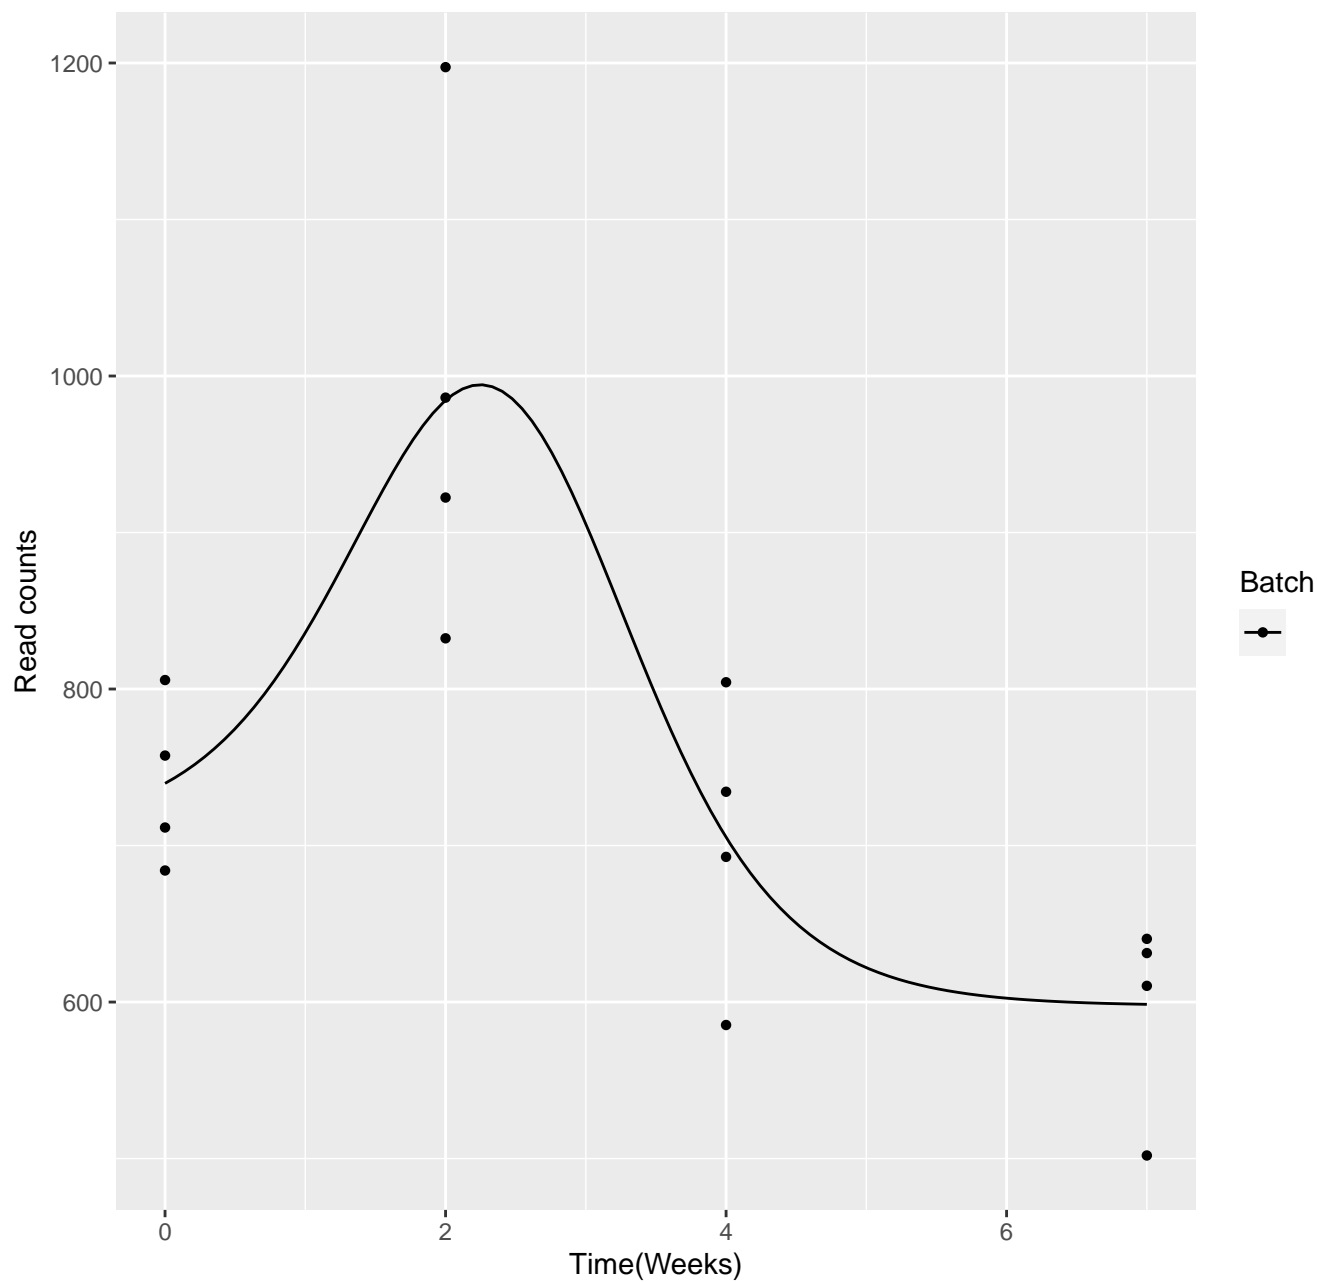

TNK2:  $\log_{10} q = -3.06$

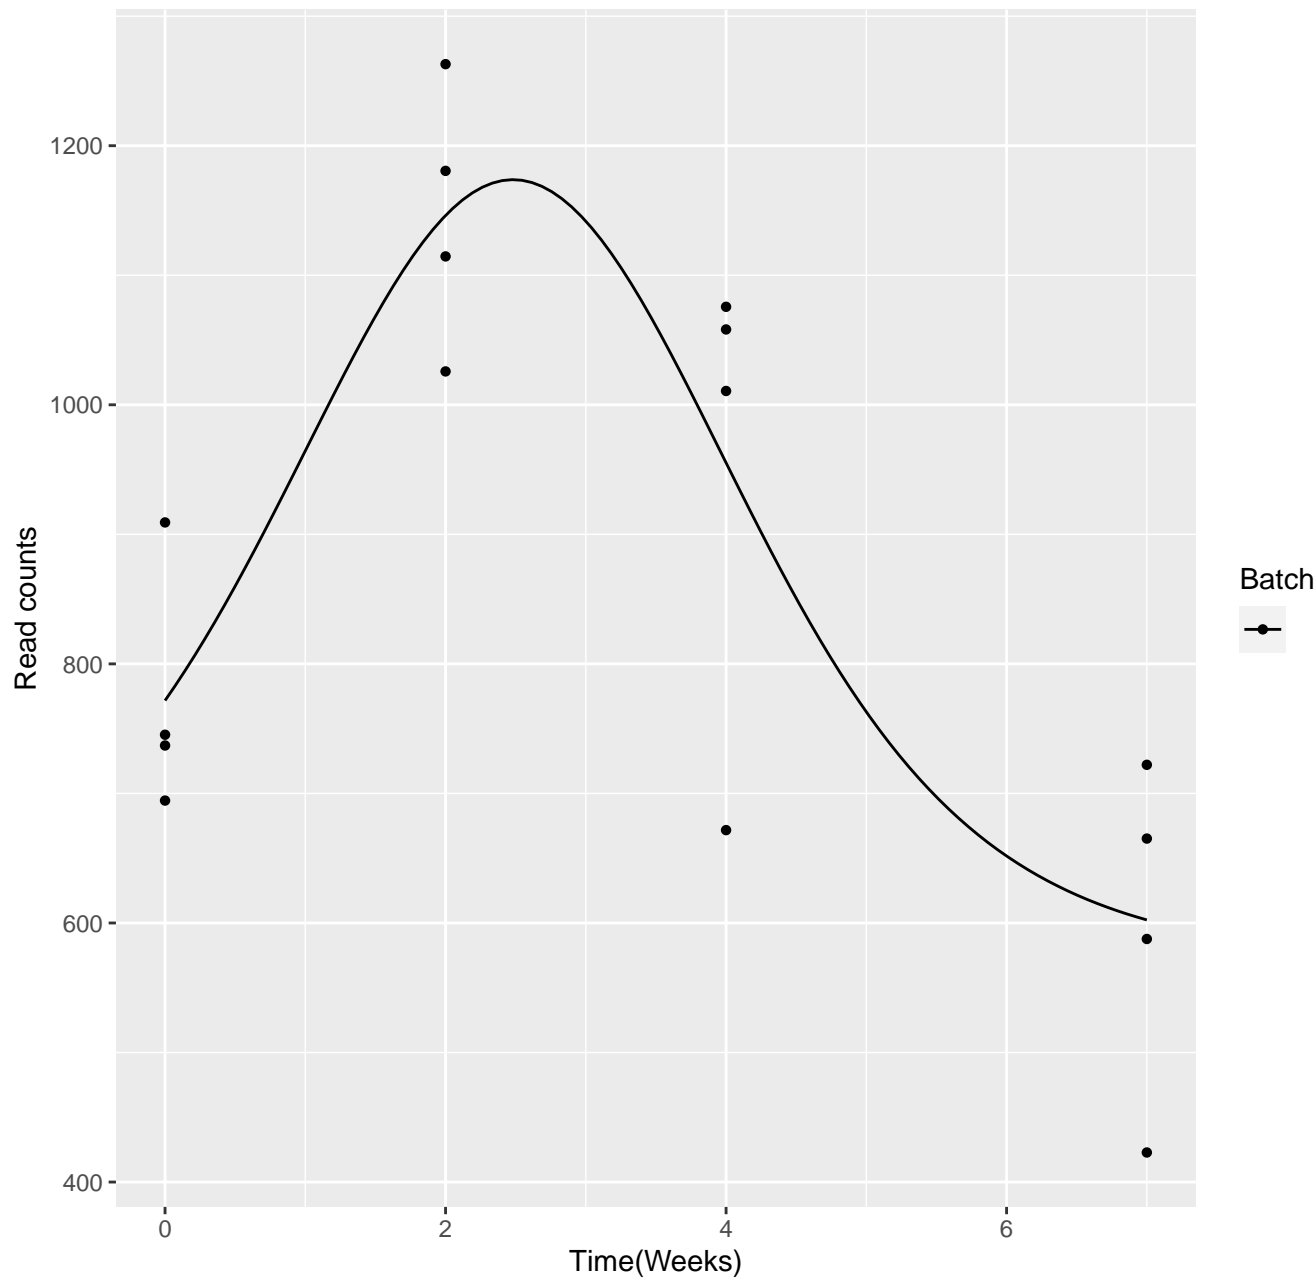



TNNI1:  $\log_{10} q = -3.05$

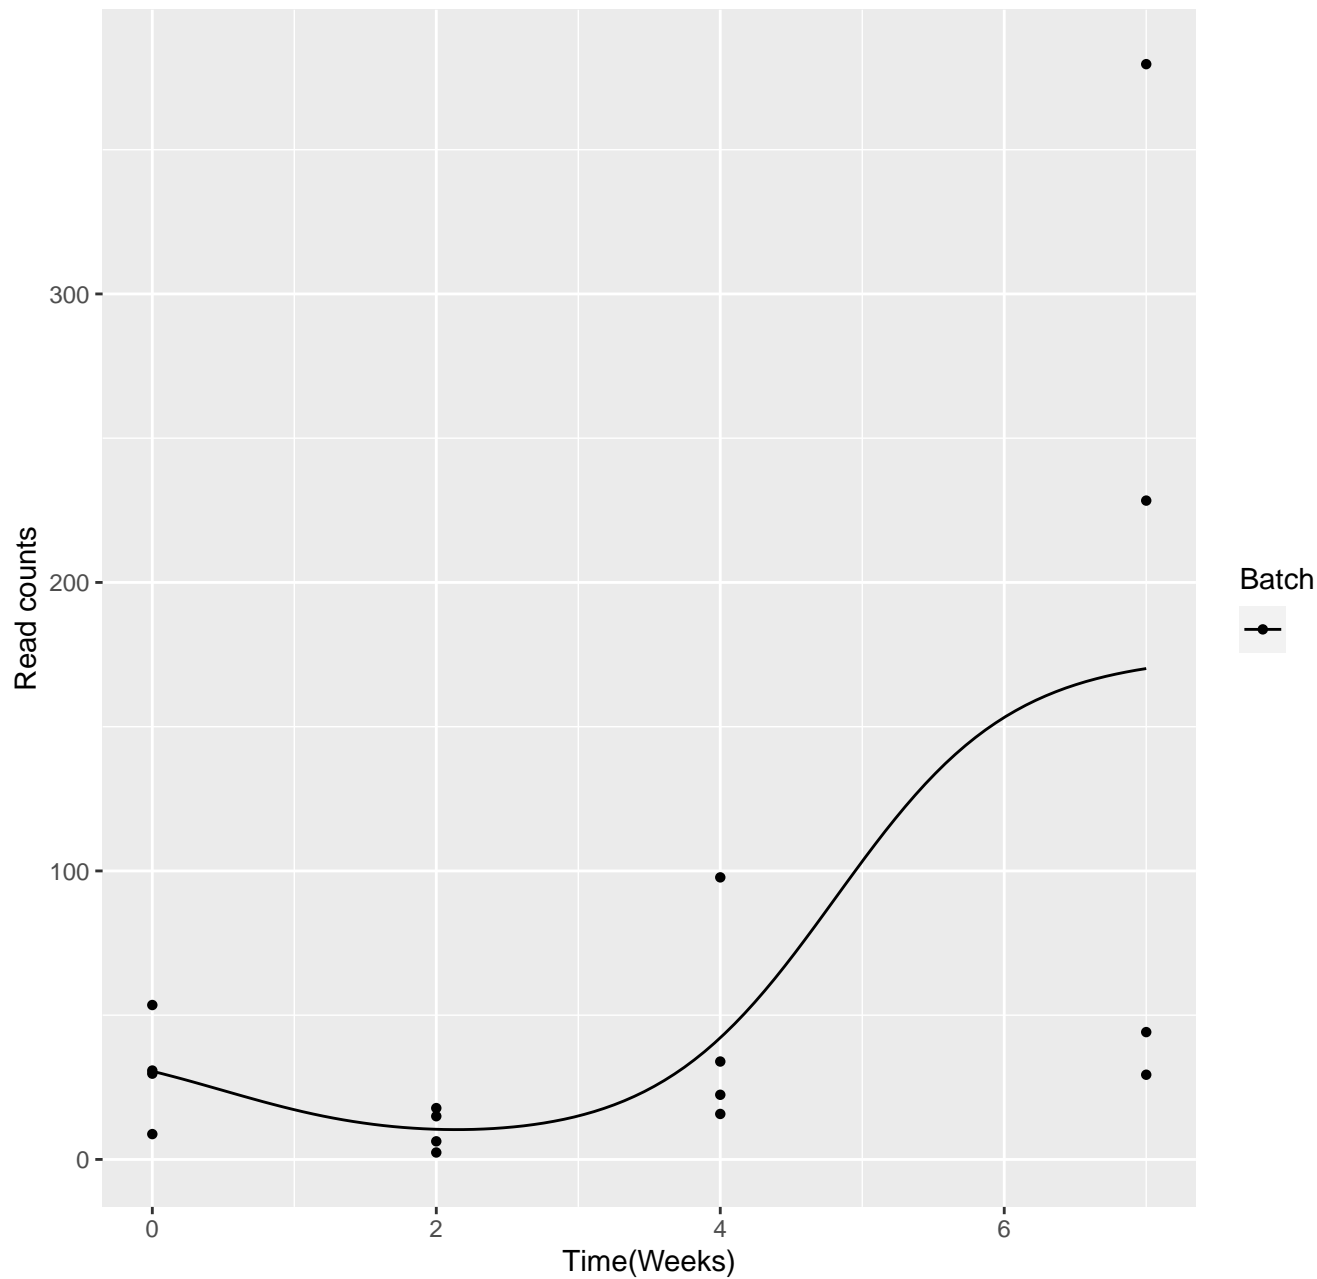

PRC1:  $\log_{10} q = -3.05$

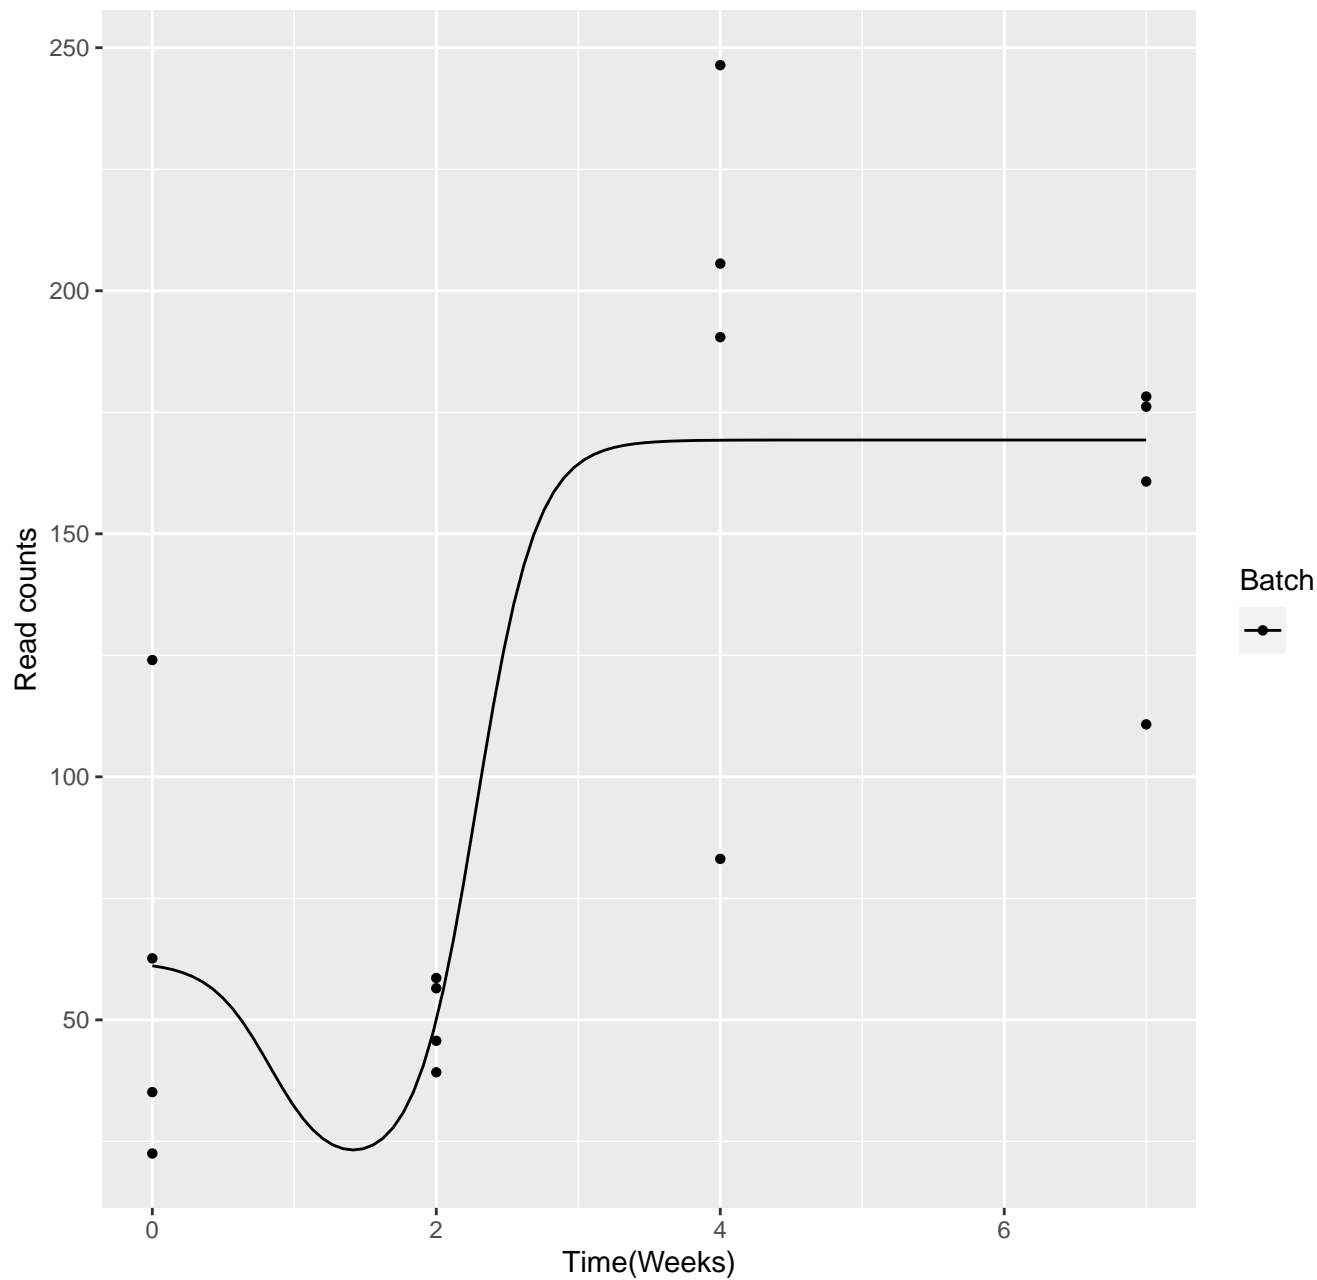

TRMT9B:  $\log_{10} q = -3.05$

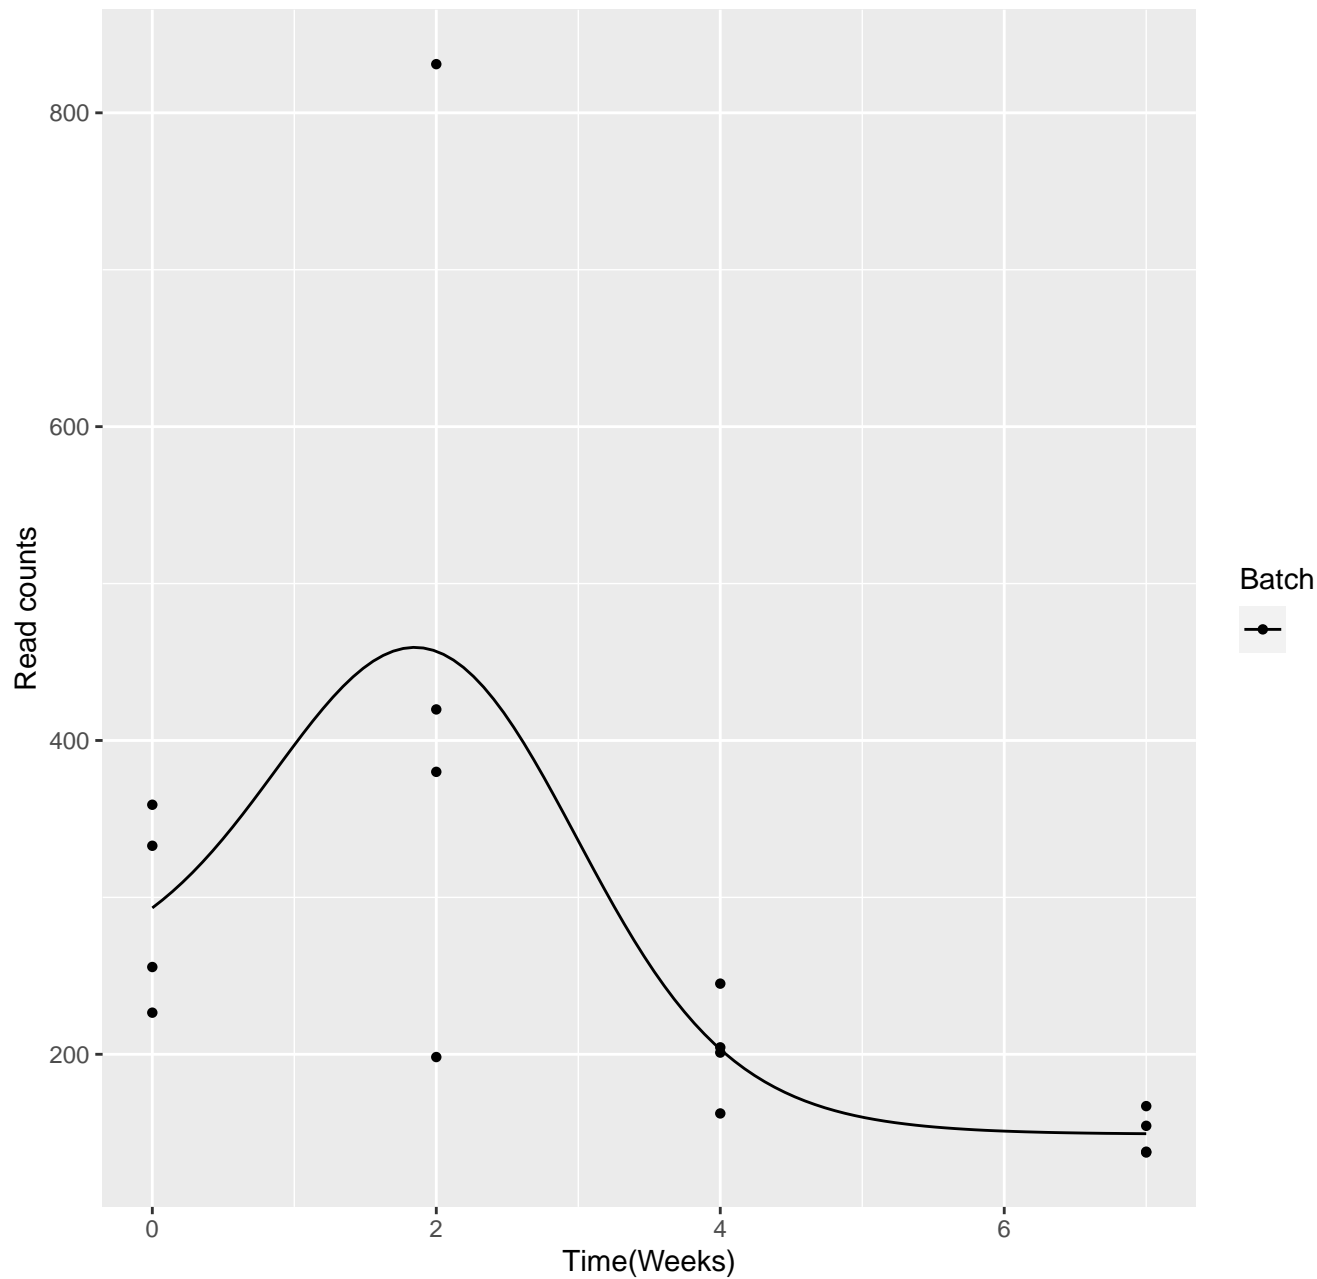

CMBL:  $\log_{10} q = -3.04$

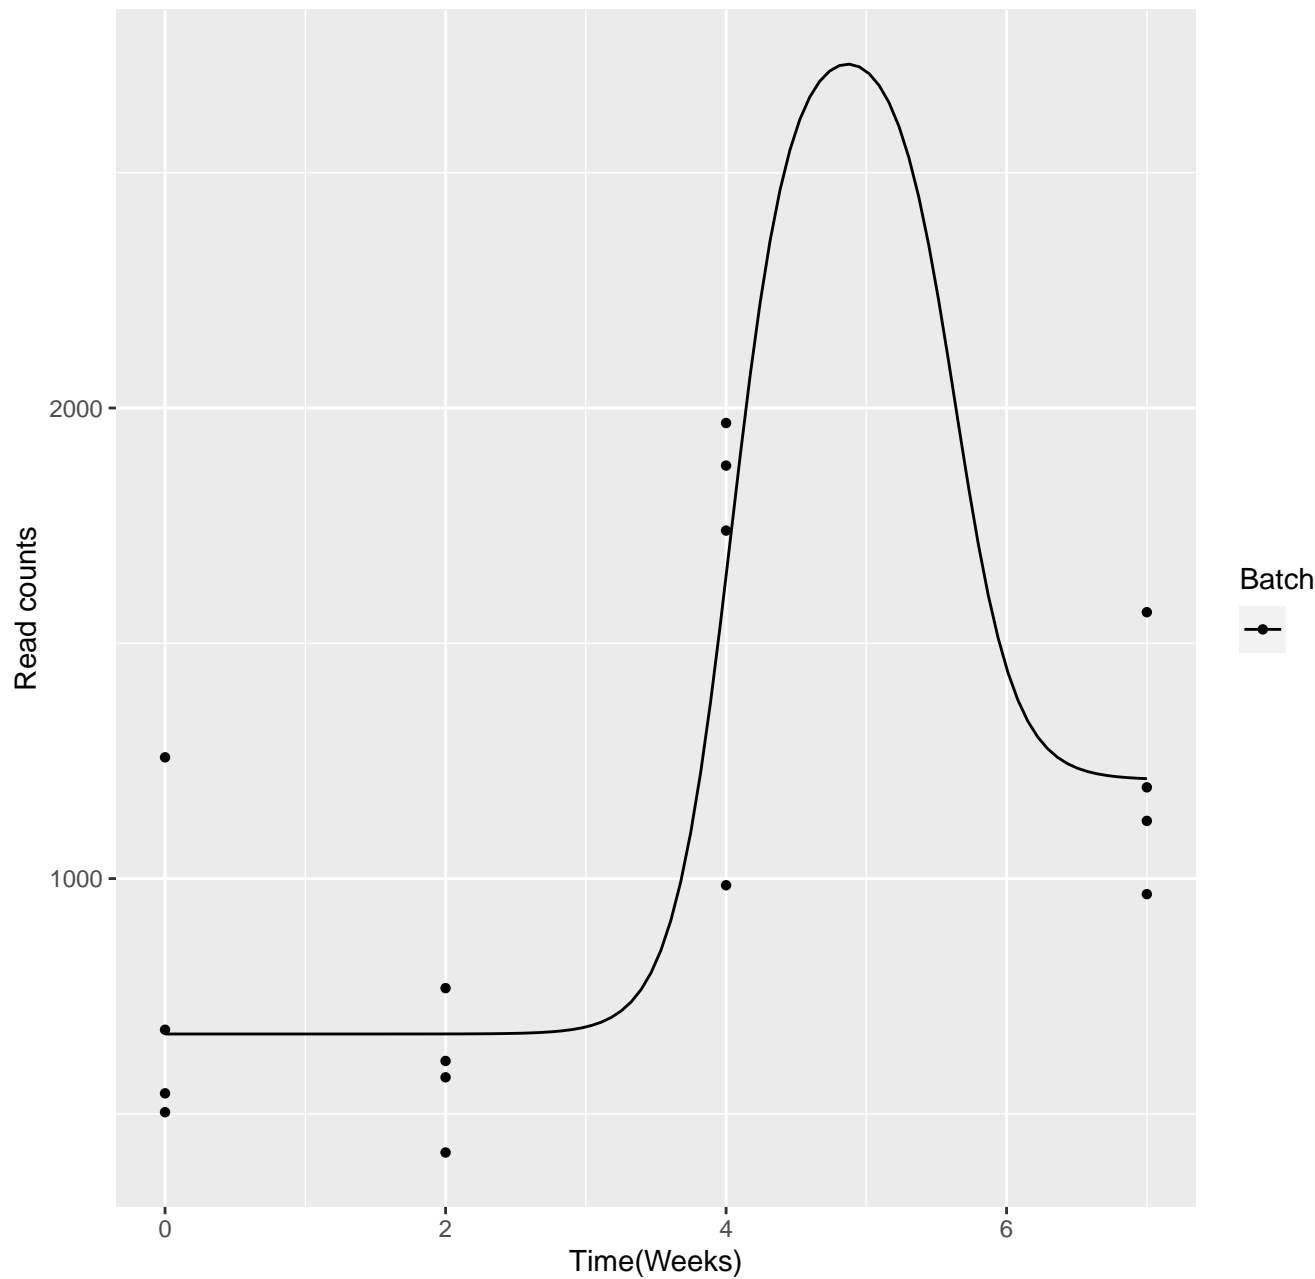

N4BP2L1:  $\log_{10} q = -3.04$

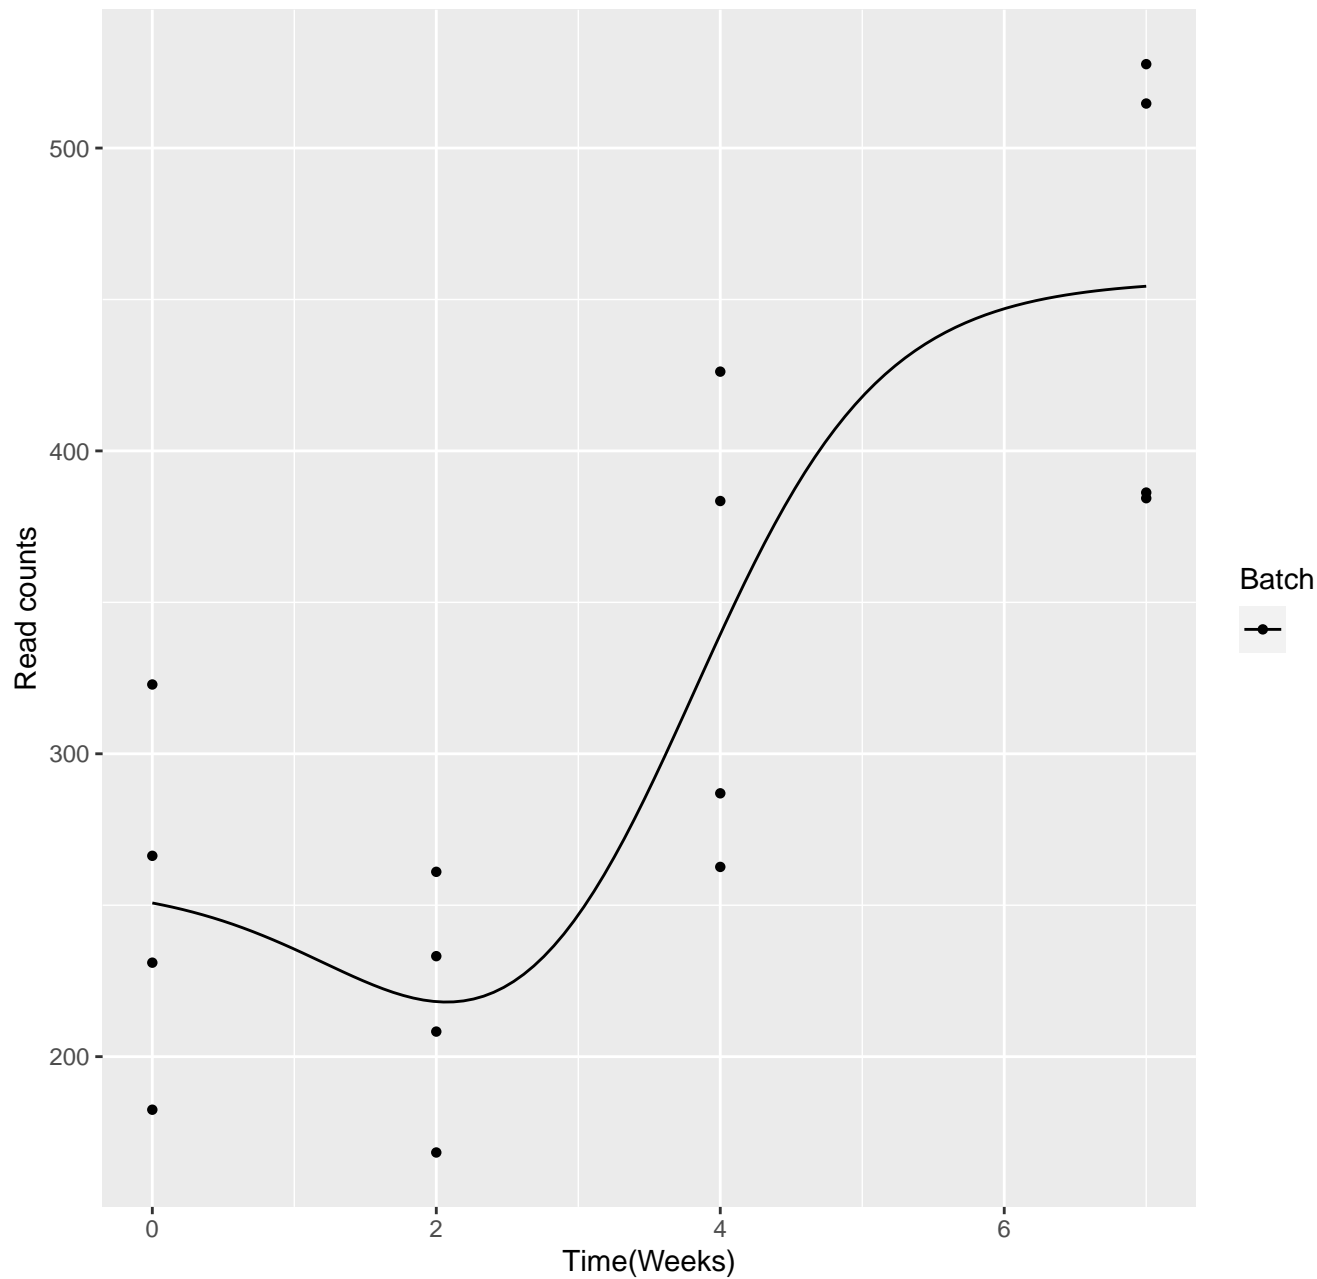

LOC100342135:  $\log_{10} q = -3.04$

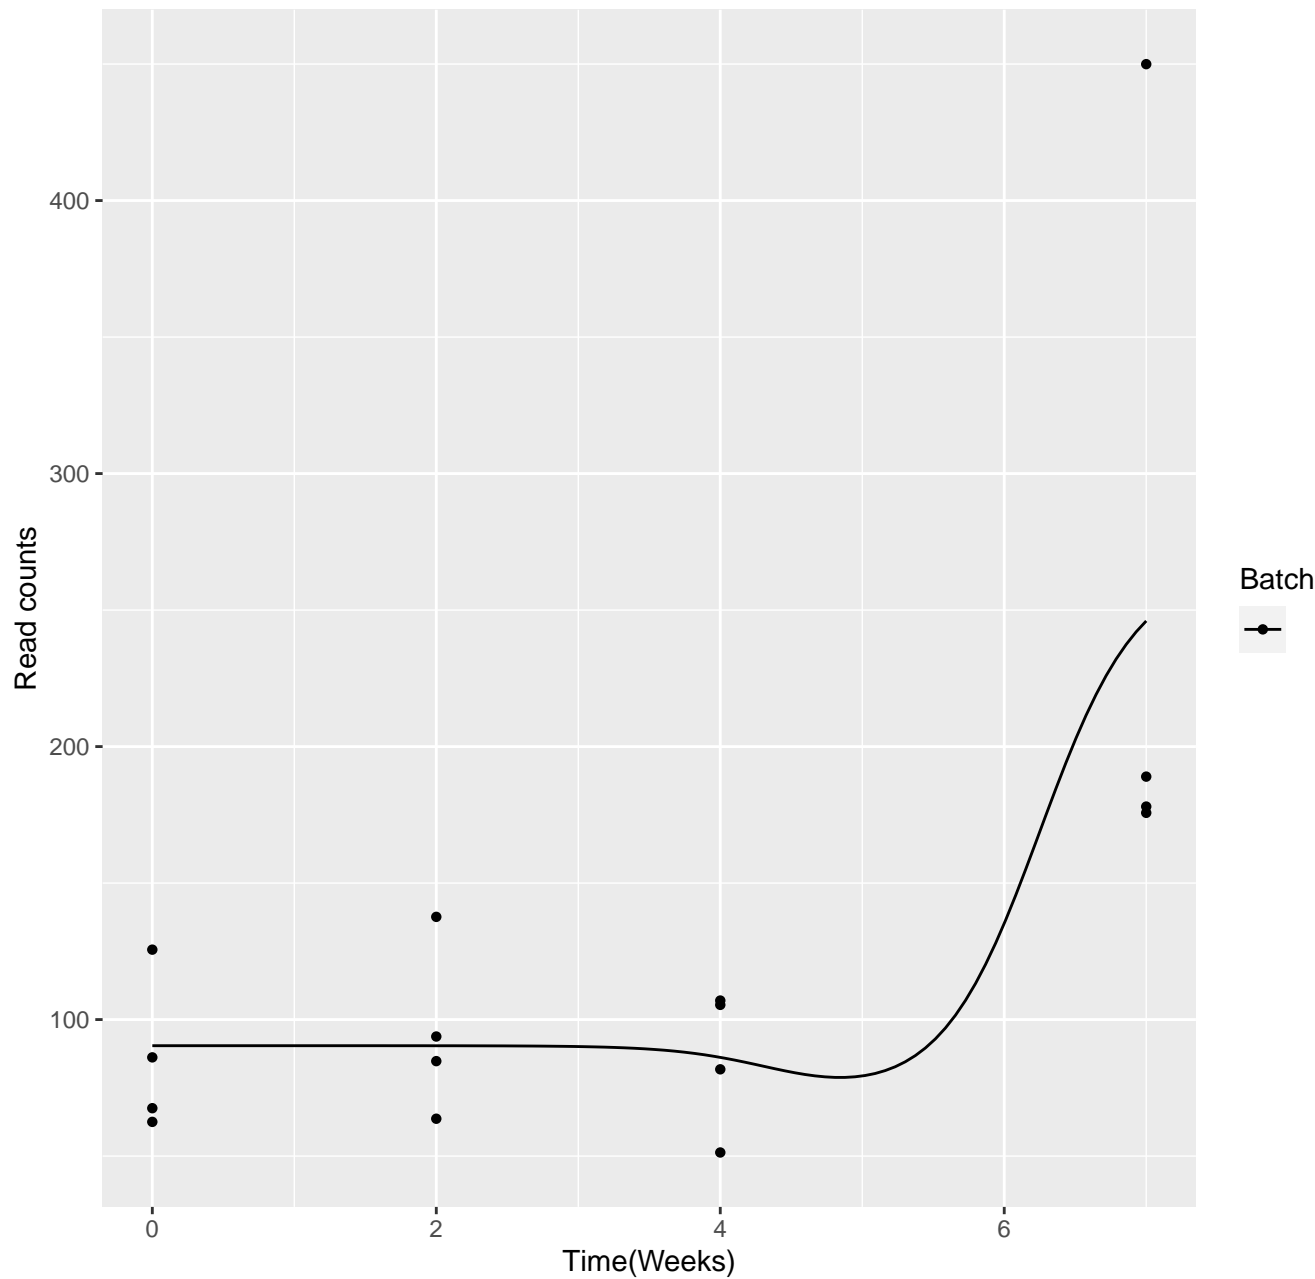

BATF:  $\log_{10} q = -3.04$

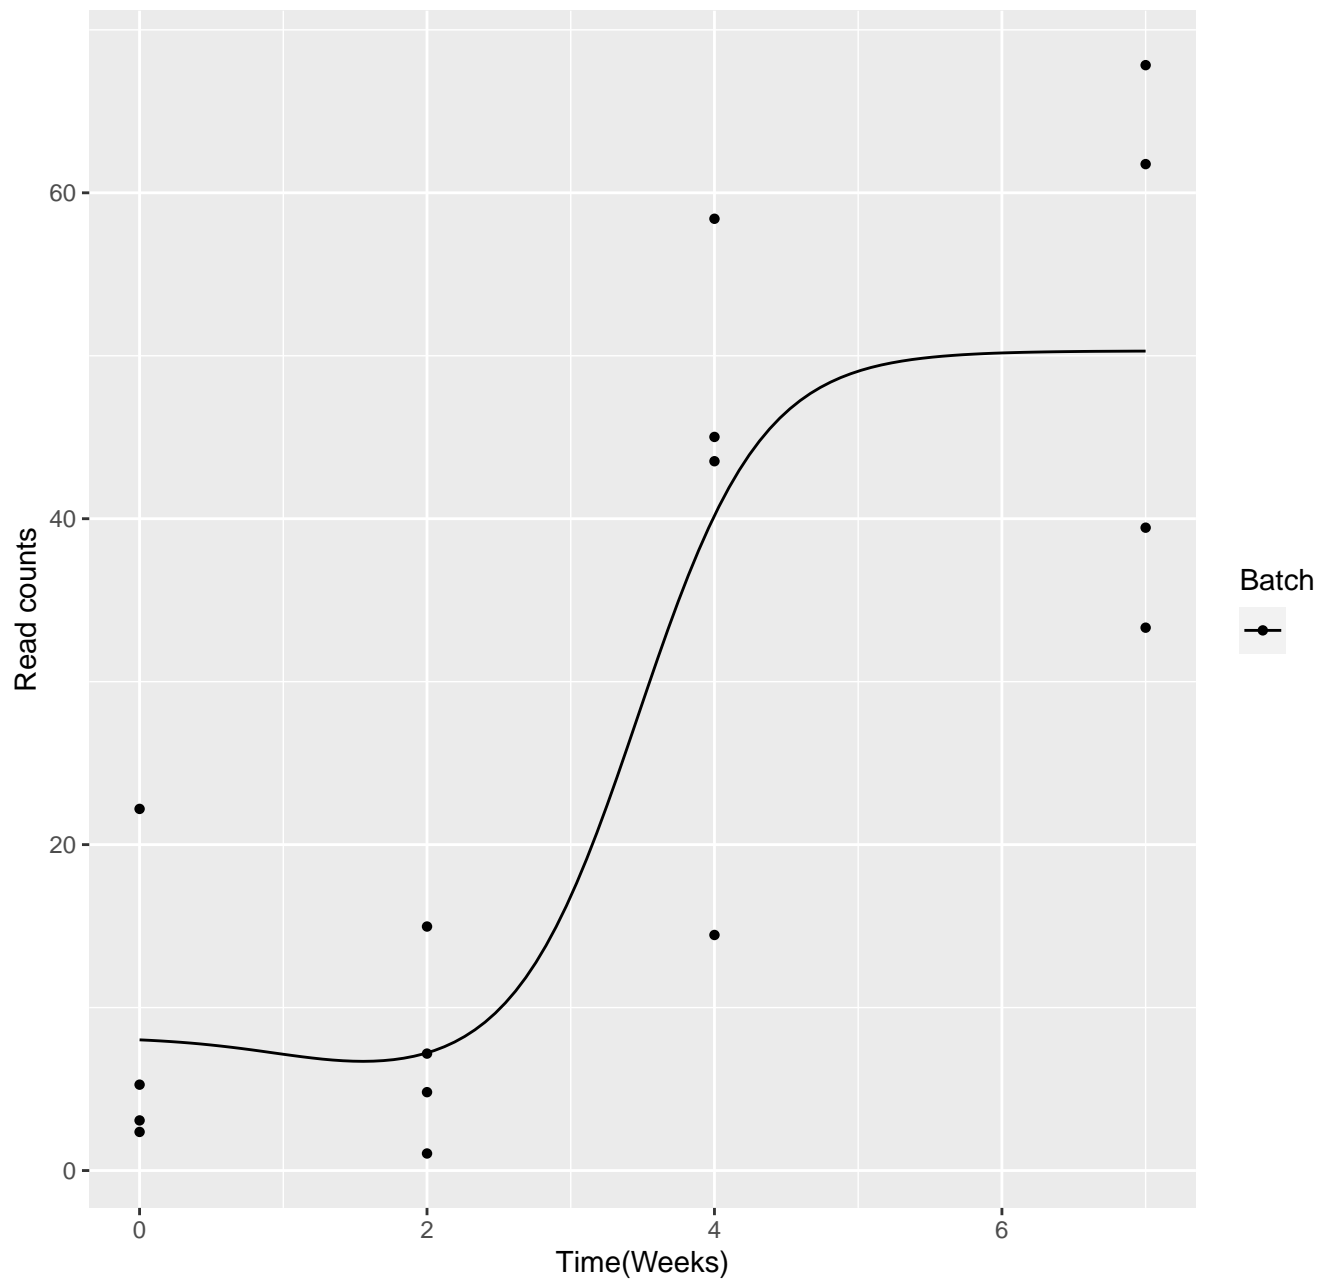

MPP2:  $\log_{10} q = -3.04$

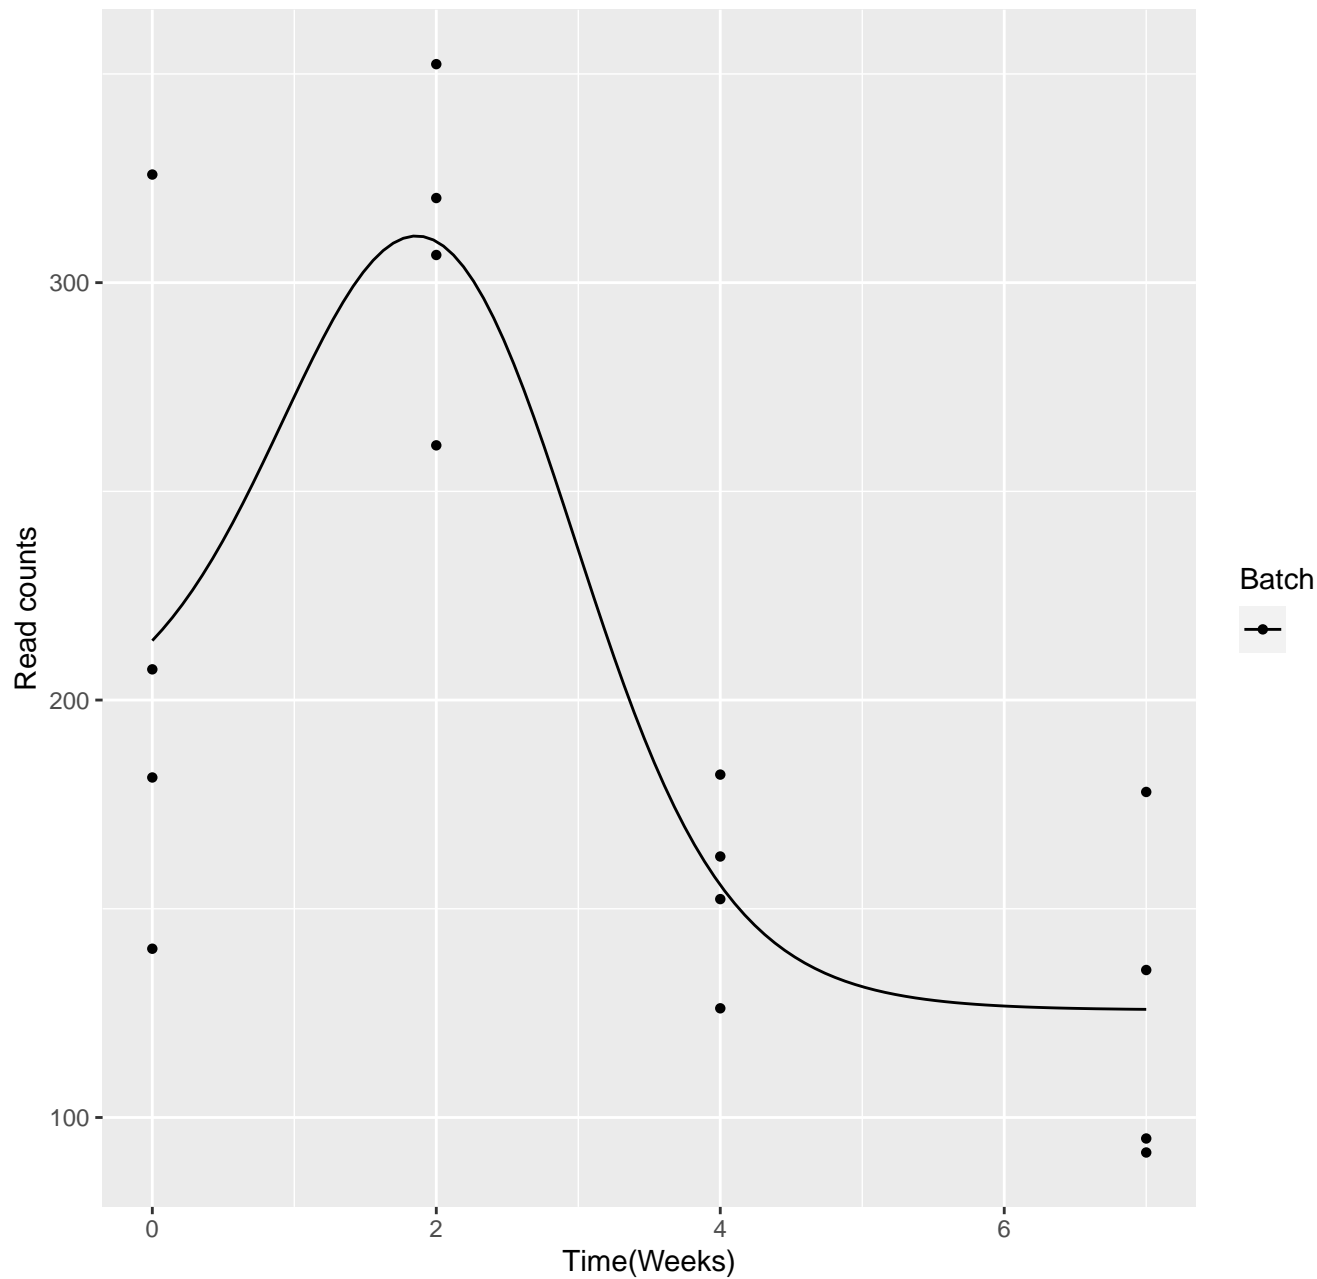



RA\_M006\_JSM7BED4F: log10 q = -3.03

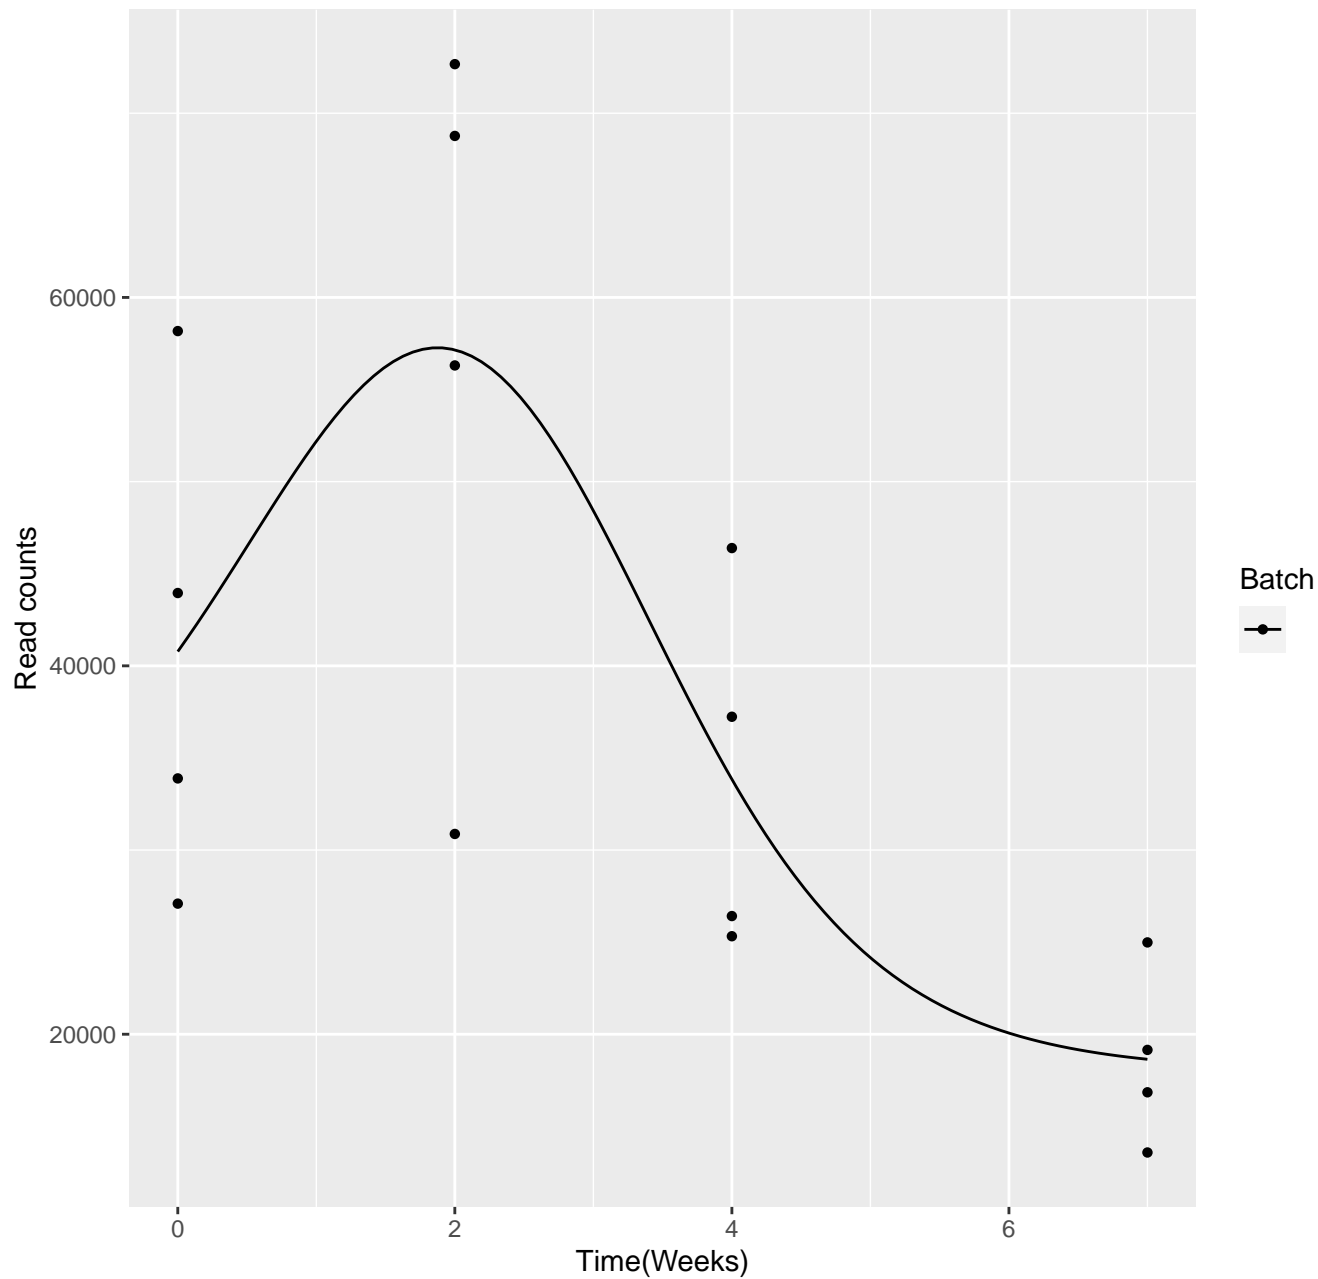

ZEB1:  $\log_{10} q = -3.03$

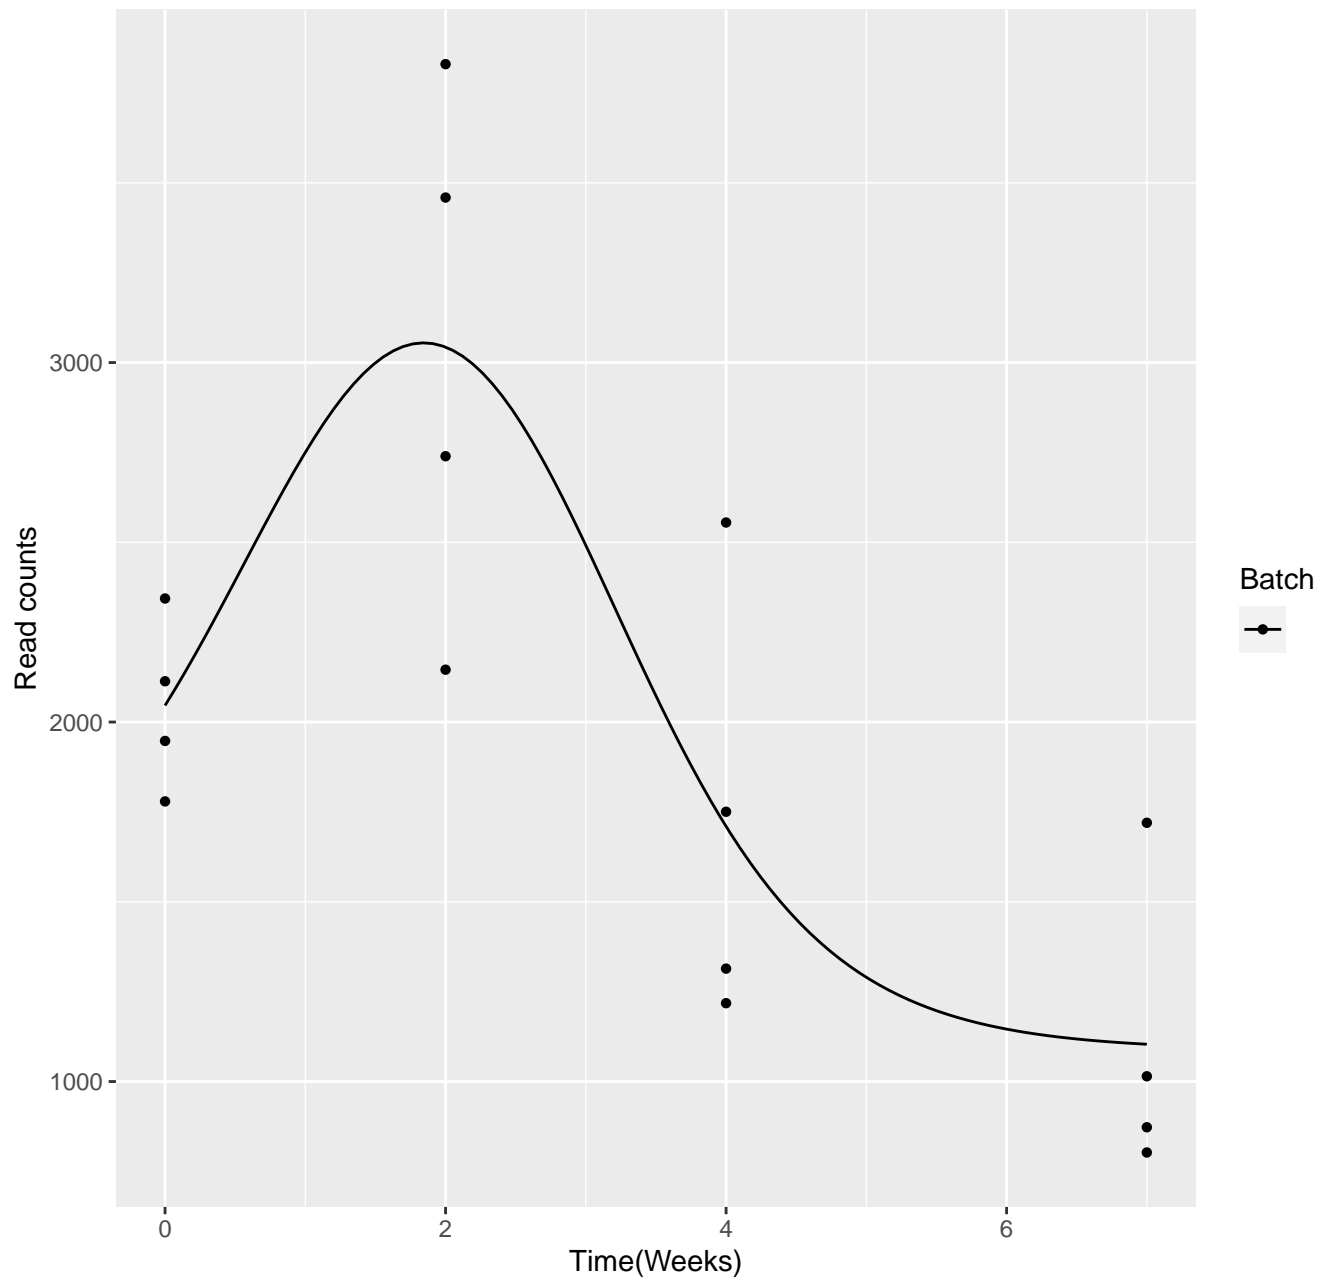

KNSTRN:  $\log_{10} q = -3.03$

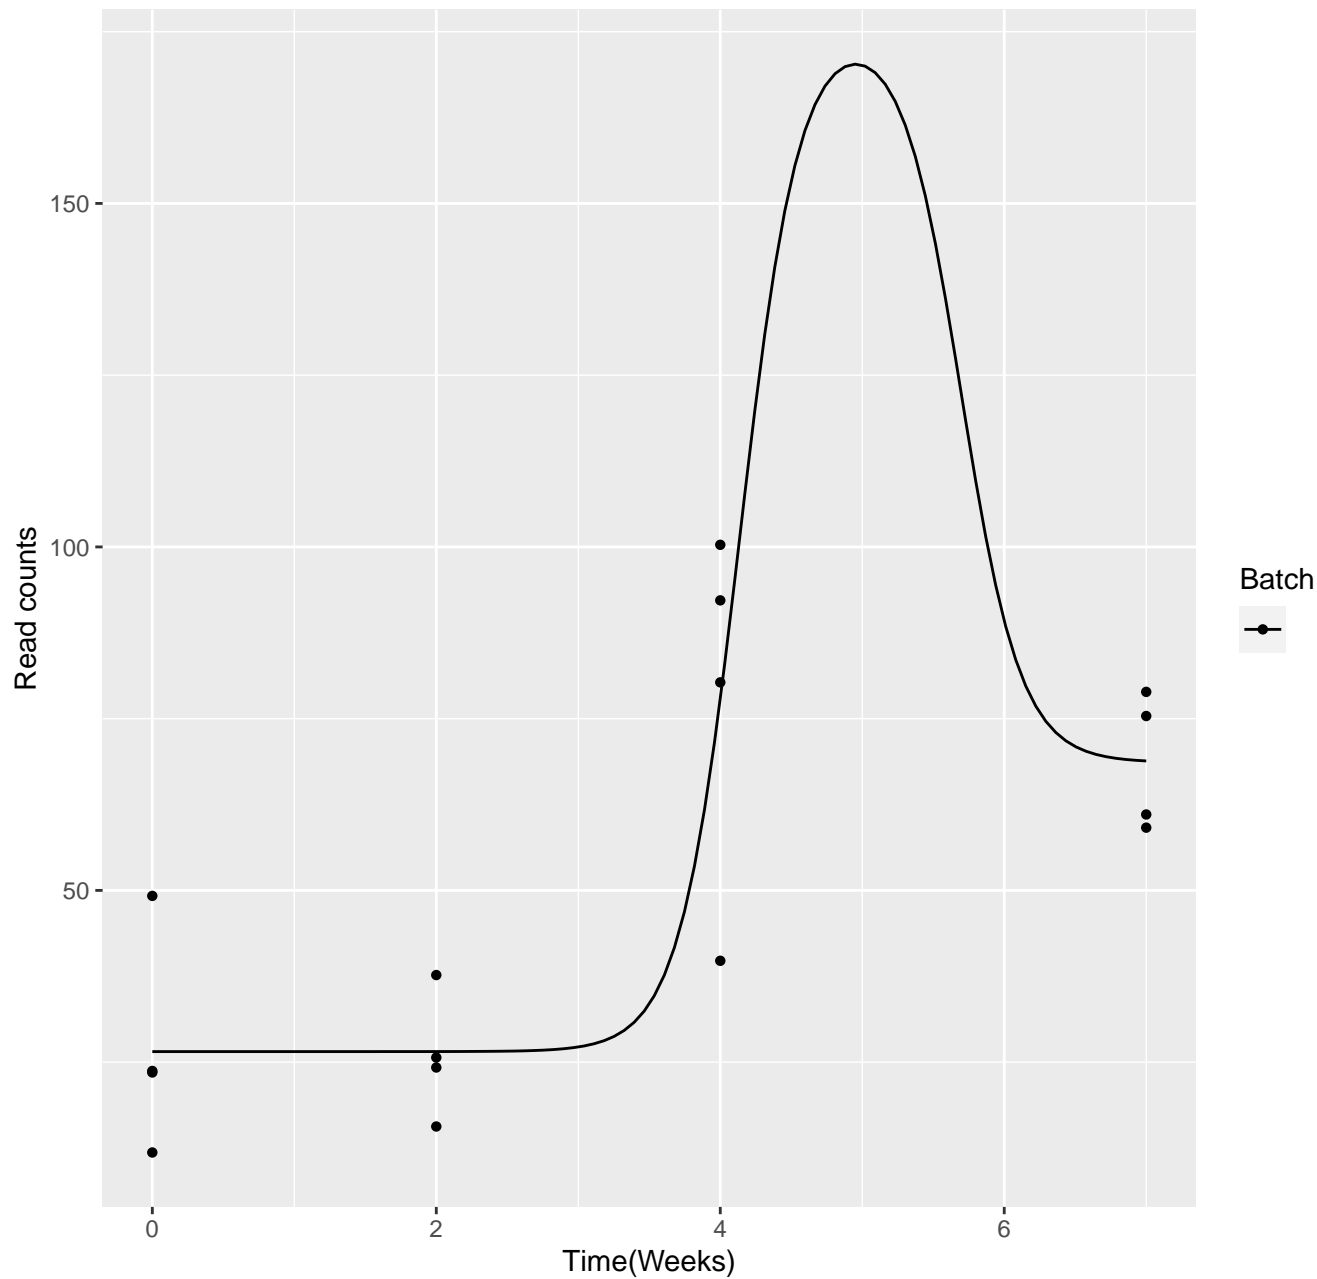

TCF7L1:  $\log_{10} q = -3.03$

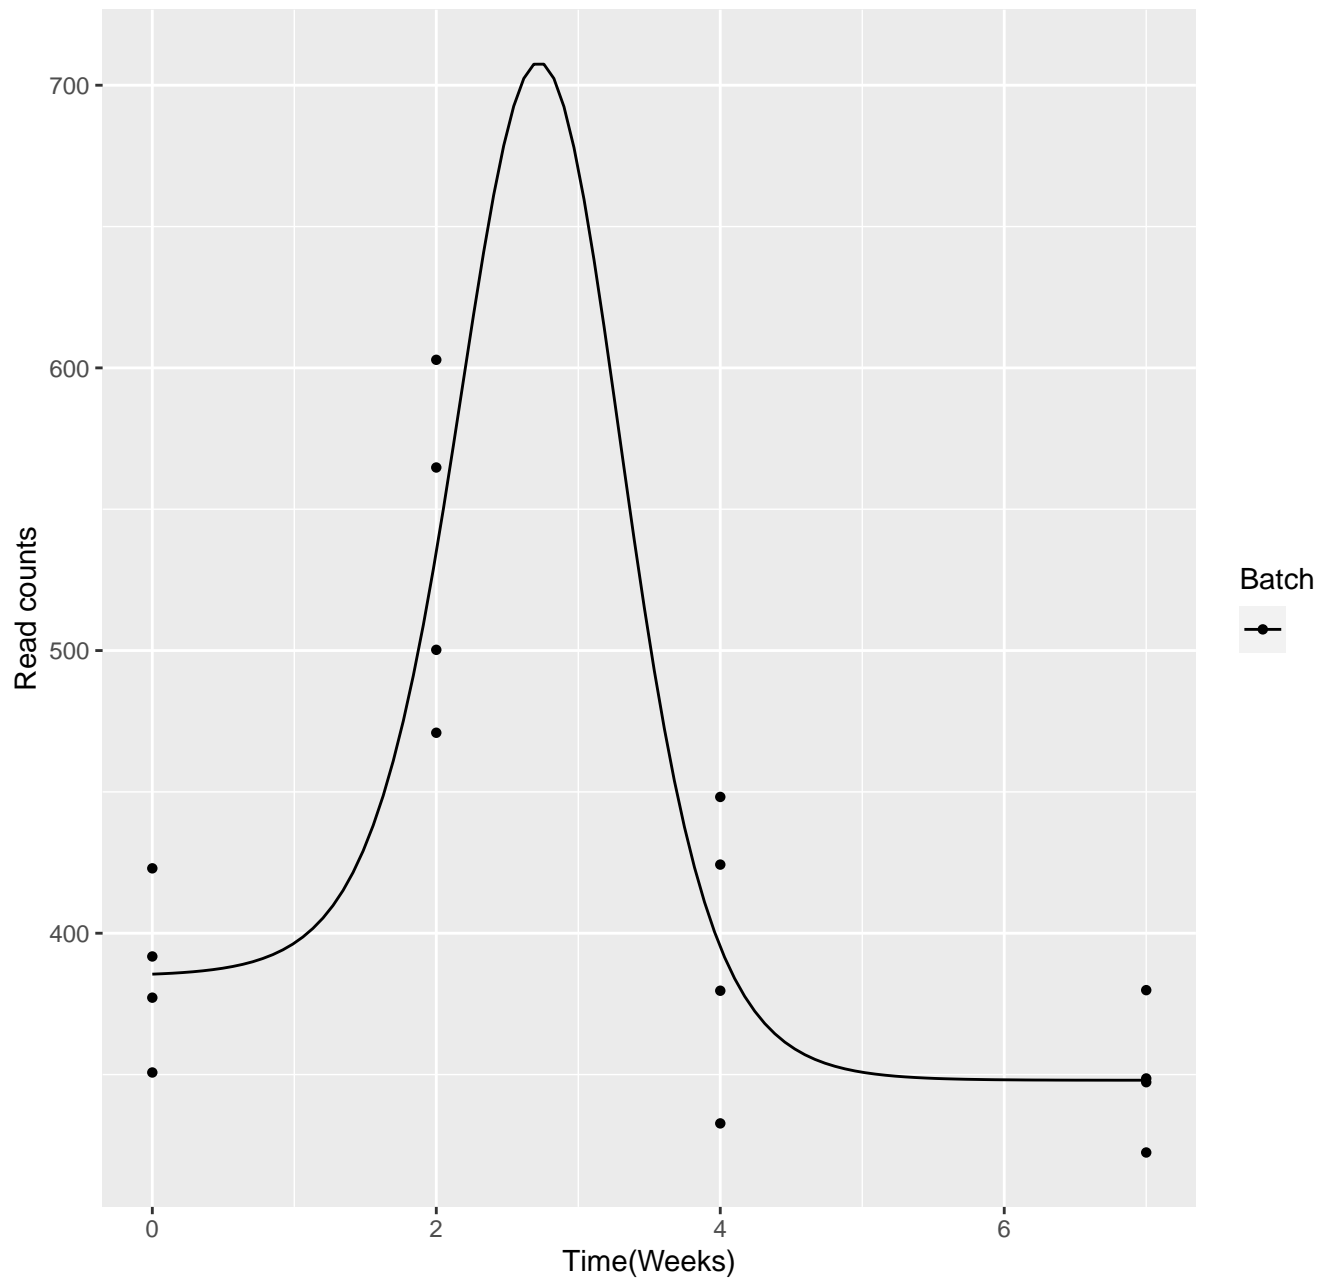

GMPR:  $\log_{10} q = -3.03$

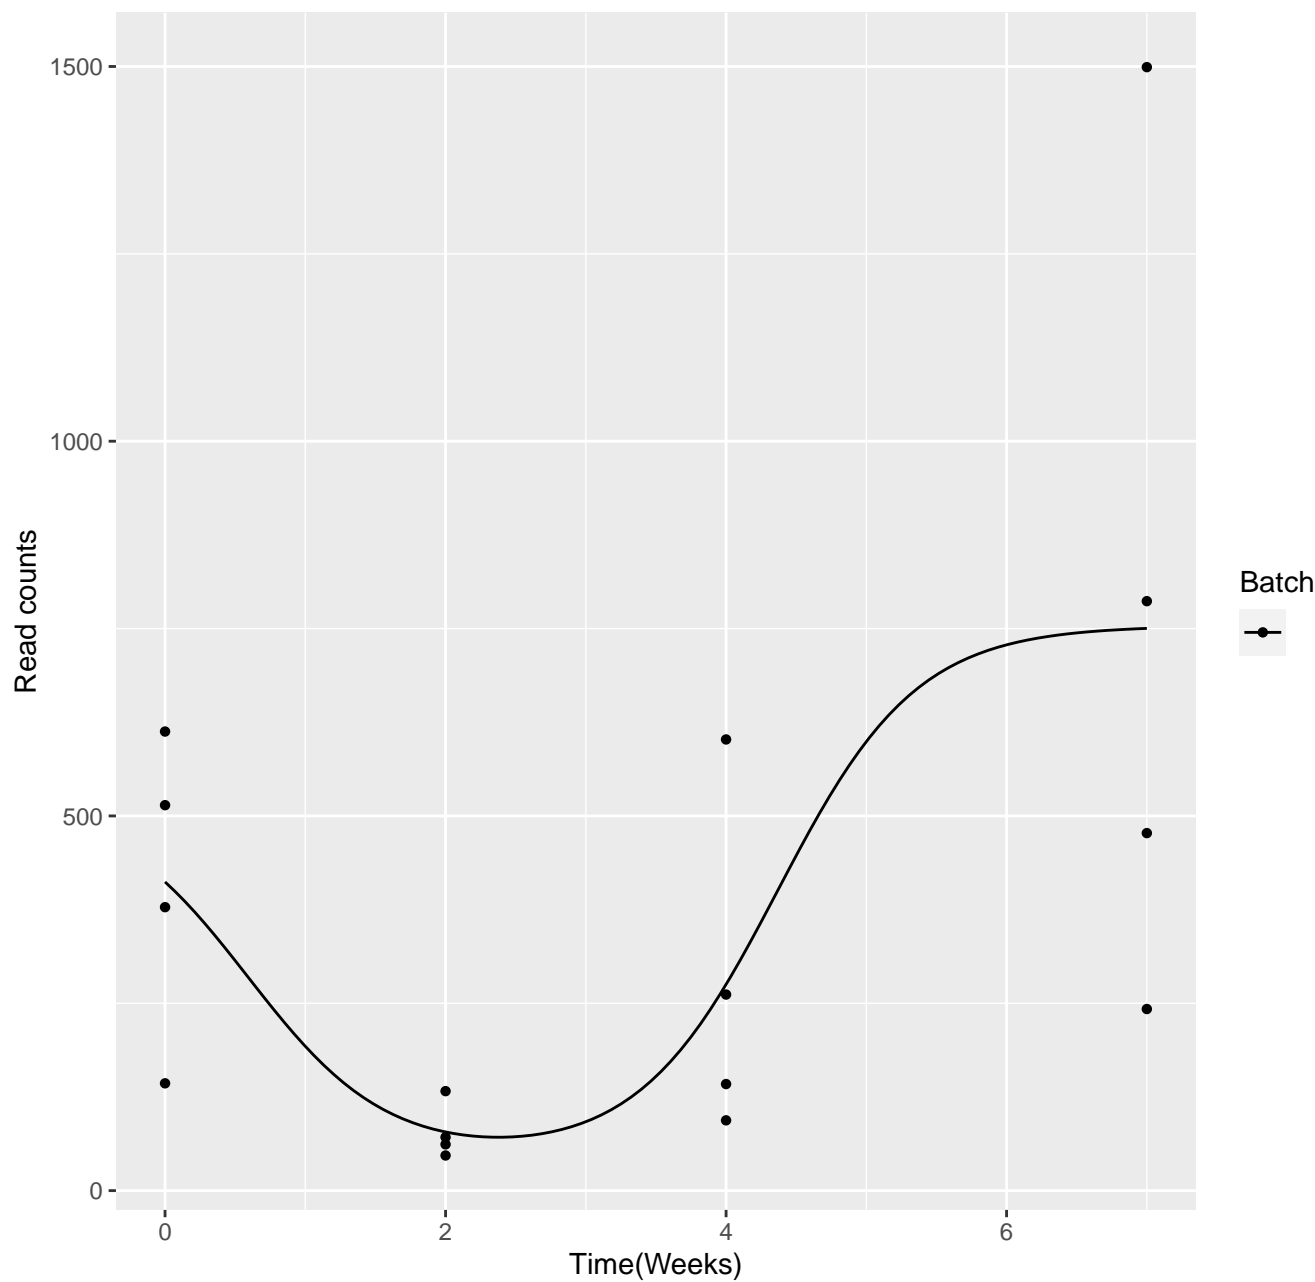

RASAL2:  $\log_{10} q = -3.02$

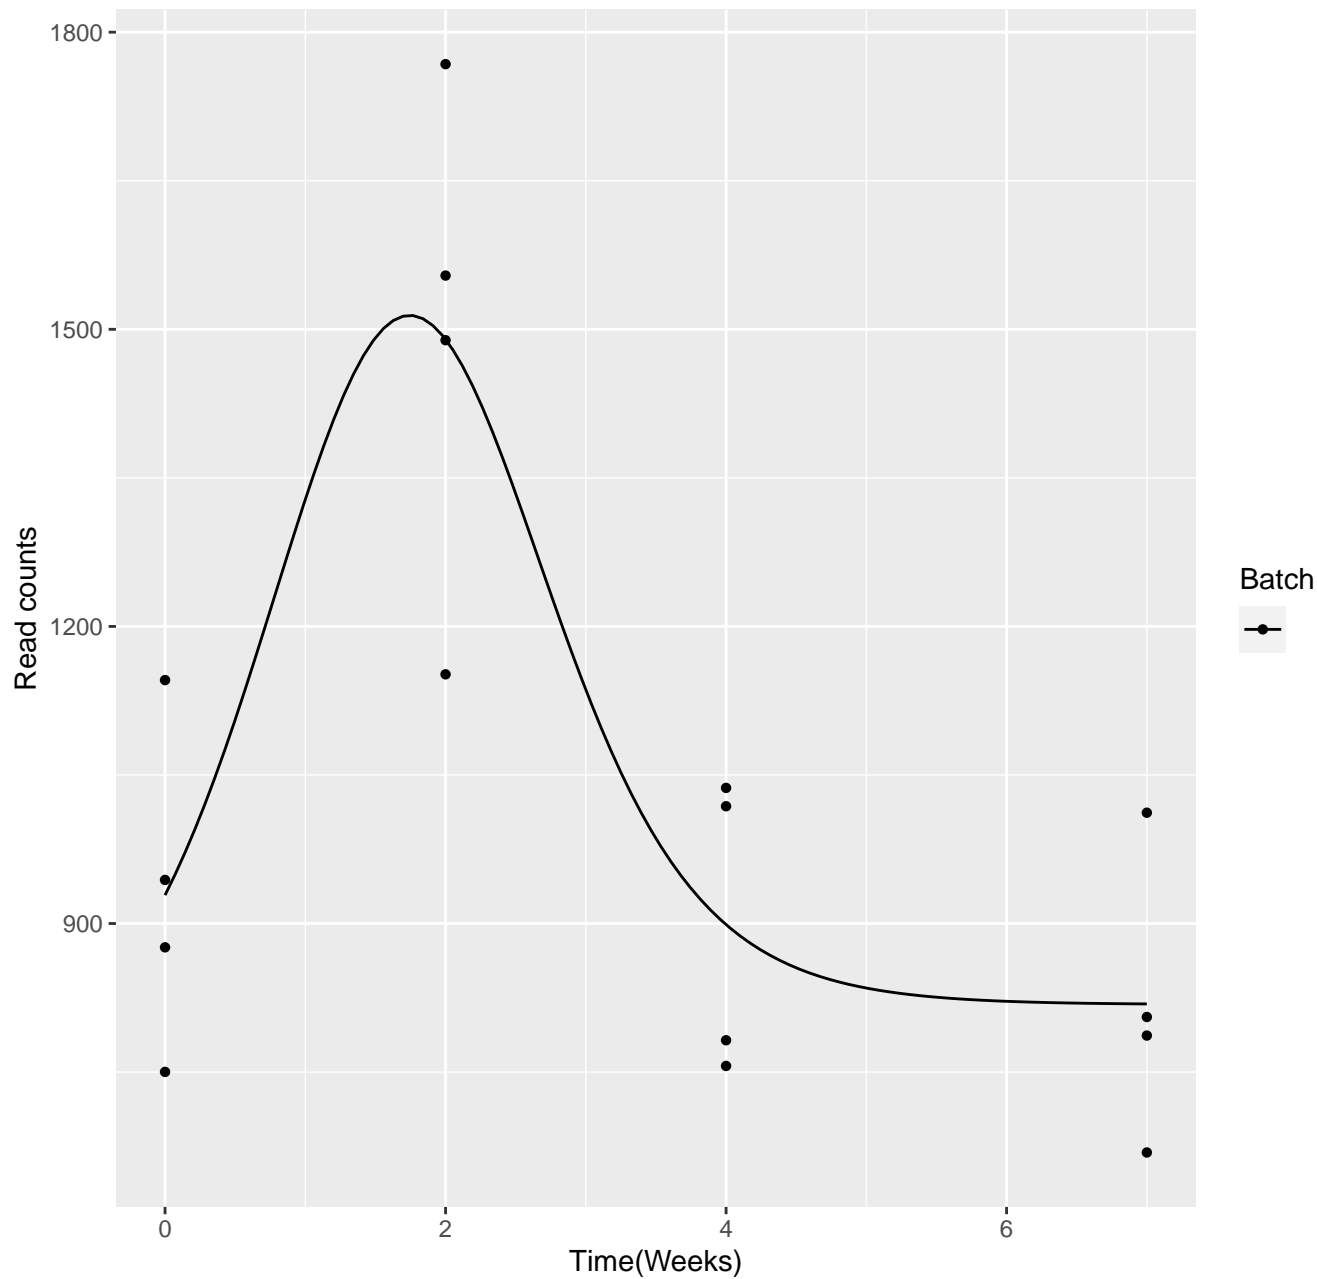

SH3BP2:  $\log_{10} q = -3.02$

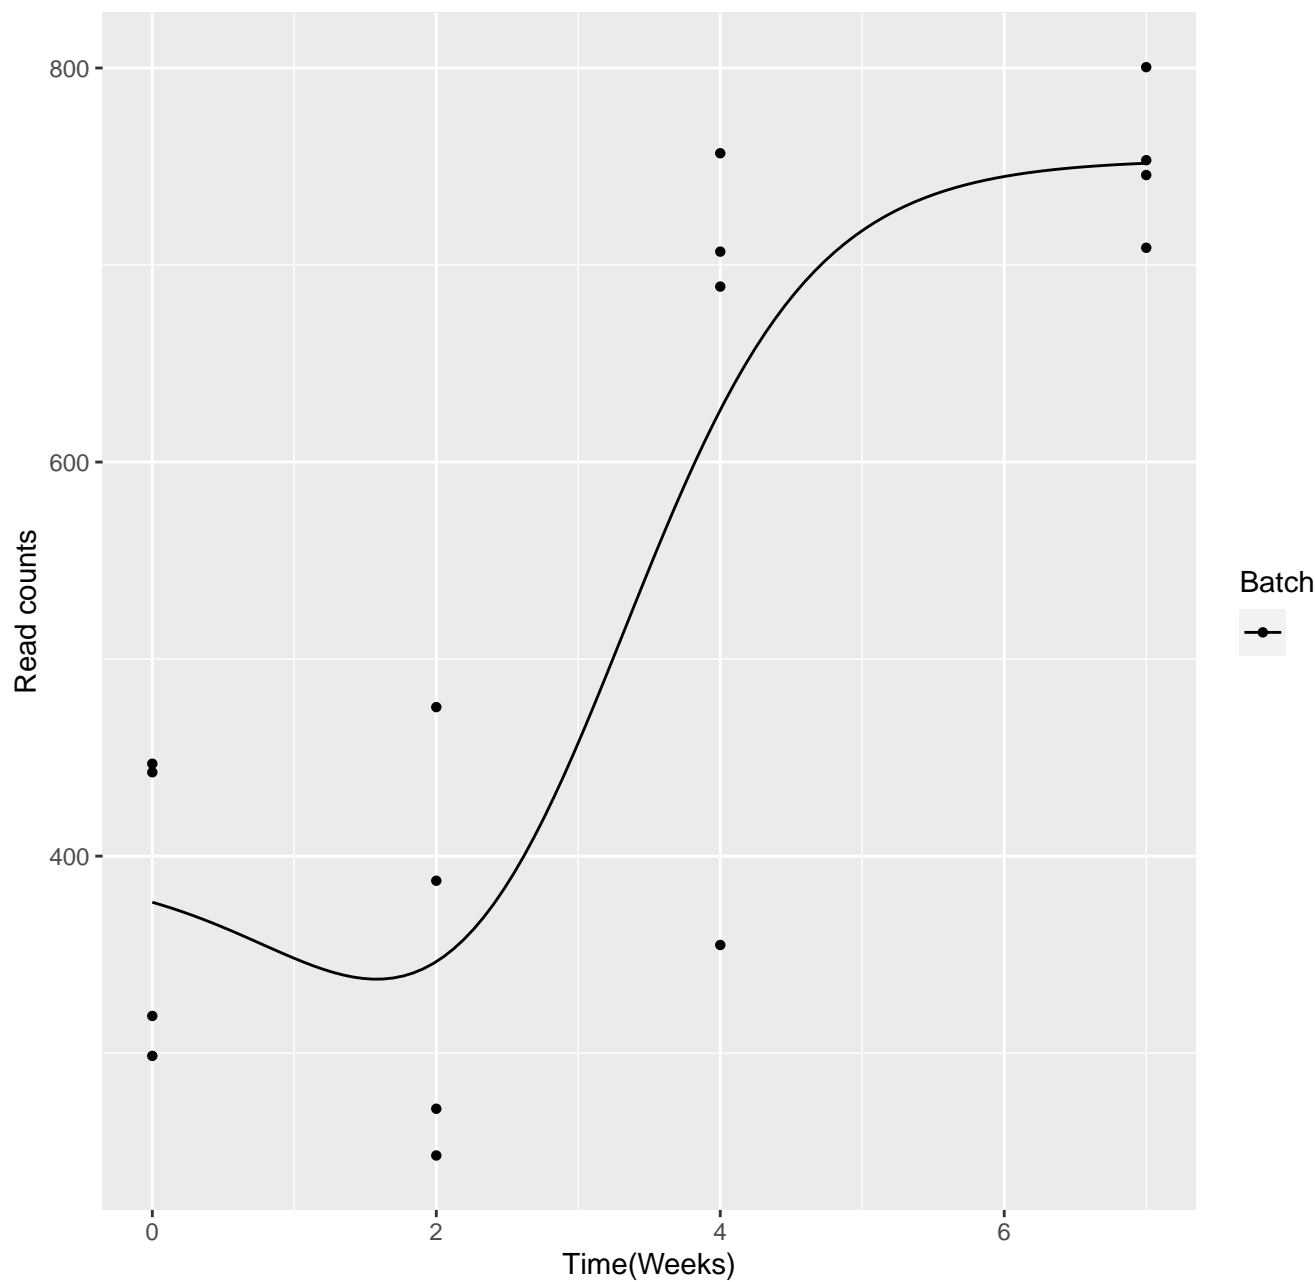

RGS19:  $\log_{10} q = -3.02$

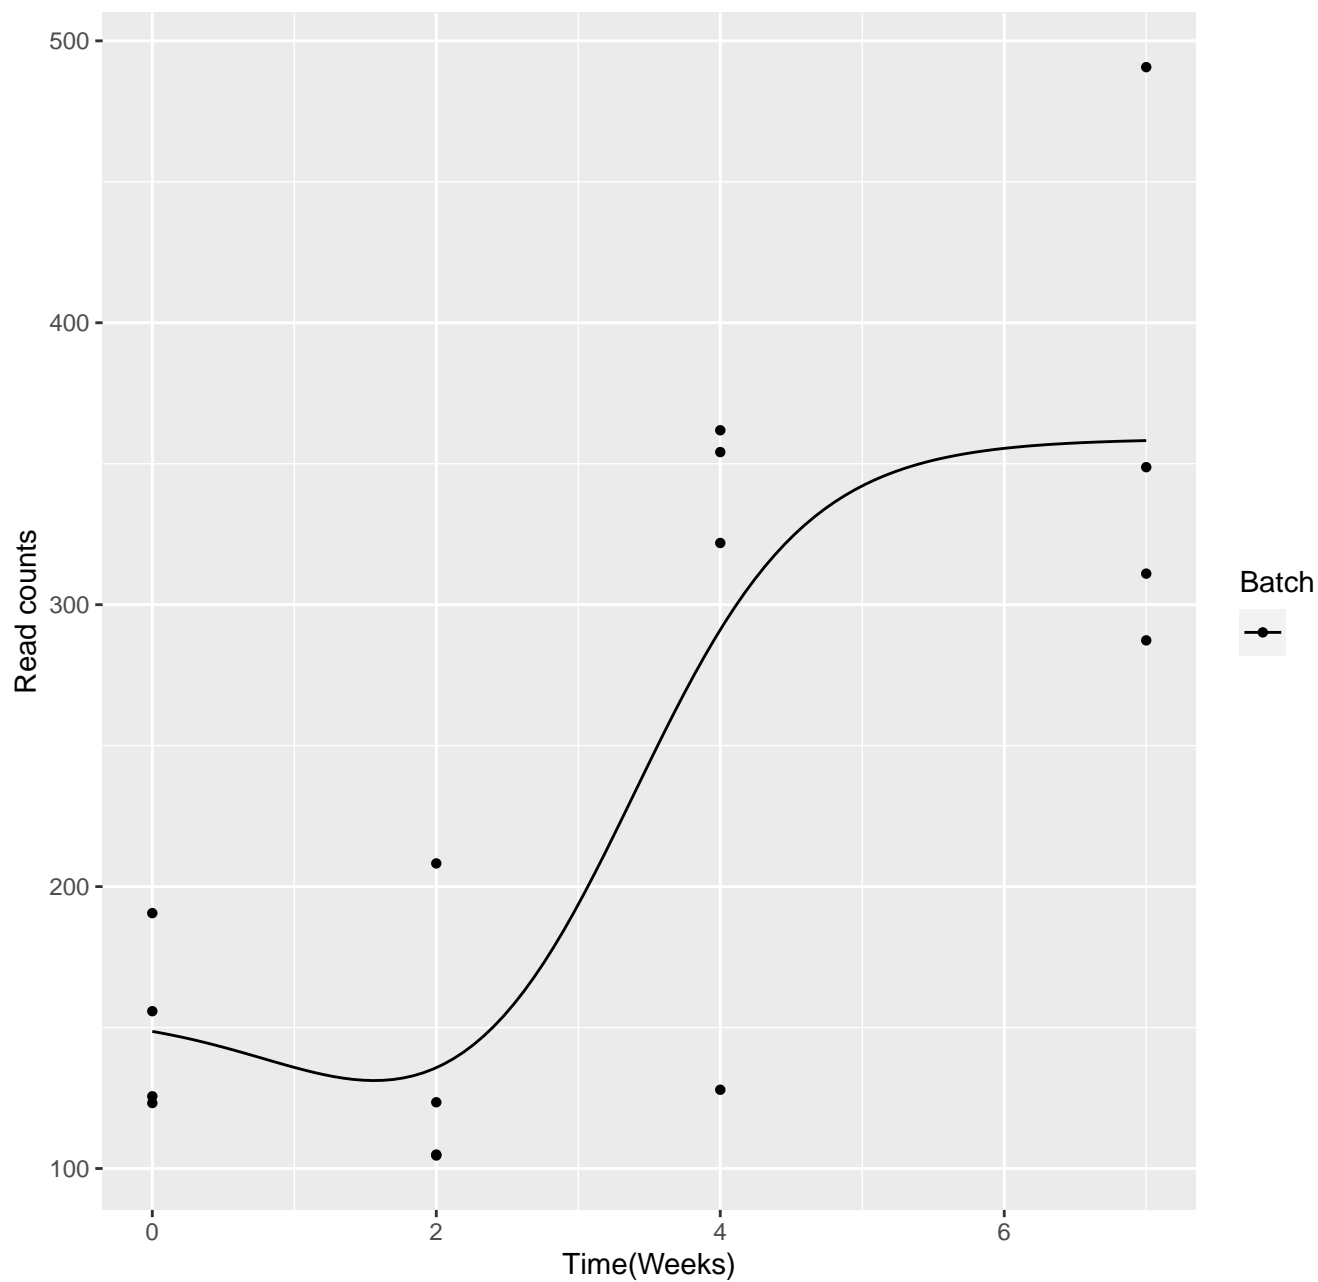



PLBD2:  $\log_{10} q = -3.01$

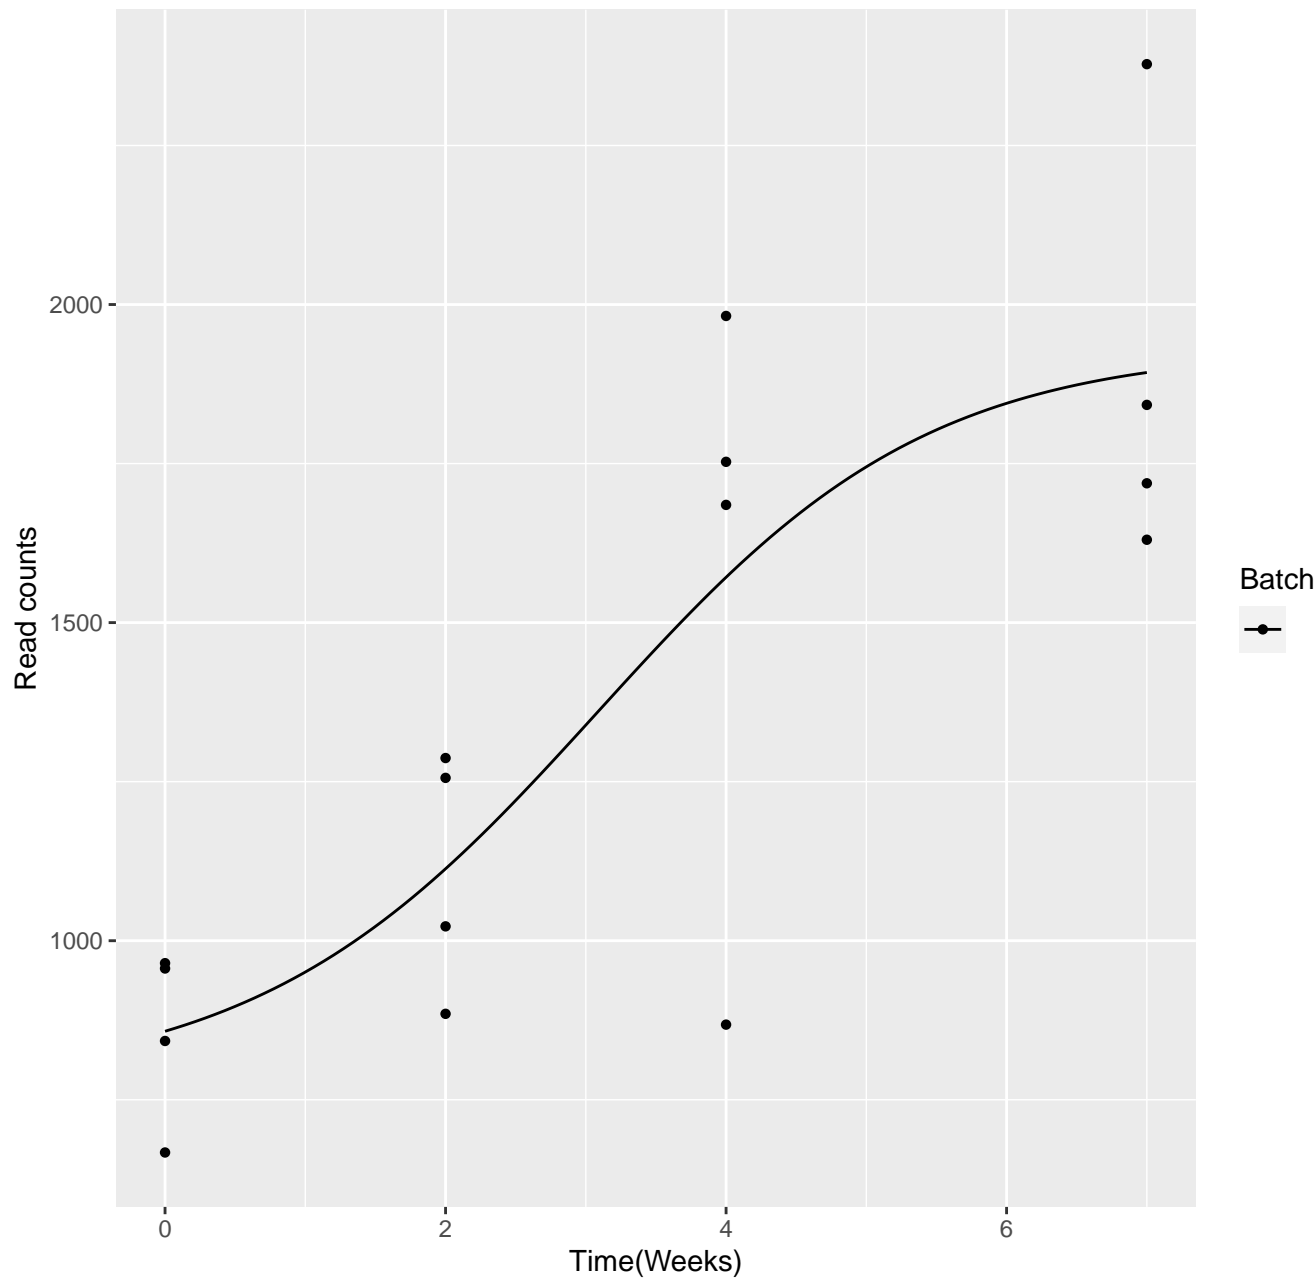

POU3F1:  $\log_{10} q = -3$

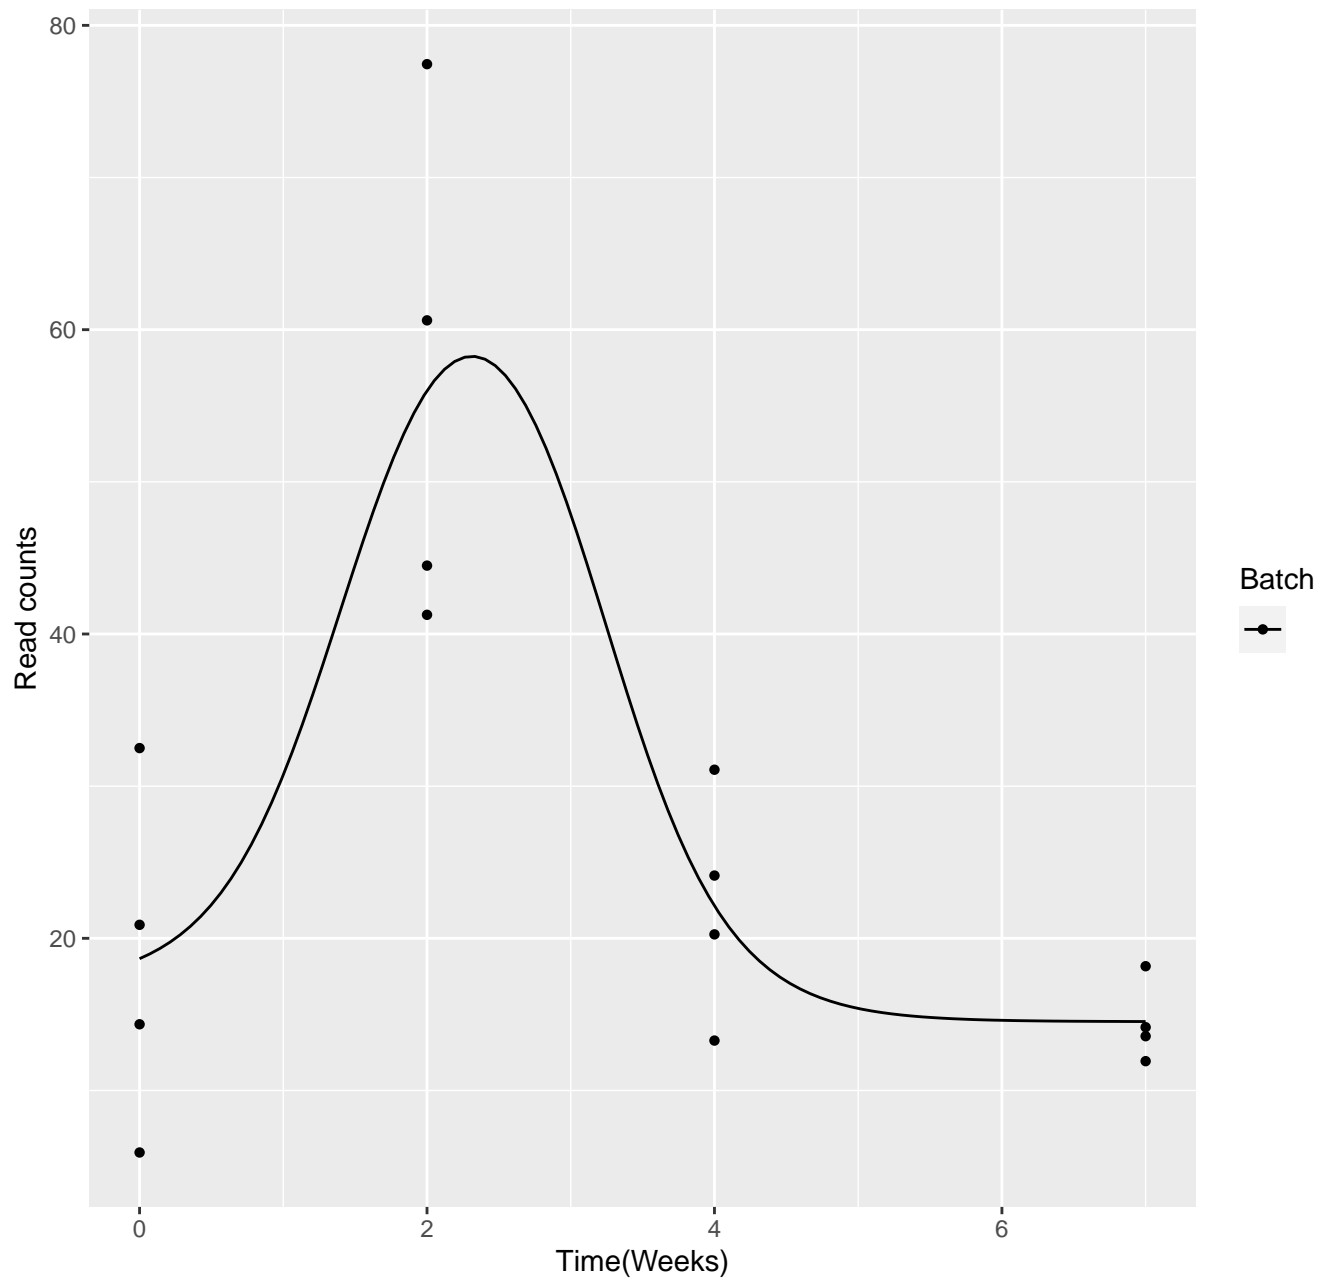

PACSIN2:  $\log_{10} q = -3$

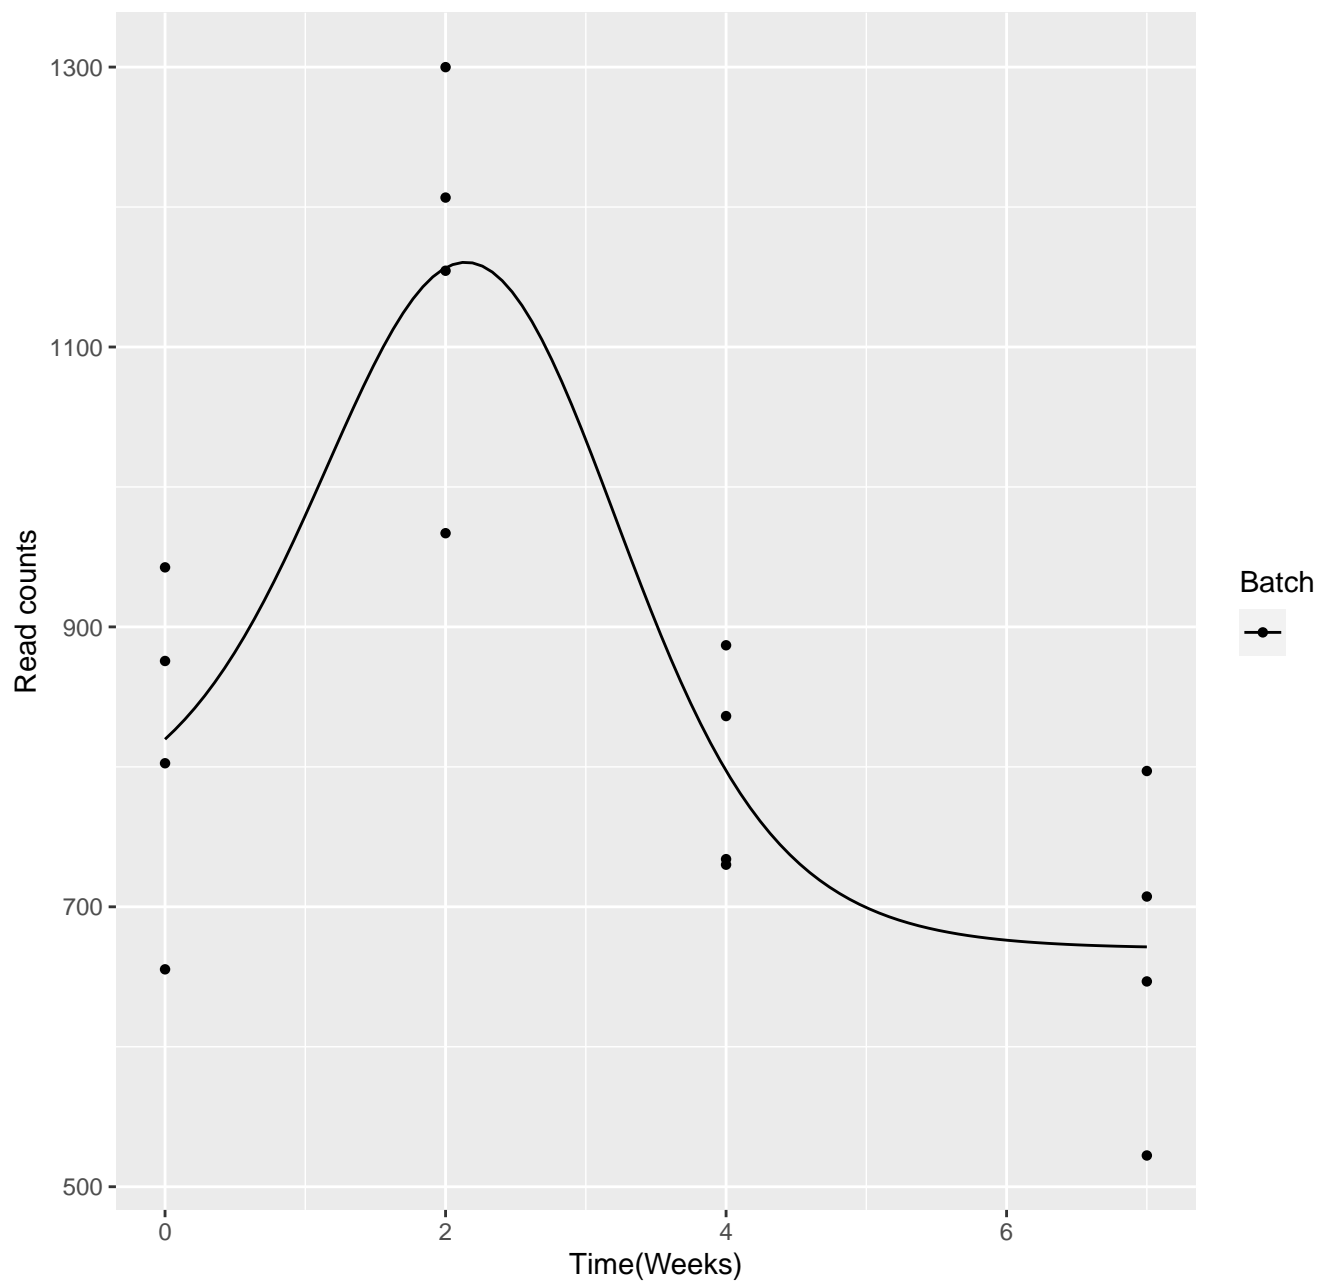

HROB:  $\log_{10} q = -2.99$

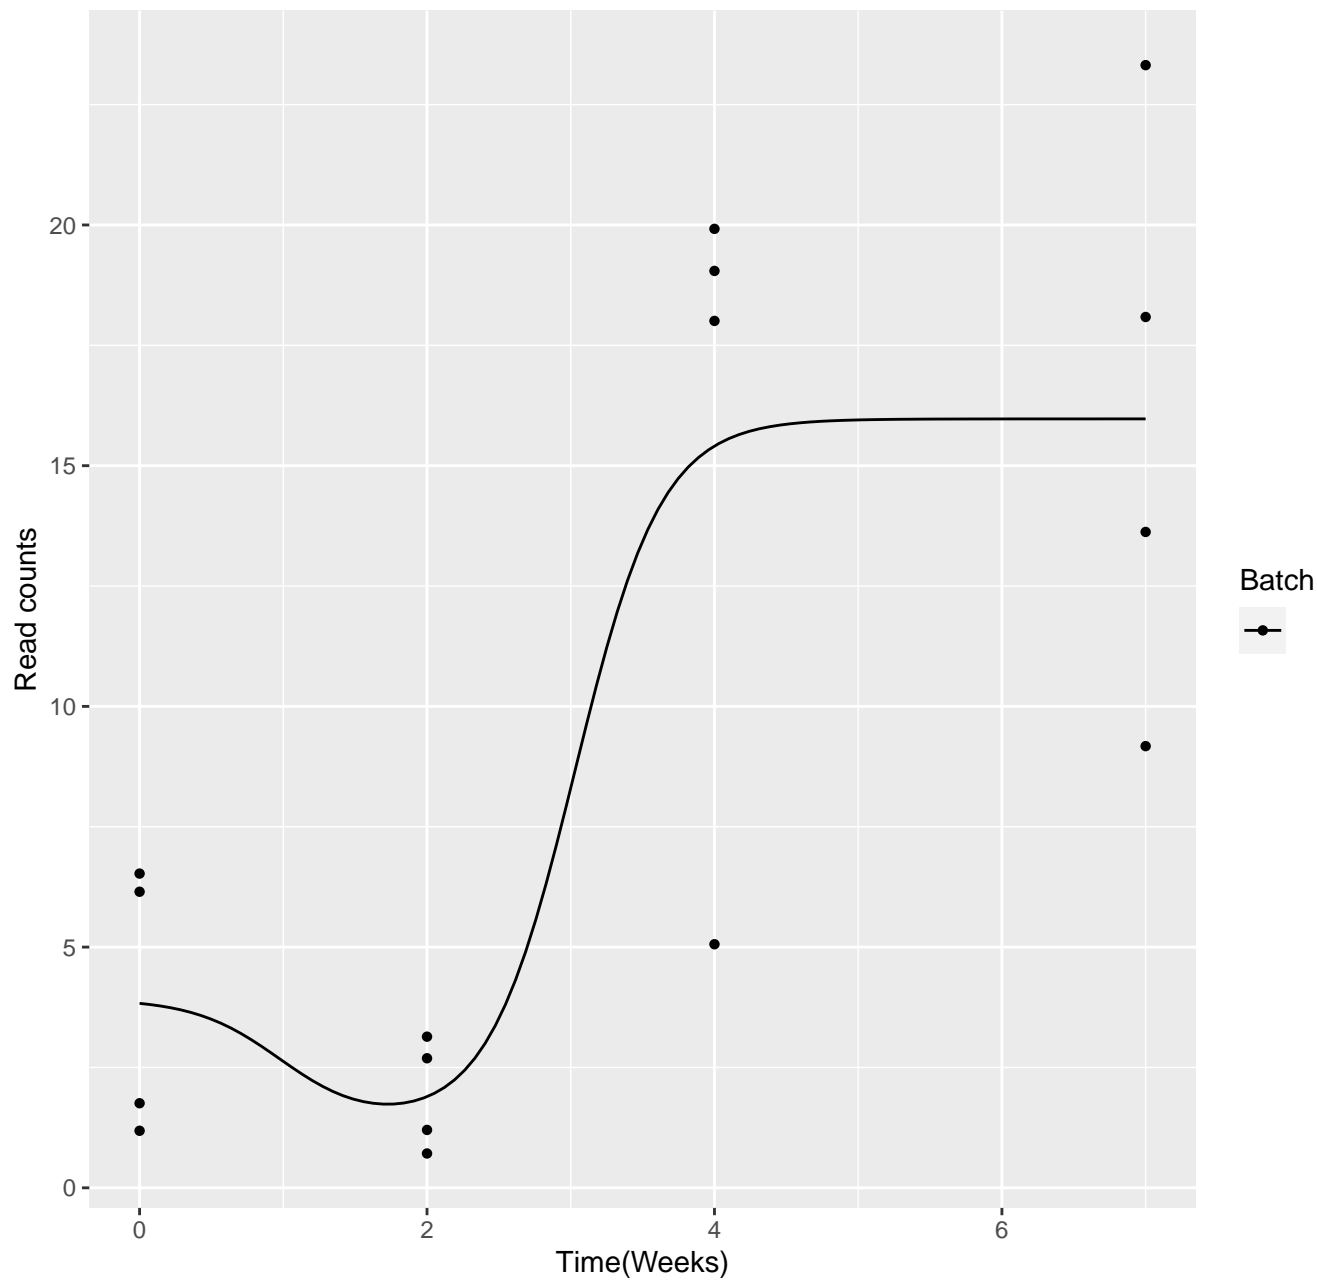

LOC108177974:  $\log_{10} q = -2.99$

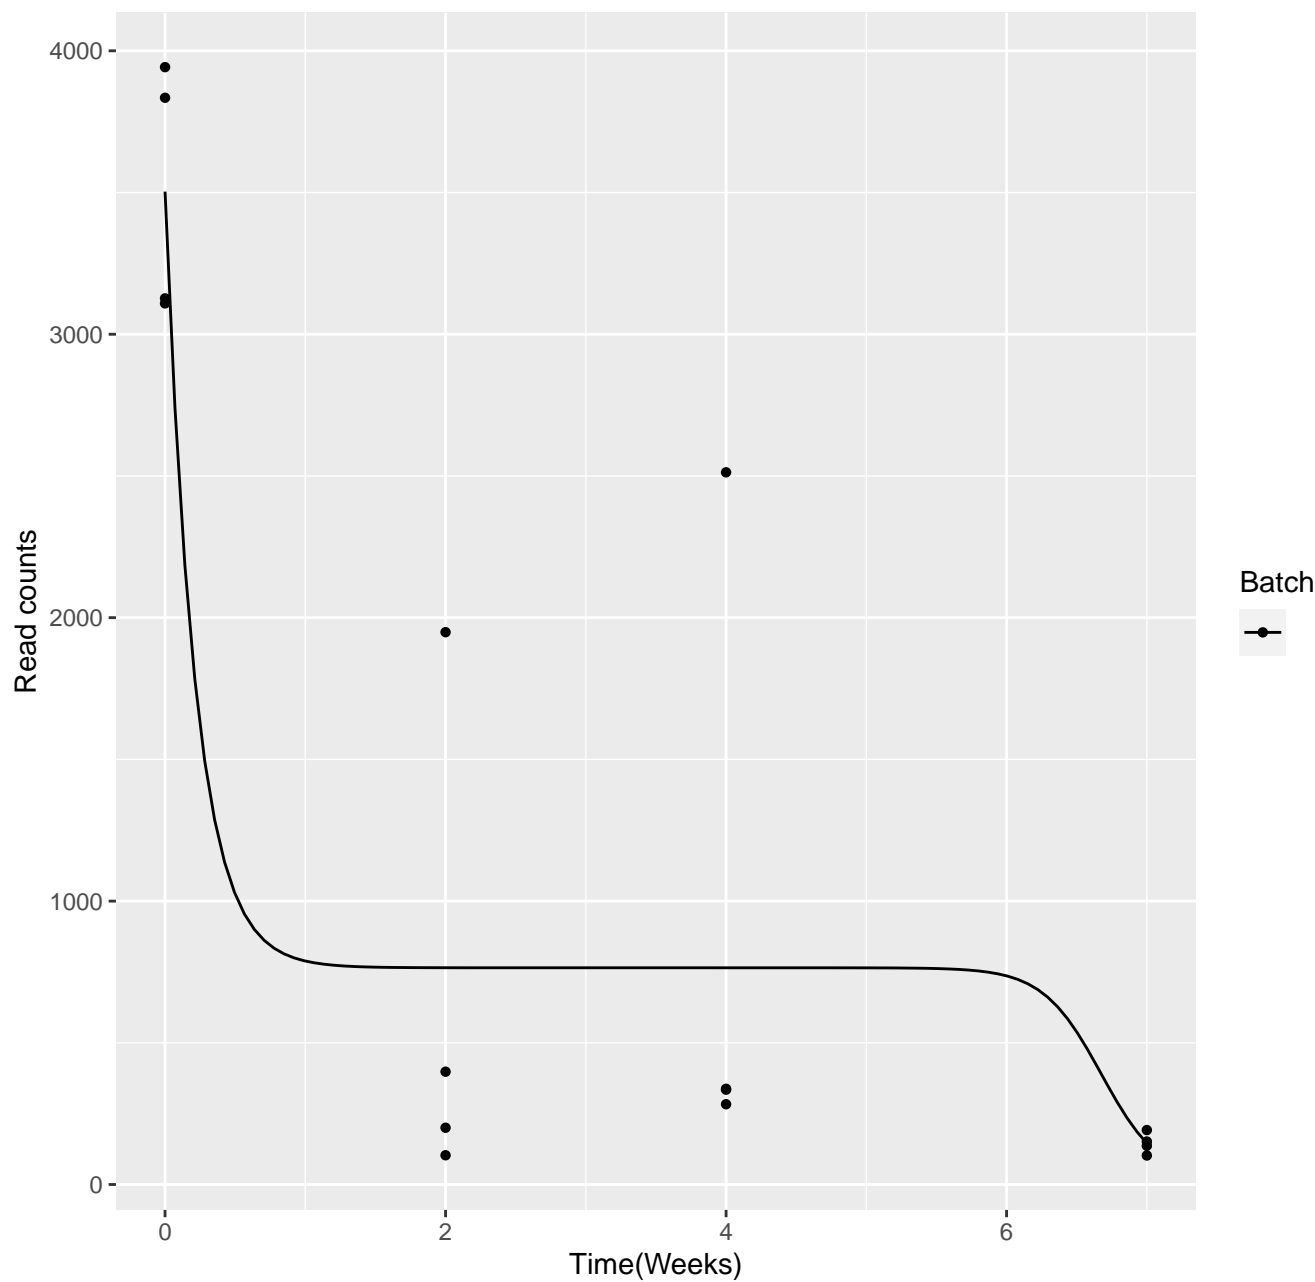

PPP1R12B:  $\log_{10} q = -2.99$

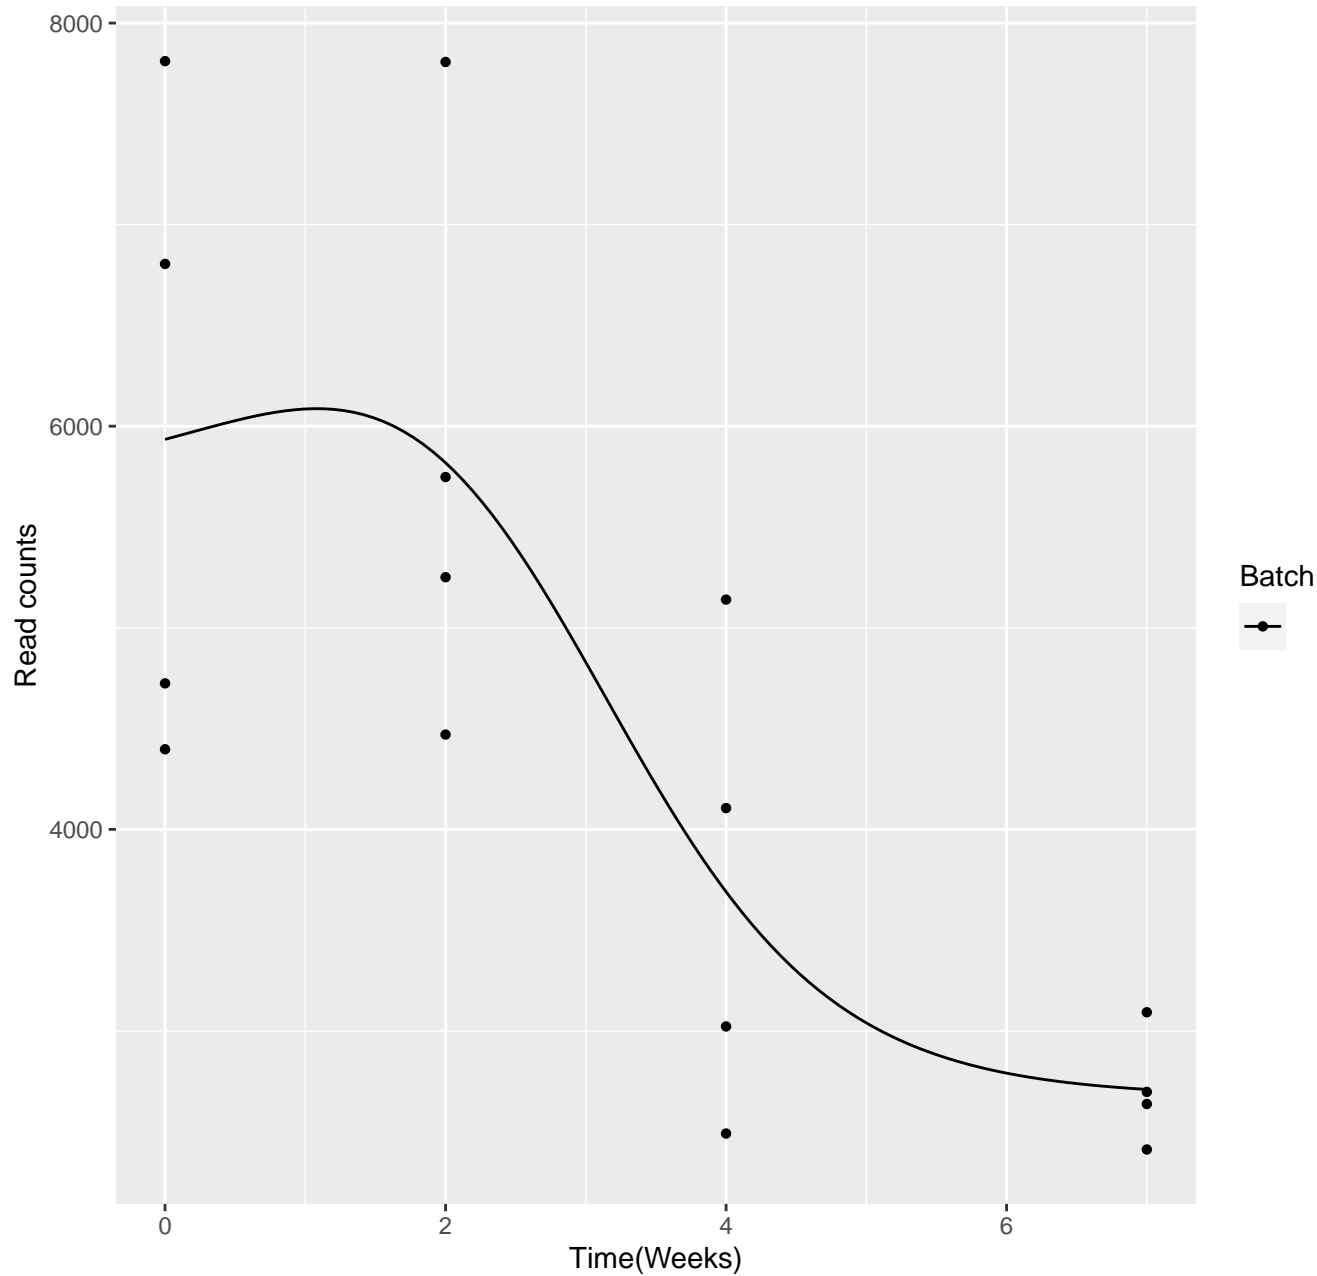

PXDNL:  $\log_{10} q = -2.99$

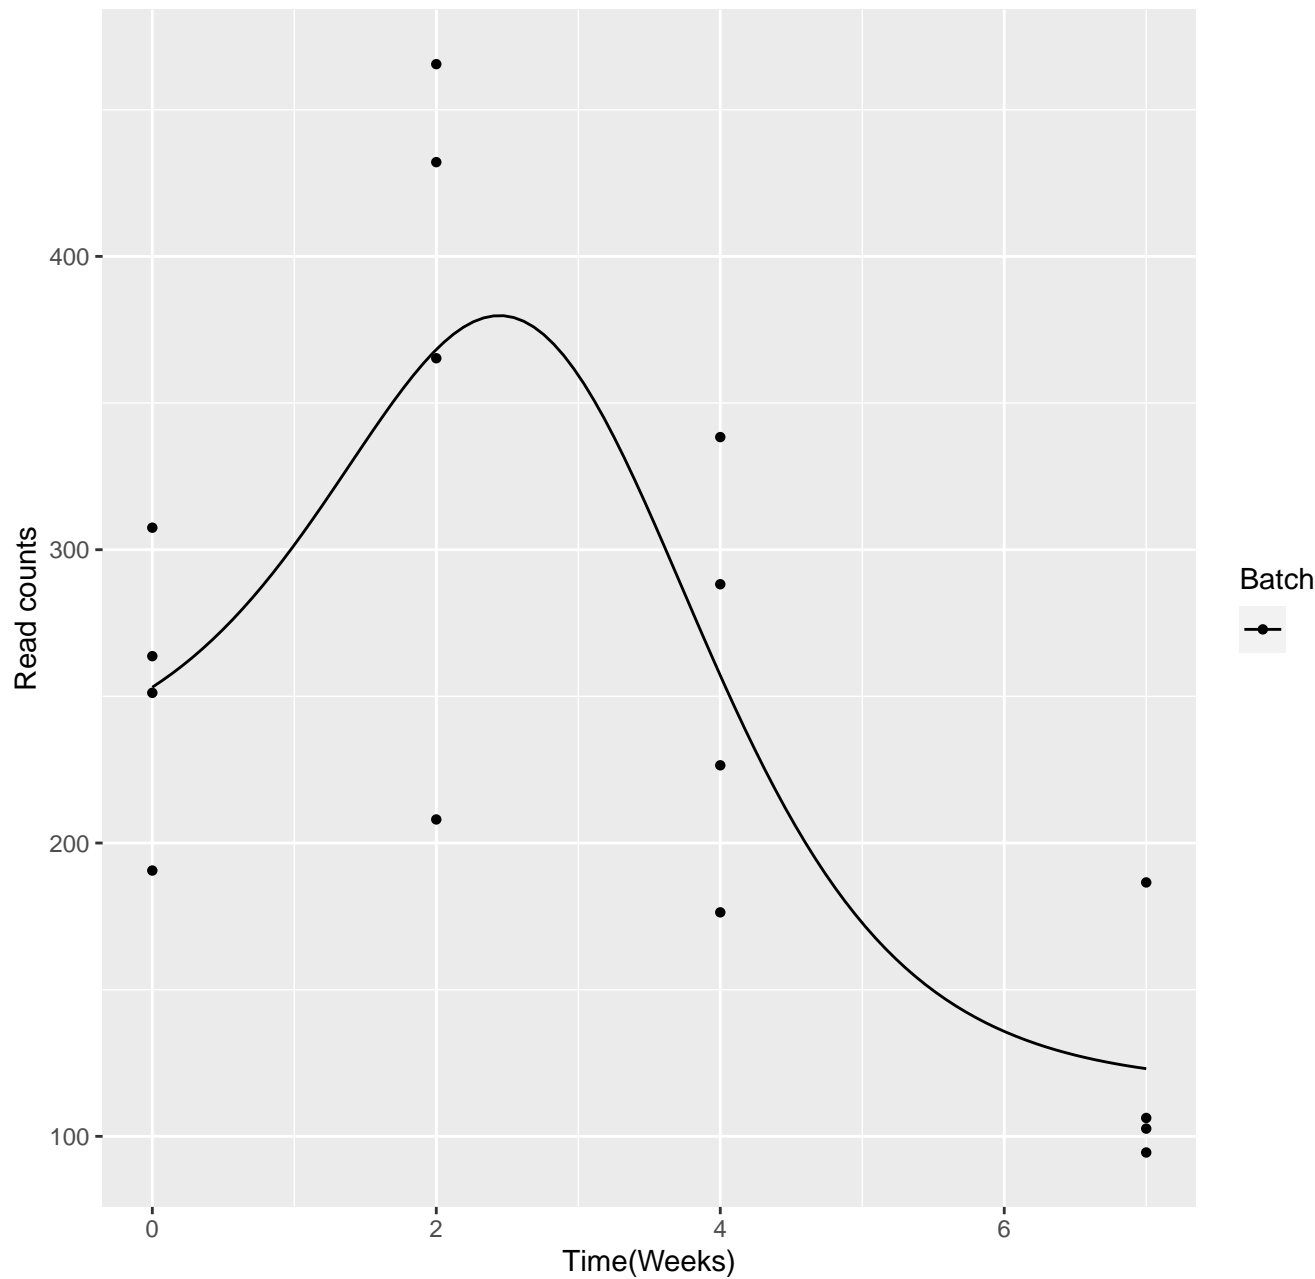

RRM2:  $\log_{10} q = -2.99$

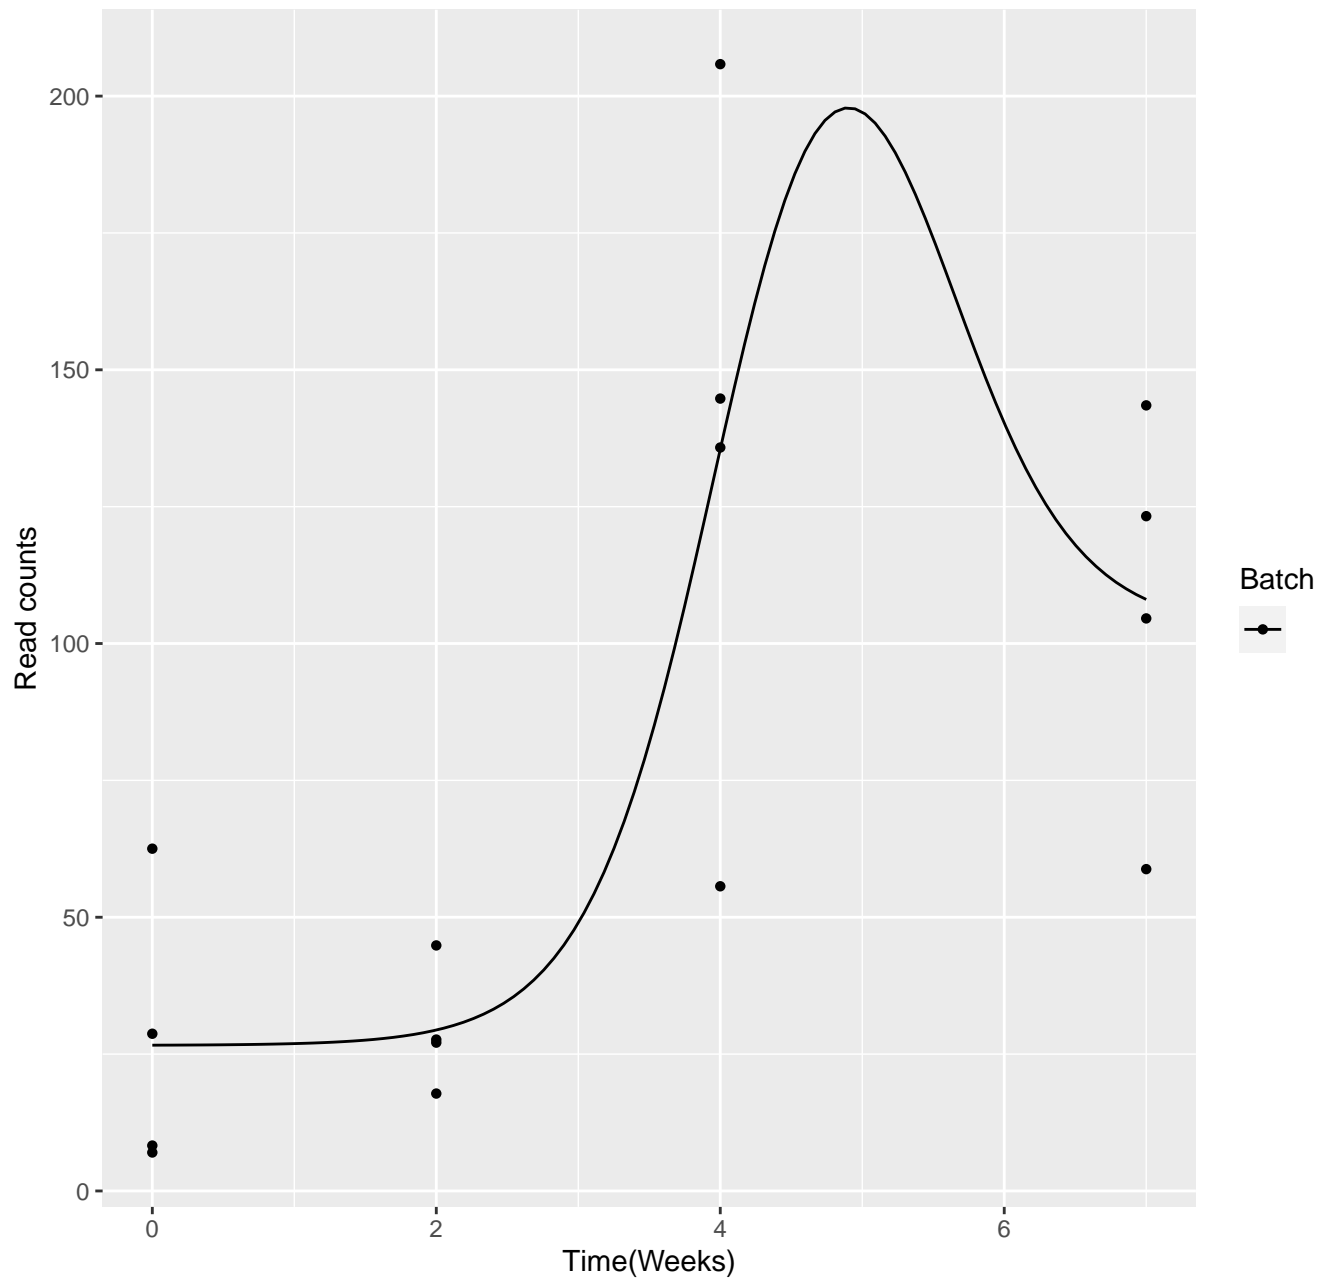



LOC100345097:  $\log_{10} q = -2.99$

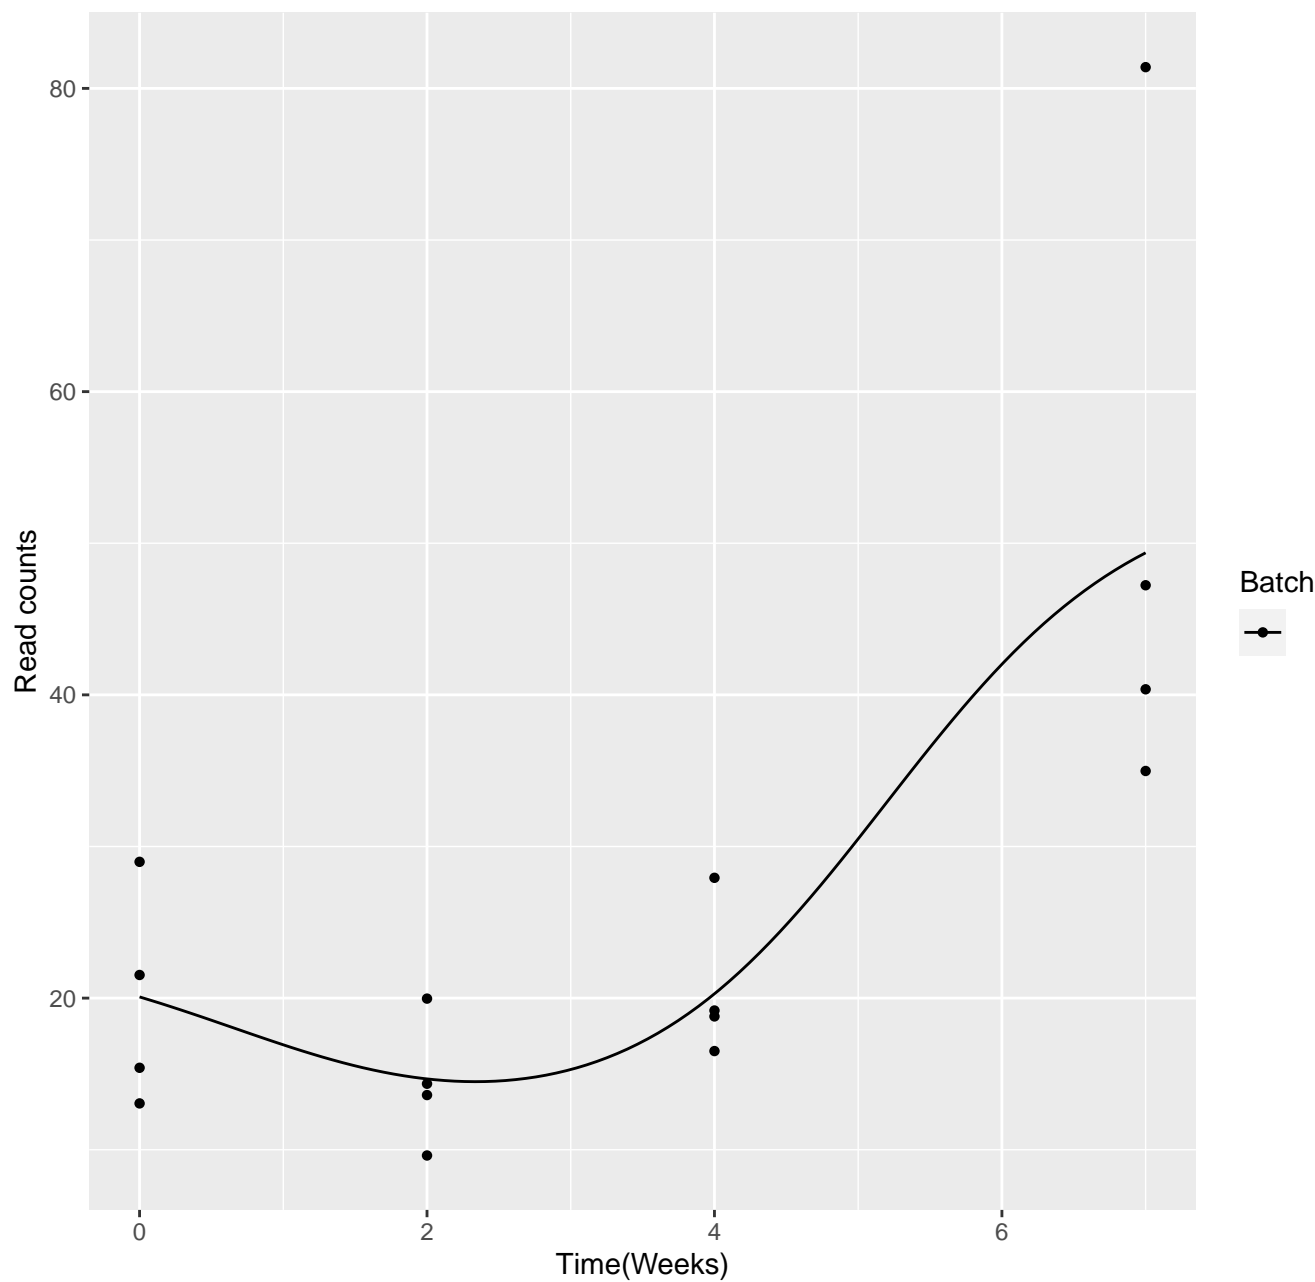

LOC108175785:  $\log_{10} q = -2.99$

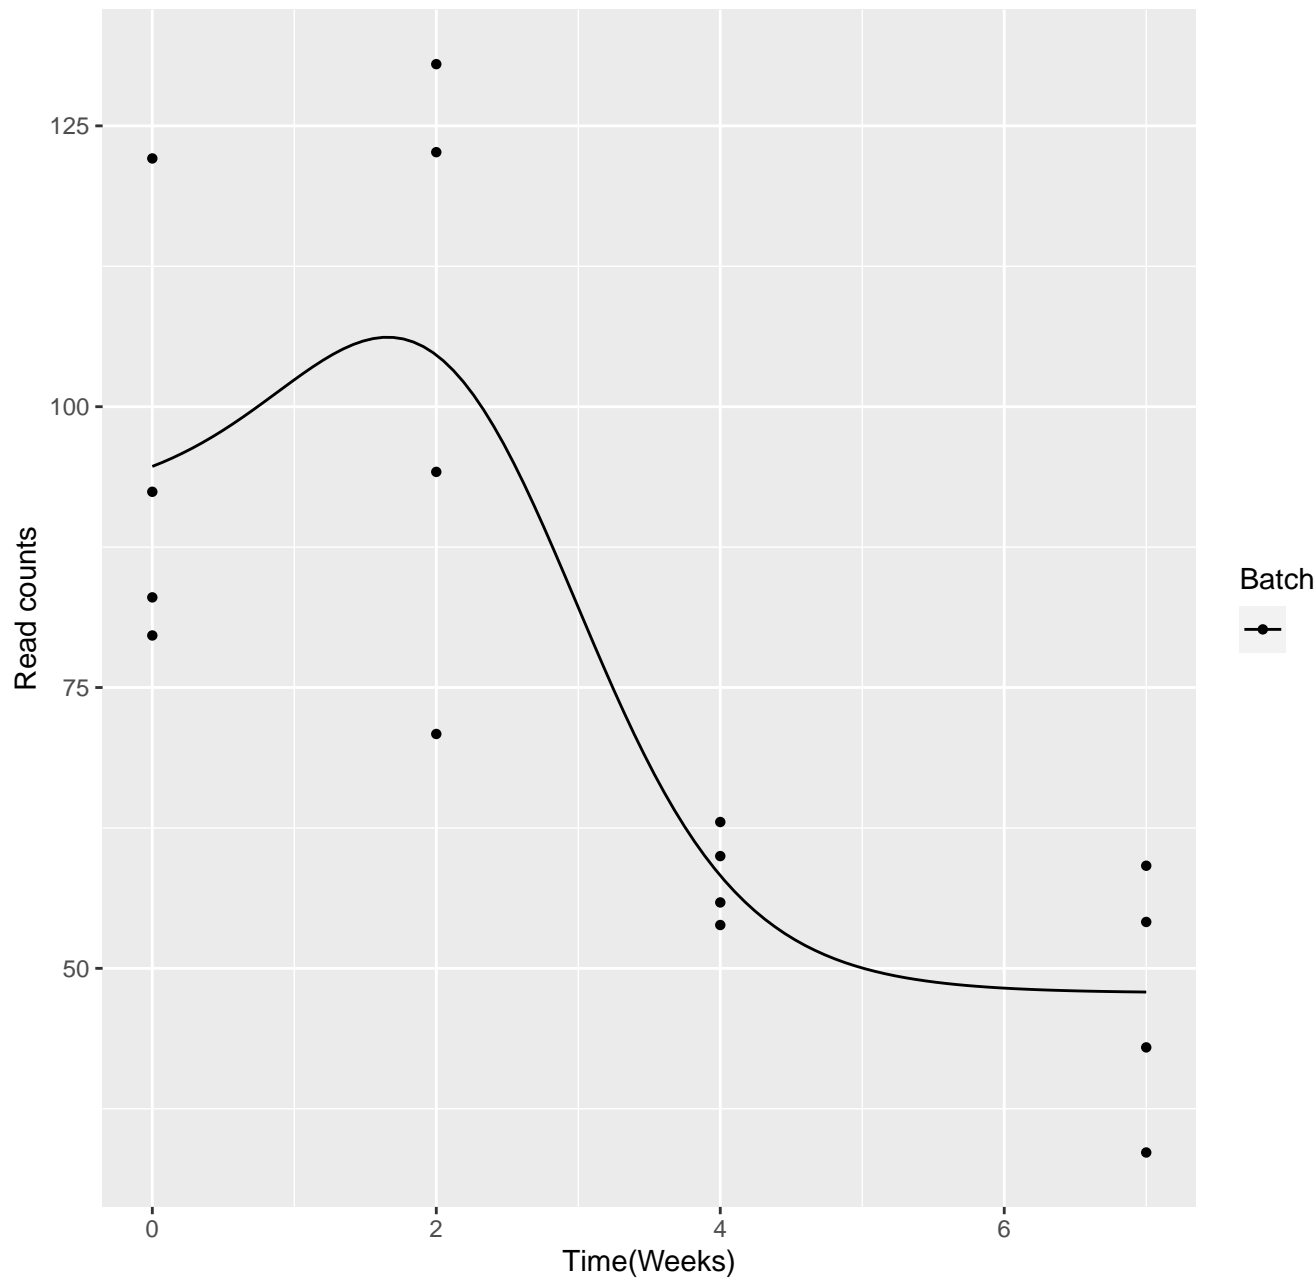

DNAJB4:  $\log_{10} q = -2.99$

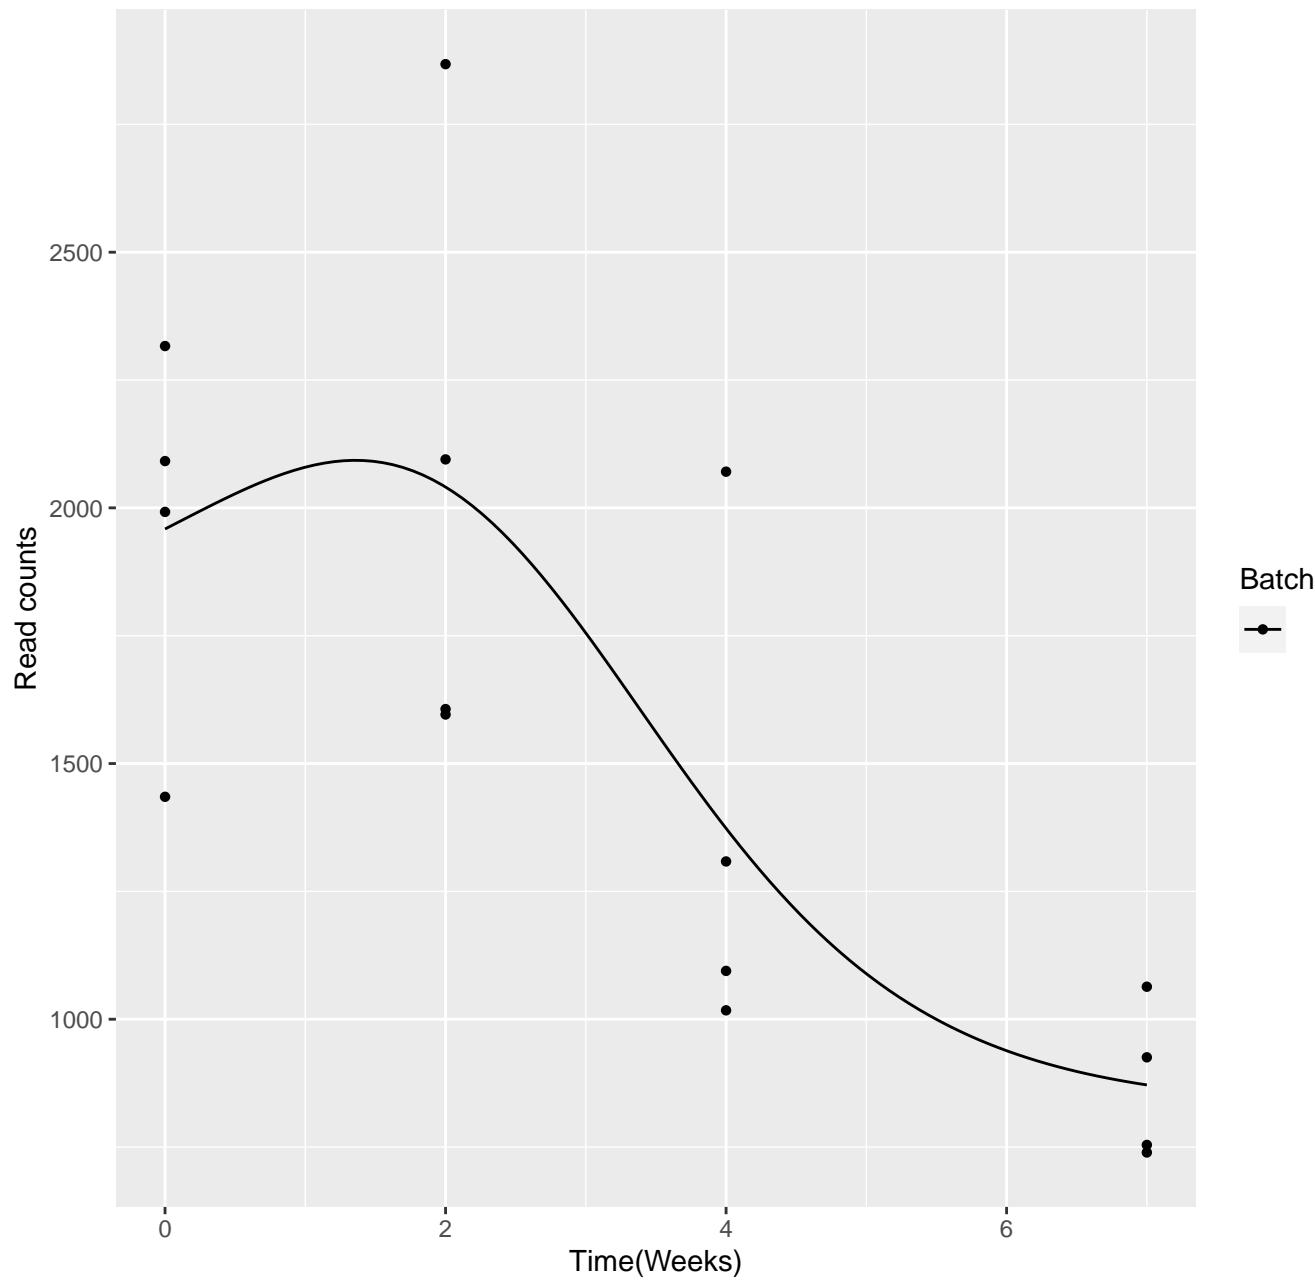

TMEM158:  $\log_{10} q = -2.99$

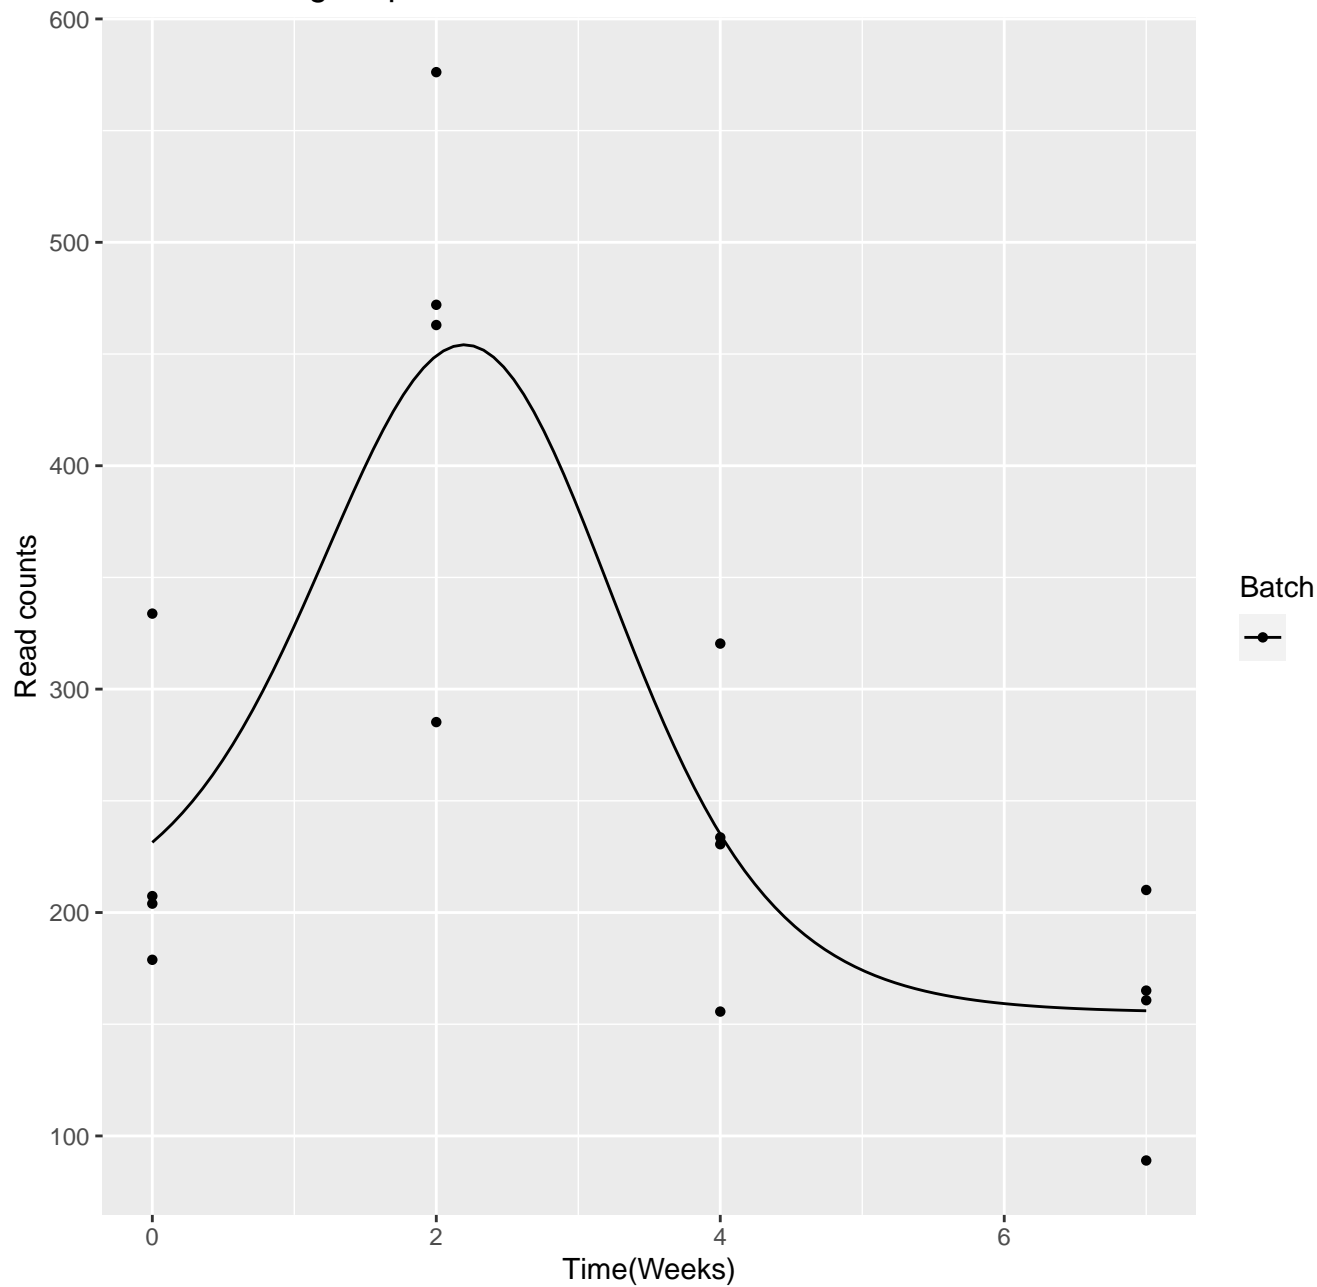

BMAL2:  $\log_{10} q = -2.96$

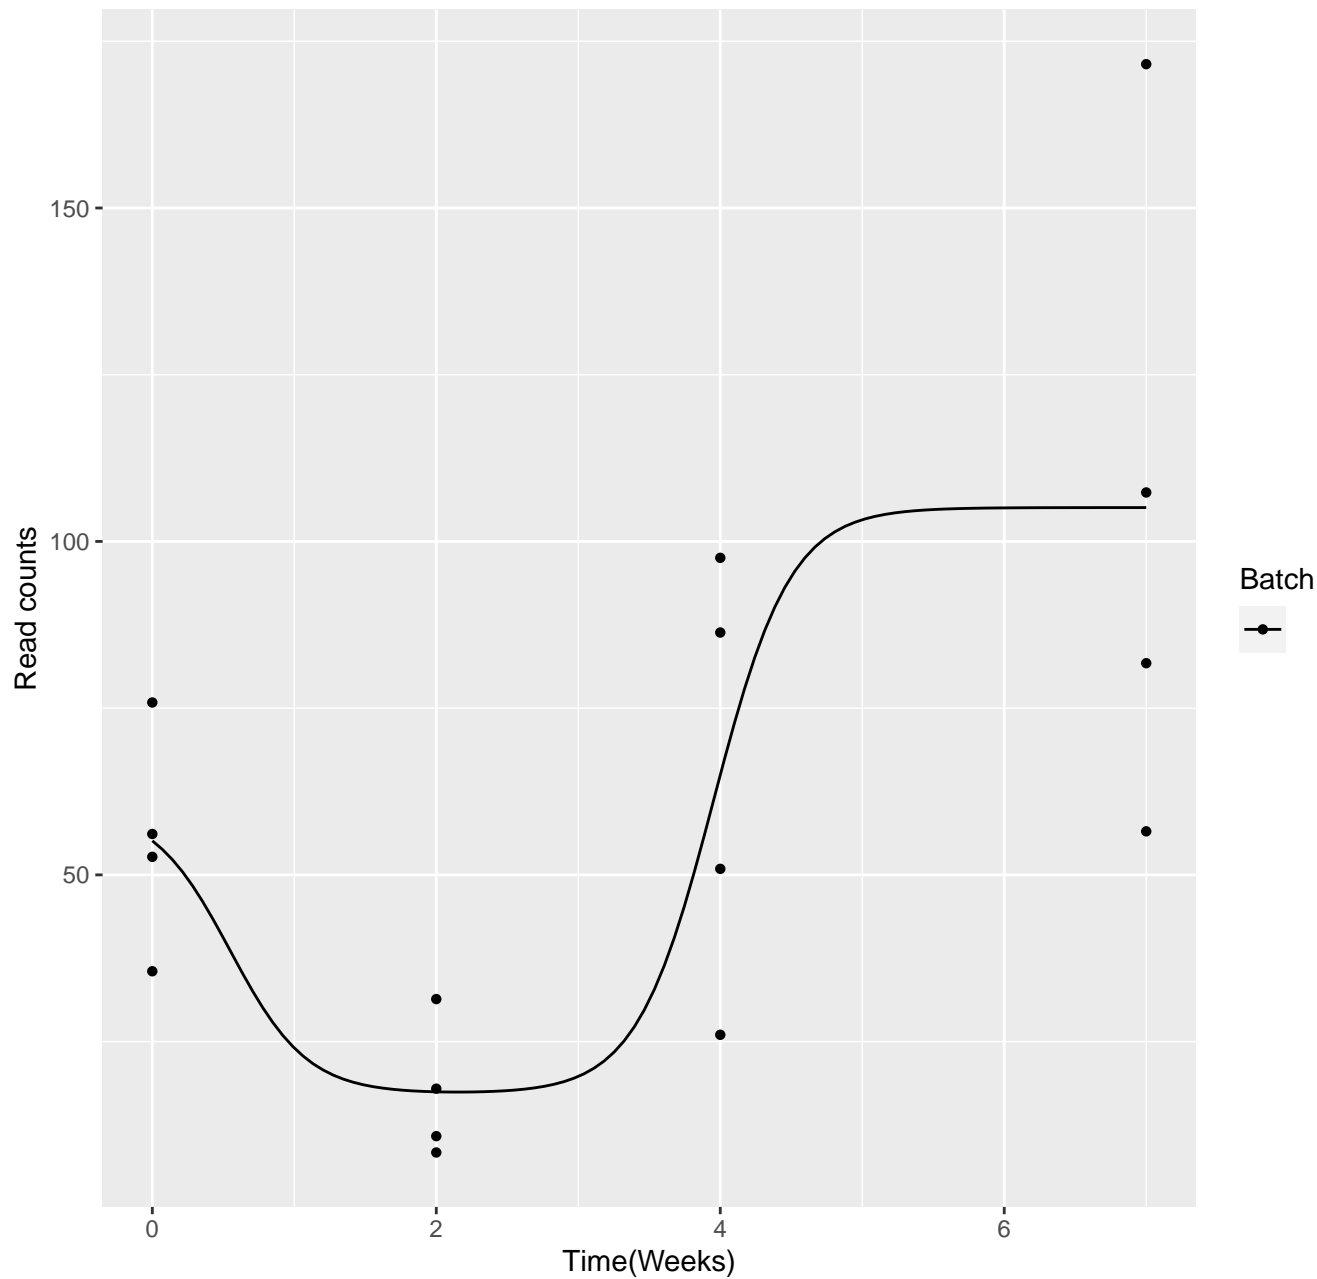

ANO4:  $\log_{10} q = -2.96$

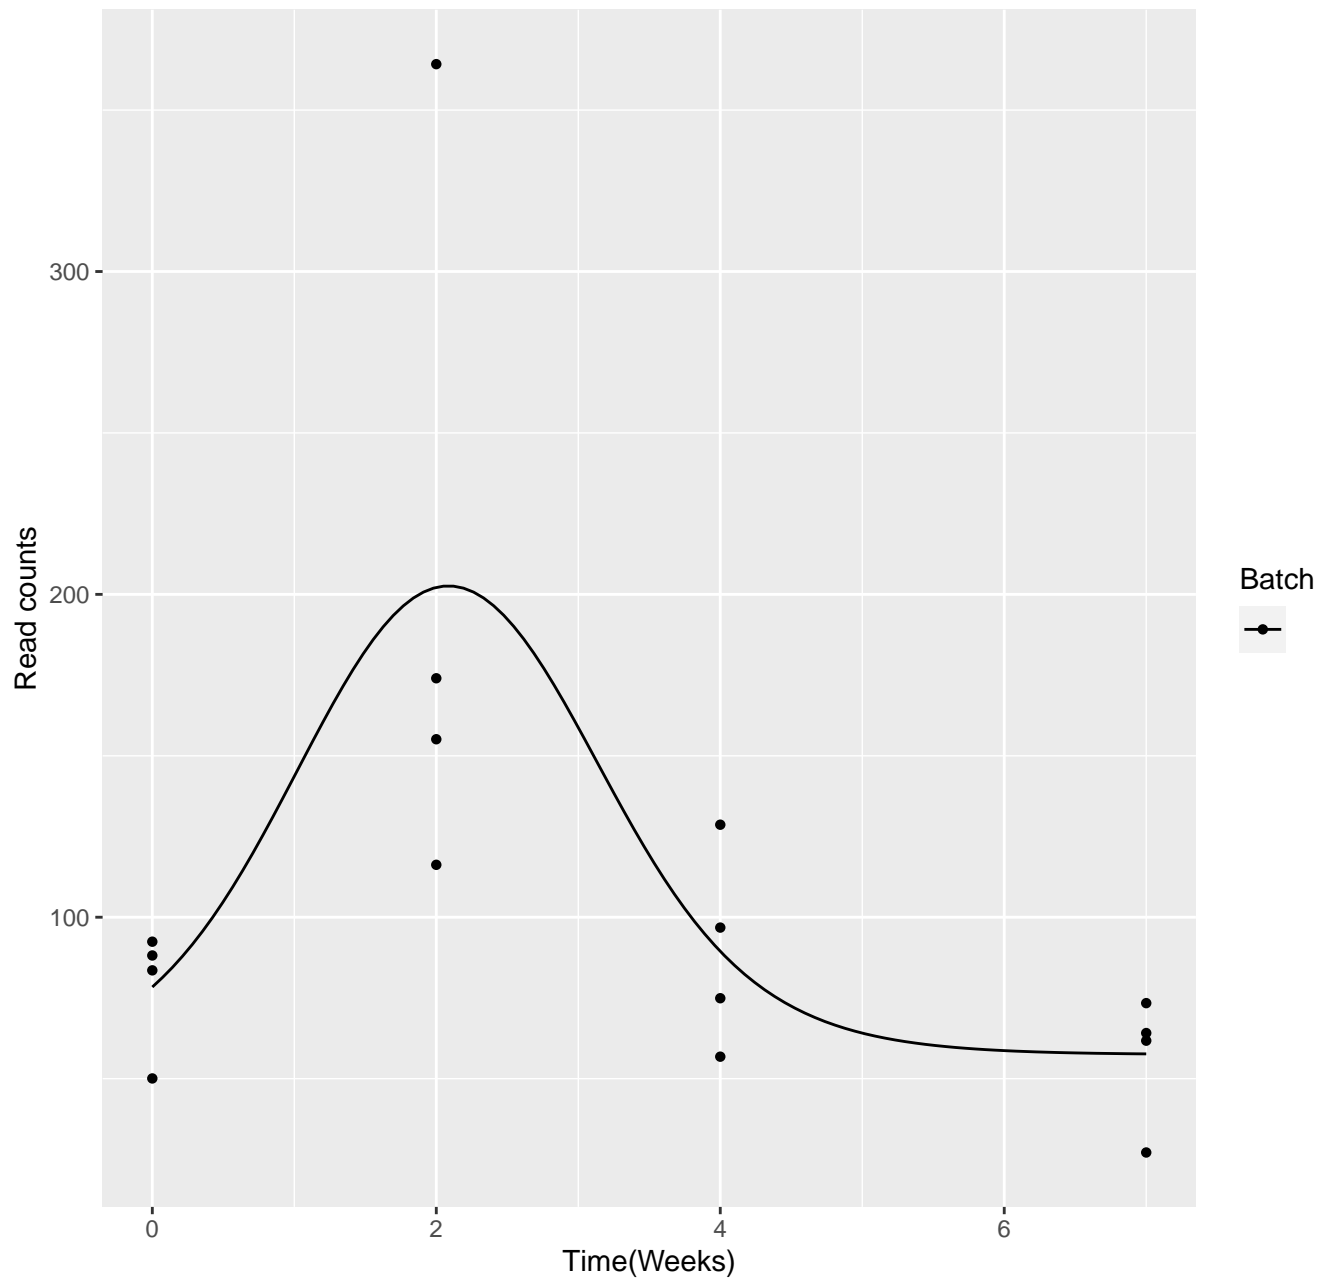

POLR3H:  $\log_{10} q = -2.96$

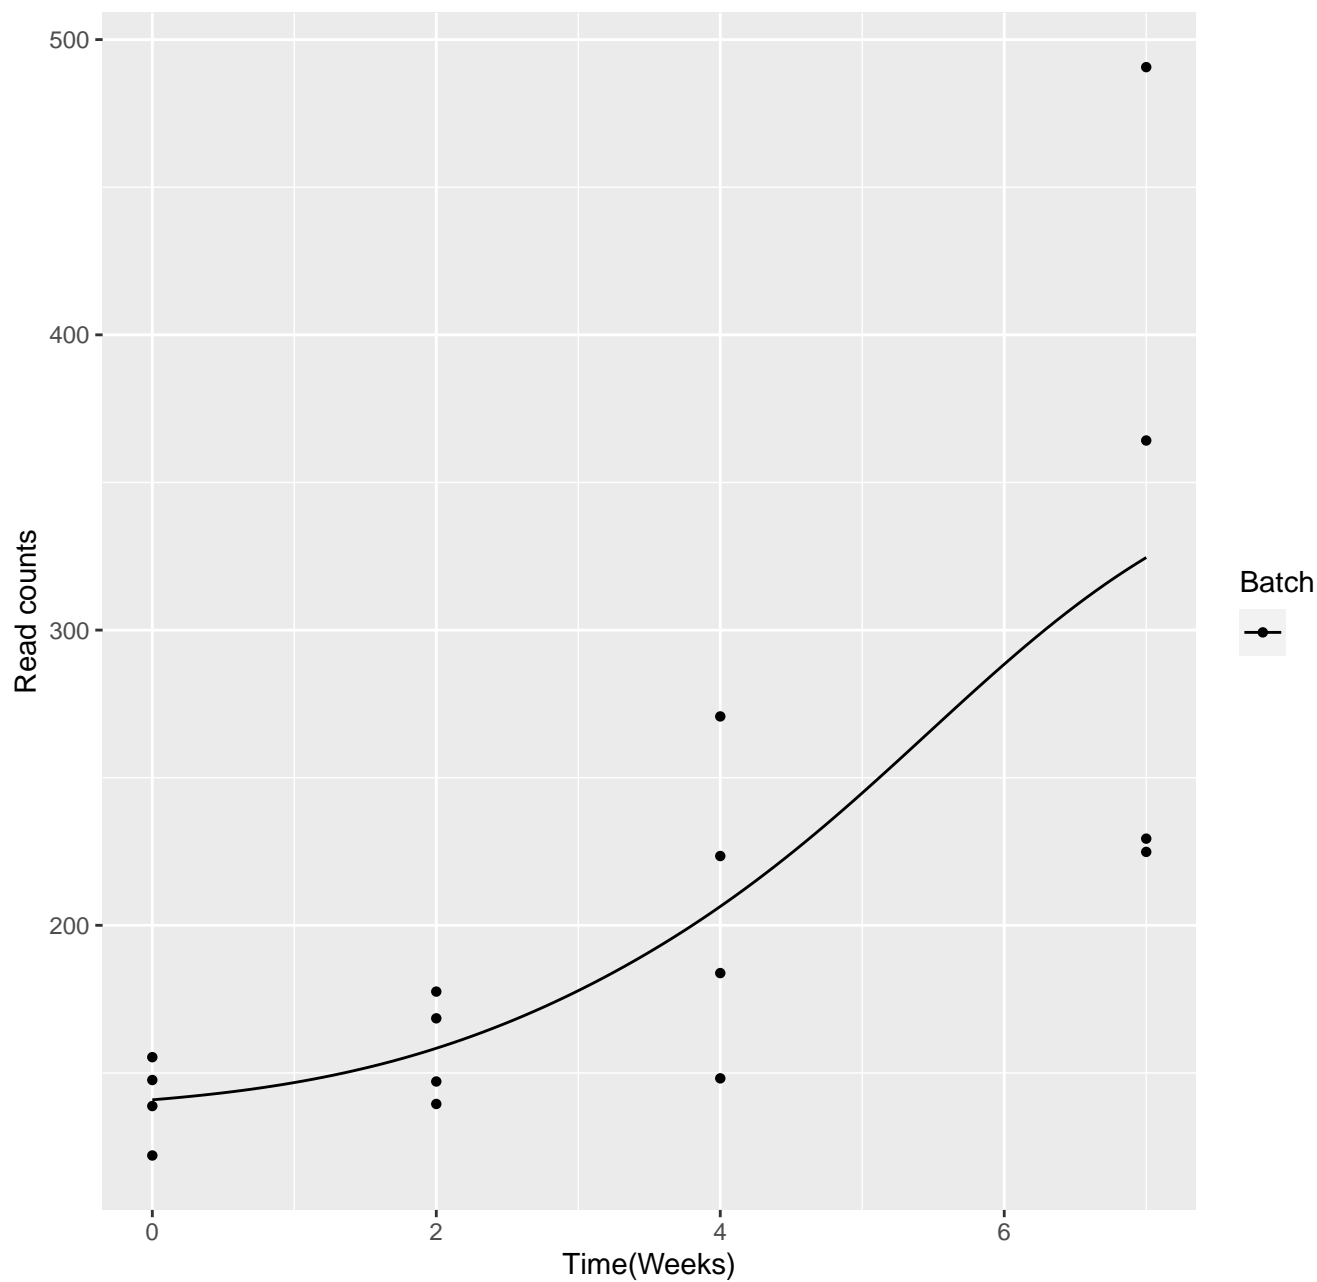

CC2D2A:  $\log_{10} q = -2.96$

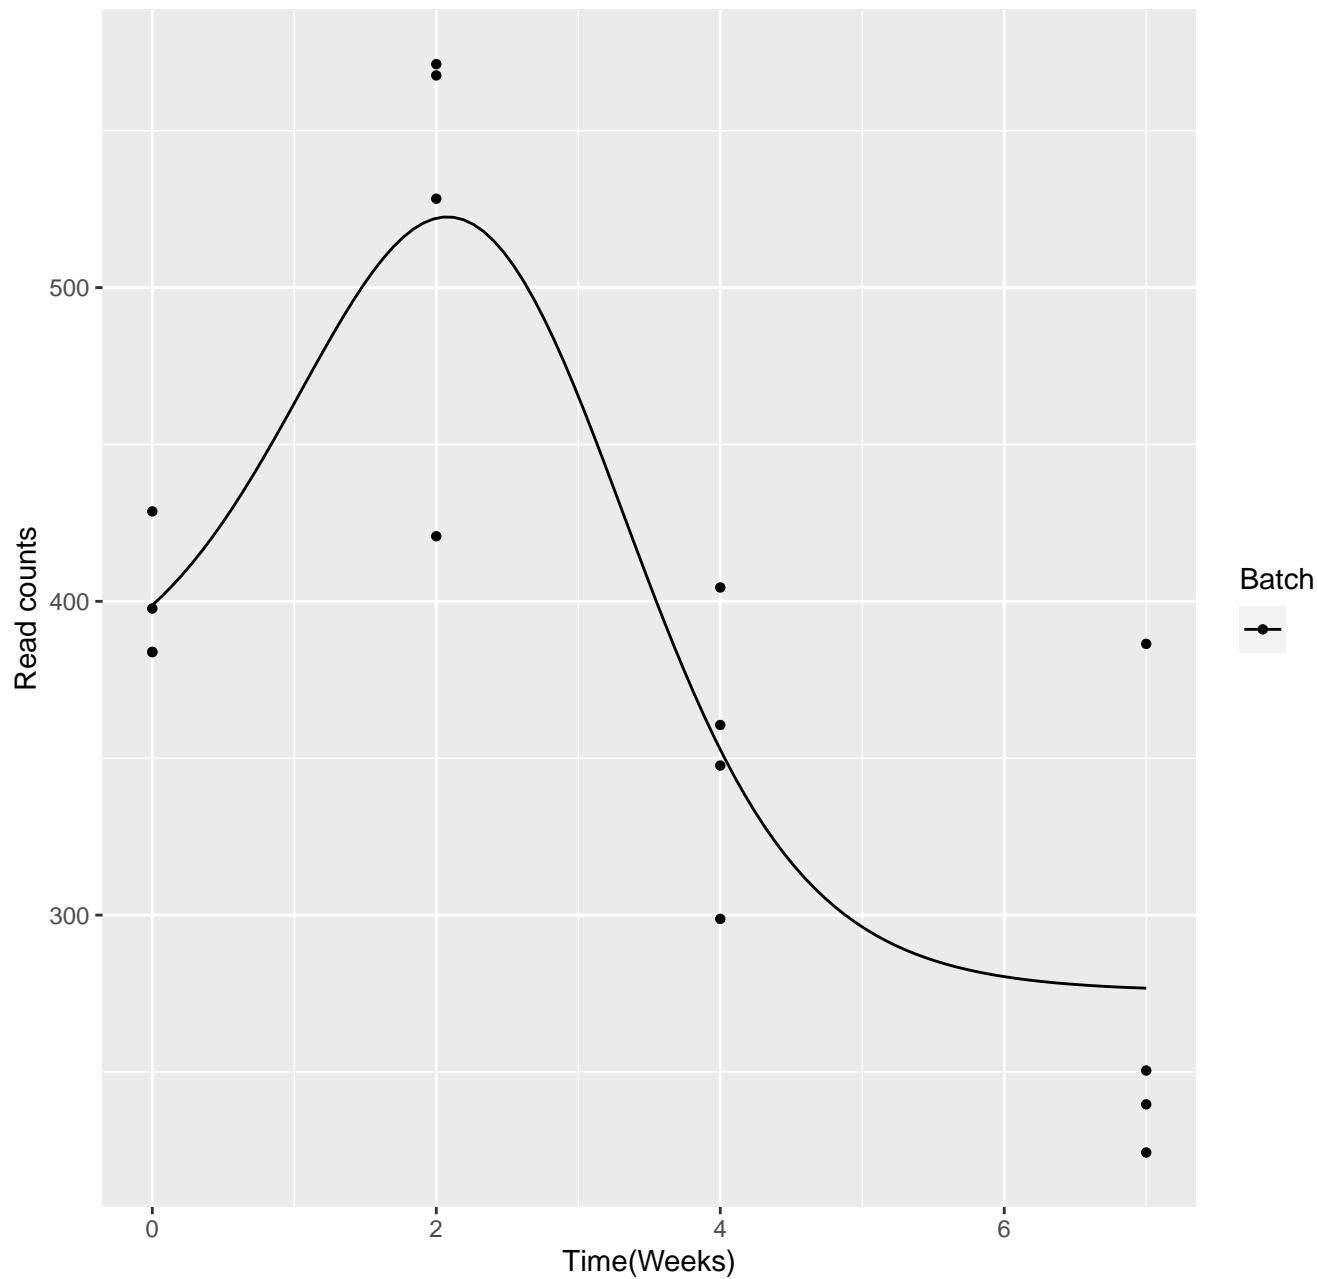



TENT5A:  $\log_{10} q = -2.96$

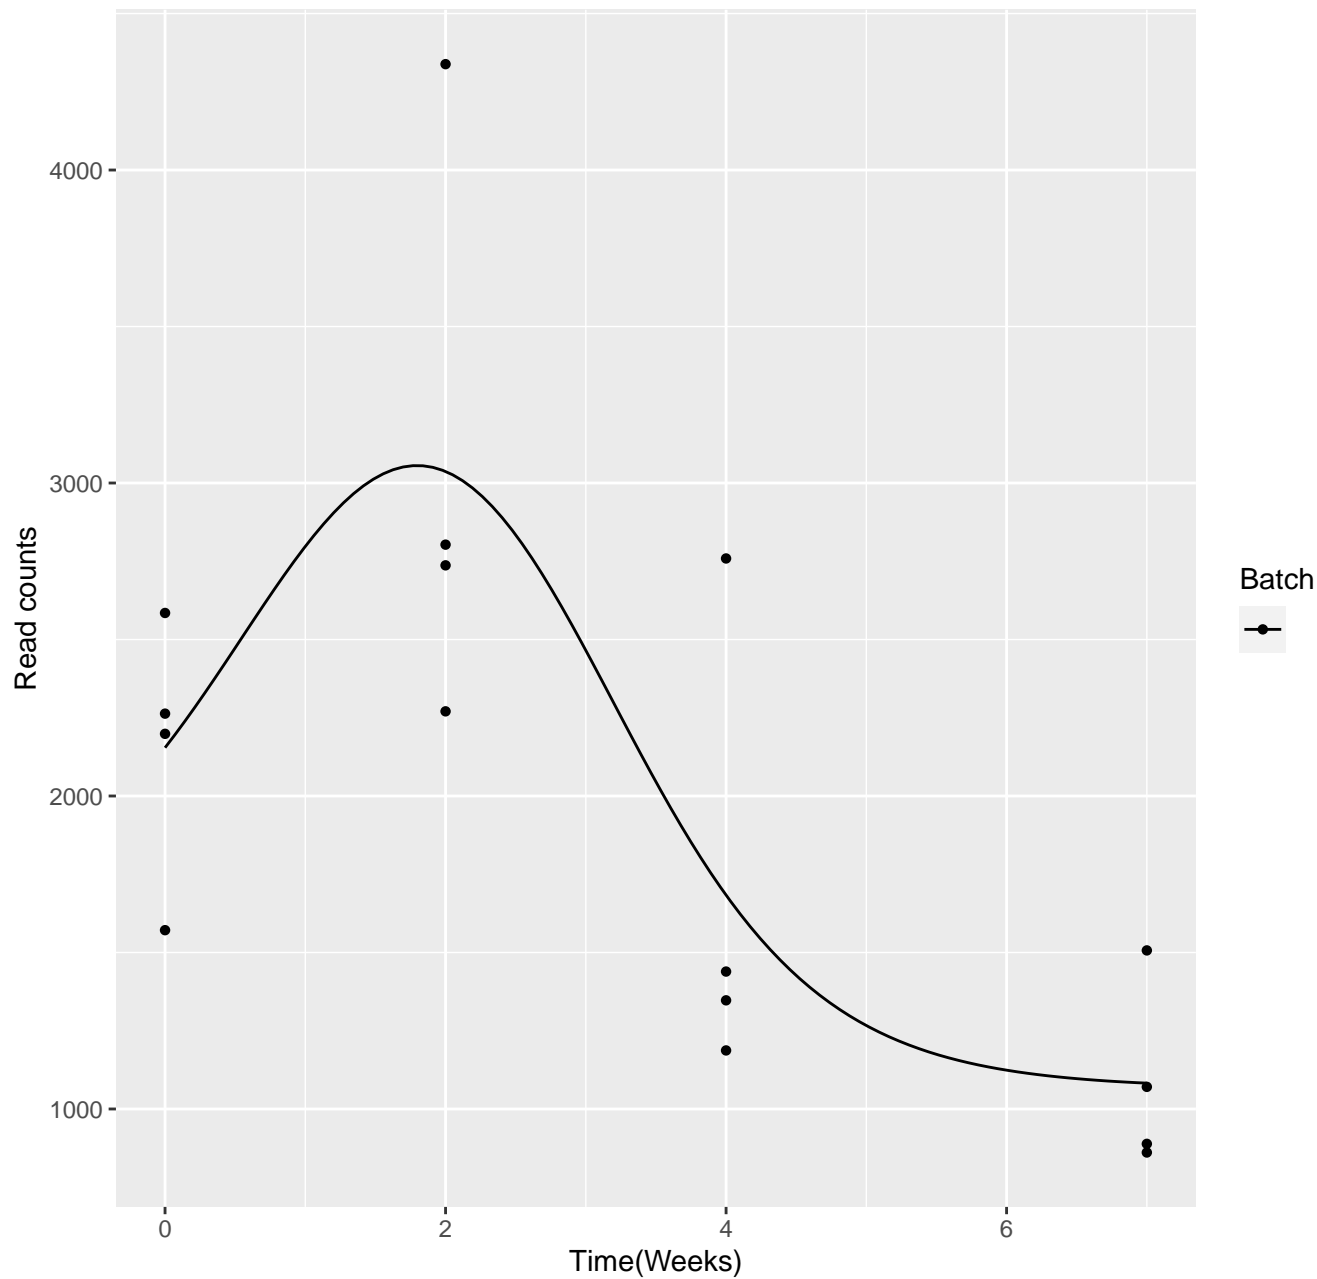

RUNX3:  $\log_{10} q = -2.96$

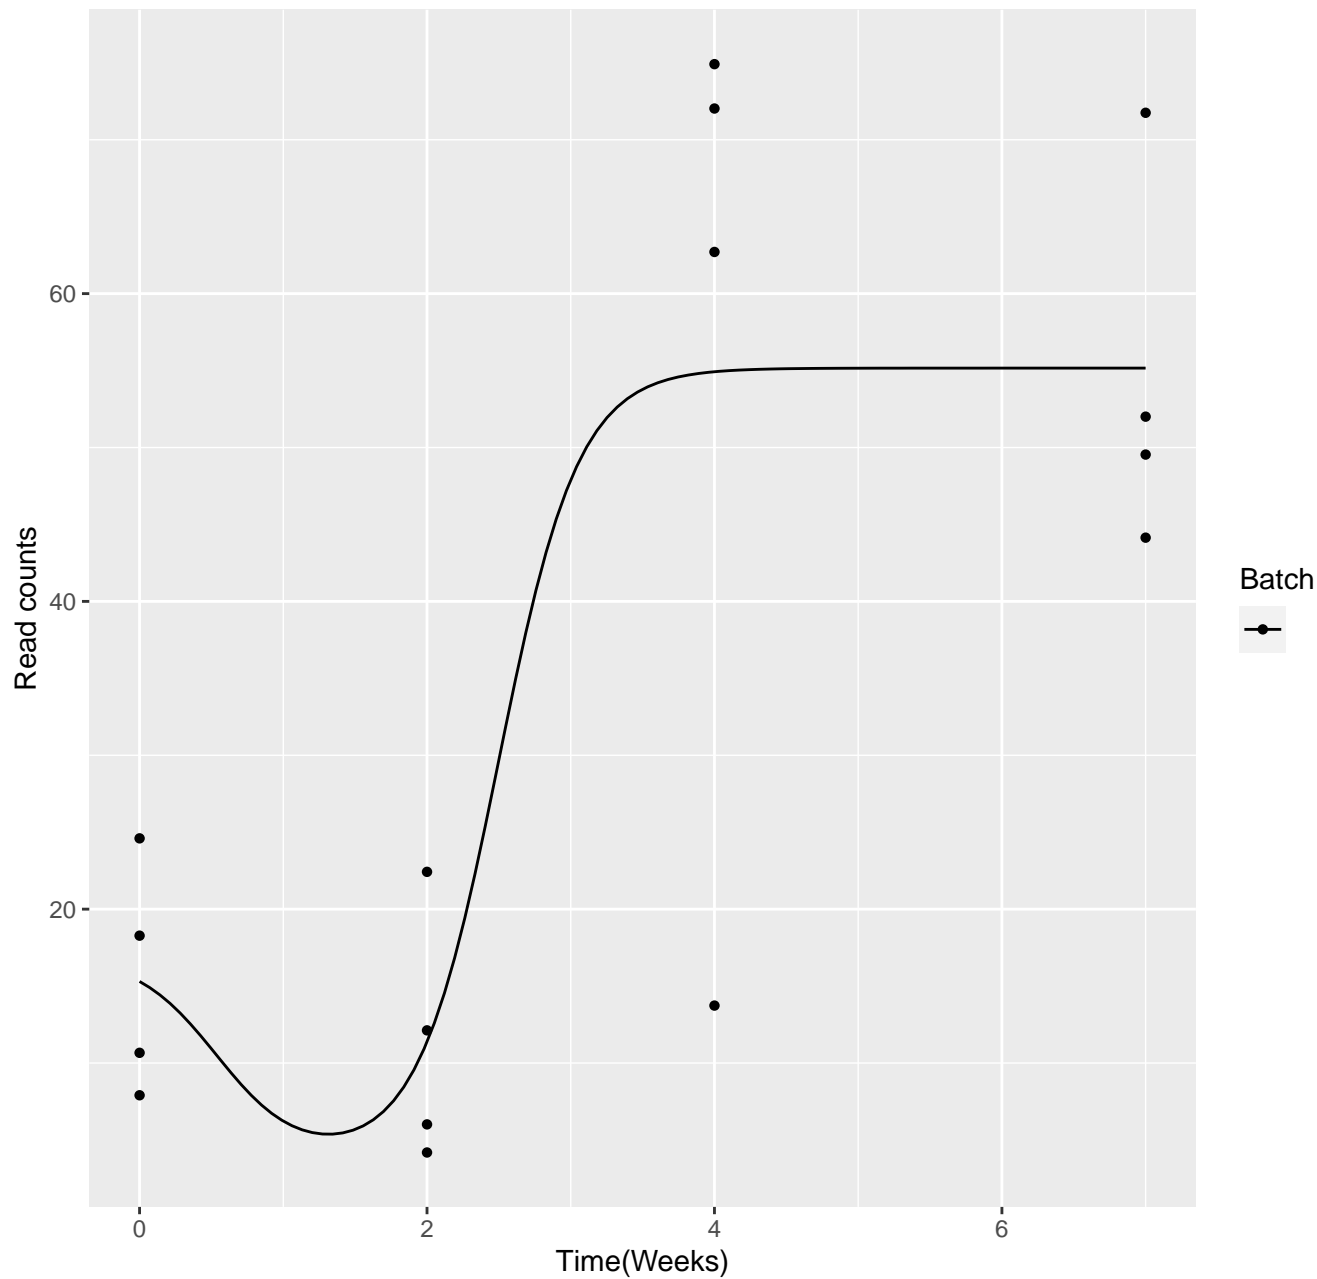

AKAP5:  $\log_{10} q = -2.95$

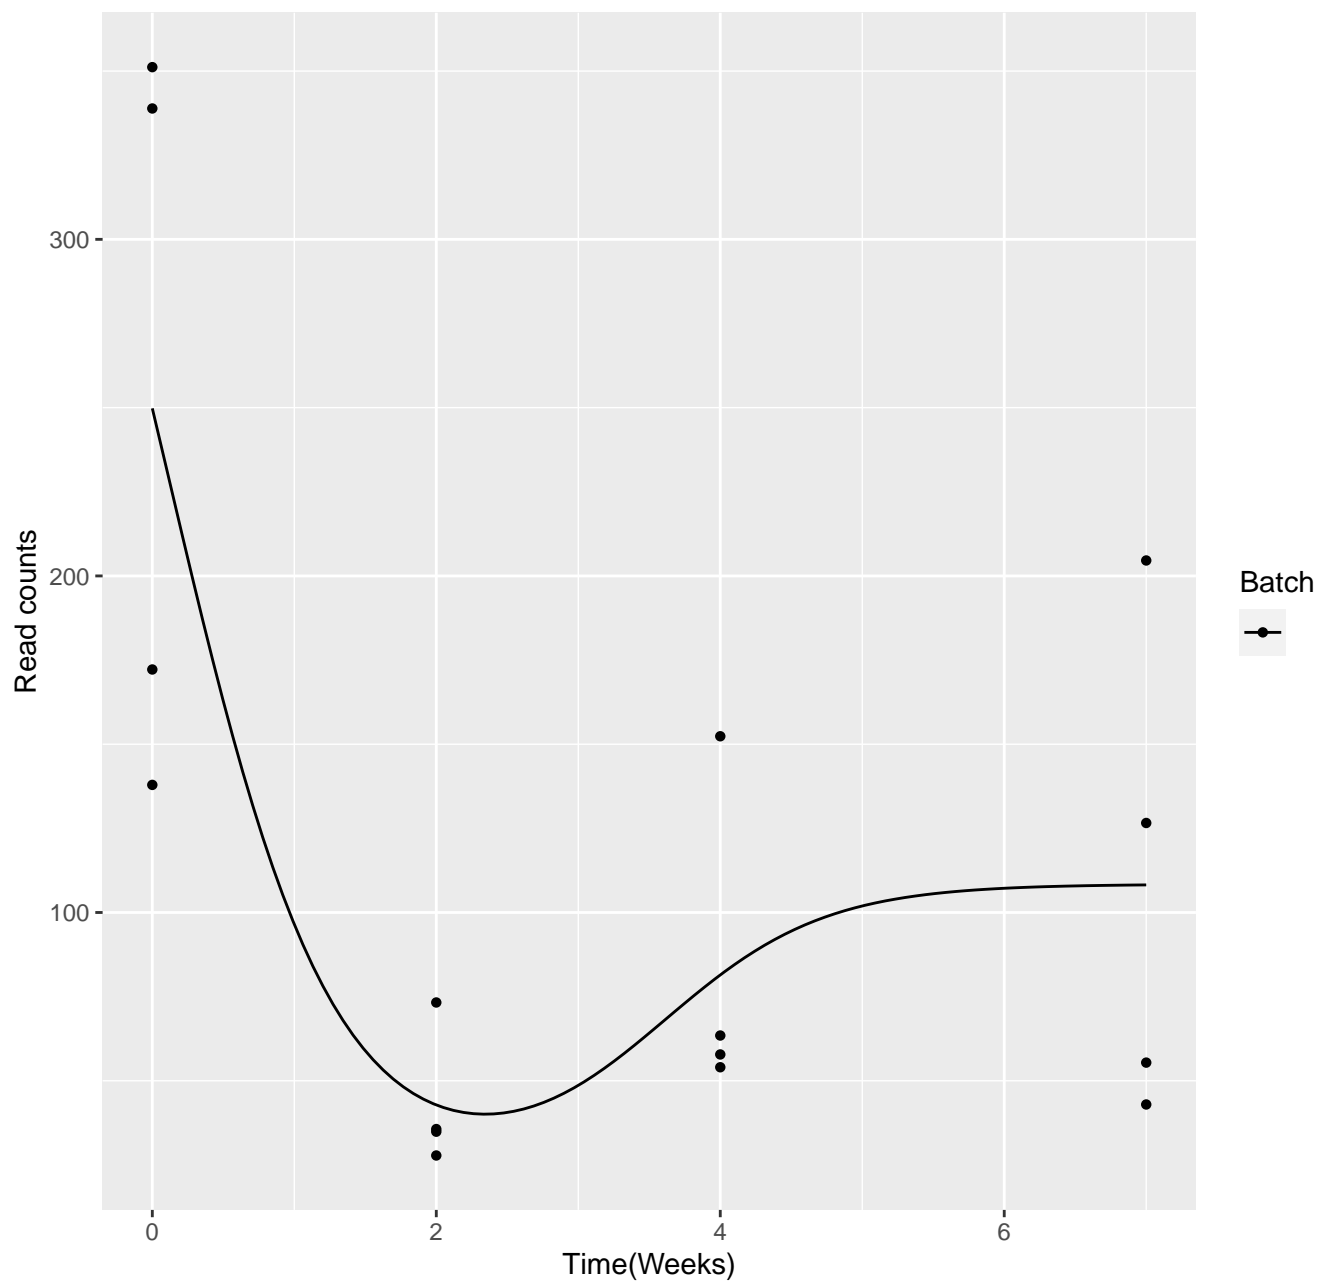

MN1:  $\log_{10} q = -2.95$

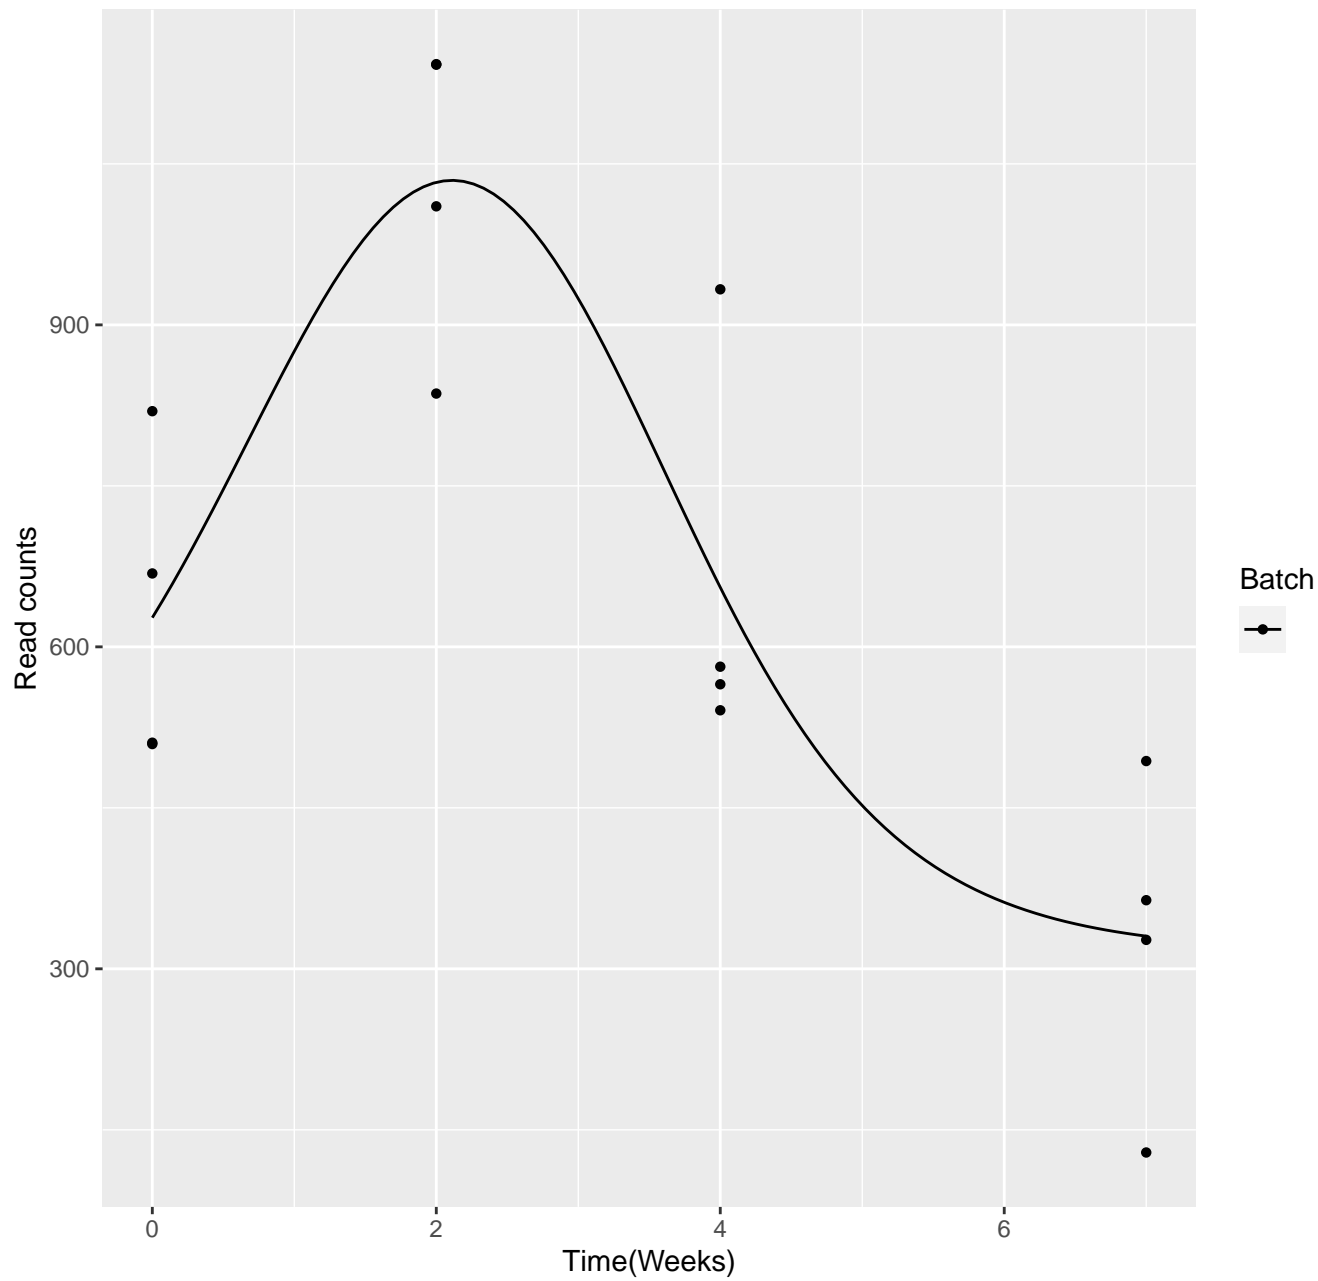

SH3BP1:  $\log_{10} q = -2.95$

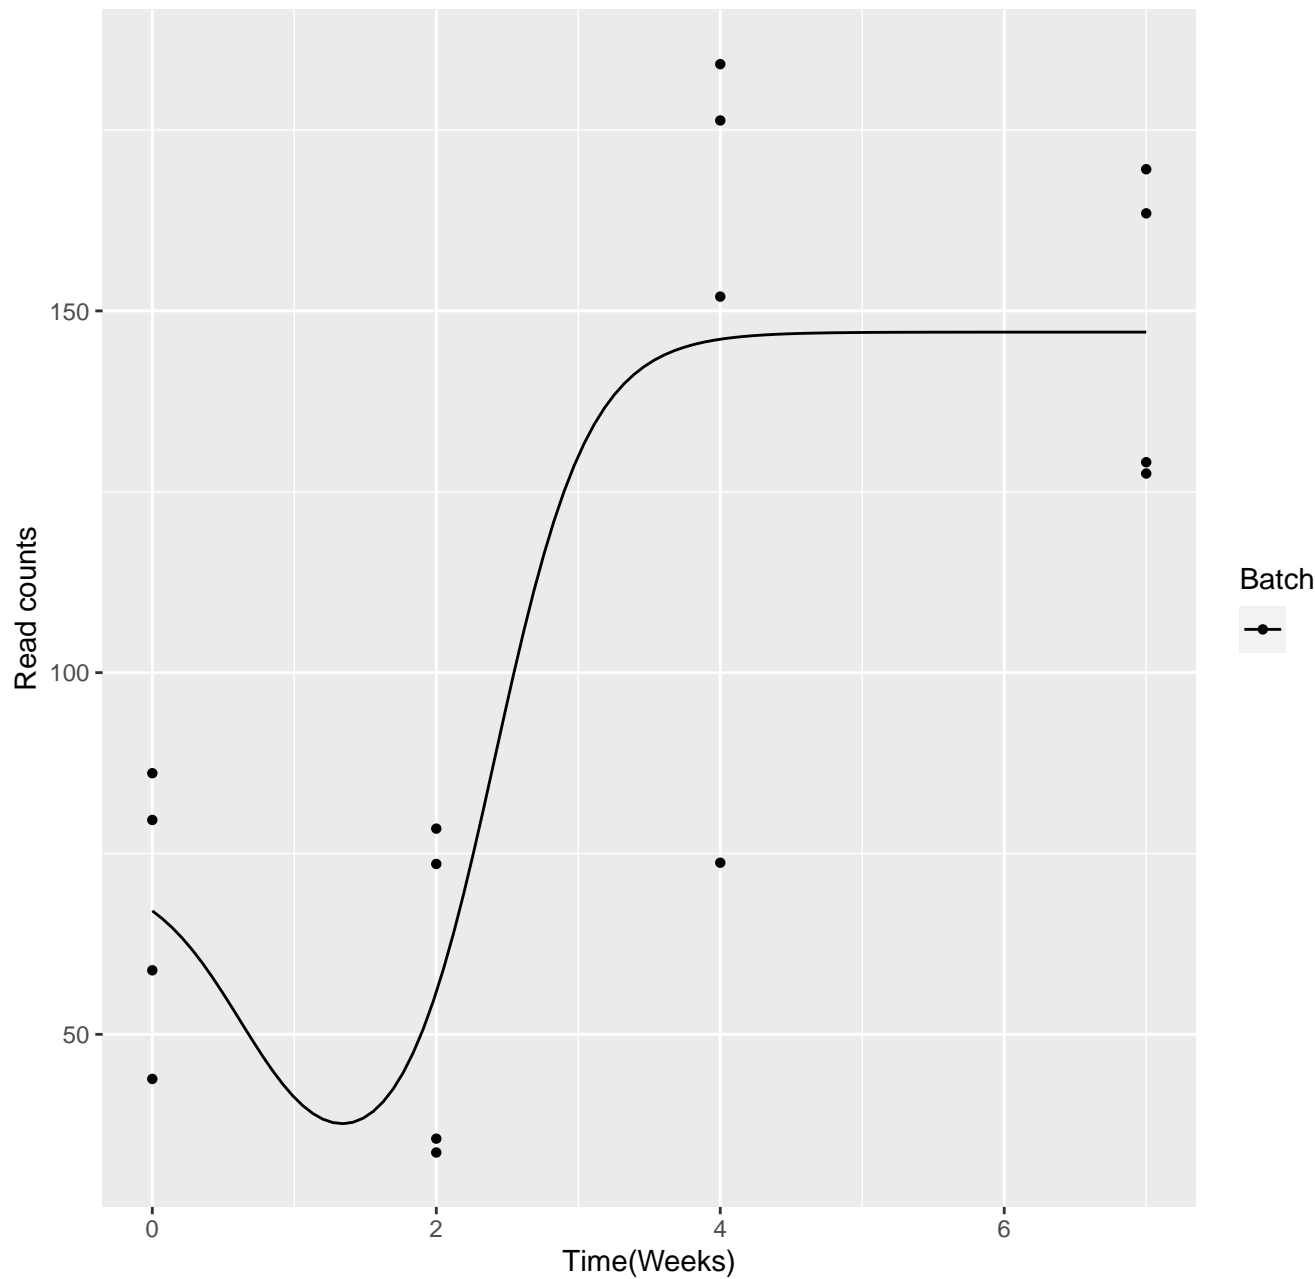

DPP3:  $\log_{10} q = -2.95$

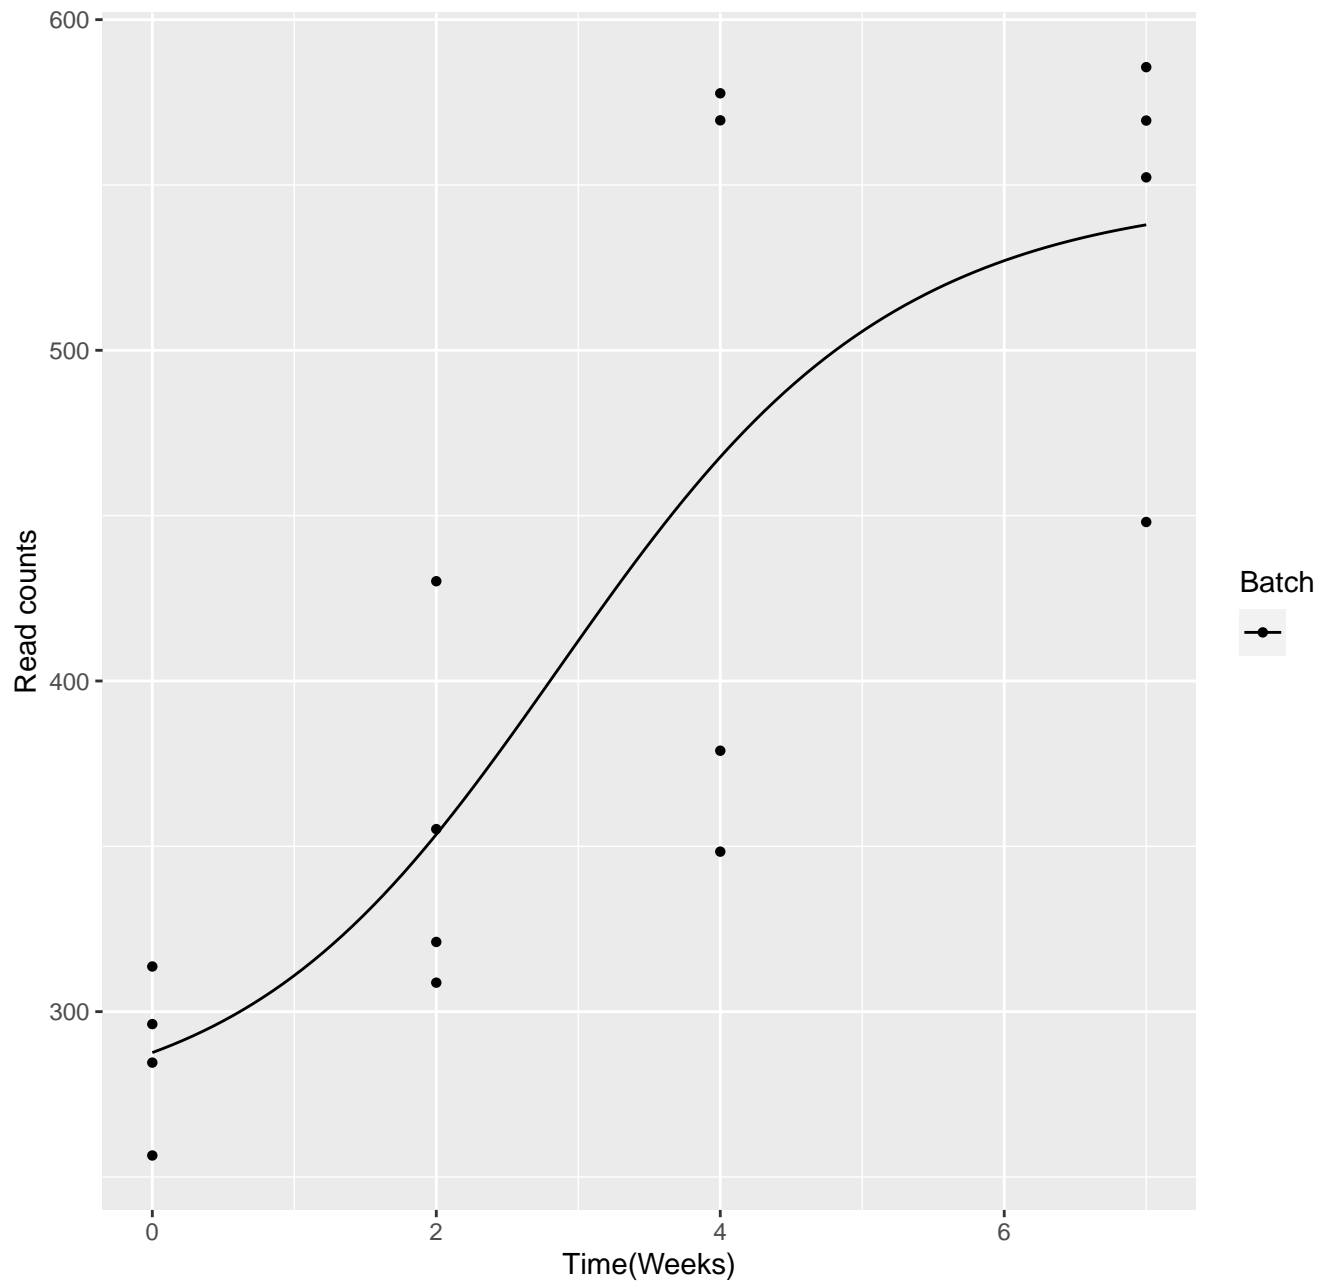

LOC100356144:  $\log_{10} q = -2.95$

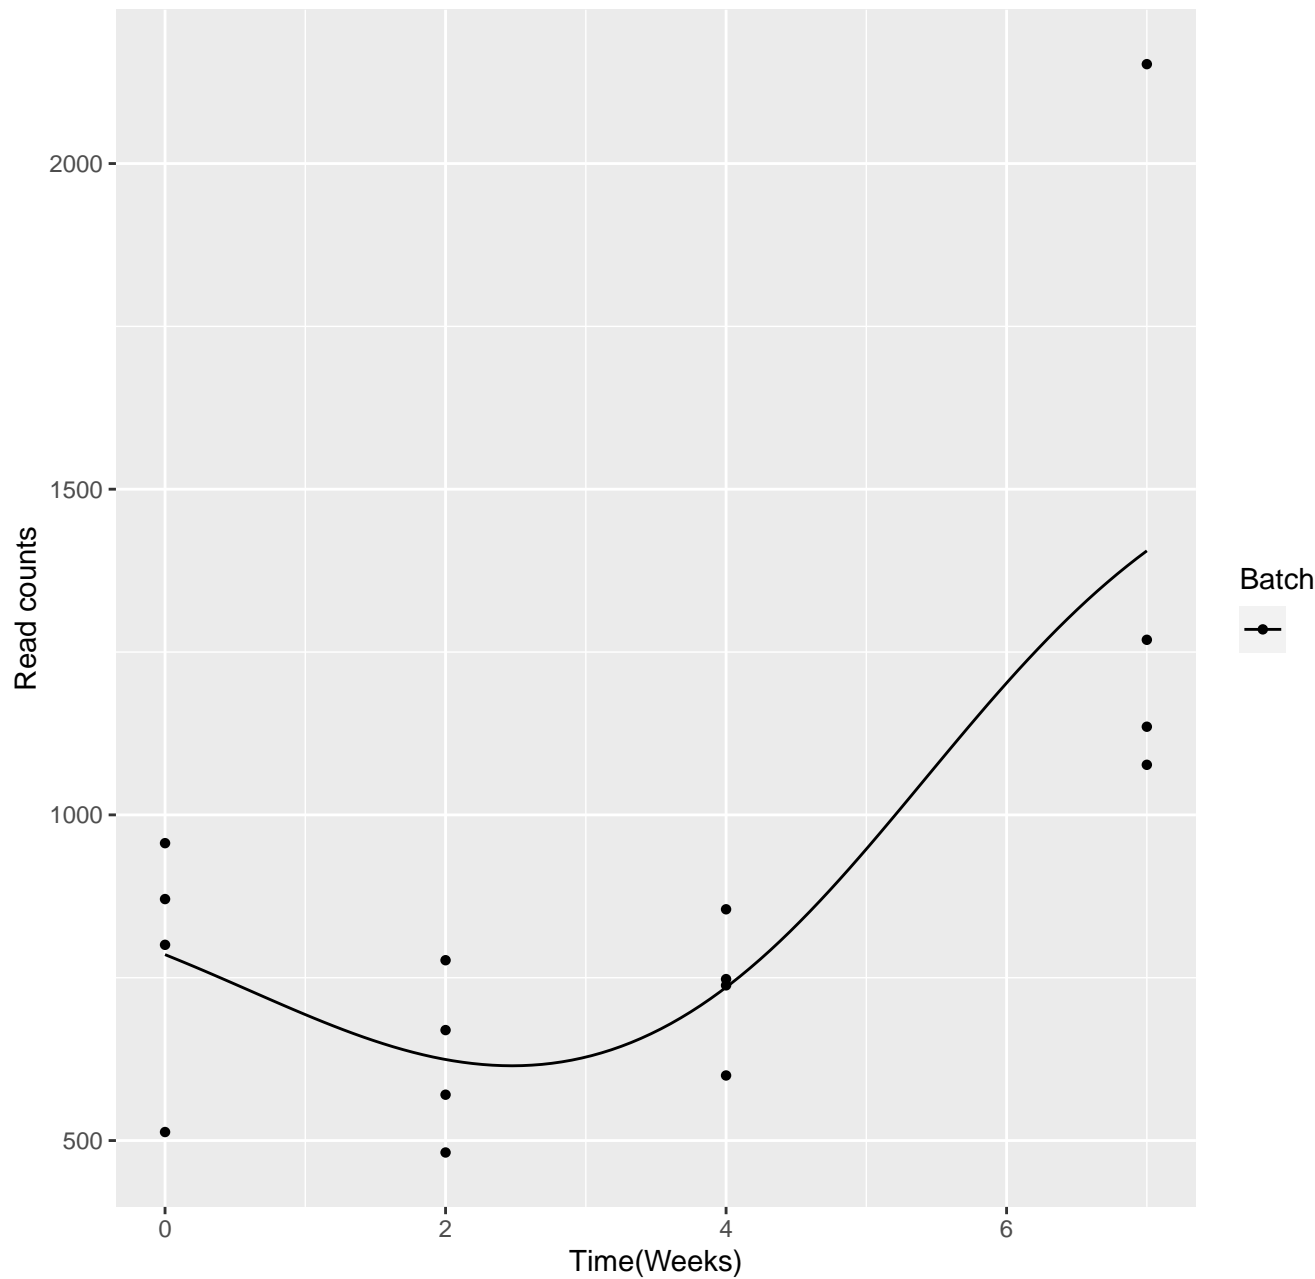

GRN:  $\log_{10} q = -2.95$

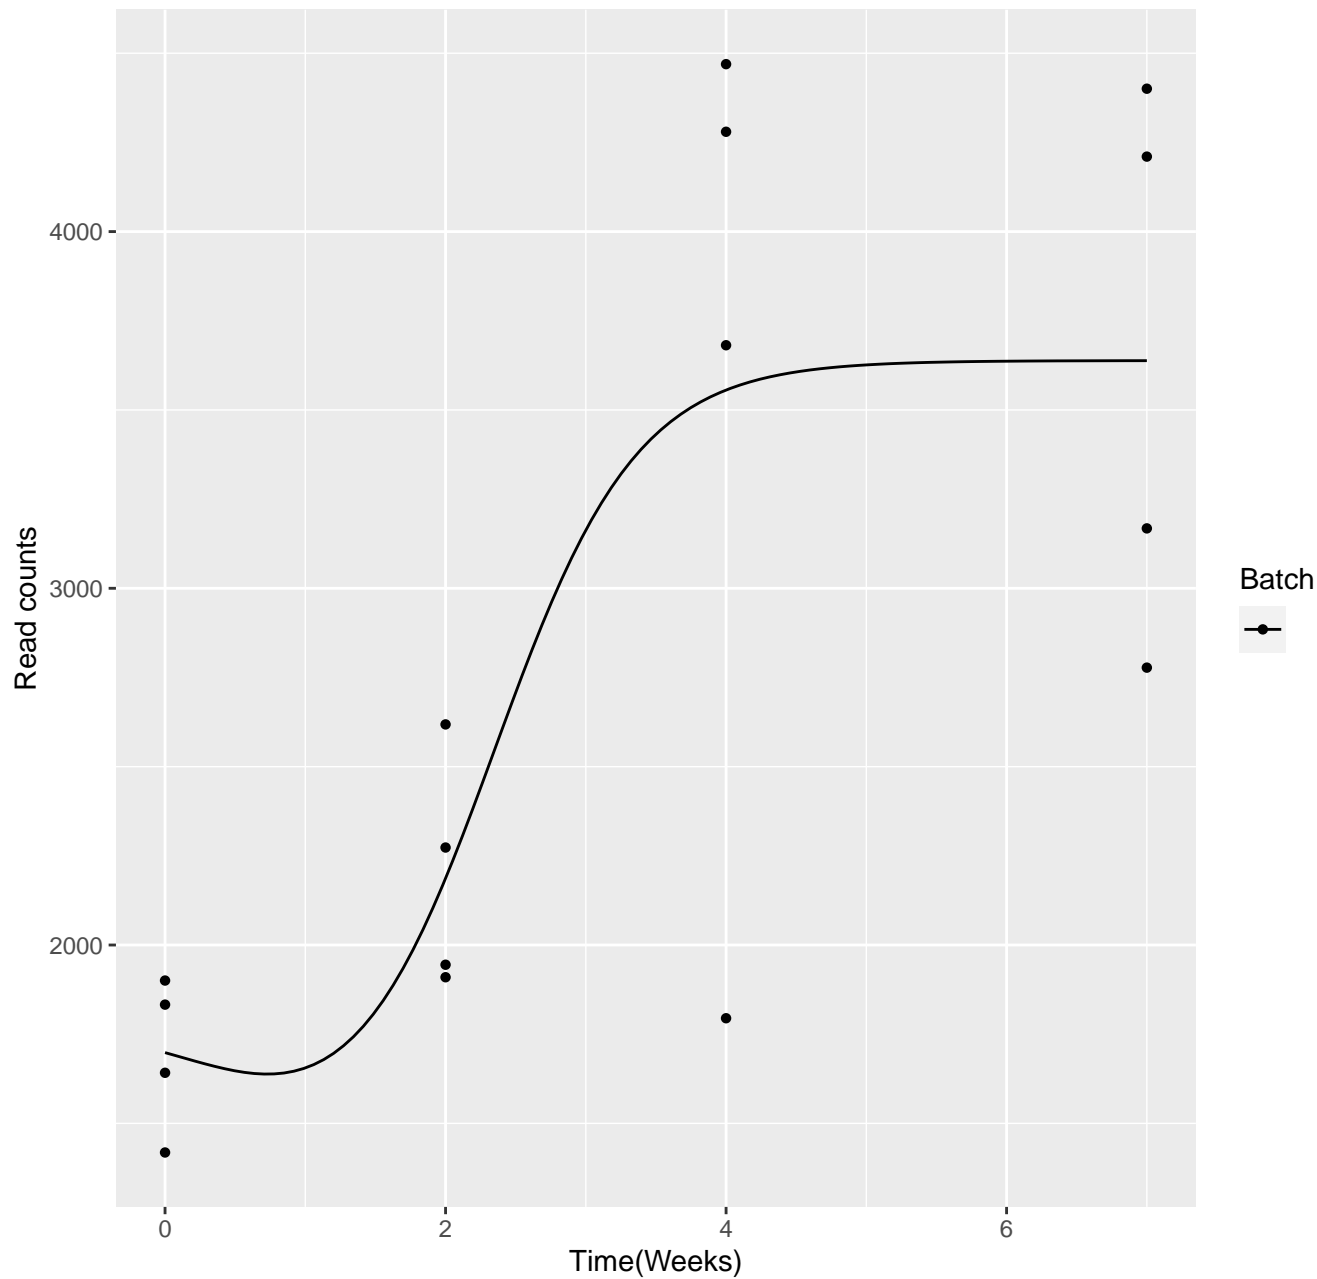



ACSS1:  $\log_{10} q = -2.95$

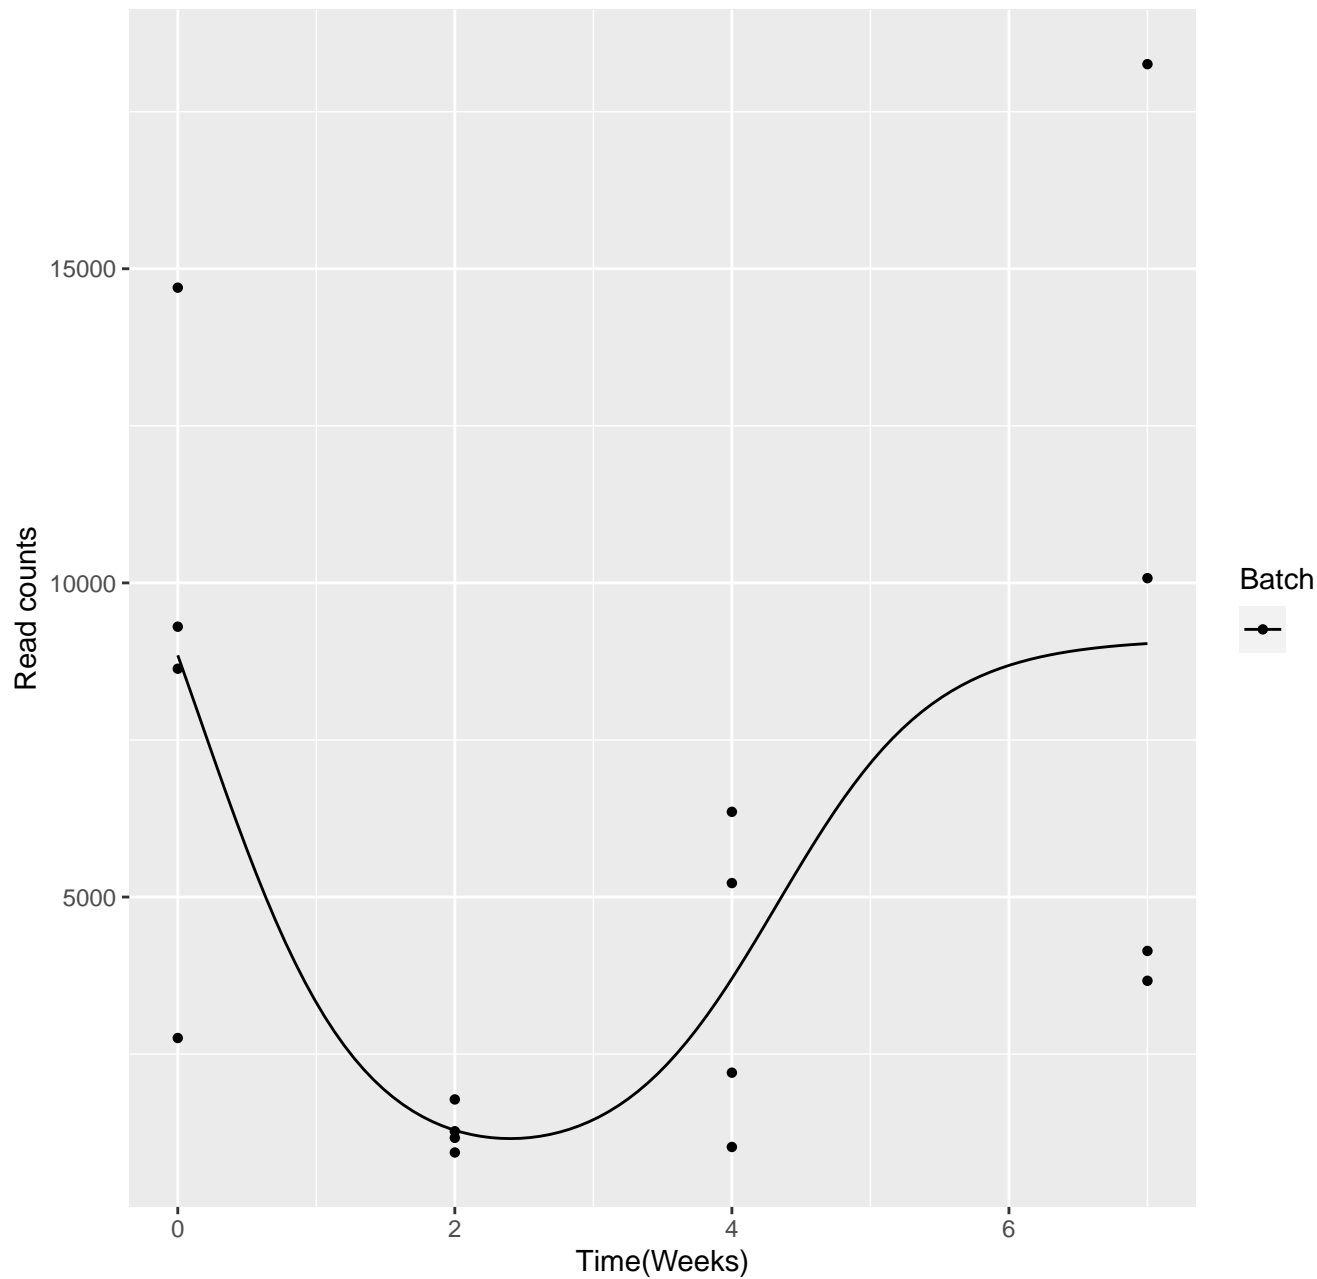

YPEL1:  $\log_{10} q = -2.95$

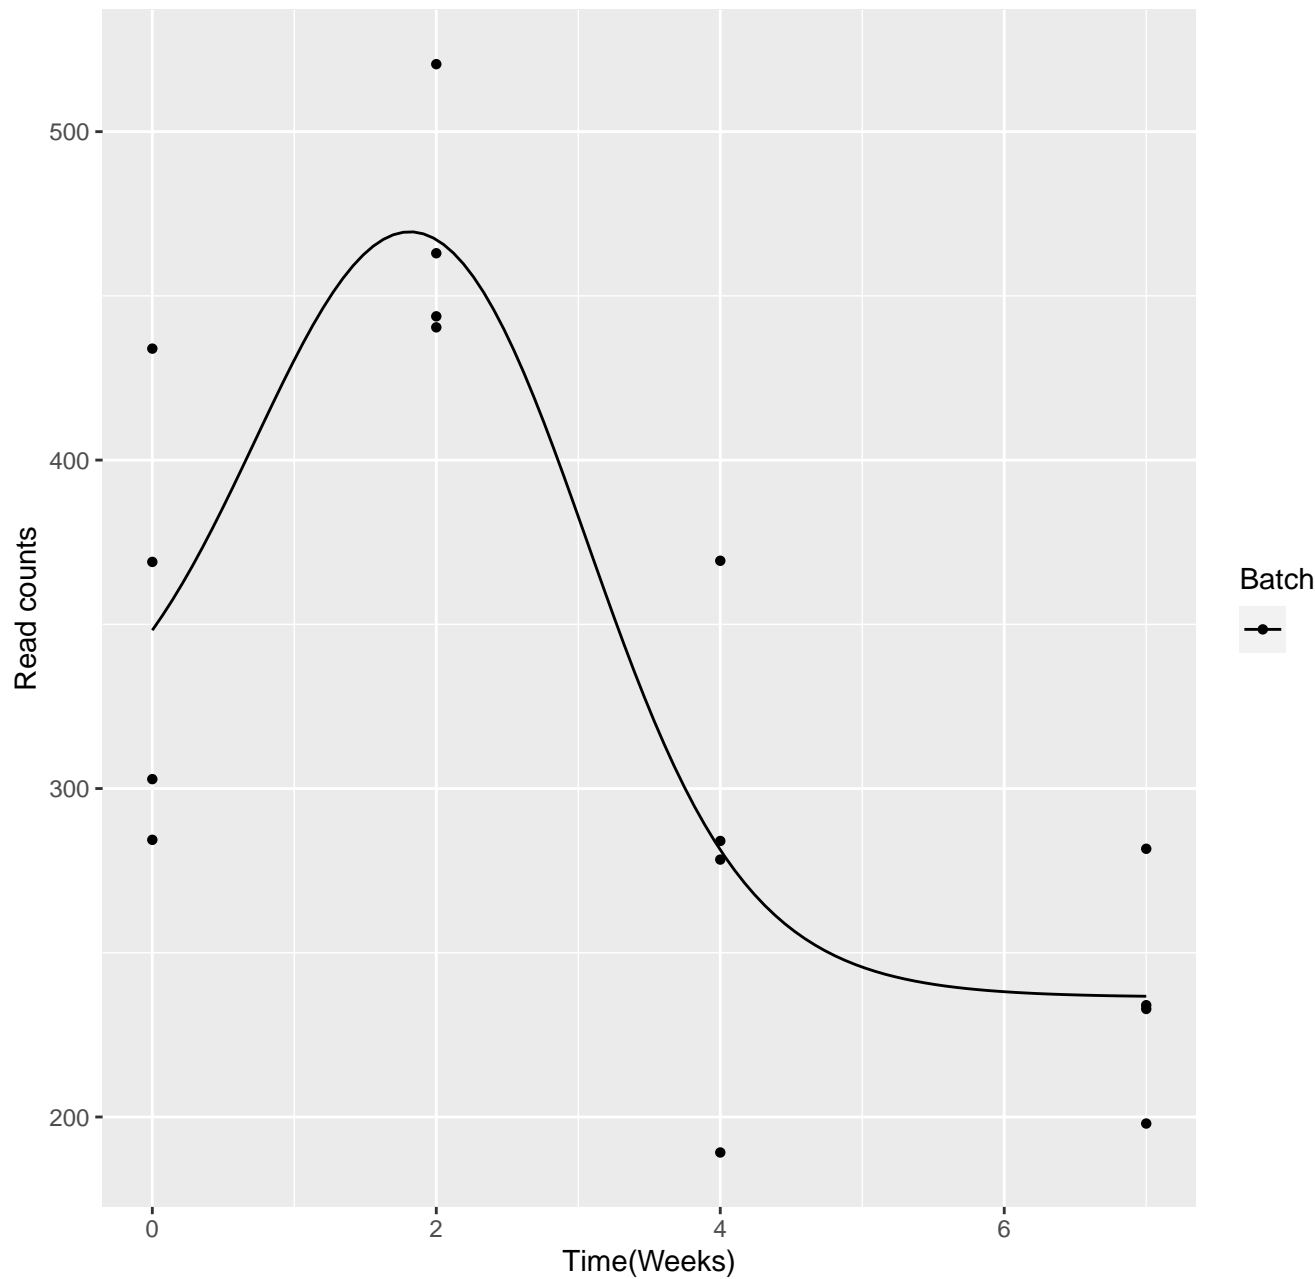

CRTAP:  $\log_{10} q = -2.95$

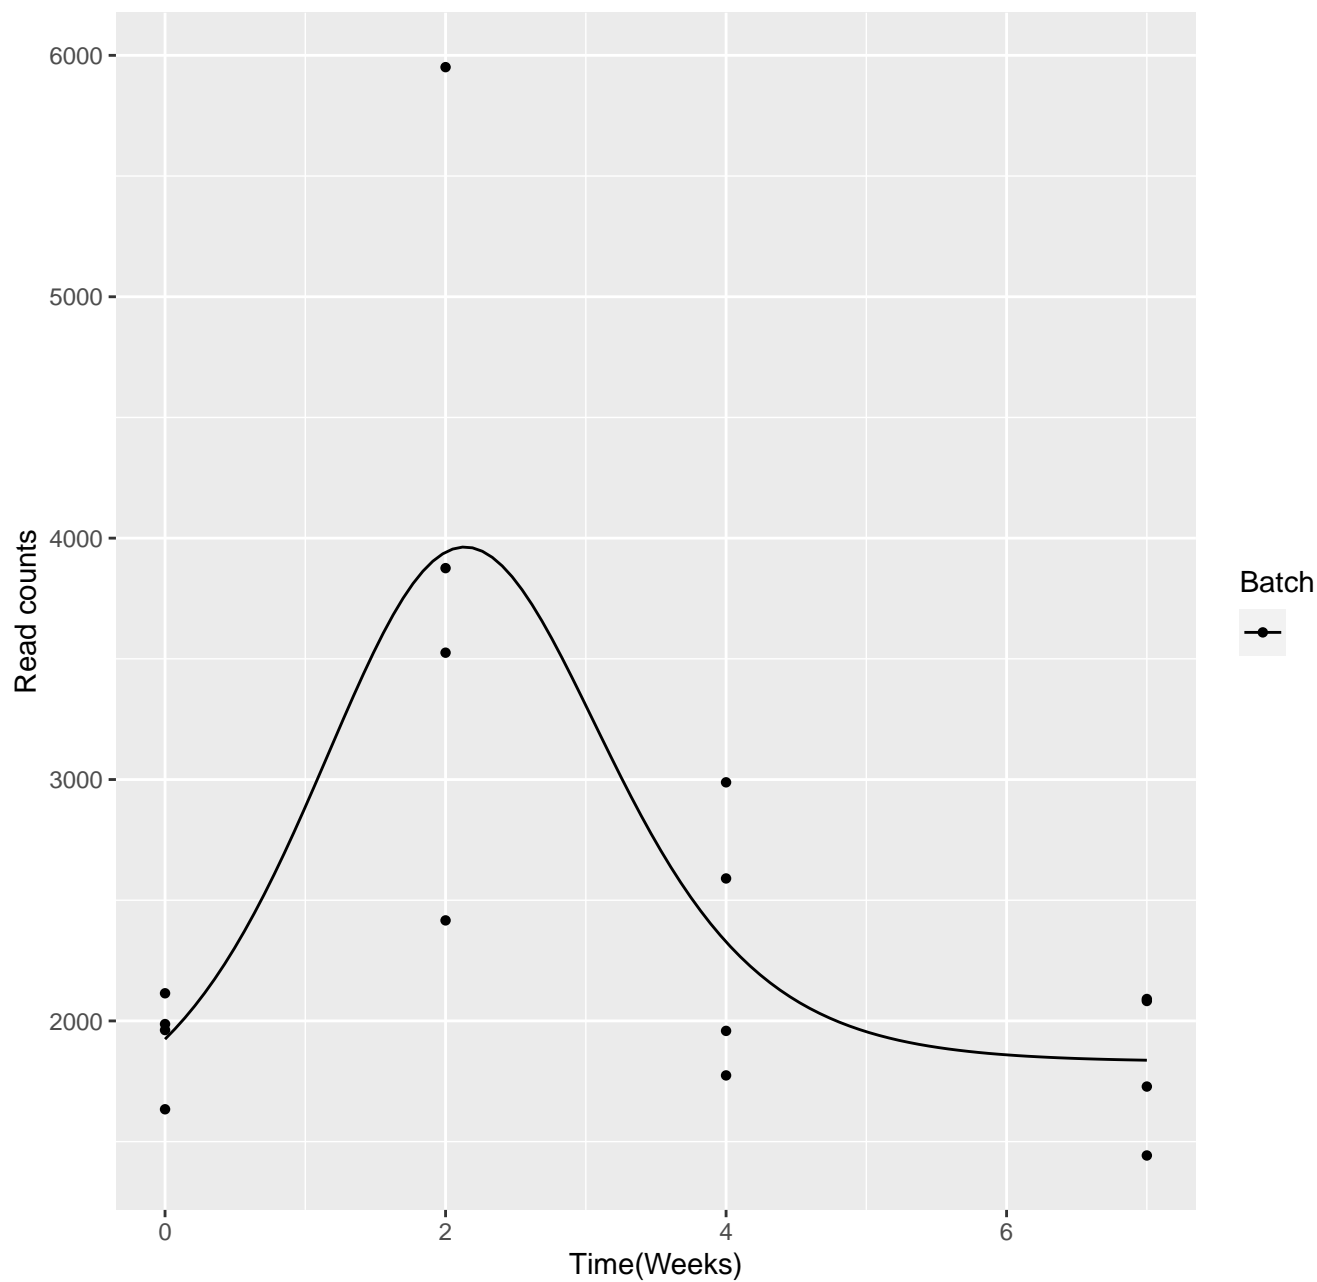

SH3D19:  $\log_{10} q = -2.94$

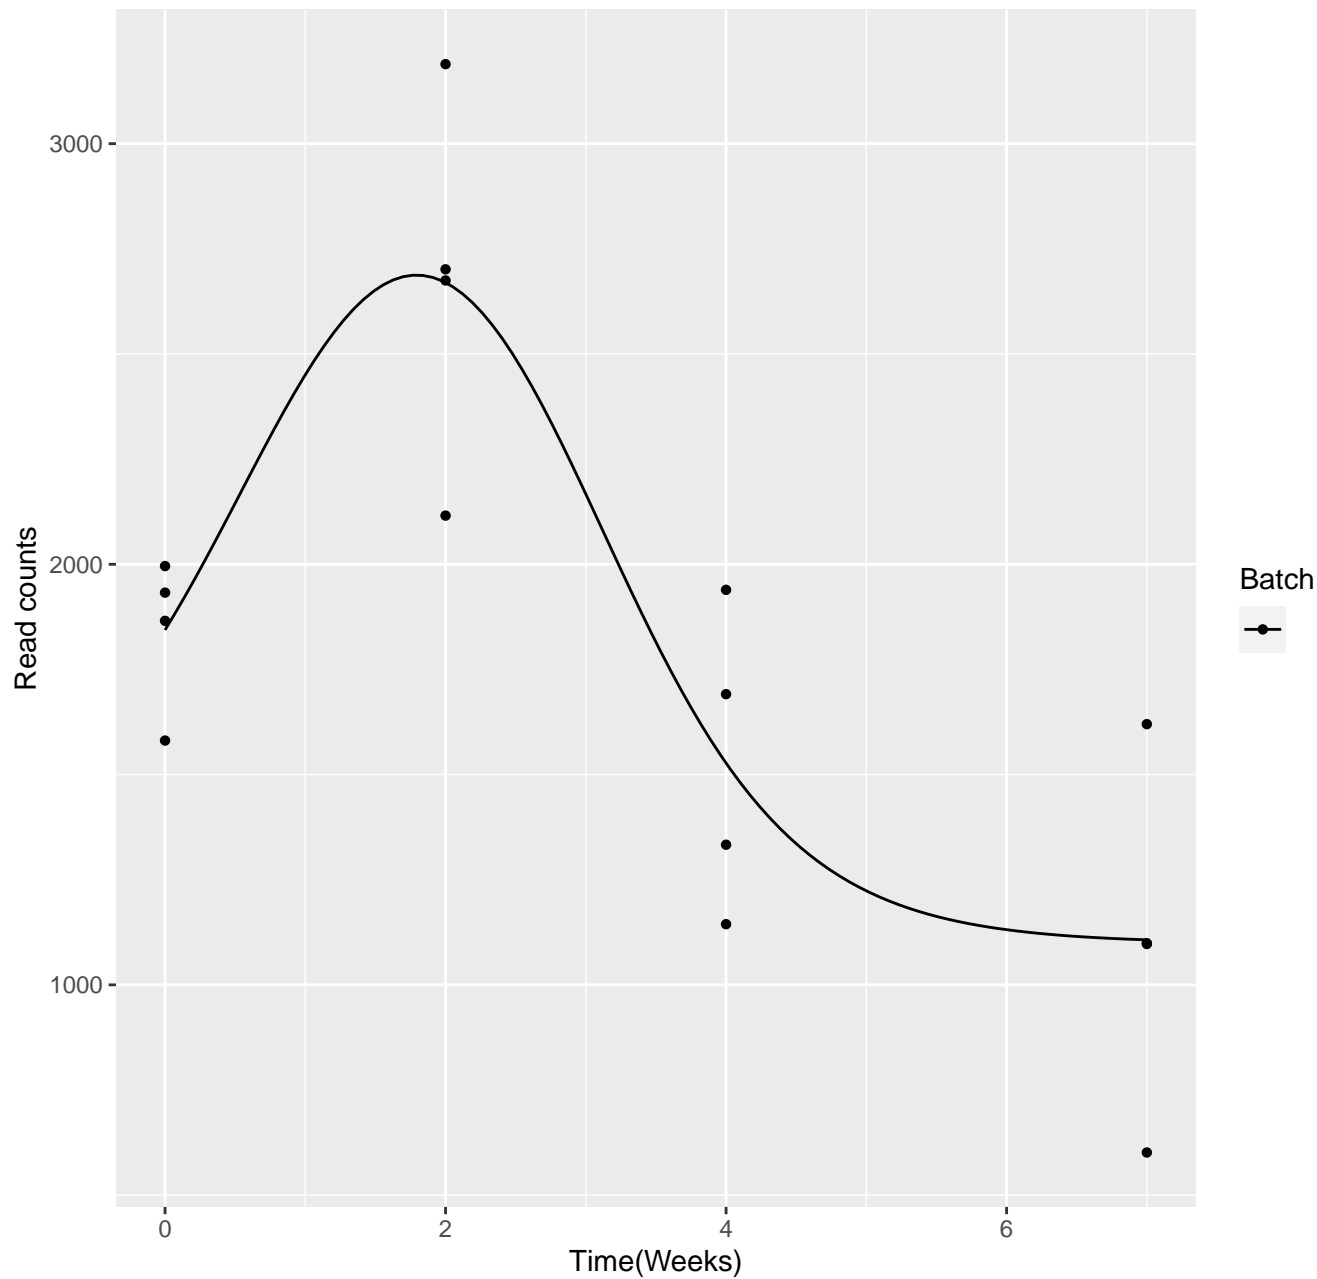

TRPM3:  $\log_{10} q = -2.94$

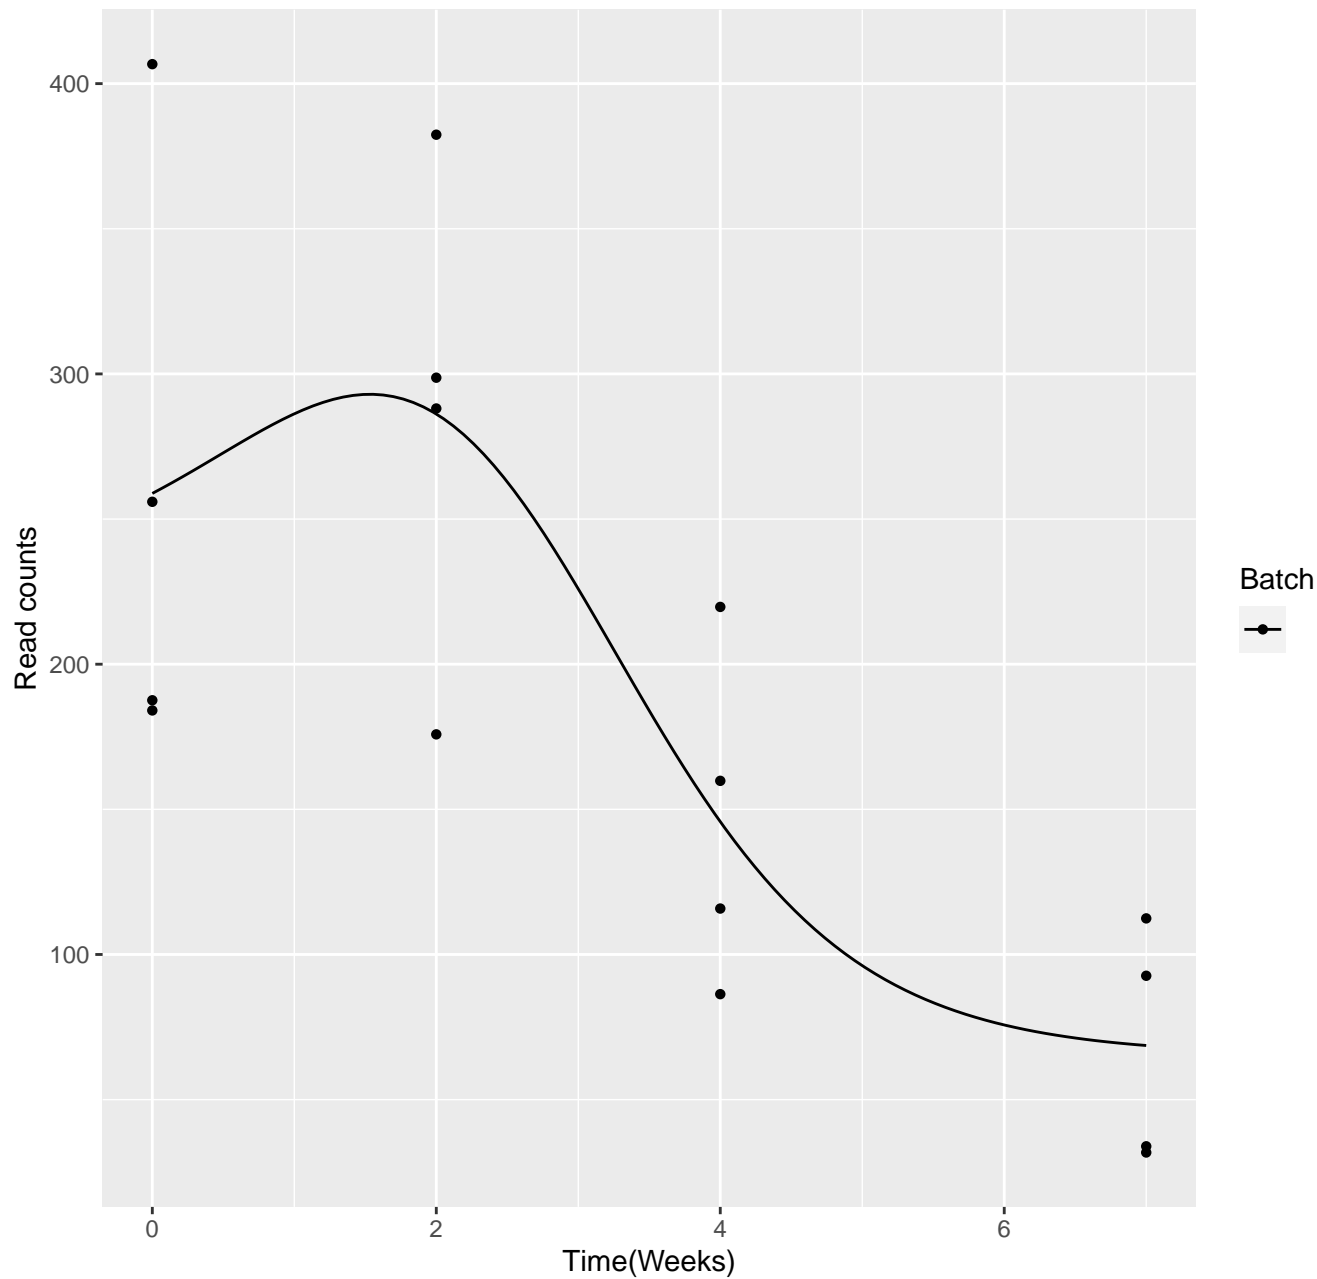

LRRC4:  $\log_{10} q = -2.94$

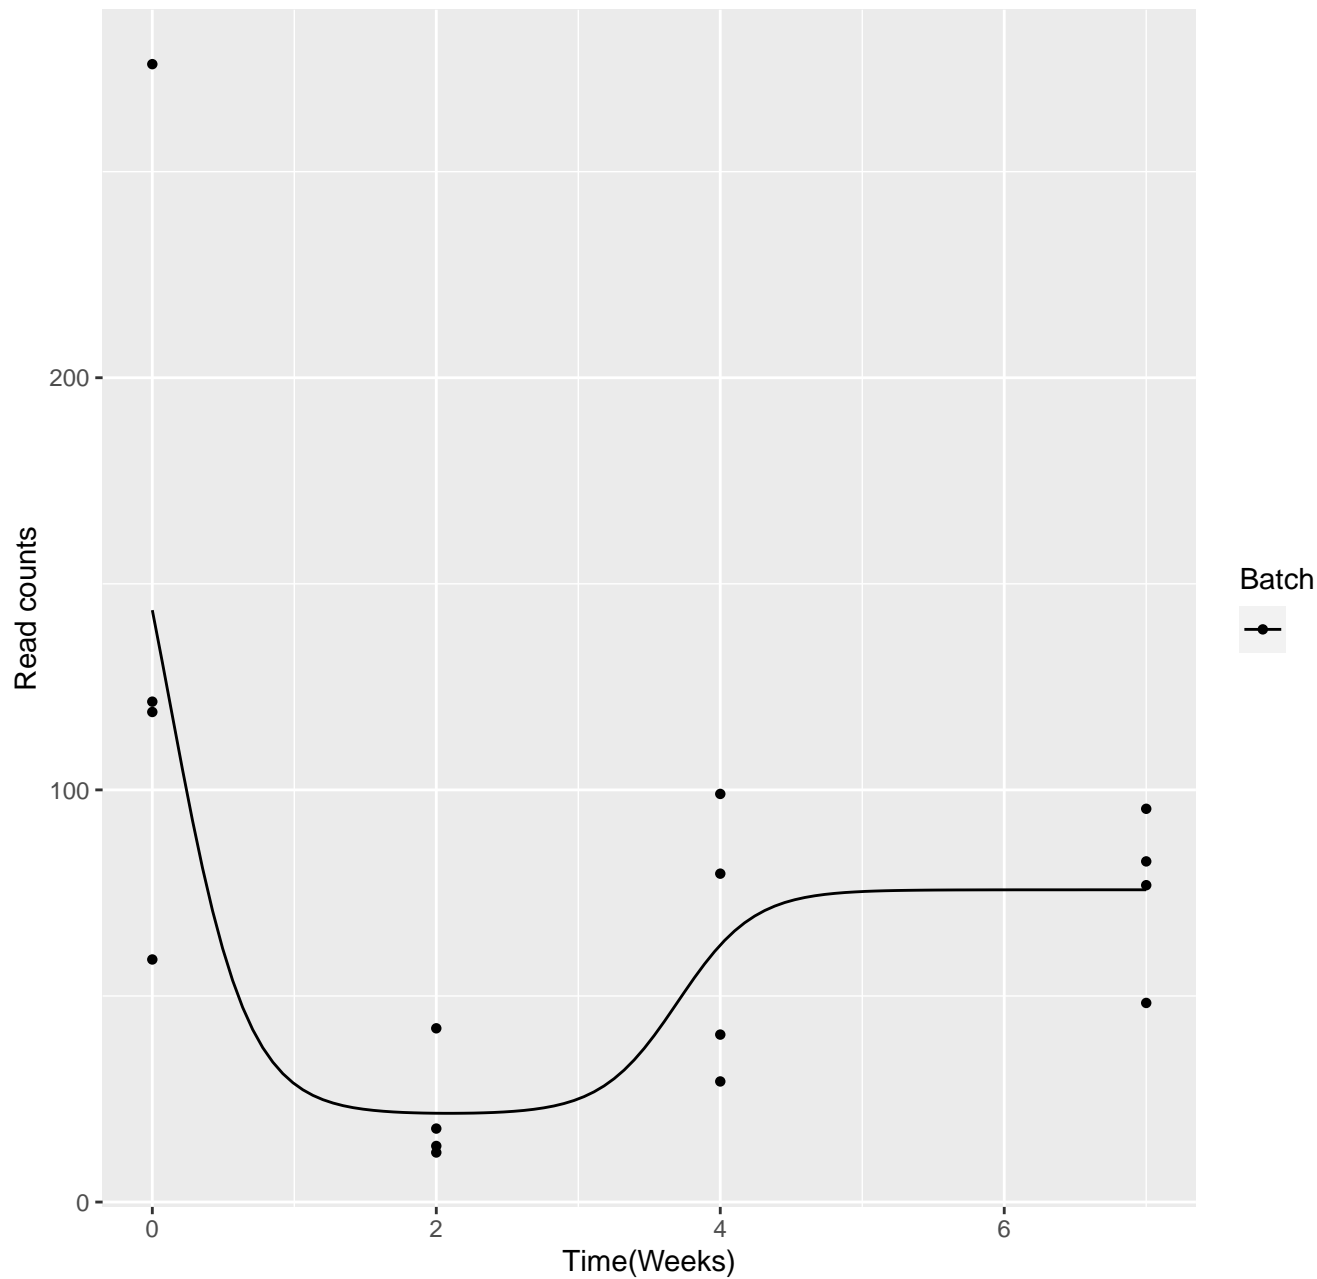

FOXN3:  $\log_{10} q = -2.94$

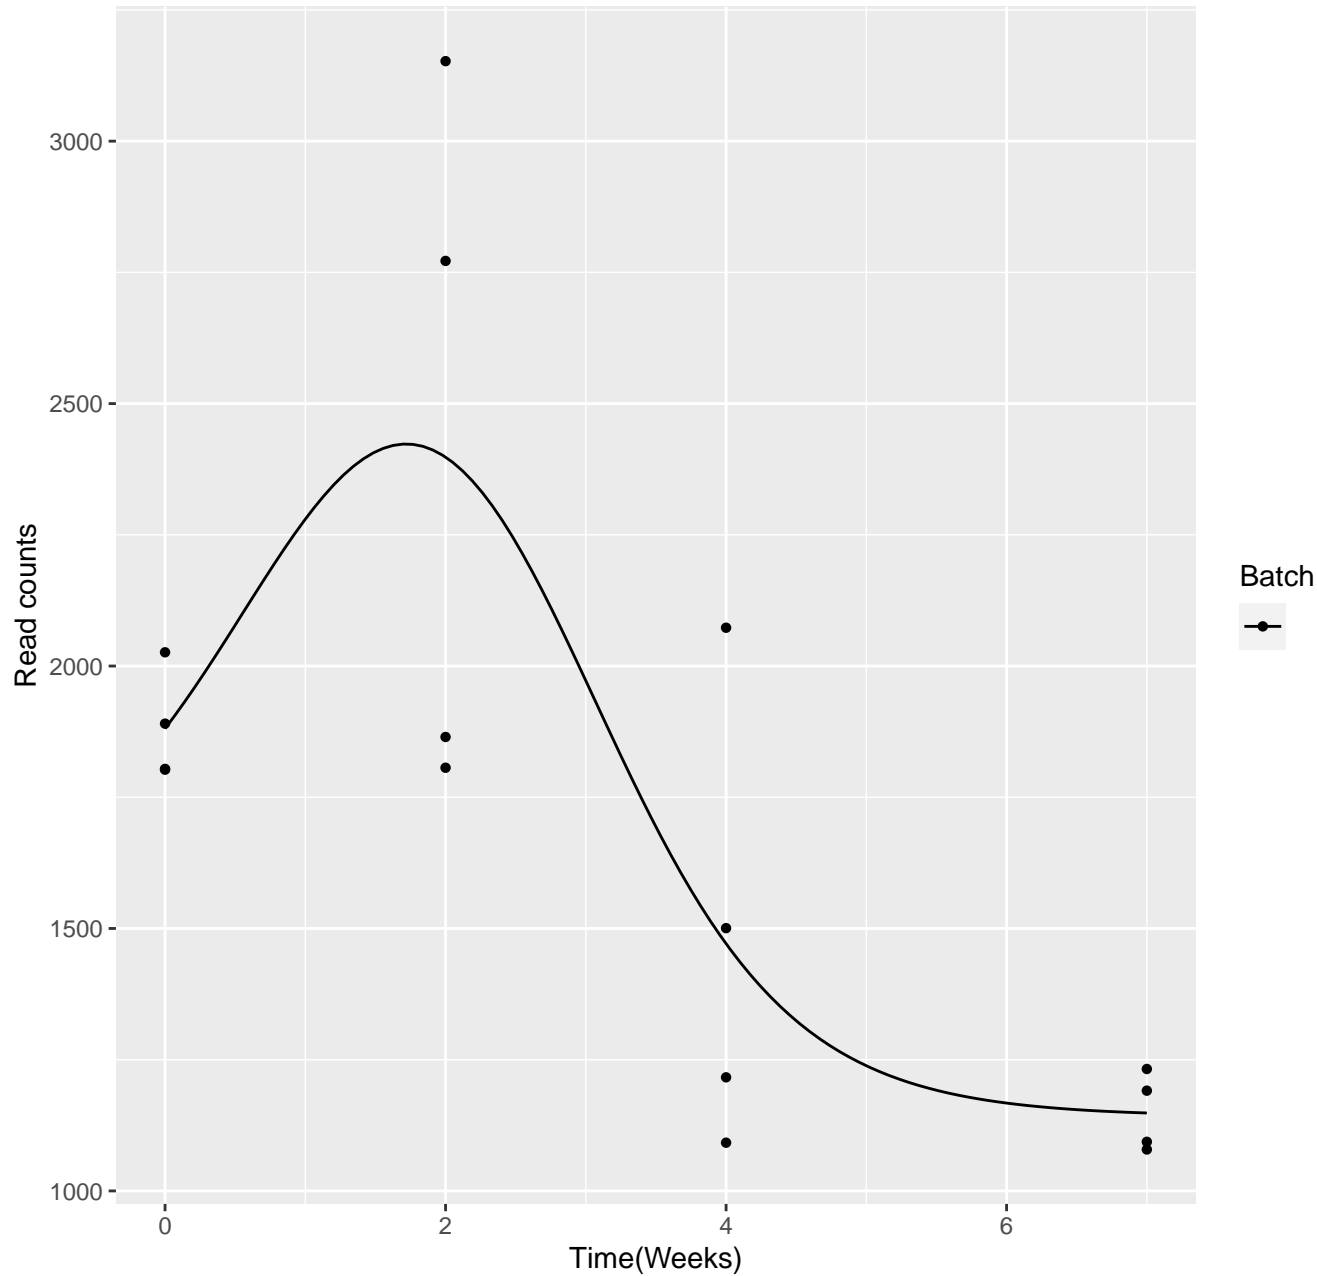

CD300A:  $\log_{10} q = -2.94$

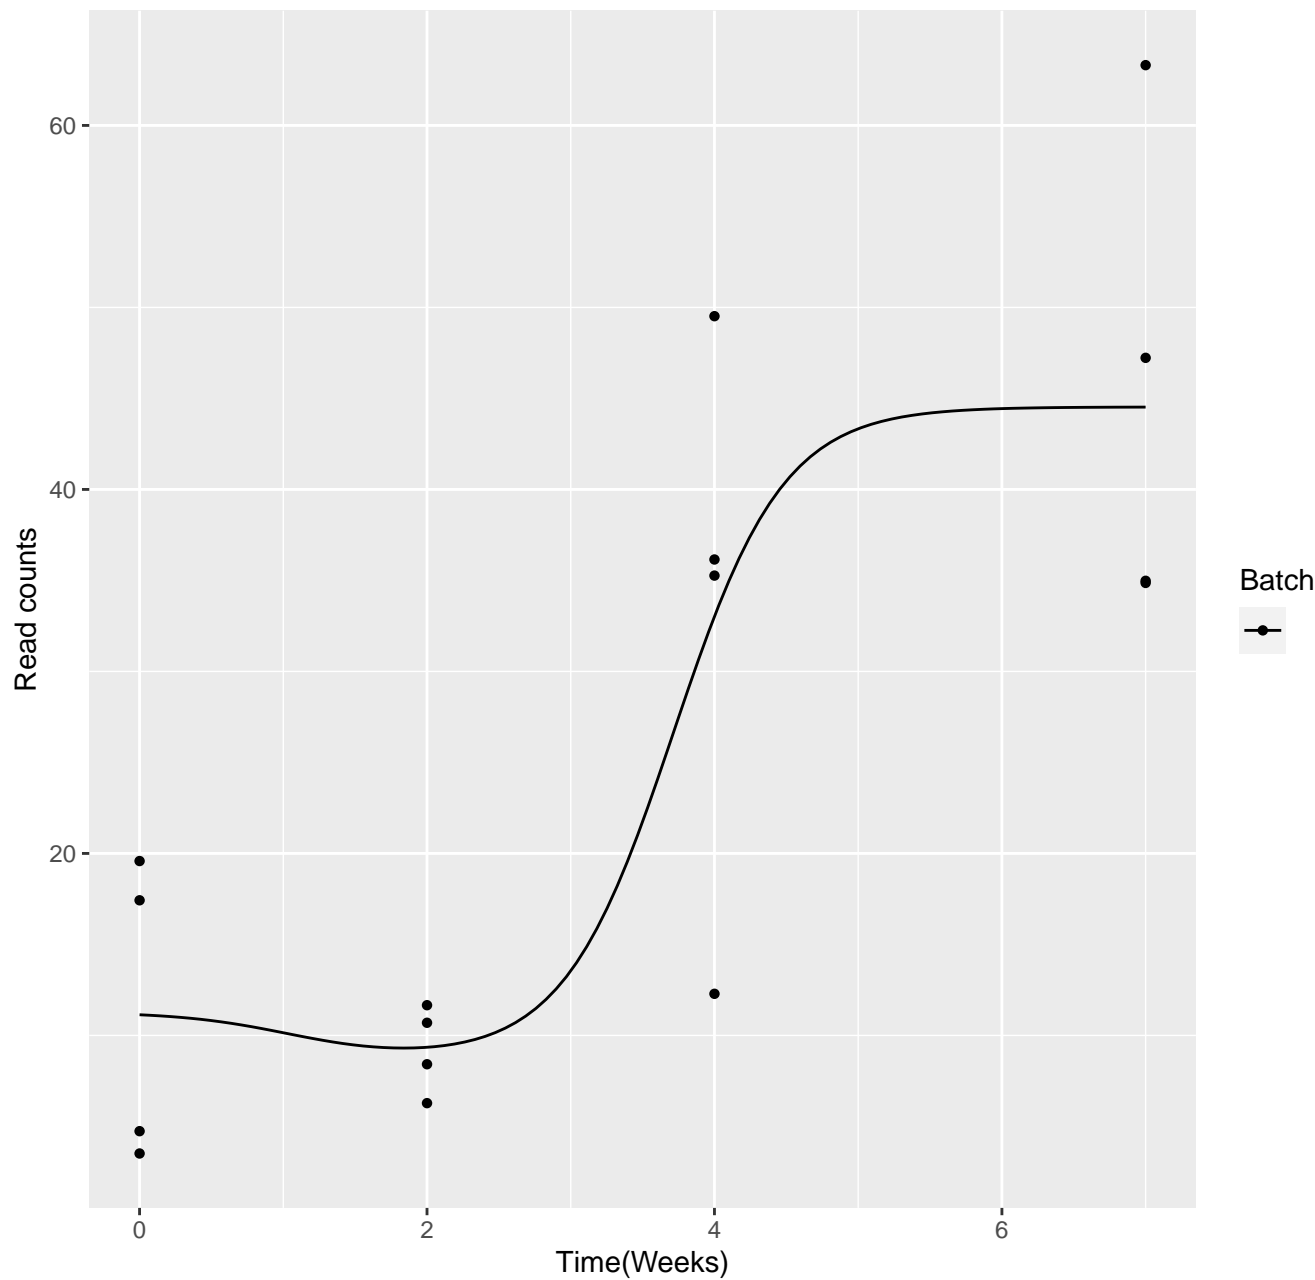



KCNQ4:  $\log_{10} q = -2.93$

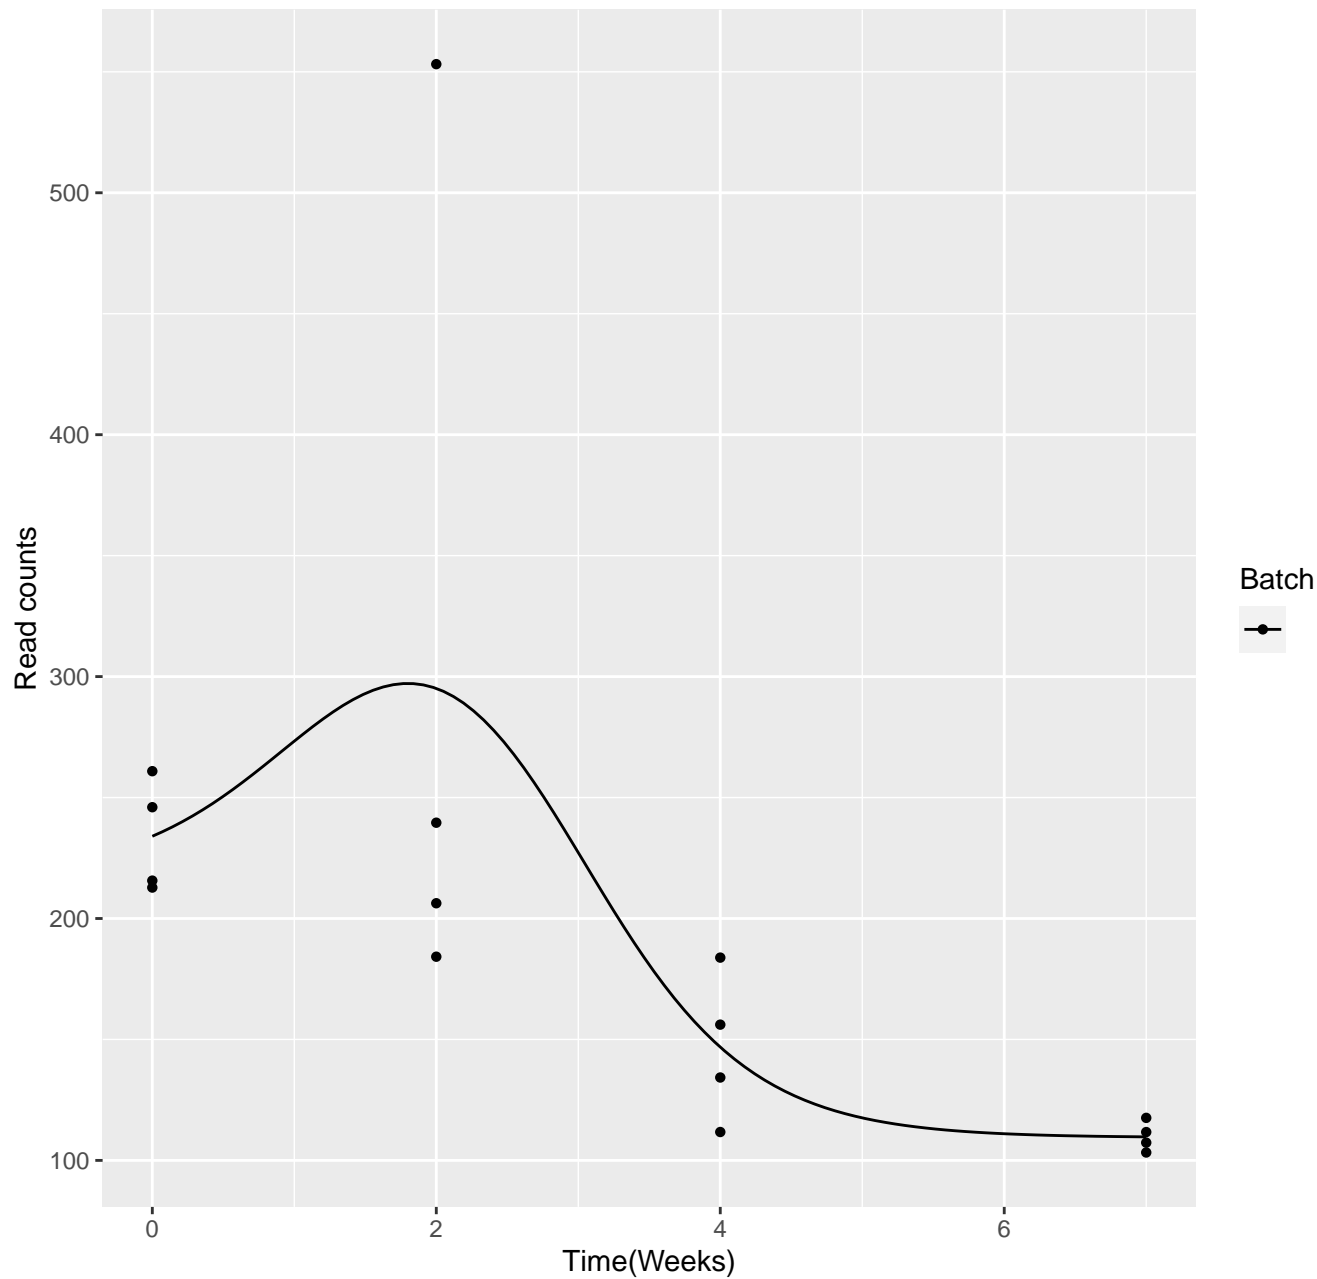

SNX5:  $\log_{10} q = -2.93$

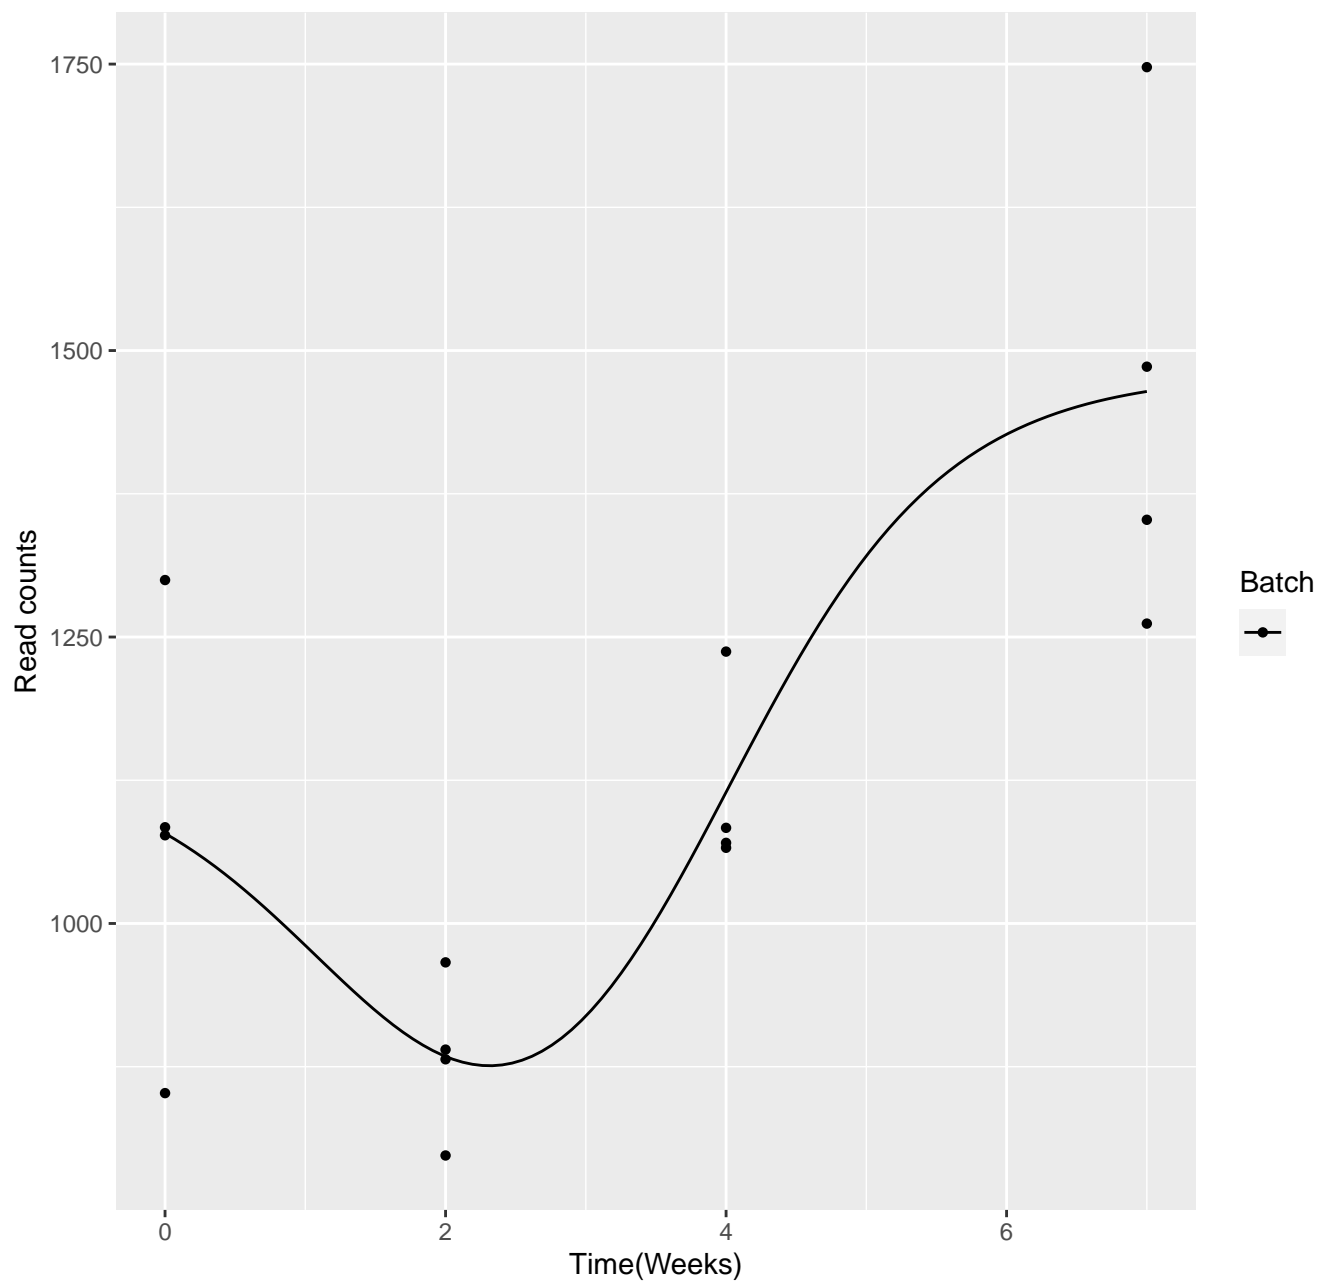

OGN:  $\log_{10} q = -2.93$

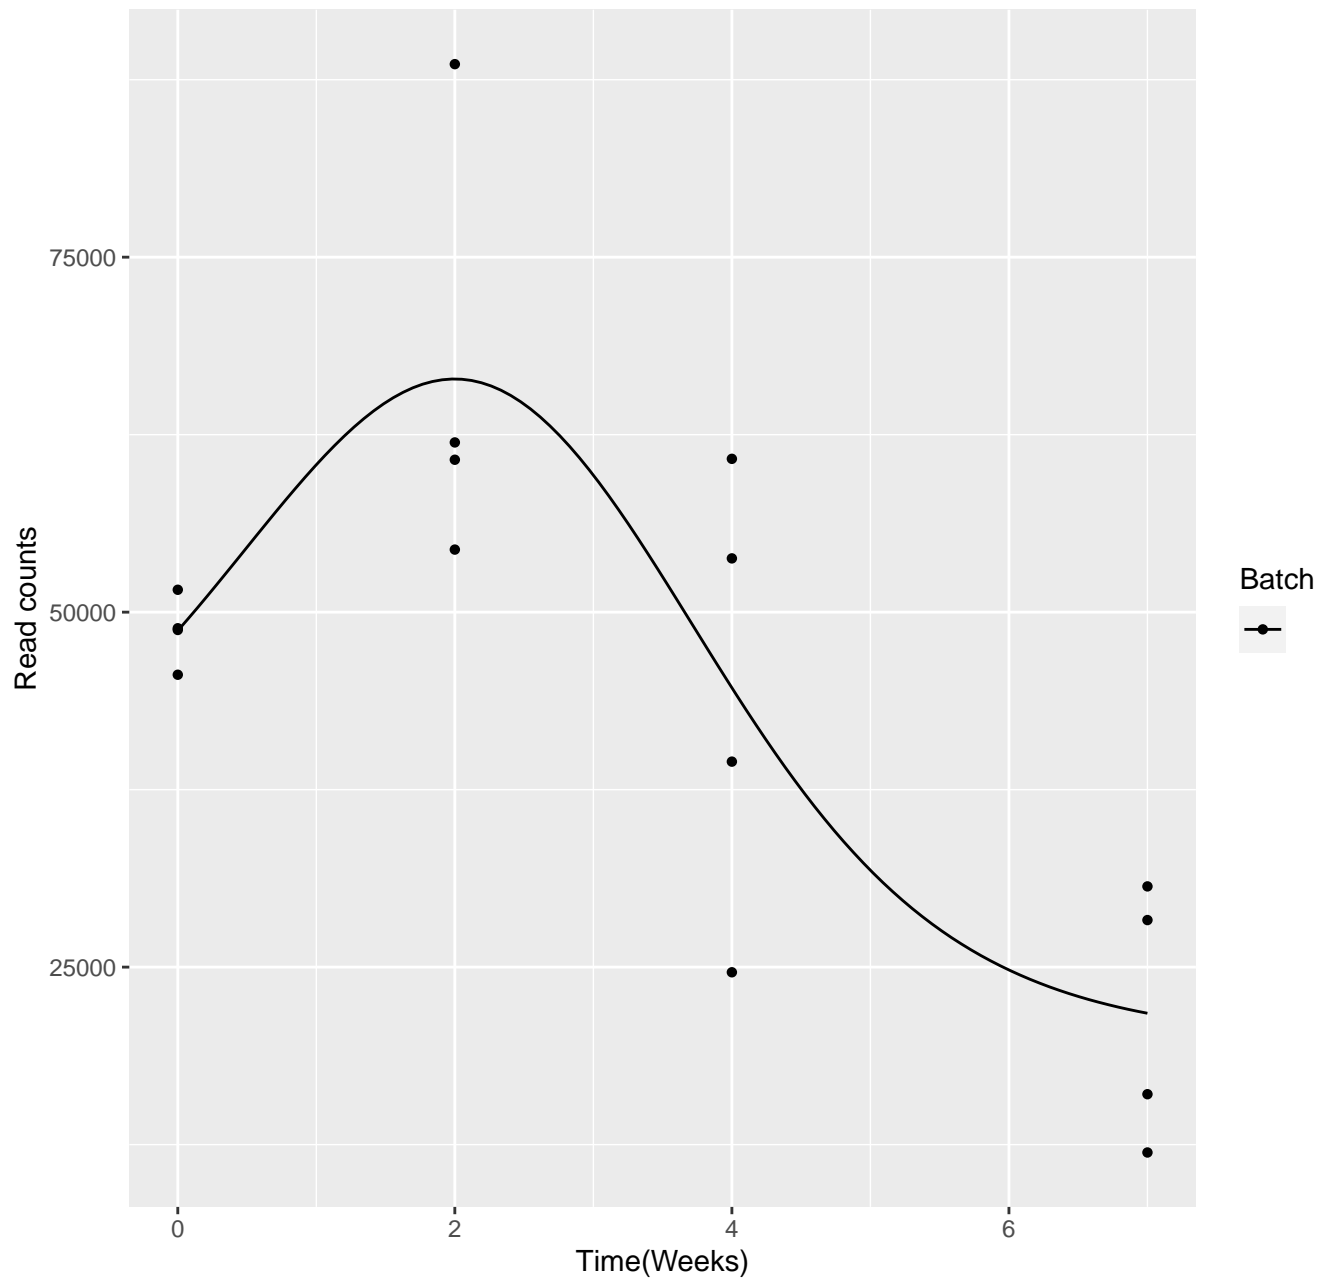

FAM114A1:  $\log_{10} q = -2.92$

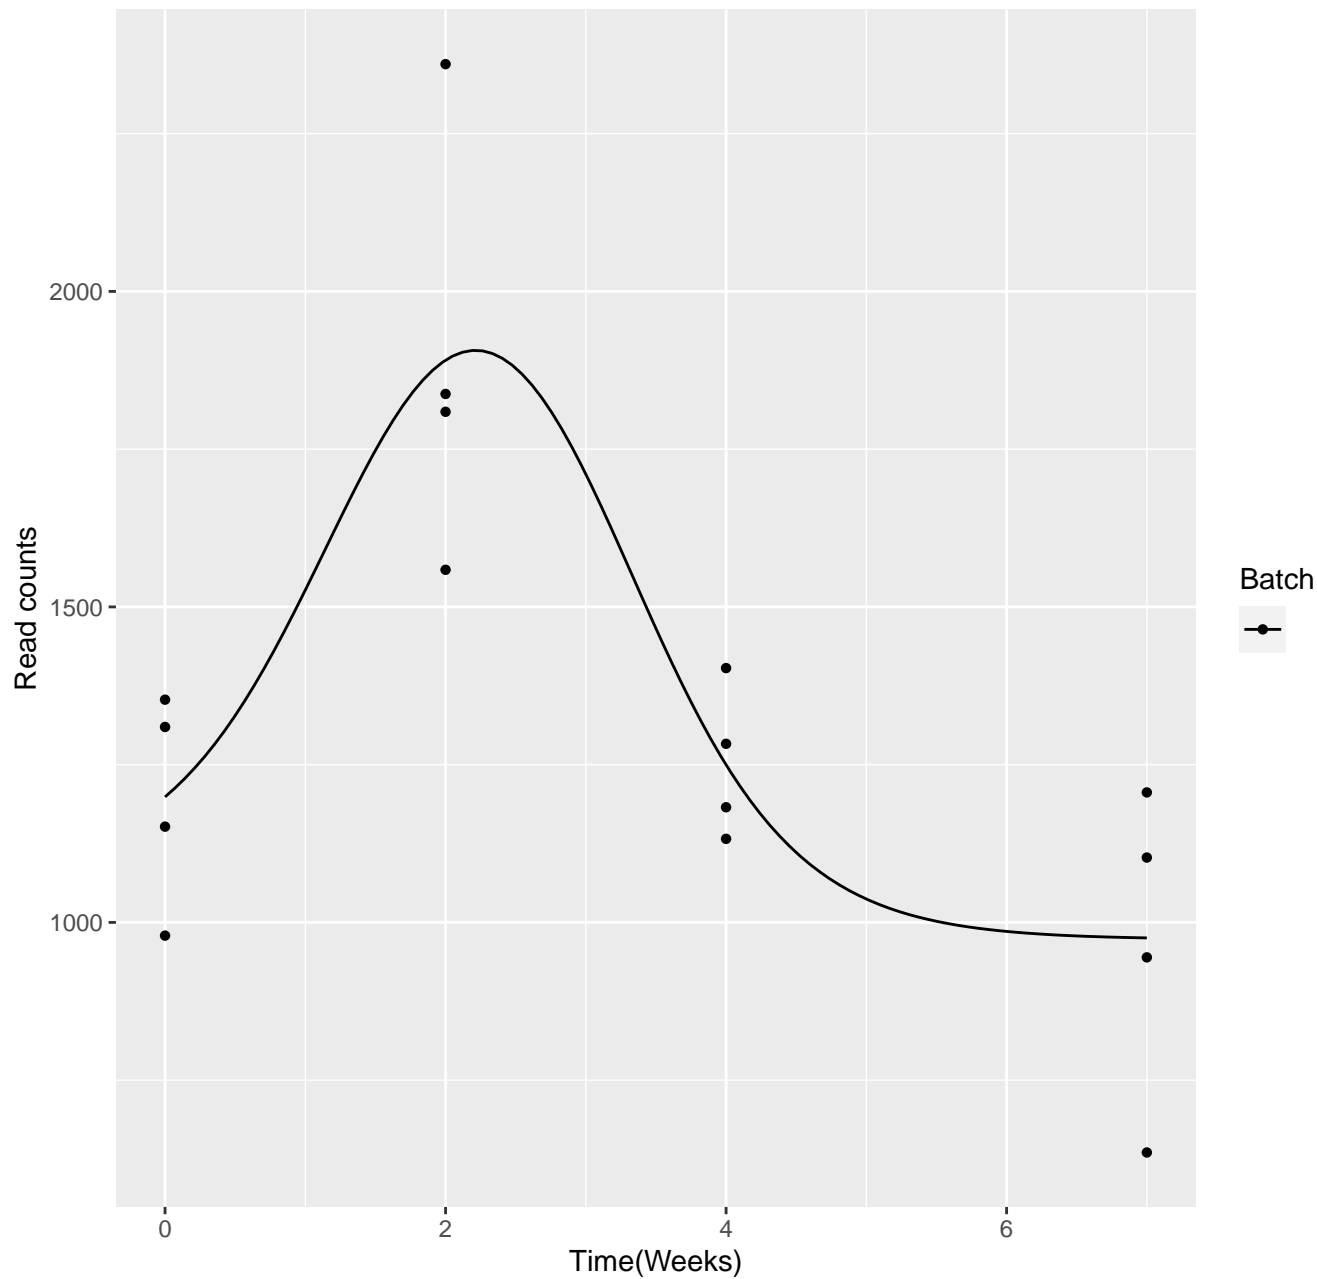

SNX18:  $\log_{10} q = -2.92$

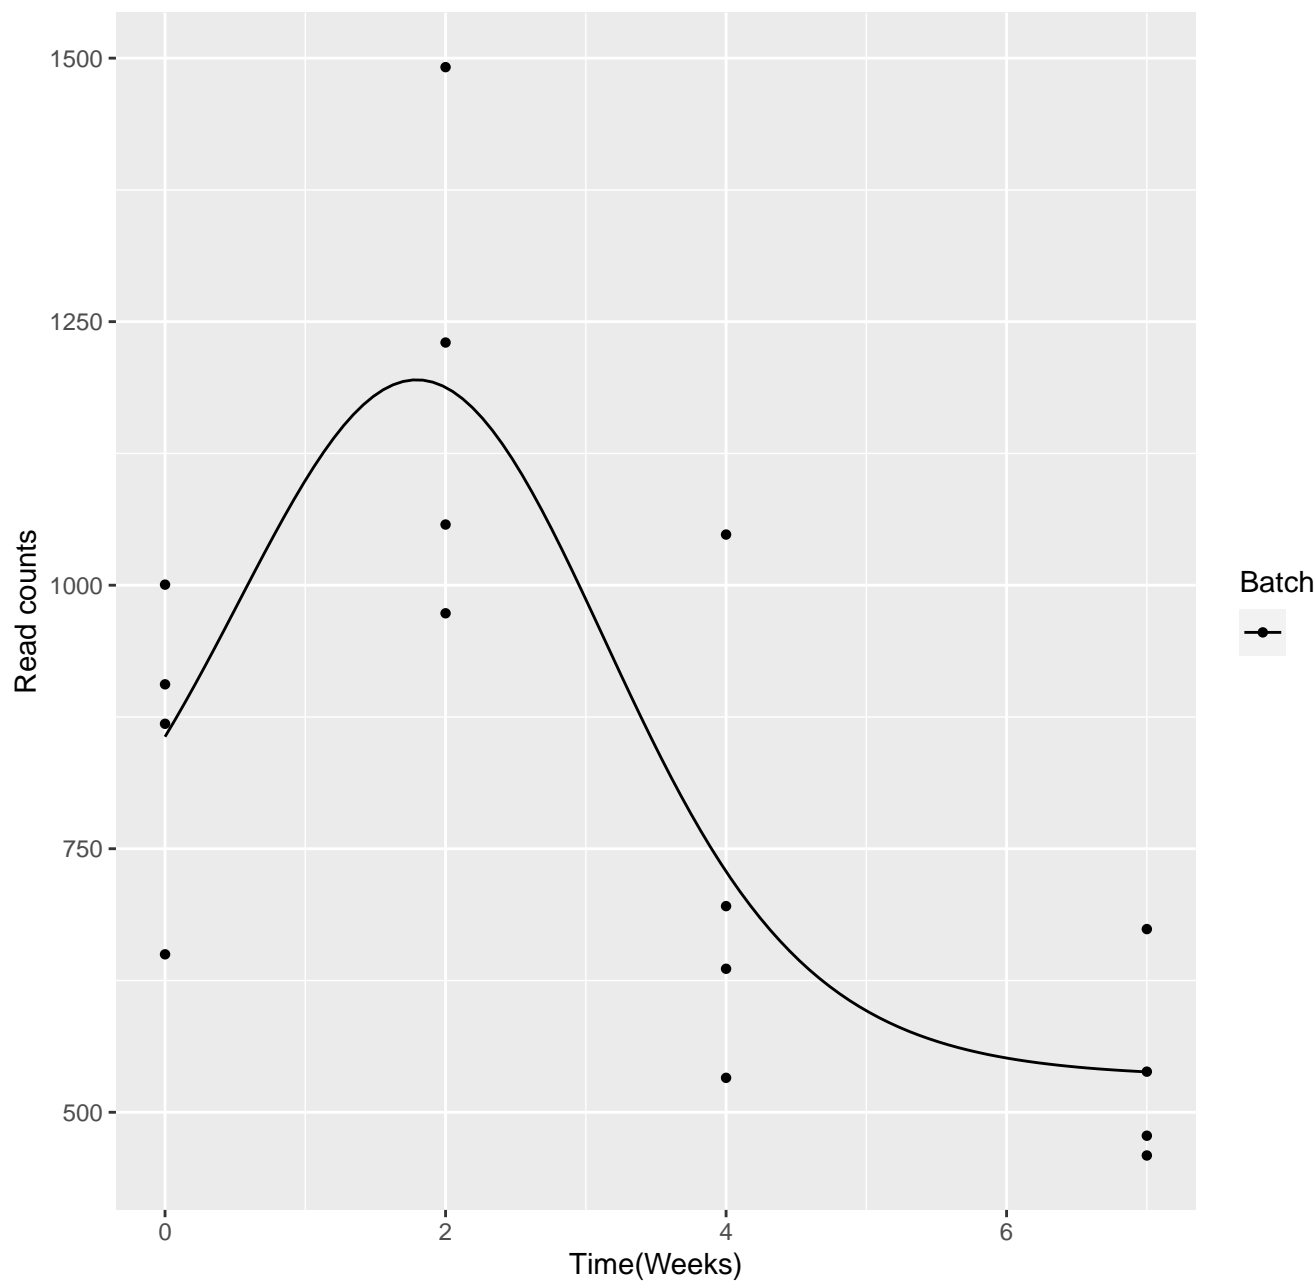

TRPV2:  $\log_{10} q = -2.92$

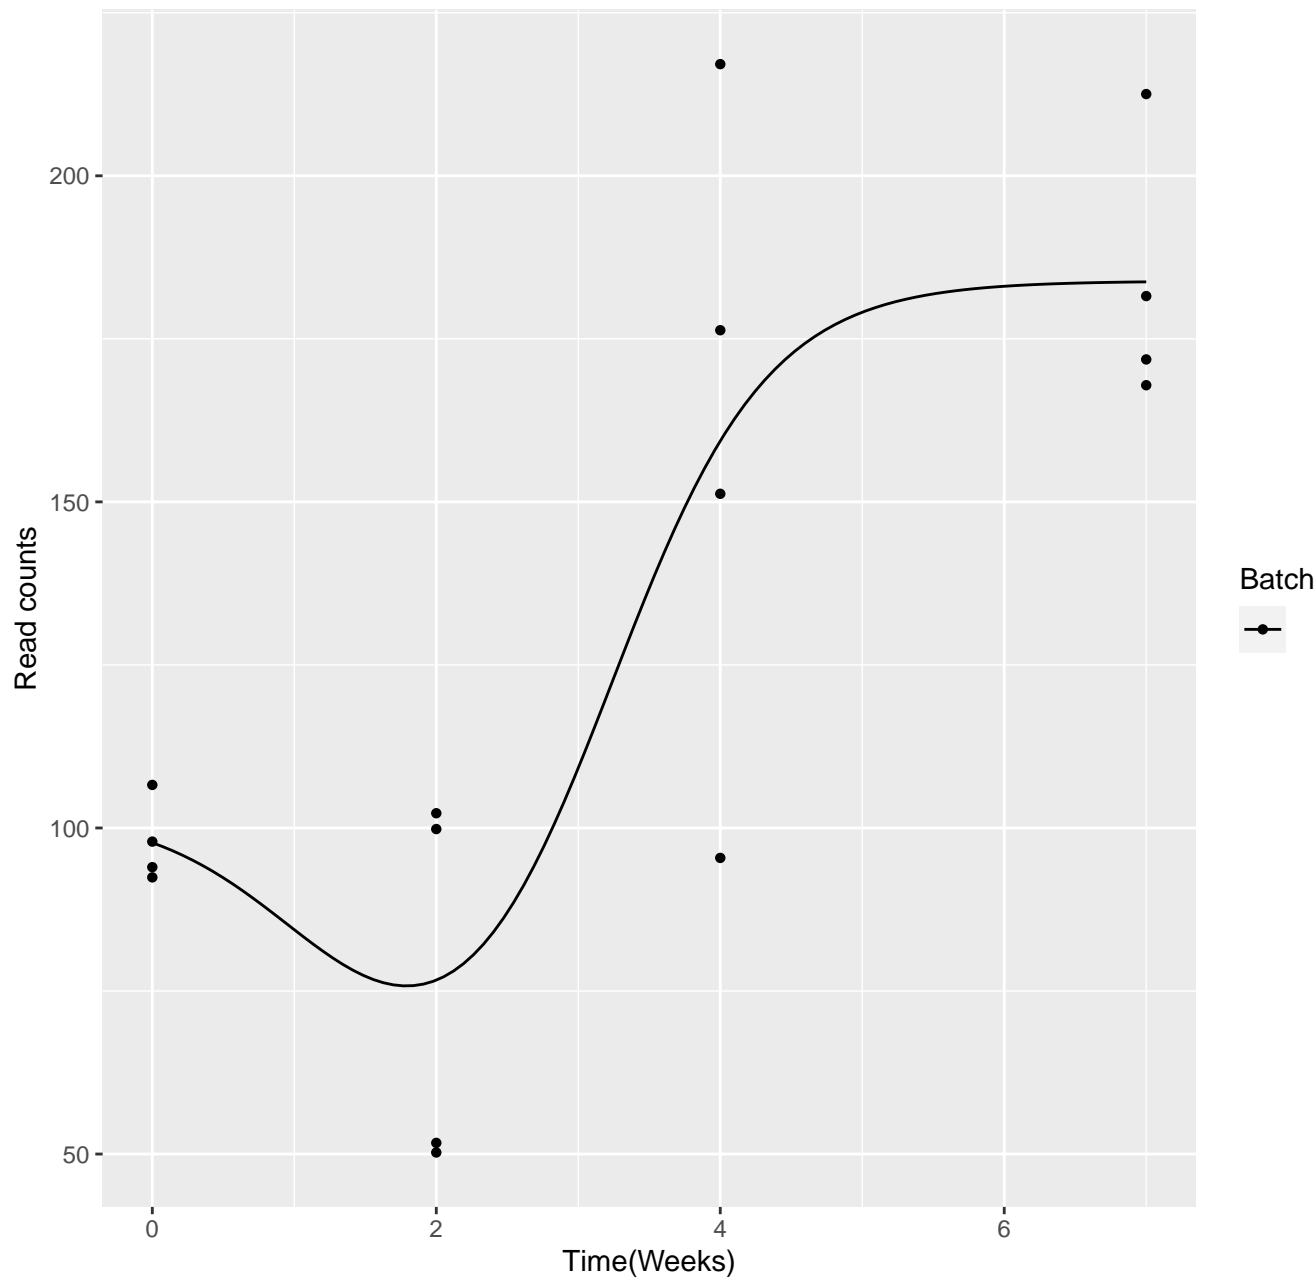

JCAD:  $\log_{10} q = -2.91$

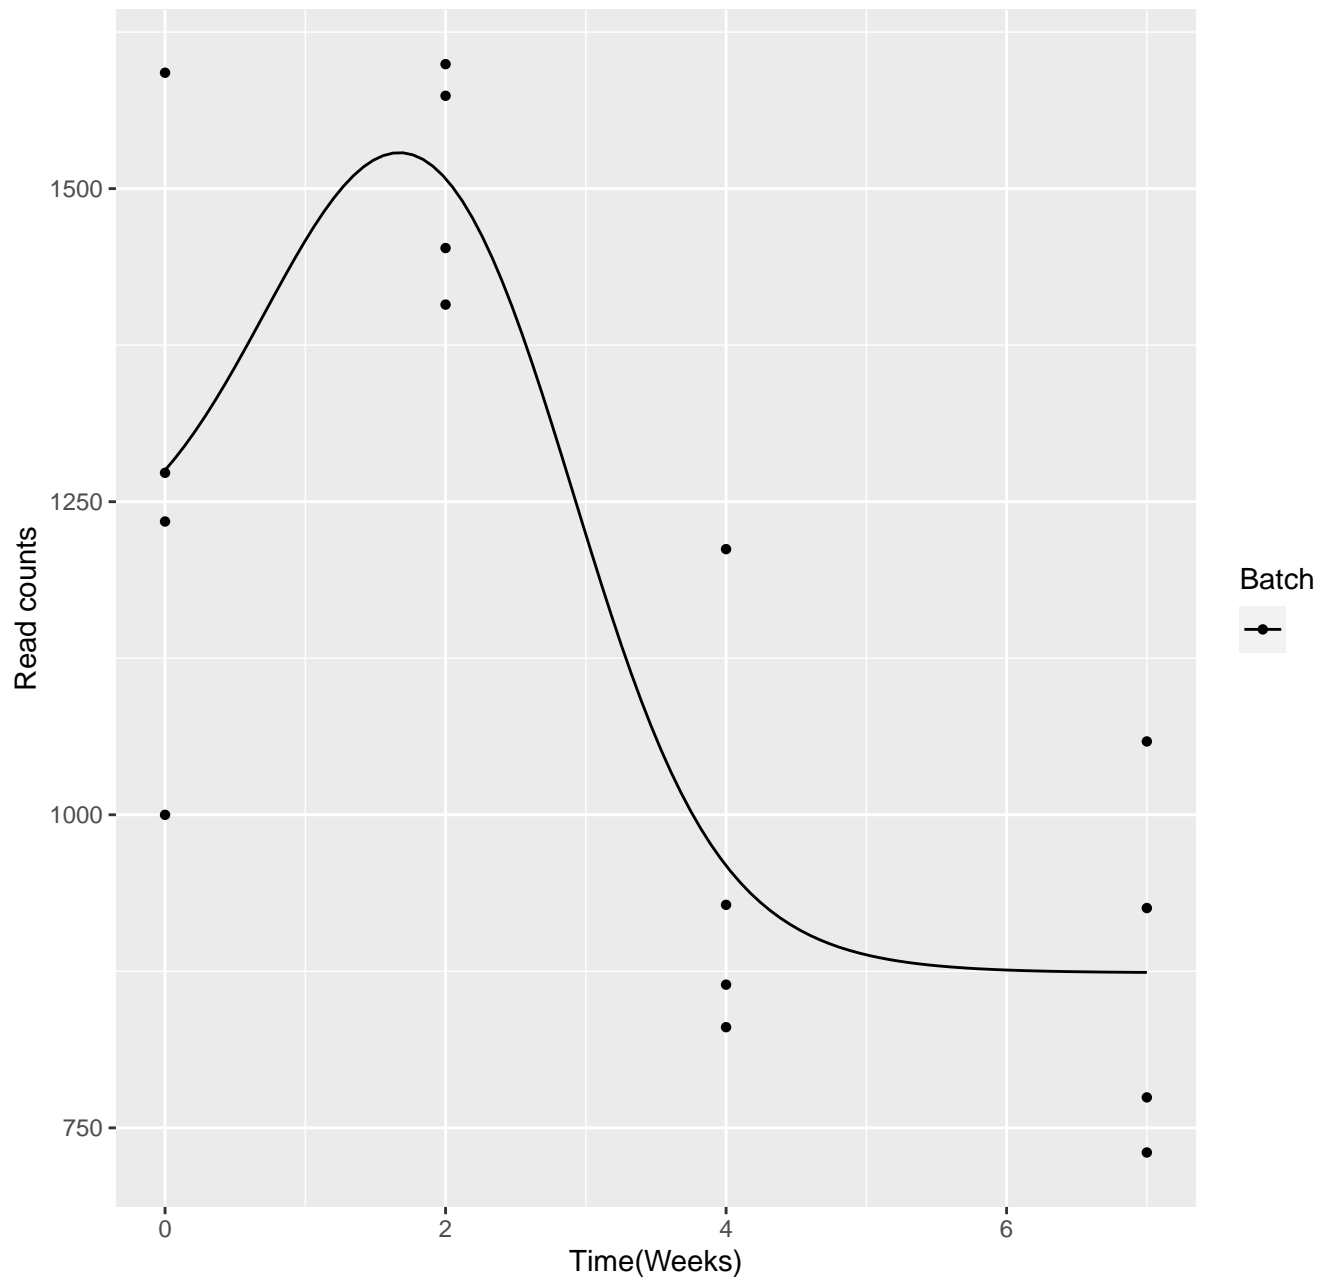

TASL:  $\log_{10} q = -2.91$

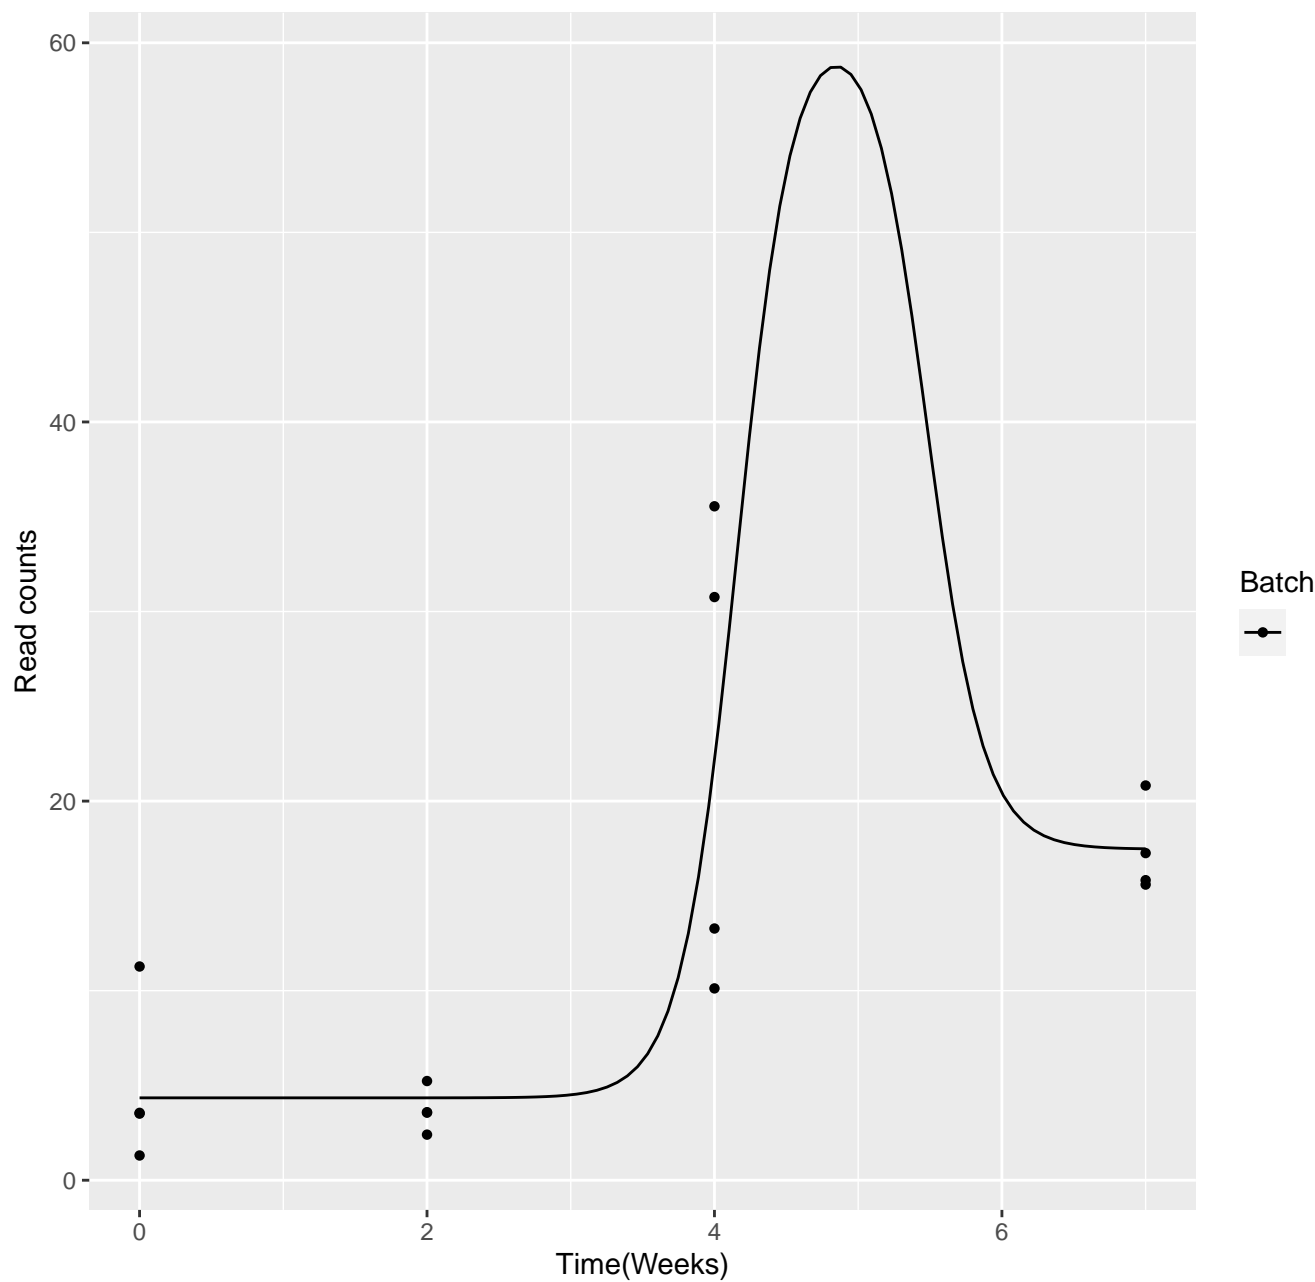



FKBP10:  $\log_{10} q = -2.91$

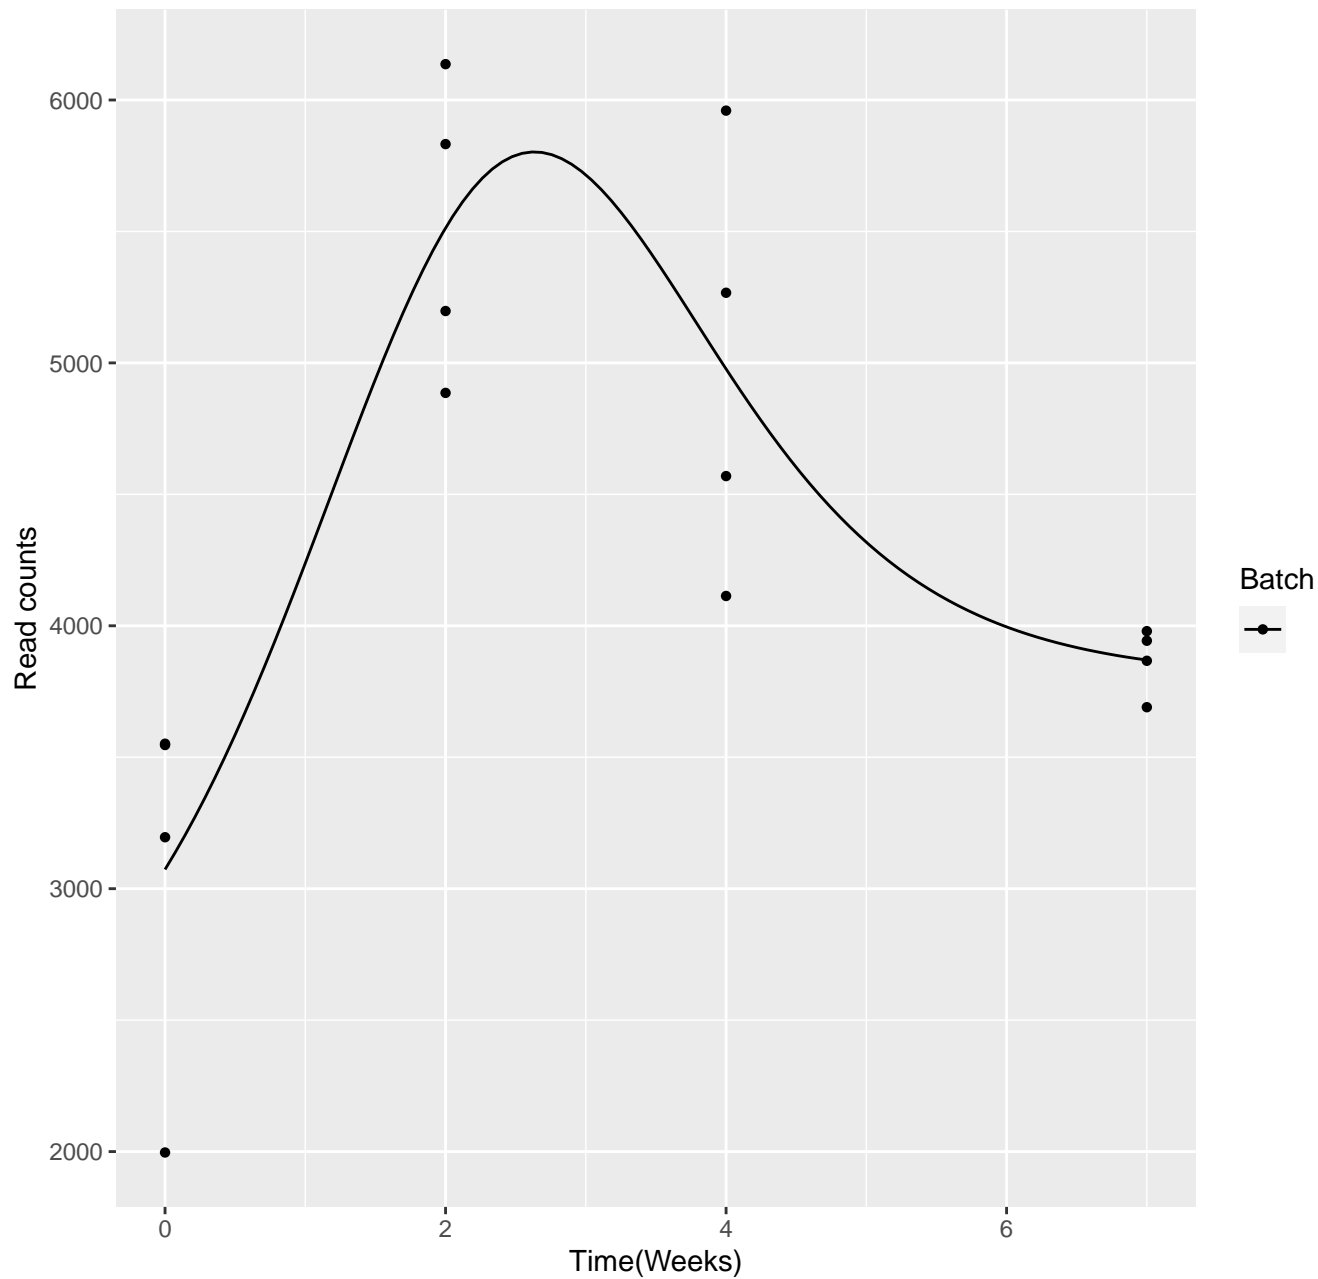

SAMHD1:  $\log_{10} q = -2.9$

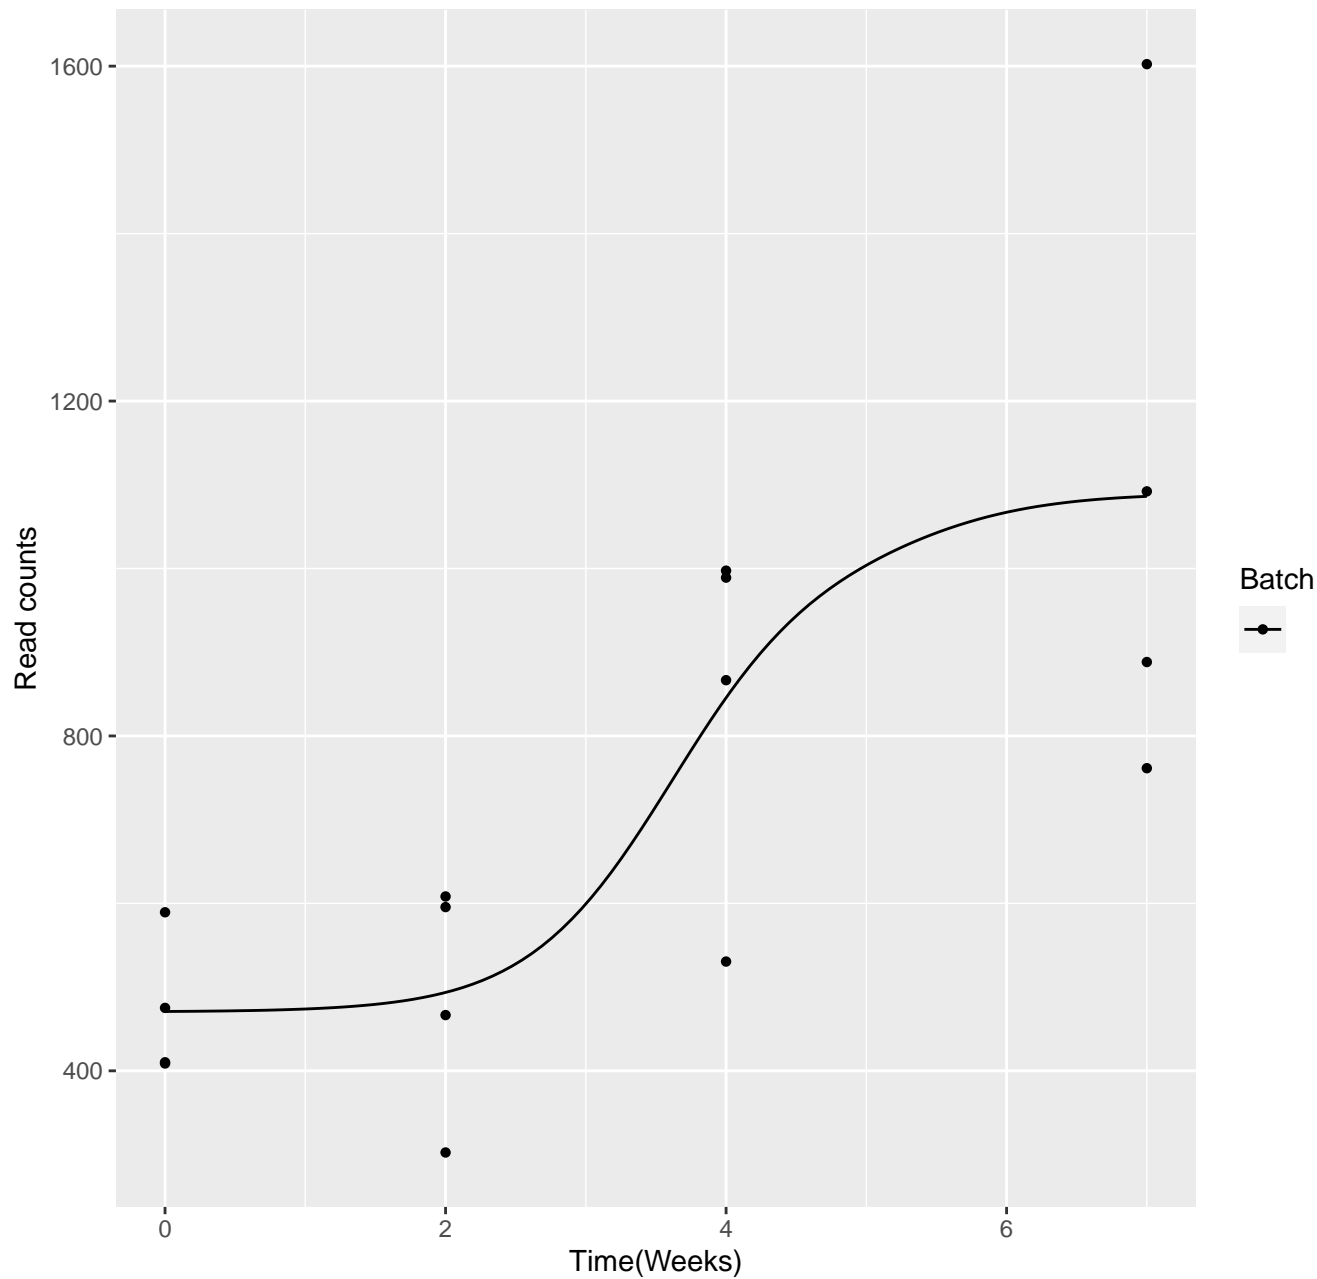

FES:  $\log_{10} q = -2.9$

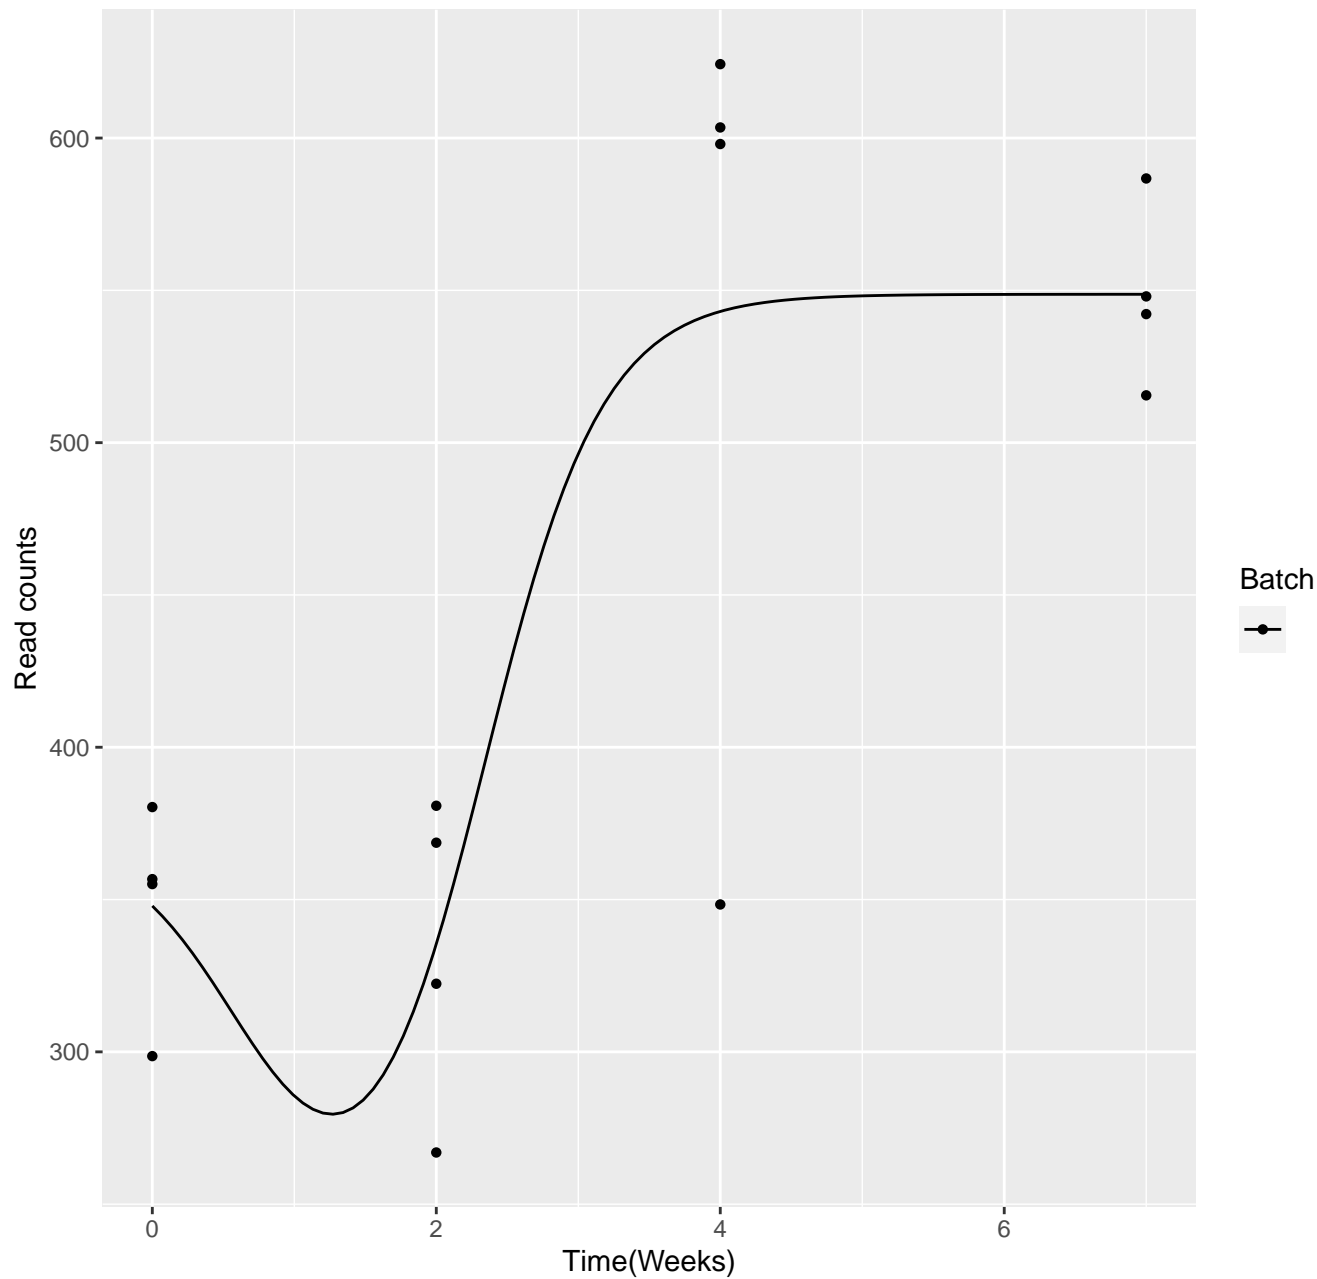

UBE2E1:  $\log_{10} q = -2.9$

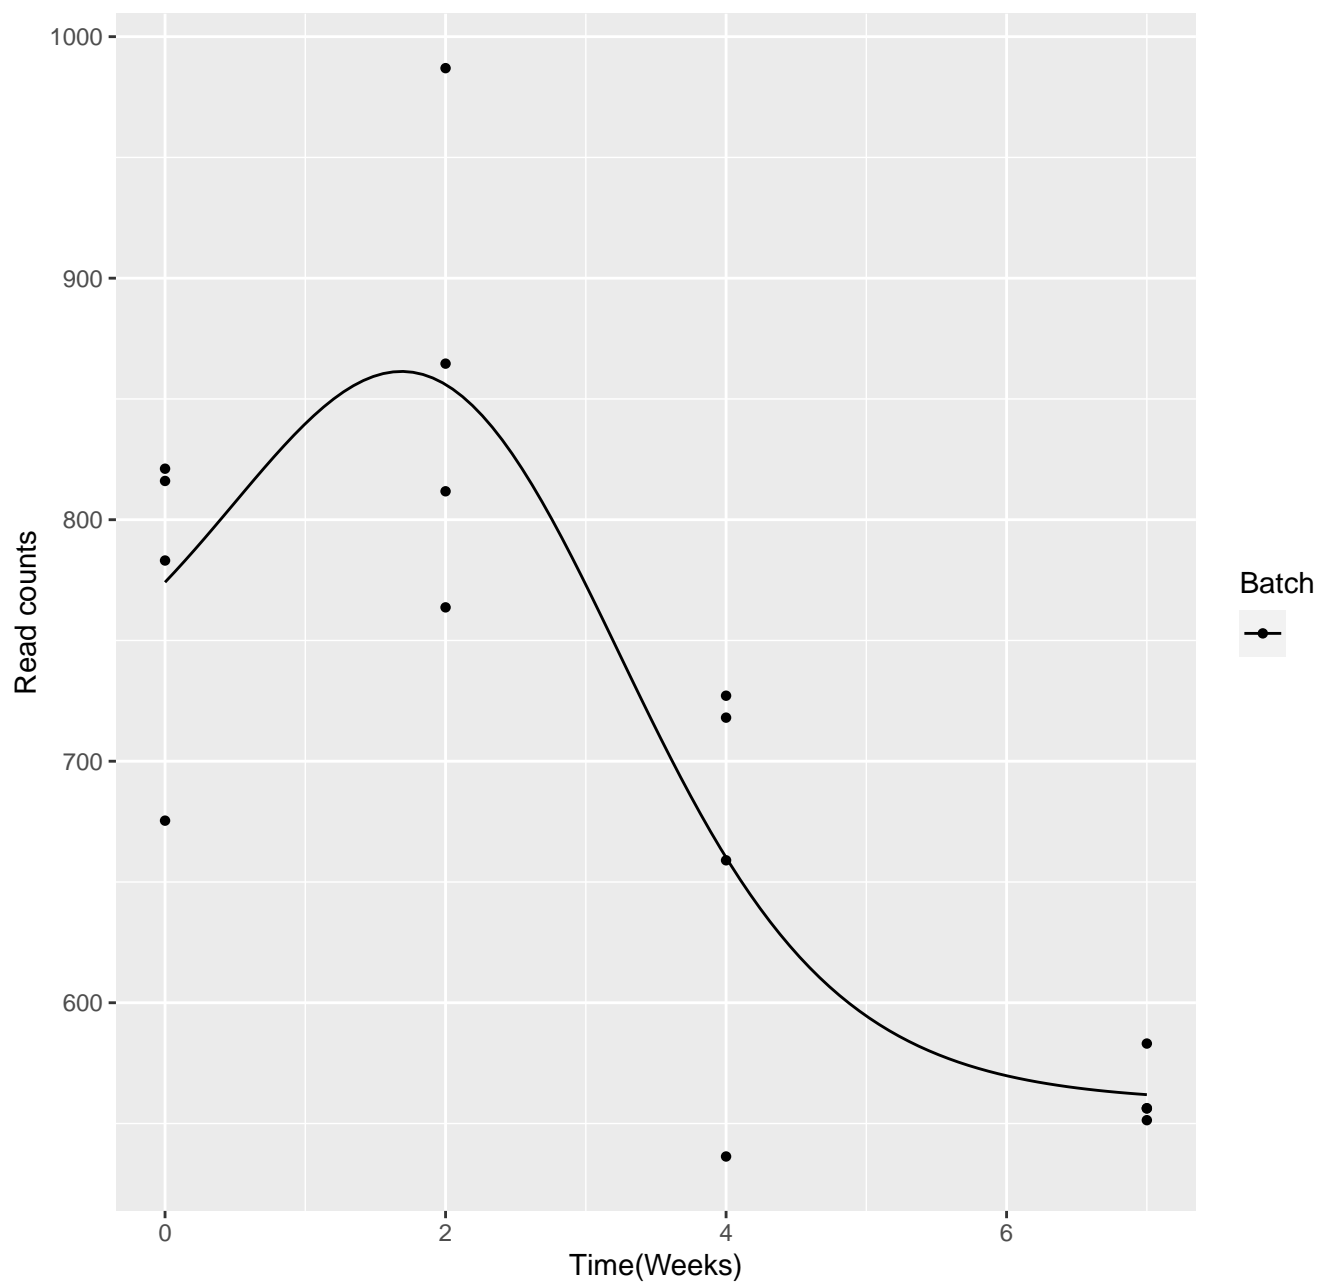

PHLDA1:  $\log_{10} q = -2.9$

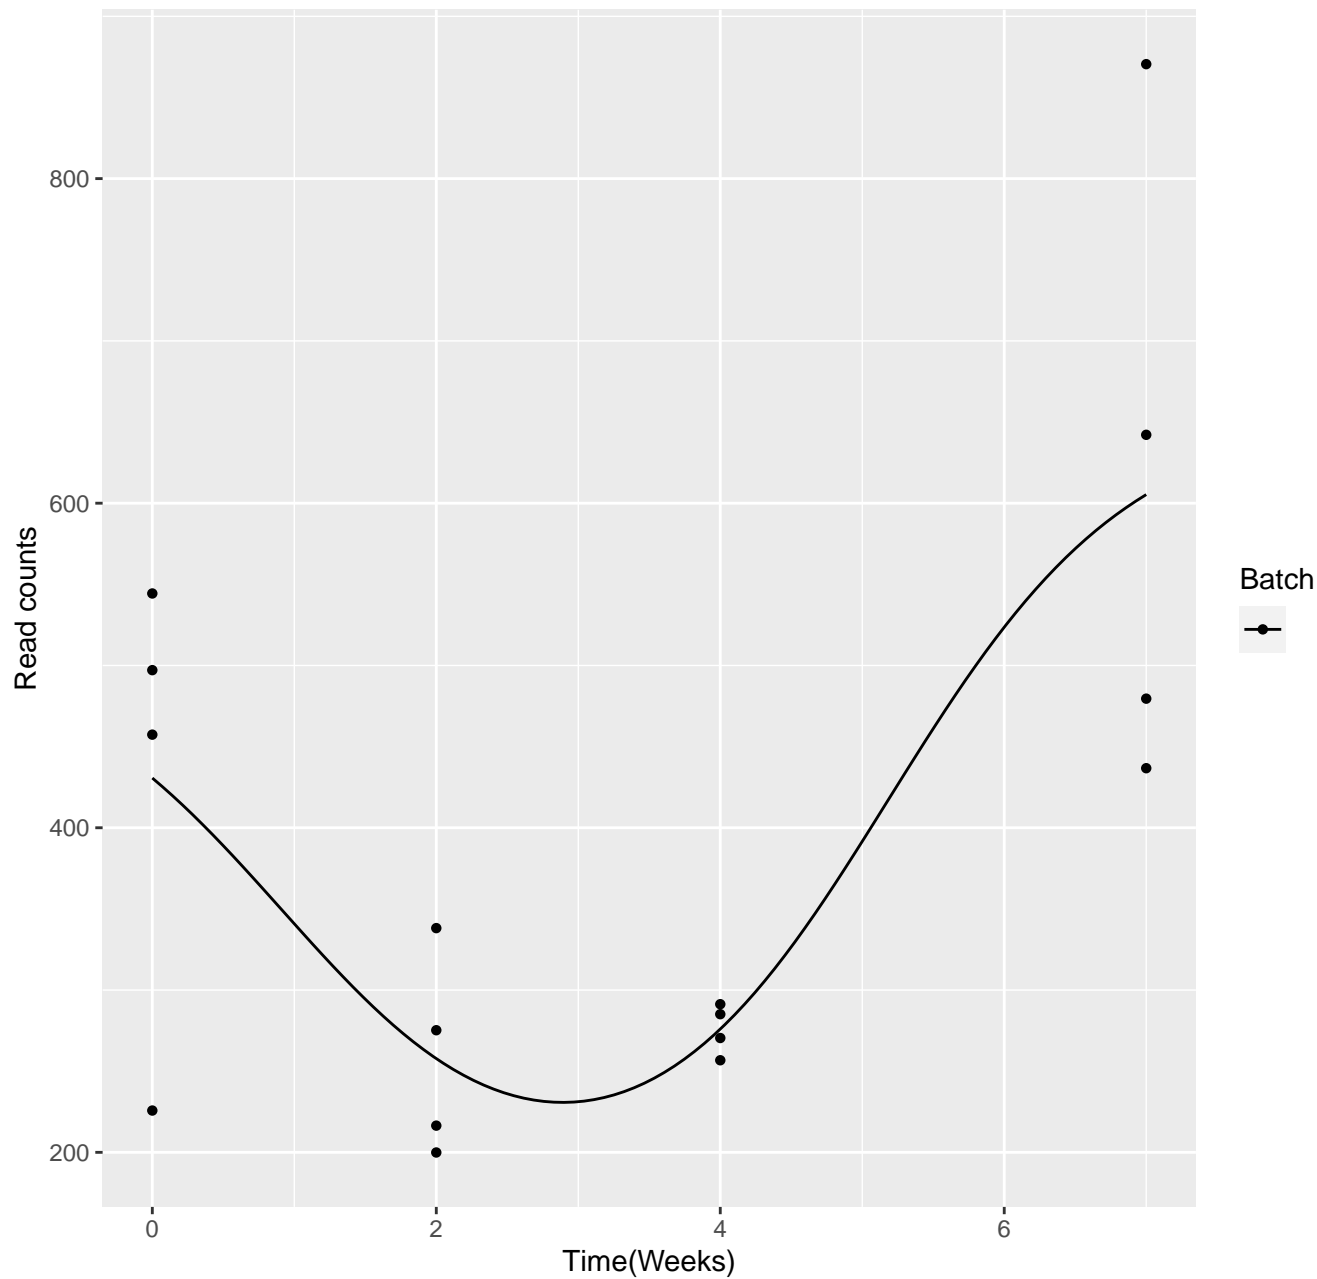

IRAG1:  $\log_{10} q = -2.9$

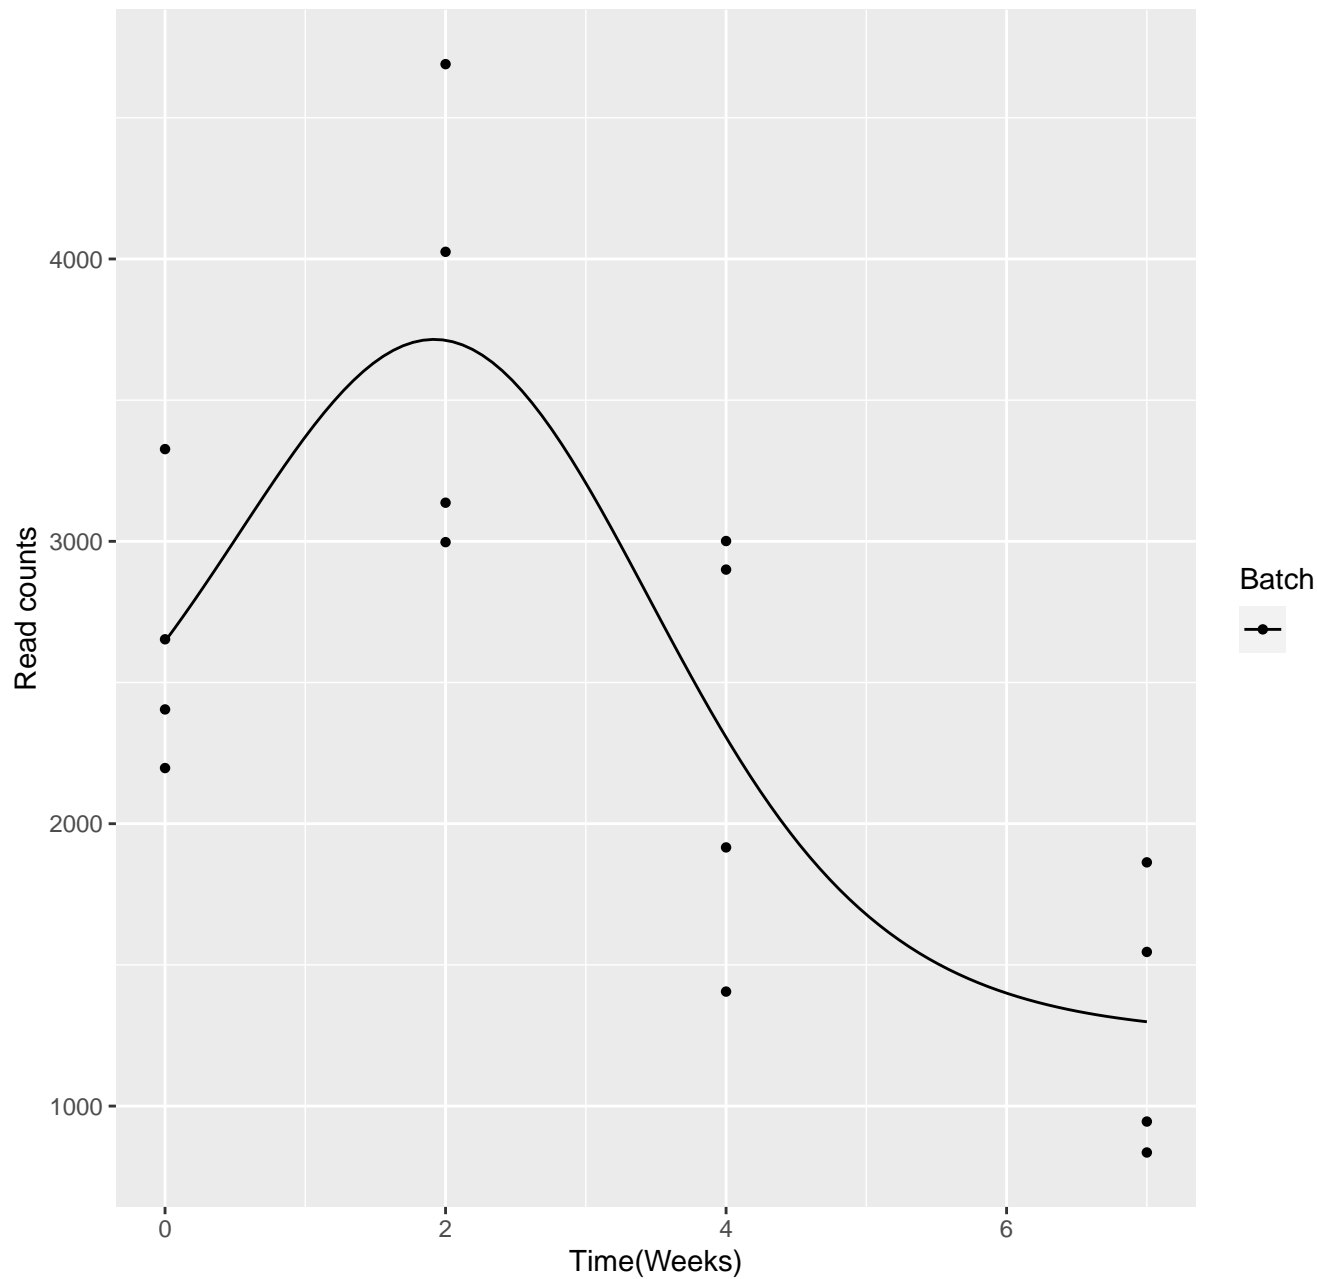

KIF20B:  $\log_{10} q = -2.89$

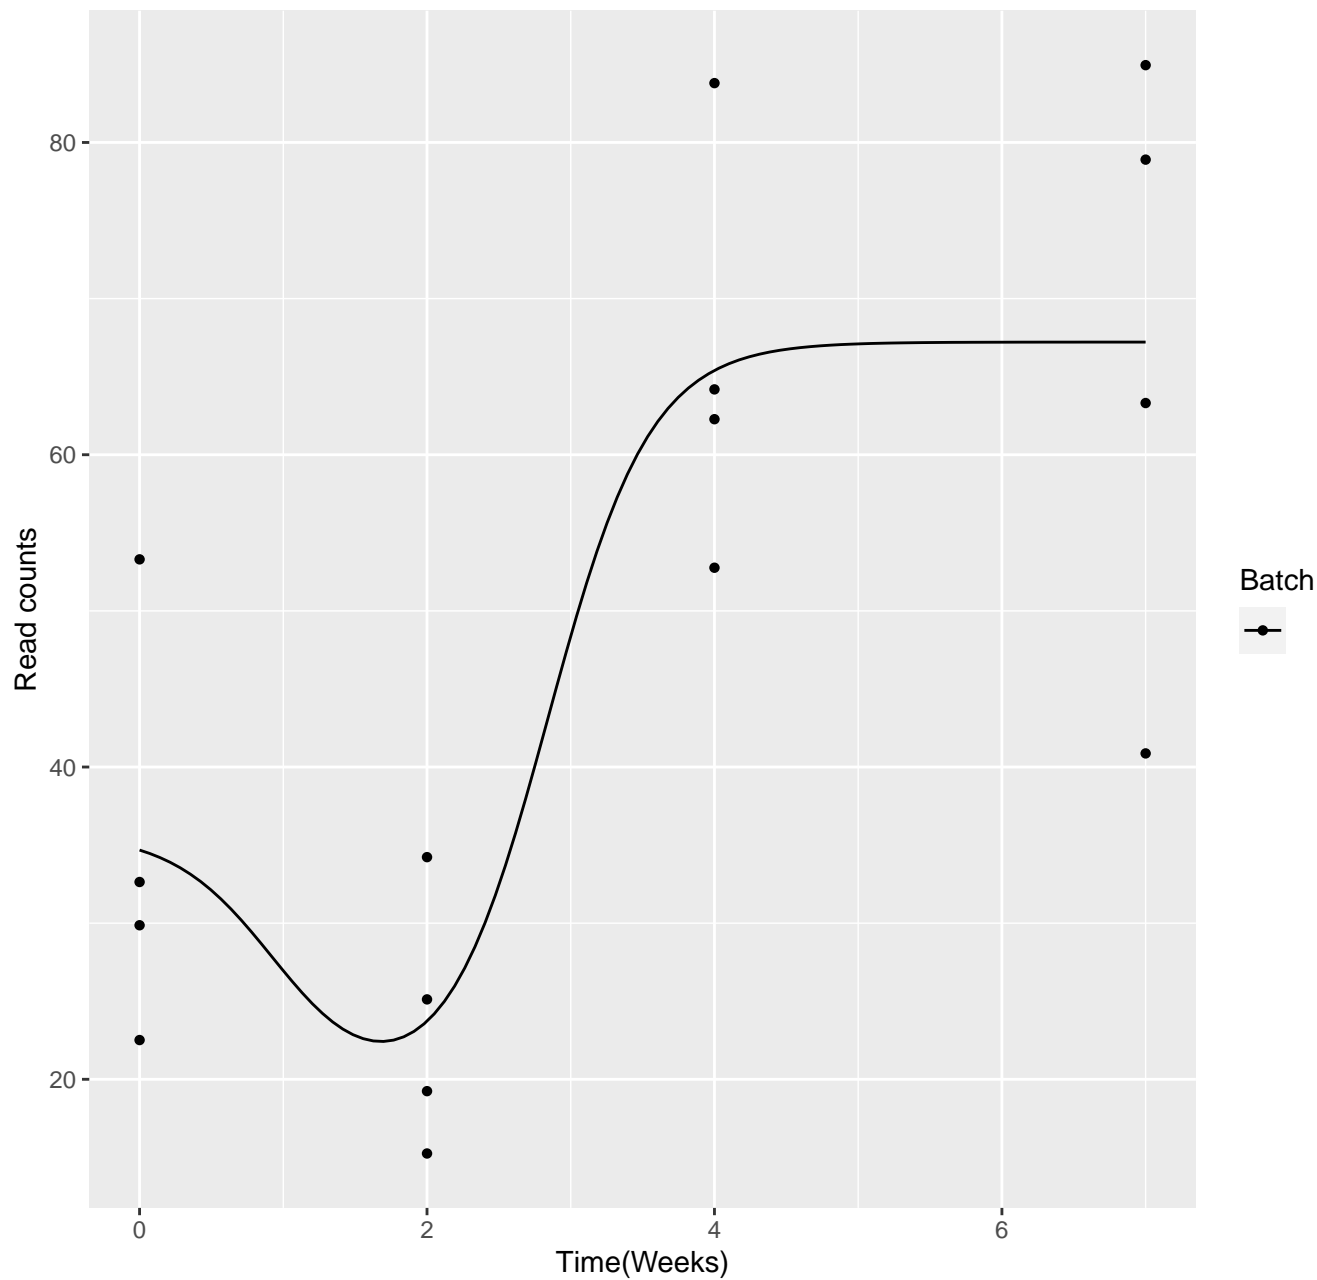

LOC100353689:  $\log_{10} q = -2.89$

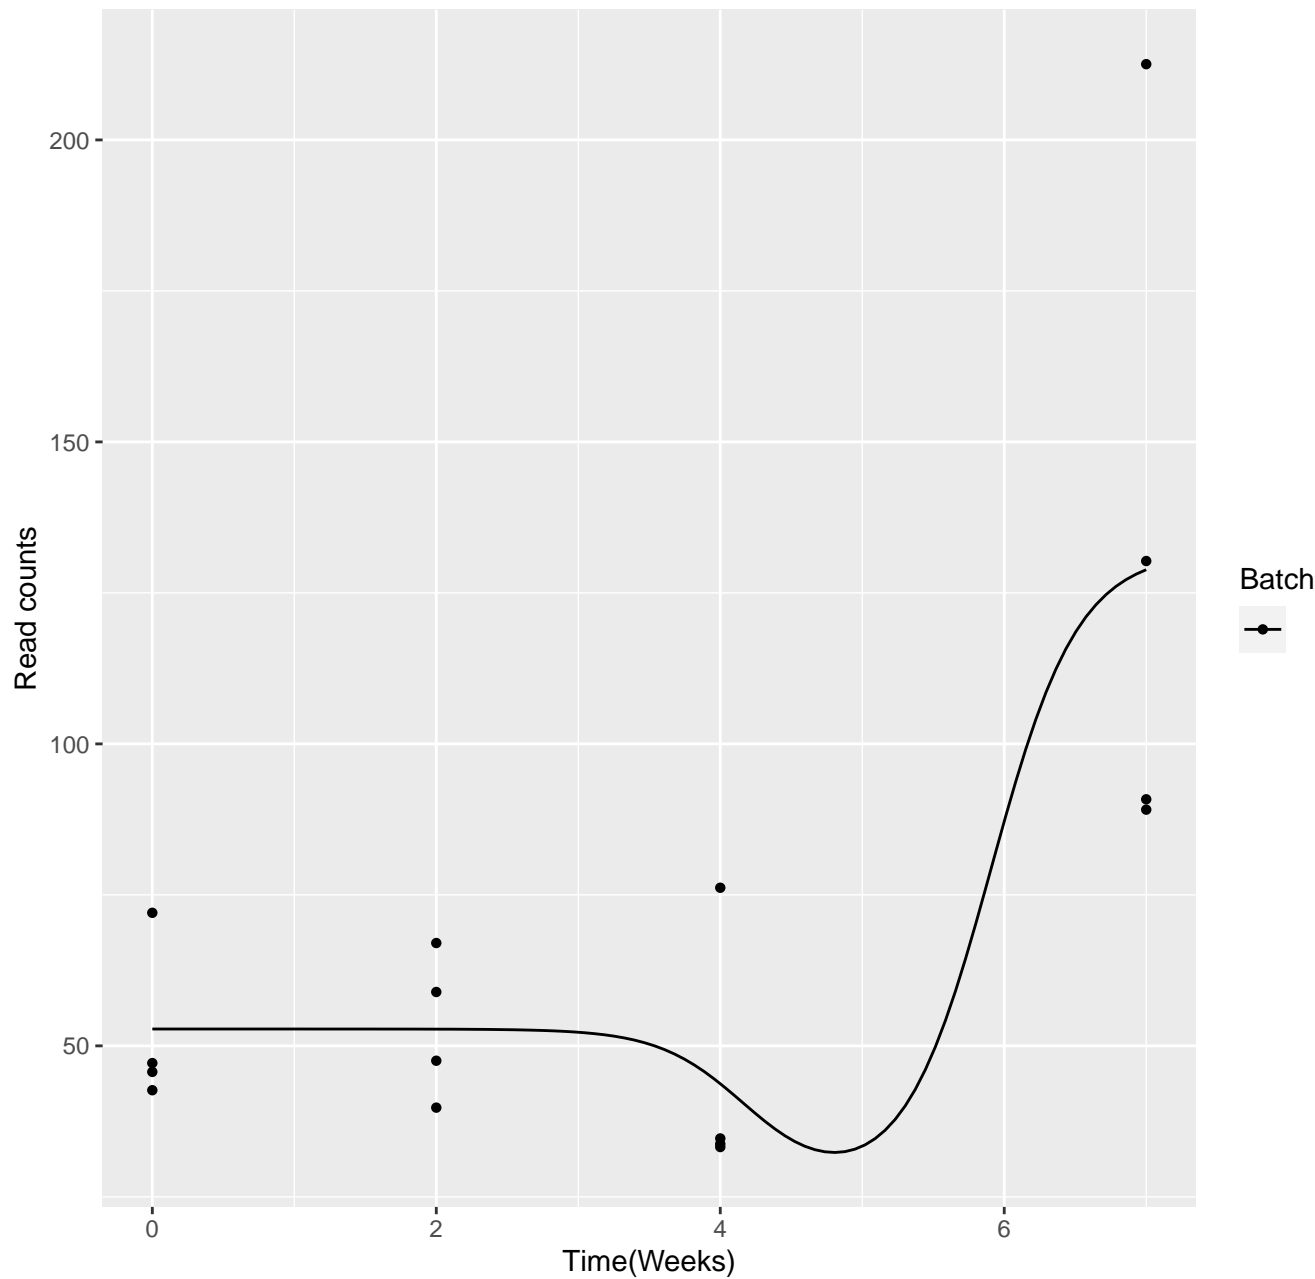



MARCHF1:  $\log_{10} q = -2.89$

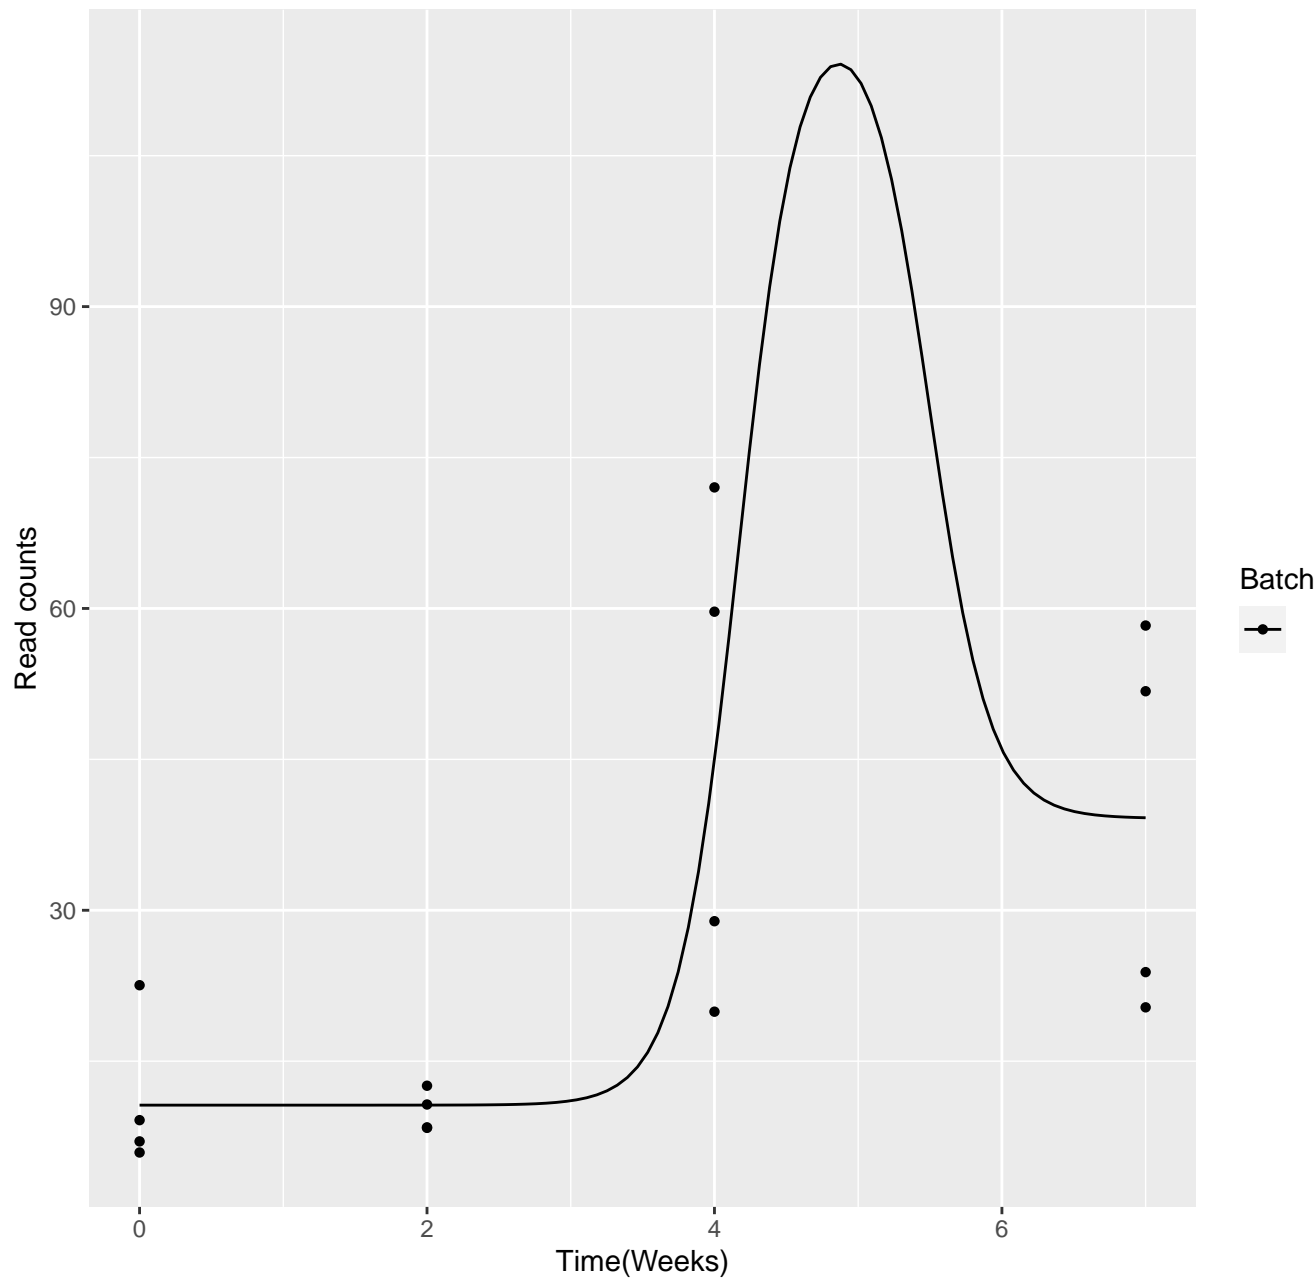

SIAH2:  $\log_{10} q = -2.89$

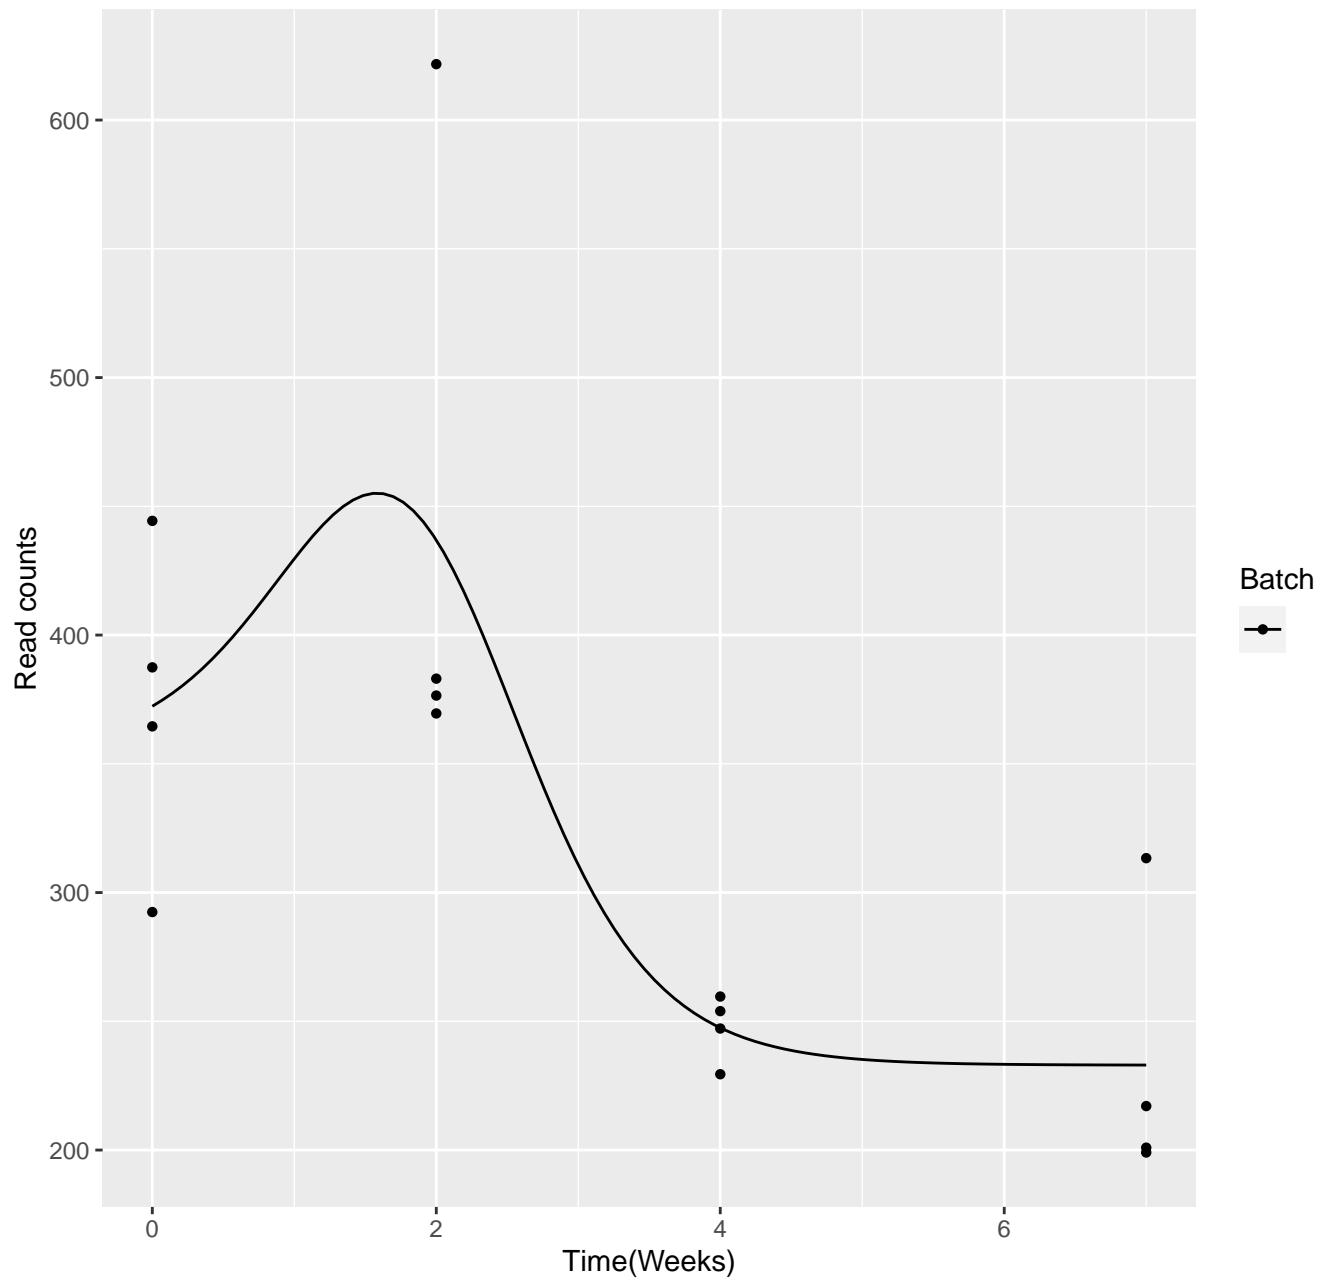

KRT19:  $\log_{10} q = -2.89$

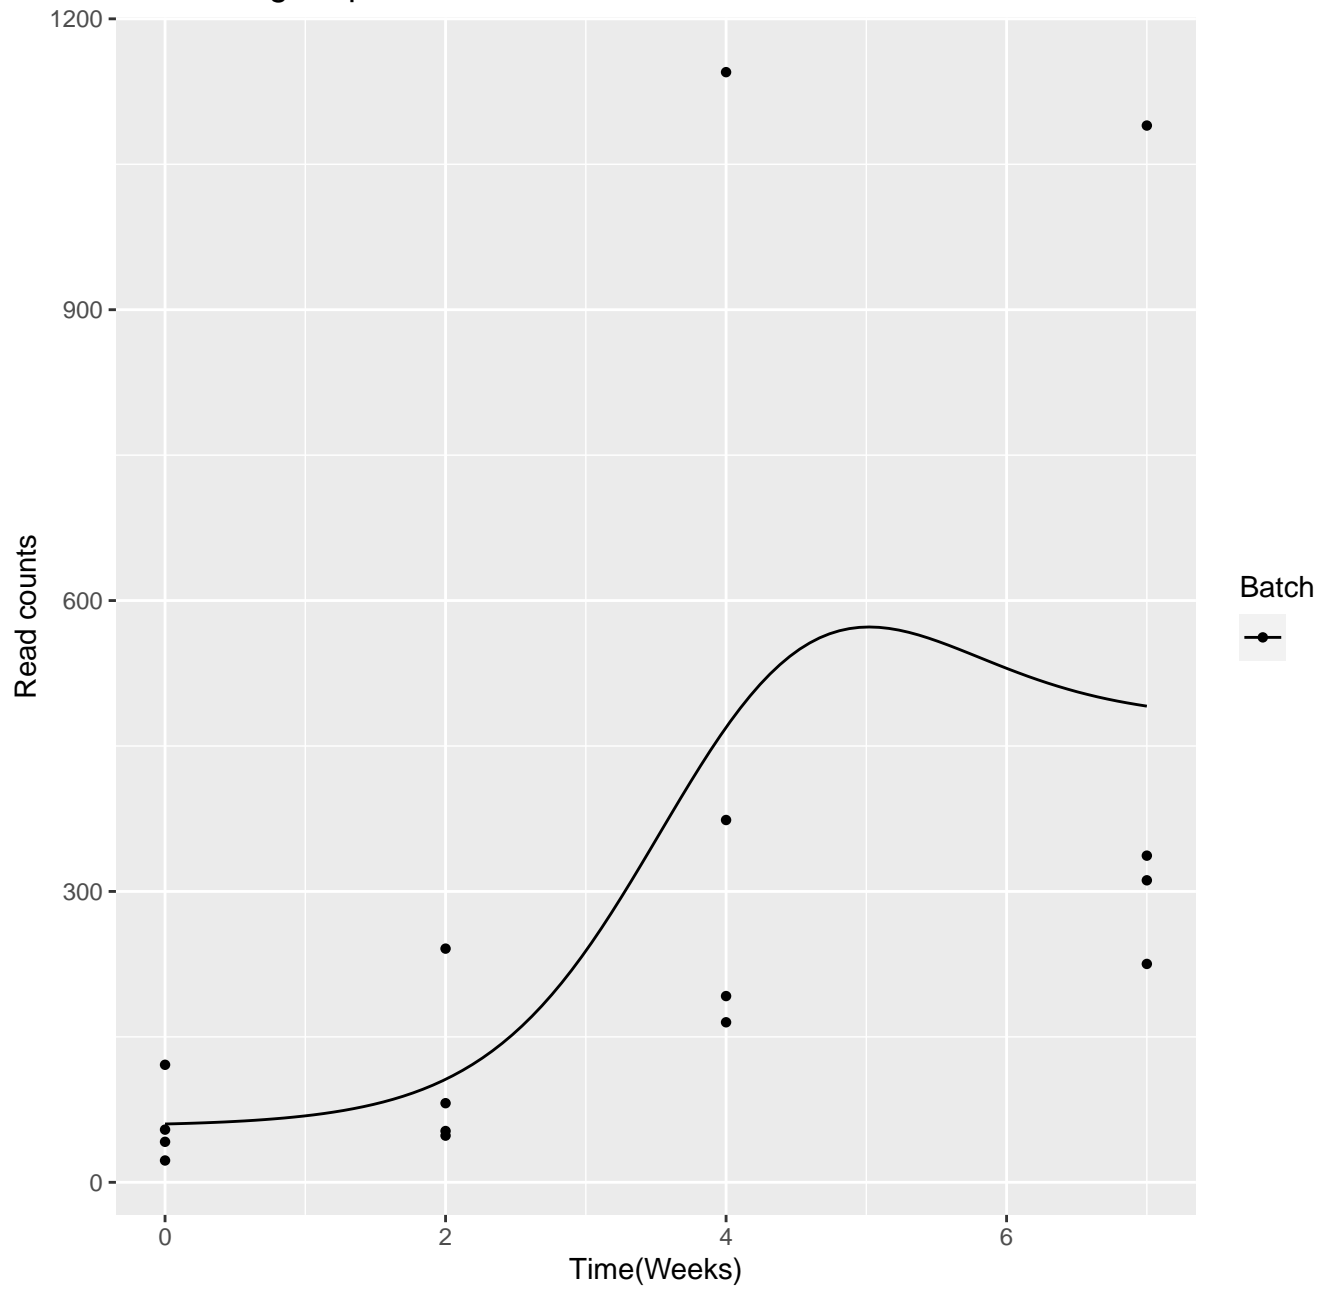

LPCAT3:  $\log_{10} q = -2.89$

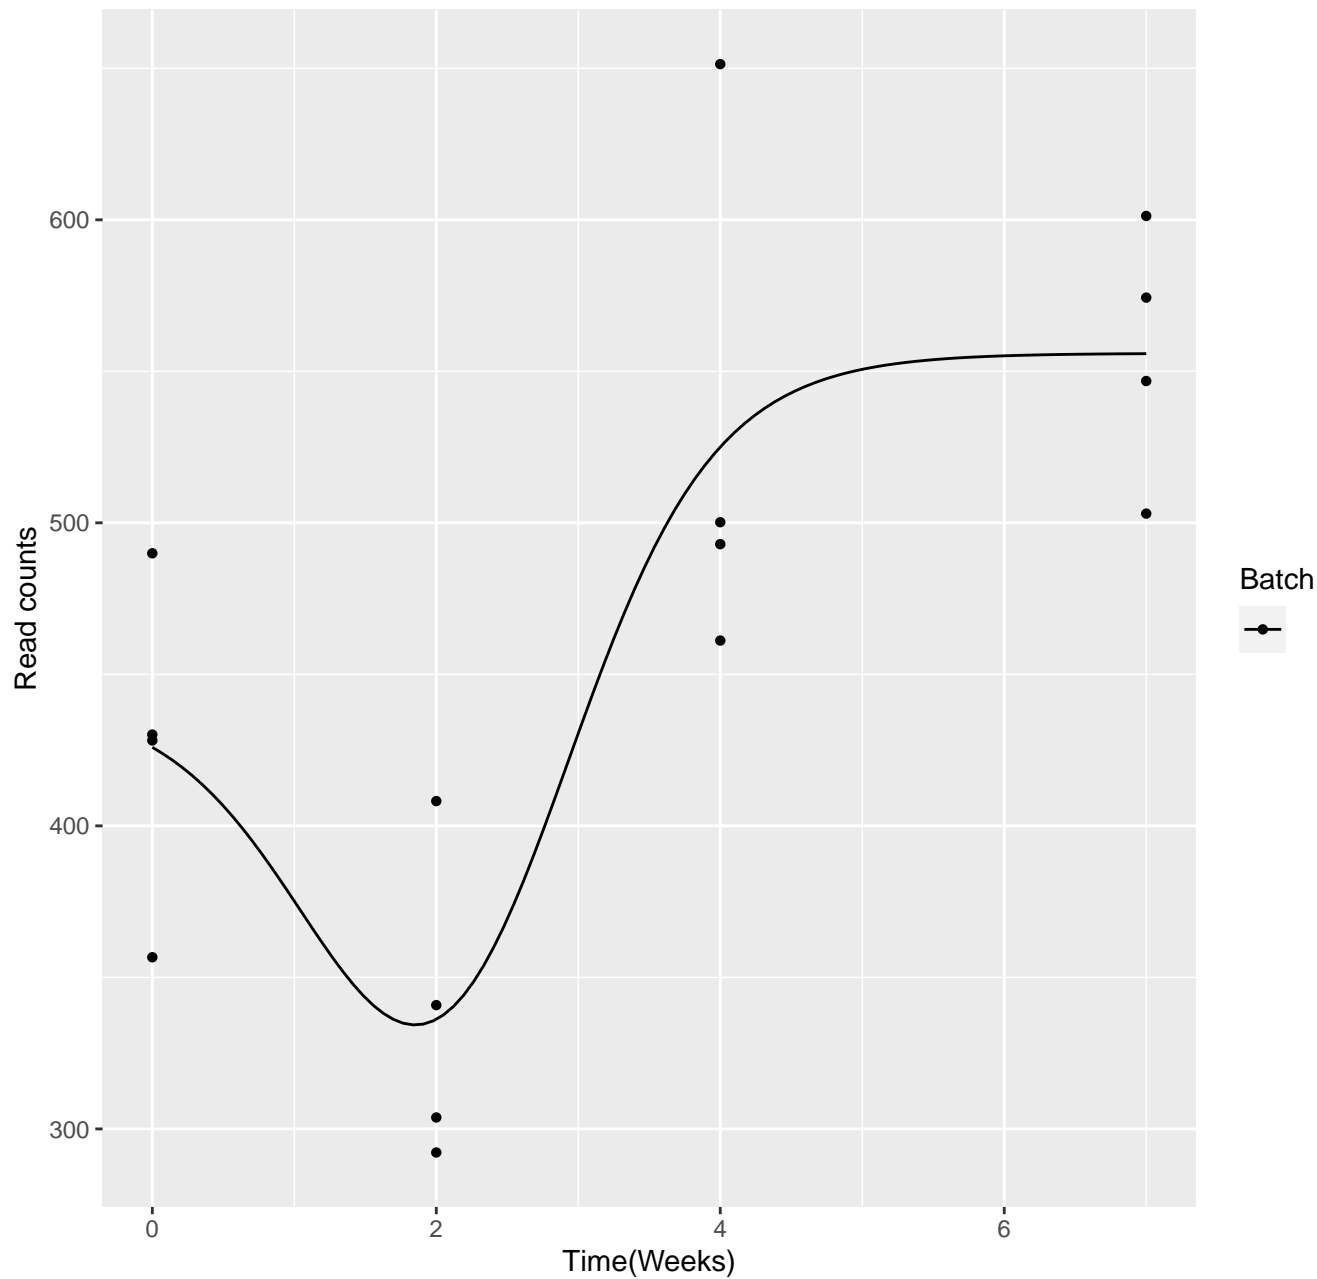

LOC127486976:  $\log_{10} q = -2.89$

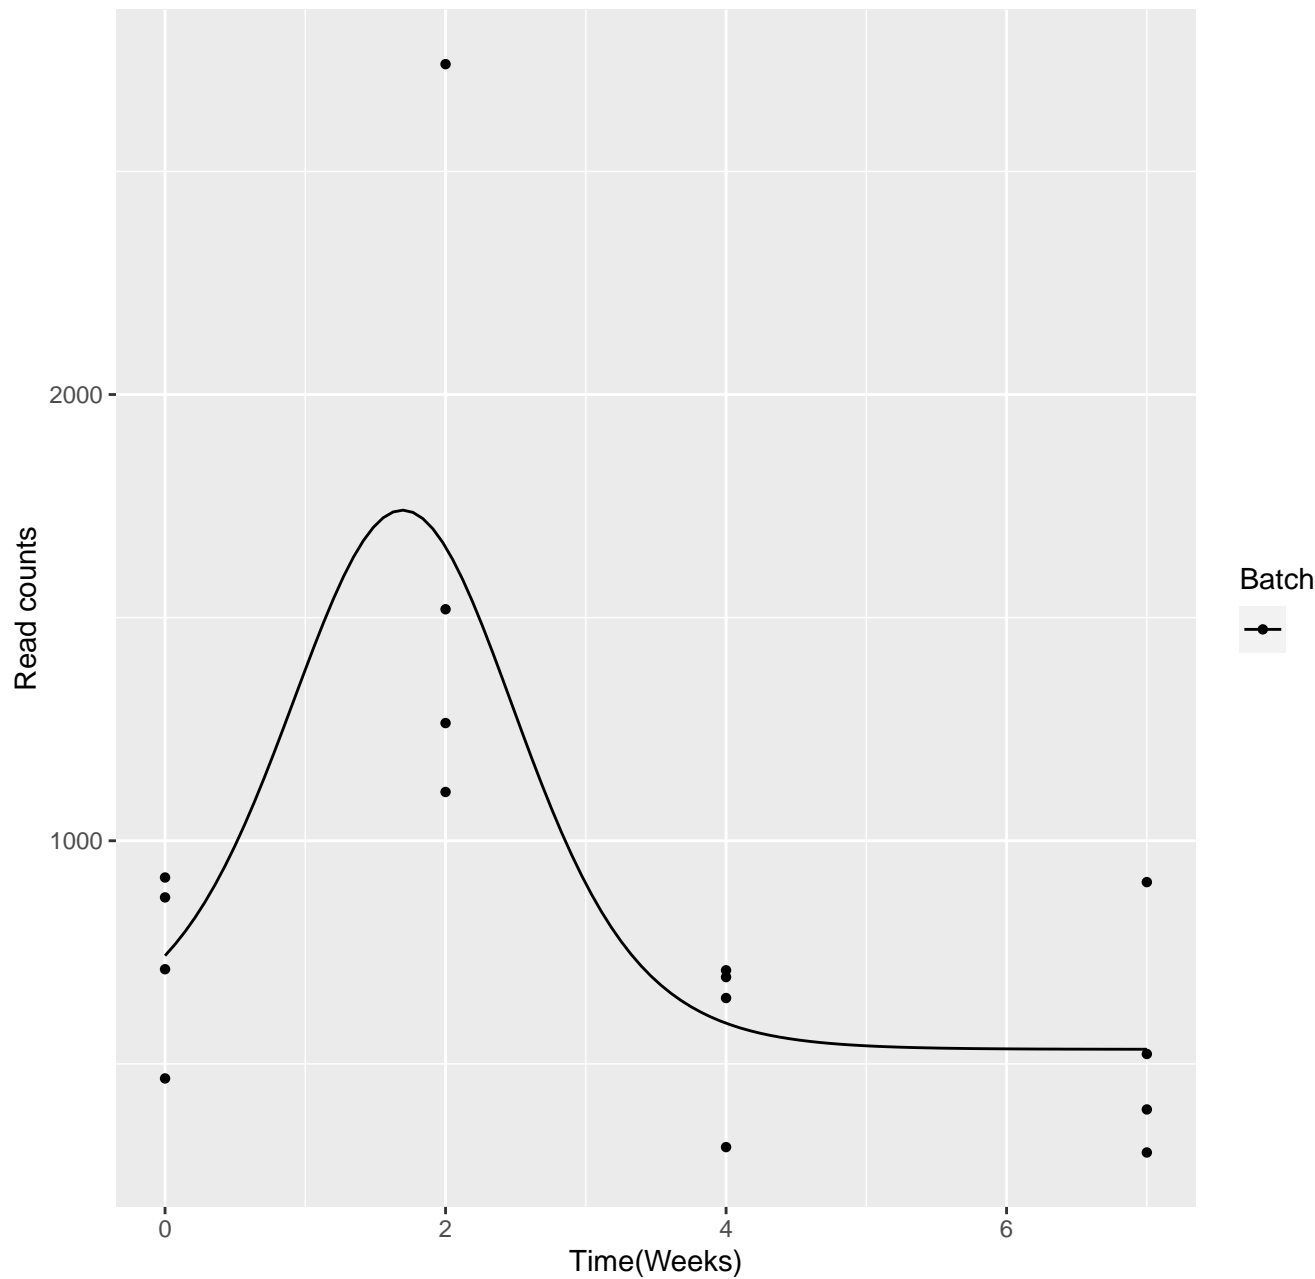

ASPH:  $\log_{10} q = -2.88$

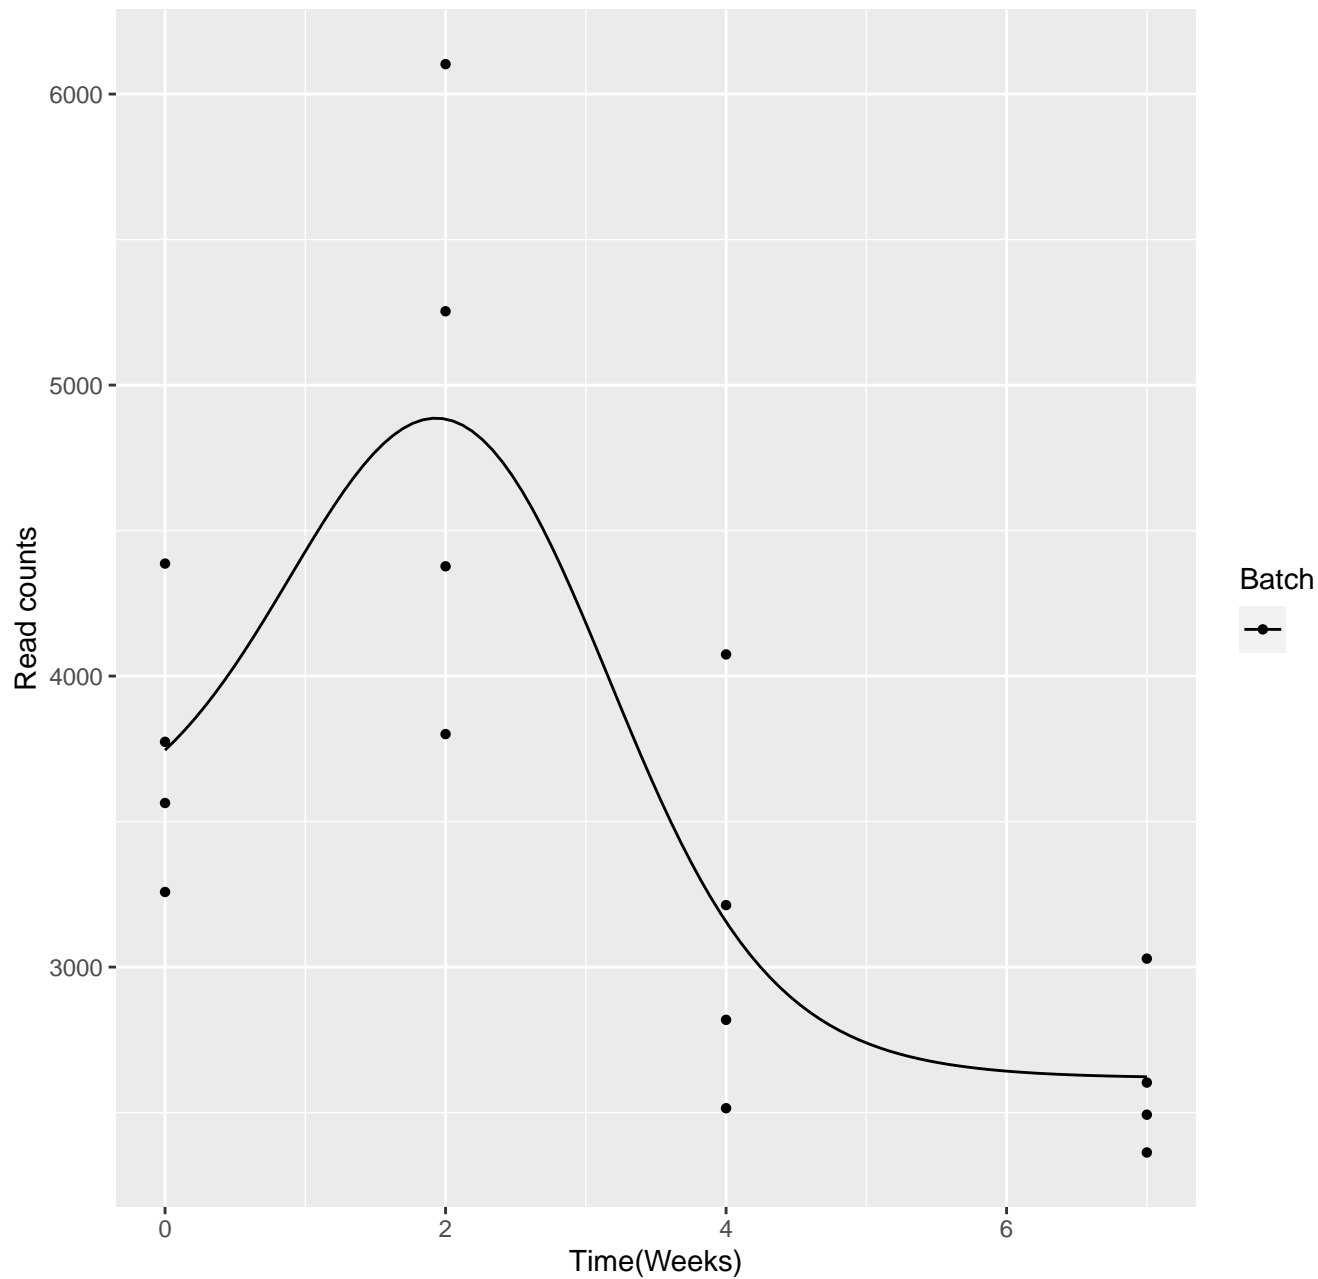

LOC100355084:  $\log_{10} q = -2.88$

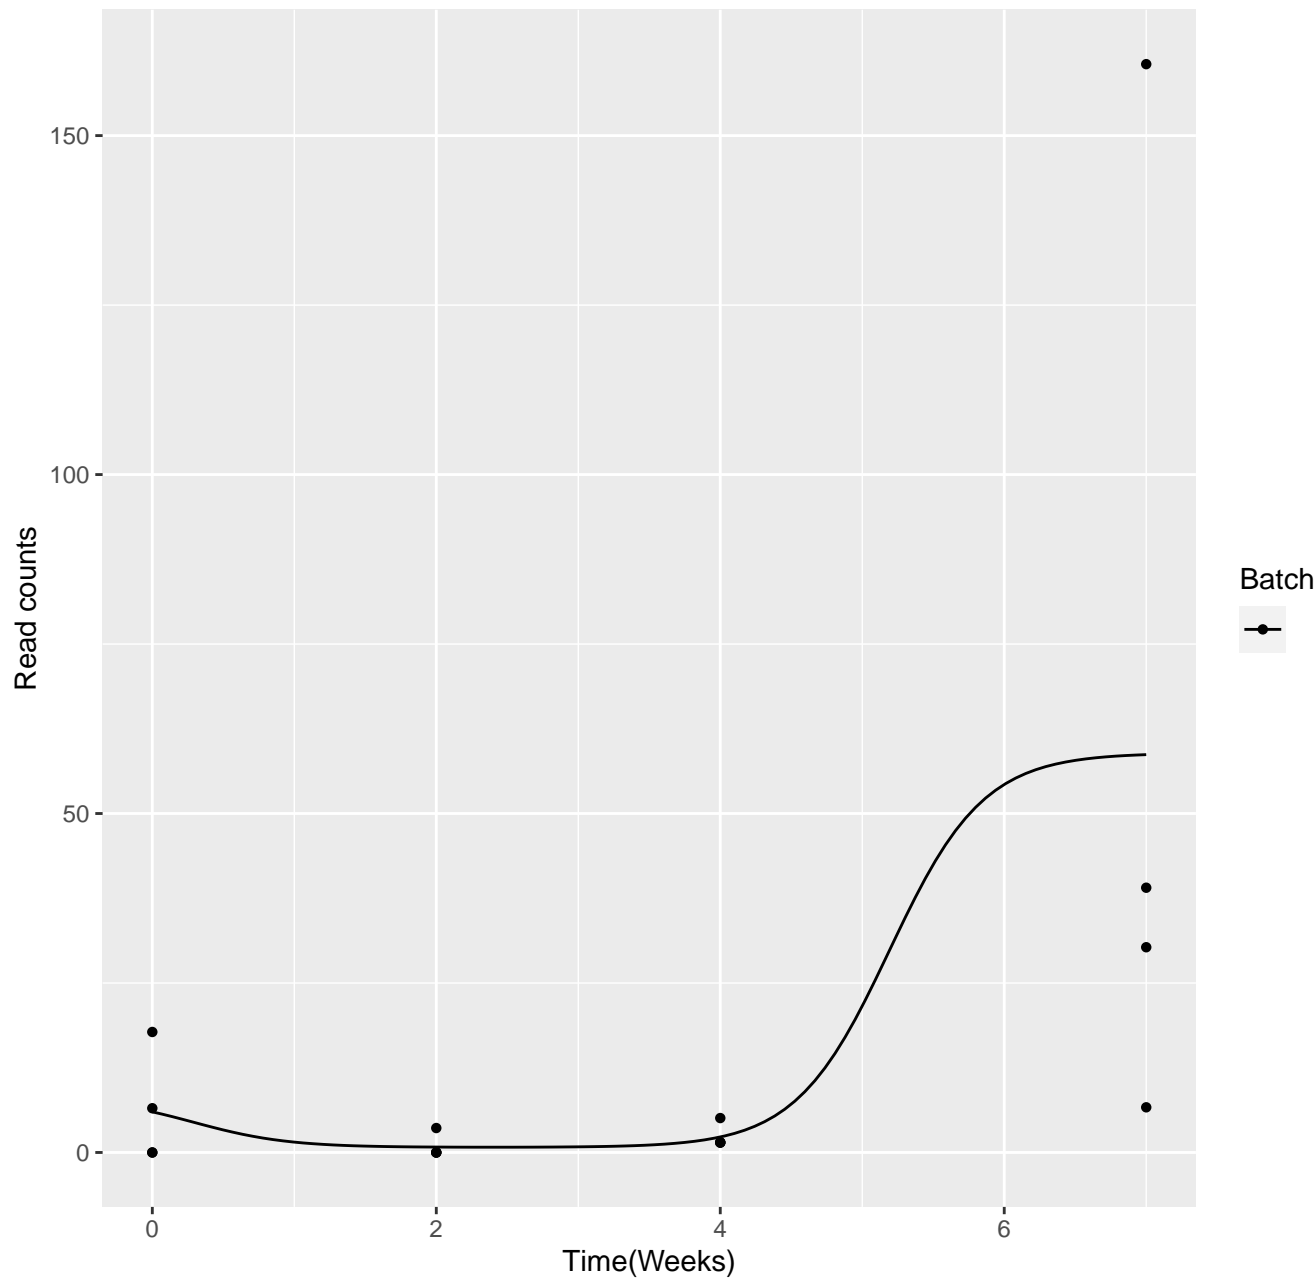

S100A8:  $\log_{10} q = -2.88$

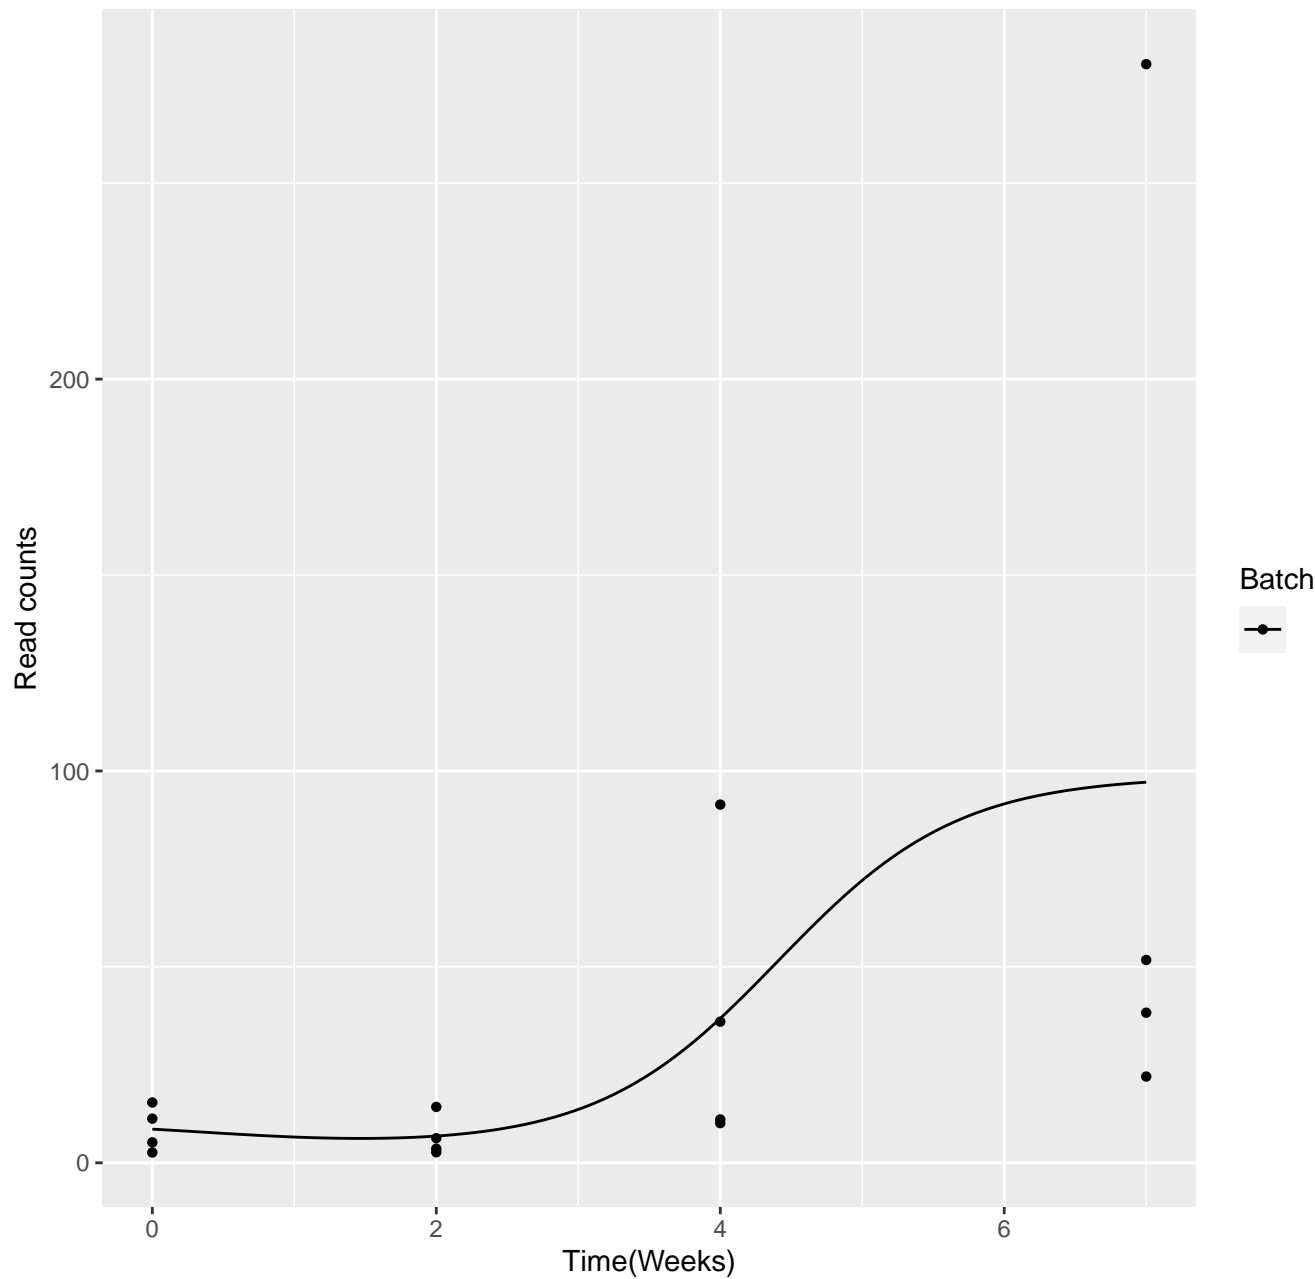



SP100:  $\log_{10} q = -2.88$

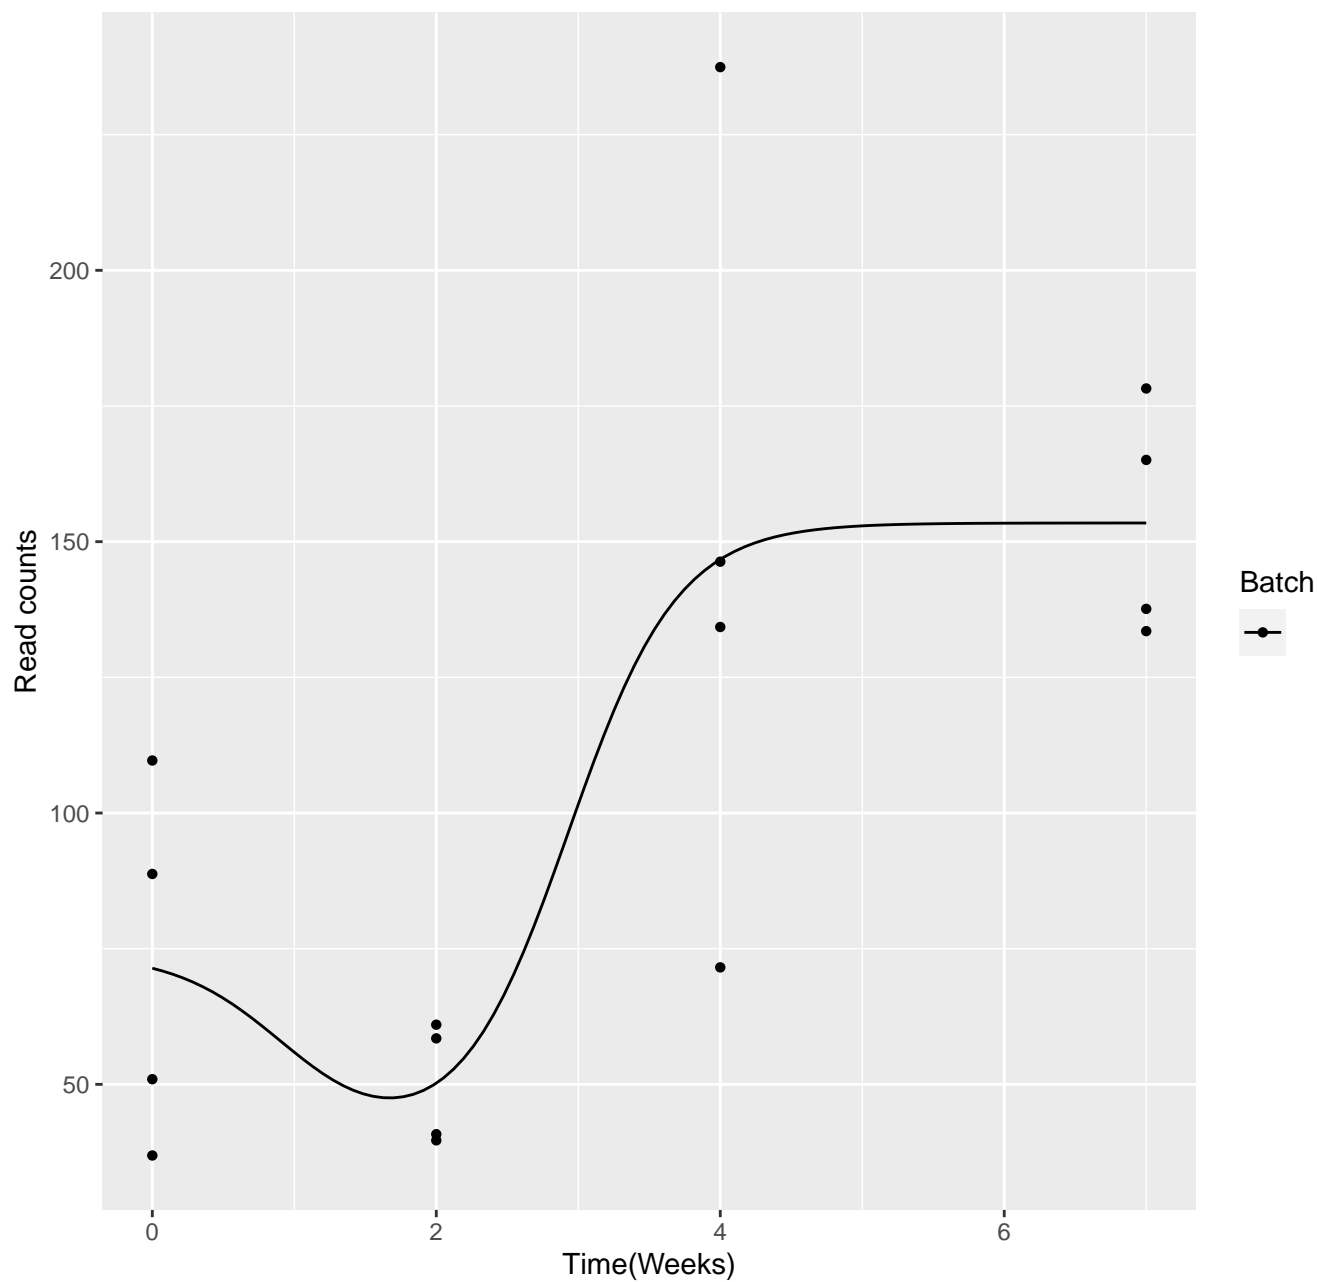

ANTXR2:  $\log_{10} q = -2.88$

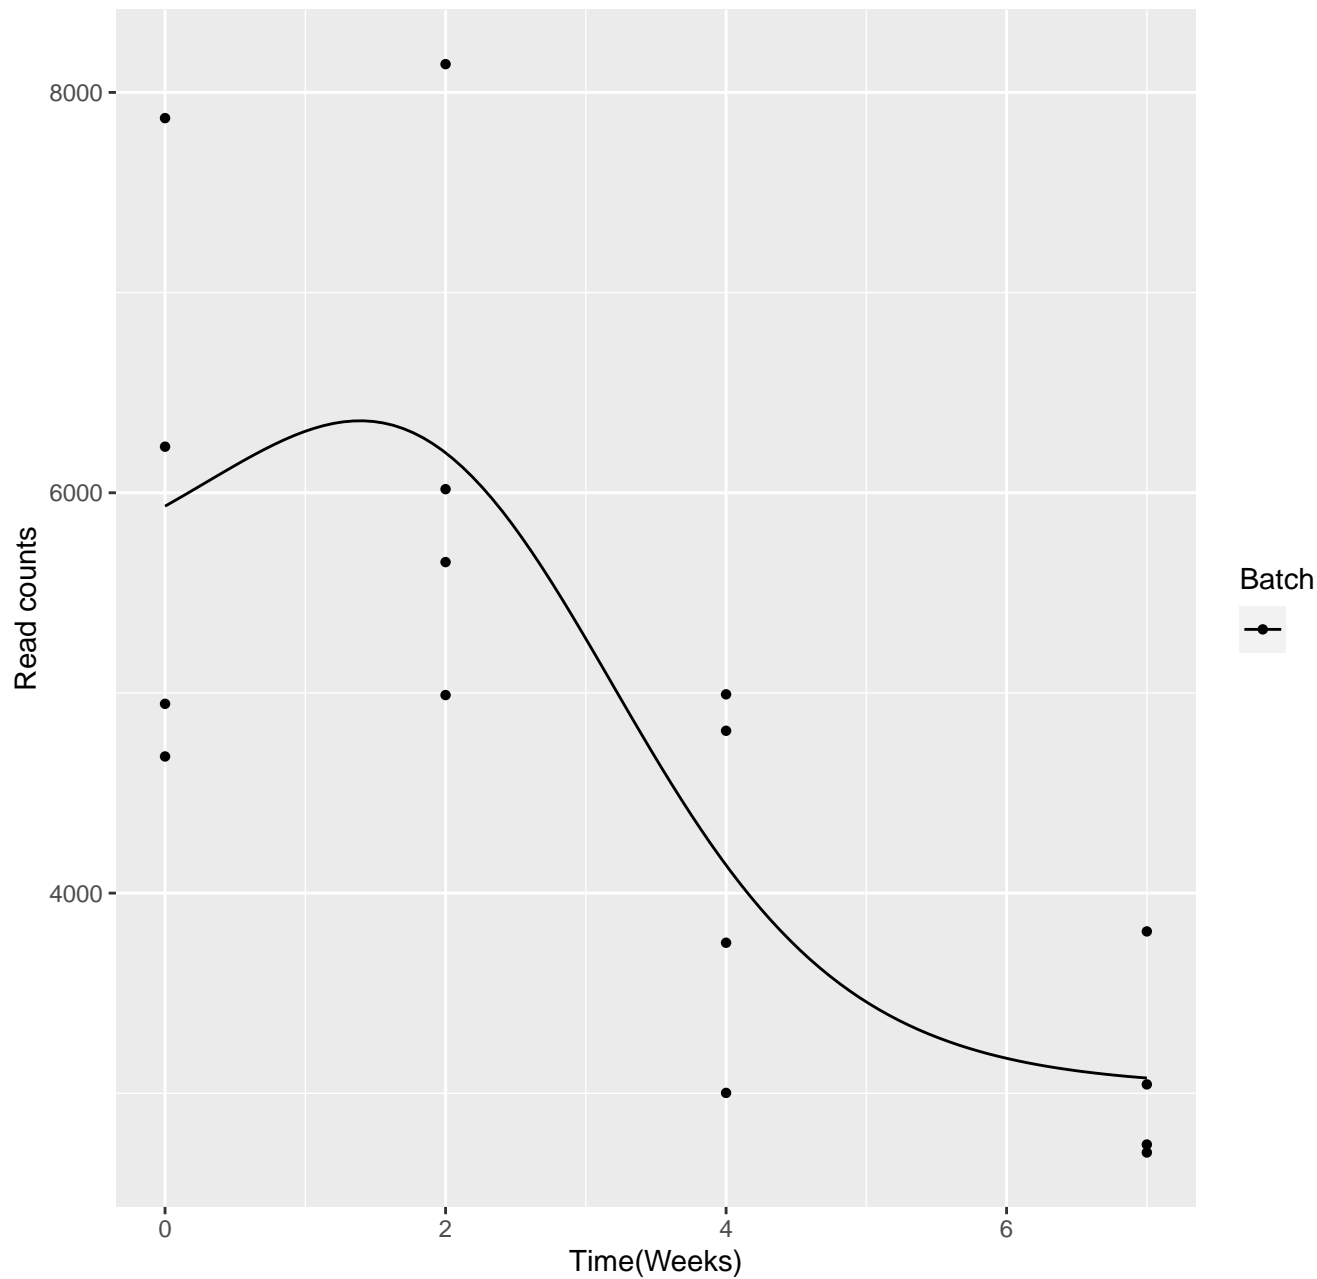

CCDC8:  $\log_{10} q = -2.87$

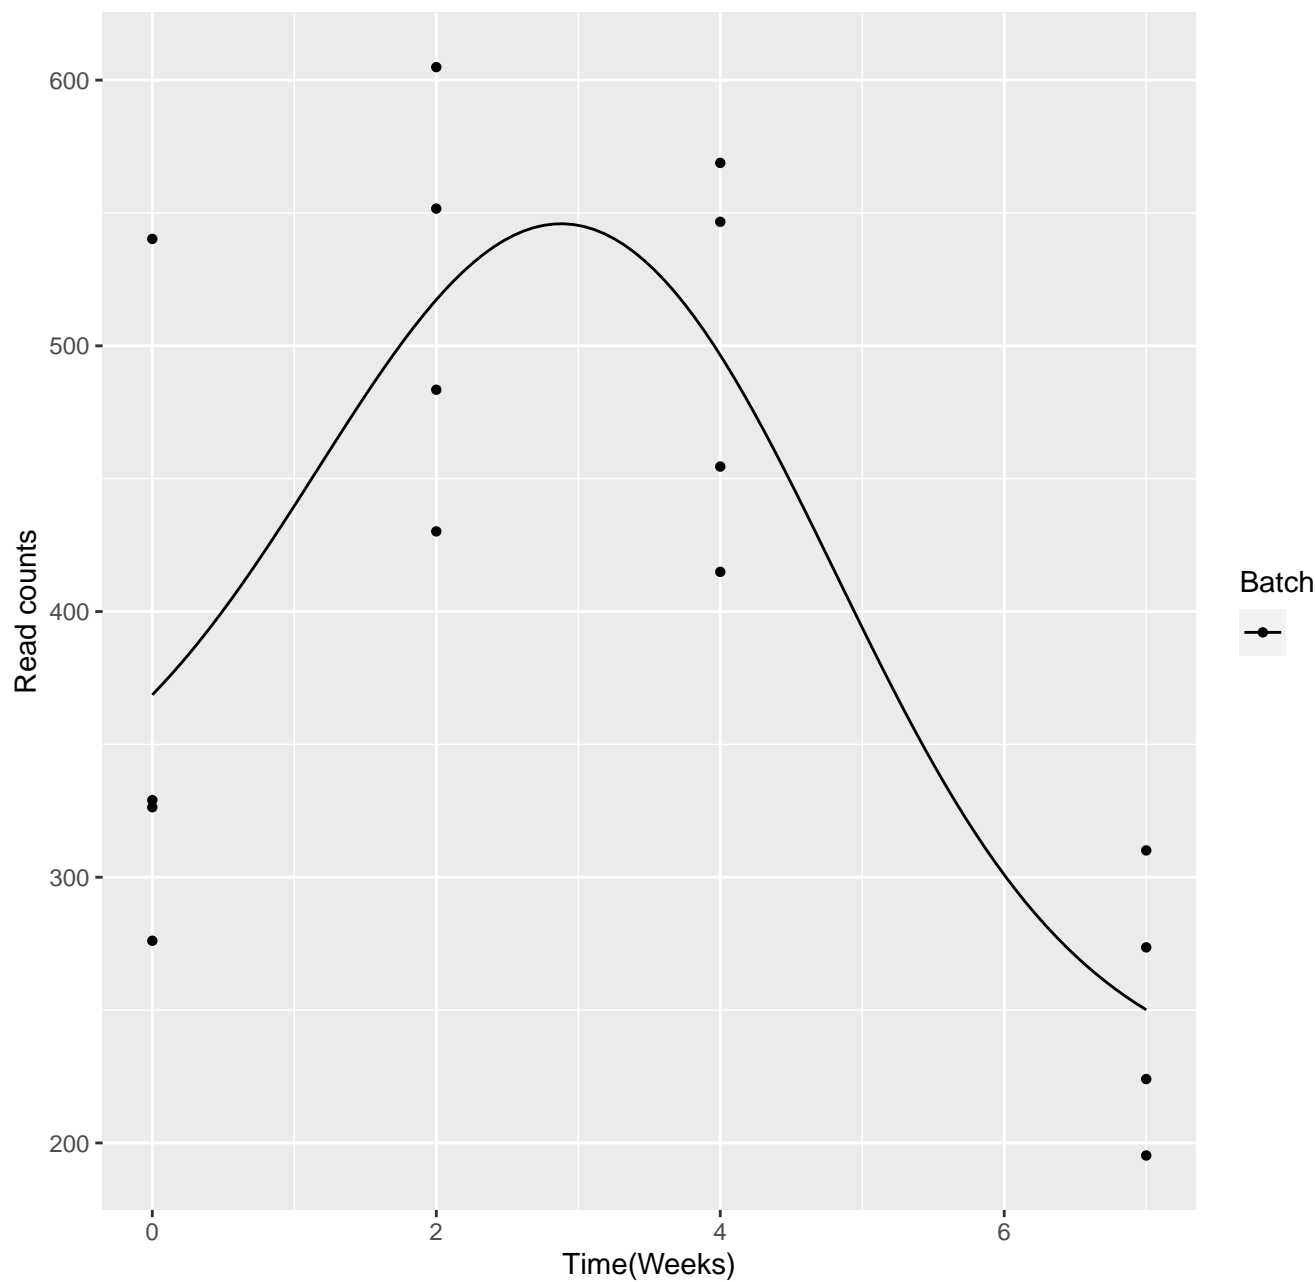

SSTR1:  $\log_{10} q = -2.87$

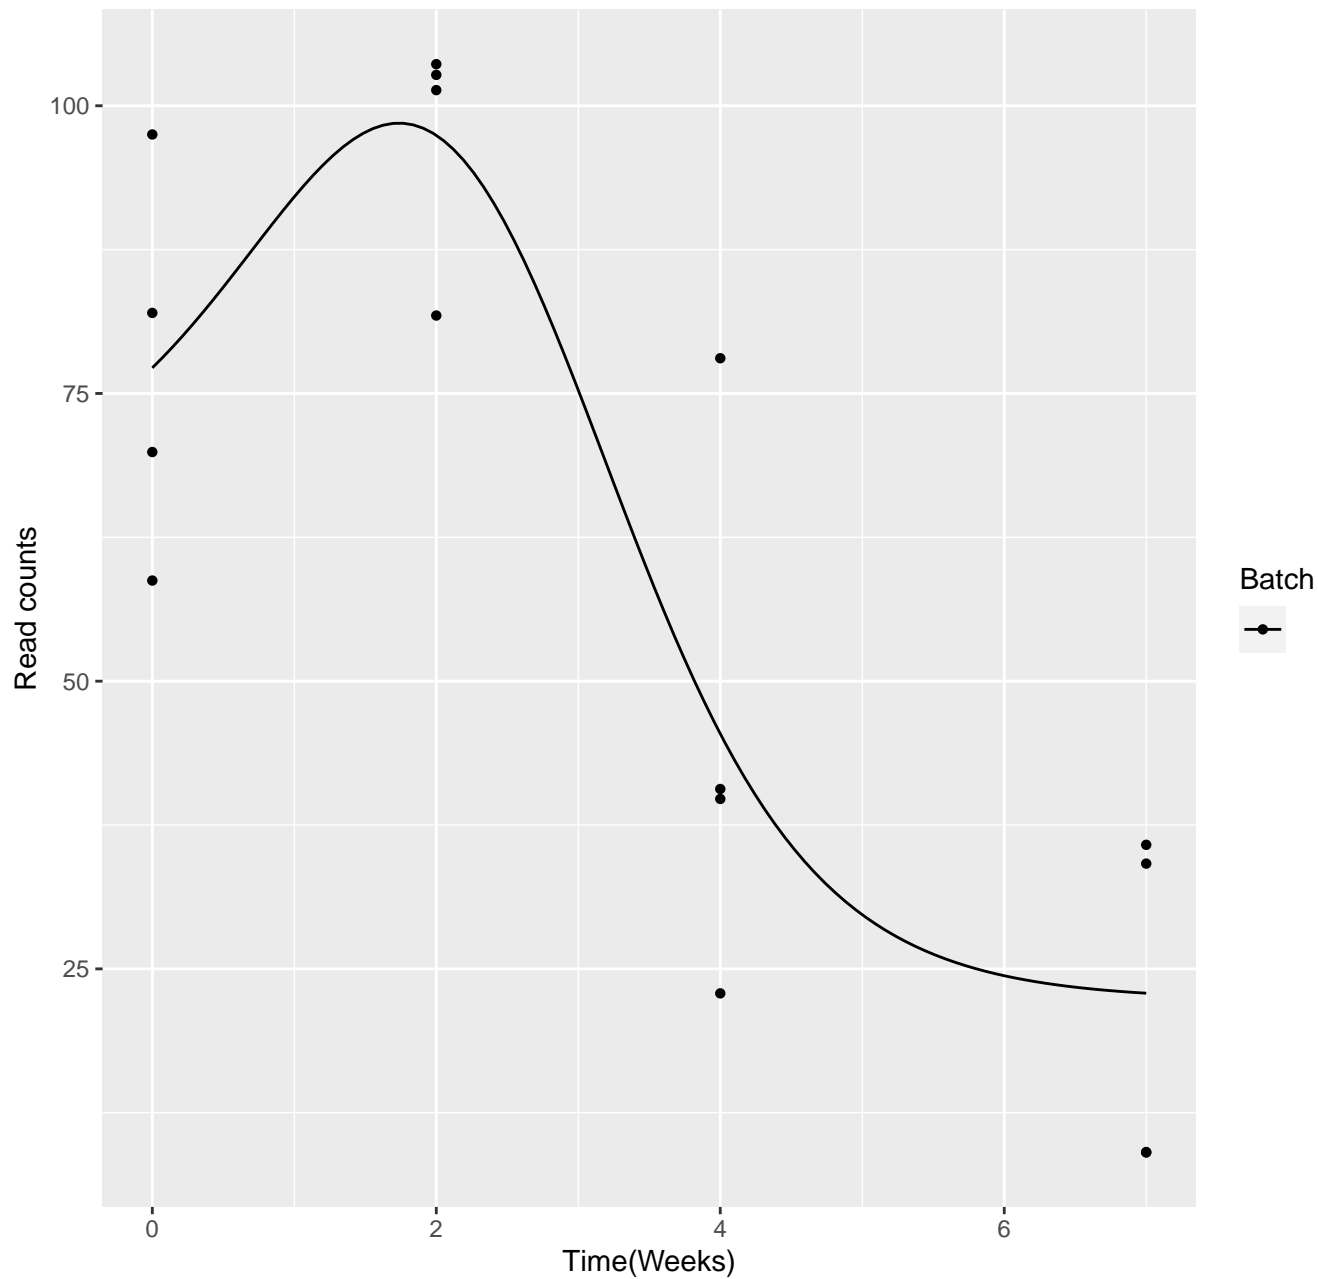

BMAL1:  $\log_{10} q = -2.87$

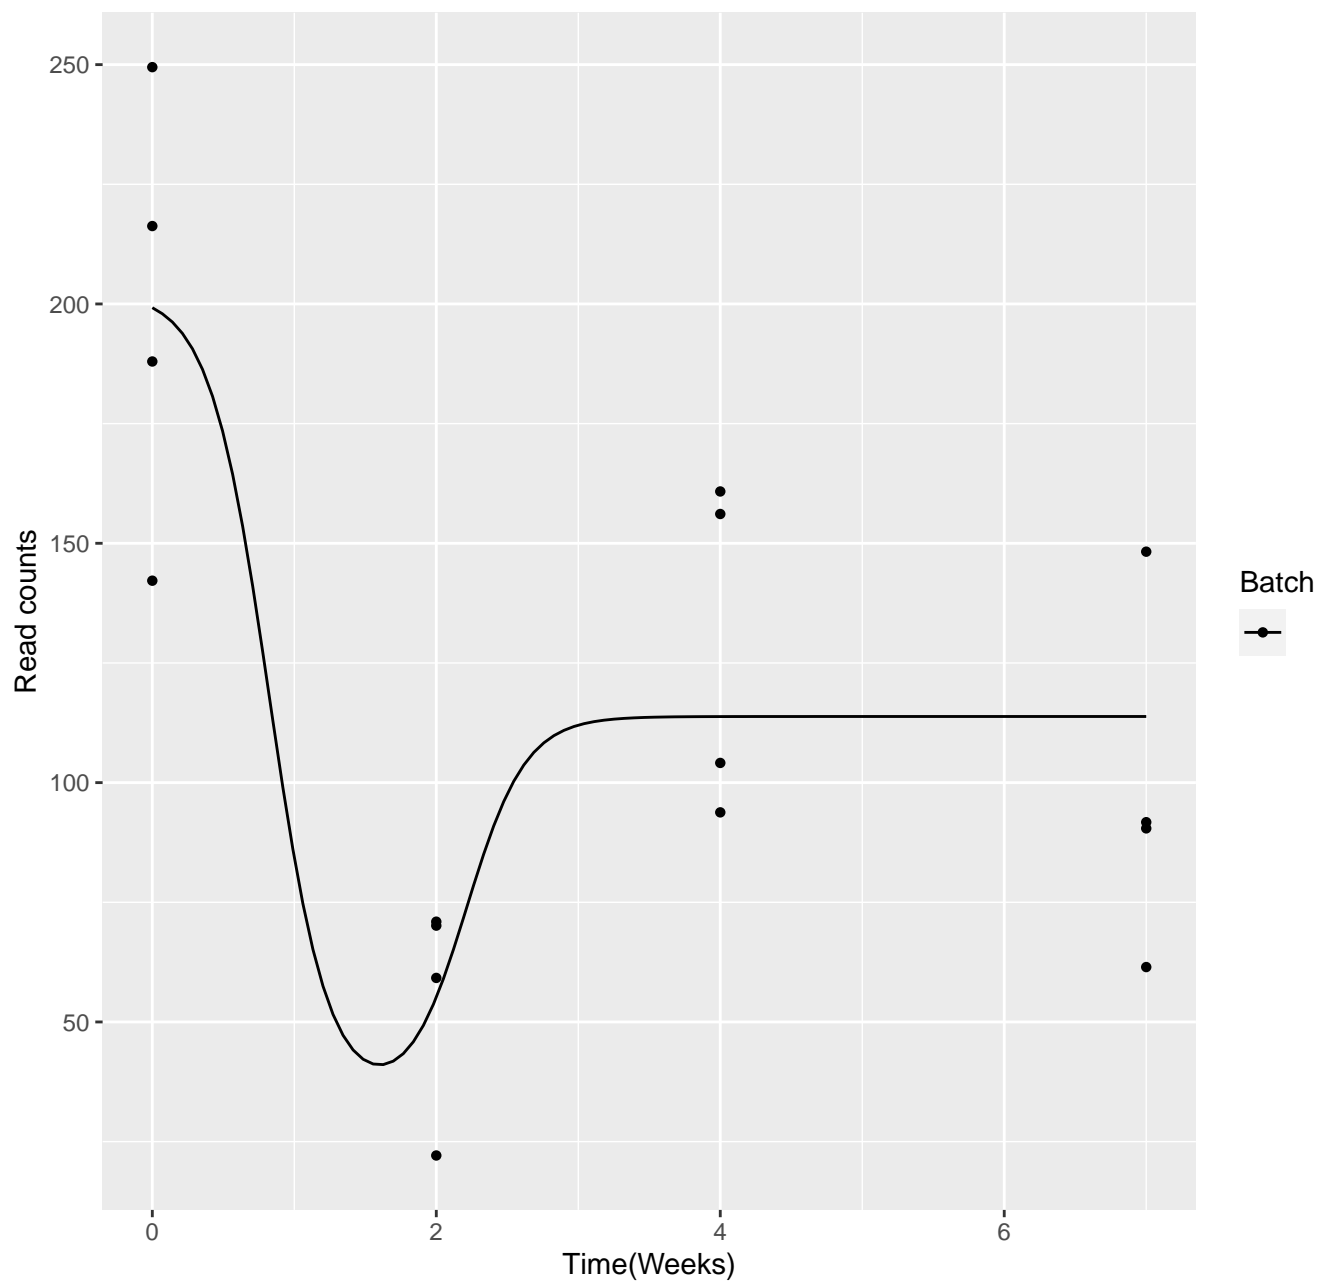

ACTB:  $\log_{10} q = -2.86$

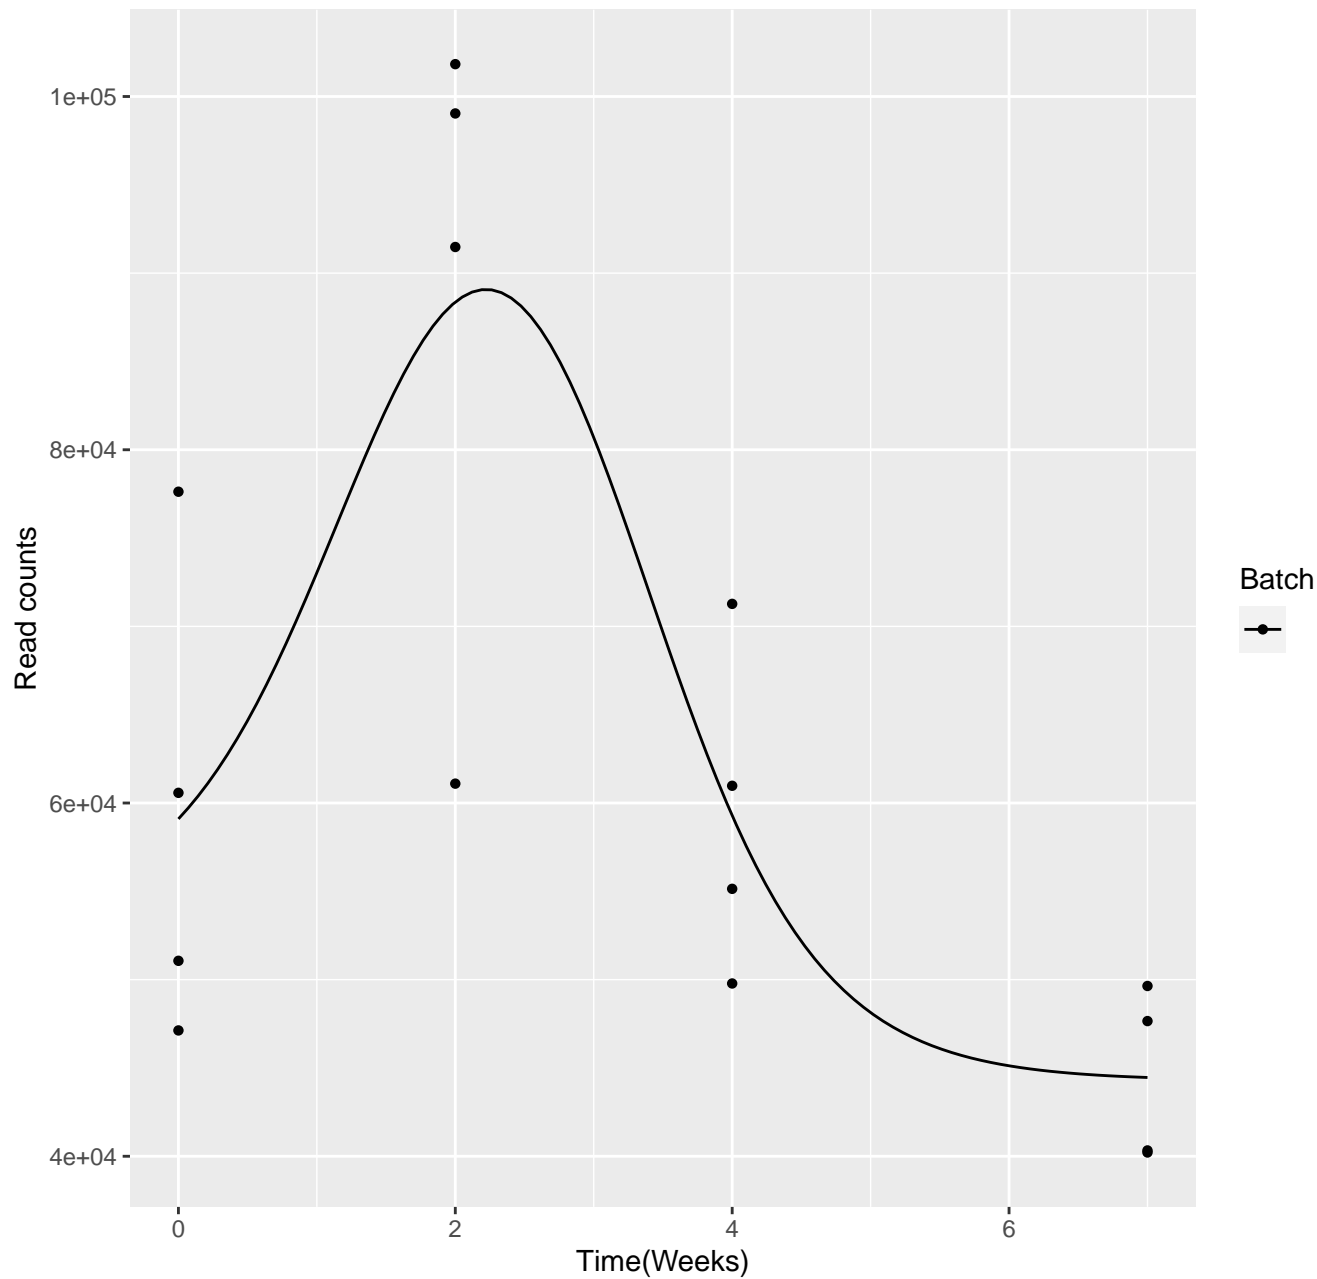

GMIP:  $\log_{10} q = -2.86$

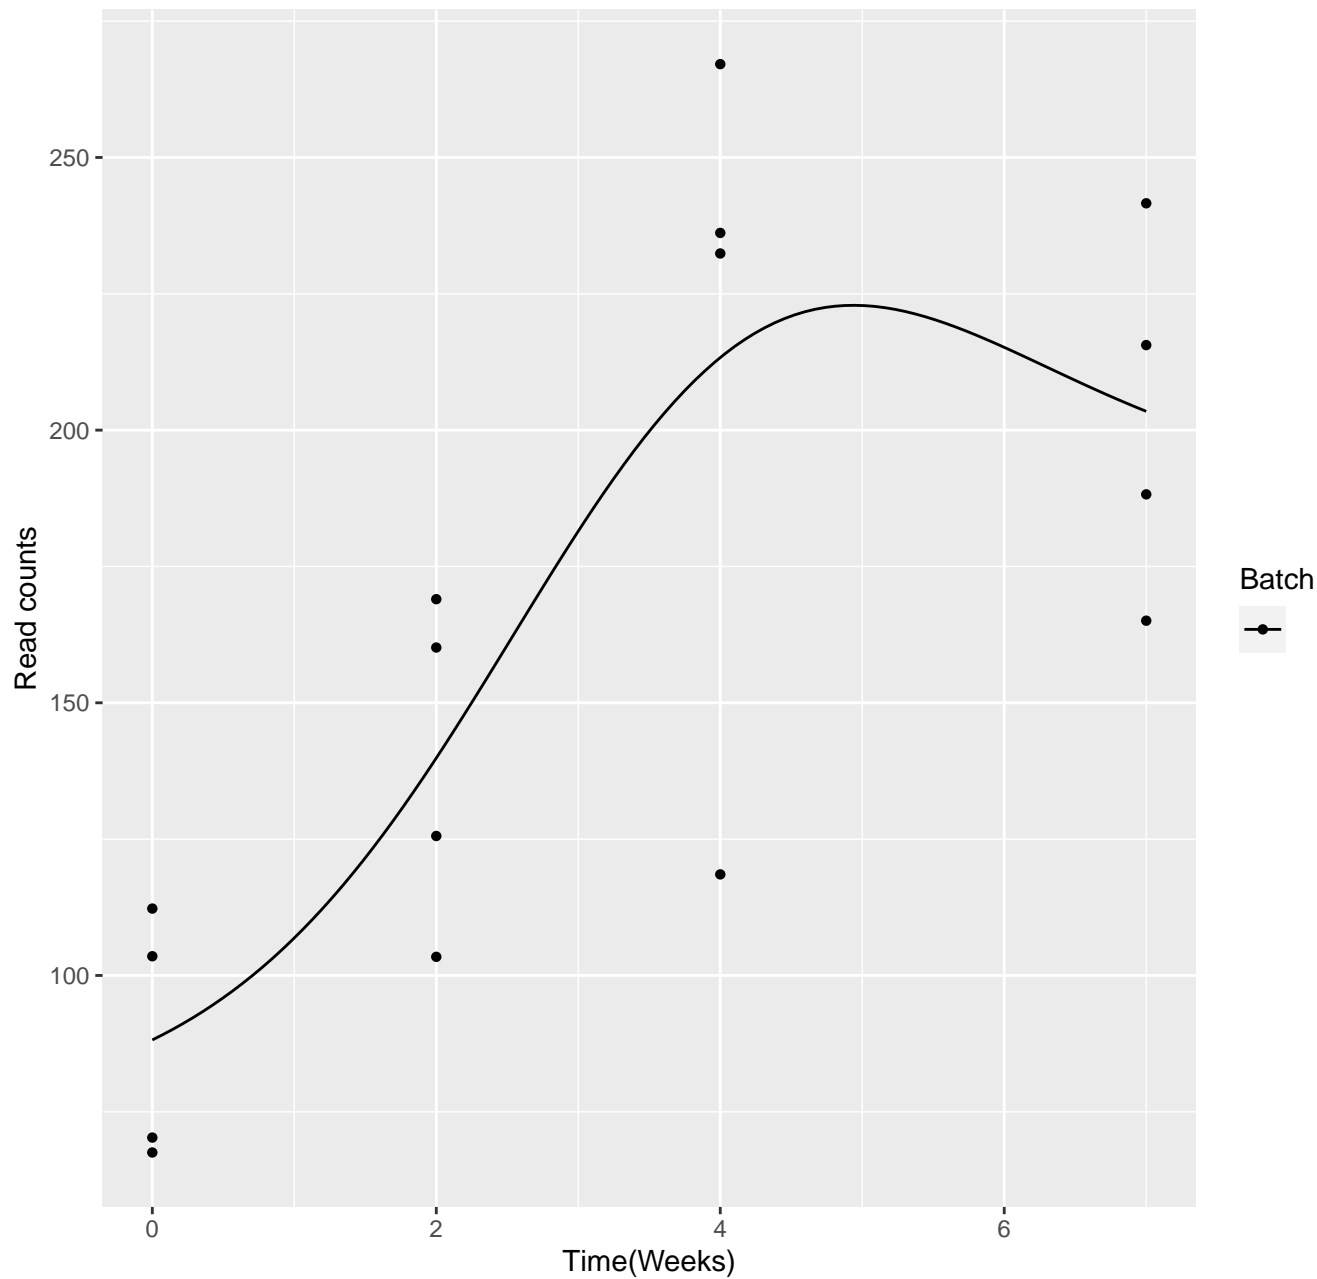

SPP1:  $\log_{10} q = -2.86$

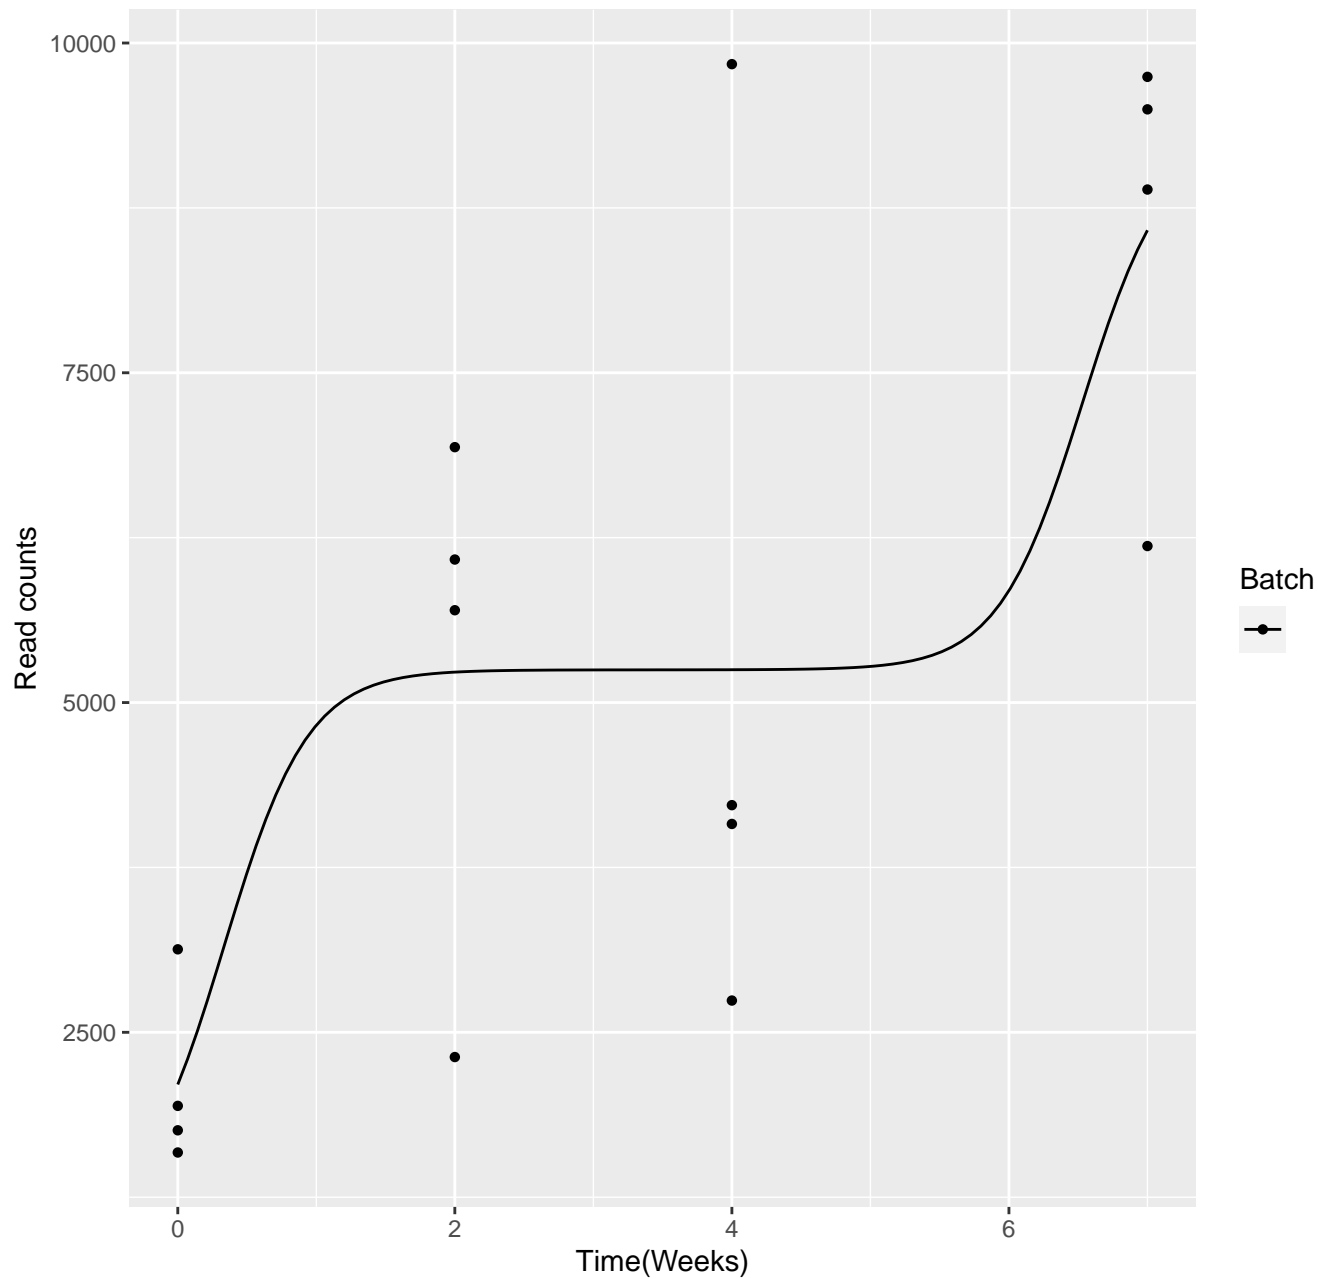



AMOTL2:  $\log_{10} q = -2.86$

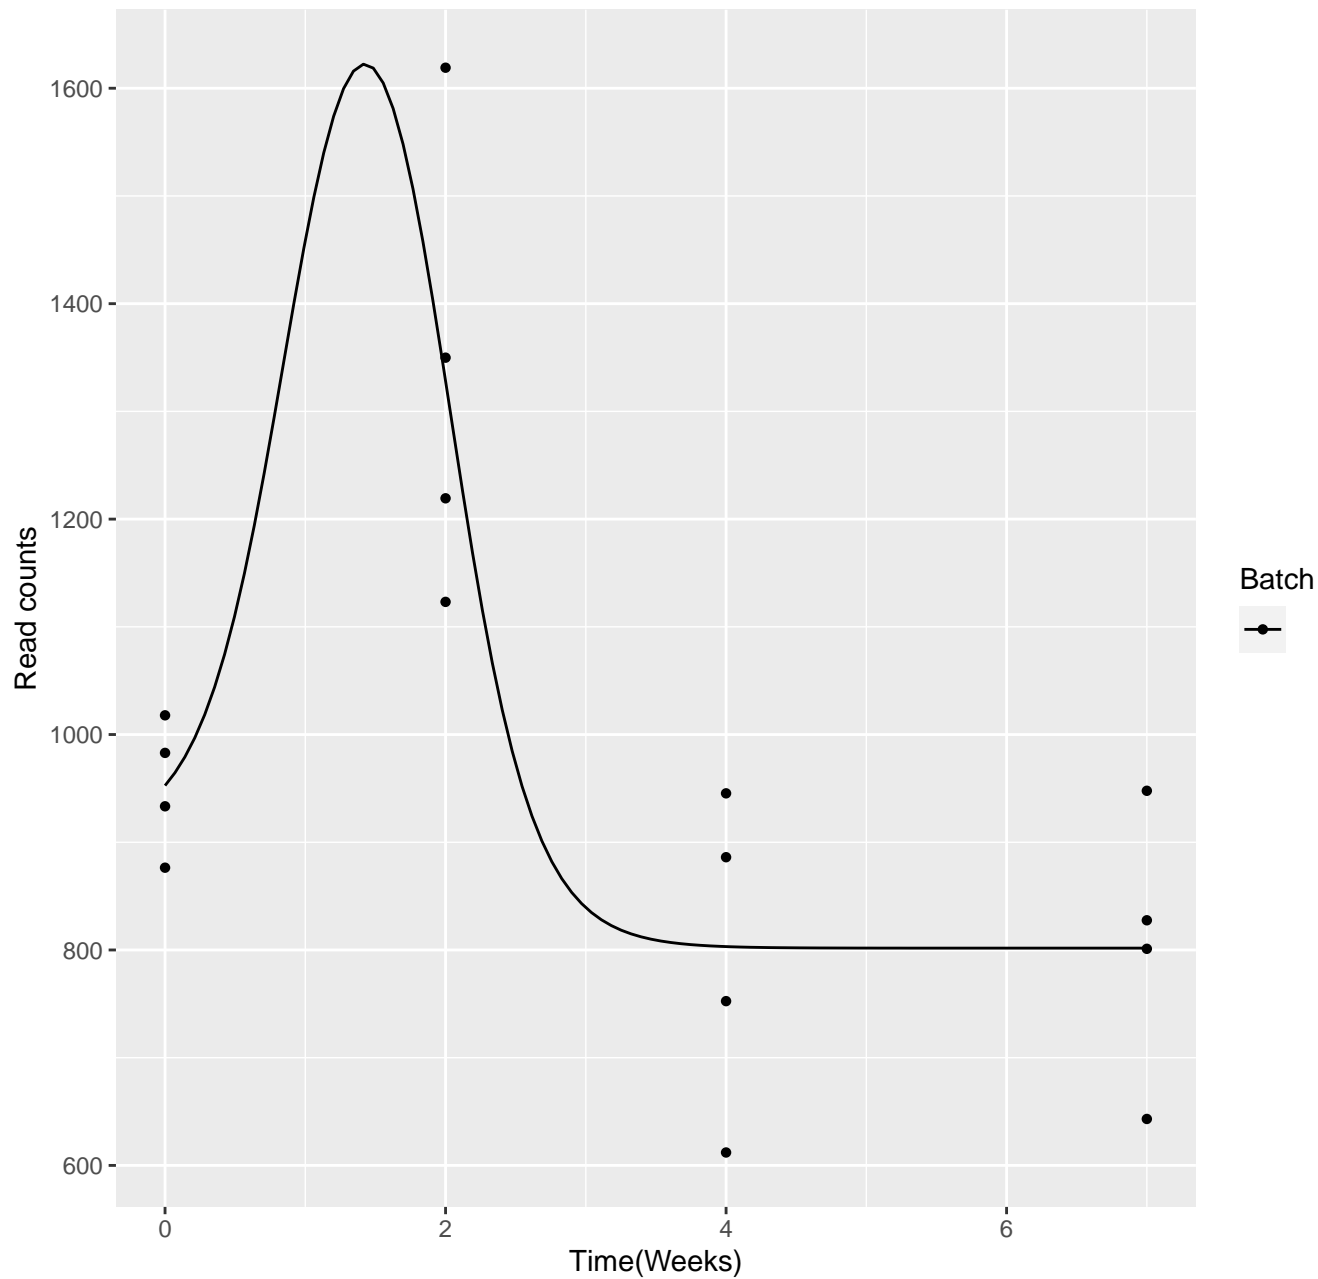

PRDM16:  $\log_{10} q = -2.86$

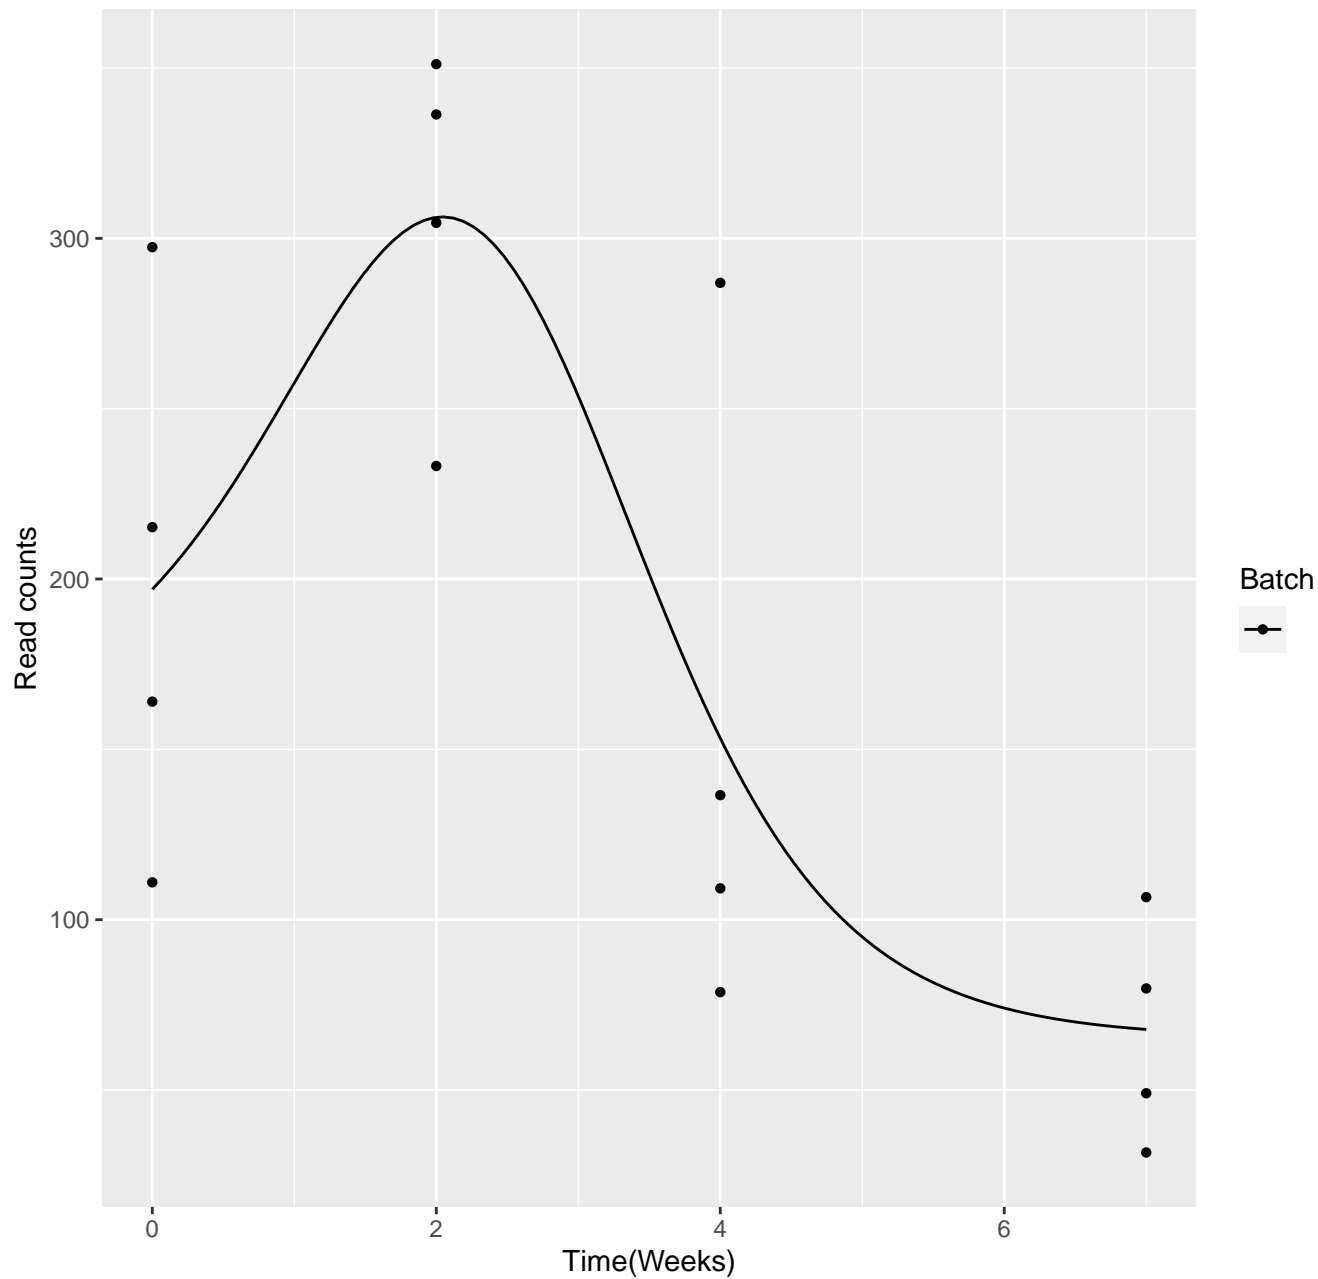

LOC100352118:  $\log_{10} q = -2.86$

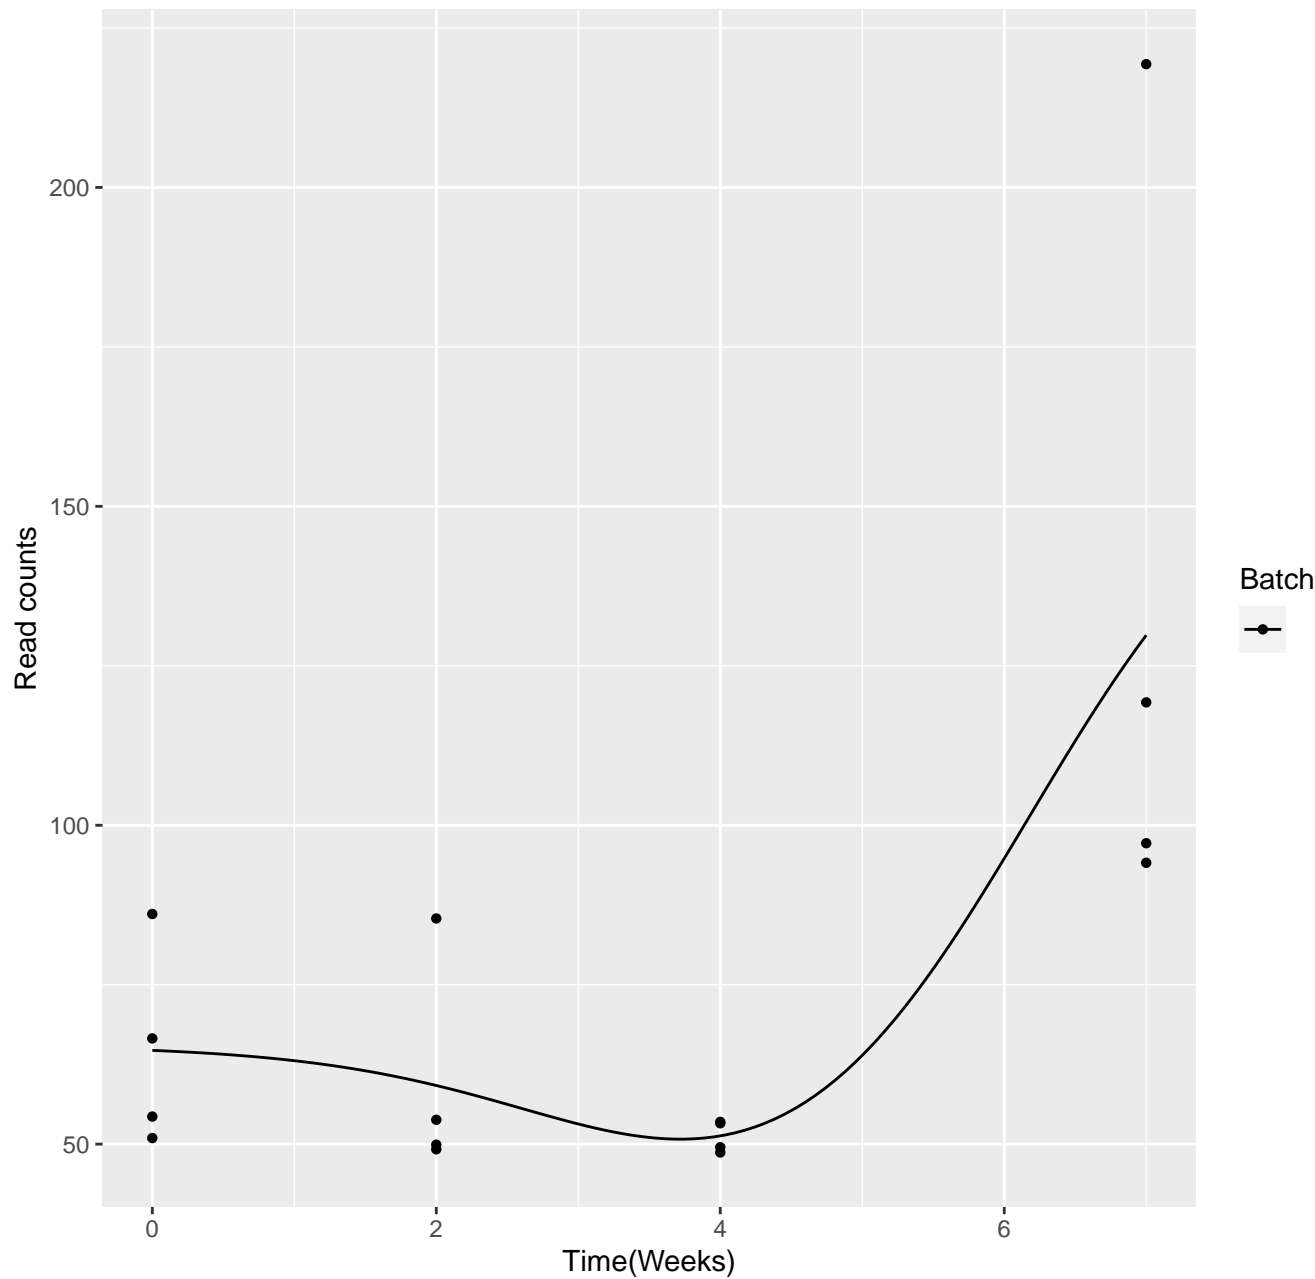

PAPPA2:  $\log_{10} q = -2.86$

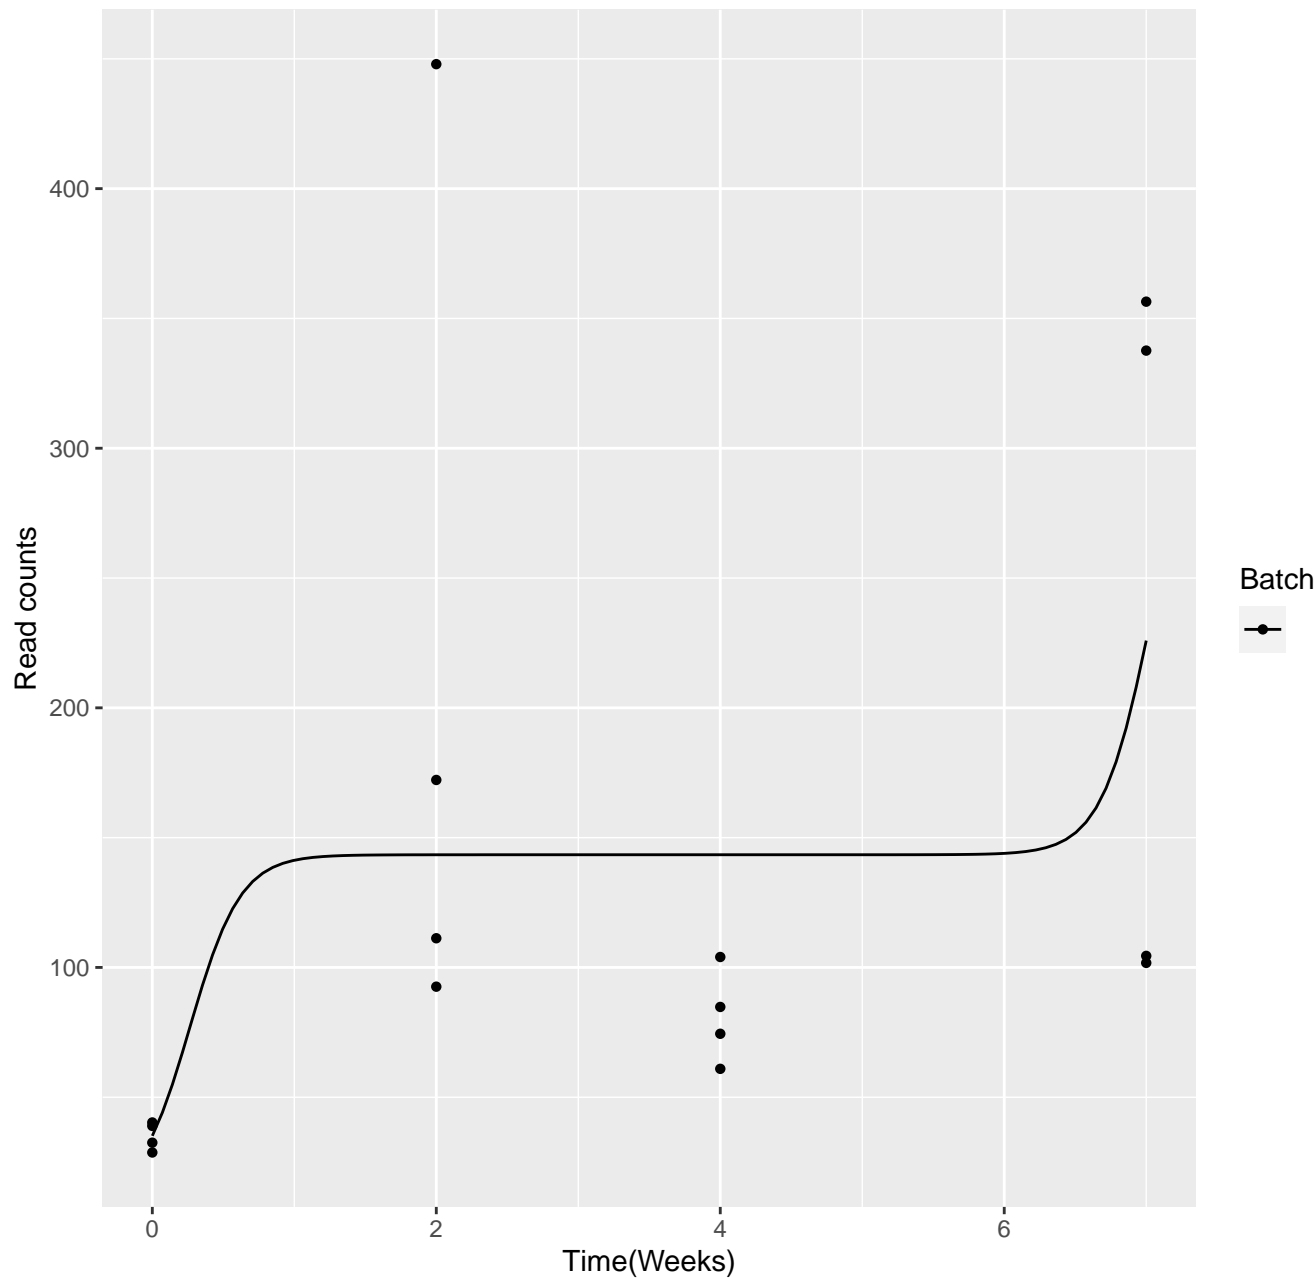

ESAM:  $\log_{10} q = -2.86$

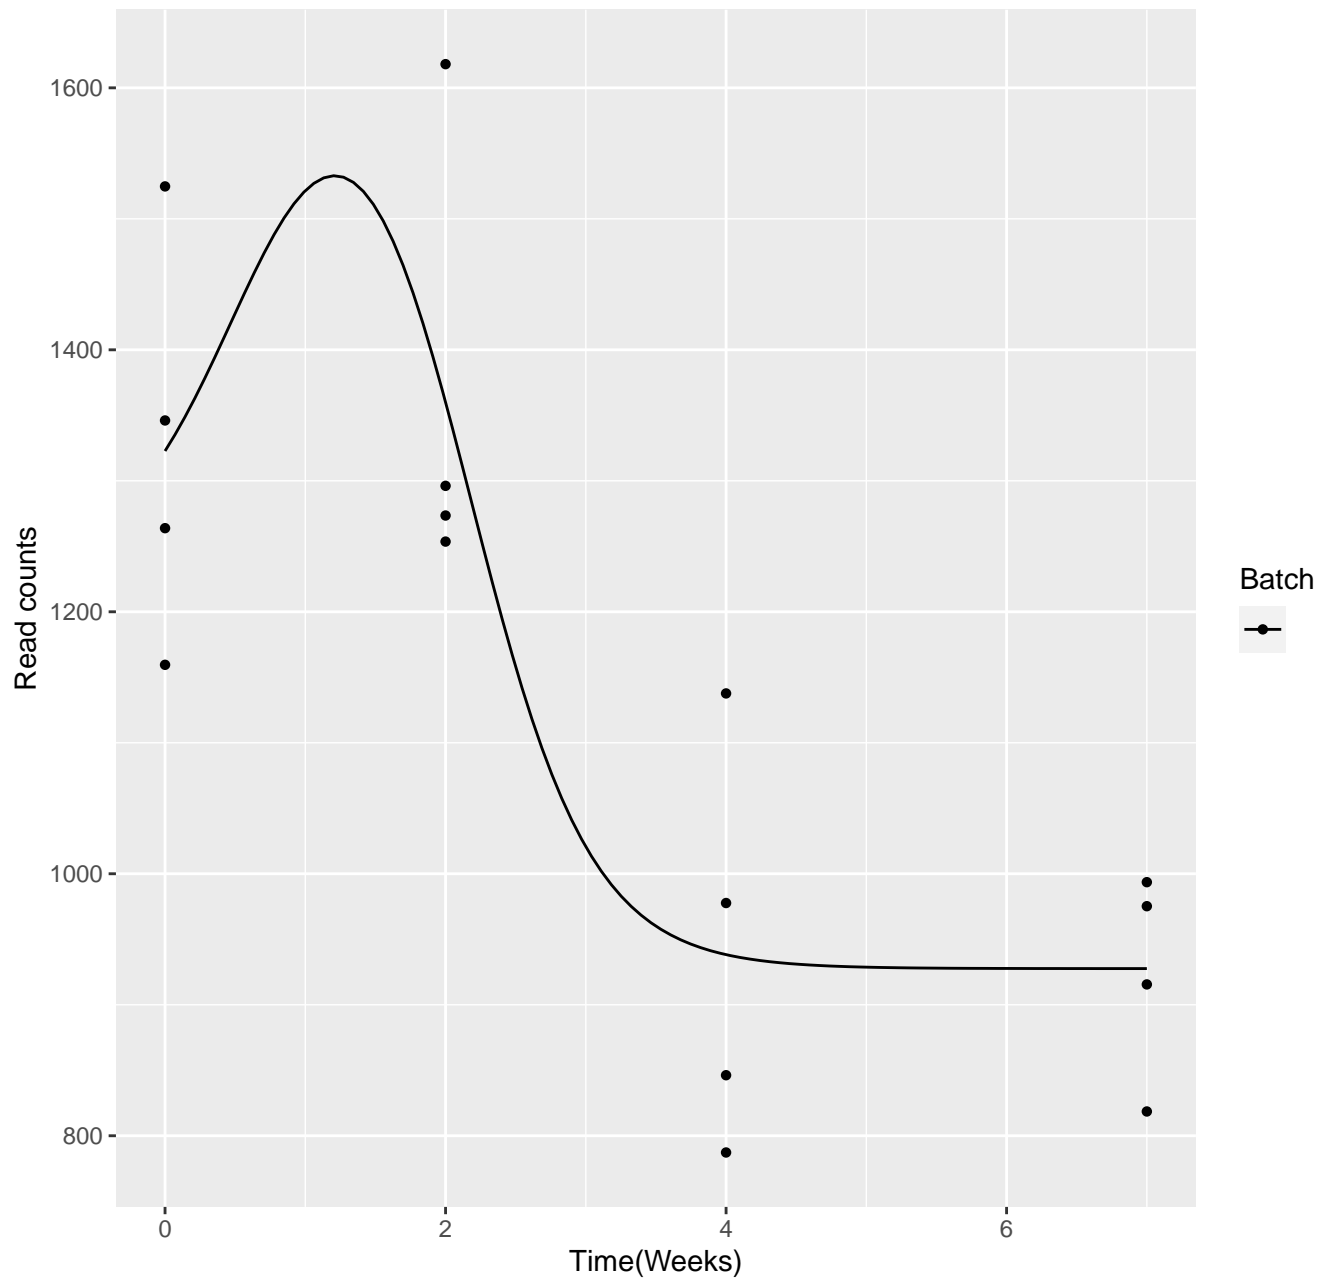

LOC127483424:  $\log_{10} q = -2.85$

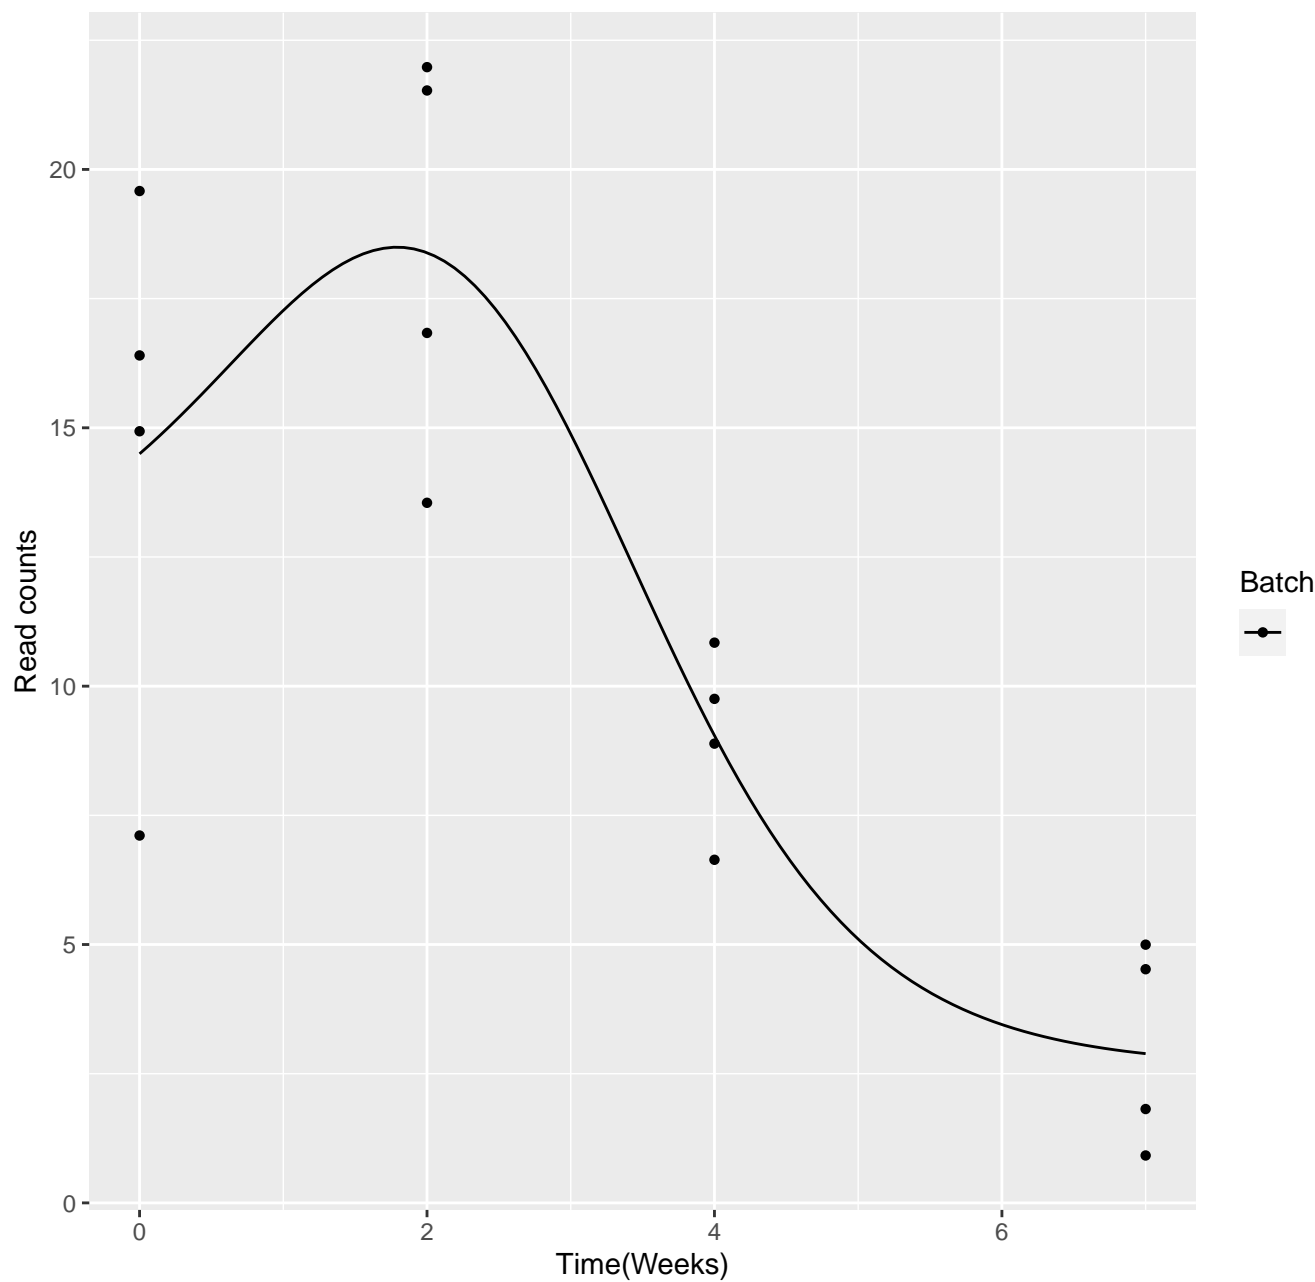

NPTN:  $\log_{10} q = -2.85$

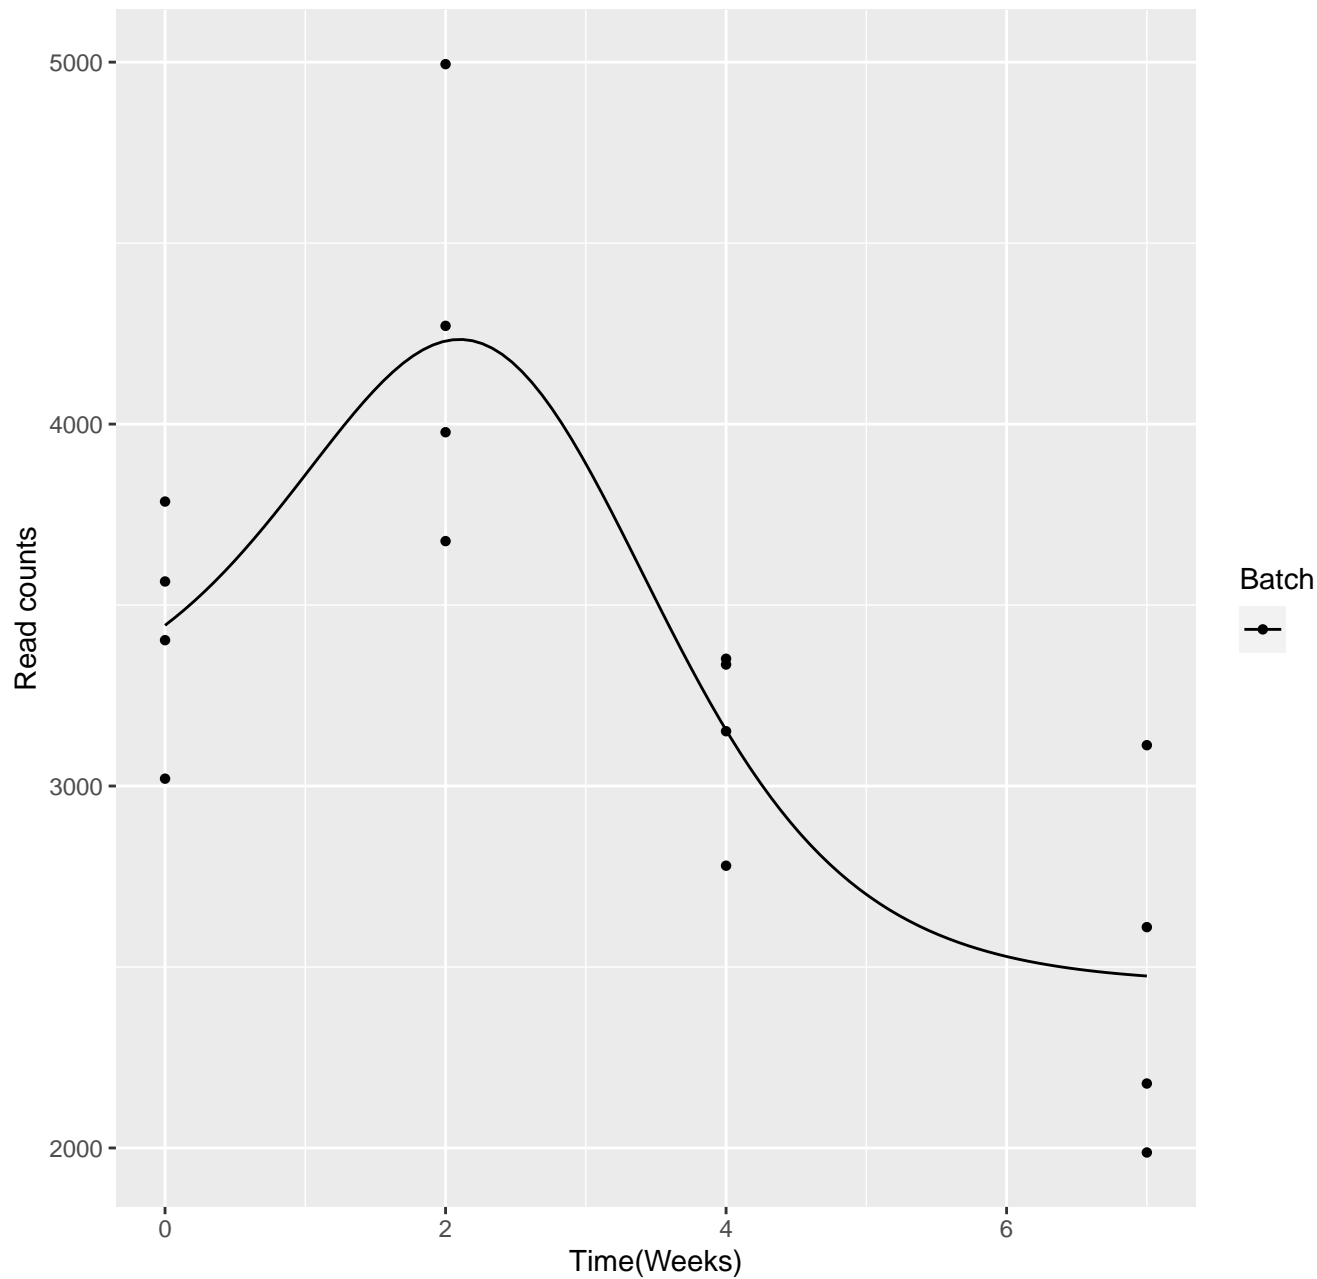

ITI15:  $\log_{10} q = -2.85$

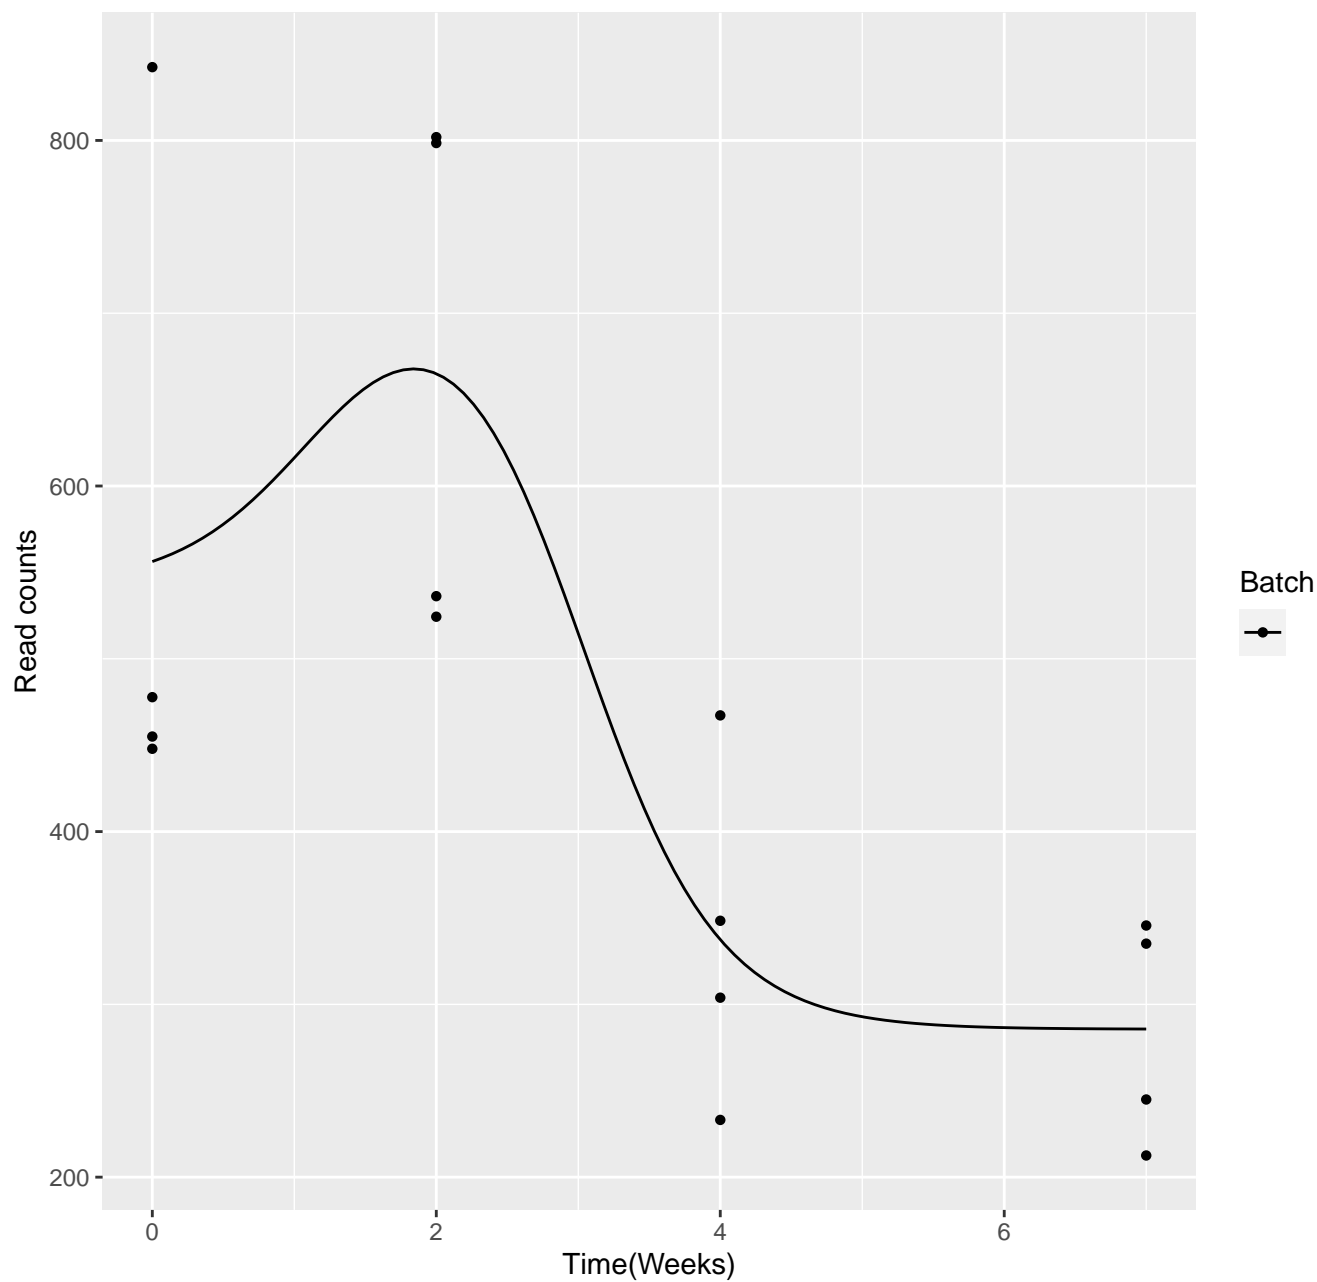



FAM149A:  $\log_{10} q = -2.85$

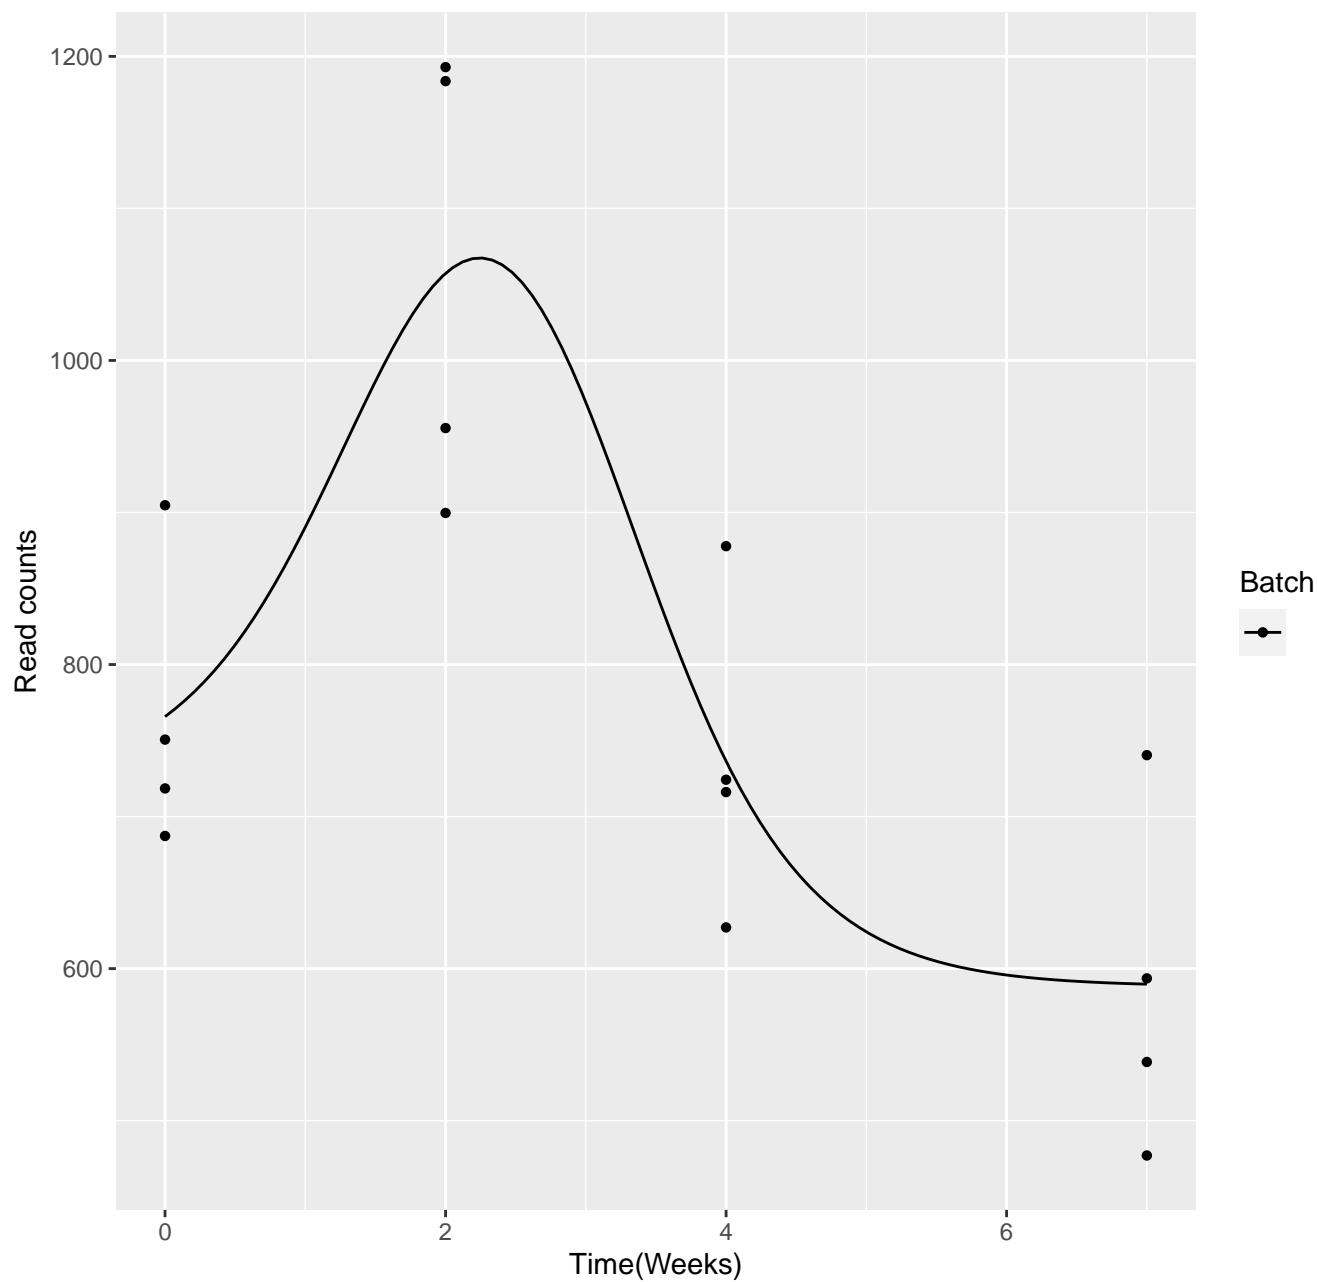

ZWILCH:  $\log_{10} q = -2.84$

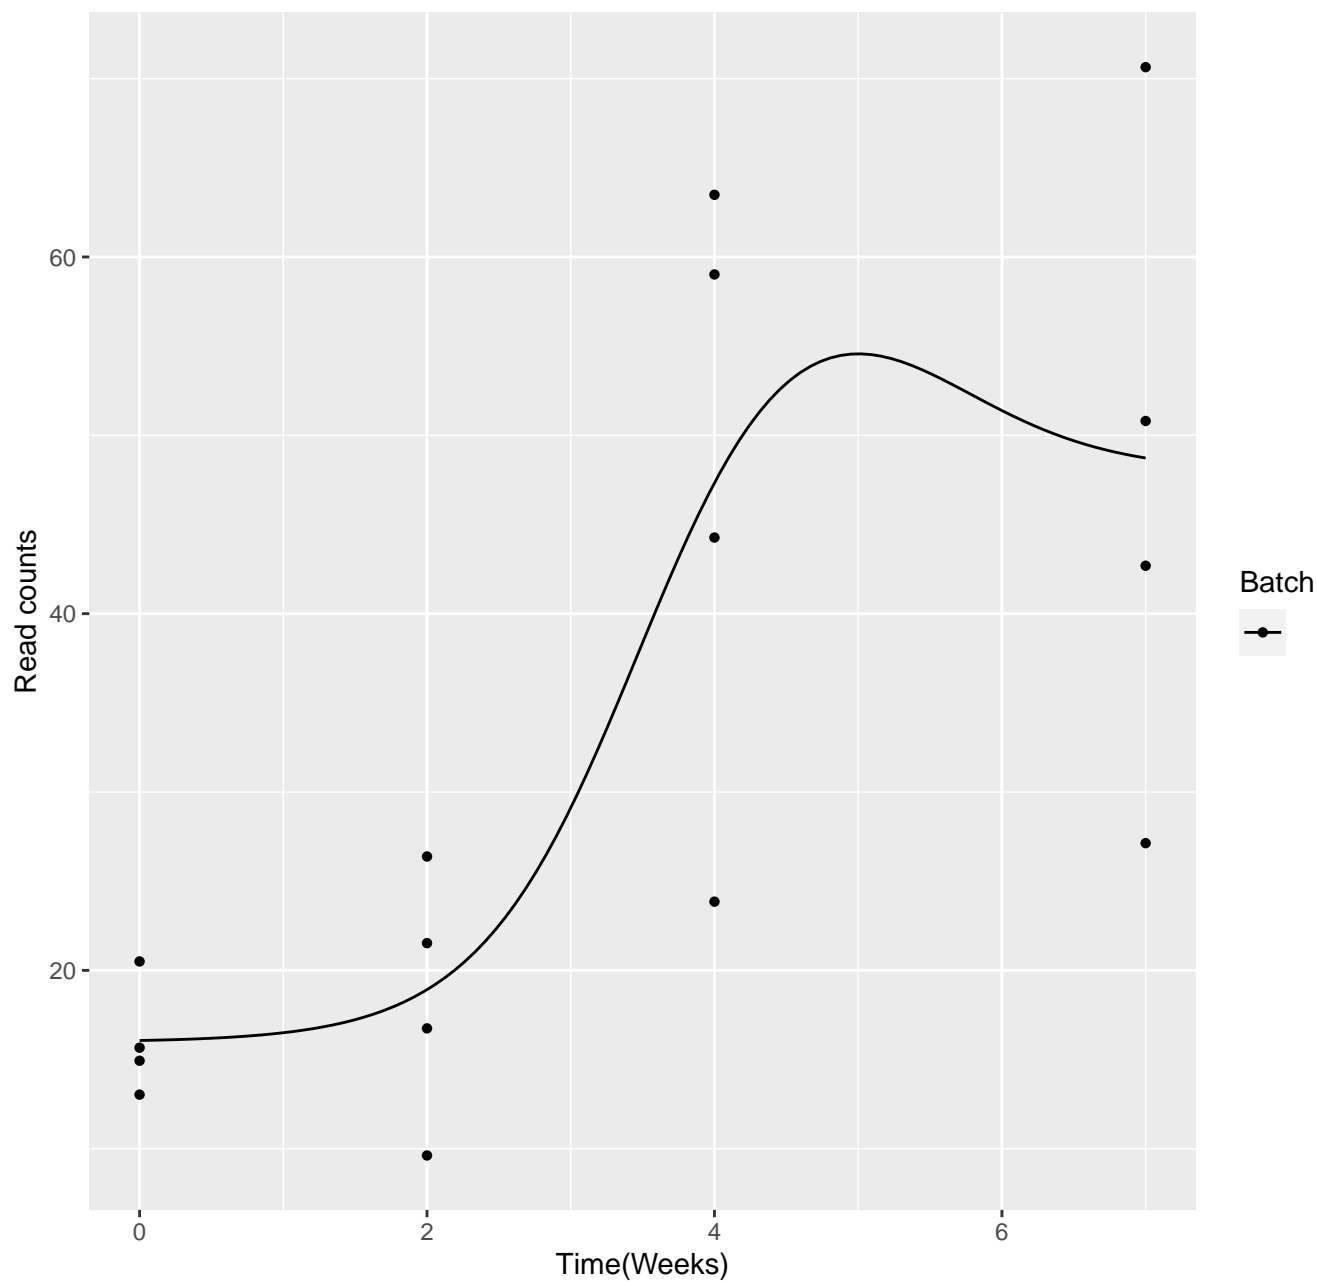

LOC108176676:  $\log_{10} q = -2.84$

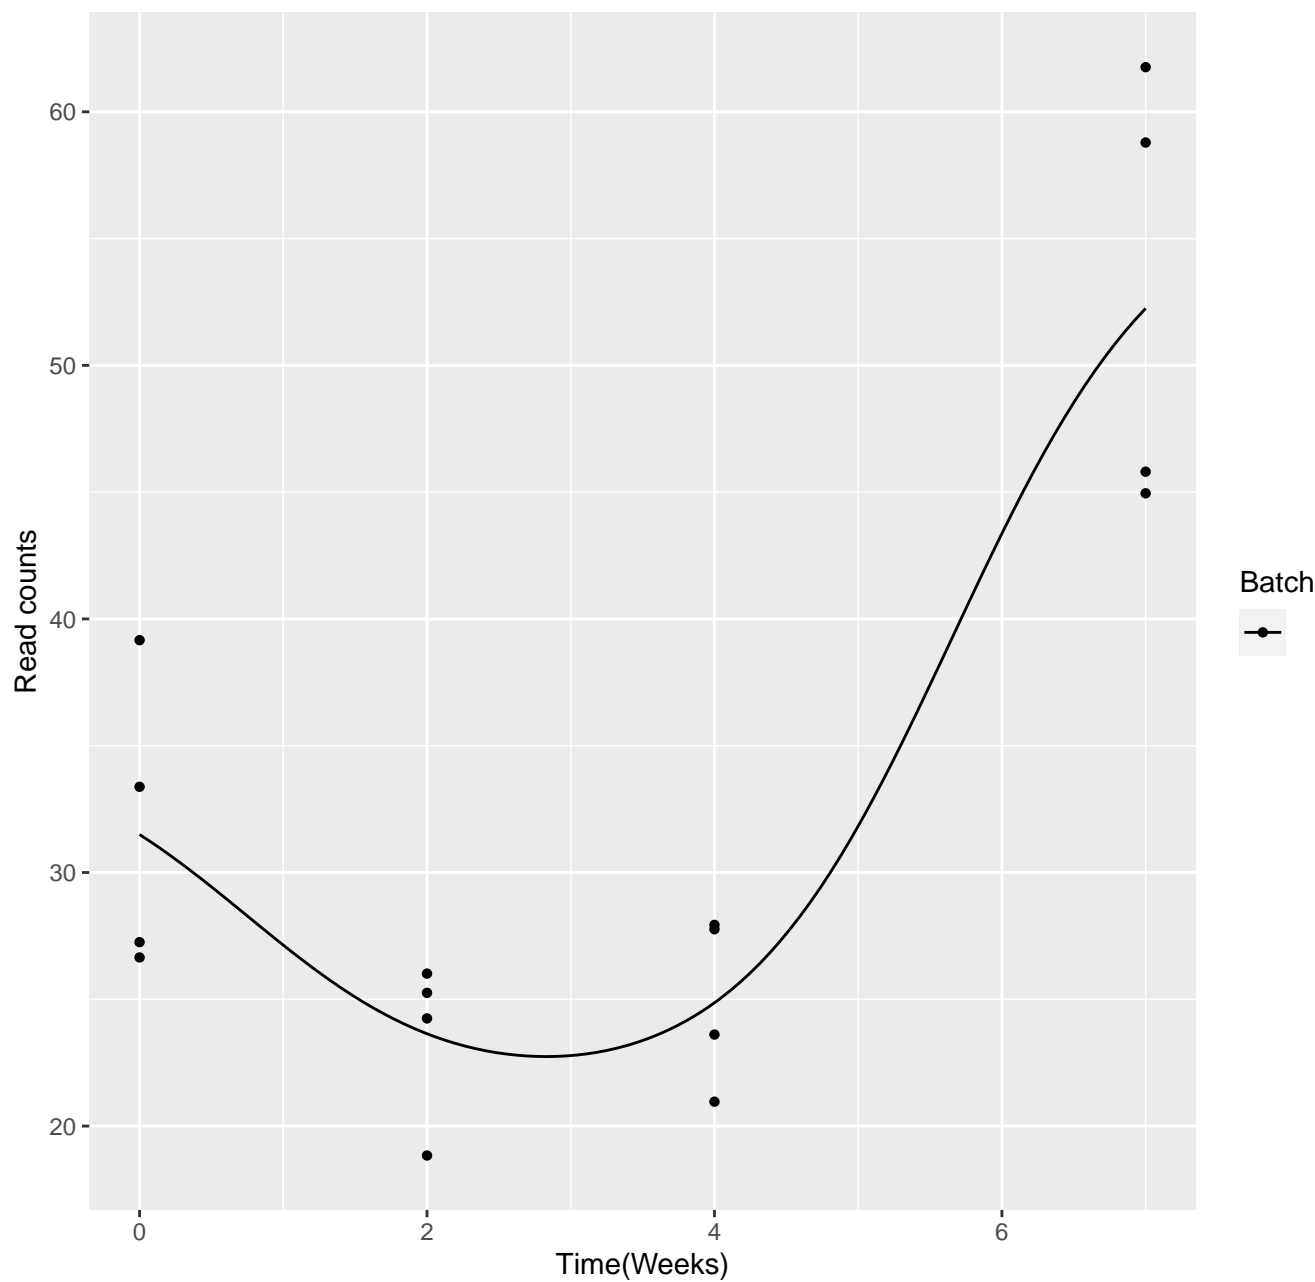

LOC127488905:  $\log_{10} q = -2.84$

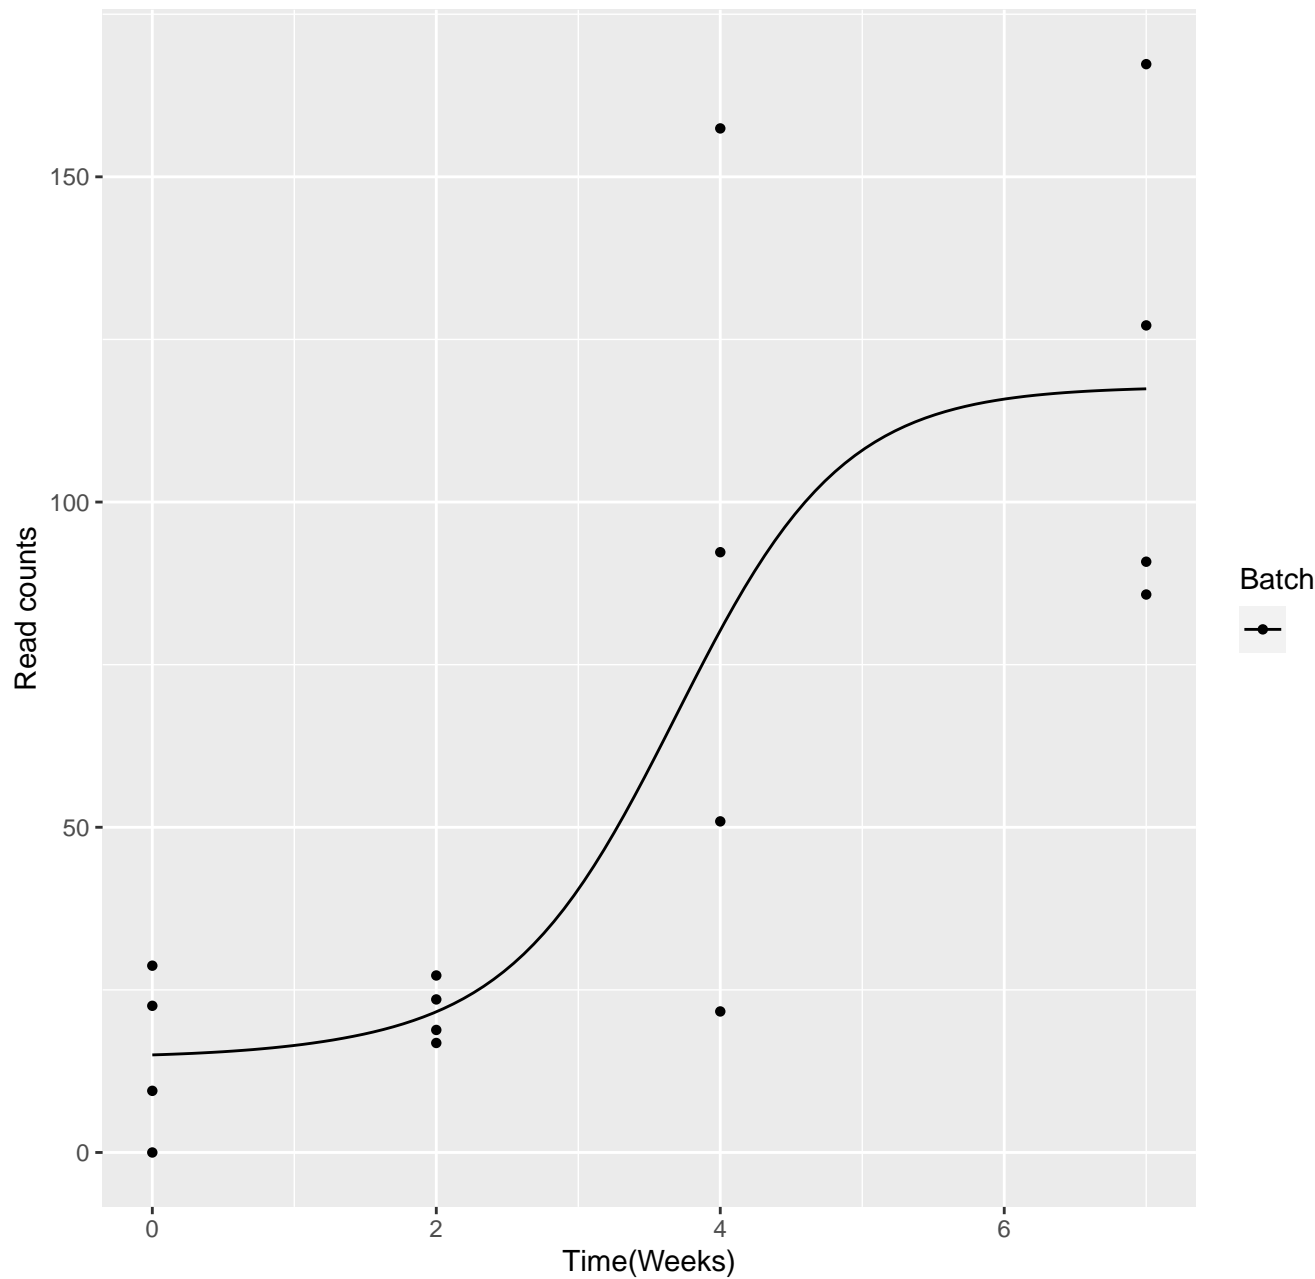

LOC108177987:  $\log_{10} q = -2.84$

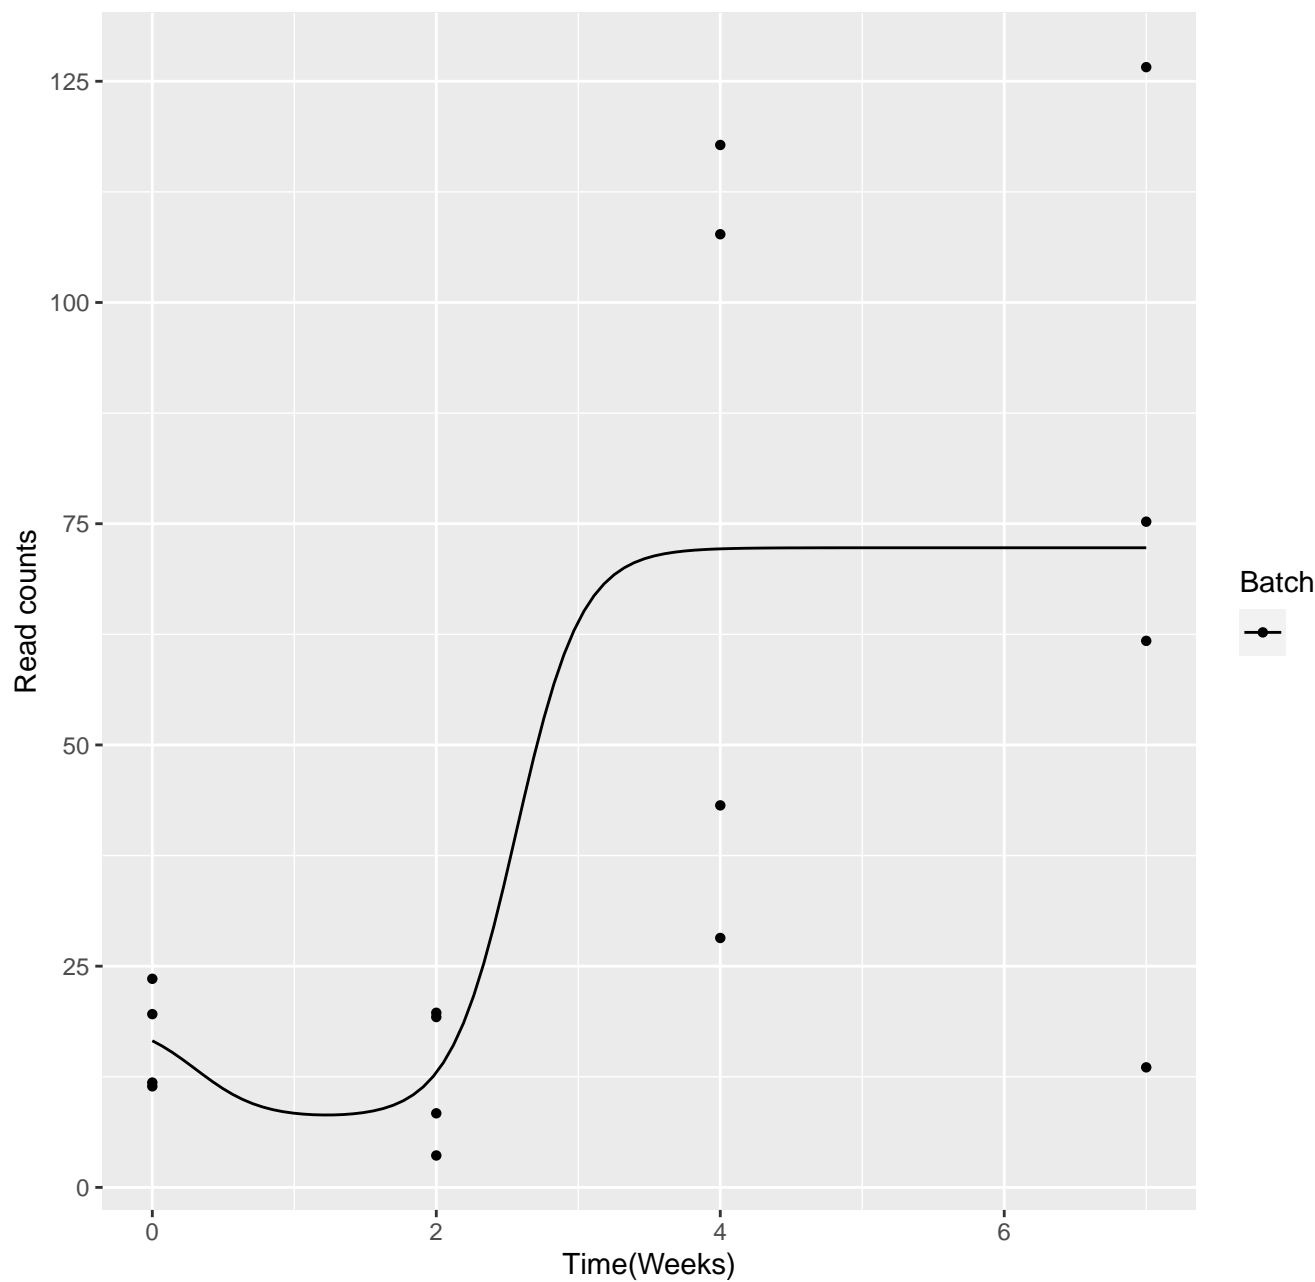

MCRIP2:  $\log_{10} q = -2.84$

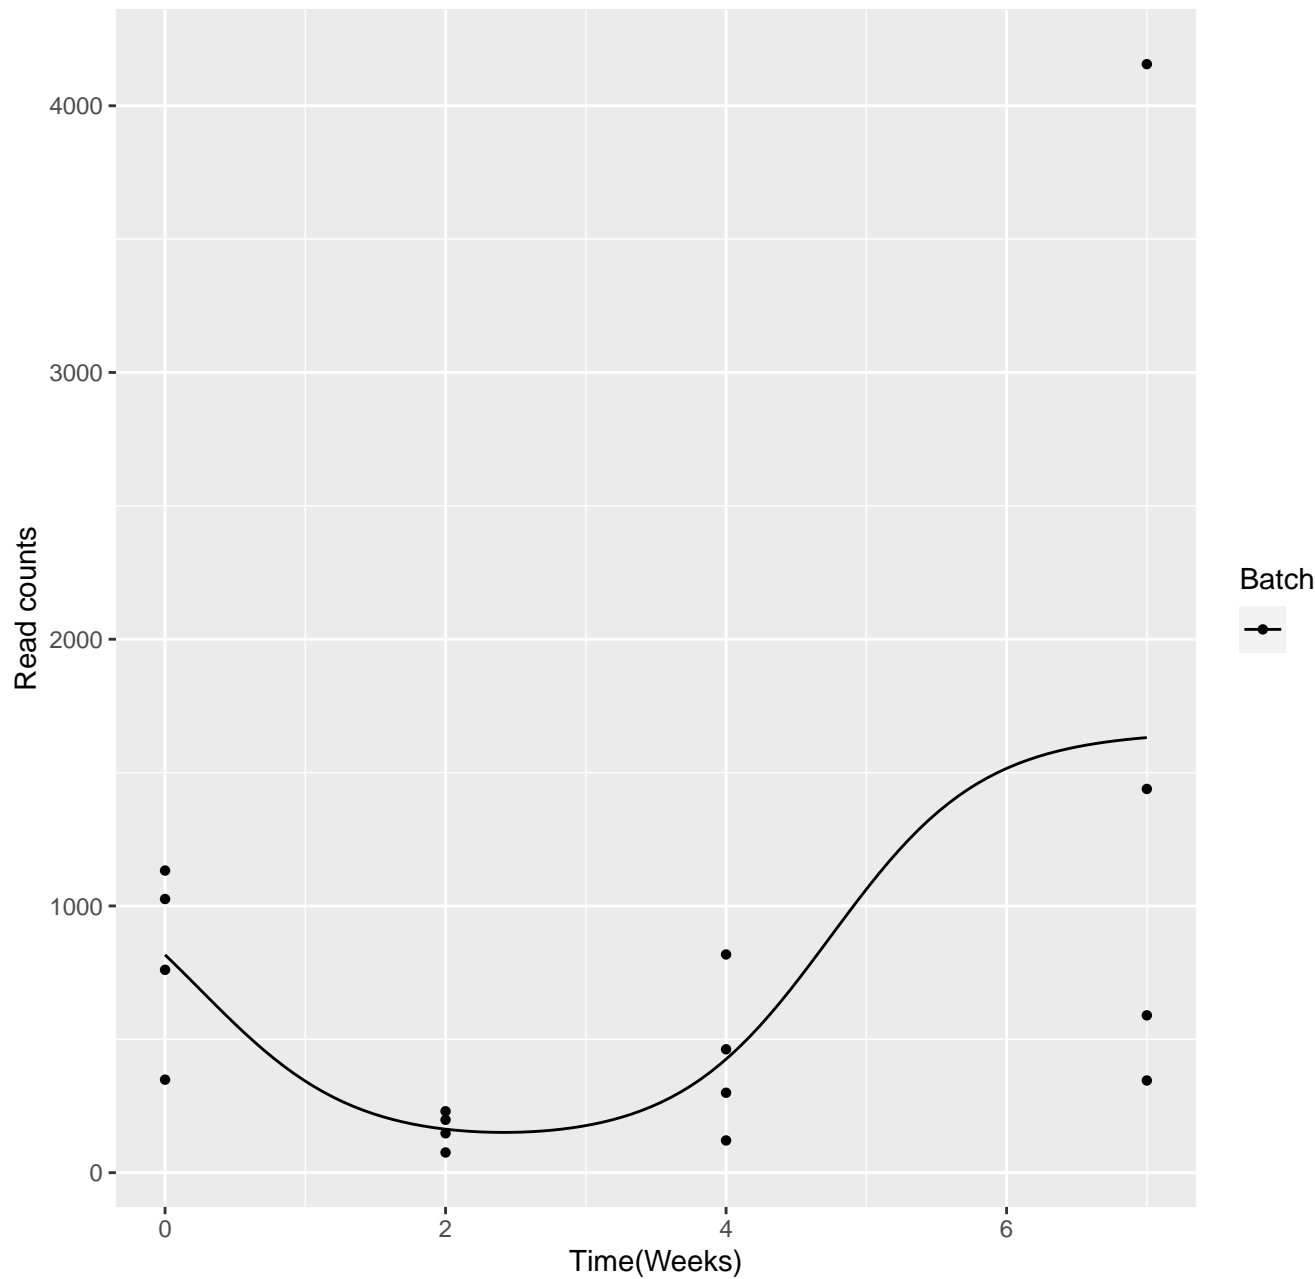

KCNMB1:  $\log_{10} q = -2.84$

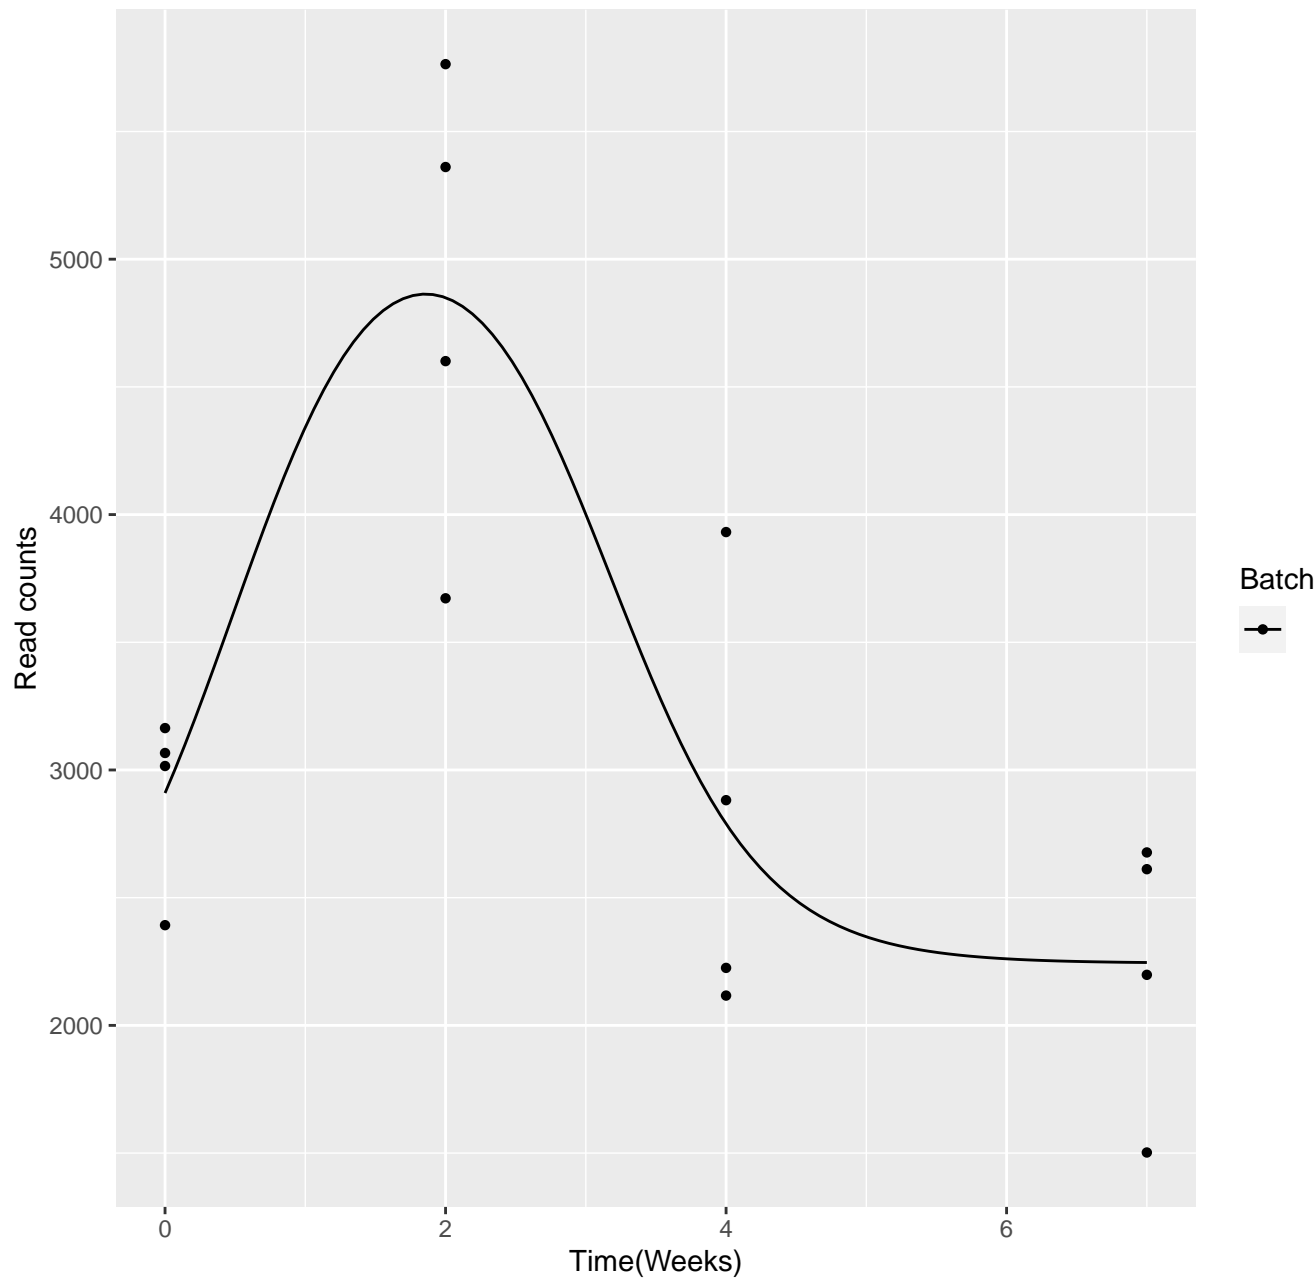

SIMC1:  $\log_{10} q = -2.84$

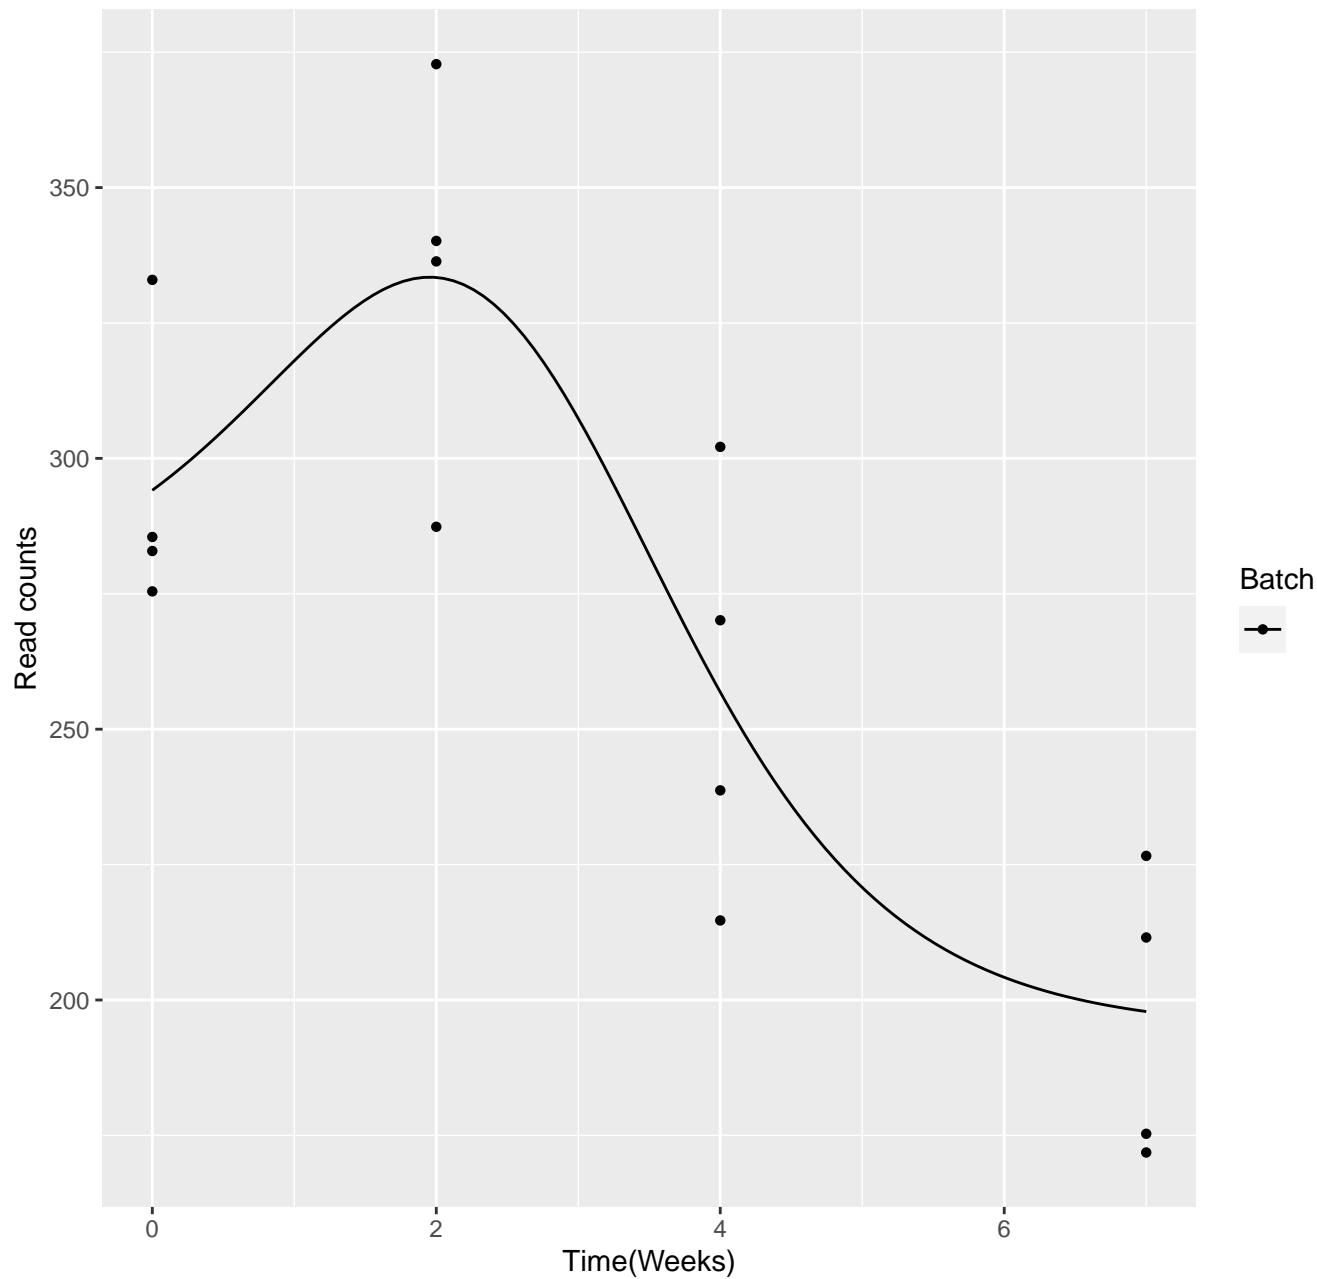



LGALSL:  $\log_{10} q = -2.83$

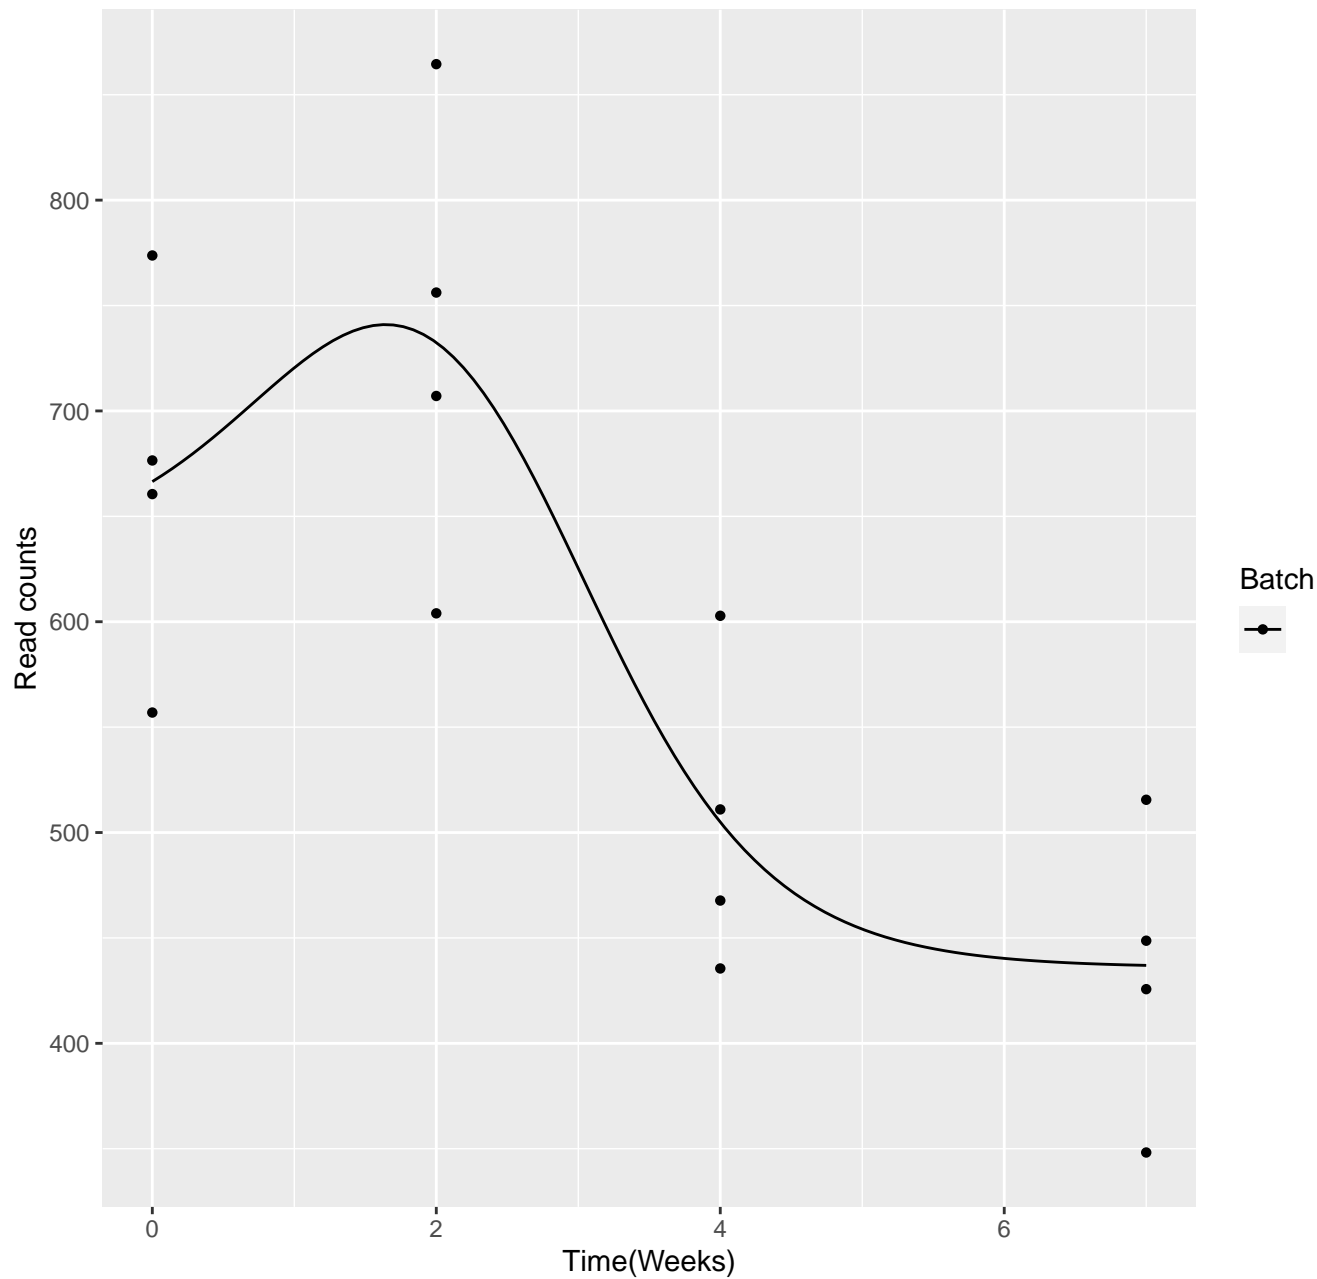

PLCB4:  $\log_{10} q = -2.82$

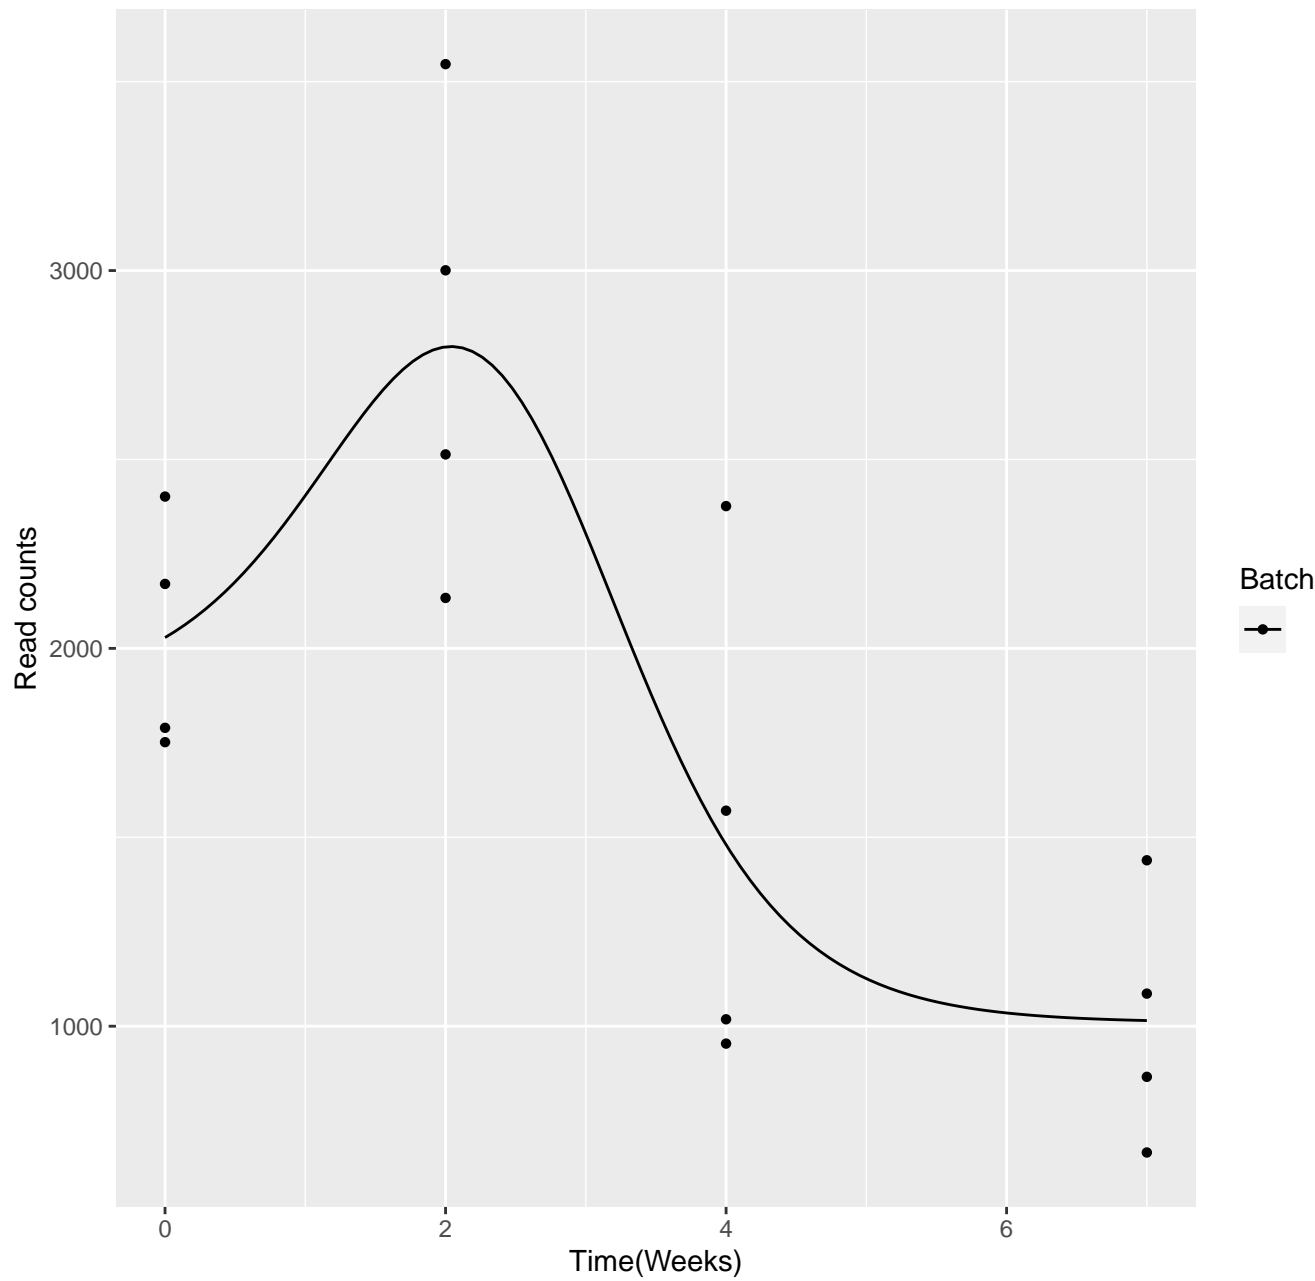

PTPRO:  $\log_{10} q = -2.82$

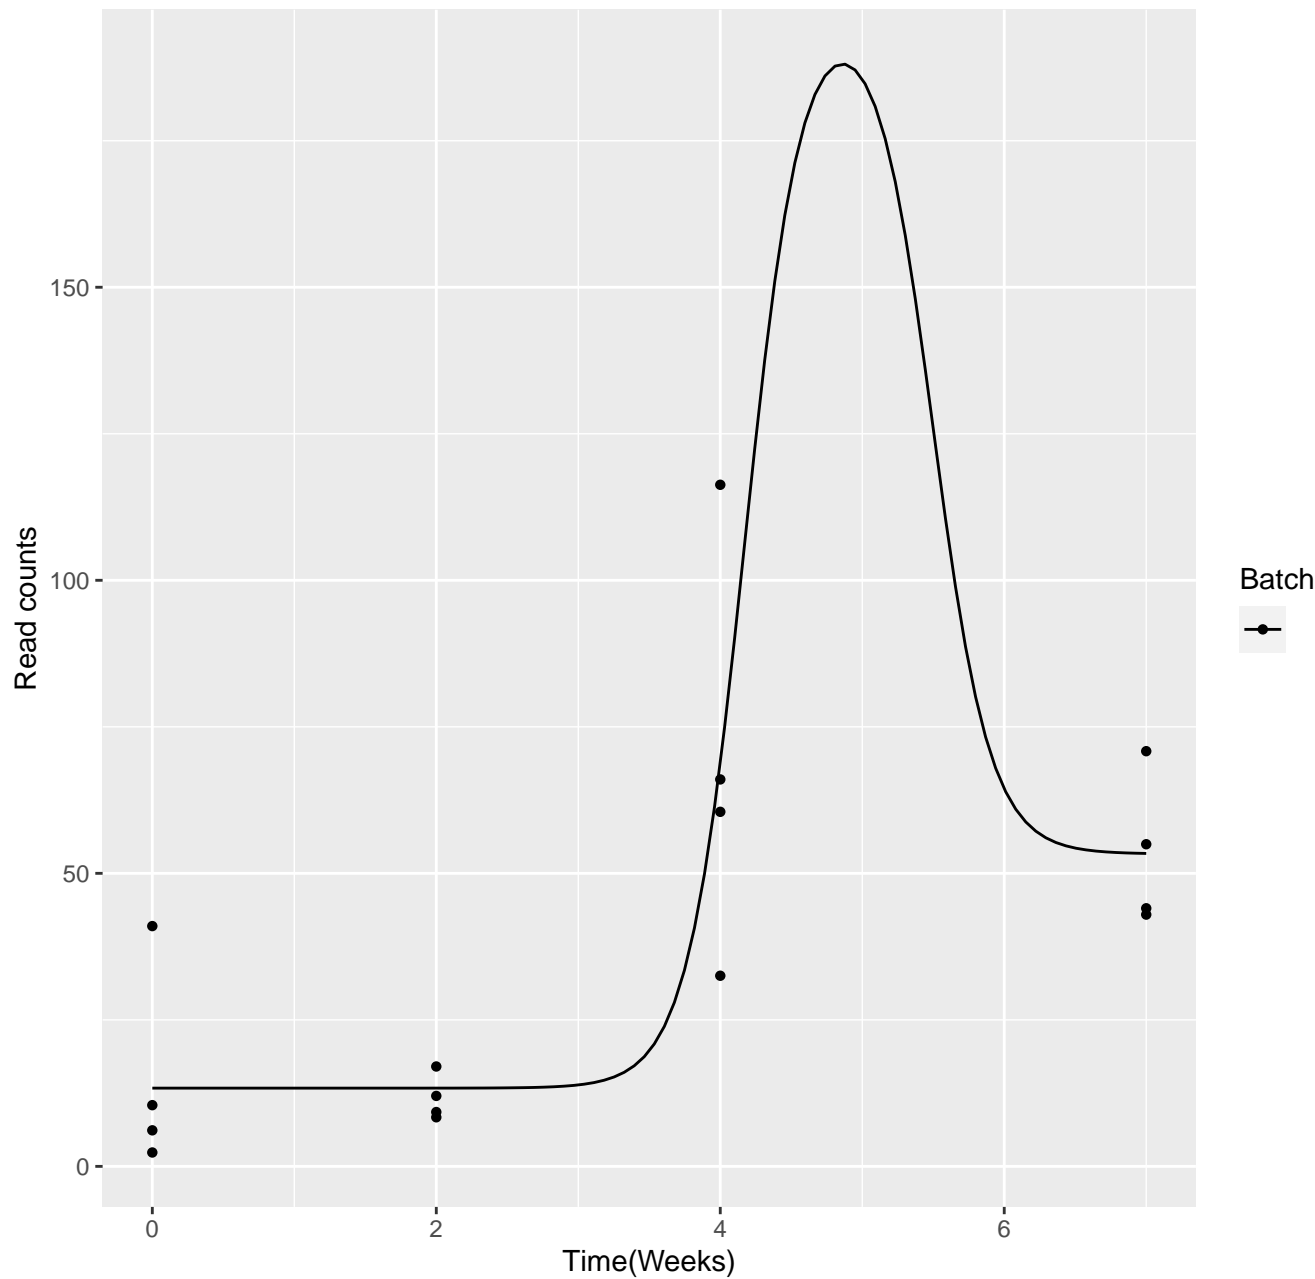

GASK1B:  $\log_{10} q = -2.82$

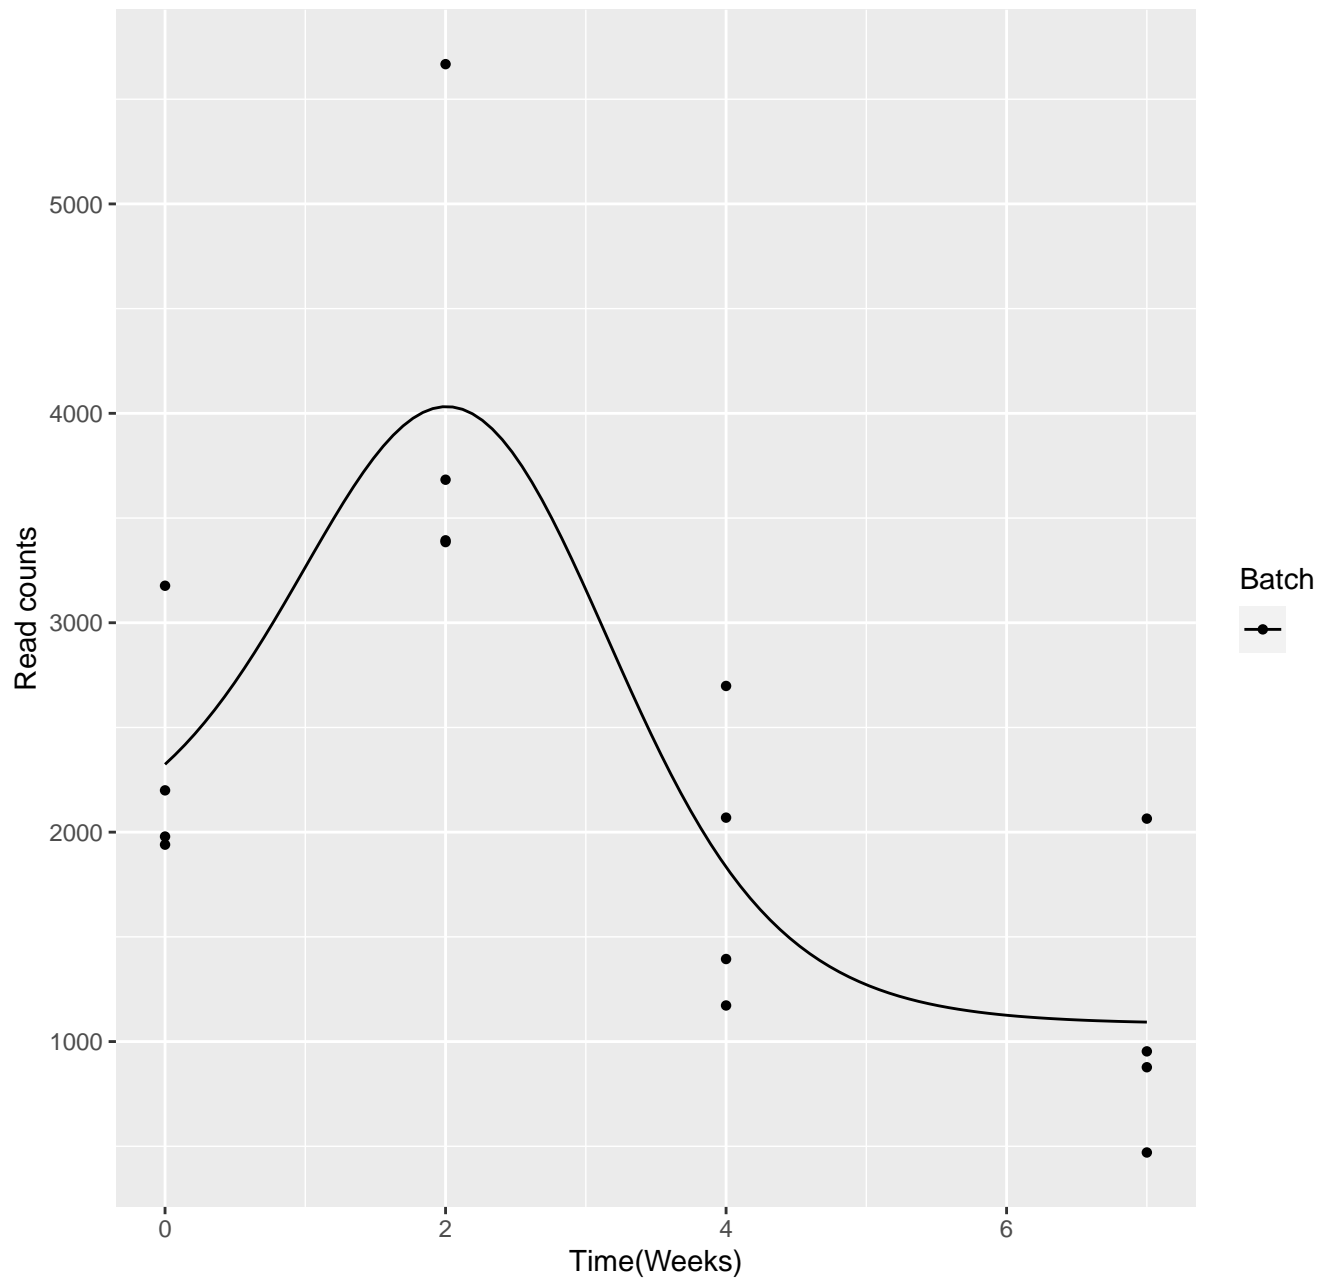

SLCO2B1:  $\log_{10} q = -2.81$

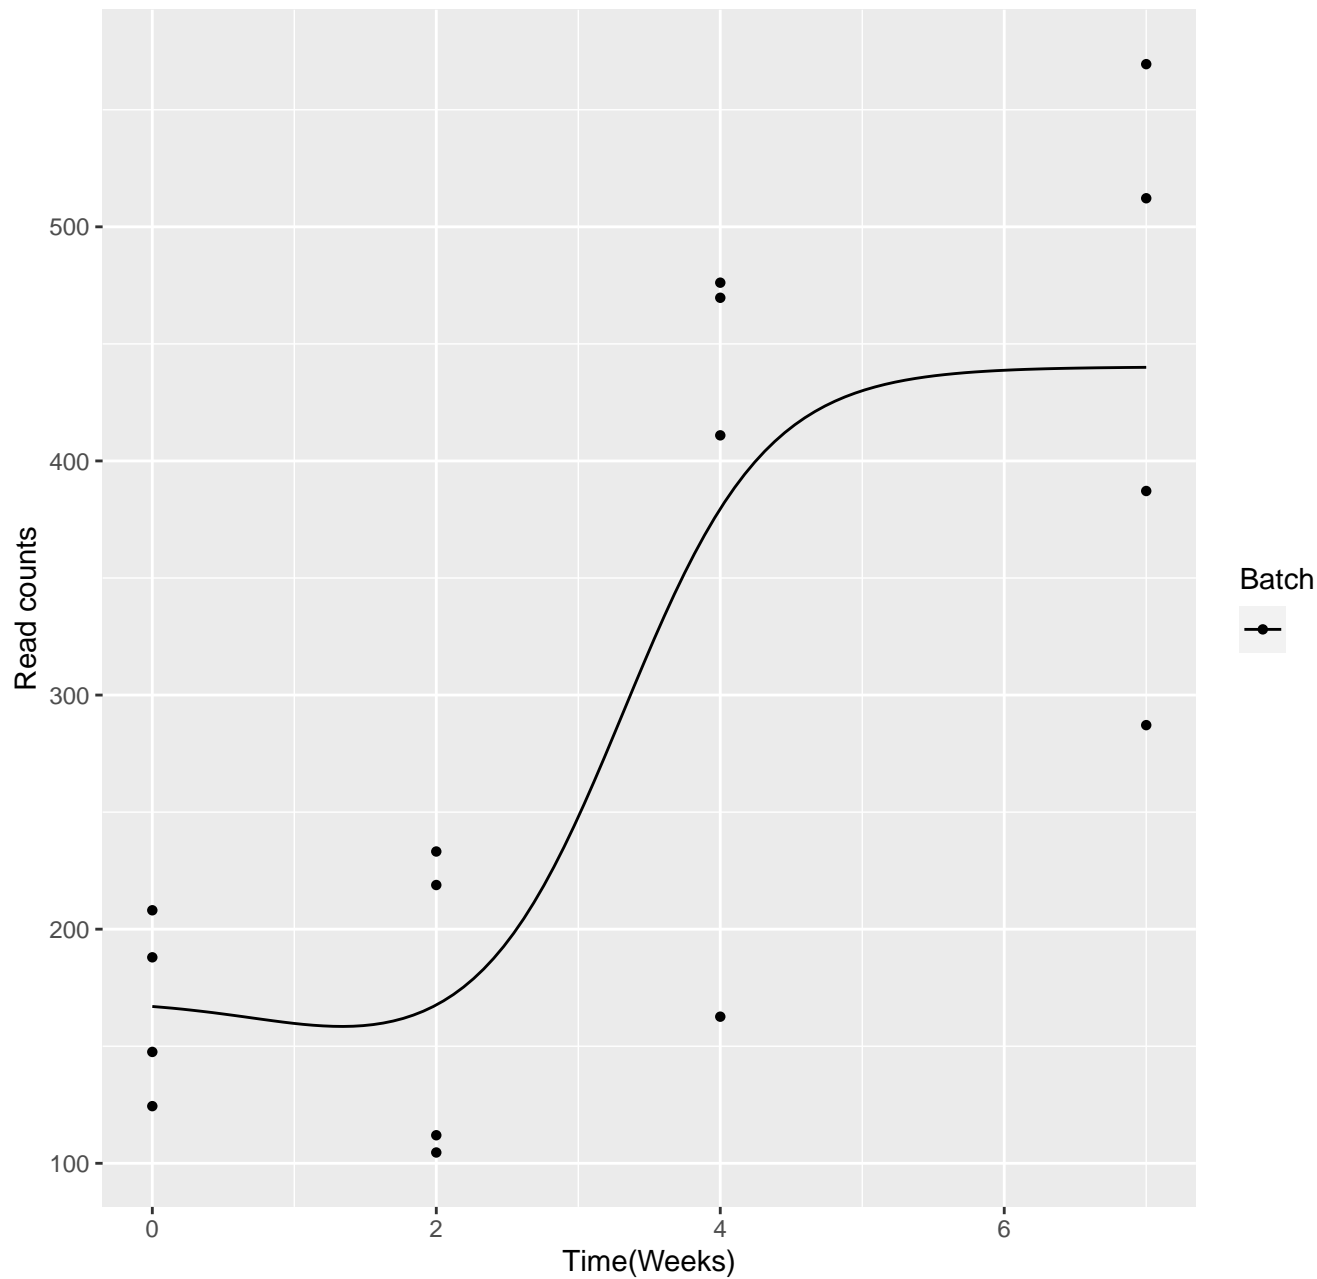

CIAO2A:  $\log_{10} q = -2.8$

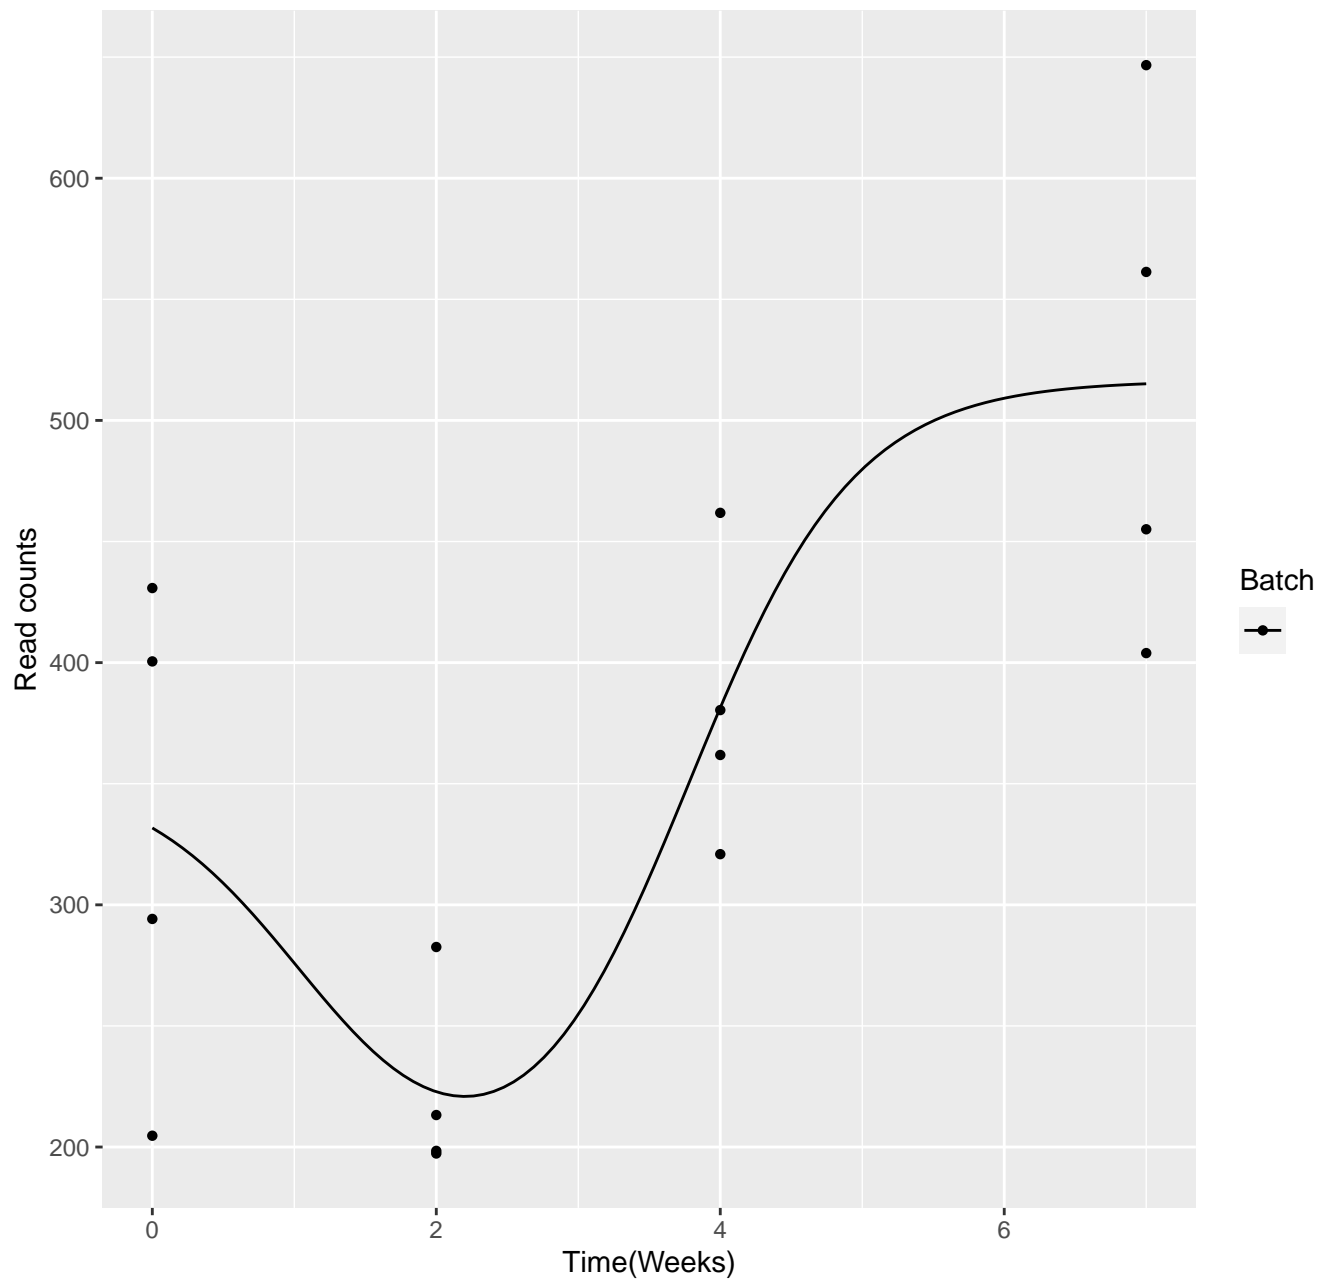

KIFC1:  $\log_{10} q = -2.8$

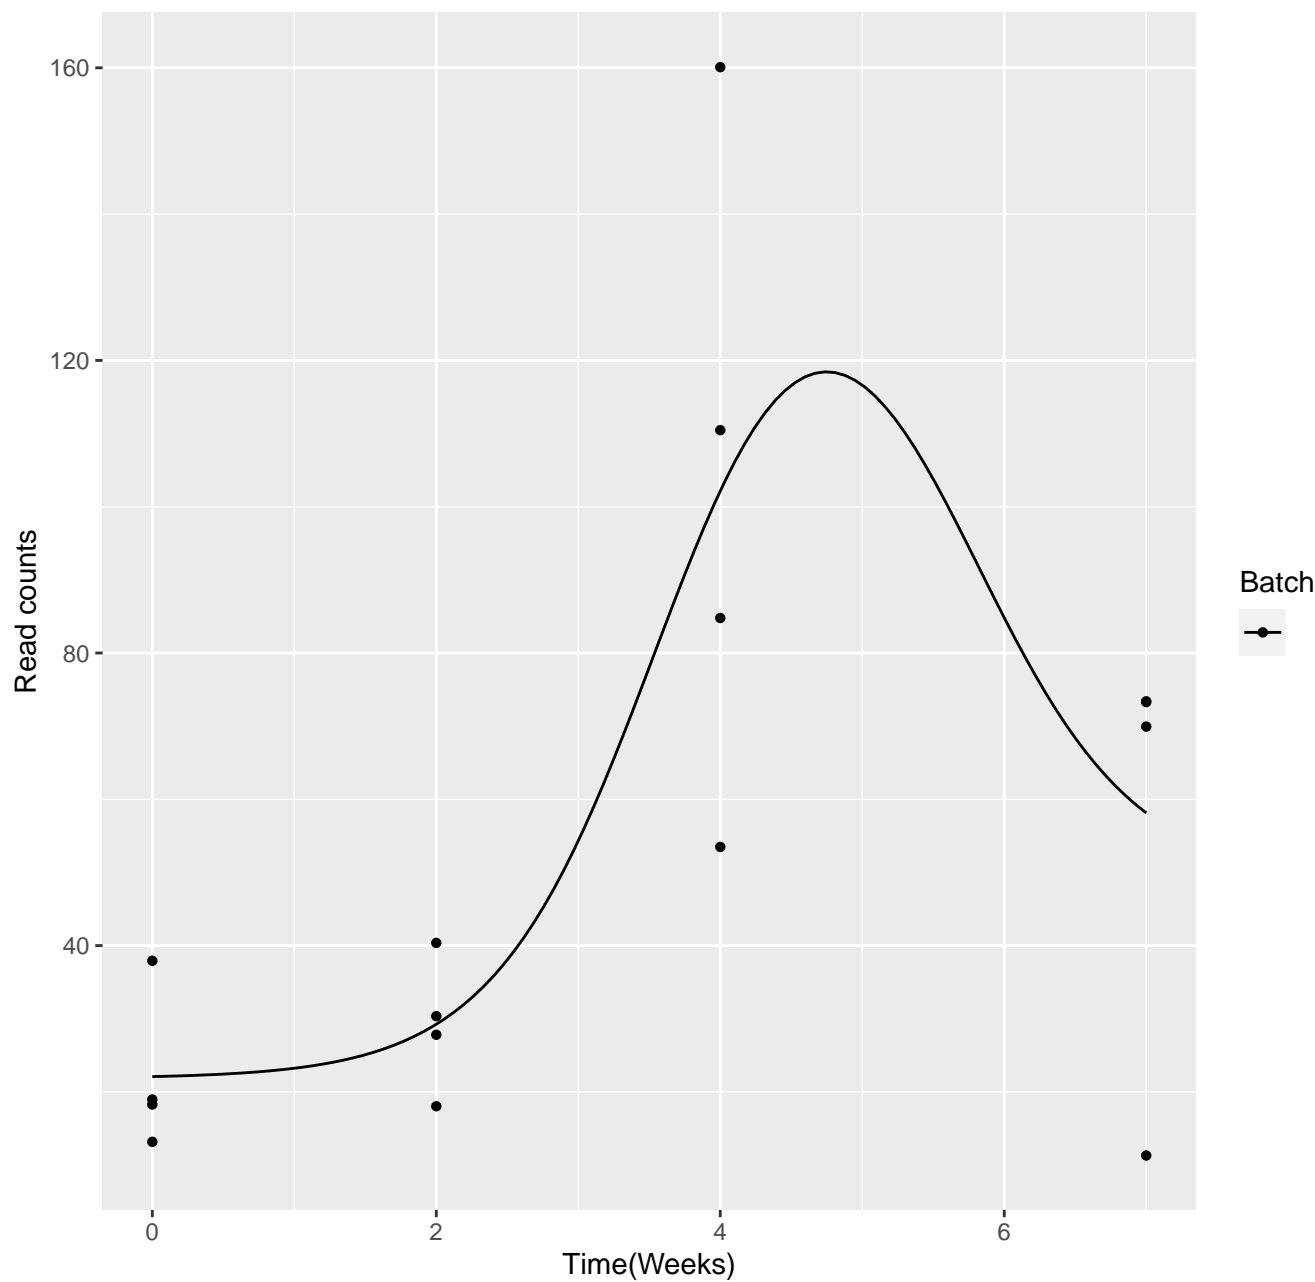

LOC127485355:  $\log_{10} q = -2.8$

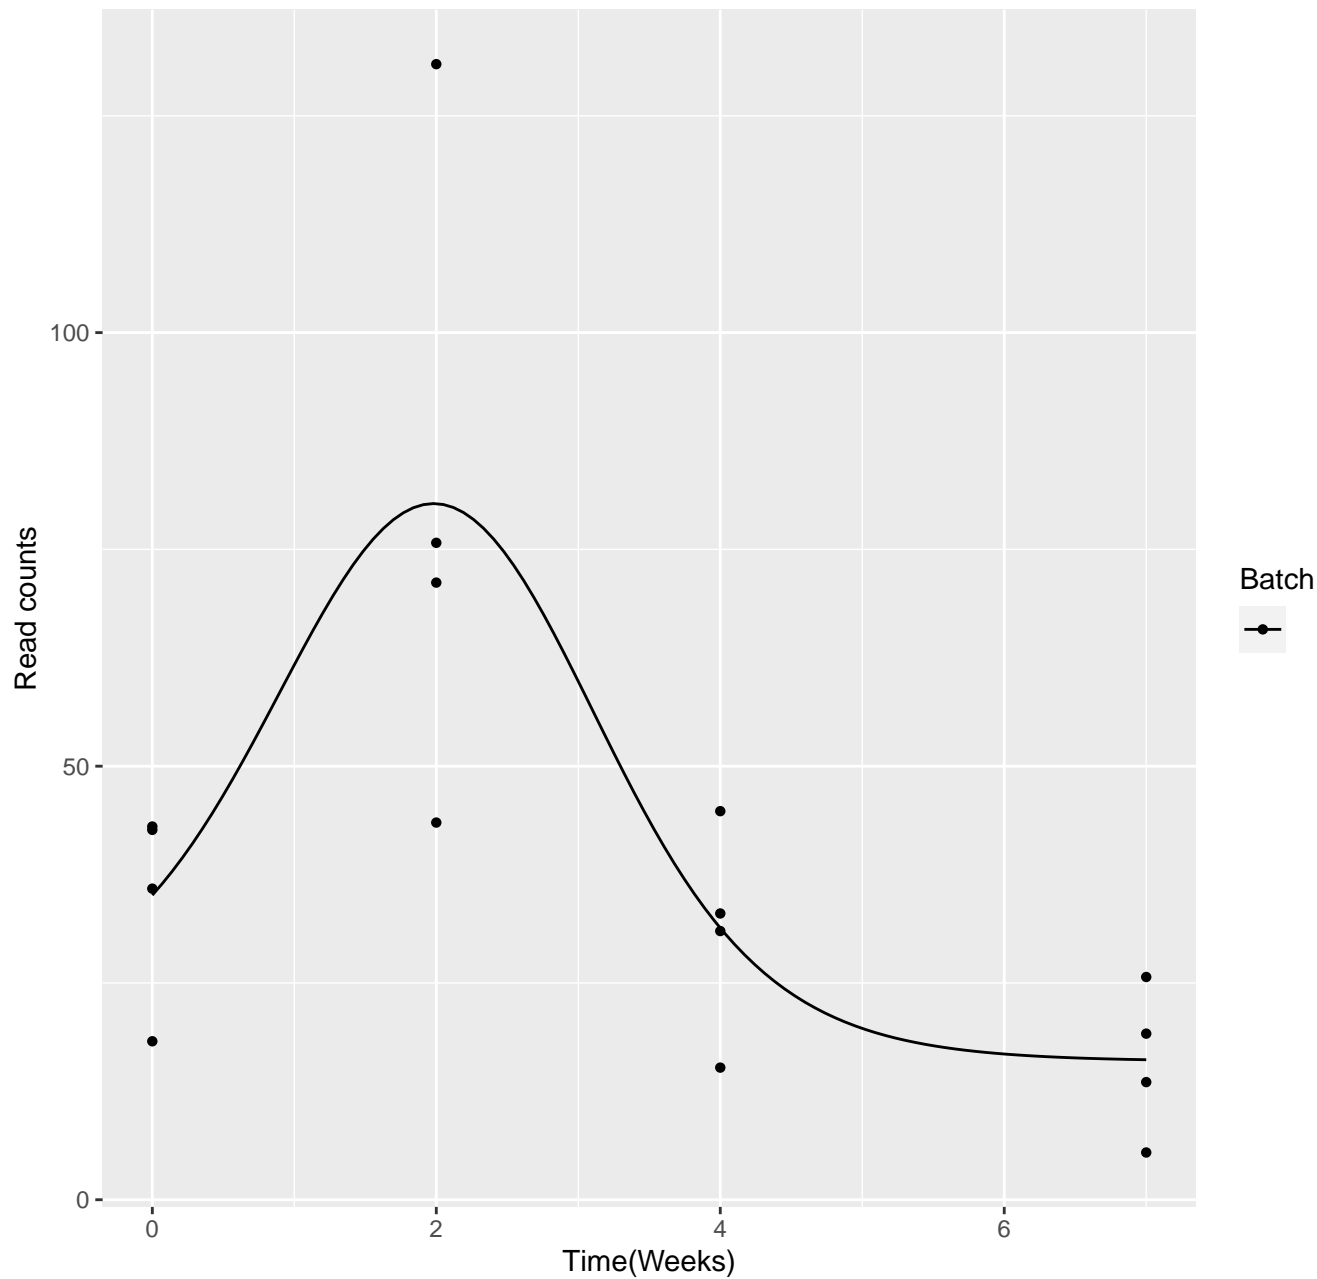



PLXNB2:  $\log_{10} q = -2.8$

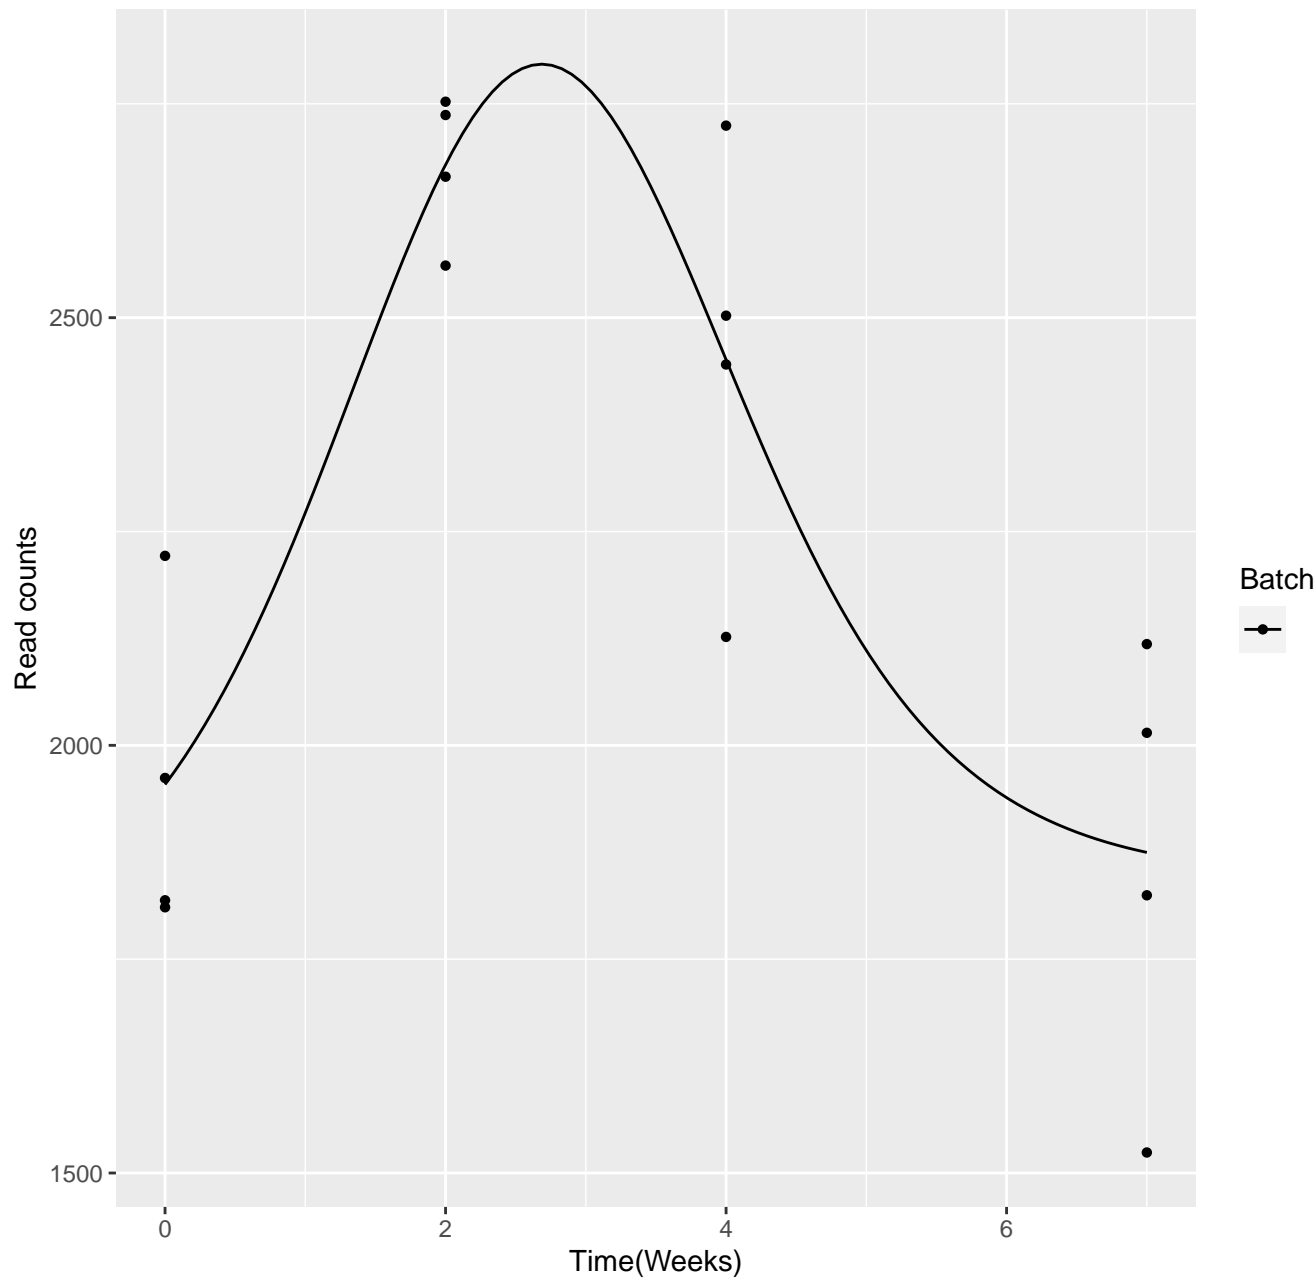

KIZ:  $\log_{10} q = -2.8$

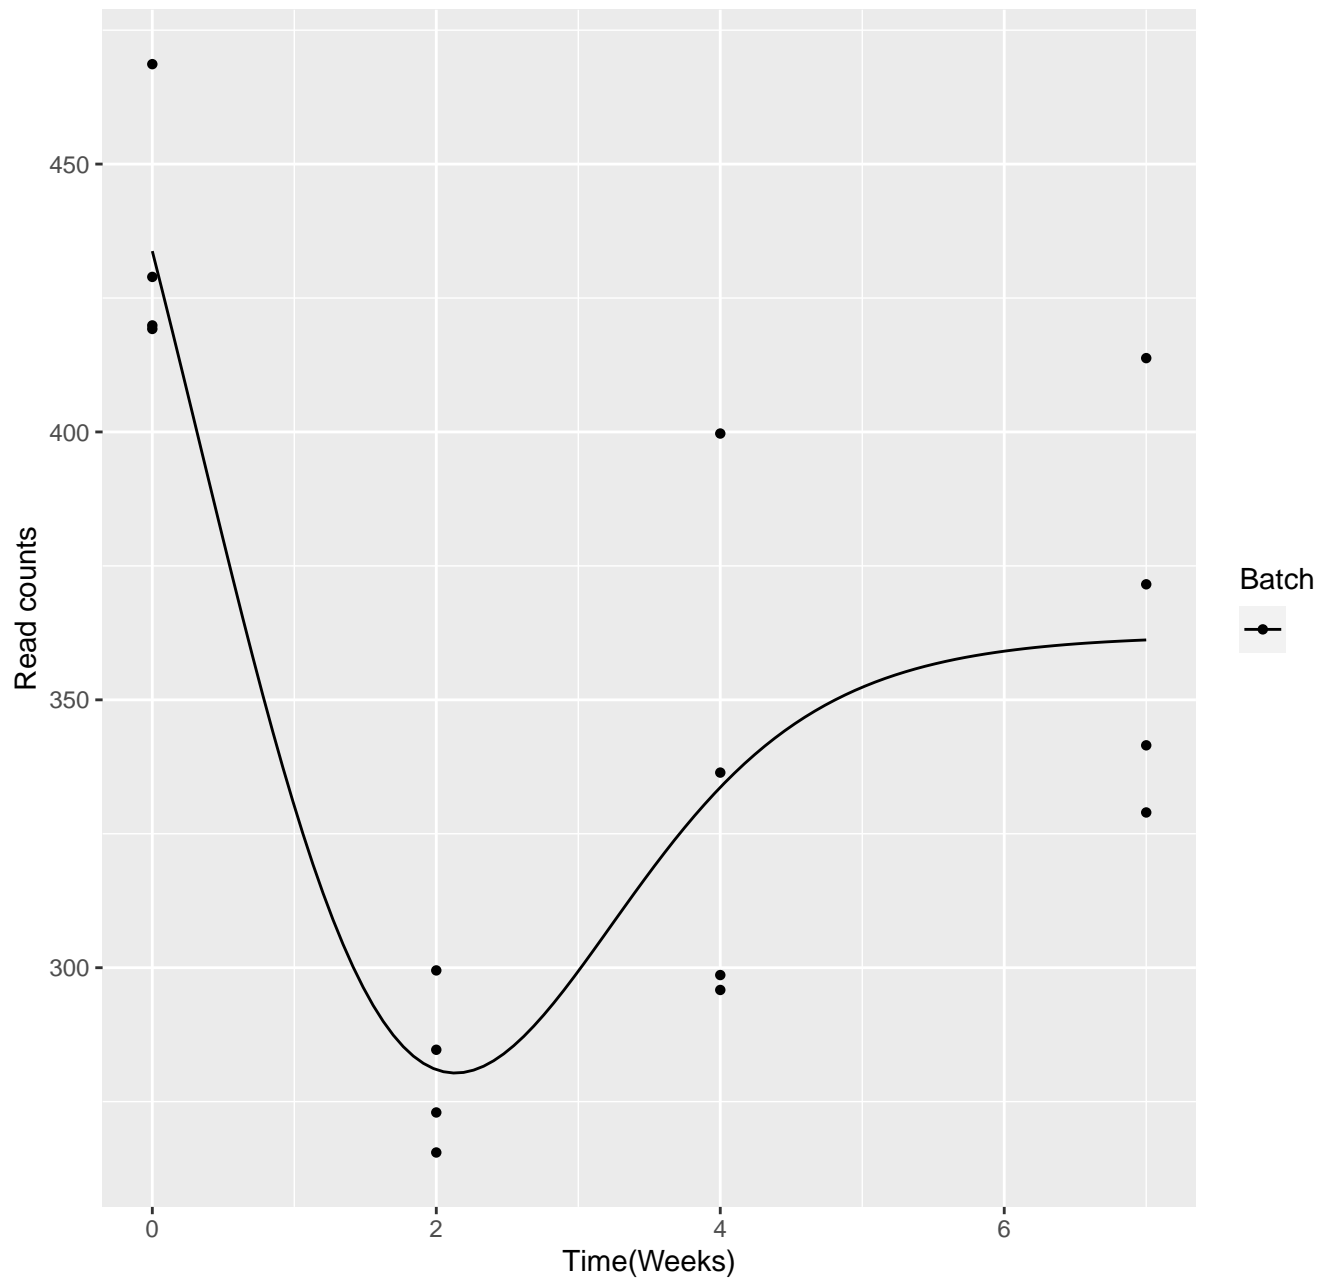

FILIP1L:  $\log_{10} q = -2.8$

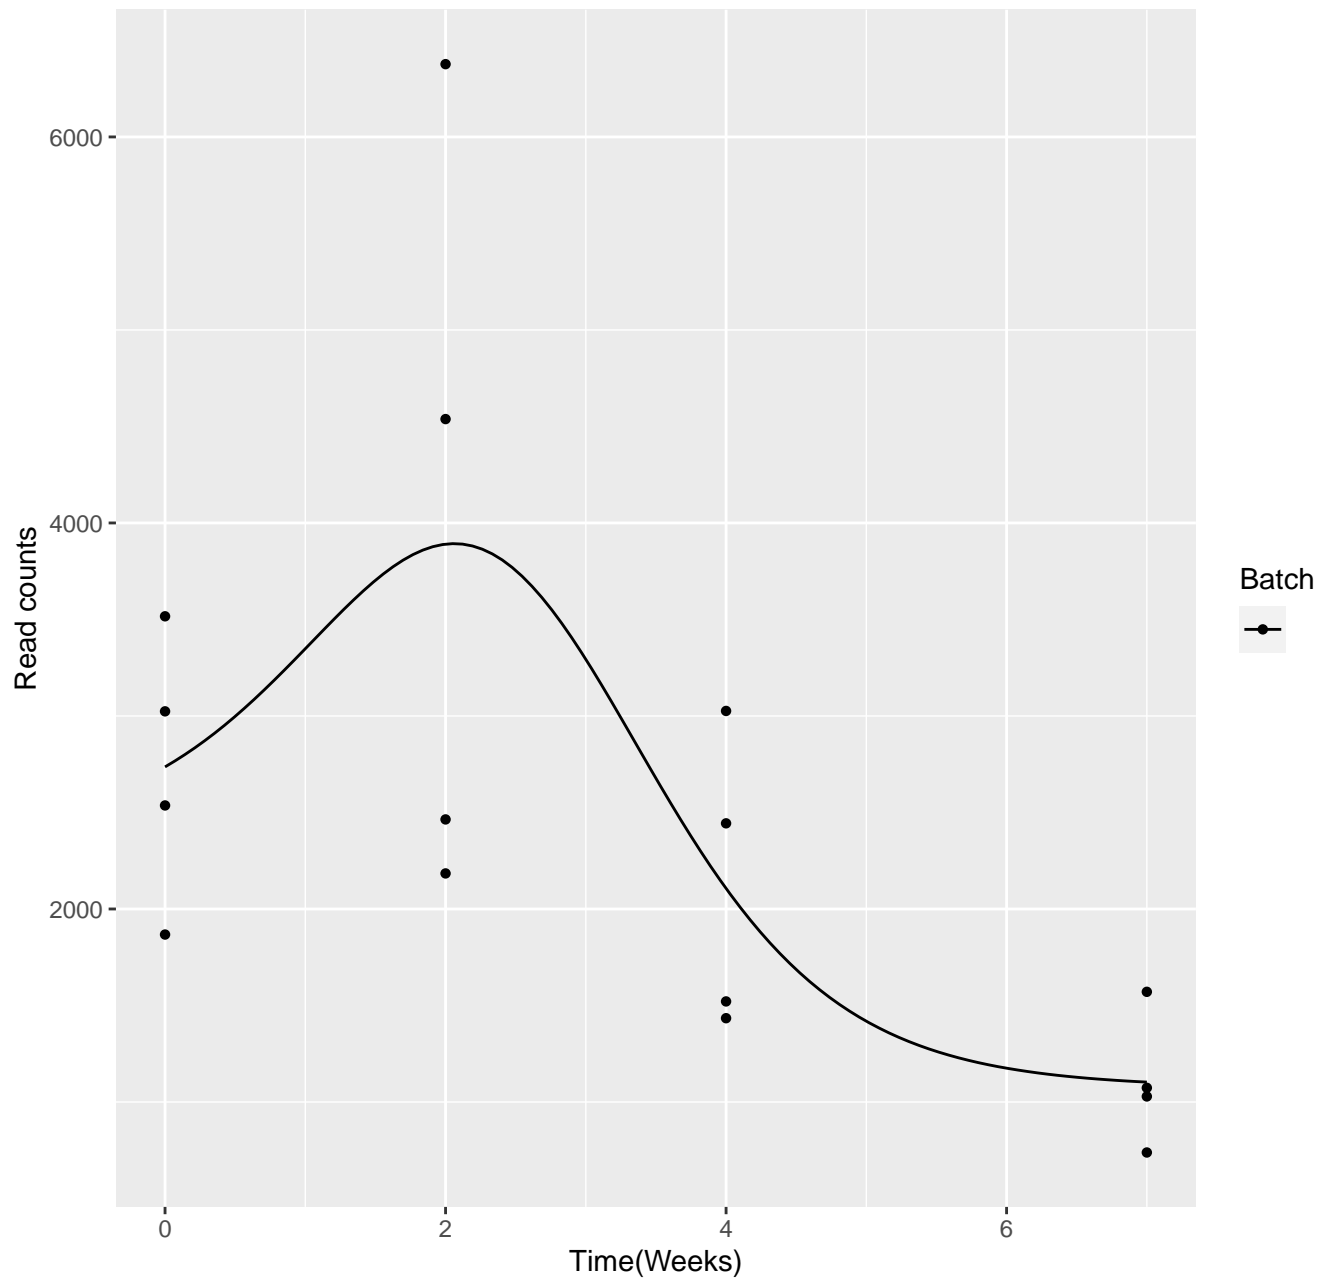

LOC103349982:  $\log_{10} q = -2.79$

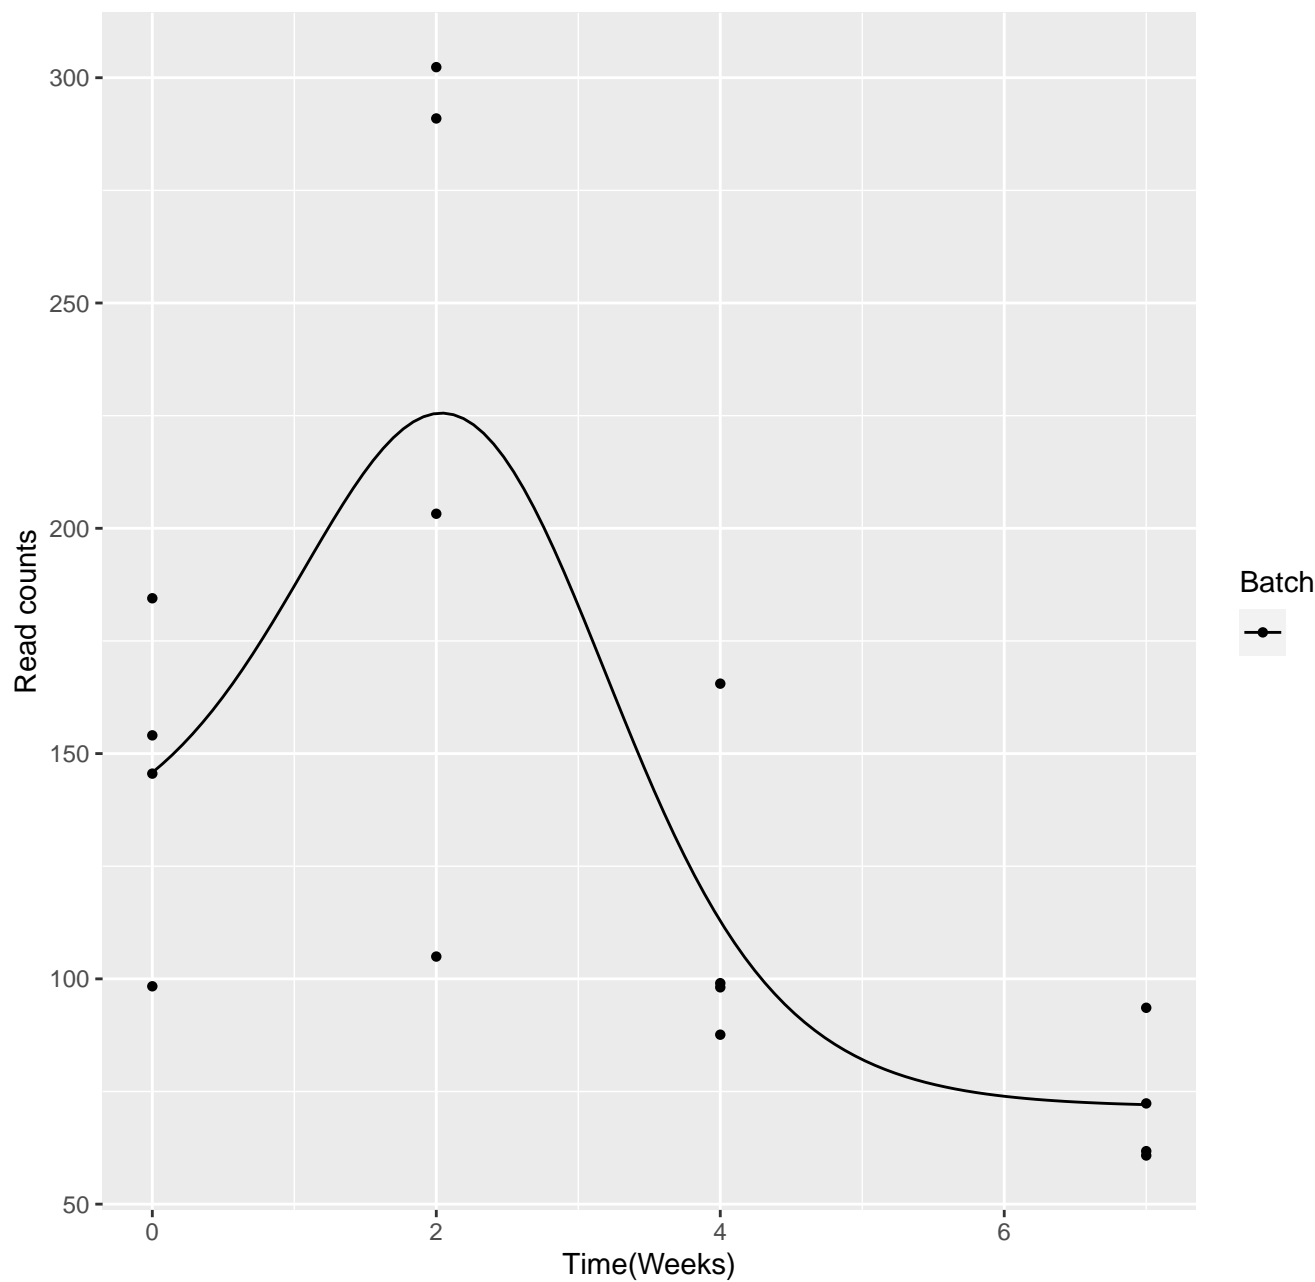

LOC100351519:  $\log_{10} q = -2.79$

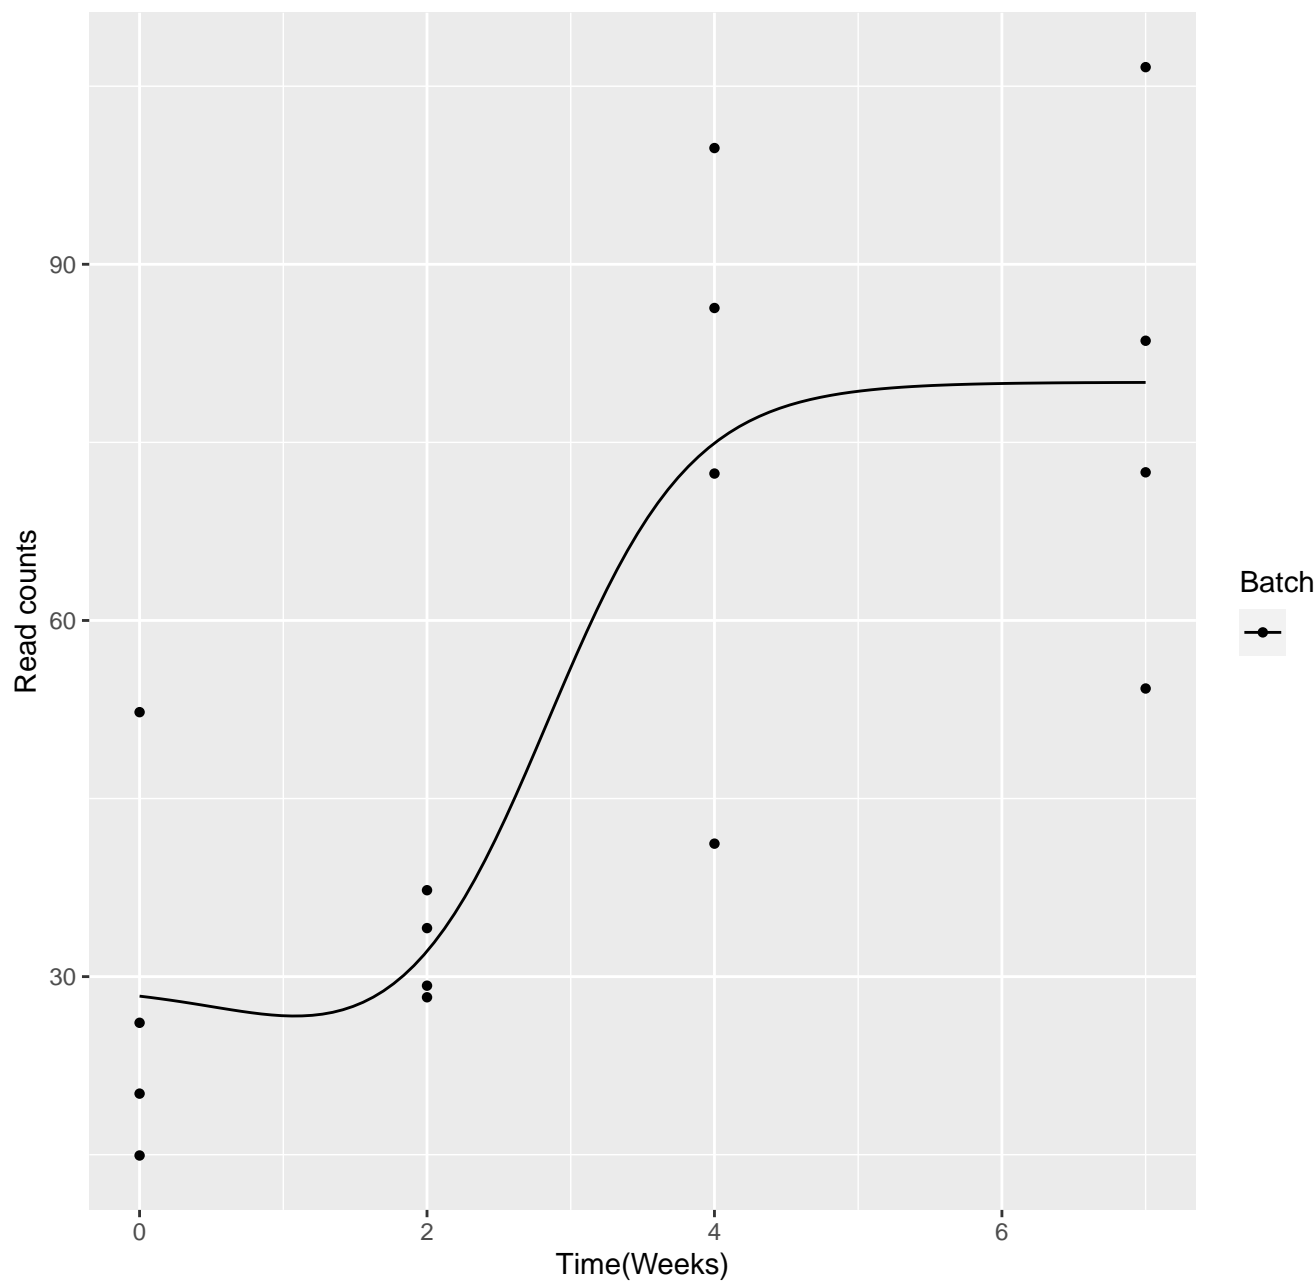

LOC108178478:  $\log_{10} q = -2.78$

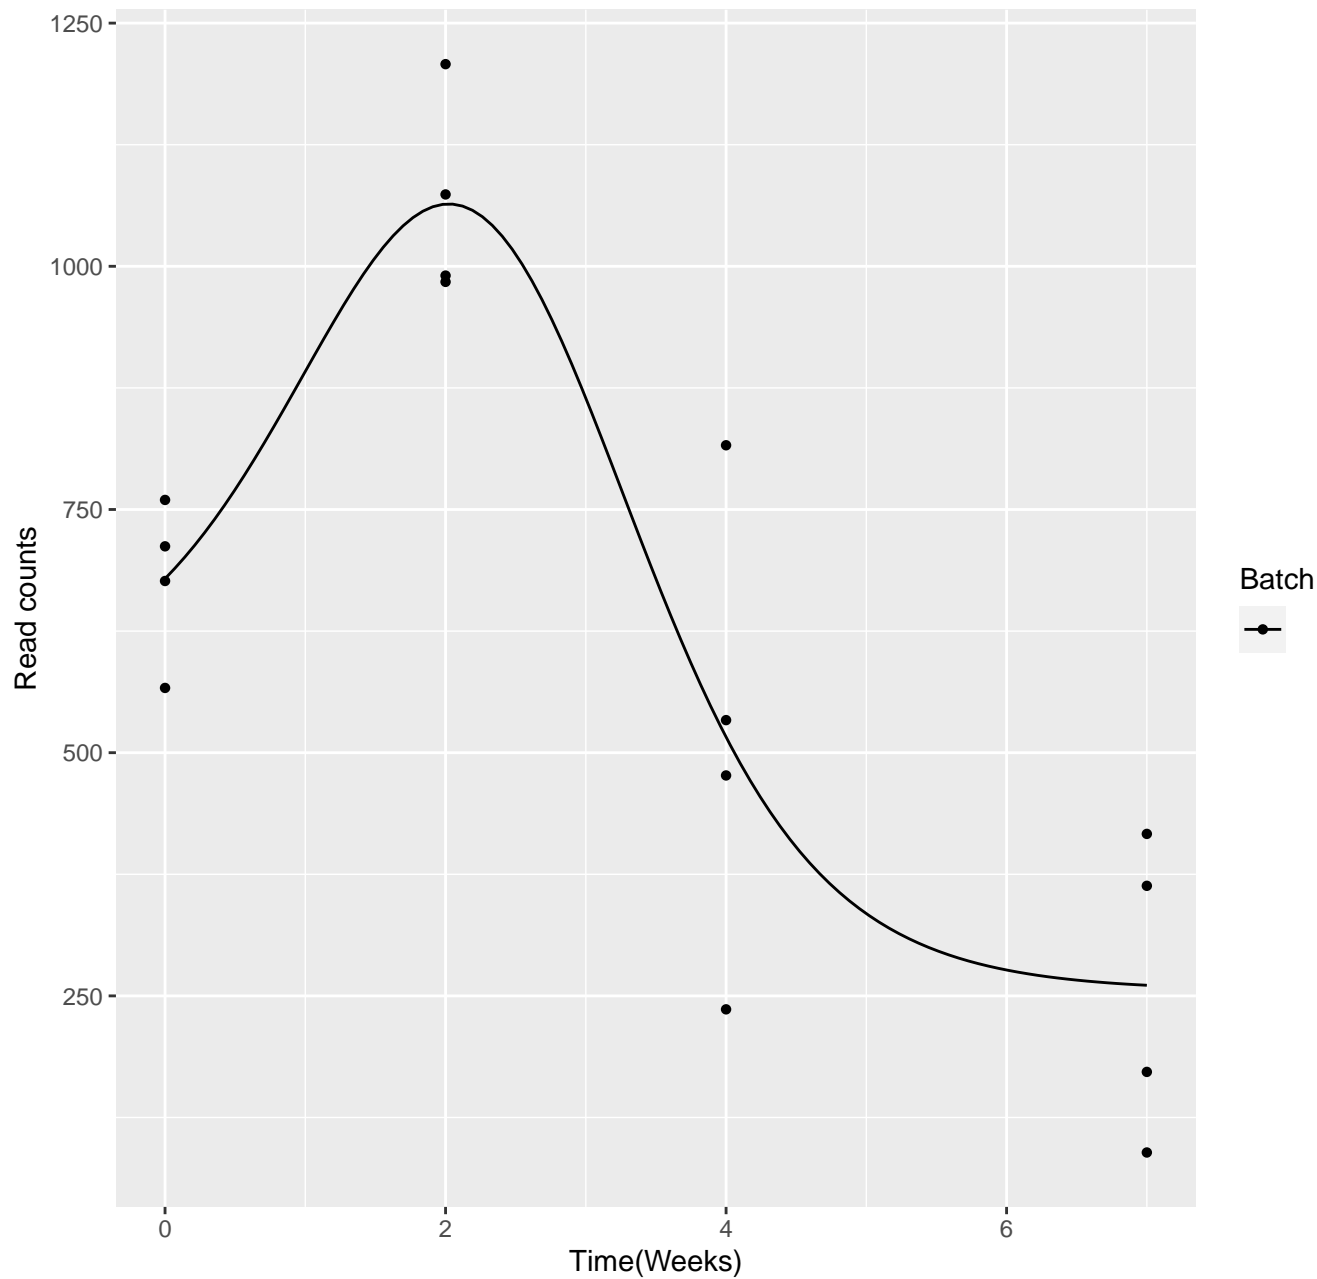

YY1:  $\log_{10} q = -2.78$

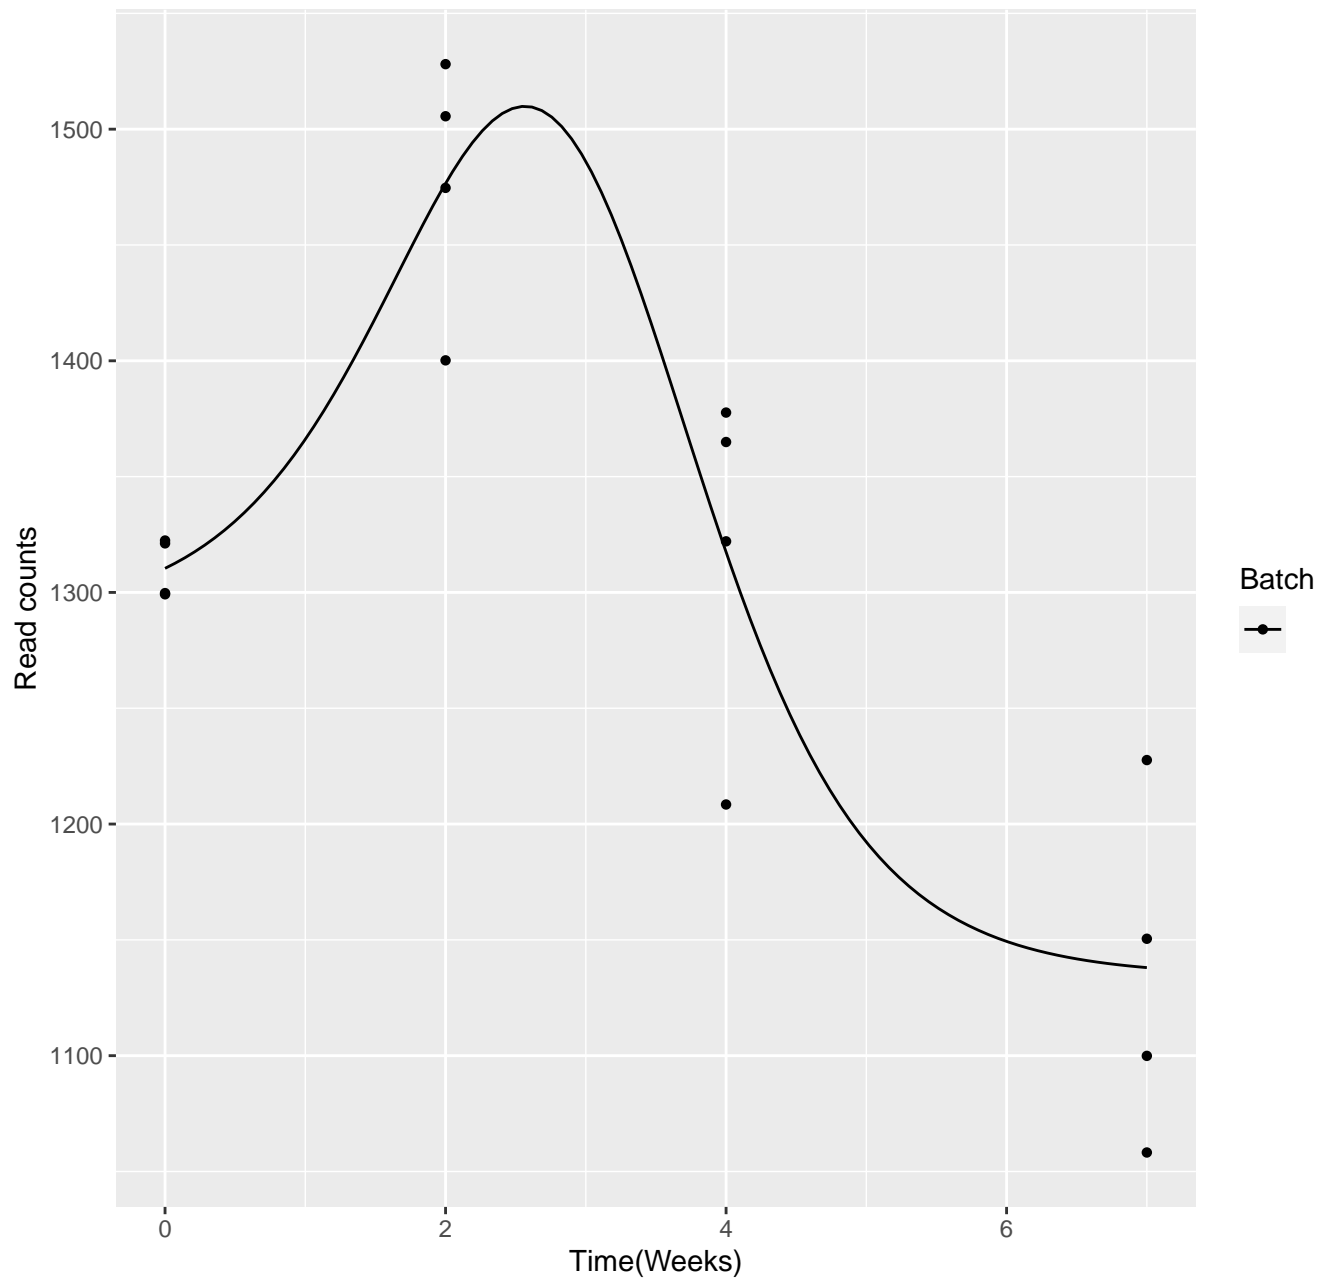

CEBPB:  $\log_{10} q = -2.78$

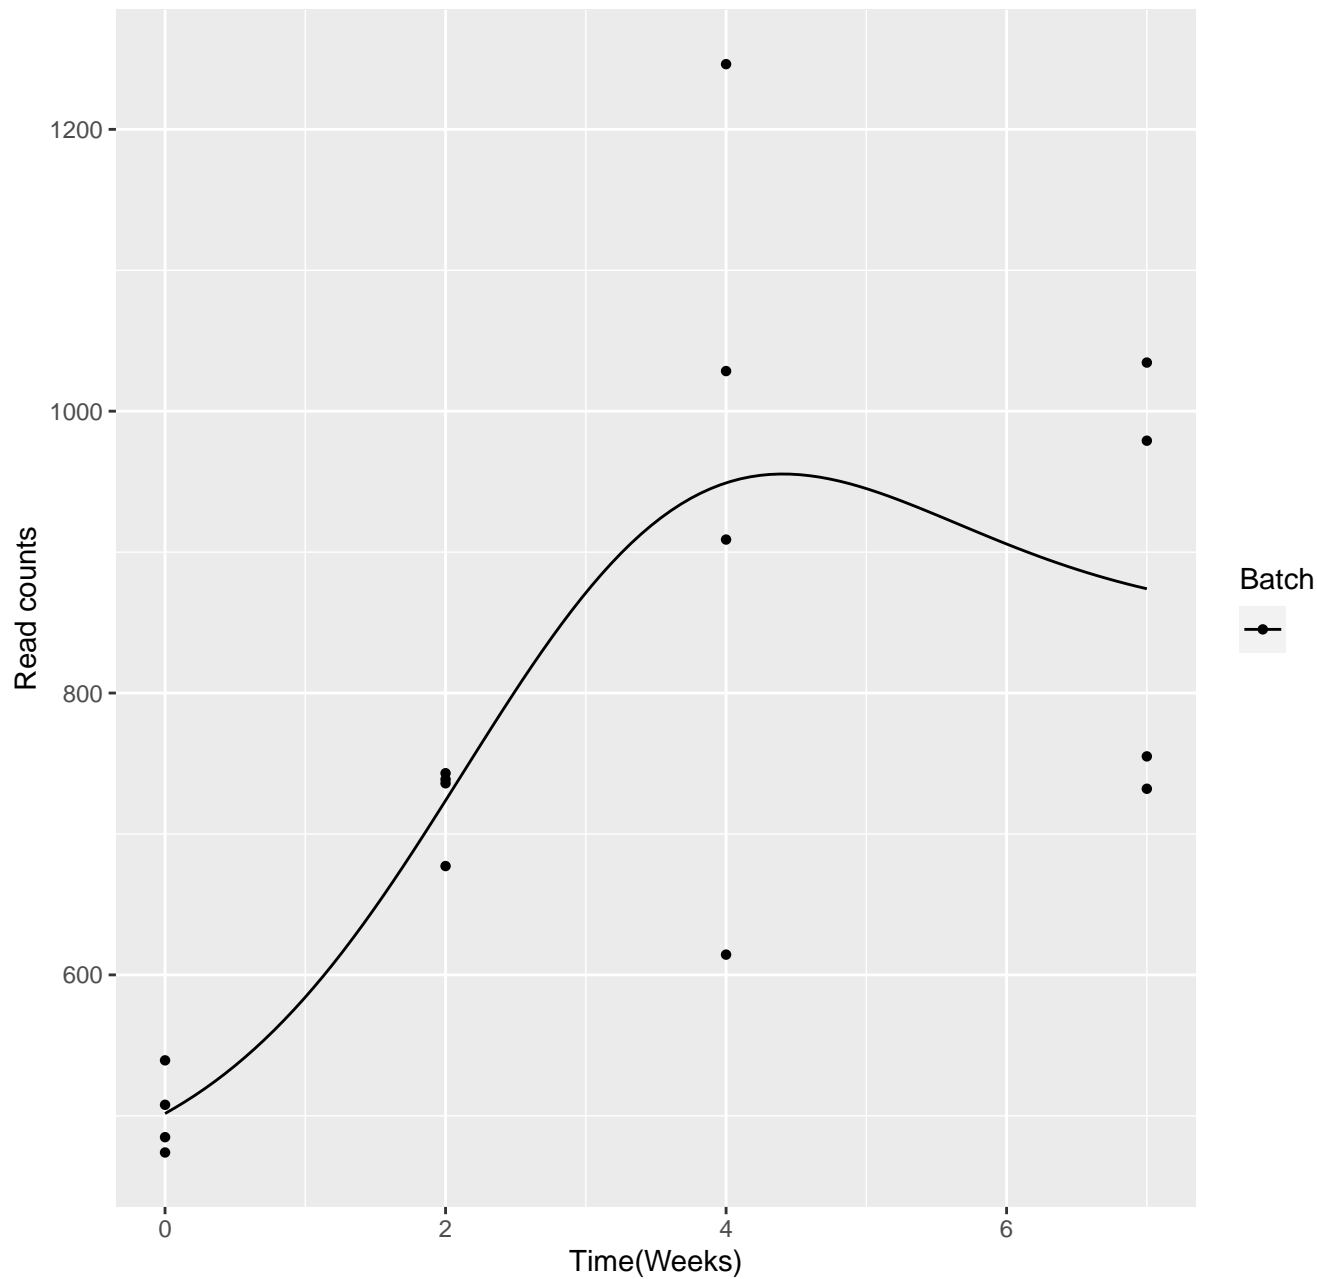



ANO10:  $\log_{10} q = -2.78$

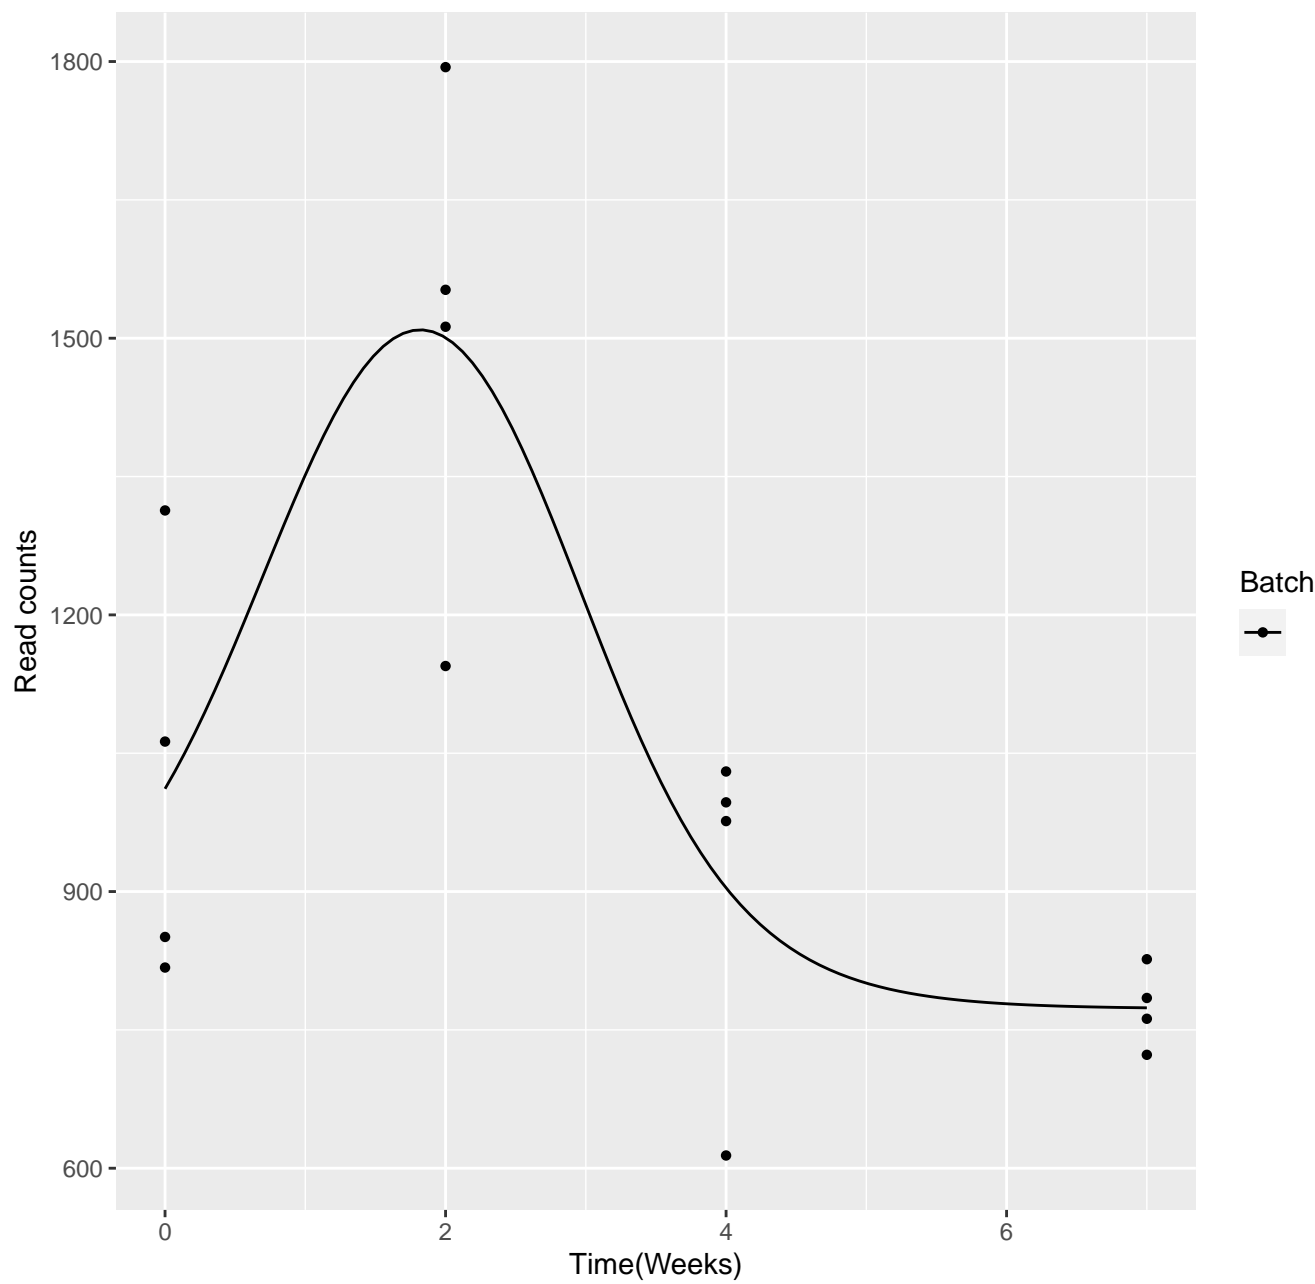

DSCC1:  $\log_{10} q = -2.78$

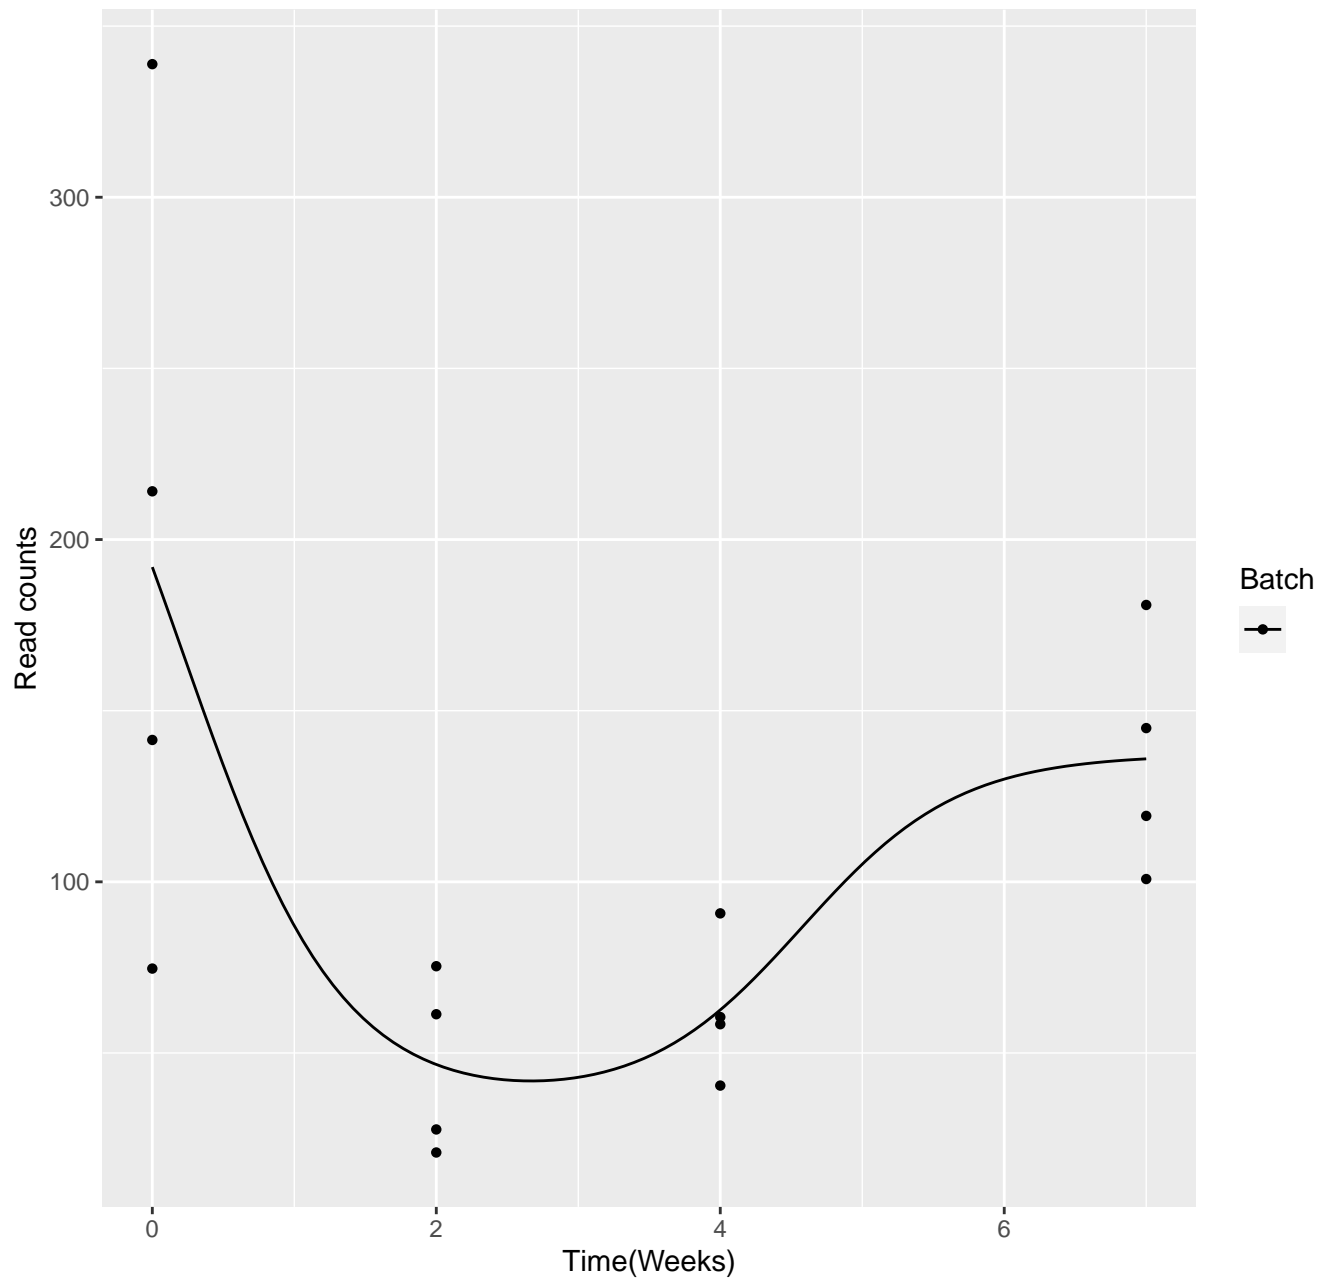

FAM167B:  $\log_{10} q = -2.78$

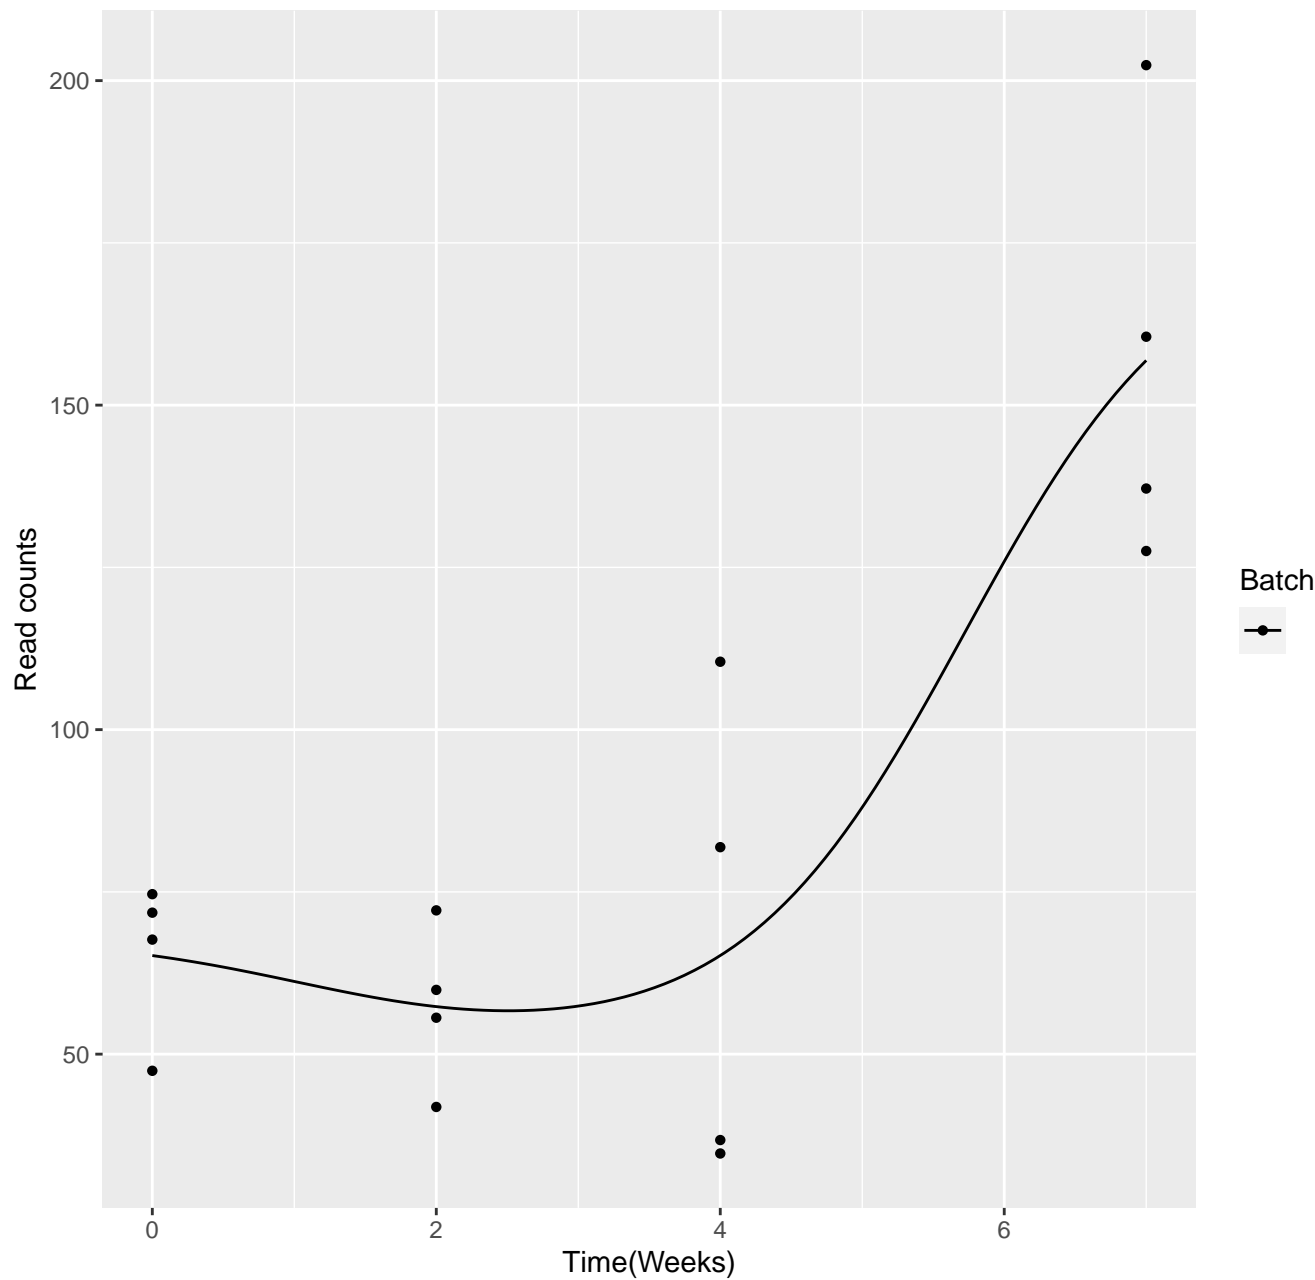

MARCHF3:  $\log_{10} q = -2.78$

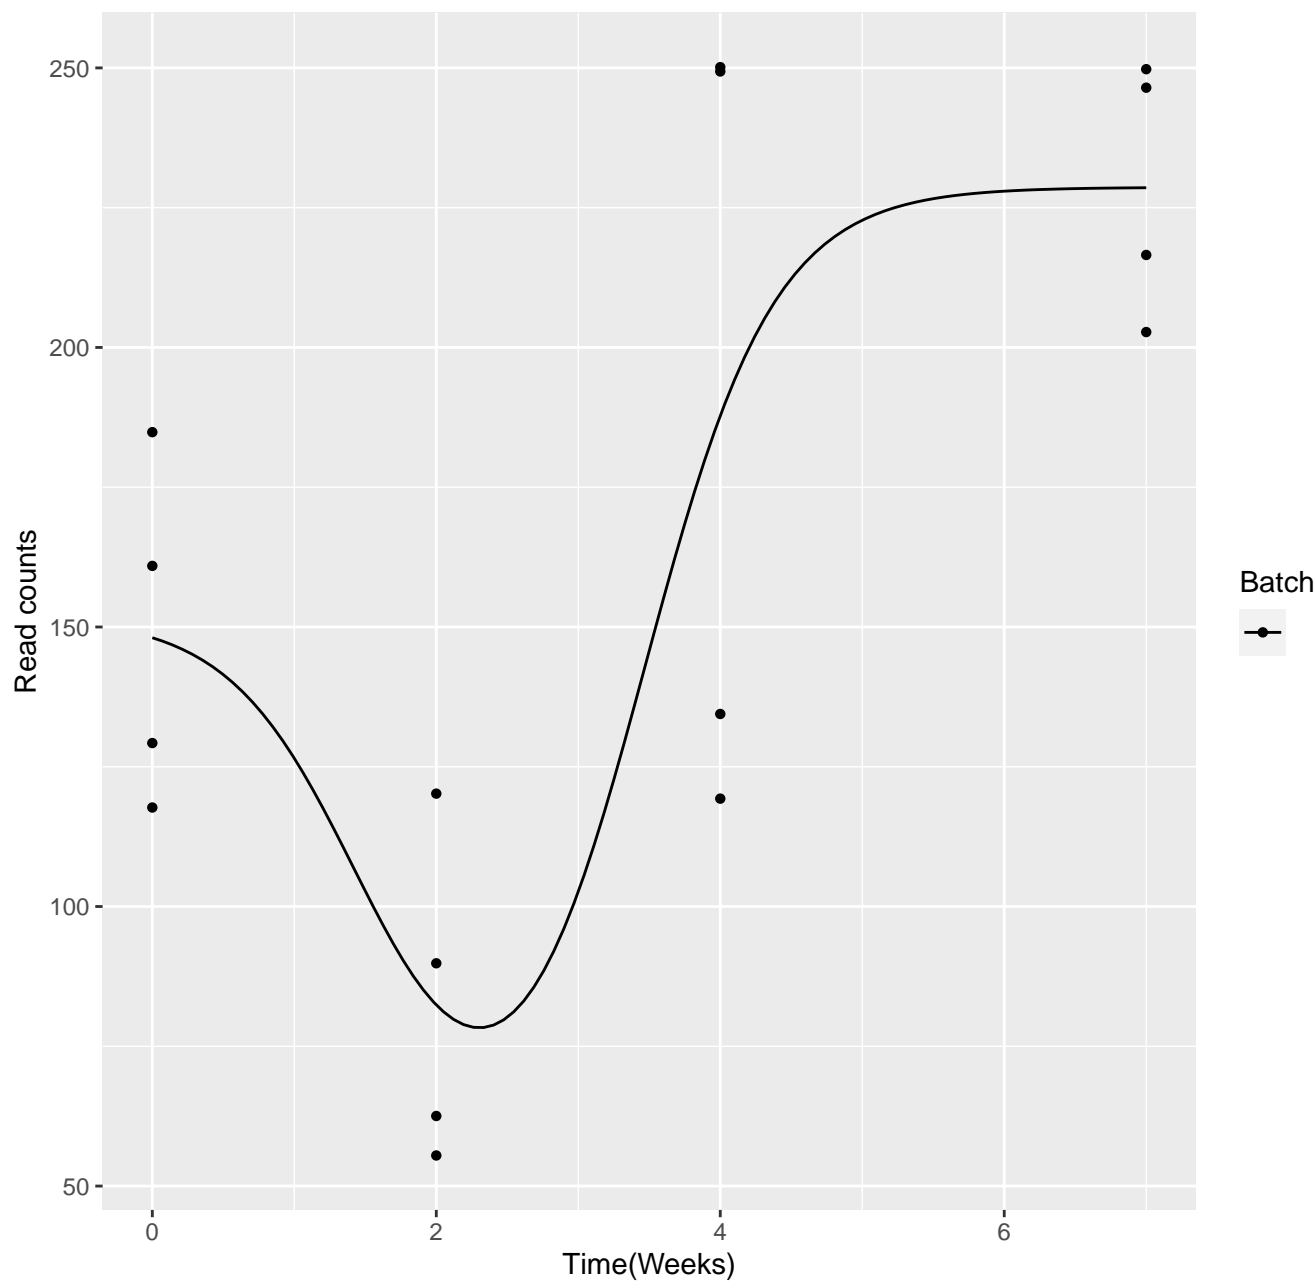

SIRPA:  $\log_{10} q = -2.78$

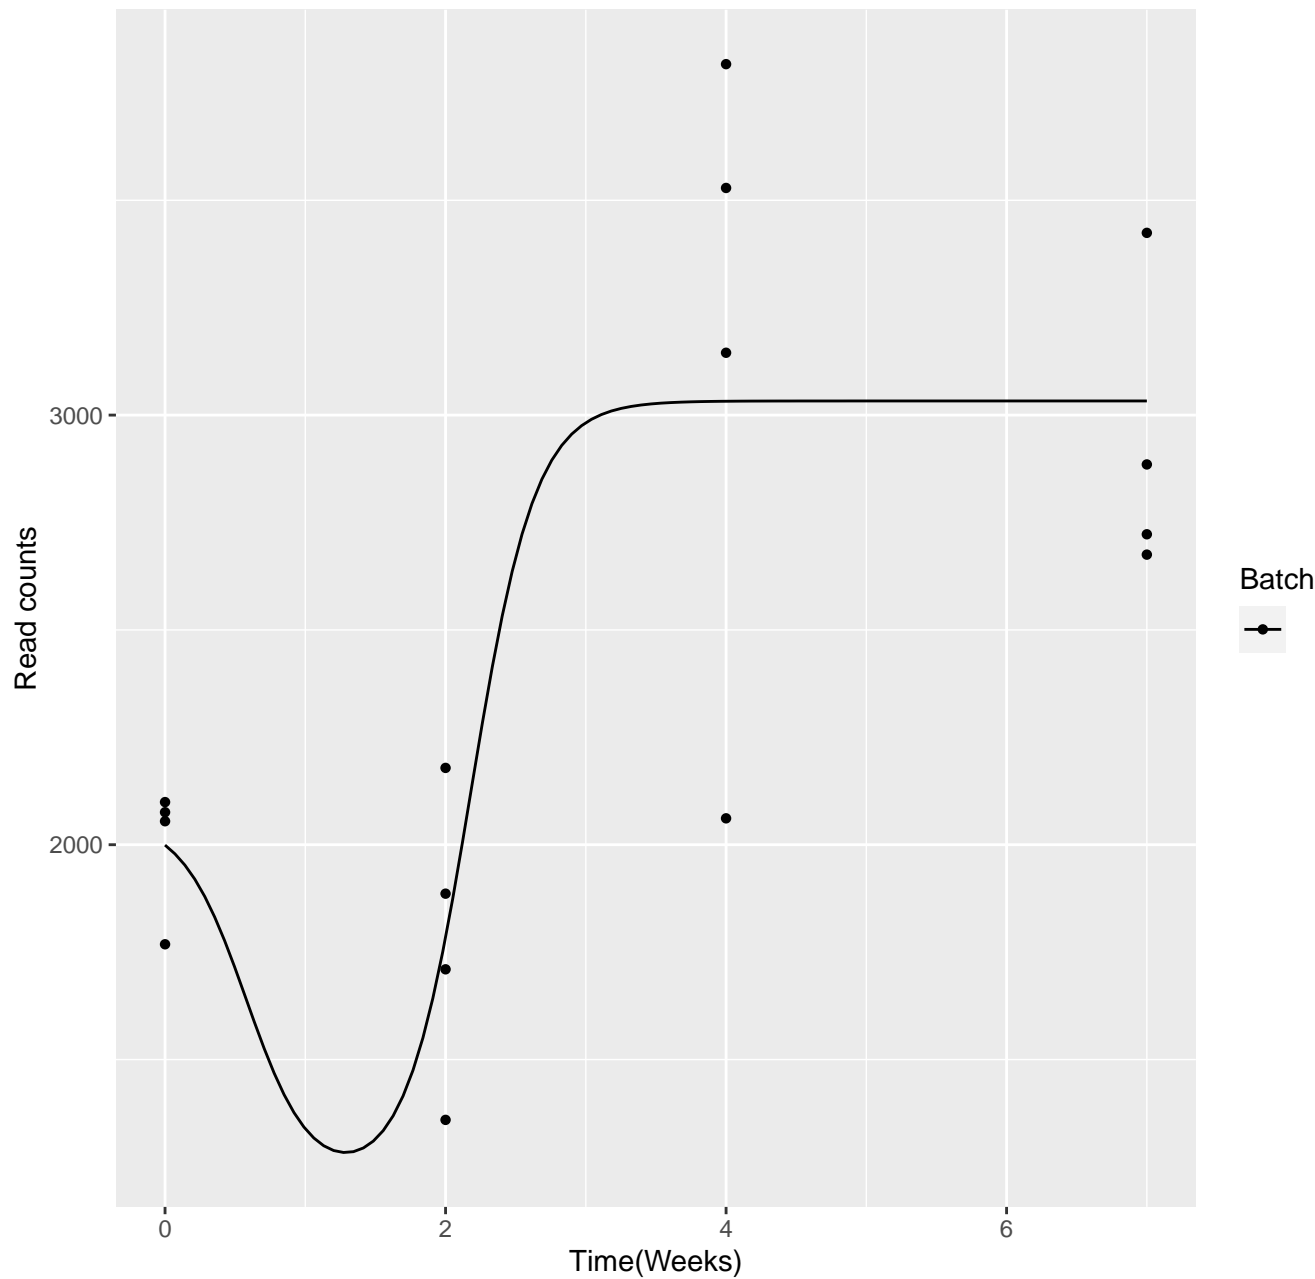

ZSWIM4:  $\log_{10} q = -2.78$

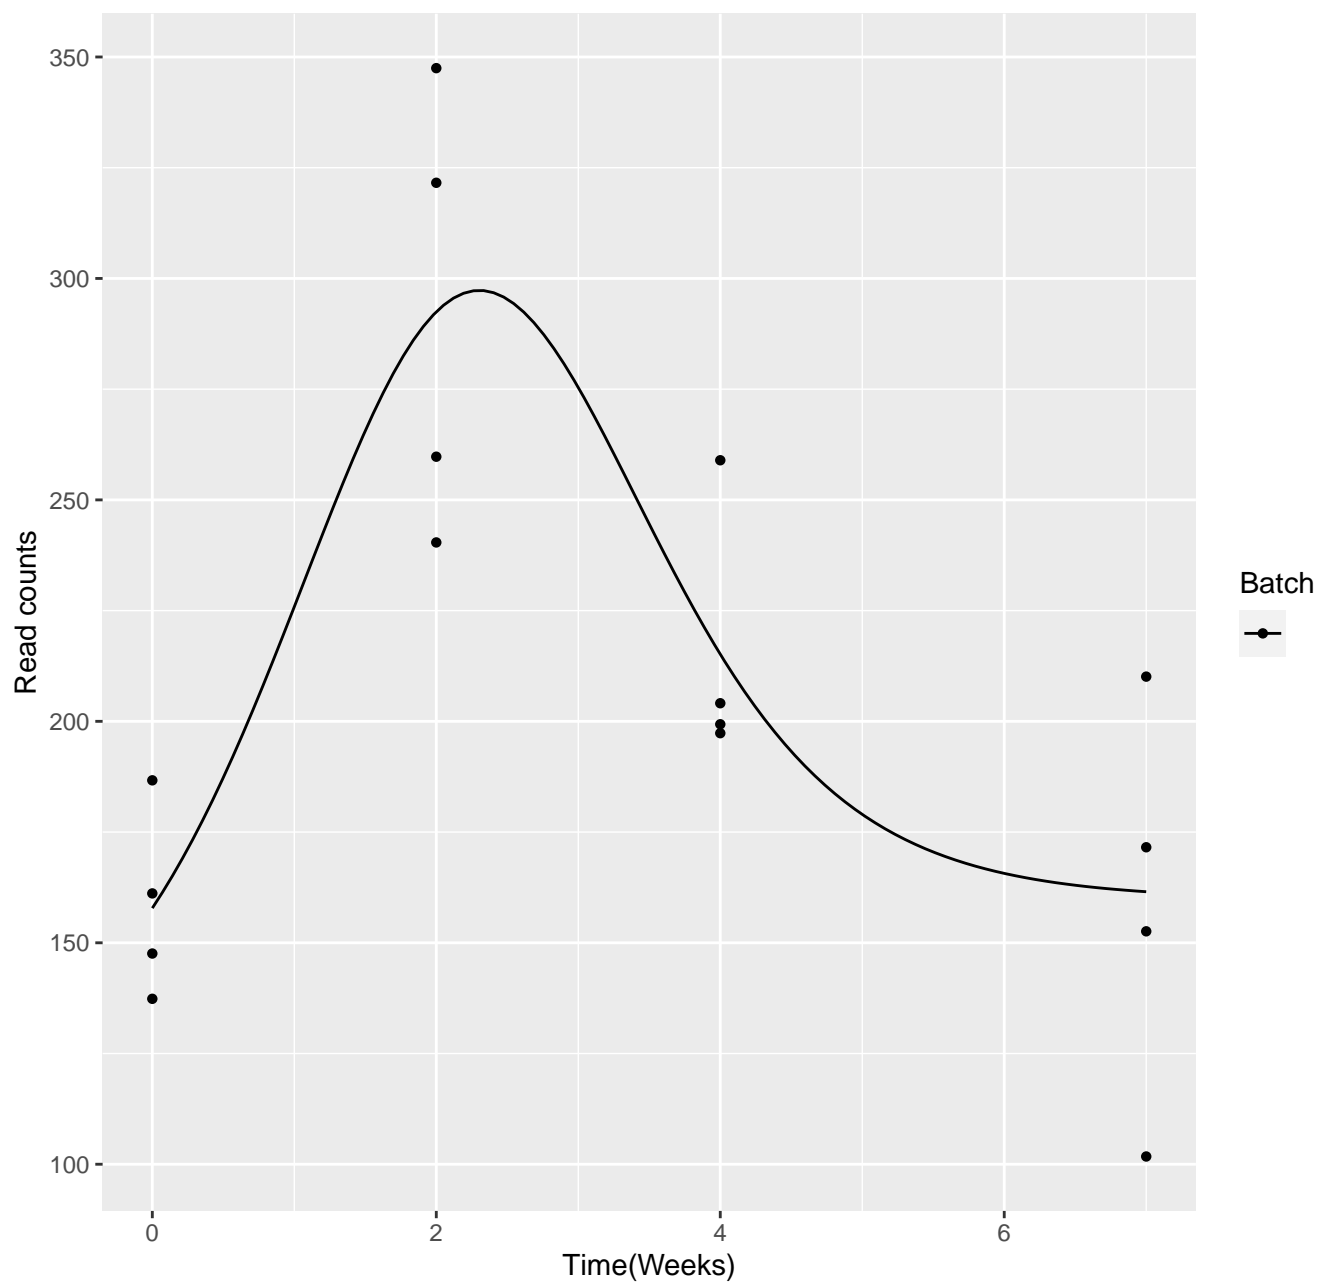

TNFSF8:  $\log_{10} q = -2.77$

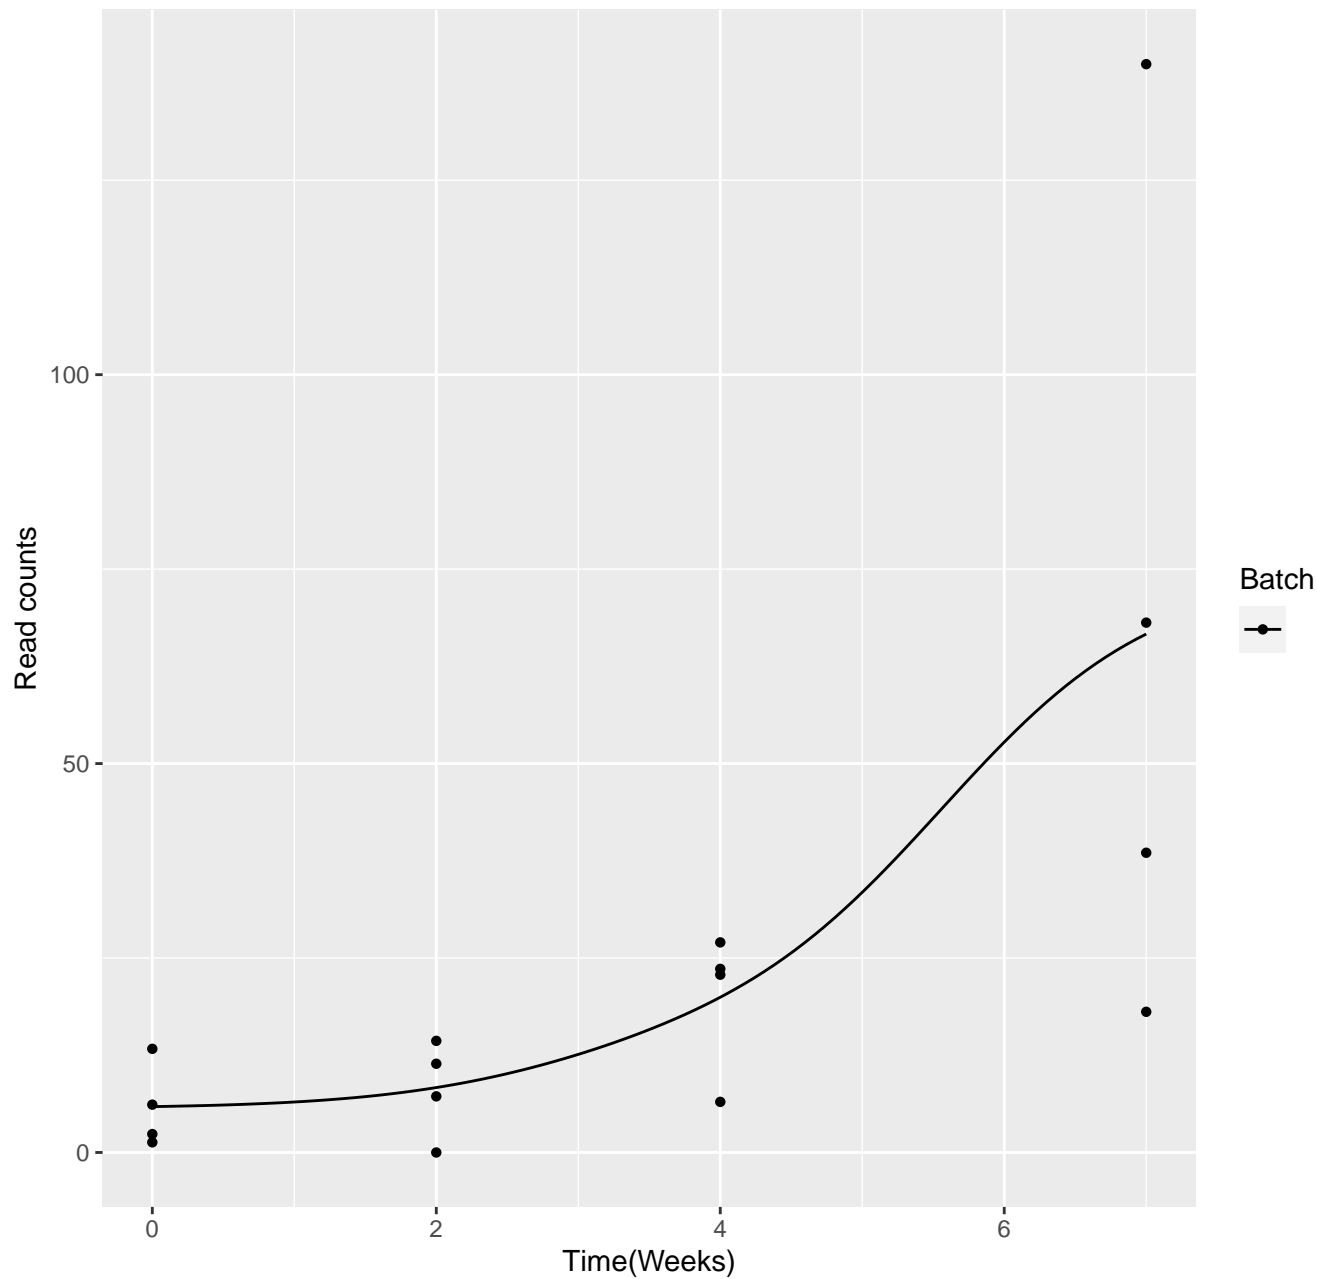

RAB13:  $\log_{10} q = -2.77$

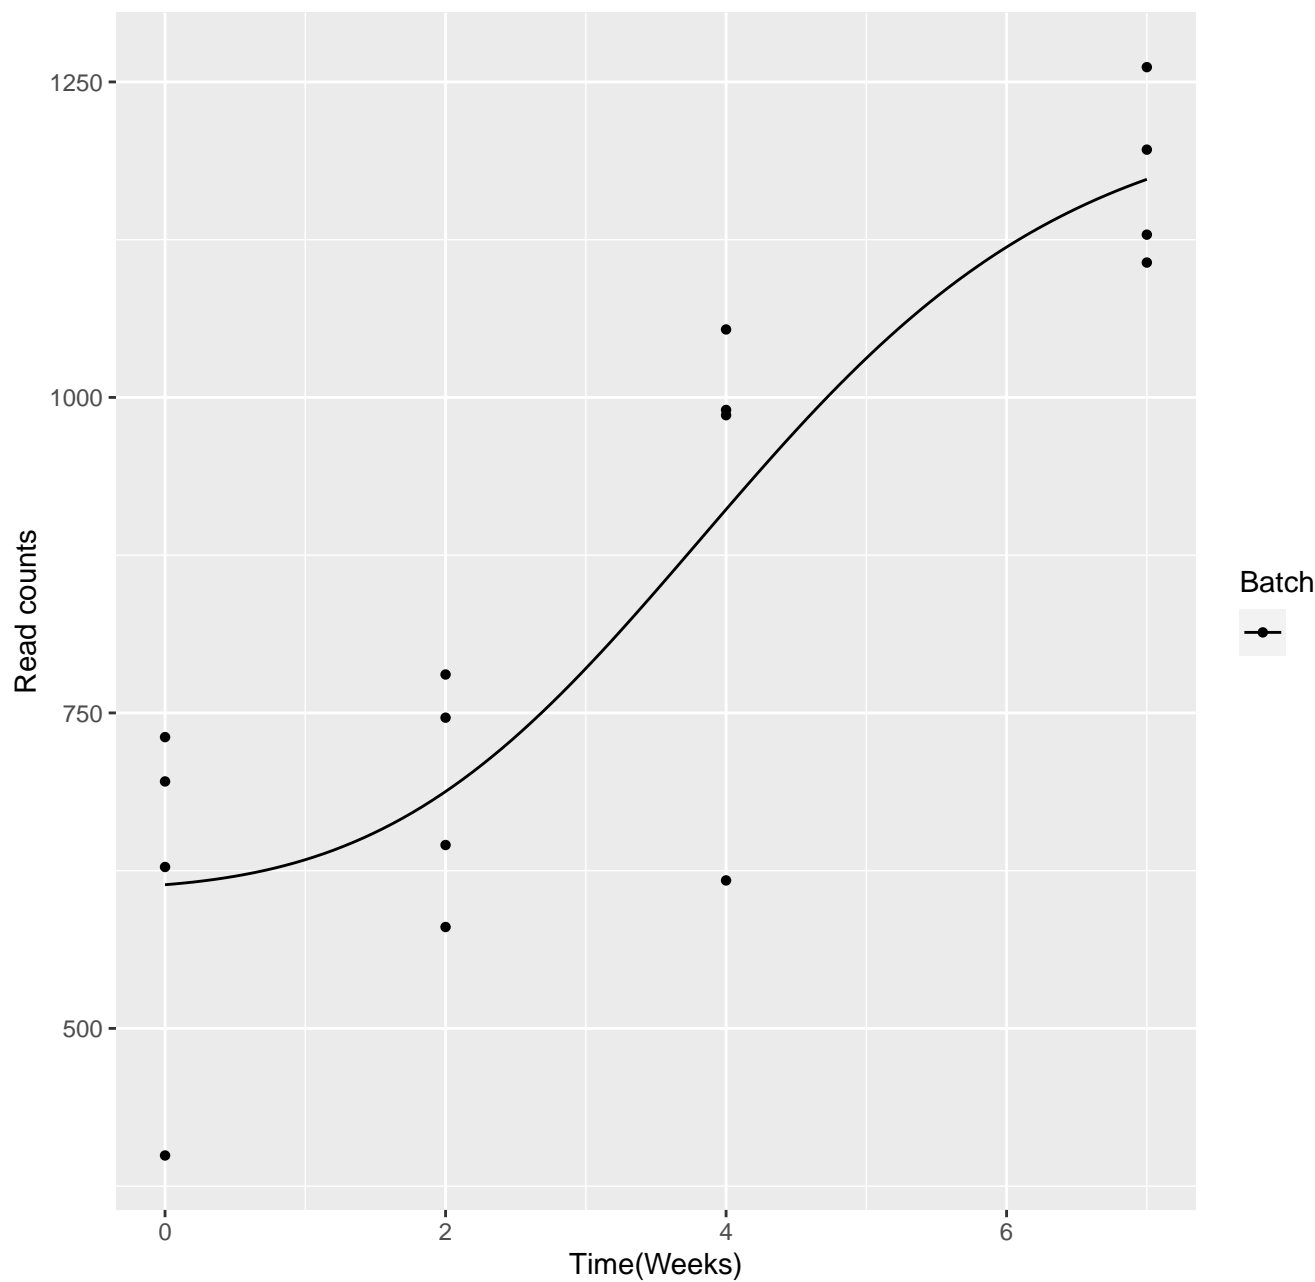



DUSP5:  $\log_{10} q = -2.77$

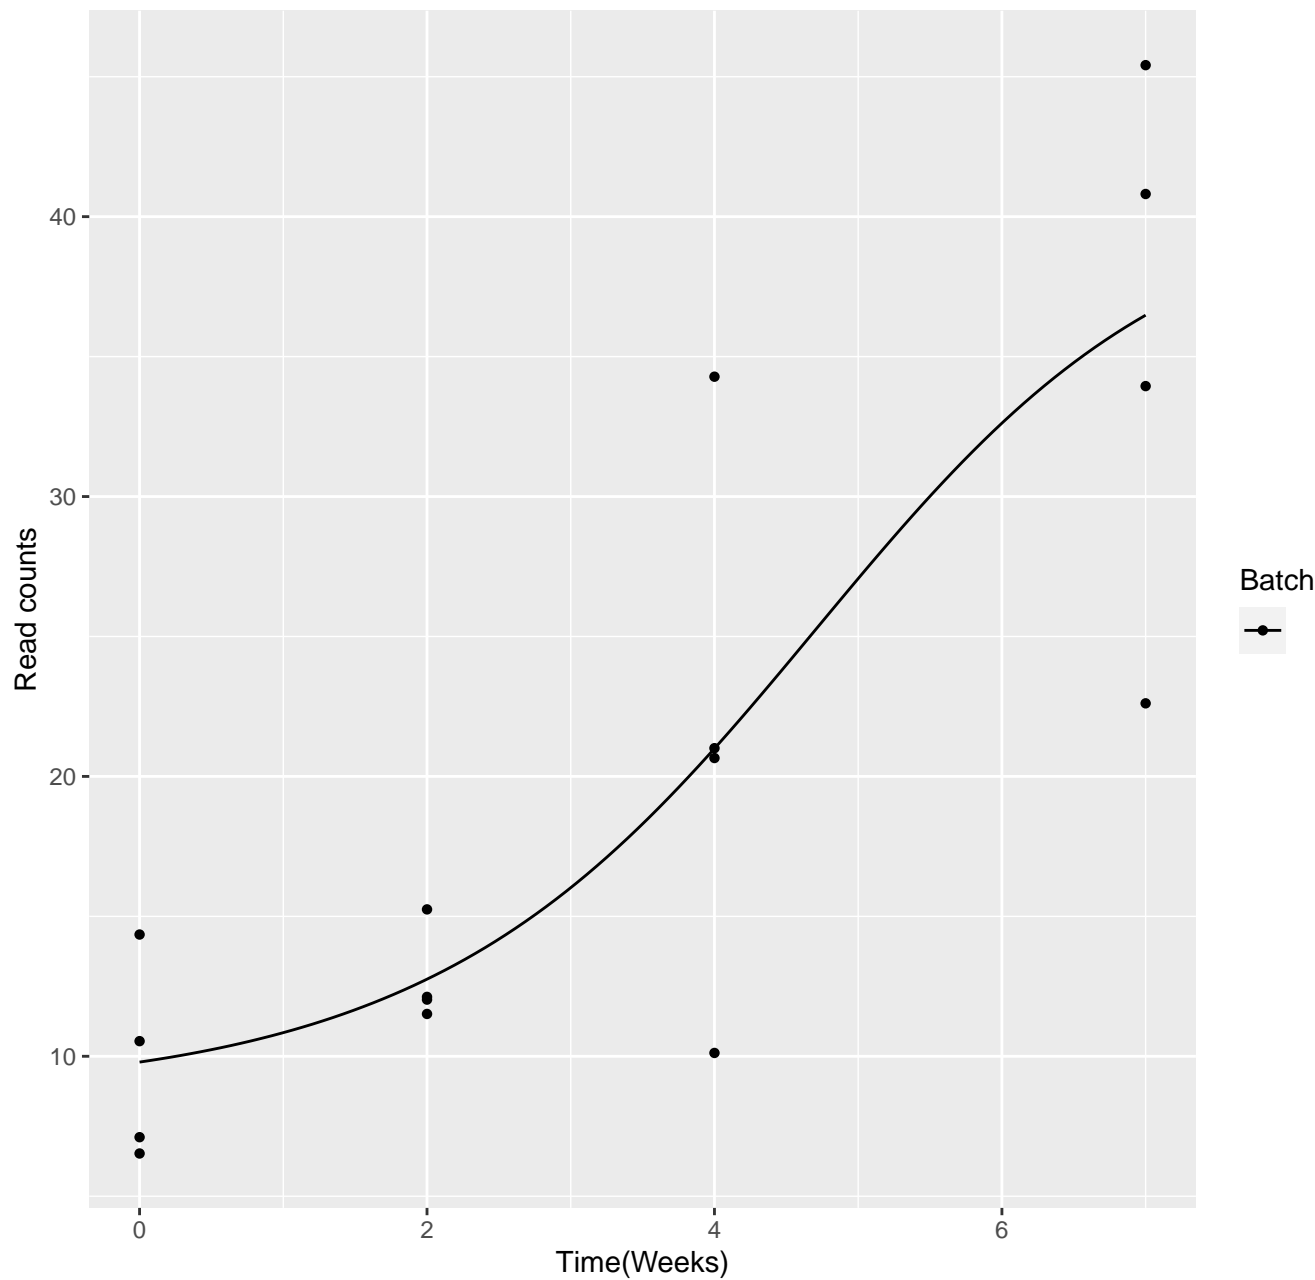

BDNF:  $\log_{10} q = -2.77$

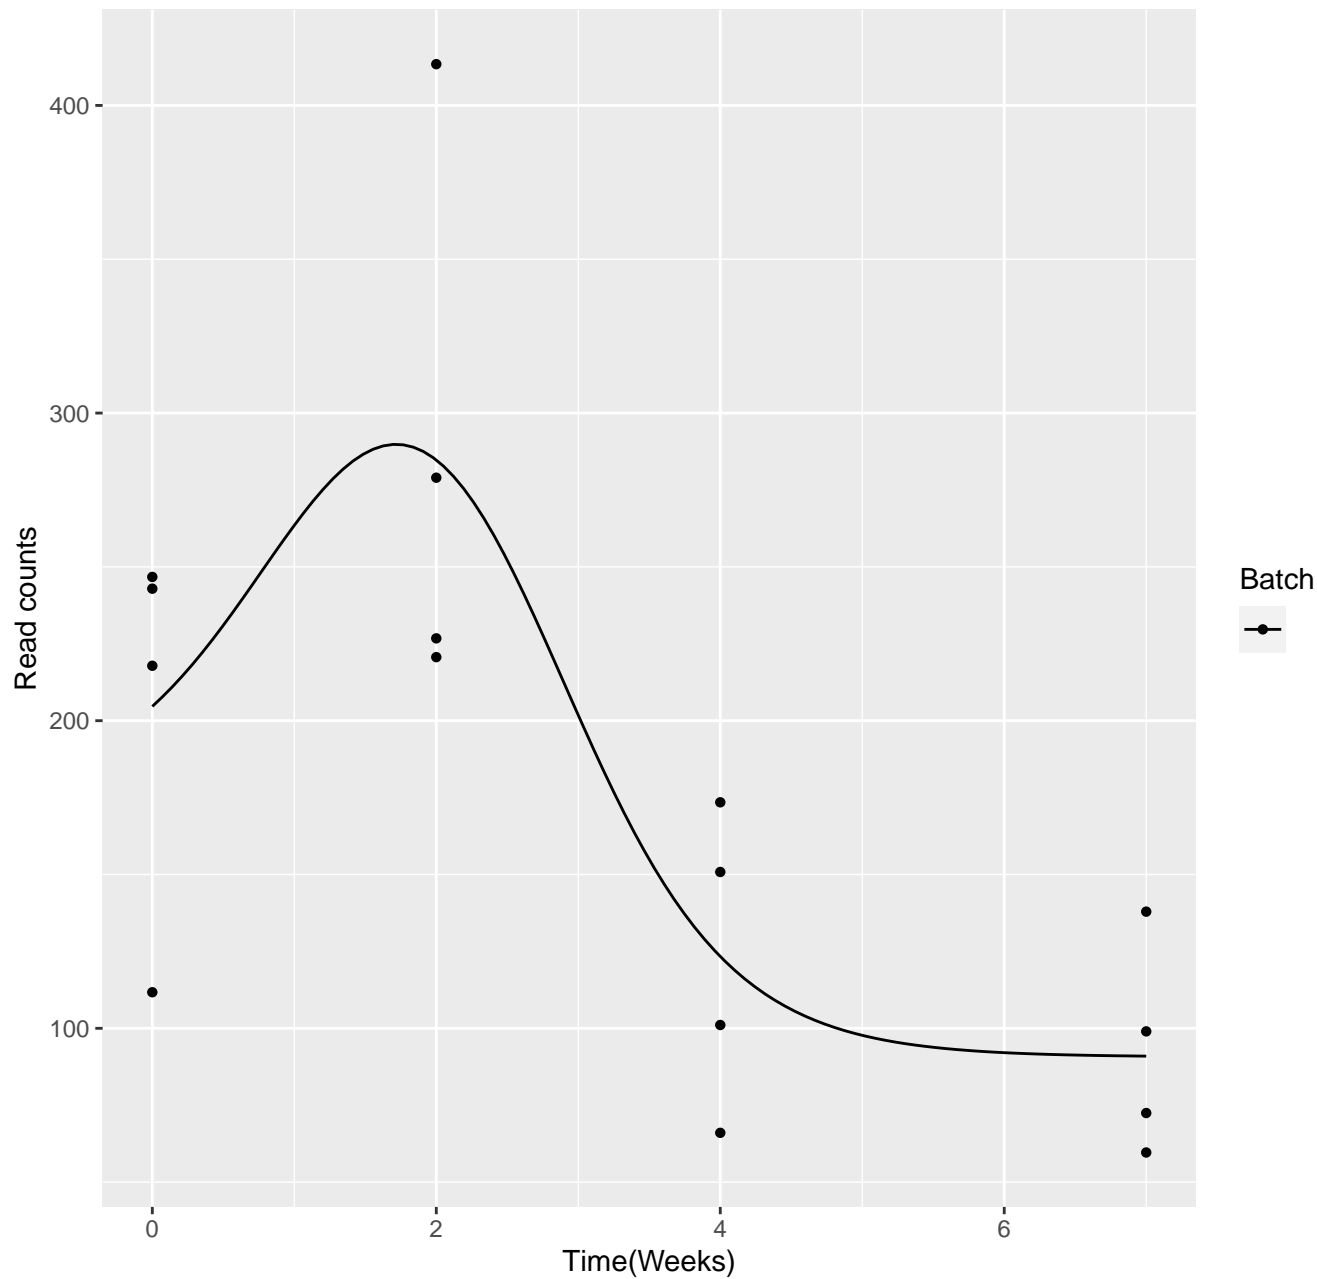

UNC13D:  $\log_{10} q = -2.77$

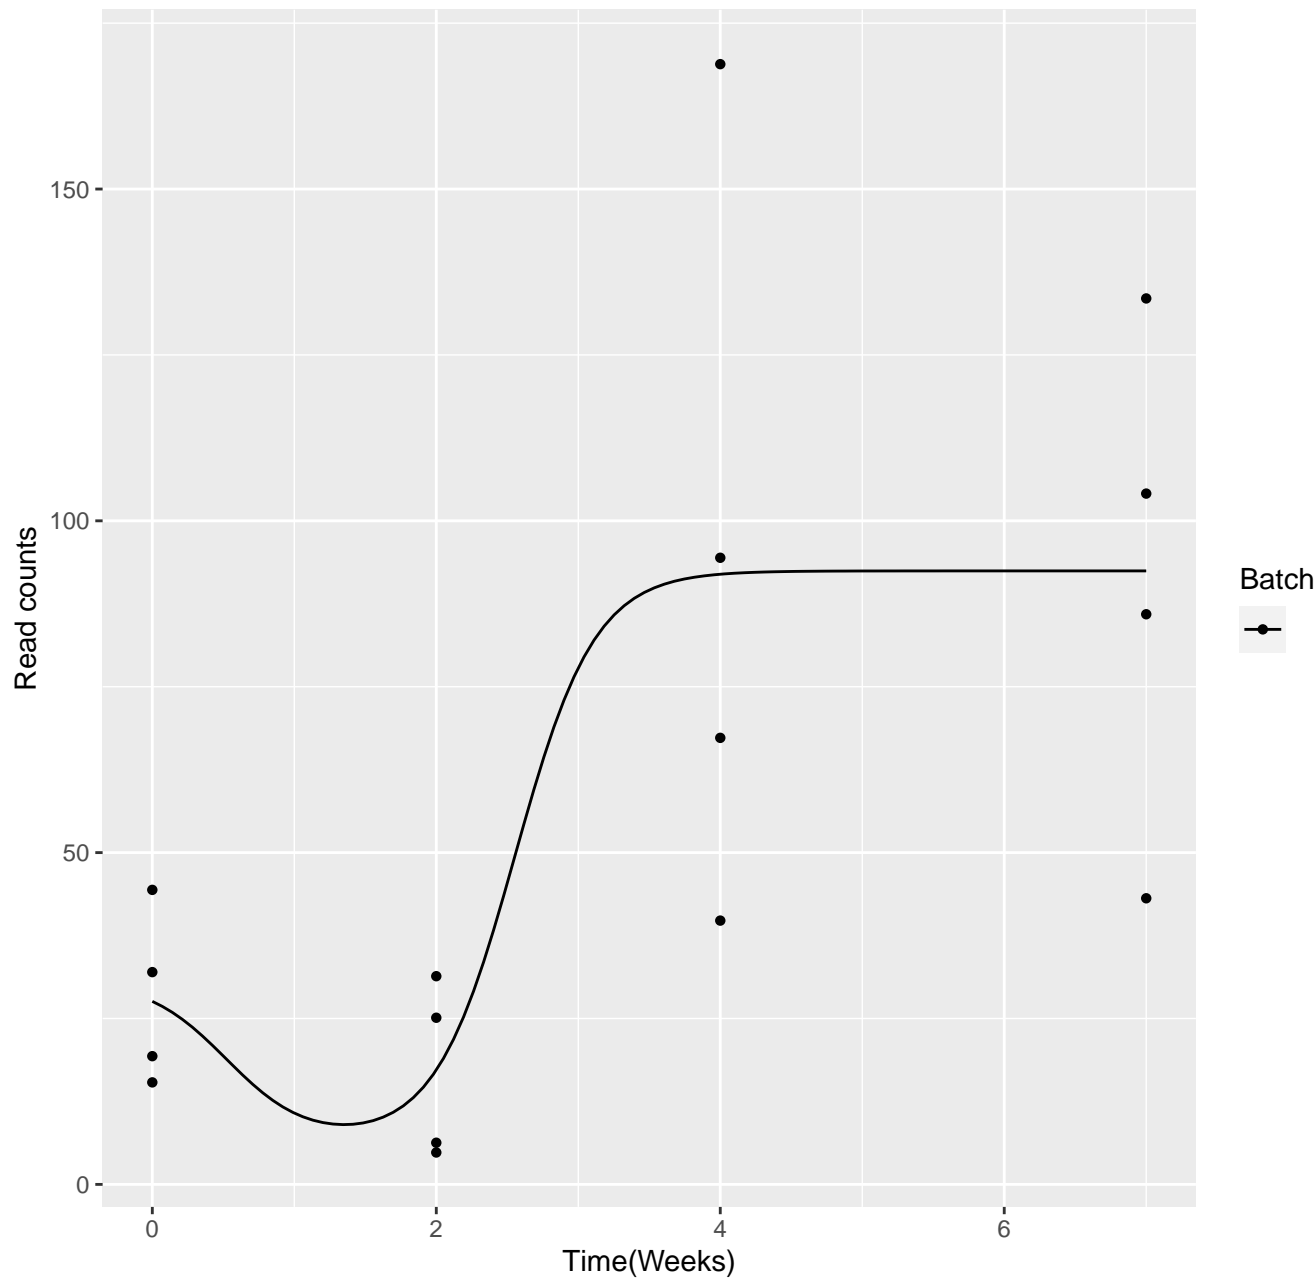

SERPINB6:  $\log_{10} q = -2.77$

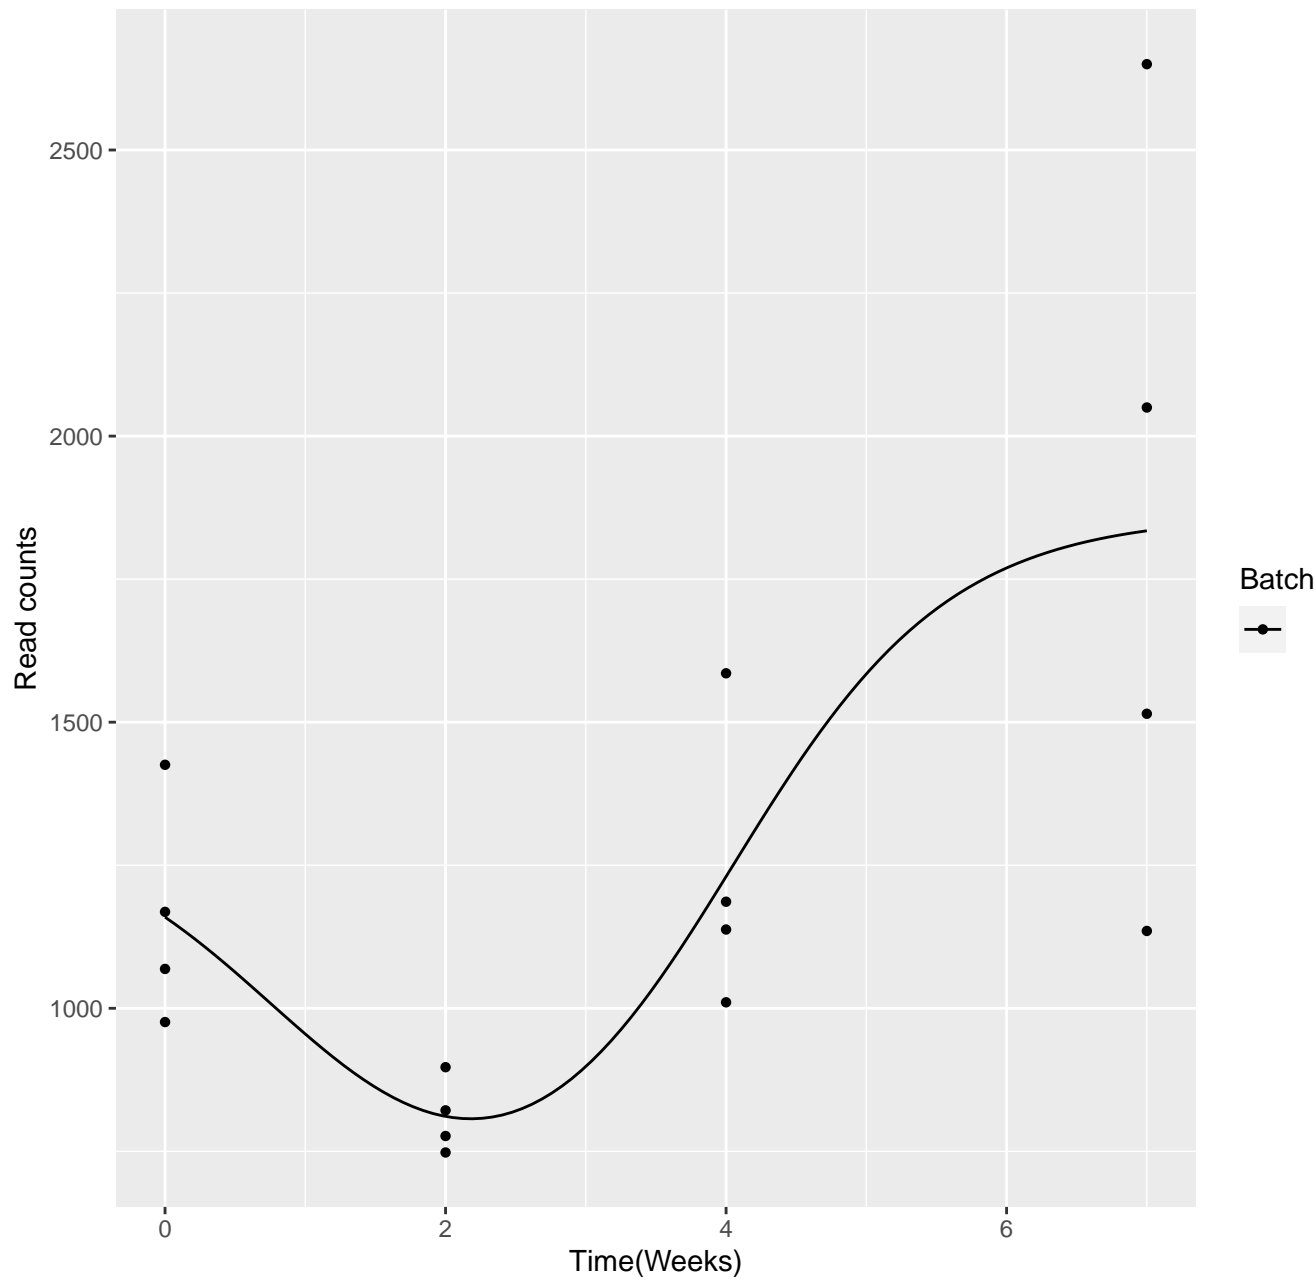

HAUS8:  $\log_{10} q = -2.77$

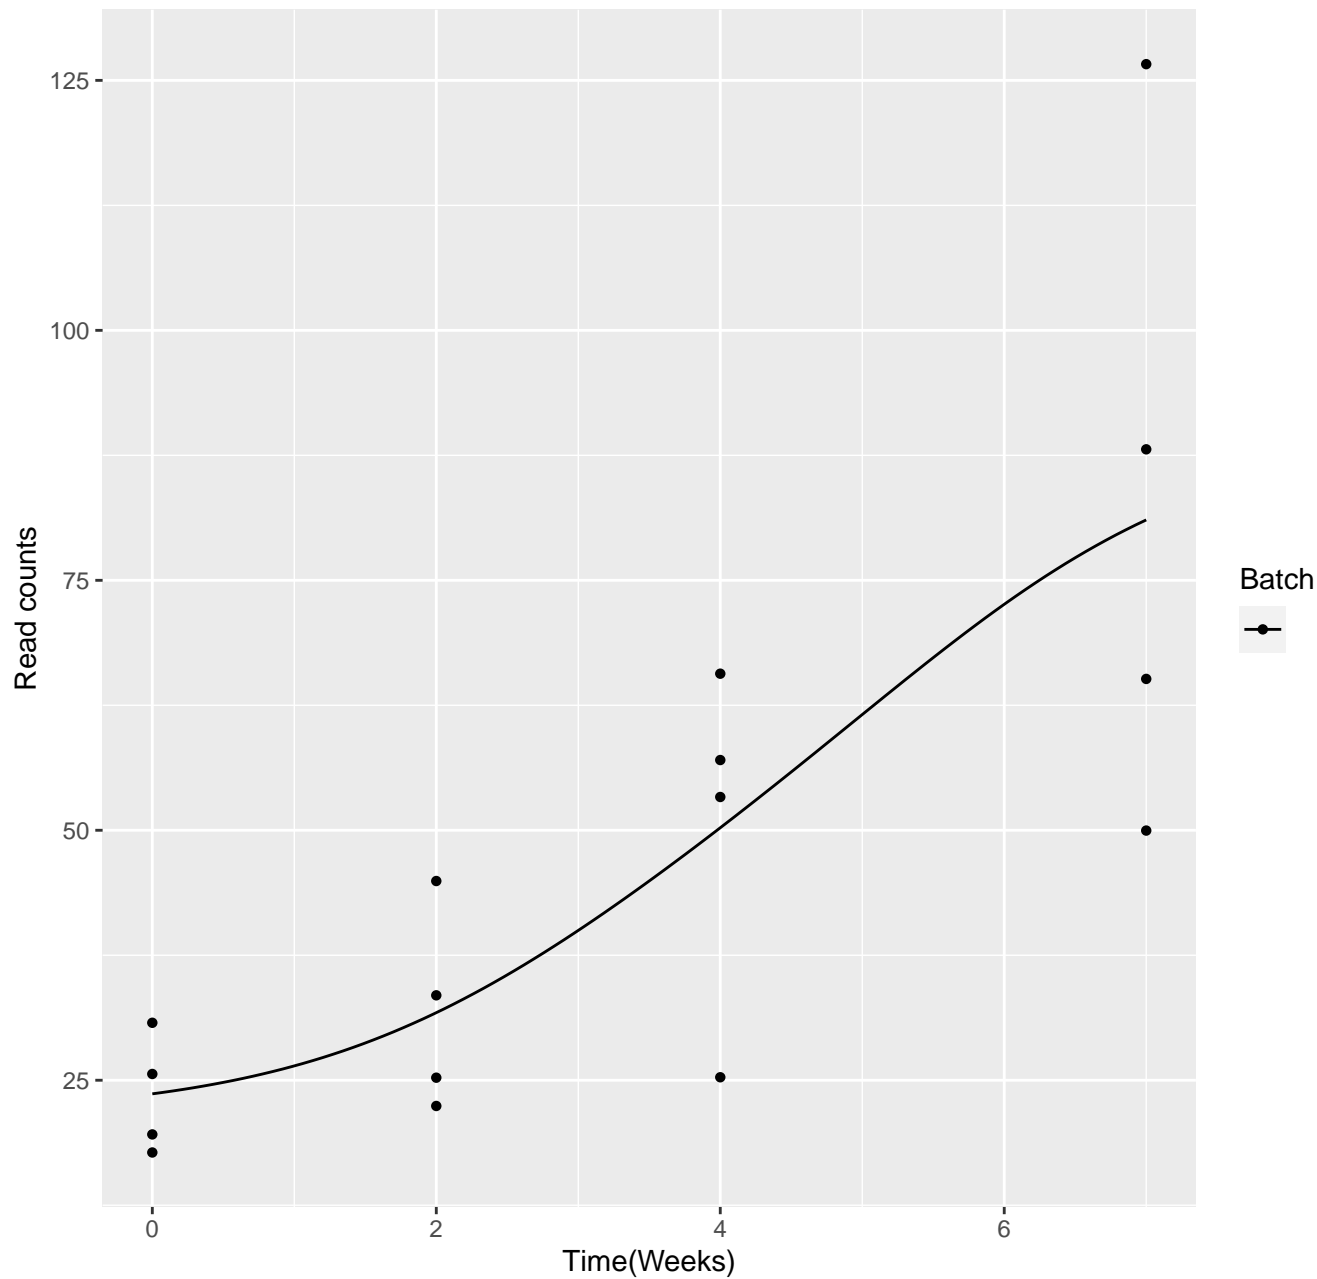

DHX40:  $\log_{10} q = -2.77$

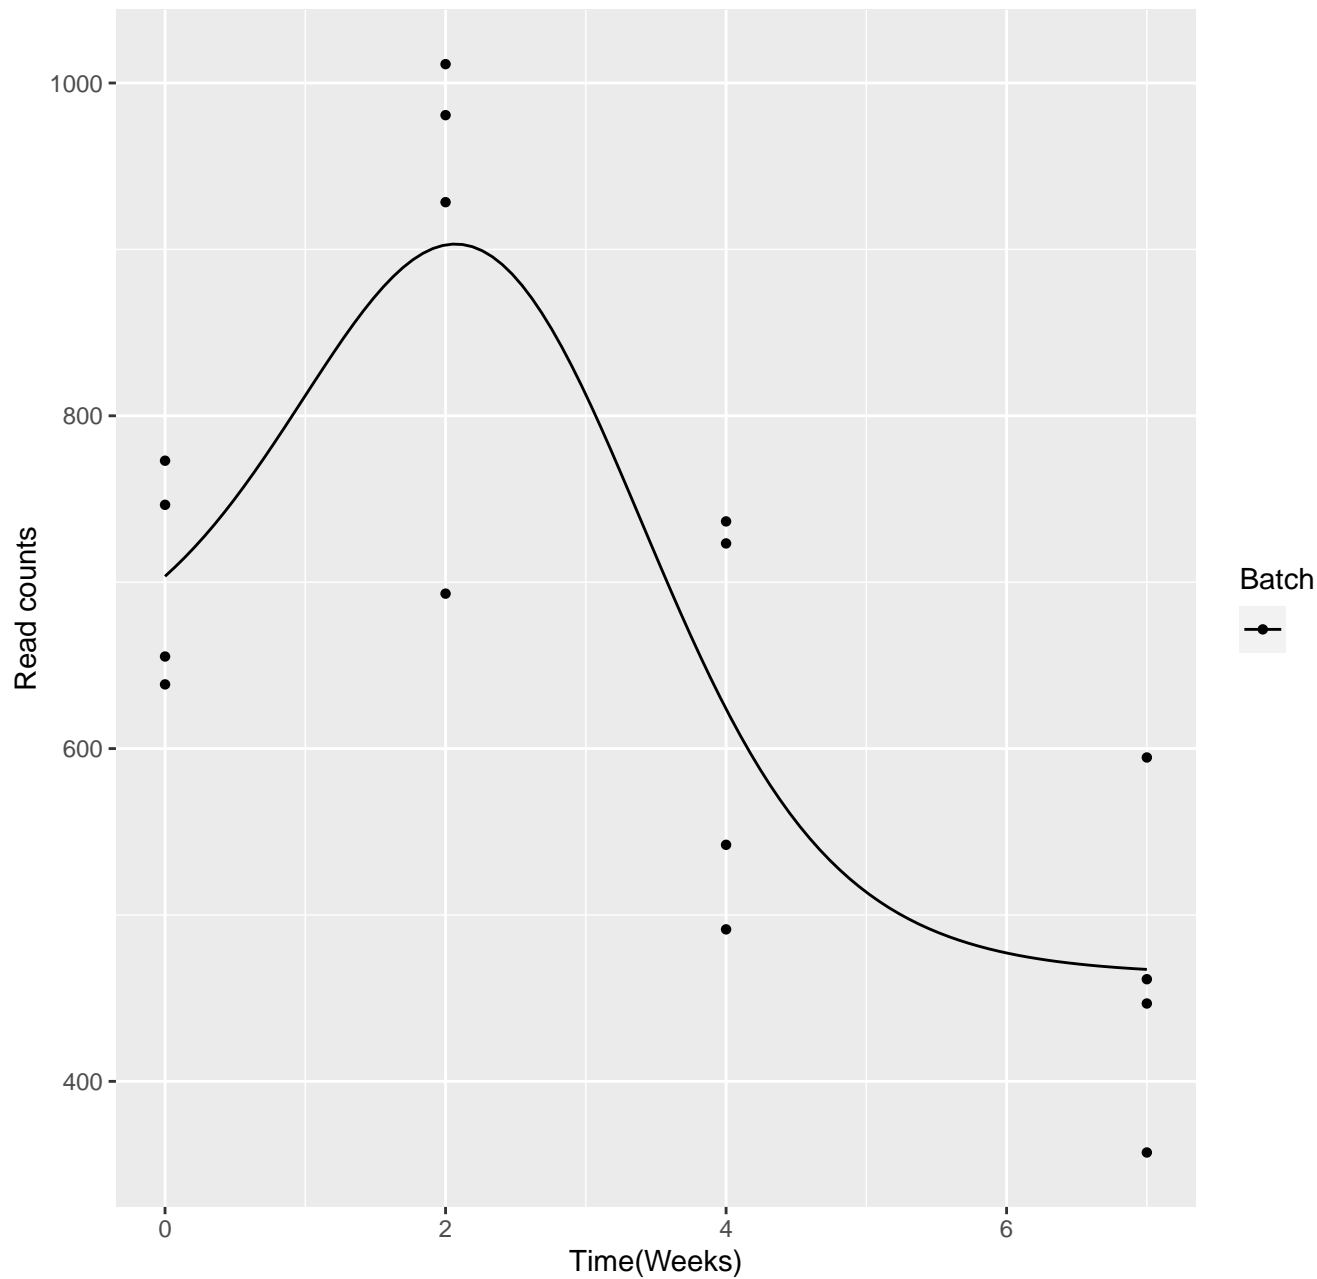

C1R:  $\log_{10} q = -2.77$

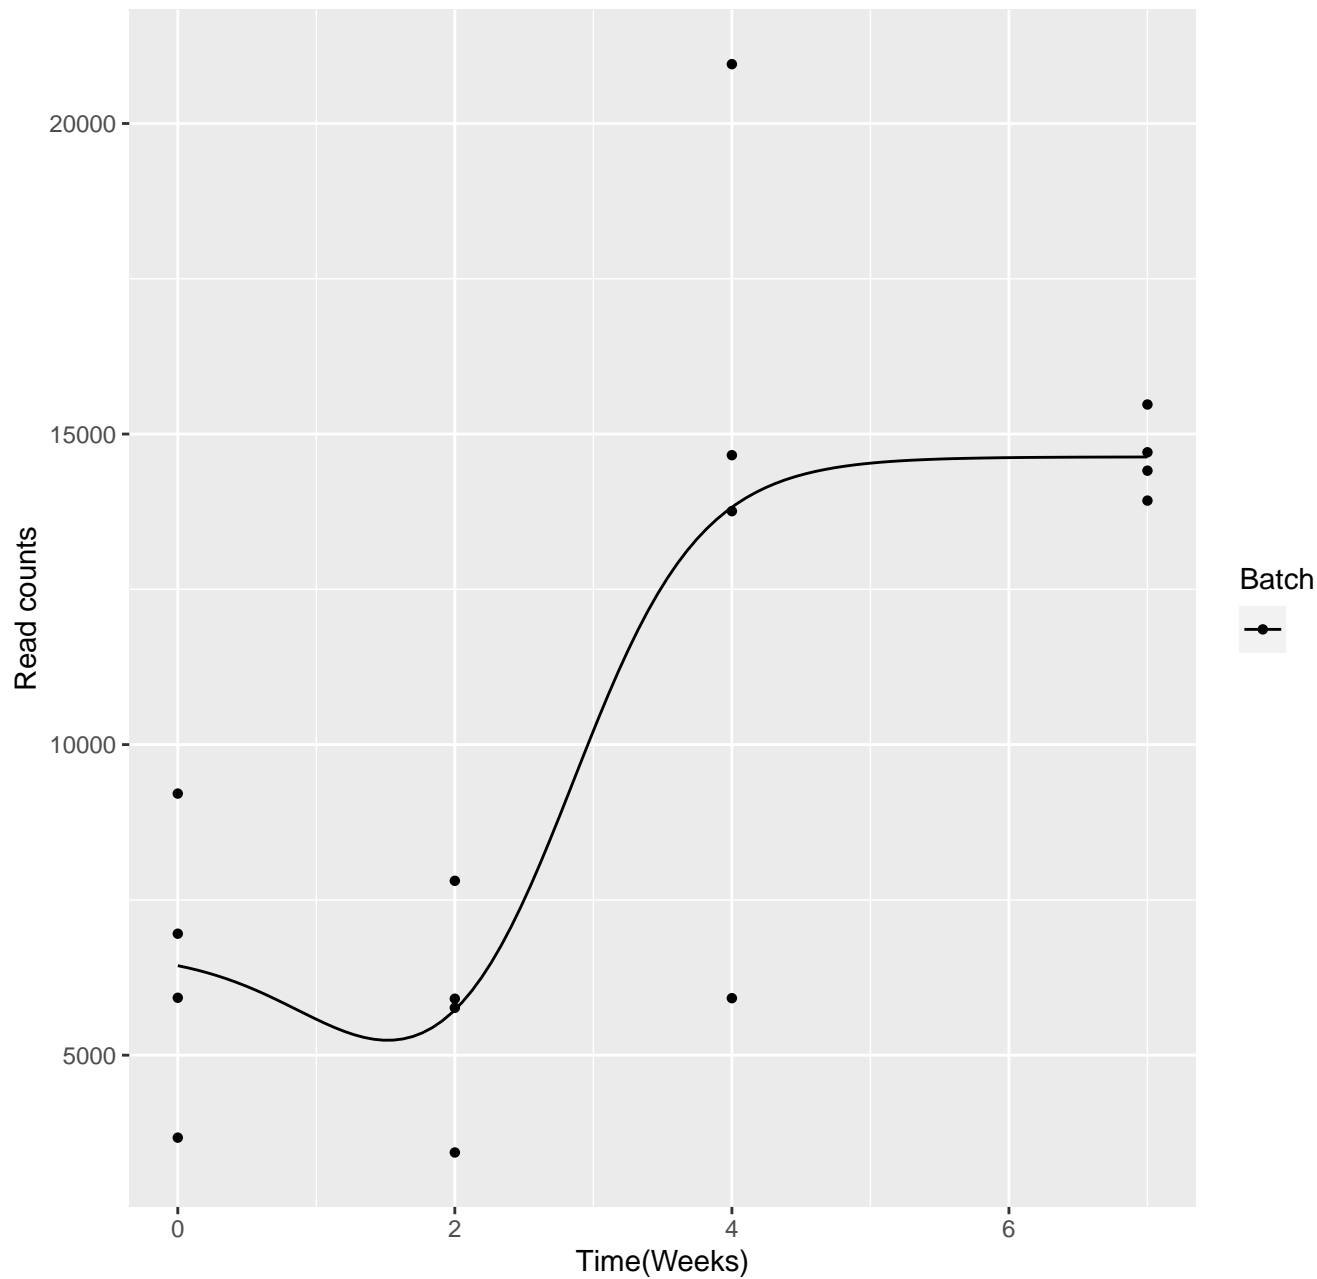

ADAM8:  $\log_{10} q = -2.77$

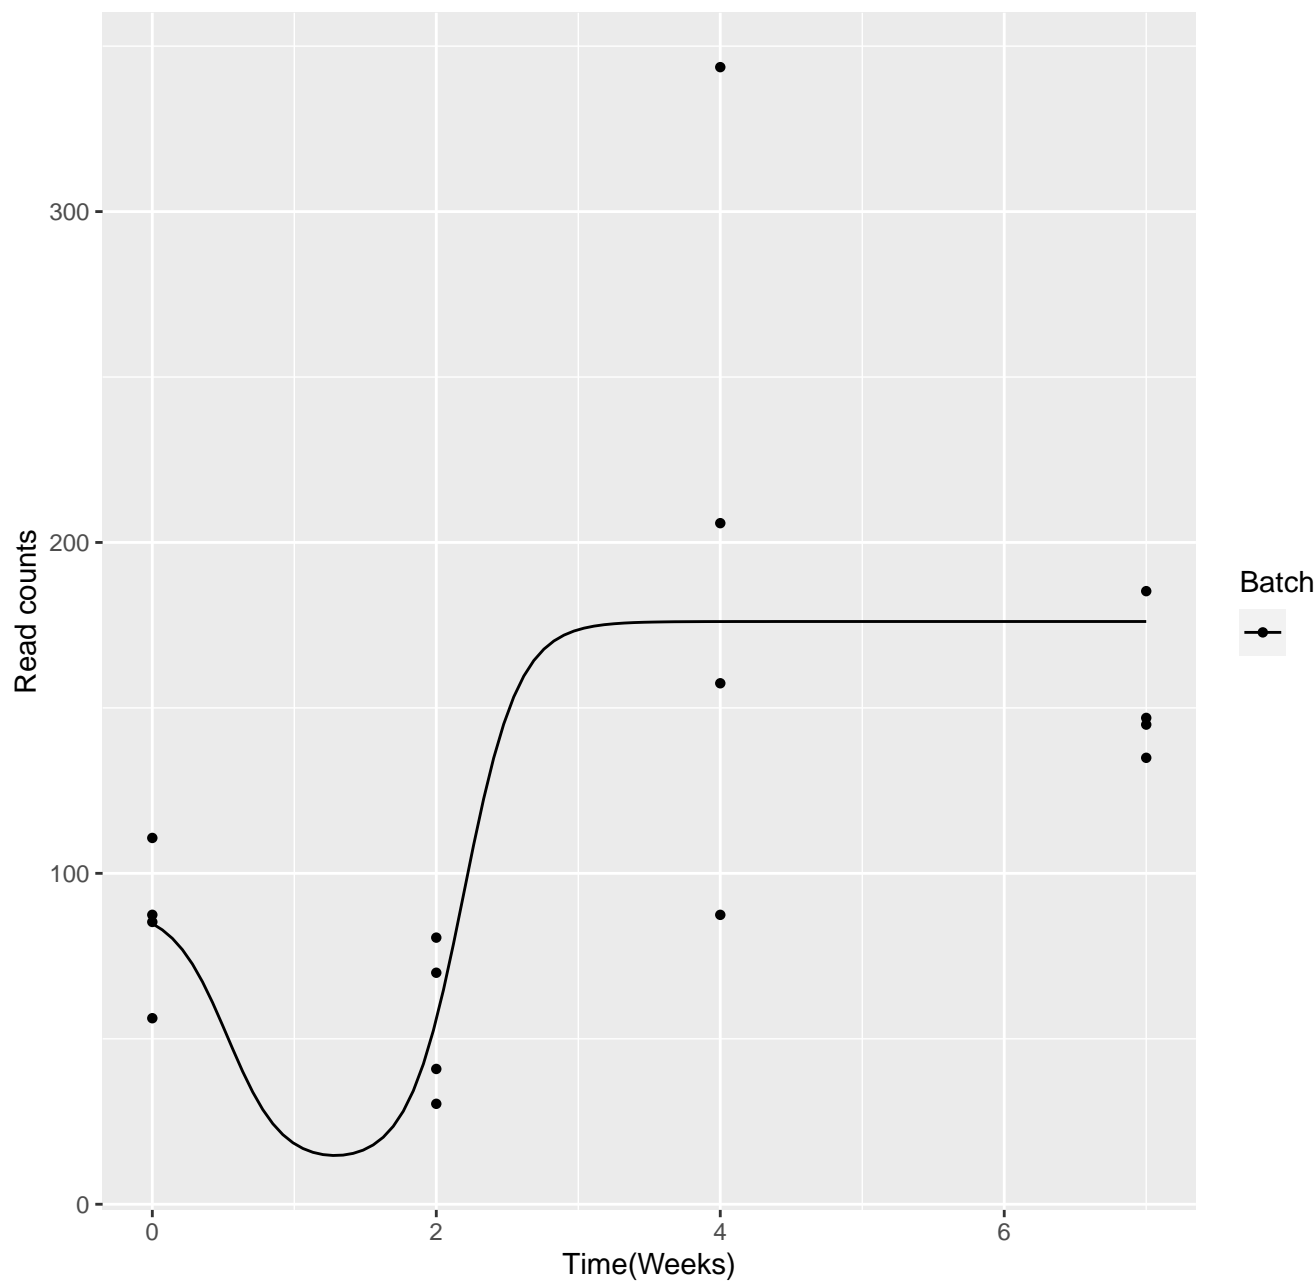



LOC127486261:  $\log_{10} q = -2.77$

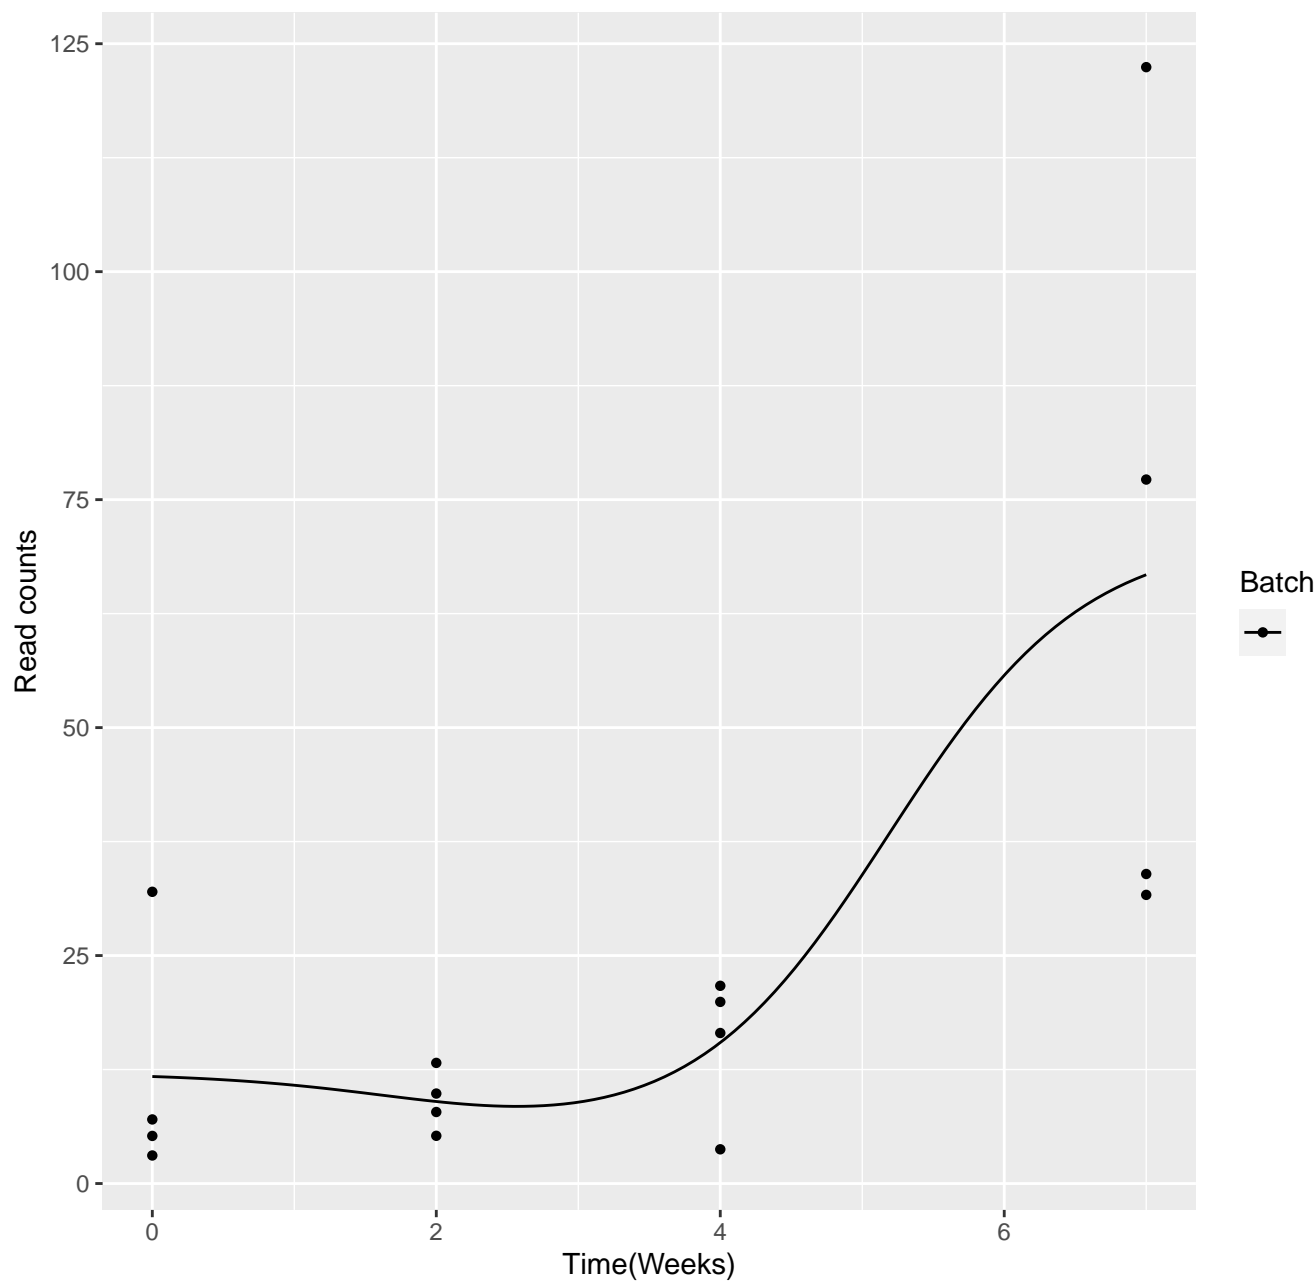

TNFRSF1A:  $\log_{10} q = -2.77$

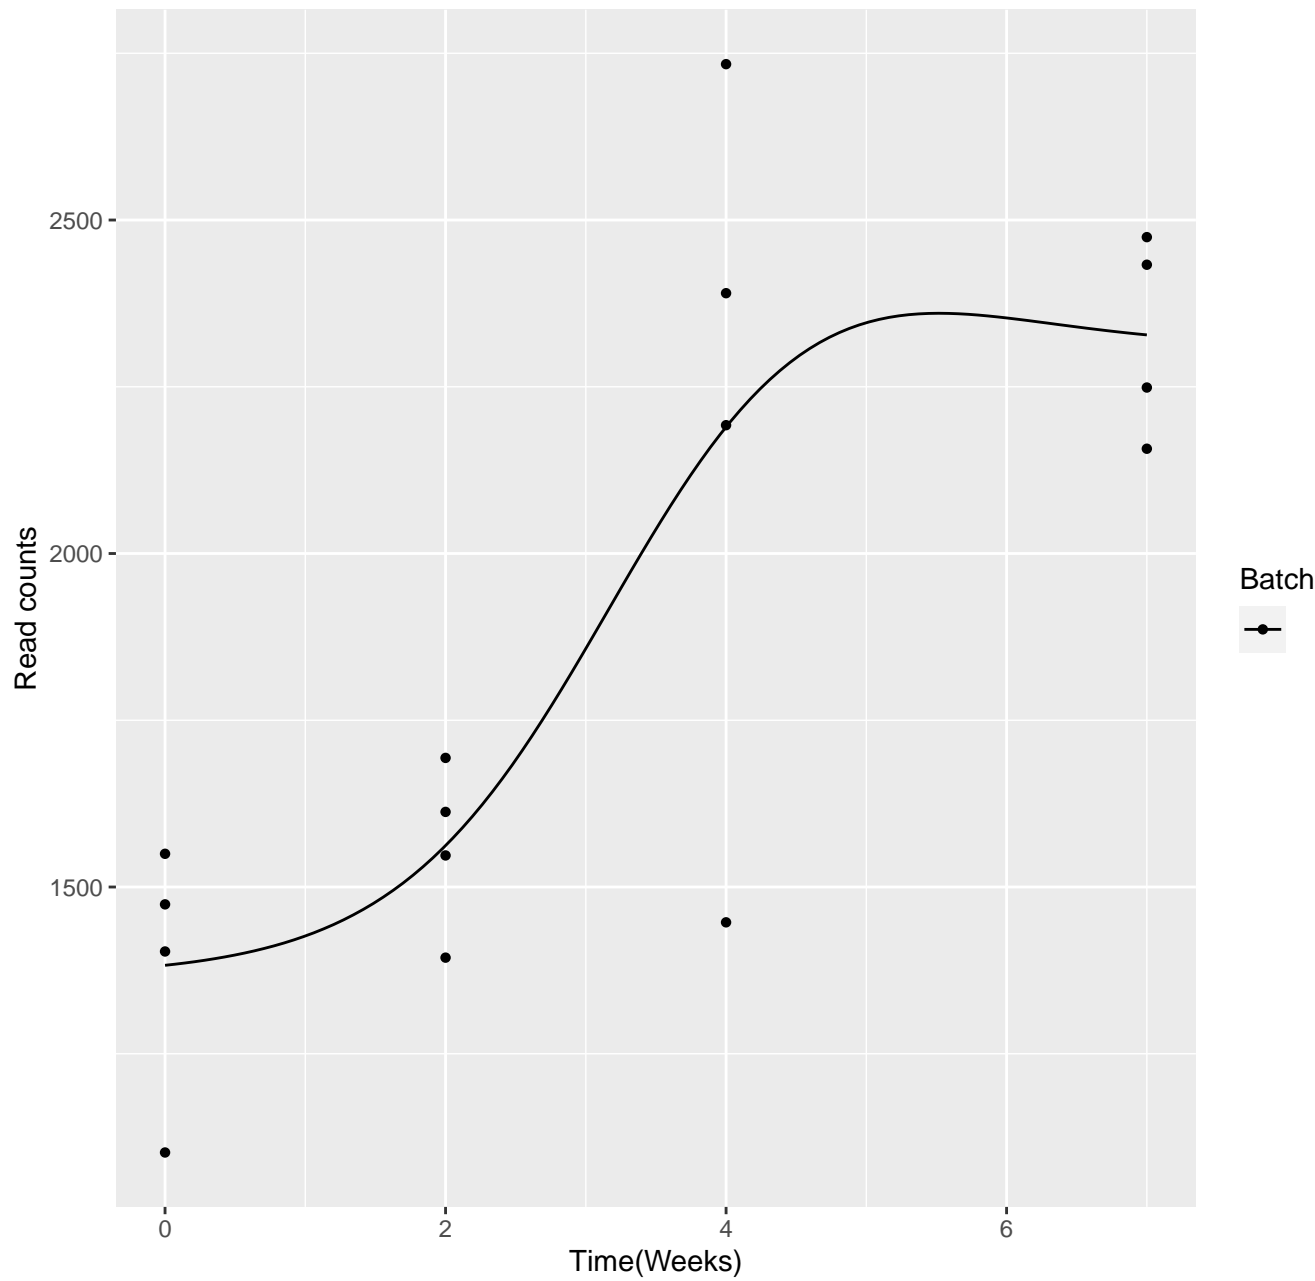

LOC127482710:  $\log_{10} q = -2.76$

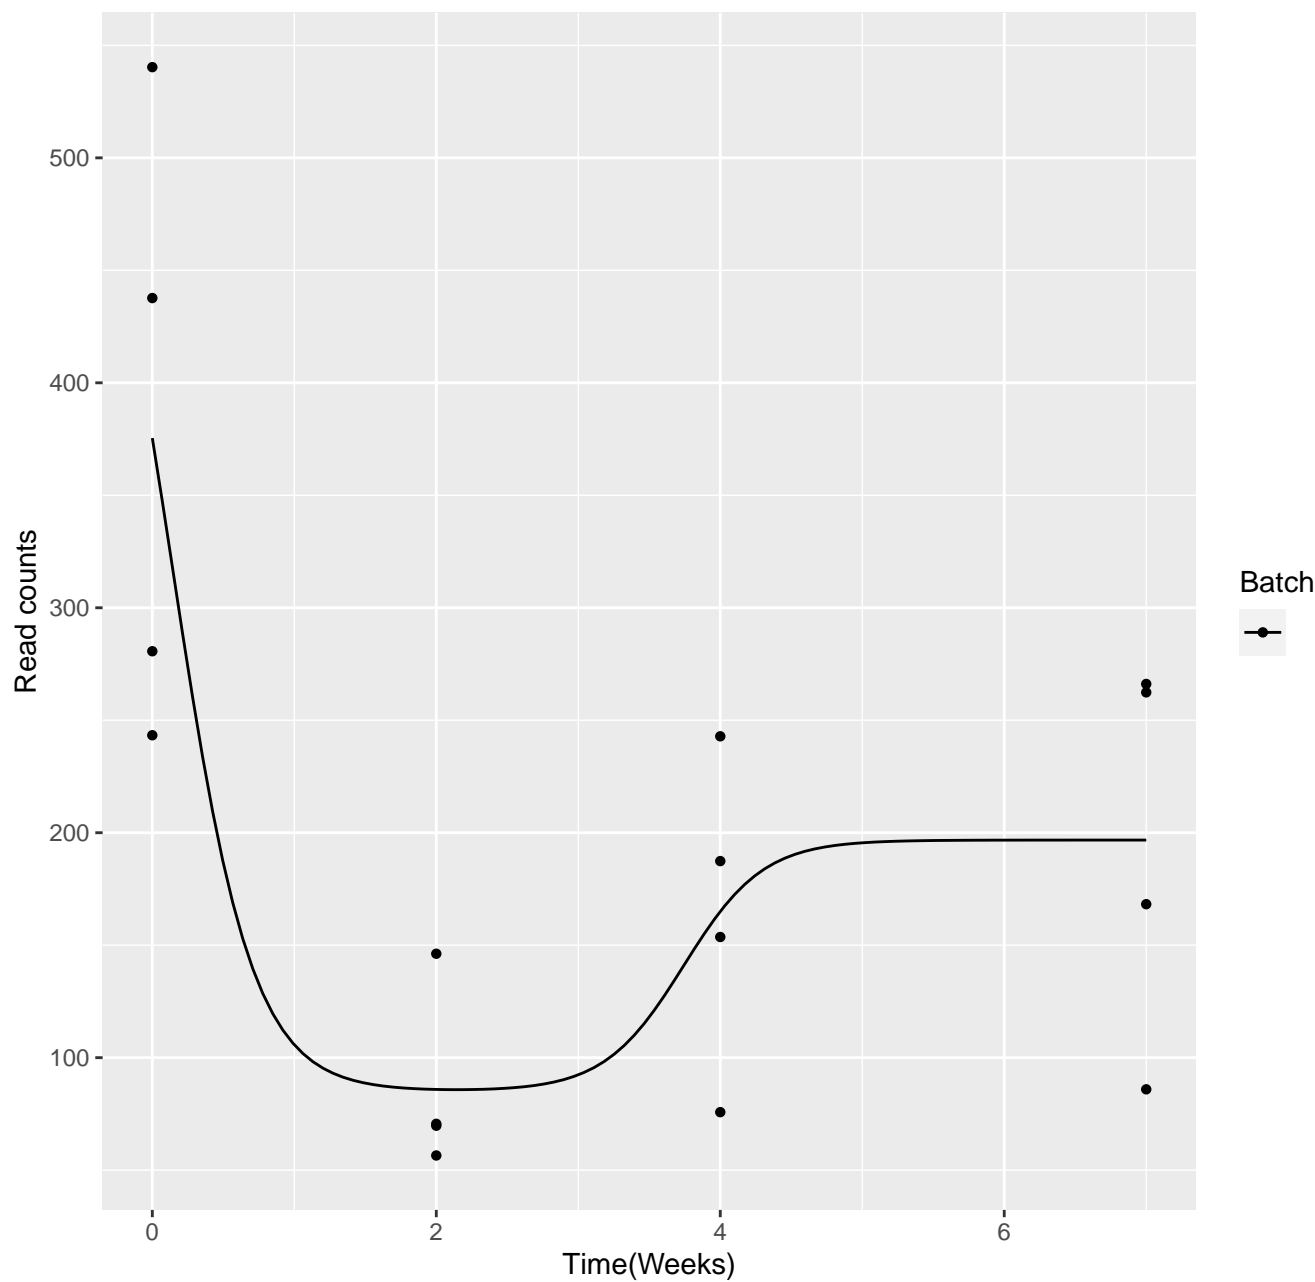

NRROS:  $\log_{10} q = -2.76$

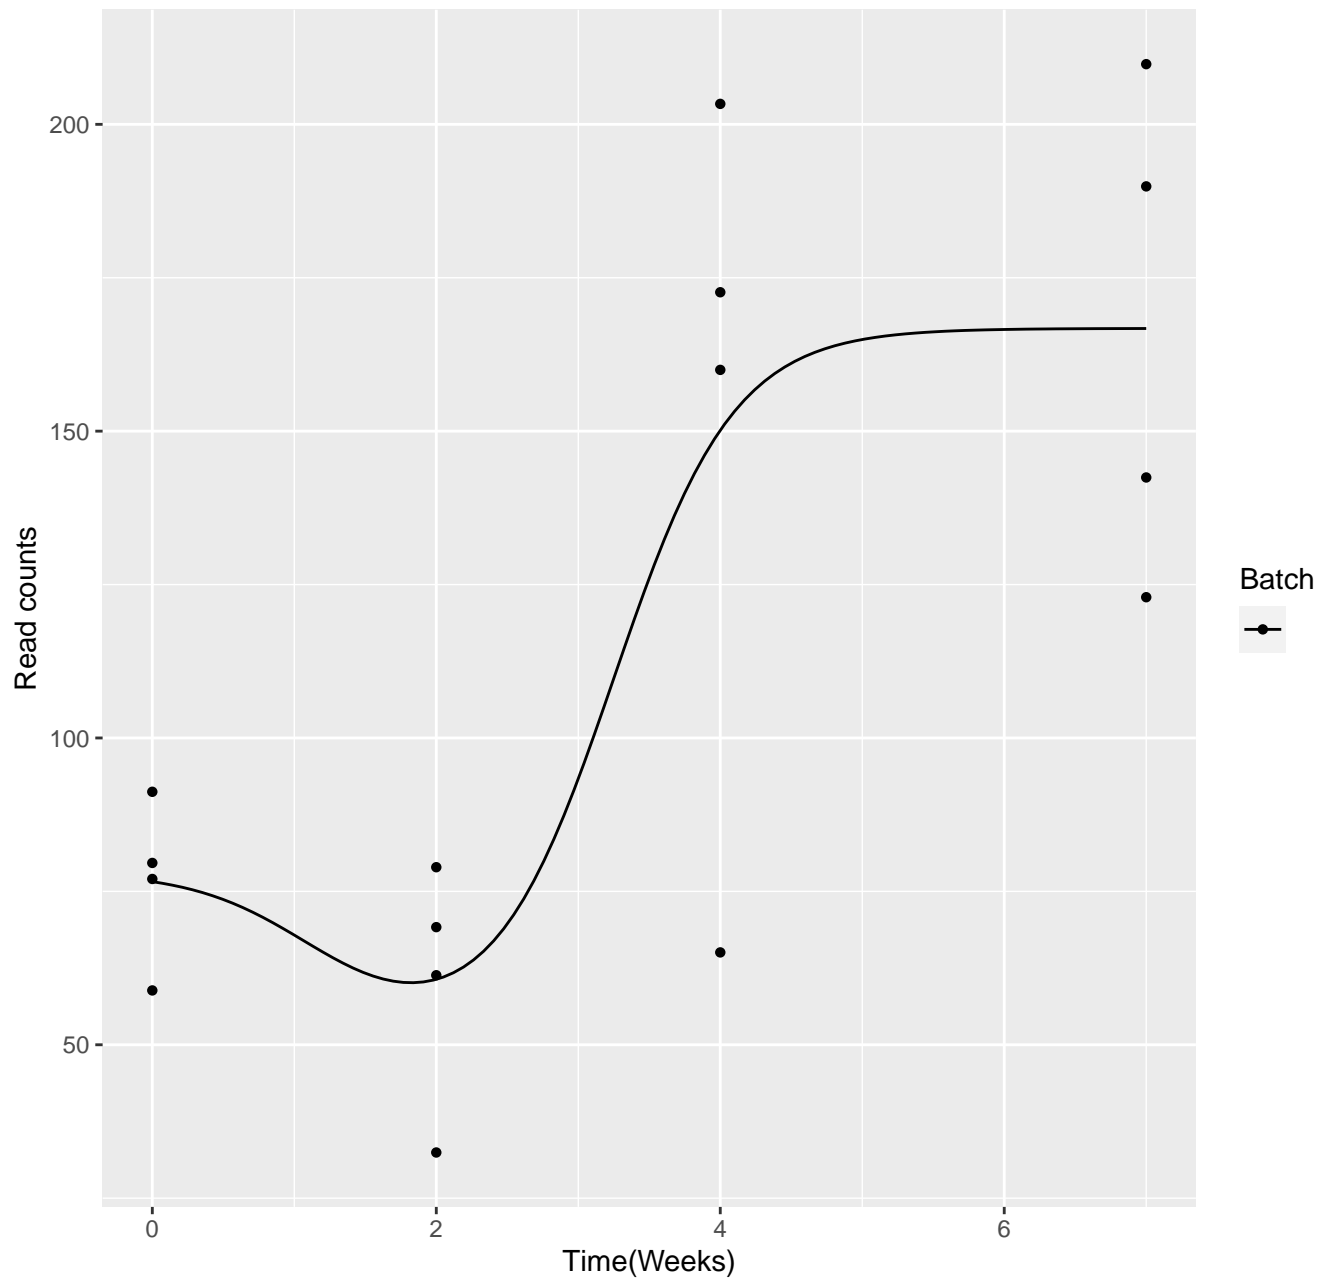

MYBPC3:  $\log_{10} q = -2.75$

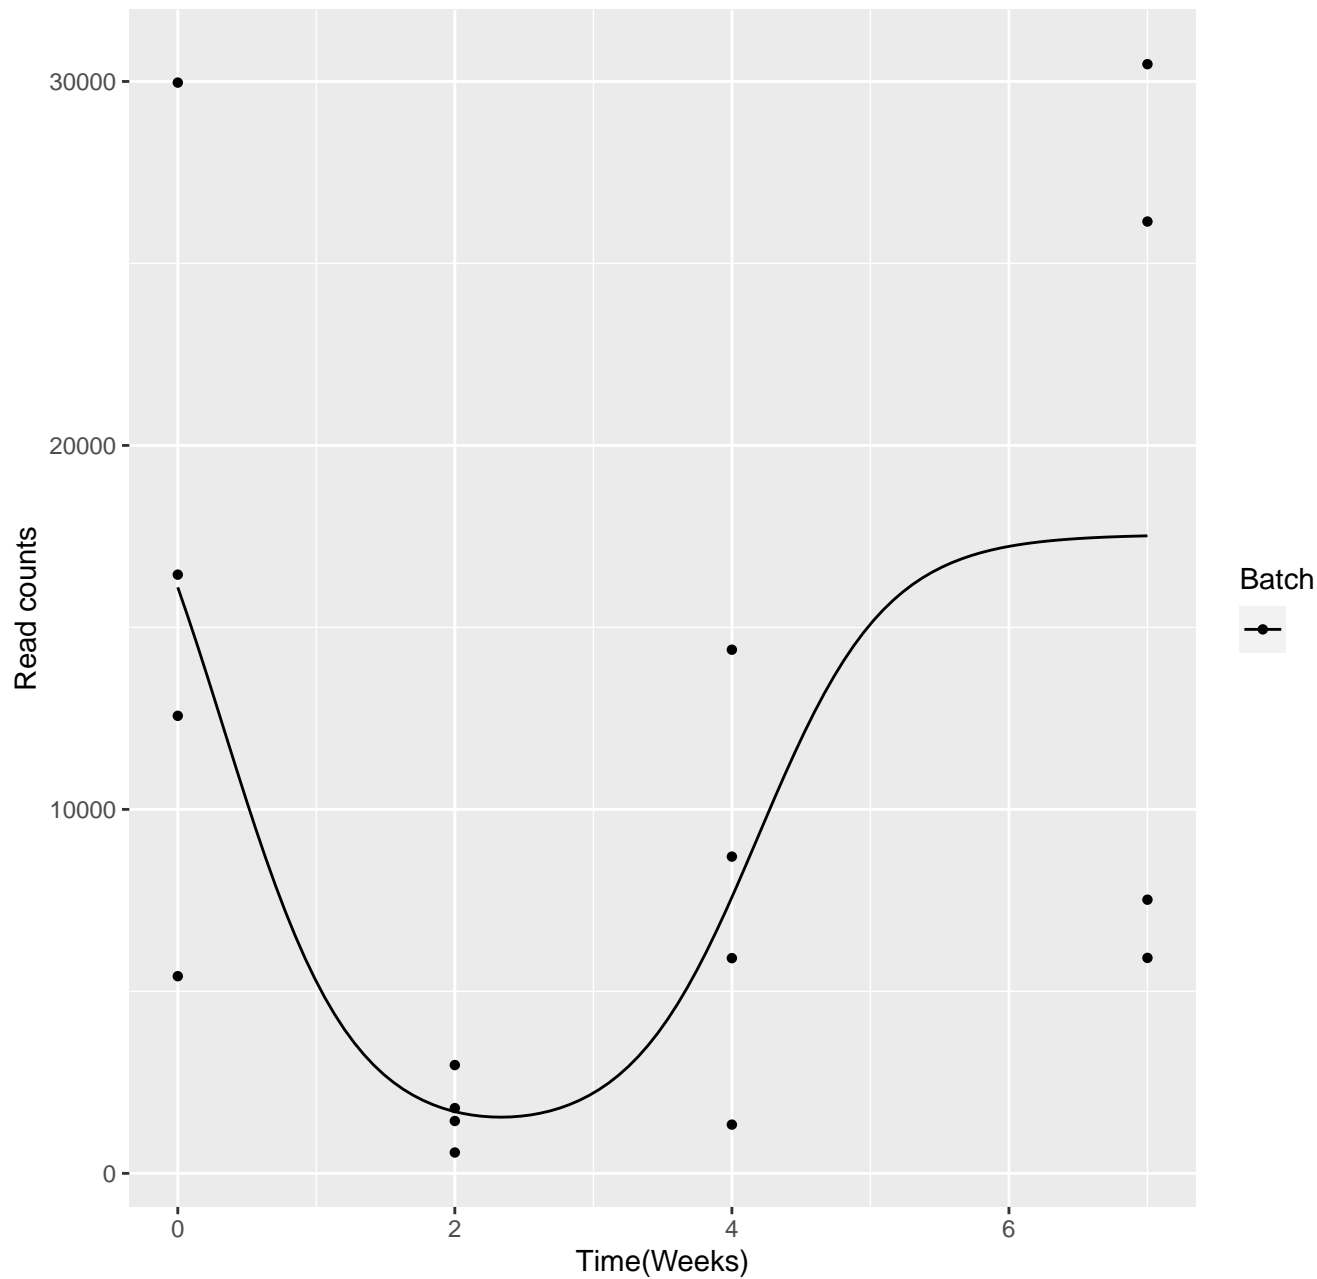

SEMA3D:  $\log_{10} q = -2.75$

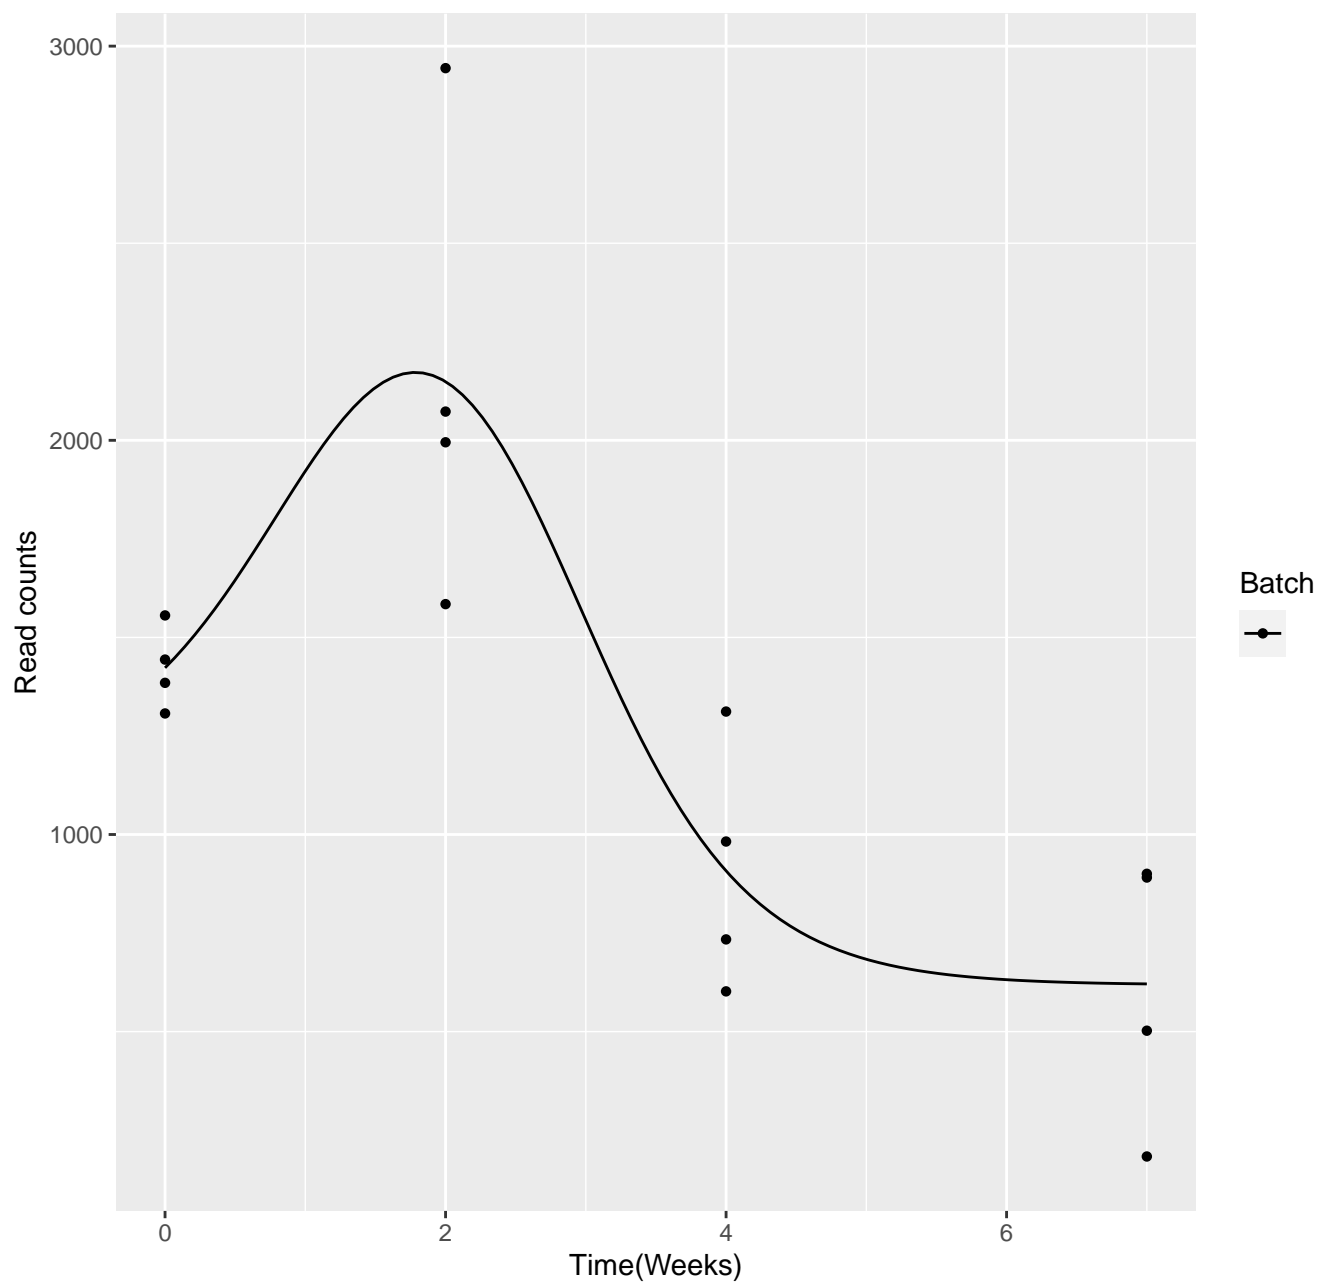

LOC100341051:  $\log_{10} q = -2.75$

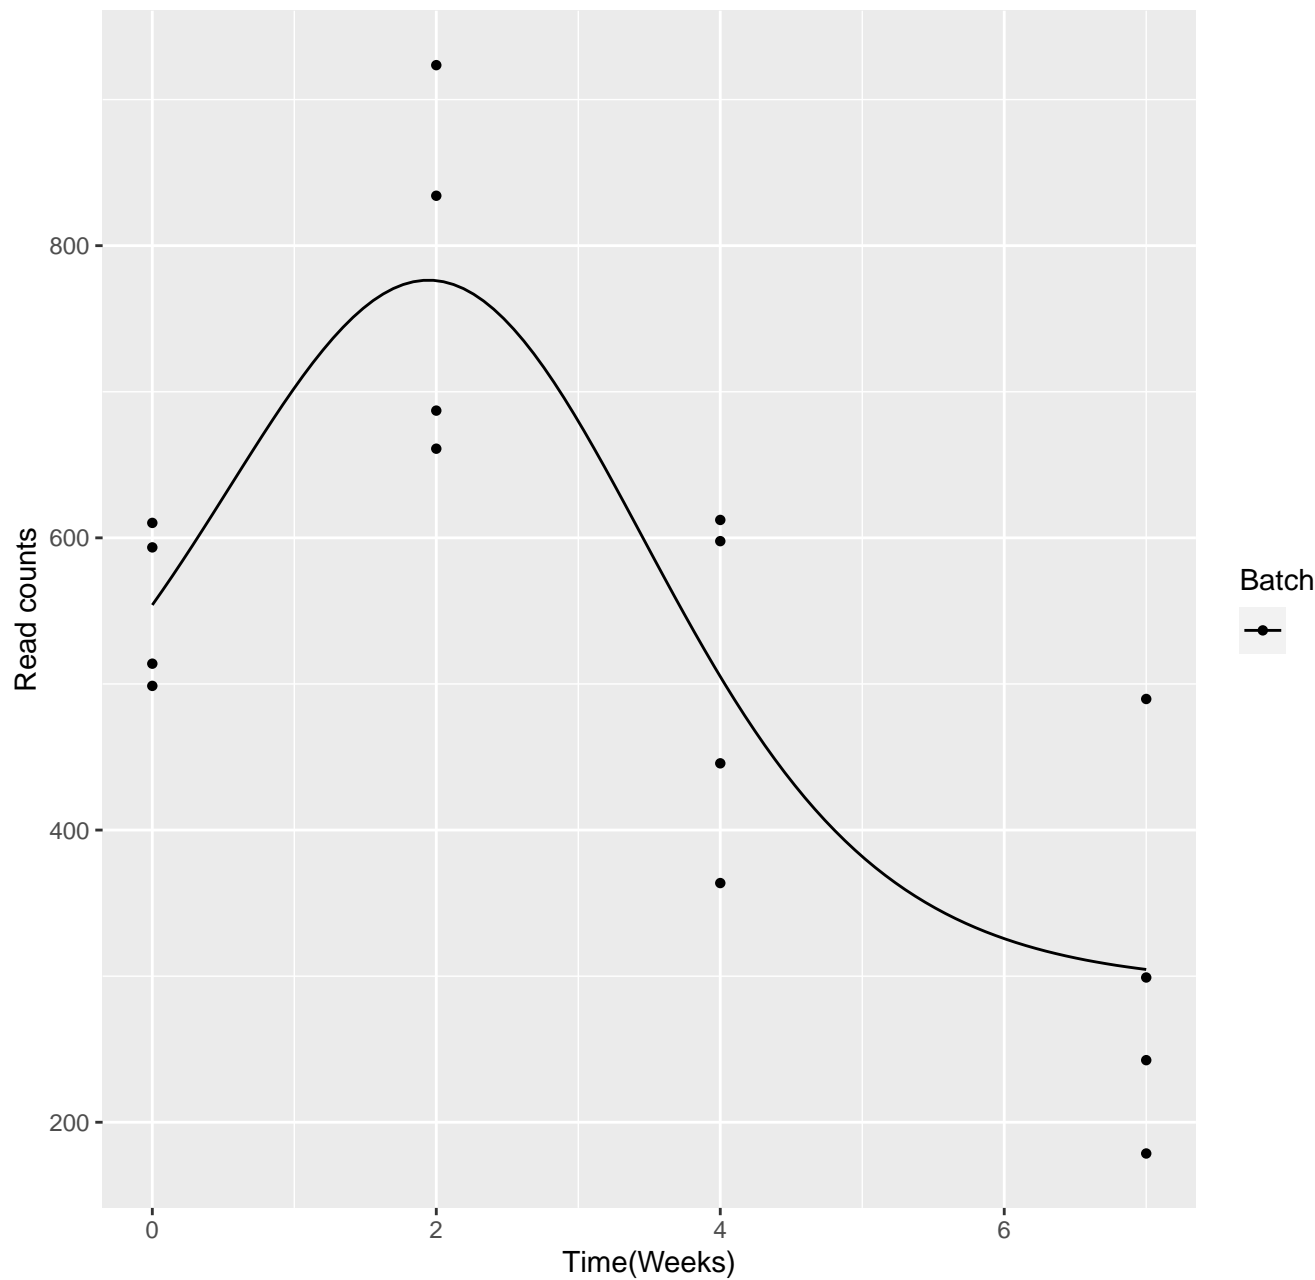

SPRYD3:  $\log_{10} q = -2.75$

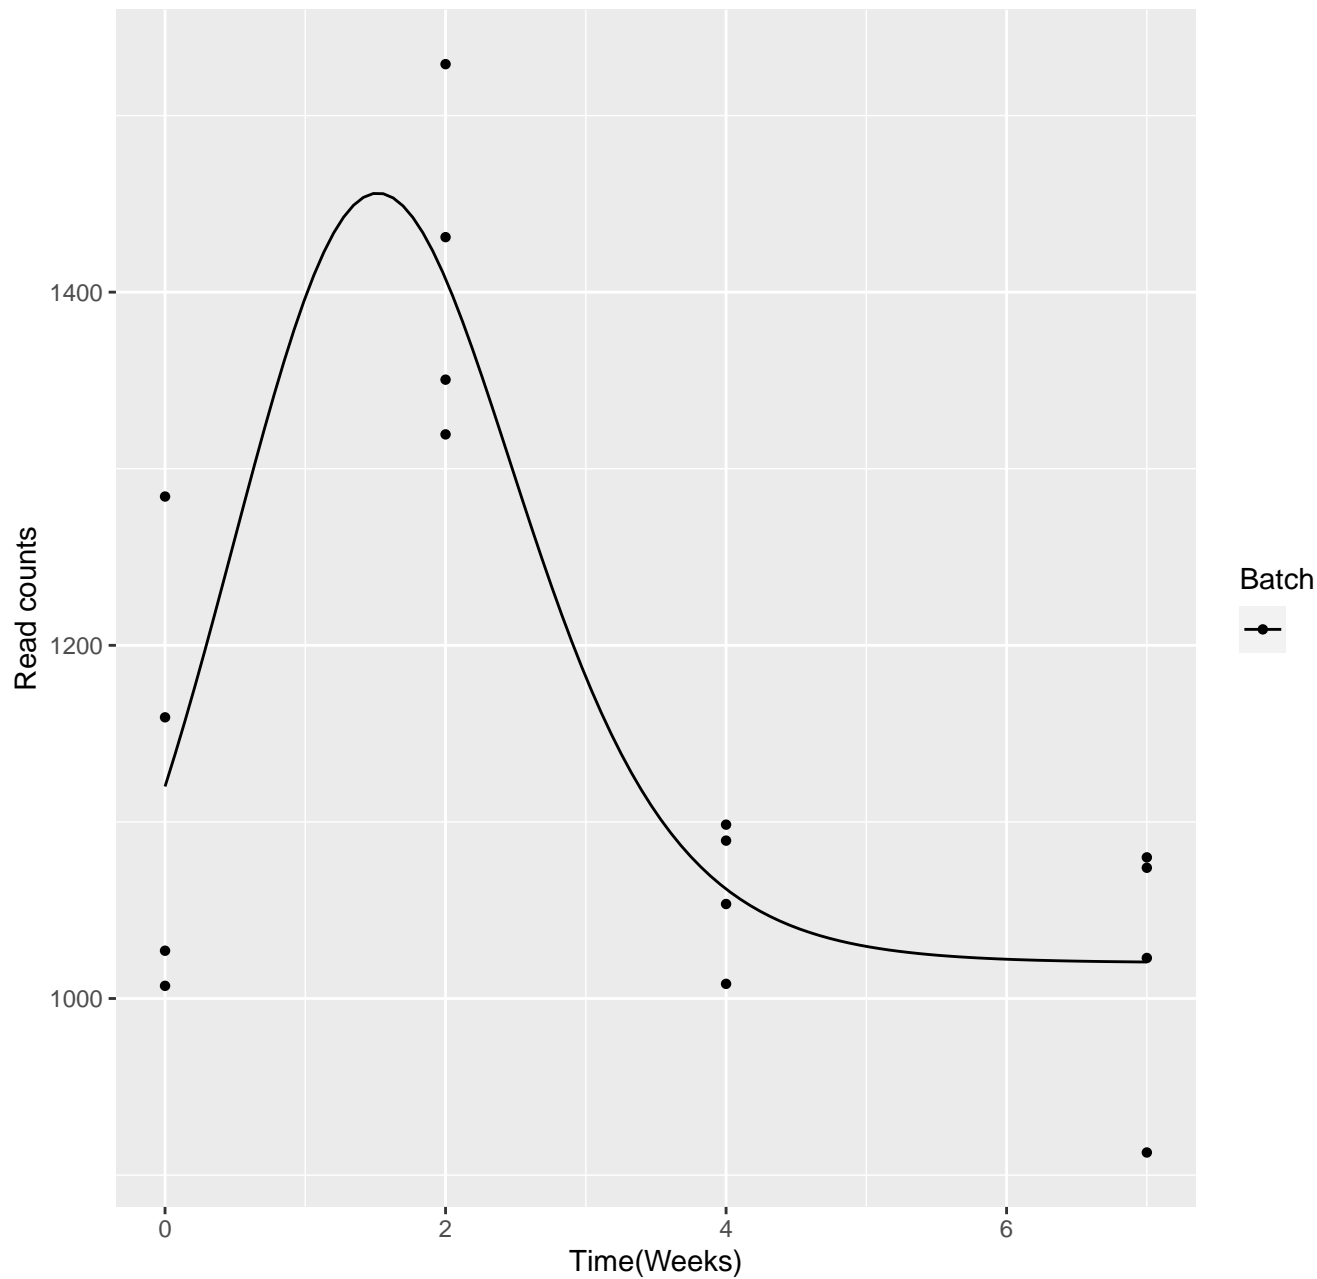



CDK14:  $\log_{10} q = -2.75$

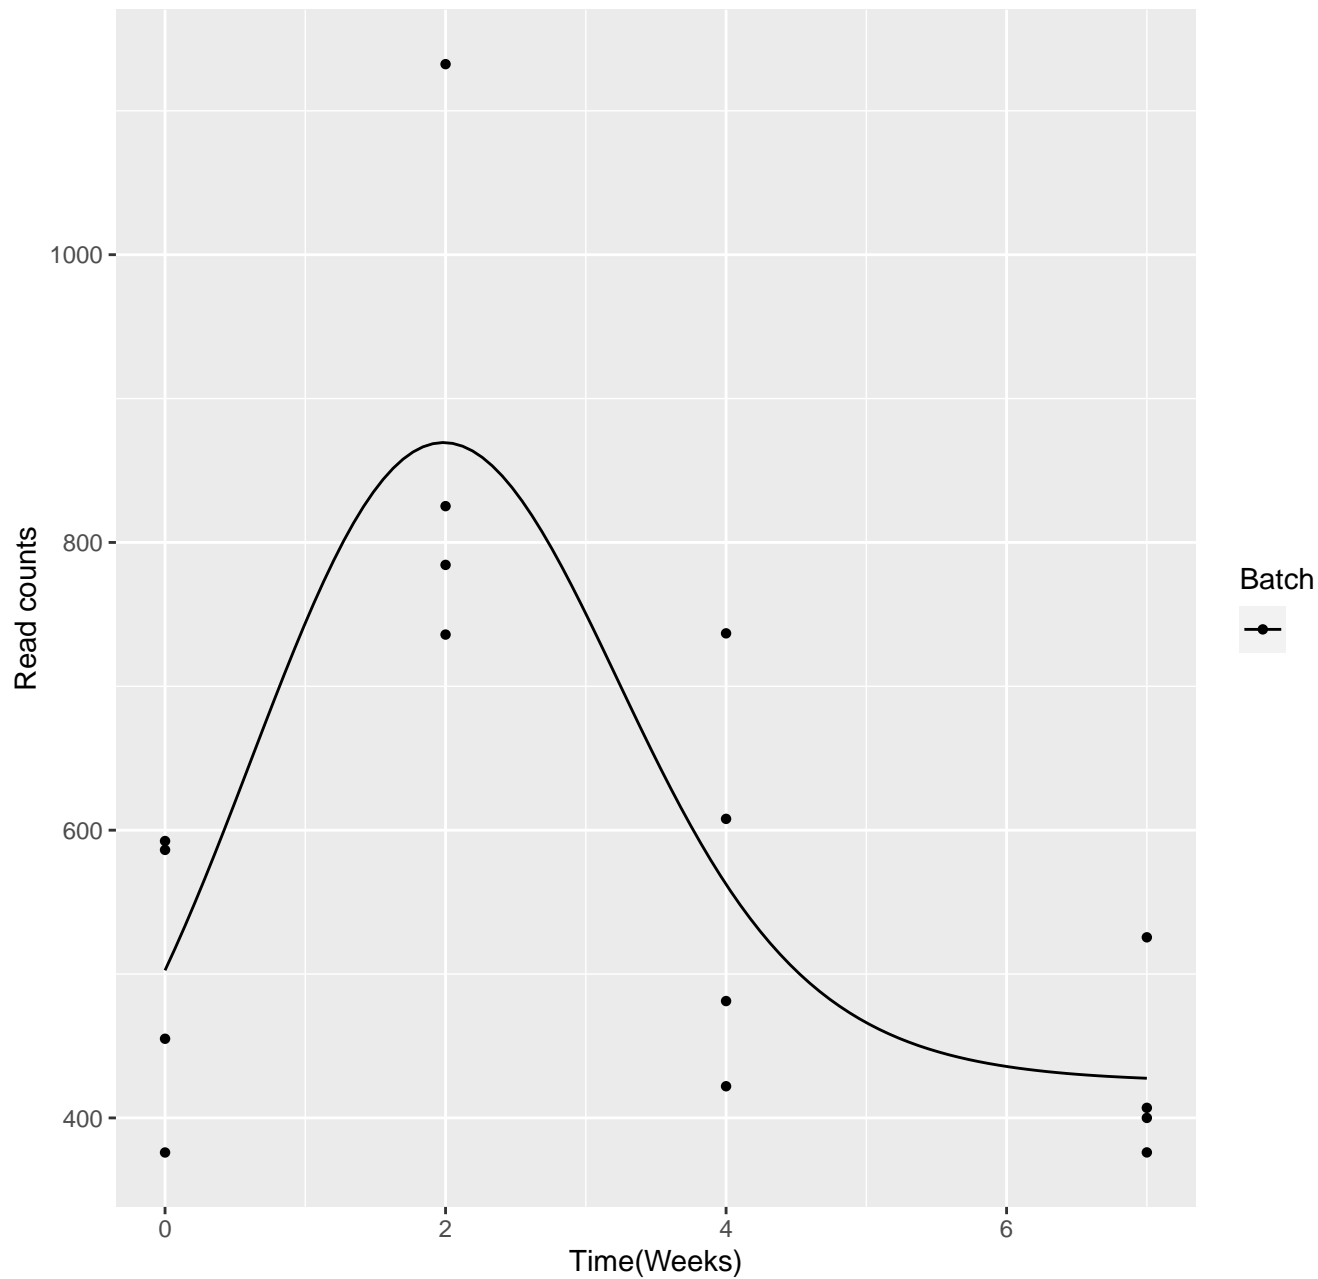

LOC100009107:  $\log_{10} q = -2.75$

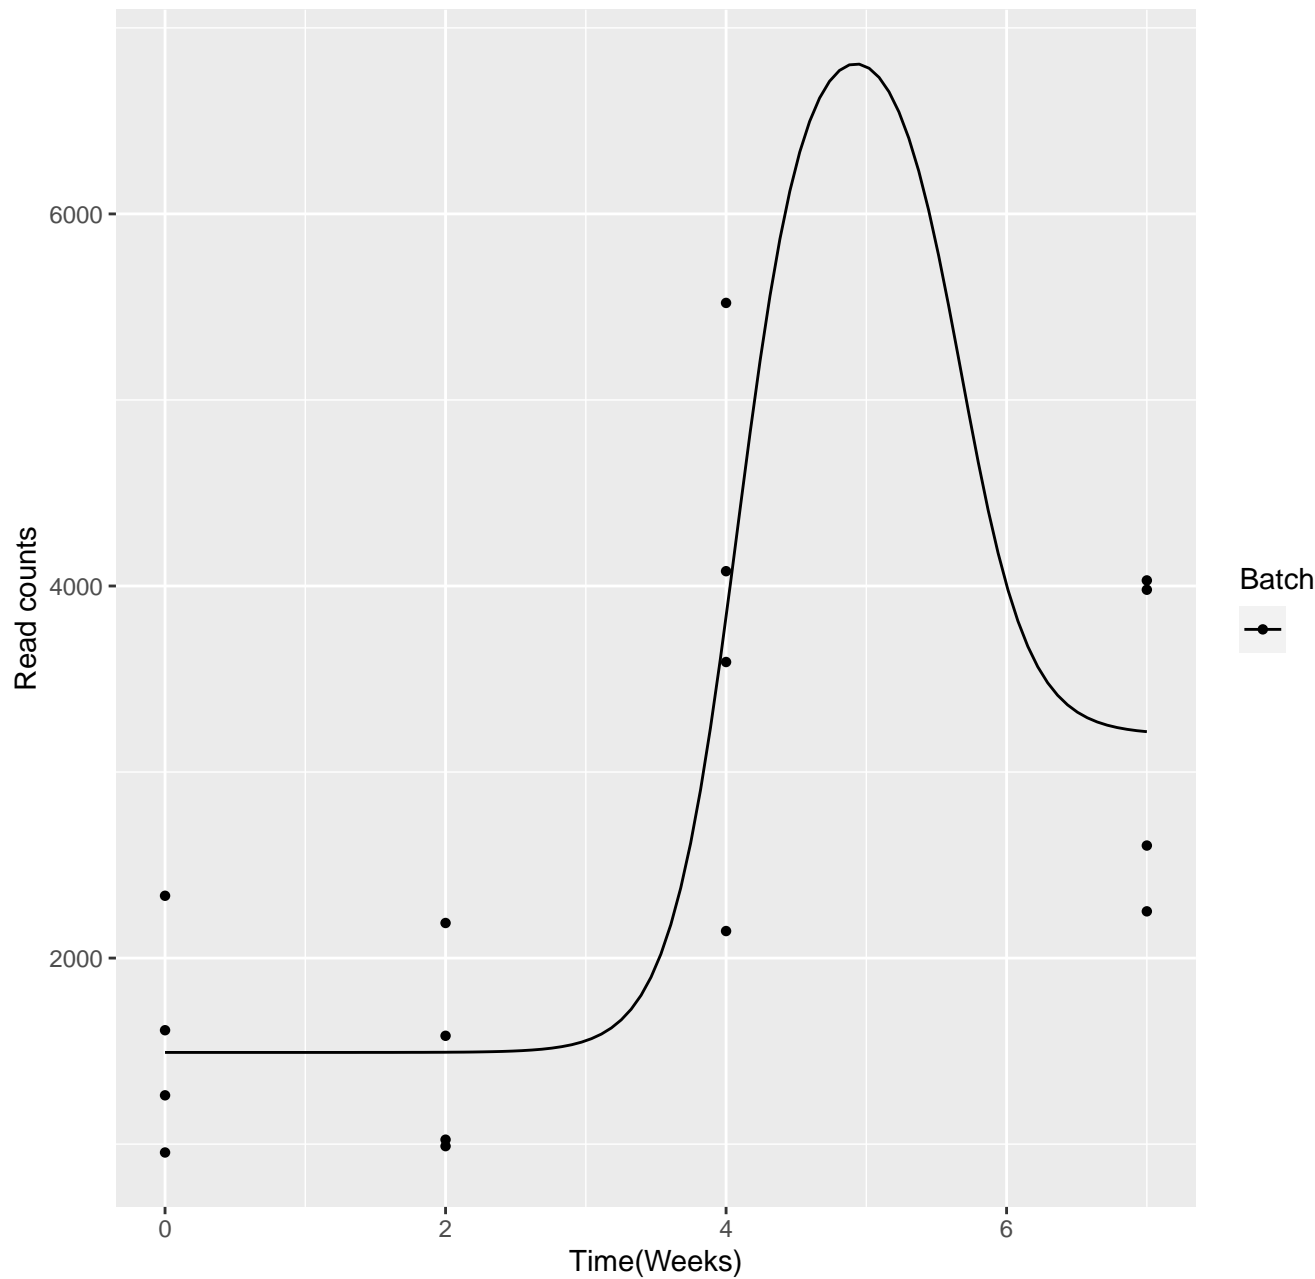

ABCC4:  $\log_{10} q = -2.74$

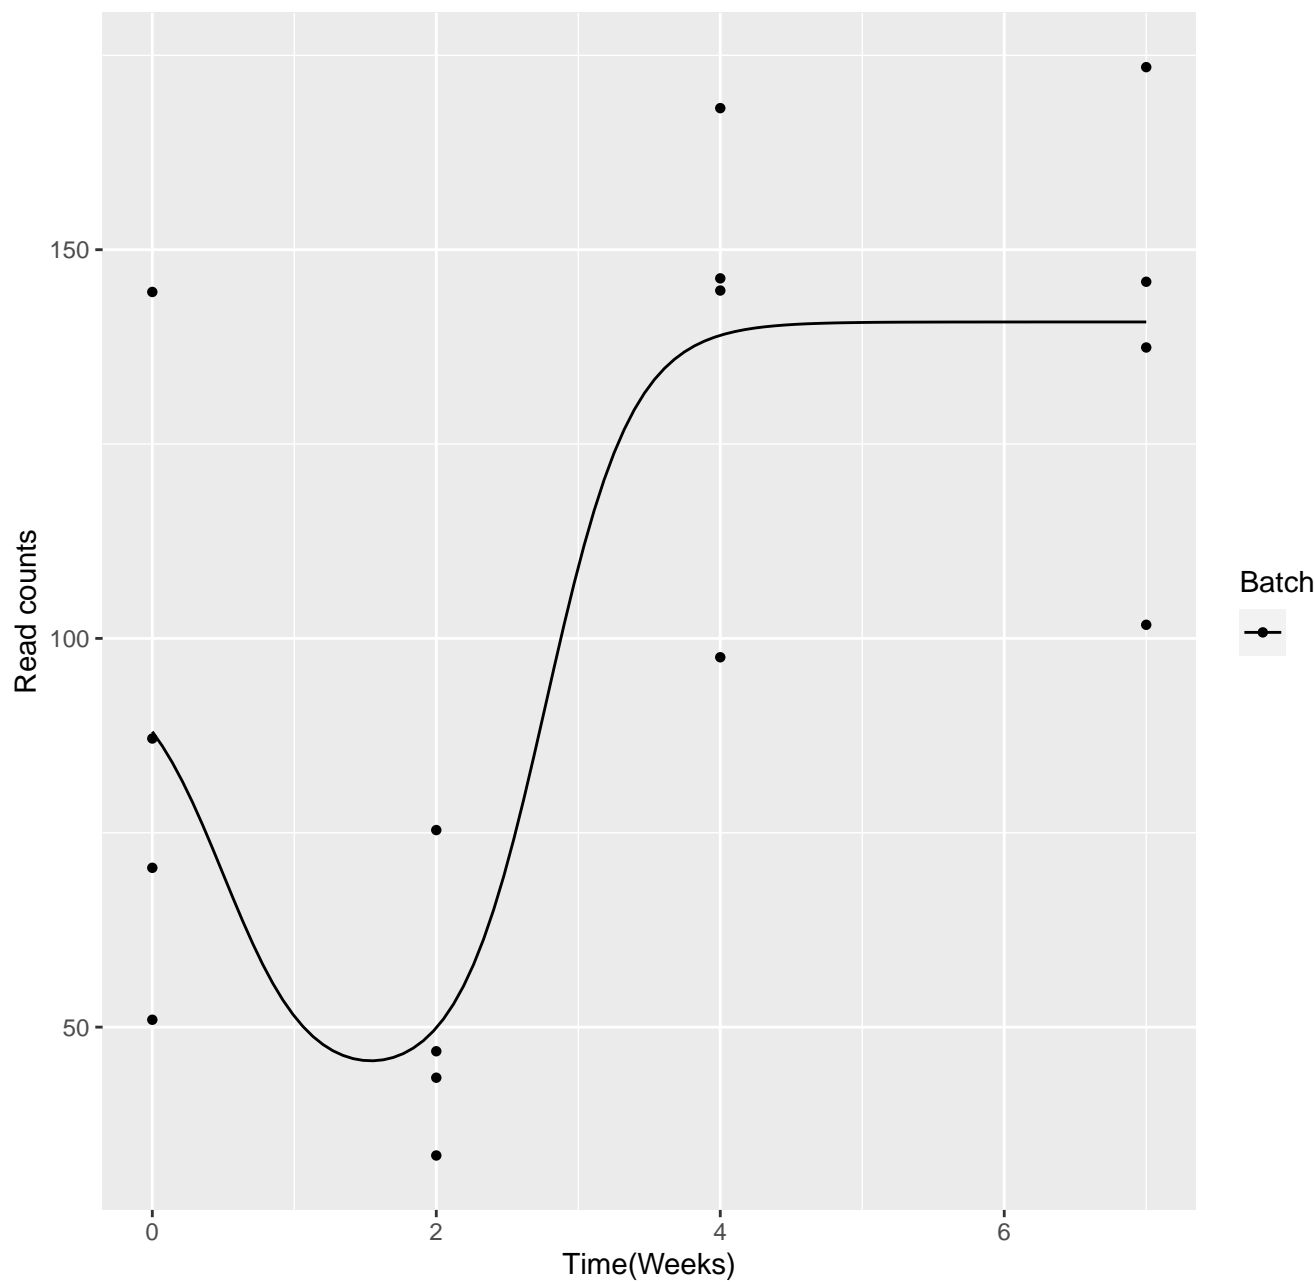

LOC108177262:  $\log_{10} q = -2.74$

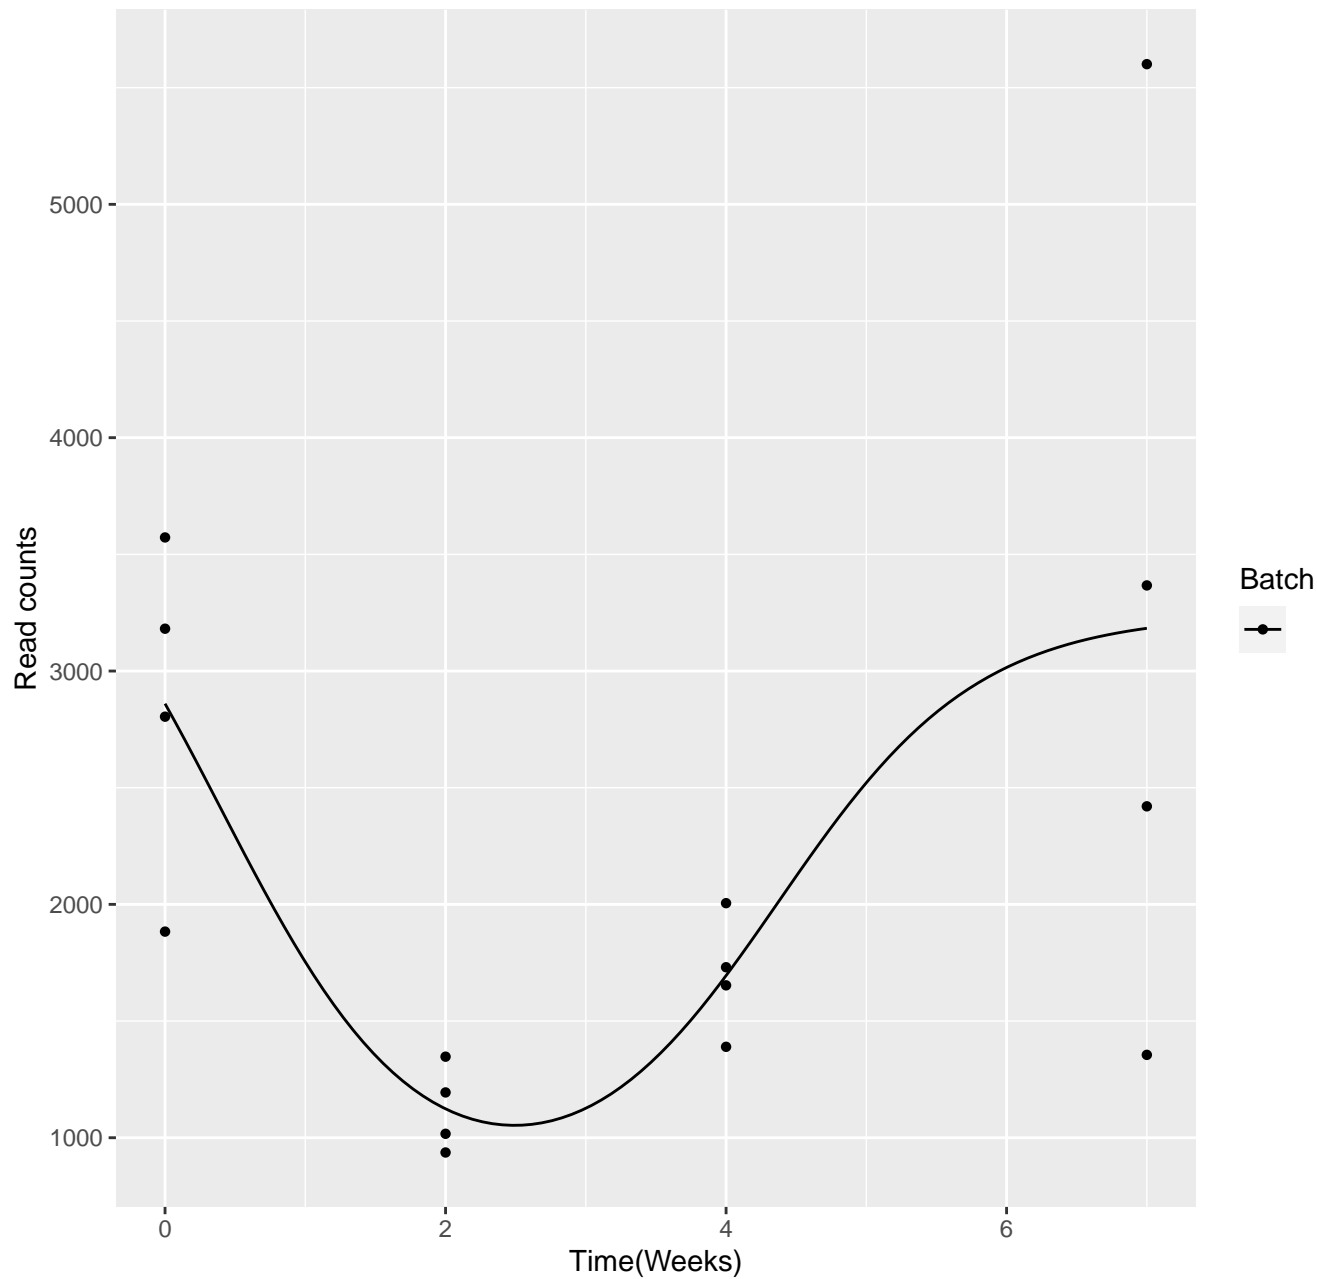

ABITRAM:  $\log_{10} q = -2.74$

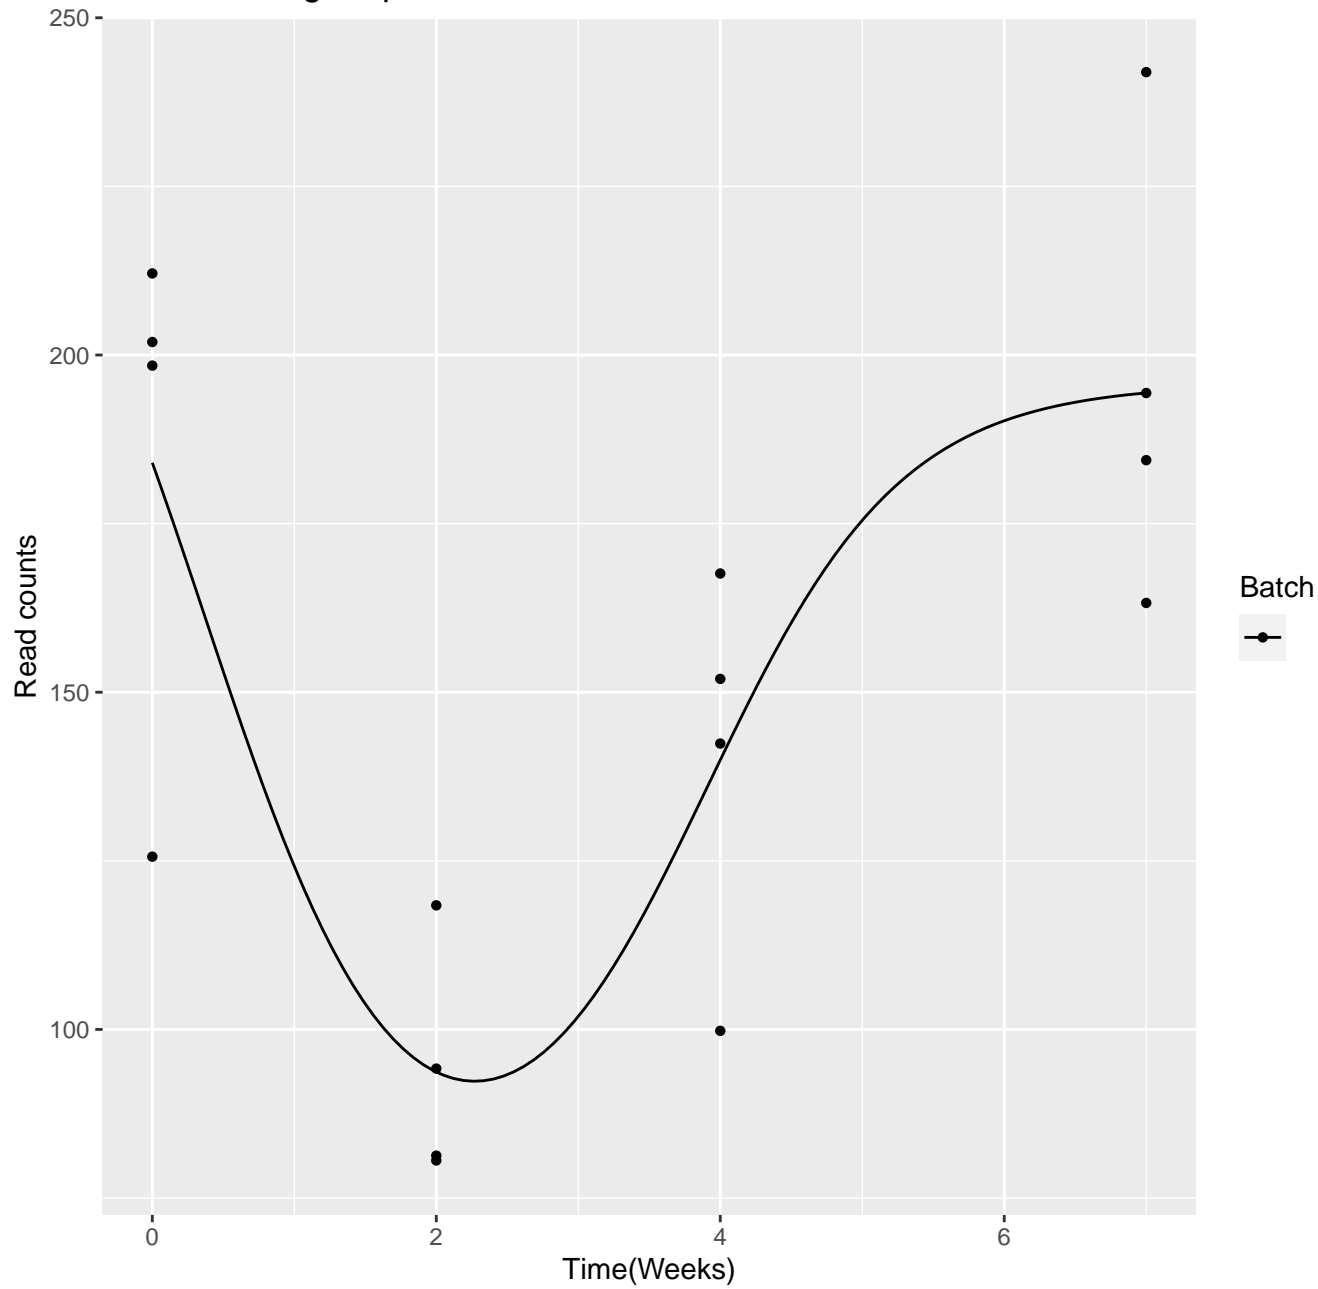

NAV3:  $\log_{10} q = -2.74$

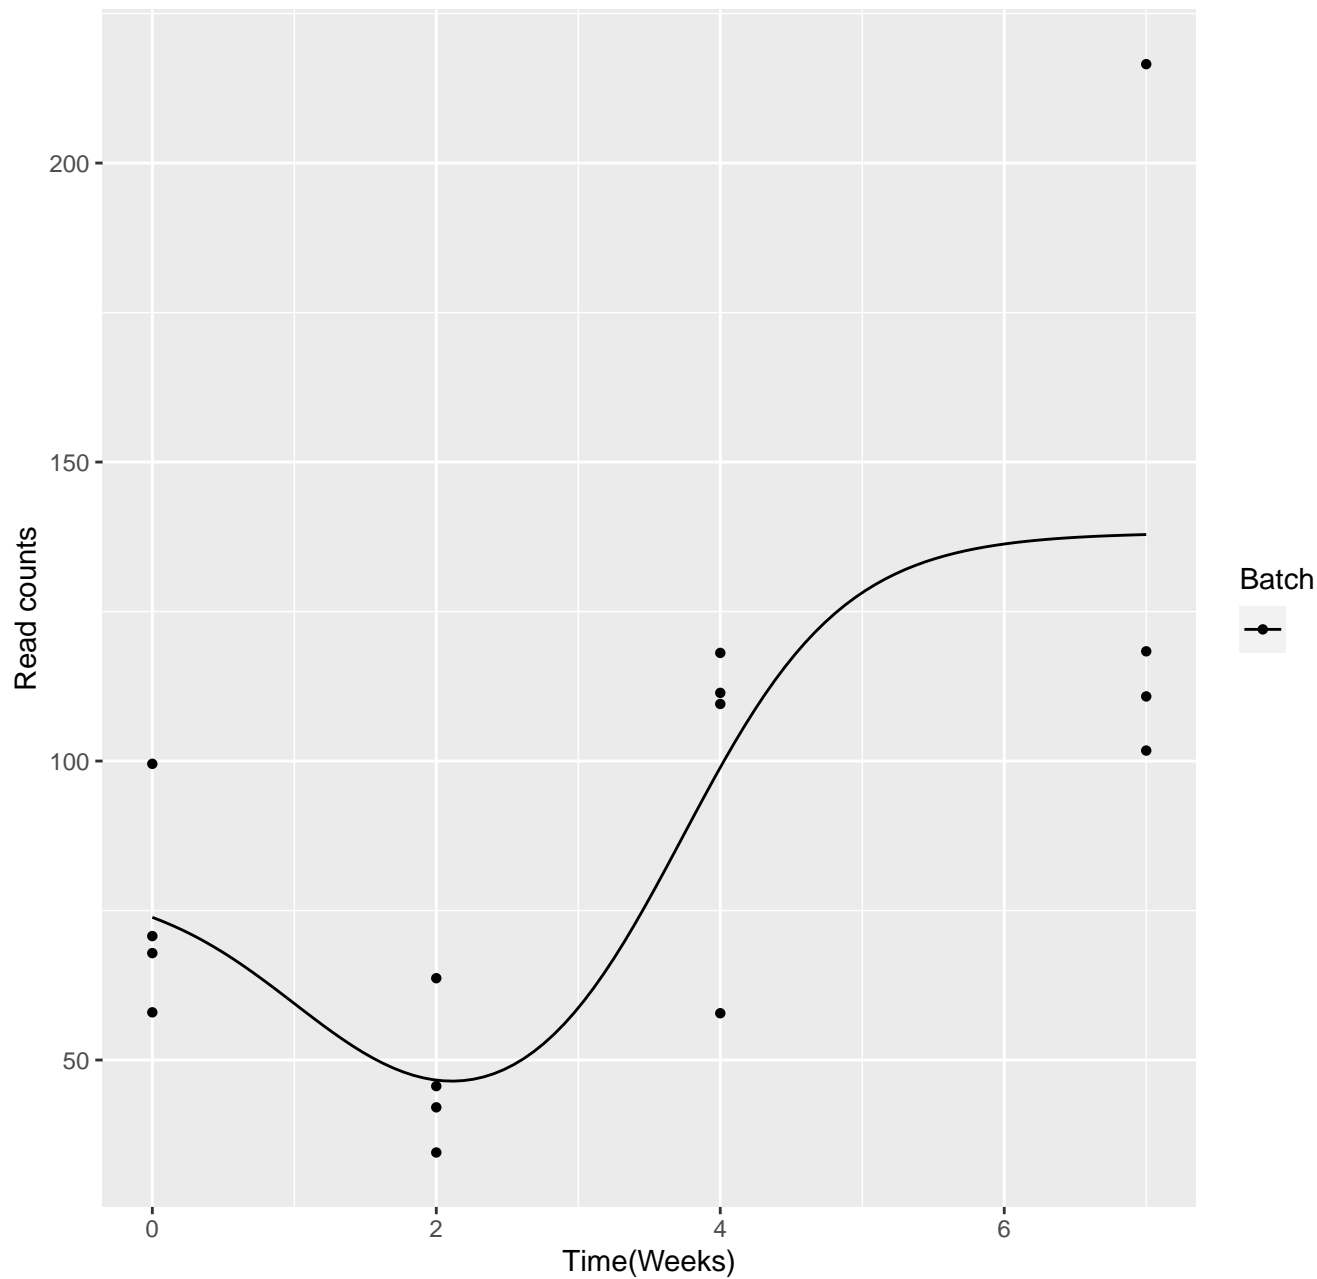

PLA1A:  $\log_{10} q = -2.74$

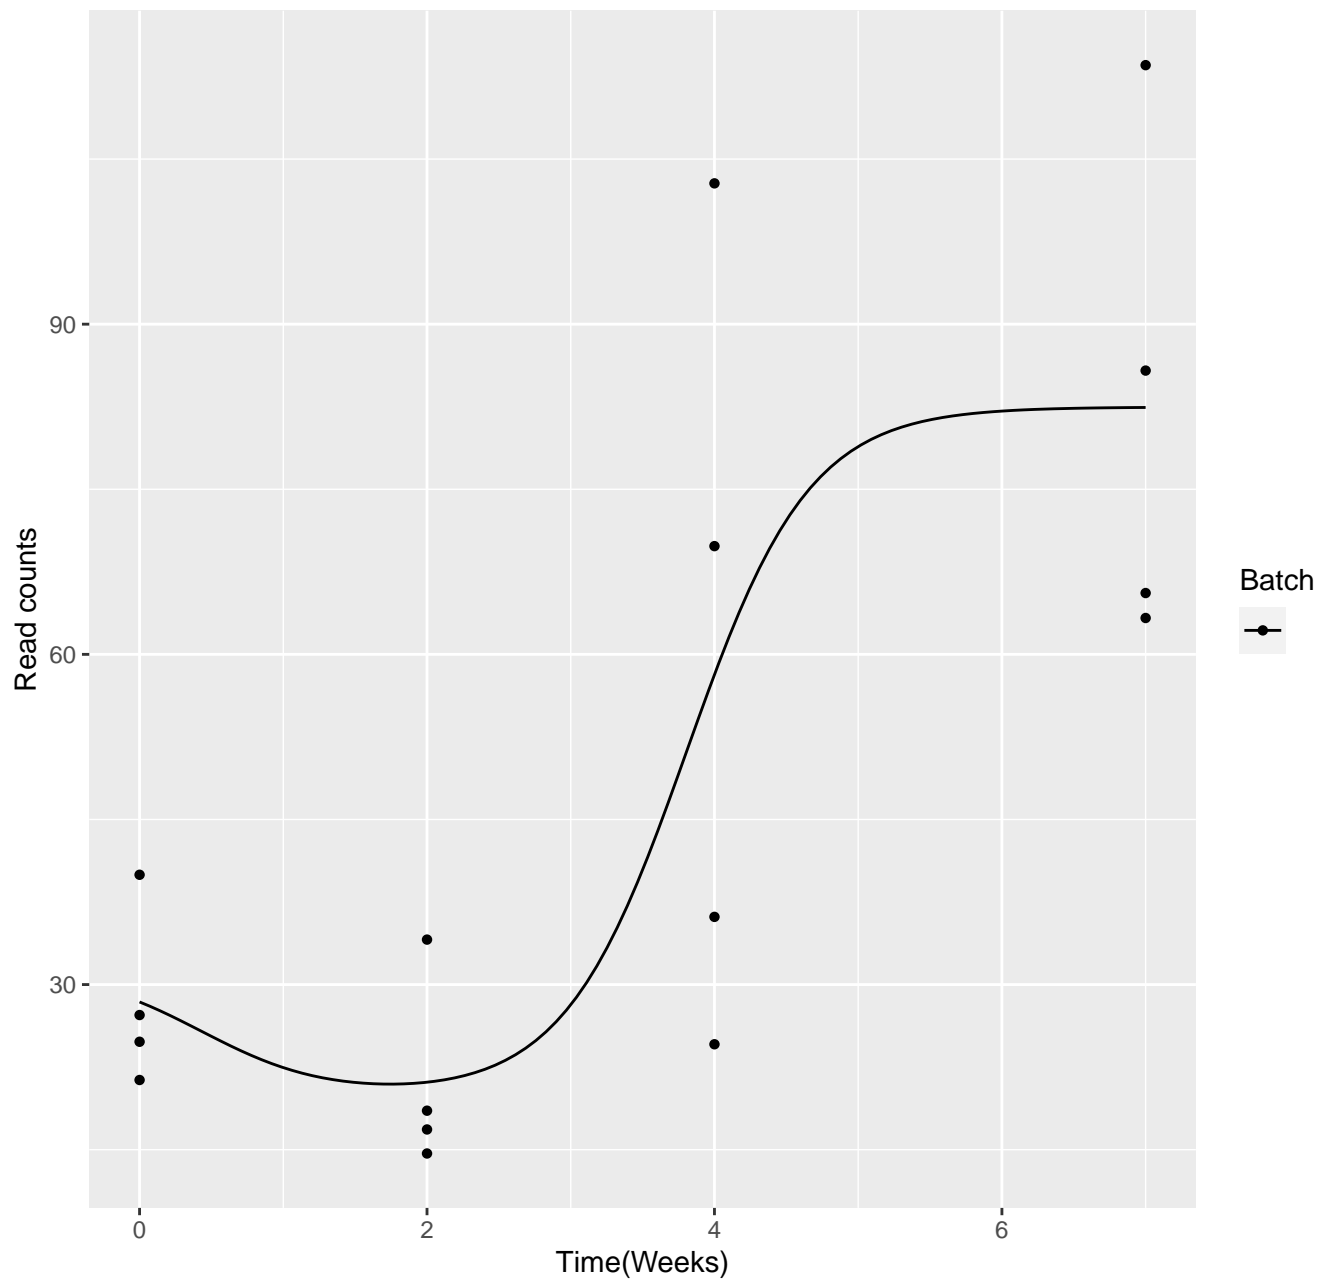

NCAM1:  $\log_{10} q = -2.74$

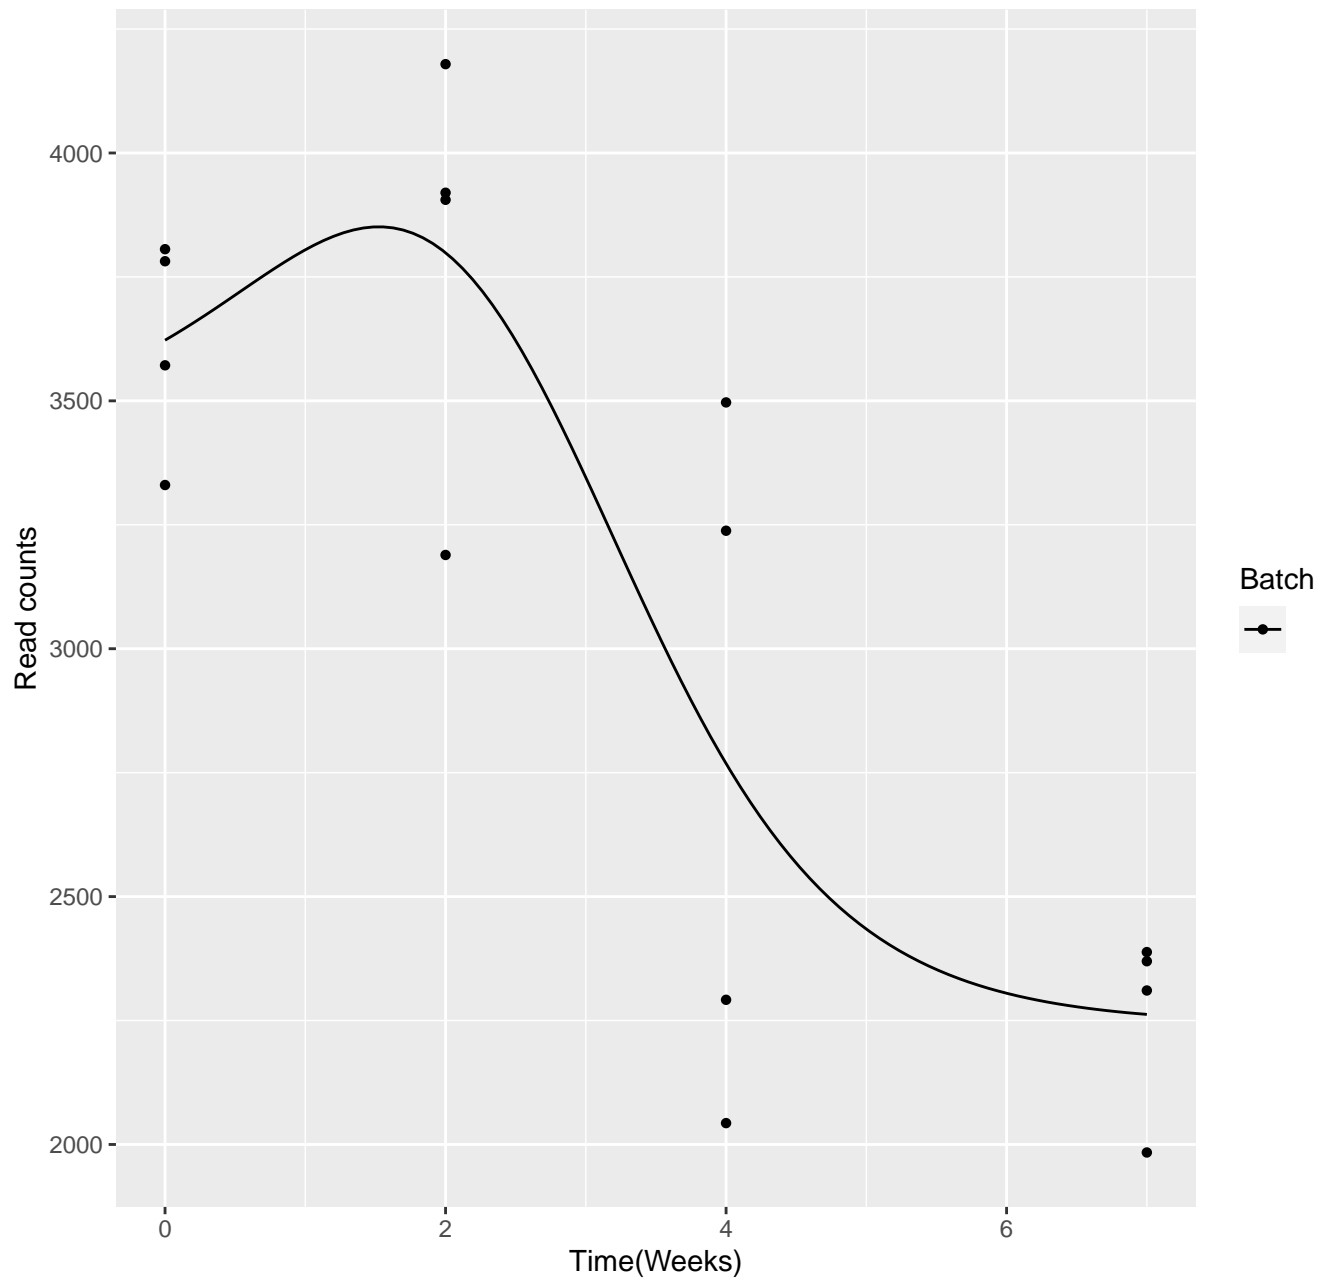



CEP55:  $\log_{10} q = -2.74$

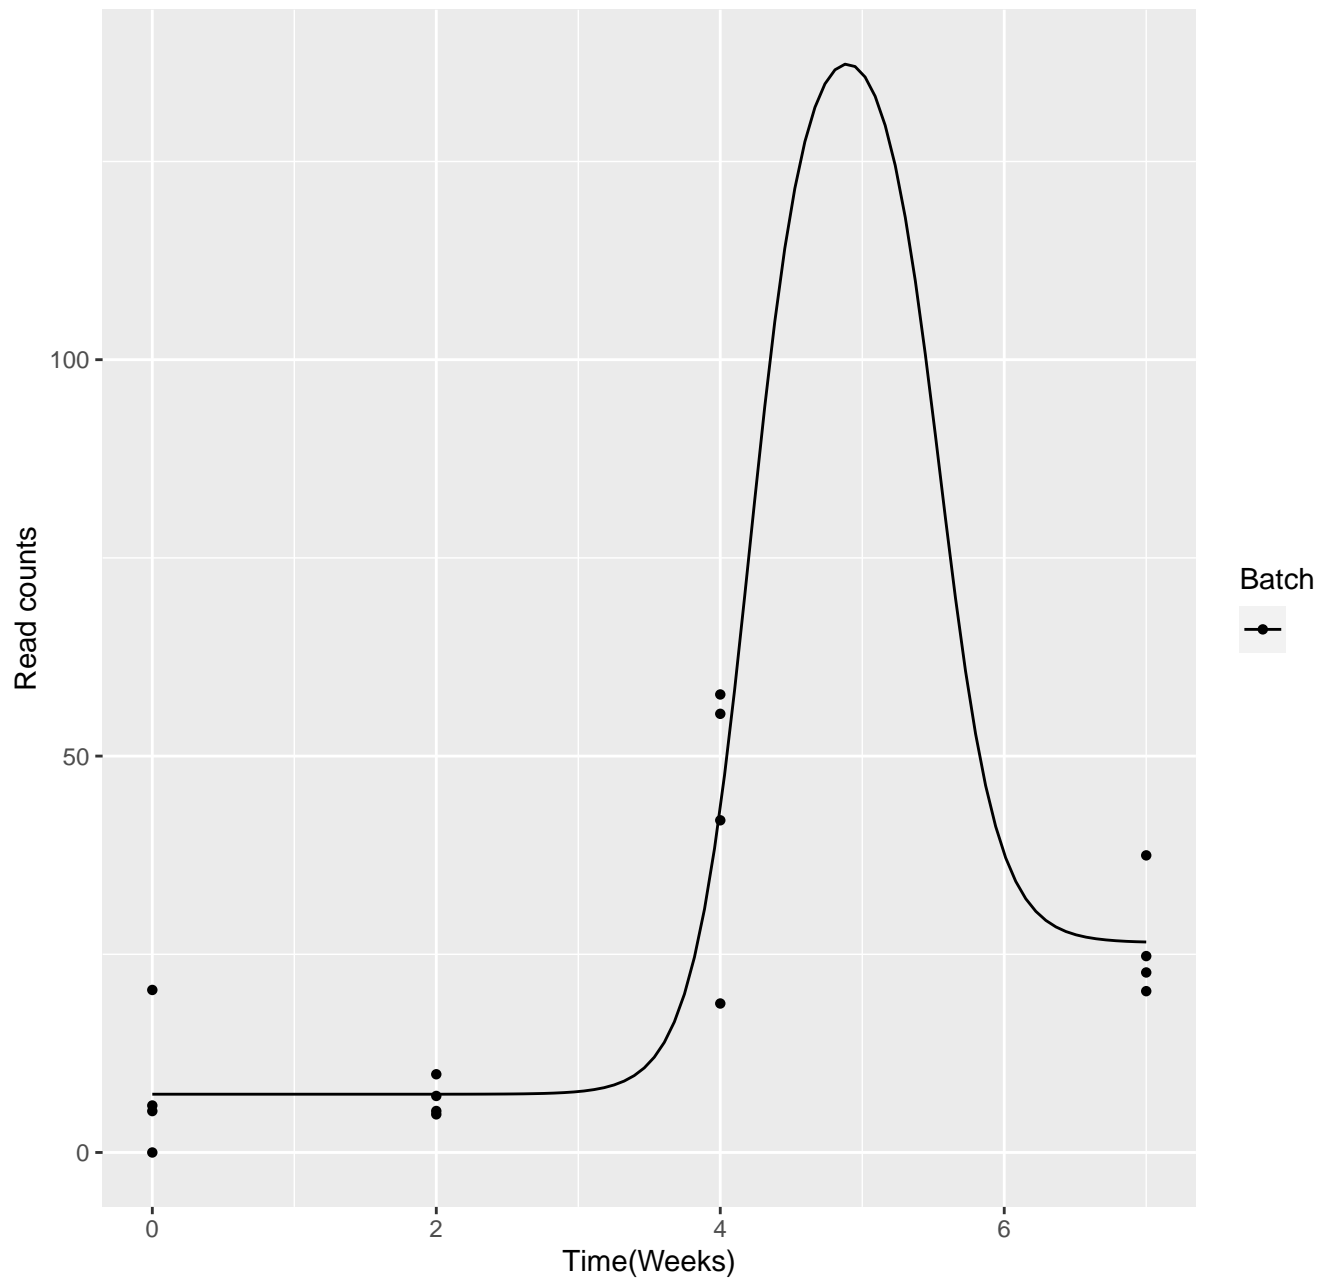

LOC103351596:  $\log_{10} q = -2.74$

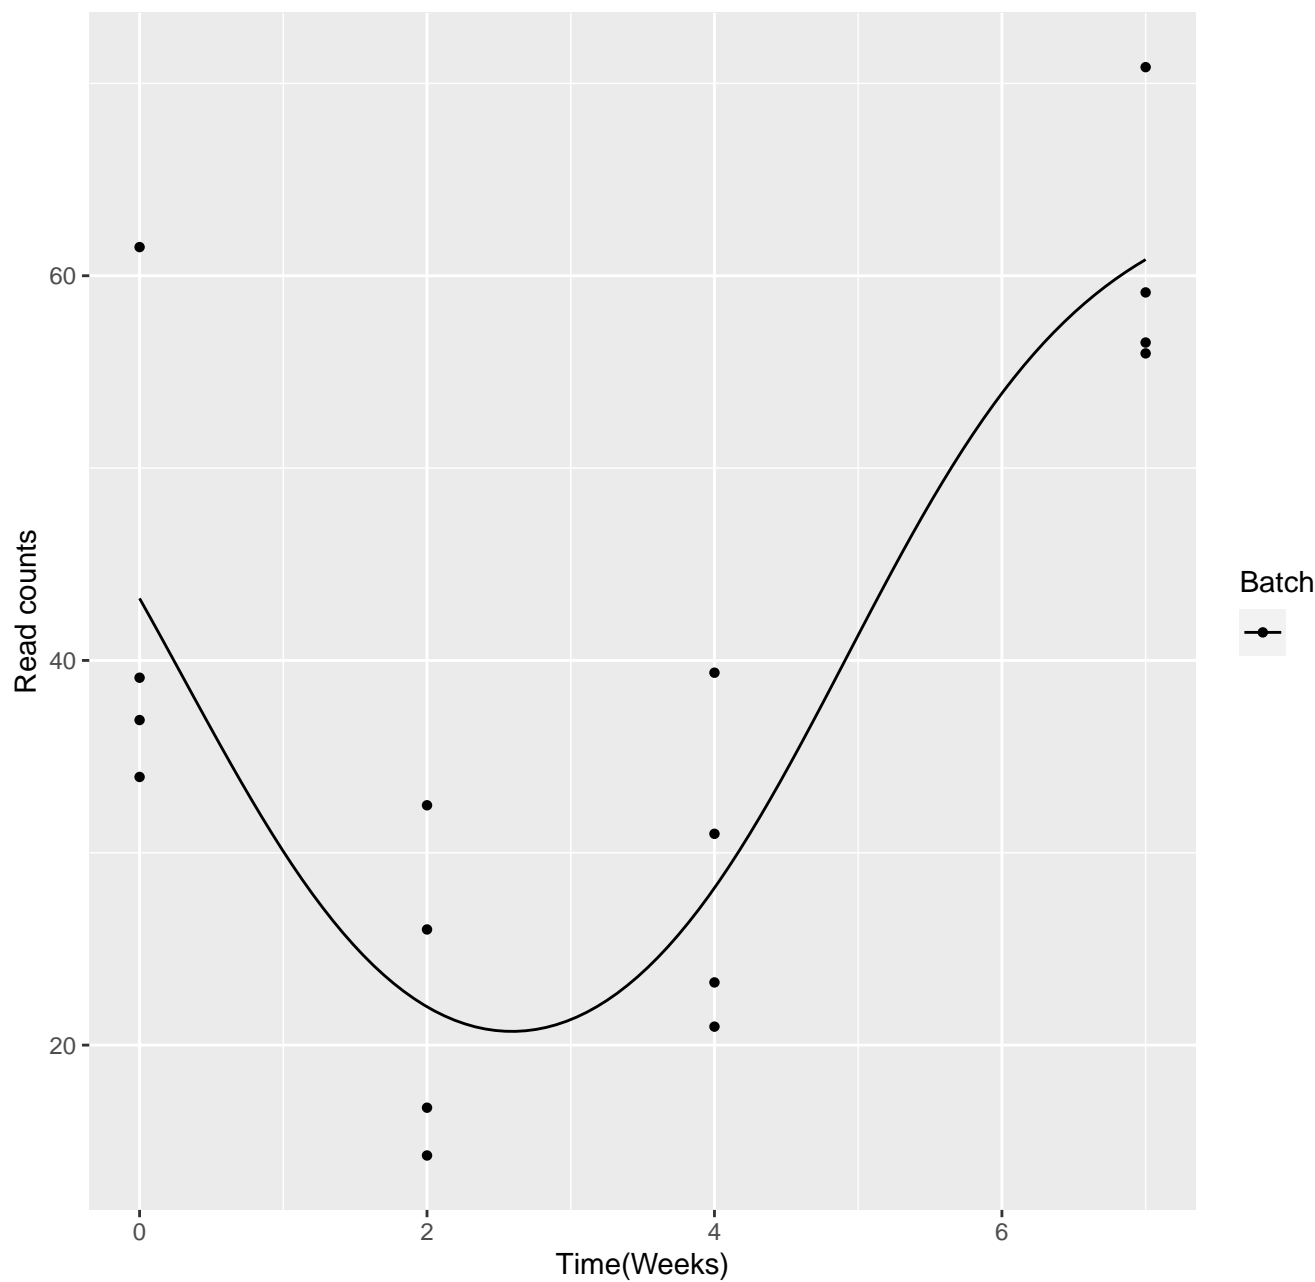

KDM6B:  $\log_{10} q = -2.74$

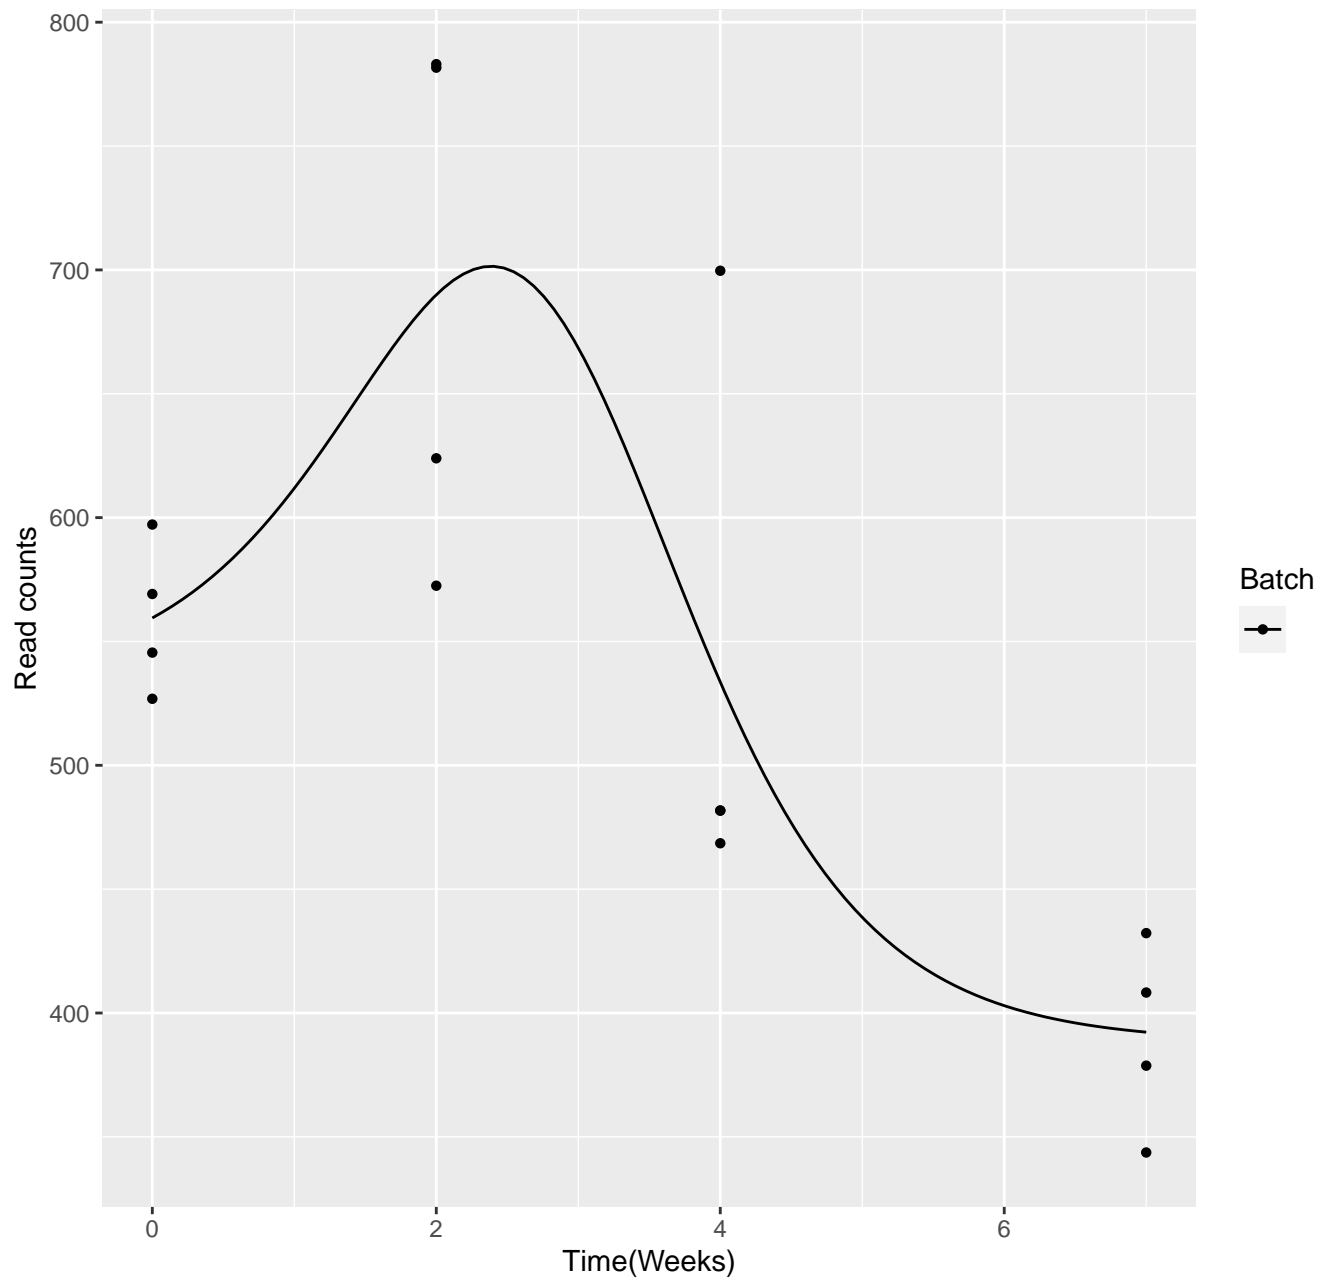

CCNB2:  $\log_{10} q = -2.73$

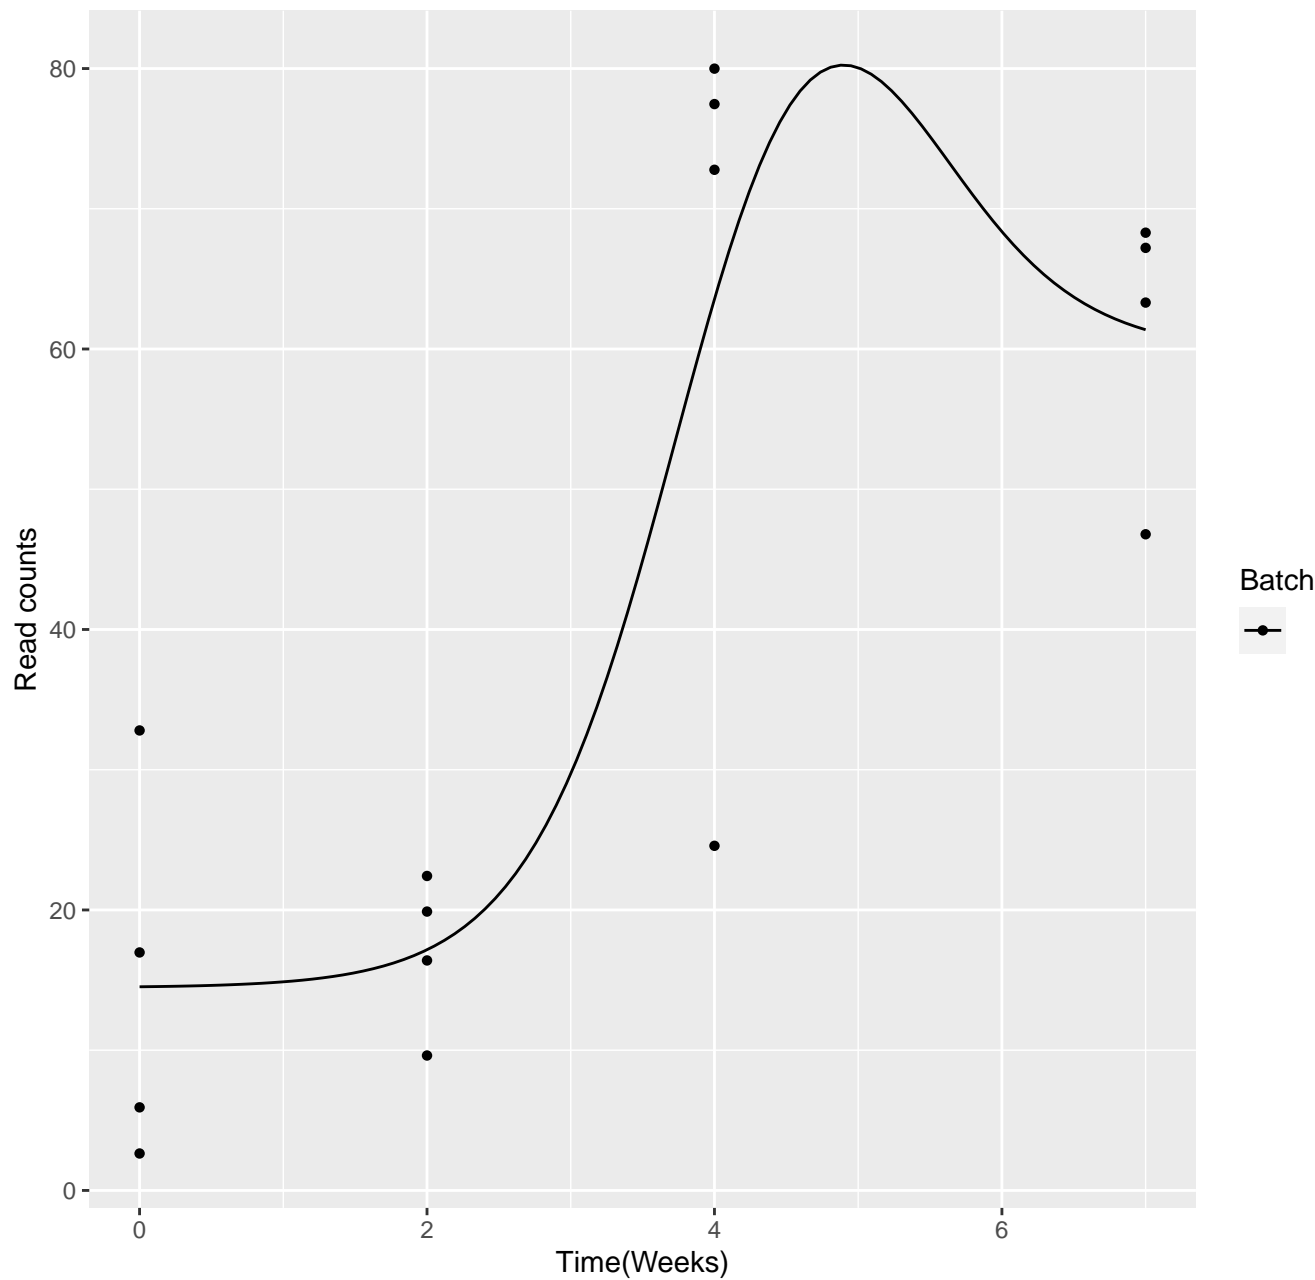

DAZAP2:  $\log_{10} q = -2.73$

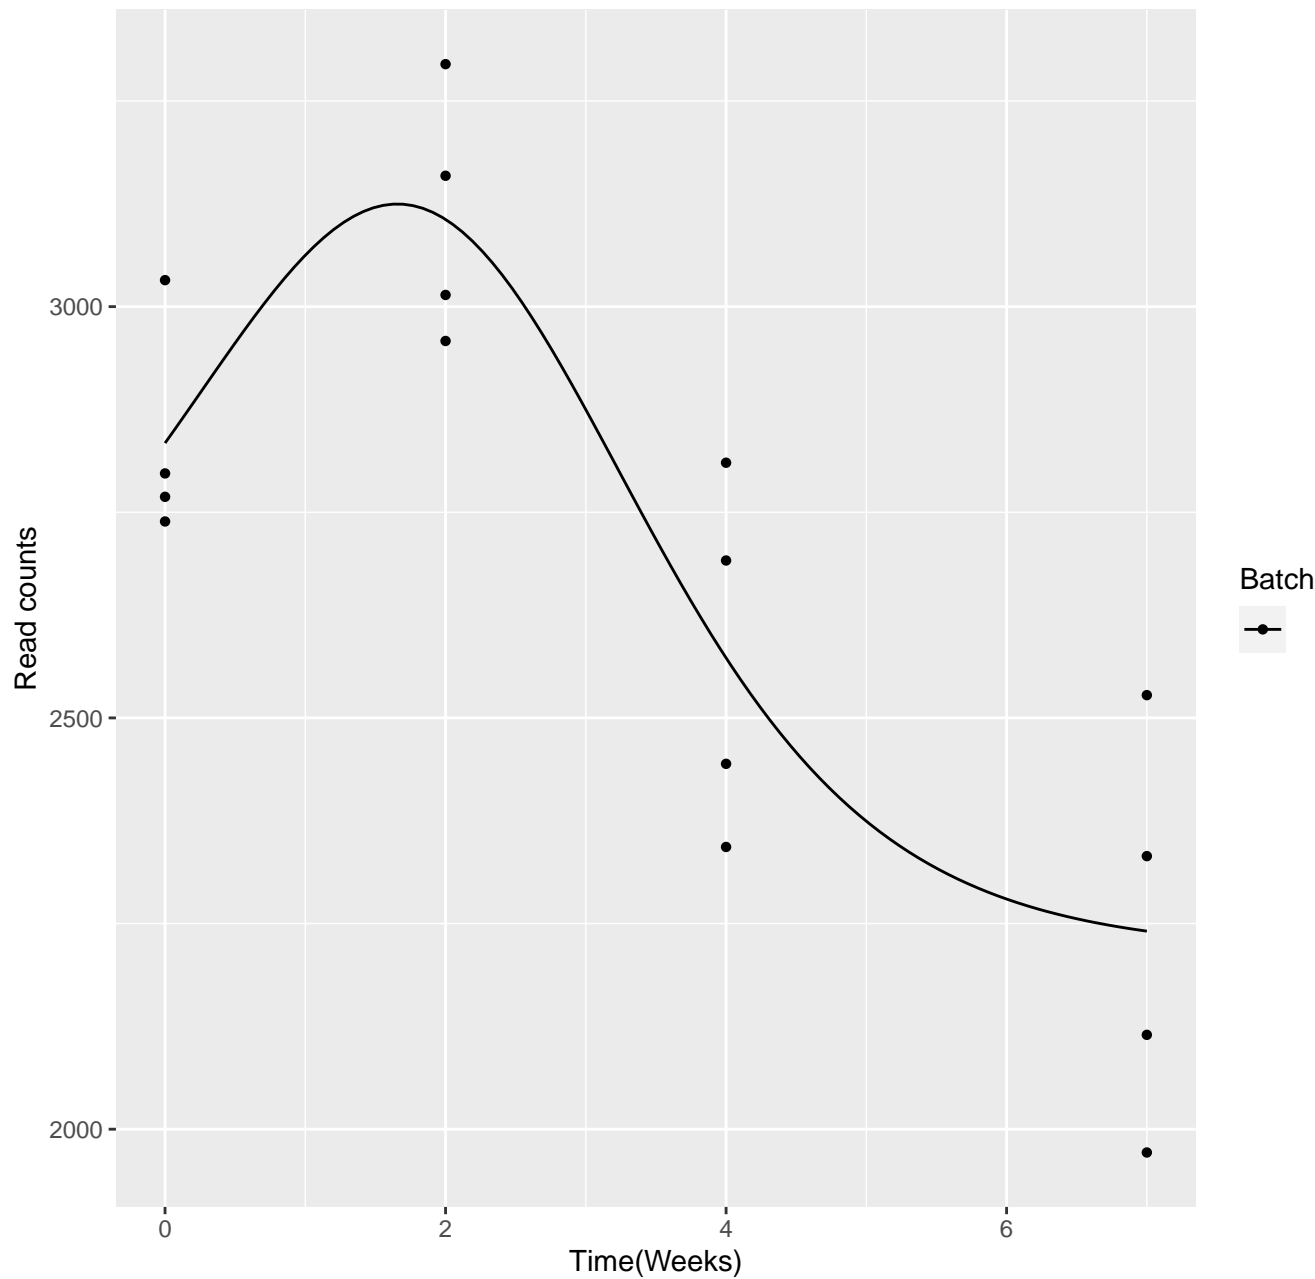

NFATC2:  $\log_{10} q = -2.73$

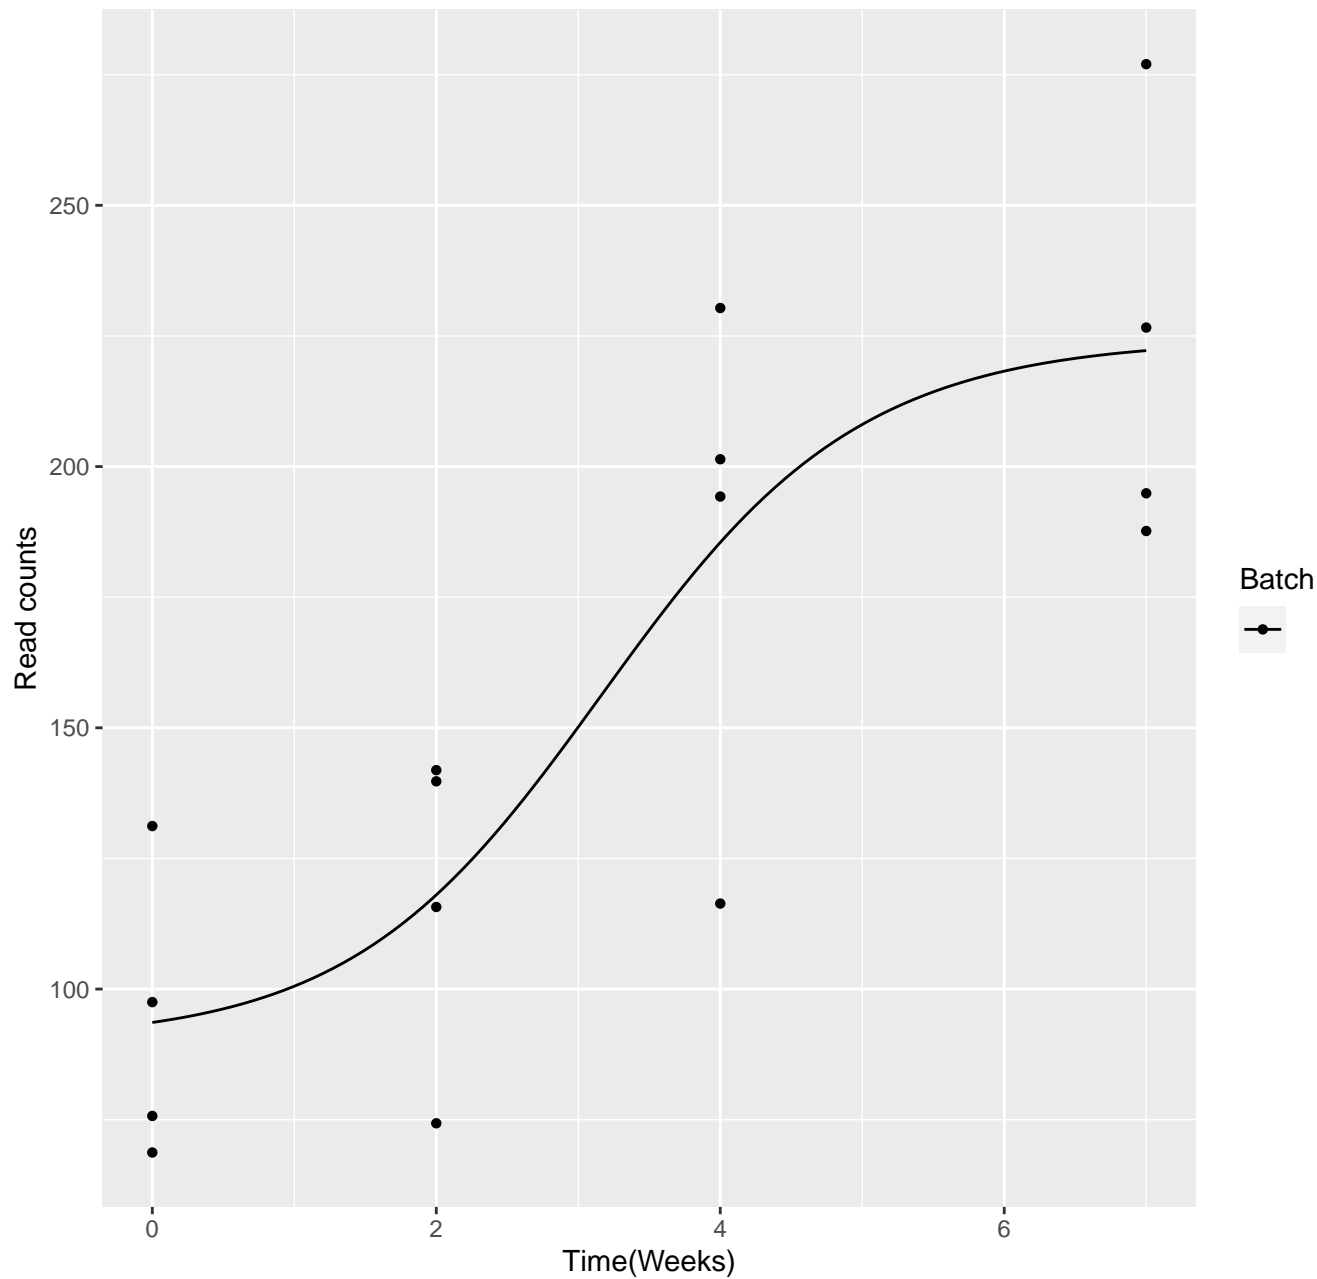

MYL9:  $\log_{10} q = -2.72$

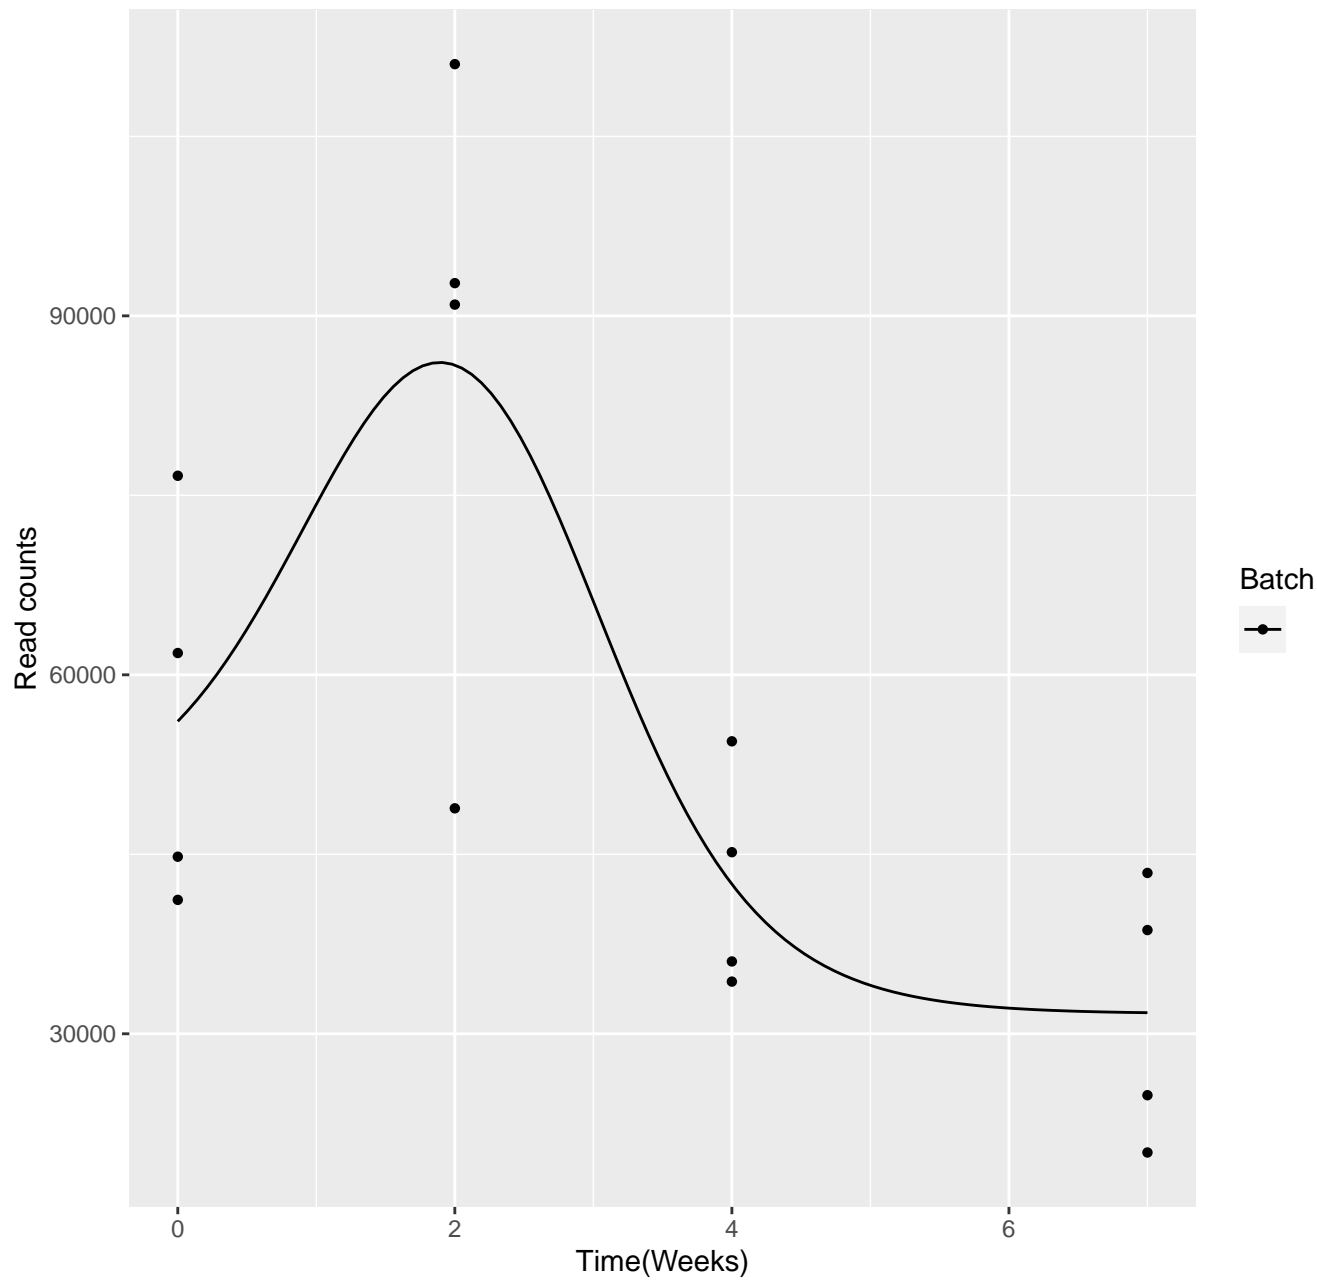

TMSB10:  $\log_{10} q = -2.72$

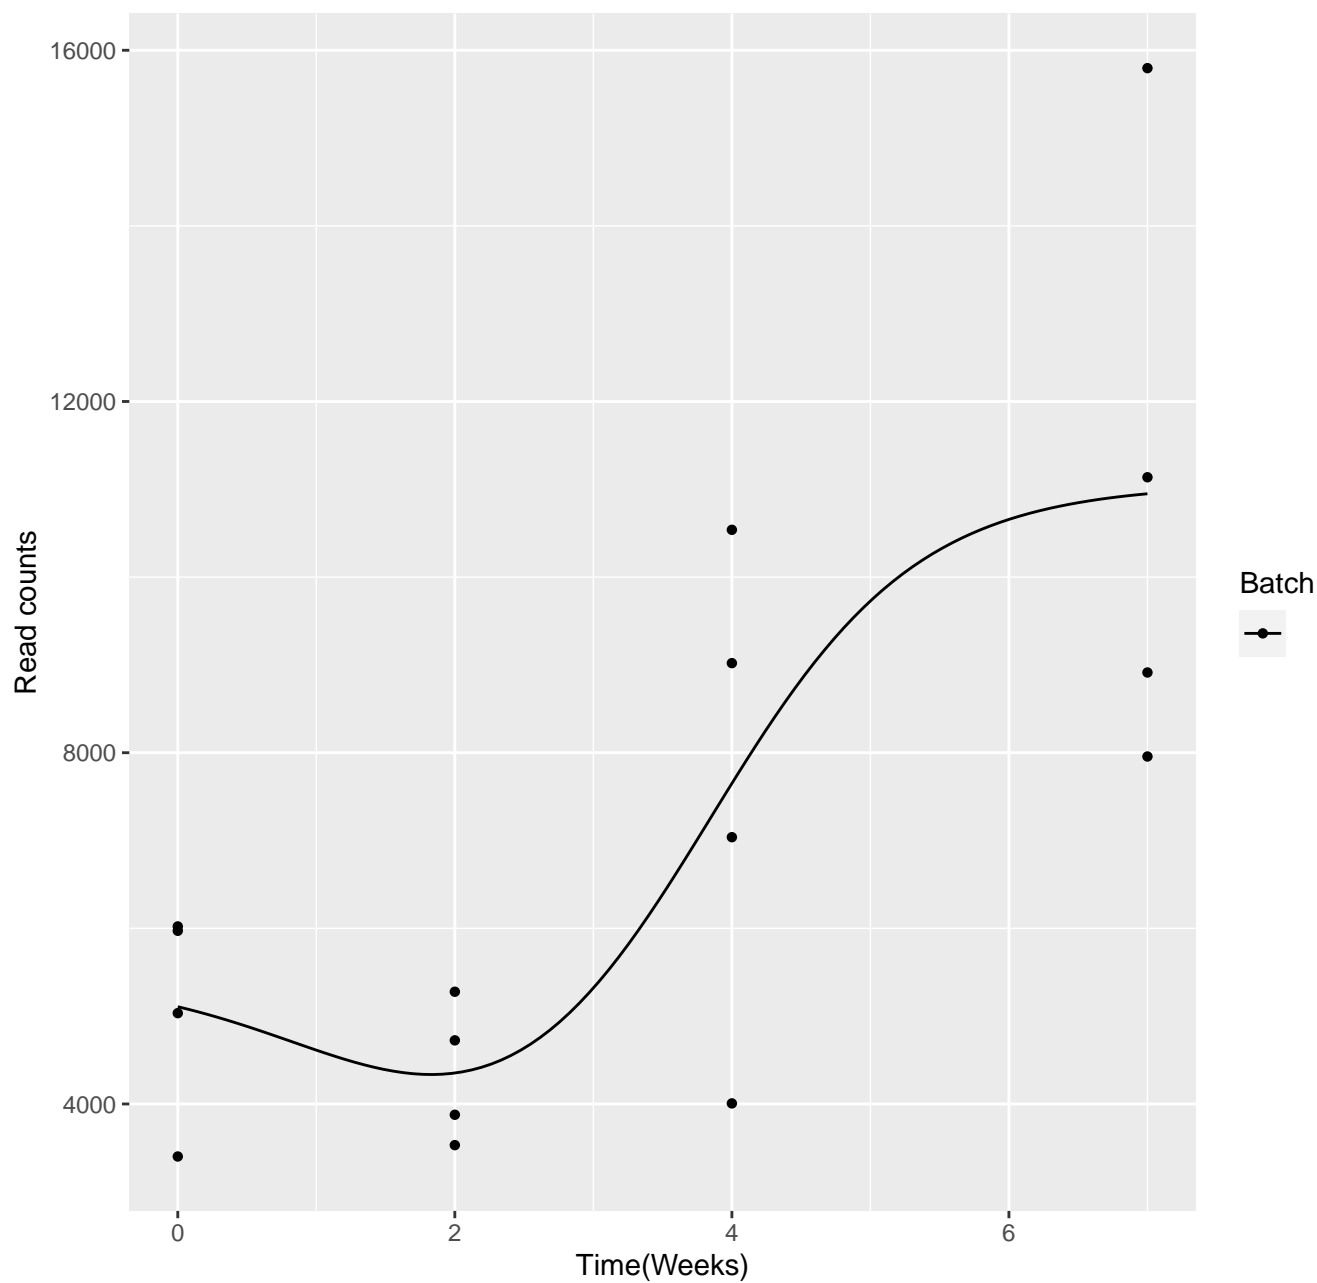



PRICKLE1:  $\log_{10} q = -2.72$

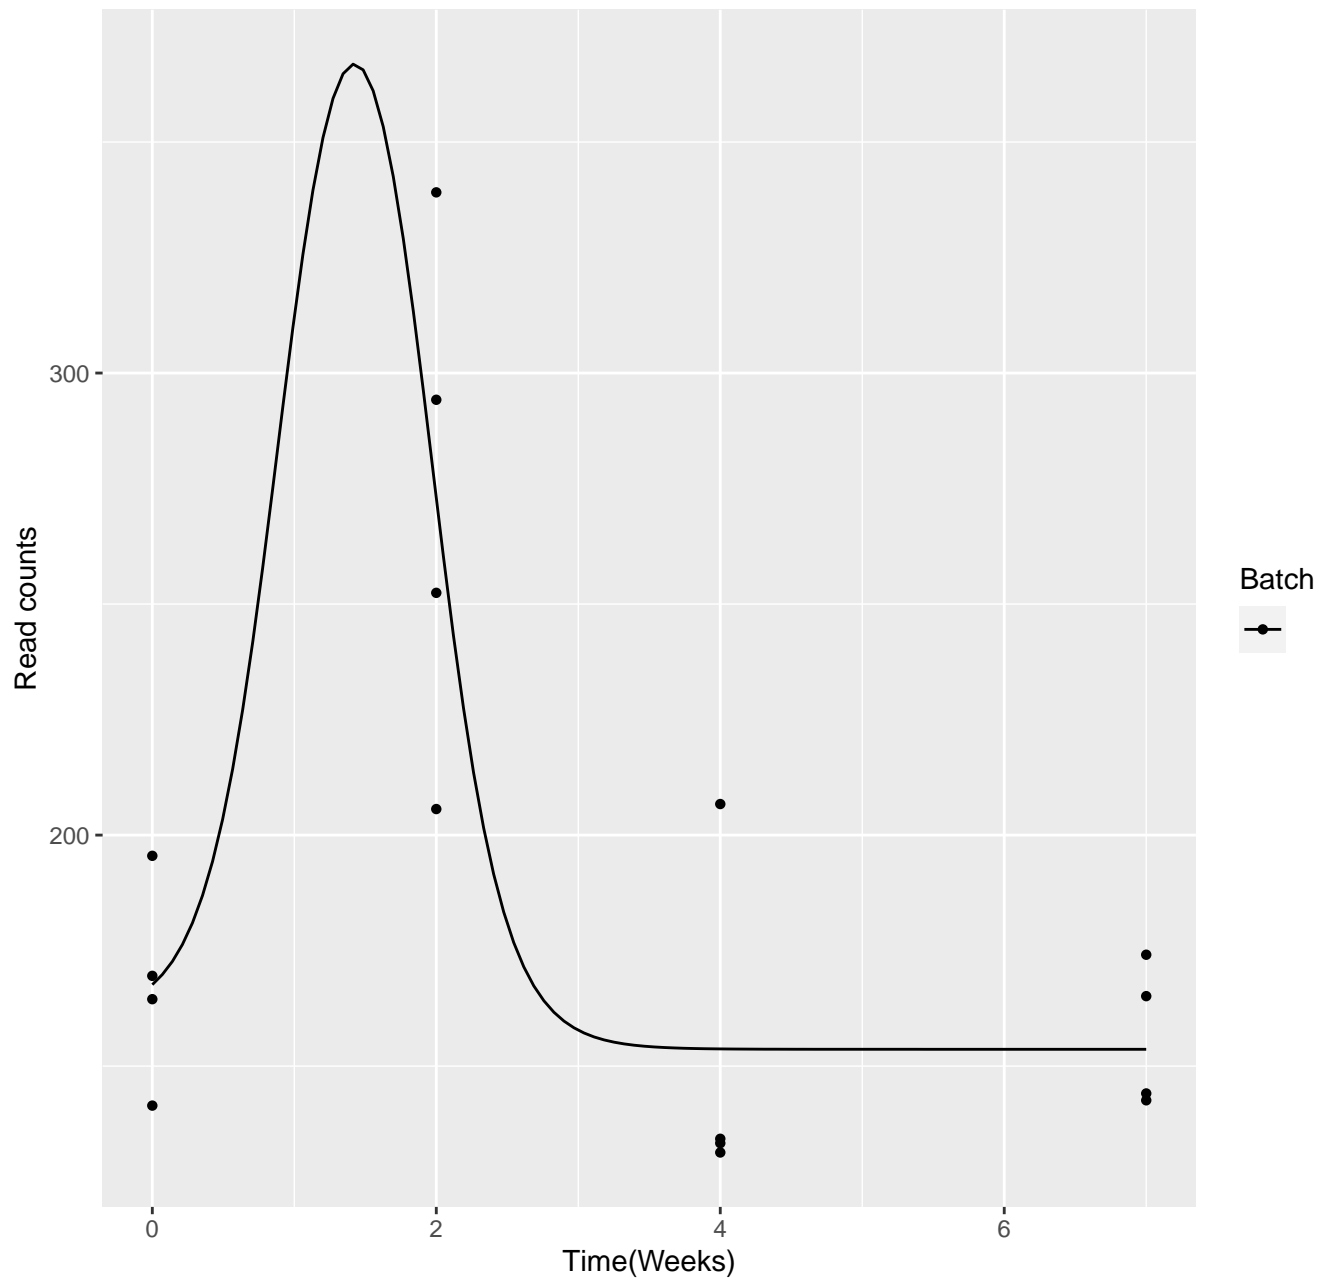

GINS1:  $\log_{10} q = -2.72$

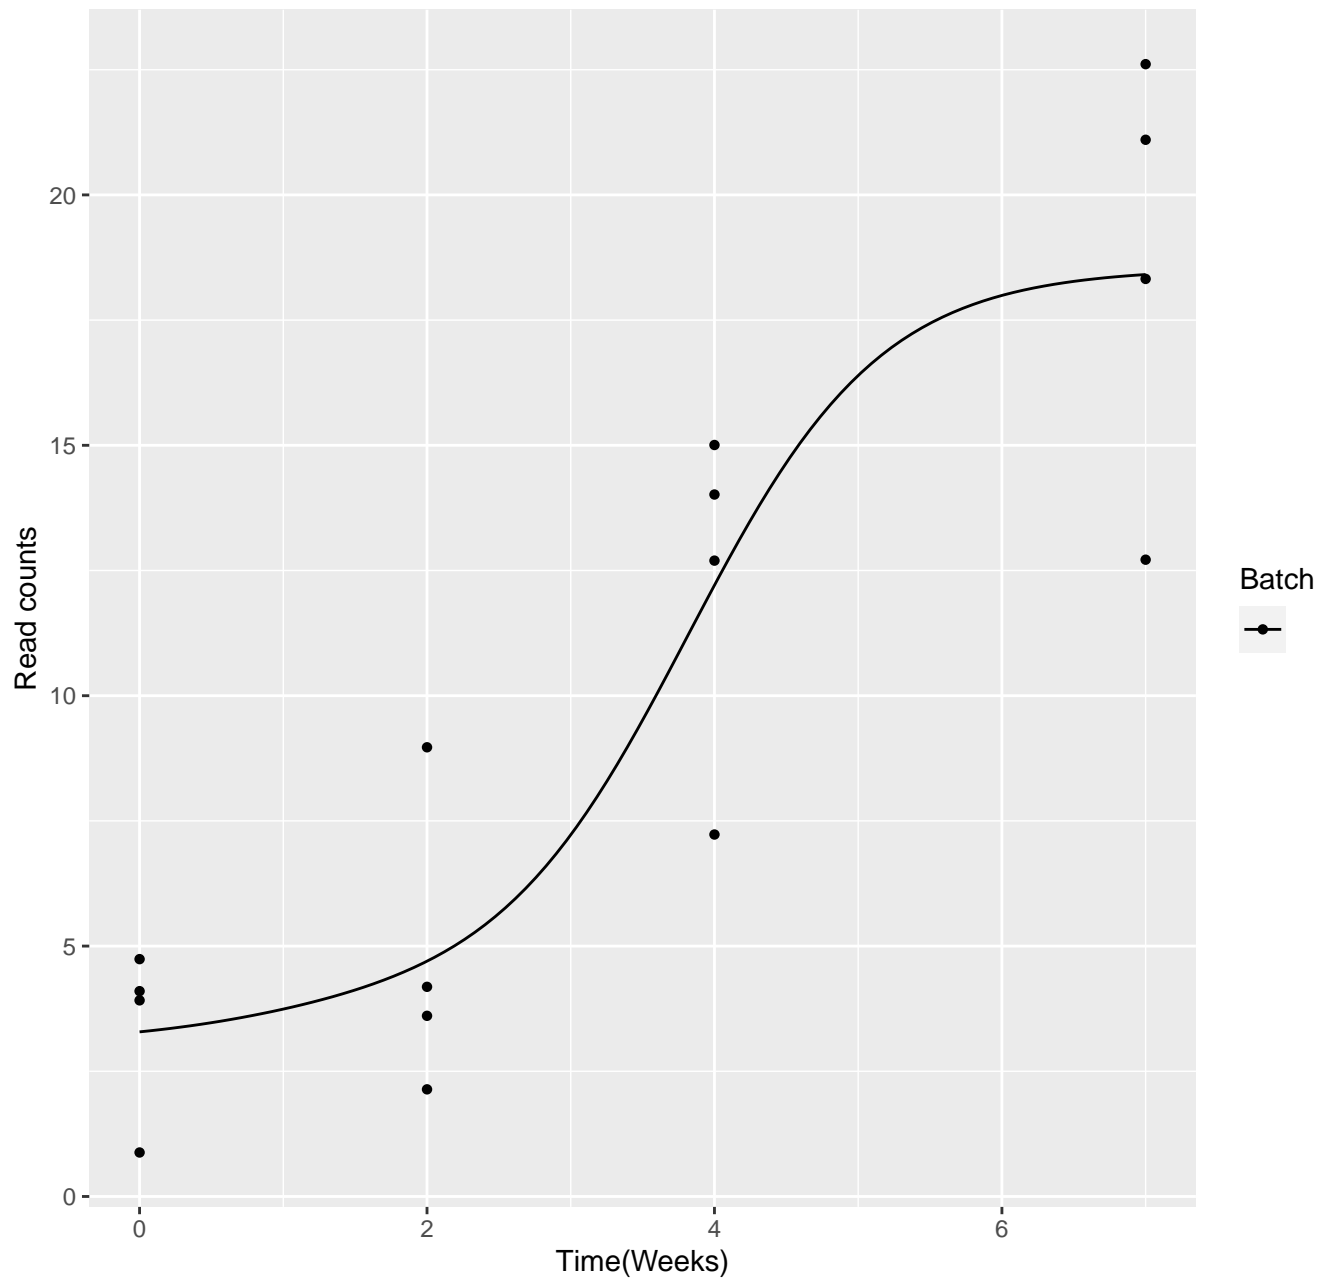

SCRG1:  $\log_{10} q = -2.72$

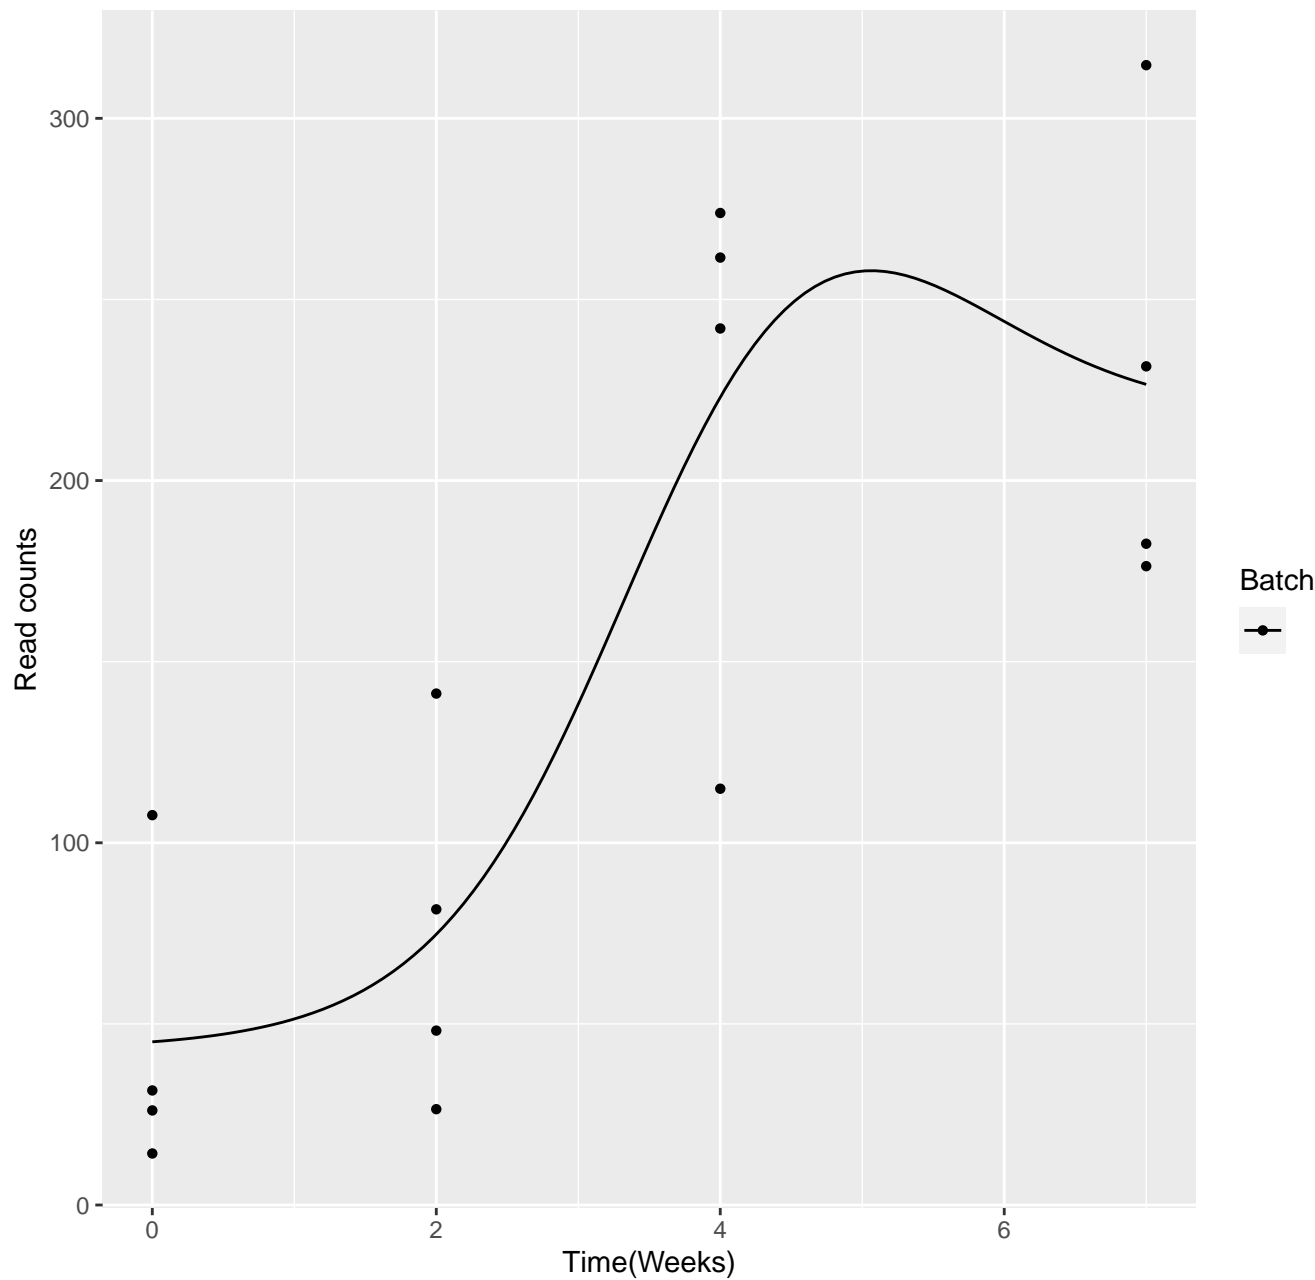

KLHL11:  $\log_{10} q = -2.72$

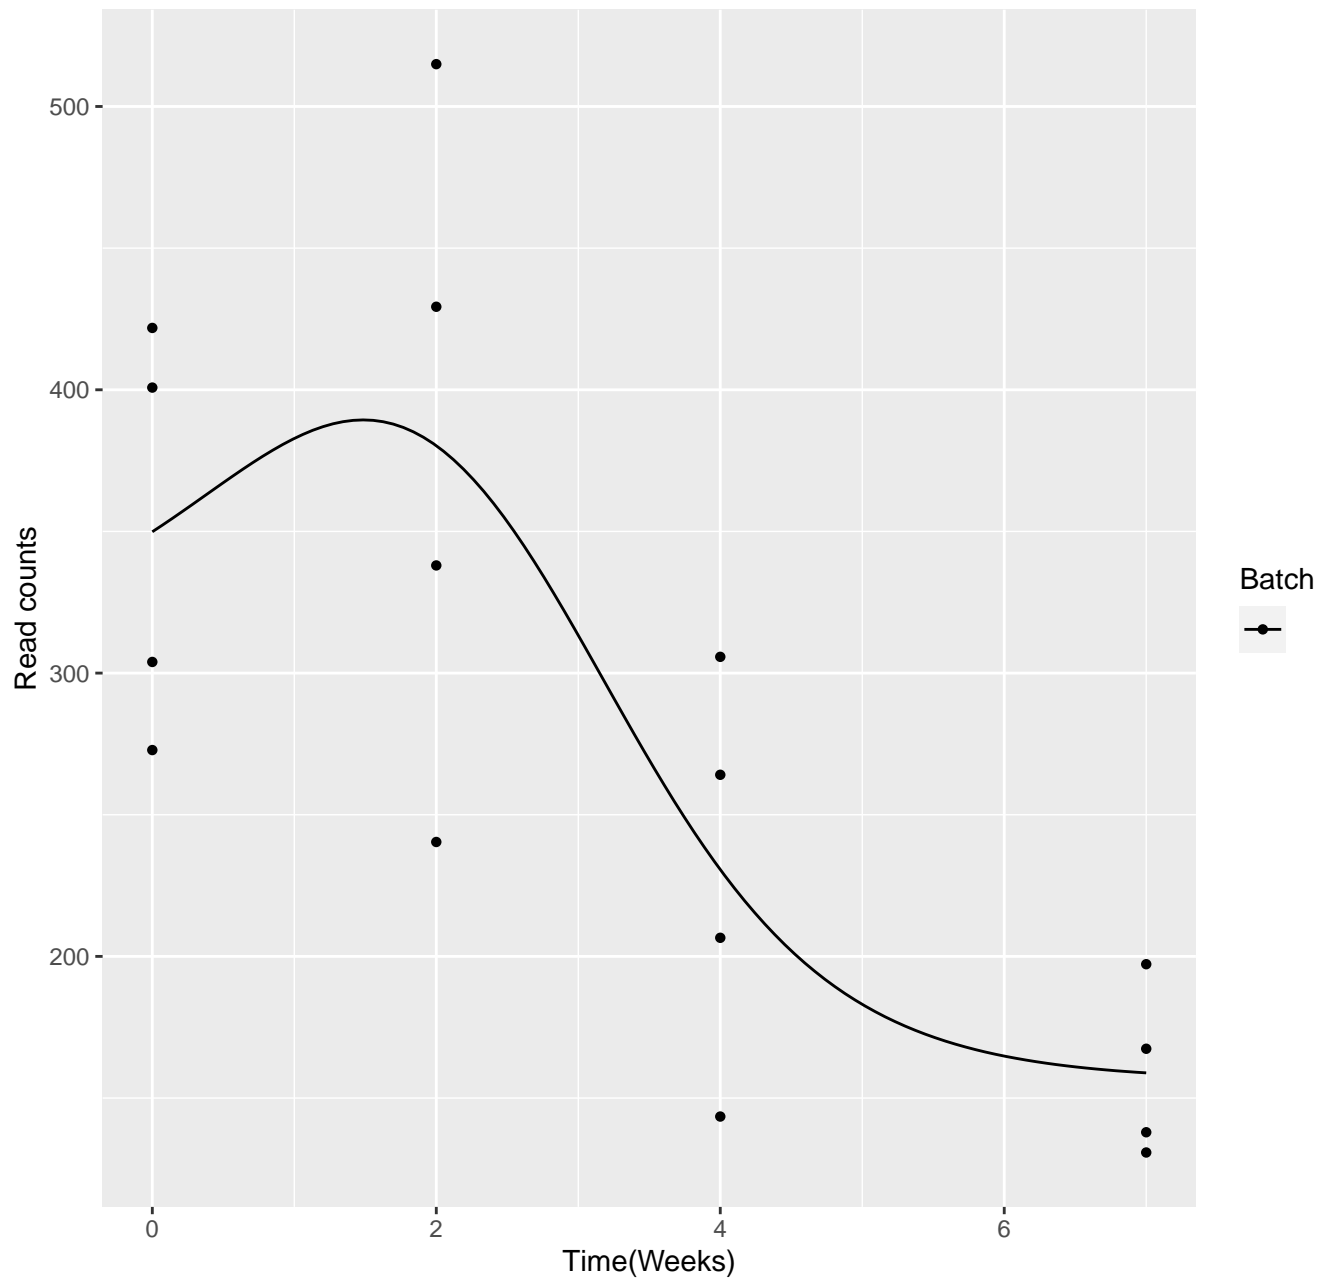

LOC100350649:  $\log_{10} q = -2.72$

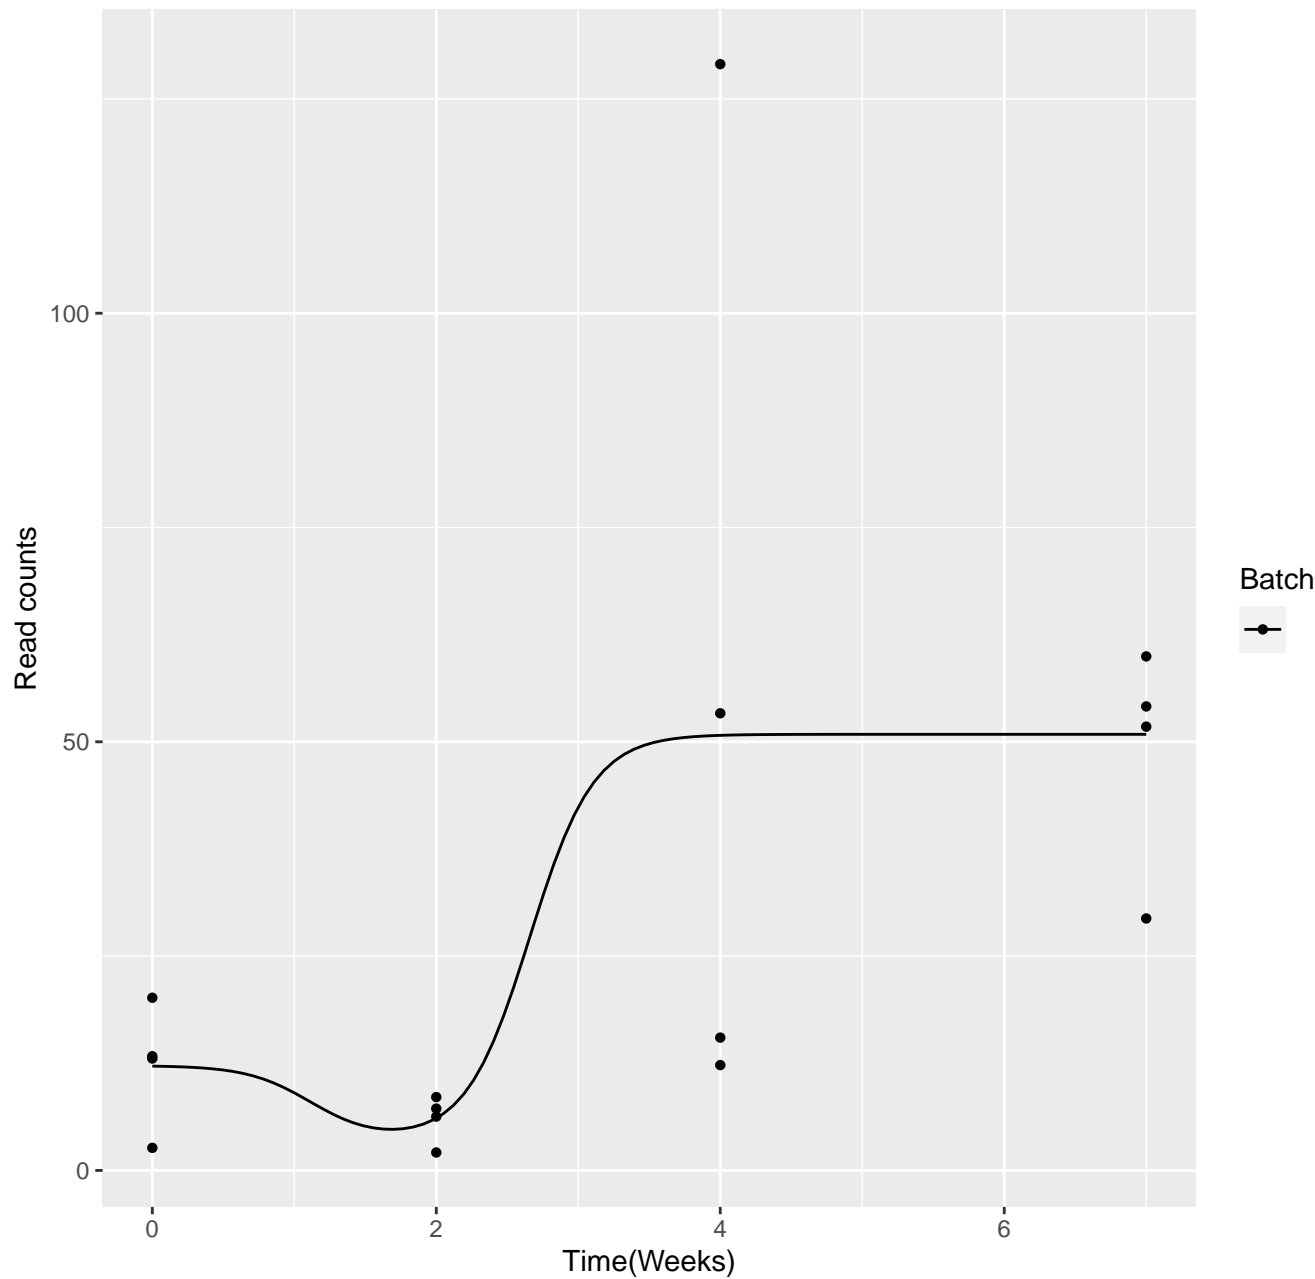

BEAN1:  $\log_{10} q = -2.72$

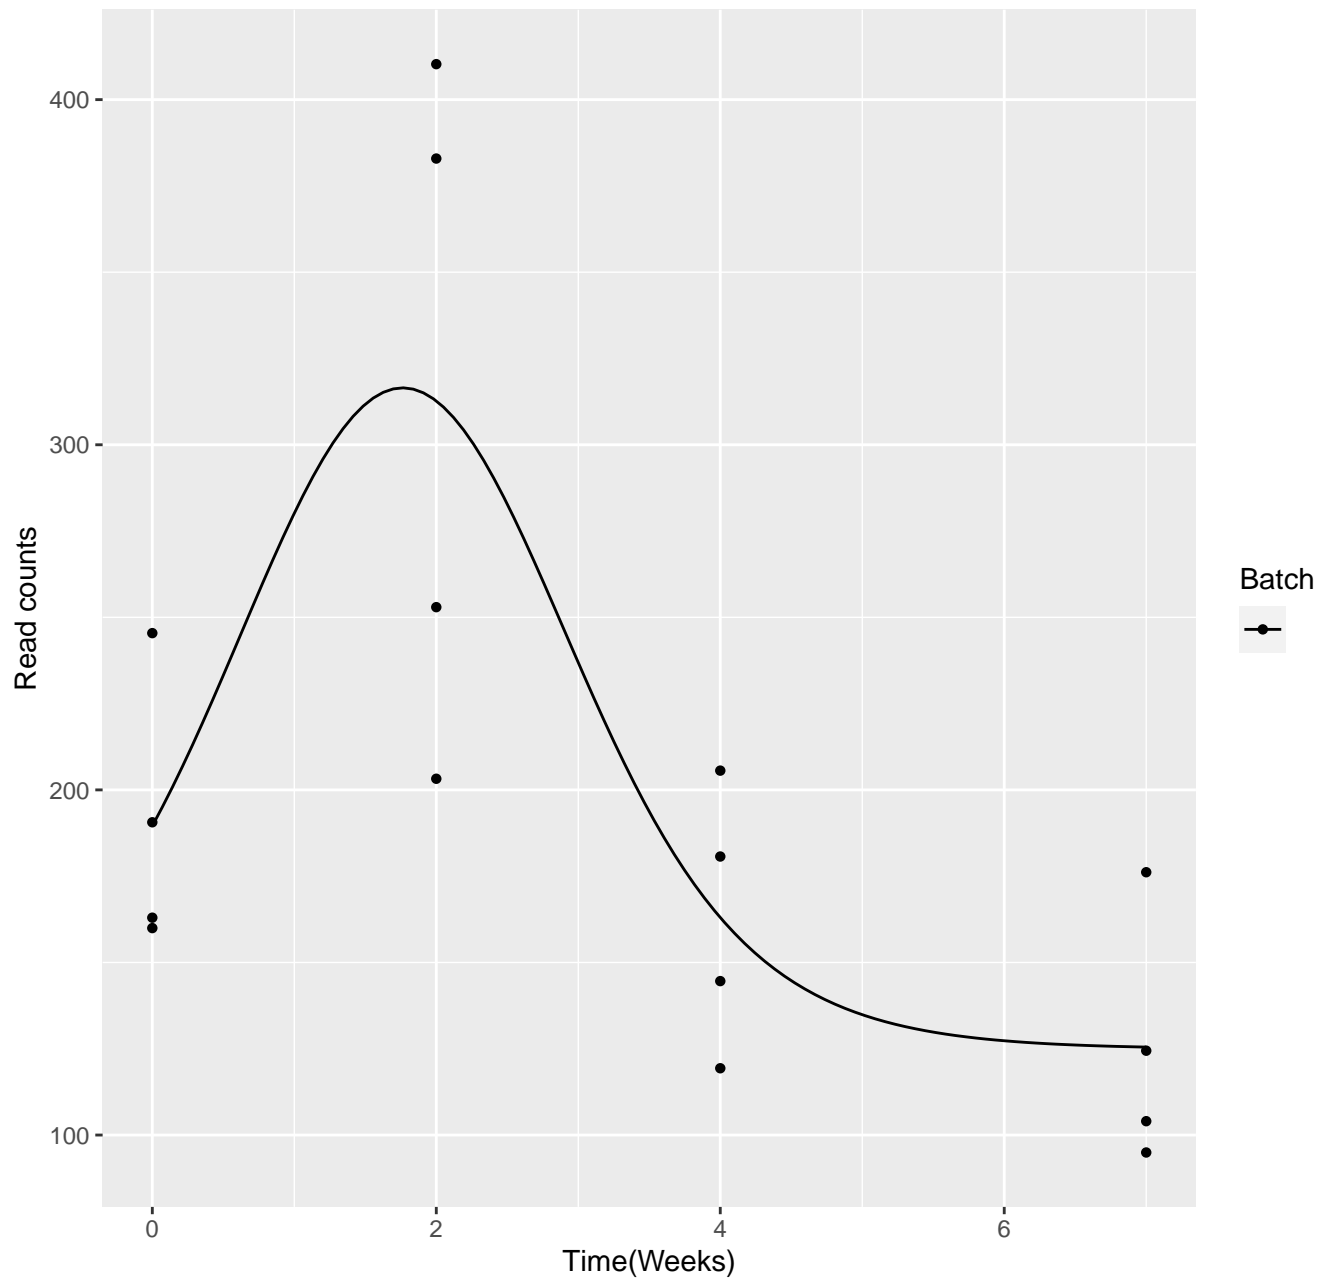

DENND1A:  $\log_{10} q = -2.72$

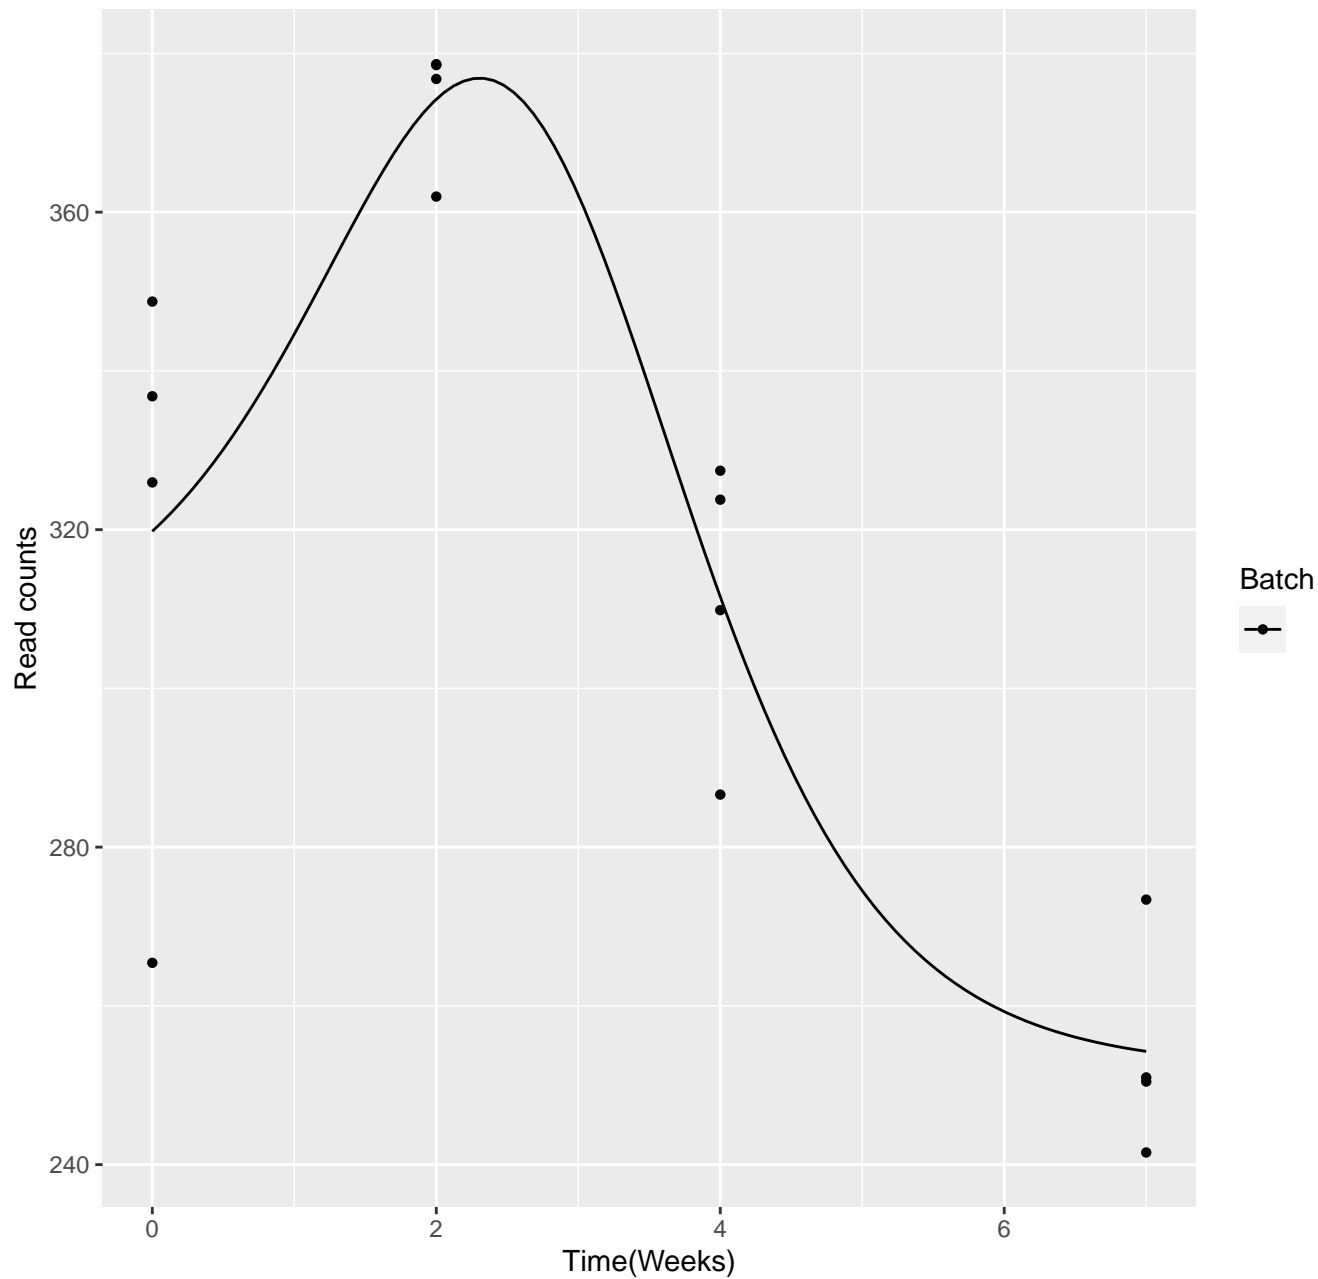

LOC100350709:  $\log_{10} q = -2.71$

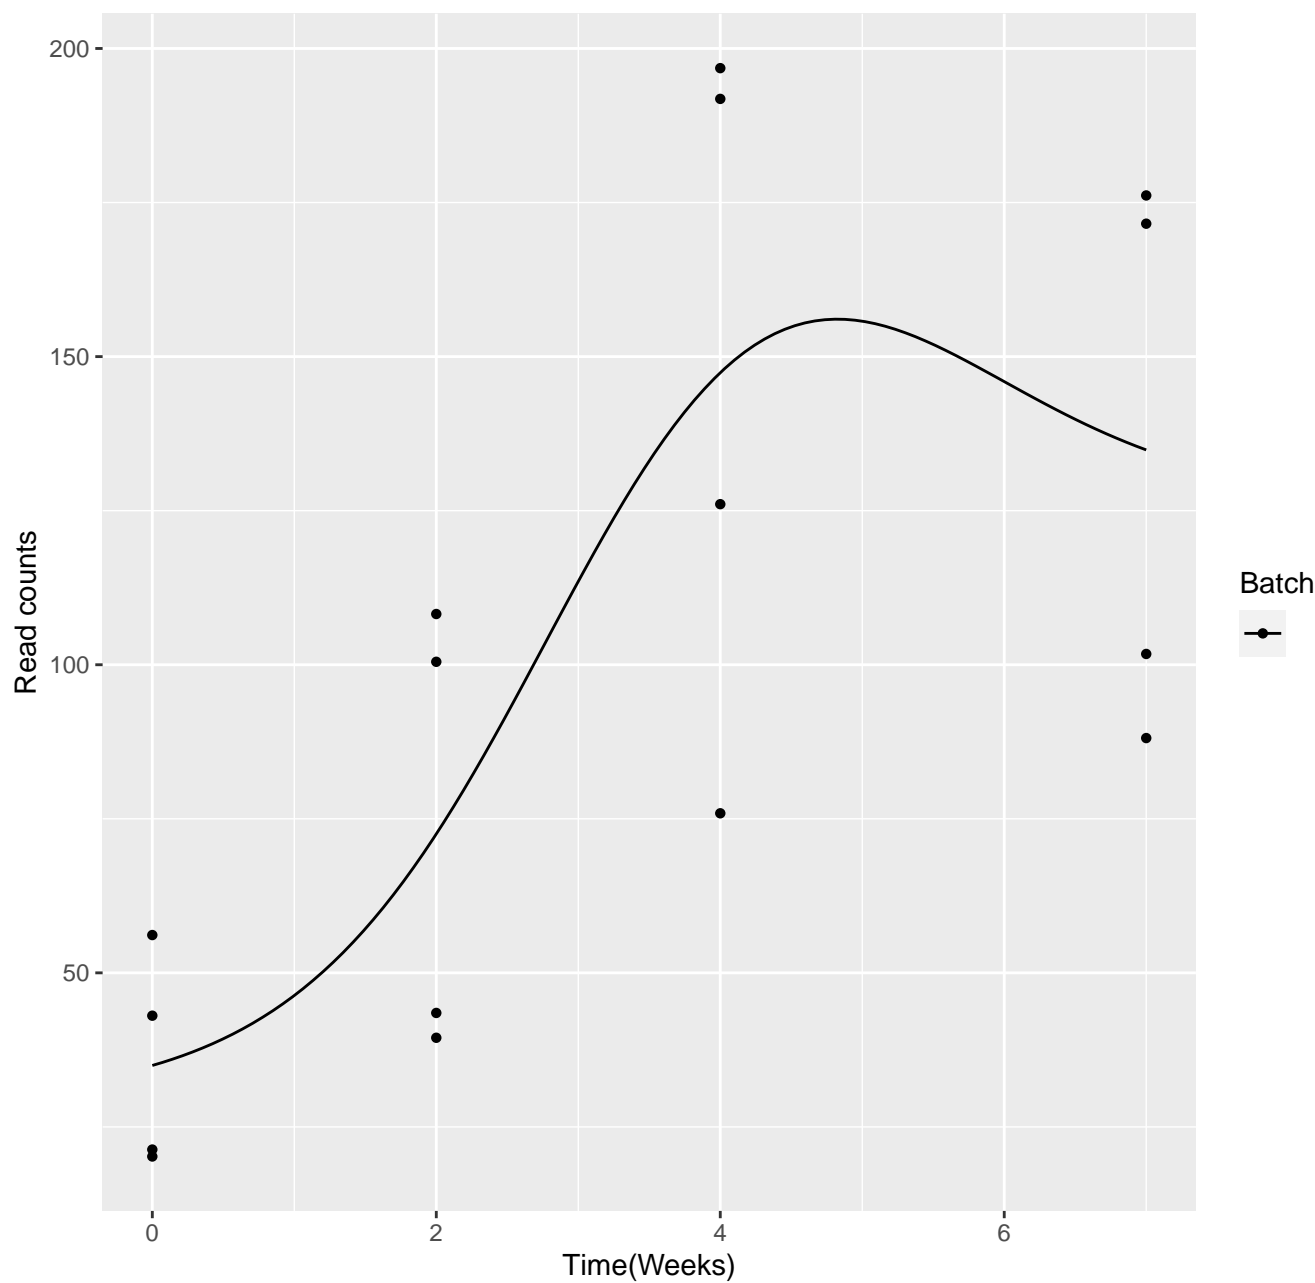



SULF1:  $\log_{10} q = -2.71$

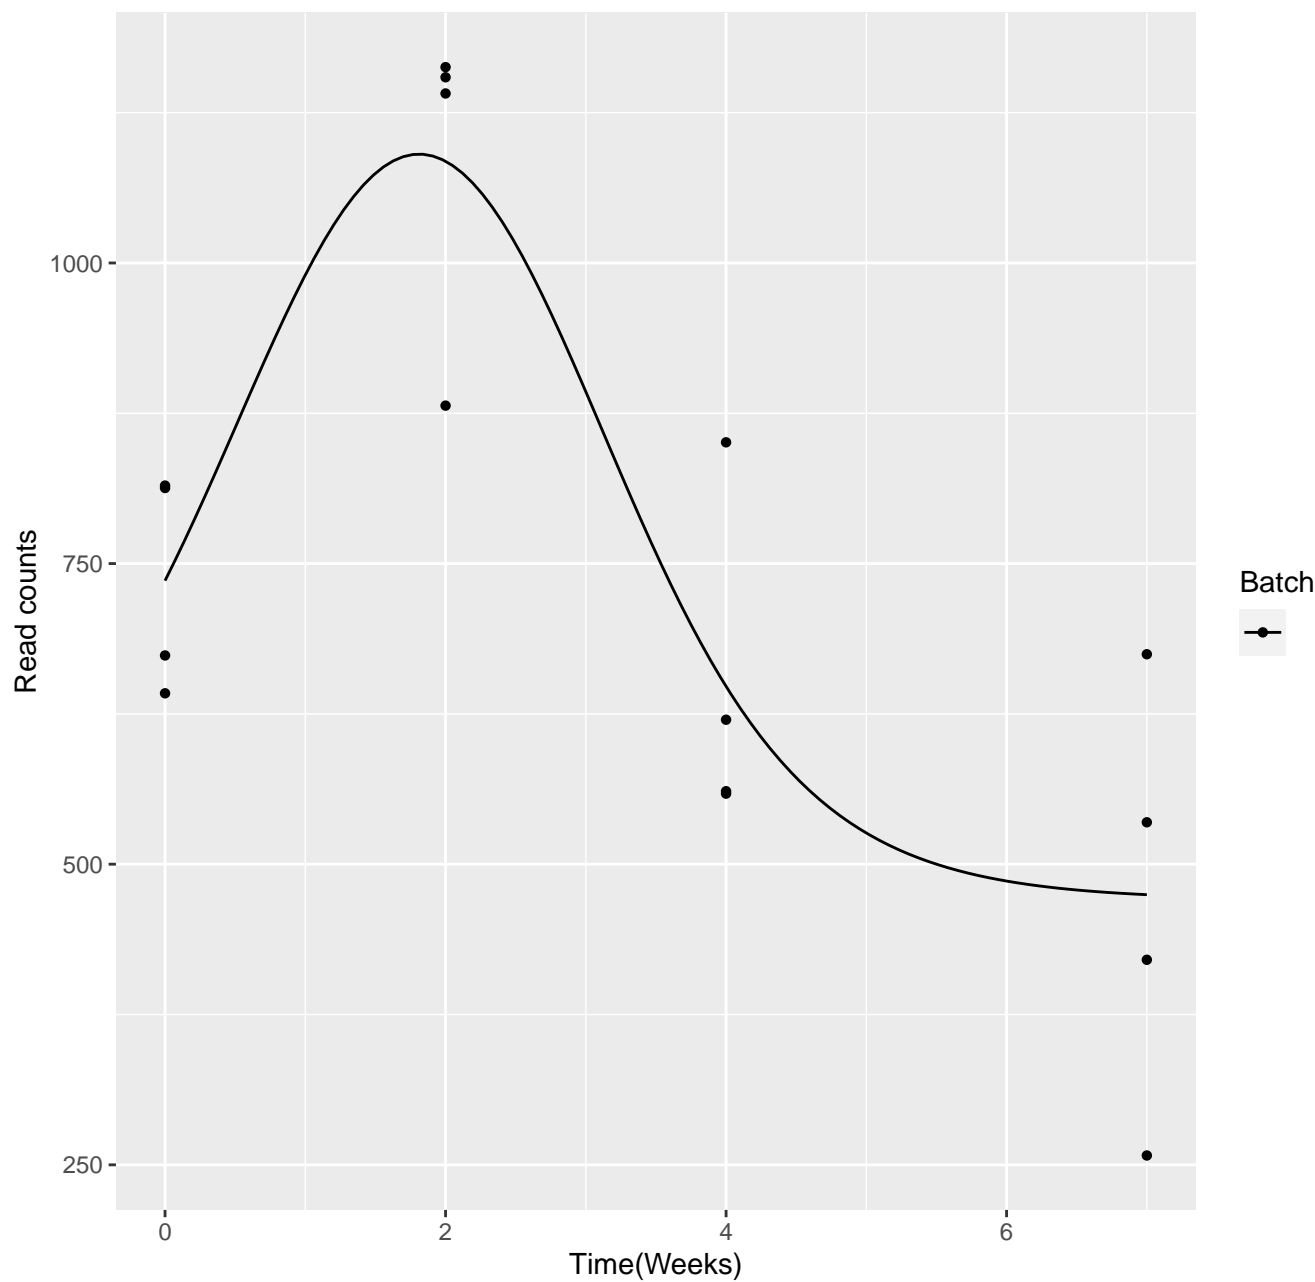

RNF150:  $\log_{10} q = -2.71$

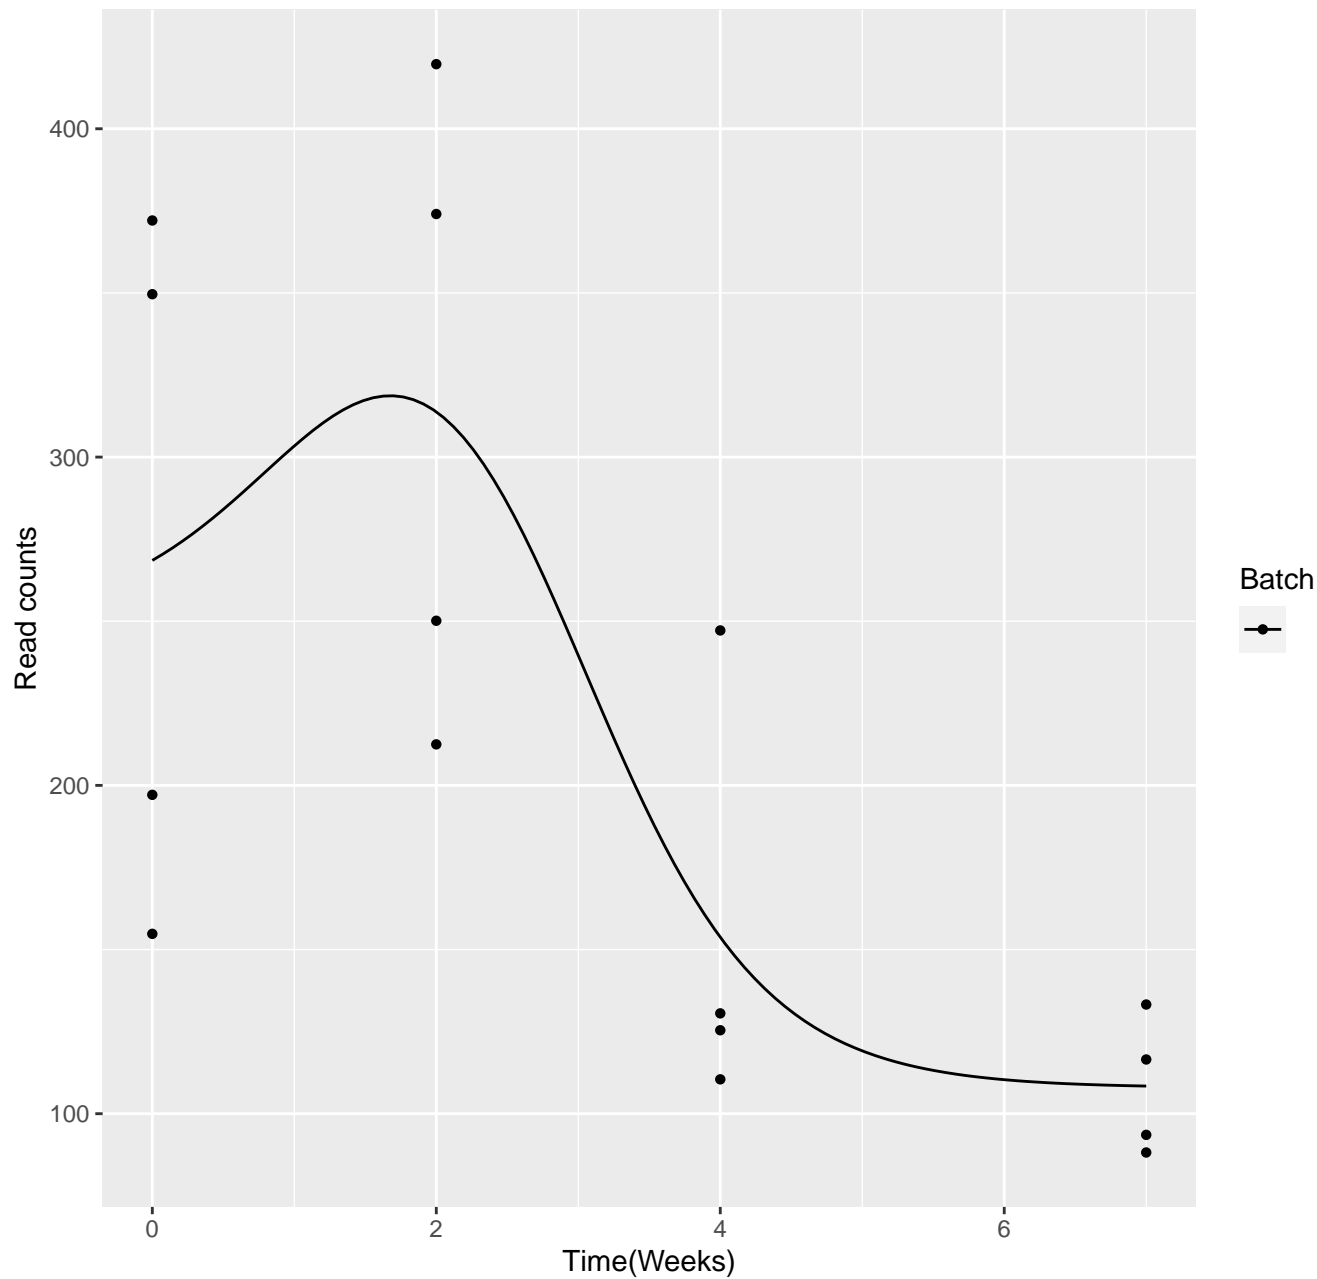

SOWAHD:  $\log_{10} q = -2.71$

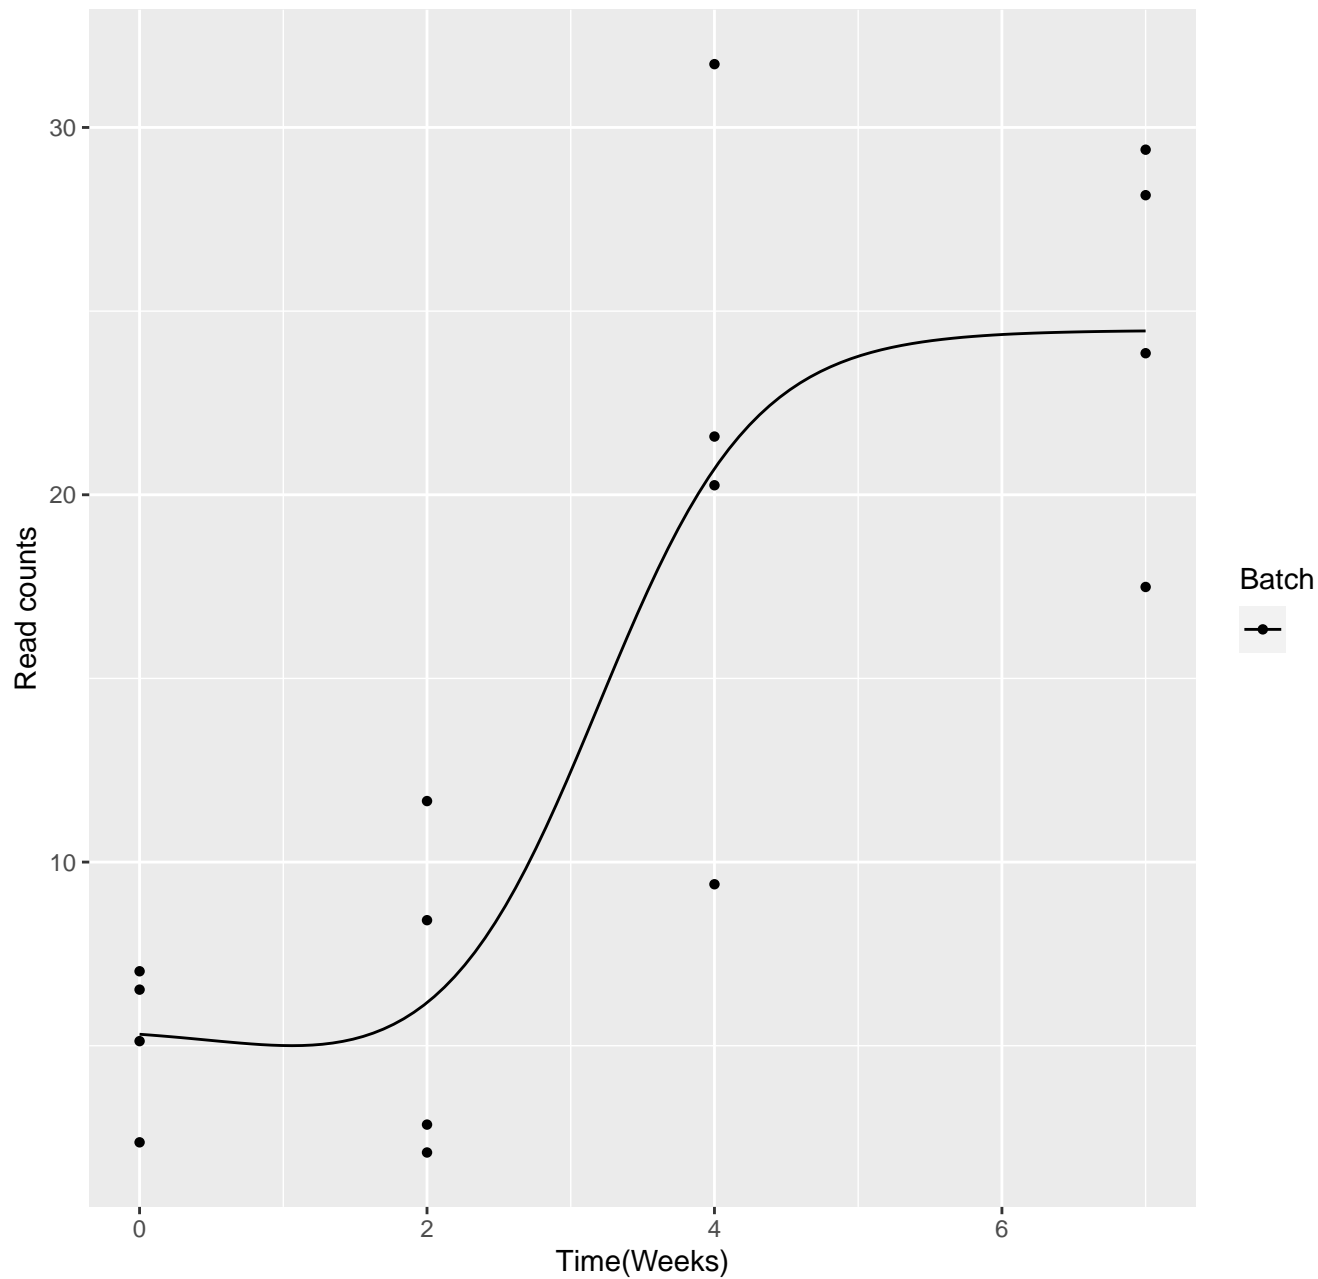

CHST3:  $\log_{10} q = -2.71$

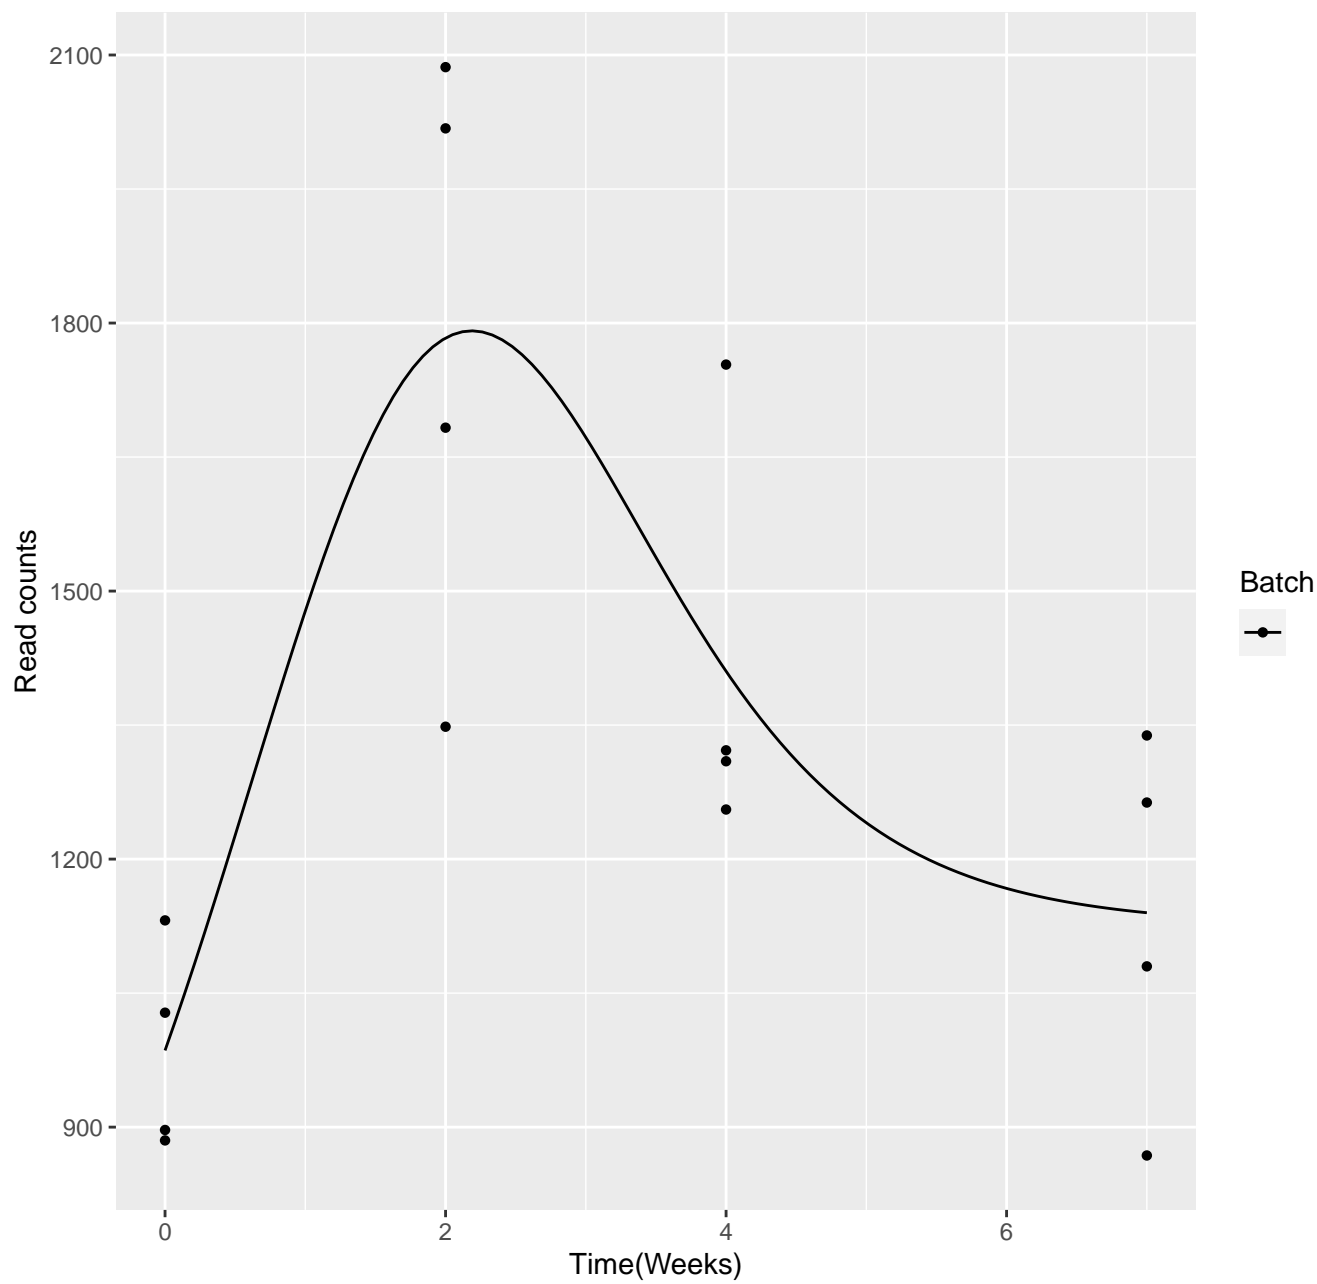

LOC100346606:  $\log_{10} q = -2.71$

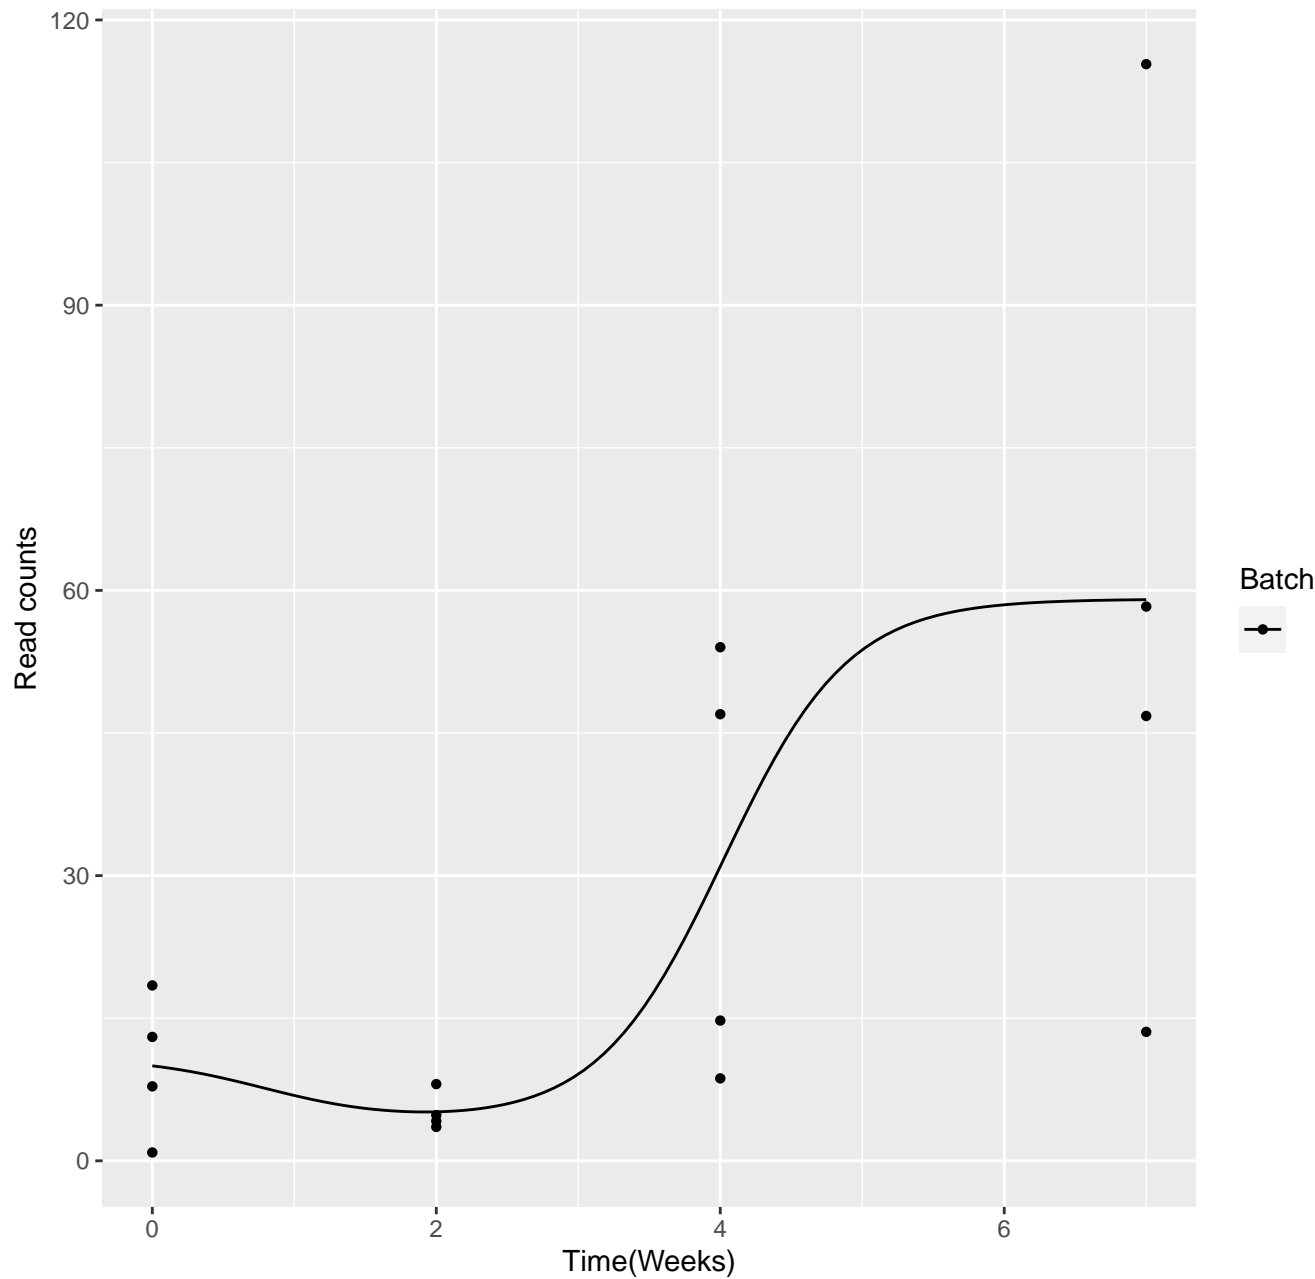

RASGRP4:  $\log_{10} q = -2.7$

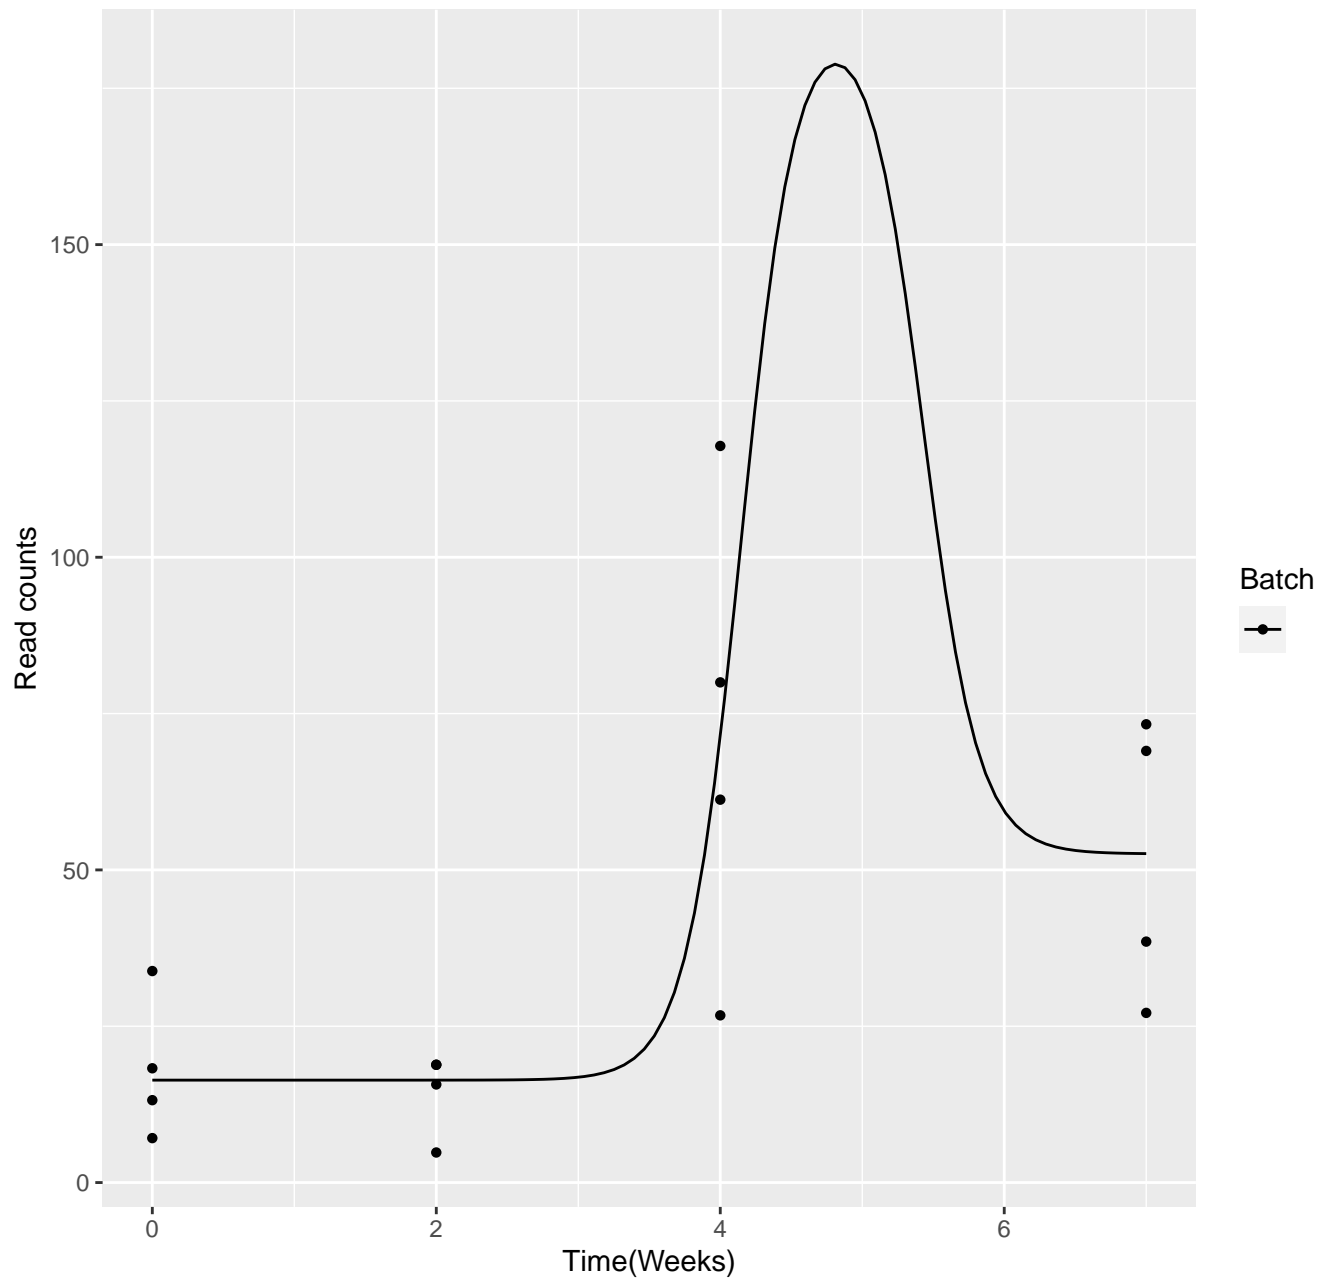

PPP2CB:  $\log_{10} q = -2.7$

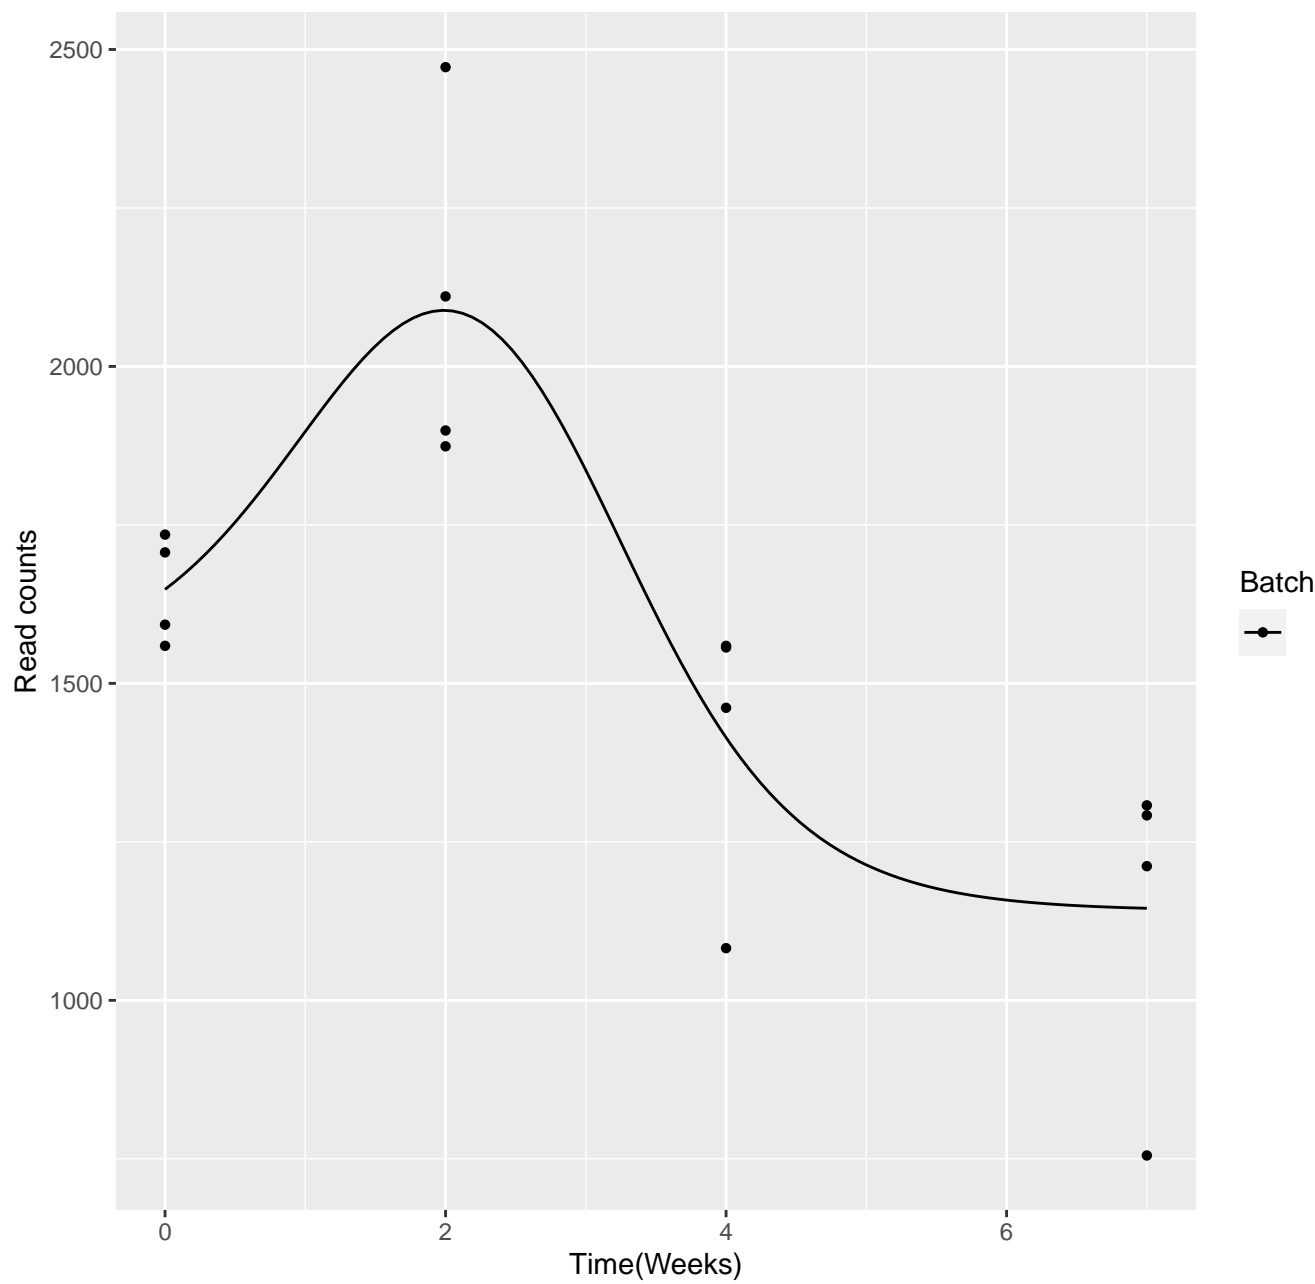

TEAD4:  $\log_{10} q = -2.7$

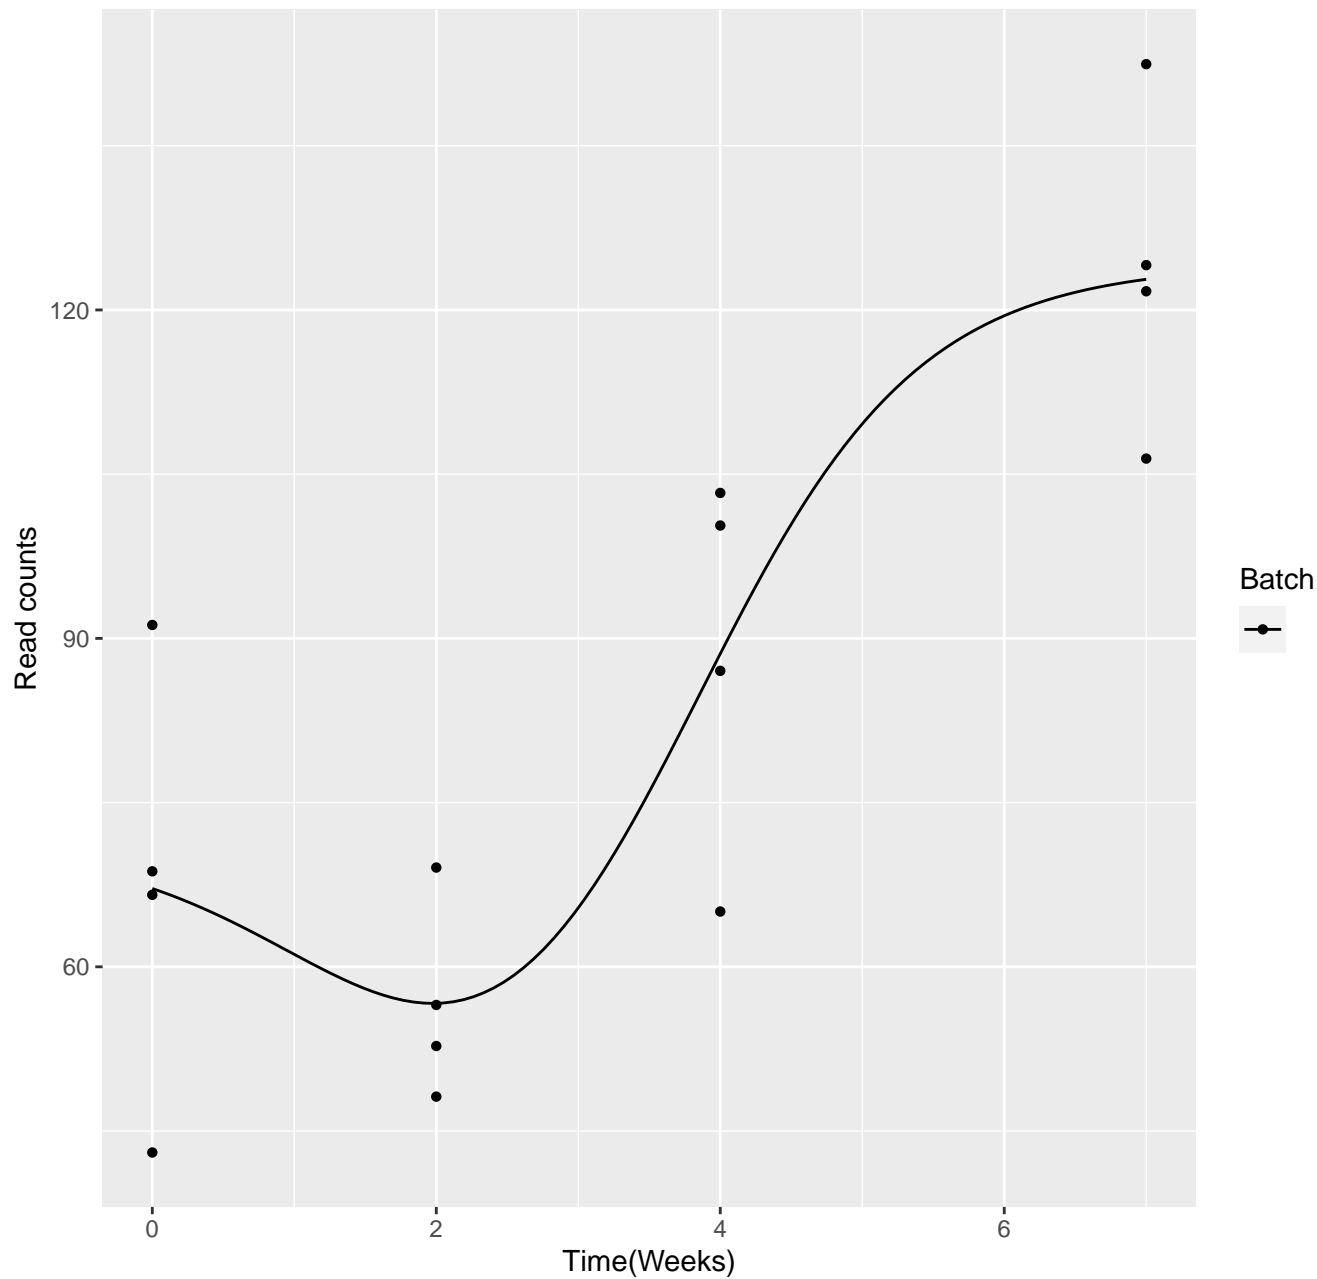



GP1BB:  $\log_{10} q = -2.69$

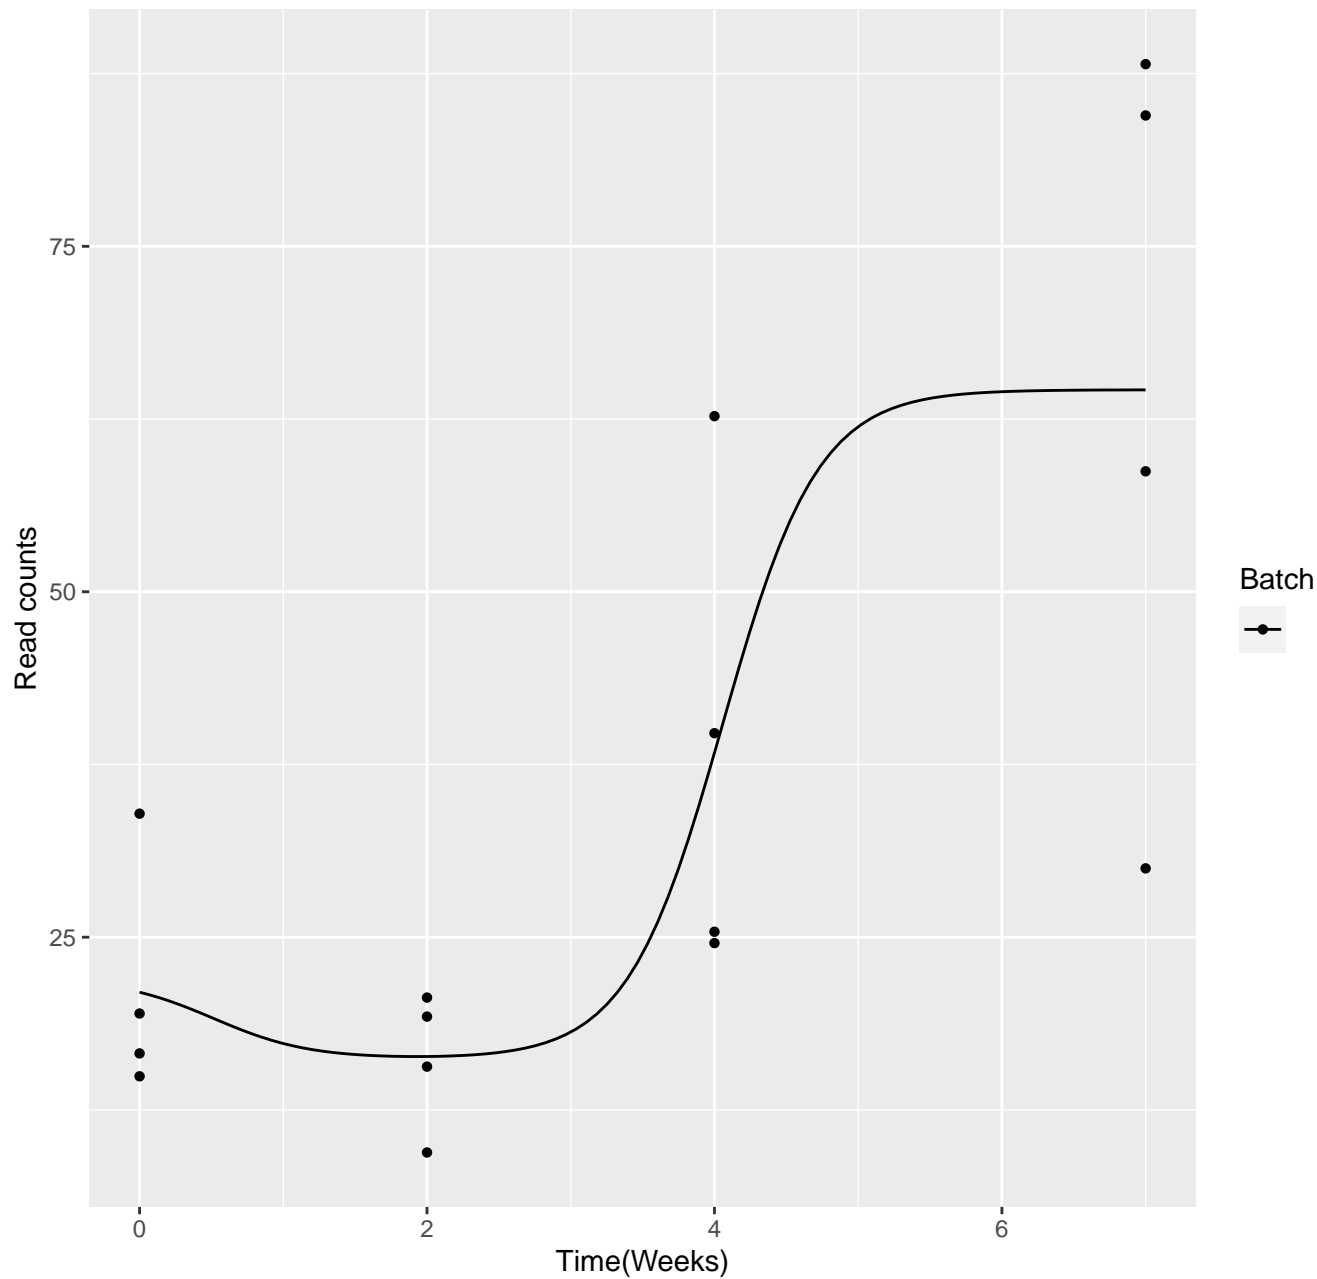

VMP1:  $\log_{10} q = -2.69$

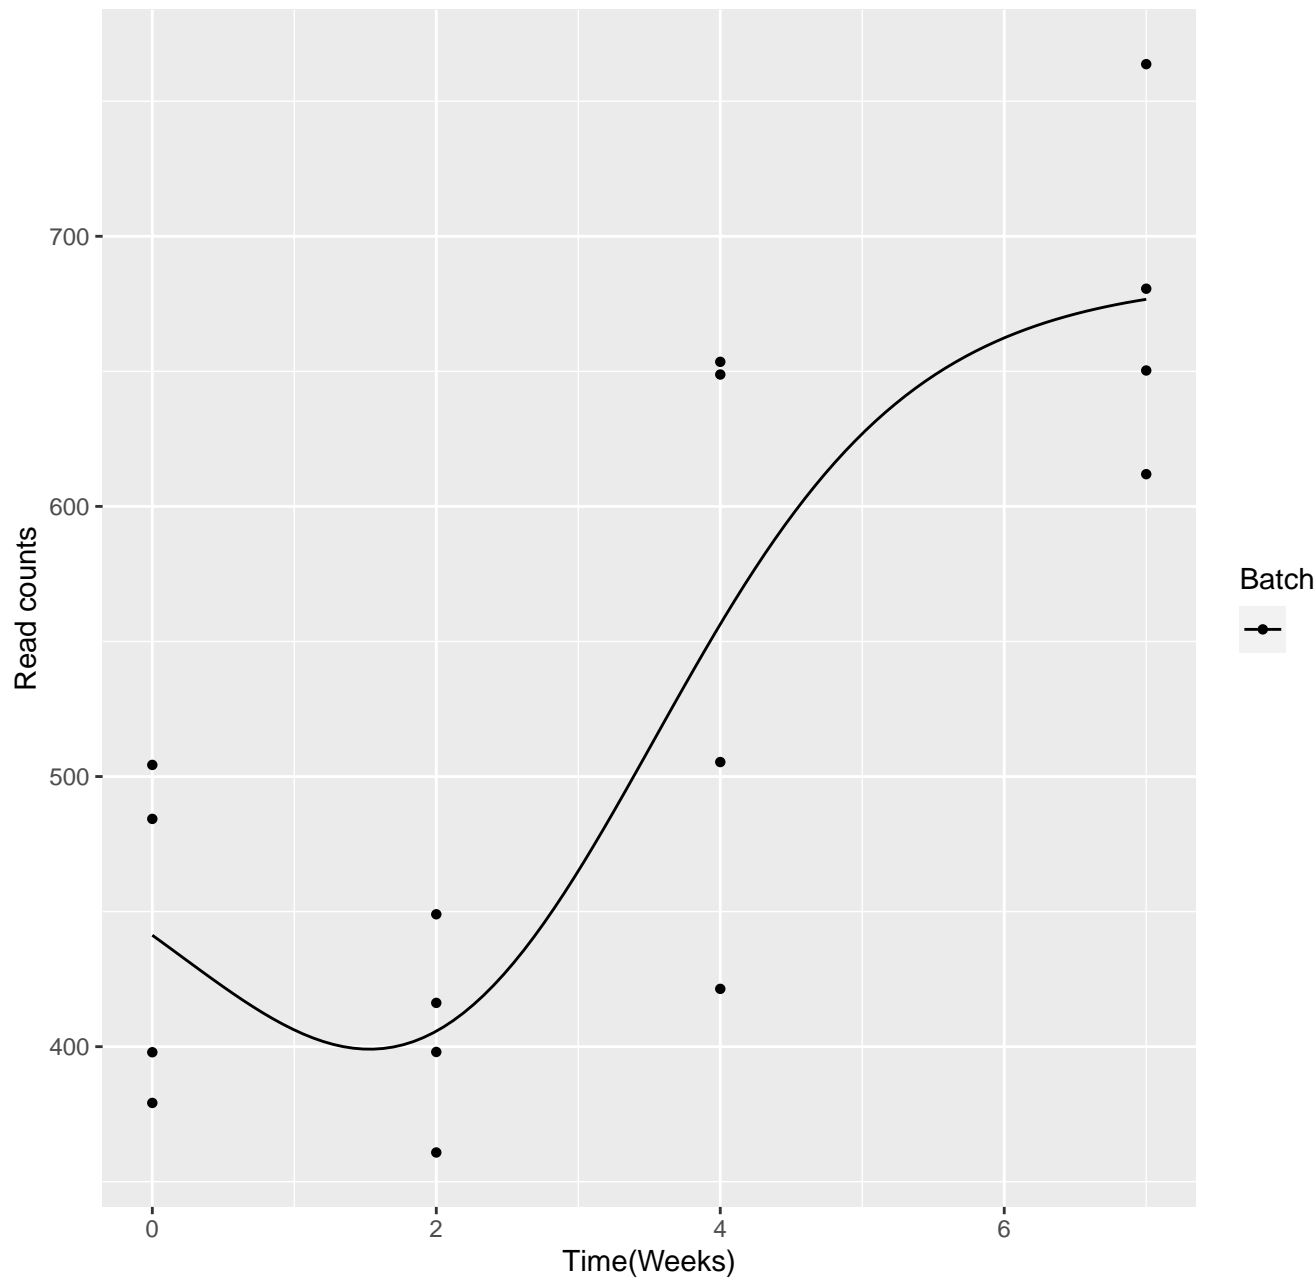

MXD3:  $\log_{10} q = -2.69$

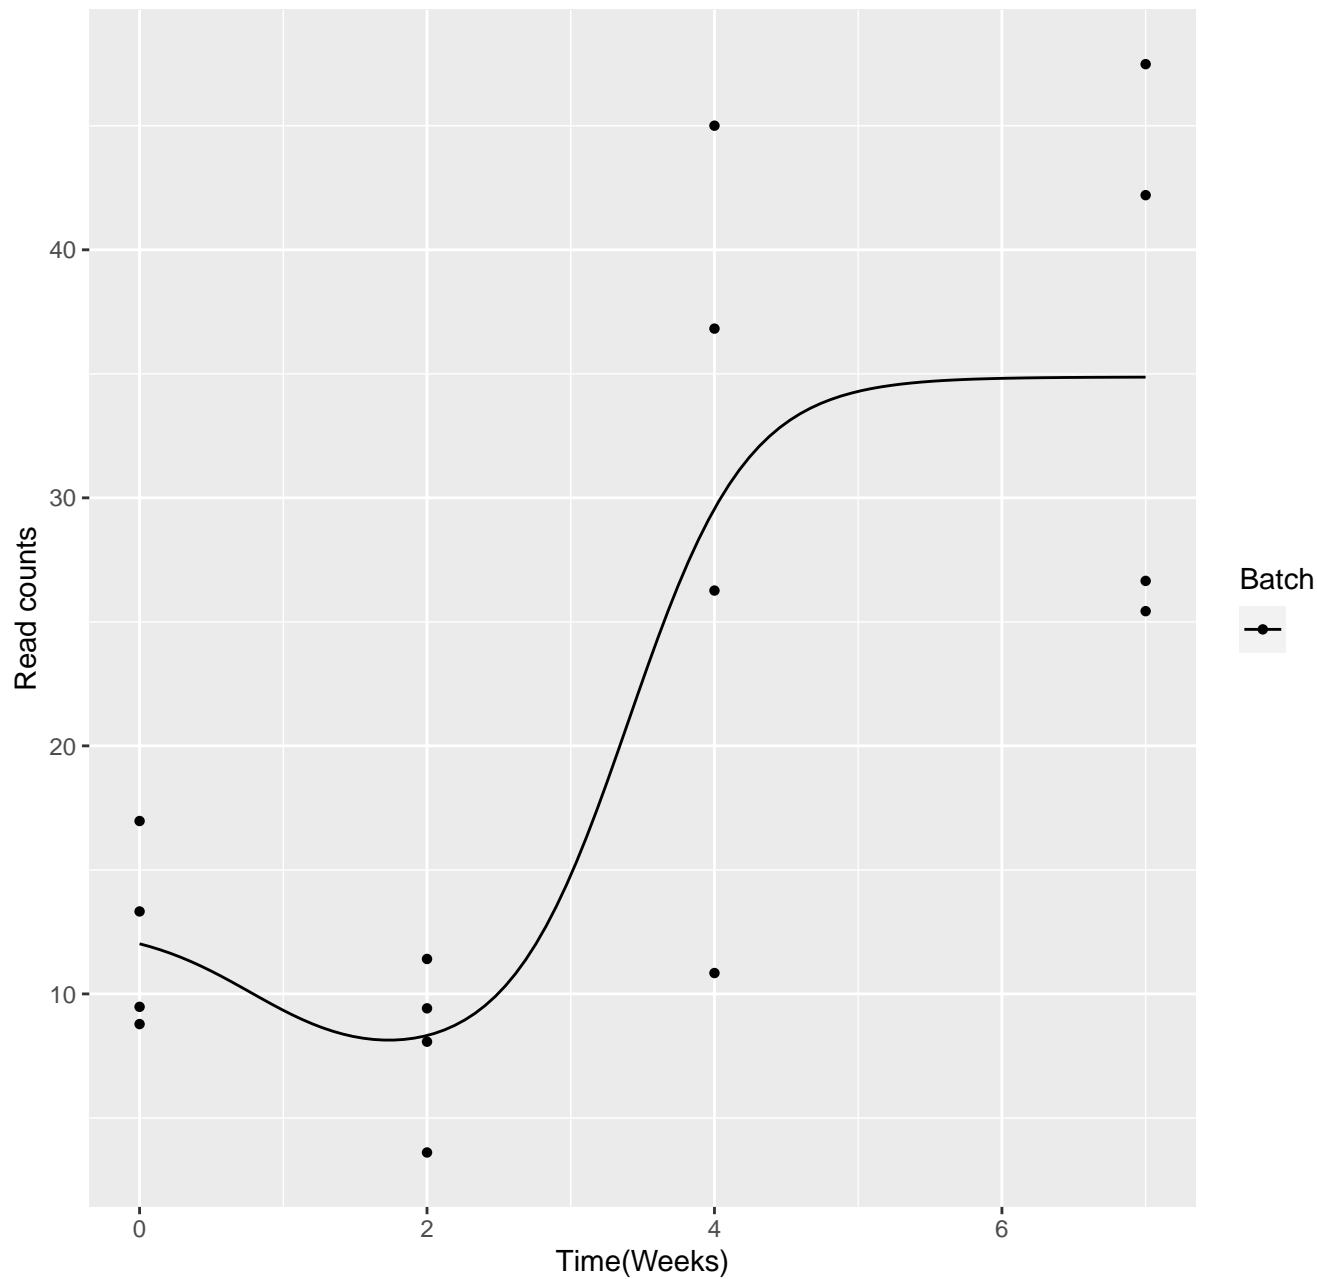

ST3GAL4:  $\log_{10} q = -2.69$

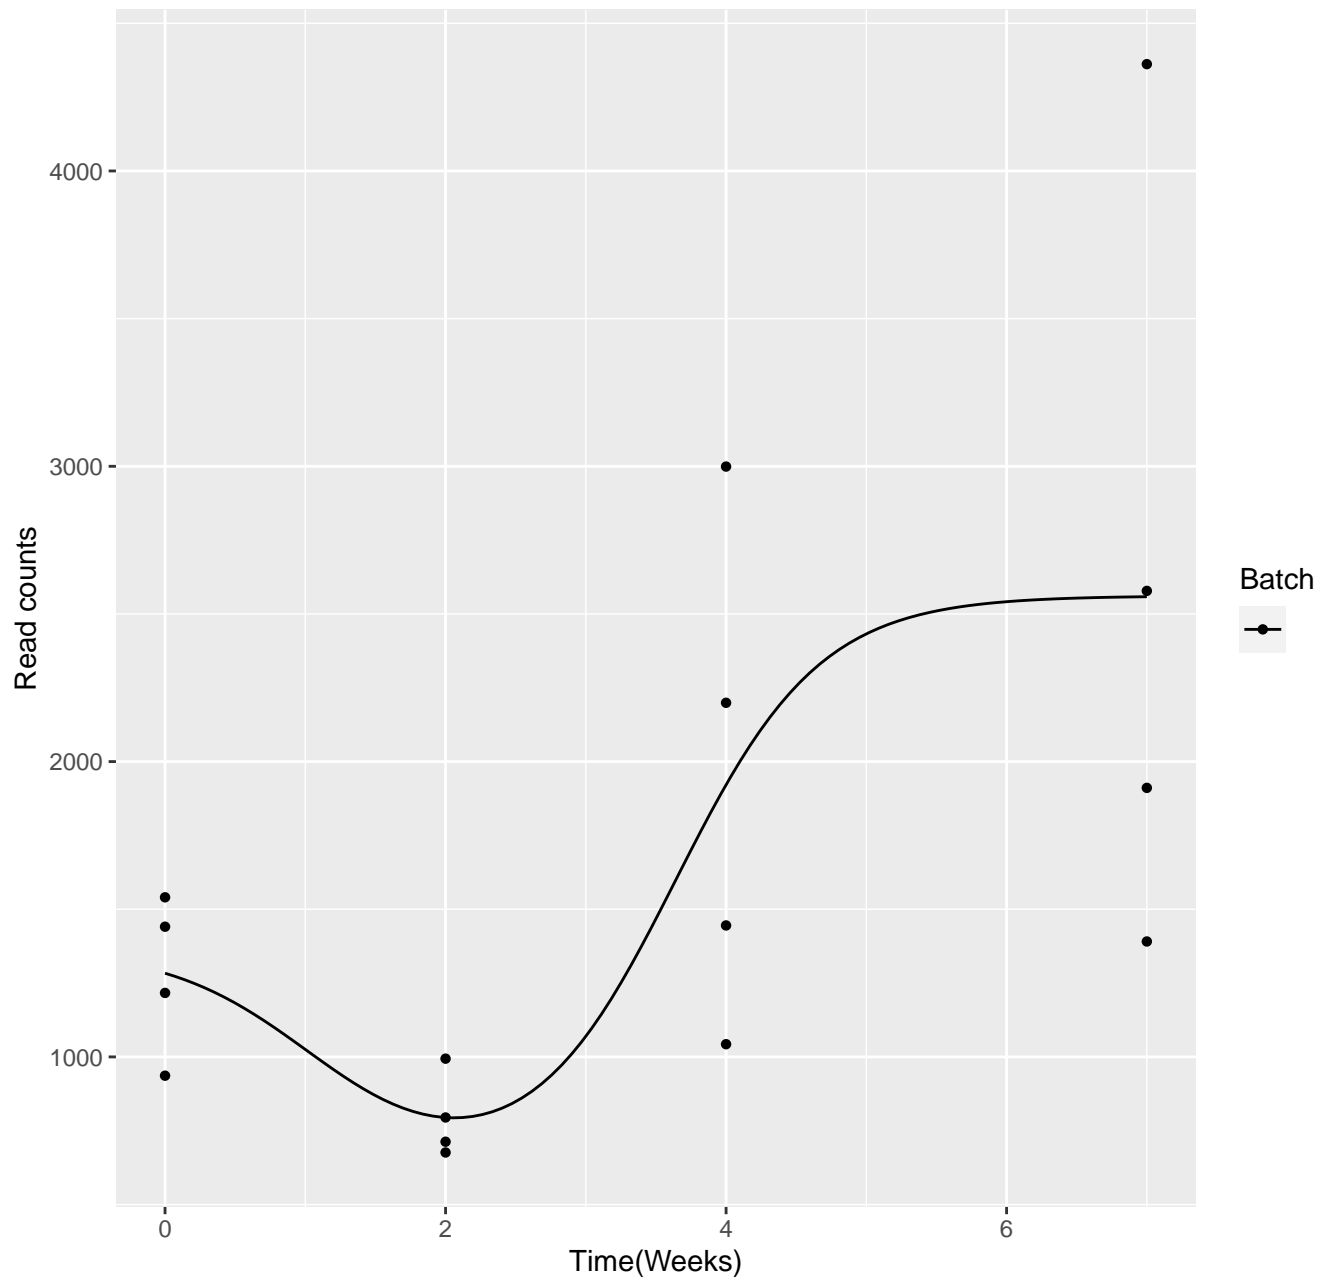

PLEKHG5:  $\log_{10} q = -2.69$

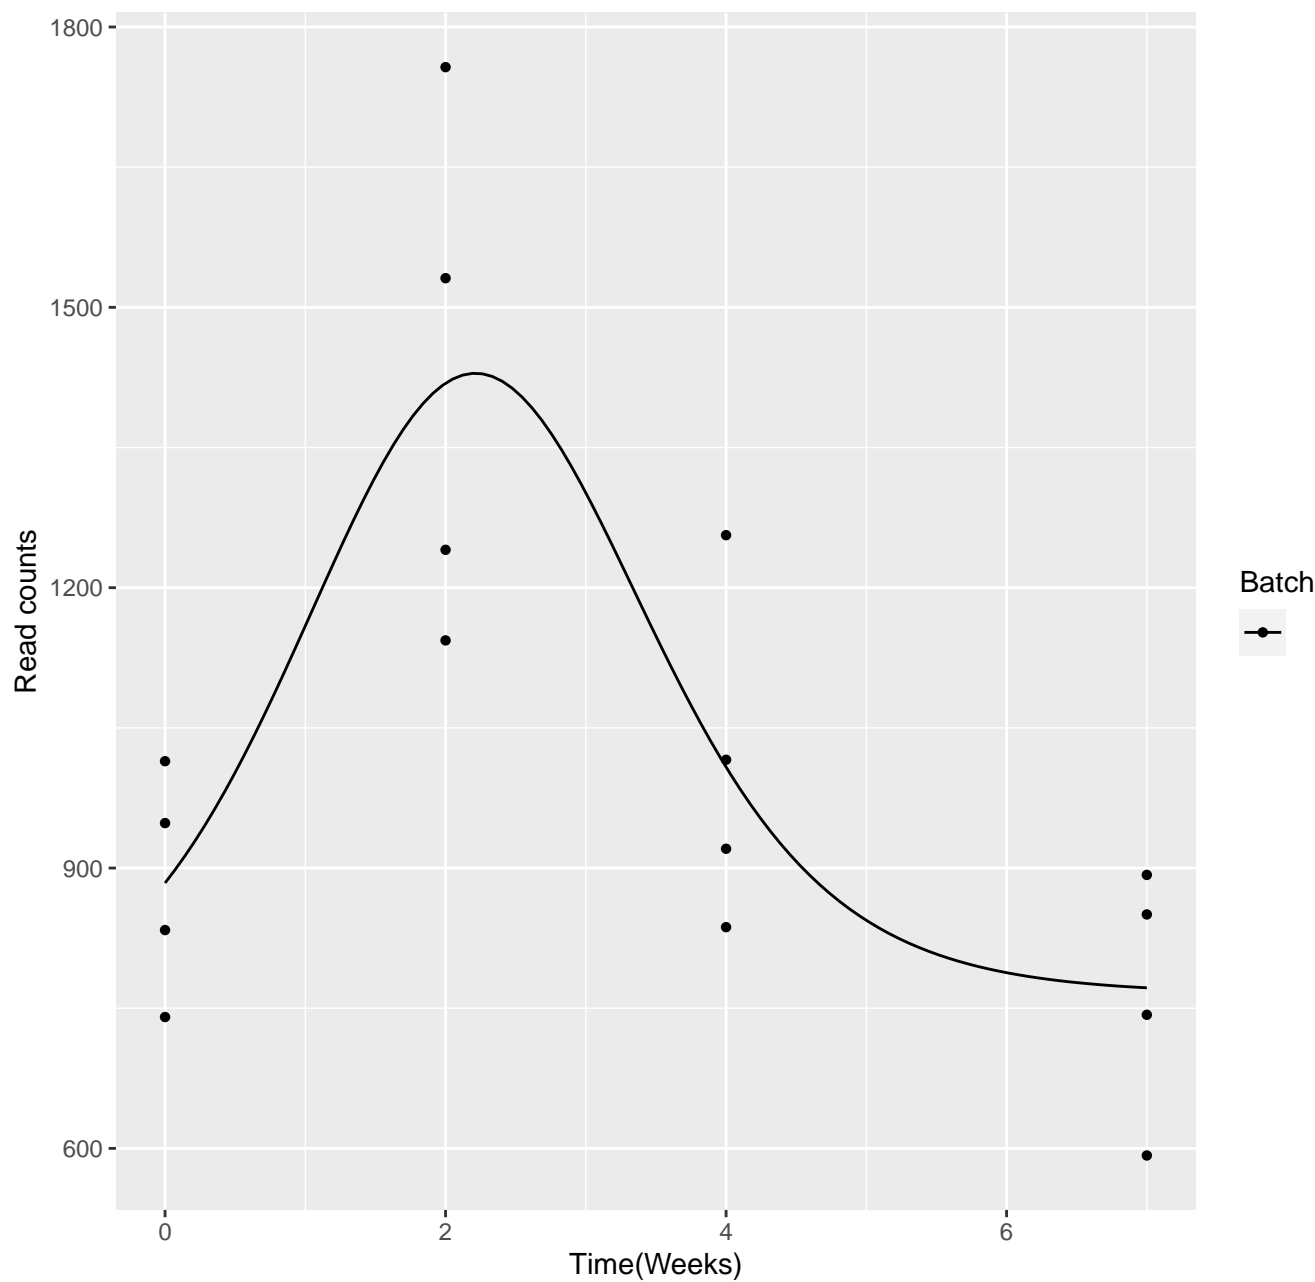

PTGIS:  $\log_{10} q = -2.69$

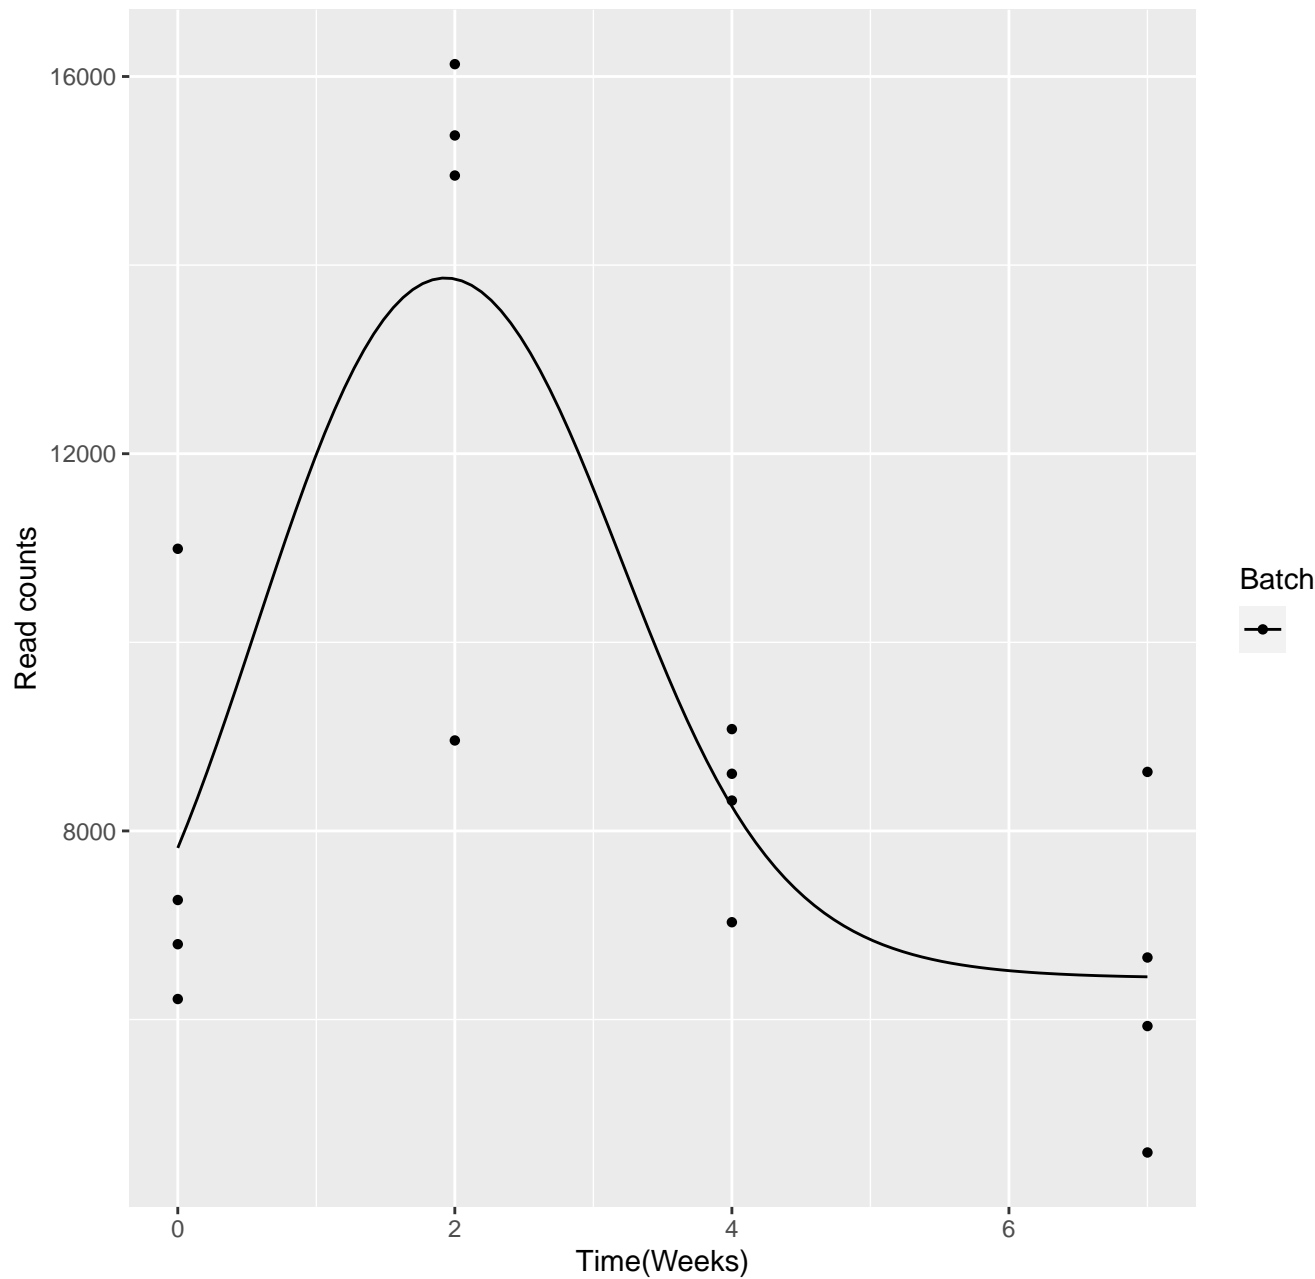

DST:  $\log_{10} q = -2.68$

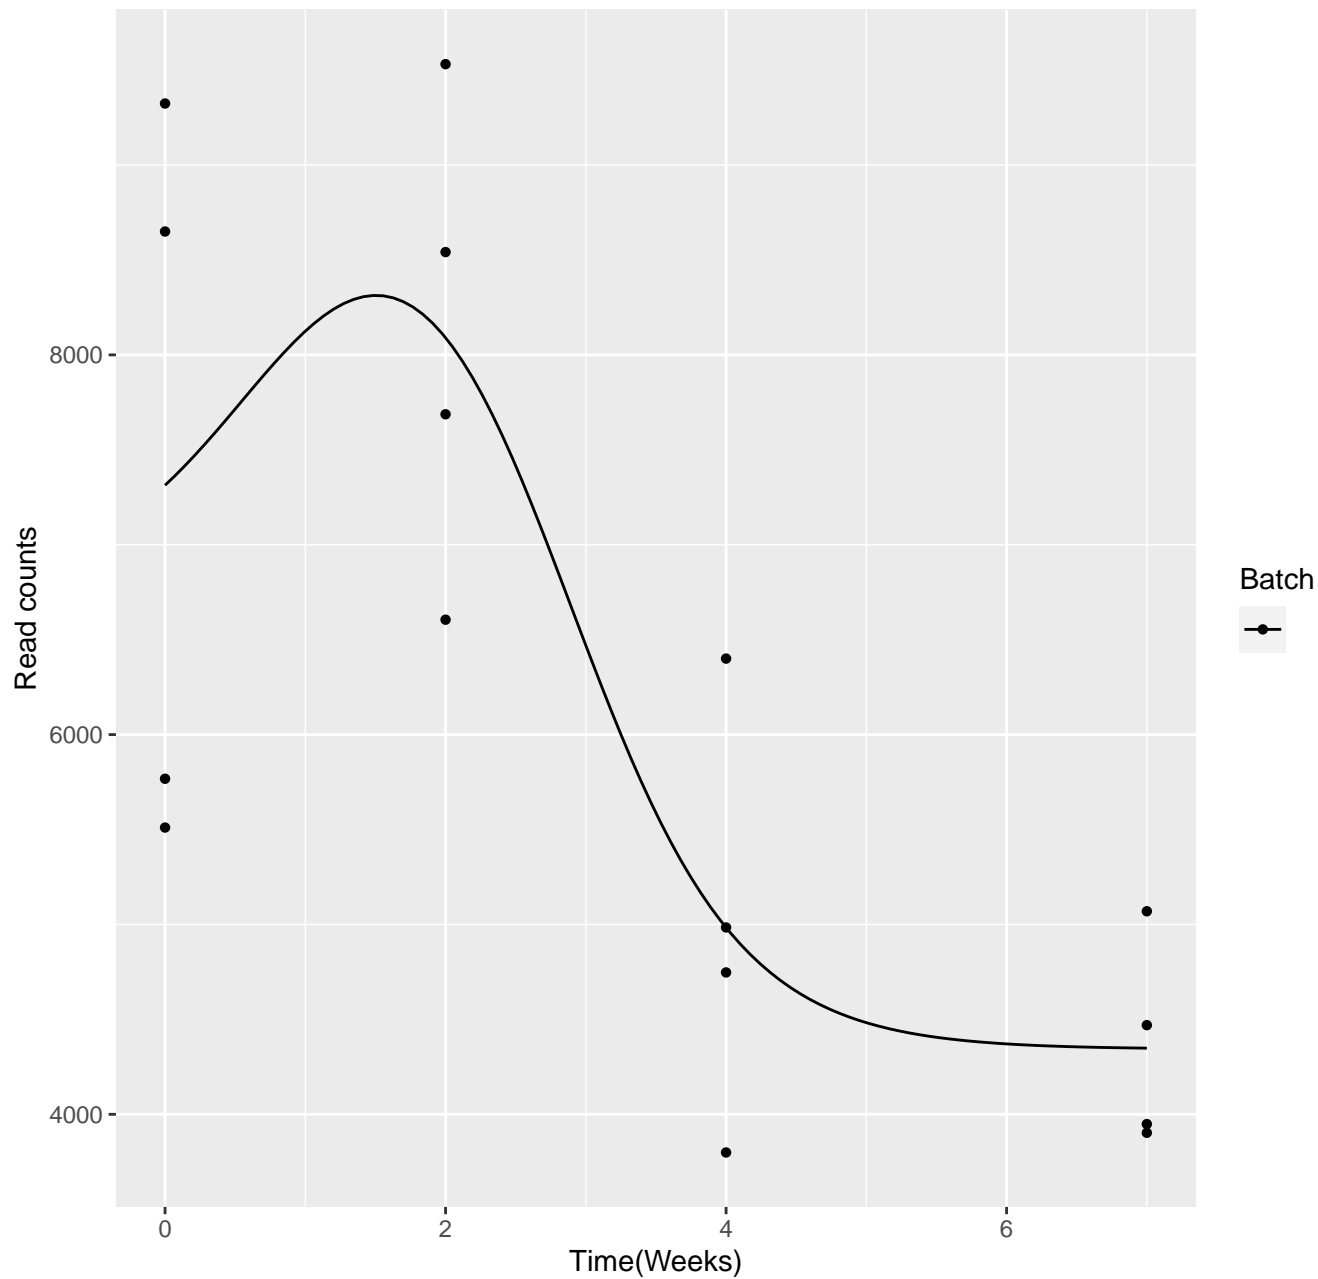

ARHGAP25:  $\log_{10} q = -2.68$

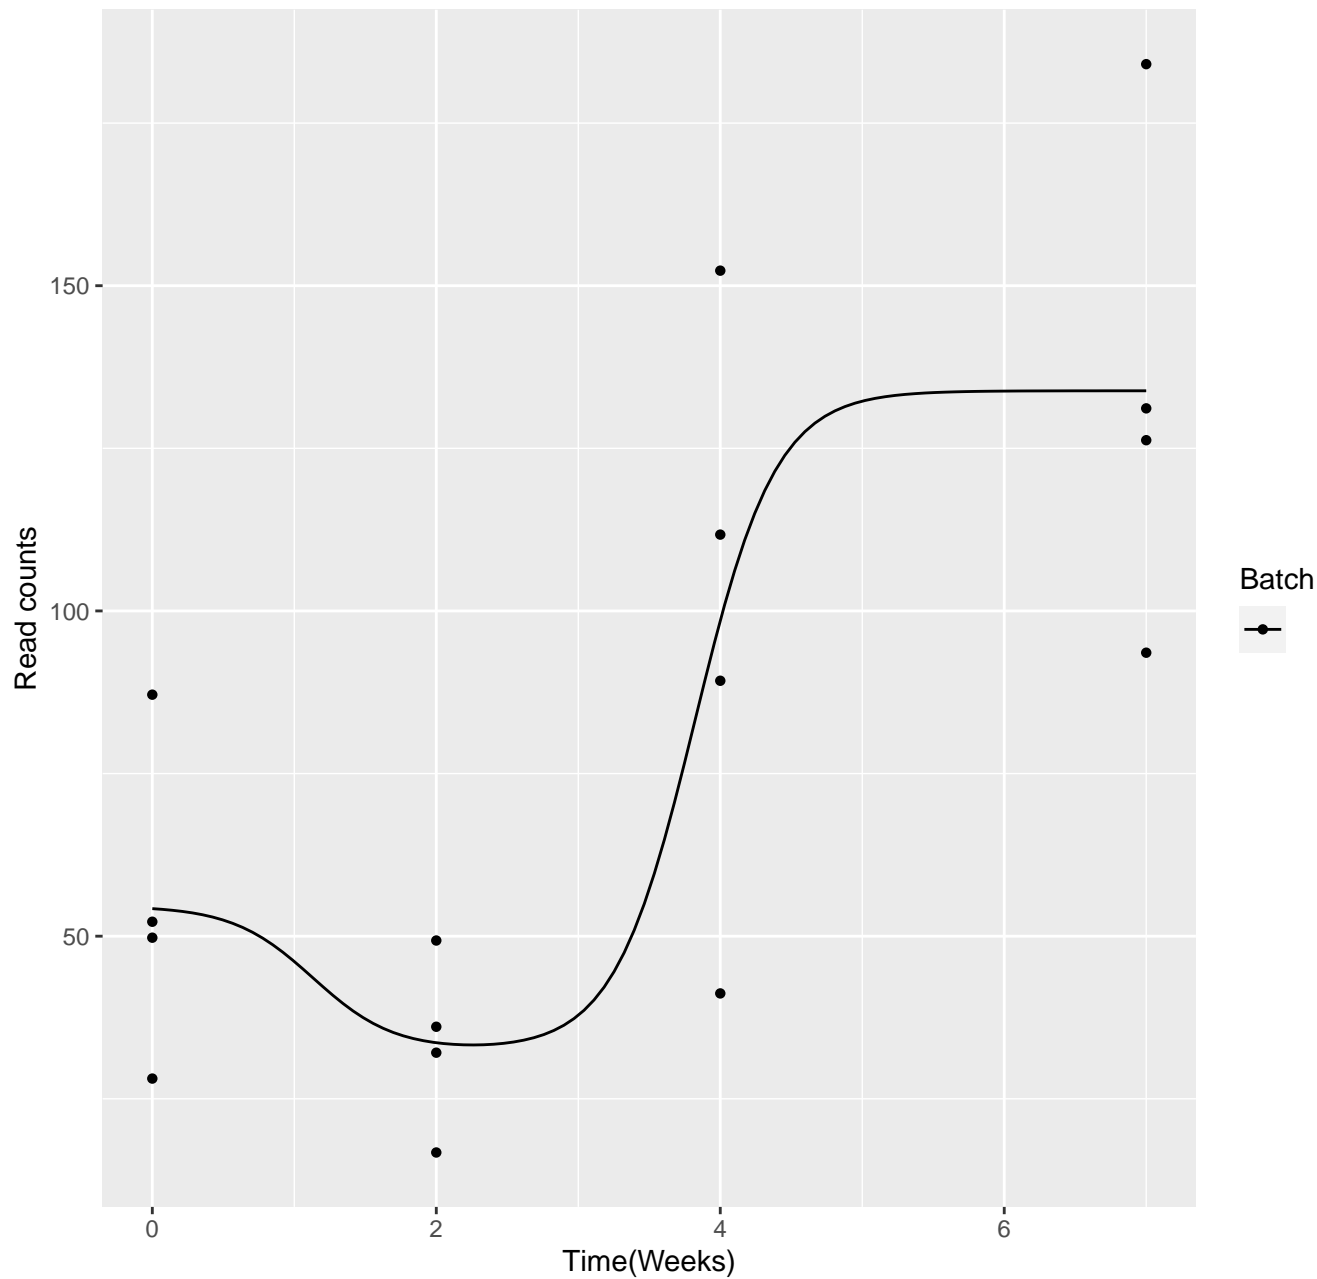



JAM3:  $\log_{10} q = -2.68$

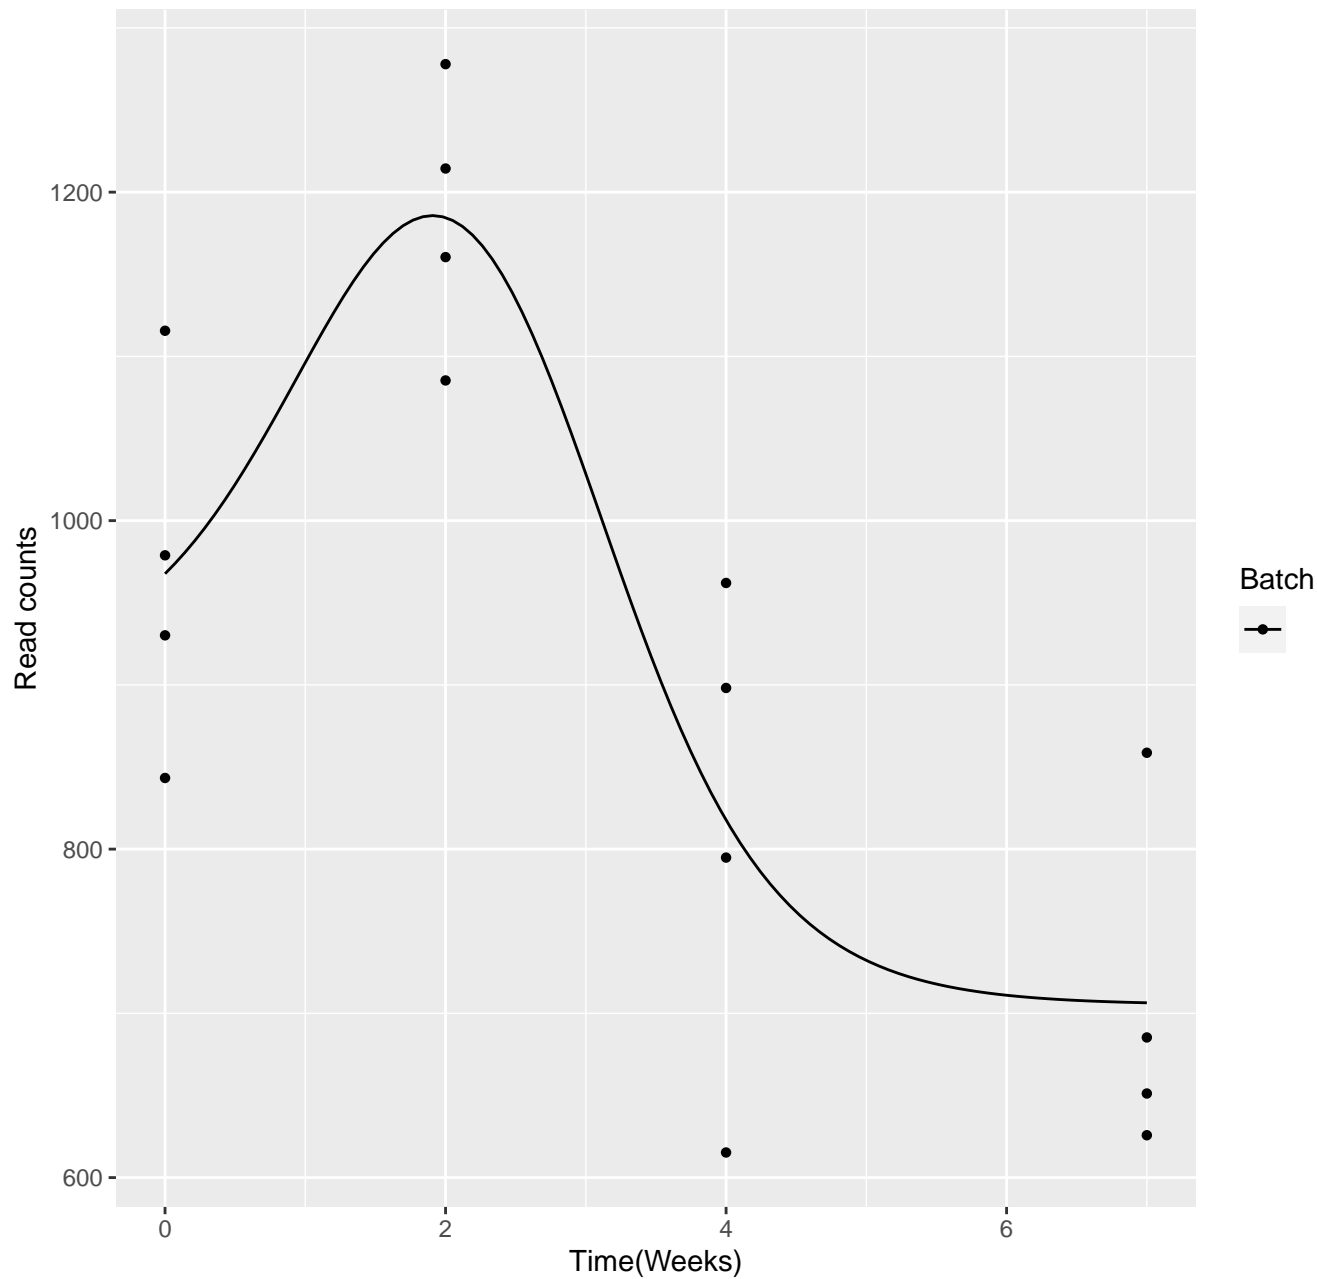

P2RY2:  $\log_{10} q = -2.68$

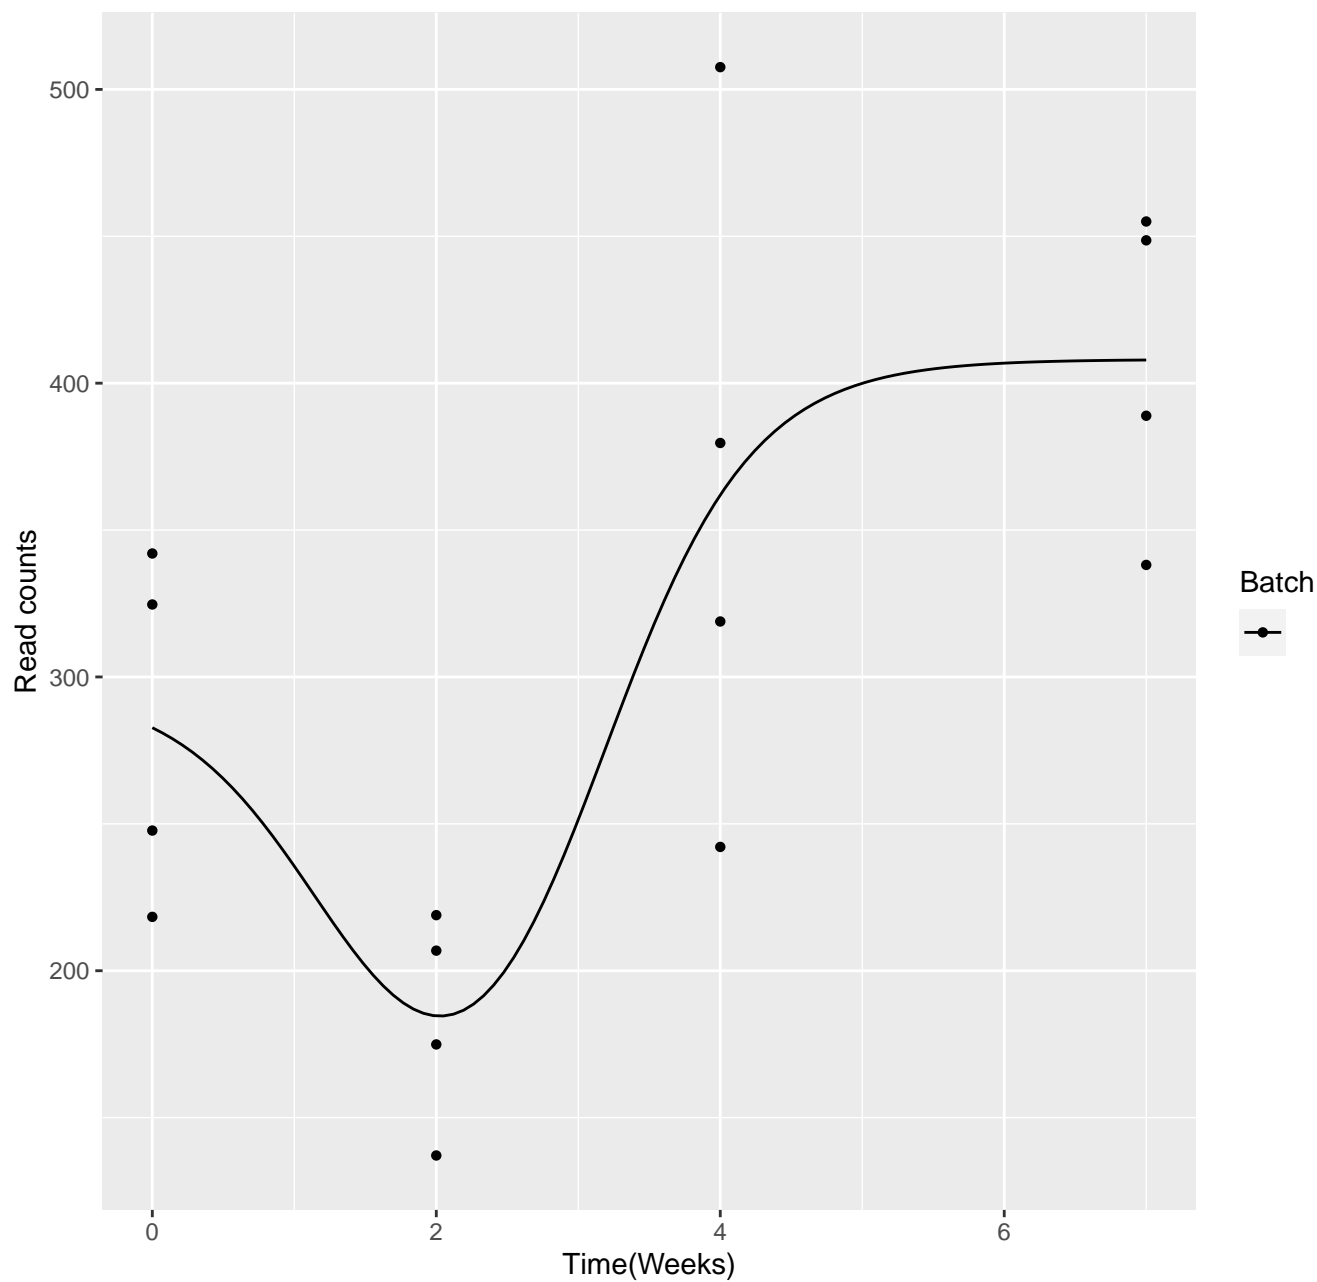

TIFA:  $\log_{10} q = -2.68$

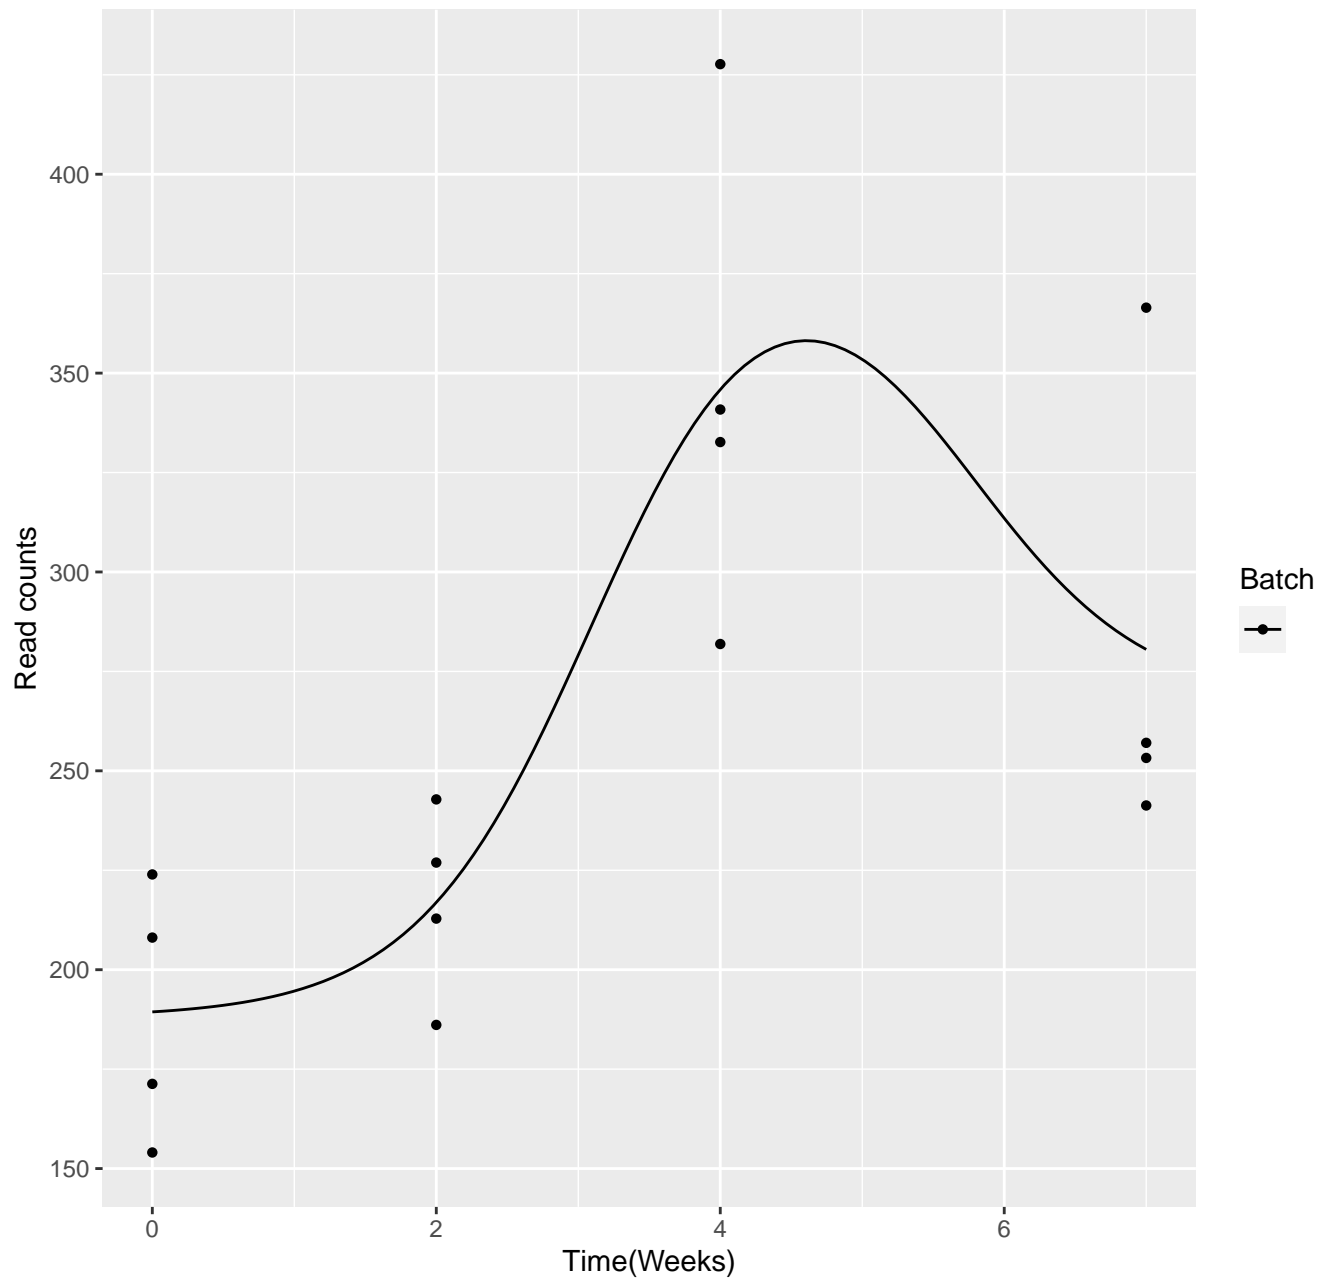

KIF21B:  $\log_{10} q = -2.68$

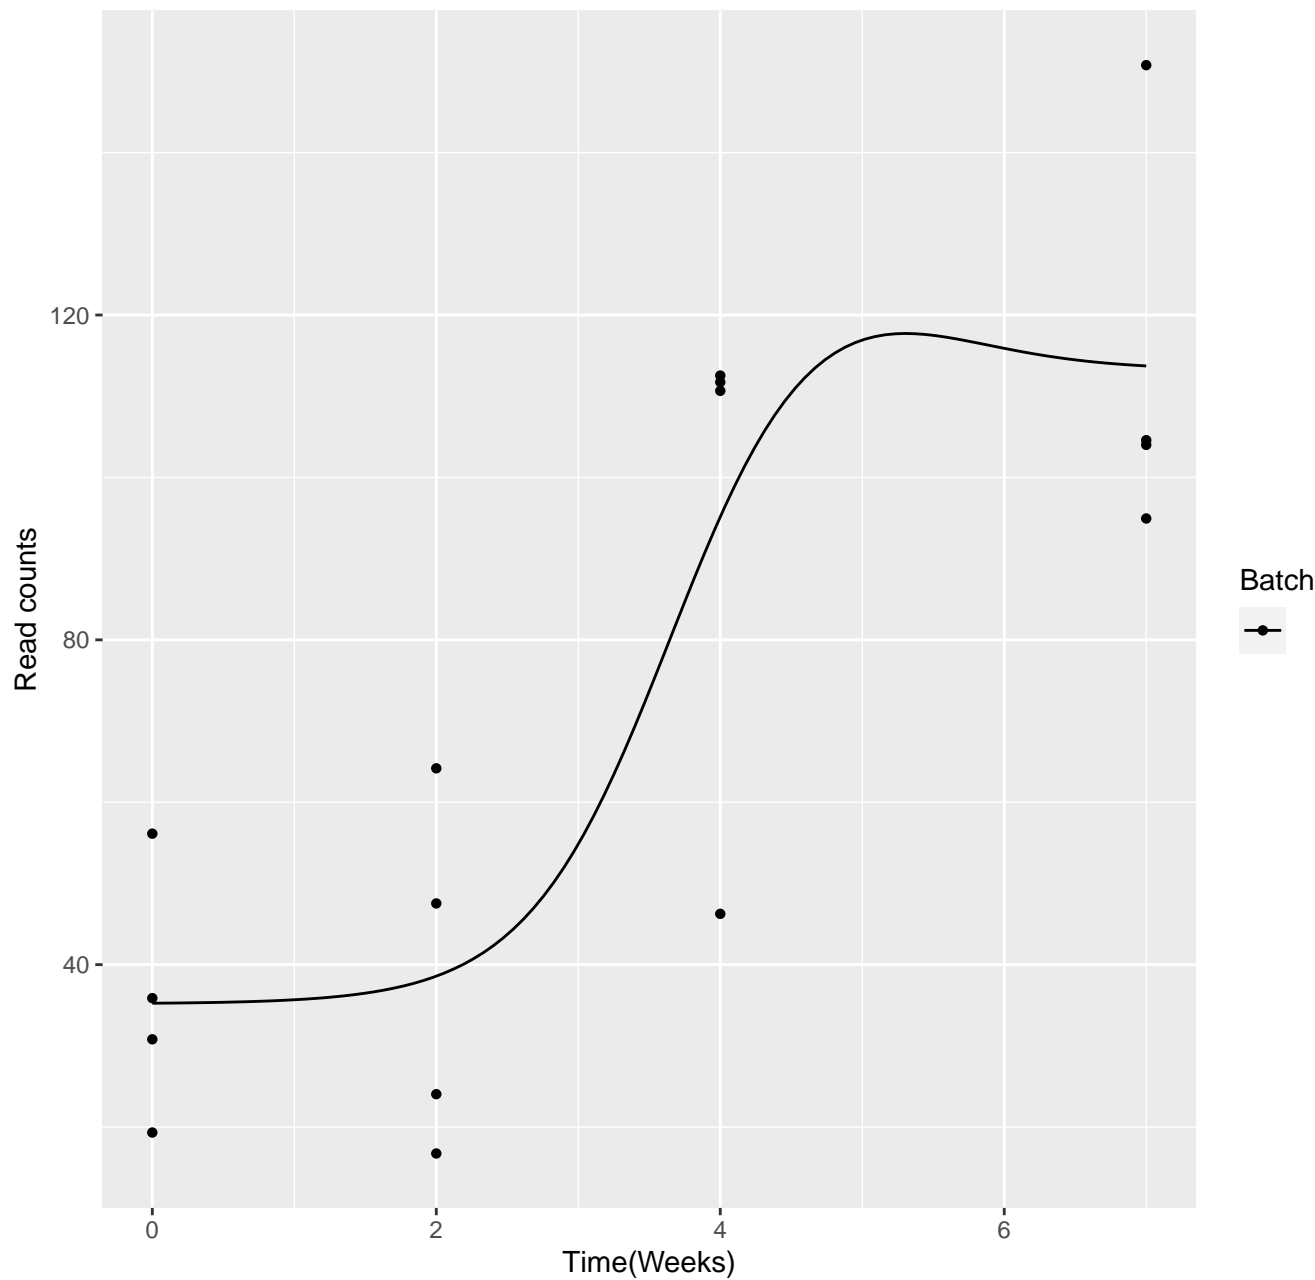

FLVCR2:  $\log_{10} q = -2.67$

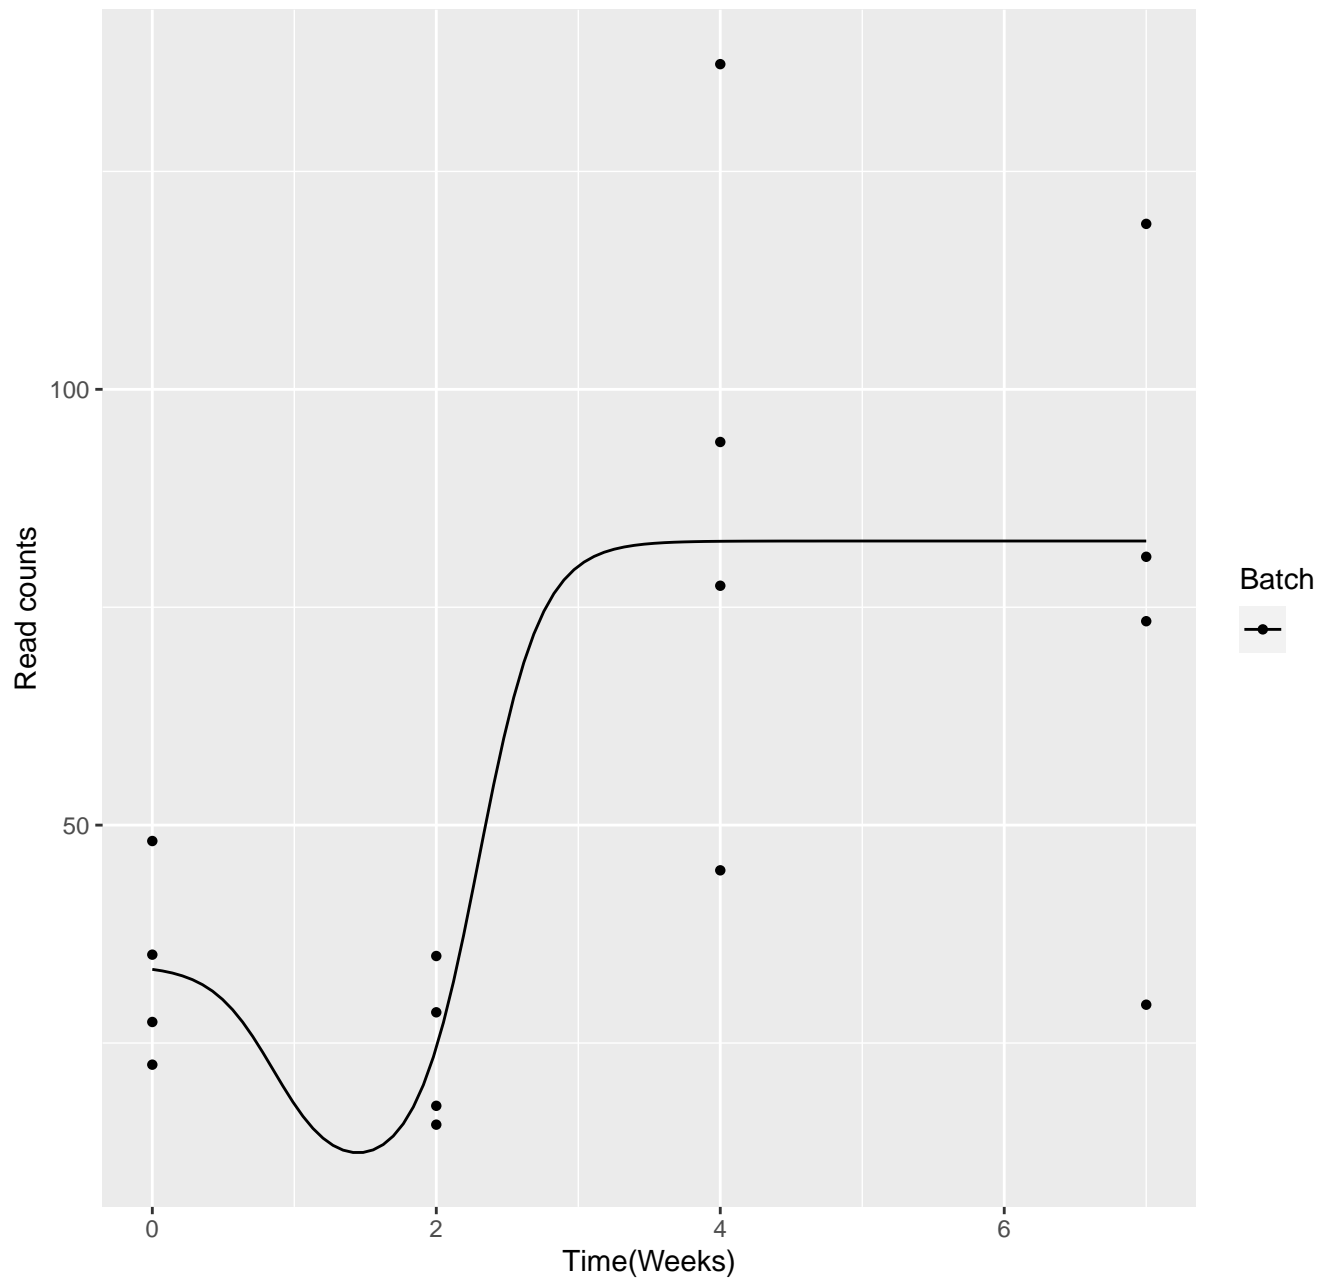

MMP1:  $\log_{10} q = -2.67$

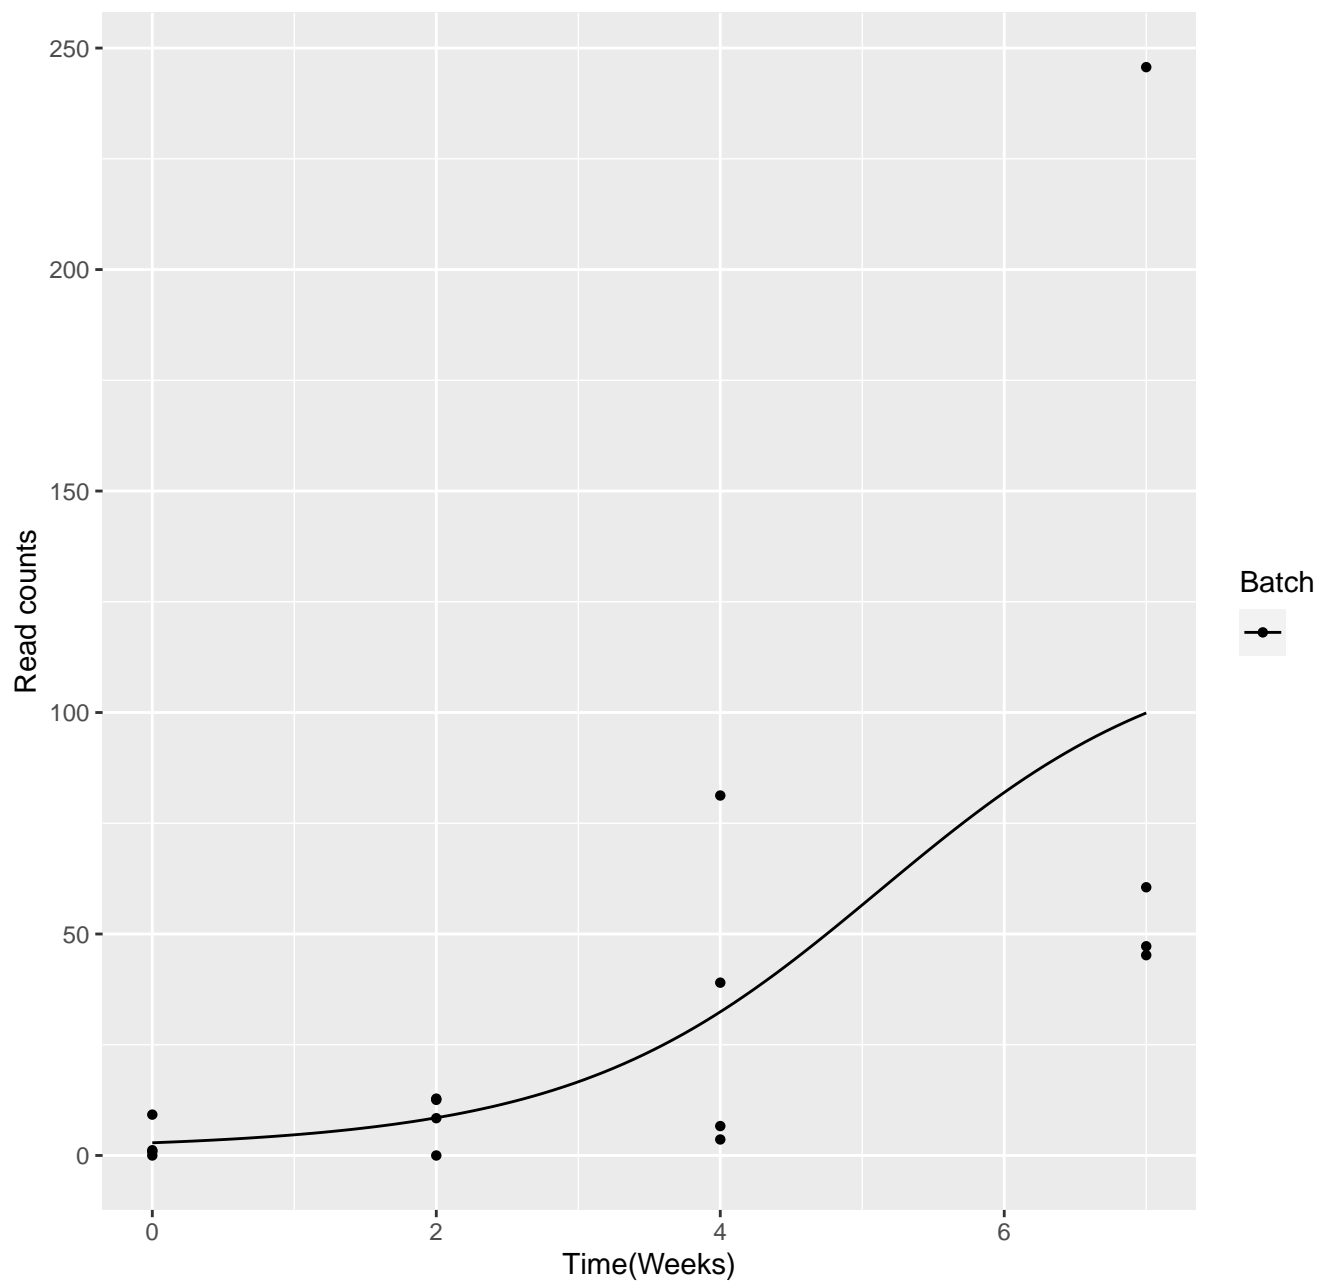

CNNM3:  $\log_{10} q = -2.67$

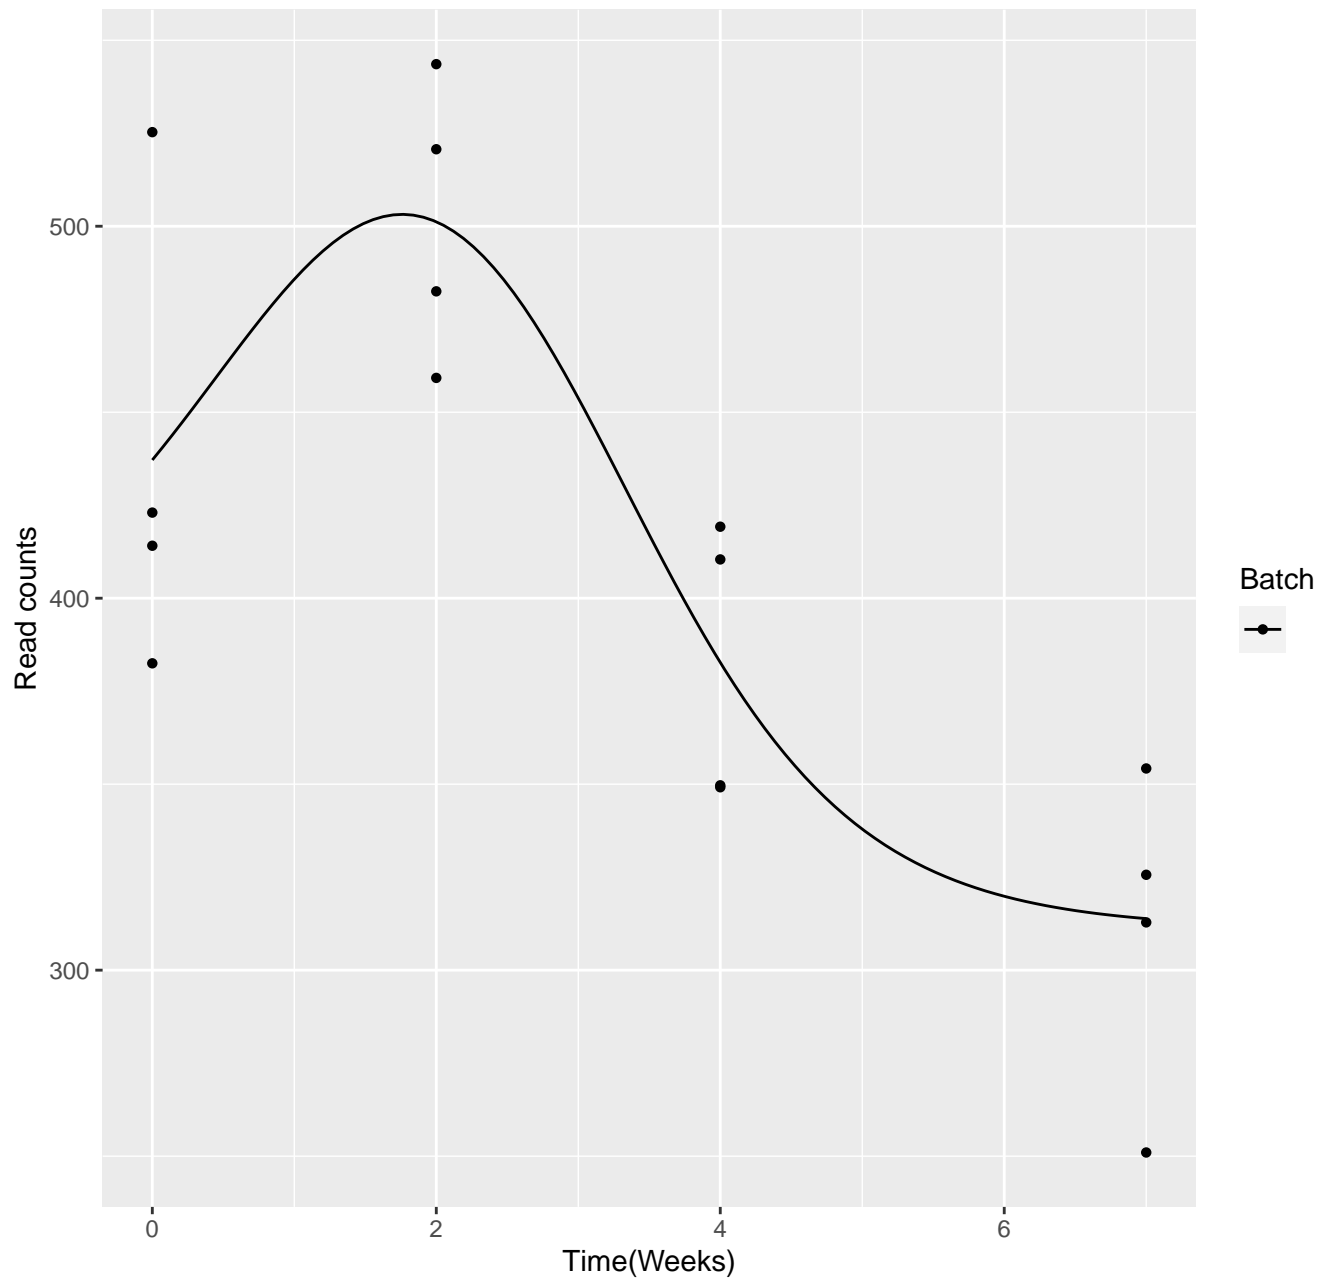

SULF2:  $\log_{10} q = -2.67$

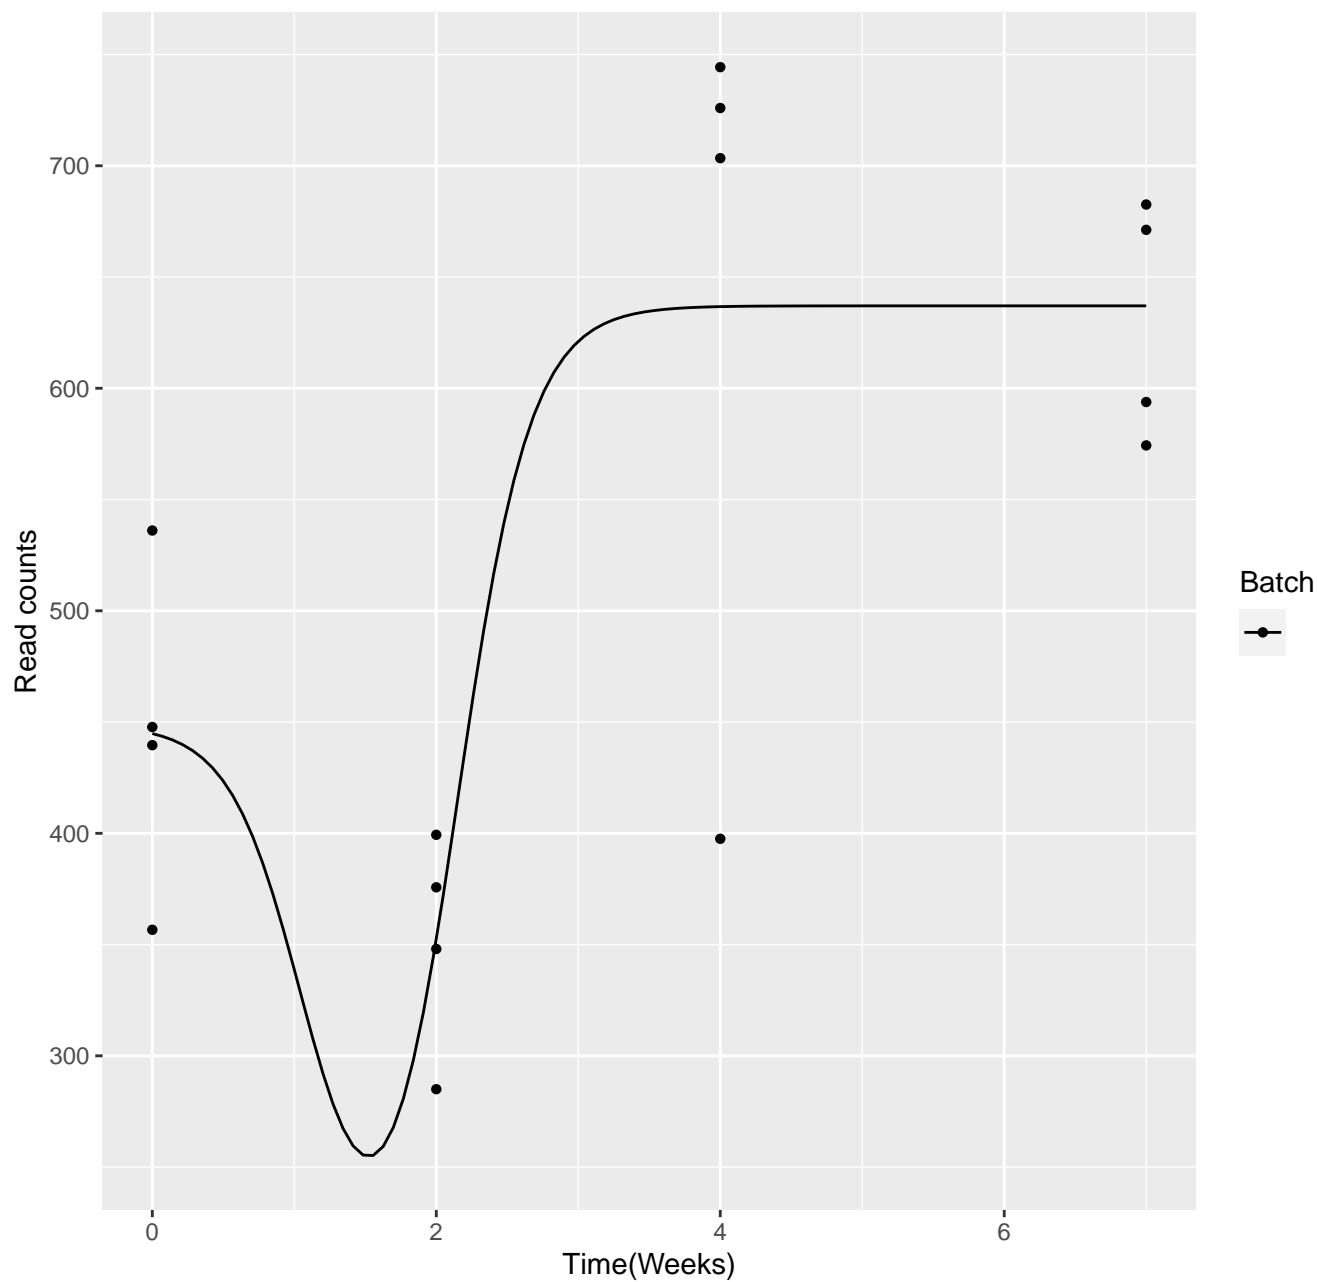



CNBP:  $\log_{10} q = -2.67$

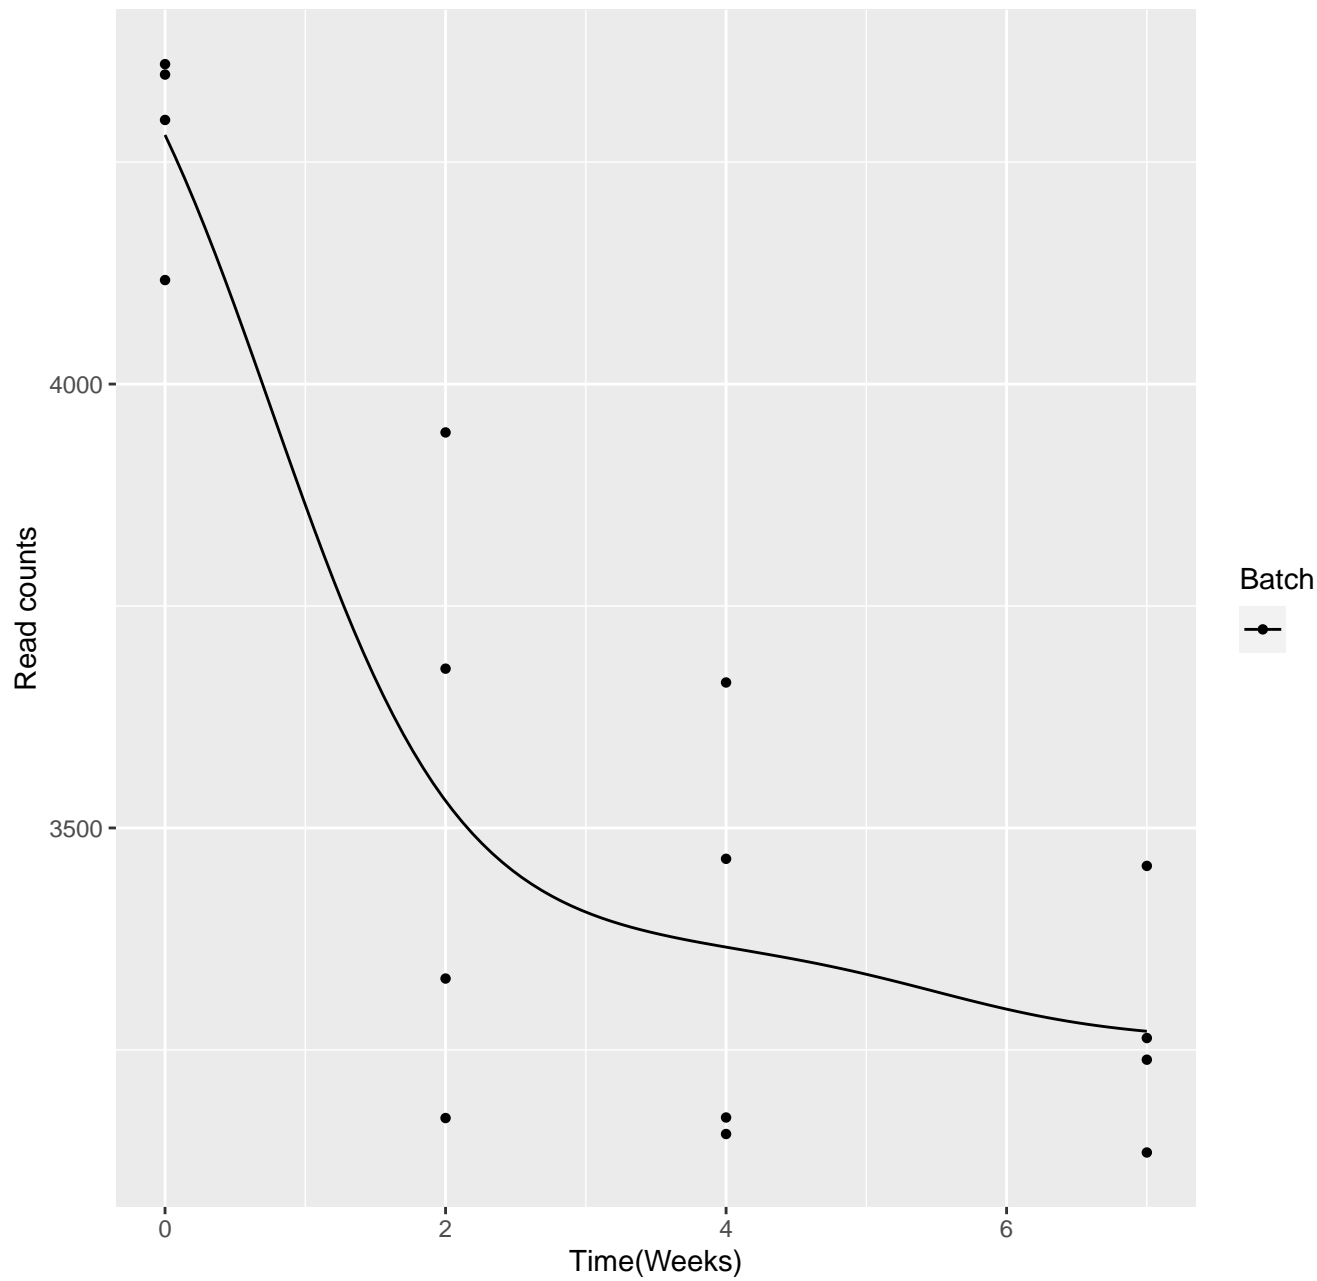

CPQ:  $\log_{10} q = -2.67$

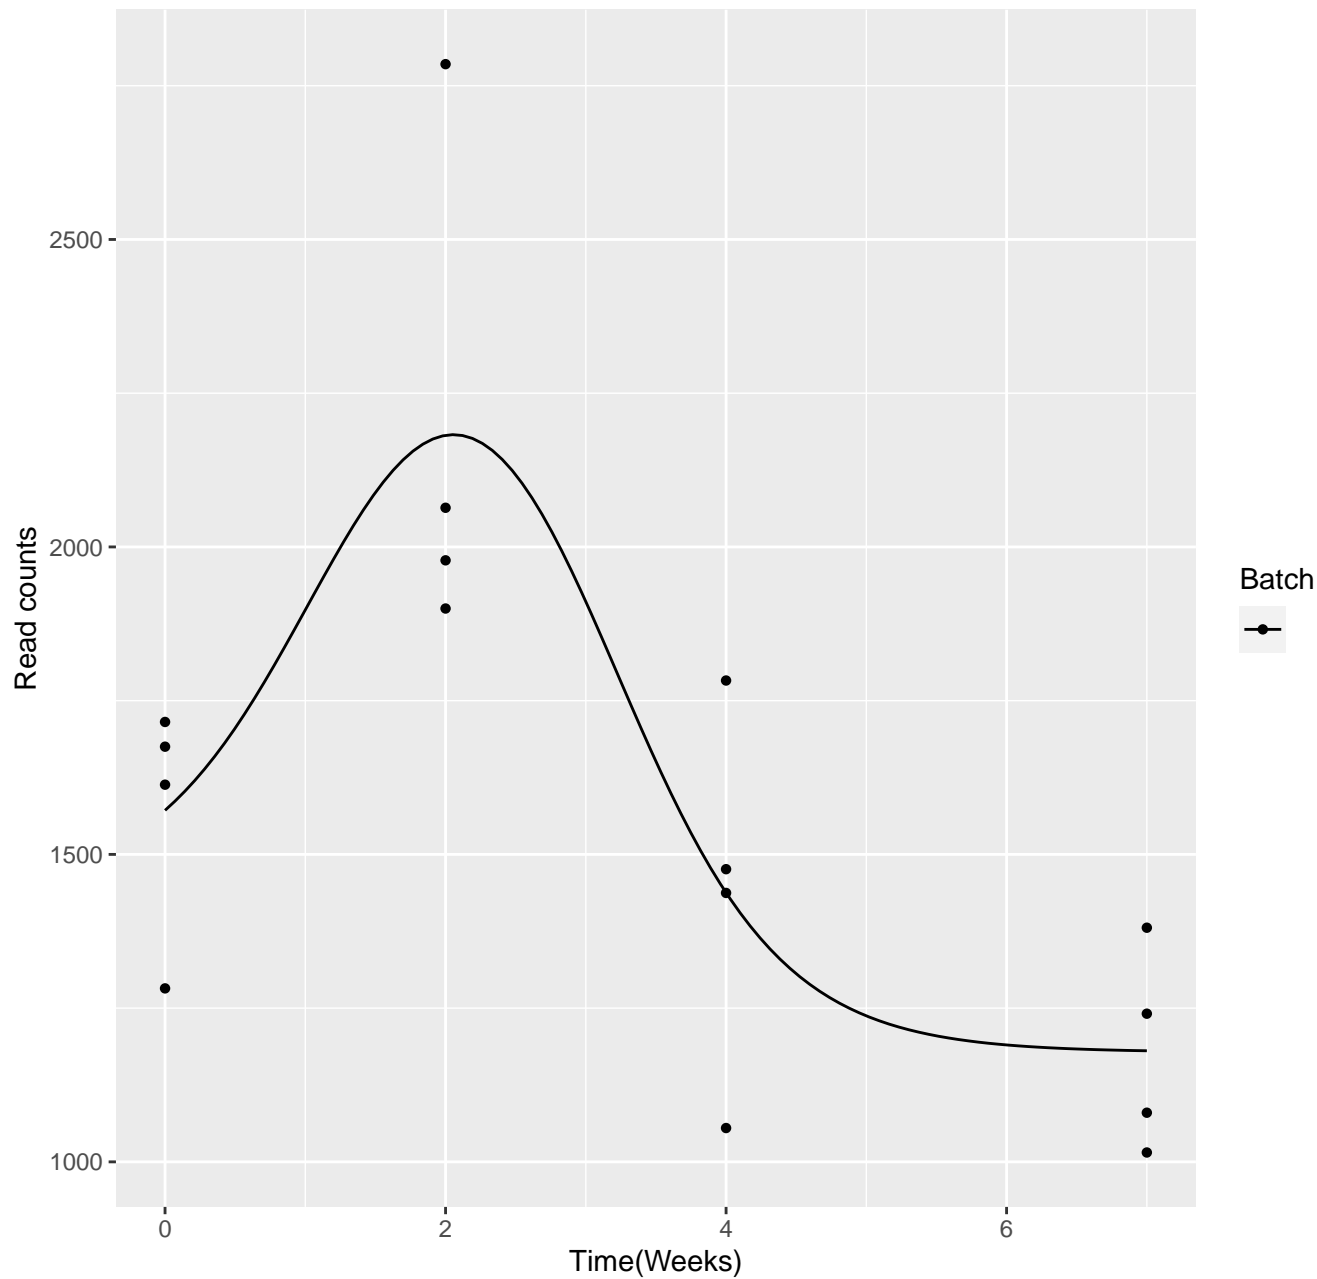

OXSM:  $\log_{10} q = -2.67$

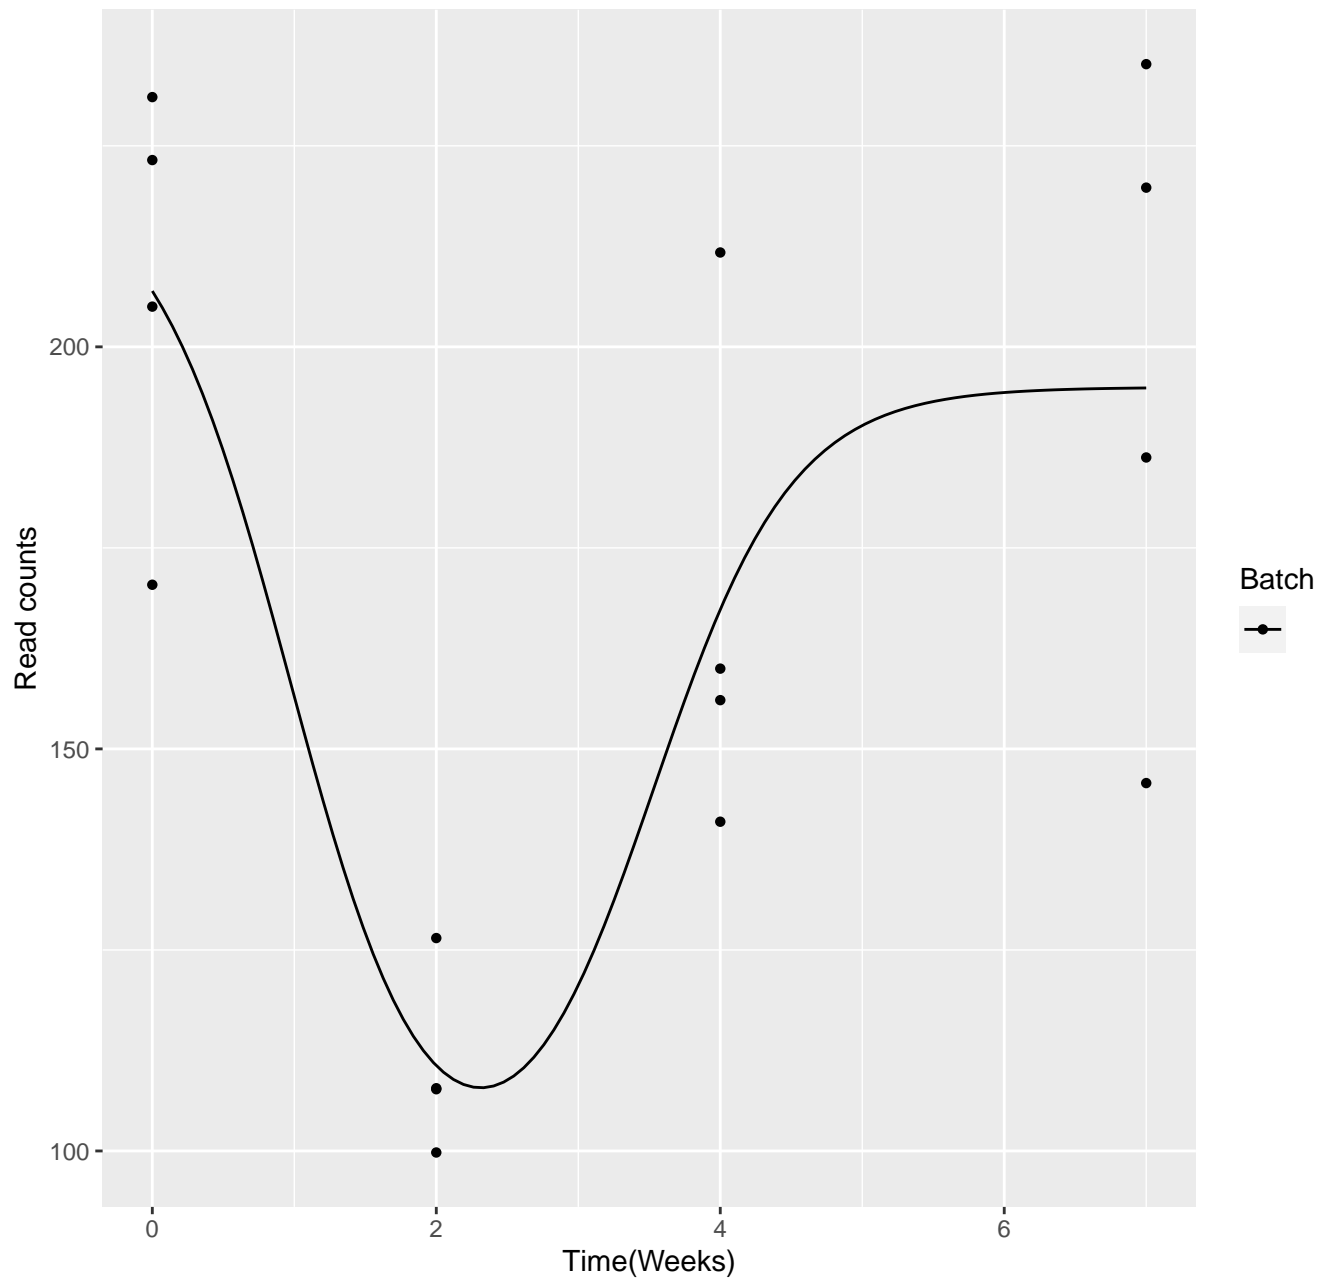

PIMREG:  $\log_{10} q = -2.66$

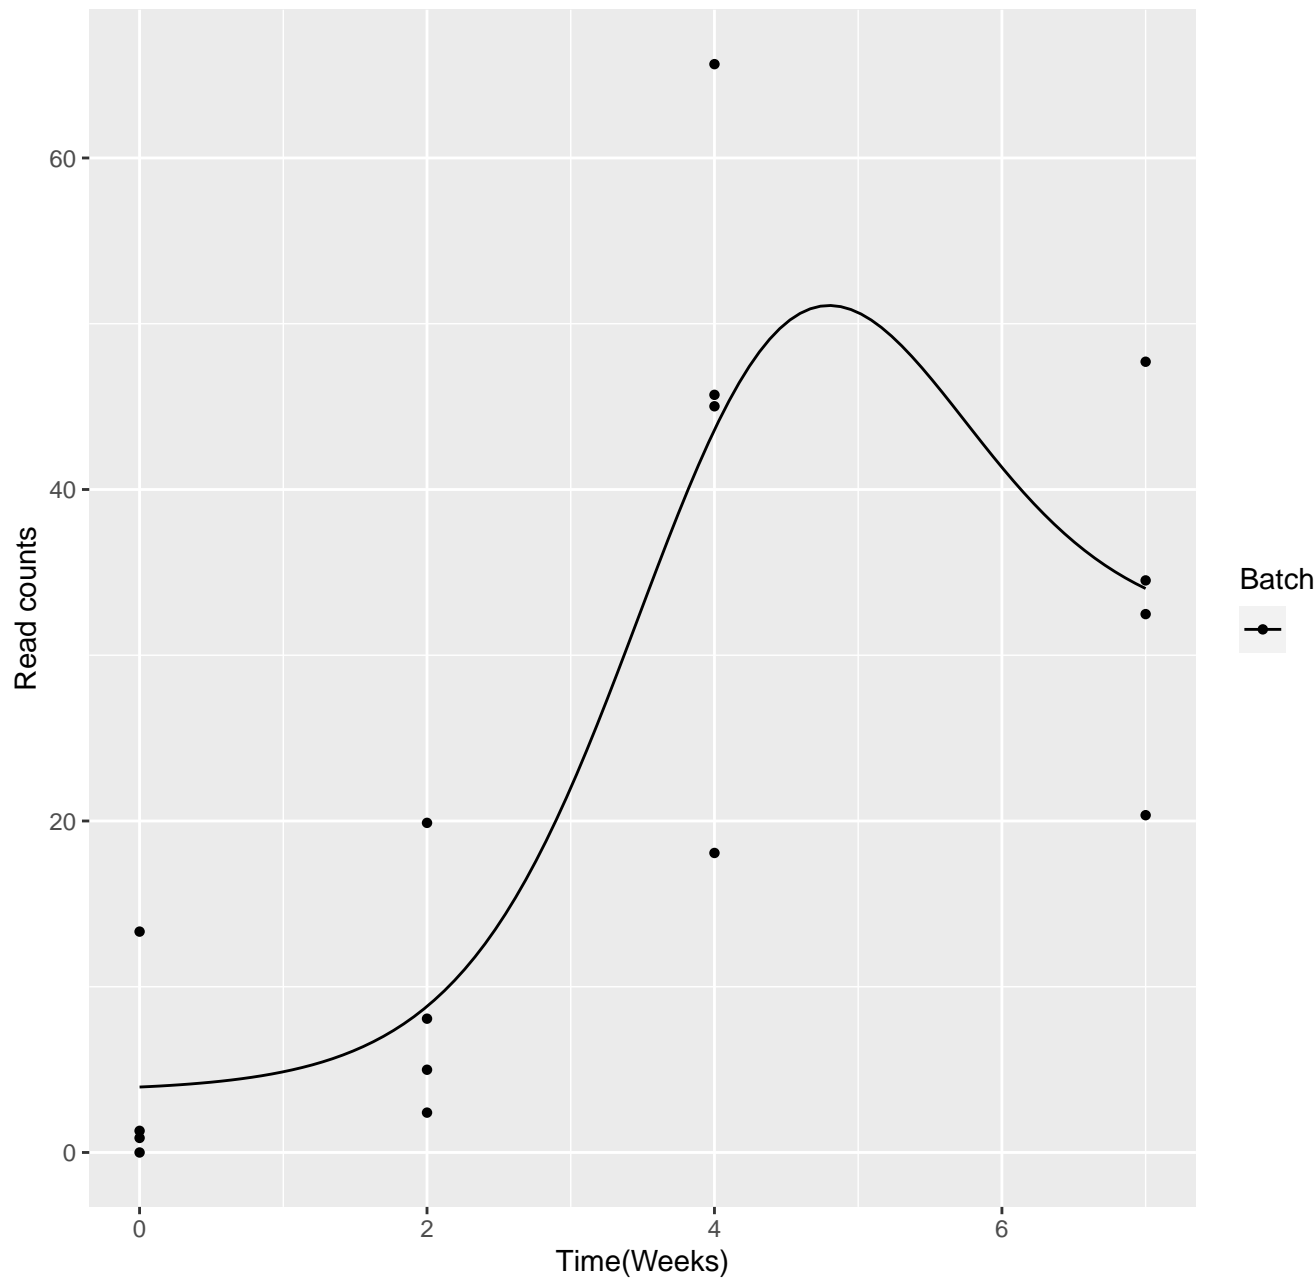

LOC100349824:  $\log_{10} q = -2.66$

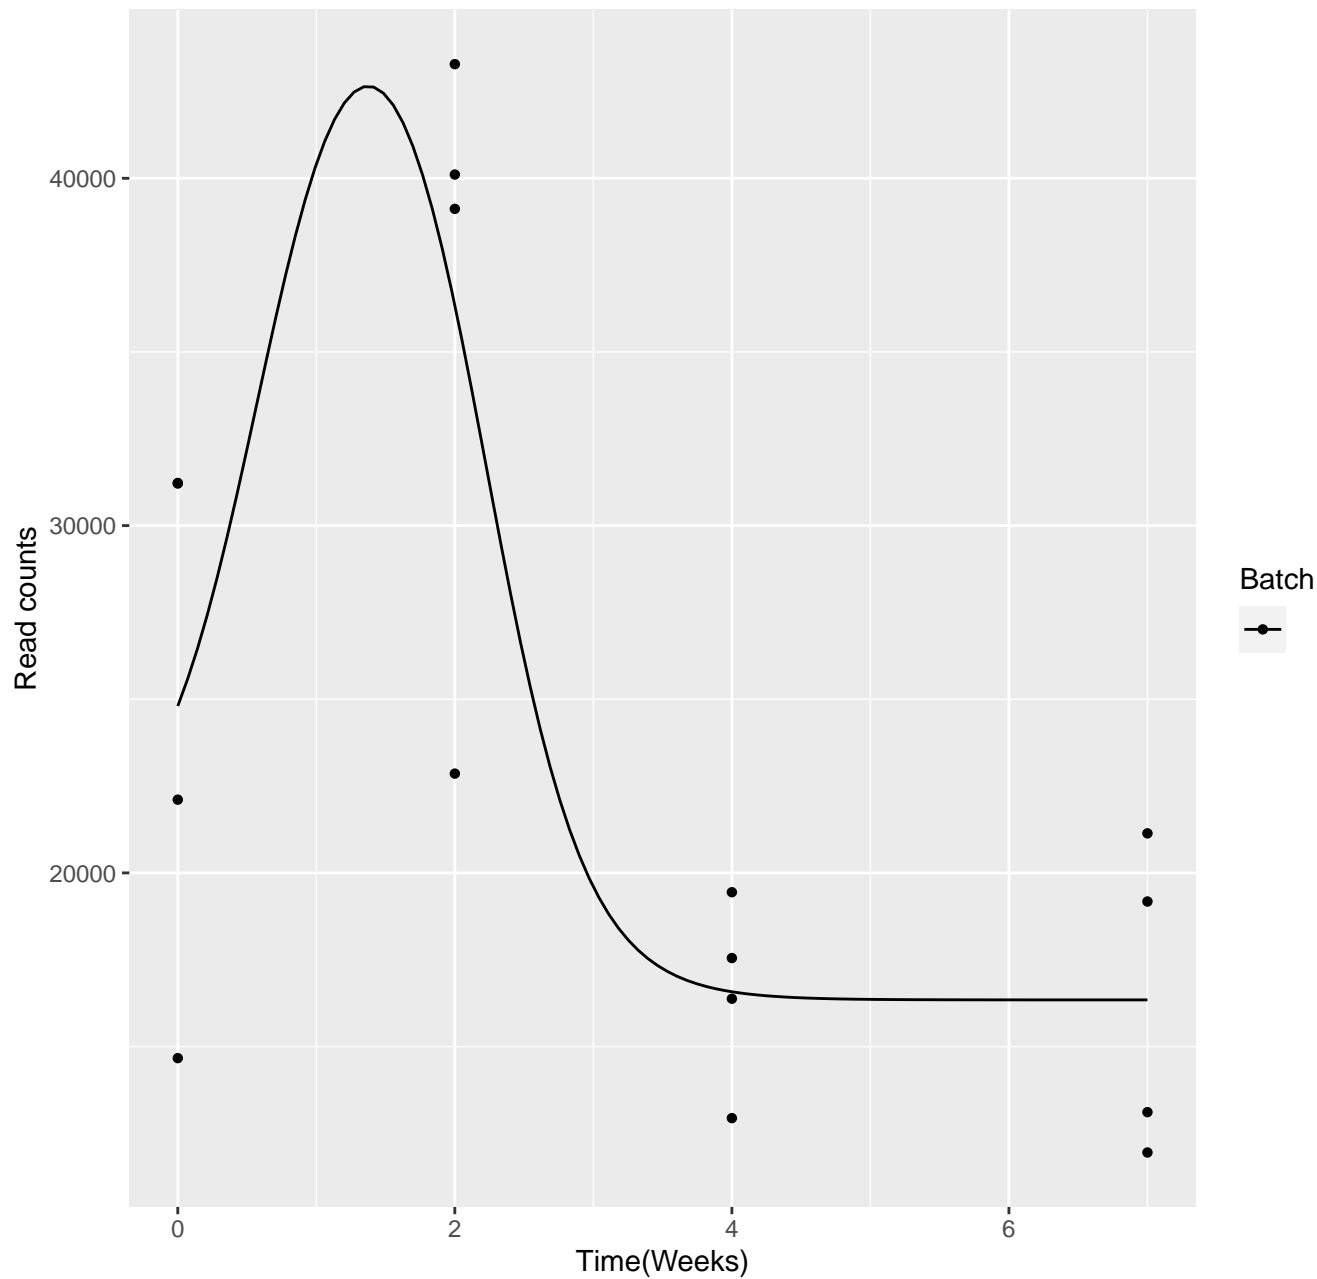

LOC127482754:  $\log_{10} q = -2.66$

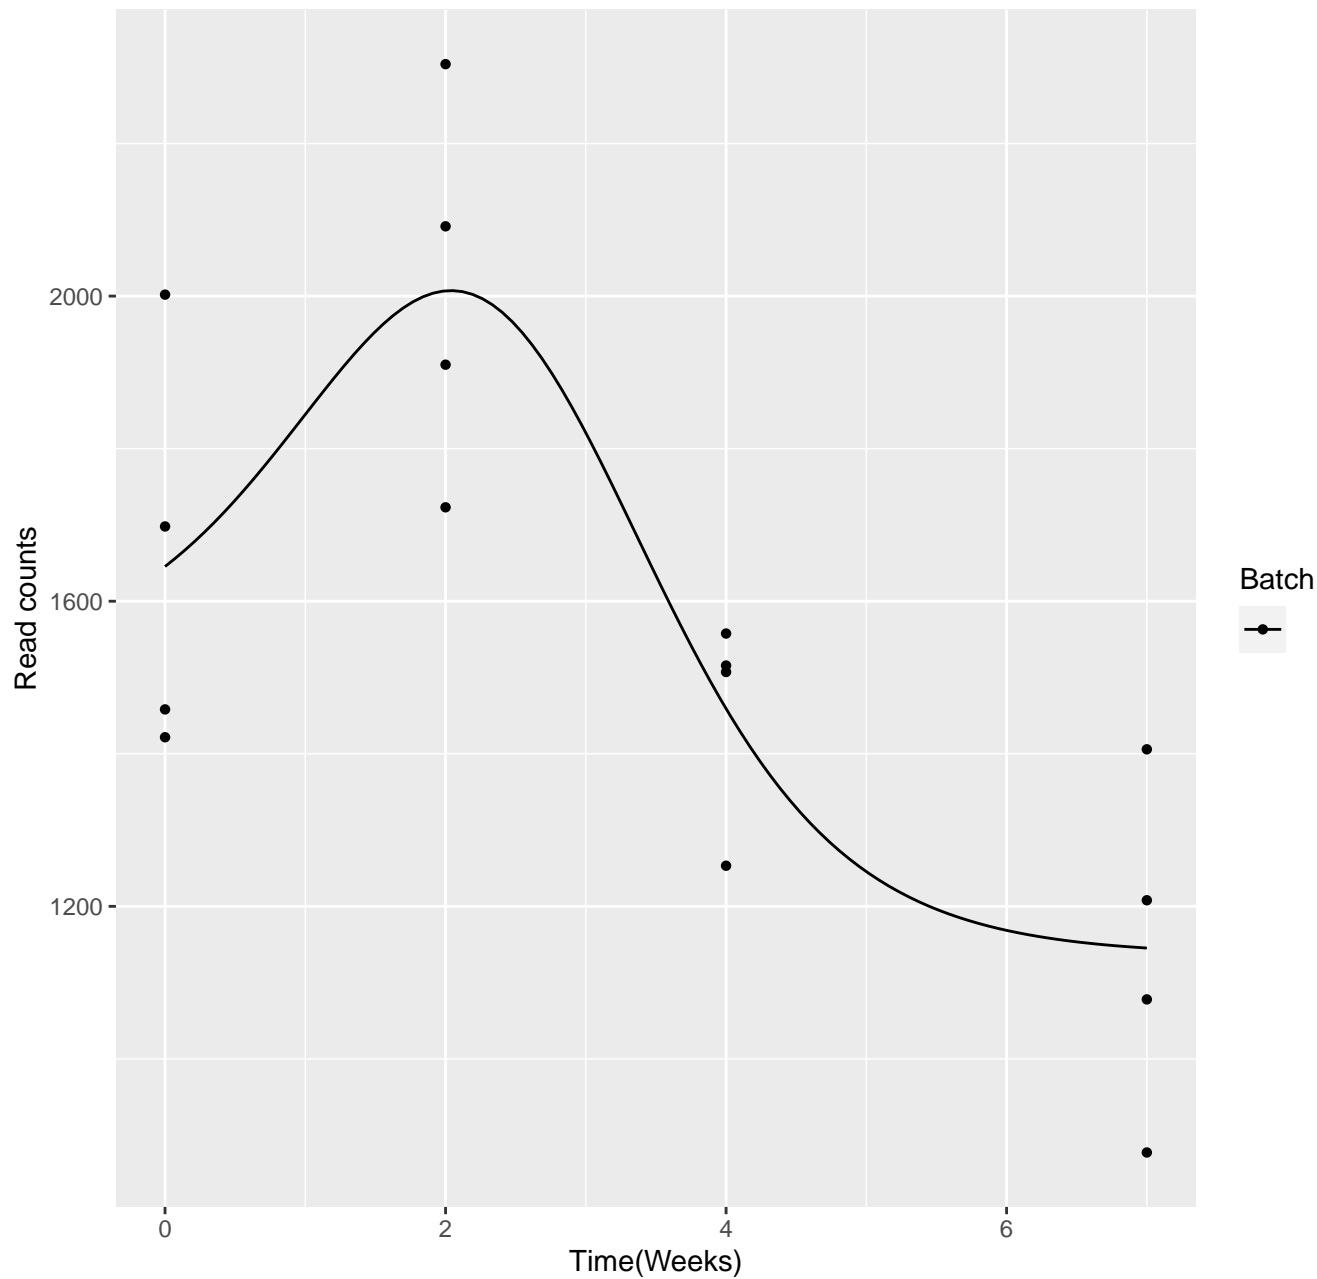

MPRIP:  $\log_{10} q = -2.66$

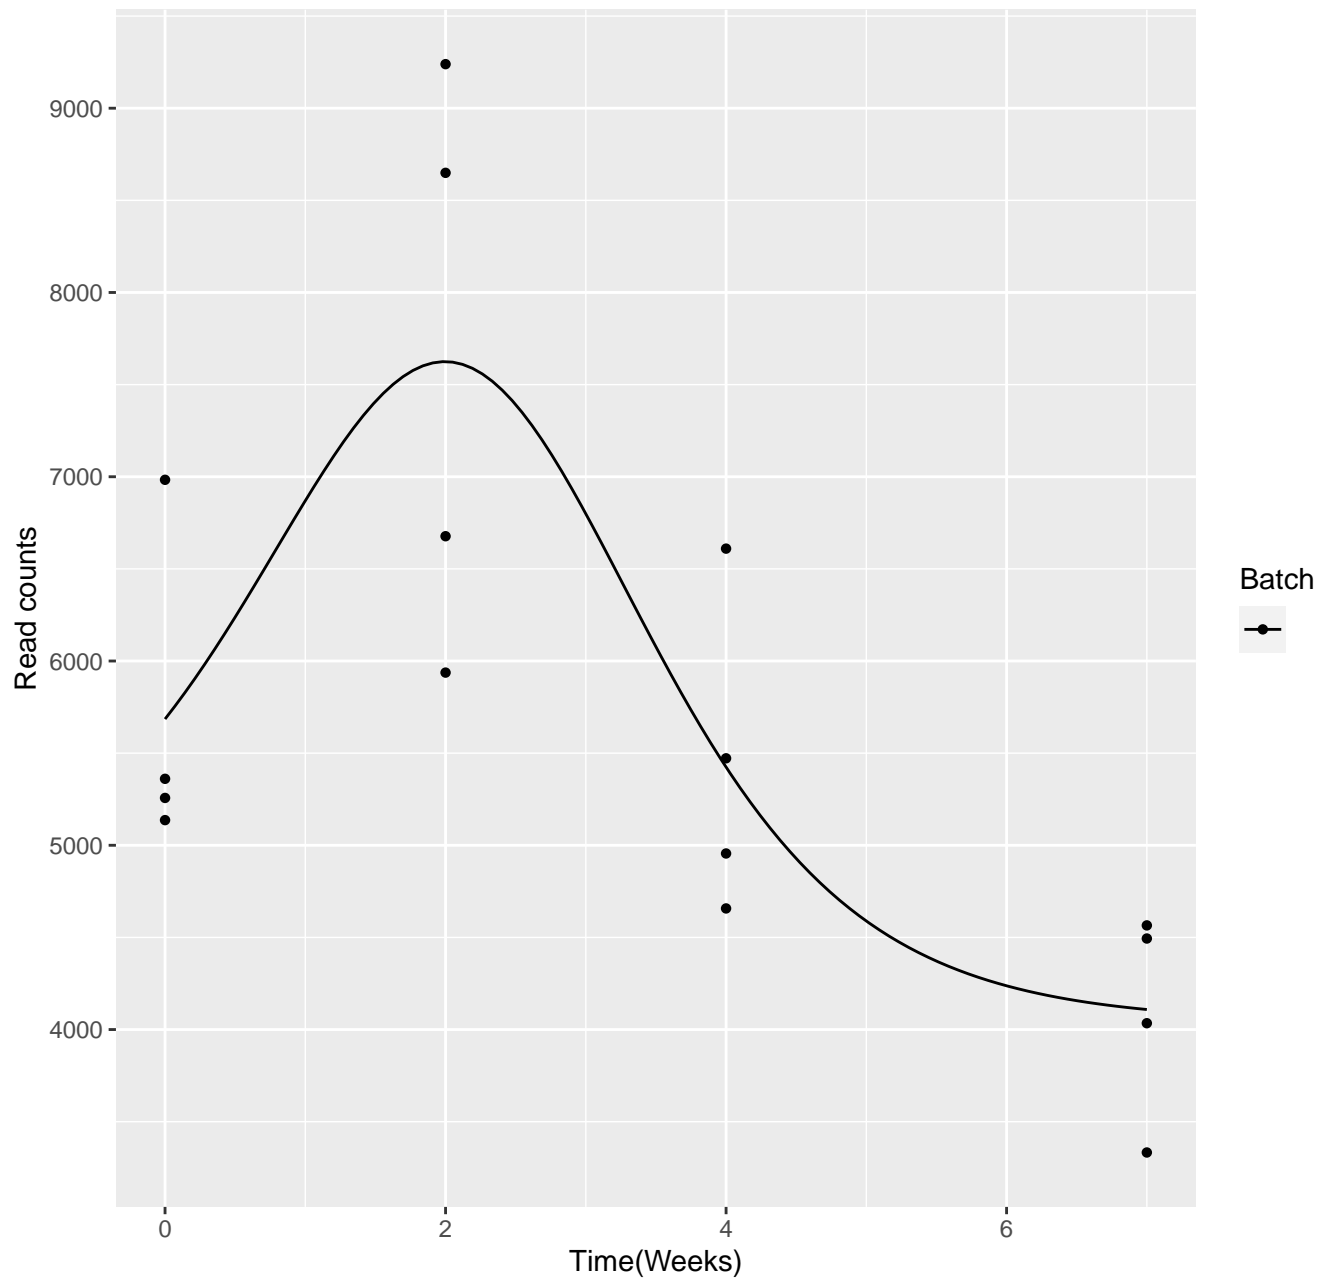

GPRC5A:  $\log_{10} q = -2.66$

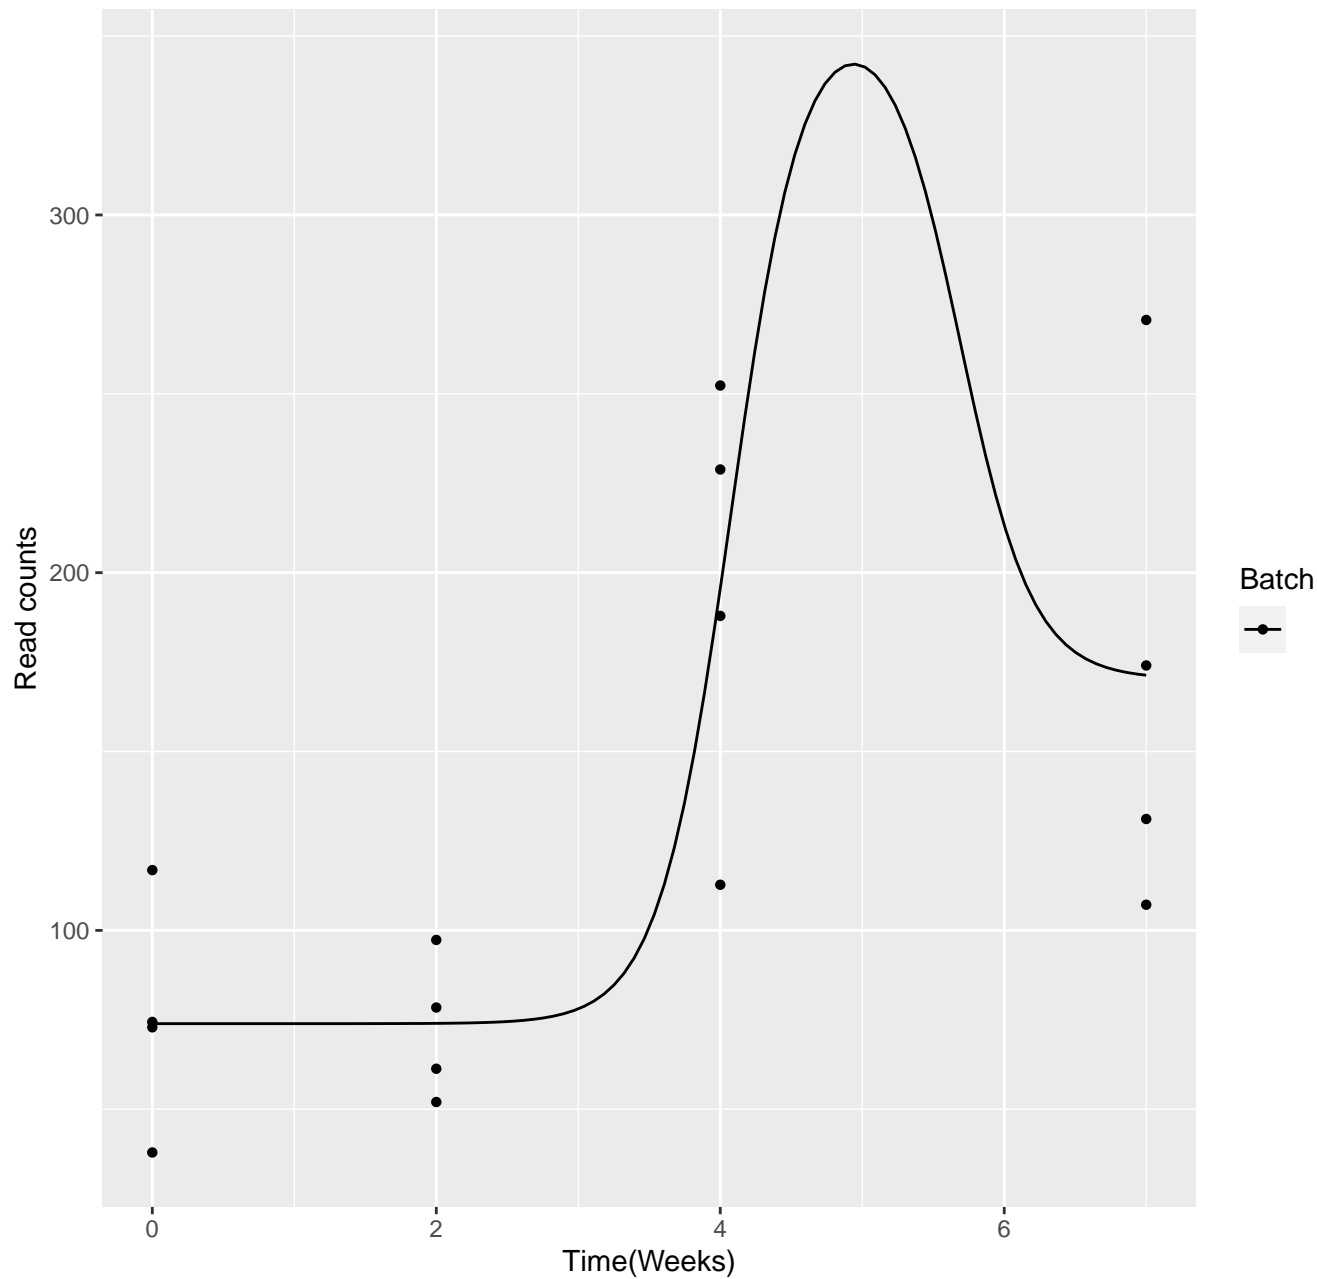



RAB20:  $\log_{10} q = -2.66$

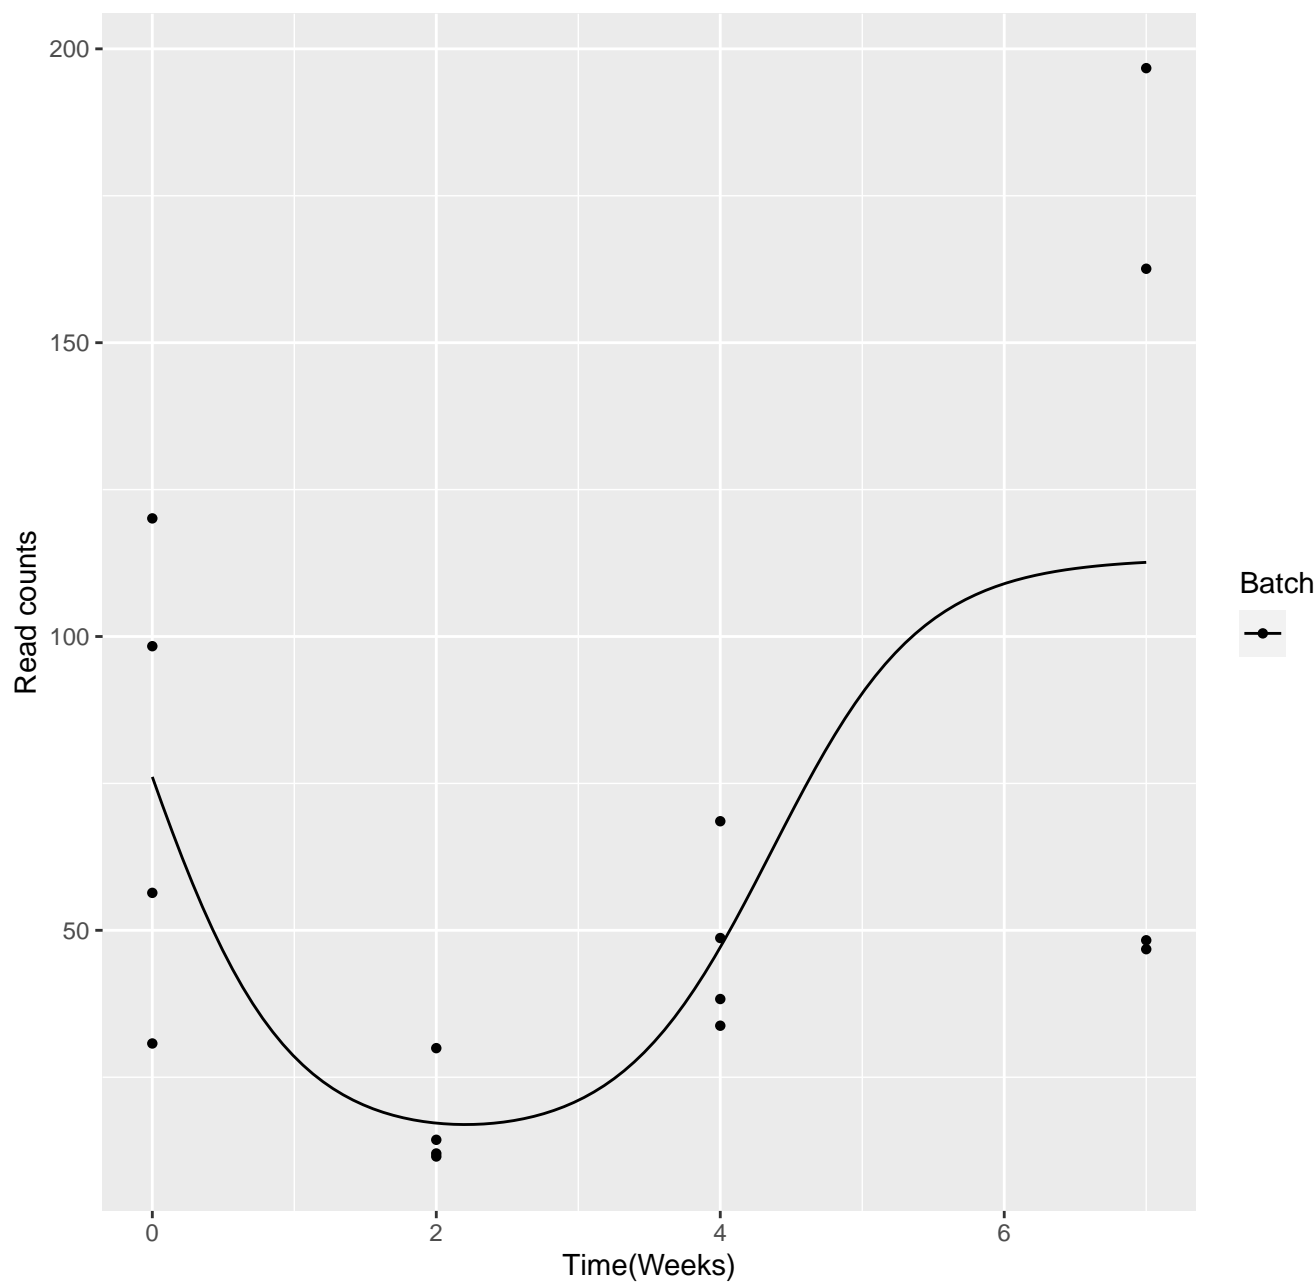

HOMER3:  $\log_{10} q = -2.65$

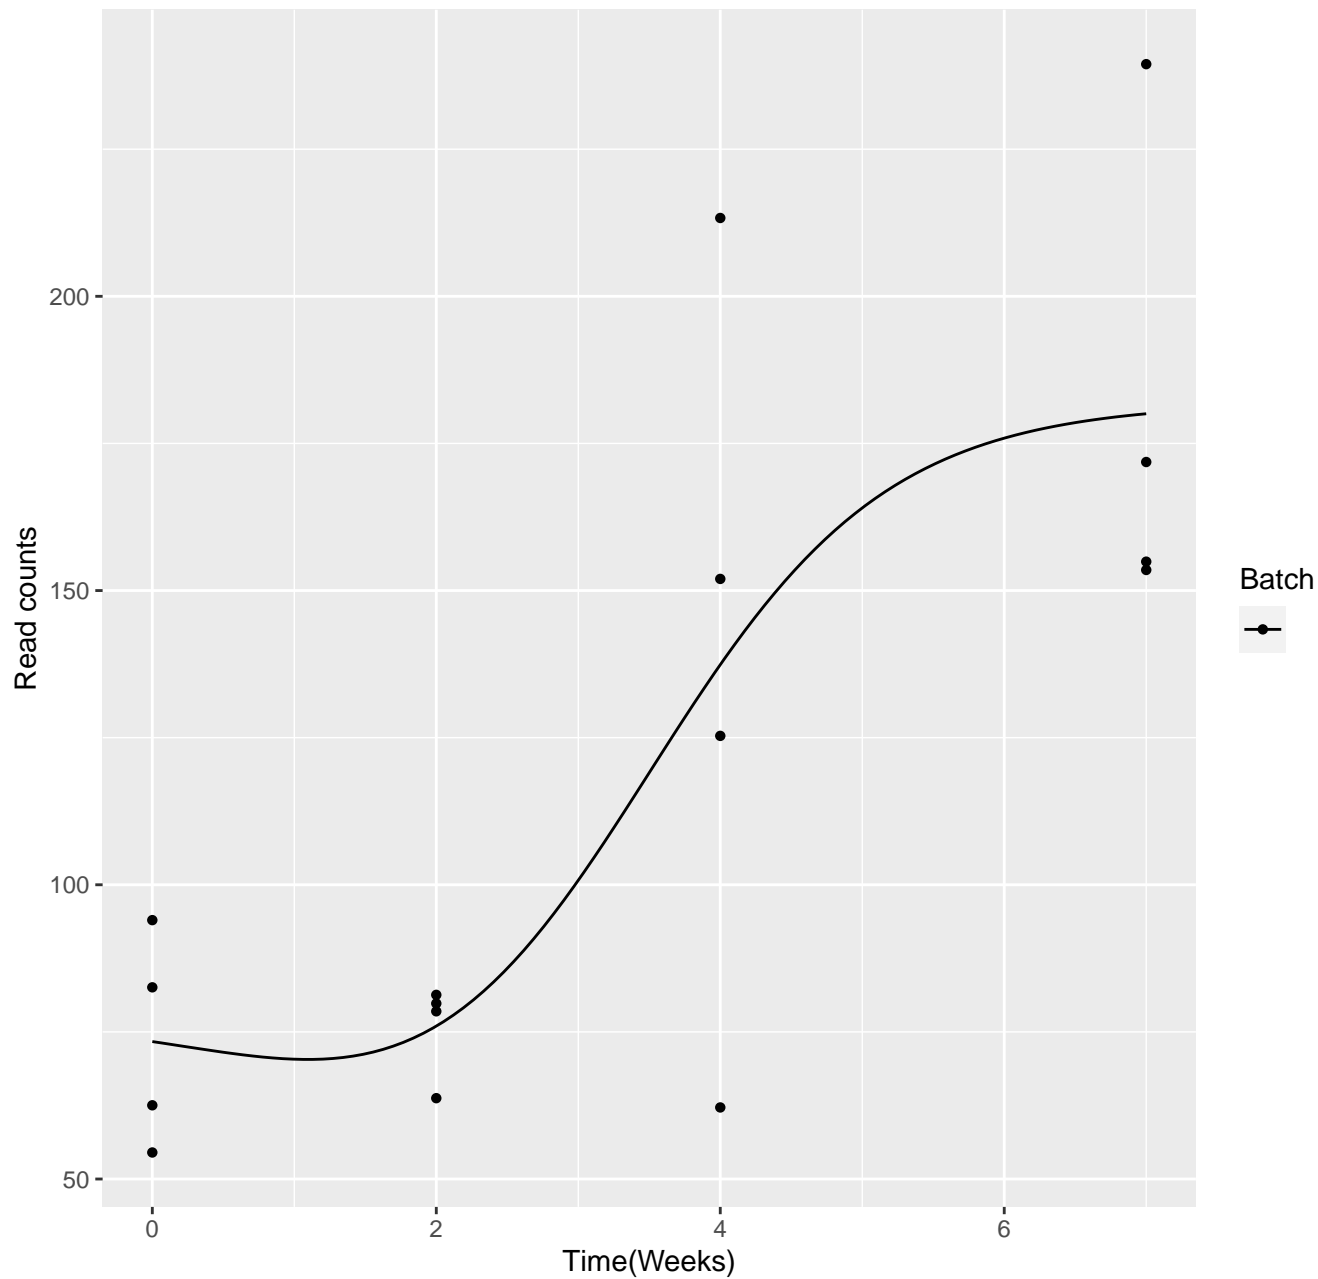

ALG2:  $\log_{10} q = -2.65$

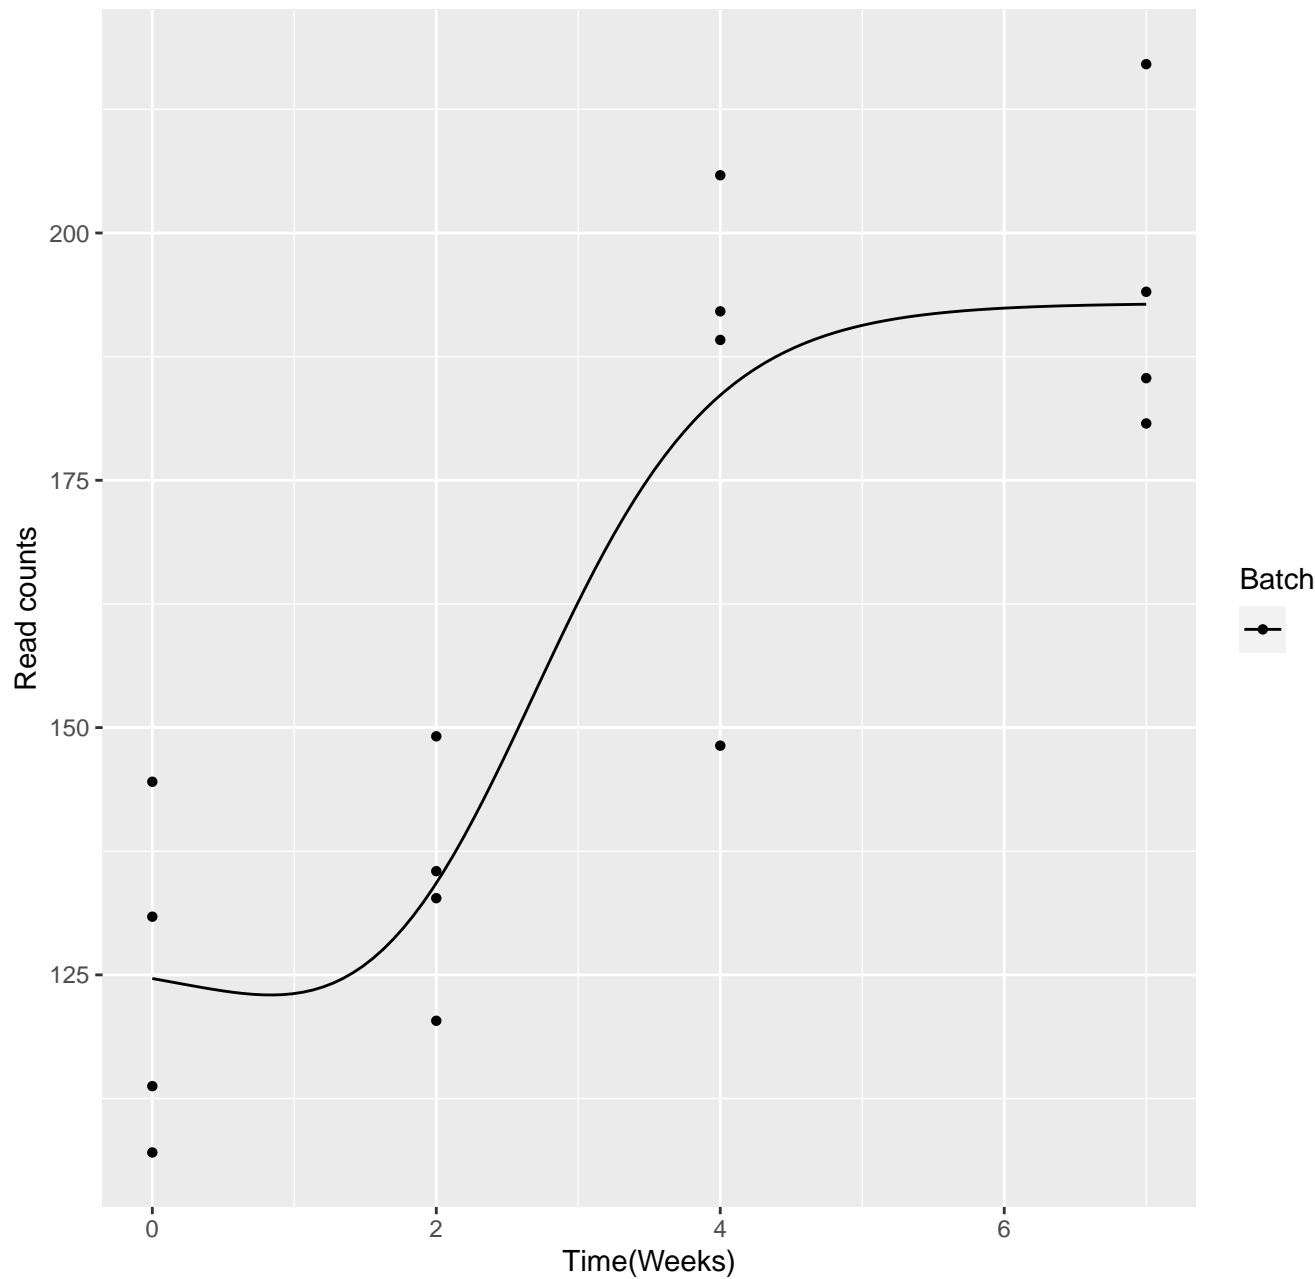

CDCA3:  $\log_{10} q = -2.65$

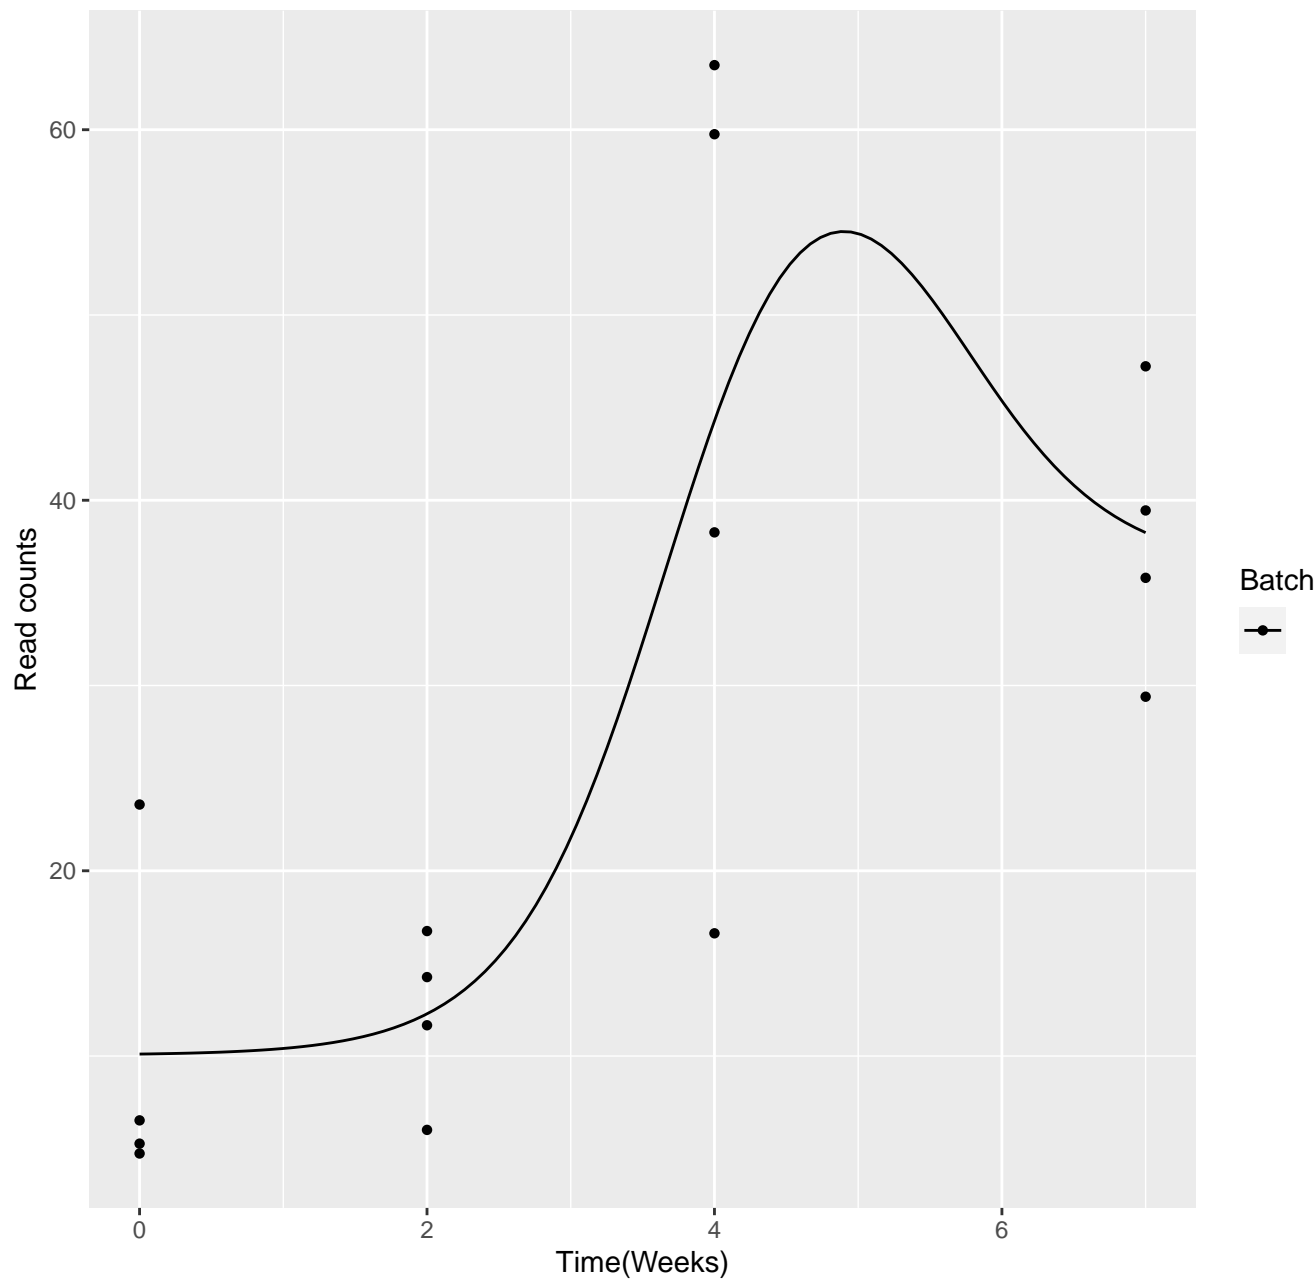

TEAD3:  $\log_{10} q = -2.65$

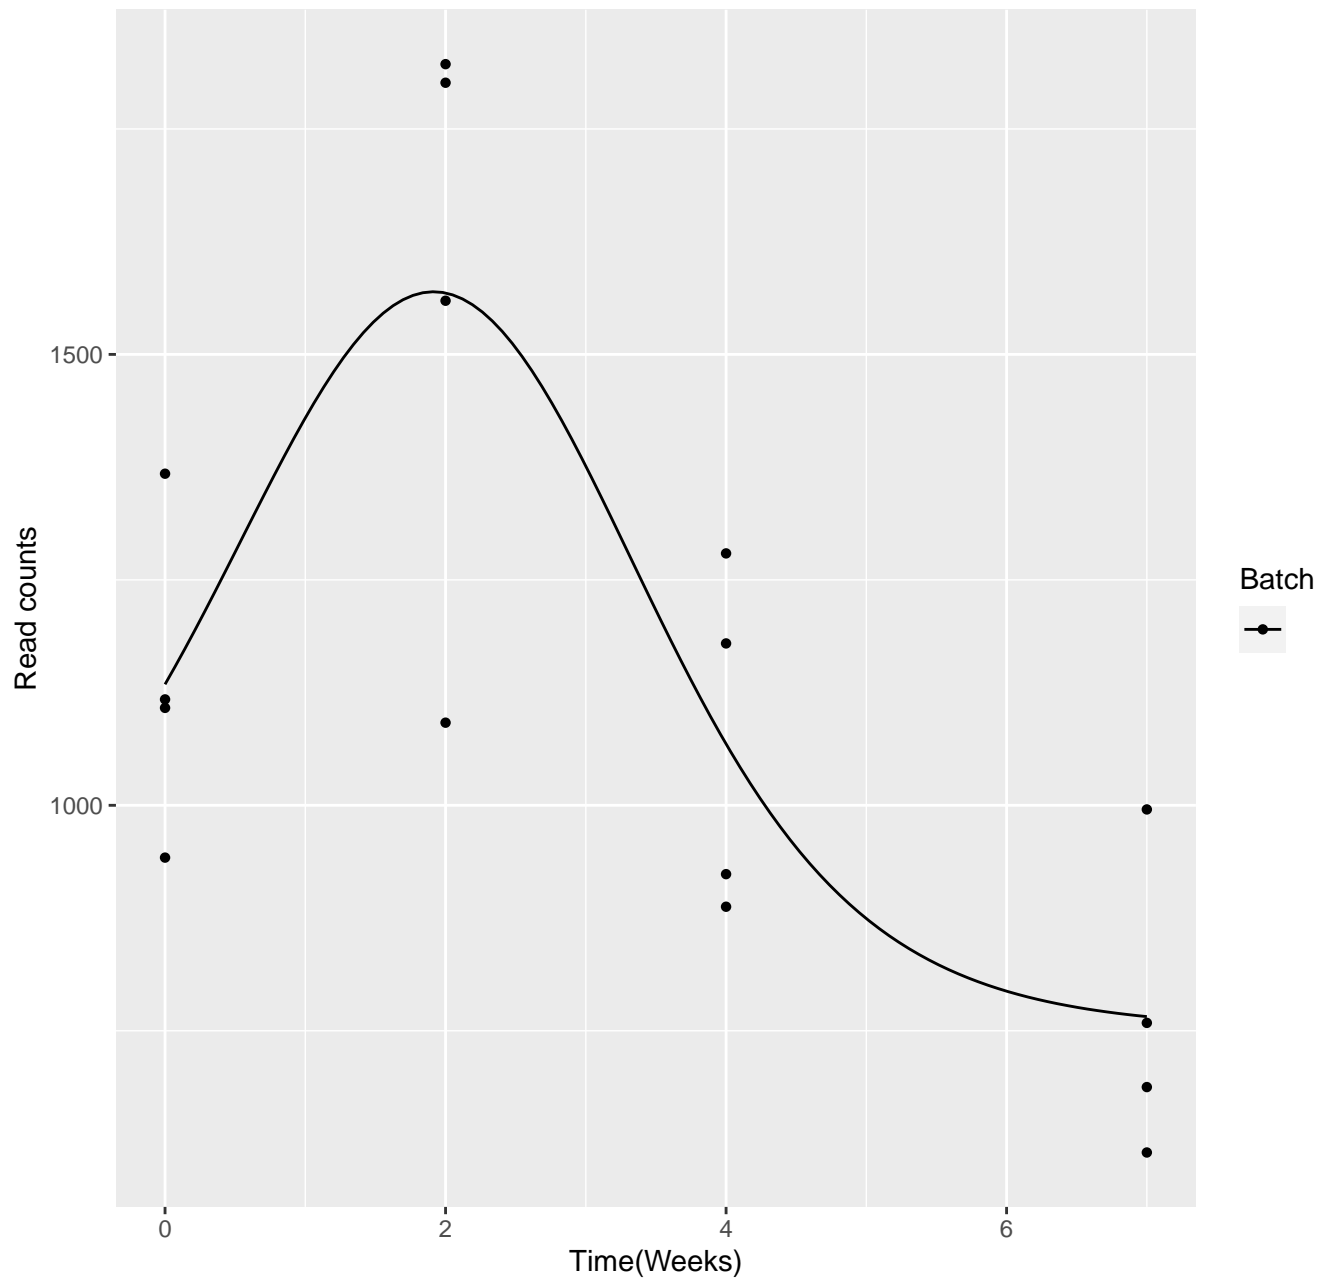

CDKN2B:  $\log_{10} q = -2.65$

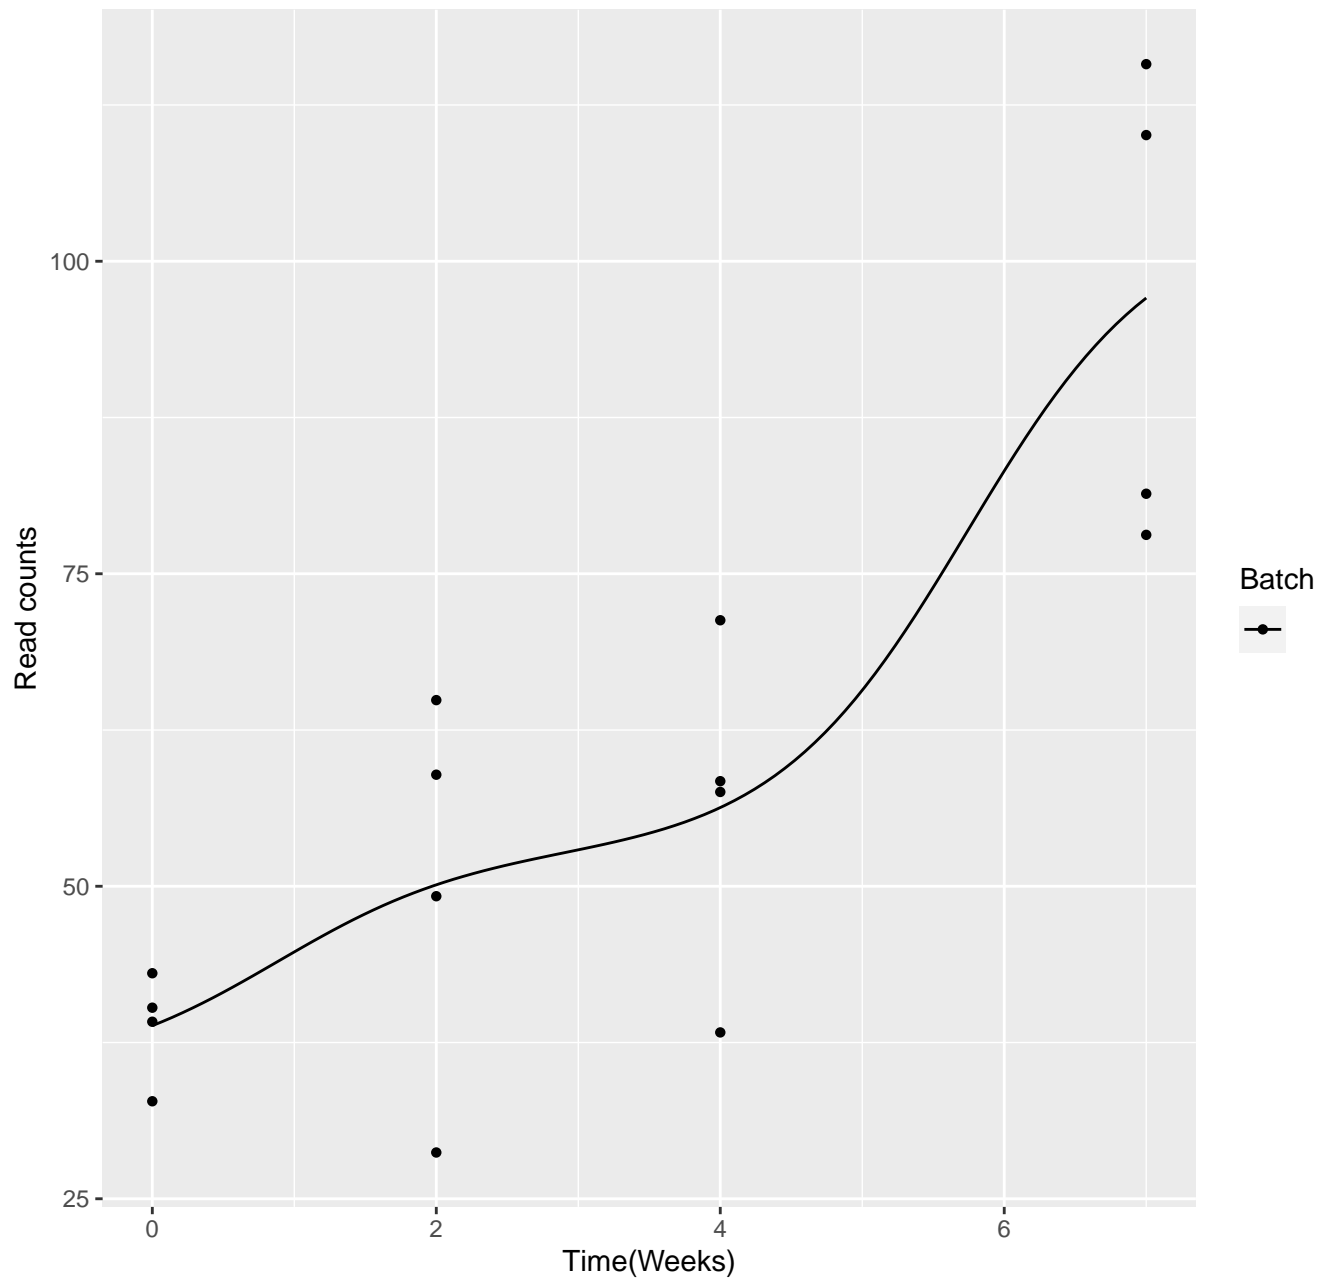

BNIPL:  $\log_{10} q = -2.65$

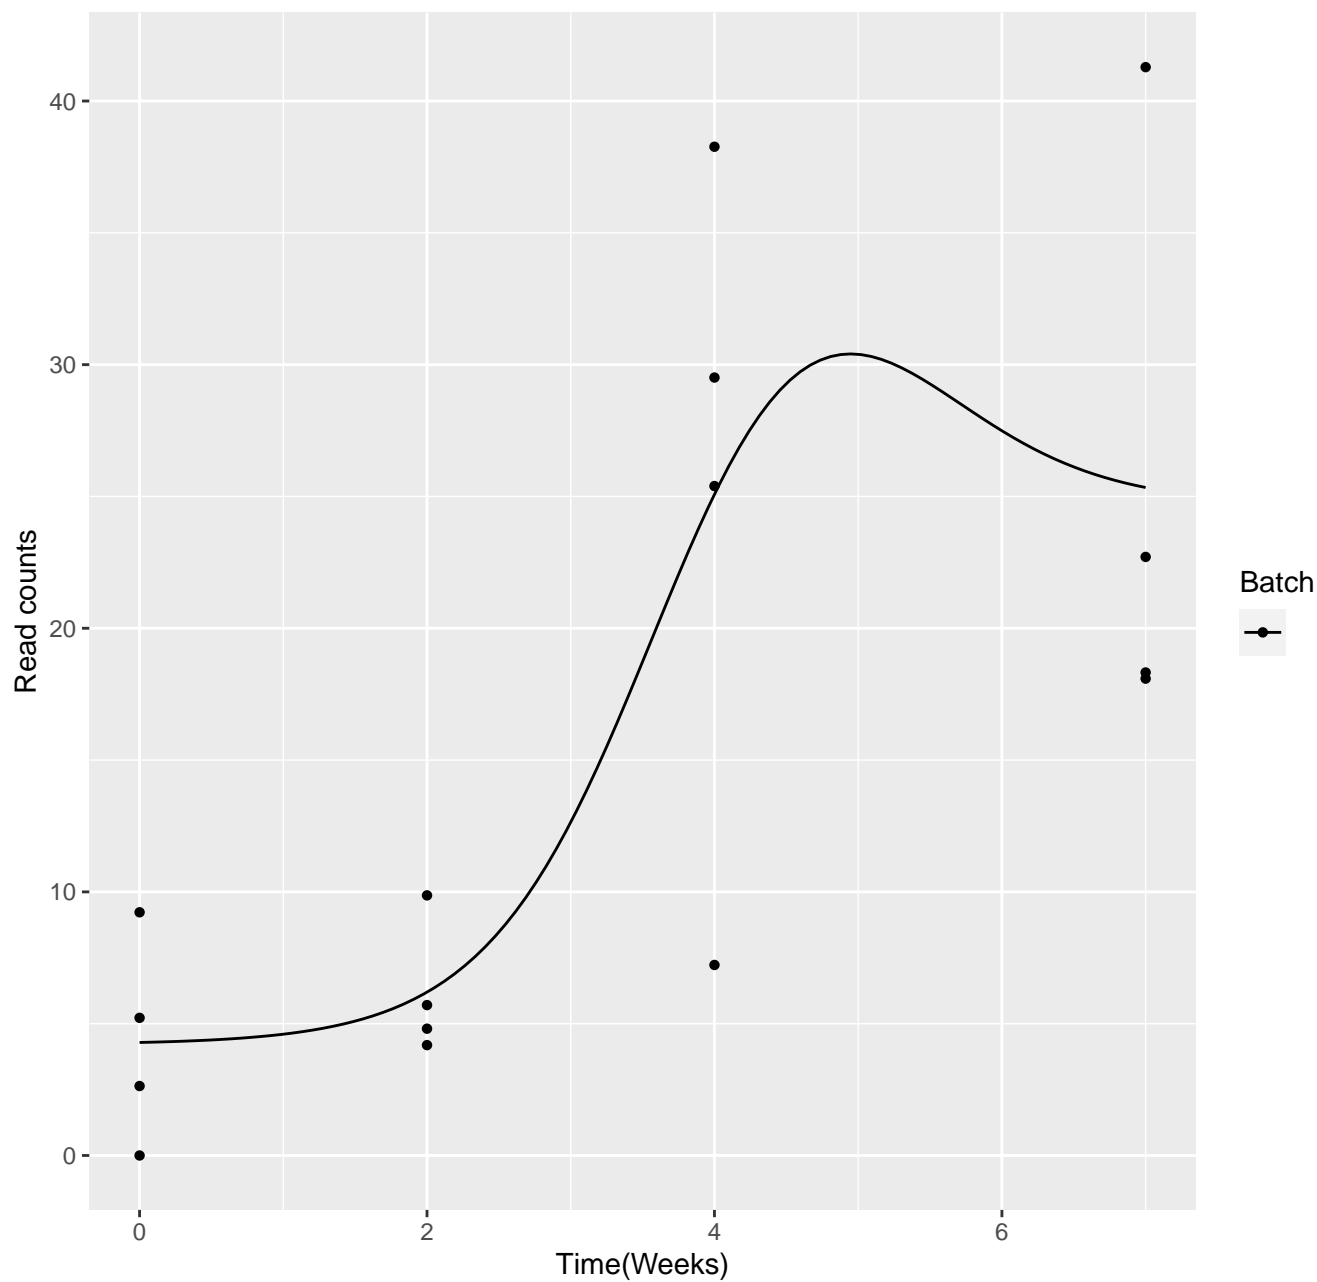

GPIHBP1:  $\log_{10} q = -2.65$

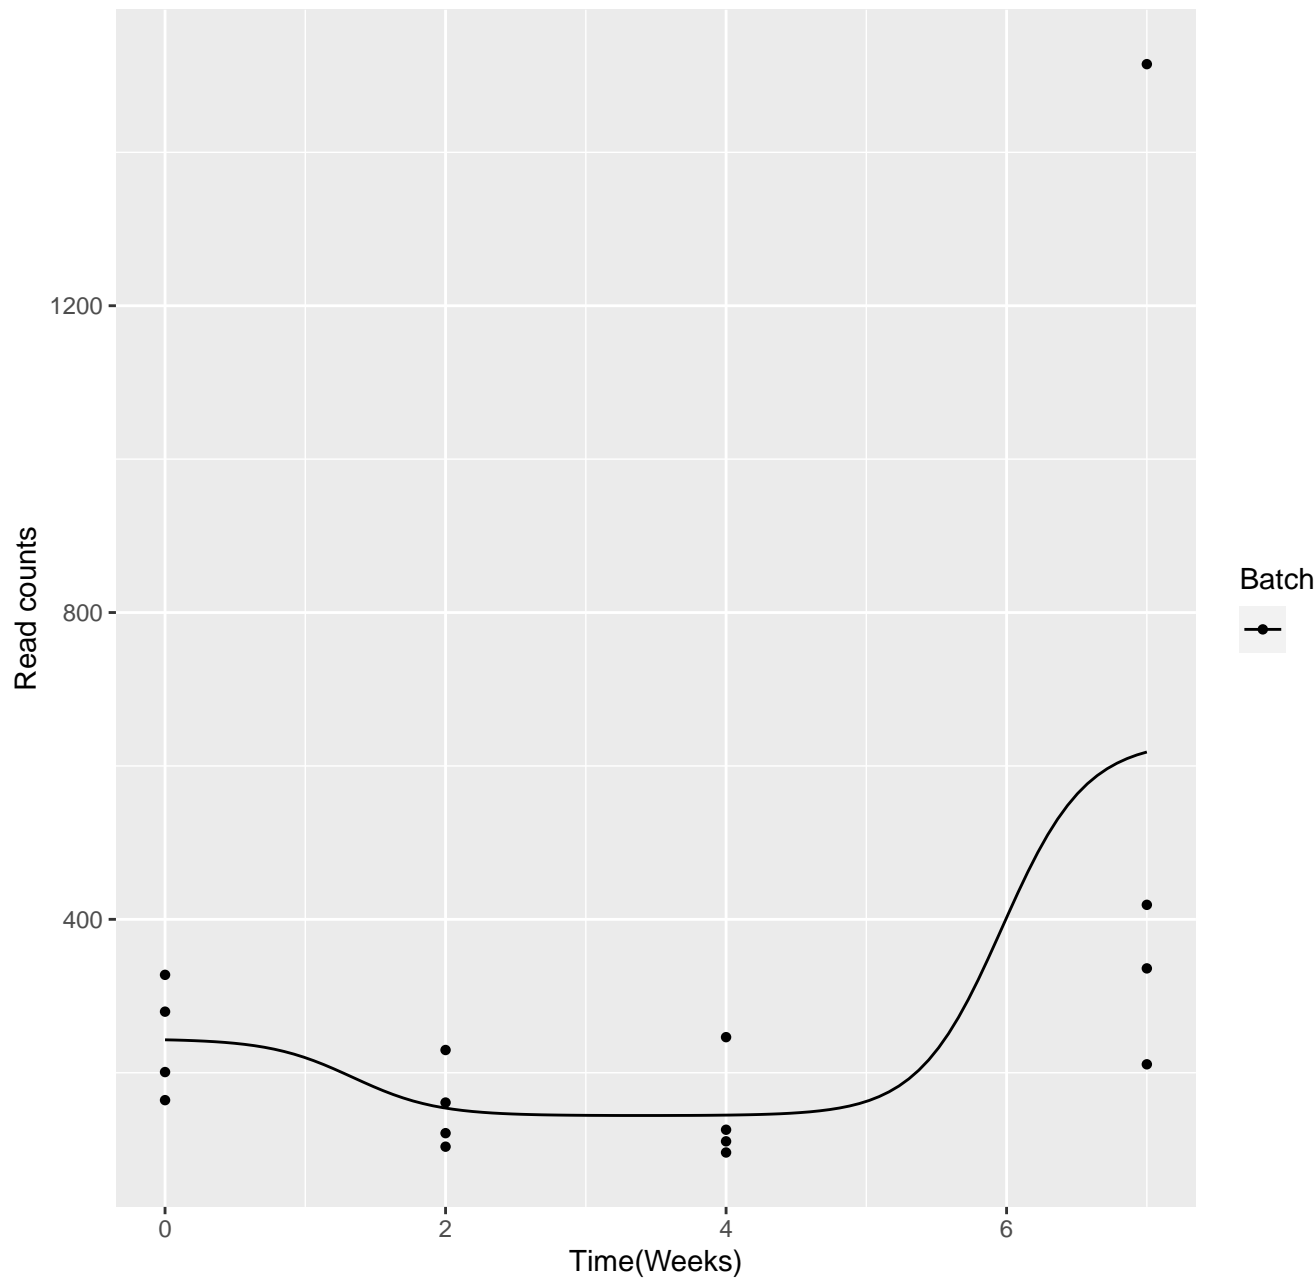



PDGFB:  $\log_{10} q = -2.65$

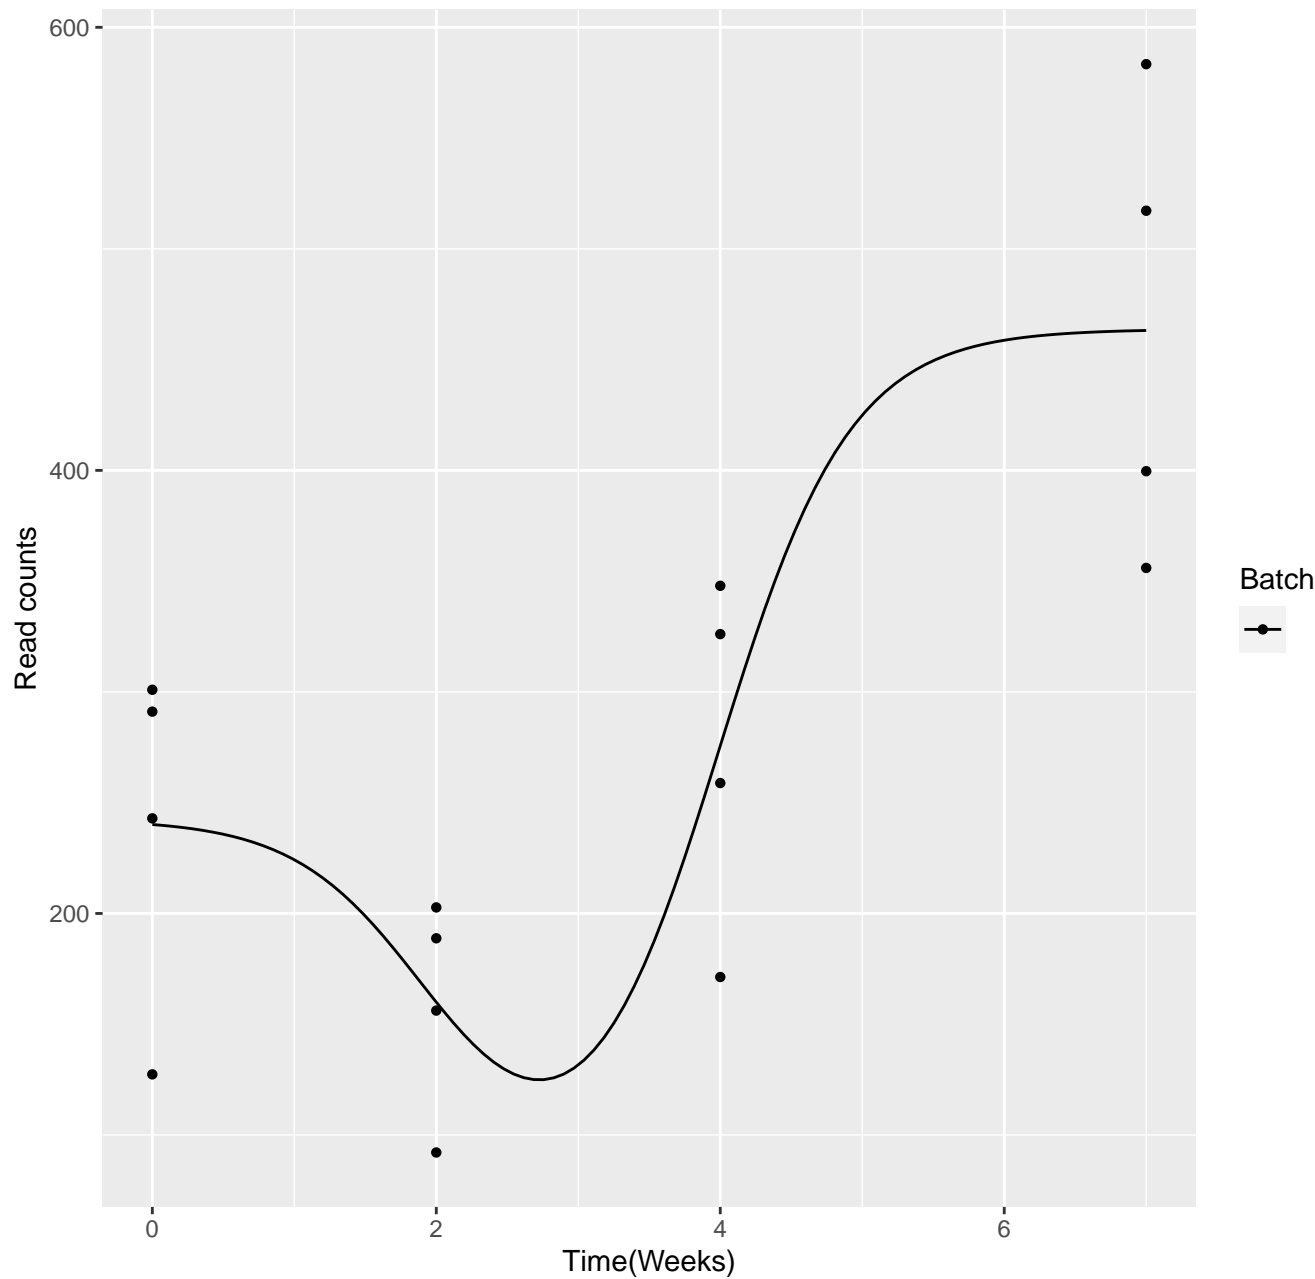

SLC38A3:  $\log_{10} q = -2.65$

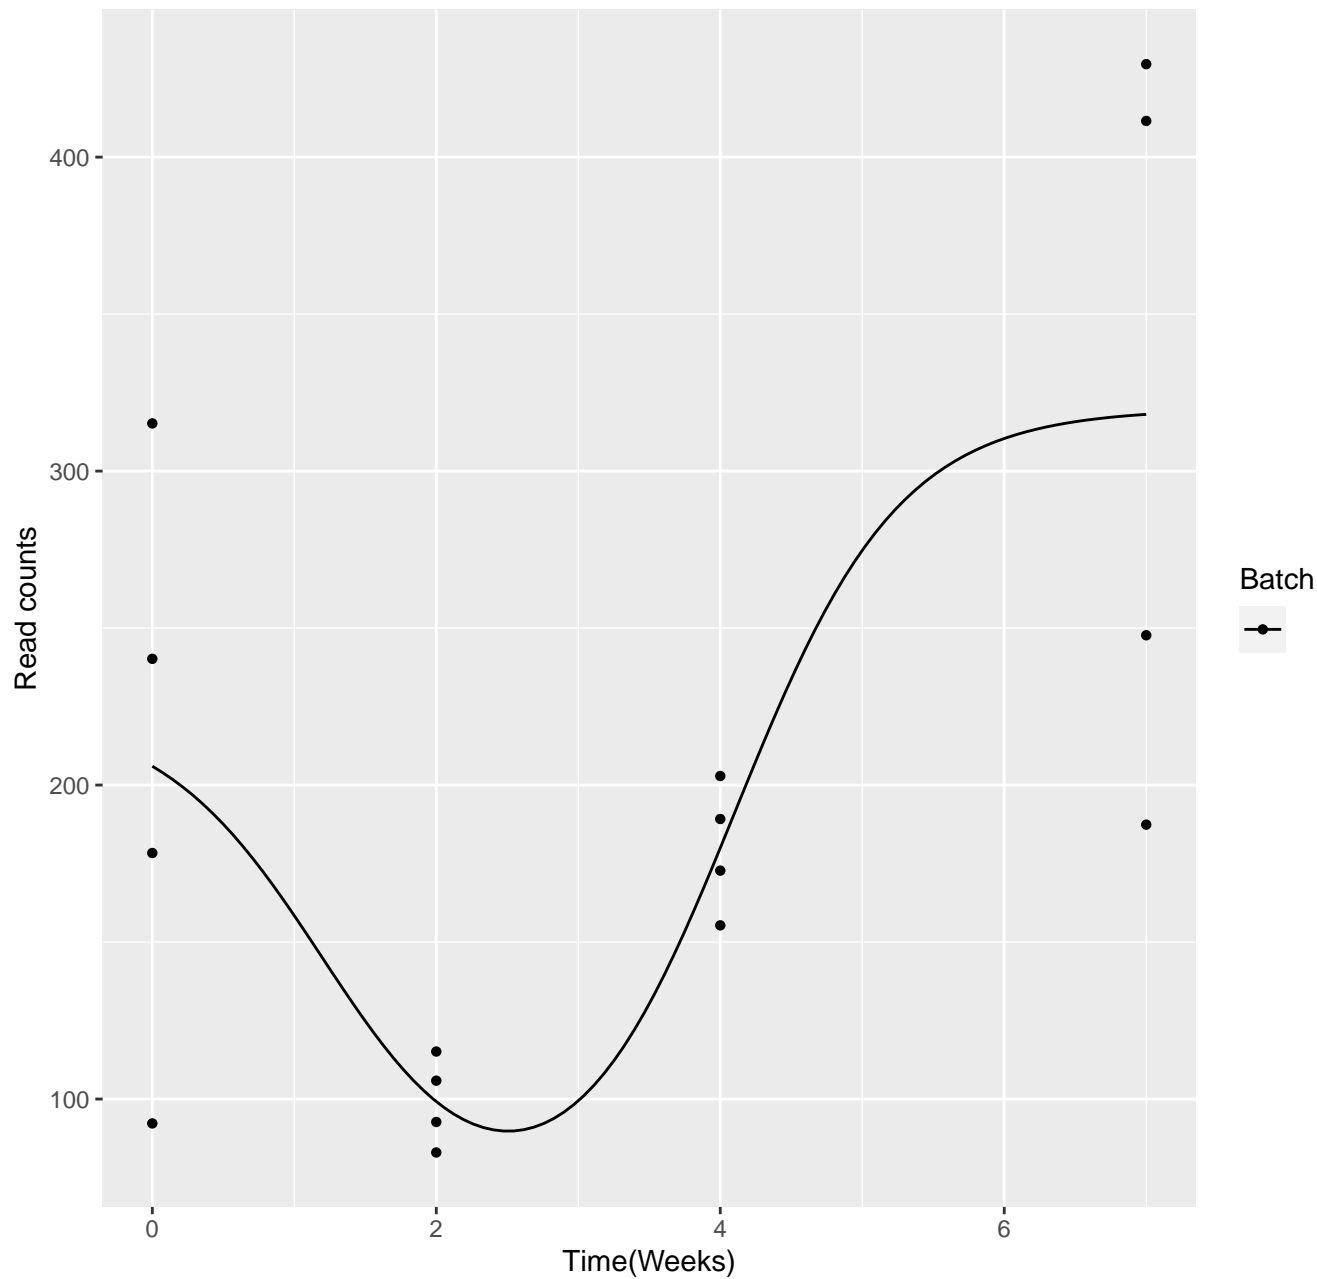

LOC103346247:  $\log_{10} q = -2.65$

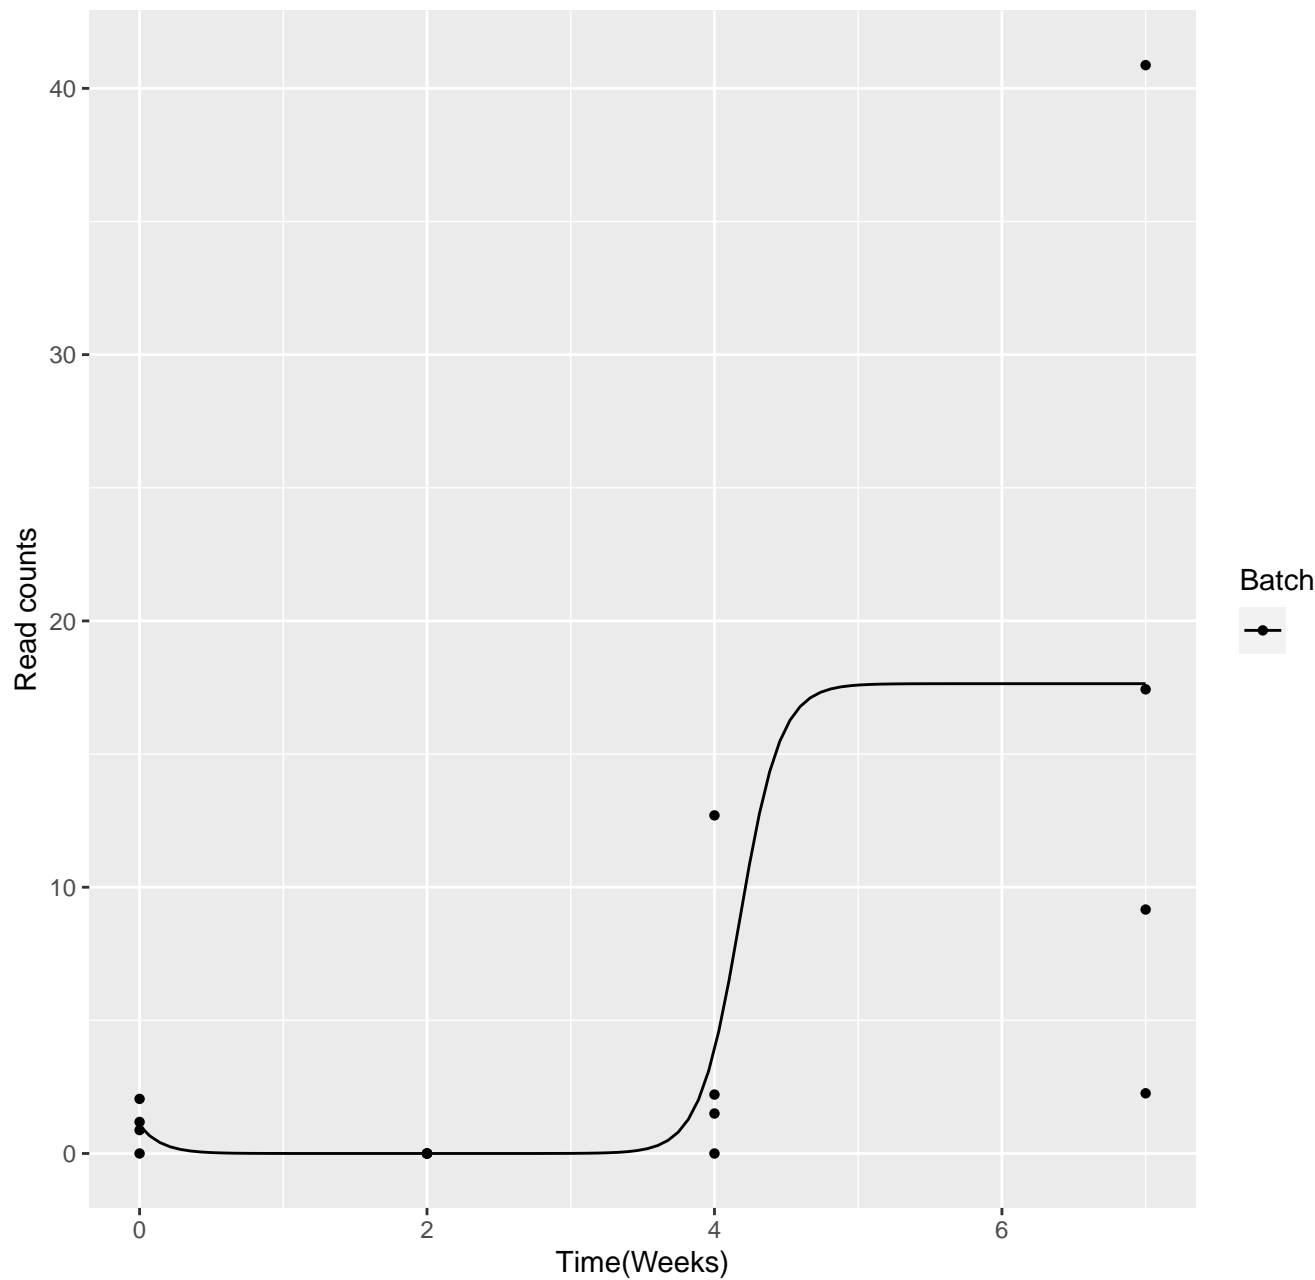

PTBP1:  $\log_{10} q = -2.64$

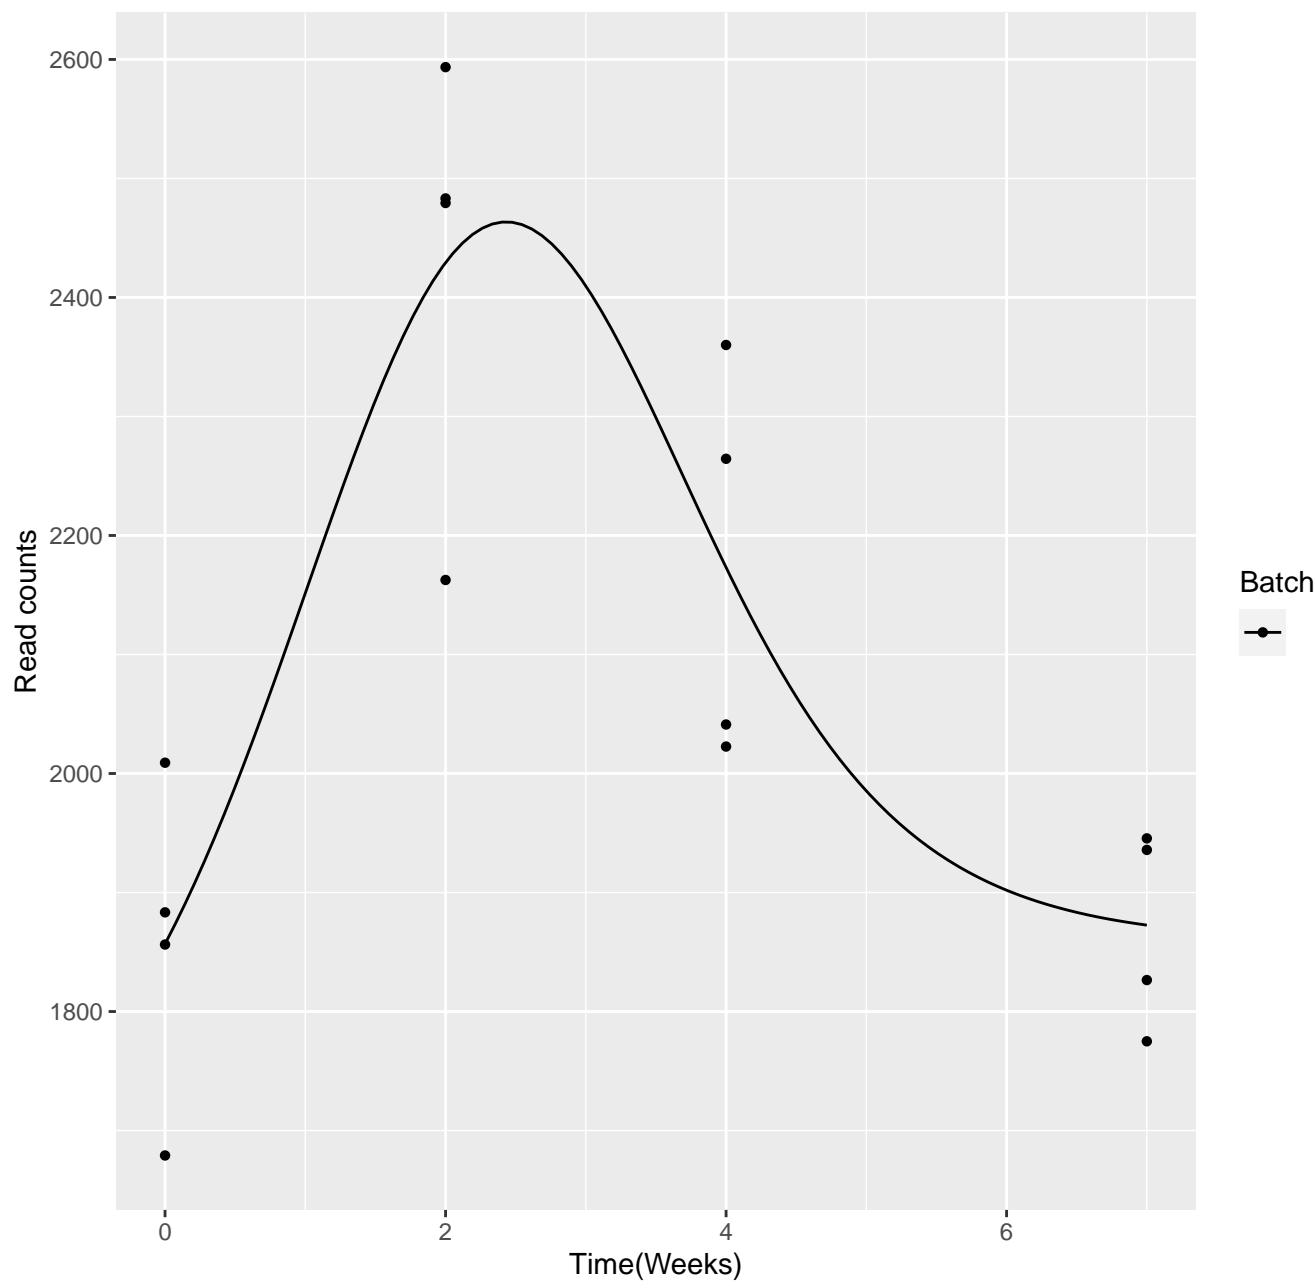

PTPN21:  $\log_{10} q = -2.64$

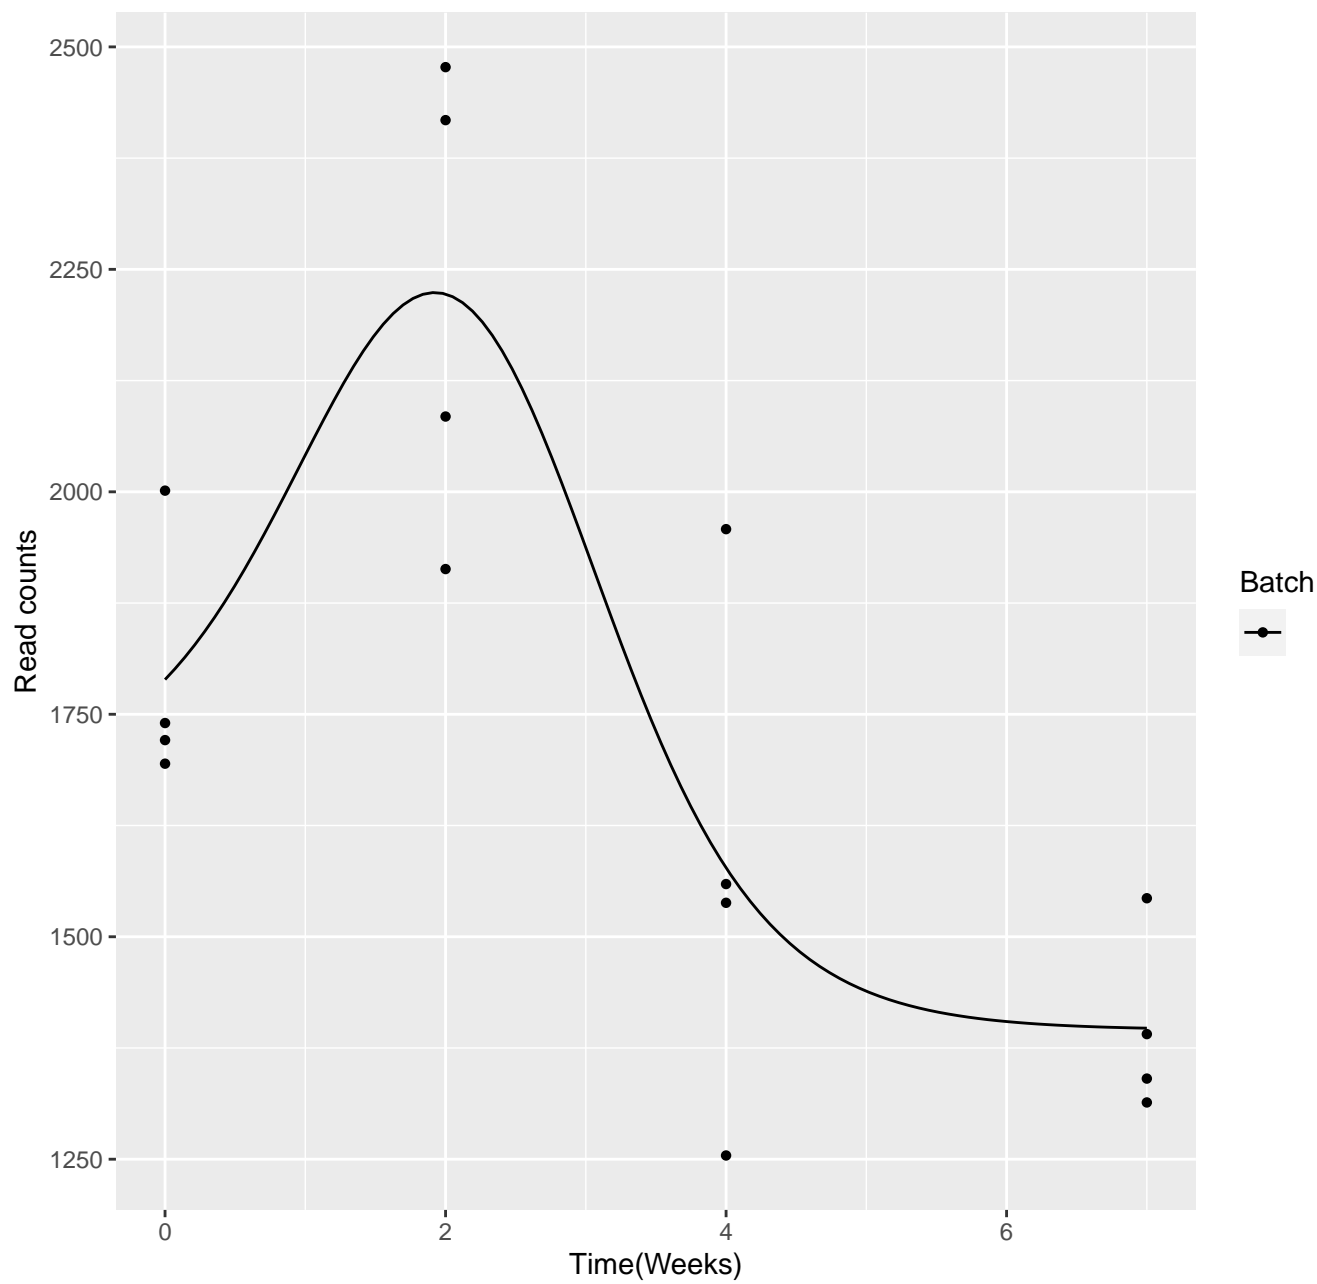

SLC66A3:  $\log_{10} q = -2.64$

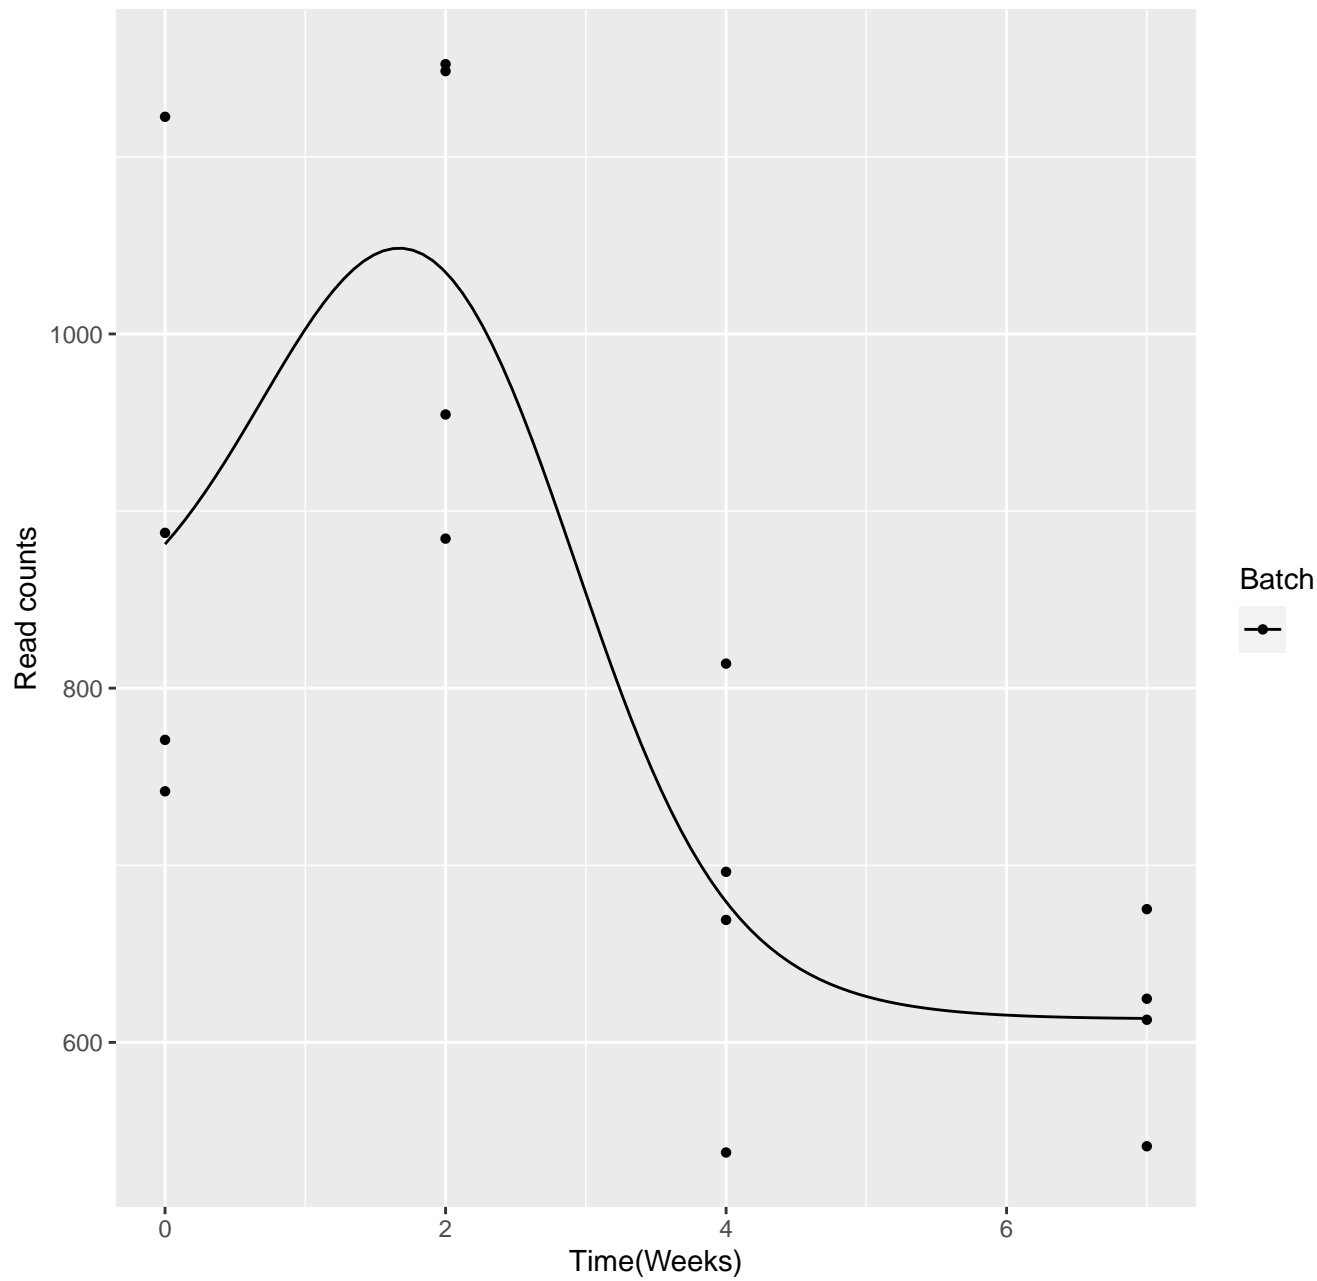

CSGALNACT2:  $\log_{10} q = -2.64$

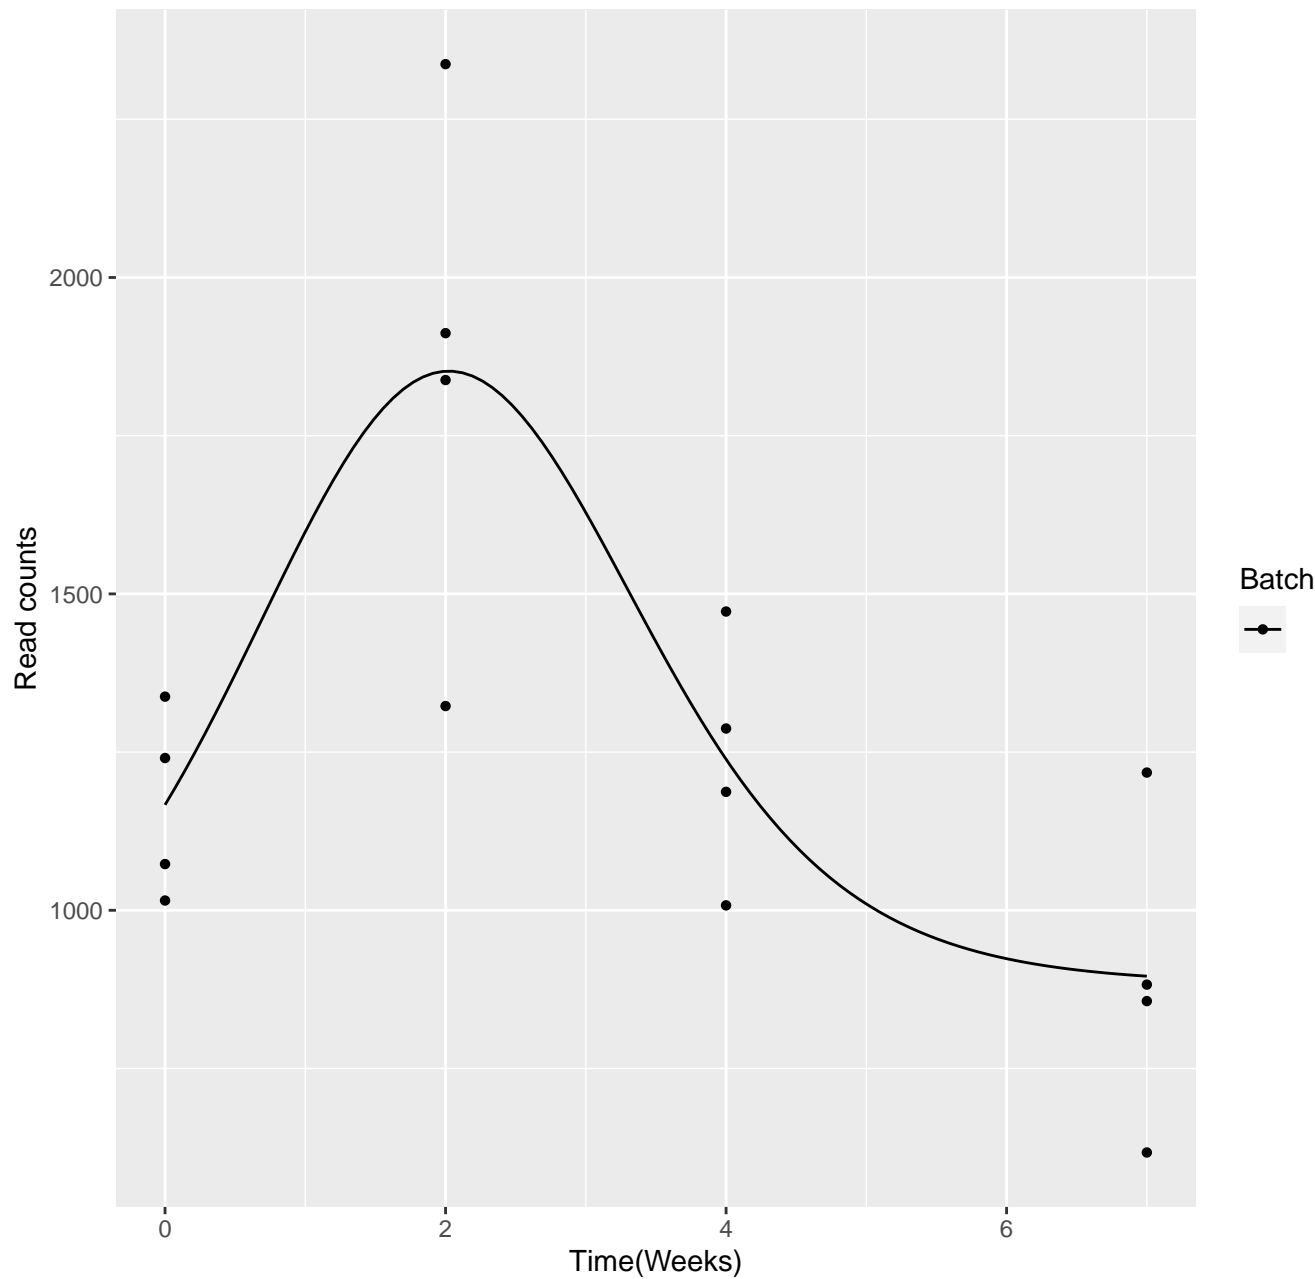

AK5:  $\log_{10} q = -2.63$

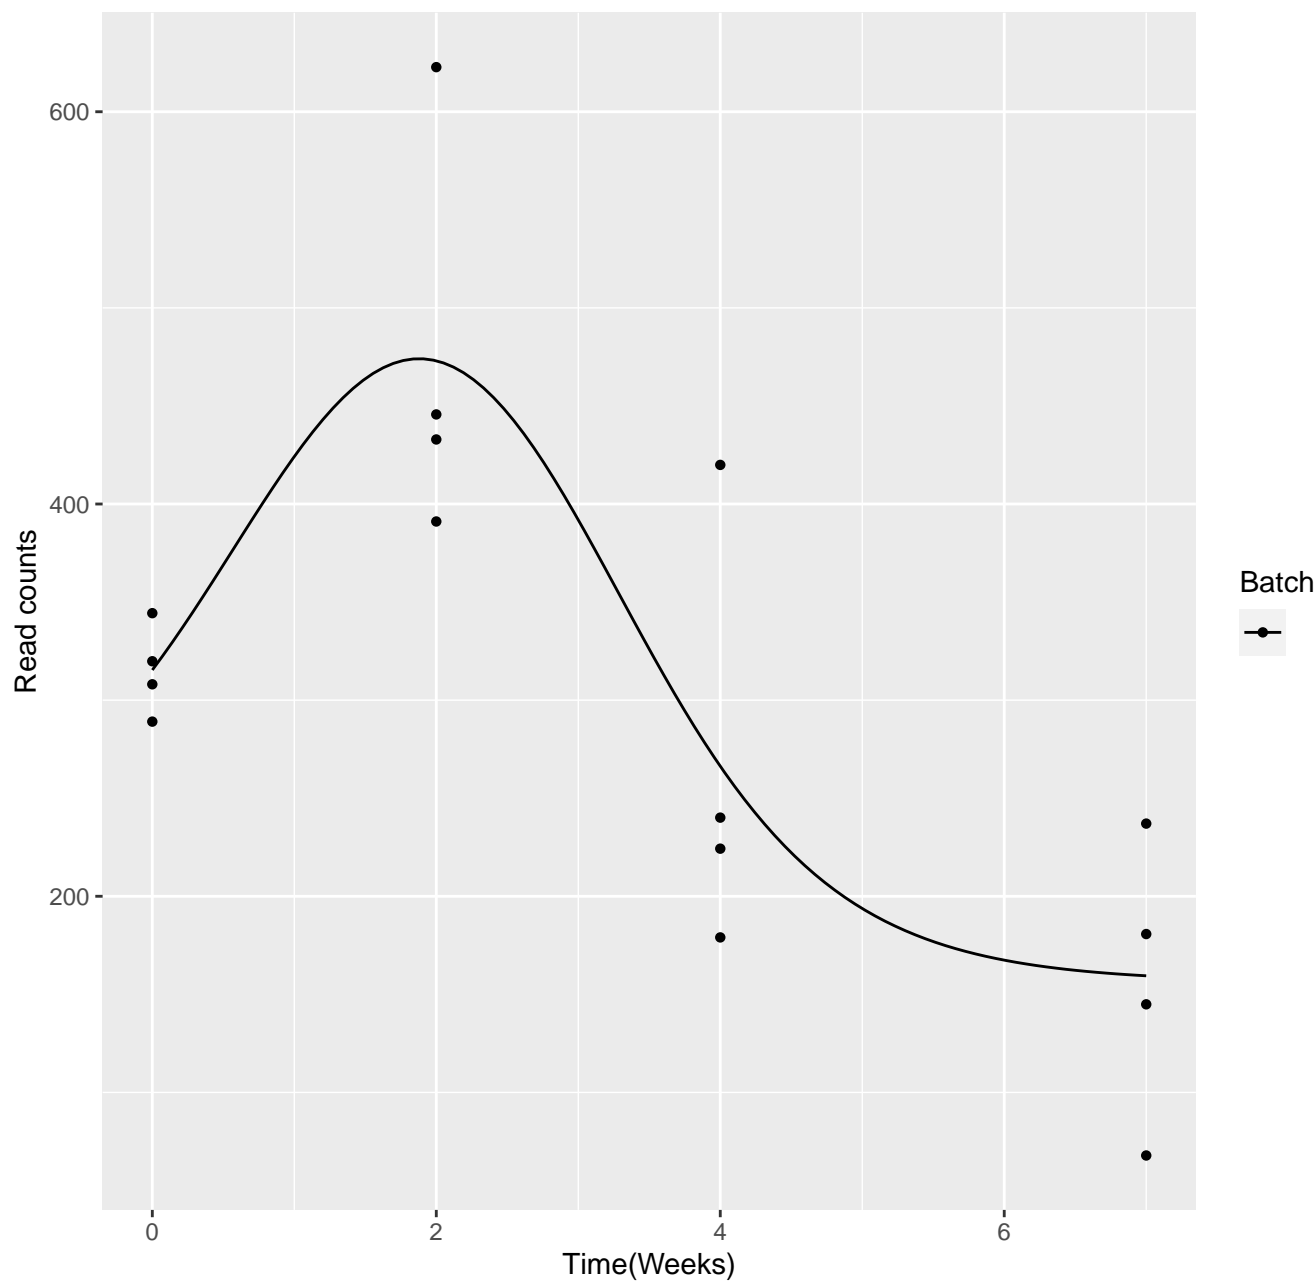



APCDD1:  $\log_{10} q = -2.63$

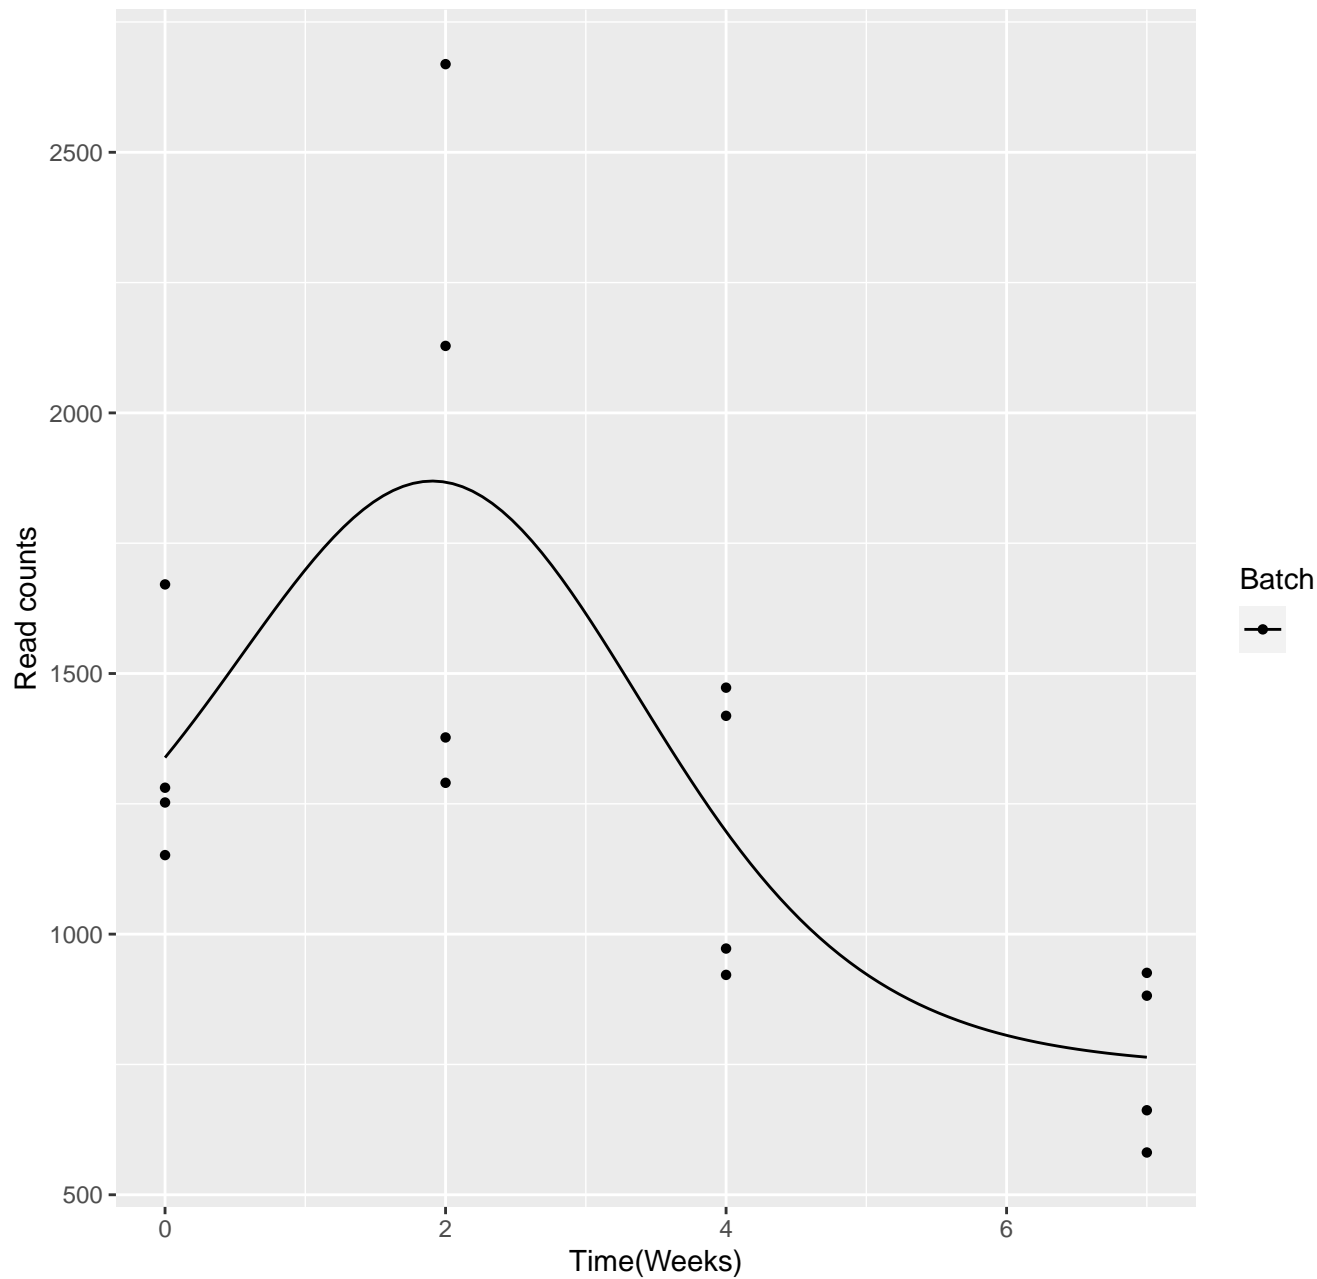

CXCR2:  $\log_{10} q = -2.63$

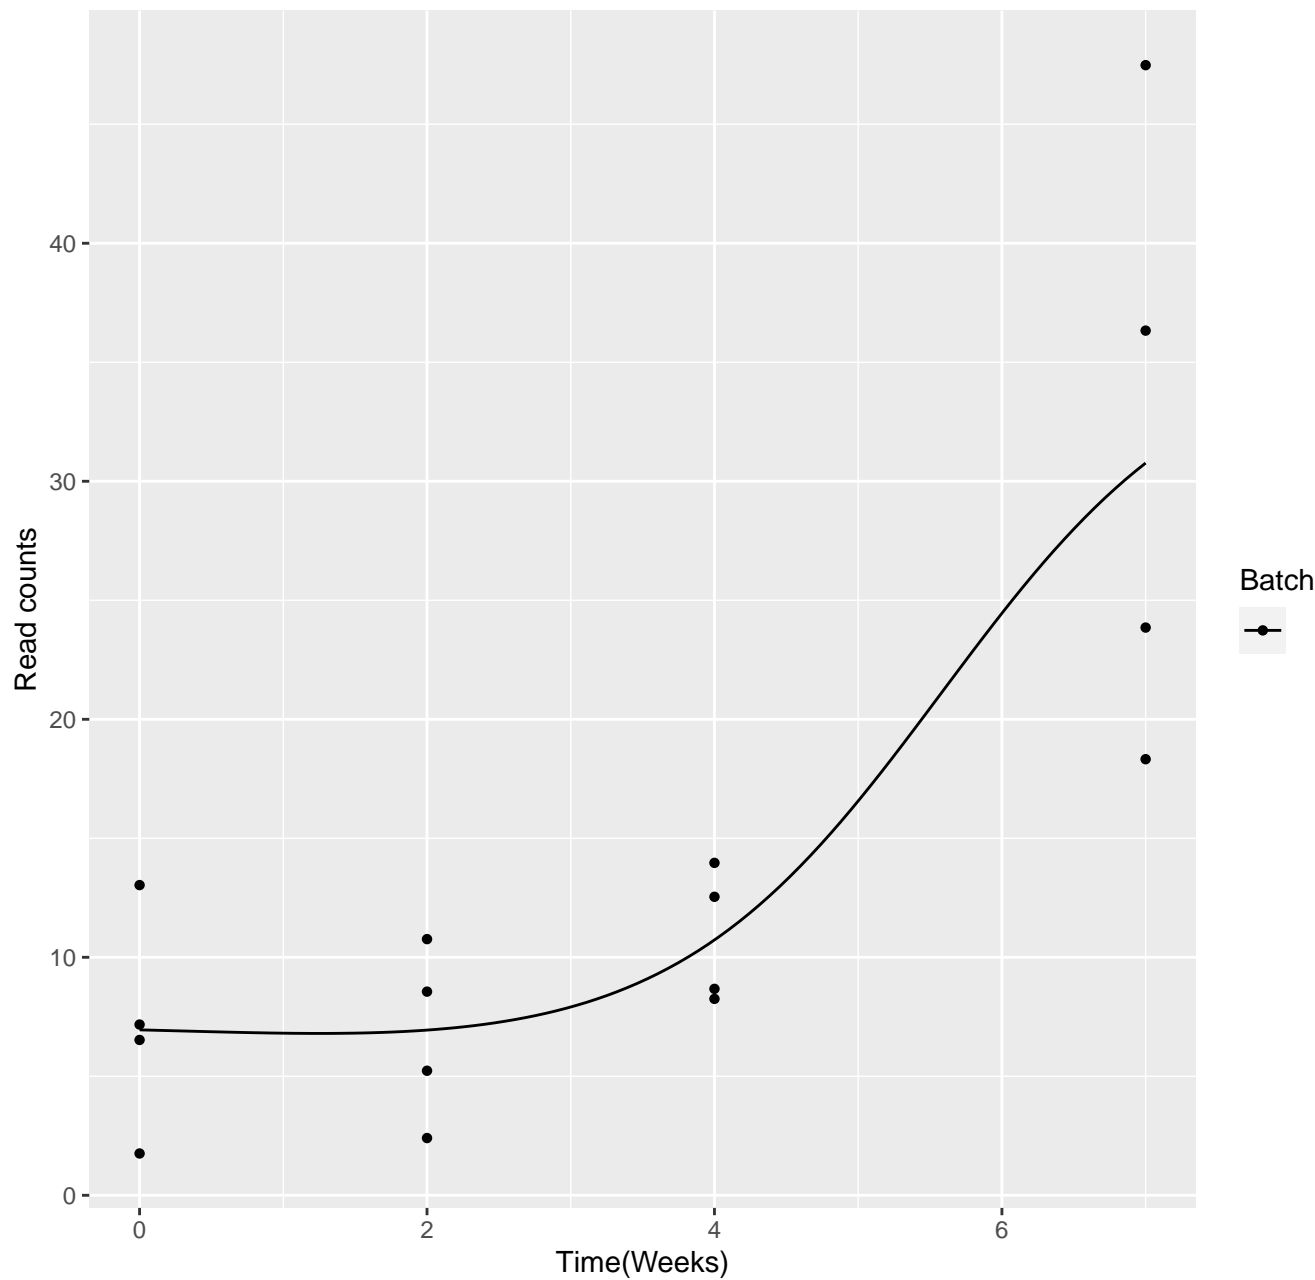

PTGIR:  $\log_{10} q = -2.63$

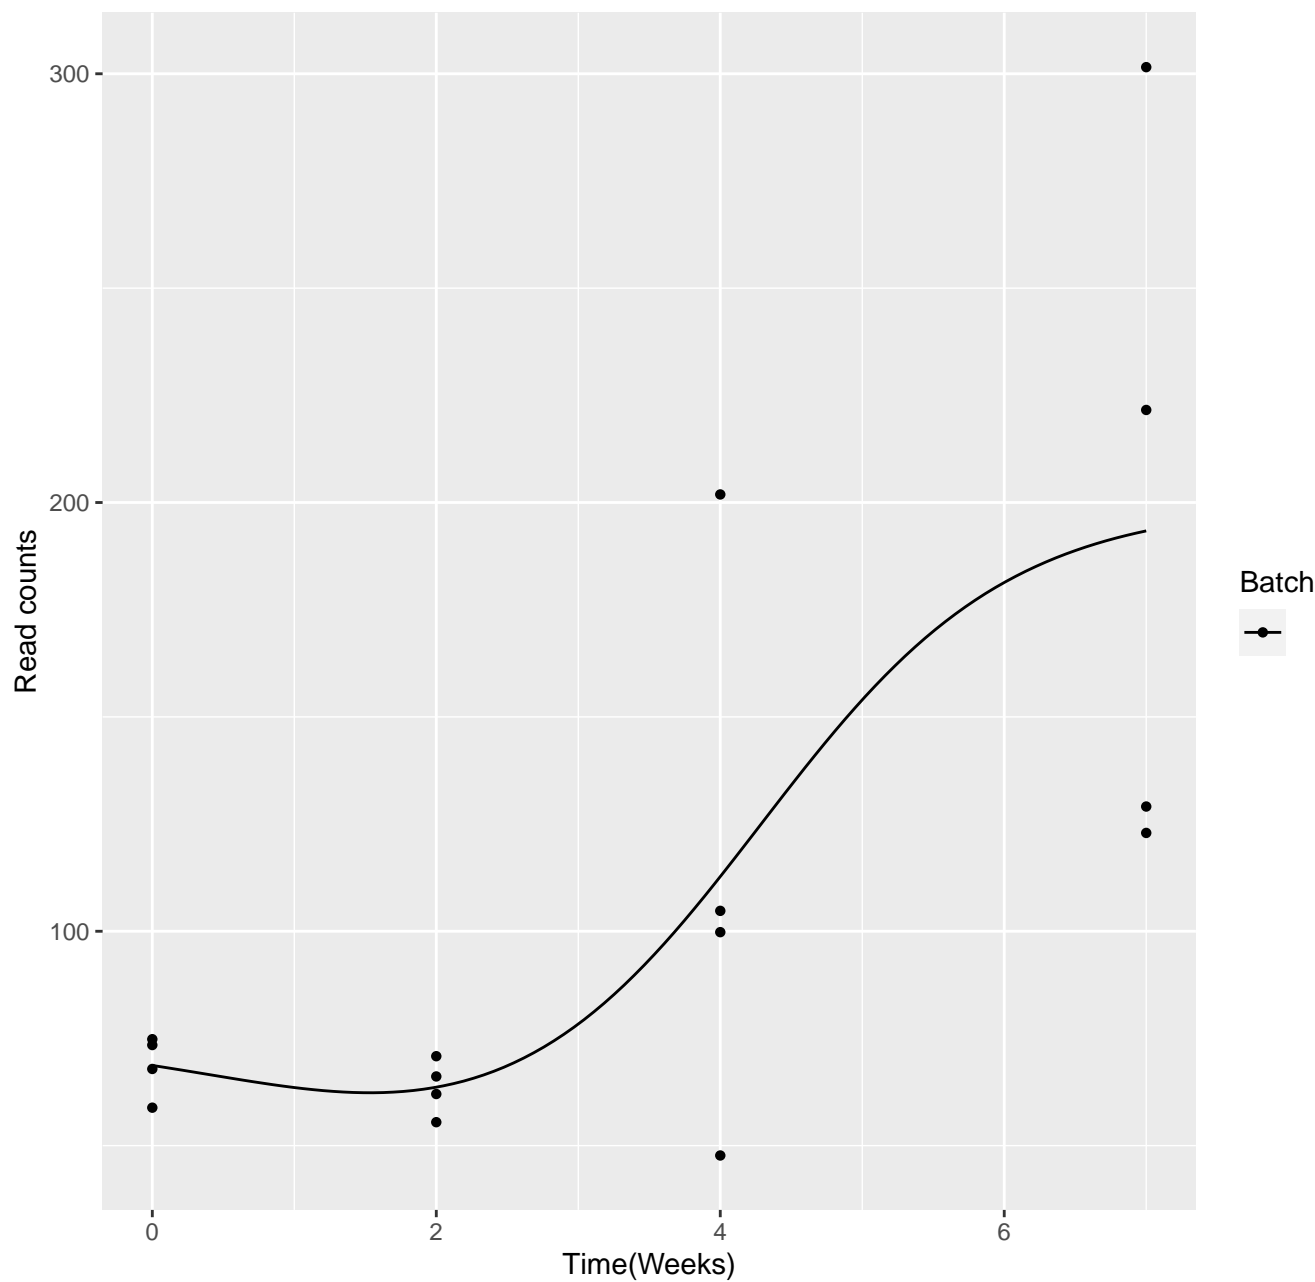

HNMT:  $\log_{10} q = -2.63$

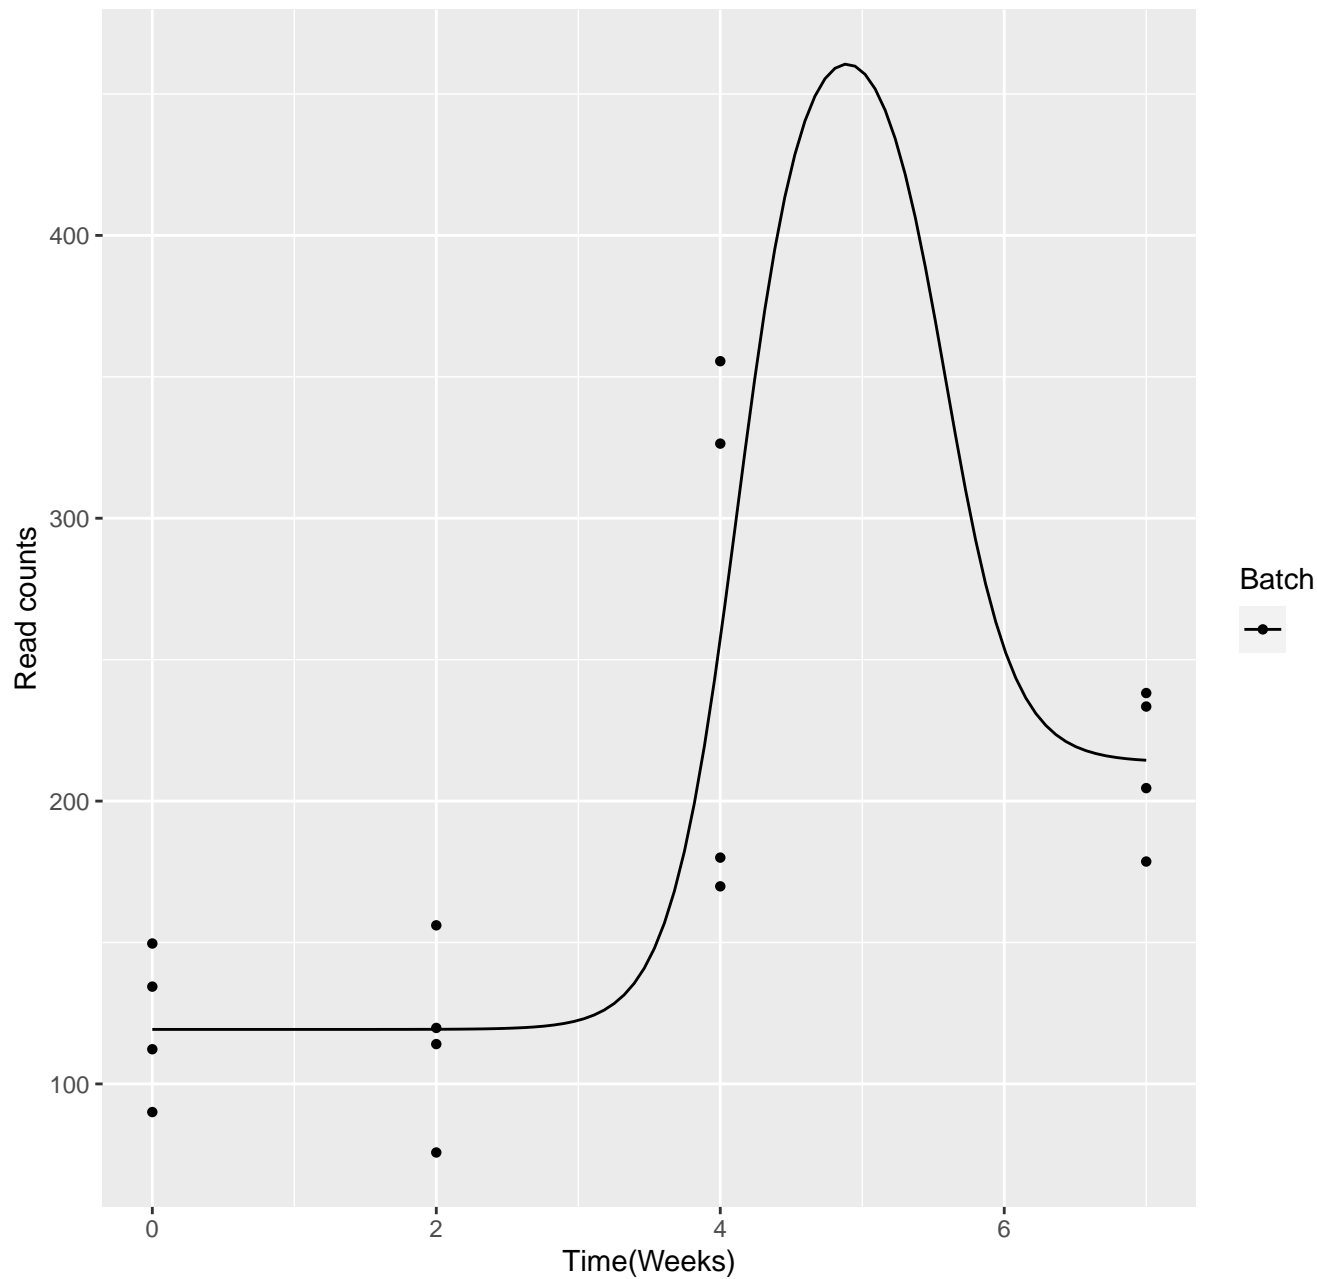

LAMB2:  $\log_{10} q = -2.62$

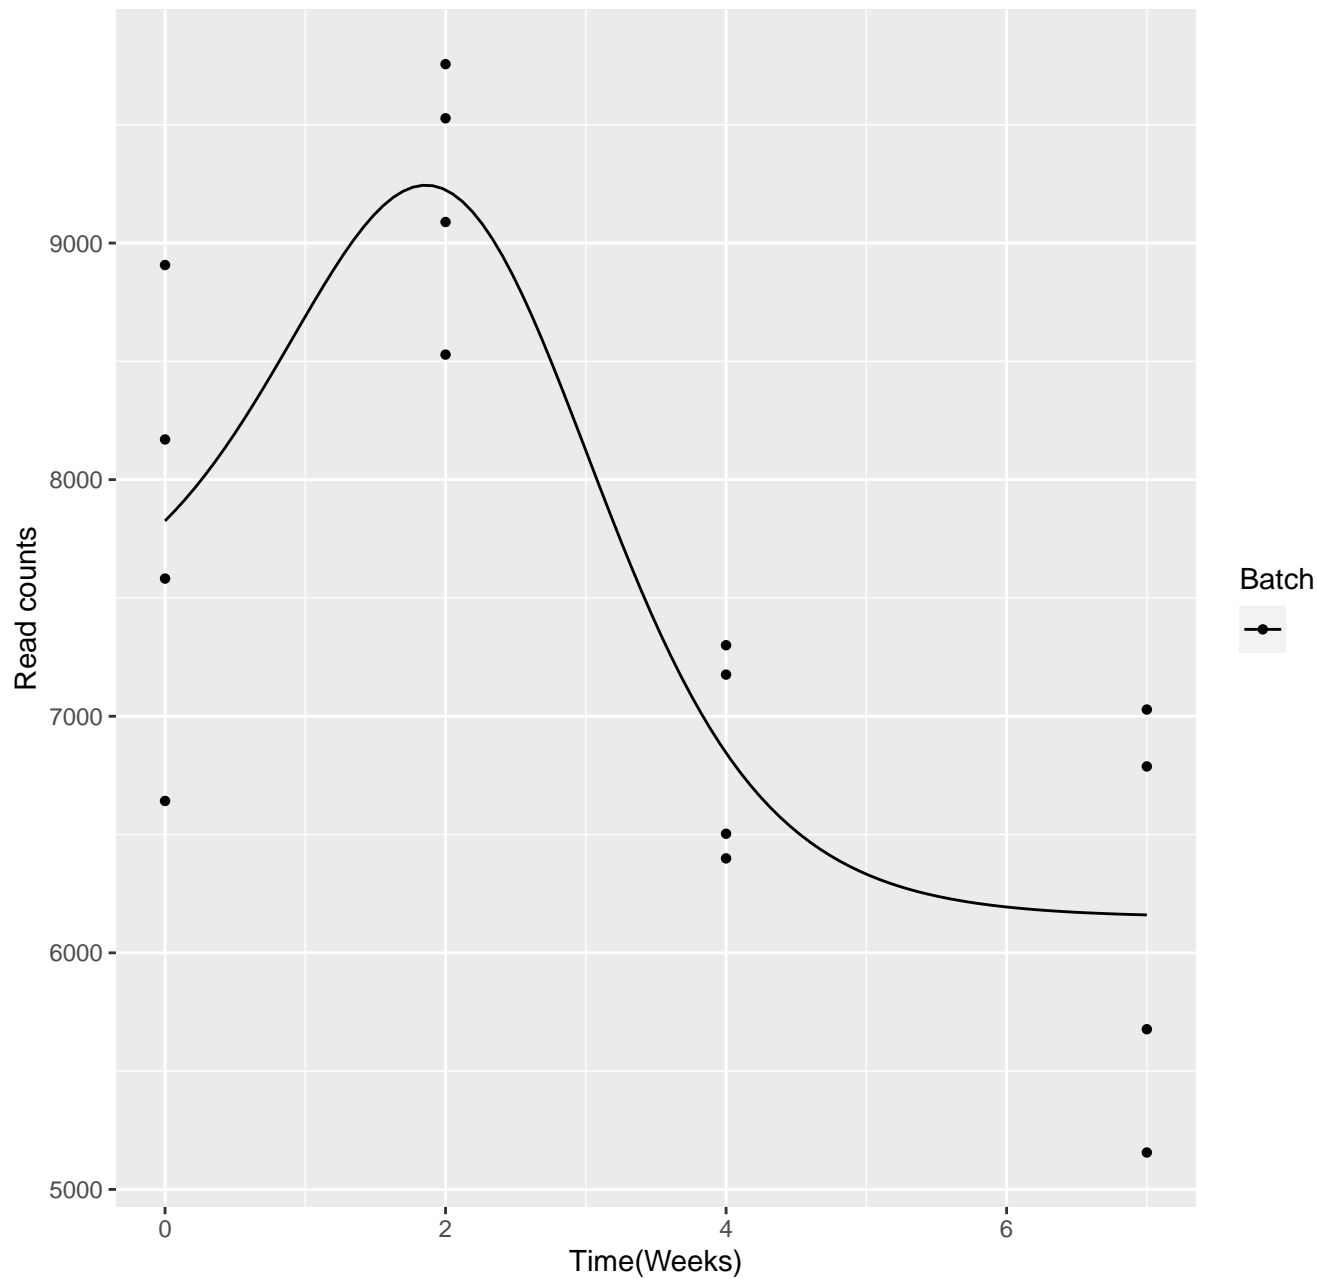

STEAP3:  $\log_{10} q = -2.62$

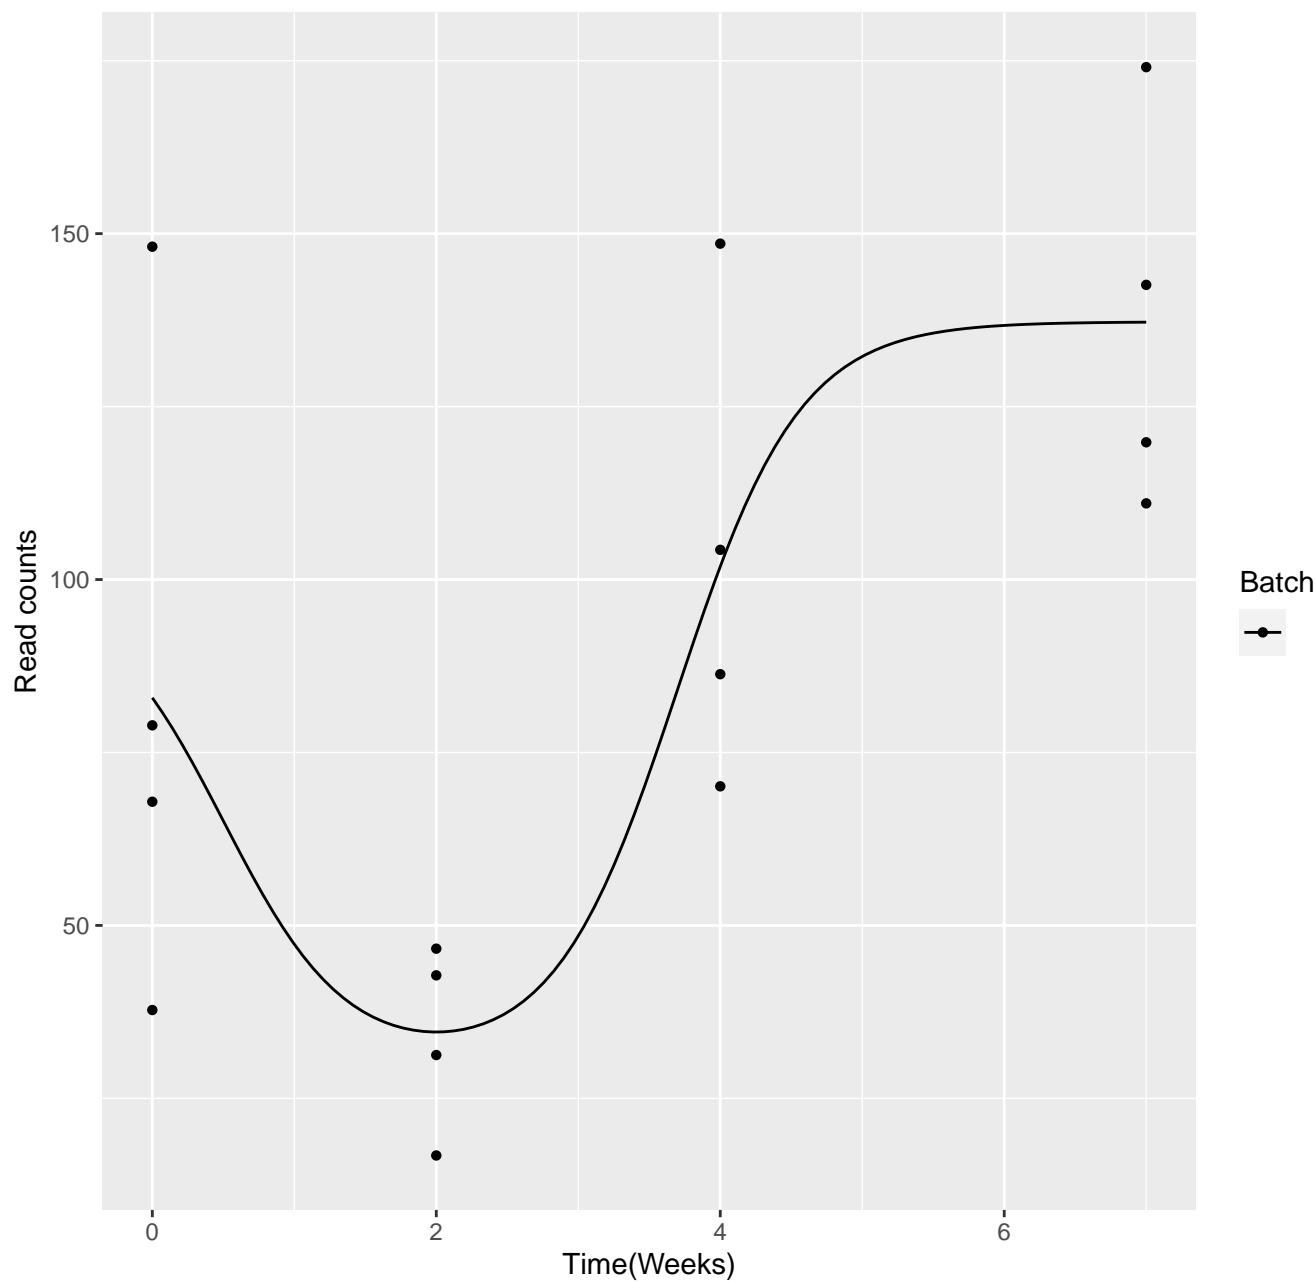

UBTD1:  $\log_{10} q = -2.62$

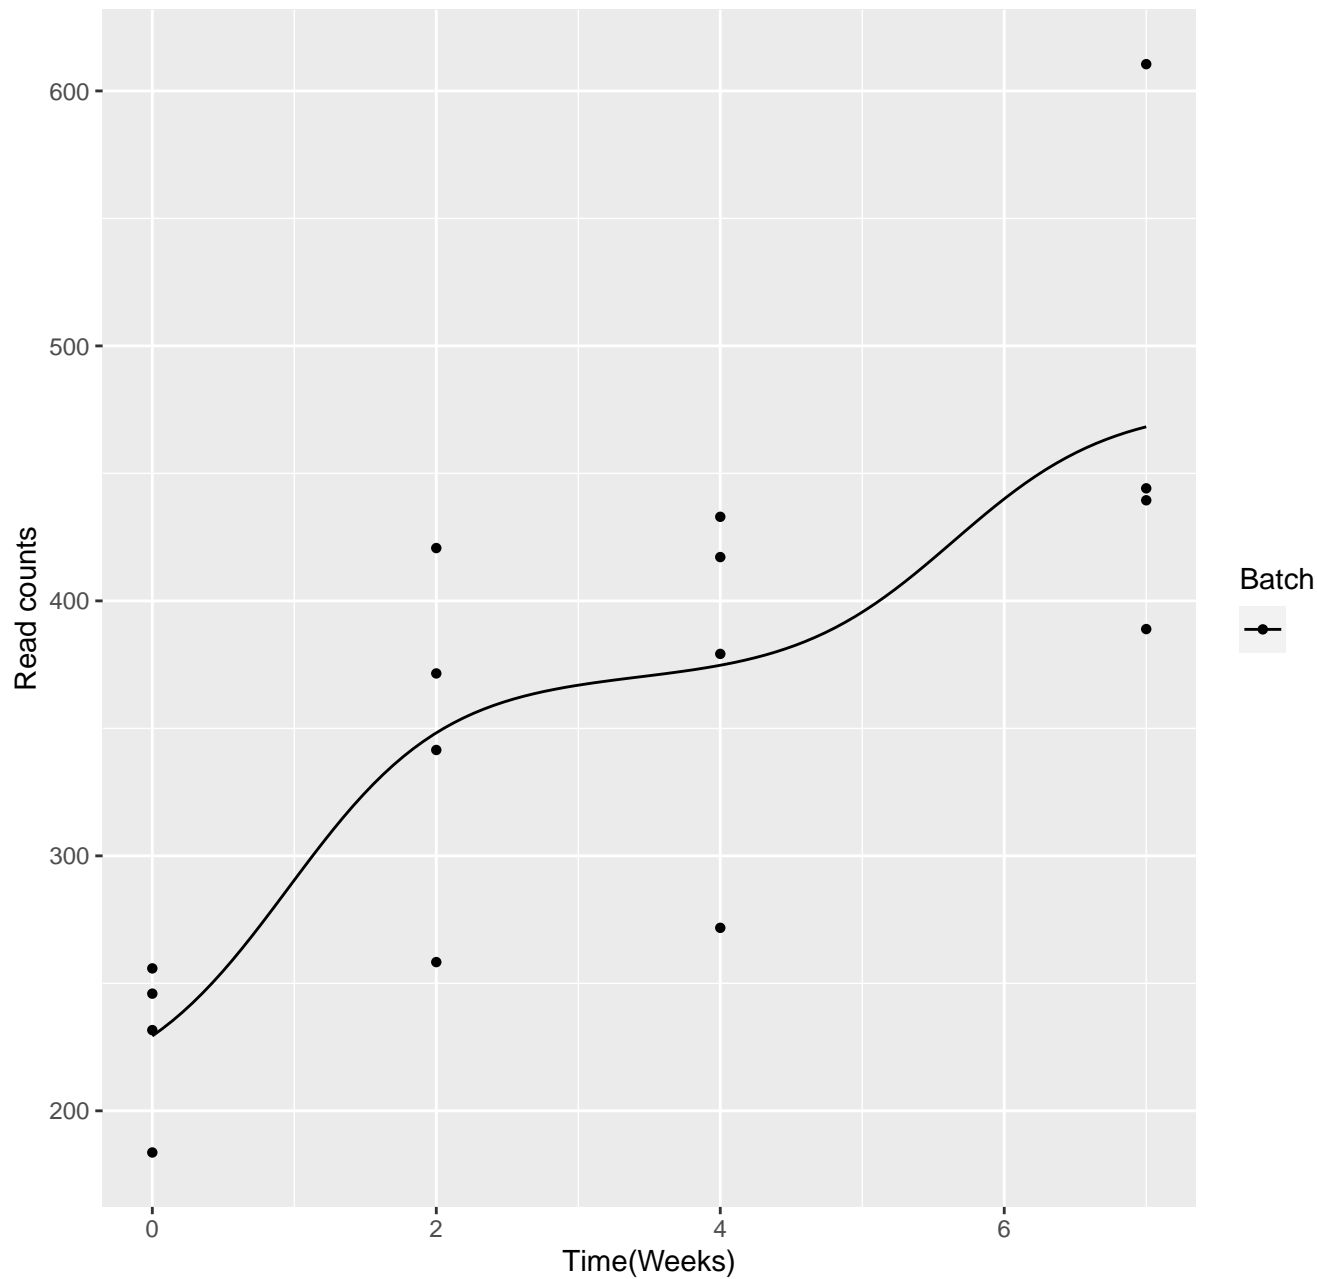

METRNL:  $\log_{10} q = -2.62$

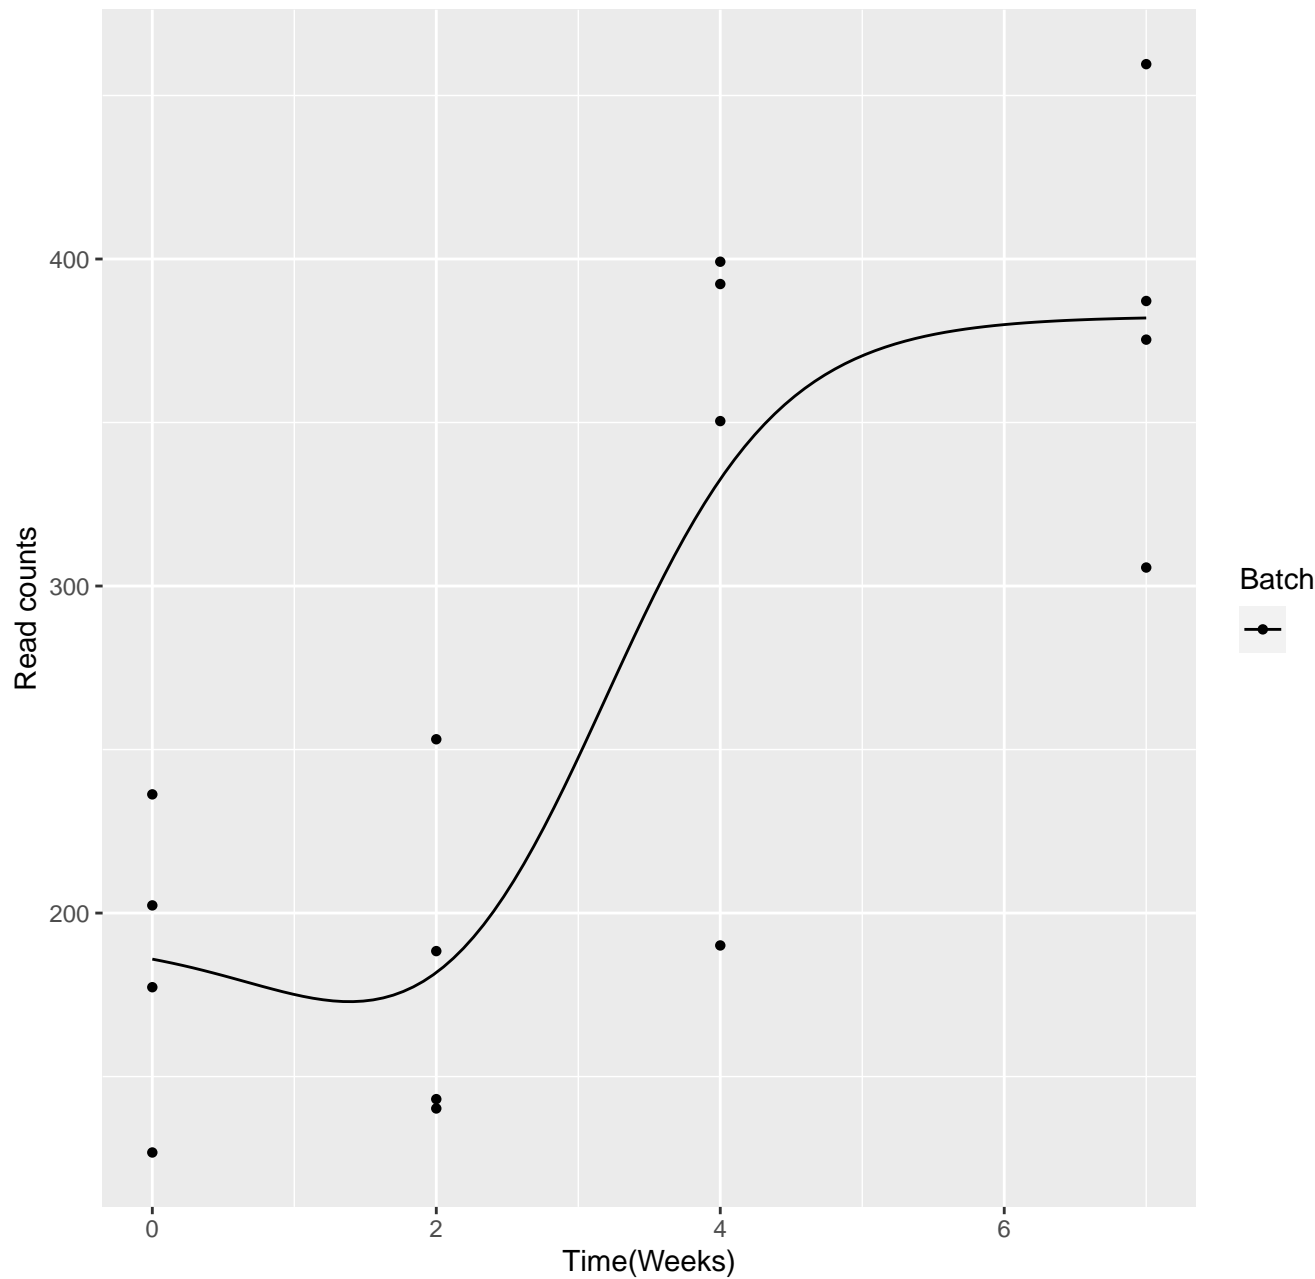



SEMA3E:  $\log_{10} q = -2.62$

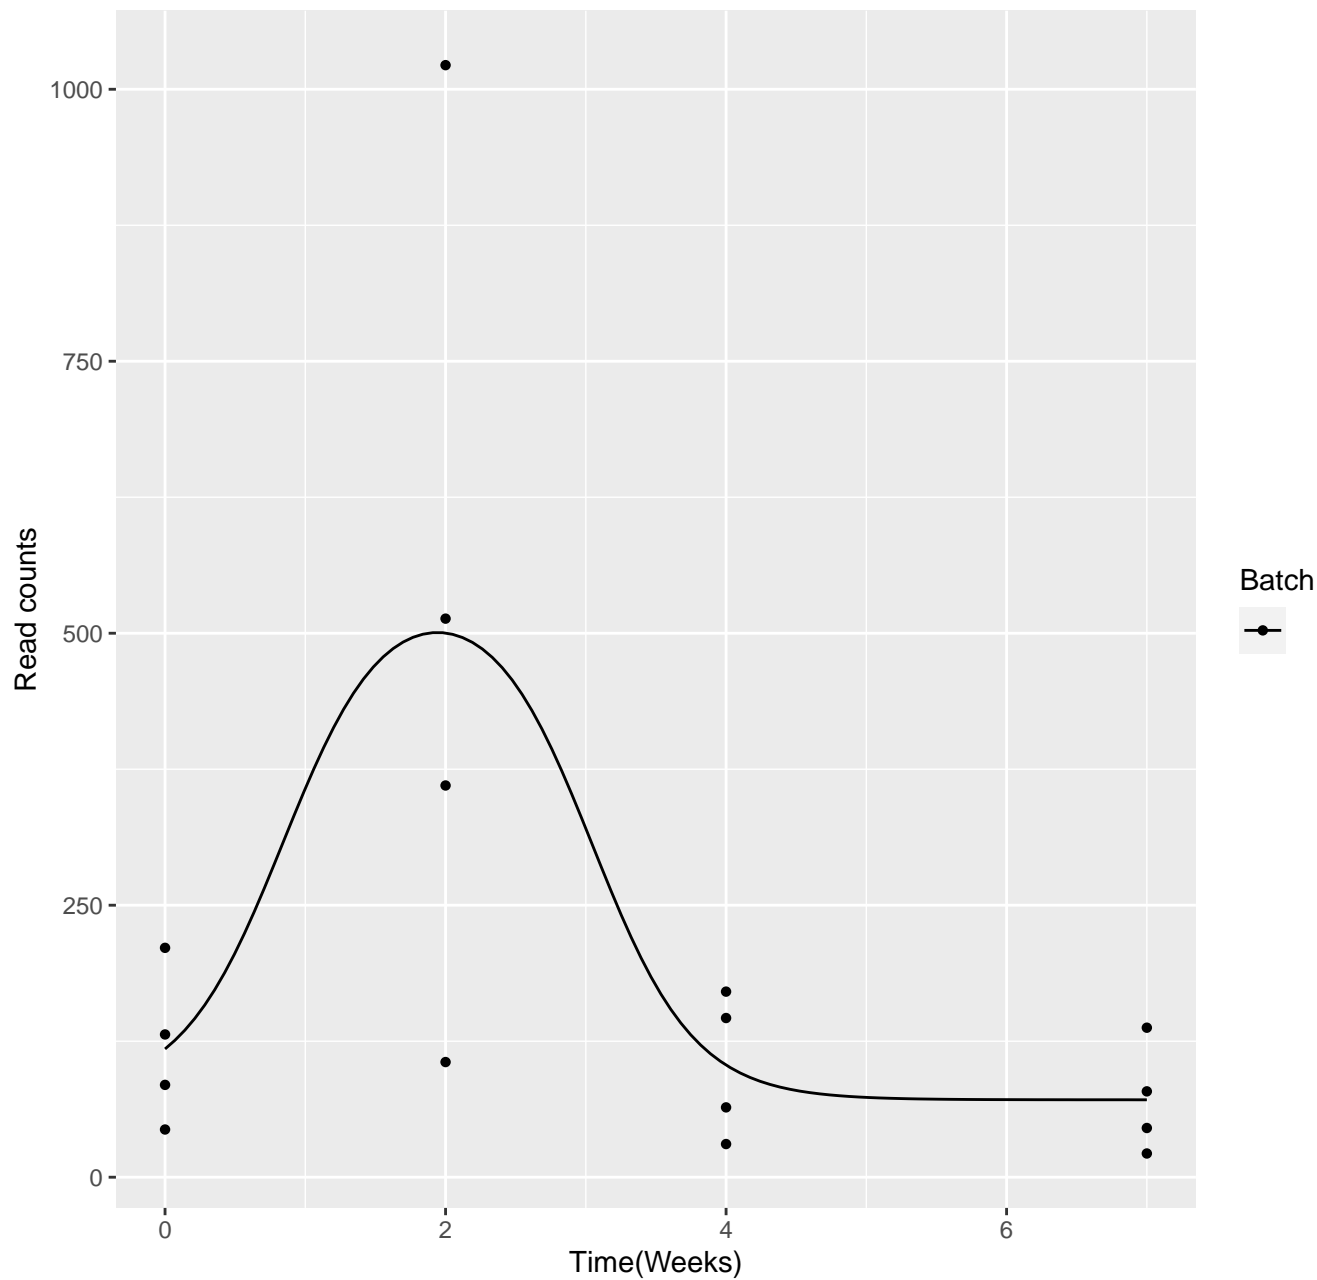

COLQ:  $\log_{10} q = -2.62$

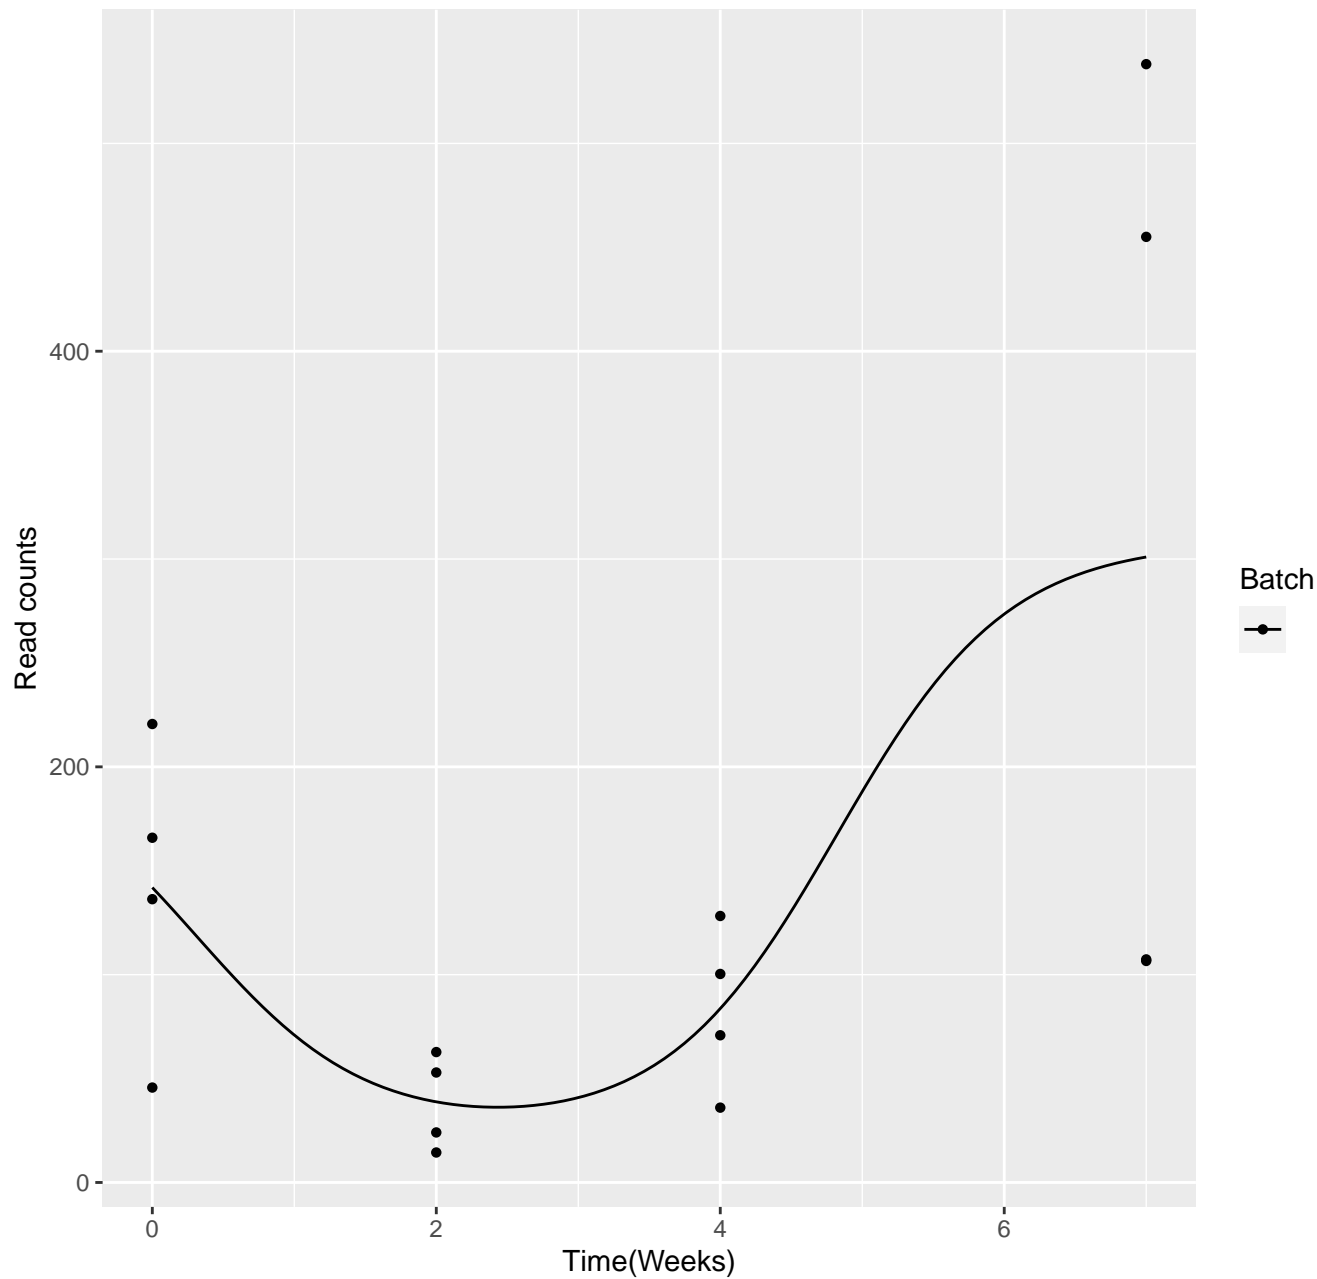

MMP14:  $\log_{10} q = -2.61$

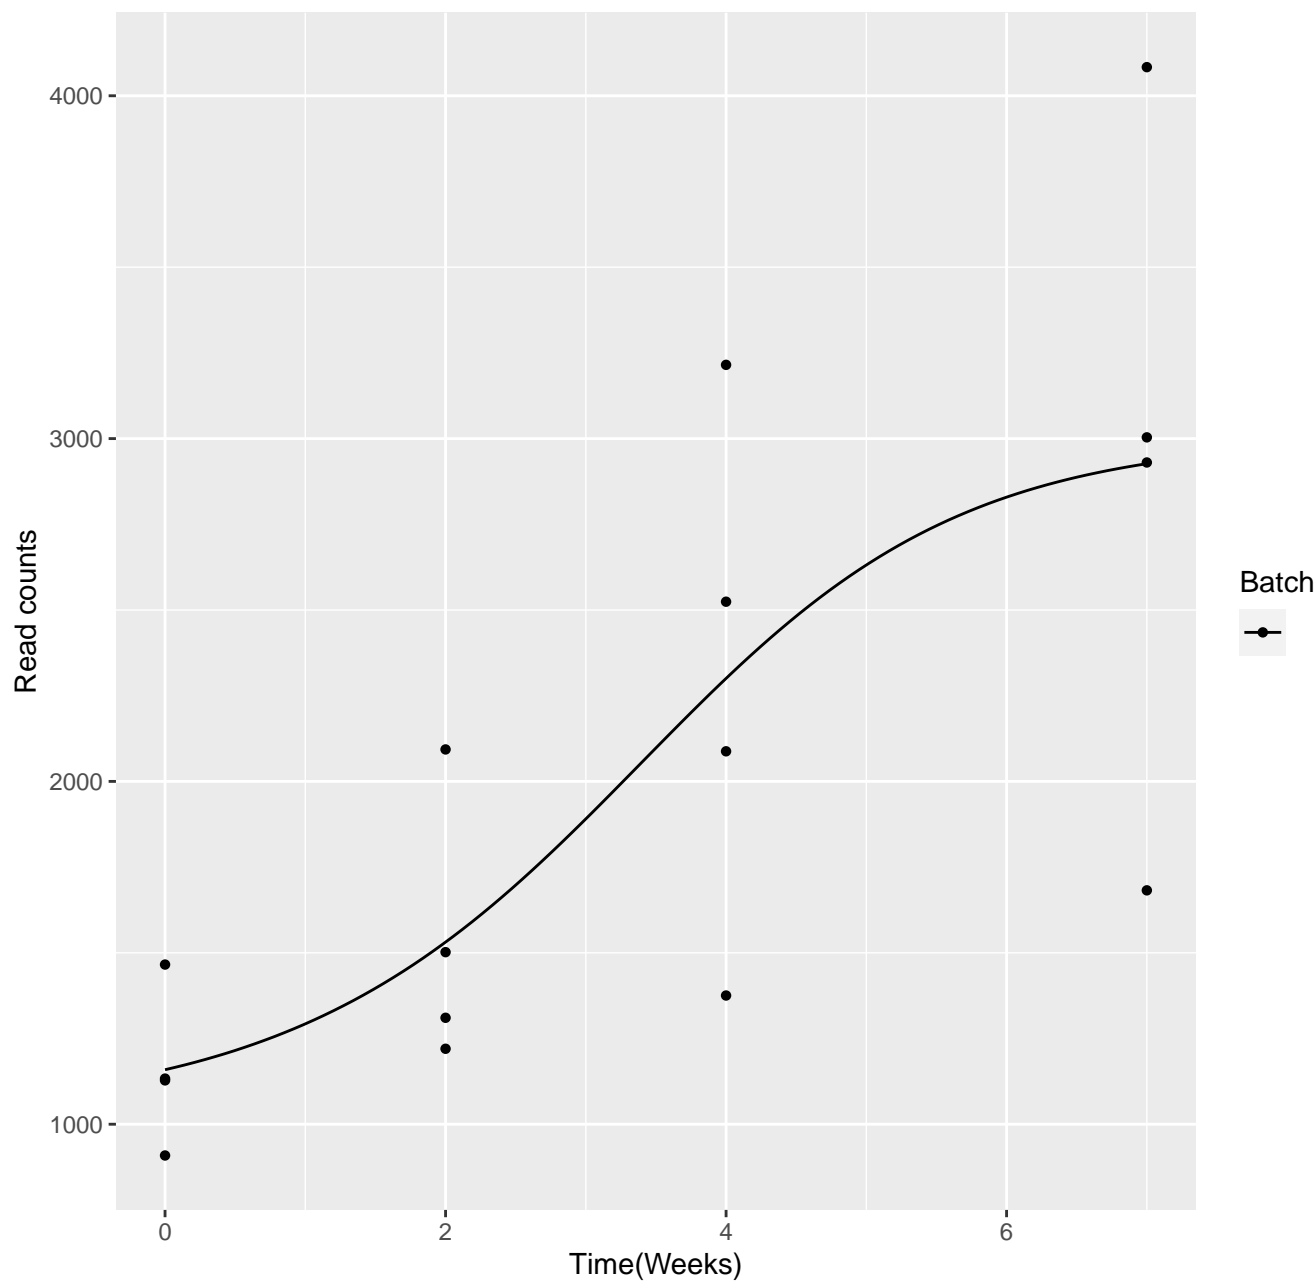

HBEGF:  $\log_{10} q = -2.61$

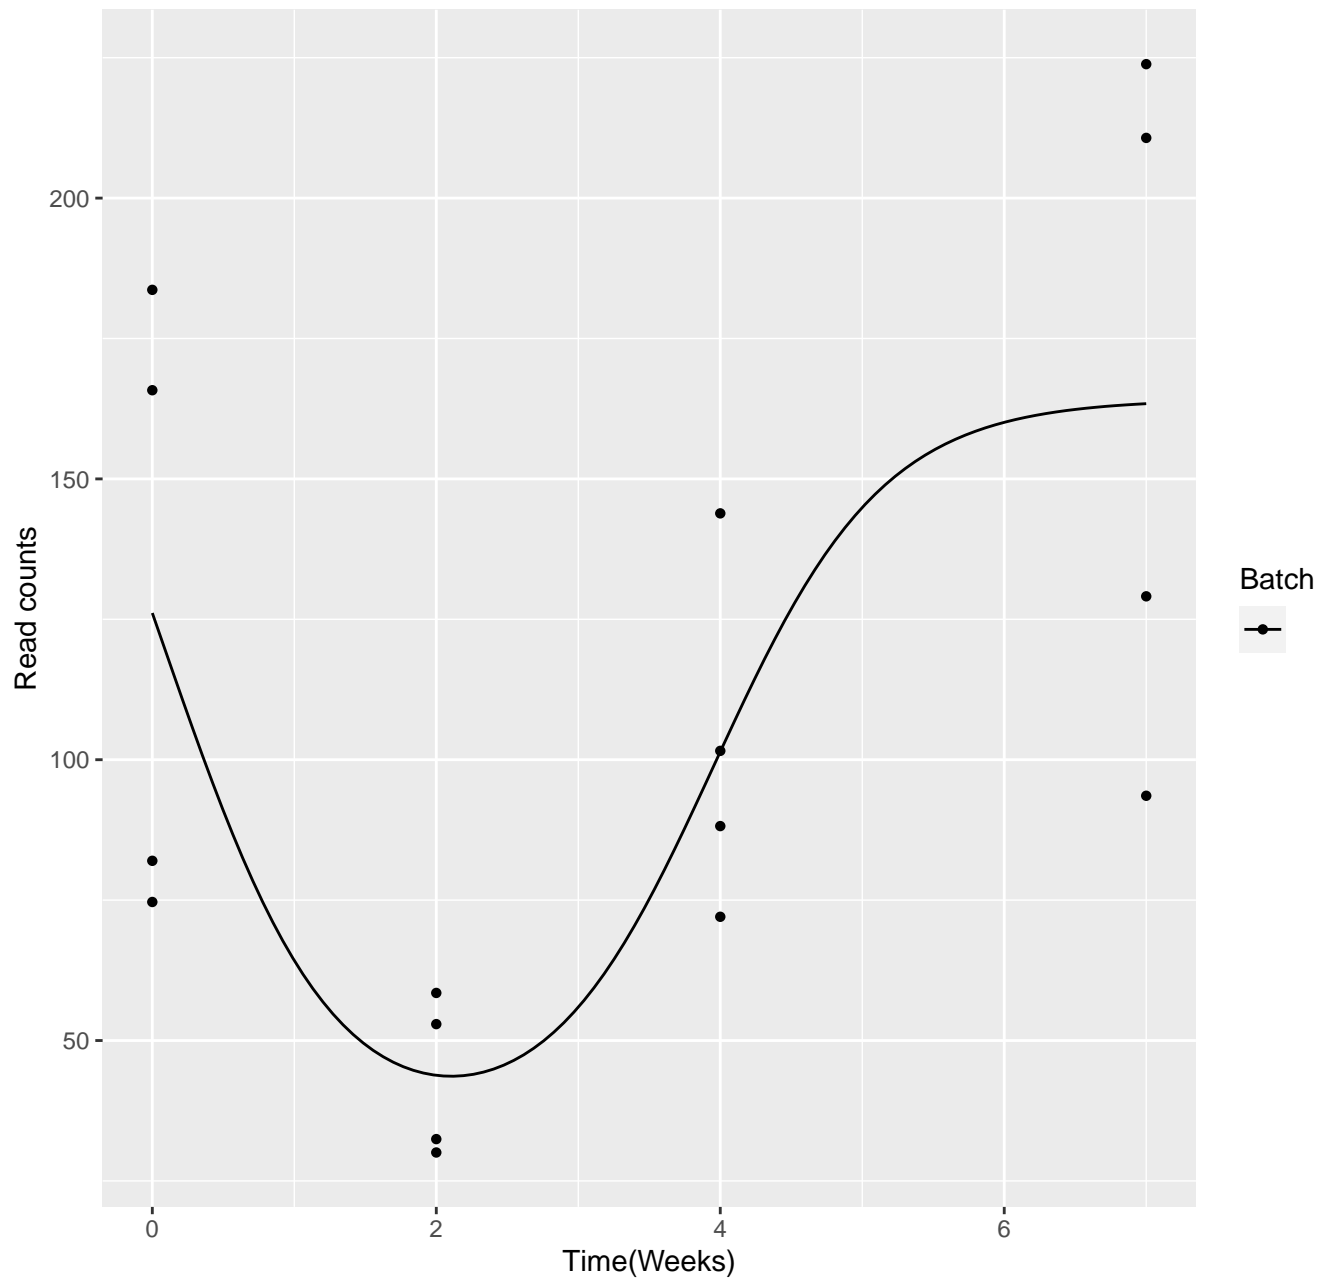

RAD51:  $\log_{10} q = -2.61$

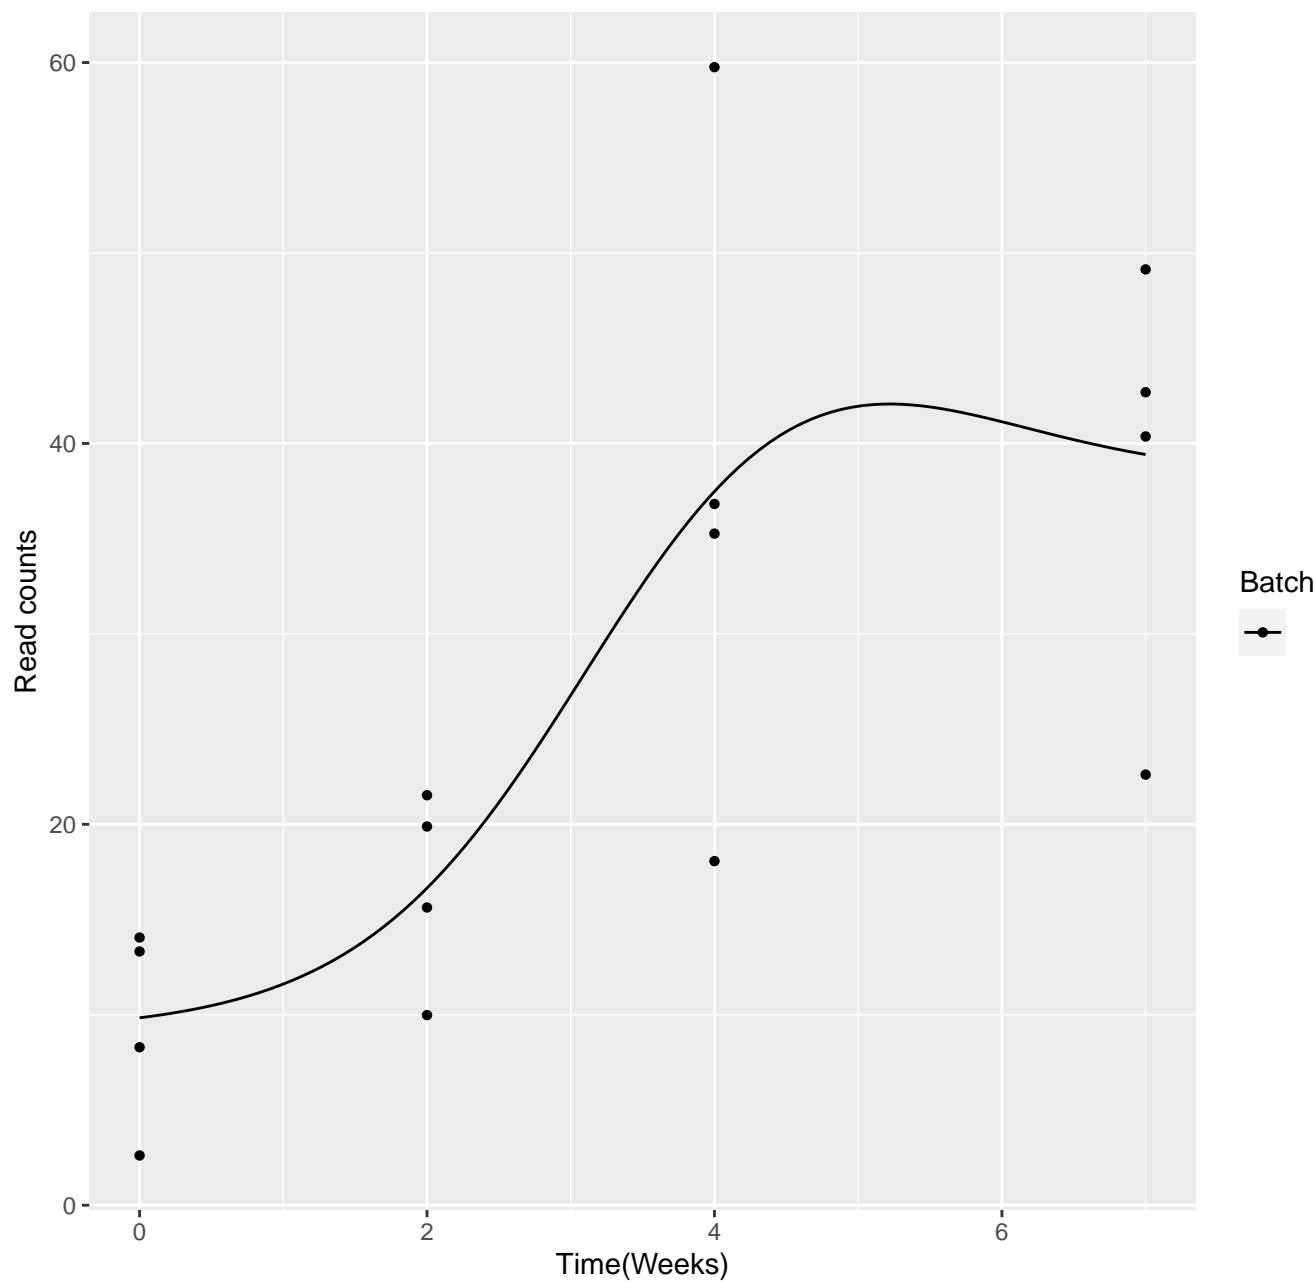

RSU1:  $\log_{10} q = -2.6$

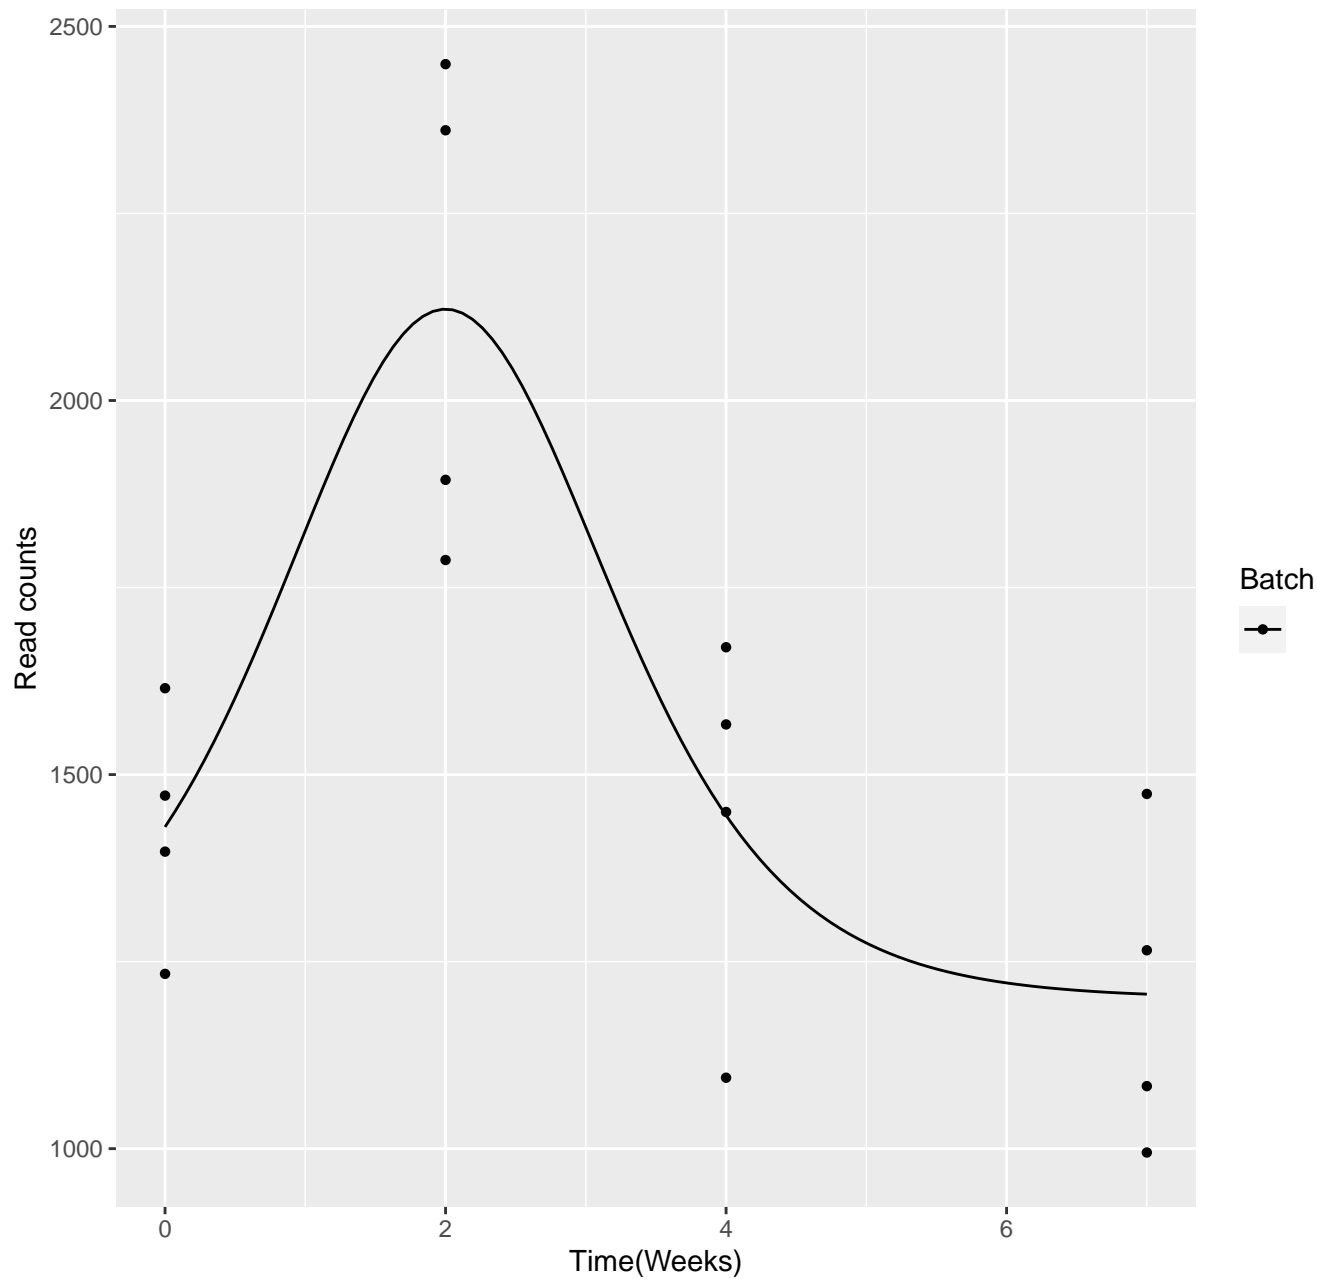

GIMAP4:  $\log_{10} q = -2.6$

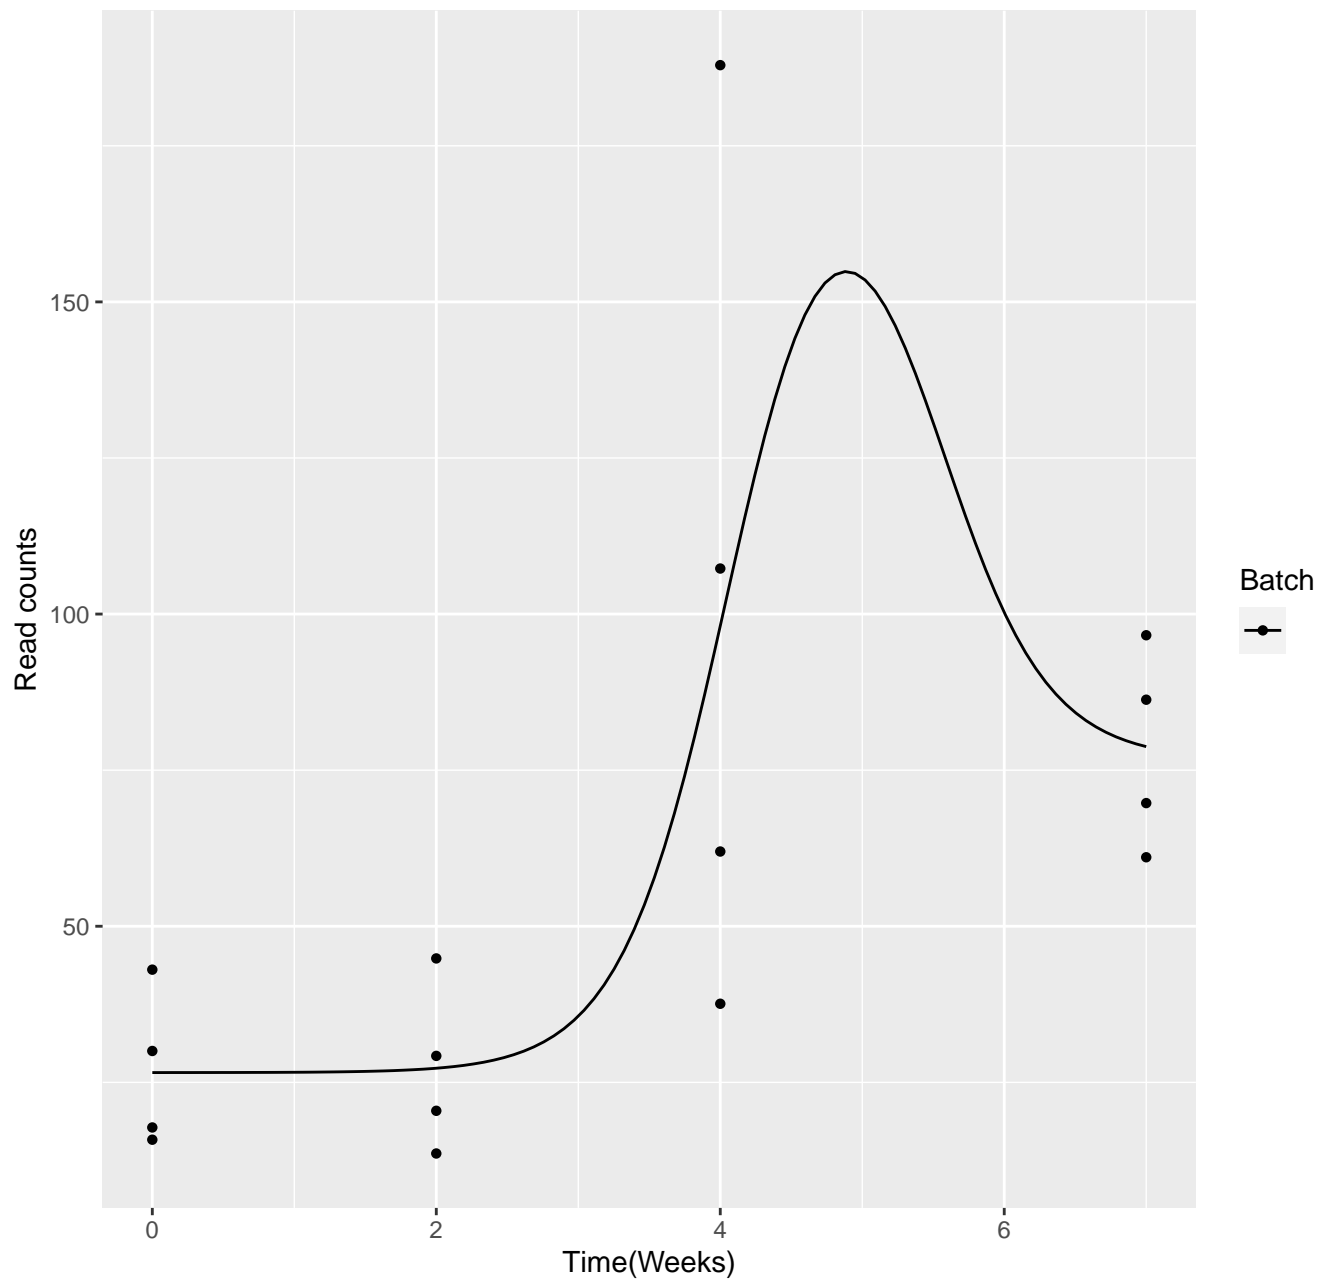

DES:  $\log_{10} q = -2.6$

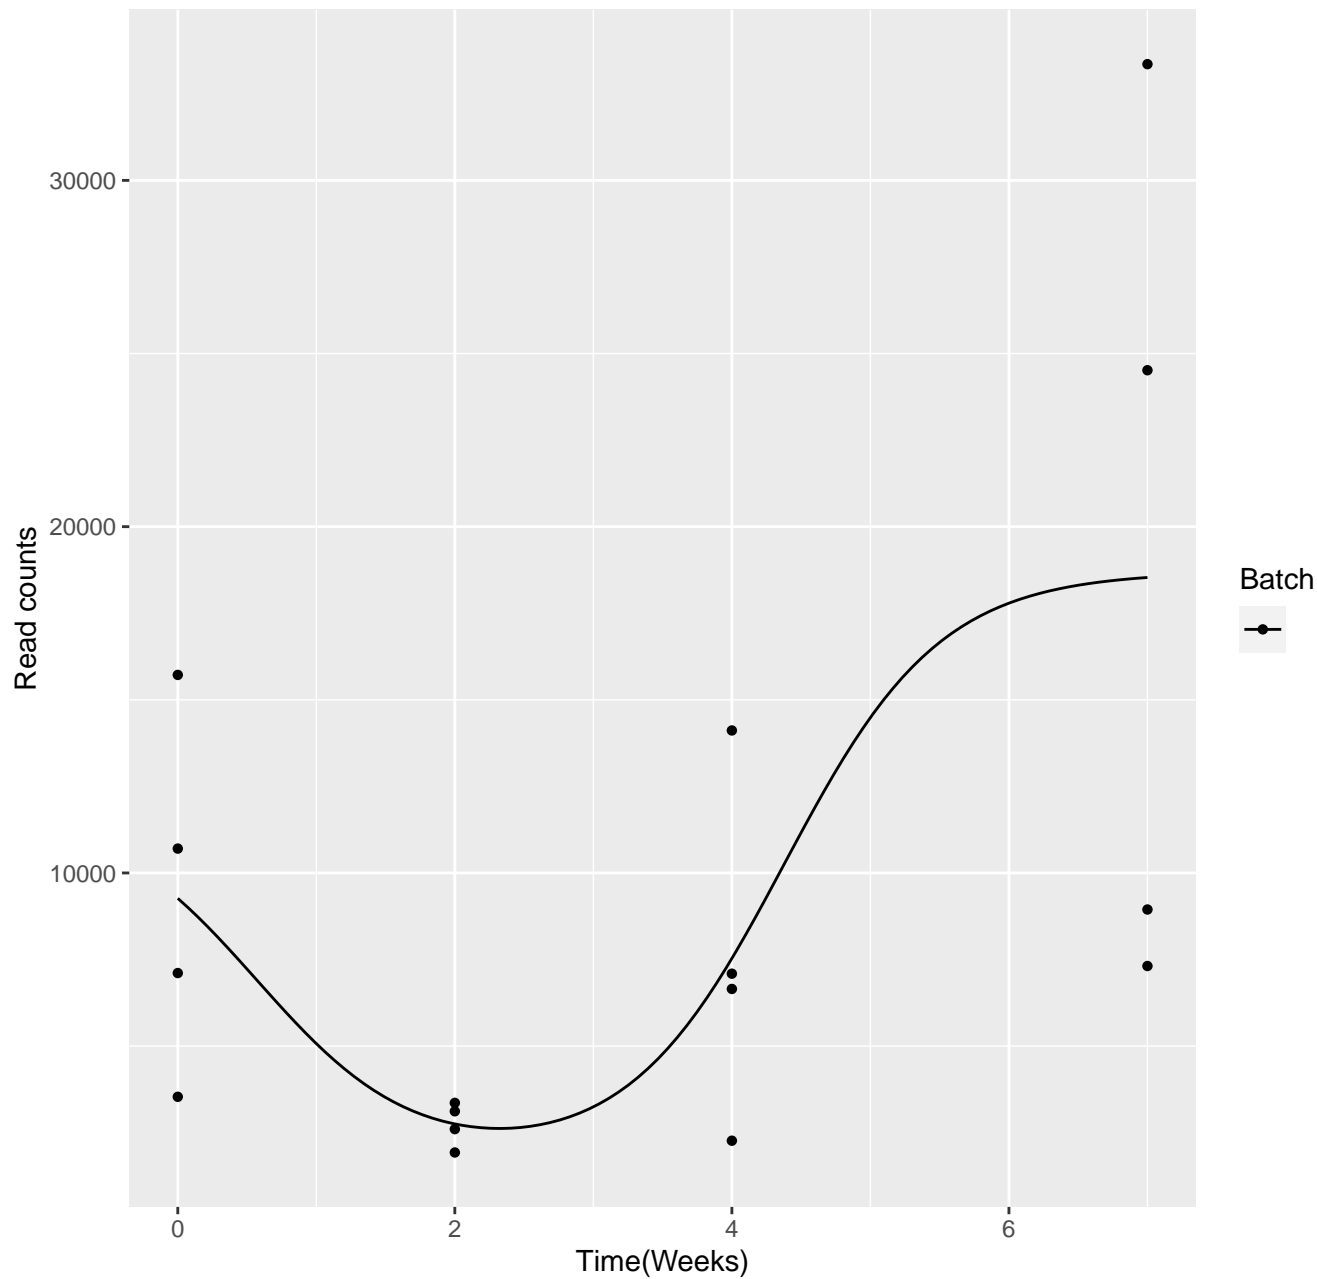



AXIN2:  $\log_{10} q = -2.6$

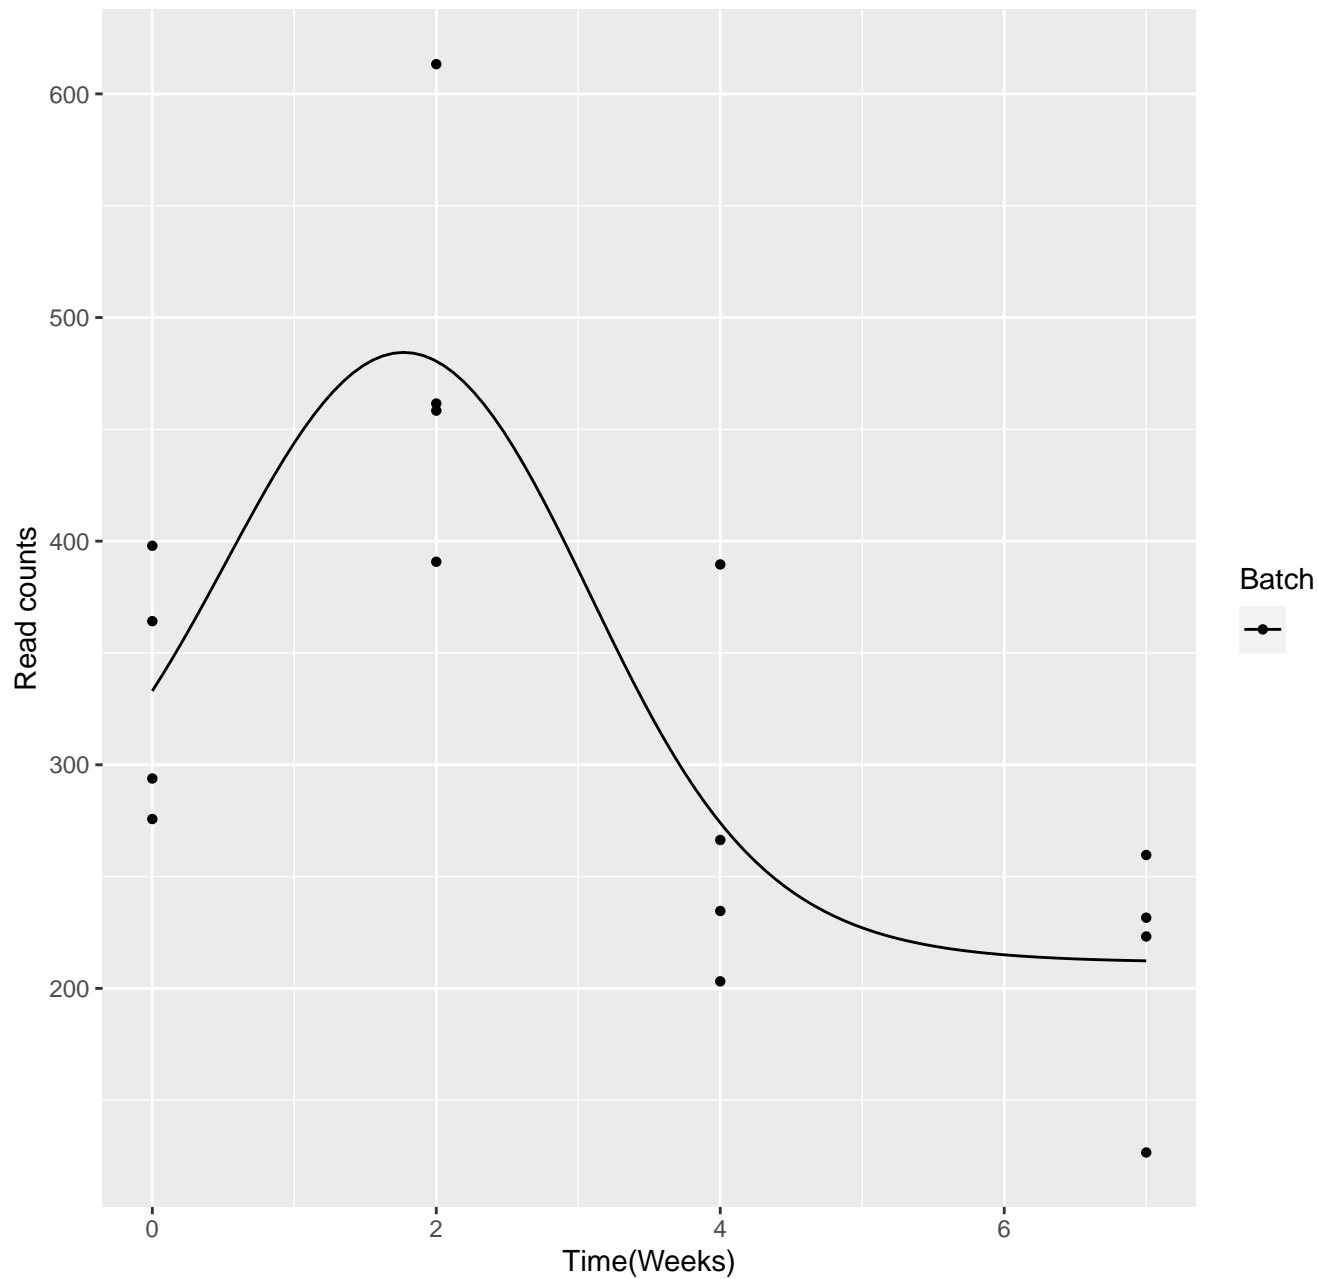

GAN:  $\log_{10} q = -2.6$

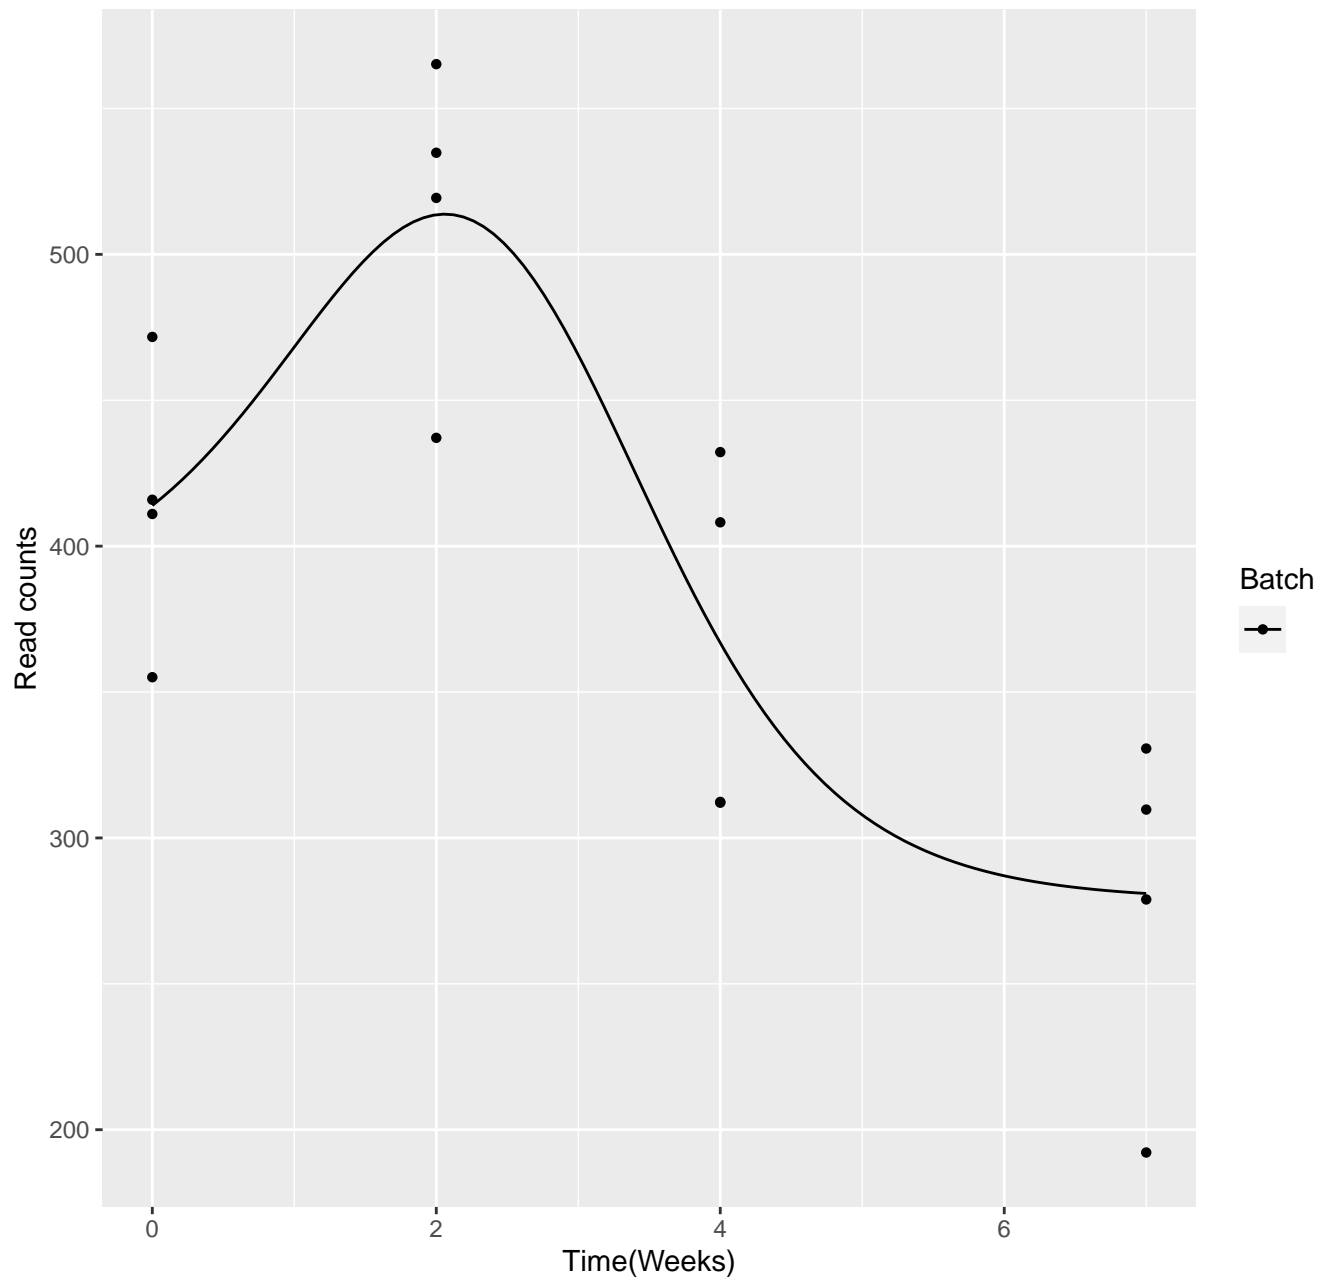

SLC46A2:  $\log_{10} q = -2.6$

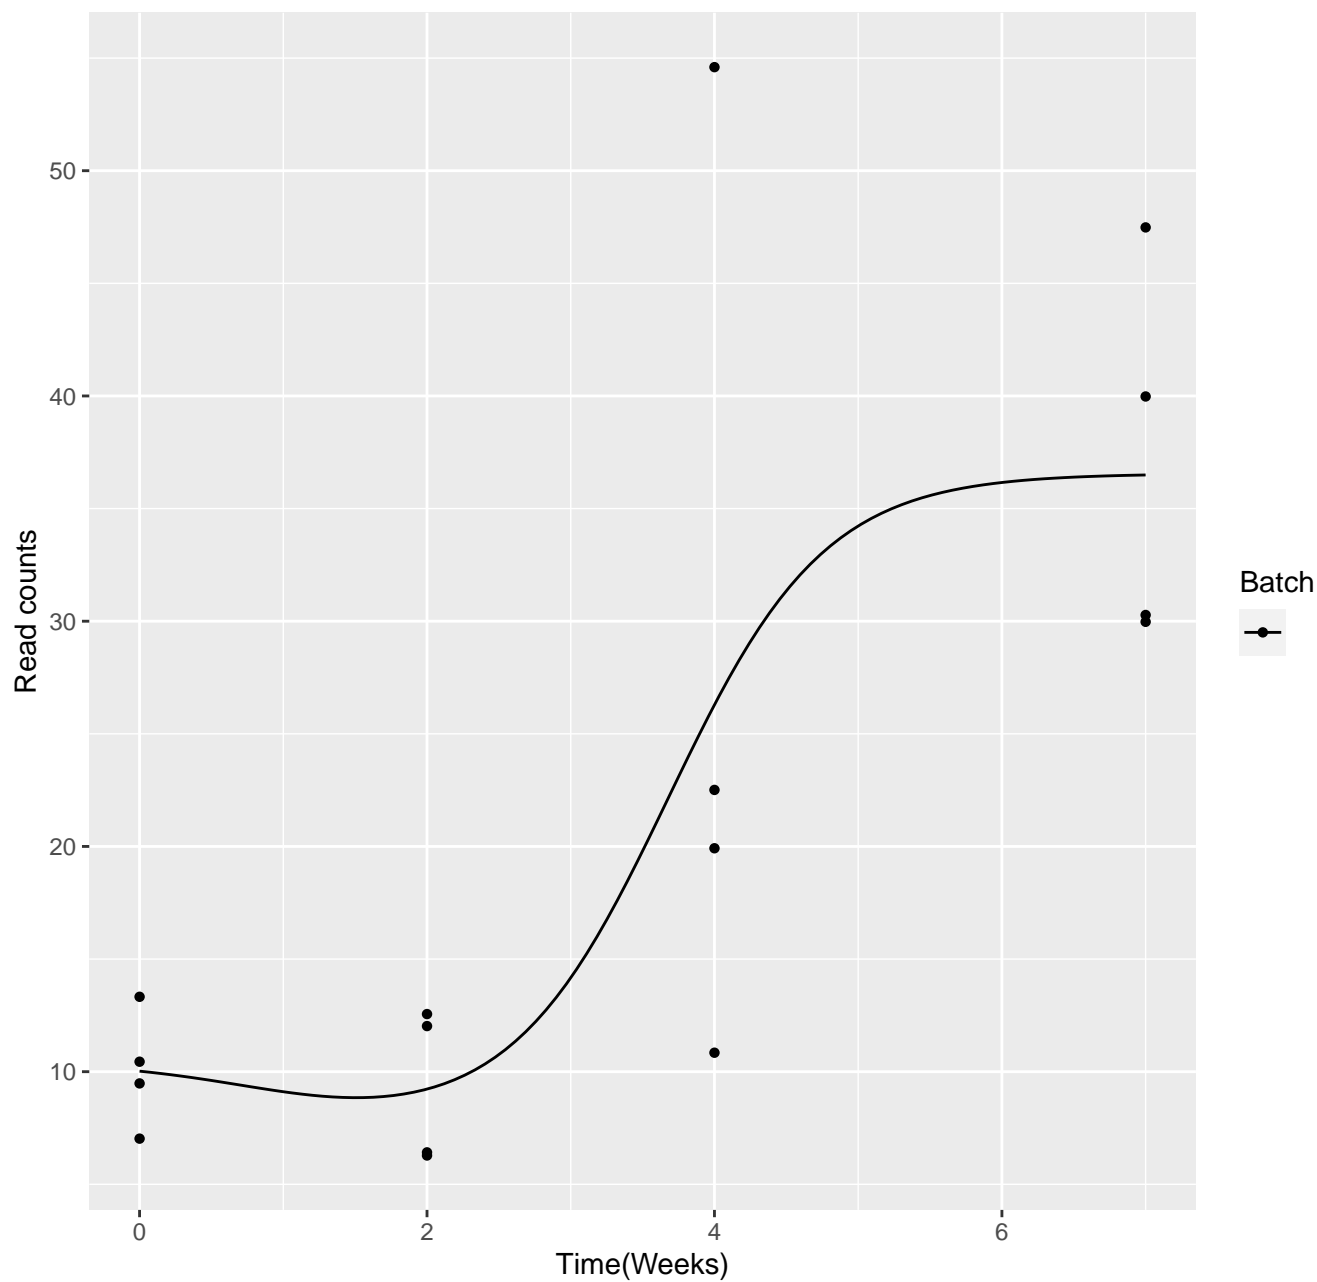

SUSD1:  $\log_{10} q = -2.6$

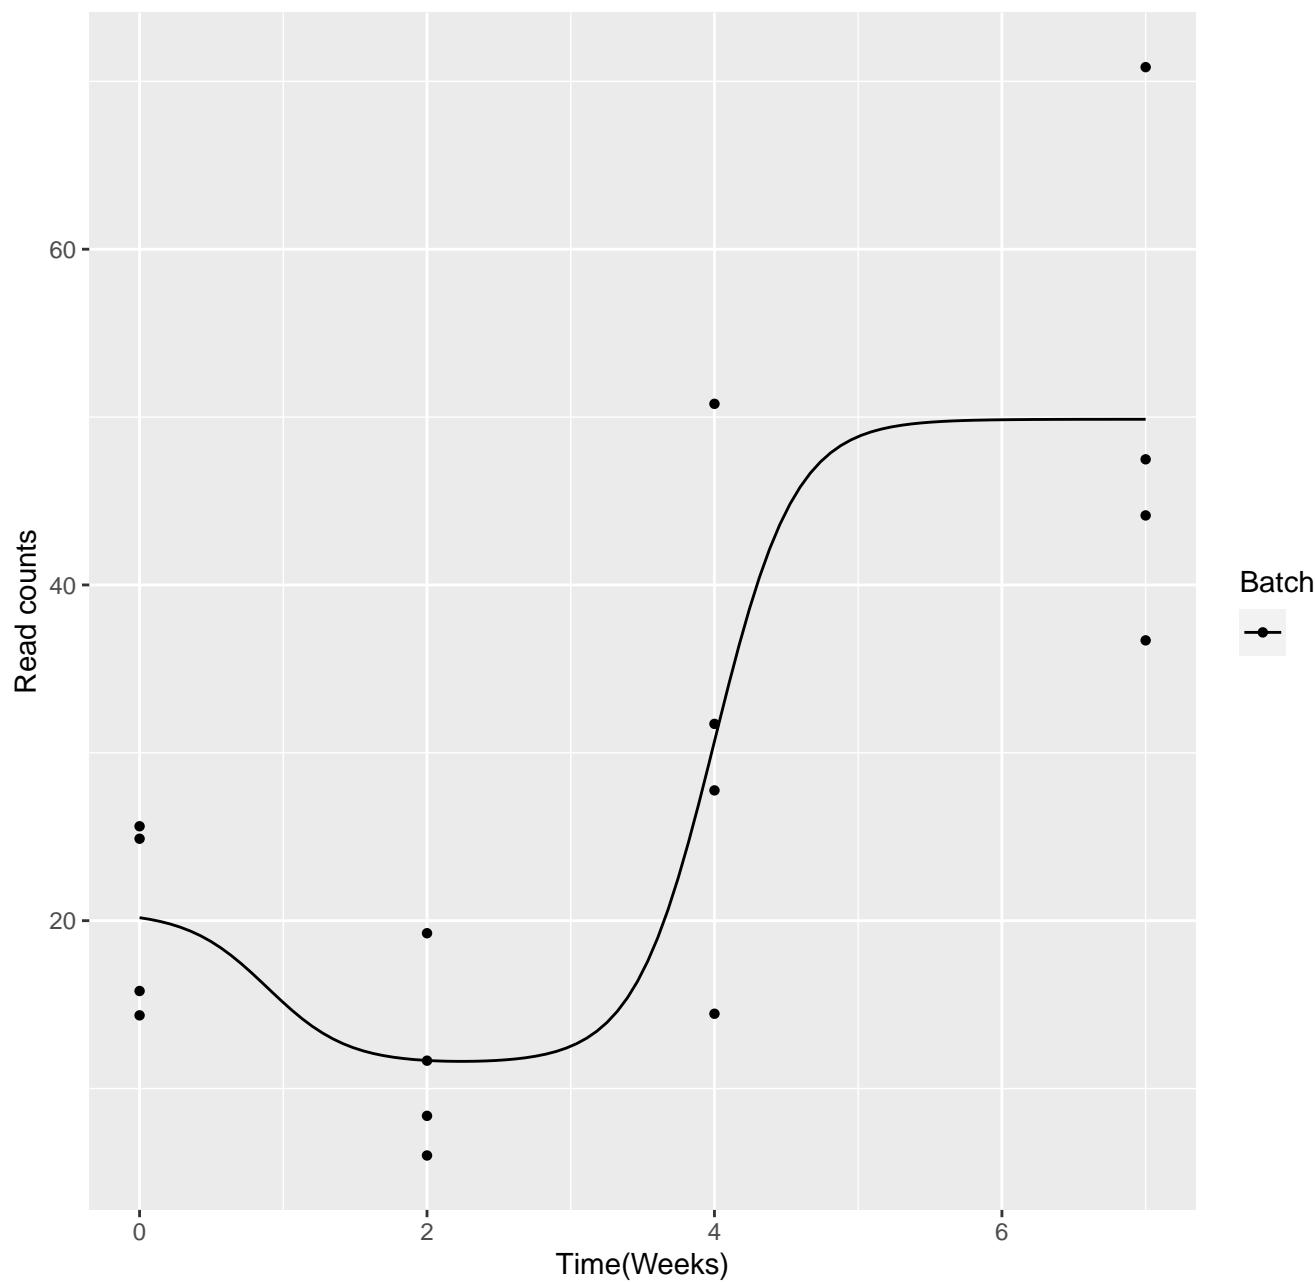

LOC100346411:  $\log_{10} q = -2.6$

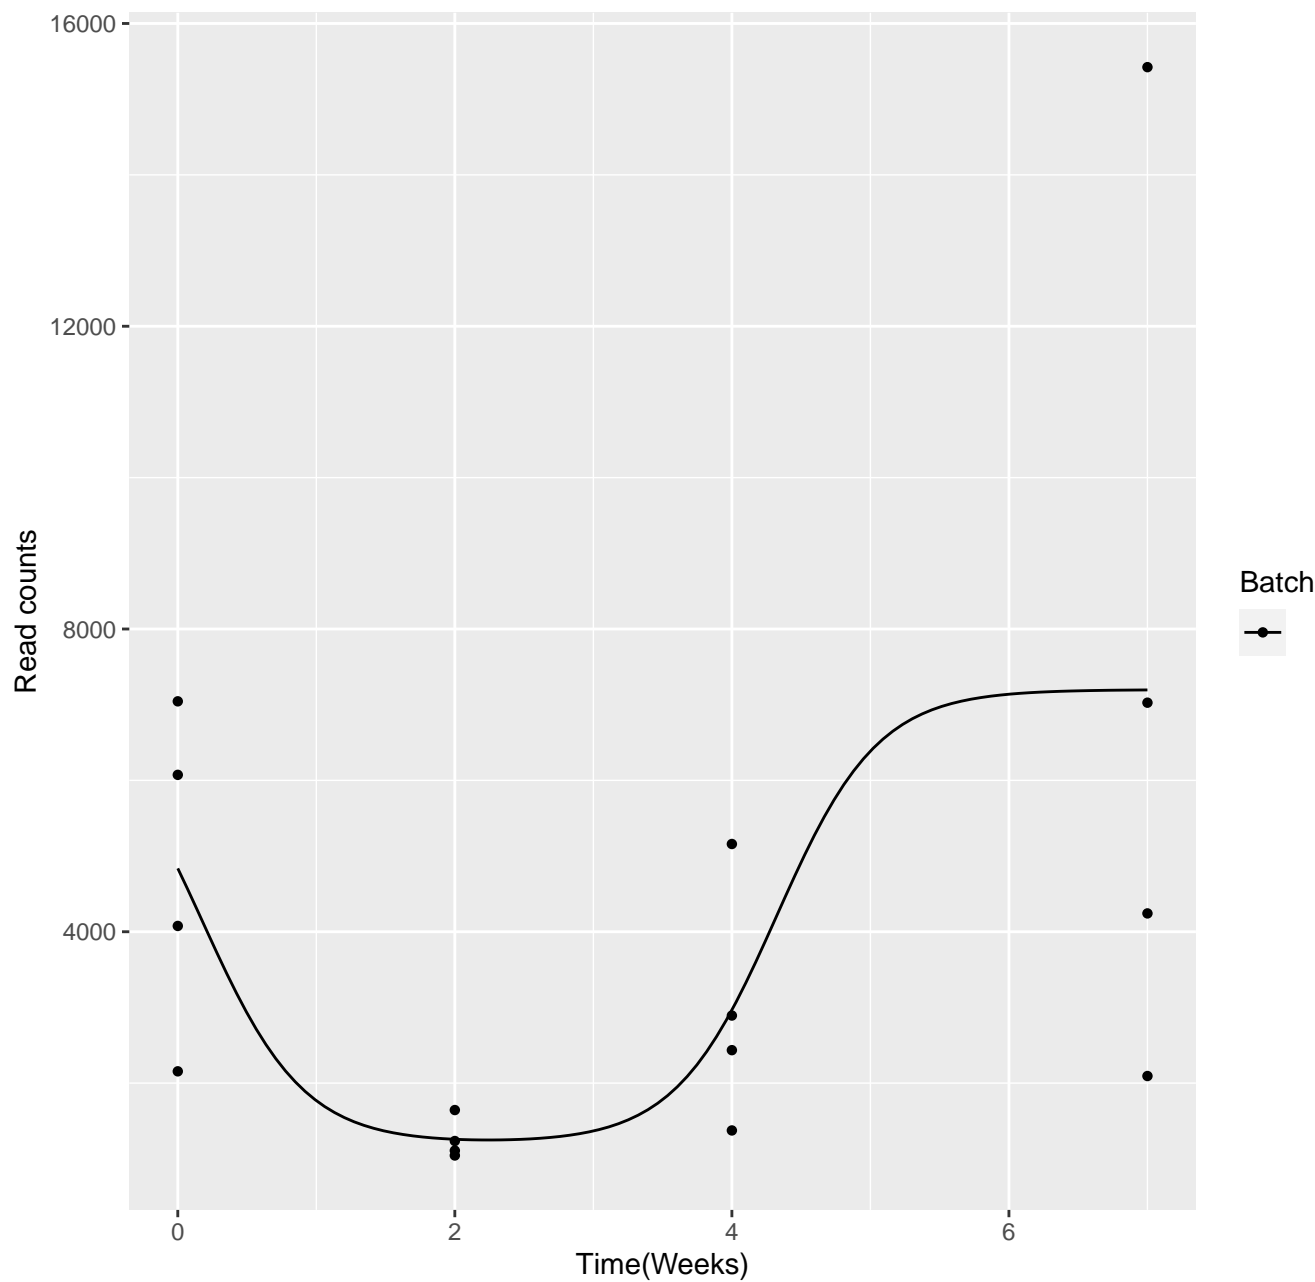

TTC28:  $\log_{10} q = -2.6$

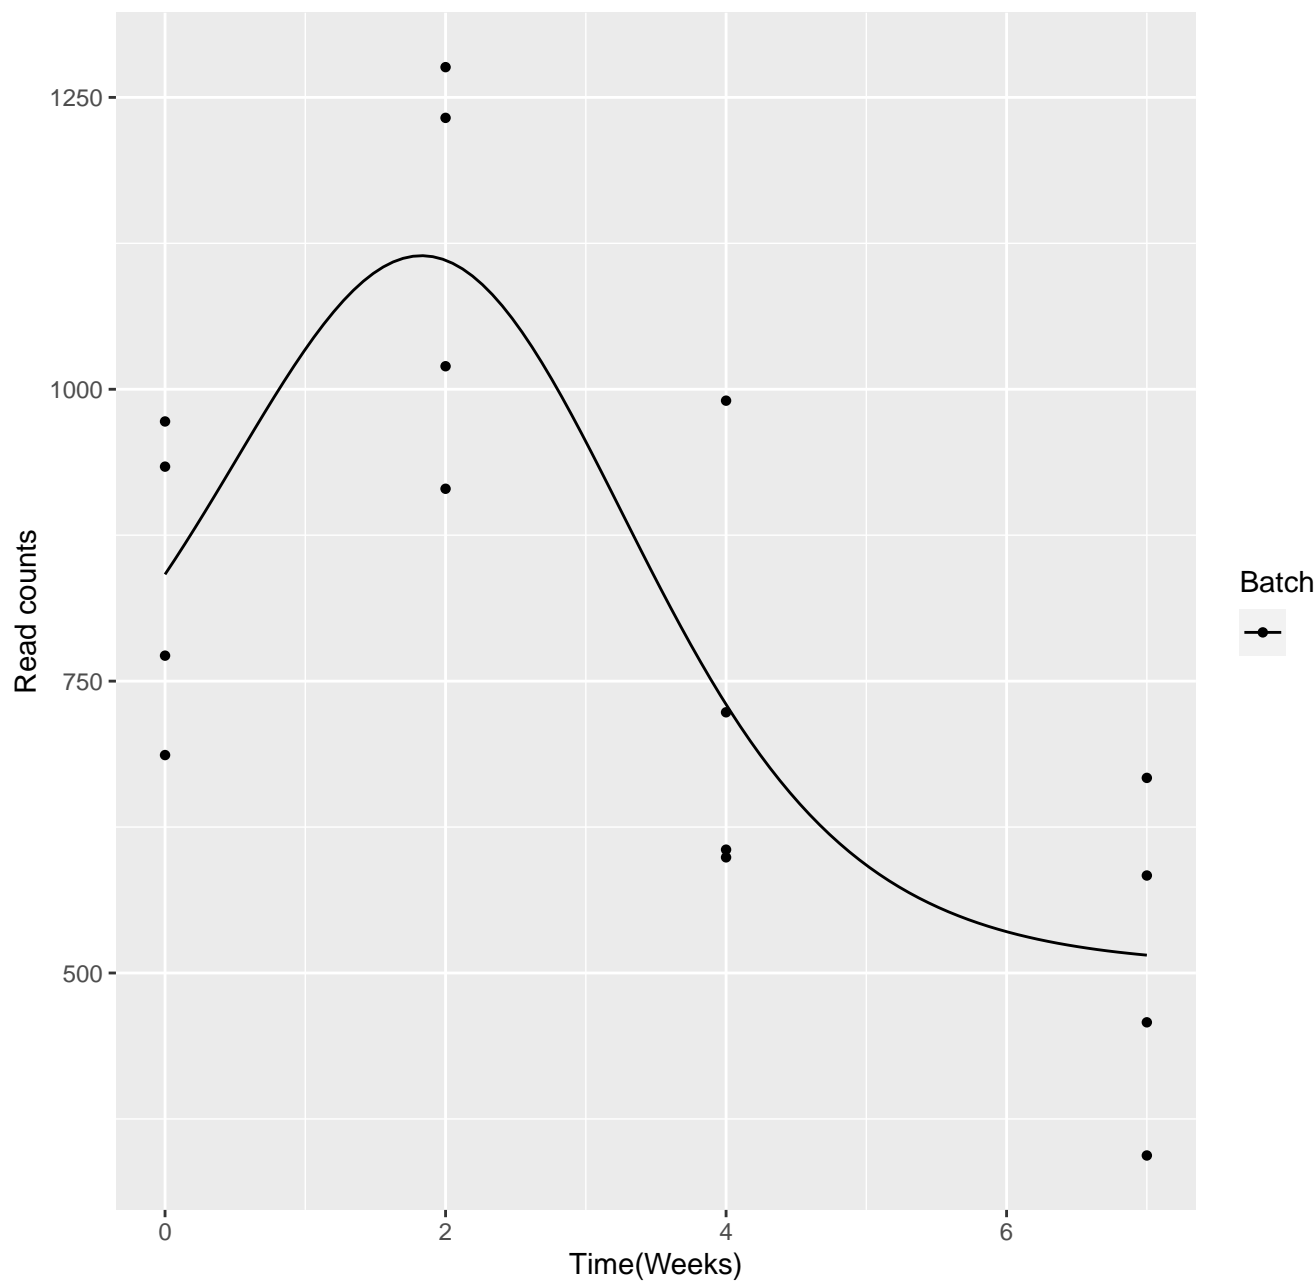

XIRP1:  $\log_{10} q = -2.6$

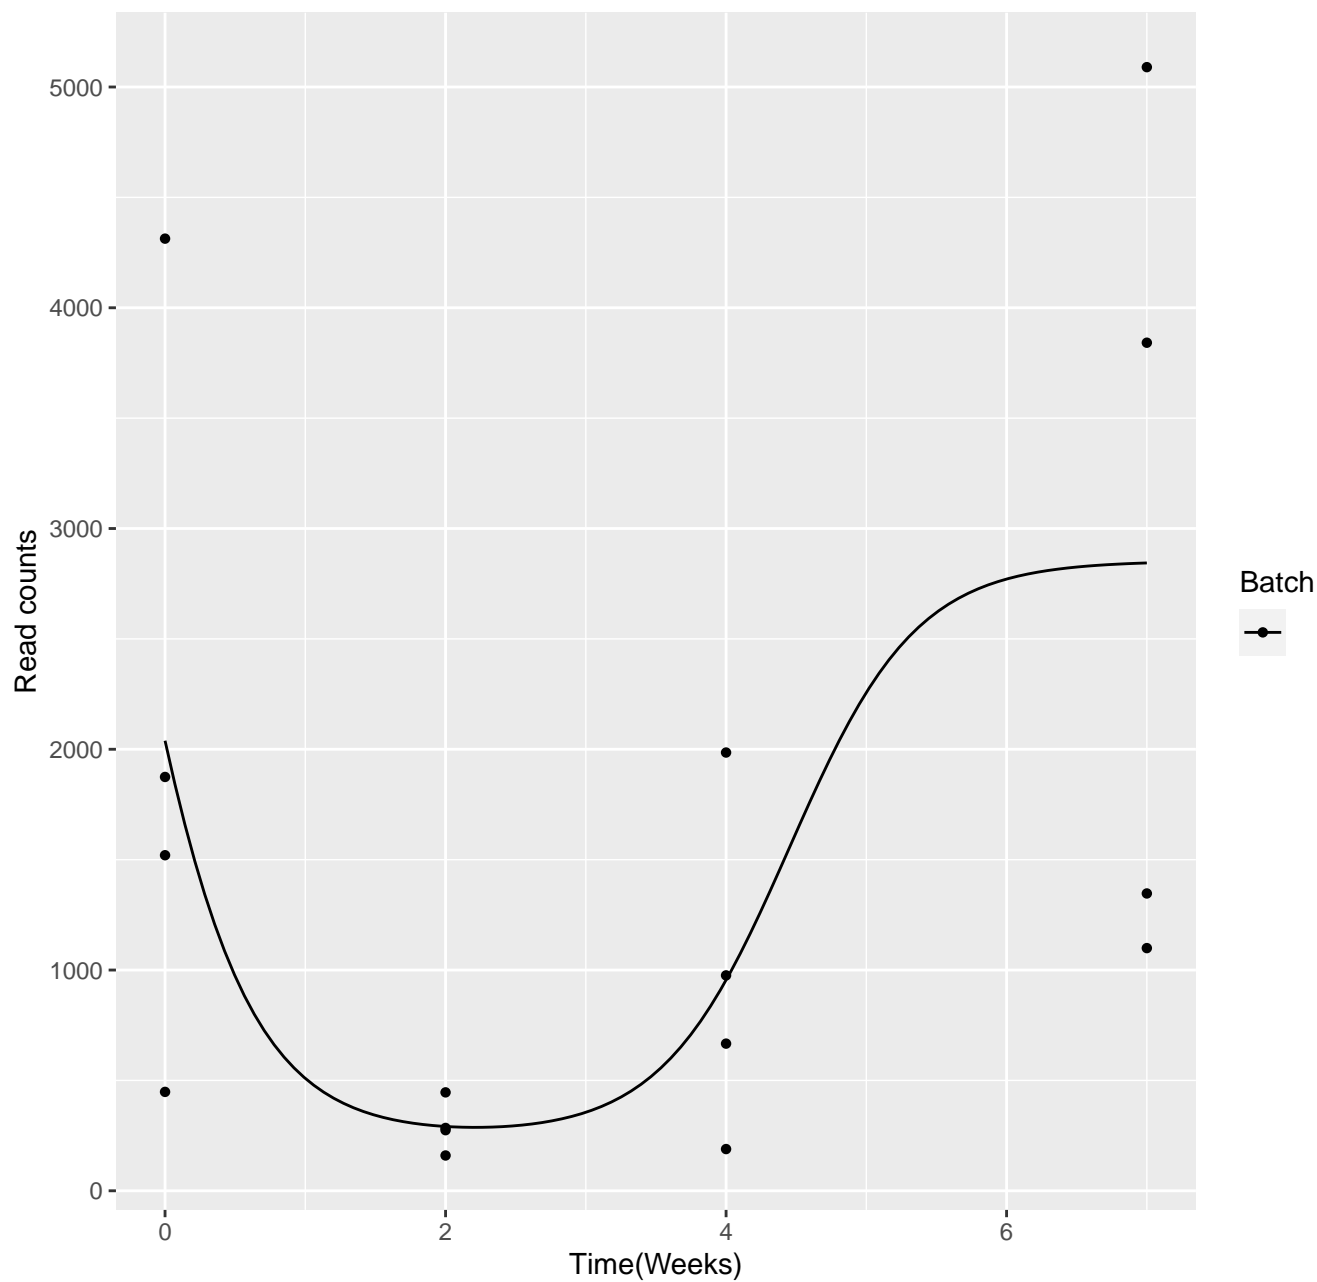

SRF:  $\log_{10} q = -2.6$

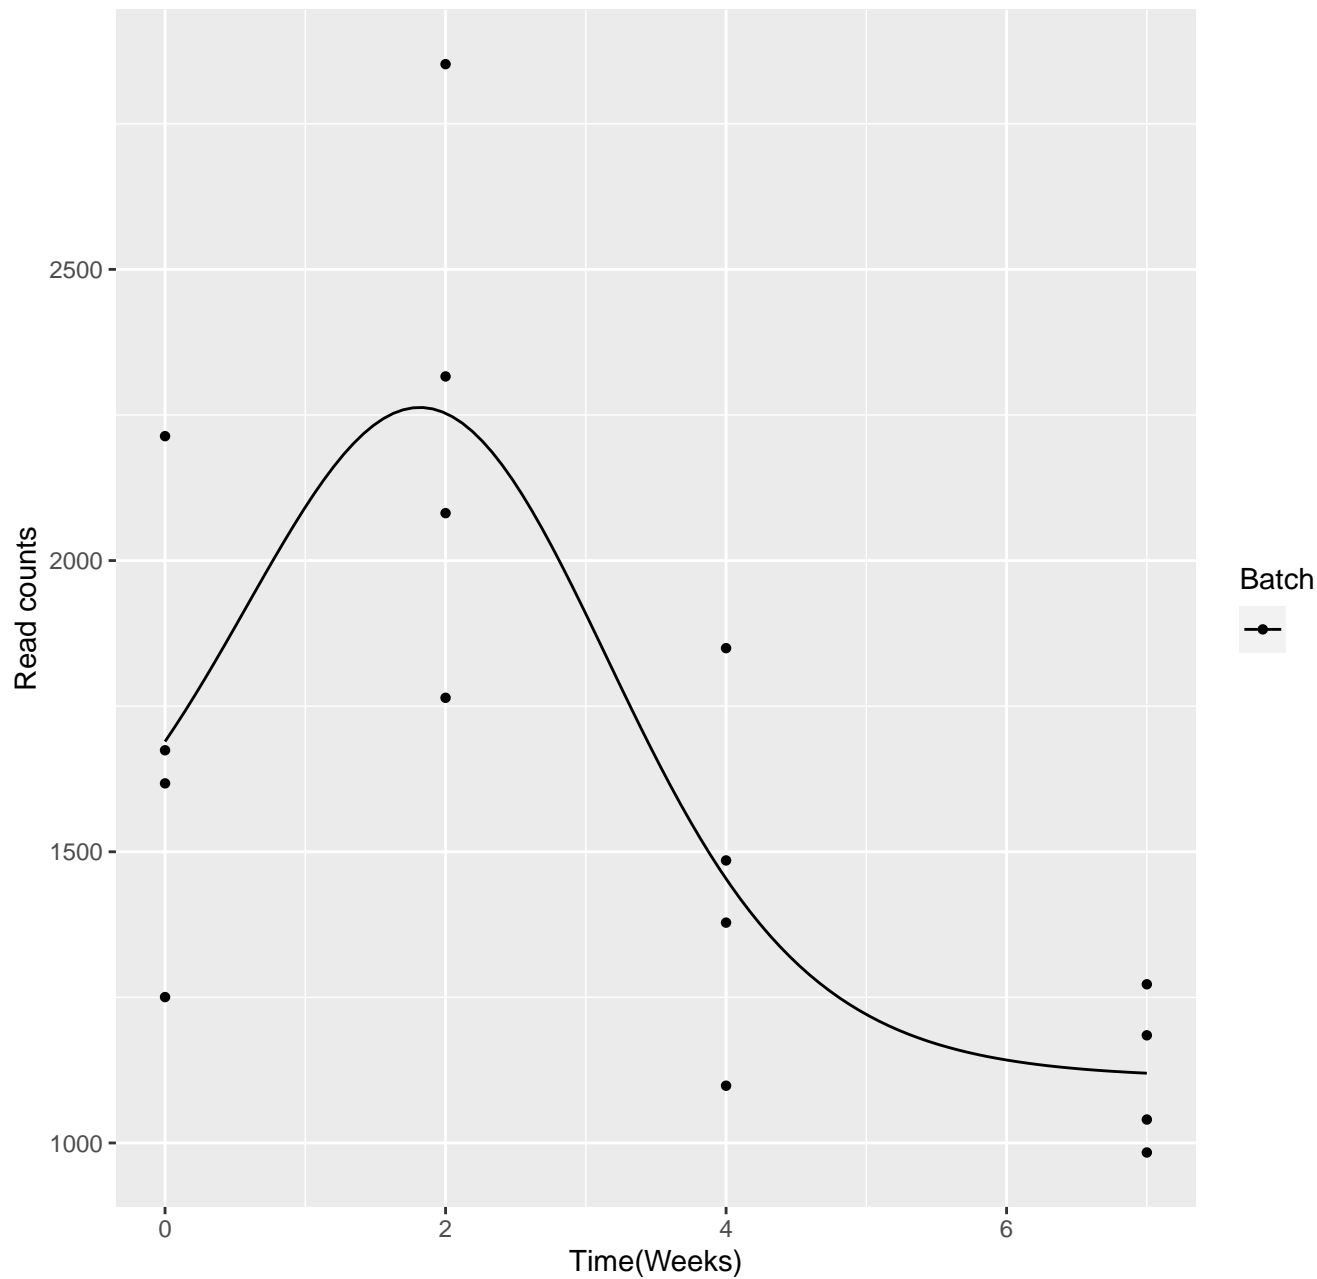



FMN1:  $\log_{10} q = -2.59$

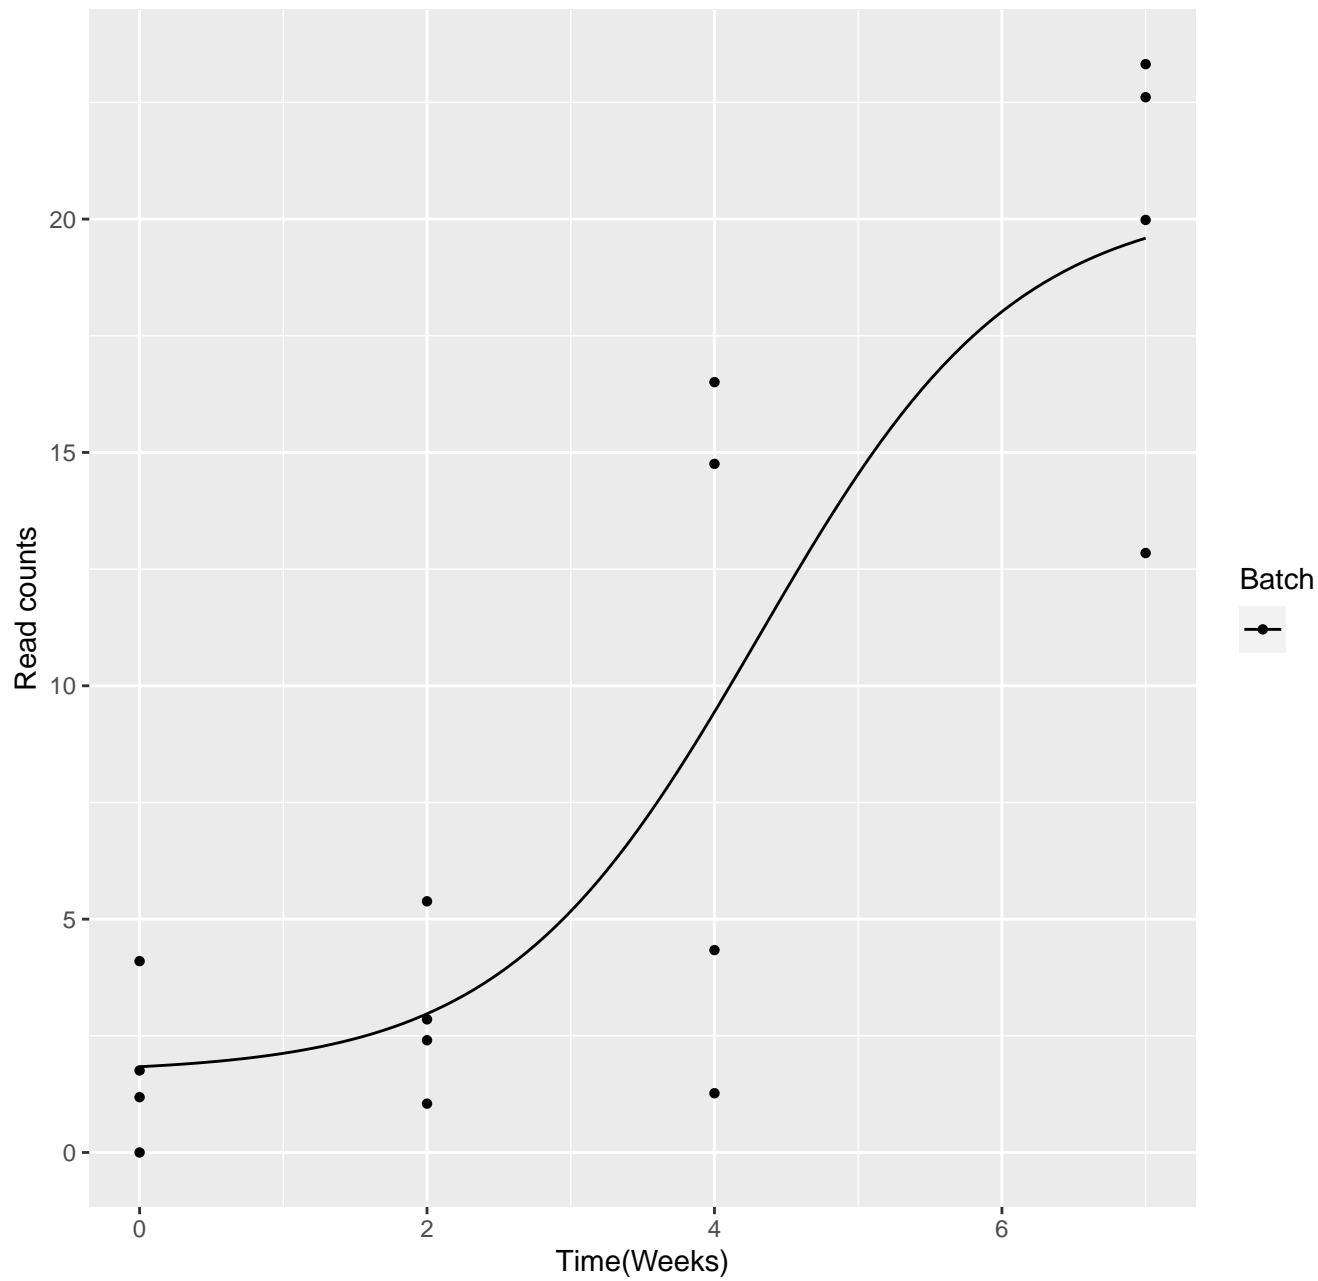

PDE7B:  $\log_{10} q = -2.59$

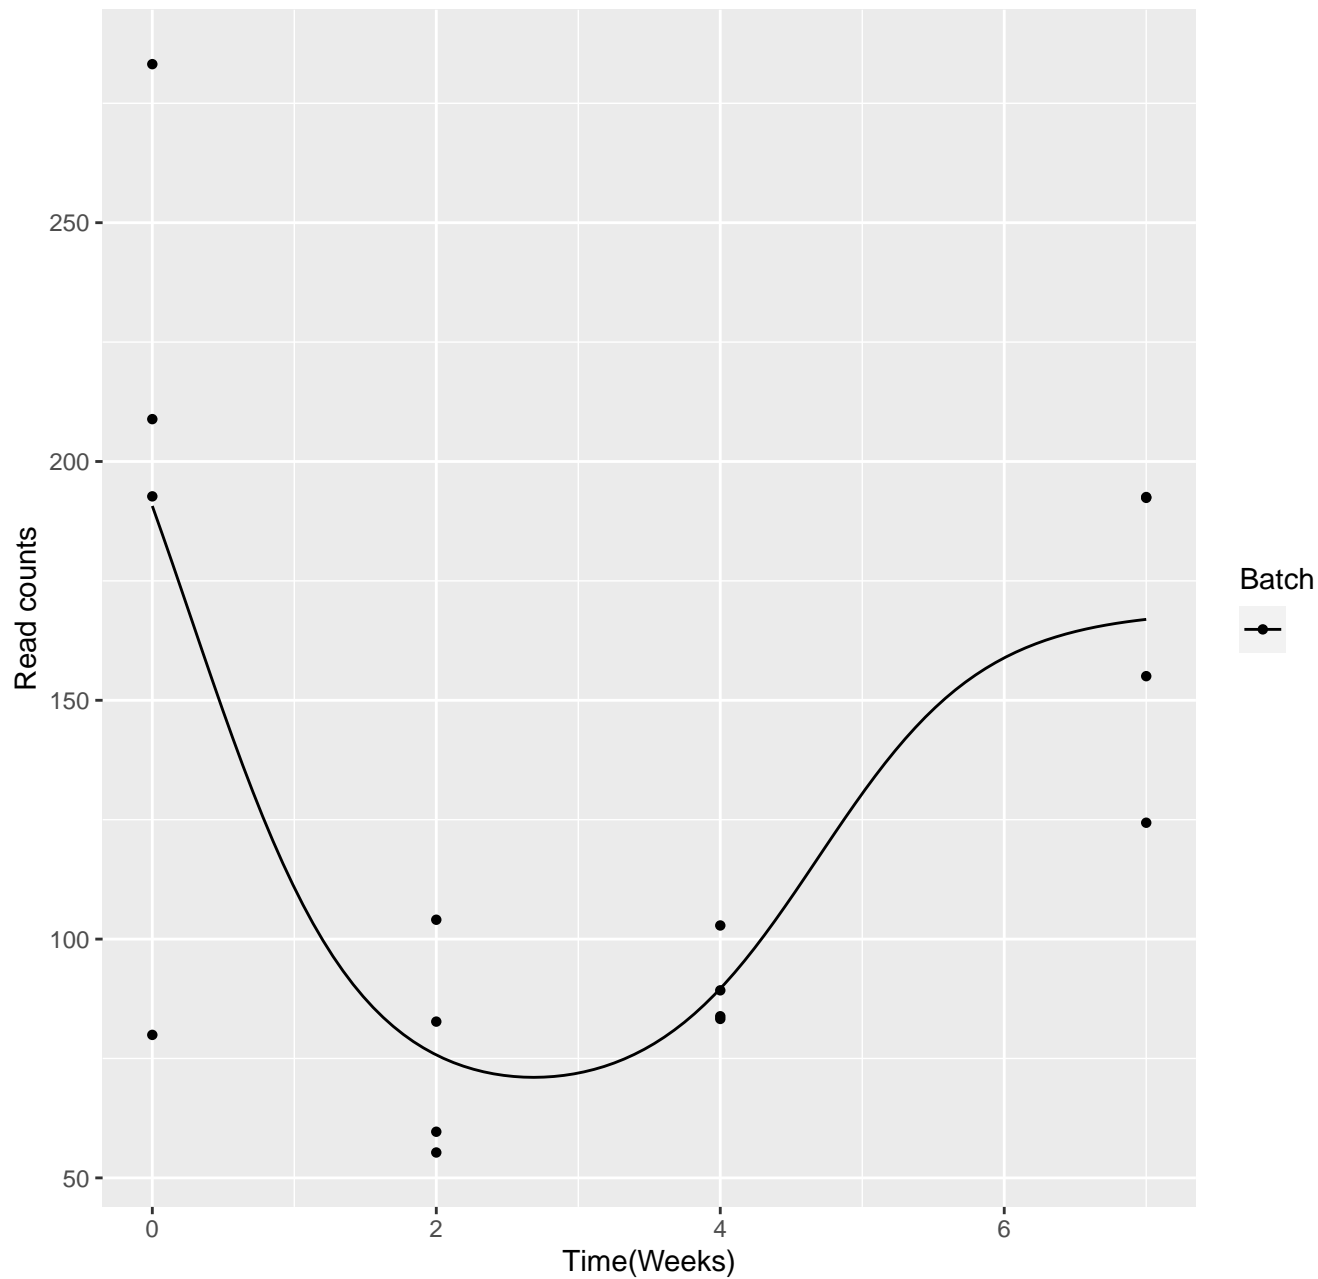

SYDE1:  $\log_{10} q = -2.59$

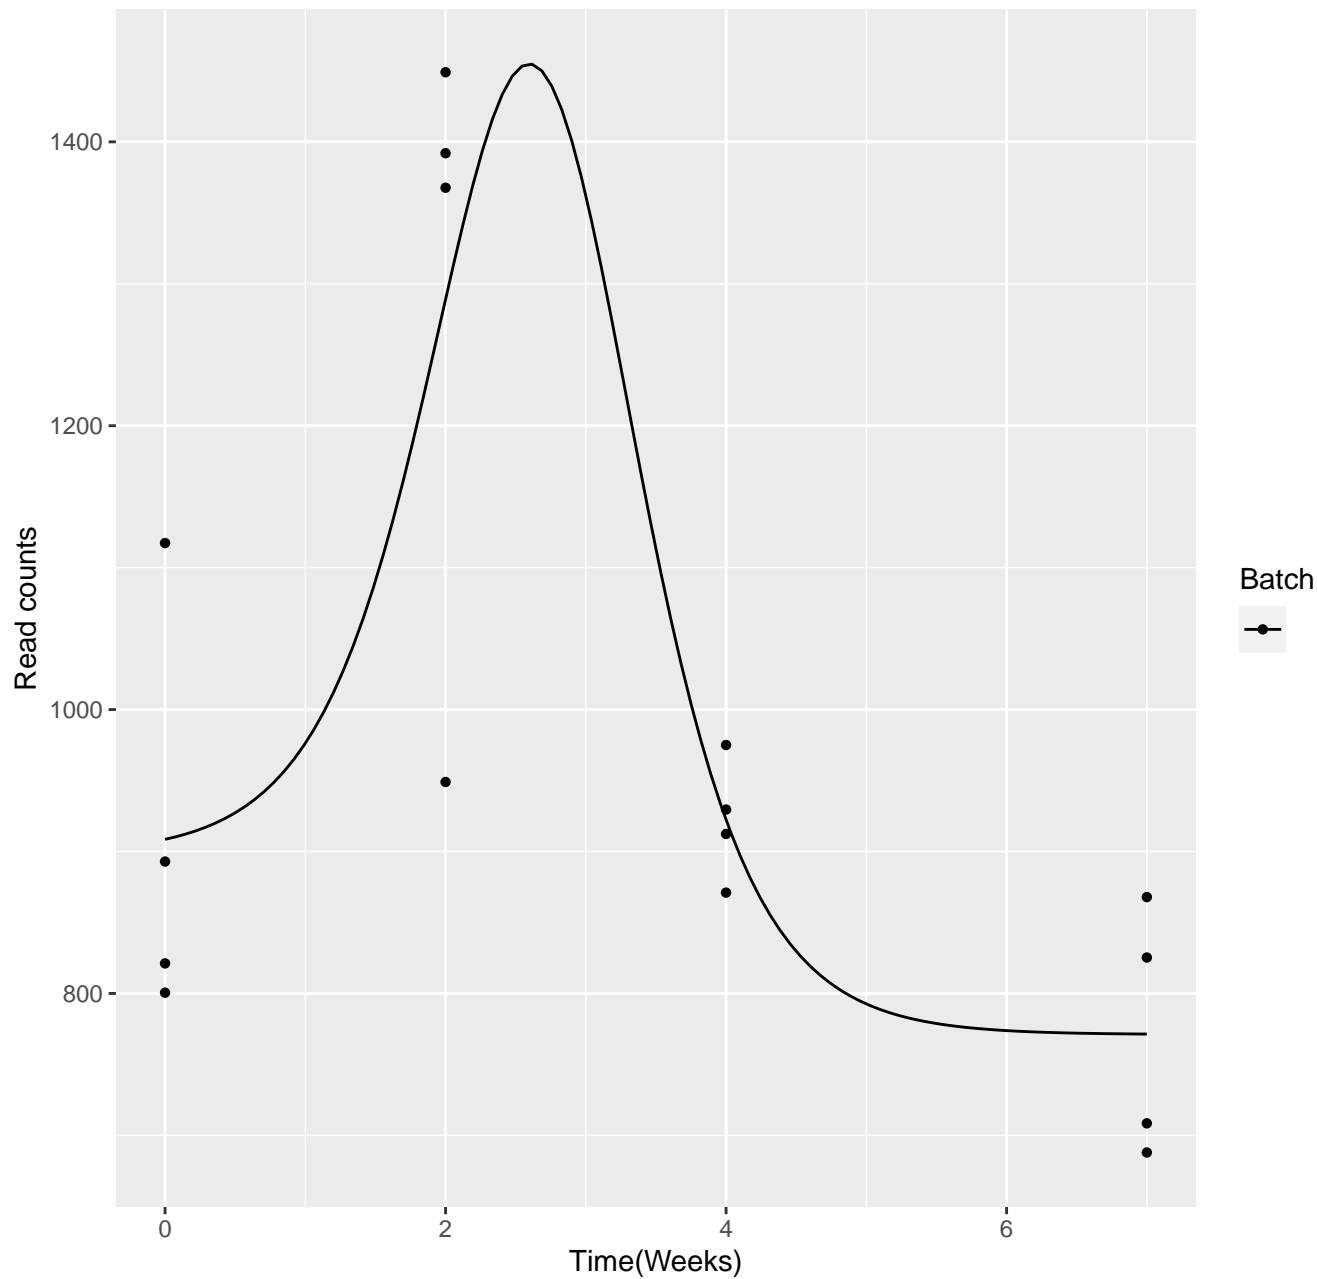

CCN4:  $\log_{10} q = -2.59$

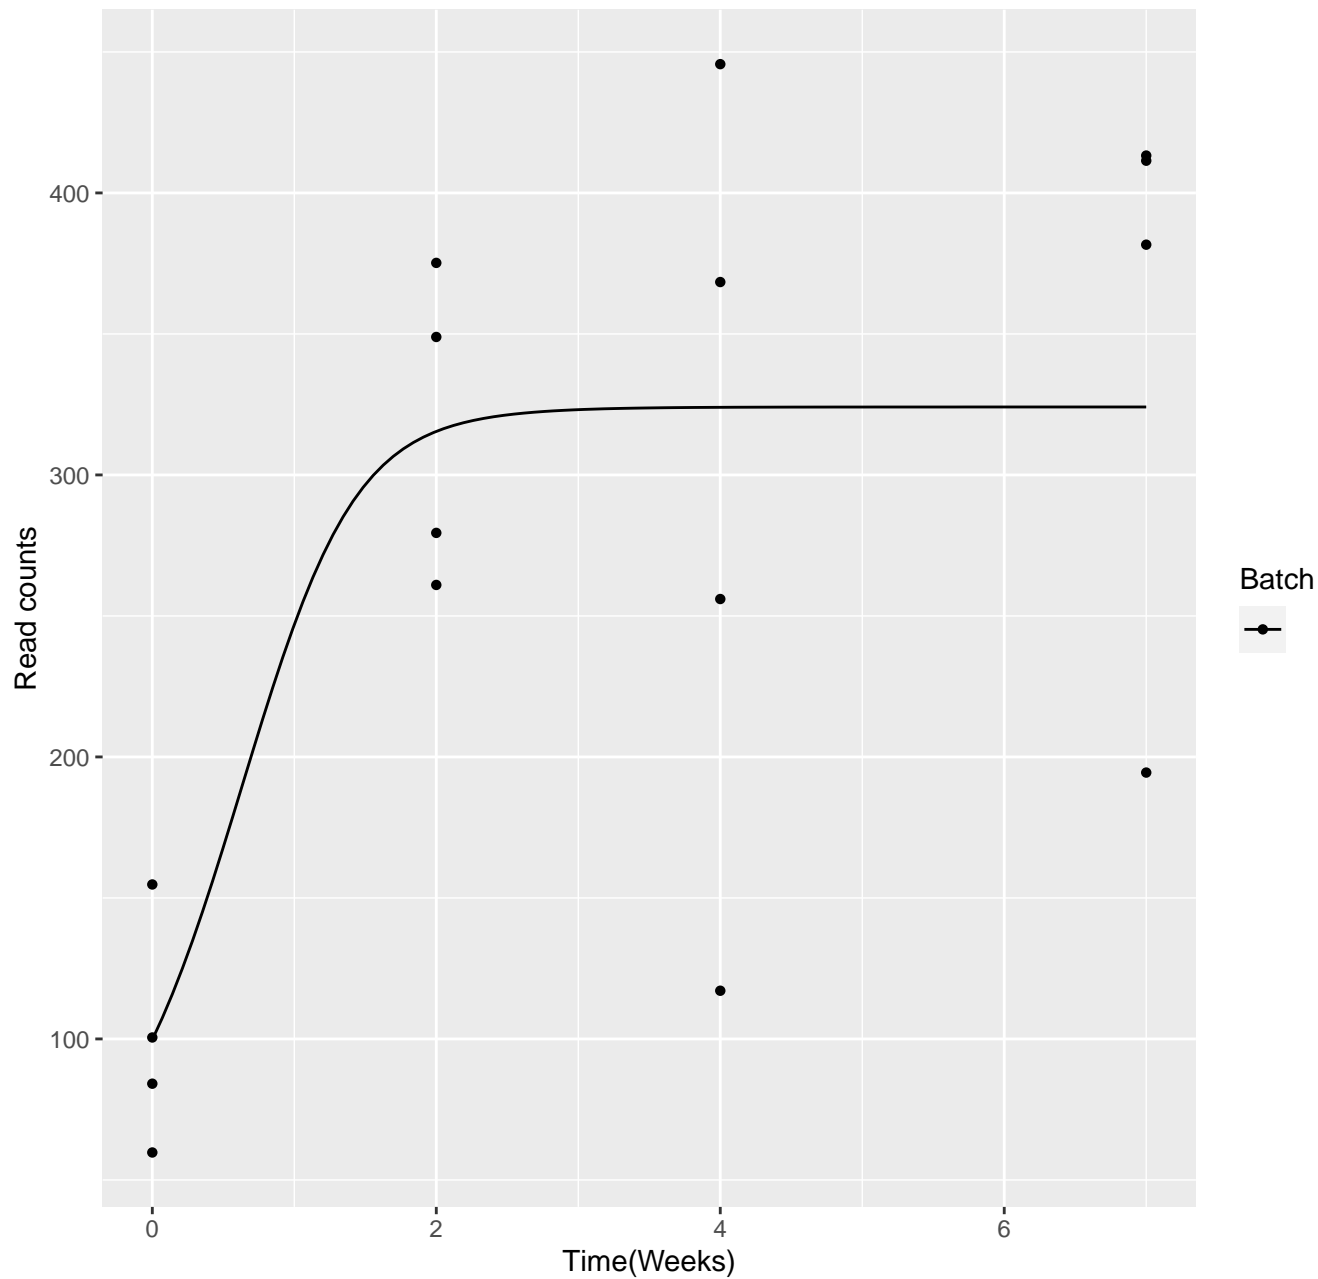

EFNB2:  $\log_{10} q = -2.59$

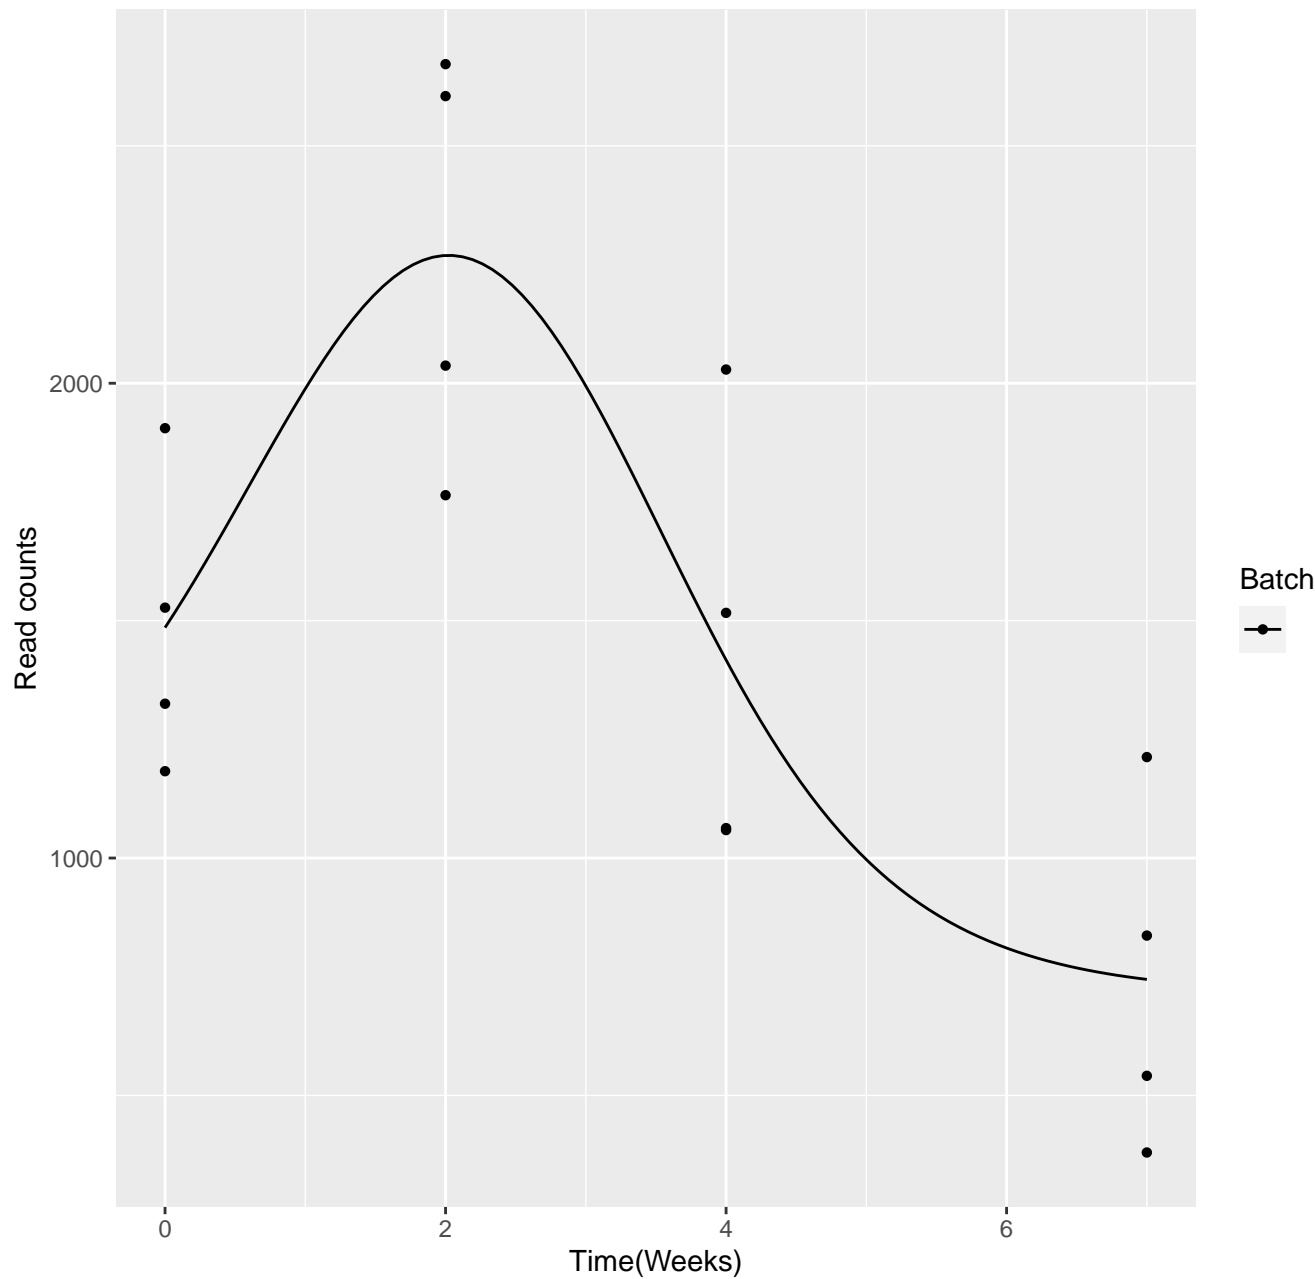

LOC100346561:  $\log_{10} q = -2.59$

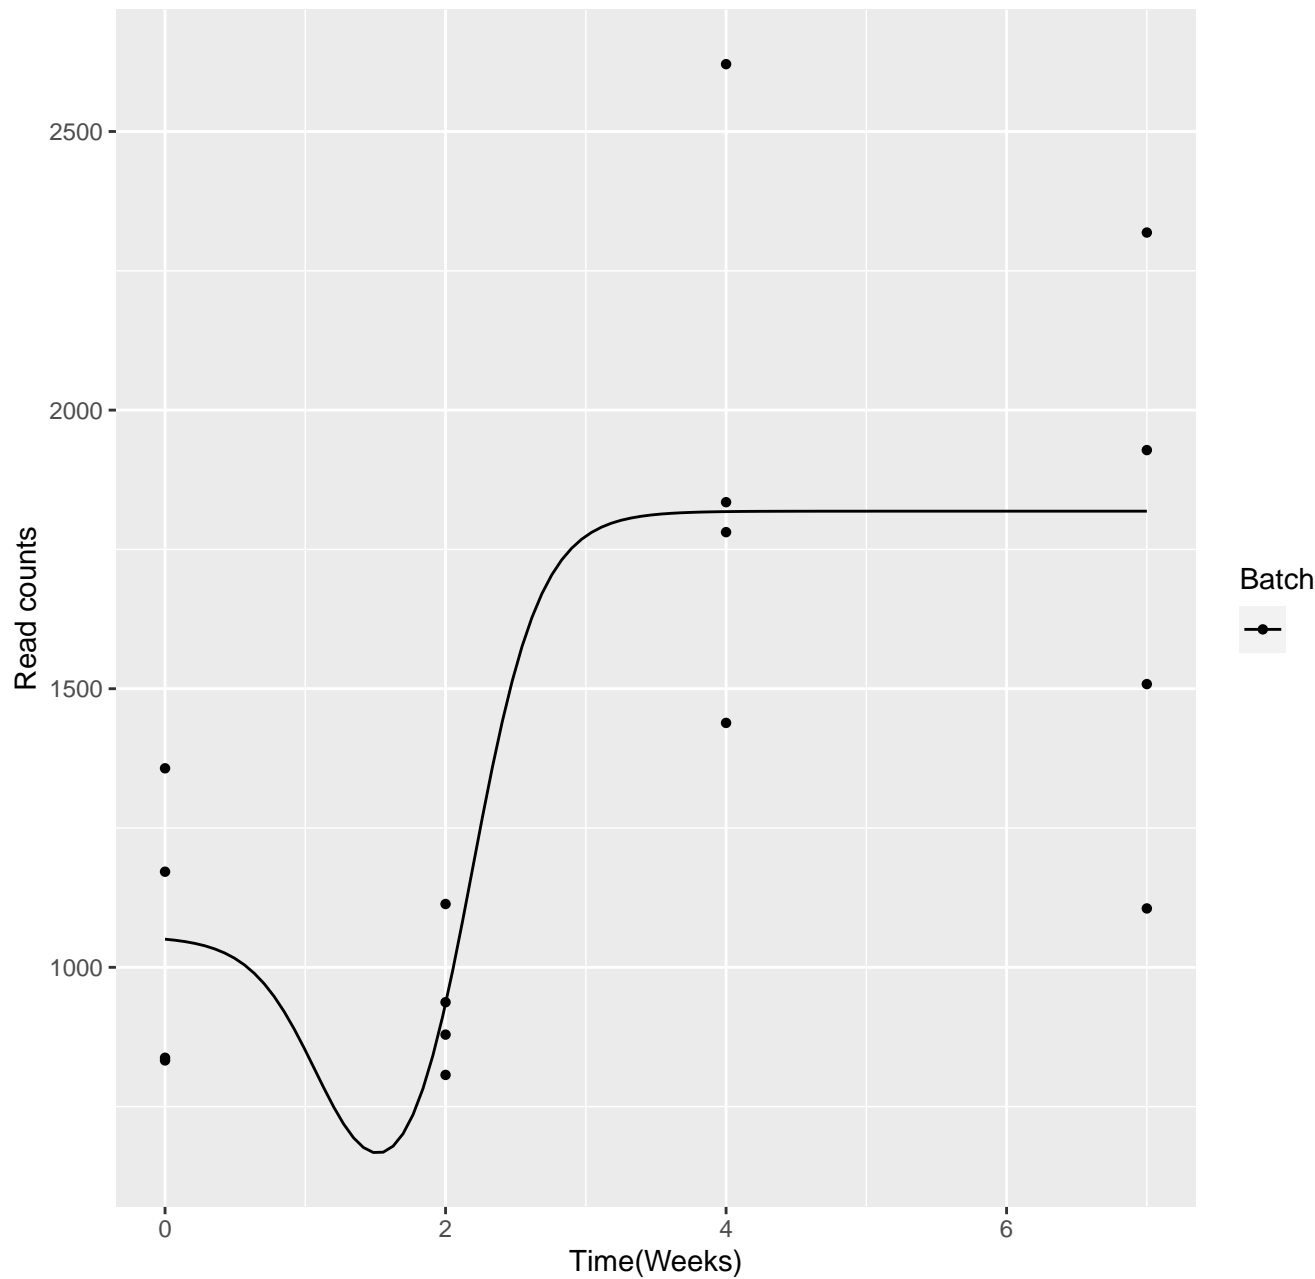

TCF19:  $\log_{10} q = -2.59$

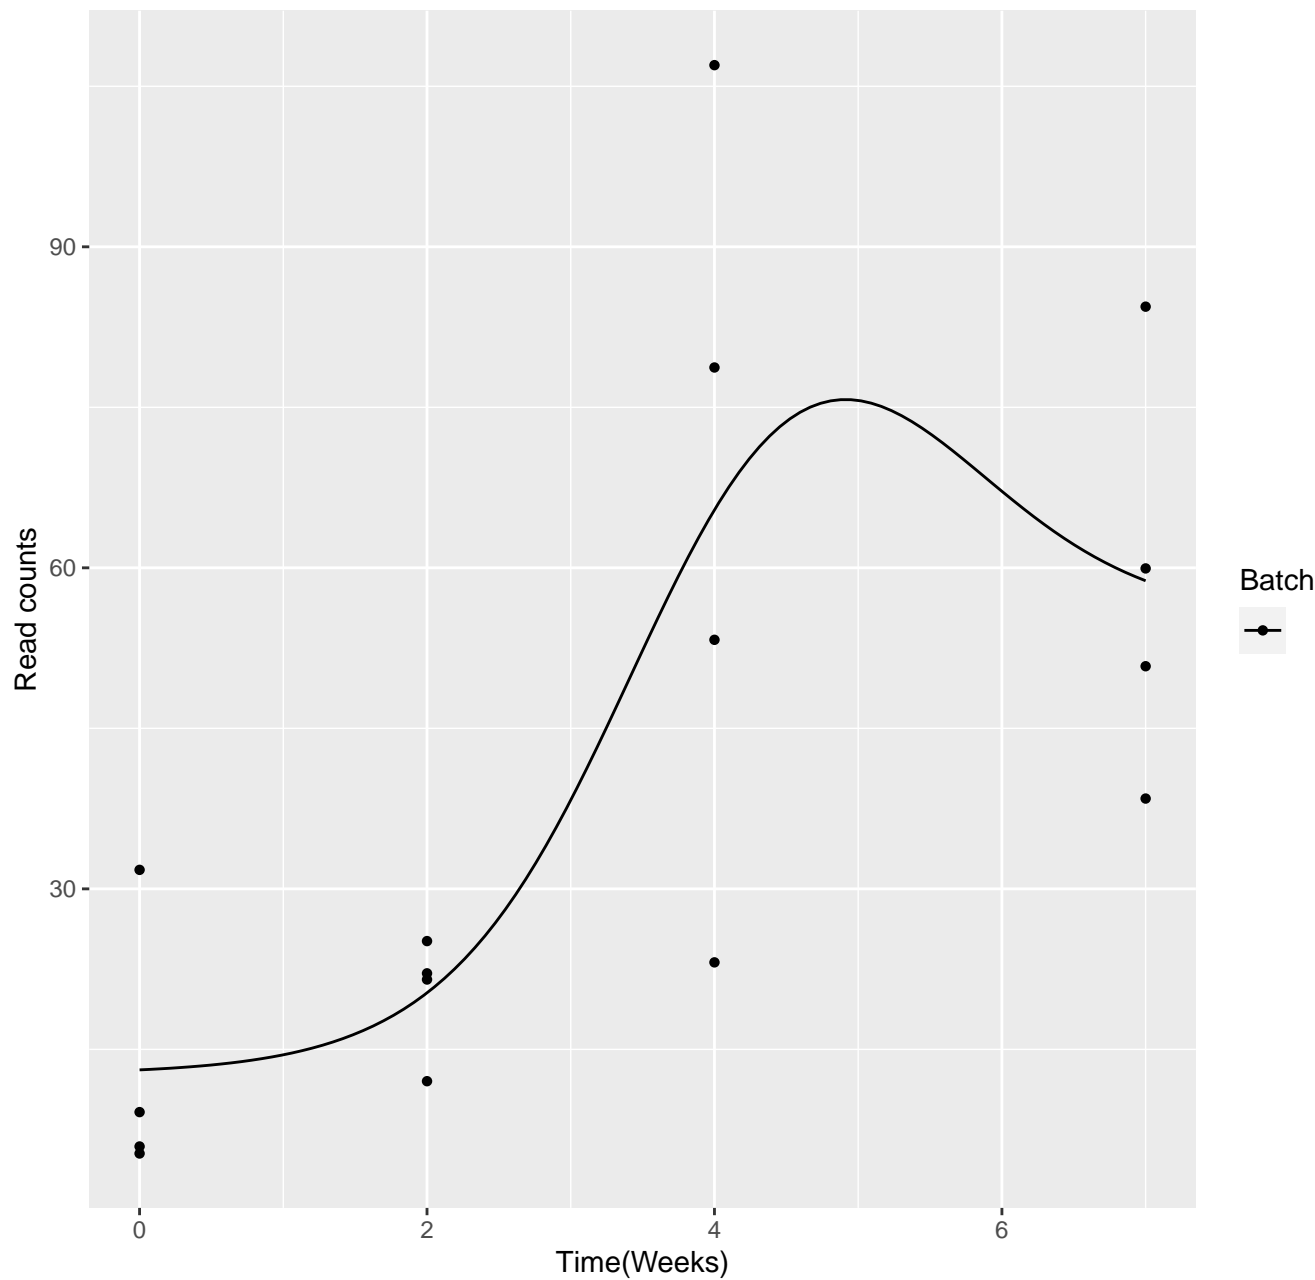

P2RY12:  $\log_{10} q = -2.59$

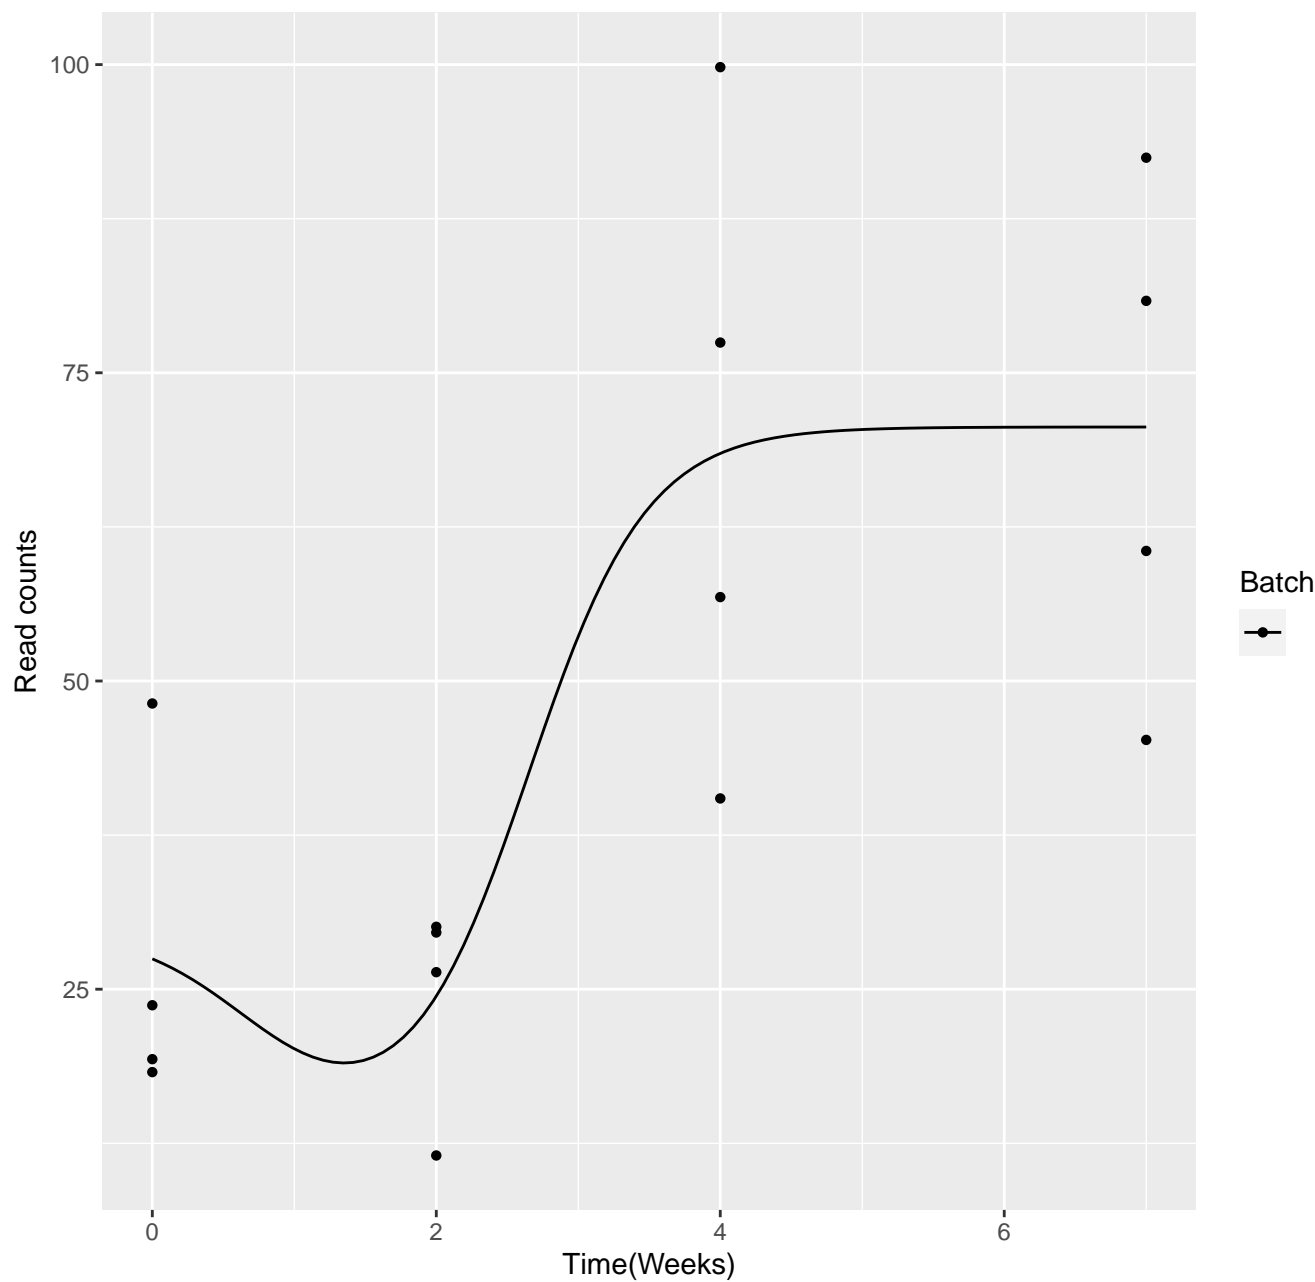



ZNF853:  $\log_{10} q = -2.59$

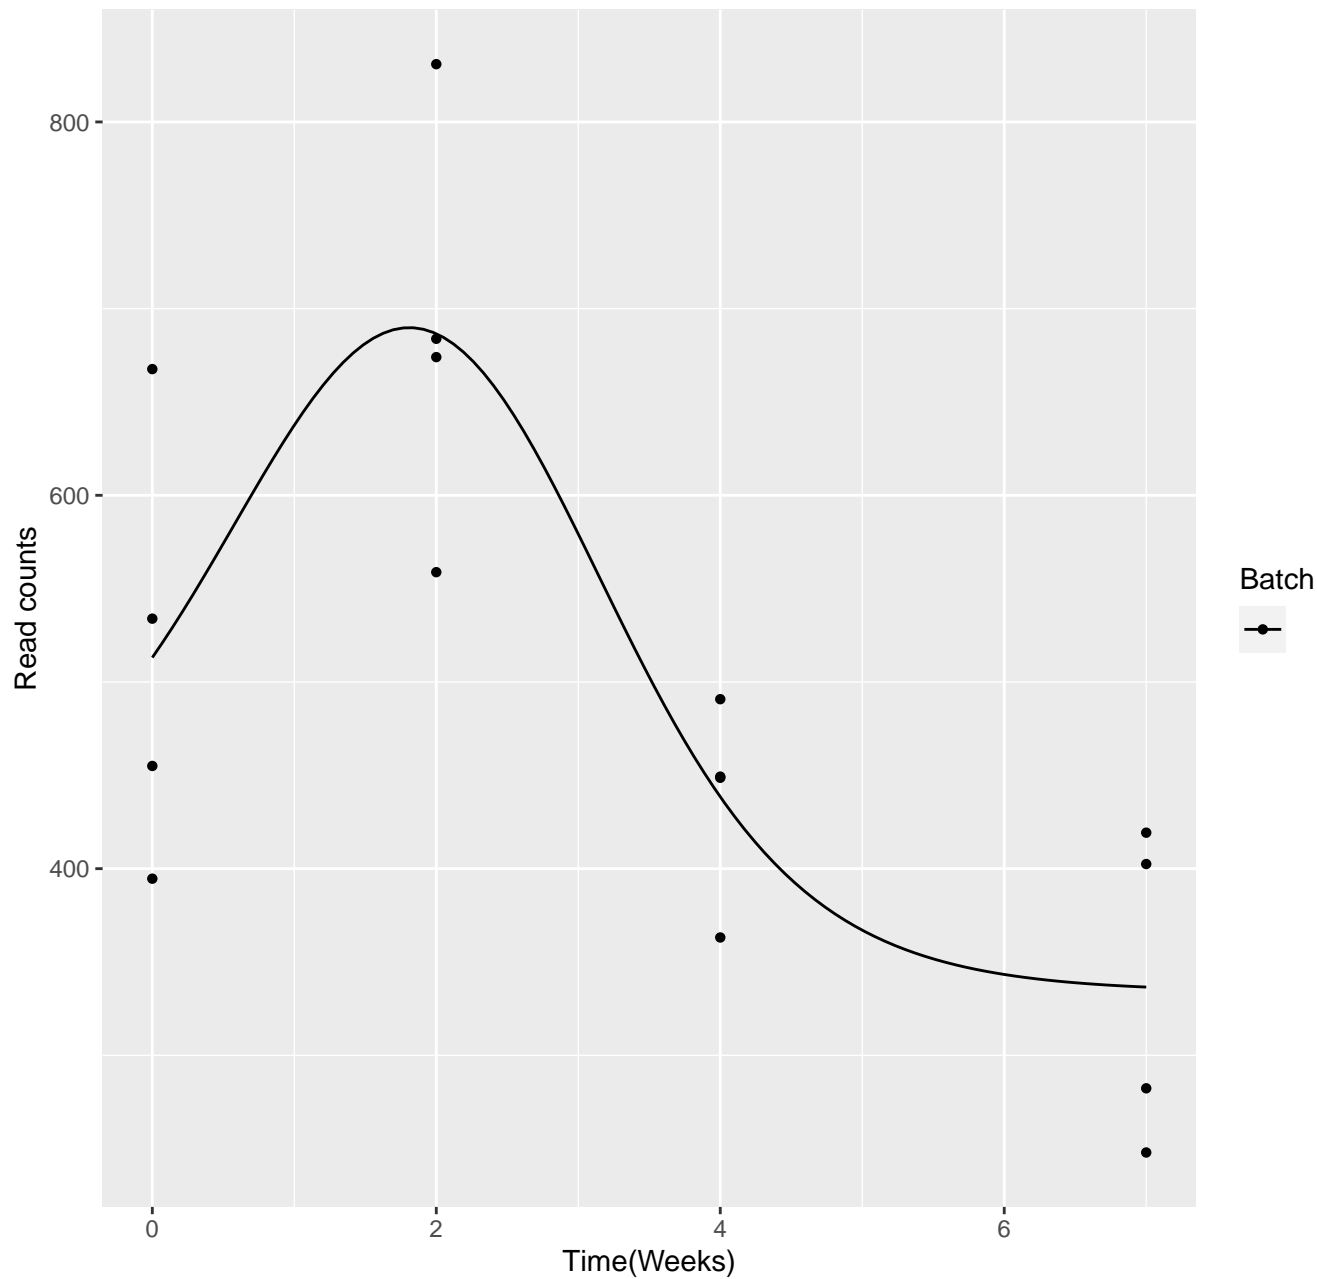

CPE:  $\log_{10} q = -2.58$

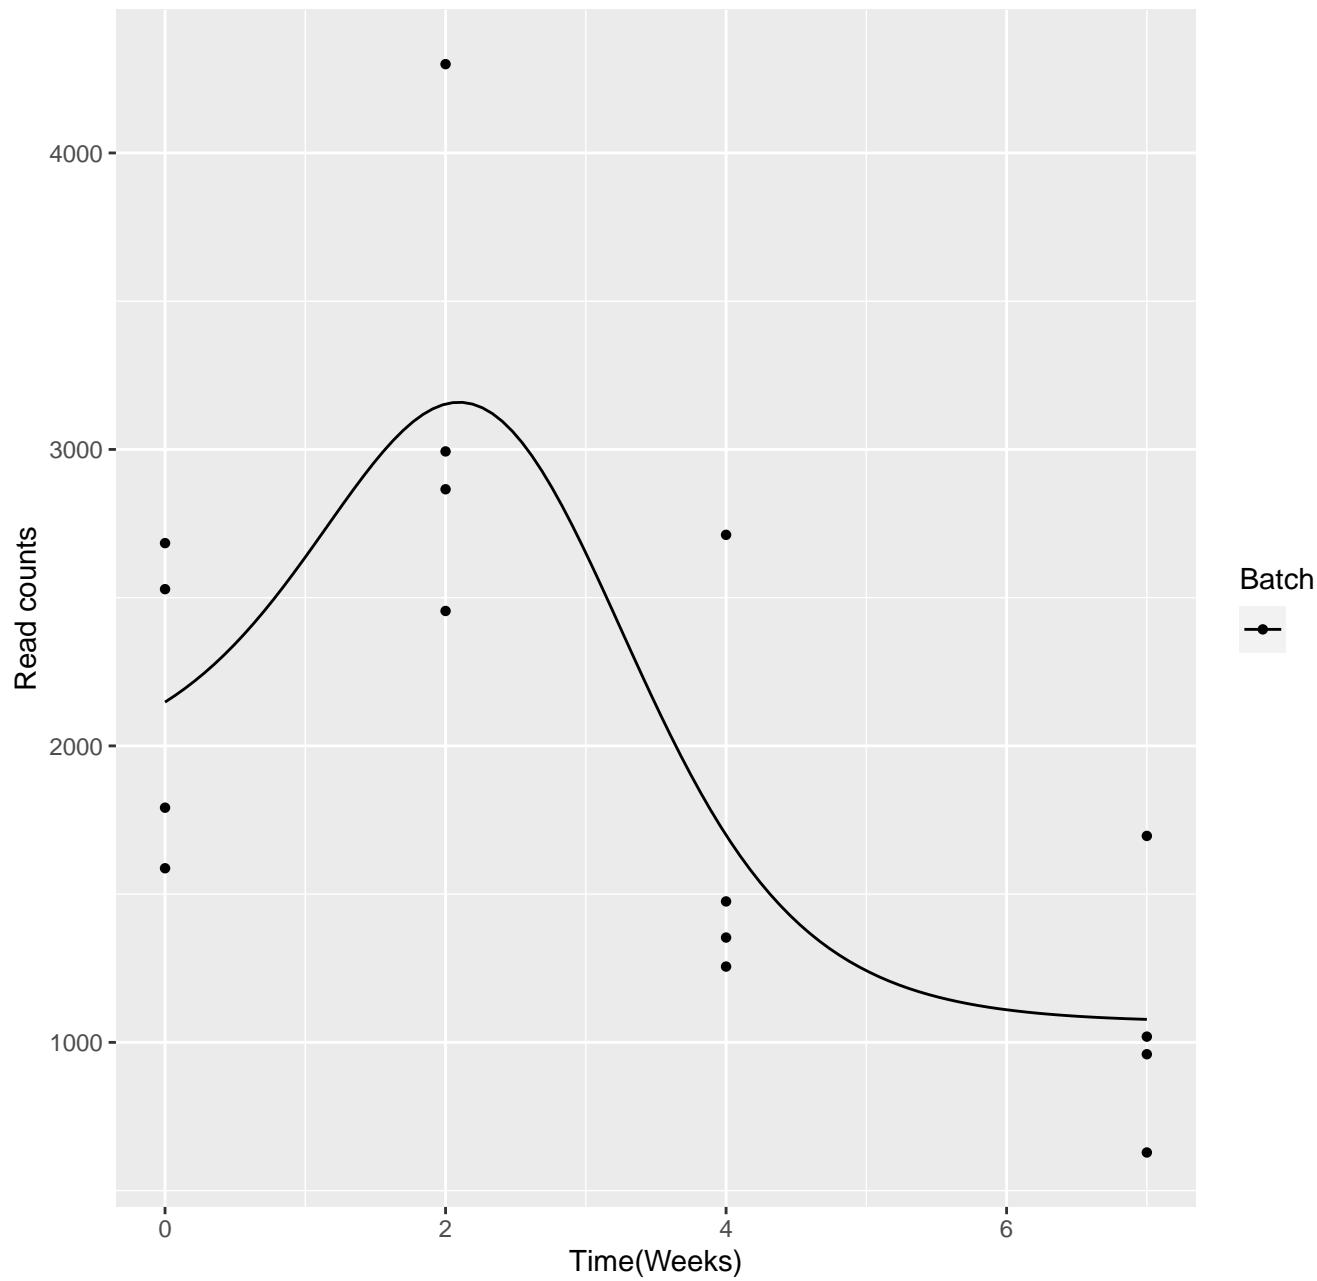

AK2:  $\log_{10} q = -2.58$

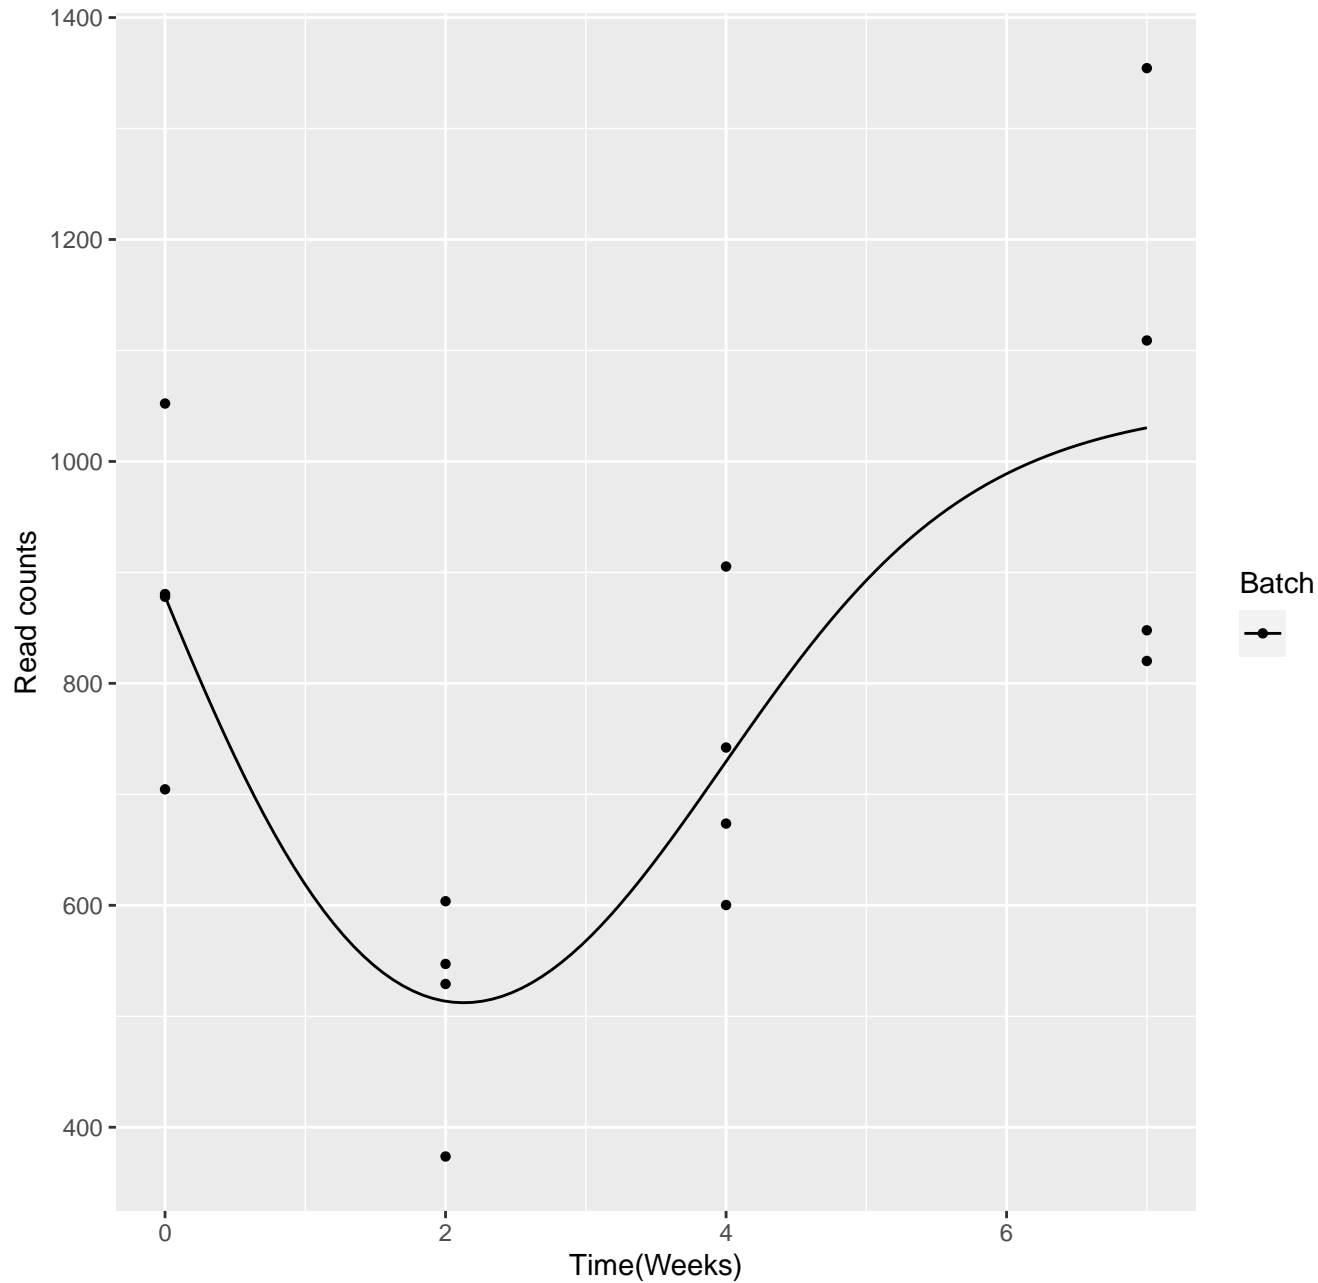

SIPA1:  $\log_{10} q = -2.58$

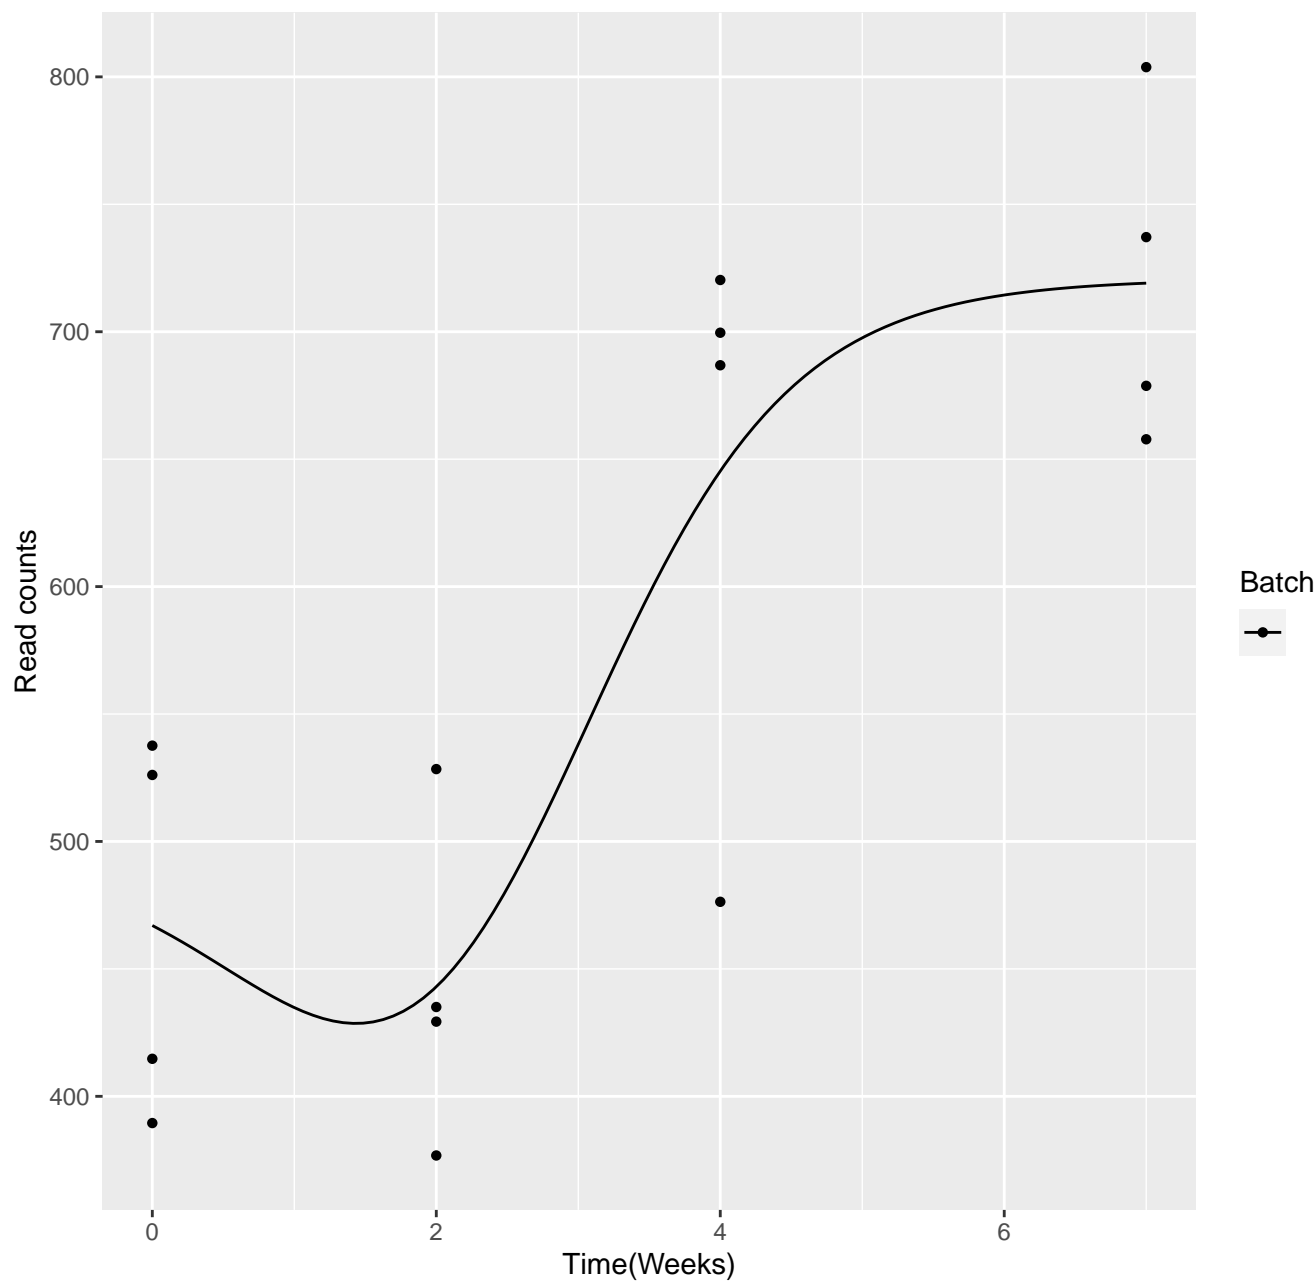

ATL2:  $\log_{10} q = -2.58$

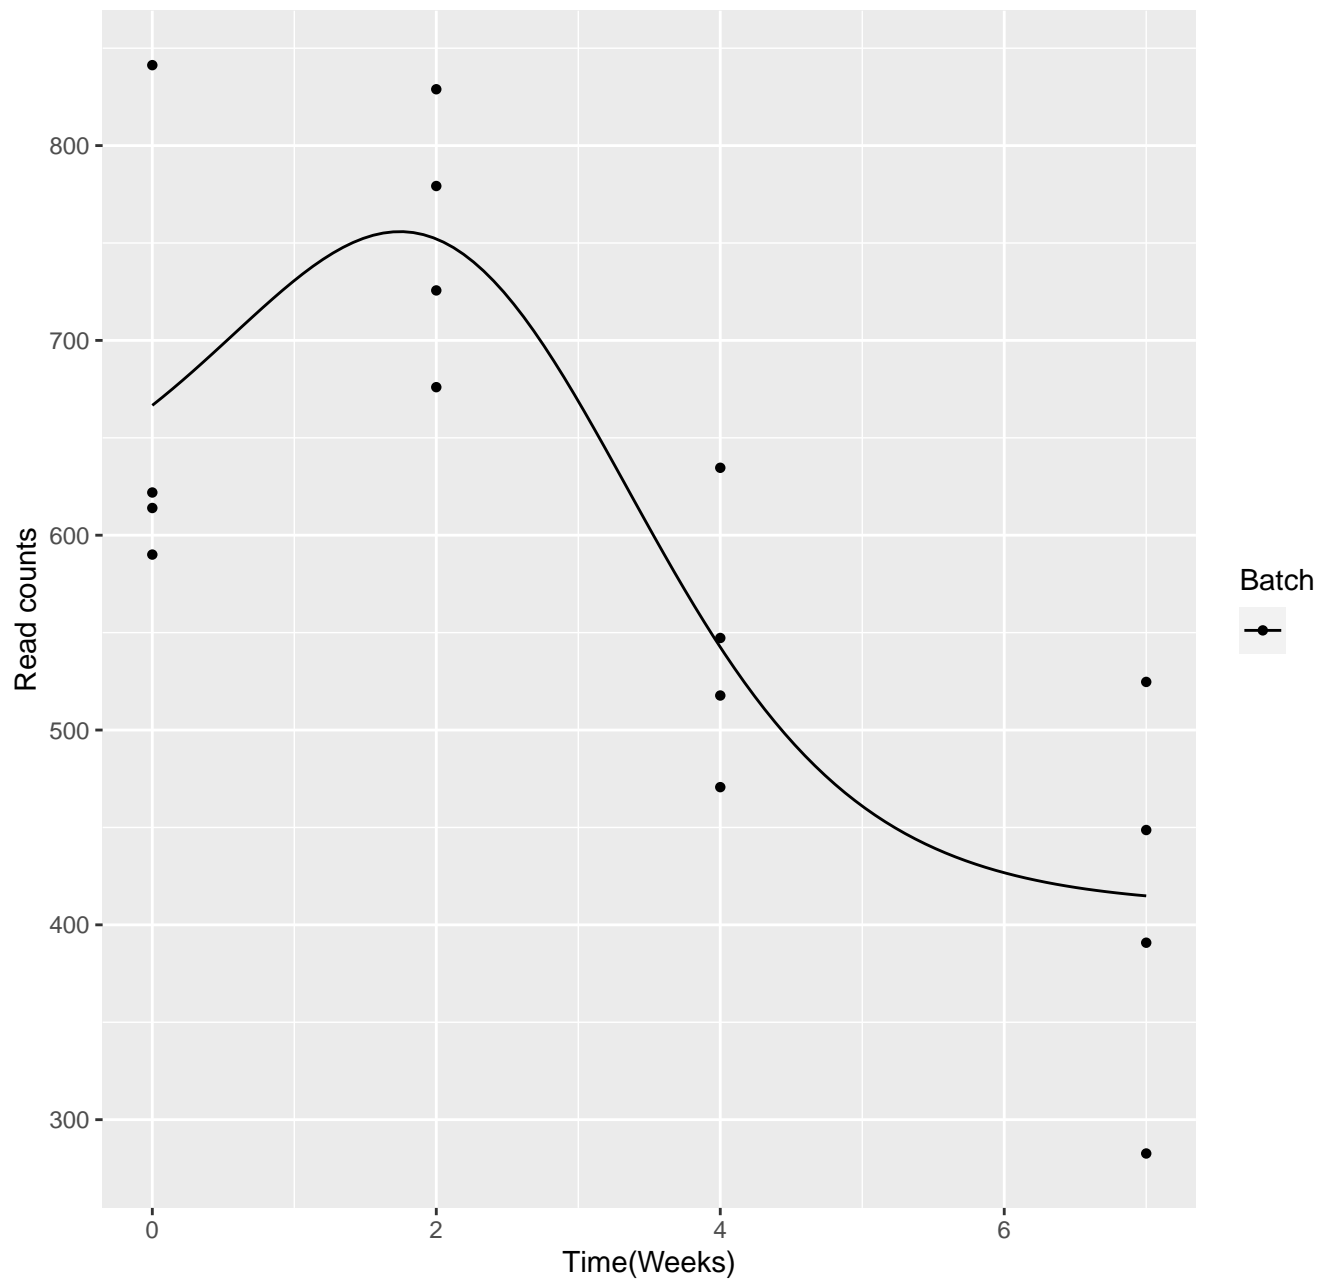

ZNF275:  $\log_{10} q = -2.58$

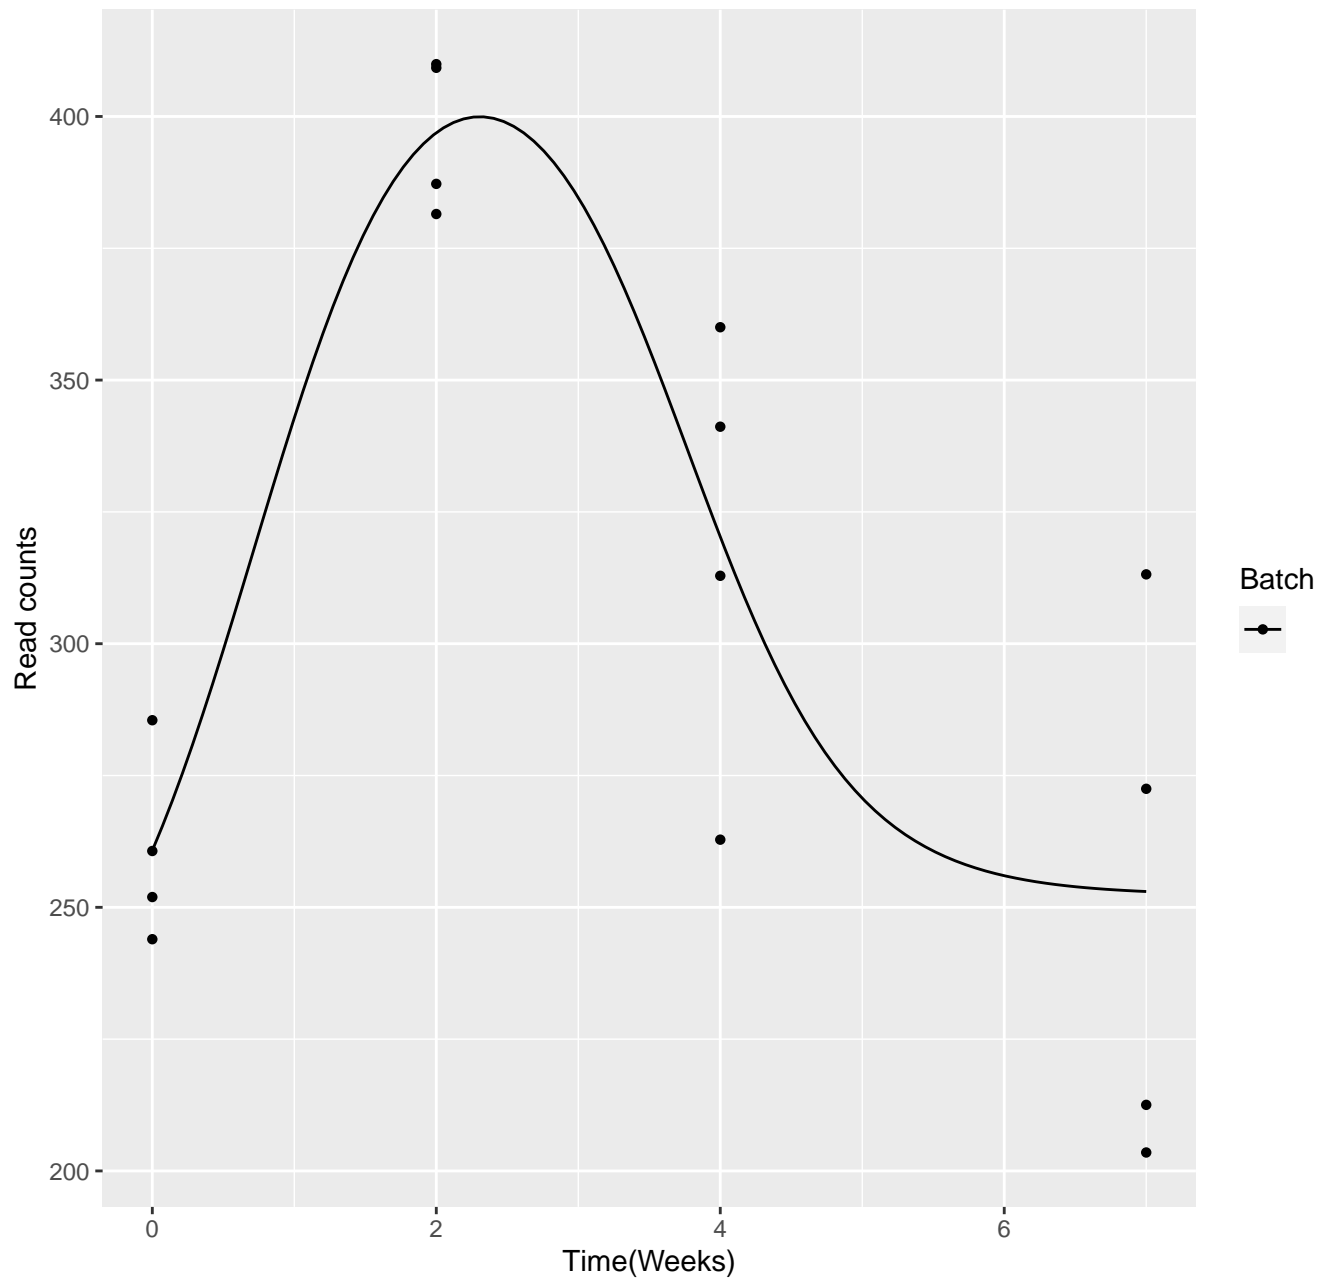

NUP210:  $\log_{10} q = -2.58$

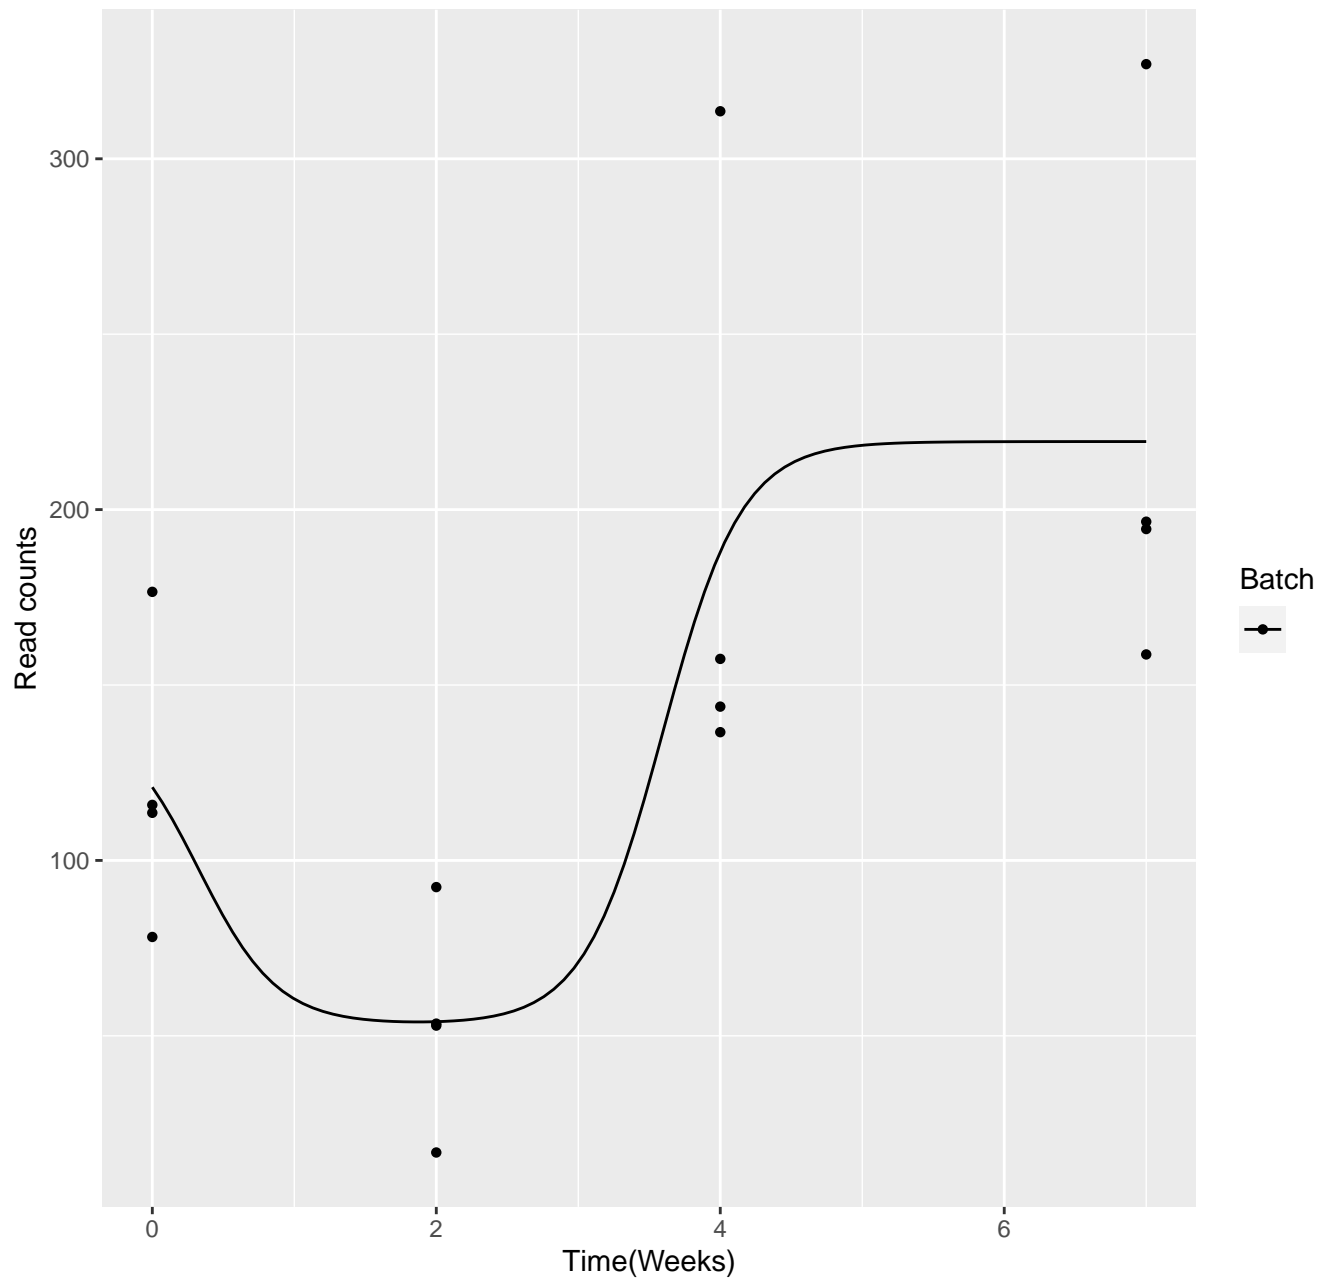

CDK18:  $\log_{10} q = -2.58$

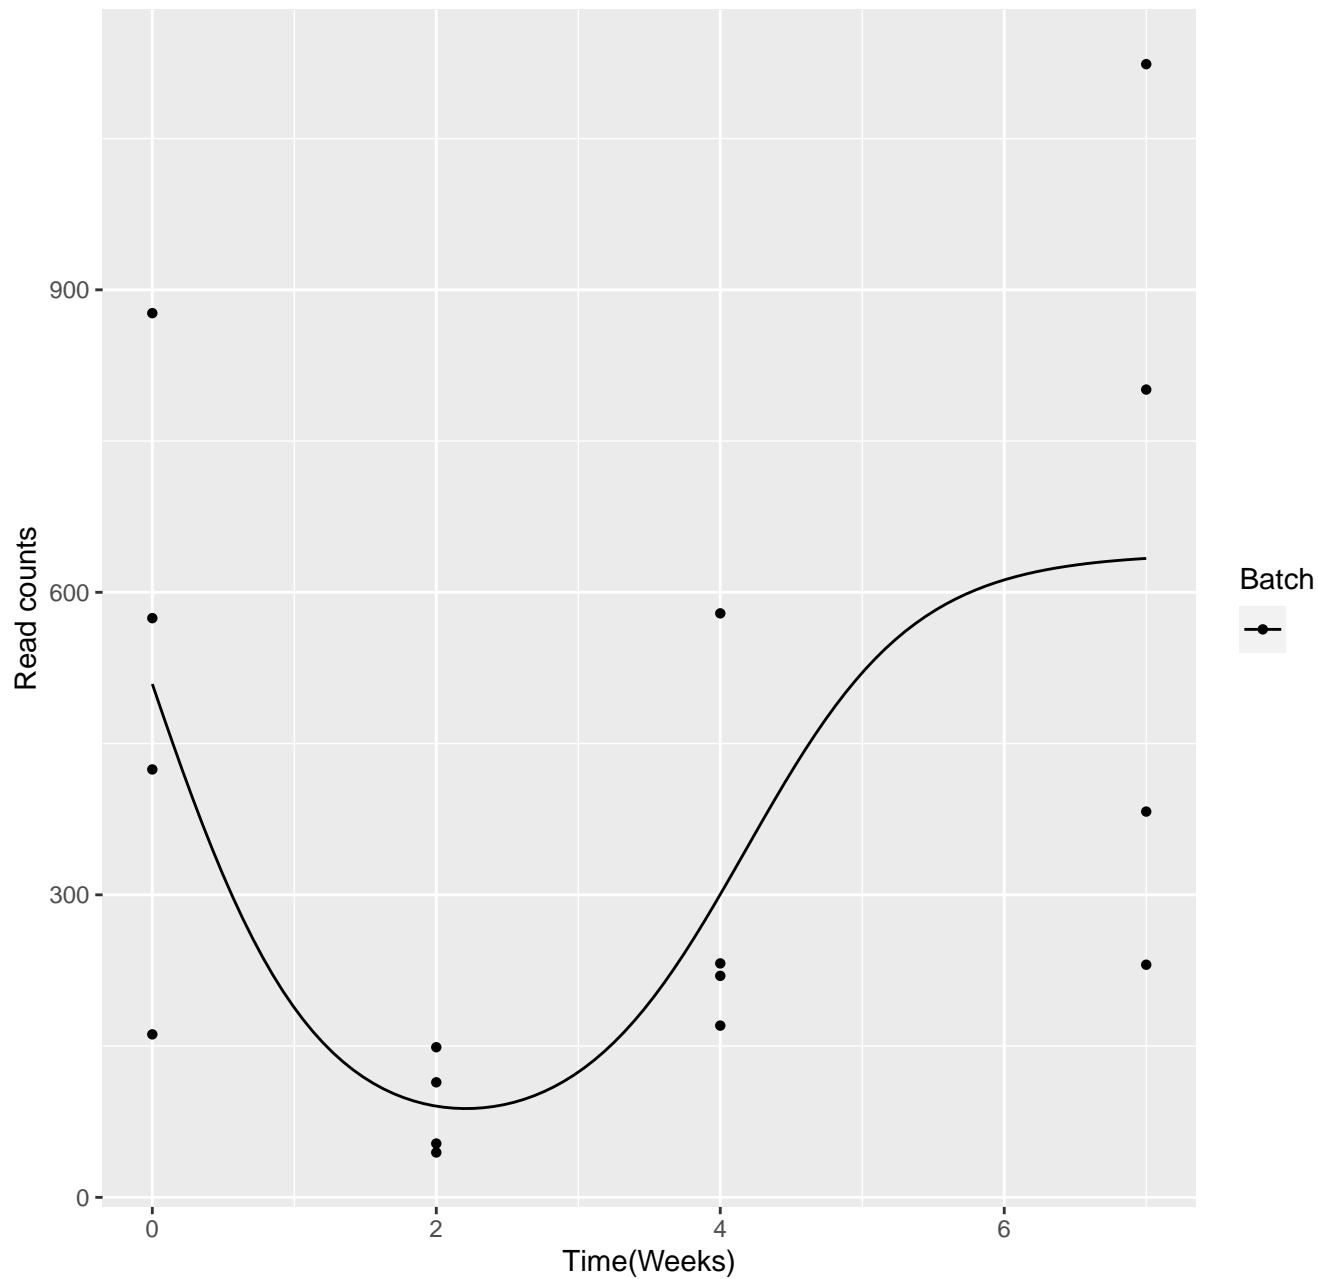



TGFB1:  $\log_{10} q = -2.58$

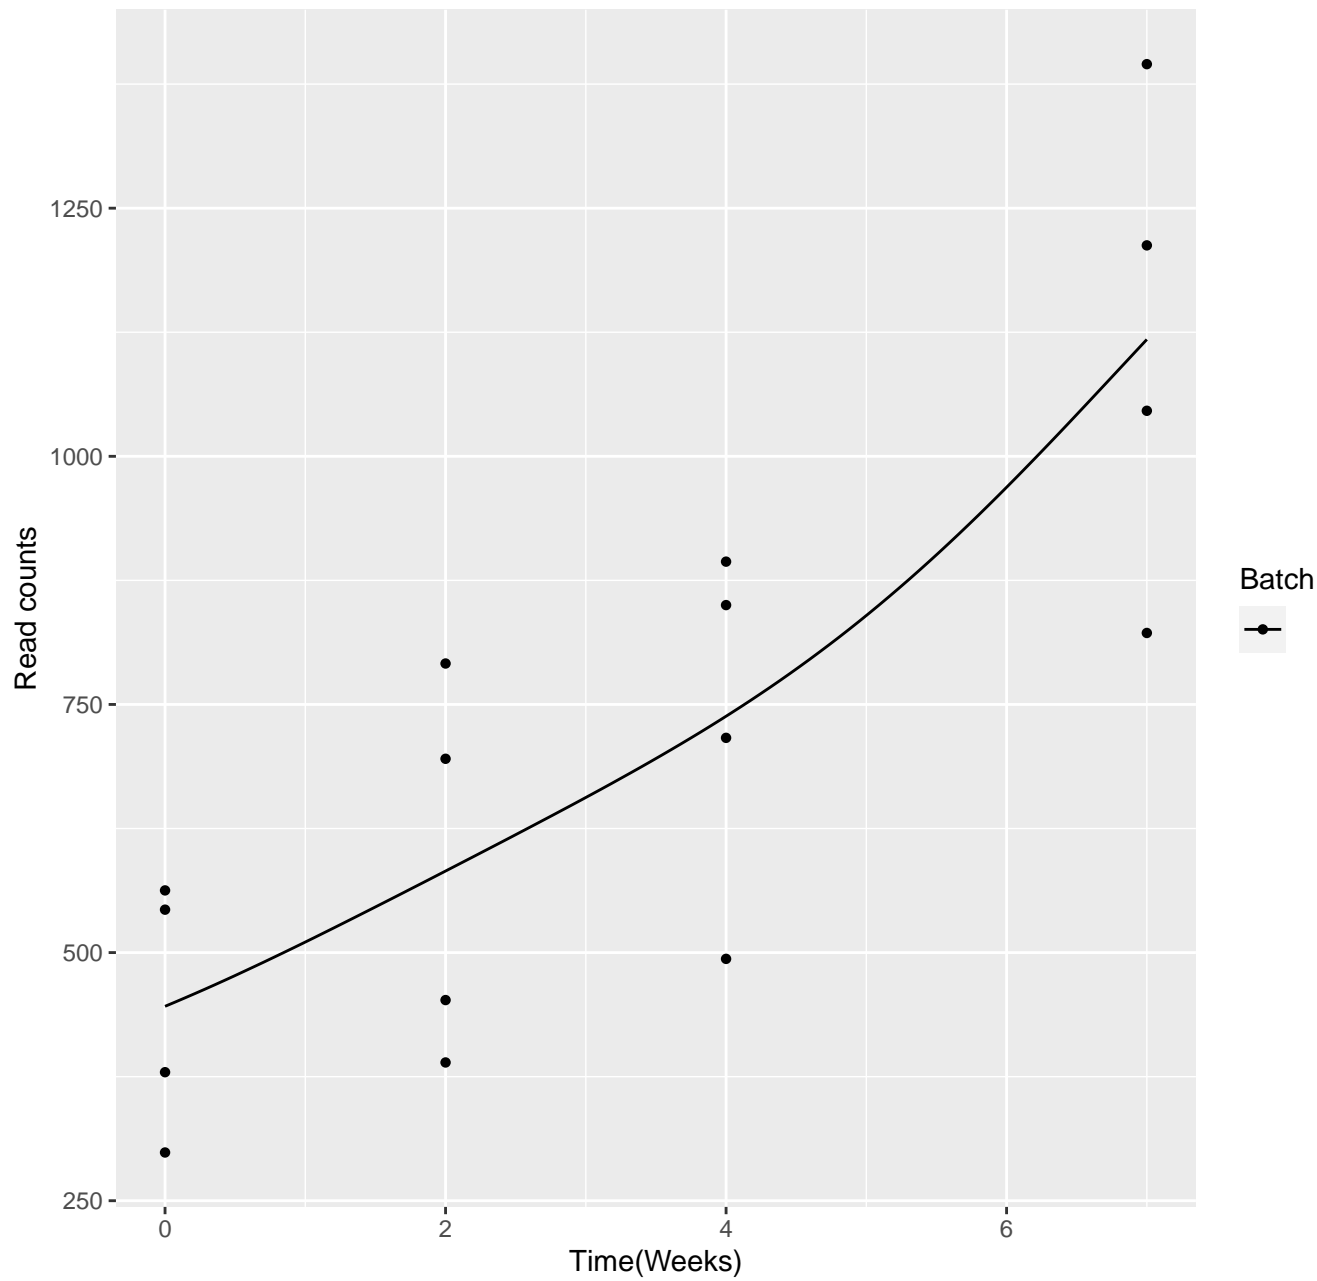

LOC100341013:  $\log_{10} q = -2.57$

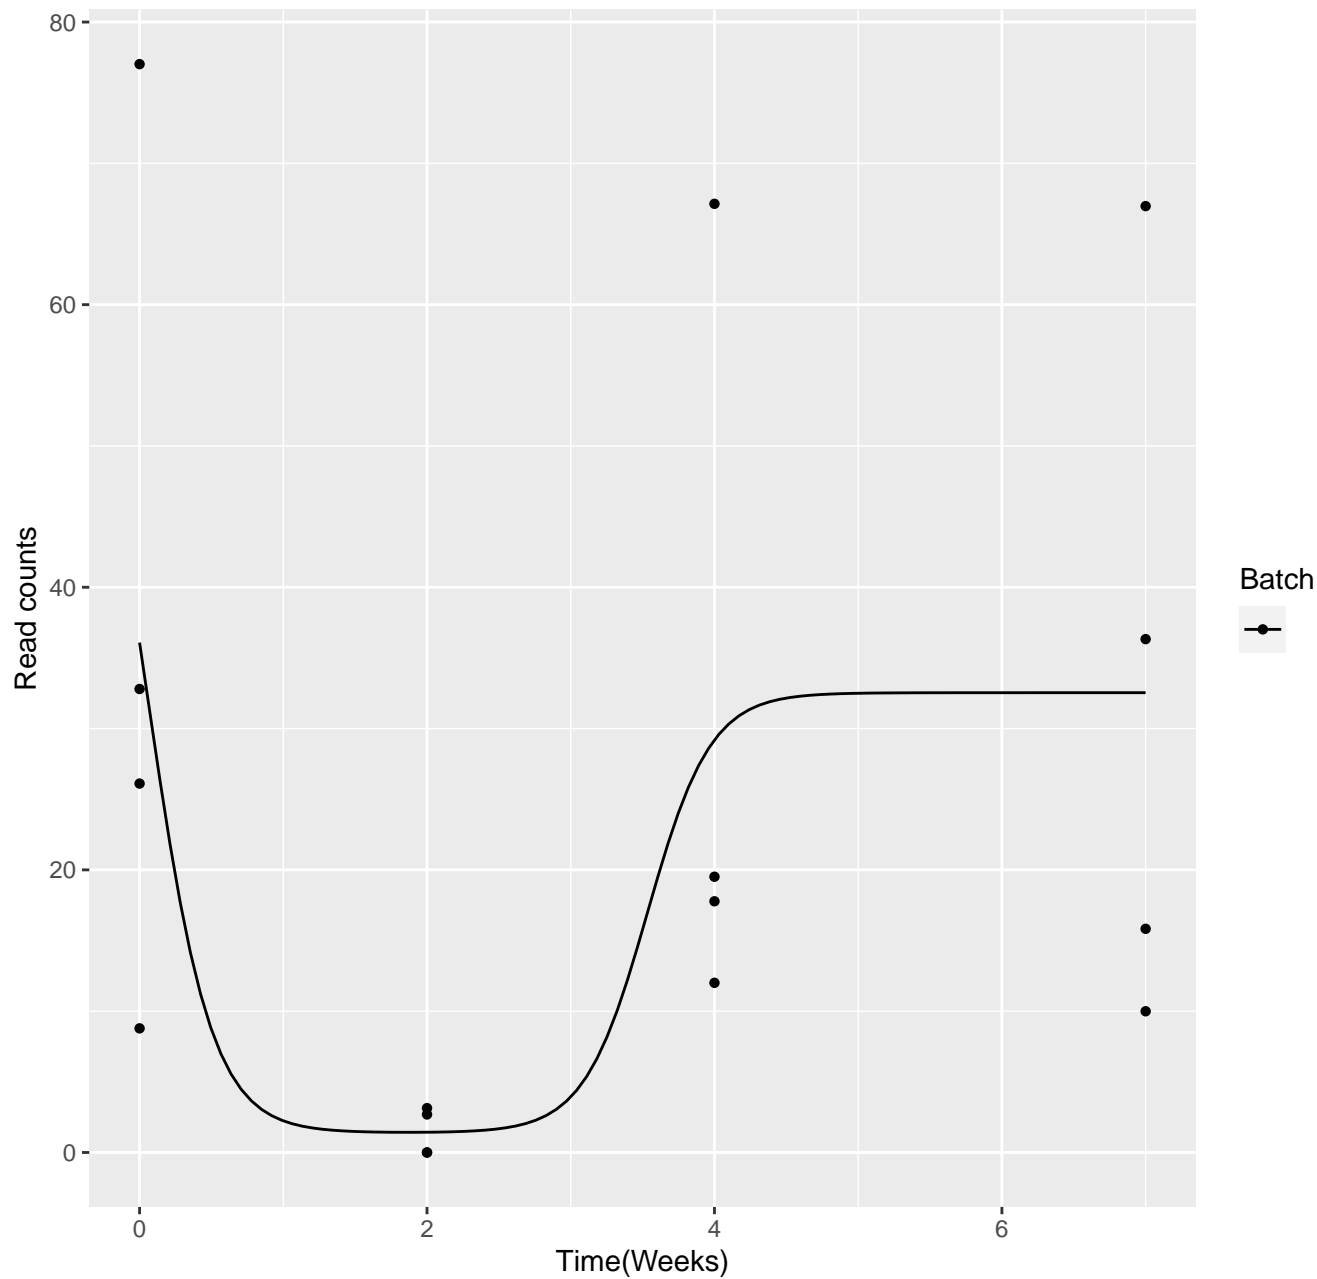

ASF1B:  $\log_{10} q = -2.57$

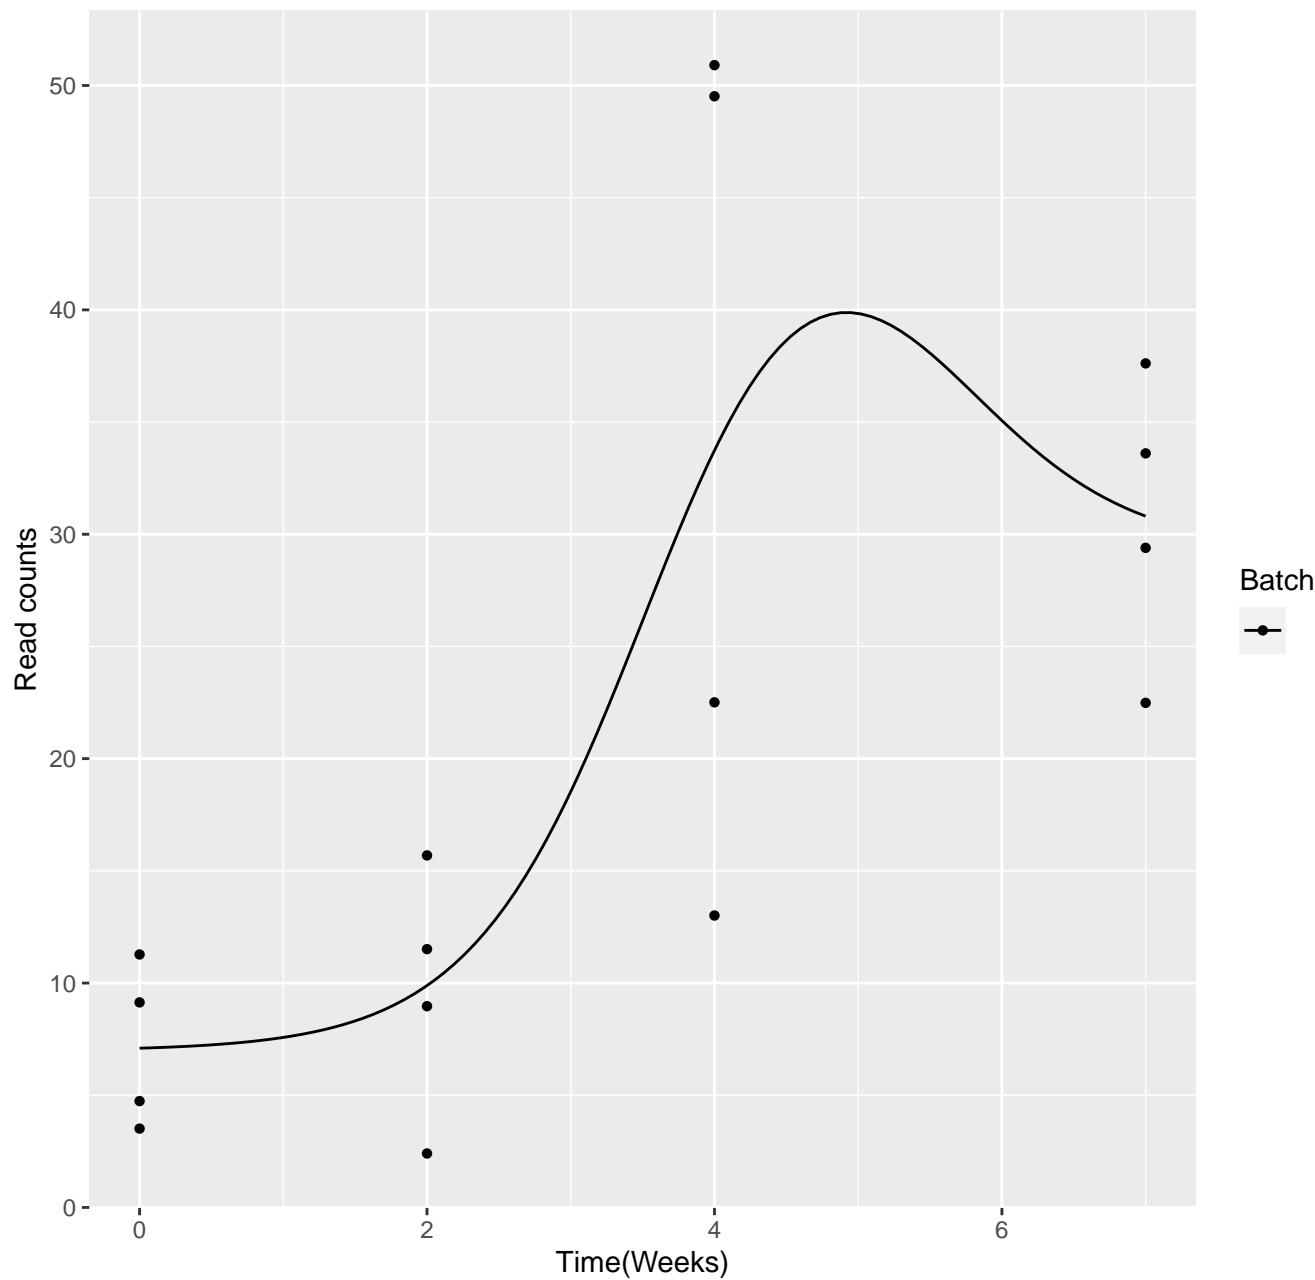

PALMD:  $\log_{10} q = -2.57$

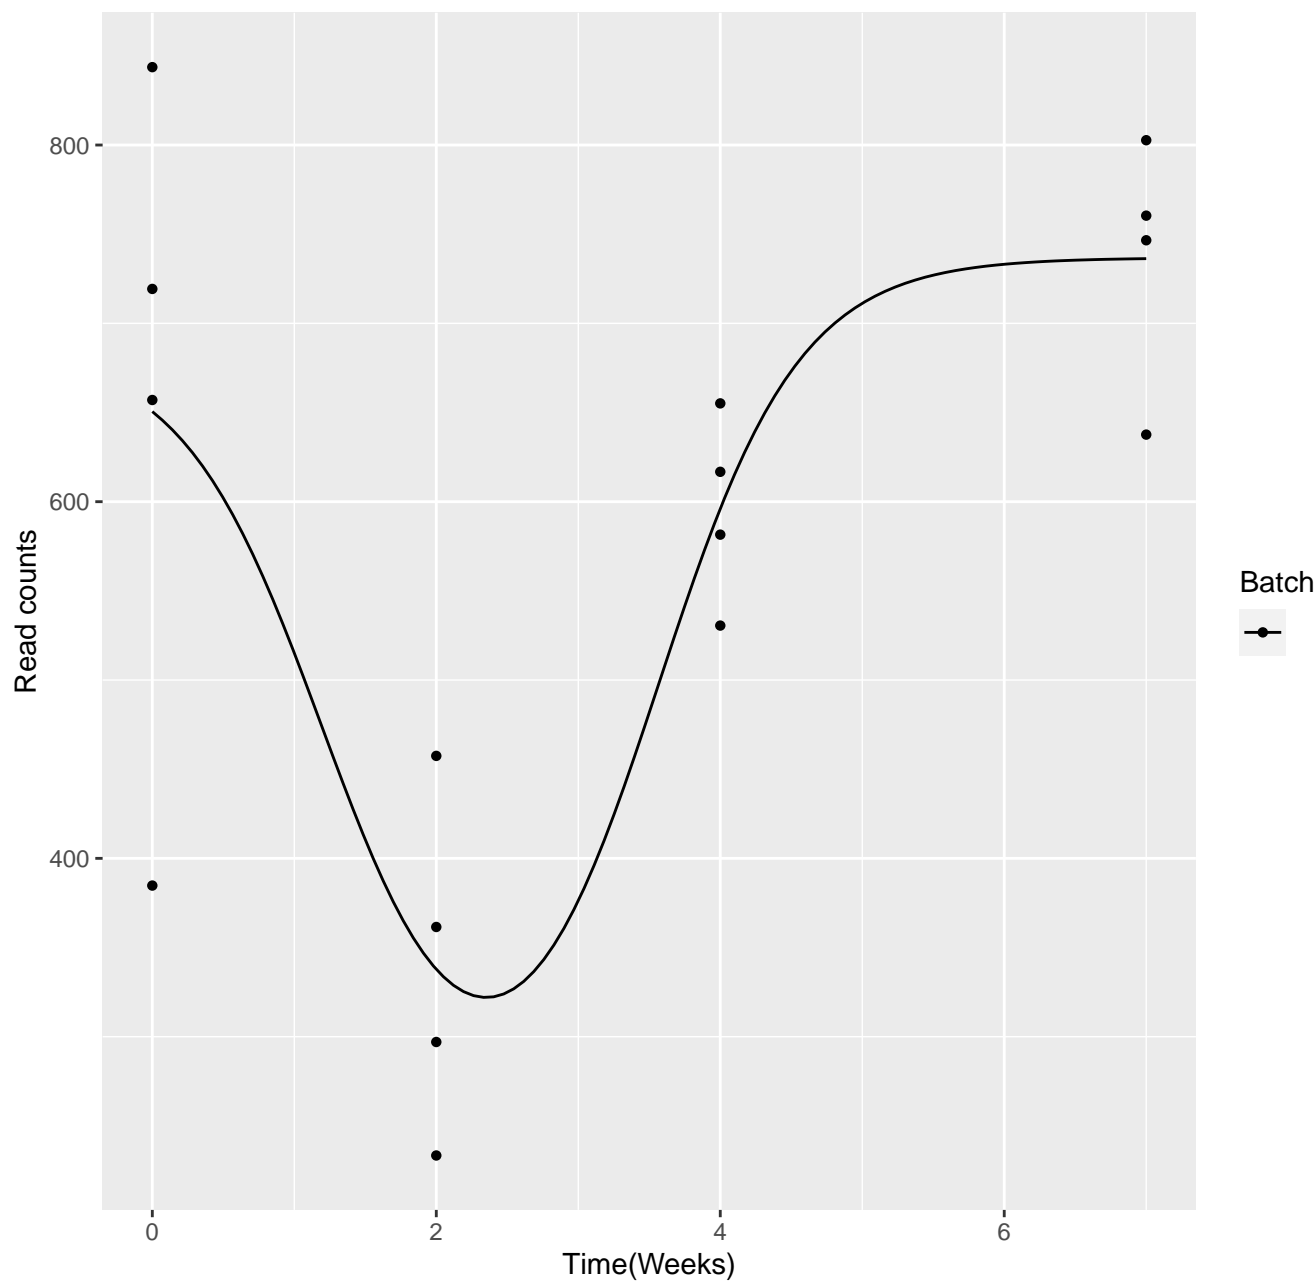

C1QL3:  $\log_{10} q = -2.57$

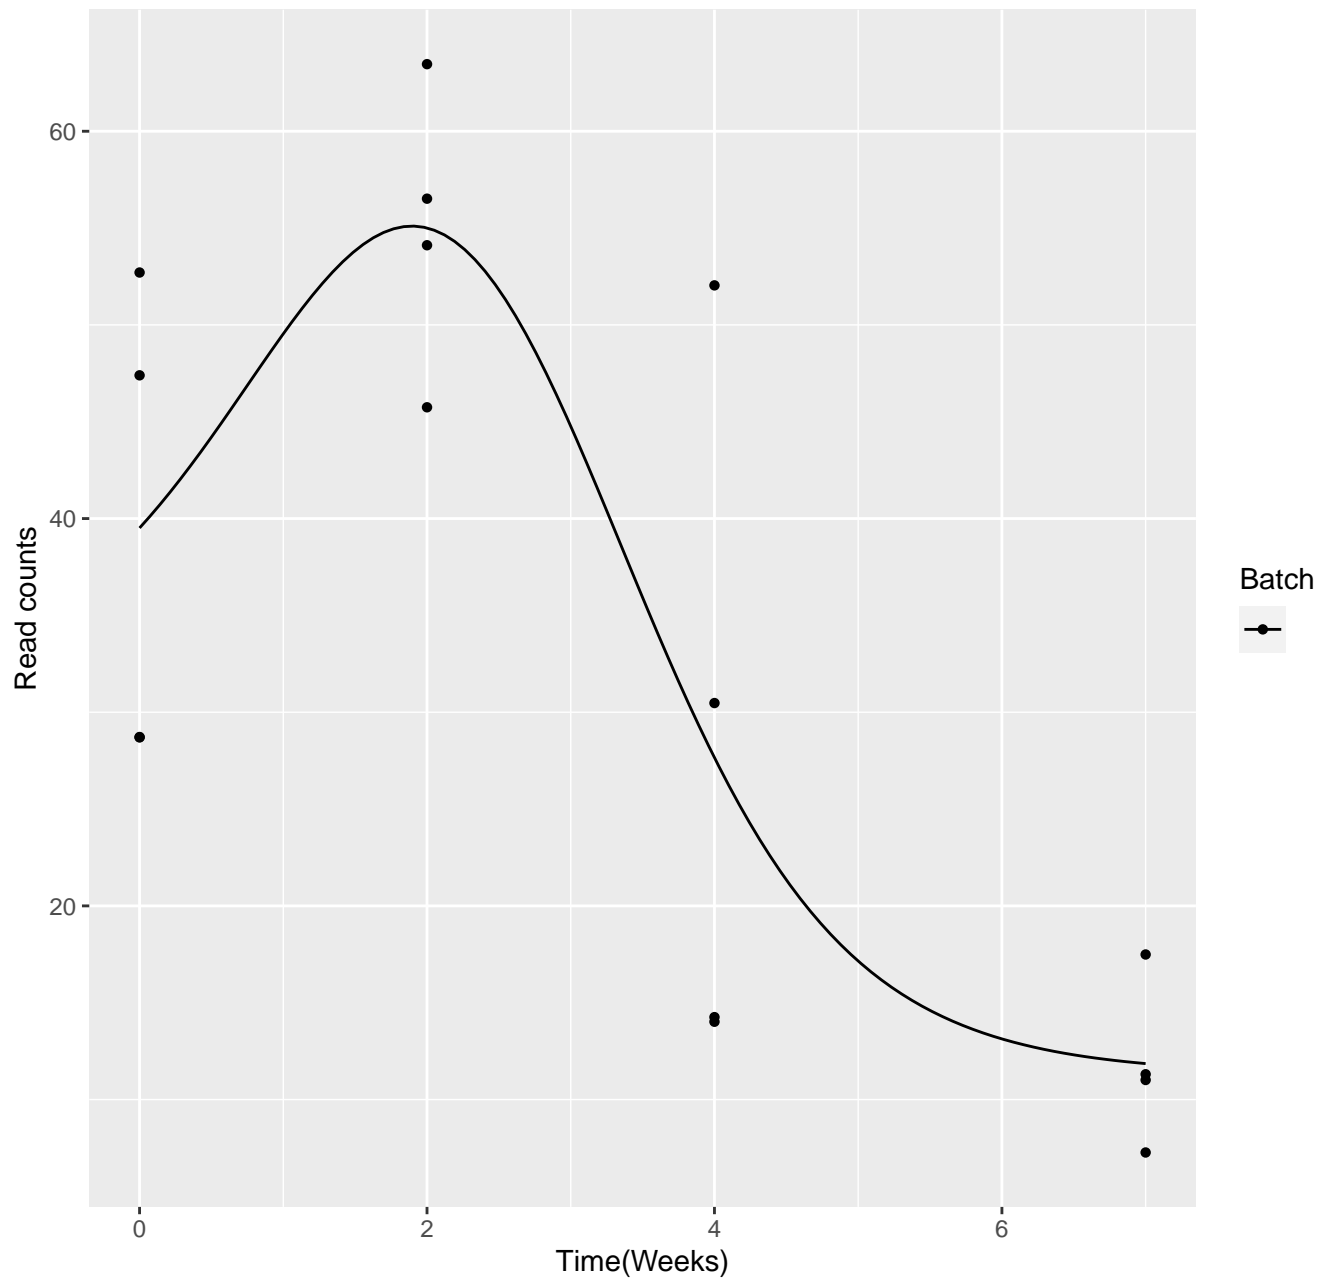

BOLA3:  $\log_{10} q = -2.57$

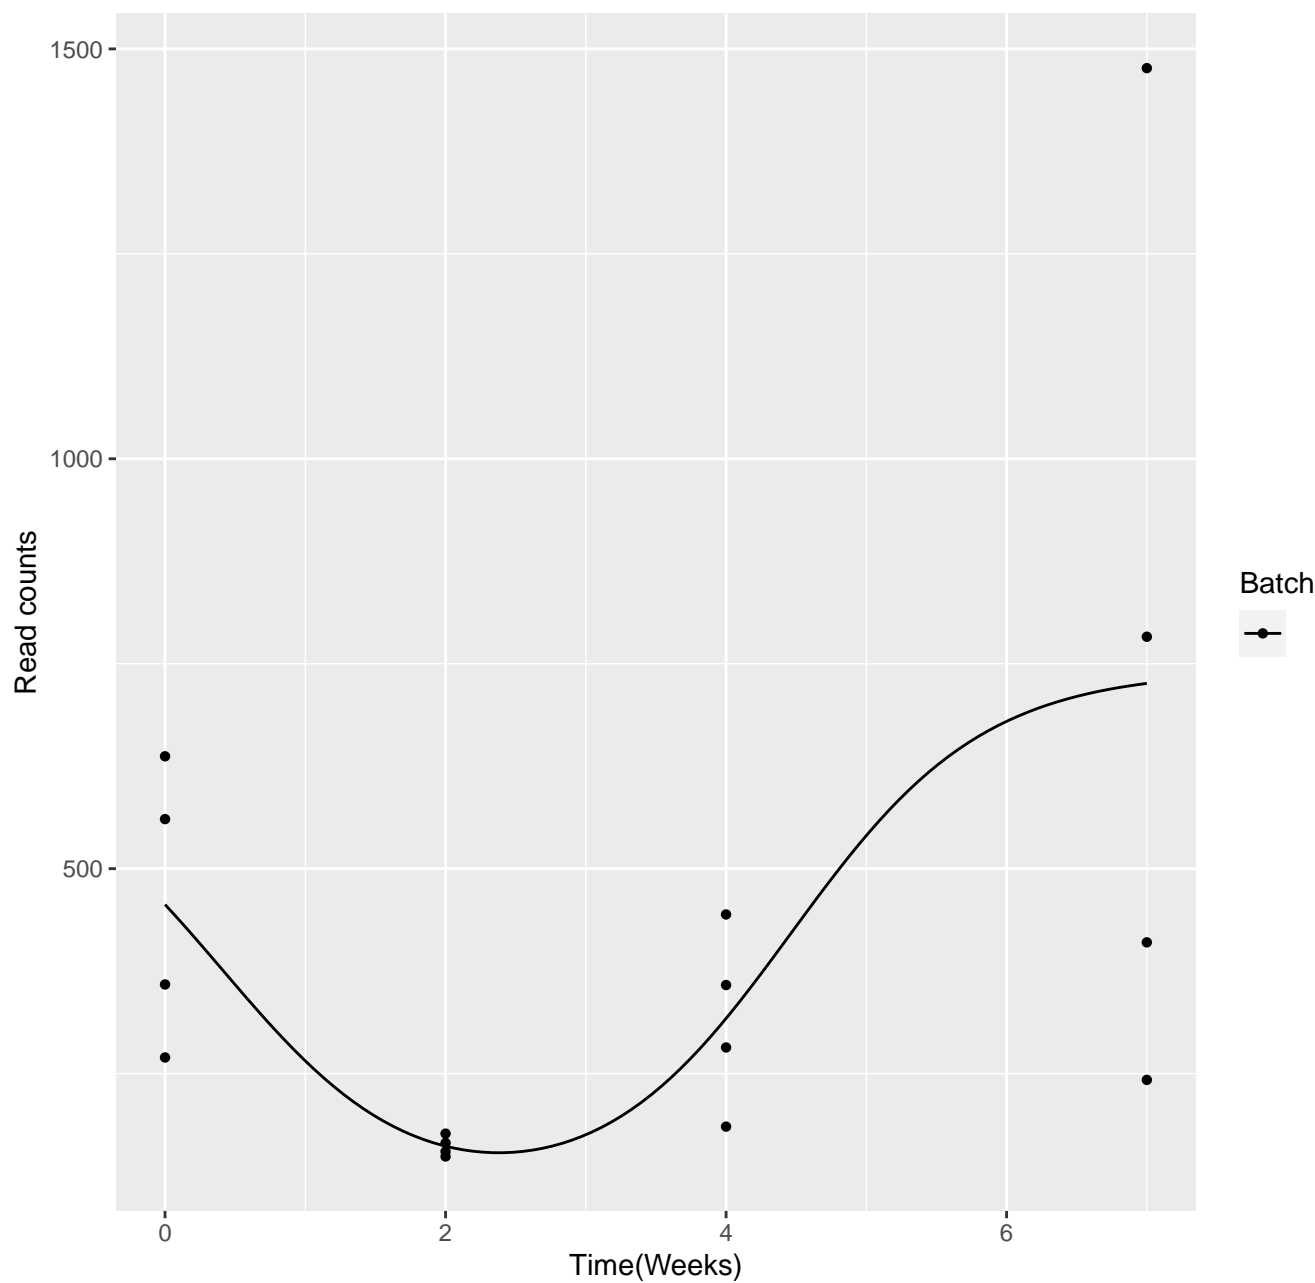

LOC100346670:  $\log_{10} q = -2.57$

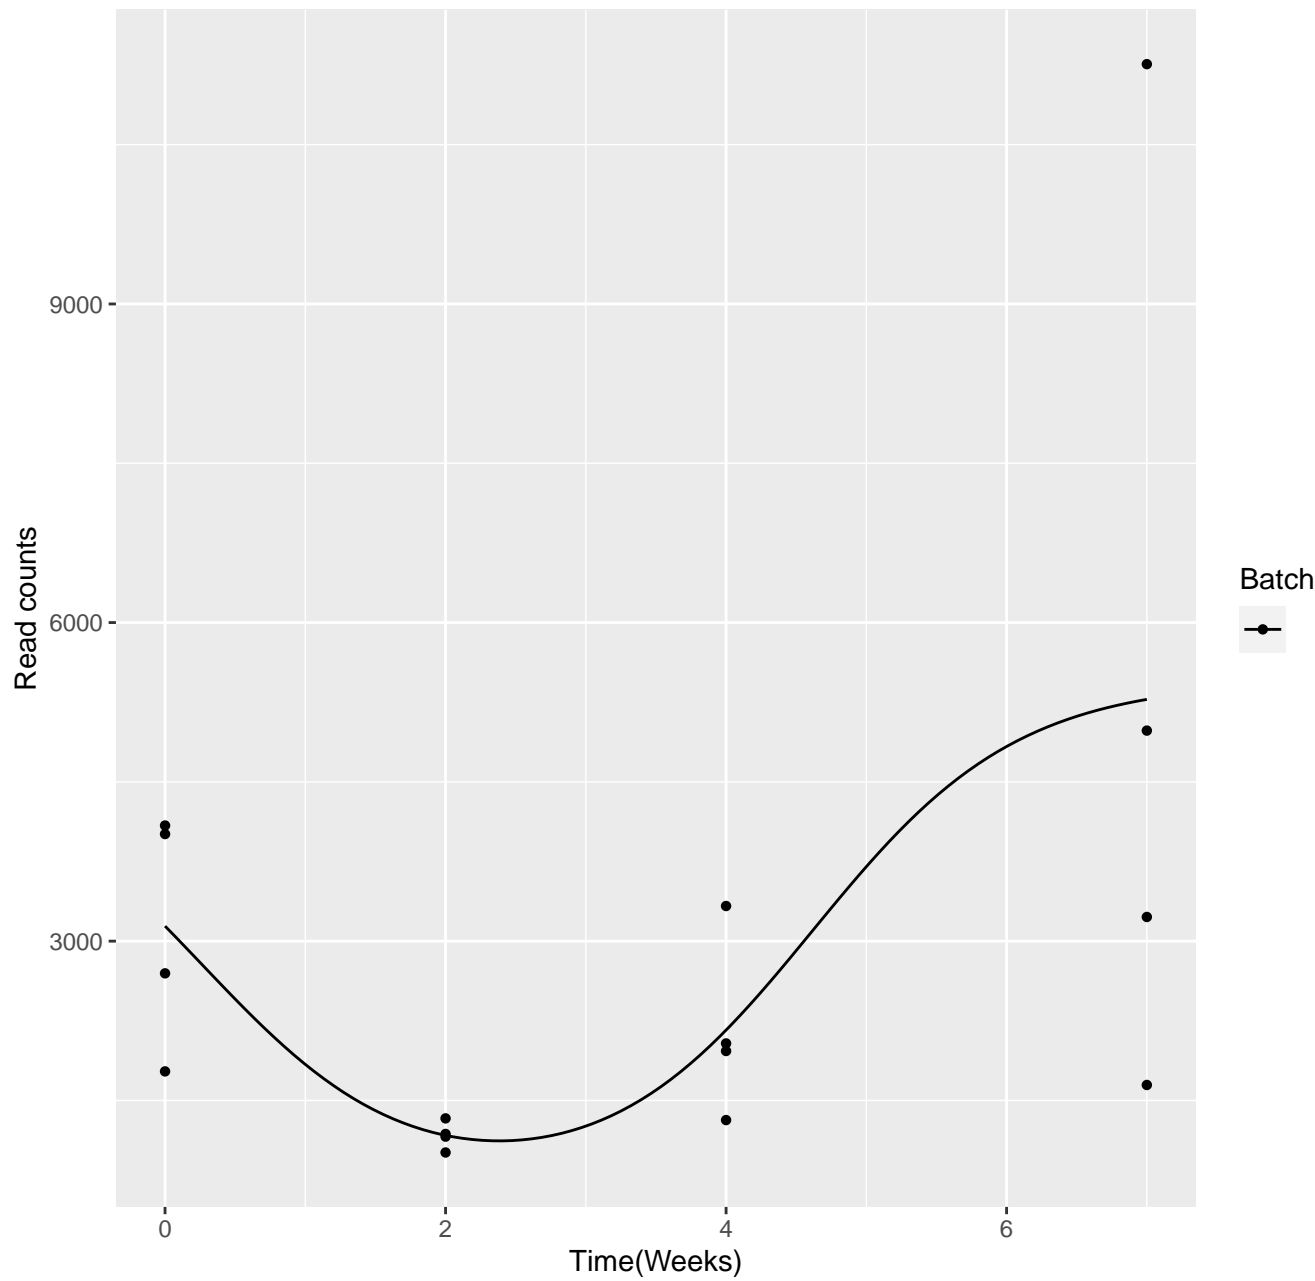

LOC127484662:  $\log_{10} q = -2.56$

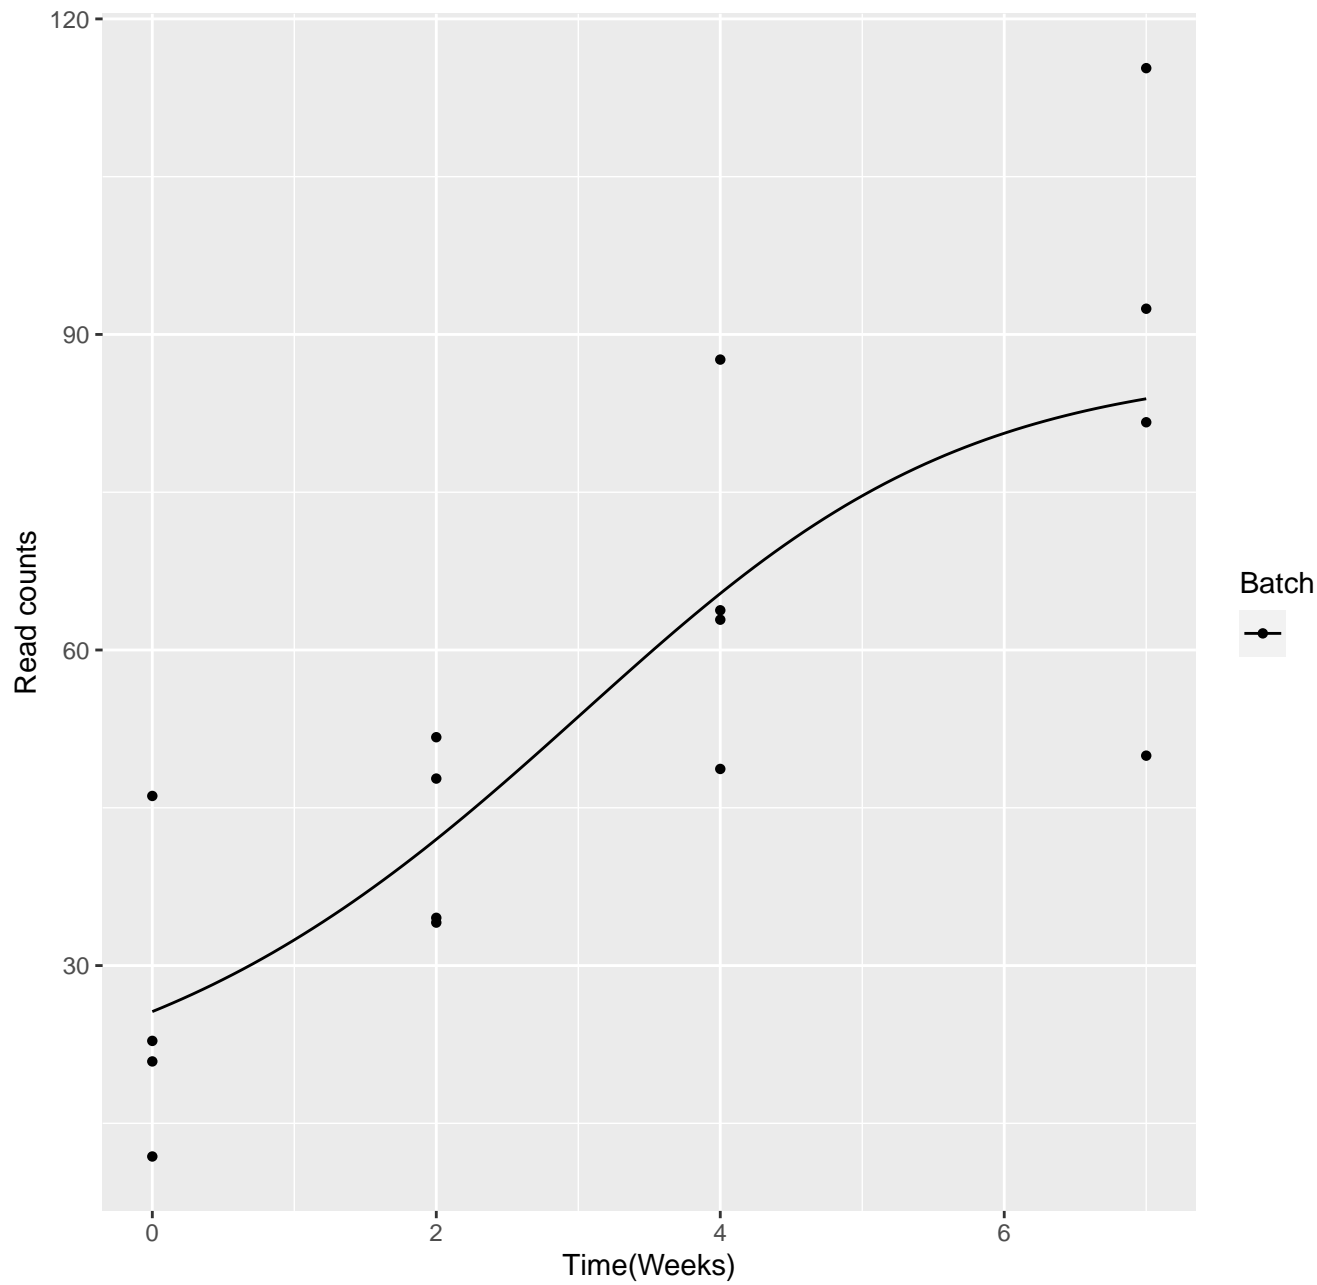



ARHGAP11A:  $\log_{10} q = -2.55$

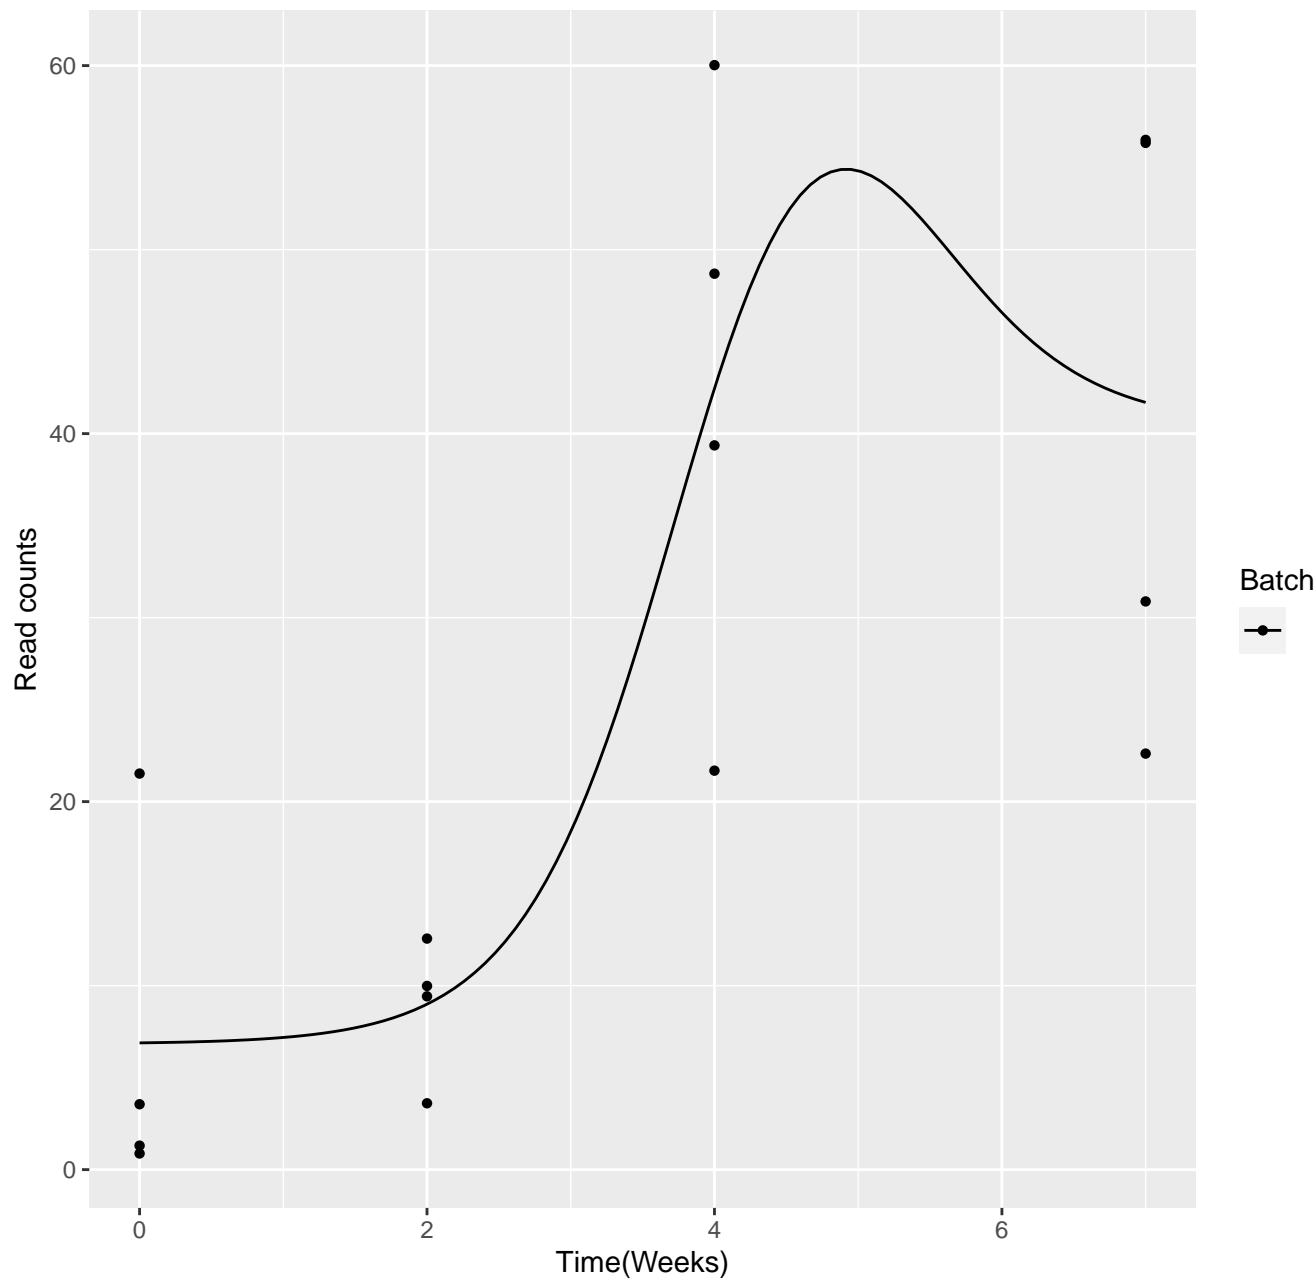

RN18S:  $\log_{10} q = -2.55$

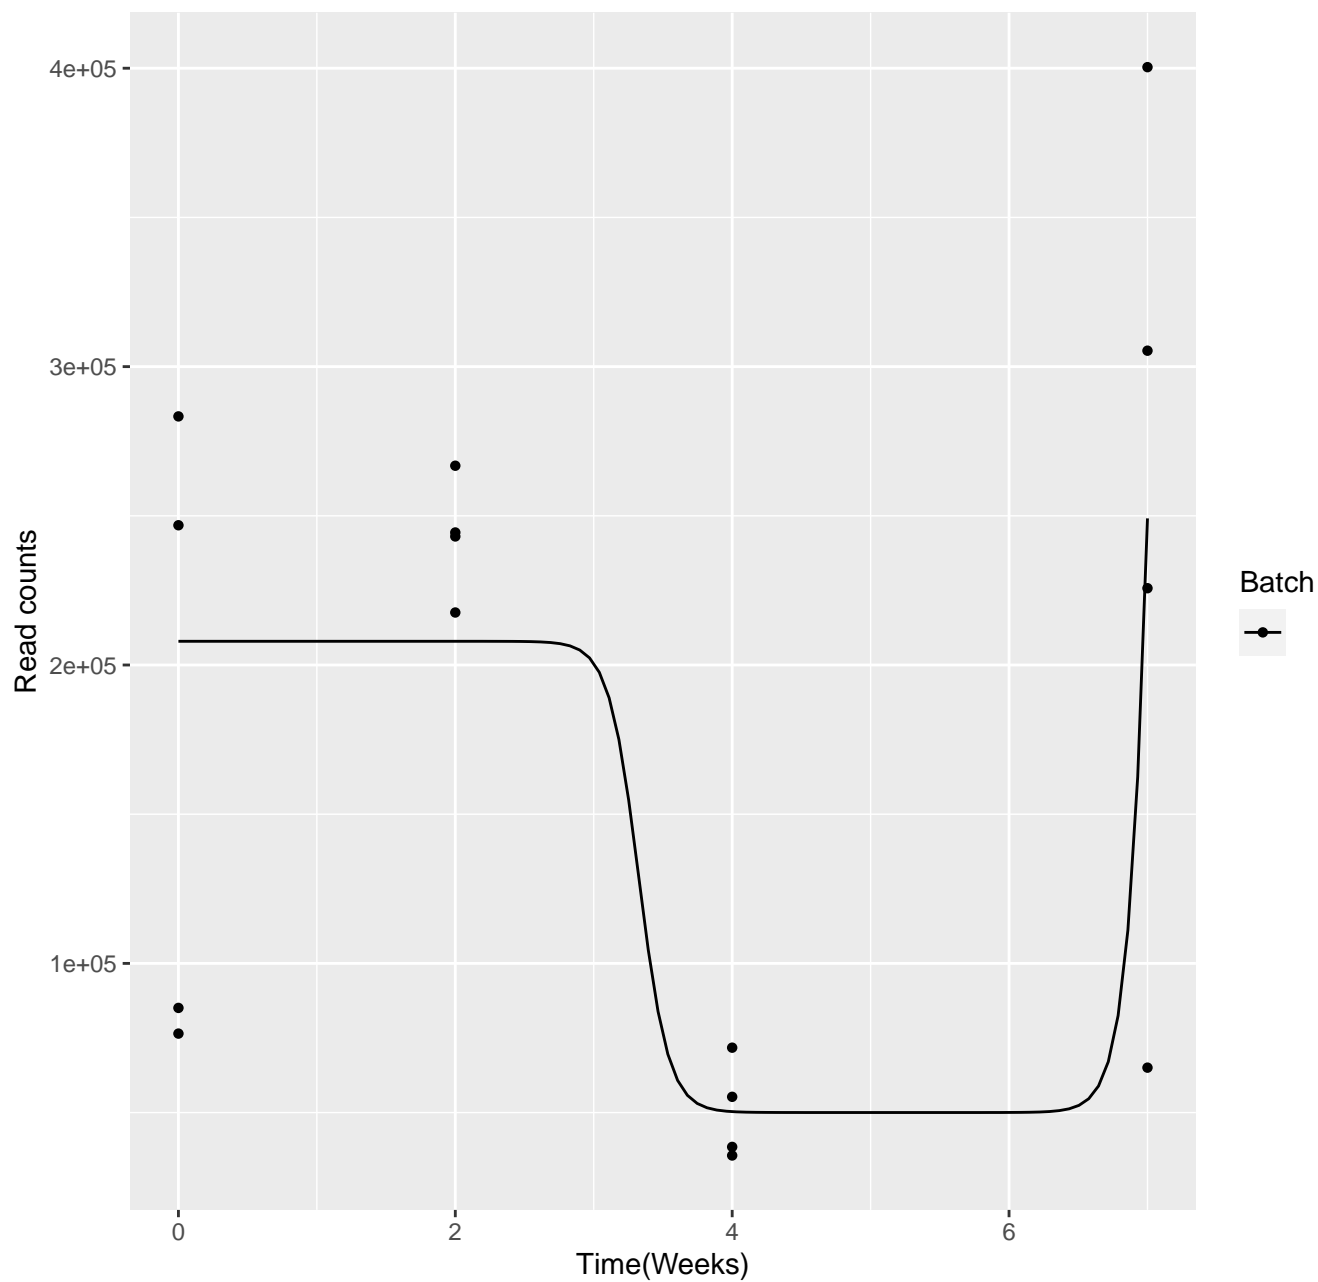

LOC127485529:  $\log_{10} q = -2.55$

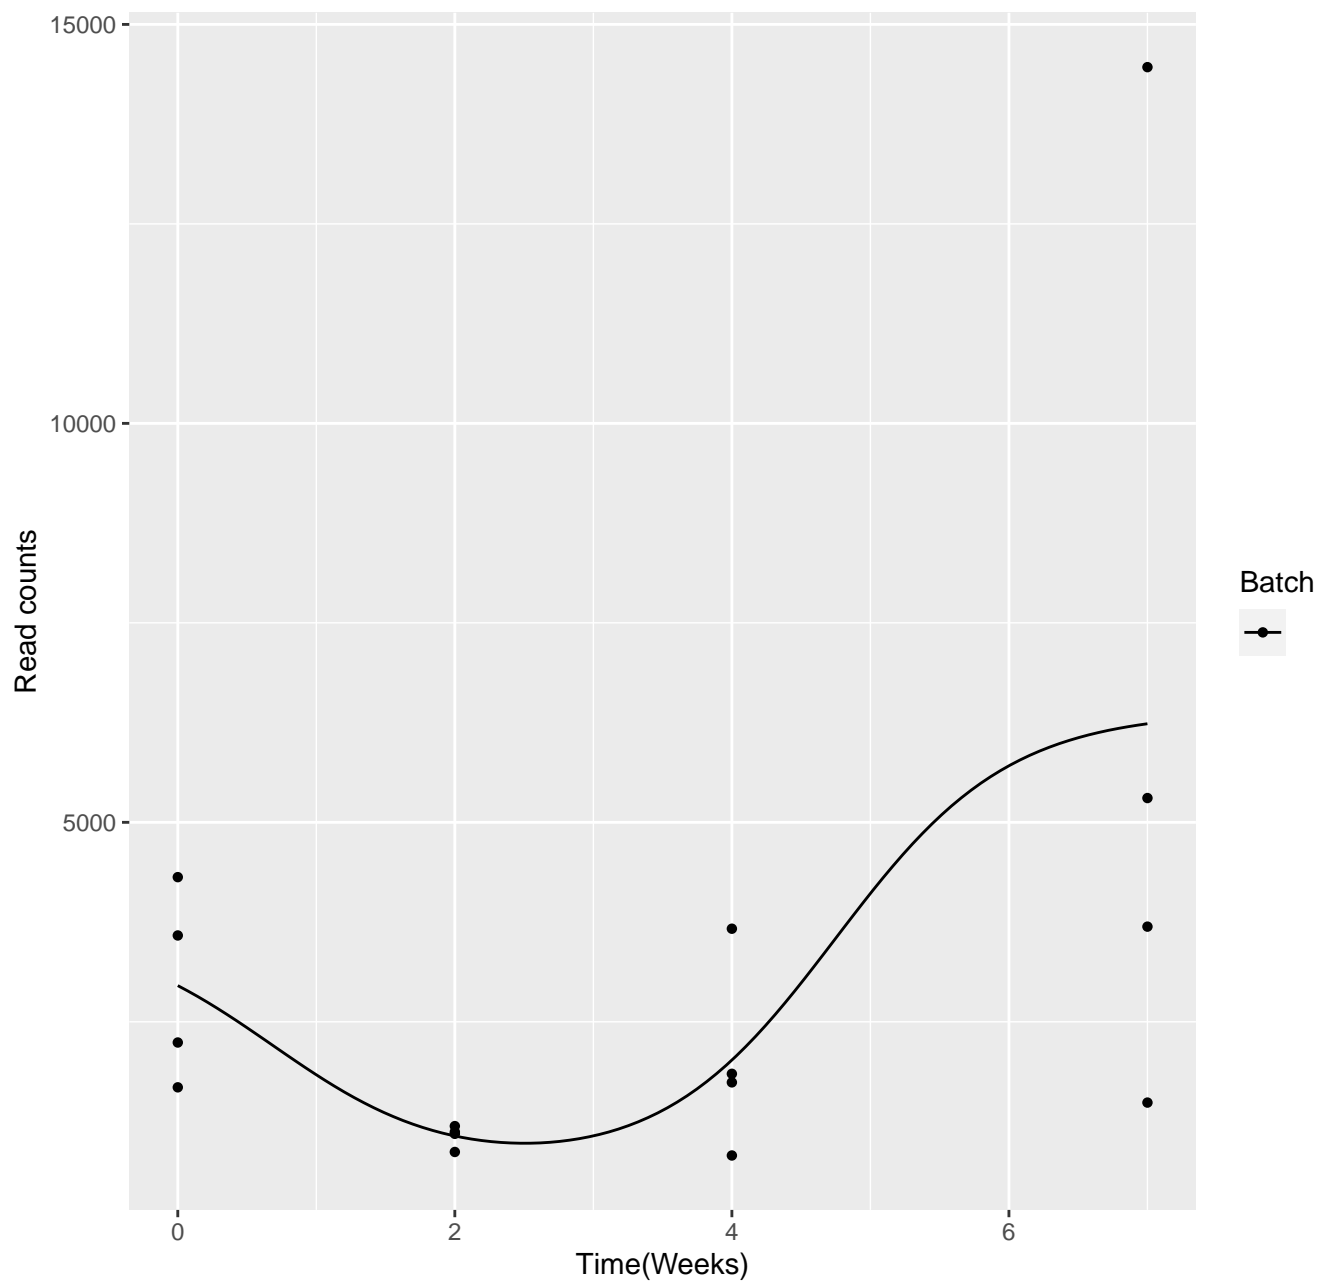

NOTCH2:  $\log_{10} q = -2.55$

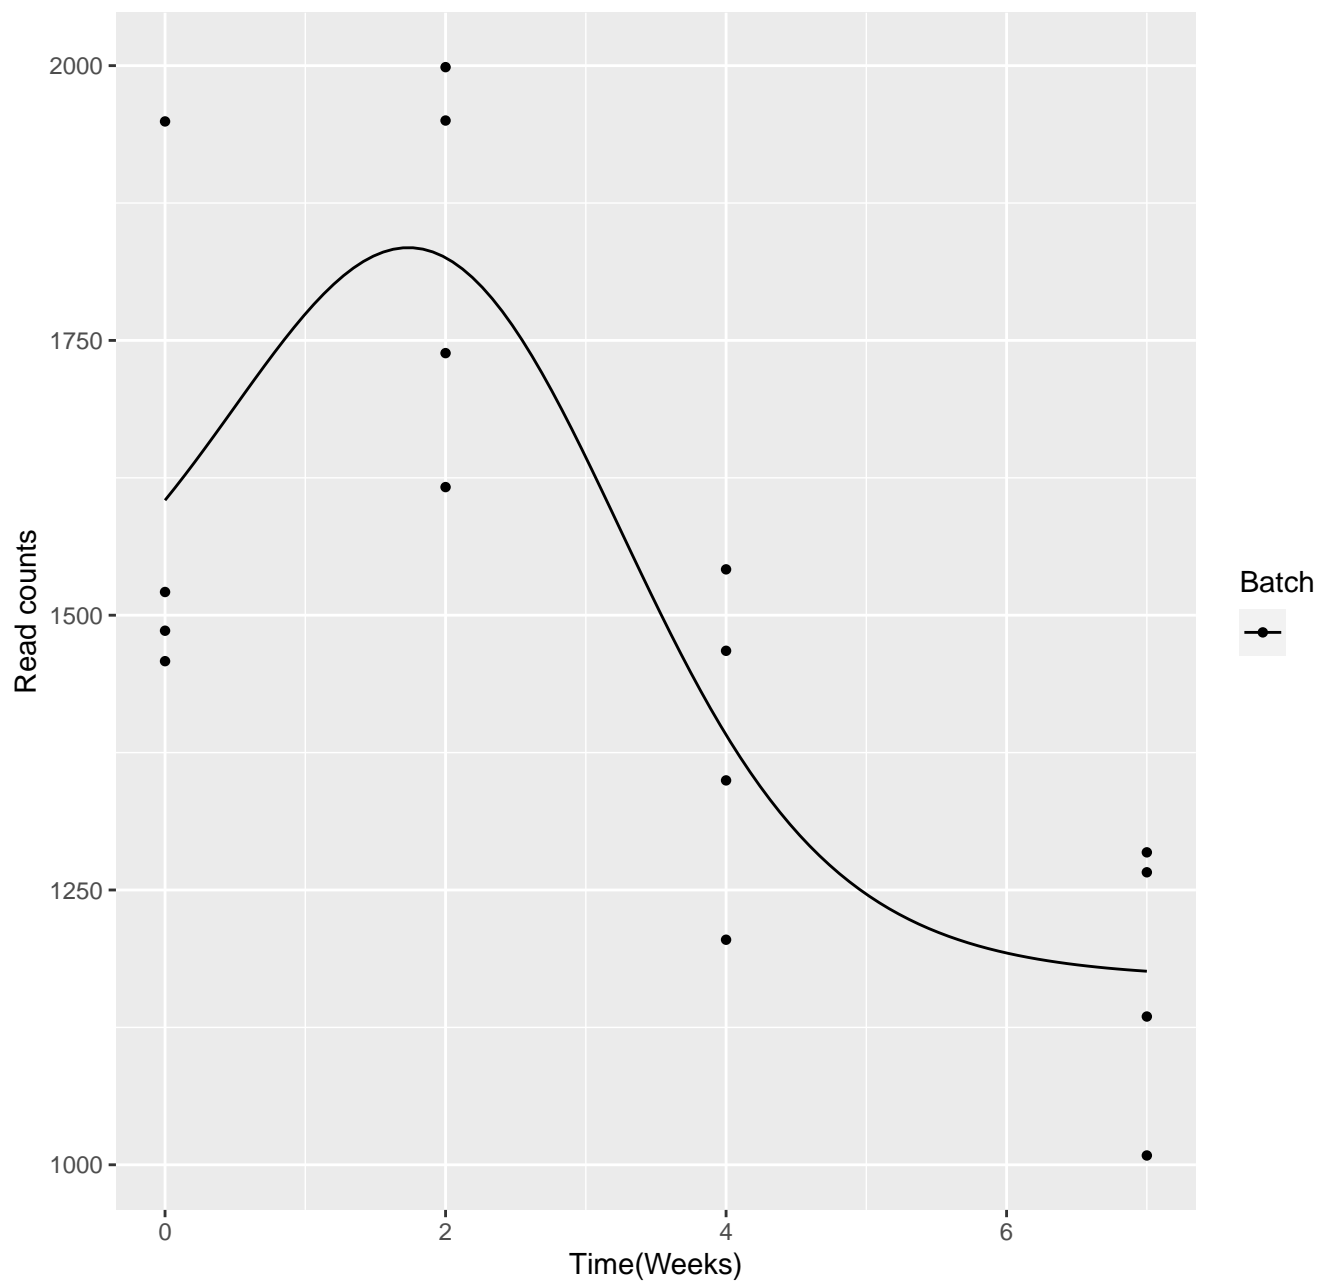

LOC103351810:  $\log_{10} q = -2.55$

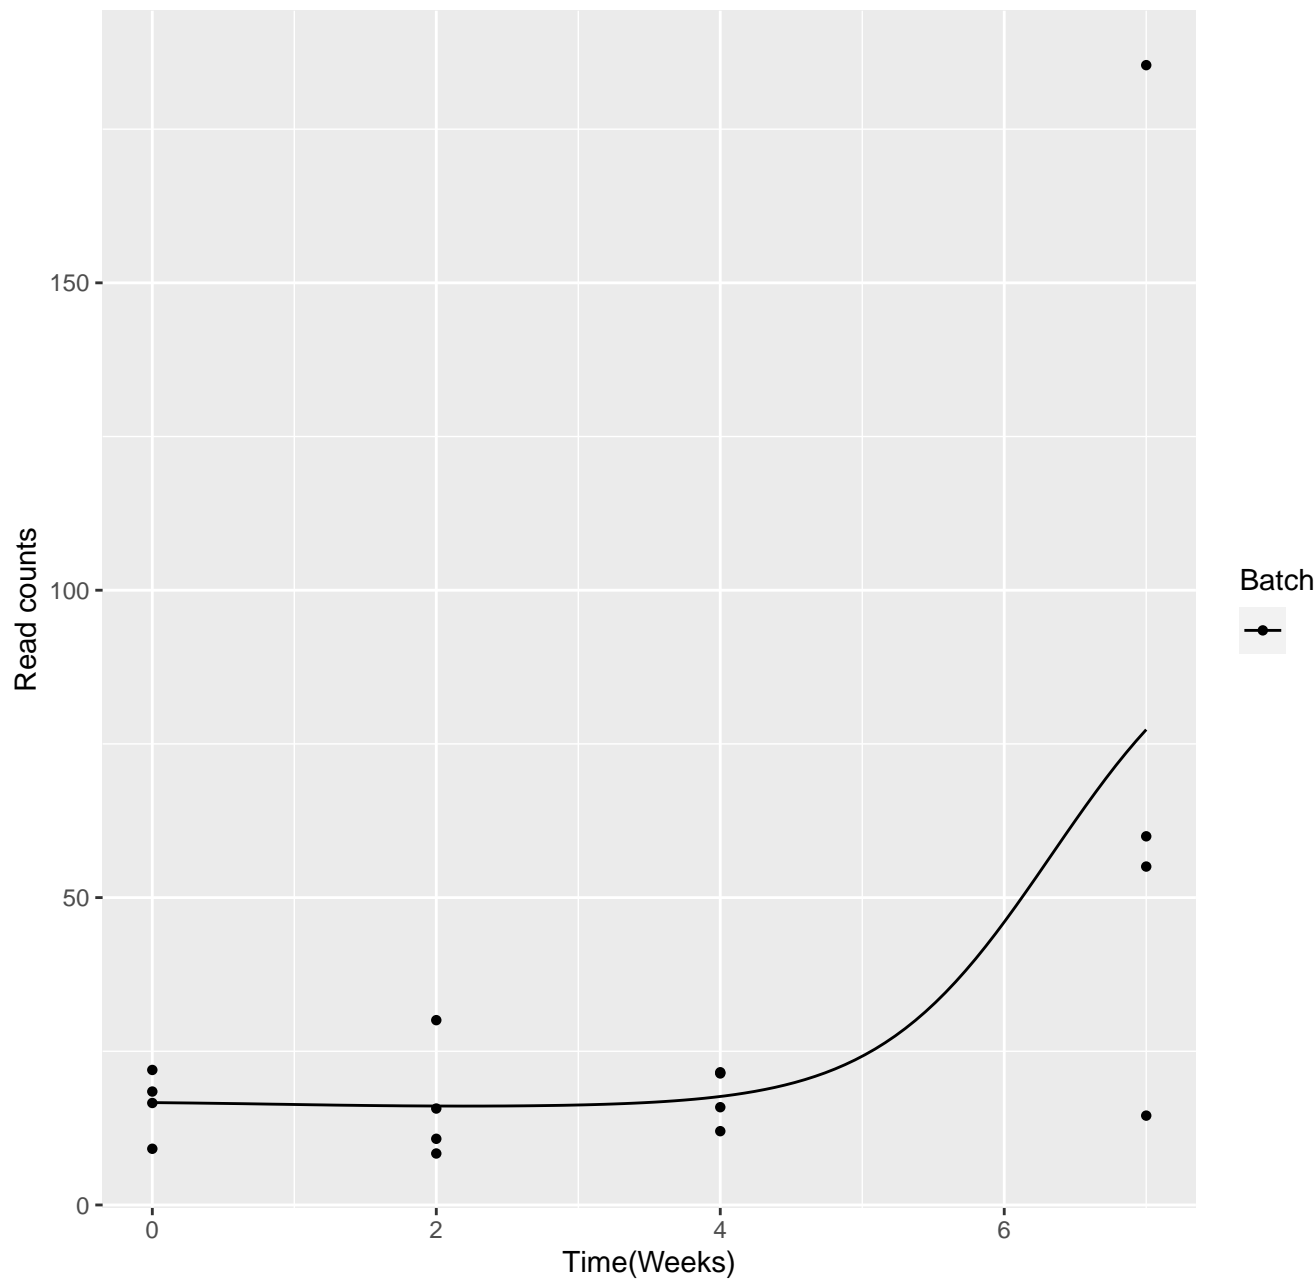

CLEC7A:  $\log_{10} q = -2.55$

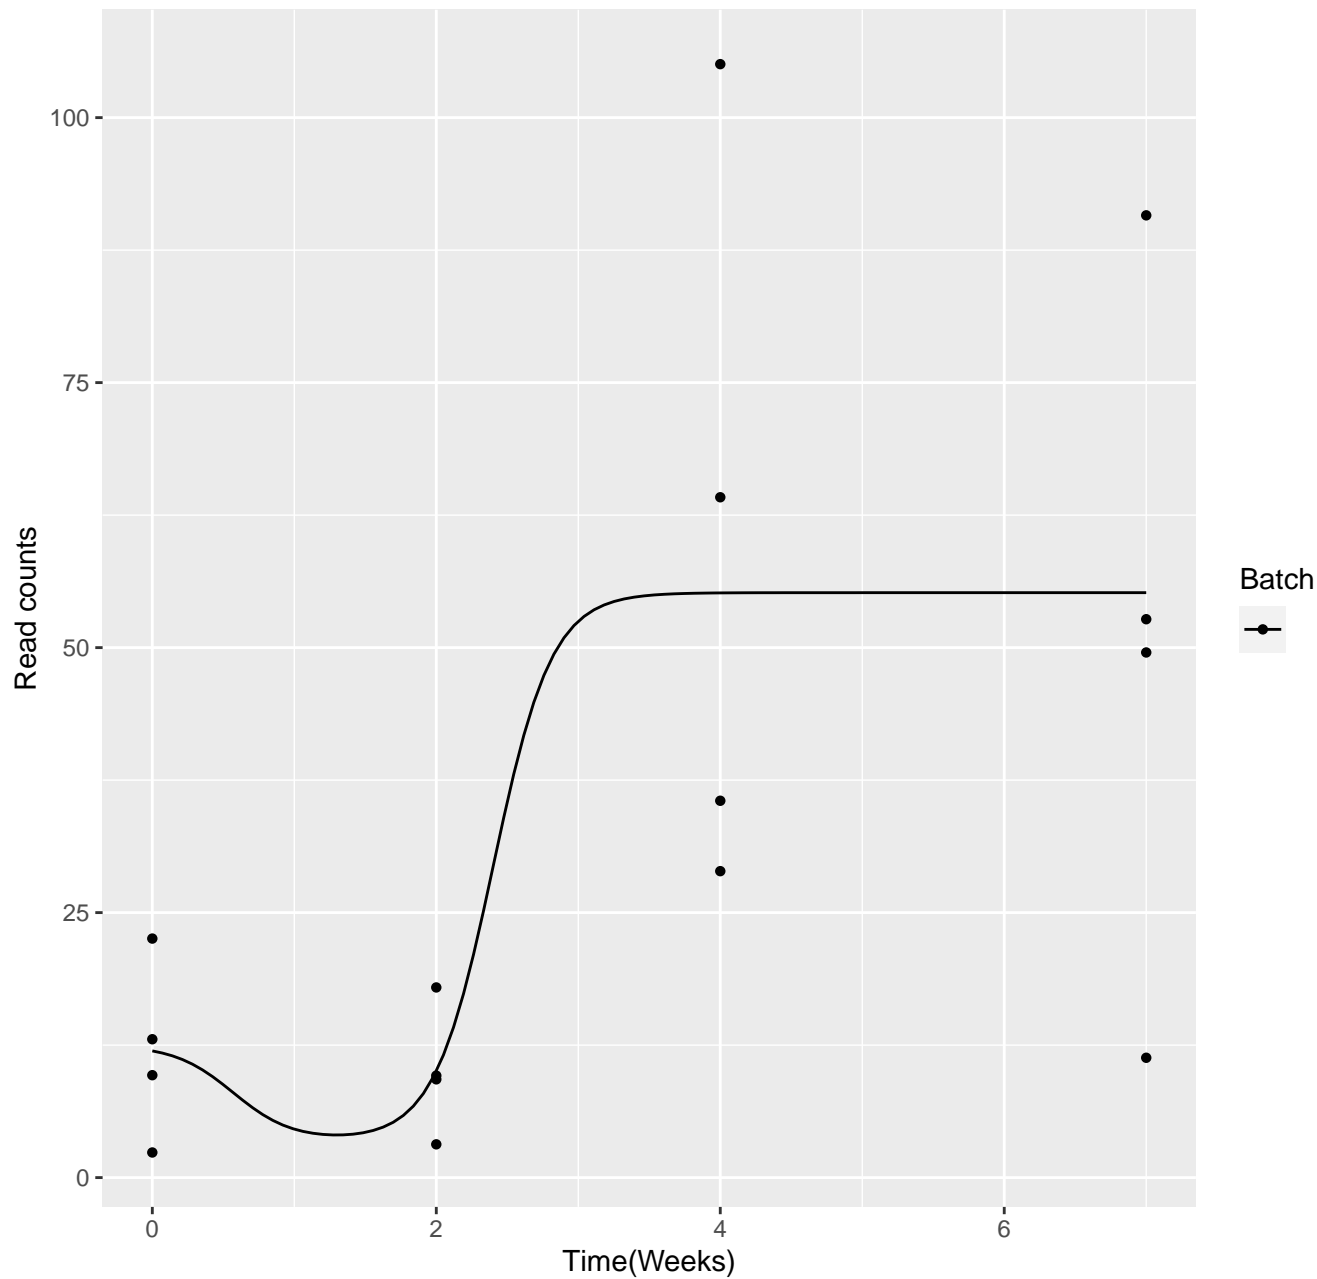

ZHX3:  $\log_{10} q = -2.55$

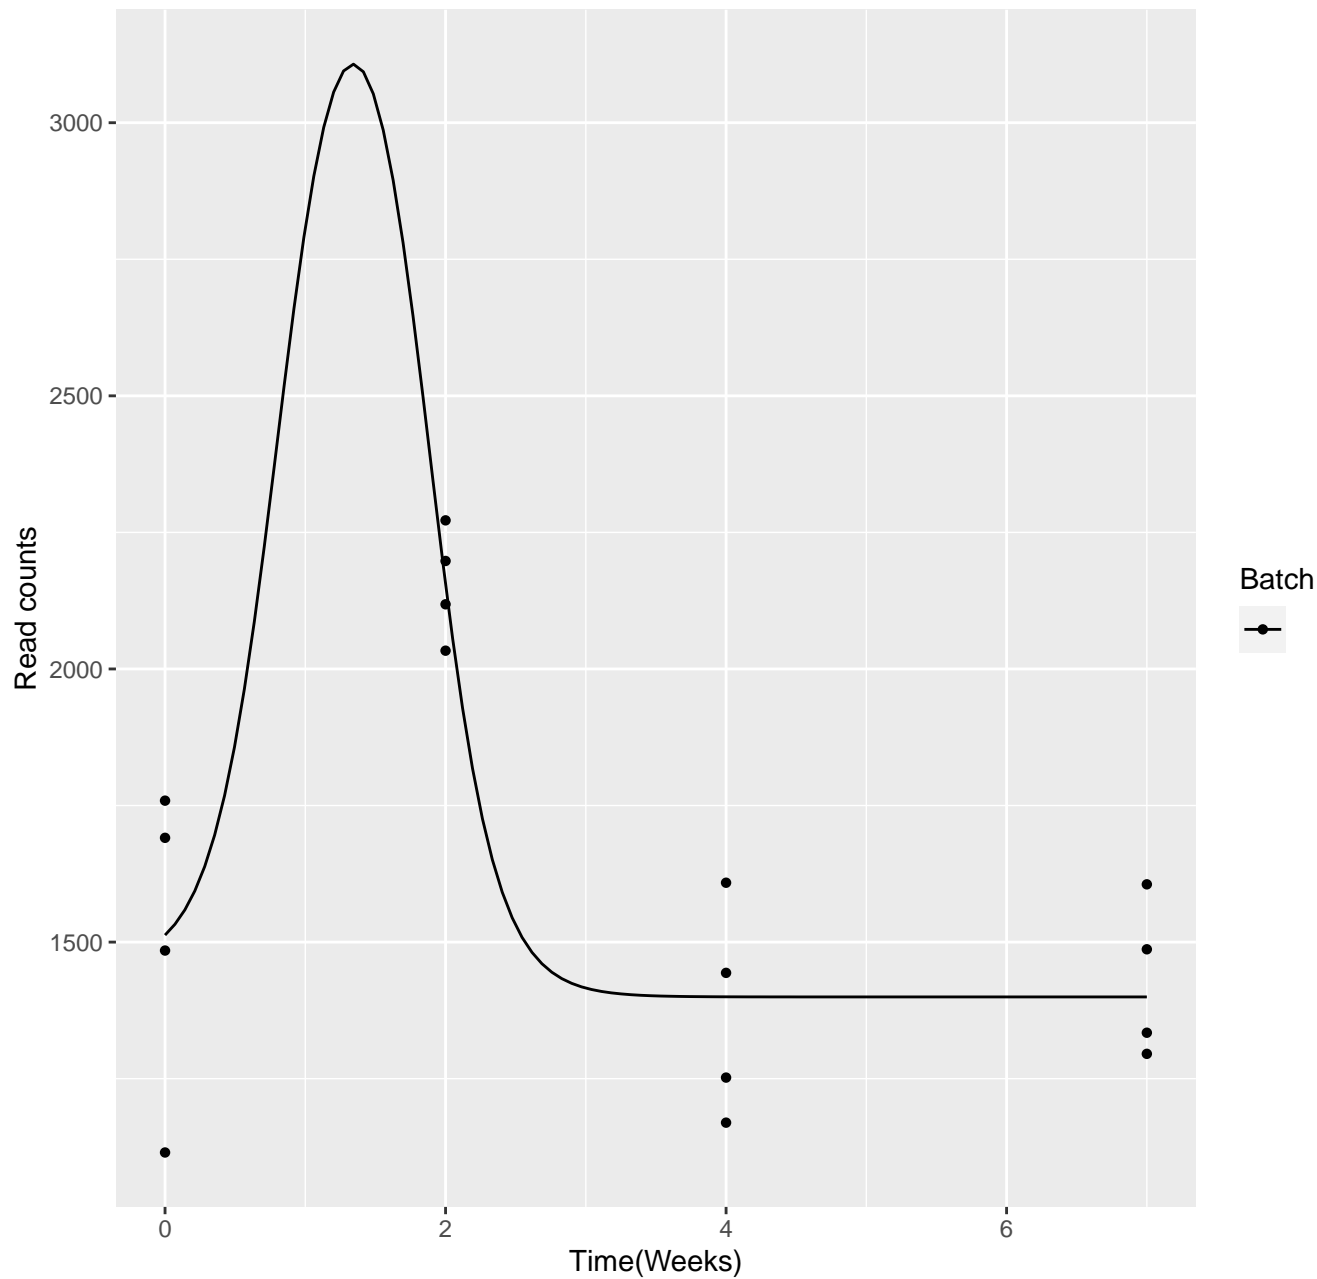

VEGFA:  $\log_{10} q = -2.54$

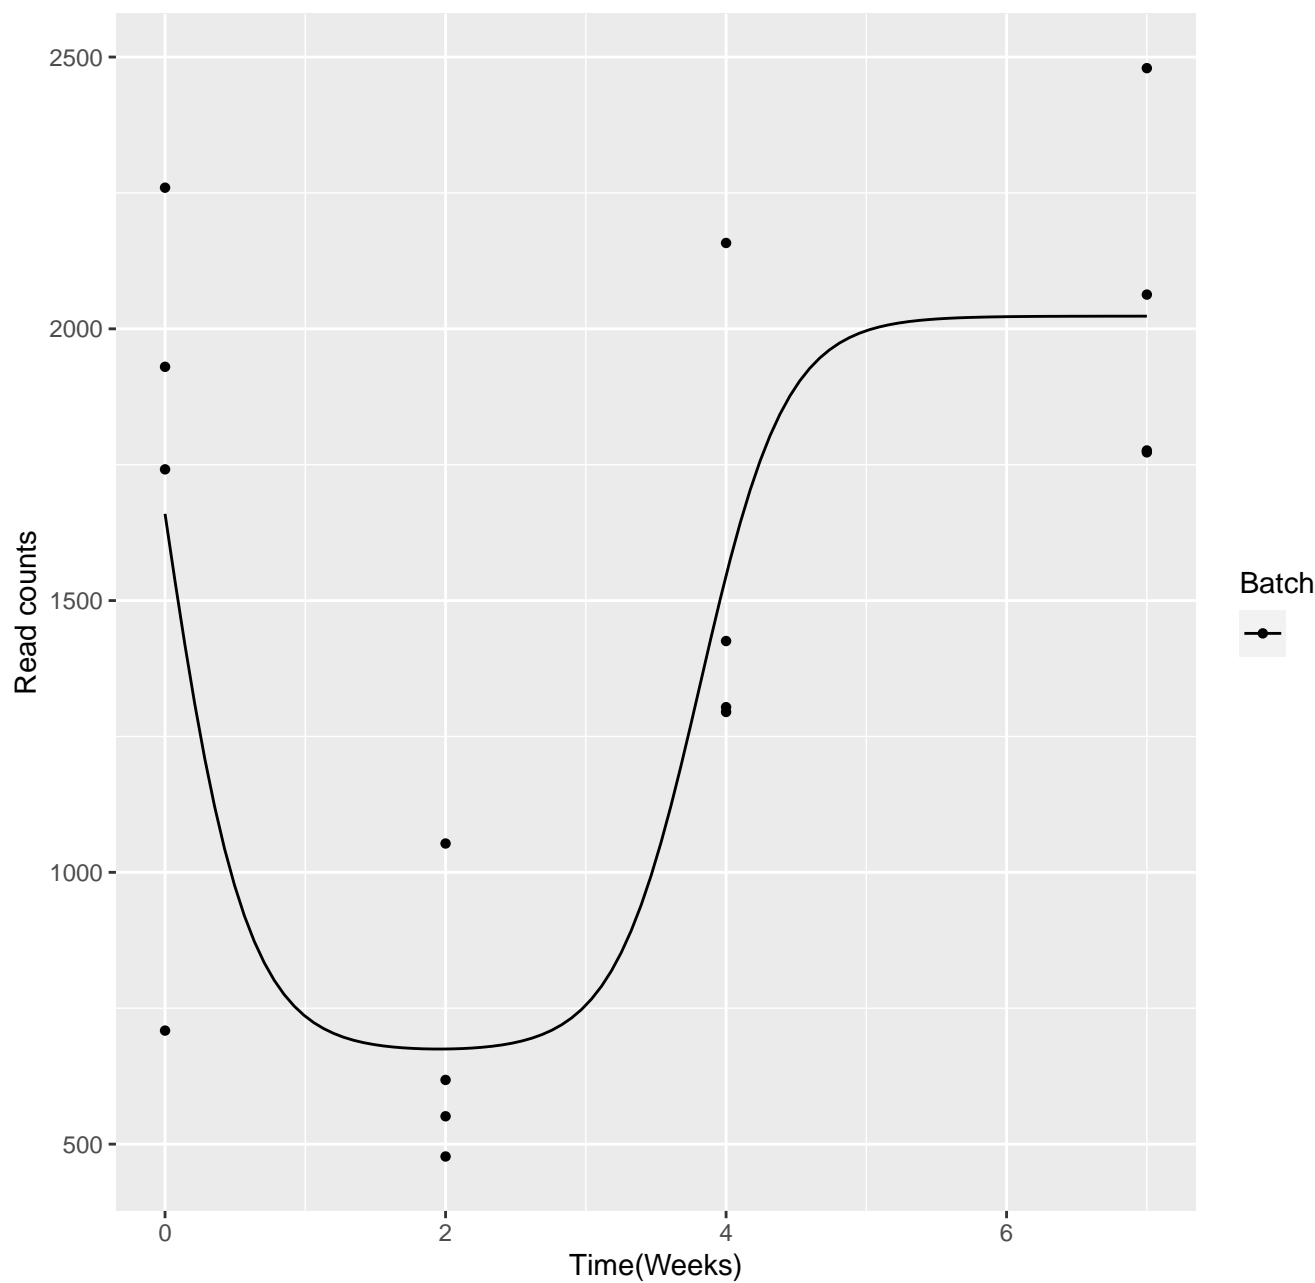



KCNIP1:  $\log_{10} q = -2.54$

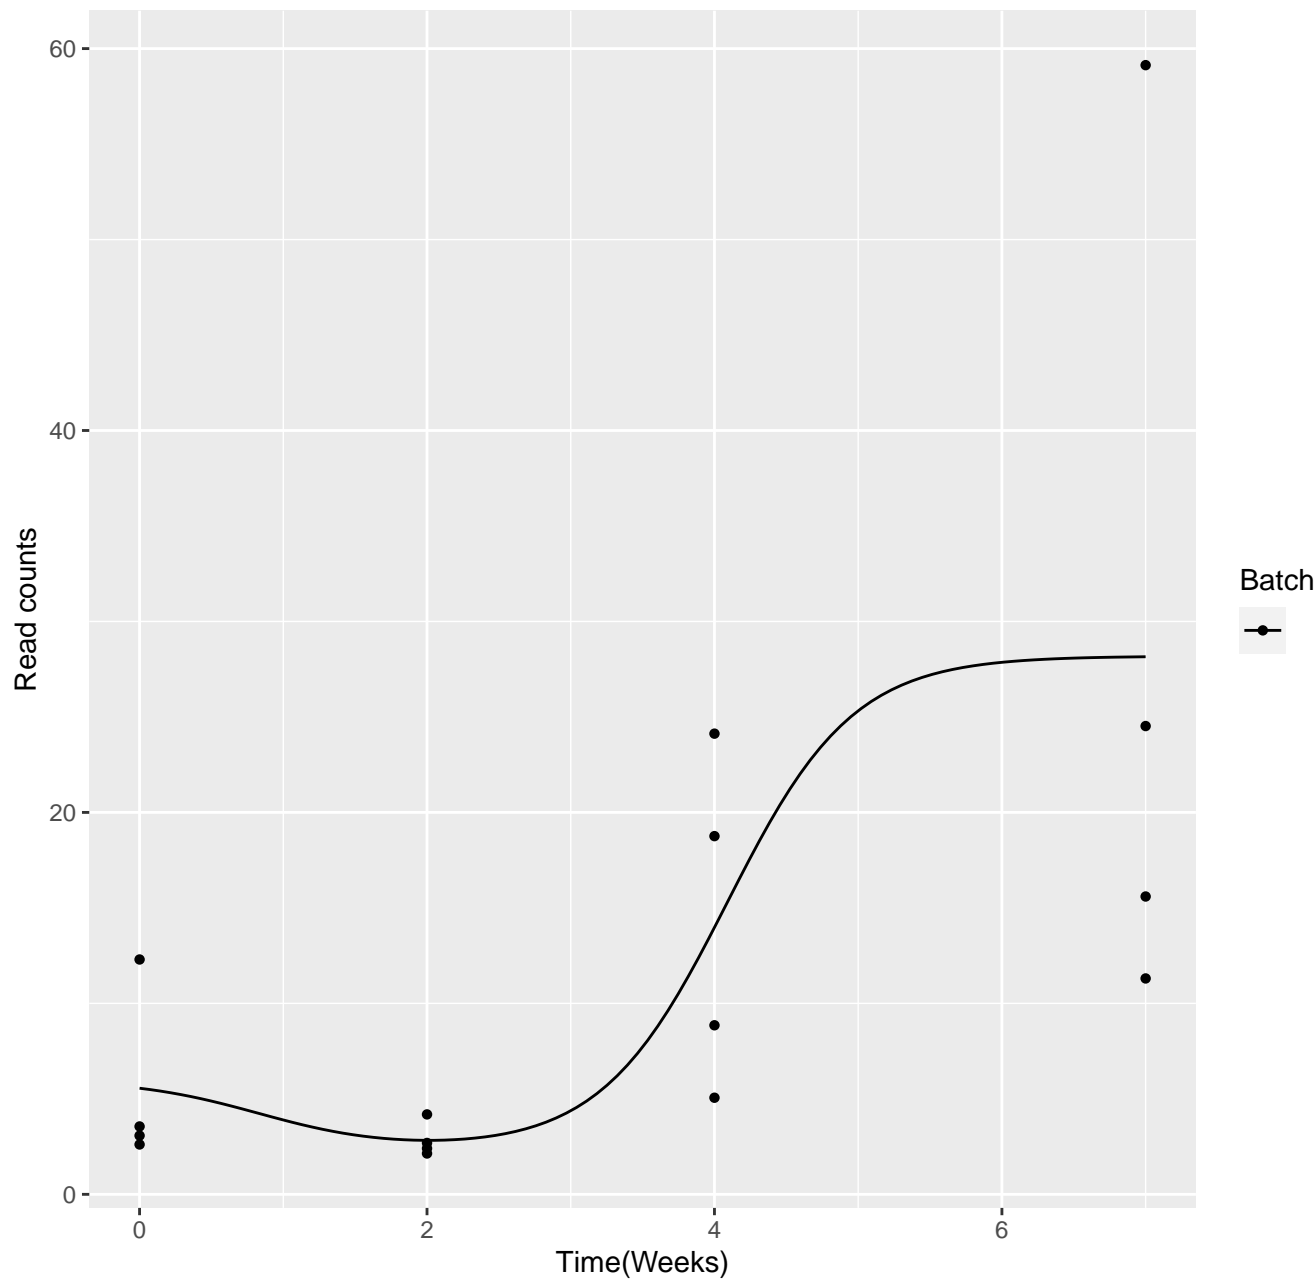

IFFO2:  $\log_{10} q = -2.54$

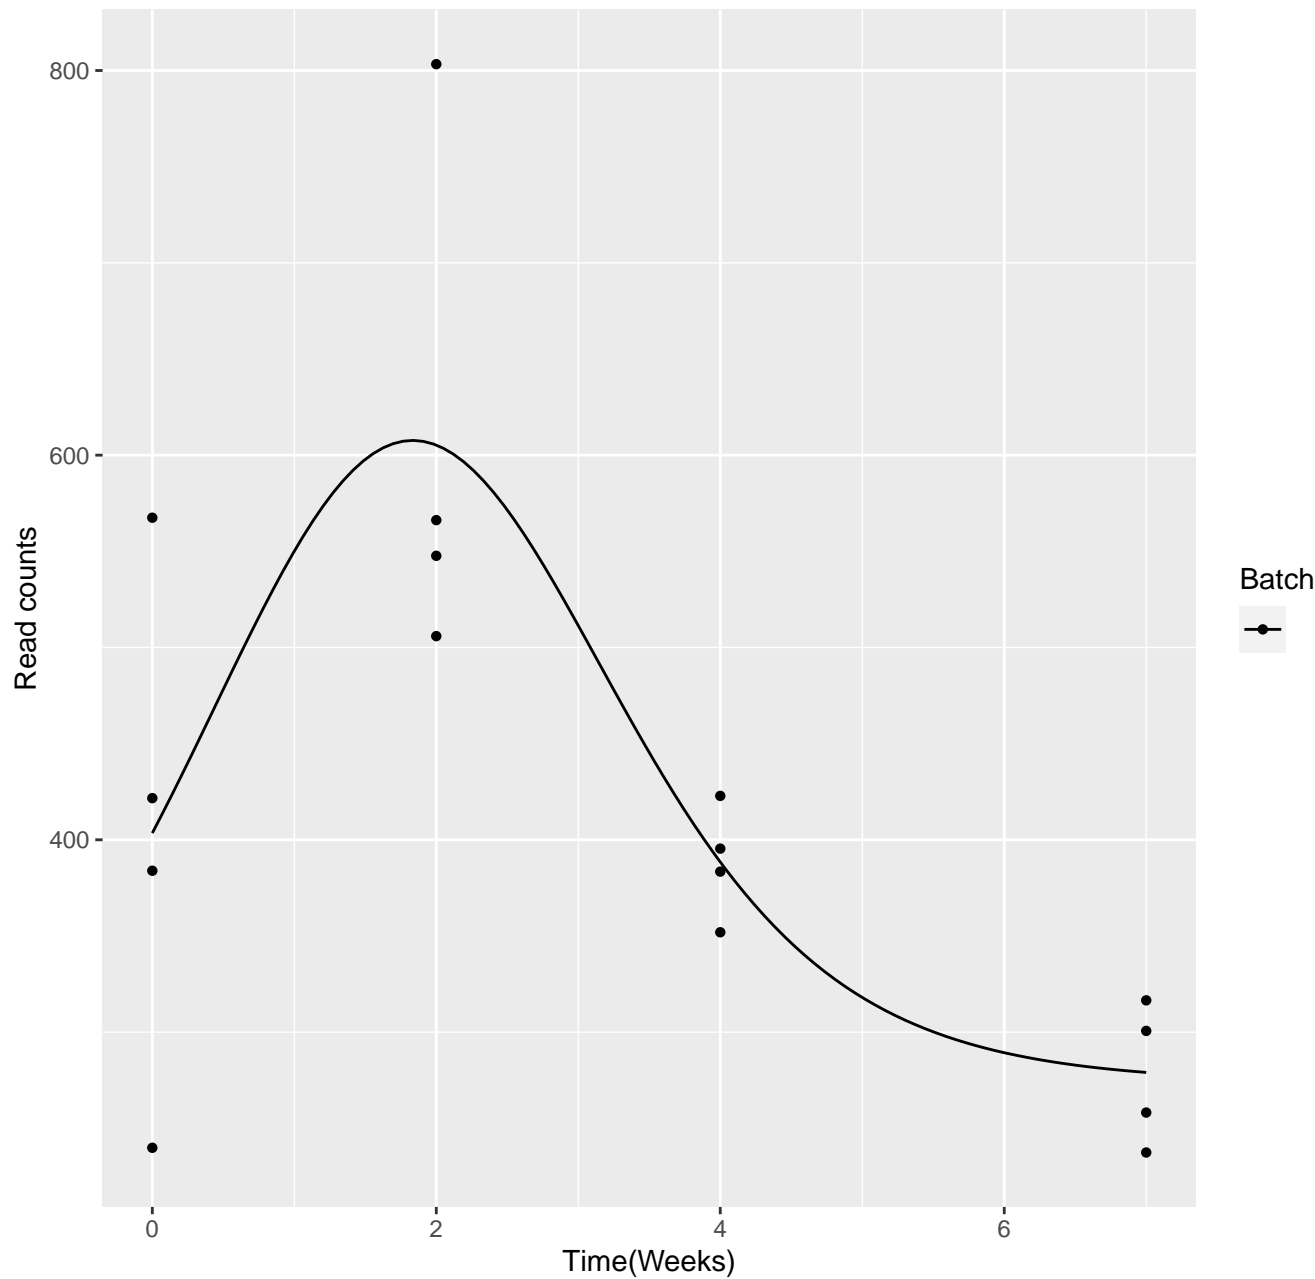

NME4:  $\log_{10} q = -2.54$

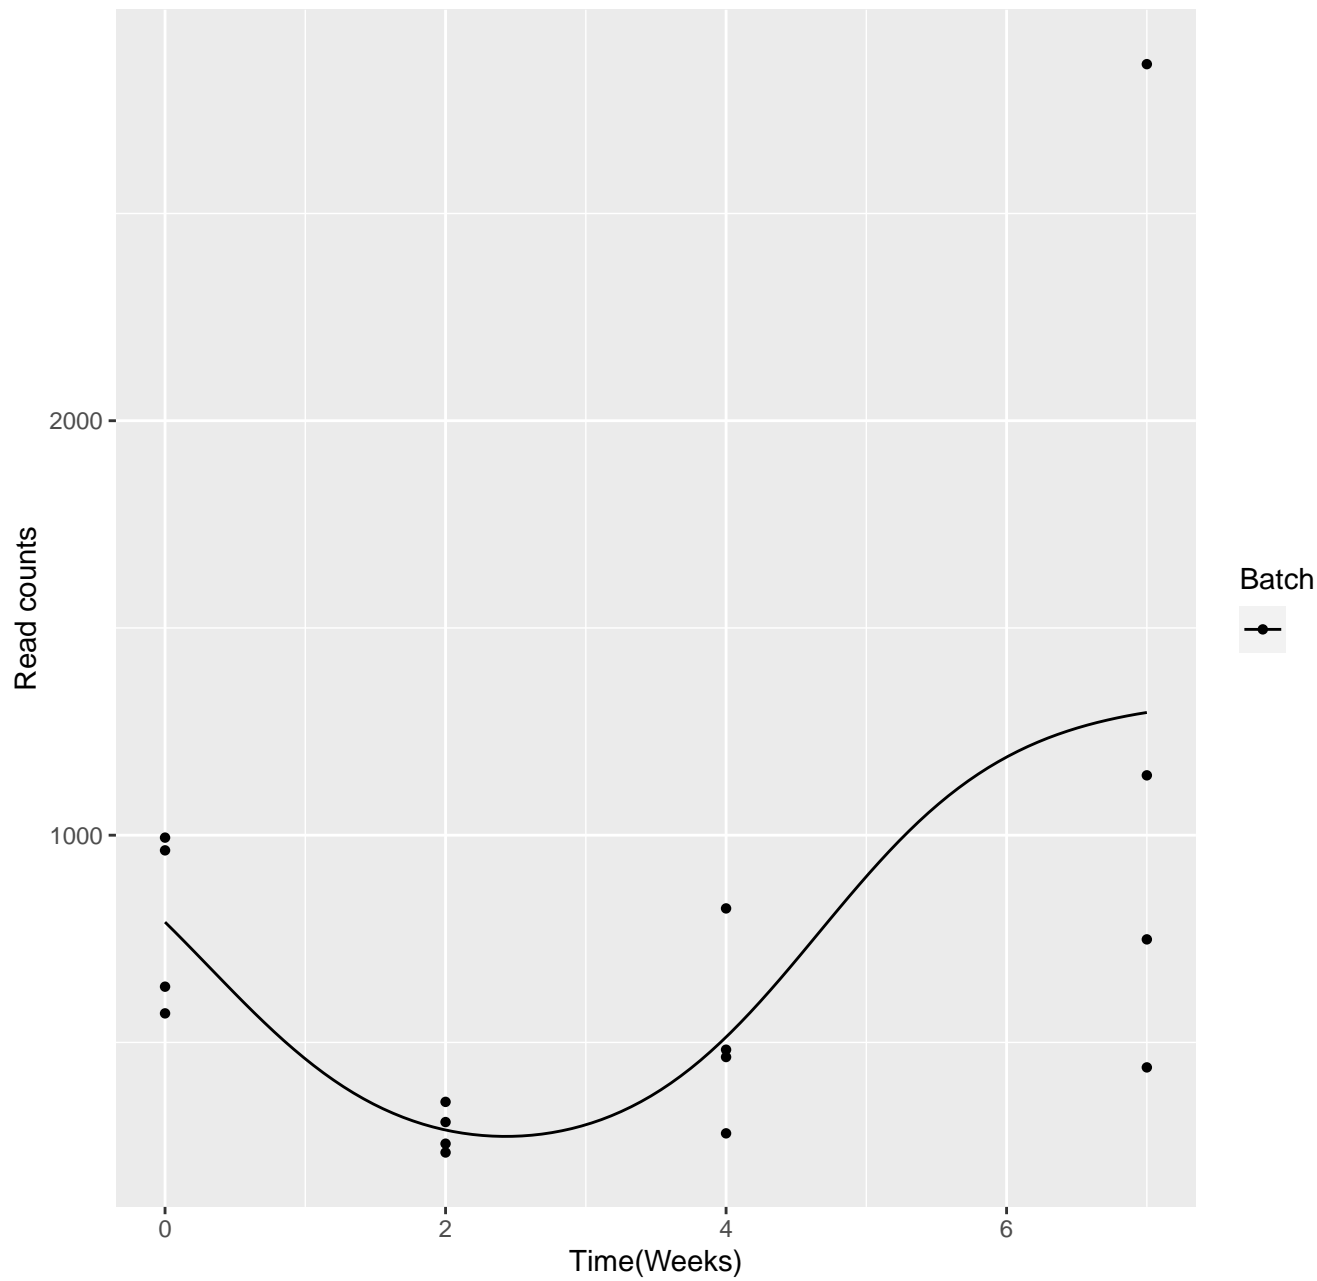

PIK3CG:  $\log_{10} q = -2.54$

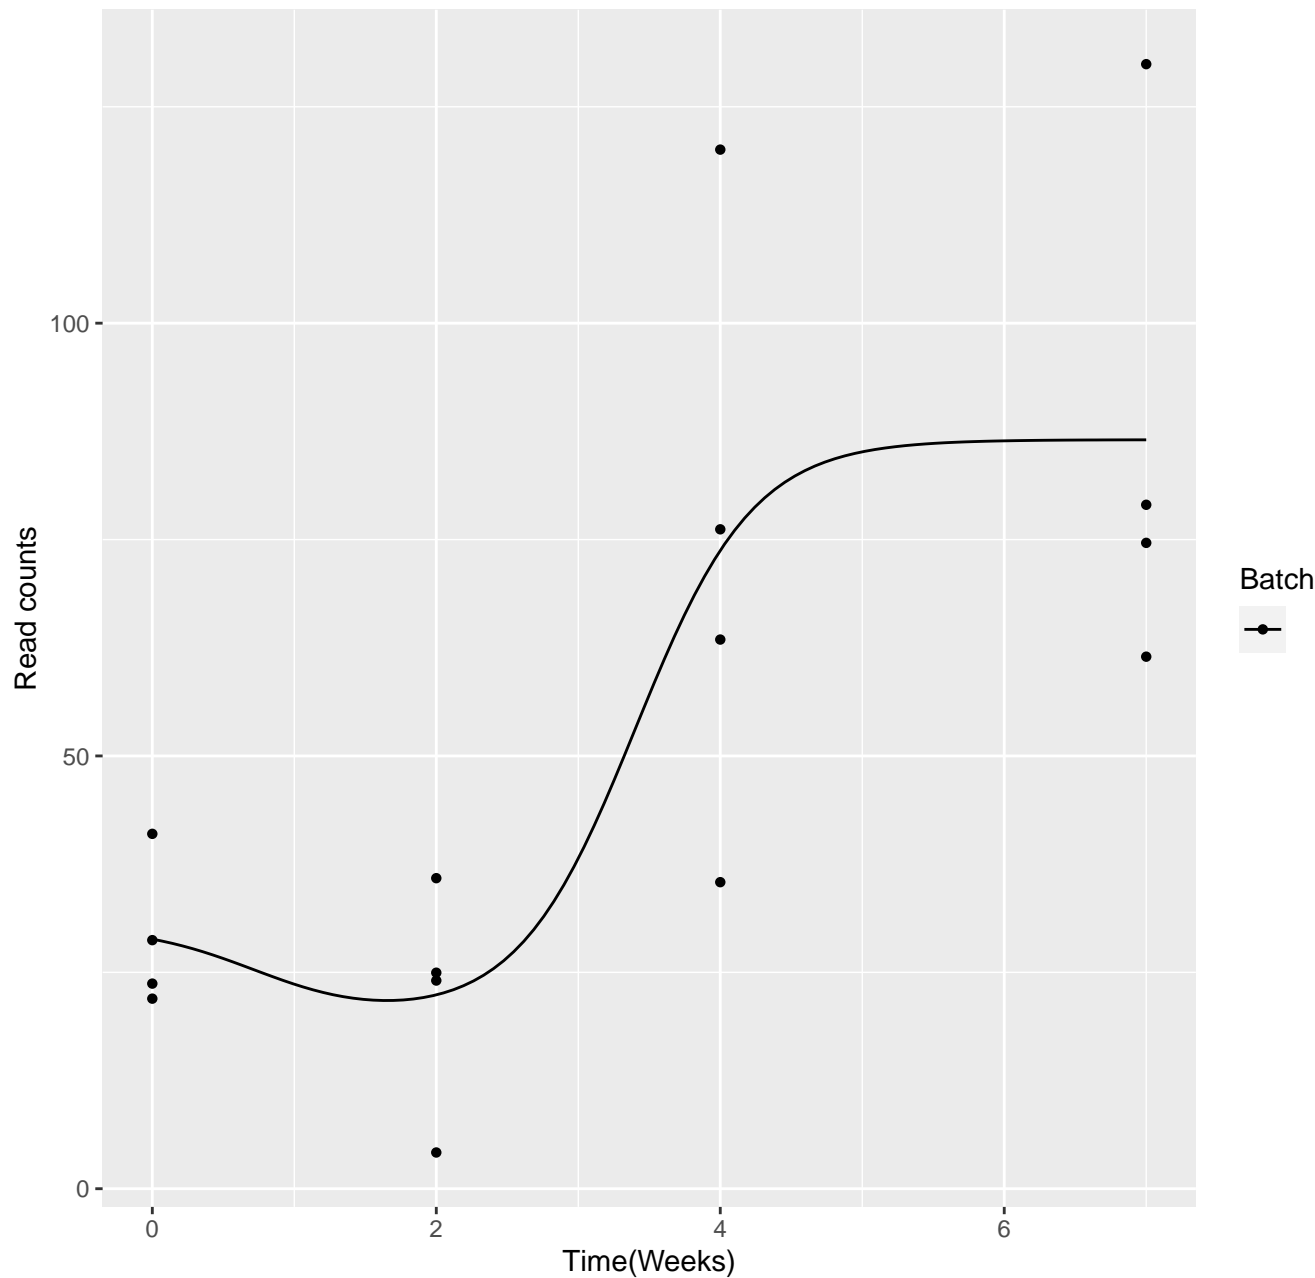

SEMA3F:  $\log_{10} q = -2.54$

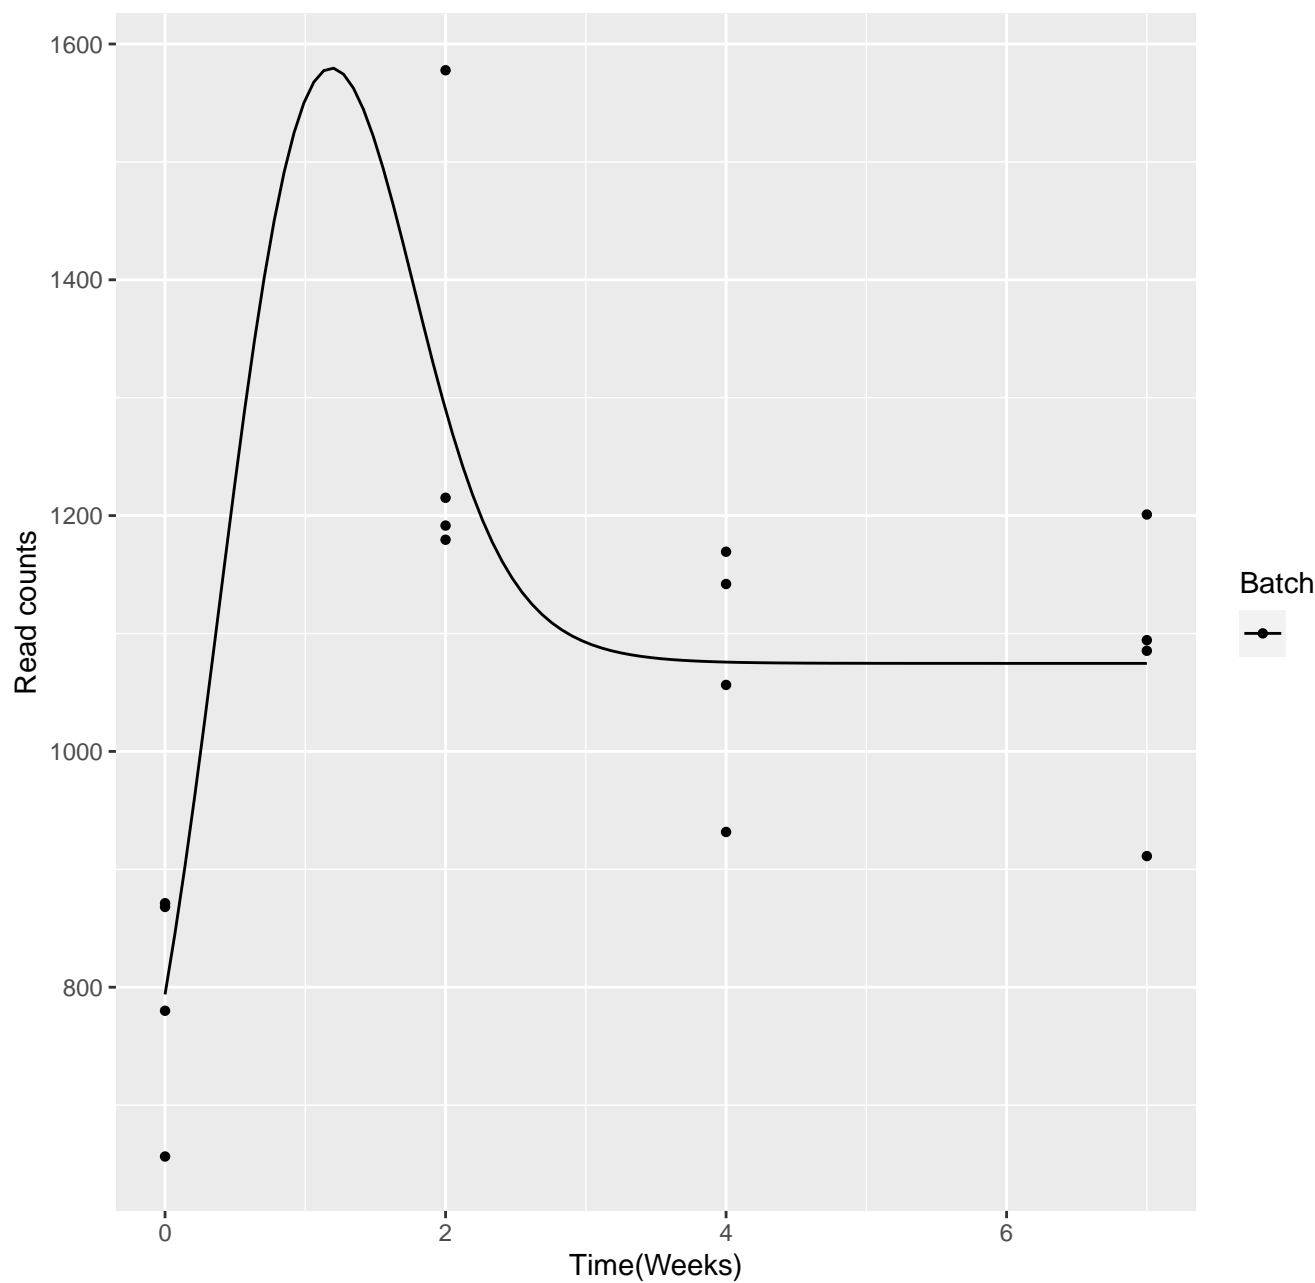

STT3B:  $\log_{10} q = -2.53$

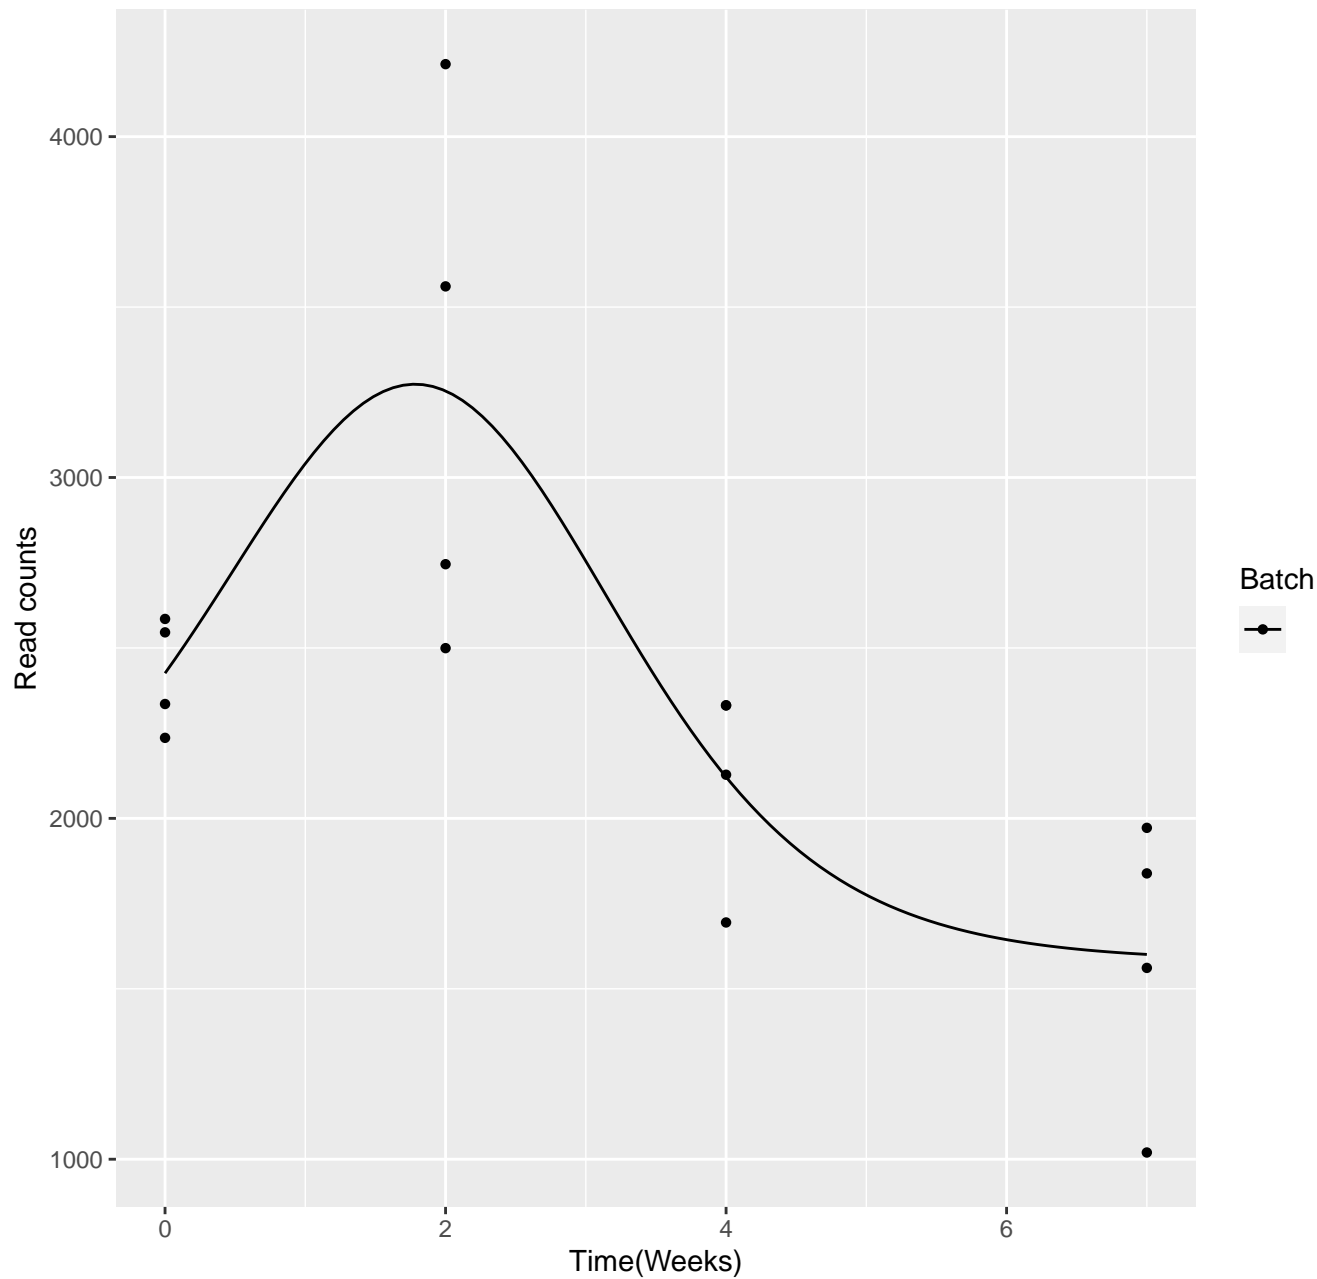

AGAP2:  $\log_{10} q = -2.53$

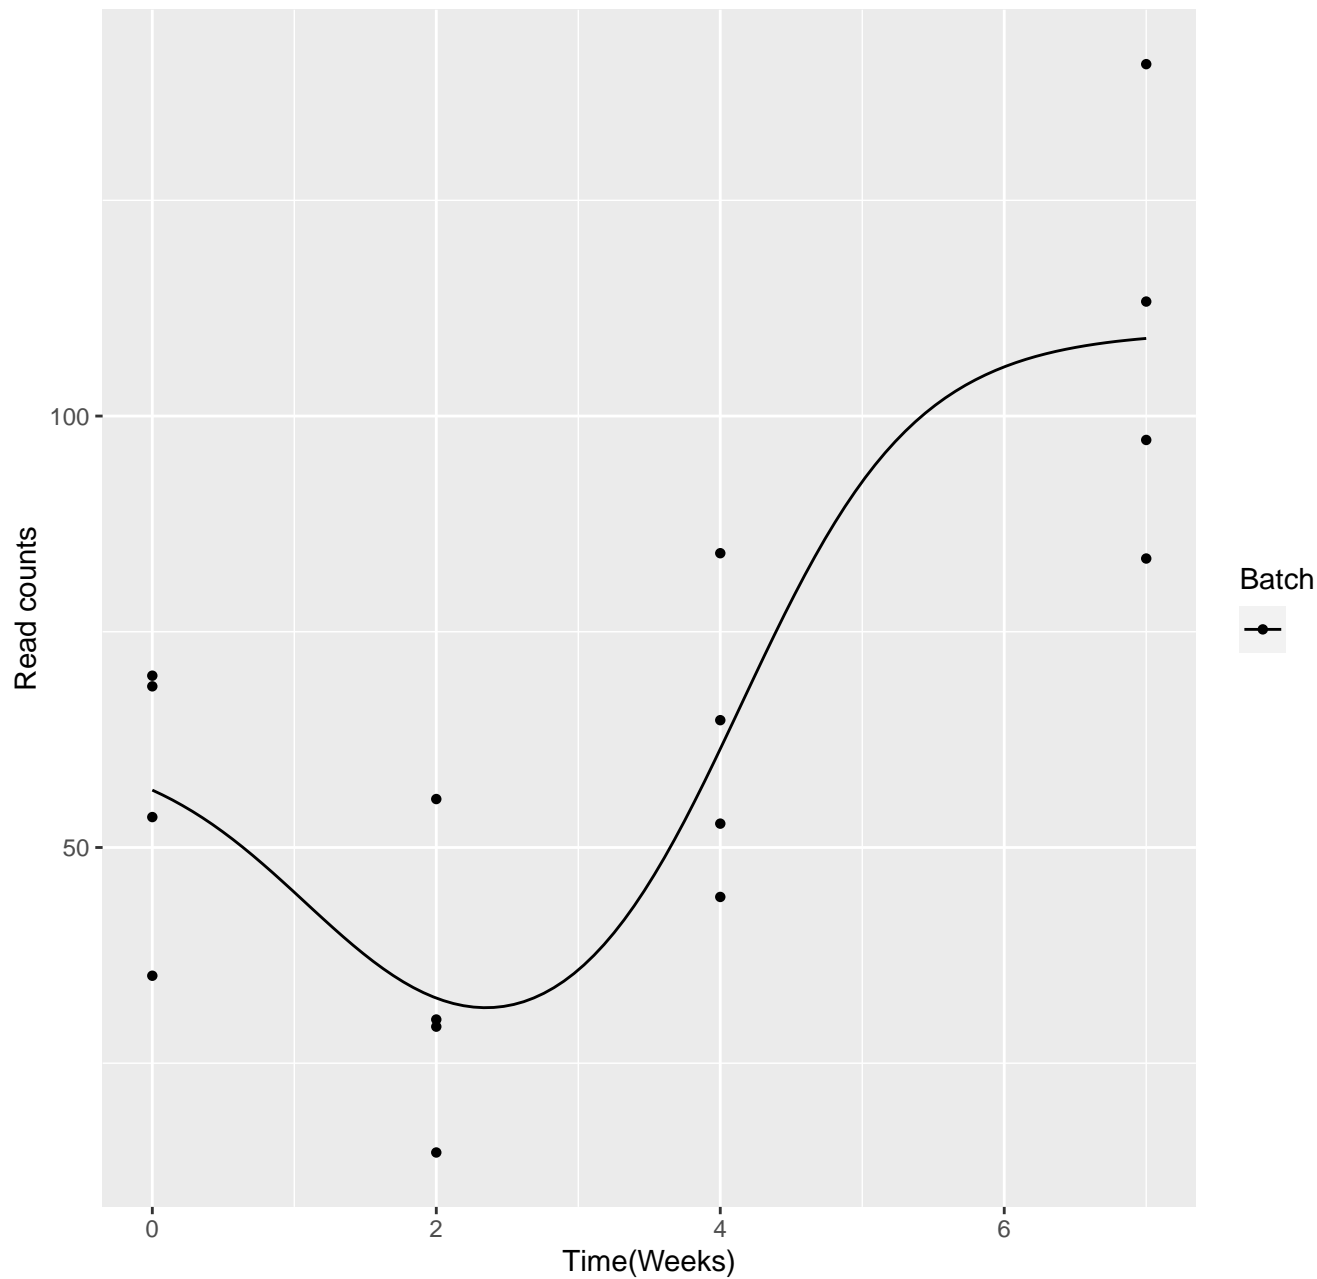

ITGA9:  $\log_{10} q = -2.53$

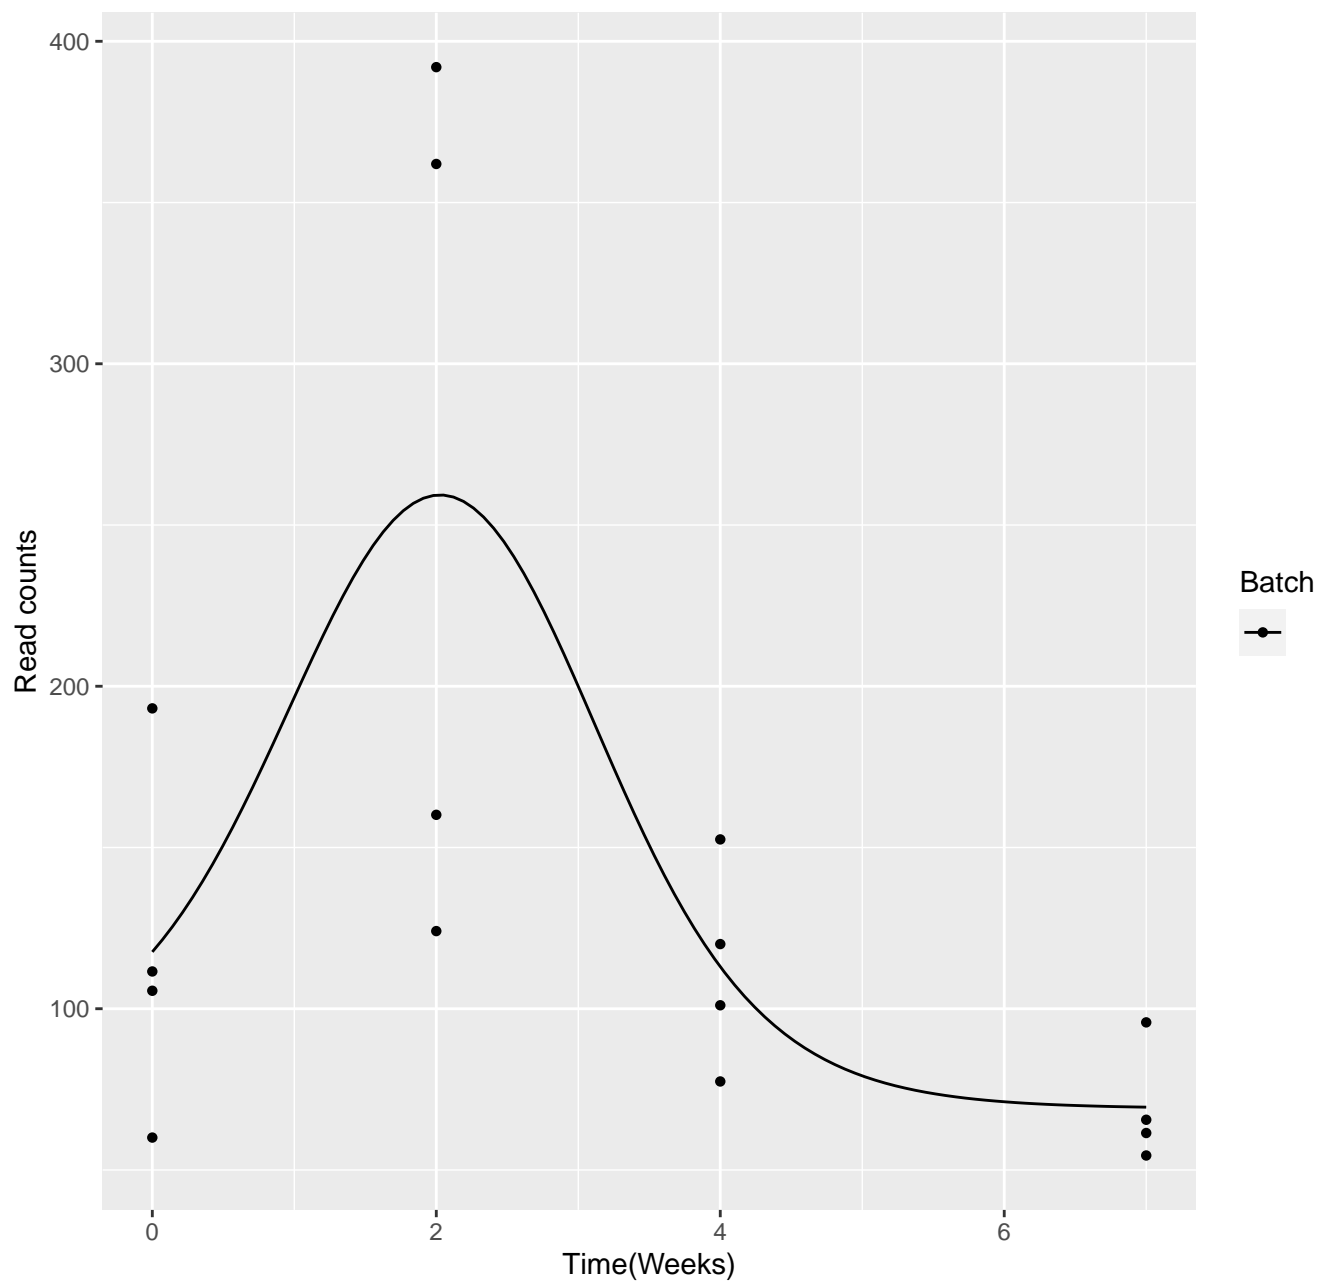



NUMBL:  $\log_{10} q = -2.53$

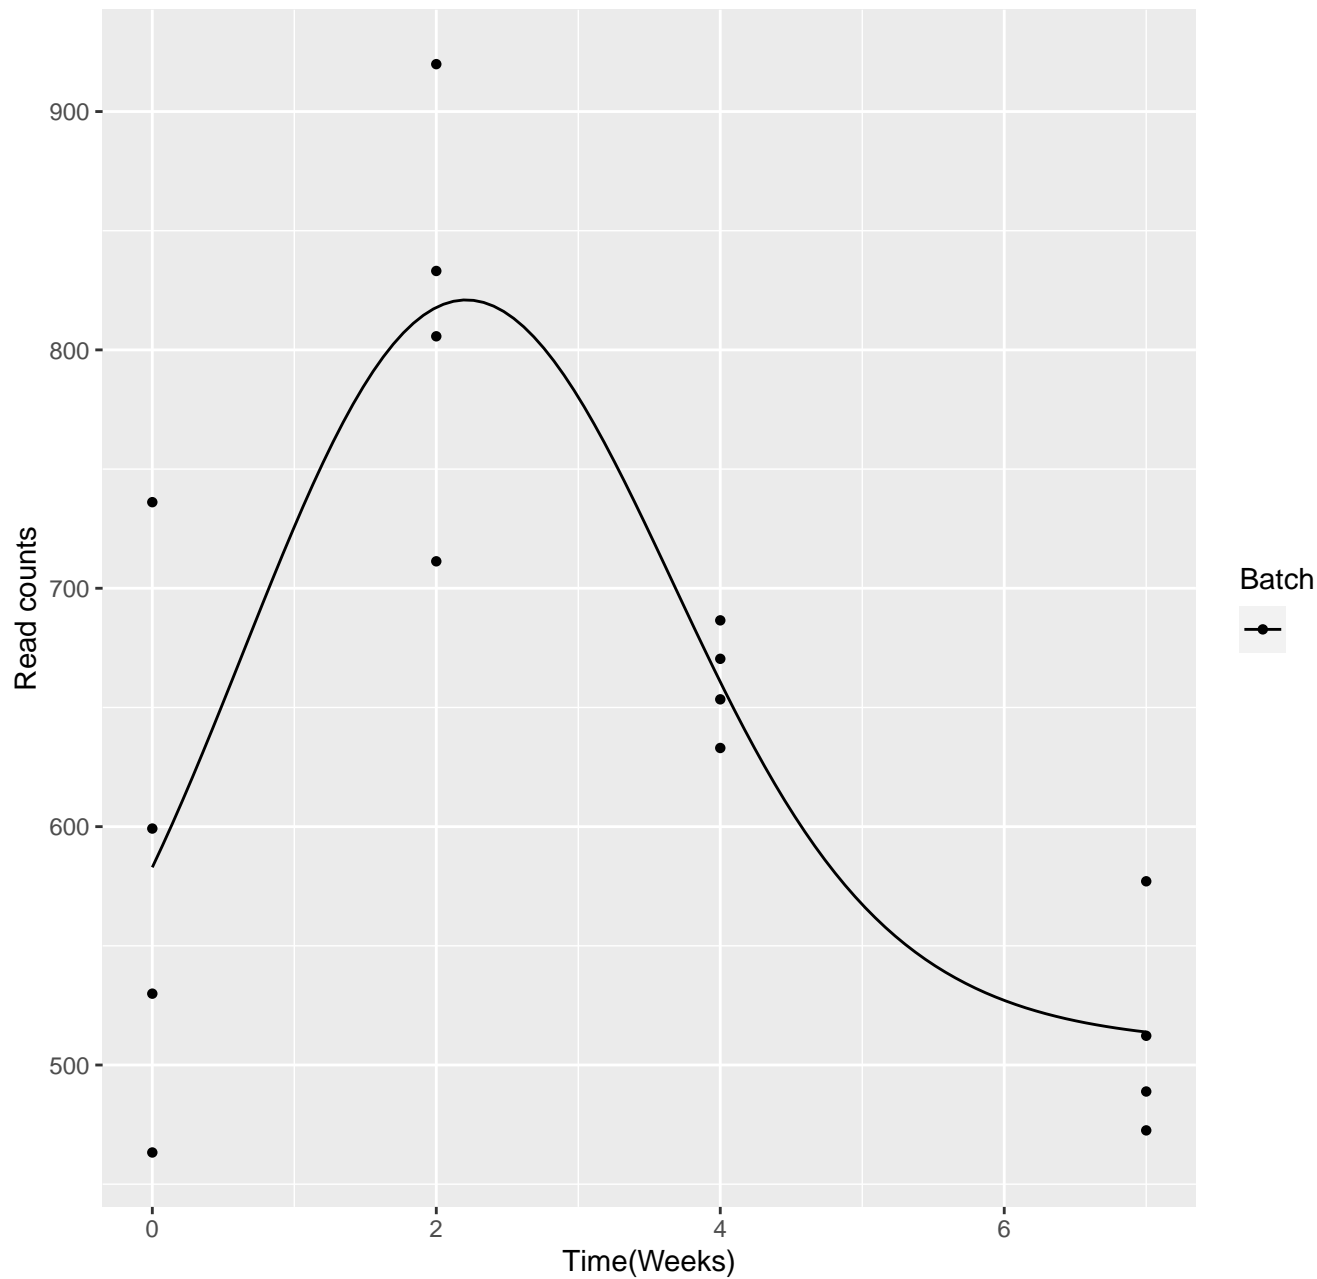

PCNX1:  $\log_{10} q = -2.53$

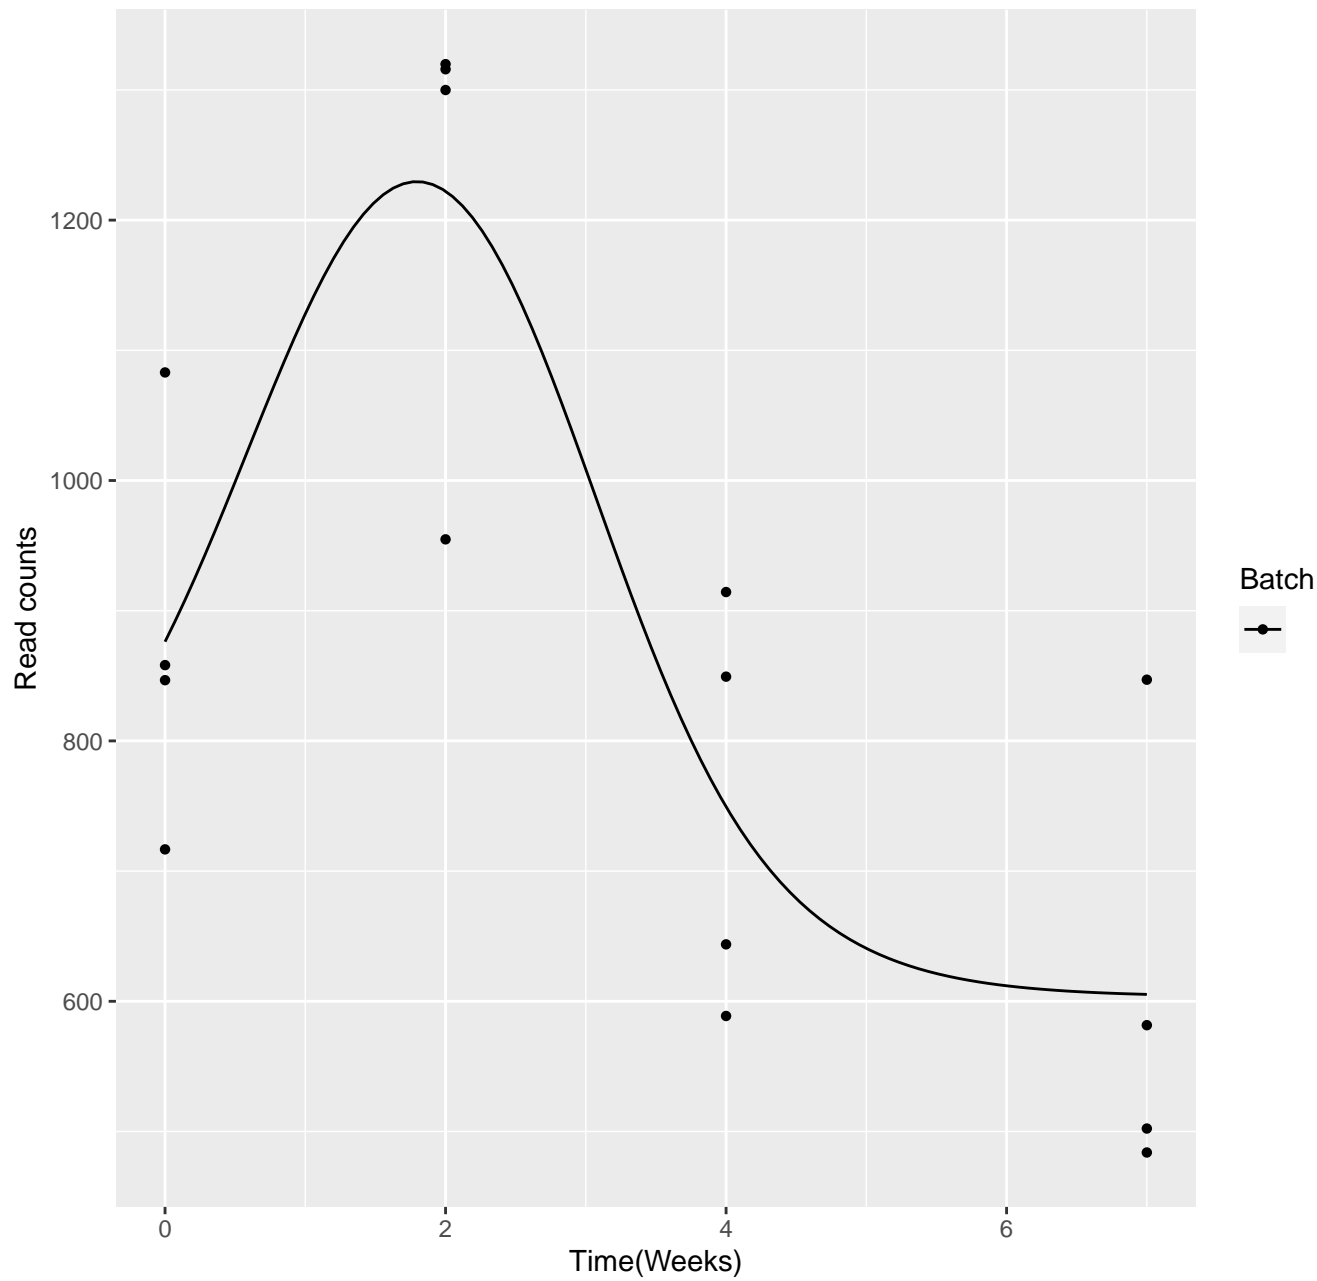

LOC100144340:  $\log_{10} q = -2.53$

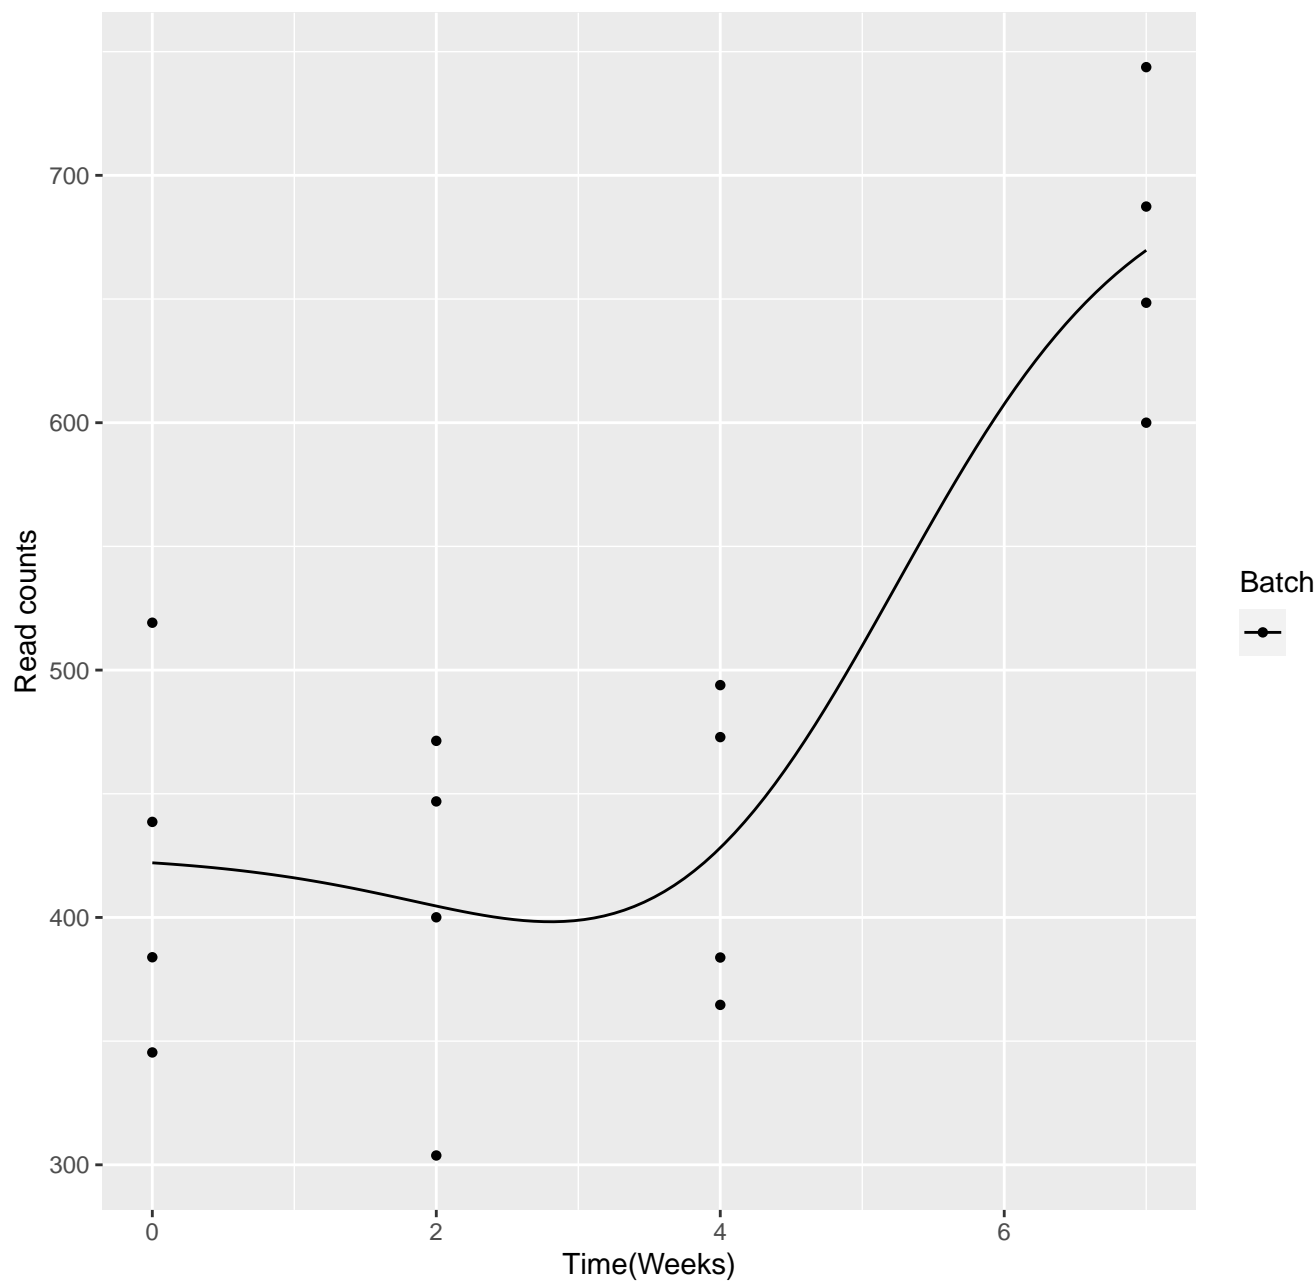

LRP2:  $\log_{10} q = -2.53$

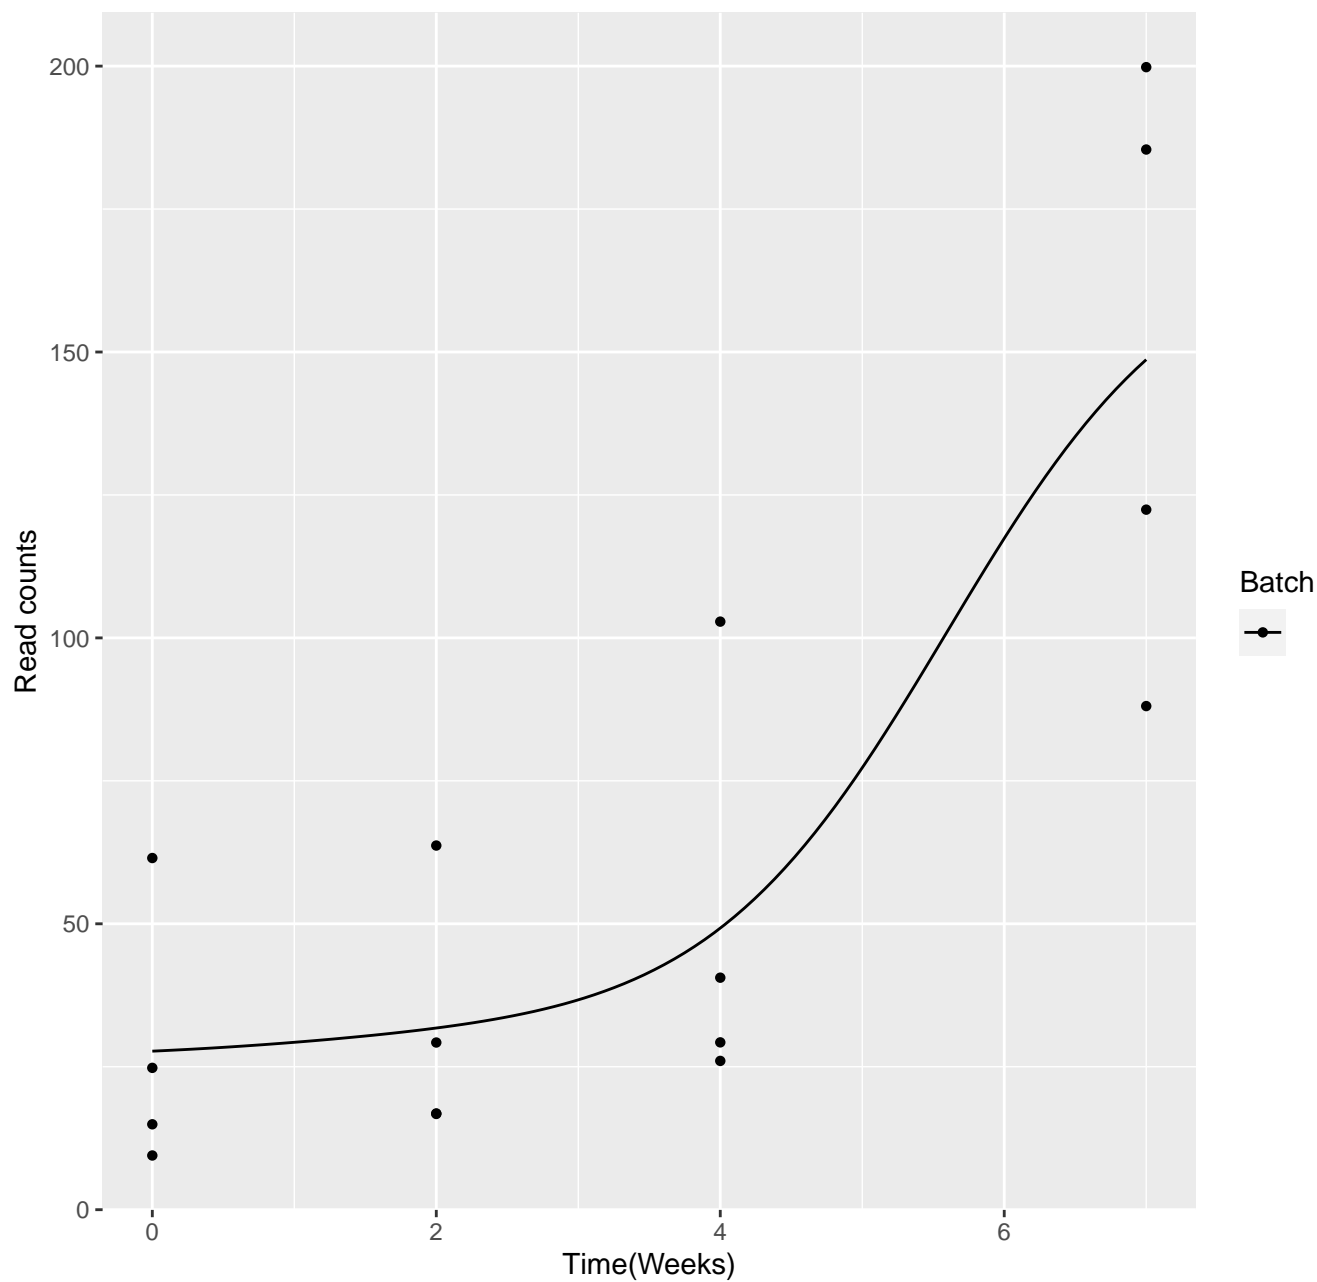

MC5R:  $\log_{10} q = -2.52$

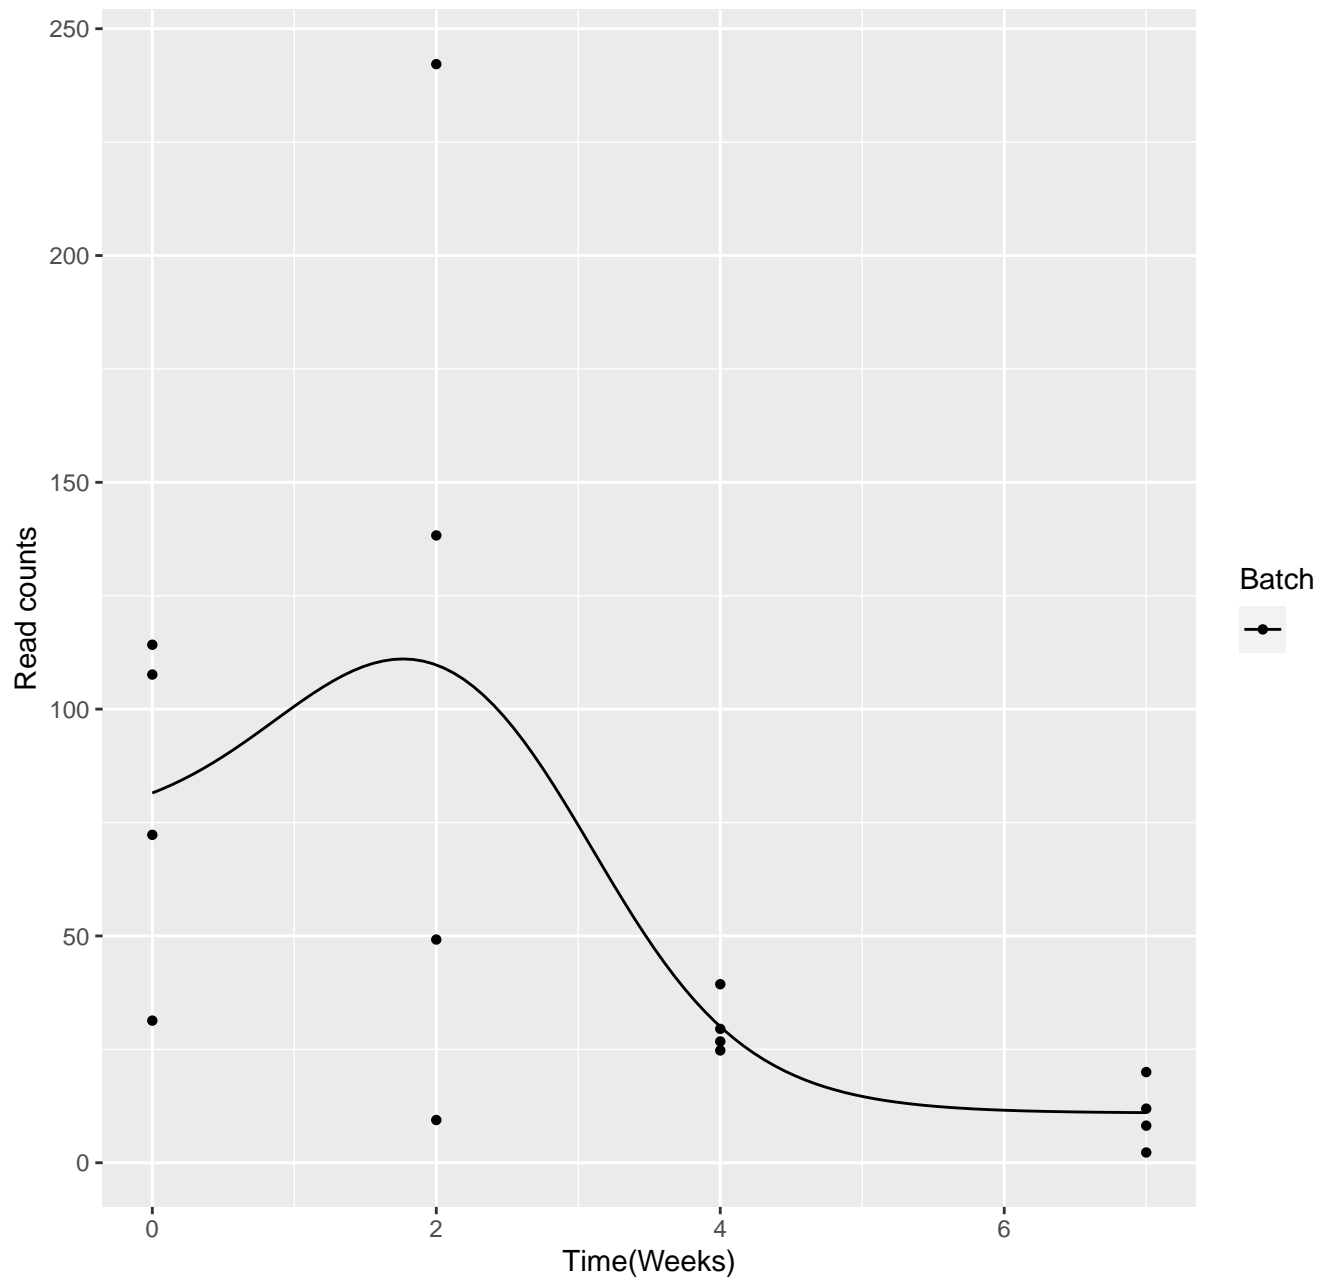

KLHL34:  $\log_{10} q = -2.52$

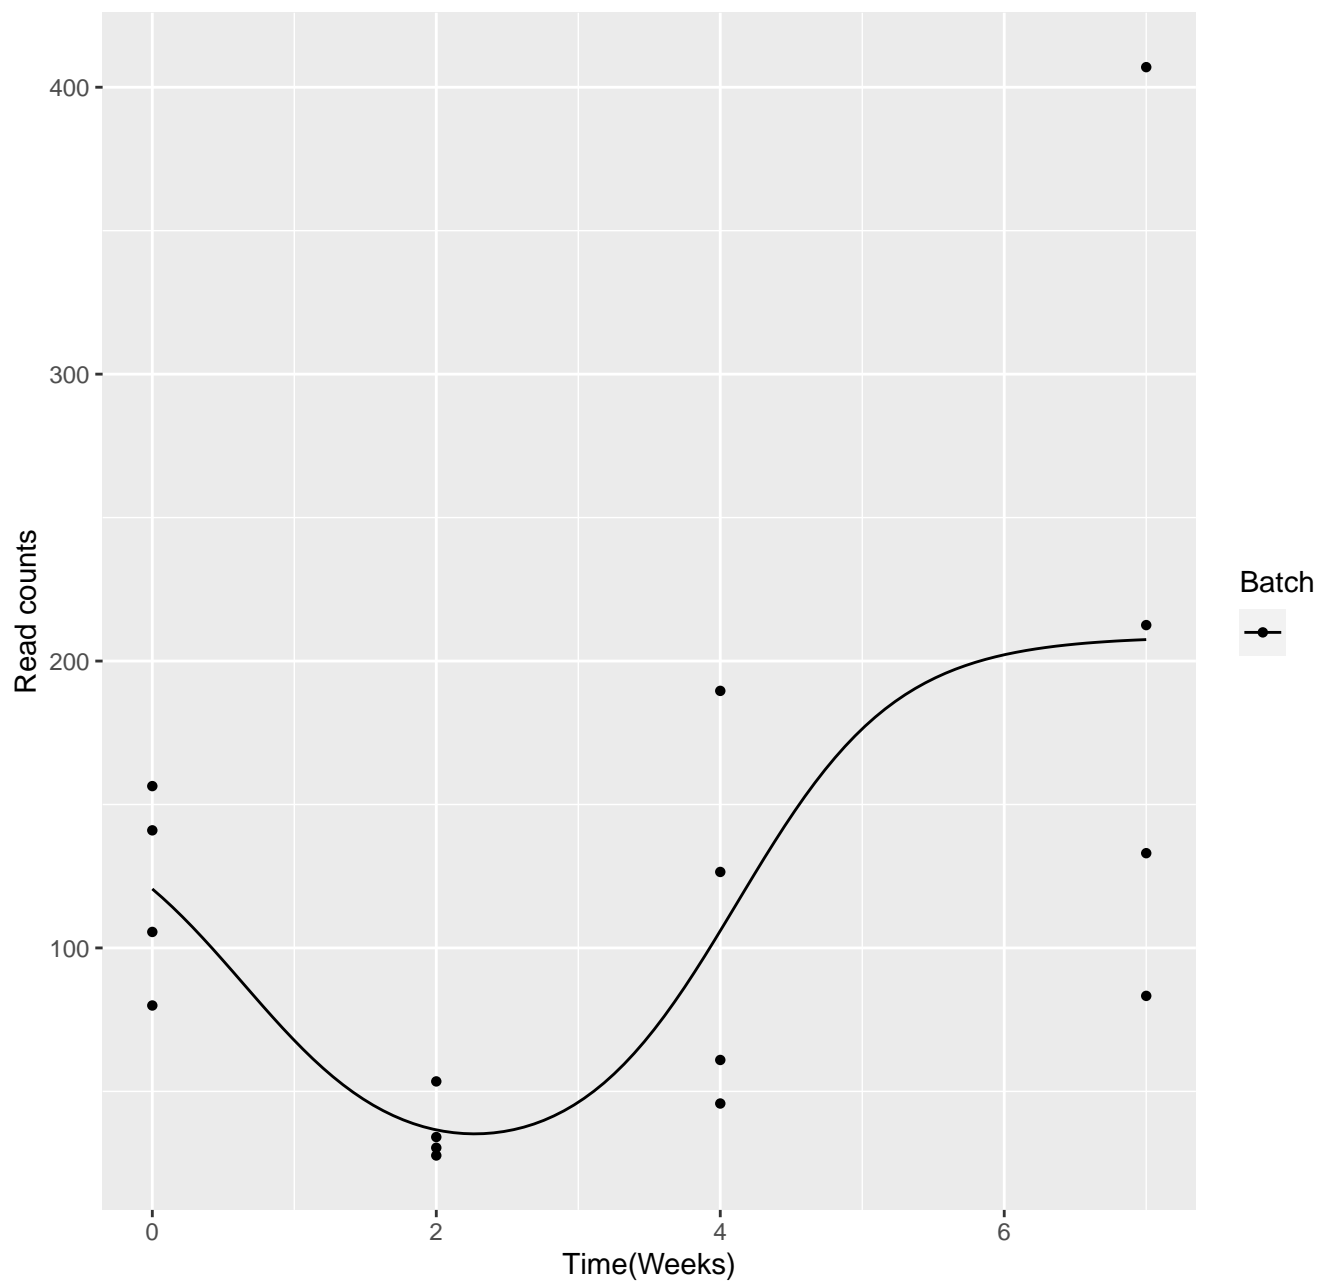

GSDMD:  $\log_{10} q = -2.52$

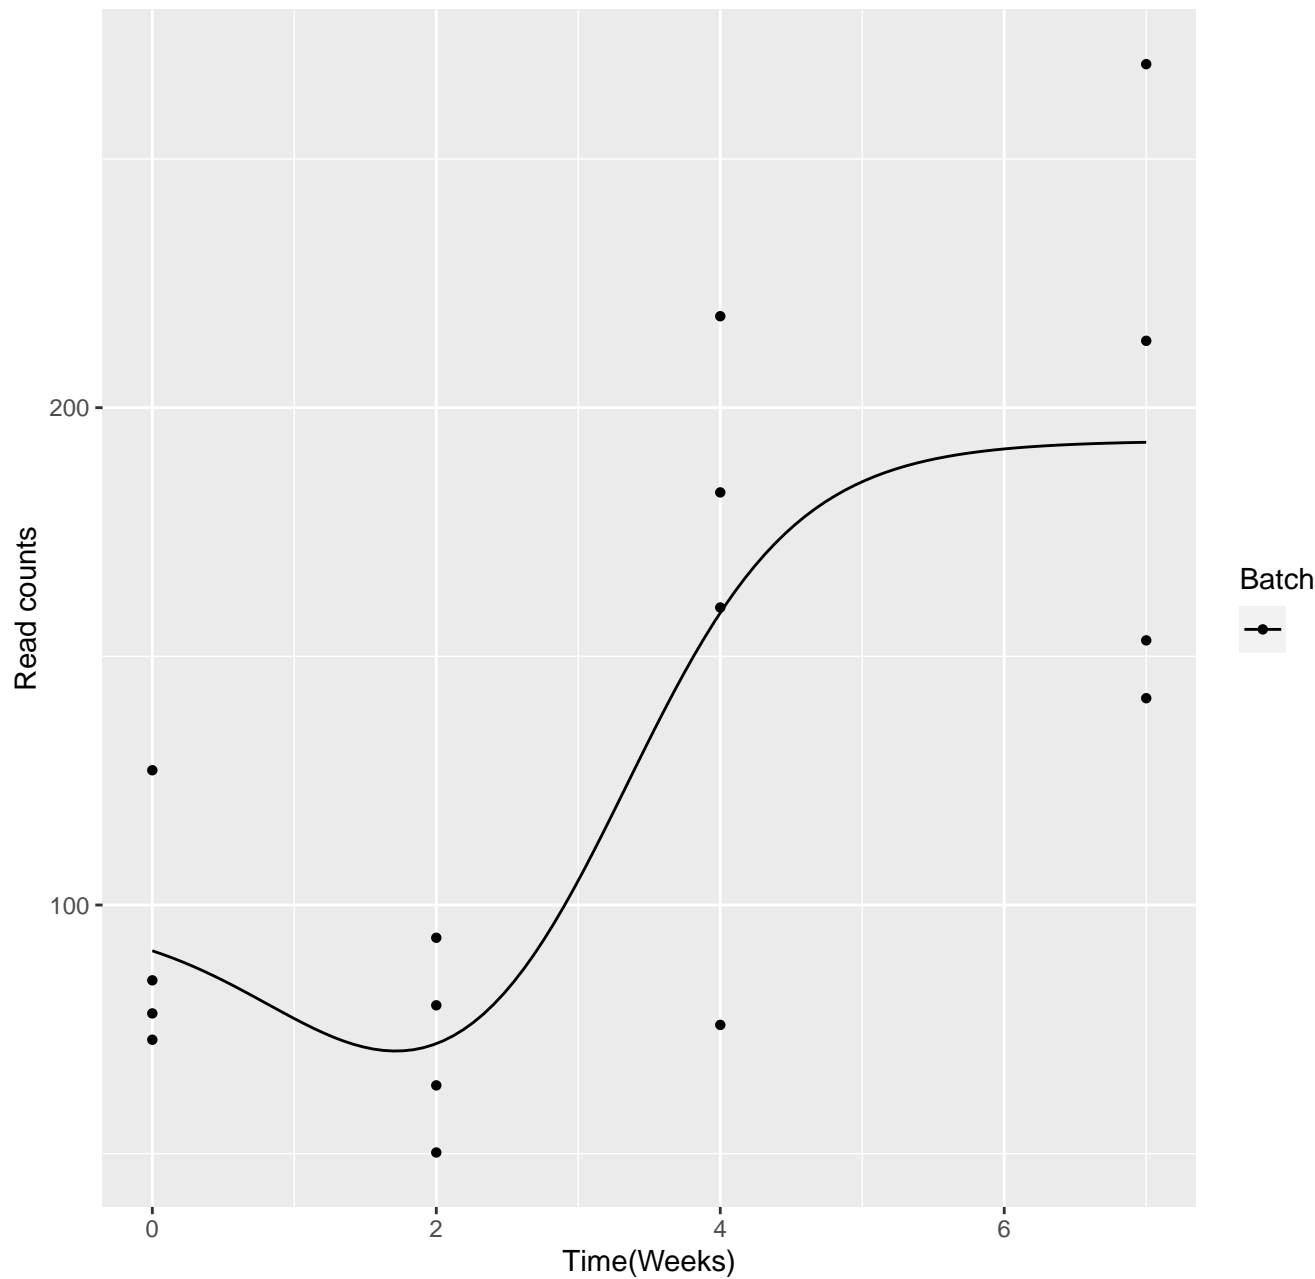

ROBO1:  $\log_{10} q = -2.51$

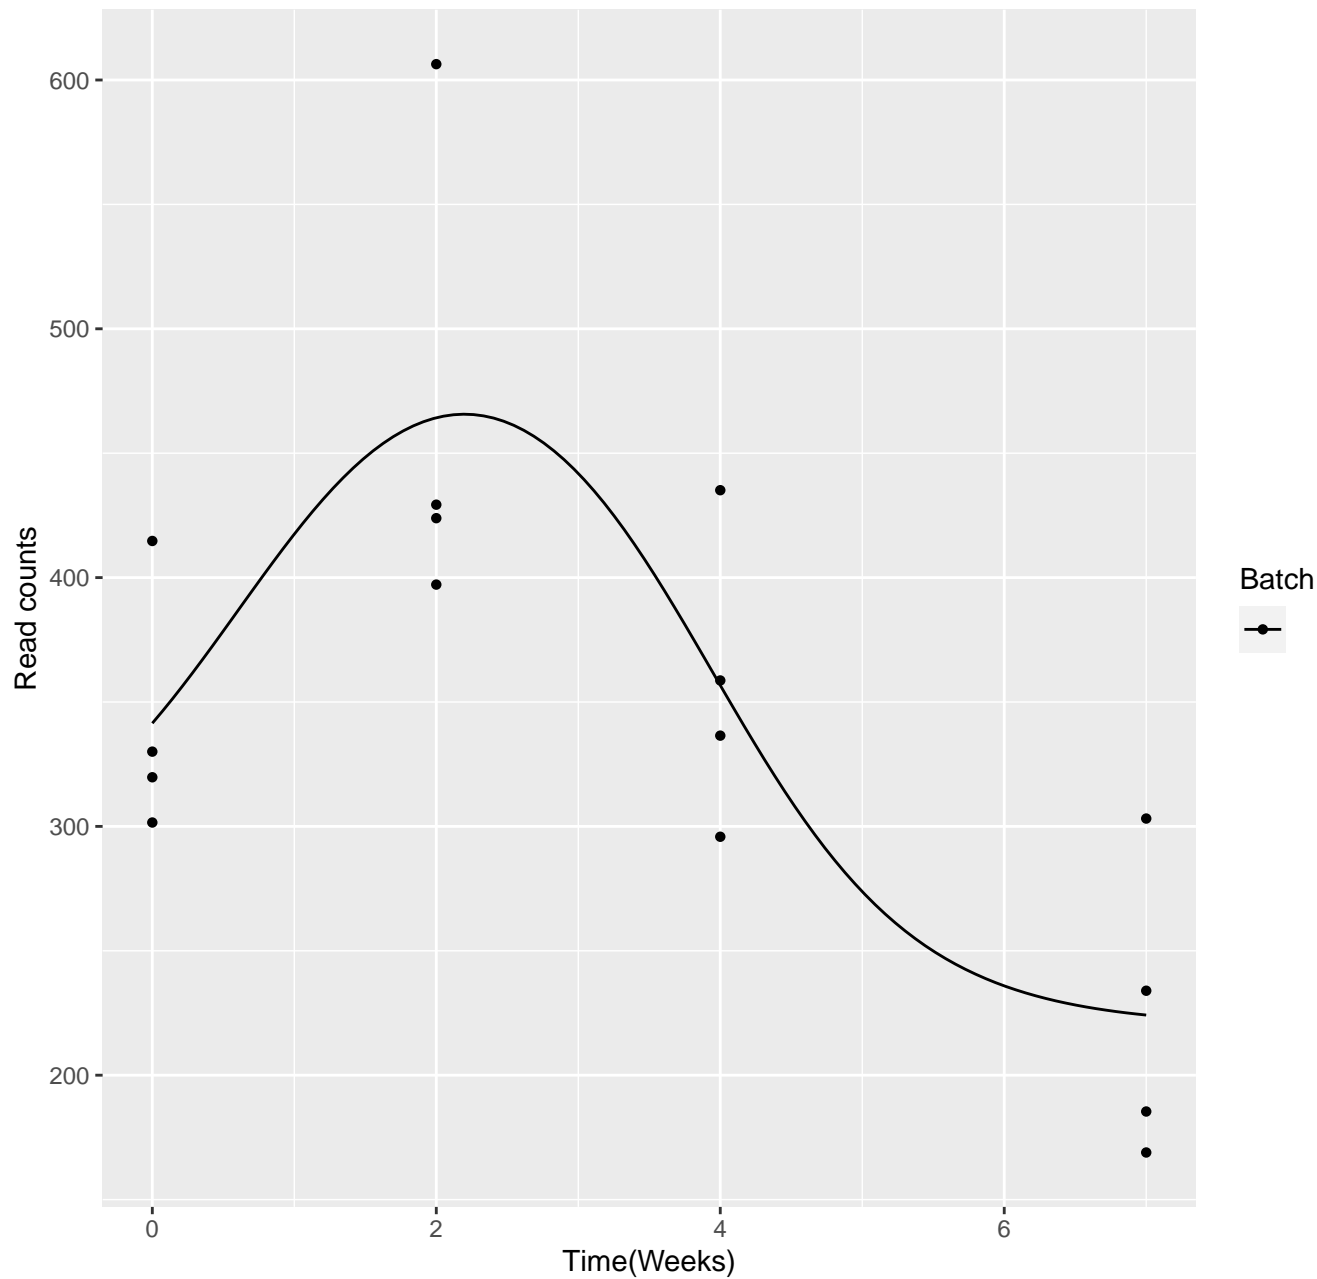



NPY5R:  $\log_{10} q = -2.51$

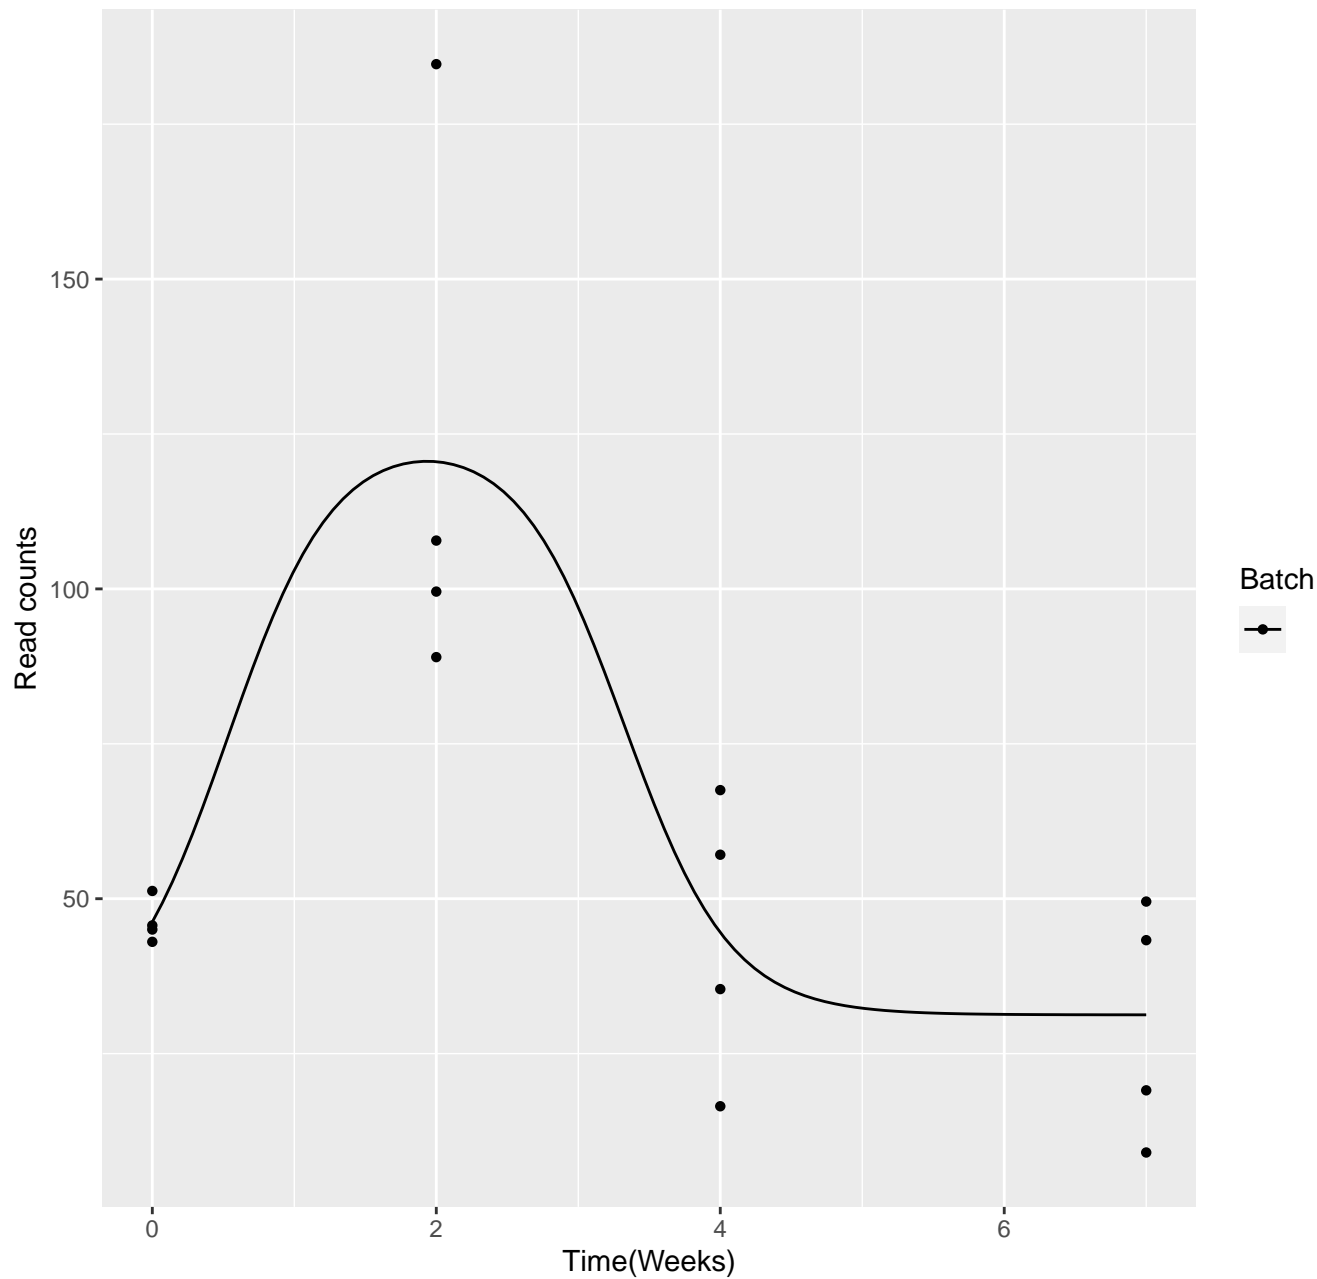

SDK1:  $\log_{10} q = -2.51$

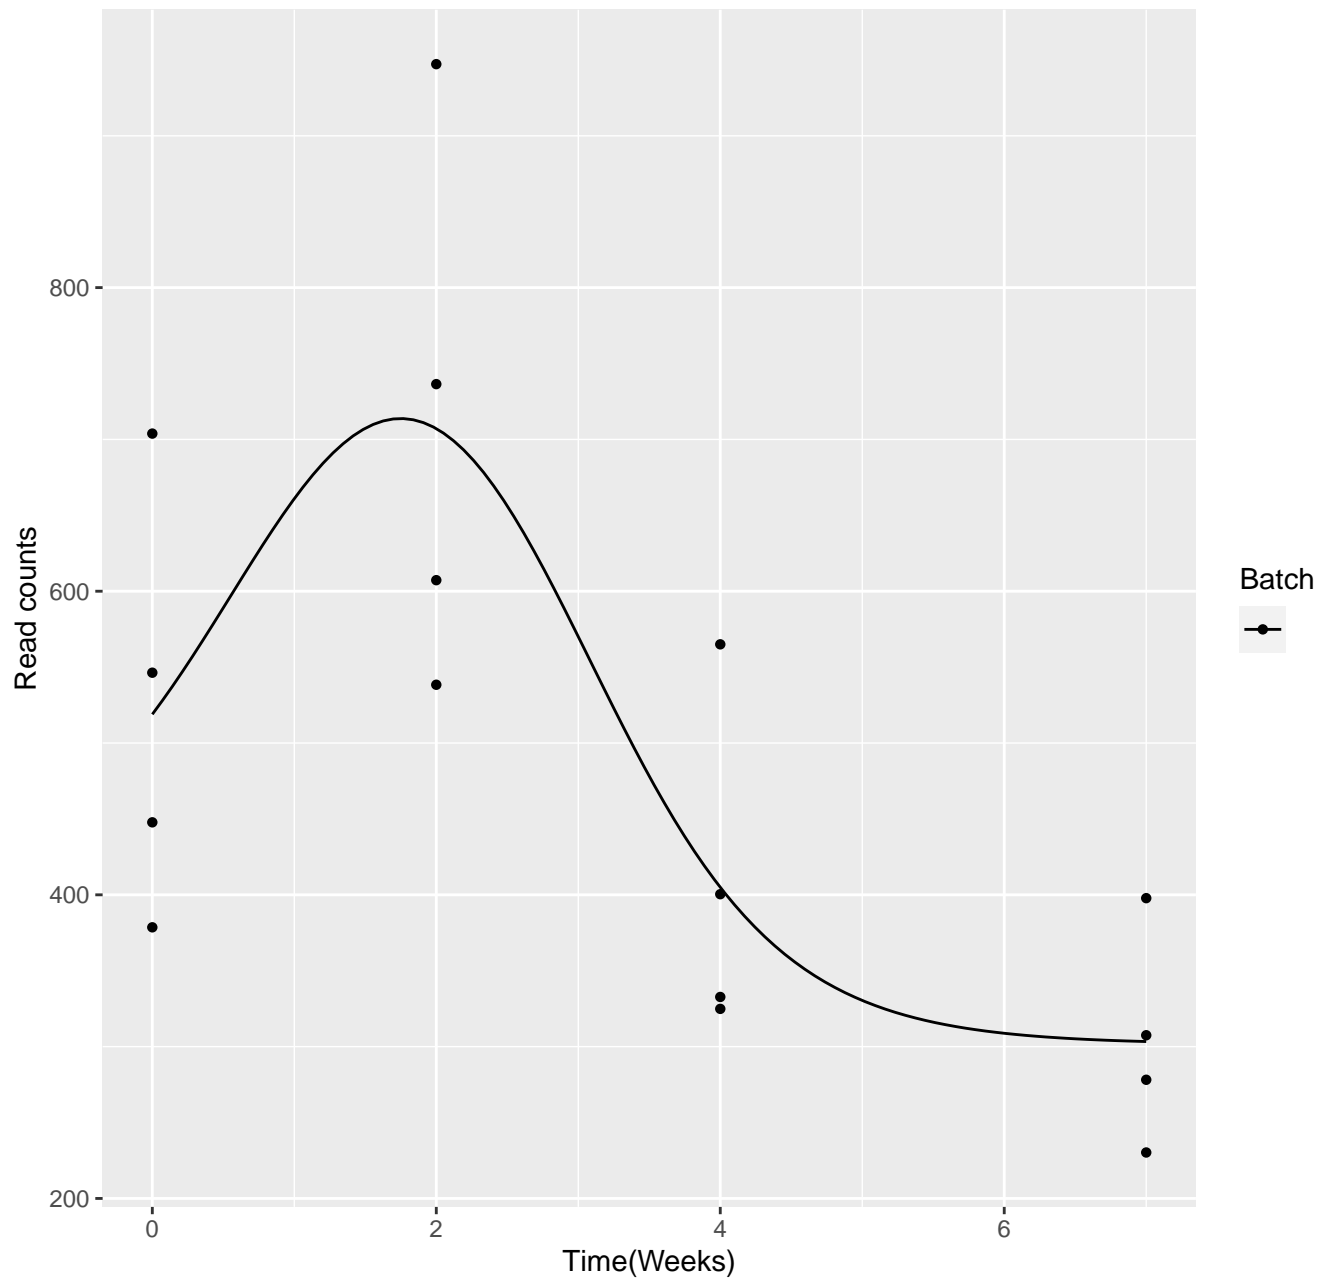

SP2:  $\log_{10} q = -2.51$

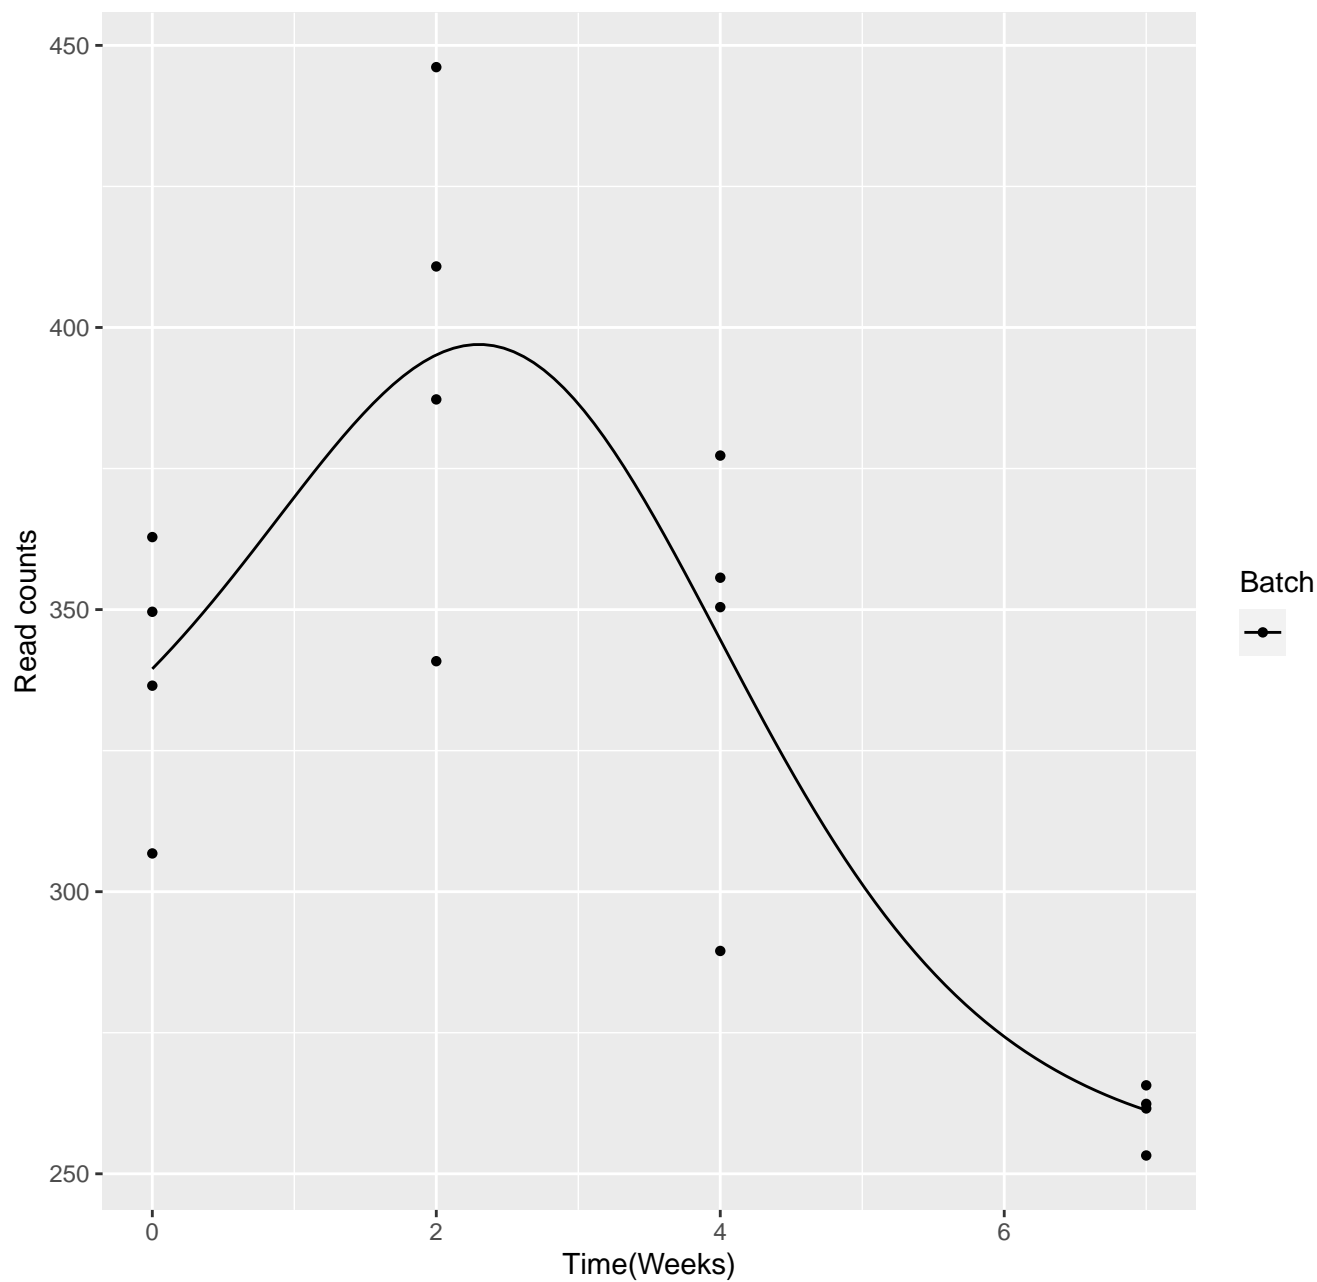

TM7SF3:  $\log_{10} q = -2.51$

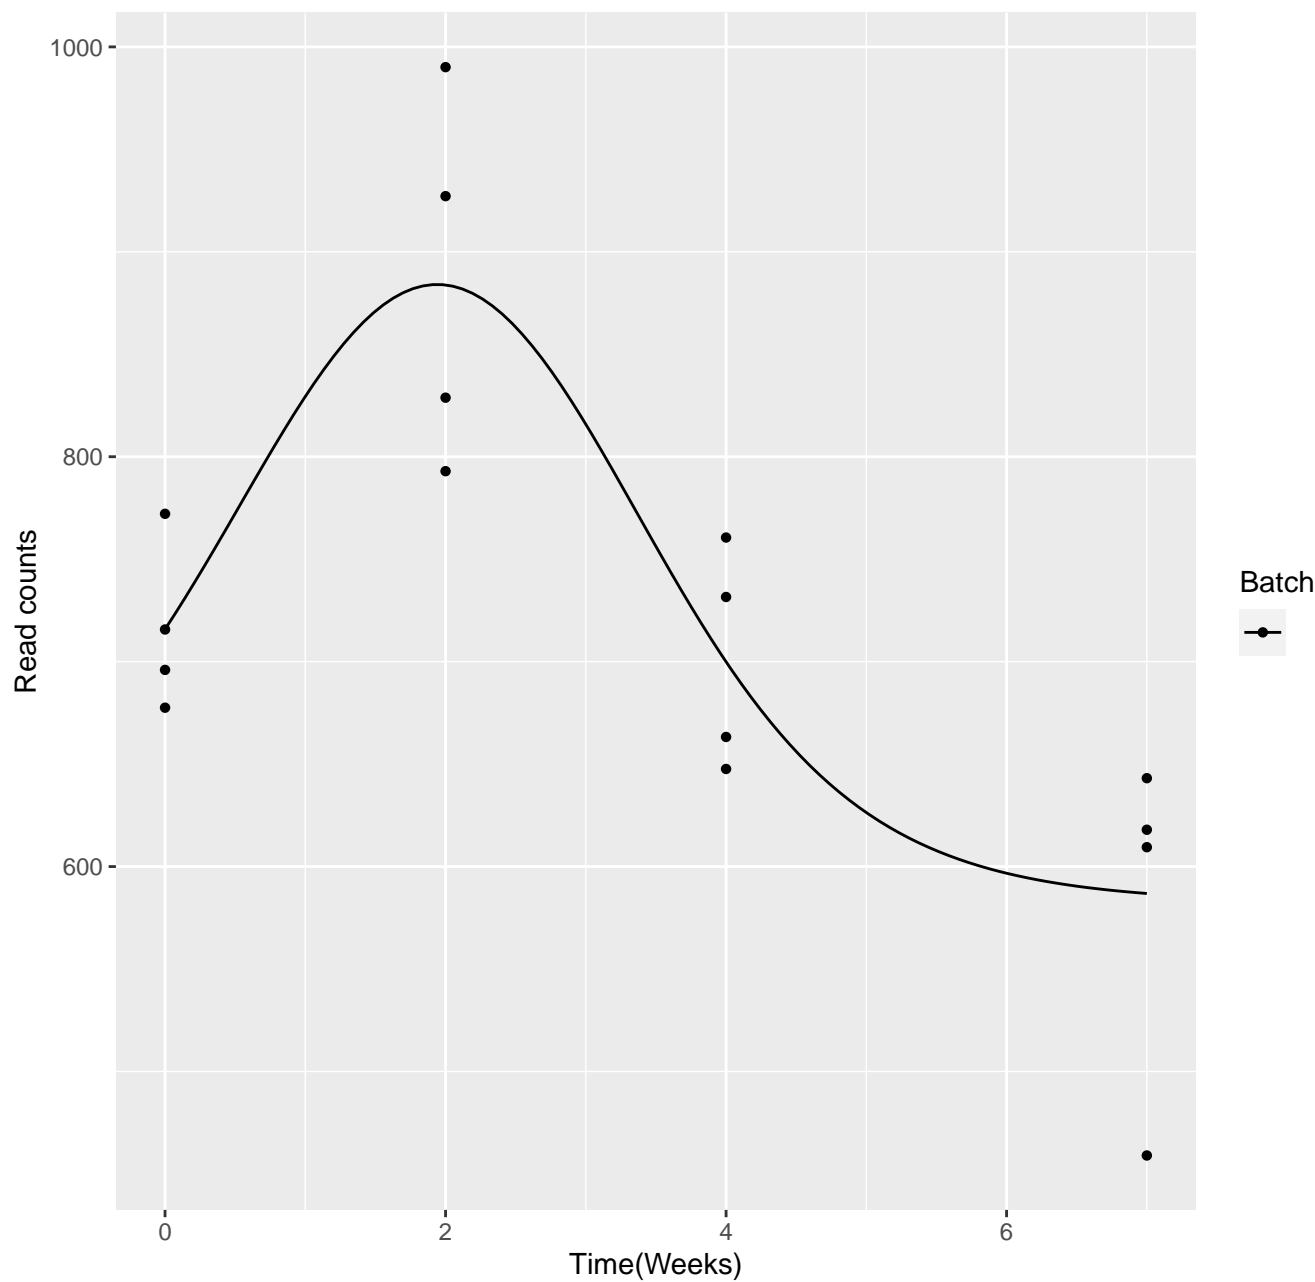

KRT32:  $\log_{10} q = -2.51$

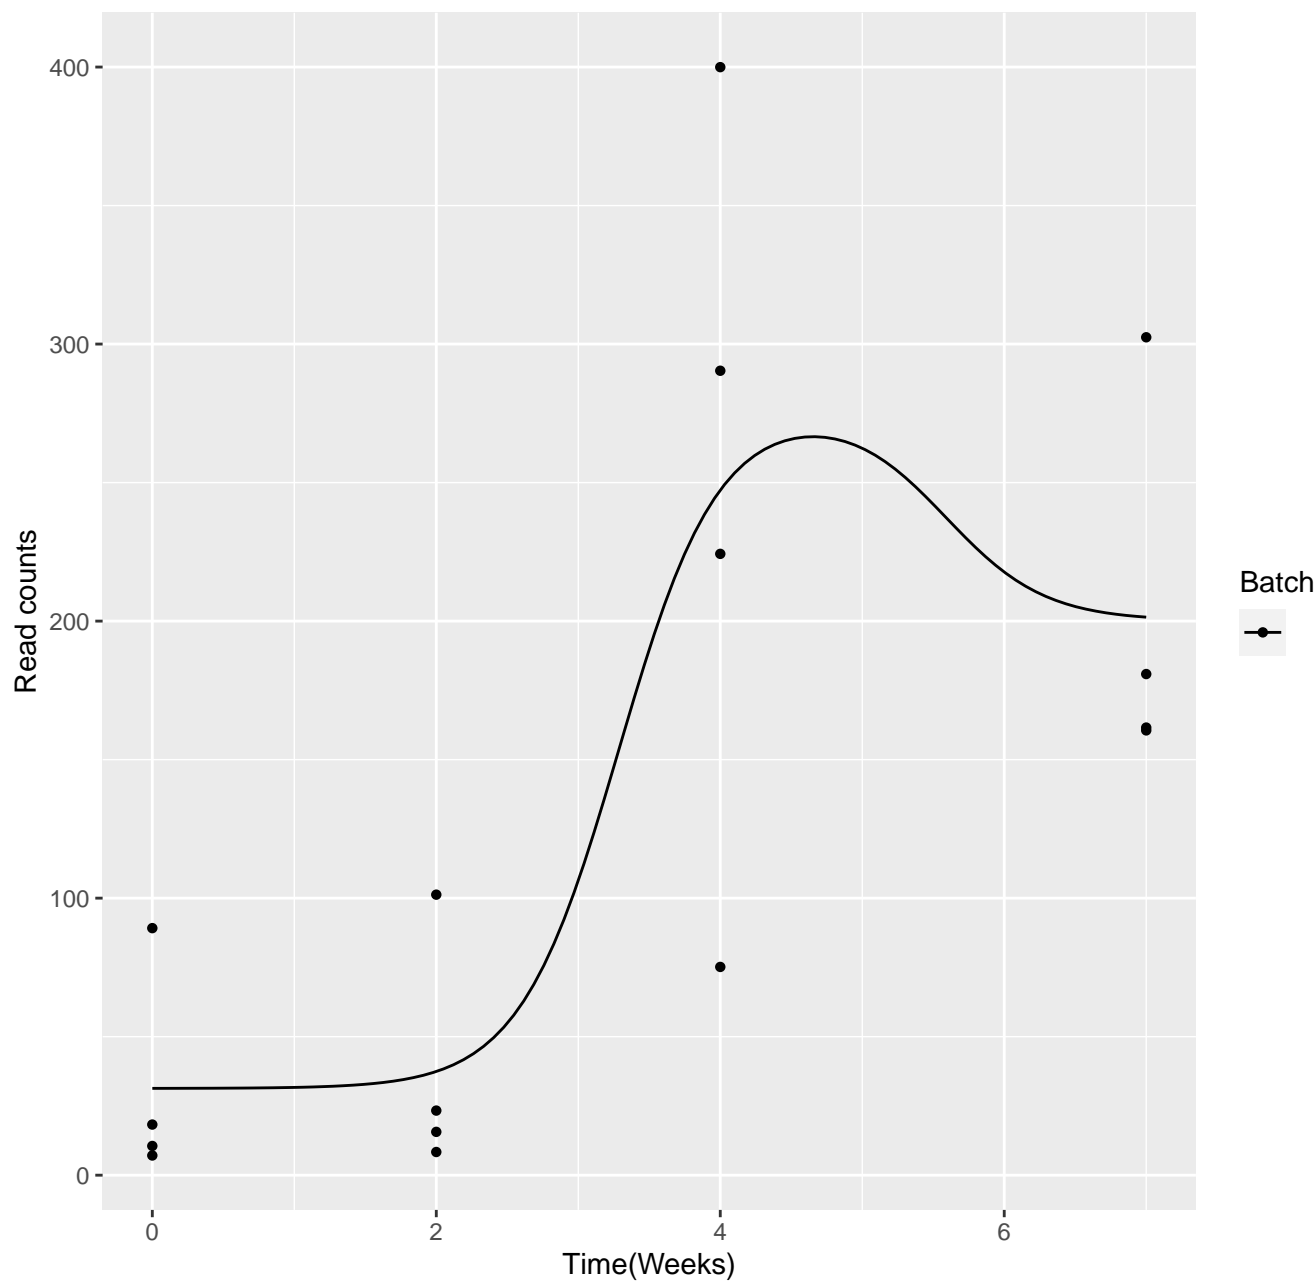

MIX23:  $\log_{10} q = -2.5$

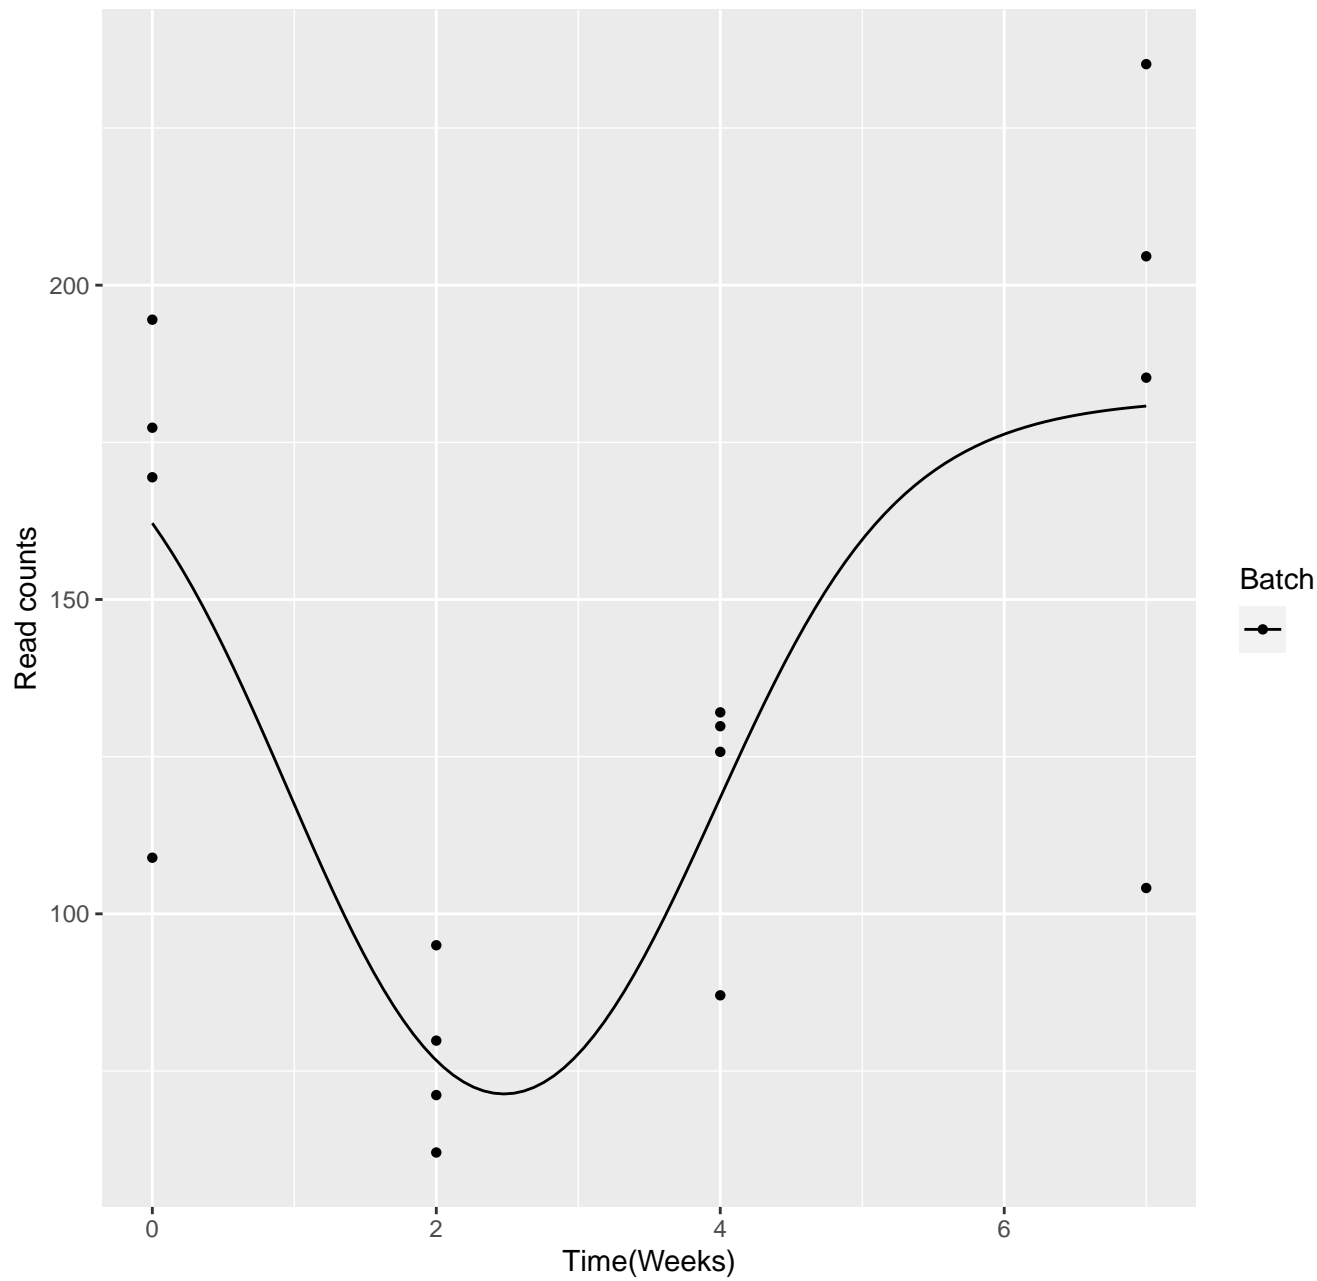

DDIT4L:  $\log_{10} q = -2.5$

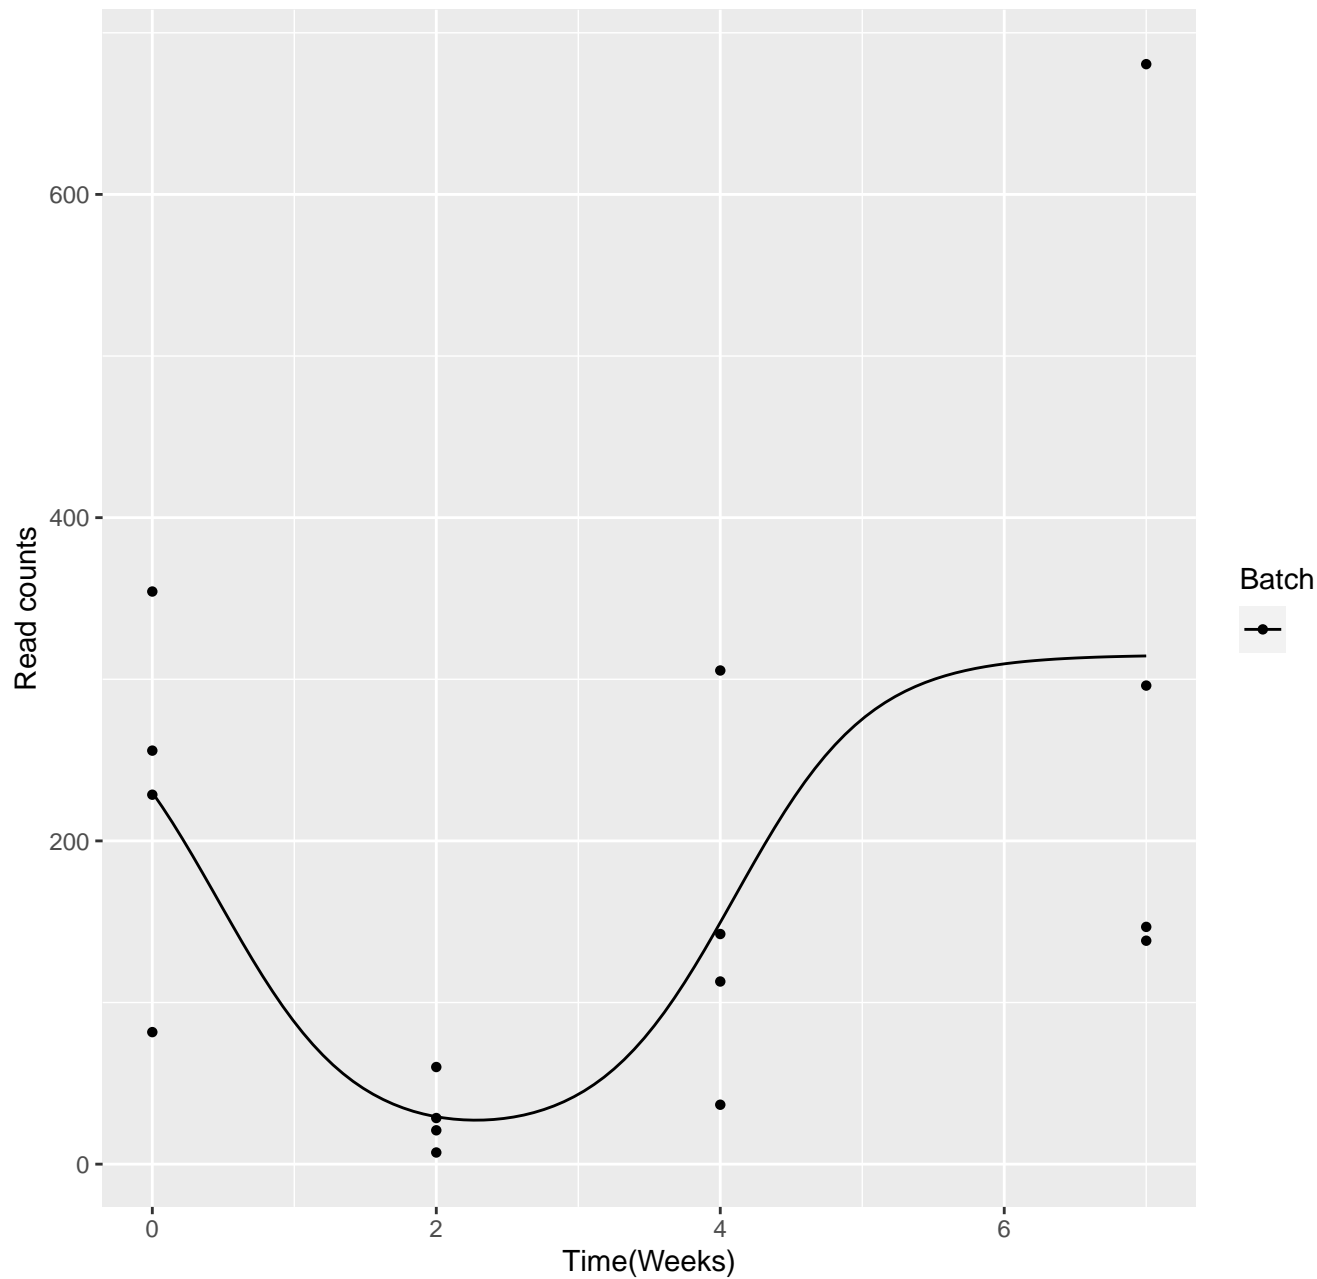

BMP10:  $\log_{10} q = -2.5$

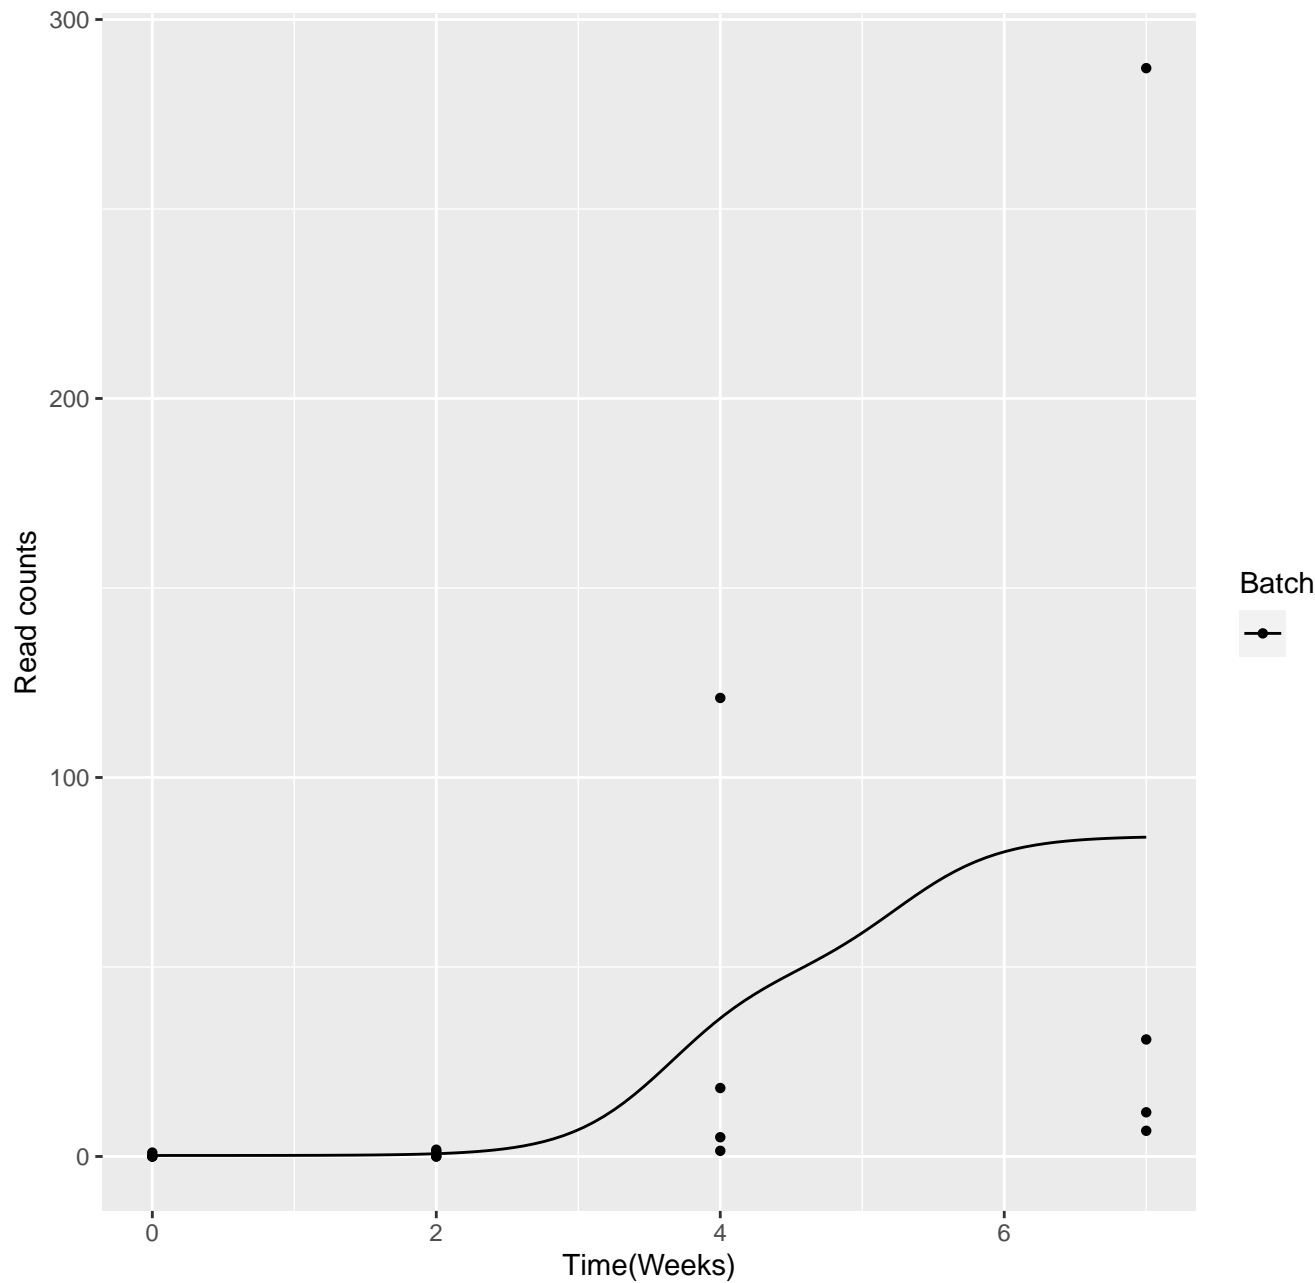



MAPKAPK3:  $\log_{10} q = -2.5$

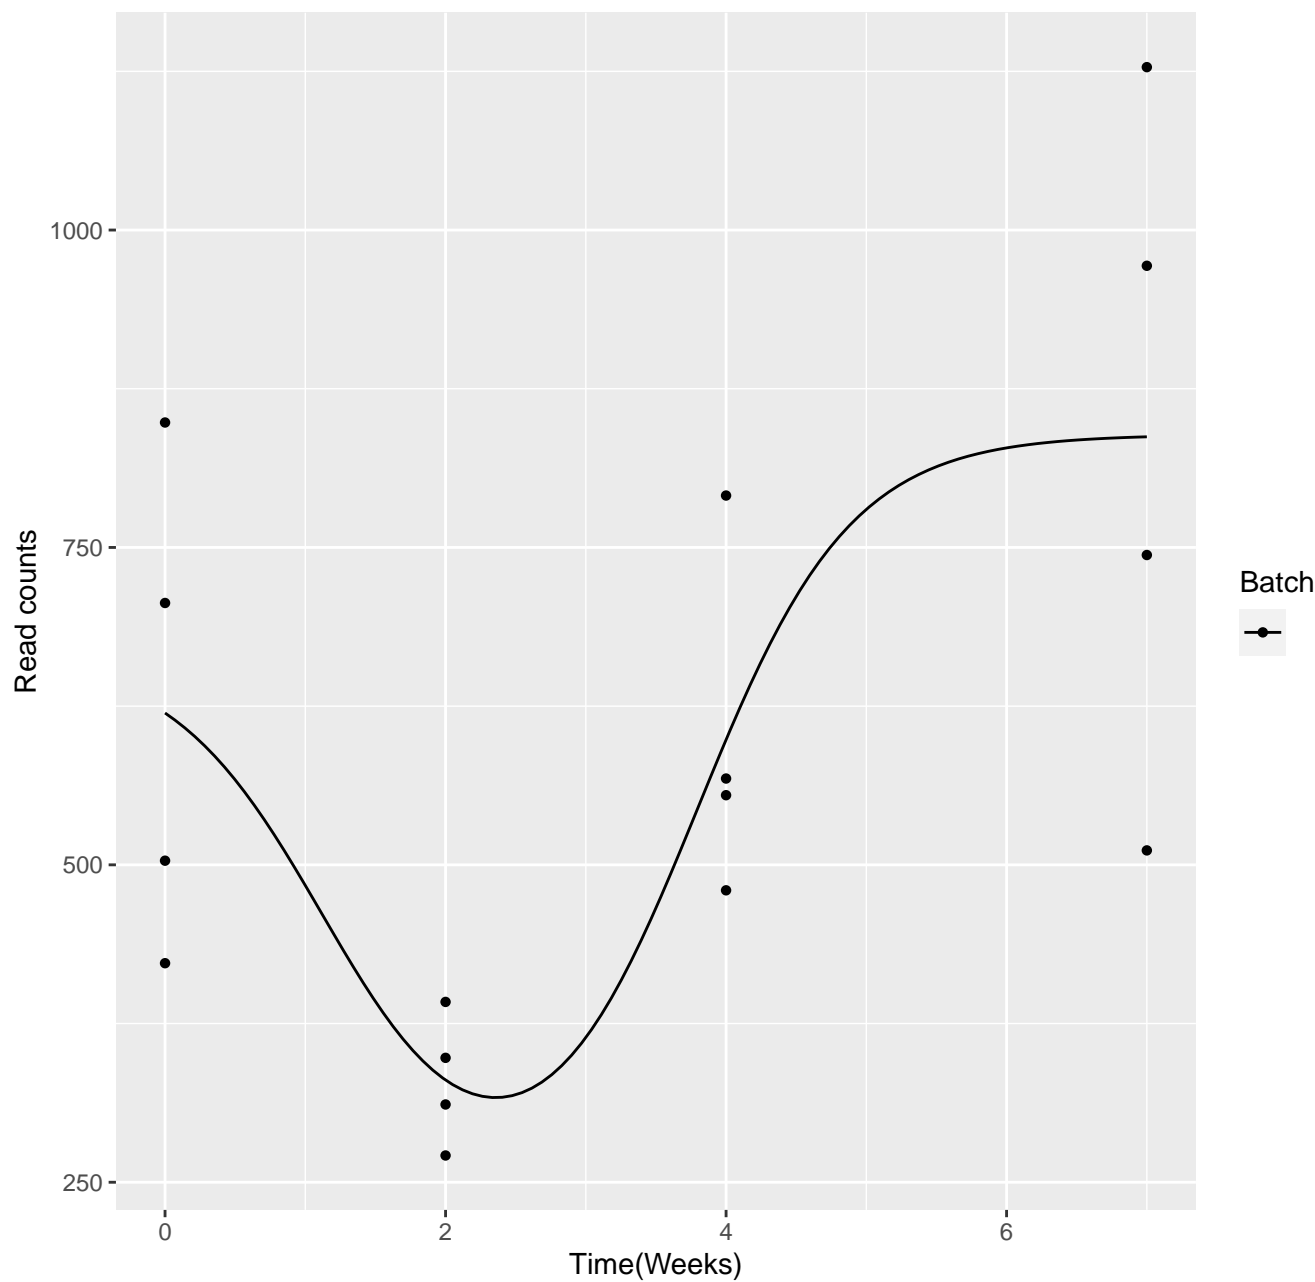

TM4SF18:  $\log_{10} q = -2.5$

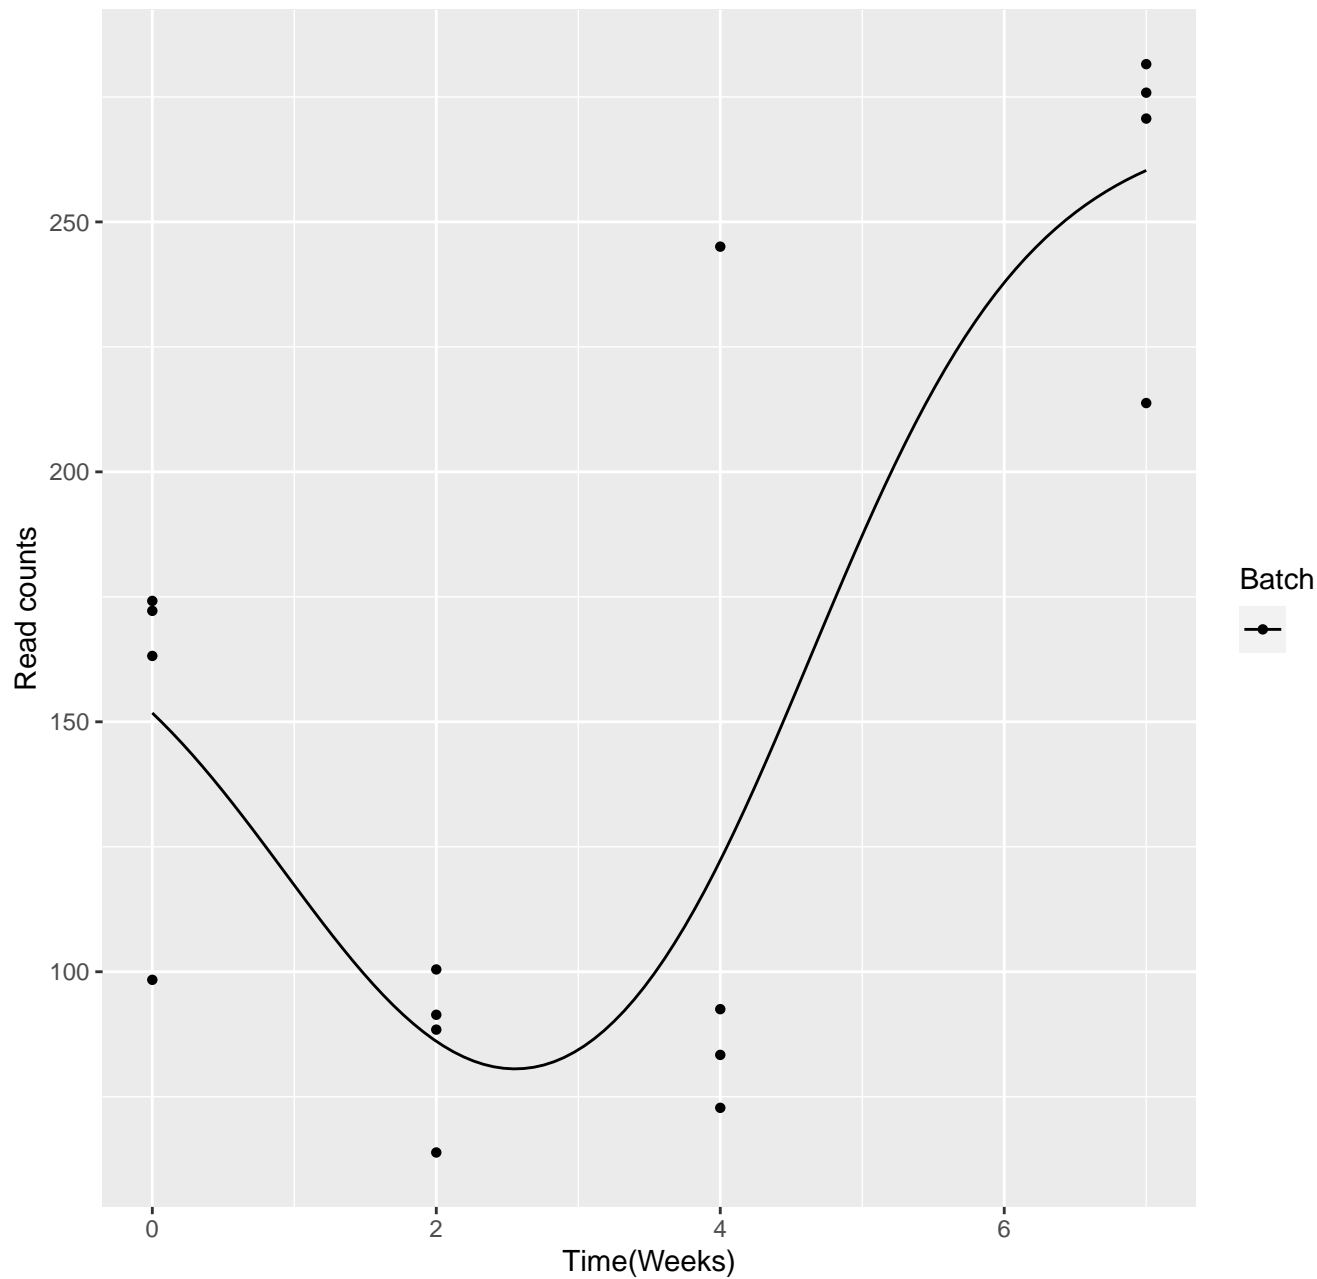

NLRX1:  $\log_{10} q = -2.49$

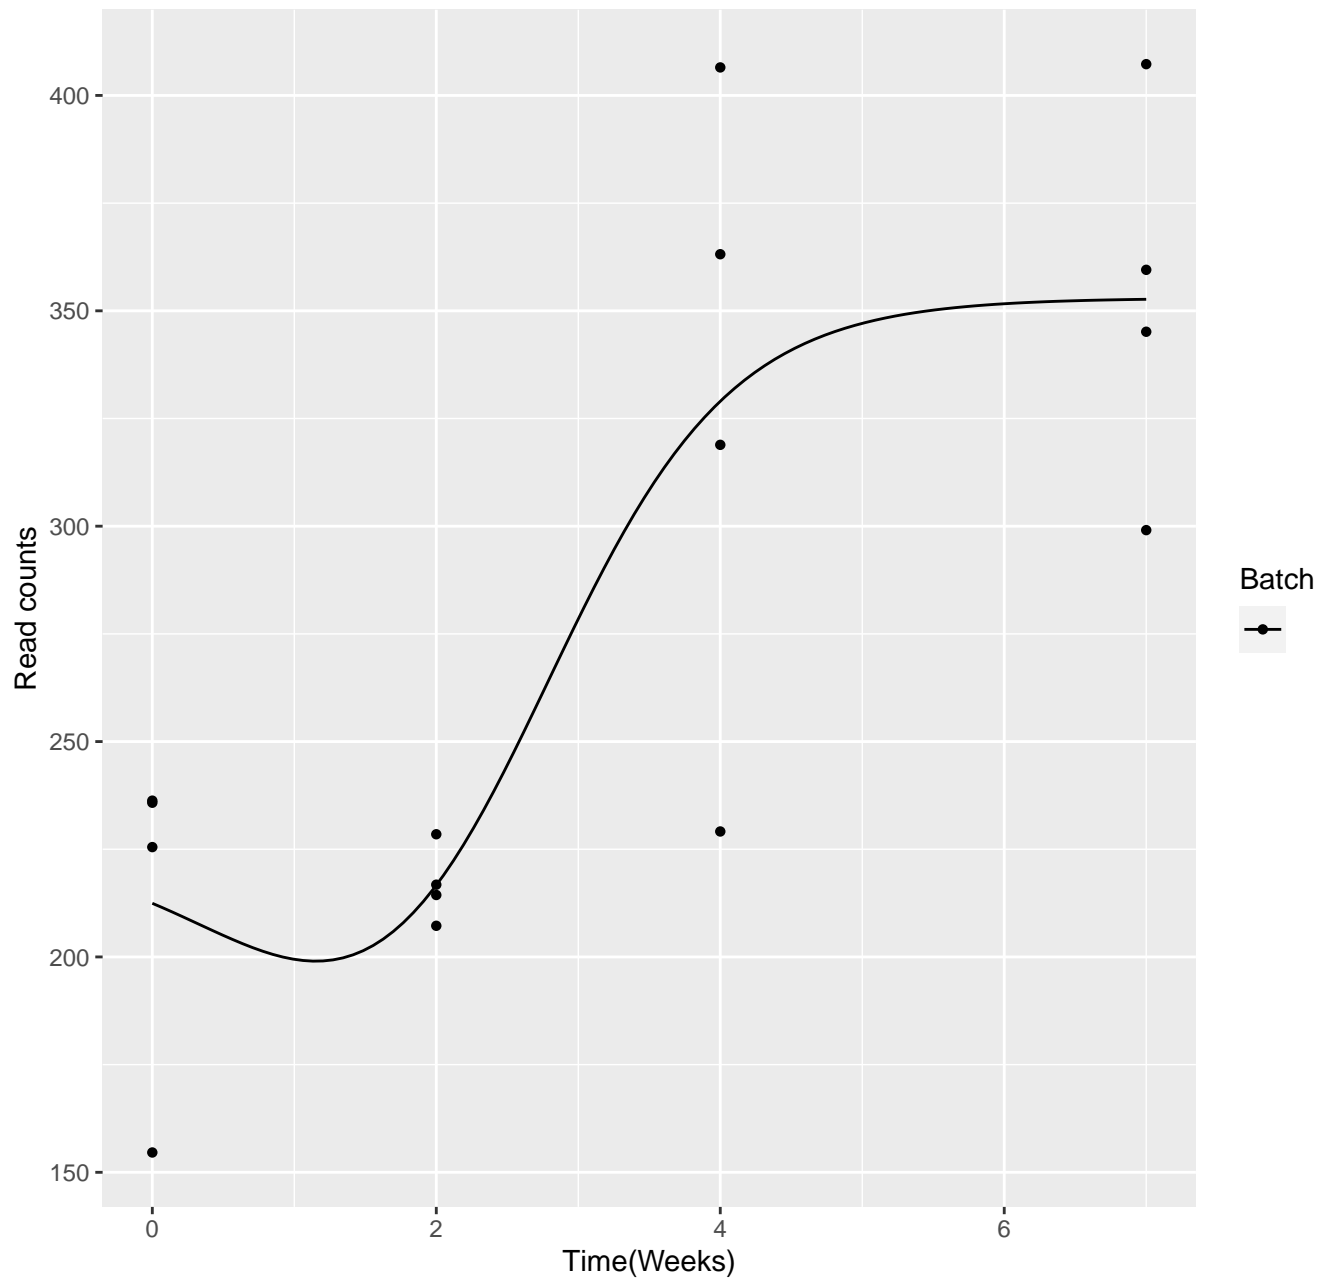

DLX3:  $\log_{10} q = -2.49$

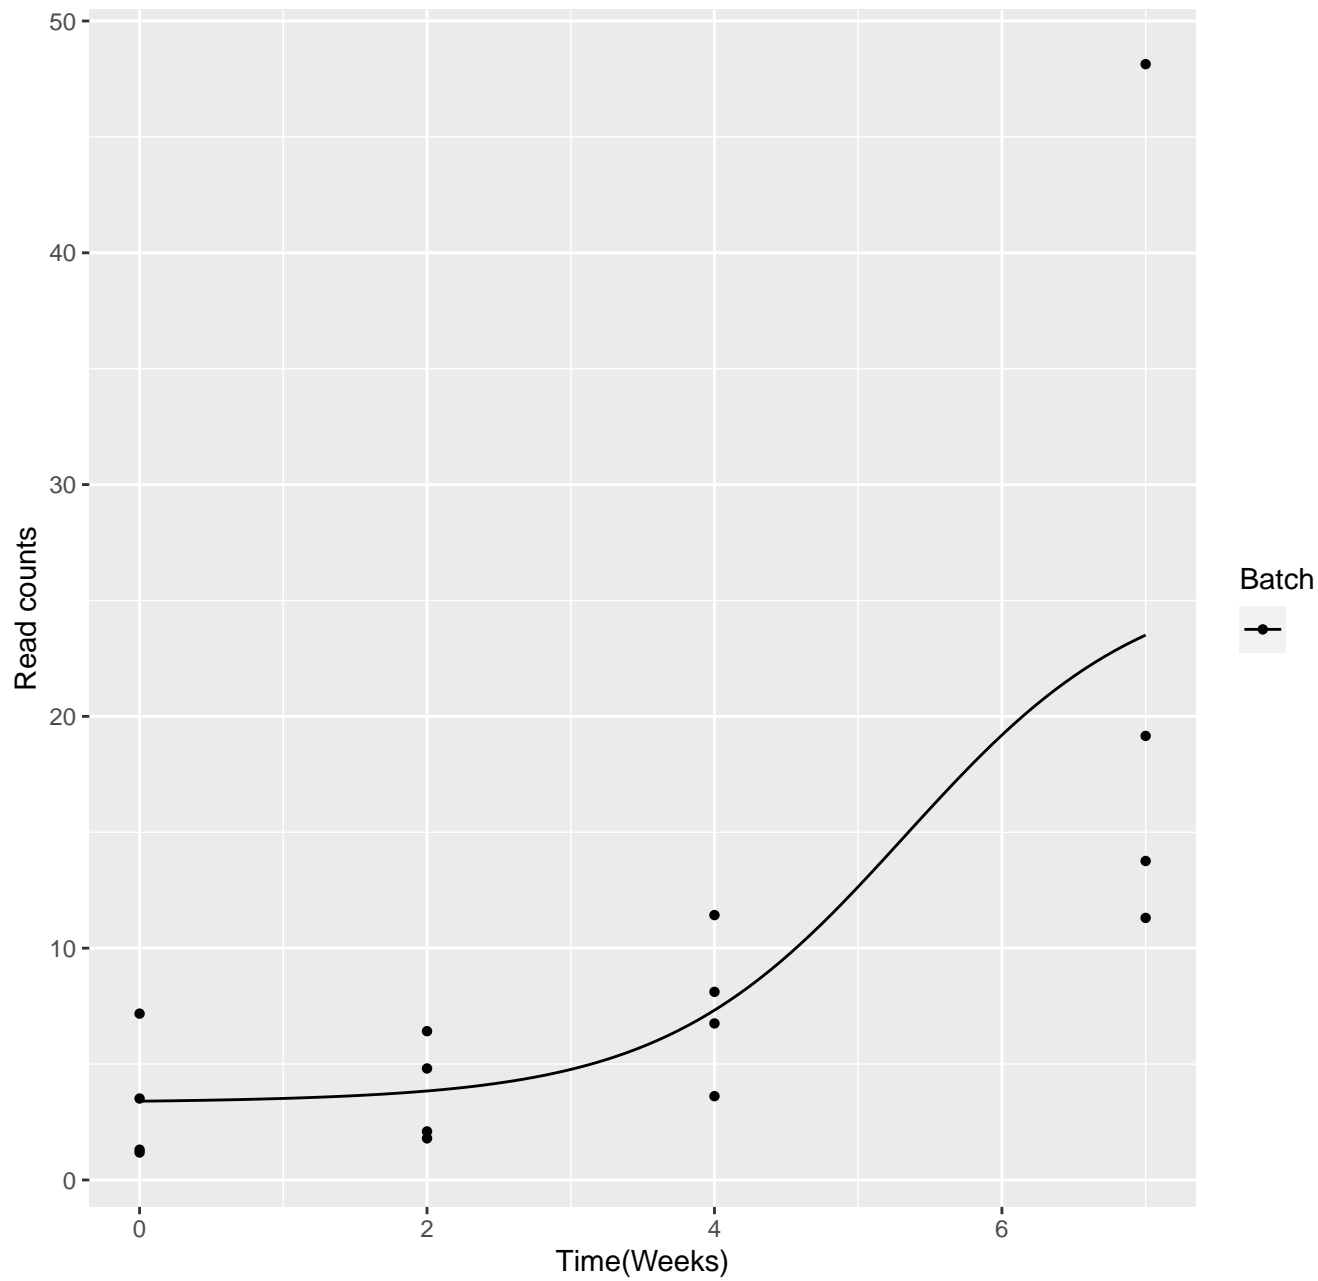

LOC100356848:  $\log_{10} q = -2.49$

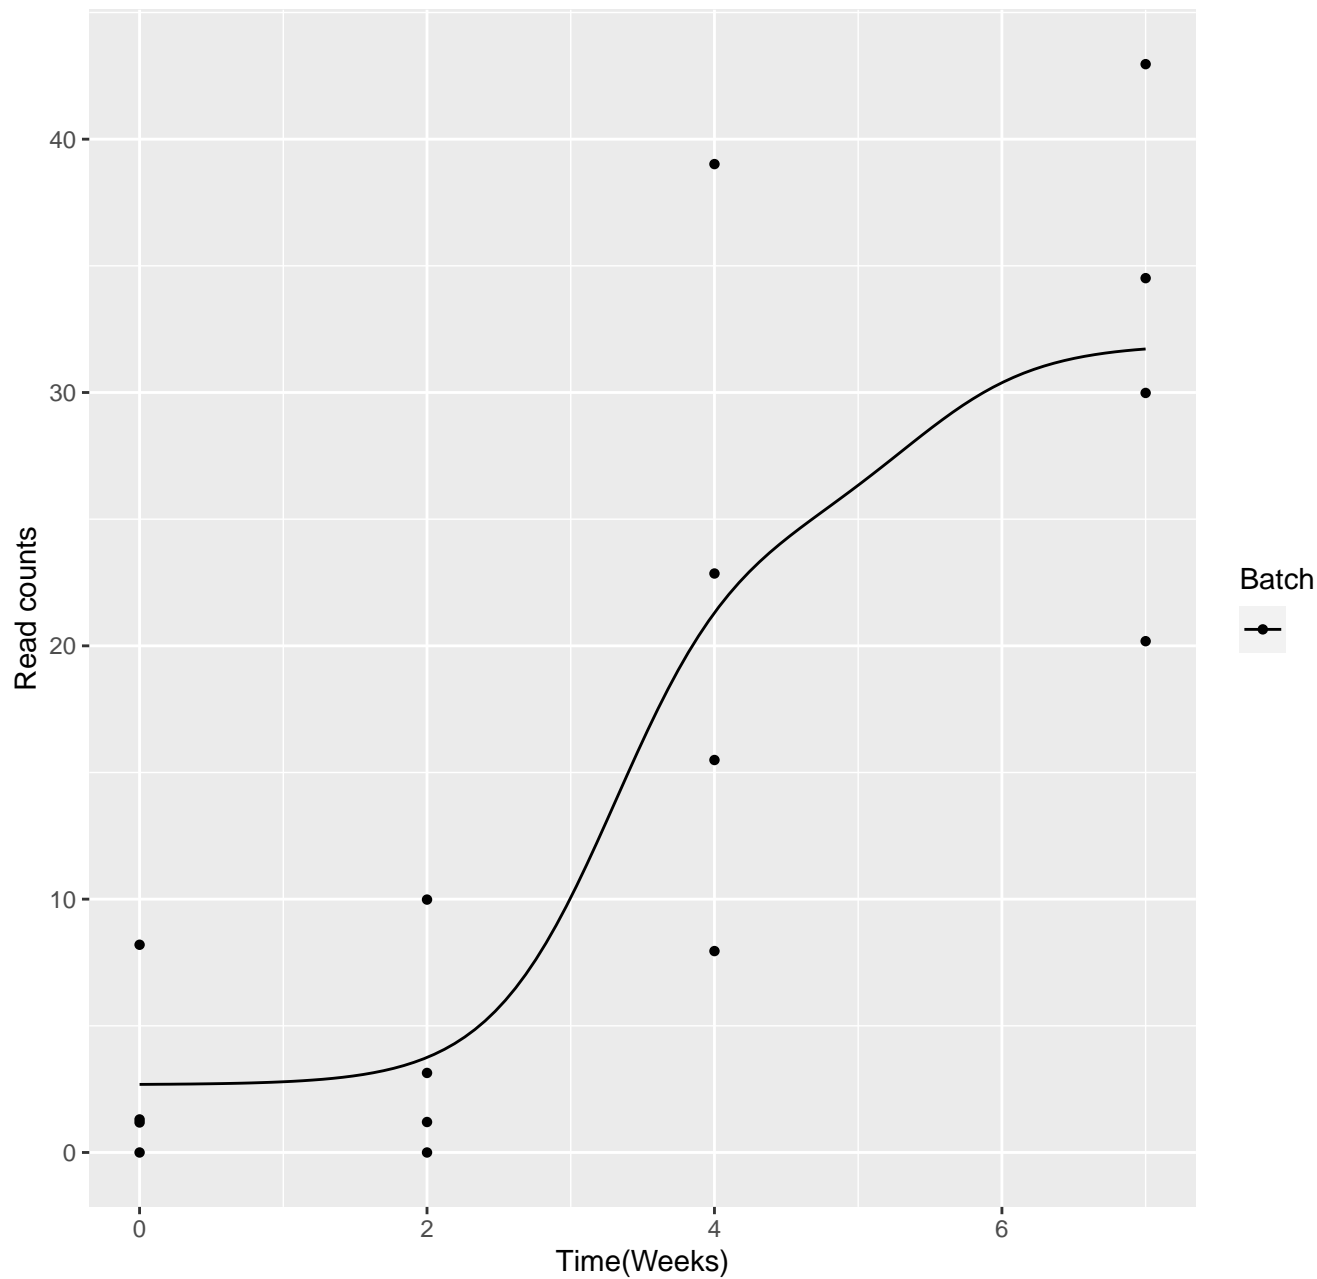

LOC100347316:  $\log_{10} q = -2.49$

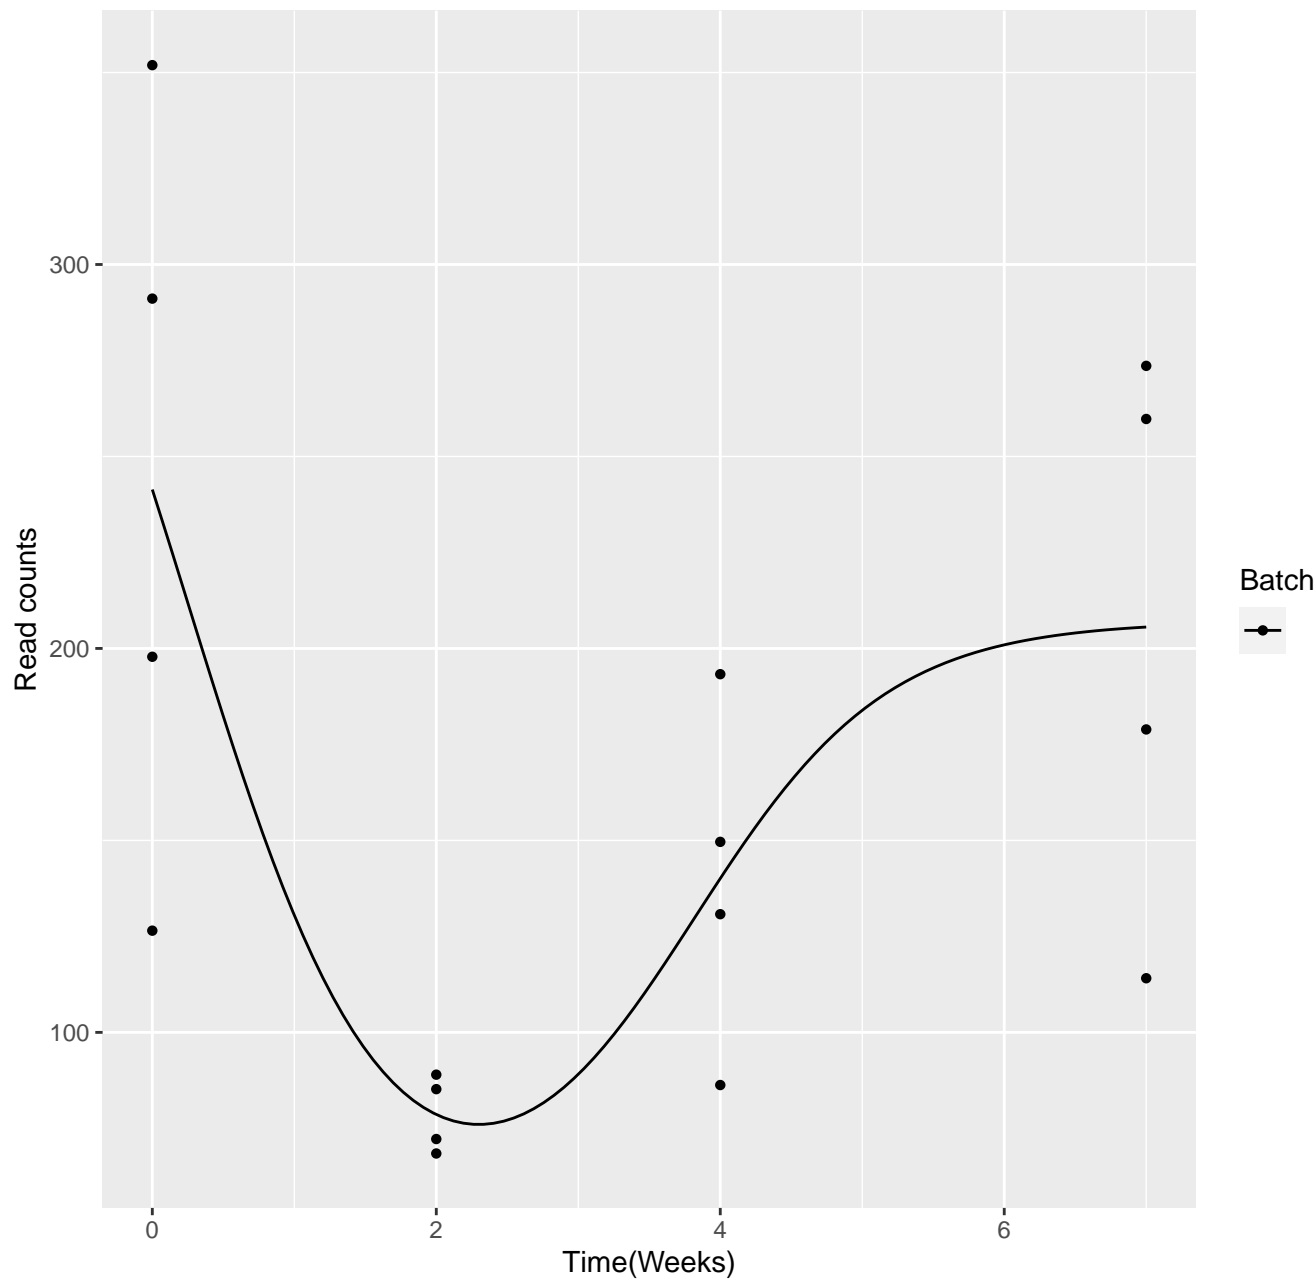

LOC127486002:  $\log_{10} q = -2.49$

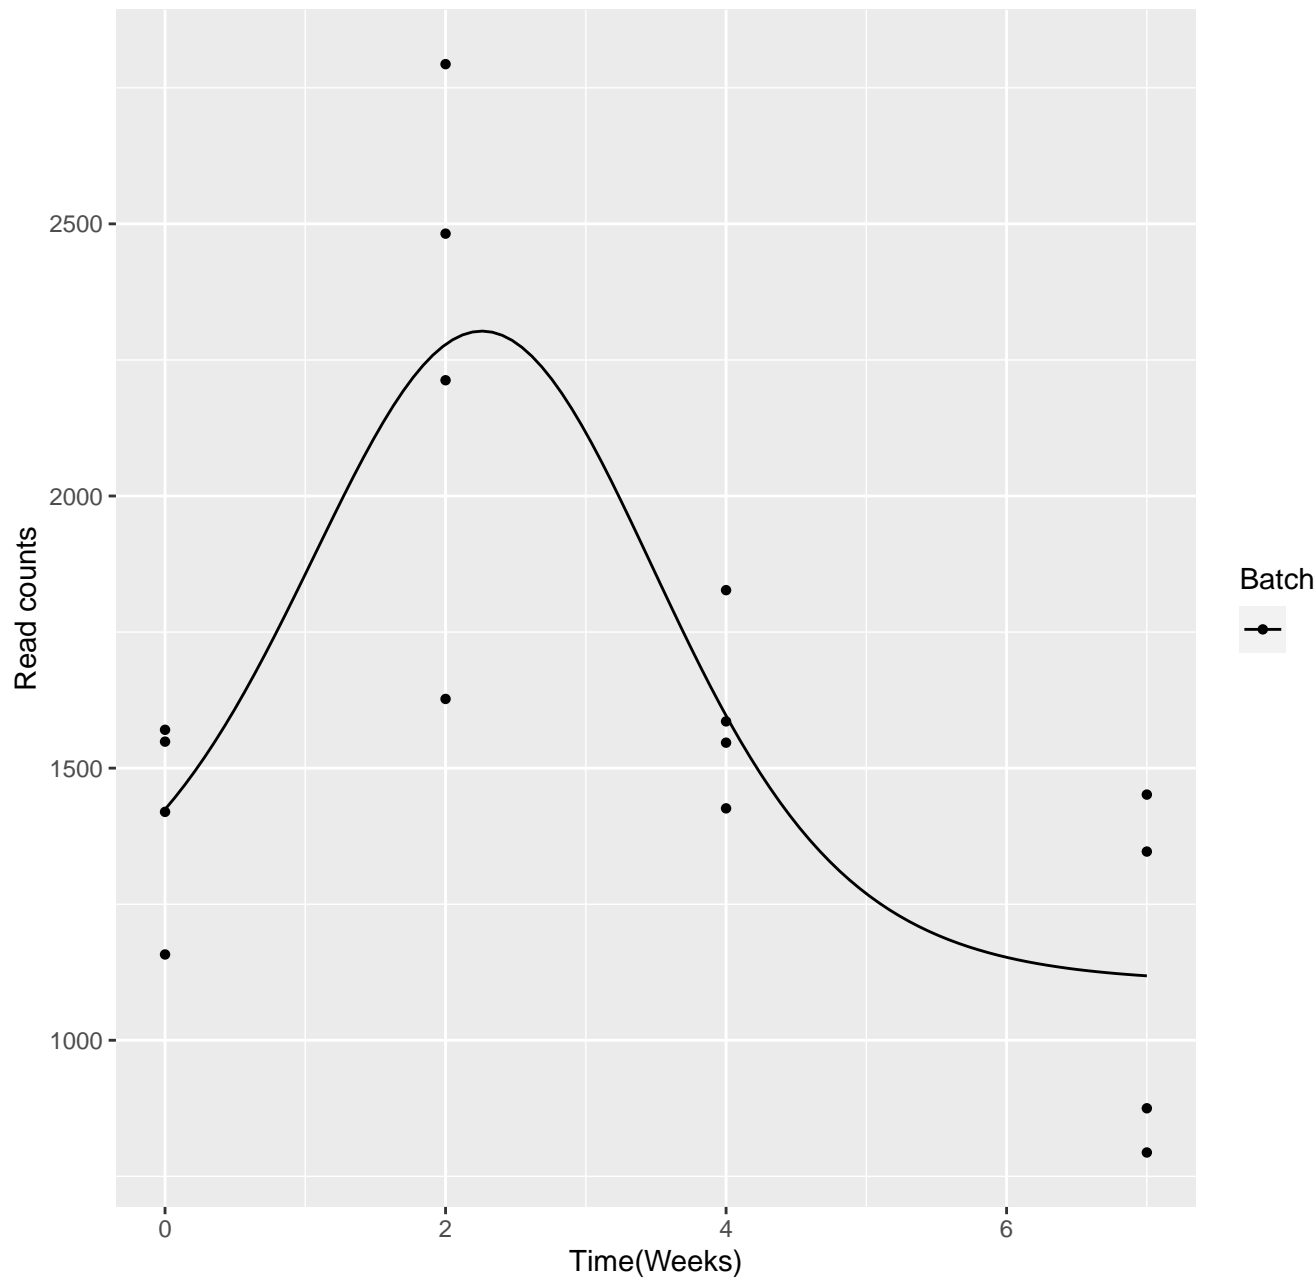

GNAT1:  $\log_{10} q = -2.49$

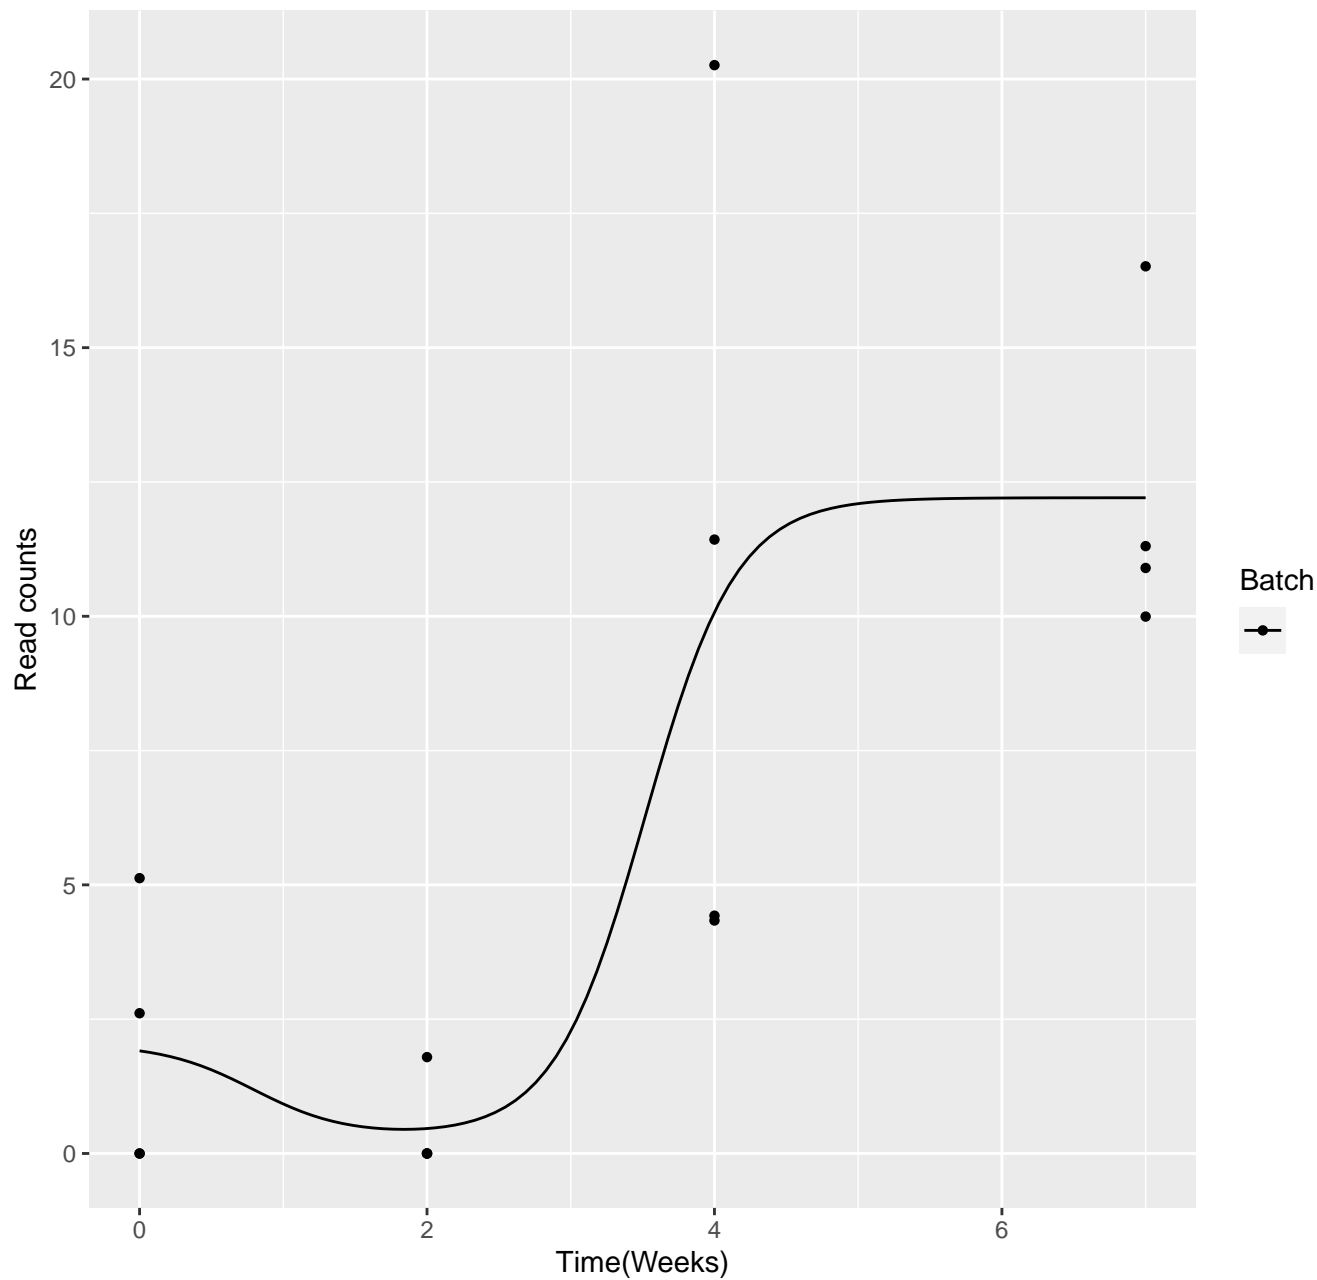



MEIS3:  $\log_{10} q = -2.48$

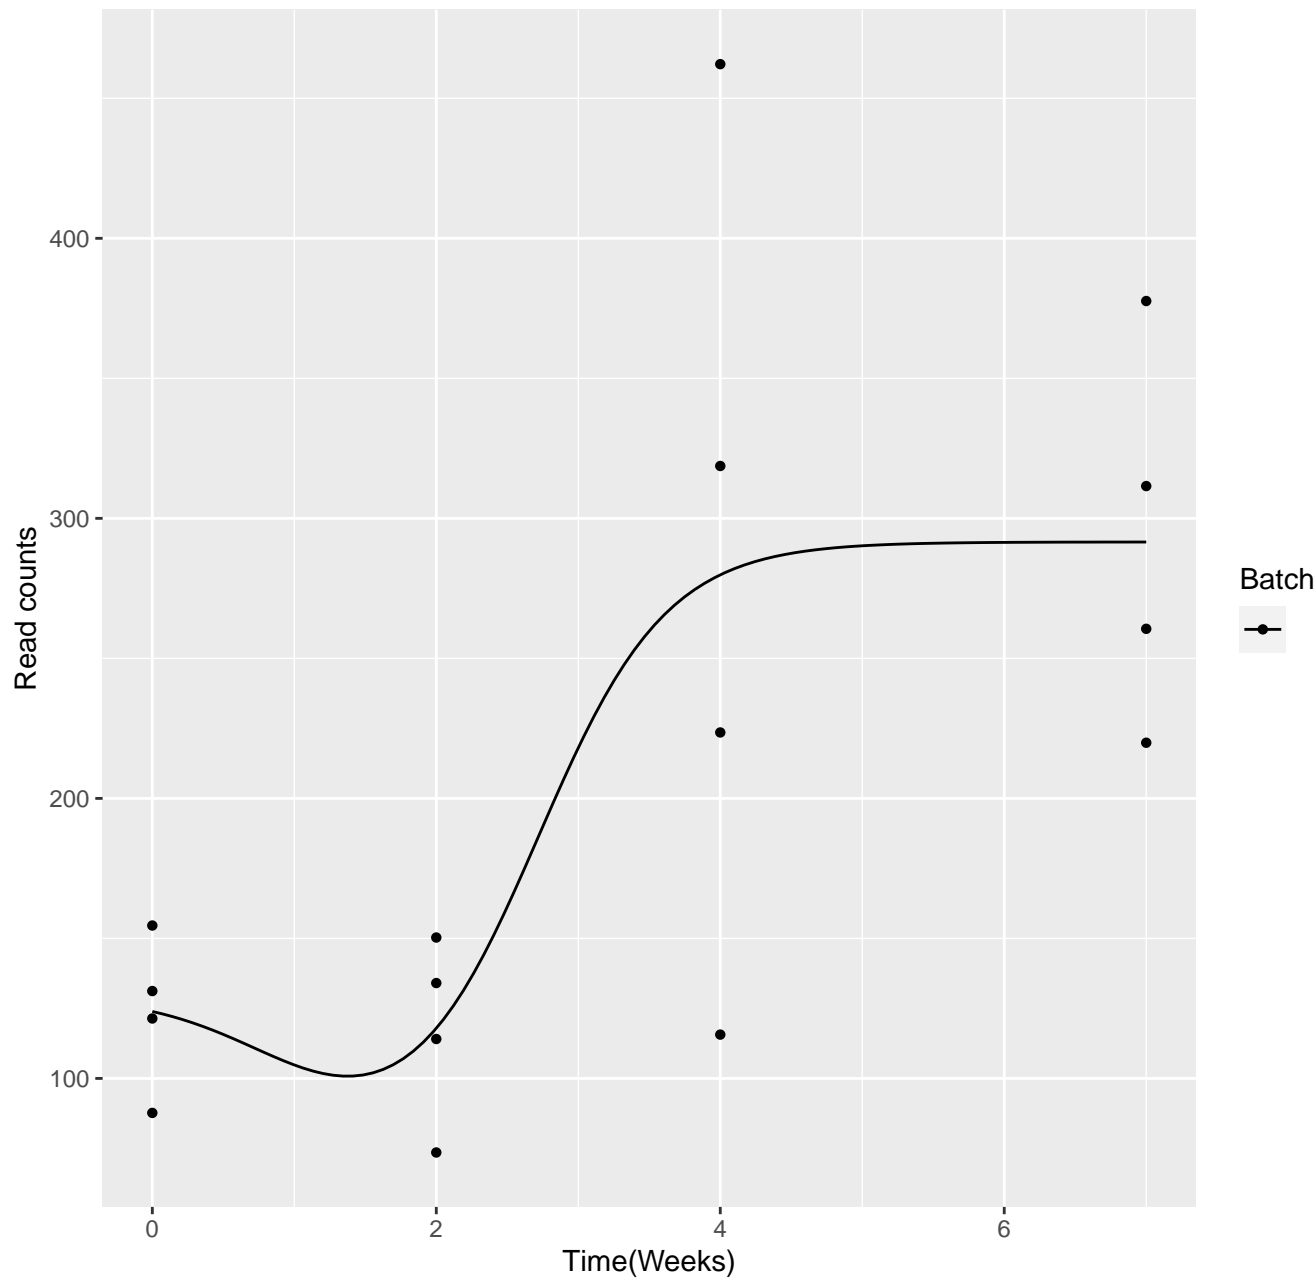

LRRC39:  $\log_{10} q = -2.48$

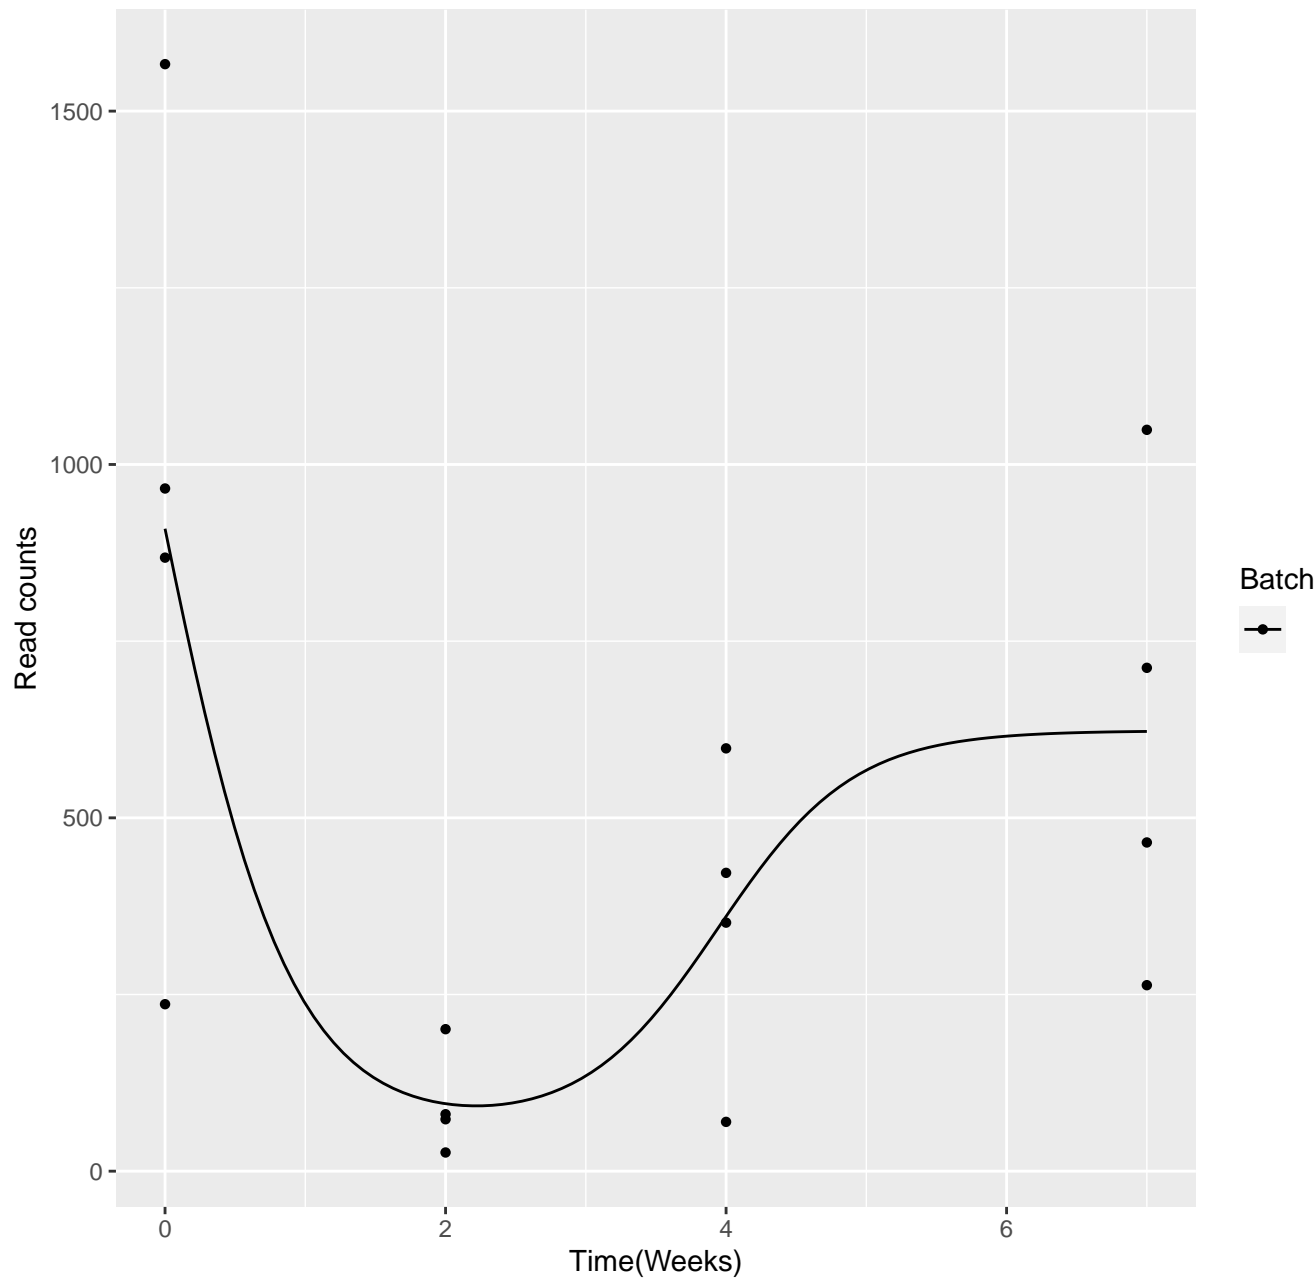

NYAP1:  $\log_{10} q = -2.48$

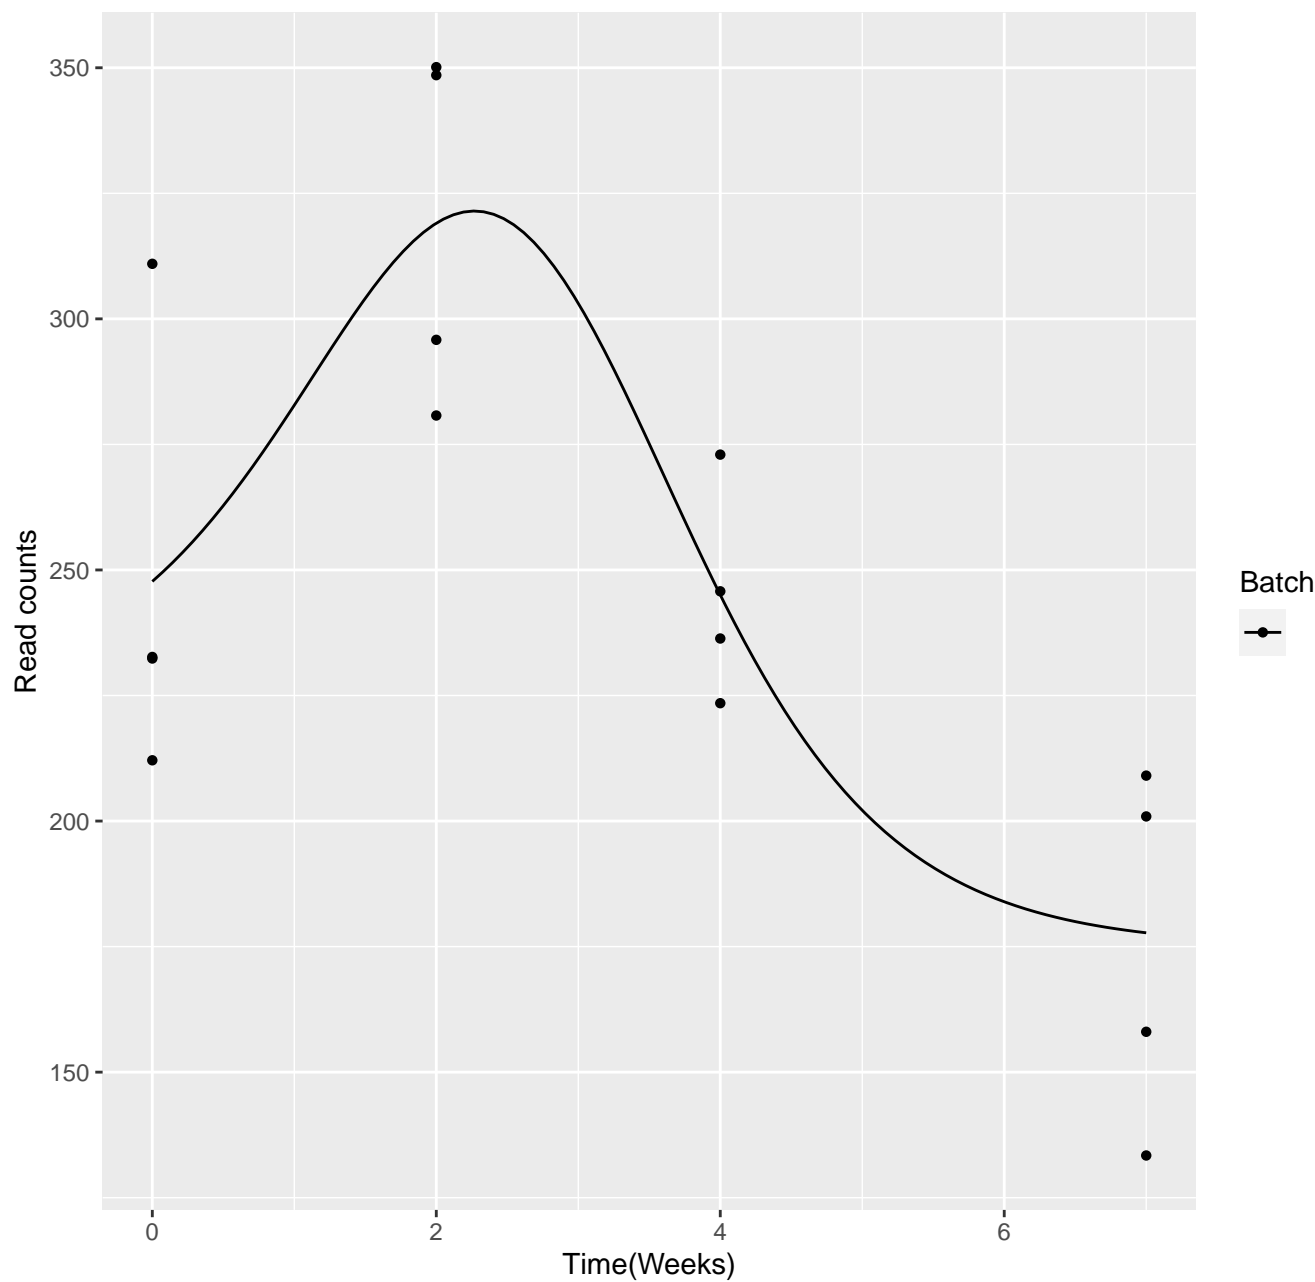

EPHX2:  $\log_{10} q = -2.48$

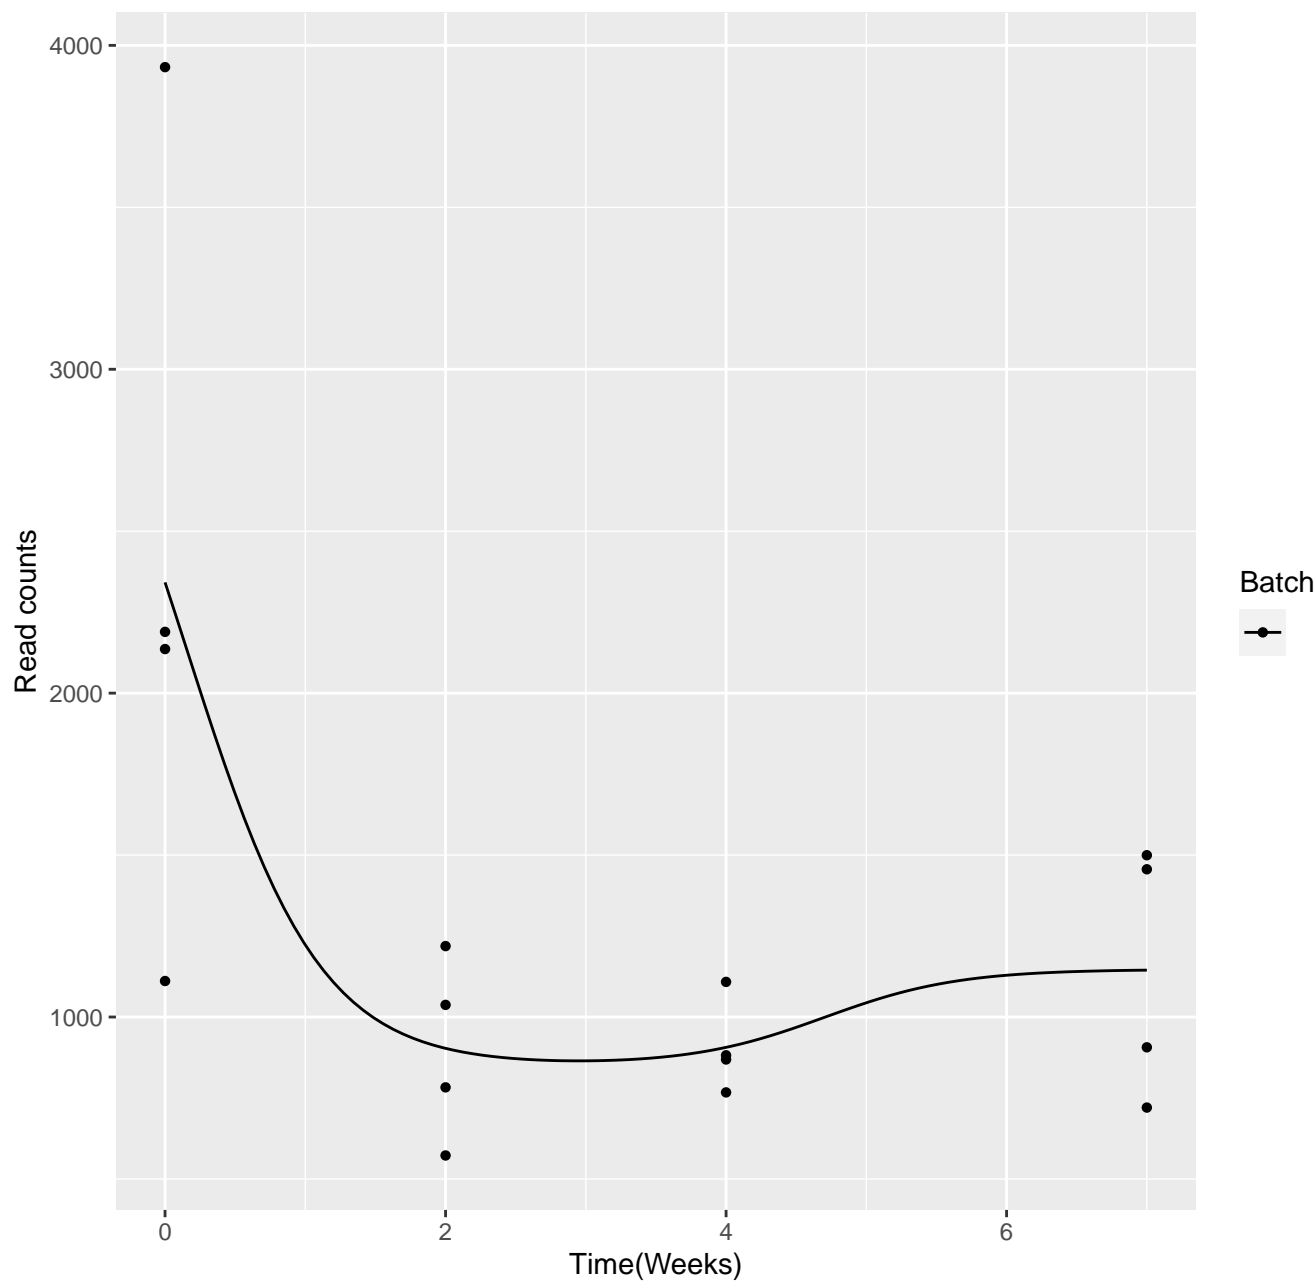

LOC100337966:  $\log_{10} q = -2.48$

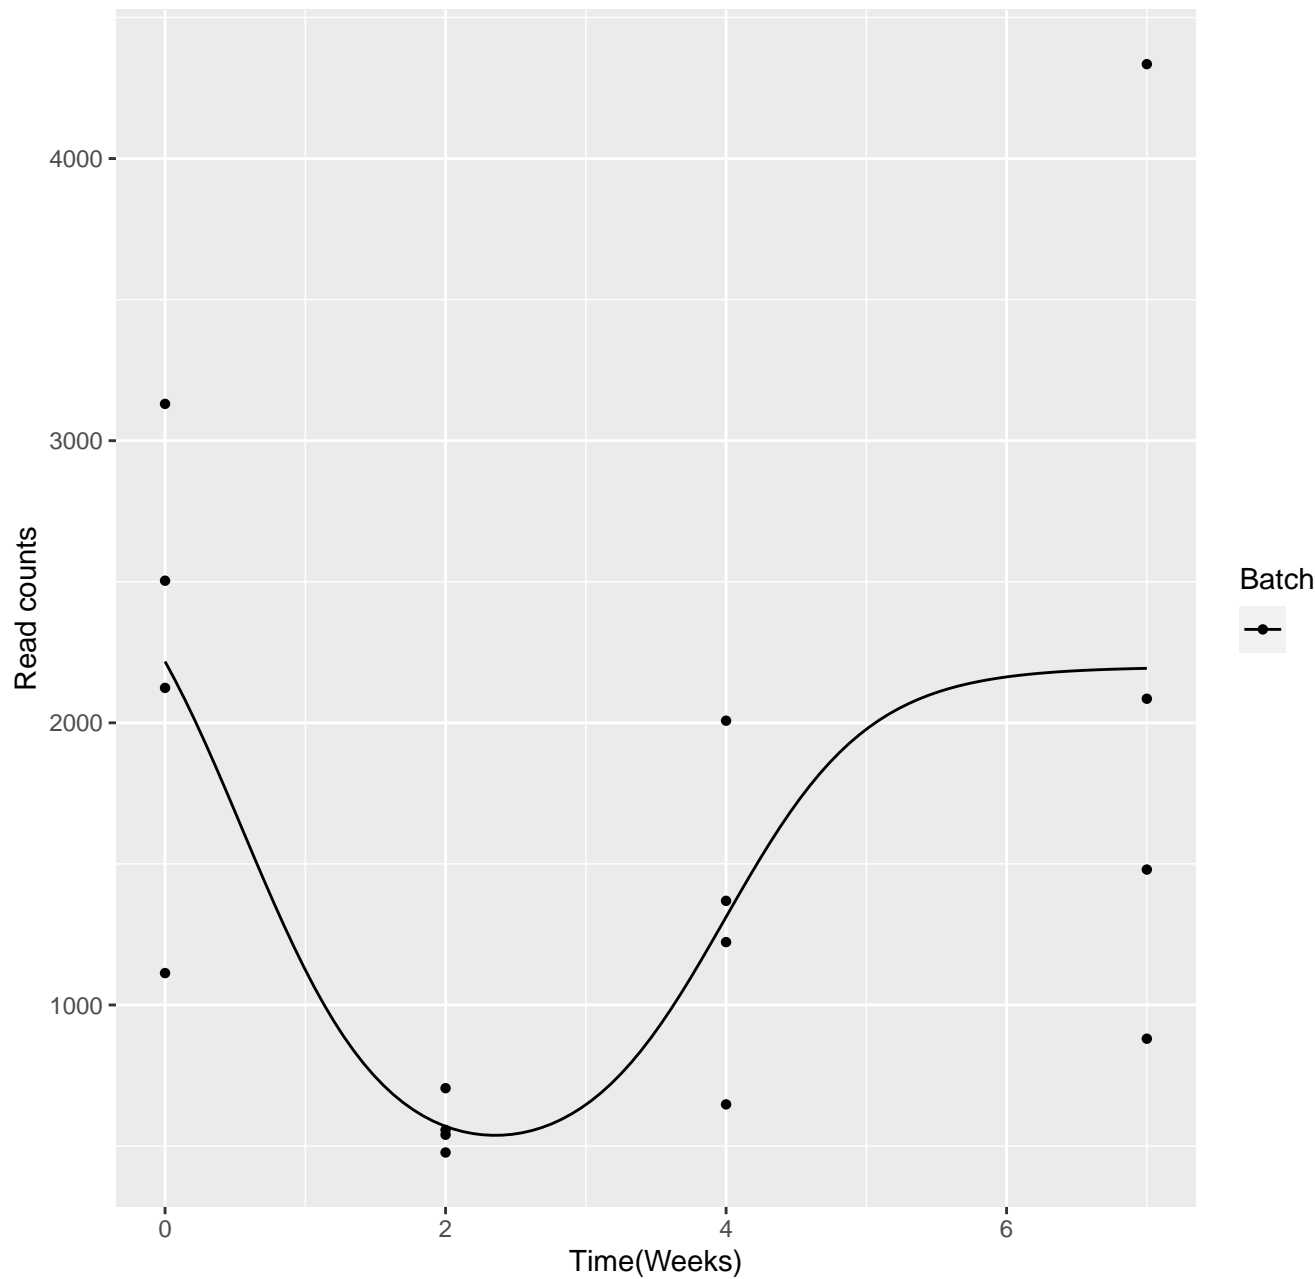

LOC127486042:  $\log_{10} q = -2.48$

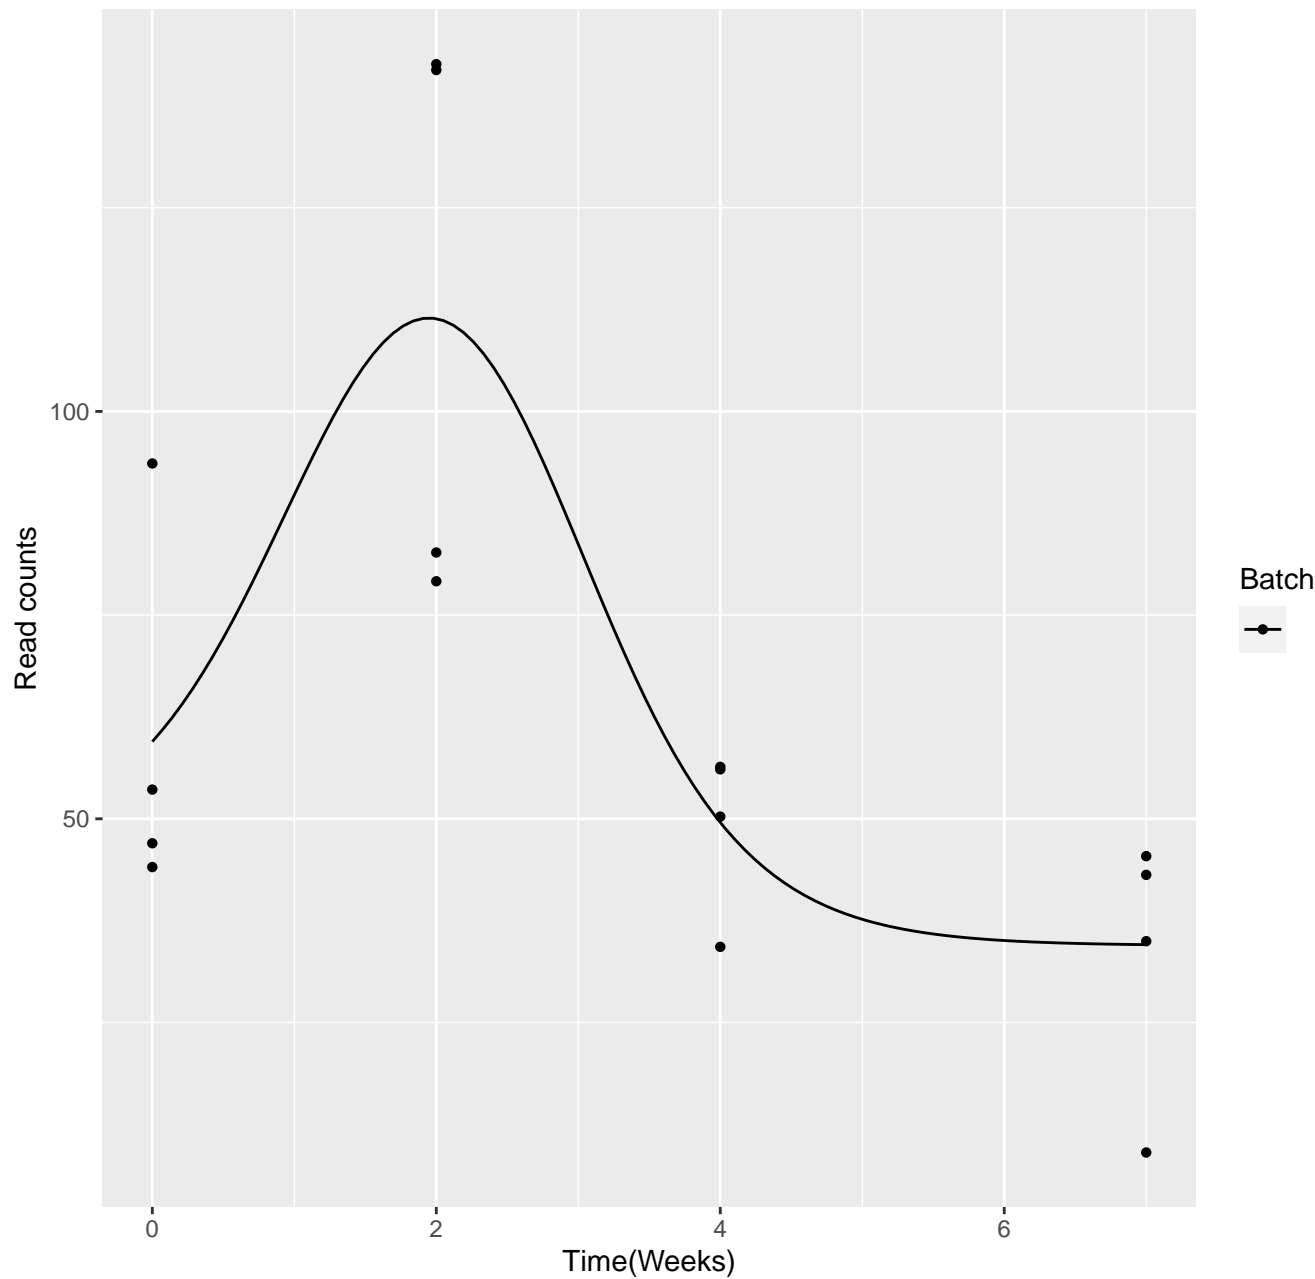

SLN:  $\log_{10} q = -2.48$

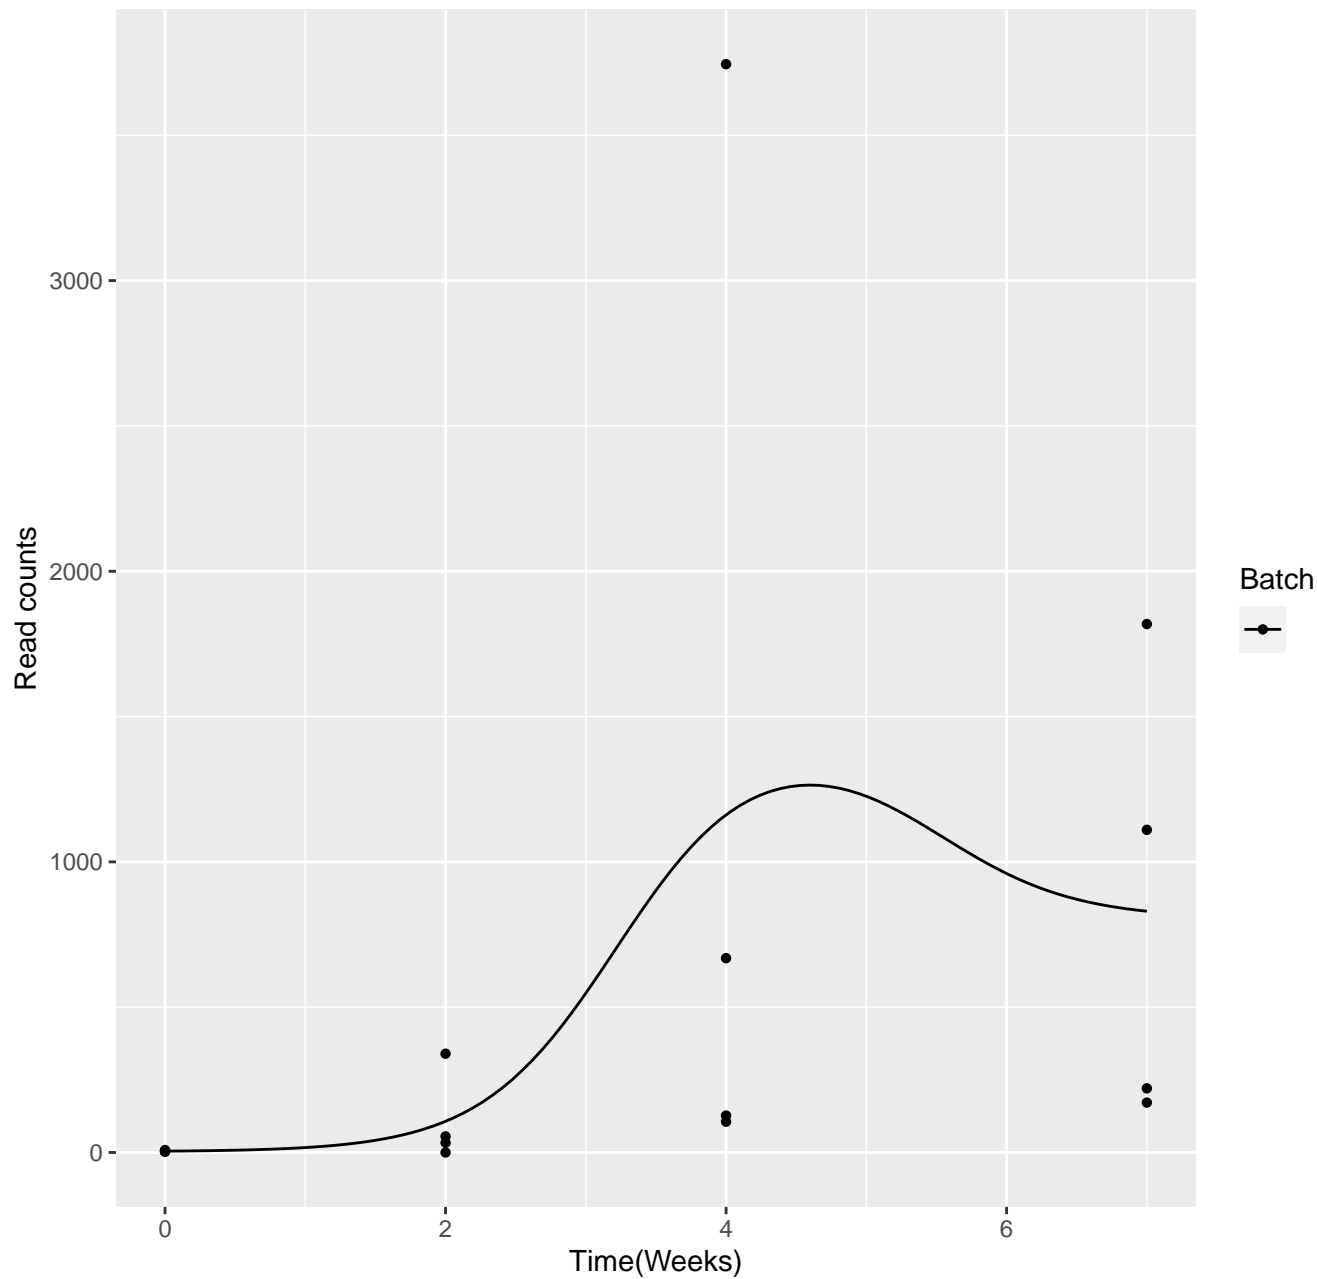

RALB:  $\log_{10} q = -2.47$

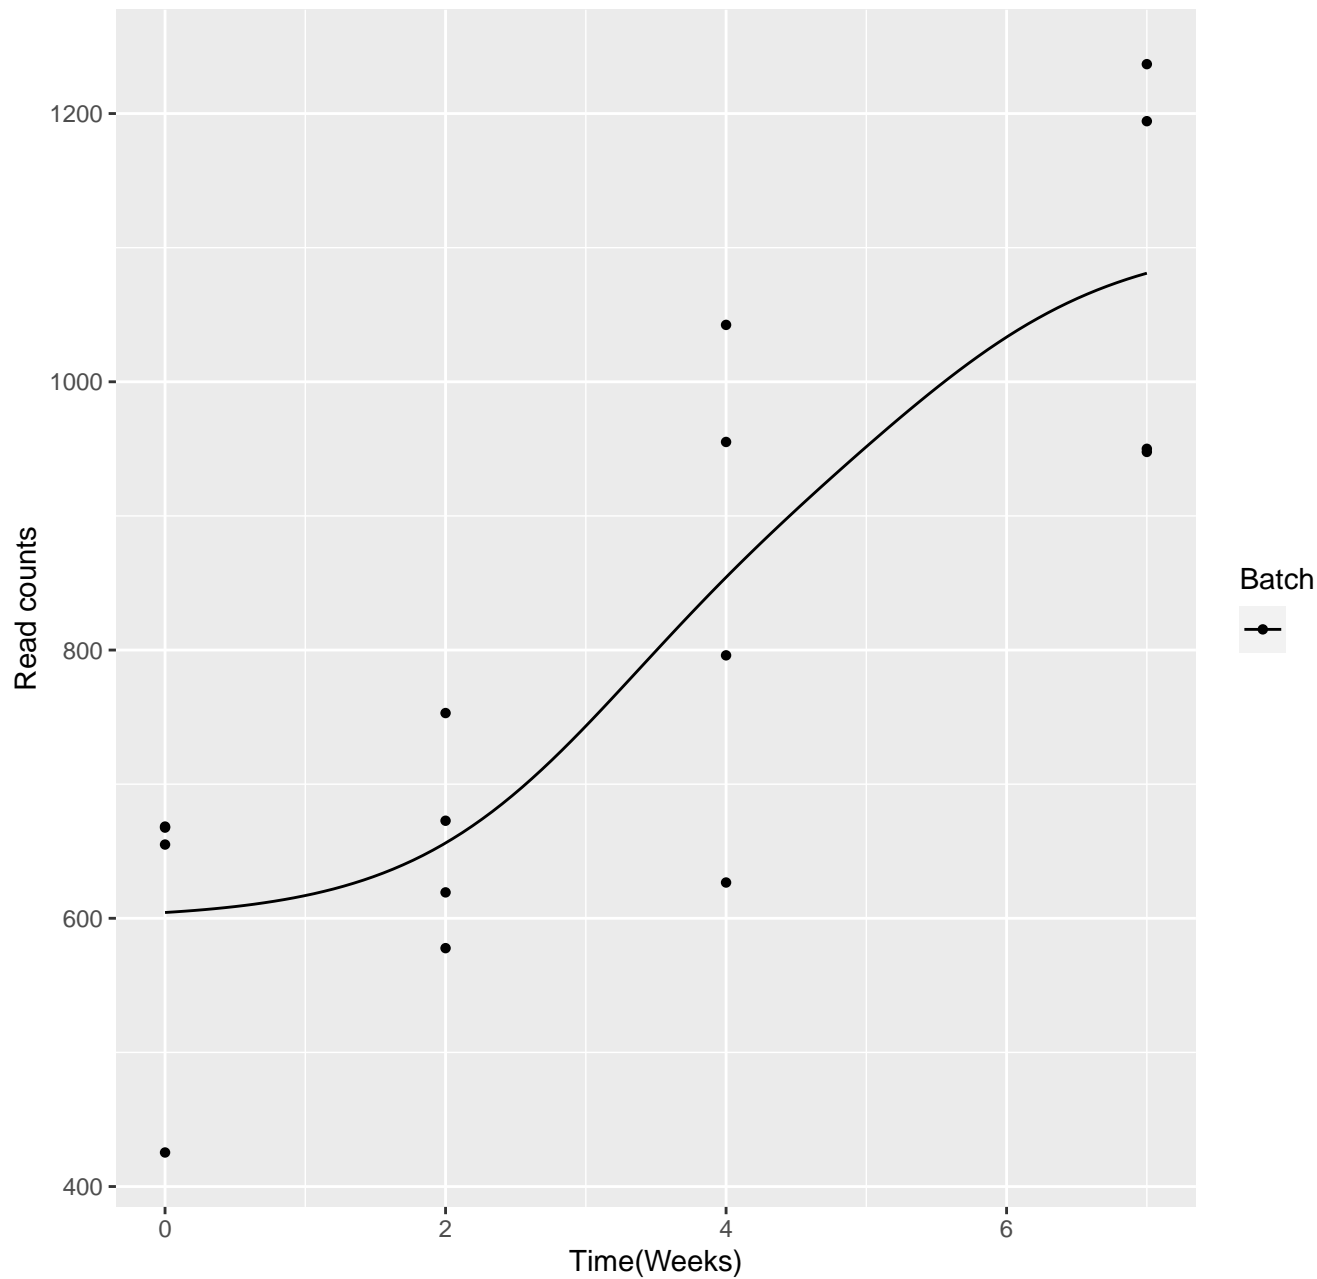



CD180:  $\log_{10} q = -2.47$

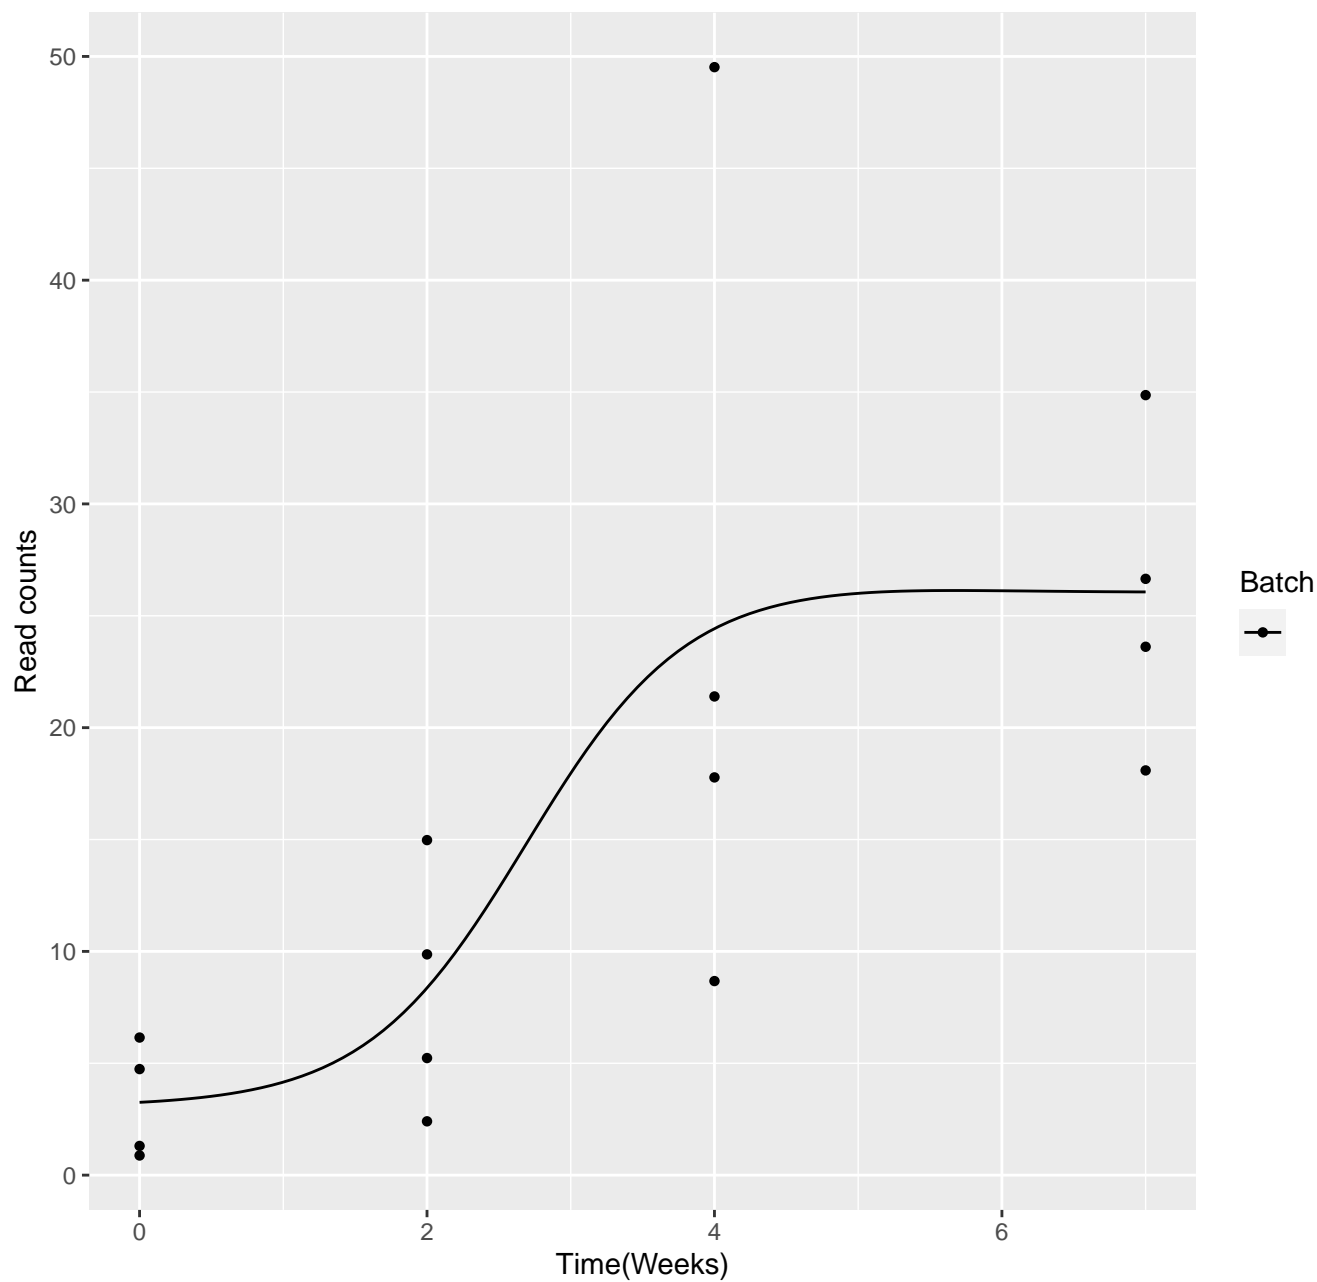

BDKRB1:  $\log_{10} q = -2.47$

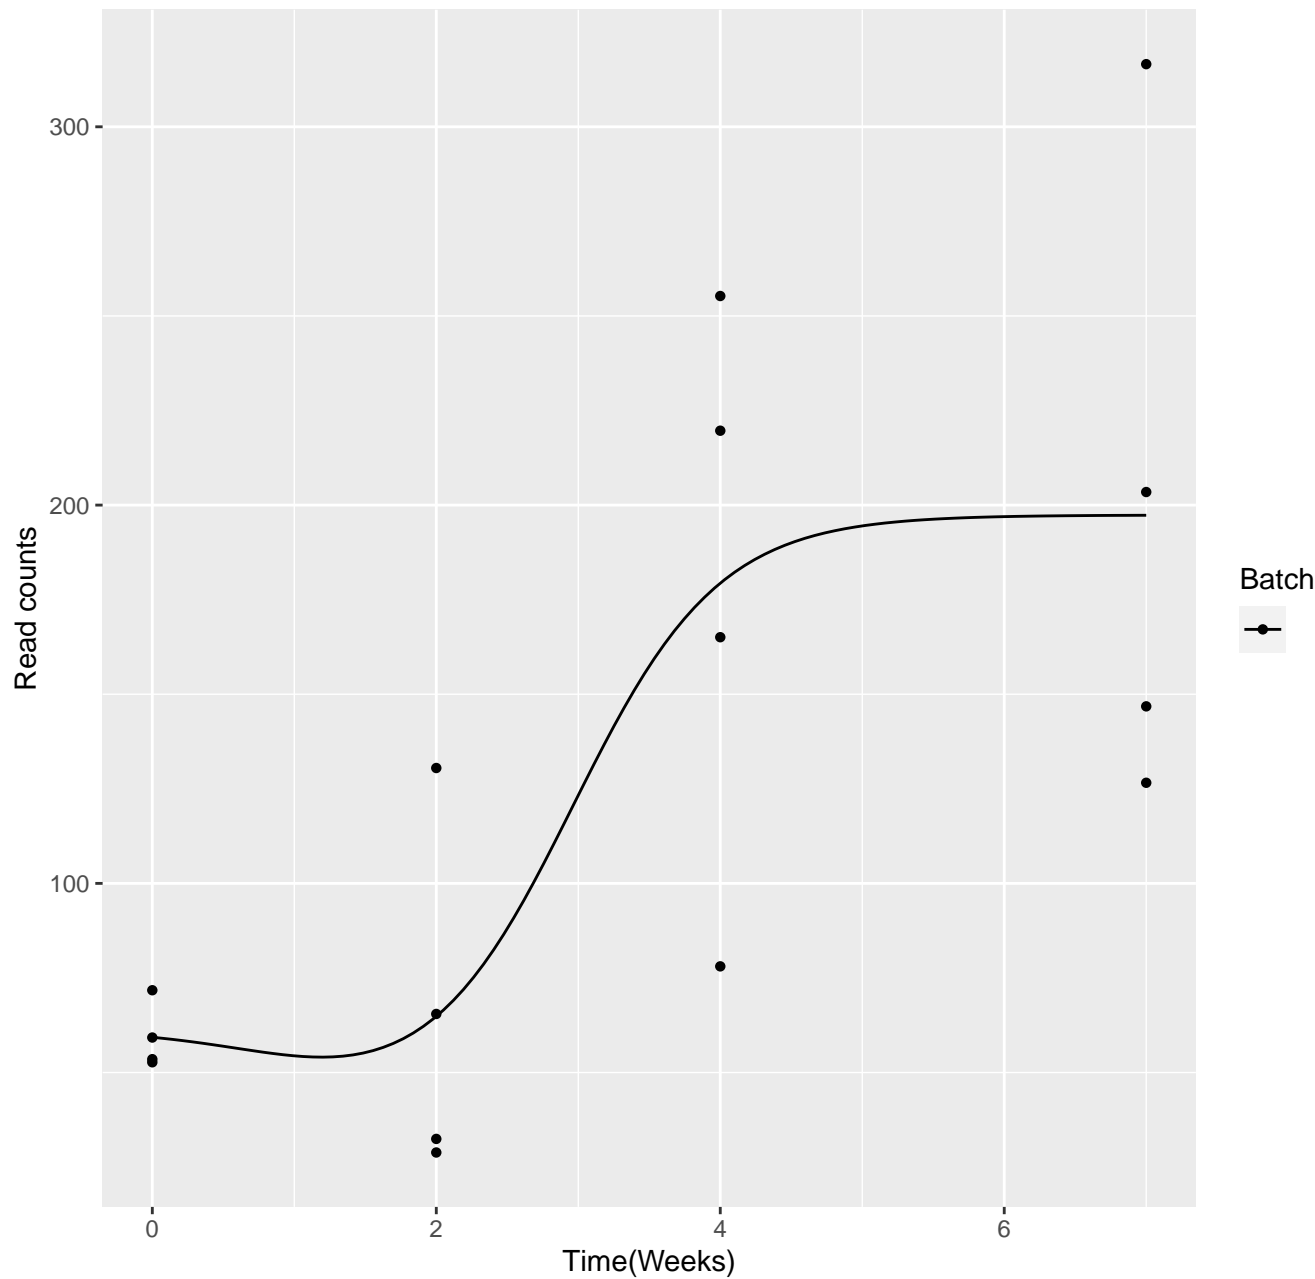

SEPTIN2:  $\log_{10} q = -2.47$

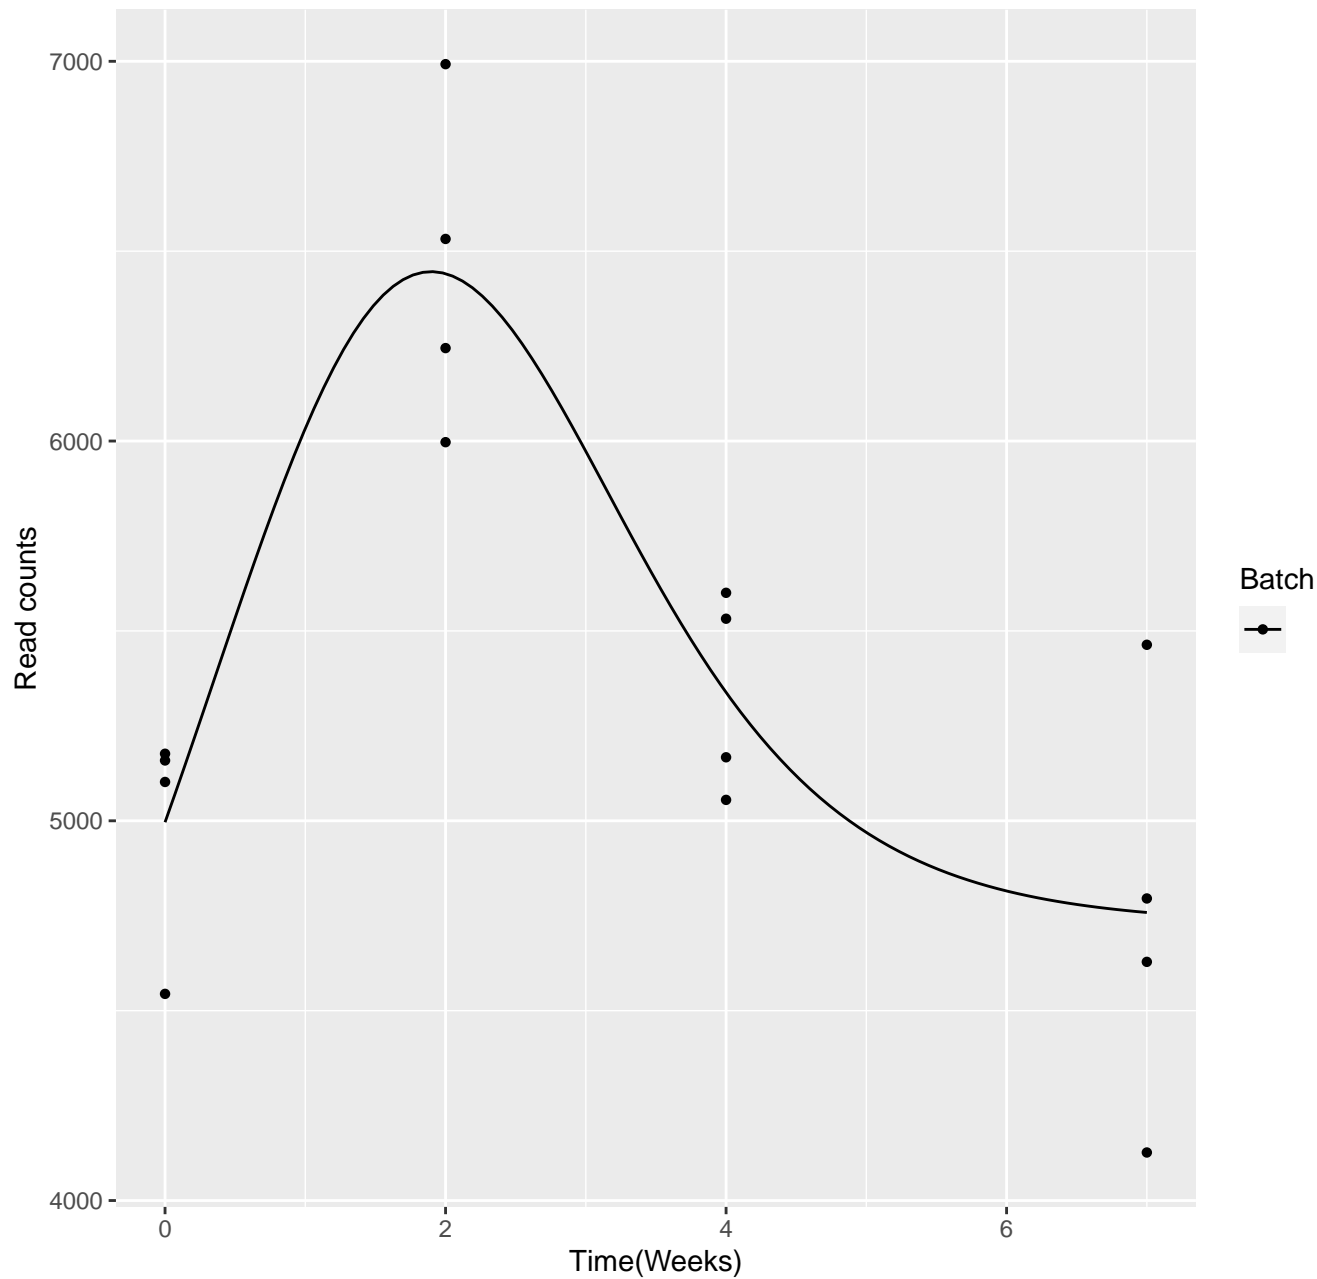

TRIM54:  $\log_{10} q = -2.47$

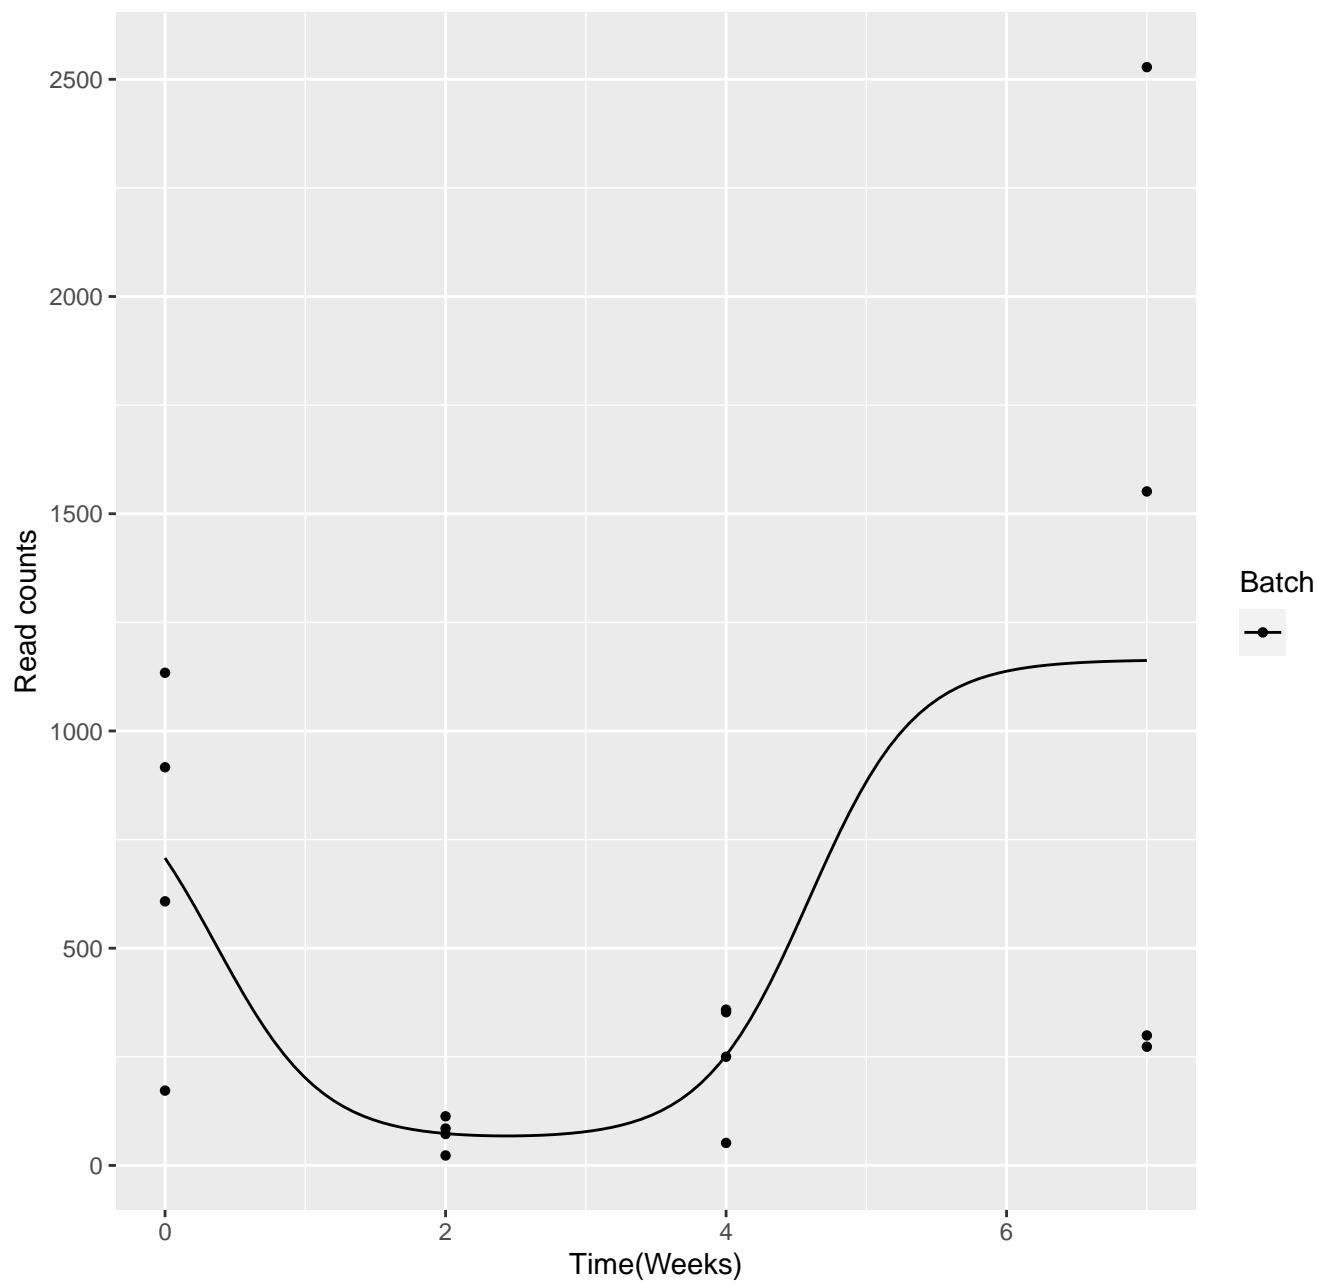

ANKRD45:  $\log_{10} q = -2.47$

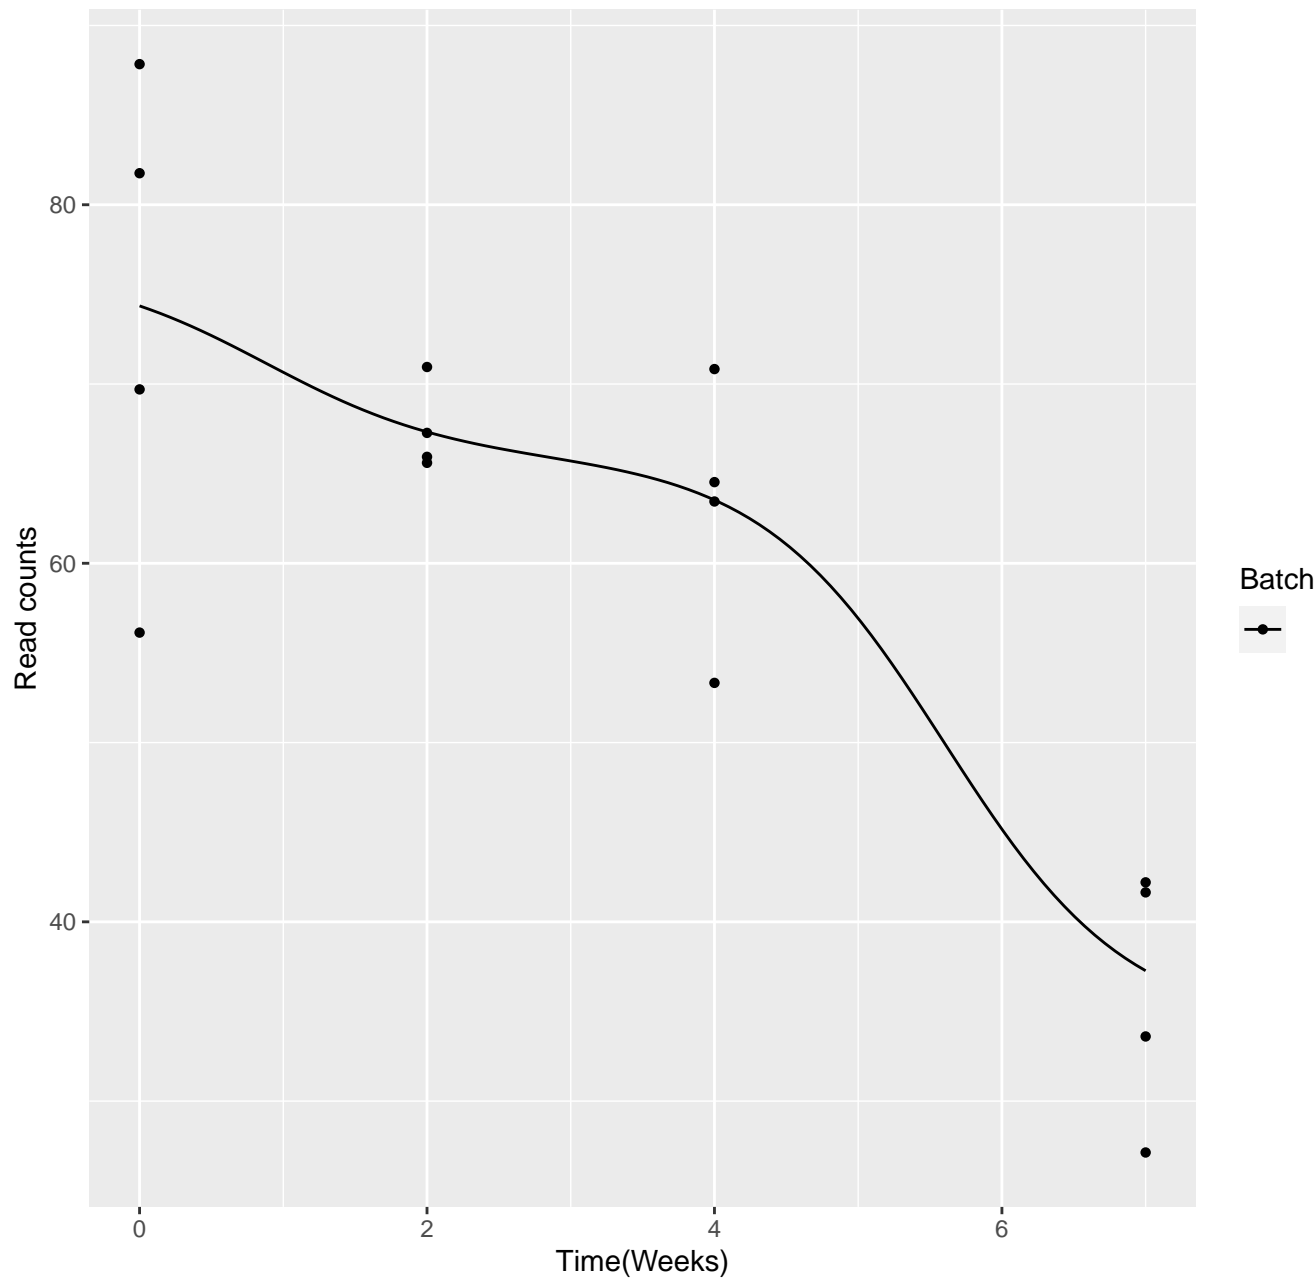

ID2:  $\log_{10} q = -2.47$

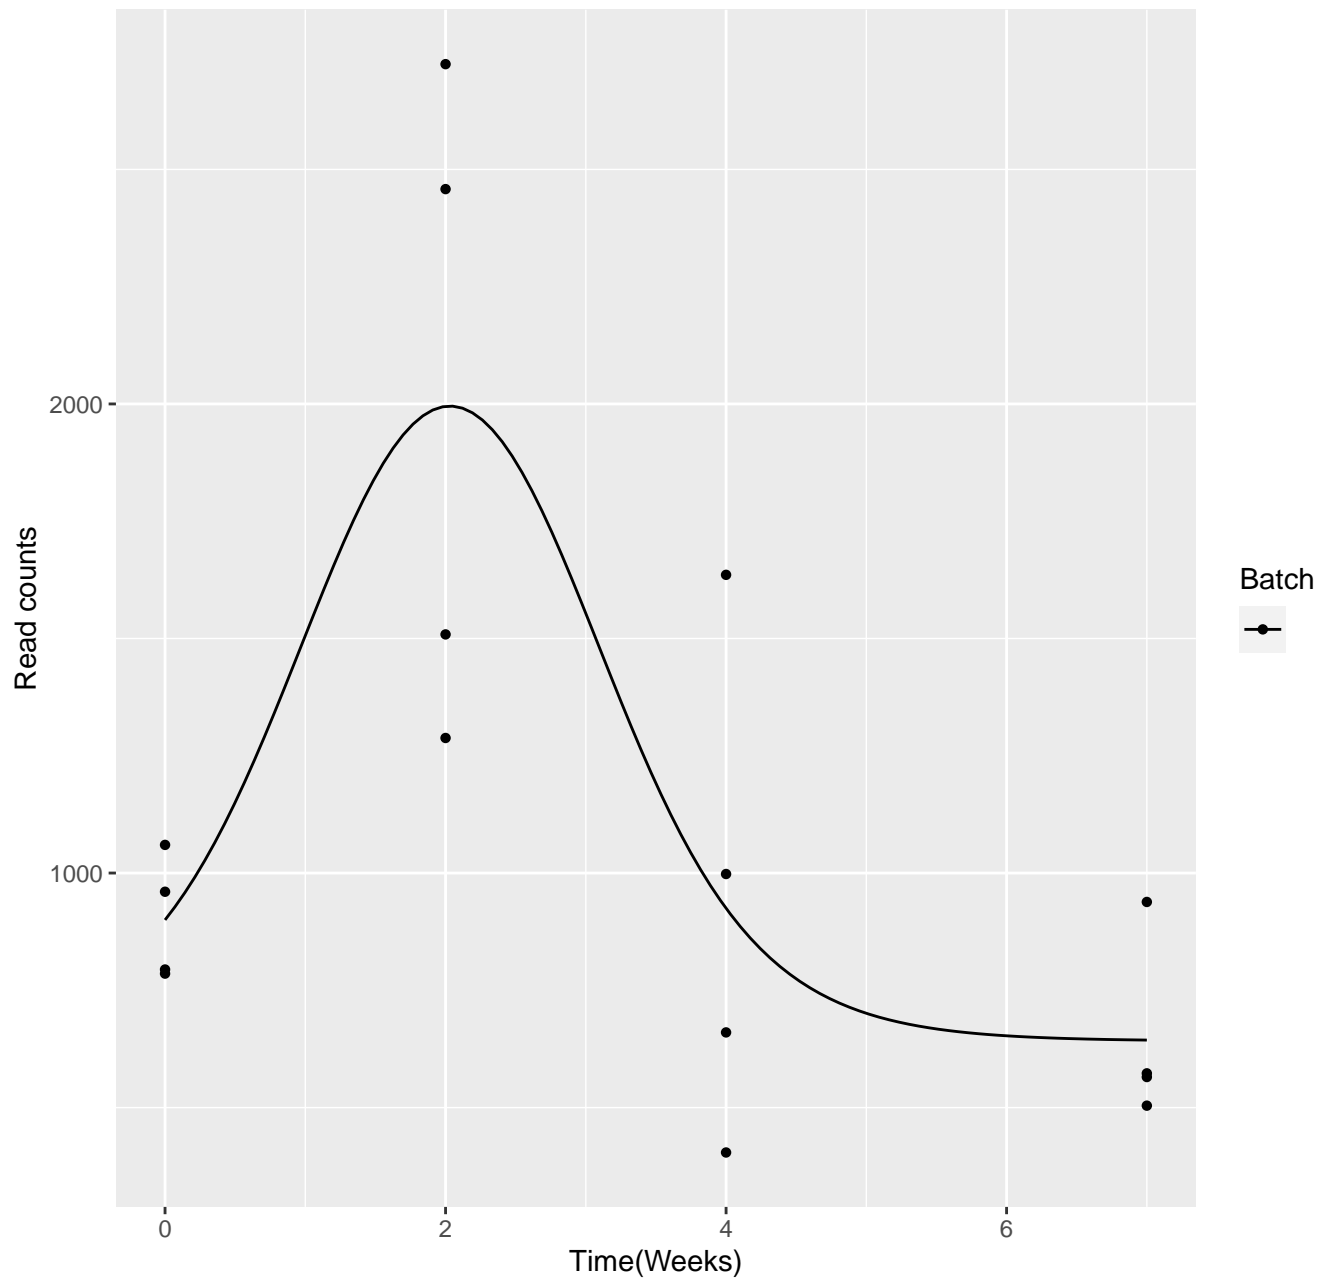

AMER1:  $\log_{10} q = -2.47$

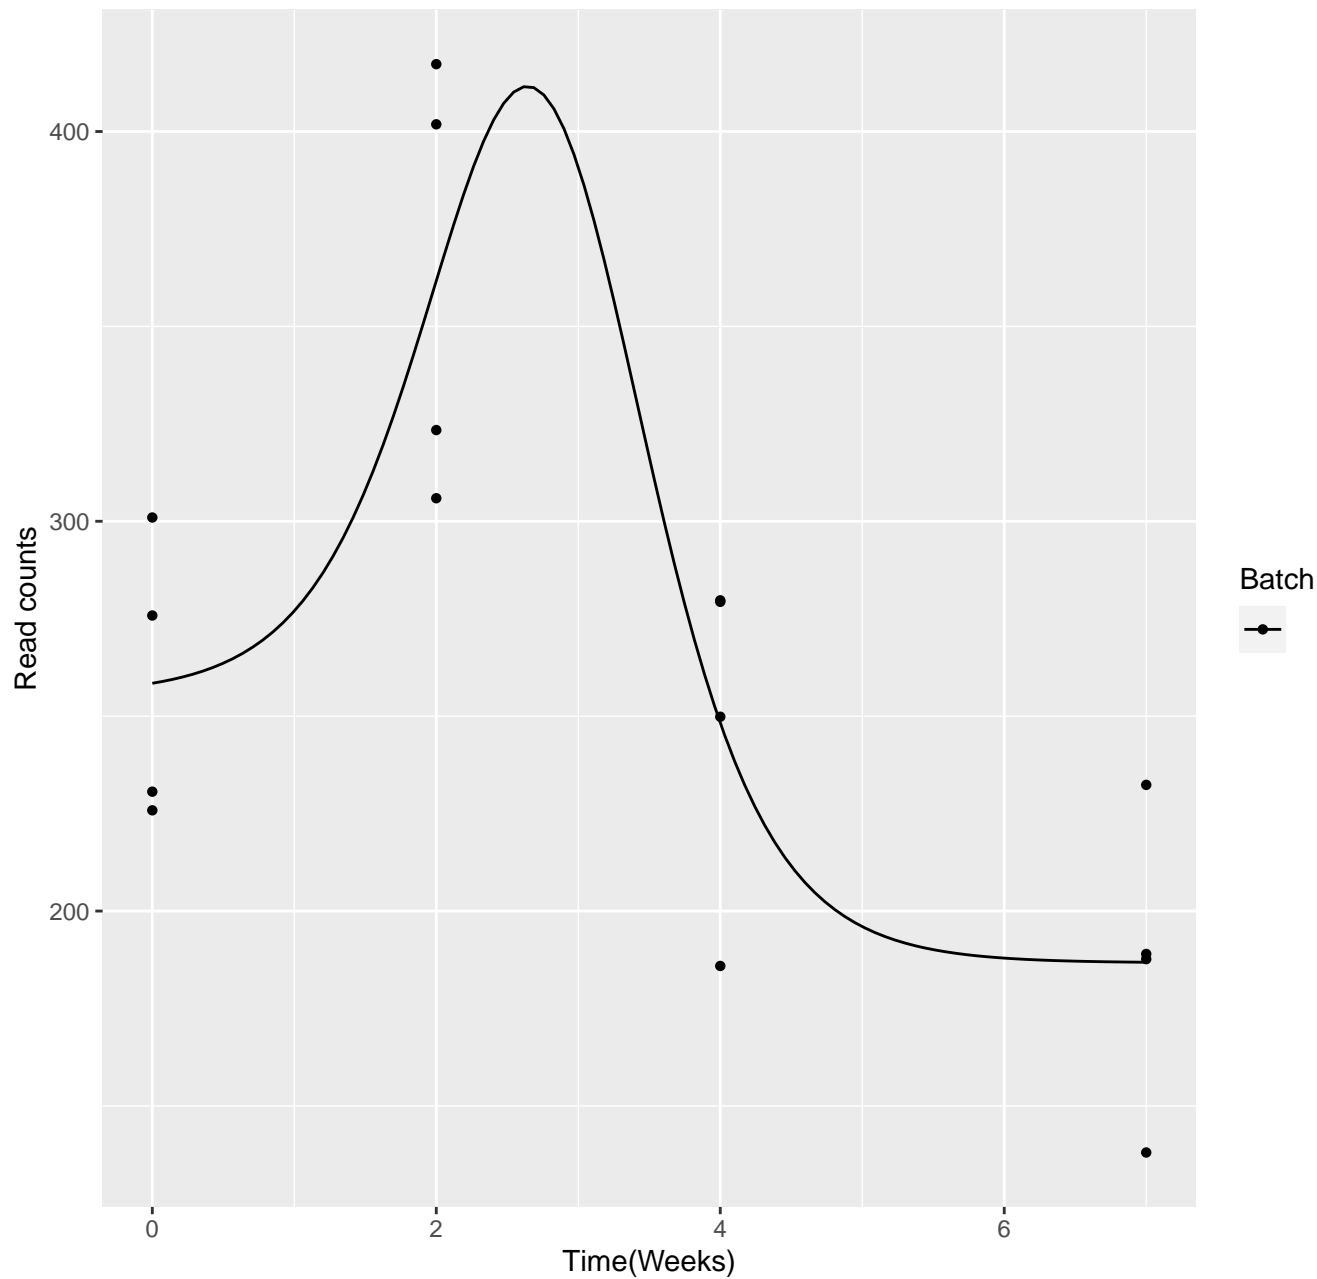

TEC:  $\log_{10} q = -2.47$

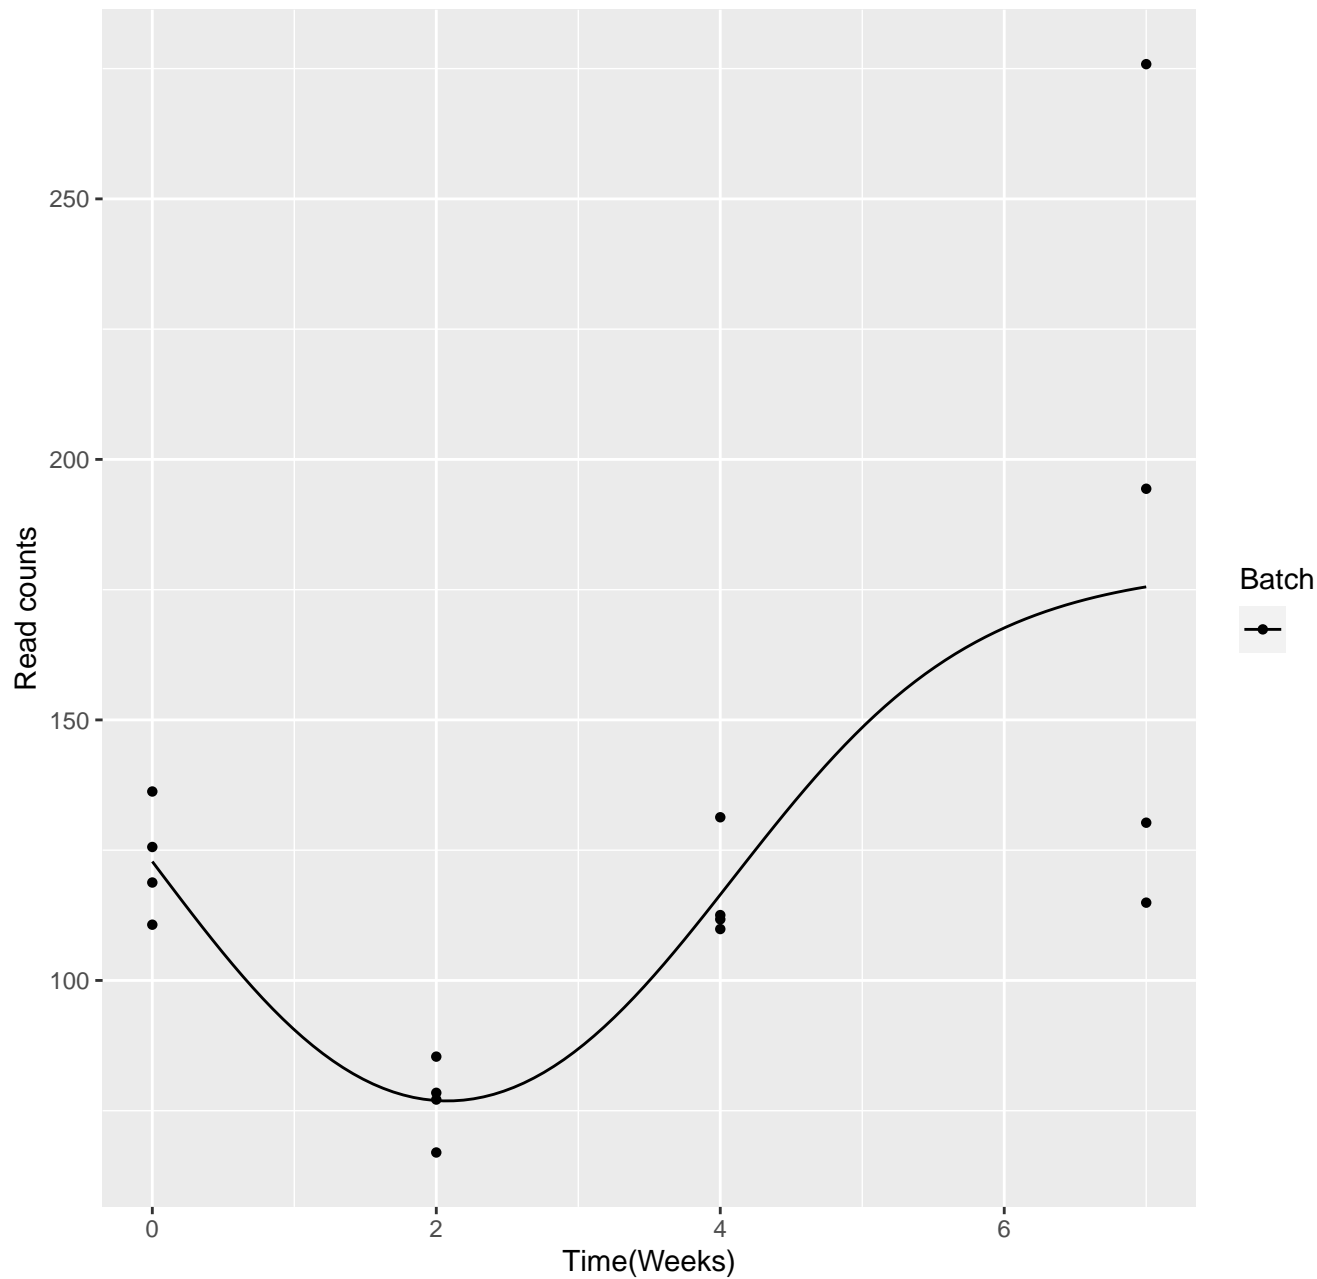



LOC100339625:  $\log_{10} q = -2.47$

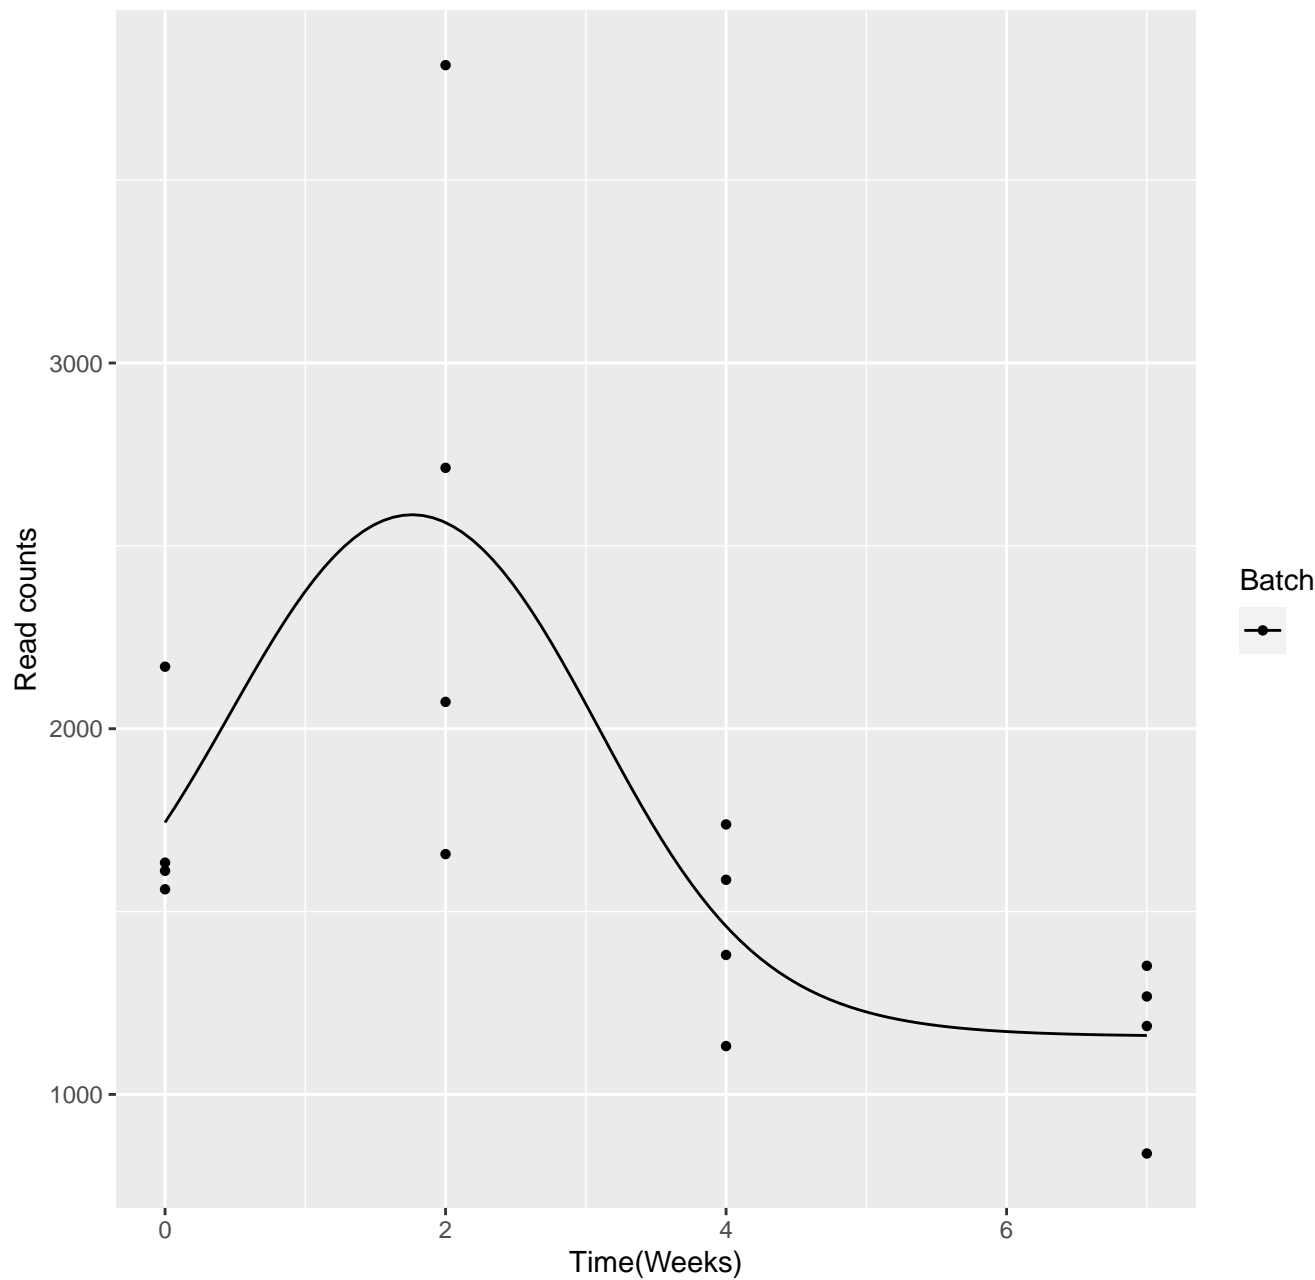

CKAP2L:  $\log_{10} q = -2.47$

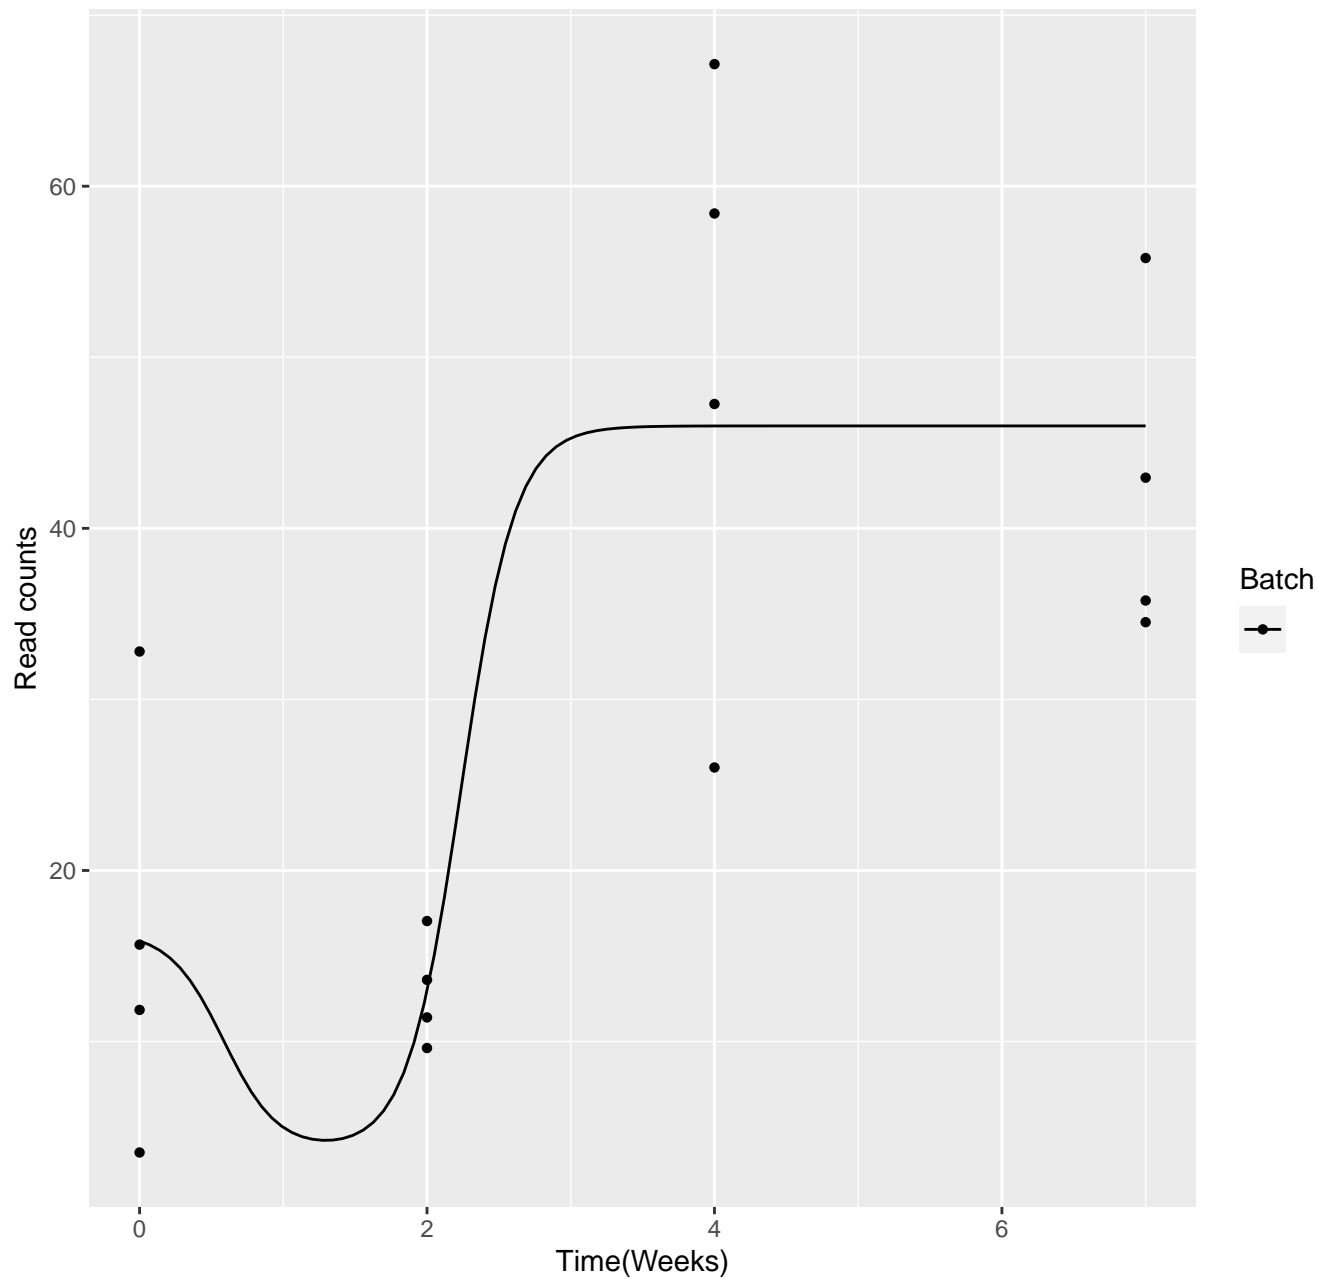

PTPN23:  $\log_{10} q = -2.46$

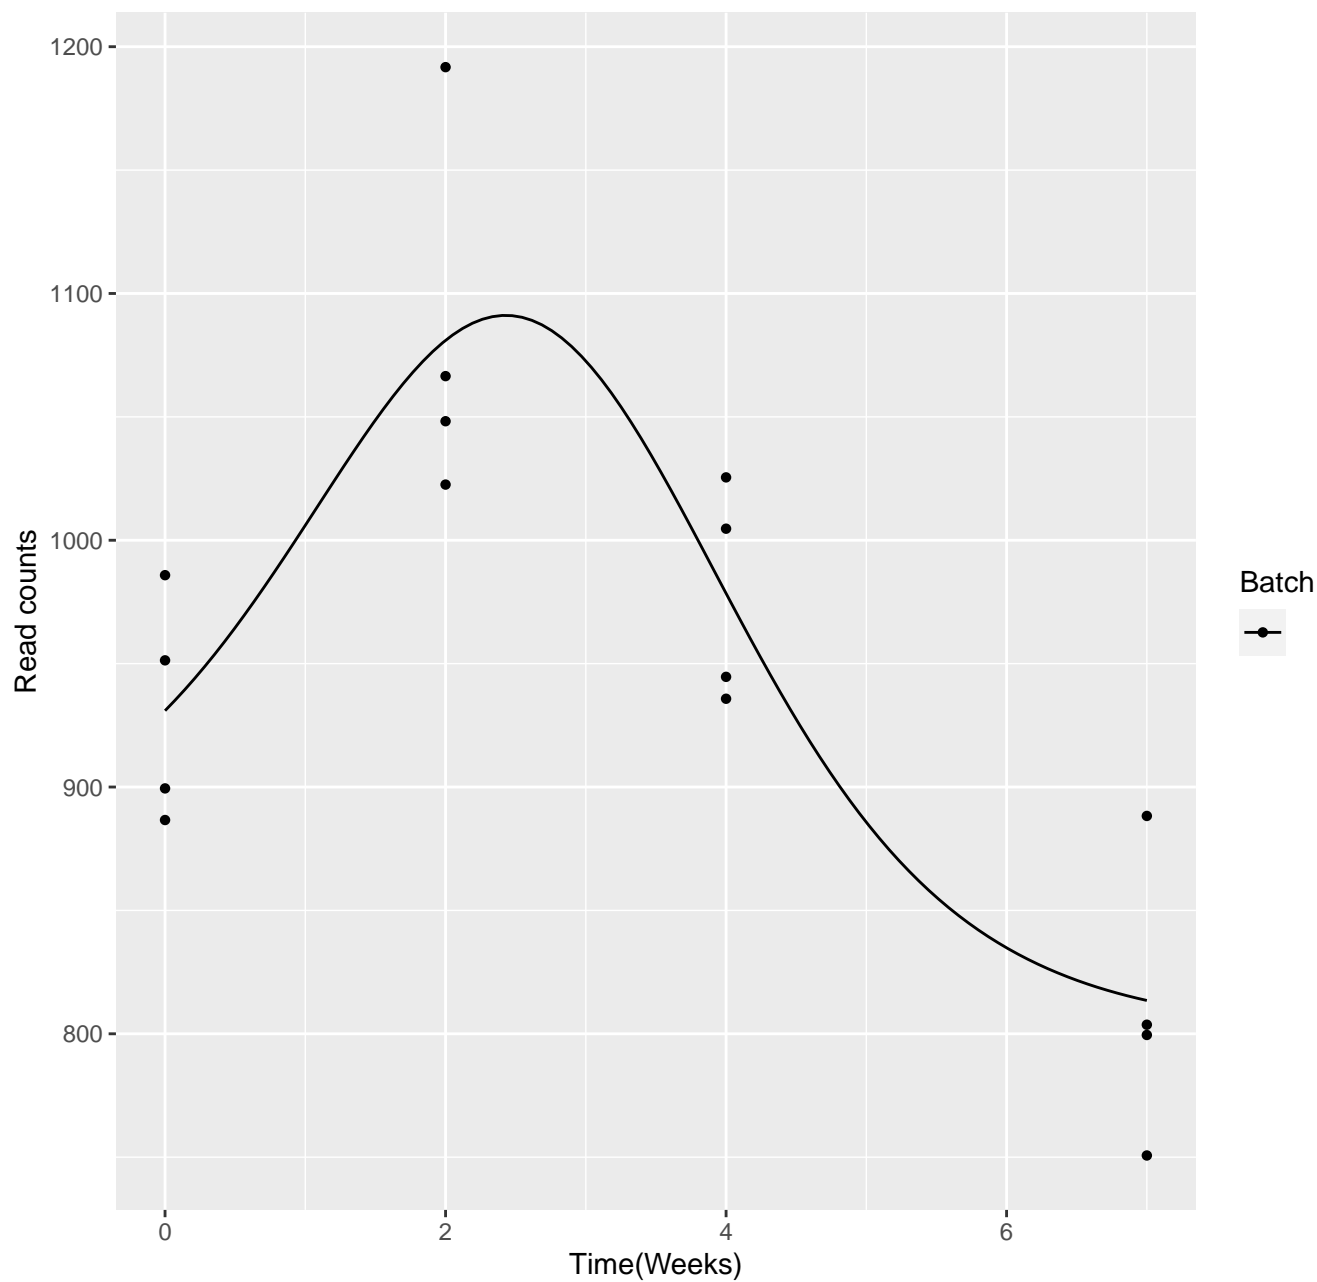

SCLT1:  $\log_{10} q = -2.46$

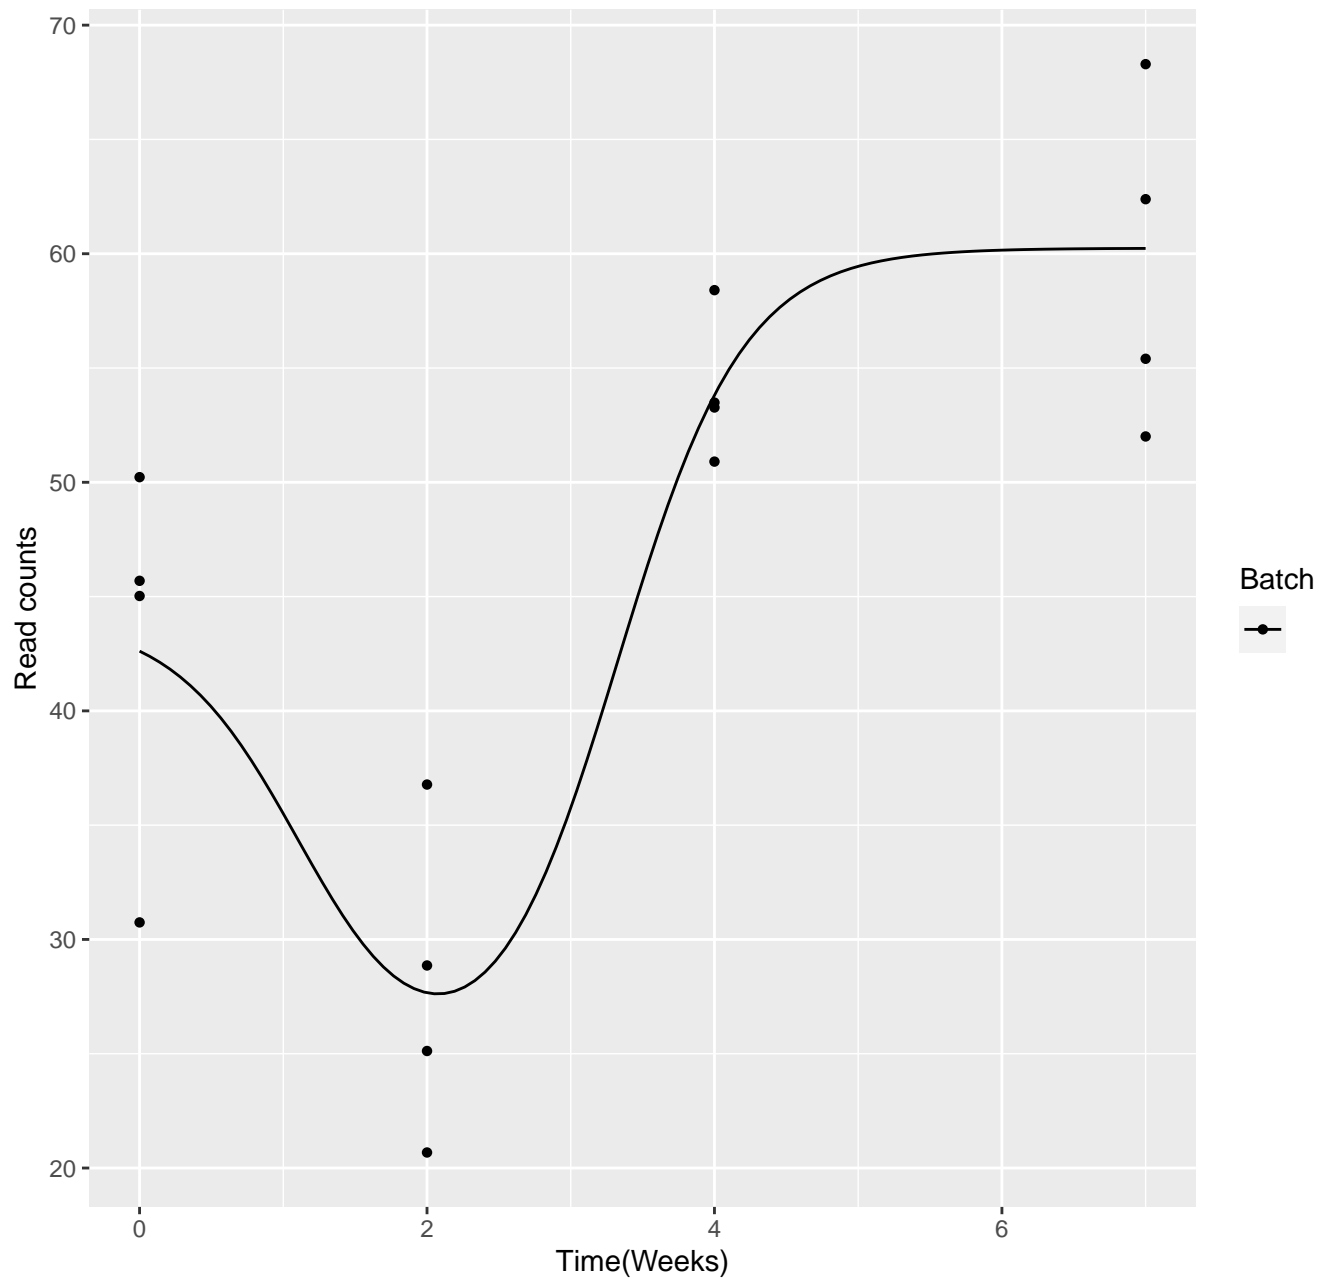

CCDC74B:  $\log_{10} q = -2.46$

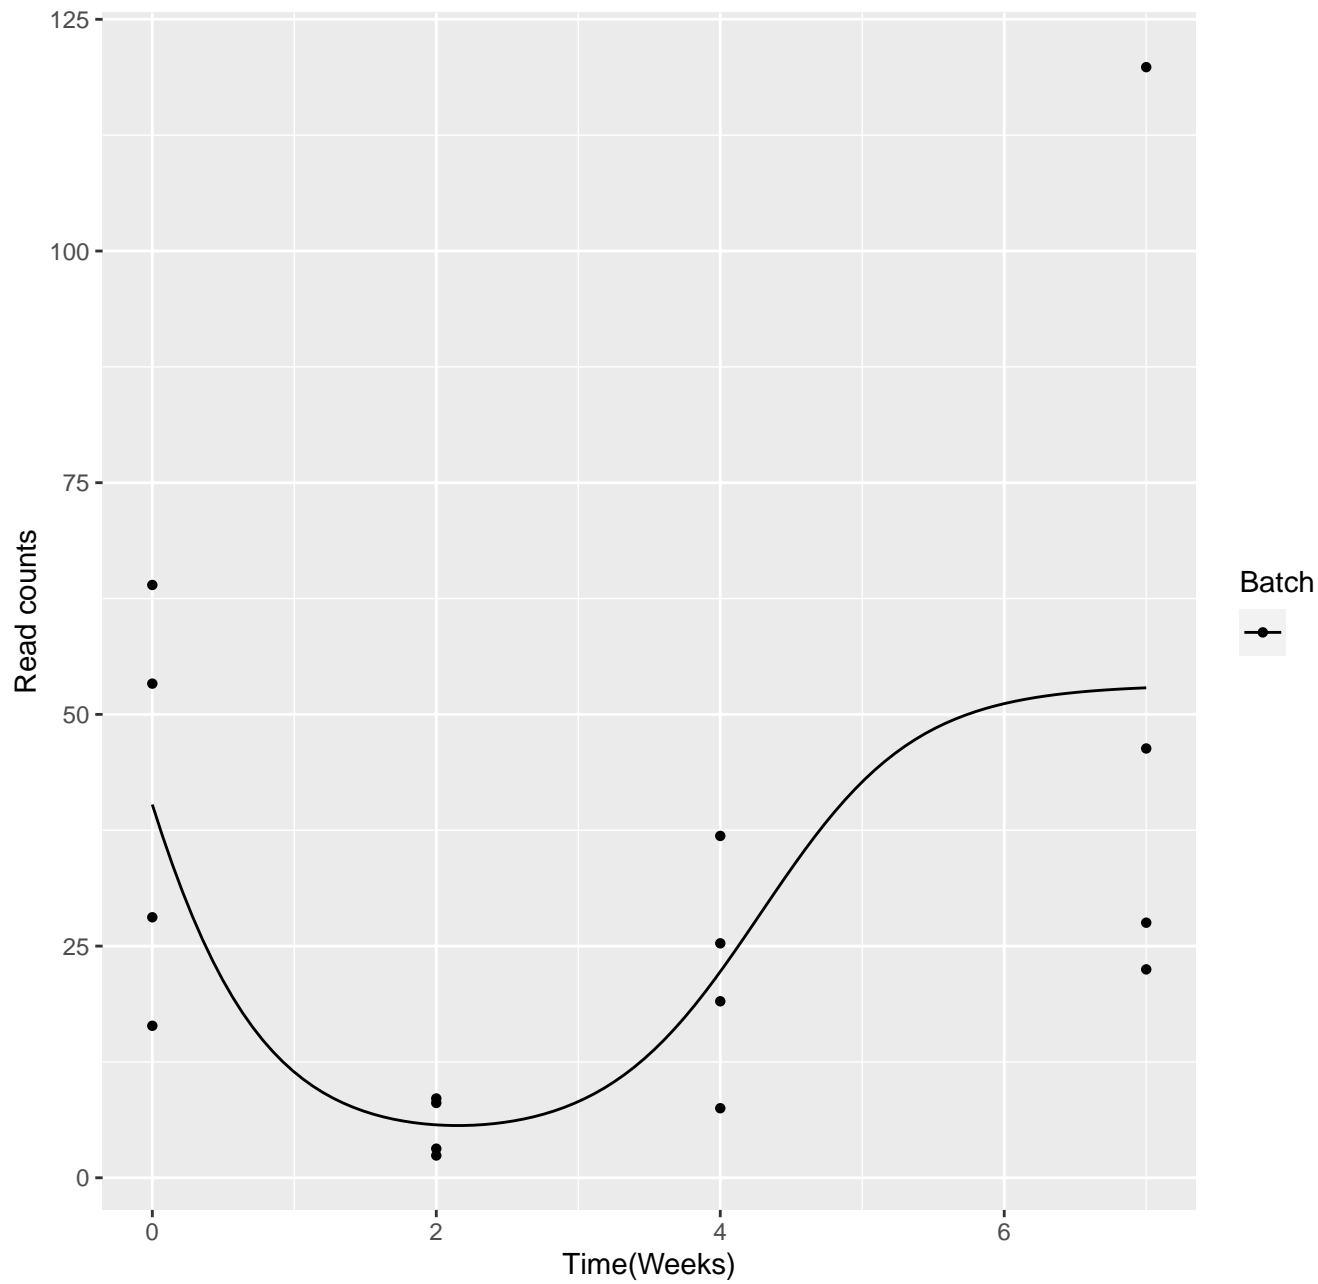

PATZ1:  $\log_{10} q = -2.46$

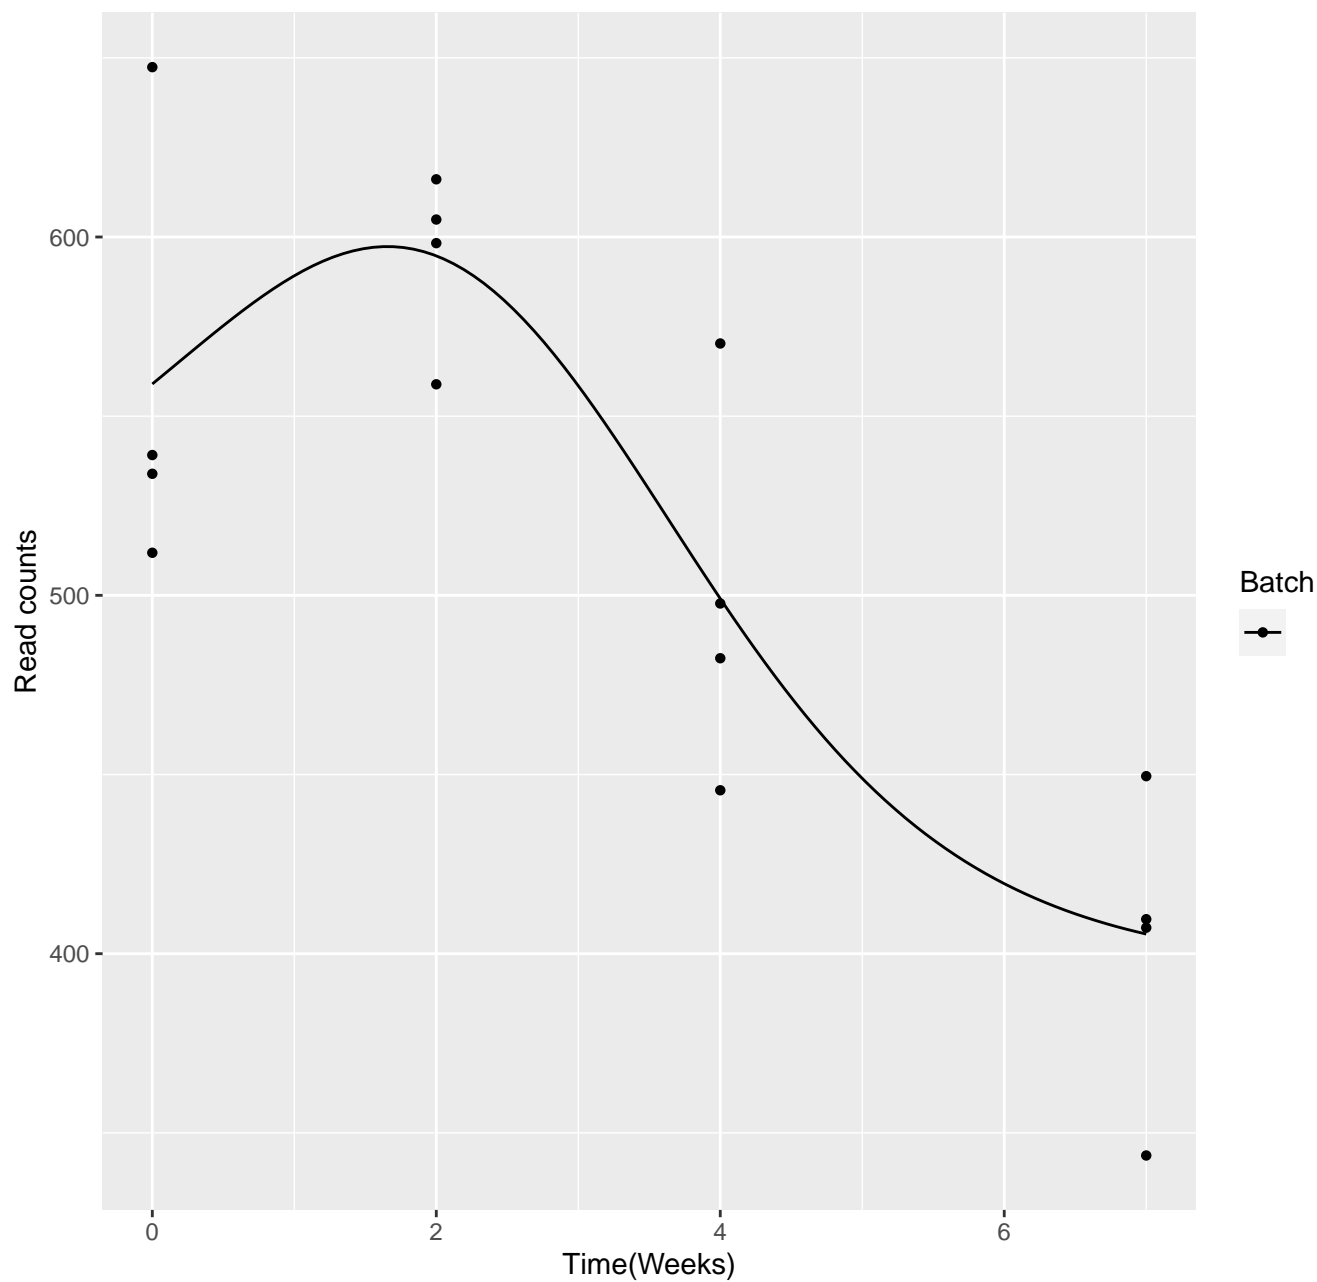

AlG1:  $\log_{10} q = -2.46$

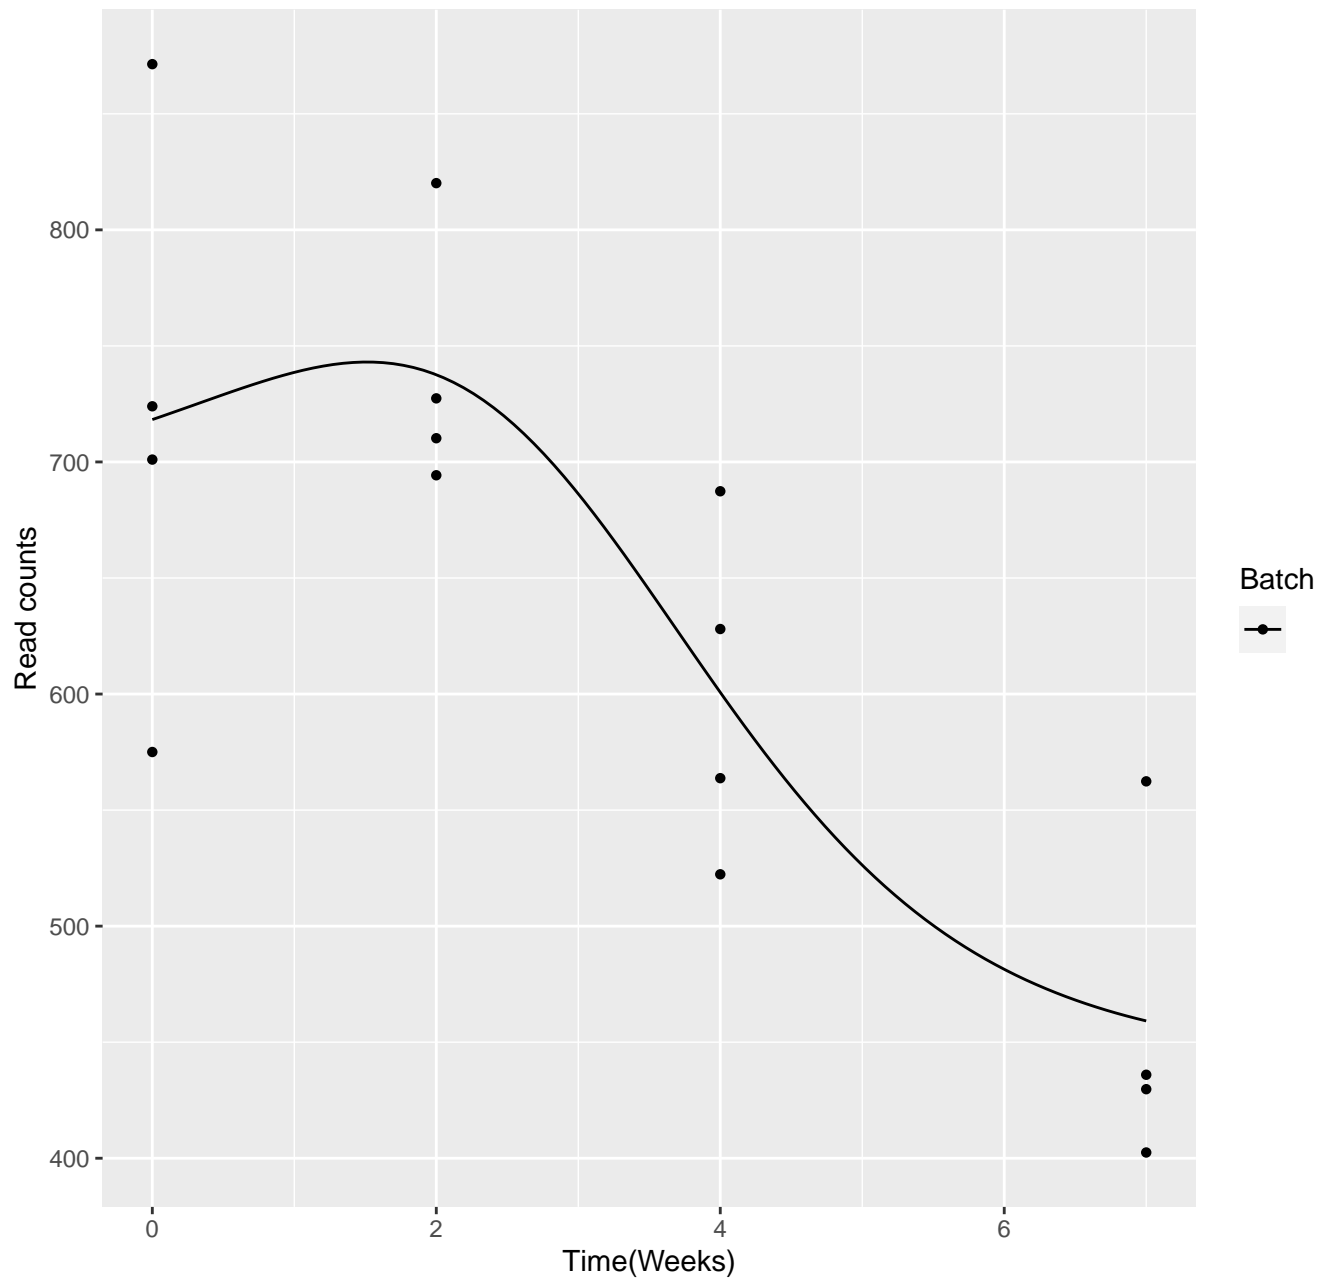

CLIC4:  $\log_{10} q = -2.46$

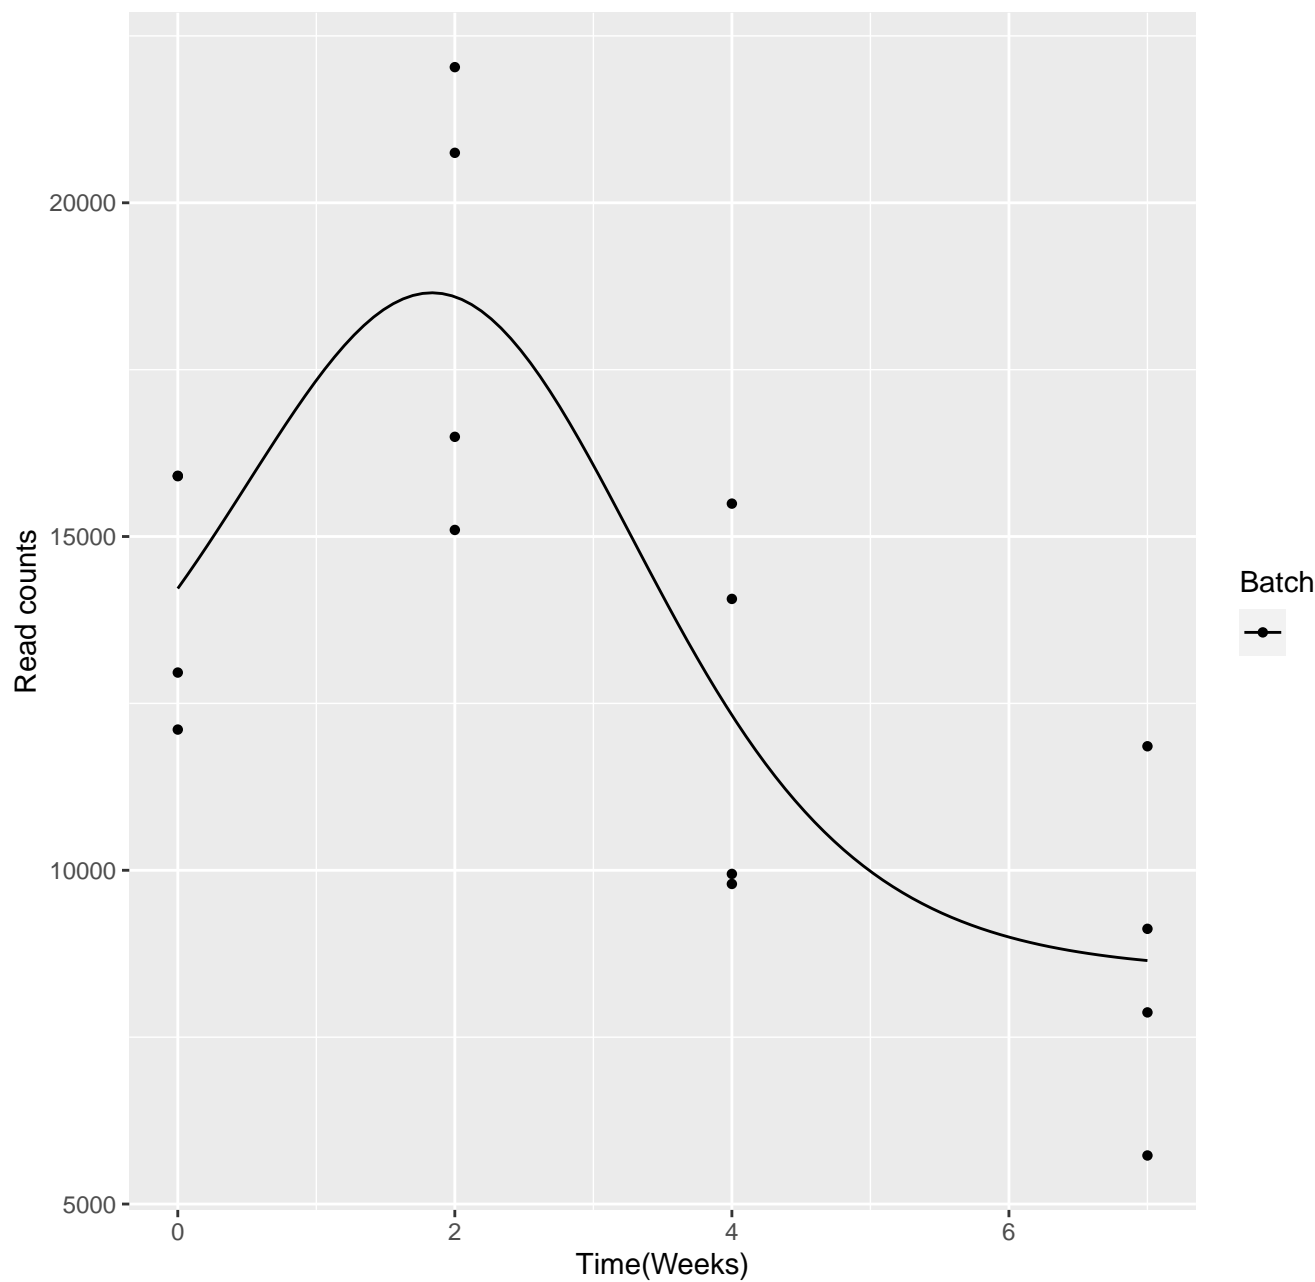



MAOB:  $\log_{10} q = -2.46$

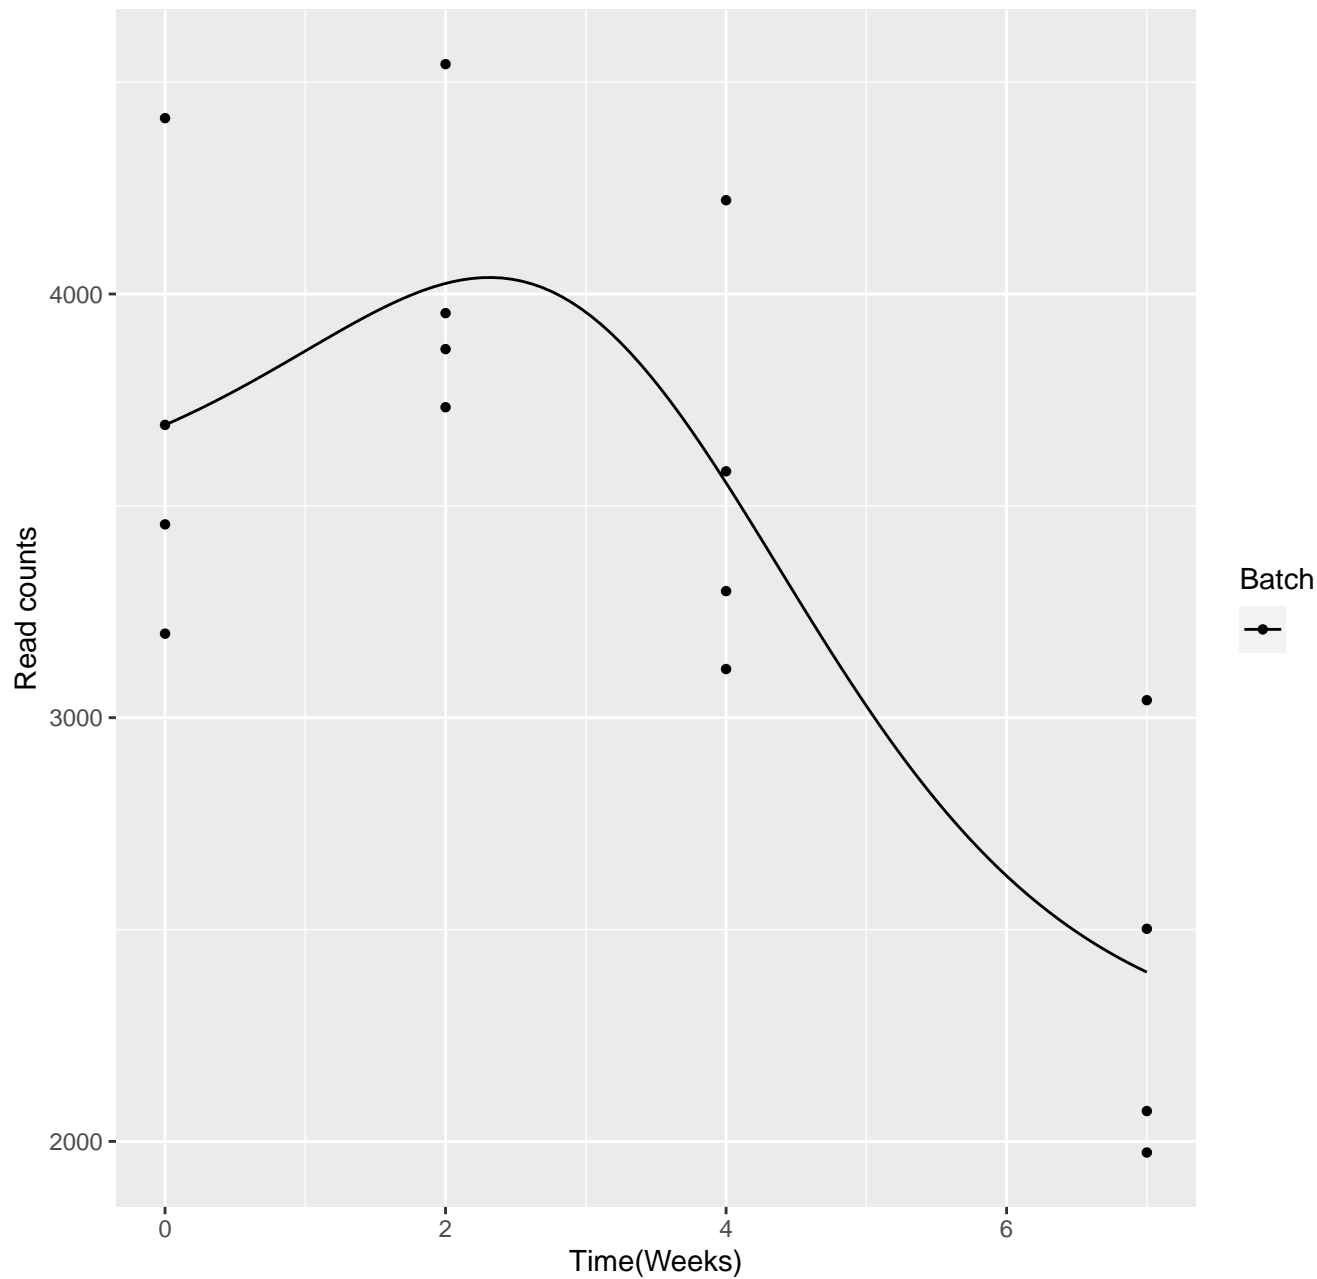

IL1RAP:  $\log_{10} q = -2.45$

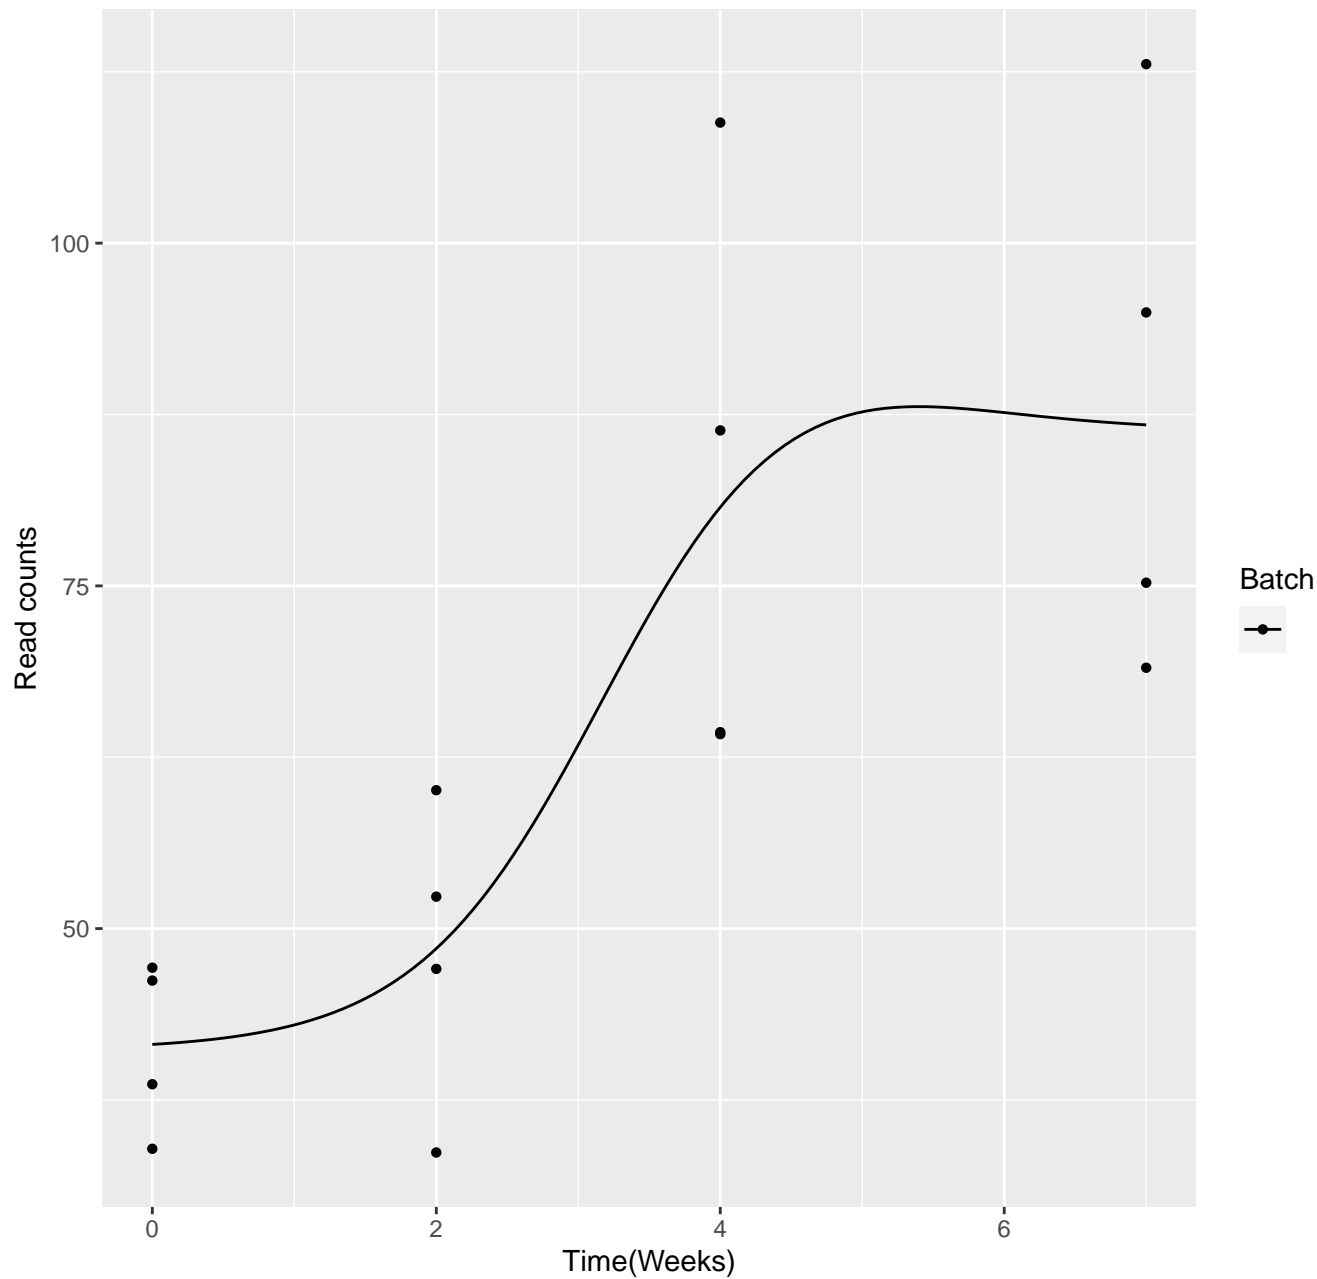

LOC103348750:  $\log_{10} q = -2.45$

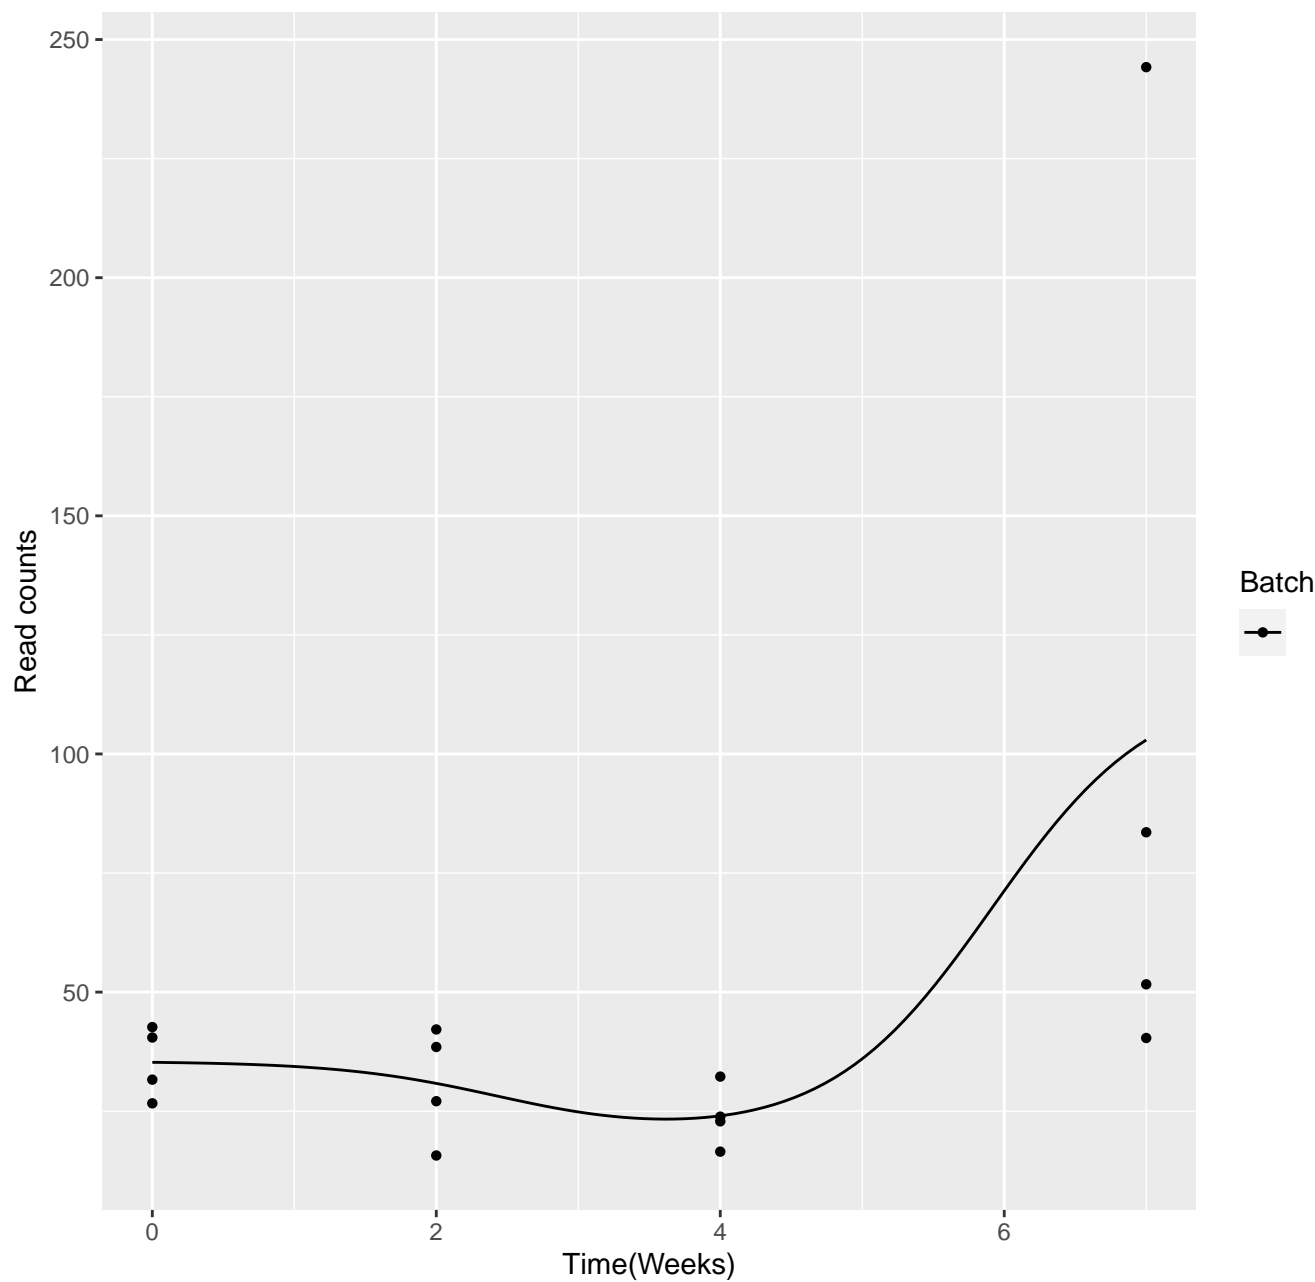

LOC103351402:  $\log_{10} q = -2.45$

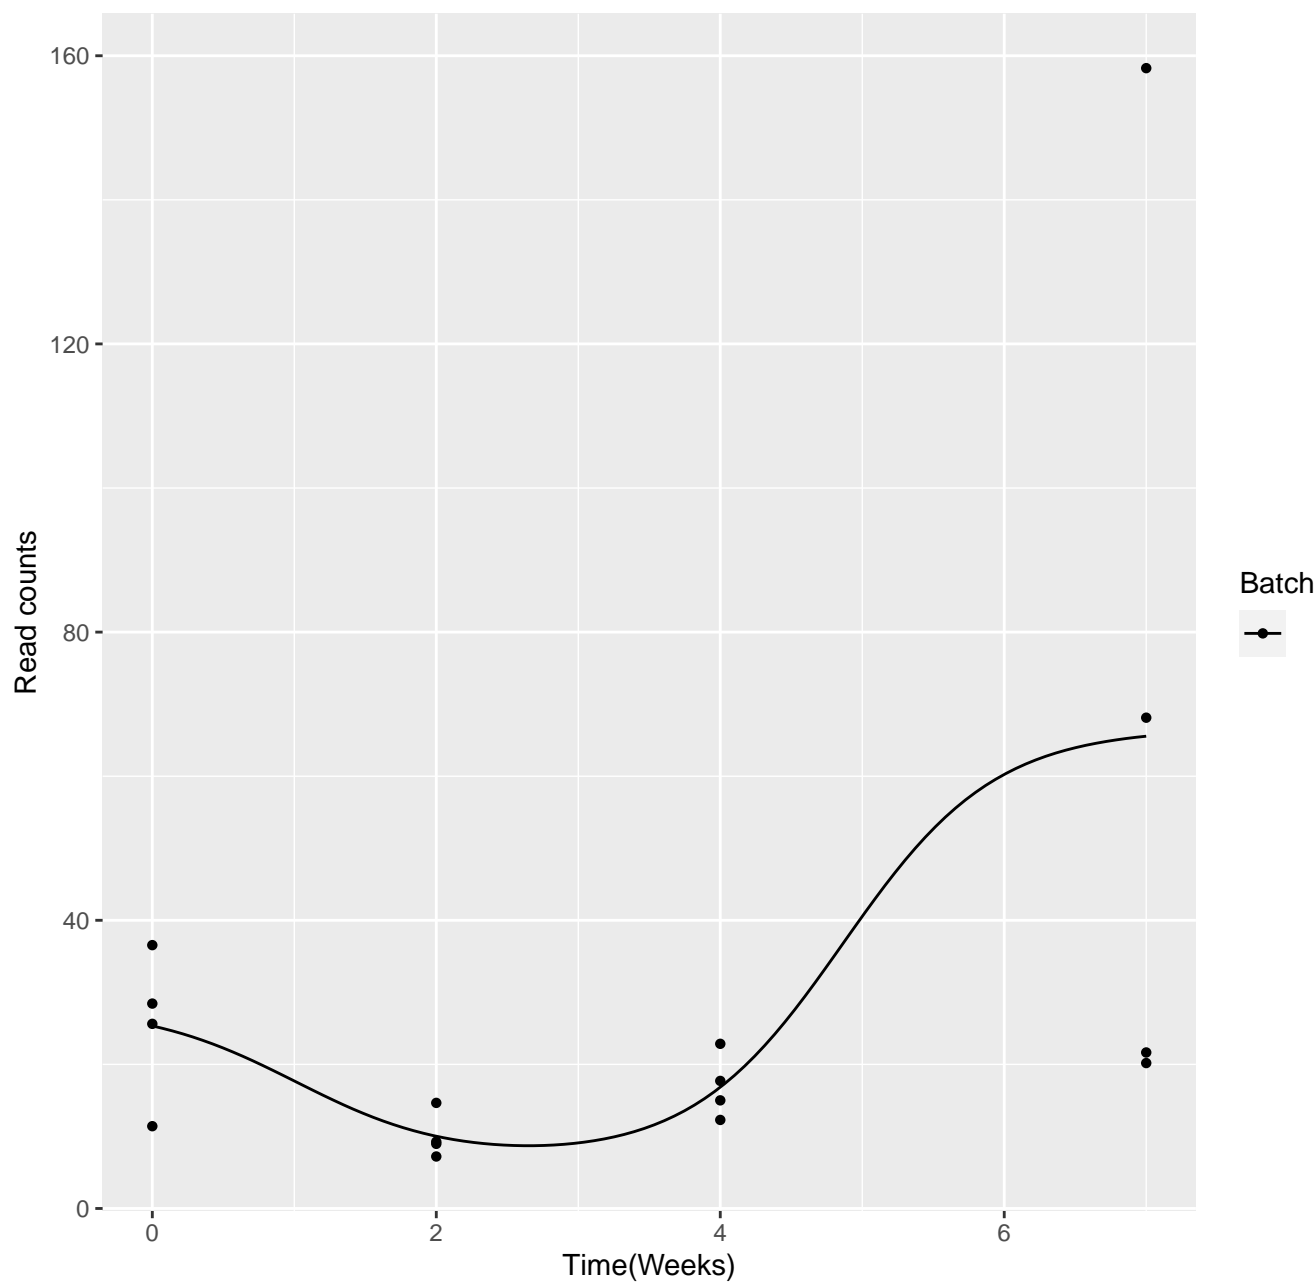

GIMAP8:  $\log_{10} q = -2.45$

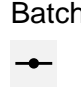

IGF1R:  $\log_{10} q = -2.45$

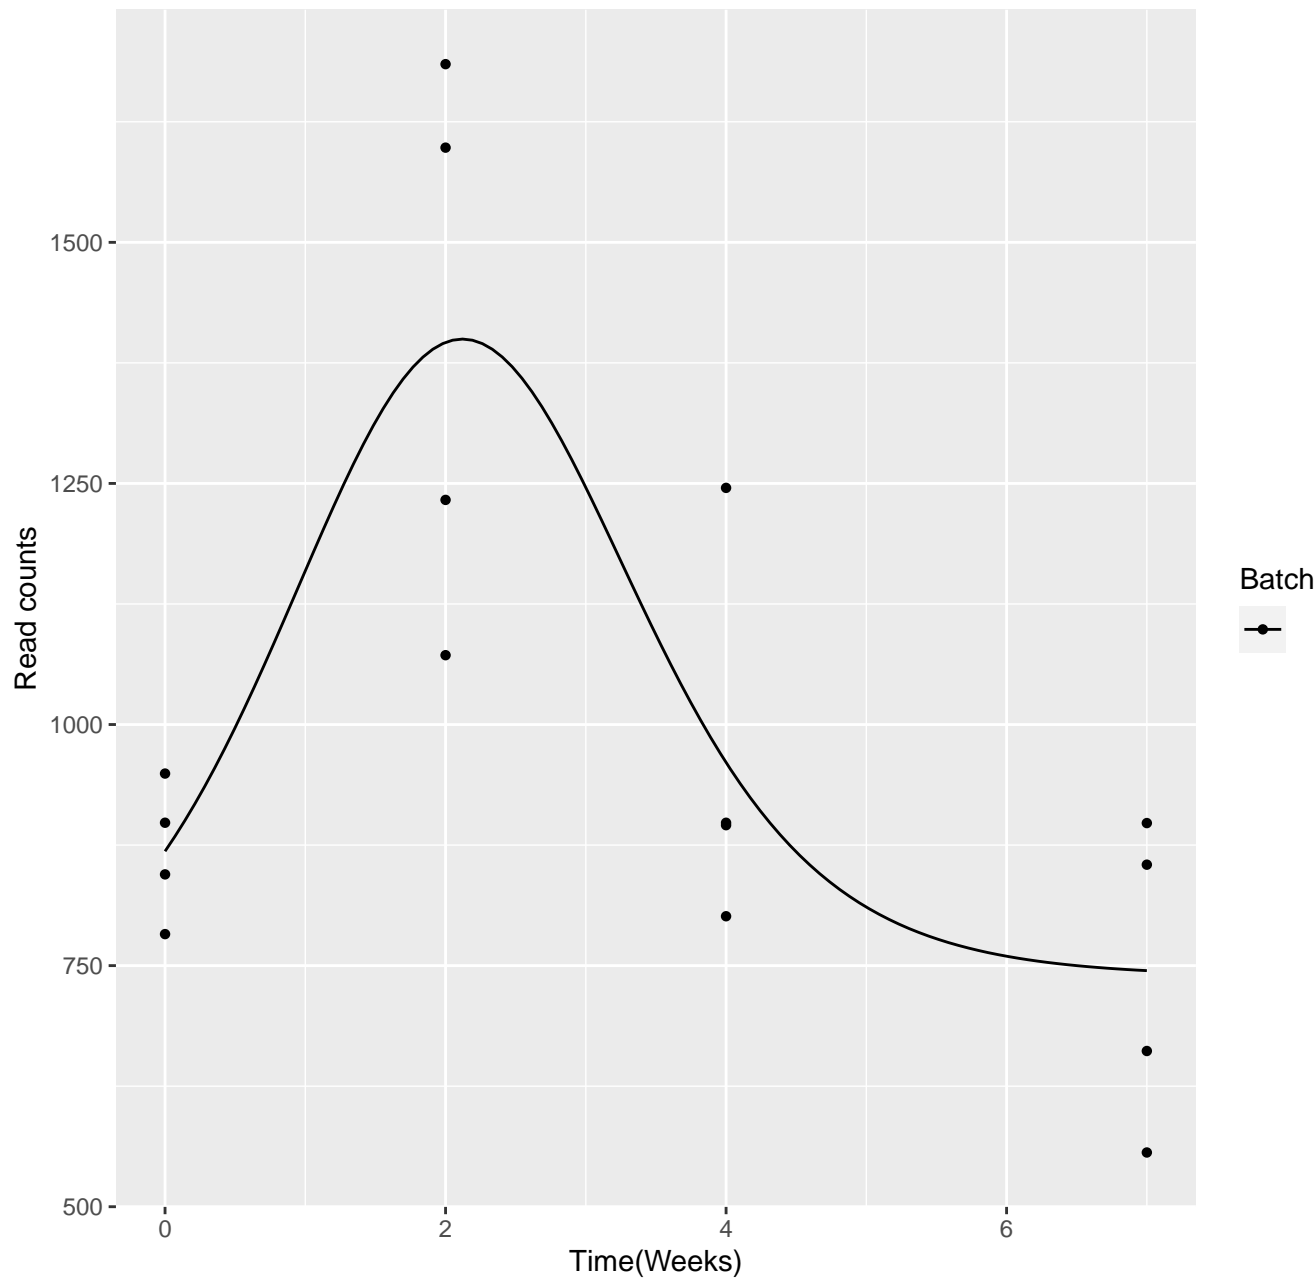

APPL2:  $\log_{10} q = -2.45$

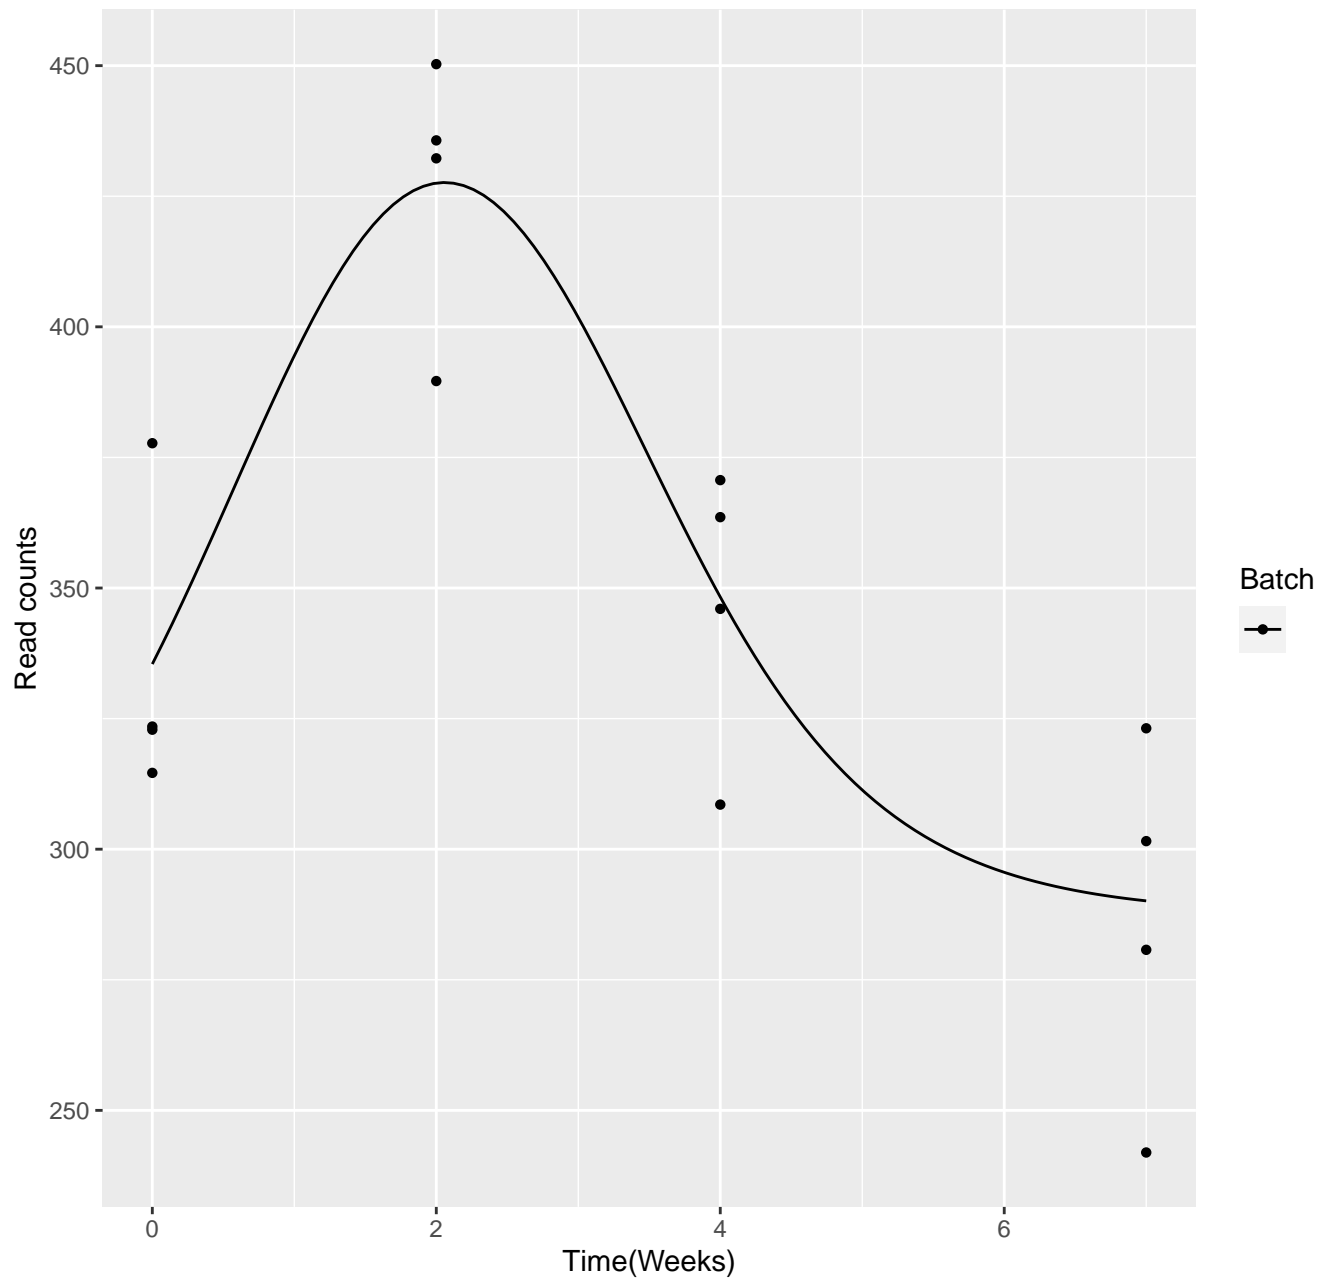

EVA1A:  $\log_{10} q = -2.45$

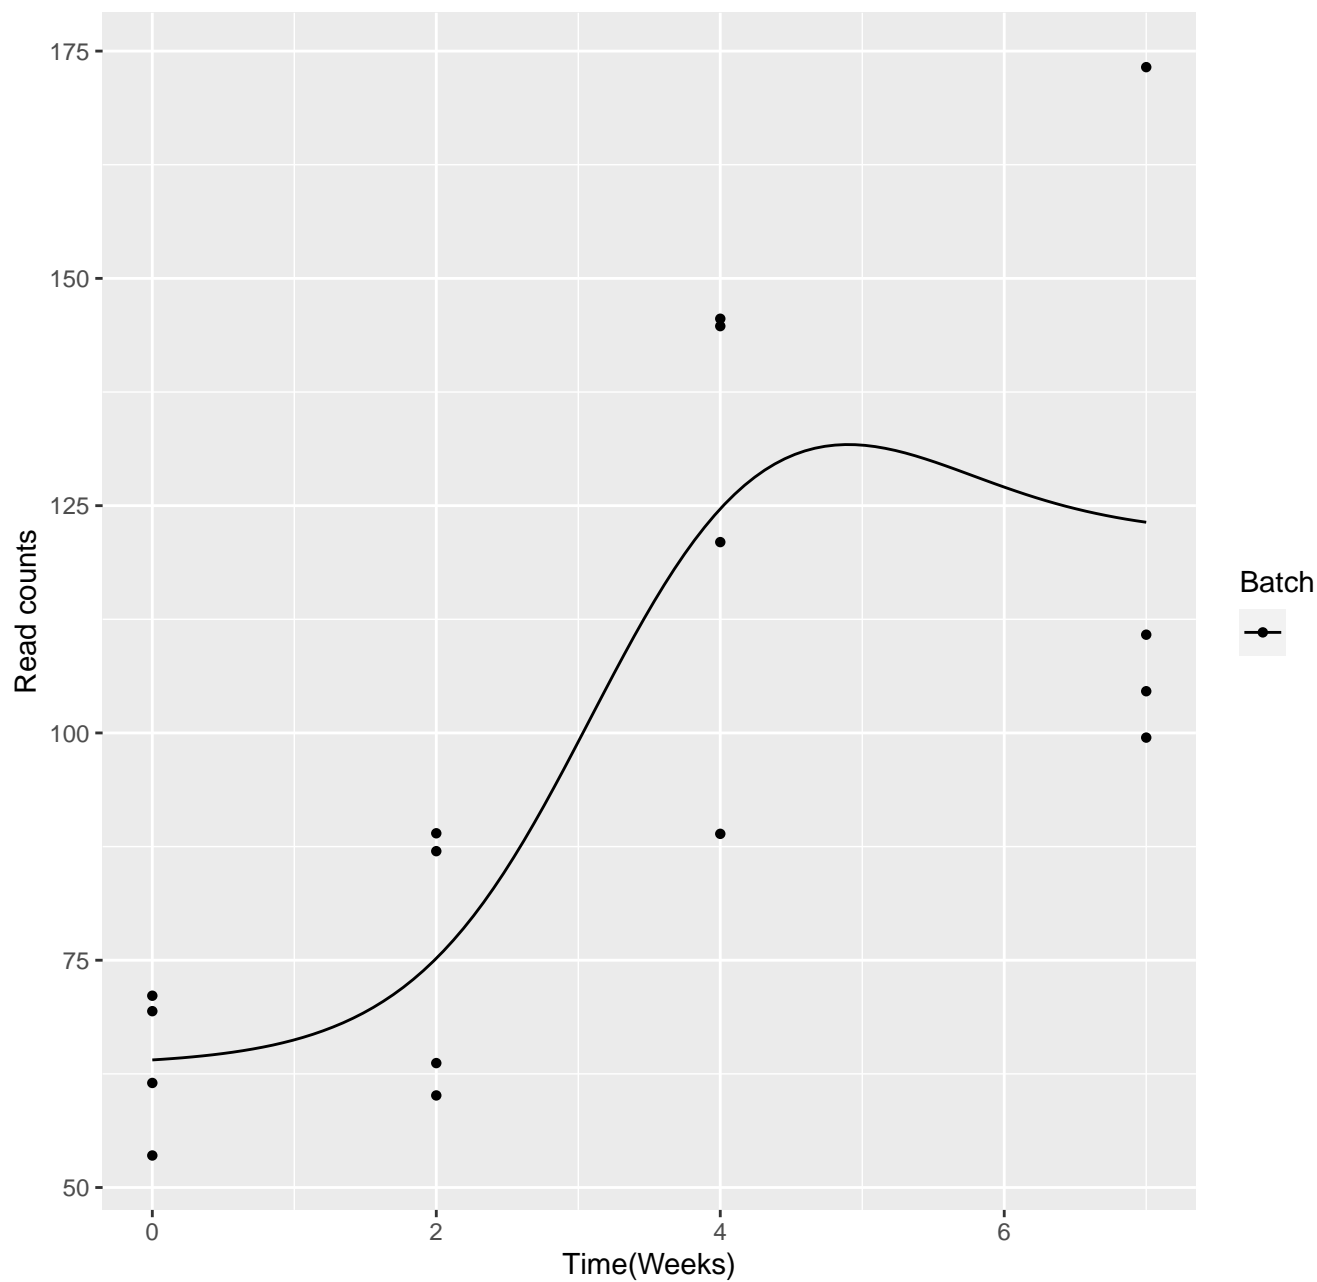



LOC100358359:  $\log_{10} q = -2.45$

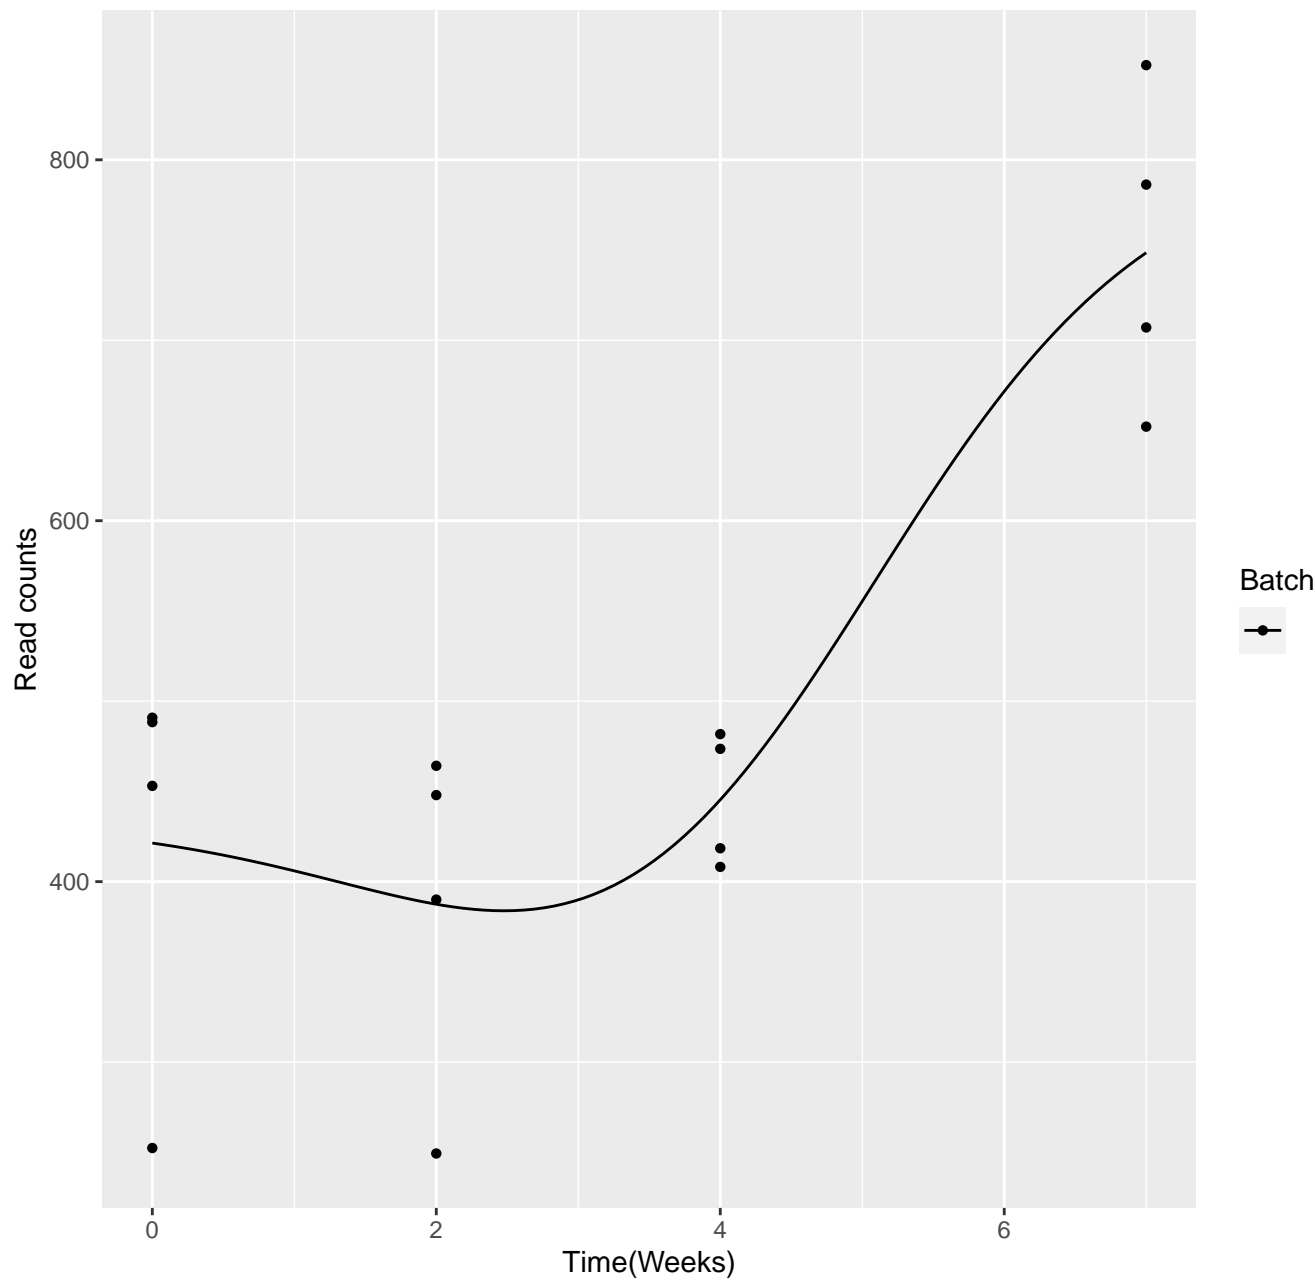

RAB39A:  $\log_{10} q = -2.45$

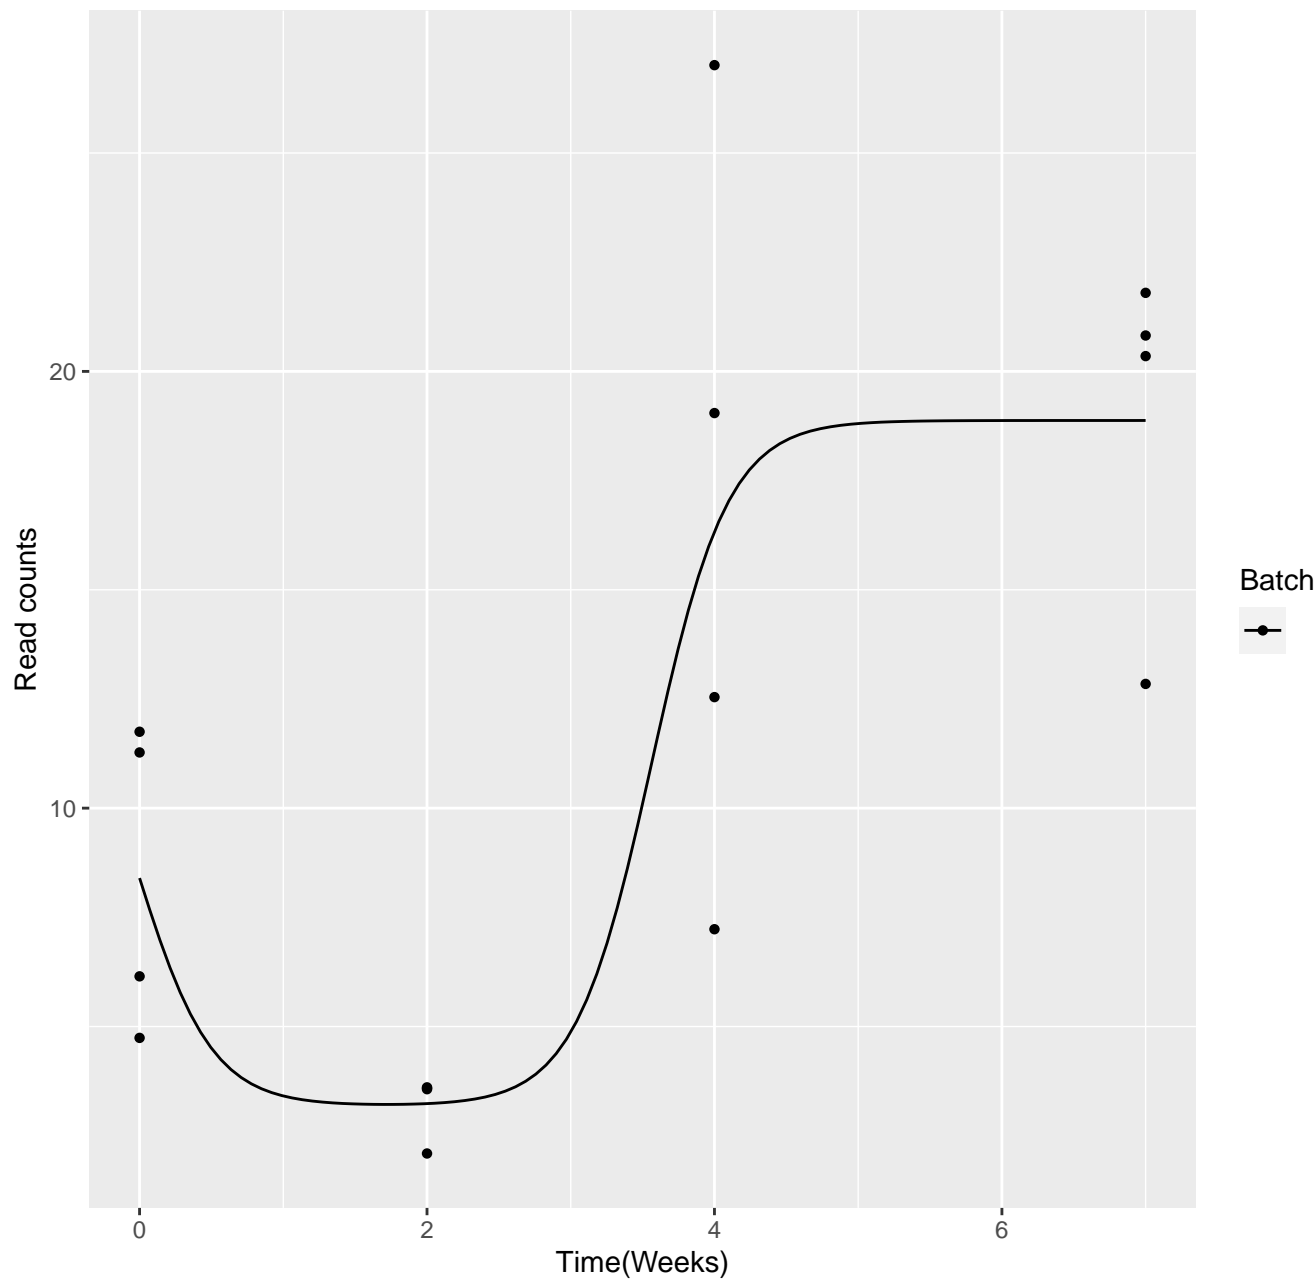

RHBDL2:  $\log_{10} q = -2.45$

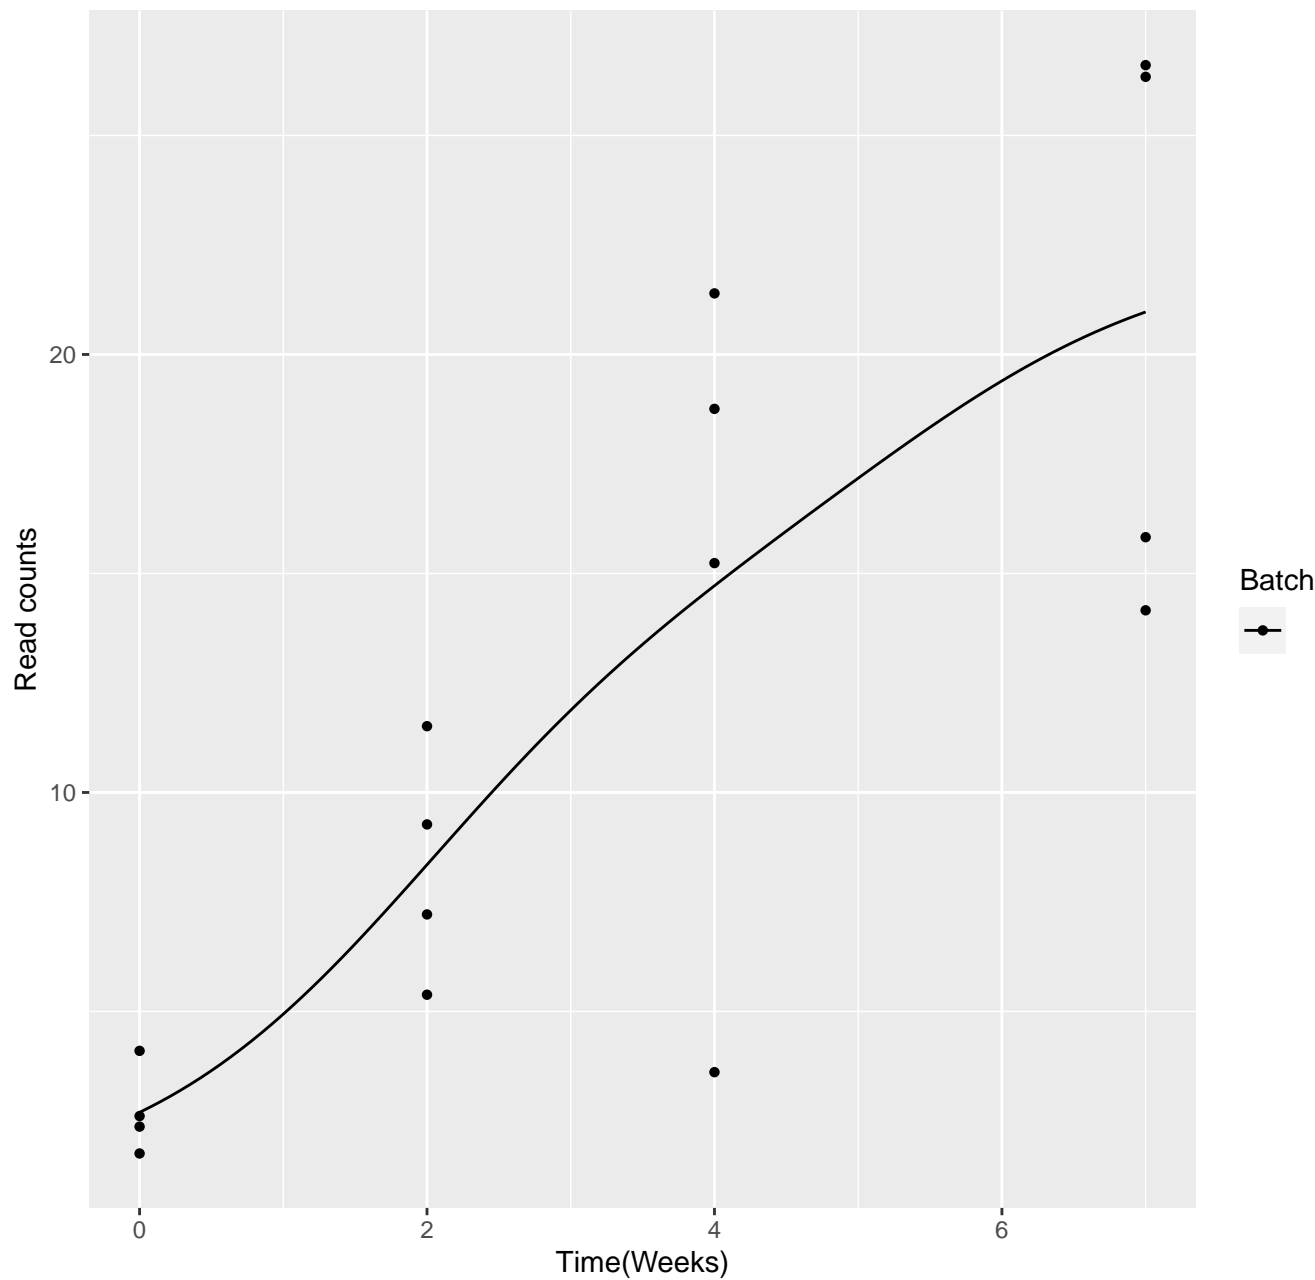

MAPRE2:  $\log_{10} q = -2.45$

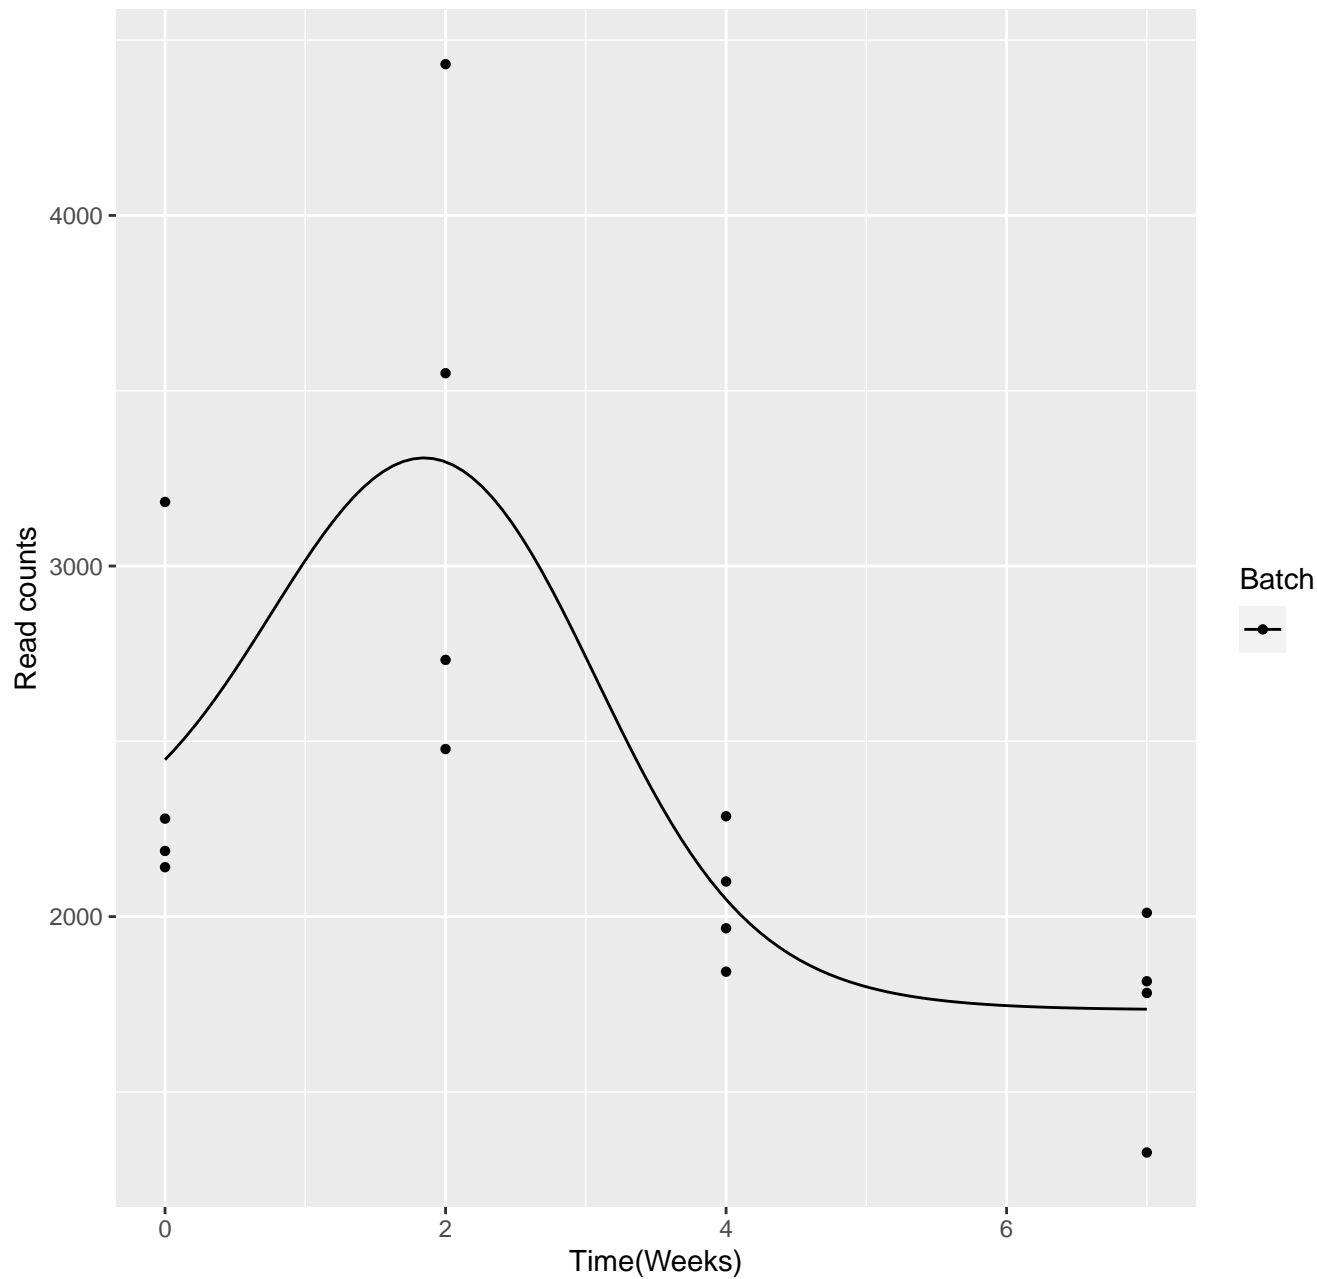

RIPOR3:  $\log_{10} q = -2.45$

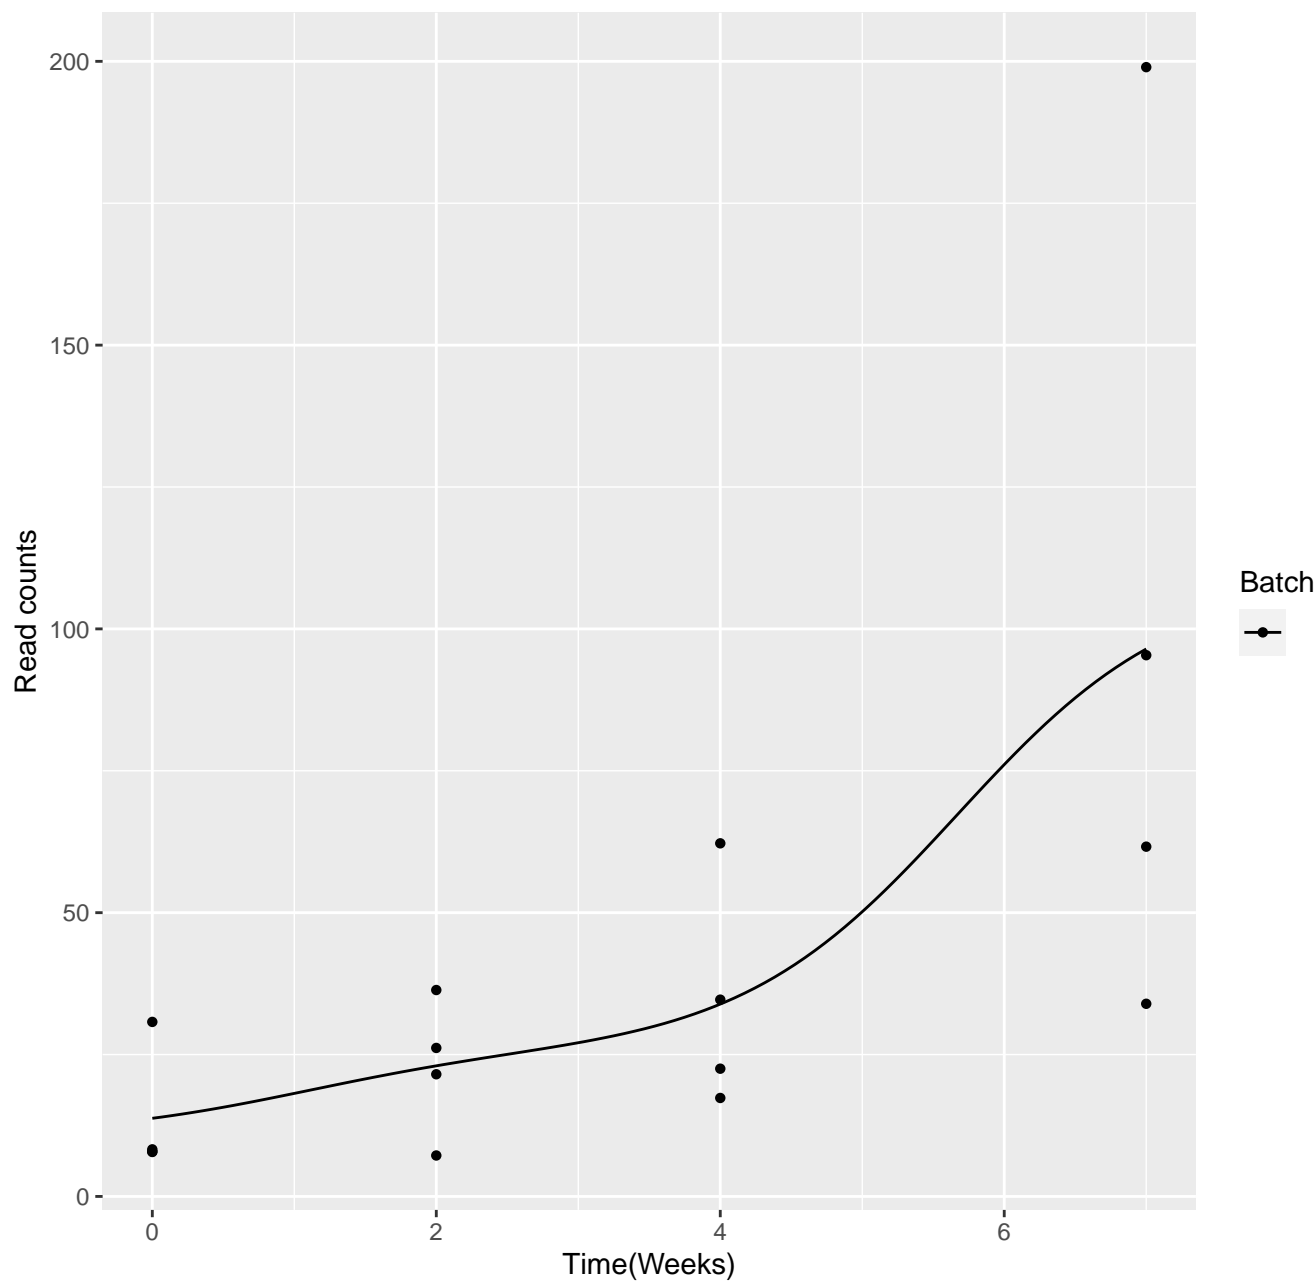

MYLK:  $\log_{10} q = -2.45$

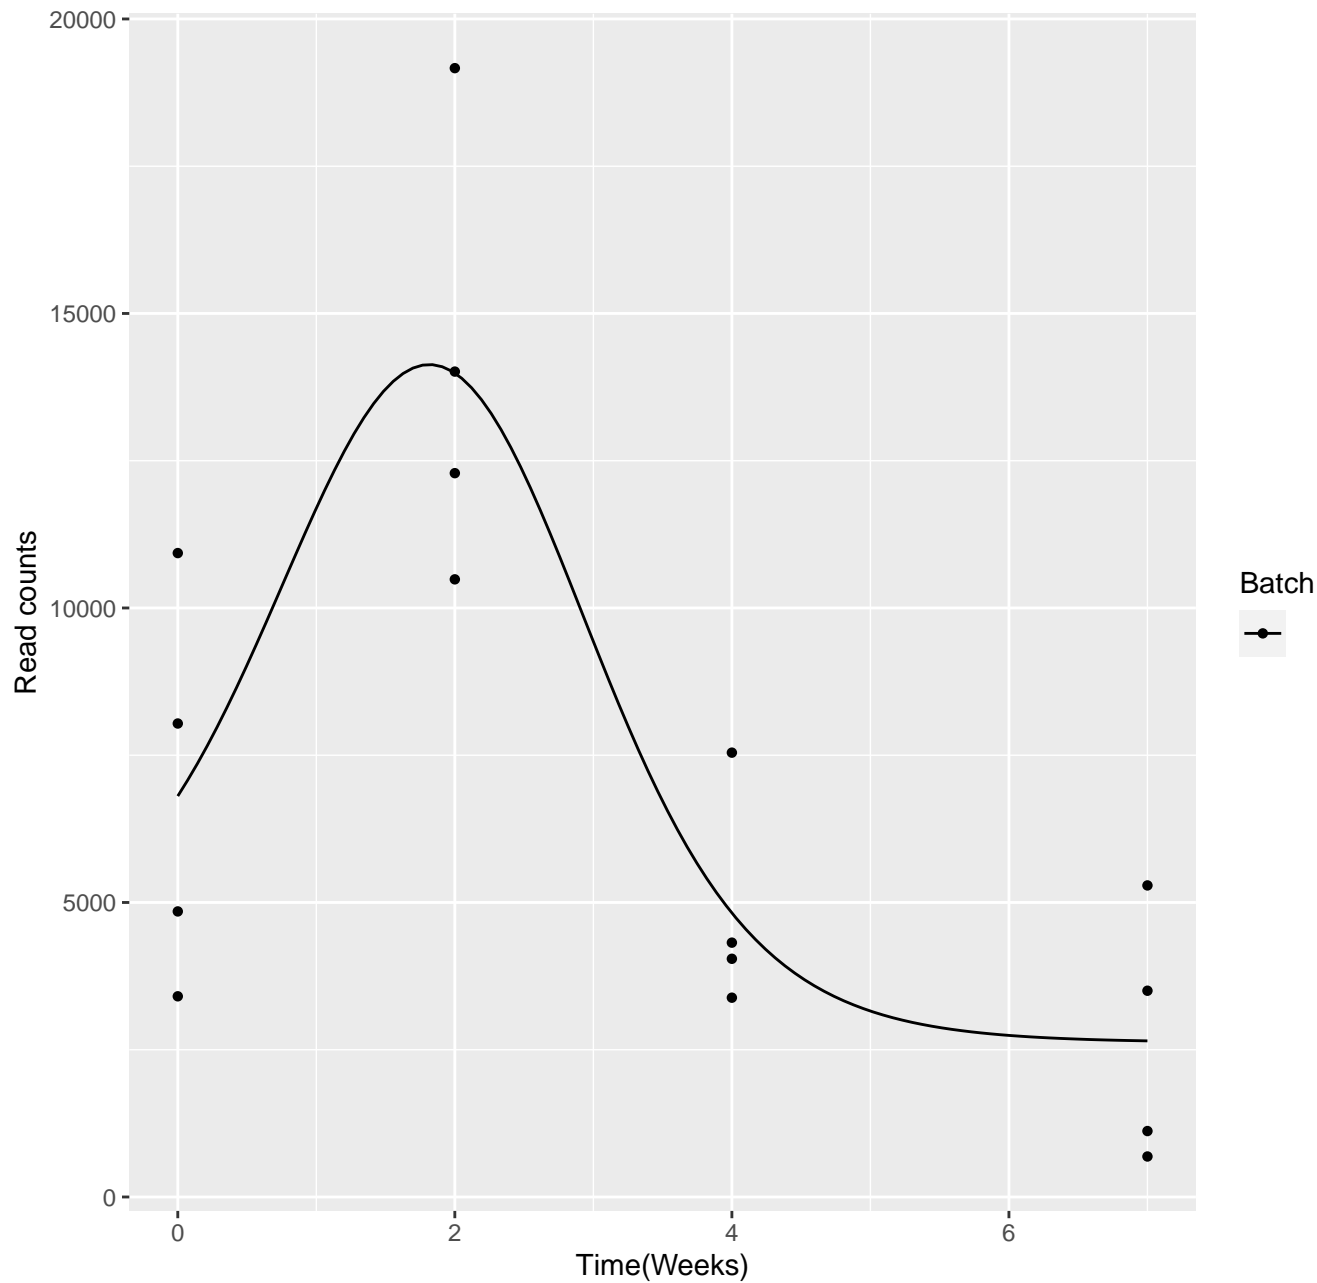

ITGA4:  $\log_{10} q = -2.44$

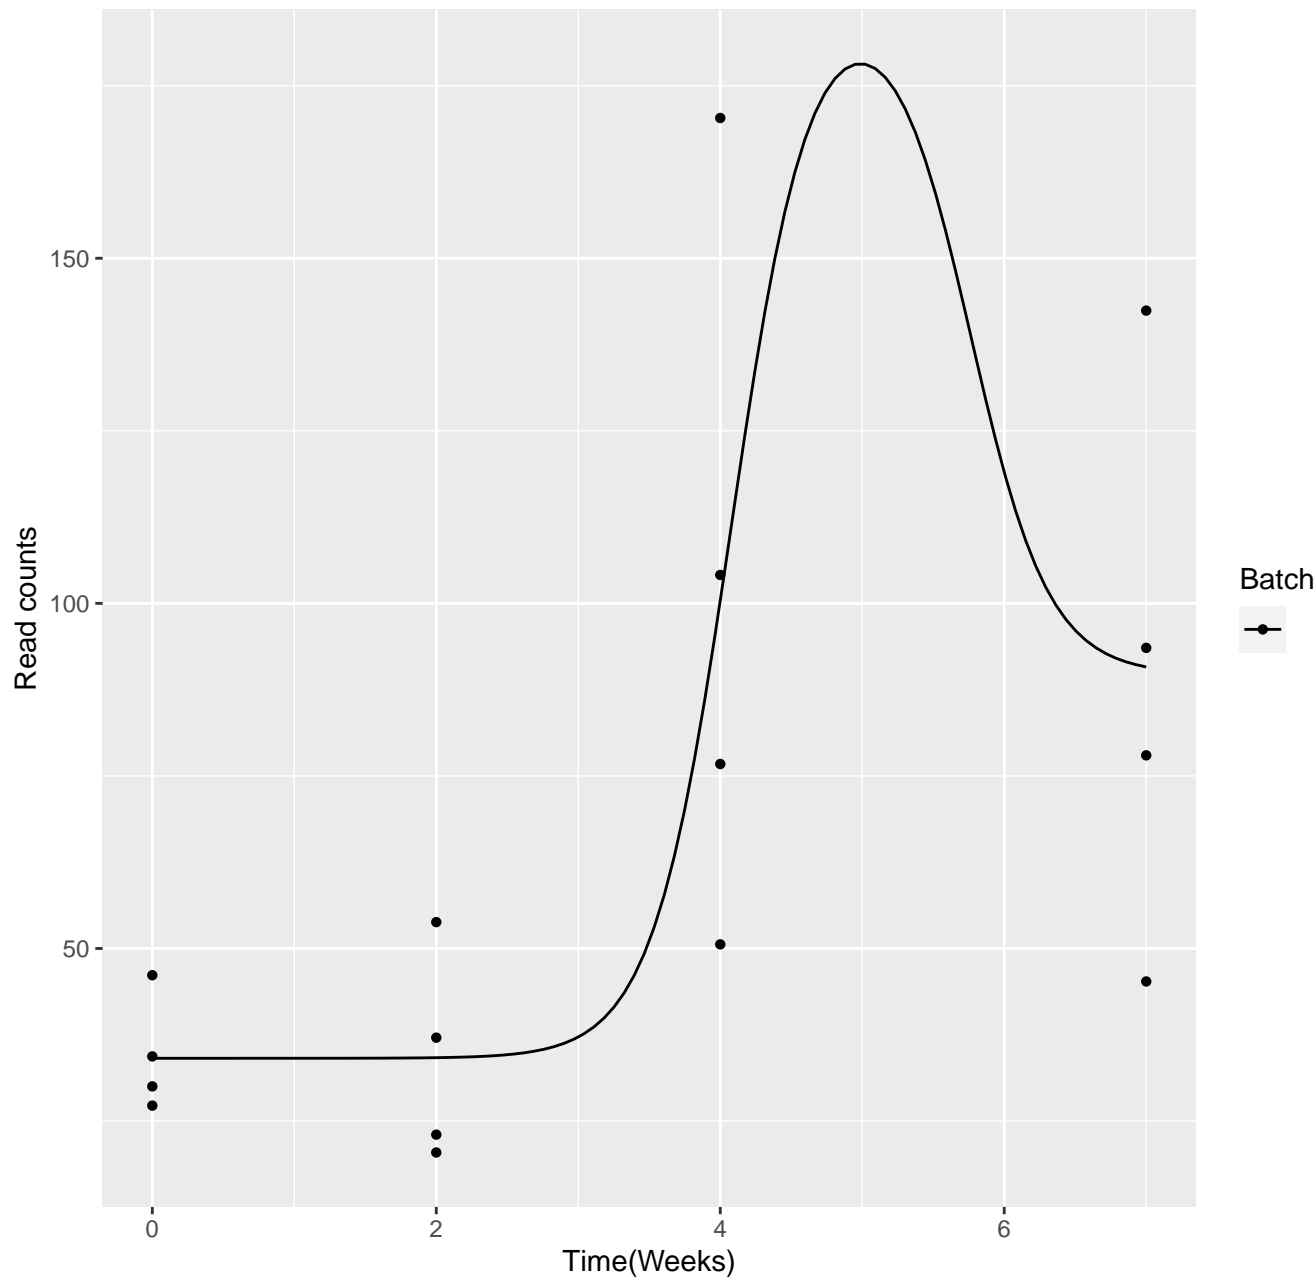

LOC103351715:  $\log_{10} q = -2.44$

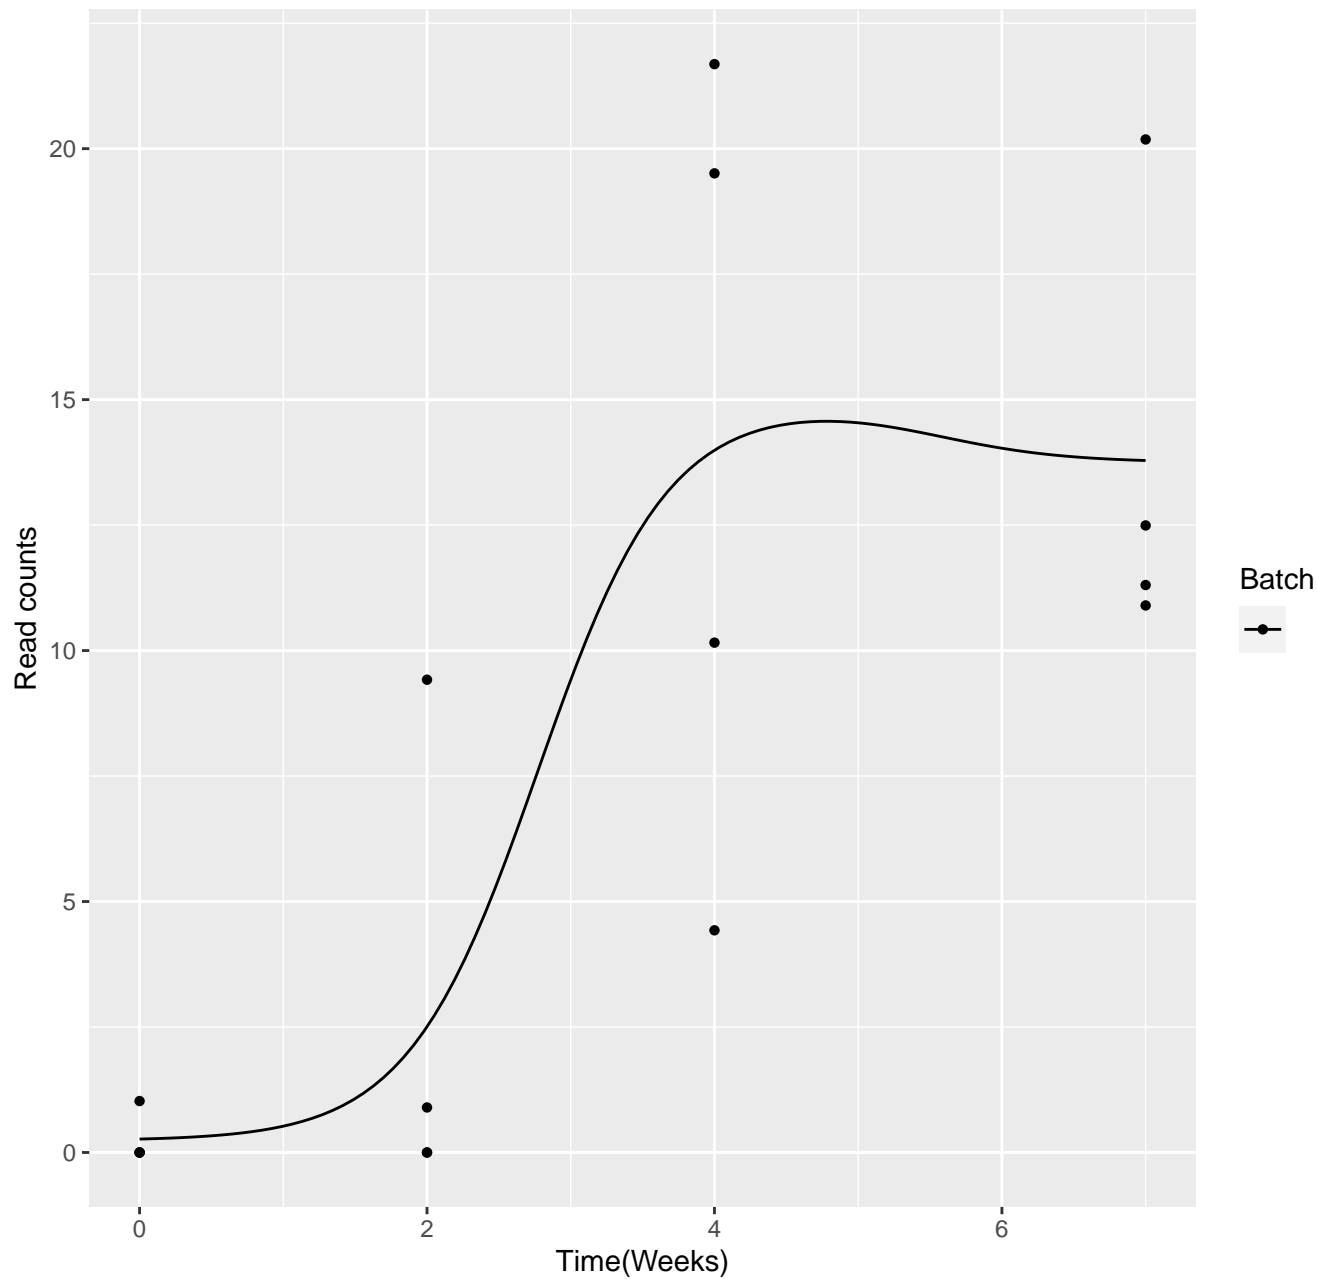



UBE2T:  $\log_{10} q = -2.44$

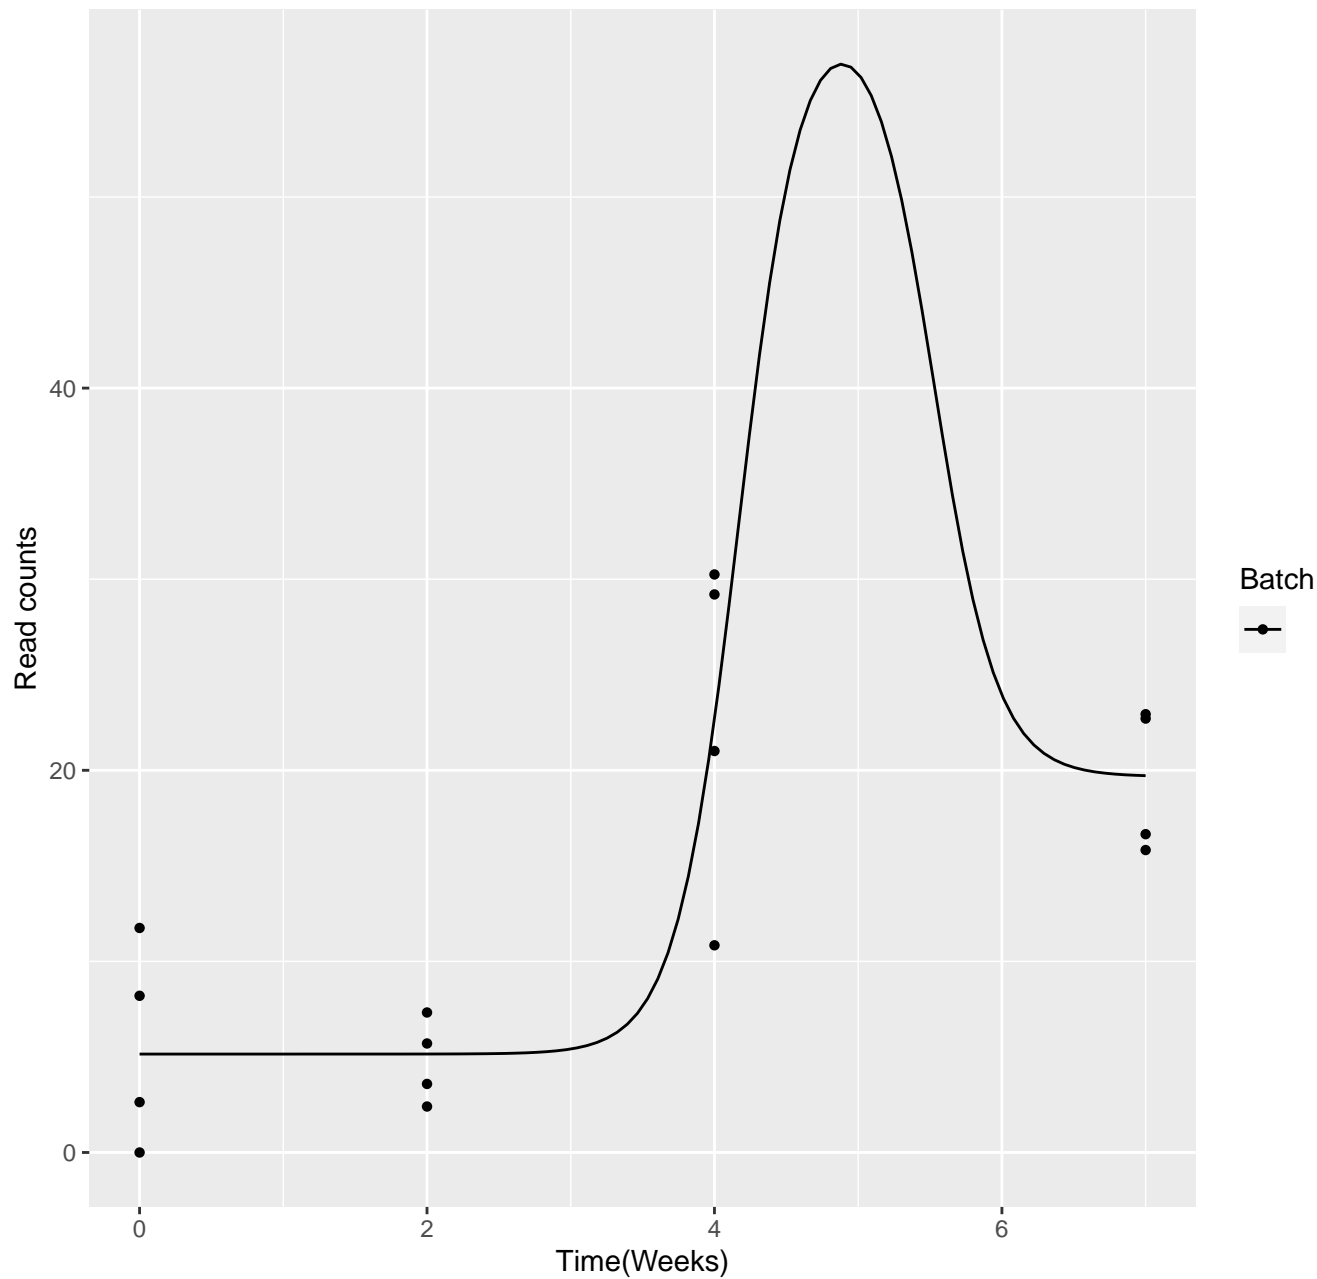

CC2D1B:  $\log_{10} q = -2.44$

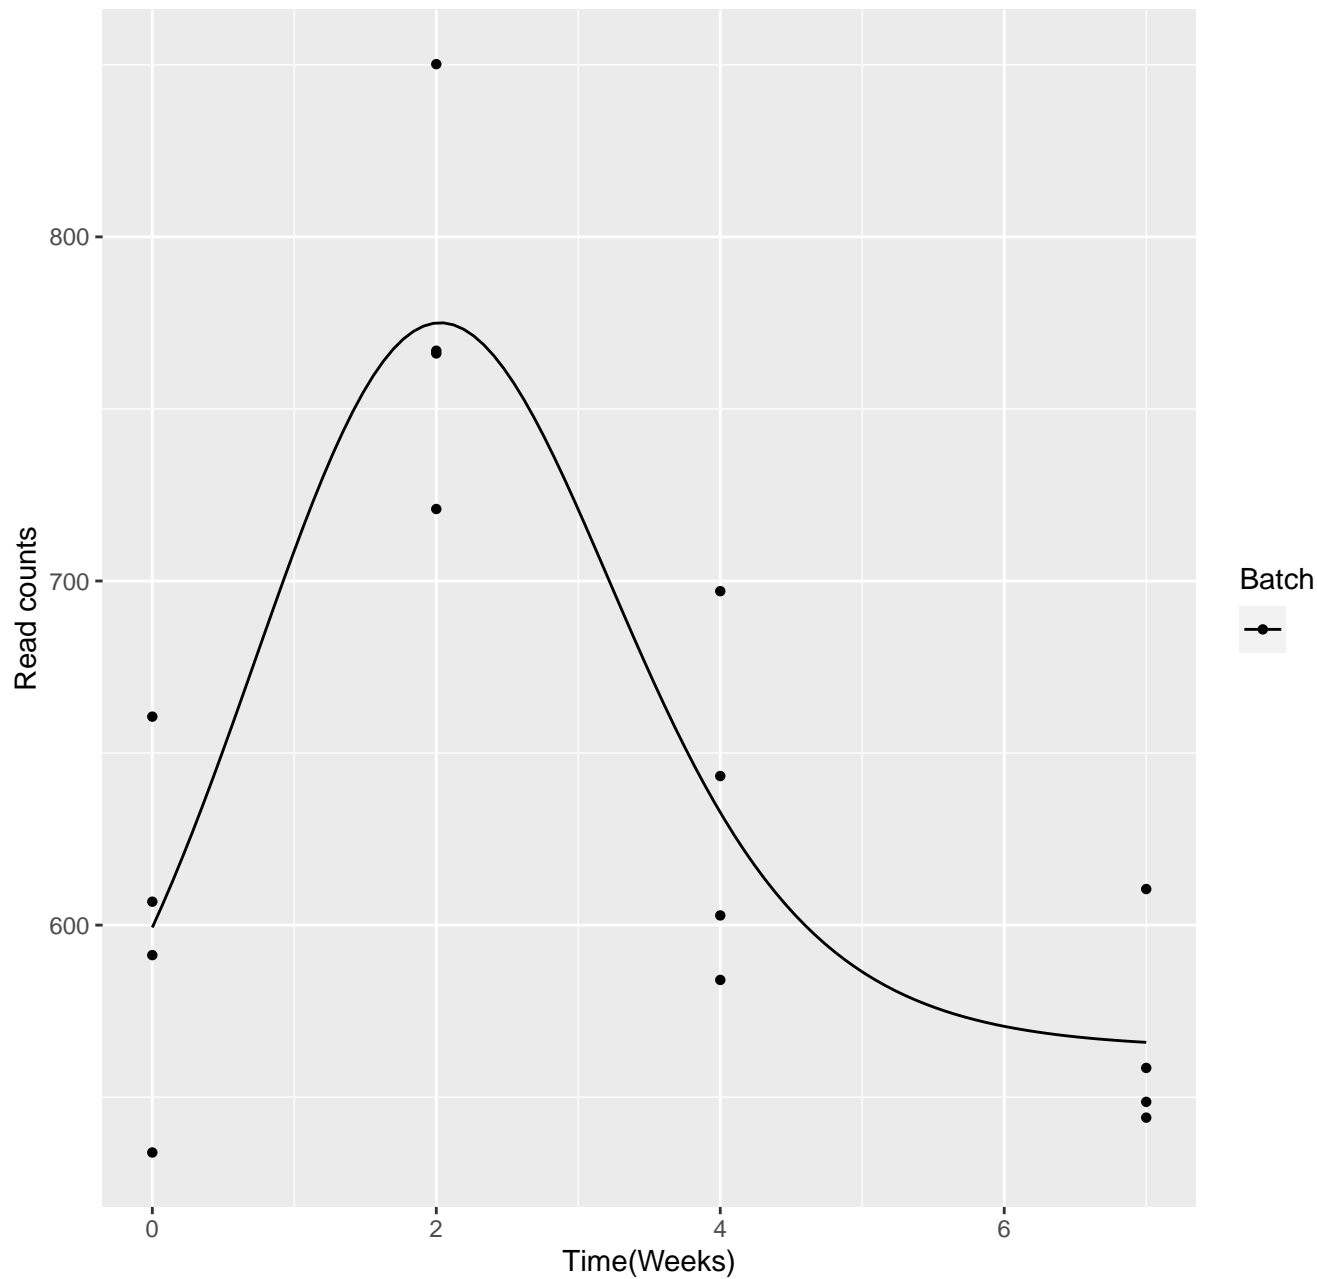

GPX1:  $\log_{10} q = -2.43$

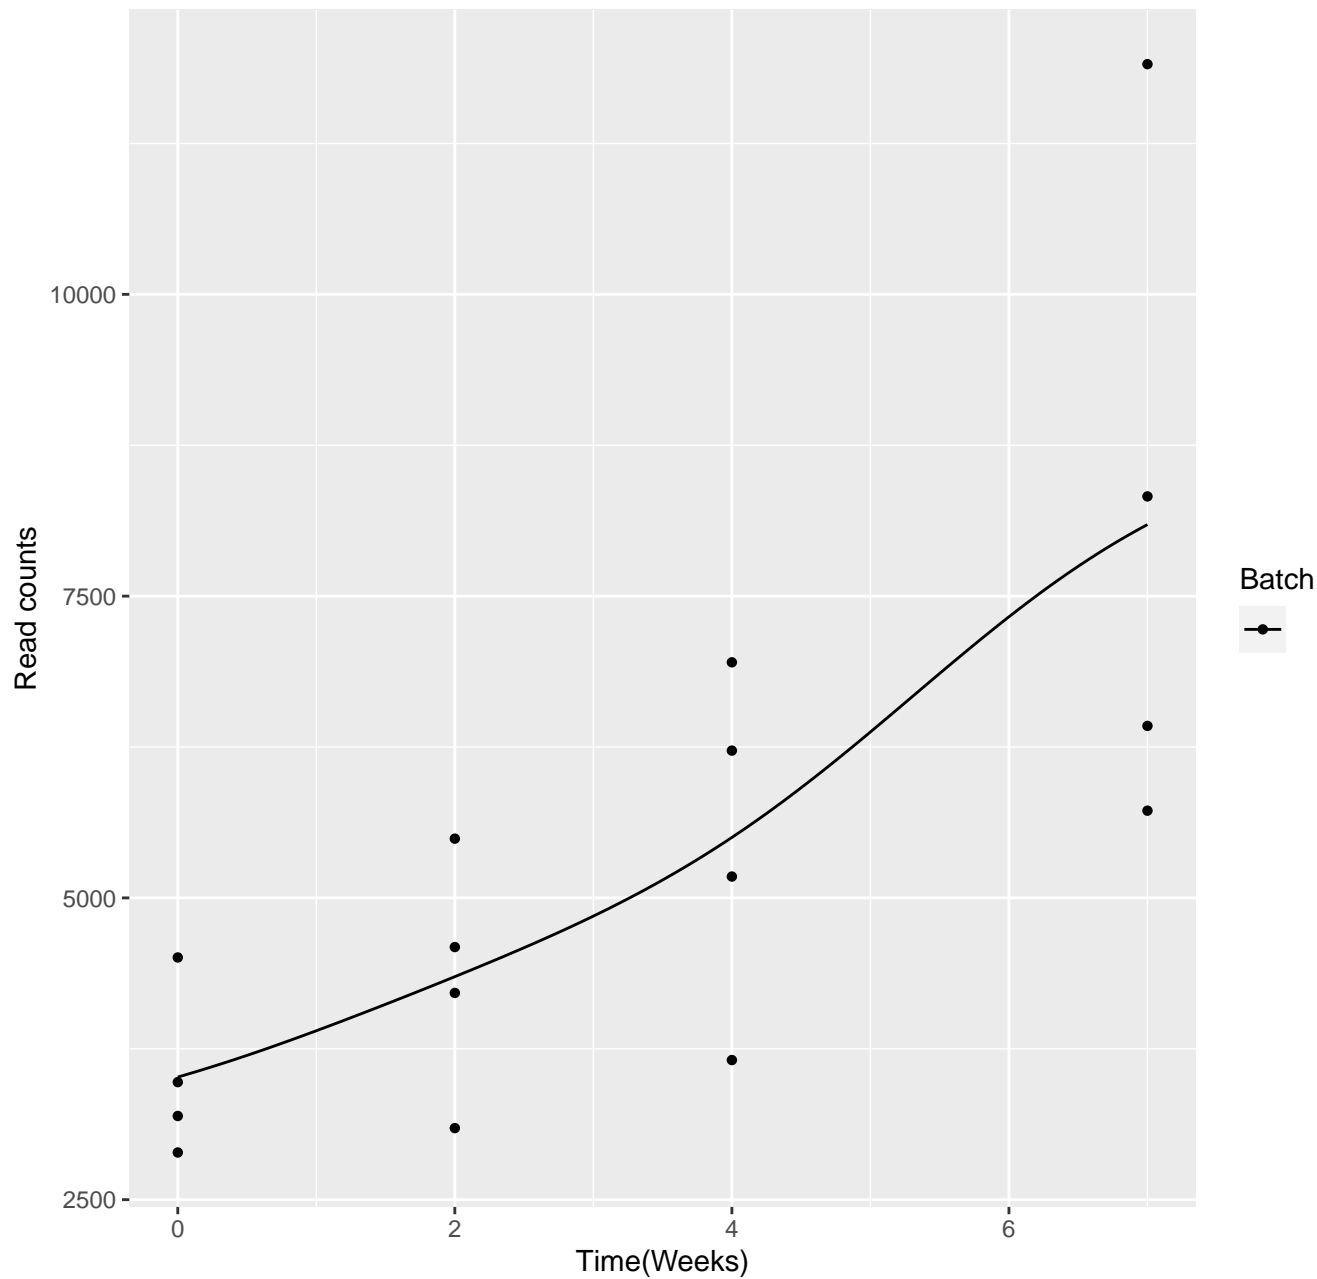

LHFPL6:  $\log_{10} q = -2.43$

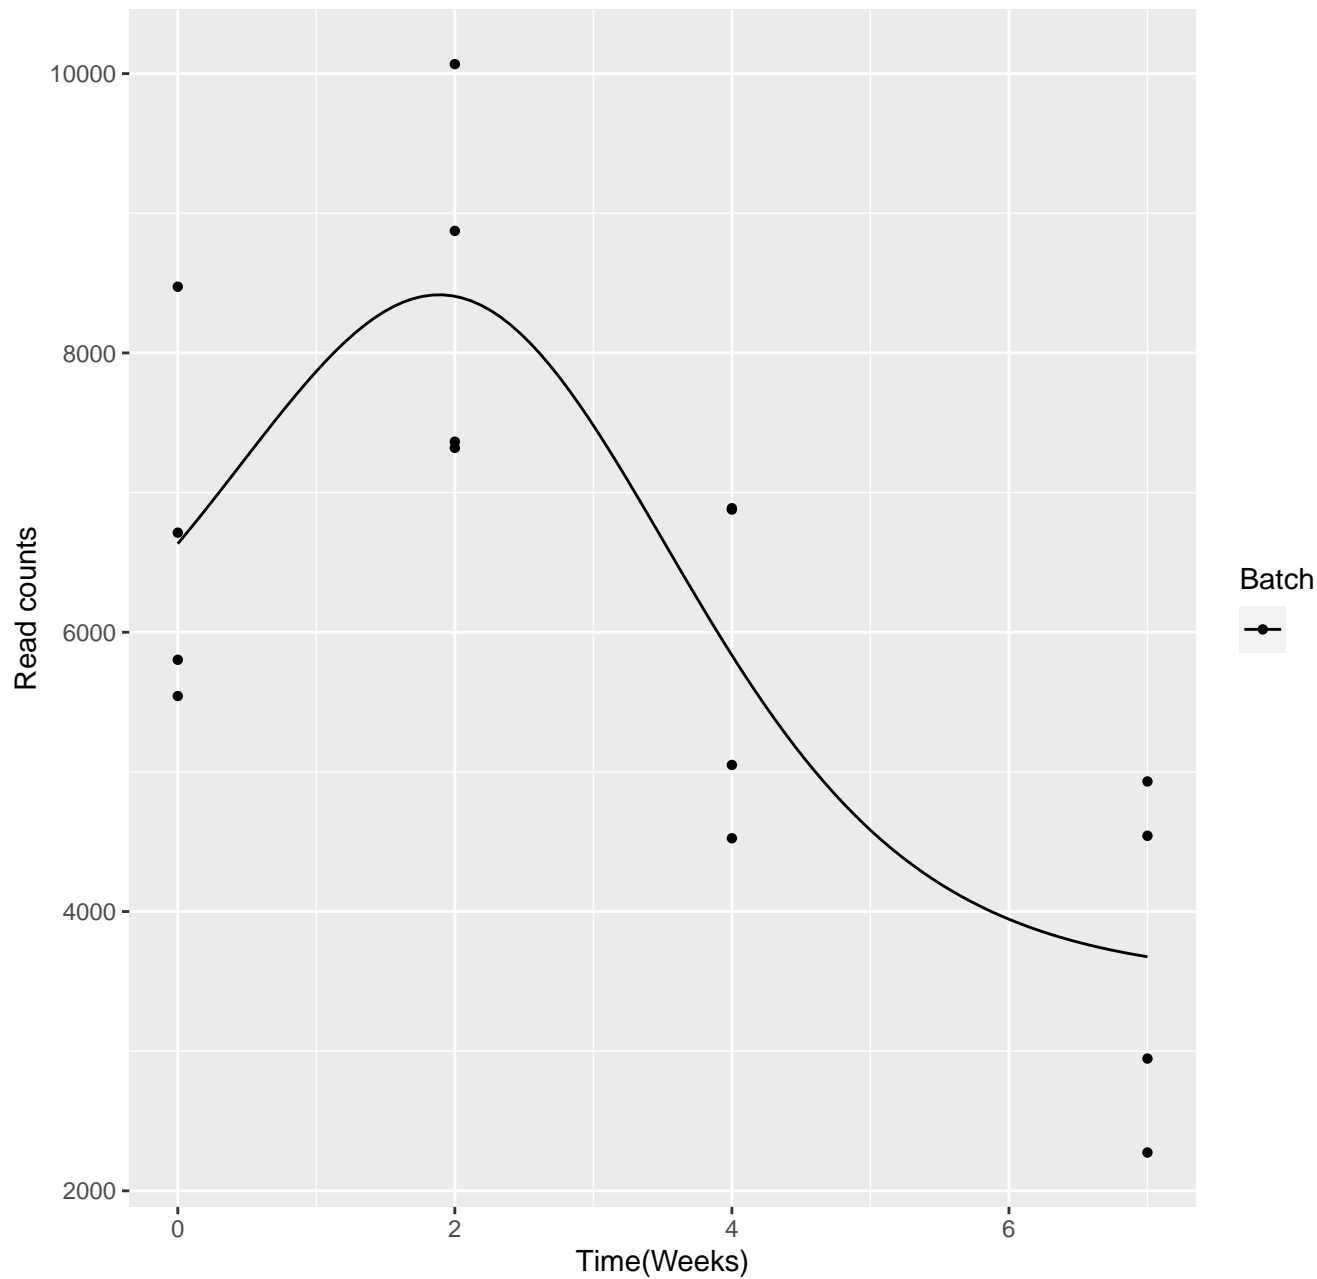

IL17D:  $\log_{10} q = -2.43$

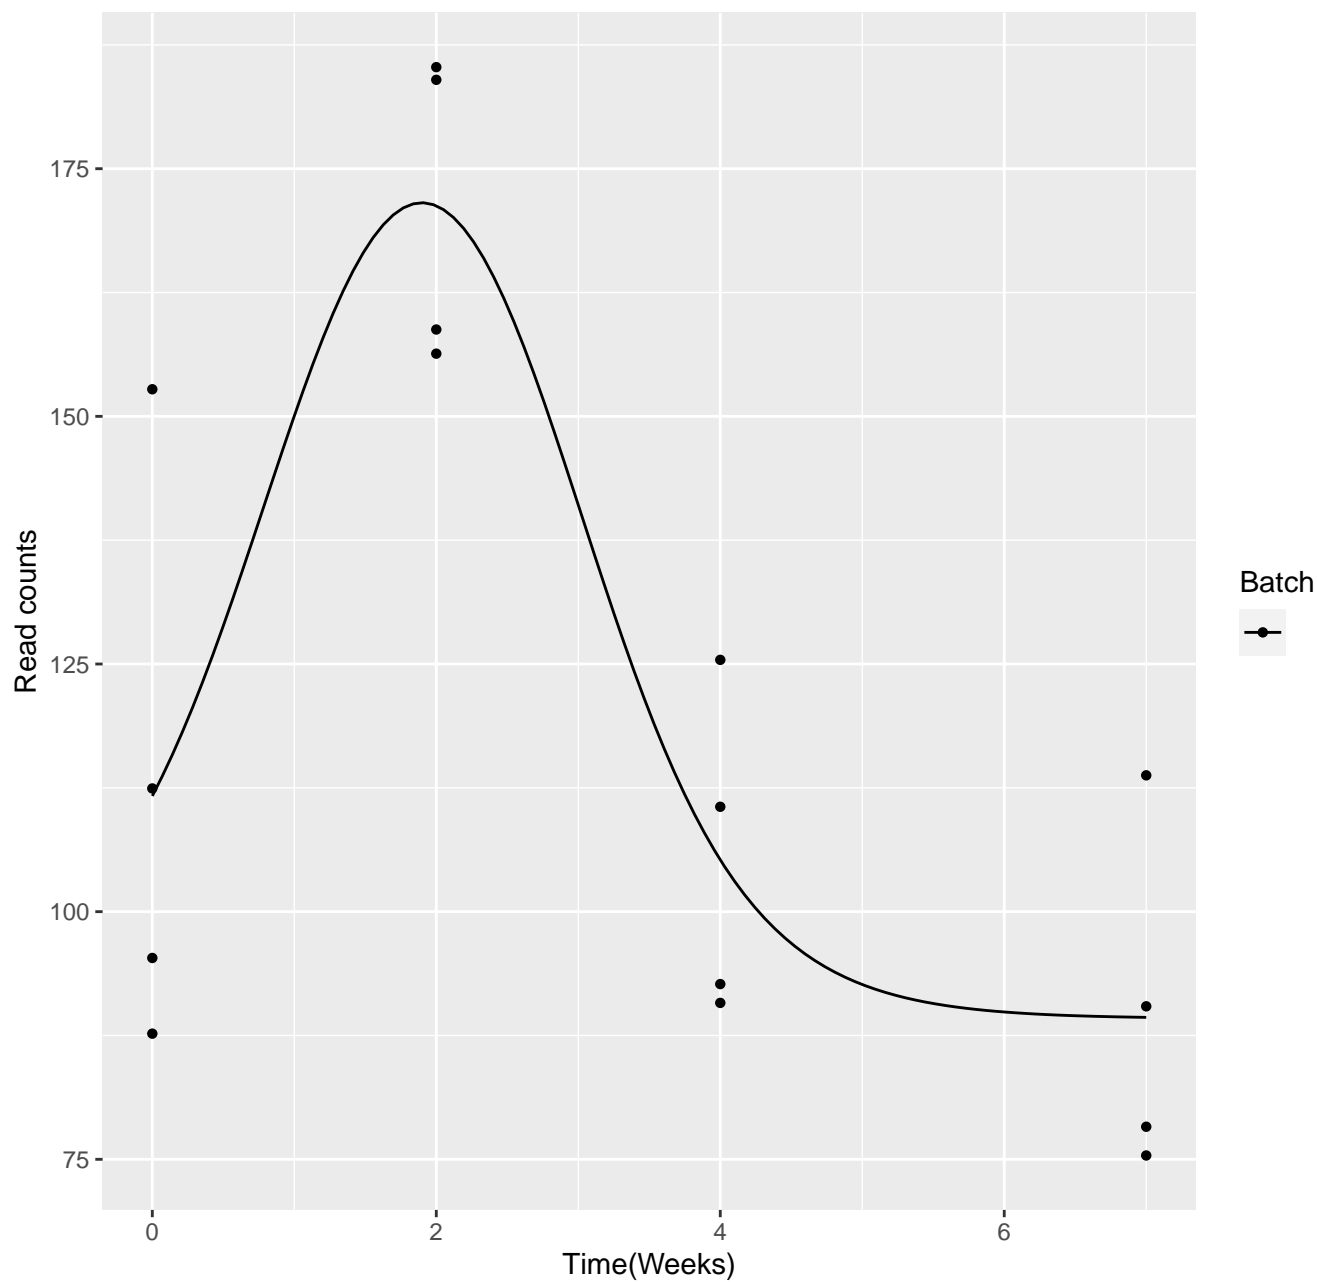

TM4SF19: log10 q = -2.43

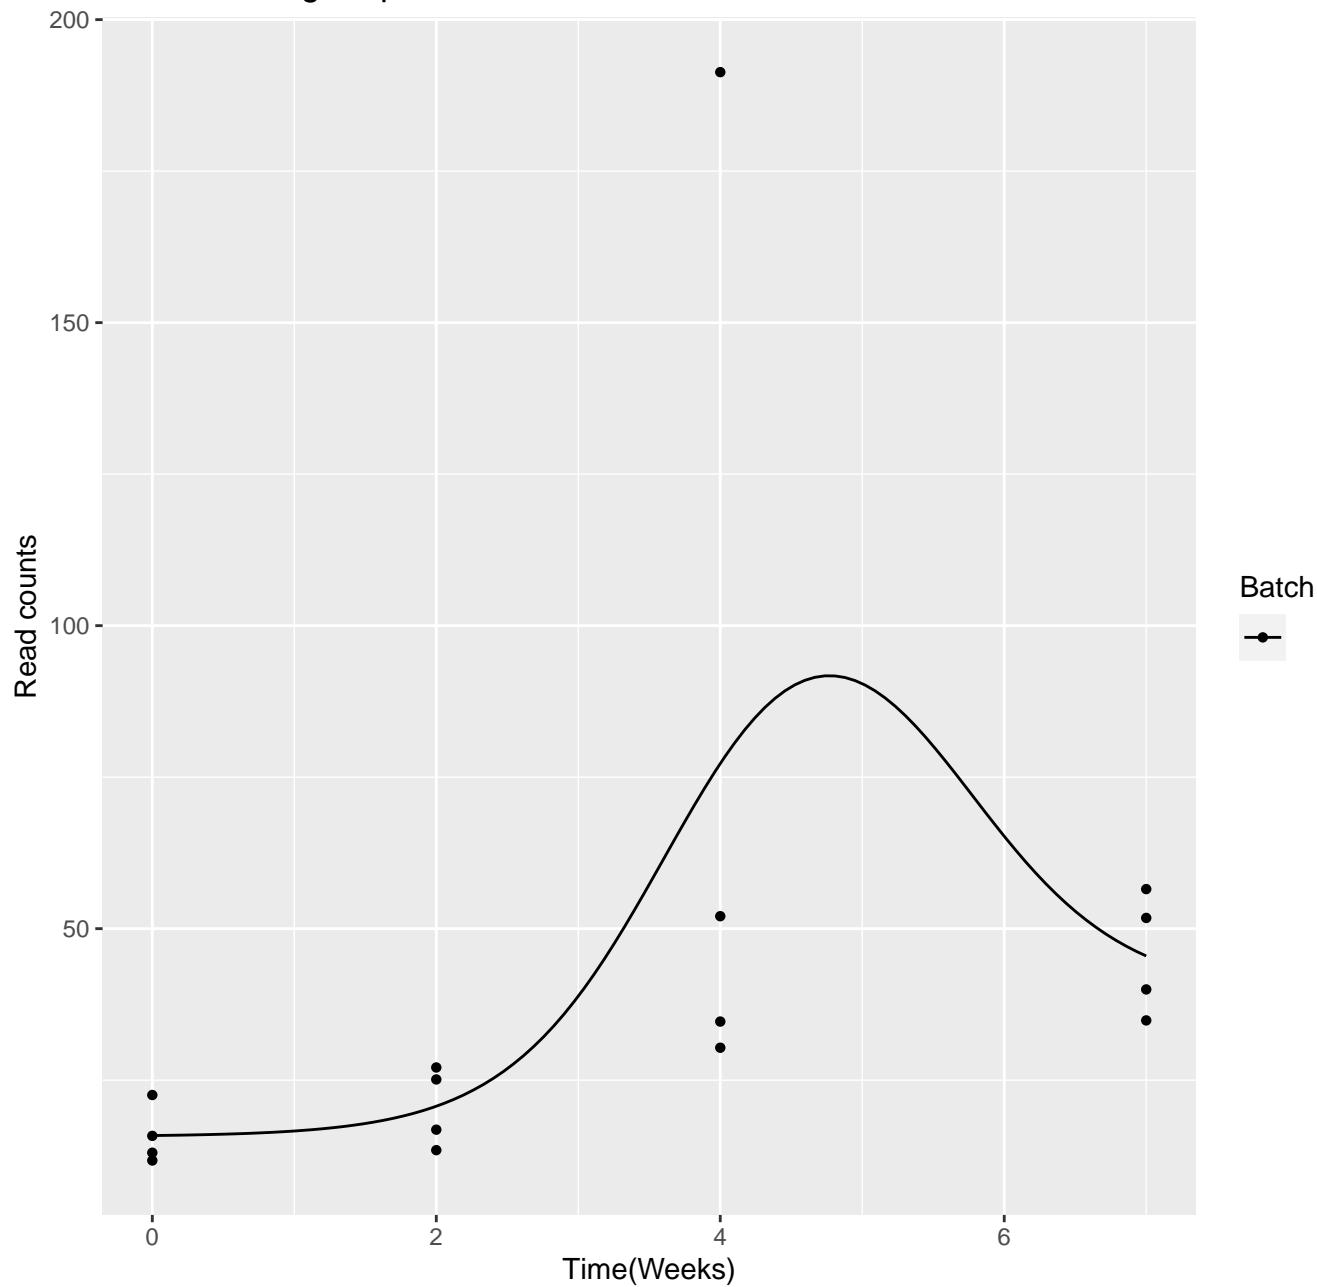

AOX1:  $\log_{10} q = -2.43$

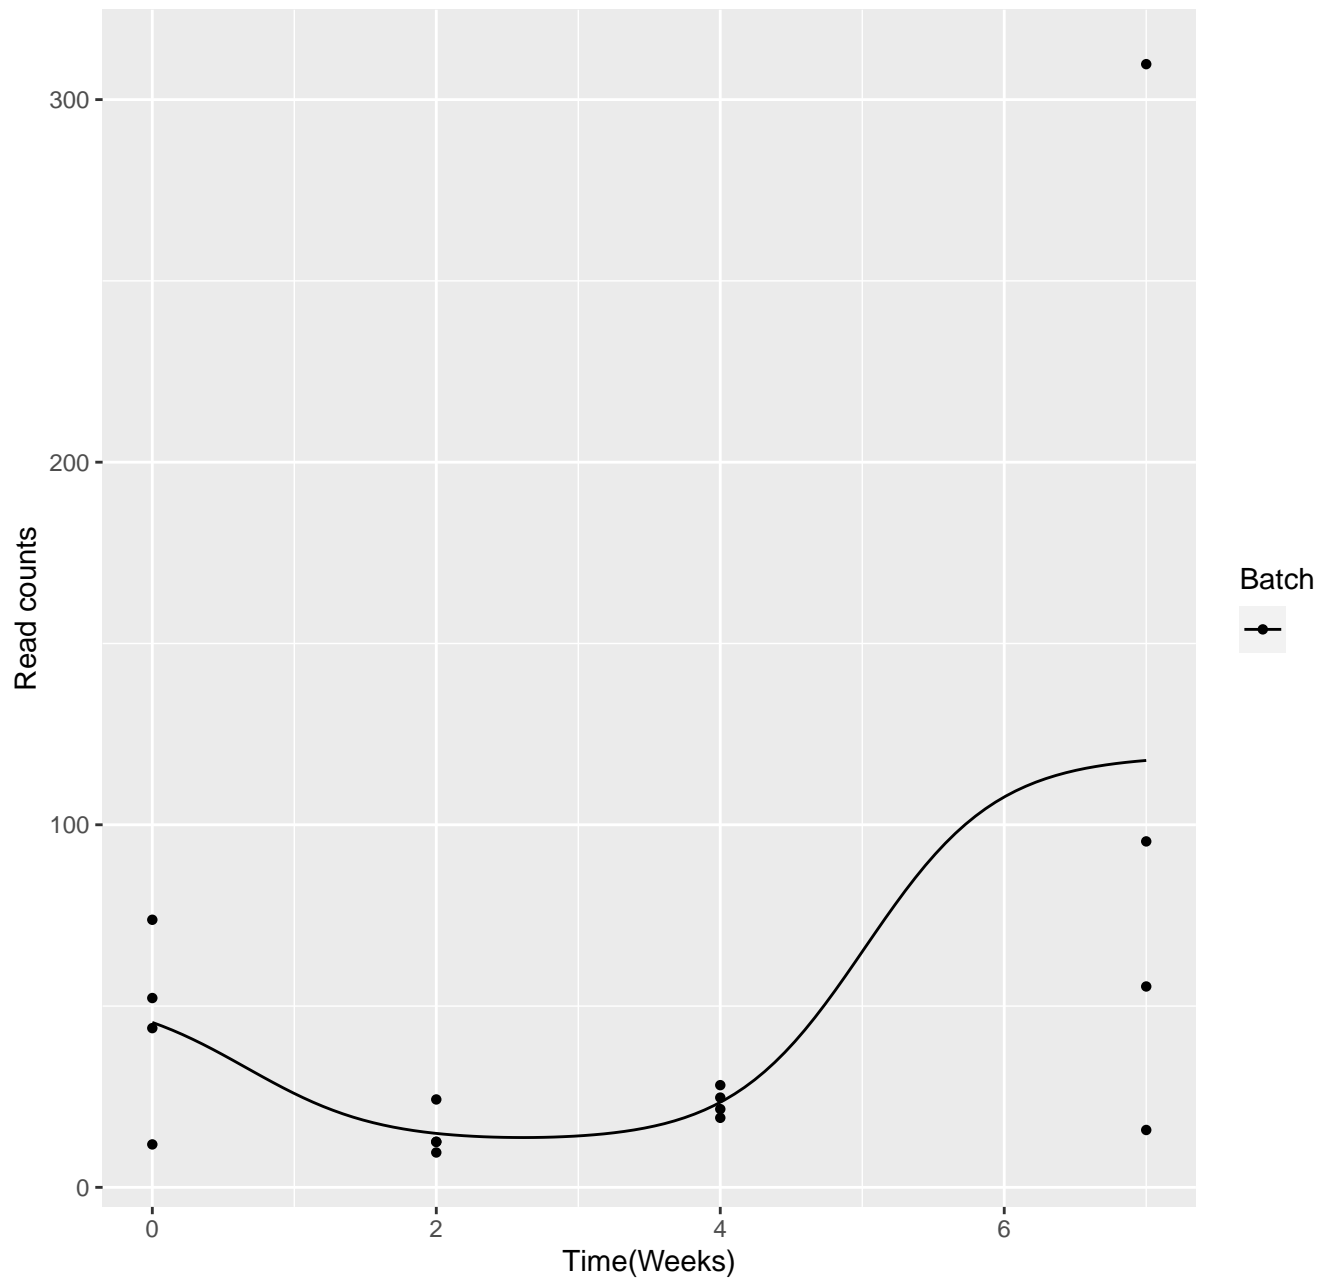

ARHGEF25:  $\log_{10} q = -2.43$

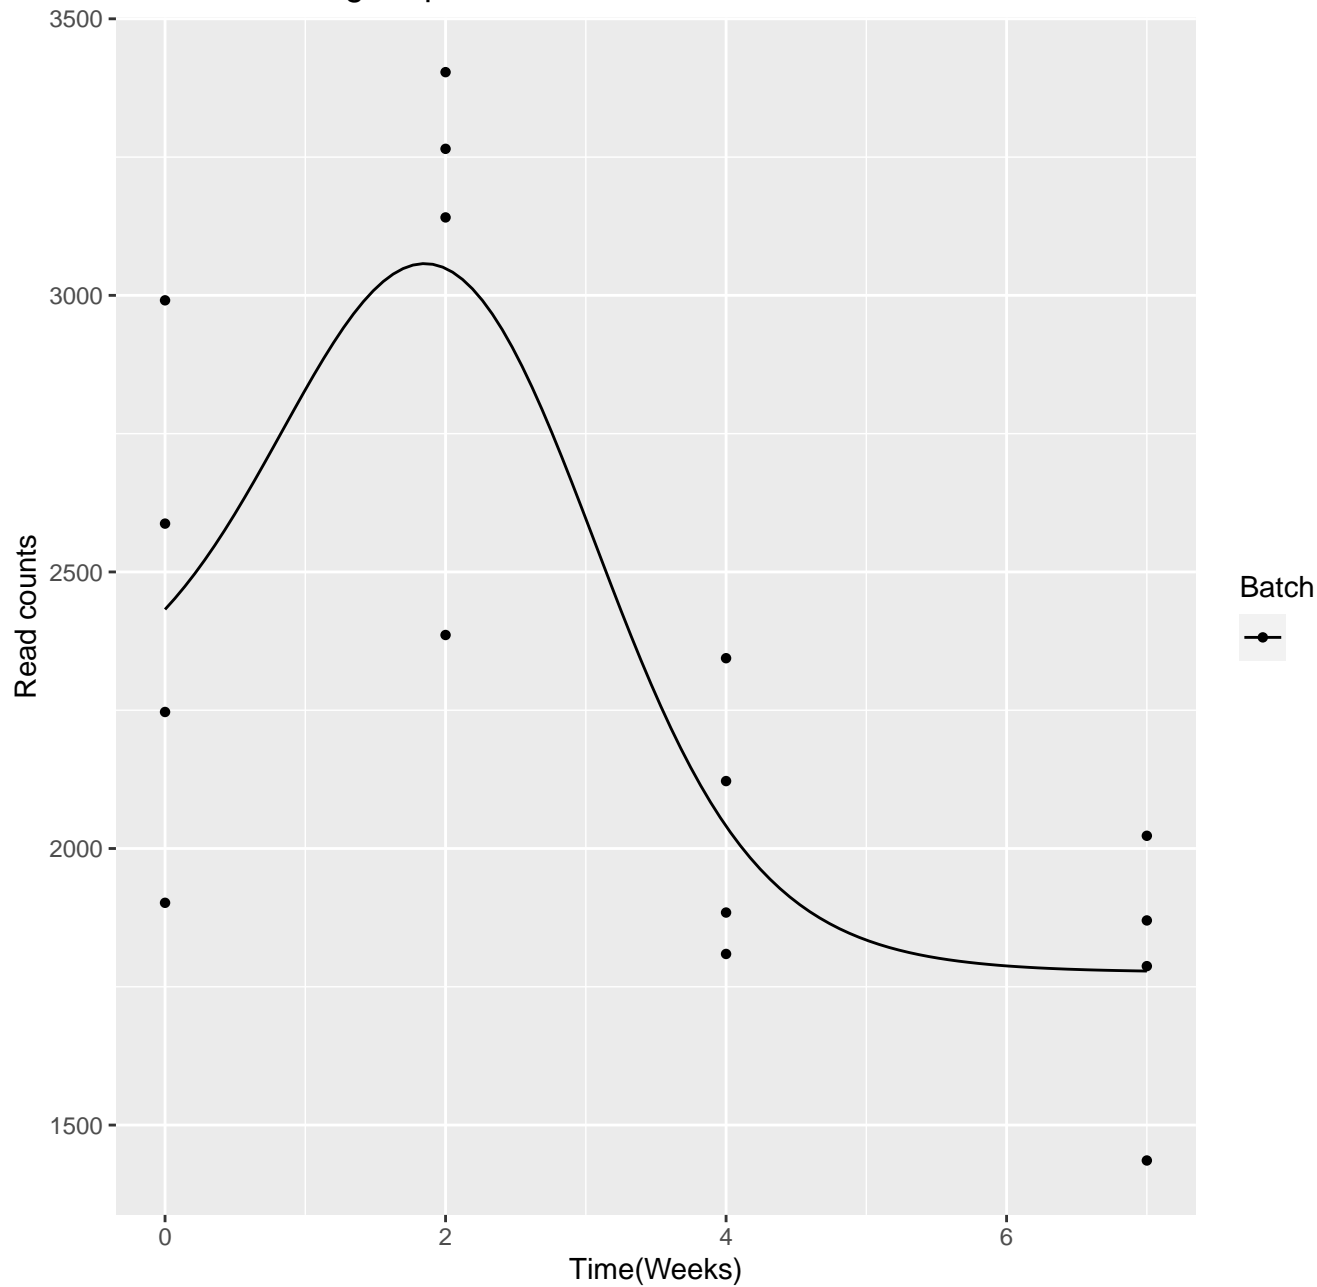



MEAK7:  $\log_{10} q = -2.43$

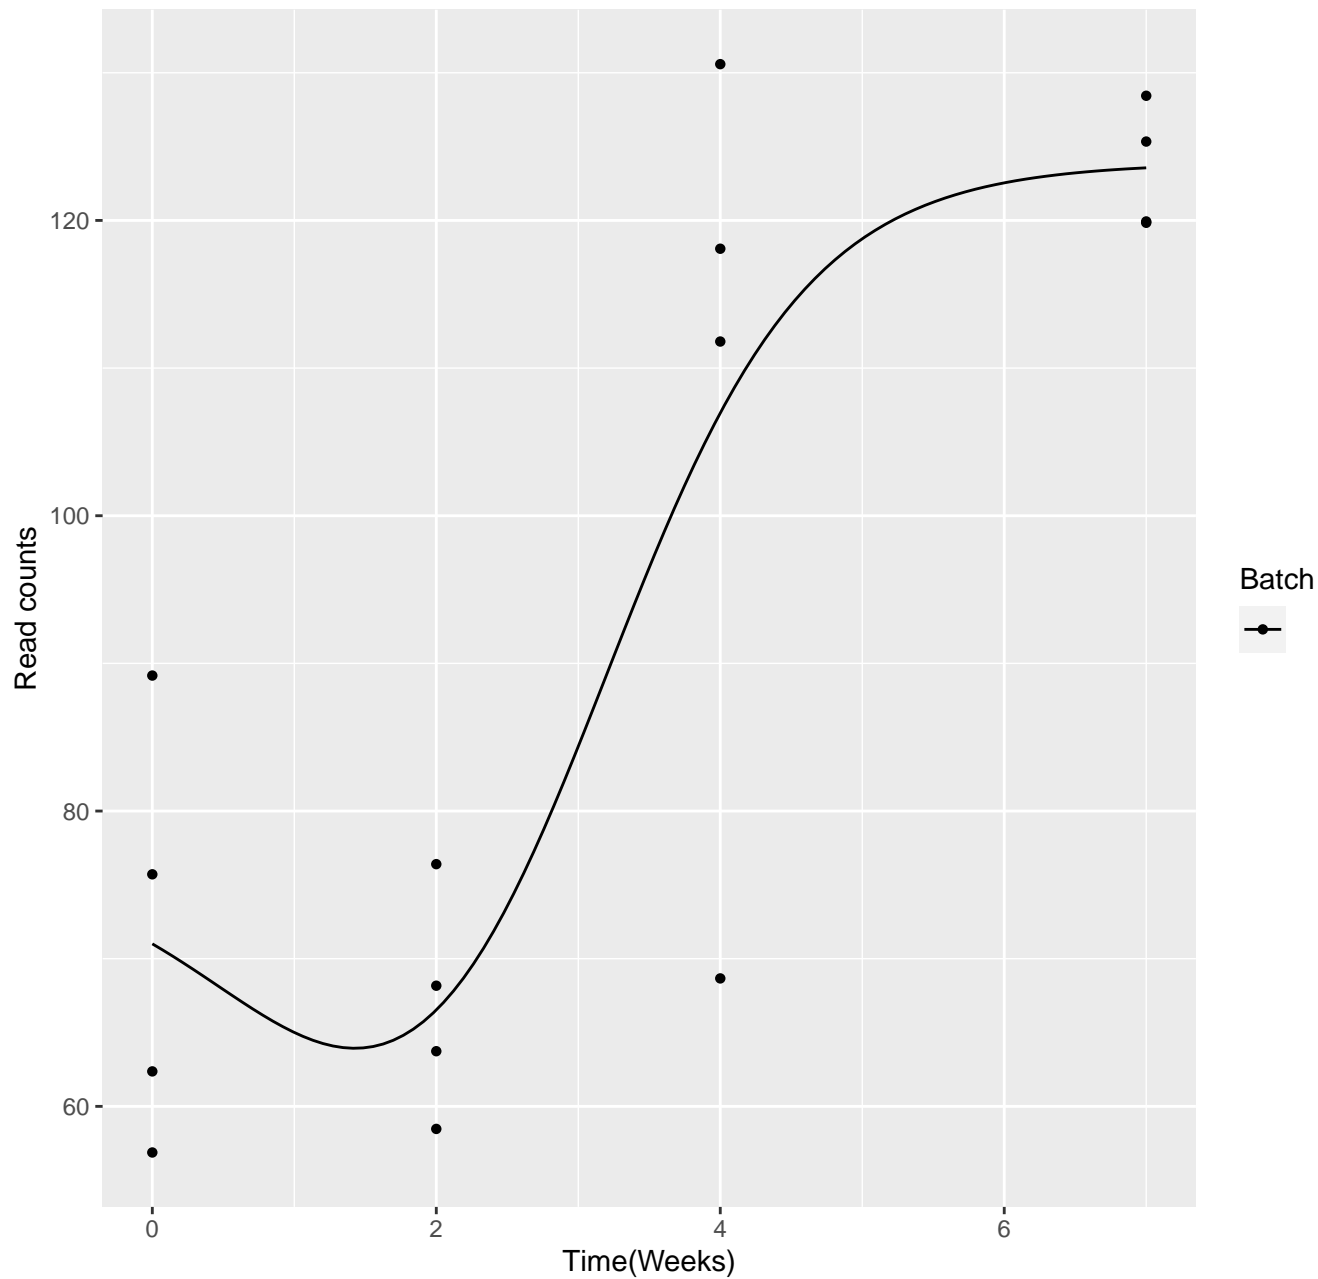

AJUBA:  $\log_{10} q = -2.43$

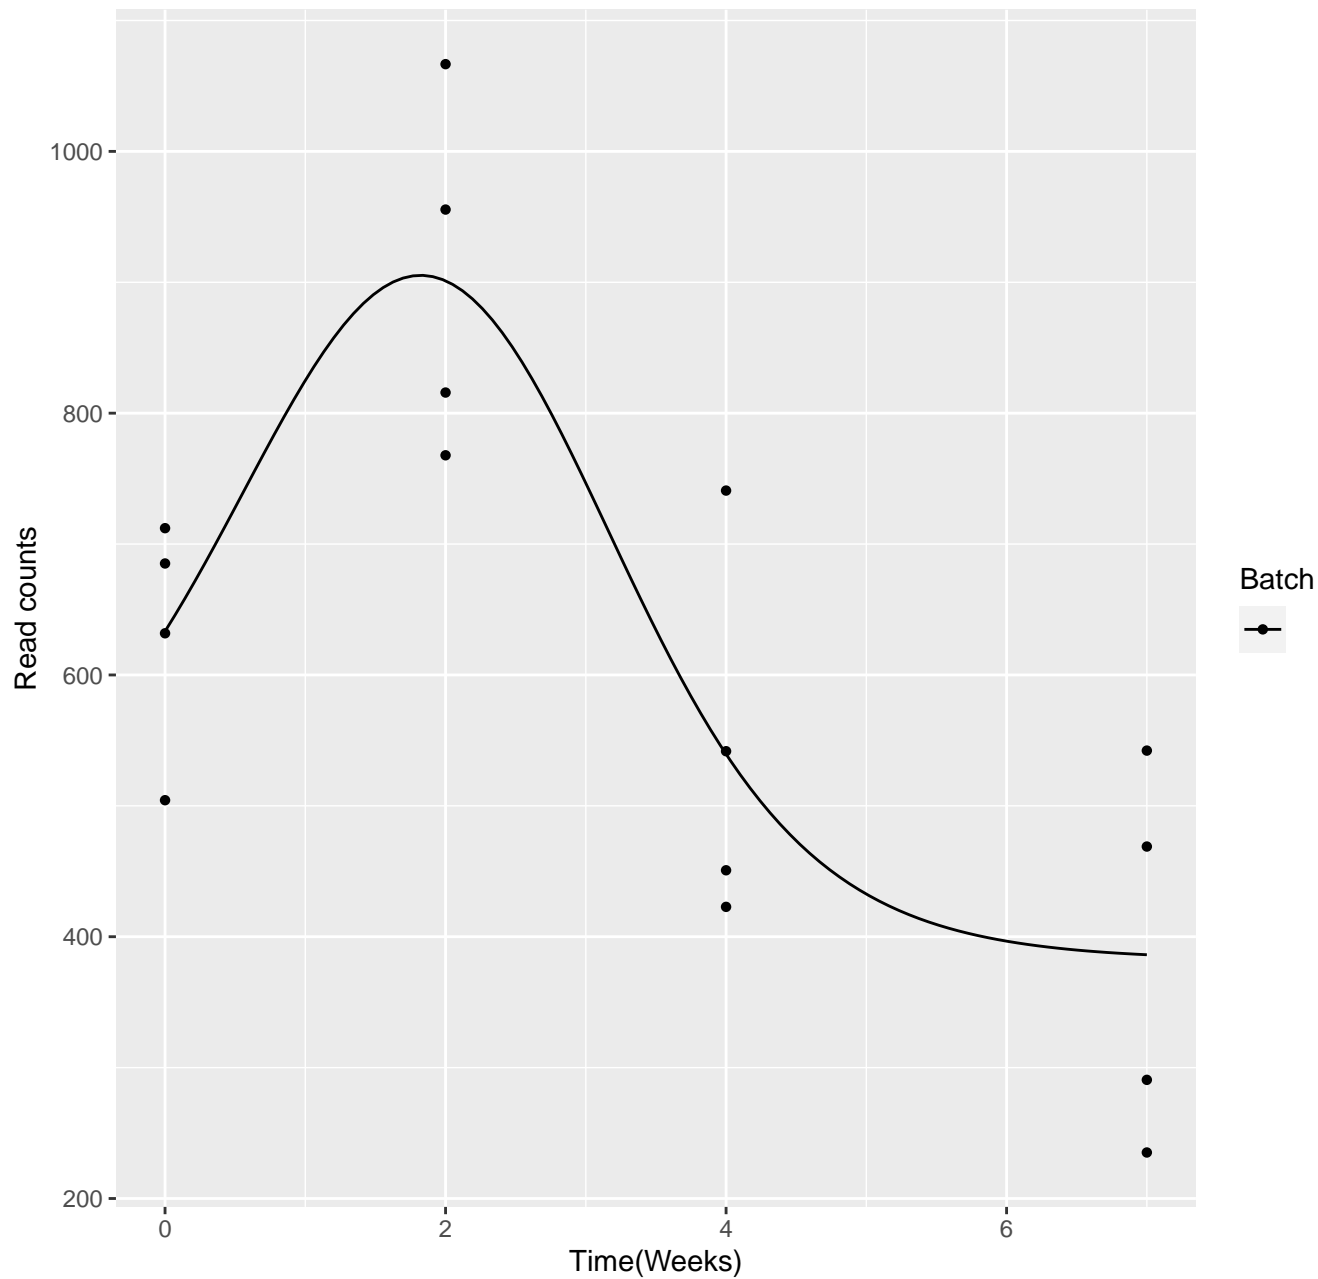

RFLNB:  $\log_{10} q = -2.43$

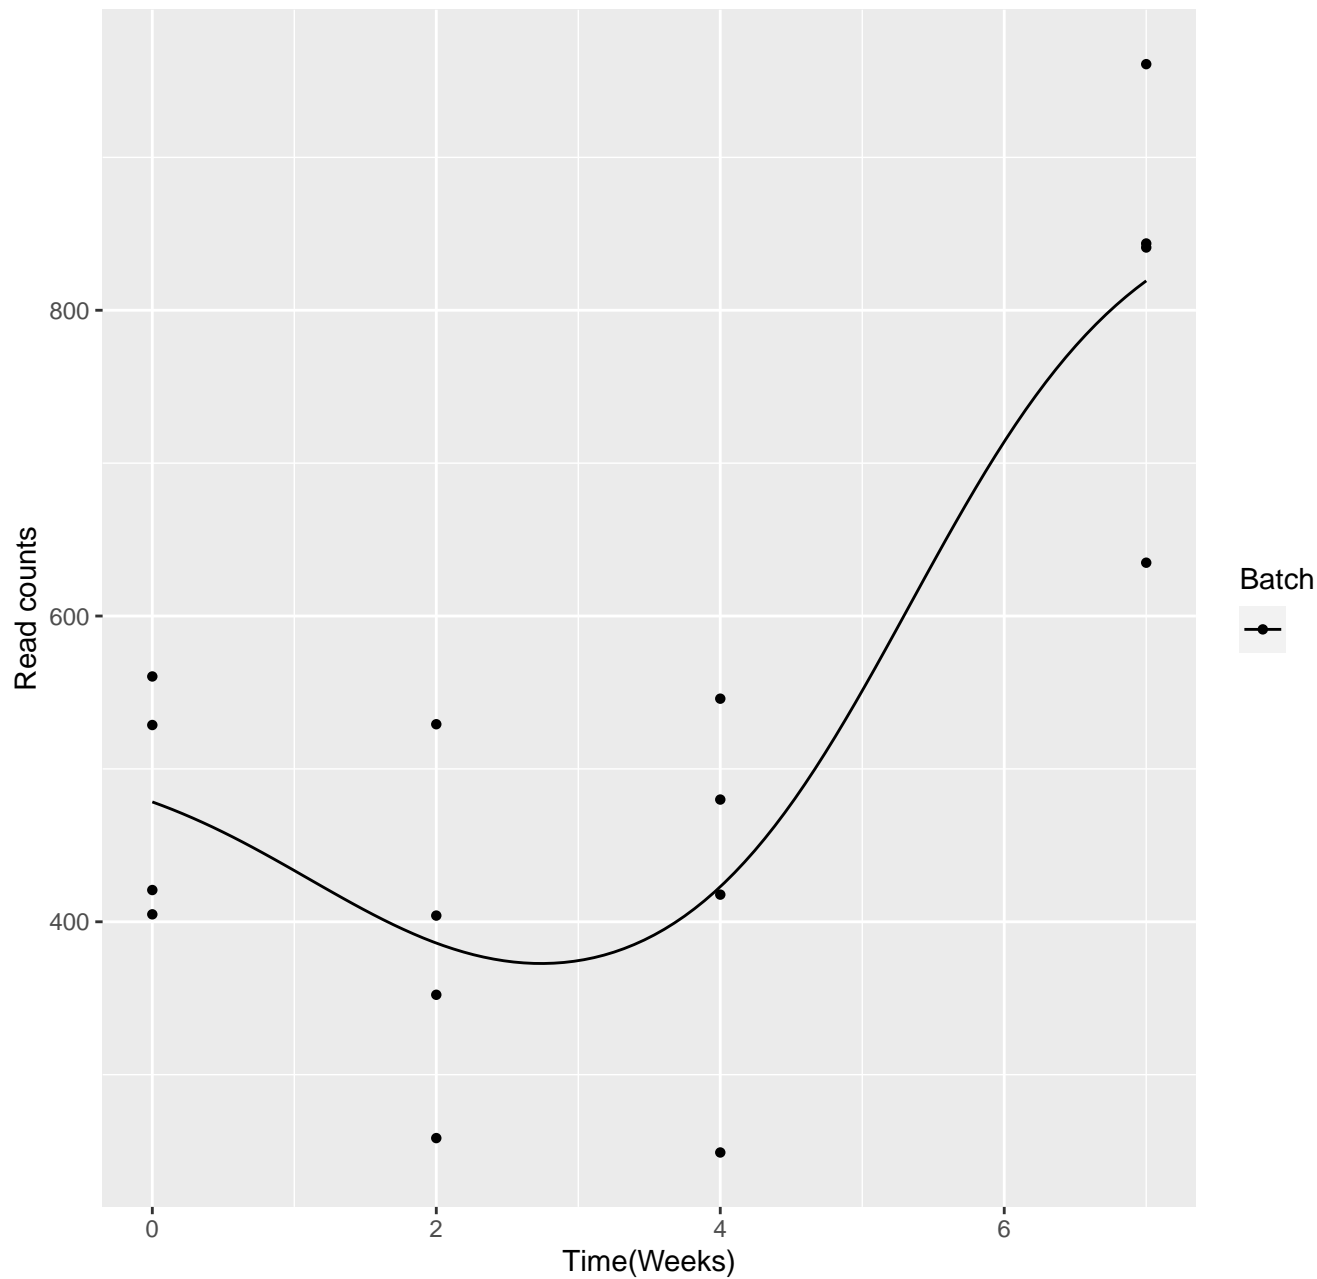

GINS4:  $\log_{10} q = -2.43$

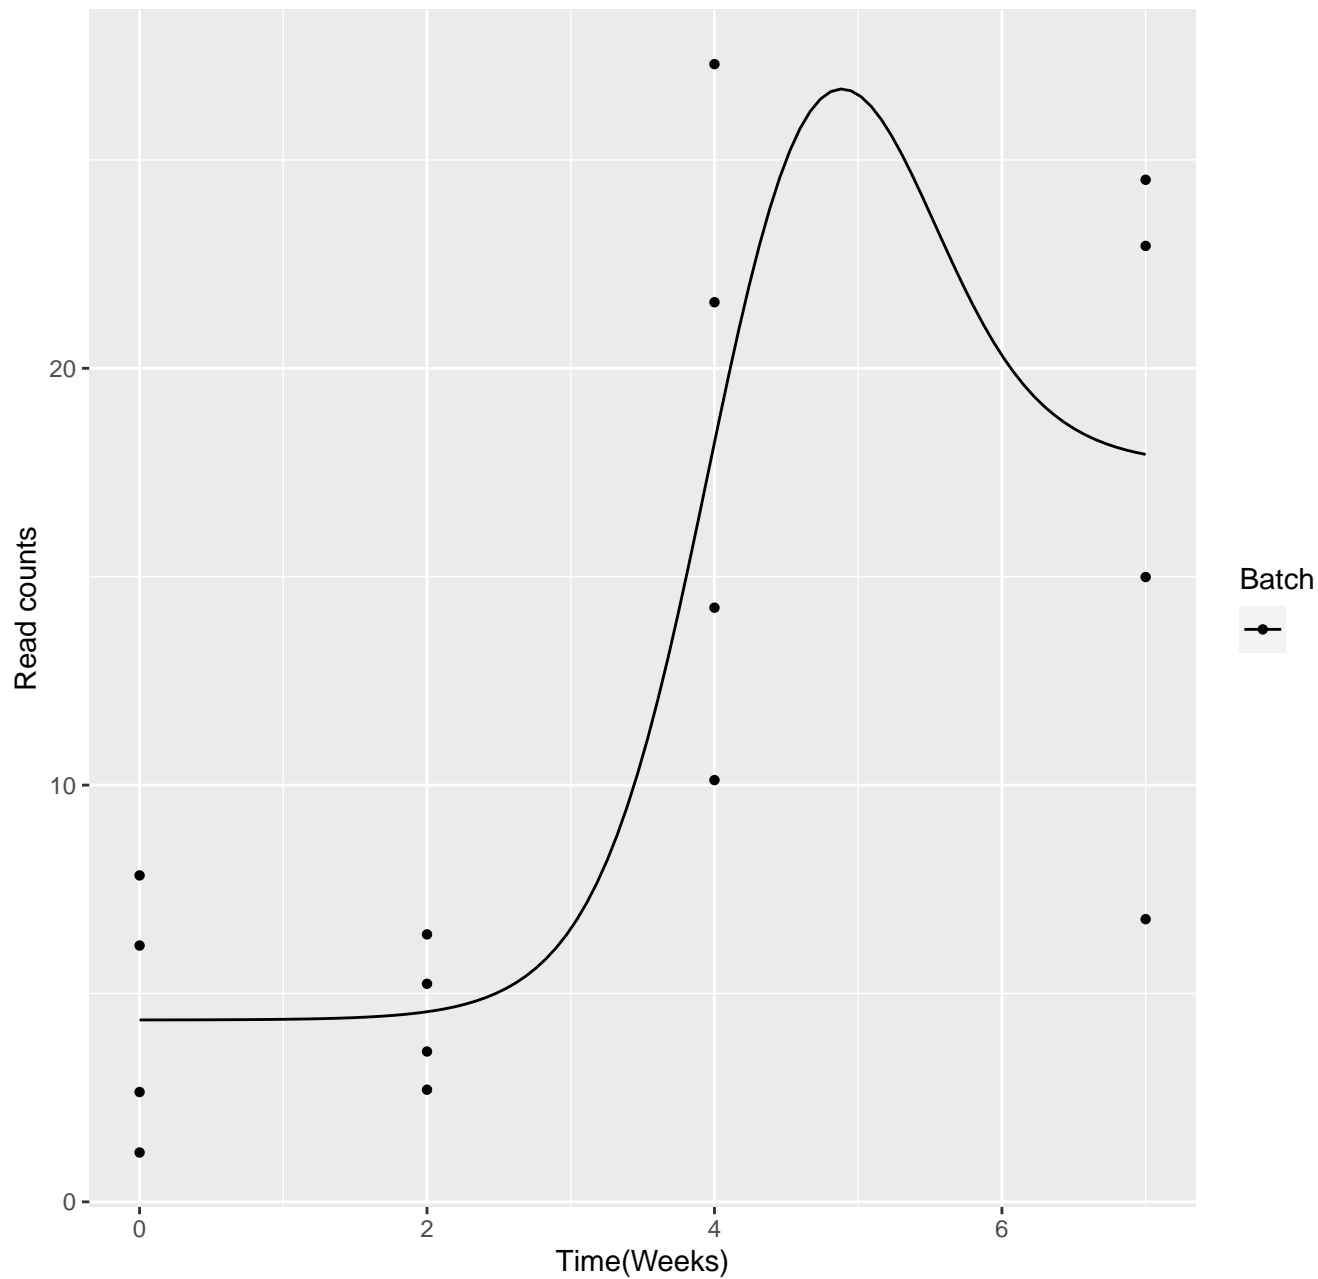

PTGDR2:  $\log_{10} q = -2.43$

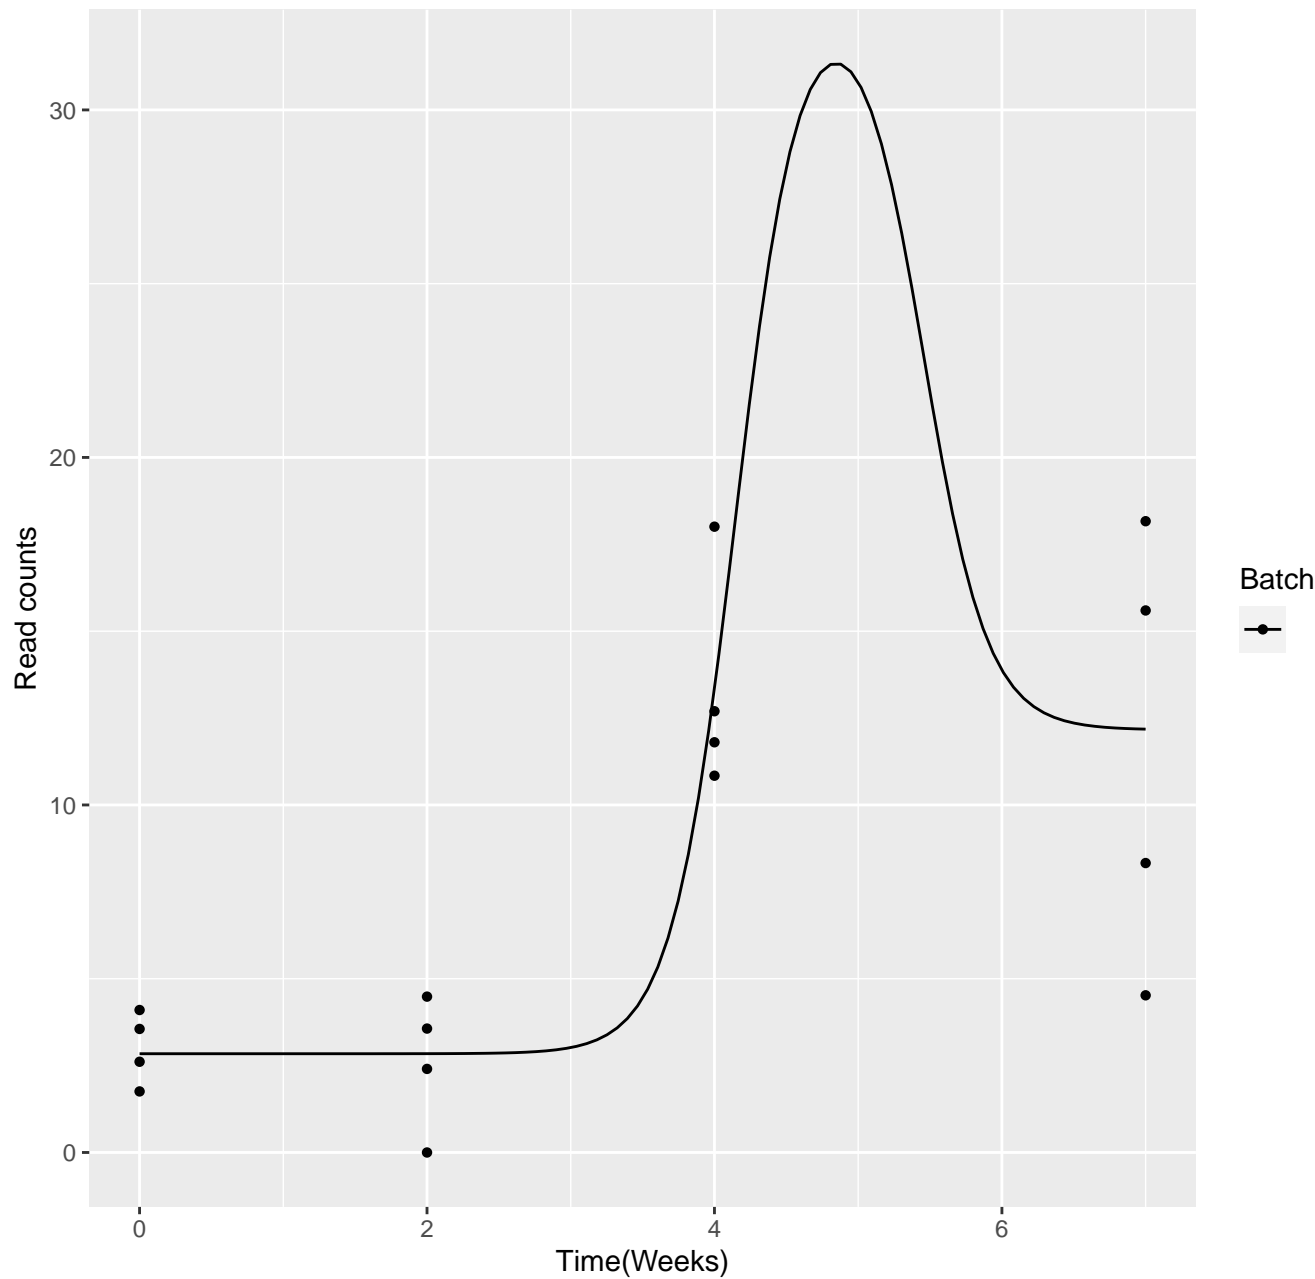

ENG:  $\log_{10} q = -2.42$

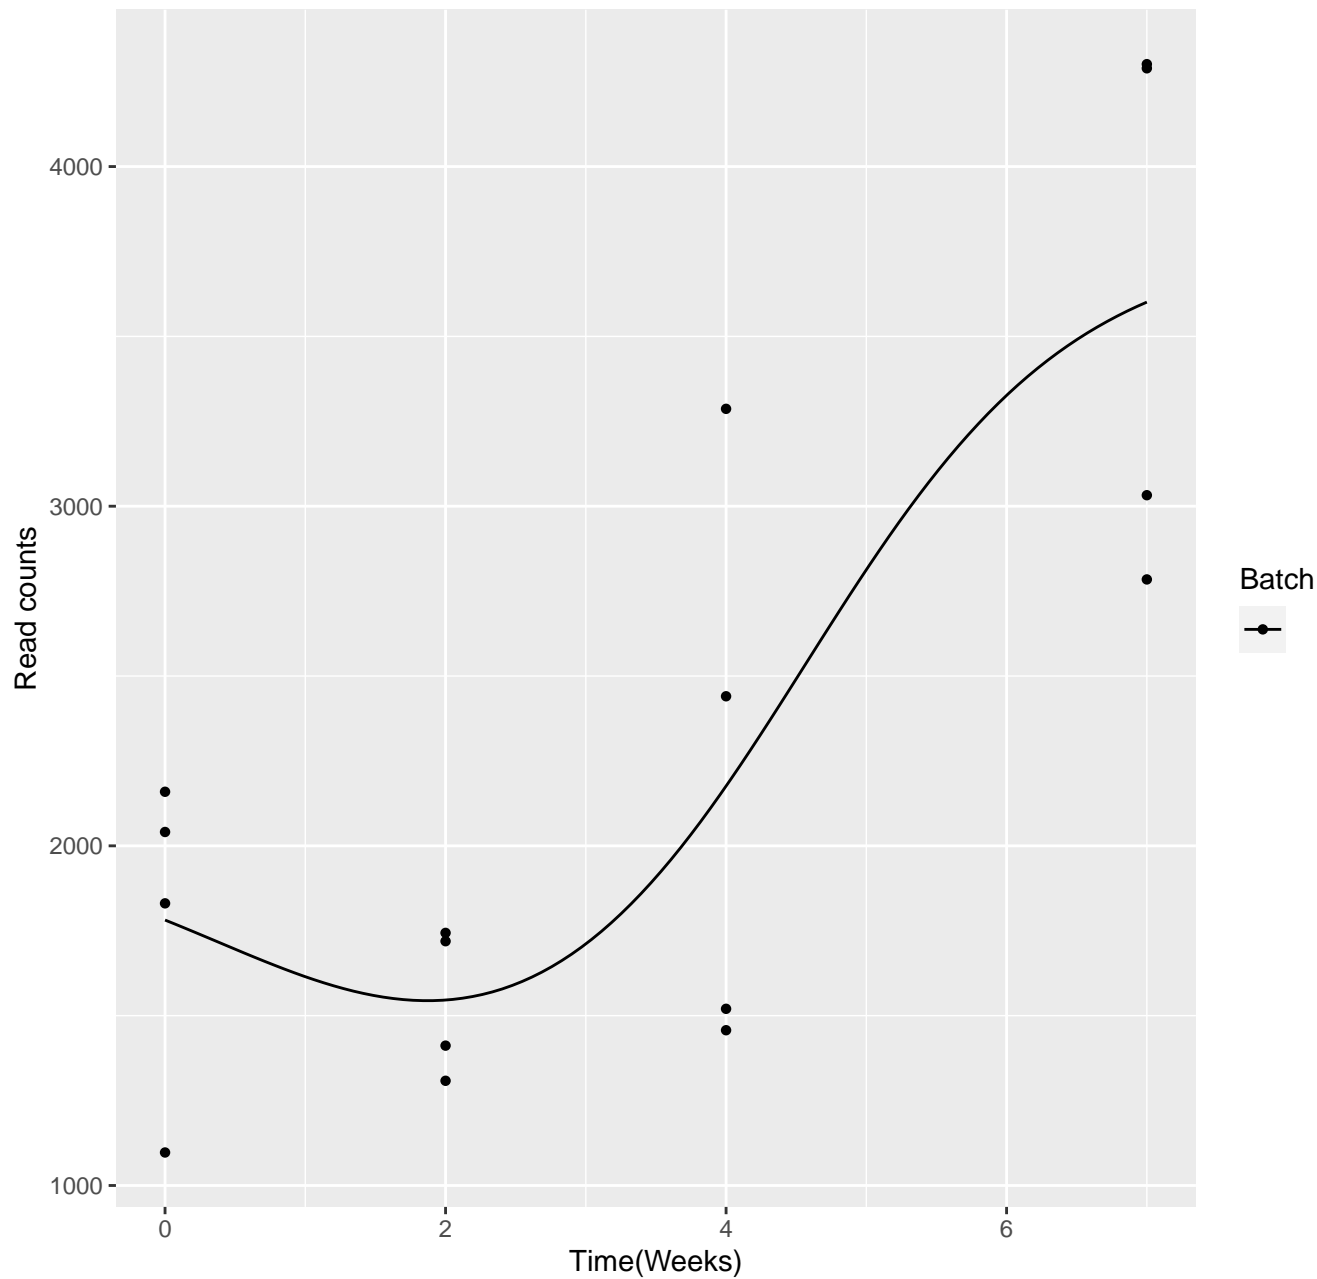

KCNE3:  $\log_{10} q = -2.42$

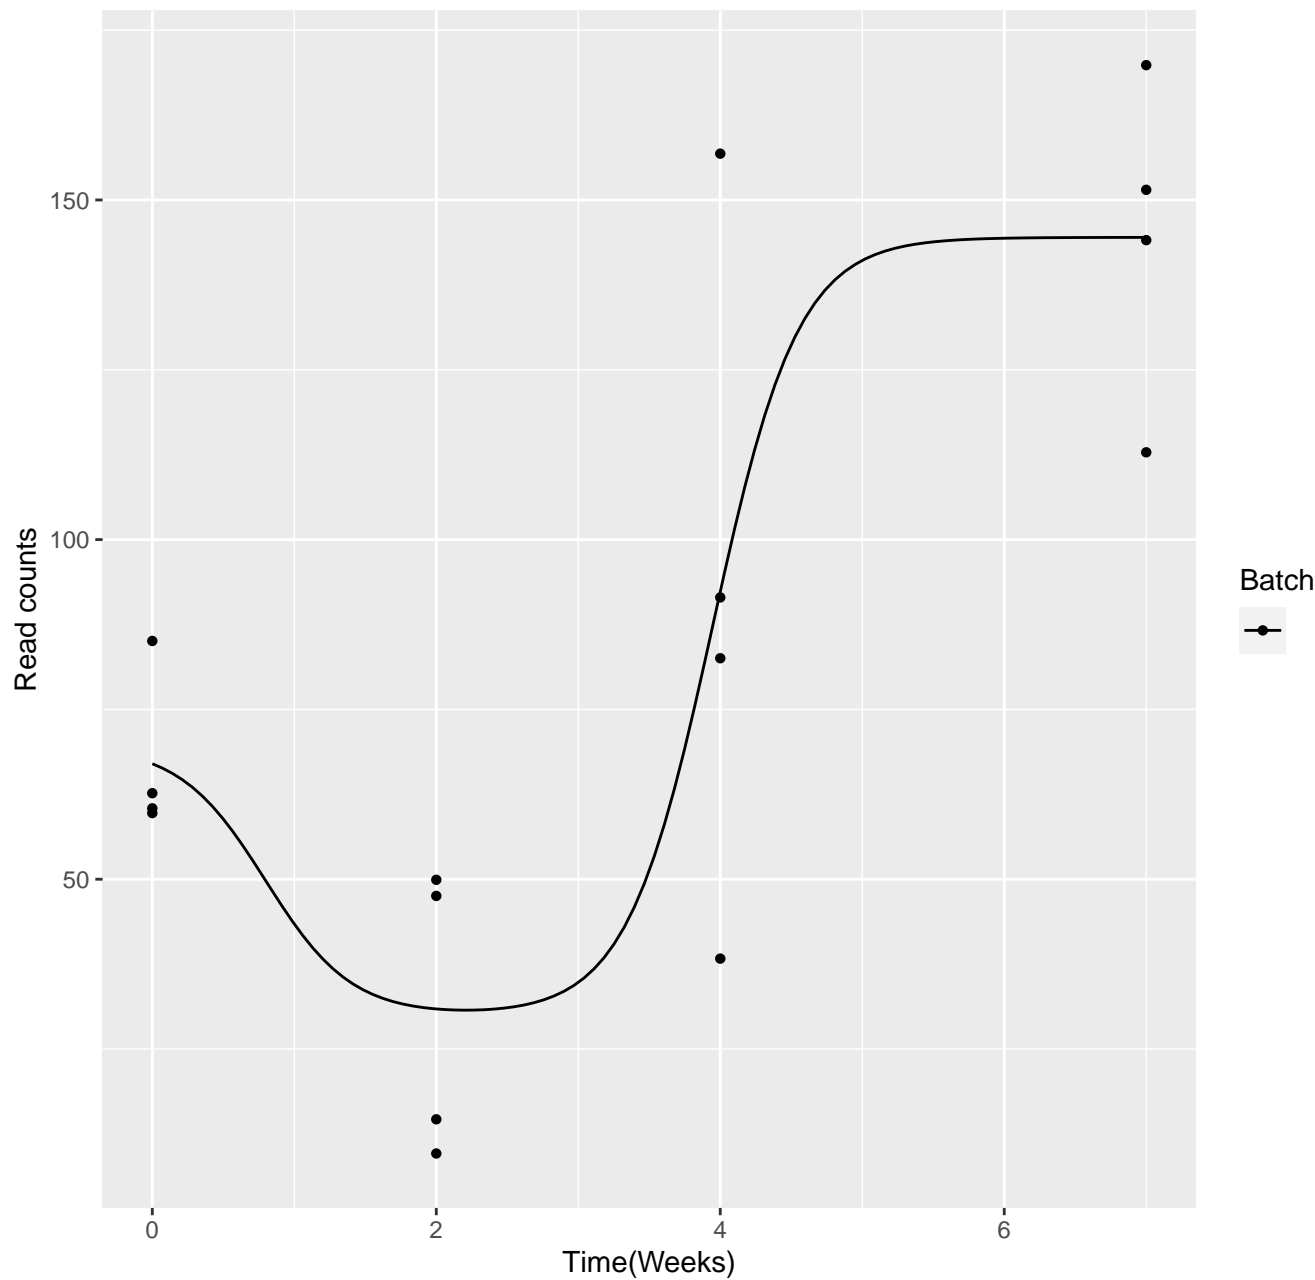

PRSS56:  $\log_{10} q = -2.42$

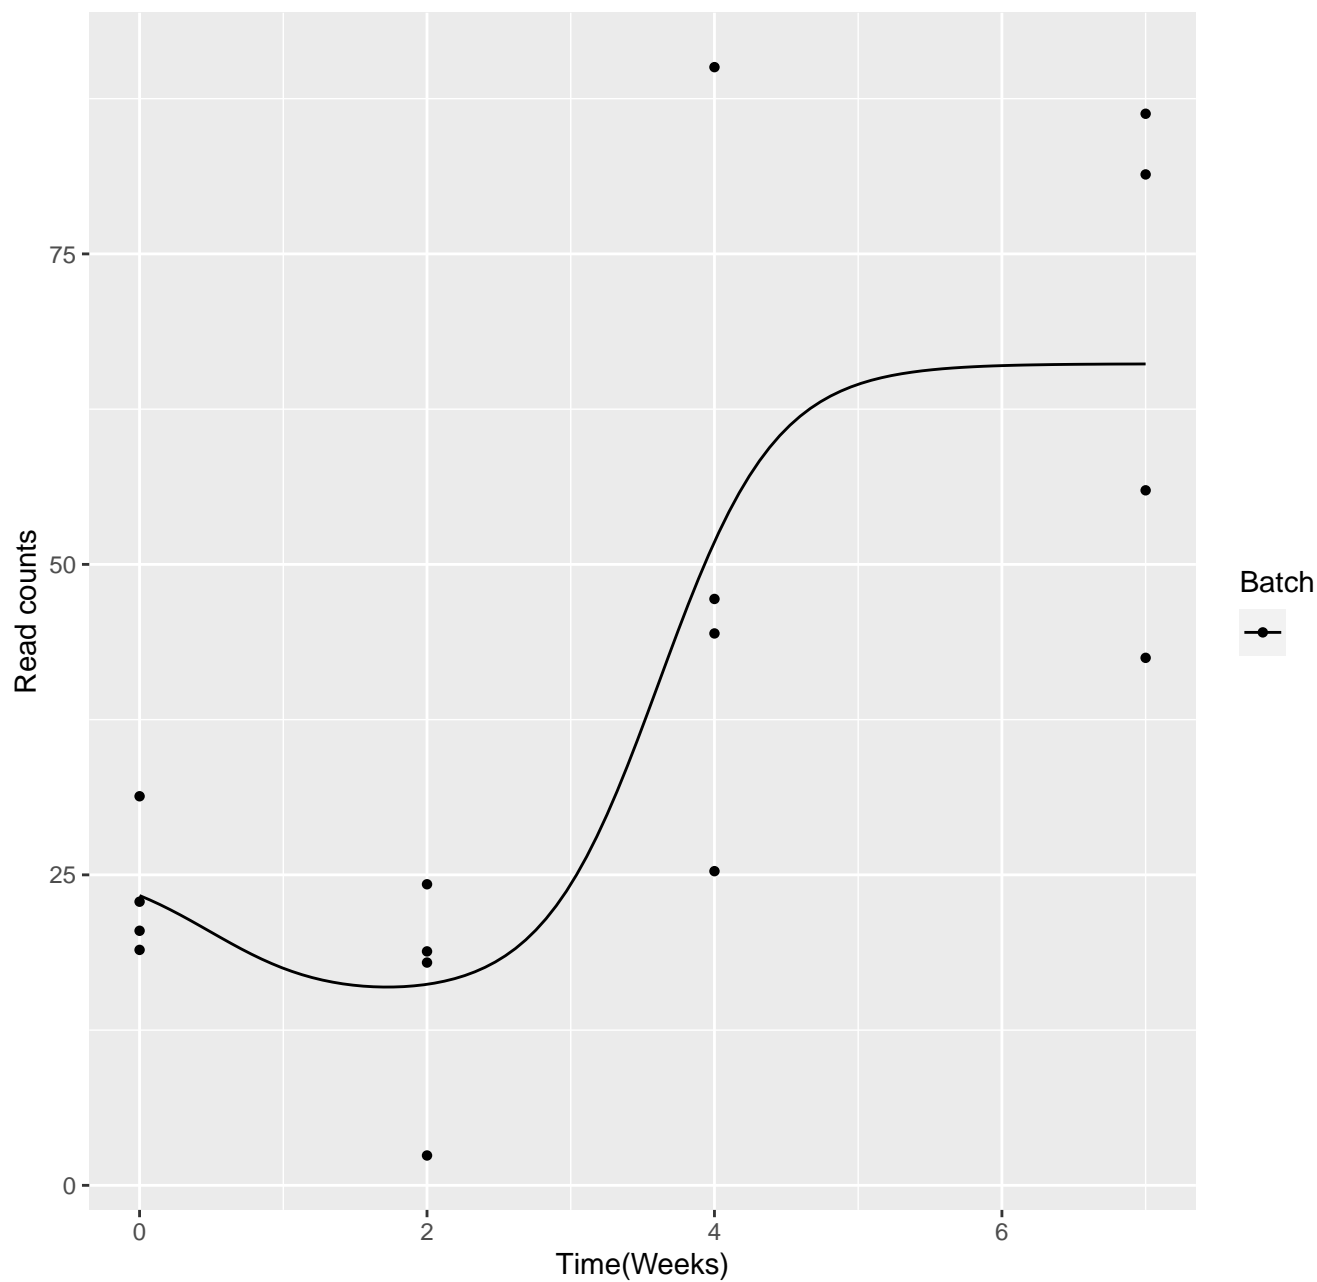



ECM1:  $\log_{10} q = -2.42$

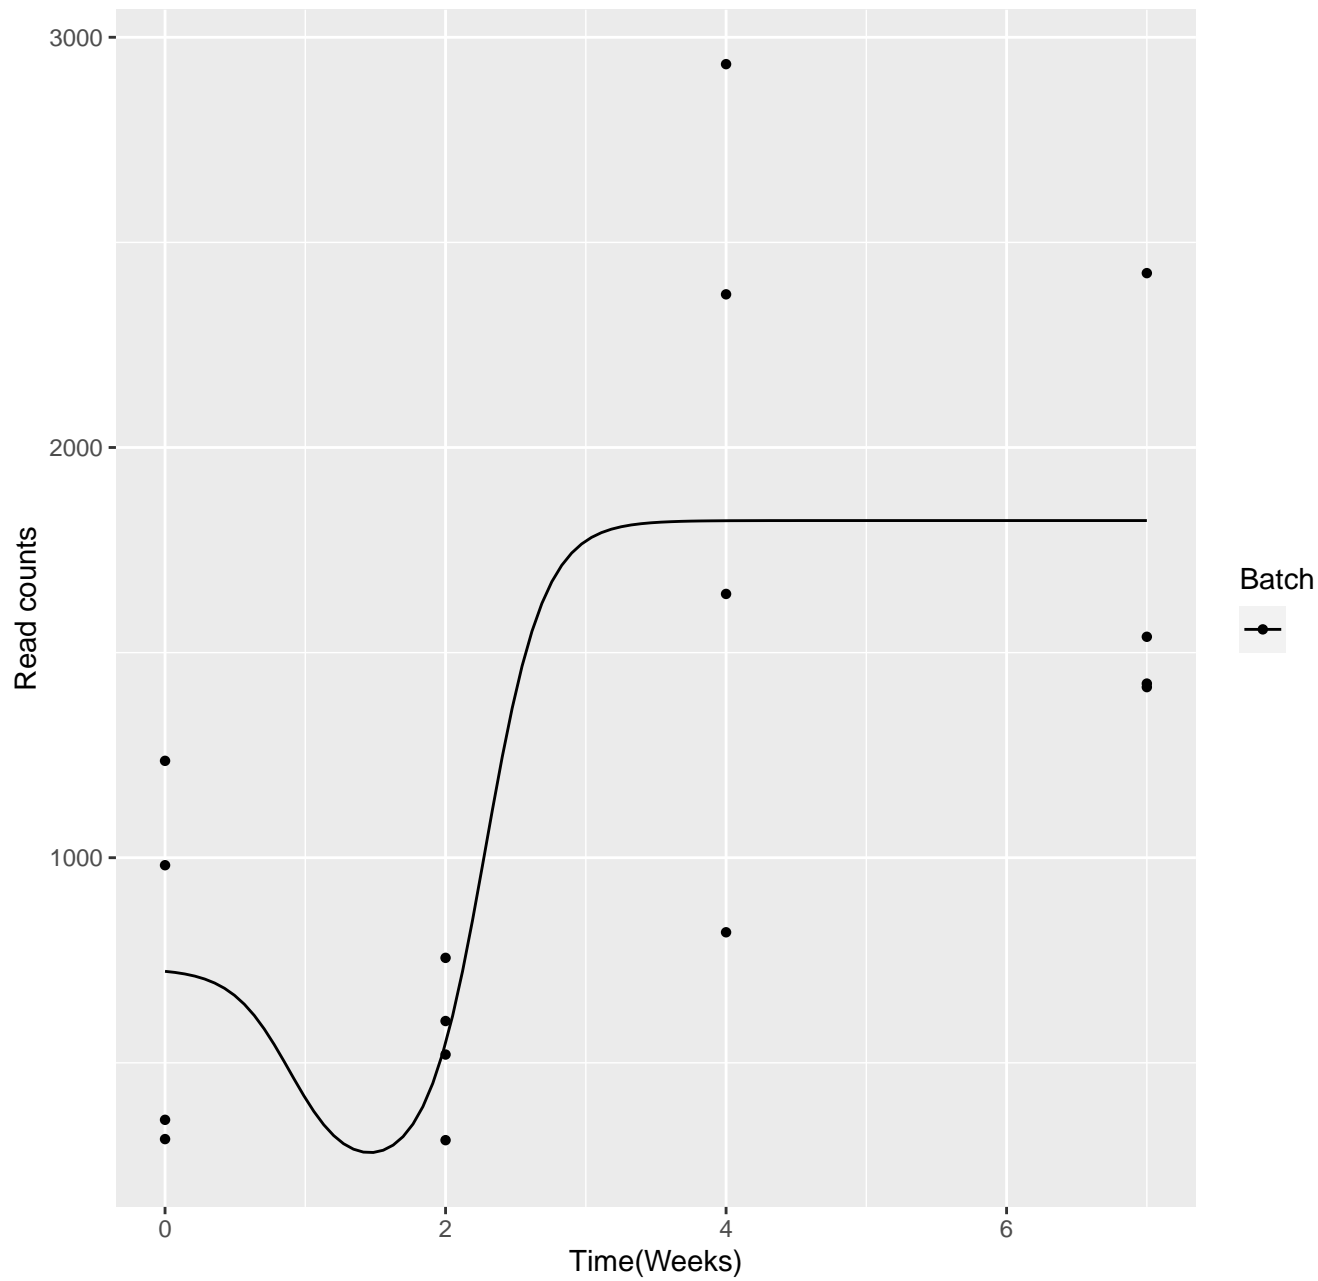

MLF1:  $\log_{10} q = -2.42$

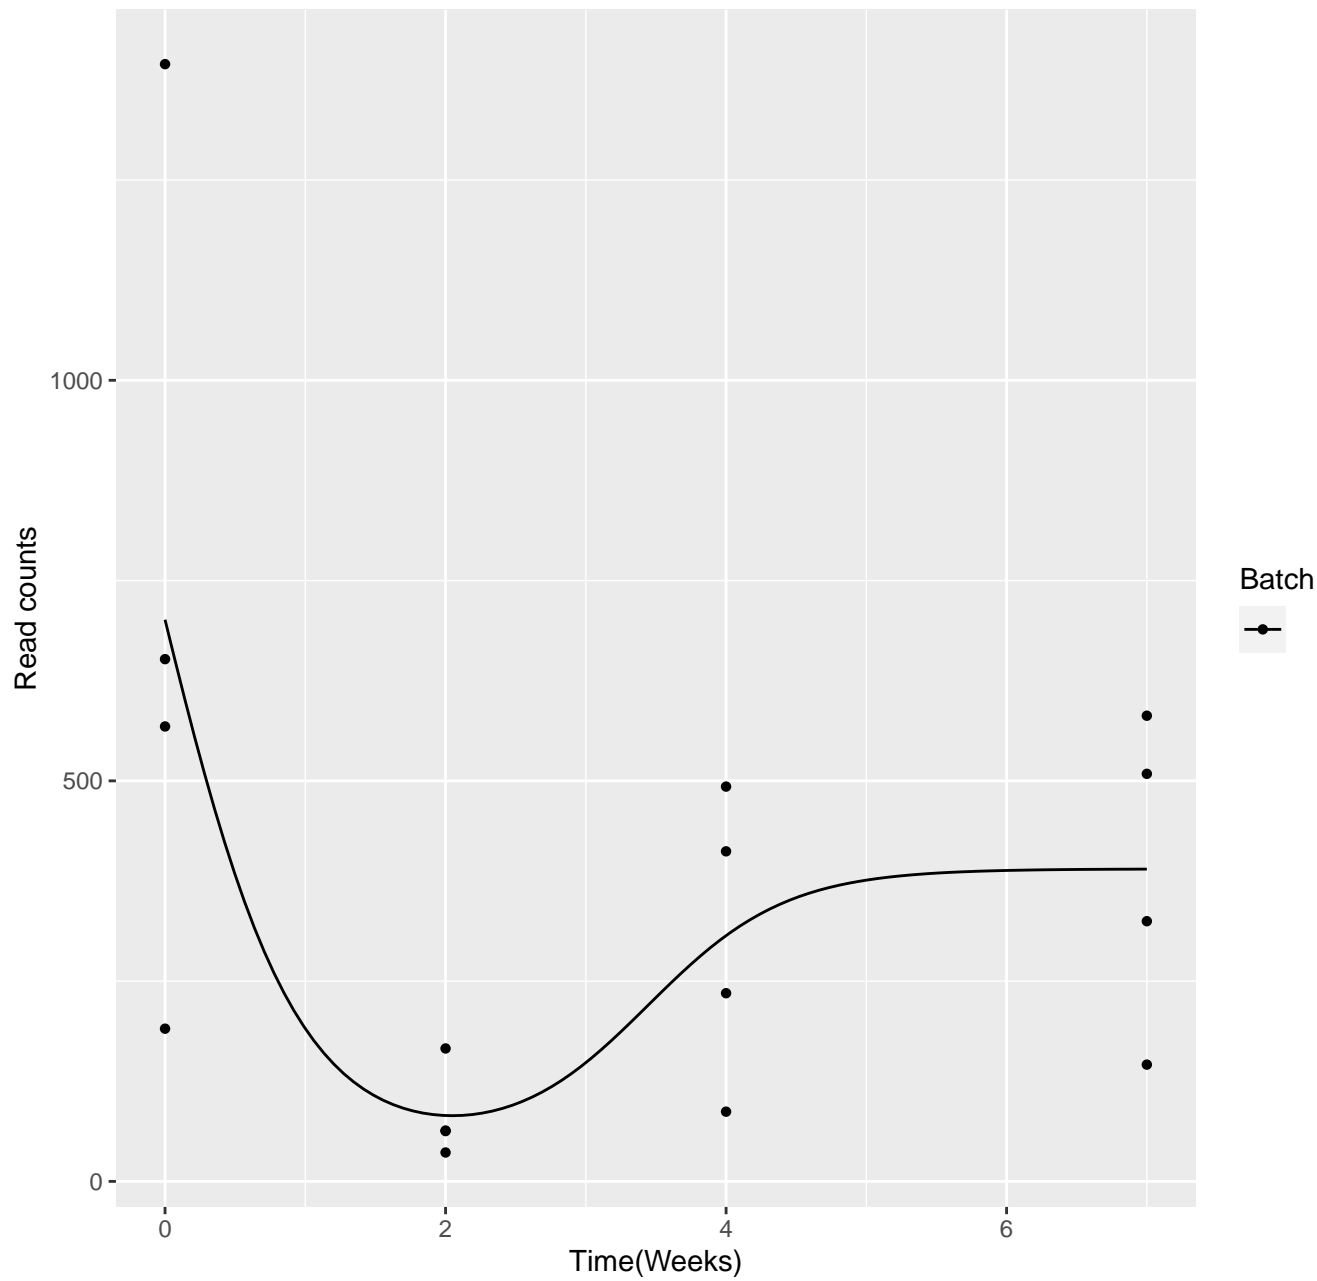

MAML1:  $\log_{10} q = -2.42$

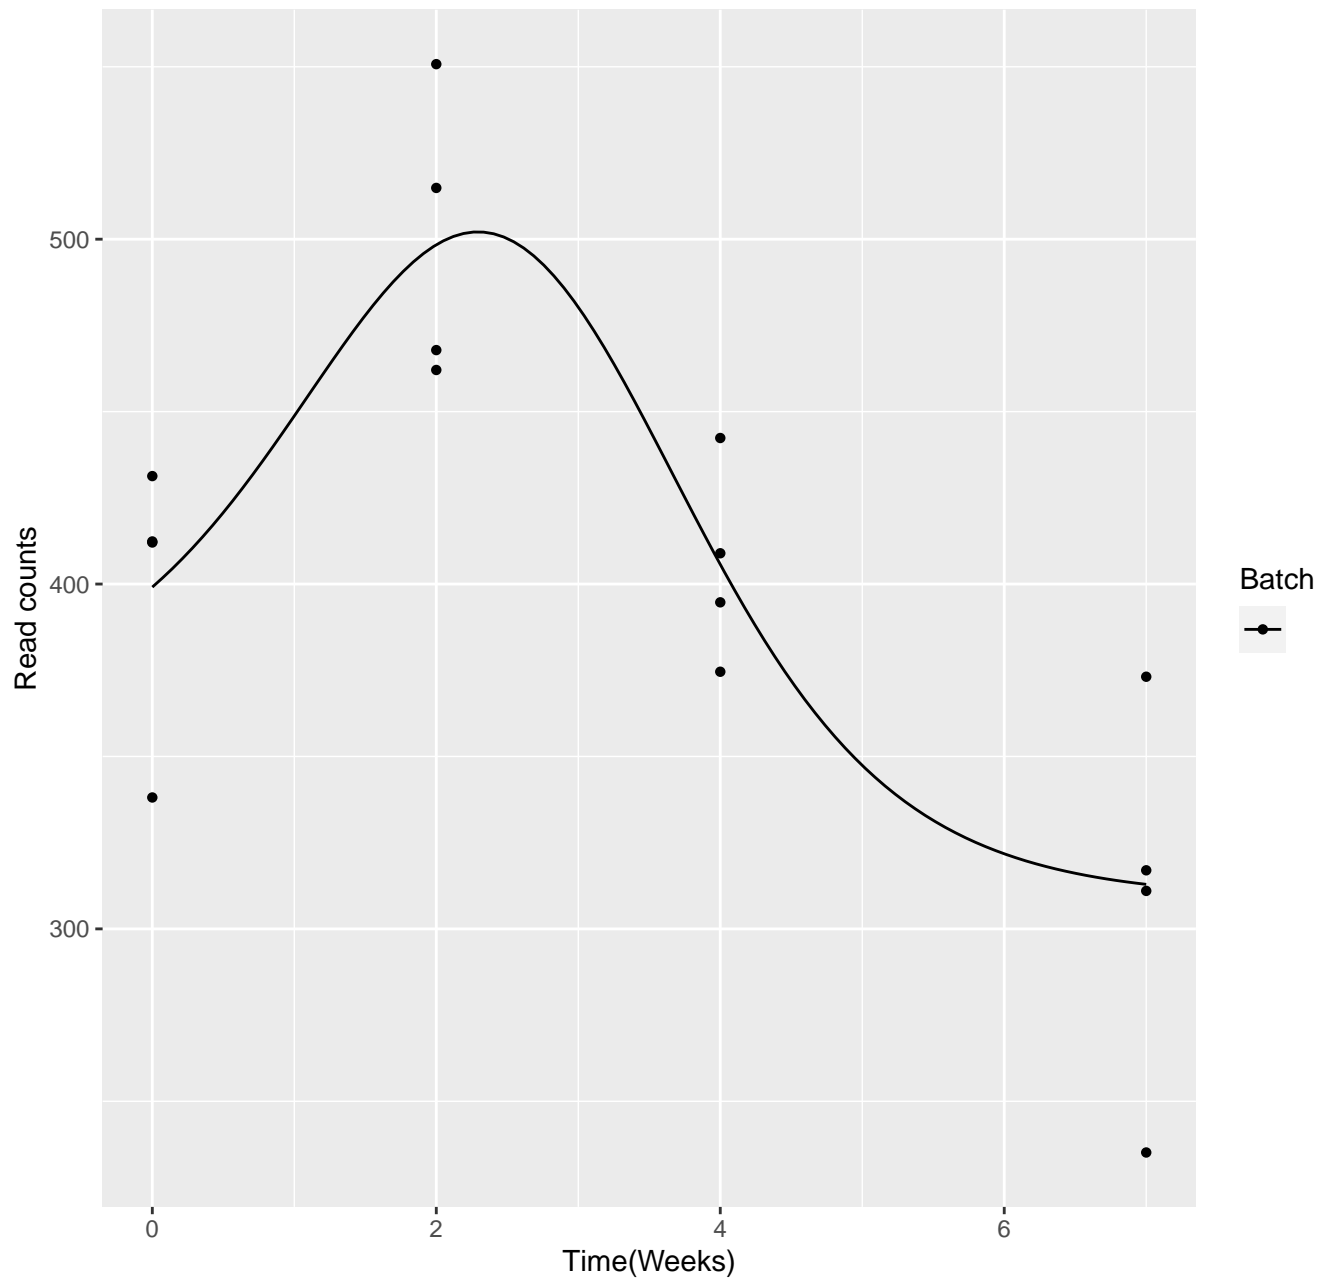

MPC2:  $\log_{10} q = -2.42$

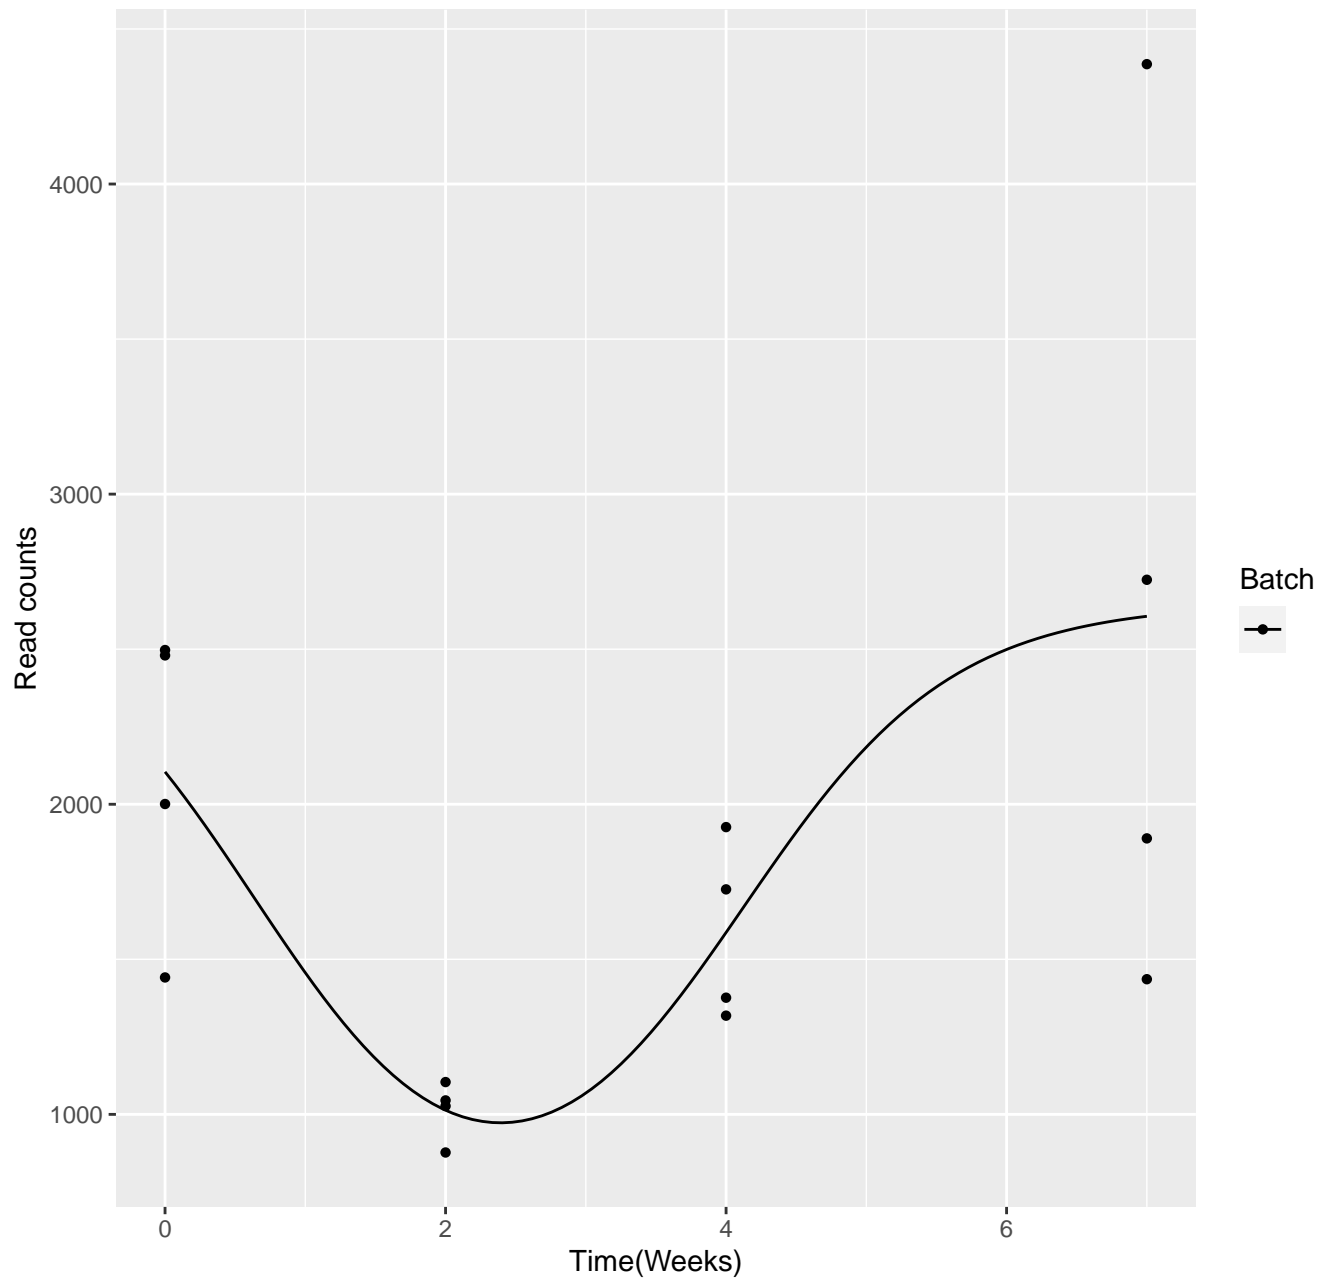

SF1:  $\log_{10} q = -2.42$

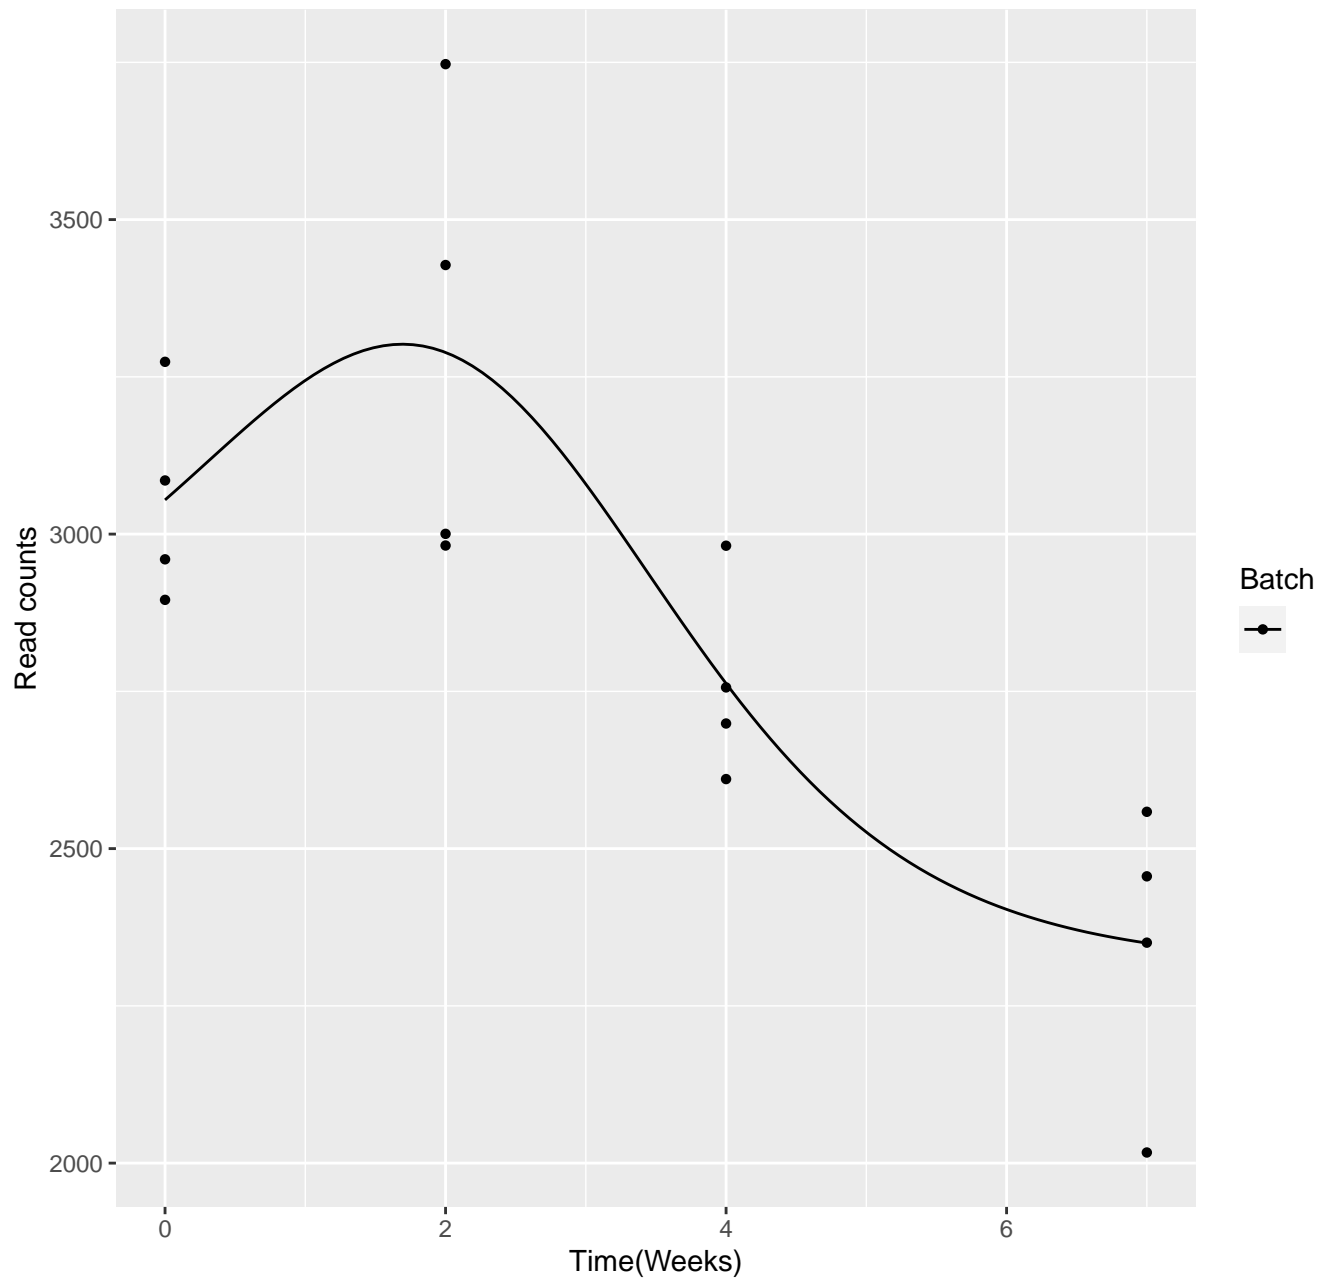

CABIN1:  $\log_{10} q = -2.42$

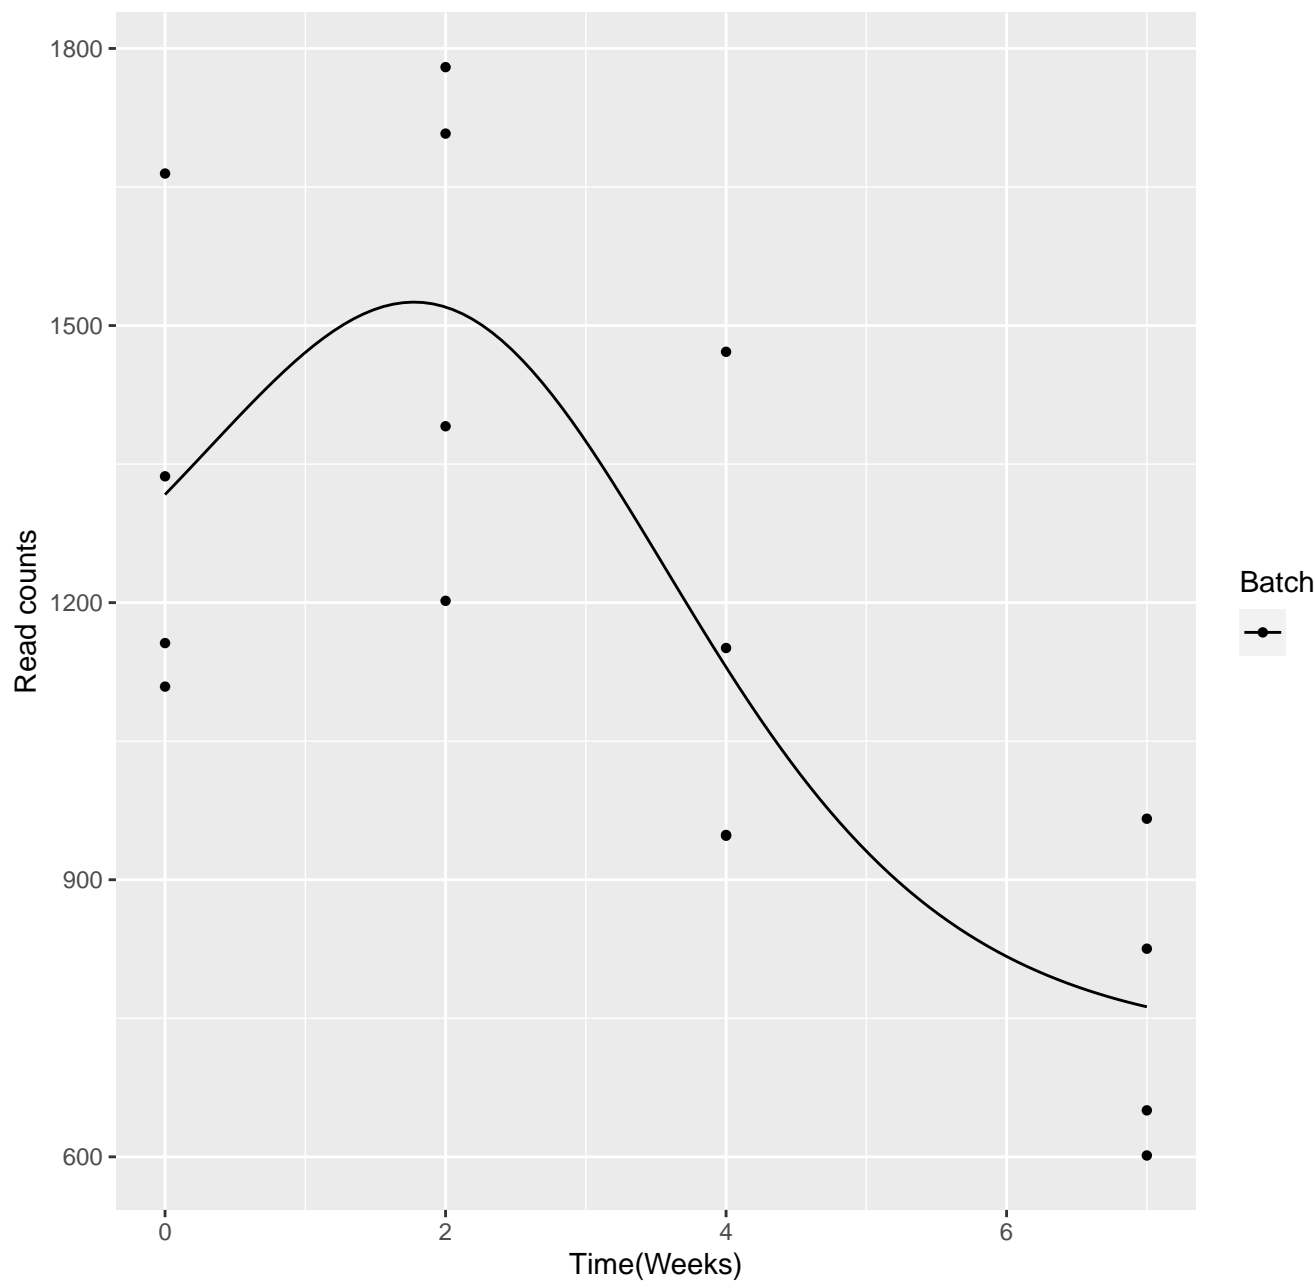

HPRT1:  $\log_{10} q = -2.42$

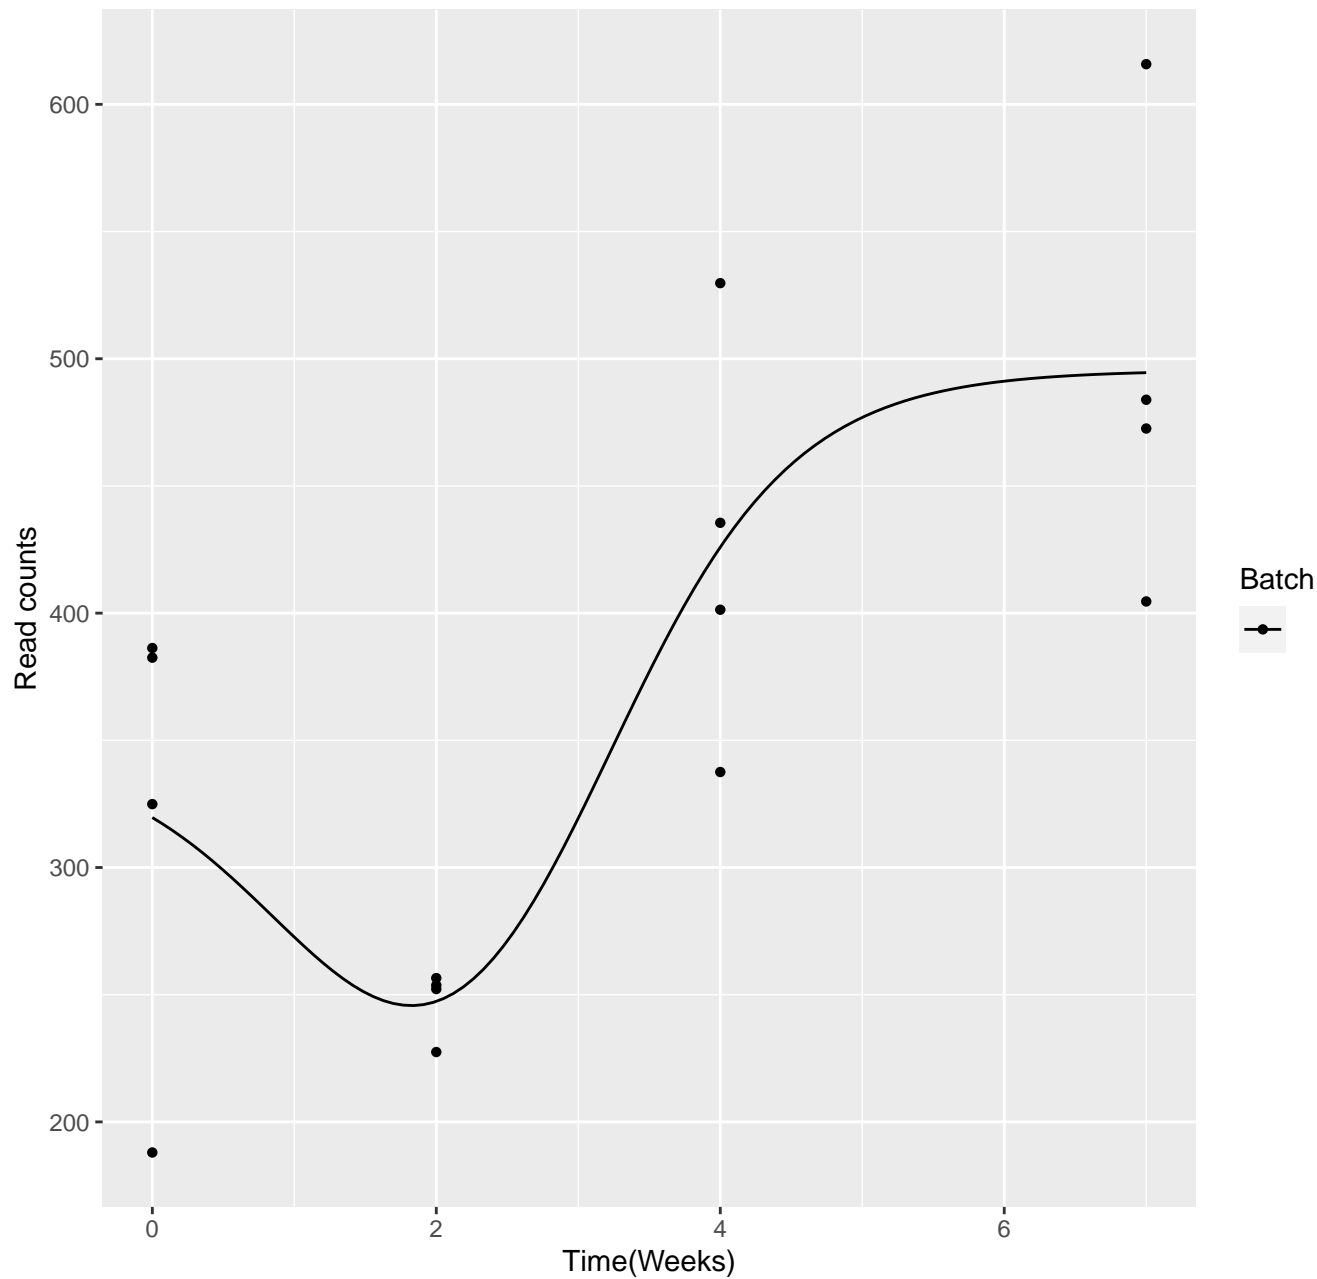

SYNPO2:  $\log_{10} q = -2.42$

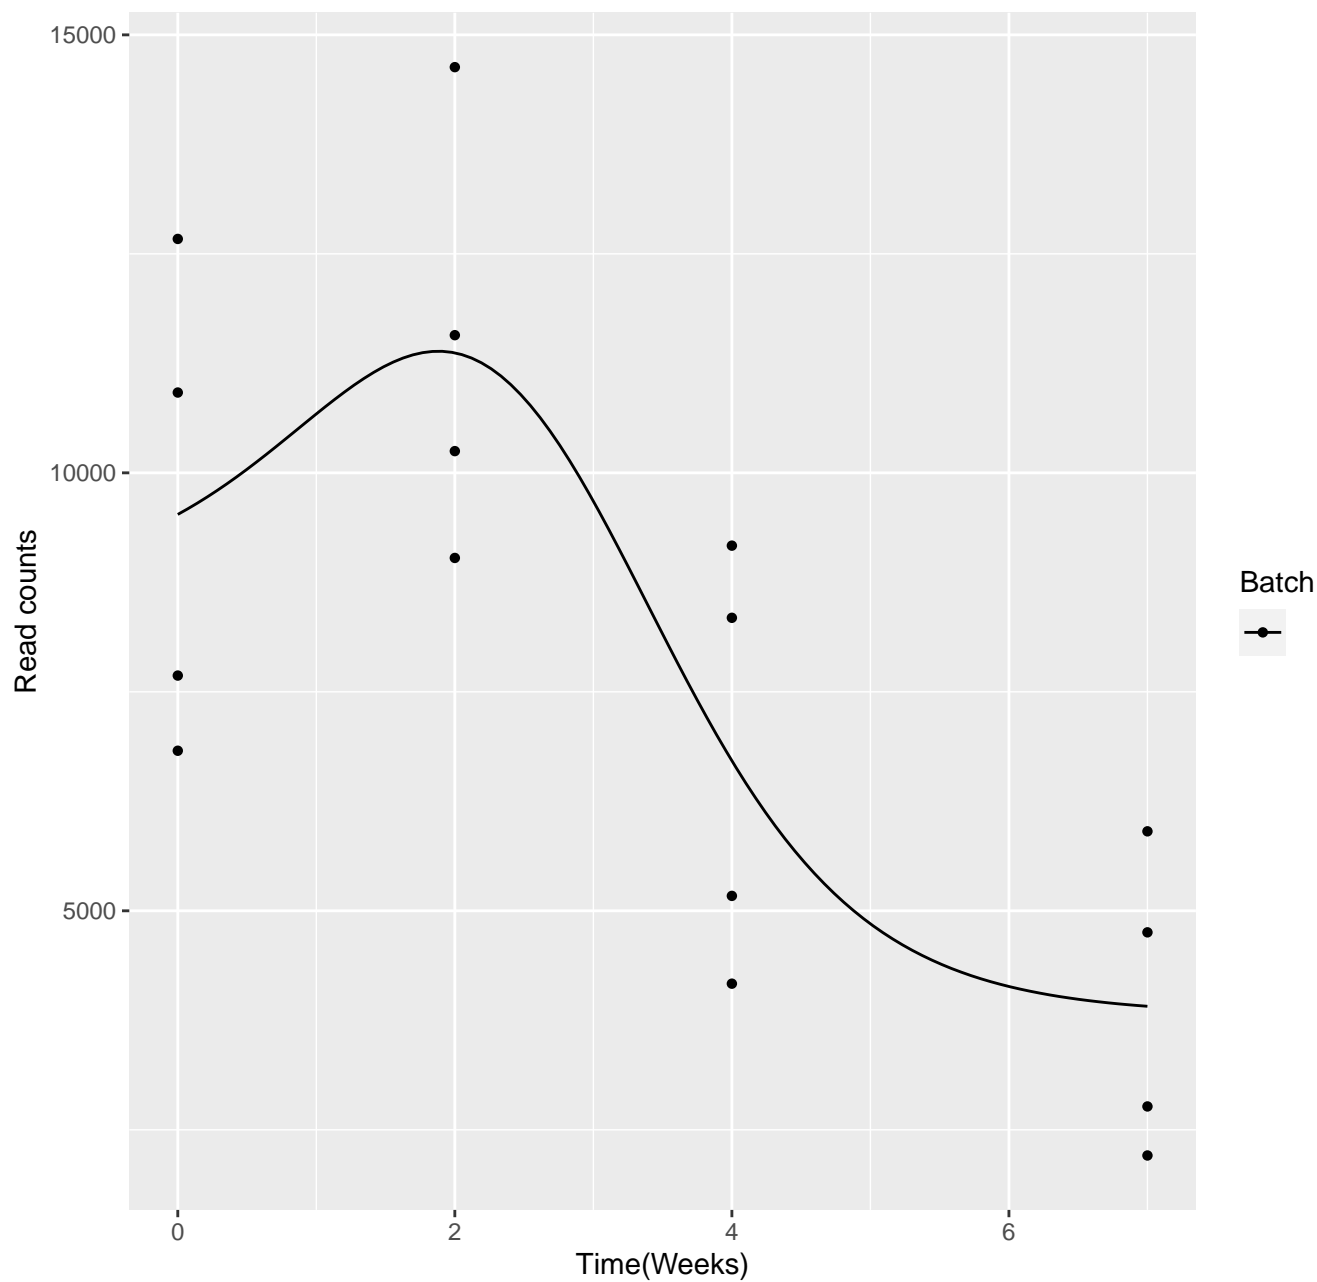



ADCY10:  $\log_{10} q = -2.42$

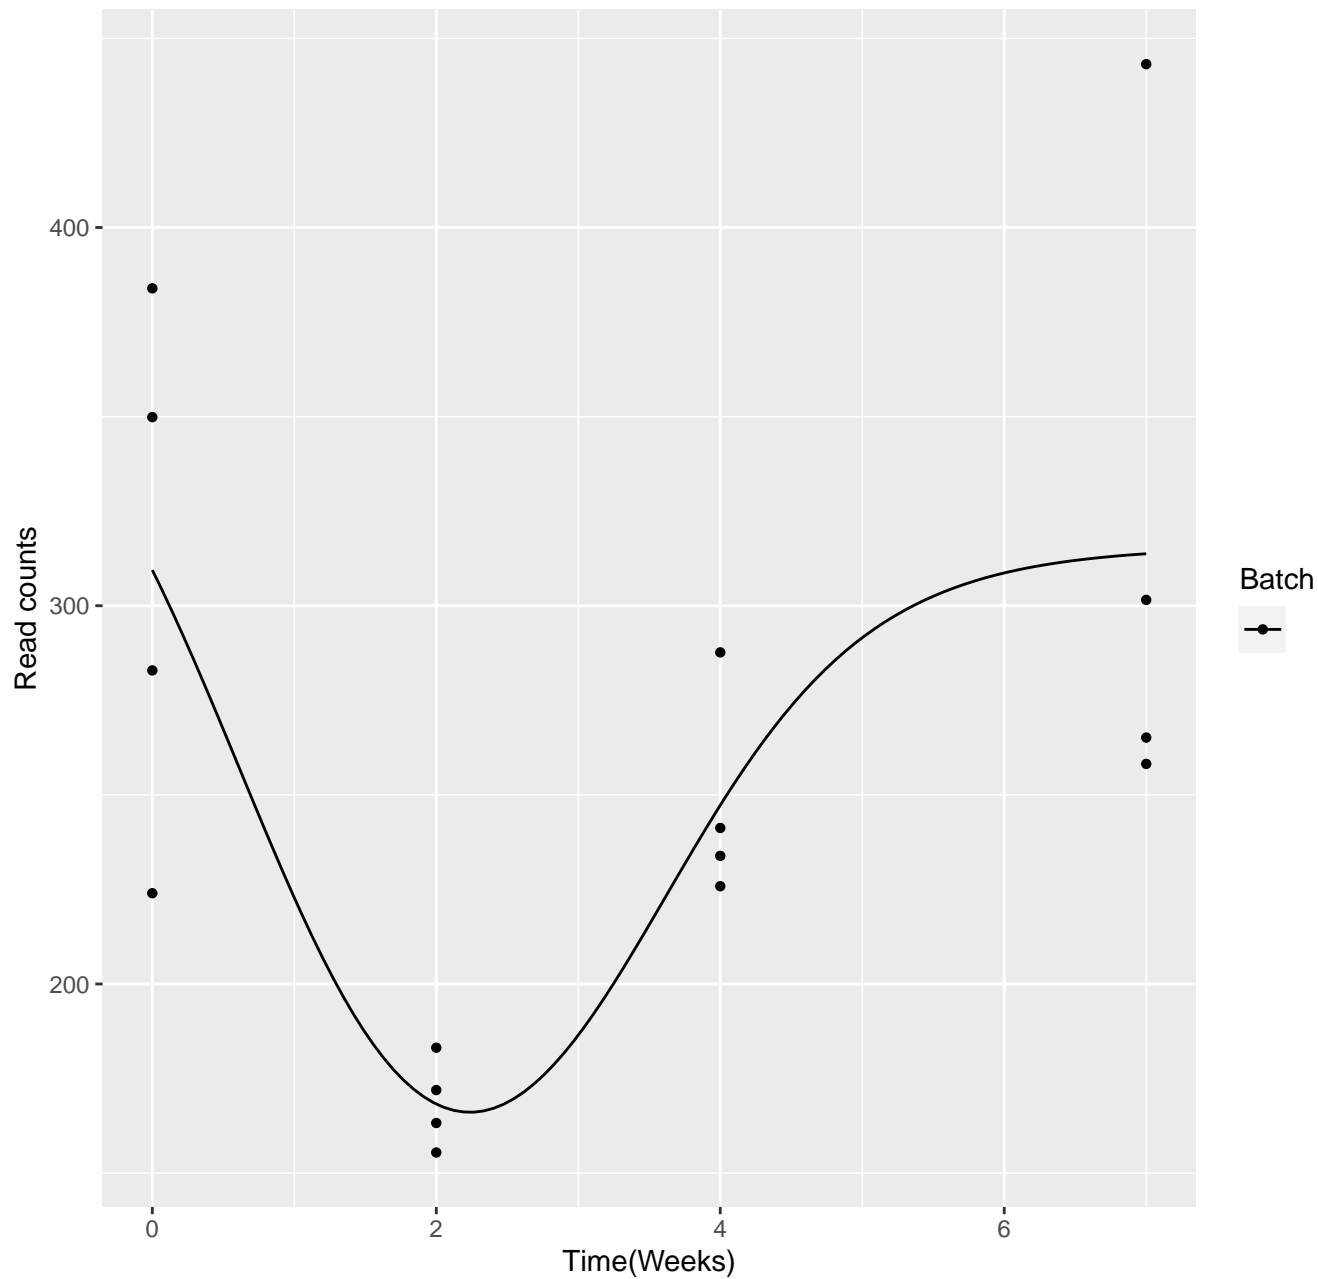

PRKG1:  $\log_{10} q = -2.42$

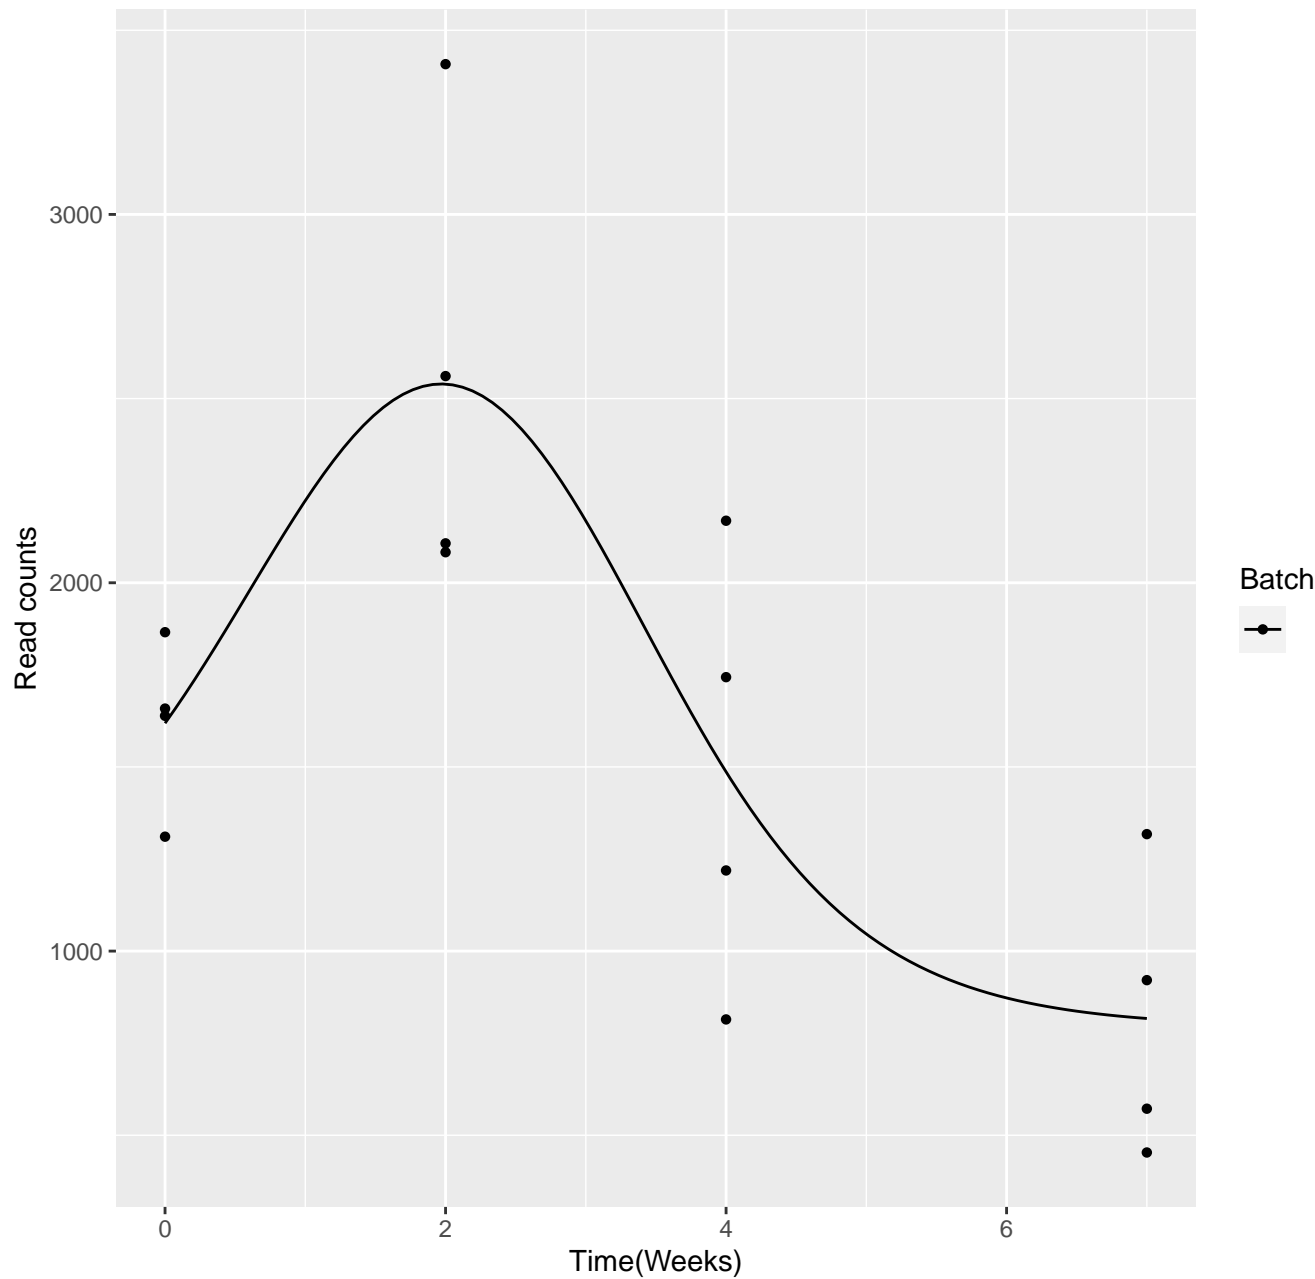

RELL2:  $\log_{10} q = -2.42$

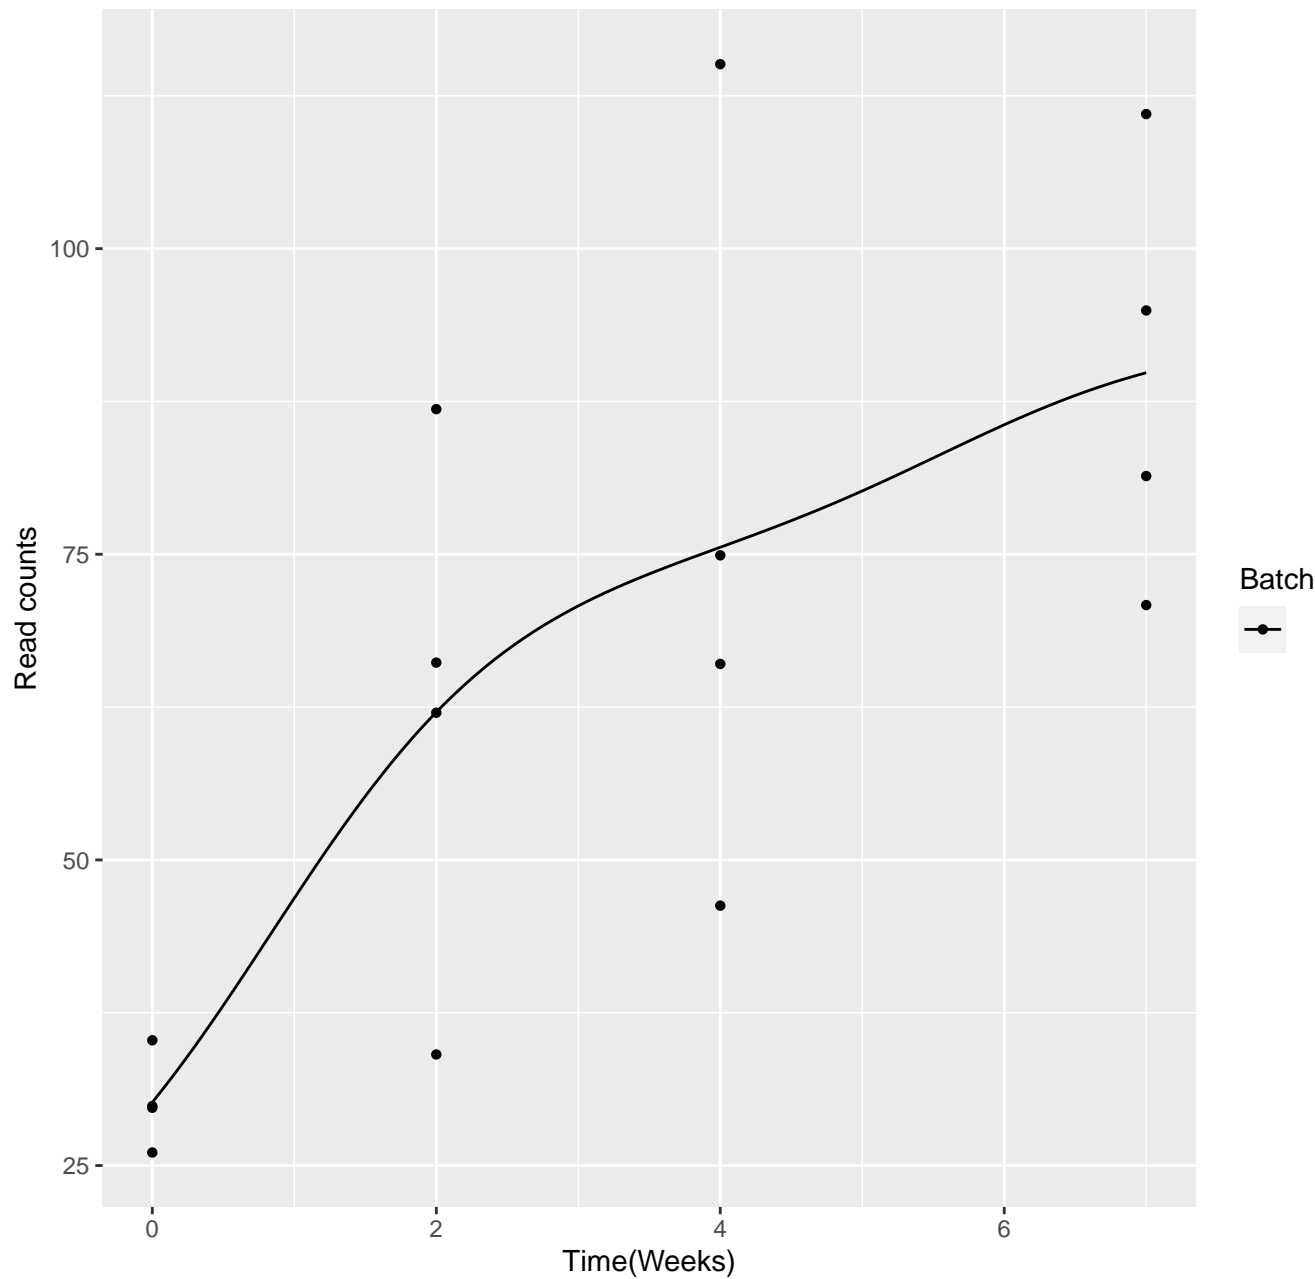

EZR:  $\log_{10} q = -2.41$

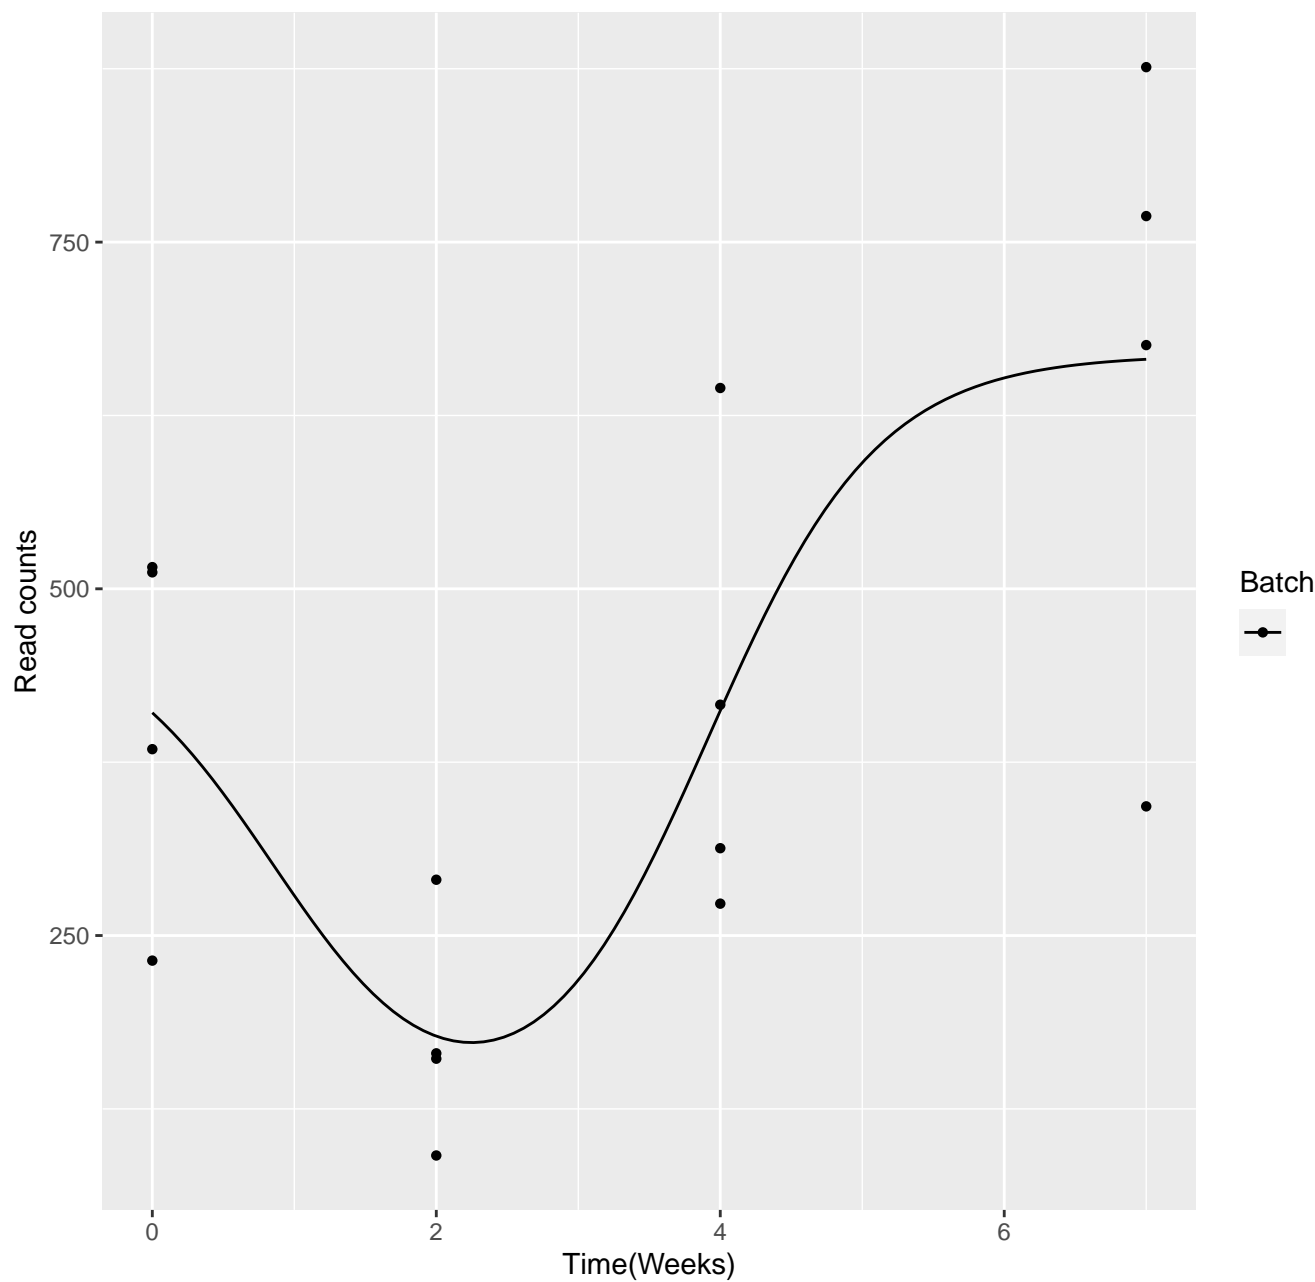

IPO8:  $\log_{10} q = -2.41$

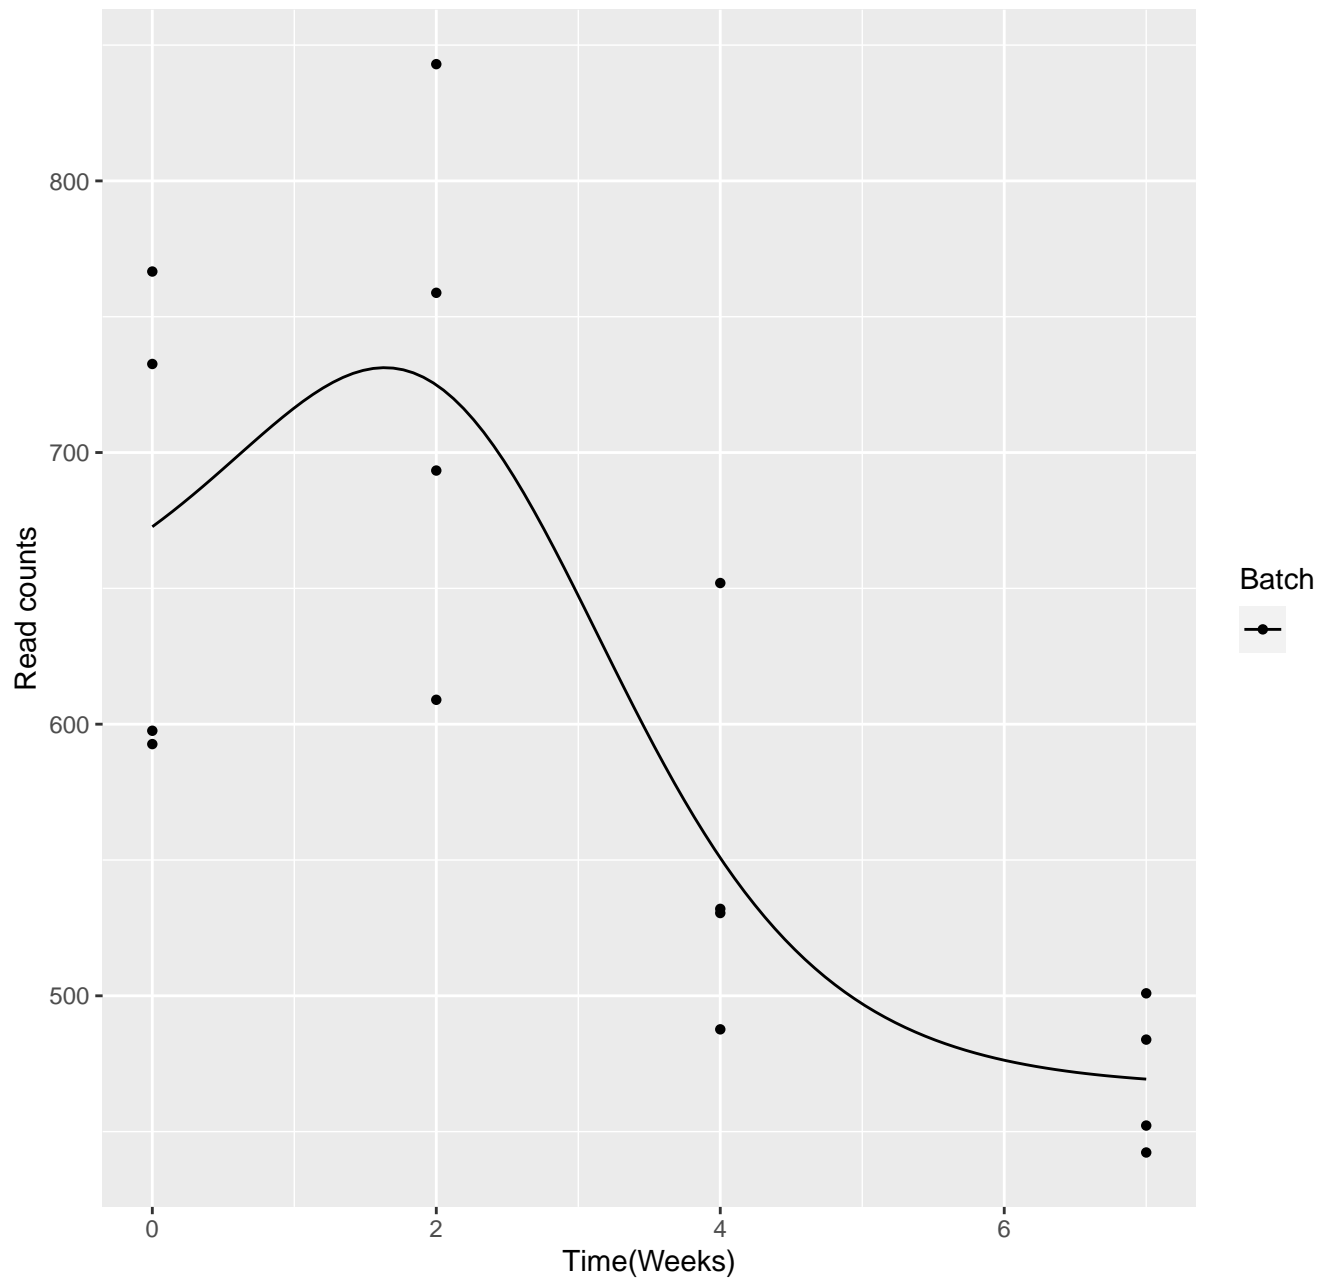

BAX:  $\log_{10} q = -2.41$

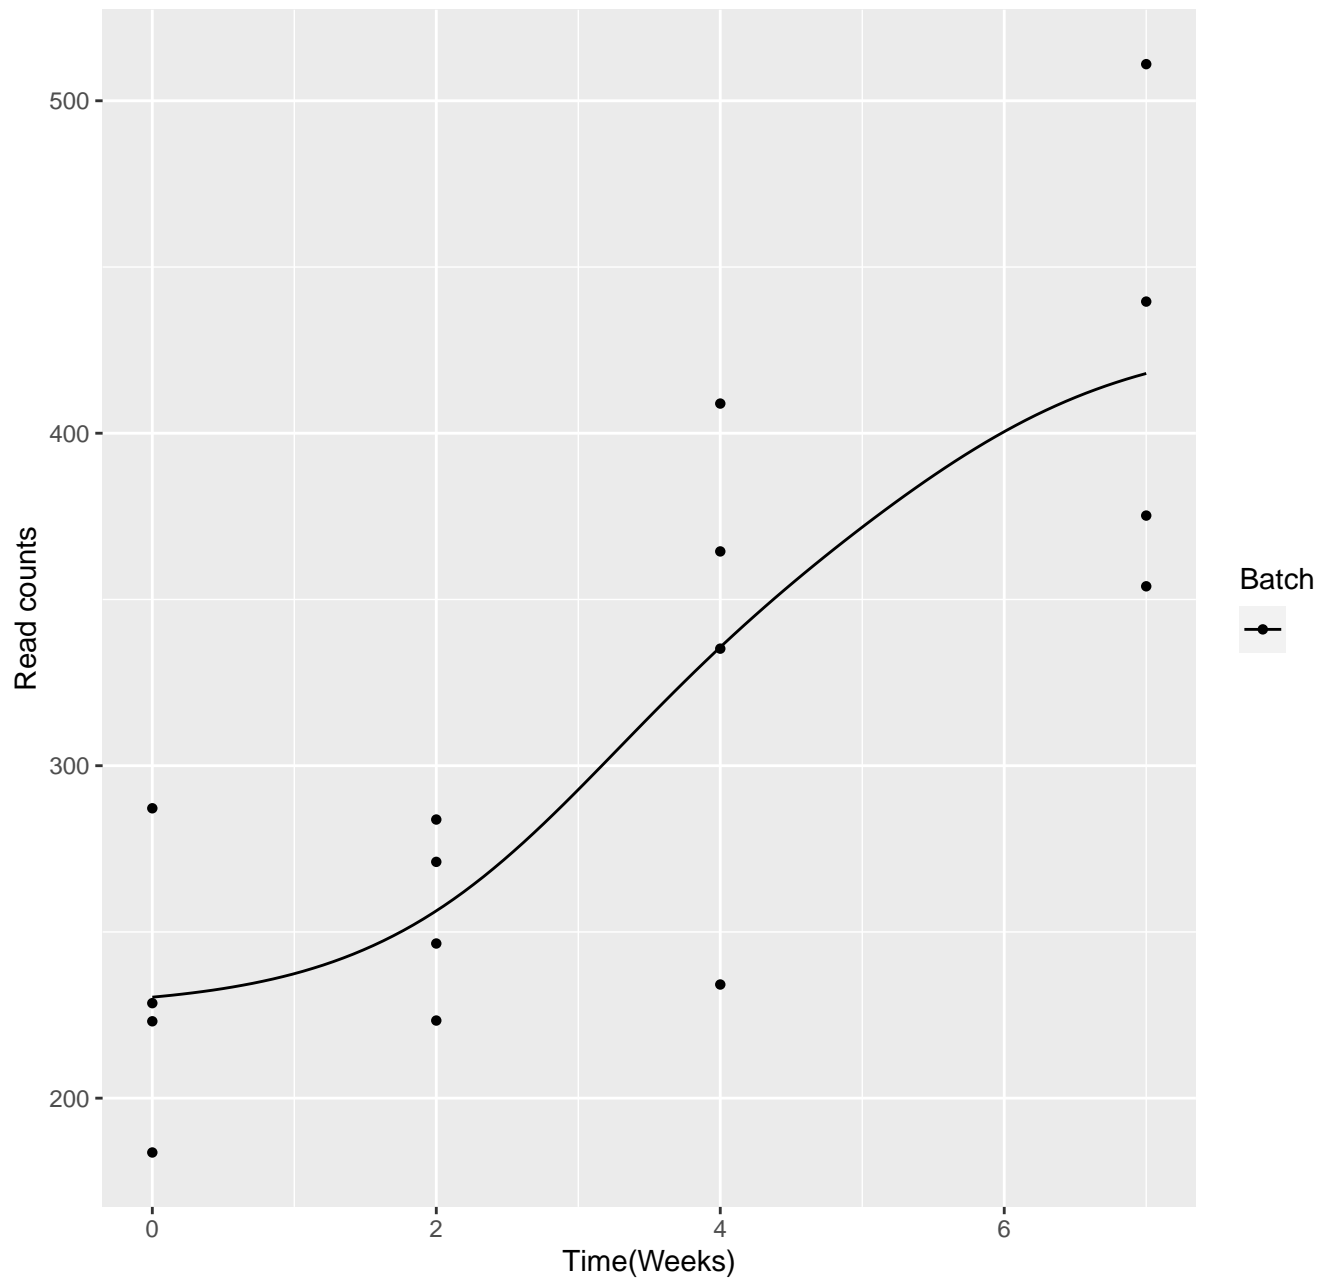

ZFPM2:  $\log_{10} q = -2.41$

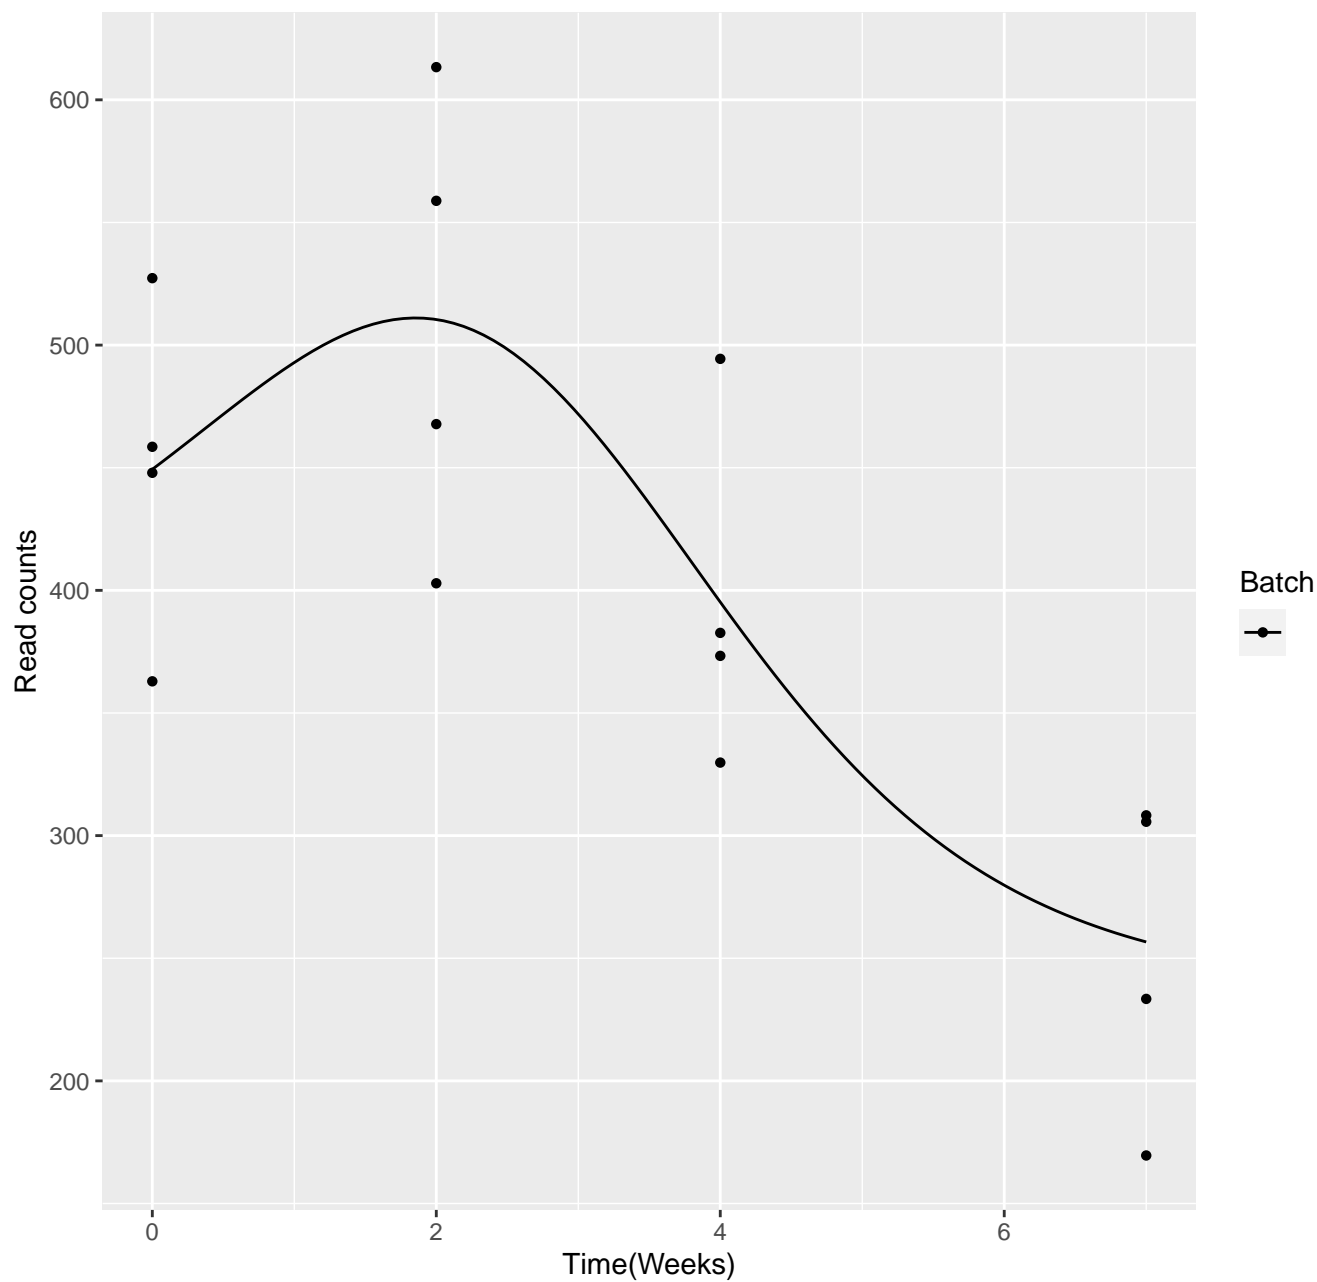

HMGN5:  $\log_{10} q = -2.41$

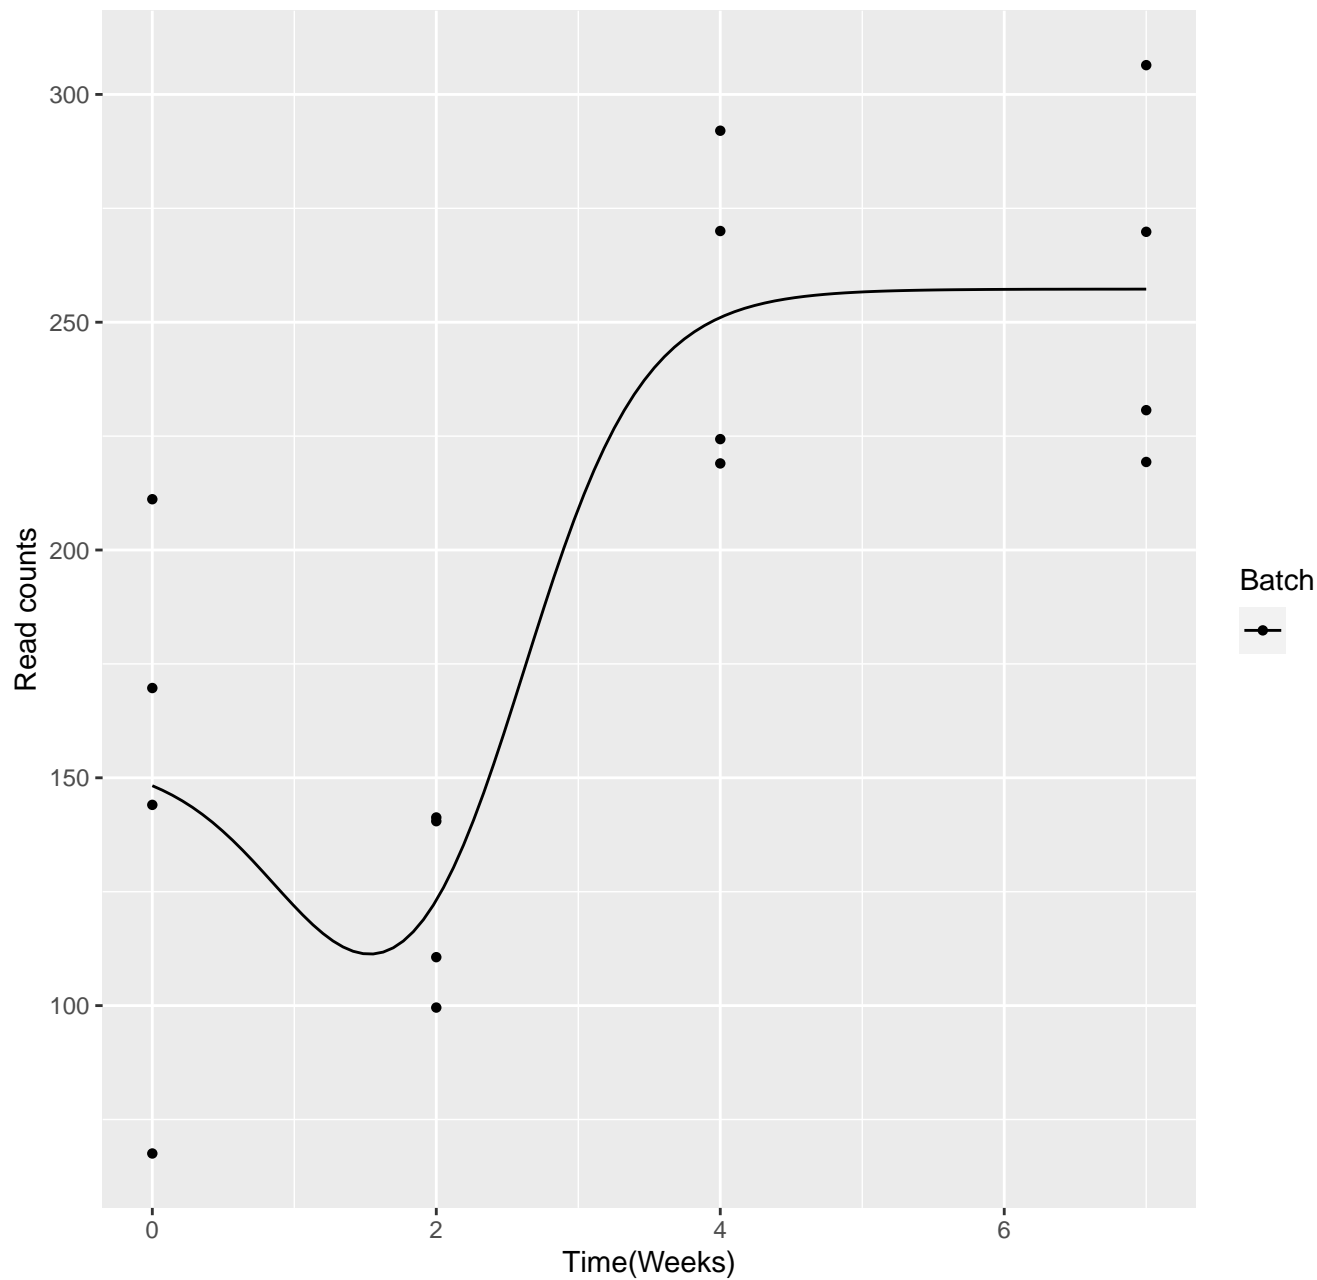



SMIM14:  $\log_{10} q = -2.41$

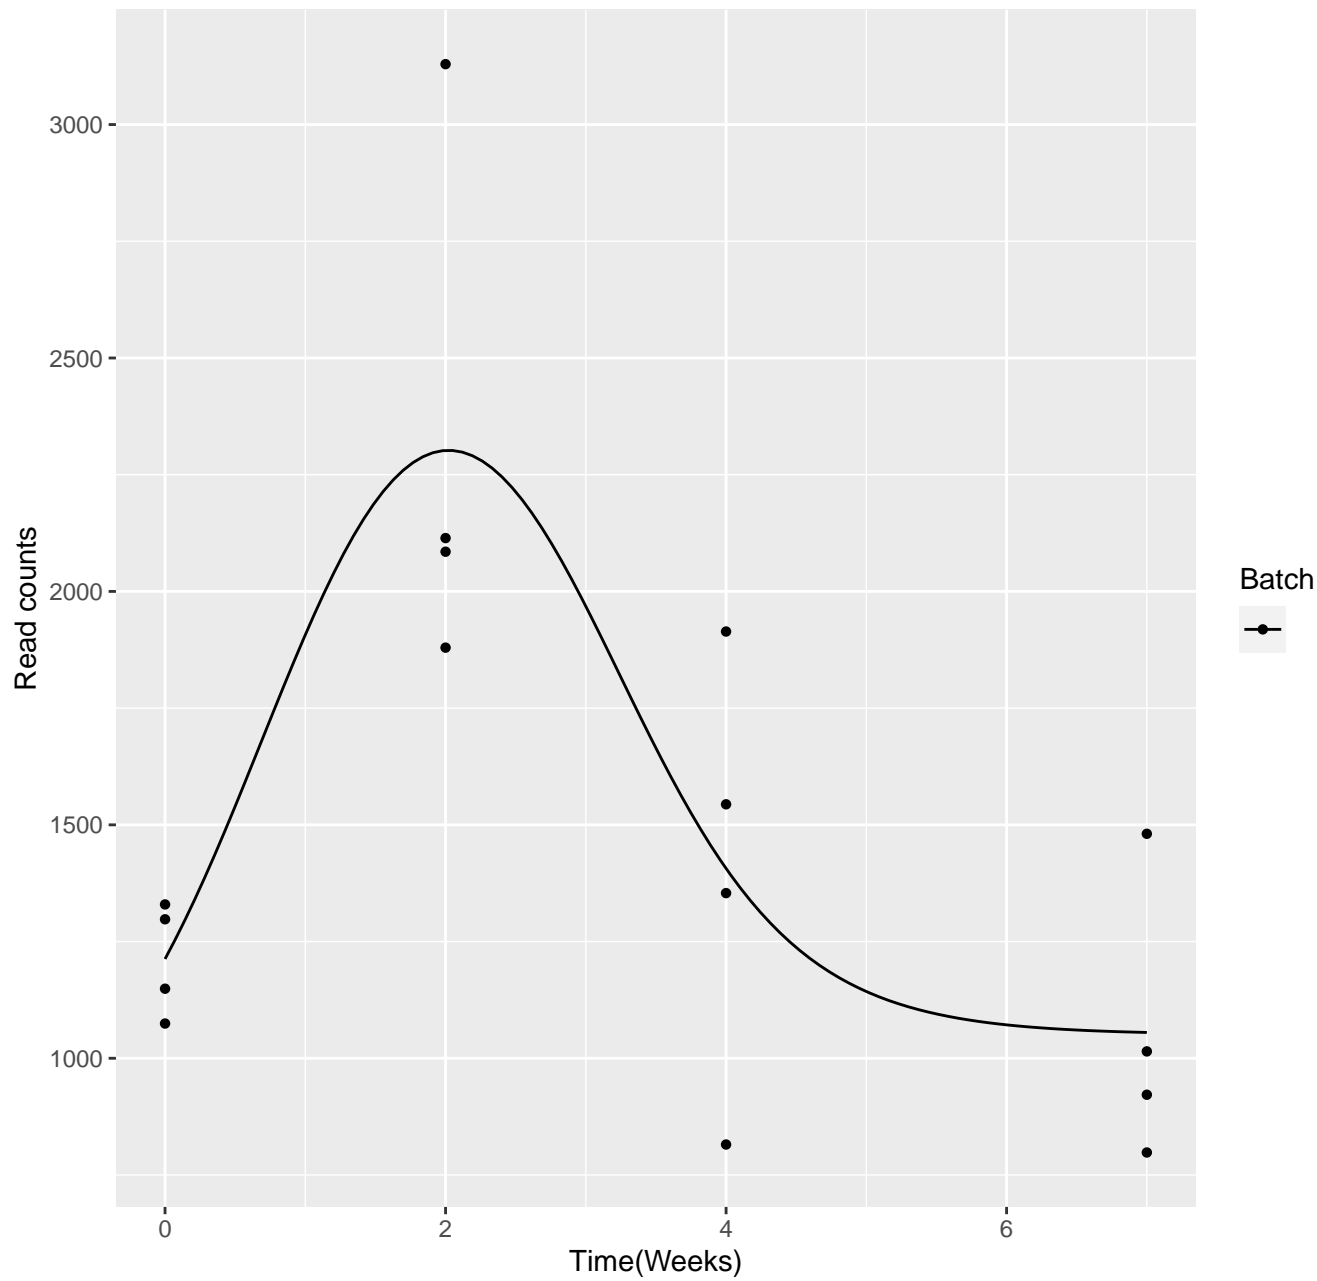

TECRL:  $\log_{10} q = -2.41$

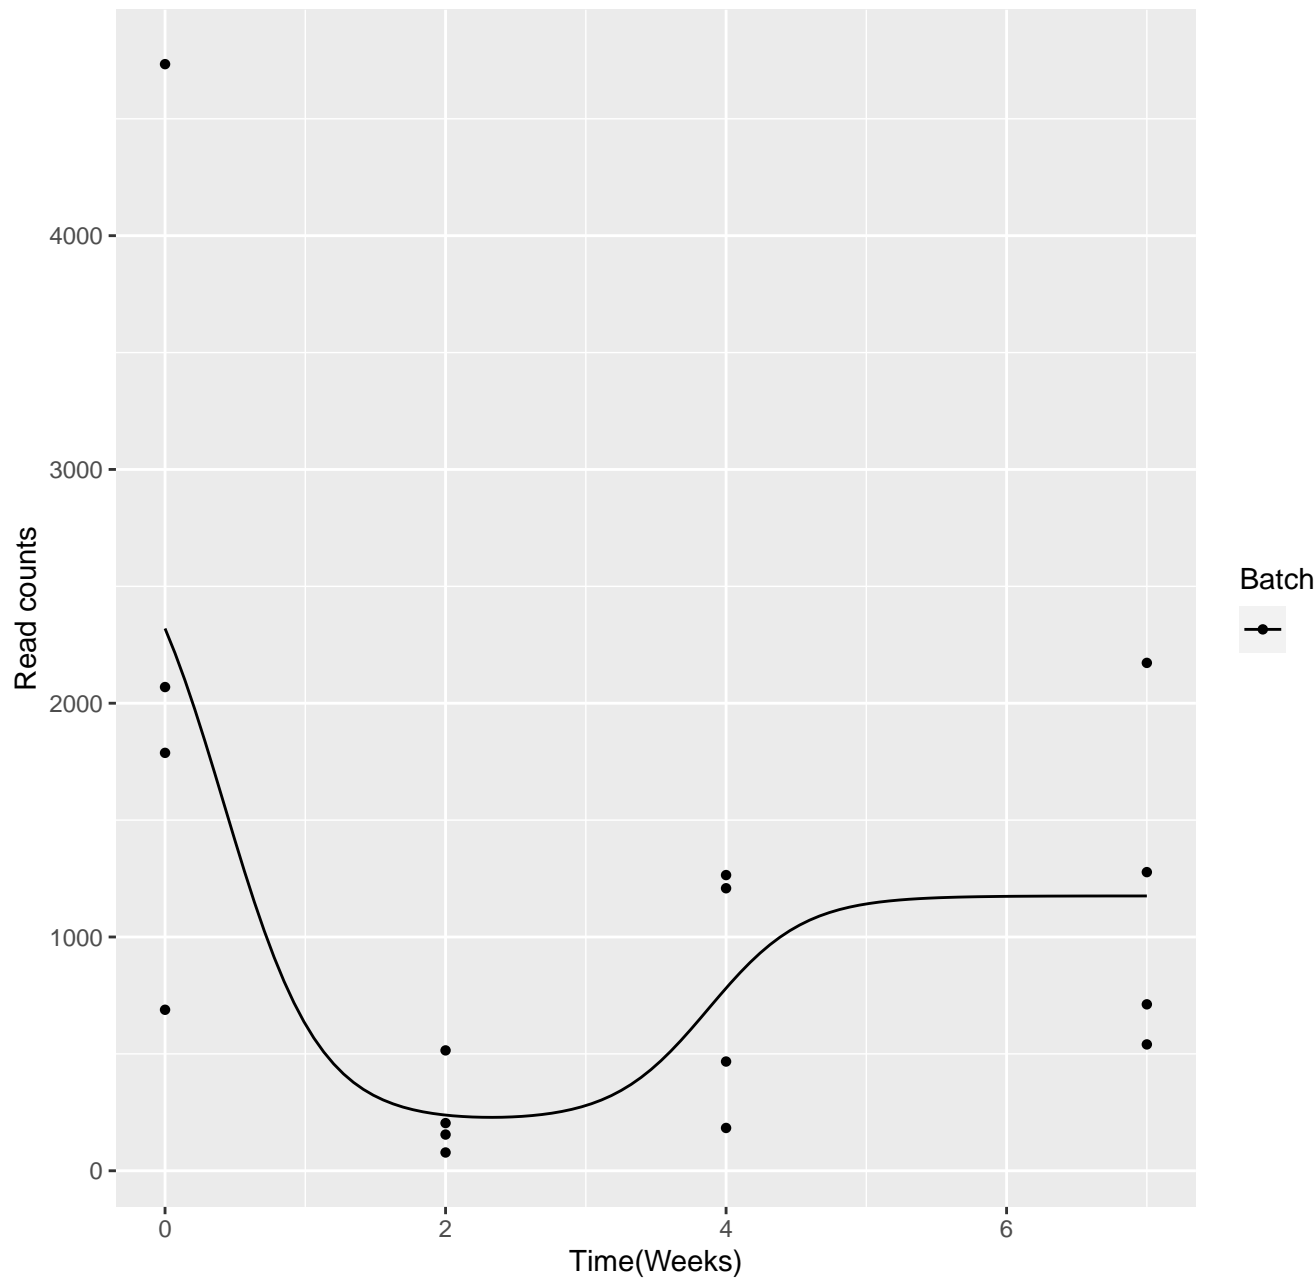

TRIM7:  $\log_{10} q = -2.41$

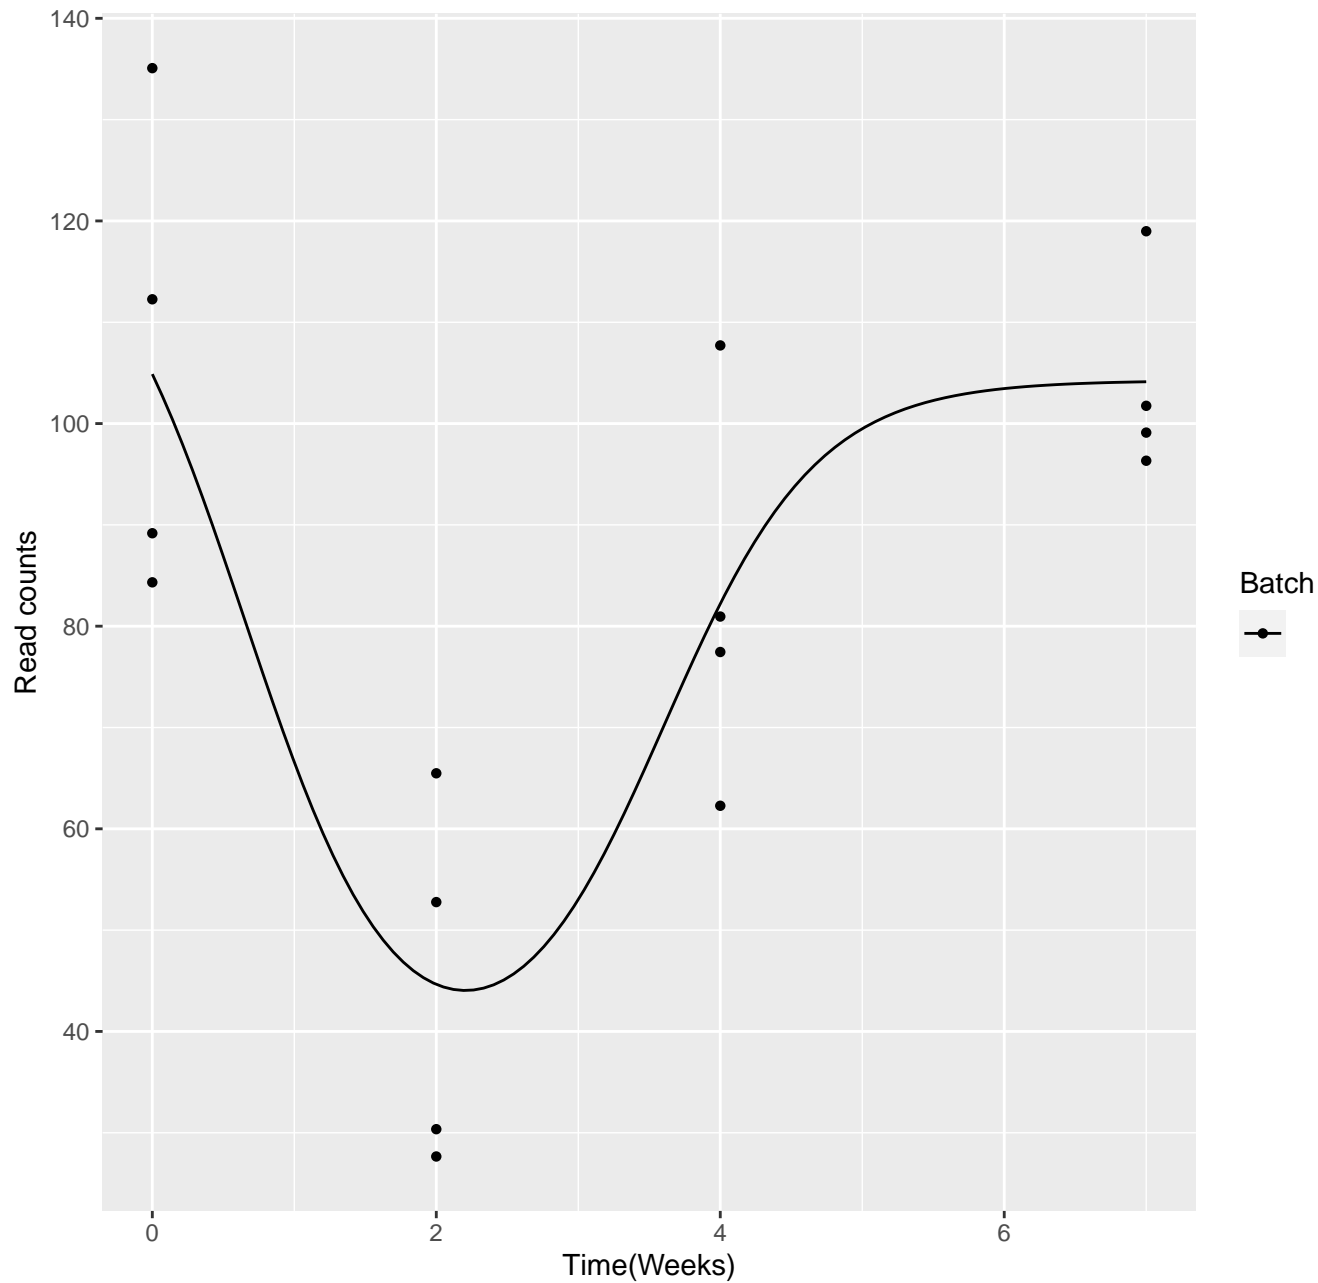

CDKN2C:  $\log_{10} q = -2.41$

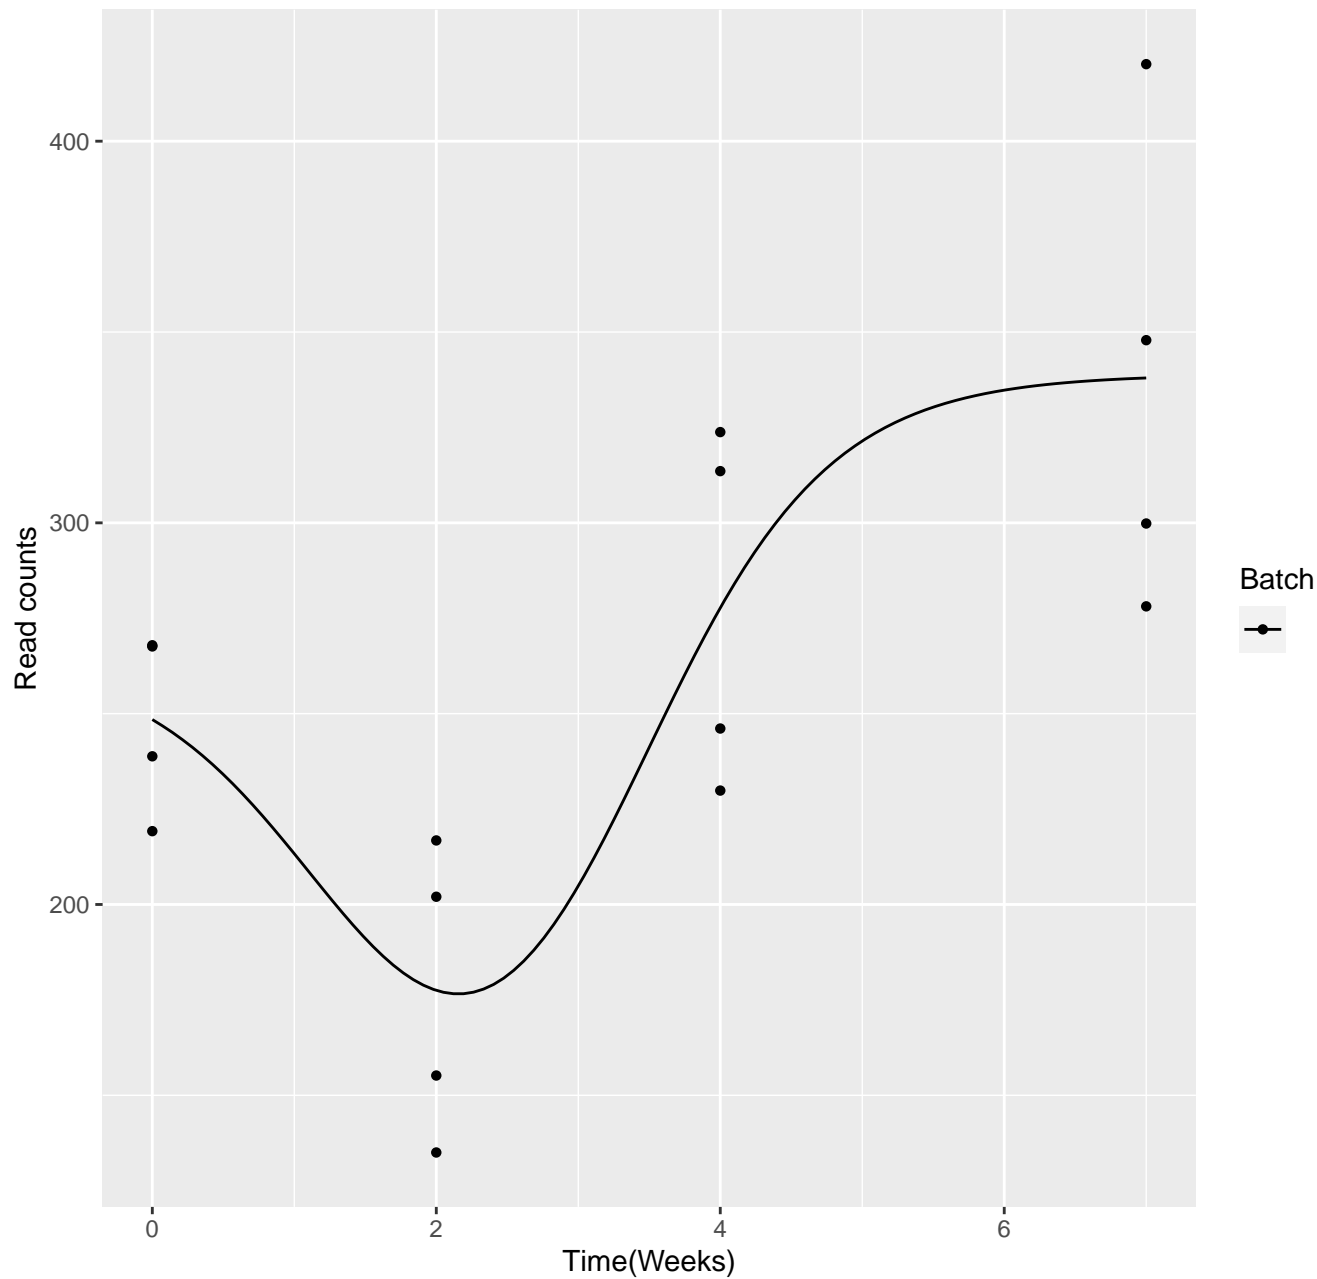

LOXL4:  $\log_{10} q = -2.41$

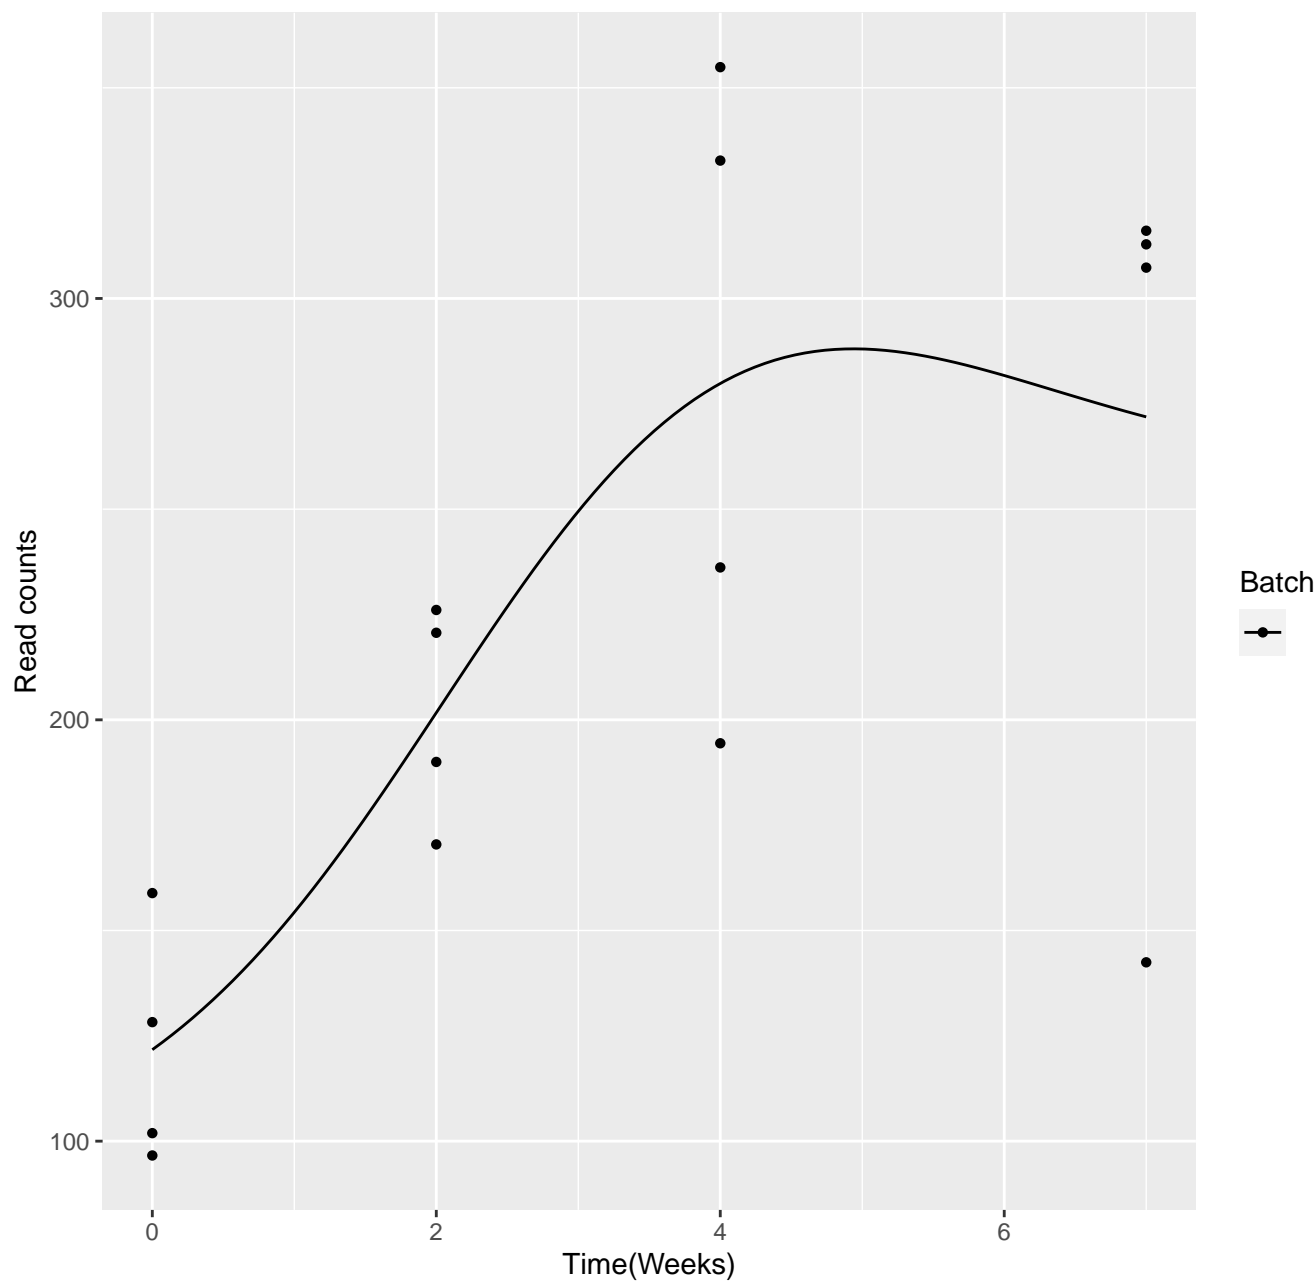

MAP2:  $\log_{10} q = -2.41$

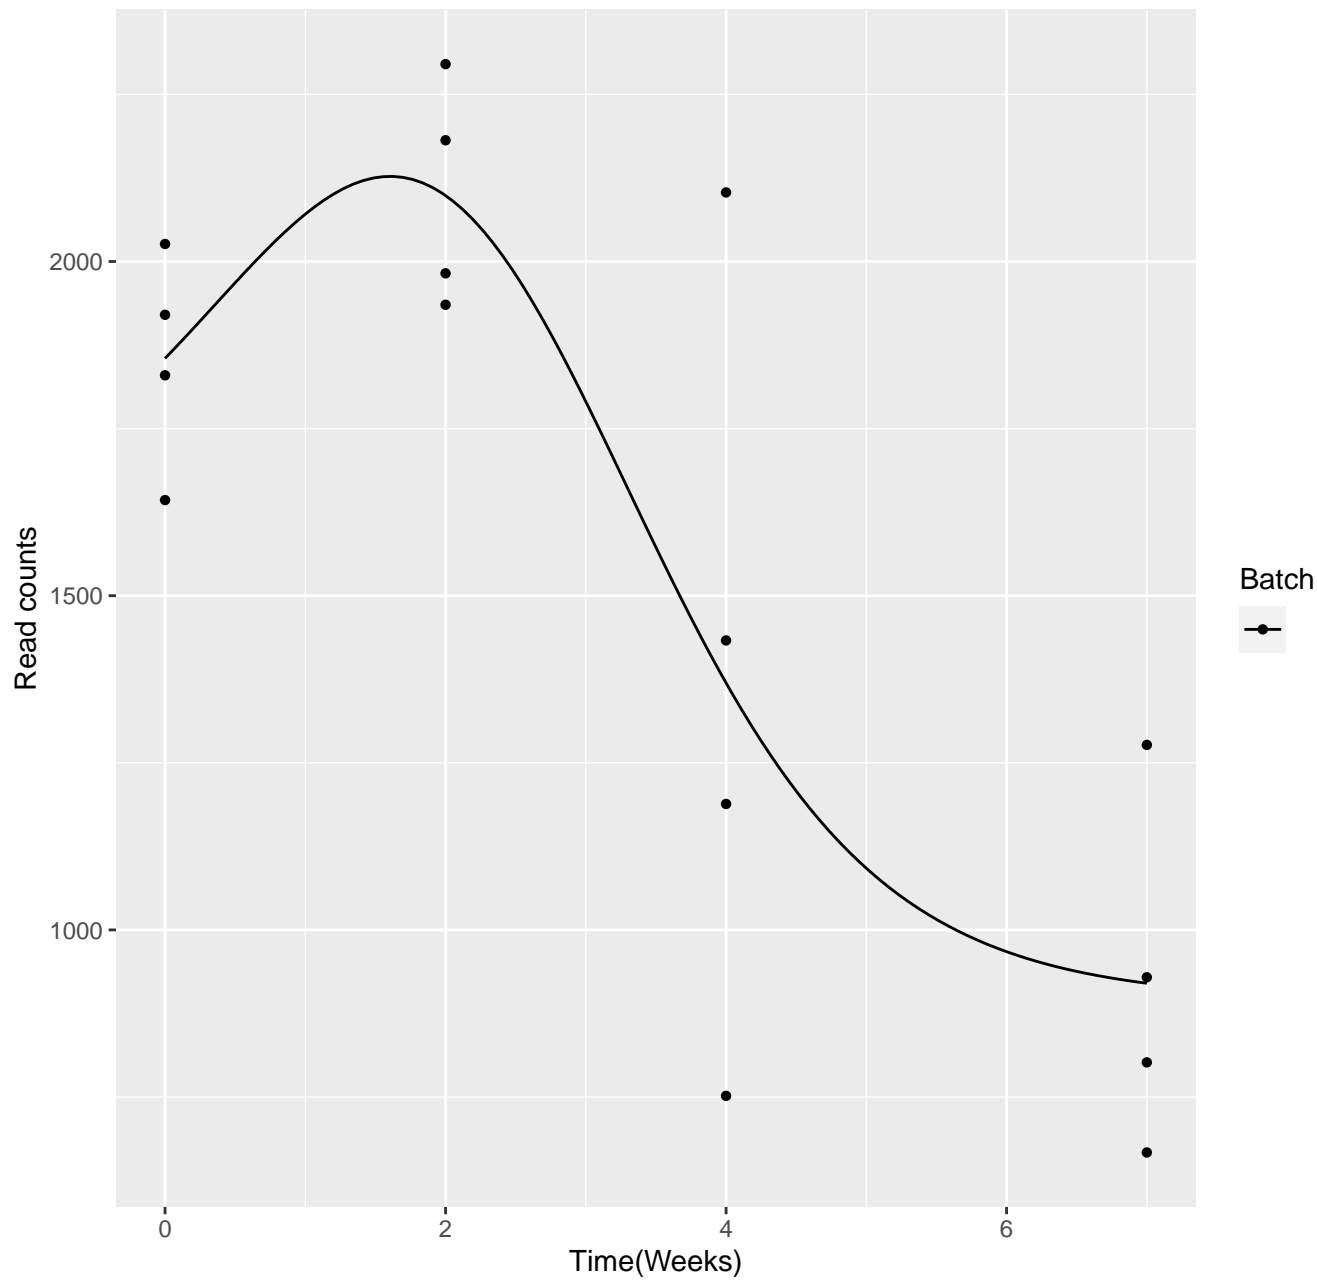

RAC1:  $\log_{10} q = -2.41$

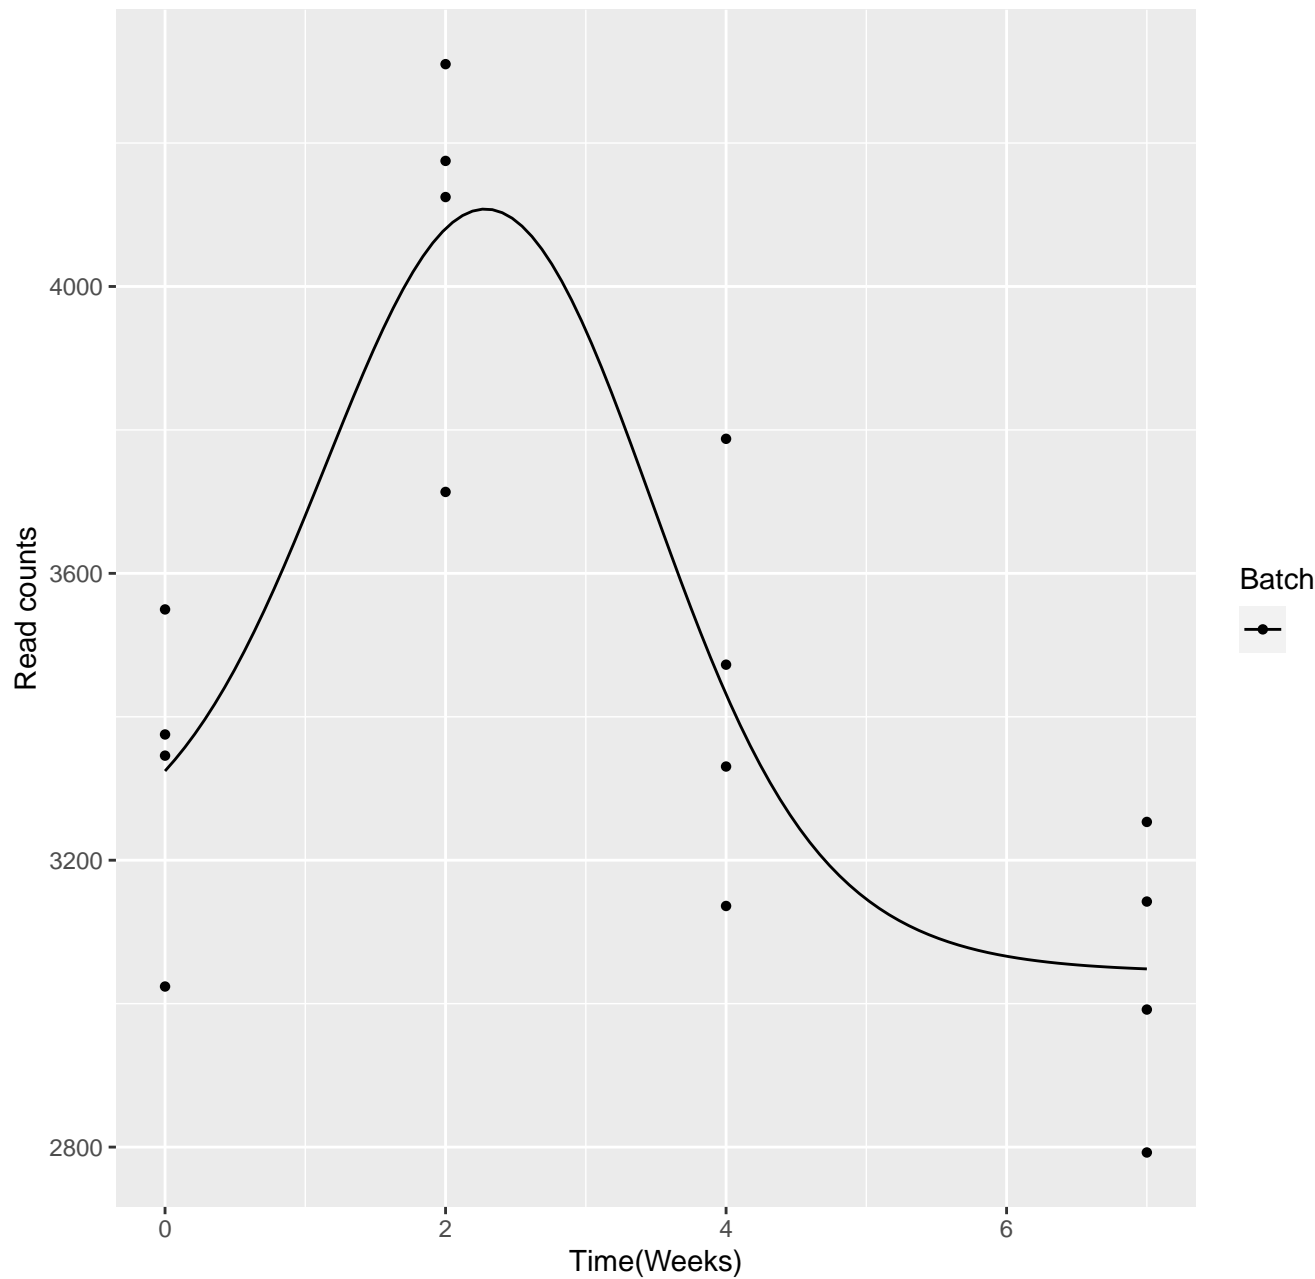

VNN1:  $\log_{10} q = -2.41$

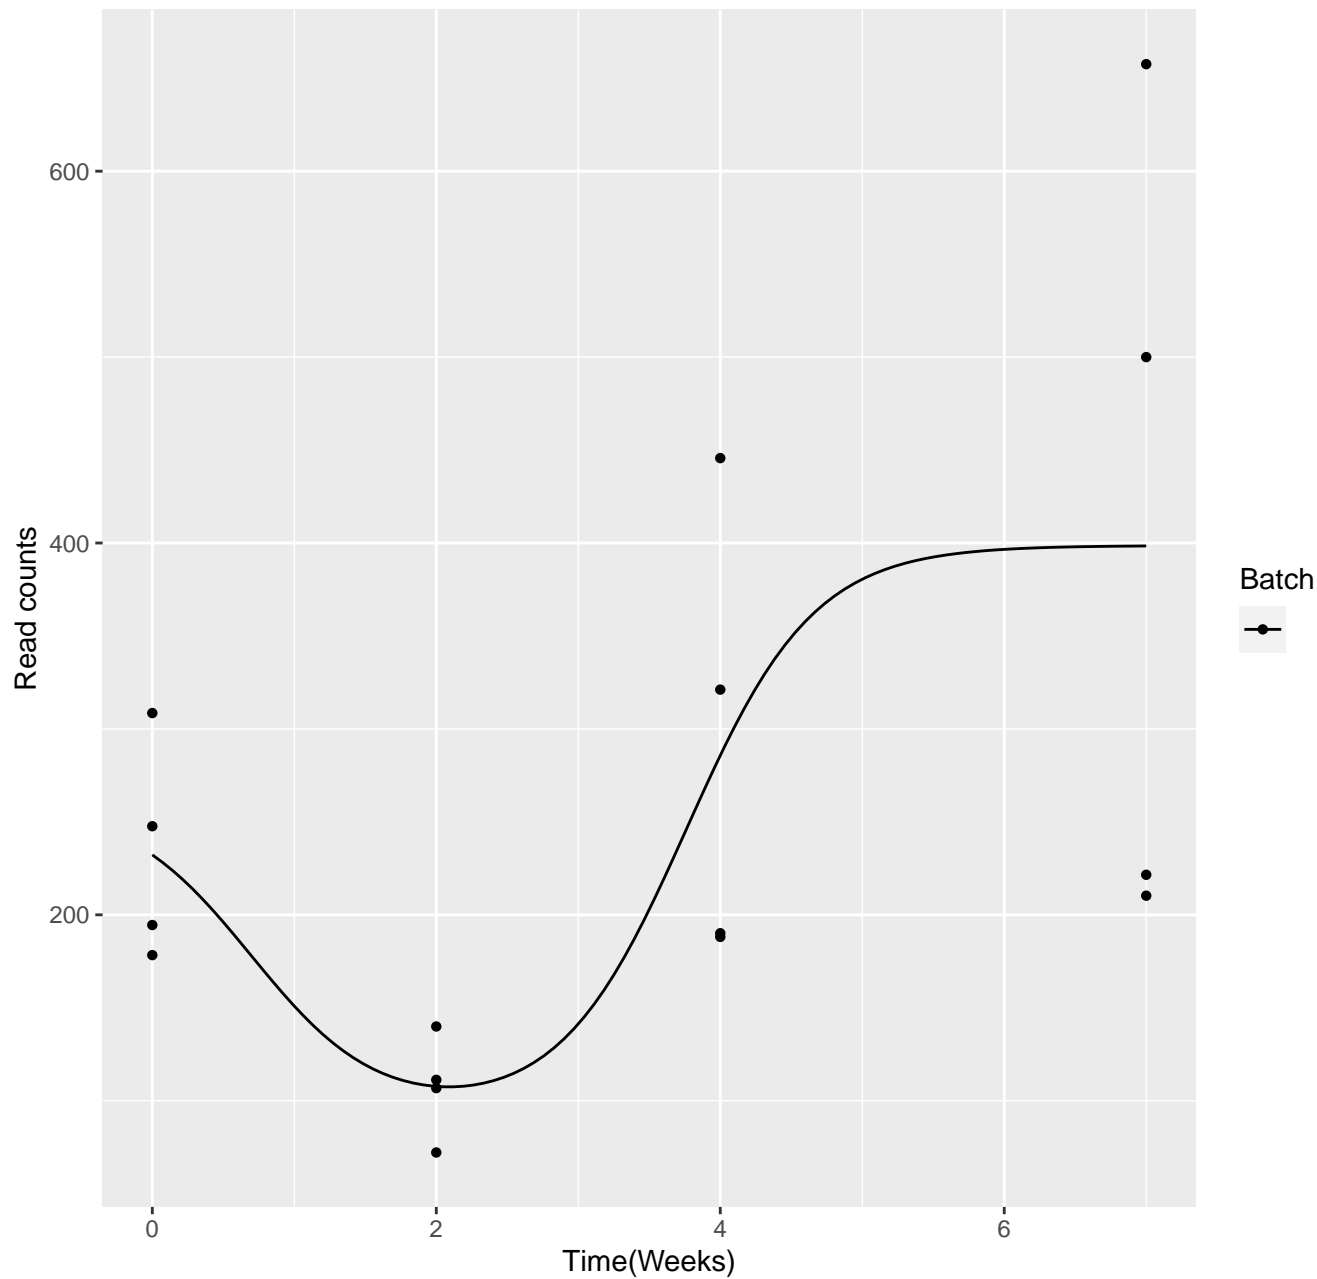



MRPL47:  $\log_{10} q = -2.4$

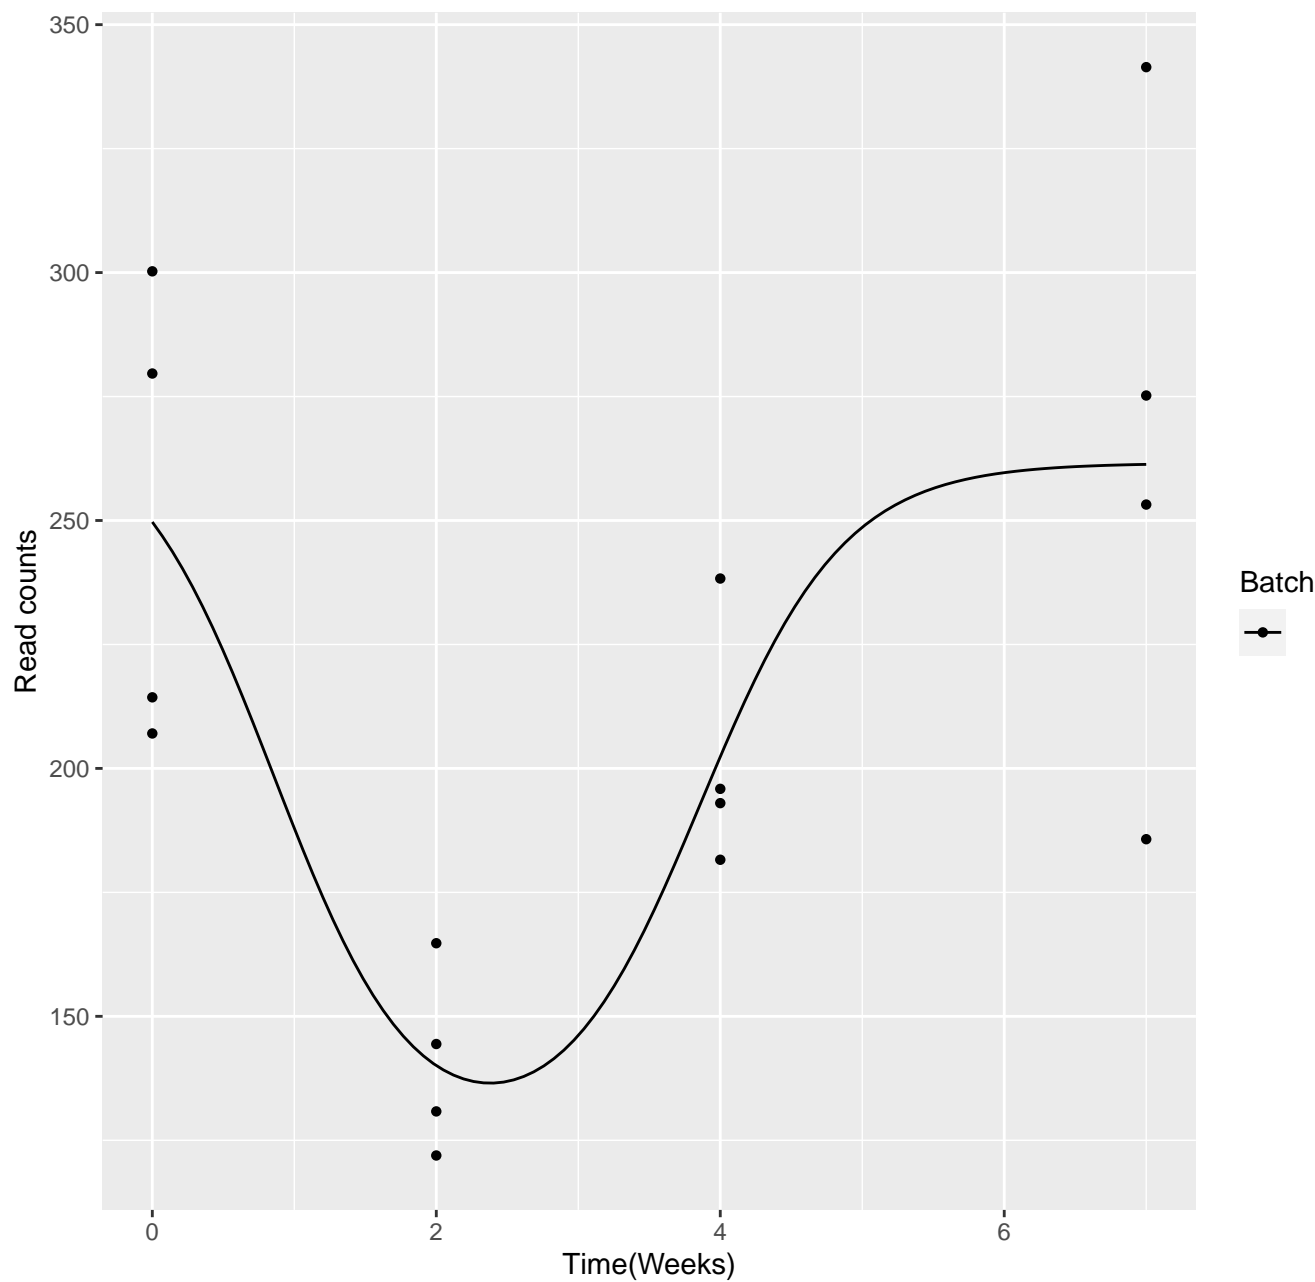

LIN7C:  $\log_{10} q = -2.4$

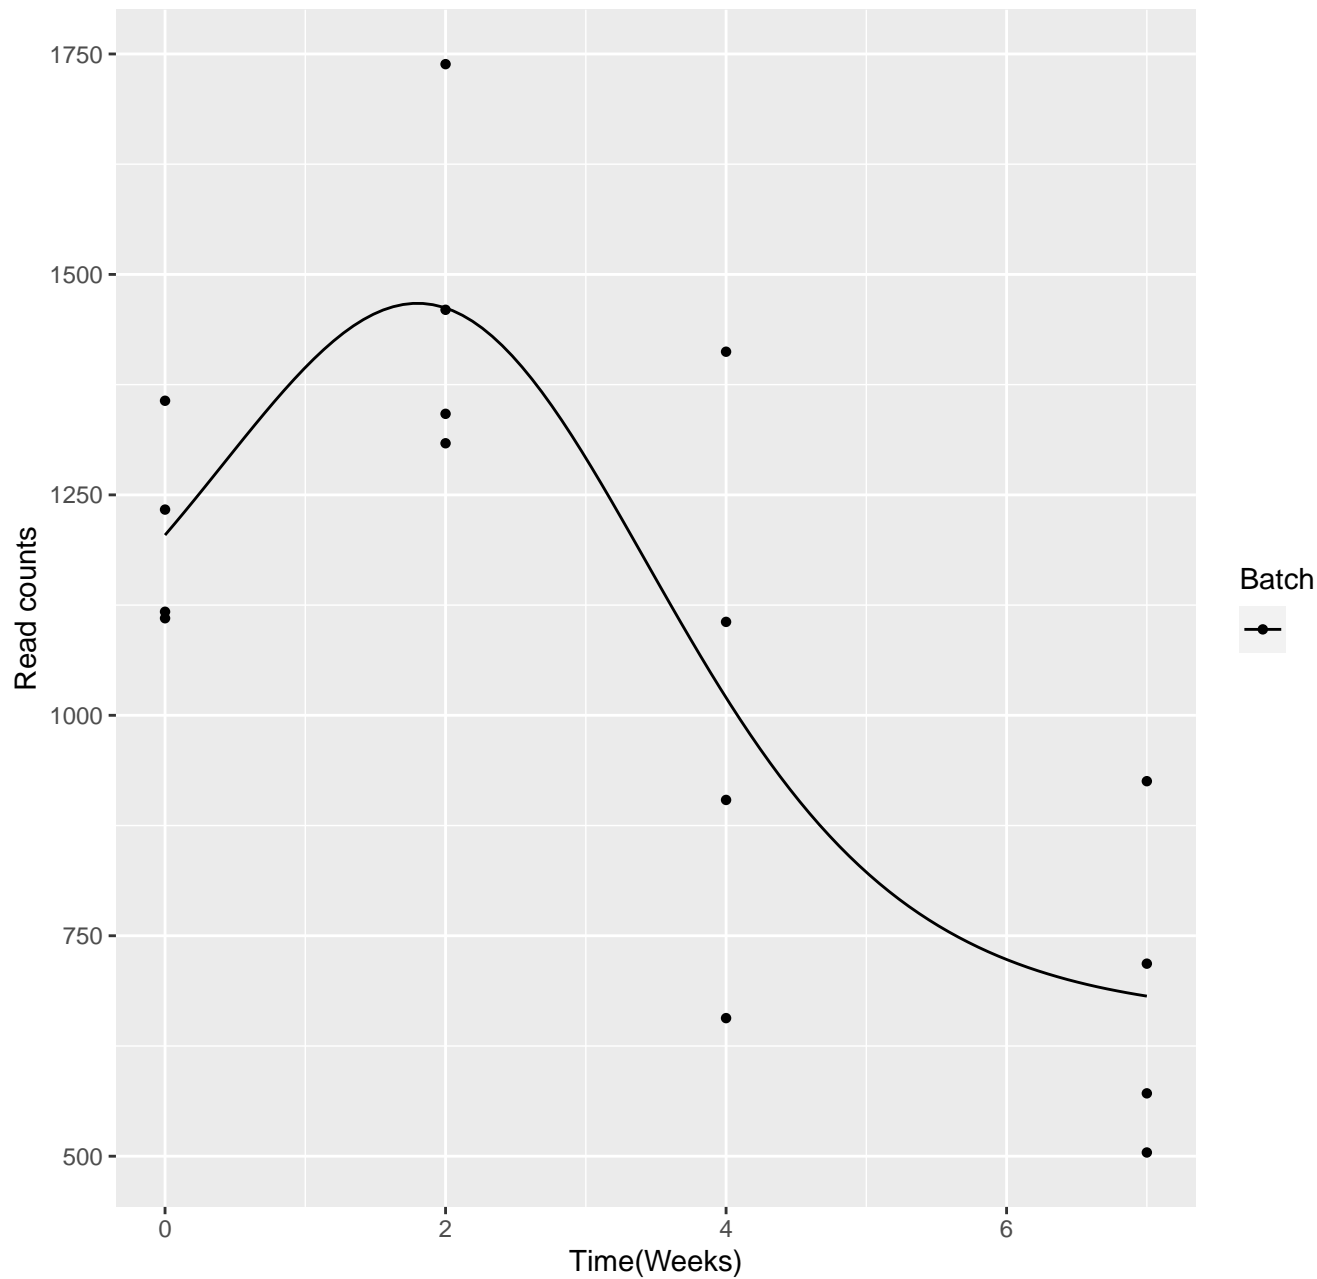

DVL2:  $\log_{10} q = -2.4$

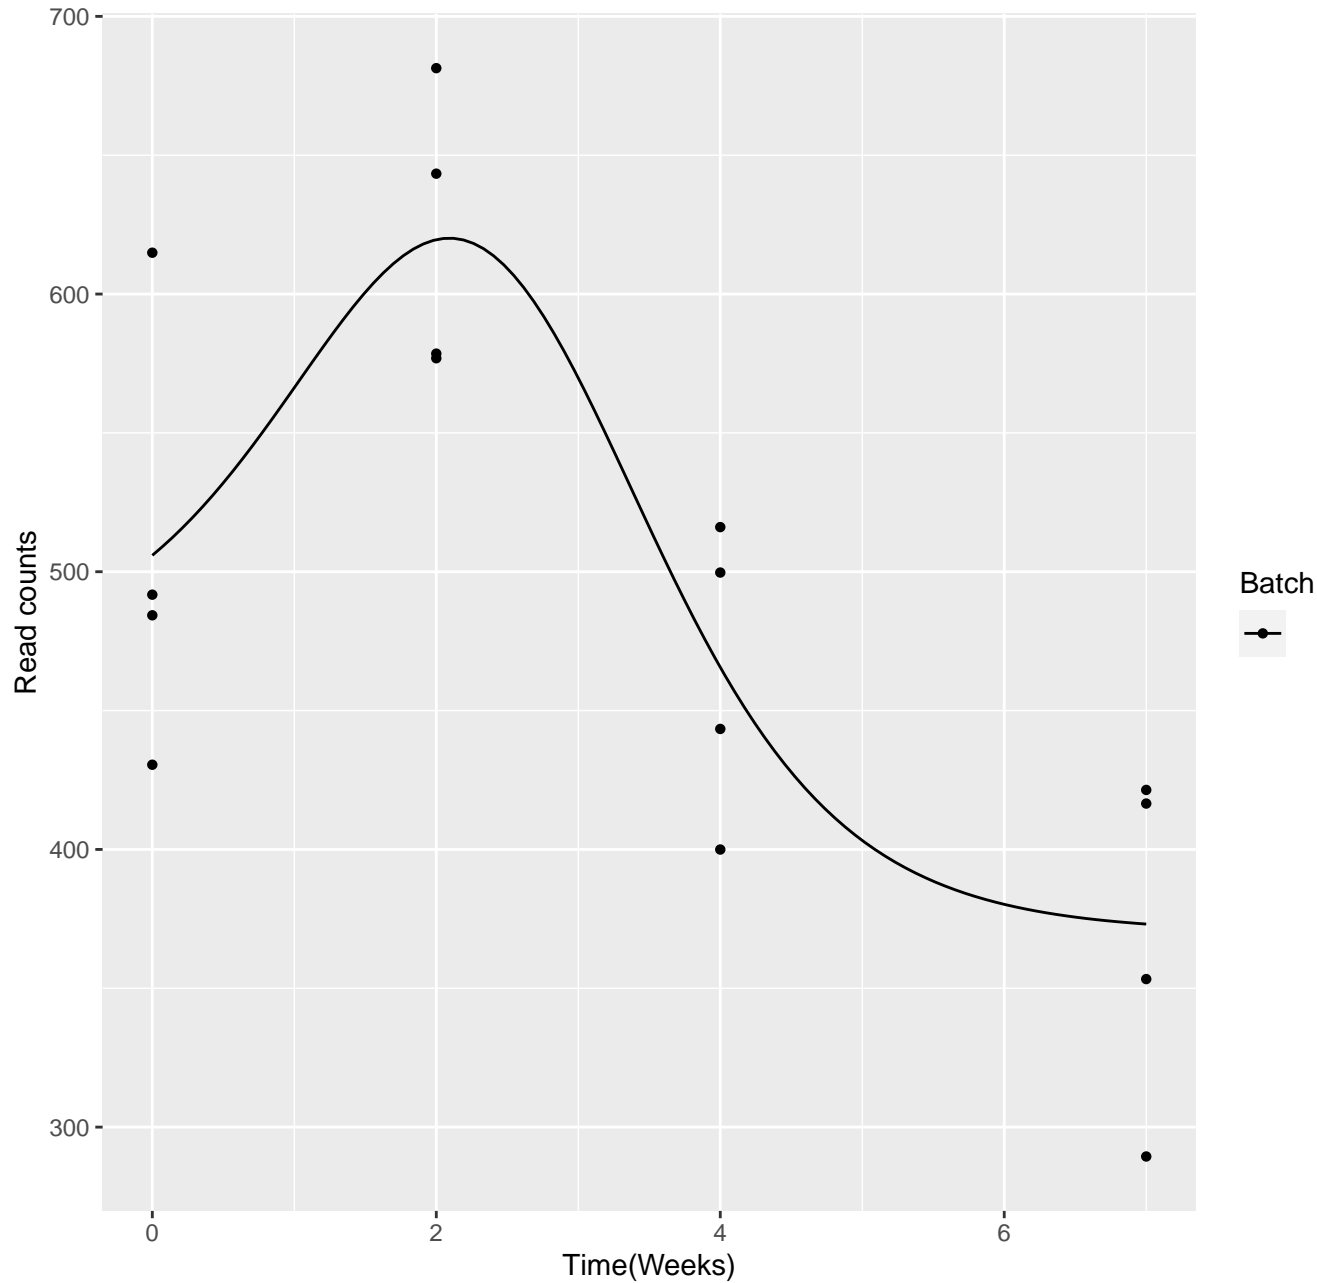

STRIP1:  $\log_{10} q = -2.4$

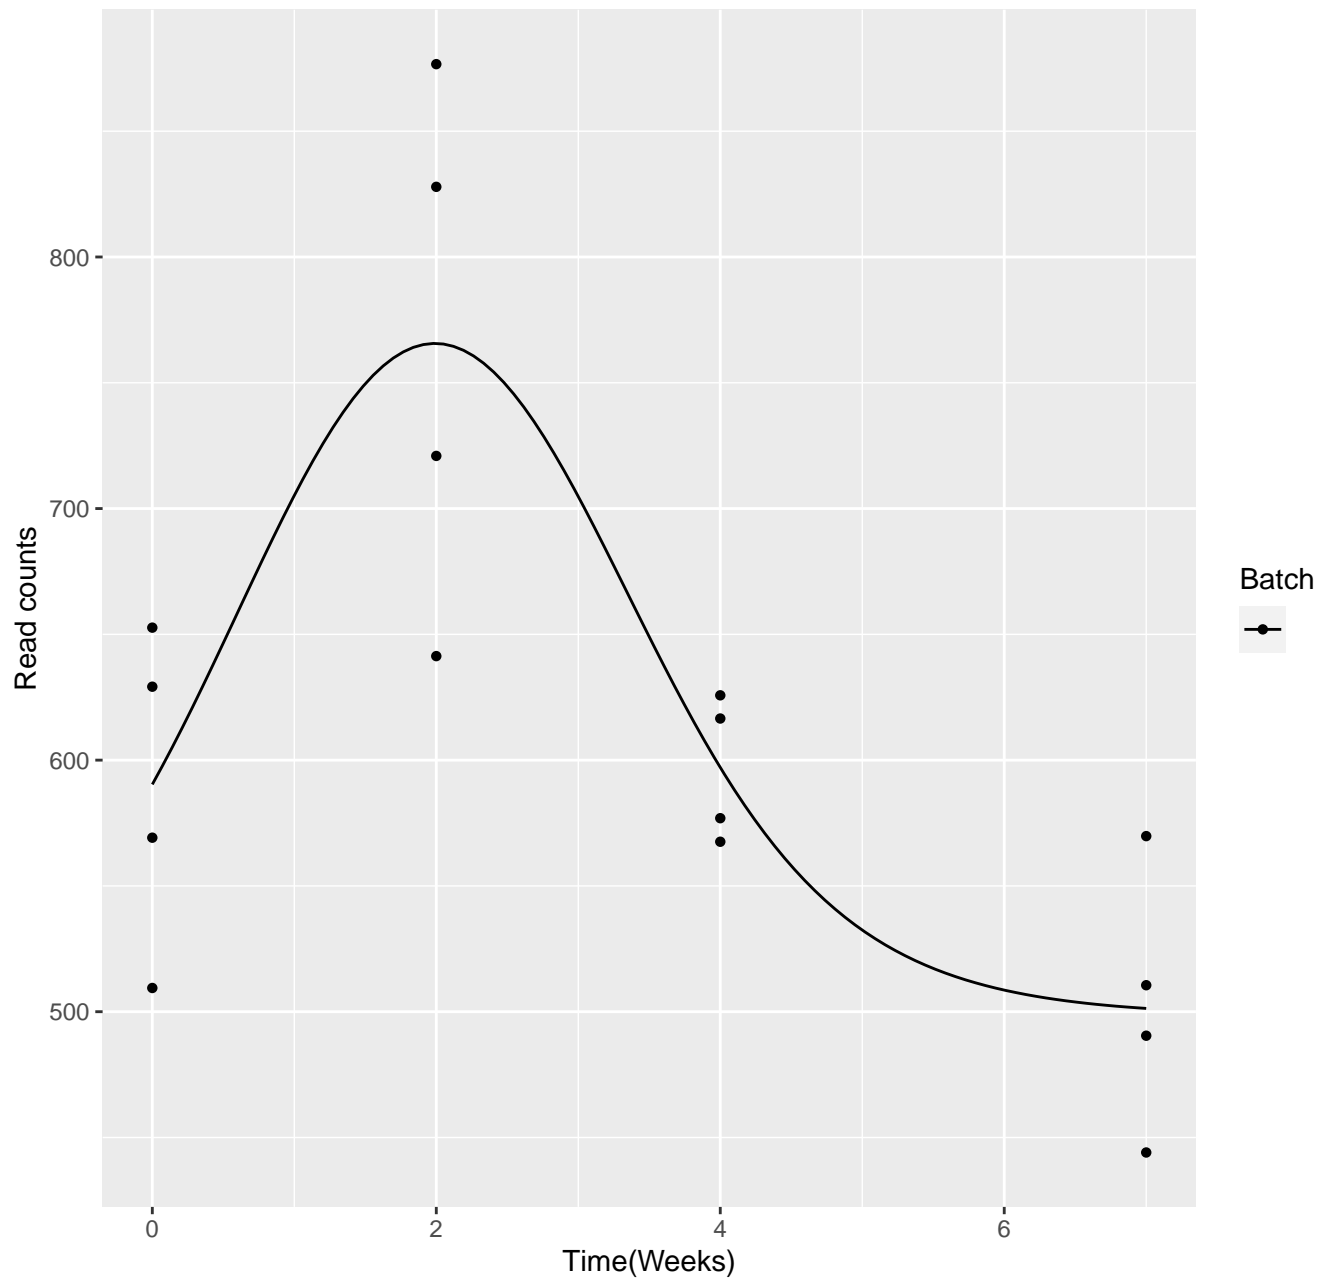

AGO1:  $\log_{10} q = -2.4$

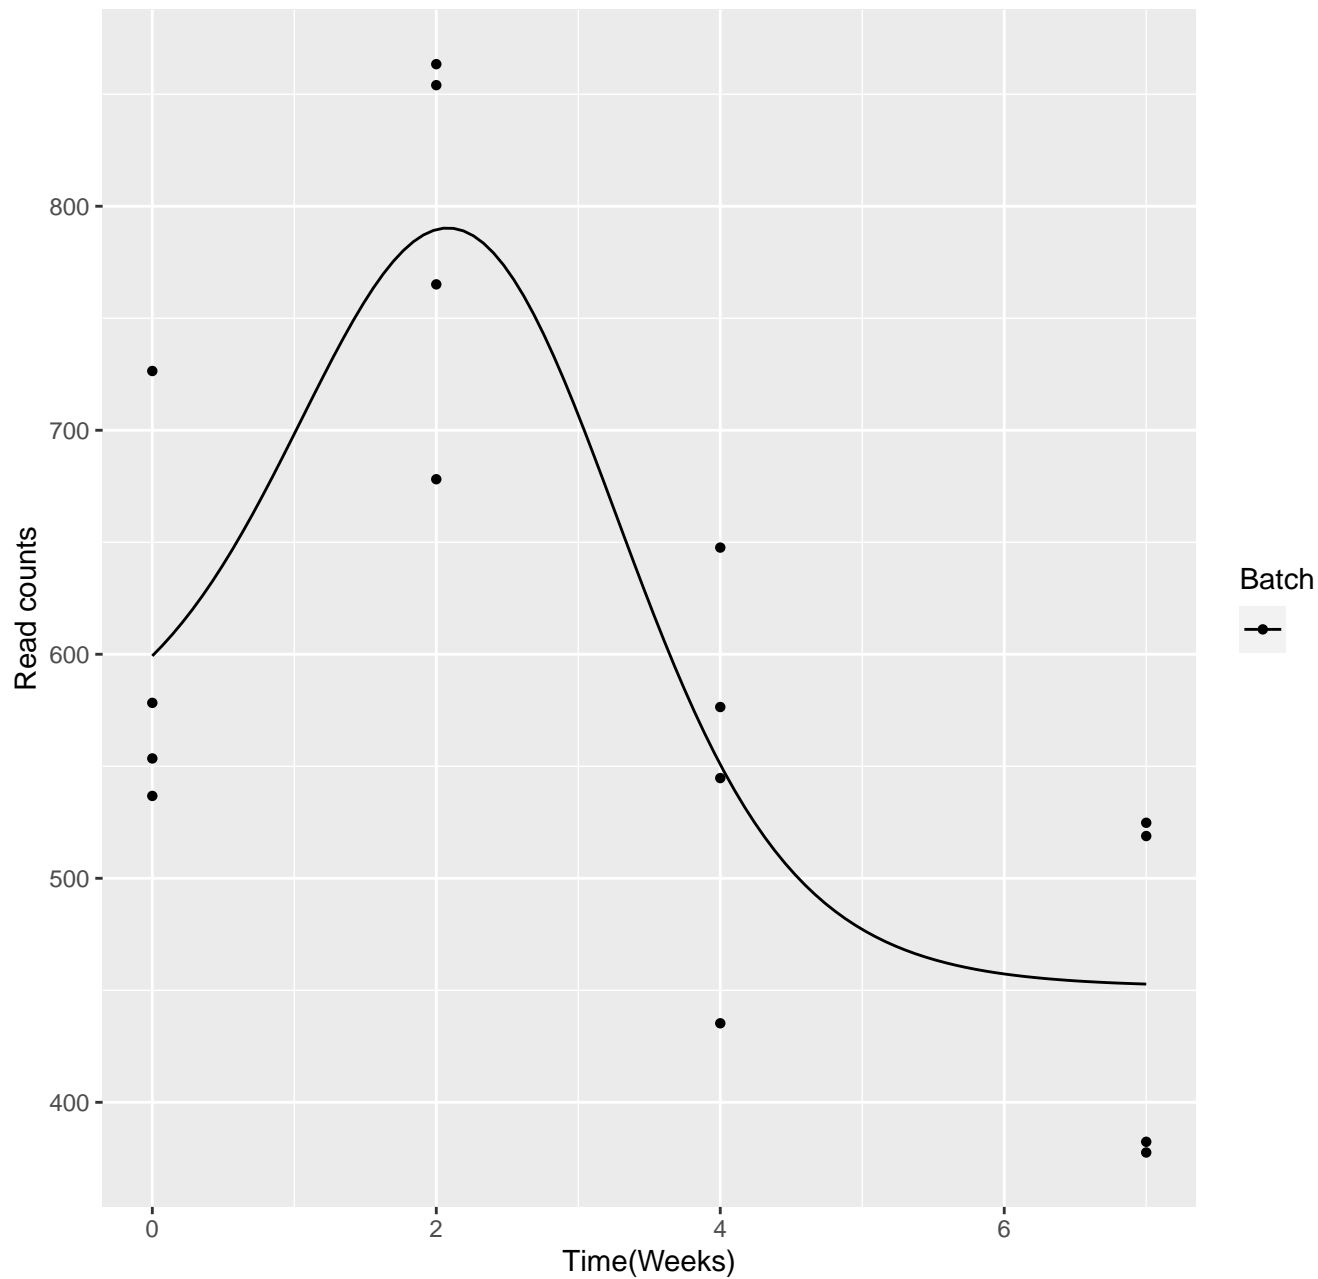

CREB5:  $\log_{10} q = -2.4$

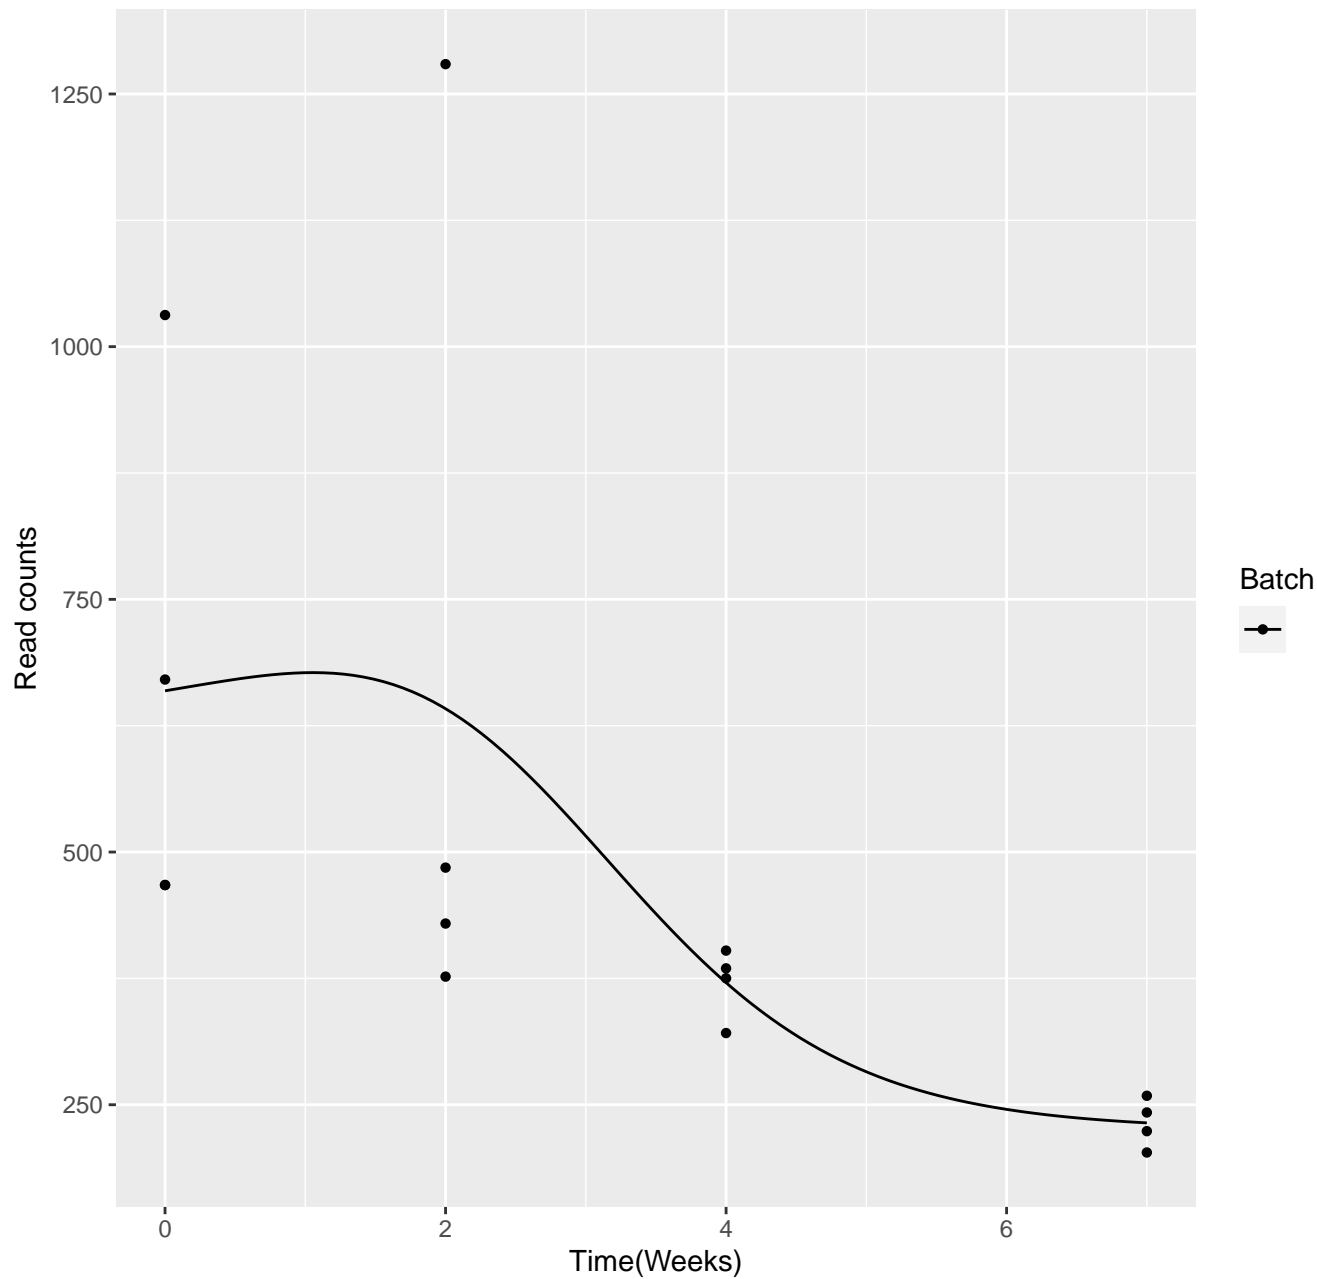

GAB3:  $\log_{10} q = -2.4$

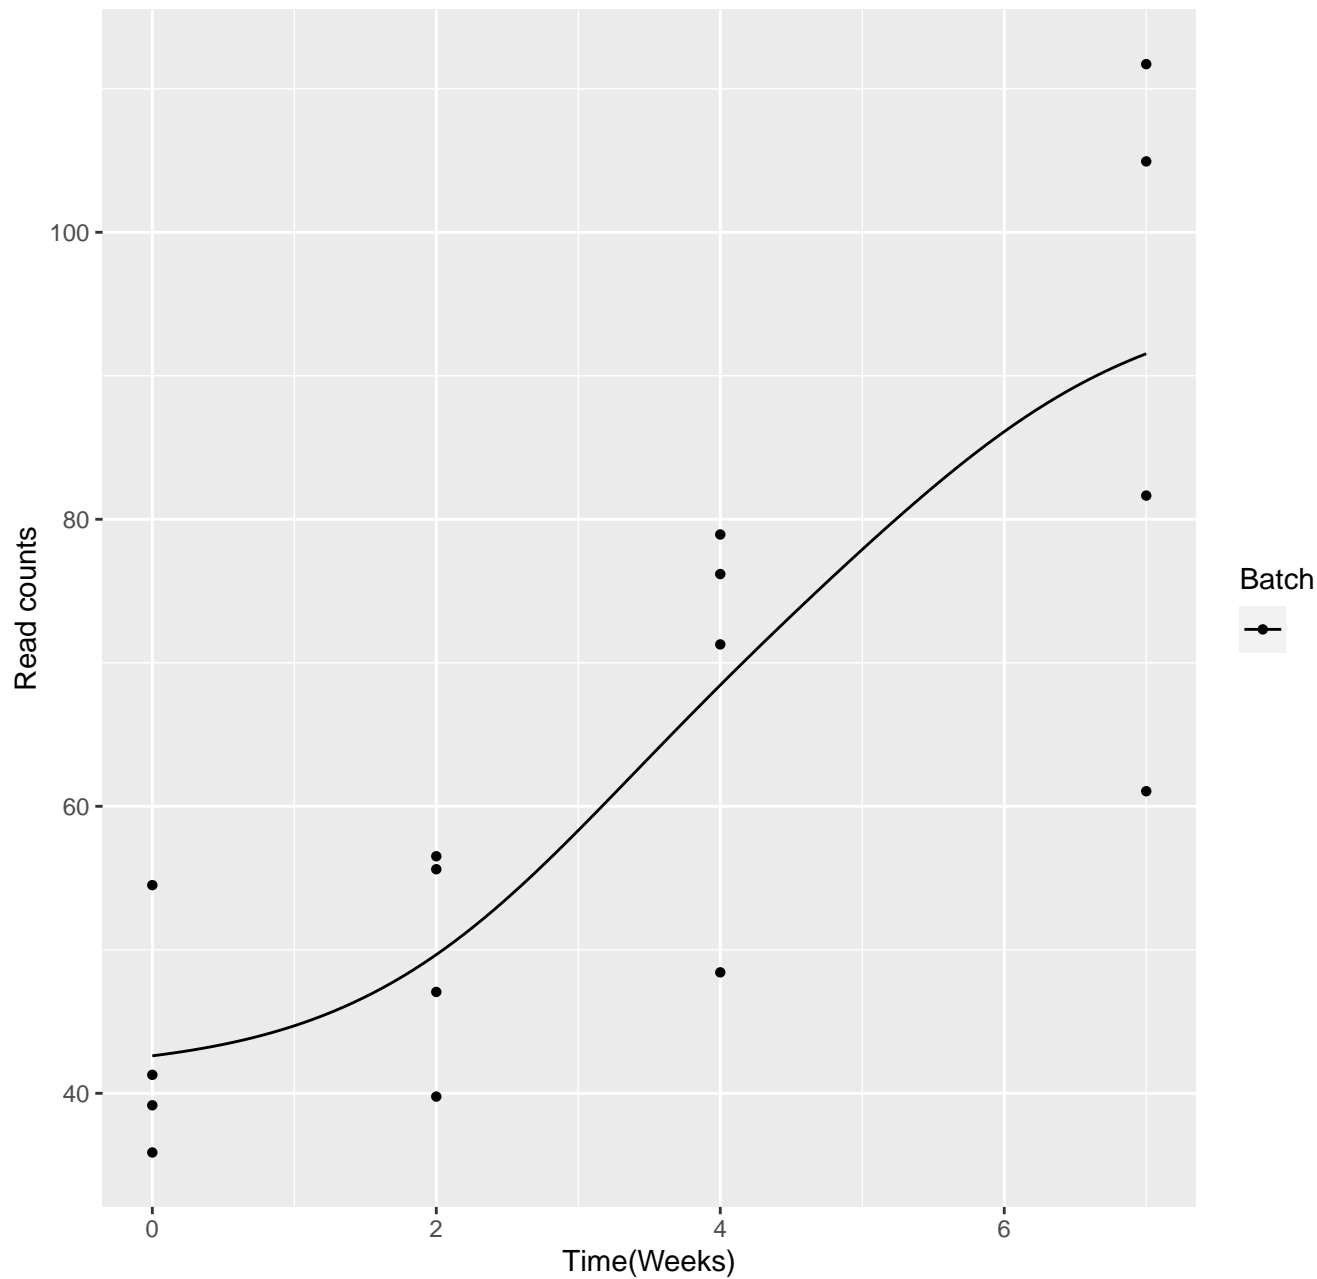

NDC80:  $\log_{10} q = -2.4$

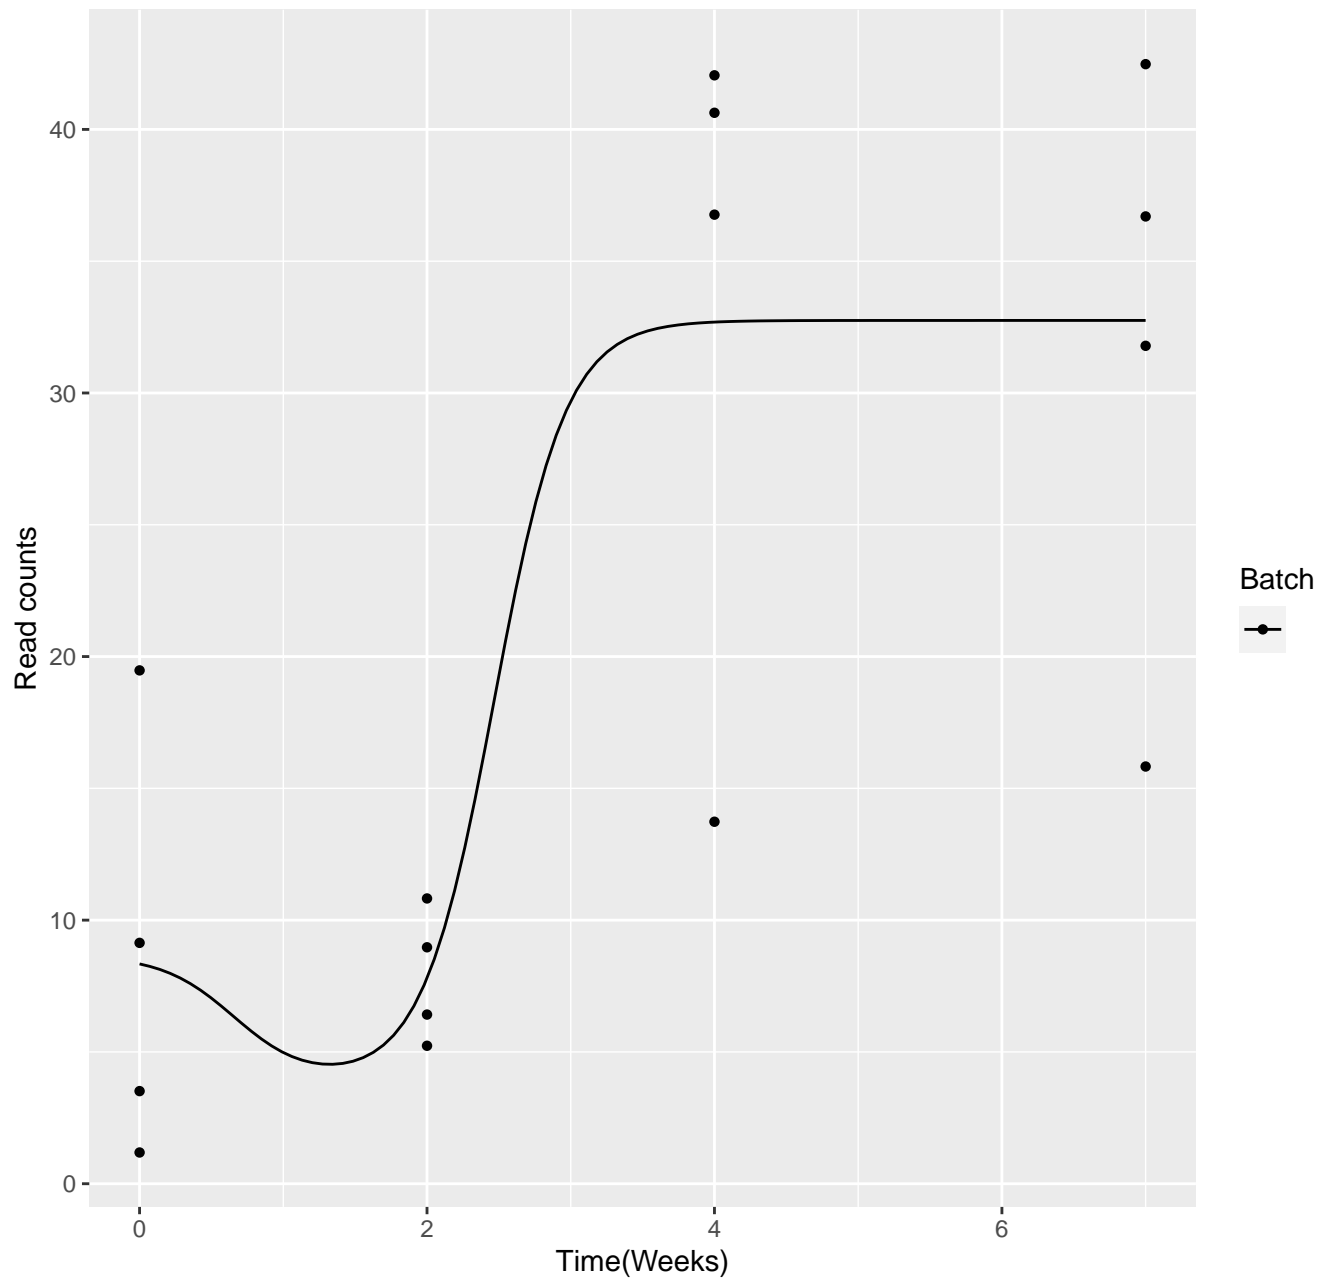



NDUFB1:  $\log_{10} q = -2.39$

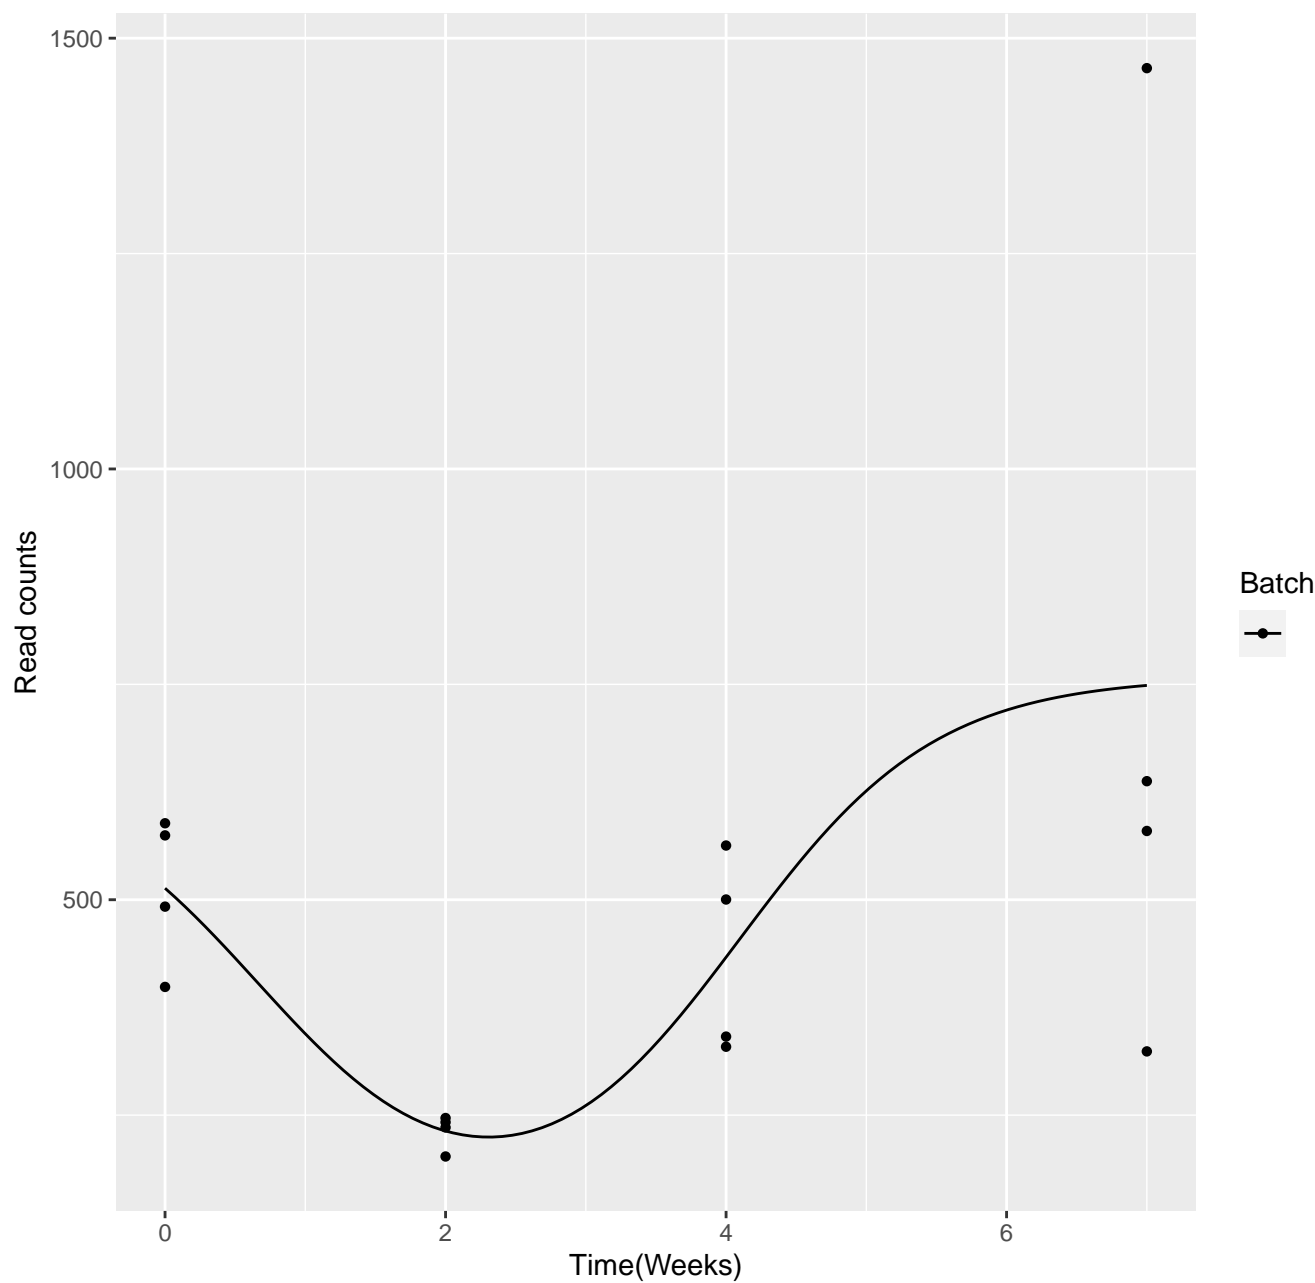

PCED1B:  $\log_{10} q = -2.39$

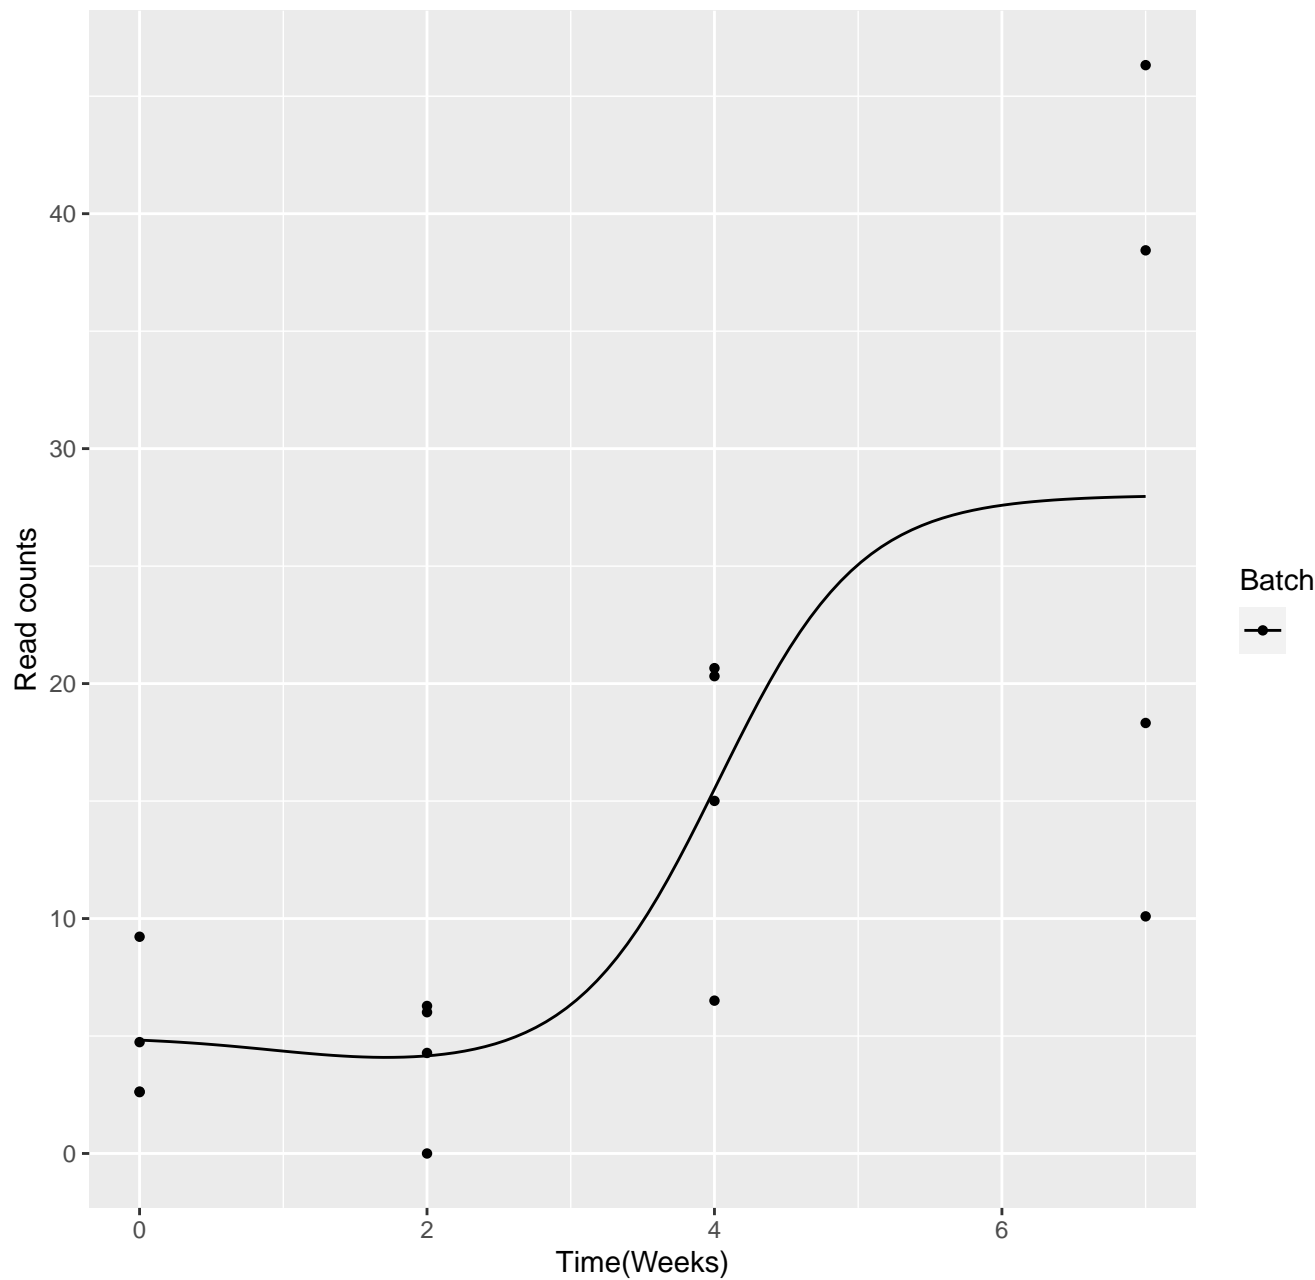

PHC1:  $\log_{10} q = -2.39$

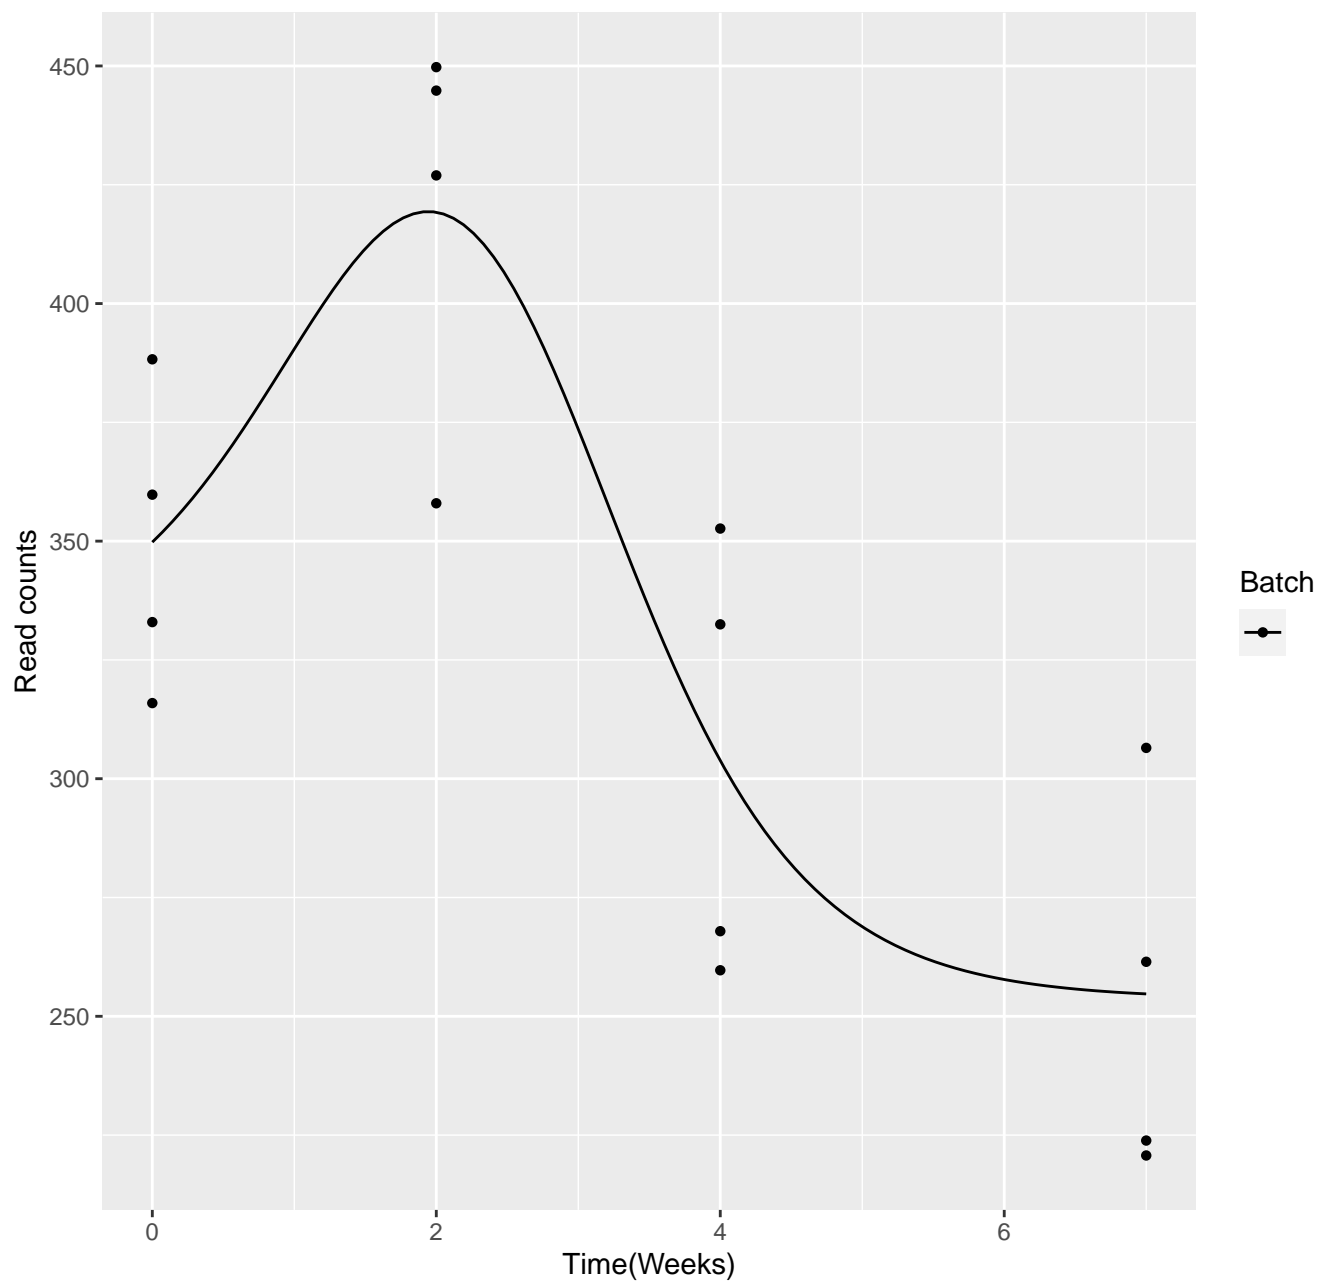

ATG4A:  $\log_{10} q = -2.39$

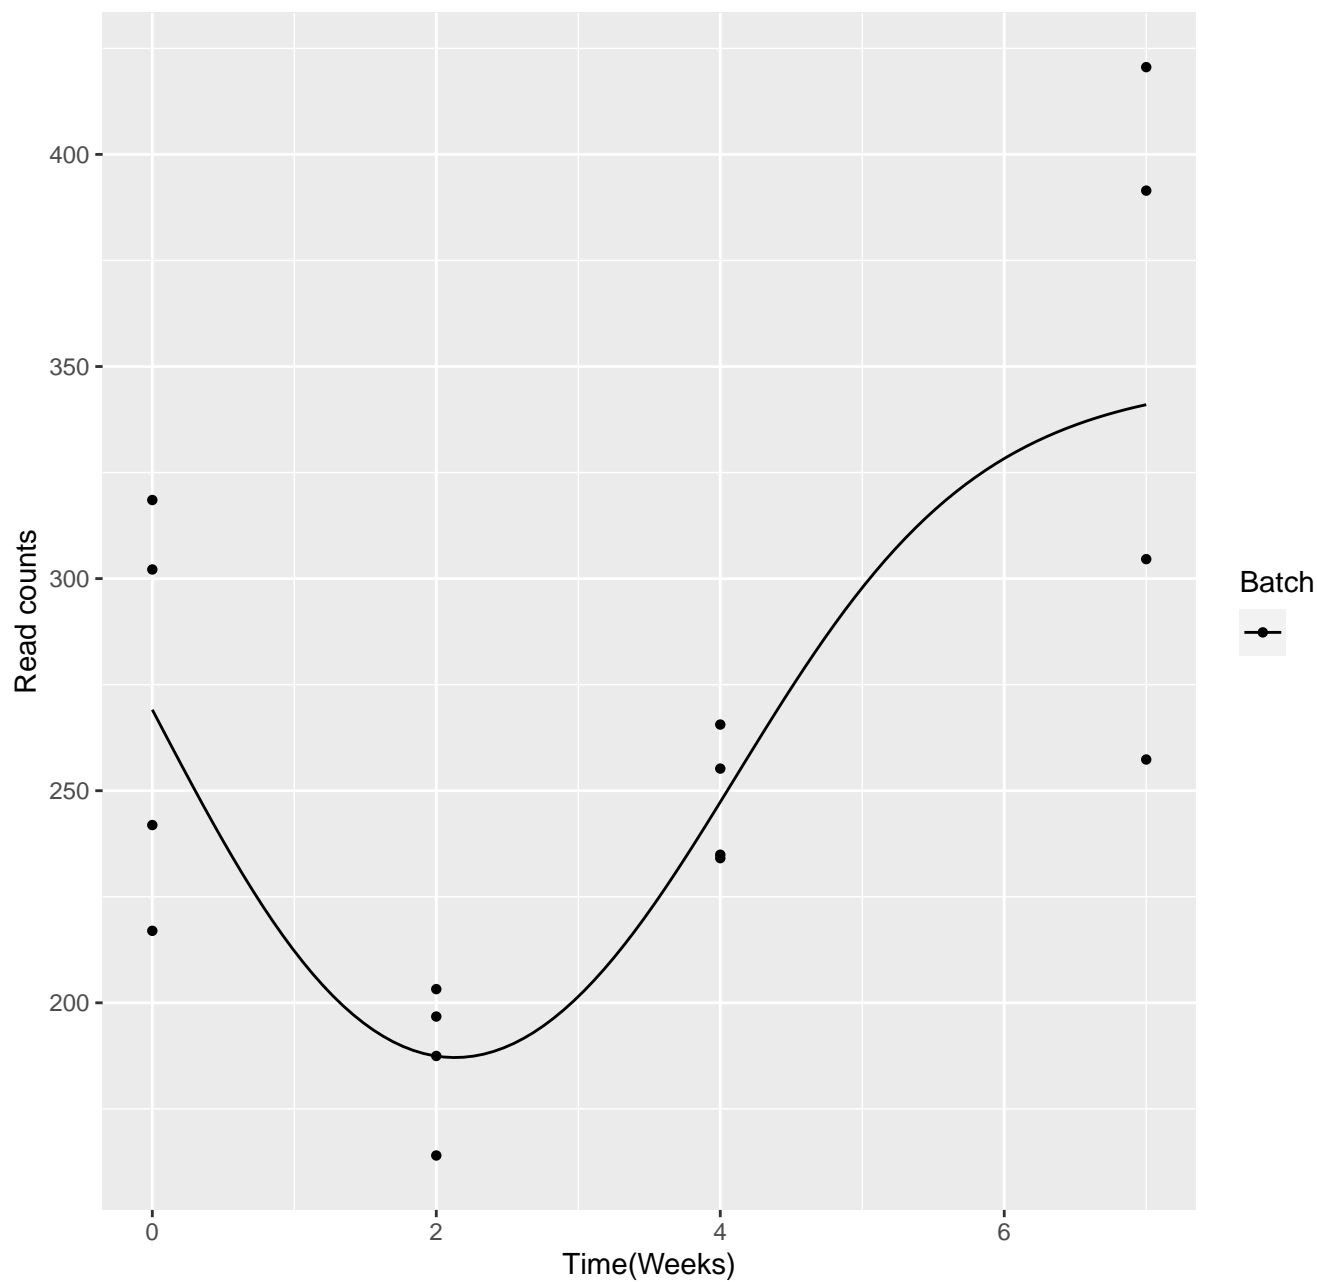

ABTB3:  $\log_{10} q = -2.39$

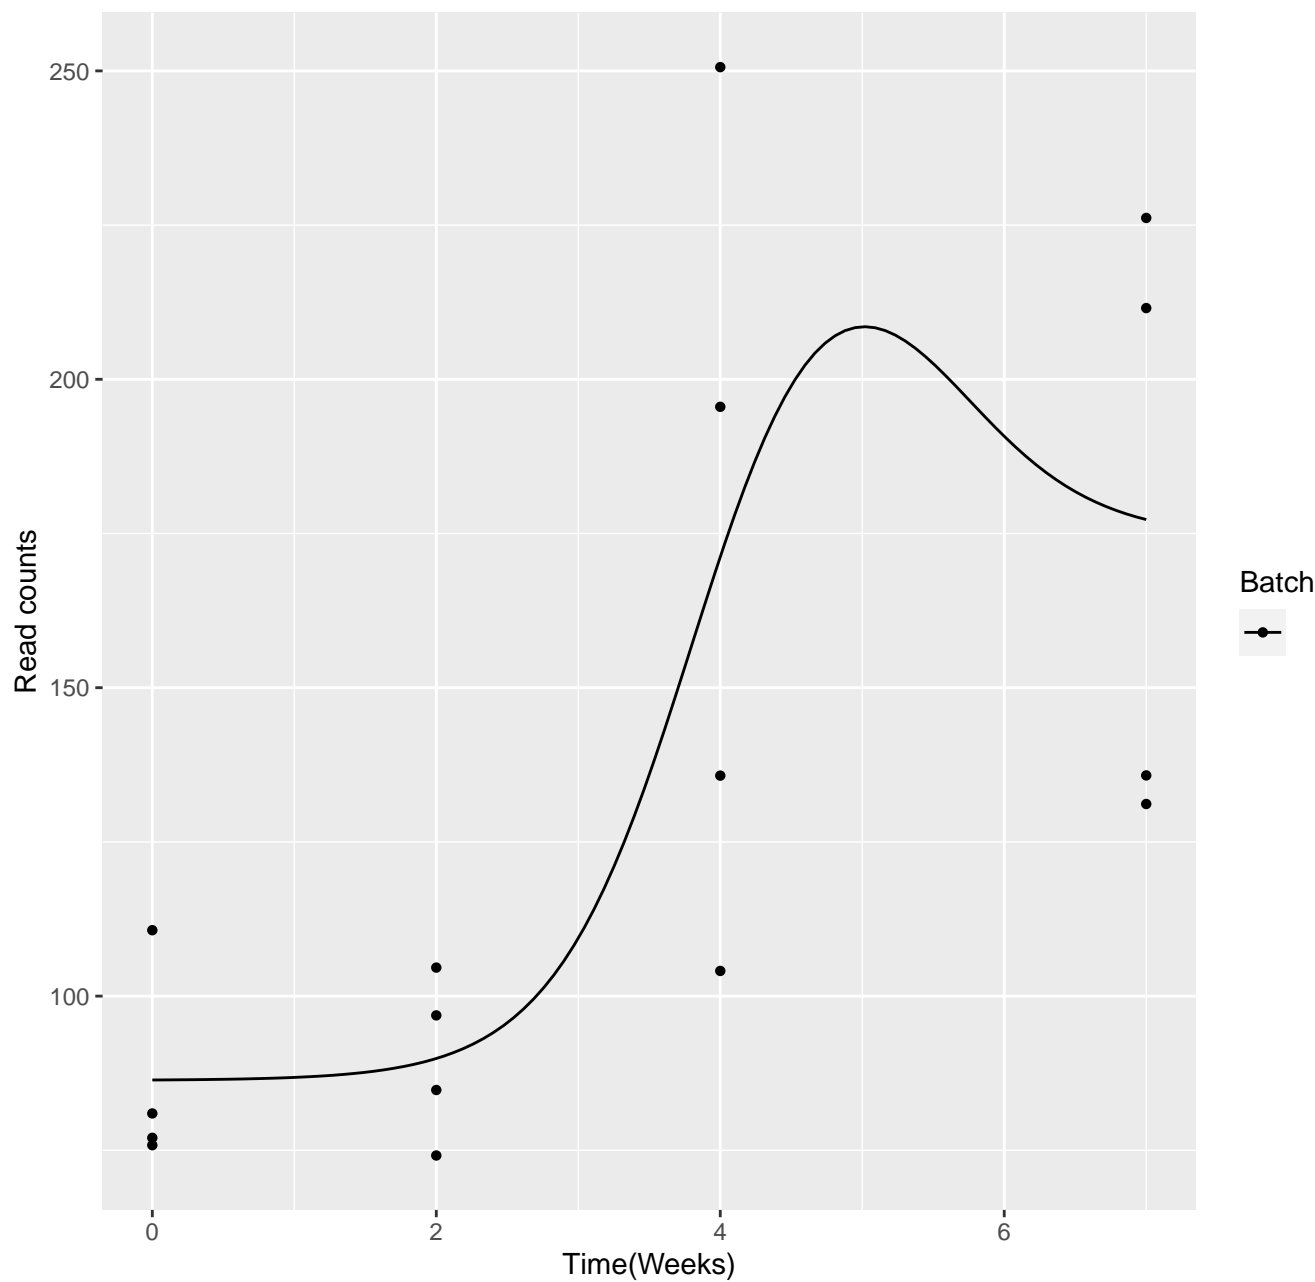

CTSB:  $\log_{10} q = -2.39$

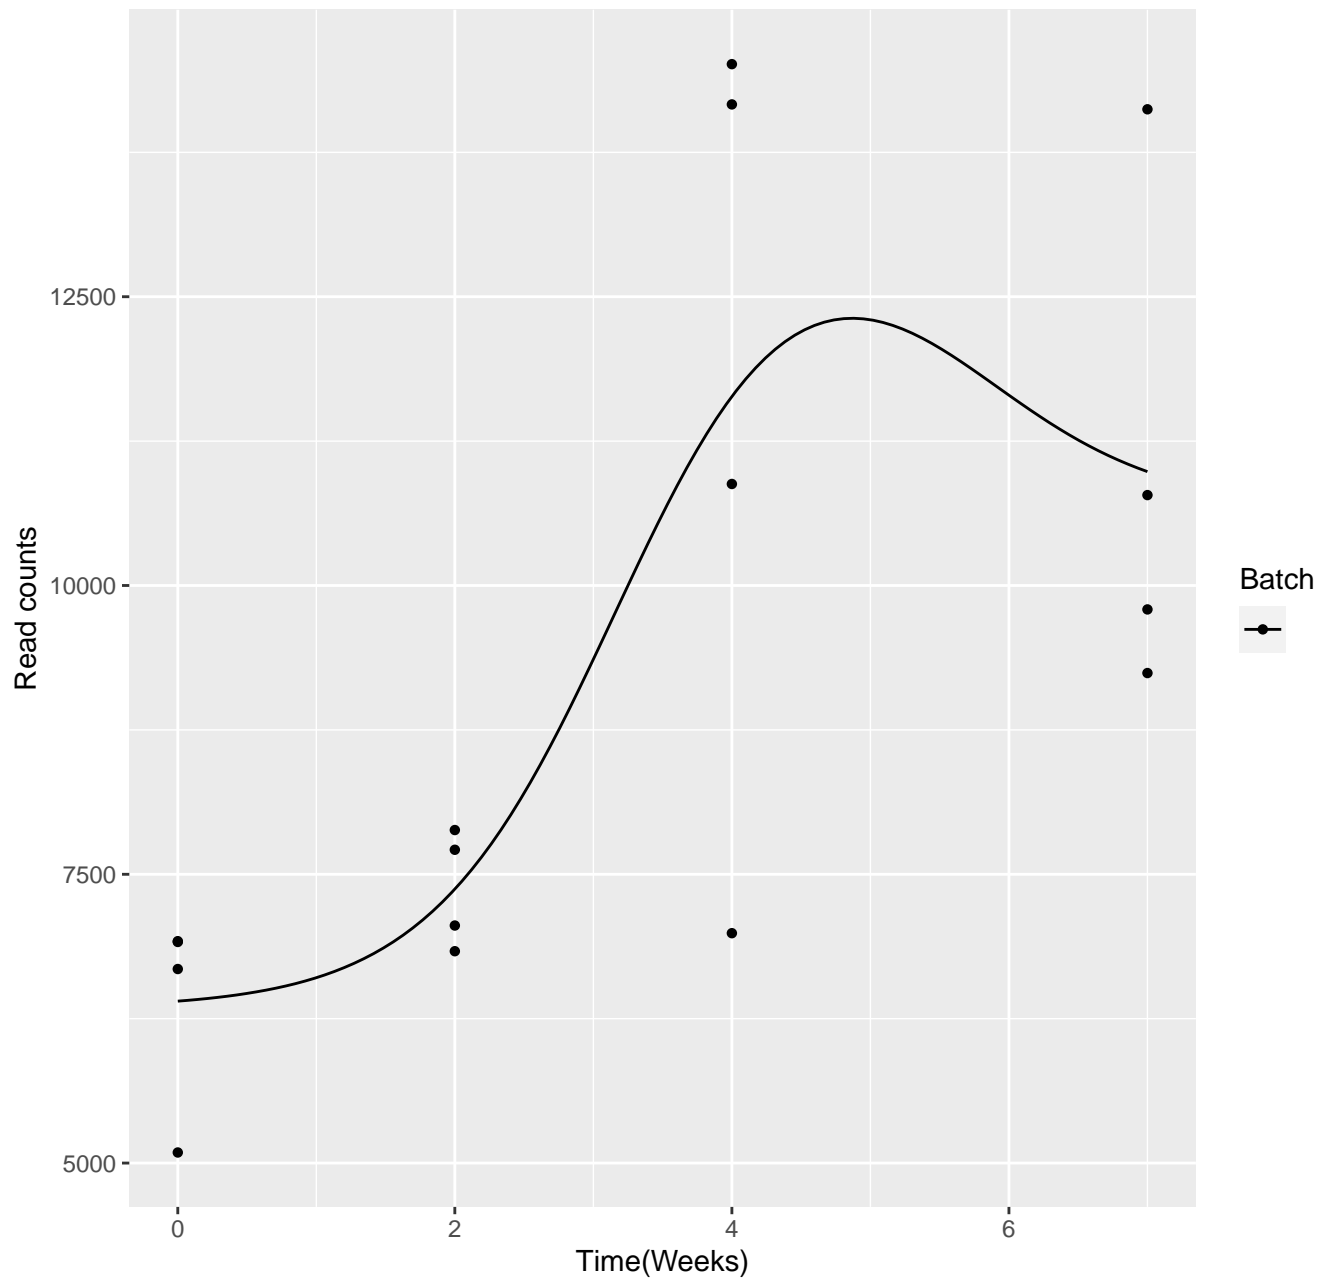

NFIL3:  $\log_{10} q = -2.39$

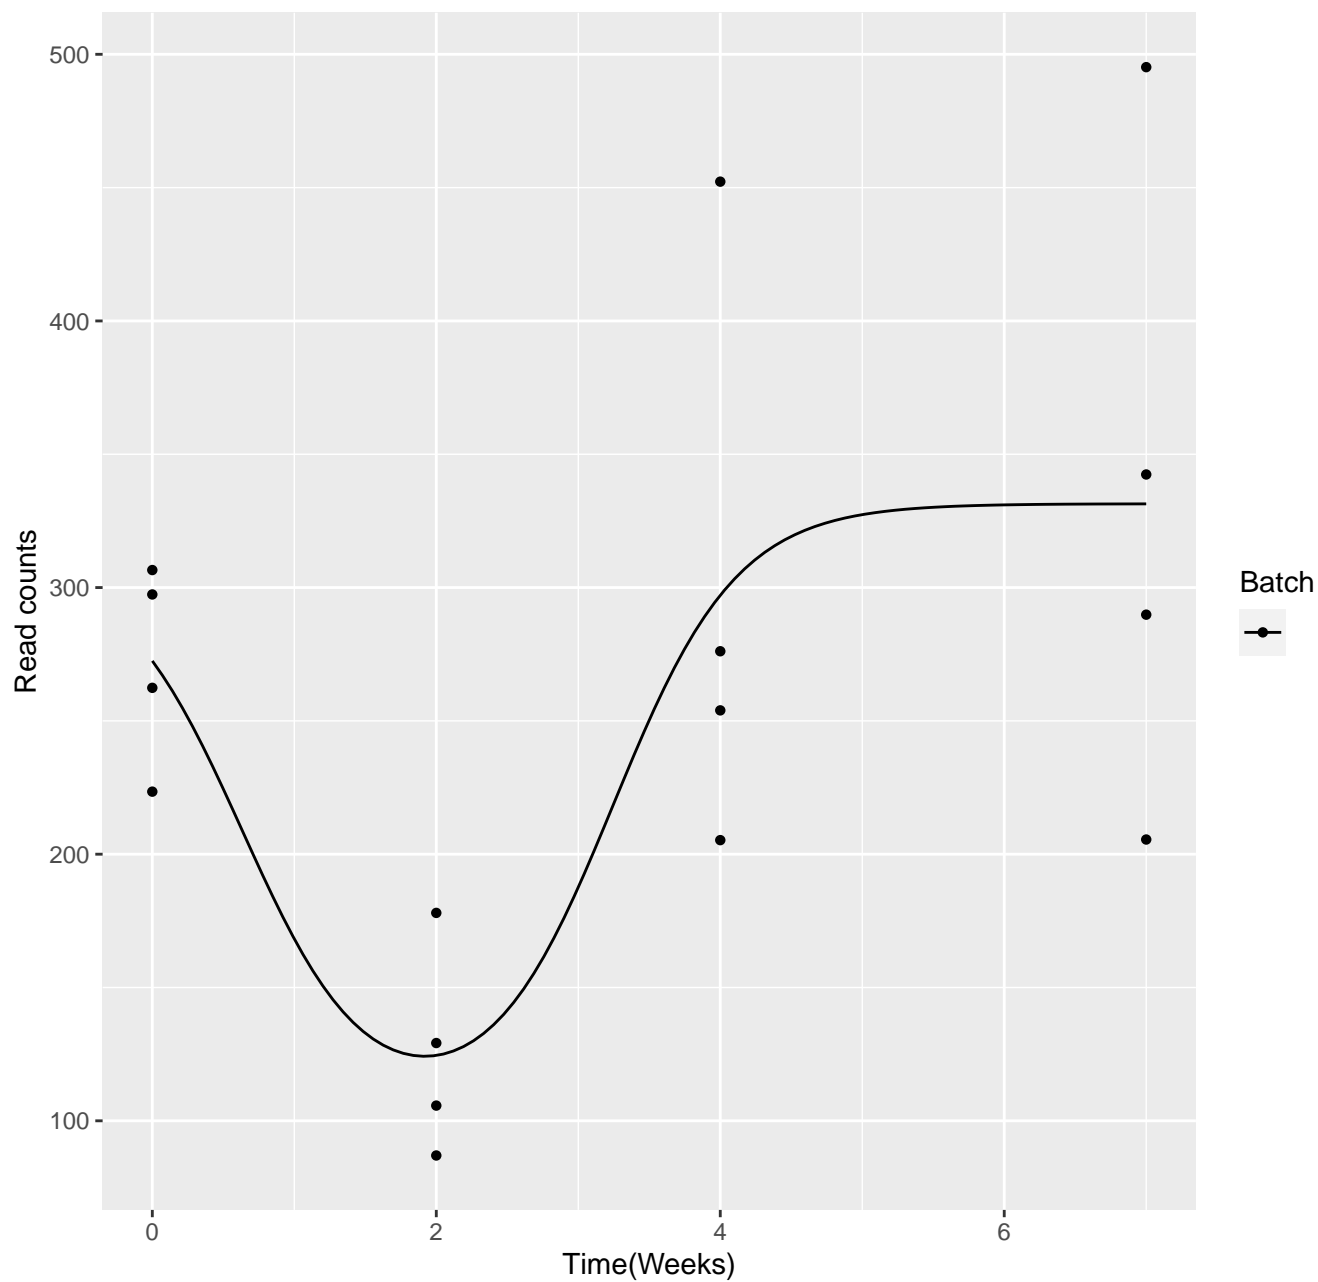

SLC16A5:  $\log_{10} q = -2.39$

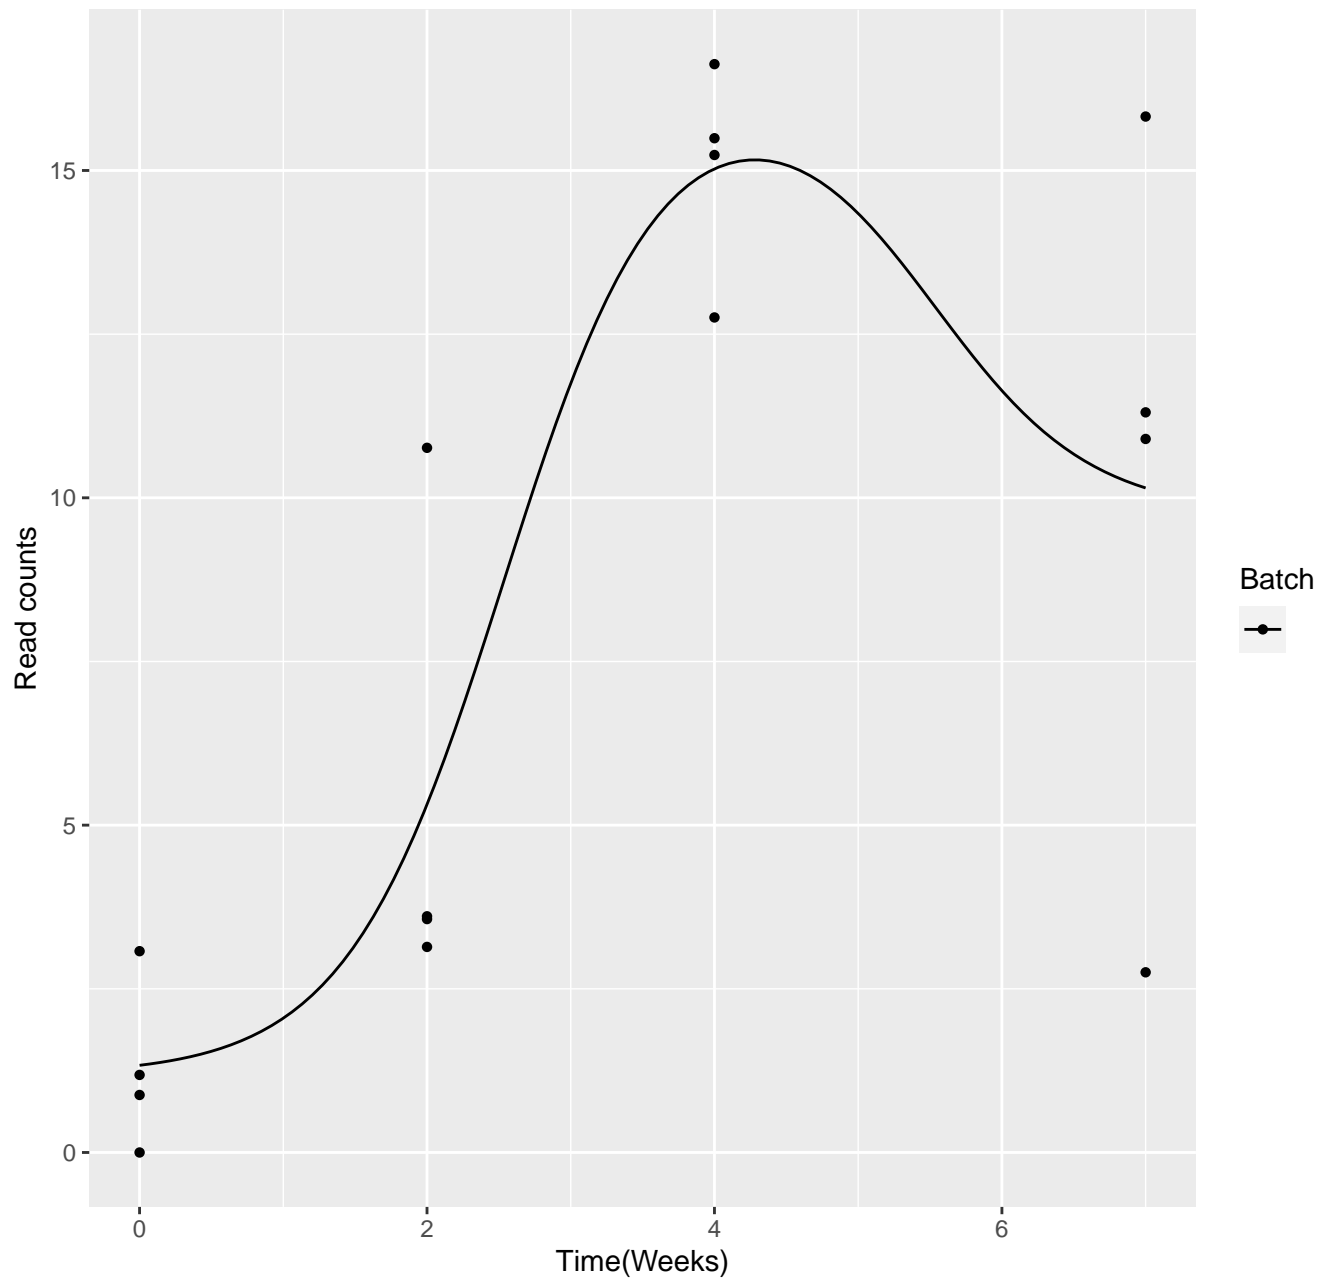



MYH8:  $\log_{10} q = -2.39$

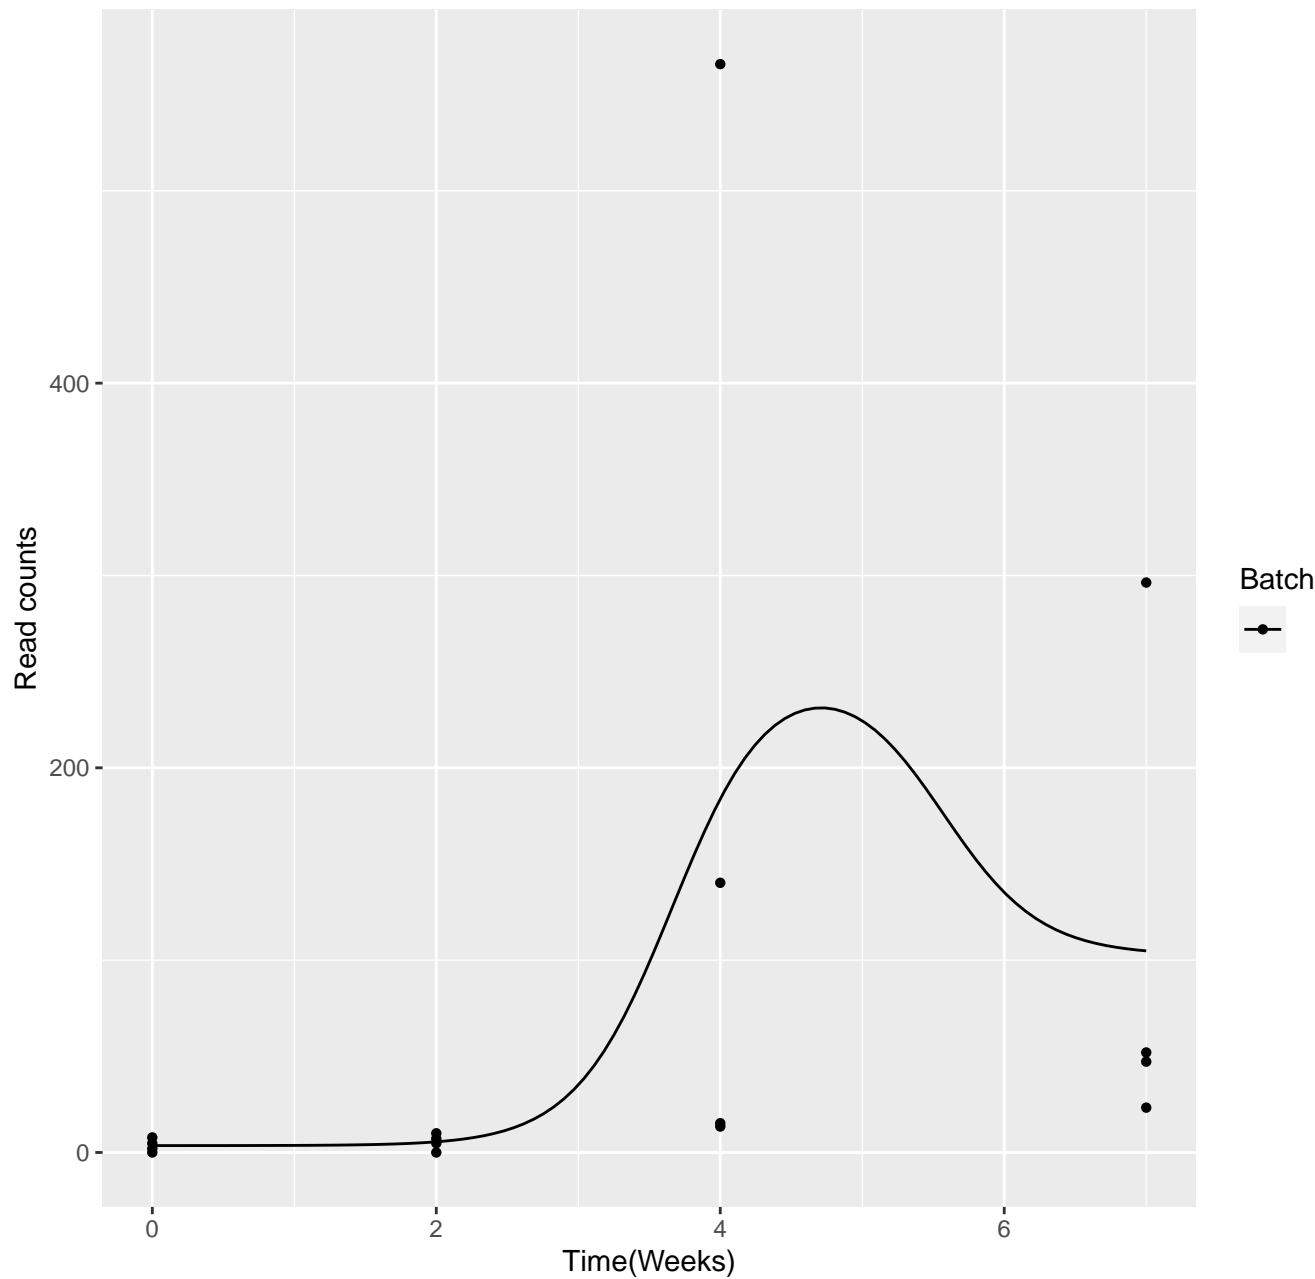

LMOD2:  $\log_{10} q = -2.38$

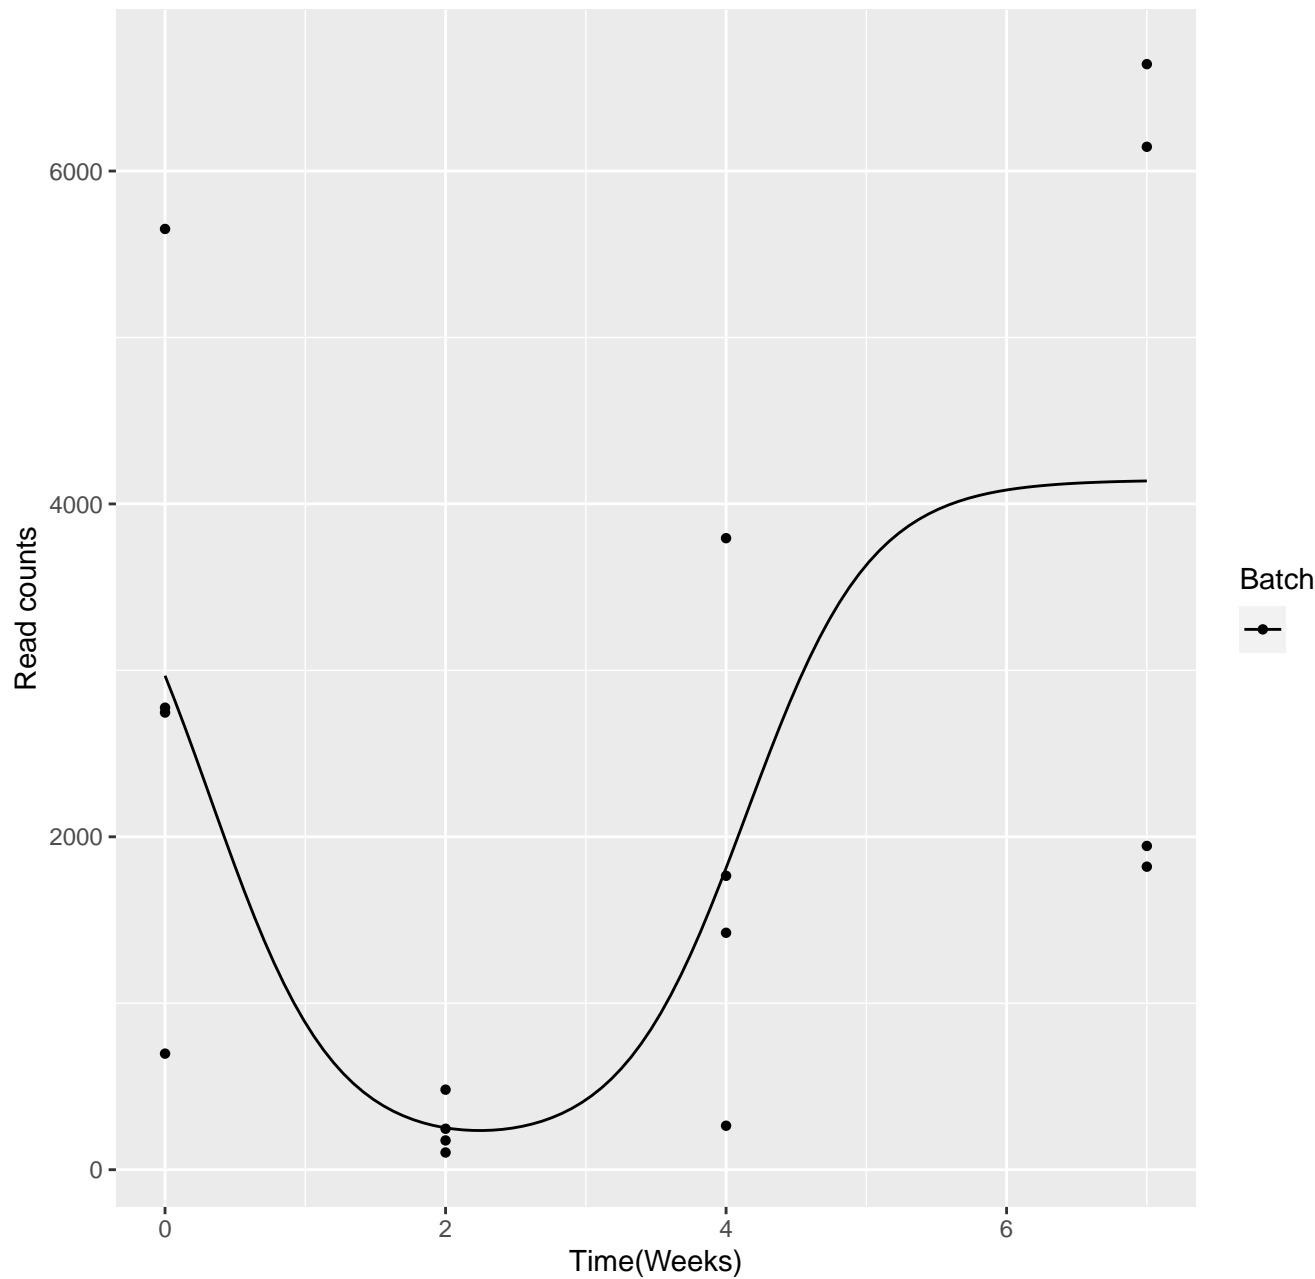

TPM2:  $\log_{10} q = -2.38$

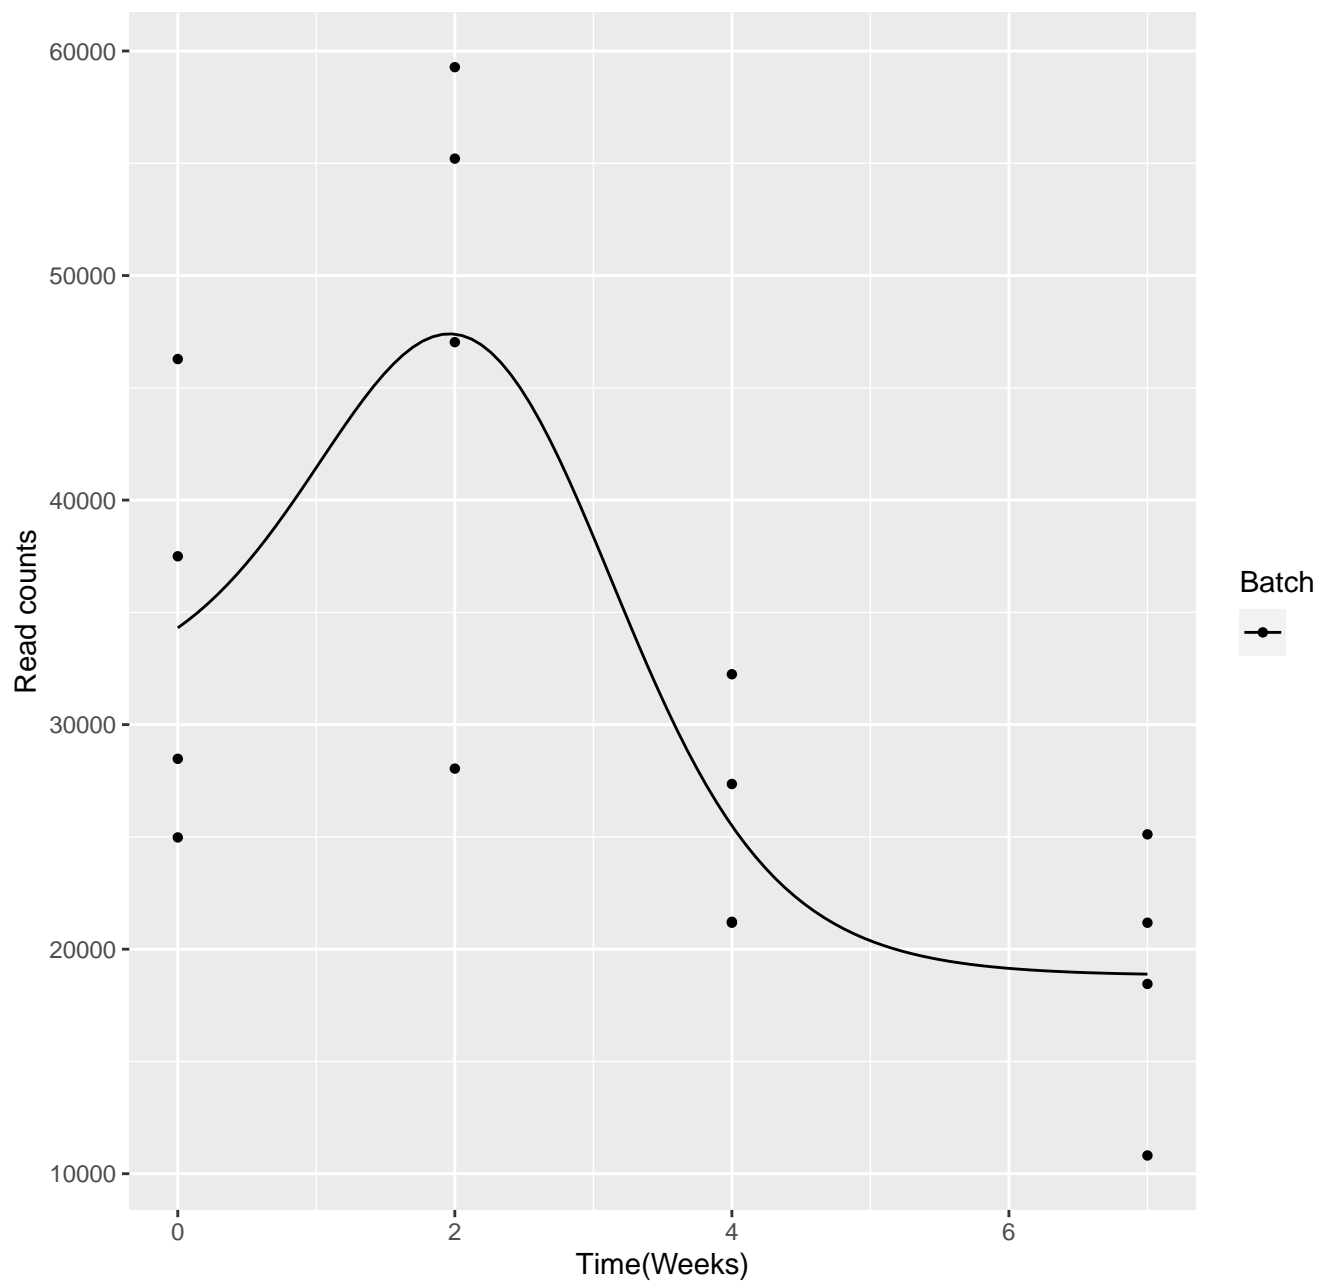

NAGA:  $\log_{10} q = -2.38$

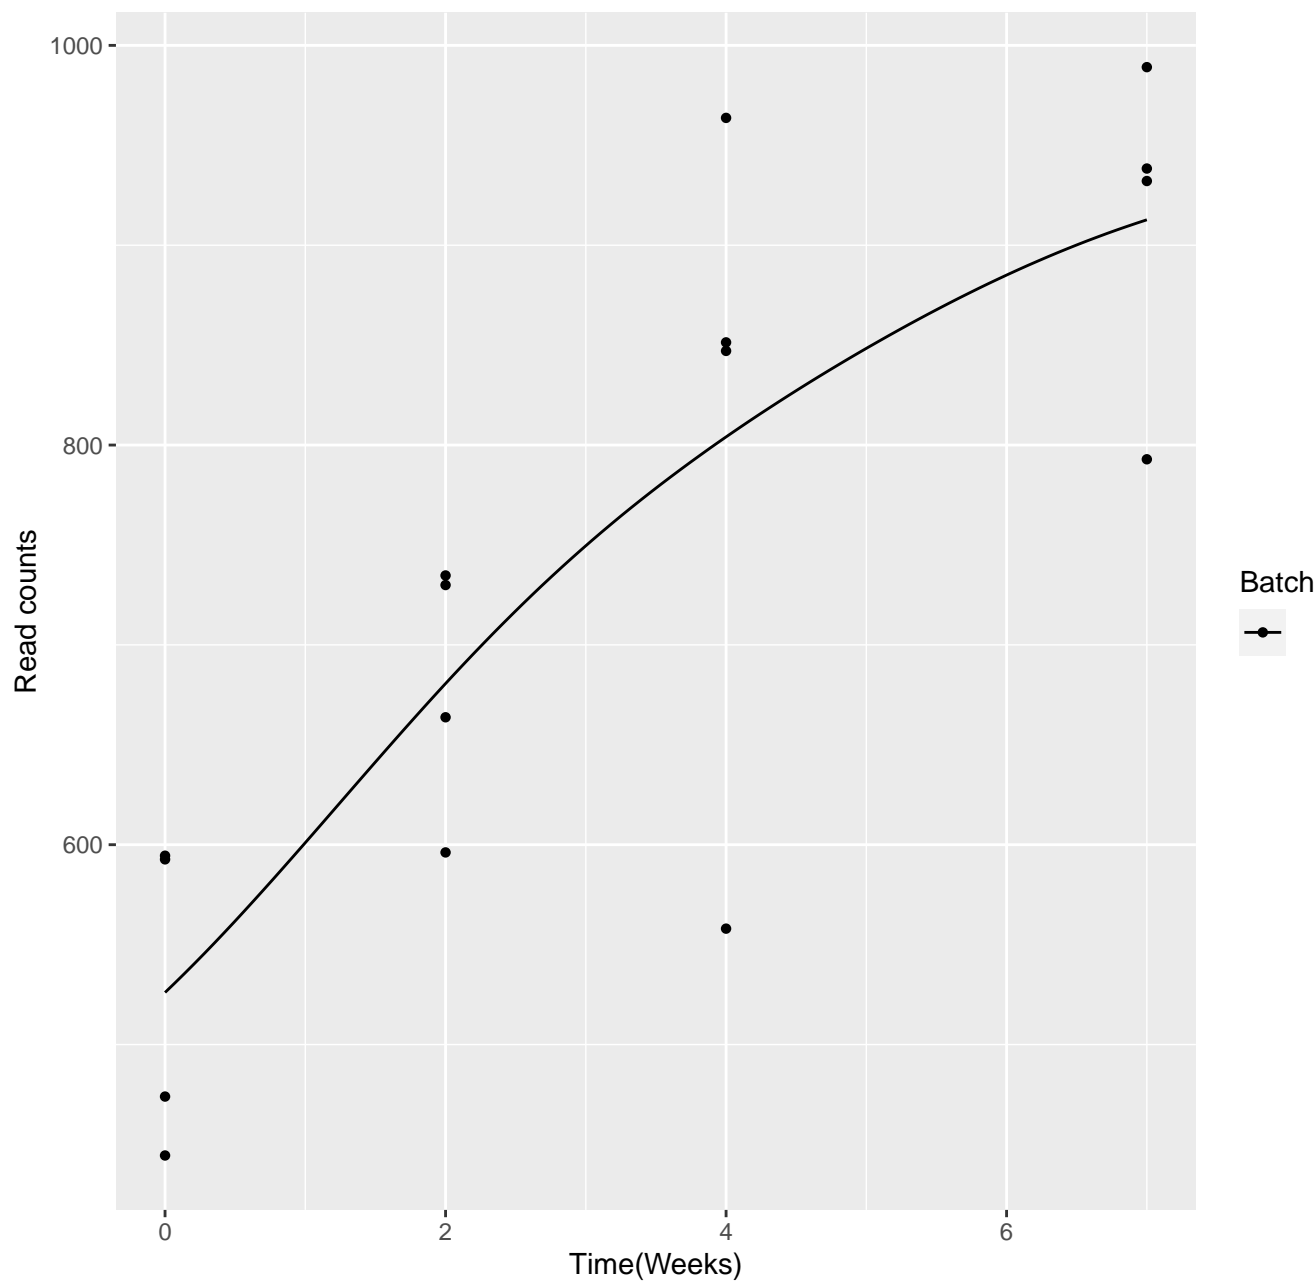

KMT5A:  $\log_{10} q = -2.38$

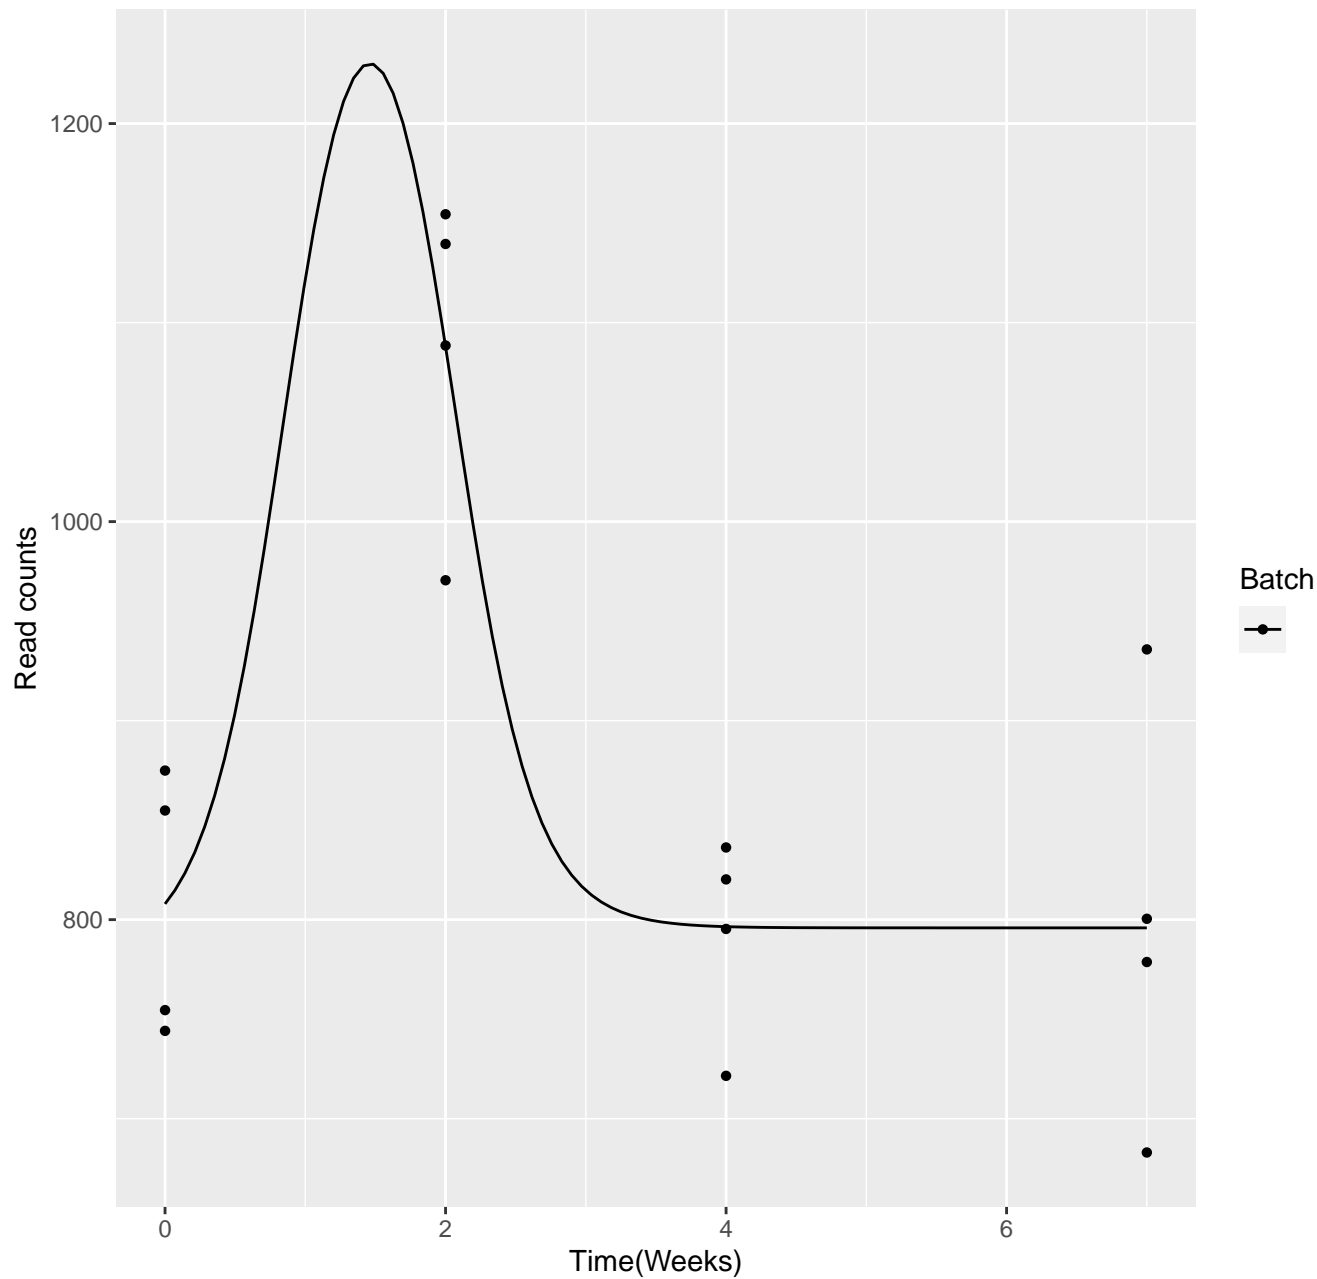

RAB11FIP3:  $\log_{10} q = -2.38$

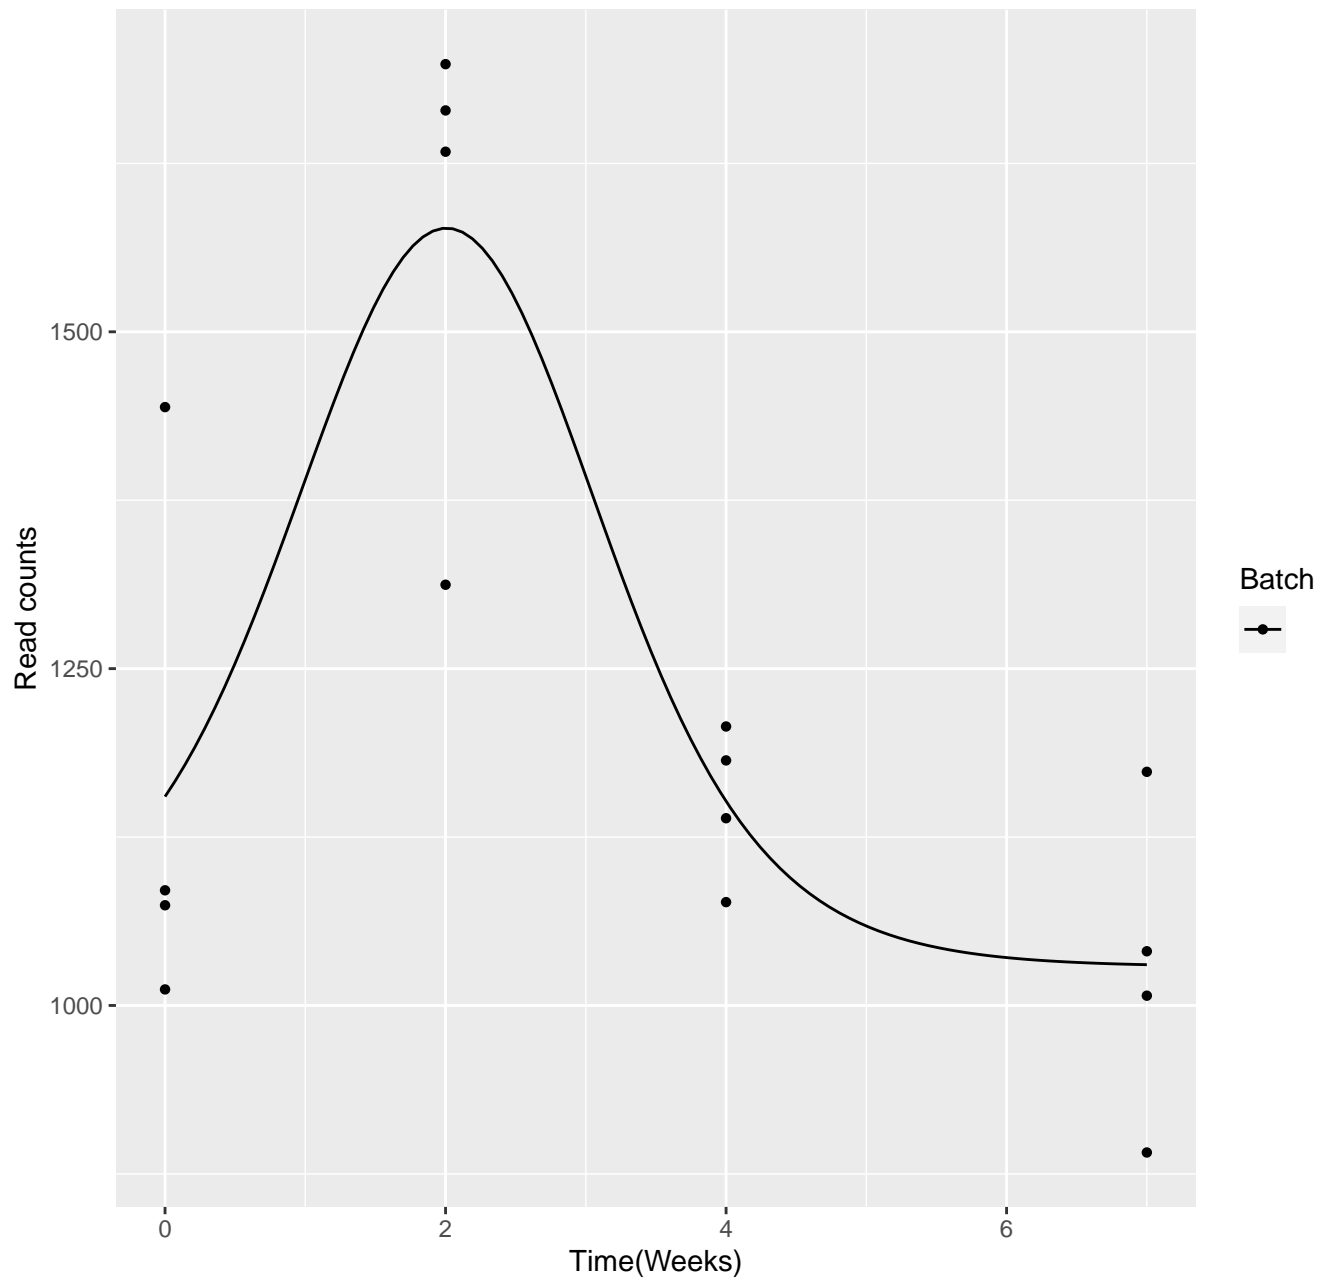

UBE2C:  $\log_{10} q = -2.38$

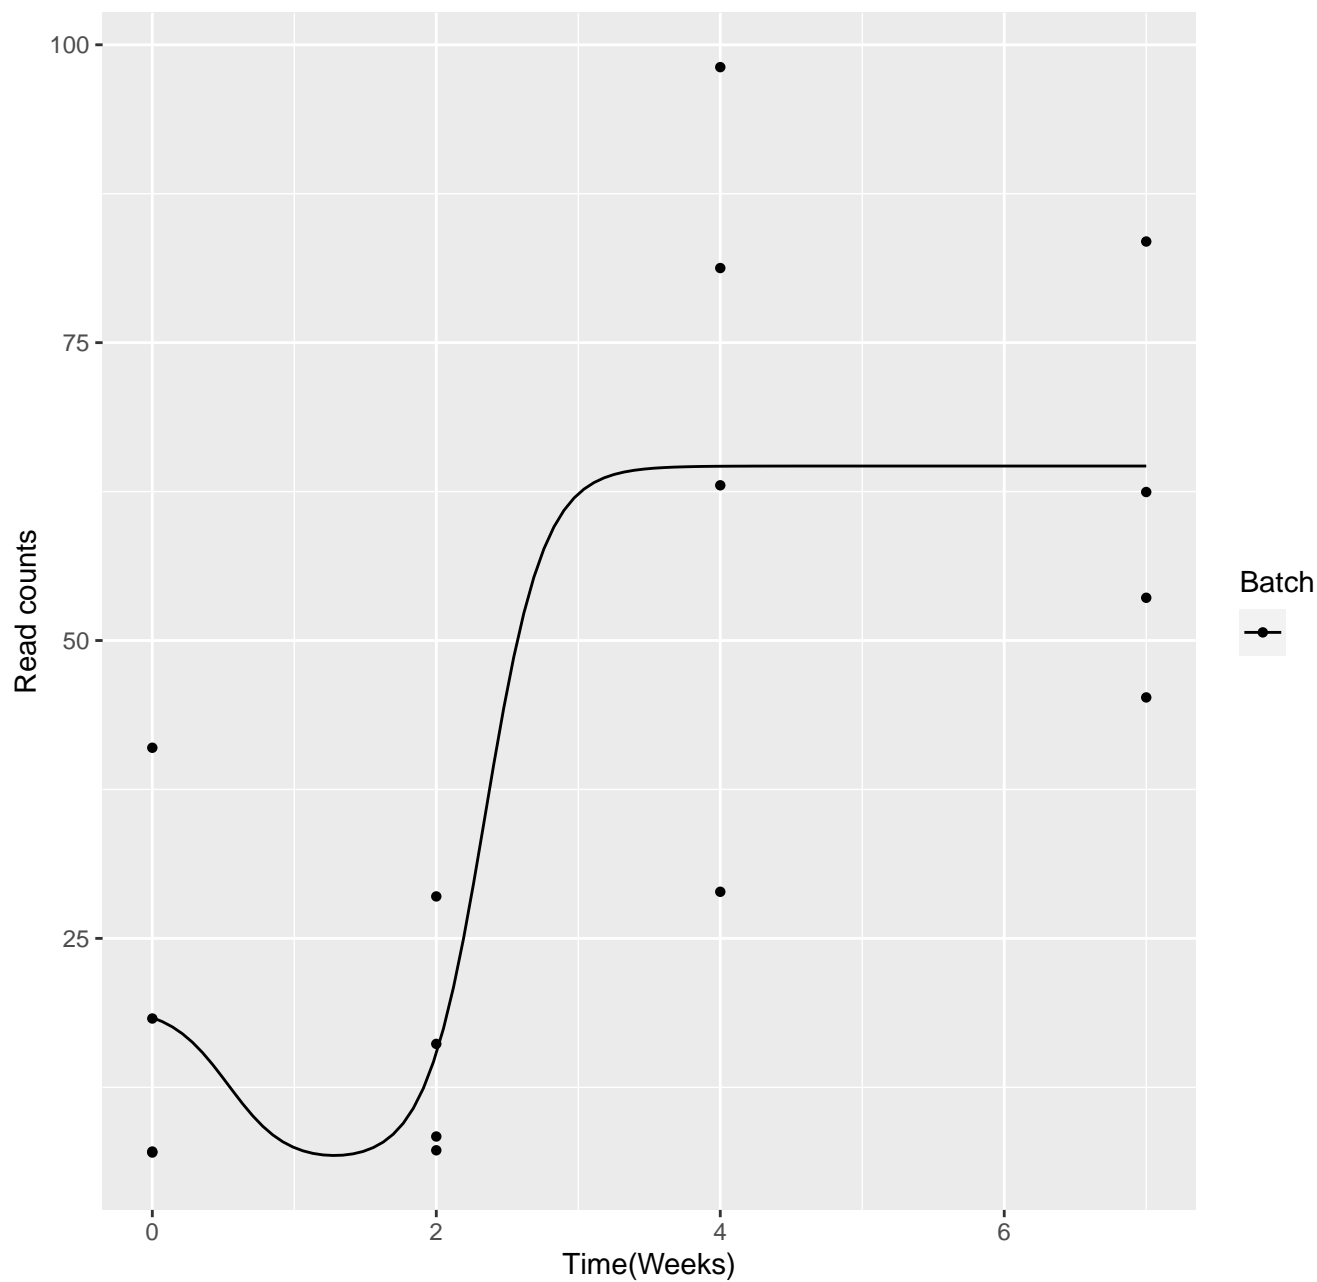

IRAG2:  $\log_{10} q = -2.38$

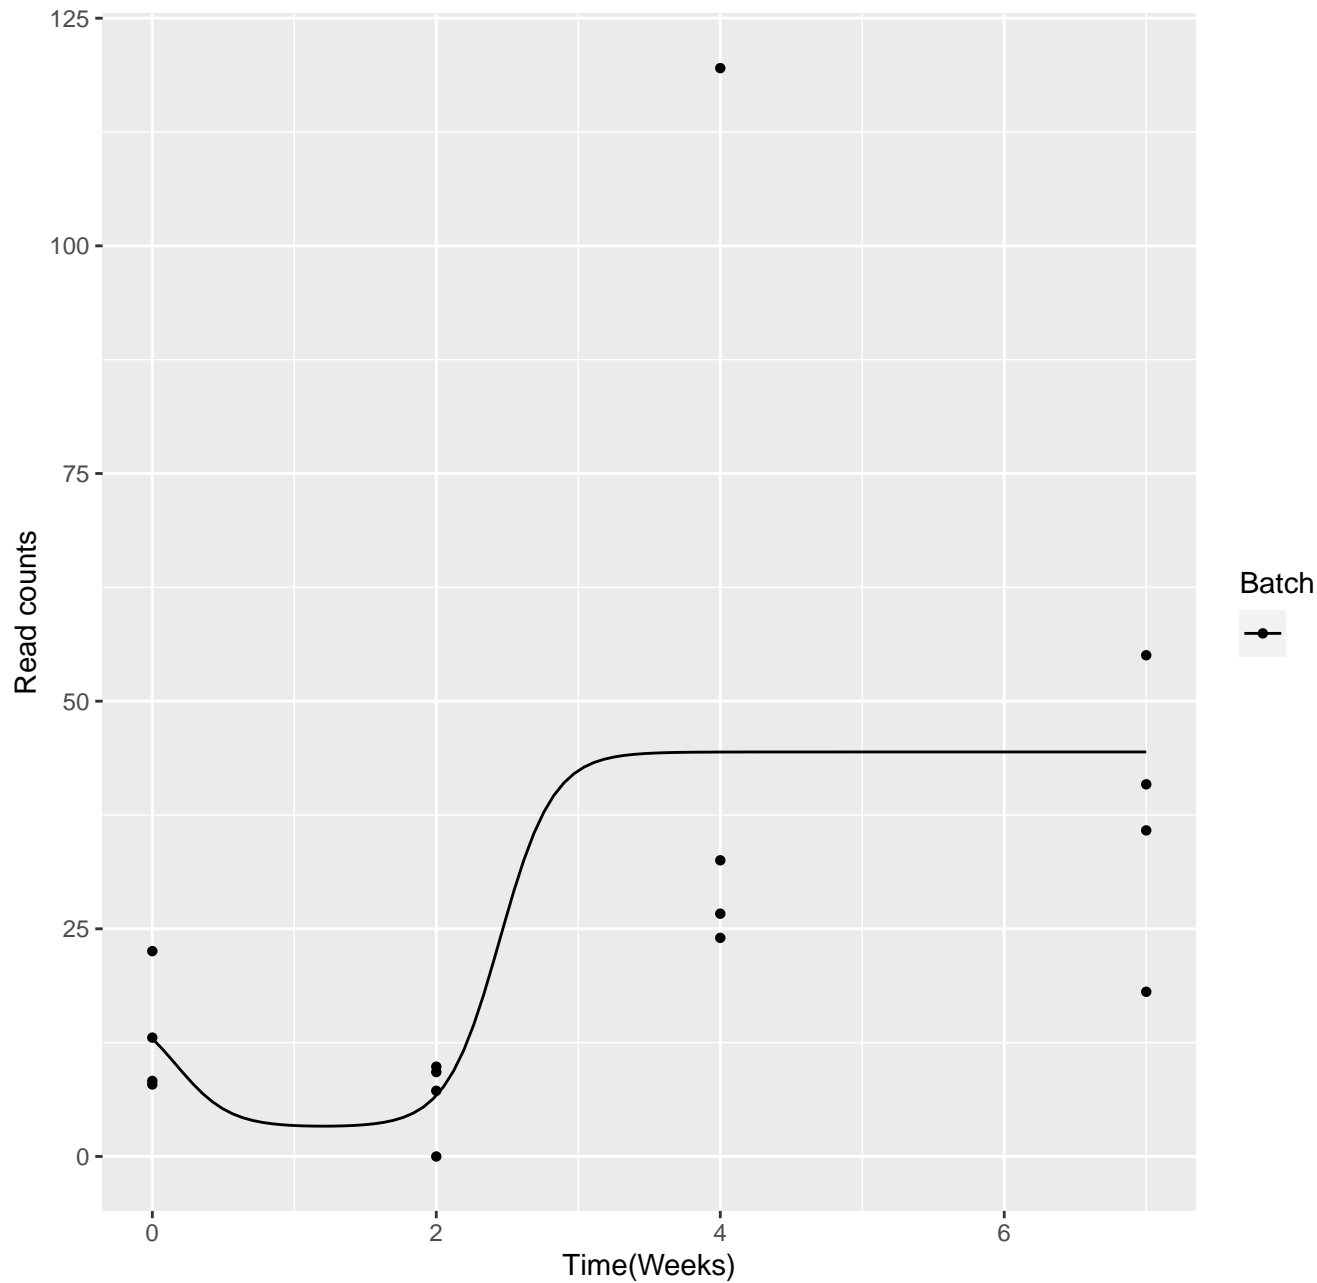



MYL3:  $\log_{10} q = -2.38$

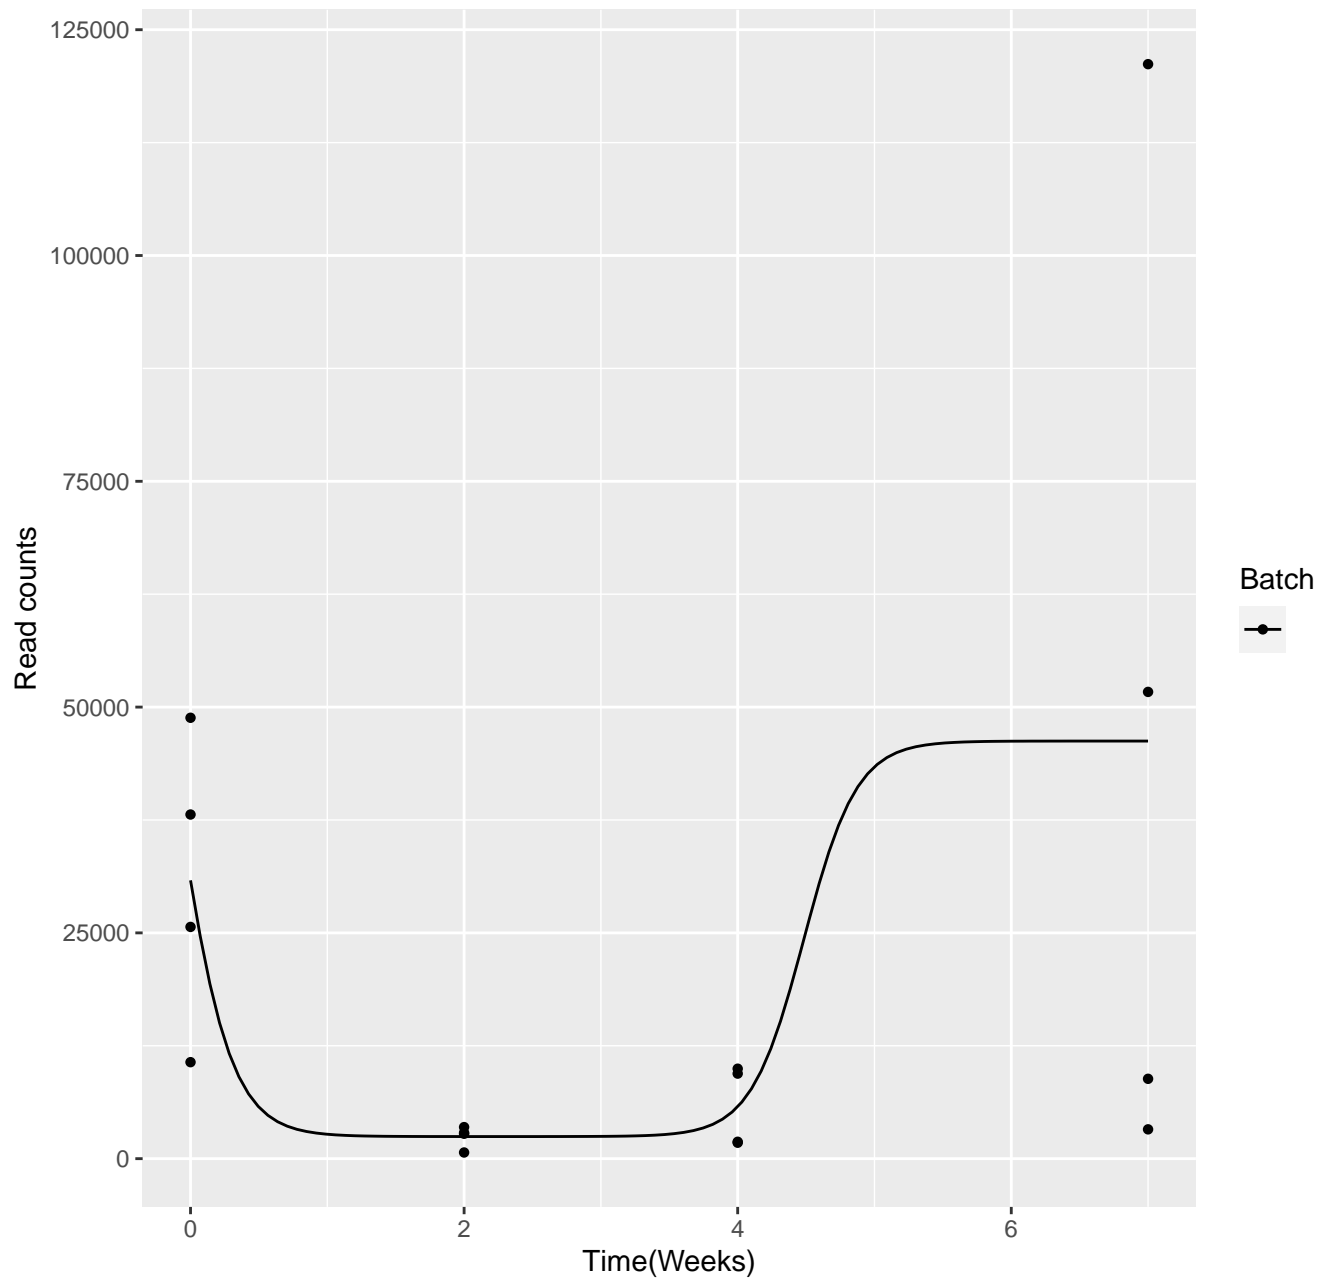

PKN3:  $\log_{10} q = -2.38$

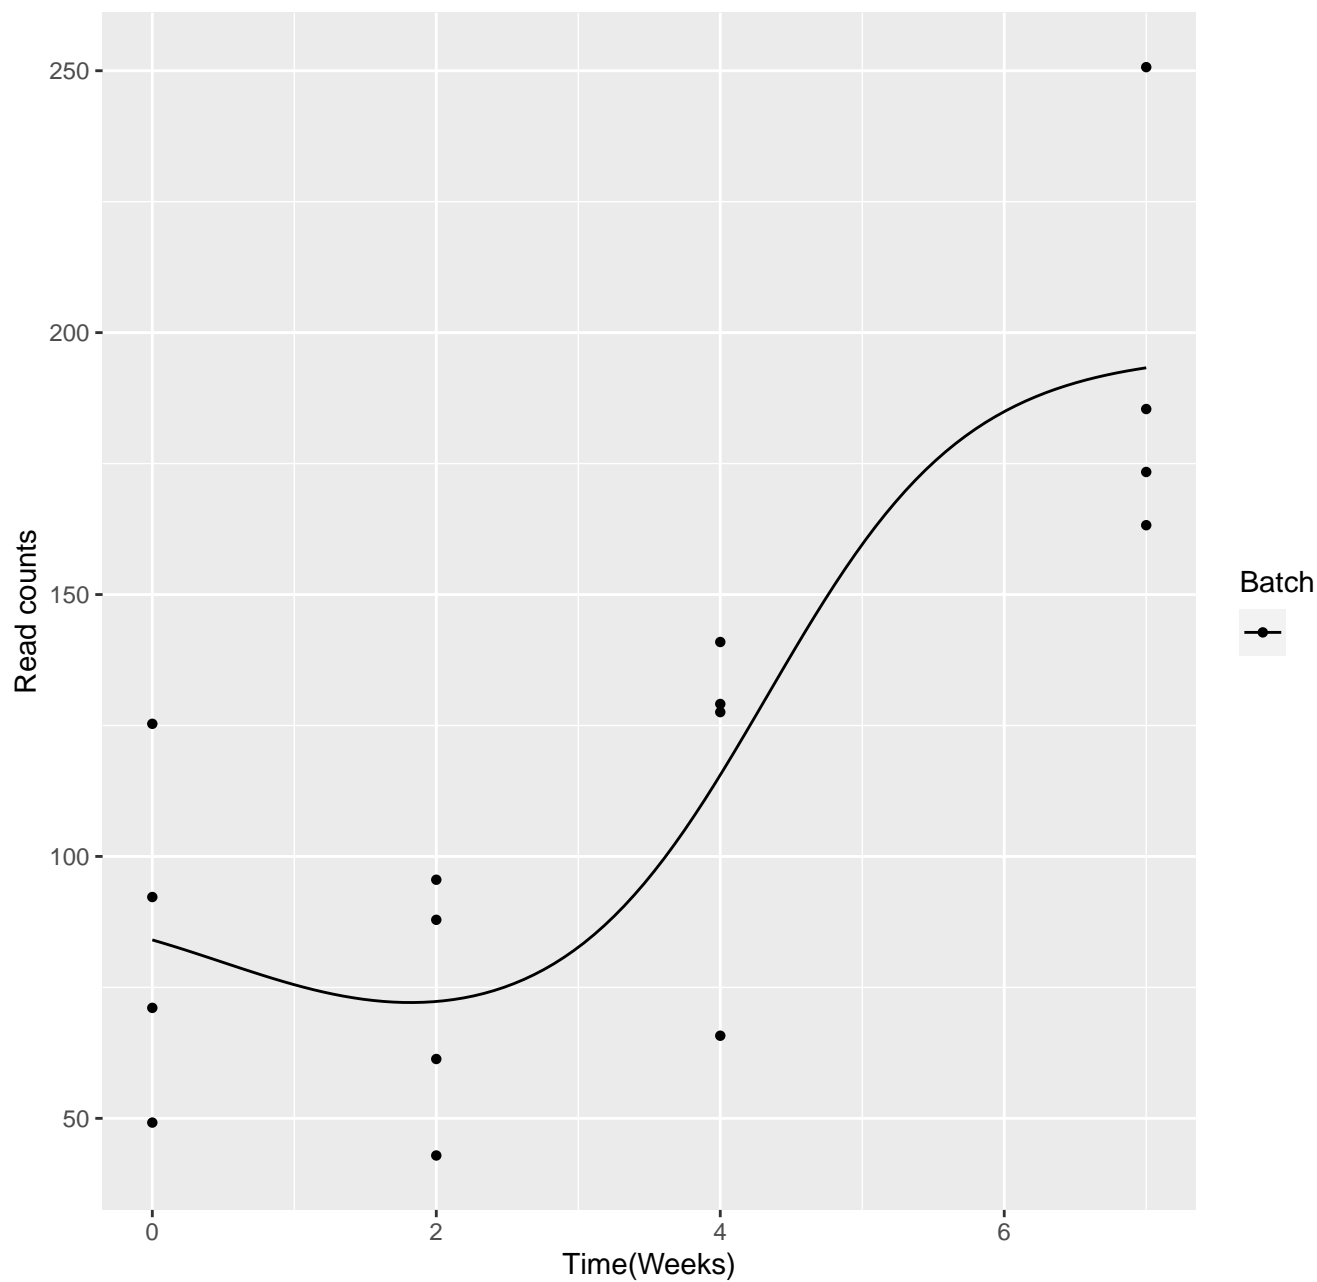

SIPA1L3:  $\log_{10} q = -2.37$

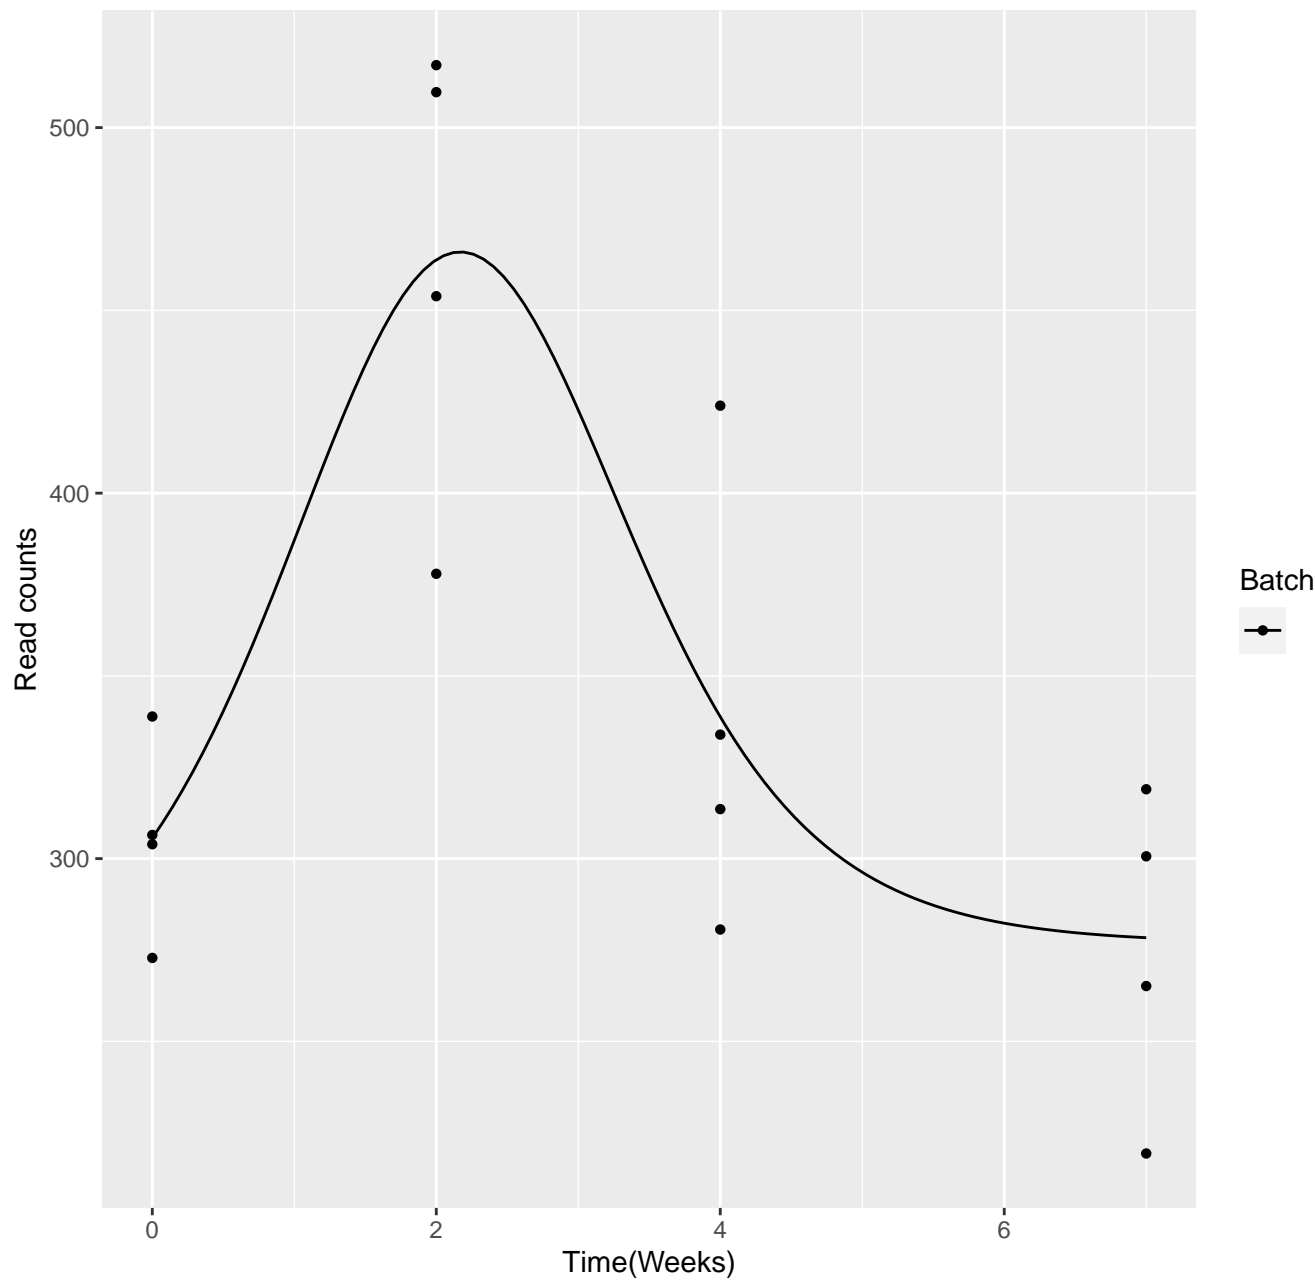

MMP12:  $\log_{10} q = -2.37$

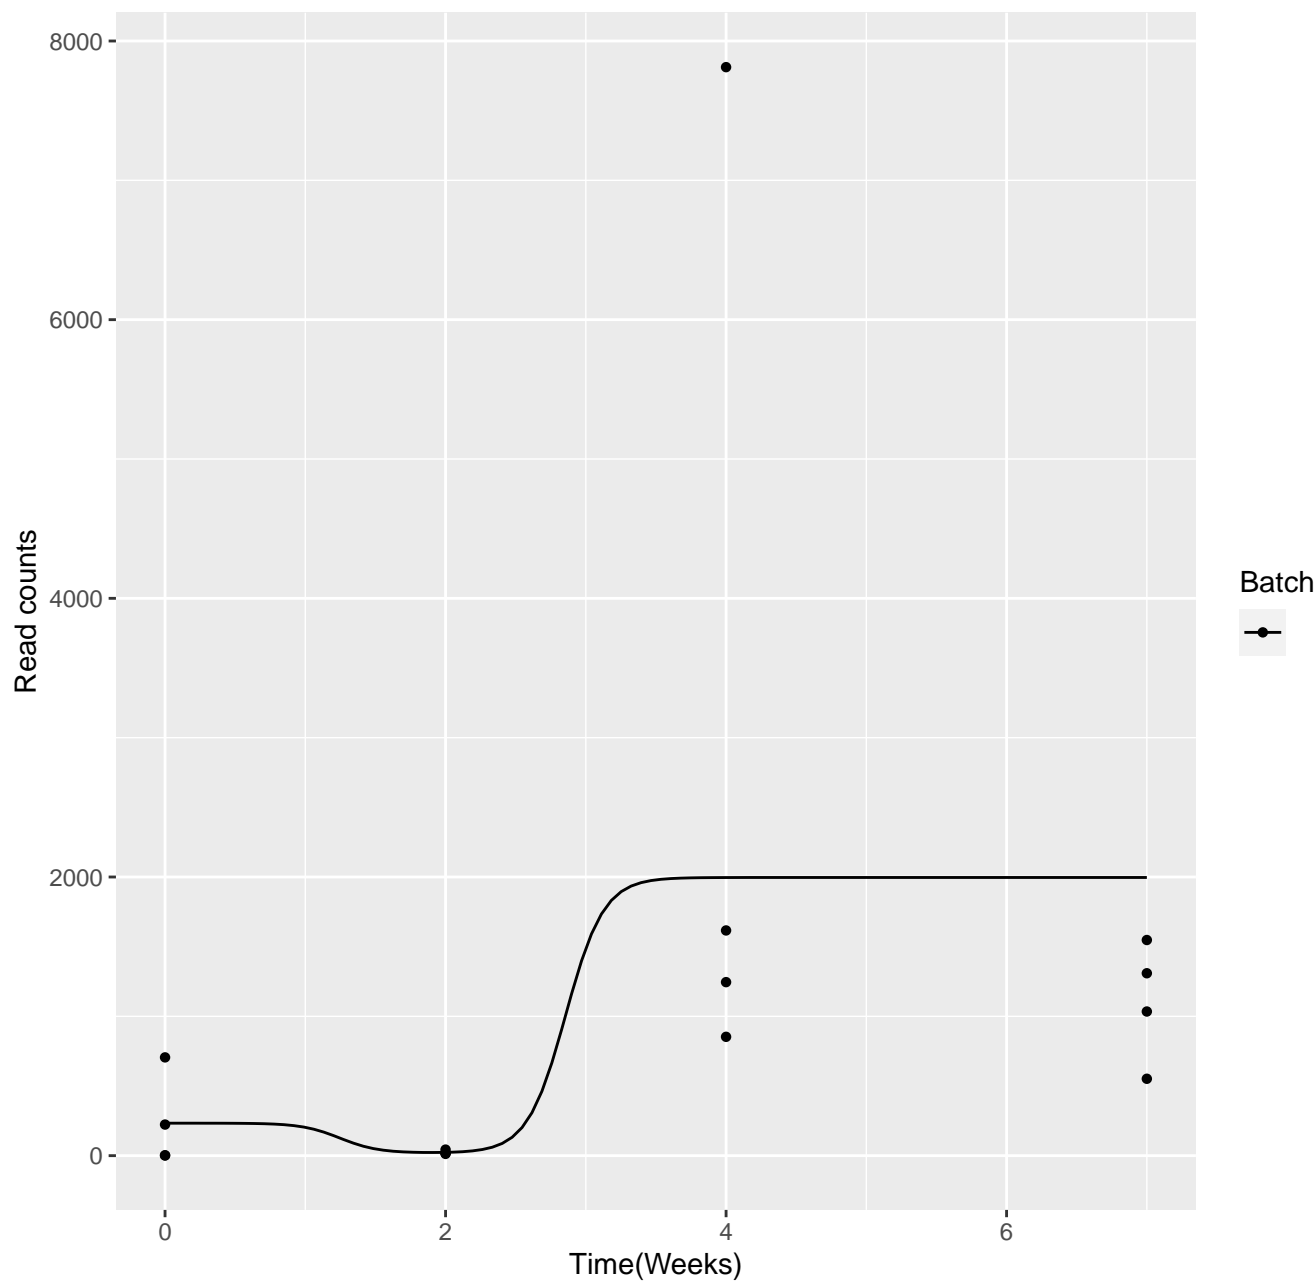

SFXN3:  $\log_{10} q = -2.37$

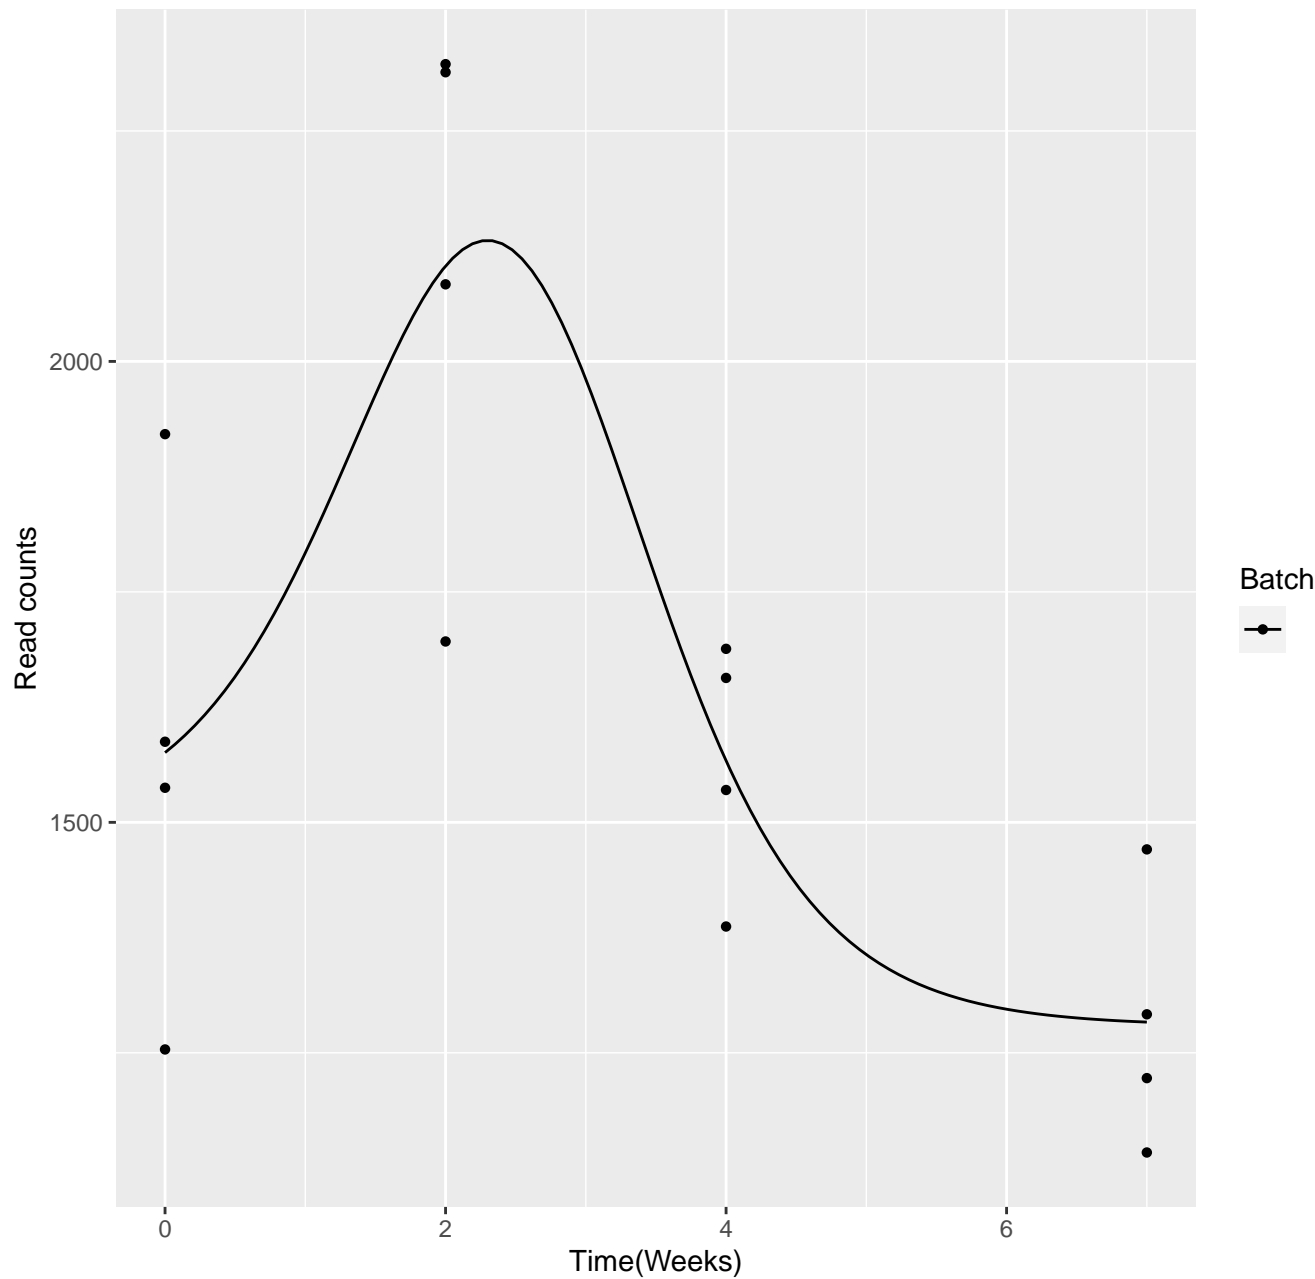

SH3D21:  $\log_{10} q = -2.37$

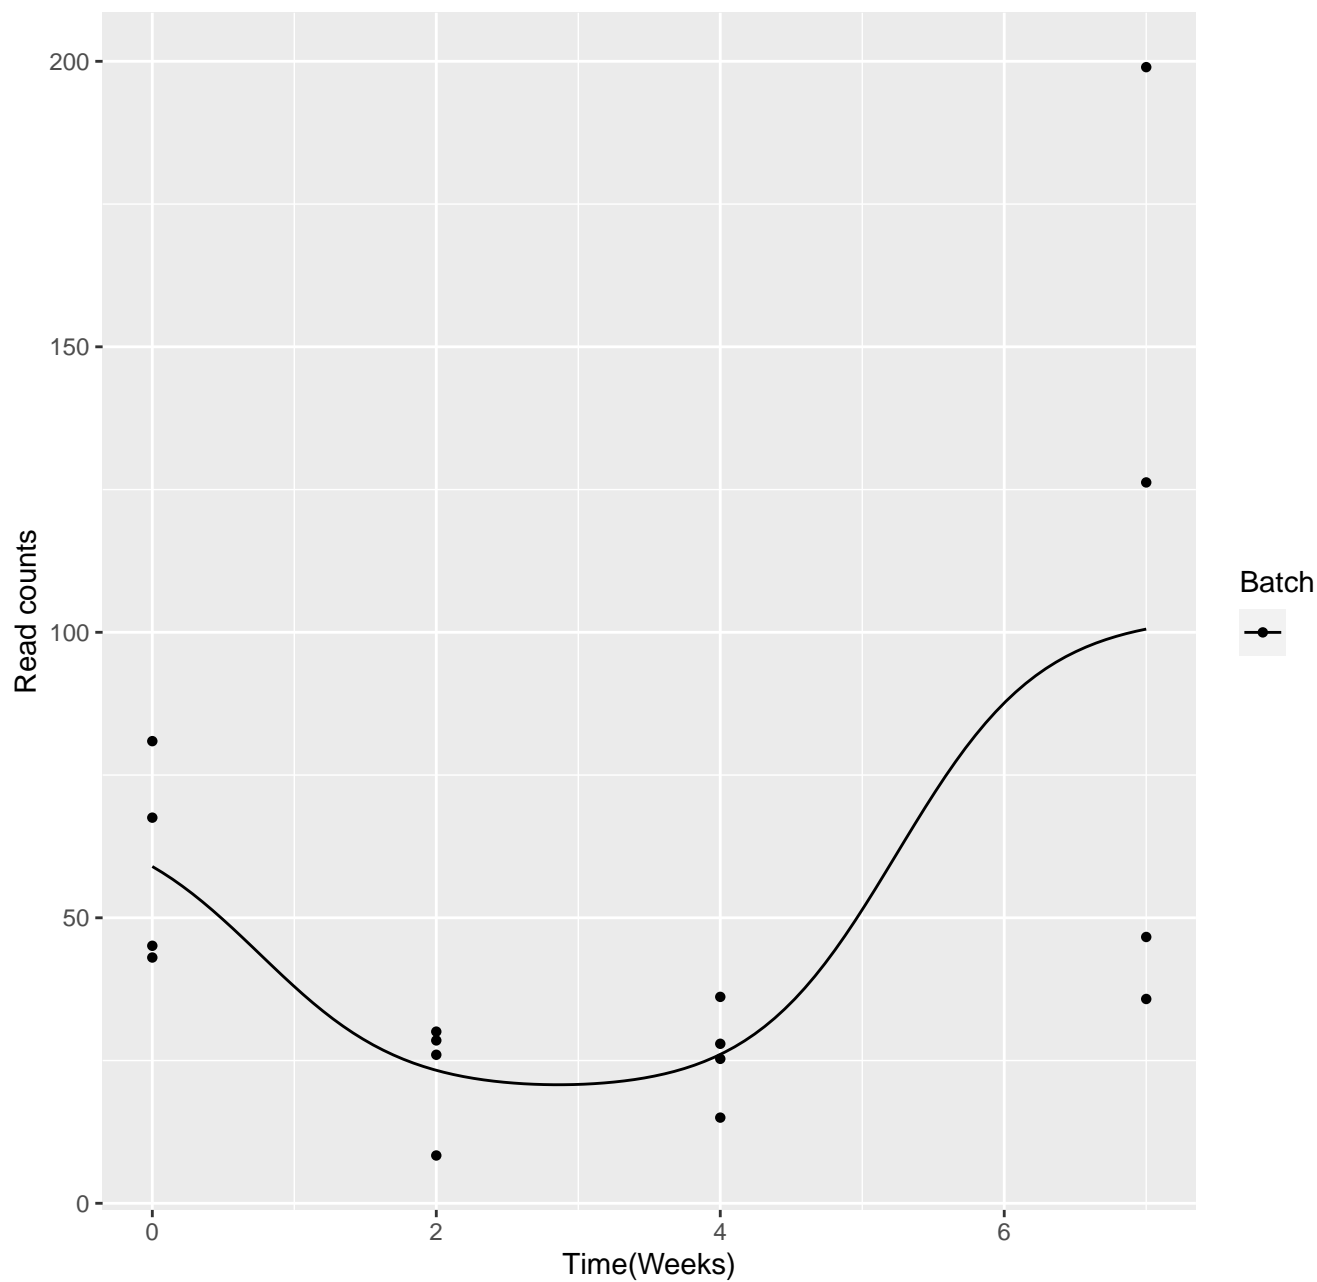

KLF7:  $\log_{10} q = -2.37$

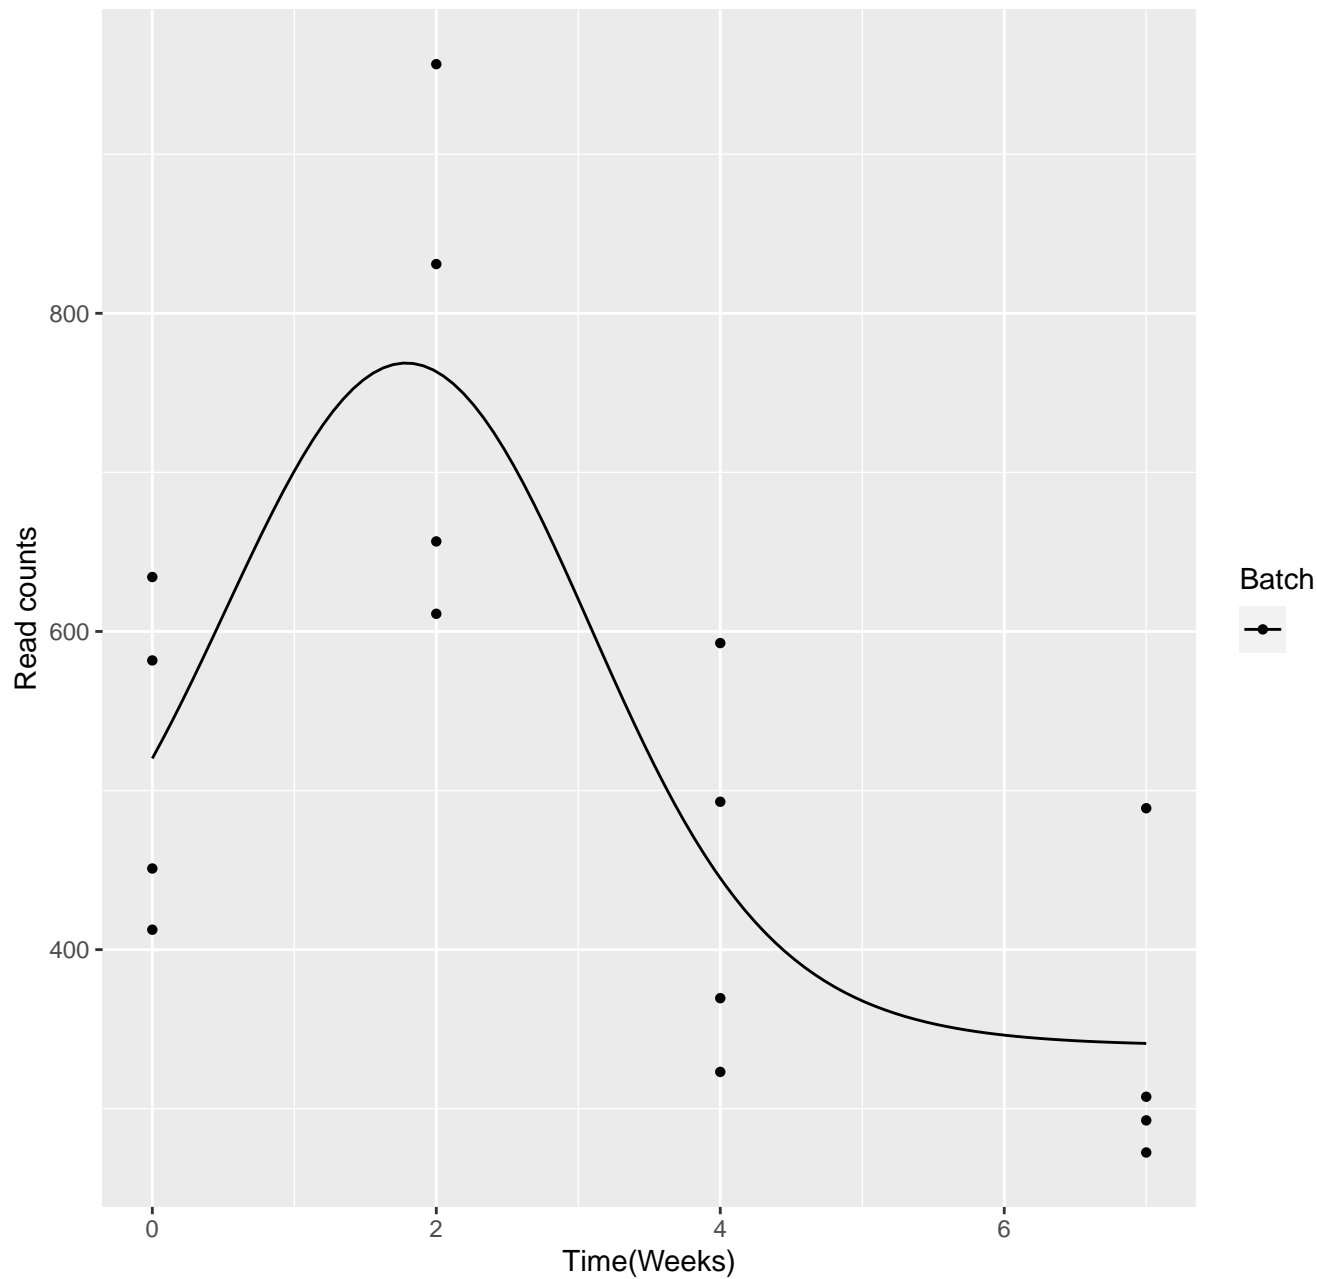

KYNU:  $\log_{10} q = -2.37$

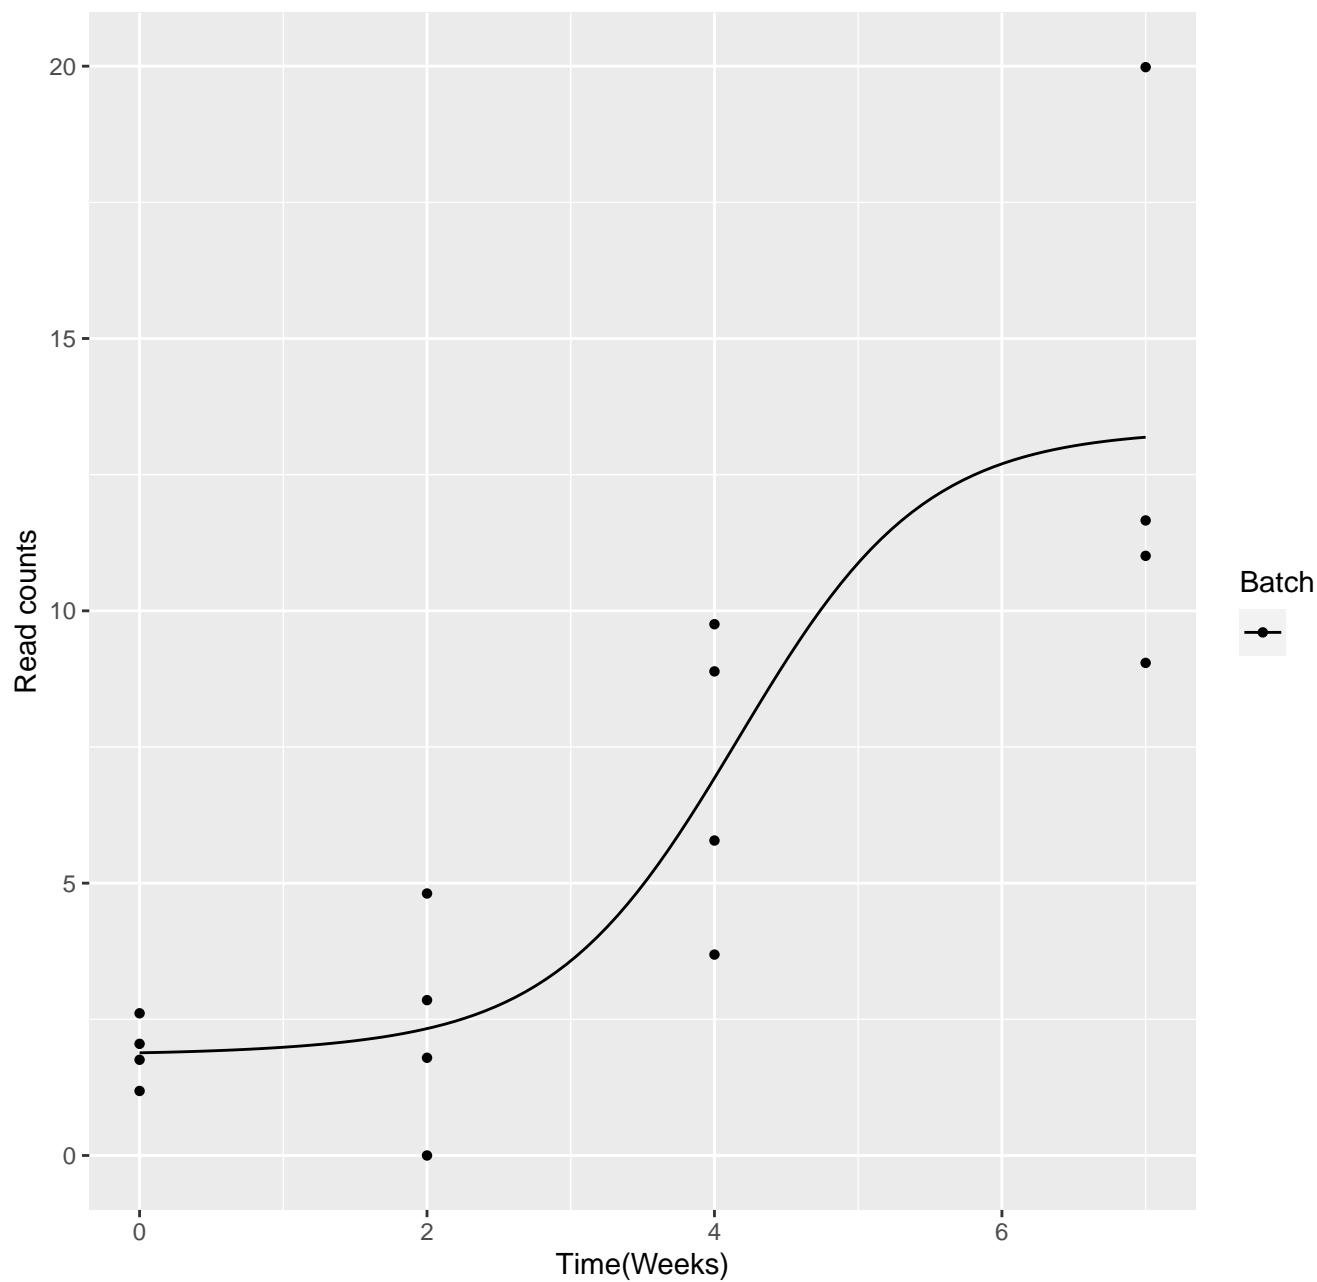



ADAMTS4:  $\log_{10} q = -2.37$

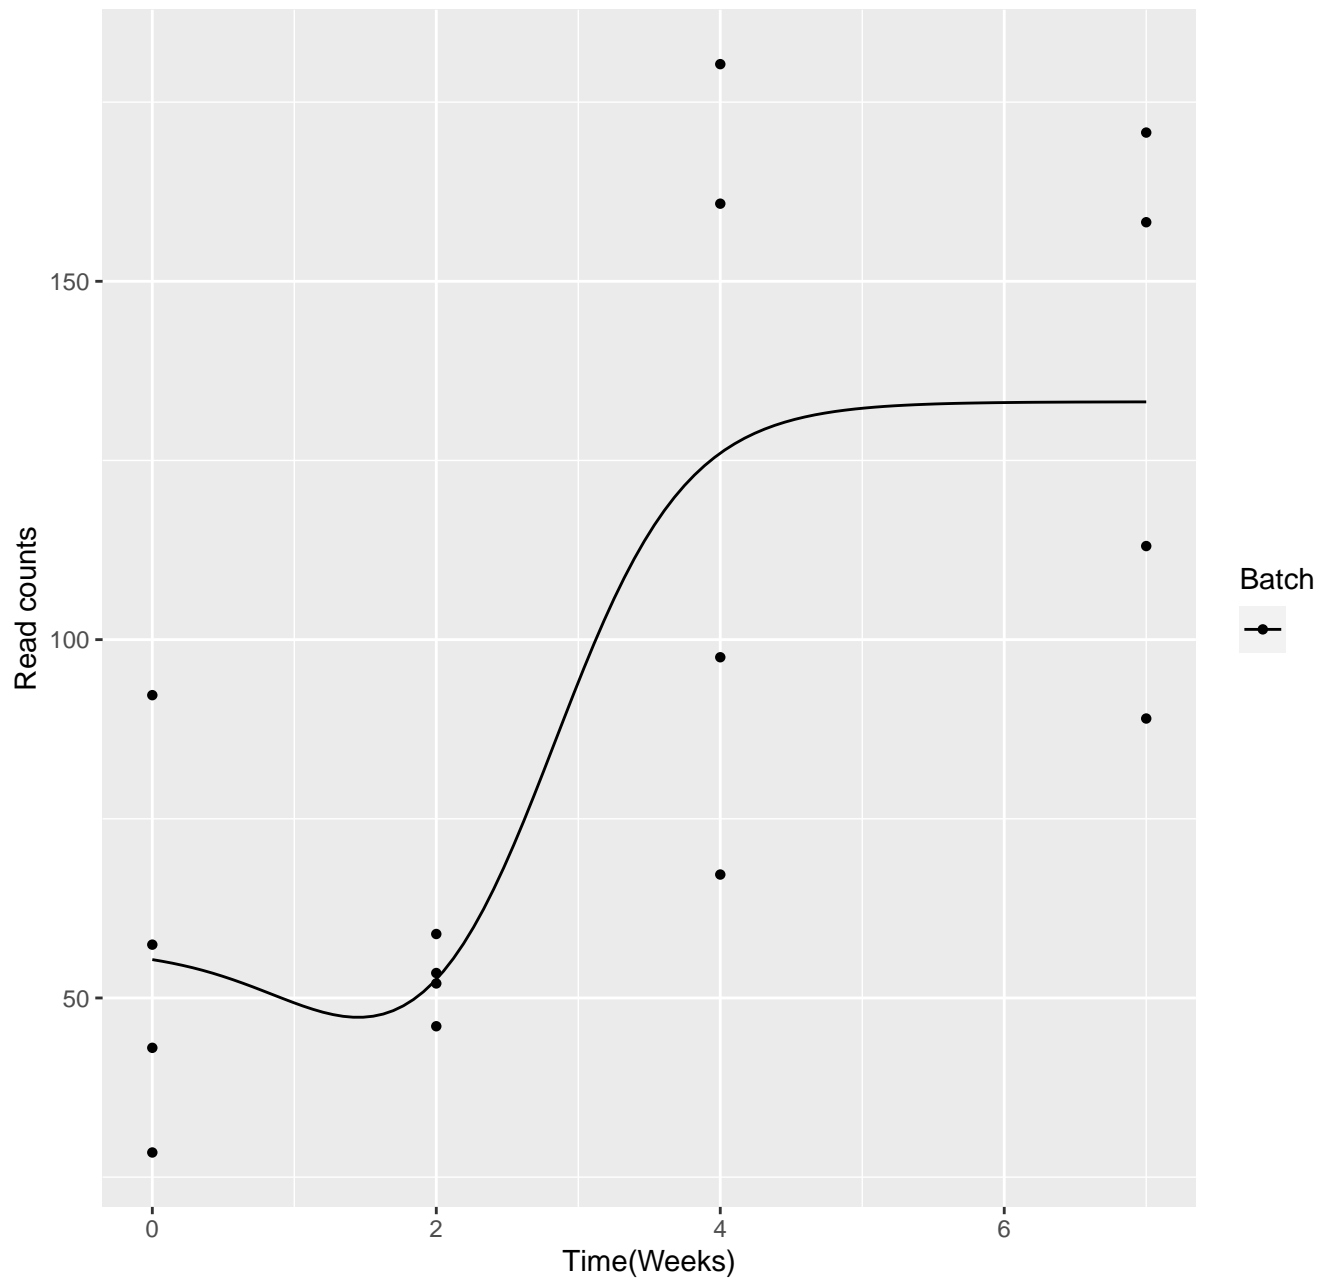

FUNDC1:  $\log_{10} q = -2.37$

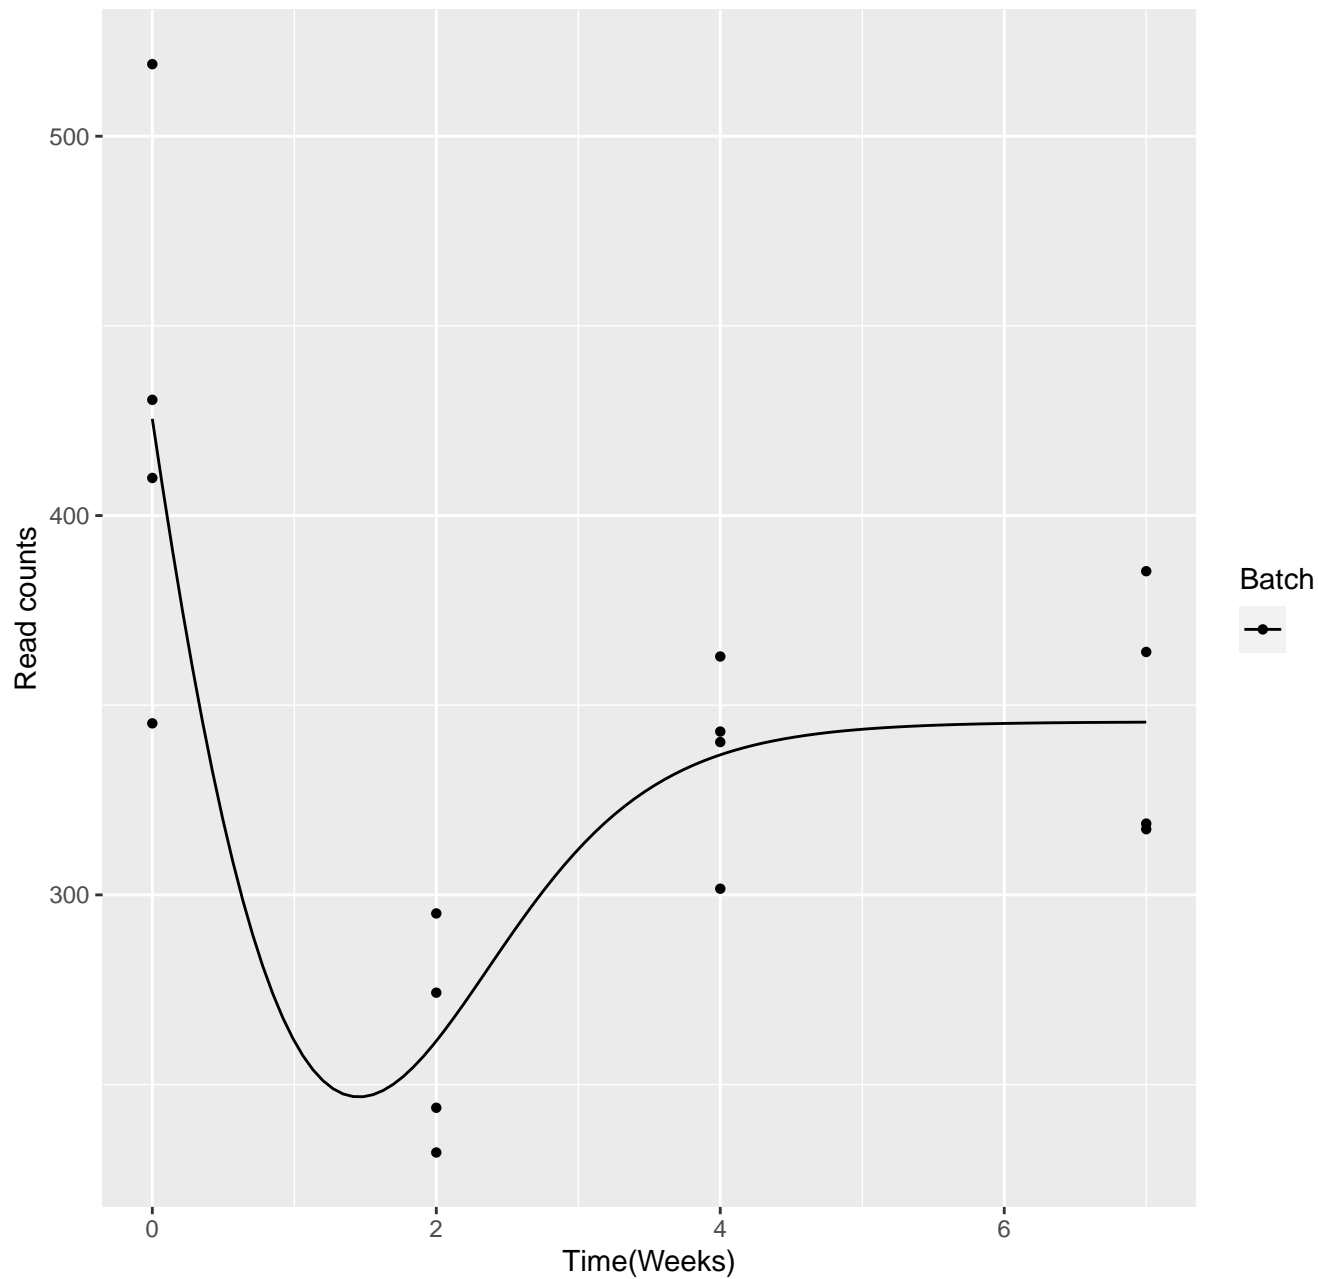

TTL:  $\log_{10} q = -2.37$

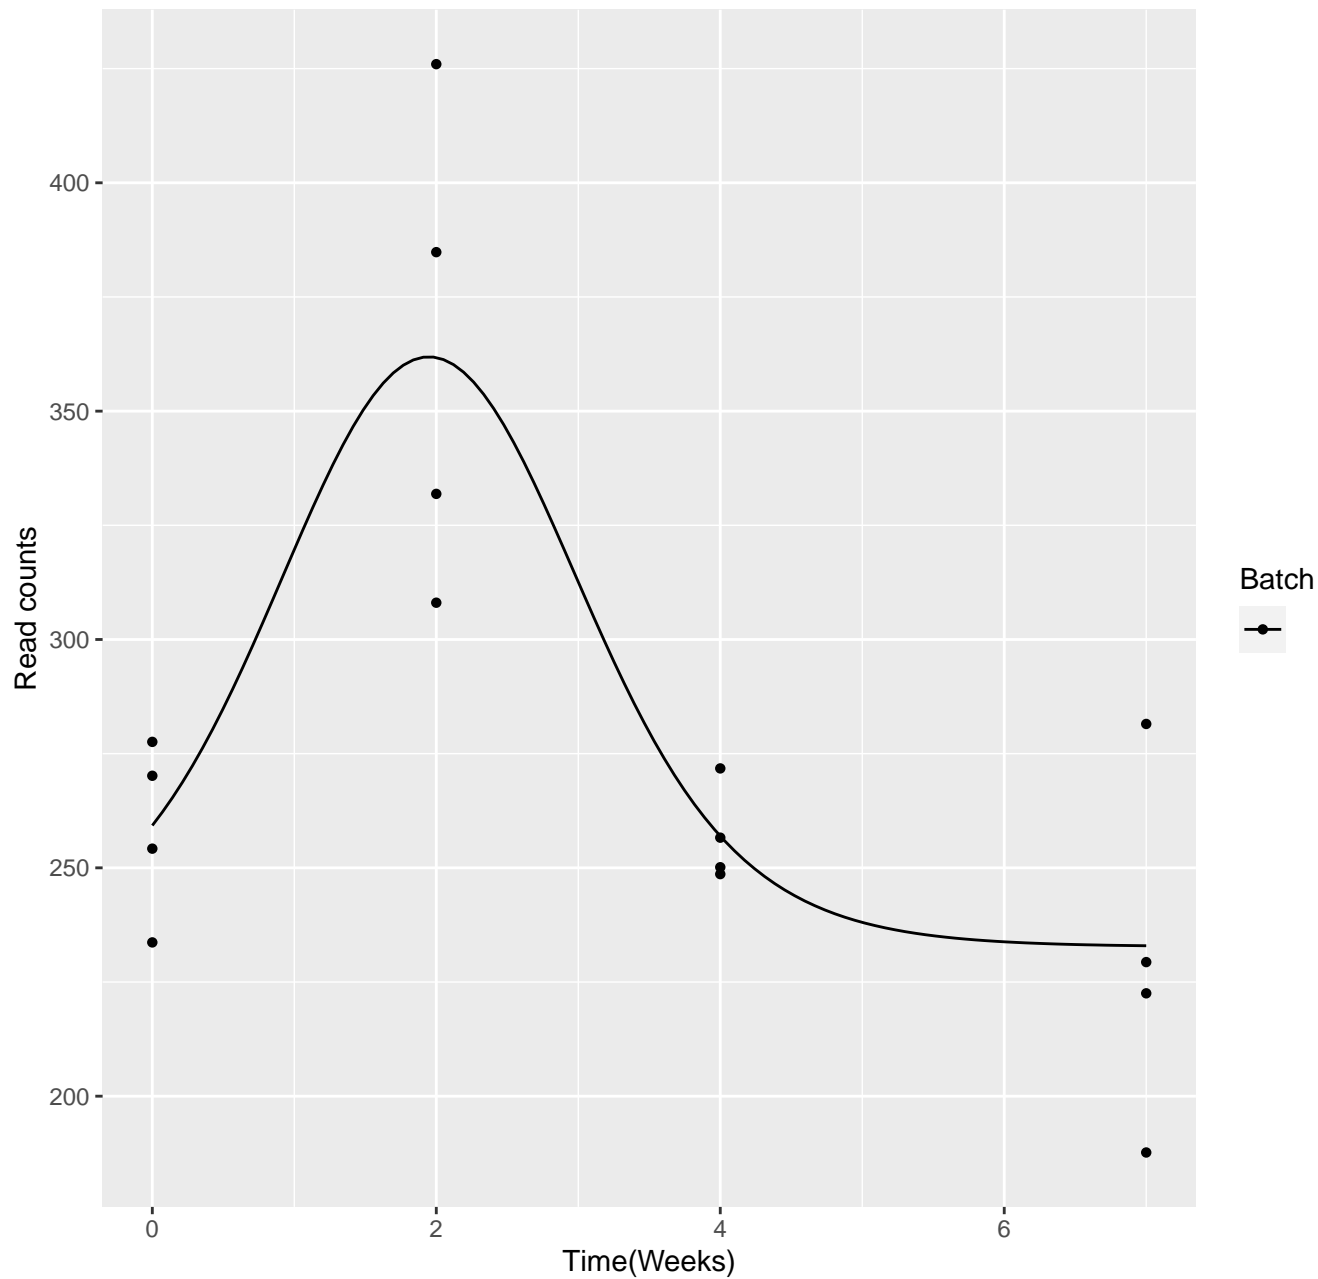

ELK1:  $\log_{10} q = -2.36$

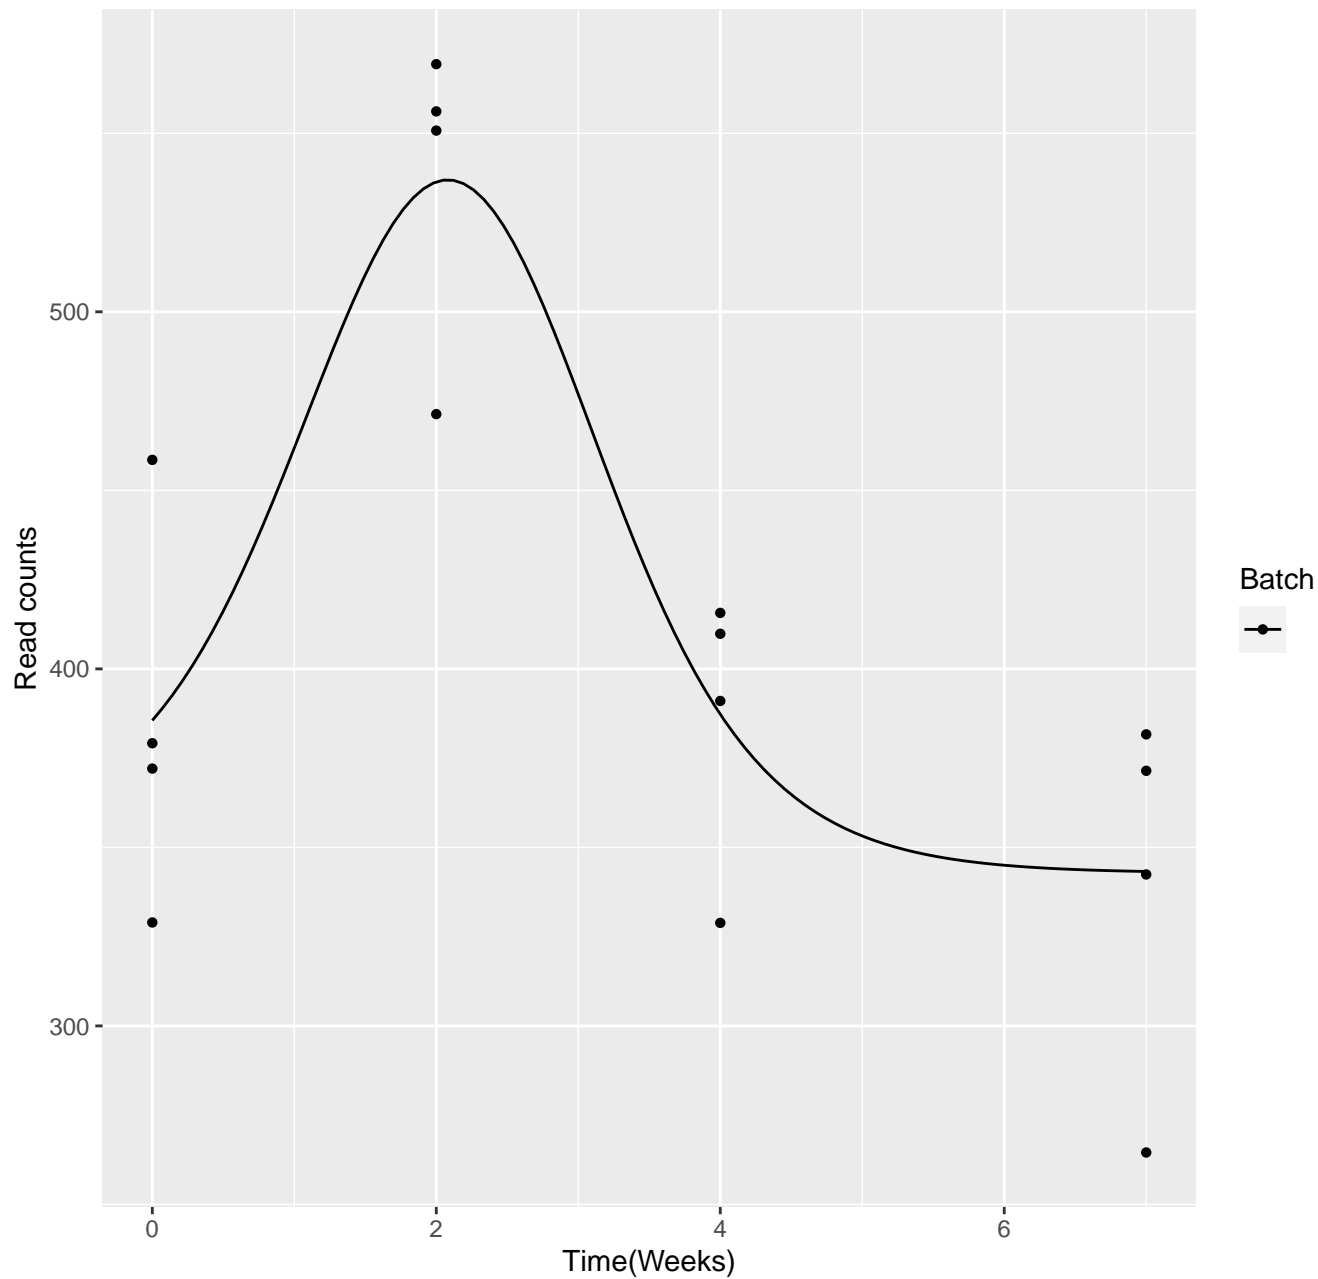

TBC1D1:  $\log_{10} q = -2.36$

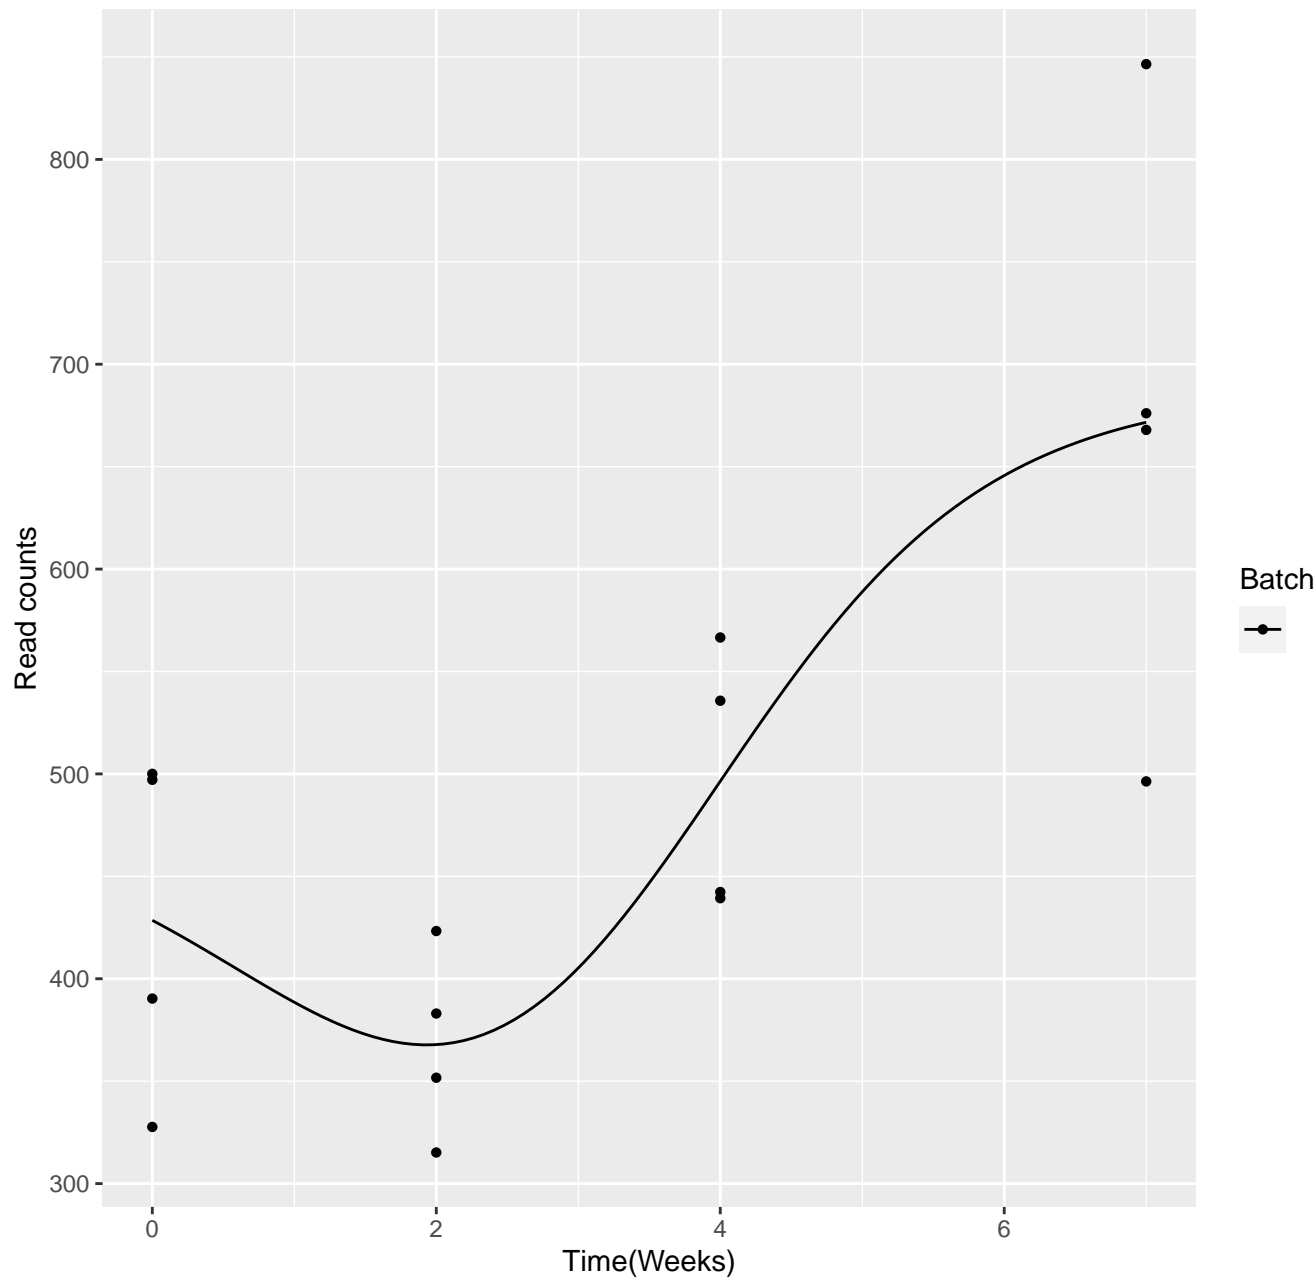

CENPE:  $\log_{10} q = -2.36$

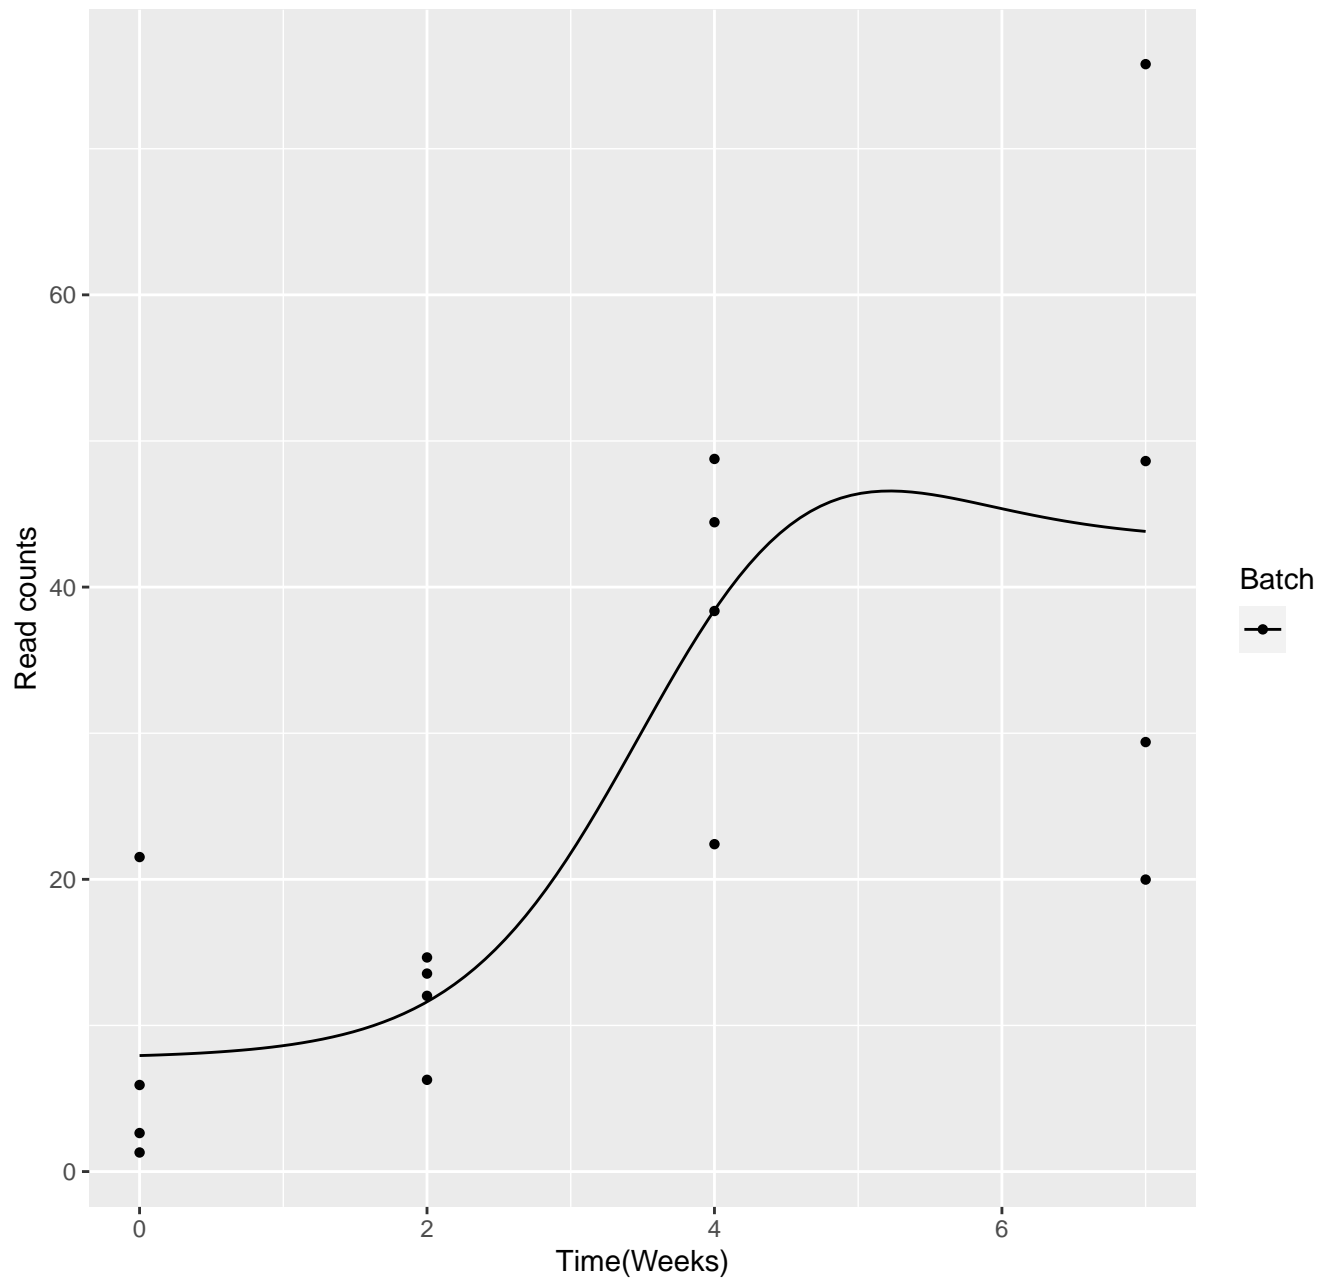

MRAS:  $\log_{10} q = -2.36$

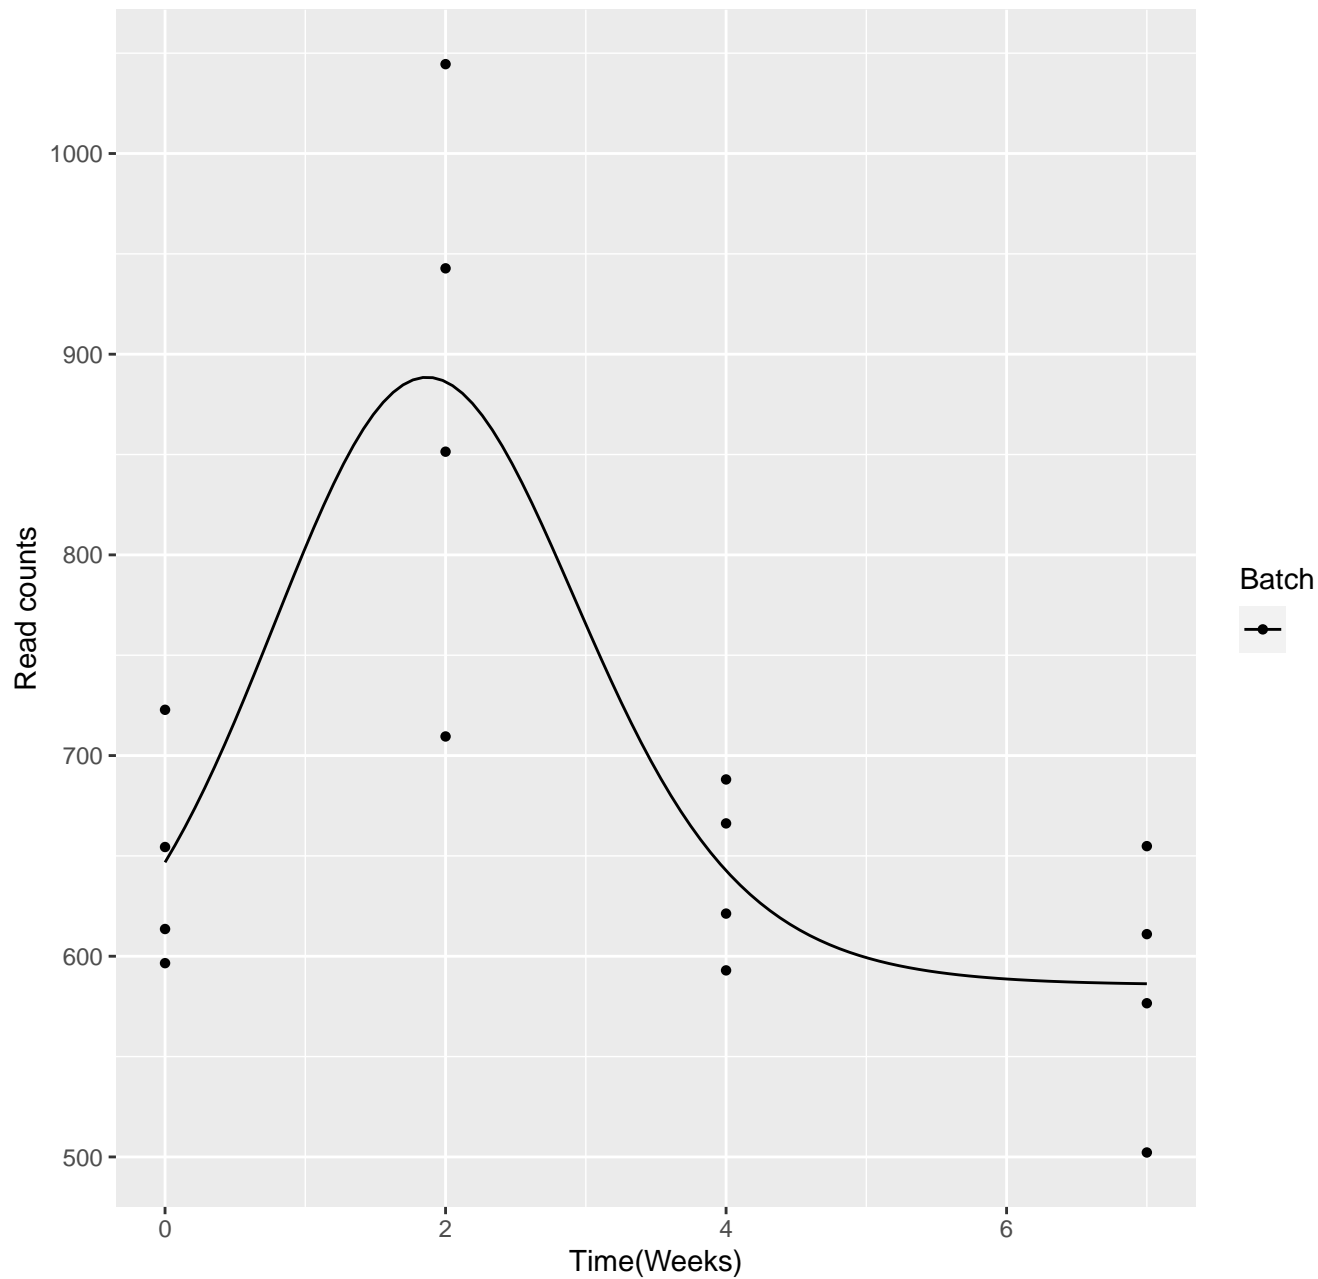

SAT2:  $\log_{10} q = -2.36$

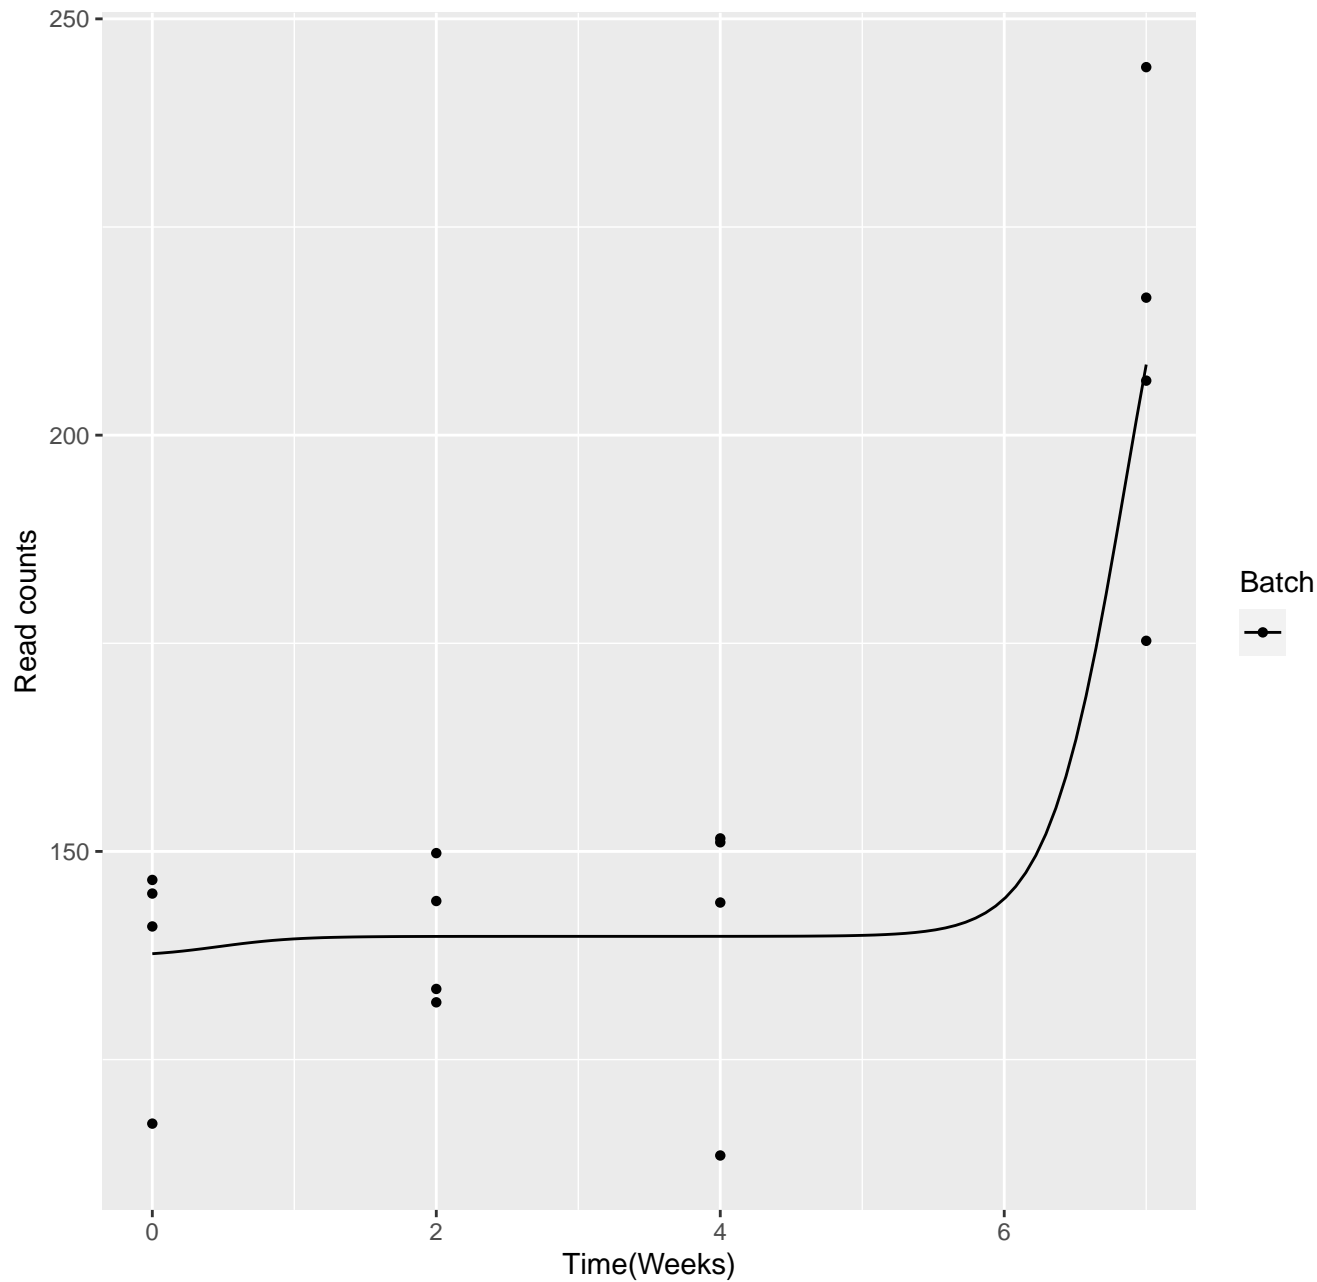



F2R:  $\log_{10} q = -2.36$

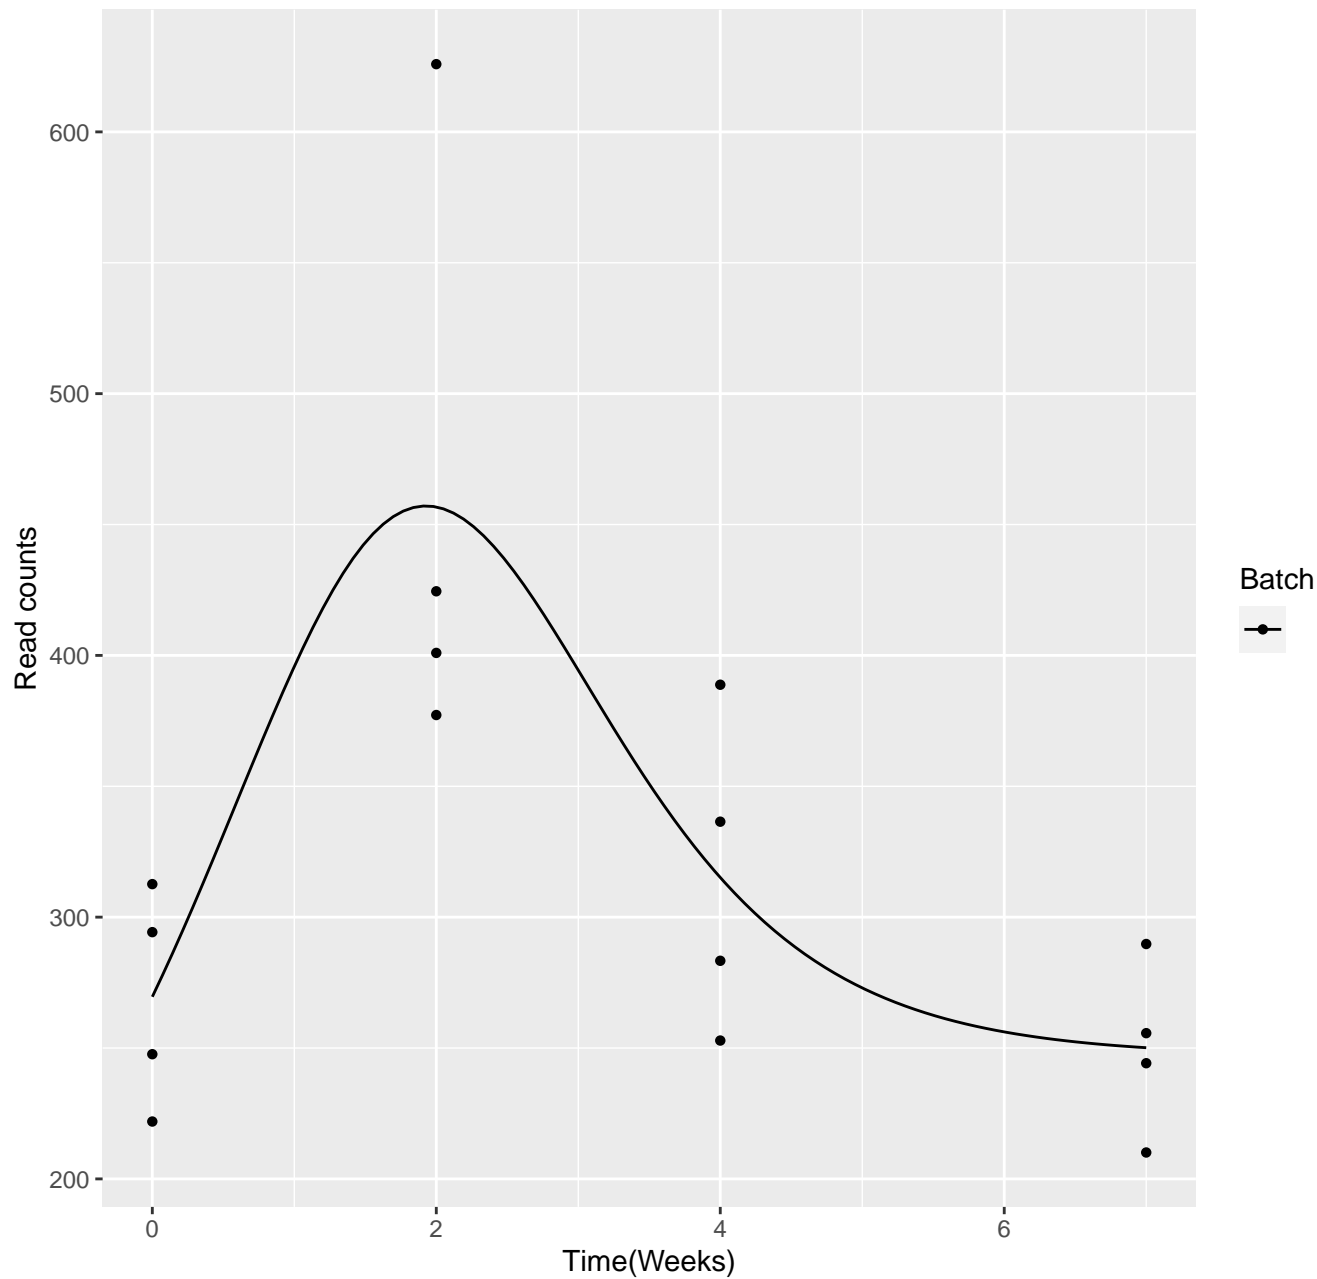

LOC100341279:  $\log_{10} q = -2.36$

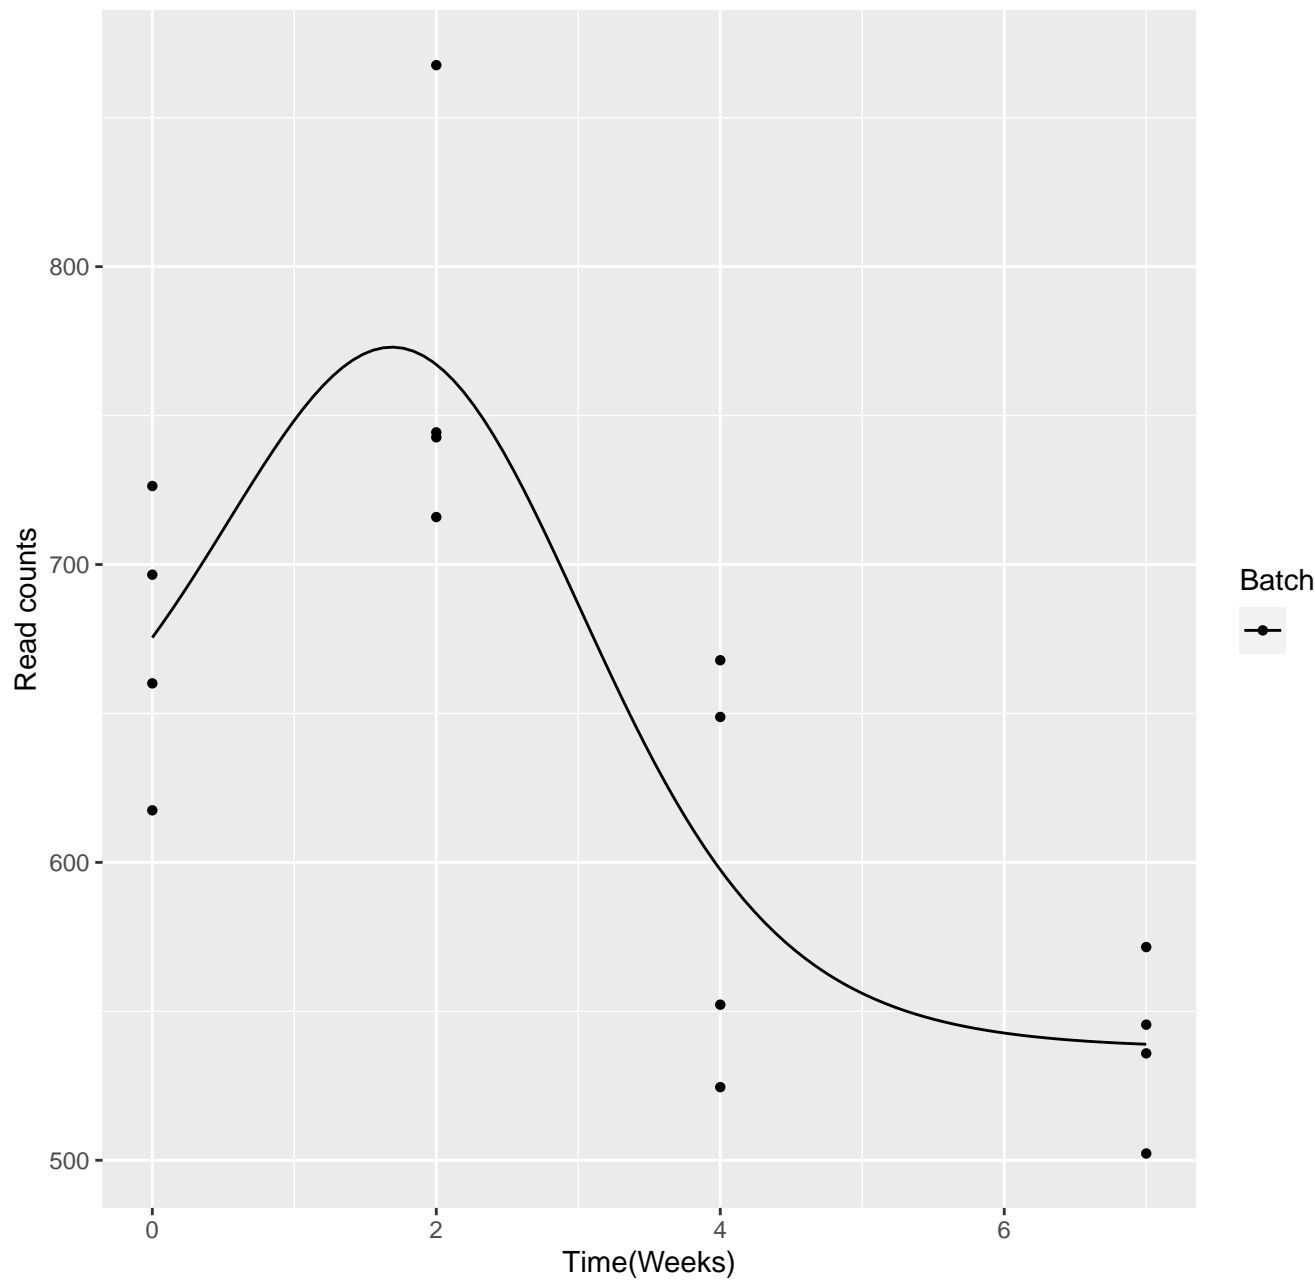

LGALS3:  $\log_{10} q = -2.36$

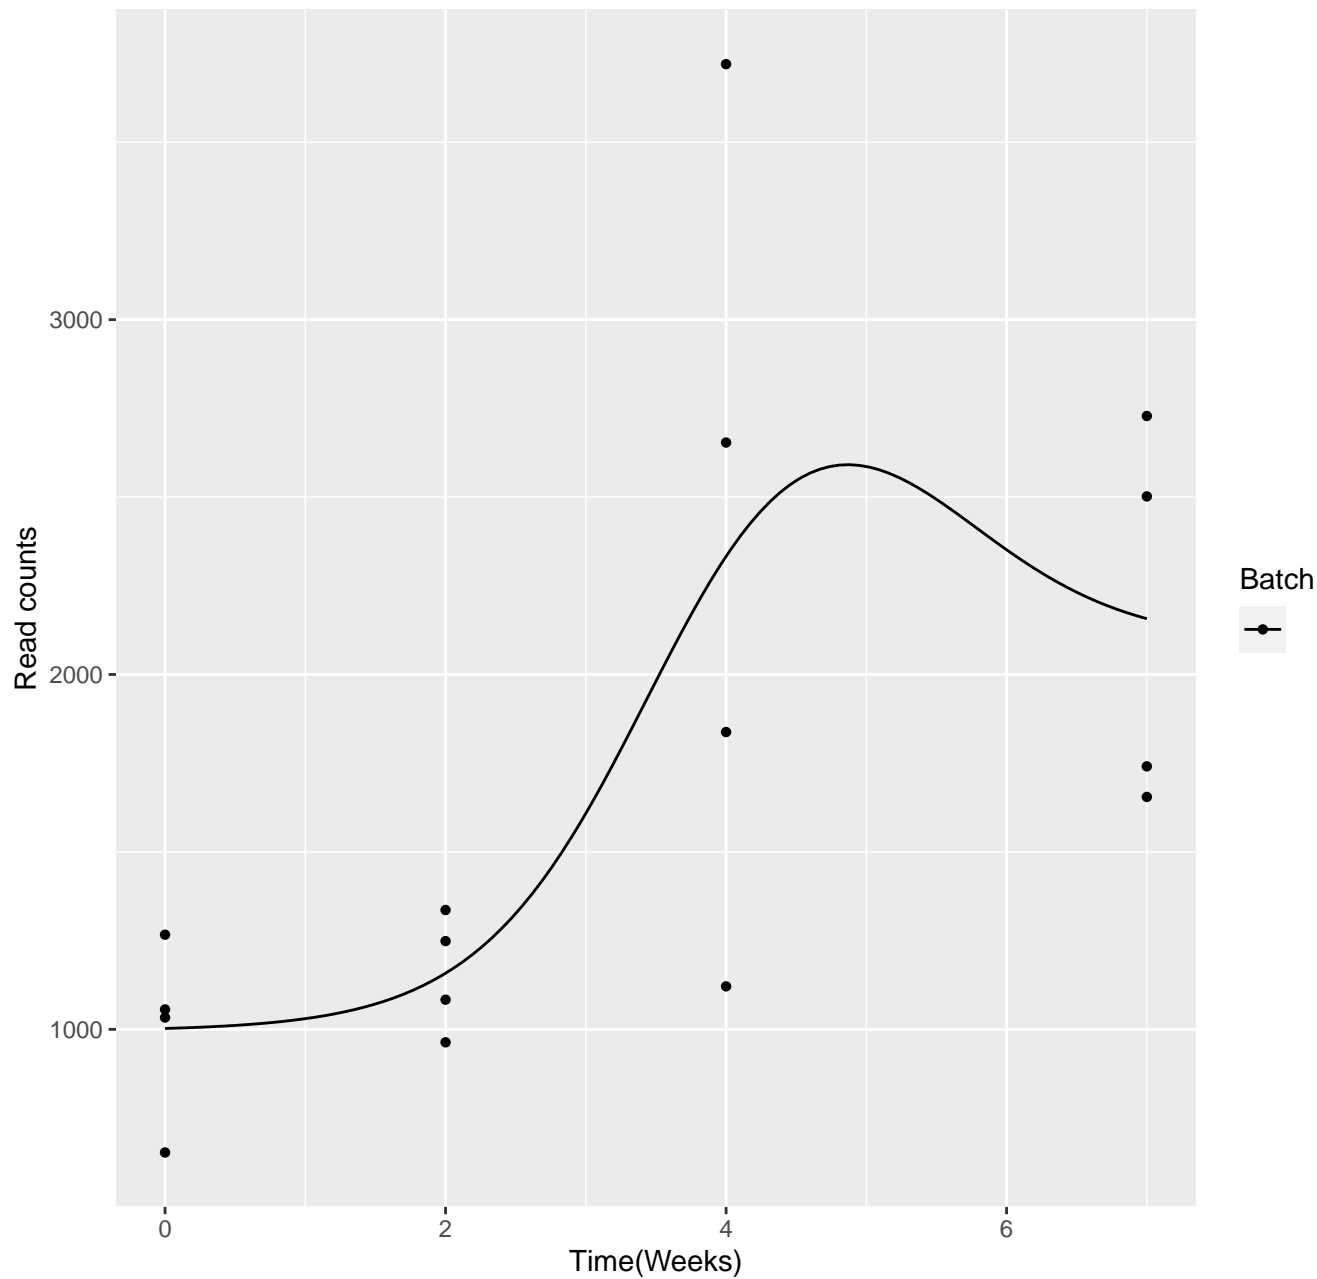

LOC100342978:  $\log_{10} q = -2.36$

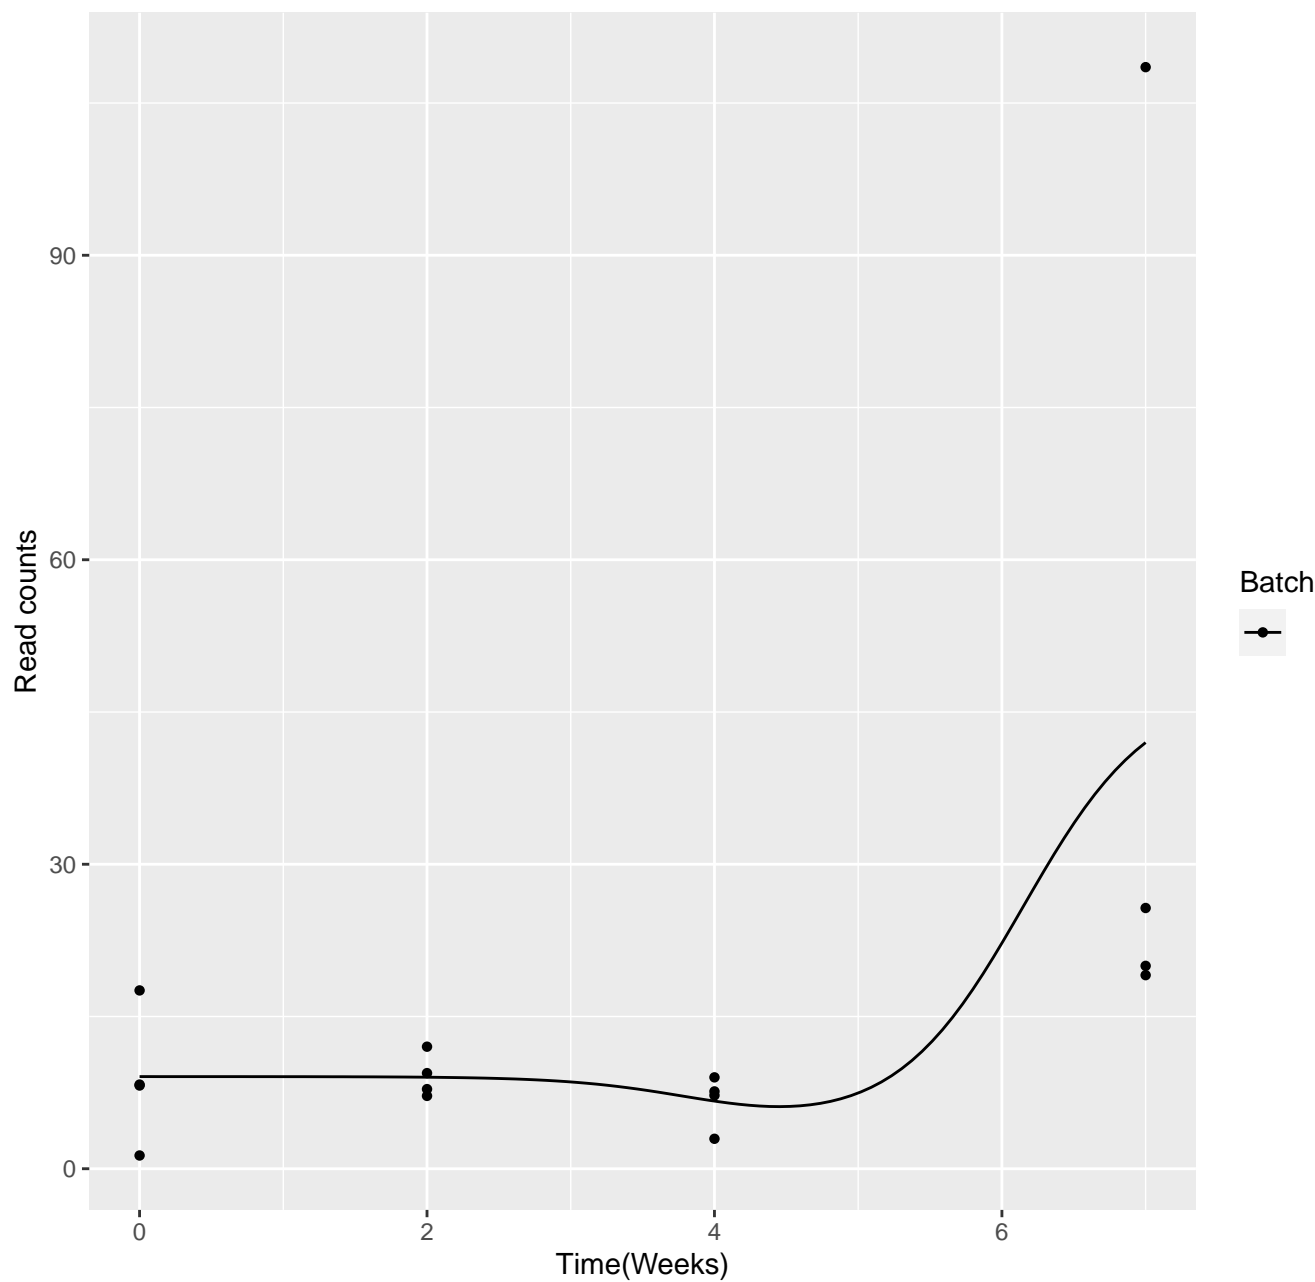

MRPL14:  $\log_{10} q = -2.35$

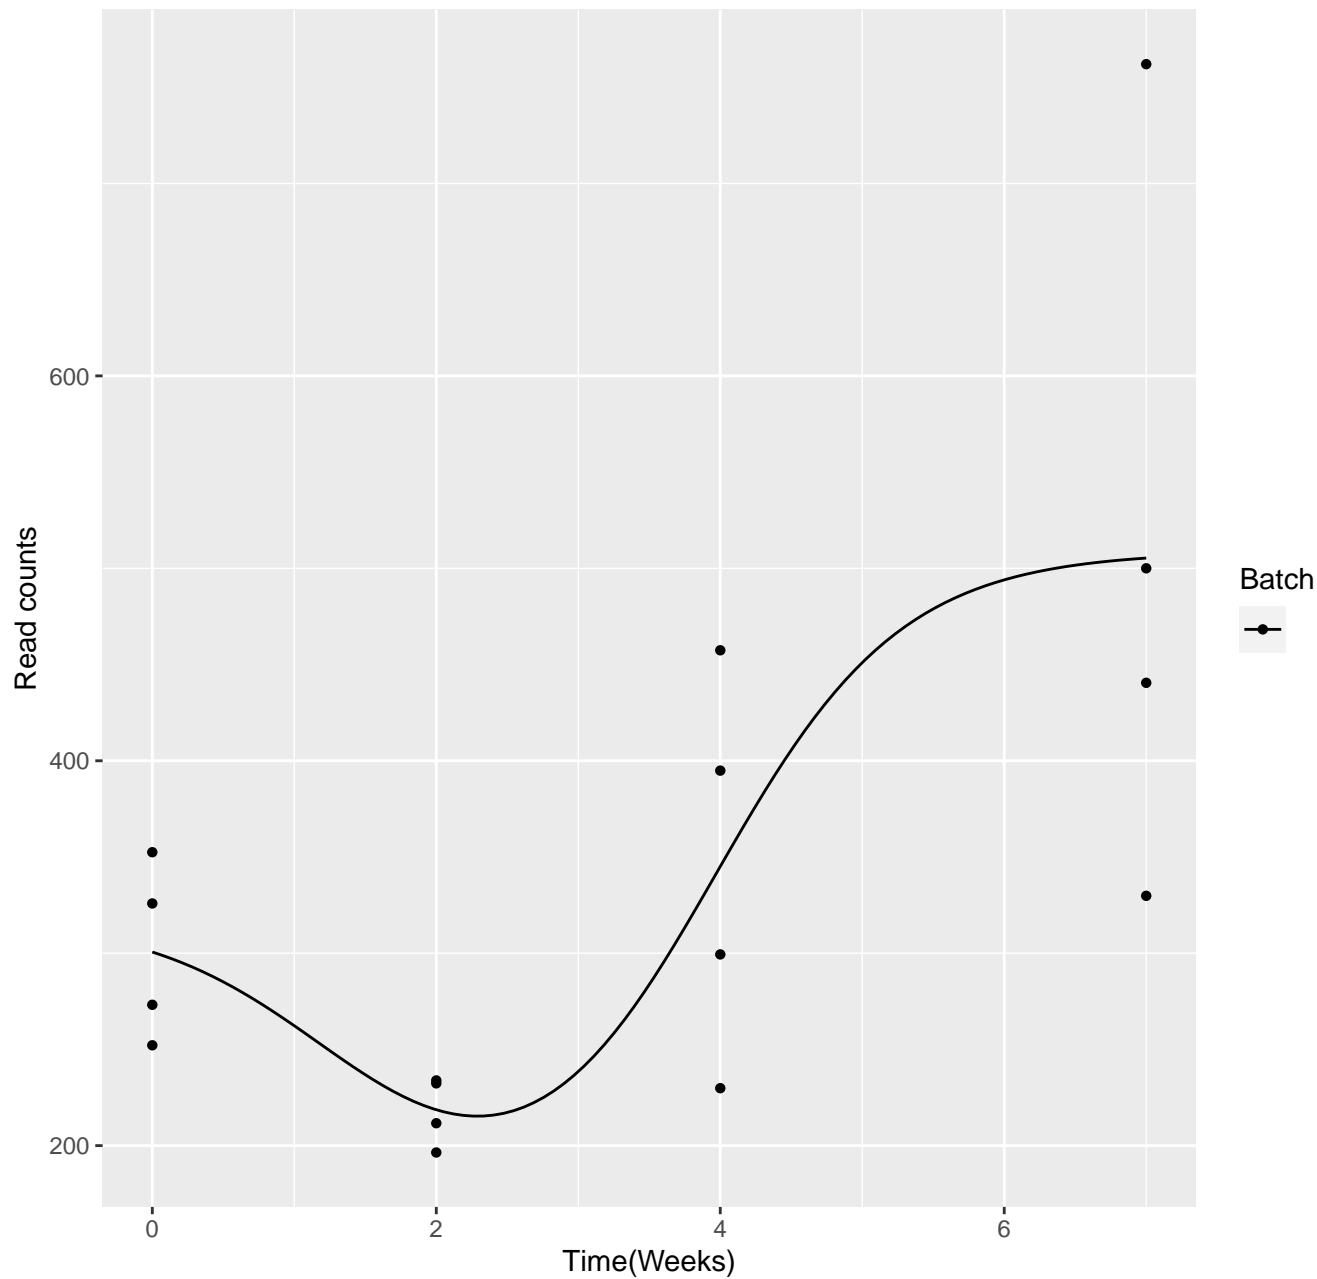

RASSF5:  $\log_{10} q = -2.35$

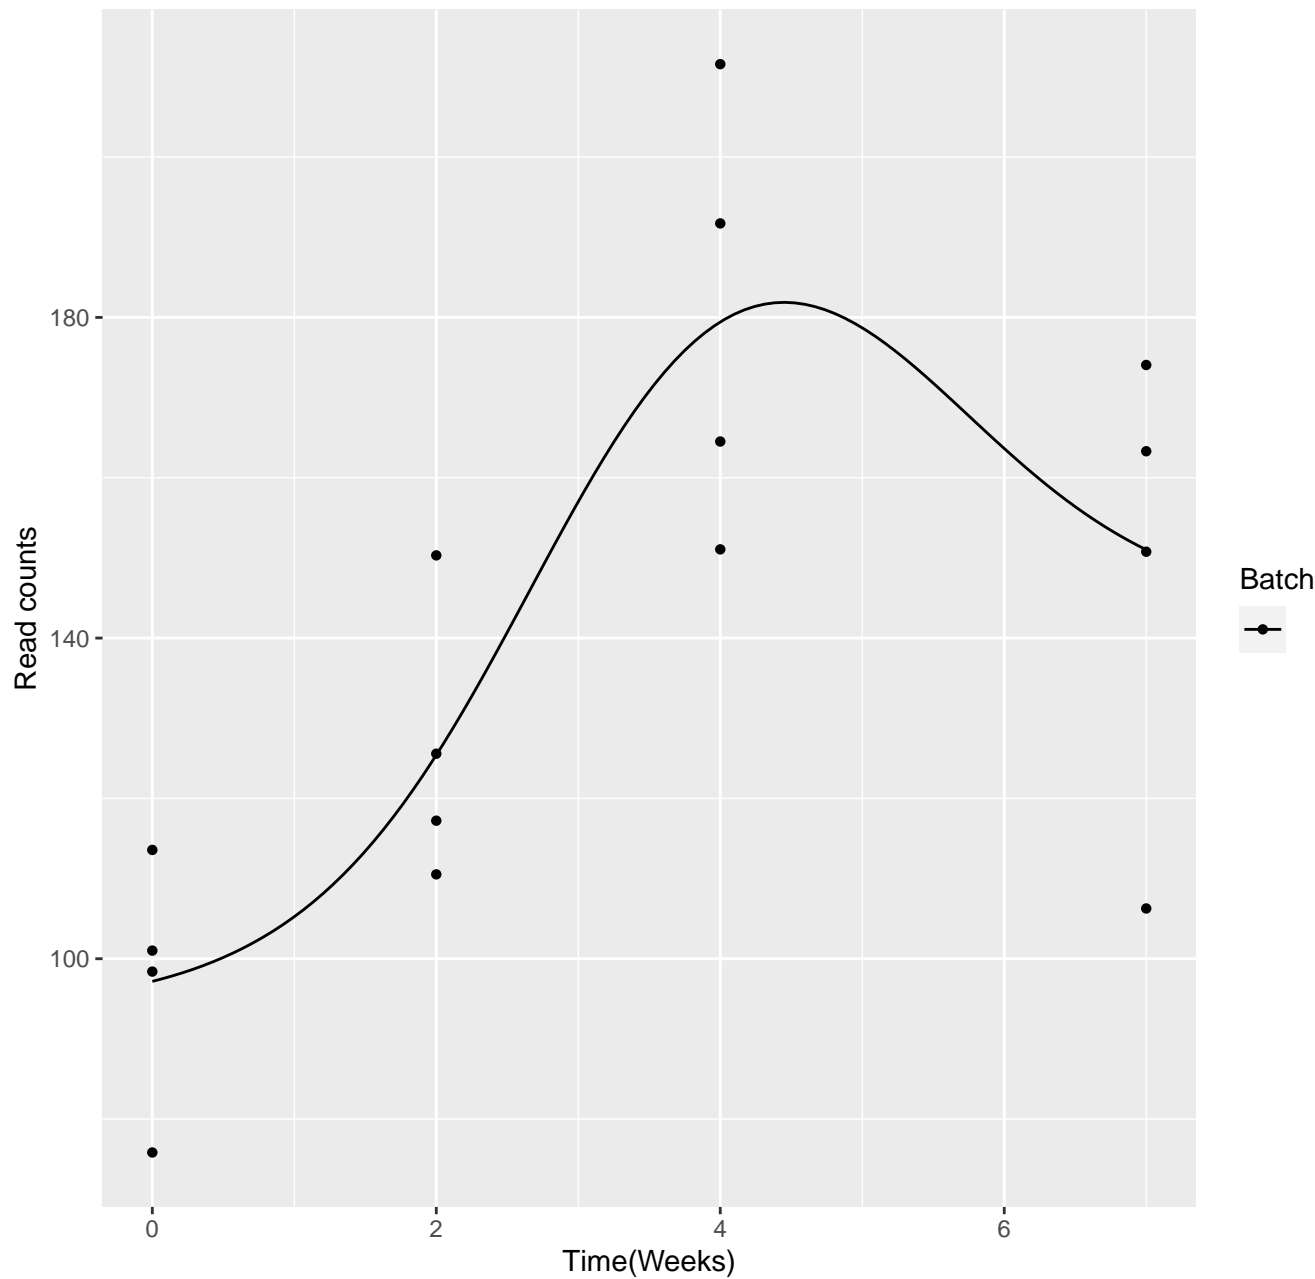

NAF1:  $\log_{10} q = -2.35$

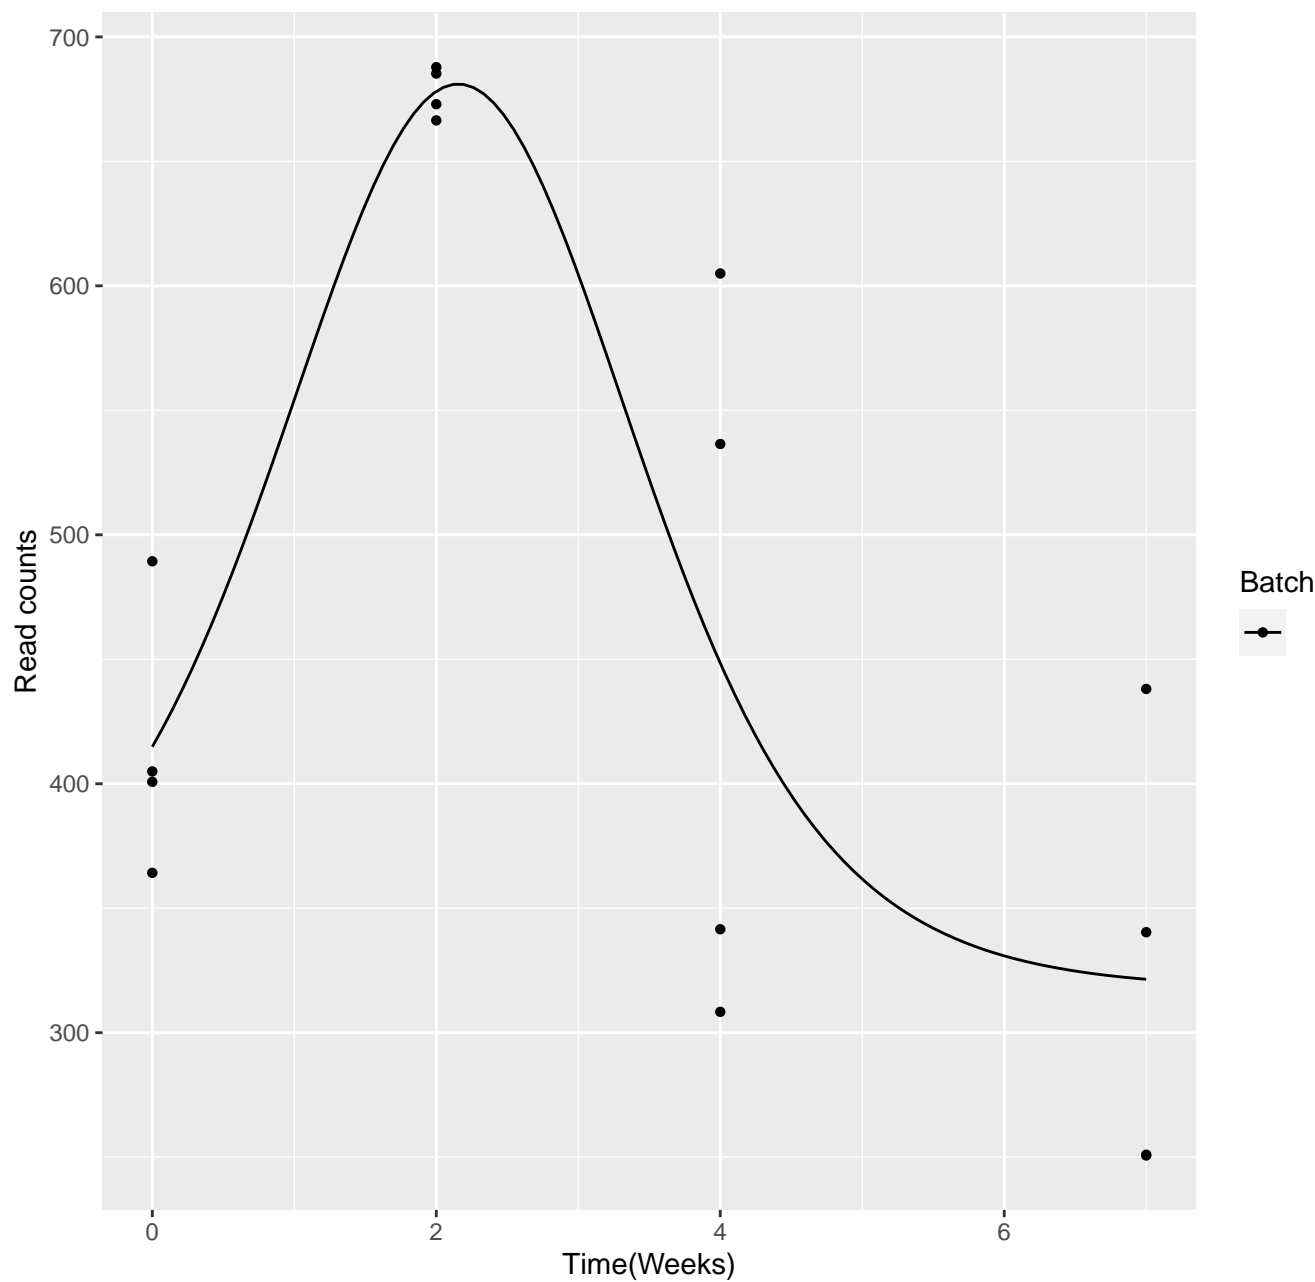

THBS3:  $\log_{10} q = -2.35$

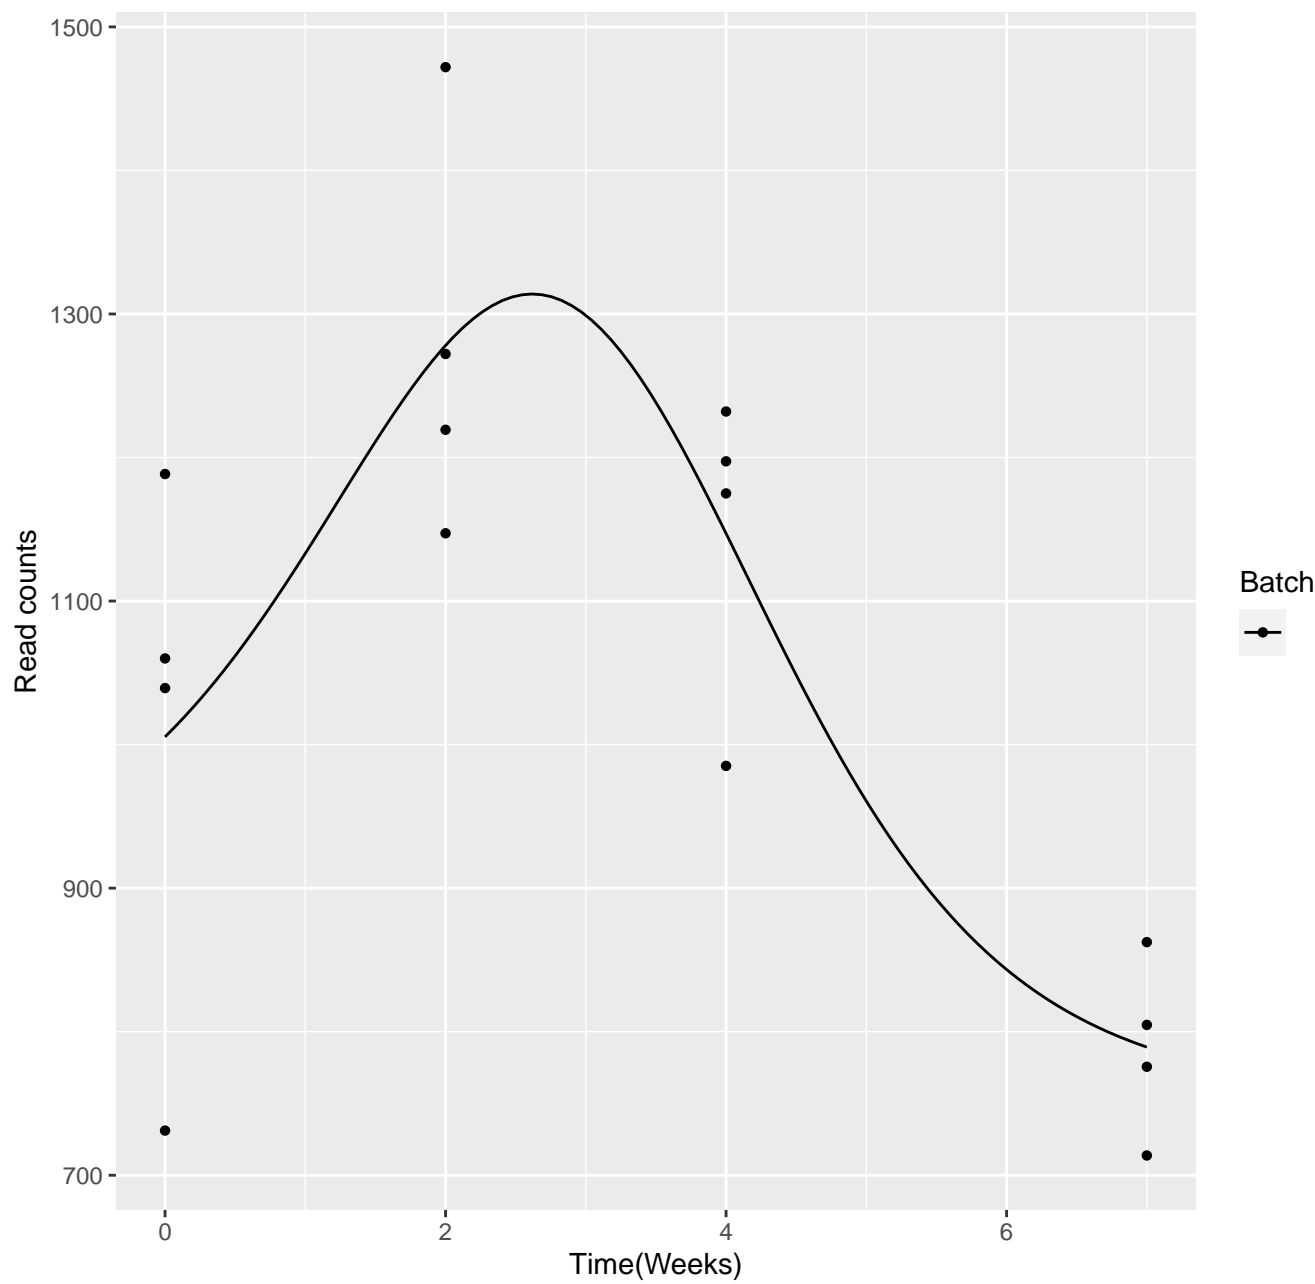



LOC100348313:  $\log_{10} q = -2.35$

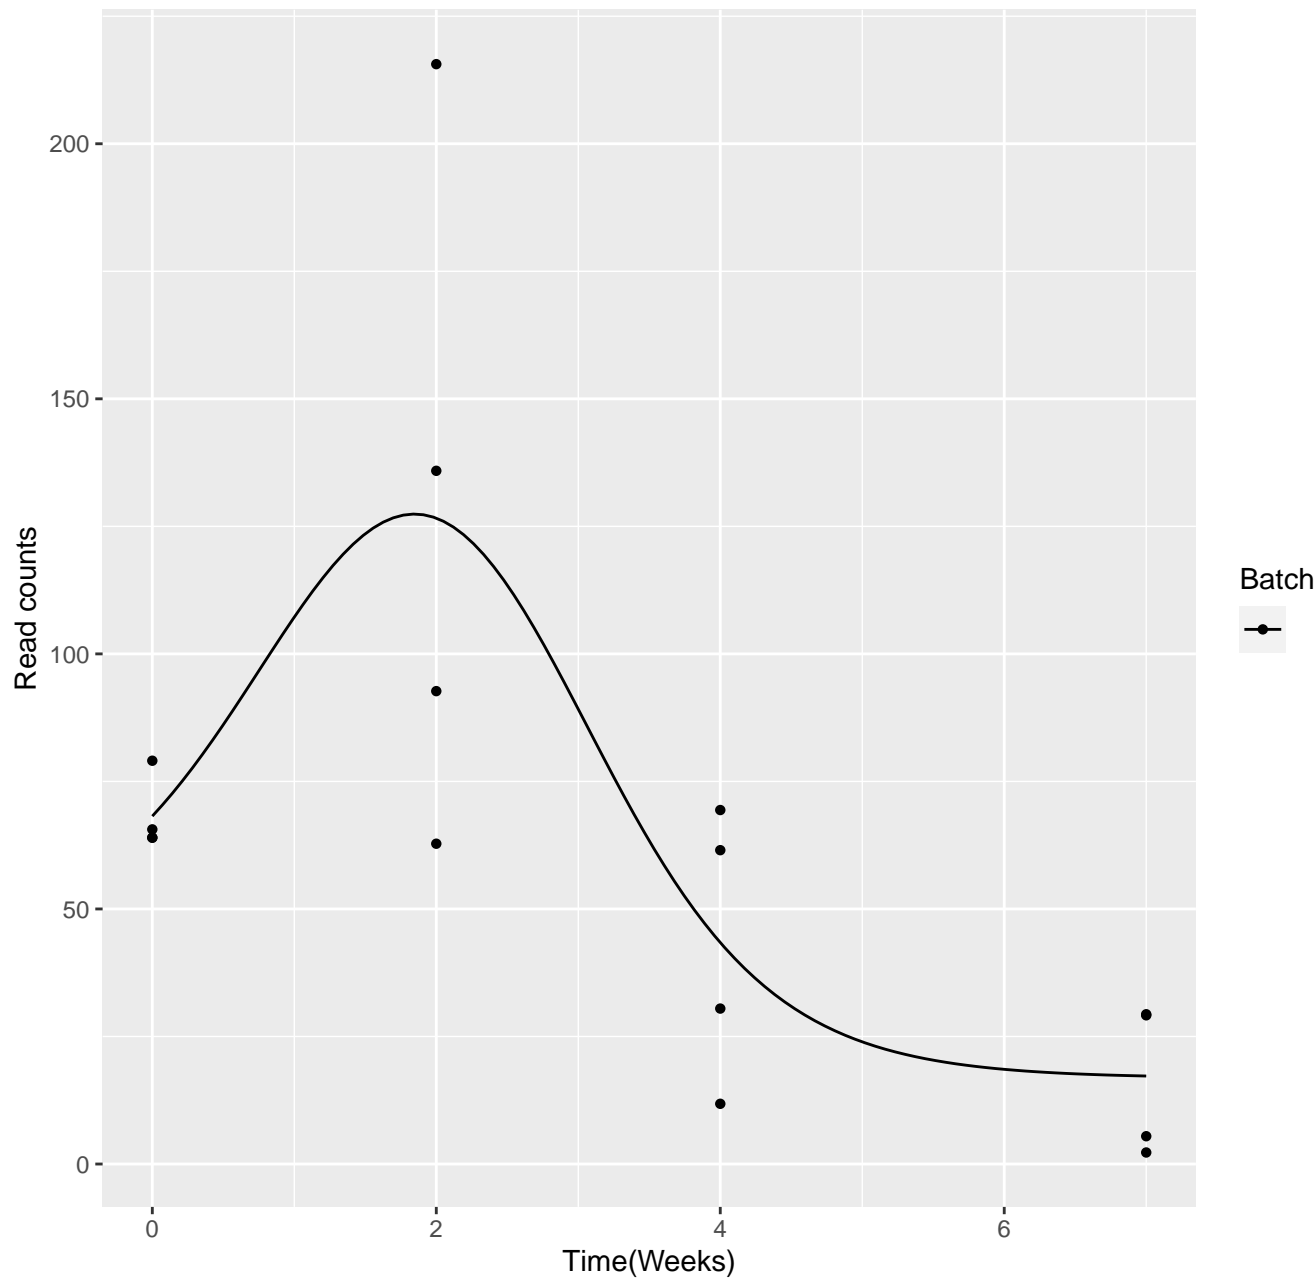

CX3CR1:  $\log_{10} q = -2.35$

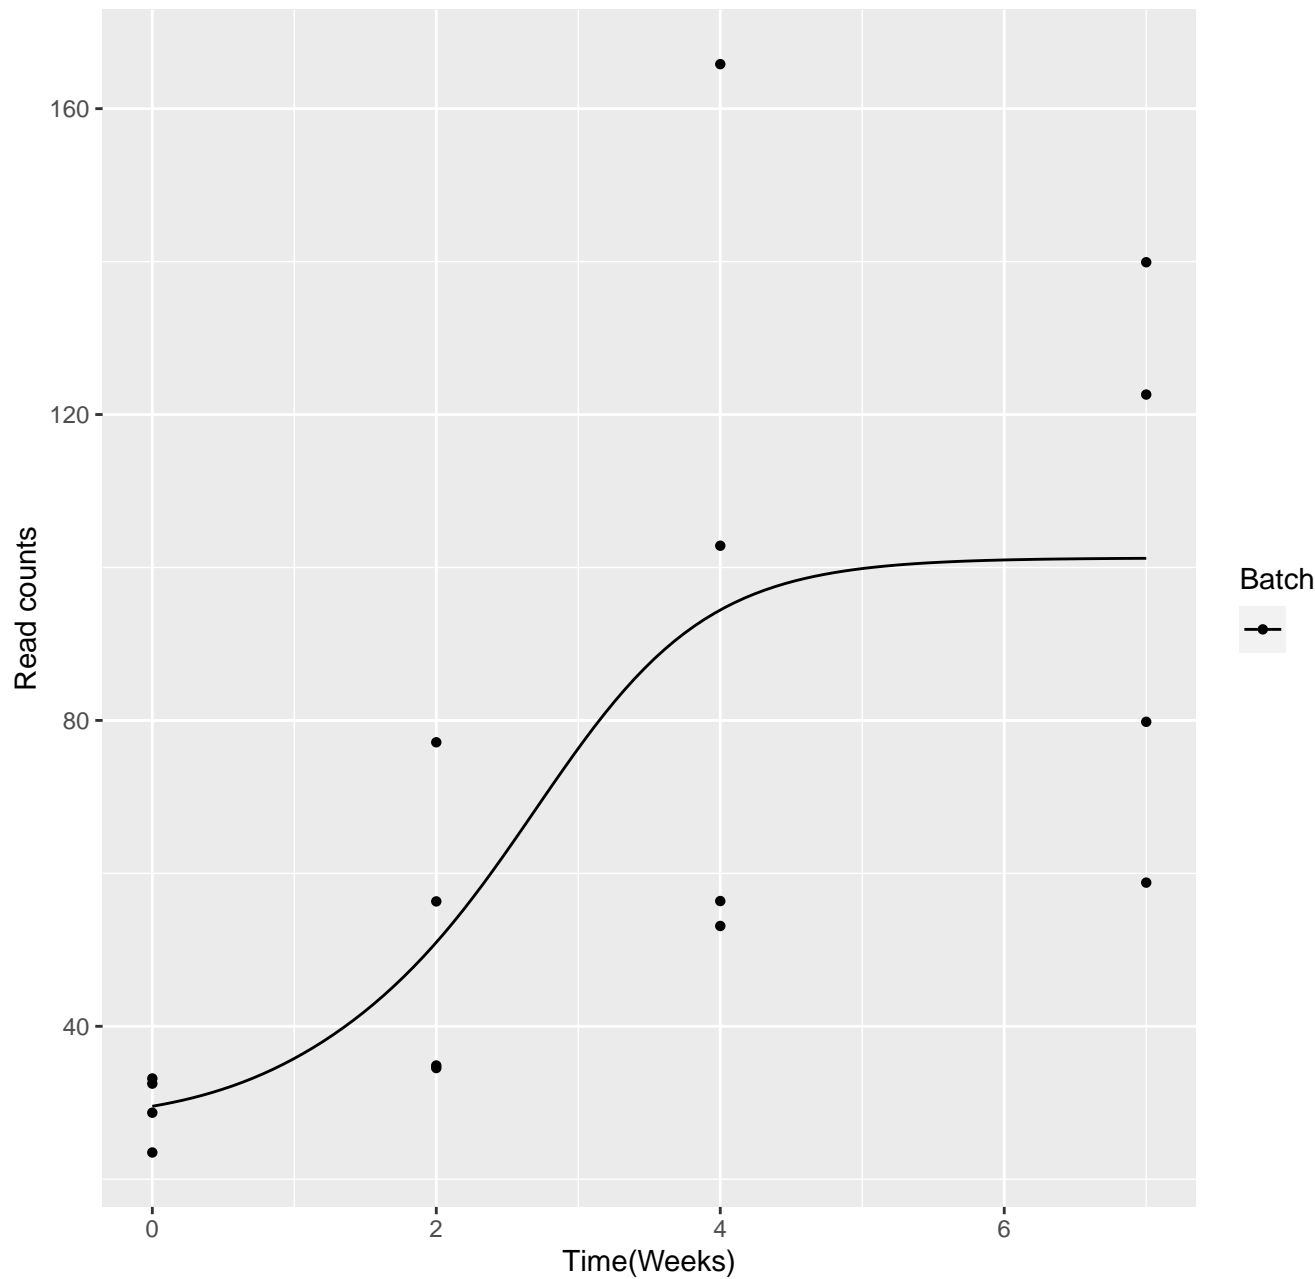

GEMIN6:  $\log_{10} q = -2.35$

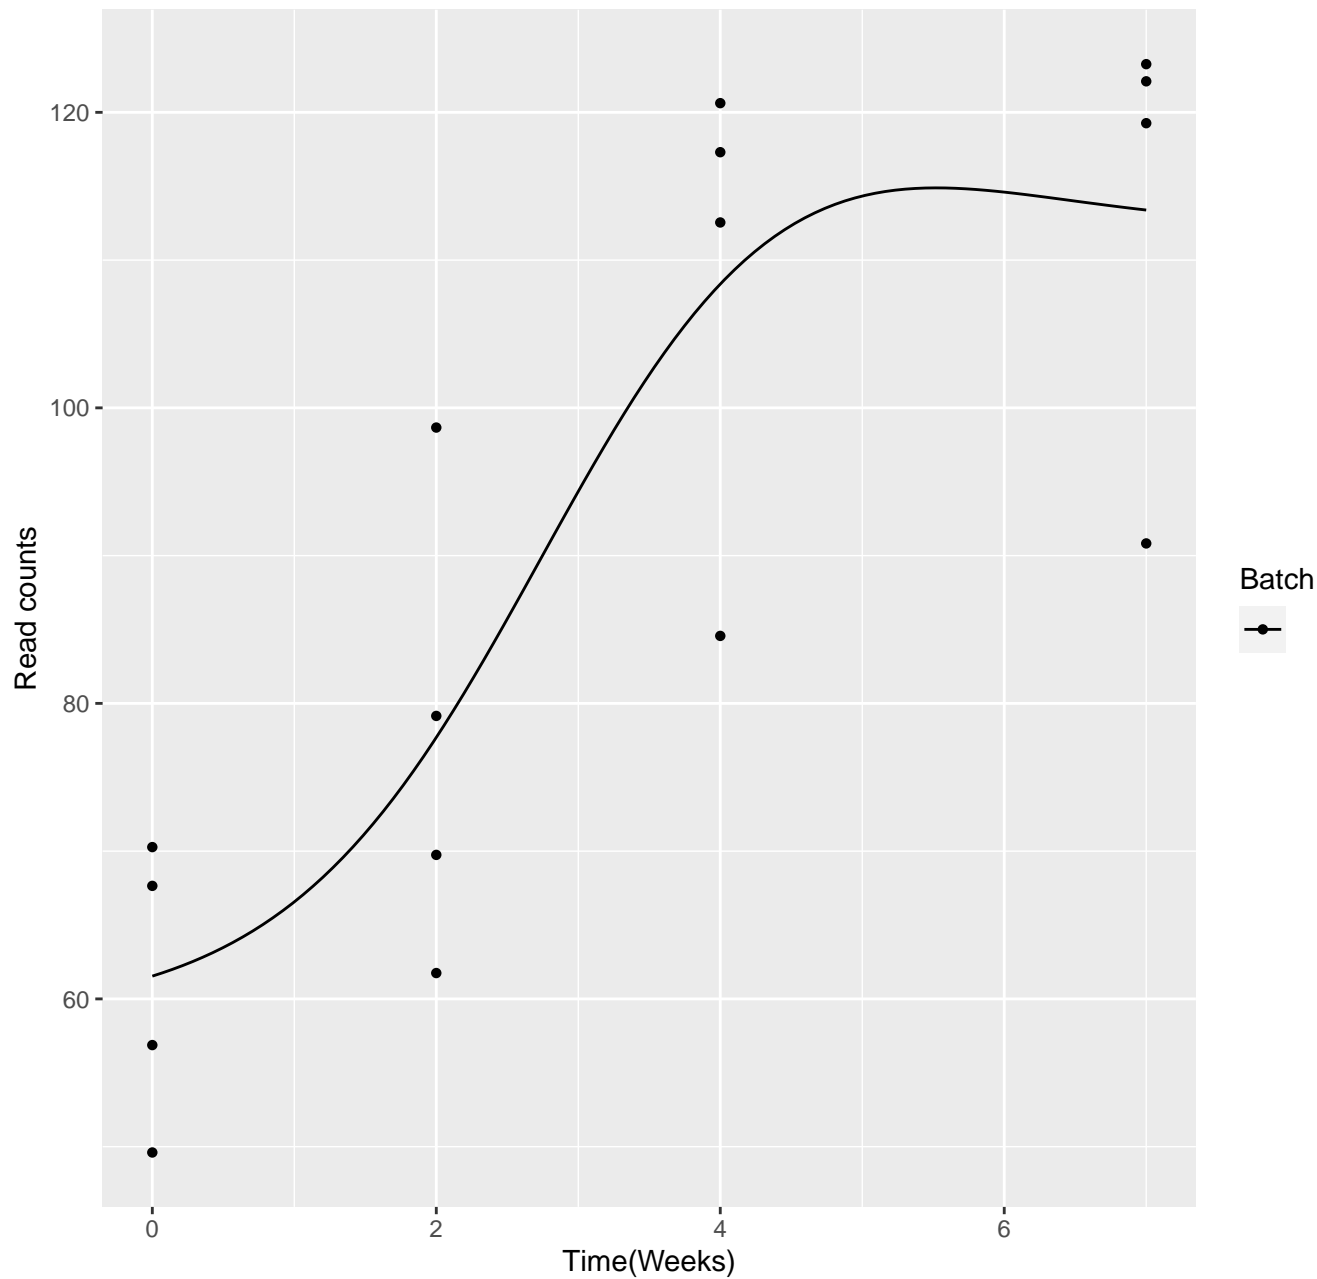

LOC127491077:  $\log_{10} q = -2.34$

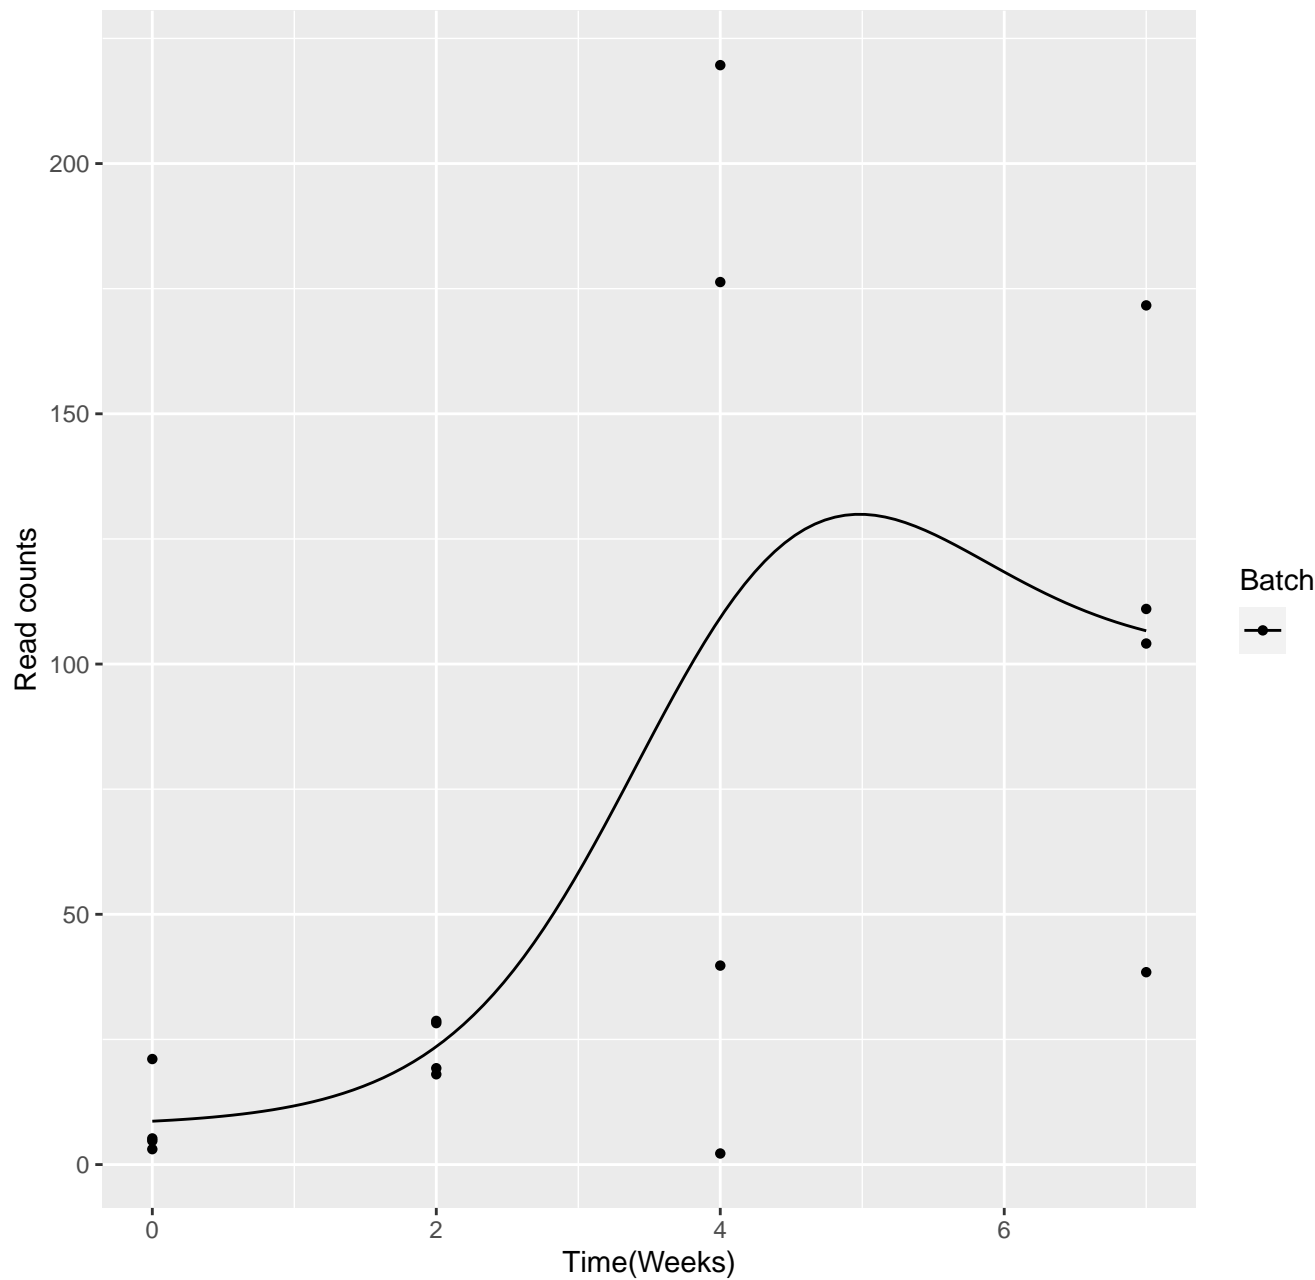

FAM78A:  $\log_{10} q = -2.34$

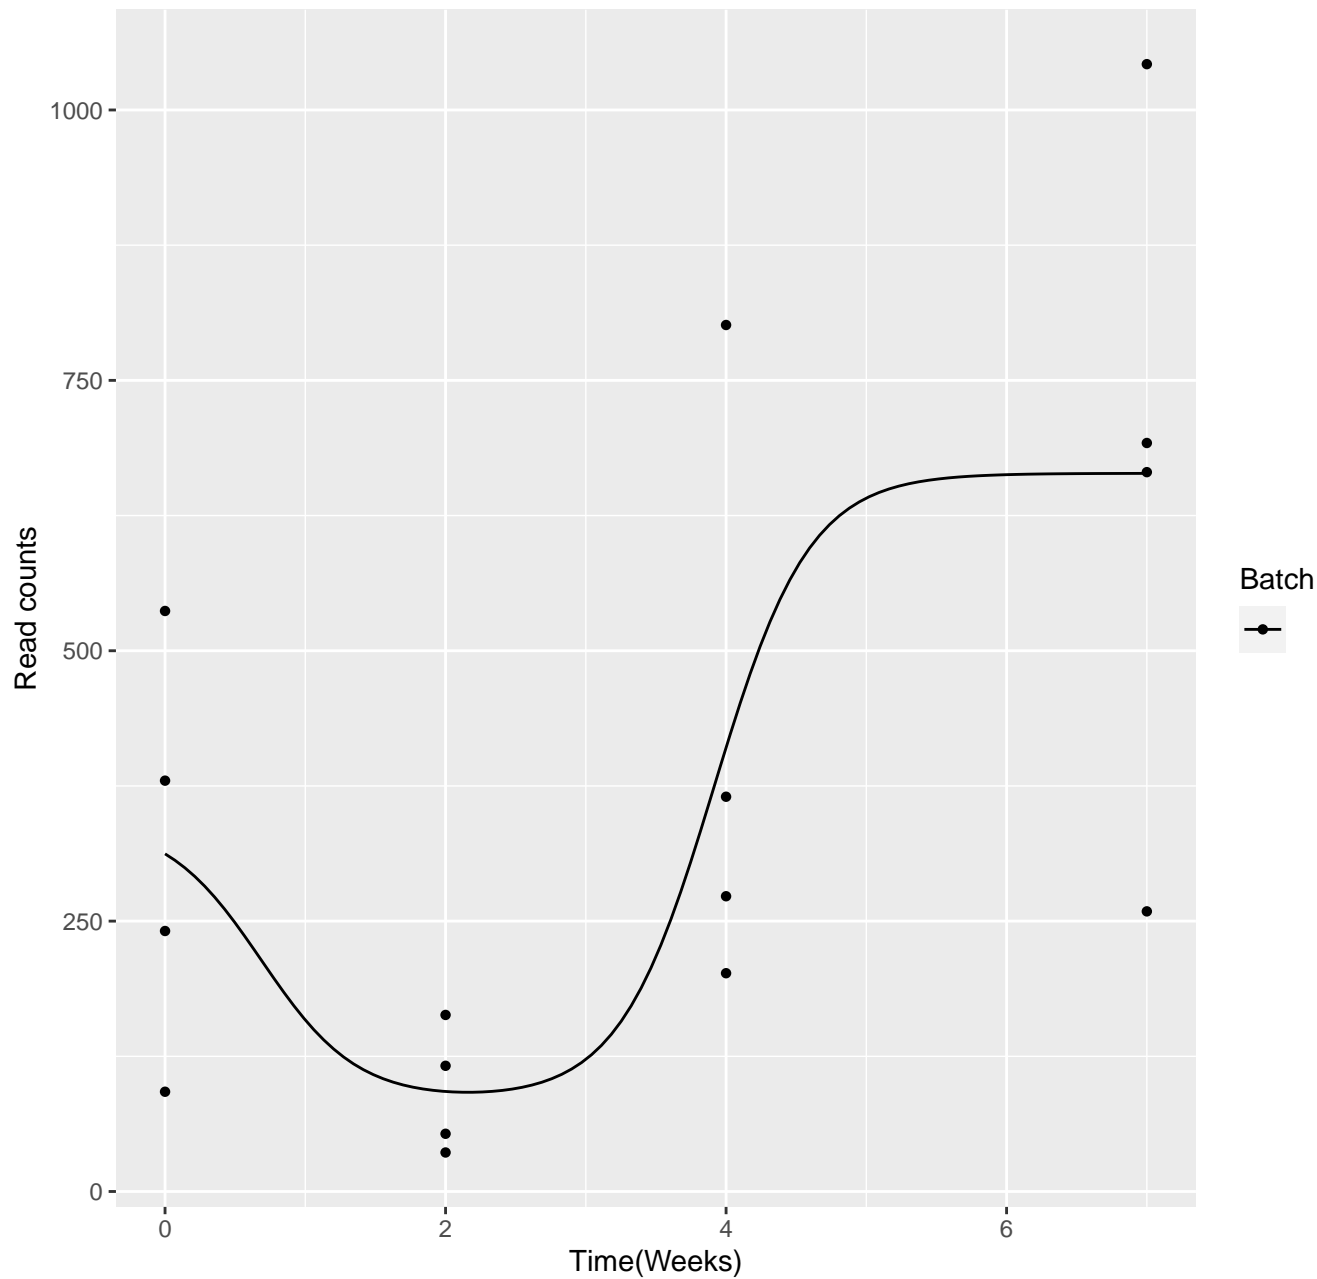

SLC35D2:  $\log_{10} q = -2.34$

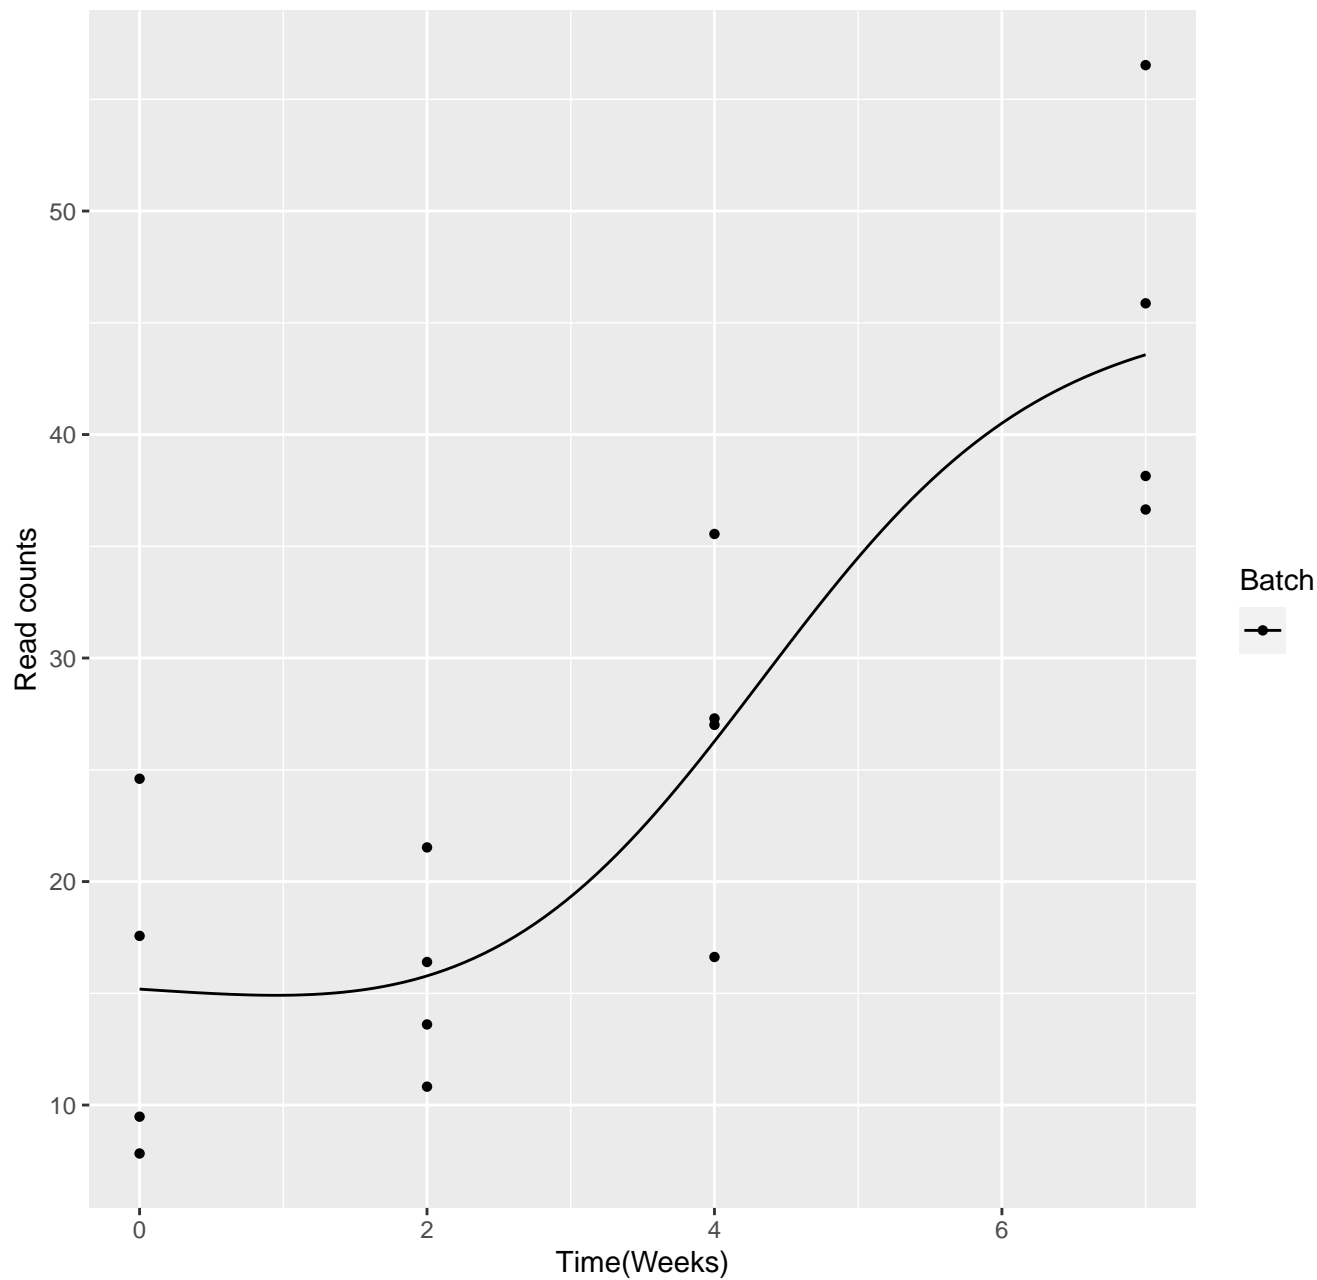

TOR1AIP1:  $\log_{10} q = -2.34$

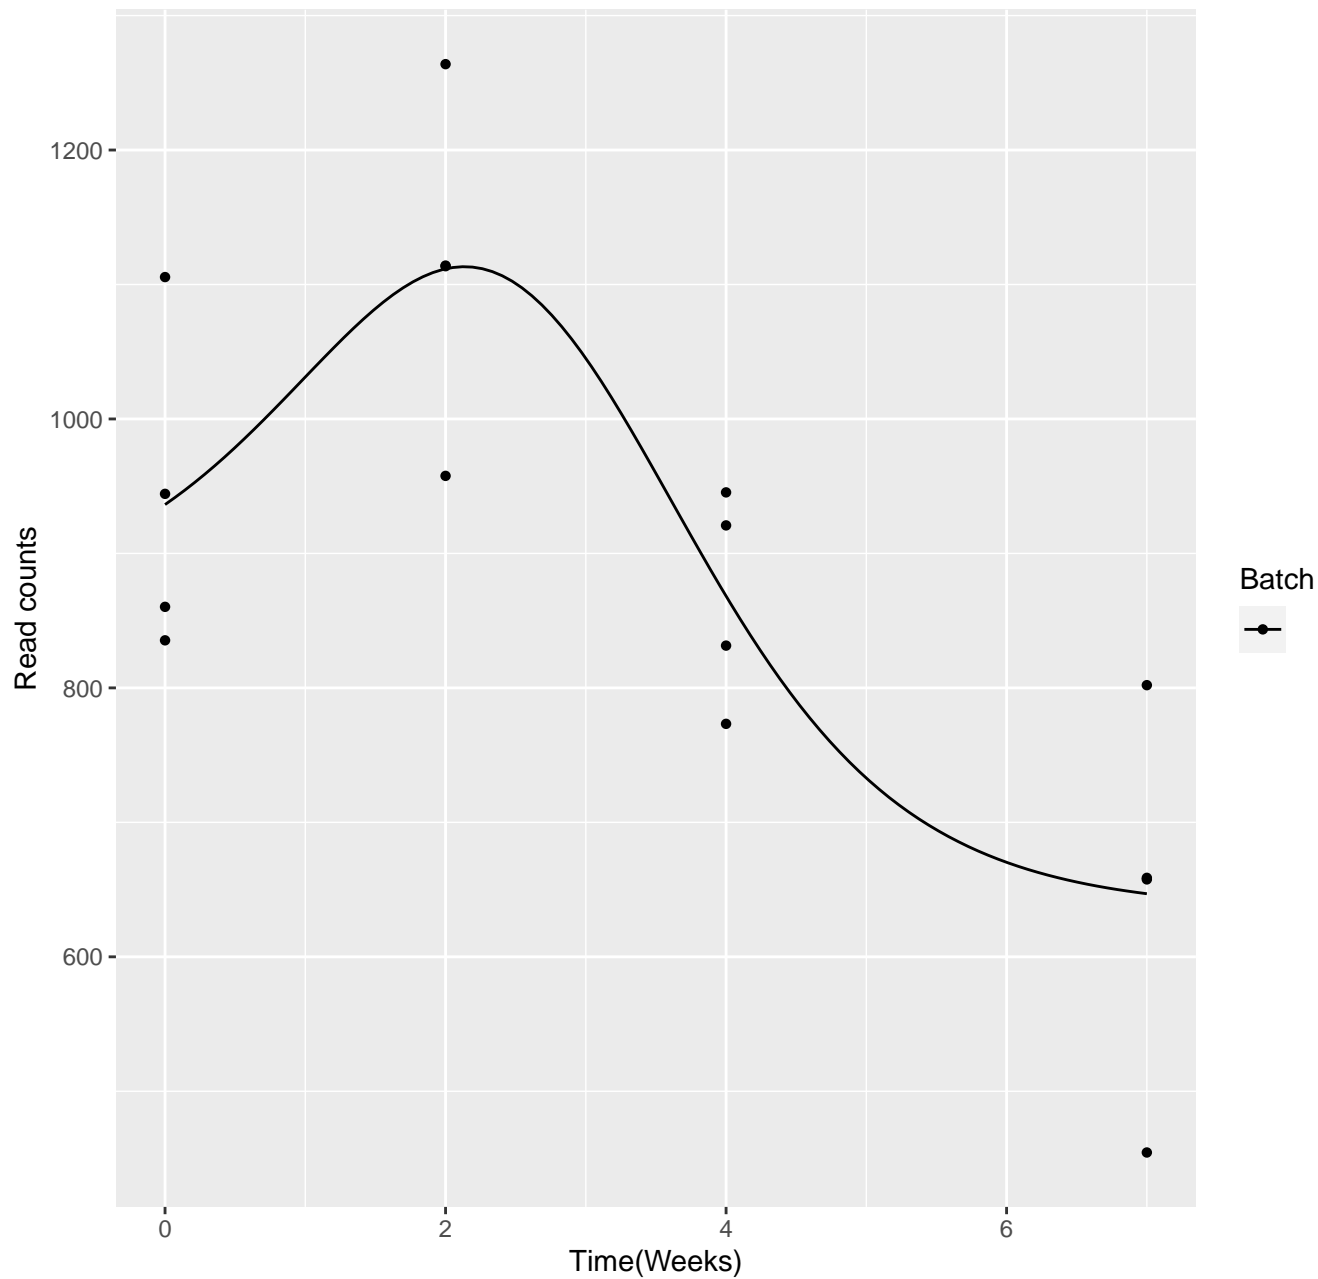

LOC100357498:  $\log_{10} q = -2.34$

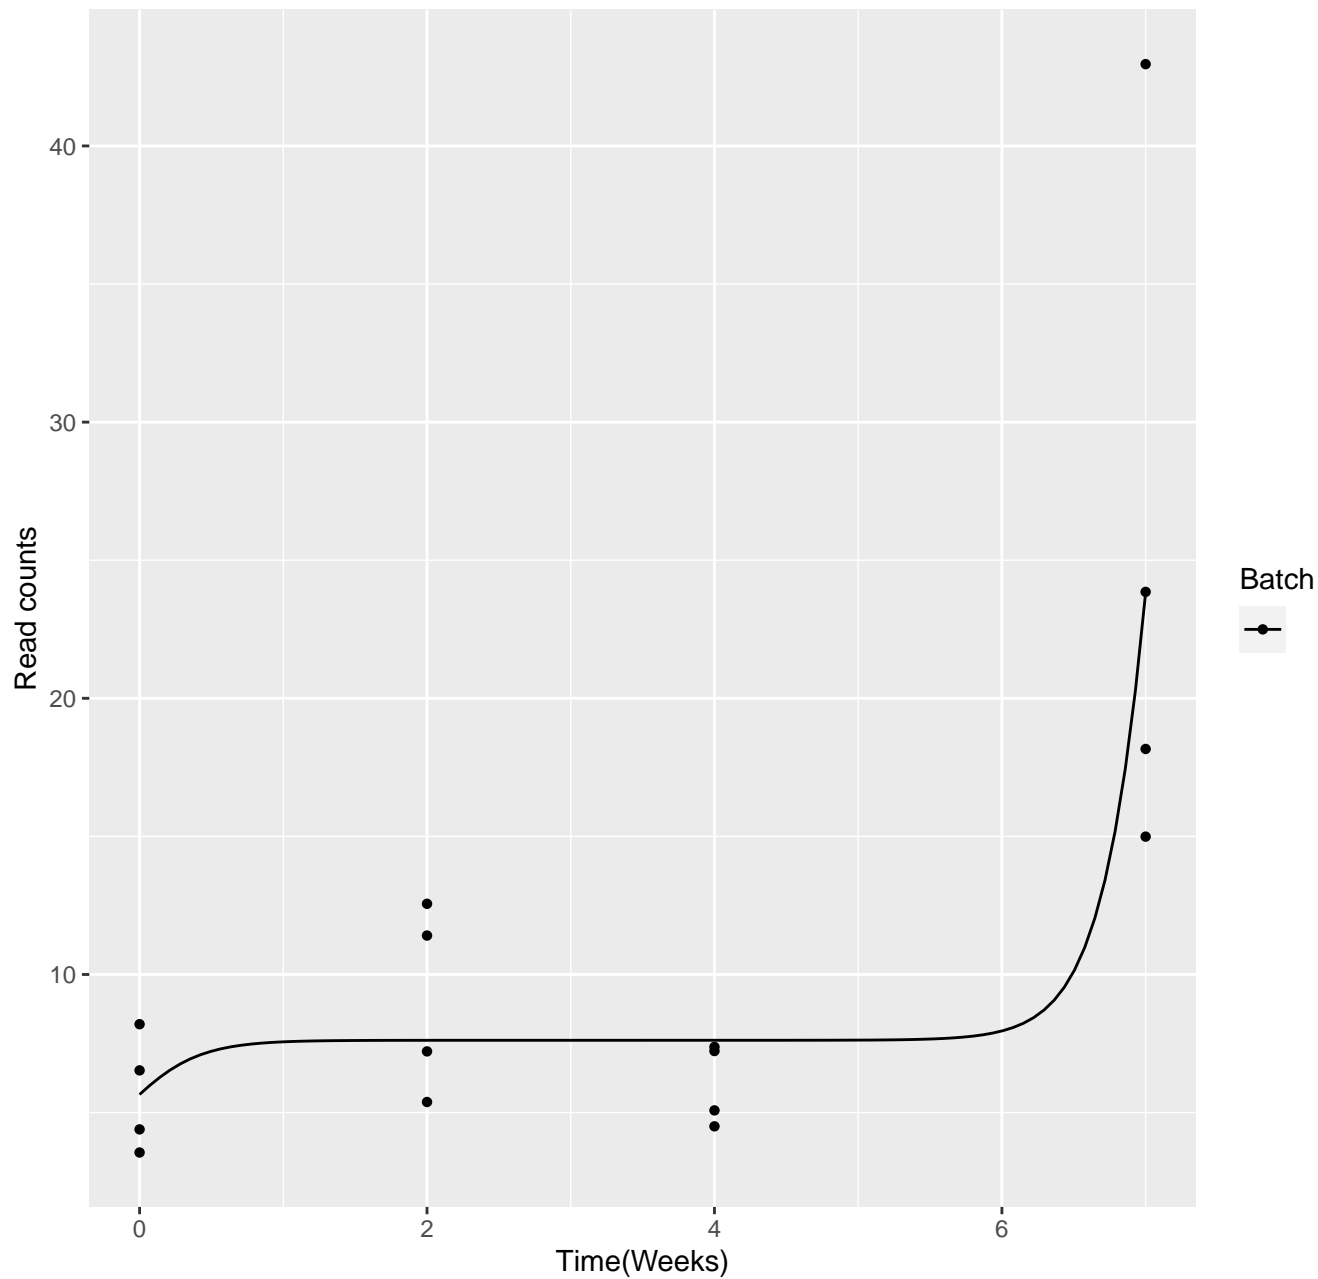



RNF180:  $\log_{10} q = -2.33$

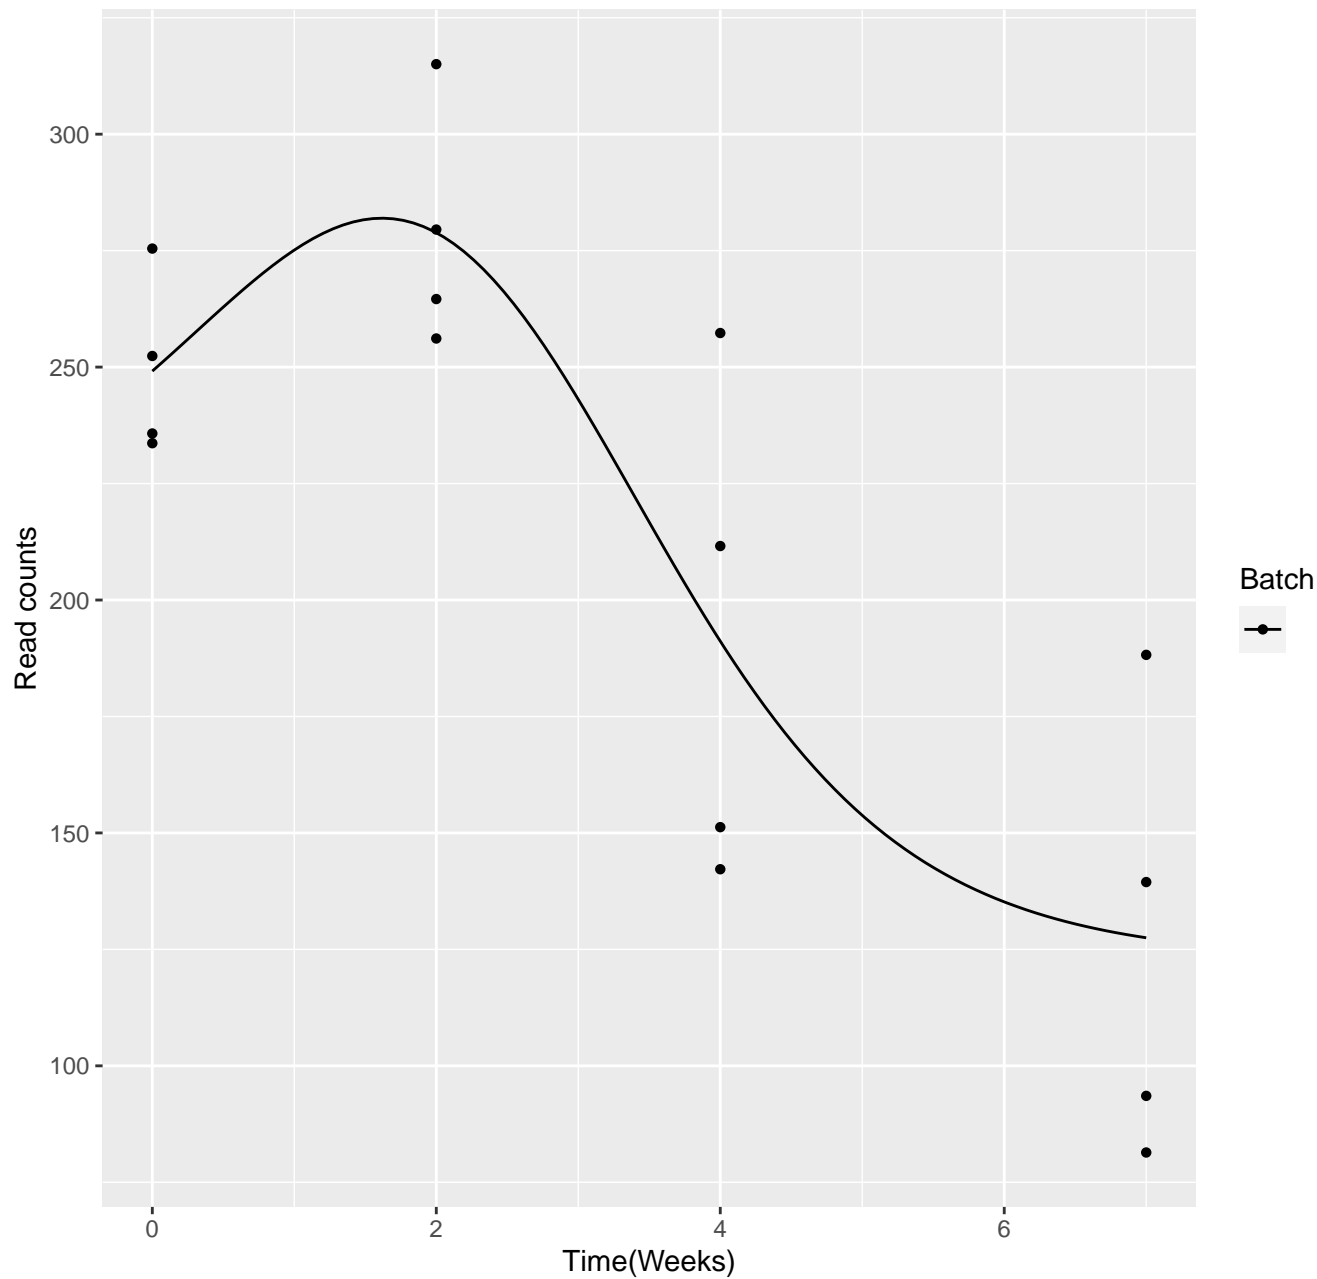

APOE:  $\log_{10} q = -2.33$

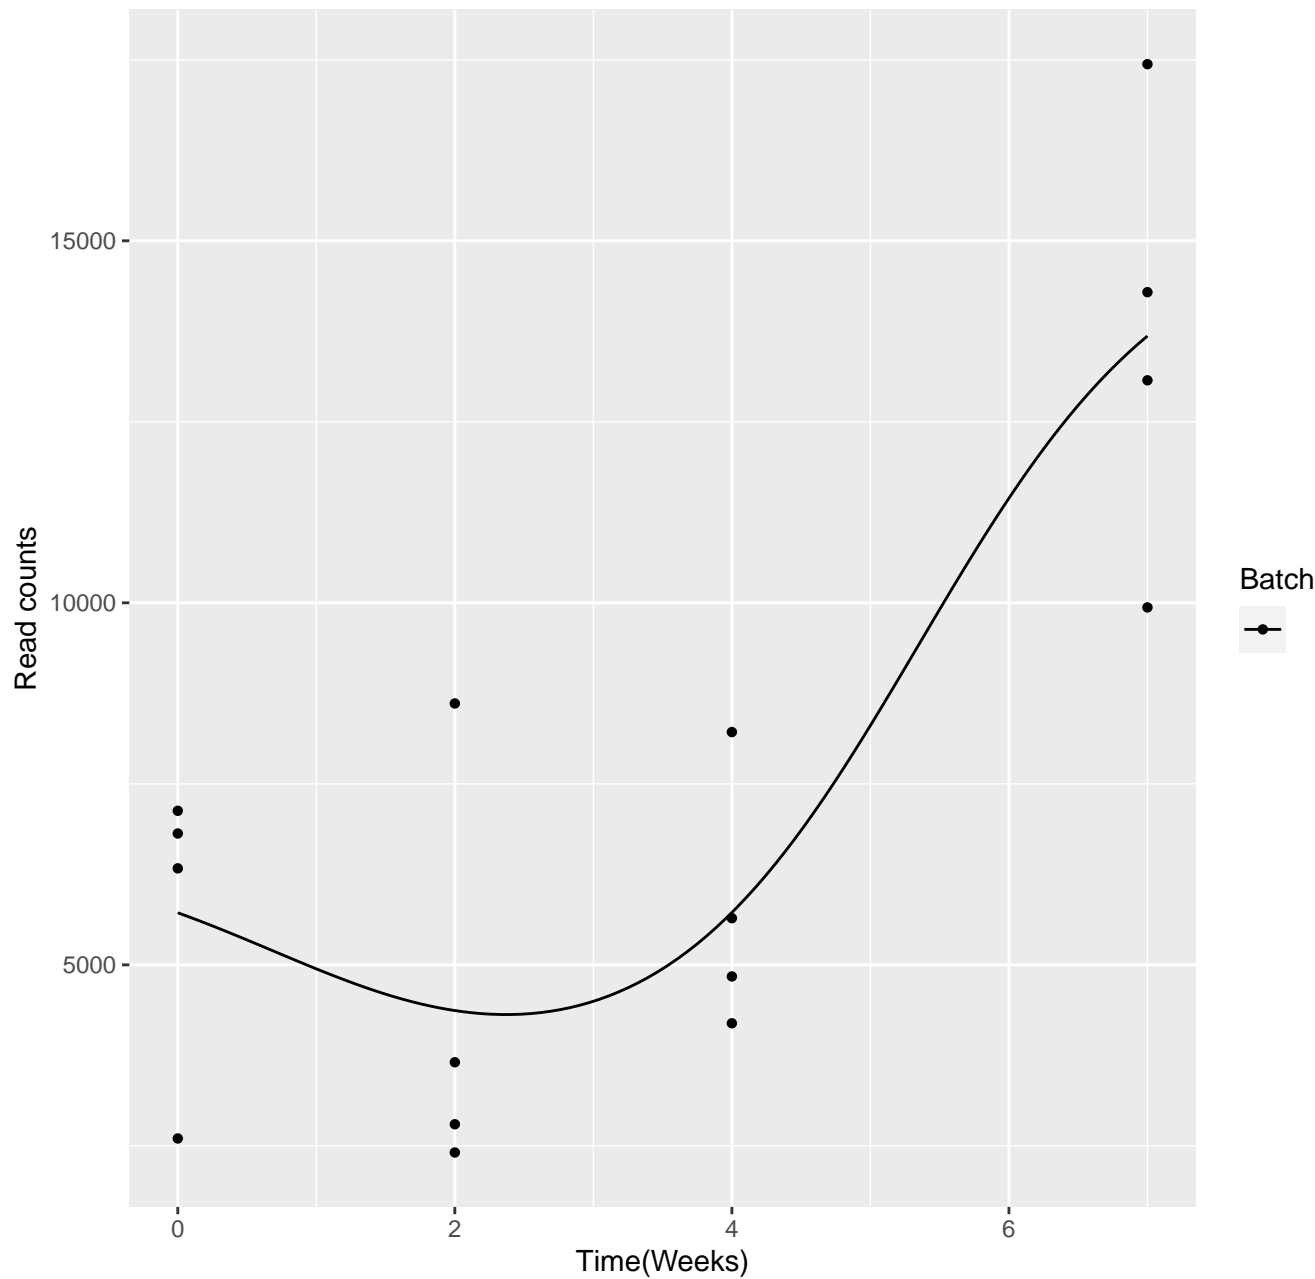

LOC100354980:  $\log_{10} q = -2.33$

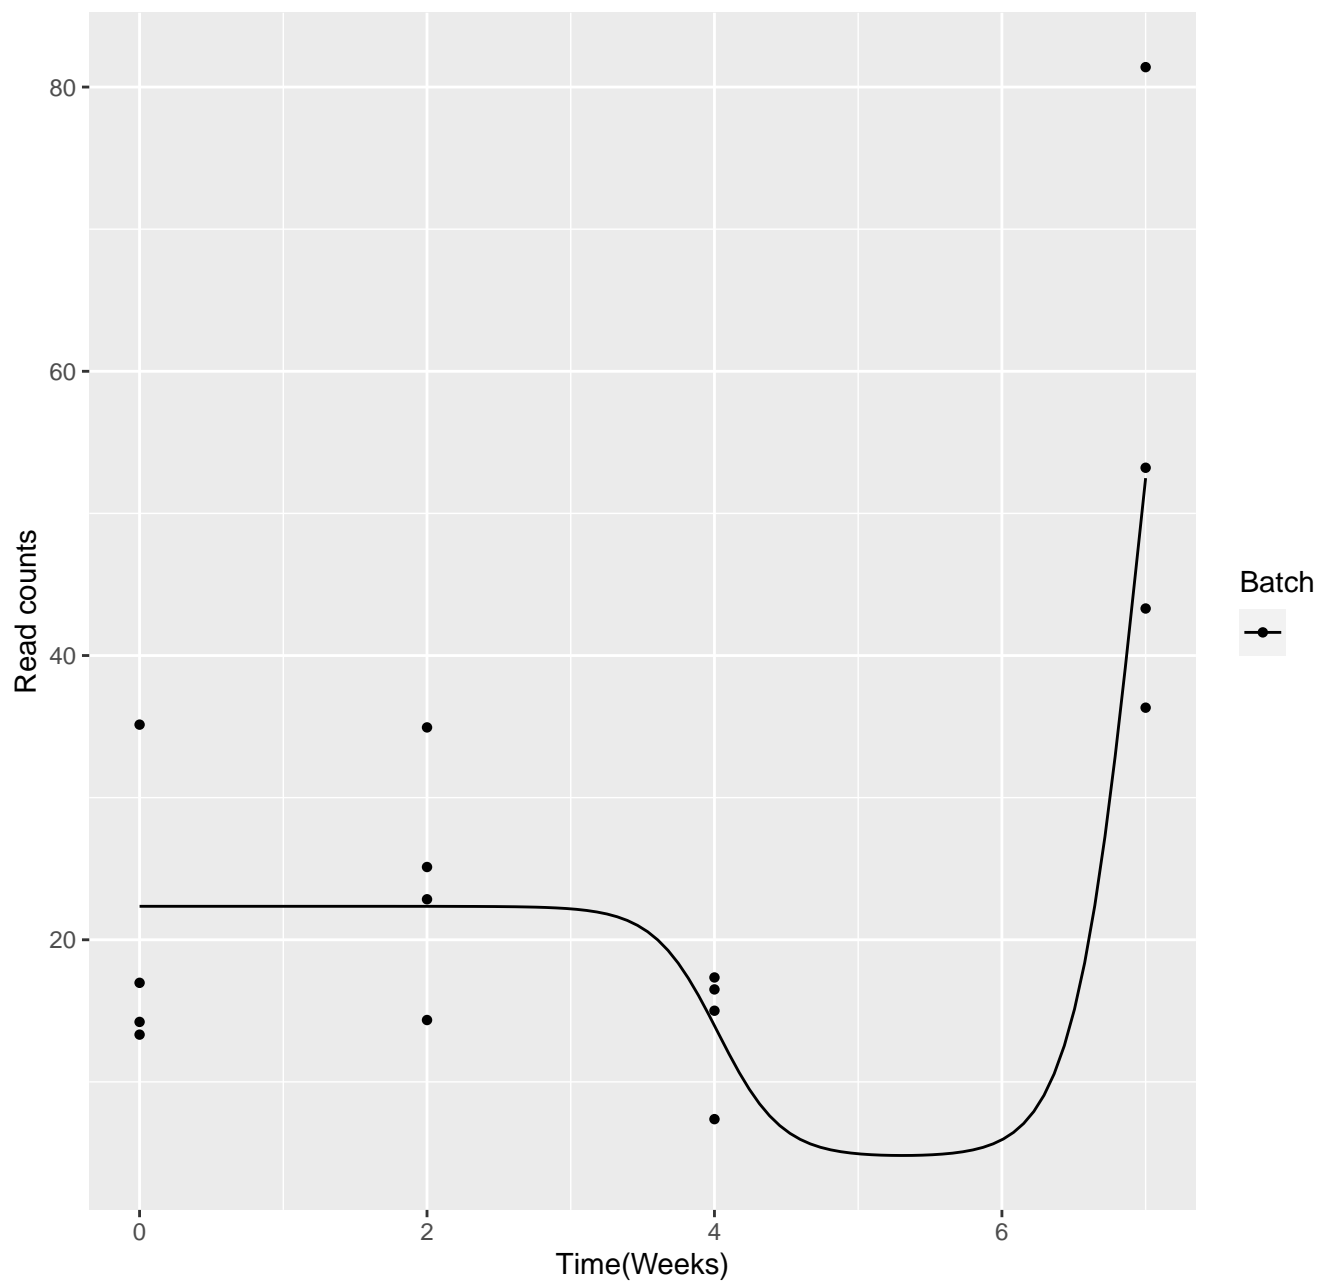

MS4A2:  $\log_{10} q = -2.33$

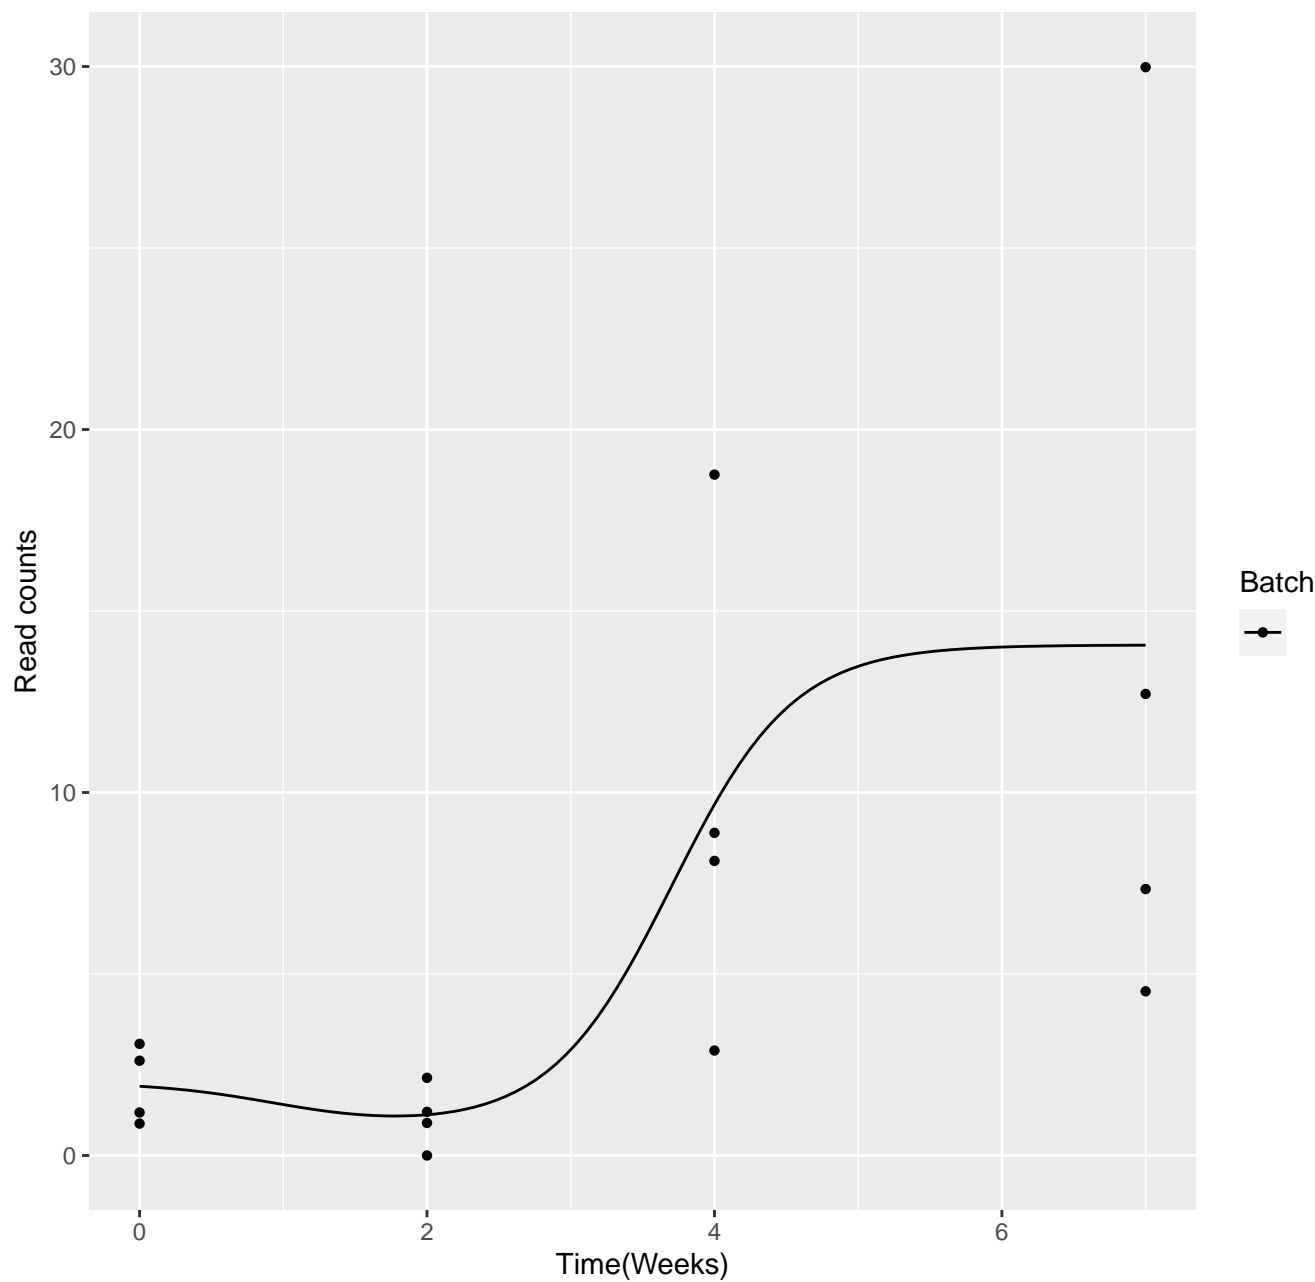

CMYA5:  $\log_{10} q = -2.33$

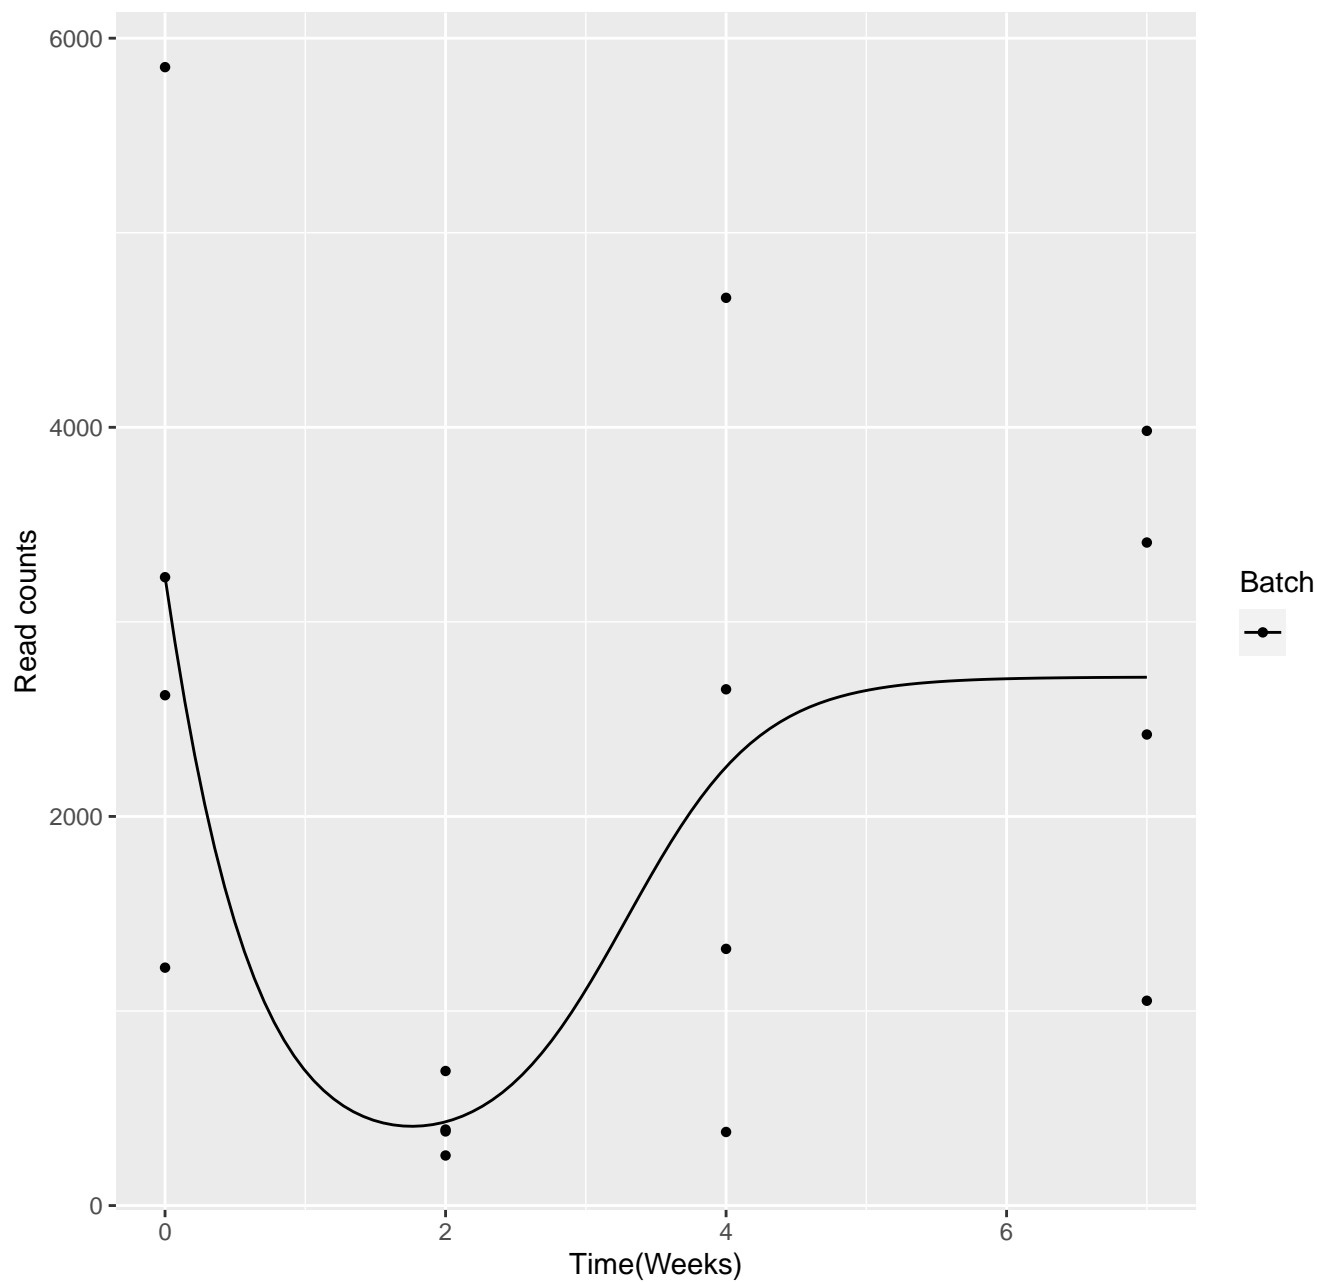

CISH:  $\log_{10} q = -2.33$

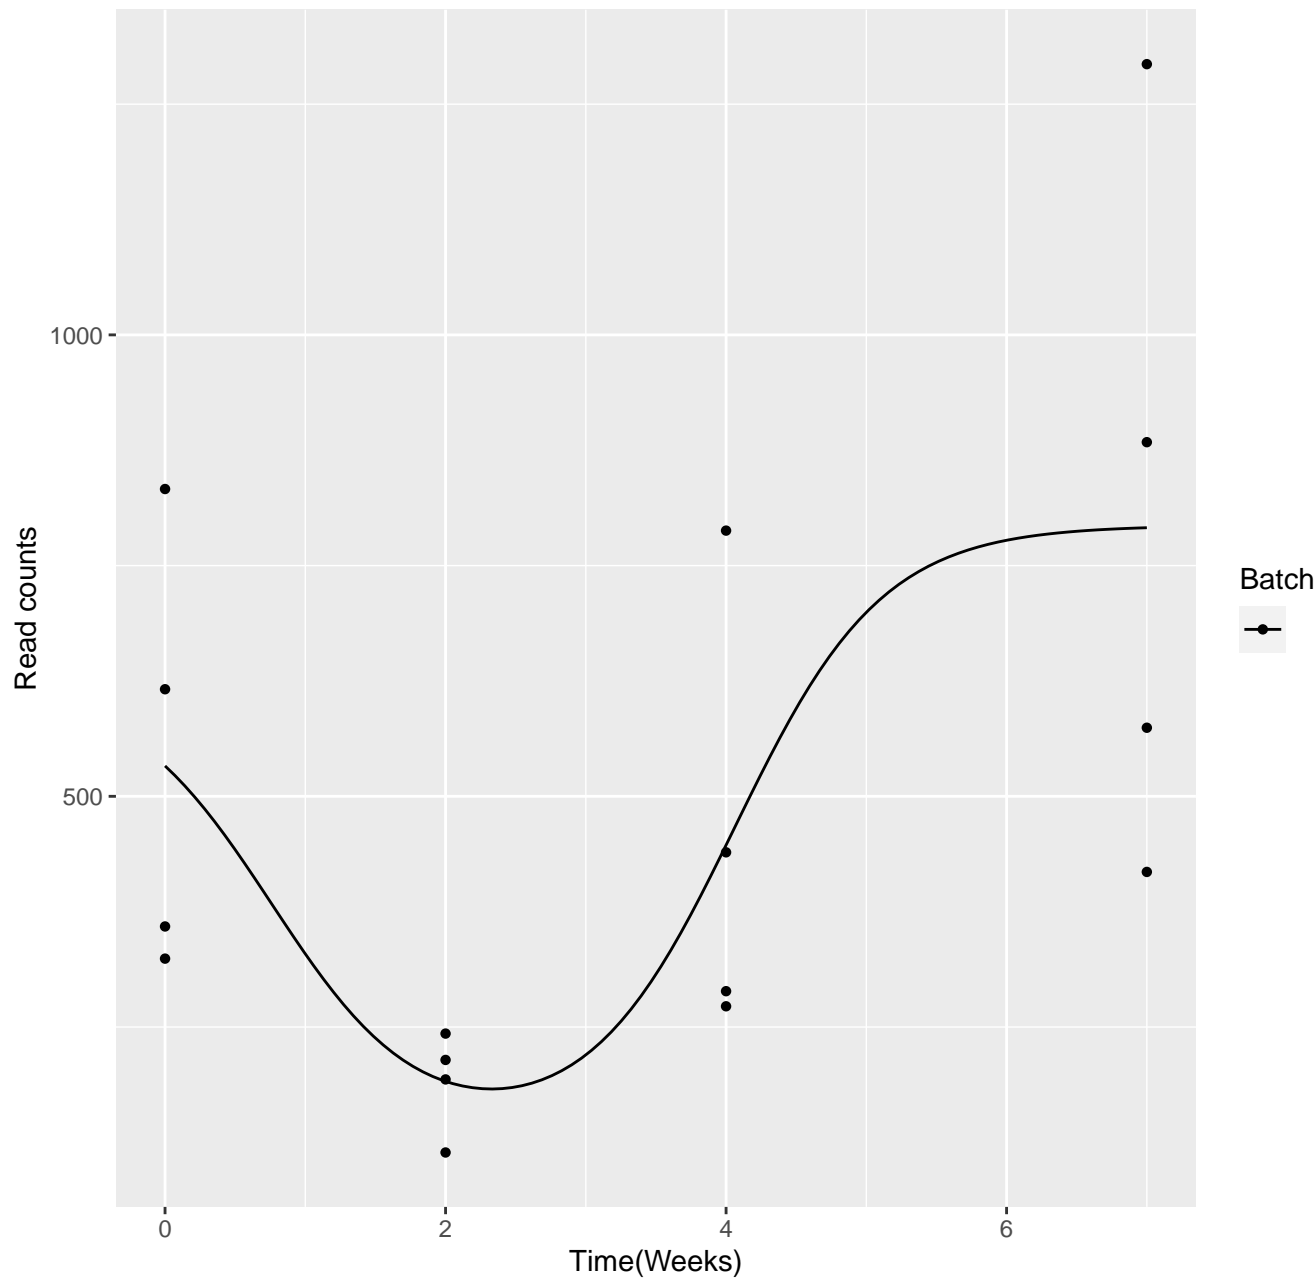

FKBP3:  $\log_{10} q = -2.32$

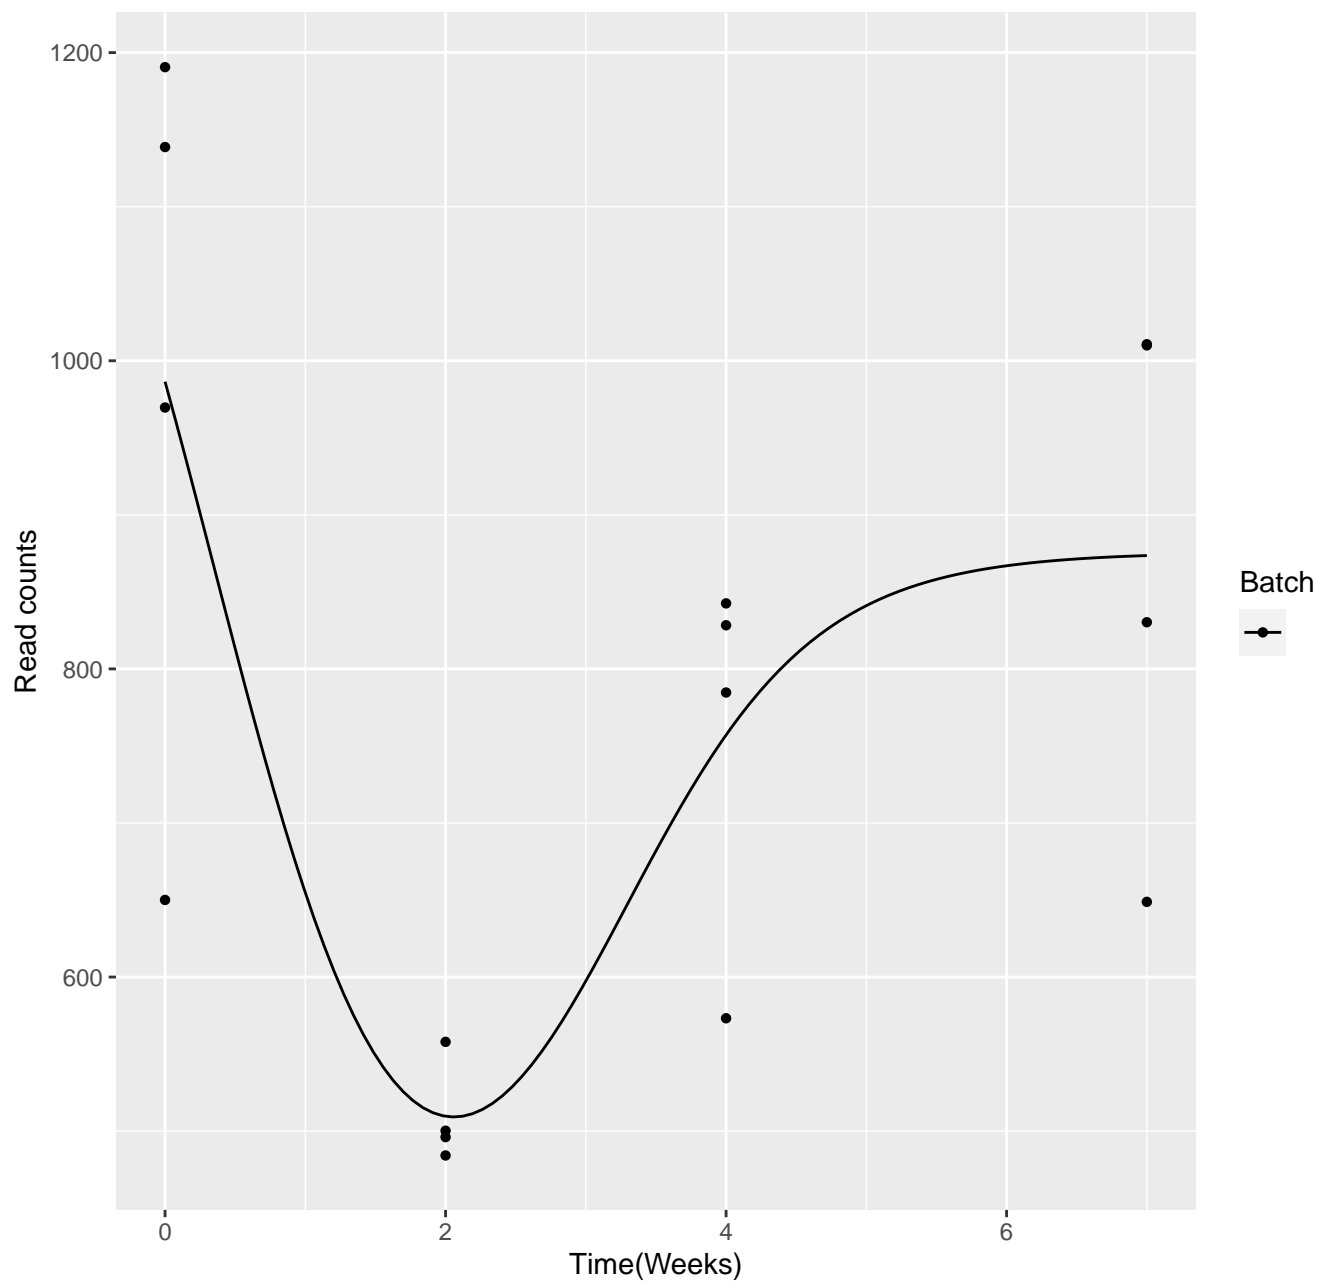

STRADB:  $\log_{10} q = -2.32$

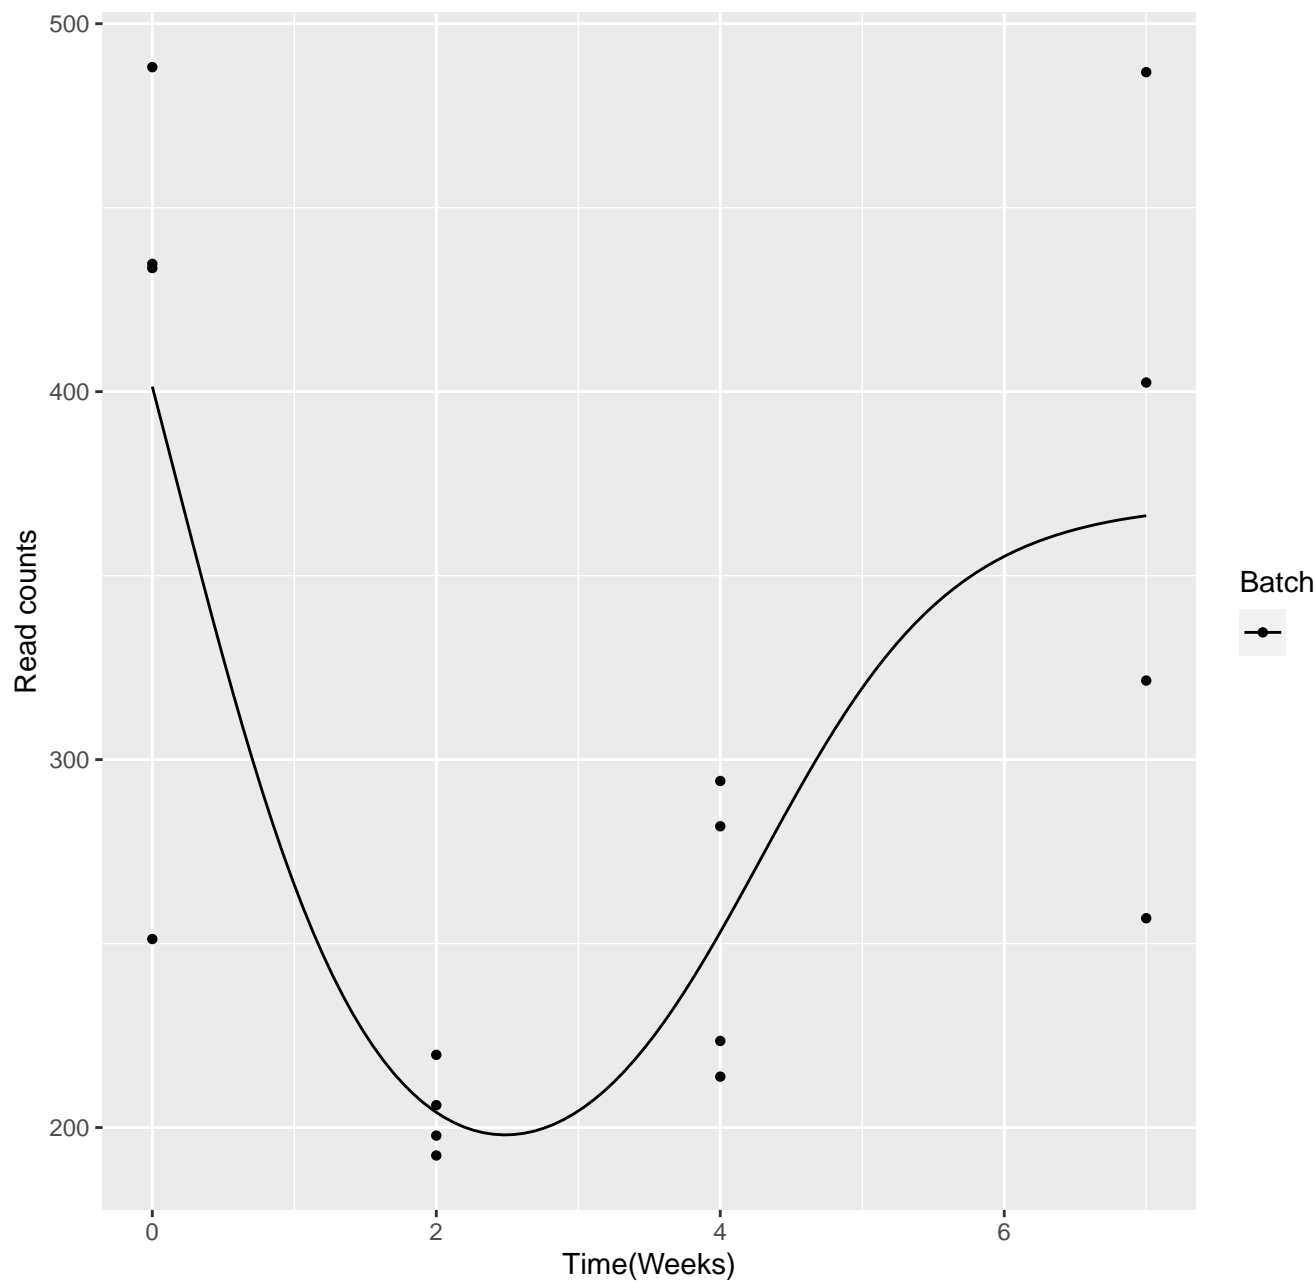



HCAR1:  $\log_{10} q = -2.32$

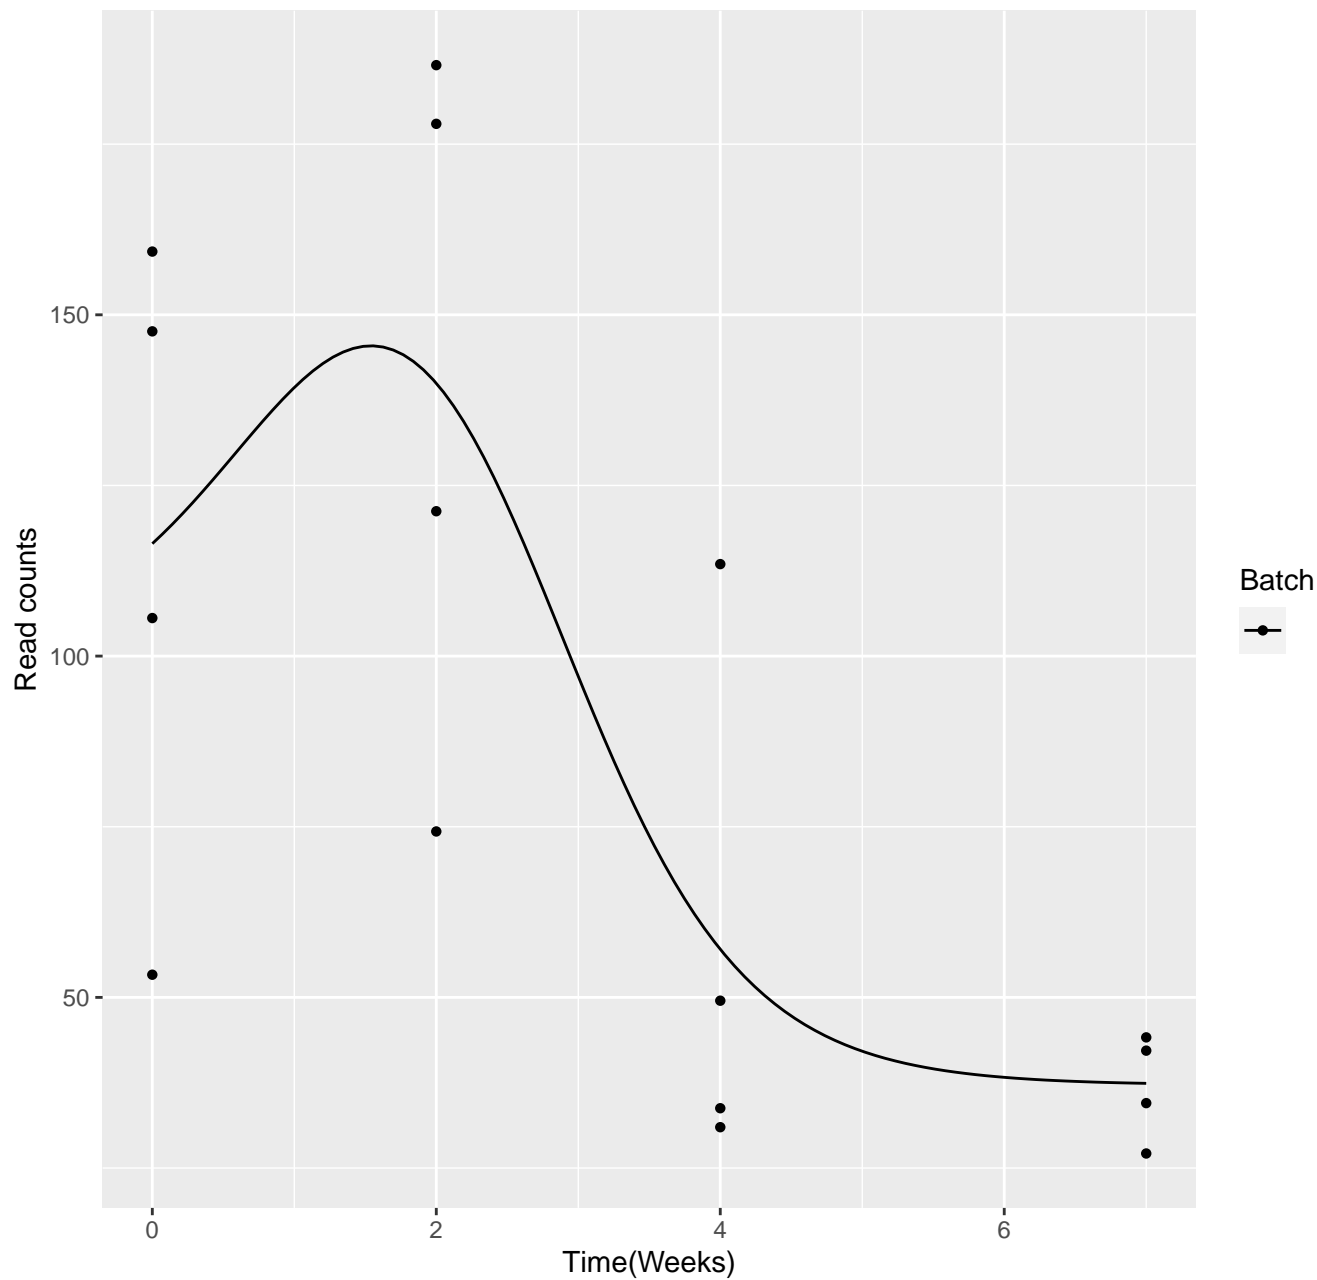

FMC1:  $\log_{10} q = -2.32$

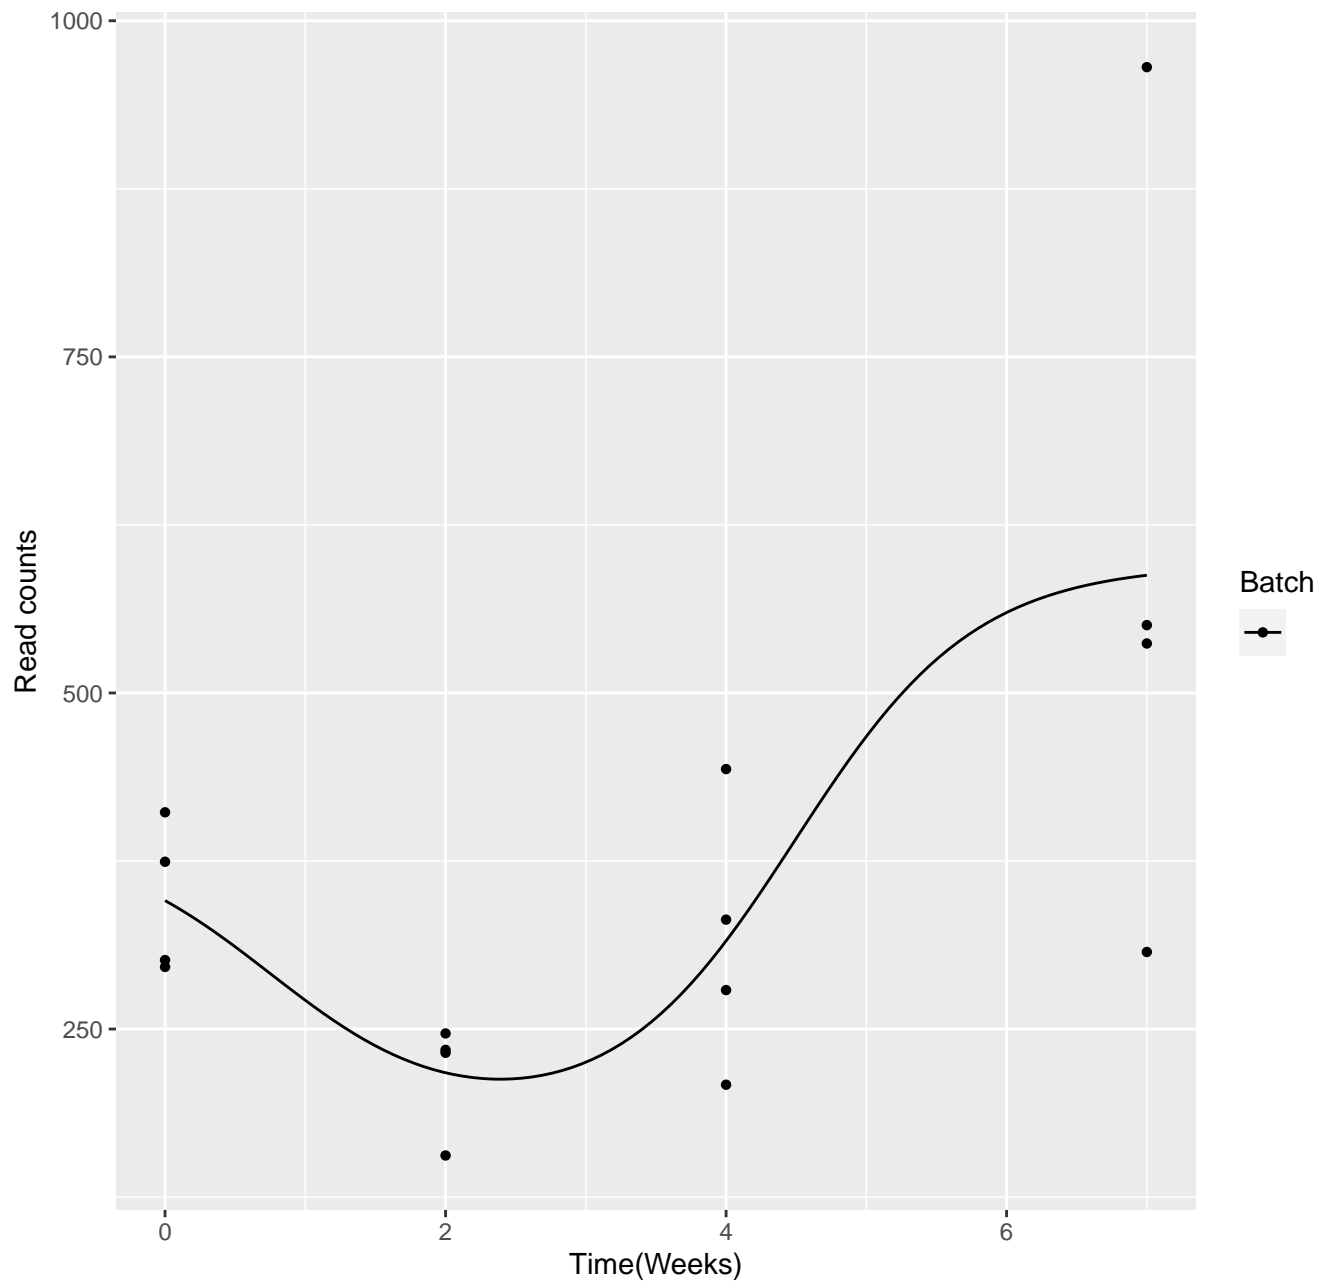

GUSB:  $\log_{10} q = -2.32$

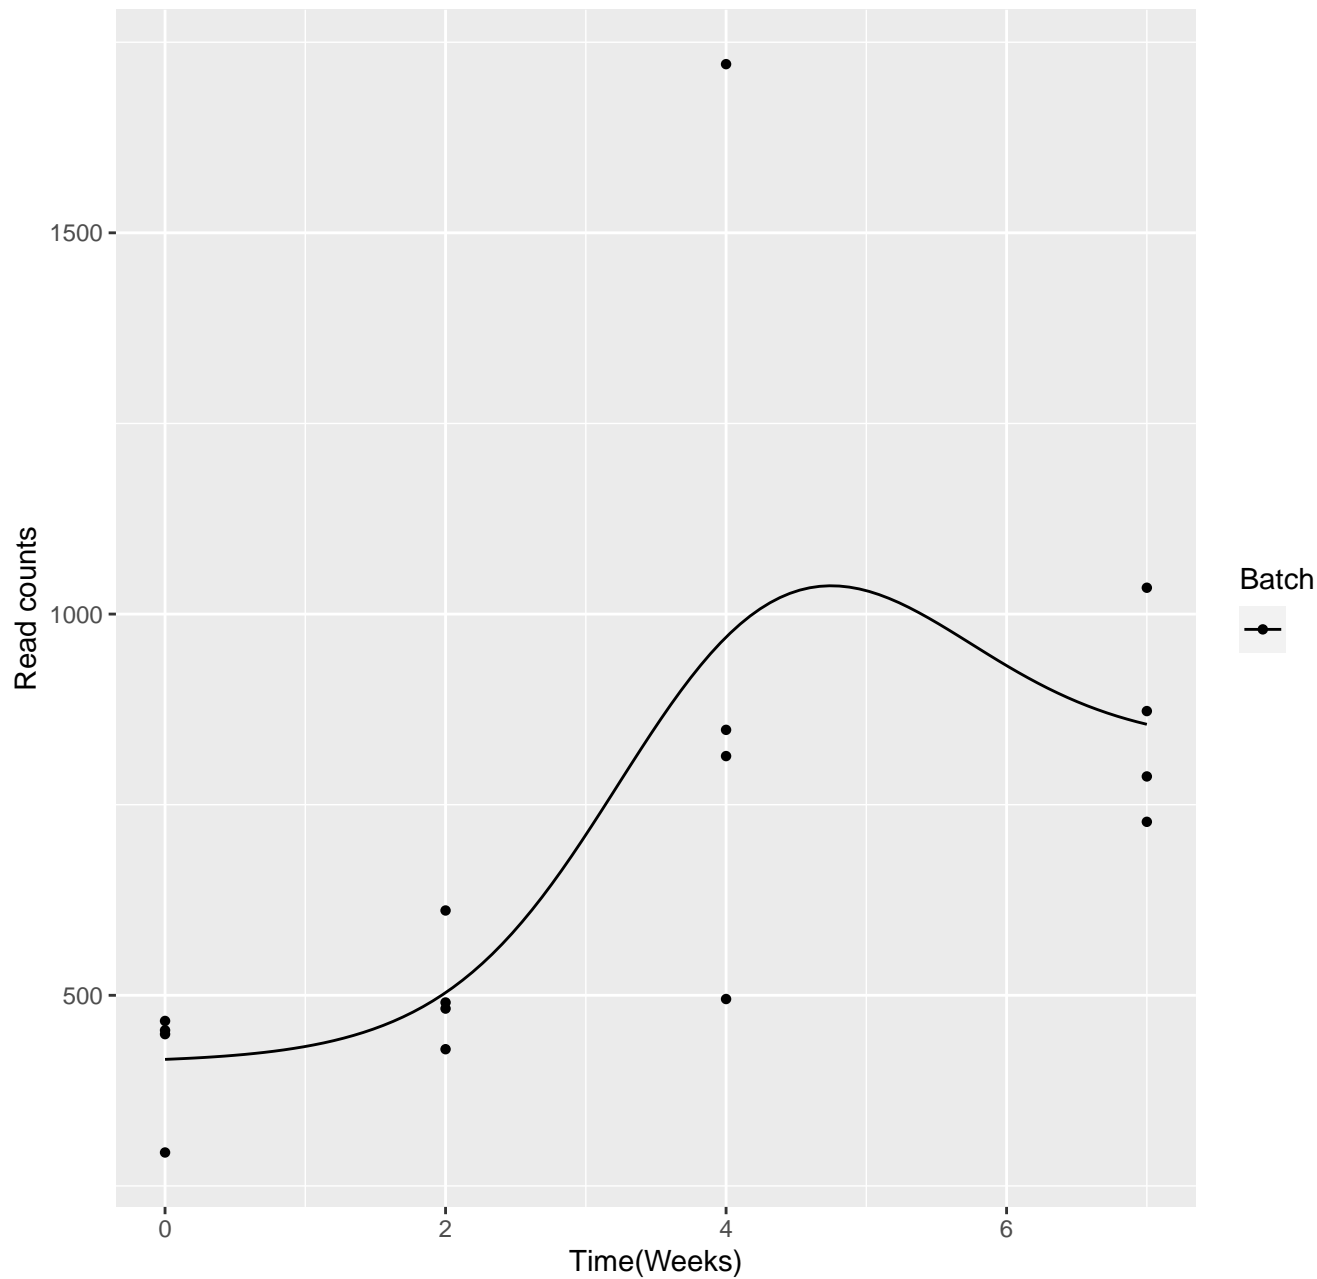

LOC100348481:  $\log_{10} q = -2.32$

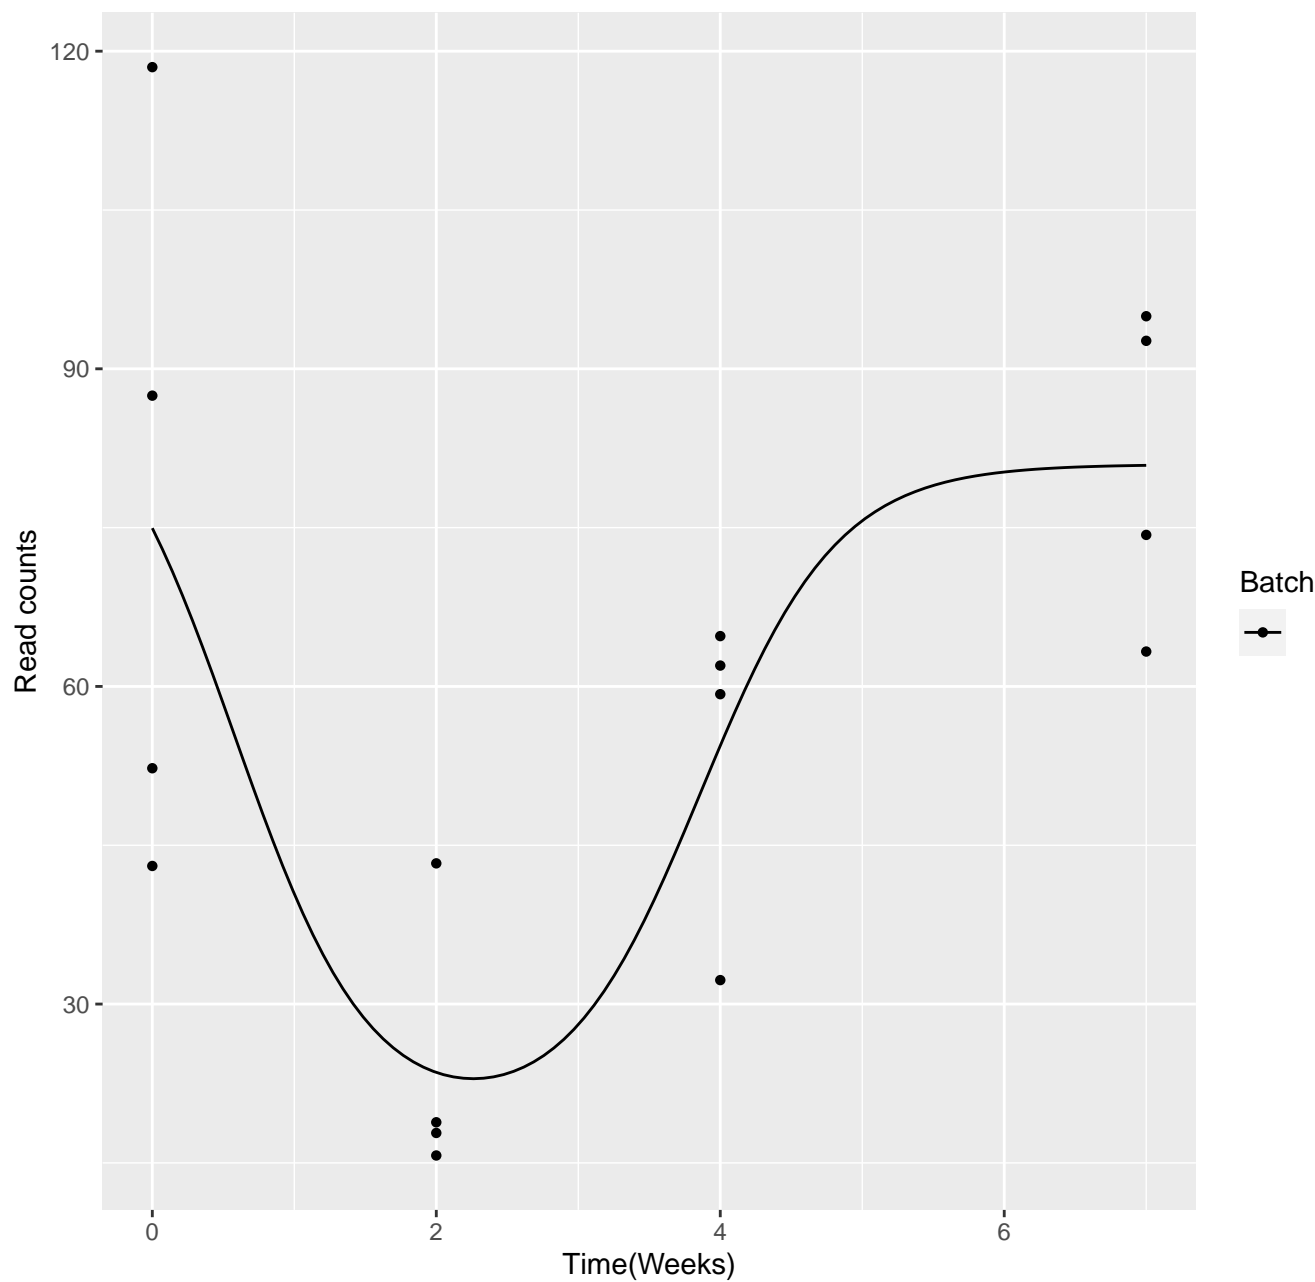

SMS:  $\log_{10} q = -2.32$

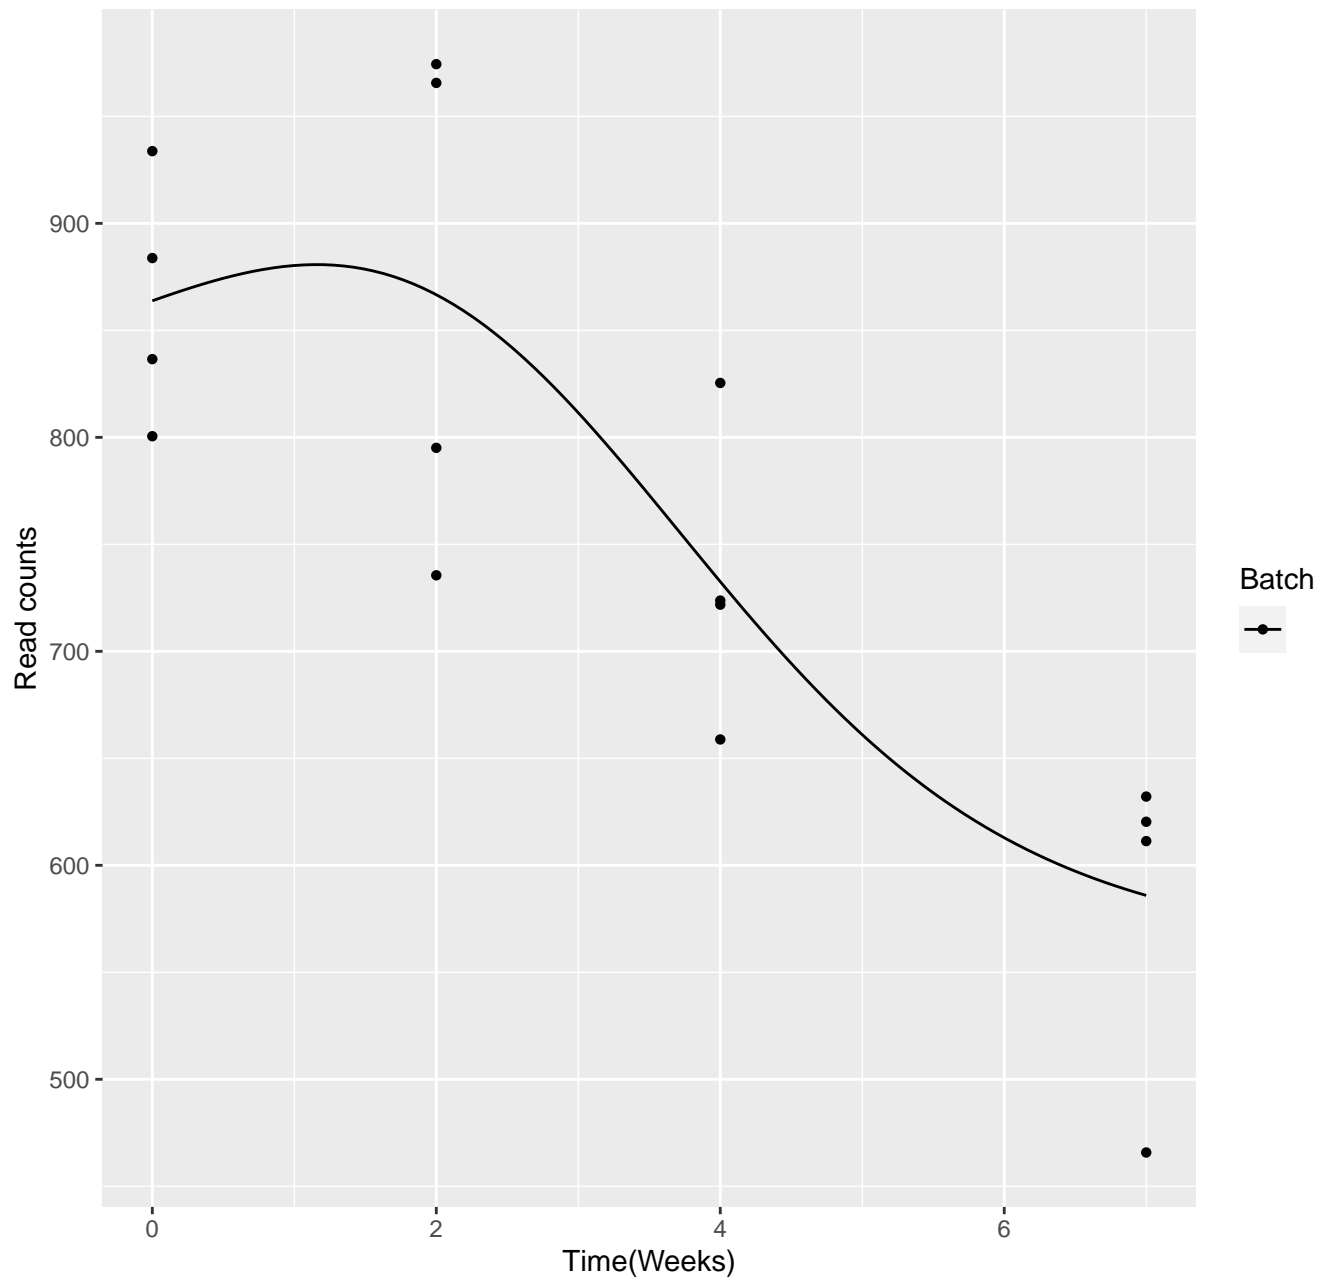

PLEKHG2:  $\log_{10} q = -2.32$

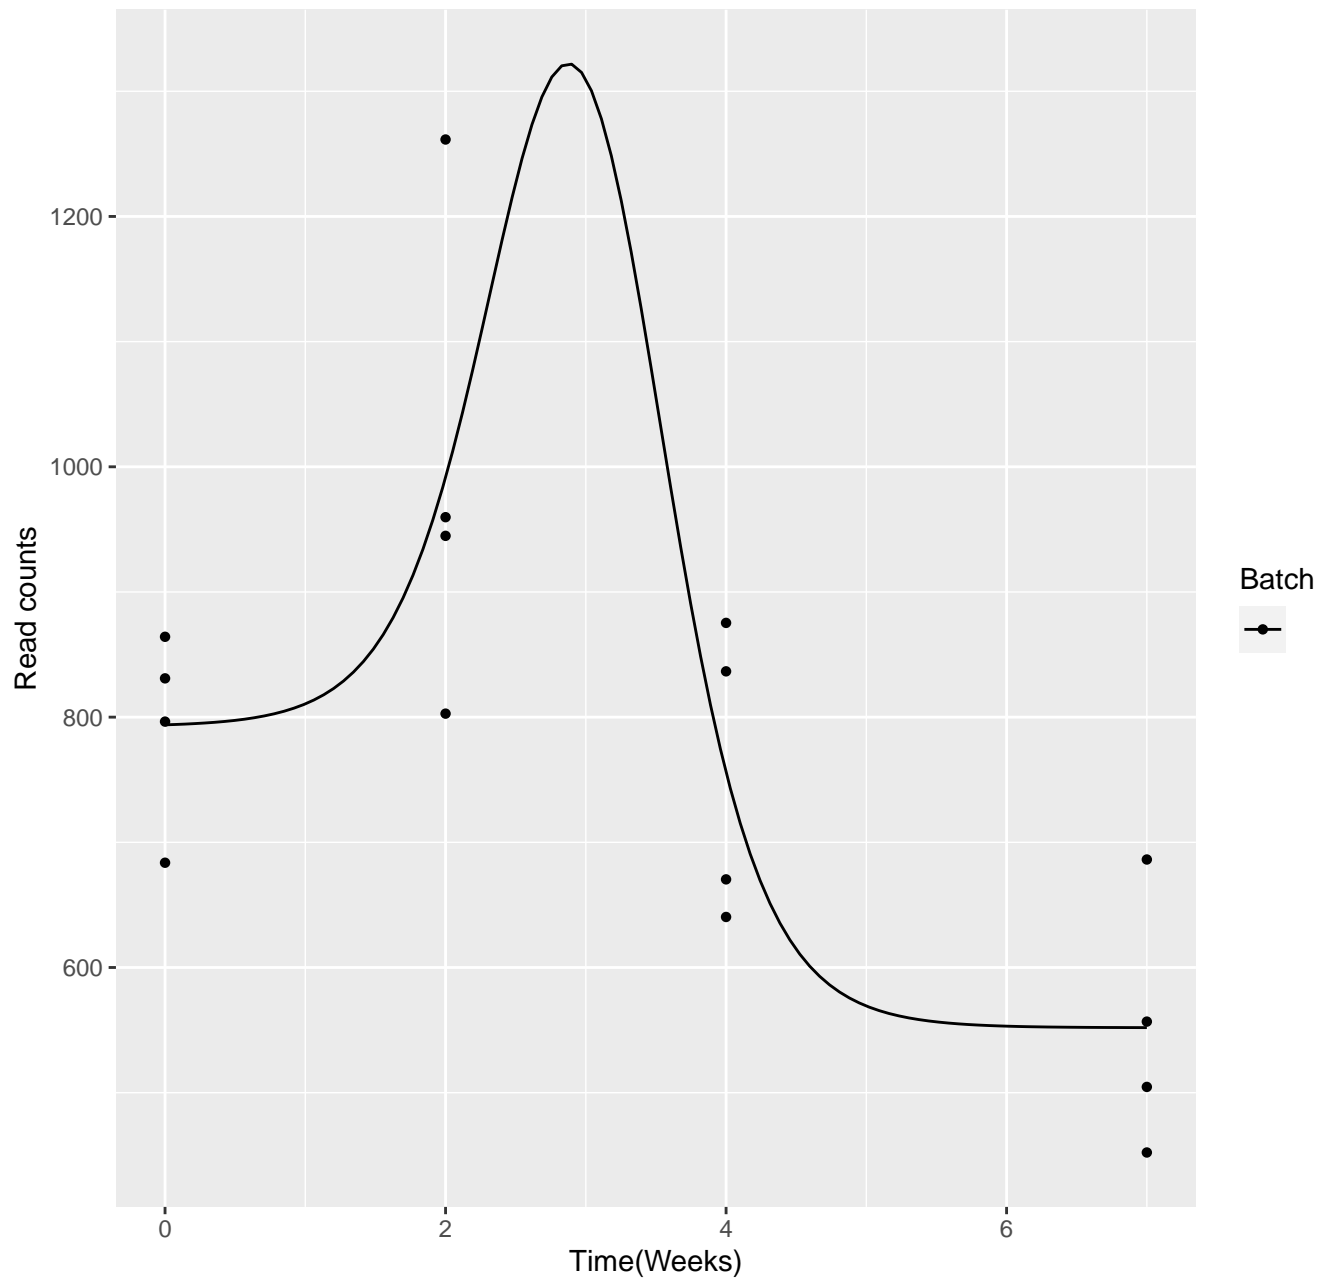

LOC103346581:  $\log_{10} q = -2.31$

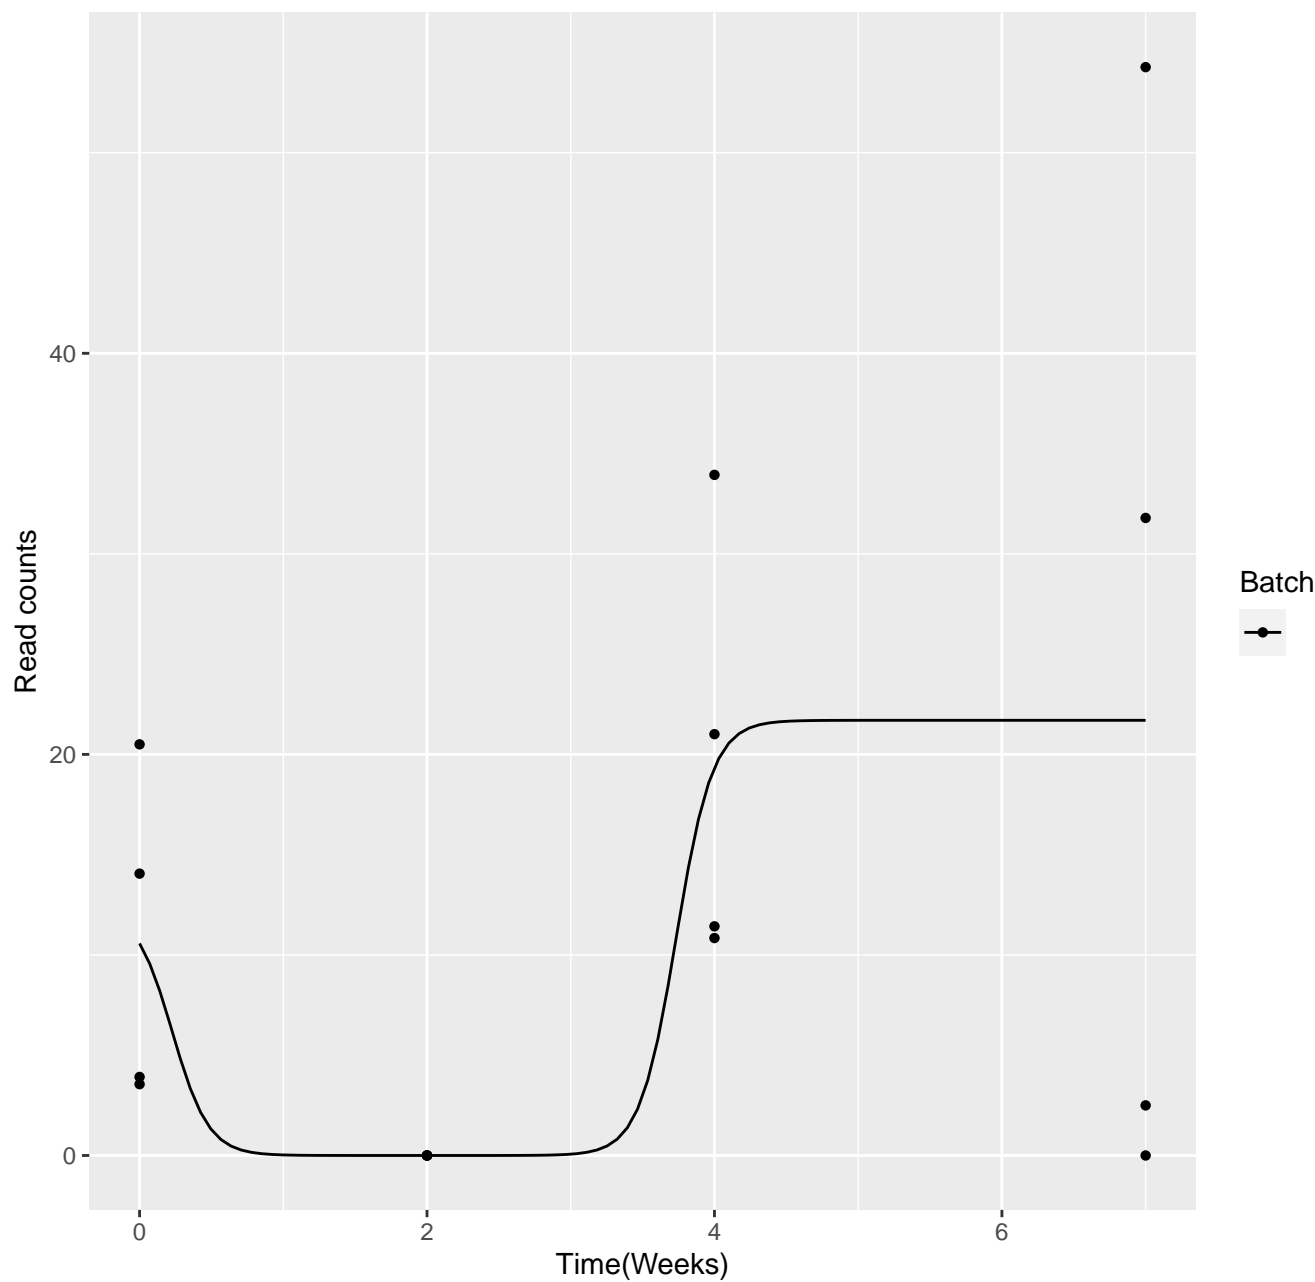

PDK3:  $\log_{10} q = -2.31$

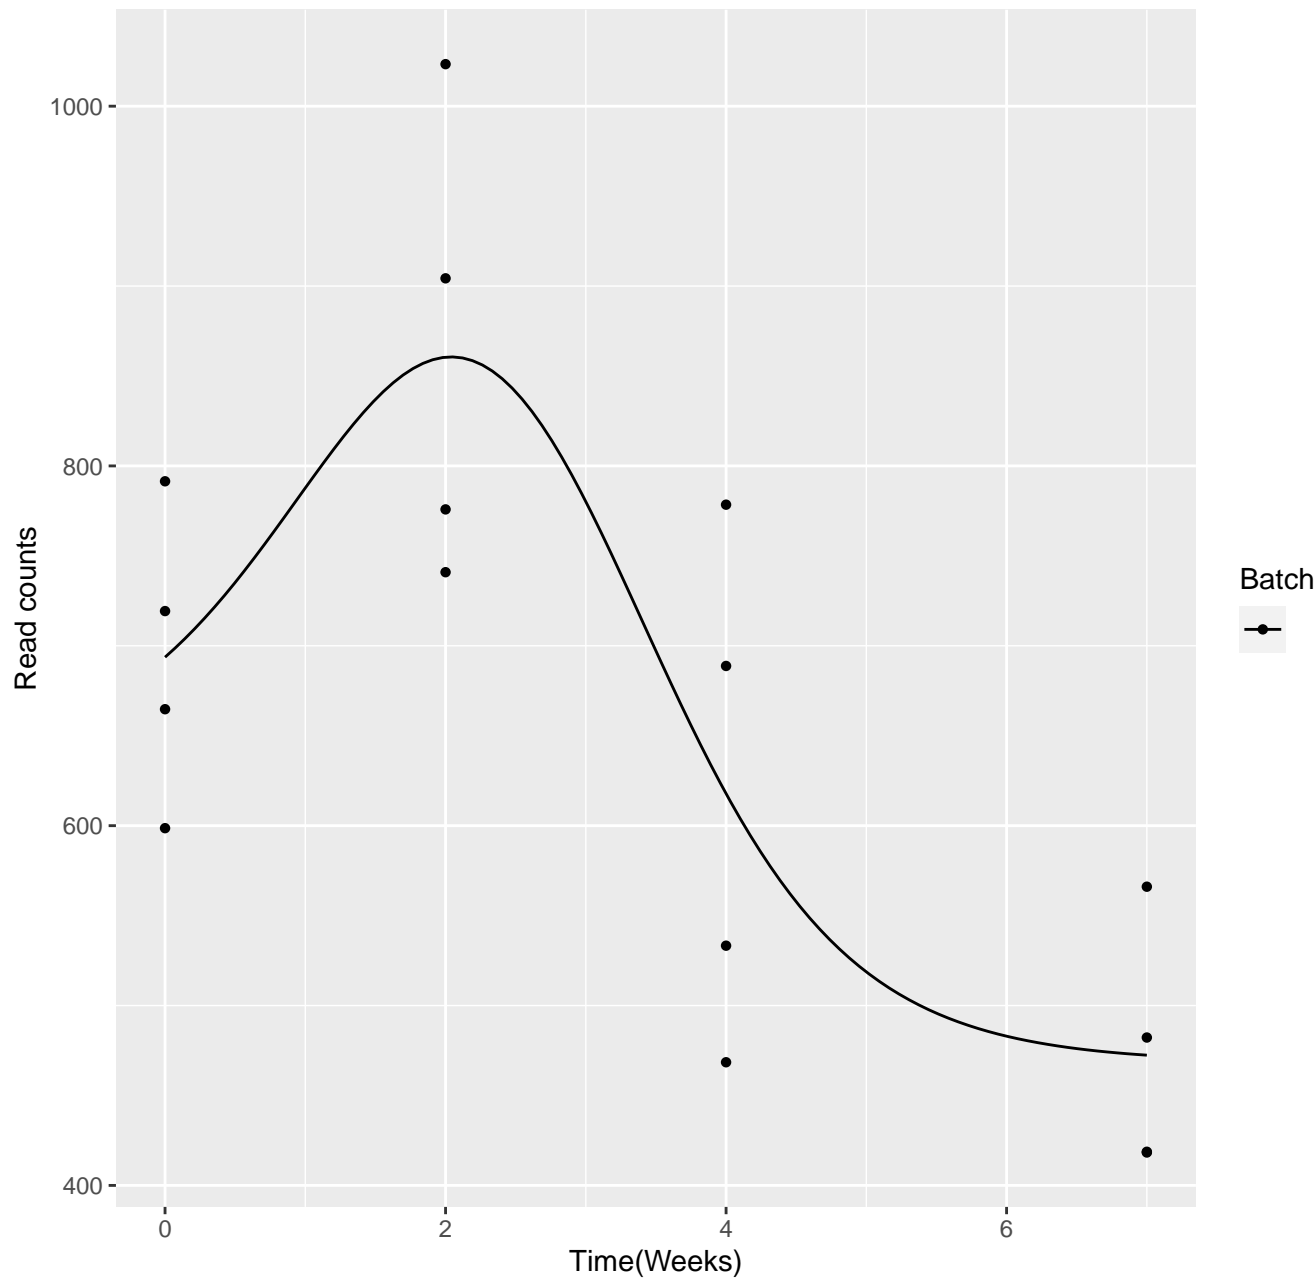



NDUFA5:  $\log_{10} q = -2.31$

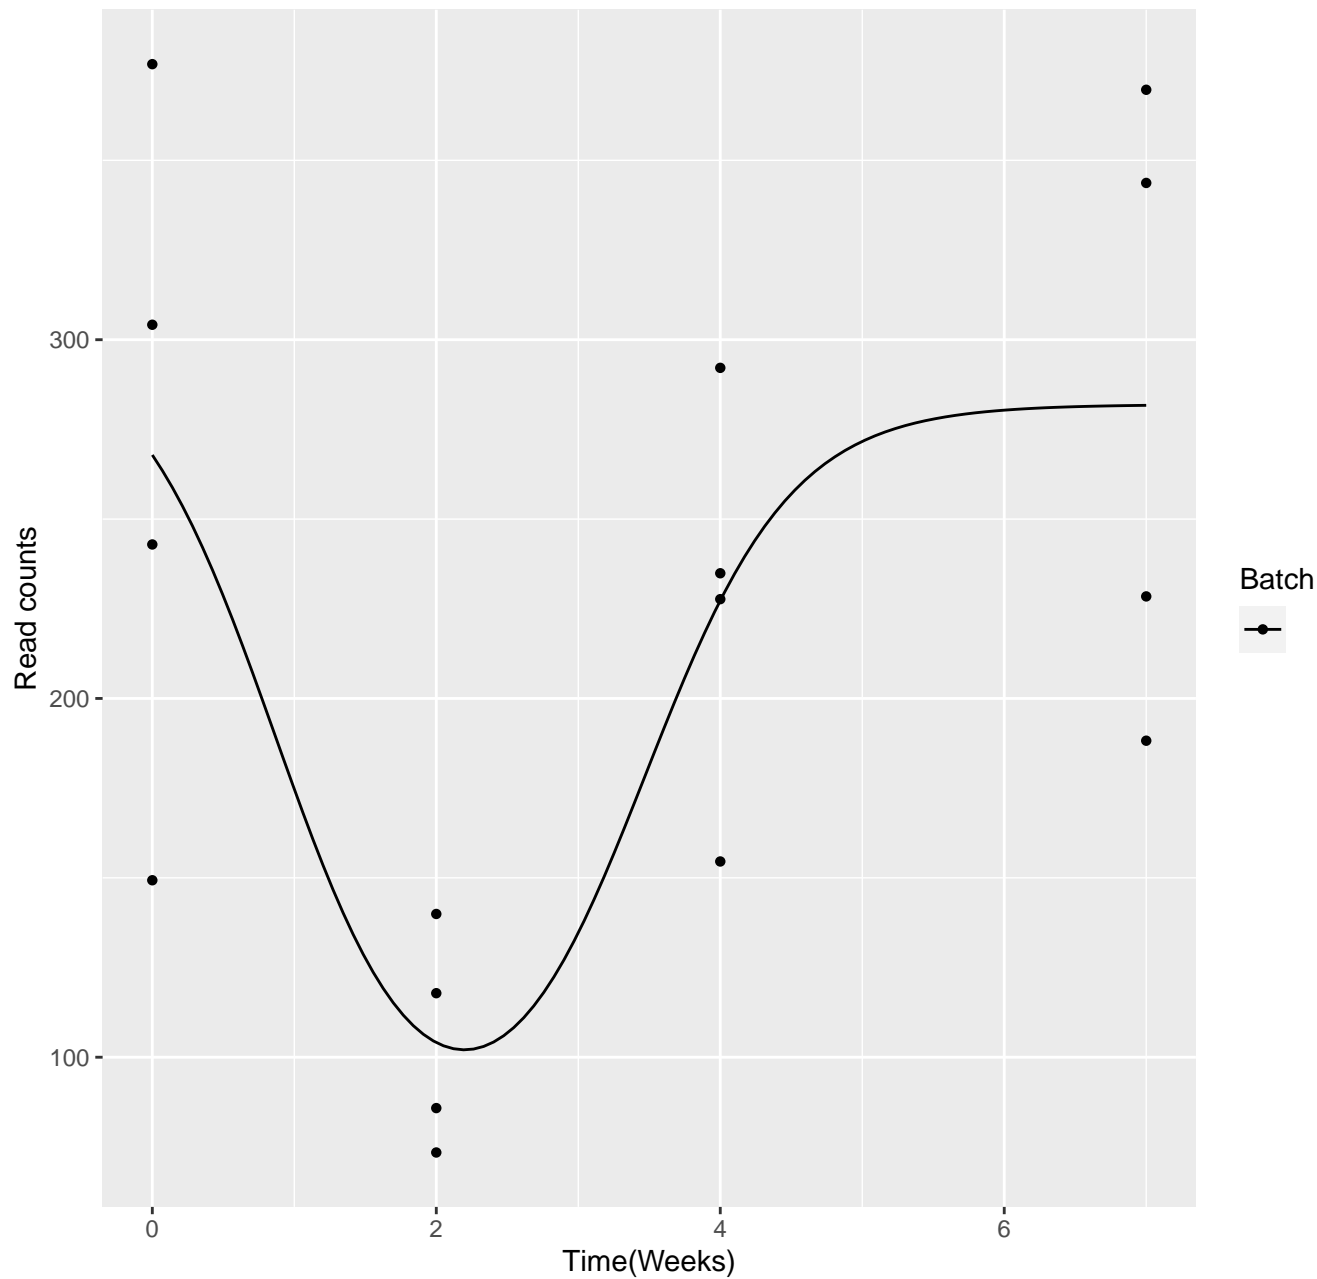

TSPO:  $\log_{10} q = -2.31$

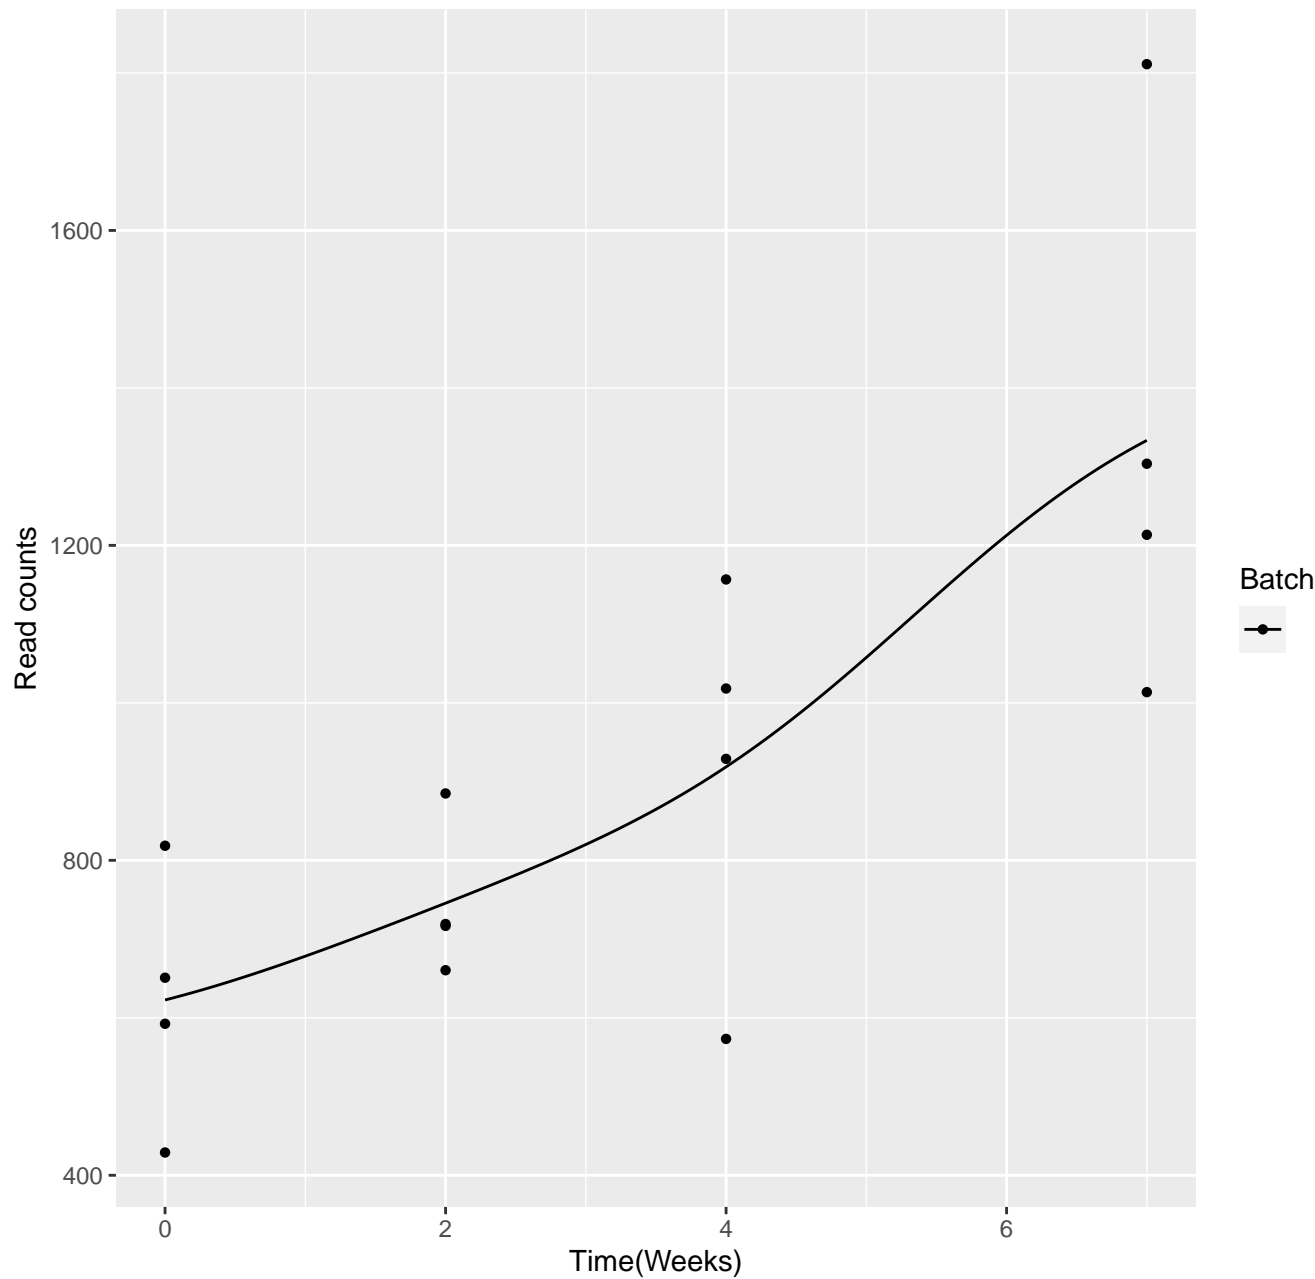

LTF:  $\log_{10} q = -2.31$

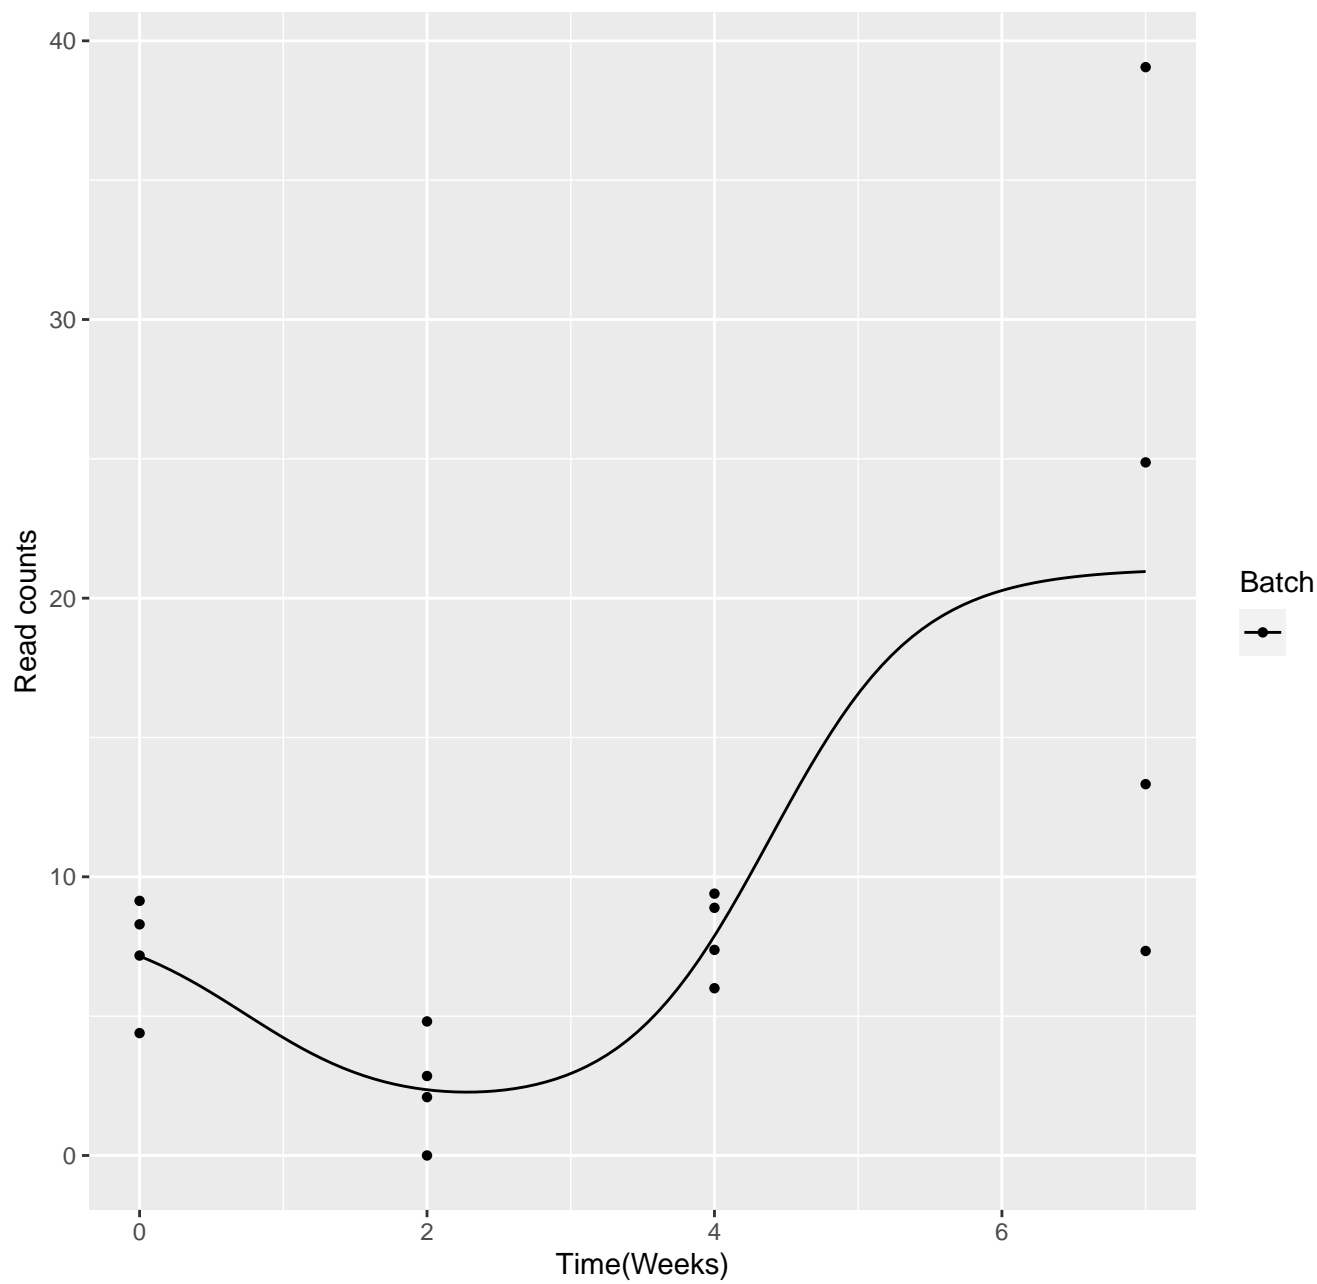

PPL:  $\log_{10} q = -2.31$

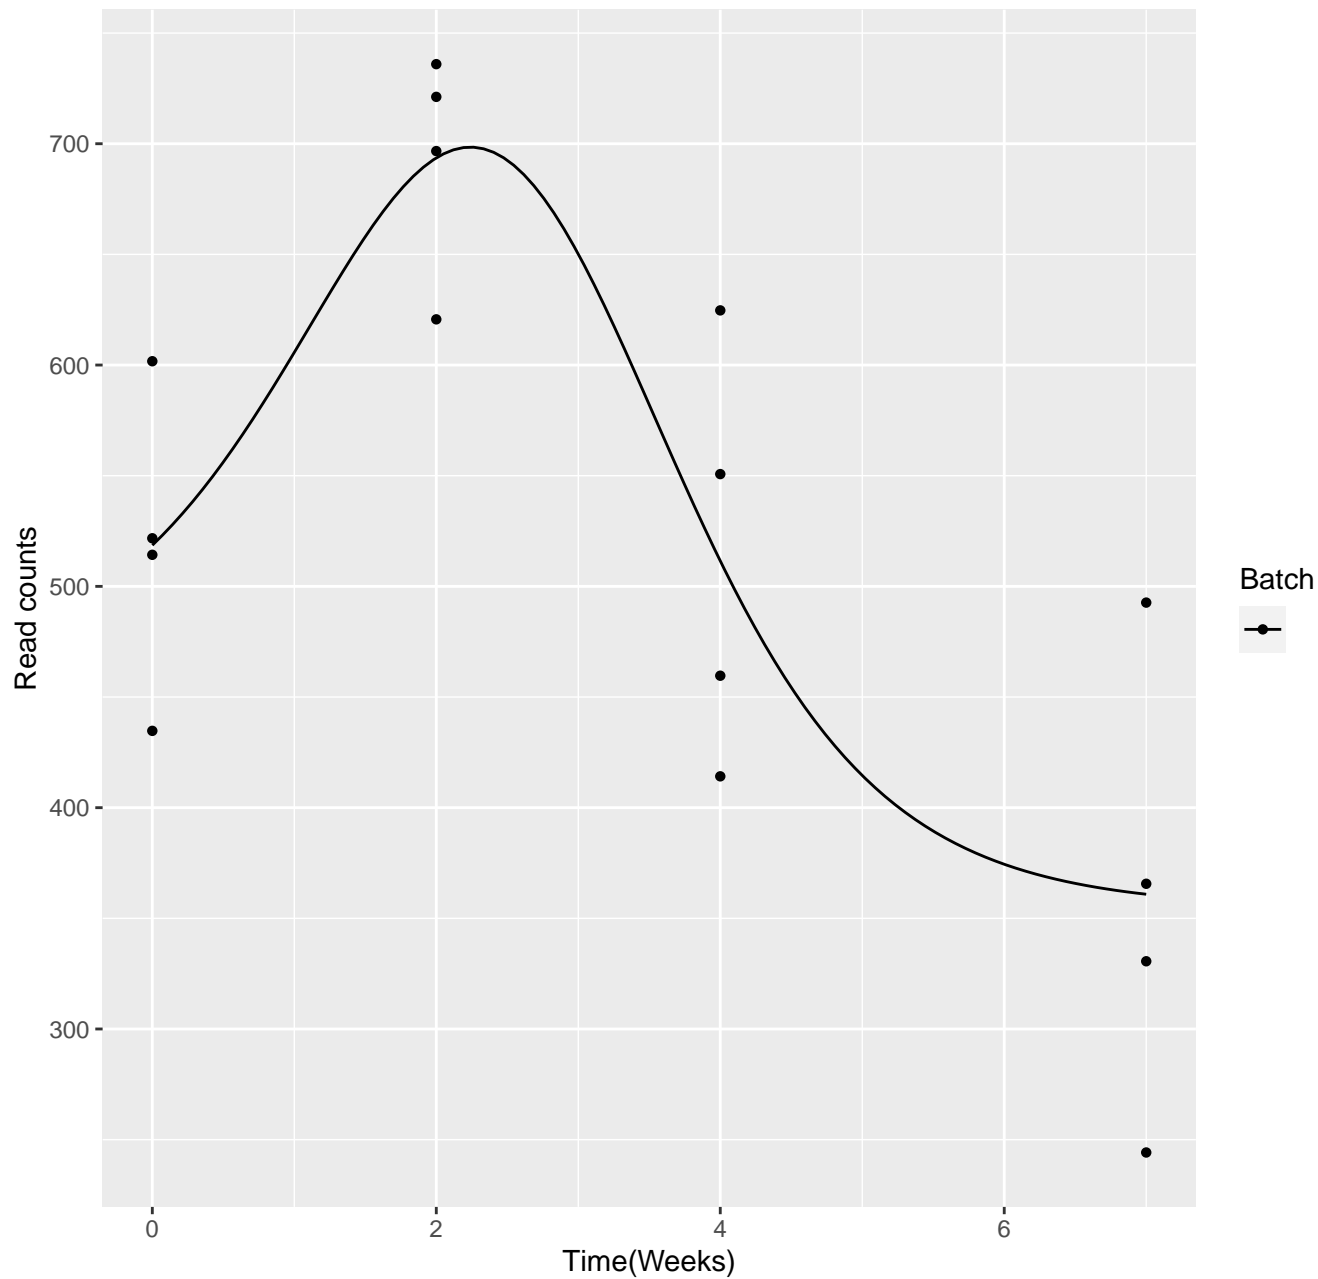

PPP1R14A:  $\log_{10} q = -2.31$

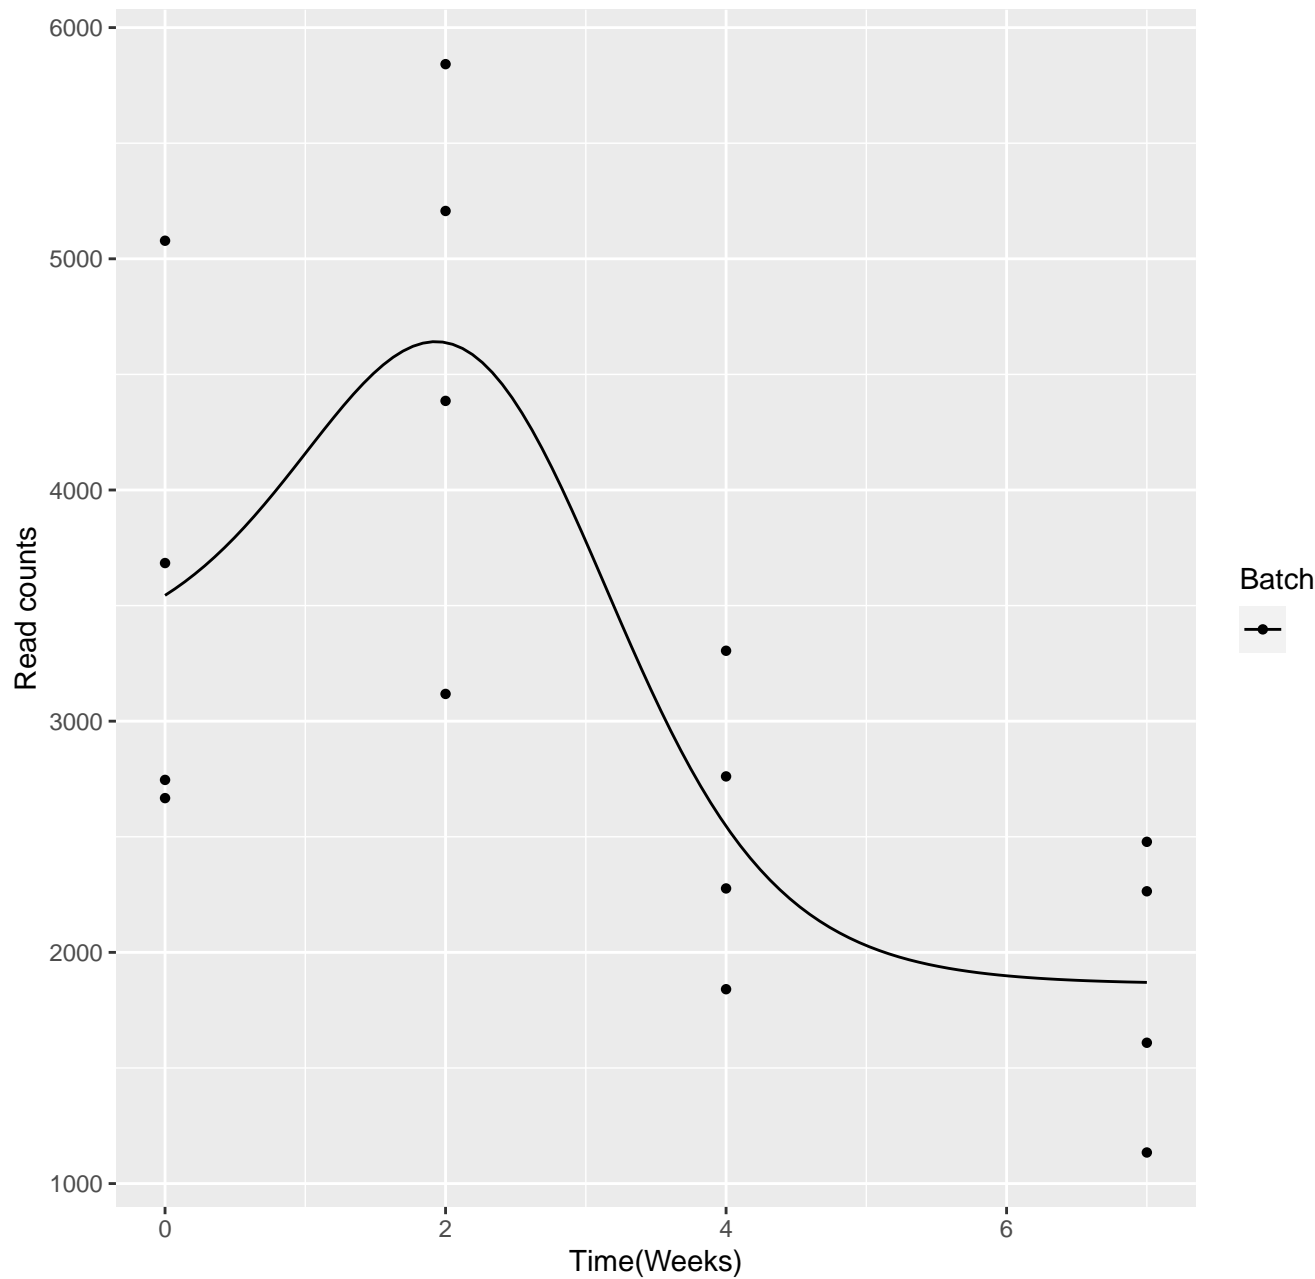

TLR4:  $\log_{10} q = -2.31$

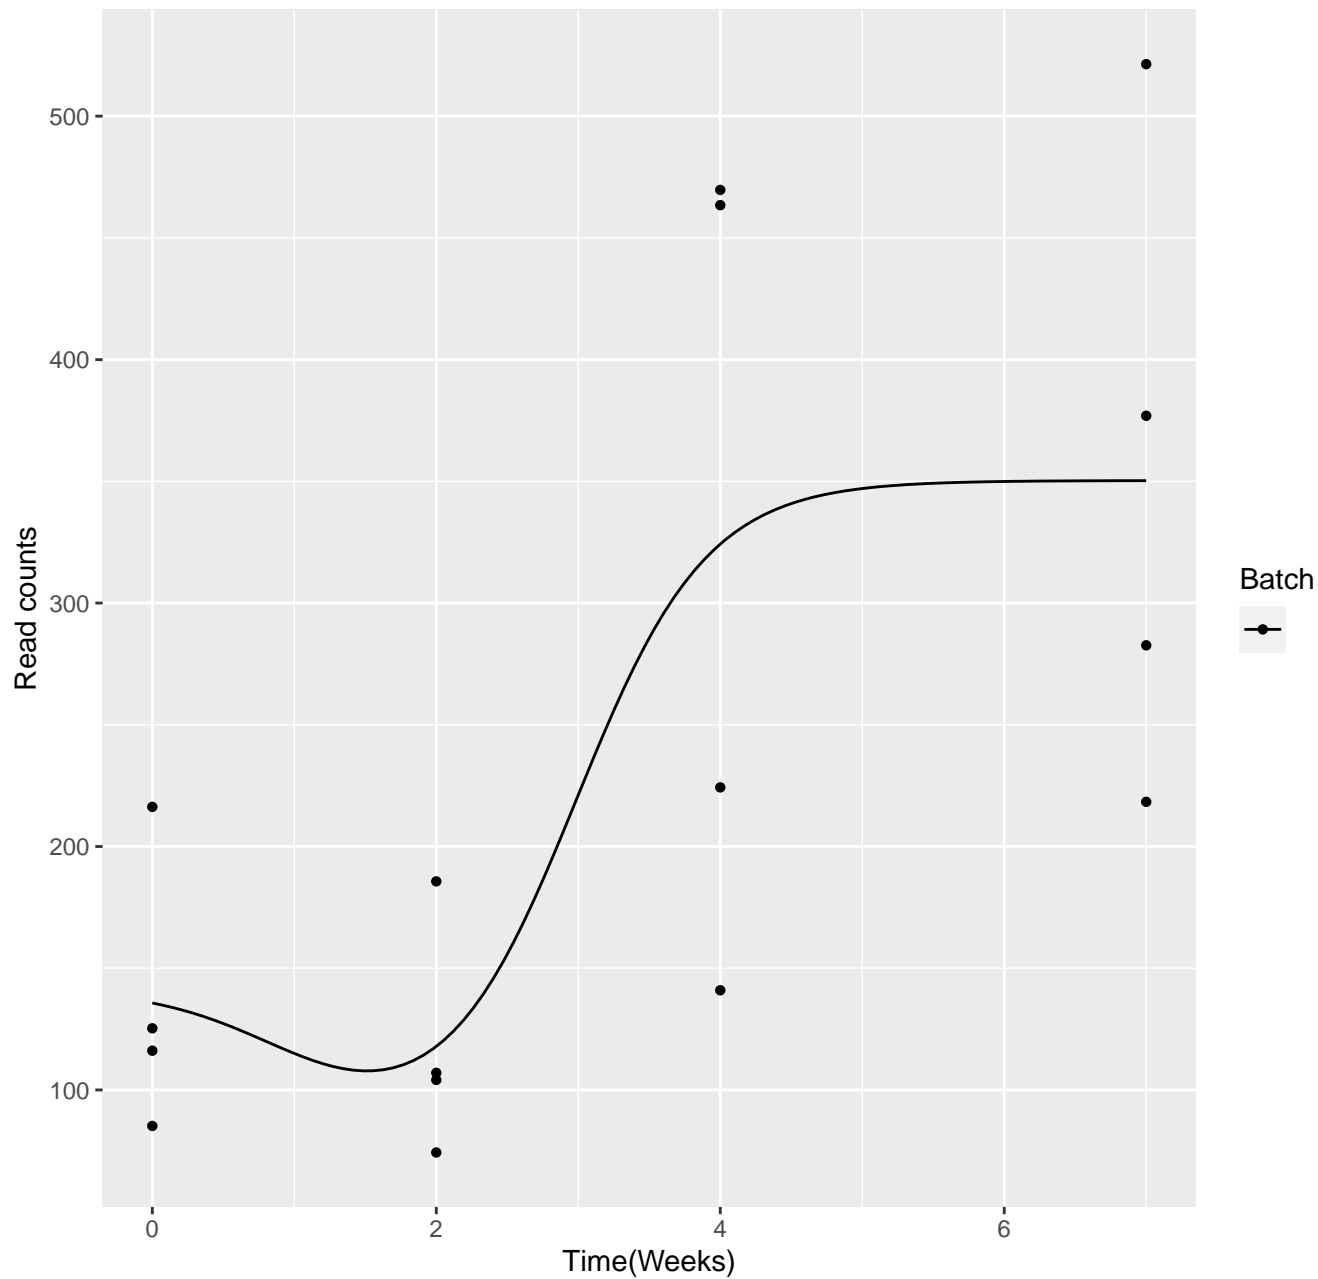

LOC103348133:  $\log_{10} q = -2.31$

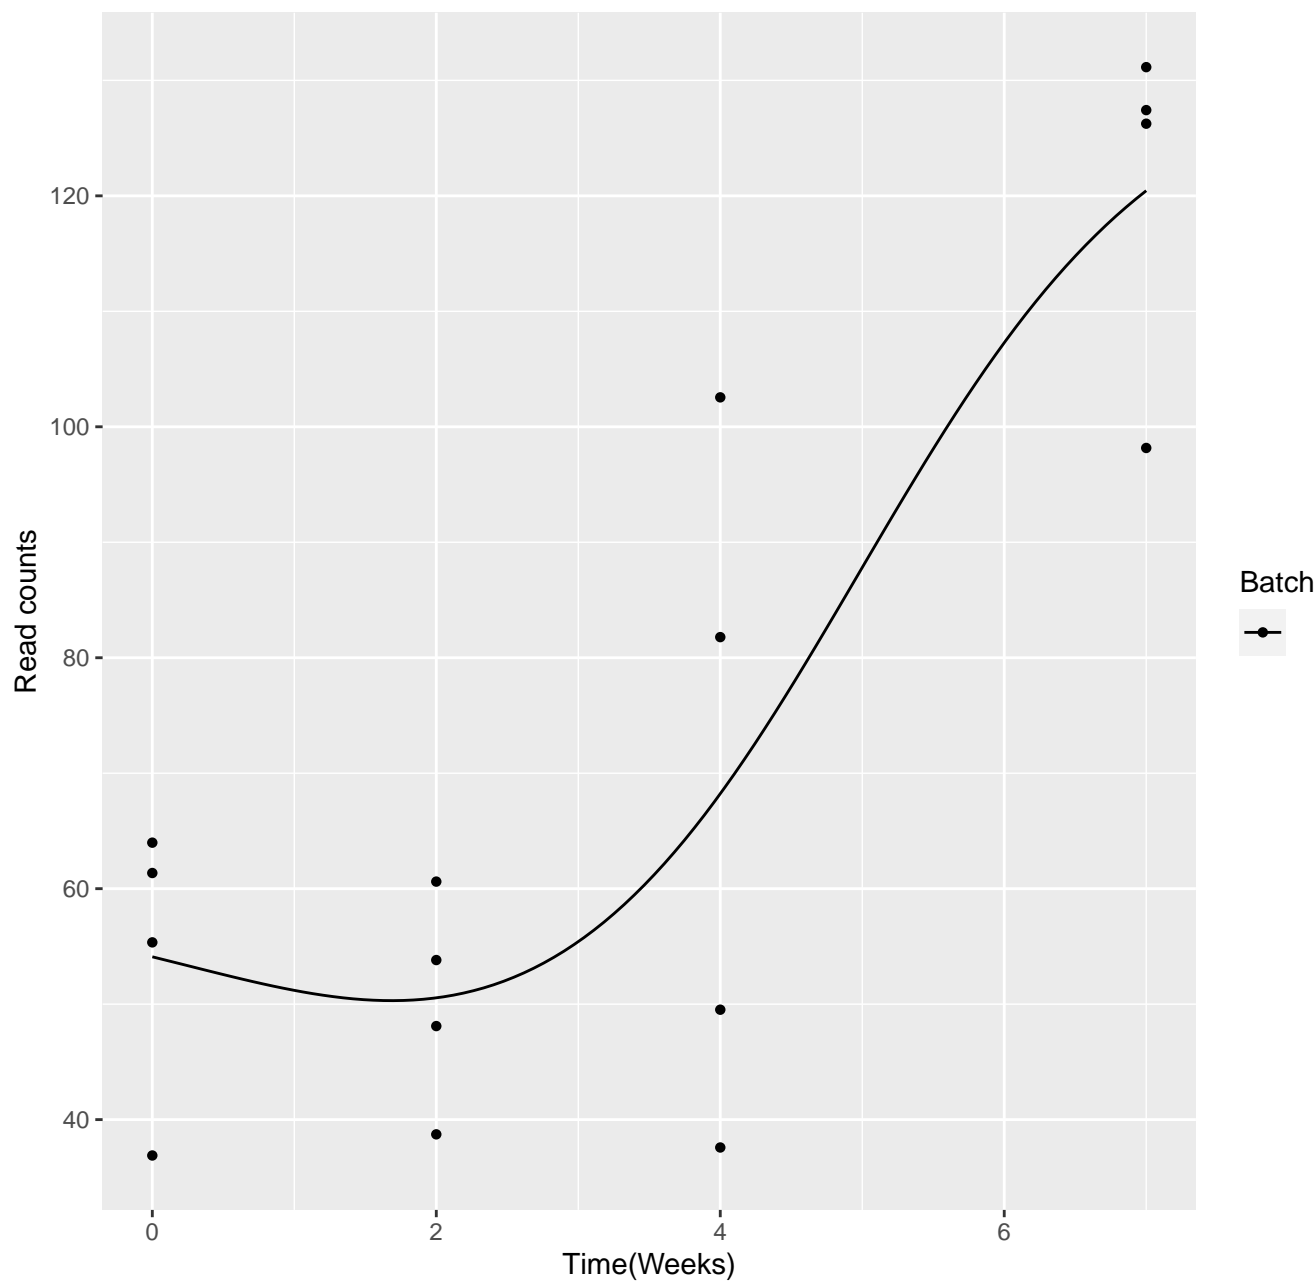

LOC103348556:  $\log_{10} q = -2.3$

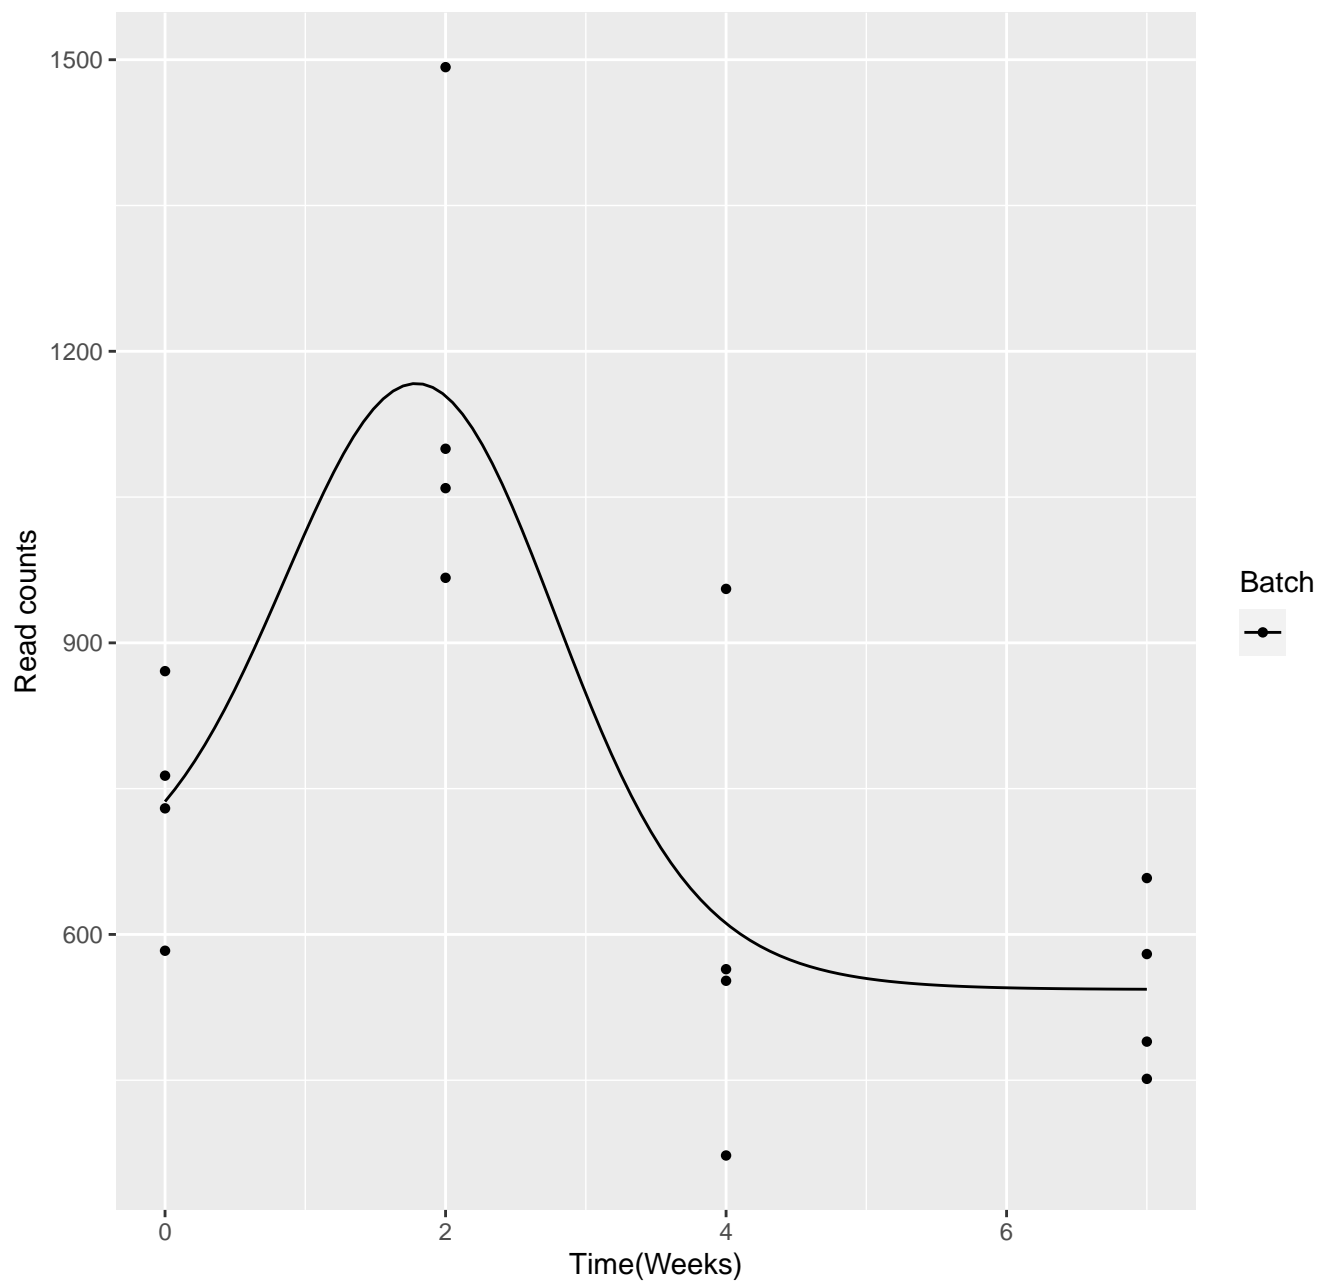



RTN4RL1:  $\log_{10} q = -2.3$

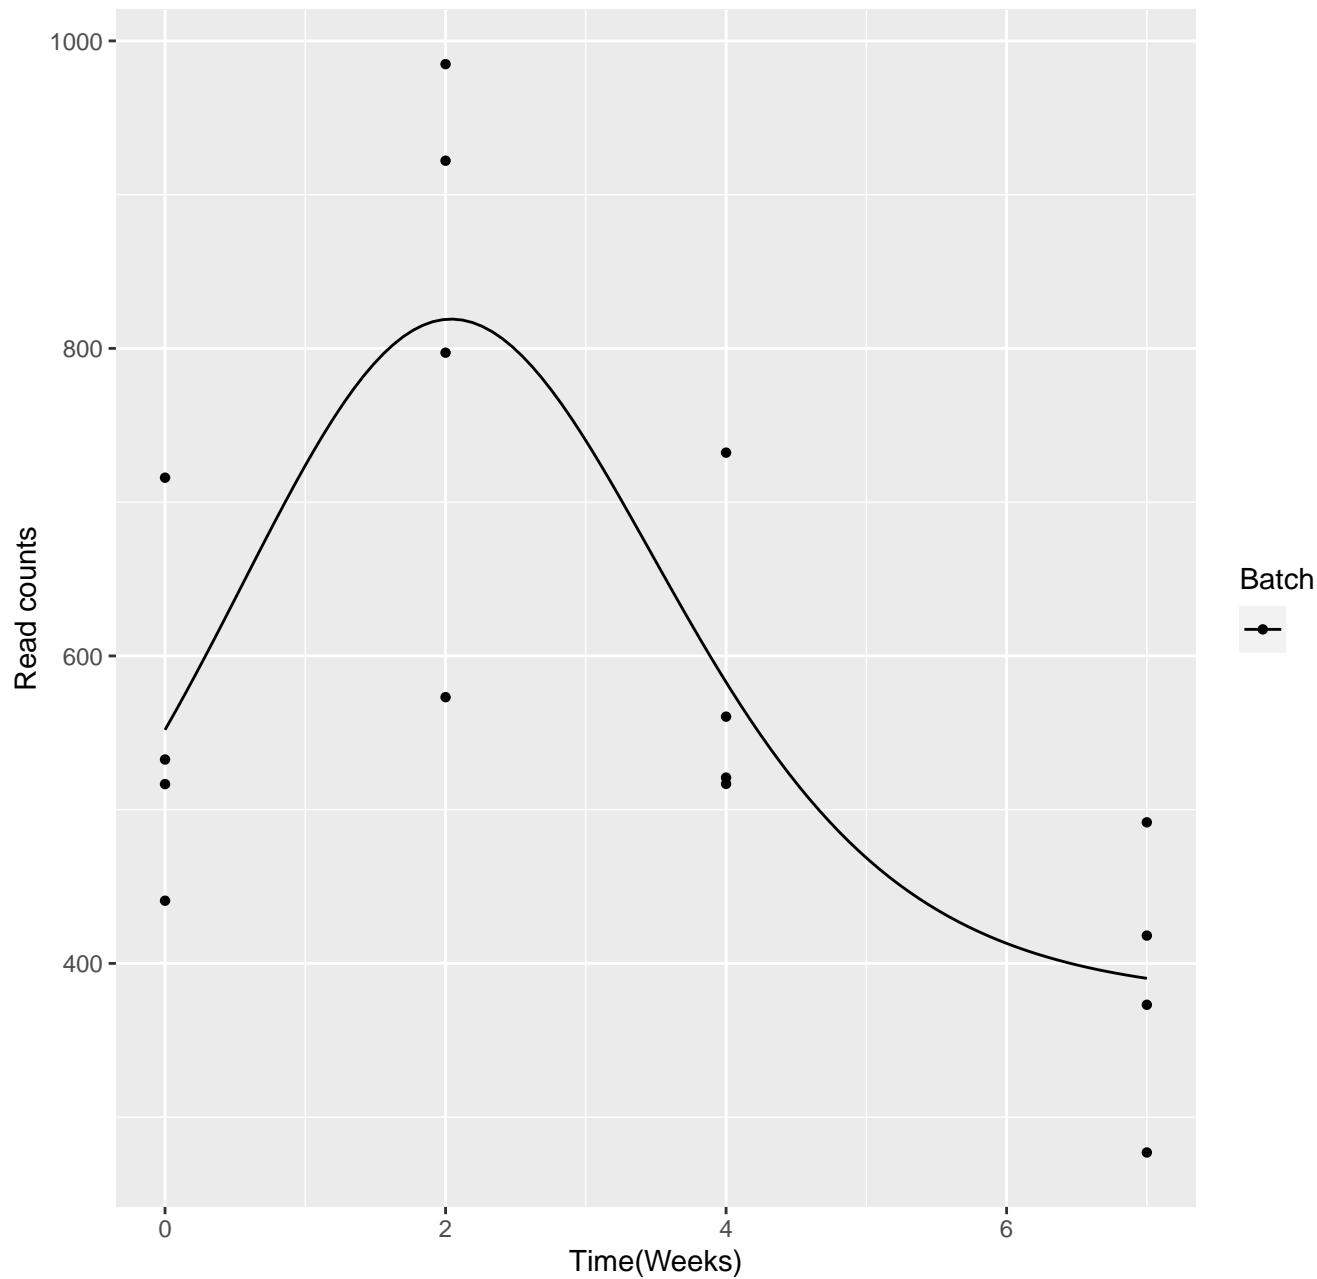

LOC100340733:  $\log_{10} q = -2.3$

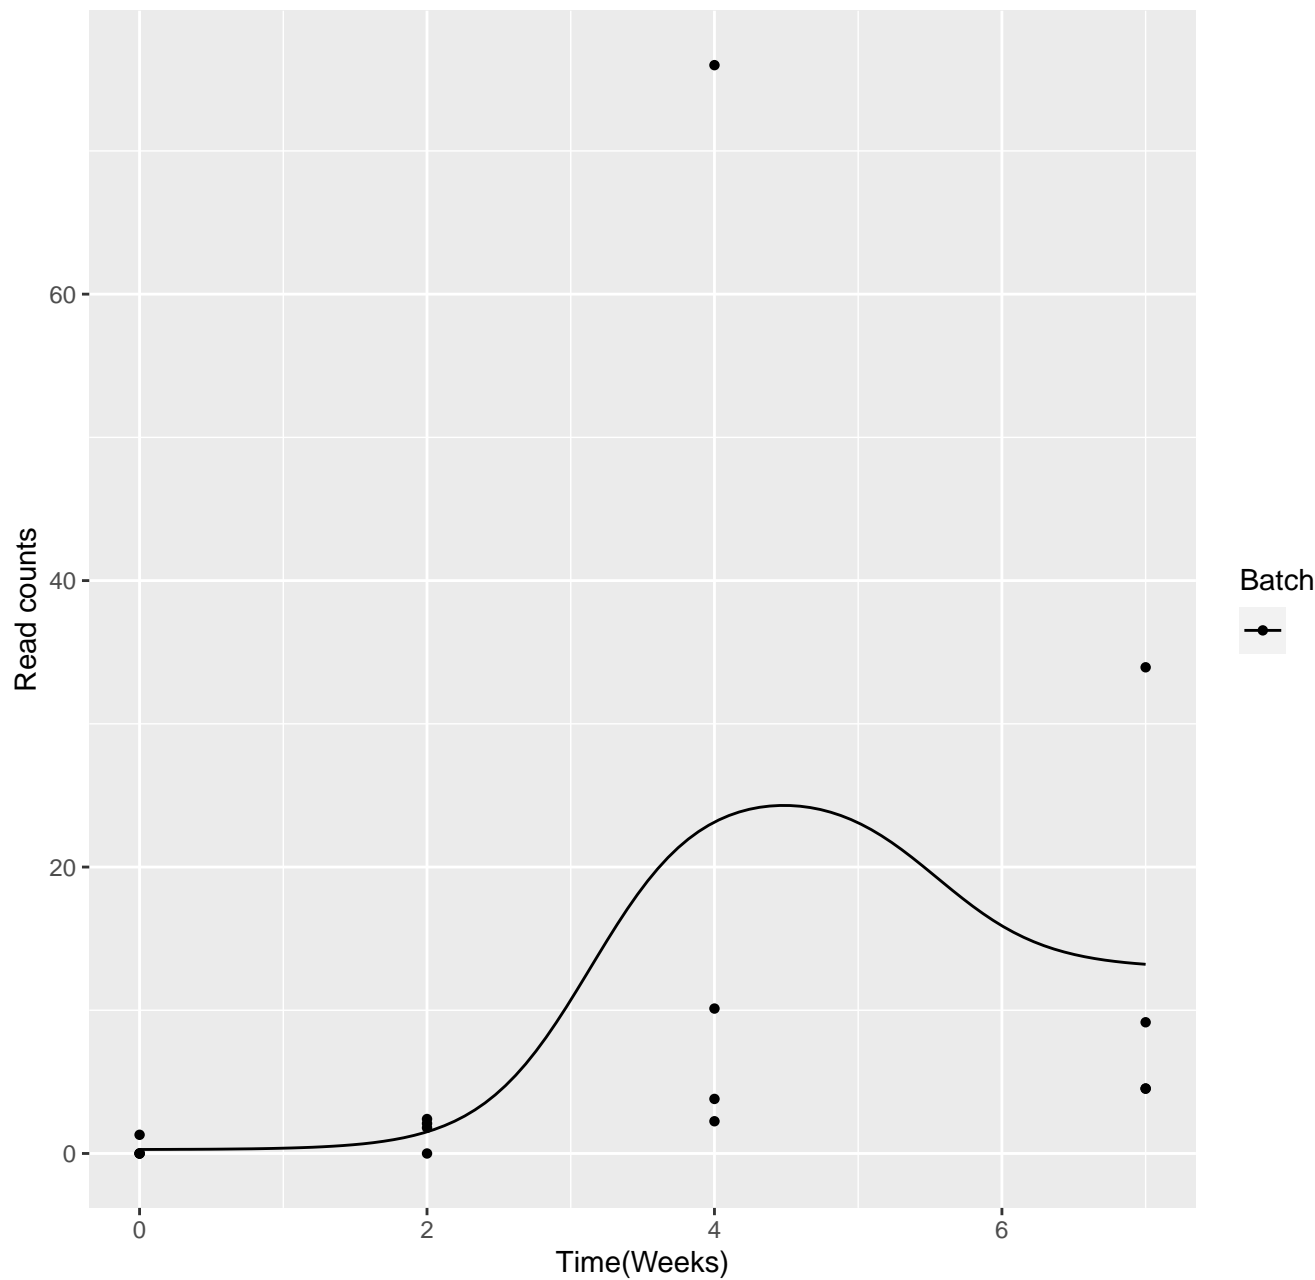

CTSH:  $\log_{10} q = -2.3$

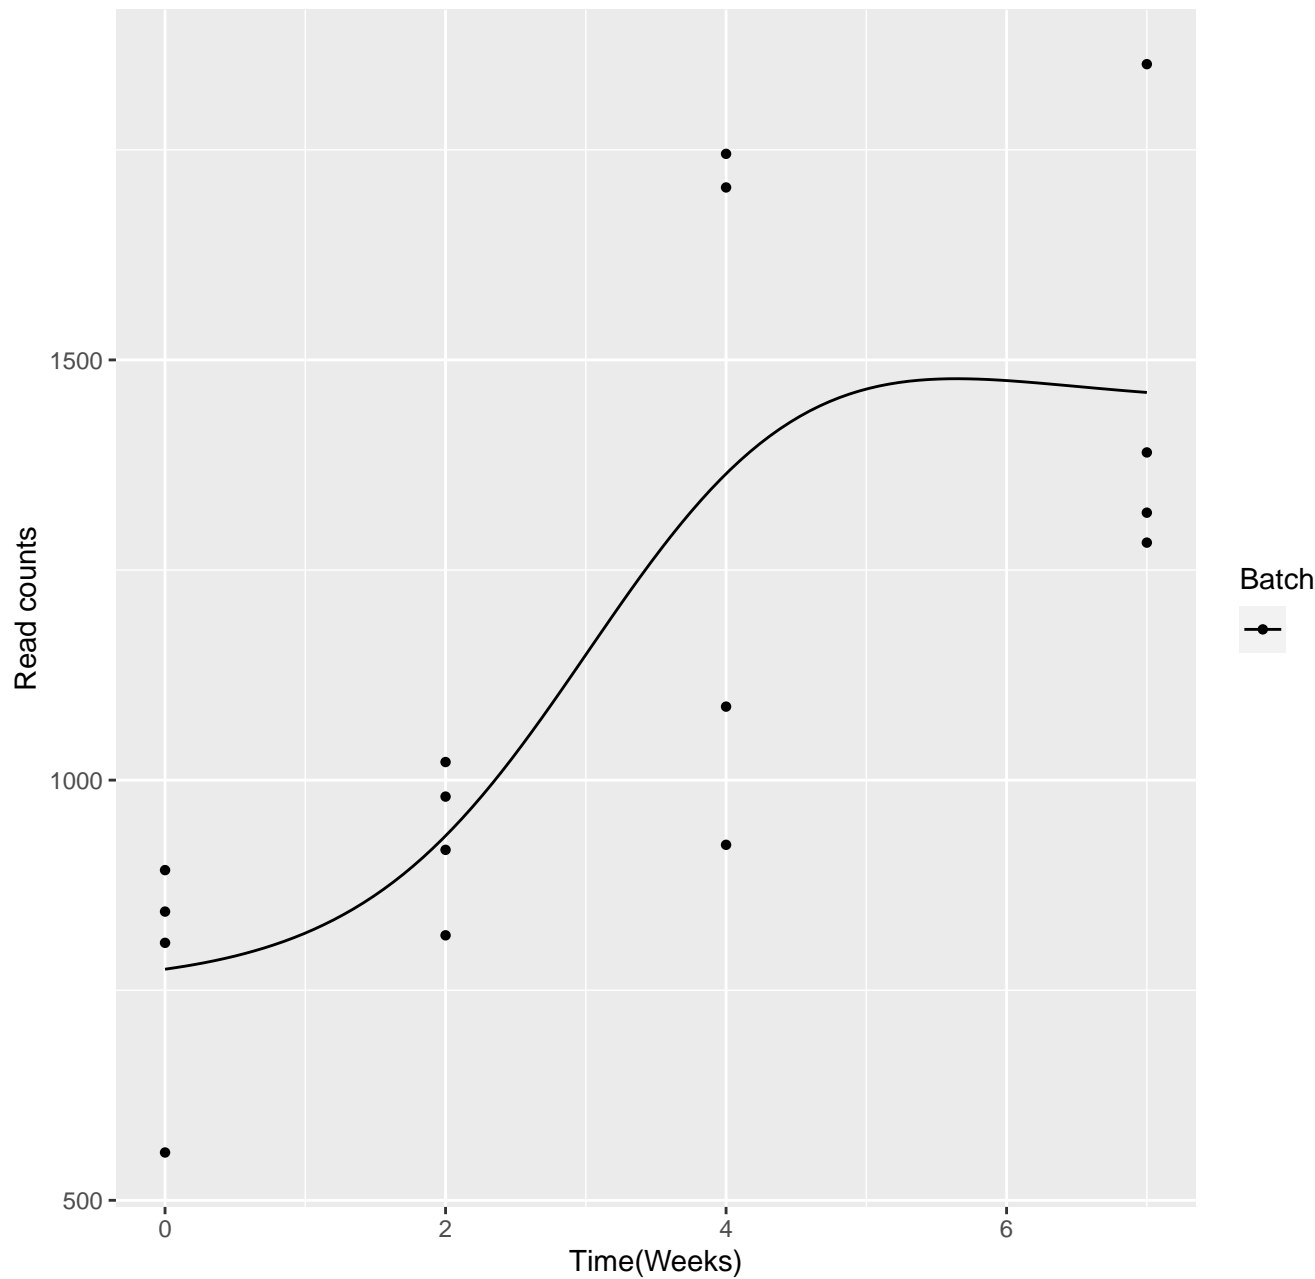

NAV2:  $\log_{10} q = -2.3$

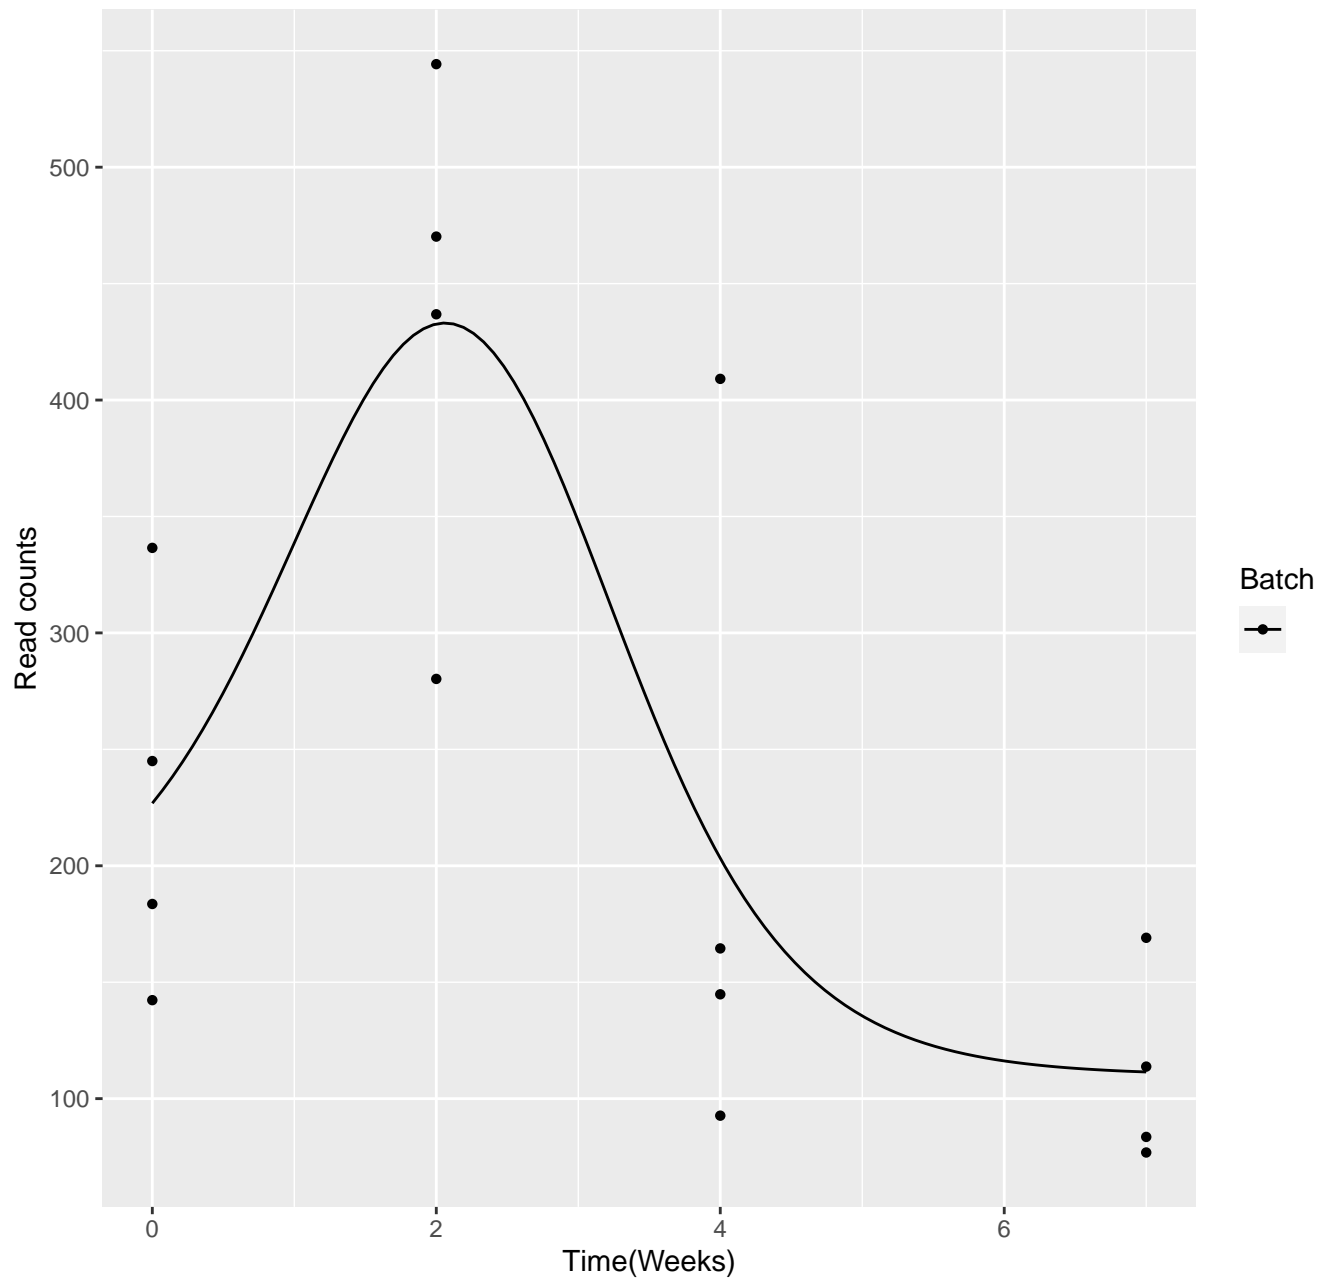

STK10:  $\log_{10} q = -2.29$

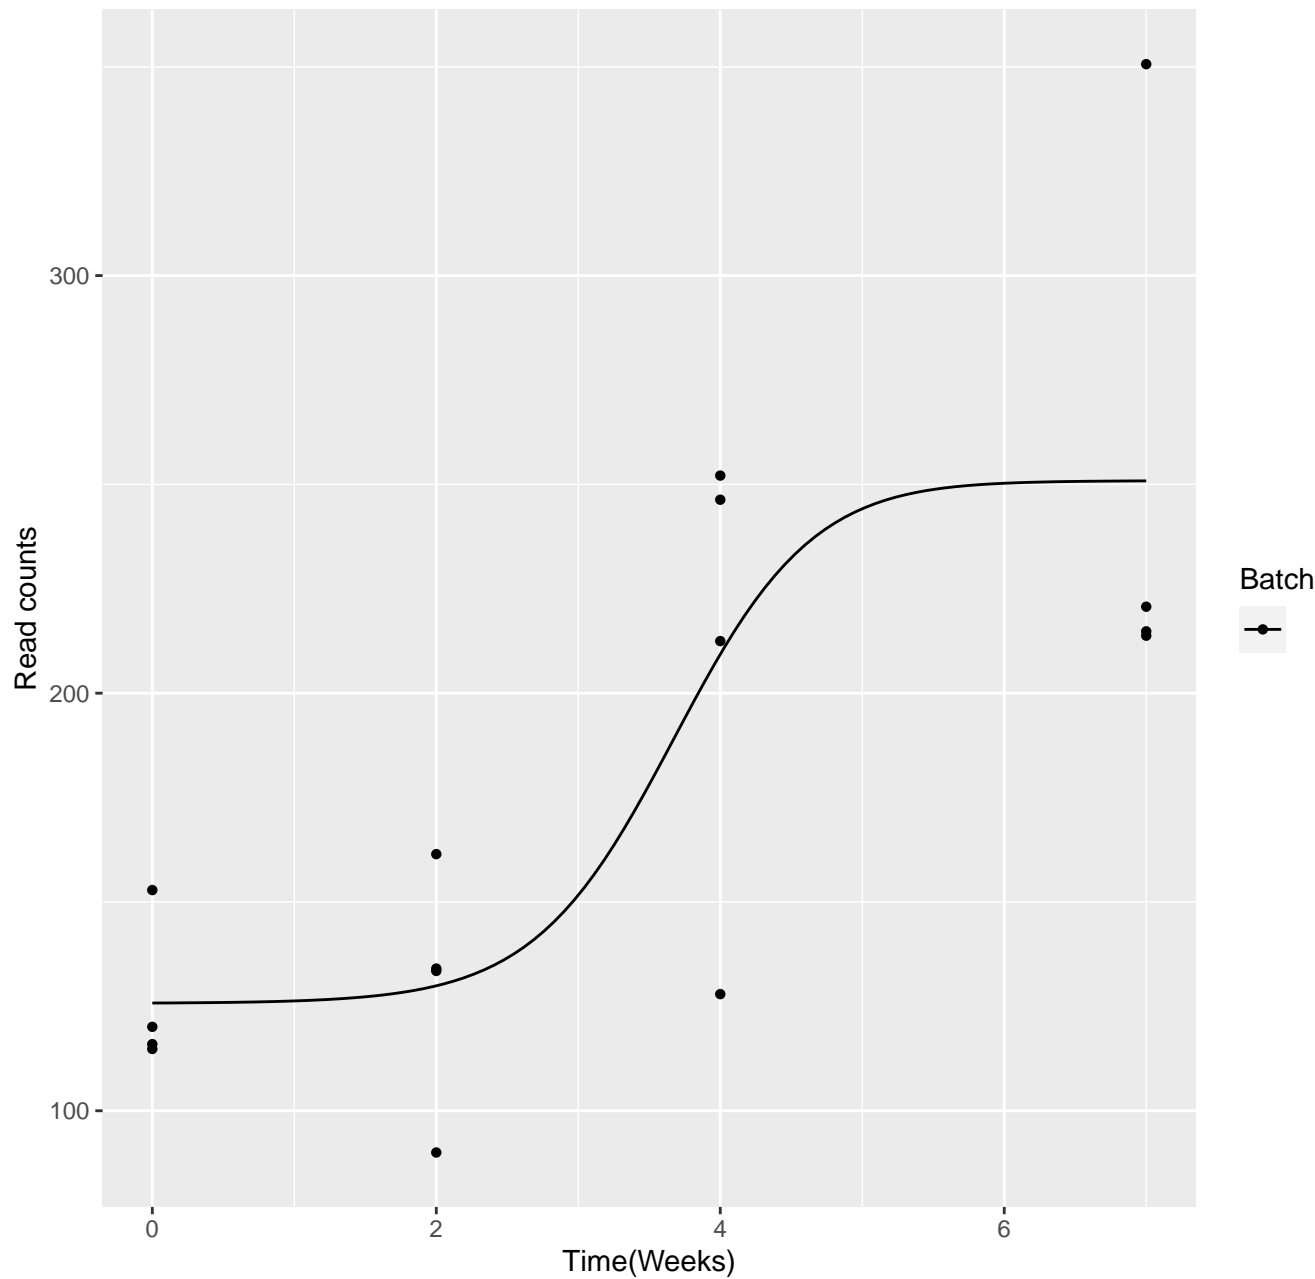

HTRA4:  $\log_{10} q = -2.29$

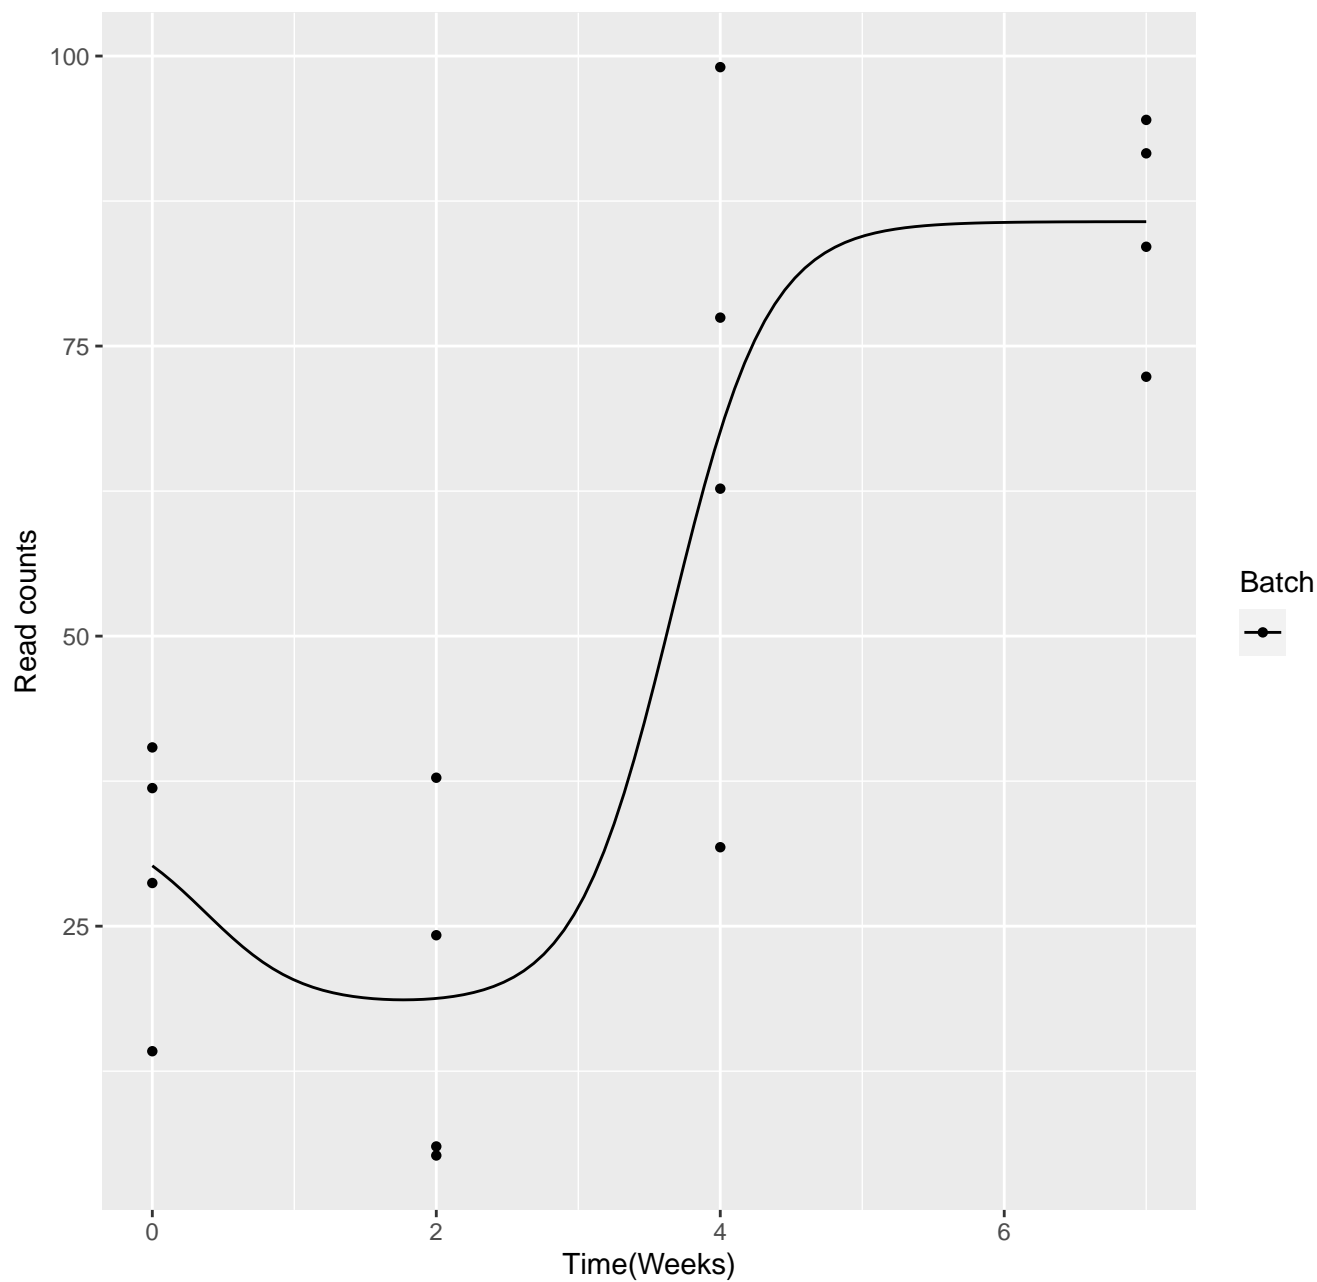

TREX1:  $\log_{10} q = -2.29$

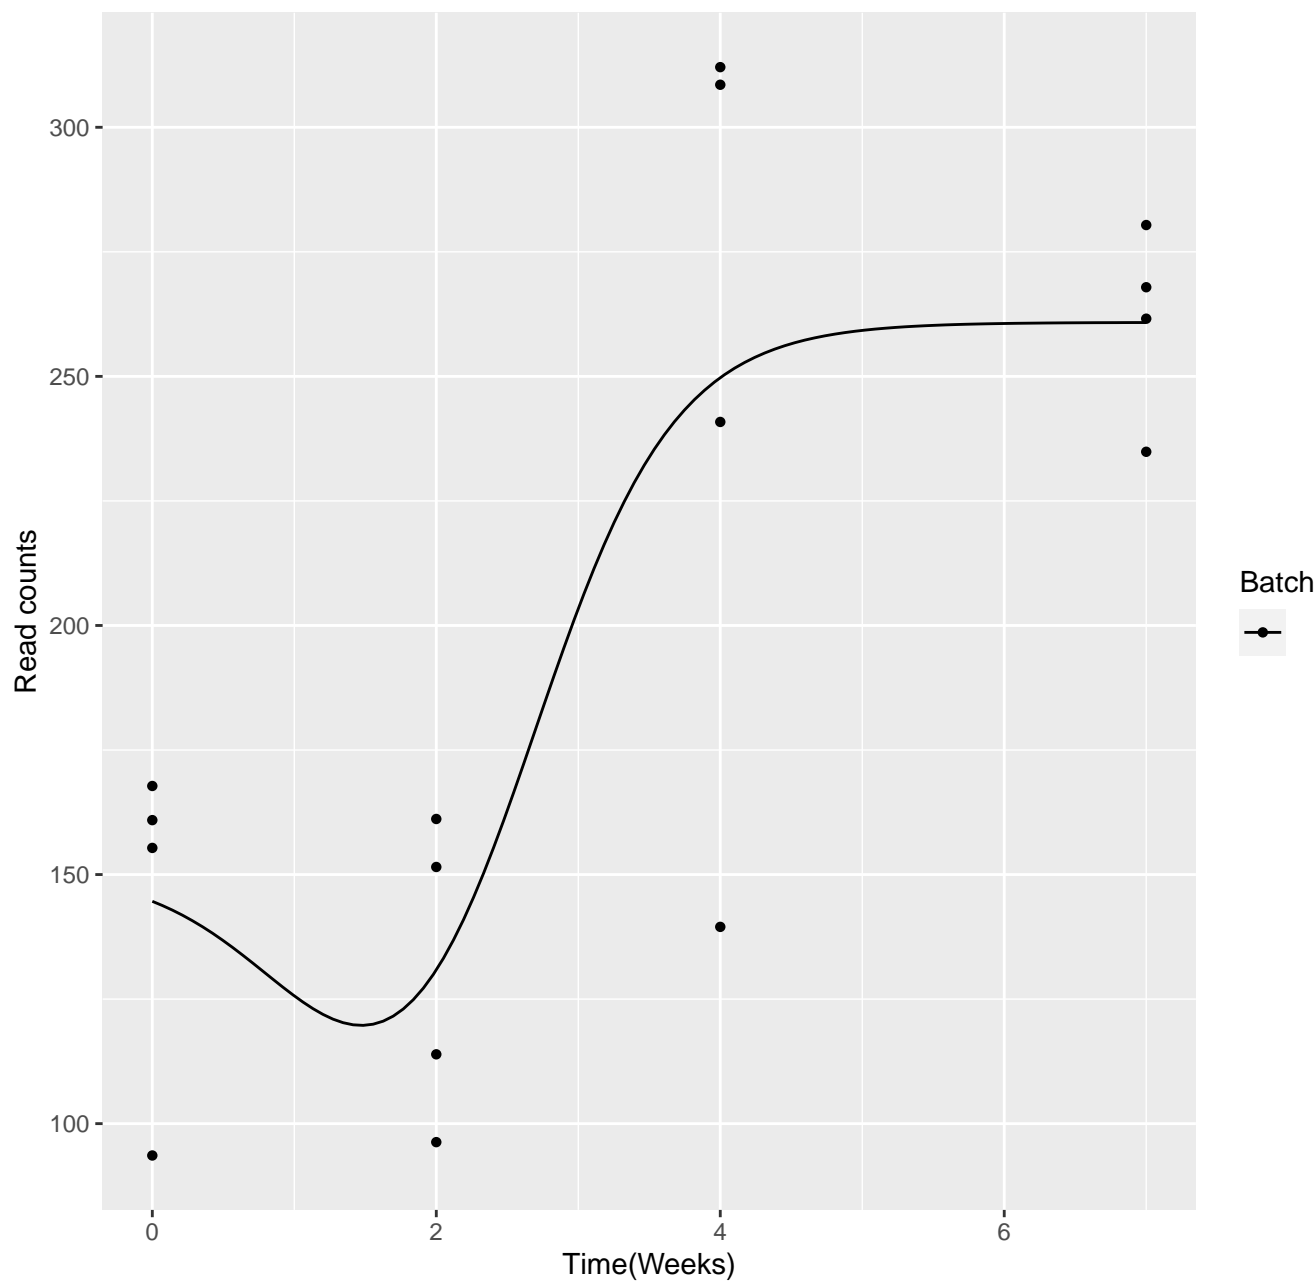

CD200R1:  $\log_{10} q = -2.29$

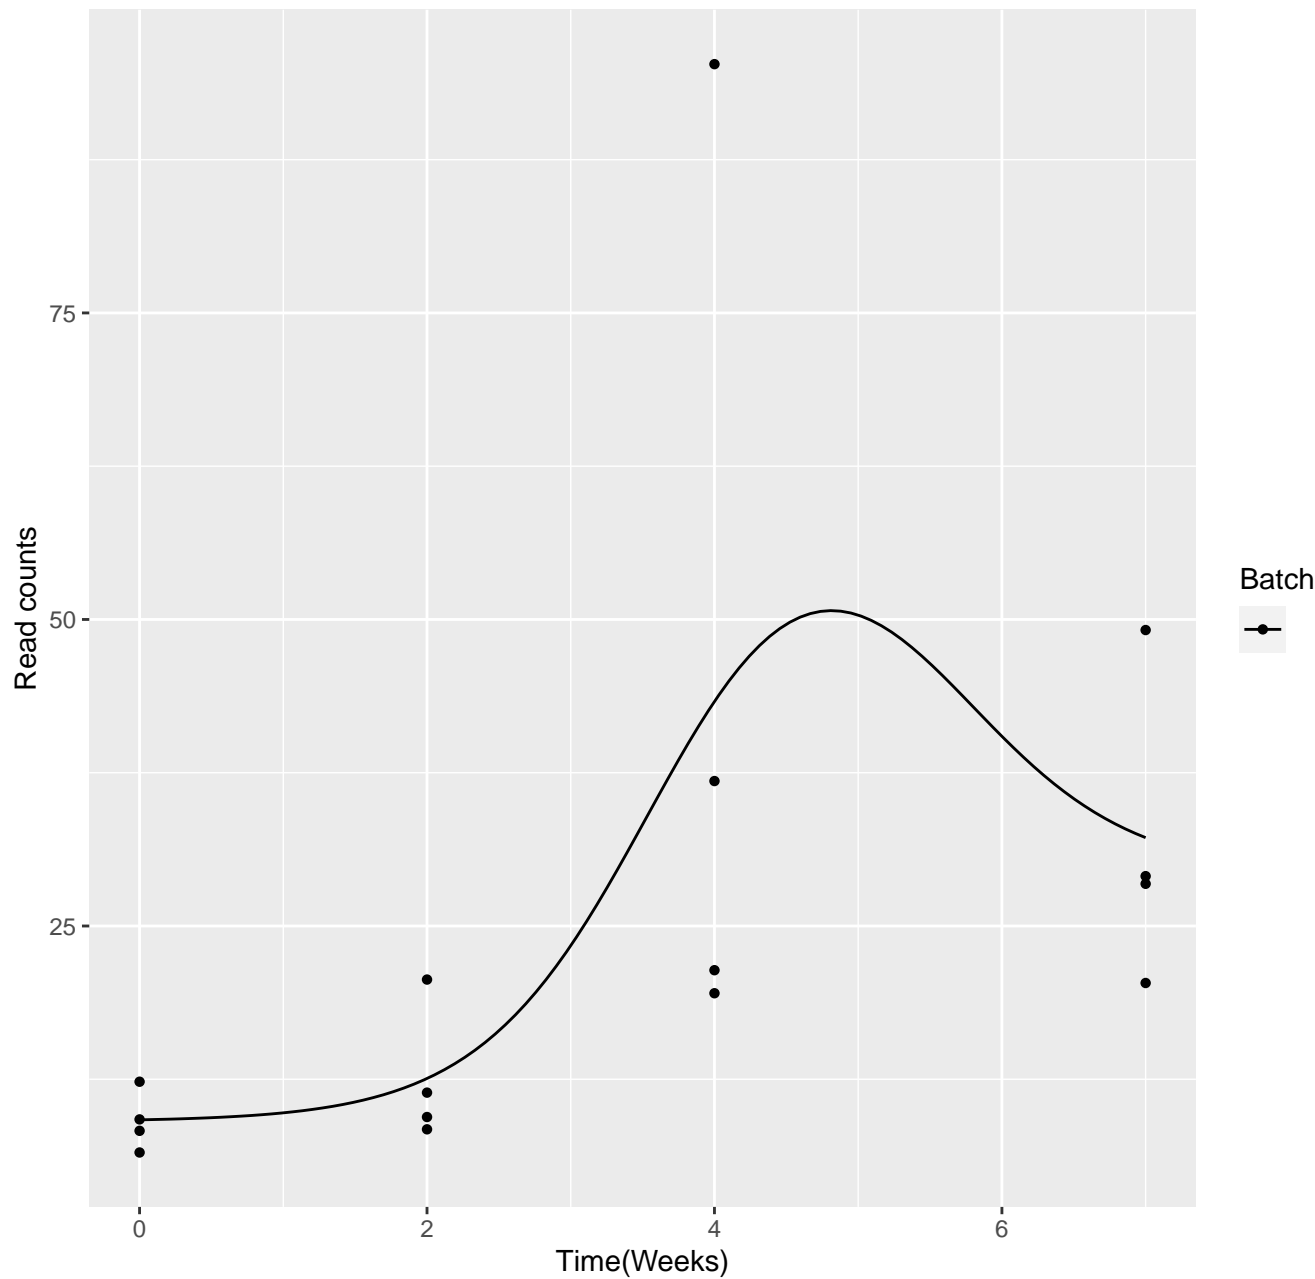



EFNA1:  $\log_{10} q = -2.29$

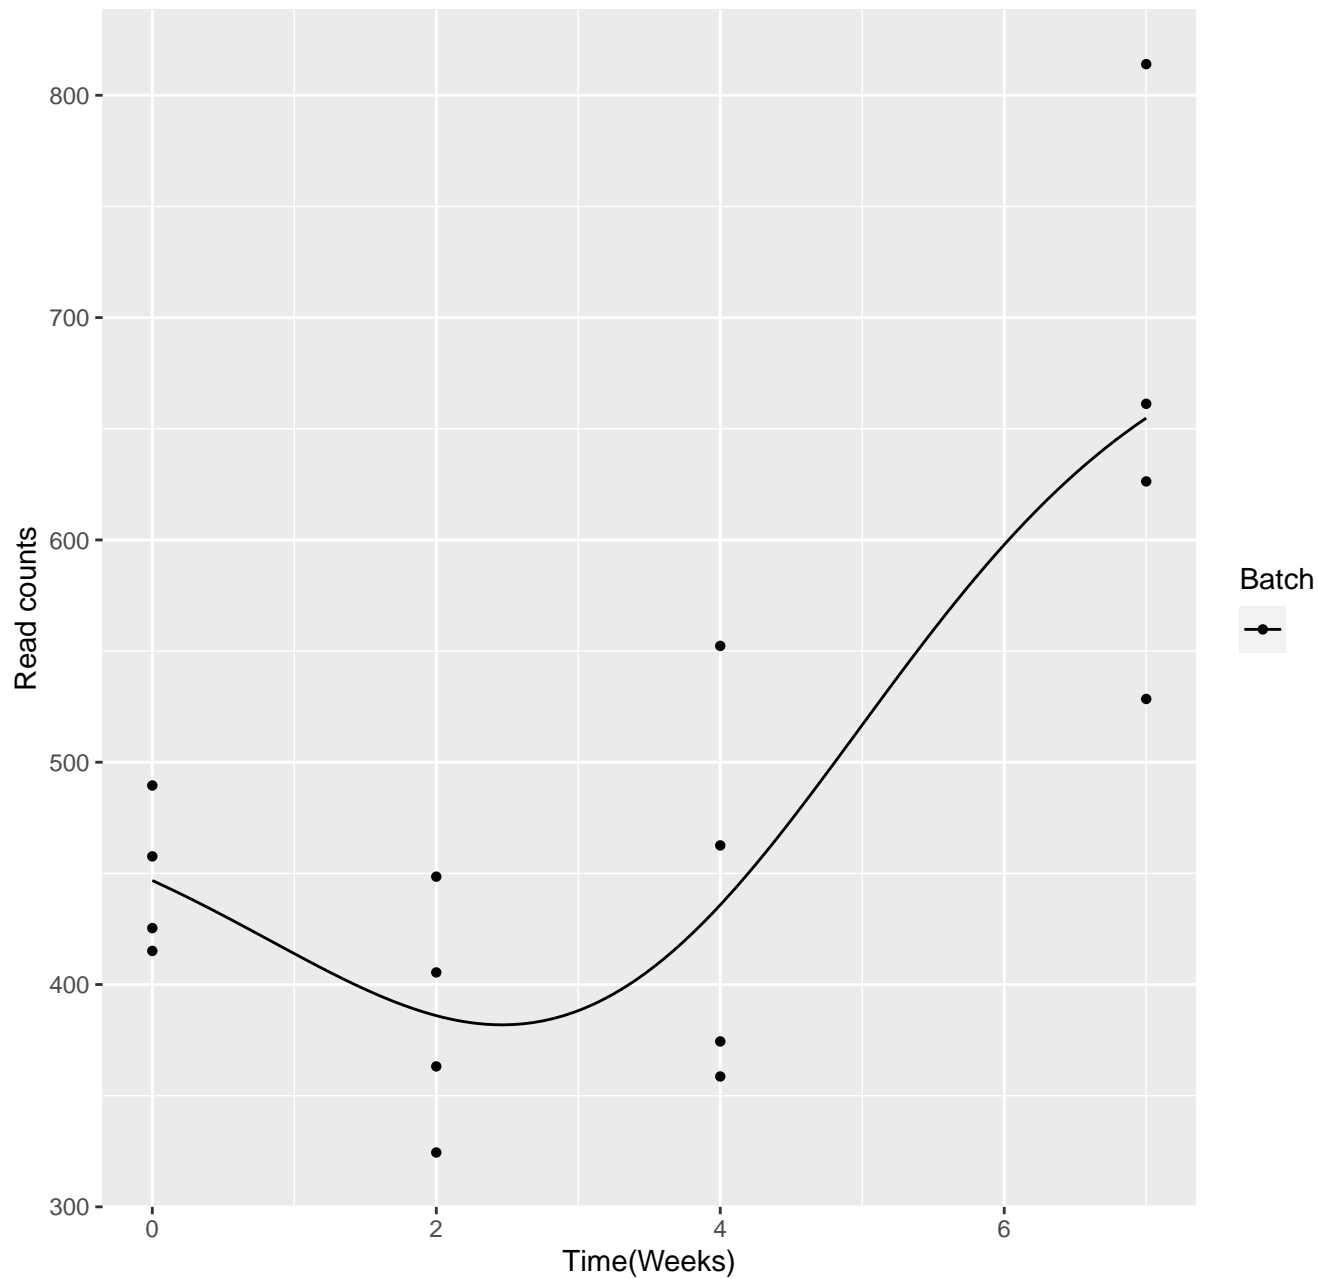

LIN52:  $\log_{10} q = -2.29$

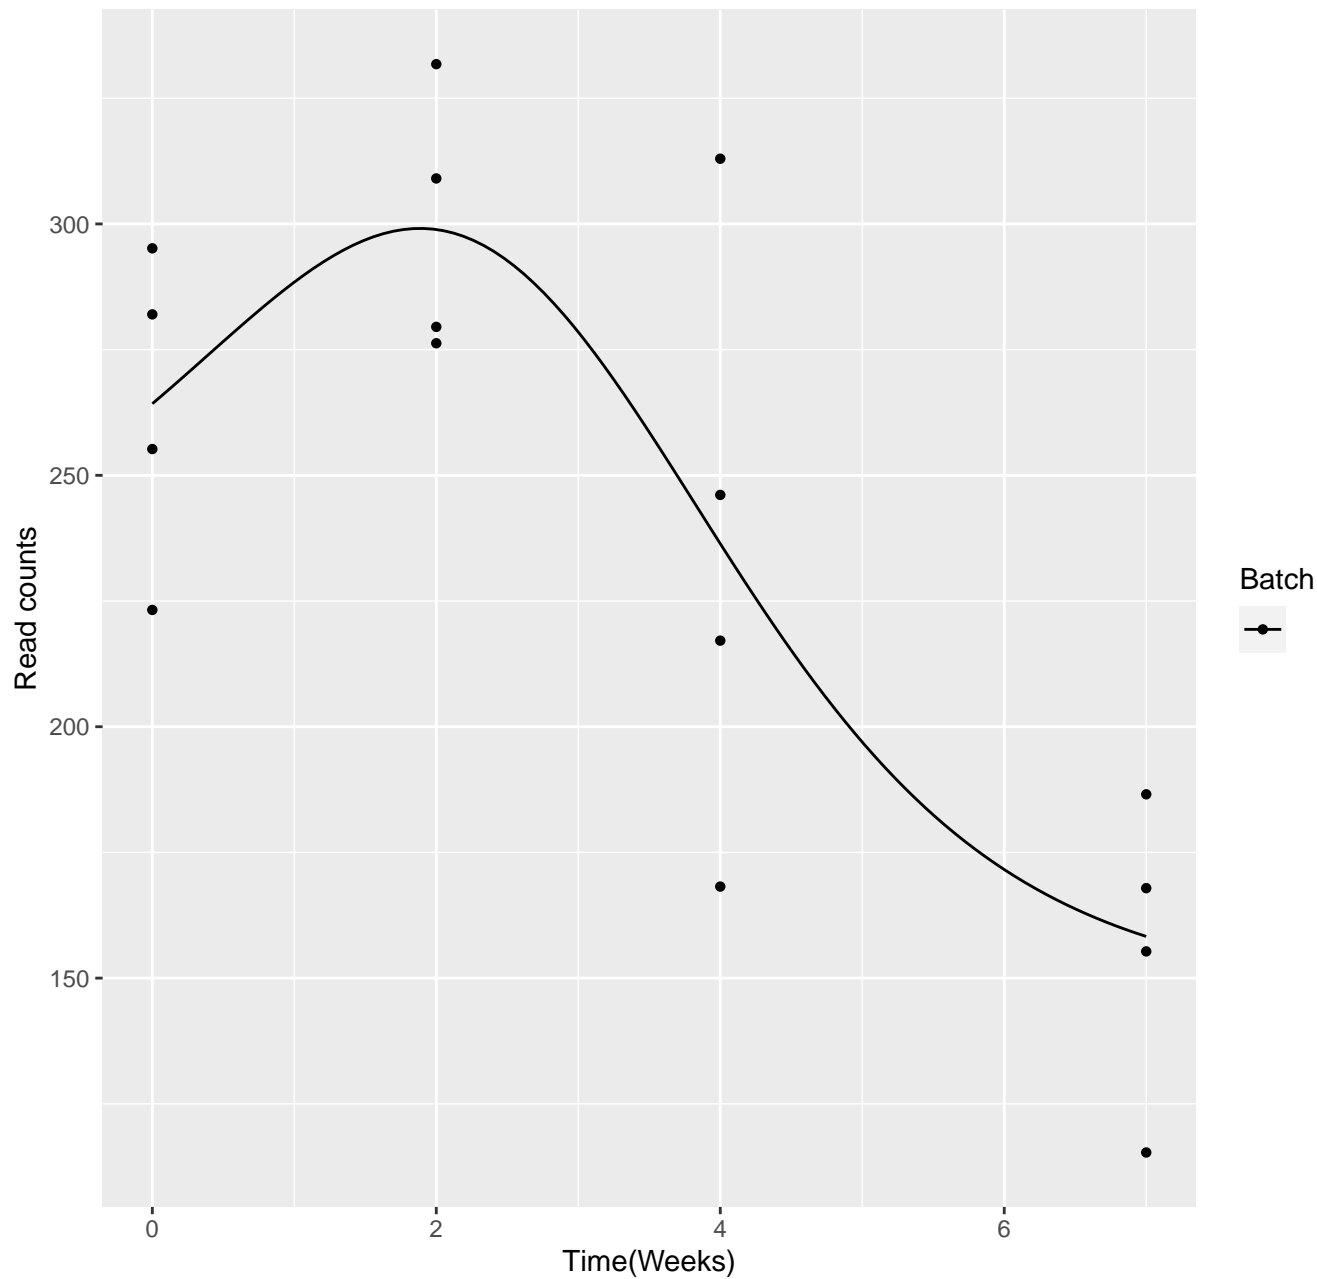

APOBEC2:  $\log_{10} q = -2.28$

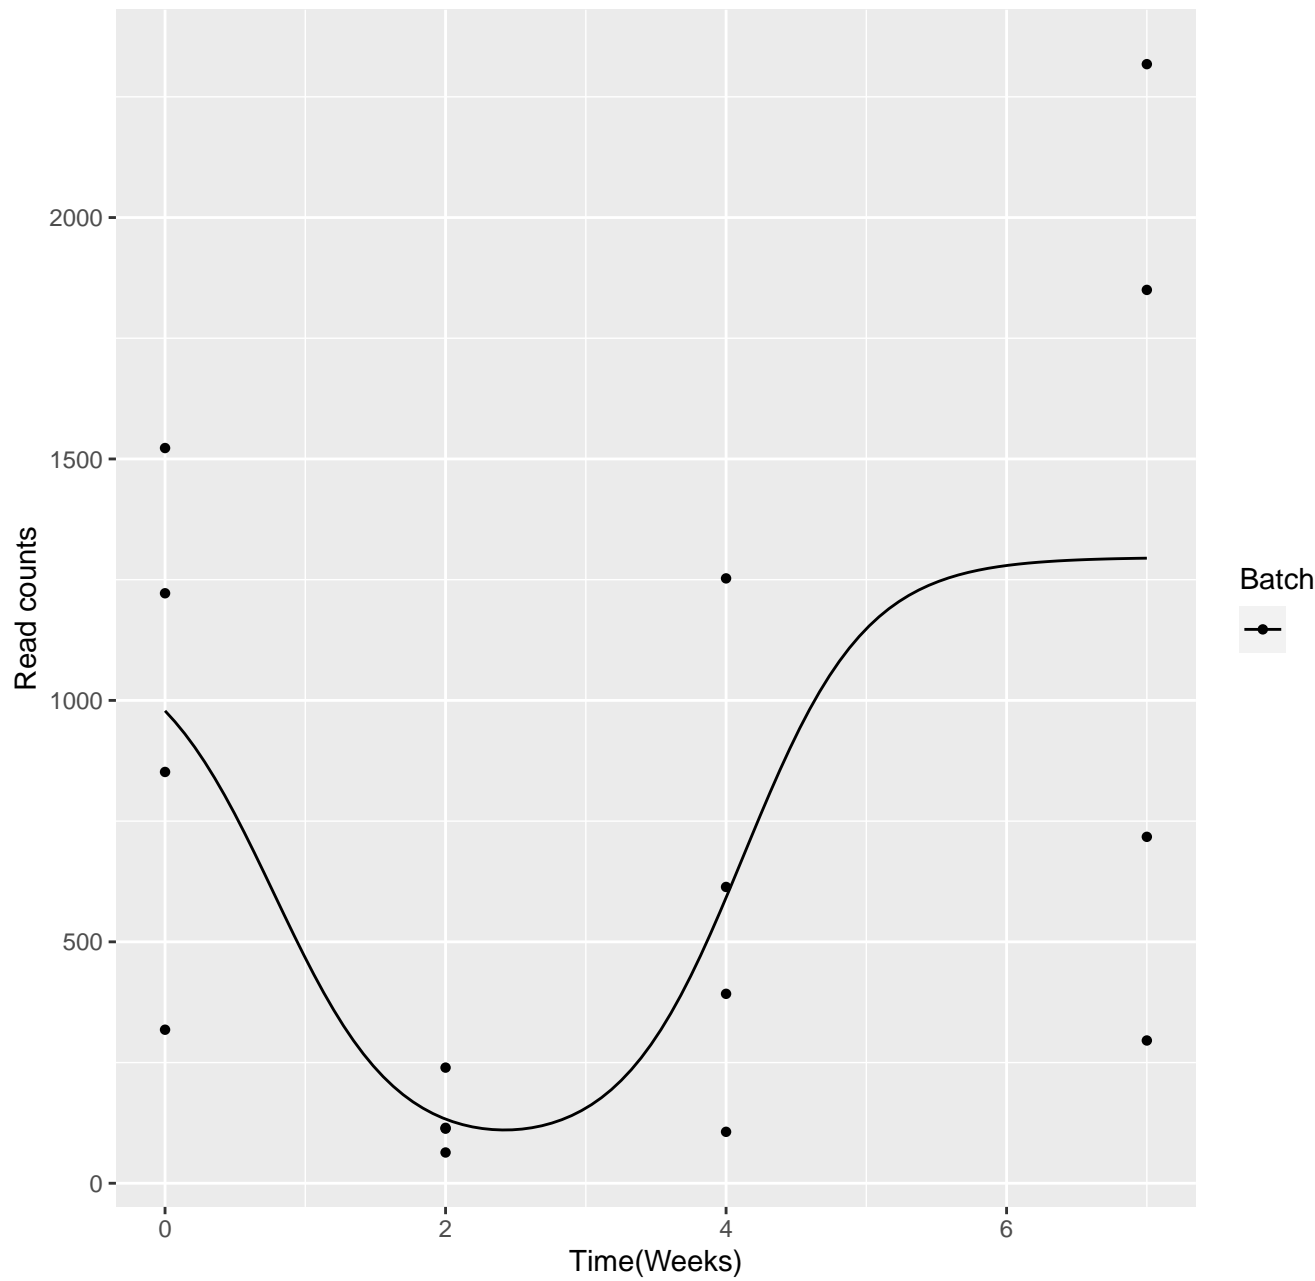

UQCRQ:  $\log_{10} q = -2.28$

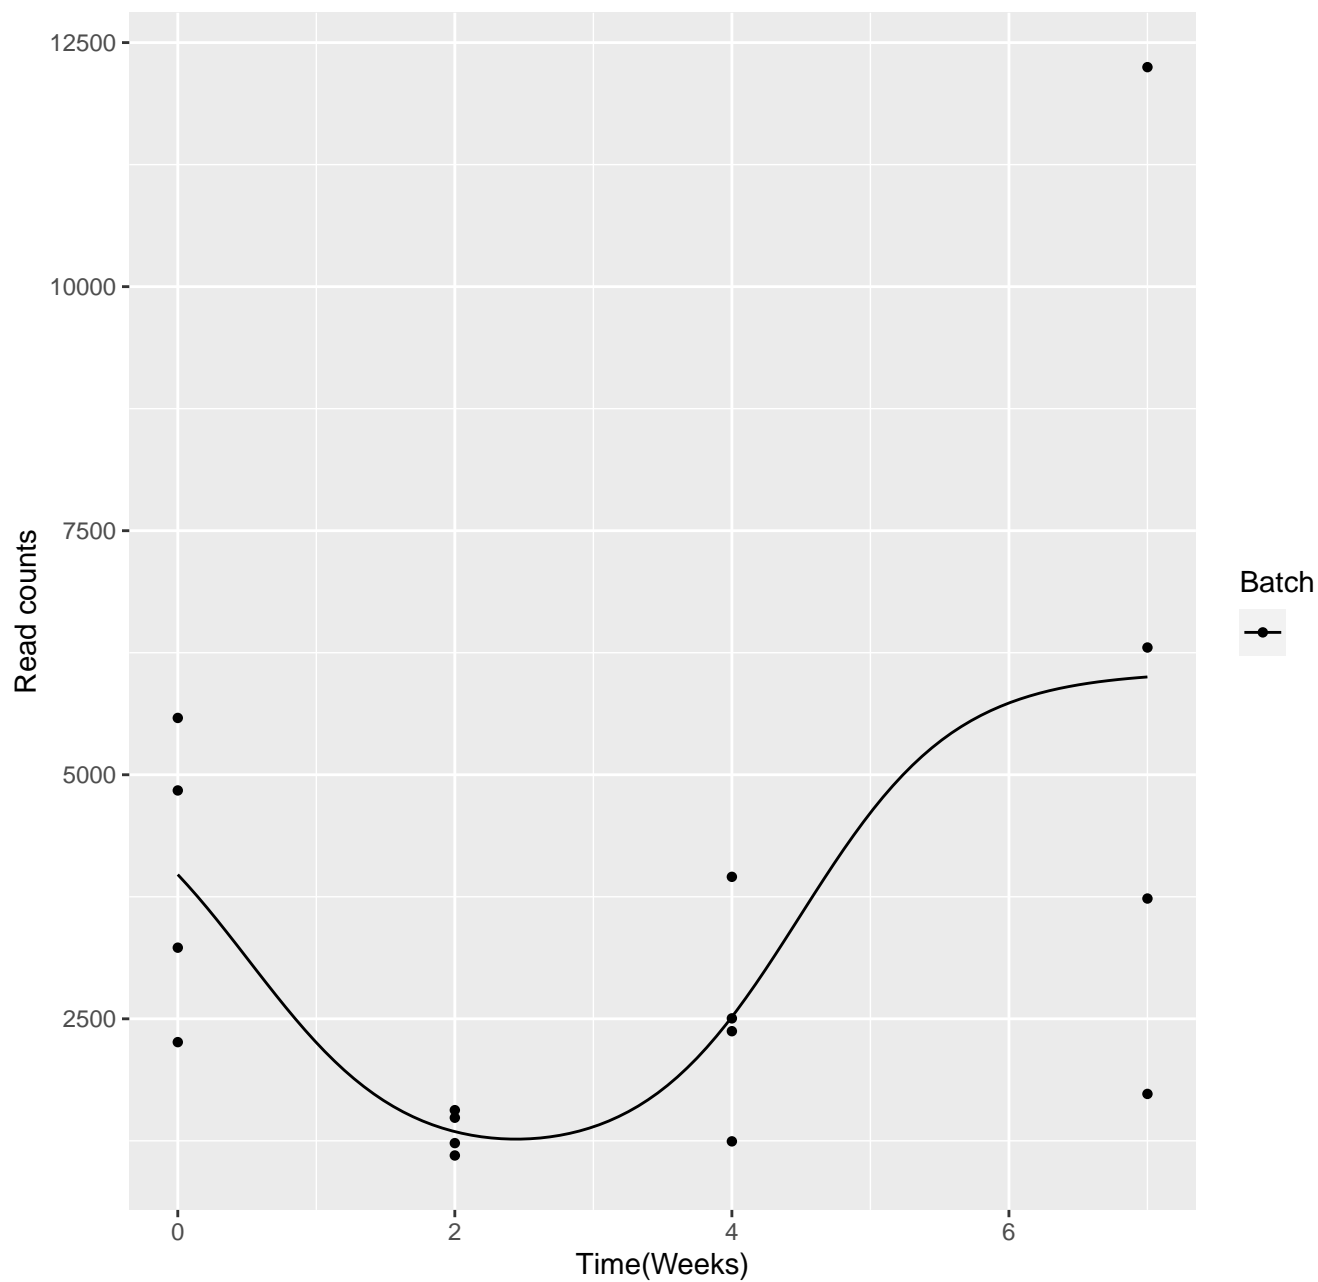

LOC127486741:  $\log_{10} q = -2.28$

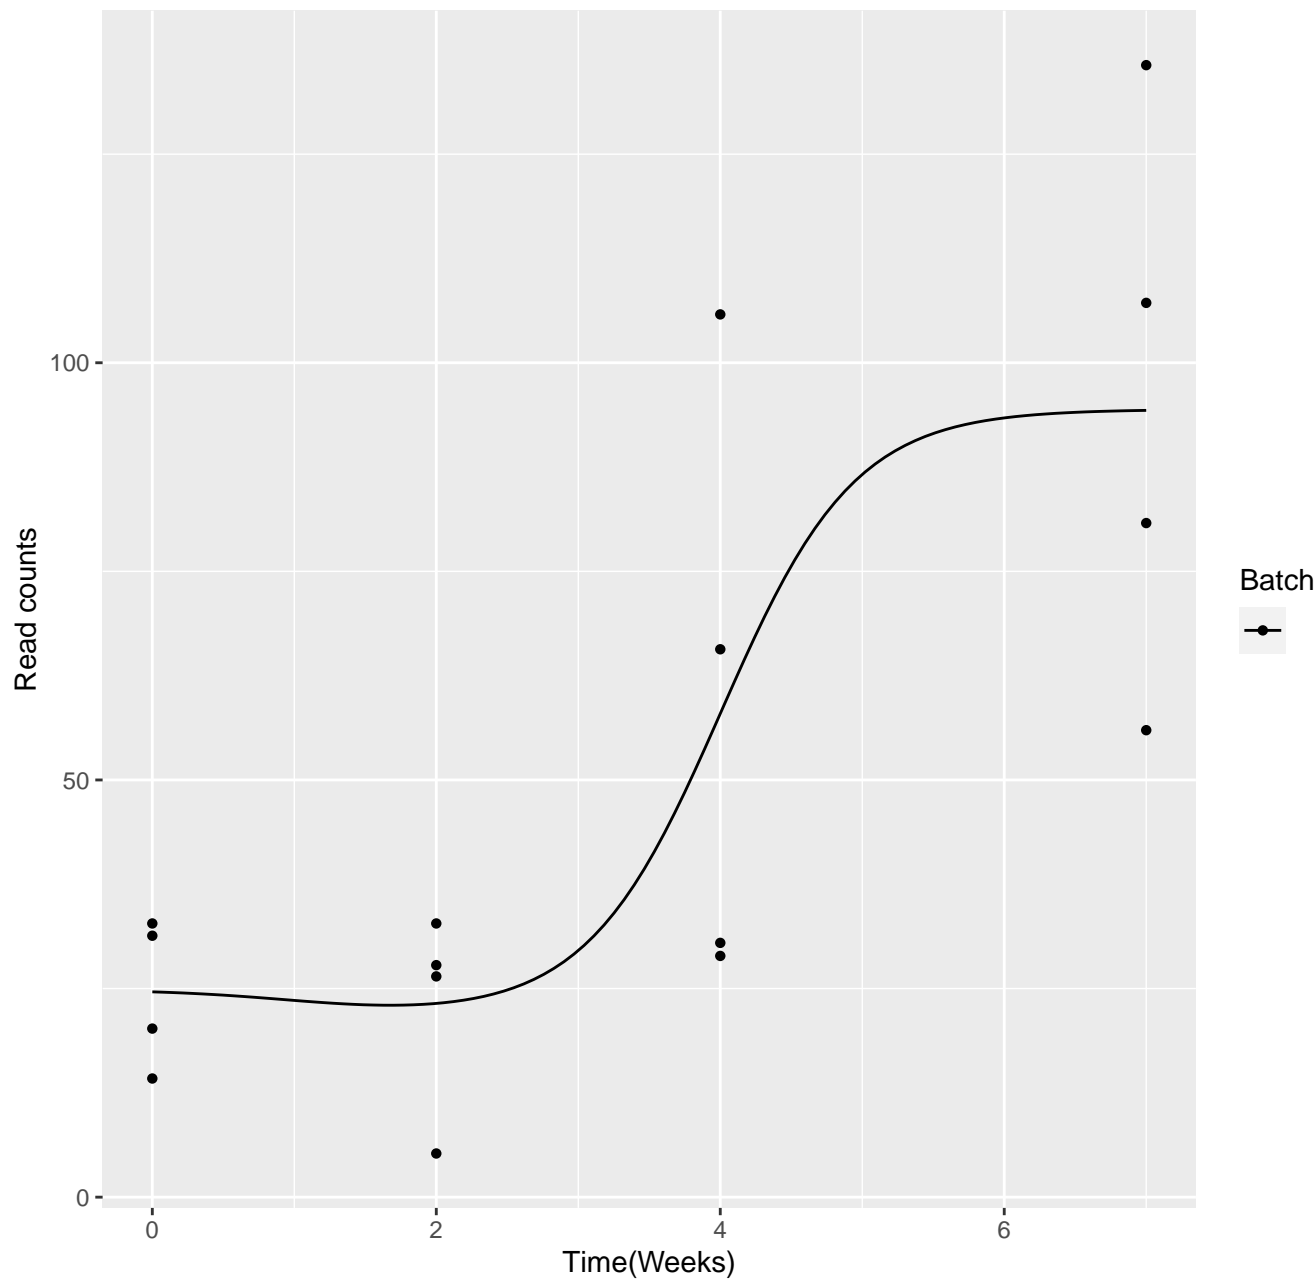

COPG1:  $\log_{10} q = -2.28$

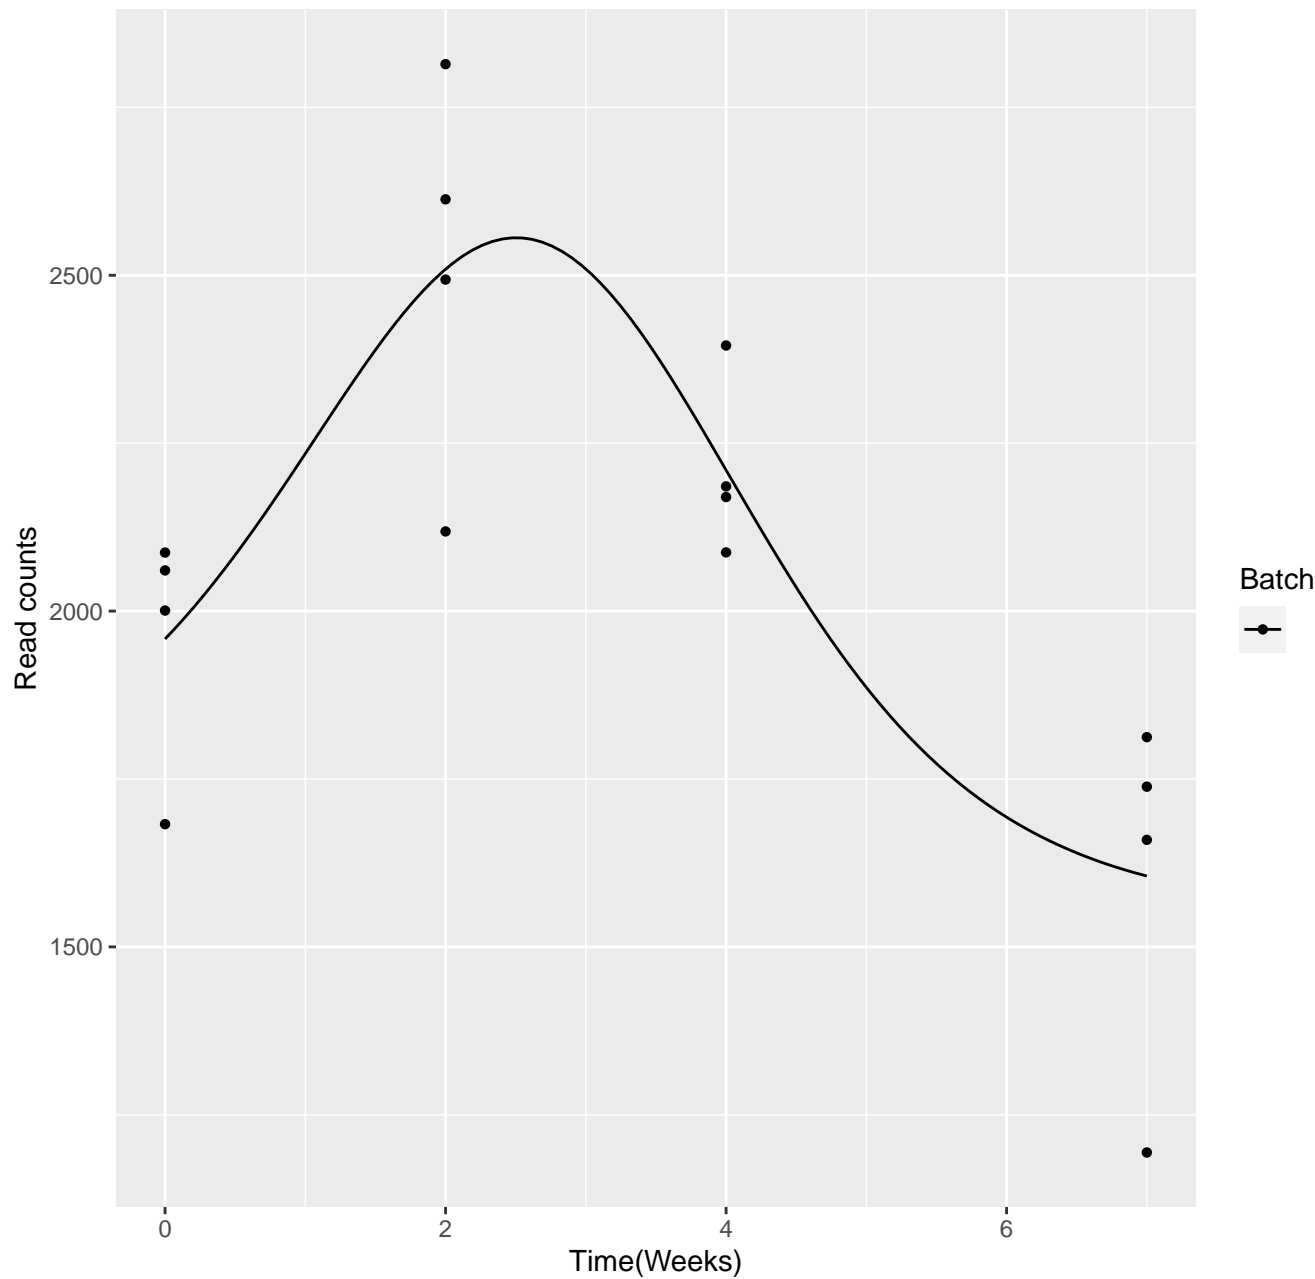

KCNQ1:  $\log_{10} q = -2.28$

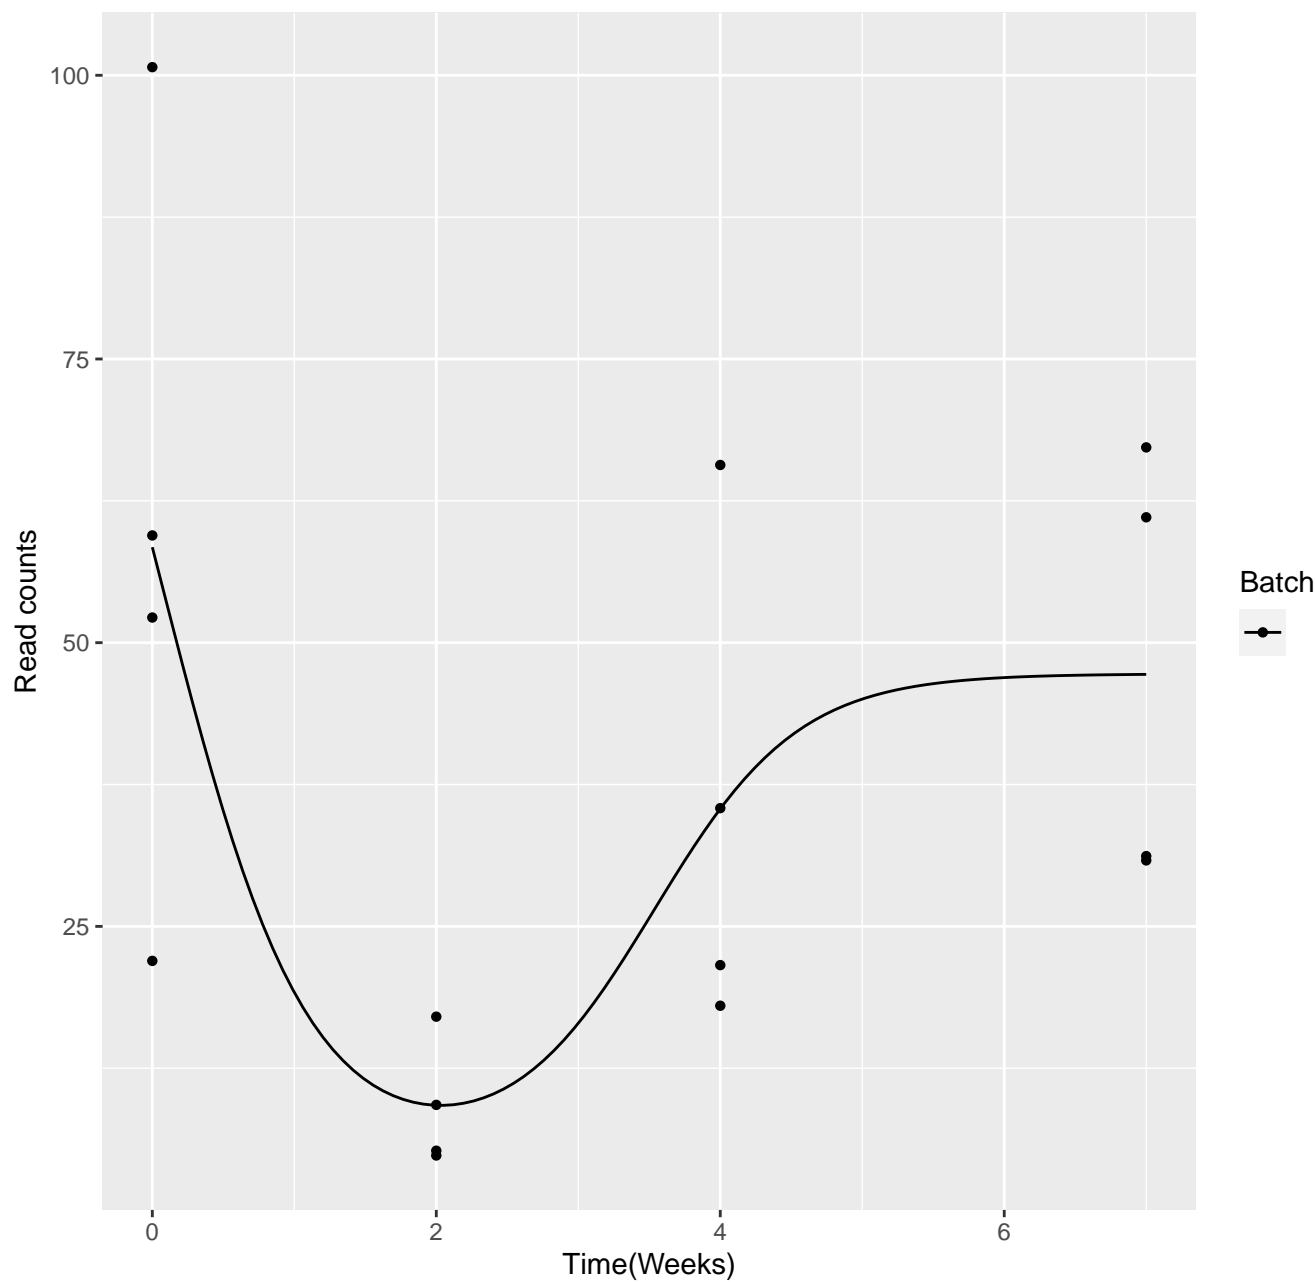

ACAN:  $\log_{10} q = -2.27$

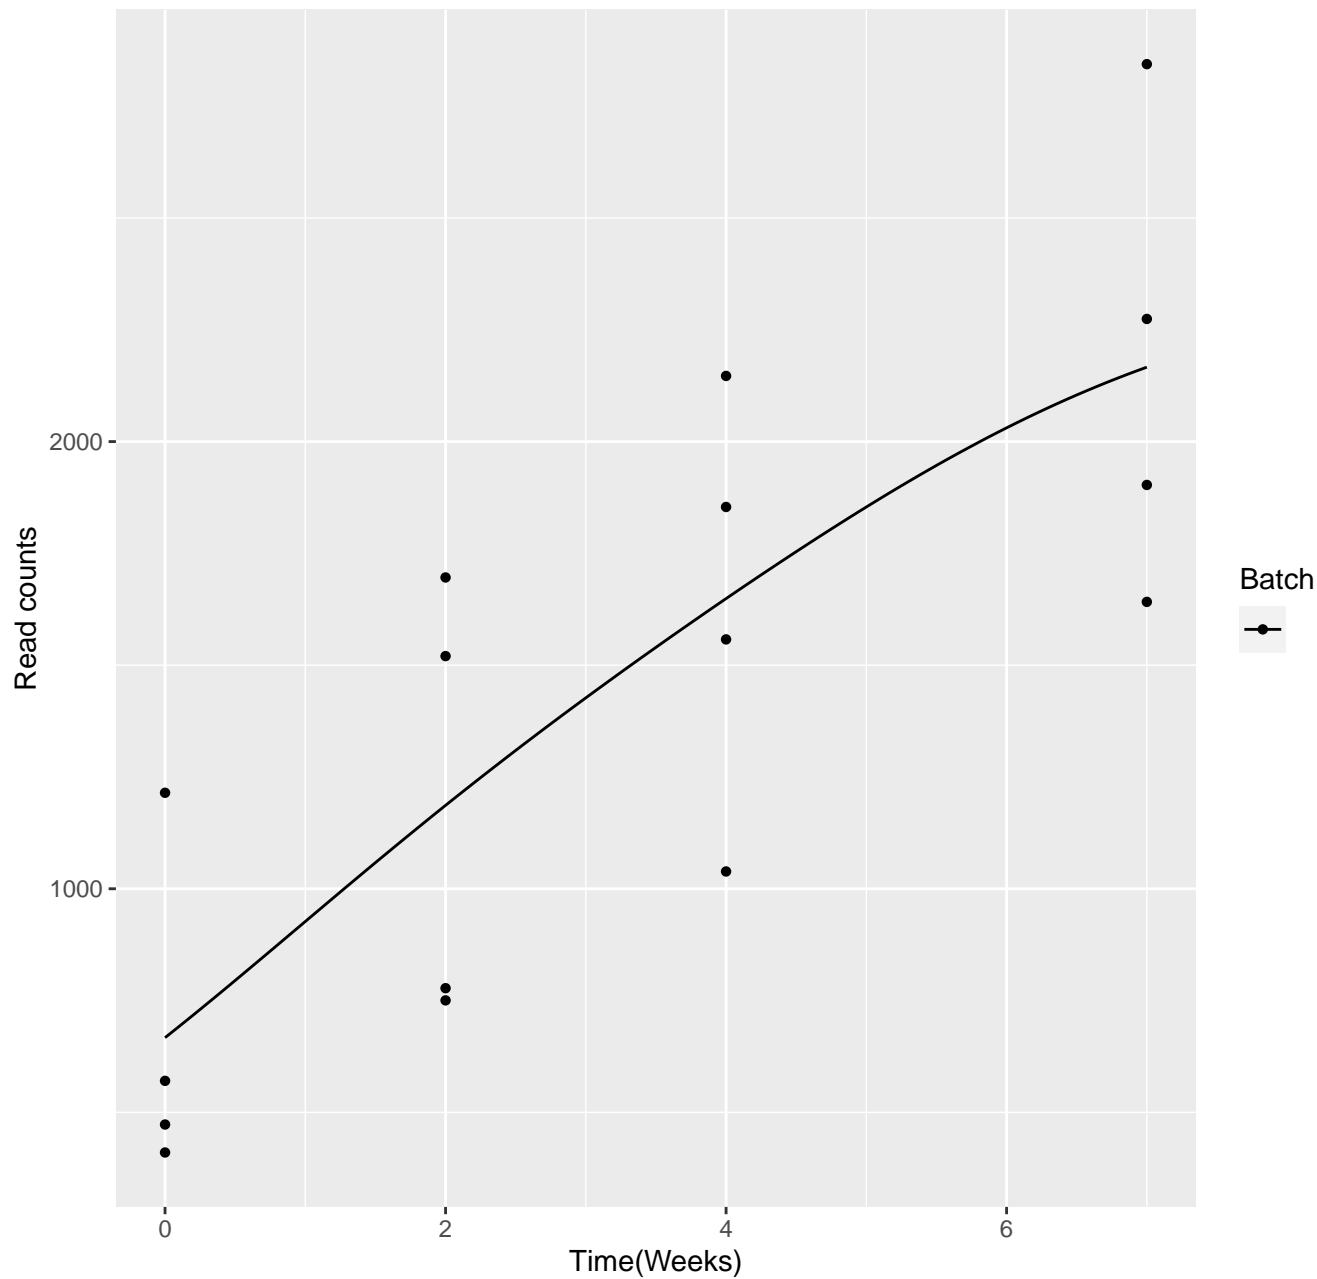



PDZRN3:  $\log_{10} q = -2.27$

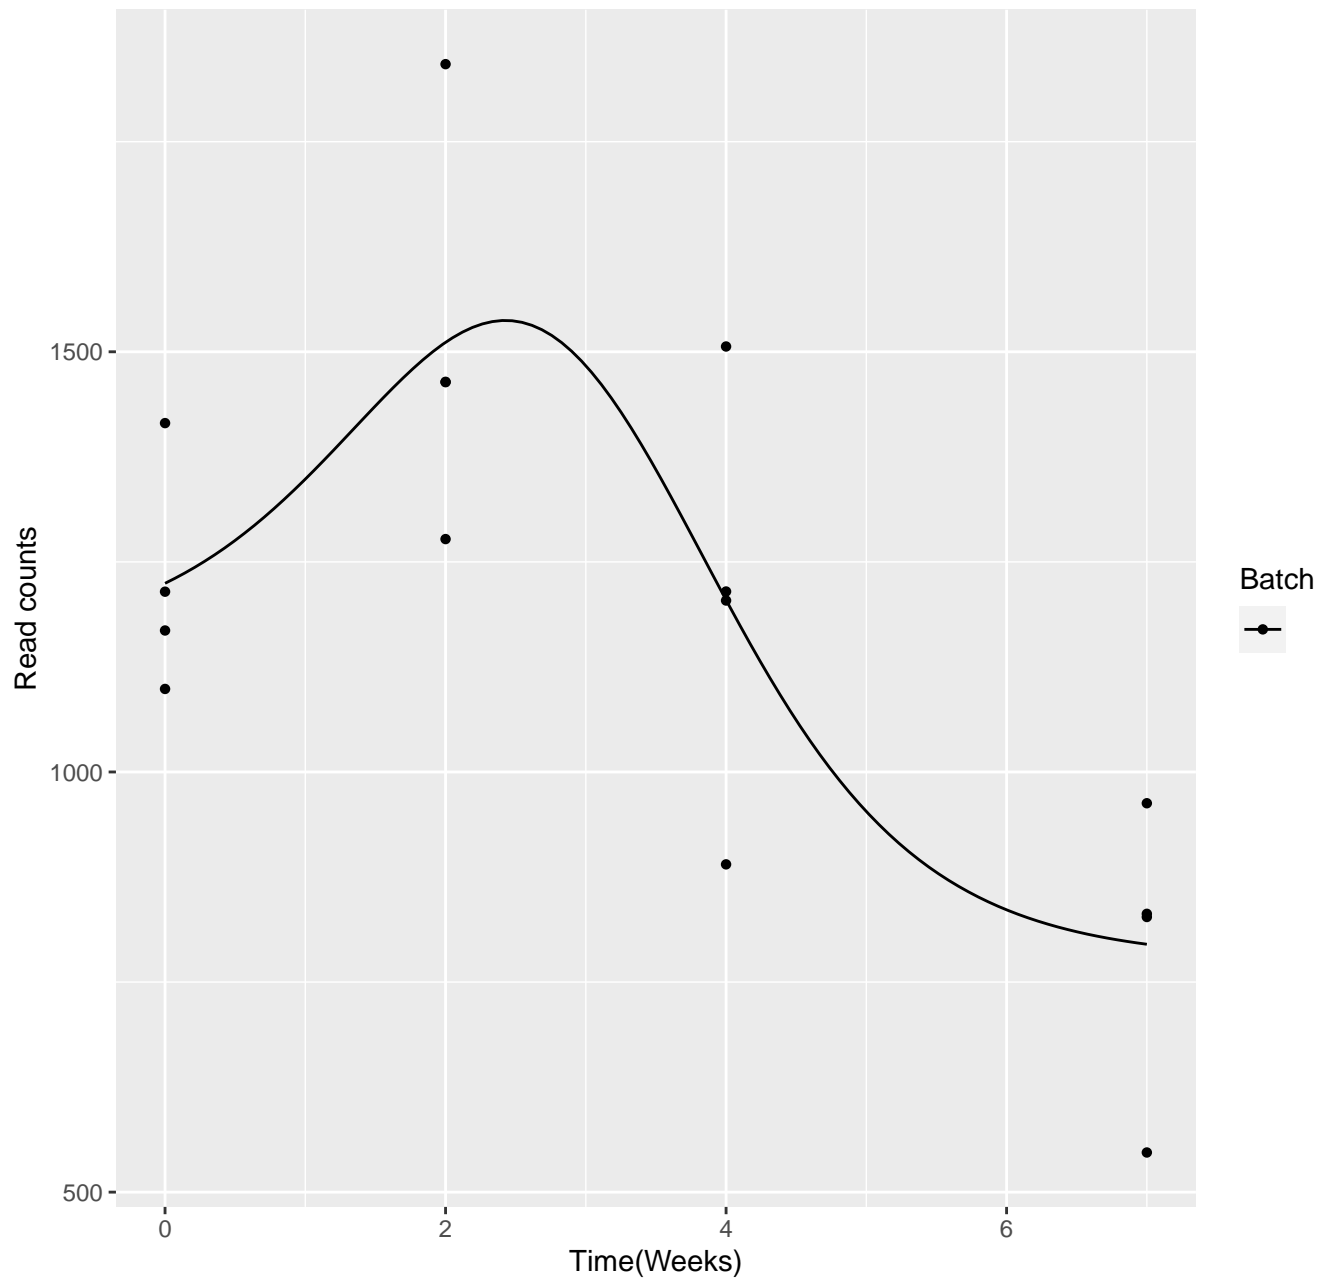

PPIF:  $\log_{10} q = -2.27$

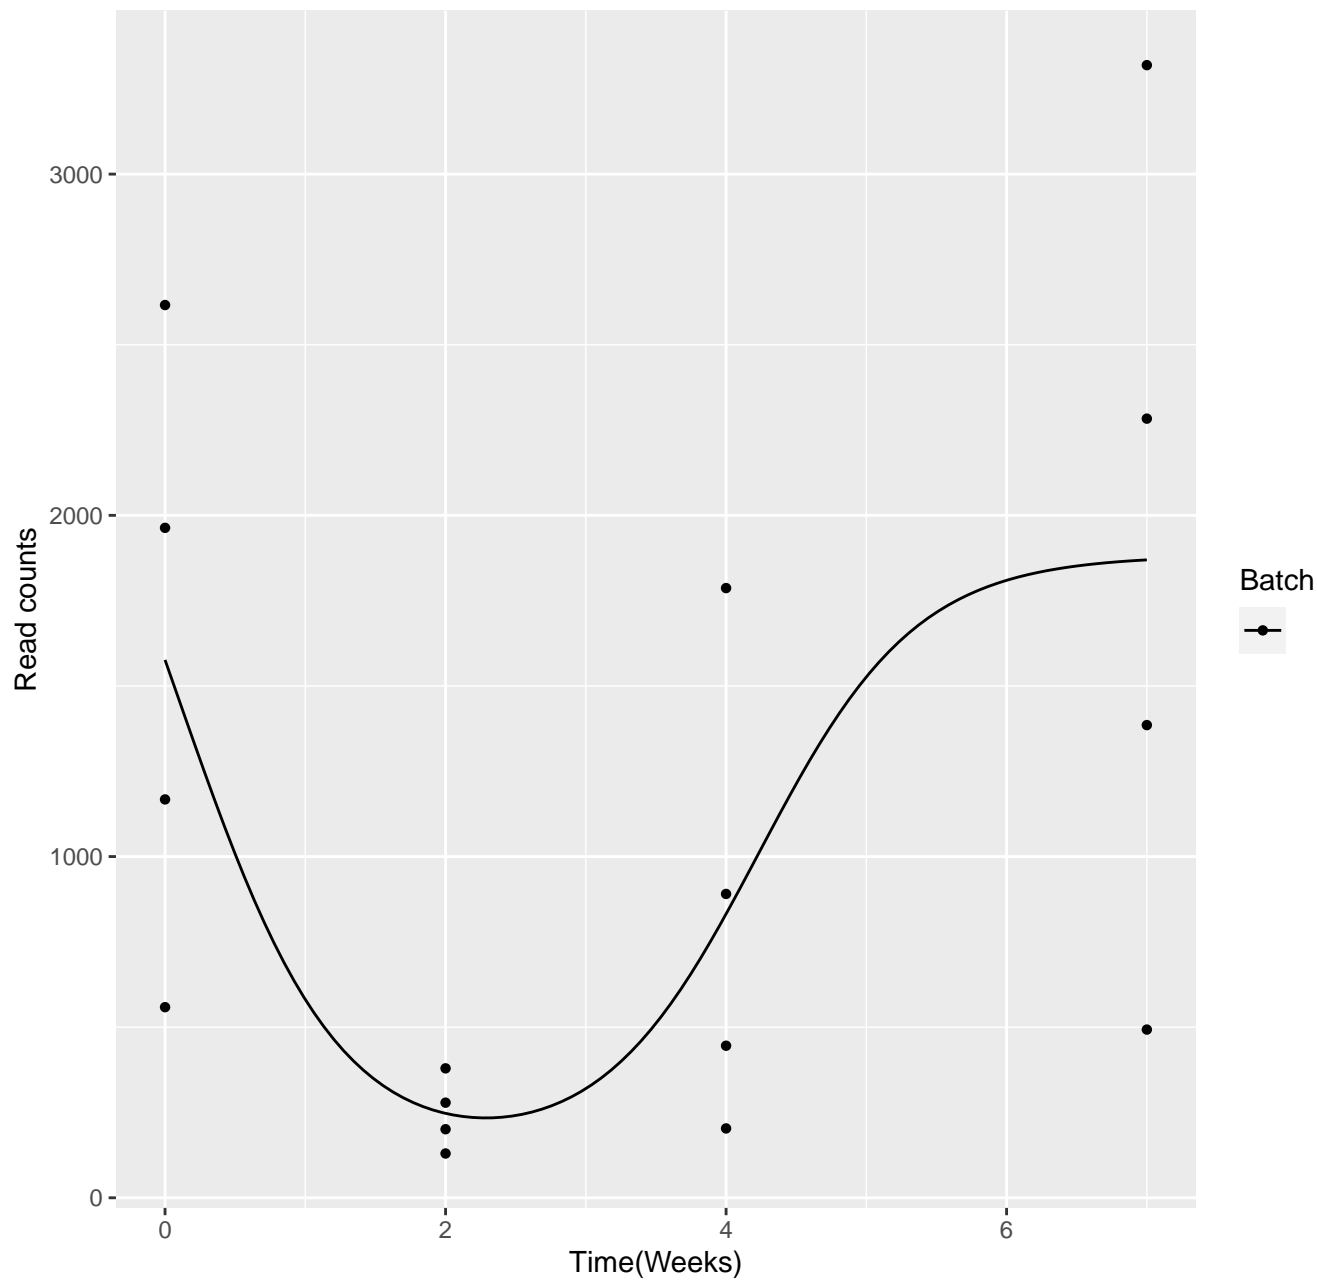

CEBPD:  $\log_{10} q = -2.27$

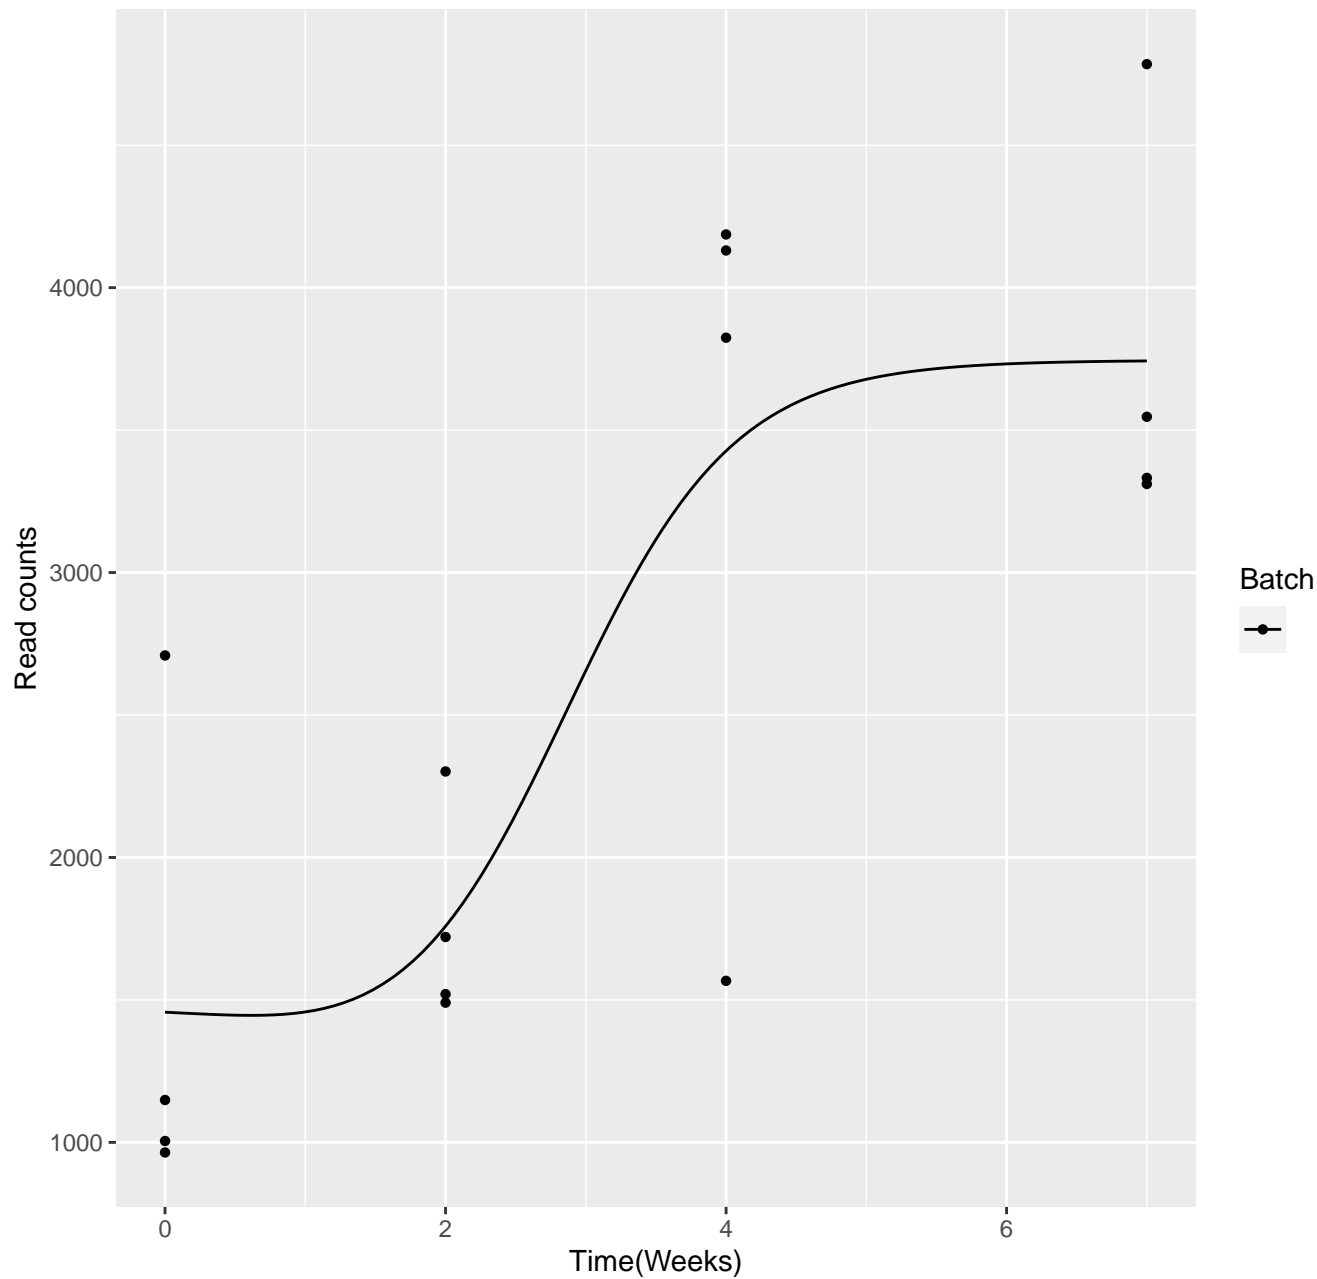

NTN4:  $\log_{10} q = -2.26$

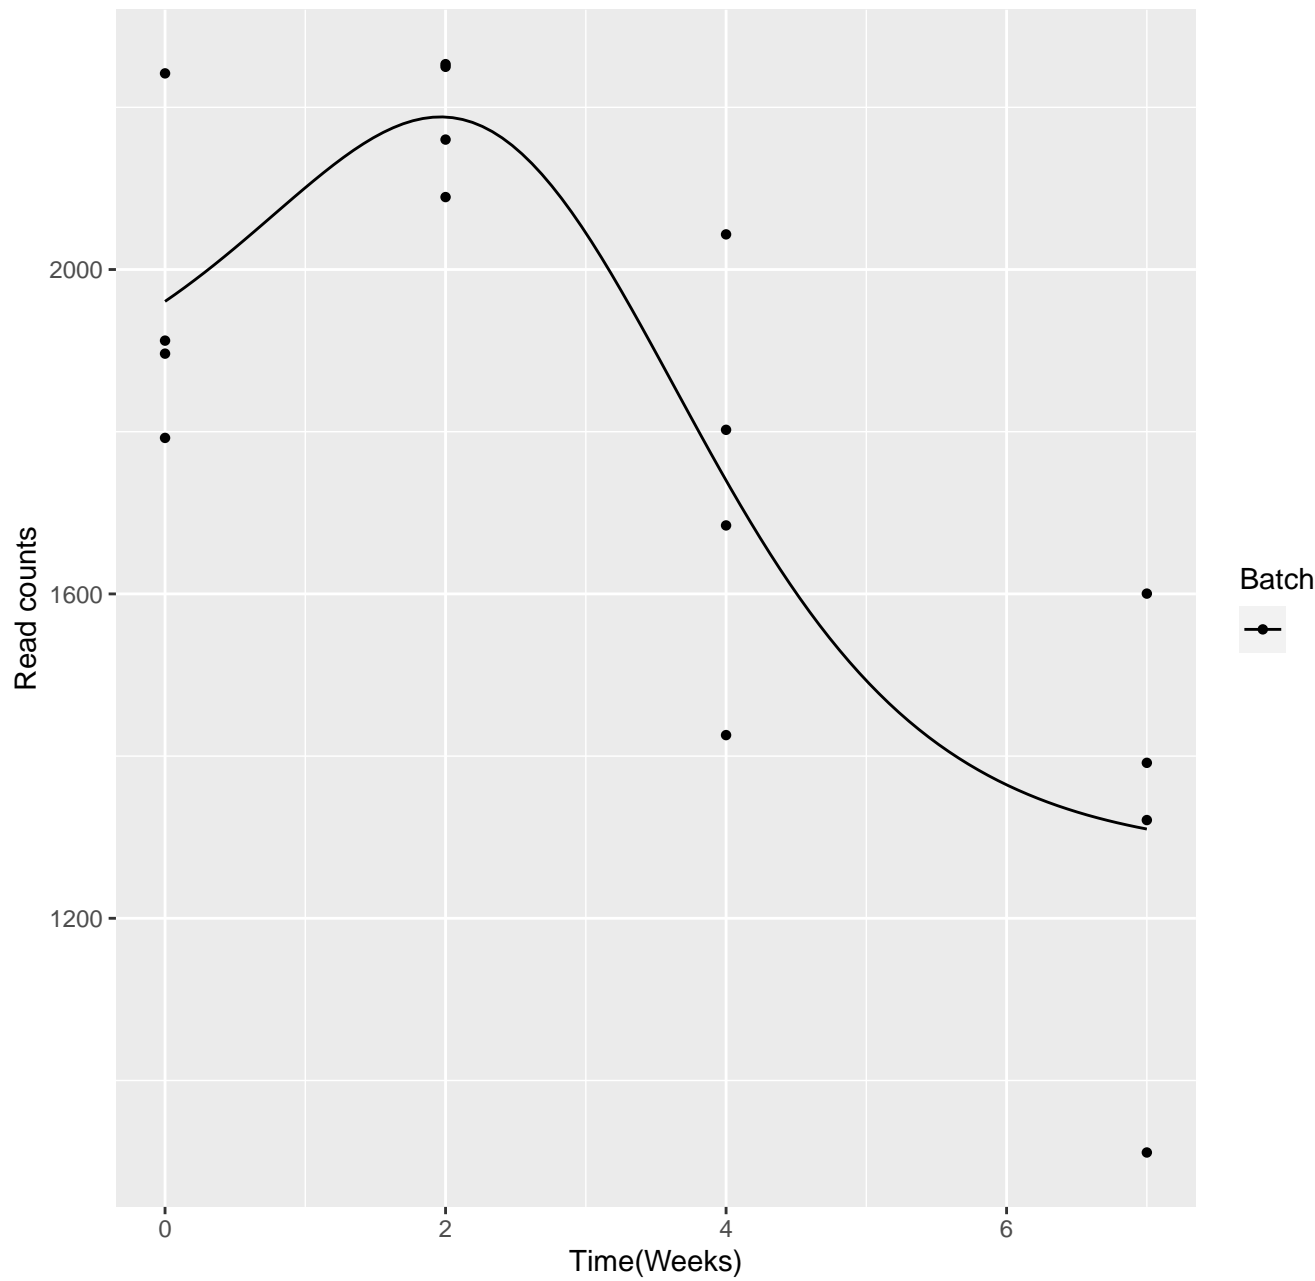

CD5L:  $\log_{10} q = -2.26$

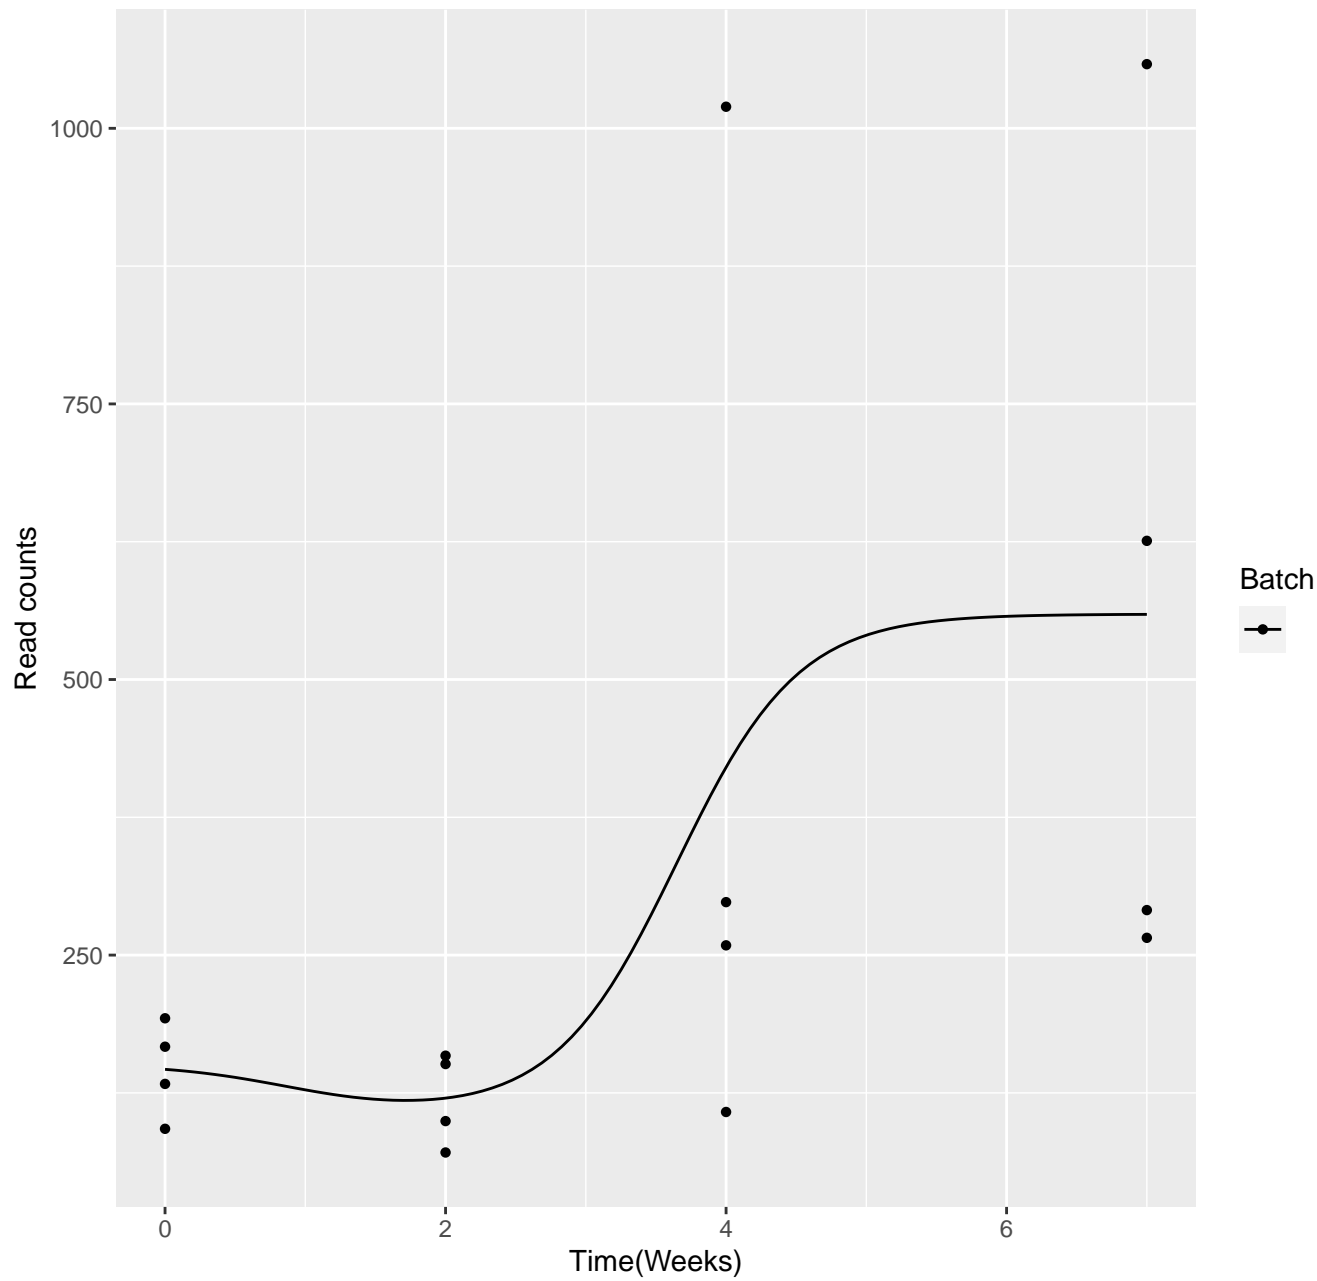

KIRREL1:  $\log_{10} q = -2.26$

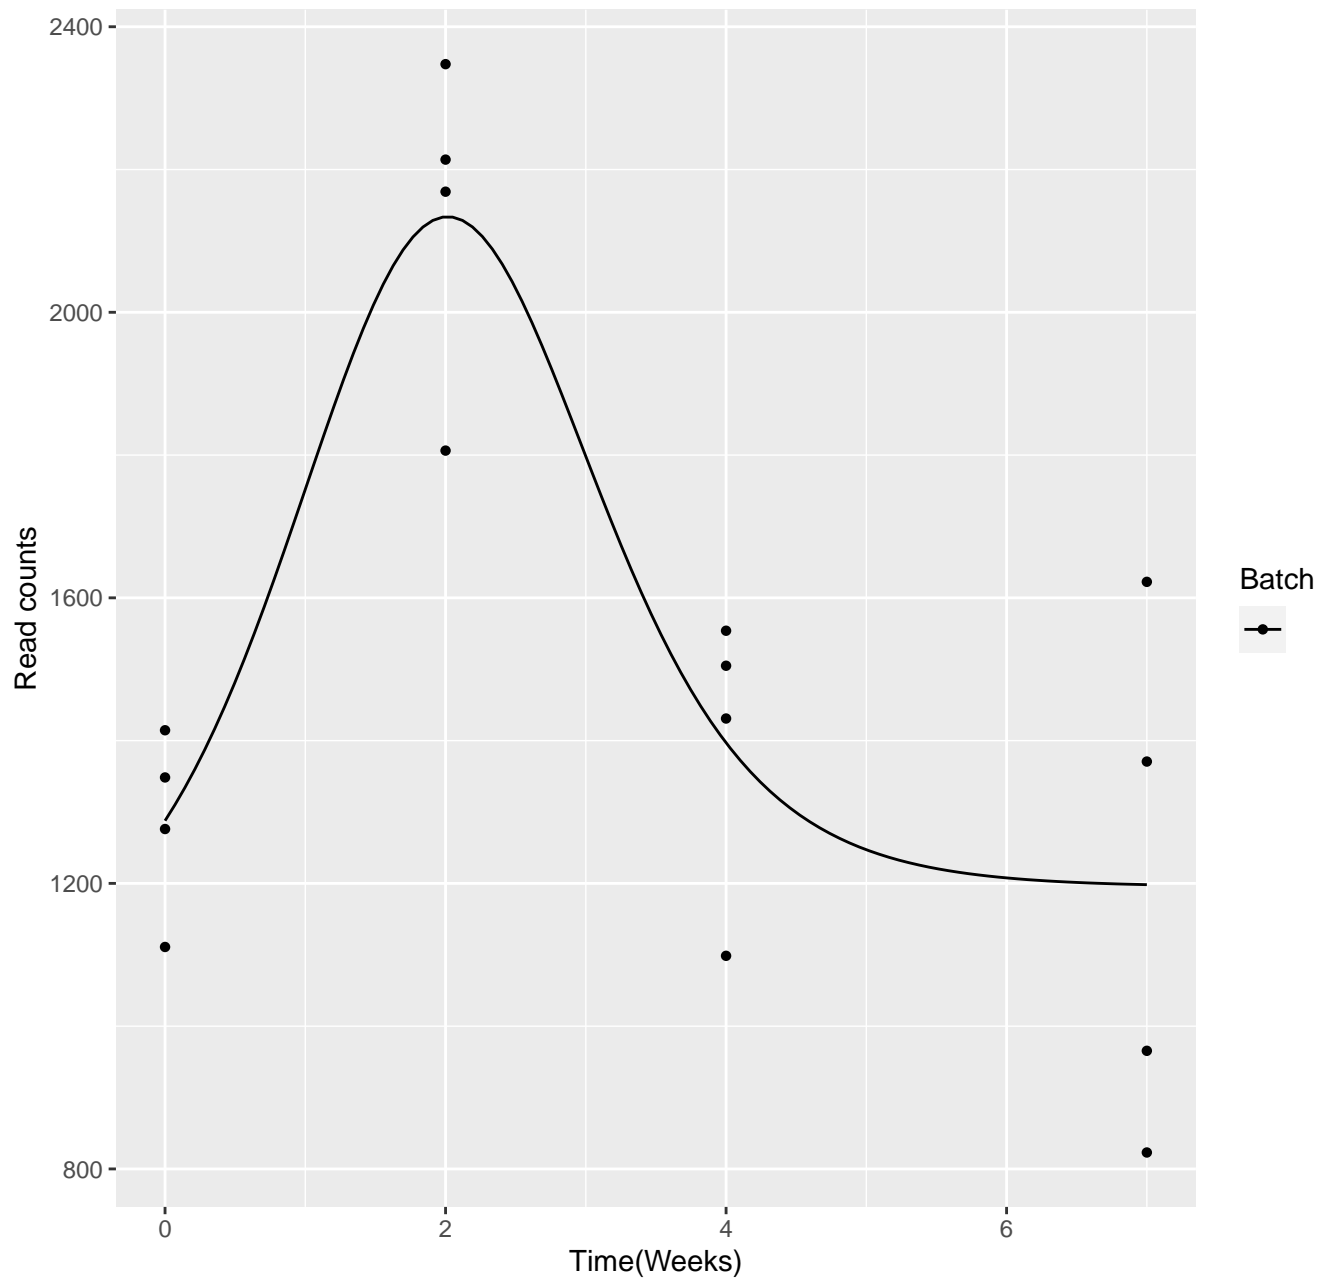

STXBP2:  $\log_{10} q = -2.26$

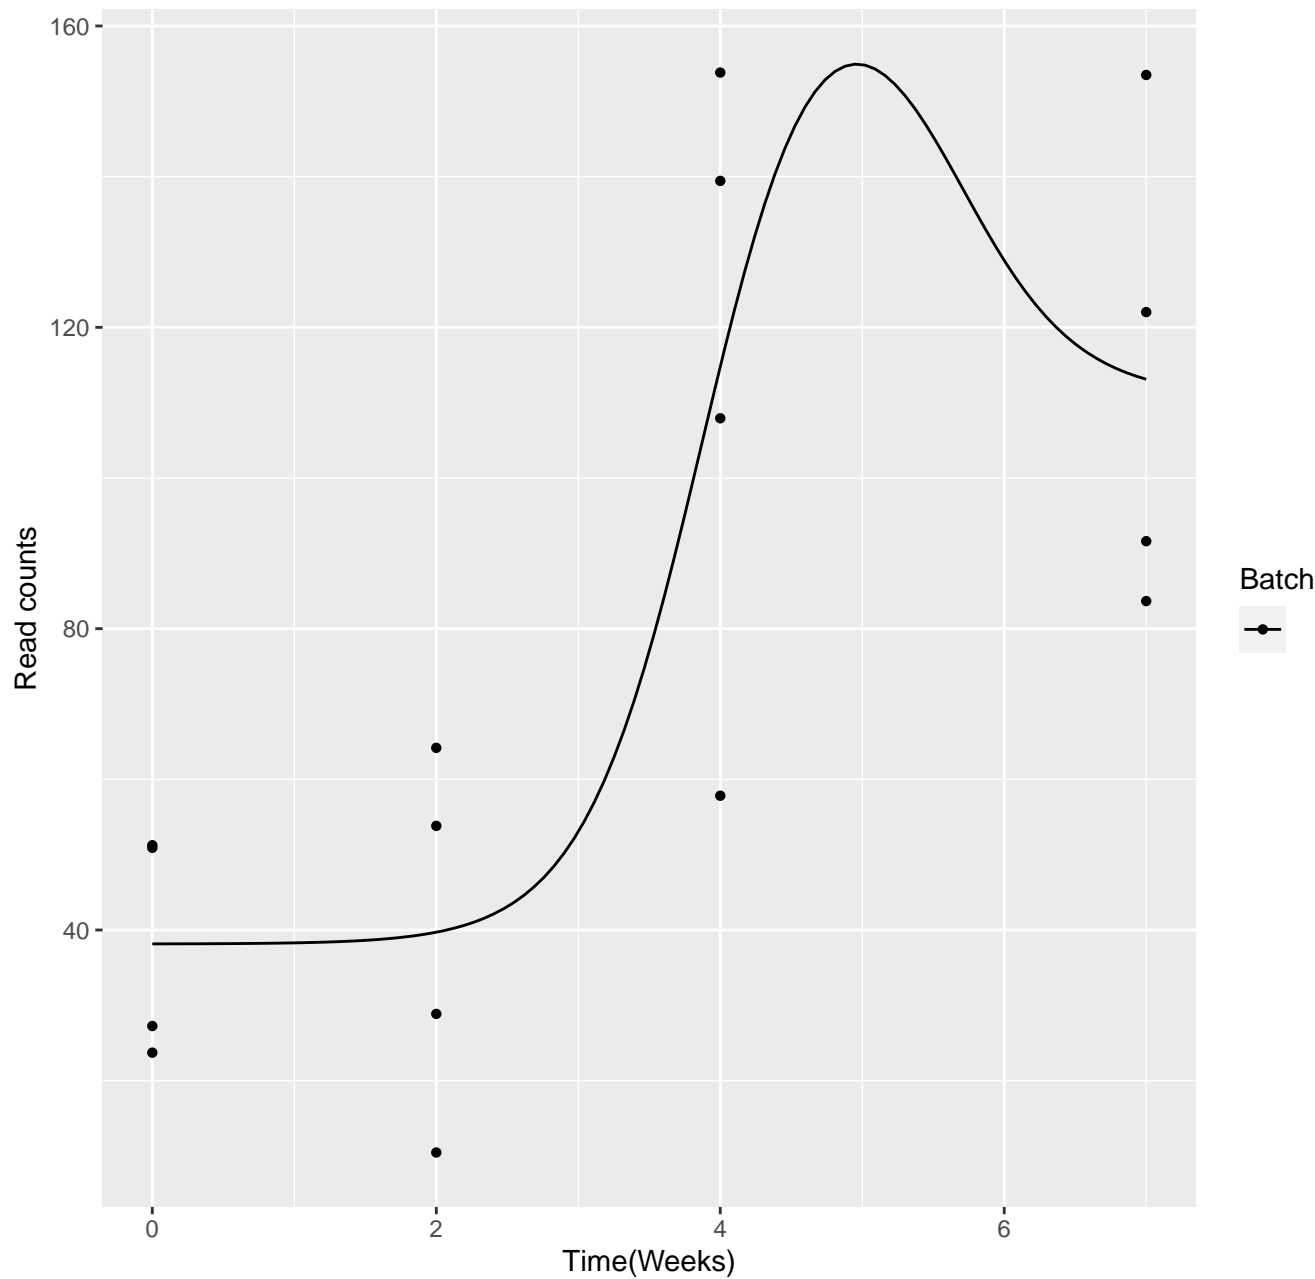

GJA4:  $\log_{10} q = -2.26$

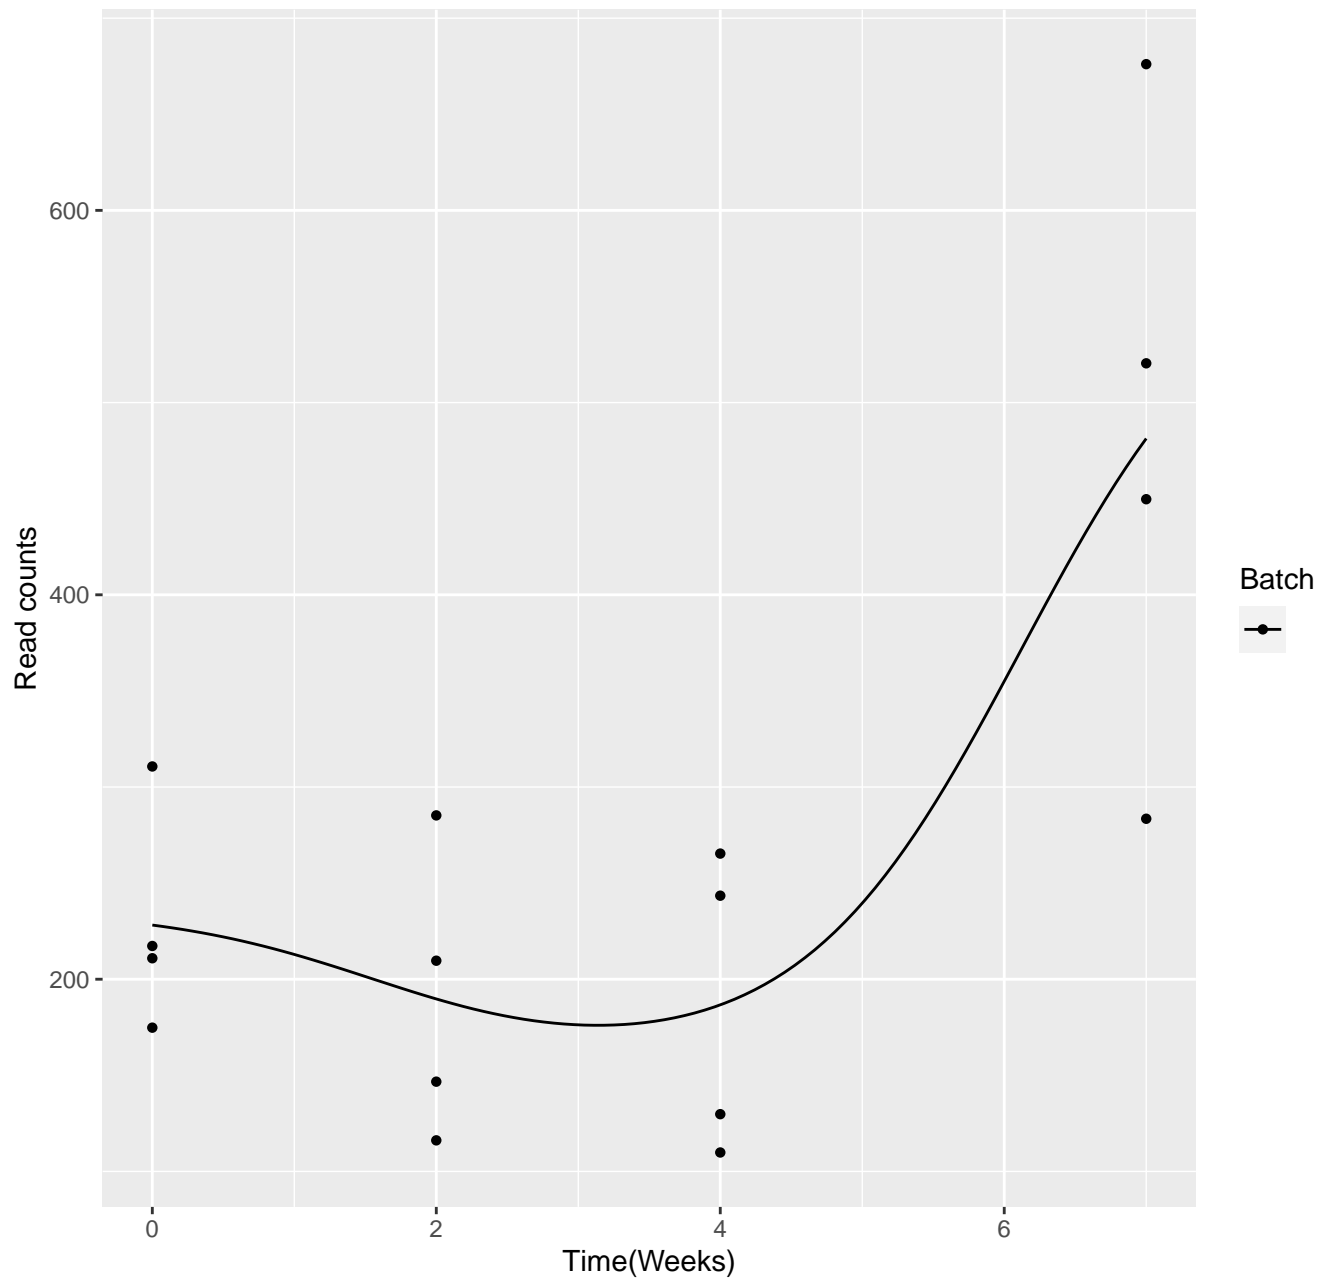



LOC100350556:  $\log_{10} q = -2.26$

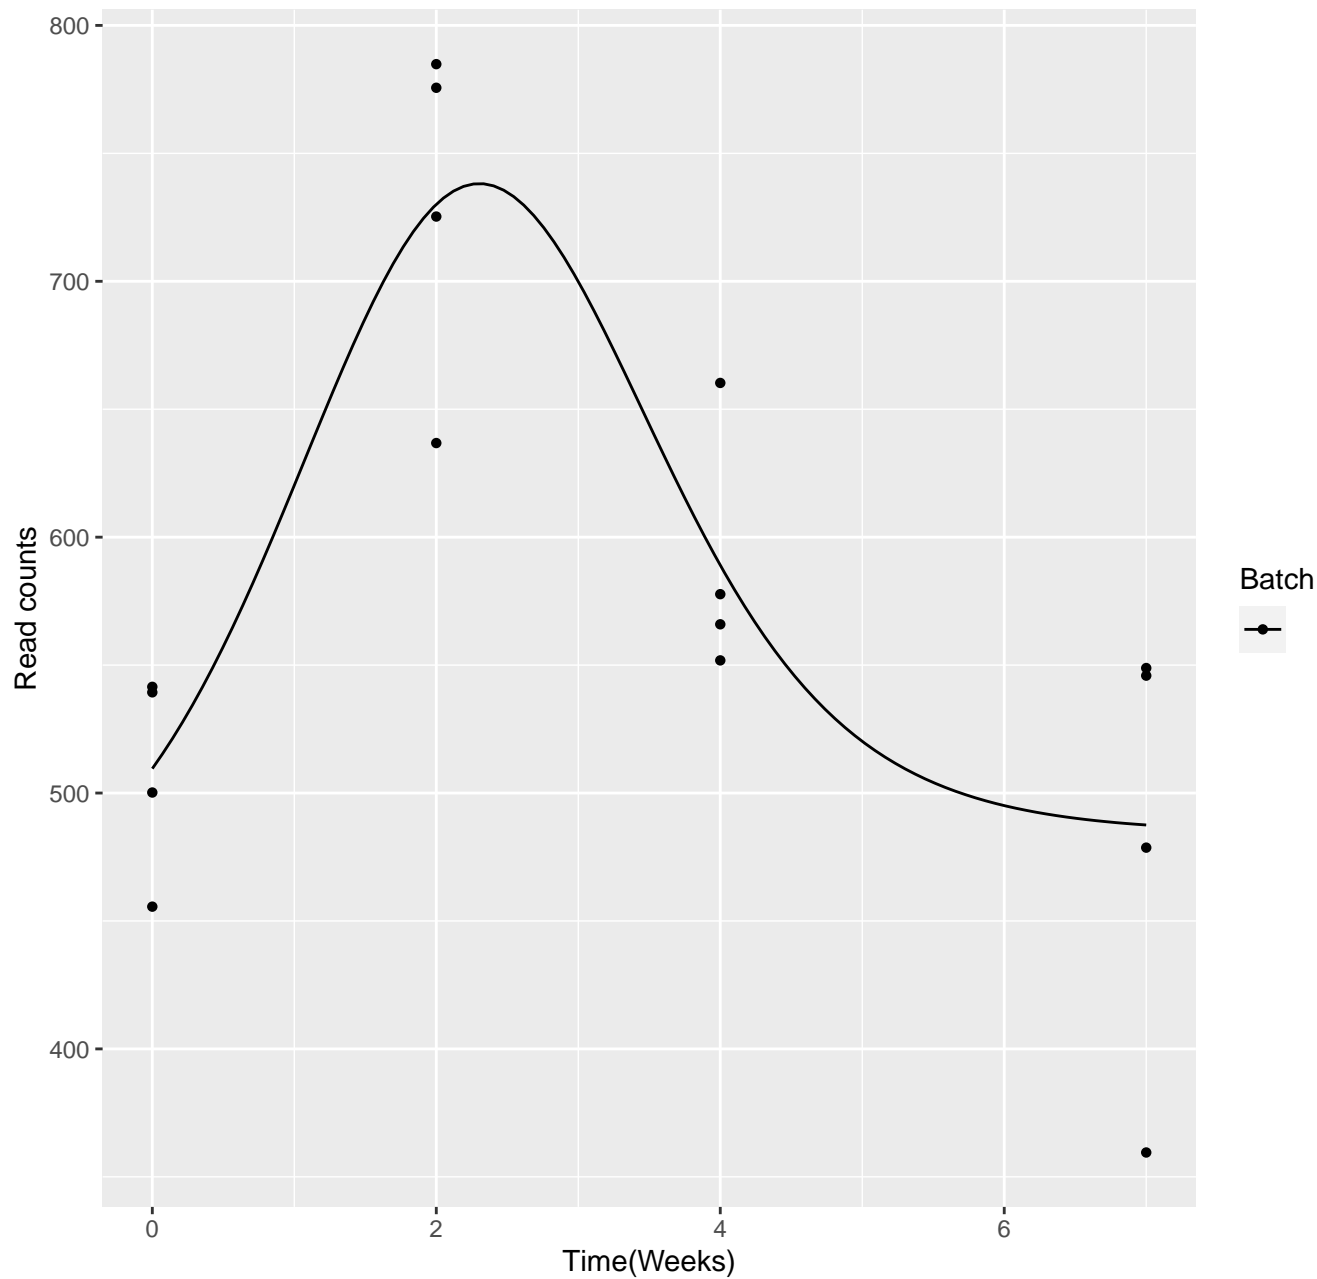

TWSG1:  $\log_{10} q = -2.26$

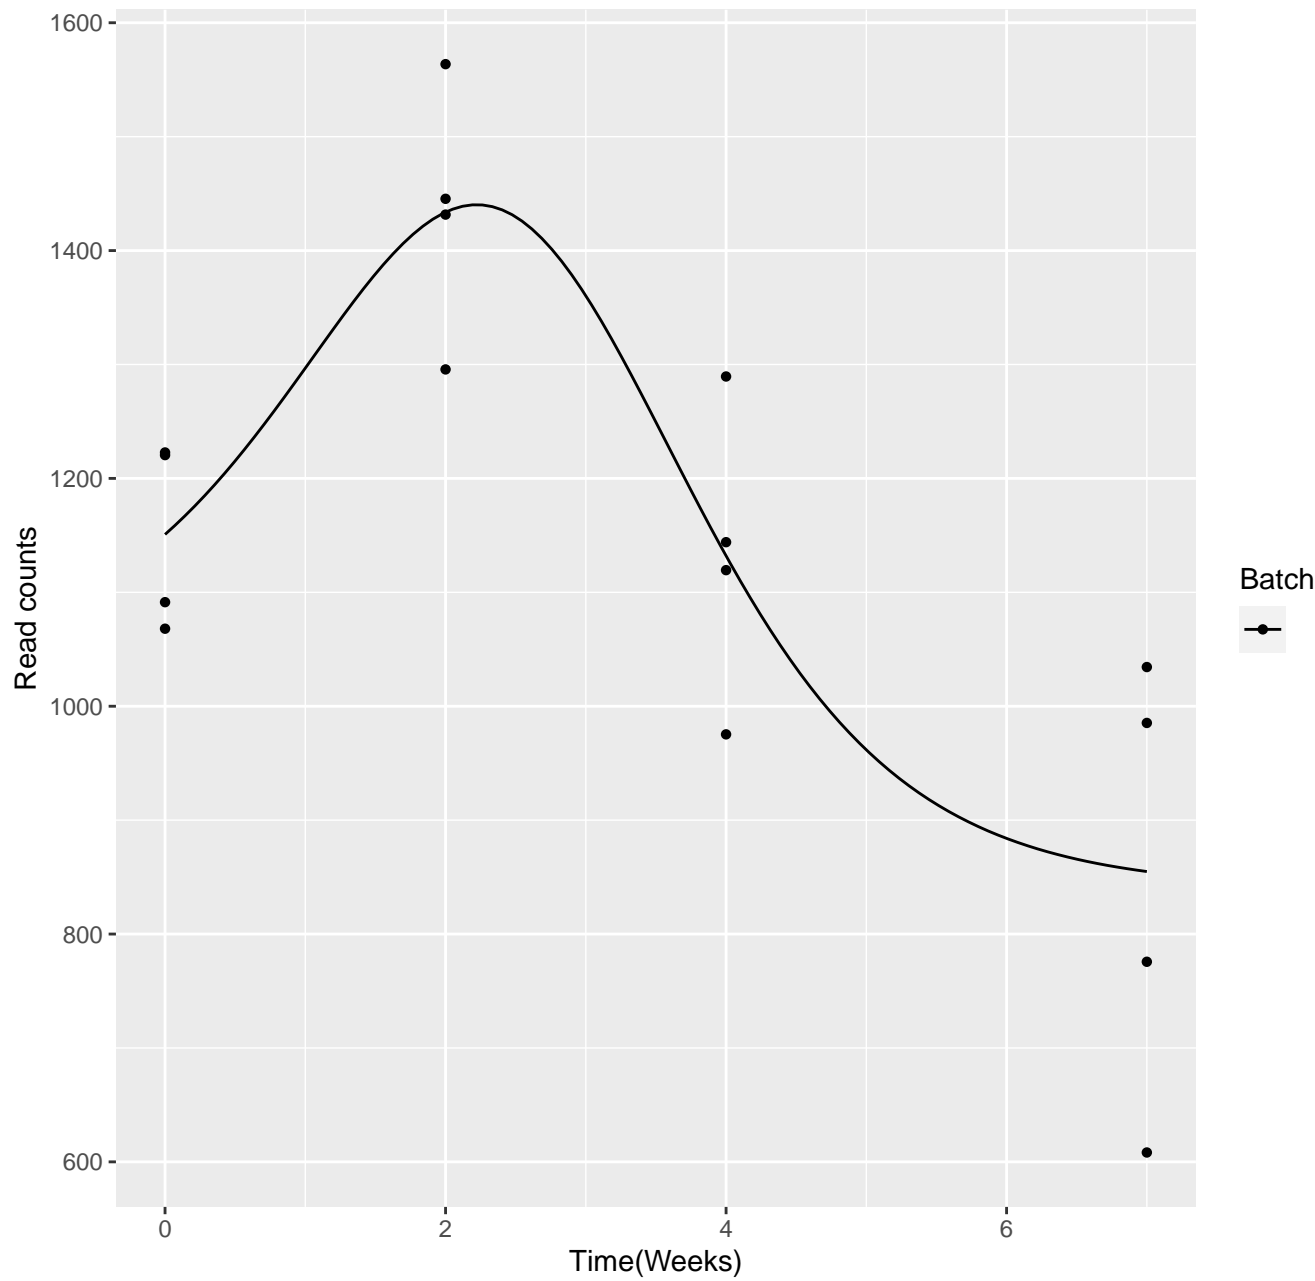

SGPL1:  $\log_{10} q = -2.25$

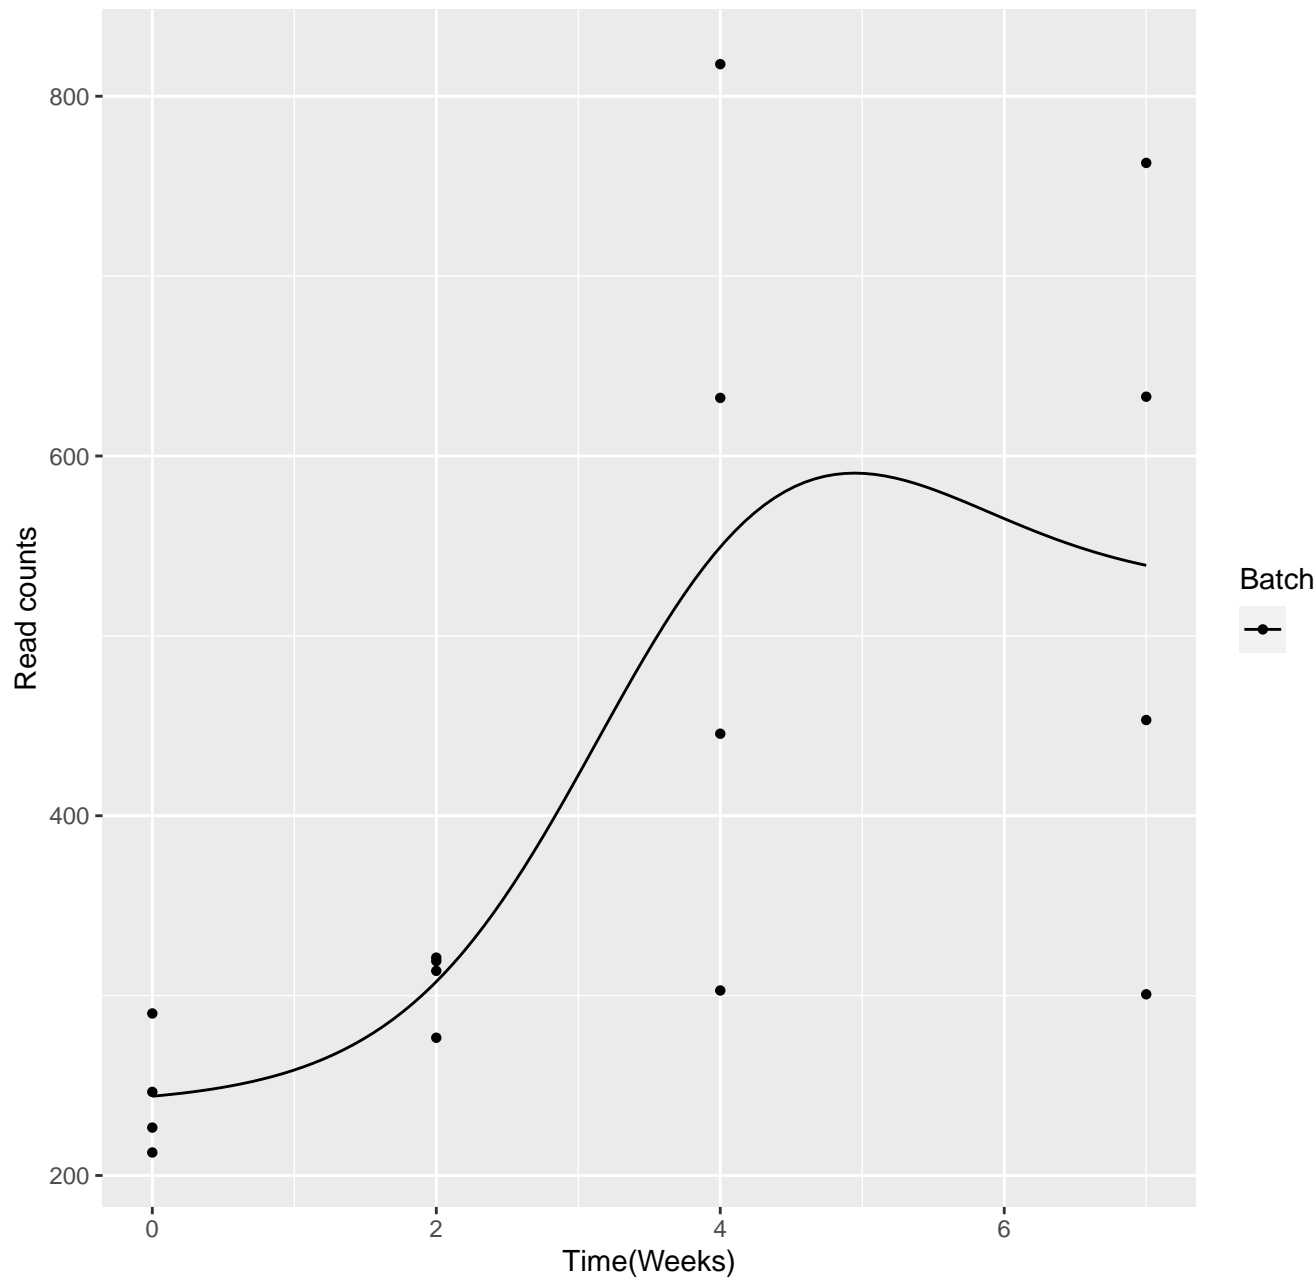

LOC103350420:  $\log_{10} q = -2.25$

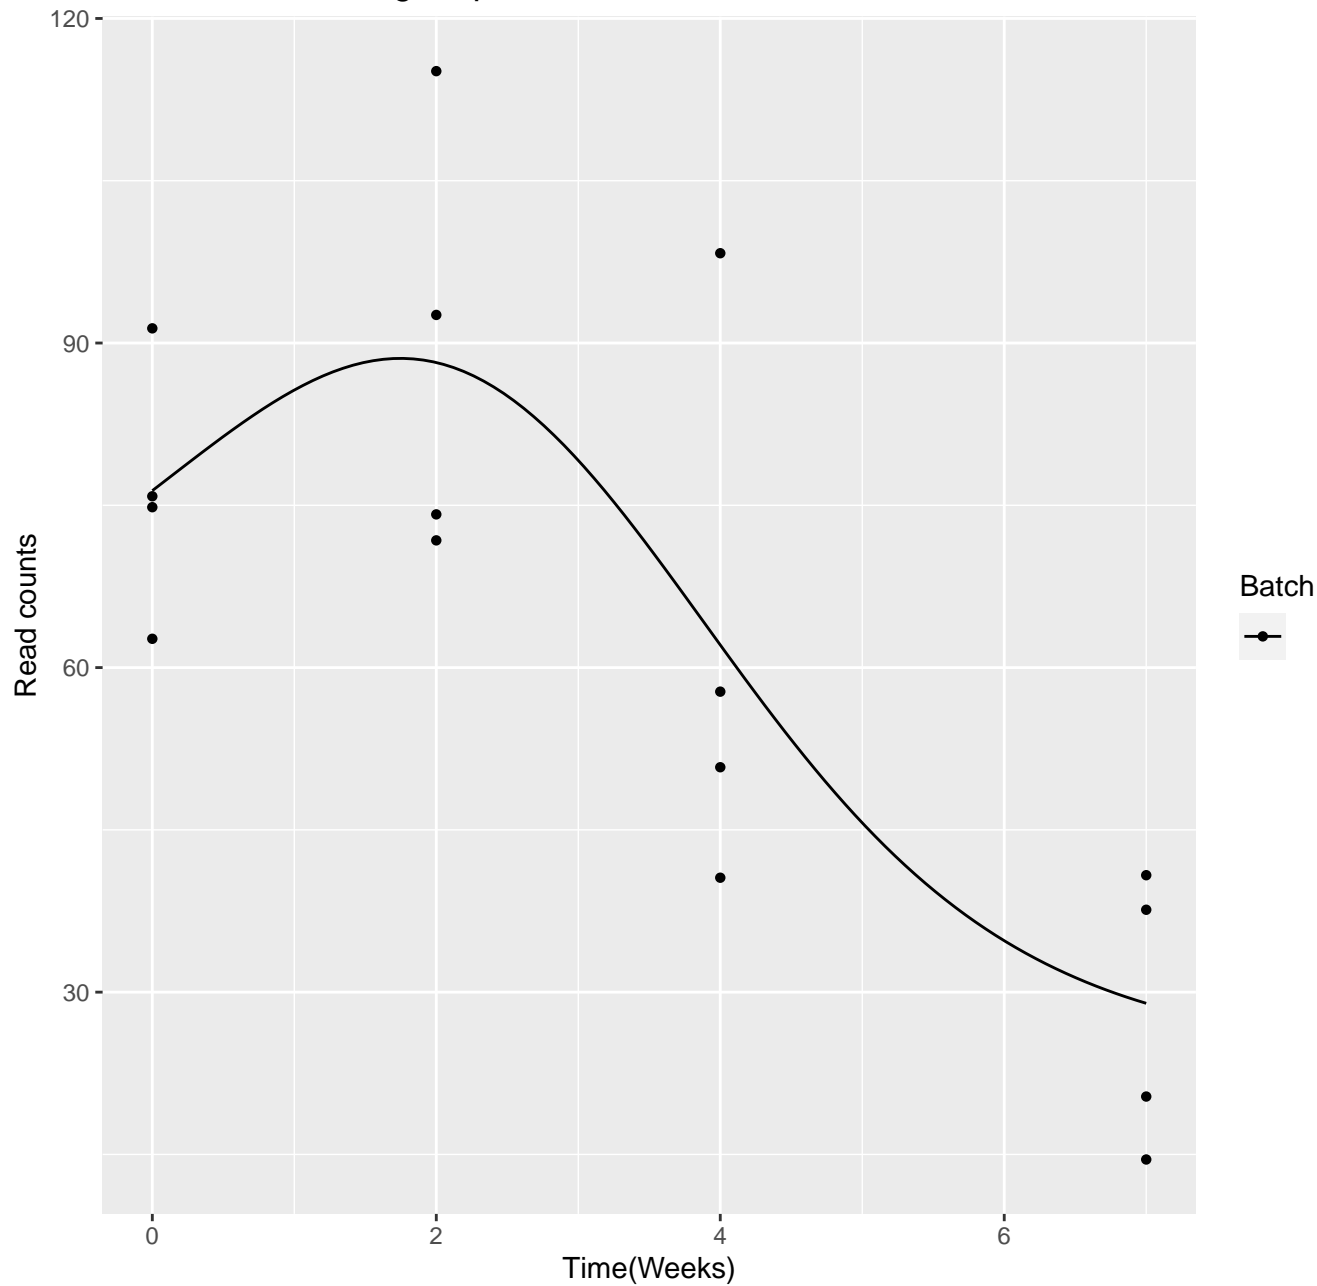

LATS2:  $\log_{10} q = -2.25$

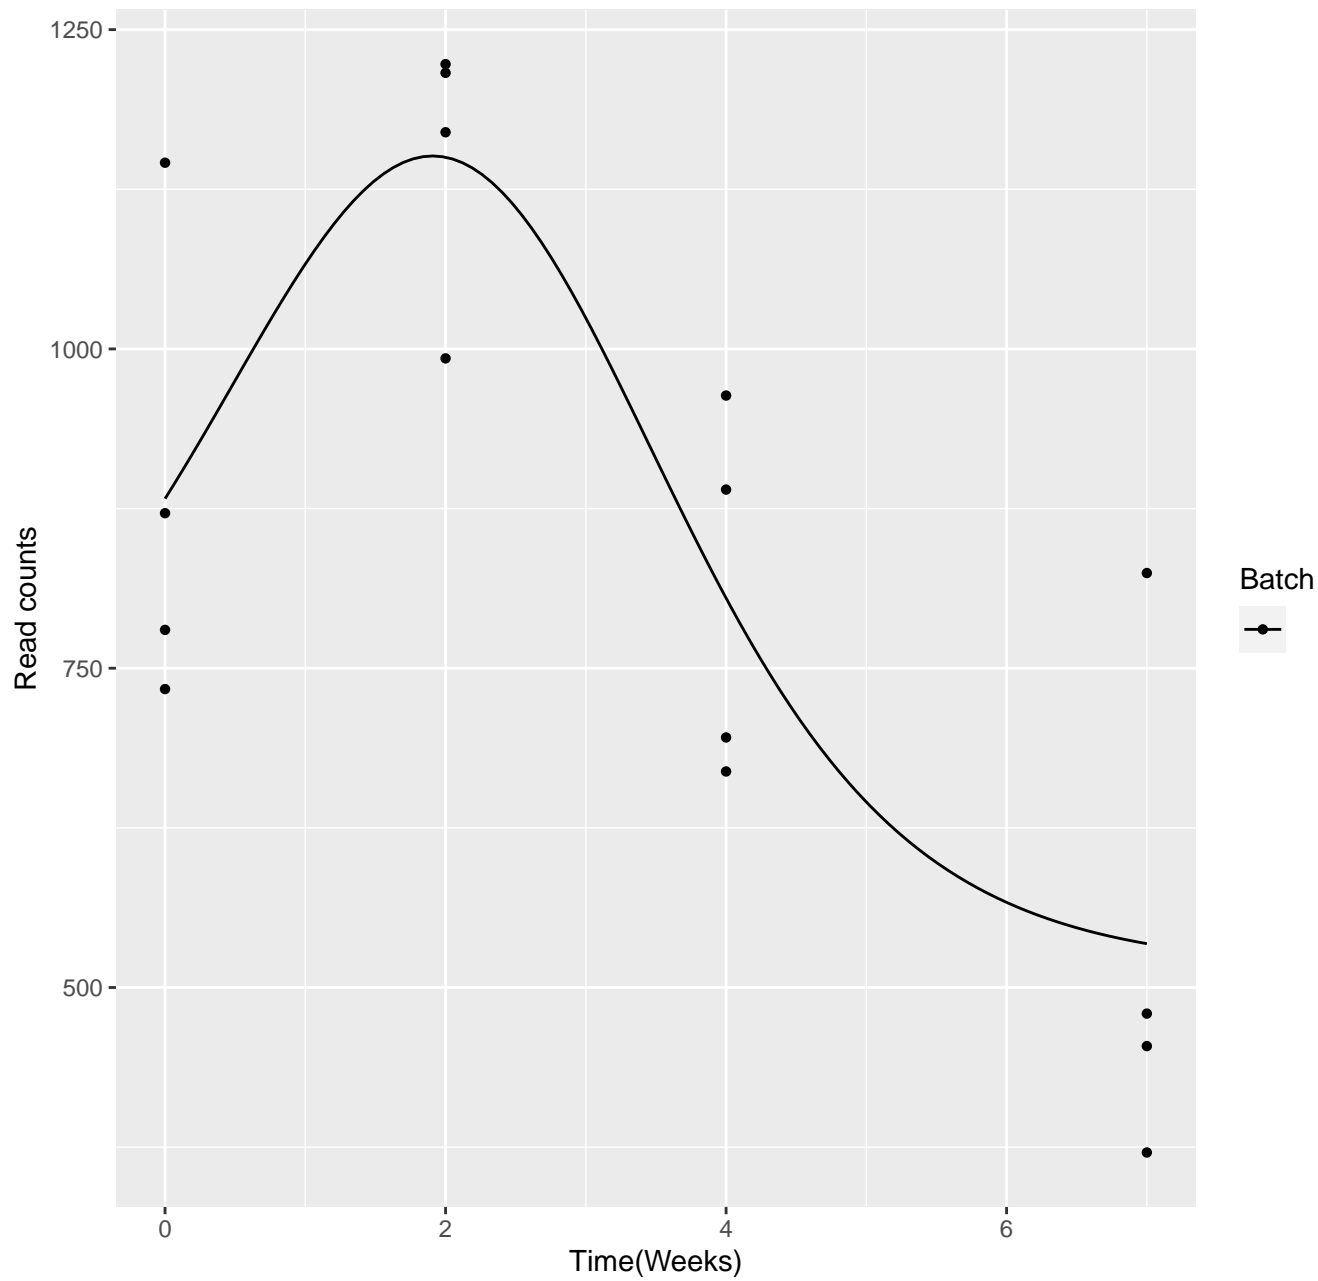

FGF23:  $\log_{10} q = -2.25$

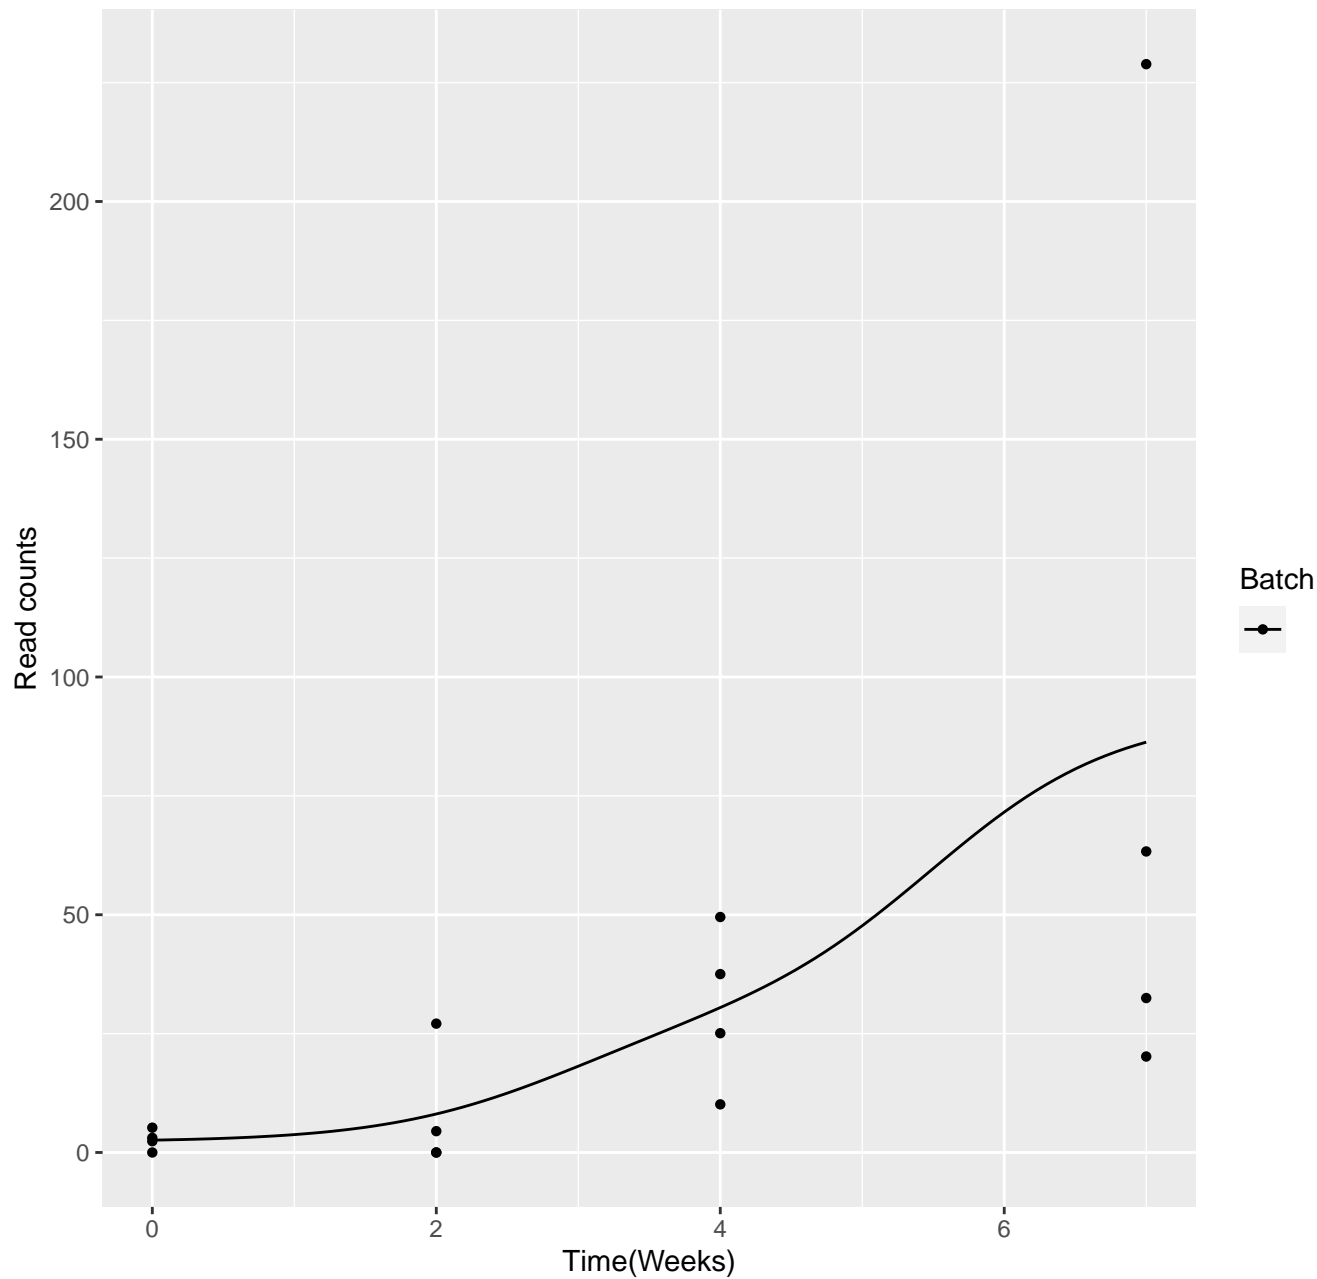

NDUFA4:  $\log_{10} q = -2.25$

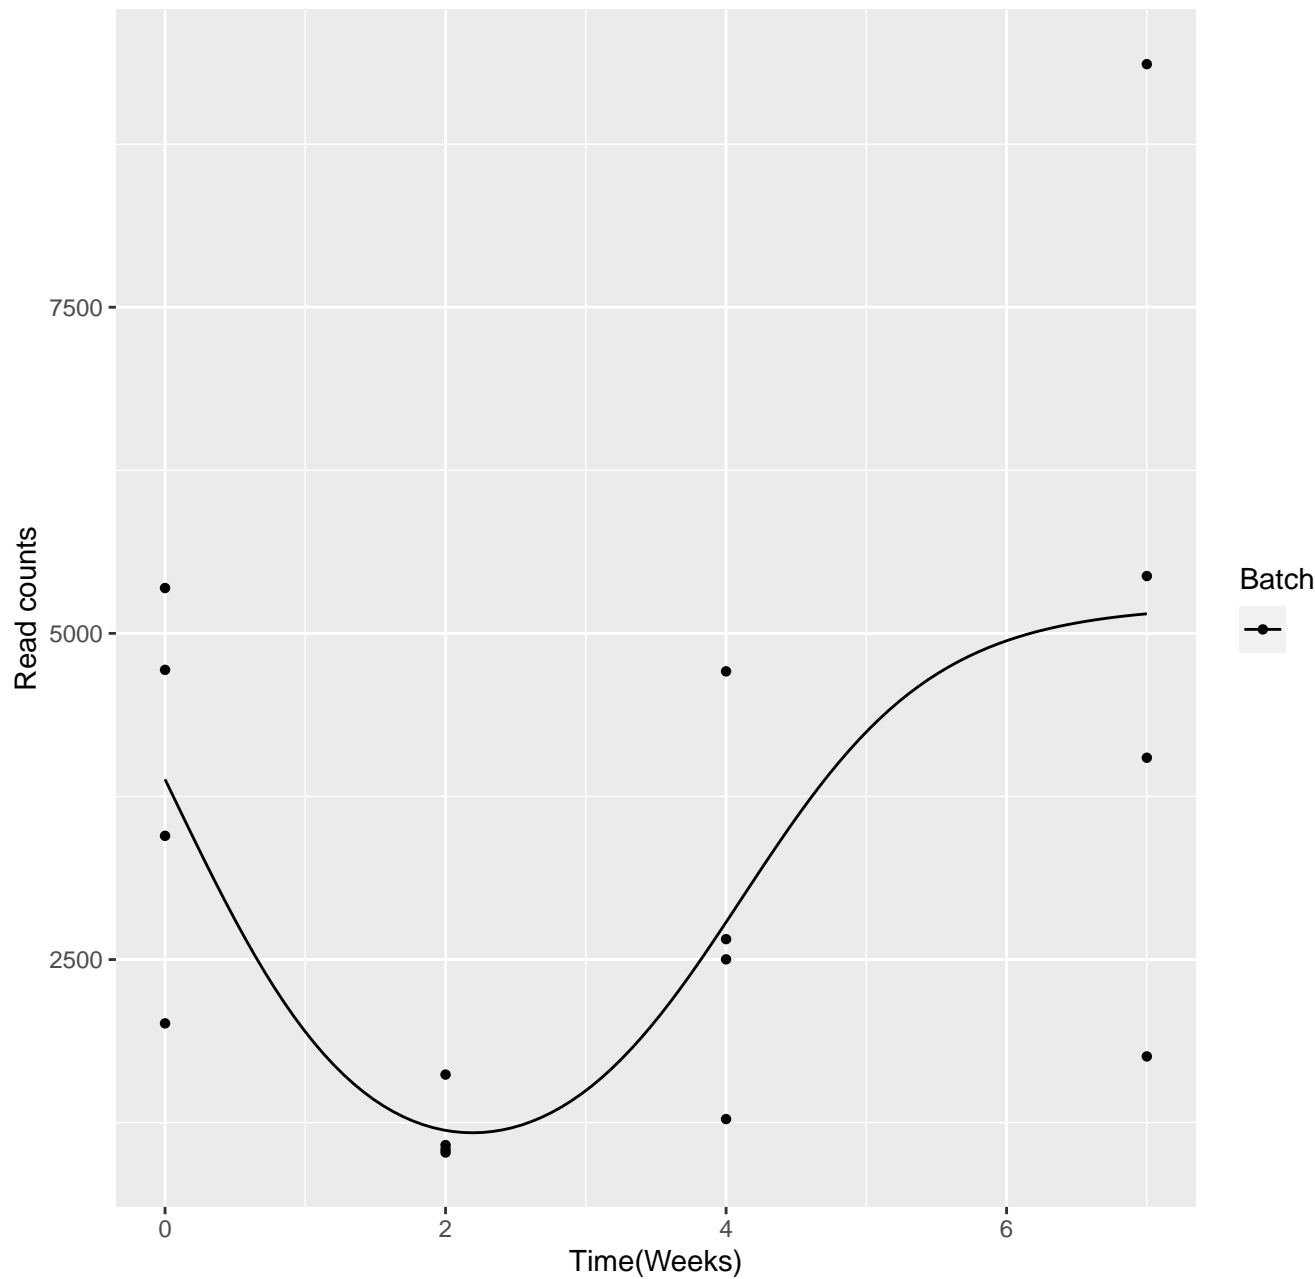

GRAMD1B:  $\log_{10} q = -2.24$

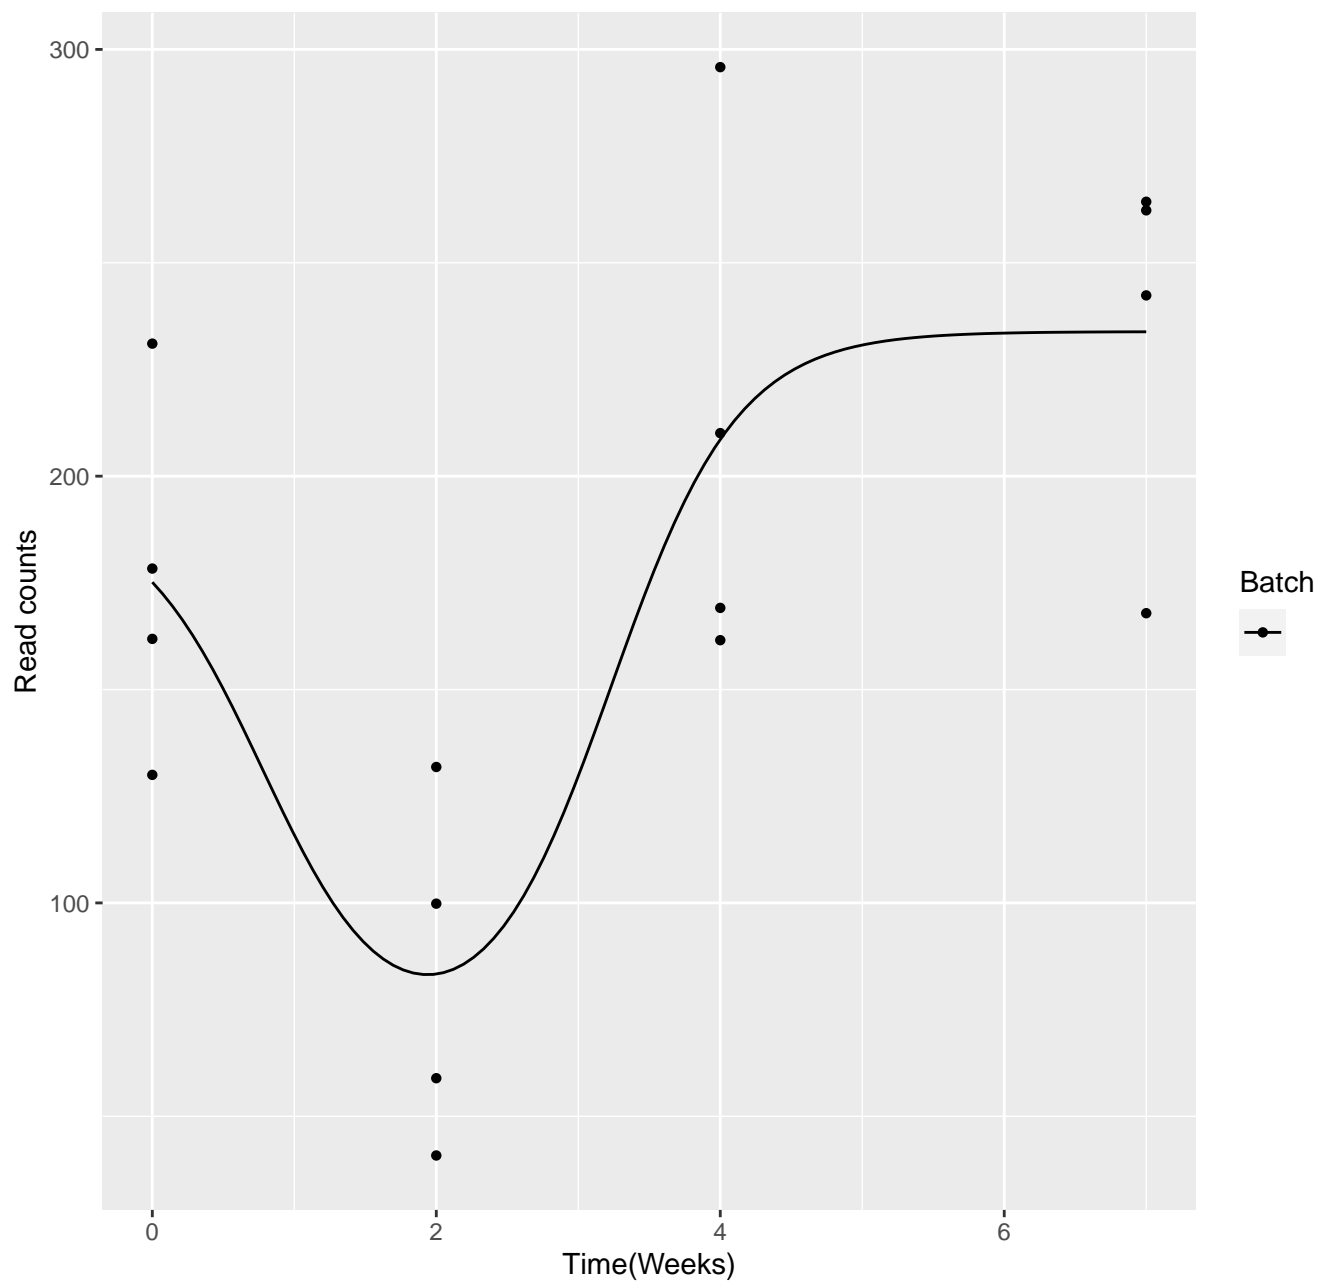



MYL2:  $\log_{10} q = -2.24$

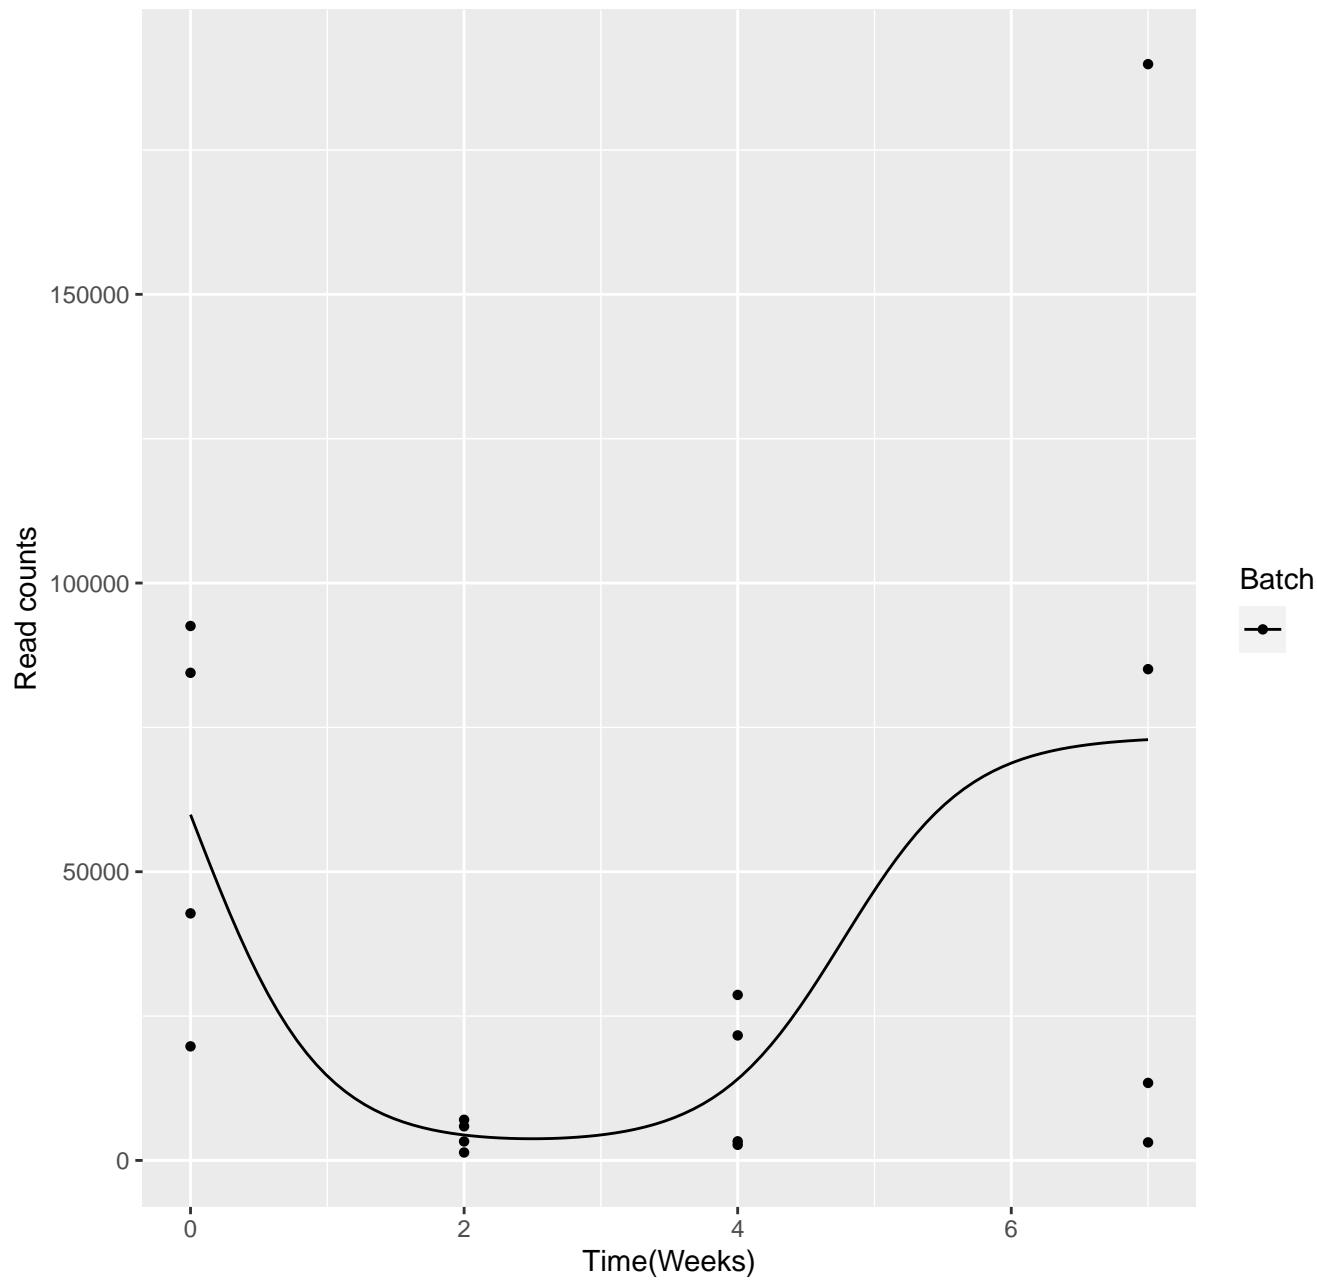

LOC100354870:  $\log_{10} q = -2.24$

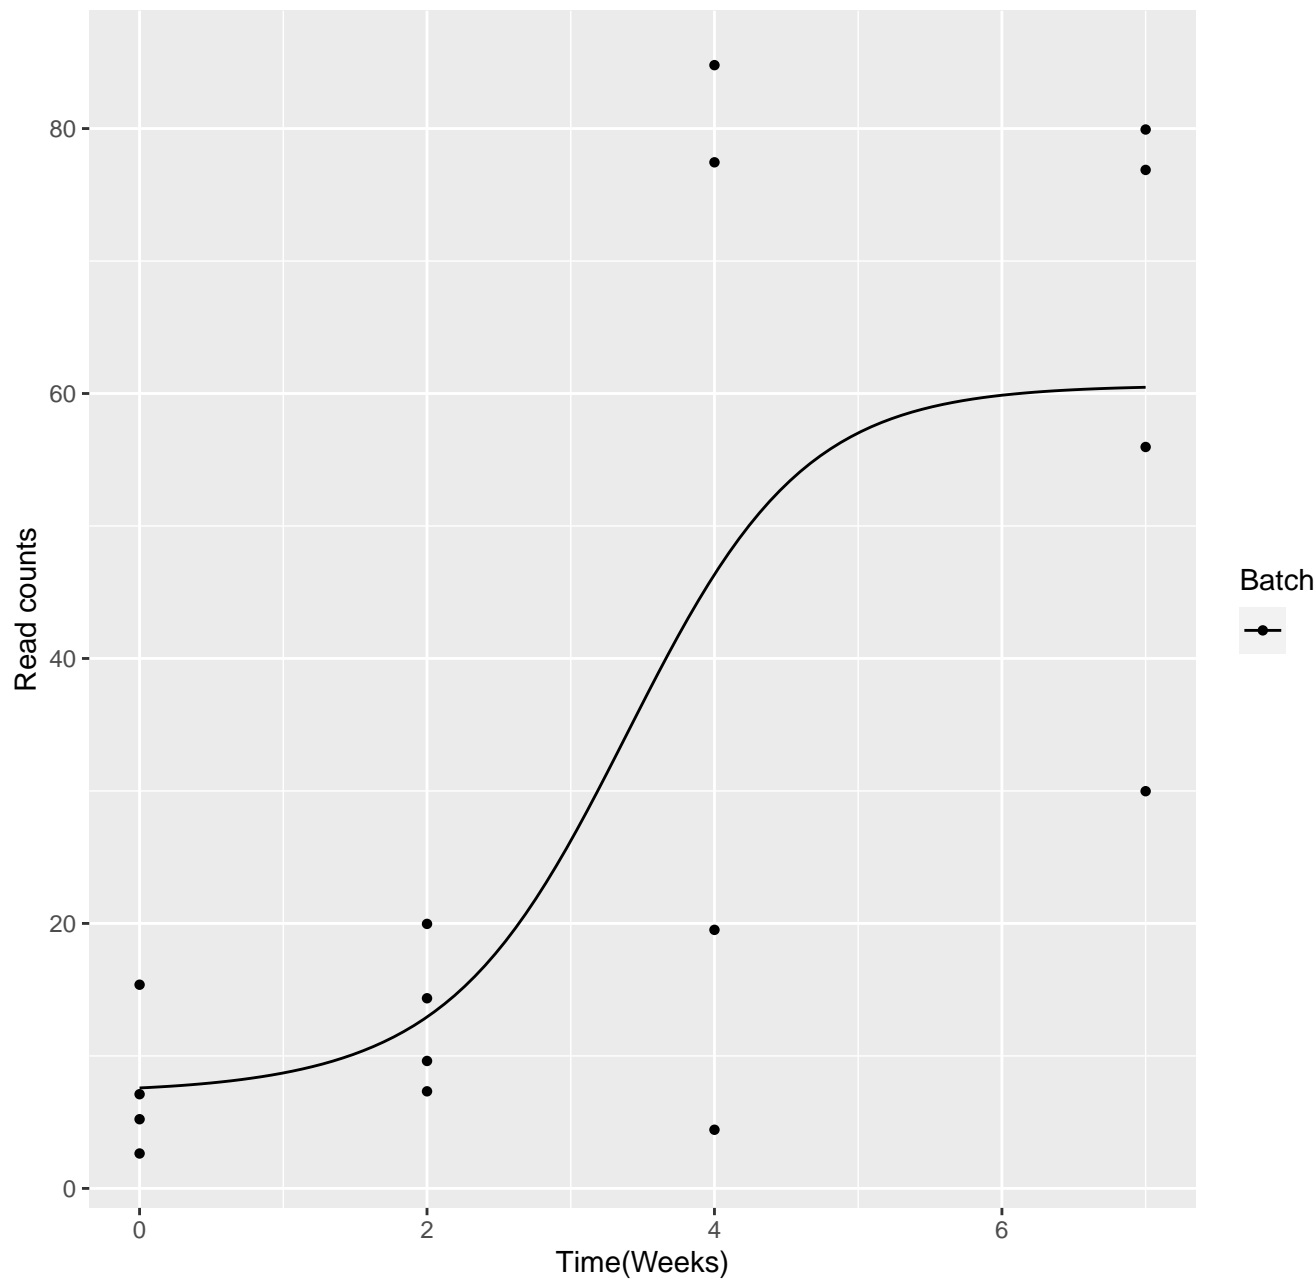

SCRN1:  $\log_{10} q = -2.24$

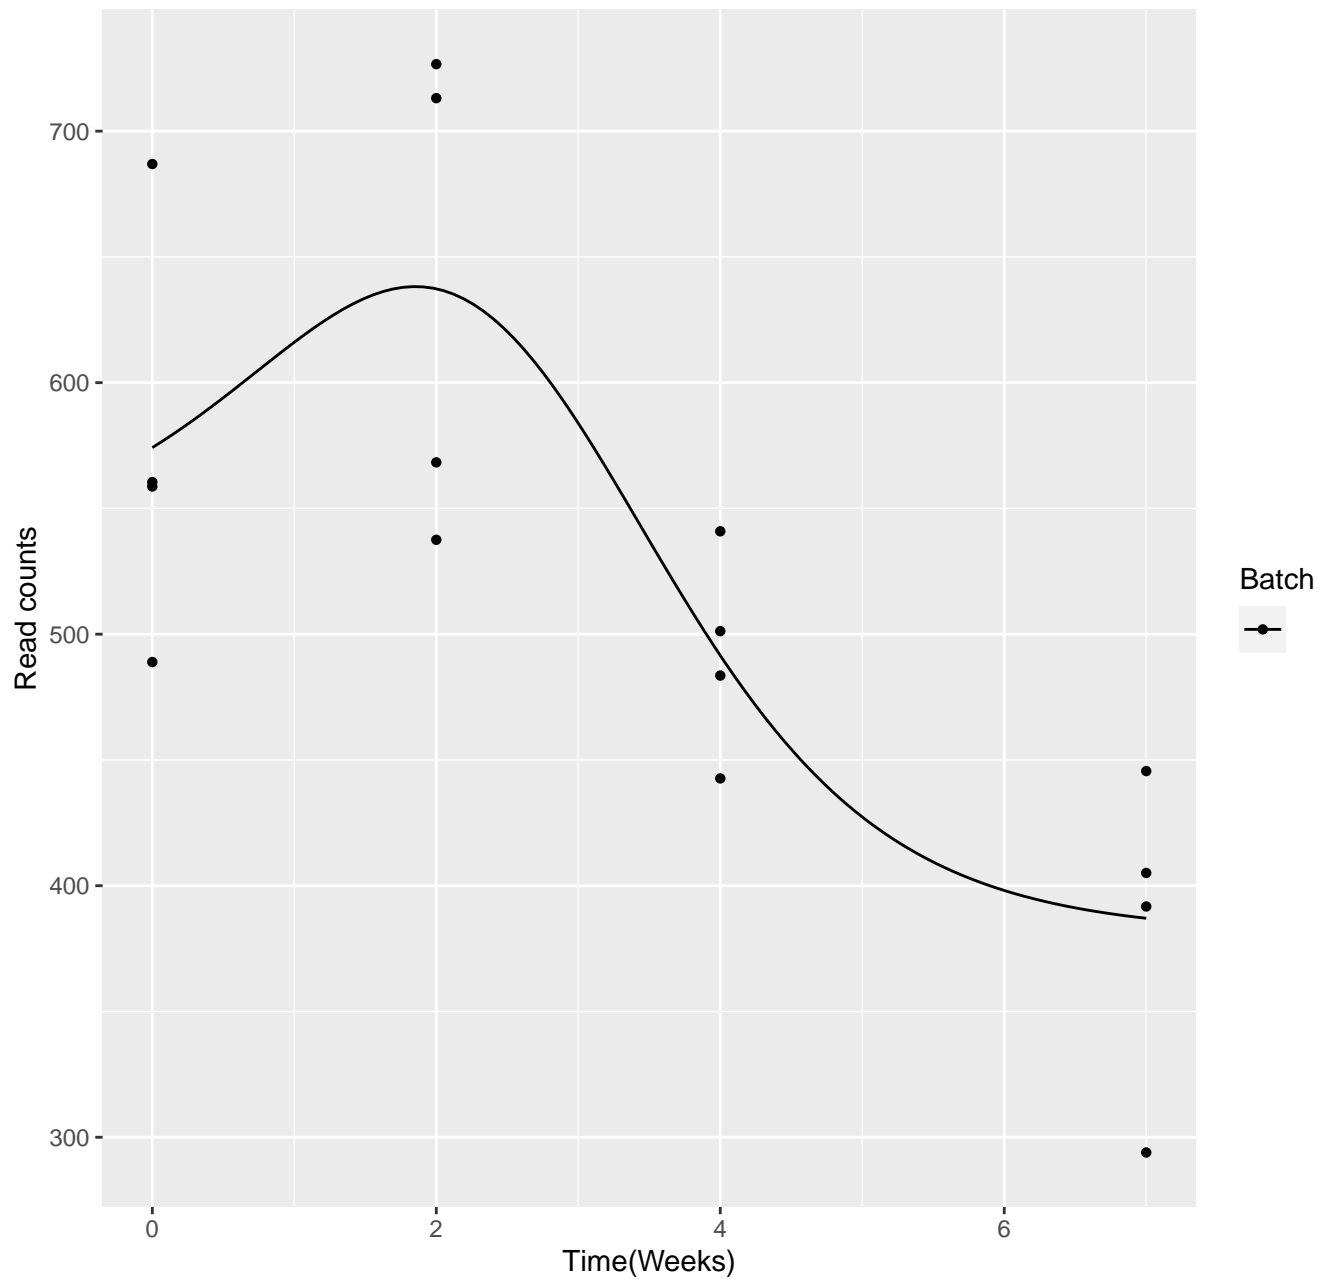

ATP5MF:  $\log_{10} q = -2.24$

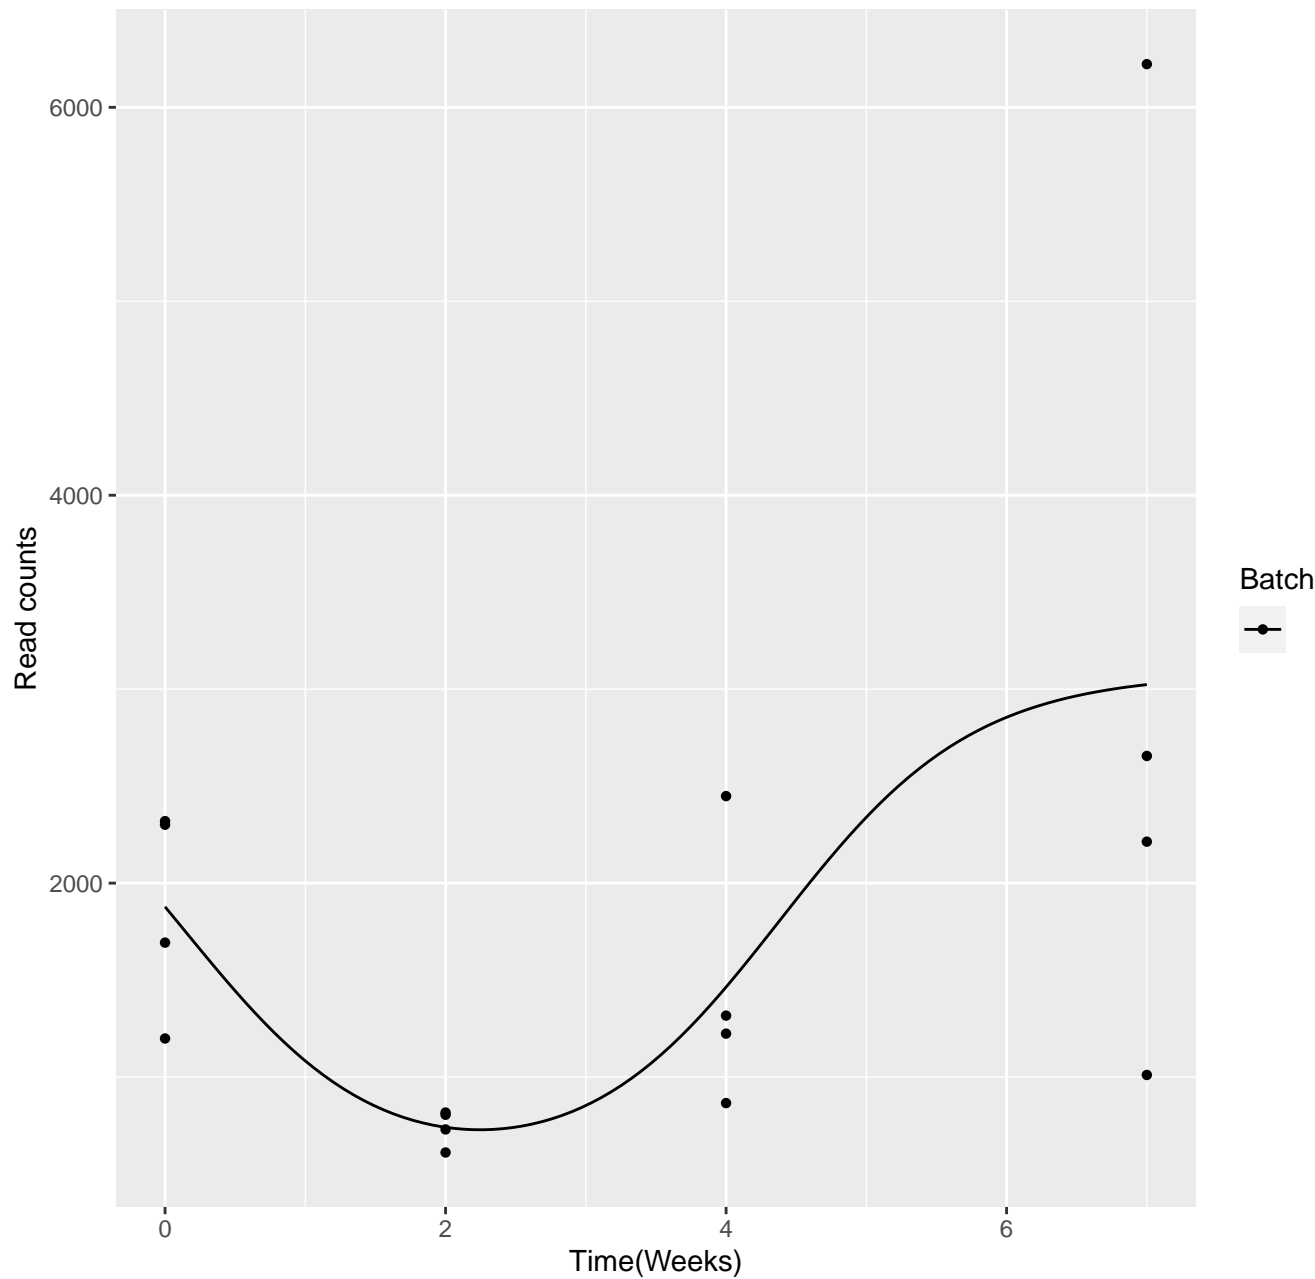

LOC100355380:  $\log_{10} q = -2.23$

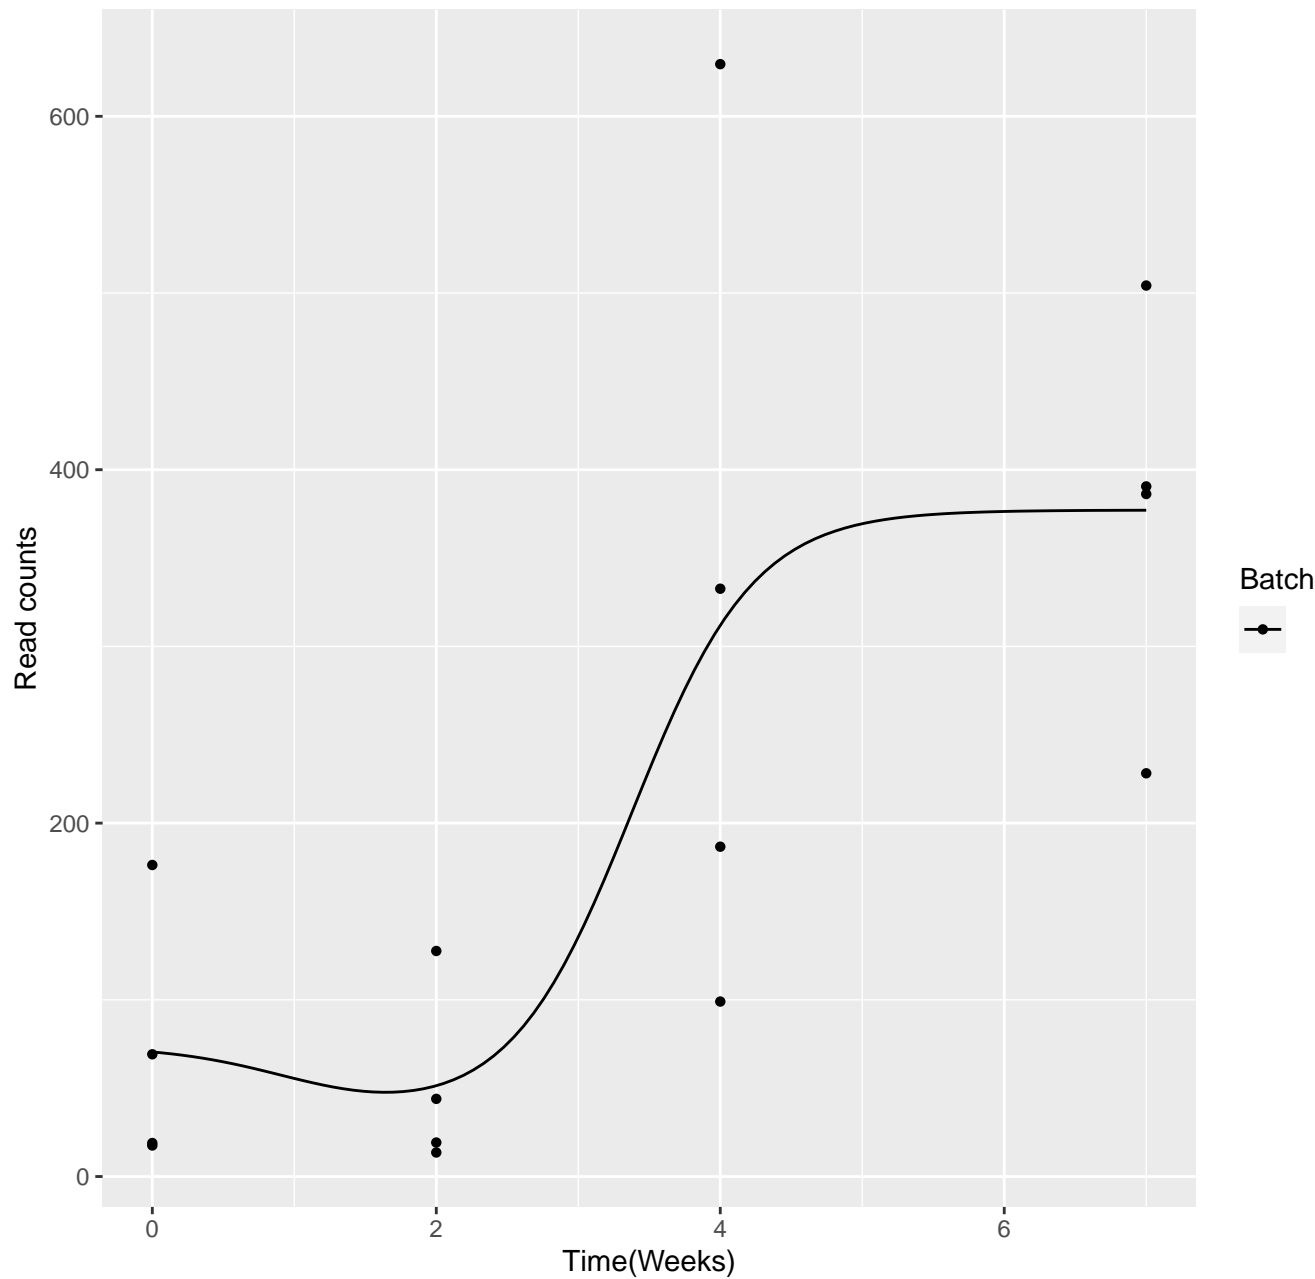

MYO1D:  $\log_{10} q = -2.23$

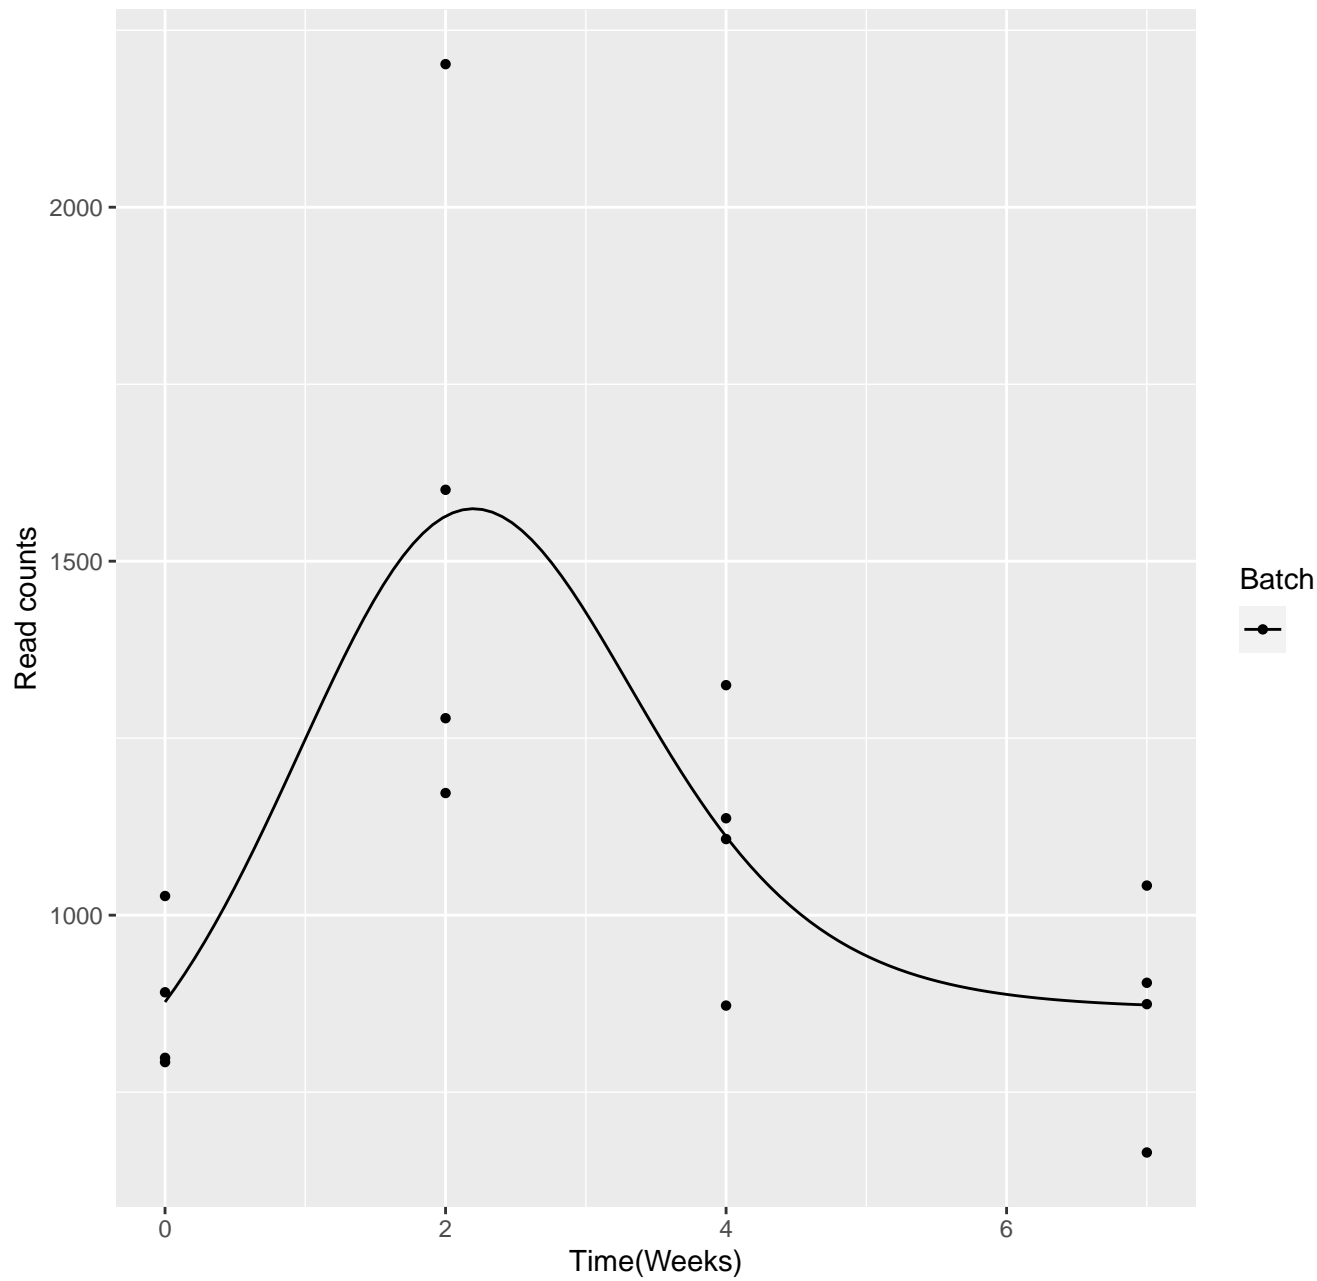

ANKRD46:  $\log_{10} q = -2.23$

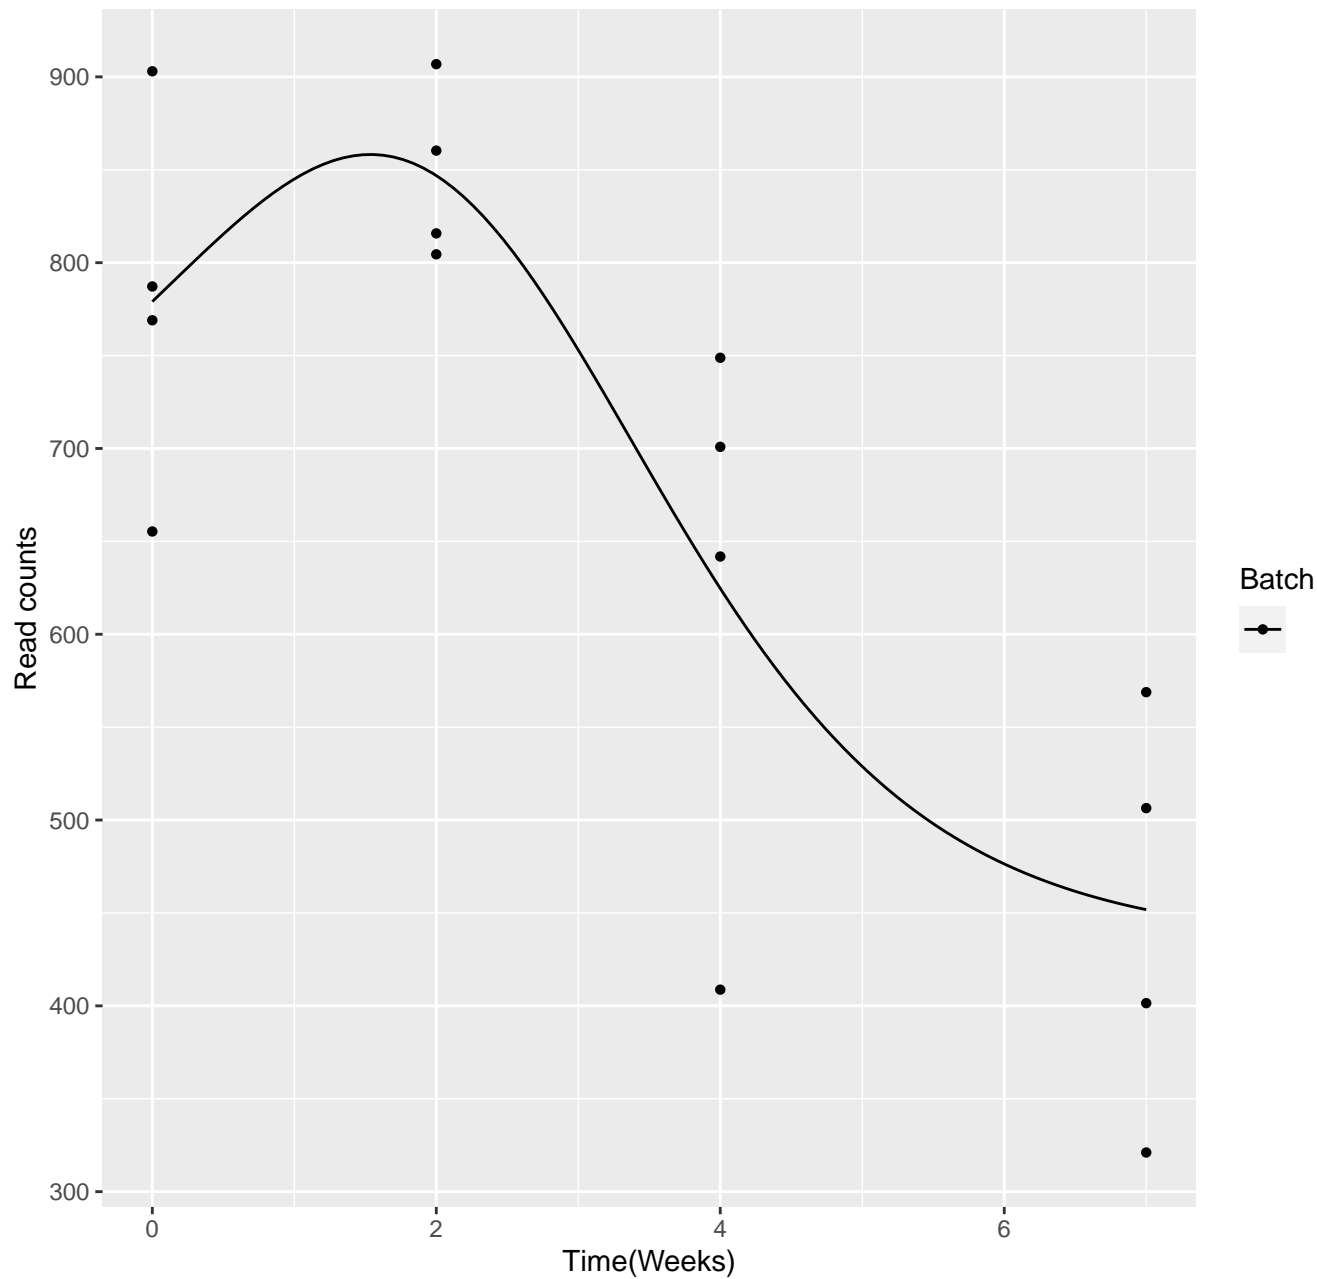

ANXA3:  $\log_{10} q = -2.23$

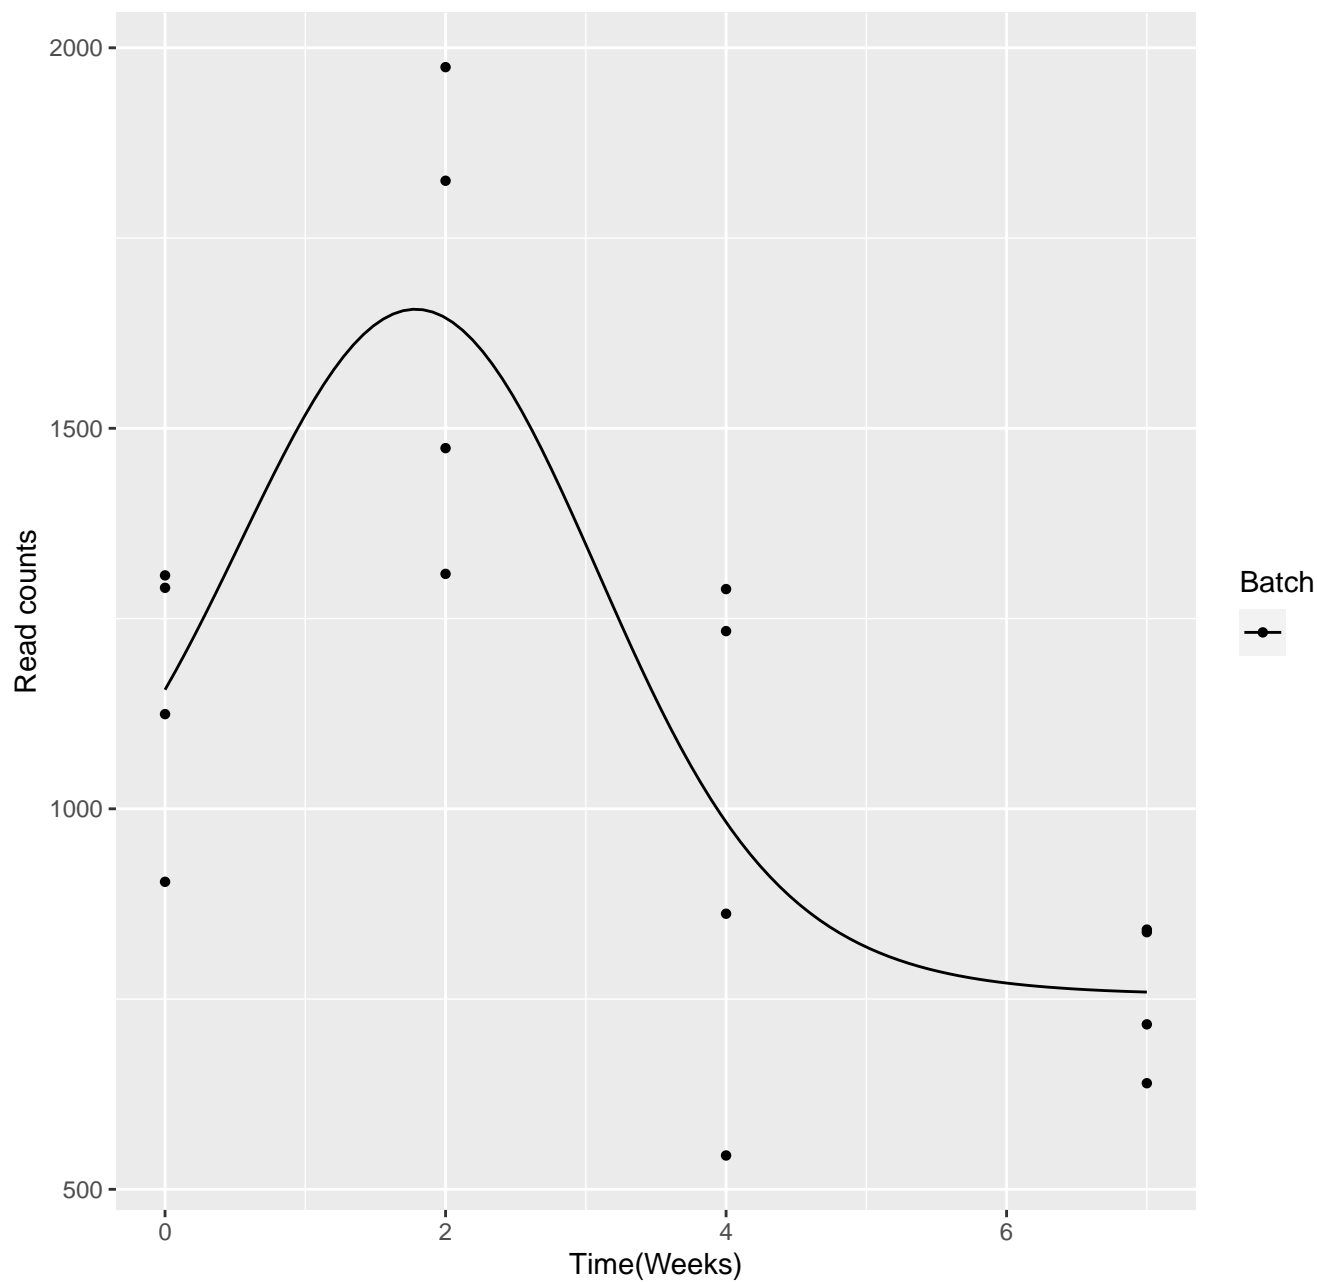



NYNRIN:  $\log_{10} q = -2.22$

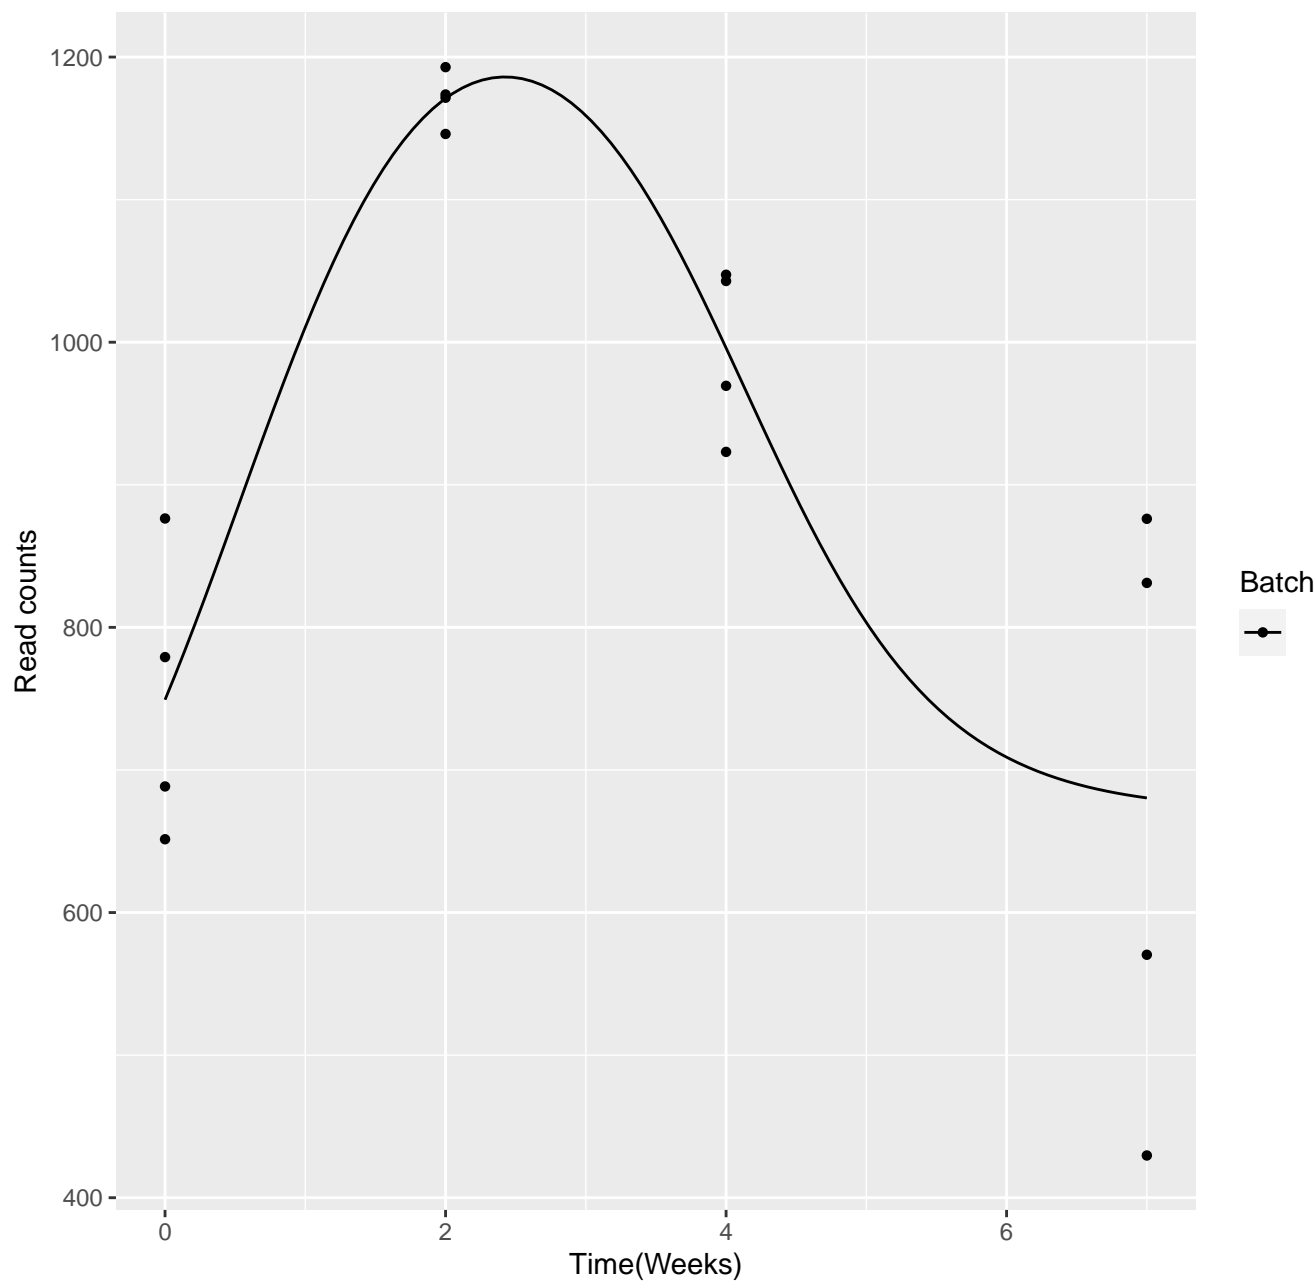

BCORL1:  $\log_{10} q = -2.22$

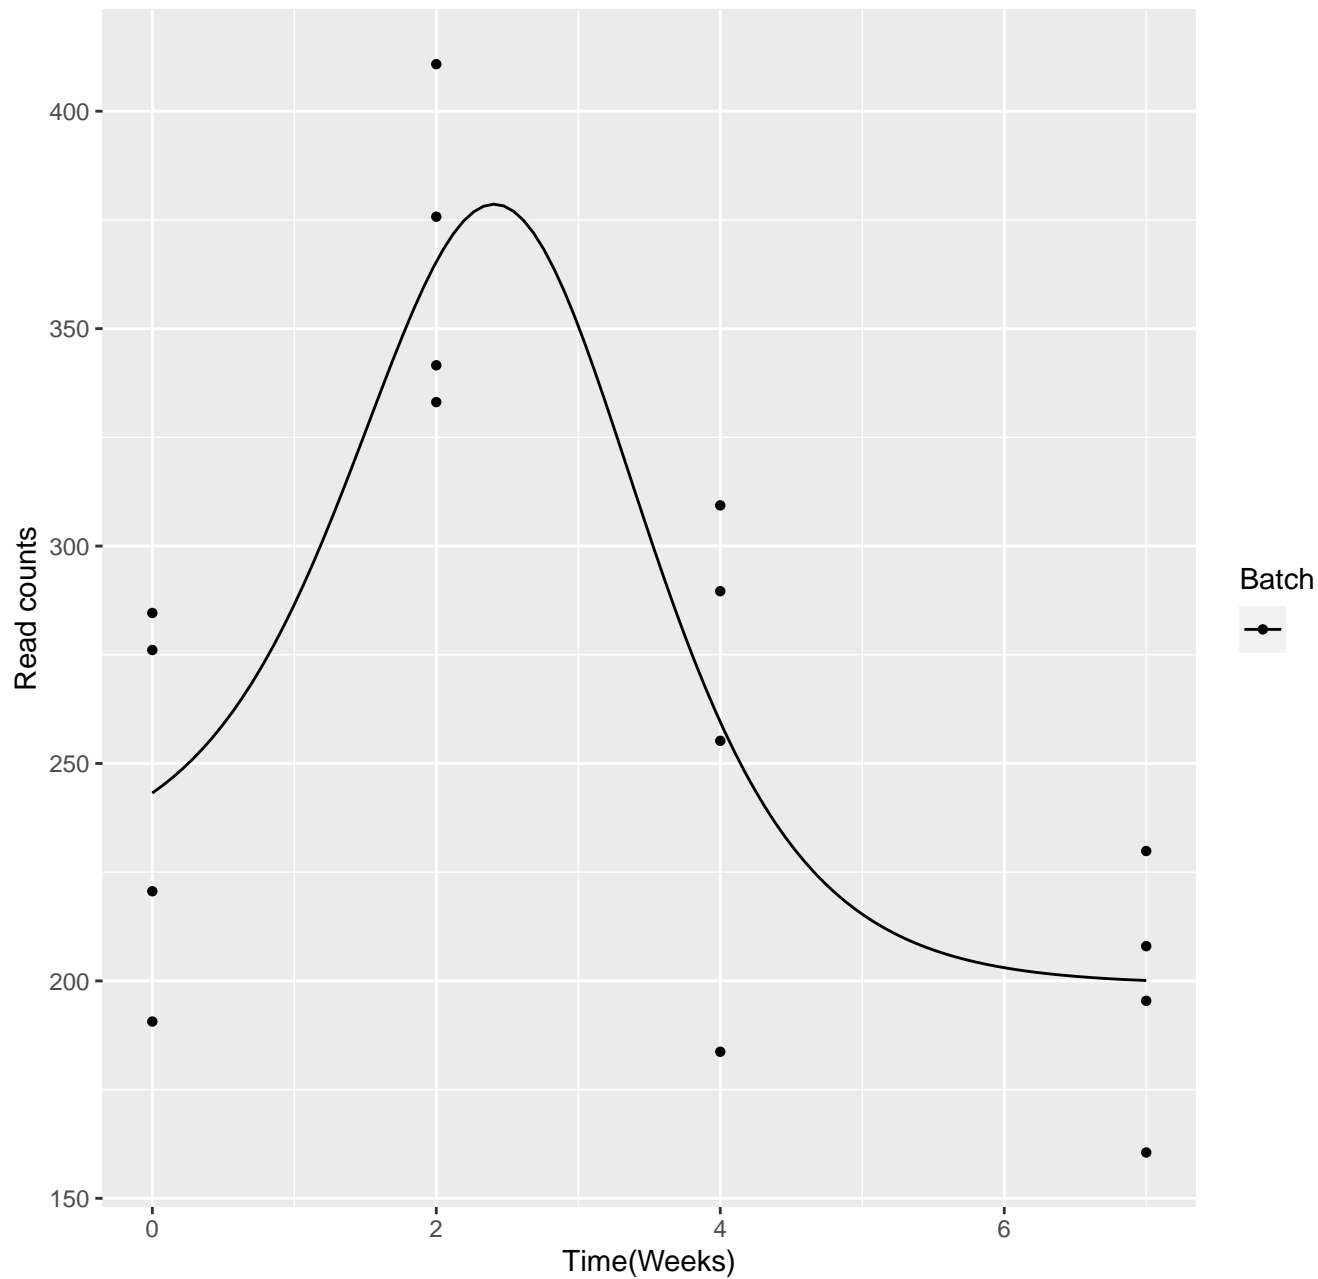

PIP5K1A:  $\log_{10} q = -2.22$

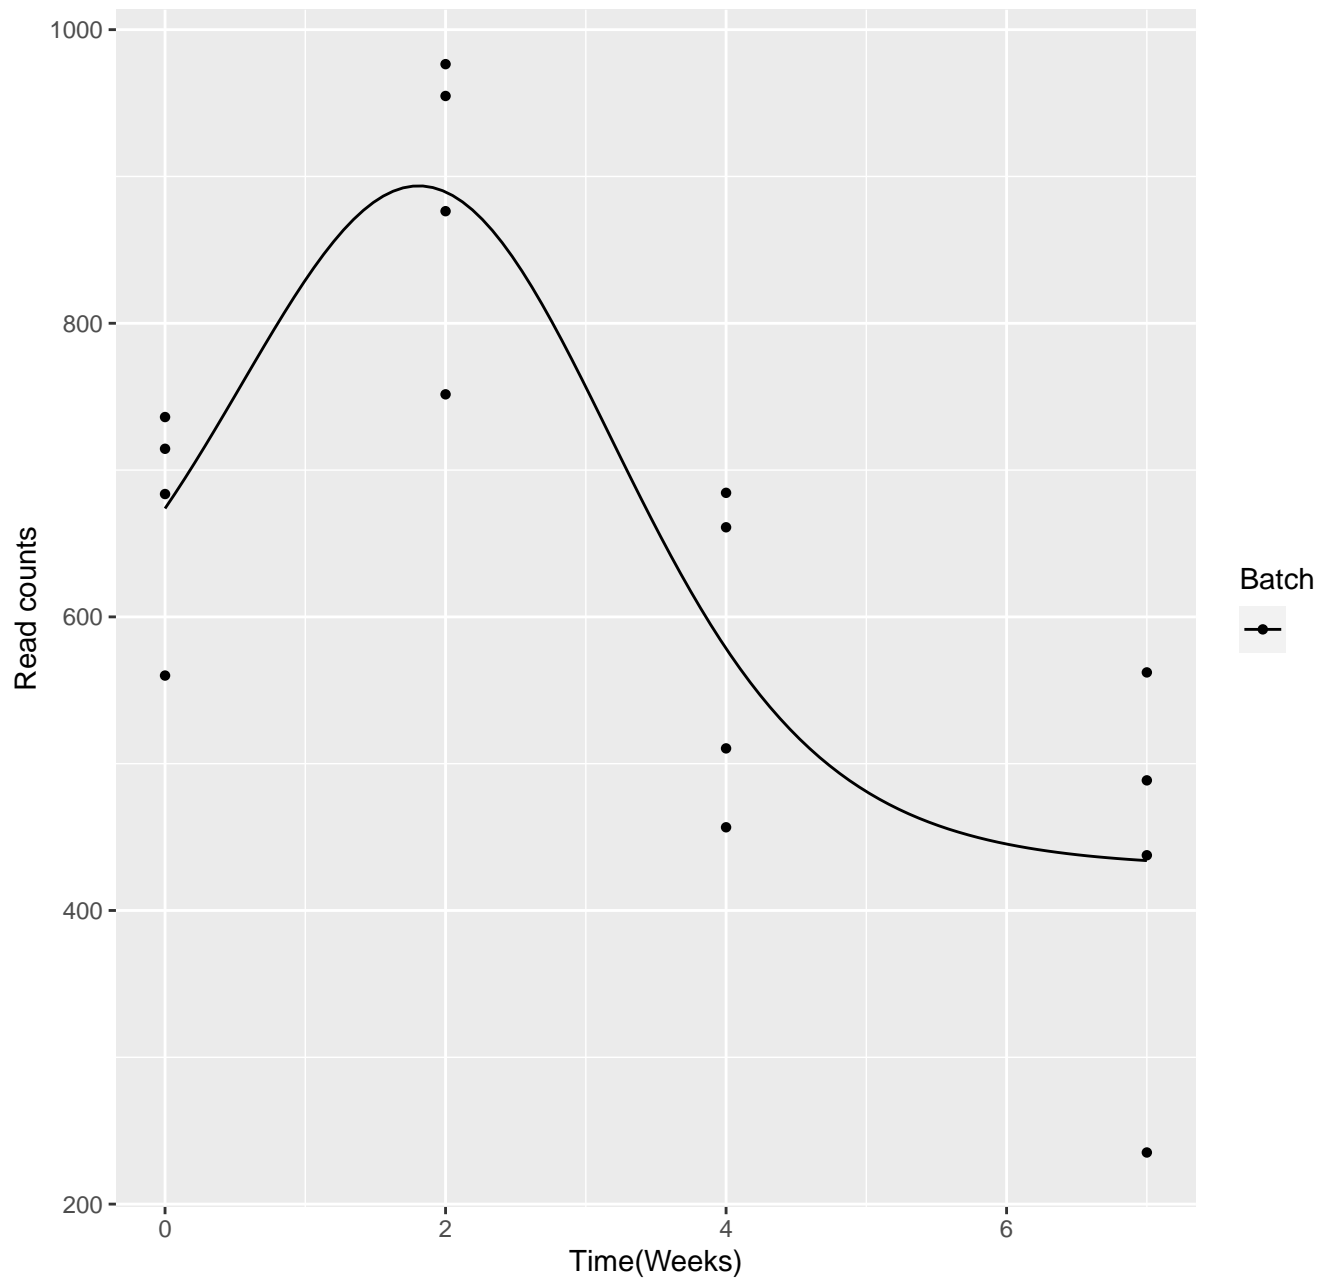

PCDH17:  $\log_{10} q = -2.21$

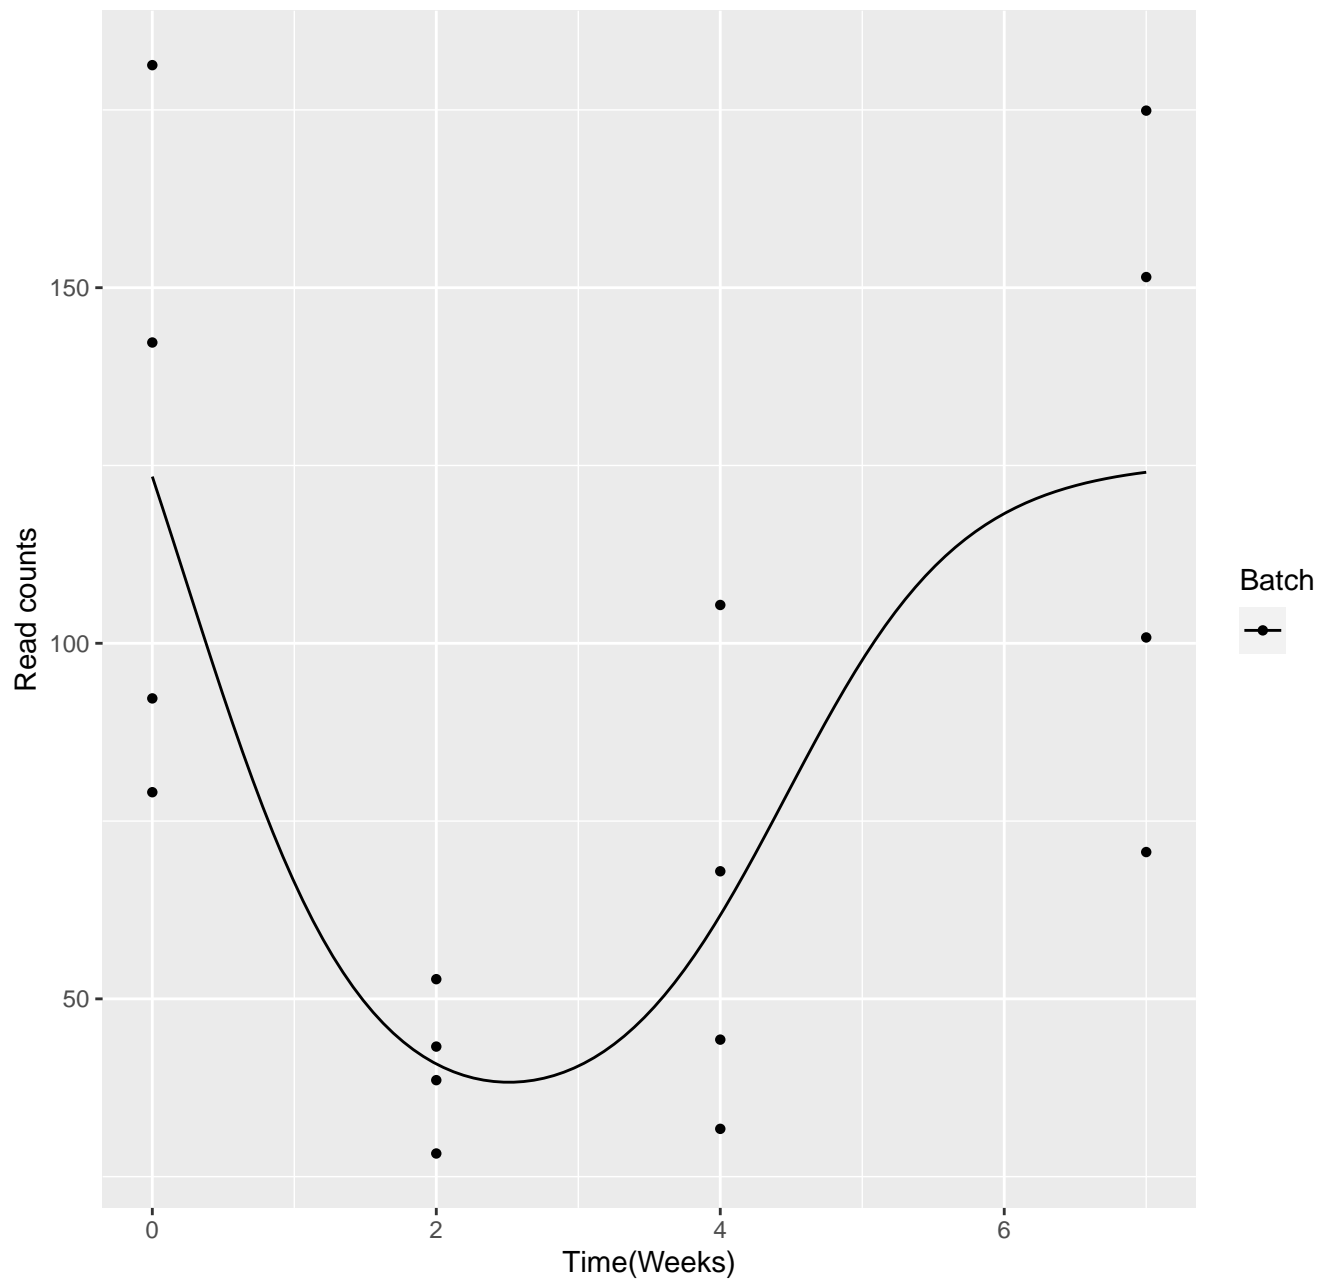

FAM241A:  $\log_{10} q = -2.21$

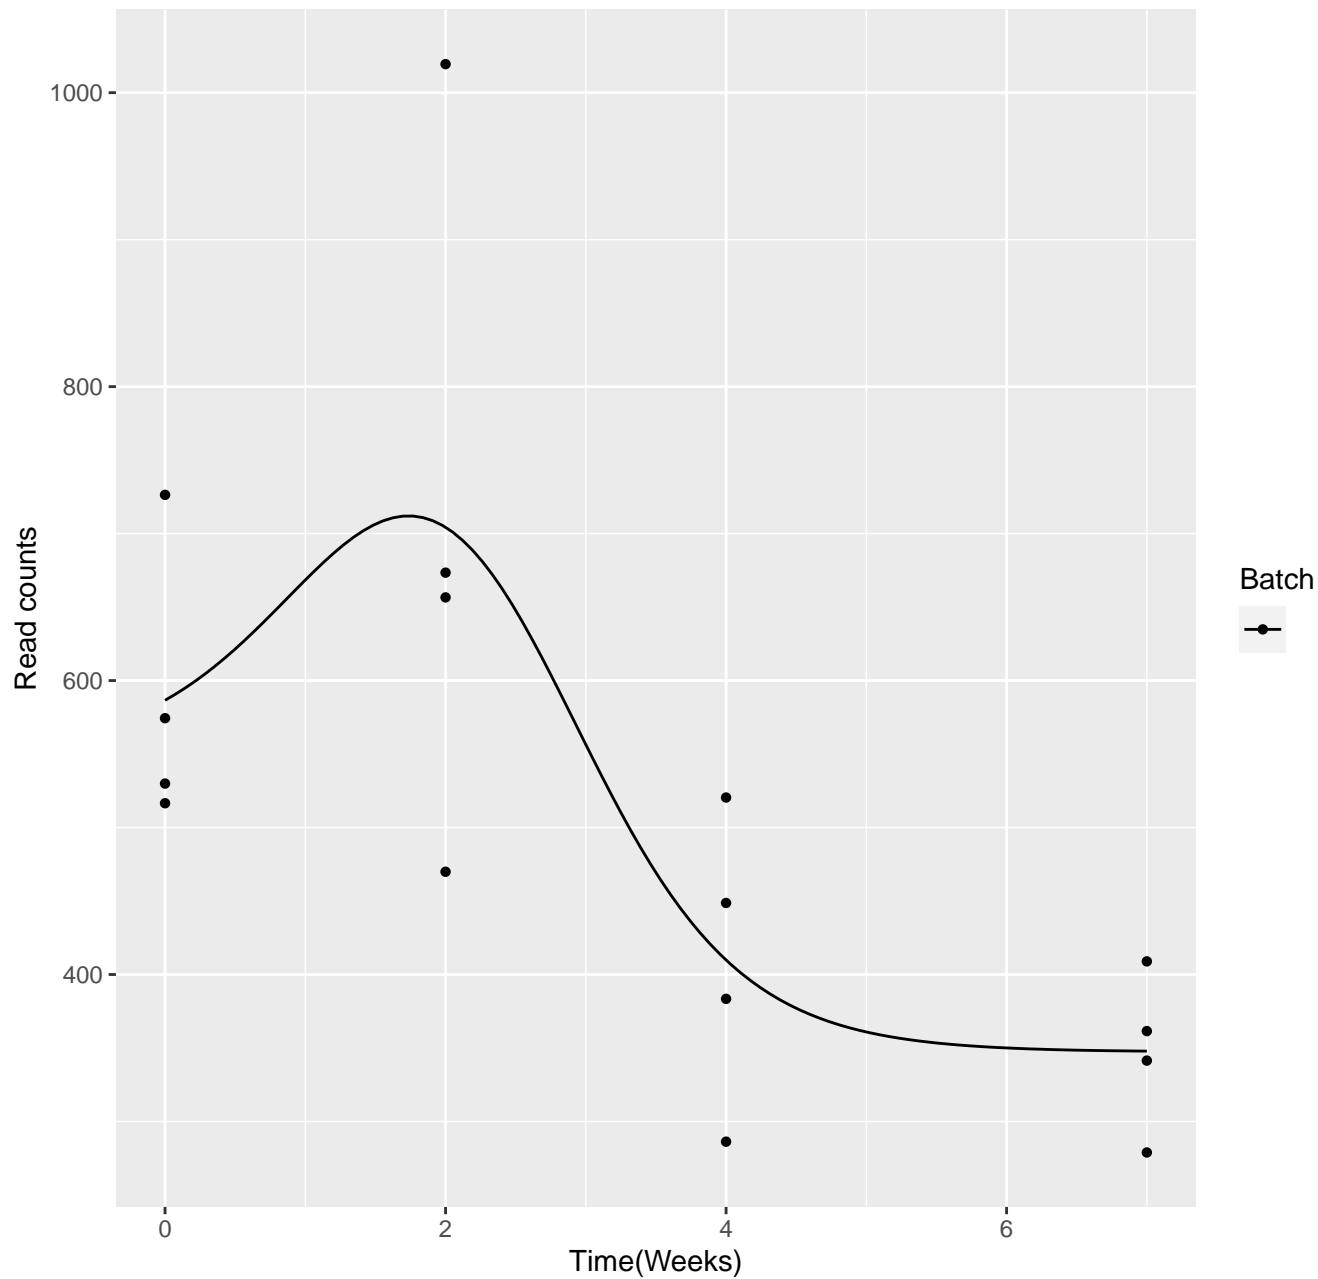

NKAIN1:  $\log_{10} q = -2.21$

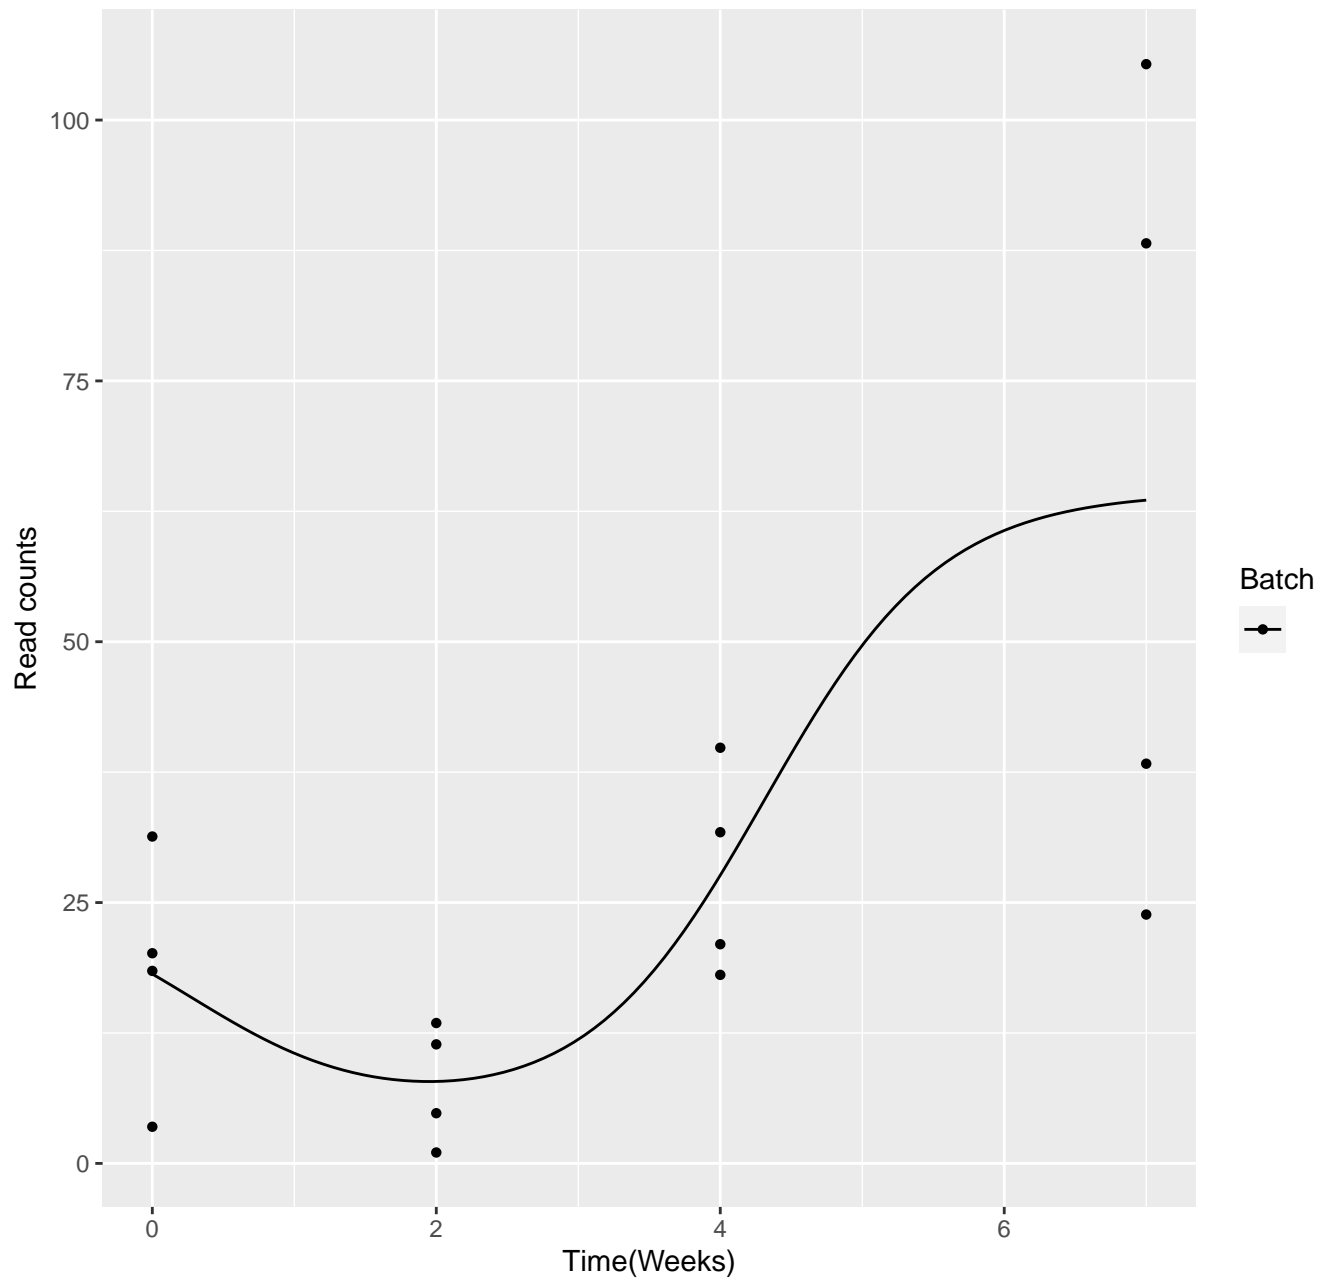

NREP:  $\log_{10} q = -2.21$

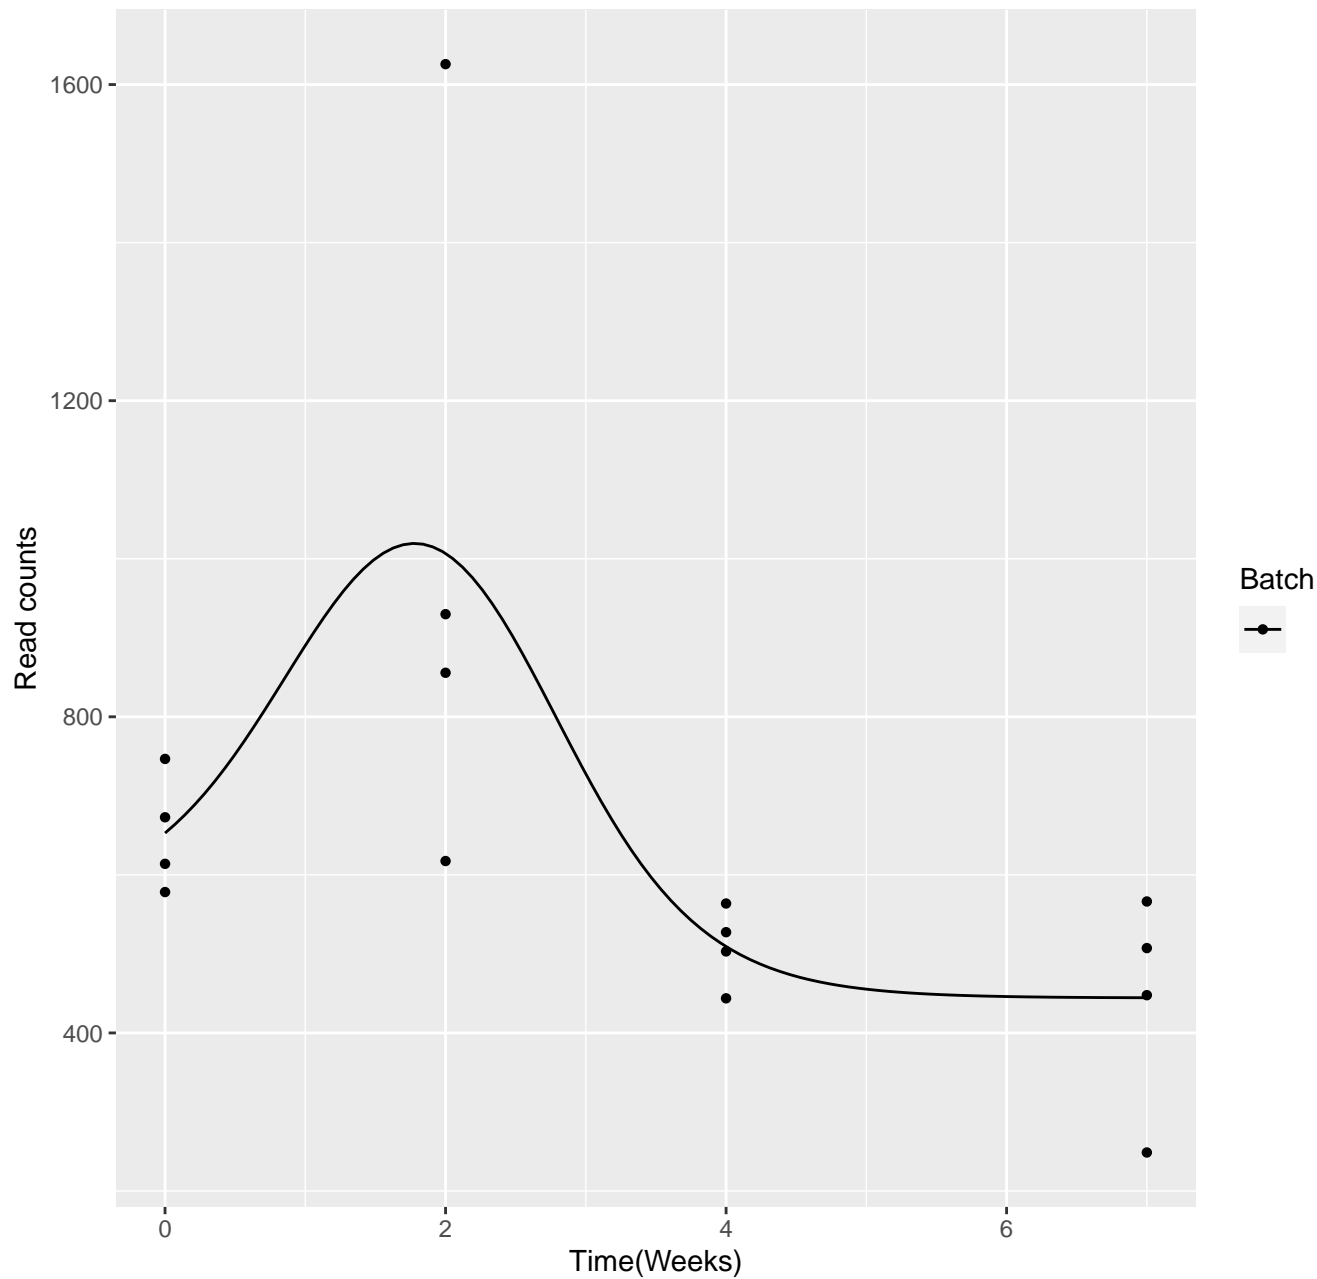

LOC100345551:  $\log_{10} q = -2.21$

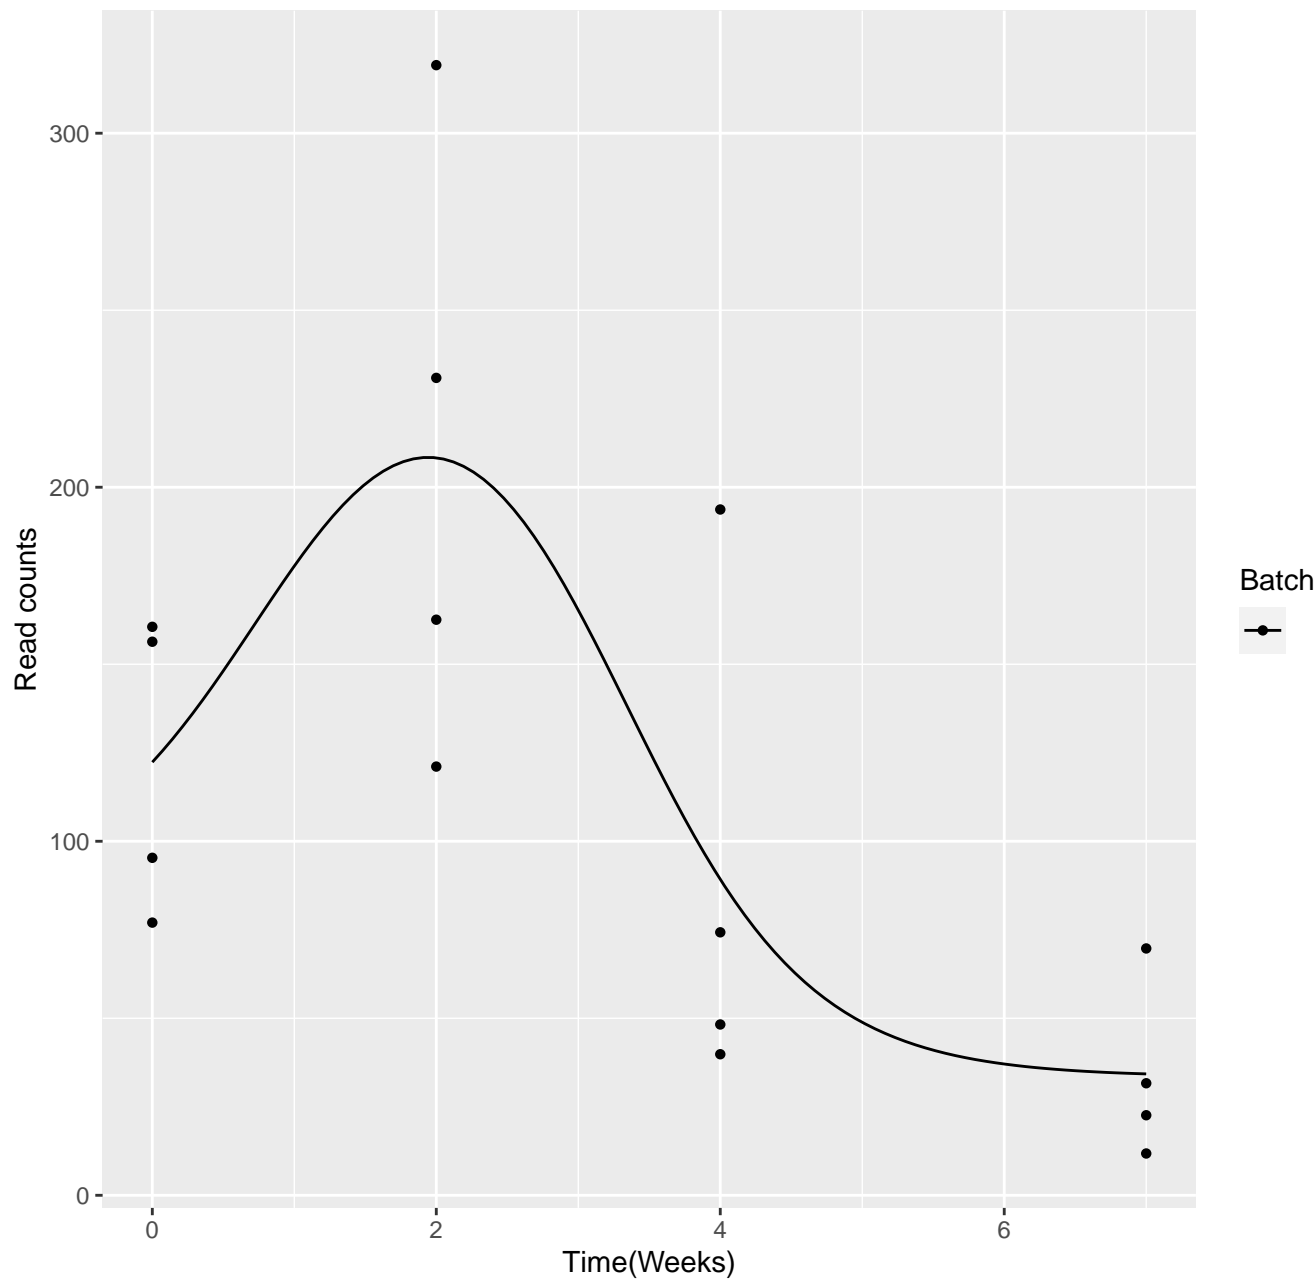



GULP1:  $\log_{10} q = -2.21$

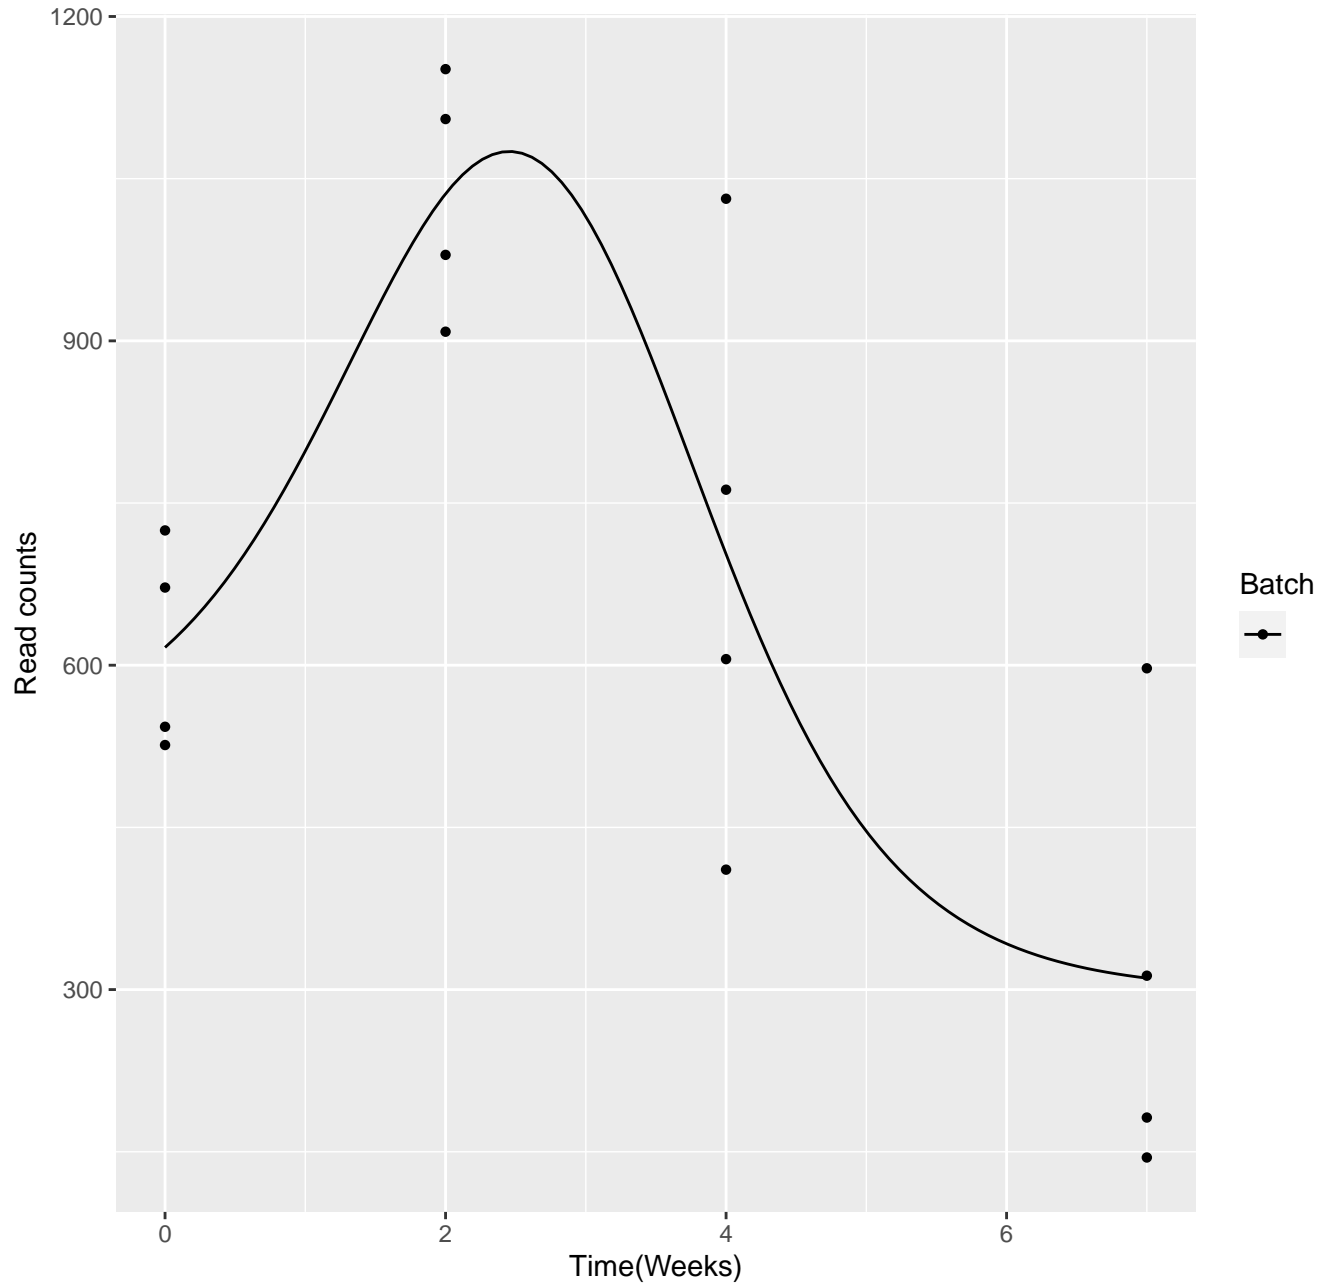

PHEX:  $\log_{10} q = -2.21$

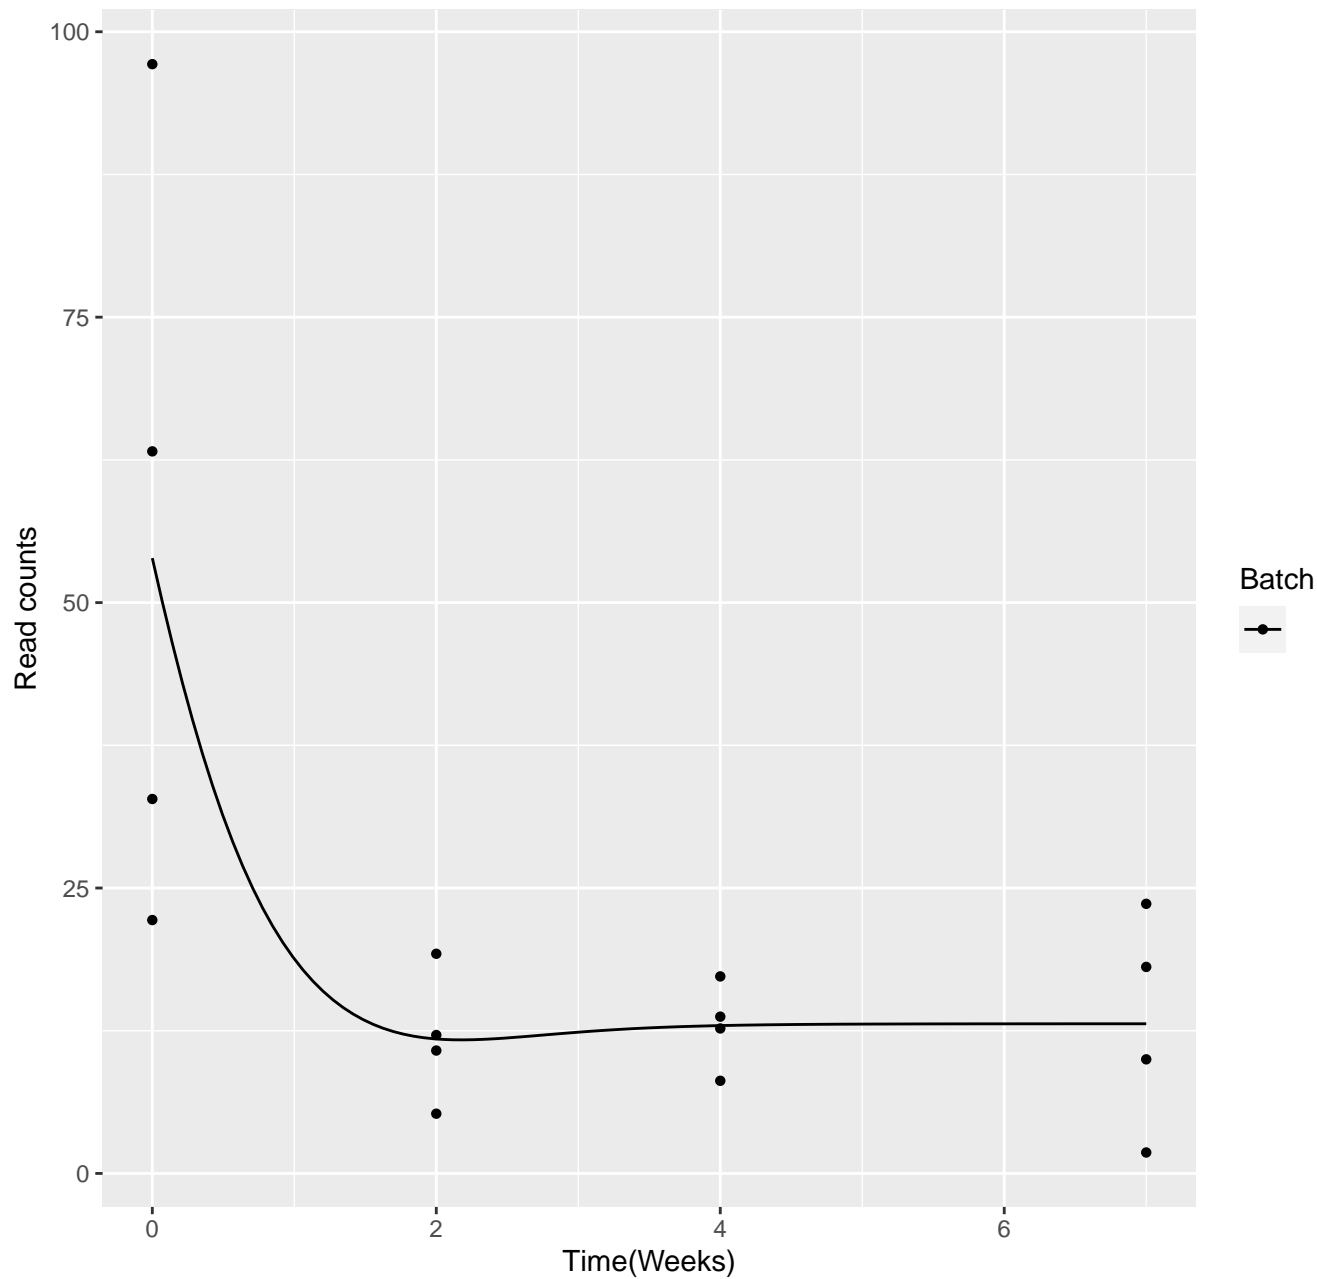

GABARAPL1:  $\log_{10} q = -2.2$

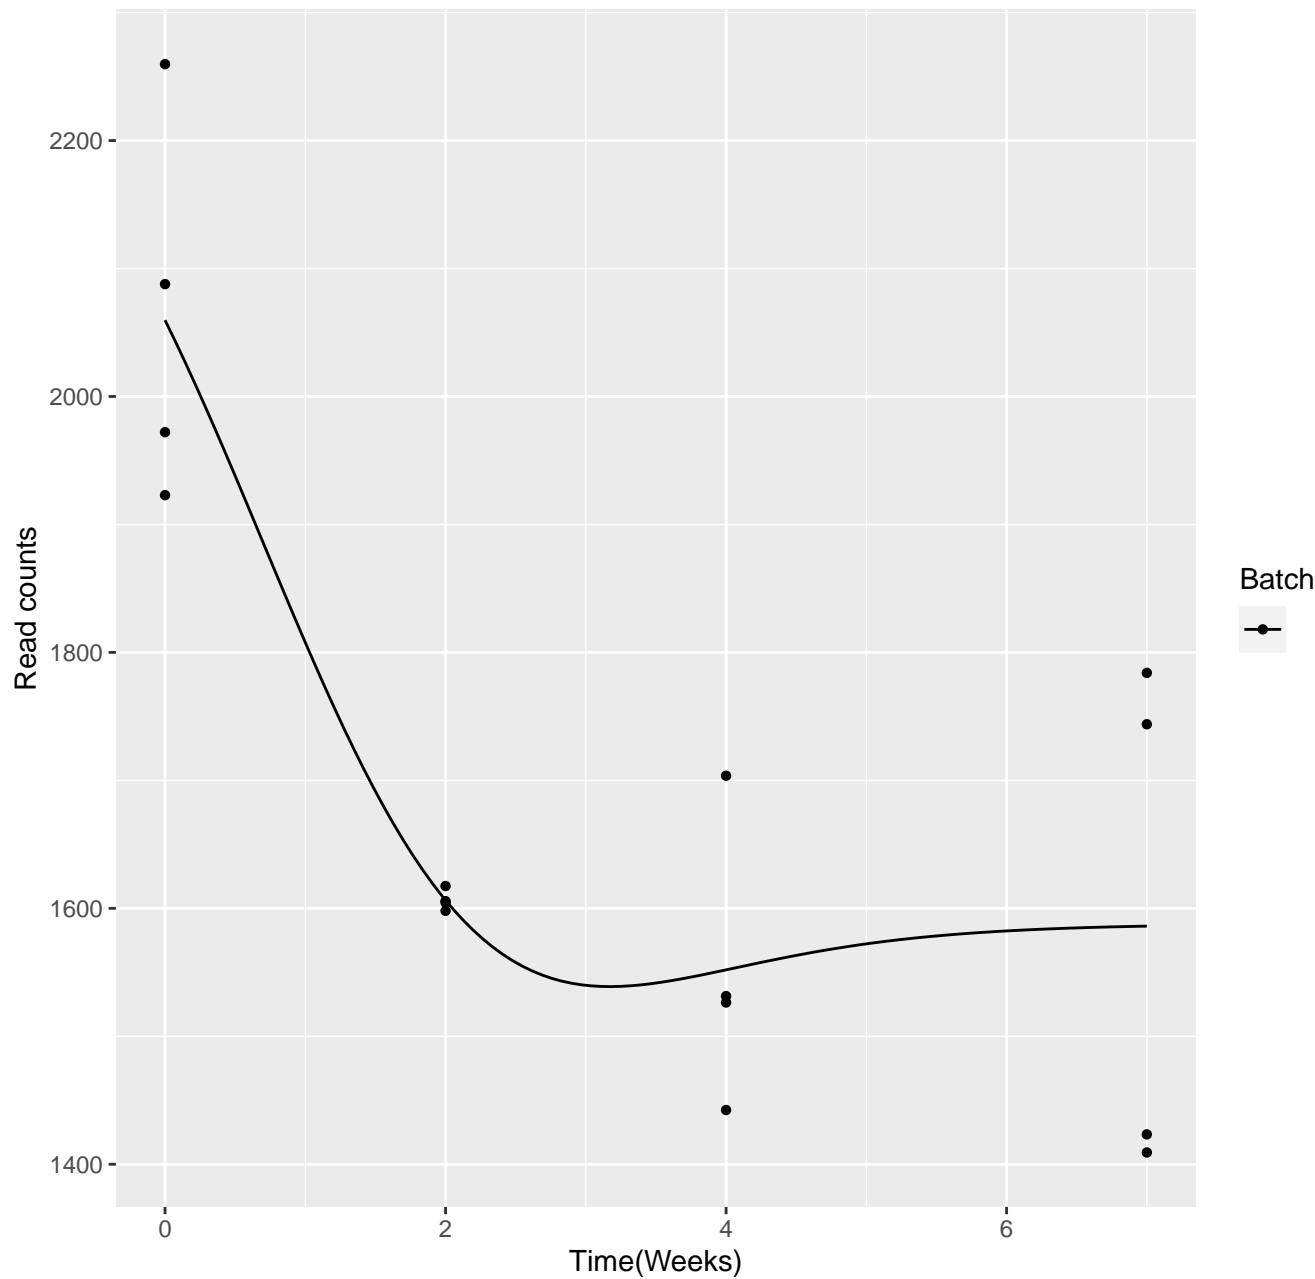

MYL4:  $\log_{10} q = -2.2$

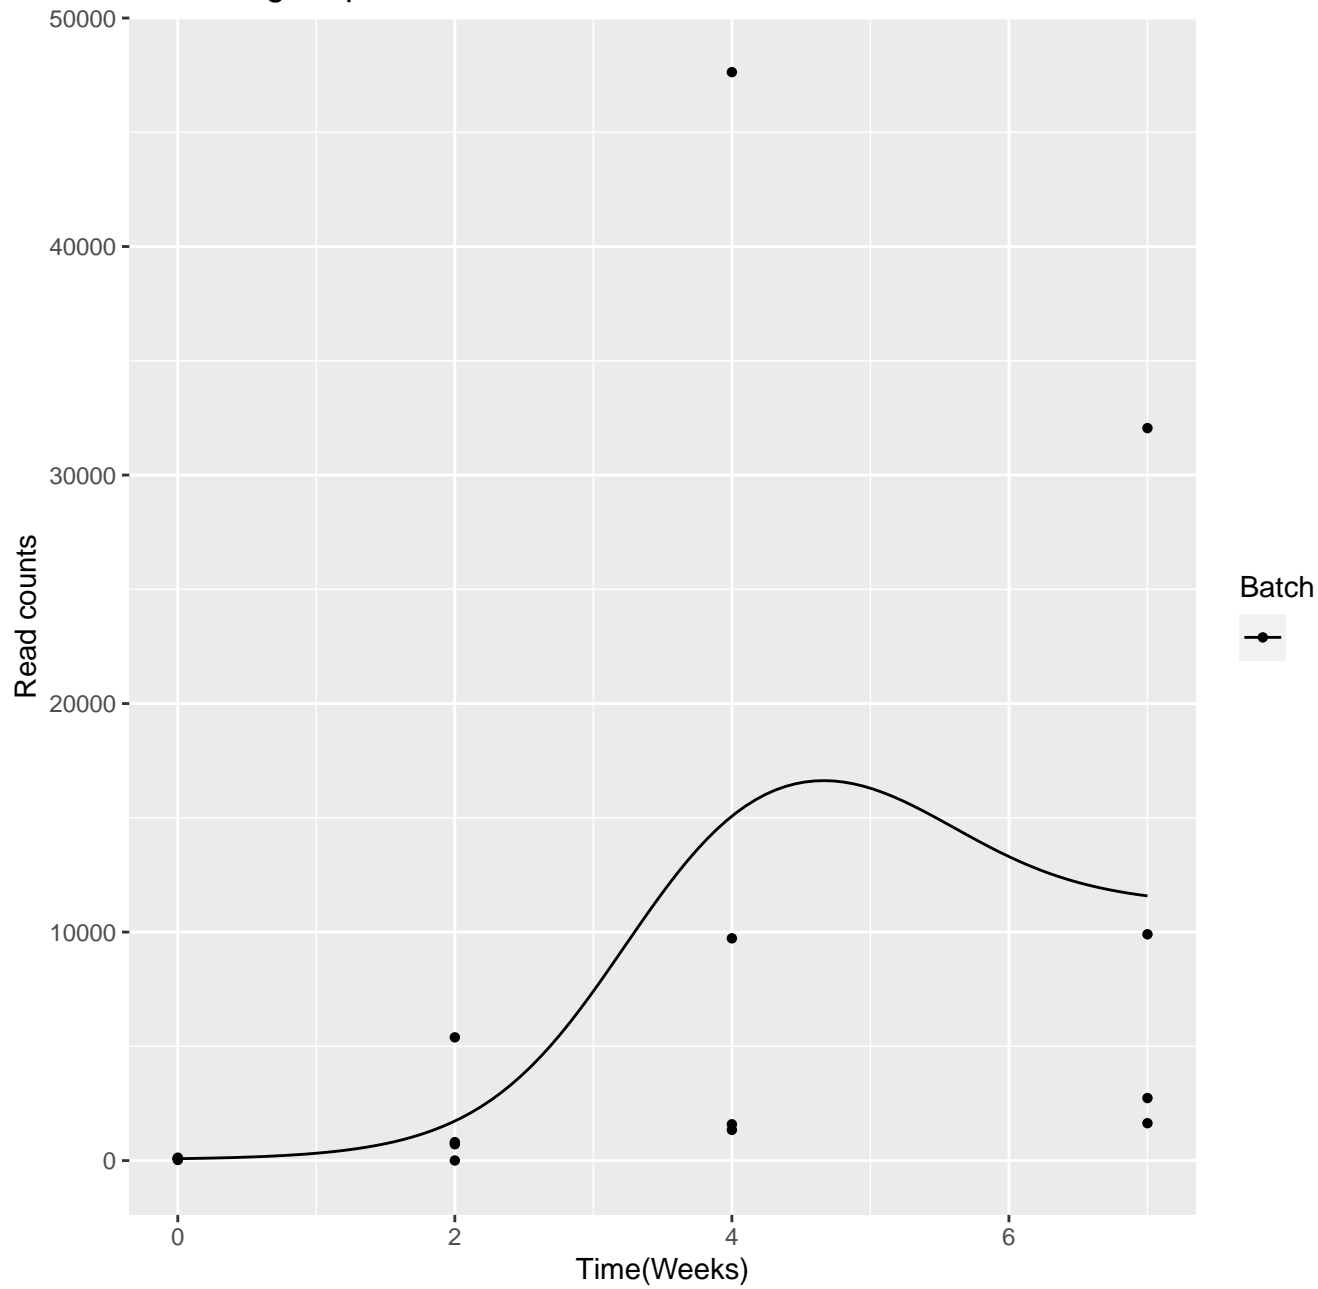

PDSS1:  $\log_{10} q = -2.19$

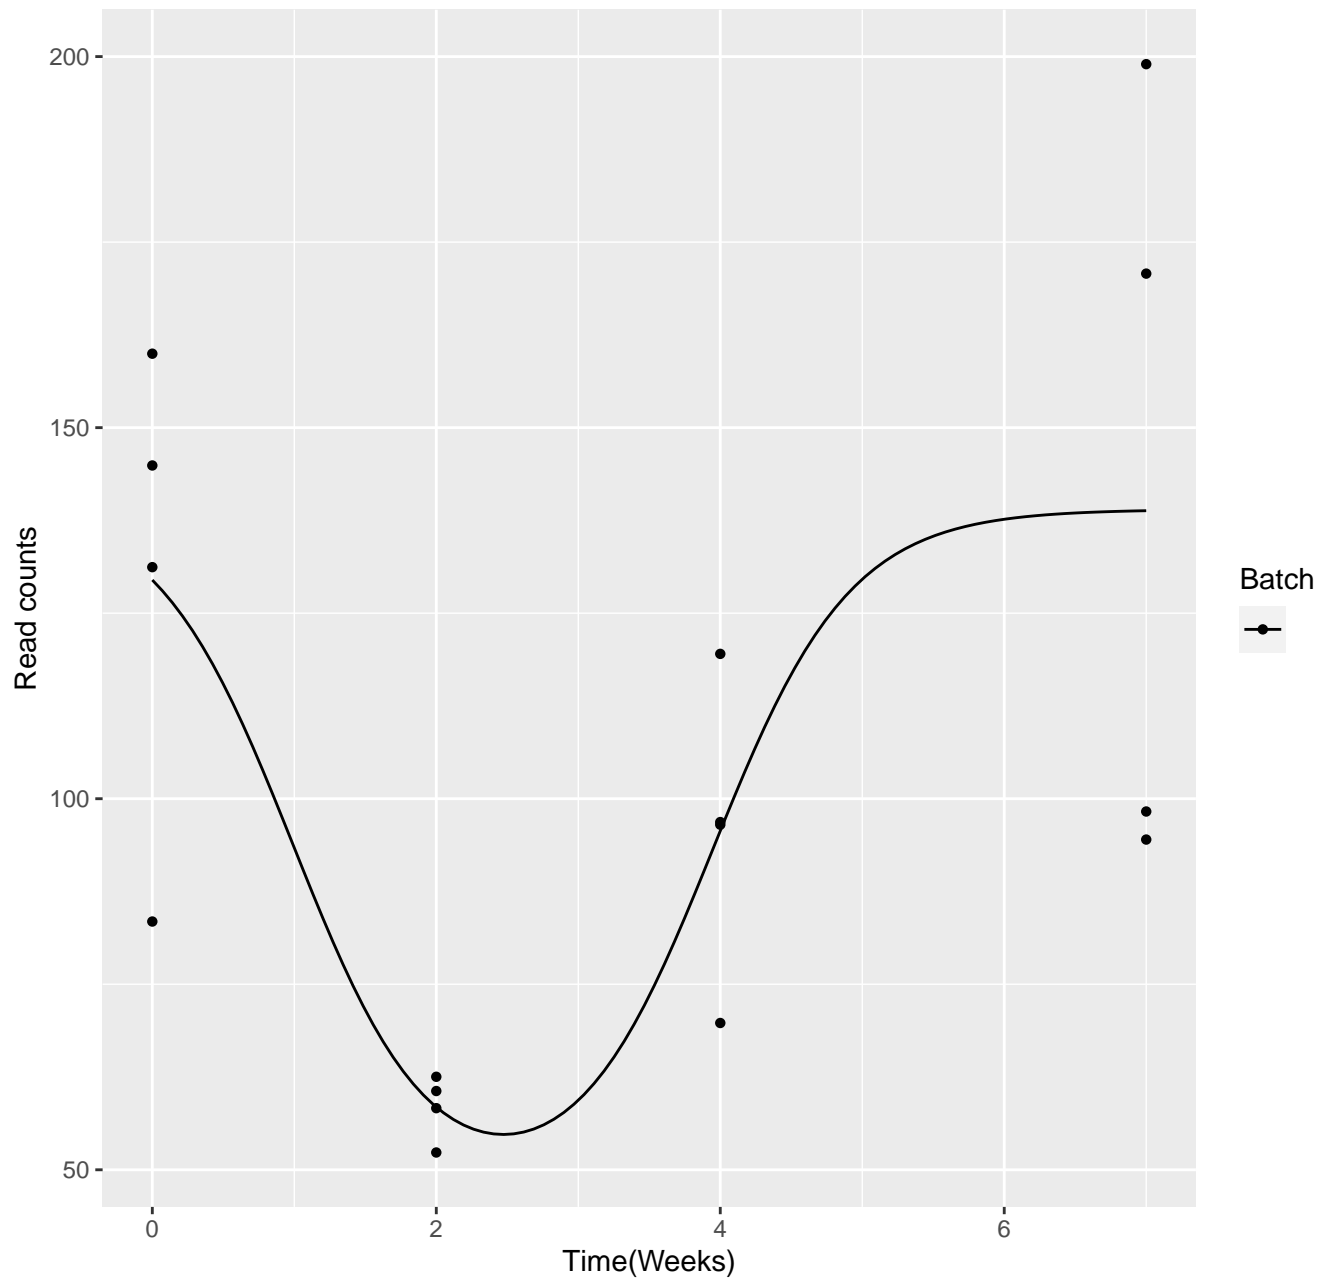

SHTN1:  $\log_{10} q = -2.19$

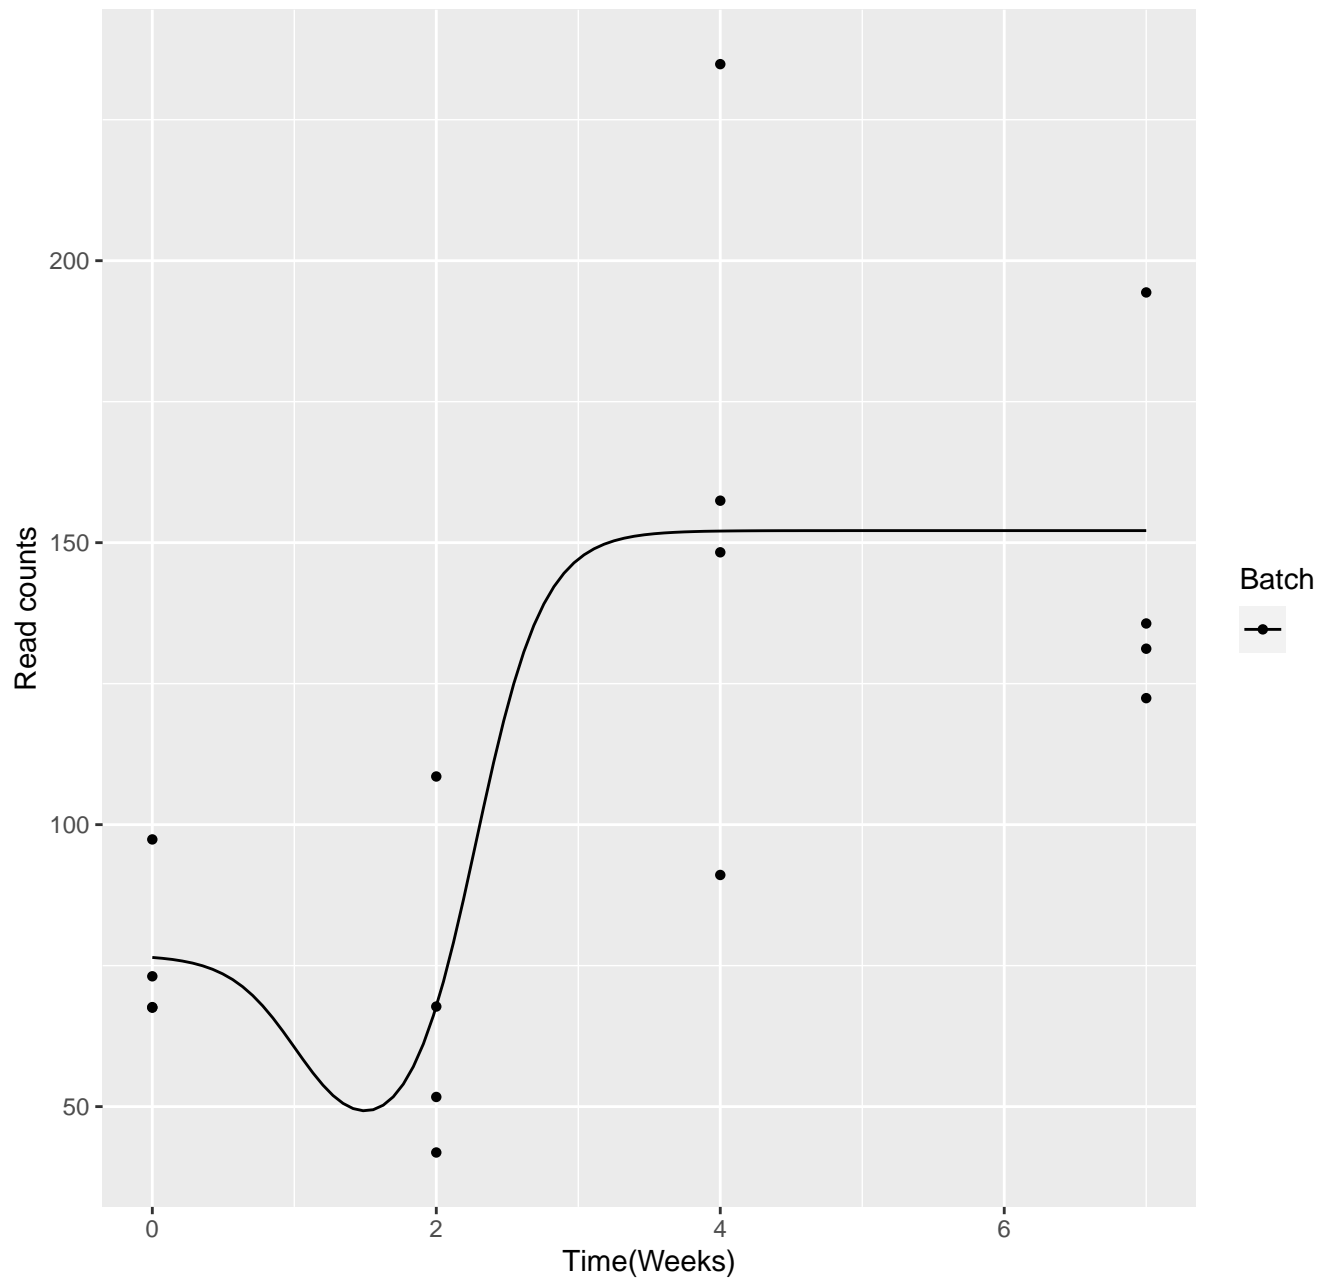

SCARF2:  $\log_{10} q = -2.19$

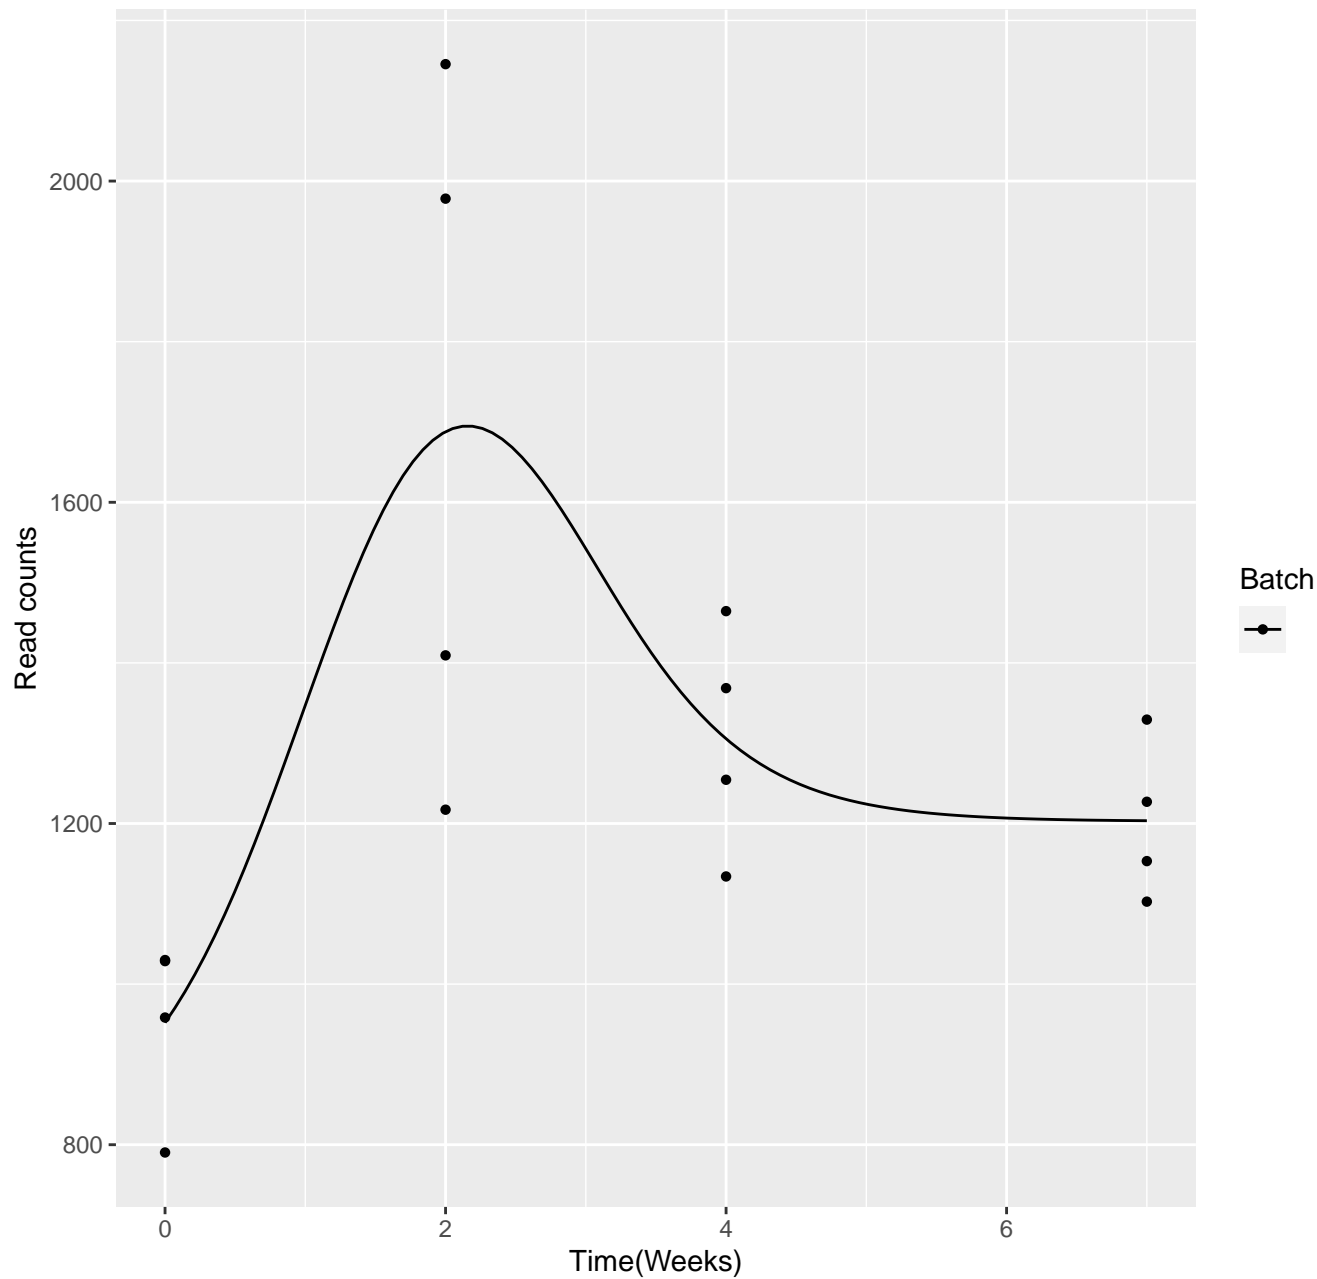

LOC100358827:  $\log_{10} q = -2.19$

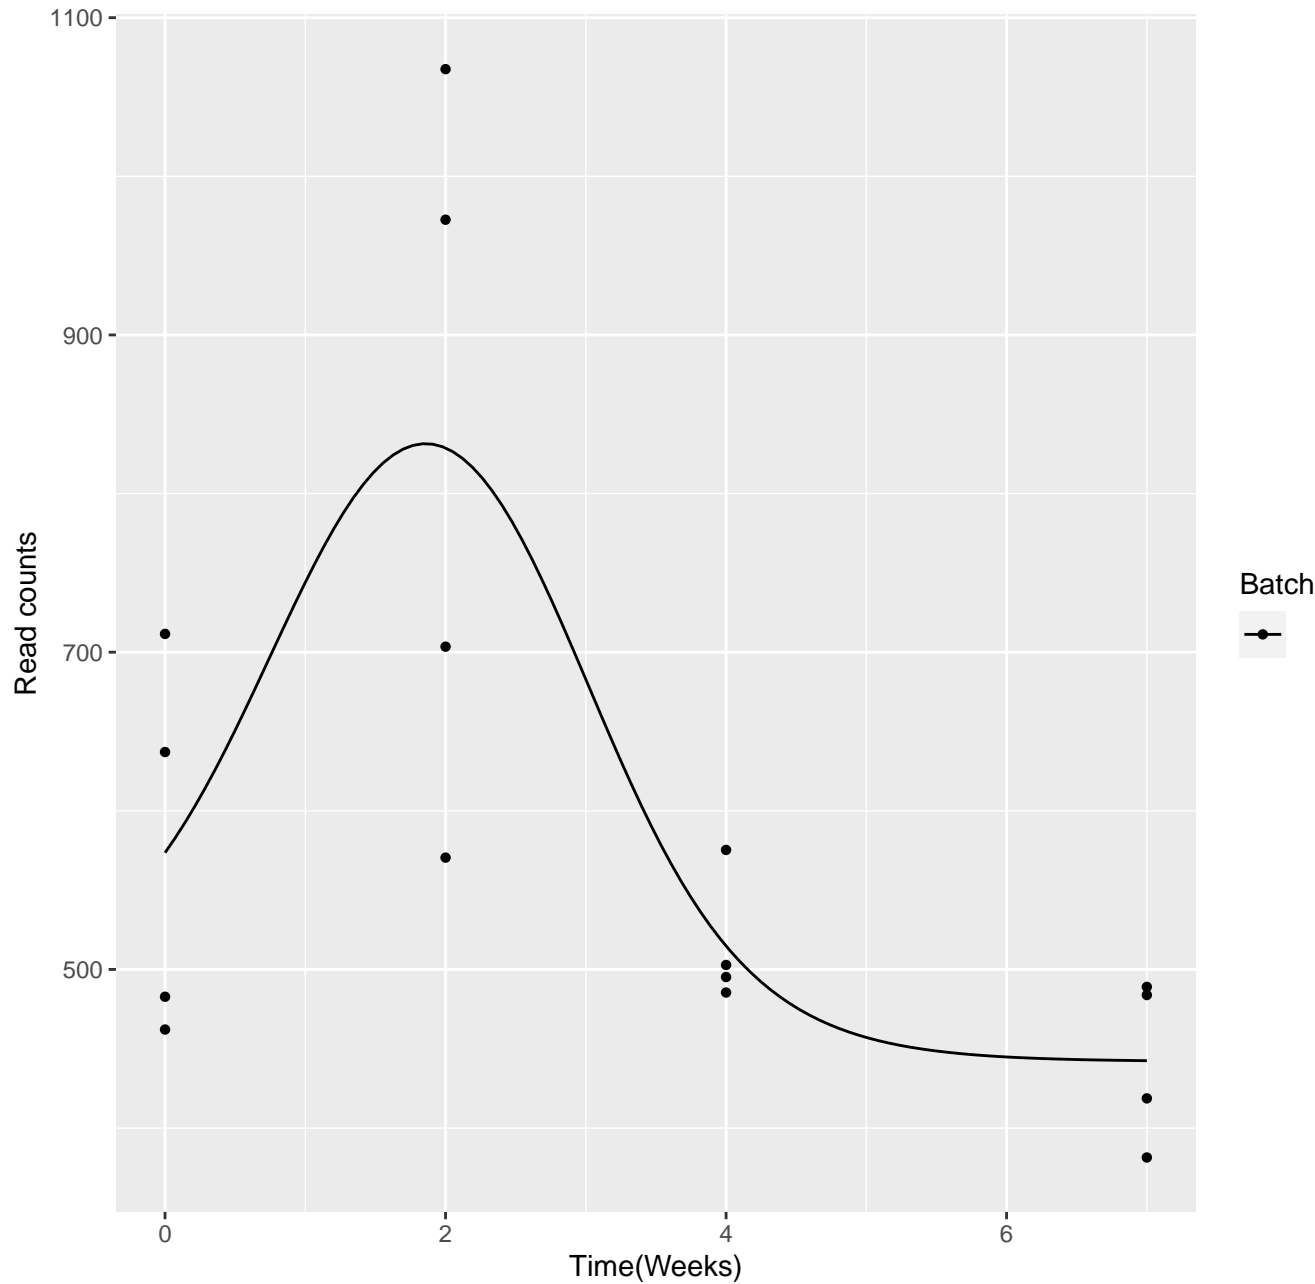



AHSG:  $\log_{10} q = -2.19$

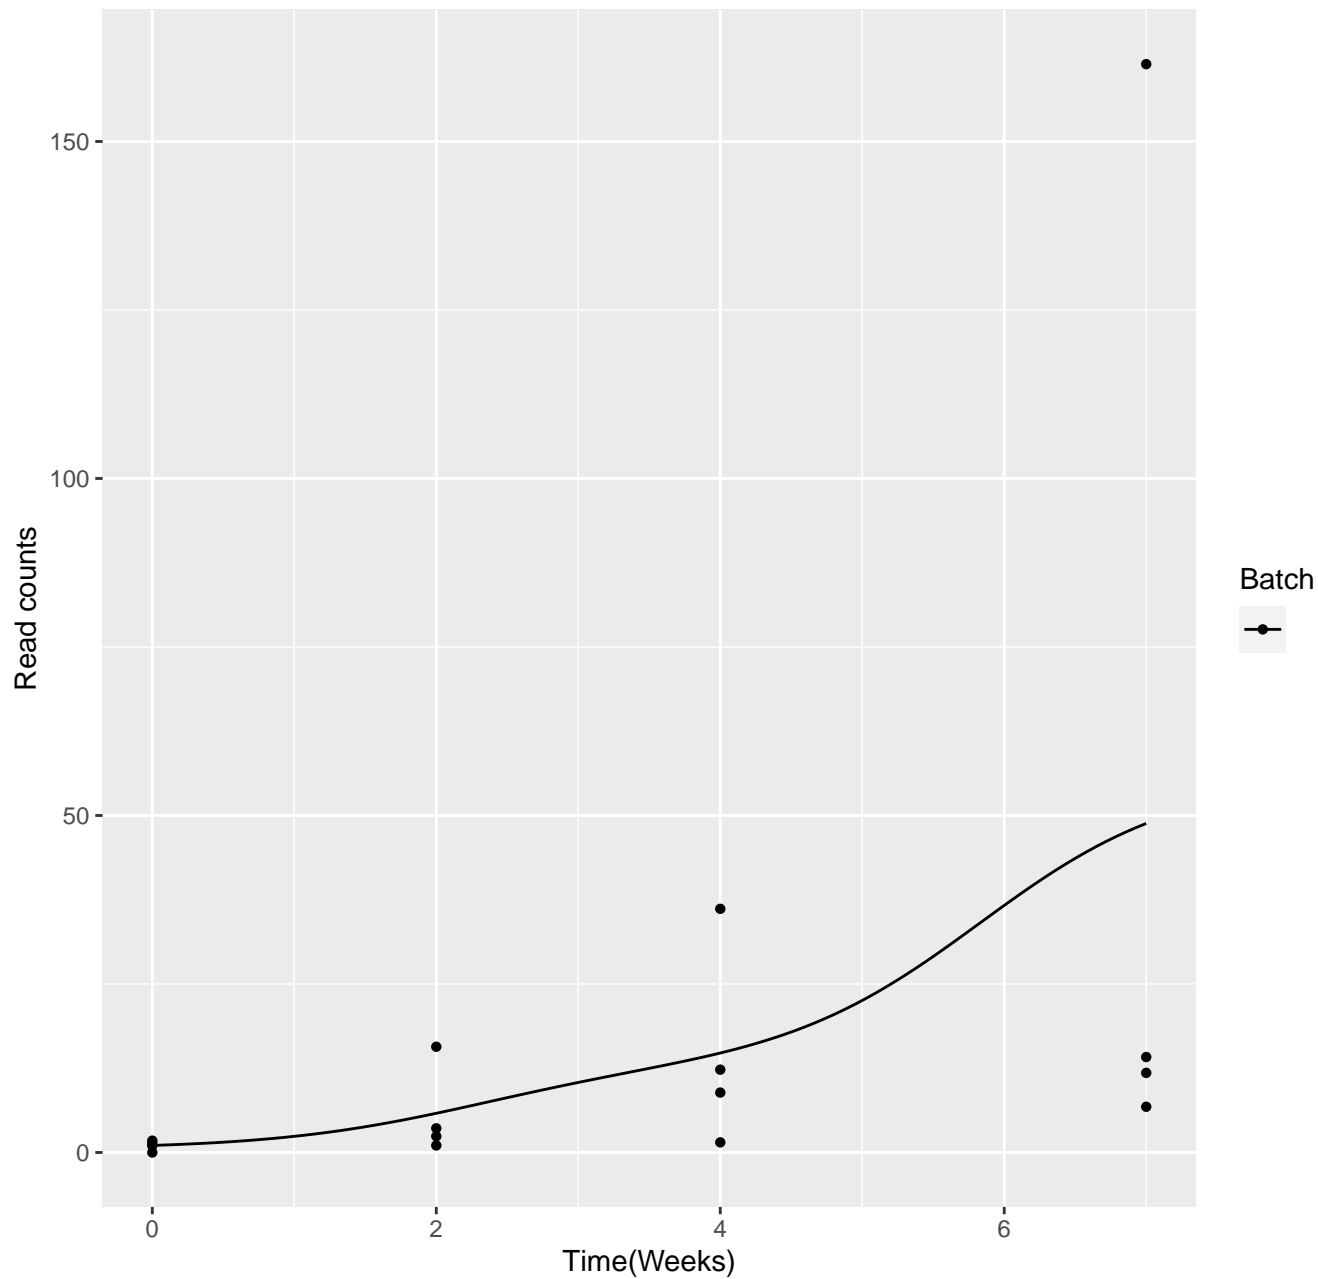

RASGEF1A:  $\log_{10} q = -2.19$

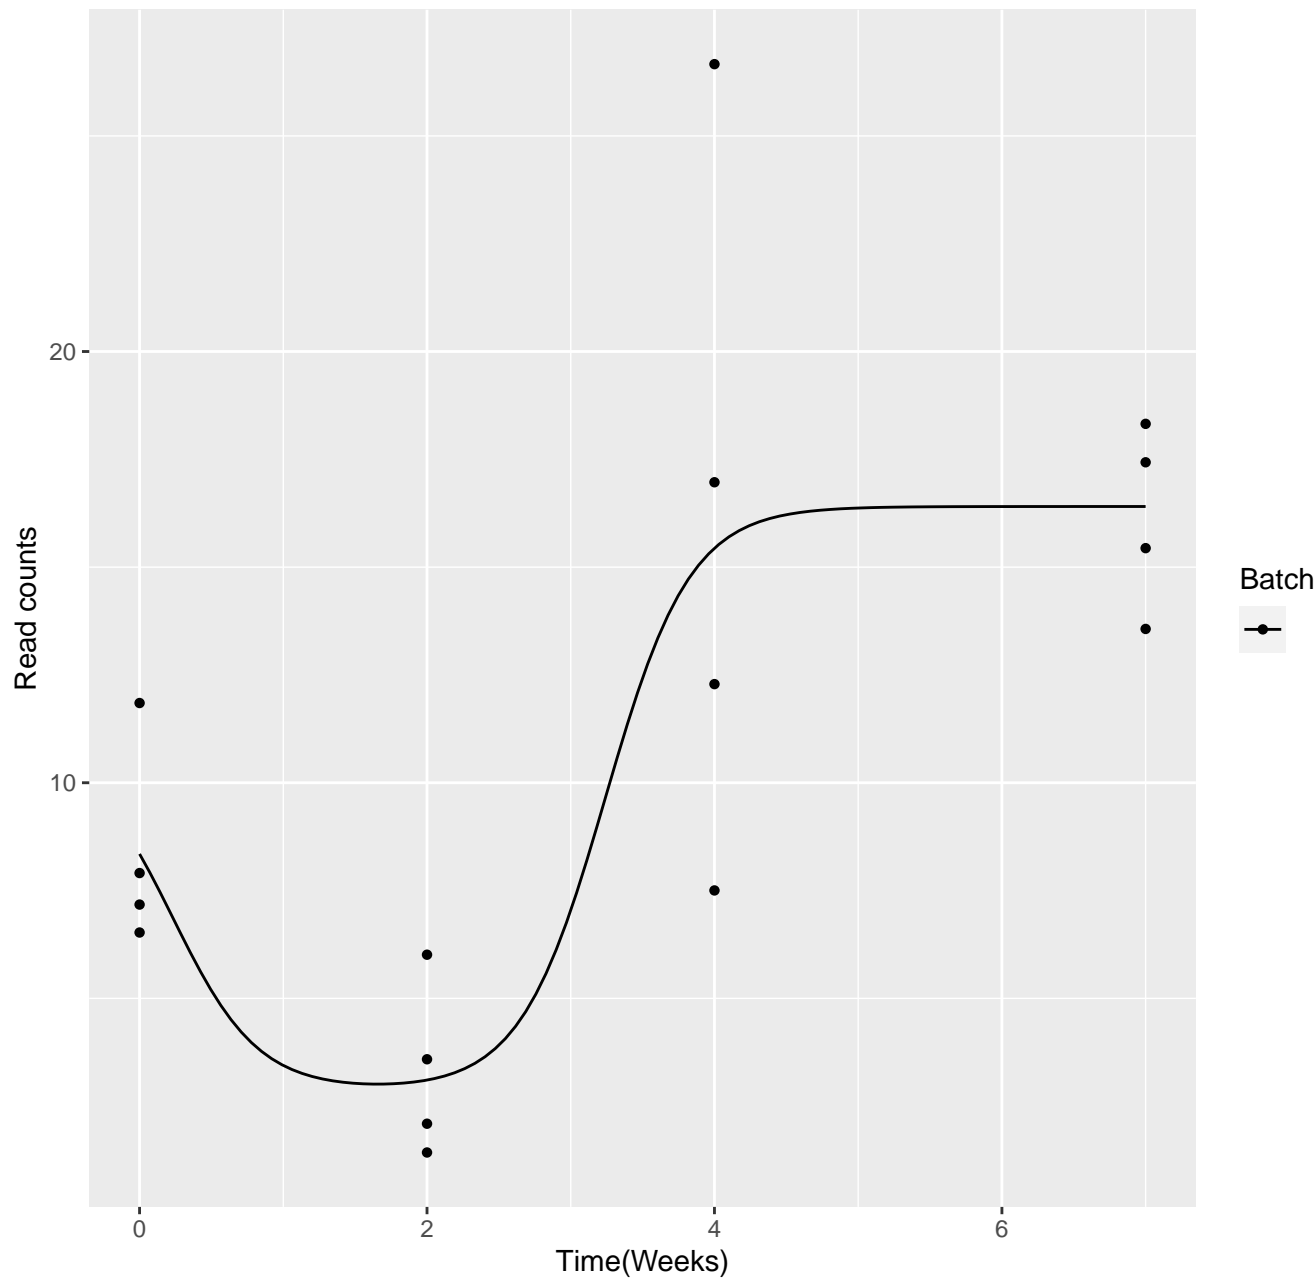

MCOLN2:  $\log_{10} q = -2.18$

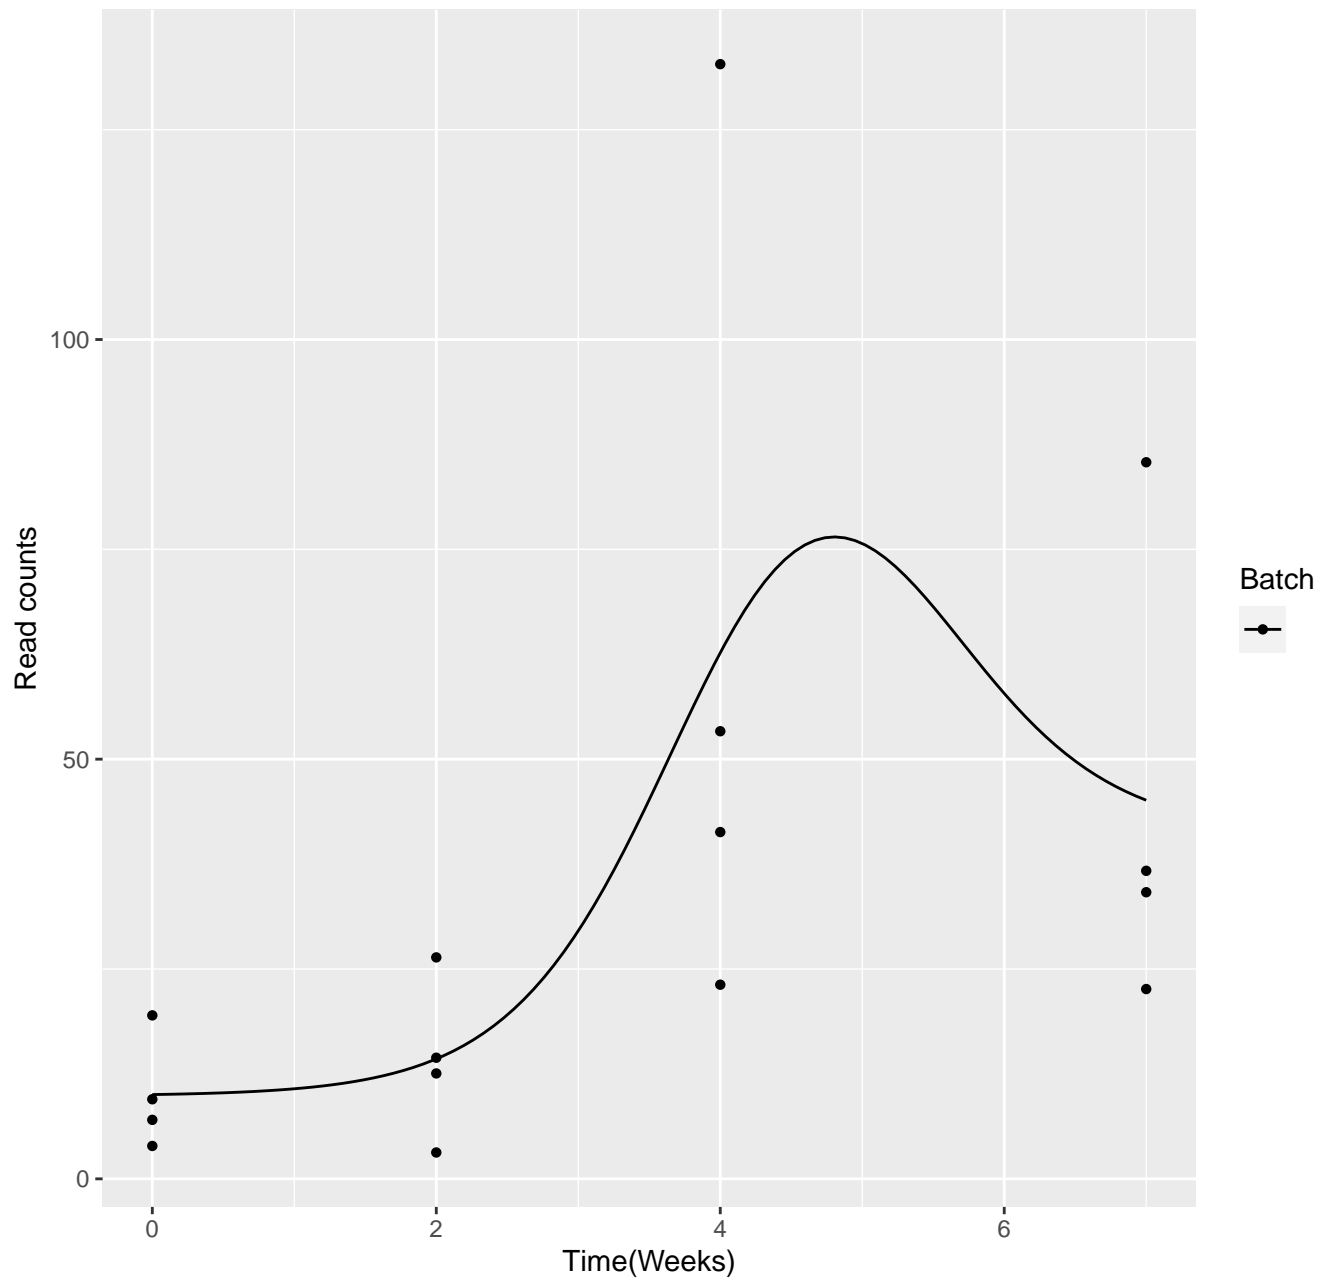

TXNRD3:  $\log_{10} q = -2.17$

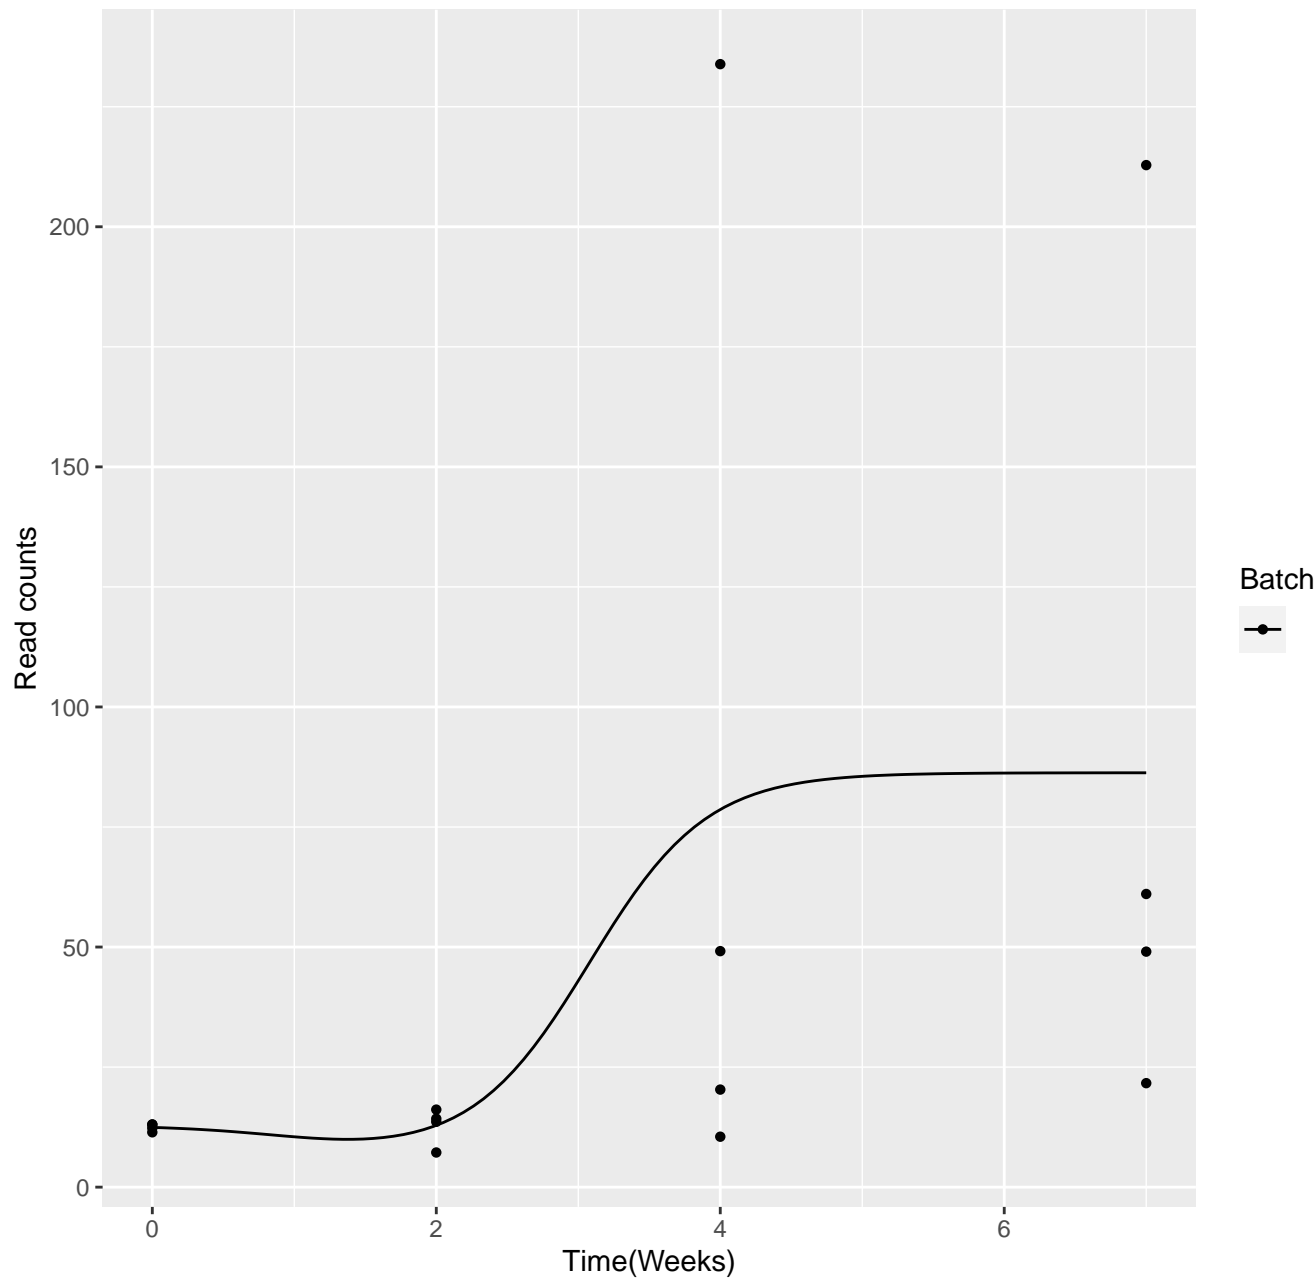

UST:  $\log_{10} q = -2.16$

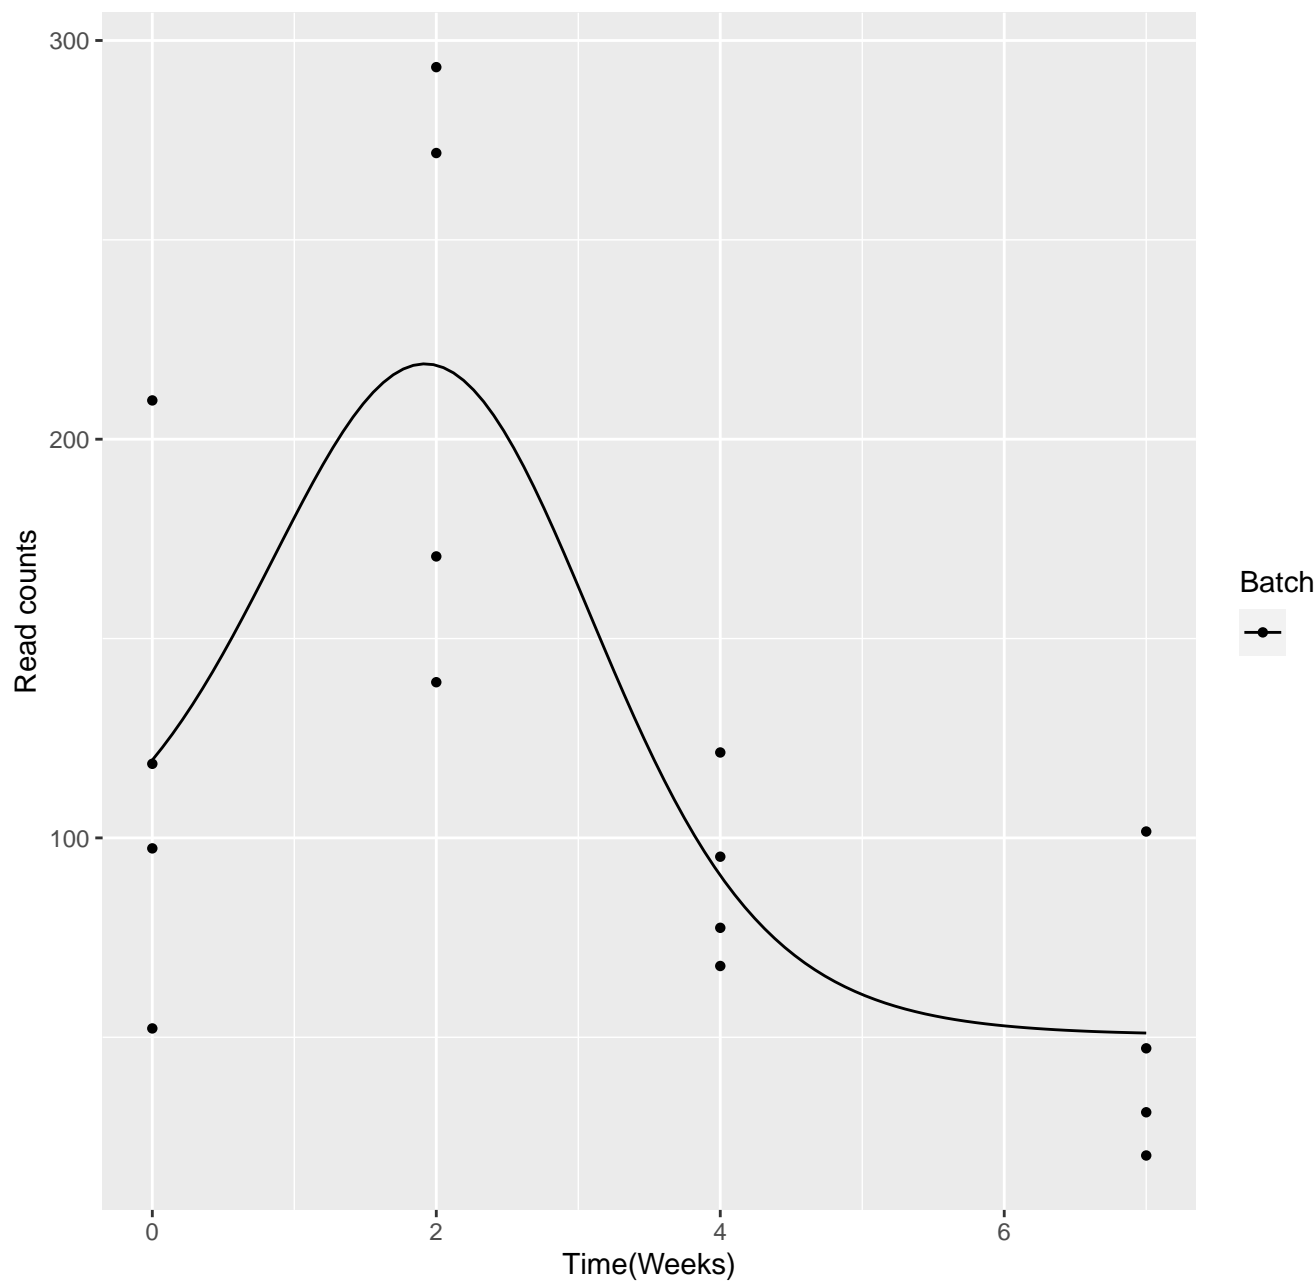

PPDPFL:  $\log_{10} q = -2.16$

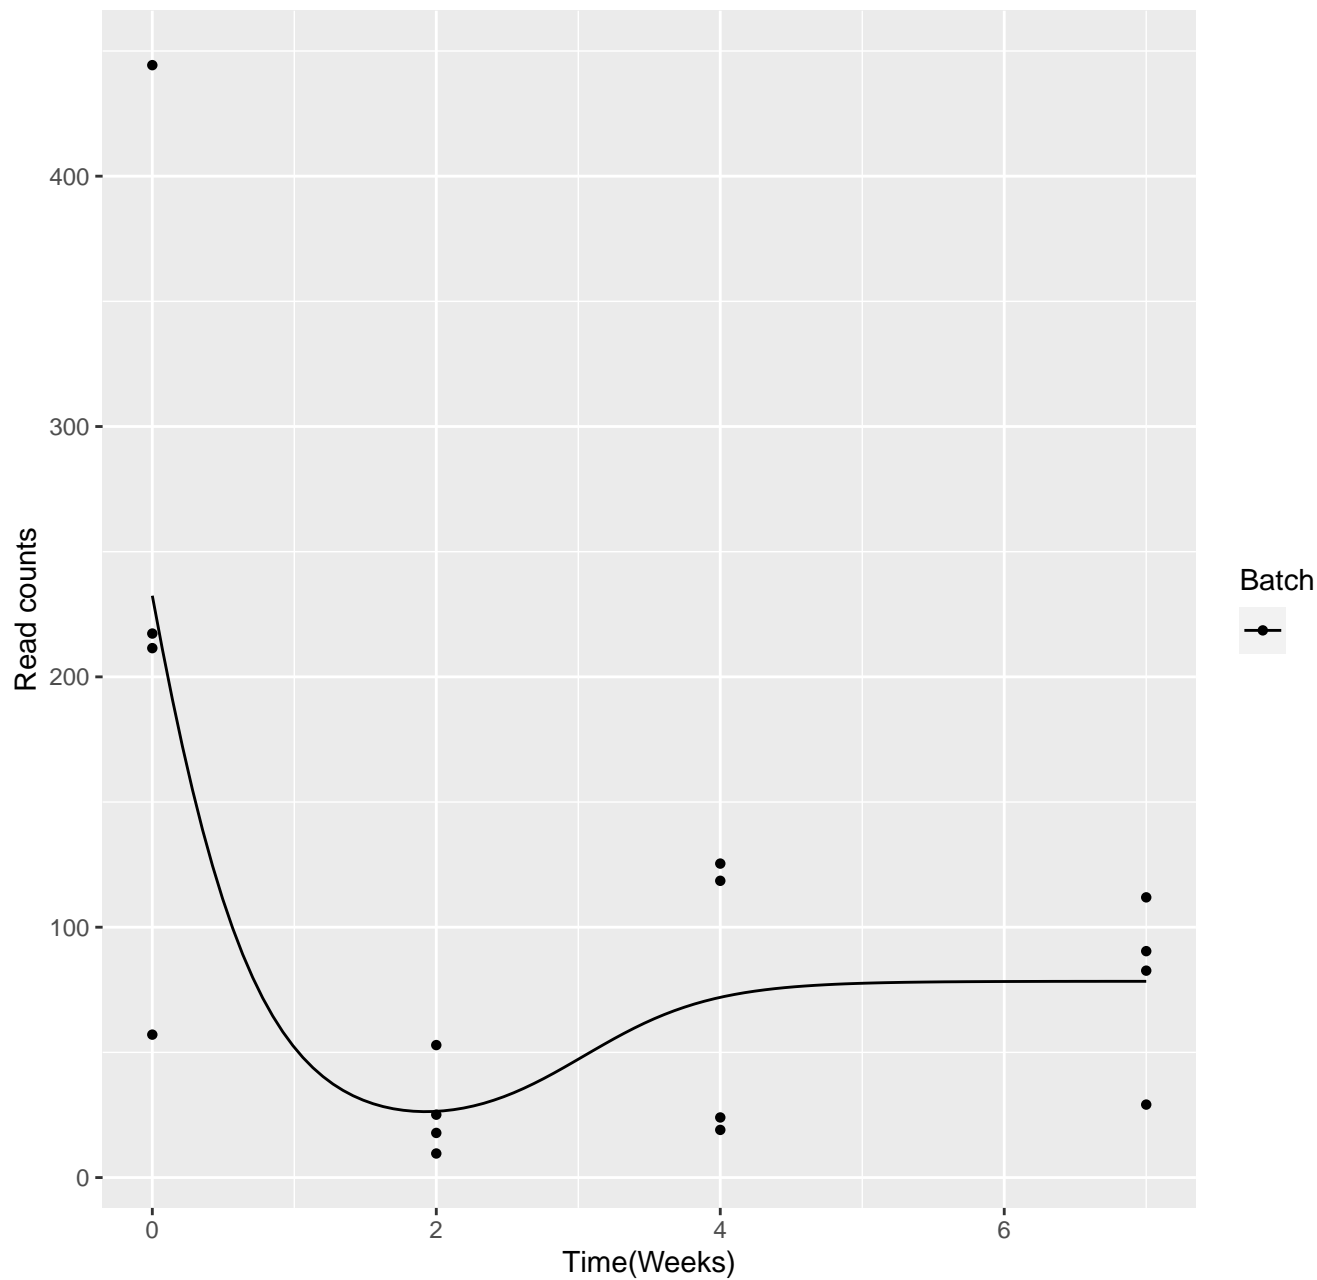

LOC100340166:  $\log_{10} q = -2.16$

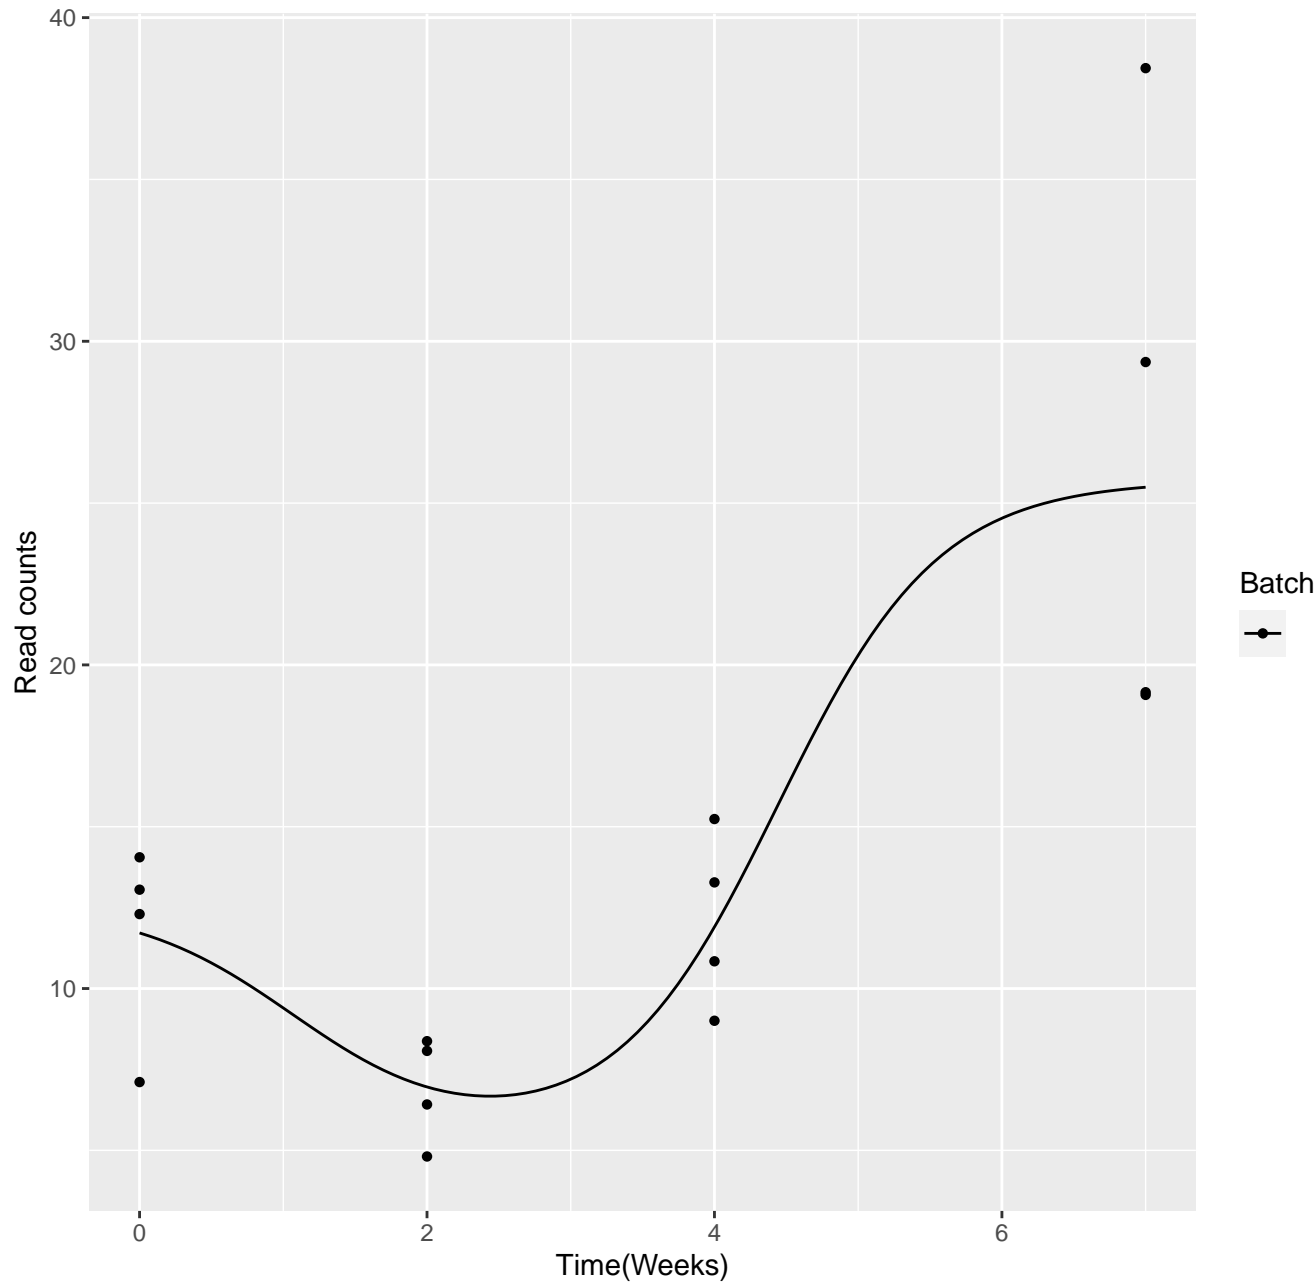

LPAR5:  $\log_{10} q = -2.15$

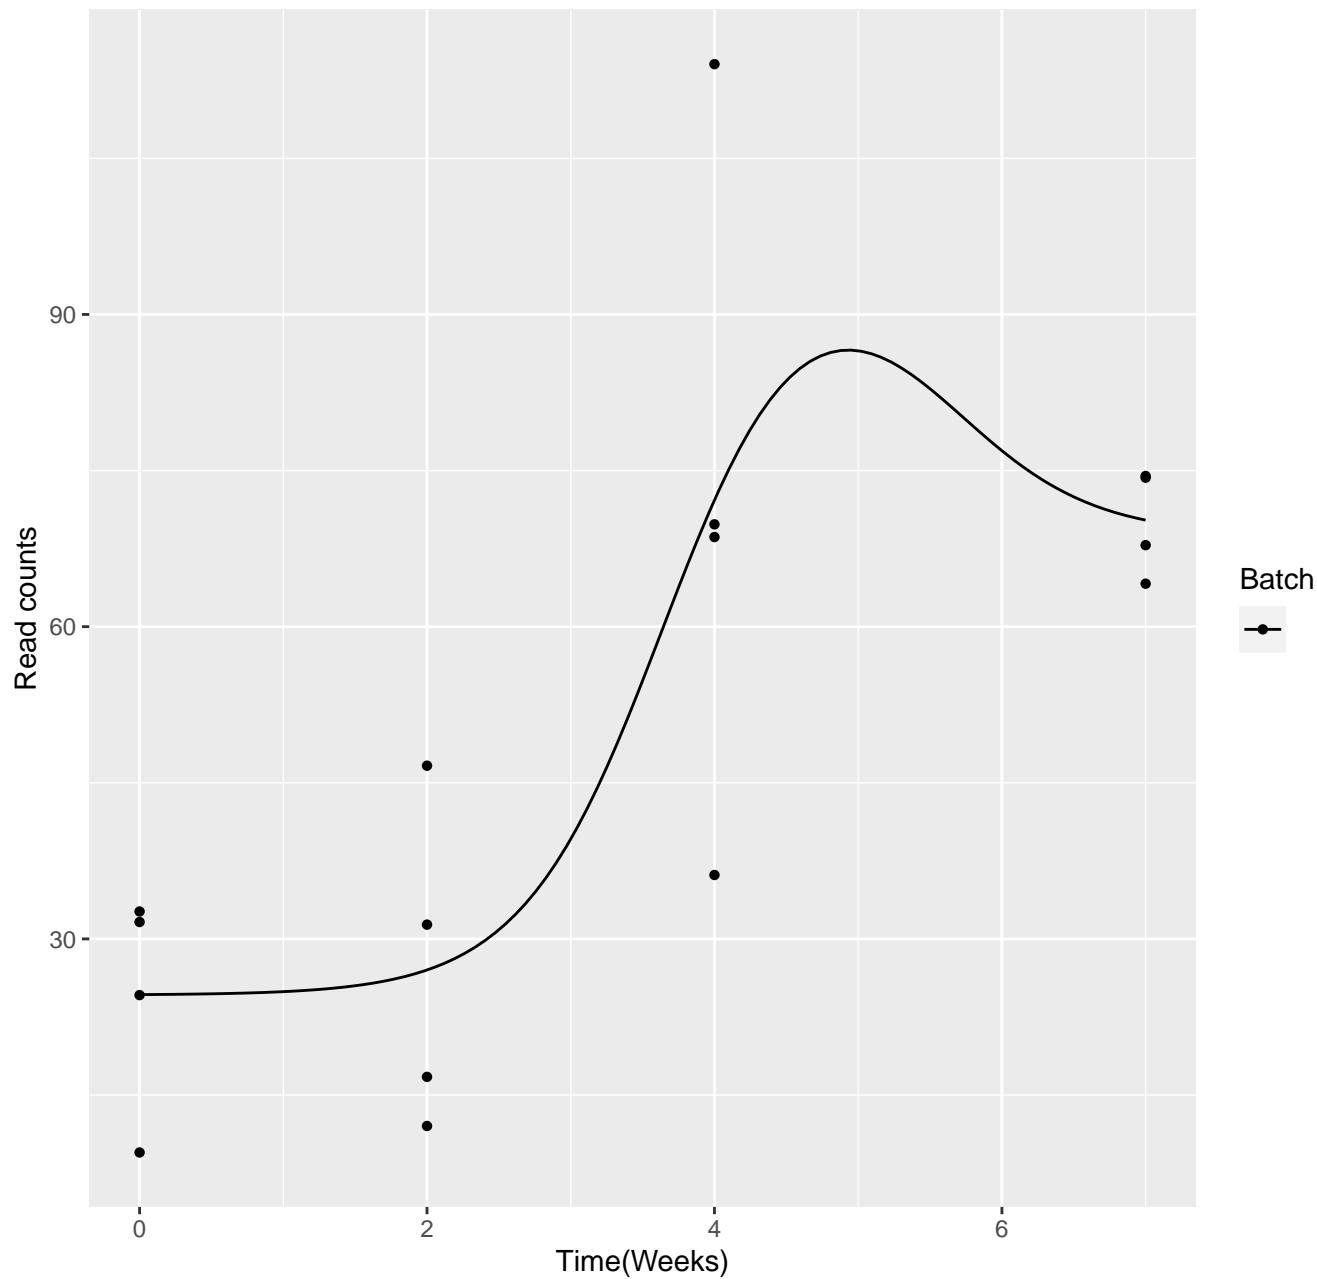



LOC100348135:  $\log_{10} q = -2.15$

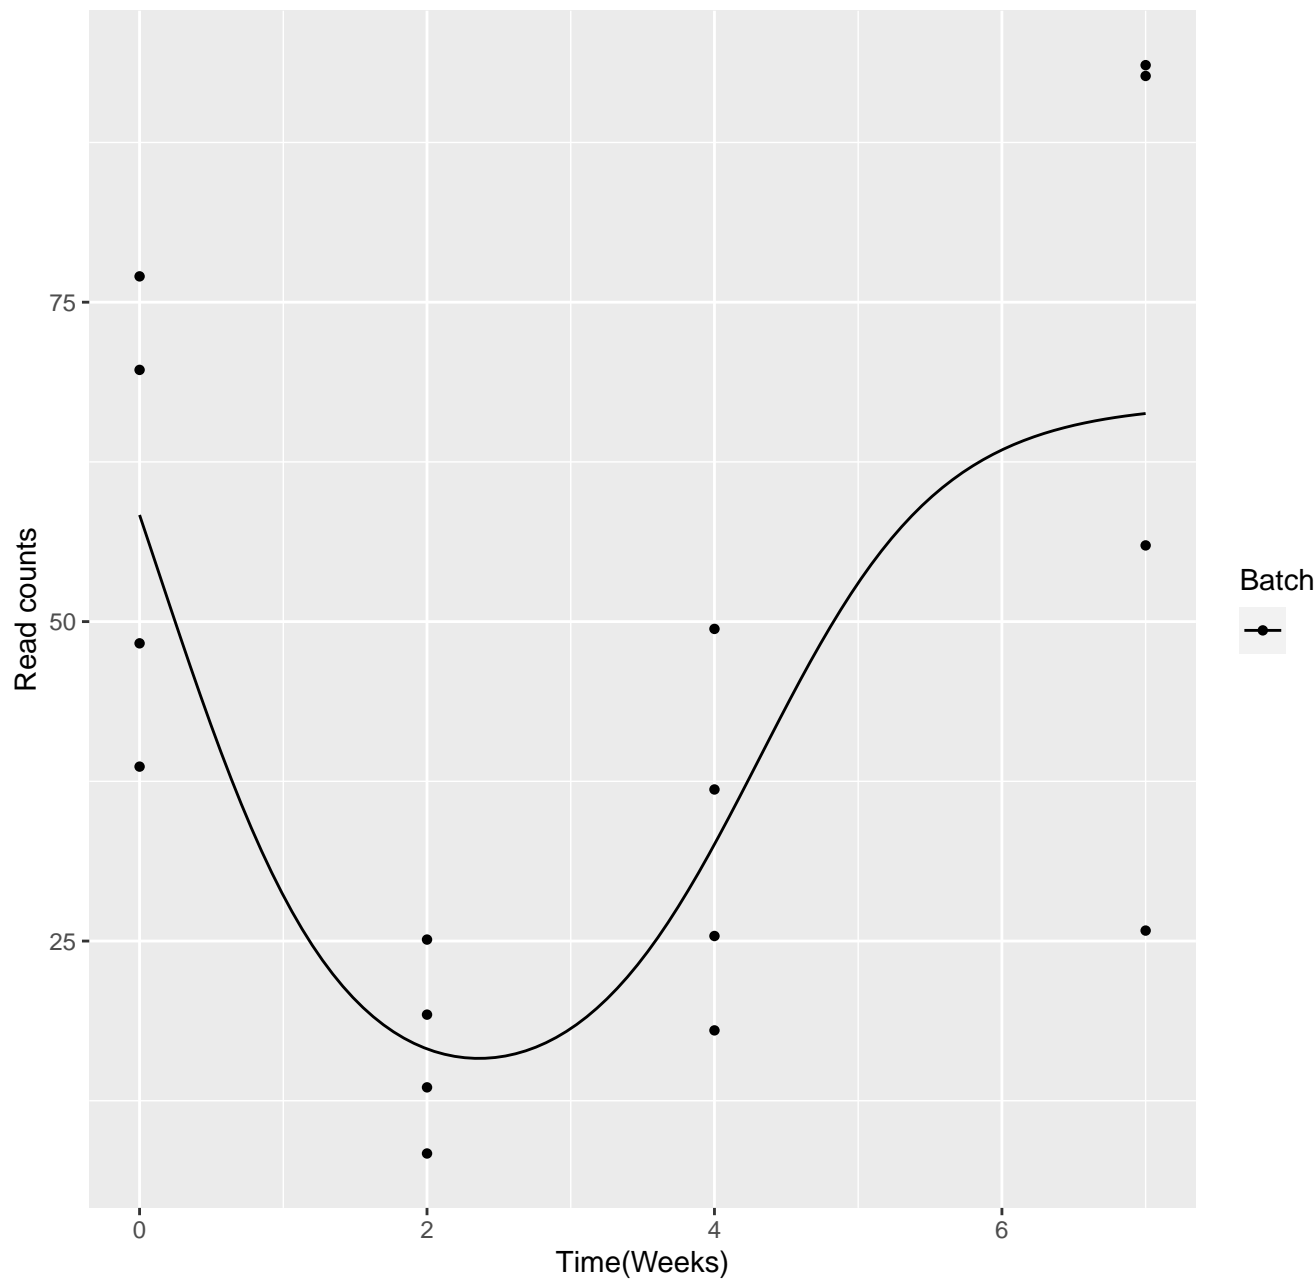

RBPMs:  $\log_{10} q = -2.14$

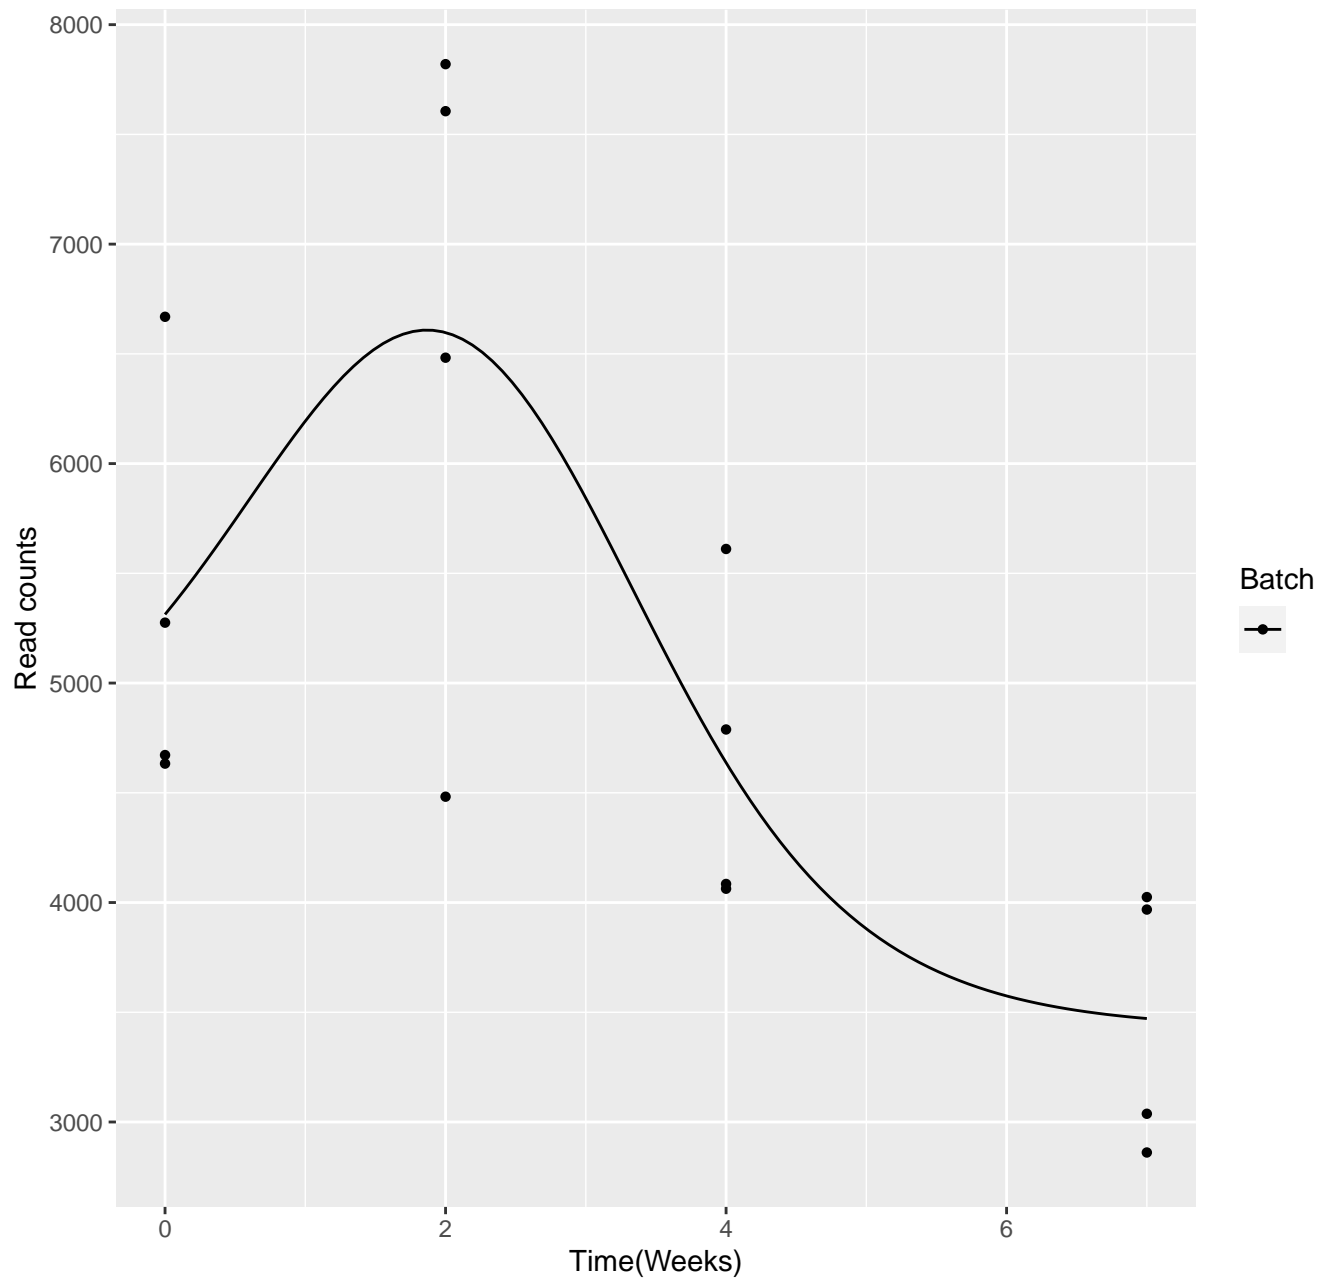

SGO2:  $\log_{10} q = -2.13$

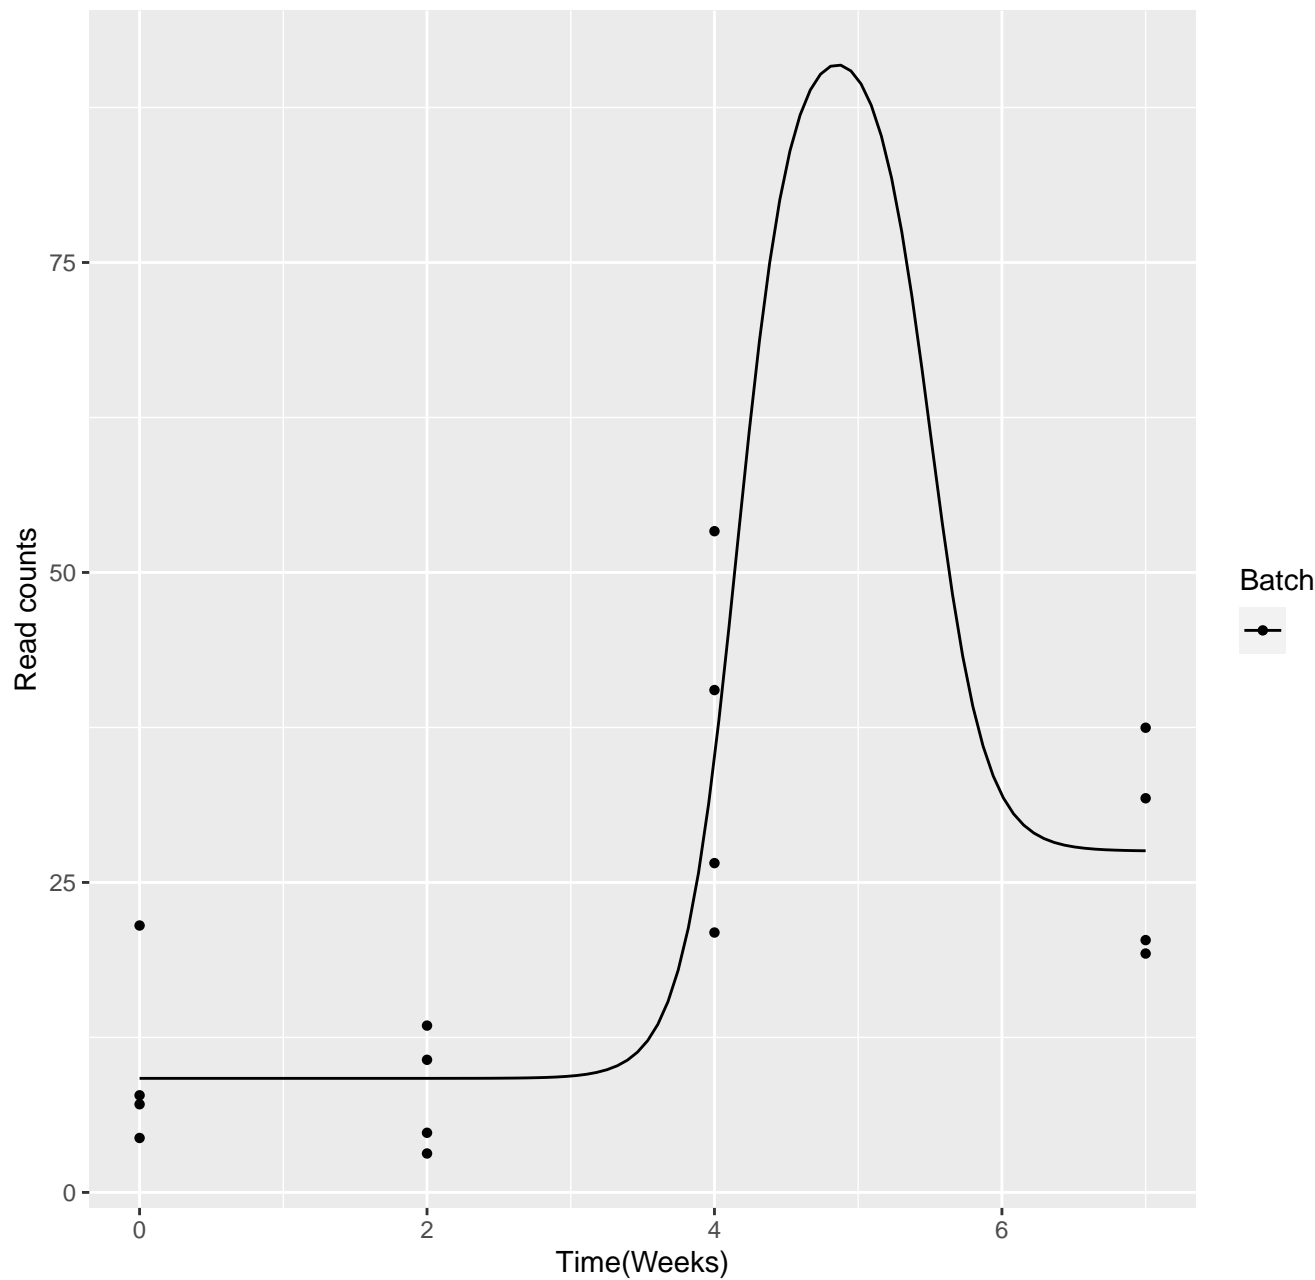

WFS1:  $\log_{10} q = -2.12$

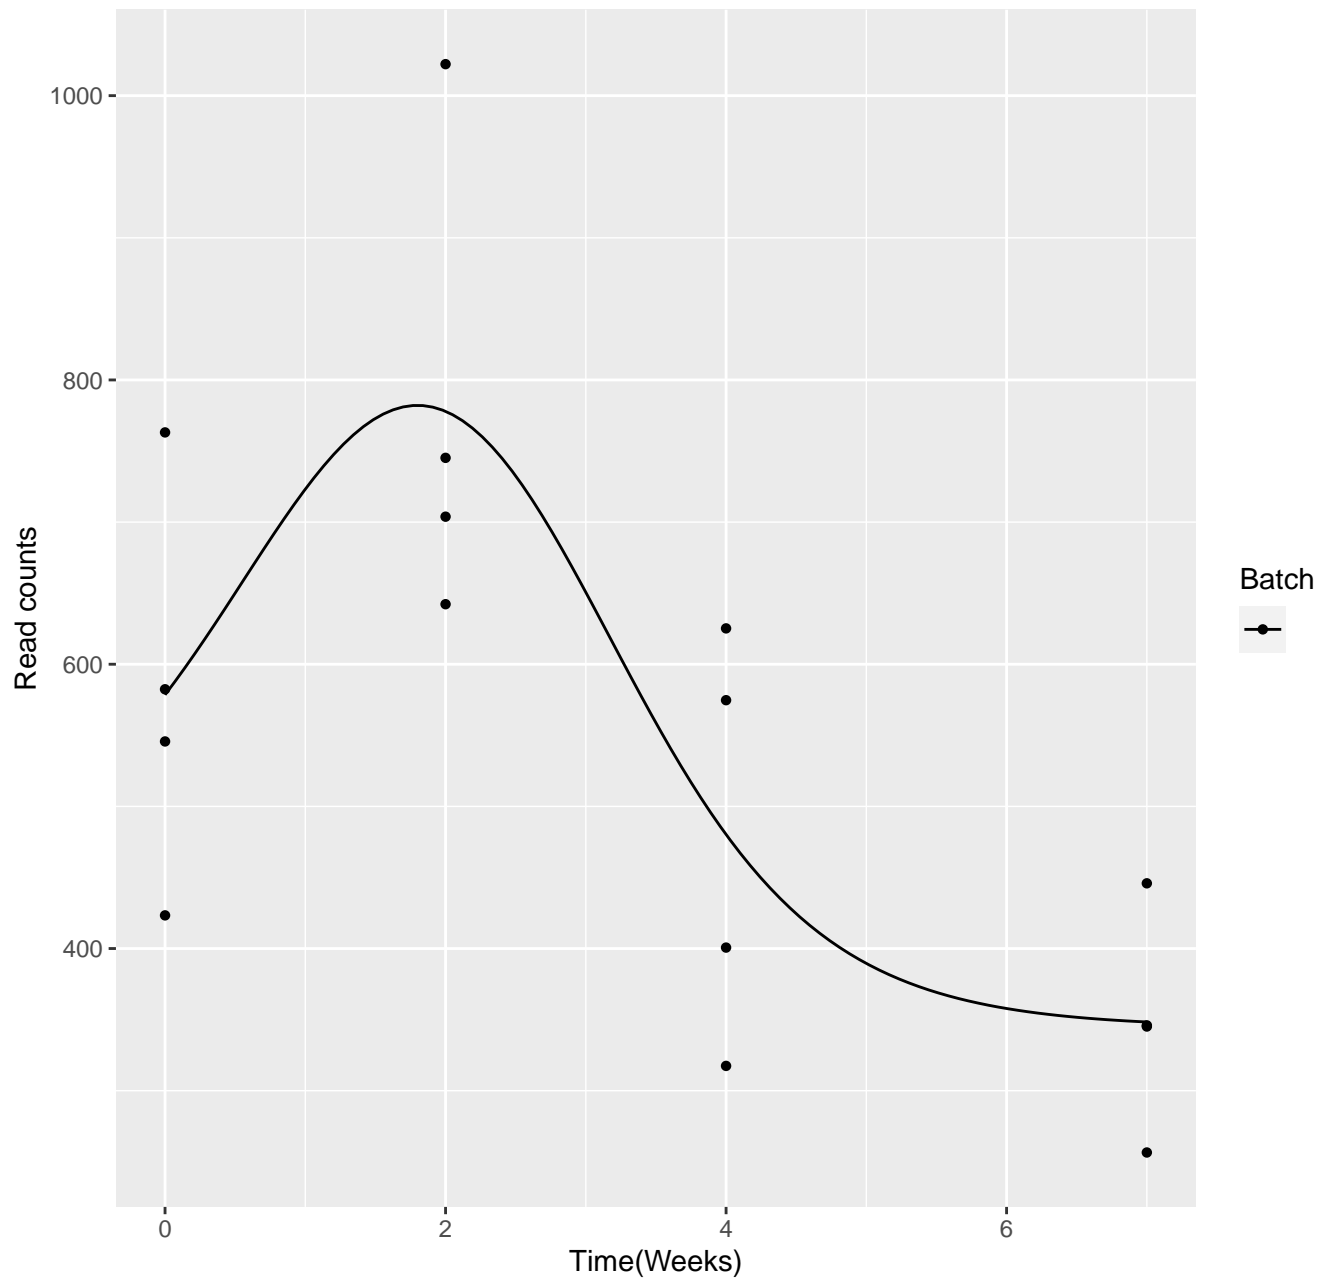

KCNK13:  $\log_{10} q = -2.11$

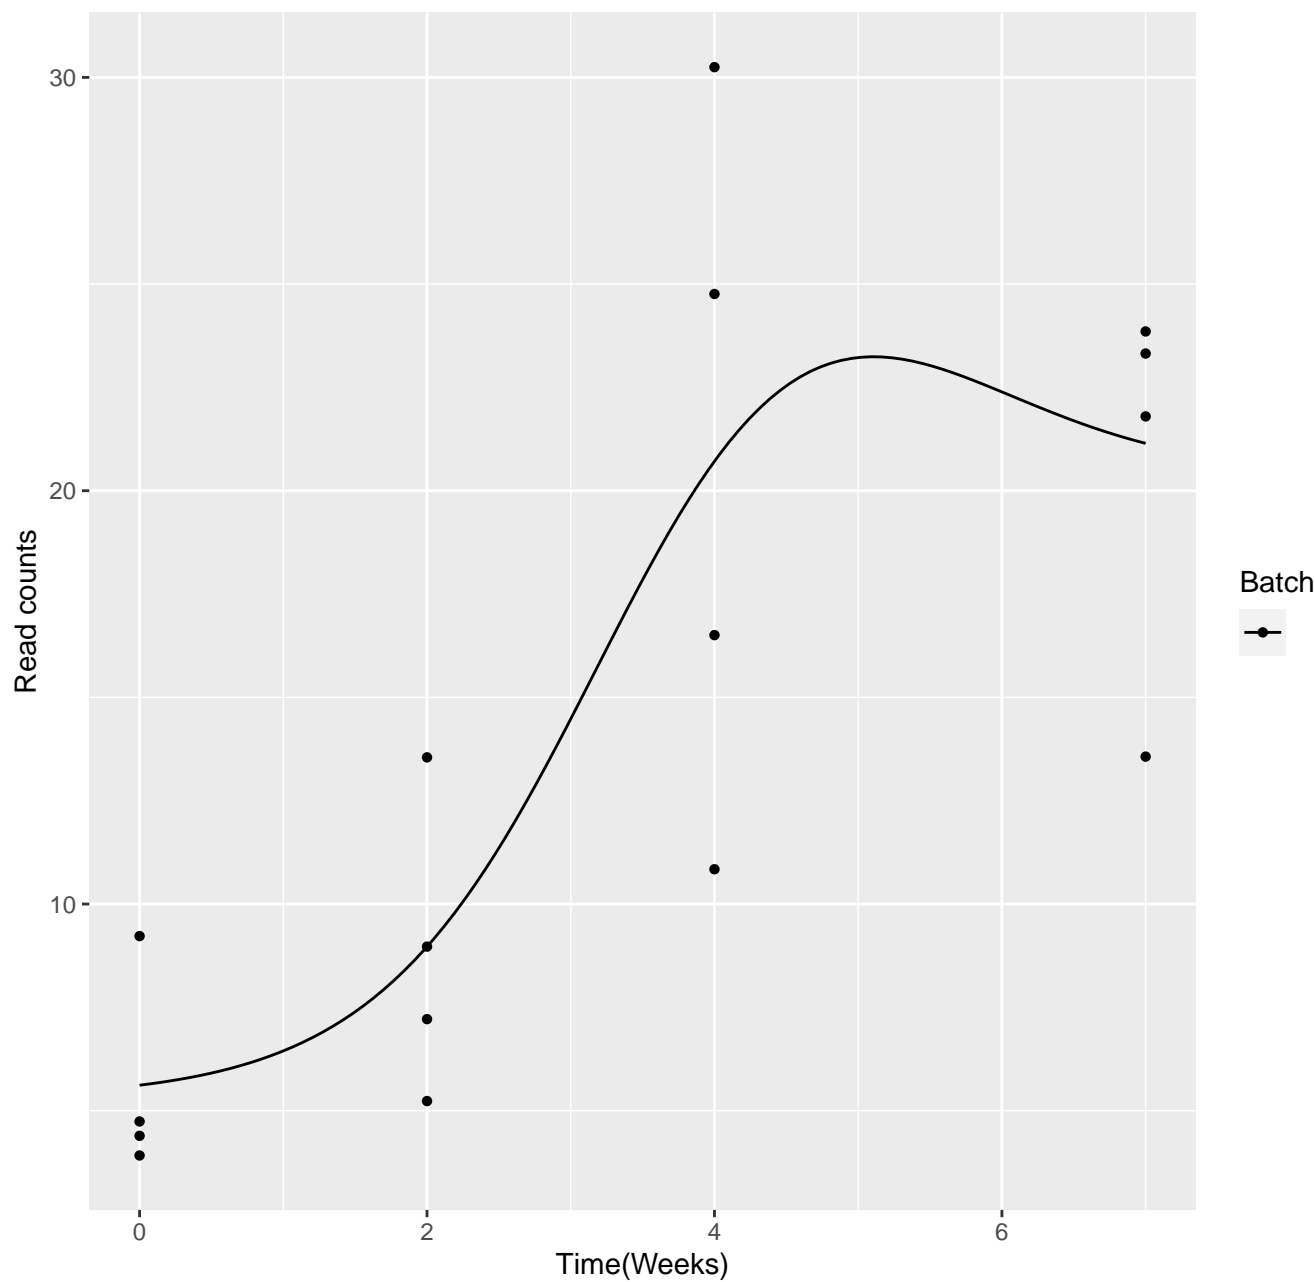

LOC103346246:  $\log_{10} q = -2.11$

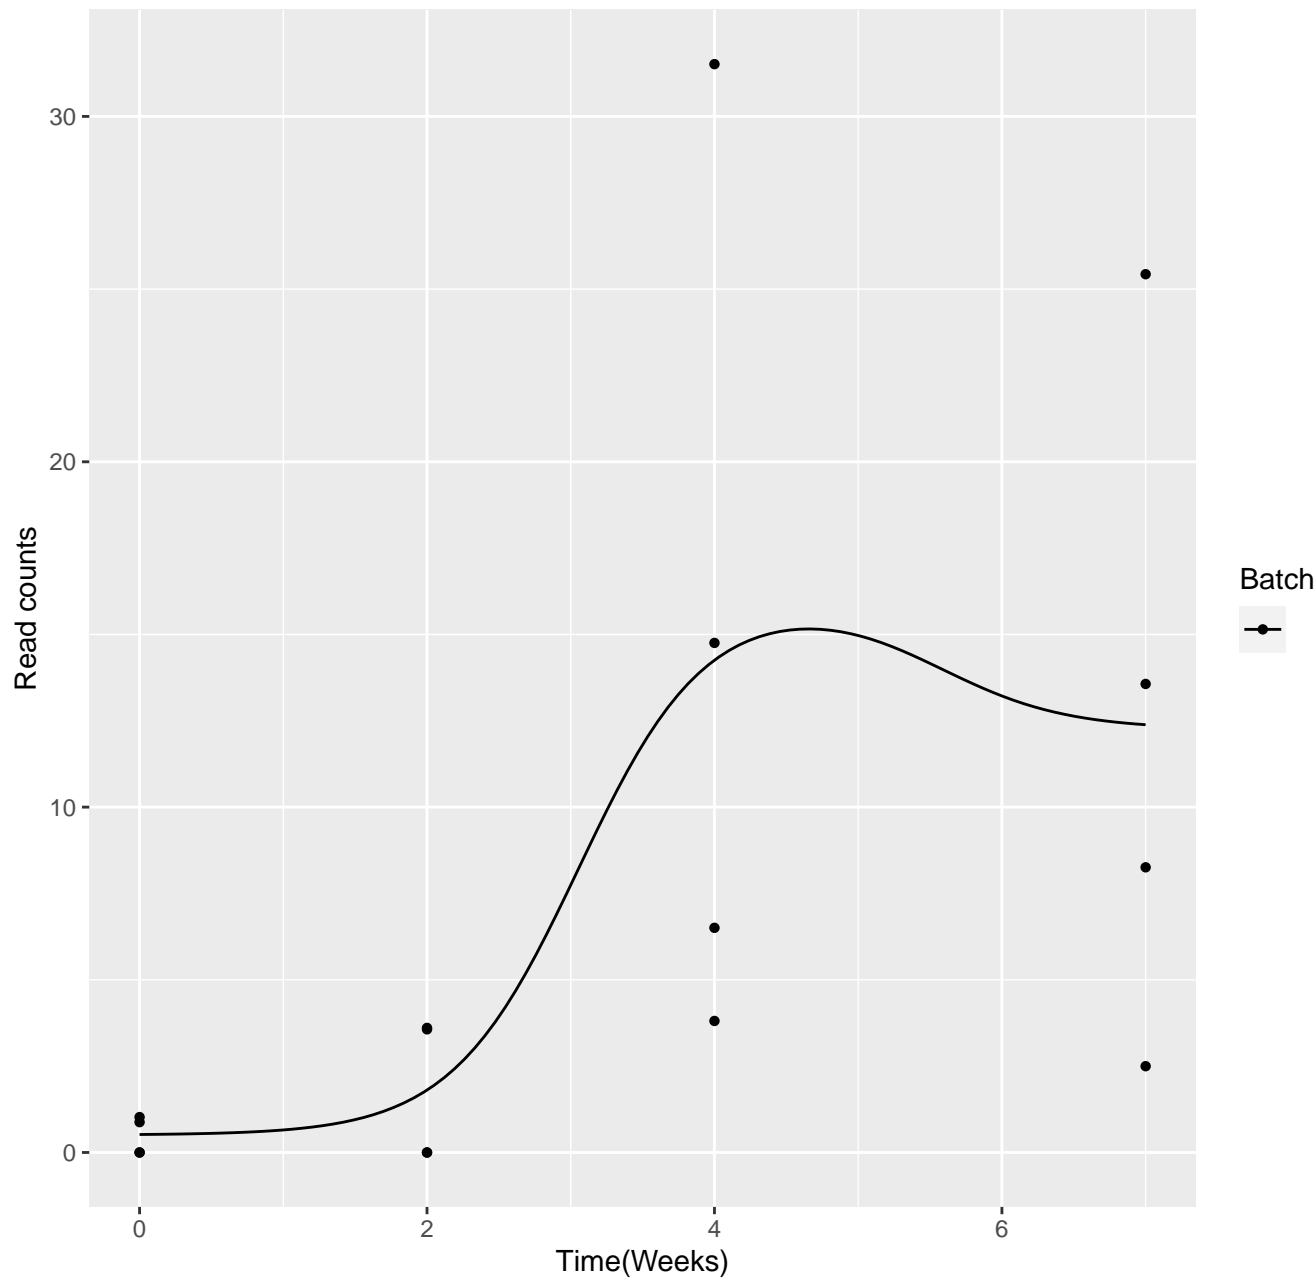

LOC100347962:  $\log_{10} q = -2.1$

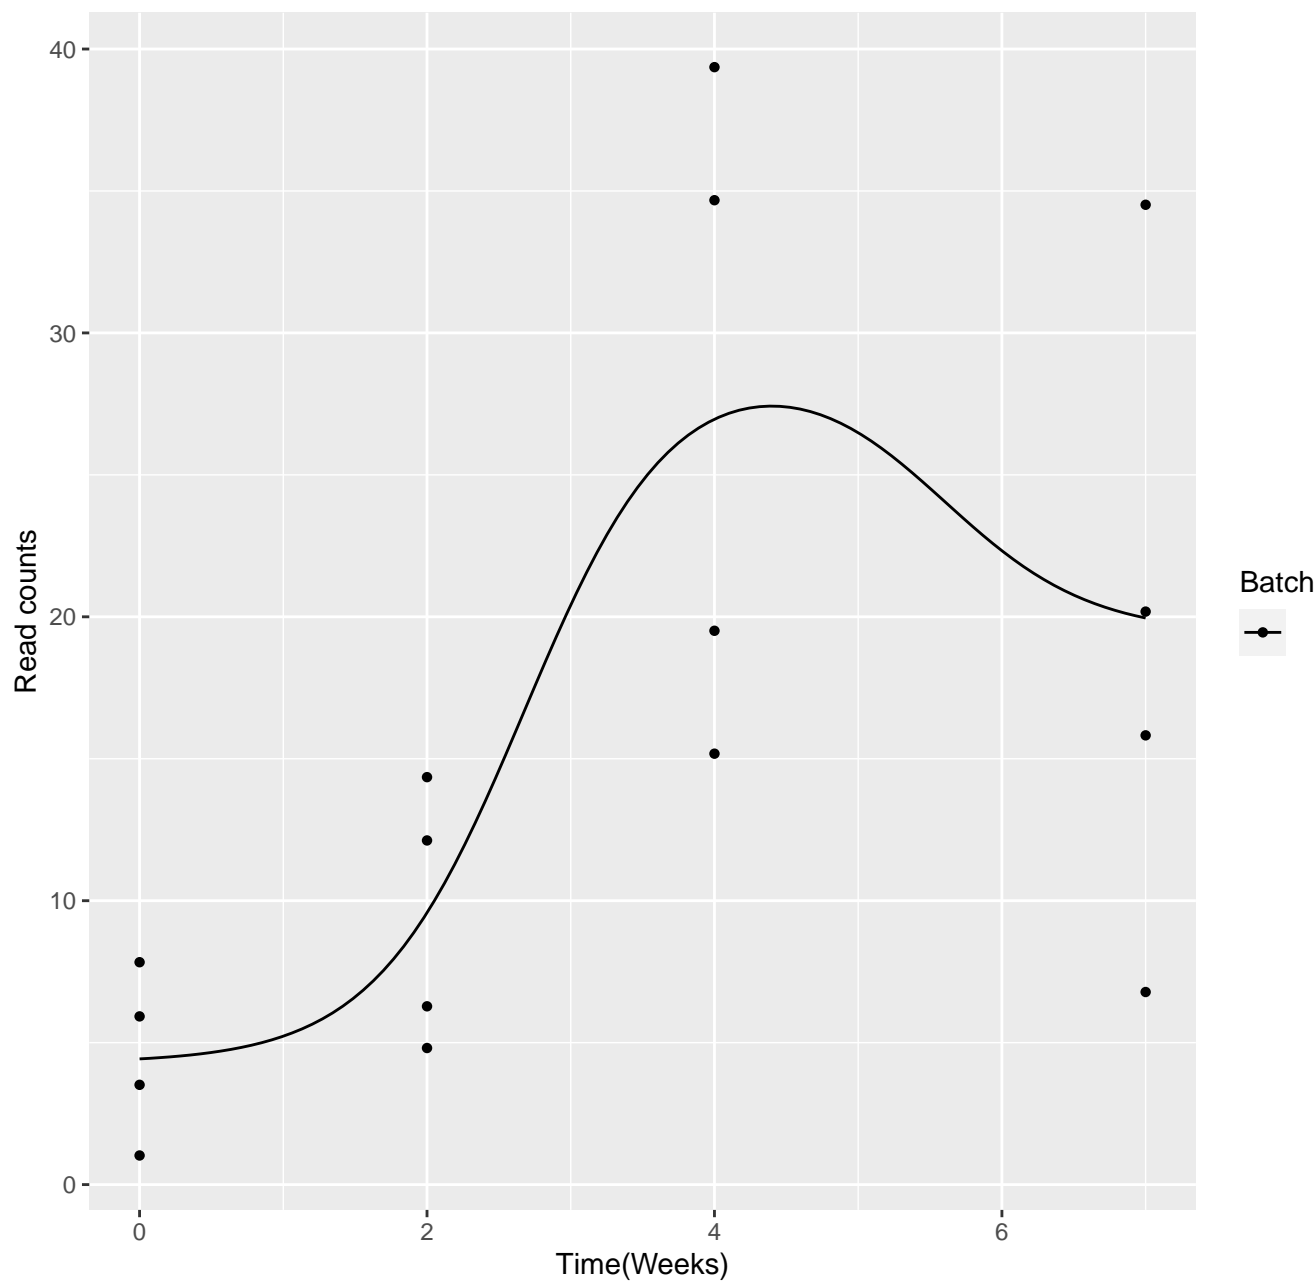

RPA4:  $\log_{10} q = -2.1$

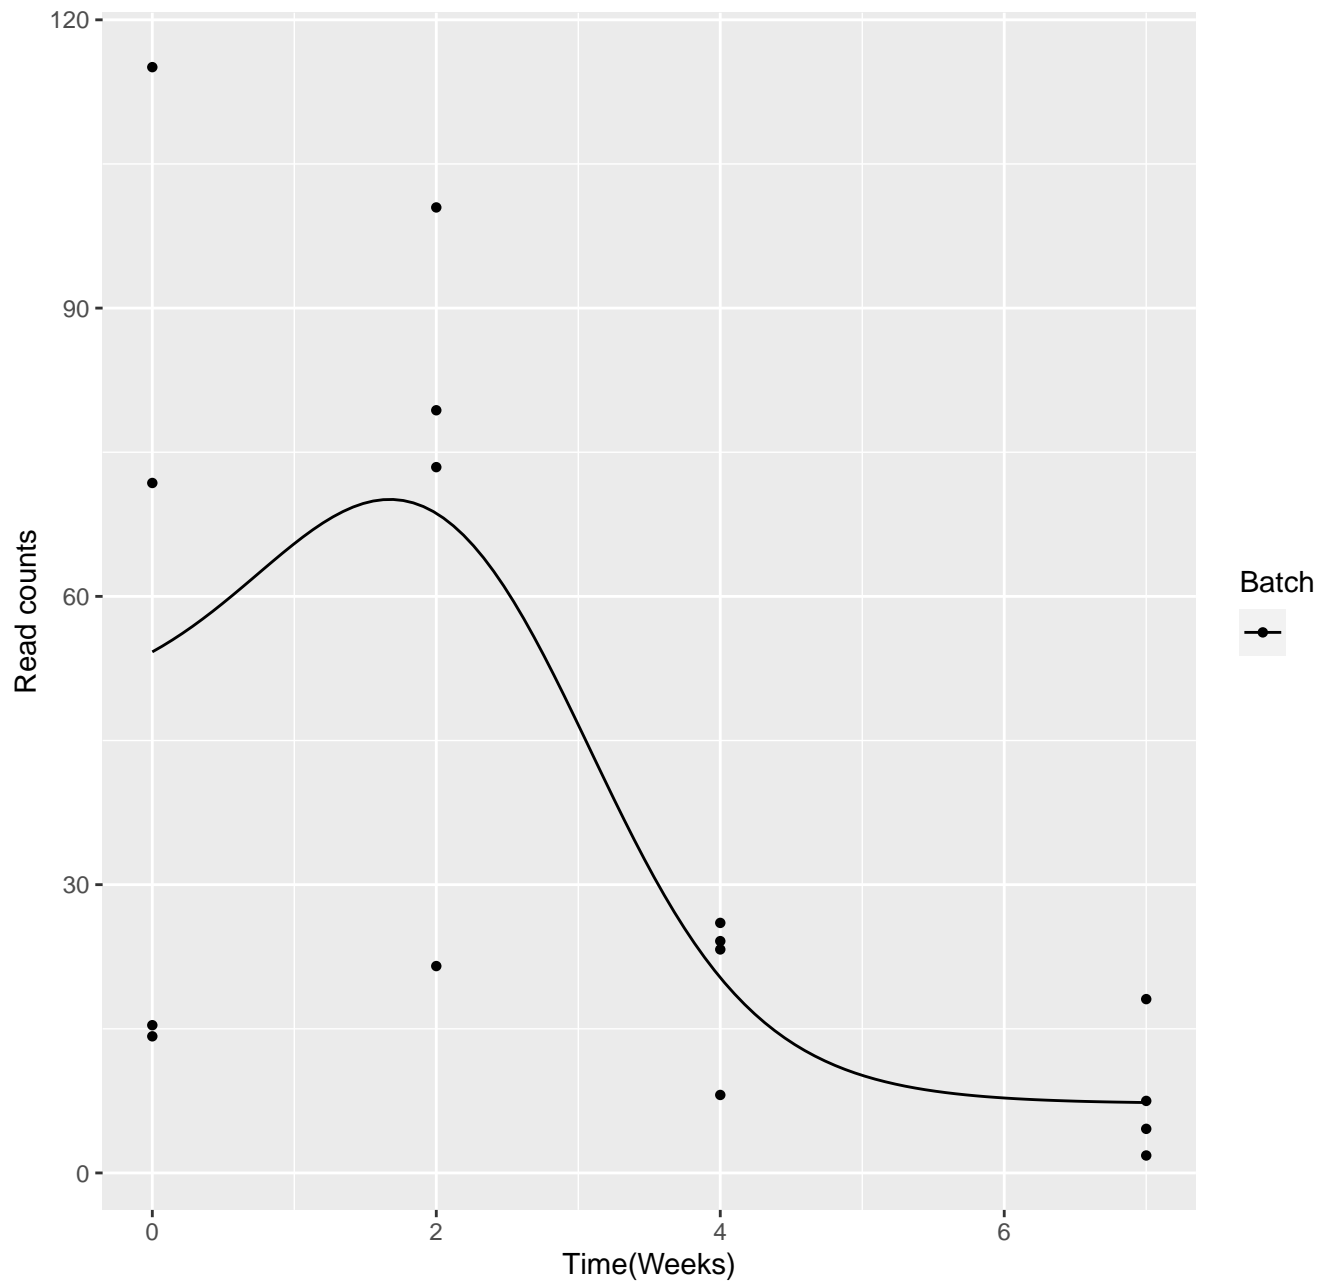

Supplement: Supplementary file 1 [file 0c68d6fa83df93006b52feec.pdf]
