# Supplementary material for: Multiomics coupled with vibrational spectroscopy identify early mechanisms of experimental aortic valve stenosis
Source: Research Square preprint supplement (doi:10.21203/rs.3.rs-4330270/v1), 2024-05-02
Supplement: Supplementary file 1 [file 043deffc6a963942e816cb34.xlsx]

## Sheet: All
Gene	p	padj	loglik_full	loglik_red	df_full	df_red	mean	converge_impulse	converge_const	allZero
LOC100340199	1.57546e-30	2.46214e-26	-41.9287	-116.76	7	2	17.3038	0	0	FALSE
LOC100339471	3.21439e-26	2.51172e-22	-62.6074	-127.3	7	2	62.6457	0	0	FALSE
LOC100353302	3.19235e-24	1.663e-20	-75.7619	-135.744	7	2	154.805	0	0	FALSE
HSPG2	1.03075e-21	4.02714e-18	-145.966	-200.018	7	2	17026.4	0	0	FALSE
PKD1	8.11997e-21	2.53798e-17	-124.25	-176.178	7	2	5853.23	0	0	FALSE
PRR15	1.16381e-20	3.03135e-17	-60.1377	-111.696	7	2	50.6759	0	0	FALSE
FBLN5	1.46563e-19	3.27212e-16	-142.078	-191.026	7	2	10647.7	0	0	FALSE
C1QTNF7	1.82707e-19	3.56918e-16	-91.4443	-140.166	7	2	496.563	0	0	FALSE
NOS2	2.83775e-19	4.92759e-16	-73.616	-121.884	7	2	121.187	0	0	FALSE
ATP10A	3.58977e-19	5.61009e-16	-93.7863	-141.811	7	2	547.618	0	0	FALSE
LOC100344156	7.93754e-19	1.12771e-15	-64.047	-111.253	7	2	71.1389	0	0	FALSE
TNN	1.28347e-18	1.6715e-15	-69.4572	-116.167	7	2	84.1754	0	0	FALSE
CRLF1	1.79521e-18	2.15812e-15	-84.1271	-130.491	7	2	203.326	0	0	FALSE
LOC100342677	3.692e-18	4.12132e-15	-50.625	-96.2439	7	2	24.4844	0	0	FALSE
LOC100341094	1.41249e-17	1.47162e-14	-67.8986	-112.13	7	2	73.2165	0	0	FALSE
PDLIM3	1.90505e-17	1.86075e-14	-123.074	-166.997	7	2	4324.65	0	0	FALSE
LOC103346238	2.28954e-17	2.10476e-14	-72.3703	-116.102	7	2	99.8609	0	0	FALSE
LOC100346213	2.97028e-17	2.57887e-14	-63.6257	-107.088	7	2	72.1084	0	0	FALSE
CD22	5.8671e-17	4.82584e-14	-59.0203	-101.778	7	2	42.1684	0	0	FALSE
LTBP4	4.16636e-16	3.2556e-13	-153.455	-194.182	7	2	24982	0	0	FALSE
PRSS53	4.8095e-16	3.57918e-13	-78.6382	-119.216	7	2	138.122	0	0	FALSE
HRH1	6.22945e-16	4.42517e-13	-67.5331	-107.842	7	2	79.2817	0	0	FALSE
LMCD1	1.27791e-15	8.68312e-13	-130.626	-170.19	7	2	4799.87	0	0	FALSE
LOC127488978	1.61939e-15	1.05449e-12	-58.6338	-97.9513	7	2	40.2679	0	0	FALSE
LOC100340903	2.00212e-15	1.25157e-12	-63.5498	-102.647	7	2	60.2589	0	0	FALSE
CDS2	3.2058e-15	1.92693e-12	-117.868	-156.476	7	2	2484.17	0	0	FALSE
MCP-1	4.30391e-15	2.49117e-12	-56.0627	-94.3644	7	2	30.589	0	0	FALSE
SLC37A2	5.7824e-15	3.2274e-12	-92.9017	-130.896	7	2	321.466	0	0	FALSE
LOC100353606	6.13312e-15	3.30512e-12	-87.6939	-125.627	7	2	318.041	0	0	FALSE
LOC100345136	7.52674e-15	3.92093e-12	-77.9682	-115.689	7	2	128.748	0	0	FALSE
SPHK1	9.5481e-15	4.81348e-12	-73.6332	-111.106	7	2	94.3984	0	0	FALSE
ALDH18A1	9.85975e-15	4.81526e-12	-104.768	-142.207	7	2	1534.06	0	0	FALSE
PLAUR	1.5338e-14	7.26369e-12	-74.161	-111.141	7	2	102.419	0	0	FALSE
AIF1	2.27694e-14	1.04659e-11	-92.3185	-128.887	7	2	317.05	0	0	FALSE
KLRG1	2.64519e-14	1.18112e-11	-43.9257	-80.3377	7	2	16.6272	0	0	FALSE
GMFG	2.90002e-14	1.25893e-11	-75.4364	-111.753	7	2	112.072	0	0	FALSE
PFKP	2.99563e-14	1.26529e-11	-114.532	-150.815	7	2	1989.51	0	0	FALSE
LOC127484430	3.37809e-14	1.38928e-11	-80.5638	-116.721	7	2	160.92	0	0	FALSE
C5AR1	3.66824e-14	1.46993e-11	-92.5396	-128.611	7	2	312.609	0	0	FALSE
NFAM1	3.77931e-14	1.47658e-11	-74.1906	-110.231	7	2	99.3117	0	0	FALSE
RPS6KA1	4.10615e-14	1.56514e-11	-78.0659	-114.02	7	2	138.395	0	0	FALSE
TIMP1	4.26187e-14	1.58582e-11	-141.633	-177.548	7	2	7347.04	0	0	FALSE
CTSE	4.88321e-14	1.73447e-11	-78.0732	-113.846	7	2	127.579	0	0	FALSE
LOC100349729	4.88333e-14	1.73447e-11	-49.3945	-85.1676	7	2	19.5081	0	0	FALSE
IRF5	5.40037e-14	1.86424e-11	-90.6711	-126.339	7	2	277.808	0	0	FALSE
OSR1	5.48727e-14	1.86424e-11	-119.578	-155.229	7	2	1794.61	0	0	FALSE
LOC100009286	6.26687e-14	2.0838e-11	-67.602	-103.115	7	2	74.844	0	0	FALSE
PTK2B	6.7448e-14	2.196e-11	-75.9561	-111.392	7	2	147.953	0	0	FALSE
LAPTM5	8.96531e-14	2.85938e-11	-126.602	-161.742	7	2	2712.33	0	0	FALSE
SLMAP	1.28617e-13	4.02005e-11	-149.402	-184.164	7	2	12724.4	0	0	FALSE
FCGR1A	1.36045e-13	4.16884e-11	-85.0184	-119.723	7	2	206.703	0	0	FALSE
CD48	1.5122e-13	4.46295e-11	-93.2806	-127.874	7	2	325.14	0	0	FALSE
LOC100358778	1.51354e-13	4.46295e-11	-81.7335	-116.326	7	2	362.228	0	0	FALSE
CD14	1.55364e-13	4.49635e-11	-107.153	-141.718	7	2	748.18	0	0	FALSE
NDUFA4L2	1.58891e-13	4.51483e-11	-80.432	-114.974	7	2	154.207	0	0	FALSE
AMIGO2	2.11864e-13	5.90597e-11	-81.4577	-115.699	7	2	201.013	0	0	FALSE
LAT2	2.16077e-13	5.90597e-11	-88.0851	-122.306	7	2	244.865	0	0	FALSE
LCP1	2.19187e-13	5.90597e-11	-118.081	-152.288	7	2	1463.42	0	0	FALSE
PTPN6	2.58234e-13	6.84014e-11	-89.4072	-123.442	7	2	262.326	0	0	FALSE
EFHD1	2.74063e-13	7.13842e-11	-126.772	-160.745	7	2	3010.79	0	0	FALSE
SELPLG	3.63154e-13	9.30388e-11	-88.9118	-122.591	7	2	243.929	0	0	FALSE
CLU	4.14554e-13	1.02922e-10	-143.664	-177.205	7	2	8931.43	0	0	FALSE
TSPAN33	4.14902e-13	1.02922e-10	-52.0907	-85.6302	7	2	24.9245	0	0	FALSE
ADAMTSL4	4.8098e-13	1.17449e-10	-133.308	-166.693	7	2	7365.27	0	0	FALSE
RUNX1	5.87547e-13	1.41264e-10	-93.0304	-126.206	7	2	313.87	0	0	FALSE
C1QTNF2	6.1919e-13	1.46617e-10	-95.9123	-129.033	7	2	639.95	0	0	FALSE
CSF2RA	6.47719e-13	1.51083e-10	-88.1866	-121.26	7	2	225.167	0	0	FALSE
LOC100339459	7.36941e-13	1.69366e-10	-76.8093	-109.748	7	2	142.025	0	0	FALSE
CXCL14	8.16131e-13	1.8309e-10	-48.853	-81.6849	7	2	20.1432	0	0	FALSE
TYROBP	8.20085e-13	1.8309e-10	-108.668	-141.494	7	2	798.86	0	0	FALSE
PVALB	8.50129e-13	1.87124e-10	-46.9007	-79.6899	7	2	35.2994	0	0	FALSE
BPGM	9.96389e-13	2.16272e-10	-77.0141	-109.637	7	2	217.327	0	0	FALSE
MATK	1.01293e-12	2.16851e-10	-79.1294	-111.735	7	2	126.964	0	0	FALSE
CCN3	1.13679e-12	2.40079e-10	-148.364	-180.849	7	2	11741.3	0	0	FALSE
CORO1A	1.1818e-12	2.46256e-10	-92.253	-124.697	7	2	296.474	0	0	FALSE
LOC100347041	1.26661e-12	2.60455e-10	-83.426	-115.798	7	2	183.921	0	0	FALSE
LOC103347778	1.35225e-12	2.74453e-10	-107.23	-139.533	7	2	744.598	0	0	FALSE
NIBAN1	1.54208e-12	3.08969e-10	-131.71	-163.876	7	2	4685.3	0	0	FALSE
TNFAIP8L2	1.68061e-12	3.32463e-10	-72.3577	-104.433	7	2	89.3015	0	0	FALSE
LOC100350957	1.80816e-12	3.53224e-10	-45.0497	-77.0488	7	2	15.1051	0	0	FALSE
LOC100337909	2.52146e-12	4.80553e-10	-93.5798	-125.23	7	2	311.006	0	0	FALSE
TREM2	2.50978e-12	4.80553e-10	-102.282	-133.937	7	2	526.583	0	0	FALSE
RUSC2	2.86033e-12	5.38569e-10	-113.096	-144.614	7	2	1895.24	0	0	FALSE
FCER1G	3.73631e-12	6.95131e-10	-99.6954	-130.934	7	2	449.626	0	0	FALSE
ATP8B4	4.17159e-12	7.58064e-10	-61.0355	-92.1582	7	2	43.4358	0	0	FALSE
ADAP2	4.38514e-12	7.87713e-10	-82.7944	-113.865	7	2	297.838	0	0	FALSE
CSPG4	4.88935e-12	8.68304e-10	-121.195	-152.151	7	2	3694.99	0	0	FALSE
LOC100344175	4.9714e-12	8.72955e-10	-59.2529	-90.1916	7	2	61.4277	0	0	FALSE
ARPC1B	5.17153e-12	8.88139e-10	-127.245	-158.142	7	2	3079.48	0	0	FALSE
POU2F2	5.14019e-12	8.88139e-10	-81.7427	-112.646	7	2	146.337	0	0	FALSE
DOCK2	5.53548e-12	9.30199e-10	-74.6364	-105.462	7	2	108.003	0	0	FALSE
LOC100009097	5.48378e-12	9.30199e-10	-104.515	-135.351	7	2	613.156	0	0	FALSE
CD68	5.61713e-12	9.33878e-10	-104.512	-135.322	7	2	638.691	0	0	FALSE
LOC100356803	5.81564e-12	9.56703e-10	-74.3646	-105.139	7	2	141.167	0	0	FALSE
LOC127486108	6.13762e-12	9.99153e-10	-56.8457	-87.5633	7	2	31.0968	0	0	FALSE
KIAA0040	6.31161e-12	1.01689e-09	-94.1198	-124.808	7	2	715.247	0	0	FALSE
BCL2A1	6.58937e-12	1.0508e-09	-90.8847	-121.528	7	2	255.725	0	0	FALSE
LOC100345060	6.77224e-12	1.06906e-09	-46.0891	-76.7034	7	2	15.6892	0	0	FALSE
LOC100341783	6.98139e-12	1.09105e-09	-115.361	-145.943	7	2	1202.55	0	0	FALSE
NPAS4	7.75294e-12	1.19963e-09	-83.6073	-114.08	7	2	191.854	0	0	FALSE
VSIG4	8.12211e-12	1.24443e-09	-105.021	-135.445	7	2	664.087	0	0	FALSE
LOC127482604	8.82618e-12	1.33918e-09	-69.8431	-100.179	7	2	79.5289	0	0	FALSE
LOC100357892	8.95036e-12	1.34496e-09	-117.328	-147.65	7	2	1465.56	0	0	FALSE
ITGB2	9.08633e-12	1.35239e-09	-107.269	-137.574	7	2	706.358	0	0	FALSE
CD84	9.59037e-12	1.41395e-09	-85.6715	-115.92	7	2	187.282	0	0	FALSE
NPNT	1.12326e-11	1.64059e-09	-130.866	-160.949	7	2	3879.11	0	0	FALSE
LST1	1.18473e-11	1.71435e-09	-71.8022	-101.829	7	2	79.2069	0	0	FALSE
MYO1F	1.39965e-11	2.00677e-09	-89.3753	-119.227	7	2	232.963	0	0	FALSE
LOC100349285	1.44838e-11	2.05775e-09	-85.8761	-115.692	7	2	200.917	0	0	FALSE
HCST	1.7032e-11	2.39799e-09	-65.0236	-94.669	7	2	51.4559	0	0	FALSE
AOAH	1.90618e-11	2.6598e-09	-82.6239	-112.151	7	2	156.357	0	0	FALSE
MICAL2	2.17144e-11	3.00313e-09	-115.214	-144.604	7	2	2911.11	0	0	FALSE
MMP13	3.0203e-11	4.14046e-09	-49.738	-78.7808	7	2	28.5049	0	0	FALSE
ADAMTS8	3.3096e-11	4.4976e-09	-90.1806	-119.127	7	2	420.077	0	0	FALSE
CLEC5A	3.53553e-11	4.76321e-09	-74.2769	-103.154	7	2	87.3902	0	0	FALSE
CTSS	3.66024e-11	4.88908e-09	-108.111	-136.951	7	2	803.096	0	0	FALSE
SPI1	3.83948e-11	5.08503e-09	-91.8618	-120.652	7	2	272.207	0	0	FALSE
HCK	4.12803e-11	5.42124e-09	-67.0842	-95.798	7	2	58.0817	0	0	FALSE
CH25H	4.17199e-11	5.43332e-09	-86.7172	-115.42	7	2	215.284	0	0	FALSE
NCKAP1L	4.23725e-11	5.47271e-09	-93.7257	-122.412	7	2	335.165	0	0	FALSE
LOC108176037	4.69529e-11	6.0146e-09	-63.1628	-91.741	7	2	45.7544	0	0	FALSE
TGFB2	4.94297e-11	6.28038e-09	-80.2988	-108.823	7	2	256.666	0	0	FALSE
FNBP1	5.09893e-11	6.4263e-09	-106.306	-134.797	7	2	1519.39	0	0	FALSE
LOC127488880	5.35116e-11	6.69024e-09	-66.1186	-94.559	7	2	49.5639	0	0	FALSE
ZNF362	5.94634e-11	7.37535e-09	-108.012	-136.341	7	2	1262.78	0	0	FALSE
MAN2A2	6.75456e-11	8.31184e-09	-111.162	-139.357	7	2	2630.2	0	0	FALSE
MSR1	7.29995e-11	8.90146e-09	-72.8489	-100.962	7	2	79.654	0	0	FALSE
PKIB	7.34764e-11	8.90146e-09	-61.2592	-89.3654	7	2	41.4028	0	0	FALSE
RANBP3L	7.52175e-11	9.04229e-09	-94.4369	-122.518	7	2	331.485	0	0	FALSE
ASAP2	8.00668e-11	9.55178e-09	-97.6265	-125.642	7	2	851.142	0	0	FALSE
TNFRSF1B	8.73658e-11	1.03436e-08	-88.5738	-116.497	7	2	340.267	0	0	FALSE
LOC100357554	8.91757e-11	1.04785e-08	-57.2949	-85.197	7	2	33.729	0	0	FALSE
LOC100339650	1.03729e-10	1.20976e-08	-71.6534	-99.3959	7	2	78.9768	0	0	FALSE
IL10RA	1.10561e-10	1.27988e-08	-84.4614	-112.137	7	2	172.444	0	0	FALSE
SMOC2	1.11762e-10	1.28427e-08	-108.354	-136.018	7	2	915.261	0	0	FALSE
HCLS1	1.16789e-10	1.3226e-08	-94.993	-122.61	7	2	325.766	0	0	FALSE
WNT8A	1.16656e-10	1.3226e-08	-73.1996	-100.818	7	2	103.827	0	0	FALSE
GPNMB	1.1862e-10	1.33366e-08	-118.995	-146.596	7	2	1418.02	0	0	FALSE
LOC100356864	1.25444e-10	1.40031e-08	-70.5609	-98.1029	7	2	79.8418	0	0	FALSE
GJB5	1.28724e-10	1.42673e-08	-71.9334	-99.4481	7	2	100.436	0	0	FALSE
LOC100343623	1.30968e-10	1.44138e-08	-56.3091	-83.8057	7	2	28.174	0	0	FALSE
PDZD2	1.32699e-10	1.45022e-08	-115.949	-143.431	7	2	1684.44	0	0	FALSE
CBX6	1.41133e-10	1.53169e-08	-109.94	-137.357	7	2	2342.7	0	0	FALSE
SUSD3	1.45788e-10	1.57129e-08	-70.2899	-97.6733	7	2	74.9101	0	0	FALSE
ARHGEF17	1.56736e-10	1.67771e-08	-116.121	-143.428	7	2	1833.74	0	0	FALSE
DOK2	1.67717e-10	1.78305e-08	-81.4765	-108.712	7	2	150.081	0	0	FALSE
BLNK	1.7225e-10	1.80265e-08	-74.3392	-101.546	7	2	93.1512	0	0	FALSE
DNAJB6	1.7212e-10	1.80265e-08	-106.794	-134.002	7	2	1389.58	0	0	FALSE
P2RX6	1.73021e-10	1.80265e-08	-56.1963	-83.3989	7	2	32.2273	0	0	FALSE
LOC127488977	1.75495e-10	1.81631e-08	-39.2458	-66.4333	7	2	10.7643	0	0	FALSE
LOC100340313	2.0584e-10	2.11636e-08	-69.0046	-96.0236	7	2	62.0108	0	0	FALSE
LOC103346239	2.09994e-10	2.14496e-08	-52.0628	-79.0608	7	2	23.1323	0	0	FALSE
C3AR1	2.11402e-10	2.14532e-08	-67.6244	-94.6153	7	2	70.1528	0	0	FALSE
SIGLEC15	2.19258e-10	2.21068e-08	-74.9323	-101.885	7	2	89.708	0	0	FALSE
CHIT1	2.36179e-10	2.36603e-08	-95.5757	-122.449	7	2	343.106	0	0	FALSE
UCP2	2.7018e-10	2.68941e-08	-106.722	-133.454	7	2	715.346	0	0	FALSE
PCOLCE2	2.81442e-10	2.78378e-08	-130.011	-156.699	7	2	6974.13	0	0	FALSE
ARL4C	3.04212e-10	2.97971e-08	-79.8387	-106.445	7	2	137.906	0	0	FALSE
ITGA8	3.05064e-10	2.97971e-08	-156.027	-182.63	7	2	16450.1	0	0	FALSE
IL1RN	3.08201e-10	2.99165e-08	-82.5009	-109.093	7	2	139.971	0	0	FALSE
ITGAX	3.22816e-10	3.11418e-08	-82.6491	-109.192	7	2	157.683	0	0	FALSE
LDLRAD4	3.42487e-10	3.28367e-08	-104.473	-130.954	7	2	1332.44	0	0	FALSE
VIL1	3.51951e-10	3.35383e-08	-52.7661	-79.2181	7	2	24.1543	0	0	FALSE
ATP6V0D2	3.59512e-10	3.38768e-08	-71.3564	-97.7859	7	2	73.177	0	0	FALSE
LOC127485727	3.59838e-10	3.38768e-08	-43.4667	-69.8953	7	2	28.4034	0	0	FALSE
MAFF	3.62323e-10	3.39065e-08	-119.783	-146.205	7	2	2016.78	0	0	FALSE
CD79A	3.99893e-10	3.71995e-08	-57.3468	-83.6637	7	2	29.956	0	0	FALSE
SOCS3	4.38004e-10	4.05037e-08	-93.4493	-119.67	7	2	353.996	0	0	FALSE
ERGIC1	5.30269e-10	4.87473e-08	-112.842	-138.86	7	2	2721.28	0	0	FALSE
SUSD5	5.34105e-10	4.88128e-08	-130.573	-156.584	7	2	3290.4	0	0	FALSE
GPR65	5.57832e-10	5.06849e-08	-59.8362	-85.8008	7	2	35.5848	0	0	FALSE
BAMBI	5.94735e-10	5.37255e-08	-101.883	-127.78	7	2	617.125	0	0	FALSE
MYO1C	6.132e-10	5.50752e-08	-130.711	-156.575	7	2	7117.35	0	0	FALSE
PLCB2	6.74793e-10	6.02609e-08	-80.0041	-105.767	7	2	126.781	0	0	FALSE
DOK3	7.41709e-10	6.58604e-08	-78.4787	-104.142	7	2	108.848	0	0	FALSE
LOC100350232	7.47964e-10	6.60405e-08	-70.3957	-96.0496	7	2	95.903	0	0	FALSE
PRKCB	8.43641e-10	7.40698e-08	-64.0109	-89.5373	7	2	57.6198	0	0	FALSE
MPEG1	8.74472e-10	7.63477e-08	-109.158	-134.647	7	2	734.667	0	0	FALSE
CPLX2	8.83762e-10	7.67302e-08	-64.5512	-90.0283	7	2	45.9223	0	0	FALSE
SLC46A1	9.29768e-10	8.02785e-08	-74.1421	-99.5654	7	2	84.4011	0	0	FALSE
CKMT1B	9.54531e-10	8.19638e-08	-51.3003	-76.6957	7	2	26.2508	0	0	FALSE
LOC100352110	9.65205e-10	8.23784e-08	-72.3753	-97.7589	7	2	83.4796	0	0	FALSE
ZYX	9.69901e-10	8.23784e-08	-144.598	-169.977	7	2	12152.1	0	0	FALSE
MILR1	9.76268e-10	8.24709e-08	-52.1036	-77.4751	7	2	21.4405	0	0	FALSE
ACTN4	9.93497e-10	8.34751e-08	-150.712	-176.065	7	2	15819.6	0	0	FALSE
CP	1.0617e-09	8.87286e-08	-108.143	-133.426	7	2	699.804	0	0	FALSE
PHTF2	1.1103e-09	9.2297e-08	-113.071	-138.306	7	2	1580.26	0	0	FALSE
LOC100353463	1.14045e-09	9.43014e-08	-136.541	-161.748	7	2	7855.94	0	0	FALSE
EFR3A	1.15628e-09	9.5107e-08	-120.893	-146.085	7	2	2107.9	0	0	FALSE
LOC127484200	1.18447e-09	9.69159e-08	-96.263	-121.43	7	2	328.894	0	0	FALSE
PTPDC1	1.1989e-09	9.75856e-08	-88.6956	-113.849	7	2	392.531	0	0	FALSE
NTF3	1.20859e-09	9.78645e-08	-84.1561	-109.301	7	2	175.518	0	0	FALSE
IGSF9B	1.22553e-09	9.87245e-08	-77.1436	-102.274	7	2	166.805	0	0	FALSE
MYH10	1.30182e-09	1.04332e-07	-115.244	-140.31	7	2	3399.8	0	0	FALSE
SLC22A3	1.34919e-09	1.07577e-07	-105.744	-130.772	7	2	733.654	0	0	FALSE
CTDSPL	1.53049e-09	1.21413e-07	-90.4522	-115.347	7	2	612.033	0	0	FALSE
LOC108178418	1.5985e-09	1.26168e-07	-81.47	-106.318	7	2	141.36	0	0	FALSE
CD80	1.61225e-09	1.26614e-07	-75.2522	-100.092	7	2	88.643	0	0	FALSE
ARHGAP22	1.69102e-09	1.32137e-07	-70.8567	-95.6454	7	2	76.4238	0	0	FALSE
SMURF1	1.74648e-09	1.35143e-07	-91.8172	-116.572	7	2	539.085	0	0	FALSE
SOST	1.74679e-09	1.35143e-07	-99.1102	-123.864	7	2	411.673	0	0	FALSE
WAS	1.78905e-09	1.37731e-07	-85.0594	-109.788	7	2	183.635	0	0	FALSE
INPP4A	1.85207e-09	1.41883e-07	-127.973	-152.665	7	2	2733.88	0	0	FALSE
TEF	2.01432e-09	1.5356e-07	-114.223	-138.826	7	2	1906.29	0	0	FALSE
FABP5	2.05262e-09	1.5572e-07	-103.411	-127.994	7	2	603.926	0	0	FALSE
KRT75	2.06717e-09	1.56067e-07	-45.6777	-70.2532	7	2	15.8347	0	0	FALSE
LOC100345649	2.08124e-09	1.56373e-07	-73.0039	-97.5721	7	2	84.4418	0	0	FALSE
IRF8	2.15538e-09	1.60763e-07	-82.4877	-107.019	7	2	170.953	0	0	FALSE
PTPN18	2.16024e-09	1.60763e-07	-70.4955	-95.0241	7	2	71.6846	0	0	FALSE
LOC103346857	2.1813e-09	1.61561e-07	-74.1526	-98.671	7	2	82.9446	0	0	FALSE
TMEM245	2.21164e-09	1.63035e-07	-124.617	-149.121	7	2	2490.09	0	0	FALSE
RLA-DRB1	2.24765e-09	1.64912e-07	-124.05	-148.536	7	2	1833.39	0	0	FALSE
CD37	2.36867e-09	1.72979e-07	-93.3057	-117.736	7	2	314.6	0	0	FALSE
PARVG	2.50223e-09	1.81883e-07	-64.0536	-88.4261	7	2	45.1848	0	0	FALSE
LOC127482726	2.62473e-09	1.89904e-07	-82.68	-107.002	7	2	291.872	0	0	FALSE
LOC103346838	2.72724e-09	1.96412e-07	-124.163	-148.444	7	2	2985.8	0	0	FALSE
CR2	2.938e-09	2.1062e-07	-58.7126	-82.9144	7	2	31.4761	0	0	FALSE
MFNG	3.04962e-09	2.17623e-07	-96.6958	-120.858	7	2	507.591	0	0	FALSE
SPTSSA	3.06984e-09	2.18071e-07	-106.66	-130.815	7	2	1012.16	0	0	FALSE
LOC127482571	3.2032e-09	2.26514e-07	-115.78	-139.89	7	2	1077.7	0	0	FALSE
PTAFR	3.25659e-09	2.29252e-07	-74.6874	-98.7797	7	2	87.0589	0	0	FALSE
GPR183	3.71715e-09	2.60501e-07	-73.6951	-97.6468	7	2	84.0723	0	0	FALSE
NCF4	3.74183e-09	2.6106e-07	-64.679	-88.6236	7	2	51.2136	0	0	FALSE
BAZ1A	3.80879e-09	2.6455e-07	-81.0939	-105.02	7	2	213.172	0	0	FALSE
CCR6	3.91685e-09	2.70852e-07	-50.6489	-74.5448	7	2	20.2275	0	0	FALSE
TK1	3.95424e-09	2.72233e-07	-71.6222	-95.508	7	2	86.7634	0	0	FALSE
BUB1	4.29292e-09	2.94253e-07	-48.0714	-71.8698	7	2	17.4053	0	0	FALSE
MMP9	4.4066e-09	3.00727e-07	-84.018	-107.789	7	2	226.474	0	0	FALSE
DDIT4	4.53349e-09	3.08041e-07	-121.712	-145.453	7	2	1844.51	0	0	FALSE
CYBB	4.61893e-09	3.12487e-07	-96.318	-120.038	7	2	343.735	0	0	FALSE
PLXNA3	4.64115e-09	3.12638e-07	-82.3992	-106.115	7	2	423.286	0	0	FALSE
CD53	5.1632e-09	3.46311e-07	-94.5945	-118.196	7	2	317.175	0	0	FALSE
LOC100359306	5.19665e-09	3.47065e-07	-101.236	-124.831	7	2	477.793	0	0	FALSE
IL3RA	5.36672e-09	3.56898e-07	-60.5472	-84.1079	7	2	44.7994	0	0	FALSE
FTH1	5.46626e-09	3.61978e-07	-165.144	-188.685	7	2	49514.5	0	0	FALSE
CHRDL2	5.50403e-09	3.62941e-07	-109.008	-132.542	7	2	696.671	0	0	FALSE
CD74	5.76918e-09	3.78827e-07	-145.427	-168.911	7	2	6875.91	0	0	FALSE
PRUNE2	5.9494e-09	3.89026e-07	-133.979	-157.43	7	2	5311.01	0	0	FALSE
METTL24	6.12713e-09	3.98978e-07	-73.4682	-96.8877	7	2	164.291	0	0	FALSE
LOC100338677	6.21643e-09	4.03114e-07	-70.9861	-94.3903	7	2	78.0805	0	0	FALSE
SYK	6.27625e-09	4.05311e-07	-77.5852	-100.979	7	2	106.783	0	0	FALSE
SMC4	6.53768e-09	4.20456e-07	-86.3861	-109.737	7	2	371.012	0	0	FALSE
BIN2	6.69883e-09	4.27874e-07	-81.1981	-104.523	7	2	139.149	0	0	FALSE
DEFB1	6.70778e-09	4.27874e-07	-74.923	-98.2461	7	2	87.7466	0	0	FALSE
RASL12	6.8478e-09	4.33269e-07	-127.323	-150.624	7	2	3710.14	0	0	FALSE
UNC45A	6.82155e-09	4.33269e-07	-124.984	-148.289	7	2	3072.32	0	0	FALSE
KCNE4	6.95669e-09	4.36623e-07	-95.3631	-118.647	7	2	414.398	0	0	FALSE
MAPK4	6.94402e-09	4.36623e-07	-100.034	-123.32	7	2	508.273	0	0	FALSE
CCR5	7.34331e-09	4.59045e-07	-80.0049	-103.231	7	2	114.638	0	0	FALSE
PTX3	7.39771e-09	4.60603e-07	-91.3864	-114.605	7	2	242.389	0	0	FALSE
LOC100343607	8.28169e-09	5.13596e-07	-84.6375	-107.736	7	2	173.738	0	0	FALSE
KL	8.52727e-09	5.26736e-07	-75.3865	-98.4537	7	2	87.5929	0	0	FALSE
FIBIN	8.56181e-09	5.26788e-07	-105.396	-128.459	7	2	1208.55	0	0	FALSE
FAM111A	8.6974e-09	5.33031e-07	-88.4584	-111.505	7	2	282.086	0	0	FALSE
GJB3	9.28903e-09	5.67066e-07	-93.7306	-116.707	7	2	372.824	0	0	FALSE
TES	9.33111e-09	5.67419e-07	-139.327	-162.298	7	2	5189.93	0	0	FALSE
CDKN1A	9.47096e-09	5.73691e-07	-114.819	-137.774	7	2	1283.49	0	0	FALSE
WEE1	9.72656e-09	5.86898e-07	-94.0509	-116.978	7	2	380.37	0	0	FALSE
DIAPH2	9.82298e-09	5.90437e-07	-119.196	-142.112	7	2	1760.88	0	0	FALSE
ALOX5AP	1.0062e-08	6.02488e-07	-87.1683	-110.059	7	2	203.091	0	0	FALSE
H1-2	1.02578e-08	6.11866e-07	-77.0997	-99.9698	7	2	125.692	0	0	FALSE
DCBLD2	1.06097e-08	6.3045e-07	-114.206	-137.04	7	2	1559.43	0	0	FALSE
BAG2	1.07153e-08	6.31921e-07	-109.631	-132.455	7	2	1316.78	0	0	FALSE
RLA-DMA	1.06763e-08	6.31921e-07	-93.8951	-116.723	7	2	272.975	0	0	FALSE
EPCAM	1.13408e-08	6.66296e-07	-51.9808	-74.7438	7	2	22.3463	0	0	FALSE
TBXAS1	1.13961e-08	6.67035e-07	-67.6876	-90.4454	7	2	63.3314	0	0	FALSE
MYO1G	1.22627e-08	7.15079e-07	-85.4091	-108.089	7	2	170.209	0	0	FALSE
EVI2B	1.23679e-08	7.16262e-07	-64.6185	-87.289	7	2	44.9419	0	0	FALSE
SLC16A3	1.23746e-08	7.16262e-07	-75.3826	-98.0525	7	2	88.7938	0	0	FALSE
LOC100343557	1.29998e-08	7.49673e-07	-120.588	-143.205	7	2	1646.23	0	0	FALSE
LOC108176497	1.31307e-08	7.54435e-07	-66.739	-89.3456	7	2	52.5199	0	0	FALSE
ARHGAP30	1.32833e-08	7.6041e-07	-87.9311	-110.525	7	2	204.495	0	0	FALSE
KCNAB1	1.34168e-08	7.6525e-07	-114.617	-137.201	7	2	1248.63	0	0	FALSE
SKI	1.38392e-08	7.86467e-07	-114.985	-137.535	7	2	2406.16	0	0	FALSE
ACTA2	1.40432e-08	7.95171e-07	-186.392	-208.926	7	2	122575	0	0	FALSE
LOC100351416	1.51052e-08	8.5222e-07	-64.1393	-86.5963	7	2	42.8558	0	0	FALSE
FERMT3	1.55303e-08	8.73051e-07	-84.1313	-106.559	7	2	154.784	0	0	FALSE
LOC100352673	1.59025e-08	8.87588e-07	-78.0992	-100.501	7	2	104.68	0	0	FALSE
LOC127493194	1.59025e-08	8.87588e-07	-78.0992	-100.501	7	2	104.68	0	0	FALSE
SLA	1.67899e-08	9.33781e-07	-79.6056	-101.95	7	2	108.935	0	0	FALSE
CENPA	1.80524e-08	1.00044e-06	-63.2049	-85.4714	7	2	40.3457	0	0	FALSE
LOC100352318	1.8286e-08	1.0098e-06	-45.5949	-67.8477	7	2	12.8924	0	0	FALSE
IFNGR2	1.86703e-08	1.02739e-06	-95.4472	-117.678	7	2	528.081	0	0	FALSE
IGSF6	1.89158e-08	1.03725e-06	-78.4711	-100.688	7	2	100.952	0	0	FALSE
LGR6	2.00513e-08	1.09567e-06	-105.982	-128.136	7	2	1204.84	0	0	FALSE
NAPSA	2.04559e-08	1.11389e-06	-73.7052	-95.8381	7	2	83.7388	0	0	FALSE
HAVCR1	2.20293e-08	1.1954e-06	-84.1536	-106.207	7	2	153.545	0	0	FALSE
NEK2	2.22386e-08	1.20258e-06	-53.7236	-75.7672	7	2	22.1496	0	0	FALSE
PRG4	2.24842e-08	1.21166e-06	-109.155	-131.187	7	2	709.581	0	0	FALSE
TIFAB	2.27829e-08	1.22354e-06	-63.9812	-85.9989	7	2	41.2383	0	0	FALSE
LOC127487418	2.34558e-08	1.25537e-06	-94.6792	-116.666	7	2	289.98	0	0	FALSE
LOC103345057	2.60613e-08	1.39005e-06	-57.5444	-79.4182	7	2	27.8929	0	0	FALSE
LOC100343268	2.63951e-08	1.40307e-06	-97.6092	-119.469	7	2	698.761	0	0	FALSE
CKS2	2.76428e-08	1.46081e-06	-69.0367	-90.8475	7	2	64.8202	0	0	FALSE
LOC100358478	2.76682e-08	1.46081e-06	-30.8894	-52.6992	7	2	5.46223	0	0	FALSE
ELN	2.8779e-08	1.51434e-06	-169.095	-190.863	7	2	34111.7	0	0	FALSE
LOC100349504	2.91021e-08	1.52521e-06	-43.8956	-65.6513	7	2	12.291	0	0	FALSE
PDZRN4	2.91807e-08	1.52521e-06	-93.7042	-115.457	7	2	334.507	0	0	FALSE
EVI2A	2.98229e-08	1.55058e-06	-81.2605	-102.99	7	2	127.563	0	0	FALSE
MCAM	2.98647e-08	1.55058e-06	-149.931	-171.659	7	2	13101.3	0	0	FALSE
CCL19	3.01726e-08	1.56138e-06	-68.4765	-90.1935	7	2	55.6535	0	0	FALSE
LOC100348124	3.09192e-08	1.58791e-06	-78.78	-100.471	7	2	211.483	0	0	FALSE
LOC100349996	3.099e-08	1.58791e-06	-80.0732	-101.762	7	2	109.396	0	0	FALSE
SLC12A4	3.07918e-08	1.58791e-06	-104.494	-126.189	7	2	2057.04	0	0	FALSE
SLC5A1	3.17531e-08	1.62169e-06	-41.8766	-63.5389	7	2	9.90084	0	0	FALSE
ADRA1B	3.23685e-08	1.64774e-06	-83.1303	-104.772	7	2	233.953	0	0	FALSE
SASH3	3.26034e-08	1.65431e-06	-73.3893	-95.0233	7	2	81.1255	0	0	FALSE
HMOX1	3.35756e-08	1.69351e-06	-91.9139	-113.517	7	2	274.518	0	0	FALSE
LOC100341142	3.35929e-08	1.69351e-06	-66.2569	-87.8589	7	2	47.3548	0	0	FALSE
INHBB	3.86193e-08	1.94065e-06	-52.7956	-74.2482	7	2	23.4794	0	0	FALSE
ARHGAP23	3.91734e-08	1.96219e-06	-95.021	-116.458	7	2	868.529	0	0	FALSE
SCARA3	3.96817e-08	1.9813e-06	-115.852	-137.276	7	2	1703.12	0	0	FALSE
LAMA5	4.01139e-08	1.9965e-06	-124.072	-145.484	7	2	4013.46	0	0	FALSE
SEMA4A	4.05743e-08	2.013e-06	-76.7894	-98.1892	7	2	123.214	0	0	FALSE
DLGAP4	4.25251e-08	2.10311e-06	-104.698	-126.048	7	2	1478.73	0	0	FALSE
PALLD	4.33234e-08	2.13583e-06	-136.575	-157.905	7	2	6279.05	0	0	FALSE
ACTN1	4.50049e-08	2.21175e-06	-139.742	-161.031	7	2	9042.29	0	0	FALSE
HBA	4.60089e-08	2.25401e-06	-165.652	-186.917	7	2	25062	0	0	FALSE
WIZ	4.76841e-08	2.32877e-06	-80.5417	-101.768	7	2	526.324	0	0	FALSE
GALNT6	4.80862e-08	2.34109e-06	-53.6096	-74.8272	7	2	20.9222	0	0	FALSE
ABCG1	4.84995e-08	2.3466e-06	-83.6546	-104.863	7	2	152.306	0	0	FALSE
DNM1L	4.8481e-08	2.3466e-06	-101.032	-122.24	7	2	1222.5	0	0	FALSE
PDE5A	4.99775e-08	2.41064e-06	-132.07	-153.246	7	2	3366.06	0	0	FALSE
ANXA8	5.02568e-08	2.41666e-06	-115.992	-137.163	7	2	1323.6	0	0	FALSE
LOC100359112	5.20555e-08	2.49547e-06	-110.108	-131.241	7	2	799.897	0	0	FALSE
LOC100008803	5.4332e-08	2.59664e-06	-61.4125	-82.4992	7	2	34.6263	0	0	FALSE
LOC127492111	5.45942e-08	2.60121e-06	-46.535	-67.6165	7	2	14.1354	0	0	FALSE
LOC100342572	5.47851e-08	2.60237e-06	-90.1336	-111.211	7	2	207.544	0	0	FALSE
LOC100345907	5.52193e-08	2.61505e-06	-57.6238	-78.6931	7	2	29.1715	0	0	FALSE
P2RY8	5.57295e-08	2.6256e-06	-49.3192	-70.3786	7	2	16.2834	0	0	FALSE
SYPL2	5.57779e-08	2.6256e-06	-81.8117	-102.87	7	2	172.299	0	0	FALSE
RASSF8	5.59729e-08	2.62686e-06	-109.892	-130.947	7	2	1469.23	0	0	FALSE
PNP	5.68761e-08	2.66126e-06	-90.2637	-111.301	7	2	341.553	0	0	FALSE
LY86	5.95041e-08	2.77591e-06	-69.699	-90.6881	7	2	57.702	0	0	FALSE
TNC	5.9948e-08	2.7883e-06	-117.37	-138.352	7	2	1213.68	0	0	FALSE
LMO2	6.06343e-08	2.79526e-06	-93.4658	-114.435	7	2	421.929	0	0	FALSE
RLA-DR-ALPHA	6.06302e-08	2.79526e-06	-130.712	-151.681	7	2	2602.66	0	0	FALSE
SLC47A1	6.05382e-08	2.79526e-06	-94.5239	-115.495	7	2	269.961	0	0	FALSE
COL13A1	6.43415e-08	2.95744e-06	-131.376	-152.281	7	2	2879.95	0	0	FALSE
CX3CL1	6.5061e-08	2.98174e-06	-101.42	-122.314	7	2	438.09	0	0	FALSE
STAC2	6.63968e-08	3.03406e-06	-103.443	-124.315	7	2	581.492	0	0	FALSE
SPSB1	7.16598e-08	3.26501e-06	-80.7089	-101.499	7	2	205.61	0	0	FALSE
BTK	7.57661e-08	3.44207e-06	-67.7639	-88.4936	7	2	55.9735	0	0	FALSE
ALOX5	7.74087e-08	3.5065e-06	-89.8392	-110.546	7	2	273.953	0	0	FALSE
PIK3R5	7.80349e-08	3.52465e-06	-81.1264	-101.824	7	2	127.283	0	0	FALSE
FOXM1	7.97687e-08	3.59258e-06	-63.2654	-83.9399	7	2	42.7207	0	0	FALSE
FAM131B	8.21003e-08	3.68696e-06	-86.4509	-107.094	7	2	196.356	0	0	FALSE
LOC100350907	8.27344e-08	3.70479e-06	-68.5236	-89.1589	7	2	56.0167	0	0	FALSE
LIMS2	8.34644e-08	3.7268e-06	-140.476	-161.102	7	2	7660.16	0	0	FALSE
LOC100358185	8.58681e-08	3.82321e-06	-73.477	-94.0723	7	2	74.7722	0	0	FALSE
TPST2	8.74356e-08	3.88194e-06	-95.8382	-116.414	7	2	598.179	0	0	FALSE
RASAL3	9.0664e-08	4.01387e-06	-69.7909	-90.3278	7	2	57.9506	0	0	FALSE
PLTP	9.26645e-08	4.09085e-06	-151.167	-171.68	7	2	10467.2	0	0	FALSE
LOC108176040	9.59643e-08	4.22459e-06	-46.6483	-67.1241	7	2	13.9977	0	0	FALSE
IL7R	9.70771e-08	4.26158e-06	-63.6336	-84.097	7	2	40.3029	0	0	FALSE
CD1C	9.7431e-08	4.26513e-06	-65.1386	-85.5981	7	2	42.8352	0	0	FALSE
KRT5	1.01275e-07	4.42102e-06	-39.7025	-60.1204	7	2	9.2256	0	0	FALSE
LOC100357005	1.03143e-07	4.49002e-06	-78.0721	-98.4704	7	2	176.391	0	0	FALSE
LOC100343809	1.0665e-07	4.62979e-06	-68.0147	-88.377	7	2	49.7589	0	0	FALSE
LOC127489325	1.09763e-07	4.75173e-06	-89.6657	-109.997	7	2	1032.15	0	0	FALSE
KCNA6	1.10708e-07	4.77941e-06	-84.9433	-105.265	7	2	234.123	0	0	FALSE
MARVELD1	1.12951e-07	4.86279e-06	-140.373	-160.673	7	2	9749.12	0	0	FALSE
RAD51B	1.1432e-07	4.90821e-06	-70.0273	-90.3149	7	2	97.6872	0	0	FALSE
NPY1R	1.15479e-07	4.94438e-06	-115.924	-136.201	7	2	1112.23	0	0	FALSE
CAMKK1	1.16222e-07	4.9626e-06	-101.363	-121.633	7	2	702.301	0	0	FALSE
FERMT2	1.19379e-07	5.08354e-06	-130.182	-150.423	7	2	4979.91	0	0	FALSE
ARHGAP9	1.2076e-07	5.12838e-06	-55.7734	-76.002	7	2	29.1718	0	0	FALSE
NIPAL4	1.29371e-07	5.47917e-06	-86.8509	-107.005	7	2	168.18	0	0	FALSE
ITGB1	1.32144e-07	5.58149e-06	-155.322	-175.453	7	2	21944.9	0	0	FALSE
APLP2	1.33169e-07	5.60962e-06	-133.064	-153.188	7	2	8910.17	0	0	FALSE
RLA-DMB	1.33978e-07	5.62851e-06	-90.1266	-110.243	7	2	204.843	0	0	FALSE
NEDD9	1.35587e-07	5.68084e-06	-111.961	-132.065	7	2	1214.84	0	0	FALSE
LOC100342906	1.3656e-07	5.70632e-06	-68.1709	-88.2671	7	2	79.7721	0	0	FALSE
LOX	1.3866e-07	5.77863e-06	-128.897	-148.977	7	2	2919.36	0	0	FALSE
LOC103348951	1.4147e-07	5.88002e-06	-71.3521	-91.4104	7	2	158.886	0	0	FALSE
DAB2IP	1.43028e-07	5.92904e-06	-99.6468	-119.693	7	2	1615.87	0	0	FALSE
HBB2	1.50257e-07	6.21222e-06	-163.555	-183.548	7	2	21650.4	0	0	FALSE
LOC108175363	1.53442e-07	6.31373e-06	-54.2387	-74.2095	7	2	25.6603	0	0	FALSE
PGM5	1.53521e-07	6.31373e-06	-157.137	-177.107	7	2	16786	0	0	FALSE
HLF	1.55059e-07	6.36028e-06	-105.835	-125.794	7	2	912.942	0	0	FALSE
ARHGDIB	1.6545e-07	6.75107e-06	-102.604	-122.494	7	2	754.597	0	0	FALSE
LOC103347295	1.65306e-07	6.75107e-06	-49.1541	-69.0447	7	2	15.938	0	0	FALSE
LOC100343802	1.77681e-07	7.23123e-06	-115.226	-135.038	7	2	1019.74	0	0	FALSE
NPPA	1.78688e-07	7.25335e-06	-128.309	-148.116	7	2	7593.92	0	0	FALSE
DLG2	1.86162e-07	7.53714e-06	-96.6886	-116.451	7	2	488.752	0	0	FALSE
LOC100356891	1.86671e-07	7.53822e-06	-48.3187	-68.0783	7	2	17.1214	0	0	FALSE
TENT5B	1.87354e-07	7.54631e-06	-101.813	-121.569	7	2	513.561	0	0	FALSE
USP20	1.92168e-07	7.72032e-06	-99.3619	-119.09	7	2	987.429	0	0	FALSE
ANAPC1	1.9312e-07	7.73867e-06	-95.3343	-115.057	7	2	613.934	0	0	FALSE
TLR1	1.96999e-07	7.87391e-06	-65.4914	-85.193	7	2	47.7783	0	0	FALSE
NFKBIE	2.12285e-07	8.46324e-06	-76.4077	-96.0287	7	2	130.141	0	0	FALSE
FOXJ2	2.22072e-07	8.83089e-06	-98.5785	-118.151	7	2	932.227	0	0	FALSE
FYB1	2.23689e-07	8.87262e-06	-74.4043	-93.9688	7	2	91.3006	0	0	FALSE
PPP1R3B	2.27786e-07	9.01224e-06	-117.82	-137.365	7	2	1828.46	0	0	FALSE
BCHE	2.33688e-07	9.22241e-06	-143.67	-163.187	7	2	6695.8	0	0	FALSE
DRAM1	2.36496e-07	9.30973e-06	-90.5932	-110.098	7	2	415.048	0	0	FALSE
ATP1A2	2.39168e-07	9.37289e-06	-122.168	-141.66	7	2	2822.72	0	0	FALSE
SSBP4	2.393e-07	9.37289e-06	-67.8764	-87.3682	7	2	158.2	0	0	FALSE
AXL	2.44906e-07	9.5685e-06	-120.26	-139.727	7	2	4857.44	0	0	FALSE
CRLF2	2.4736e-07	9.59876e-06	-57.2664	-76.7224	7	2	24.8289	0	0	FALSE
GADD45A	2.47524e-07	9.59876e-06	-111.54	-130.996	7	2	1107.97	0	0	FALSE
SYT11	2.46979e-07	9.59876e-06	-104.288	-123.746	7	2	1234.09	0	0	FALSE
ARL11	2.50244e-07	9.68024e-06	-63.7013	-83.1448	7	2	39.0852	0	0	FALSE
CRIM1	2.53028e-07	9.76375e-06	-116.44	-135.871	7	2	1606.46	0	0	FALSE
EDA	2.60352e-07	1.00216e-05	-81.2952	-100.696	7	2	230.465	0	0	FALSE
RAB7A	2.64497e-07	1.01162e-05	-111.203	-130.586	7	2	3711.13	0	0	FALSE
TLR6	2.64751e-07	1.01162e-05	-81.7926	-101.175	7	2	176.387	0	0	FALSE
ZNF365	2.6346e-07	1.01162e-05	-91.0984	-110.486	7	2	332.898	0	0	FALSE
ARID3A	2.72386e-07	1.03796e-05	-65.5663	-84.9184	7	2	70.4911	0	0	FALSE
LOC100341160	2.72973e-07	1.03796e-05	-44.9063	-64.256	7	2	64.3354	0	0	FALSE
RENBP	2.80203e-07	1.06287e-05	-87.4706	-106.792	7	2	240.441	0	0	FALSE
PDLIM7	2.83969e-07	1.07455e-05	-142.481	-161.788	7	2	9867.15	0	0	FALSE
CSRP1	2.99709e-07	1.13136e-05	-172.908	-192.157	7	2	54377.8	0	0	FALSE
MS4A6A	3.02119e-07	1.13771e-05	-90.4872	-109.727	7	2	262.442	0	0	FALSE
CSRP2	3.08808e-07	1.16011e-05	-124.885	-144.102	7	2	2866.22	0	0	FALSE
SAA3	3.13977e-07	1.1767e-05	-123.872	-143.071	7	2	1629.5	0	0	FALSE
LOC100353865	3.16384e-07	1.18288e-05	-106.199	-125.389	7	2	1551.29	0	0	FALSE
LOC100342098	3.22314e-07	1.20218e-05	-77.6357	-96.806	7	2	146.835	0	0	FALSE
MAP4K1	3.35975e-07	1.25015e-05	-65.6976	-84.823	7	2	49.568	0	0	FALSE
CCR2	3.55886e-07	1.31796e-05	-68.3357	-87.3989	7	2	49.2938	0	0	FALSE
CRTC3	3.59628e-07	1.32867e-05	-98.2411	-117.293	7	2	969.824	0	0	FALSE
CNN1	3.68325e-07	1.3544e-05	-154.449	-173.475	7	2	14230.2	0	0	FALSE
RAC2	3.67603e-07	1.3544e-05	-92.0498	-111.078	7	2	223.952	0	0	FALSE
SBNO2	3.69521e-07	1.3556e-05	-92.5195	-111.542	7	2	540.443	0	0	FALSE
ABCA6	3.7447e-07	1.36944e-05	-92.8911	-111.899	7	2	241.595	0	0	FALSE
ABCC3	3.76463e-07	1.36944e-05	-78.2653	-97.2677	7	2	109.84	0	0	FALSE
LIMD2	3.76238e-07	1.36944e-05	-83.3833	-102.386	7	2	192.448	0	0	FALSE
LOC100338413	3.77674e-07	1.36944e-05	-48.8062	-67.8052	7	2	15.3253	0	0	FALSE
LOC127488159	3.77556e-07	1.36944e-05	-46.556	-65.5553	7	2	18.3203	0	0	FALSE
BUB1B	4.00918e-07	1.44701e-05	-58.5134	-77.4479	7	2	30.0444	0	0	FALSE
DENND1C	4.00212e-07	1.44701e-05	-68.3184	-87.2547	7	2	54.9542	0	0	FALSE
TACSTD2	4.02287e-07	1.4486e-05	-69.2606	-88.1913	7	2	58.3064	0	0	FALSE
NPR1	4.11895e-07	1.47979e-05	-132.238	-151.143	7	2	3892.17	0	0	FALSE
FBXL2	4.20465e-07	1.50712e-05	-76.3882	-95.2711	7	2	114.19	0	0	FALSE
GIMAP1	4.36128e-07	1.55898e-05	-67.6546	-86.498	7	2	55.1927	0	0	FALSE
HPSE2	4.36931e-07	1.55898e-05	-80.7369	-99.5783	7	2	140.761	0	0	FALSE
LYN	4.43176e-07	1.57767e-05	-87.8791	-106.705	7	2	242.938	0	0	FALSE
LOC108177670	4.47827e-07	1.5906e-05	-51.9512	-70.7659	7	2	19.165	0	0	FALSE
FGL1	4.59927e-07	1.62987e-05	-59.818	-78.6039	7	2	31.1945	0	0	FALSE
LOC127482788	4.64373e-07	1.6419e-05	-107.475	-126.251	7	2	660.374	0	0	FALSE
WDFY4	4.74084e-07	1.67246e-05	-74.6385	-93.3916	7	2	88.997	0	0	FALSE
CCL22	4.75674e-07	1.67429e-05	-66.8146	-85.5641	7	2	46.7703	0	0	FALSE
LOC100348711	4.80467e-07	1.68736e-05	-50.2282	-68.9668	7	2	19.403	0	0	FALSE
PER2	4.98066e-07	1.74524e-05	-86.7982	-105.498	7	2	229.34	0	0	FALSE
TRPM1	5.00255e-07	1.74899e-05	-35.9512	-54.6462	7	2	6.96137	0	0	FALSE
ALAS2	5.04369e-07	1.75701e-05	-106.196	-124.882	7	2	582.043	0	0	FALSE
SERPINE1	5.04799e-07	1.75701e-05	-128.187	-146.872	7	2	2192.24	0	0	FALSE
GLS	5.0795e-07	1.76281e-05	-117.497	-136.175	7	2	1973.24	0	0	FALSE
TRIM14	5.0872e-07	1.76281e-05	-68.8703	-87.5471	7	2	65.343	0	0	FALSE
APOBR	5.15999e-07	1.78408e-05	-71.8811	-90.5425	7	2	64.451	0	0	FALSE
DSTN	5.2092e-07	1.79712e-05	-162.751	-181.403	7	2	30464.5	0	0	FALSE
CHN2	5.27915e-07	1.81724e-05	-69.3708	-88.0075	7	2	71.7989	0	0	FALSE
COL21A1	5.30498e-07	1.82212e-05	-114.466	-133.097	7	2	1468.58	0	0	FALSE
PRSS35	5.37353e-07	1.84161e-05	-110.169	-128.787	7	2	1337.63	0	0	FALSE
LOC100338913	5.52713e-07	1.88724e-05	-83.0001	-101.587	7	2	127.303	0	0	FALSE
SLC38A5	5.53082e-07	1.88724e-05	-87.6259	-106.212	7	2	227.3	0	0	FALSE
STS	5.5942e-07	1.90471e-05	-79.2831	-97.857	7	2	443.869	0	0	FALSE
LOC100347711	5.74687e-07	1.95244e-05	-61.6172	-80.162	7	2	34.7688	0	0	FALSE
RARB	5.77108e-07	1.95439e-05	-65.1086	-83.6488	7	2	95.7876	0	0	FALSE
SLC4A1	5.77764e-07	1.95439e-05	-37.806	-56.345	7	2	7.51355	0	0	FALSE
FMNL1	6.19319e-07	2.09044e-05	-90.383	-108.847	7	2	278.867	0	0	FALSE
CD72	6.21549e-07	2.09344e-05	-50.3007	-68.7606	7	2	16.5249	0	0	FALSE
TNFSF11	6.24784e-07	2.09981e-05	-34.7762	-53.2304	7	2	8.45689	0	0	FALSE
IL4R	6.38346e-07	2.13621e-05	-96.9351	-115.366	7	2	403.204	0	0	FALSE
SLC29A1	6.3788e-07	2.13621e-05	-111.836	-130.268	7	2	1949.22	0	0	FALSE
SIGLEC5	6.47601e-07	2.16254e-05	-65.6232	-84.0386	7	2	48.4524	0	0	FALSE
BASP1	6.52476e-07	2.16591e-05	-89.7626	-108.17	7	2	291.861	0	0	FALSE
GTF2E2	6.52765e-07	2.16591e-05	-98.3961	-116.803	7	2	796.978	0	0	FALSE
LOC103351517	6.51241e-07	2.16591e-05	-83.263	-101.672	7	2	128.049	0	0	FALSE
FOLR2	6.60803e-07	2.18793e-05	-101.75	-120.143	7	2	433.12	0	0	FALSE
CIART	6.79362e-07	2.24462e-05	-76.8274	-95.1909	7	2	154.634	0	0	FALSE
RGS10	6.88029e-07	2.26846e-05	-94.5211	-112.871	7	2	321.671	0	0	FALSE
RACGAP1	6.91533e-07	2.27522e-05	-69.131	-87.4753	7	2	74.2415	0	0	FALSE
KCTD10	7.16703e-07	2.34814e-05	-129.264	-147.57	7	2	4074.25	0	0	FALSE
NDST1	7.19514e-07	2.35242e-05	-94.6975	-112.999	7	2	955.533	0	0	FALSE
TMEM200B	7.22273e-07	2.35651e-05	-105.604	-123.901	7	2	900.904	0	0	FALSE
SRGN	7.28958e-07	2.37336e-05	-104.374	-122.662	7	2	602.416	0	0	FALSE
ITIH2	7.37612e-07	2.39655e-05	-48.7071	-66.9814	7	2	15.1023	0	0	FALSE
TMEM229B	7.53822e-07	2.44413e-05	-48.5149	-66.7657	7	2	17.4508	0	0	FALSE
LOC127482783	7.58935e-07	2.45562e-05	-100.532	-118.775	7	2	582.043	0	0	FALSE
TLN1	7.76828e-07	2.50832e-05	-144.141	-162.359	7	2	11402.3	0	0	FALSE
WDFY3	7.85872e-07	2.53229e-05	-109.281	-127.486	7	2	1299.84	0	0	FALSE
ASB13	7.91032e-07	2.54367e-05	-81.5138	-99.7123	7	2	311.1	0	0	FALSE
LOC127483137	7.9799e-07	2.56078e-05	-59.1783	-77.3673	7	2	37.4528	0	0	FALSE
LCP2	8.30096e-07	2.65835e-05	-75.1749	-93.3212	7	2	80.3449	0	0	FALSE
ALKAL2	8.47777e-07	2.69838e-05	-63.1922	-81.3155	7	2	36.911	0	0	FALSE
BLVRA	8.47157e-07	2.69838e-05	-83.1319	-101.256	7	2	172.184	0	0	FALSE
SPN	8.4702e-07	2.69838e-05	-81.4021	-99.5264	7	2	111.234	0	0	FALSE
PLXDC2	8.55214e-07	2.71652e-05	-117.324	-135.438	7	2	2328.22	0	0	FALSE
ITGAM	8.60755e-07	2.72501e-05	-84.9089	-103.016	7	2	140.906	0	0	FALSE
RNF122	8.61373e-07	2.72501e-05	-72.6885	-90.7946	7	2	105.27	0	0	FALSE
SMTN	8.68512e-07	2.74204e-05	-155.596	-173.693	7	2	18351.5	0	0	FALSE
PYCR3	8.71251e-07	2.74514e-05	-74.4349	-92.5286	7	2	135.476	0	0	FALSE
CNKSR3	8.7631e-07	2.75e-05	-88.0198	-106.107	7	2	211.675	0	0	FALSE
IGFBPL1	8.74941e-07	2.75e-05	-69.6762	-87.7653	7	2	56.5393	0	0	FALSE
GDF10	9.06101e-07	2.83778e-05	-107.249	-125.301	7	2	844.666	0	0	FALSE
STAB1	9.12858e-07	2.85323e-05	-123.94	-141.983	7	2	2410.17	0	0	FALSE
POGK	9.2102e-07	2.87299e-05	-83.7998	-101.833	7	2	321.258	0	0	FALSE
SH2B3	9.26948e-07	2.88573e-05	-90.9733	-109	7	2	513.656	0	0	FALSE
LOC100340939	9.49911e-07	2.95133e-05	-61.1283	-79.1282	7	2	35.349	0	0	FALSE
SESN2	9.52429e-07	2.95328e-05	-71.2567	-89.2537	7	2	99.1317	0	0	FALSE
NPPB	9.8599e-07	3.0513e-05	-137.76	-155.719	7	2	6651.7	0	0	FALSE
LOC108177633	9.88231e-07	3.05219e-05	-55.1503	-73.1072	7	2	27.8495	0	0	FALSE
BIRC5	1.01079e-06	3.11571e-05	-67.1101	-85.0426	7	2	64.6167	0	0	FALSE
GOLIM4	1.01651e-06	3.12717e-05	-122.803	-140.73	7	2	3193.49	0	0	FALSE
KIF20A	1.06829e-06	3.28e-05	-70.6087	-88.481	7	2	65.7386	0	0	FALSE
ZNF532	1.08566e-06	3.32681e-05	-116.816	-134.67	7	2	2627.14	0	0	FALSE
IL10RB	1.10501e-06	3.37948e-05	-91.5069	-109.343	7	2	298.966	0	0	FALSE
BMP3	1.14141e-06	3.48399e-05	-105.806	-123.607	7	2	560.437	0	0	FALSE
DCHS1	1.15917e-06	3.53128e-05	-102.03	-119.814	7	2	1412.1	0	0	FALSE
CCR1	1.21985e-06	3.7017e-05	-66.5314	-84.2596	7	2	48.769	0	0	FALSE
CAPG	1.23063e-06	3.72719e-05	-110.563	-128.282	7	2	1053.94	0	0	FALSE
H1-4	1.2366e-06	3.73802e-05	-75.7472	-93.4605	7	2	157.319	0	0	FALSE
MCP2	1.28808e-06	3.88611e-05	-62.18	-79.8491	7	2	33.2788	0	0	FALSE
IL34	1.29621e-06	3.9031e-05	-87.0326	-104.695	7	2	232.847	0	0	FALSE
ROCK1	1.30272e-06	3.91517e-05	-121.61	-139.267	7	2	2583.59	0	0	FALSE
GPR34	1.38414e-06	4.15188e-05	-79.599	-97.1899	7	2	135.965	0	0	FALSE
ERCC6L	1.39158e-06	4.16621e-05	-40.4218	-58.0068	7	2	10.5554	0	0	FALSE
CIITA	1.40854e-06	4.20362e-05	-65.2659	-82.8377	7	2	47.3023	0	0	FALSE
UTRN	1.40945e-06	4.20362e-05	-109.201	-126.772	7	2	1437.05	0	0	FALSE
CTNNAL1	1.41431e-06	4.21005e-05	-116.411	-133.979	7	2	1641.54	0	0	FALSE
PCLAF	1.45739e-06	4.33004e-05	-70.1798	-87.7145	7	2	58.2638	0	0	FALSE
JAZF1	1.46248e-06	4.33694e-05	-96.3179	-113.849	7	2	609.462	0	0	FALSE
ARRB2	1.46616e-06	4.33961e-05	-81.8388	-99.367	7	2	324.069	0	0	FALSE
FZD7	1.49832e-06	4.4264e-05	-89.3769	-106.882	7	2	421.365	0	0	FALSE
HK3	1.5263e-06	4.4921e-05	-56.9828	-74.4673	7	2	26.325	0	0	FALSE
LOC100352880	1.57415e-06	4.61595e-05	-103.168	-120.619	7	2	448.984	0	0	FALSE
MAGI2	1.57429e-06	4.61595e-05	-72.4647	-89.9155	7	2	105.566	0	0	FALSE
LOC108178648	1.60559e-06	4.69892e-05	-56.1272	-73.5565	7	2	23.4452	0	0	FALSE
EPN2	1.61692e-06	4.71441e-05	-106.735	-124.156	7	2	1643.83	0	0	FALSE
FSTL3	1.61573e-06	4.71441e-05	-107.361	-124.783	7	2	887.605	0	0	FALSE
EPHB3	1.62469e-06	4.72825e-05	-95.0467	-112.463	7	2	666.008	0	0	FALSE
TNS1	1.69628e-06	4.92742e-05	-157.557	-174.927	7	2	23619.3	0	0	FALSE
ZNRF3	1.7015e-06	4.93341e-05	-99.8923	-117.259	7	2	522.841	0	0	FALSE
MLANA	1.71154e-06	4.95332e-05	-64.0784	-81.4382	7	2	38.1136	0	0	FALSE
E2F2	1.71925e-06	4.96644e-05	-45.3071	-62.662	7	2	16.4745	0	0	FALSE
SLC7A7	1.73629e-06	5.0064e-05	-83.2025	-100.547	7	2	136.824	0	0	FALSE
LOC127492398	1.74946e-06	5.03509e-05	-84.9537	-102.29	7	2	140.17	0	0	FALSE
L3MBTL1	1.812e-06	5.20551e-05	-80.5766	-97.8743	7	2	184.305	0	0	FALSE
NCF2	1.83193e-06	5.2531e-05	-80.4485	-97.7342	7	2	107.35	0	0	FALSE
C1RL	1.87665e-06	5.37149e-05	-89.9571	-107.217	7	2	217.087	0	0	FALSE
LOC108176480	1.88442e-06	5.38386e-05	-146.066	-163.321	7	2	10071.1	0	0	FALSE
RNASE6	1.89169e-06	5.39478e-05	-82.0784	-99.3292	7	2	128.377	0	0	FALSE
TSPAN2	1.89716e-06	5.40051e-05	-108.376	-125.624	7	2	863.091	0	0	FALSE
MS4A4A	1.93074e-06	5.47617e-05	-90.3678	-107.596	7	2	249.773	0	0	FALSE
PRKAG3	1.92962e-06	5.47617e-05	-72.4898	-89.719	7	2	87.1292	0	0	FALSE
RADIL	1.9373e-06	5.4848e-05	-84.6665	-101.891	7	2	362.227	0	0	FALSE
MFAP3L	1.95108e-06	5.51383e-05	-114.505	-131.722	7	2	1243.78	0	0	FALSE
ZNF710	1.9652e-06	5.54371e-05	-78.4419	-95.6512	7	2	266.368	0	0	FALSE
MYH11	1.9689e-06	5.54413e-05	-188.839	-206.046	7	2	120558	0	0	FALSE
TRABD2A	1.97282e-06	5.54518e-05	-68.2015	-85.4066	7	2	70.1665	0	0	FALSE
LGALS9	2.01872e-06	5.664e-05	-92.2625	-109.442	7	2	215.937	0	0	FALSE
DERA	2.07752e-06	5.81855e-05	-81.3512	-98.4999	7	2	286.107	0	0	FALSE
TENT4A	2.1053e-06	5.8858e-05	-86.0663	-103.2	7	2	518.043	0	0	FALSE
LOC100359168	2.11252e-06	5.89544e-05	-45.1329	-62.2634	7	2	11.9248	0	0	FALSE
CEMIP	2.1621e-06	6.0218e-05	-85.9444	-103.05	7	2	146.091	0	0	FALSE
GUCY1B1	2.16551e-06	6.0218e-05	-101.594	-118.697	7	2	780.023	0	0	FALSE
LOC100348666	2.20848e-06	6.13039e-05	-44.8068	-61.8888	7	2	11.9363	0	0	FALSE
RBM47	2.29729e-06	6.36561e-05	-57.912	-74.951	7	2	29.4097	0	0	FALSE
GBE1	2.30925e-06	6.38744e-05	-109.428	-126.461	7	2	1201.86	0	0	FALSE
LOC100341181	2.37086e-06	6.54624e-05	-107.006	-124.01	7	2	926.904	0	0	FALSE
ACTA1	2.45386e-06	6.76315e-05	-156.556	-173.523	7	2	14794.5	0	0	FALSE
KLF13	2.45807e-06	6.76315e-05	-101.765	-118.731	7	2	921.359	0	0	FALSE
DUSP13	2.5011e-06	6.86946e-05	-79.4065	-96.3528	7	2	98.5677	0	0	FALSE
EHD2	2.55746e-06	7.01192e-05	-119.55	-136.472	7	2	3613.04	0	0	FALSE
DAPP1	2.61584e-06	7.15942e-05	-61.3051	-78.2025	7	2	31.271	0	0	FALSE
IQGAP1	2.7136e-06	7.41401e-05	-126.137	-142.994	7	2	4554.47	0	0	FALSE
ANKRD1	2.78716e-06	7.6017e-05	-161.404	-178.232	7	2	16072.2	0	0	FALSE
FLT3	2.82701e-06	7.69696e-05	-58.4885	-75.3012	7	2	27.6952	0	0	FALSE
PELI2	2.84523e-06	7.7331e-05	-82.0679	-98.8735	7	2	257.314	0	0	FALSE
LOC127484209	2.9091e-06	7.89296e-05	-53.3538	-70.1351	7	2	23.0056	0	0	FALSE
MFGE8	2.94341e-06	7.9722e-05	-150.402	-167.171	7	2	18726.5	0	0	FALSE
DEF6	3.22919e-06	8.73112e-05	-75.3197	-91.9871	7	2	105.376	0	0	FALSE
FAM98A	3.30637e-06	8.92434e-05	-103.823	-120.465	7	2	1338.23	0	0	FALSE
DDR2	3.33358e-06	8.9668e-05	-124.274	-140.907	7	2	3396.95	0	0	FALSE
MYEF2	3.33079e-06	8.9668e-05	-82.2355	-98.869	7	2	391.479	0	0	FALSE
KANK1	3.36981e-06	9.0487e-05	-132.54	-149.161	7	2	4512.43	0	0	FALSE
FER	3.40036e-06	9.11507e-05	-87.4116	-104.023	7	2	562.982	0	0	FALSE
IL20RB	3.48261e-06	9.31956e-05	-63.4184	-80.0032	7	2	36.0685	0	0	FALSE
TUBA1C	3.49866e-06	9.34651e-05	-99.3133	-115.893	7	2	676.78	0	0	FALSE
INPP5F	3.54469e-06	9.4533e-05	-86.9375	-103.503	7	2	429.18	0	0	FALSE
CCL2	3.58216e-06	9.53697e-05	-78.3113	-94.8653	7	2	98.754	0	0	FALSE
TESK1	3.63457e-06	9.66005e-05	-109.983	-126.521	7	2	1741.34	0	0	FALSE
SEMA3B	3.65676e-06	9.70253e-05	-115.578	-132.11	7	2	1982.21	0	0	FALSE
LRRC25	3.69577e-06	9.7894e-05	-80.3226	-96.8425	7	2	123.5	0	0	FALSE
CDV3	3.71799e-06	9.83159e-05	-109.594	-126.108	7	2	2833.45	0	0	FALSE
JAK3	3.73033e-06	9.84757e-05	-87.9956	-104.505	7	2	219.826	0	0	FALSE
B3GLCT	3.78752e-06	9.94316e-05	-97.7121	-114.205	7	2	505.297	0	0	FALSE
FCHO1	3.78361e-06	9.94316e-05	-62.067	-78.5612	7	2	53.0727	0	0	FALSE
MAFB	3.79199e-06	9.94316e-05	-97.2087	-113.7	7	2	452.946	0	0	FALSE
TRIM56	3.77846e-06	9.94316e-05	-93.0571	-109.553	7	2	867.937	0	0	FALSE
SLC15A3	3.84746e-06	0.000100717	-104.105	-120.581	7	2	747.594	0	0	FALSE
CTXN1	3.86952e-06	0.000101125	-65.7867	-82.2563	7	2	57.8991	0	0	FALSE
FHL3	3.95365e-06	0.000103151	-91.0128	-107.459	7	2	362.998	0	0	FALSE
LOC100343299	4.02095e-06	0.000104732	-90.9934	-107.421	7	2	200.647	0	0	FALSE
KNL1	4.03514e-06	0.000104768	-52.8759	-69.2996	7	2	18.6666	0	0	FALSE
PTPN7	4.03571e-06	0.000104768	-62.5292	-78.9528	7	2	34.8624	0	0	FALSE
LOC100344565	4.14891e-06	0.000107528	-81.0578	-97.4512	7	2	106.21	0	0	FALSE
PPP1R9A	4.19552e-06	0.000108556	-98.8177	-115.199	7	2	561.335	0	0	FALSE
FTL	4.23618e-06	0.000109427	-153.228	-169.598	7	2	14869.2	0	0	FALSE
PLD3	4.30931e-06	0.000111132	-118.785	-135.136	7	2	2271.28	0	0	FALSE
FRZB	4.36881e-06	0.000112481	-126.041	-142.378	7	2	2898.5	0	0	FALSE
ST3GAL5	4.40656e-06	0.000113266	-79.5747	-95.9021	7	2	136.985	0	0	FALSE
TROAP	4.54689e-06	0.000116681	-56.948	-73.2411	7	2	24.5631	0	0	FALSE
CD163	4.64706e-06	0.000119056	-103.056	-119.325	7	2	441.339	0	0	FALSE
LOC103349936	4.67474e-06	0.000119569	-92.4306	-108.693	7	2	217.071	0	0	FALSE
SMAD7	4.7245e-06	0.000120645	-87.742	-103.993	7	2	516.01	0	0	FALSE
CALCOCO1	4.78429e-06	0.000121773	-108.036	-124.274	7	2	1755.66	0	0	FALSE
DZIP1	4.78168e-06	0.000121773	-107.243	-123.481	7	2	703.179	0	0	FALSE
ITPR1	4.8113e-06	0.000122262	-106.626	-122.858	7	2	1216.63	0	0	FALSE
TBC1D16	4.8541e-06	0.000123149	-103.331	-119.552	7	2	940.545	0	0	FALSE
VIM	4.86231e-06	0.000123158	-168.286	-184.505	7	2	71933.6	0	0	FALSE
RARA	4.88077e-06	0.000123425	-94.0585	-110.274	7	2	700.165	0	0	FALSE
TNFAIP6	4.98916e-06	0.000125962	-87.8646	-104.056	7	2	163.767	0	0	FALSE
KIF18B	5.0736e-06	0.000127887	-54.8621	-71.0351	7	2	21.2443	0	0	FALSE
CGAS	5.10162e-06	0.00012818	-53.7315	-69.8985	7	2	23.4353	0	0	FALSE
JAML	5.09354e-06	0.00012818	-72.8067	-88.9755	7	2	67.7239	0	0	FALSE
ANXA4	5.20437e-06	0.000130343	-89.8626	-106.008	7	2	362.803	0	0	FALSE
LMOD1	5.2012e-06	0.000130343	-158.228	-174.373	7	2	17411.1	0	0	FALSE
HMGA1	5.28349e-06	0.000132113	-88.5785	-104.707	7	2	231.655	0	0	FALSE
INPP5D	5.32486e-06	0.000132728	-83.7136	-99.8337	7	2	188.461	0	0	FALSE
ITGAL	5.32509e-06	0.000132728	-85.1621	-101.282	7	2	135.673	0	0	FALSE
CARD6	5.3386e-06	0.000132852	-81.9993	-98.1165	7	2	145.484	0	0	FALSE
LOC127488927	5.34708e-06	0.000132852	-101.969	-118.084	7	2	717.325	0	0	FALSE
ATP2A3	5.37101e-06	0.000132982	-121.991	-138.102	7	2	1603.05	0	0	FALSE
FFAR4	5.37784e-06	0.000132982	-80.0405	-96.1497	7	2	145.864	0	0	FALSE
SGO1	5.37506e-06	0.000132982	-48.8205	-64.9303	7	2	14.3334	0	0	FALSE
RECK	5.4688e-06	0.000135018	-115.371	-131.462	7	2	1578.55	0	0	FALSE
BRMS1L	5.54136e-06	0.000136379	-85.5041	-101.581	7	2	440.771	0	0	FALSE
FXYD5	5.53272e-06	0.000136379	-119.781	-135.859	7	2	1471.43	0	0	FALSE
PBXIP1	5.60506e-06	0.000137729	-126.277	-142.341	7	2	4141.86	0	0	FALSE
SQOR	5.62763e-06	0.000138067	-91.6659	-107.725	7	2	621.049	0	0	FALSE
IL4I1	5.67101e-06	0.000138913	-63.4402	-79.4912	7	2	38.8262	0	0	FALSE
CDC42BPB	5.74936e-06	0.000139955	-102.587	-118.623	7	2	1942.85	0	0	FALSE
CORO1C	5.74768e-06	0.000139955	-118.377	-134.413	7	2	2653.78	0	0	FALSE
LOC103352415	5.738e-06	0.000139955	-76.8779	-92.9161	7	2	129.425	0	0	FALSE
TAGAP	5.74226e-06	0.000139955	-64.8141	-80.8514	7	2	41.8801	0	0	FALSE
LOC103347344	5.7752e-06	0.000140365	-49.9036	-65.9347	7	2	17.0659	0	0	FALSE
APOA4	5.82496e-06	0.000141355	-36.4501	-52.4718	7	2	9.70379	0	0	FALSE
PAQR6	5.83811e-06	0.000141454	-94.0964	-110.116	7	2	780.752	0	0	FALSE
LOC100348415	5.95852e-06	0.000144148	-94.5048	-110.502	7	2	701.341	0	0	FALSE
GYPA	5.97641e-06	0.000144357	-65.7356	-81.7292	7	2	42.7841	0	0	FALSE
BCL2	5.99058e-06	0.000144476	-105.897	-121.888	7	2	1024.72	0	0	FALSE
LOC127486885	6.01544e-06	0.000144853	-116.879	-132.865	7	2	975.268	0	0	FALSE
CDC20	6.18063e-06	0.000148373	-74.1183	-90.0749	7	2	78.2288	0	0	FALSE
TPPP	6.1748e-06	0.000148373	-88.9765	-104.934	7	2	377.44	0	0	FALSE
ZBTB4	6.25531e-06	0.000149936	-114.491	-130.434	7	2	2555.85	0	0	FALSE
AKT3	6.35853e-06	0.000152176	-111.878	-127.804	7	2	1652.83	0	0	FALSE
CD1D	6.49145e-06	0.00015512	-104.386	-120.289	7	2	470.827	0	0	FALSE
GPR158	6.54656e-06	0.00015575	-28.4172	-44.3108	7	2	6.52917	0	0	FALSE
PLET1	6.54772e-06	0.00015575	-56.6198	-72.5132	7	2	25.4371	0	0	FALSE
SERPINA3	6.54443e-06	0.00015575	-63.8835	-79.7775	7	2	37.8501	0	0	FALSE
SGCB	6.57503e-06	0.000156162	-114.868	-130.756	7	2	2520.47	0	0	FALSE
ILK	6.59788e-06	0.000156467	-127.587	-143.472	7	2	5106.37	0	0	FALSE
C1QTNF6	6.61353e-06	0.0001566	-106.388	-122.271	7	2	649.864	0	0	FALSE
KCNAB2	6.69836e-06	0.000158369	-91.7092	-107.578	7	2	378.331	0	0	FALSE
THRA	6.72284e-06	0.000158708	-113.663	-129.527	7	2	1782.76	0	0	FALSE
LOC127482743	7.08475e-06	0.000166999	-39.0679	-54.8748	7	2	7.97882	0	0	FALSE
NEK7	7.10794e-06	0.000167294	-124.06	-139.863	7	2	2862.83	0	0	FALSE
GGH	7.21374e-06	0.000169528	-75.5604	-91.3474	7	2	92.5708	0	0	FALSE
KCNA5	7.26731e-06	0.000170531	-105.12	-120.899	7	2	654.116	0	0	FALSE
JPT1	7.29431e-06	0.000170908	-87.9945	-103.769	7	2	258.364	0	0	FALSE
CENPF	7.4005e-06	0.000173136	-71.9834	-87.7424	7	2	62.5509	0	0	FALSE
DTX2	7.66599e-06	0.000179079	-73.0315	-88.7518	7	2	151.669	0	0	FALSE
CTDSP2	7.78879e-06	0.000181676	-124.406	-140.109	7	2	6546.79	0	0	FALSE
FAM83D	7.88063e-06	0.000183545	-72.3485	-88.0385	7	2	69.1529	0	0	FALSE
MYBL2	7.93637e-06	0.000184568	-47.7076	-63.3898	7	2	14.3418	0	0	FALSE
PRDM11	8.09068e-06	0.000187877	-78.7227	-94.3837	7	2	314.423	0	0	FALSE
LOC108178979	8.10805e-06	0.000188001	-55.4645	-71.1232	7	2	22.7771	0	0	FALSE
CXCL16	8.14285e-06	0.000188528	-98.6141	-114.268	7	2	558.27	0	0	FALSE
DEPP1	8.33466e-06	0.000192399	-107.128	-122.756	7	2	554.474	0	0	FALSE
SH2D4B	8.32905e-06	0.000192399	-51.1878	-66.8169	7	2	17.3455	0	0	FALSE
SLC15A2	8.7483e-06	0.00020165	-72.1122	-87.6874	7	2	59.9977	0	0	FALSE
MTHFR	8.78556e-06	0.00020221	-98.2631	-113.834	7	2	737.743	0	0	FALSE
LOC103349307	8.81338e-06	0.000202552	-40.8557	-56.4227	7	2	8.36938	0	0	FALSE
RHBDF2	9.02107e-06	0.000207021	-84.9977	-100.539	7	2	288.288	0	0	FALSE
HEY2	9.24744e-06	0.000211905	-106.837	-122.351	7	2	888.749	0	0	FALSE
FCHSD2	9.28128e-06	0.000212369	-102.559	-118.069	7	2	787.912	0	0	FALSE
FHL2	9.35531e-06	0.00021375	-123	-138.502	7	2	1691.7	0	0	FALSE
CASS4	9.3953e-06	0.00021435	-54.9681	-70.4648	7	2	25.571	0	0	FALSE
PLEK2	9.47507e-06	0.000215855	-59.3533	-74.8407	7	2	27.3404	0	0	FALSE
PARVA	9.49198e-06	0.000215925	-129.228	-144.713	7	2	4223.3	0	0	FALSE
LZTS3	9.53939e-06	0.000216688	-90.2548	-105.735	7	2	654.917	0	0	FALSE
NFE2	9.56761e-06	0.000217014	-41.7774	-57.2541	7	2	10.9565	0	0	FALSE
LAMC1	9.82881e-06	0.000222615	-133.134	-148.581	7	2	9784.6	0	0	FALSE
LOC108175419	9.88829e-06	0.000223638	-70.9551	-86.3955	7	2	57.579	0	0	FALSE
TFEC	1.00416e-05	0.000226777	-68.2433	-83.6668	7	2	59.1318	0	0	FALSE
GCNT1	1.03375e-05	0.000233124	-65.6418	-81.0334	7	2	46.7579	0	0	FALSE
LYL1	1.04522e-05	0.00023526	-77.7602	-93.1396	7	2	149.622	0	0	FALSE
SPC25	1.04623e-05	0.00023526	-59.9271	-75.3055	7	2	47.5307	0	0	FALSE
WFDC1	1.06057e-05	0.00023814	-147.761	-163.124	7	2	11057.7	0	0	FALSE
RTN4RL2	1.07035e-05	0.000239993	-69.243	-84.5962	7	2	59.6105	0	0	FALSE
ASPM	1.07803e-05	0.000241368	-60.658	-76.0034	7	2	30.5374	0	0	FALSE
TBC1D8	1.09043e-05	0.000243794	-87.3964	-102.729	7	2	481.084	0	0	FALSE
LURAP1	1.09328e-05	0.000243878	-94.6915	-110.021	7	2	412.75	0	0	FALSE
MCU	1.09393e-05	0.000243878	-97.8234	-113.153	7	2	811.882	0	0	FALSE
BID	1.09711e-05	0.00024424	-61.1616	-76.4877	7	2	39.0214	0	0	FALSE
LPXN	1.10443e-05	0.000245519	-69.8321	-85.1509	7	2	58.1133	0	0	FALSE
SNX10	1.11022e-05	0.000246456	-93.2265	-108.54	7	2	280.478	0	0	FALSE
BLM	1.12183e-05	0.00024868	-73.2495	-88.5511	7	2	89.0615	0	0	FALSE
HAS1	1.13746e-05	0.000251788	-71.3353	-86.6216	7	2	62.6478	0	0	FALSE
ANAPC7	1.15873e-05	0.000256133	-101.71	-116.976	7	2	976.165	0	0	FALSE
TCEAL4	1.16373e-05	0.000256876	-96.4883	-111.75	7	2	1101.5	0	0	FALSE
PAPOLB	1.17224e-05	0.000258389	-55.3694	-70.6226	7	2	33.075	0	0	FALSE
PLXNC1	1.20063e-05	0.000264274	-55.7666	-70.9934	7	2	25.4654	0	0	FALSE
PLEK	1.23118e-05	0.000270617	-73.2018	-88.4009	7	2	93.5746	0	0	FALSE
NR1D2	1.24243e-05	0.000272706	-128.712	-143.901	7	2	3409.29	0	0	FALSE
LOC100353356	1.24543e-05	0.000272982	-46.1557	-61.3422	7	2	12.1112	0	0	FALSE
CCNF	1.25849e-05	0.000275458	-54.2069	-69.3819	7	2	19.5571	0	0	FALSE
C1QTNF9	1.2864e-05	0.000281172	-83.2348	-98.3856	7	2	179.563	0	0	FALSE
KIFC3	1.29012e-05	0.000281593	-103.324	-118.471	7	2	945.678	0	0	FALSE
FRY	1.29858e-05	0.000283043	-107.511	-122.652	7	2	1035.26	0	0	FALSE
CD101	1.30406e-05	0.000283842	-55.7438	-70.8795	7	2	21.5926	0	0	FALSE
ADAM12	1.31184e-05	0.000285139	-86.5073	-101.636	7	2	149.065	0	0	FALSE
ADARB1	1.31628e-05	0.000285705	-118.262	-133.387	7	2	2469.69	0	0	FALSE
LOC100125981	1.3315e-05	0.000288609	-96.4561	-111.569	7	2	391.616	0	0	FALSE
LOC100351163	1.35113e-05	0.000292457	-125.686	-140.782	7	2	1672.77	0	0	FALSE
P2RX1	1.35511e-05	0.000292914	-96.3921	-111.486	7	2	268.776	0	0	FALSE
FGR	1.40707e-05	0.000303726	-80.6144	-95.6663	7	2	111.488	0	0	FALSE
LOC100355379	1.4384e-05	0.000309207	-96.4714	-111.499	7	2	779.873	0	0	FALSE
MCEMP1	1.43505e-05	0.000309207	-53.617	-68.6472	7	2	18.6033	0	0	FALSE
MYH7	1.43744e-05	0.000309207	-185.71	-200.738	7	2	73045.2	0	0	FALSE
LTBP3	1.45449e-05	0.000312235	-118.541	-133.556	7	2	1700.53	0	0	FALSE
ARL10	1.46045e-05	0.000313085	-79.1493	-94.1601	7	2	358.413	0	0	FALSE
RNF144B	1.4629e-05	0.000313181	-77.3123	-92.3213	7	2	170.925	0	0	FALSE
DACT1	1.46744e-05	0.000313724	-107.92	-122.926	7	2	919.862	0	0	FALSE
VCAM1	1.48453e-05	0.000316944	-112.246	-127.239	7	2	989.463	0	0	FALSE
LOC100348203	1.52903e-05	0.000325999	-33.22	-48.1802	7	2	6.61939	0	0	FALSE
RGMA	1.55346e-05	0.000330755	-89.7259	-104.669	7	2	544.17	0	0	FALSE
TRDN	1.55683e-05	0.000331022	-110.525	-125.465	7	2	639.882	0	0	FALSE
ABL1	1.58296e-05	0.000336121	-105.243	-120.165	7	2	1814.45	0	0	FALSE
KIF4A	1.597e-05	0.000338641	-51.1741	-66.0863	7	2	16.9971	0	0	FALSE
LOC103347271	1.6056e-05	0.000340005	-68.55	-83.4563	7	2	81.504	0	0	FALSE
LOC100346996	1.63337e-05	0.000345416	-68.3219	-83.2092	7	2	62.8219	0	0	FALSE
EZH2	1.64e-05	0.000346036	-62.409	-77.2919	7	2	45.3853	0	0	FALSE
HIVEP1	1.64073e-05	0.000346036	-85.2236	-100.106	7	2	375.855	0	0	FALSE
MYOCD	1.64625e-05	0.000346732	-119.053	-133.932	7	2	1702.92	0	0	FALSE
LOC127488889	1.67351e-05	0.000352001	-126.012	-140.873	7	2	2117.37	0	0	FALSE
CLDN7	1.69082e-05	0.000355162	-56.3816	-71.2308	7	2	22.8885	0	0	FALSE
FAT4	1.70991e-05	0.000358345	-118.529	-133.366	7	2	1444.79	0	0	FALSE
TICAM2	1.71056e-05	0.000358345	-61.4183	-76.2546	7	2	49.7852	0	0	FALSE
CSF1R	1.71914e-05	0.000359662	-117.036	-131.867	7	2	1208.62	0	0	FALSE
LOC127488898	1.73437e-05	0.000362363	-126.016	-140.837	7	2	2111.79	0	0	FALSE
SHKBP1	1.74239e-05	0.000363551	-79.5348	-94.3508	7	2	211.9	0	0	FALSE
ENO3	1.74699e-05	0.000364026	-147.239	-162.053	7	2	6782.49	0	0	FALSE
MTARC2	1.75339e-05	0.000364873	-110.367	-125.176	7	2	1889.1	0	0	FALSE
TGFB1I1	1.76869e-05	0.000367567	-130.443	-145.242	7	2	4515.2	0	0	FALSE
NR1D1	1.80712e-05	0.000375054	-119.017	-133.793	7	2	1576.07	0	0	FALSE
EGR1	1.81511e-05	0.000376213	-123.596	-138.366	7	2	1605.41	0	0	FALSE
GNG11	1.83181e-05	0.000379173	-116.602	-131.363	7	2	2198.27	0	0	FALSE
PANK1	1.83997e-05	0.000380358	-91.6912	-106.447	7	2	306.479	0	0	FALSE
CCL7	1.84823e-05	0.000381058	-65.8952	-80.646	7	2	43.0867	0	0	FALSE
LOC100347327	1.84602e-05	0.000381058	-122.294	-137.046	7	2	1621.38	0	0	FALSE
CSPG5	1.92702e-05	0.000396779	-72.2333	-86.938	7	2	128.667	0	0	FALSE
LOC100328693	1.96183e-05	0.000403414	-73.2983	-87.9832	7	2	157.433	0	0	FALSE
LOC127490290	1.97106e-05	0.000404249	-38.072	-52.7517	7	2	7.43675	0	0	FALSE
MCM6	1.96915e-05	0.000404249	-78.2748	-92.9556	7	2	132.515	0	0	FALSE
ANO6	1.9768e-05	0.000404434	-93.1191	-107.796	7	2	1013.6	0	0	FALSE
TEDC1	1.97714e-05	0.000404434	-66.0529	-80.7292	7	2	81.1021	0	0	FALSE
LOC100352672	1.98975e-05	0.00040648	-74.4638	-89.1331	7	2	70.6741	0	0	FALSE
SGCD	1.99892e-05	0.000407822	-103.962	-118.627	7	2	839.311	0	0	FALSE
IL17RD	2.00771e-05	0.000409081	-89.2529	-103.912	7	2	429.166	0	0	FALSE
PTPRC	2.02237e-05	0.000411531	-91.0132	-105.665	7	2	201.16	0	0	FALSE
LZTS2	2.08466e-05	0.000423655	-112.864	-127.482	7	2	2297.77	0	0	FALSE
XDH	2.08765e-05	0.000423713	-44.7796	-59.3957	7	2	10.6342	0	0	FALSE
SORBS1	2.09146e-05	0.000423935	-143.379	-157.993	7	2	8233.51	0	0	FALSE
ARHGAP4	2.10536e-05	0.000426199	-76.0725	-90.6794	7	2	122.337	0	0	FALSE
KCTD15	2.12167e-05	0.000428945	-104.427	-119.025	7	2	1278.8	0	0	FALSE
GLP2R	2.15741e-05	0.000435608	-52.8547	-67.4345	7	2	17.497	0	0	FALSE
WTIP	2.1816e-05	0.000439924	-85.3695	-99.937	7	2	314.064	0	0	FALSE
GSS	2.19197e-05	0.000441446	-83.2208	-97.7831	7	2	351.834	0	0	FALSE
LOC100340175	2.21547e-05	0.000445602	-133.829	-148.379	7	2	4298.04	0	0	FALSE
ANKFY1	2.24661e-05	0.000451266	-96.9634	-111.498	7	2	1010.64	0	0	FALSE
IPO9	2.2494e-05	0.000451266	-101.797	-116.331	7	2	1123.71	0	0	FALSE
LOC103349585	2.26432e-05	0.000453677	-48.7773	-63.3036	7	2	16.9526	0	0	FALSE
RPA3	2.27599e-05	0.000455042	-86.5171	-101.038	7	2	247.244	0	0	FALSE
TFCP2L1	2.27696e-05	0.000455042	-74.9913	-89.5114	7	2	71.7568	0	0	FALSE
ESD	2.29259e-05	0.000456998	-99.8846	-114.397	7	2	1009.75	0	0	FALSE
LRRK1	2.29083e-05	0.000456998	-95.1754	-109.689	7	2	786.931	0	0	FALSE
INAVA	2.29657e-05	0.000457208	-41.705	-56.2157	7	2	8.88982	0	0	FALSE
FAT1	2.39159e-05	0.000475518	-121.8	-136.266	7	2	2537.65	0	0	FALSE
ADAMTS9	2.41155e-05	0.000478878	-97.2959	-111.752	7	2	305.888	0	0	FALSE
TMEM8B	2.41813e-05	0.000479575	-99.424	-113.878	7	2	939.23	0	0	FALSE
ZBTB38	2.44619e-05	0.000484525	-98.1013	-112.542	7	2	756.996	0	0	FALSE
LOC100338527	2.45458e-05	0.000485571	-74.1669	-88.6039	7	2	69.1734	0	0	FALSE
JUNB	2.45974e-05	0.000485977	-113.833	-128.267	7	2	1206.27	0	0	FALSE
TRIM3	2.46905e-05	0.000487201	-85.9127	-100.343	7	2	566.929	0	0	FALSE
IKZF1	2.52462e-05	0.000497538	-68.554	-82.9598	7	2	49.4364	0	0	FALSE
ABI3BP	2.56478e-05	0.000504817	-126.759	-141.148	7	2	3091.81	0	0	FALSE
GPRC5B	2.58888e-05	0.000508918	-92.6656	-107.044	7	2	459.968	0	0	FALSE
SH3KBP1	2.60615e-05	0.00051167	-98.1752	-112.546	7	2	463.944	0	0	FALSE
LOC103350039	2.61933e-05	0.000512969	-104.995	-119.36	7	2	531.684	0	0	FALSE
SUN2	2.6182e-05	0.000512969	-135.093	-149.459	7	2	5950.17	0	0	FALSE
BGLAP	2.63275e-05	0.000514951	-73.6773	-88.0367	7	2	71.1953	0	0	FALSE
P2RY13	2.65422e-05	0.000518502	-50.3761	-64.7265	7	2	17.5978	0	0	FALSE
IL6R	2.67271e-05	0.000521462	-80.0069	-94.3496	7	2	140.85	0	0	FALSE
LOC103346273	2.6977e-05	0.000525681	-76.0067	-90.3391	7	2	85.595	0	0	FALSE
KDM1A	2.70138e-05	0.000525742	-96.8346	-111.165	7	2	1055.35	0	0	FALSE
C1QTNF5	2.73413e-05	0.000531455	-103.46	-117.777	7	2	734.829	0	0	FALSE
APOD	2.75029e-05	0.000533932	-154.773	-169.084	7	2	10114.9	0	0	FALSE
HAPLN1	2.77155e-05	0.000537391	-105.915	-120.217	7	2	794.75	0	0	FALSE
BCL9	2.7808e-05	0.000538517	-89.6752	-103.974	7	2	348.678	0	0	FALSE
FMNL3	2.79706e-05	0.000540996	-91.9252	-106.217	7	2	552.096	0	0	FALSE
PRR16	2.8124e-05	0.000542619	-60.6214	-74.9076	7	2	29.7045	0	0	FALSE
SVIL	2.81e-05	0.000542619	-144.554	-158.841	7	2	9092.71	0	0	FALSE
PADI2	2.82706e-05	0.000544776	-50.8168	-65.0973	7	2	15.5634	0	0	FALSE
TOP2A	2.85051e-05	0.000548618	-80.2522	-94.5235	7	2	119.926	0	0	FALSE
F5	2.86548e-05	0.00055082	-96.788	-111.053	7	2	267.355	0	0	FALSE
IKBKE	2.88999e-05	0.000554849	-88.039	-102.295	7	2	364.687	0	0	FALSE
MAP1B	2.9126e-05	0.000558504	-133.226	-147.473	7	2	4532.86	0	0	FALSE
CYFIP2	2.93359e-05	0.000561841	-75.8966	-90.136	7	2	117.017	0	0	FALSE
DUSP10	2.94927e-05	0.000564151	-80.2632	-94.4967	7	2	175.507	0	0	FALSE
NAB2	2.95368e-05	0.000564305	-92.9214	-107.153	7	2	578.482	0	0	FALSE
LOC100351957	2.95771e-05	0.000564385	-54.3735	-68.6038	7	2	30.3642	0	0	FALSE
AURKA	2.9986e-05	0.000571488	-58.2897	-72.5048	7	2	28.0739	0	0	FALSE
PHF1	3.00505e-05	0.000572021	-99.5985	-113.811	7	2	1020.85	0	0	FALSE
CALD1	3.01671e-05	0.000573543	-152.193	-166.402	7	2	14809	0	0	FALSE
FLRT1	3.08376e-05	0.000585578	-102.593	-116.777	7	2	587.017	0	0	FALSE
MAMDC2	3.092e-05	0.00058643	-118.408	-132.589	7	2	1529.58	0	0	FALSE
FOS	3.13723e-05	0.000593568	-122.216	-136.381	7	2	1419.61	0	0	FALSE
LOC127491115	3.13431e-05	0.000593568	-51.7696	-65.9356	7	2	19.4079	0	0	FALSE
PTP4A3	3.16743e-05	0.000597833	-123.575	-137.729	7	2	1422.69	0	0	FALSE
SLIT2	3.16636e-05	0.000597833	-113.632	-127.786	7	2	1253.74	0	0	FALSE
IL21R	3.18955e-05	0.000601158	-58.3477	-72.4943	7	2	23.87	0	0	FALSE
PRSS23	3.19274e-05	0.000601158	-120.163	-134.308	7	2	1851.52	0	0	FALSE
LOC100354088	3.1979e-05	0.000601405	-80.8722	-95.0159	7	2	100.536	0	0	FALSE
LEP	3.20709e-05	0.000602409	-79.9671	-94.1076	7	2	95.1654	0	0	FALSE
ZNF311	3.27401e-05	0.000614241	-85.9901	-100.108	7	2	350.365	0	0	FALSE
MSRB3	3.27965e-05	0.000614561	-137.67	-151.786	7	2	6666.65	0	0	FALSE
SV2A	3.28748e-05	0.000615289	-91.7313	-105.844	7	2	359.476	0	0	FALSE
STON1	3.30362e-05	0.000617571	-100.149	-114.257	7	2	866.53	0	0	FALSE
MAPK1	3.33428e-05	0.000622559	-101.107	-115.205	7	2	1067.4	0	0	FALSE
CXCR1	3.34977e-05	0.000624705	-69.2634	-83.3557	7	2	52.9111	0	0	FALSE
LOC127484192	3.35637e-05	0.000625189	-49.7947	-63.8848	7	2	15.1629	0	0	FALSE
FMOD	3.37238e-05	0.000627424	-146.333	-160.417	7	2	11261.8	0	0	FALSE
APBB1	3.37871e-05	0.000627854	-93.0106	-107.093	7	2	879.69	0	0	FALSE
PARP3	3.39574e-05	0.000630269	-94.9683	-109.045	7	2	452.963	0	0	FALSE
UGT1A7	3.4651e-05	0.00064238	-80.4414	-94.4961	7	2	143.818	0	0	FALSE
TMEM117	3.47724e-05	0.000643866	-88.5235	-102.574	7	2	476.997	0	0	FALSE
PIK3R6	3.48418e-05	0.000644387	-60.8998	-74.9484	7	2	33.3511	0	0	FALSE
MYO7A	3.49173e-05	0.000645021	-88.2725	-102.319	7	2	197.157	0	0	FALSE
HIGD1B	3.50456e-05	0.000646627	-67.5939	-81.6359	7	2	53.5371	0	0	FALSE
CDCA8	3.57223e-05	0.000658336	-55.0093	-69.0302	7	2	20.8844	0	0	FALSE
P2RY11	3.59763e-05	0.000662234	-38.4913	-52.5042	7	2	7.17069	0	0	FALSE
RGS5	3.65711e-05	0.000672393	-182.679	-196.674	7	2	77380.4	0	0	FALSE
EXOSC5	3.70854e-05	0.000681046	-72.8599	-86.8391	7	2	115.354	0	0	FALSE
ALDH1A1	3.74001e-05	0.00068602	-125.994	-139.964	7	2	4770.92	0	0	FALSE
CDK5RAP1	3.77148e-05	0.000690981	-71.939	-85.8995	7	2	209.792	0	0	FALSE
LOC103348576	3.80559e-05	0.000695666	-61.2401	-75.1907	7	2	56.8588	0	0	FALSE
PKN2	3.80595e-05	0.000695666	-98.5565	-112.507	7	2	651.832	0	0	FALSE
EIF4EBP2	3.83113e-05	0.00069945	-145.93	-159.873	7	2	14237.1	0	0	FALSE
FAM181B	3.83842e-05	0.000699963	-90.6795	-104.62	7	2	337.75	0	0	FALSE
LOC127487713	3.85637e-05	0.000702417	-67.5532	-81.489	7	2	45.6643	0	0	FALSE
APLN	3.87149e-05	0.00070435	-78.3221	-92.2535	7	2	98.0701	0	0	FALSE
RAB33A	3.88051e-05	0.000705169	-78.8567	-92.7855	7	2	87.0506	0	0	FALSE
FLNA	4.01311e-05	0.000728419	-171.358	-185.25	7	2	31342.1	0	0	FALSE
DUSP1	4.03794e-05	0.000732076	-130.354	-144.239	7	2	2296.54	0	0	FALSE
SLC9A5	4.05235e-05	0.000733836	-76.0325	-89.9132	7	2	231.424	0	0	FALSE
FRYL	4.06595e-05	0.000735447	-99.1567	-113.034	7	2	780.675	0	0	FALSE
GALNT2	4.13519e-05	0.000747106	-105.925	-119.783	7	2	1399.57	0	0	FALSE
LOC100355766	4.22611e-05	0.000762652	-77.3278	-91.1618	7	2	79.6776	0	0	FALSE
APOO	4.23736e-05	0.0007638	-93.5428	-107.374	7	2	278.298	0	0	FALSE
ACSM1	4.24926e-05	0.000765063	-66.288	-80.1159	7	2	41.0927	0	0	FALSE
ITGB7	4.35738e-05	0.000783627	-72.8725	-86.6725	7	2	138.292	0	0	FALSE
MTUS2	4.377e-05	0.000786251	-119.627	-133.422	7	2	2030.89	0	0	FALSE
TRAF3IP3	4.41719e-05	0.000792559	-58.3665	-72.1513	7	2	30.8049	0	0	FALSE
FOSL1	4.43792e-05	0.000795365	-45.4199	-59.1995	7	2	11.2435	0	0	FALSE
ICAM1	4.45568e-05	0.000797633	-105.123	-118.898	7	2	809.437	0	0	FALSE
LRP5	4.49861e-05	0.000804397	-103.917	-117.682	7	2	1403.33	0	0	FALSE
OSR2	4.50814e-05	0.00080518	-85.174	-98.9361	7	2	189.618	0	0	FALSE
CREM	4.52463e-05	0.000807203	-105.652	-119.41	7	2	809.556	0	0	FALSE
VCL	4.53346e-05	0.000807855	-147.09	-160.846	7	2	10038.1	0	0	FALSE
ITGB8	4.54027e-05	0.000808147	-93.1596	-106.914	7	2	426.267	0	0	FALSE
PTCHD1	4.60434e-05	0.00081862	-98.6772	-112.416	7	2	404.051	0	0	FALSE
JCHAIN	4.62049e-05	0.000820557	-84.1927	-97.9274	7	2	197.251	0	0	FALSE
LOC127482561	4.67221e-05	0.000828801	-107.592	-121.314	7	2	1306.48	0	0	FALSE
NOD1	4.75095e-05	0.000841813	-94.2524	-107.956	7	2	564.592	0	0	FALSE
SHMT2	4.75635e-05	0.000841815	-83.6645	-97.367	7	2	220.644	0	0	FALSE
IGFBP3	4.78888e-05	0.000846614	-117.685	-131.38	7	2	1019.6	0	0	FALSE
CLIC2	4.80396e-05	0.000847489	-98.9849	-112.676	7	2	469.186	0	0	FALSE
MANSC1	4.80468e-05	0.000847489	-98.2907	-111.982	7	2	620.807	0	0	FALSE
ZNF385D	4.82027e-05	0.00084928	-109.539	-123.226	7	2	852.353	0	0	FALSE
LOC100341926	4.84586e-05	0.00085268	-81.1533	-94.835	7	2	210.045	0	0	FALSE
LOC127488213	4.85048e-05	0.00085268	-83.4216	-97.1022	7	2	157.785	0	0	FALSE
DPEP1	4.89807e-05	0.00086008	-36.9206	-50.5904	7	2	7.10742	0	0	FALSE
NET1	4.92836e-05	0.000864427	-128.009	-141.672	7	2	3810.2	0	0	FALSE
WRNIP1	4.97158e-05	0.000871029	-93.5174	-107.171	7	2	757.461	0	0	FALSE
TNK2	5.01504e-05	0.000877661	-100.576	-114.219	7	2	869.456	0	0	FALSE
TNNI1	5.04776e-05	0.000882397	-73.5126	-87.1489	7	2	63.0919	0	0	FALSE
PRC1	5.11518e-05	0.000893185	-80.1581	-93.7796	7	2	112.445	0	0	FALSE
TRMT9B	5.15513e-05	0.000899156	-90.9441	-104.557	7	2	275.785	0	0	FALSE
CMBL	5.18157e-05	0.000902559	-112.075	-125.682	7	2	1048.83	0	0	FALSE
N4BP2L1	5.18619e-05	0.000902559	-87.1894	-100.796	7	2	315.362	0	0	FALSE
LOC100342135	5.26311e-05	0.000914926	-80.2733	-93.863	7	2	127.372	0	0	FALSE
BATF	5.28092e-05	0.000917002	-59.9927	-73.5786	7	2	26.3068	0	0	FALSE
MPP2	5.30432e-05	0.000920044	-82.8972	-96.4782	7	2	201.562	0	0	FALSE
RA_M006_JSM7BED4F	5.3309e-05	0.000923629	-169.016	-182.591	7	2	37603.2	0	0	FALSE
ZEB1	5.33932e-05	0.000924062	-120.565	-134.139	7	2	1975.79	0	0	FALSE
KNSTRN	5.34914e-05	0.000924739	-65.6497	-79.2214	7	2	49.9627	0	0	FALSE
TCF7L1	5.43295e-05	0.000937154	-81.7692	-95.3235	7	2	416.602	0	0	FALSE
GMPR	5.44229e-05	0.000937729	-102.357	-115.909	7	2	378.42	0	0	FALSE
RASAL2	5.52356e-05	0.000950685	-103.57	-117.106	7	2	1034.34	0	0	FALSE
SH3BP2	5.56503e-05	0.000956768	-97.7744	-111.302	7	2	524.958	0	0	FALSE
RGS19	5.57683e-05	0.000957744	-88.2283	-101.754	7	2	233.07	0	0	FALSE
PLBD2	5.70122e-05	0.000978032	-111.794	-125.294	7	2	1358.64	0	0	FALSE
POU3F1	5.87317e-05	0.00100642	-56.9238	-70.3913	7	2	27.9905	0	0	FALSE
PACSIN2	5.88656e-05	0.00100761	-97.6009	-111.066	7	2	861.588	0	0	FALSE
HROB	5.94578e-05	0.00101664	-42.4947	-55.9485	7	2	9.28028	0	0	FALSE
LOC108177974	5.99823e-05	0.00102211	-120.477	-133.921	7	2	1294.62	0	0	FALSE
PPP1R12B	5.98978e-05	0.00102211	-132.146	-145.591	7	2	4538.5	0	0	FALSE
PXDNL	5.9997e-05	0.00102211	-88.0019	-101.446	7	2	250.759	0	0	FALSE
RRM2	6.00394e-05	0.00102211	-76.0458	-89.4887	7	2	74.9763	0	0	FALSE
LOC100345097	6.05182e-05	0.00102914	-53.5632	-66.9973	7	2	25.5677	0	0	FALSE
LOC108175785	6.06004e-05	0.00102942	-65.4244	-78.8569	7	2	76.4315	0	0	FALSE
DNAJB4	6.07495e-05	0.00103083	-115.417	-128.847	7	2	1561.17	0	0	FALSE
TMEM158	6.10245e-05	0.00103437	-89.5738	-102.999	7	2	268.254	0	0	FALSE
BMAL2	6.43146e-05	0.00108896	-70.9659	-84.332	7	2	60.5356	0	0	FALSE
ANO4	6.46978e-05	0.00109308	-77.8422	-91.2017	7	2	106.997	0	0	FALSE
POLR3H	6.46557e-05	0.00109308	-82.7191	-96.0793	7	2	206.852	0	0	FALSE
CC2D2A	6.55422e-05	0.00110495	-86.8673	-100.212	7	2	387.947	0	0	FALSE
TENT5A	6.55286e-05	0.00110495	-121.185	-134.531	7	2	1989.44	0	0	FALSE
RUNX3	6.56735e-05	0.00110597	-62.9617	-76.3045	7	2	34.1409	0	0	FALSE
AKAP5	6.61354e-05	0.00111256	-82.8519	-96.1869	7	2	120.375	0	0	FALSE
MN1	6.67354e-05	0.00112144	-104.675	-118	7	2	661.549	0	0	FALSE
SH3BP1	6.68727e-05	0.00112254	-75.8665	-89.1891	7	2	103.869	0	0	FALSE
DPP3	6.70707e-05	0.001124	-88.6755	-101.995	7	2	411.499	0	0	FALSE
LOC100356144	6.71031e-05	0.001124	-105.929	-119.248	7	2	886.595	0	0	FALSE
GRN	6.71934e-05	0.0011243	-124.2	-137.518	7	2	2769.6	0	0	FALSE
ACSS1	6.75695e-05	0.00112846	-145.794	-159.105	7	2	5717.27	0	0	FALSE
YPEL1	6.75865e-05	0.00112846	-86.4249	-99.7356	7	2	333.642	0	0	FALSE
CRTAP	6.79353e-05	0.00113308	-122.432	-135.736	7	2	2508.09	0	0	FALSE
SH3D19	6.88341e-05	0.00114684	-117.26	-130.55	7	2	1787.05	0	0	FALSE
TRPM3	6.90967e-05	0.00114999	-88.3927	-101.679	7	2	189.845	0	0	FALSE
LRRC4	6.91811e-05	0.00115017	-75.2727	-88.5574	7	2	75.5993	0	0	FALSE
FOXN3	6.92941e-05	0.00115083	-114.09	-127.373	7	2	1724.82	0	0	FALSE
CD300A	6.97231e-05	0.00115672	-57.1284	-70.4043	7	2	24.3424	0	0	FALSE
KCNQ4	7.03625e-05	0.00116609	-84.2044	-97.4702	7	2	196.508	0	0	FALSE
SNX5	7.05478e-05	0.00116793	-100.277	-113.539	7	2	1134.64	0	0	FALSE
OGN	7.14772e-05	0.00118206	-172.059	-185.307	7	2	45385.6	0	0	FALSE
FAM114A1	7.24647e-05	0.00119712	-108.235	-121.468	7	2	1329.03	0	0	FALSE
SNX18	7.26665e-05	0.00119919	-103.031	-116.261	7	2	827.924	0	0	FALSE
TRPV2	7.28982e-05	0.00120174	-76.1779	-89.4041	7	2	129.155	0	0	FALSE
JCAD	7.41311e-05	0.00122078	-103.929	-117.137	7	2	1154.29	0	0	FALSE
TASL	7.47033e-05	0.00122891	-46.1585	-59.3574	7	2	12.0999	0	0	FALSE
FKBP10	7.56869e-05	0.00124378	-125.714	-138.898	7	2	4358.87	0	0	FALSE
SAMHD1	7.64774e-05	0.00125545	-104.463	-117.635	7	2	723.818	0	0	FALSE
FES	7.67218e-05	0.00125814	-89.5422	-102.711	7	2	443.675	0	0	FALSE
UBE2E1	7.68523e-05	0.00125896	-90.2312	-103.398	7	2	713.521	0	0	FALSE
PHLDA1	7.73032e-05	0.00126502	-94.379	-107.54	7	2	391.519	0	0	FALSE
IRAG1	7.78354e-05	0.0012724	-124.814	-137.967	7	2	2490.63	0	0	FALSE
KIF20B	7.84688e-05	0.00127751	-62.5645	-75.7084	7	2	47.6858	0	0	FALSE
LOC100353689	7.83242e-05	0.00127751	-69.6488	-82.7947	7	2	68.8434	0	0	FALSE
MARCHF1	7.84754e-05	0.00127751	-58.2153	-71.3591	7	2	26.4092	0	0	FALSE
SIAH2	7.83399e-05	0.00127751	-86.6172	-99.7629	7	2	322.486	0	0	FALSE
KRT19	7.8593e-05	0.0012781	-98.0765	-111.219	7	2	281.619	0	0	FALSE
LPCAT3	7.88232e-05	0.00128051	-86.9409	-100.08	7	2	460.405	0	0	FALSE
LOC127486976	7.89908e-05	0.0012819	-111.708	-124.844	7	2	881.475	0	0	FALSE
ASPH	8.08816e-05	0.00130986	-123.141	-136.251	7	2	3602.15	0	0	FALSE
LOC100355084	8.08194e-05	0.00130986	-44.8956	-58.0065	7	2	16.6237	0	0	FALSE
S100A8	8.10152e-05	0.00131067	-64.7568	-77.8649	7	2	36.8501	0	0	FALSE
SP100	8.13174e-05	0.0013142	-77.0382	-90.1422	7	2	105.302	0	0	FALSE
ANTXR2	8.16092e-05	0.00131755	-131.141	-144.241	7	2	4837.44	0	0	FALSE
CCDC8	8.31465e-05	0.00134098	-91.42	-104.499	7	2	408.873	0	0	FALSE
SSTR1	8.35309e-05	0.00134579	-69.9714	-83.0454	7	2	60.7767	0	0	FALSE
BMAL1	8.36955e-05	0.00134706	-79.2926	-92.3644	7	2	120.389	0	0	FALSE
ACTB	8.51642e-05	0.00136788	-170.187	-183.24	7	2	62803.8	0	0	FALSE
GMIP	8.51247e-05	0.00136788	-79.3703	-92.4231	7	2	161.346	0	0	FALSE
SPP1	8.55409e-05	0.00137252	-140.735	-153.783	7	2	5290.83	0	0	FALSE
AMOTL2	8.56874e-05	0.00137346	-100.648	-113.694	7	2	971.752	0	0	FALSE
PRDM16	8.61172e-05	0.00137893	-87.5208	-100.561	7	2	181.07	0	0	FALSE
LOC100352118	8.67568e-05	0.00138775	-68.5073	-81.5388	7	2	75.4129	0	0	FALSE
PAPPA2	8.68645e-05	0.00138806	-87.4837	-100.514	7	2	137.019	0	0	FALSE
ESAM	8.72747e-05	0.00139319	-100.505	-113.53	7	2	1137.09	0	0	FALSE
LOC127483424	8.86695e-05	0.00141401	-42.2828	-55.2899	7	2	11.2785	0	0	FALSE
NPTN	8.88796e-05	0.00141591	-118.727	-131.732	7	2	3326.23	0	0	FALSE
ITIH5	8.91267e-05	0.0014184	-96.812	-109.813	7	2	461.217	0	0	FALSE
FAM149A	8.94753e-05	0.0014225	-97.2121	-110.209	7	2	787.659	0	0	FALSE
ZWILCH	9.00022e-05	0.00142943	-58.4527	-71.4431	7	2	32.7931	0	0	FALSE
LOC108176676	9.05265e-05	0.00143629	-50.652	-63.6359	7	2	32.5936	0	0	FALSE
LOC127488905	9.06384e-05	0.00143661	-73.3754	-86.358	7	2	58.4174	0	0	FALSE
LOC108177987	9.1139e-05	0.00144308	-67.7305	-80.7069	7	2	43.5998	0	0	FALSE
MCRIP2	9.14664e-05	0.0014468	-114.024	-126.996	7	2	758.493	0	0	FALSE
KCNMB1	9.18824e-05	0.00145191	-125.276	-138.243	7	2	3199.15	0	0	FALSE
SIMC1	9.22699e-05	0.00145656	-77.6334	-90.5959	7	2	270.905	0	0	FALSE
LGALSL	9.39383e-05	0.0014814	-92.0779	-105.02	7	2	585.301	0	0	FALSE
PLCB4	9.64185e-05	0.00151898	-120.206	-133.119	7	2	1830.56	0	0	FALSE
PTPRO	9.67357e-05	0.00152244	-65.3357	-78.2453	7	2	37.2941	0	0	FALSE
GASK1B	9.71691e-05	0.00152773	-127.307	-140.212	7	2	2320.69	0	0	FALSE
SLCO2B1	9.95311e-05	0.00156329	-93.0819	-105.96	7	2	288.493	0	0	FALSE
CIAO2A	9.98562e-05	0.00156682	-90.5957	-103.47	7	2	362.233	0	0	FALSE
KIFC1	0.000100477	0.00157499	-69.2802	-82.1473	7	2	53.0741	0	0	FALSE
LOC127485355	0.000101044	0.00158228	-64.3204	-77.1811	7	2	40.8275	0	0	FALSE
PLXNB2	0.000101145	0.00158228	-108.222	-121.082	7	2	2240.65	0	0	FALSE
KIZ	0.000101409	0.00158482	-78.5093	-91.3661	7	2	351.643	0	0	FALSE
FILIP1L	0.000102338	0.00159774	-127.526	-140.372	7	2	2459.12	0	0	FALSE
LOC103349982	0.000103979	0.00162173	-79.9054	-92.7341	7	2	139.292	0	0	FALSE
LOC100351519	0.000104183	0.00162331	-66.1852	-79.0116	7	2	53.9423	0	0	FALSE
LOC108178478	0.000105611	0.00164383	-107.124	-119.935	7	2	630.014	0	0	FALSE
YY1	0.000105711	0.00164383	-90.179	-102.989	7	2	1311.9	0	0	FALSE
CEBPB	0.000106056	0.00164756	-98.8852	-111.692	7	2	762.267	0	0	FALSE
ANO10	0.000107783	0.00166899	-104.968	-117.757	7	2	1047.86	0	0	FALSE
DSCC1	0.000107897	0.00166899	-80.3122	-93.0994	7	2	108.876	0	0	FALSE
FAM167B	0.000108076	0.00166899	-72.9166	-85.7019	7	2	85.8012	0	0	FALSE
MARCHF3	0.000107763	0.00166899	-80.8044	-93.593	7	2	161.395	0	0	FALSE
SIRPA	0.000107996	0.00166899	-117.995	-130.781	7	2	2462.02	0	0	FALSE
ZSWIM4	0.000108052	0.00166899	-79.1075	-91.893	7	2	207.195	0	0	FALSE
TNFSF8	0.000109001	0.00168161	-59.4467	-72.2224	7	2	25.212	0	0	FALSE
RAB13	0.000109155	0.00168232	-101.791	-114.565	7	2	845.984	0	0	FALSE
DUSP5	0.00010959	0.00168736	-50.2646	-63.0343	7	2	19.9464	0	0	FALSE
BDNF	0.00011052	0.00169964	-84.9688	-97.7291	7	2	176.138	0	0	FALSE
UNC13D	0.000110605	0.00169964	-71.9389	-84.6983	7	2	57.2921	0	0	FALSE
SERPINB6	0.000110754	0.00170026	-110.386	-123.144	7	2	1257.89	0	0	FALSE
HAUS8	0.000111107	0.00170401	-63.658	-76.4123	7	2	46.2816	0	0	FALSE
DHX40	0.000111373	0.0017064	-96.8049	-109.556	7	2	674.578	0	0	FALSE
C1R	0.000111605	0.00170829	-149.637	-162.386	7	2	10155.3	0	0	FALSE
ADAM8	0.000112082	0.00171056	-80.6046	-93.3491	7	2	123.191	0	0	FALSE
LOC127486261	0.000112001	0.00171056	-59.7292	-72.4745	7	2	25.7115	0	0	FALSE
TNFRSF1A	0.000111923	0.00171056	-111.94	-124.686	7	2	1865.32	0	0	FALSE
LOC127482710	0.000113341	0.00172809	-89.7531	-102.485	7	2	205.535	0	0	FALSE
NRROS	0.000114149	0.00173871	-77.2035	-89.9275	7	2	113.47	0	0	FALSE
MYBPC3	0.000115855	0.00176126	-156.581	-169.288	7	2	10724.6	0	0	FALSE
SEMA3D	0.000115775	0.00176126	-117.795	-130.503	7	2	1275.01	0	0	FALSE
LOC100341051	0.000116318	0.00176487	-98.6739	-111.377	7	2	535.056	0	0	FALSE
SPRYD3	0.000116225	0.00176487	-94.4383	-107.142	7	2	1153.24	0	0	FALSE
CDK14	0.000117264	0.0017775	-97.0553	-109.749	7	2	590.901	0	0	FALSE
LOC100009107	0.000117485	0.00177912	-127.541	-140.233	7	2	2509.64	0	0	FALSE
ABCC4	0.000119414	0.00180658	-75.2116	-87.885	7	2	104.376	0	0	FALSE
LOC108177262	0.000119627	0.00180806	-124.759	-137.43	7	2	2214.68	0	0	FALSE
ABITRAM	0.000120103	0.00181	-75.4506	-88.1175	7	2	152.41	0	0	FALSE
NAV3	0.000120058	0.00181	-71.9574	-84.6248	7	2	89.1803	0	0	FALSE
PLA1A	0.000120012	0.00181	-65.917	-78.5847	7	2	47.4342	0	0	FALSE
NCAM1	0.000120226	0.00181011	-119.291	-131.957	7	2	3113.38	0	0	FALSE
CEP55	0.000120487	0.00181229	-56.8047	-69.468	7	2	21.2751	0	0	FALSE
LOC103351596	0.000121789	0.00183012	-57.8574	-70.5087	7	2	38.2236	0	0	FALSE
KDM6B	0.000122015	0.00183175	-90.329	-102.978	7	2	544.332	0	0	FALSE
CCNB2	0.000122753	0.00184106	-65.5701	-78.2125	7	2	39.1434	0	0	FALSE
DAZAP2	0.000123777	0.00185463	-107.274	-119.907	7	2	2689.12	0	0	FALSE
NFATC2	0.00012564	0.00187896	-79.1186	-91.7349	7	2	154.739	0	0	FALSE
MYL9	0.000126256	0.00188636	-174.565	-187.175	7	2	54067.9	0	0	FALSE
TMSB10	0.000127359	0.00190101	-141.603	-154.204	7	2	7014.33	0	0	FALSE
PRICKLE1	0.000128152	0.00191104	-76.9428	-89.5368	7	2	187.252	0	0	FALSE
GINS1	0.000128631	0.00191634	-41.5525	-54.1424	7	2	9.60339	0	0	FALSE
SCRG1	0.000128872	0.0019181	-86.4106	-98.9984	7	2	142.283	0	0	FALSE
KLHL11	0.000129395	0.00192406	-88.7087	-101.292	7	2	280.002	0	0	FALSE
LOC100350649	0.000129525	0.00192416	-62.1488	-74.7308	7	2	30.0188	0	0	FALSE
BEAN1	0.000129755	0.0019257	-83.1161	-95.6961	7	2	197.932	0	0	FALSE
DENND1A	0.000129875	0.0019257	-73.8278	-86.4069	7	2	315.688	0	0	FALSE
LOC100350709	0.000130501	0.00193315	-78.0873	-90.6609	7	2	97.5586	0	0	FALSE
SULF1	0.000130899	0.00193721	-102.459	-115.029	7	2	735.832	0	0	FALSE
RNF150	0.000132167	0.00195227	-87.23	-99.7894	7	2	211.148	0	0	FALSE
SOWAHD	0.000132138	0.00195227	-48.325	-60.8846	7	2	14.1297	0	0	FALSE
CHST3	0.000132789	0.00195961	-107.159	-119.713	7	2	1330.26	0	0	FALSE
LOC100346606	0.000133372	0.00196636	-60.1729	-72.7221	7	2	26.3245	0	0	FALSE
RASGRP4	0.000135688	0.00199862	-65.354	-77.8838	7	2	39.2698	0	0	FALSE
PPP2CB	0.000136985	0.00201392	-109.537	-122.056	7	2	1574.28	0	0	FALSE
TEAD4	0.000136908	0.00201392	-66.4067	-78.9265	7	2	83.4577	0	0	FALSE
GP1BB	0.000137445	0.00201879	-60.9716	-73.4869	7	2	34.812	0	0	FALSE
VMP1	0.000139404	0.00204564	-90.0003	-102.5	7	2	519.577	0	0	FALSE
MXD3	0.000140613	0.00205968	-53.3942	-65.8839	7	2	21.0691	0	0	FALSE
ST3GAL4	0.000140625	0.00205968	-120.796	-133.285	7	2	1638.89	0	0	FALSE
PLEKHG5	0.000140922	0.00206018	-103.38	-115.867	7	2	1021.18	0	0	FALSE
PTGIS	0.00014084	0.00206018	-142.421	-154.909	7	2	9096.77	0	0	FALSE
DST	0.000142019	0.00207428	-134.091	-146.57	7	2	6184.07	0	0	FALSE
ARHGAP25	0.000142326	0.00207681	-74.4158	-86.892	7	2	79.9118	0	0	FALSE
JAM3	0.000143658	0.002094	-98.5625	-111.028	7	2	919.447	0	0	FALSE
P2RY2	0.000143771	0.002094	-88.0423	-100.507	7	2	309.063	0	0	FALSE
TIFA	0.000144639	0.00210468	-81.145	-93.603	7	2	258.561	0	0	FALSE
KIF21B	0.000144866	0.00210602	-72.3886	-84.8448	7	2	70.6022	0	0	FALSE
FLVCR2	0.000146801	0.00213217	-68.7428	-81.184	7	2	55.8173	0	0	FALSE
MMP1	0.00014701	0.00213321	-62.14	-74.5796	7	2	35.9152	0	0	FALSE
CNNM3	0.000147268	0.00213394	-83.1592	-95.5969	7	2	409.083	0	0	FALSE
SULF2	0.000147333	0.00213394	-93.5777	-106.015	7	2	517.643	0	0	FALSE
CNBP	0.000148117	0.00214331	-109.971	-122.402	7	2	3611.74	0	0	FALSE
CPQ	0.000148409	0.00214555	-110.109	-122.538	7	2	1593.22	0	0	FALSE
OXSM	0.000148633	0.0021468	-74.2191	-86.6464	7	2	169.416	0	0	FALSE
PIMREG	0.000150057	0.00216536	-58.1793	-70.5959	7	2	22.6512	0	0	FALSE
LOC100349824	0.000152941	0.00220136	-159.915	-172.31	7	2	23516.8	0	0	FALSE
LOC127482754	0.000152974	0.00220136	-108.004	-120.399	7	2	1564.53	0	0	FALSE
MPRIP	0.000152729	0.00220136	-130.21	-142.607	7	2	5711.08	0	0	FALSE
GPRC5A	0.000153581	0.00220659	-80.4501	-92.8405	7	2	128.773	0	0	FALSE
RAB20	0.00015362	0.00220659	-72.8766	-85.2668	7	2	62.8126	0	0	FALSE
HOMER3	0.000154501	0.00221721	-76.4545	-88.8382	7	2	116.507	0	0	FALSE
ALG2	0.000155447	0.0022267	-68.8285	-81.2054	7	2	158.81	0	0	FALSE
CDCA3	0.000155323	0.0022267	-58.4594	-70.8372	7	2	26.2476	0	0	FALSE
TEAD3	0.000155608	0.00222696	-106.734	-119.11	7	2	1134.32	0	0	FALSE
CDKN2B	0.000156049	0.00223122	-63.5143	-75.8868	7	2	60.3882	0	0	FALSE
BNIPL	0.000156329	0.00223319	-51.0777	-63.4482	7	2	15.2548	0	0	FALSE
GPIHBP1	0.000157764	0.00225163	-97.2469	-109.607	7	2	289.029	0	0	FALSE
PDGFB	0.000158443	0.00225926	-91.1123	-103.468	7	2	284.247	0	0	FALSE
SLC38A3	0.000158635	0.00225993	-86.2061	-98.5601	7	2	200.291	0	0	FALSE
LOC103346247	0.000159001	0.00226309	-31.4035	-43.7549	7	2	5.67383	0	0	FALSE
PTBP1	0.000159405	0.00226676	-102.067	-114.416	7	2	2084.25	0	0	FALSE
PTPN21	0.000160772	0.00228413	-107.061	-119.4	7	2	1746.91	0	0	FALSE
SLC66A3	0.000162421	0.00230547	-97.6779	-110.005	7	2	802.561	0	0	FALSE
CSGALNACT2	0.000163368	0.00231679	-109.517	-121.838	7	2	1288.54	0	0	FALSE
AK5	0.000164311	0.00232807	-92.3679	-104.682	7	2	303.583	0	0	FALSE
APCDD1	0.000165624	0.00234237	-112.424	-124.729	7	2	1291.86	0	0	FALSE
CXCR2	0.00016577	0.00234237	-48.1291	-60.4335	7	2	13.5354	0	0	FALSE
PTGIR	0.000165725	0.00234237	-77.9374	-90.2421	7	2	109.3	0	0	FALSE
HNMT	0.000166379	0.00234885	-81.7621	-94.0624	7	2	177.603	0	0	FALSE
LAMB2	0.000168786	0.00237913	-128.249	-140.533	7	2	7514.58	0	0	FALSE
STEAP3	0.000168828	0.00237913	-75.2977	-87.5815	7	2	88.9615	0	0	FALSE
UBTD1	0.000170478	0.00240021	-87.814	-100.087	7	2	354.818	0	0	FALSE
METRNL	0.000170682	0.00240092	-88.1124	-100.384	7	2	270.363	0	0	FALSE
SEMA3E	0.000171985	0.00241707	-92.7638	-105.027	7	2	198.029	0	0	FALSE
COLQ	0.000172248	0.00241859	-86.9759	-99.2372	7	2	140.867	0	0	FALSE
MMP14	0.000176128	0.00247085	-121.217	-133.453	7	2	1979.38	0	0	FALSE
HBEGF	0.000176866	0.00247898	-77.9599	-90.1913	7	2	108.243	0	0	FALSE
RAD51	0.000177269	0.0024824	-56.6181	-68.847	7	2	25.9123	0	0	FALSE
RSU1	0.000178888	0.00250283	-108.8	-121.018	7	2	1551.38	0	0	FALSE
GIMAP4	0.00017931	0.00250648	-70.5786	-82.7946	7	2	57.656	0	0	FALSE
DES	0.000179616	0.00250852	-153.863	-166.077	7	2	9520.27	0	0	FALSE
AXIN2	0.000180481	0.00251386	-89.6378	-101.846	7	2	325.022	0	0	FALSE
GAN	0.000180342	0.00251386	-87.1204	-99.3298	7	2	394.045	0	0	FALSE
SLC46A2	0.000180387	0.00251386	-53.1781	-65.3873	7	2	20.3634	0	0	FALSE
SUSD1	0.000181277	0.0025227	-57.1979	-69.4015	7	2	27.8988	0	0	FALSE
LOC100346411	0.000182013	0.00252656	-139.739	-151.938	7	2	4063.12	0	0	FALSE
TTC28	0.000182039	0.00252656	-102.563	-114.762	7	2	799.504	0	0	FALSE
XIRP1	0.000181768	0.00252656	-125.617	-137.818	7	2	1531.84	0	0	FALSE
SRF	0.000183131	0.00253946	-112.655	-124.848	7	2	1629.31	0	0	FALSE
FMN1	0.000183441	0.00254151	-42.0703	-54.2606	7	2	8.35568	0	0	FALSE
PDE7B	0.000184339	0.00254942	-78.6652	-90.85	7	2	130.33	0	0	FALSE
SYDE1	0.000184206	0.00254942	-99.3915	-111.577	7	2	973.414	0	0	FALSE
CCN4	0.000184517	0.00254963	-92.6885	-104.872	7	2	265.93	0	0	FALSE
EFNB2	0.000185504	0.002561	-117.906	-130.083	7	2	1479.09	0	0	FALSE
LOC100346561	0.000185755	0.0025622	-113.523	-125.699	7	2	1405.38	0	0	FALSE
TCF19	0.000185953	0.00256267	-65.5508	-77.7257	7	2	39.4356	0	0	FALSE
P2RY12	0.000186717	0.00257093	-65.2879	-77.4582	7	2	47.7706	0	0	FALSE
ZNF853	0.000188193	0.00258899	-93.7795	-105.941	7	2	494.097	0	0	FALSE
CPE	0.000189554	0.00260541	-122.813	-134.966	7	2	2019.5	0	0	FALSE
AK2	0.000189746	0.00260576	-101.04	-113.192	7	2	787.141	0	0	FALSE
SIPA1	0.000189924	0.00260592	-92.1289	-104.28	7	2	568.283	0	0	FALSE
ATL2	0.000191955	0.00263147	-94.2993	-106.438	7	2	594.193	0	0	FALSE
ZNF275	0.000192969	0.00264305	-80.0109	-92.1441	7	2	308.374	0	0	FALSE
NUP210	0.000193196	0.00264384	-84.2967	-96.4285	7	2	145.472	0	0	FALSE
CDK18	0.000194418	0.00265675	-102.675	-114.8	7	2	382.972	0	0	FALSE
TGFB1	0.000194479	0.00265675	-104.492	-116.616	7	2	720.522	0	0	FALSE
LOC100341013	0.000195705	0.00267116	-59.202	-71.3192	7	2	24.7789	0	0	FALSE
ASF1B	0.000195909	0.00267161	-54.6307	-66.7467	7	2	20.3774	0	0	FALSE
PALMD	0.000196281	0.00267435	-98.0292	-110.143	7	2	579.679	0	0	FALSE
C1QL3	0.000196456	0.00267441	-60.1719	-72.2848	7	2	33.6463	0	0	FALSE
BOLA3	0.000197193	0.0026821	-101.702	-113.811	7	2	414.573	0	0	FALSE
LOC100346670	0.00019974	0.00271438	-133.291	-145.386	7	2	2937.12	0	0	FALSE
LOC127484662	0.000202224	0.00274575	-66.0403	-78.1206	7	2	54.029	0	0	FALSE
ARHGAP11A	0.000205776	0.00279156	-59.7353	-71.7959	7	2	25.0421	0	0	FALSE
RN18S	0.000207068	0.00280664	-200.07	-212.123	7	2	178827	0	0	FALSE
LOC127485529	0.000207707	0.00281286	-135.673	-147.723	7	2	3068.67	0	0	FALSE
NOTCH2	0.000208068	0.00281532	-103.733	-115.781	7	2	1499.68	0	0	FALSE
LOC103351810	0.000208585	0.00281986	-62.7424	-74.7877	7	2	31.2759	0	0	FALSE
CLEC7A	0.000210096	0.00283784	-63.9534	-75.9905	7	2	33.1839	0	0	FALSE
ZHX3	0.000211167	0.00284985	-107.286	-119.317	7	2	1617.31	0	0	FALSE
VEGFA	0.000212585	0.00286651	-118.101	-130.125	7	2	1475.68	0	0	FALSE
KCNIP1	0.000212905	0.00286835	-48.224	-60.2461	7	2	12.6203	0	0	FALSE
IFFO2	0.000214058	0.0028814	-92.3558	-104.372	7	2	419.33	0	0	FALSE
NME4	0.000215256	0.00289503	-110.912	-122.922	7	2	721.23	0	0	FALSE
PIK3CG	0.000215623	0.00289747	-69.2648	-81.2726	7	2	52.8287	0	0	FALSE
SEMA3F	0.000216671	0.00290905	-99.095	-111.097	7	2	1058.96	0	0	FALSE
STT3B	0.000217841	0.00292225	-118.866	-130.863	7	2	2350.61	0	0	FALSE
AGAP2	0.000218239	0.00292508	-68.7625	-80.7567	7	2	64.6345	0	0	FALSE
ITGA9	0.000219096	0.00293002	-83.0094	-94.9991	7	2	139.976	0	0	FALSE
NUMBL	0.000219165	0.00293002	-91.135	-103.124	7	2	644.582	0	0	FALSE
PCNX1	0.00021917	0.00293002	-102.996	-114.985	7	2	863.475	0	0	FALSE
LOC100144340	0.000222032	0.00296335	-90.0785	-102.053	7	2	480.42	0	0	FALSE
LRP2	0.000222043	0.00296335	-74.2153	-86.1899	7	2	64.0612	0	0	FALSE
MC5R	0.0002245	0.00299359	-73.1297	-85.0919	7	2	58.0666	0	0	FALSE
KLHL34	0.000227057	0.0030251	-82.3435	-94.2929	7	2	117.116	0	0	FALSE
GSDMD	0.00022764	0.00303028	-78.8128	-90.7593	7	2	128.338	0	0	FALSE
ROBO1	0.000232467	0.00309191	-87.9374	-99.8602	7	2	347.072	0	0	FALSE
NPY5R	0.000233942	0.00310369	-70.9016	-82.8172	7	2	60.7443	0	0	FALSE
SDK1	0.000233784	0.00310369	-96.7017	-108.618	7	2	483.868	0	0	FALSE
SP2	0.00023403	0.00310369	-76.9665	-88.8816	7	2	335.907	0	0	FALSE
TM7SF3	0.000234147	0.00310369	-90.0865	-102.001	7	2	722.118	0	0	FALSE
KRT32	0.000234896	0.00311098	-86.0975	-98.0085	7	2	129.299	0	0	FALSE
MIX23	0.000236839	0.00313405	-76.2469	-88.1486	7	2	133.993	0	0	FALSE
DDIT4L	0.000238111	0.00314823	-91.4508	-103.346	7	2	180.44	0	0	FALSE
BMP10	0.000241398	0.00318898	-47.185	-59.0651	7	2	30.4522	0	0	FALSE
MAPKAPK3	0.000241922	0.00319321	-100.768	-112.646	7	2	595.896	0	0	FALSE
TM4SF18	0.000242128	0.00319323	-82.4566	-94.3333	7	2	154.715	0	0	FALSE
NLRX1	0.000243118	0.00320358	-82.627	-94.499	7	2	277.618	0	0	FALSE
DLX3	0.000244087	0.00321364	-43.7334	-55.601	7	2	9.45919	0	0	FALSE
LOC100356848	0.000245438	0.00322871	-51.3827	-63.244	7	2	14.7436	0	0	FALSE
LOC100347316	0.000246393	0.00323854	-83.6712	-95.5281	7	2	166.024	0	0	FALSE
LOC127486002	0.00024721	0.00324655	-113.092	-124.945	7	2	1604.73	0	0	FALSE
GNAT1	0.000247572	0.00324858	-37.3789	-49.2305	7	2	6.1511	0	0	FALSE
MEIS3	0.000251508	0.00329746	-87.4366	-99.2703	7	2	203.144	0	0	FALSE
LRRC39	0.00025185	0.00329917	-107.649	-119.481	7	2	496.629	0	0	FALSE
NYAP1	0.000254845	0.00333562	-78.6814	-90.5002	7	2	247.817	0	0	FALSE
EPHX2	0.000256077	0.00334054	-117.276	-129.09	7	2	1323.82	0	0	FALSE
LOC100337966	0.000255937	0.00334054	-122.913	-134.727	7	2	1572.52	0	0	FALSE
LOC127486042	0.000255839	0.00334054	-69.387	-81.2013	7	2	63.747	0	0	FALSE
SLN	0.000255801	0.00334054	-96.2428	-108.057	7	2	525.74	0	0	FALSE
RALB	0.00025754	0.00335683	-99.9334	-111.74	7	2	798.411	0	0	FALSE
CD180	0.000258149	0.00336196	-51.4581	-63.2623	7	2	15.5574	0	0	FALSE
BDKRB1	0.000259034	0.00336606	-82.8035	-94.6038	7	2	124.946	0	0	FALSE
SEPTIN2	0.00025911	0.00336606	-118.538	-130.338	7	2	5384.31	0	0	FALSE
TRIM54	0.000258843	0.00336606	-108.089	-119.89	7	2	548.691	0	0	FALSE
ANKRD45	0.00026062	0.00338006	-57.3354	-69.1288	7	2	60.8365	0	0	FALSE
ID2	0.000260609	0.00338006	-115.243	-127.036	7	2	1116.32	0	0	FALSE
AMER1	0.000263618	0.00341328	-82.1639	-93.9444	7	2	264.221	0	0	FALSE
TEC	0.000263476	0.00341328	-73.004	-84.785	7	2	122.229	0	0	FALSE
LOC100339625	0.000264028	0.00341575	-116.421	-128.2	7	2	1732.36	0	0	FALSE
CKAP2L	0.000264309	0.00341656	-60.2022	-71.9796	7	2	30.2103	0	0	FALSE
PTPN23	0.000265709	0.00343181	-87.6944	-99.4659	7	2	952.212	0	0	FALSE
SCLT1	0.000266134	0.00343447	-55.4709	-67.2406	7	2	46.01	0	0	FALSE
CCDC74B	0.000268621	0.00346084	-62.2213	-73.9805	7	2	29.8661	0	0	FALSE
PATZ1	0.000268568	0.00346084	-84.0557	-95.8151	7	2	515.063	0	0	FALSE
AIG1	0.00027068	0.0034845	-92.0678	-103.818	7	2	629.296	0	0	FALSE
CLIC4	0.000272054	0.00349931	-148.089	-159.834	7	2	13446.8	0	0	FALSE
MAOB	0.000272345	0.00350018	-120.156	-131.899	7	2	3417.98	0	0	FALSE
IL1RAP	0.00027389	0.00351713	-63.3936	-75.1308	7	2	64.322	0	0	FALSE
LOC103348750	0.000274972	0.00352813	-68.0033	-79.736	7	2	47.4661	0	0	FALSE
LOC103351402	0.000275628	0.00353365	-61.3199	-73.0499	7	2	28.8316	0	0	FALSE
GIMAP8	0.000276063	0.00353632	-56.9195	-68.6477	7	2	23.4019	0	0	FALSE
IGF1R	0.000277033	0.00354585	-103.946	-115.671	7	2	992.878	0	0	FALSE
APPL2	0.000277377	0.00354734	-77.1884	-88.9112	7	2	351.014	0	0	FALSE
EVA1A	0.000277935	0.00355157	-69.0983	-80.8188	7	2	96.846	0	0	FALSE
LOC100358359	0.000278456	0.00355241	-95.0459	-106.764	7	2	500.003	0	0	FALSE
RAB39A	0.00027826	0.00355241	-44.2005	-55.9197	7	2	11.6747	0	0	FALSE
RHBDL2	0.000279359	0.00356103	-45.1725	-56.8873	7	2	11.6934	0	0	FALSE
MAPRE2	0.000279791	0.00356363	-118.267	-129.98	7	2	2382.57	0	0	FALSE
RIPOR3	0.000281546	0.00358307	-67.5398	-79.2457	7	2	41.2976	0	0	FALSE
MYLK	0.000282242	0.003589	-148.76	-160.463	7	2	7066.83	0	0	FALSE
ITGA4	0.000282715	0.00359209	-71.1243	-82.8255	7	2	64.9452	0	0	FALSE
LOC103351715	0.000283517	0.00359687	-39.9878	-51.6858	7	2	7.67599	0	0	FALSE
UBE2T	0.000283551	0.00359687	-48.775	-60.4728	7	2	13.2296	0	0	FALSE
CC2D1B	0.000288246	0.00365345	-84.5177	-96.1969	7	2	644.018	0	0	FALSE
GPX1	0.000290178	0.00367496	-135.696	-147.367	7	2	5363.52	0	0	FALSE
LHFPL6	0.000291273	0.00368584	-136.751	-148.419	7	2	6137.95	0	0	FALSE
IL17D	0.000291788	0.00368937	-70.0312	-81.6966	7	2	119.683	0	0	FALSE
TM4SF19	0.000292275	0.00369254	-65.3378	-77.0013	7	2	39.9629	0	0	FALSE
AOX1	0.000295028	0.00371831	-70.7979	-82.4508	7	2	49.7227	0	0	FALSE
ARHGEF25	0.000294851	0.00371831	-115.01	-126.663	7	2	2325.36	0	0	FALSE
MEAK7	0.000294736	0.00371831	-66.3711	-78.0251	7	2	91.9102	0	0	FALSE
AJUBA	0.000297526	0.00374677	-100.549	-112.192	7	2	615.151	0	0	FALSE
RFLNB	0.000297928	0.00374881	-97.9296	-109.571	7	2	525.979	0	0	FALSE
GINS4	0.00029857	0.00375244	-45.1136	-56.753	7	2	11.3398	0	0	FALSE
PTGDR2	0.000298697	0.00375244	-39.4772	-51.1161	7	2	7.88018	0	0	FALSE
ENG	0.000301995	0.00378832	-122.823	-134.45	7	2	2275.56	0	0	FALSE
KCNE3	0.000302038	0.00378832	-76.3666	-87.9929	7	2	83.4158	0	0	FALSE
PRSS56	0.000302296	0.00378852	-64.5918	-76.2171	7	2	39.203	0	0	FALSE
ECM1	0.000303724	0.00380336	-119.481	-131.101	7	2	1228.62	0	0	FALSE
MLF1	0.000304167	0.00380586	-102.719	-114.337	7	2	369.798	0	0	FALSE
MAML1	0.000304929	0.00381105	-82.975	-94.5905	7	2	404.544	0	0	FALSE
MPC2	0.000305313	0.00381105	-119.905	-131.519	7	2	1826.83	0	0	FALSE
SF1	0.000305287	0.00381105	-109.739	-121.353	7	2	2864.48	0	0	FALSE
CABIN1	0.000307094	0.00382411	-107.745	-119.352	7	2	1182.7	0	0	FALSE
HPRT1	0.000306856	0.00382411	-89.8747	-101.483	7	2	371.667	0	0	FALSE
SYNPO2	0.00030692	0.00382411	-145.282	-156.89	7	2	7879.58	0	0	FALSE
ADCY10	0.000308317	0.0038332	-82.663	-94.2659	7	2	259.025	0	0	FALSE
PRKG1	0.000308178	0.0038332	-120.033	-131.637	7	2	1615.52	0	0	FALSE
RELL2	0.000308559	0.0038332	-66.8901	-78.4921	7	2	64.4555	0	0	FALSE
EZR	0.00031113	0.00386206	-100.155	-111.748	7	2	416.02	0	0	FALSE
IPO8	0.000313224	0.00388497	-89.9017	-101.487	7	2	604.779	0	0	FALSE
BAX	0.000314726	0.00390024	-84.8885	-96.468	7	2	309.682	0	0	FALSE
ZFPM2	0.000314954	0.00390024	-90.4118	-101.991	7	2	403.128	0	0	FALSE
HMGN5	0.000315875	0.00390069	-82.7474	-94.3228	7	2	194.861	0	0	FALSE
SMIM14	0.000315868	0.00390069	-114.787	-126.362	7	2	1494.32	0	0	FALSE
TECRL	0.000315438	0.00390069	-120.969	-132.546	7	2	1128.39	0	0	FALSE
TRIM7	0.000315989	0.00390069	-69.1378	-80.7128	7	2	83.5931	0	0	FALSE
CDKN2C	0.0003187	0.00392248	-81.7065	-93.2718	7	2	260.075	0	0	FALSE
LOXL4	0.000318657	0.00392248	-84.5536	-96.119	7	2	218.967	0	0	FALSE
MAP2	0.000318758	0.00392248	-115.735	-127.3	7	2	1560.75	0	0	FALSE
RAC1	0.000318353	0.00392248	-110.068	-121.635	7	2	3472.26	0	0	FALSE
VNN1	0.000319934	0.00393386	-92.3139	-103.875	7	2	255.907	0	0	FALSE
MRPL47	0.000322493	0.0039622	-79.0642	-90.6161	7	2	212.74	0	0	FALSE
LIN7C	0.000323311	0.00396913	-108.043	-119.592	7	2	1092.19	0	0	FALSE
DVL2	0.00032444	0.00397987	-87.9743	-99.5194	7	2	491.398	0	0	FALSE
STRIP1	0.000324876	0.00398208	-88.4299	-99.9734	7	2	614.321	0	0	FALSE
AGO1	0.000327108	0.00400105	-93.0457	-104.581	7	2	598.433	0	0	FALSE
CREB5	0.000327207	0.00400105	-101.091	-112.626	7	2	476.135	0	0	FALSE
GAB3	0.00032675	0.00400105	-62.2336	-73.7706	7	2	63.0332	0	0	FALSE
NDC80	0.000327447	0.00400105	-55.6271	-67.1616	7	2	20.4567	0	0	FALSE
NDUFB1	0.000330338	0.00403088	-101.121	-112.645	7	2	481	0	0	FALSE
PCED1B	0.000330662	0.00403088	-49.315	-60.8385	7	2	12.958	0	0	FALSE
PHC1	0.000330422	0.00403088	-81.5476	-93.0719	7	2	332.166	0	0	FALSE
ATG4A	0.000332132	0.00404565	-80.3349	-91.8533	7	2	260.451	0	0	FALSE
ABTB3	0.000334465	0.00407089	-76.9188	-88.4293	7	2	131.224	0	0	FALSE
CTSB	0.000336119	0.00408466	-140.751	-152.256	7	2	9098.92	0	0	FALSE
NFIL3	0.000336046	0.00408466	-88.9605	-100.466	7	2	256.128	0	0	FALSE
SLC16A5	0.000338293	0.00410788	-40.4431	-51.9406	7	2	8.05015	0	0	FALSE
MYH8	0.000338752	0.00411027	-68.6498	-80.1459	7	2	74.5074	0	0	FALSE
LMOD2	0.000340533	0.00412866	-131.252	-142.742	7	2	2292.14	0	0	FALSE
TPM2	0.000341346	0.00413531	-165.493	-176.981	7	2	31521.5	0	0	FALSE
NAGA	0.000344556	0.00417097	-96.4288	-107.906	7	2	730.724	0	0	FALSE
KMT5A	0.00034492	0.00417214	-92.2318	-103.707	7	2	872.465	0	0	FALSE
RAB11FIP3	0.00034559	0.00417702	-100.908	-112.382	7	2	1228.91	0	0	FALSE
UBE2C	0.000347325	0.00419474	-66.5701	-78.0377	7	2	40.7219	0	0	FALSE
IRAG2	0.000348162	0.0042016	-61.2751	-72.74	7	2	27.1779	0	0	FALSE
MYL3	0.000349118	0.00420989	-165.692	-177.153	7	2	21313.8	0	0	FALSE
PKN3	0.000349806	0.00421493	-77.2866	-88.7461	7	2	116.014	0	0	FALSE
SIPA1L3	0.000351123	0.00422755	-83.7902	-95.2455	7	2	347.047	0	0	FALSE
MMP12	0.000354383	0.00425696	-111.322	-122.767	7	2	1062.63	0	0	FALSE
SFXN3	0.000354137	0.00425696	-107.16	-118.605	7	2	1632.81	0	0	FALSE
SH3D21	0.000353937	0.00425696	-69.7954	-81.2416	7	2	51.6563	0	0	FALSE
KLF7	0.000355123	0.00426257	-97.2597	-108.702	7	2	517.578	0	0	FALSE
KYNU	0.000357134	0.00428341	-36.0216	-47.4576	7	2	6.05924	0	0	FALSE
ADAMTS4	0.00035743	0.00428368	-74.9885	-86.4235	7	2	91.7486	0	0	FALSE
FUNDC1	0.000359797	0.00430544	-80.9685	-92.3961	7	2	341.869	0	0	FALSE
TTL	0.000359733	0.00430544	-77.4801	-88.9078	7	2	278.019	0	0	FALSE
ELK1	0.000361774	0.00432578	-84.2056	-95.6269	7	2	413.462	0	0	FALSE
TBC1D1	0.00036241	0.00433008	-91.8609	-103.28	7	2	490.63	0	0	FALSE
CENPE	0.000364231	0.00434852	-59.6366	-71.0502	7	2	25.4597	0	0	FALSE
MRAS	0.000366224	0.00436564	-91.337	-102.744	7	2	690.987	0	0	FALSE
SAT2	0.000365991	0.00436564	-68.481	-79.8891	7	2	155.704	0	0	FALSE
F2R	0.000367414	0.00437648	-85.9968	-97.4005	7	2	323.288	0	0	FALSE
LOC100341279	0.00036782	0.00437798	-86.596	-97.9984	7	2	645.249	0	0	FALSE
LGALS3	0.000368706	0.00438518	-119.551	-130.951	7	2	1662.67	0	0	FALSE
LOC100342978	0.000369618	0.00439269	-53.0187	-64.4156	7	2	16.0722	0	0	FALSE
MRPL14	0.00037268	0.00442571	-90.9764	-102.364	7	2	341.716	0	0	FALSE
RASSF5	0.000374319	0.00444181	-71.0135	-82.396	7	2	138.652	0	0	FALSE
NAF1	0.000375474	0.00444876	-94.36	-105.739	7	2	466.045	0	0	FALSE
THBS3	0.00037546	0.00444876	-100.052	-111.431	7	2	1055.84	0	0	FALSE
LOC100348313	0.000376266	0.00445476	-74.5612	-85.9378	7	2	63.8164	0	0	FALSE
CX3CR1	0.000381204	0.00450783	-71.4807	-82.8425	7	2	69.0973	0	0	FALSE
GEMIN6	0.000381325	0.00450783	-64.9755	-76.337	7	2	90.2737	0	0	FALSE
LOC127491077	0.000383065	0.00452497	-74.1727	-85.529	7	2	62.0247	0	0	FALSE
FAM78A	0.000385211	0.00454688	-102.43	-113.78	7	2	369.461	0	0	FALSE
SLC35D2	0.000386111	0.00455407	-53.5417	-64.889	7	2	24.9477	0	0	FALSE
TOR1AIP1	0.00038988	0.00459505	-98.9924	-110.329	7	2	891.088	0	0	FALSE
LOC100357498	0.000391679	0.00461277	-43.671	-55.002	7	2	10.848	0	0	FALSE
RNF180	0.00039299	0.00462474	-82.756	-94.0832	7	2	211.75	0	0	FALSE
APOE	0.000393333	0.00462528	-146.546	-157.873	7	2	7373.32	0	0	FALSE
LOC100354980	0.000394069	0.00463046	-57.0533	-68.3774	7	2	27.3113	0	0	FALSE
MS4A2	0.000395247	0.00464081	-38.7347	-50.0553	7	2	6.72273	0	0	FALSE
CMYA5	0.000402514	0.00472259	-131.02	-142.32	7	2	2157.67	0	0	FALSE
CISH	0.000403484	0.00473042	-103.961	-115.258	7	2	490.109	0	0	FALSE
FKBP3	0.000403958	0.00473243	-100.662	-111.958	7	2	781.174	0	0	FALSE
STRADB	0.000407193	0.00476675	-87.407	-98.6937	7	2	305.635	0	0	FALSE
HCAR1	0.000407939	0.0047719	-76.6057	-87.8904	7	2	87.7424	0	0	FALSE
FMC1	0.000408791	0.0047783	-94.9911	-106.273	7	2	365.742	0	0	FALSE
GUSB	0.000411329	0.00480437	-104.656	-115.931	7	2	686.201	0	0	FALSE
LOC100348481	0.000413197	0.00482139	-68.1853	-79.4554	7	2	58.2017	0	0	FALSE
SMS	0.000413403	0.00482139	-92.736	-104.006	7	2	762.528	0	0	FALSE
PLEKHG2	0.000414963	0.00483597	-97.8466	-109.112	7	2	773.742	0	0	FALSE
LOC103346581	0.000416053	0.00484507	-45.957	-57.2192	7	2	12.8196	0	0	FALSE
PDK3	0.000417975	0.00486382	-95.9594	-107.216	7	2	661.406	0	0	FALSE
NDUFA5	0.000418793	0.00486971	-87.1856	-98.4403	7	2	219.94	0	0	FALSE
TSPO	0.000421916	0.00490238	-106.085	-117.331	7	2	904.437	0	0	FALSE
LTF	0.000423941	0.00491222	-43.6582	-54.899	7	2	9.42333	0	0	FALSE
PPL	0.00042402	0.00491222	-93.463	-104.704	7	2	521.465	0	0	FALSE
PPP1R14A	0.000423622	0.00491222	-128.71	-139.952	7	2	3149.85	0	0	FALSE
TLR4	0.000423859	0.00491222	-91.7882	-103.029	7	2	231.975	0	0	FALSE
LOC103348133	0.000427684	0.00495099	-68.2946	-79.5254	7	2	72.9714	0	0	FALSE
LOC103348556	0.000429855	0.00497244	-103.721	-114.946	7	2	761.709	0	0	FALSE
RTN4RL1	0.000433379	0.00500951	-97.4821	-108.698	7	2	586.404	0	0	FALSE
LOC100340733	0.000433806	0.00501073	-41.0381	-52.2527	7	2	9.63771	0	0	FALSE
CTSH	0.000438312	0.00505819	-108.04	-119.243	7	2	1133.55	0	0	FALSE
NAV2	0.000438562	0.00505819	-92.5108	-103.713	7	2	243.619	0	0	FALSE
STK10	0.00044123	0.00508521	-80.3223	-91.5176	7	2	178.871	0	0	FALSE
HTRA4	0.000445555	0.00513111	-69.5093	-80.6935	7	2	50.453	0	0	FALSE
TREX1	0.00044587	0.00513111	-82.498	-93.6813	7	2	196.36	0	0	FALSE
CD200R1	0.000449011	0.00515966	-57.2814	-68.4567	7	2	24.4149	0	0	FALSE
EFNA1	0.000450884	0.00517621	-89.965	-101.136	7	2	479.903	0	0	FALSE
LIN52	0.000451113	0.00517621	-80.6788	-91.8489	7	2	239.731	0	0	FALSE
APOBEC2	0.000453114	0.00519535	-114.599	-125.764	7	2	749.007	0	0	FALSE
UQCRQ	0.000454854	0.00521148	-136.547	-147.708	7	2	3460.14	0	0	FALSE
LOC127486741	0.000455989	0.00522066	-69.2105	-80.3683	7	2	49.7665	0	0	FALSE
COPG1	0.000457727	0.00523672	-109.764	-120.917	7	2	2071.39	0	0	FALSE
KCNQ1	0.000458436	0.00524099	-64.8036	-75.9553	7	2	37.3558	0	0	FALSE
ACAN	0.000465957	0.00532308	-119.246	-130.379	7	2	1417.22	0	0	FALSE
PDZRN3	0.0004677	0.00533909	-106.541	-117.669	7	2	1184.16	0	0	FALSE
PPIF	0.000471572	0.00537937	-120.941	-132.061	7	2	1130.92	0	0	FALSE
CEBPD	0.000476129	0.00542738	-128.32	-139.428	7	2	2596.13	0	0	FALSE
NTN4	0.000478907	0.00545461	-110.017	-121.119	7	2	1799.96	0	0	FALSE
CD5L	0.000482561	0.00548072	-99.6151	-110.708	7	2	311.136	0	0	FALSE
KIRREL1	0.000481867	0.00548072	-110.771	-121.866	7	2	1504.44	0	0	FALSE
STXBP2	0.000482365	0.00548072	-74.9758	-86.0694	7	2	76.4546	0	0	FALSE
GJA4	0.000483435	0.00548665	-92.2142	-103.305	7	2	270.859	0	0	FALSE
LOC100350556	0.000486141	0.00550937	-88.918	-100.003	7	2	579.601	0	0	FALSE
TWSG1	0.000489827	0.00554712	-102.22	-113.296	7	2	1143.25	0	0	FALSE
SGPL1	0.000491841	0.00556589	-96.391	-107.462	7	2	410.208	0	0	FALSE
LOC103350420	0.000496022	0.00560914	-67.9109	-78.9727	7	2	64.0331	0	0	FALSE
LATS2	0.000499567	0.00564515	-104.06	-115.114	7	2	843.213	0	0	FALSE
FGF23	0.000502539	0.00567062	-60.8481	-71.895	7	2	31.7991	0	0	FALSE
NDUFA4	0.00050291	0.00567062	-135.108	-146.154	7	2	3251.5	0	0	FALSE
GRAMD1B	0.000506325	0.005705	-83.9443	-94.9826	7	2	174.959	0	0	FALSE
MYL2	0.000507345	0.00571238	-176.418	-187.454	7	2	37813.2	0	0	FALSE
LOC100354870	0.000508599	0.00571996	-63.8299	-74.863	7	2	31.7116	0	0	FALSE
SCRN1	0.00050875	0.00571996	-89.7615	-100.794	7	2	522.862	0	0	FALSE
ATP5MF	0.000517207	0.00581086	-124.936	-135.95	7	2	1776.02	0	0	FALSE
LOC100355380	0.000518927	0.005826	-93.7998	-104.81	7	2	202.573	0	0	FALSE
MYO1D	0.00052117	0.00584698	-106.709	-117.715	7	2	1106.67	0	0	FALSE
ANKRD46	0.00052308	0.00586419	-98.3374	-109.338	7	2	675.793	0	0	FALSE
ANXA3	0.000527644	0.00591113	-109.623	-120.614	7	2	1136.07	0	0	FALSE
NYNRIN	0.000537336	0.00600678	-101.633	-112.604	7	2	899.63	0	0	FALSE
BCORL1	0.000543459	0.00606222	-81.9526	-92.91	7	2	267.444	0	0	FALSE
PIP5K1A	0.000546235	0.00608884	-99.2301	-110.182	7	2	644.019	0	0	FALSE
PCDH17	0.000550623	0.00613338	-75.349	-86.2914	7	2	87.1748	0	0	FALSE
FAM241A	0.000551256	0.00613606	-96.5604	-107.502	7	2	512.268	0	0	FALSE
NKAIN1	0.000554484	0.00616322	-62.43	-73.3645	7	2	29.0469	0	0	FALSE
NREP	0.000557273	0.00618542	-102.79	-113.719	7	2	653.374	0	0	FALSE
LOC100345551	0.000558195	0.00619125	-83.0438	-93.9707	7	2	113.583	0	0	FALSE
GULP1	0.000560611	0.00621364	-107.175	-118.097	7	2	666.531	0	0	FALSE
PHEX	0.000562144	0.00622621	-58.0802	-68.999	7	2	22.8827	0	0	FALSE
GABARAPL1	0.000572226	0.00631996	-100.824	-111.723	7	2	1700.49	0	0	FALSE
MYL4	0.000572164	0.00631996	-139.228	-150.126	7	2	7114.68	0	0	FALSE
PDSS1	0.000584274	0.00644847	-73.2318	-84.1065	7	2	105.101	0	0	FALSE
SHTN1	0.000587234	0.00647656	-76.486	-87.3549	7	2	112.058	0	0	FALSE
SCARF2	0.000589303	0.0064948	-106.271	-117.136	7	2	1287.66	0	0	FALSE
LOC100358827	0.000590746	0.00650016	-96.1643	-107.026	7	2	590.294	0	0	FALSE
AHSG	0.000593713	0.00652042	-51.6421	-62.4984	7	2	17.6066	0	0	FALSE
RASGEF1A	0.000594474	0.00652418	-43.1031	-53.9579	7	2	10.8187	0	0	FALSE
MCOLN2	0.000603552	0.00660646	-64.218	-75.0555	7	2	33.0933	0	0	FALSE
TXNRD3	0.000621908	0.0067824	-70.3726	-81.1759	7	2	47.5859	0	0	FALSE
UST	0.000632056	0.00687388	-82.3905	-93.1752	7	2	119.926	0	0	FALSE
PPDPFL	0.000634986	0.00690095	-82.755	-93.5344	7	2	102.166	0	0	FALSE
LOC100340166	0.000639659	0.00693621	-43.9205	-54.6915	7	2	13.734	0	0	FALSE
LPAR5	0.000656163	0.00709164	-67.0961	-77.8379	7	2	48.4978	0	0	FALSE
LOC100348135	0.00066099	0.00713887	-65.4366	-76.17	7	2	43.1052	0	0	FALSE
RBPMS	0.000667827	0.00718788	-130.232	-140.954	7	2	5005.09	0	0	FALSE
SGO2	0.000687539	0.00736454	-54.8547	-65.5429	7	2	20.2806	0	0	FALSE
WFS1	0.000714622	0.00759736	-98.5201	-109.164	7	2	546.472	0	0	FALSE
KCNK13	0.000740242	0.00782713	-46.3651	-56.9687	7	2	14.1828	0	0	FALSE
LOC103346246	0.000739707	0.00782713	-39.8062	-50.4106	7	2	7.26532	0	0	FALSE
LOC100347962	0.000744547	0.00785671	-50.7325	-61.3293	7	2	15.3259	0	0	FALSE
RPA4	0.000746422	0.00786595	-66.9137	-77.5077	7	2	37.8079	0	0	FALSE

## Sheet: 2 weeks_reviewed only
Gene	p	padj	loglik_full	loglik_red	df_full	df_red	mean	converge_impulse	converge_const	allZero
HSPG2	1.03075e-21	4.02714e-18	-145.966	-200.018	7	2	17026.4	0	0	FALSE
PKD1	8.11997e-21	2.53798e-17	-124.25	-176.178	7	2	5853.23	0	0	FALSE
FBLN5	1.46563e-19	3.27212e-16	-142.078	-191.026	7	2	10647.7	0	0	FALSE
C1QTNF7	1.82707e-19	3.56918e-16	-91.4443	-140.166	7	2	496.563	0	0	FALSE
ATP10A	3.58977e-19	5.61009e-16	-93.7863	-141.811	7	2	547.618	0	0	FALSE
PDLIM3	1.90505e-17	1.86075e-14	-123.074	-166.997	7	2	4324.65	0	0	FALSE
LTBP4	4.16636e-16	3.2556e-13	-153.455	-194.182	7	2	24982	0	0	FALSE
HRH1	6.22945e-16	4.42517e-13	-67.5331	-107.842	7	2	79.2817	0	0	FALSE
LMCD1	1.27791e-15	8.68312e-13	-130.626	-170.19	7	2	4799.87	0	0	FALSE
CDS2	3.2058e-15	1.92693e-12	-117.868	-156.476	7	2	2484.17	0	0	FALSE
ALDH18A1	9.85975e-15	4.81526e-12	-104.768	-142.207	7	2	1534.06	0	0	FALSE
PFKP	2.99563e-14	1.26529e-11	-114.532	-150.815	7	2	1989.51	0	0	FALSE
OSR1	5.48727e-14	1.86424e-11	-119.578	-155.229	7	2	1794.61	0	0	FALSE
SLMAP	1.28617e-13	4.02005e-11	-149.402	-184.164	7	2	12724.4	0	0	FALSE
AMIGO2	2.11864e-13	5.90597e-11	-81.4577	-115.699	7	2	201.013	0	0	FALSE
EFHD1	2.74063e-13	7.13842e-11	-126.772	-160.745	7	2	3010.79	0	0	FALSE
ADAMTSL4	4.8098e-13	1.17449e-10	-133.308	-166.693	7	2	7365.27	0	0	FALSE
C1QTNF2	6.1919e-13	1.46617e-10	-95.9123	-129.033	7	2	639.95	0	0	FALSE
CCN3	1.13679e-12	2.40079e-10	-148.364	-180.849	7	2	11741.3	0	0	FALSE
NIBAN1	1.54208e-12	3.08969e-10	-131.71	-163.876	7	2	4685.3	0	0	FALSE
RUSC2	2.86033e-12	5.38569e-10	-113.096	-144.614	7	2	1895.24	0	0	FALSE
CSPG4	4.88935e-12	8.68304e-10	-121.195	-152.151	7	2	3694.99	0	0	FALSE
KIAA0040	6.31161e-12	1.01689e-09	-94.1198	-124.808	7	2	715.247	0	0	FALSE
NPAS4	7.75294e-12	1.19963e-09	-83.6073	-114.08	7	2	191.854	0	0	FALSE
MICAL2	2.17144e-11	3.00313e-09	-115.214	-144.604	7	2	2911.11	0	0	FALSE
ADAMTS8	3.3096e-11	4.4976e-09	-90.1806	-119.127	7	2	420.077	0	0	FALSE
TGFB2	4.94297e-11	6.28038e-09	-80.2988	-108.823	7	2	256.666	0	0	FALSE
FNBP1	5.09893e-11	6.4263e-09	-106.306	-134.797	7	2	1519.39	0	0	FALSE
ZNF362	5.94634e-11	7.37535e-09	-108.012	-136.341	7	2	1262.78	0	0	FALSE
MAN2A2	6.75456e-11	8.31184e-09	-111.162	-139.357	7	2	2630.2	0	0	FALSE
RANBP3L	7.52175e-11	9.04229e-09	-94.4369	-122.518	7	2	331.485	0	0	FALSE
ASAP2	8.00668e-11	9.55178e-09	-97.6265	-125.642	7	2	851.142	0	0	FALSE
SMOC2	1.11762e-10	1.28427e-08	-108.354	-136.018	7	2	915.261	0	0	FALSE
WNT8A	1.16656e-10	1.3226e-08	-73.1996	-100.818	7	2	103.827	0	0	FALSE
PDZD2	1.32699e-10	1.45022e-08	-115.949	-143.431	7	2	1684.44	0	0	FALSE
CBX6	1.41133e-10	1.53169e-08	-109.94	-137.357	7	2	2342.7	0	0	FALSE
ARHGEF17	1.56736e-10	1.67771e-08	-116.121	-143.428	7	2	1833.74	0	0	FALSE
DNAJB6	1.7212e-10	1.80265e-08	-106.794	-134.002	7	2	1389.58	0	0	FALSE
PCOLCE2	2.81442e-10	2.78378e-08	-130.011	-156.699	7	2	6974.13	0	0	FALSE
ITGA8	3.05064e-10	2.97971e-08	-156.027	-182.63	7	2	16450.1	0	0	FALSE
LDLRAD4	3.42487e-10	3.28367e-08	-104.473	-130.954	7	2	1332.44	0	0	FALSE
MAFF	3.62323e-10	3.39065e-08	-119.783	-146.205	7	2	2016.78	0	0	FALSE
ERGIC1	5.30269e-10	4.87473e-08	-112.842	-138.86	7	2	2721.28	0	0	FALSE
SUSD5	5.34105e-10	4.88128e-08	-130.573	-156.584	7	2	3290.4	0	0	FALSE
BAMBI	5.94735e-10	5.37255e-08	-101.883	-127.78	7	2	617.125	0	0	FALSE
MYO1C	6.132e-10	5.50752e-08	-130.711	-156.575	7	2	7117.35	0	0	FALSE
ZYX	9.69901e-10	8.23784e-08	-144.598	-169.977	7	2	12152.1	0	0	FALSE
ACTN4	9.93497e-10	8.34751e-08	-150.712	-176.065	7	2	15819.6	0	0	FALSE
PHTF2	1.1103e-09	9.2297e-08	-113.071	-138.306	7	2	1580.26	0	0	FALSE
EFR3A	1.15628e-09	9.5107e-08	-120.893	-146.085	7	2	2107.9	0	0	FALSE
PTPDC1	1.1989e-09	9.75856e-08	-88.6956	-113.849	7	2	392.531	0	0	FALSE
NTF3	1.20859e-09	9.78645e-08	-84.1561	-109.301	7	2	175.518	0	0	FALSE
MYH10	1.30182e-09	1.04332e-07	-115.244	-140.31	7	2	3399.8	0	0	FALSE
SLC22A3	1.34919e-09	1.07577e-07	-105.744	-130.772	7	2	733.654	0	0	FALSE
CTDSPL	1.53049e-09	1.21413e-07	-90.4522	-115.347	7	2	612.033	0	0	FALSE
SMURF1	1.74648e-09	1.35143e-07	-91.8172	-116.572	7	2	539.085	0	0	FALSE
SOST	1.74679e-09	1.35143e-07	-99.1102	-123.864	7	2	411.673	0	0	FALSE
INPP4A	1.85207e-09	1.41883e-07	-127.973	-152.665	7	2	2733.88	0	0	FALSE
TEF	2.01432e-09	1.5356e-07	-114.223	-138.826	7	2	1906.29	0	0	FALSE
TMEM245	2.21164e-09	1.63035e-07	-124.617	-149.121	7	2	2490.09	0	0	FALSE
CR2	2.938e-09	2.1062e-07	-58.7126	-82.9144	7	2	31.4761	0	0	FALSE
SPTSSA	3.06984e-09	2.18071e-07	-106.66	-130.815	7	2	1012.16	0	0	FALSE
PLXNA3	4.64115e-09	3.12638e-07	-82.3992	-106.115	7	2	423.286	0	0	FALSE
PRUNE2	5.9494e-09	3.89026e-07	-133.979	-157.43	7	2	5311.01	0	0	FALSE
METTL24	6.12713e-09	3.98978e-07	-73.4682	-96.8877	7	2	164.291	0	0	FALSE
RASL12	6.8478e-09	4.33269e-07	-127.323	-150.624	7	2	3710.14	0	0	FALSE
UNC45A	6.82155e-09	4.33269e-07	-124.984	-148.289	7	2	3072.32	0	0	FALSE
MAPK4	6.94402e-09	4.36623e-07	-100.034	-123.32	7	2	508.273	0	0	FALSE
KL	8.52727e-09	5.26736e-07	-75.3865	-98.4537	7	2	87.5929	0	0	FALSE
FIBIN	8.56181e-09	5.26788e-07	-105.396	-128.459	7	2	1208.55	0	0	FALSE
TES	9.33111e-09	5.67419e-07	-139.327	-162.298	7	2	5189.93	0	0	FALSE
WEE1	9.72656e-09	5.86898e-07	-94.0509	-116.978	7	2	380.37	0	0	FALSE
DIAPH2	9.82298e-09	5.90437e-07	-119.196	-142.112	7	2	1760.88	0	0	FALSE
DCBLD2	1.06097e-08	6.3045e-07	-114.206	-137.04	7	2	1559.43	0	0	FALSE
KCNAB1	1.34168e-08	7.6525e-07	-114.617	-137.201	7	2	1248.63	0	0	FALSE
SKI	1.38392e-08	7.86467e-07	-114.985	-137.535	7	2	2406.16	0	0	FALSE
ACTA2	1.40432e-08	7.95171e-07	-186.392	-208.926	7	2	122575	0	0	FALSE
LGR6	2.00513e-08	1.09567e-06	-105.982	-128.136	7	2	1204.84	0	0	FALSE
ELN	2.8779e-08	1.51434e-06	-169.095	-190.863	7	2	34111.7	0	0	FALSE
PDZRN4	2.91807e-08	1.52521e-06	-93.7042	-115.457	7	2	334.507	0	0	FALSE
MCAM	2.98647e-08	1.55058e-06	-149.931	-171.659	7	2	13101.3	0	0	FALSE
SLC12A4	3.07918e-08	1.58791e-06	-104.494	-126.189	7	2	2057.04	0	0	FALSE
ADRA1B	3.23685e-08	1.64774e-06	-83.1303	-104.772	7	2	233.953	0	0	FALSE
ARHGAP23	3.91734e-08	1.96219e-06	-95.021	-116.458	7	2	868.529	0	0	FALSE
LAMA5	4.01139e-08	1.9965e-06	-124.072	-145.484	7	2	4013.46	0	0	FALSE
DLGAP4	4.25251e-08	2.10311e-06	-104.698	-126.048	7	2	1478.73	0	0	FALSE
PALLD	4.33234e-08	2.13583e-06	-136.575	-157.905	7	2	6279.05	0	0	FALSE
ACTN1	4.50049e-08	2.21175e-06	-139.742	-161.031	7	2	9042.29	0	0	FALSE
WIZ	4.76841e-08	2.32877e-06	-80.5417	-101.768	7	2	526.324	0	0	FALSE
DNM1L	4.8481e-08	2.3466e-06	-101.032	-122.24	7	2	1222.5	0	0	FALSE
PDE5A	4.99775e-08	2.41064e-06	-132.07	-153.246	7	2	3366.06	0	0	FALSE
SYPL2	5.57779e-08	2.6256e-06	-81.8117	-102.87	7	2	172.299	0	0	FALSE
RASSF8	5.59729e-08	2.62686e-06	-109.892	-130.947	7	2	1469.23	0	0	FALSE
COL13A1	6.43415e-08	2.95744e-06	-131.376	-152.281	7	2	2879.95	0	0	FALSE
SPSB1	7.16598e-08	3.26501e-06	-80.7089	-101.499	7	2	205.61	0	0	FALSE
FAM131B	8.21003e-08	3.68696e-06	-86.4509	-107.094	7	2	196.356	0	0	FALSE
LIMS2	8.34644e-08	3.7268e-06	-140.476	-161.102	7	2	7660.16	0	0	FALSE
MARVELD1	1.12951e-07	4.86279e-06	-140.373	-160.673	7	2	9749.12	0	0	FALSE
NPY1R	1.15479e-07	4.94438e-06	-115.924	-136.201	7	2	1112.23	0	0	FALSE
CAMKK1	1.16222e-07	4.9626e-06	-101.363	-121.633	7	2	702.301	0	0	FALSE
FERMT2	1.19379e-07	5.08354e-06	-130.182	-150.423	7	2	4979.91	0	0	FALSE
NIPAL4	1.29371e-07	5.47917e-06	-86.8509	-107.005	7	2	168.18	0	0	FALSE
ITGB1	1.32144e-07	5.58149e-06	-155.322	-175.453	7	2	21944.9	0	0	FALSE
APLP2	1.33169e-07	5.60962e-06	-133.064	-153.188	7	2	8910.17	0	0	FALSE
NEDD9	1.35587e-07	5.68084e-06	-111.961	-132.065	7	2	1214.84	0	0	FALSE
LOX	1.3866e-07	5.77863e-06	-128.897	-148.977	7	2	2919.36	0	0	FALSE
DAB2IP	1.43028e-07	5.92904e-06	-99.6468	-119.693	7	2	1615.87	0	0	FALSE
PGM5	1.53521e-07	6.31373e-06	-157.137	-177.107	7	2	16786	0	0	FALSE
HLF	1.55059e-07	6.36028e-06	-105.835	-125.794	7	2	912.942	0	0	FALSE
DLG2	1.86162e-07	7.53714e-06	-96.6886	-116.451	7	2	488.752	0	0	FALSE
TENT5B	1.87354e-07	7.54631e-06	-101.813	-121.569	7	2	513.561	0	0	FALSE
USP20	1.92168e-07	7.72032e-06	-99.3619	-119.09	7	2	987.429	0	0	FALSE
ANAPC1	1.9312e-07	7.73867e-06	-95.3343	-115.057	7	2	613.934	0	0	FALSE
FOXJ2	2.22072e-07	8.83089e-06	-98.5785	-118.151	7	2	932.227	0	0	FALSE
PPP1R3B	2.27786e-07	9.01224e-06	-117.82	-137.365	7	2	1828.46	0	0	FALSE
BCHE	2.33688e-07	9.22241e-06	-143.67	-163.187	7	2	6695.8	0	0	FALSE
ATP1A2	2.39168e-07	9.37289e-06	-122.168	-141.66	7	2	2822.72	0	0	FALSE
SSBP4	2.393e-07	9.37289e-06	-67.8764	-87.3682	7	2	158.2	0	0	FALSE
AXL	2.44906e-07	9.5685e-06	-120.26	-139.727	7	2	4857.44	0	0	FALSE
GADD45A	2.47524e-07	9.59876e-06	-111.54	-130.996	7	2	1107.97	0	0	FALSE
SYT11	2.46979e-07	9.59876e-06	-104.288	-123.746	7	2	1234.09	0	0	FALSE
CRIM1	2.53028e-07	9.76375e-06	-116.44	-135.871	7	2	1606.46	0	0	FALSE
EDA	2.60352e-07	1.00216e-05	-81.2952	-100.696	7	2	230.465	0	0	FALSE
RAB7A	2.64497e-07	1.01162e-05	-111.203	-130.586	7	2	3711.13	0	0	FALSE
TLR6	2.64751e-07	1.01162e-05	-81.7926	-101.175	7	2	176.387	0	0	FALSE
ZNF365	2.6346e-07	1.01162e-05	-91.0984	-110.486	7	2	332.898	0	0	FALSE
PDLIM7	2.83969e-07	1.07455e-05	-142.481	-161.788	7	2	9867.15	0	0	FALSE
CSRP1	2.99709e-07	1.13136e-05	-172.908	-192.157	7	2	54377.8	0	0	FALSE
CSRP2	3.08808e-07	1.16011e-05	-124.885	-144.102	7	2	2866.22	0	0	FALSE
CRTC3	3.59628e-07	1.32867e-05	-98.2411	-117.293	7	2	969.824	0	0	FALSE
CNN1	3.68325e-07	1.3544e-05	-154.449	-173.475	7	2	14230.2	0	0	FALSE
SBNO2	3.69521e-07	1.3556e-05	-92.5195	-111.542	7	2	540.443	0	0	FALSE
NPR1	4.11895e-07	1.47979e-05	-132.238	-151.143	7	2	3892.17	0	0	FALSE
FBXL2	4.20465e-07	1.50712e-05	-76.3882	-95.2711	7	2	114.19	0	0	FALSE
HPSE2	4.36931e-07	1.55898e-05	-80.7369	-99.5783	7	2	140.761	0	0	FALSE
PER2	4.98066e-07	1.74524e-05	-86.7982	-105.498	7	2	229.34	0	0	FALSE
SERPINE1	5.04799e-07	1.75701e-05	-128.187	-146.872	7	2	2192.24	0	0	FALSE
GLS	5.0795e-07	1.76281e-05	-117.497	-136.175	7	2	1973.24	0	0	FALSE
DSTN	5.2092e-07	1.79712e-05	-162.751	-181.403	7	2	30464.5	0	0	FALSE
COL21A1	5.30498e-07	1.82212e-05	-114.466	-133.097	7	2	1468.58	0	0	FALSE
PRSS35	5.37353e-07	1.84161e-05	-110.169	-128.787	7	2	1337.63	0	0	FALSE
STS	5.5942e-07	1.90471e-05	-79.2831	-97.857	7	2	443.869	0	0	FALSE
RARB	5.77108e-07	1.95439e-05	-65.1086	-83.6488	7	2	95.7876	0	0	FALSE
GTF2E2	6.52765e-07	2.16591e-05	-98.3961	-116.803	7	2	796.978	0	0	FALSE
CIART	6.79362e-07	2.24462e-05	-76.8274	-95.1909	7	2	154.634	0	0	FALSE
KCTD10	7.16703e-07	2.34814e-05	-129.264	-147.57	7	2	4074.25	0	0	FALSE
NDST1	7.19514e-07	2.35242e-05	-94.6975	-112.999	7	2	955.533	0	0	FALSE
TMEM200B	7.22273e-07	2.35651e-05	-105.604	-123.901	7	2	900.904	0	0	FALSE
TLN1	7.76828e-07	2.50832e-05	-144.141	-162.359	7	2	11402.3	0	0	FALSE
WDFY3	7.85872e-07	2.53229e-05	-109.281	-127.486	7	2	1299.84	0	0	FALSE
ASB13	7.91032e-07	2.54367e-05	-81.5138	-99.7123	7	2	311.1	0	0	FALSE
ALKAL2	8.47777e-07	2.69838e-05	-63.1922	-81.3155	7	2	36.911	0	0	FALSE
BLVRA	8.47157e-07	2.69838e-05	-83.1319	-101.256	7	2	172.184	0	0	FALSE
PLXDC2	8.55214e-07	2.71652e-05	-117.324	-135.438	7	2	2328.22	0	0	FALSE
RNF122	8.61373e-07	2.72501e-05	-72.6885	-90.7946	7	2	105.27	0	0	FALSE
SMTN	8.68512e-07	2.74204e-05	-155.596	-173.693	7	2	18351.5	0	0	FALSE
PYCR3	8.71251e-07	2.74514e-05	-74.4349	-92.5286	7	2	135.476	0	0	FALSE
GDF10	9.06101e-07	2.83778e-05	-107.249	-125.301	7	2	844.666	0	0	FALSE
POGK	9.2102e-07	2.87299e-05	-83.7998	-101.833	7	2	321.258	0	0	FALSE
SH2B3	9.26948e-07	2.88573e-05	-90.9733	-109	7	2	513.656	0	0	FALSE
SESN2	9.52429e-07	2.95328e-05	-71.2567	-89.2537	7	2	99.1317	0	0	FALSE
BIRC5	1.01079e-06	3.11571e-05	-67.1101	-85.0426	7	2	64.6167	0	0	FALSE
GOLIM4	1.01651e-06	3.12717e-05	-122.803	-140.73	7	2	3193.49	0	0	FALSE
ZNF532	1.08566e-06	3.32681e-05	-116.816	-134.67	7	2	2627.14	0	0	FALSE
BMP3	1.14141e-06	3.48399e-05	-105.806	-123.607	7	2	560.437	0	0	FALSE
DCHS1	1.15917e-06	3.53128e-05	-102.03	-119.814	7	2	1412.1	0	0	FALSE
H1-4	1.2366e-06	3.73802e-05	-75.7472	-93.4605	7	2	157.319	0	0	FALSE
ROCK1	1.30272e-06	3.91517e-05	-121.61	-139.267	7	2	2583.59	0	0	FALSE
UTRN	1.40945e-06	4.20362e-05	-109.201	-126.772	7	2	1437.05	0	0	FALSE
CTNNAL1	1.41431e-06	4.21005e-05	-116.411	-133.979	7	2	1641.54	0	0	FALSE
JAZF1	1.46248e-06	4.33694e-05	-96.3179	-113.849	7	2	609.462	0	0	FALSE
FZD7	1.49832e-06	4.4264e-05	-89.3769	-106.882	7	2	421.365	0	0	FALSE
MAGI2	1.57429e-06	4.61595e-05	-72.4647	-89.9155	7	2	105.566	0	0	FALSE
EPN2	1.61692e-06	4.71441e-05	-106.735	-124.156	7	2	1643.83	0	0	FALSE
FSTL3	1.61573e-06	4.71441e-05	-107.361	-124.783	7	2	887.605	0	0	FALSE
EPHB3	1.62469e-06	4.72825e-05	-95.0467	-112.463	7	2	666.008	0	0	FALSE
TNS1	1.69628e-06	4.92742e-05	-157.557	-174.927	7	2	23619.3	0	0	FALSE
ZNRF3	1.7015e-06	4.93341e-05	-99.8923	-117.259	7	2	522.841	0	0	FALSE
TSPAN2	1.89716e-06	5.40051e-05	-108.376	-125.624	7	2	863.091	0	0	FALSE
MFAP3L	1.95108e-06	5.51383e-05	-114.505	-131.722	7	2	1243.78	0	0	FALSE
MYH11	1.9689e-06	5.54413e-05	-188.839	-206.046	7	2	120558	0	0	FALSE
DERA	2.07752e-06	5.81855e-05	-81.3512	-98.4999	7	2	286.107	0	0	FALSE
TENT4A	2.1053e-06	5.8858e-05	-86.0663	-103.2	7	2	518.043	0	0	FALSE
GBE1	2.30925e-06	6.38744e-05	-109.428	-126.461	7	2	1201.86	0	0	FALSE
KLF13	2.45807e-06	6.76315e-05	-101.765	-118.731	7	2	921.359	0	0	FALSE
EHD2	2.55746e-06	7.01192e-05	-119.55	-136.472	7	2	3613.04	0	0	FALSE
IQGAP1	2.7136e-06	7.41401e-05	-126.137	-142.994	7	2	4554.47	0	0	FALSE
ANKRD1	2.78716e-06	7.6017e-05	-161.404	-178.232	7	2	16072.2	0	0	FALSE
PELI2	2.84523e-06	7.7331e-05	-82.0679	-98.8735	7	2	257.314	0	0	FALSE
MFGE8	2.94341e-06	7.9722e-05	-150.402	-167.171	7	2	18726.5	0	0	FALSE
FAM98A	3.30637e-06	8.92434e-05	-103.823	-120.465	7	2	1338.23	0	0	FALSE
DDR2	3.33358e-06	8.9668e-05	-124.274	-140.907	7	2	3396.95	0	0	FALSE
KANK1	3.36981e-06	9.0487e-05	-132.54	-149.161	7	2	4512.43	0	0	FALSE
FER	3.40036e-06	9.11507e-05	-87.4116	-104.023	7	2	562.982	0	0	FALSE
INPP5F	3.54469e-06	9.4533e-05	-86.9375	-103.503	7	2	429.18	0	0	FALSE
TESK1	3.63457e-06	9.66005e-05	-109.983	-126.521	7	2	1741.34	0	0	FALSE
SEMA3B	3.65676e-06	9.70253e-05	-115.578	-132.11	7	2	1982.21	0	0	FALSE
CDV3	3.71799e-06	9.83159e-05	-109.594	-126.108	7	2	2833.45	0	0	FALSE
B3GLCT	3.78752e-06	9.94316e-05	-97.7121	-114.205	7	2	505.297	0	0	FALSE
TRIM56	3.77846e-06	9.94316e-05	-93.0571	-109.553	7	2	867.937	0	0	FALSE
CTXN1	3.86952e-06	0.000101125	-65.7867	-82.2563	7	2	57.8991	0	0	FALSE
PPP1R9A	4.19552e-06	0.000108556	-98.8177	-115.199	7	2	561.335	0	0	FALSE
FRZB	4.36881e-06	0.000112481	-126.041	-142.378	7	2	2898.5	0	0	FALSE
ST3GAL5	4.40656e-06	0.000113266	-79.5747	-95.9021	7	2	136.985	0	0	FALSE
SMAD7	4.7245e-06	0.000120645	-87.742	-103.993	7	2	516.01	0	0	FALSE
DZIP1	4.78168e-06	0.000121773	-107.243	-123.481	7	2	703.179	0	0	FALSE
ITPR1	4.8113e-06	0.000122262	-106.626	-122.858	7	2	1216.63	0	0	FALSE
TBC1D16	4.8541e-06	0.000123149	-103.331	-119.552	7	2	940.545	0	0	FALSE
VIM	4.86231e-06	0.000123158	-168.286	-184.505	7	2	71933.6	0	0	FALSE
RARA	4.88077e-06	0.000123425	-94.0585	-110.274	7	2	700.165	0	0	FALSE
ANXA4	5.20437e-06	0.000130343	-89.8626	-106.008	7	2	362.803	0	0	FALSE
LMOD1	5.2012e-06	0.000130343	-158.228	-174.373	7	2	17411.1	0	0	FALSE
HMGA1	5.28349e-06	0.000132113	-88.5785	-104.707	7	2	231.655	0	0	FALSE
ATP2A3	5.37101e-06	0.000132982	-121.991	-138.102	7	2	1603.05	0	0	FALSE
FFAR4	5.37784e-06	0.000132982	-80.0405	-96.1497	7	2	145.864	0	0	FALSE
RECK	5.4688e-06	0.000135018	-115.371	-131.462	7	2	1578.55	0	0	FALSE
PBXIP1	5.60506e-06	0.000137729	-126.277	-142.341	7	2	4141.86	0	0	FALSE
SQOR	5.62763e-06	0.000138067	-91.6659	-107.725	7	2	621.049	0	0	FALSE
CDC42BPB	5.74936e-06	0.000139955	-102.587	-118.623	7	2	1942.85	0	0	FALSE
CORO1C	5.74768e-06	0.000139955	-118.377	-134.413	7	2	2653.78	0	0	FALSE
PAQR6	5.83811e-06	0.000141454	-94.0964	-110.116	7	2	780.752	0	0	FALSE
BCL2	5.99058e-06	0.000144476	-105.897	-121.888	7	2	1024.72	0	0	FALSE
TPPP	6.1748e-06	0.000148373	-88.9765	-104.934	7	2	377.44	0	0	FALSE
ZBTB4	6.25531e-06	0.000149936	-114.491	-130.434	7	2	2555.85	0	0	FALSE
AKT3	6.35853e-06	0.000152176	-111.878	-127.804	7	2	1652.83	0	0	FALSE
SGCB	6.57503e-06	0.000156162	-114.868	-130.756	7	2	2520.47	0	0	FALSE
ILK	6.59788e-06	0.000156467	-127.587	-143.472	7	2	5106.37	0	0	FALSE
THRA	6.72284e-06	0.000158708	-113.663	-129.527	7	2	1782.76	0	0	FALSE
NEK7	7.10794e-06	0.000167294	-124.06	-139.863	7	2	2862.83	0	0	FALSE
KCNA5	7.26731e-06	0.000170531	-105.12	-120.899	7	2	654.116	0	0	FALSE
JPT1	7.29431e-06	0.000170908	-87.9945	-103.769	7	2	258.364	0	0	FALSE
CTDSP2	7.78879e-06	0.000181676	-124.406	-140.109	7	2	6546.79	0	0	FALSE
FAM83D	7.88063e-06	0.000183545	-72.3485	-88.0385	7	2	69.1529	0	0	FALSE
DEPP1	8.33466e-06	0.000192399	-107.128	-122.756	7	2	554.474	0	0	FALSE
MTHFR	8.78556e-06	0.00020221	-98.2631	-113.834	7	2	737.743	0	0	FALSE
FCHSD2	9.28128e-06	0.000212369	-102.559	-118.069	7	2	787.912	0	0	FALSE
FHL2	9.35531e-06	0.00021375	-123	-138.502	7	2	1691.7	0	0	FALSE
PARVA	9.49198e-06	0.000215925	-129.228	-144.713	7	2	4223.3	0	0	FALSE
LZTS3	9.53939e-06	0.000216688	-90.2548	-105.735	7	2	654.917	0	0	FALSE
LAMC1	9.82881e-06	0.000222615	-133.134	-148.581	7	2	9784.6	0	0	FALSE
WFDC1	1.06057e-05	0.00023814	-147.761	-163.124	7	2	11057.7	0	0	FALSE
TBC1D8	1.09043e-05	0.000243794	-87.3964	-102.729	7	2	481.084	0	0	FALSE
LURAP1	1.09328e-05	0.000243878	-94.6915	-110.021	7	2	412.75	0	0	FALSE
MCU	1.09393e-05	0.000243878	-97.8234	-113.153	7	2	811.882	0	0	FALSE
ANAPC7	1.15873e-05	0.000256133	-101.71	-116.976	7	2	976.165	0	0	FALSE
PAPOLB	1.17224e-05	0.000258389	-55.3694	-70.6226	7	2	33.075	0	0	FALSE
NR1D2	1.24243e-05	0.000272706	-128.712	-143.901	7	2	3409.29	0	0	FALSE
KIFC3	1.29012e-05	0.000281593	-103.324	-118.471	7	2	945.678	0	0	FALSE
FRY	1.29858e-05	0.000283043	-107.511	-122.652	7	2	1035.26	0	0	FALSE
ADARB1	1.31628e-05	0.000285705	-118.262	-133.387	7	2	2469.69	0	0	FALSE
P2RX1	1.35511e-05	0.000292914	-96.3921	-111.486	7	2	268.776	0	0	FALSE
MYH7	1.43744e-05	0.000309207	-185.71	-200.738	7	2	73045.2	0	0	FALSE
LTBP3	1.45449e-05	0.000312235	-118.541	-133.556	7	2	1700.53	0	0	FALSE
ARL10	1.46045e-05	0.000313085	-79.1493	-94.1601	7	2	358.413	0	0	FALSE
RNF144B	1.4629e-05	0.000313181	-77.3123	-92.3213	7	2	170.925	0	0	FALSE
DACT1	1.46744e-05	0.000313724	-107.92	-122.926	7	2	919.862	0	0	FALSE
RGMA	1.55346e-05	0.000330755	-89.7259	-104.669	7	2	544.17	0	0	FALSE
TRDN	1.55683e-05	0.000331022	-110.525	-125.465	7	2	639.882	0	0	FALSE
ABL1	1.58296e-05	0.000336121	-105.243	-120.165	7	2	1814.45	0	0	FALSE
HIVEP1	1.64073e-05	0.000346036	-85.2236	-100.106	7	2	375.855	0	0	FALSE
FAT4	1.70991e-05	0.000358345	-118.529	-133.366	7	2	1444.79	0	0	FALSE
TICAM2	1.71056e-05	0.000358345	-61.4183	-76.2546	7	2	49.7852	0	0	FALSE
ENO3	1.74699e-05	0.000364026	-147.239	-162.053	7	2	6782.49	0	0	FALSE
MTARC2	1.75339e-05	0.000364873	-110.367	-125.176	7	2	1889.1	0	0	FALSE
TGFB1I1	1.76869e-05	0.000367567	-130.443	-145.242	7	2	4515.2	0	0	FALSE
NR1D1	1.80712e-05	0.000375054	-119.017	-133.793	7	2	1576.07	0	0	FALSE
EGR1	1.81511e-05	0.000376213	-123.596	-138.366	7	2	1605.41	0	0	FALSE
GNG11	1.83181e-05	0.000379173	-116.602	-131.363	7	2	2198.27	0	0	FALSE
MCM6	1.96915e-05	0.000404249	-78.2748	-92.9556	7	2	132.515	0	0	FALSE
ANO6	1.9768e-05	0.000404434	-93.1191	-107.796	7	2	1013.6	0	0	FALSE
SGCD	1.99892e-05	0.000407822	-103.962	-118.627	7	2	839.311	0	0	FALSE
IL17RD	2.00771e-05	0.000409081	-89.2529	-103.912	7	2	429.166	0	0	FALSE
LZTS2	2.08466e-05	0.000423655	-112.864	-127.482	7	2	2297.77	0	0	FALSE
SORBS1	2.09146e-05	0.000423935	-143.379	-157.993	7	2	8233.51	0	0	FALSE
KCTD15	2.12167e-05	0.000428945	-104.427	-119.025	7	2	1278.8	0	0	FALSE
WTIP	2.1816e-05	0.000439924	-85.3695	-99.937	7	2	314.064	0	0	FALSE
GSS	2.19197e-05	0.000441446	-83.2208	-97.7831	7	2	351.834	0	0	FALSE
ANKFY1	2.24661e-05	0.000451266	-96.9634	-111.498	7	2	1010.64	0	0	FALSE
IPO9	2.2494e-05	0.000451266	-101.797	-116.331	7	2	1123.71	0	0	FALSE
RPA3	2.27599e-05	0.000455042	-86.5171	-101.038	7	2	247.244	0	0	FALSE
ESD	2.29259e-05	0.000456998	-99.8846	-114.397	7	2	1009.75	0	0	FALSE
LRRK1	2.29083e-05	0.000456998	-95.1754	-109.689	7	2	786.931	0	0	FALSE
INAVA	2.29657e-05	0.000457208	-41.705	-56.2157	7	2	8.88982	0	0	FALSE
FAT1	2.39159e-05	0.000475518	-121.8	-136.266	7	2	2537.65	0	0	FALSE
ADAMTS9	2.41155e-05	0.000478878	-97.2959	-111.752	7	2	305.888	0	0	FALSE
ZBTB38	2.44619e-05	0.000484525	-98.1013	-112.542	7	2	756.996	0	0	FALSE
JUNB	2.45974e-05	0.000485977	-113.833	-128.267	7	2	1206.27	0	0	FALSE
TRIM3	2.46905e-05	0.000487201	-85.9127	-100.343	7	2	566.929	0	0	FALSE
GPRC5B	2.58888e-05	0.000508918	-92.6656	-107.044	7	2	459.968	0	0	FALSE
SH3KBP1	2.60615e-05	0.00051167	-98.1752	-112.546	7	2	463.944	0	0	FALSE
SUN2	2.6182e-05	0.000512969	-135.093	-149.459	7	2	5950.17	0	0	FALSE
KDM1A	2.70138e-05	0.000525742	-96.8346	-111.165	7	2	1055.35	0	0	FALSE
HAPLN1	2.77155e-05	0.000537391	-105.915	-120.217	7	2	794.75	0	0	FALSE
BCL9	2.7808e-05	0.000538517	-89.6752	-103.974	7	2	348.678	0	0	FALSE
FMNL3	2.79706e-05	0.000540996	-91.9252	-106.217	7	2	552.096	0	0	FALSE
PRR16	2.8124e-05	0.000542619	-60.6214	-74.9076	7	2	29.7045	0	0	FALSE
SVIL	2.81e-05	0.000542619	-144.554	-158.841	7	2	9092.71	0	0	FALSE
F5	2.86548e-05	0.00055082	-96.788	-111.053	7	2	267.355	0	0	FALSE
MAP1B	2.9126e-05	0.000558504	-133.226	-147.473	7	2	4532.86	0	0	FALSE
CYFIP2	2.93359e-05	0.000561841	-75.8966	-90.136	7	2	117.017	0	0	FALSE
DUSP10	2.94927e-05	0.000564151	-80.2632	-94.4967	7	2	175.507	0	0	FALSE
NAB2	2.95368e-05	0.000564305	-92.9214	-107.153	7	2	578.482	0	0	FALSE
PHF1	3.00505e-05	0.000572021	-99.5985	-113.811	7	2	1020.85	0	0	FALSE
CALD1	3.01671e-05	0.000573543	-152.193	-166.402	7	2	14809	0	0	FALSE
FLRT1	3.08376e-05	0.000585578	-102.593	-116.777	7	2	587.017	0	0	FALSE
MAMDC2	3.092e-05	0.00058643	-118.408	-132.589	7	2	1529.58	0	0	FALSE
FOS	3.13723e-05	0.000593568	-122.216	-136.381	7	2	1419.61	0	0	FALSE
PTP4A3	3.16743e-05	0.000597833	-123.575	-137.729	7	2	1422.69	0	0	FALSE
SLIT2	3.16636e-05	0.000597833	-113.632	-127.786	7	2	1253.74	0	0	FALSE
PRSS23	3.19274e-05	0.000601158	-120.163	-134.308	7	2	1851.52	0	0	FALSE
MSRB3	3.27965e-05	0.000614561	-137.67	-151.786	7	2	6666.65	0	0	FALSE
SV2A	3.28748e-05	0.000615289	-91.7313	-105.844	7	2	359.476	0	0	FALSE
STON1	3.30362e-05	0.000617571	-100.149	-114.257	7	2	866.53	0	0	FALSE
MAPK1	3.33428e-05	0.000622559	-101.107	-115.205	7	2	1067.4	0	0	FALSE
FMOD	3.37238e-05	0.000627424	-146.333	-160.417	7	2	11261.8	0	0	FALSE
APBB1	3.37871e-05	0.000627854	-93.0106	-107.093	7	2	879.69	0	0	FALSE
PARP3	3.39574e-05	0.000630269	-94.9683	-109.045	7	2	452.963	0	0	FALSE
TMEM117	3.47724e-05	0.000643866	-88.5235	-102.574	7	2	476.997	0	0	FALSE
HIGD1B	3.50456e-05	0.000646627	-67.5939	-81.6359	7	2	53.5371	0	0	FALSE
RGS5	3.65711e-05	0.000672393	-182.679	-196.674	7	2	77380.4	0	0	FALSE
EXOSC5	3.70854e-05	0.000681046	-72.8599	-86.8391	7	2	115.354	0	0	FALSE
ALDH1A1	3.74001e-05	0.00068602	-125.994	-139.964	7	2	4770.92	0	0	FALSE
CDK5RAP1	3.77148e-05	0.000690981	-71.939	-85.8995	7	2	209.792	0	0	FALSE
PKN2	3.80595e-05	0.000695666	-98.5565	-112.507	7	2	651.832	0	0	FALSE
EIF4EBP2	3.83113e-05	0.00069945	-145.93	-159.873	7	2	14237.1	0	0	FALSE
FAM181B	3.83842e-05	0.000699963	-90.6795	-104.62	7	2	337.75	0	0	FALSE
APLN	3.87149e-05	0.00070435	-78.3221	-92.2535	7	2	98.0701	0	0	FALSE
RAB33A	3.88051e-05	0.000705169	-78.8567	-92.7855	7	2	87.0506	0	0	FALSE
FLNA	4.01311e-05	0.000728419	-171.358	-185.25	7	2	31342.1	0	0	FALSE
DUSP1	4.03794e-05	0.000732076	-130.354	-144.239	7	2	2296.54	0	0	FALSE
SLC9A5	4.05235e-05	0.000733836	-76.0325	-89.9132	7	2	231.424	0	0	FALSE
FRYL	4.06595e-05	0.000735447	-99.1567	-113.034	7	2	780.675	0	0	FALSE
GALNT2	4.13519e-05	0.000747106	-105.925	-119.783	7	2	1399.57	0	0	FALSE
APOO	4.23736e-05	0.0007638	-93.5428	-107.374	7	2	278.298	0	0	FALSE
MTUS2	4.377e-05	0.000786251	-119.627	-133.422	7	2	2030.89	0	0	FALSE
ICAM1	4.45568e-05	0.000797633	-105.123	-118.898	7	2	809.437	0	0	FALSE
LRP5	4.49861e-05	0.000804397	-103.917	-117.682	7	2	1403.33	0	0	FALSE
OSR2	4.50814e-05	0.00080518	-85.174	-98.9361	7	2	189.618	0	0	FALSE
CREM	4.52463e-05	0.000807203	-105.652	-119.41	7	2	809.556	0	0	FALSE
VCL	4.53346e-05	0.000807855	-147.09	-160.846	7	2	10038.1	0	0	FALSE
ITGB8	4.54027e-05	0.000808147	-93.1596	-106.914	7	2	426.267	0	0	FALSE
PTCHD1	4.60434e-05	0.00081862	-98.6772	-112.416	7	2	404.051	0	0	FALSE
JCHAIN	4.62049e-05	0.000820557	-84.1927	-97.9274	7	2	197.251	0	0	FALSE
SHMT2	4.75635e-05	0.000841815	-83.6645	-97.367	7	2	220.644	0	0	FALSE
MANSC1	4.80468e-05	0.000847489	-98.2907	-111.982	7	2	620.807	0	0	FALSE
ZNF385D	4.82027e-05	0.00084928	-109.539	-123.226	7	2	852.353	0	0	FALSE
NET1	4.92836e-05	0.000864427	-128.009	-141.672	7	2	3810.2	0	0	FALSE
WRNIP1	4.97158e-05	0.000871029	-93.5174	-107.171	7	2	757.461	0	0	FALSE
TNK2	5.01504e-05	0.000877661	-100.576	-114.219	7	2	869.456	0	0	FALSE
TRMT9B	5.15513e-05	0.000899156	-90.9441	-104.557	7	2	275.785	0	0	FALSE
MPP2	5.30432e-05	0.000920044	-82.8972	-96.4782	7	2	201.562	0	0	FALSE
RA_M006_JSM7BED4F	5.3309e-05	0.000923629	-169.016	-182.591	7	2	37603.2	0	0	FALSE
ZEB1	5.33932e-05	0.000924062	-120.565	-134.139	7	2	1975.79	0	0	FALSE
TCF7L1	5.43295e-05	0.000937154	-81.7692	-95.3235	7	2	416.602	0	0	FALSE
GMPR	5.44229e-05	0.000937729	-102.357	-115.909	7	2	378.42	0	0	FALSE
RASAL2	5.52356e-05	0.000950685	-103.57	-117.106	7	2	1034.34	0	0	FALSE
PLBD2	5.70122e-05	0.000978032	-111.794	-125.294	7	2	1358.64	0	0	FALSE
POU3F1	5.87317e-05	0.00100642	-56.9238	-70.3913	7	2	27.9905	0	0	FALSE
PACSIN2	5.88656e-05	0.00100761	-97.6009	-111.066	7	2	861.588	0	0	FALSE
PXDNL	5.9997e-05	0.00102211	-88.0019	-101.446	7	2	250.759	0	0	FALSE
TMEM158	6.10245e-05	0.00103437	-89.5738	-102.999	7	2	268.254	0	0	FALSE
BMAL2	6.43146e-05	0.00108896	-70.9659	-84.332	7	2	60.5356	0	0	FALSE
ANO4	6.46978e-05	0.00109308	-77.8422	-91.2017	7	2	106.997	0	0	FALSE
CC2D2A	6.55422e-05	0.00110495	-86.8673	-100.212	7	2	387.947	0	0	FALSE
TENT5A	6.55286e-05	0.00110495	-121.185	-134.531	7	2	1989.44	0	0	FALSE
AKAP5	6.61354e-05	0.00111256	-82.8519	-96.1869	7	2	120.375	0	0	FALSE
MN1	6.67354e-05	0.00112144	-104.675	-118	7	2	661.549	0	0	FALSE
DPP3	6.70707e-05	0.001124	-88.6755	-101.995	7	2	411.499	0	0	FALSE
GRN	6.71934e-05	0.0011243	-124.2	-137.518	7	2	2769.6	0	0	FALSE
ACSS1	6.75695e-05	0.00112846	-145.794	-159.105	7	2	5717.27	0	0	FALSE
YPEL1	6.75865e-05	0.00112846	-86.4249	-99.7356	7	2	333.642	0	0	FALSE
CRTAP	6.79353e-05	0.00113308	-122.432	-135.736	7	2	2508.09	0	0	FALSE
SH3D19	6.88341e-05	0.00114684	-117.26	-130.55	7	2	1787.05	0	0	FALSE
LRRC4	6.91811e-05	0.00115017	-75.2727	-88.5574	7	2	75.5993	0	0	FALSE
FOXN3	6.92941e-05	0.00115083	-114.09	-127.373	7	2	1724.82	0	0	FALSE
SNX5	7.05478e-05	0.00116793	-100.277	-113.539	7	2	1134.64	0	0	FALSE
OGN	7.14772e-05	0.00118206	-172.059	-185.307	7	2	45385.6	0	0	FALSE
FAM114A1	7.24647e-05	0.00119712	-108.235	-121.468	7	2	1329.03	0	0	FALSE
SNX18	7.26665e-05	0.00119919	-103.031	-116.261	7	2	827.924	0	0	FALSE
JCAD	7.41311e-05	0.00122078	-103.929	-117.137	7	2	1154.29	0	0	FALSE
FKBP10	7.56869e-05	0.00124378	-125.714	-138.898	7	2	4358.87	0	0	FALSE
UBE2E1	7.68523e-05	0.00125896	-90.2312	-103.398	7	2	713.521	0	0	FALSE
PHLDA1	7.73032e-05	0.00126502	-94.379	-107.54	7	2	391.519	0	0	FALSE
IRAG1	7.78354e-05	0.0012724	-124.814	-137.967	7	2	2490.63	0	0	FALSE
LPCAT3	7.88232e-05	0.00128051	-86.9409	-100.08	7	2	460.405	0	0	FALSE
ASPH	8.08816e-05	0.00130986	-123.141	-136.251	7	2	3602.15	0	0	FALSE
BMAL1	8.36955e-05	0.00134706	-79.2926	-92.3644	7	2	120.389	0	0	FALSE
ACTB	8.51642e-05	0.00136788	-170.187	-183.24	7	2	62803.8	0	0	FALSE
SPP1	8.55409e-05	0.00137252	-140.735	-153.783	7	2	5290.83	0	0	FALSE
AMOTL2	8.56874e-05	0.00137346	-100.648	-113.694	7	2	971.752	0	0	FALSE
PRDM16	8.61172e-05	0.00137893	-87.5208	-100.561	7	2	181.07	0	0	FALSE
PAPPA2	8.68645e-05	0.00138806	-87.4837	-100.514	7	2	137.019	0	0	FALSE
NPTN	8.88796e-05	0.00141591	-118.727	-131.732	7	2	3326.23	0	0	FALSE
FAM149A	8.94753e-05	0.0014225	-97.2121	-110.209	7	2	787.659	0	0	FALSE
MCRIP2	9.14664e-05	0.0014468	-114.024	-126.996	7	2	758.493	0	0	FALSE
KCNMB1	9.18824e-05	0.00145191	-125.276	-138.243	7	2	3199.15	0	0	FALSE
PLCB4	9.64185e-05	0.00151898	-120.206	-133.119	7	2	1830.56	0	0	FALSE
GASK1B	9.71691e-05	0.00152773	-127.307	-140.212	7	2	2320.69	0	0	FALSE
CIAO2A	9.98562e-05	0.00156682	-90.5957	-103.47	7	2	362.233	0	0	FALSE
PLXNB2	0.000101145	0.00158228	-108.222	-121.082	7	2	2240.65	0	0	FALSE
KIZ	0.000101409	0.00158482	-78.5093	-91.3661	7	2	351.643	0	0	FALSE
FILIP1L	0.000102338	0.00159774	-127.526	-140.372	7	2	2459.12	0	0	FALSE
YY1	0.000105711	0.00164383	-90.179	-102.989	7	2	1311.9	0	0	FALSE
CEBPB	0.000106056	0.00164756	-98.8852	-111.692	7	2	762.267	0	0	FALSE
ANO10	0.000107783	0.00166899	-104.968	-117.757	7	2	1047.86	0	0	FALSE
DSCC1	0.000107897	0.00166899	-80.3122	-93.0994	7	2	108.876	0	0	FALSE
MARCHF3	0.000107763	0.00166899	-80.8044	-93.593	7	2	161.395	0	0	FALSE
ZSWIM4	0.000108052	0.00166899	-79.1075	-91.893	7	2	207.195	0	0	FALSE
BDNF	0.00011052	0.00169964	-84.9688	-97.7291	7	2	176.138	0	0	FALSE
SERPINB6	0.000110754	0.00170026	-110.386	-123.144	7	2	1257.89	0	0	FALSE
HAUS8	0.000111107	0.00170401	-63.658	-76.4123	7	2	46.2816	0	0	FALSE
DHX40	0.000111373	0.0017064	-96.8049	-109.556	7	2	674.578	0	0	FALSE
MYBPC3	0.000115855	0.00176126	-156.581	-169.288	7	2	10724.6	0	0	FALSE
SEMA3D	0.000115775	0.00176126	-117.795	-130.503	7	2	1275.01	0	0	FALSE
SPRYD3	0.000116225	0.00176487	-94.4383	-107.142	7	2	1153.24	0	0	FALSE
CDK14	0.000117264	0.0017775	-97.0553	-109.749	7	2	590.901	0	0	FALSE
ABCC4	0.000119414	0.00180658	-75.2116	-87.885	7	2	104.376	0	0	FALSE
ABITRAM	0.000120103	0.00181	-75.4506	-88.1175	7	2	152.41	0	0	FALSE
NAV3	0.000120058	0.00181	-71.9574	-84.6248	7	2	89.1803	0	0	FALSE
KDM6B	0.000122015	0.00183175	-90.329	-102.978	7	2	544.332	0	0	FALSE
DAZAP2	0.000123777	0.00185463	-107.274	-119.907	7	2	2689.12	0	0	FALSE
MYL9	0.000126256	0.00188636	-174.565	-187.175	7	2	54067.9	0	0	FALSE
PRICKLE1	0.000128152	0.00191104	-76.9428	-89.5368	7	2	187.252	0	0	FALSE
BEAN1	0.000129755	0.0019257	-83.1161	-95.6961	7	2	197.932	0	0	FALSE
DENND1A	0.000129875	0.0019257	-73.8278	-86.4069	7	2	315.688	0	0	FALSE
SULF1	0.000130899	0.00193721	-102.459	-115.029	7	2	735.832	0	0	FALSE
CHST3	0.000132789	0.00195961	-107.159	-119.713	7	2	1330.26	0	0	FALSE
PPP2CB	0.000136985	0.00201392	-109.537	-122.056	7	2	1574.28	0	0	FALSE
PLEKHG5	0.000140922	0.00206018	-103.38	-115.867	7	2	1021.18	0	0	FALSE
PTGIS	0.00014084	0.00206018	-142.421	-154.909	7	2	9096.77	0	0	FALSE
JAM3	0.000143658	0.002094	-98.5625	-111.028	7	2	919.447	0	0	FALSE
P2RY2	0.000143771	0.002094	-88.0423	-100.507	7	2	309.063	0	0	FALSE
CNNM3	0.000147268	0.00213394	-83.1592	-95.5969	7	2	409.083	0	0	FALSE
SULF2	0.000147333	0.00213394	-93.5777	-106.015	7	2	517.643	0	0	FALSE
CNBP	0.000148117	0.00214331	-109.971	-122.402	7	2	3611.74	0	0	FALSE
CPQ	0.000148409	0.00214555	-110.109	-122.538	7	2	1593.22	0	0	FALSE
OXSM	0.000148633	0.0021468	-74.2191	-86.6464	7	2	169.416	0	0	FALSE
MPRIP	0.000152729	0.00220136	-130.21	-142.607	7	2	5711.08	0	0	FALSE
RAB20	0.00015362	0.00220659	-72.8766	-85.2668	7	2	62.8126	0	0	FALSE
TEAD3	0.000155608	0.00222696	-106.734	-119.11	7	2	1134.32	0	0	FALSE
CDKN2B	0.000156049	0.00223122	-63.5143	-75.8868	7	2	60.3882	0	0	FALSE
SLC38A3	0.000158635	0.00225993	-86.2061	-98.5601	7	2	200.291	0	0	FALSE
PTBP1	0.000159405	0.00226676	-102.067	-114.416	7	2	2084.25	0	0	FALSE
PTPN21	0.000160772	0.00228413	-107.061	-119.4	7	2	1746.91	0	0	FALSE
CSGALNACT2	0.000163368	0.00231679	-109.517	-121.838	7	2	1288.54	0	0	FALSE
AK5	0.000164311	0.00232807	-92.3679	-104.682	7	2	303.583	0	0	FALSE
APCDD1	0.000165624	0.00234237	-112.424	-124.729	7	2	1291.86	0	0	FALSE
LAMB2	0.000168786	0.00237913	-128.249	-140.533	7	2	7514.58	0	0	FALSE
STEAP3	0.000168828	0.00237913	-75.2977	-87.5815	7	2	88.9615	0	0	FALSE
UBTD1	0.000170478	0.00240021	-87.814	-100.087	7	2	354.818	0	0	FALSE
SEMA3E	0.000171985	0.00241707	-92.7638	-105.027	7	2	198.029	0	0	FALSE
COLQ	0.000172248	0.00241859	-86.9759	-99.2372	7	2	140.867	0	0	FALSE
MMP14	0.000176128	0.00247085	-121.217	-133.453	7	2	1979.38	0	0	FALSE
HBEGF	0.000176866	0.00247898	-77.9599	-90.1913	7	2	108.243	0	0	FALSE
RAD51	0.000177269	0.0024824	-56.6181	-68.847	7	2	25.9123	0	0	FALSE
RSU1	0.000178888	0.00250283	-108.8	-121.018	7	2	1551.38	0	0	FALSE
DES	0.000179616	0.00250852	-153.863	-166.077	7	2	9520.27	0	0	FALSE
AXIN2	0.000180481	0.00251386	-89.6378	-101.846	7	2	325.022	0	0	FALSE
GAN	0.000180342	0.00251386	-87.1204	-99.3298	7	2	394.045	0	0	FALSE
TTC28	0.000182039	0.00252656	-102.563	-114.762	7	2	799.504	0	0	FALSE
XIRP1	0.000181768	0.00252656	-125.617	-137.818	7	2	1531.84	0	0	FALSE
SRF	0.000183131	0.00253946	-112.655	-124.848	7	2	1629.31	0	0	FALSE
PDE7B	0.000184339	0.00254942	-78.6652	-90.85	7	2	130.33	0	0	FALSE
SYDE1	0.000184206	0.00254942	-99.3915	-111.577	7	2	973.414	0	0	FALSE
CCN4	0.000184517	0.00254963	-92.6885	-104.872	7	2	265.93	0	0	FALSE
EFNB2	0.000185504	0.002561	-117.906	-130.083	7	2	1479.09	0	0	FALSE
ZNF853	0.000188193	0.00258899	-93.7795	-105.941	7	2	494.097	0	0	FALSE
CPE	0.000189554	0.00260541	-122.813	-134.966	7	2	2019.5	0	0	FALSE
AK2	0.000189746	0.00260576	-101.04	-113.192	7	2	787.141	0	0	FALSE
ZNF275	0.000192969	0.00264305	-80.0109	-92.1441	7	2	308.374	0	0	FALSE
NUP210	0.000193196	0.00264384	-84.2967	-96.4285	7	2	145.472	0	0	FALSE
CDK18	0.000194418	0.00265675	-102.675	-114.8	7	2	382.972	0	0	FALSE
TGFB1	0.000194479	0.00265675	-104.492	-116.616	7	2	720.522	0	0	FALSE
PALMD	0.000196281	0.00267435	-98.0292	-110.143	7	2	579.679	0	0	FALSE
C1QL3	0.000196456	0.00267441	-60.1719	-72.2848	7	2	33.6463	0	0	FALSE
BOLA3	0.000197193	0.0026821	-101.702	-113.811	7	2	414.573	0	0	FALSE
NOTCH2	0.000208068	0.00281532	-103.733	-115.781	7	2	1499.68	0	0	FALSE
ZHX3	0.000211167	0.00284985	-107.286	-119.317	7	2	1617.31	0	0	FALSE
VEGFA	0.000212585	0.00286651	-118.101	-130.125	7	2	1475.68	0	0	FALSE
IFFO2	0.000214058	0.0028814	-92.3558	-104.372	7	2	419.33	0	0	FALSE
NME4	0.000215256	0.00289503	-110.912	-122.922	7	2	721.23	0	0	FALSE
SEMA3F	0.000216671	0.00290905	-99.095	-111.097	7	2	1058.96	0	0	FALSE
STT3B	0.000217841	0.00292225	-118.866	-130.863	7	2	2350.61	0	0	FALSE
ITGA9	0.000219096	0.00293002	-83.0094	-94.9991	7	2	139.976	0	0	FALSE
NUMBL	0.000219165	0.00293002	-91.135	-103.124	7	2	644.582	0	0	FALSE
PCNX1	0.00021917	0.00293002	-102.996	-114.985	7	2	863.475	0	0	FALSE
MC5R	0.0002245	0.00299359	-73.1297	-85.0919	7	2	58.0666	0	0	FALSE
KLHL34	0.000227057	0.0030251	-82.3435	-94.2929	7	2	117.116	0	0	FALSE
ROBO1	0.000232467	0.00309191	-87.9374	-99.8602	7	2	347.072	0	0	FALSE
NPY5R	0.000233942	0.00310369	-70.9016	-82.8172	7	2	60.7443	0	0	FALSE
SDK1	0.000233784	0.00310369	-96.7017	-108.618	7	2	483.868	0	0	FALSE
SP2	0.00023403	0.00310369	-76.9665	-88.8816	7	2	335.907	0	0	FALSE
TM7SF3	0.000234147	0.00310369	-90.0865	-102.001	7	2	722.118	0	0	FALSE
MIX23	0.000236839	0.00313405	-76.2469	-88.1486	7	2	133.993	0	0	FALSE
DDIT4L	0.000238111	0.00314823	-91.4508	-103.346	7	2	180.44	0	0	FALSE
MAPKAPK3	0.000241922	0.00319321	-100.768	-112.646	7	2	595.896	0	0	FALSE
TM4SF18	0.000242128	0.00319323	-82.4566	-94.3333	7	2	154.715	0	0	FALSE
LRRC39	0.00025185	0.00329917	-107.649	-119.481	7	2	496.629	0	0	FALSE
NYAP1	0.000254845	0.00333562	-78.6814	-90.5002	7	2	247.817	0	0	FALSE
EPHX2	0.000256077	0.00334054	-117.276	-129.09	7	2	1323.82	0	0	FALSE
RALB	0.00025754	0.00335683	-99.9334	-111.74	7	2	798.411	0	0	FALSE
CD180	0.000258149	0.00336196	-51.4581	-63.2623	7	2	15.5574	0	0	FALSE
BDKRB1	0.000259034	0.00336606	-82.8035	-94.6038	7	2	124.946	0	0	FALSE
SEPTIN2	0.00025911	0.00336606	-118.538	-130.338	7	2	5384.31	0	0	FALSE
TRIM54	0.000258843	0.00336606	-108.089	-119.89	7	2	548.691	0	0	FALSE
ANKRD45	0.00026062	0.00338006	-57.3354	-69.1288	7	2	60.8365	0	0	FALSE
ID2	0.000260609	0.00338006	-115.243	-127.036	7	2	1116.32	0	0	FALSE
AMER1	0.000263618	0.00341328	-82.1639	-93.9444	7	2	264.221	0	0	FALSE
TEC	0.000263476	0.00341328	-73.004	-84.785	7	2	122.229	0	0	FALSE
PTPN23	0.000265709	0.00343181	-87.6944	-99.4659	7	2	952.212	0	0	FALSE
SCLT1	0.000266134	0.00343447	-55.4709	-67.2406	7	2	46.01	0	0	FALSE
CCDC74B	0.000268621	0.00346084	-62.2213	-73.9805	7	2	29.8661	0	0	FALSE
CLIC4	0.000272054	0.00349931	-148.089	-159.834	7	2	13446.8	0	0	FALSE
IGF1R	0.000277033	0.00354585	-103.946	-115.671	7	2	992.878	0	0	FALSE
APPL2	0.000277377	0.00354734	-77.1884	-88.9112	7	2	351.014	0	0	FALSE
RAB39A	0.00027826	0.00355241	-44.2005	-55.9197	7	2	11.6747	0	0	FALSE
RHBDL2	0.000279359	0.00356103	-45.1725	-56.8873	7	2	11.6934	0	0	FALSE
MAPRE2	0.000279791	0.00356363	-118.267	-129.98	7	2	2382.57	0	0	FALSE
MYLK	0.000282242	0.003589	-148.76	-160.463	7	2	7066.83	0	0	FALSE
CC2D1B	0.000288246	0.00365345	-84.5177	-96.1969	7	2	644.018	0	0	FALSE
LHFPL6	0.000291273	0.00368584	-136.751	-148.419	7	2	6137.95	0	0	FALSE
IL17D	0.000291788	0.00368937	-70.0312	-81.6966	7	2	119.683	0	0	FALSE
AOX1	0.000295028	0.00371831	-70.7979	-82.4508	7	2	49.7227	0	0	FALSE
ARHGEF25	0.000294851	0.00371831	-115.01	-126.663	7	2	2325.36	0	0	FALSE
AJUBA	0.000297526	0.00374677	-100.549	-112.192	7	2	615.151	0	0	FALSE
GINS4	0.00029857	0.00375244	-45.1136	-56.753	7	2	11.3398	0	0	FALSE
KCNE3	0.000302038	0.00378832	-76.3666	-87.9929	7	2	83.4158	0	0	FALSE
MLF1	0.000304167	0.00380586	-102.719	-114.337	7	2	369.798	0	0	FALSE
MAML1	0.000304929	0.00381105	-82.975	-94.5905	7	2	404.544	0	0	FALSE
MPC2	0.000305313	0.00381105	-119.905	-131.519	7	2	1826.83	0	0	FALSE
SF1	0.000305287	0.00381105	-109.739	-121.353	7	2	2864.48	0	0	FALSE
HPRT1	0.000306856	0.00382411	-89.8747	-101.483	7	2	371.667	0	0	FALSE
ADCY10	0.000308317	0.0038332	-82.663	-94.2659	7	2	259.025	0	0	FALSE
PRKG1	0.000308178	0.0038332	-120.033	-131.637	7	2	1615.52	0	0	FALSE
RELL2	0.000308559	0.0038332	-66.8901	-78.4921	7	2	64.4555	0	0	FALSE
EZR	0.00031113	0.00386206	-100.155	-111.748	7	2	416.02	0	0	FALSE
HMGN5	0.000315875	0.00390069	-82.7474	-94.3228	7	2	194.861	0	0	FALSE
SMIM14	0.000315868	0.00390069	-114.787	-126.362	7	2	1494.32	0	0	FALSE
TECRL	0.000315438	0.00390069	-120.969	-132.546	7	2	1128.39	0	0	FALSE
TRIM7	0.000315989	0.00390069	-69.1378	-80.7128	7	2	83.5931	0	0	FALSE
CDKN2C	0.0003187	0.00392248	-81.7065	-93.2718	7	2	260.075	0	0	FALSE
LOXL4	0.000318657	0.00392248	-84.5536	-96.119	7	2	218.967	0	0	FALSE
MAP2	0.000318758	0.00392248	-115.735	-127.3	7	2	1560.75	0	0	FALSE
RAC1	0.000318353	0.00392248	-110.068	-121.635	7	2	3472.26	0	0	FALSE
VNN1	0.000319934	0.00393386	-92.3139	-103.875	7	2	255.907	0	0	FALSE
MRPL47	0.000322493	0.0039622	-79.0642	-90.6161	7	2	212.74	0	0	FALSE
LIN7C	0.000323311	0.00396913	-108.043	-119.592	7	2	1092.19	0	0	FALSE
DVL2	0.00032444	0.00397987	-87.9743	-99.5194	7	2	491.398	0	0	FALSE
STRIP1	0.000324876	0.00398208	-88.4299	-99.9734	7	2	614.321	0	0	FALSE
AGO1	0.000327108	0.00400105	-93.0457	-104.581	7	2	598.433	0	0	FALSE
NDUFB1	0.000330338	0.00403088	-101.121	-112.645	7	2	481	0	0	FALSE
PHC1	0.000330422	0.00403088	-81.5476	-93.0719	7	2	332.166	0	0	FALSE
ATG4A	0.000332132	0.00404565	-80.3349	-91.8533	7	2	260.451	0	0	FALSE
NFIL3	0.000336046	0.00408466	-88.9605	-100.466	7	2	256.128	0	0	FALSE
SLC16A5	0.000338293	0.00410788	-40.4431	-51.9406	7	2	8.05015	0	0	FALSE
LMOD2	0.000340533	0.00412866	-131.252	-142.742	7	2	2292.14	0	0	FALSE
TPM2	0.000341346	0.00413531	-165.493	-176.981	7	2	31521.5	0	0	FALSE
NAGA	0.000344556	0.00417097	-96.4288	-107.906	7	2	730.724	0	0	FALSE
KMT5A	0.00034492	0.00417214	-92.2318	-103.707	7	2	872.465	0	0	FALSE
RAB11FIP3	0.00034559	0.00417702	-100.908	-112.382	7	2	1228.91	0	0	FALSE
MYL3	0.000349118	0.00420989	-165.692	-177.153	7	2	21313.8	0	0	FALSE
SIPA1L3	0.000351123	0.00422755	-83.7902	-95.2455	7	2	347.047	0	0	FALSE
SFXN3	0.000354137	0.00425696	-107.16	-118.605	7	2	1632.81	0	0	FALSE
SH3D21	0.000353937	0.00425696	-69.7954	-81.2416	7	2	51.6563	0	0	FALSE
KLF7	0.000355123	0.00426257	-97.2597	-108.702	7	2	517.578	0	0	FALSE
FUNDC1	0.000359797	0.00430544	-80.9685	-92.3961	7	2	341.869	0	0	FALSE
TTL	0.000359733	0.00430544	-77.4801	-88.9078	7	2	278.019	0	0	FALSE
ELK1	0.000361774	0.00432578	-84.2056	-95.6269	7	2	413.462	0	0	FALSE
MRAS	0.000366224	0.00436564	-91.337	-102.744	7	2	690.987	0	0	FALSE
F2R	0.000367414	0.00437648	-85.9968	-97.4005	7	2	323.288	0	0	FALSE
MRPL14	0.00037268	0.00442571	-90.9764	-102.364	7	2	341.716	0	0	FALSE
RASSF5	0.000374319	0.00444181	-71.0135	-82.396	7	2	138.652	0	0	FALSE
NAF1	0.000375474	0.00444876	-94.36	-105.739	7	2	466.045	0	0	FALSE
THBS3	0.00037546	0.00444876	-100.052	-111.431	7	2	1055.84	0	0	FALSE
CX3CR1	0.000381204	0.00450783	-71.4807	-82.8425	7	2	69.0973	0	0	FALSE
GEMIN6	0.000381325	0.00450783	-64.9755	-76.337	7	2	90.2737	0	0	FALSE
FAM78A	0.000385211	0.00454688	-102.43	-113.78	7	2	369.461	0	0	FALSE
TOR1AIP1	0.00038988	0.00459505	-98.9924	-110.329	7	2	891.088	0	0	FALSE
RNF180	0.00039299	0.00462474	-82.756	-94.0832	7	2	211.75	0	0	FALSE
CMYA5	0.000402514	0.00472259	-131.02	-142.32	7	2	2157.67	0	0	FALSE
CISH	0.000403484	0.00473042	-103.961	-115.258	7	2	490.109	0	0	FALSE
FKBP3	0.000403958	0.00473243	-100.662	-111.958	7	2	781.174	0	0	FALSE
STRADB	0.000407193	0.00476675	-87.407	-98.6937	7	2	305.635	0	0	FALSE
FMC1	0.000408791	0.0047783	-94.9911	-106.273	7	2	365.742	0	0	FALSE
PLEKHG2	0.000414963	0.00483597	-97.8466	-109.112	7	2	773.742	0	0	FALSE
PDK3	0.000417975	0.00486382	-95.9594	-107.216	7	2	661.406	0	0	FALSE
NDUFA5	0.000418793	0.00486971	-87.1856	-98.4403	7	2	219.94	0	0	FALSE
LTF	0.000423941	0.00491222	-43.6582	-54.899	7	2	9.42333	0	0	FALSE
PPL	0.00042402	0.00491222	-93.463	-104.704	7	2	521.465	0	0	FALSE
RTN4RL1	0.000433379	0.00500951	-97.4821	-108.698	7	2	586.404	0	0	FALSE
NAV2	0.000438562	0.00505819	-92.5108	-103.713	7	2	243.619	0	0	FALSE
EFNA1	0.000450884	0.00517621	-89.965	-101.136	7	2	479.903	0	0	FALSE
LIN52	0.000451113	0.00517621	-80.6788	-91.8489	7	2	239.731	0	0	FALSE
APOBEC2	0.000453114	0.00519535	-114.599	-125.764	7	2	749.007	0	0	FALSE
UQCRQ	0.000454854	0.00521148	-136.547	-147.708	7	2	3460.14	0	0	FALSE
COPG1	0.000457727	0.00523672	-109.764	-120.917	7	2	2071.39	0	0	FALSE
KCNQ1	0.000458436	0.00524099	-64.8036	-75.9553	7	2	37.3558	0	0	FALSE
ACAN	0.000465957	0.00532308	-119.246	-130.379	7	2	1417.22	0	0	FALSE
PDZRN3	0.0004677	0.00533909	-106.541	-117.669	7	2	1184.16	0	0	FALSE
PPIF	0.000471572	0.00537937	-120.941	-132.061	7	2	1130.92	0	0	FALSE
KIRREL1	0.000481867	0.00548072	-110.771	-121.866	7	2	1504.44	0	0	FALSE
TWSG1	0.000489827	0.00554712	-102.22	-113.296	7	2	1143.25	0	0	FALSE
LATS2	0.000499567	0.00564515	-104.06	-115.114	7	2	843.213	0	0	FALSE
NDUFA4	0.00050291	0.00567062	-135.108	-146.154	7	2	3251.5	0	0	FALSE
GRAMD1B	0.000506325	0.005705	-83.9443	-94.9826	7	2	174.959	0	0	FALSE
MYL2	0.000507345	0.00571238	-176.418	-187.454	7	2	37813.2	0	0	FALSE
SCRN1	0.00050875	0.00571996	-89.7615	-100.794	7	2	522.862	0	0	FALSE
ATP5MF	0.000517207	0.00581086	-124.936	-135.95	7	2	1776.02	0	0	FALSE
MYO1D	0.00052117	0.00584698	-106.709	-117.715	7	2	1106.67	0	0	FALSE
ANXA3	0.000527644	0.00591113	-109.623	-120.614	7	2	1136.07	0	0	FALSE
NYNRIN	0.000537336	0.00600678	-101.633	-112.604	7	2	899.63	0	0	FALSE
BCORL1	0.000543459	0.00606222	-81.9526	-92.91	7	2	267.444	0	0	FALSE
PIP5K1A	0.000546235	0.00608884	-99.2301	-110.182	7	2	644.019	0	0	FALSE
PCDH17	0.000550623	0.00613338	-75.349	-86.2914	7	2	87.1748	0	0	FALSE
NKAIN1	0.000554484	0.00616322	-62.43	-73.3645	7	2	29.0469	0	0	FALSE
NREP	0.000557273	0.00618542	-102.79	-113.719	7	2	653.374	0	0	FALSE
GULP1	0.000560611	0.00621364	-107.175	-118.097	7	2	666.531	0	0	FALSE
PHEX	0.000562144	0.00622621	-58.0802	-68.999	7	2	22.8827	0	0	FALSE
GABARAPL1	0.000572226	0.00631996	-100.824	-111.723	7	2	1700.49	0	0	FALSE
PDSS1	0.000584274	0.00644847	-73.2318	-84.1065	7	2	105.101	0	0	FALSE
SCARF2	0.000589303	0.0064948	-106.271	-117.136	7	2	1287.66	0	0	FALSE
RASGEF1A	0.000594474	0.00652418	-43.1031	-53.9579	7	2	10.8187	0	0	FALSE
UST	0.000632056	0.00687388	-82.3905	-93.1752	7	2	119.926	0	0	FALSE
PPDPFL	0.000634986	0.00690095	-82.755	-93.5344	7	2	102.166	0	0	FALSE
RBPMS	0.000667827	0.00718788	-130.232	-140.954	7	2	5005.09	0	0	FALSE
WFS1	0.000714622	0.00759736	-98.5201	-109.164	7	2	546.472	0	0	FALSE

## Sheet: 4 weeks_reviewed only
Gene	p	padj	loglik_full	loglik_red	df_full	df_red	mean	converge_impulse	converge_const	allZero
PRR15	1.16381e-20	3.03135e-17	-60.1377	-111.696	7	2	50.6759	0	0	FALSE
NOS2	2.83775e-19	4.92759e-16	-73.616	-121.884	7	2	121.187	0	0	FALSE
TNN	1.28347e-18	1.6715e-15	-69.4572	-116.167	7	2	84.1754	0	0	FALSE
CD22	5.8671e-17	4.82584e-14	-59.0203	-101.778	7	2	42.1684	0	0	FALSE
PRSS53	4.8095e-16	3.57918e-13	-78.6382	-119.216	7	2	138.122	0	0	FALSE
MCP-1	4.30391e-15	2.49117e-12	-56.0627	-94.3644	7	2	30.589	0	0	FALSE
SLC37A2	5.7824e-15	3.2274e-12	-92.9017	-130.896	7	2	321.466	0	0	FALSE
SPHK1	9.5481e-15	4.81348e-12	-73.6332	-111.106	7	2	94.3984	0	0	FALSE
PLAUR	1.5338e-14	7.26369e-12	-74.161	-111.141	7	2	102.419	0	0	FALSE
AIF1	2.27694e-14	1.04659e-11	-92.3185	-128.887	7	2	317.05	0	0	FALSE
KLRG1	2.64519e-14	1.18112e-11	-43.9257	-80.3377	7	2	16.6272	0	0	FALSE
GMFG	2.90002e-14	1.25893e-11	-75.4364	-111.753	7	2	112.072	0	0	FALSE
C5AR1	3.66824e-14	1.46993e-11	-92.5396	-128.611	7	2	312.609	0	0	FALSE
NFAM1	3.77931e-14	1.47658e-11	-74.1906	-110.231	7	2	99.3117	0	0	FALSE
RPS6KA1	4.10615e-14	1.56514e-11	-78.0659	-114.02	7	2	138.395	0	0	FALSE
TIMP1	4.26187e-14	1.58582e-11	-141.633	-177.548	7	2	7347.04	0	0	FALSE
CTSE	4.88321e-14	1.73447e-11	-78.0732	-113.846	7	2	127.579	0	0	FALSE
IRF5	5.40037e-14	1.86424e-11	-90.6711	-126.339	7	2	277.808	0	0	FALSE
PTK2B	6.7448e-14	2.196e-11	-75.9561	-111.392	7	2	147.953	0	0	FALSE
LAPTM5	8.96531e-14	2.85938e-11	-126.602	-161.742	7	2	2712.33	0	0	FALSE
FCGR1A	1.36045e-13	4.16884e-11	-85.0184	-119.723	7	2	206.703	0	0	FALSE
CD48	1.5122e-13	4.46295e-11	-93.2806	-127.874	7	2	325.14	0	0	FALSE
CD14	1.55364e-13	4.49635e-11	-107.153	-141.718	7	2	748.18	0	0	FALSE
NDUFA4L2	1.58891e-13	4.51483e-11	-80.432	-114.974	7	2	154.207	0	0	FALSE
LAT2	2.16077e-13	5.90597e-11	-88.0851	-122.306	7	2	244.865	0	0	FALSE
LCP1	2.19187e-13	5.90597e-11	-118.081	-152.288	7	2	1463.42	0	0	FALSE
PTPN6	2.58234e-13	6.84014e-11	-89.4072	-123.442	7	2	262.326	0	0	FALSE
SELPLG	3.63154e-13	9.30388e-11	-88.9118	-122.591	7	2	243.929	0	0	FALSE
CLU	4.14554e-13	1.02922e-10	-143.664	-177.205	7	2	8931.43	0	0	FALSE
TSPAN33	4.14902e-13	1.02922e-10	-52.0907	-85.6302	7	2	24.9245	0	0	FALSE
RUNX1	5.87547e-13	1.41264e-10	-93.0304	-126.206	7	2	313.87	0	0	FALSE
CSF2RA	6.47719e-13	1.51083e-10	-88.1866	-121.26	7	2	225.167	0	0	FALSE
CXCL14	8.16131e-13	1.8309e-10	-48.853	-81.6849	7	2	20.1432	0	0	FALSE
TYROBP	8.20085e-13	1.8309e-10	-108.668	-141.494	7	2	798.86	0	0	FALSE
PVALB	8.50129e-13	1.87124e-10	-46.9007	-79.6899	7	2	35.2994	0	0	FALSE
BPGM	9.96389e-13	2.16272e-10	-77.0141	-109.637	7	2	217.327	0	0	FALSE
MATK	1.01293e-12	2.16851e-10	-79.1294	-111.735	7	2	126.964	0	0	FALSE
CORO1A	1.1818e-12	2.46256e-10	-92.253	-124.697	7	2	296.474	0	0	FALSE
TNFAIP8L2	1.68061e-12	3.32463e-10	-72.3577	-104.433	7	2	89.3015	0	0	FALSE
TREM2	2.50978e-12	4.80553e-10	-102.282	-133.937	7	2	526.583	0	0	FALSE
FCER1G	3.73631e-12	6.95131e-10	-99.6954	-130.934	7	2	449.626	0	0	FALSE
ATP8B4	4.17159e-12	7.58064e-10	-61.0355	-92.1582	7	2	43.4358	0	0	FALSE
ADAP2	4.38514e-12	7.87713e-10	-82.7944	-113.865	7	2	297.838	0	0	FALSE
ARPC1B	5.17153e-12	8.88139e-10	-127.245	-158.142	7	2	3079.48	0	0	FALSE
POU2F2	5.14019e-12	8.88139e-10	-81.7427	-112.646	7	2	146.337	0	0	FALSE
DOCK2	5.53548e-12	9.30199e-10	-74.6364	-105.462	7	2	108.003	0	0	FALSE
CD68	5.61713e-12	9.33878e-10	-104.512	-135.322	7	2	638.691	0	0	FALSE
BCL2A1	6.58937e-12	1.0508e-09	-90.8847	-121.528	7	2	255.725	0	0	FALSE
VSIG4	8.12211e-12	1.24443e-09	-105.021	-135.445	7	2	664.087	0	0	FALSE
ITGB2	9.08633e-12	1.35239e-09	-107.269	-137.574	7	2	706.358	0	0	FALSE
CD84	9.59037e-12	1.41395e-09	-85.6715	-115.92	7	2	187.282	0	0	FALSE
NPNT	1.12326e-11	1.64059e-09	-130.866	-160.949	7	2	3879.11	0	0	FALSE
LST1	1.18473e-11	1.71435e-09	-71.8022	-101.829	7	2	79.2069	0	0	FALSE
MYO1F	1.39965e-11	2.00677e-09	-89.3753	-119.227	7	2	232.963	0	0	FALSE
HCST	1.7032e-11	2.39799e-09	-65.0236	-94.669	7	2	51.4559	0	0	FALSE
AOAH	1.90618e-11	2.6598e-09	-82.6239	-112.151	7	2	156.357	0	0	FALSE
CLEC5A	3.53553e-11	4.76321e-09	-74.2769	-103.154	7	2	87.3902	0	0	FALSE
CTSS	3.66024e-11	4.88908e-09	-108.111	-136.951	7	2	803.096	0	0	FALSE
SPI1	3.83948e-11	5.08503e-09	-91.8618	-120.652	7	2	272.207	0	0	FALSE
HCK	4.12803e-11	5.42124e-09	-67.0842	-95.798	7	2	58.0817	0	0	FALSE
CH25H	4.17199e-11	5.43332e-09	-86.7172	-115.42	7	2	215.284	0	0	FALSE
NCKAP1L	4.23725e-11	5.47271e-09	-93.7257	-122.412	7	2	335.165	0	0	FALSE
MSR1	7.29995e-11	8.90146e-09	-72.8489	-100.962	7	2	79.654	0	0	FALSE
PKIB	7.34764e-11	8.90146e-09	-61.2592	-89.3654	7	2	41.4028	0	0	FALSE
TNFRSF1B	8.73658e-11	1.03436e-08	-88.5738	-116.497	7	2	340.267	0	0	FALSE
IL10RA	1.10561e-10	1.27988e-08	-84.4614	-112.137	7	2	172.444	0	0	FALSE
HCLS1	1.16789e-10	1.3226e-08	-94.993	-122.61	7	2	325.766	0	0	FALSE
GPNMB	1.1862e-10	1.33366e-08	-118.995	-146.596	7	2	1418.02	0	0	FALSE
GJB5	1.28724e-10	1.42673e-08	-71.9334	-99.4481	7	2	100.436	0	0	FALSE
SUSD3	1.45788e-10	1.57129e-08	-70.2899	-97.6733	7	2	74.9101	0	0	FALSE
DOK2	1.67717e-10	1.78305e-08	-81.4765	-108.712	7	2	150.081	0	0	FALSE
BLNK	1.7225e-10	1.80265e-08	-74.3392	-101.546	7	2	93.1512	0	0	FALSE
P2RX6	1.73021e-10	1.80265e-08	-56.1963	-83.3989	7	2	32.2273	0	0	FALSE
C3AR1	2.11402e-10	2.14532e-08	-67.6244	-94.6153	7	2	70.1528	0	0	FALSE
SIGLEC15	2.19258e-10	2.21068e-08	-74.9323	-101.885	7	2	89.708	0	0	FALSE
CHIT1	2.36179e-10	2.36603e-08	-95.5757	-122.449	7	2	343.106	0	0	FALSE
UCP2	2.7018e-10	2.68941e-08	-106.722	-133.454	7	2	715.346	0	0	FALSE
ARL4C	3.04212e-10	2.97971e-08	-79.8387	-106.445	7	2	137.906	0	0	FALSE
IL1RN	3.08201e-10	2.99165e-08	-82.5009	-109.093	7	2	139.971	0	0	FALSE
ITGAX	3.22816e-10	3.11418e-08	-82.6491	-109.192	7	2	157.683	0	0	FALSE
ATP6V0D2	3.59512e-10	3.38768e-08	-71.3564	-97.7859	7	2	73.177	0	0	FALSE
CD79A	3.99893e-10	3.71995e-08	-57.3468	-83.6637	7	2	29.956	0	0	FALSE
SOCS3	4.38004e-10	4.05037e-08	-93.4493	-119.67	7	2	353.996	0	0	FALSE
GPR65	5.57832e-10	5.06849e-08	-59.8362	-85.8008	7	2	35.5848	0	0	FALSE
PLCB2	6.74793e-10	6.02609e-08	-80.0041	-105.767	7	2	126.781	0	0	FALSE
DOK3	7.41709e-10	6.58604e-08	-78.4787	-104.142	7	2	108.848	0	0	FALSE
PRKCB	8.43641e-10	7.40698e-08	-64.0109	-89.5373	7	2	57.6198	0	0	FALSE
MPEG1	8.74472e-10	7.63477e-08	-109.158	-134.647	7	2	734.667	0	0	FALSE
CPLX2	8.83762e-10	7.67302e-08	-64.5512	-90.0283	7	2	45.9223	0	0	FALSE
SLC46A1	9.29768e-10	8.02785e-08	-74.1421	-99.5654	7	2	84.4011	0	0	FALSE
MILR1	9.76268e-10	8.24709e-08	-52.1036	-77.4751	7	2	21.4405	0	0	FALSE
CP	1.0617e-09	8.87286e-08	-108.143	-133.426	7	2	699.804	0	0	FALSE
IGSF9B	1.22553e-09	9.87245e-08	-77.1436	-102.274	7	2	166.805	0	0	FALSE
CD80	1.61225e-09	1.26614e-07	-75.2522	-100.092	7	2	88.643	0	0	FALSE
ARHGAP22	1.69102e-09	1.32137e-07	-70.8567	-95.6454	7	2	76.4238	0	0	FALSE
WAS	1.78905e-09	1.37731e-07	-85.0594	-109.788	7	2	183.635	0	0	FALSE
FABP5	2.05262e-09	1.5572e-07	-103.411	-127.994	7	2	603.926	0	0	FALSE
KRT75	2.06717e-09	1.56067e-07	-45.6777	-70.2532	7	2	15.8347	0	0	FALSE
IRF8	2.15538e-09	1.60763e-07	-82.4877	-107.019	7	2	170.953	0	0	FALSE
PTPN18	2.16024e-09	1.60763e-07	-70.4955	-95.0241	7	2	71.6846	0	0	FALSE
RLA-DRB1	2.24765e-09	1.64912e-07	-124.05	-148.536	7	2	1833.39	0	0	FALSE
CD37	2.36867e-09	1.72979e-07	-93.3057	-117.736	7	2	314.6	0	0	FALSE
PARVG	2.50223e-09	1.81883e-07	-64.0536	-88.4261	7	2	45.1848	0	0	FALSE
MFNG	3.04962e-09	2.17623e-07	-96.6958	-120.858	7	2	507.591	0	0	FALSE
PTAFR	3.25659e-09	2.29252e-07	-74.6874	-98.7797	7	2	87.0589	0	0	FALSE
GPR183	3.71715e-09	2.60501e-07	-73.6951	-97.6468	7	2	84.0723	0	0	FALSE
NCF4	3.74183e-09	2.6106e-07	-64.679	-88.6236	7	2	51.2136	0	0	FALSE
BAZ1A	3.80879e-09	2.6455e-07	-81.0939	-105.02	7	2	213.172	0	0	FALSE
CCR6	3.91685e-09	2.70852e-07	-50.6489	-74.5448	7	2	20.2275	0	0	FALSE
TK1	3.95424e-09	2.72233e-07	-71.6222	-95.508	7	2	86.7634	0	0	FALSE
BUB1	4.29292e-09	2.94253e-07	-48.0714	-71.8698	7	2	17.4053	0	0	FALSE
MMP9	4.4066e-09	3.00727e-07	-84.018	-107.789	7	2	226.474	0	0	FALSE
DDIT4	4.53349e-09	3.08041e-07	-121.712	-145.453	7	2	1844.51	0	0	FALSE
CYBB	4.61893e-09	3.12487e-07	-96.318	-120.038	7	2	343.735	0	0	FALSE
CD53	5.1632e-09	3.46311e-07	-94.5945	-118.196	7	2	317.175	0	0	FALSE
FTH1	5.46626e-09	3.61978e-07	-165.144	-188.685	7	2	49514.5	0	0	FALSE
CHRDL2	5.50403e-09	3.62941e-07	-109.008	-132.542	7	2	696.671	0	0	FALSE
CD74	5.76918e-09	3.78827e-07	-145.427	-168.911	7	2	6875.91	0	0	FALSE
SYK	6.27625e-09	4.05311e-07	-77.5852	-100.979	7	2	106.783	0	0	FALSE
SMC4	6.53768e-09	4.20456e-07	-86.3861	-109.737	7	2	371.012	0	0	FALSE
BIN2	6.69883e-09	4.27874e-07	-81.1981	-104.523	7	2	139.149	0	0	FALSE
DEFB1	6.70778e-09	4.27874e-07	-74.923	-98.2461	7	2	87.7466	0	0	FALSE
KCNE4	6.95669e-09	4.36623e-07	-95.3631	-118.647	7	2	414.398	0	0	FALSE
CCR5	7.34331e-09	4.59045e-07	-80.0049	-103.231	7	2	114.638	0	0	FALSE
FAM111A	8.6974e-09	5.33031e-07	-88.4584	-111.505	7	2	282.086	0	0	FALSE
GJB3	9.28903e-09	5.67066e-07	-93.7306	-116.707	7	2	372.824	0	0	FALSE
CDKN1A	9.47096e-09	5.73691e-07	-114.819	-137.774	7	2	1283.49	0	0	FALSE
ALOX5AP	1.0062e-08	6.02488e-07	-87.1683	-110.059	7	2	203.091	0	0	FALSE
H1-2	1.02578e-08	6.11866e-07	-77.0997	-99.9698	7	2	125.692	0	0	FALSE
BAG2	1.07153e-08	6.31921e-07	-109.631	-132.455	7	2	1316.78	0	0	FALSE
RLA-DMA	1.06763e-08	6.31921e-07	-93.8951	-116.723	7	2	272.975	0	0	FALSE
EPCAM	1.13408e-08	6.66296e-07	-51.9808	-74.7438	7	2	22.3463	0	0	FALSE
TBXAS1	1.13961e-08	6.67035e-07	-67.6876	-90.4454	7	2	63.3314	0	0	FALSE
MYO1G	1.22627e-08	7.15079e-07	-85.4091	-108.089	7	2	170.209	0	0	FALSE
EVI2B	1.23679e-08	7.16262e-07	-64.6185	-87.289	7	2	44.9419	0	0	FALSE
SLC16A3	1.23746e-08	7.16262e-07	-75.3826	-98.0525	7	2	88.7938	0	0	FALSE
ARHGAP30	1.32833e-08	7.6041e-07	-87.9311	-110.525	7	2	204.495	0	0	FALSE
FERMT3	1.55303e-08	8.73051e-07	-84.1313	-106.559	7	2	154.784	0	0	FALSE
SLA	1.67899e-08	9.33781e-07	-79.6056	-101.95	7	2	108.935	0	0	FALSE
CENPA	1.80524e-08	1.00044e-06	-63.2049	-85.4714	7	2	40.3457	0	0	FALSE
IFNGR2	1.86703e-08	1.02739e-06	-95.4472	-117.678	7	2	528.081	0	0	FALSE
IGSF6	1.89158e-08	1.03725e-06	-78.4711	-100.688	7	2	100.952	0	0	FALSE
NAPSA	2.04559e-08	1.11389e-06	-73.7052	-95.8381	7	2	83.7388	0	0	FALSE
HAVCR1	2.20293e-08	1.1954e-06	-84.1536	-106.207	7	2	153.545	0	0	FALSE
NEK2	2.22386e-08	1.20258e-06	-53.7236	-75.7672	7	2	22.1496	0	0	FALSE
PRG4	2.24842e-08	1.21166e-06	-109.155	-131.187	7	2	709.581	0	0	FALSE
TIFAB	2.27829e-08	1.22354e-06	-63.9812	-85.9989	7	2	41.2383	0	0	FALSE
CKS2	2.76428e-08	1.46081e-06	-69.0367	-90.8475	7	2	64.8202	0	0	FALSE
EVI2A	2.98229e-08	1.55058e-06	-81.2605	-102.99	7	2	127.563	0	0	FALSE
CCL19	3.01726e-08	1.56138e-06	-68.4765	-90.1935	7	2	55.6535	0	0	FALSE
SASH3	3.26034e-08	1.65431e-06	-73.3893	-95.0233	7	2	81.1255	0	0	FALSE
HMOX1	3.35756e-08	1.69351e-06	-91.9139	-113.517	7	2	274.518	0	0	FALSE
INHBB	3.86193e-08	1.94065e-06	-52.7956	-74.2482	7	2	23.4794	0	0	FALSE
SCARA3	3.96817e-08	1.9813e-06	-115.852	-137.276	7	2	1703.12	0	0	FALSE
SEMA4A	4.05743e-08	2.013e-06	-76.7894	-98.1892	7	2	123.214	0	0	FALSE
GALNT6	4.80862e-08	2.34109e-06	-53.6096	-74.8272	7	2	20.9222	0	0	FALSE
ABCG1	4.84995e-08	2.3466e-06	-83.6546	-104.863	7	2	152.306	0	0	FALSE
ANXA8	5.02568e-08	2.41666e-06	-115.992	-137.163	7	2	1323.6	0	0	FALSE
P2RY8	5.57295e-08	2.6256e-06	-49.3192	-70.3786	7	2	16.2834	0	0	FALSE
PNP	5.68761e-08	2.66126e-06	-90.2637	-111.301	7	2	341.553	0	0	FALSE
LY86	5.95041e-08	2.77591e-06	-69.699	-90.6881	7	2	57.702	0	0	FALSE
TNC	5.9948e-08	2.7883e-06	-117.37	-138.352	7	2	1213.68	0	0	FALSE
LMO2	6.06343e-08	2.79526e-06	-93.4658	-114.435	7	2	421.929	0	0	FALSE
RLA-DR-ALPHA	6.06302e-08	2.79526e-06	-130.712	-151.681	7	2	2602.66	0	0	FALSE
SLC47A1	6.05382e-08	2.79526e-06	-94.5239	-115.495	7	2	269.961	0	0	FALSE
CX3CL1	6.5061e-08	2.98174e-06	-101.42	-122.314	7	2	438.09	0	0	FALSE
STAC2	6.63968e-08	3.03406e-06	-103.443	-124.315	7	2	581.492	0	0	FALSE
BTK	7.57661e-08	3.44207e-06	-67.7639	-88.4936	7	2	55.9735	0	0	FALSE
ALOX5	7.74087e-08	3.5065e-06	-89.8392	-110.546	7	2	273.953	0	0	FALSE
PIK3R5	7.80349e-08	3.52465e-06	-81.1264	-101.824	7	2	127.283	0	0	FALSE
FOXM1	7.97687e-08	3.59258e-06	-63.2654	-83.9399	7	2	42.7207	0	0	FALSE
TPST2	8.74356e-08	3.88194e-06	-95.8382	-116.414	7	2	598.179	0	0	FALSE
RASAL3	9.0664e-08	4.01387e-06	-69.7909	-90.3278	7	2	57.9506	0	0	FALSE
PLTP	9.26645e-08	4.09085e-06	-151.167	-171.68	7	2	10467.2	0	0	FALSE
IL7R	9.70771e-08	4.26158e-06	-63.6336	-84.097	7	2	40.3029	0	0	FALSE
CD1C	9.7431e-08	4.26513e-06	-65.1386	-85.5981	7	2	42.8352	0	0	FALSE
KRT5	1.01275e-07	4.42102e-06	-39.7025	-60.1204	7	2	9.2256	0	0	FALSE
KCNA6	1.10708e-07	4.77941e-06	-84.9433	-105.265	7	2	234.123	0	0	FALSE
RAD51B	1.1432e-07	4.90821e-06	-70.0273	-90.3149	7	2	97.6872	0	0	FALSE
ARHGAP9	1.2076e-07	5.12838e-06	-55.7734	-76.002	7	2	29.1718	0	0	FALSE
RLA-DMB	1.33978e-07	5.62851e-06	-90.1266	-110.243	7	2	204.843	0	0	FALSE
ARHGDIB	1.6545e-07	6.75107e-06	-102.604	-122.494	7	2	754.597	0	0	FALSE
NPPA	1.78688e-07	7.25335e-06	-128.309	-148.116	7	2	7593.92	0	0	FALSE
TLR1	1.96999e-07	7.87391e-06	-65.4914	-85.193	7	2	47.7783	0	0	FALSE
NFKBIE	2.12285e-07	8.46324e-06	-76.4077	-96.0287	7	2	130.141	0	0	FALSE
FYB1	2.23689e-07	8.87262e-06	-74.4043	-93.9688	7	2	91.3006	0	0	FALSE
DRAM1	2.36496e-07	9.30973e-06	-90.5932	-110.098	7	2	415.048	0	0	FALSE
CRLF2	2.4736e-07	9.59876e-06	-57.2664	-76.7224	7	2	24.8289	0	0	FALSE
ARL11	2.50244e-07	9.68024e-06	-63.7013	-83.1448	7	2	39.0852	0	0	FALSE
ARID3A	2.72386e-07	1.03796e-05	-65.5663	-84.9184	7	2	70.4911	0	0	FALSE
RENBP	2.80203e-07	1.06287e-05	-87.4706	-106.792	7	2	240.441	0	0	FALSE
MS4A6A	3.02119e-07	1.13771e-05	-90.4872	-109.727	7	2	262.442	0	0	FALSE
SAA3	3.13977e-07	1.1767e-05	-123.872	-143.071	7	2	1629.5	0	0	FALSE
MAP4K1	3.35975e-07	1.25015e-05	-65.6976	-84.823	7	2	49.568	0	0	FALSE
CCR2	3.55886e-07	1.31796e-05	-68.3357	-87.3989	7	2	49.2938	0	0	FALSE
RAC2	3.67603e-07	1.3544e-05	-92.0498	-111.078	7	2	223.952	0	0	FALSE
ABCA6	3.7447e-07	1.36944e-05	-92.8911	-111.899	7	2	241.595	0	0	FALSE
ABCC3	3.76463e-07	1.36944e-05	-78.2653	-97.2677	7	2	109.84	0	0	FALSE
LIMD2	3.76238e-07	1.36944e-05	-83.3833	-102.386	7	2	192.448	0	0	FALSE
BUB1B	4.00918e-07	1.44701e-05	-58.5134	-77.4479	7	2	30.0444	0	0	FALSE
DENND1C	4.00212e-07	1.44701e-05	-68.3184	-87.2547	7	2	54.9542	0	0	FALSE
TACSTD2	4.02287e-07	1.4486e-05	-69.2606	-88.1913	7	2	58.3064	0	0	FALSE
GIMAP1	4.36128e-07	1.55898e-05	-67.6546	-86.498	7	2	55.1927	0	0	FALSE
LYN	4.43176e-07	1.57767e-05	-87.8791	-106.705	7	2	242.938	0	0	FALSE
FGL1	4.59927e-07	1.62987e-05	-59.818	-78.6039	7	2	31.1945	0	0	FALSE
WDFY4	4.74084e-07	1.67246e-05	-74.6385	-93.3916	7	2	88.997	0	0	FALSE
CCL22	4.75674e-07	1.67429e-05	-66.8146	-85.5641	7	2	46.7703	0	0	FALSE
TRIM14	5.0872e-07	1.76281e-05	-68.8703	-87.5471	7	2	65.343	0	0	FALSE
APOBR	5.15999e-07	1.78408e-05	-71.8811	-90.5425	7	2	64.451	0	0	FALSE
CHN2	5.27915e-07	1.81724e-05	-69.3708	-88.0075	7	2	71.7989	0	0	FALSE
FMNL1	6.19319e-07	2.09044e-05	-90.383	-108.847	7	2	278.867	0	0	FALSE
CD72	6.21549e-07	2.09344e-05	-50.3007	-68.7606	7	2	16.5249	0	0	FALSE
IL4R	6.38346e-07	2.13621e-05	-96.9351	-115.366	7	2	403.204	0	0	FALSE
SLC29A1	6.3788e-07	2.13621e-05	-111.836	-130.268	7	2	1949.22	0	0	FALSE
SIGLEC5	6.47601e-07	2.16254e-05	-65.6232	-84.0386	7	2	48.4524	0	0	FALSE
BASP1	6.52476e-07	2.16591e-05	-89.7626	-108.17	7	2	291.861	0	0	FALSE
FOLR2	6.60803e-07	2.18793e-05	-101.75	-120.143	7	2	433.12	0	0	FALSE
RGS10	6.88029e-07	2.26846e-05	-94.5211	-112.871	7	2	321.671	0	0	FALSE
RACGAP1	6.91533e-07	2.27522e-05	-69.131	-87.4753	7	2	74.2415	0	0	FALSE
SRGN	7.28958e-07	2.37336e-05	-104.374	-122.662	7	2	602.416	0	0	FALSE
ITIH2	7.37612e-07	2.39655e-05	-48.7071	-66.9814	7	2	15.1023	0	0	FALSE
TMEM229B	7.53822e-07	2.44413e-05	-48.5149	-66.7657	7	2	17.4508	0	0	FALSE
LCP2	8.30096e-07	2.65835e-05	-75.1749	-93.3212	7	2	80.3449	0	0	FALSE
SPN	8.4702e-07	2.69838e-05	-81.4021	-99.5264	7	2	111.234	0	0	FALSE
ITGAM	8.60755e-07	2.72501e-05	-84.9089	-103.016	7	2	140.906	0	0	FALSE
CNKSR3	8.7631e-07	2.75e-05	-88.0198	-106.107	7	2	211.675	0	0	FALSE
IGFBPL1	8.74941e-07	2.75e-05	-69.6762	-87.7653	7	2	56.5393	0	0	FALSE
STAB1	9.12858e-07	2.85323e-05	-123.94	-141.983	7	2	2410.17	0	0	FALSE
KIF20A	1.06829e-06	3.28e-05	-70.6087	-88.481	7	2	65.7386	0	0	FALSE
IL10RB	1.10501e-06	3.37948e-05	-91.5069	-109.343	7	2	298.966	0	0	FALSE
CCR1	1.21985e-06	3.7017e-05	-66.5314	-84.2596	7	2	48.769	0	0	FALSE
CAPG	1.23063e-06	3.72719e-05	-110.563	-128.282	7	2	1053.94	0	0	FALSE
MCP2	1.28808e-06	3.88611e-05	-62.18	-79.8491	7	2	33.2788	0	0	FALSE
IL34	1.29621e-06	3.9031e-05	-87.0326	-104.695	7	2	232.847	0	0	FALSE
GPR34	1.38414e-06	4.15188e-05	-79.599	-97.1899	7	2	135.965	0	0	FALSE
ERCC6L	1.39158e-06	4.16621e-05	-40.4218	-58.0068	7	2	10.5554	0	0	FALSE
CIITA	1.40854e-06	4.20362e-05	-65.2659	-82.8377	7	2	47.3023	0	0	FALSE
PCLAF	1.45739e-06	4.33004e-05	-70.1798	-87.7145	7	2	58.2638	0	0	FALSE
ARRB2	1.46616e-06	4.33961e-05	-81.8388	-99.367	7	2	324.069	0	0	FALSE
HK3	1.5263e-06	4.4921e-05	-56.9828	-74.4673	7	2	26.325	0	0	FALSE
MLANA	1.71154e-06	4.95332e-05	-64.0784	-81.4382	7	2	38.1136	0	0	FALSE
E2F2	1.71925e-06	4.96644e-05	-45.3071	-62.662	7	2	16.4745	0	0	FALSE
SLC7A7	1.73629e-06	5.0064e-05	-83.2025	-100.547	7	2	136.824	0	0	FALSE
NCF2	1.83193e-06	5.2531e-05	-80.4485	-97.7342	7	2	107.35	0	0	FALSE
C1RL	1.87665e-06	5.37149e-05	-89.9571	-107.217	7	2	217.087	0	0	FALSE
RNASE6	1.89169e-06	5.39478e-05	-82.0784	-99.3292	7	2	128.377	0	0	FALSE
MS4A4A	1.93074e-06	5.47617e-05	-90.3678	-107.596	7	2	249.773	0	0	FALSE
PRKAG3	1.92962e-06	5.47617e-05	-72.4898	-89.719	7	2	87.1292	0	0	FALSE
RADIL	1.9373e-06	5.4848e-05	-84.6665	-101.891	7	2	362.227	0	0	FALSE
ZNF710	1.9652e-06	5.54371e-05	-78.4419	-95.6512	7	2	266.368	0	0	FALSE
TRABD2A	1.97282e-06	5.54518e-05	-68.2015	-85.4066	7	2	70.1665	0	0	FALSE
LGALS9	2.01872e-06	5.664e-05	-92.2625	-109.442	7	2	215.937	0	0	FALSE
CEMIP	2.1621e-06	6.0218e-05	-85.9444	-103.05	7	2	146.091	0	0	FALSE
GUCY1B1	2.16551e-06	6.0218e-05	-101.594	-118.697	7	2	780.023	0	0	FALSE
RBM47	2.29729e-06	6.36561e-05	-57.912	-74.951	7	2	29.4097	0	0	FALSE
DUSP13	2.5011e-06	6.86946e-05	-79.4065	-96.3528	7	2	98.5677	0	0	FALSE
DAPP1	2.61584e-06	7.15942e-05	-61.3051	-78.2025	7	2	31.271	0	0	FALSE
FLT3	2.82701e-06	7.69696e-05	-58.4885	-75.3012	7	2	27.6952	0	0	FALSE
DEF6	3.22919e-06	8.73112e-05	-75.3197	-91.9871	7	2	105.376	0	0	FALSE
MYEF2	3.33079e-06	8.9668e-05	-82.2355	-98.869	7	2	391.479	0	0	FALSE
IL20RB	3.48261e-06	9.31956e-05	-63.4184	-80.0032	7	2	36.0685	0	0	FALSE
TUBA1C	3.49866e-06	9.34651e-05	-99.3133	-115.893	7	2	676.78	0	0	FALSE
CCL2	3.58216e-06	9.53697e-05	-78.3113	-94.8653	7	2	98.754	0	0	FALSE
LRRC25	3.69577e-06	9.7894e-05	-80.3226	-96.8425	7	2	123.5	0	0	FALSE
JAK3	3.73033e-06	9.84757e-05	-87.9956	-104.505	7	2	219.826	0	0	FALSE
FCHO1	3.78361e-06	9.94316e-05	-62.067	-78.5612	7	2	53.0727	0	0	FALSE
MAFB	3.79199e-06	9.94316e-05	-97.2087	-113.7	7	2	452.946	0	0	FALSE
SLC15A3	3.84746e-06	0.000100717	-104.105	-120.581	7	2	747.594	0	0	FALSE
FHL3	3.95365e-06	0.000103151	-91.0128	-107.459	7	2	362.998	0	0	FALSE
KNL1	4.03514e-06	0.000104768	-52.8759	-69.2996	7	2	18.6666	0	0	FALSE
PTPN7	4.03571e-06	0.000104768	-62.5292	-78.9528	7	2	34.8624	0	0	FALSE
FTL	4.23618e-06	0.000109427	-153.228	-169.598	7	2	14869.2	0	0	FALSE
PLD3	4.30931e-06	0.000111132	-118.785	-135.136	7	2	2271.28	0	0	FALSE
TROAP	4.54689e-06	0.000116681	-56.948	-73.2411	7	2	24.5631	0	0	FALSE
CD163	4.64706e-06	0.000119056	-103.056	-119.325	7	2	441.339	0	0	FALSE
CALCOCO1	4.78429e-06	0.000121773	-108.036	-124.274	7	2	1755.66	0	0	FALSE
TNFAIP6	4.98916e-06	0.000125962	-87.8646	-104.056	7	2	163.767	0	0	FALSE
KIF18B	5.0736e-06	0.000127887	-54.8621	-71.0351	7	2	21.2443	0	0	FALSE
CGAS	5.10162e-06	0.00012818	-53.7315	-69.8985	7	2	23.4353	0	0	FALSE
JAML	5.09354e-06	0.00012818	-72.8067	-88.9755	7	2	67.7239	0	0	FALSE
INPP5D	5.32486e-06	0.000132728	-83.7136	-99.8337	7	2	188.461	0	0	FALSE
ITGAL	5.32509e-06	0.000132728	-85.1621	-101.282	7	2	135.673	0	0	FALSE
CARD6	5.3386e-06	0.000132852	-81.9993	-98.1165	7	2	145.484	0	0	FALSE
SGO1	5.37506e-06	0.000132982	-48.8205	-64.9303	7	2	14.3334	0	0	FALSE
BRMS1L	5.54136e-06	0.000136379	-85.5041	-101.581	7	2	440.771	0	0	FALSE
FXYD5	5.53272e-06	0.000136379	-119.781	-135.859	7	2	1471.43	0	0	FALSE
IL4I1	5.67101e-06	0.000138913	-63.4402	-79.4912	7	2	38.8262	0	0	FALSE
TAGAP	5.74226e-06	0.000139955	-64.8141	-80.8514	7	2	41.8801	0	0	FALSE
APOA4	5.82496e-06	0.000141355	-36.4501	-52.4718	7	2	9.70379	0	0	FALSE
GYPA	5.97641e-06	0.000144357	-65.7356	-81.7292	7	2	42.7841	0	0	FALSE
CDC20	6.18063e-06	0.000148373	-74.1183	-90.0749	7	2	78.2288	0	0	FALSE
GPR158	6.54656e-06	0.00015575	-28.4172	-44.3108	7	2	6.52917	0	0	FALSE
PLET1	6.54772e-06	0.00015575	-56.6198	-72.5132	7	2	25.4371	0	0	FALSE
SERPINA3	6.54443e-06	0.00015575	-63.8835	-79.7775	7	2	37.8501	0	0	FALSE
C1QTNF6	6.61353e-06	0.0001566	-106.388	-122.271	7	2	649.864	0	0	FALSE
KCNAB2	6.69836e-06	0.000158369	-91.7092	-107.578	7	2	378.331	0	0	FALSE
GGH	7.21374e-06	0.000169528	-75.5604	-91.3474	7	2	92.5708	0	0	FALSE
CENPF	7.4005e-06	0.000173136	-71.9834	-87.7424	7	2	62.5509	0	0	FALSE
DTX2	7.66599e-06	0.000179079	-73.0315	-88.7518	7	2	151.669	0	0	FALSE
MYBL2	7.93637e-06	0.000184568	-47.7076	-63.3898	7	2	14.3418	0	0	FALSE
PRDM11	8.09068e-06	0.000187877	-78.7227	-94.3837	7	2	314.423	0	0	FALSE
CXCL16	8.14285e-06	0.000188528	-98.6141	-114.268	7	2	558.27	0	0	FALSE
SH2D4B	8.32905e-06	0.000192399	-51.1878	-66.8169	7	2	17.3455	0	0	FALSE
SLC15A2	8.7483e-06	0.00020165	-72.1122	-87.6874	7	2	59.9977	0	0	FALSE
RHBDF2	9.02107e-06	0.000207021	-84.9977	-100.539	7	2	288.288	0	0	FALSE
HEY2	9.24744e-06	0.000211905	-106.837	-122.351	7	2	888.749	0	0	FALSE
CASS4	9.3953e-06	0.00021435	-54.9681	-70.4648	7	2	25.571	0	0	FALSE
PLEK2	9.47507e-06	0.000215855	-59.3533	-74.8407	7	2	27.3404	0	0	FALSE
NFE2	9.56761e-06	0.000217014	-41.7774	-57.2541	7	2	10.9565	0	0	FALSE
TFEC	1.00416e-05	0.000226777	-68.2433	-83.6668	7	2	59.1318	0	0	FALSE
GCNT1	1.03375e-05	0.000233124	-65.6418	-81.0334	7	2	46.7579	0	0	FALSE
LYL1	1.04522e-05	0.00023526	-77.7602	-93.1396	7	2	149.622	0	0	FALSE
SPC25	1.04623e-05	0.00023526	-59.9271	-75.3055	7	2	47.5307	0	0	FALSE
RTN4RL2	1.07035e-05	0.000239993	-69.243	-84.5962	7	2	59.6105	0	0	FALSE
ASPM	1.07803e-05	0.000241368	-60.658	-76.0034	7	2	30.5374	0	0	FALSE
BID	1.09711e-05	0.00024424	-61.1616	-76.4877	7	2	39.0214	0	0	FALSE
LPXN	1.10443e-05	0.000245519	-69.8321	-85.1509	7	2	58.1133	0	0	FALSE
SNX10	1.11022e-05	0.000246456	-93.2265	-108.54	7	2	280.478	0	0	FALSE
HAS1	1.13746e-05	0.000251788	-71.3353	-86.6216	7	2	62.6478	0	0	FALSE
TCEAL4	1.16373e-05	0.000256876	-96.4883	-111.75	7	2	1101.5	0	0	FALSE
PLXNC1	1.20063e-05	0.000264274	-55.7666	-70.9934	7	2	25.4654	0	0	FALSE
PLEK	1.23118e-05	0.000270617	-73.2018	-88.4009	7	2	93.5746	0	0	FALSE
CCNF	1.25849e-05	0.000275458	-54.2069	-69.3819	7	2	19.5571	0	0	FALSE
C1QTNF9	1.2864e-05	0.000281172	-83.2348	-98.3856	7	2	179.563	0	0	FALSE
CD101	1.30406e-05	0.000283842	-55.7438	-70.8795	7	2	21.5926	0	0	FALSE
ADAM12	1.31184e-05	0.000285139	-86.5073	-101.636	7	2	149.065	0	0	FALSE
FGR	1.40707e-05	0.000303726	-80.6144	-95.6663	7	2	111.488	0	0	FALSE
MCEMP1	1.43505e-05	0.000309207	-53.617	-68.6472	7	2	18.6033	0	0	FALSE
VCAM1	1.48453e-05	0.000316944	-112.246	-127.239	7	2	989.463	0	0	FALSE
KIF4A	1.597e-05	0.000338641	-51.1741	-66.0863	7	2	16.9971	0	0	FALSE
EZH2	1.64e-05	0.000346036	-62.409	-77.2919	7	2	45.3853	0	0	FALSE
MYOCD	1.64625e-05	0.000346732	-119.053	-133.932	7	2	1702.92	0	0	FALSE
CLDN7	1.69082e-05	0.000355162	-56.3816	-71.2308	7	2	22.8885	0	0	FALSE
CSF1R	1.71914e-05	0.000359662	-117.036	-131.867	7	2	1208.62	0	0	FALSE
SHKBP1	1.74239e-05	0.000363551	-79.5348	-94.3508	7	2	211.9	0	0	FALSE
PANK1	1.83997e-05	0.000380358	-91.6912	-106.447	7	2	306.479	0	0	FALSE
CCL7	1.84823e-05	0.000381058	-65.8952	-80.646	7	2	43.0867	0	0	FALSE
CSPG5	1.92702e-05	0.000396779	-72.2333	-86.938	7	2	128.667	0	0	FALSE
TEDC1	1.97714e-05	0.000404434	-66.0529	-80.7292	7	2	81.1021	0	0	FALSE
PTPRC	2.02237e-05	0.000411531	-91.0132	-105.665	7	2	201.16	0	0	FALSE
XDH	2.08765e-05	0.000423713	-44.7796	-59.3957	7	2	10.6342	0	0	FALSE
ARHGAP4	2.10536e-05	0.000426199	-76.0725	-90.6794	7	2	122.337	0	0	FALSE
GLP2R	2.15741e-05	0.000435608	-52.8547	-67.4345	7	2	17.497	0	0	FALSE
TMEM8B	2.41813e-05	0.000479575	-99.424	-113.878	7	2	939.23	0	0	FALSE
IKZF1	2.52462e-05	0.000497538	-68.554	-82.9598	7	2	49.4364	0	0	FALSE
ABI3BP	2.56478e-05	0.000504817	-126.759	-141.148	7	2	3091.81	0	0	FALSE
BGLAP	2.63275e-05	0.000514951	-73.6773	-88.0367	7	2	71.1953	0	0	FALSE
P2RY13	2.65422e-05	0.000518502	-50.3761	-64.7265	7	2	17.5978	0	0	FALSE
IL6R	2.67271e-05	0.000521462	-80.0069	-94.3496	7	2	140.85	0	0	FALSE
C1QTNF5	2.73413e-05	0.000531455	-103.46	-117.777	7	2	734.829	0	0	FALSE
APOD	2.75029e-05	0.000533932	-154.773	-169.084	7	2	10114.9	0	0	FALSE
PADI2	2.82706e-05	0.000544776	-50.8168	-65.0973	7	2	15.5634	0	0	FALSE
TOP2A	2.85051e-05	0.000548618	-80.2522	-94.5235	7	2	119.926	0	0	FALSE
IKBKE	2.88999e-05	0.000554849	-88.039	-102.295	7	2	364.687	0	0	FALSE
AURKA	2.9986e-05	0.000571488	-58.2897	-72.5048	7	2	28.0739	0	0	FALSE
IL21R	3.18955e-05	0.000601158	-58.3477	-72.4943	7	2	23.87	0	0	FALSE
LEP	3.20709e-05	0.000602409	-79.9671	-94.1076	7	2	95.1654	0	0	FALSE
ZNF311	3.27401e-05	0.000614241	-85.9901	-100.108	7	2	350.365	0	0	FALSE
CXCR1	3.34977e-05	0.000624705	-69.2634	-83.3557	7	2	52.9111	0	0	FALSE
UGT1A7	3.4651e-05	0.00064238	-80.4414	-94.4961	7	2	143.818	0	0	FALSE
PIK3R6	3.48418e-05	0.000644387	-60.8998	-74.9484	7	2	33.3511	0	0	FALSE
MYO7A	3.49173e-05	0.000645021	-88.2725	-102.319	7	2	197.157	0	0	FALSE
CDCA8	3.57223e-05	0.000658336	-55.0093	-69.0302	7	2	20.8844	0	0	FALSE
P2RY11	3.59763e-05	0.000662234	-38.4913	-52.5042	7	2	7.17069	0	0	FALSE
ACSM1	4.24926e-05	0.000765063	-66.288	-80.1159	7	2	41.0927	0	0	FALSE
ITGB7	4.35738e-05	0.000783627	-72.8725	-86.6725	7	2	138.292	0	0	FALSE
TRAF3IP3	4.41719e-05	0.000792559	-58.3665	-72.1513	7	2	30.8049	0	0	FALSE
FOSL1	4.43792e-05	0.000795365	-45.4199	-59.1995	7	2	11.2435	0	0	FALSE
NOD1	4.75095e-05	0.000841813	-94.2524	-107.956	7	2	564.592	0	0	FALSE
CLIC2	4.80396e-05	0.000847489	-98.9849	-112.676	7	2	469.186	0	0	FALSE
DPEP1	4.89807e-05	0.00086008	-36.9206	-50.5904	7	2	7.10742	0	0	FALSE
PRC1	5.11518e-05	0.000893185	-80.1581	-93.7796	7	2	112.445	0	0	FALSE
CMBL	5.18157e-05	0.000902559	-112.075	-125.682	7	2	1048.83	0	0	FALSE
N4BP2L1	5.18619e-05	0.000902559	-87.1894	-100.796	7	2	315.362	0	0	FALSE
BATF	5.28092e-05	0.000917002	-59.9927	-73.5786	7	2	26.3068	0	0	FALSE
KNSTRN	5.34914e-05	0.000924739	-65.6497	-79.2214	7	2	49.9627	0	0	FALSE
SH3BP2	5.56503e-05	0.000956768	-97.7744	-111.302	7	2	524.958	0	0	FALSE
RGS19	5.57683e-05	0.000957744	-88.2283	-101.754	7	2	233.07	0	0	FALSE
HROB	5.94578e-05	0.00101664	-42.4947	-55.9485	7	2	9.28028	0	0	FALSE
PPP1R12B	5.98978e-05	0.00102211	-132.146	-145.591	7	2	4538.5	0	0	FALSE
RRM2	6.00394e-05	0.00102211	-76.0458	-89.4887	7	2	74.9763	0	0	FALSE
DNAJB4	6.07495e-05	0.00103083	-115.417	-128.847	7	2	1561.17	0	0	FALSE
POLR3H	6.46557e-05	0.00109308	-82.7191	-96.0793	7	2	206.852	0	0	FALSE
RUNX3	6.56735e-05	0.00110597	-62.9617	-76.3045	7	2	34.1409	0	0	FALSE
SH3BP1	6.68727e-05	0.00112254	-75.8665	-89.1891	7	2	103.869	0	0	FALSE
TRPM3	6.90967e-05	0.00114999	-88.3927	-101.679	7	2	189.845	0	0	FALSE
CD300A	6.97231e-05	0.00115672	-57.1284	-70.4043	7	2	24.3424	0	0	FALSE
KCNQ4	7.03625e-05	0.00116609	-84.2044	-97.4702	7	2	196.508	0	0	FALSE
TRPV2	7.28982e-05	0.00120174	-76.1779	-89.4041	7	2	129.155	0	0	FALSE
TASL	7.47033e-05	0.00122891	-46.1585	-59.3574	7	2	12.0999	0	0	FALSE
SAMHD1	7.64774e-05	0.00125545	-104.463	-117.635	7	2	723.818	0	0	FALSE
FES	7.67218e-05	0.00125814	-89.5422	-102.711	7	2	443.675	0	0	FALSE
KIF20B	7.84688e-05	0.00127751	-62.5645	-75.7084	7	2	47.6858	0	0	FALSE
MARCHF1	7.84754e-05	0.00127751	-58.2153	-71.3591	7	2	26.4092	0	0	FALSE
SIAH2	7.83399e-05	0.00127751	-86.6172	-99.7629	7	2	322.486	0	0	FALSE
KRT19	7.8593e-05	0.0012781	-98.0765	-111.219	7	2	281.619	0	0	FALSE
S100A8	8.10152e-05	0.00131067	-64.7568	-77.8649	7	2	36.8501	0	0	FALSE
SP100	8.13174e-05	0.0013142	-77.0382	-90.1422	7	2	105.302	0	0	FALSE
ANTXR2	8.16092e-05	0.00131755	-131.141	-144.241	7	2	4837.44	0	0	FALSE
SSTR1	8.35309e-05	0.00134579	-69.9714	-83.0454	7	2	60.7767	0	0	FALSE
GMIP	8.51247e-05	0.00136788	-79.3703	-92.4231	7	2	161.346	0	0	FALSE
ESAM	8.72747e-05	0.00139319	-100.505	-113.53	7	2	1137.09	0	0	FALSE
ITIH5	8.91267e-05	0.0014184	-96.812	-109.813	7	2	461.217	0	0	FALSE
ZWILCH	9.00022e-05	0.00142943	-58.4527	-71.4431	7	2	32.7931	0	0	FALSE
SIMC1	9.22699e-05	0.00145656	-77.6334	-90.5959	7	2	270.905	0	0	FALSE
LGALSL	9.39383e-05	0.0014814	-92.0779	-105.02	7	2	585.301	0	0	FALSE
PTPRO	9.67357e-05	0.00152244	-65.3357	-78.2453	7	2	37.2941	0	0	FALSE
SLCO2B1	9.95311e-05	0.00156329	-93.0819	-105.96	7	2	288.493	0	0	FALSE
KIFC1	0.000100477	0.00157499	-69.2802	-82.1473	7	2	53.0741	0	0	FALSE
FAM167B	0.000108076	0.00166899	-72.9166	-85.7019	7	2	85.8012	0	0	FALSE
SIRPA	0.000107996	0.00166899	-117.995	-130.781	7	2	2462.02	0	0	FALSE
TNFSF8	0.000109001	0.00168161	-59.4467	-72.2224	7	2	25.212	0	0	FALSE
RAB13	0.000109155	0.00168232	-101.791	-114.565	7	2	845.984	0	0	FALSE
DUSP5	0.00010959	0.00168736	-50.2646	-63.0343	7	2	19.9464	0	0	FALSE
UNC13D	0.000110605	0.00169964	-71.9389	-84.6983	7	2	57.2921	0	0	FALSE
C1R	0.000111605	0.00170829	-149.637	-162.386	7	2	10155.3	0	0	FALSE
ADAM8	0.000112082	0.00171056	-80.6046	-93.3491	7	2	123.191	0	0	FALSE
TNFRSF1A	0.000111923	0.00171056	-111.94	-124.686	7	2	1865.32	0	0	FALSE
NRROS	0.000114149	0.00173871	-77.2035	-89.9275	7	2	113.47	0	0	FALSE
PLA1A	0.000120012	0.00181	-65.917	-78.5847	7	2	47.4342	0	0	FALSE
NCAM1	0.000120226	0.00181011	-119.291	-131.957	7	2	3113.38	0	0	FALSE
CEP55	0.000120487	0.00181229	-56.8047	-69.468	7	2	21.2751	0	0	FALSE
CCNB2	0.000122753	0.00184106	-65.5701	-78.2125	7	2	39.1434	0	0	FALSE
NFATC2	0.00012564	0.00187896	-79.1186	-91.7349	7	2	154.739	0	0	FALSE
TMSB10	0.000127359	0.00190101	-141.603	-154.204	7	2	7014.33	0	0	FALSE
GINS1	0.000128631	0.00191634	-41.5525	-54.1424	7	2	9.60339	0	0	FALSE
SCRG1	0.000128872	0.0019181	-86.4106	-98.9984	7	2	142.283	0	0	FALSE
KLHL11	0.000129395	0.00192406	-88.7087	-101.292	7	2	280.002	0	0	FALSE
RNF150	0.000132167	0.00195227	-87.23	-99.7894	7	2	211.148	0	0	FALSE
SOWAHD	0.000132138	0.00195227	-48.325	-60.8846	7	2	14.1297	0	0	FALSE
RASGRP4	0.000135688	0.00199862	-65.354	-77.8838	7	2	39.2698	0	0	FALSE
TEAD4	0.000136908	0.00201392	-66.4067	-78.9265	7	2	83.4577	0	0	FALSE
GP1BB	0.000137445	0.00201879	-60.9716	-73.4869	7	2	34.812	0	0	FALSE
VMP1	0.000139404	0.00204564	-90.0003	-102.5	7	2	519.577	0	0	FALSE
MXD3	0.000140613	0.00205968	-53.3942	-65.8839	7	2	21.0691	0	0	FALSE
ST3GAL4	0.000140625	0.00205968	-120.796	-133.285	7	2	1638.89	0	0	FALSE
DST	0.000142019	0.00207428	-134.091	-146.57	7	2	6184.07	0	0	FALSE
ARHGAP25	0.000142326	0.00207681	-74.4158	-86.892	7	2	79.9118	0	0	FALSE
TIFA	0.000144639	0.00210468	-81.145	-93.603	7	2	258.561	0	0	FALSE
KIF21B	0.000144866	0.00210602	-72.3886	-84.8448	7	2	70.6022	0	0	FALSE
FLVCR2	0.000146801	0.00213217	-68.7428	-81.184	7	2	55.8173	0	0	FALSE
MMP1	0.00014701	0.00213321	-62.14	-74.5796	7	2	35.9152	0	0	FALSE
PIMREG	0.000150057	0.00216536	-58.1793	-70.5959	7	2	22.6512	0	0	FALSE
GPRC5A	0.000153581	0.00220659	-80.4501	-92.8405	7	2	128.773	0	0	FALSE
HOMER3	0.000154501	0.00221721	-76.4545	-88.8382	7	2	116.507	0	0	FALSE
ALG2	0.000155447	0.0022267	-68.8285	-81.2054	7	2	158.81	0	0	FALSE
CDCA3	0.000155323	0.0022267	-58.4594	-70.8372	7	2	26.2476	0	0	FALSE
BNIPL	0.000156329	0.00223319	-51.0777	-63.4482	7	2	15.2548	0	0	FALSE
SLC66A3	0.000162421	0.00230547	-97.6779	-110.005	7	2	802.561	0	0	FALSE
PTGIR	0.000165725	0.00234237	-77.9374	-90.2421	7	2	109.3	0	0	FALSE
HNMT	0.000166379	0.00234885	-81.7621	-94.0624	7	2	177.603	0	0	FALSE
METRNL	0.000170682	0.00240092	-88.1124	-100.384	7	2	270.363	0	0	FALSE
GIMAP4	0.00017931	0.00250648	-70.5786	-82.7946	7	2	57.656	0	0	FALSE
SLC46A2	0.000180387	0.00251386	-53.1781	-65.3873	7	2	20.3634	0	0	FALSE
SUSD1	0.000181277	0.0025227	-57.1979	-69.4015	7	2	27.8988	0	0	FALSE
FMN1	0.000183441	0.00254151	-42.0703	-54.2606	7	2	8.35568	0	0	FALSE
TCF19	0.000185953	0.00256267	-65.5508	-77.7257	7	2	39.4356	0	0	FALSE
P2RY12	0.000186717	0.00257093	-65.2879	-77.4582	7	2	47.7706	0	0	FALSE
SIPA1	0.000189924	0.00260592	-92.1289	-104.28	7	2	568.283	0	0	FALSE
ATL2	0.000191955	0.00263147	-94.2993	-106.438	7	2	594.193	0	0	FALSE
ASF1B	0.000195909	0.00267161	-54.6307	-66.7467	7	2	20.3774	0	0	FALSE
ARHGAP11A	0.000205776	0.00279156	-59.7353	-71.7959	7	2	25.0421	0	0	FALSE
RN18S	0.000207068	0.00280664	-200.07	-212.123	7	2	178827	0	0	FALSE
CLEC7A	0.000210096	0.00283784	-63.9534	-75.9905	7	2	33.1839	0	0	FALSE
KCNIP1	0.000212905	0.00286835	-48.224	-60.2461	7	2	12.6203	0	0	FALSE
PIK3CG	0.000215623	0.00289747	-69.2648	-81.2726	7	2	52.8287	0	0	FALSE
AGAP2	0.000218239	0.00292508	-68.7625	-80.7567	7	2	64.6345	0	0	FALSE
LRP2	0.000222043	0.00296335	-74.2153	-86.1899	7	2	64.0612	0	0	FALSE
GSDMD	0.00022764	0.00303028	-78.8128	-90.7593	7	2	128.338	0	0	FALSE
KRT32	0.000234896	0.00311098	-86.0975	-98.0085	7	2	129.299	0	0	FALSE
BMP10	0.000241398	0.00318898	-47.185	-59.0651	7	2	30.4522	0	0	FALSE
NLRX1	0.000243118	0.00320358	-82.627	-94.499	7	2	277.618	0	0	FALSE
DLX3	0.000244087	0.00321364	-43.7334	-55.601	7	2	9.45919	0	0	FALSE
GNAT1	0.000247572	0.00324858	-37.3789	-49.2305	7	2	6.1511	0	0	FALSE
MEIS3	0.000251508	0.00329746	-87.4366	-99.2703	7	2	203.144	0	0	FALSE
SLN	0.000255801	0.00334054	-96.2428	-108.057	7	2	525.74	0	0	FALSE
CKAP2L	0.000264309	0.00341656	-60.2022	-71.9796	7	2	30.2103	0	0	FALSE
PATZ1	0.000268568	0.00346084	-84.0557	-95.8151	7	2	515.063	0	0	FALSE
AIG1	0.00027068	0.0034845	-92.0678	-103.818	7	2	629.296	0	0	FALSE
MAOB	0.000272345	0.00350018	-120.156	-131.899	7	2	3417.98	0	0	FALSE
IL1RAP	0.00027389	0.00351713	-63.3936	-75.1308	7	2	64.322	0	0	FALSE
GIMAP8	0.000276063	0.00353632	-56.9195	-68.6477	7	2	23.4019	0	0	FALSE
EVA1A	0.000277935	0.00355157	-69.0983	-80.8188	7	2	96.846	0	0	FALSE
RIPOR3	0.000281546	0.00358307	-67.5398	-79.2457	7	2	41.2976	0	0	FALSE
ITGA4	0.000282715	0.00359209	-71.1243	-82.8255	7	2	64.9452	0	0	FALSE
UBE2T	0.000283551	0.00359687	-48.775	-60.4728	7	2	13.2296	0	0	FALSE
GPX1	0.000290178	0.00367496	-135.696	-147.367	7	2	5363.52	0	0	FALSE
TM4SF19	0.000292275	0.00369254	-65.3378	-77.0013	7	2	39.9629	0	0	FALSE
MEAK7	0.000294736	0.00371831	-66.3711	-78.0251	7	2	91.9102	0	0	FALSE
PTGDR2	0.000298697	0.00375244	-39.4772	-51.1161	7	2	7.88018	0	0	FALSE
ENG	0.000301995	0.00378832	-122.823	-134.45	7	2	2275.56	0	0	FALSE
PRSS56	0.000302296	0.00378852	-64.5918	-76.2171	7	2	39.203	0	0	FALSE
ECM1	0.000303724	0.00380336	-119.481	-131.101	7	2	1228.62	0	0	FALSE
CABIN1	0.000307094	0.00382411	-107.745	-119.352	7	2	1182.7	0	0	FALSE
SYNPO2	0.00030692	0.00382411	-145.282	-156.89	7	2	7879.58	0	0	FALSE
IPO8	0.000313224	0.00388497	-89.9017	-101.487	7	2	604.779	0	0	FALSE
BAX	0.000314726	0.00390024	-84.8885	-96.468	7	2	309.682	0	0	FALSE
ZFPM2	0.000314954	0.00390024	-90.4118	-101.991	7	2	403.128	0	0	FALSE
CREB5	0.000327207	0.00400105	-101.091	-112.626	7	2	476.135	0	0	FALSE
GAB3	0.00032675	0.00400105	-62.2336	-73.7706	7	2	63.0332	0	0	FALSE
NDC80	0.000327447	0.00400105	-55.6271	-67.1616	7	2	20.4567	0	0	FALSE
PCED1B	0.000330662	0.00403088	-49.315	-60.8385	7	2	12.958	0	0	FALSE
ABTB3	0.000334465	0.00407089	-76.9188	-88.4293	7	2	131.224	0	0	FALSE
CTSB	0.000336119	0.00408466	-140.751	-152.256	7	2	9098.92	0	0	FALSE
MYH8	0.000338752	0.00411027	-68.6498	-80.1459	7	2	74.5074	0	0	FALSE
UBE2C	0.000347325	0.00419474	-66.5701	-78.0377	7	2	40.7219	0	0	FALSE
IRAG2	0.000348162	0.0042016	-61.2751	-72.74	7	2	27.1779	0	0	FALSE
MMP12	0.000354383	0.00425696	-111.322	-122.767	7	2	1062.63	0	0	FALSE
KYNU	0.000357134	0.00428341	-36.0216	-47.4576	7	2	6.05924	0	0	FALSE
ADAMTS4	0.00035743	0.00428368	-74.9885	-86.4235	7	2	91.7486	0	0	FALSE
TBC1D1	0.00036241	0.00433008	-91.8609	-103.28	7	2	490.63	0	0	FALSE
CENPE	0.000364231	0.00434852	-59.6366	-71.0502	7	2	25.4597	0	0	FALSE
LGALS3	0.000368706	0.00438518	-119.551	-130.951	7	2	1662.67	0	0	FALSE
SLC35D2	0.000386111	0.00455407	-53.5417	-64.889	7	2	24.9477	0	0	FALSE
MS4A2	0.000395247	0.00464081	-38.7347	-50.0553	7	2	6.72273	0	0	FALSE
HCAR1	0.000407939	0.0047719	-76.6057	-87.8904	7	2	87.7424	0	0	FALSE
GUSB	0.000411329	0.00480437	-104.656	-115.931	7	2	686.201	0	0	FALSE
SMS	0.000413403	0.00482139	-92.736	-104.006	7	2	762.528	0	0	FALSE
TSPO	0.000421916	0.00490238	-106.085	-117.331	7	2	904.437	0	0	FALSE
PPP1R14A	0.000423622	0.00491222	-128.71	-139.952	7	2	3149.85	0	0	FALSE
TLR4	0.000423859	0.00491222	-91.7882	-103.029	7	2	231.975	0	0	FALSE
CTSH	0.000438312	0.00505819	-108.04	-119.243	7	2	1133.55	0	0	FALSE
STK10	0.00044123	0.00508521	-80.3223	-91.5176	7	2	178.871	0	0	FALSE
HTRA4	0.000445555	0.00513111	-69.5093	-80.6935	7	2	50.453	0	0	FALSE
TREX1	0.00044587	0.00513111	-82.498	-93.6813	7	2	196.36	0	0	FALSE
CD200R1	0.000449011	0.00515966	-57.2814	-68.4567	7	2	24.4149	0	0	FALSE
CEBPD	0.000476129	0.00542738	-128.32	-139.428	7	2	2596.13	0	0	FALSE
NTN4	0.000478907	0.00545461	-110.017	-121.119	7	2	1799.96	0	0	FALSE
CD5L	0.000482561	0.00548072	-99.6151	-110.708	7	2	311.136	0	0	FALSE
STXBP2	0.000482365	0.00548072	-74.9758	-86.0694	7	2	76.4546	0	0	FALSE
SGPL1	0.000491841	0.00556589	-96.391	-107.462	7	2	410.208	0	0	FALSE
FGF23	0.000502539	0.00567062	-60.8481	-71.895	7	2	31.7991	0	0	FALSE
ANKRD46	0.00052308	0.00586419	-98.3374	-109.338	7	2	675.793	0	0	FALSE
FAM241A	0.000551256	0.00613606	-96.5604	-107.502	7	2	512.268	0	0	FALSE
MYL4	0.000572164	0.00631996	-139.228	-150.126	7	2	7114.68	0	0	FALSE
SHTN1	0.000587234	0.00647656	-76.486	-87.3549	7	2	112.058	0	0	FALSE
AHSG	0.000593713	0.00652042	-51.6421	-62.4984	7	2	17.6066	0	0	FALSE
MCOLN2	0.000603552	0.00660646	-64.218	-75.0555	7	2	33.0933	0	0	FALSE
TXNRD3	0.000621908	0.0067824	-70.3726	-81.1759	7	2	47.5859	0	0	FALSE
LPAR5	0.000656163	0.00709164	-67.0961	-77.8379	7	2	48.4978	0	0	FALSE
SGO2	0.000687539	0.00736454	-54.8547	-65.5429	7	2	20.2806	0	0	FALSE
KCNK13	0.000740242	0.00782713	-46.3651	-56.9687	7	2	14.1828	0	0	FALSE
RPA4	0.000746422	0.00786595	-66.9137	-77.5077	7	2	37.8079	0	0	FALSE

## Sheet: 7 weeks_reviewed only
Gene	p	padj	loglik_full	loglik_red	df_full	df_red	mean	converge_impulse	converge_const	allZero
CRLF1	1.79521e-18	2.15812e-15	-84.1271	-130.491	7	2	203.326	0	0	FALSE
MMP13	3.0203e-11	4.14046e-09	-49.738	-78.7808	7	2	28.5049	0	0	FALSE
VIL1	3.51951e-10	3.35383e-08	-52.7661	-79.2181	7	2	24.1543	0	0	FALSE
CKMT1B	9.54531e-10	8.19638e-08	-51.3003	-76.6957	7	2	26.2508	0	0	FALSE
IL3RA	5.36672e-09	3.56898e-07	-60.5472	-84.1079	7	2	44.7994	0	0	FALSE
PTX3	7.39771e-09	4.60603e-07	-91.3864	-114.605	7	2	242.389	0	0	FALSE
SLC5A1	3.17531e-08	1.62169e-06	-41.8766	-63.5389	7	2	9.90084	0	0	FALSE
HBA	4.60089e-08	2.25401e-06	-165.652	-186.917	7	2	25062	0	0	FALSE
HBB2	1.50257e-07	6.21222e-06	-163.555	-183.548	7	2	21650.4	0	0	FALSE
TRPM1	5.00255e-07	1.74899e-05	-35.9512	-54.6462	7	2	6.96137	0	0	FALSE
ALAS2	5.04369e-07	1.75701e-05	-106.196	-124.882	7	2	582.043	0	0	FALSE
SLC38A5	5.53082e-07	1.88724e-05	-87.6259	-106.212	7	2	227.3	0	0	FALSE
SLC4A1	5.77764e-07	1.95439e-05	-37.806	-56.345	7	2	7.51355	0	0	FALSE
TNFSF11	6.24784e-07	2.09981e-05	-34.7762	-53.2304	7	2	8.45689	0	0	FALSE
NPPB	9.8599e-07	3.0513e-05	-137.76	-155.719	7	2	6651.7	0	0	FALSE
L3MBTL1	1.812e-06	5.20551e-05	-80.5766	-97.8743	7	2	184.305	0	0	FALSE
ACTA1	2.45386e-06	6.76315e-05	-156.556	-173.523	7	2	14794.5	0	0	FALSE
CD1D	6.49145e-06	0.00015512	-104.386	-120.289	7	2	470.827	0	0	FALSE
BLM	1.12183e-05	0.00024868	-73.2495	-88.5511	7	2	89.0615	0	0	FALSE
TFCP2L1	2.27696e-05	0.000455042	-74.9913	-89.5114	7	2	71.7568	0	0	FALSE
IGFBP3	4.78888e-05	0.000846614	-117.685	-131.38	7	2	1019.6	0	0	FALSE
TNNI1	5.04776e-05	0.000882397	-73.5126	-87.1489	7	2	63.0919	0	0	FALSE
CCDC8	8.31465e-05	0.00134098	-91.42	-104.499	7	2	408.873	0	0	FALSE
GPIHBP1	0.000157764	0.00225163	-97.2469	-109.607	7	2	289.029	0	0	FALSE
PDGFB	0.000158443	0.00225926	-91.1123	-103.468	7	2	284.247	0	0	FALSE
CXCR2	0.00016577	0.00234237	-48.1291	-60.4335	7	2	13.5354	0	0	FALSE
RFLNB	0.000297928	0.00374881	-97.9296	-109.571	7	2	525.979	0	0	FALSE
PKN3	0.000349806	0.00421493	-77.2866	-88.7461	7	2	116.014	0	0	FALSE
SAT2	0.000365991	0.00436564	-68.481	-79.8891	7	2	155.704	0	0	FALSE
APOE	0.000393333	0.00462528	-146.546	-157.873	7	2	7373.32	0	0	FALSE
GJA4	0.000483435	0.00548665	-92.2142	-103.305	7	2	270.859	0	0	FALSE
