# Supplementary material for: Multiomics coupled with vibrational spectroscopy identify early mechanisms of experimental aortic valve stenosis
Source: Research Square preprint supplement (doi:10.21203/rs.3.rs-4330270/v1), 2024-05-02
Supplement: Supplementary file 2 [file 06f56893ce5bc8351fdff200.xlsx]

## Sheet: HSA_enriched_terms_miR_21_5p_do
category	subcategory	ID	Description	GeneRatio	BgRatio	pvalue	p.adjust	qvalue	geneID	Count
Genetic Information Processing	Chromosome	hsa03083	Polycomb repressive complex	9/140	84/8661	7.66766e-06	0.00172522	0.00154968	10238/7322/7528/221937/8473/80012/26013/6045/121536	9
Organismal Systems	Endocrine system	hsa04928	Parathyroid hormone synthesis, secretion and action	8/140	106/8661	0.000303484	0.0324587	0.0291559	9586/4040/596/673/2773/9365/3708/5337	8
Cellular Processes	Cellular community - eukaryotes	hsa04510	Focal adhesion	11/140	203/8661	0.000432783	0.0324587	0.0291559	3910/7414/3696/596/673/3480/1286/3672/8516/1399/3915	11
Organismal Systems	Nervous system	hsa04722	Neurotrophin signaling pathway	8/140	119/8661	0.000662007	0.0372379	0.0334488	4908/2549/596/673/7189/57498/2309/1399	8
Cellular Processes	Cell motility	hsa04810	Regulation of actin cytoskeleton	11/140	229/8661	0.00117738	0.0529819	0.0475907	7414/1073/3696/1730/673/23365/3672/10787/5217/8516/1399	11
Organismal Systems	Nervous system	hsa04730	Long-term depression	5/140	60/8661	0.00274988	0.0851295	0.0764672	673/2773/3480/2982/3708	5
Organismal Systems	Aging	hsa04211	Longevity regulating pathway	6/140	89/8661	0.00310234	0.0851295	0.0764672	9586/2308/9365/2309/3480/26060	6
Environmental Information Processing	Signaling molecules and interaction	hsa04512	ECM-receptor interaction	6/140	89/8661	0.00310234	0.0851295	0.0764672	3910/3696/1286/3672/8516/3915	6
Metabolism	Amino acid metabolism	hsa00310	Lysine degradation	5/140	63/8661	0.00340518	0.0851295	0.0764672	54904/387893/55870/8085/93166	5
Human Diseases	Cardiovascular disease	hsa05410	Hypertrophic cardiomyopathy	6/140	97/8661	0.0047504	0.103114	0.0926217	6547/3696/6645/7042/3672/8516	6
Human Diseases	Cancer: specific types	hsa05211	Renal cell carcinoma	5/140	69/8661	0.00504113	0.103114	0.0926217	2549/673/7042/9915/1399	5
Human Diseases	Cancer: specific types	hsa05225	Hepatocellular carcinoma	8/140	168/8661	0.00579986	0.106689	0.0958328	4040/2549/6602/673/7042/6595/3480/196528	8
Human Diseases	Cardiovascular disease	hsa05414	Dilated cardiomyopathy	6/140	103/8661	0.00635474	0.106689	0.0958328	6547/3696/6645/7042/3672/8516	6
Human Diseases	Infectious disease: bacterial	hsa05131	Shigellosis	10/140	247/8661	0.00663842	0.106689	0.0958328	7414/2308/596/7322/7189/2309/23048/5217/3708/1399	10
Human Diseases	Drug resistance: antineoplastic	hsa01521	EGFR tyrosine kinase inhibitor resistance	5/140	79/8661	0.00889531	0.127478	0.114506	2549/596/673/2309/3480	5
Human Diseases	Infectious disease: parasitic	hsa05145	Toxoplasmosis	6/140	111/8661	0.00906509	0.127478	0.114506	3910/596/7042/2773/7189/3915	6
Environmental Information Processing	Signal transduction	hsa04392	Hippo signaling pathway - multiple species	3/140	29/8661	0.0111087	0.137131	0.123177	9113/10413/6788	3
Human Diseases	Cardiovascular disease	hsa05412	Arrhythmogenic right ventricular cardiomyopathy	5/140	84/8661	0.0114319	0.137131	0.123177	6547/3696/6645/3672/8516	5
Genetic Information Processing	Chromosome	hsa03082	ATP-dependent chromatin remodeling	6/140	117/8661	0.01158	0.137131	0.123177	57459/6602/7528/6595/23506/196528	6
Human Diseases	Cancer: specific types	hsa05222	Small cell lung cancer	5/140	92/8661	0.0164476	0.178007	0.159894	3910/596/7189/1286/3915	5
Organismal Systems	Aging	hsa04213	Longevity regulating pathway - multiple species	4/140	61/8661	0.0167628	0.178007	0.159894	2308/1979/2309/3480	4
Cellular Processes	Transport and catabolism	hsa04140	Autophagy - animal	7/140	165/8661	0.0174051	0.178007	0.159894	3920/596/27072/7189/3480/3708/8417	7
Cellular Processes	Transport and catabolism	hsa04144	Endocytosis	9/140	250/8661	0.0199035	0.182061	0.163536	22841/83737/57403/23111/9798/7189/3480/9559/5337	9
Environmental Information Processing	Signal transduction	hsa04070	Phosphatidylinositol signaling system	5/140	97/8661	0.020229	0.182061	0.163536	22908/54928/9107/160851/3708	5
Human Diseases	Cancer: specific types	hsa05215	Prostate cancer	5/140	97/8661	0.020229	0.182061	0.163536	9586/2308/596/673/3480	5
Environmental Information Processing	Signal transduction	hsa04010	MAPK signaling pathway	10/140	301/8661	0.0238488	0.204501	0.183692	6788/5922/4908/673/7042/11221/7189/3480/5921/1399	10
Human Diseases	Infectious disease: parasitic	hsa05146	Amoebiasis	5/140	102/8661	0.0245401	0.204501	0.183692	3910/7414/7042/1286/3915	5
Genetic Information Processing	Folding, sorting and degradation	hsa04120	Ubiquitin mediated proteolysis	6/140	142/8661	0.0273909	0.220106	0.197709	83737/55284/7322/7189/64682/6477	6
Environmental Information Processing	Signal transduction	hsa04151	PI3K-Akt signaling pathway	11/140	359/8661	0.0307014	0.2382	0.213962	9586/3910/4908/3696/596/2309/3480/1286/3672/8516/3915	11
Human Diseases	Infectious disease: bacterial	hsa05100	Bacterial invasion of epithelial cells	4/140	77/8661	0.0357352	0.268014	0.240742	7414/2549/26084/1399	4
Environmental Information Processing	Signal transduction	hsa04390	Hippo signaling pathway	6/140	157/8661	0.0416704	0.293423	0.263566	9113/10413/6788/7042/7159/1740	6
Human Diseases	Infectious disease: viral	hsa05165	Human papillomavirus infection	10/140	331/8661	0.0417312	0.293423	0.263566	182/9586/3910/3696/2308/1740/1286/3672/8516/3915	10
Human Diseases	Cancer: overview	hsa05205	Proteoglycans in cancer	7/140	205/8661	0.0482934	0.329273	0.295768	7078/2549/673/7042/23365/3480/3708	7
Human Diseases	Cancer: specific types	hsa05210	Colorectal cancer	4/140	86/8661	0.0502643	0.332632	0.298785	596/673/7042/26060	4
Human Diseases	Infectious disease: viral	hsa05170	Human immunodeficiency virus 1 infection	7/140	212/8661	0.0559582	0.359731	0.323127	1073/596/2773/7189/7465/3708/1399	7
Environmental Information Processing	Signal transduction	hsa04068	FoxO signaling pathway	5/140	131/8661	0.0608917	0.376971	0.338613	2308/673/7042/2309/3480	5
Environmental Information Processing	Signal transduction	hsa04310	Wnt signaling pathway	6/140	174/8661	0.0626997	0.376971	0.338613	4040/79718/2239/84133/59352/6477	6
Human Diseases	Cancer: overview	hsa05206	MicroRNAs in cancer	9/140	310/8661	0.0636662	0.376971	0.338613	8434/7078/596/7042/23405/23414/7431/2744/1399	9
Organismal Systems	Circulatory system	hsa04270	Vascular smooth muscle contraction	5/140	134/8661	0.0657996	0.379613	0.340986	800/673/23365/2982/3708	5
Organismal Systems	Environmental adaptation	hsa04713	Circadian entrainment	4/140	97/8661	0.0718061	0.40391	0.36281	2773/8864/2982/3708	4
Human Diseases	Drug resistance: antineoplastic	hsa01522	Endocrine resistance	4/140	98/8661	0.0739661	0.405911	0.364608	182/596/673/3480	4
Human Diseases	Endocrine and metabolic disease	hsa04933	AGE-RAGE signaling pathway in diabetic complications	4/140	100/8661	0.0783841	0.419915	0.377187	2308/596/7042/1286	4
Organismal Systems	Immune system	hsa04621	NOD-like receptor signaling pathway	6/140	186/8661	0.0807401	0.422477	0.379488	596/90550/10059/7189/140609/3708	6
Organismal Systems	Endocrine system	hsa04914	Progesterone-mediated oocyte maturation	4/140	102/8661	0.0829317	0.424083	0.38093	673/2773/64682/3480	4
Environmental Information Processing	Signal transduction	hsa04014	Ras signaling pathway	7/140	236/8661	0.0877443	0.438722	0.39408	5922/4908/2549/9462/3480/5921/5337	7
Human Diseases	Cancer: specific types	hsa05226	Gastric cancer	5/140	149/8661	0.0935415	0.45754	0.410983	4040/2549/596/673/7042	5
Human Diseases	Endocrine and metabolic disease	hsa04931	Insulin resistance	4/140	108/8661	0.0973317	0.46595	0.418537	9586/2308/8473/79660	4
Organismal Systems	Endocrine system	hsa04924	Renin secretion	3/140	69/8661	0.100478	0.467687	0.420098	2773/2982/3708	3
Organismal Systems	Endocrine system	hsa04917	Prolactin signaling pathway	3/140	70/8661	0.103796	0.467687	0.420098	9655/2309/30837	3
Organismal Systems	Environmental adaptation	hsa04710	Circadian rhythm	2/140	34/8661	0.104125	0.467687	0.420098	8864/9975	2
Human Diseases	Endocrine and metabolic disease	hsa04934	Cushing syndrome	5/140	155/8661	0.106088	0.467687	0.420098	9586/673/2773/8085/3708	5
Cellular Processes	Cell growth and death	hsa04218	Cellular senescence	5/140	156/8661	0.108257	0.467687	0.420098	2308/7042/90550/2309/3708	5
Organismal Systems	Nervous system	hsa04725	Cholinergic synapse	4/140	113/8661	0.110166	0.467687	0.420098	9586/596/2773/3708	4
Environmental Information Processing	Signal transduction	hsa04668	TNF signaling pathway	4/140	114/8661	0.11282	0.470085	0.422252	182/9586/83737/10059	4
Organismal Systems	Nervous system	hsa04724	Glutamatergic synapse	4/140	115/8661	0.115503	0.472513	0.424432	2773/2744/3708/5337	4
Human Diseases	Infectious disease: viral	hsa05161	Hepatitis B	5/140	162/8661	0.12172	0.475094	0.426751	9586/596/673/7042/7189	5
Human Diseases	Infectious disease: bacterial	hsa05133	Pertussis	3/140	76/8661	0.12458	0.475094	0.426751	1073/2773/7189	3
Human Diseases	Cancer: specific types	hsa05212	Pancreatic cancer	3/140	76/8661	0.12458	0.475094	0.426751	673/7042/5337	3
Human Diseases	Cancer: specific types	hsa05220	Chronic myeloid leukemia	3/140	76/8661	0.12458	0.475094	0.426751	673/7042/1399	3
Organismal Systems	Endocrine system	hsa04935	Growth hormone synthesis, secretion and action	4/140	120/8661	0.12933	0.479668	0.430859	9586/2773/3708/1399	4
Environmental Information Processing	Signal transduction	hsa04022	cGMP-PKG signaling pathway	5/140	166/8661	0.131112	0.479668	0.430859	6547/9586/2773/2982/3708	5
Environmental Information Processing	Signal transduction	hsa04152	AMPK signaling pathway	4/140	121/8661	0.132175	0.479668	0.430859	9586/2308/2309/3480	4
Organismal Systems	Immune system	hsa04611	Platelet activation	4/140	124/8661	0.140865	0.50309	0.451899	2773/23365/2982/3708	4
Metabolism	Energy metabolism	hsa00920	Sulfur metabolism	1/140	8661-10-01	0.150452	0.528931	0.47511	54928	1
Environmental Information Processing	Signal transduction	hsa04012	ErbB signaling pathway	3/140	85/8661	0.158256	0.547808	0.492066	2549/673/1399	3
Cellular Processes	Cell growth and death	hsa04114	Oocyte meiosis	4/140	131/8661	0.16199	0.552239	0.496046	64682/8243/3480/3708	4
Human Diseases	Infectious disease: bacterial	hsa05152	Tuberculosis	5/140	180/8661	0.166417	0.558864	0.501998	3920/596/7042/23365/7189	5
Cellular Processes	Cellular community - eukaryotes	hsa04540	Gap junction	3/140	88/8661	0.170052	0.560047	0.503059	2773/2982/3708	3
Organismal Systems	Development and regeneration	hsa04360	Axon guidance	5/140	182/8661	0.171748	0.560047	0.503059	1073/9723/2773/23365/5921	5
Organismal Systems	Endocrine system	hsa04910	Insulin signaling pathway	4/140	137/8661	0.180959	0.573462	0.51511	2308/673/79660/1399	4
Organismal Systems	Endocrine system	hsa04915	Estrogen signaling pathway	4/140	137/8661	0.180959	0.573462	0.51511	9586/596/2773/3708	4
Environmental Information Processing	Signal transduction	hsa04371	Apelin signaling pathway	4/140	139/8661	0.187443	0.577923	0.519117	182/6547/2773/3708	4
Human Diseases	Substance dependence	hsa05030	Cocaine addiction	2/140	49/8661	0.187504	0.577923	0.519117	9586/2773	2
Human Diseases	Neurodegenerative disease	hsa05017	Spinocerebellar ataxia	4/140	143/8661	0.200631	0.610027	0.547954	4287/90550/3708/5718	4
Organismal Systems	Immune system	hsa04666	Fc gamma R-mediated phagocytosis	3/140	97/8661	0.206825	0.620474	0.557338	1073/1399/5337	3
Organismal Systems	Excretory system	hsa04961	Endocrine and other factor-regulated calcium reabsorption	2/140	53/8661	0.211106	0.620801	0.557632	6547/9365	2
Human Diseases	Cancer: specific types	hsa05224	Breast cancer	4/140	147/8661	0.214091	0.620801	0.557632	182/4040/673/3480	4
Human Diseases	Infectious disease: bacterial	hsa05132	Salmonella infection	6/140	249/8661	0.215211	0.620801	0.557632	596/27072/26084/7189/10787/5217	6
Human Diseases	Infectious disease: parasitic	hsa05142	Chagas disease	3/140	102/8661	0.227983	0.644052	0.578517	7042/2773/7189	3
Environmental Information Processing	Signal transduction	hsa04340	Hedgehog signaling pathway	2/140	56/8661	0.228996	0.644052	0.578517	730094/596	2
Organismal Systems	Digestive system	hsa04974	Protein digestion and absorption	3/140	103/8661	0.232265	0.64518	0.57953	6547/1286/7373	3
Organismal Systems	Circulatory system	hsa04261	Adrenergic signaling in cardiomyocytes	4/140	154/8661	0.238222	0.649131	0.583079	6547/9586/596/2773	4
Human Diseases	Cancer: specific types	hsa05213	Endometrial cancer	2/140	58/8661	0.240982	0.649131	0.583079	673/2309	2
Environmental Information Processing	Signal transduction	hsa04150	mTOR signaling pathway	4/140	156/8661	0.245234	0.649131	0.583079	4040/57600/673/3480	4
Cellular Processes	Cell growth and death	hsa04110	Cell cycle	4/140	157/8661	0.248758	0.649131	0.583079	7042/64682/8243/7465	4
Organismal Systems	Endocrine system	hsa04922	Glucagon signaling pathway	3/140	107/8661	0.249534	0.649131	0.583079	9586/2308/3708	3
Environmental Information Processing	Signal transduction	hsa04015	Rap1 signaling pathway	5/140	210/8661	0.252434	0.649131	0.583079	673/2773/3480/5217/1399	5
Environmental Information Processing	Signal transduction	hsa04350	TGF-beta signaling pathway	3/140	108/8661	0.253882	0.649131	0.583079	6497/7042/4052	3
Environmental Information Processing	Signal transduction	hsa04330	Notch signaling pathway	2/140	62/8661	0.265026	0.670011	0.601834	182/83737	2
Genetic Information Processing	Information processing in viruses	hsa03250	Viral life cycle - HIV-1	2/140	63/8661	0.271043	0.671454	0.603131	22936/7514	2
Metabolism	Lipid metabolism	hsa00100	Steroid biosynthesis	1/140	20/8661	0.278405	0.671454	0.603131	6309	1
Organismal Systems	Endocrine system	hsa04927	Cortisol synthesis and secretion	2/140	65/8661	0.283071	0.671454	0.603131	9586/3708	2
Organismal Systems	Nervous system	hsa04726	Serotonergic synapse	3/140	115/8661	0.284592	0.671454	0.603131	673/2773/3708	3
Human Diseases	Infectious disease: viral	hsa05166	Human T-cell leukemia virus 1 infection	5/140	222/8661	0.28963	0.671454	0.603131	9586/4487/7042/64682/7514	5
Metabolism	Glycan biosynthesis and metabolism	hsa00532	Glycosaminoglycan biosynthesis - chondroitin sulfate / dermatan sulfate	1/140	21/8661	0.290096	0.671454	0.603131	10090	1
Metabolism	Metabolism of cofactors and vitamins	hsa00770	Pantothenate and CoA biosynthesis	1/140	21/8661	0.290096	0.671454	0.603131	79646	1
Organismal Systems	Nervous system	hsa04720	Long-term potentiation	2/140	67/8661	0.295083	0.671454	0.603131	673/3708	2
Human Diseases	Cancer: specific types	hsa05221	Acute myeloid leukemia	2/140	67/8661	0.295083	0.671454	0.603131	673/8864	2
Genetic Information Processing	Folding, sorting and degradation	hsa04141	Protein processing in endoplasmic reticulum	4/140	170/8661	0.29544	0.671454	0.603131	22824/596/4287/7322	4
Human Diseases	Infectious disease: viral	hsa05163	Human cytomegalovirus infection	5/140	225/8661	0.299092	0.671879	0.603512	9586/2773/23365/3708/1399	5
Metabolism	Amino acid metabolism	hsa00220	Arginine biosynthesis	1/140	22/8661	0.301599	0.671879	0.603512	2744	1
Environmental Information Processing	Signal transduction	hsa04071	Sphingolipid signaling pathway	3/140	121/8661	0.311163	0.683556	0.614001	596/2773/5337	3
Organismal Systems	Excretory system	hsa04964	Proximal tubule bicarbonate reclamation	1/140	23/8661	0.312917	0.683556	0.614001	2744	1
Metabolism	Glycan biosynthesis and metabolism	hsa00534	Glycosaminoglycan biosynthesis - heparan sulfate / heparin	1/140	24/8661	0.324053	0.689795	0.619605	2135	1
Human Diseases	Cancer: specific types	hsa05218	Melanoma	2/140	72/8661	0.32497	0.689795	0.619605	673/3480	2
Human Diseases	Cancer: specific types	hsa05223	Non-small cell lung cancer	2/140	72/8661	0.32497	0.689795	0.619605	673/2309	2
Metabolism	Carbohydrate metabolism	hsa00562	Inositol phosphate metabolism	2/140	73/8661	0.330913	0.695844	0.625039	22908/9107	2
Cellular Processes	Cell growth and death	hsa04115	p53 signaling pathway	2/140	74/8661	0.336841	0.700414	0.629144	596/6477	2
Organismal Systems	Endocrine system	hsa04918	Thyroid hormone synthesis	2/140	75/8661	0.342754	0.700414	0.629144	9586/3708	2
Human Diseases	Cancer: specific types	hsa05214	Glioma	2/140	75/8661	0.342754	0.700414	0.629144	673/3480	2
Organismal Systems	Endocrine system	hsa04926	Relaxin signaling pathway	3/140	129/8661	0.346693	0.700414	0.629144	9586/2773/1286	3
Organismal Systems	Digestive system	hsa04971	Gastric acid secretion	2/140	76/8661	0.348651	0.700414	0.629144	2773/3708	2
Human Diseases	Infectious disease: parasitic	hsa05140	Leishmaniasis	2/140	77/8661	0.35453	0.705922	0.634091	7042/7189	2
Organismal Systems	Nervous system	hsa04728	Dopaminergic synapse	3/140	132/8661	0.359992	0.71051	0.638212	9586/2773/3708	3
Organismal Systems	Development and regeneration	hsa04380	Osteoclast differentiation	3/140	135/8661	0.373253	0.728517	0.654387	7042/7189/3708	3
Organismal Systems	Immune system	hsa04062	Chemokine signaling pathway	4/140	192/8661	0.376356	0.728517	0.654387	673/2773/2309/1399	4
Human Diseases	Cancer: overview	hsa05202	Transcriptional misregulation in cancer	4/140	193/8661	0.380042	0.728517	0.654387	2308/8864/3480/9915	4
Human Diseases	Infectious disease: bacterial	hsa05135	Yersinia infection	3/140	137/8661	0.382067	0.728517	0.654387	23365/7189/1399	3
Metabolism	Carbohydrate metabolism	hsa00053	Ascorbate and aldarate metabolism	1/140	30/8661	0.387203	0.732107	0.657612	9365	1
Human Diseases	Endocrine and metabolic disease	hsa04936	Alcoholic liver disease	3/140	142/8661	0.403978	0.73743	0.662393	2308/7189/2309	3
Cellular Processes	Cell growth and death	hsa04215	Apoptosis - multiple species	1/140	32/8661	0.406923	0.73743	0.662393	596	1
Organismal Systems	Circulatory system	hsa04260	Cardiac muscle contraction	2/140	87/8661	0.412165	0.73743	0.662393	6547/444	2
Human Diseases	Infectious disease: viral	hsa05169	Epstein-Barr virus infection	4/140	202/8661	0.413092	0.73743	0.662393	596/7189/7431/5718	4
Genetic Information Processing	Folding, sorting and degradation	hsa04130	SNARE interactions in vesicular transport	1/140	33/8661	0.416545	0.73743	0.662393	8417	1
Organismal Systems	Nervous system	hsa04727	GABAergic synapse	2/140	89/8661	0.4234	0.73743	0.662393	2773/2744	2
Human Diseases	Neurodegenerative disease	hsa05010	Alzheimer disease	7/140	384/8661	0.427878	0.73743	0.662393	57142/4040/55334/673/90550/3708/5718	7
Environmental Information Processing	Signal transduction	hsa04072	Phospholipase D signaling pathway	3/140	148/8661	0.429975	0.73743	0.662393	2549/160851/5337	3
Human Diseases	Neurodegenerative disease	hsa05012	Parkinson disease	5/140	266/8661	0.430835	0.73743	0.662393	55334/2773/90550/3708/5718	5
Metabolism	Carbohydrate metabolism	hsa00040	Pentose and glucuronate interconversions	1/140	36/8661	0.444492	0.73743	0.662393	9365	1
Cellular Processes	Cellular community - eukaryotes	hsa04520	Adherens junction	2/140	93/8661	0.445533	0.73743	0.662393	7414/3480	2
Organismal Systems	Endocrine system	hsa04912	GnRH signaling pathway	2/140	93/8661	0.445533	0.73743	0.662393	3708/5337	2
Organismal Systems	Digestive system	hsa04970	Salivary secretion	2/140	93/8661	0.445533	0.73743	0.662393	2982/3708	2
Human Diseases	Cancer: overview	hsa05207	Chemical carcinogenesis - receptor activation	4/140	212/8661	0.449377	0.73743	0.662393	182/9586/596/2773	4
Human Diseases	Neurodegenerative disease	hsa05020	Prion disease	5/140	272/8661	0.449975	0.73743	0.662393	9586/90550/3708/3915/5718	5
Metabolism	Amino acid metabolism	hsa00250	Alanine, aspartate and glutamate metabolism	1/140	37/8661	0.453509	0.73743	0.662393	2744	1
Metabolism	Metabolism of cofactors and vitamins	hsa00760	Nicotinate and nicotinamide metabolism	1/140	37/8661	0.453509	0.73743	0.662393	4907	1
Human Diseases	Infectious disease: parasitic	hsa05143	African trypanosomiasis	1/140	37/8661	0.453509	0.73743	0.662393	3910	1
Human Diseases	Cancer: specific types	hsa05216	Thyroid cancer	1/140	37/8661	0.453509	0.73743	0.662393	673	1
Organismal Systems	Endocrine system	hsa04921	Oxytocin signaling pathway	3/140	154/8661	0.455568	0.73743	0.662393	2773/2982/3708	3
NA	NA	hsa04148	Efferocytosis	3/140	156/8661	0.463995	0.745707	0.669828	27072/23200/1399	3
Organismal Systems	Endocrine system	hsa04925	Aldosterone synthesis and secretion	2/140	98/8661	0.472528	0.748724	0.672538	9586/3708	2
Human Diseases	Cancer: overview	hsa05231	Choline metabolism in cancer	2/140	98/8661	0.472528	0.748724	0.672538	160851/5337	2
Metabolism	Lipid metabolism	hsa00564	Glycerophospholipid metabolism	2/140	99/8661	0.477833	0.751835	0.675332	160851/5337	2
Human Diseases	Cancer: specific types	hsa05219	Bladder cancer	1/140	41/8661	0.488146	0.757869	0.680753	673	1
Environmental Information Processing	Signal transduction	hsa04024	cAMP signaling pathway	4/140	225/8661	0.495455	0.757869	0.680753	9586/673/2773/5337	4
Metabolism	Glycan biosynthesis and metabolism	hsa00513	Various types of N-glycan biosynthesis	1/140	42/8661	0.496459	0.757869	0.680753	79796	1
Cellular Processes	Transport and catabolism	hsa04137	Mitophagy - animal	2/140	103/8661	0.498727	0.757869	0.680753	2309/6477	2
Environmental Information Processing	Signal transduction	hsa04064	NF-kappa B signaling pathway	2/140	104/8661	0.503867	0.757869	0.680753	596/7189	2
Organismal Systems	Immune system	hsa04625	C-type lectin receptor signaling pathway	2/140	104/8661	0.503867	0.757869	0.680753	23365/3708	2
Environmental Information Processing	Signal transduction	hsa04630	JAK-STAT signaling pathway	3/140	166/8661	0.505246	0.757869	0.680753	596/9655/30837	3
Genetic Information Processing	Transcription	hsa03022	Basal transcription factors	1/140	44/8661	0.512686	0.75891	0.681687	2957	1
Organismal Systems	Excretory system	hsa04962	Vasopressin-regulated water reabsorption	1/140	44/8661	0.512686	0.75891	0.681687	9586	1
Genetic Information Processing	Translation	hsa03013	Nucleocytoplasmic transport	2/140	108/8661	0.524089	0.767988	0.689841	3843/7514	2
Genetic Information Processing	Folding, sorting and degradation	hsa03050	Proteasome	1/140	46/8661	0.528393	0.767988	0.689841	5718	1
Environmental Information Processing	Signal transduction	hsa04066	HIF-1 signaling pathway	2/140	109/8661	0.529058	0.767988	0.689841	596/3480	2
Metabolism	Glycan biosynthesis and metabolism	hsa00514	Other types of O-glycan biosynthesis	1/140	47/8661	0.536057	0.773159	0.694486	8473	1
Organismal Systems	Immune system	hsa04670	Leukocyte transendothelial migration	2/140	115/8661	0.558134	0.790068	0.709675	7414/2773	2
Metabolism	Lipid metabolism	hsa00565	Ether lipid metabolism	1/140	50/8661	0.558314	0.790068	0.709675	5337	1
Human Diseases	Infectious disease: parasitic	hsa05144	Malaria	1/140	50/8661	0.558314	0.790068	0.709675	7042	1
Organismal Systems	Endocrine system	hsa04913	Ovarian steroidogenesis	1/140	51/8661	0.565495	0.795228	0.71431	3480	1
Metabolism	Glycan biosynthesis and metabolism	hsa00510	N-Glycan biosynthesis	1/140	53/8661	0.579512	0.80924	0.726897	79796	1
Organismal Systems	Endocrine system	hsa04919	Thyroid hormone signaling pathway	2/140	121/8661	0.585923	0.80924	0.726897	2308/7068	2
Environmental Information Processing	Signal transduction	hsa04020	Calcium signaling pathway	4/140	253/8661	0.588597	0.80924	0.726897	6547/444/90550/3708	4
Human Diseases	Substance dependence	hsa05034	Alcoholism	3/140	188/8661	0.589846	0.80924	0.726897	9586/673/2773	3
Metabolism	Metabolism of other amino acids	hsa00480	Glutathione metabolism	1/140	57/8661	0.606211	0.825385	0.741398	10314	1
Metabolism	Nucleotide metabolism	hsa00240	Pyrimidine metabolism	1/140	58/8661	0.612619	0.825385	0.741398	4907	1
Organismal Systems	Endocrine system	hsa04923	Regulation of lipolysis in adipocytes	1/140	58/8661	0.612619	0.825385	0.741398	2773	1
Metabolism	Nucleotide metabolism	hsa00230	Purine metabolism	2/140	128/8661	0.616701	0.825938	0.741896	4907/2982	2
Organismal Systems	Digestive system	hsa04978	Mineral absorption	1/140	60/8661	0.625125	0.827384	0.743194	6547	1
Human Diseases	Infectious disease: bacterial	hsa05130	Pathogenic Escherichia coli infection	3/140	198/8661	0.625134	0.827384	0.743194	23365/7189/10787	3
Metabolism	Lipid metabolism	hsa00561	Glycerolipid metabolism	1/140	63/8661	0.643136	0.833834	0.748987	160851	1
Human Diseases	Cancer: overview	hsa05203	Viral carcinogenesis	3/140	204/8661	0.645298	0.833834	0.748987	9586/5922/2957	3
Organismal Systems	Endocrine system	hsa04929	GnRH secretion	1/140	64/8661	0.648947	0.833834	0.748987	3708	1
Cellular Processes	Cell growth and death	hsa04210	Apoptosis	2/140	136/8661	0.64971	0.833834	0.748987	596/3708	2
Human Diseases	Immune disease	hsa05321	Inflammatory bowel disease	1/140	65/8661	0.654664	0.833834	0.748987	7042	1
Human Diseases	Neurodegenerative disease	hsa05022	Pathways of neurodegeneration - multiple diseases	7/140	476/8661	0.655982	0.833834	0.748987	4040/596/673/4287/90550/3708/5718	7
Human Diseases	Infectious disease: viral	hsa05162	Measles	2/140	138/8661	0.657605	0.833834	0.748987	596/7189	2
Human Diseases	Cardiovascular disease	hsa05416	Viral myocarditis	1/140	67/8661	0.665822	0.833834	0.748987	6645	1
Metabolism	Metabolism of cofactors and vitamins	hsa00830	Retinol metabolism	1/140	68/8661	0.671266	0.833834	0.748987	51109	1
Human Diseases	Substance dependence	hsa05031	Amphetamine addiction	1/140	69/8661	0.676621	0.833834	0.748987	9586	1
Cellular Processes	Cellular community - eukaryotes	hsa04550	Signaling pathways regulating pluripotency of stem cells	2/140	143/8661	0.676724	0.833834	0.748987	7994/3480	2
Human Diseases	Cardiovascular disease	hsa05417	Lipid and atherosclerosis	3/140	215/8661	0.680266	0.833834	0.748987	596/7189/3708	3
Organismal Systems	Endocrine system	hsa04920	Adipocytokine signaling pathway	1/140	70/8661	0.681891	0.833834	0.748987	26060	1
Human Diseases	Cancer: overview	hsa05230	Central carbon metabolism in cancer	1/140	70/8661	0.681891	0.833834	0.748987	2744	1
Organismal Systems	Immune system	hsa04622	RIG-I-like receptor signaling pathway	1/140	71/8661	0.687075	0.835631	0.750602	7189	1
Organismal Systems	Nervous system	hsa04723	Retrograde endocannabinoid signaling	2/140	148/8661	0.694973	0.838868	0.753509	2773/3708	2
Human Diseases	Drug resistance: antineoplastic	hsa01524	Platinum drug resistance	1/140	73/8661	0.697192	0.838868	0.753509	596	1
Human Diseases	Cancer: overview	hsa05208	Chemical carcinogenesis - reactive oxygen species	3/140	223/8661	0.704068	0.839179	0.753789	673/2309/5337	3
Human Diseases	Neurodegenerative disease	hsa05014	Amyotrophic lateral sclerosis	5/140	364/8661	0.70684	0.839179	0.753789	6428/596/90550/5217/5718	5
Cellular Processes	Transport and catabolism	hsa04145	Phagosome	2/140	152/8661	0.708958	0.839179	0.753789	3920/8417	2
Metabolism	Global and overview maps	hsa01240	Biosynthesis of cofactors	2/140	153/8661	0.71237	0.839179	0.753789	51109/79646	2
Genetic Information Processing	Folding, sorting and degradation	hsa03018	RNA degradation	1/140	79/8661	0.725637	0.84048	0.754957	11044	1
Environmental Information Processing	Signaling molecules and interaction	hsa04514	Cell adhesion molecules	2/140	157/8661	0.725688	0.84048	0.754957	3696/8516	2
Human Diseases	Infectious disease: viral	hsa05160	Hepatitis C	2/140	158/8661	0.728936	0.84048	0.754957	673/7189	2
Organismal Systems	Environmental adaptation	hsa04714	Thermogenesis	3/140	232/8661	0.72922	0.84048	0.754957	9586/6602/6595	3
Cellular Processes	Cell growth and death	hsa04217	Necroptosis	2/140	159/8661	0.732151	0.84048	0.754957	596/10059	2
Organismal Systems	Immune system	hsa04623	Cytosolic DNA-sensing pathway	1/140	83/8661	0.74311	0.848729	0.762367	85364	1
Metabolism	Global and overview maps	hsa01232	Nucleotide metabolism	1/140	85/8661	0.751427	0.853894	0.767007	4907	1
Organismal Systems	Endocrine system	hsa04911	Insulin secretion	1/140	86/8661	0.755485	0.854191	0.767274	9586	1
Human Diseases	Cancer: overview	hsa05235	PD-L1 expression and PD-1 checkpoint pathway in cancer	1/140	89/8661	0.767268	0.863176	0.775344	7189	1
Human Diseases	Substance dependence	hsa05032	Morphine addiction	1/140	91/8661	0.774808	0.866544	0.778369	2773	1
Organismal Systems	Immune system	hsa04658	Th1 and Th2 cell differentiation	1/140	92/8661	0.778487	0.866544	0.778369	182	1
Human Diseases	Immune disease	hsa05323	Rheumatoid arthritis	1/140	93/8661	0.782106	0.866544	0.778369	7042	1
Organismal Systems	Immune system	hsa04657	IL-17 signaling pathway	1/140	94/8661	0.785666	0.866544	0.778369	7189	1
Organismal Systems	Sensory system	hsa04750	Inflammatory mediator regulation of TRP channels	1/140	98/8661	0.799339	0.876648	0.787445	3708	1
Organismal Systems	Immune system	hsa04640	Hematopoietic cell lineage	1/140	99/8661	0.80262	0.876648	0.787445	3672	1
Organismal Systems	Endocrine system	hsa04916	Melanogenesis	1/140	101/8661	0.809023	0.878523	0.78913	2773	1
Organismal Systems	Digestive system	hsa04972	Pancreatic secretion	1/140	102/8661	0.812146	0.878523	0.78913	3708	1
Organismal Systems	Immune system	hsa04620	Toll-like receptor signaling pathway	1/140	108/8661	0.82985	0.893379	0.802474	7189	1
Metabolism	Global and overview maps	hsa01200	Carbon metabolism	1/140	115/8661	0.84842	0.909022	0.816525	2098	1
Genetic Information Processing	Transcription	hsa03040	Spliceosome	2/140	217/8661	0.870356	0.928105	0.833666	6428/10772	2
Human Diseases	Neurodegenerative disease	hsa05016	Huntington disease	3/140	306/8661	0.877365	0.93108	0.836338	9586/3708/5718	3
Cellular Processes	Transport and catabolism	hsa04142	Lysosome	1/140	132/8661	0.88556	0.93108	0.836338	3920	1
Organismal Systems	Immune system	hsa04650	Natural killer cell mediated cytotoxicity	1/140	132/8661	0.88556	0.93108	0.836338	673	1
Human Diseases	Cardiovascular disease	hsa05418	Fluid shear stress and atherosclerosis	1/140	139/8661	0.898084	0.939855	0.844221	596	1
Human Diseases	Endocrine and metabolic disease	hsa04932	Non-alcoholic fatty liver disease	1/140	155/8661	0.92183	0.96024	0.862531	83737	1
Genetic Information Processing	Translation	hsa03008	Ribosome biogenesis in eukaryotes	1/140	167/8661	0.935954	0.961643	0.863791	7514	1
Cellular Processes	Cellular community - eukaryotes	hsa04530	Tight junction	1/140	170/8661	0.939069	0.961643	0.863791	1740	1
Human Diseases	Infectious disease: viral	hsa05164	Influenza A	1/140	171/8661	0.940074	0.961643	0.863791	7514	1
Environmental Information Processing	Signaling molecules and interaction	hsa04080	Neuroactive ligand-receptor interaction	3/140	367/8661	0.940273	0.961643	0.863791	10424/7068/10857	3
Environmental Information Processing	Signaling molecules and interaction	hsa04060	Cytokine-cytokine receptor interaction	2/140	297/8661	0.95604	0.9721	0.873185	7042/651	2
Human Diseases	Infectious disease: viral	hsa05167	Kaposi sarcoma-associated herpesvirus infection	1/140	194/8661	0.959139	0.9721	0.873185	3708	1
Human Diseases	Cardiovascular disease	hsa05415	Diabetic cardiomyopathy	1/140	203/8661	0.964835	0.973488	0.874431	7042	1
Human Diseases	Infectious disease: viral	hsa05171	Coronavirus disease - COVID-19	1/140	233/8661	0.978705	0.983075	0.883042	7189	1
Organismal Systems	Sensory system	hsa04740	Olfactory transduction	1/140	439/8661	0.999353	0.999353	0.897664	6547	1

## Sheet: HSA_enriched_terms_miR_146a_5p_
category	subcategory	ID	Description	GeneRatio	BgRatio	pvalue	p.adjust	qvalue	geneID	Count
Genetic Information Processing	Chromosome	hsa03083	Polycomb repressive complex	11/215	84/8661	6.47041e-06	0.00148819	0.00138943	121536/26053/63035/10238/221937/3066/22992/1911/80012/57713/7528	11
Environmental Information Processing	Signal transduction	hsa04330	Notch signaling pathway	9/215	62/8661	1.96008e-05	0.0022541	0.00210451	6310/342371/1488/3066/23493/83737/182/4853/23013	9
Genetic Information Processing	Information processing in viruses	hsa03250	Viral life cycle - HIV-1	8/215	63/8661	0.000151497	0.0088271	0.00824132	636/23299/22936/4131/4298/9972/10955/7514	8
Cellular Processes	Cellular community - eukaryotes	hsa04510	Focal adhesion	15/215	203/8661	0.000153515	0.0088271	0.00824132	673/1286/1793/1956/2316/3680/3685/3915/5063/55742/4660/5879/6093/7414/331	15
Cellular Processes	Transport and catabolism	hsa04144	Endocytosis	16/215	250/8661	0.000478144	0.0219946	0.020535	273/8853/832/867/1956/2869/9922/9798/83737/57403/55680/23111/7189/9559/112936/147179	16
Environmental Information Processing	Signal transduction	hsa04392	Hippo signaling pathway - multiple species	5/215	29/8661	0.000656967	0.0251837	0.0235125	8642/79633/26524/6788/10413	5
Genetic Information Processing	Folding, sorting and degradation	hsa04120	Ubiquitin mediated proteolysis	11/215	142/8661	0.000789665	0.0259461	0.0242243	867/23291/83737/8554/9063/25898/6477/7189/7326/55284/331	11
Cellular Processes	Cell motility	hsa04810	Regulation of actin cytoskeleton	14/215	229/8661	0.00166521	0.0478747	0.0446977	673/1073/1793/1956/8826/3680/3685/10787/5063/4660/5879/6093/54434/7414	14
Metabolism	Amino acid metabolism	hsa00310	Lysine degradation	6/215	63/8661	0.00456396	0.104403	0.0974747	55870/79813/4297/8085/93166/29072	6
Human Diseases	Cardiovascular disease	hsa05412	Arrhythmogenic right ventricular cardiomyopathy	7/215	84/8661	0.00473272	0.104403	0.0974747	775/1756/3680/3685/6443/6444/6645	7
Human Diseases	Cancer: overview	hsa05205	Proteoglycans in cancer	12/215	205/8661	0.00499319	0.104403	0.0974747	673/867/1655/1956/2316/2549/8826/3685/4660/5727/5879/6093	12
Human Diseases	Cardiovascular disease	hsa05416	Viral myocarditis	6/215	67/8661	0.00617757	0.118403	0.110546	1756/1982/5879/6443/6444/6645	6
Cellular Processes	Cellular community - eukaryotes	hsa04520	Adherens junction	7/215	93/8661	0.00821424	0.145329	0.135685	1956/2241/57493/8826/5879/6093/7414	7
Human Diseases	Cardiovascular disease	hsa05410	Hypertrophic cardiomyopathy	7/215	97/8661	0.0102544	0.168465	0.157285	775/1756/3680/3685/6443/6444/6645	7
Human Diseases	Cardiovascular disease	hsa05414	Dilated cardiomyopathy	7/215	103/8661	0.0139742	0.214271	0.200052	775/1756/3680/3685/6443/6444/6645	7
Organismal Systems	Development and regeneration	hsa04360	Axon guidance	10/215	182/8661	0.0151591	0.217912	0.203451	1073/1948/2044/2048/2773/5063/5727/5879/6093/54434	10
Human Diseases	Cancer: overview	hsa05202	Transcriptional misregulation in cancer	10/215	193/8661	0.0219098	0.296427	0.276755	9915/5218/1655/2120/3066/4297/4211/4298/6760/6935	10
Genetic Information Processing	Chromosome	hsa03082	ATP-dependent chromatin remodeling	7/215	117/8661	0.0262349	0.335224	0.312978	196528/57634/3066/6595/6604/6760/7528	7
Human Diseases	Cancer: specific types	hsa05211	Renal cell carcinoma	5/215	69/8661	0.0280199	0.339188	0.316679	9915/673/2549/5063/5879	5
Environmental Information Processing	Signal transduction	hsa04070	Phosphatidylinositol signaling system	6/215	97/8661	0.0333256	0.383244	0.357811	8760/160851/3631/22876/8897/9110	6
Organismal Systems	Endocrine system	hsa04926	Relaxin signaling pathway	7/215	129/8661	0.0413786	0.414898	0.387365	1286/64764/1956/2353/2773/10681/122042	7
Human Diseases	Infectious disease: bacterial	hsa05100	Bacterial invasion of epithelial cells	5/215	77/8661	0.0421097	0.414898	0.387365	867/1793/2549/5879/7414	5
Metabolism	Glycan biosynthesis and metabolism	hsa00533	Glycosaminoglycan biosynthesis - keratan sulfate	2/215	14/8661	0.0458777	0.414898	0.387365	10678/8702	2
Organismal Systems	Endocrine system	hsa04928	Parathyroid hormone synthesis, secretion and action	6/215	106/8661	0.0480422	0.414898	0.387365	673/64764/1956/1958/2353/2773	6
Organismal Systems	Circulatory system	hsa04270	Vascular smooth muscle contraction	7/215	134/8661	0.0490836	0.414898	0.387365	673/775/2982/3778/3779/4660/6093	7
Environmental Information Processing	Signal transduction	hsa04340	Hedgehog signaling pathway	4/215	56/8661	0.0497818	0.414898	0.387365	23291/730094/5727/8405	4
Environmental Information Processing	Signal transduction	hsa04350	TGF-beta signaling pathway	6/215	108/8661	0.0517811	0.414898	0.387365	25805/657/2200/3066/6093/6498	6
Cellular Processes	Transport and catabolism	hsa04140	Autophagy - animal	8/215	165/8661	0.0529757	0.414898	0.387365	3920/8897/9110/4077/55014/8417/7189/23001	8
Environmental Information Processing	Signal transduction	hsa04024	cAMP signaling pathway	10/215	225/8661	0.0535767	0.414898	0.387365	627/673/775/64764/2353/2773/4886/5727/5879/6093	10
Human Diseases	Infectious disease: bacterial	hsa05135	Yersinia infection	7/215	137/8661	0.0541171	0.414898	0.387365	1793/2353/5586/5879/6093/7189/147179	7
Environmental Information Processing	Signal transduction	hsa04012	ErbB signaling pathway	5/215	85/8661	0.0598176	0.443808	0.414356	673/867/1956/2549/5063	5
Human Diseases	Cancer: specific types	hsa05210	Colorectal cancer	5/215	86/8661	0.0622885	0.447699	0.417989	26060/673/1956/2353/5879	5
Metabolism	Metabolism of other amino acids	hsa00450	Selenocompound metabolism	2/215	17/8661	0.065333	0.455351	0.425133	4548/9060	2
Environmental Information Processing	Signal transduction	hsa04310	Wnt signaling pathway	8/215	174/8661	0.067965	0.459763	0.429253	25805/1488/23500/23291/55366/5879/6477/84133	8
Organismal Systems	Nervous system	hsa04727	GABAergic synapse	5/215	89/8661	0.0700432	0.460284	0.429739	775/2773/10681/10243/54407	5
Organismal Systems	Nervous system	hsa04722	Neurotrophin signaling pathway	6/215	119/8661	0.0754571	0.465944	0.435023	627/673/2549/5879/6272/7189	6
Human Diseases	Cancer: specific types	hsa05222	Small cell lung cancer	5/215	92/8661	0.0783066	0.465944	0.435023	1286/3685/3915/7189/331	5
Human Diseases	Infectious disease: viral	hsa05170	Human immunodeficiency virus 1 infection	9/215	212/8661	0.0814371	0.465944	0.435023	1073/1111/23291/2353/2773/10681/5063/5879/7189	9
Human Diseases	Cancer: overview	hsa05207	Chemical carcinogenesis - receptor activation	9/215	212/8661	0.0814371	0.465944	0.435023	775/64764/1956/2353/2773/182/23633/4853/331	9
Organismal Systems	Endocrine system	hsa04921	Oxytocin signaling pathway	7/215	154/8661	0.0885917	0.465944	0.435023	775/1956/2353/2773/2982/4660/6093	7
Human Diseases	Endocrine and metabolic disease	hsa04934	Cushing syndrome	7/215	155/8661	0.0909356	0.465944	0.435023	673/775/64764/1956/2773/4297/8085	7
Organismal Systems	Endocrine system	hsa04924	Renin secretion	4/215	69/8661	0.0918727	0.465944	0.435023	775/2773/2982/3778	4
Human Diseases	Substance dependence	hsa05031	Amphetamine addiction	4/215	69/8661	0.0918727	0.465944	0.435023	775/64764/2353/3066	4
Organismal Systems	Immune system	hsa04666	Fc gamma R-mediated phagocytosis	5/215	97/8661	0.0931888	0.465944	0.435023	273/8853/1073/1793/5879	5
Organismal Systems	Environmental adaptation	hsa04713	Circadian entrainment	5/215	97/8661	0.0931888	0.465944	0.435023	775/2353/2773/10681/2982	5
Human Diseases	Cancer: specific types	hsa05215	Prostate cancer	5/215	97/8661	0.0931888	0.465944	0.435023	673/64764/1956/6716/6935	5
Human Diseases	Drug resistance: antineoplastic	hsa01522	Endocrine resistance	5/215	98/8661	0.0963284	0.471394	0.440112	673/1956/2353/182/4853	5
Metabolism	Carbohydrate metabolism	hsa00562	Inositol phosphate metabolism	4/215	73/8661	0.1074	0.489828	0.457322	3631/22876/8897/9110	4
Organismal Systems	Nervous system	hsa04728	Dopaminergic synapse	6/215	132/8661	0.110166	0.489828	0.457322	775/64764/2353/2773/10681/5525	6
Environmental Information Processing	Signal transduction	hsa04151	PI3K-Akt signaling pathway	13/215	359/8661	0.110516	0.489828	0.457322	627/1286/64764/1956/2668/10681/3680/3685/3915/9223/5586/5525/5879	13
Metabolism	Glycan biosynthesis and metabolism	hsa00534	Glycosaminoglycan biosynthesis - heparan sulfate / heparin	2/215	24/8661	0.118608	0.489828	0.457322	2131/9957	2
Environmental Information Processing	Signal transduction	hsa04022	cGMP-PKG signaling pathway	7/215	166/8661	0.118981	0.489828	0.457322	775/64764/2773/2982/3778/3779/6093	7
Human Diseases	Infectious disease: bacterial	hsa05130	Pathogenic Escherichia coli infection	8/215	198/8661	0.119546	0.489828	0.457322	2353/10787/5063/5879/6093/10802/7189/147179	8
Human Diseases	Infectious disease: bacterial	hsa05133	Pertussis	4/215	76/8661	0.119772	0.489828	0.457322	1073/2353/2773/7189	4
Human Diseases	Cancer: specific types	hsa05220	Chronic myeloid leukemia	4/215	76/8661	0.119772	0.489828	0.457322	673/867/1488/3066	4
Human Diseases	Infectious disease: viral	hsa05165	Human papillomavirus infection	12/215	331/8661	0.121196	0.489828	0.457322	1286/64764/1956/3066/23493/3680/3685/182/3915/9223/4853/5525	12
Human Diseases	Substance dependence	hsa05030	Cocaine addiction	3/215	49/8661	0.121392	0.489828	0.457322	627/64764/2773	3
Environmental Information Processing	Signal transduction	hsa04010	MAPK signaling pathway	11/215	301/8661	0.128812	0.508987	0.47521	627/673/775/1956/2316/2353/2668/5879/6788/57551/7189	11
Genetic Information Processing	Translation	hsa03013	Nucleocytoplasmic transport	5/215	108/8661	0.130566	0.508987	0.47521	55705/23633/9972/81929/7514	5
Metabolism	Glycan biosynthesis and metabolism	hsa00563	Glycosylphosphatidylinositol (GPI)-anchor biosynthesis	2/215	26/8661	0.135333	0.518777	0.48435	2822/80055	2
Organismal Systems	Nervous system	hsa04725	Cholinergic synapse	5/215	113/8661	0.149498	0.560099	0.52293	775/64764/2353/2773/10681	5
Metabolism	Glycan biosynthesis and metabolism	hsa00601	Glycosphingolipid biosynthesis - lacto and neolacto series	2/215	28/8661	0.152542	0.560099	0.52293	10678/8702	2
Environmental Information Processing	Signal transduction	hsa04668	TNF signaling pathway	5/215	114/8661	0.153418	0.560099	0.52293	64764/2353/83737/182/331	5
Human Diseases	Cancer: specific types	hsa05224	Breast cancer	6/215	147/8661	0.158644	0.570128	0.532293	673/1956/2353/23493/182/4853	6
Organismal Systems	Endocrine system	hsa04911	Insulin secretion	4/215	86/8661	0.165027	0.58394	0.545189	775/64764/3778/3779	4
Environmental Information Processing	Signaling molecules and interaction	hsa04512	ECM-receptor interaction	4/215	89/8661	0.179661	0.626093	0.584544	1286/3680/3685/3915	4
Organismal Systems	Nervous system	hsa04730	Long-term depression	3/215	60/8661	0.186403	0.631134	0.589251	673/2773/2982	3
Human Diseases	Substance dependence	hsa05034	Alcoholism	7/215	188/8661	0.186596	0.631134	0.589251	627/673/64764/2773/10681/3066/10014	7
Genetic Information Processing	Folding, sorting and degradation	hsa04130	SNARE interactions in vesicular transport	2/215	33/8661	0.197129	0.657096	0.61349	55014/8417	2
Organismal Systems	Immune system	hsa04657	IL-17 signaling pathway	4/215	94/8661	0.20496	0.668097	0.623762	1994/2353/5596/7189	4
Organismal Systems	Environmental adaptation	hsa04710	Circadian rhythm	2/215	34/8661	0.206239	0.668097	0.623762	79365/23291	2
Genetic Information Processing	Translation	hsa03015	mRNA surveillance pathway	4/215	97/8661	0.220615	0.700618	0.654124	23708/5525/8731/8189	4
Metabolism	Energy metabolism	hsa00920	Sulfur metabolism	1/215	8661-10-01	0.22237	0.700618	0.654124	9060	1
Human Diseases	Cancer: overview	hsa05231	Choline metabolism in cancer	4/215	98/8661	0.225904	0.702134	0.655539	160851/1956/2353/5879	4
Human Diseases	Cancer: specific types	hsa05216	Thyroid cancer	2/215	37/8661	0.233804	0.713733	0.666369	673/8030	2
Human Diseases	Endocrine and metabolic disease	hsa04933	AGE-RAGE signaling pathway in diabetic complications	4/215	100/8661	0.236578	0.713733	0.666369	1286/1958/50507/5879	4
Human Diseases	Cancer: specific types	hsa05225	Hepatocellular carcinoma	6/215	168/8661	0.238945	0.713733	0.666369	196528/673/1956/2549/6595/6604	6
Genetic Information Processing	Folding, sorting and degradation	hsa04141	Protein processing in endoplasmic reticulum	6/215	170/8661	0.247184	0.728875	0.680505	9532/80267/22824/10802/22872/7326	6
Environmental Information Processing	Signal transduction	hsa04371	Apelin signaling pathway	5/215	139/8661	0.263047	0.765834	0.715012	1958/2773/10681/10014/182	5
Human Diseases	Cancer: specific types	hsa05219	Bladder cancer	2/215	41/8661	0.270839	0.778662	0.726988	673/1956	2
Human Diseases	Infectious disease: bacterial	hsa05132	Salmonella infection	8/215	249/8661	0.278062	0.781178	0.729338	140735/2316/2353/10787/5063/5879/112574/7189	8
Cellular Processes	Cell growth and death	hsa04115	p53 signaling pathway	3/215	74/8661	0.278507	0.781178	0.729338	1111/25898/6477	3
Human Diseases	Cancer: specific types	hsa05212	Pancreatic cancer	3/215	76/8661	0.292098	0.807992	0.754373	673/1956/5879	3
Human Diseases	Infectious disease: parasitic	hsa05145	Toxoplasmosis	4/215	111/8661	0.297077	0.807992	0.754373	2773/3915/7189/331	4
Organismal Systems	Excretory system	hsa04962	Vasopressin-regulated water reabsorption	2/215	44/8661	0.298606	0.807992	0.754373	64764/140735	2
Human Diseases	Drug resistance: antineoplastic	hsa01521	EGFR tyrosine kinase inhibitor resistance	3/215	79/8661	0.312563	0.825886	0.771079	673/1956/2549	3
Organismal Systems	Immune system	hsa04670	Leukocyte transendothelial migration	4/215	115/8661	0.319582	0.825886	0.771079	2773/5879/6093/7414	4
Organismal Systems	Nervous system	hsa04724	Glutamatergic synapse	4/215	115/8661	0.319582	0.825886	0.771079	775/2773/10681/54407	4
Organismal Systems	Nervous system	hsa04726	Serotonergic synapse	4/215	115/8661	0.319582	0.825886	0.771079	673/775/2773/10681	4
Human Diseases	Infectious disease: viral	hsa05163	Human cytomegalovirus infection	7/215	225/8661	0.325649	0.832213	0.776986	64764/1956/2773/10681/3685/5879/6093	7
Organismal Systems	Immune system	hsa04062	Chemokine signaling pathway	6/215	192/8661	0.342043	0.847064	0.790852	673/2773/10681/2869/5879/6093	6
Organismal Systems	Endocrine system	hsa04935	Growth hormone synthesis, secretion and action	4/215	120/8661	0.347886	0.847064	0.790852	775/64764/2353/2773	4
Environmental Information Processing	Signal transduction	hsa04390	Hippo signaling pathway	5/215	157/8661	0.350618	0.847064	0.790852	657/23291/26524/6788/10413	5
Environmental Information Processing	Signaling molecules and interaction	hsa04514	Cell adhesion molecules	5/215	157/8661	0.350618	0.847064	0.790852	3680/3685/23114/5789/22865	5
Environmental Information Processing	Signal transduction	hsa04071	Sphingolipid signaling pathway	4/215	121/8661	0.353557	0.847064	0.790852	2773/5525/5879/6093	4
Organismal Systems	Endocrine system	hsa04919	Thyroid hormone signaling pathway	4/215	121/8661	0.353557	0.847064	0.790852	3066/3685/4853/7068	4
Environmental Information Processing	Signal transduction	hsa04014	Ras signaling pathway	7/215	236/8661	0.370292	0.863393	0.806097	627/1956/2549/10681/5063/5879/9462	7
Metabolism	Amino acid metabolism	hsa00270	Cysteine and methionine metabolism	2/215	52/8661	0.371508	0.863393	0.806097	4144/4548	2
Cellular Processes	Cellular community - eukaryotes	hsa04540	Gap junction	3/215	88/8661	0.373962	0.863393	0.806097	1956/2773/2982	3
Organismal Systems	Aging	hsa04211	Longevity regulating pathway	3/215	89/8661	0.38074	0.863393	0.806097	26060/64764/79813	3
Human Diseases	Cancer: overview	hsa05235	PD-L1 expression and PD-1 checkpoint pathway in cancer	3/215	89/8661	0.38074	0.863393	0.806097	1956/2353/7189	3
Human Diseases	Substance dependence	hsa05032	Morphine addiction	3/215	91/8661	0.394248	0.863393	0.806097	2773/10681/2869	3
Metabolism	Metabolism of cofactors and vitamins	hsa00670	One carbon pool by folate	1/215	20/8661	0.39547	0.863393	0.806097	4548	1
Organismal Systems	Immune system	hsa04658	Th1 and Th2 cell differentiation	3/215	92/8661	0.400973	0.863393	0.806097	2353/182/4853	3
Organismal Systems	Endocrine system	hsa04912	GnRH signaling pathway	3/215	93/8661	0.407679	0.863393	0.806097	775/1956/1958	3
Metabolism	Glycan biosynthesis and metabolism	hsa00532	Glycosaminoglycan biosynthesis - chondroitin sulfate / dermatan sulfate	1/215	21/8661	0.410512	0.863393	0.806097	337876	1
Metabolism	Metabolism of cofactors and vitamins	hsa00770	Pantothenate and CoA biosynthesis	1/215	21/8661	0.410512	0.863393	0.806097	79646	1
Cellular Processes	Cellular community - eukaryotes	hsa04530	Tight junction	5/215	170/8661	0.41498	0.863393	0.806097	51421/9223/5879/6093/8189	5
Human Diseases	Infectious disease: bacterial	hsa05131	Shigellosis	7/215	247/8661	0.415311	0.863393	0.806097	1793/1956/23291/5879/6093/7189/7414	7
Cellular Processes	Transport and catabolism	hsa04142	Lysosome	4/215	132/8661	0.415718	0.863393	0.806097	10947/3920/6272/23335	4
Environmental Information Processing	Signal transduction	hsa04015	Rap1 signaling pathway	6/215	210/8661	0.422228	0.863393	0.806097	673/1956/2773/9223/5879/26037	6
Organismal Systems	Endocrine system	hsa04923	Regulation of lipolysis in adipocytes	2/215	58/8661	0.424189	0.863393	0.806097	2773/4886	2
Human Diseases	Cancer: specific types	hsa05213	Endometrial cancer	2/215	58/8661	0.424189	0.863393	0.806097	673/1956	2
Metabolism	Metabolism of terpenoids and polyketides	hsa00900	Terpenoid backbone biosynthesis	1/215	23/8661	0.439486	0.879542	0.821174	51449	1
Organismal Systems	Endocrine system	hsa04910	Insulin signaling pathway	4/215	137/8661	0.443595	0.879542	0.821174	673/867/5257/79660	4
Organismal Systems	Endocrine system	hsa04915	Estrogen signaling pathway	4/215	137/8661	0.443595	0.879542	0.821174	64764/1956/2353/2773	4
Organismal Systems	Aging	hsa04213	Longevity regulating pathway - multiple species	2/215	61/8661	0.449671	0.883969	0.825308	1979/3066	2
Human Diseases	Cardiovascular disease	hsa05418	Fluid shear stress and atherosclerosis	4/215	139/8661	0.454639	0.886161	0.827354	657/2353/3685/5879	4
Human Diseases	Infectious disease: parasitic	hsa05142	Chagas disease	3/215	102/8661	0.466857	0.891027	0.831897	2353/2773/7189	3
Human Diseases	Infectious disease: parasitic	hsa05146	Amoebiasis	3/215	102/8661	0.466857	0.891027	0.831897	1286/3915/7414	3
Human Diseases	Infectious disease: viral	hsa05166	Human T-cell leukemia virus 1 infection	6/215	222/8661	0.475141	0.891027	0.831897	1111/64764/1958/2353/331/7514	6
Cellular Processes	Cellular community - eukaryotes	hsa04550	Signaling pathways regulating pluripotency of stem cells	4/215	143/8661	0.476506	0.891027	0.831897	657/4211/6498/56916	4
Human Diseases	Neurodegenerative disease	hsa05017	Spinocerebellar ataxia	4/215	143/8661	0.476506	0.891027	0.831897	6310/342371/5718/9698	4
Organismal Systems	Endocrine system	hsa04927	Cortisol synthesis and secretion	2/215	65/8661	0.482638	0.895215	0.835807	775/64764	2
Metabolism	Metabolism of cofactors and vitamins	hsa00790	Folate biosynthesis	1/215	27/8661	0.493251	0.907581	0.847353	10243	1
Organismal Systems	Nervous system	hsa04720	Long-term potentiation	2/215	67/8661	0.498661	0.910254	0.849848	673/775	2
Organismal Systems	Immune system	hsa04620	Toll-like receptor signaling pathway	3/215	108/8661	0.50484	0.914278	0.853605	2353/5879/7189	3
Human Diseases	Infectious disease: bacterial	hsa05120	Epithelial cell signaling in Helicobacter pylori infection	2/215	70/8661	0.522095	0.919174	0.858176	1956/5879	2
Cellular Processes	Transport and catabolism	hsa04145	Phagosome	4/215	152/8661	0.524407	0.919174	0.858176	3685/3920/5879/8417	4
Metabolism	Global and overview maps	hsa01240	Biosynthesis of cofactors	4/215	153/8661	0.529602	0.919174	0.858176	10243/4144/79646/55163	4
Organismal Systems	Circulatory system	hsa04261	Adrenergic signaling in cardiomyocytes	4/215	154/8661	0.53477	0.919174	0.858176	775/64764/2773/5525	4
Human Diseases	Cancer: specific types	hsa05218	Melanoma	2/215	72/8661	0.537307	0.919174	0.858176	673/1956	2
Human Diseases	Cancer: specific types	hsa05223	Non-small cell lung cancer	2/215	72/8661	0.537307	0.919174	0.858176	673/1956	2
NA	NA	hsa04148	Efferocytosis	4/215	156/8661	0.545022	0.919174	0.858176	1793/3685/5879/9392	4
Cellular Processes	Cell growth and death	hsa04218	Cellular senescence	4/215	156/8661	0.545022	0.919174	0.858176	1111/23291/204851/91750	4
Cellular Processes	Cell growth and death	hsa04110	Cell cycle	4/215	157/8661	0.550104	0.919174	0.858176	1111/114799/3066/5525	4
Cellular Processes	Cell growth and death	hsa04215	Apoptosis - multiple species	1/215	32/8661	0.553293	0.919174	0.858176	331	1
Human Diseases	Infectious disease: viral	hsa05160	Hepatitis C	4/215	158/8661	0.555157	0.919174	0.858176	673/1956/8554/7189	4
Metabolism	Global and overview maps	hsa01230	Biosynthesis of amino acids	2/215	75/8661	0.559497	0.919174	0.858176	4144/4548	2
Human Diseases	Cancer: specific types	hsa05214	Glioma	2/215	75/8661	0.559497	0.919174	0.858176	673/1956	2
Human Diseases	Infectious disease: parasitic	hsa05140	Leishmaniasis	2/215	77/8661	0.573866	0.923209	0.861943	2353/7189	2
Human Diseases	Infectious disease: viral	hsa05161	Hepatitis B	4/215	162/8661	0.575064	0.923209	0.861943	673/64764/2353/7189	4
Human Diseases	Cancer: overview	hsa05203	Viral carcinogenesis	5/215	204/8661	0.575172	0.923209	0.861943	1111/64764/3066/10014/5879	5
Environmental Information Processing	Signal transduction	hsa04152	AMPK signaling pathway	3/215	121/8661	0.582023	0.923209	0.861943	64764/1994/5525	3
Organismal Systems	Immune system	hsa04660	T cell receptor signaling pathway	3/215	121/8661	0.582023	0.923209	0.861943	2353/5063/5525	3
Environmental Information Processing	Signal transduction	hsa04630	JAK-STAT signaling pathway	4/215	166/8661	0.594465	0.930456	0.868709	1956/2273/8554/9063	4
Metabolism	Carbohydrate metabolism	hsa00500	Starch and sucrose metabolism	1/215	36/8661	0.596184	0.930456	0.868709	2992	1
Organismal Systems	Immune system	hsa04611	Platelet activation	3/215	124/8661	0.598728	0.930456	0.868709	2773/2982/6093	3
Organismal Systems	Immune system	hsa04662	B cell receptor signaling pathway	2/215	84/8661	0.621456	0.956724	0.893234	2353/5879	2
Organismal Systems	Sensory system	hsa04742	Taste transduction	2/215	86/8661	0.634282	0.956724	0.893234	775/6326	2
Organismal Systems	Circulatory system	hsa04260	Cardiac muscle contraction	2/215	87/8661	0.640567	0.956724	0.893234	444/775	2
Metabolism	Glycan biosynthesis and metabolism	hsa00513	Various types of N-glycan biosynthesis	1/215	42/8661	0.652956	0.956724	0.893234	79796	1
Human Diseases	Cancer: overview	hsa05208	Chemical carcinogenesis - reactive oxygen species	5/215	223/8661	0.654081	0.956724	0.893234	673/1956/2353/50507/5879	5
Organismal Systems	Development and regeneration	hsa04380	Osteoclast differentiation	3/215	135/8661	0.656173	0.956724	0.893234	2353/5879/7189	3
Human Diseases	Endocrine and metabolic disease	hsa04940	Type I diabetes mellitus	1/215	43/8661	0.661613	0.956724	0.893234	1363	1
Genetic Information Processing	Replication and repair	hsa03410	Base excision repair	1/215	44/8661	0.670055	0.956724	0.893234	7515	1
Human Diseases	Infectious disease: viral	hsa05162	Measles	3/215	138/8661	0.670781	0.956724	0.893234	2353/25898/7189	3
Human Diseases	Neurodegenerative disease	hsa05020	Prion disease	6/215	272/8661	0.673341	0.956724	0.893234	775/64764/1958/3915/5718/5879	6
Organismal Systems	Digestive system	hsa04970	Salivary secretion	2/215	93/8661	0.676507	0.956724	0.893234	2982/3778	2
Genetic Information Processing	Folding, sorting and degradation	hsa03050	Proteasome	1/215	46/8661	0.686315	0.956724	0.893234	5718	1
Human Diseases	Endocrine and metabolic disease	hsa04930	Type II diabetes mellitus	1/215	46/8661	0.686315	0.956724	0.893234	775	1
Metabolism	Carbohydrate metabolism	hsa00620	Pyruvate metabolism	1/215	47/8661	0.694143	0.956724	0.893234	4199	1
Organismal Systems	Endocrine system	hsa04925	Aldosterone synthesis and secretion	2/215	98/8661	0.704187	0.956724	0.893234	775/64764	2
Metabolism	Lipid metabolism	hsa00564	Glycerophospholipid metabolism	2/215	99/8661	0.709481	0.956724	0.893234	8760/160851	2
Environmental Information Processing	Signal transduction	hsa04072	Phospholipase D signaling pathway	3/215	148/8661	0.716184	0.956724	0.893234	160851/1956/2549	3
Organismal Systems	Nervous system	hsa04723	Retrograde endocannabinoid signaling	3/215	148/8661	0.716184	0.956724	0.893234	775/2773/10681	3
Organismal Systems	Endocrine system	hsa04916	Melanogenesis	2/215	101/8661	0.719834	0.956724	0.893234	64764/2773	2
Human Diseases	Cancer: specific types	hsa05226	Gastric cancer	3/215	149/8661	0.720449	0.956724	0.893234	673/1956/2549	3
Organismal Systems	Digestive system	hsa04979	Cholesterol metabolism	1/215	51/8661	0.72356	0.956724	0.893234	6272	1
Organismal Systems	Endocrine system	hsa04914	Progesterone-mediated oocyte maturation	2/215	102/8661	0.724894	0.956724	0.893234	673/2773	2
Organismal Systems	Digestive system	hsa04972	Pancreatic secretion	2/215	102/8661	0.724894	0.956724	0.893234	3778/5879	2
Cellular Processes	Transport and catabolism	hsa04137	Mitophagy - animal	2/215	103/8661	0.729876	0.956724	0.893234	4077/6477	2
Organismal Systems	Digestive system	hsa04974	Protein digestion and absorption	2/215	103/8661	0.729876	0.956724	0.893234	1286/54407	2
Environmental Information Processing	Signal transduction	hsa04064	NF-kappa B signaling pathway	2/215	104/8661	0.734782	0.956724	0.893234	7189/331	2
Metabolism	Glycan biosynthesis and metabolism	hsa00510	N-Glycan biosynthesis	1/215	53/8661	0.737194	0.956724	0.893234	79796	1
Human Diseases	Infectious disease: viral	hsa05169	Epstein-Barr virus infection	4/215	202/8661	0.743823	0.956724	0.893234	3066/5718/5879/7189	4
Human Diseases	Endocrine and metabolic disease	hsa04932	Non-alcoholic fatty liver disease	3/215	155/8661	0.744998	0.956724	0.893234	2353/83737/5879	3
Organismal Systems	Endocrine system	hsa04922	Glucagon signaling pathway	2/215	107/8661	0.74905	0.956724	0.893234	64764/5257	2
Human Diseases	Endocrine and metabolic disease	hsa04931	Insulin resistance	2/215	108/8661	0.753657	0.956724	0.893234	64764/79660	2
Environmental Information Processing	Signal transduction	hsa04020	Calcium signaling pathway	5/215	253/8661	0.75829	0.956724	0.893234	444/775/1956/2668/5257	5
Metabolism	Metabolism of other amino acids	hsa00480	Glutathione metabolism	1/215	57/8661	0.762487	0.956724	0.893234	10314	1
Environmental Information Processing	Signal transduction	hsa04370	VEGF signaling pathway	1/215	59/8661	0.77421	0.956724	0.893234	5879	1
Human Diseases	Cancer: overview	hsa05206	MicroRNAs in cancer	6/215	310/8661	0.787699	0.956724	0.893234	1956/3066/10014/4853/6093/6935	6
Metabolism	Lipid metabolism	hsa00140	Steroid hormone biosynthesis	1/215	62/8661	0.790722	0.956724	0.893234	6716	1
Metabolism	Lipid metabolism	hsa00561	Glycerolipid metabolism	1/215	63/8661	0.795955	0.956724	0.893234	160851	1
Human Diseases	Cancer: specific types	hsa05217	Basal cell carcinoma	1/215	63/8661	0.795955	0.956724	0.893234	5727	1
Organismal Systems	Endocrine system	hsa04929	GnRH secretion	1/215	64/8661	0.801057	0.956724	0.893234	775	1
Human Diseases	Cancer: specific types	hsa05221	Acute myeloid leukemia	1/215	67/8661	0.815615	0.956724	0.893234	673	1
Organismal Systems	Immune system	hsa04664	Fc epsilon RI signaling pathway	1/215	68/8661	0.820227	0.956724	0.893234	5879	1
Organismal Systems	Endocrine system	hsa04917	Prolactin signaling pathway	1/215	70/8661	0.829111	0.956724	0.893234	2353	1
Organismal Systems	Endocrine system	hsa04920	Adipocytokine signaling pathway	1/215	70/8661	0.829111	0.956724	0.893234	26060	1
Human Diseases	Cancer: overview	hsa05230	Central carbon metabolism in cancer	1/215	70/8661	0.829111	0.956724	0.893234	1956	1
Metabolism	Nucleotide metabolism	hsa00230	Purine metabolism	2/215	128/8661	0.831564	0.956724	0.893234	2982/9060	2
Organismal Systems	Immune system	hsa04622	RIG-I-like receptor signaling pathway	1/215	71/8661	0.833388	0.956724	0.893234	7189	1
Environmental Information Processing	Signal transduction	hsa04068	FoxO signaling pathway	2/215	131/8661	0.841127	0.956724	0.893234	673/1956	2
Cellular Processes	Cell growth and death	hsa04114	Oocyte meiosis	2/215	131/8661	0.841127	0.956724	0.893234	23291/5525	2
Human Diseases	Drug resistance: antineoplastic	hsa01524	Platinum drug resistance	1/215	73/8661	0.841624	0.956724	0.893234	331	1
Human Diseases	Neurodegenerative disease	hsa05022	Pathways of neurodegeneration - multiple diseases	9/215	476/8661	0.843298	0.956724	0.893234	6310/342371/627/673/775/50507/5718/5879/7326	9
Organismal Systems	Immune system	hsa04650	Natural killer cell mediated cytotoxicity	2/215	132/8661	0.844204	0.956724	0.893234	673/5879	2
Organismal Systems	Immune system	hsa04621	NOD-like receptor signaling pathway	3/215	186/8661	0.845588	0.956724	0.893234	5586/7189/331	3
Organismal Systems	Endocrine system	hsa03320	PPAR signaling pathway	1/215	75/8661	0.849455	0.956724	0.893234	4199	1
Organismal Systems	Endocrine system	hsa04918	Thyroid hormone synthesis	1/215	75/8661	0.849455	0.956724	0.893234	64764	1
Organismal Systems	Digestive system	hsa04971	Gastric acid secretion	1/215	76/8661	0.853225	0.956724	0.893234	2773	1
Cellular Processes	Cell growth and death	hsa04210	Apoptosis	2/215	136/8661	0.855981	0.956724	0.893234	2353/331	2
Organismal Systems	Immune system	hsa04613	Neutrophil extracellular trap formation	3/215	191/8661	0.858123	0.956724	0.893234	3066/10014/5879	3
Cellular Processes	Cell motility	hsa04814	Motor proteins	3/215	193/8661	0.862884	0.956724	0.893234	832/140735/4649	3
Genetic Information Processing	Folding, sorting and degradation	hsa03018	RNA degradation	1/215	79/8661	0.86398	0.956724	0.893234	11044	1
Human Diseases	Infectious disease: viral	hsa05167	Kaposi sarcoma-associated herpesvirus infection	3/215	194/8661	0.865211	0.956724	0.893234	2353/10681/5879	3
Human Diseases	Endocrine and metabolic disease	hsa04936	Alcoholic liver disease	2/215	142/8661	0.872134	0.959765	0.896074	50507/7189	2
Human Diseases	Neurodegenerative disease	hsa05012	Parkinson disease	4/215	266/8661	0.901556	0.979043	0.914072	2773/5718/55334/7326	4
Environmental Information Processing	Signal transduction	hsa04150	mTOR signaling pathway	2/215	156/8661	0.903568	0.979043	0.914072	673/81929	2
Human Diseases	Immune disease	hsa05323	Rheumatoid arthritis	1/215	93/8661	0.904672	0.979043	0.914072	2353	1
Human Diseases	Cardiovascular disease	hsa05417	Lipid and atherosclerosis	3/215	215/8661	0.906679	0.979043	0.914072	2353/5879/7189	3
Environmental Information Processing	Signaling molecules and interaction	hsa04061	Viral protein interaction with cytokine and cytokine receptor	1/215	100/8661	0.920212	0.979114	0.914138	57007	1
Genetic Information Processing	Translation	hsa03008	Ribosome biogenesis in eukaryotes	2/215	167/8661	0.923054	0.979114	0.914138	54552/7514	2
Human Diseases	Infectious disease: viral	hsa05164	Influenza A	2/215	171/8661	0.929175	0.979114	0.914138	23633/7514	2
Organismal Systems	Environmental adaptation	hsa04714	Thermogenesis	3/215	232/8661	0.931418	0.979114	0.914138	64764/6595/6604	3
Human Diseases	Infectious disease: viral	hsa05171	Coronavirus disease - COVID-19	3/215	233/8661	0.932668	0.979114	0.914138	1956/2353/7189	3
Organismal Systems	Immune system	hsa04659	Th17 cell differentiation	1/215	108/8661	0.934908	0.979114	0.914138	2353	1
Environmental Information Processing	Signal transduction	hsa04066	HIF-1 signaling pathway	1/215	109/8661	0.936544	0.979114	0.914138	1956	1
Human Diseases	Infectious disease: bacterial	hsa05152	Tuberculosis	2/215	180/8661	0.941314	0.979301	0.914313	3920/7189	2
Metabolism	Global and overview maps	hsa01200	Carbon metabolism	1/215	115/8661	0.945536	0.979301	0.914313	4199	1
Human Diseases	Neurodegenerative disease	hsa05016	Huntington disease	4/215	306/8661	0.949496	0.979301	0.914313	627/64764/3066/5718	4
Human Diseases	Cardiovascular disease	hsa05415	Diabetic cardiomyopathy	2/215	203/8661	0.964008	0.98659	0.921118	5165/5879	2
Human Diseases	Neurodegenerative disease	hsa05010	Alzheimer disease	5/215	384/8661	0.965223	0.98659	0.921118	673/775/50507/5718/55334	5
Genetic Information Processing	Transcription	hsa03040	Spliceosome	2/215	217/8661	0.973415	0.98659	0.921118	1655/10772	2
Environmental Information Processing	Signaling molecules and interaction	hsa04060	Cytokine-cytokine receptor interaction	3/215	297/8661	0.980304	0.98659	0.921118	57007/651/657	3
Human Diseases	Neurodegenerative disease	hsa05014	Amyotrophic lateral sclerosis	4/215	364/8661	0.982161	0.98659	0.921118	9972/5718/5879/81929	4
Cellular Processes	Cell growth and death	hsa04217	Necroptosis	1/215	159/8661	0.9823	0.98659	0.921118	331	1
Environmental Information Processing	Signaling molecules and interaction	hsa04080	Neuroactive ligand-receptor interaction	3/215	367/8661	0.99533	0.99533	0.929278	4886/122042/7068	3

## Sheet: HSA_enriched_terms_miR_204_5p_u
category	subcategory	ID	Description	GeneRatio	BgRatio	pvalue	p.adjust	qvalue	geneID	Count
Organismal Systems	Immune system	hsa04640	Hematopoietic cell lineage	1946-05-01	99/8673	0.000165633	0.0253418	0.023886	2209/2322/3566/3570/3575	5
Organismal Systems	Immune system	hsa04062	Chemokine signaling pathway	1946-06-01	192/8673	0.000487884	0.0373231	0.035179	729230/1234/9547/3055/3718/5579	6
Environmental Information Processing	Signaling molecules and interaction	hsa04060	Cytokine-cytokine receptor interaction	1946-07-01	297/8673	0.000873827	0.0395677	0.0372947	729230/1234/64109/9547/3566/3570/3575	7
Human Diseases	Immune disease	hsa05340	Primary immunodeficiency	1946-03-01	38/8673	0.00103445	0.0395677	0.0372947	4261/3575/3718	3
Organismal Systems	Immune system	hsa04666	Fc gamma R-mediated phagocytosis	1946-04-01	97/8673	0.00167445	0.040943	0.0385909	2209/3055/3635/5579	4
Environmental Information Processing	Signal transduction	hsa04630	JAK-STAT signaling pathway	1946-05-01	166/8673	0.00175821	0.040943	0.0385909	64109/3566/3570/3575/3718	5
Environmental Information Processing	Signaling molecules and interaction	hsa04061	Viral protein interaction with cytokine and cytokine receptor	1946-04-01	100/8673	0.00187321	0.040943	0.0385909	729230/1234/9547/3570	4
Human Diseases	Infectious disease: parasitic	hsa05140	Leishmaniasis	1946-03-01	77/8673	0.00776661	0.148536	0.140003	1536/2209/5579	3
Organismal Systems	Immune system	hsa04662	B cell receptor signaling pathway	1946-03-01	84/8673	0.00985951	0.167612	0.157983	27071/3635/5579	3
Human Diseases	Cancer: overview	hsa05202	Transcriptional misregulation in cancer	1946-04-01	193/8673	0.018731	0.246649	0.23248	2209/2322/4005/5966	4
Environmental Information Processing	Signal transduction	hsa04066	HIF-1 signaling pathway	1946-03-01	108/8673	0.019345	0.246649	0.23248	1536/3570/5579	3
Organismal Systems	Immune system	hsa04659	Th17 cell differentiation	1946-03-01	108/8673	0.019345	0.246649	0.23248	3566/3570/3718	3
Human Diseases	Cancer: overview	hsa05203	Viral carcinogenesis	1946-04-01	204/8673	0.0224569	0.2643	0.249117	1234/3718/5966/6672	4
Environmental Information Processing	Signal transduction	hsa04151	PI3K-Akt signaling pathway	1946-05-01	359/8673	0.0403719	0.425722	0.401265	2322/3566/3570/3575/3718	5
Human Diseases	Cancer: specific types	hsa05221	Acute myeloid leukemia	1946-02-01	67/8673	0.0489414	0.425722	0.401265	2209/2322	2
NA	NA	hsa04148	Efferocytosis	1946-03-01	156/8673	0.049376	0.425722	0.401265	9023/5029/140885	3
Organismal Systems	Immune system	hsa04664	Fc epsilon RI signaling pathway	1946-02-01	68/8673	0.0502578	0.425722	0.401265	3635/2206	2
Cellular Processes	Cell growth and death	hsa04217	Necroptosis	1946-03-01	159/8673	0.0517336	0.425722	0.401265	1536/3718/353376	3
Human Diseases	Infectious disease: viral	hsa05161	Hepatitis B	1946-03-01	162/8673	0.0541455	0.425722	0.401265	3718/5579/353376	3
Human Diseases	Cancer: specific types	hsa05223	Non-small cell lung cancer	1946-02-01	72/8673	0.0556499	0.425722	0.401265	3718/5579	2
Human Diseases	Infectious disease: bacterial	hsa05133	Pertussis	1946-02-01	76/8673	0.0612365	0.446152	0.420522	3394/353376	2
Human Diseases	Drug resistance: antineoplastic	hsa01521	EGFR tyrosine kinase inhibitor resistance	1946-02-01	79/8673	0.0655481	0.455857	0.429669	3570/5579	2
Organismal Systems	Immune system	hsa04613	Neutrophil extracellular trap formation	1946-03-01	191/8673	0.0801512	0.509994	0.480696	1536/2209/5579	3
Organismal Systems	Immune system	hsa04658	Th1 and Th2 cell differentiation	1946-02-01	92/8673	0.0853301	0.509994	0.480696	3566/3718	2
Metabolism	Lipid metabolism	hsa00120	Primary bile acid biosynthesis	1946-01-01	17/8673	0.0865152	0.509994	0.480696	9023	1
Human Diseases	Cardiovascular disease	hsa05415	Diabetic cardiomyopathy	1946-03-01	203/8673	0.0922545	0.509994	0.480696	1536/4698/5579	3
Environmental Information Processing	Signal transduction	hsa04070	Phosphatidylinositol signaling system	1946-02-01	97/8673	0.0933685	0.509994	0.480696	3635/5579	2
Organismal Systems	Sensory system	hsa04750	Inflammatory mediator regulation of TRP channels	1946-02-01	98/8673	0.0950022	0.509994	0.480696	5029/5579	2
Human Diseases	Endocrine and metabolic disease	hsa04933	AGE-RAGE signaling pathway in diabetic complications	1946-02-01	100/8673	0.0982946	0.509994	0.480696	1536/5579	2
Human Diseases	Cardiovascular disease	hsa05417	Lipid and atherosclerosis	1946-03-01	215/8673	0.105078	0.509994	0.480696	1536/5452/353376	3
Metabolism	Metabolism of cofactors and vitamins	hsa00770	Pantothenate and CoA biosynthesis	1946-01-01	21/8673	0.105782	0.509994	0.480696	8876	1
Environmental Information Processing	Signal transduction	hsa04064	NF-kappa B signaling pathway	1946-02-01	105/8673	0.106665	0.509994	0.480696	5579/353376	2
Organismal Systems	Immune system	hsa04620	Toll-like receptor signaling pathway	1946-02-01	108/8673	0.111779	0.511266	0.481895	941/353376	2
Human Diseases	Infectious disease: viral	hsa05163	Human cytomegalovirus infection	1946-03-01	225/8673	0.116278	0.511266	0.481895	1234/3570/5579	3
Human Diseases	Infectious disease: parasitic	hsa05145	Toxoplasmosis	1946-02-01	111/8673	0.116956	0.511266	0.481895	1234/4261	2
Organismal Systems	Immune system	hsa04670	Leukocyte transendothelial migration	1946-02-01	115/8673	0.123954	0.519187	0.489361	1536/5579	2
Human Diseases	Infectious disease: viral	hsa05171	Coronavirus disease - COVID-19	1946-03-01	233/8673	0.125555	0.519187	0.489361	1536/3570/5579	3
Environmental Information Processing	Signal transduction	hsa04014	Ras signaling pathway	1946-03-01	236/8673	0.129103	0.519809	0.489947	2322/5579/5966	3
Environmental Information Processing	Signal transduction	hsa04071	Sphingolipid signaling pathway	1946-02-01	121/8673	0.134637	0.528192	0.497848	2206/5579	2
Organismal Systems	Sensory system	hsa04744	Phototransduction	1946-01-01	29/8673	0.143131	0.547476	0.516025	2779	1
Human Diseases	Immune disease	hsa05310	Asthma	1946-01-01	31/8673	0.152227	0.568067	0.535433	2206	1
Organismal Systems	Development and regeneration	hsa04380	Osteoclast differentiation	1946-02-01	135/8673	0.160317	0.579068	0.545802	2209/140885	2
Human Diseases	Immune disease	hsa05322	Systemic lupus erythematosus	1946-02-01	137/8673	0.164059	0.579068	0.545802	941/2209	2
Metabolism	Glycan biosynthesis and metabolism	hsa00512	Mucin type O-glycan biosynthesis	1946-01-01	36/8673	0.174556	0.579068	0.545802	11226	1
Organismal Systems	Excretory system	hsa04960	Aldosterone-regulated sodium reabsorption	1946-01-01	37/8673	0.178952	0.579068	0.545802	5579	1
Human Diseases	Infectious disease: parasitic	hsa05143	African trypanosomiasis	1946-01-01	37/8673	0.178952	0.579068	0.545802	5579	1
Human Diseases	Immune disease	hsa05330	Allograft rejection	1946-01-01	38/8673	0.183326	0.579068	0.545802	941	1
Organismal Systems	Nervous system	hsa04723	Retrograde endocannabinoid signaling	1946-02-01	148/8673	0.184913	0.579068	0.545802	4698/5579	2
Metabolism	Amino acid metabolism	hsa00260	Glycine, serine and threonine metabolism	1946-01-01	40/8673	0.192004	0.579068	0.545802	669	1
Cellular Processes	Transport and catabolism	hsa04145	Phagosome	1946-02-01	152/8673	0.192595	0.579068	0.545802	1536/2209	2
Cellular Processes	Cell growth and death	hsa04216	Ferroptosis	1946-01-01	41/8673	0.196309	0.579068	0.545802	1536	1
Human Diseases	Endocrine and metabolic disease	hsa04932	Non-alcoholic fatty liver disease	1946-02-01	155/8673	0.198385	0.579068	0.545802	3570/4698	2
Human Diseases	Immune disease	hsa05332	Graft-versus-host disease	1946-01-01	42/8673	0.200592	0.579068	0.545802	941	1
Human Diseases	Endocrine and metabolic disease	hsa04940	Type I diabetes mellitus	1946-01-01	43/8673	0.204853	0.580416	0.547073	941	1
Metabolism	Glycan biosynthesis and metabolism	hsa00514	Other types of O-glycan biosynthesis	1946-01-01	47/8673	0.221674	0.605645	0.570852	11226	1
Organismal Systems	Digestive system	hsa04973	Carbohydrate digestion and absorption	1946-01-01	47/8673	0.221674	0.605645	0.570852	5579	1
Human Diseases	Infectious disease: viral	hsa05164	Influenza A	1946-02-01	171/8673	0.229596	0.606601	0.571754	4261/5579	2
Organismal Systems	Immune system	hsa04672	Intestinal immune network for IgA production	1946-01-01	49/8673	0.229953	0.606601	0.571754	941	1
Organismal Systems	Excretory system	hsa04961	Endocrine and other factor-regulated calcium reabsorption	1946-01-01	53/8673	0.246255	0.615023	0.579692	5579	1
Human Diseases	Immune disease	hsa05320	Autoimmune thyroid disease	1946-01-01	53/8673	0.246255	0.615023	0.579692	941	1
Human Diseases	Infectious disease: bacterial	hsa05152	Tuberculosis	1946-02-01	180/8673	0.247321	0.615023	0.579692	4261/2209	2
Organismal Systems	Immune system	hsa04621	NOD-like receptor signaling pathway	1946-02-01	186/8673	0.259174	0.615023	0.579692	1536/9051	2
Metabolism	Metabolism of other amino acids	hsa00480	Glutathione metabolism	1946-01-01	57/8673	0.262219	0.615023	0.579692	6241	1
Metabolism	Nucleotide metabolism	hsa00240	Pyrimidine metabolism	1946-01-01	58/8673	0.266157	0.615023	0.579692	6241	1
Environmental Information Processing	Signal transduction	hsa04370	VEGF signaling pathway	1946-01-01	59/8673	0.270076	0.615023	0.579692	5579	1
Organismal Systems	Nervous system	hsa04730	Long-term depression	1946-01-01	60/8673	0.273974	0.615023	0.579692	5579	1
Human Diseases	Infectious disease: viral	hsa05167	Kaposi sarcoma-associated herpesvirus infection	1946-02-01	194/8673	0.274998	0.615023	0.579692	1234/3055	2
Genetic Information Processing	Information processing in viruses	hsa03250	Viral life cycle - HIV-1	1946-01-01	63/8673	0.285546	0.615023	0.579692	1234	1
Organismal Systems	Endocrine system	hsa04929	GnRH secretion	1946-01-01	64/8673	0.289363	0.615023	0.579692	5579	1
Human Diseases	Immune disease	hsa05321	Inflammatory bowel disease	1946-01-01	65/8673	0.29316	0.615023	0.579692	3566	1
Metabolism	Carbohydrate metabolism	hsa00010	Glycolysis / Gluconeogenesis	1946-01-01	66/8673	0.296937	0.615023	0.579692	669	1
Organismal Systems	Nervous system	hsa04720	Long-term potentiation	1946-01-01	67/8673	0.300695	0.615023	0.579692	5579	1
Environmental Information Processing	Signal transduction	hsa04015	Rap1 signaling pathway	1946-02-01	210/8673	0.306605	0.615023	0.579692	2533/5579	2
Human Diseases	Substance dependence	hsa05031	Amphetamine addiction	1946-01-01	69/8673	0.308151	0.615023	0.579692	5579	1
Human Diseases	Cardiovascular disease	hsa05416	Viral myocarditis	1946-01-01	69/8673	0.308151	0.615023	0.579692	941	1
Human Diseases	Infectious disease: viral	hsa05170	Human immunodeficiency virus 1 infection	1946-02-01	212/8673	0.310545	0.615023	0.579692	1234/5579	2
Human Diseases	Cancer: overview	hsa05230	Central carbon metabolism in cancer	1946-01-01	70/8673	0.31185	0.615023	0.579692	2322	1
Metabolism	Carbohydrate metabolism	hsa00562	Inositol phosphate metabolism	1946-01-01	73/8673	0.322831	0.615023	0.579692	3635	1
Cellular Processes	Cell growth and death	hsa04115	p53 signaling pathway	1946-01-01	75/8673	0.330056	0.615023	0.579692	6241	1
Organismal Systems	Endocrine system	hsa04918	Thyroid hormone synthesis	1946-01-01	75/8673	0.330056	0.615023	0.579692	5579	1
Human Diseases	Cancer: specific types	hsa05214	Glioma	1946-01-01	75/8673	0.330056	0.615023	0.579692	5579	1
Human Diseases	Infectious disease: viral	hsa05166	Human T-cell leukemia virus 1 infection	1946-02-01	222/8673	0.330177	0.615023	0.579692	701/3718	2
Organismal Systems	Digestive system	hsa04971	Gastric acid secretion	1946-01-01	76/8673	0.33364	0.615023	0.579692	5579	1
Organismal Systems	Immune system	hsa04612	Antigen processing and presentation	1946-01-01	78/8673	0.340752	0.61612	0.580725	4261	1
Metabolism	Xenobiotics biodegradation and metabolism	hsa00983	Drug metabolism - other enzymes	1946-01-01	80/8673	0.34779	0.61612	0.580725	6241	1
Metabolism	Global and overview maps	hsa01232	Nucleotide metabolism	1946-01-01	85/8673	0.365065	0.61612	0.580725	6241	1
Environmental Information Processing	Signal transduction	hsa04012	ErbB signaling pathway	1946-01-01	85/8673	0.365065	0.61612	0.580725	5579	1
Organismal Systems	Immune system	hsa04610	Complement and coagulation cascades	1946-01-01	86/8673	0.368466	0.61612	0.580725	1191	1
Organismal Systems	Endocrine system	hsa04911	Insulin secretion	1946-01-01	86/8673	0.368466	0.61612	0.580725	5579	1
Cellular Processes	Cellular community - eukaryotes	hsa04540	Gap junction	1946-01-01	88/8673	0.375215	0.61612	0.580725	5579	1
Organismal Systems	Nervous system	hsa04727	GABAergic synapse	1946-01-01	89/8673	0.378563	0.61612	0.580725	5579	1
Human Diseases	Cancer: overview	hsa05235	PD-L1 expression and PD-1 checkpoint pathway in cancer	1946-01-01	89/8673	0.378563	0.61612	0.580725	353376	1
Cellular Processes	Transport and catabolism	hsa04144	Endocytosis	1946-02-01	250/8673	0.384297	0.61612	0.580725	1234/30011	2
Human Diseases	Substance dependence	hsa05032	Morphine addiction	1946-01-01	91/8673	0.385205	0.61612	0.580725	5579	1
Organismal Systems	Endocrine system	hsa04912	GnRH signaling pathway	1946-01-01	93/8673	0.391779	0.61612	0.580725	5579	1
Organismal Systems	Digestive system	hsa04970	Salivary secretion	1946-01-01	93/8673	0.391779	0.61612	0.580725	5579	1
Human Diseases	Immune disease	hsa05323	Rheumatoid arthritis	1946-01-01	93/8673	0.391779	0.61612	0.580725	941	1
Human Diseases	Infectious disease: bacterial	hsa05150	Staphylococcus aureus infection	1946-01-01	96/8673	0.40151	0.61612	0.580725	2209	1
Organismal Systems	Environmental adaptation	hsa04713	Circadian entrainment	1946-01-01	97/8673	0.40472	0.61612	0.580725	5579	1
Organismal Systems	Endocrine system	hsa04925	Aldosterone synthesis and secretion	1946-01-01	98/8673	0.407913	0.61612	0.580725	5579	1
Human Diseases	Cancer: overview	hsa05231	Choline metabolism in cancer	1946-01-01	98/8673	0.407913	0.61612	0.580725	5579	1
Organismal Systems	Endocrine system	hsa04916	Melanogenesis	1946-01-01	101/8673	0.417392	0.61612	0.580725	5579	1
Organismal Systems	Digestive system	hsa04972	Pancreatic secretion	1946-01-01	102/8673	0.420518	0.61612	0.580725	5579	1
Human Diseases	Infectious disease: parasitic	hsa05146	Amoebiasis	1946-01-01	102/8673	0.420518	0.61612	0.580725	5579	1
Human Diseases	Neurodegenerative disease	hsa05020	Prion disease	1946-02-01	272/8673	0.425574	0.61612	0.580725	1536/4698	2
Organismal Systems	Endocrine system	hsa04928	Parathyroid hormone synthesis, secretion and action	1946-01-01	106/8673	0.432861	0.61612	0.580725	5579	1
Genetic Information Processing	Translation	hsa03013	Nucleocytoplasmic transport	1946-01-01	108/8673	0.438935	0.61612	0.580725	23225	1
Environmental Information Processing	Signal transduction	hsa04350	TGF-beta signaling pathway	1946-01-01	108/8673	0.438935	0.61612	0.580725	7050	1
Human Diseases	Endocrine and metabolic disease	hsa04931	Insulin resistance	1946-01-01	108/8673	0.438935	0.61612	0.580725	5579	1
Organismal Systems	Nervous system	hsa04725	Cholinergic synapse	1946-01-01	113/8673	0.453844	0.627981	0.591905	5579	1
Organismal Systems	Nervous system	hsa04724	Glutamatergic synapse	1946-01-01	115/8673	0.459699	0.627981	0.591905	5579	1
Organismal Systems	Nervous system	hsa04726	Serotonergic synapse	1946-01-01	115/8673	0.459699	0.627981	0.591905	5579	1
Human Diseases	Neurodegenerative disease	hsa05022	Pathways of neurodegeneration - multiple diseases	1946-03-01	476/8673	0.466584	0.629009	0.592874	1536/4698/5579	3
Organismal Systems	Endocrine system	hsa04935	Growth hormone synthesis, secretion and action	1946-01-01	120/8673	0.474067	0.629009	0.592874	5579	1
Environmental Information Processing	Signal transduction	hsa04010	MAPK signaling pathway	1946-02-01	299/8673	0.474305	0.629009	0.592874	2322/5579	2
Organismal Systems	Endocrine system	hsa04919	Thyroid hormone signaling pathway	1946-01-01	121/8673	0.476896	0.629009	0.592874	5579	1
Metabolism	Nucleotide metabolism	hsa00230	Purine metabolism	1946-01-01	128/8673	0.496284	0.642526	0.605614	6241	1
Environmental Information Processing	Signal transduction	hsa04068	FoxO signaling pathway	1946-01-01	131/8673	0.504376	0.642526	0.605614	3575	1
Organismal Systems	Immune system	hsa04650	Natural killer cell mediated cytotoxicity	1946-01-01	132/8673	0.507045	0.642526	0.605614	5579	1
Organismal Systems	Nervous system	hsa04728	Dopaminergic synapse	1946-01-01	132/8673	0.507045	0.642526	0.605614	5579	1
Metabolism	Energy metabolism	hsa00190	Oxidative phosphorylation	1946-01-01	134/8673	0.512341	0.642526	0.605614	4698	1
Organismal Systems	Circulatory system	hsa04270	Vascular smooth muscle contraction	1946-01-01	134/8673	0.512341	0.642526	0.605614	5579	1
Human Diseases	Infectious disease: bacterial	hsa05135	Yersinia infection	1946-01-01	137/8673	0.52018	0.643014	0.606074	2533	1
Human Diseases	Infectious disease: viral	hsa05162	Measles	1946-01-01	138/8673	0.522766	0.643014	0.606074	3718	1
Environmental Information Processing	Signal transduction	hsa04371	Apelin signaling pathway	1946-01-01	139/8673	0.525338	0.643014	0.606074	8862	1
Cellular Processes	Cellular community - eukaryotes	hsa04550	Signaling pathways regulating pluripotency of stem cells	1946-01-01	143/8673	0.535492	0.64512	0.608059	3718	1
Human Diseases	Neurodegenerative disease	hsa05017	Spinocerebellar ataxia	1946-01-01	143/8673	0.535492	0.64512	0.608059	5579	1
Environmental Information Processing	Signal transduction	hsa04072	Phospholipase D signaling pathway	1946-01-01	148/8673	0.547885	0.654894	0.617272	2206	1
Organismal Systems	Endocrine system	hsa04921	Oxytocin signaling pathway	1946-01-01	154/8673	0.56233	0.655004	0.617376	5579	1
Environmental Information Processing	Signal transduction	hsa04150	mTOR signaling pathway	1946-01-01	156/8673	0.567045	0.655004	0.617376	5579	1
Cellular Processes	Cell growth and death	hsa04218	Cellular senescence	1946-01-01	156/8673	0.567045	0.655004	0.617376	2305	1
Cellular Processes	Cell growth and death	hsa04110	Cell cycle	1946-01-01	157/8673	0.569383	0.655004	0.617376	701	1
Environmental Information Processing	Signaling molecules and interaction	hsa04514	Cell adhesion molecules	1946-01-01	157/8673	0.569383	0.655004	0.617376	941	1
Human Diseases	Neurodegenerative disease	hsa05014	Amyotrophic lateral sclerosis	1946-02-01	364/8673	0.581146	0.663547	0.625428	4698/23225	2
Environmental Information Processing	Signaling molecules and interaction	hsa04080	Neuroactive ligand-receptor interaction	1946-02-01	367/8673	0.58569	0.663782	0.62565	8862/5029	2
Human Diseases	Cancer: specific types	hsa05225	Hepatocellular carcinoma	1946-01-01	168/8673	0.594303	0.668591	0.630182	5579	1
Environmental Information Processing	Signal transduction	hsa04310	Wnt signaling pathway	1946-01-01	174/8673	0.607296	0.677169	0.638268	5579	1
Human Diseases	Neurodegenerative disease	hsa05010	Alzheimer disease	1946-02-01	384/8673	0.61078	0.677169	0.638268	1536/4698	2
Organismal Systems	Development and regeneration	hsa04360	Axon guidance	1946-01-01	182/8673	0.623988	0.686836	0.647378	10507	1
Cellular Processes	Cell motility	hsa04814	Motor proteins	1946-01-01	193/8673	0.645811	0.705779	0.665234	10112	1
Human Diseases	Infectious disease: bacterial	hsa05130	Pathogenic Escherichia coli infection	1946-01-01	198/8673	0.655316	0.706107	0.665543	3071	1
Cellular Processes	Cellular community - eukaryotes	hsa04510	Focal adhesion	1946-01-01	202/8673	0.66274	0.706107	0.665543	5579	1
Human Diseases	Infectious disease: viral	hsa05169	Epstein-Barr virus infection	1946-01-01	202/8673	0.66274	0.706107	0.665543	3718	1
Human Diseases	Cancer: overview	hsa05205	Proteoglycans in cancer	1946-01-01	203/8673	0.664571	0.706107	0.665543	5579	1
Human Diseases	Cancer: overview	hsa05207	Chemical carcinogenesis - receptor activation	1946-01-01	212/8673	0.680622	0.718174	0.676916	5579	1
Human Diseases	Cancer: overview	hsa05208	Chemical carcinogenesis - reactive oxygen species	1946-01-01	223/8673	0.699222	0.732746	0.690652	4698	1
Cellular Processes	Cell motility	hsa04810	Regulation of actin cytoskeleton	1946-01-01	229/8673	0.708916	0.737758	0.695376	3071	1
Organismal Systems	Environmental adaptation	hsa04714	Thermogenesis	1946-01-01	232/8673	0.713648	0.737758	0.695376	4698	1
Human Diseases	Infectious disease: bacterial	hsa05132	Salmonella infection	1946-01-01	247/8673	0.736202	0.755965	0.712537	3071	1
Environmental Information Processing	Signal transduction	hsa04020	Calcium signaling pathway	1946-01-01	253/8673	0.744728	0.759622	0.715984	5579	1
Human Diseases	Neurodegenerative disease	hsa05012	Parkinson disease	1946-01-01	266/8673	0.762287	0.772384	0.728012	4698	1
Human Diseases	Neurodegenerative disease	hsa05016	Huntington disease	1946-01-01	306/8673	0.809227	0.813388	0.766661	4698	1
Human Diseases	Cancer: overview	hsa05206	MicroRNAs in cancer	1946-01-01	310/8673	0.813388	0.813388	0.766661	5579	1
