# Supplementary material for: Multiomics coupled with vibrational spectroscopy identify early mechanisms of experimental aortic valve stenosis
Source: Research Square preprint supplement (doi:10.21203/rs.3.rs-4330270/v1), 2024-05-02
Supplement: Supplementary file 3 [file 0e8dc1cf0da499bd9f9075a2.xlsx]

## Sheet: TarBase_v9_miRNA_gene_direct_in
gene_name	gene_id	mirna_name	mirna_id	experiments	publications	cell_lines	micro_tscore	Regulation
ACAP2	ENSG00000114331	hsa-miR-21-5p	MIMAT0000076	6	5	5	0.45	Down
ACAP2	ENSG00000114331	hsa-miR-23b-3p	MIMAT0000418	4	3	3	0.78	Down
ACAP2	ENSG00000114331	hsa-miR-125b-5p	MIMAT0000423	1	1	1	0.49	Down
ADCY5	ENSG00000173175	hsa-miR-21-5p	MIMAT0000076	1	1	1	NA	Down
ADCY5	ENSG00000173175	hsa-miR-133a-3p	MIMAT0000427	1	1	1	0.78	Down
ANXA11	ENSG00000122359	hsa-miR-21-5p	MIMAT0000076	5	5	5	0.40	Down
ANXA11	ENSG00000122359	hsa-miR-125b-5p	MIMAT0000423	1	1	1	0.62	Down
ANXA11	ENSG00000122359	hsa-miR-143-3p	MIMAT0000435	1	1	1	0.42	Down
ANXA11	ENSG00000122359	hsa-miR-146a-5p	MIMAT0000449	3	2	2	0.40	Down
ATP1B3	ENSG00000069849	hsa-miR-143-3p	MIMAT0000435	1	1	1	NA	Up
ATP1B3	ENSG00000069849	hsa-miR-23b-3p	MIMAT0000418	5	4	3	0.40	Up
ATP2A1	ENSG00000196296	hsa-miR-23b-3p	MIMAT0000418	1	1	1	NA	Down
ATP6V1D	ENSG00000100554	hsa-miR-21-5p	MIMAT0000076	5	4	3	NA	Up
B2M	ENSG00000166710	hsa-miR-21-5p	MIMAT0000076	5	4	5	0.-28	Up
B2M	ENSG00000166710	hsa-miR-143-3p	MIMAT0000435	1	1	1	0.40	Up
CACNA2D1	ENSG00000153956	hsa-miR-21-5p	MIMAT0000076	3	2	2	NA	Down
CACNA2D1	ENSG00000153956	hsa-miR-146a-5p	MIMAT0000449	5	2	1	0.71	Down
CACNA2D1	ENSG00000153956	hsa-miR-23b-3p	MIMAT0000418	2	2	1	0.68	Down
CACNB1	ENSG00000067191	hsa-miR-146a-5p	MIMAT0000449	1	1	1	0.67	Down
CAMK2D	ENSG00000145349	hsa-miR-21-5p	MIMAT0000076	5	4	4	0.39	Down
CAMK2D	ENSG00000145349	hsa-miR-23b-3p	MIMAT0000418	1	1	1	0.70	Down
CAMK2D	ENSG00000145349	hsa-miR-143-3p	MIMAT0000435	1	1	1	0.41	Down
CD63	ENSG00000135404	hsa-miR-23b-3p	MIMAT0000418	2	1	2	NA	Up
CKB	ENSG00000166165	hsa-miR-204-5p	MIMAT0000265	2	1	1	NA	Down
CKB	ENSG00000166165	hsa-miR-23b-3p	MIMAT0000418	1	1	1	NA	Down
CKB	ENSG00000166165	hsa-miR-146a-5p	MIMAT0000449	1	1	1	0.39	Down
CLU	ENSG00000120885	hsa-miR-21-5p	MIMAT0000076	7	7	5	NA	Up
CLU	ENSG00000120885	hsa-miR-125b-5p	MIMAT0000423	3	3	3	0.38	Up
COL12A1	ENSG00000111799	hsa-miR-21-5p	MIMAT0000076	4	4	4	0.55	Up
COL12A1	ENSG00000111799	hsa-miR-143-3p	MIMAT0000435	1	1	1	0.69	Up
COL12A1	ENSG00000111799	hsa-miR-23b-3p	MIMAT0000418	4	3	3	0.54	Up
COL12A1	ENSG00000111799	hsa-miR-204-5p	MIMAT0000265	1	1	1	0.54	Up
COL12A1	ENSG00000111799	hsa-miR-125b-5p	MIMAT0000423	1	1	1	0.42	Up
COL12A1	ENSG00000111799	hsa-miR-499a-5p	MIMAT0002870	1	1	1	0.42	Up
CST3	ENSG00000101439	hsa-miR-133a-3p	MIMAT0000427	1	1	1	0.49	Up
DAG1	ENSG00000173402	hsa-miR-21-5p	MIMAT0000076	14	12	9	0.57	Down
DAG1	ENSG00000173402	hsa-miR-146a-5p	MIMAT0000449	1	1	1	NA	Down
DAG1	ENSG00000173402	hsa-miR-204-5p	MIMAT0000265	1	1	1	0.44	Down
ETF1	ENSG00000120705	hsa-miR-21-5p	MIMAT0000076	3	2	2	NA	Up
ETF1	ENSG00000120705	hsa-miR-125b-5p	MIMAT0000423	1	1	1	NA	Up
ETF1	ENSG00000120705	hsa-miR-23b-3p	MIMAT0000418	4	4	4	0.80	Up
ETF1	ENSG00000120705	hsa-miR-146a-5p	MIMAT0000449	3	2	2	0.76	Up
FGB	ENSG00000171564	hsa-miR-23b-3p	MIMAT0000418	1	1	1	0.47	Up
FLNB	ENSG00000136068	hsa-miR-21-5p	MIMAT0000076	16	12	11	0.40	Up
FLNB	ENSG00000136068	hsa-miR-204-5p	MIMAT0000265	2	2	2	0.50	Up
FLNB	ENSG00000136068	hsa-miR-125b-5p	MIMAT0000423	5	2	2	0.49	Up
FLNB	ENSG00000136068	hsa-miR-143-3p	MIMAT0000435	1	1	1	0.44	Up
FLNB	ENSG00000136068	hsa-miR-23b-3p	MIMAT0000418	4	2	4	0.40	Up
FN1	ENSG00000115414	hsa-miR-21-5p	MIMAT0000076	18	10	10	0.40	Up
FN1	ENSG00000115414	hsa-miR-143-3p	MIMAT0000435	5	4	3	0.71	Up
FN1	ENSG00000115414	hsa-miR-133a-3p	MIMAT0000427	1	1	1	0.70	Up
FN1	ENSG00000115414	hsa-miR-146a-5p	MIMAT0000449	2	2	2	0.56	Up
FN1	ENSG00000115414	hsa-miR-23b-3p	MIMAT0000418	9	8	5	0.46	Up
FN1	ENSG00000115414	hsa-miR-125b-5p	MIMAT0000423	12	7	6	0.40	Up
FTH1	ENSG00000167996	hsa-miR-21-5p	MIMAT0000076	5	4	5	NA	Up
FTL	ENSG00000087086	hsa-miR-21-5p	MIMAT0000076	16	8	13	NA	Up
FTL	ENSG00000087086	hsa-miR-133a-3p	MIMAT0000427	2	1	1	0.92	Up
GOT2	ENSG00000125166	hsa-miR-23b-3p	MIMAT0000418	2	2	2	NA	Down
GOT2	ENSG00000125166	hsa-miR-21-5p	MIMAT0000076	1	1	1	NA	Down
GOT2	ENSG00000125166	hsa-miR-125b-5p	MIMAT0000423	2	2	2	0.40	Down
GOT2	ENSG00000125166	hsa-miR-499a-5p	MIMAT0002870	1	1	1	0.40	Down
GYG1	ENSG00000163754	hsa-miR-21-5p	MIMAT0000076	1	1	1	0.48	Down
GYG1	ENSG00000163754	hsa-miR-143-3p	MIMAT0000435	2	2	2	0.54	Down
HMGCR	ENSG00000113161	hsa-miR-21-5p	MIMAT0000076	2	2	2	0.45	Up
ITIH3	ENSG00000162267	hsa-miR-125b-5p	MIMAT0000423	1	1	1	0.55	Up
LGALS3	ENSG00000131981	hsa-miR-21-5p	MIMAT0000076	1	1	1	NA	Up
MGP	ENSG00000111341	hsa-miR-21-5p	MIMAT0000076	1	1	1	0.40	Up
MMP2	ENSG00000087245	hsa-miR-23b-3p	MIMAT0000418	2	2	2	NA	Up
MYH11	ENSG00000133392	hsa-miR-21-5p	MIMAT0000076	3	2	1	0.45	Down
MYH11	ENSG00000133392	hsa-miR-146a-5p	MIMAT0000449	1	1	1	0.48	Down
MYH11	ENSG00000133392	hsa-miR-204-5p	MIMAT0000265	1	1	1	0.36	Down
MYLK	ENSG00000065534	hsa-miR-499a-5p	MIMAT0002870	1	1	1	0.87	Down
MYLK	ENSG00000065534	hsa-miR-133a-3p	MIMAT0000427	1	1	1	0.55	Down
MYLK	ENSG00000065534	hsa-miR-21-5p	MIMAT0000076	1	1	1	NA	Down
MYLK	ENSG00000065534	hsa-miR-23b-3p	MIMAT0000418	3	2	2	0.50	Down
MYLK	ENSG00000065534	hsa-miR-146a-5p	MIMAT0000449	1	1	1	0.48	Down
PEBP1	ENSG00000089220	hsa-miR-499a-5p	MIMAT0002870	4	3	1	NA	Down
PEBP1	ENSG00000089220	hsa-miR-23b-3p	MIMAT0000418	4	4	2	0.63	Down
PEBP1	ENSG00000089220	hsa-miR-21-5p	MIMAT0000076	7	6	5	NA	Down
PEBP1	ENSG00000089220	hsa-miR-125b-5p	MIMAT0000423	2	2	2	0.44	Down
PFKP	ENSG00000067057	hsa-miR-21-5p	MIMAT0000076	10	8	7	NA	Down
PPIA	ENSG00000196262	hsa-miR-125b-5p	MIMAT0000423	1	1	1	NA	Down
PPIA	ENSG00000196262	hsa-miR-21-5p	MIMAT0000076	1	1	1	0.49	Down
PPP1CB	ENSG00000213639	hsa-miR-23b-3p	MIMAT0000418	13	9	7	0.95	Down
PPP1CB	ENSG00000213639	hsa-miR-146a-5p	MIMAT0000449	2	2	2	0.48	Down
PPP1CB	ENSG00000213639	hsa-miR-21-5p	MIMAT0000076	13	8	6	0.54	Down
PRKCG	ENSG00000126583	hsa-miR-21-5p	MIMAT0000076	1	1	1	NA	Up
PRKCG	ENSG00000126583	hsa-miR-23b-3p	MIMAT0000418	1	1	1	0.36	Up
PRKG1	ENSG00000185532	hsa-miR-21-5p	MIMAT0000076	2	2	1	0.48	Down
PYGM	ENSG00000068976	hsa-miR-21-5p	MIMAT0000076	1	1	1	0.39	Down
RAD51	ENSG00000051180	hsa-miR-23b-3p	MIMAT0000418	2	2	1	NA	Up
RAD51	ENSG00000051180	hsa-miR-21-5p	MIMAT0000076	1	1	1	0.51	Up
RYR2	ENSG00000198626	hsa-miR-499a-5p	MIMAT0002870	1	1	1	NA	Down
RYR2	ENSG00000198626	hsa-miR-23b-3p	MIMAT0000418	5	4	2	0.81	Down
RYR2	ENSG00000198626	hsa-miR-133a-3p	MIMAT0000427	1	1	1	0.56	Down
RYR2	ENSG00000198626	hsa-miR-143-3p	MIMAT0000435	1	1	1	0.53	Down
RYR2	ENSG00000198626	hsa-miR-146a-5p	MIMAT0000449	3	2	1	0.45	Down
RYR2	ENSG00000198626	hsa-miR-21-5p	MIMAT0000076	5	4	3	0.44	Down
SERPIND1	ENSG00000099937	hsa-miR-21-5p	MIMAT0000076	1	1	1	0.40	Up
SLC12A4	ENSG00000124067	hsa-miR-143-3p	MIMAT0000435	2	2	1	0.39	Up
SLC9A3	ENSG00000066230	hsa-miR-21-5p	MIMAT0000076	1	1	1	0.36	Up
SLMAP	ENSG00000163681	hsa-miR-146a-5p	MIMAT0000449	1	1	1	NA	Down
SLMAP	ENSG00000163681	hsa-miR-23b-3p	MIMAT0000418	1	1	1	0.61	Down
SLMAP	ENSG00000163681	hsa-miR-125b-5p	MIMAT0000423	1	1	1	0.47	Down
SLMAP	ENSG00000163681	hsa-miR-21-5p	MIMAT0000076	9	8	7	0.58	Down
SORL1	ENSG00000137642	hsa-miR-499a-5p	MIMAT0002870	2	1	1	0.70	Up
SORL1	ENSG00000137642	hsa-miR-146a-5p	MIMAT0000449	1	1	1	0.45	Up
SORL1	ENSG00000137642	hsa-miR-23b-3p	MIMAT0000418	4	3	2	0.42	Up
SORL1	ENSG00000137642	hsa-miR-21-5p	MIMAT0000076	7	6	5	0.59	Up
SORL1	ENSG00000137642	hsa-miR-125b-5p	MIMAT0000423	2	1	1	0.39	Up
SORL1	ENSG00000137642	hsa-miR-133a-3p	MIMAT0000427	2	2	2	0.37	Up
SPARC	ENSG00000113140	hsa-miR-204-5p	MIMAT0000265	1	1	1	0.63	Up
SPARC	ENSG00000113140	hsa-miR-23b-3p	MIMAT0000418	3	3	2	0.43	Up
SPARC	ENSG00000113140	hsa-miR-21-5p	MIMAT0000076	5	4	5	NA	Up
SSR1	ENSG00000124783	hsa-miR-23b-3p	MIMAT0000418	1	1	1	0.75	Up
SSR1	ENSG00000124783	hsa-miR-125b-5p	MIMAT0000423	1	1	1	0.47	Up
TES	ENSG00000135269	hsa-miR-23b-3p	MIMAT0000418	12	7	11	0.65	Down
TES	ENSG00000135269	hsa-miR-21-5p	MIMAT0000076	6	5	5	NA	Down
TGFBI	ENSG00000120708	hsa-miR-146a-5p	MIMAT0000449	2	2	2	NA	Up
TGFBI	ENSG00000120708	hsa-miR-143-3p	MIMAT0000435	3	2	2	0.47	Up
TGFBI	ENSG00000120708	hsa-miR-21-5p	MIMAT0000076	8	6	6	0.93	Up
TIMP1	ENSG00000102265	hsa-miR-21-5p	MIMAT0000076	5	5	5	NA	Up
YBX1	ENSG00000065978	hsa-miR-21-5p	MIMAT0000076	1	1	1	NA	Up

## Sheet: Info
gene_name:	Gene name
gene_id:	Ensembl Gene ID
mirna_name:	miRBase miRNA name
mirna_id:	miRBase miRNA ID
experiments:	Number of experiments validating the miRNA:gene interaction
publications:	Number of pulbications validating the miRNA:gene interaction
cell_lines:	Number of different cell lines used to test the miRNA:gene interaction
micro_tscore:	Score [0,1] of the miRNA:gene interactions as calculated by DIANA-microT-CDS 2023
Only TarBase v9 DIRECT interactions have been included
