# Supplementary material for: Multiomics coupled with vibrational spectroscopy identify early mechanisms of experimental aortic valve stenosis
Source: Research Square preprint supplement (doi:10.21203/rs.3.rs-4330270/v1), 2024-05-02
Supplement: Supplementary file 4 [file 3abf7dabad319a647647b4e6.xlsx]

## Sheet: Aortic valve (initial dataset)
	C45	E33	C38	C42	C43	E25	E26	1059	E35	E39	E40	E37	1062	E41	E38	1063
A4GALT	32.9049	27.7437	27.791	36.4437	49.9691	45.7052	32.0855	21.6486	26.556	46.4488	59.263	39.8432	31.989	50.0994	45.9432	40.8221
AAAS	9.59871	15.5935	9.05662	11.0837	7.34076	10.299	18.8086	13.4602	16.3138	11.03	10.3125	16.7546	15.7517	12.0136	9.9389	16.9152
AADAC	3.57918	4.79333	4.49266	7.04747	3.9299	1.54872	5.20458	6.01133	5.99481	4.11963	1.43592	5.94134	4.02676	3.15358	3.85067	5.77108
AADAT	13.1779	10.1327	13.6919	11.8526	18.2407	13.2416	9.99692	8.10223	7.56722	11.03	13.5107	13.5462	5.32953	12.1638	16.4954	9.02146
AAGAB	25.2169	28.0319	24.1748	21.719	21.0583	23.2309	26.1775	28.2925	32.5292	28.0401	24.737	29.7661	23.2131	28.4824	24.6131	28.0594
AAK1	49.2137	61.5245	49.5618	41.3879	54.203	35.3883	47.2535	59.5253	54.6412	47.0435	40.2057	51.452	53.5322	42.6985	47.1968	53.5981
AAMDC	28.2267	30.1555	27.4551	24.9224	24.0984	20.6755	25.1984	20.4516	25.1586	20.9968	14.9466	19.3688	27.003	15.7179	20.7624	27.8604
AAMP	108.352	121.168	97.4835	136.336	89.5721	110.966	115.789	104.61	120.191	102.193	113.177	114.608	113.934	140.359	104.957	124.642
AAR2	10.6562	13.8339	11.4099	10.5071	9.56523	10.6862	15.6137	12.5454	13.7586	12.1596	13.4454	12.8927	10.7775	13.9659	11.6561	12.9352
AARD	2.60304	0.667425	3.49429	3.13933	2.07617	4.02668	2.98877	3.85509	2.94827	3.72096	3.32872	5.3472	1.53964	5.35609	5.0475	3.11771
AARS1	87.2832	103.815	98.9097	130.314	93.0571	116.387	115.738	109.642	121.37	94.6186	160.627	100.112	90.3651	110.526	104.853	94.7253
AARS2	9.84274	10.0114	9.91237	7.81628	11.6414	5.26566	13.0888	9.86643	8.4517	6.57812	7.3754	9.3279	9.00098	5.65643	9.21039	10.0165
AARSD1	43.2755	53.212	43.7143	56.1876	29.1406	37.4017	37.5142	36.5254	50.7102	39.07	34.3315	45.0947	42.5178	45.3515	35.8529	52.3377
AASDH	9.02929	9.70801	13.264	13.9668	10.9741	10.2216	10.6153	16.4005	11.3017	13.2891	9.13767	14.7939	7.81664	13.7156	10.6674	9.81747
AASDHPPT	8.05315	8.13045	8.98531	8.3929	10.3067	8.36311	9.1209	15.355	12.8741	14.5516	9.59455	13.5462	6.277	9.76109	13.7896	10.8125
AASS	43.1722	25.5442	50.8326	39.5696	61.4599	31.3942	41.0183	32.3946	34.2913	39.1205	29.7627	35.5862	25.108	29.457	46.0858	28.8448
AATF	16.1063	14.0159	17.1149	21.2065	16.6835	17.2683	19.0663	19.9942	18.8689	17.8074	15.5993	19.4876	12.0803	18.0705	15.9751	15.7875
ABAT	2.84707	2.36633	3.70822	3.45967	3.04011	3.02001	1.75204	3.85509	2.35861	2.99005	1.43592	4.63424	2.36868	3.60409	3.64253	1.65836
ABCA1	17.0824	65.7717	61.3283	17.8749	17.8699	19.8237	38.1841	94.3518	86.9739	40.5318	17.4268	67.7906	37.662	34.4391	28.776	40.7292
ABCA2	43.845	34.7061	38.7937	55.3547	27.2127	47.0812	51.1698	26.3976	40.0965	31.8939	33.7441	37.2522	31.9772	63.372	44.8031	50.6794
ABCA4	0.569415	0.36405	0.784432	0.448475	0.593193	0.61949	0.309183	0.392044	0.294827	1.19602	0.195807	0.35648	1.53964	0.901024	0.832578	0.265337
ABCA5	8.62257	8.79788	14.9042	10.7634	15.4972	9.29234	12.1612	12.4147	10.5155	17.741	7.1796	12.7145	5.68483	11.2127	11.6041	8.35811
ABCA6	3.66052	29.306	9.34187	4.67696	6.82171	2.71027	14.3255	45.6731	64.8619	6.97679	3.78561	28.3996	26.8845	5.15586	6.50451	15.1242
ABCA7	4.63666	5.15738	3.77954	1.47356	4.89384	1.00667	2.11275	2.48294	2.75172	1.39536	1.43592	2.02005	4.14519	1.80205	3.85067	2.58704
ABCA8	96.947	65.7123	170.496	116.739	107.791	55.2933	98.3702	148.06	125.179	191.083	92.6984	120.928	66.1442	96.2383	81.4532	64.8218
ABCA9	8.80153	4.12469	8.49754	6.71944	3.80311	3.17101	6.03062	9.0843	8.08317	9.51635	6.64113	8.95003	3.13969	6.7787	4.40642	5.95681
ABCB1	11.9577	18.9531	12.6222	12.9417	21.6515	8.59	48.2326	31.4288	17.5913	19.2692	4.37303	12.1797	15.9886	8.05916	18.2647	12.5312
ABCB6	37.5814	46.6591	33.3027	37.9923	37.297	38.4858	44.3163	36.1987	39.3102	35.0169	34.0704	39.0346	40.5044	38.3936	42.2533	37.6778
ABCB7	16.5944	16.0789	23.533	18.2594	24.2467	16.5713	17.1597	22.4118	20.0482	20.5982	16.5783	25.2507	11.3697	14.0159	19.6697	17.0479
ABCC1	14.154	21.6003	16.6157	16.7858	17.8699	19.8237	20.5091	18.2954	16.0189	23.5882	17.0352	19.547	7.22447	17.0694	20.6583	14.6599
ABCC10	11.0629	8.55518	13.264	15.6966	8.97204	10.3764	15.15	12.6107	12.9724	11.6944	11.2915	12.0609	6.277	12.314	13.2172	17.5122
ABCC2	0.732105	1.51688	0.71312	0.896951	0.963938	0.61949	0.876019	1.63351	1.17931	1.4618	0.71796	1.24768	0.947472	0.901024	0.884614	0.729677
ABCC3	2.60304	14.3193	4.99184	2.94712	1.11224	2.86514	9.68774	15.6817	17.1	3.98674	2.41496	18.537	6.86917	5.40614	4.78732	11.8738
ABCC4	4.39263	11.5889	6.06152	3.71594	9.04619	3.02001	11.749	10.7812	11.2034	5.58143	2.08861	11.5856	5.32953	3.05347	7.02488	10.5471
ABCC5	34.3276	59.9469	46.2815	54.8421	43.3031	36.7048	57.8688	70.3718	68.7929	57.7413	42.947	74.5043	31.7403	56.1638	46.052	58.4405
ABCC6	0.244035	0.2427	0.570496	0.704747	0.296596	0.542053	0.824488	0.326703	0.589654	0.664457	0.71796	0	0.59217	0.650739	0.67647	0.331671
ABCC8	0.569415	2.06295	0.427872	0.256272	0.444894	0.0774362	28.8056	1.50283	0.982756	2.99005	0	1.30709	2.84242	1.10125	8.37781	10.2155
ABCC9	30.9924	31.9151	34.5863	29.8556	48.8642	32.9878	26.3836	47.1106	32.1361	34.0866	31.0028	35.648	18.831	23.5267	38.8189	22.8853
ABCD1	13.2592	15.2294	11.6239	12.7495	18.2407	14.0934	19.5301	14.5056	21.9155	15.8141	12.0095	18.5964	6.98761	13.9158	16.4434	11.9402
ABCD2	13.5846	12.135	18.1846	10.6353	5.85778	17.6555	5.92601	12.1533	19.7534	29.8341	6.00475	9.8032	3.55302	9.46075	8.84614	7.76111
ABCD3	41.0792	39.1961	50.5602	39.2736	65.177	40.1894	48.4902	46.0651	43.143	49.1698	42.0985	48.3031	25.2264	35.6905	47.509	37.6115
ABCD4	13.4219	16.0789	13.8345	17.1061	11.1224	9.98927	17.7265	21.105	23.2913	14.4852	9.72509	14.7345	11.0144	14.2162	12.5407	14.6599
ABCE1	48.9762	46.6348	55.1256	49.2669	56.0871	48.2613	47.5575	67.7294	51.0738	54.6961	43.4992	61.7186	28.9915	41.3385	55.3737	45.5484
ABCF1	66.0017	81.7954	64.8754	64.0013	55.1966	60.4513	80.754	70.2405	77.5119	55.3725	62.4599	65.7866	95.0018	69.8268	74.1634	84.3367
ABCF2	42.833	60.5864	43.1409	42.7301	47.9915	48.4859	53.0965	47.8502	51.9829	42.0754	44.4567	51.1151	44.9954	46.0123	47.8816	49.8814
ABCF3	49.2137	64.4369	57.4062	65.8618	55.9825	52.734	77.0381	61.6162	66.4343	62.3925	46.0147	57.0368	55.3087	58.8168	55.6786	61.4918
ABCG1	3.00976	28.5173	6.98858	2.56272	2.59522	3.32976	14.0678	21.8238	21.031	5.04987	2.28442	19.3688	14.2121	7.20819	5.56786	13.2668
ABCG4	6.01953	7.82708	6.63202	8.52103	6.97001	6.81438	10.9245	7.97155	8.74653	6.97679	8.61552	9.3279	6.6323	9.76109	10.2511	8.95512
ABHD10	14.9675	13.4092	14.2624	11.4682	15.7938	5.73028	17.6234	11.7613	10.1224	12.4253	10.1167	13.1304	6.51387	8.20933	14.7262	12.0065
ABHD11	18.1399	21.0542	13.0501	9.99459	16.4611	8.20824	16.1291	7.97155	12.481	9.50173	6.00475	9.38731	26.4108	10.4118	9.83483	17.6449
ABHD12	34.0836	77.118	32.3043	37.8641	22.7638	32.2135	50.5514	55.0821	72.3309	34.4853	41.0542	82.4657	58.0327	46.9533	34.4999	63.0839
ABHD13	13.3406	13.4699	22.2493	18.0671	14.4591	20.056	13.6556	28.1618	26.043	26.3789	23.1705	28.0431	10.8959	16.1183	18.3167	18.5073
ABHD14A	70.1194	79.4236	66.1775	88.2856	51.4595	101.364	91.0544	88.2751	114.884	83.7215	96.4024	103.023	78.7586	102.867	78.9388	105.206
ABHD14B	54.2571	56.0031	58.975	85.6588	40.1146	65.0464	71.0606	76.3831	83.7308	58.738	62.1361	87.2188	52.5847	73.2332	64.0565	81.3921
ABHD15	2.92842	4.30793	2.92379	1.7939	1.11224	3.94925	3.09183	5.22725	5.01206	6.51167	1.43592	5.7631	2.72398	2.65301	3.1742	2.58704
ABHD16A	59.8699	49.4502	53.9119	77.0096	57.2431	59.0064	64.6193	51.9458	69.3826	64.2529	59.7212	66.3647	52.94	62.9215	57.7601	62.5532
ABHD17B	9.19198	7.58438	9.76974	7.68815	10.6775	9.21491	7.78111	16.5312	13.3655	10.3655	9.20294	10.2191	4.50049	9.81115	12.1244	11.4095
ABHD17C	14.4794	23.6026	13.9772	10.3149	14.1625	7.279	15.4592	18.6221	17.5913	11.6944	8.2239	12.8333	13.2646	10.0614	13.8416	11.4758
ABHD18	12.9339	15.3508	14.5476	8.84137	17.3509	10.4539	10.1515	15.4857	13.7586	11.3622	8.55025	12.7145	11.0144	9.01024	14.8823	10.0165
ABHD2	24.9737	46.5044	29.9674	33.118	32.2689	28.0063	38.5701	46.6068	38.8896	42.4541	23.5465	42.613	19.345	24.6335	32.1895	35.3435
ABHD3	4.79935	6.85628	7.27382	3.33153	6.00607	5.18822	9.06474	7.73894	6.48619	7.7077	6.07002	10.3973	4.4543	5.8066	6.84015	8.22545
ABHD4	115.103	152.658	128.576	146.523	135.767	108.643	116.562	165.116	145.939	120.732	113.111	165.526	133.475	120.637	125.771	131.607
ABHD5	19.5228	25.7262	23.1051	17.0421	16.3869	15.9519	16.2836	21.301	30.7603	19.6015	14.0328	22.7553	16.2255	15.7179	17.8484	20.7626
ABHD6	18.1399	12.135	14.6903	21.655	15.2006	10.9185	12.6765	15.7471	15.4293	18.6048	13.576	16.7546	9.94846	14.2162	18.3167	12.4708
ABI1	42.8688	50.421	55.4094	51.0621	52.4234	54.1279	40.6576	75.7951	66.0412	70.2331	58.4811	78.485	33.9906	50.4573	57.4479	46.7656
ABI2	20.4989	20.2655	21.4649	27.0367	22.8379	27.1027	18.6025	32.801	31.2516	35.1497	23.3663	31.5485	11.9618	24.3777	28.7239	25.008
ABI3	3.74187	11.5283	4.49266	2.30644	4.67139	1.78103	6.90509	9.017	7.6655	4.31897	1.56646	8.49611	7.69821	4.15472	3.85067	5.63841
ABI3BP	204.501	104.725	325.896	286.127	235.053	145.425	221.066	108.792	216.206	401.598	211.472	186.855	58.2695	294.034	289.893	154.89
ABITRAM	12.3644	12.9845	14.0485	9.16171	13.2727	5.18822	10.6153	12.8068	12.9724	8.77083	5.87422	7.90198	12.6724	5.70648	10.2511	13.3332
ABL1	108.27	92.5901	115.383	155.301	107.145	169.895	112.13	112.713	127.169	147.709	139.48	146.513	66.4415	155.377	138.468	113.962
ABL2	21.8818	21.479	20.2526	26.46	23.9501	21.1401	18.0357	24.8948	19.0655	26.7776	21.5388	23.5277	14.6858	26.5802	23	18.6399
ABLIM1	424.621	560.213	436.501	348.85	1015.55	178.568	445.842	305.075	279.594	426.116	149.923	188.994	480.368	216.546	402.916	374.059
ABLIM2	14.4794	16.3823	13.6206	9.28985	16.3869	2.40052	20.9729	5.29259	5.89654	9.1695	4.6341	4.04011	23.0946	7.80887	9.9389	13.6649
ABLIM3	54.0131	46.2951	53.2701	44.9757	65.8444	35.3883	61.1667	61.1588	45.5016	68.8377	23.9537	31.0732	36.1224	31.4858	42.3054	43.5816
ABR	46.9361	78.9382	62.4693	65.4774	62.8043	57.2253	99.9692	79.7809	79.1119	75.8145	46.6674	105.696	45.9524	66.926	70.2488	79.1367
ABRA	11.0629	41.3197	6.20414	3.26746	19.6495	0.774362	34.9377	7.64485	12.1862	4.05318	0.326345	1.72299	23.5684	0.80091	11.1878	14.9252
ABRACL	7.97181	11.1035	8.41482	7.72274	4.59724	8.28567	10.6153	15.159	14.25	8.57149	11.161	20.6758	7.93508	12.4642	9.67872	13.7975
ABRAXAS1	8.29719	8.61585	9.76974	8.07256	7.5632	6.73695	4.99846	10.1931	6.68274	5.91366	7.24487	9.3279	5.9217	6.75768	8.74207	8.55712
ABRAXAS2	19.1161	17.171	22.178	21.0143	19.7237	16.8037	17.5719	20.3863	21.5224	22.7244	19.7765	22.3394	9.94846	18.0205	19.5656	17.5122
ABT1	19.3601	17.3531	18.6124	23.1285	16.9801	22.2242	16.5413	20.5823	18.9672	17.8739	19.0586	21.9829	16.8176	20.6234	19.5656	20.9616
ABTB1	28.7148	37.3151	25.6723	25.7553	19.8719	25.2442	30.1454	29.7953	27.1241	22.1264	26.9561	28.6372	45.5971	40.7963	22.1674	31.5751
ABTB2	15.2115	12.9238	16.8296	19.2844	18.1665	23.9278	13.5525	12.3494	12.7758	19.535	15.5993	19.4876	7.22447	20.3731	24.0927	12.6035
ABTB3	4.79935	15.1081	5.63365	8.07256	4.74554	6.73695	9.48162	16.5965	15.1344	7.17613	5.28679	19.8441	6.86917	5.20591	7.4932	9.81747
ACAA1	43.6009	43.6253	49.3479	70.0262	38.3351	55.6766	55.4468	53.5793	61.2257	49.2362	47.6464	62.5623	63.2438	81.4425	50.3189	61.2265
ACAA2	219.225	303.679	192.186	154.788	322.474	101.596	219.778	137.869	133.557	129.237	101.82	106.231	249.54	95.5586	159.751	181.159
ACACA	29.6909	32.5825	38.0806	54.7781	32.848	50.6433	48.3356	40.7725	46.8775	42.9903	37.2034	42.8964	24.3974	39.7452	44.5429	41.5252
ACACB	91.3504	89.3137	101.406	76.2408	67.1791	103.61	67.6596	66.2554	90.7084	186.048	42.4249	54.3632	45.5971	77.0876	67.1786	66.6659
ACAD10	25.6237	24.27	18.8264	21.2705	33.9603	11.6929	20.9214	17.9687	14.0534	17.3423	10.8999	14.8533	14.4489	16.719	20.2941	17.7776
ACAD11	10.5748	9.10126	16.687	12.4932	22.4672	9.36978	15.3046	14.8323	10.0241	16.7443	9.9209	12.0015	6.6323	9.66098	13.7375	12.8025
ACAD8	20.987	25.9082	21.251	23.0644	24.2467	17.036	20.6637	19.6022	24.3724	18.0068	13.1844	19.9629	18.2388	18.3208	18.681	17.4459
ACAD9	24.1595	39.3174	19.1116	17.0421	32.1807	12.6221	29.527	19.0141	16.7069	13.0898	11.8137	15.5663	31.9772	13.3151	20.7624	24.7427
ACADL	213.856	193.978	187.051	139.604	269.013	112.282	160.981	118.659	127.267	129.037	107.563	98.1509	143.897	87.1991	155.432	143.879
ACADM	112.744	110.368	135.707	75.9205	194.419	59.8582	102.649	79.3235	70.2671	77.4756	73.493	59.7698	86.1015	60.1684	117.133	89.0205
ACADSB	84.9242	81.4259	94.7023	73.4859	116.414	55.5217	76.8835	74.7496	68.5964	72.16	54.826	53.2344	96.5237	58.4164	87.4727	78.2744
ACADVL	202.305	288.206	184.27	121.537	324.254	77.7459	218.283	109.772	124.319	122.924	70.1642	94.8831	212.471	77.7884	139.977	173.995
ACAN	35.5478	151.93	84.5047	29.9197	29.5855	48.3202	149.954	149.303	143.482	125.649	48.4949	123.342	85.9831	106.721	74.7759	205.636
ACAP1	4.96204	5.21805	6.06152	6.9834	4.00405	7.82106	3.91632	5.88065	6.78102	6.57812	4.50357	10.2785	3.07928	7.80887	5.88008	5.50574
ACAP2	35.0597	32.0971	49.2053	44.1428	41.5976	44.8356	32.2581	57.4344	53.855	59.2695	45.8189	63.8694	16.2255	41.4471	49.9547	33.6315
ACAP3	47.6682	56.1851	50.6315	46.0648	44.3411	55.7541	61.6305	61.9429	69.5791	50.698	53.3248	64.6417	46.3077	73.3834	51.5678	66.5332
ACAT1	246.557	264.058	211.297	126.214	330.037	78.5203	194.425	105.002	116.358	104.32	90.5935	84.2481	237.342	89.6519	168.597	174.061
ACAT2	14.7234	17.4137	14.2624	23.7051	11.1965	17.2683	15.4592	18.034	19.95	16.6114	17.3616	19.7846	15.7517	17.1194	20.0339	23.814
ACBD3	37.256	34.9488	52.9848	50.6136	44.8602	57.69	44.4708	60.3747	55.2309	66.8443	66.6397	64.5823	18.7126	49.3561	57.3958	43.9796
ACBD4	24.3222	18.4452	22.0354	29.4712	22.2447	24.5473	28.2387	16.9886	24.5689	21.0633	26.1729	21.6859	24.9896	32.0865	24.457	27.6614
ACBD5	32.1313	28.0319	44.9979	37.5438	40.6337	40.8089	24.9408	42.6674	37.5413	49.502	39.0962	45.7483	19.66	37.5427	45.3755	28.192
ACBD6	18.2213	17.7171	15.4034	17.0421	15.5713	11.538	21.179	15.2897	18.2793	10.5649	11.2915	13.8433	20.8444	12.6644	13.8416	17.3796
ACCS	2.44035	2.30565	2.70986	0.768815	0.222447	0.542053	2.67959	2.94033	3.34137	0.730902	1.82753	1.84181	2.13181	2.00227	0.988686	2.18903
ACCSL	0.569415	0.424725	0.784432	0.576611	0.593193	1.31642	0.618366	0.915422	0.786205	0.996685	0.392267	0.237653	0	0.450512	0.884614	0.530674
ACD	18.1399	21.0542	20.3239	23.0644	14.7557	16.4939	24.5801	19.2755	21.7189	16.1463	18.2101	23.8842	19.4232	21.4744	19.3574	18.4409
ACE	23.59	24.1487	23.319	20.3095	20.0202	13.2416	21.4882	18.8834	10.4172	22.1264	8.09336	11.0509	21.0813	12.2139	11.6561	13.6649
ACE2	0.97614	2.85173	0.784432	0.576611	0.963938	0.232309	1.13367	1.7642	0.982756	1.39536	0.130538	0.297067	3.55302	0.0500569	0.93665	2.18903
ACER2	25.1356	39.9242	38.1519	14.2231	31.3651	17.578	21.3852	36.5254	27.812	31.2959	14.2287	17.3487	20.2522	14.9169	15.3507	23.8803
ACER3	2.359	2.427	2.70986	3.2034	3.48501	1.9359	2.47347	3.07101	2.35861	2.12626	1.697	2.61419	2.36868	2.40273	2.80995	2.91871
ACIN1	151.383	140.887	159.596	189.321	135.322	165.713	172.421	185.633	175.913	183.855	162.455	181.508	104.103	166.639	185.717	189.583
ACKR1	15.7809	34.5848	31.6625	10.3149	6.59927	20.4432	16.5928	48.8748	28.9913	15.6147	10.9652	17.9428	36.7145	14.6667	7.59727	24.8753
ACKR2	37.012	25.9689	34.5863	49.7167	29.363	18.0426	26.4352	21.1704	69.874	42.3923	51.6278	38.084	33.8721	33.8885	30.233	26.202
ACKR3	44.0076	27.3644	27.5977	75.5361	46.7139	62.6459	41.1214	30.8408	51.2016	50.9638	53.7164	55.6109	25.3449	42.8487	46.3642	34.0295
ACKR4	2.359	7.40235	3.13773	2.62678	0.519043	1.39385	2.93724	3.13635	4.71723	2.05982	2.02334	4.75307	3.55302	3.85438	3.1742	2.5207
ACLY	48.5158	47.835	56.8071	64.806	44.7275	60.9113	63.4774	75.5272	81.5334	72.6098	65.0197	77.2487	27.5501	58.2962	79.9348	59.9701
ACO1	36.7679	57.2166	54.9102	42.413	54.9445	45.6099	42.8734	64.4912	55.7223	56.1466	33.1567	74.6232	30.7928	36.3913	41.1606	48.6893
ACO2	517.029	666.151	470.231	289.523	861.612	141.321	729.26	288.675	264.853	261.796	139.806	179.963	560.43	162.084	425.343	439.398
ACOD1	0.894795	1.03148	1.28362	0	1.92788	0.696926	1.39132	0.588065	4.91378	1.12958	0	4.81248	0.236868	0.550626	0.572397	1.52569
ACOT11	55.5586	31.0656	55.9799	87.5168	54.4254	49.172	57.3133	41.7526	47.5654	53.6881	34.0052	55.3138	24.6343	57.7656	67.4388	61.2265
ACOT13	103.552	29.6701	76.7317	41.8363	123.013	13.7836	87.6019	24.8948	38.3275	28.5716	16.7089	20.6164	91.5495	18.2708	46.8845	49.3527
ACOT7	19.0347	20.6902	14.6903	22.5519	9.56523	22.2242	24.7862	18.0993	24.7655	18.1397	22.1262	26.7954	15.5149	25.1786	21.6991	24.6763
ACOT8	14.8048	16.807	11.9091	14.2871	11.1965	13.0093	16.6444	11.4346	18.2793	11.03	14.555	15.9822	19.8969	16.1684	12.4366	17.6449
ACOT9	34.0836	35.1915	37.6527	45.4882	36.4072	34.3817	28.8571	36.068	41.4723	34.6846	33.5483	36.4798	37.662	36.2912	28.9321	31.2434
ACOX1	12.7411	23.1845	21.9819	20.1743	40.9147	30.6624	22.1664	35.393	18.9672	43.3691	19.7197	32.5211	12.9093	21.2642	24.7484	17.8857
ACOX2	6.67029	4.06523	4.06478	2.17831	3.11426	2.63283	6.44132	3.65907	3.04654	2.25915	0.587422	2.19829	2.13181	1.75199	3.22624	2.85237
ACOXL	0.406725	1.27418	0.998368	0.448475	0.370745	0.154872	0.103061	0.588065	1.17931	0.398674	0.326345	0.53472	0.355302	0.550626	0.520361	0.663342
ACP1	36.1172	41.1983	44.2134	36.7109	34.5535	33.0846	34.2678	40.1812	41.374	39.6681	34.9189	44.7383	29.3574	38.4437	37.8813	42.3876
ACP2	41.4046	53.5154	50.275	60.416	37.5194	52.6566	54.6739	59.3293	65.8447	54.419	49.4087	59.5322	42.2809	57.8657	47.0927	57.7771
ACP6	9.35467	11.8923	11.6952	10.9556	7.34076	6.81438	17.1081	10.9119	9.92584	10.4984	8.02809	10.9915	9.23785	7.95904	10.5113	11.2768
ACRBP	0.894795	1.15283	1.35493	1.34543	1.03809	0.929234	1.44285	1.56817	1.76896	1.12958	0.979036	1.60416	0.829038	1.90216	1.40498	0.796011
ACSF2	245.174	222.131	215.148	161.131	329.889	89.2065	224.415	121.86	162.941	120.732	107.629	111.281	317.522	117.033	180.513	184.807
ACSF3	10.6399	11.7983	8.474	7.33898	8.85859	6.68816	12.9532	7.20119	7.46502	6.15685	4.46049	6.79808	4.25178	6.54794	8.07965	6.80191
ACSL1	2.68438	5.03603	5.49102	3.97221	18.8339	5.3431	7.72958	4.90054	3.43965	10.0333	2.15388	2.61419	1.18434	2.80318	6.97284	2.1227
ACSL3	33.4328	38.1646	43.6429	43.9506	39.8922	41.2735	34.3193	43.5822	42.6516	44.0535	44.0566	55.9674	15.278	37.5927	45.7397	32.1721
ACSL4	43.845	51.2097	50.3463	43.374	55.0186	50.8756	52.5611	77.2326	55.5257	63.7214	47.7117	63.8099	27.9504	47.0535	66.346	50.016
ACSL5	7.2397	14.8047	9.62712	5.3817	8.3047	6.04002	10.6153	18.6221	20.2448	12.6911	5.80895	14.6751	9.83002	7.3083	8.01356	12.6698
ACSL6	3.82321	6.61358	2.85248	2.43458	3.11426	2.01334	7.05968	5.55395	3.93102	3.0565	2.34969	4.04011	2.48711	2.40273	3.90271	5.57208
ACSM1	1.70824	8.61585	0.570496	0.576611	2.15032	0.232309	4.01938	5.68463	3.73447	1.5947	0.522152	2.31712	5.32953	1.8521	1.50905	4.70973
ACSM5	39.6964	65.2863	56.7643	38.3767	51.1629	33.7622	66.4744	51.8151	45.6982	46.3791	29.7627	54.9574	38.4911	33.0375	44.647	54.9911
ACSS1	579.664	673.068	600.661	201.045	919.819	60.1679	443.987	287.695	170.606	131.762	79.3672	80.921	956.236	81.9431	375.961	299.499
ACSS2	27.576	32.1578	27.1699	30.8807	26.3229	30.7422	24.6316	24.9601	26.5344	25.8474	18.7975	24.3001	23.3315	21.7747	32.1063	30.2484
ACSS3	8.78526	11.4676	13.6919	8.71323	7.5632	5.80771	4.79234	11.892	9.63101	17.741	3.32872	6.41664	6.39544	6.65756	7.75338	5.77108
ACTA1	1101.82	5155.51	415.963	211.944	1055.67	20.0397	500.073	872.94	781.296	49.4236	74.1457	77.0841	3820.02	100.515	325.378	412.586
ACTA2	7684.25	2297.91	7495.82	11837.1	6085.84	13983.4	4393.45	4402.91	6131.71	10695.2	19184.2	9044.31	3287.25	13483.3	9218.27	5184.09
ACTB	3774.66	2694.14	3552.76	5661.58	2948.89	6557.27	3477.18	3738.62	4267.92	4525.83	6176.27	4828.26	2106.39	6421.61	5131.21	3589.23
ACTC1	2277.5	2909.19	1475.8	732.04	3732.52	153.014	4861.29	772.26	824.631	976.286	157.951	335.032	2353.75	245.729	2149.4	2806.67
ACTG2	554.61	281.047	556.733	906.753	395.734	1450.15	359.013	465.748	590.342	705.653	1145.21	764.293	487.356	1060.66	489.816	674.088
ACTL6A	13.3406	12.9238	16.0452	19.4766	15.7938	17.7329	14.9954	18.6874	16.3138	19.8672	17.3616	21.8047	5.68483	16.0182	18.3687	14.3945
ACTL7B	1.13883	2.1843	0.855744	1.72983	0.963938	0.309745	1.23673	0.849428	0.884481	0.332228	0.522152	1.06944	2.25025	0.750853	1.71719	2.65337
ACTMAP	53.769	45.6276	49.4905	70.1544	41.2269	63.4977	53.3341	42.21	55.4275	46.9106	46.4063	46.1048	46.5446	64.3231	62.3913	49.8833
ACTN1	393.283	355.314	492.866	665.565	421.044	1135.15	552.064	541.383	612.614	723.162	1034.96	757.759	228.685	912.372	682.072	504.615
ACTN2	579.176	931.604	531.346	213.282	1297.61	30.9745	866.589	323.763	258.661	170.566	59.3296	75.2767	766.623	61.4698	446.678	435.949
ACTN3	0.48807	1.15283	0.427872	0.512543	0.370745	0.309745	0.721427	0.718746	1.57241	0.664457	0.326345	1.30709	1.06591	0.750853	0.468325	1.12768
ACTN4	868.948	467.439	879.533	1303.95	832.595	1674.16	659.007	716.358	805.012	1390.67	2312.11	1024.23	465.219	1904.68	1370.28	689.666
ACTR10	76.4643	77.2393	86.858	81.4303	77.8565	77.2039	69.7723	81.0223	85.4998	81.3295	72.2528	91.0213	48.6764	73.1331	81.2284	75.5547
ACTR1A	99.2409	128.813	91.9925	98.9849	93.3537	107.869	121.921	115.784	119.798	106.446	119.051	131.185	110.736	106.171	98.4523	118.738
ACTR1B	30.9924	37.8612	48.5635	62.9787	81.0449	87.6578	55.5499	63.6417	39.6051	110.1	62.4625	59.1757	14.6858	66.1251	59.5814	34.4938
ACTR2	210.033	180.205	291.88	307.782	262.043	405.378	172.215	336.765	297.677	390.036	453.294	390.227	98.8924	332.978	322.052	229.185
ACTR3	97.3106	109.998	134.984	126.707	99.9959	141.471	117.649	183.951	179.884	151.141	145.588	241.202	55.5455	119.011	141.765	127.911
ACTR3B	25.705	26.9397	25.6723	27.8695	26.5454	28.4191	18.8086	21.0397	22.112	25.7145	32.6998	19.1311	16.5808	27.1809	23.6764	19.9666
ACTR5	8.54122	9.58666	10.9107	13.1339	9.41693	10.5313	10.6153	10.5198	10.3189	9.70107	10.182	11.0509	6.75074	11.8635	10.095	12.3382
ACTR6	11.3883	11.3462	11.4812	10.7634	10.0843	11.3057	10.3576	14.8977	18.3775	13.422	12.6622	14.4969	4.85579	10.0614	14.9864	13.0015
ACTR8	32.294	39.2567	42.6446	41.5801	47.6779	30.5099	53.7463	36.5907	32.5292	36.6116	29.2405	31.4891	37.3067	32.6871	41.1606	44.1123
ACTRT3	1.70824	2.00228	2.13936	3.3956	1.26053	1.62616	2.26734	1.69886	2.35861	1.32891	1.10957	1.24768	1.77651	1.45165	2.08144	2.98504
ACVR1	36.4426	41.6837	49.7045	39.8502	48.7901	41.5832	47.5111	58.5452	52.9706	59.8675	49.8003	61.0769	16.8176	48.405	55.1583	41.7906
ACVR1B	14.6421	19.7801	14.1198	13.7746	16.1645	16.339	23.0341	23.9147	26.043	16.1463	11.9442	29.172	12.4356	14.7167	16.6516	20.9616
ACVR1C	1.95228	2.48768	5.63365	6.72713	2.44692	6.65951	1.23673	6.07667	3.53792	5.71433	1.37065	2.6736	3.19772	1.50171	3.01809	1.19402
ACVR2A	15.5369	12.5597	17.4001	18.9	17.2767	15.4098	14.1194	22.6732	20.3431	20.3324	19.646	19.2499	8.88255	18.4209	19.8258	16.9816
ACVR2B	0.732105	1.03148	0.35656	1.08915	1.48298	0.851798	1.28826	1.82954	1.08103	1.12958	0.522152	0.8912	1.53964	0.350398	0.728506	1.59202
ACVRL1	24.5662	45.8072	27.3838	25.6912	27.2127	19.6688	36.4836	53.9713	54.7395	35.0833	21.7346	34.9351	37.3067	25.2287	24.8212	39.1372
ACY1	26.9252	27.9712	17.3288	26.2038	20.8359	21.0626	22.5704	20.9743	21.8172	20.7975	17.1658	19.6064	25.937	24.7281	22.9479	25.207
ACYP1	18.0586	26.515	21.1797	26.0756	14.0883	10.4539	19.5816	19.0795	19.4586	12.7576	13.9023	16.9328	17.1729	16.719	16.5475	19.0379
ACYP2	15.0488	18.8699	12.9788	6.21459	17.0543	7.279	13.0888	13.1988	11.0069	8.4386	7.57121	9.03083	12.3171	8.05916	12.7488	12.9352
ADA	19.5228	10.9215	14.9755	31.3292	12.3087	12.777	13.3979	12.0227	29.581	27.5749	21.7999	15.8634	10.5406	29.3333	18.6289	15.8539
ADAD1	0.732105	0.303375	0.855744	0.704747	0.741491	1.54872	2.88571	1.7642	0.786205	2.12626	2.28442	1.48533	0	1.00114	2.08144	1.52569
ADAL	1.6269	2.60903	2.85248	1.7939	2.22447	1.23898	2.26734	2.28692	2.55517	2.19271	1.37065	2.19829	1.65808	1.15131	1.50905	1.59202
ADAM10	34.4089	38.9534	51.9864	51.1903	49.0125	47.4684	40.2453	78.9968	61.2257	66.3128	46.8632	69.5136	25.108	50.4573	47.9253	43.3163
ADAM12	2.359	17.171	5.41971	1.65936	1.26053	3.40719	12.1056	41.622	18.7706	10.4984	2.93711	20.5541	6.6323	4.10466	3.38235	20.6963
ADAM15	132.836	159.879	114.099	155.172	105.662	117.084	146.965	139.241	173.948	128.174	146.921	154.118	128.027	205.133	121.66	159.268
ADAM17	32.0499	44.0501	31.092	33.4434	33.812	40.4991	46.2229	51.031	53.7568	51.296	47.5811	72.009	22.8578	41.1968	39.8076	40.6629
ADAM18	2.52169	1.82025	2.42461	6.02238	3.11426	4.4913	2.67959	5.16191	2.94827	8.50504	2.7413	5.05014	0.236868	3.95449	2.80995	4.24539
ADAM19	57.8363	40.7736	53.4127	106.801	70.3675	91.3747	46.9958	70.0451	43.2413	67.3094	77.4744	66.84	23.0946	69.6792	80.4999	43.5153
ADAM2	3.00976	1.88093	4.27872	2.37051	4.2265	1.54872	1.44285	3.46305	2.65344	3.0565	1.0443	2.25771	0.947472	2.85324	2.4457	1.85736
ADAM22	7.02658	8.08252	9.90738	4.32138	19.6732	11.8586	24.0606	6.044	6.72795	24.1995	5.39579	7.09217	8.3567	4.42052	9.62304	11.6111
ADAM23	2.76573	2.85173	2.63854	2.69085	2.81766	1.7036	3.40101	4.90054	4.52068	2.85716	1.24011	2.43595	0.947472	3.55404	1.97737	2.38803
ADAM33	2.76573	1.82025	2.70986	4.03628	3.48501	16.1067	5.5653	3.59373	6.87929	4.5183	9.59455	5.28779	1.06591	6.00682	4.78732	11.8075
ADAM8	5.45011	12.3777	7.7017	4.10035	5.33873	2.63283	14.377	10.5852	12.1862	5.18276	1.8928	27.2113	7.69821	5.65643	6.29637	10.4808
ADAM9	67.5977	125.112	121.801	91.0405	94.1693	110.037	104.813	202.033	187.805	135.748	106.389	219.829	44.4128	99.463	117.237	107.793
ADAMTS1	77.6845	79.3023	101.477	88.9903	84.1592	87.2706	129.651	180.471	97.8825	136.147	120.617	106.528	62.6516	101.966	87.0044	105.869
ADAMTS10	43.9263	30.3375	48.9913	51.1262	32.9222	47.0812	44.3678	46.3918	45.2068	51.6947	50.0614	47.9466	25.4633	67.7269	55.0022	53.2664
ADAMTS12	5.69415	8.2518	9.05662	6.72713	5.85778	12.6221	5.77142	17.3153	12.1862	14.7509	8.94186	11.1697	3.67145	5.90671	7.80542	5.30674
ADAMTS14	0.81345	1.63823	0.427872	1.02509	0.444894	0.61949	1.75204	1.30681	2.35861	0.265783	0.261076	0.950614	0.829038	0.550626	0.520361	0.995014
ADAMTS15	30.8298	22.4498	44.9266	46.7696	24.3209	39.8796	44.8831	42.8634	57.2947	46.3791	27.5435	45.3918	12.0803	32.4369	43.8144	29.5851
ADAMTS16	4.71801	0.667425	1.92542	9.48205	2.81766	2.71027	1.39132	0.849428	9.33618	3.92029	0.587422	2.49536	0.118434	4.50512	2.39366	0.46434
ADAMTS17	1.87093	4.30793	3.5656	3.26746	2.00202	3.79437	4.01938	4.63918	4.32413	5.75685	4.82991	5.22838	0.59217	5.70648	3.01809	4.6434
ADAMTS19	3.41649	1.15283	2.13936	3.2034	2.07617	1.54872	1.54592	0.980109	2.65344	3.65451	1.43592	2.37653	0.118434	4.05461	2.02941	1.19402
ADAMTS2	35.6291	49.6929	44.6413	47.6025	31.7358	34.1494	49.0571	57.8918	85.8929	84.7182	51.432	67.6718	26.1739	60.5688	37.414	48.3577
ADAMTS3	6.26356	5.76413	10.055	6.91933	9.93597	6.04002	11.0275	4.76986	6.97757	12.2924	6.65744	5.16896	4.73736	12.6644	9.62668	8.15911
ADAMTS4	3.57918	11.4069	6.41808	3.13933	1.77958	3.79437	11.2337	12.4147	13.9551	3.85385	2.87184	7.72374	5.9217	3.75427	4.83936	6.43442
ADAMTS5	13.7473	12.6204	17.6141	16.7858	13.1244	9.91183	11.1821	21.6277	27.2223	21.4619	9.13767	15.6851	14.9227	11.6132	11.3439	11.2768
ADAMTS6	13.666	9.95071	21.3223	18.0031	20.1685	15.0226	13.0372	29.4686	16.9034	26.5783	17.5574	17.1705	5.32953	15.6177	15.9231	11.2768
ADAMTS7	21.231	21.9037	22.392	13.7105	35.6657	10.5313	48.4387	25.2215	21.7189	16.4121	17.8185	19.7252	18.1204	12.6644	23.8325	29.5851
ADAMTS8	19.7668	10.7395	28.1682	41.9004	18.9822	44.2935	27.4142	17.5766	29.0896	39.2694	46.9937	35.5886	10.8959	42.7486	35.0723	16.4509
ADAMTS9	5.45011	8.55518	13.1214	9.03357	15.4972	73.7193	12.4189	34.3038	11.6948	65.0503	22.9094	14.9128	9.23785	23.4266	12.3326	6.63342
ADAMTSL1	7.40239	9.28328	6.5607	7.17561	6.67342	5.73028	36.9989	16.0084	7.6655	18.0732	4.4383	9.62496	9.83002	8.55972	17.1199	11.2105
ADAMTSL3	45.5532	41.9264	91.8498	104.879	63.2492	132.571	71.782	134.014	107.219	143.057	111.218	141.82	28.7795	101.916	95.4863	56.6494
ADAMTSL4	488.802	347.122	523.287	484.61	482.117	977.167	343.915	277.044	388.582	658.41	725.792	483.684	294.072	795.704	416.133	355.75
ADAMTSL5	176.193	114.008	121.016	182.85	146.889	197.153	131.454	74.3576	119.307	148.44	193.849	117.757	158.702	220	151.789	112.238
ADAP1	5.85684	10.7395	5.06315	6.53493	2.07617	1.16154	7.47193	12.088	11.4982	3.72096	1.24011	15.6257	9.83002	8.3595	4.05882	8.62345
ADAP2	17.1394	34.6928	16.8332	15.4038	15.6047	9.79878	22.1107	28.6074	29.523	13.4101	9.39874	29.6728	28.5461	12.7985	16.6042	29.9937
ADAR	108.308	108.339	135.564	146.075	127.536	125.524	139.643	153.019	192.377	168.034	132.873	161.929	72.741	132.947	132.926	116.515
ADARB1	122.668	129.177	158.313	109.044	94.6142	236.258	163.506	158.32	184.463	175.749	297.757	220.721	111.92	251.936	156.473	150.446
ADAT1	1.6269	3.21578	0.998368	1.7939	1.77958	0.851798	1.54592	2.61362	2.75172	2.92361	1.17484	2.02005	1.06591	0.650739	1.3009	1.32668
ADAT2	3.49783	3.33713	3.99347	4.54882	4.44894	7.58875	4.58622	4.8352	4.32413	4.78409	4.89518	5.22838	4.50049	5.90671	5.35972	3.44938
ADCK1	2.30125	7.0383	1.01192	0.267804	3.25514	0.816177	6.76184	1.69493	4.25927	0.581399	0.729708	3.89276	2.48948	1.94271	2.56278	2.26001
ADCK2	8.62257	10.4968	7.98694	13.0058	7.7115	7.66618	7.00815	13.7215	9.92584	11.3622	6.78798	12.9521	5.5664	11.1627	12.1244	8.22545
ADCK5	12.5271	12.9845	13.8345	16.5936	9.41693	13.9385	16.5413	15.5511	18.8689	14.8838	15.0772	19.9629	12.554	19.9226	14.2579	17.0479
ADCY10	21.8005	20.1441	19.6821	16.3373	24.0243	11.0734	16.3352	20.2556	18.6724	12.0931	11.4221	17.8834	23.2131	10.9124	20.7104	19.1706
ADCY2	7.40239	8.43383	10.8394	10.5712	9.93597	5.57541	18.9632	16.6619	20.6379	13.422	11.3568	12.4768	9.11942	9.81115	15.2986	18.3746
ADCY3	32.538	28.2746	41.2896	36.7109	27.5093	31.4391	38.8025	35.3493	44.5189	50.698	28.2615	37.7275	17.0545	38.4937	35.8529	30.3811
ADCY4	17.6519	24.7554	14.3337	12.237	13.94	12.1575	18.6025	35.2839	18.181	18.4054	8.94186	11.9421	18.1204	13.2651	11.6041	16.0529
ADCY5	60.6834	65.7717	83.0072	71.4998	197.607	97.1824	70.8029	43.4515	44.0275	124.12	71.7307	58.2251	21.0813	61.62	102.563	41.3309
ADCY6	101.437	93.6823	105.684	105.007	133.765	93.6126	98.7325	97.4228	99.2584	136.081	102.146	96.6655	79.2323	103.718	103.084	91.9956
ADCY7	34.653	55.275	44.6413	32.7387	33.0705	64.1172	58.1264	66.5821	67.8102	80.3328	77.0175	93.0413	20.2522	58.8168	46.6764	48.8883
ADCY8	0.569415	0.303375	0.71312	0.384407	0.889789	0.464617	0.463775	0.196022	0.687929	2.79072	1.56646	0.950614	0.473736	1.30148	0.988686	0.530674
ADCY9	68.0044	68.5628	69.1013	66.054	144.368	55.3669	74.0494	48.352	41.6689	63.1234	57.6326	44.0847	35.7671	52.1593	65.4094	39.2035
ADCYAP1R1	15.5369	13.7126	25.3871	18.5797	18.2407	14.016	18.551	22.9999	26.5344	28.8374	23.8232	28.3402	10.6591	23.5768	21.9072	29.4524
ADD1	285.521	249.738	282.823	382.165	272.127	332.124	291.355	279.266	312.91	338.275	325.627	326.773	161.662	345.943	320.751	287.095
ADD2	0.32538	0.7281	0.427872	0.192204	0.296596	0.232309	1.23673	1.82954	1.27758	0.797348	0.0652691	0.950614	1.42121	0.400455	0.208144	0.862345
ADD3	82.4025	72.8707	119.59	119.166	99.4339	70.8541	75.7499	104.284	128.446	135.748	68.9894	102.666	44.4128	84.5461	101.366	72.835
ADGRA2	168.71	180.448	208.516	213.731	177.365	286.204	288.159	287.499	257.286	296.68	264.405	324.635	87.878	272.009	277.3	249.815
ADGRA3	32.294	36.7084	40.4339	39.2096	39.0024	37.3242	44.2132	55.0821	43.5361	51.0303	35.6369	48.5407	22.384	40.1957	43.9705	43.9796
ADGRB1	1.78959	1.2135	1.2123	3.01119	0.593193	0.774362	3.19489	3.00567	1.96551	1.19602	0.391614	1.54475	1.18434	2.80318	1.04072	3.31671
ADGRB2	27.4946	19.1733	28.4535	32.995	25.7297	31.2842	23.0857	25.2215	29.581	37.8076	24.6717	38.084	12.9093	38.7941	27.2149	27.7277
ADGRB3	0.244035	0.36405	0.998368	1.92204	0.370745	0.154872	0.154592	1.69886	0.982756	0.863793	0	1.12885	1.06591	1.40159	0.208144	0.265337
ADGRD1	11.4696	13.2878	13.6206	24.9224	13.4951	13.9385	22.2612	14.3096	42.9464	19.6679	18.3406	25.013	7.57978	18.0705	13.6855	17.2469
ADGRE2	0.665402	0.191733	0.590463	0.468336	0.077115	0.160293	1.15789	0.81349	1.73653	0.0697679	0	3.14534	0	0.725825	0.485497	0.274624
ADGRE5	16.4984	30.7525	15.2408	22.3398	16.0874	8.20282	17.6508	28.4591	34.4289	23.5849	7.1796	31.3738	15.0411	21.4494	13.6163	18.8296
ADGRF5	53.6064	84.0956	85.7883	32.995	67.9205	40.8089	60.0846	113.039	46.0913	81.5288	23.2358	37.3116	97.2343	31.5358	40.5882	47.8933
ADGRG1	20.0922	53.4547	36.3691	11.7885	23.357	21.0626	27.4658	54.8861	34.2982	33.9537	9.65982	20.7353	36.5961	16.0182	11.5	28.1257
ADGRG2	10.0868	8.7372	11.9804	11.5322	7.48906	9.13747	9.94539	9.08234	11.2034	16.4785	6.00475	12.7739	4.14519	11.7133	9.00225	10.4145
ADGRG3	1.13883	1.82025	0.499184	1.21729	0.667342	1.23898	1.75204	2.28692	2.65344	3.65451	2.08861	1.24768	2.13181	2.5529	1.3009	2.25536
ADGRG5	0.406725	2.427	0.855744	0.448475	0.222447	0.309745	2.57653	1.50283	1.47413	0.863793	0.261076	2.49536	0.473736	0.650739	0.572397	1.59202
ADGRG6	5.77549	8.0091	12.1944	9.03357	8.0081	8.36311	32.2581	27.5737	10.5155	22.5915	5.22152	11.8233	6.15857	10.2617	15.819	24.5437
ADGRL1	3.82321	2.54835	4.56397	5.25357	4.74554	7.20157	9.73927	5.35793	9.43446	5.04987	1.76226	5.40662	4.02676	4.80546	6.14026	5.90375
ADGRL2	89.9676	54.6075	109.036	134.03	121.308	154.795	86.4682	146.494	116.064	162.194	102.733	142.295	40.7413	112.027	132.64	79.2031
ADGRL3	1.38286	1.33485	1.71149	2.75492	2.22447	3.25232	2.57653	3.33237	1.47413	4.71764	2.34969	2.49536	0.59217	1.95222	2.65384	2.05636
ADGRL4	19.6855	32.2184	35.0142	11.1478	24.1726	14.8677	15.0984	54.6901	29.4827	25.1829	10.3778	18.2399	17.6467	9.56086	14.466	17.0479
ADGRV1	0.48807	0.667425	0.427872	0.704747	0.370745	0.0774362	0.824488	1.11079	0.589654	0.664457	0.391614	0.653547	0.236868	0.850967	0.832578	0.796011
ADH1A	32.538	22.6318	42.4306	17.4905	15.7196	20.598	27.6719	29.1419	45.5999	41.595	16.252	17.2893	25.8186	19.372	17.8484	21.6913
ADH2-1	0.65076	0.19598	0.763038	0.33956	0.0897204	0.717833	0.403484	0.914768	0.452068	1.07708	0	0.505608	0.118434	0.979613	0.275271	0.0663342
ADH2-2	1.54555	0.89617	1.73288	0.941798	0.429323	1.83756	0.111821	1.30681	1.41517	4.17212	0	0.623246	0.118434	1.02266	0.193054	0.597008
ADH5	61.9849	61.9492	67.9603	70.6028	55.8342	66.1305	61.7851	71.4173	77.9326	65.5819	67.6187	78.9009	51.1635	63.8726	64.1605	74.9577
ADHFE1	46.6107	35.4342	48.3495	45.5523	65.6961	25.7088	31.6397	25.5482	23.9793	40.6647	23.7579	26.3201	30.4375	30.0842	45.3235	31.8404
ADI1	11.795	13.2878	10.982	15.5685	10.6775	12.3124	11.1306	10.3892	11.5965	14.2194	12.4011	11.4668	10.8959	8.50967	10.3032	14.5935
ADIPOQ	147.56	122.928	86.9293	66.951	49.0867	105.236	41.1214	183.607	109.381	103.124	25.8465	40.3417	44.7681	85.1467	49.6945	53.9961
ADIPOR1	118.276	193.614	118.521	113.464	127.611	121.188	136.607	156.752	130.019	124.851	122.51	154.415	123.171	124.541	118.59	130.546
ADIPOR2	88.3407	89.9204	73.38	74.3828	113.967	63.8074	87.0351	67.5622	65.6481	87.7083	38.574	58.2251	69.047	42.4983	71.5497	69.9163
ADISSP	30.423	31.0049	26.4568	33.059	22.5413	24.7021	31.0729	25.4175	37.1482	27.8407	17.0352	26.1419	44.5312	31.0853	24.3009	29.1871
ADK	16.1877	34.8275	26.0289	13.5824	16.906	13.5513	26.0744	37.2441	29.9741	18.6712	16.8394	37.7869	14.0936	16.0683	24.0927	29.5187
ADM	18.7907	16.4429	14.7616	24.2817	23.5794	9.44722	25.8683	12.8721	15.0362	18.2726	10.443	15.3881	13.0277	15.0171	18.2126	18.7063
ADNP	50.5152	46.4164	65.607	72.653	72.8885	90.368	63.0244	80.8917	75.7705	94.0658	74.2834	79.2574	21.555	73.1331	80.9188	49.8833
ADNP2	81.0196	77.482	117.95	114.81	102.252	132.493	99.2478	116.633	87.5636	145.117	97.8383	113.242	44.1759	109.324	104.072	78.6061
ADO	39.5337	29.9735	44.2847	49.973	44.7119	49.2494	37.7203	45.8038	48.9413	52.1598	46.08	51.6302	19.66	47.3037	45.5316	38.6729
ADORA1	5.28742	3.94388	4.7779	1.85797	2.96596	2.86514	7.47193	1.56817	6.09309	4.6512	0.71796	2.97067	2.48711	4.70535	3.38235	4.70973
ADORA1_1	4.48618	3399.45	2643.28	1849.14	5208.95	2154.83	1.61754	1460.9	1568.8	1737.01	2.07882	910.013	5415.95	0.64273	0	2812.57
ADORA2A	6.83298	5.52143	4.99184	4.03628	4.30065	3.32976	3.86479	5.35793	3.2431	4.18608	4.11195	3.62421	3.55302	5.1058	3.48642	4.17906
ADORA2B	1.38286	3.3978	1.14099	1.66577	0.963938	0.696926	2.06122	2.28692	3.43965	2.19271	1.10957	3.50539	1.30277	1.60182	0.988686	2.25536
ADORA3	0.081345	1.39553	0.285248	0.512543	0.370745	0.232309	0.618366	1.37215	0.589654	0.531565	0.130538	1.42592	0.118434	0.550626	0.780542	0.663342
ADPGK	25.2169	38.1646	30.3076	36.0062	21.7257	23.618	37.8749	42.9941	45.6982	35.2162	34.201	45.6889	23.8052	39.595	30.8054	38.8719
ADPRH	37.4187	56.6705	47.0659	49.2682	34.4052	48.9397	60.4968	67.6275	74.0015	59.2695	45.362	87.4565	29.8454	50.3072	46.7805	47.0973
ADPRHL1	143.563	227.754	167.767	61.4341	391.162	70.7372	253.634	107.57	81.5865	110.694	90.1235	43.4133	160.003	59.0901	145.724	103.57
ADPRM	3.9859	4.3686	5.27709	6.53493	4.67139	3.32976	5.04999	3.13635	4.22585	3.85385	5.09099	4.456	3.43459	4.00455	4.11085	4.90873
ADPRS	21.0684	20.1441	17.9706	27.8695	17.425	22.8437	23.9102	21.0397	23.4879	20.2659	22.8442	23.6465	17.7651	24.7281	19.1493	24.212
ADRA1A	21.8005	2.79105	17.2575	69.6418	21.3549	108.256	21.5913	32.2783	14.7413	36.678	50.9751	34.1033	4.97423	34.1388	42.9818	13.0015
ADRA1B	7.80912	8.4945	12.9075	15.5044	14.8298	24.315	17.4688	9.27836	11.4982	23.9204	32.3082	21.2106	6.86917	21.6746	18.5249	10.4145
ADRA1D	7.56508	1.2135	7.7017	13.0058	8.3047	11.6929	9.17243	3.78975	3.93102	9.03661	13.6412	10.8726	0.829038	7.45847	15.0905	6.96509
ADRA2B	0.81345	0.667425	0.998368	0.768815	0.519043	1.39385	0.154592	0.980109	0.786205	0.46512	0.587422	0.653547	0.236868	0.500569	0.364253	0.132668
ADRB1	11.6323	16.3823	16.1165	5.76611	26.3229	1.39385	22.1581	6.66474	8.0586	7.17613	1.8928	2.6736	12.554	2.00227	14.2579	11.2105
ADRB2	3.41649	6.24953	5.77627	2.37051	4.2265	2.01334	4.43163	8.16757	6.38792	5.24921	0.913767	6.2384	4.50049	4.15472	3.01809	5.57208
ADRM1	72.8038	91.9834	64.5374	82.071	60.6539	71.4736	105.225	67.2355	83.5343	65.9141	63.8331	82.941	90.1283	90.3026	72.2782	83.6475
ADSL	24.4848	34.5848	22.2493	21.4627	25.2107	15.9519	30.5576	24.3067	23.0948	14.7509	14.0328	18.8934	34.109	20.1229	21.4909	26.3347
ADSS1	68.2485	59.5829	44.6413	29.8556	86.0129	6.58208	77.8111	16.4005	21.8172	17.2759	8.09336	8.79318	95.6947	13.1149	39.2873	50.8784
ADSS2	44.333	48.0546	50.7028	66.5025	41.8942	60.5551	39.1117	60.5707	58.2774	69.5686	66.6397	104.33	24.7527	79.7406	60.1017	55.7208
ADTRP	9.68005	4.42928	5.9189	6.72713	8.52714	4.18155	5.97754	8.23291	11.8914	4.11963	5.09099	6.95136	3.07928	4.50512	5.41176	8.22545
AEBP1	588.043	878.635	790.85	644.715	456.313	760.036	1148.31	1176	1180.88	1064.13	851.696	1242.39	532.242	849.415	850.426	1027.32
AEBP2	26.0304	16.0789	29.0953	26.6522	22.8379	28.2642	18.0357	27.3124	23.9793	29.0367	25.8465	29.3502	13.5015	26.0296	32.5226	20.8953
AEN	18.4653	23.906	15.3321	16.5295	15.3489	17.036	24.0648	29.2726	24.5689	9.83396	14.0981	25.3101	32.0956	18.3709	16.1832	28.2584
AFAP1L1	25.2169	21.7823	20.5379	16.8499	34.0344	7.74362	18.0872	19.9942	12.7758	20.2659	5.80895	8.13963	12.4356	9.16041	15.2466	12.0728
AFAP1L2	18.7093	13.4699	21.9641	33.3794	24.0243	26.4057	16.0775	33.389	25.1586	31.0301	20.3639	25.5477	3.55302	24.2776	24.0407	9.95014
AFDN	36.6052	51.6345	47.5651	36.6468	44.4894	36.9371	50.706	66.7127	46.4844	60.532	33.9399	37.9651	50.5713	47.2036	41.5769	48.225
AFF1	18.9534	34.5848	40.0773	24.0255	33.812	27.5673	26.0229	34.9572	30.8585	45.183	25.2591	34.9945	16.107	26.5802	28.0475	26.7327
AFF2	1.87093	1.15283	2.85248	5.31764	3.11426	3.79437	2.88571	6.73008	2.94827	4.98342	2.15388	5.16896	0.947472	3.15358	3.7466	3.64838
AFF3	8.05315	6.24953	9.98368	10.7634	8.82374	8.59542	8.14182	7.31815	5.01206	9.70107	4.56883	7.48608	3.67145	8.25938	11.4479	5.2404
AFF4	49.7831	46.113	67.889	72.653	82.1572	101.751	49.3147	74.8803	66.8274	107.11	94.3138	78.3662	24.5158	77.0375	77.4297	48.424
AFG1L	12.0391	13.2272	9.55581	7.04747	12.2346	6.4272	10.5638	8.23291	7.56722	6.04655	4.24249	7.78315	12.0803	6.50739	7.85745	9.75113
AFG3L2	31.8872	39.5601	42.1454	33.2512	69.7001	35.0786	40.8637	40.9685	28.5982	40.4654	29.1753	36.658	13.9752	26.2298	43.294	27.2634
AFMID	1.46421	6.7956	2.56723	2.94712	2.52107	3.25232	5.04999	3.59373	6.78102	2.12626	2.54549	5.16896	5.5664	4.55518	3.38235	3.84739
AFTPH	25.9491	30.3375	31.1633	32.995	33.1446	33.9945	23.3949	37.9629	38.9171	36.5451	27.413	40.6387	12.0803	30.3845	33.6674	25.0743
AGA	20.9057	19.9014	30.0223	26.2038	20.91	32.9104	14.9439	34.6959	27.812	45.1166	22.8442	34.4597	12.4356	25.1285	28.0995	23.018
AGAP2	3.33514	9.40463	4.7779	2.56272	4.37479	1.9359	5.87448	8.88632	5.01206	4.11963	0.913767	3.50539	5.09266	2.05233	3.79864	6.03642
AGAP3	67.9353	54.1901	66.5719	79.8677	54.8903	60.3646	59.2637	50.4612	61.3859	50.9778	70.5878	59.8685	60.4132	82.5733	62.0302	62.8643
AGBL1	0.406725	0.2427	0.570496	0.256272	0.370745	0.387181	1.13367	0.718746	0.196551	0.398674	0.261076	1.42592	0.118434	0.850967	0.624433	0.132668
AGBL2	4.22994	2.27713	3.49429	3.32641	2.07098	2.22861	2.56777	3.28794	3.11042	2.23723	3.00238	3.25585	4.02676	2.85274	3.27411	3.94158
AGBL3	0.9737	1.75412	0.927056	1.21729	0.963938	0.542053	1.38617	1.63155	1.9606	2.8359	0.456231	0.950614	0.829038	1.40159	0.988686	1.19136
AGBL5	8.54122	9.34396	7.34514	7.43188	7.93395	3.87181	8.45101	7.90621	8.54998	5.58143	5.15626	6.95136	6.51387	6.25711	7.02488	7.09776
AGFG1	33.3514	37.6792	44.9266	41.8363	45.0826	41.0412	41.1214	54.4287	58.1792	48.5053	45.5578	57.8686	24.0421	38.744	41.3167	38.3412
AGFG2	30.179	32.0364	34.4437	38.1204	26.9903	39.5699	42.4096	26.7896	27.1241	35.4155	32.6345	32.0238	22.8578	35.6905	36.9977	37.8768
AGGF1	71.0508	75.6903	53.5418	73.2488	57.9623	74.9396	63.7489	84.9219	80.2696	74.0291	78.4736	74.0237	89.8464	81.5977	58.9689	69.3949
AGK	27.9827	26.6363	32.9461	37.4157	28.9181	35.9304	34.1647	34.5652	33.0206	34.5517	29.1753	34.8756	19.0679	34.0887	31.1696	30.6464
AGL	46.9361	48.6007	53.9832	30.176	84.5299	29.0386	54.88	44.8236	34.3965	44.9173	29.3058	31.9644	35.2933	26.7304	53.337	43.5153
AGO1	36.0358	25.5679	38.4978	52.9765	33.5747	55.5713	30.421	40.7261	44.6594	56.6469	53.2452	43.127	19.7785	47.5896	46.6041	37.9259
AGO2	4.55532	6.91695	3.77954	6.34272	8.52714	9.29234	6.28672	6.86076	5.79826	11.8273	6.39637	5.46603	2.96085	6.80773	8.27374	6.50075
AGO3	31.5619	26.1273	30.9601	41.9081	37.0152	46.8768	27.1901	39.5121	35.1404	44.5498	52.0338	39.9329	33.6353	41.7119	40.9207	37.4961
AGO4	7.56508	8.19113	12.0517	9.48205	12.457	11.538	10.2546	14.963	8.74653	14.4187	11.4221	13.3086	3.31615	8.60978	10.9796	9.35313
AGPAT2	68.8992	70.201	49.4905	59.455	58.3553	42.0479	78.9963	33.7157	48.2533	45.1166	31.3291	36.4798	111.21	48.5552	50.371	57.5781
AGPAT3	82.4025	86.8866	72.1677	99.4334	67.6239	82.0049	86.9315	70.6985	93.2636	86.1136	80.8684	81.8716	78.5217	98.2116	80.708	90.0156
AGPAT5	30.2603	34.3421	40.6478	36.9672	45.8983	38.7955	36.4836	45.4117	41.4723	48.8376	37.5297	42.54	19.1863	36.7918	46.9886	34.5601
AGPS	27.82	23.2907	30.3982	29.5481	29.601	32.764	25.4684	43.1653	38.7894	41.3006	34.7349	43.8524	13.4766	31.6234	33.9328	26.4999
AGRN	164.317	111.096	183.343	193.293	127.24	153.633	171.184	154.334	203.824	182.061	133.671	176.755	76.8637	204.082	164.226	144.41
AGTPBP1	23.102	24.5127	28.2396	19.0282	44.6377	13.5513	13.1403	14.963	15.7241	21.5284	17.5574	14.8533	22.8578	15.9181	24.2488	14.4609
AGTR1	6.18222	7.15965	10.1263	10.4431	5.33873	14.3257	9.63621	13.2641	9.33618	7.77414	7.04906	5.58486	4.14519	12.2639	8.37781	12.5372
AGTRAP	67.8417	88.5856	73.7366	75.8564	53.1649	76.5844	79.0478	94.4825	89.8239	86.6451	69.3157	95.2396	69.6392	92.7554	77.0135	93.5976
AHCTF1	11.8764	14.3193	22.4633	16.1451	19.5754	20.7529	16.2321	30.7754	19.3603	25.8474	17.949	25.2507	7.93508	17.9704	17.1719	16.7162
AHCY	40.6034	60.868	45.3102	43.6431	44.3174	33.0157	62.8487	52.5926	55.5798	47.1252	26.4784	57.7783	44.9729	37.0831	45.9973	53.0422
AHCYL1	72.0717	85.3698	83.5777	88.4137	75.3355	76.8941	63.5902	87.099	85.0084	107.509	64.1595	91.6748	58.1511	73.6837	71.6017	72.437
AHCYL2	21.7191	27.4858	25.8863	28.5743	30.4011	27.1027	25.5591	36.3947	27.4189	42.5252	26.434	37.6681	13.1462	26.4801	27.7352	25.4723
AHDC1	41.6486	34.9488	46.2102	53.4326	61.9145	70.3121	50.706	47.96	49.6292	85.582	57.7631	59.7104	15.278	62.8714	86.432	49.8833
AHI1	20.1736	19.7801	21.6788	21.2065	18.8339	22.0693	14.9439	24.2414	23.193	18.339	18.7322	20.26	31.6219	22.876	26.5384	25.4723
AHNAK	1084	915.283	1426.95	1894.36	1487.13	1769.65	964.961	1407.04	1126.83	1985.4	1280.97	1620.14	596.789	1486.79	1397.85	932.261
AHNAK2	1.05748	1.6989	1.42624	1.9861	0.889789	0.929234	4.74081	0.849428	2.75172	3.0565	0.913767	2.79243	0.710604	2.80318	2.60181	4.17906
AHR	2.03362	3.21578	4.56397	5.44577	9.93597	9.44722	5.5653	13.3295	4.4224	12.3589	2.67603	7.30784	1.89494	4.85552	4.73529	2.45437
AHSA1	109.978	94.6531	102.19	121.409	106.033	102.835	125.477	95.92	116.555	94.6851	97.4467	110.746	107.301	103.918	109.12	114.029
AHSA2P	31.6432	22.025	22.9625	33.4434	27.5093	32.7555	26.5898	28.6192	33.3154	28.1065	28.7837	33.2715	18.002	33.2378	29.8687	34.0295
AHSG	0.081345	0.788775	0.071312	0.128136	0	0.154872	2.525	1.11079	0.687929	0.265783	0.0652691	0.118827	0.355302	1.10125	0.884614	11.6748
AIDA	94.1975	85.8552	126.222	119.615	111.891	128.312	87.6534	134.798	152.131	140.001	147.834	146.989	56.8483	112.278	124.002	92.2046
AIF1	7.32105	41.0163	12.8362	5.70204	4.37479	6.4272	29.9908	43.1901	50.5137	8.03992	2.93711	45.9859	37.4251	7.10808	12.5407	40.3975
AIF1L	55.1519	32.2184	60.8291	154.468	62.4335	60.3228	40.6576	38.6163	84.3205	70.8311	104.692	67.1371	18.9494	64.7235	54.1176	44.3113
AIFM1	63.2864	67.41	54.3397	37.0953	81.0449	23.076	73.3795	37.8322	34.9861	35.1497	23.6274	26.3201	59.6907	23.9272	52.3483	48.6893
AIFM2	49.4578	63.9515	38.4372	35.6218	39.3732	32.7555	45.3984	35.7413	41.2758	41.4621	20.5598	31.4297	65.9677	31.6359	30.4411	42.3876
AIG1	43.6823	29.124	40.006	63.5554	45.3051	52.8115	36.4836	33.7157	43.6344	51.4289	45.362	49.729	21.0813	49.8566	49.4863	40.6629
AIMP1	50.5152	45.2029	55.1955	47.6665	36.4813	44.6032	48.1295	56.4543	64.174	45.3824	47.6464	54.4226	55.7824	45.7019	47.613	53.3327
AIMP2	46.7734	56.3671	44.2847	61.1208	39.3732	48.1653	57.6627	52.4032	49.6292	37.2096	35.9633	45.7483	63.1253	47.0535	43.0859	54.1287
AJUBA	39.371	19.416	35.0855	49.973	44.5636	68.6859	31.4852	36.7868	32.7258	56.8775	59.5907	42.8964	12.3171	57.2651	53.337	39.2035
AK1	87.5272	89.1923	56.0512	40.2346	90.9809	16.4939	91.7759	33.7811	41.2758	28.5052	15.2077	21.3888	108.012	23.2264	47.2488	72.7687
AK2	65.5641	74.0842	61.257	51.3825	54.9445	35.2335	51.8397	66.5167	70.0705	44.7179	23.3011	47.5307	70.942	37.1422	48.4977	59.3028
AK3	36.3612	34.2814	49.5618	40.9394	78.3014	35.9304	52.9219	44.3009	32.2344	57.0104	29.11	38.8563	9.23785	27.4812	49.2262	28.5901
AK4	8.21584	9.40463	7.34514	4.74102	19.2788	7.20157	8.03876	8.16757	5.11033	8.77083	2.93711	6.77312	7.46134	3.90444	7.70135	4.77606
AK5	19.9295	15.8362	20.11	25.1146	19.2788	27.877	15.6653	11.3693	13.8569	28.9703	38.8351	19.0123	3.55302	31.2855	30.233	13.0678
AK6	15.7476	16.1717	17.649	18.0716	13.7257	14.0113	15.5864	17.6112	19.1284	14.2473	14.1112	22.5206	16.3415	15.9772	17.2723	19.7882
AK8	0.16269	0.303375	0.35656	0.896951	0.593193	0	1.28826	0.980109	0.786205	0.996685	0.195807	0.71296	0.473736	1.80205	0.468325	1.52569
AK9	0.97614	0.36405	0.784432	1.08915	1.70543	1.62616	0.618366	0.784087	0.687929	0.598011	0.522152	0.35648	0.355302	1.20136	1.56108	0.928679
AKAP1	114.778	97.7475	130.358	124.356	140.29	120.258	88.581	108.204	85.4998	117.808	99.3395	92.9819	84.0881	92.405	122.805	80.0654
AKAP10	16.513	19.1126	23.3903	20.4377	20.9842	27.4124	20.8183	32.7356	25.0603	32.2926	27.6741	31.1326	11.1328	25.2787	23.4683	19.9666
AKAP11	35.4664	22.3284	42.288	40.1065	47.5296	47.1586	24.9408	51.1617	40.4896	61.9273	49.0823	47.6495	13.9752	48.6052	57.8121	31.9731
AKAP12	180.261	111.035	282.752	395.299	222.521	407.314	171.236	306.643	273.992	351.697	279.025	296.413	83.8513	243.276	238.846	162.983
AKAP13	63.8558	114.736	78.7284	64.9649	83.566	55.5217	105.586	105.852	94.0498	96.8778	42.5554	112.113	78.7586	65.4243	79.8754	96.251
AKAP17A	4.39263	4.06523	5.20578	6.15052	5.26458	6.1949	4.2255	7.77553	5.11033	8.83727	5.35206	6.95136	4.26362	4.85552	8.7941	6.83243
AKAP3	0.65076	1.09215	0.855744	1.02509	0.963938	0.851798	0.824488	1.04545	0.687929	1.66114	0.326345	0.53472	0.355302	0.750853	1.40498	0.530674
AKAP5	21.8851	3.71999	11.9562	10.0298	21.174	2.26114	4.41771	9.90433	11.7764	2.0638	4.59298	4.26944	2.24077	2.52136	4.18579	14.7806
AKAP6	107.457	116.071	100.122	76.1767	192.862	66.2854	84.0463	60.3747	61.5205	78.4059	74.6678	50.8578	57.9142	56.0136	83.57	47.3626
AKAP7	13.1779	15.2294	17.4001	7.56001	18.4631	5.11079	11.3882	19.0141	13.3655	9.83396	5.67841	10.7538	9.47472	7.50853	11.8642	9.41946
AKAP8	63.2051	77.7247	75.5907	79.1239	55.0928	68.8408	80.4392	81.4144	84.7136	72.8909	65.987	84.0699	69.2839	84.496	71.3936	82.0554
AKAP8L	53.769	51.8772	54.9815	53.817	48.0486	52.5792	58.281	49.7895	54.9361	42.5252	45.5578	51.452	53.6506	55.5131	50.7352	45.837
AKAP9	61.1714	54.3648	61.7562	83.7367	62.7301	62.8782	65.2376	80.6303	76.0653	62.5254	61.5487	71.3554	82.5485	80.992	97.1514	91.0769
AKIP1	8.94795	10.9822	8.98531	6.66306	4.15235	6.11746	11.1306	9.80109	9.23791	9.10305	9.79036	10.6944	7.22447	10.0614	8.89818	11.8738
AKIRIN1	39.9241	45.3091	41.9735	38.8309	44.8394	48.3628	39.5048	49.3008	53.5042	48.3379	48.0909	59.0937	19.8566	43.2226	49.6232	42.1627
AKIRIN2	27.0879	31.4297	32.1617	28.6384	21.7998	24.4698	28.4449	31.2981	34.593	31.0301	24.8675	32.4397	15.6333	30.2844	30.5452	30.4474
AKNA	6.34491	17.5351	6.63202	4.9973	6.30267	4.72361	10.203	14.571	17.5913	6.17945	3.78561	21.9829	5.5664	7.45847	6.1923	13.5322
AKNAD1	3.2538	5.40008	2.70986	1.6017	4.52309	0.61949	9.84233	1.89488	1.57241	1.92692	1.95807	1.42592	5.09266	0.550626	5.0475	7.62844
AKR1B1	73.6172	93.3789	54.1971	59.0706	67.1791	49.9463	94.0947	71.3519	87.7601	43.2561	53.7164	84.2481	85.9831	58.967	69.8845	91.7402
AKR1B10	42.2181	59.8863	41.4323	59.0065	35.4433	37.2468	49.83	59.1986	64.174	46.6448	46.7326	53.3532	39.3201	47.2036	54.8461	73.1003
AKT1	139.263	201.077	138.417	154.019	144.146	144.883	189.323	156.556	182.793	145.45	148.161	176.933	204.536	176.701	147.678	193.563
AKT1S1	77.1972	80.2731	77.4448	102.957	61.0988	88.7419	83.9948	65.5366	82.5515	68.3726	77.0828	86.2682	116.657	125.192	81.1243	89.4849
AKT2	129.095	113.584	110.819	170.292	108.183	160.835	130.527	113.954	134.638	151.895	118.333	126.491	100.787	142.412	133.785	132.27
AKT3	87.1205	69.9583	110.248	108.659	95.6523	156.034	79.5116	118.92	102.993	150.034	201.159	134.928	48.4395	148.719	127.905	86.8315
AKTIP	46.7734	45.3243	51.9864	52.4716	58.207	48.1653	38.3387	39.4657	38.6223	51.4954	51.9542	43.4906	33.1615	48.1047	48.0814	39.9332
ALAD	30.5044	31.733	25.2444	26.396	24.9882	19.5914	28.4449	21.3664	21.9155	23.1895	21.6041	18.0022	35.2933	24.0273	22.0113	27.3297
ALAS1	71.0142	96.534	64.68	49.9089	88.534	42.1253	101.361	55.2781	50.8085	54.5519	34.4621	55.3732	74.7319	44.8009	69.8845	77.7437
ALAS2	25.461	96.1699	14.0485	18.2594	48.5676	12.6995	18.551	163.221	57.7861	19.3357	7.83229	21.3888	35.0565	16.9693	30.1809	69.3856
ALCAM	0.81345	2.54835	2.06805	4.86916	3.41086	2.32309	1.70051	6.73008	2.75172	6.91035	1.37065	3.38656	0.59217	3.20364	2.86199	1.12768
ALDH16A1	27.3319	34.4027	30.165	51.7028	25.2107	31.7488	36.1229	34.0424	38.524	28.5716	31.4597	35.648	38.7279	59.2173	29.5045	35.0245
ALDH18A1	90.3743	67.2279	100.407	107.634	89.9428	121.033	92.7549	76.5792	109.97	152.626	184.385	102.963	44.1759	156.828	122.337	72.9013
ALDH1A1	370.038	246.887	431.794	511.07	399.144	272.498	236.53	333.107	359.099	443.857	246.521	359.748	156.451	368.218	339.38	228.389
ALDH1A2	21.0684	30.4589	37.724	34.3404	13.1985	37.0145	50.2938	37.1788	48.3516	50.1665	38.4435	63.2752	15.6333	43.9499	38.9751	60.1652
ALDH1A3	15.3742	14.4407	20.8231	24.7943	16.906	18.817	10.3061	29.4033	30.4654	26.0467	18.667	32.7368	10.3038	27.3811	13.6855	10.4145
ALDH1L1	18.0586	24.8161	16.5444	17.939	16.0162	8.36311	15.3561	13.3295	11.4	10.7642	11.8137	8.49611	42.6362	10.2116	14.9864	11.9402
ALDH1L2	7.97181	8.91923	10.7681	12.4292	8.37884	12.3898	11.4398	22.9999	19.1637	23.6547	18.0795	13.9027	3.67145	8.81001	13.0611	10.3481
ALDH2	307.484	226.197	329.247	499.409	458.464	316.249	453.005	166.03	241.267	306.447	188.04	211.452	163.676	245.379	332.979	280.527
ALDH3A2	29.2915	32.0971	30.3925	36.0702	27.7681	29.8292	31.1832	38.1151	37.6396	36.0674	30.3423	48.7273	21.7919	37.4676	32.9909	37.4125
ALDH3B1	13.3406	15.3065	14.9755	20.8221	8.52714	11.9252	18.4479	18.034	23.7827	16.0134	14.0981	23.5277	13.2646	22.1251	13.4774	20.2983
ALDH4A1	69.794	93.6823	58.975	39.0174	92.8346	19.359	103.782	39.6617	40.9809	37.6082	17.1005	26.2607	104.459	28.132	49.8506	77.6774
ALDH5A1	36.8062	19.9123	34.5207	32.5055	64.9457	16.744	42.7765	22.1799	26.0568	28.646	20.1662	21.6752	29.0933	24.8432	32.905	27.4591
ALDH6A1	129.176	109.094	179.706	153.25	269.606	120.646	141.142	118.462	100.831	132.758	99.6006	122.689	67.6258	107.072	169.117	106.665
ALDH7A1	90.6183	96.5947	99.195	110.325	107.442	93.0009	116.098	72.2014	82.7481	85.3162	74.4067	74.9202	105.288	77.2878	101.574	104.277
ALDH9A1	45.8786	55.3356	51.5586	69.1933	45.1568	51.4176	40.2969	54.298	66.6309	54.3525	50.7793	59.0569	35.6486	50.0068	52.3483	54.5267
ALDOA	1267.76	1734.88	1031.67	945.963	1438.57	881.146	1365.92	899.544	981.97	749.307	744.851	895.775	1905.25	817.579	1021.21	1155.74
ALDOB	7.89046	8.37315	11.8378	14.9919	11.0482	13.2416	12.0066	11.1732	10.3189	9.30239	16.5783	13.1898	14.5674	11.2127	16.6516	11.8075
ALDOC	85.4936	36.223	71.0267	59.0706	23.8019	53.8956	30.2999	45.0197	59.9481	87.7754	25.1286	39.4505	22.1472	33.5381	33.5633	30.7791
ALG1	5.93818	5.21805	4.99184	6.53493	2.81766	5.73028	5.77142	5.03123	7.17412	6.77746	4.89518	8.08022	6.6323	8.30944	4.83936	5.50574
ALG11	13.1779	14.4407	15.4747	17.6827	20.391	18.6621	14.1709	17.642	17.3948	21.3955	17.0352	16.101	12.7909	14.6166	23.104	16.6499
ALG12	13.5033	18.9913	14.7616	18.1312	13.1985	10.7636	21.0245	20.6476	17.1982	17.4088	14.4245	18.9529	12.6724	19.0717	13.5814	19.6349
ALG13	3.2538	1.6989	4.92053	6.53493	3.33671	5.26566	3.34948	5.29259	6.38792	5.98011	6.00475	5.46603	1.18434	5.1058	5.15158	4.31173
ALG14	16.513	16.9283	18.7551	16.5295	15.6455	18.5072	15.2015	22.6732	21.8172	20.2659	24.8675	21.0917	13.9752	21.4243	21.595	18.7063
ALG2	6.67029	12.0743	10.055	9.54612	7.11831	9.60209	14.377	15.2244	14.6431	9.83396	7.50594	15.2098	11.3697	9.51081	10.6674	13.3995
ALG3	12.5271	16.7463	12.2657	18.0671	11.3448	15.4098	23.4464	19.9289	21.1293	21.8606	13.6412	22.2206	13.5015	17.8202	15.7149	16.5836
ALG5	16.7571	22.3891	20.2526	18.0671	12.2346	15.1001	21.2821	23.0652	31.2516	20.3324	22.1915	23.3494	12.9093	16.9192	18.1086	25.0743
ALG6	10.9002	9.28328	13.6206	13.5824	10.6775	9.13747	8.86325	15.8778	14.9379	13.1562	13.9676	15.4475	6.51387	12.314	11.3439	11.0115
ALG8	8.94795	6.5529	8.62875	9.41798	8.08225	7.04669	6.38979	10.3238	11.8914	8.23926	7.50594	10.8132	4.02676	7.05802	10.3032	7.89377
ALG9	9.35467	7.7664	14.1911	14.3512	12.5312	13.8611	8.6056	13.9829	13.8569	17.0101	16.3173	15.2098	4.50049	12.1138	12.1765	10.3481
ALKAL2	2.359	0.60675	1.42624	0.896951	1.70543	2.94258	1.90663	0.849428	0.196551	2.72427	9.98617	1.36651	0.829038	9.36063	1.24887	0.995014
ALKBH1	14.4794	13.2878	13.5493	15.8248	15.4972	10.9185	14.377	14.6363	16.6086	13.0898	10.0514	14.5563	12.0803	14.066	14.0498	13.7312
ALKBH2	6.5076	6.5529	6.98858	7.43188	4.96799	3.09745	6.13213	8.29825	7.17412	6.37878	6.26583	8.13963	8.64568	7.95904	6.03619	7.62844
ALKBH3	6.67029	12.2564	5.84758	10.9556	9.19448	6.65951	11.1306	8.82033	9.43446	8.90372	5.1556	10.635	9.94846	10.3618	8.27374	11.2768
ALKBH4	10.5748	12.2564	12.2657	14.6715	11.6414	14.558	11.4398	13.5255	16.1172	10.4984	15.4688	14.9722	13.7383	20.3731	13.8936	17.0479
ALKBH6	8.1345	11.8923	8.48613	8.96951	5.33873	7.97593	10.6153	9.80109	13.1689	8.17282	9.39874	11.4668	12.554	11.5131	8.89818	13.2668
ALKBH8	1.48455	1.37368	1.75285	3.4744	1.12113	2.22706	1.5691	3.10891	2.08344	3.20866	1.22249	2.92135	0.660862	1.04419	3.52961	0.748914
ALMS1	9.43602	5.0967	12.6222	12.7495	8.3047	11.1508	5.87448	12.4801	8.64825	12.5582	8.61552	13.9027	6.15857	12.2139	9.67872	11.3432
ALOX12	0.081345	0.667425	0.427872	0.896951	0.593193	0.542053	1.49439	1.17613	1.86724	1.06313	0.71796	0.772374	0.829038	0.850967	0.67647	1.12768
ALOX15	0.16269	1.15283	0.570496	0.256272	0	0.464617	10.976	0.980109	1.27758	0.863793	0.0652691	1.48533	0.829038	2.40273	3.33031	6.56709
ALOX5	10.0054	37.4972	12.4083	12.3651	8.1564	6.50464	27.2596	19.6675	41.1775	9.1695	6.52691	43.2529	15.3964	14.066	16.8597	29.1207
ALOX5AP	5.12473	19.2947	9.91237	6.9834	4.00405	3.87181	19.8908	25.0254	32.0379	6.8439	3.06765	35.9451	21.3181	6.50739	6.71266	22.819
ALOXE3	2.03362	2.06295	1.7828	2.05017	1.85373	1.16154	2.16428	1.69886	1.08103	1.32891	0.587422	0.772374	0.59217	0.80091	1.61312	1.45935
ALPK1	11.4696	13.7732	15.3321	7.17561	8.74959	7.89849	13.1918	18.1647	16.2155	14.618	11.4221	18.834	11.0144	12.9647	10.9796	11.6748
ALPK2	36.1172	49.8749	27.883	14.7356	82.5279	2.55539	65.4953	21.8891	16.7069	12.3589	3.13291	5.16896	44.1759	3.80432	32.8868	28.6564
ALPK3	157.077	259.446	154.248	110.773	220.816	135.126	167.938	120.619	103.877	122.592	133.997	82.5252	265.884	128.546	155.692	128.688
ALPL	6.34491	14.4407	6.27546	5.12543	3.26256	2.63283	9.37856	13.0681	26.4361	7.37547	4.76464	13.0709	13.2646	7.6587	5.82804	14.0629
ALS2	14.8048	14.0159	17.8993	18.2594	16.0162	15.4872	17.0566	20.3863	17.2965	18.937	15.4035	17.2893	10.6591	14.3663	17.1719	13.8639
ALS2CL	22.4512	22.0857	28.81	21.5909	27.5093	18.4298	21.3852	18.0993	15.9207	28.4387	16.7089	16.9922	16.107	18.1206	18.5769	16.7826
AMACR	11.1443	8.79788	9.76974	11.34	9.34278	7.51131	11.5944	9.14768	9.92584	10.8306	10.8999	9.50614	6.75074	7.95904	11.8642	10.2155
AMBRA1	34.4089	43.1399	39.9347	51.4465	35.0725	39.1827	42.2035	41.8833	38.8189	46.6448	35.9633	39.6287	22.2656	42.9989	39.9637	39.0709
AMD1	48.807	43.504	44.7126	53.8811	41.6718	59.471	38.2357	57.4997	62.1102	50.8974	65.1385	62.6217	41.5703	54.612	61.4547	49.7507
AMDHD2	36.1172	55.821	31.8051	32.6106	22.9862	29.2709	52.5096	44.889	62.0119	33.4886	30.0238	57.0368	54.7165	42.2981	30.233	57.7771
AMER1	14.0727	9.22261	16.0452	20.1173	18.8339	26.8704	12.9857	18.23	21.6206	29.7677	20.1681	19.7846	9.83002	21.4744	20.138	13.6649
AMER2	0.16269	0.2427	0.570496	0.384407	0.667342	0.309745	0.206122	1.7642	0.393102	0.664457	0.456883	0.475307	0.829038	0.650739	0.312217	0.0663342
AMFR	85.4936	97.9902	100.764	113.721	109.666	96.3306	107.235	98.4683	101.126	112.492	97.6425	100.112	55.0718	98.6621	107.975	88.3572
AMHR2	12.1204	10.6181	12.123	15.12	6.82171	9.29234	8.70866	9.73575	16.1172	6.8439	10.1167	13.7245	10.7775	14.7668	12.0724	11.8075
AMIGO1	5.45011	6.5529	6.06152	8.7773	8.37884	5.3431	10.9245	7.51417	7.86205	10.4984	4.56883	7.96139	5.5664	5.40614	8.58596	7.76111
AMIGO2	12.6898	5.0967	10.982	16.2732	13.8659	29.2709	7.05968	4.70452	7.17412	21.1962	28.7837	12.9521	5.80327	22.8259	11.1878	8.75612
AMIGO3	1.95228	4.00455	2.70986	2.37051	2.15032	2.09078	4.38009	3.26703	4.32413	3.12295	3.85087	3.32715	2.96085	3.60409	3.12217	3.18404
AMMECR1	1.54555	1.6989	0.855744	1.40949	2.15032	1.39385	1.75204	3.20169	1.67069	2.45849	1.43592	1.66357	1.18434	1.45165	2.28959	0.729677
AMMECR1L	27.6573	27.0004	28.1682	33.8279	31.5134	41.5832	31.3821	41.9487	39.4085	44.1199	35.3106	41.5299	13.9752	32.4369	31.3778	26.3347
AMN1	11.2256	9.16193	11.8378	11.276	12.8278	8.9826	10.5122	9.53973	9.33618	13.6878	10.8347	10.8726	7.81664	9.11035	12.3326	10.6798
AMOT	12.0391	10.8002	15.4747	18.4516	14.8298	13.7836	10.3576	15.355	14.0534	22.4586	14.2287	15.3286	4.73736	13.5654	14.8823	11.2105
AMOTL1	38.6389	54.1828	51.7725	62.4662	53.3132	60.013	53.5917	90.8888	59.8499	65.7147	55.544	67.9095	36.1224	49.2059	59.6854	63.4819
AMOTL2	58.1617	53.5154	60.9718	71.692	63.694	72.3254	52.5611	74.3576	47.3688	119.934	76.0385	70.1672	43.3468	94.7577	68.0632	46.5003
AMPD2	34.5716	33.1892	35.9412	49.973	30.1787	43.8289	49.83	39.7271	44.912	50.8309	47.9075	50.2043	22.384	58.7167	48.8099	41.0609
AMPD3	6.99567	13.0451	7.05989	5.63798	12.457	3.79437	13.5525	5.48861	4.52068	8.83727	1.8928	3.44597	9.35629	3.45392	8.74207	7.23043
AMPH	4.06725	2.427	4.7779	12.6854	7.26661	12.3898	3.24642	5.48861	3.73447	6.51167	5.54787	5.28779	0.710604	8.65984	6.7647	3.51571
AMT	4.63666	5.27873	4.84922	8.20069	3.6333	5.96259	7.4204	6.20736	6.19136	7.30902	7.76702	8.61494	3.31615	8.81001	6.45248	6.56709
AMZ2	60.1953	62.6166	61.8275	52.4075	73.5559	51.8822	58.8479	55.2781	54.6412	47.6415	46.9937	53.2344	67.0336	50.3572	50.8393	61.0938
ANAPC1	30.9111	24.27	38.4372	38.9533	43.7479	49.5592	34.0101	44.9543	34.7896	72.0935	69.8379	47.6495	19.66	60.3686	43.19	25.6713
ANAPC10	6.10087	3.70118	5.84758	6.27865	4.00405	3.87181	4.58622	5.29259	6.78102	4.38541	4.50357	6.00075	3.90832	5.1058	5.20361	5.57208
ANAPC13	72.153	87.3114	78.7284	96.9347	61.6179	82.7019	84.0978	82.0024	99.3567	76.1467	78.3881	91.9719	81.8379	88.6507	71.4976	101.226
ANAPC15	20.5437	26.0278	19.2008	18.5336	16.8622	15.0126	26.6676	18.56	18.7313	18.638	20.3555	18.5429	37.9095	21.4379	18.6768	27.611
ANAPC16	30.8298	40.7736	39.8634	36.3265	34.1827	25.9411	35.8137	41.5566	42.3568	35.0169	25.6507	38.9752	30.3191	31.0853	34.2918	37.6778
ANAPC4	23.5087	20.5688	31.5912	32.2902	22.8379	25.5539	16.3352	31.7555	31.3499	31.4952	26.8909	37.2522	16.3439	27.6814	26.1742	31.5088
ANAPC5	56.7926	48.1098	34.1214	31.9641	39.5882	15.1055	26.7742	71.2487	52.6885	30.2687	36.0507	63.4939	41.7504	11.5486	36.2301	14.8894
ANAPC7	49.051	51.8772	63.1824	73.55	55.9084	78.7526	51.3244	59.9173	55.8206	78.273	124.338	71.8902	41.0966	95.4585	66.242	55.7871
ANG	6.86877	7.53766	6.60634	5.58031	6.22333	3.37235	7.36474	5.26841	9.33913	5.46183	3.07221	9.65408	9.24614	4.51213	6.69184	12.579
ANGEL1	29.2029	34.4634	29.1666	34.917	26.3229	32.6781	34.577	38.5509	48.4499	51.5618	32.2429	44.5006	22.6209	48.6052	32.5226	32.6364
ANGEL2	17.0824	11.8316	22.8198	22.1675	21.3549	22.3016	15.6653	27.1163	22.3086	26.7776	20.4945	23.4089	12.0803	20.9738	24.2488	19.5023
ANGPT1	19.6855	13.5305	23.0338	25.7553	20.6876	28.0319	20.303	48.6787	32.0379	33.7544	32.8303	39.2128	16.5808	24.0273	42.0452	25.9367
ANGPT2	8.78526	15.2901	20.2526	20.5017	9.86183	15.9519	12.8311	33.9771	14.5448	19.0035	8.94186	25.013	9.23785	10.0114	25.6018	11.5422
ANGPT4	8.54122	24.8768	11.6952	16.3373	5.70948	4.87848	11.3882	19.5368	43.9292	7.90703	4.04668	16.6357	14.3305	7.95904	8.74207	24.7427
ANGPTL1	17.8959	17.4744	25.0305	22.616	21.0583	13.7836	19.5816	29.4686	24.0775	30.3657	16.3825	34.8162	5.9217	18.0205	21.7511	11.2768
ANGPTL2	123.726	157.755	114.884	116.988	112.113	73.3321	134.907	95.6586	223.38	172.493	75.5163	136.175	76.3899	138.057	104.384	128.954
ANGPTL4	38.3135	85.2484	82.2227	53.2404	30.4753	53.8182	65.1861	99.7097	97.2929	64.7845	24.2148	48.3625	48.2026	36.4915	20.7104	37.3462
ANGPTL5	9.35467	6.5529	15.9739	10.2509	8.97204	3.87181	9.68774	2.15624	7.37067	10.3655	6.85325	4.93131	1.18434	11.0125	10.043	5.30674
ANGPTL7	69.6313	46.7805	86.5728	71.8842	48.9384	87.2706	209.781	18.1647	43.4378	154.951	312.639	43.0153	26.6477	235.468	135.502	101.757
ANK1	182.375	211.817	123.869	67.2072	294.149	13.2416	282.49	55.3435	69.186	80.067	17.8837	26.6766	194.587	26.7804	144.294	205.901
ANK2	75.6508	52.3019	93.5613	71.8201	69.9967	46.694	75.8014	53.5139	83.8291	101.064	36.6159	54.3632	28.0689	47.4039	60.57	52.7357
ANK3	36.7679	45.8703	41.0044	33.1231	69.8484	15.3324	47.305	47.6986	28.0086	32.0932	15.3382	26.736	49.387	23.4767	35.957	25.2733
ANKDD1A	0.81345	0.84945	0.499184	0.32034	0.519043	0.232309	0.669897	0.849428	0.786205	0.265783	0.326345	0.831787	0.710604	0.250284	0.728506	0.597008
ANKDD1B	1.05748	0.970801	1.06968	1.66577	0.963938	1.39385	0.876019	1.30681	1.08103	1.72759	0.522152	0.35648	0.710604	0.850967	1.09276	1.19402
ANKFY1	55.884	47.5692	60.5439	87.9652	62.656	88.2773	64.9285	72.136	78.4239	91.0305	83.0875	83.5352	35.8855	80.3413	74.0994	54.5931
ANKH	135.358	423.876	172.646	175.546	173.286	194.984	239.514	419.748	260.627	222.526	213.495	331.408	137.739	219.9	215.69	369.415
ANKHD1	56.9415	55.3963	68.2456	78.291	62.8784	80.3013	57.9718	91.4115	67.9085	81.7946	61.8751	65.4735	61.2304	68.4778	90.3867	69.7173
ANKIB1	28.3081	25.4228	37.7954	34.8529	37.8902	39.7248	32.7219	37.5055	44.224	49.5685	34.7231	46.5801	15.8702	37.8931	35.3846	30.1821
ANKLE2	24.9835	23.6566	28.8272	31.2914	26.6811	31.9881	27.4446	29.6352	25.8465	31.5278	25.8955	34.6974	18.1986	30.3345	28.7239	25.7377
ANKMY2	48.0749	47.6299	42.0741	50.1011	35.3691	39.1053	59.6208	49.7242	46.9757	46.9771	36.3549	48.0654	42.6362	42.5984	47.509	50.0823
ANKRA2	11.3883	9.82936	12.8362	16.017	10.9741	16.2616	9.53315	16.4658	11.3017	17.741	15.2077	15.091	6.04013	14.4664	14.2579	10.3481
ANKRD1	1514.56	2836.25	1061.62	506.649	2624.21	52.734	1389.01	839.888	799.57	257.676	92.9431	185.132	2377.92	162.985	939.772	1187.58
ANKRD11	50.1085	53.8188	58.5471	67.0791	62.5818	72.8675	72.2458	68.6076	66.6309	80.1335	62.4625	69.9889	44.2943	67.4767	73.2669	55.9198
ANKRD12	94.3431	69.6501	98.6252	103.443	48.5795	98.1666	57.0221	122.531	120.621	62.8828	90.5484	91.4847	134.659	107.737	146.98	125.131
ANKRD13A	30.5857	29.8521	34.3011	34.5967	27.2127	33.2201	25.4561	38.2242	35.8706	38.1398	32.5693	38.5593	17.4098	32.9875	33.5113	30.1821
ANKRD13B	9.92409	10.9215	9.05662	9.09764	5.78363	7.35644	16.026	11.1732	14.7413	12.3589	8.68078	12.5956	8.29038	13.9659	10.095	12.6698
ANKRD13C	27.4946	30.0341	41.6462	31.9058	36.9262	40.7314	31.8974	50.0509	44.4206	43.1232	46.08	52.2838	16.4623	36.6416	41.837	33.0344
ANKRD13D	13.9913	13.2272	11.0534	20.8221	10.6033	11.3057	16.902	16.5965	19.262	13.4885	14.6855	17.824	10.4222	21.9249	16.8077	16.1192
ANKRD16	8.05315	6.67425	8.3435	8.5851	6.30267	6.89182	6.54438	6.66474	8.25515	9.43528	9.39874	7.84256	5.32953	11.413	10.3552	6.96509
ANKRD17	52.0608	62.0706	55.9799	59.9676	61.6179	58.9289	44.5224	80.6956	70.7584	66.9108	58.938	60.5422	74.0213	57.0148	79.0429	72.1053
ANKRD23	195.438	379.866	94.7066	85.3775	377.408	14.819	48.6732	83.1564	116.106	23.1497	32.9028	25.5008	321.573	38.3686	93.8711	50.5202
ANKRD26	9.19198	7.34168	9.69843	10.1227	6.59927	8.82773	8.19335	13.4602	12.5793	10.8971	7.76702	9.8032	5.2111	8.30944	10.9796	9.28679
ANKRD27	32.538	21.0815	30.9166	10.1394	40.2177	36.7822	31.7428	26.8909	26.3379	41.1405	36.3549	33.9524	6.26161	32.9374	38.5067	24.7427
ANKRD28	15.8623	21.2363	22.7485	21.1424	20.9842	13.8611	16.1806	28.9459	19.95	25.5816	12.4664	26.1419	13.9752	19.2218	17.9525	14.9252
ANKRD29	24.8102	27.6678	25.6723	33.059	34.0344	24.315	21.3336	41.818	40.0965	45.5153	39.2267	34.638	14.9227	32.4369	22.9479	28.5901
ANKRD31	0.32538	1.15283	0.499184	0.192204	0.370745	0.774362	1.03061	1.11079	0.687929	0.863793	0.195807	0.772374	0.473736	0.250284	0.312217	0.530674
ANKRD33B	3.82321	3.21578	5.27709	7.17561	13.2727	7.20157	11.9036	2.61362	2.94827	4.6512	2.93711	2.79243	2.01338	3.55404	8.11763	7.62844
ANKRD34A	3.09111	1.39553	3.99347	4.80509	4.67139	7.279	2.26734	3.20169	2.55517	5.18276	3.98141	3.74304	0.710604	5.60637	5.56786	3.11771
ANKRD35	5.93818	7.58438	7.7017	10.6353	5.85778	8.05336	8.91478	11.7613	11.5965	8.83727	9.79036	12.0015	6.15857	10.3618	10.6674	13.7975
ANKRD37	4.22994	8.13045	5.77627	5.63798	2.07617	7.35644	7.57499	5.22725	6.68274	3.58807	5.87422	11.8827	5.9217	3.80432	5.67194	7.69477
ANKRD39	11.2598	11.9129	13.9016	11.7494	9.5022	9.65087	18.1619	15.4426	11.456	9.07648	6.06284	9.19659	19.9905	16.8942	12.1265	16.0131
ANKRD40	81.1823	77.4213	79.9407	83.7367	105.737	68.4536	70.7514	74.9457	74.9843	85.0504	72.5792	72.5437	59.4539	69.6291	80.5519	69.7173
ANKRD42	8.62257	7.15965	11.4099	11.9166	9.26863	9.52465	8.81172	11.0426	6.97757	8.10637	9.65982	10.1597	2.96085	7.15813	10.5113	8.09278
ANKRD44	23.102	14.6227	28.7387	30.6245	38.7058	35.9304	14.377	36.0027	26.5344	50.4987	50.3224	40.8764	15.0411	28.5324	41.3167	17.3132
ANKRD45	3.48157	2.23163	4.84922	6.40679	5.09256	4.56874	4.41204	3.27356	4.08827	5.00602	4.10999	5.12856	1.46977	4.62826	5.09954	3.01953
ANKRD46	40.8352	26.8184	54.7676	65.8618	48.1227	51.8048	28.5479	44.6276	54.2481	67.1766	53.6512	59.2945	16.8176	57.2651	46.2081	36.6165
ANKRD49	6.26356	6.12818	8.77138	7.23967	5.33873	5.80771	5.77142	7.97155	7.07584	7.24258	5.41733	9.8032	3.67145	7.20819	6.97284	6.69976
ANKRD50	21.231	17.8991	20.6805	23.3207	18.9822	20.598	13.1918	32.4743	24.962	33.5551	21.4735	27.2707	11.8434	24.9283	23.4683	20.6963
ANKRD54	30.9111	31.4297	27.0272	34.6607	21.9481	29.8904	37.8234	32.6703	35.3792	29.1696	30.5459	37.3116	27.003	40.3458	30.6493	40.3975
ANKRD55	0.894795	2.12363	1.35493	1.15322	1.26053	0.61949	1.28826	3.00567	2.84999	1.06313	0.587422	1.01003	1.65808	1.55176	1.14479	1.32668
ANKRD6	1.78959	2.12363	1.99674	3.33153	2.44692	1.23898	6.64744	3.85509	2.55517	5.64788	1.56646	2.02005	1.42121	3.50398	3.69456	2.78604
ANKRD65	0.894795	2.1843	1.42624	4.61289	0.444894	1.16154	1.54592	2.15624	1.86724	1.06313	1.0443	1.06944	2.13181	3.2537	0.93665	1.45935
ANKRD9	9.27333	16.989	5.84758	6.08645	13.1244	4.18155	10.1515	5.22725	6.68274	5.24921	2.67603	3.92128	20.0153	6.60751	6.34841	9.75113
ANKS1A	99.4036	97.2621	112.245	119.166	121.382	95.866	129.032	106.374	99.7498	141.197	83.5444	110.449	73.5475	109.174	103.916	89.9492
ANKS1B	14.3167	4.48995	24.2461	20.8221	26.842	24.7021	20.5607	21.8891	22.9965	46.1133	37.2686	26.8548	4.85579	25.4289	36.3212	11.8075
ANKS3	21.9631	31.8544	20.11	29.9838	19.5754	25.3216	29.4239	34.0424	31.2516	26.7112	25.2591	32.5585	21.9103	35.0899	21.9592	27.5287
ANKS6	30.5857	31.8544	29.8084	30.7526	24.395	32.2909	48.7479	32.997	44.224	32.1597	34.201	44.0253	23.3315	35.4403	32.7307	35.9532
ANKZF1	16.513	16.989	16.8296	23.7692	14.4591	17.2683	19.3755	20.3863	18.2793	18.0068	16.7089	19.7252	17.2914	18.9716	21.1267	17.9766
ANLN	1.22017	3.27645	3.85085	0.704747	0.444894	2.86514	7.36887	5.94599	4.91378	2.25915	2.41496	7.30784	1.77651	1.70193	2.86199	6.23542
ANO1	148.048	73.9629	163.875	162.412	94.3918	193.436	121.509	138.391	132.967	165.051	275.501	194.757	53.6506	250.435	204.502	144.609
ANO10	66.2213	48.3076	59.2168	95.7636	51.1718	99.9616	42.8822	59.7971	75.5848	84.7654	111.878	81.5787	41.048	106.179	71.7599	59.7632
ANO2	2.84707	5.27873	4.7779	1.7939	8.89789	0.851798	10.8214	1.17613	2.84999	1.92692	0.652691	1.01003	4.38206	0.850967	5.93212	3.38305
ANO4	5.20608	4.1259	6.13283	3.65187	5.78363	9.98927	3.96785	5.03123	5.79826	12.8905	22.7136	7.66432	1.42121	8.15927	9.26243	5.30674
ANO5	1.016	1.02784	1.19947	0.269726	2.21335	0.367048	0.901784	0.267243	0.522826	1.59137	0.335483	0.731973	0.723632	0.841456	1.46117	0.911432
ANO6	49.051	59.2188	61.9701	76.3049	61.9886	85.7993	73.3795	71.6786	71.9378	89.303	74.8636	87.5753	40.9782	86.4983	73.6311	58.4405
ANOS1	43.6351	41.4404	48.3987	50.9237	35.5078	38.0978	44.2312	48.9401	46.8185	43.389	36.5096	48.3244	25.7002	44.7363	43.6583	45.0675
ANP32A	76.383	70.7471	82.5793	89.6951	65.6219	75.1131	89.457	80.8917	78.817	70.4324	61.2224	78.9009	64.9018	69.1285	78.3144	84.4435
ANP32B	67.679	89.5564	93.1335	96.8066	62.2852	92.6137	104.504	126.173	106.138	83.3228	80.9336	97.3191	71.2973	94.157	93.5609	105.14
ANP32E	37.5765	33.4605	49.7366	59.4345	57.8303	54.5236	38.6196	64.3997	41.1726	67.1766	44.8053	48.2912	16.5286	44.9721	61.7351	32.3379
ANPEP	2.76573	4.42928	5.63365	7.88035	4.81969	3.25232	6.95662	9.3437	7.76377	7.30902	4.24249	22.1018	2.01338	5.55631	7.12895	7.23043
ANTKMT	24.0781	35.4949	23.4616	37.4797	18.1665	31.3617	33.5979	19.0141	17.6896	20.133	23.3011	16.0416	55.664	42.248	27.8914	35.2898
ANTXR1	290.076	219.941	466.951	523.883	341.605	520.836	312.945	456.469	455.999	581.865	460.147	534.958	116.657	409.515	473.789	305.602
ANTXR2	291.784	203.383	344.08	574.112	389.876	524.243	209.678	298.803	290.404	418.807	375.297	380.958	141.647	350.248	359.465	198.406
ANXA1	315.537	345.362	399.775	347.184	222.892	374.481	330.001	390.606	510.247	392.029	423.335	537.097	205.009	341.188	350.567	401.853
ANXA11	25.0543	34.16	32.7322	43.2458	47.9744	53.1212	39.3178	33.8464	34.3965	62.8576	36.4854	49.1943	8.88255	34.5392	38.4027	26.3347
ANXA2	324.567	449.299	381.234	432.715	215.7	338.783	517.573	529.978	656.579	379.139	388.938	699.117	314.679	394.048	375.337	524.173
ANXA3	81.4263	42.7152	78.2293	94.1157	56.5757	127.15	38.0295	65.7326	66.7291	96.9442	113.829	97.6756	37.5436	103.468	92.7804	60.8285
ANXA4	16.269	16.625	24.6026	33.3153	24.9141	33.5299	31.279	20.3209	22.7017	41.7279	34.9189	27.449	6.6323	30.6348	23.4683	13.7312
ANXA5	331.806	347.607	425.804	355.577	245.137	417.071	384.315	410.535	477.62	456.814	452.51	511.193	223.367	380.282	346.092	392.168
ANXA6	241.107	227.835	245.028	333.025	251.514	324.767	321.447	259.075	302.689	300.401	252.461	280.55	198.969	259.395	279.278	303.744
ANXA8	50.7593	160.789	64.8226	61.5052	28.844	17.036	137.896	150.218	155.865	43.7212	42.0333	191.905	121.75	55.6632	61.923	136.781
AOAH	2.68438	22.8745	3.63691	1.7939	2.96596	3.25232	11.4913	23.5226	31.743	4.25252	2.15388	33.5685	6.98761	4.70535	6.71266	18.3746
AOPEP	118.113	125.294	87.7138	117.052	78.3014	123.588	95.7437	89.6473	91.5929	72.2929	136.673	99.8739	141.41	168.592	110.733	128.622
AOX1	3.27495	3.70239	5.1637	3.21493	0.739266	0.641172	1.33155	1.26695	1.62843	0.932232	0.764953	1.9446	16.2195	1.70944	2.00495	6.87422
AOX3	12.6898	9.70801	15.0468	8.26476	7.26661	8.86799	6.80203	19.6022	13.6603	22.1928	1.76226	11.348	7.07998	6.30717	6.1923	9.98065
AP1AR	12.7712	9.15647	17.2832	16.55	22.0334	19.2135	12.154	18.3633	15.3968	25.6062	20.8319	18.995	4.83092	16.6534	17.8016	9.02146
AP1B1	40.1031	57.5199	42.2167	44.3991	43.8221	45.6874	78.9448	52.7299	71.6429	51.9605	41.6417	65.0576	42.9915	44.5006	46.2601	53.0011
AP1G1	49.4578	48.1153	67.3185	75.7923	68.7362	73.0998	51.5821	75.3377	73.2153	83.3228	70.6864	78.9603	27.9504	64.9238	64.2646	50.7457
AP1G2	0.97614	0.788775	1.92542	0.640679	0.593193	0.232309	1.95816	1.37215	1.08103	1.12958	0.391614	1.7824	0.59217	0.80091	0.572397	0.928679
AP1M1	21.8818	26.4543	26.6707	28.4461	24.395	27.335	34.4224	27.6391	31.743	29.1032	22.9747	34.3409	21.3181	28.3322	29.4004	27.396
AP1S1	21.3937	30.5802	22.5346	27.9977	15.3489	24.0052	29.1147	31.8862	28.5982	19.9337	26.8909	32.9744	30.3191	29.3333	23.3642	40.5302
AP1S2	46.1226	59.9469	60.3299	47.3462	43.3772	75.7326	50.5514	81.4797	118.422	66.8443	85.4372	99.8739	33.9906	82.3936	58.8528	63.4819
AP2B1	29.2842	40.5309	45.9249	48.2431	61.0247	64.272	51.6336	72.0053	51.8895	84.2531	48.6254	62.9187	24.5158	44.4004	48.3936	41.3262
AP2M1	238.142	288.626	232.742	278.739	195.837	253.227	311.329	321.248	374.163	256.83	250.475	335.967	245.52	285.645	250.839	289.422
AP2S1	8.05315	32.2184	6.5607	15.8248	6.67342	11.1508	10.3576	19.7982	12.7758	16.0134	14.2287	11.4074	40.2676	18.0205	5.67194	8.15911
AP3B1	35.2248	43.6727	51.9023	42.4136	48.2436	52.3941	60.316	57.2684	61.5166	59.0821	42.4255	63.5485	24.8889	38.3986	57.8714	50.2568
AP3B2	0.244035	0.4854	0.641808	0.512543	0.519043	0.464617	0.412244	1.50283	0.491378	0.199337	0	1.12885	1.06591	0.550626	0.416289	0.862345
AP3M1	30.8298	34.5848	31.9478	32.8028	39.818	30.5873	31.279	45.8038	43.8309	43.5883	29.5669	49.2537	18.2388	31.4357	36.4773	37.2798
AP3M2	12.9339	12.8024	13.9058	15.12	10.3067	17.2683	11.2852	14.0482	15.8224	17.143	25.7813	15.1504	14.8043	25.1786	15.1945	14.6599
AP3S1	50.2712	61.2818	55.9086	49.076	38.2609	49.4043	50.9122	62.2696	78.817	50.7645	65.2691	74.8608	54.8349	62.8714	44.7511	62.4205
AP3S2	22.6139	21.1149	21.3936	29.0228	18.9822	17.3457	25.353	19.3408	23.3896	23.1231	14.2939	22.4582	27.3583	17.7201	20.0859	30.1821
AP4B1	16.3503	15.6542	19.1116	20.9502	20.6876	13.0867	16.1291	17.0539	14.5448	18.0732	14.9466	15.9228	12.0803	14.1661	18.9411	16.5836
AP4E1	12.0391	23.8453	21.6788	18.7719	17.1284	18.5072	19.2724	18.034	19.8517	35.2162	14.0328	34.4597	5.9217	23.8271	25.3416	24.1457
AP4M1	7.80912	10.3148	8.48613	7.04747	5.70948	9.52465	11.3882	11.6306	10.8103	9.50173	7.83229	9.92203	6.98761	9.46075	7.90949	10.4808
AP4S1	8.05315	7.09898	8.3435	8.07256	7.41491	7.89849	6.38979	7.77553	8.94308	7.37547	7.83229	8.31787	6.51387	7.00796	9.05428	7.76111
AP5B1	8.05315	11.5283	8.05826	8.26476	7.26661	9.36978	8.70866	9.40904	10.712	10.3655	9.20294	7.84256	9.00098	10.3618	9.21039	10.6135
AP5M1	10.0054	7.88775	12.123	8.64917	8.37884	9.06003	10.1	12.4147	8.94308	11.5615	10.8999	13.1304	4.61893	9.81115	9.83483	7.69477
AP5S1	11.307	15.9575	9.84106	10.7634	10.6775	9.67952	9.73927	15.2244	13.8569	8.4386	9.26821	9.50614	17.6467	11.0125	8.74207	14.2619
AP5Z1	14.4794	22.0857	14.7616	15.8888	10.6033	13.7836	24.8377	19.9289	23.9793	15.4154	15.0119	24.0624	16.3439	19.6724	15.4027	22.9516
APAF1	9.17572	7.3793	14.2859	12.0384	11.9358	14.6045	7.83625	18.5214	11.8471	18.4274	14.1967	15.7208	3.91188	13.208	14.1304	9.14152
APBA1	20.987	44.5962	22.4633	22.0394	42.6357	16.0293	16.1291	21.6931	26.4361	24.5184	12.7275	23.5277	25.2264	16.8191	16.1832	19.3696
APBA2	0.97614	1.2135	0.927056	1.92204	1.55713	0.387181	0.669897	0.980109	0.982756	1.19602	0.783229	0.831787	1.18434	1.65188	0.93665	1.39302
APBA3	26.1117	26.6363	20.3239	24.6661	17.425	23.076	32.3096	23.4573	25.6499	20.2659	22.1262	25.9042	25.3449	32.4869	24.1448	30.4474
APBB1	55.1519	45.5063	58.2619	74.4469	48.1969	72.0157	57.7142	52.0111	55.5257	71.0968	73.5582	66.6024	40.2676	79.4403	67.1786	52.7357
APBB1IP	5.28742	11.4069	4.70659	10.3149	4.74554	5.03335	7.52346	10.1931	18.7706	6.113	5.80895	21.5076	8.17195	5.20591	5.41176	9.41946
APBB2	20.5803	20.3055	25.0305	23.6878	26.6195	24.7796	20.9729	34.7612	27.1241	35.773	30.4807	26.3368	12.9093	28.7326	22.4963	17.4074
APBB3	29.3655	20.6295	34.0158	42.2848	21.5032	37.634	22.7765	30.8408	27.4189	32.0932	43.5345	40.9952	15.8702	51.058	34.3959	23.4823
APC	31.8872	33.796	41.9315	38.6329	47.752	53.7407	31.8974	55.1475	45.6982	54.419	46.1452	43.7282	17.0545	39.2946	45.2194	30.7128
APCDD1	104.122	58.9155	87.1433	83.993	80.1551	83.089	67.9172	51.9458	71.3481	157.676	85.8941	116.628	30.4375	187.363	102.147	66.9312
APEH	54.4198	60.6144	56.0512	68.5527	52.2009	53.8182	64.4647	56.6503	62.2085	57.3426	52.6721	56.7992	54.0059	64.3231	56.9795	65.8699
APEX1	28.4707	37.8005	29.8797	33.3153	23.876	32.5232	36.8443	35.0879	42.1602	28.2394	27.6088	35.2915	23.0946	34.339	31.4298	37.7442
APEX2	9.59871	15.4115	10.9107	13.5824	10.0843	10.9959	12.4704	14.8977	15.4293	13.8207	12.7275	17.3487	11.6065	14.3663	11.1357	15.1905
APH1A	39.9404	58.1874	42.8585	38.9533	36.9262	33.2201	48.5418	48.0253	53.2654	46.7113	29.4363	52.0461	48.5579	35.6405	37.6741	56.8484
APH1B	19.2788	46.113	30.8781	26.2678	20.8359	16.5713	21.6428	41.4259	43.0447	28.0401	17.8185	54.0662	26.6477	27.5313	19.9819	26.998
API5	34.0836	34.9488	45.7823	46.3852	43.0065	48.8622	34.577	52.4685	44.6171	51.5618	44.4482	56.1456	17.5282	39.0444	49.4863	35.4888
APIP	7.89046	8.85856	9.05662	10.6993	9.12034	8.9826	10.1515	8.42894	9.13963	8.4386	8.68078	11.4656	7.57978	8.65984	9.57465	9.61846
APLF	28.1454	21.479	33.0888	35.2373	28.4732	33.375	28.2903	33.3237	31.4482	35.0833	26.7603	34.638	12.4356	26.2298	35.8529	26.9317
APLN	3.9859	9.22261	4.06478	3.13933	9.04619	1.85847	11.2337	21.6931	13.2672	2.79072	0.913767	8.13963	3.43459	2.60296	5.98415	10.0828
APLNR	40.3471	17.6564	18.6124	34.2763	28.3991	19.7462	17.7265	55.7355	20.6379	25.1165	11.2915	6.29782	10.7775	11.7634	18.5249	24.5437
APLP1	0.97614	1.2135	0.998368	0.640679	0.81564	0.232309	1.39132	1.69886	1.27758	0.797348	0.913767	0.8912	1.77651	0.901024	0.728506	3.78105
APLP2	527.766	420.053	622.34	728.068	581.106	788.688	456.354	604.858	633.878	795.62	814.949	731.616	273.819	791.549	647.798	458.303
APMAP	30.0976	37.4972	24.8166	41.7082	26.842	31.9811	30.5061	26.4629	43.8309	37.874	27.2825	34.4597	18.5941	35.8908	27.5271	29.6514
APOA1	1.54555	1.82025	0.784432	2.30644	0.444894	0.542053	5.04999	0.914768	1.57241	1.12958	0.130538	0.653547	1.30277	1.05119	3.12217	7.29677
APOA4	0.406725	3.3978	0	0.128136	0.0741491	0	0.927549	0.522725	0.0982756	0	0	0	1.42121	0	0.208144	3.25038
APOB	1.46421	1.75958	1.85411	1.08915	1.11224	2.24565	0.566836	2.22158	1.57241	1.4618	1.17484	2.31712	0.710604	1.8521	1.19683	1.52569
APOBEC1	0.081345	0.303375	0.213936	0.384407	0.296596	0.309745	0.927549	0.784087	0.884481	0.132891	0	0.831787	0.118434	0.450512	0.208144	0.331671
APOBEC2	76.1389	123.595	59.2603	23.1926	95.2816	4.10412	87.4988	23.1959	30.3672	17.741	7.04906	8.4367	121.395	8.05916	44.1787	51.8734
APOBR	1.87093	8.0091	2.78117	1.08915	0.963938	0.464617	7.11121	4.76986	7.17412	1.86048	0.456883	19.1905	3.90832	1.55176	2.75791	9.81747
APOD	305.776	1279.64	445.129	316.624	104.476	127.073	443.678	1232.06	1105.31	221.463	87.6563	606.729	2536.38	644.132	176.038	1079.52
APOE	444.144	1165.01	440.566	496.975	162.831	180.194	338.04	1025.65	635.843	178.407	227.92	446.967	748.503	604.387	301.862	718.466
APOL3	4.06725	4.67198	6.91726	3.13933	4.0782	2.71027	2.93724	6.46872	3.43965	3.85385	1.50119	2.55477	10.5406	2.65301	1.66516	3.64838
APOLD1	7.79285	13.1058	11.6103	6.9046	9.55114	4.94972	7.29981	15.1296	8.03305	12.3522	5.99888	9.58694	11.2382	9.1529	9.09643	11.8002
APOM	2.03362	1.82025	2.56723	1.72983	2.15032	1.54872	1.33979	1.82954	1.86724	2.05982	1.697	2.07947	1.77651	2.00227	1.56108	2.65337
APOO	27.9013	31.4831	21.7773	13.667	35.0977	4.98302	25.5313	13.975	17.4508	9.7602	6.06545	11.6949	31.4087	6.36023	18.6669	22.6823
APOOL	30.6671	31.9151	31.4486	19.9892	32.7739	12.3898	30.2484	24.0453	24.6672	19.6015	15.3382	20.9729	20.4891	14.4664	26.3823	26.003
APP	757.729	707.532	987.671	920.784	1005.61	1029.51	894.673	959.592	842.124	1244.96	1085.16	981.271	308.994	914.589	948.931	690.805
APPBP2	41.73	39.6815	51.7725	51.5747	42.1167	55.212	36.9474	59.1986	60.1447	63.3227	49.8003	61.8493	21.7919	50.6075	52.4004	44.7756
APPL1	46.2853	43.4433	67.5325	54.9703	68.5879	60.013	52.9219	68.673	60.7343	79.1368	65.3343	61.9681	24.7527	50.8578	65.9818	43.7143
APPL2	19.6041	20.1441	22.4633	27.5492	20.2427	25.0893	24.1678	25.3521	23.881	33.3557	26.9561	29.3502	12.6724	30.5847	26.1742	20.2983
APTX	11.8137	8.64862	10.8694	10.5911	8.63837	8.82231	12.6533	11.6084	12.5252	7.7954	9.47837	9.77469	4.44957	9.48027	11.2944	12.963
AQP1	1381.08	1606.07	1471.45	1752.32	1065.82	1332.99	2271.41	2128.99	1886.3	1412.3	2660.76	1763.15	1247.11	1605.32	1603.7	2384.58
AQP11	1.38286	0.910126	0.499184	1.34543	0.741491	0.309745	0.515305	0.849428	0.393102	0.863793	0.391614	0.475307	0.947472	0.901024	0.520361	0.597008
AQP3	53.1183	73.4775	53.2701	33.6997	47.4554	26.2509	55.4468	45.085	34.6913	42.193	16.6436	17.111	38.4911	19.8726	26.2262	41.4589
AQP4	1.13883	0.970801	1.06968	1.47356	1.48298	2.47796	0.618366	1.96022	2.45689	7.77414	0.456883	0.653547	0.236868	1.15131	1.76923	0.796011
AQP7	27.2506	28.0925	22.7485	10.8275	17.3509	9.91183	5.97754	8.42894	15.7241	16.545	5.61314	6.17899	16.6992	6.65756	6.97284	7.09776
AQP8	4.39263	5.52143	4.1361	1.15322	1.40883	5.65284	4.43163	3.85509	6.48619	11.0964	5.80895	2.79243	2.72398	14.2662	1.09276	7.62844
AQR	14.4794	15.5935	22.2493	20.4377	20.7617	21.6047	18.6541	24.8948	20.5396	23.1895	17.1005	22.6365	7.93508	18.7213	21.6991	15.7875
AR	0.65076	1.03148	0.641808	1.72983	0.667342	1.16154	0.154592	0.980109	1.57241	1.4618	0.456883	0.653547	0.473736	1.25142	0.832578	0.796011
ARAF	52.0608	56.6705	45.0692	54.5859	53.0166	48.0104	63.8463	51.8804	54.543	50.5651	44.3177	49.1943	57.7958	44.4505	53.1289	50.9447
ARAP1	79.5554	87.3114	67.8177	97.2551	60.2832	74.6485	93.3733	84.028	117.243	108.24	102.799	106.469	68.218	113.629	82.061	97.3787
ARAP2	1.46421	3.51915	2.3533	1.6017	1.92788	1.16154	3.60714	5.35793	4.0293	2.65783	0.652691	4.93131	1.53964	2.05233	2.08144	2.7197
ARAP3	35.141	38.1646	36.6544	26.2038	37.0004	25.5539	41.0183	58.3491	32.3327	39.5352	17.1658	44.3224	22.0287	27.0307	25.914	30.8454
ARCN1	93.5467	108.851	122.015	134.991	107.442	144.496	104.607	146.82	149.084	160.267	163.499	165.644	59.9276	129.948	133.317	109.38
AREL1	24.9729	29.124	32.8035	34.0841	31.8099	38.4858	28.2387	39.7271	33.7085	39.6681	36.6812	43.7282	24.3974	30.0842	36.4253	26.2684
ARF1	243.833	279.875	239.191	278.968	262.485	264.781	303.328	277.886	307.365	272.247	302.952	304.898	233.22	288.226	268.849	299.375
ARF3	66.3775	95.1991	79.2989	99.2412	66.8083	87.5029	98.8871	113.627	127.857	116.346	88.1785	142.414	66.9152	104.969	90.3867	108.324
ARF4	148.59	155.554	171.828	165.016	123.492	160.91	171.015	212.674	259.569	187.276	211.016	248.473	87.6471	179.469	175.984	177.684
ARF5	32.4567	29.306	24.8879	32.6746	22.6896	29.0386	30.9698	22.8692	30.4654	27.1098	32.3082	32.6773	37.5436	38.1934	27.9434	35.0245
ARF6	55.1519	49.9962	58.9037	57.0204	50.6438	68.9956	53.2826	72.4627	83.7308	60.8642	71.6002	83.8917	34.2274	61.4698	65.8257	57.5118
ARFGAP1	40.0217	42.1085	37.5814	51.0621	24.2467	43.9063	48.078	42.6021	44.6171	36.4787	47.1243	42.0052	39.557	59.7178	36.4253	44.6429
ARFGAP2	63.1628	65.3531	62.8123	82.3279	54.4921	66.8623	72.1051	60.9863	69.017	67.9978	55.1524	64.915	65.8244	75.0818	59.56	61.9217
ARFGAP3	22.8579	25.8476	23.8895	29.4072	17.1284	26.1734	34.2678	29.8606	33.2172	26.7112	31.0681	30.7167	24.7527	33.6883	23.5203	36.2185
ARFGEF1	26.5185	24.9374	32.0191	29.9838	42.0425	30.2001	31.8974	42.6674	28.9913	45.8475	27.4783	36.1827	15.3964	24.5779	32.8348	24.809
ARFGEF2	12.2017	20.1441	19.896	21.0783	27.5835	23.2309	23.9102	22.9999	18.6724	26.9769	16.1867	22.9336	15.0411	17.0694	21.1787	17.2469
ARFGEF3	47.8309	26.7577	40.7905	30.7526	38.7058	40.9637	29.0117	26.855	33.9051	46.0468	67.7493	27.1519	30.7928	49.6564	47.7171	40.9946
ARFIP1	22.8579	19.7801	26.1715	28.3821	19.6495	25.6314	24.3224	30.6447	35.5758	33.4886	28.9142	40.104	11.9618	28.5825	30.5972	23.3497
ARFIP2	23.4274	21.5396	28.4535	27.357	16.906	24.315	25.9714	25.4828	32.1361	27.4421	26.8909	32.0238	21.4366	31.1354	24.3529	25.8704
ARFRP1	37.256	39.0747	40.22	42.2207	34.0344	31.4391	53.0764	41.622	43.7327	34.884	32.9609	41.4705	35.2933	38.8942	36.4773	44.7093
ARG2	0.244035	0.7281	0.427872	0.192204	0.148298	0.387181	0.360714	0.522725	1.08103	0.664457	1.17484	0.71296	0.473736	1.00114	0.468325	0.530674
ARGLU1	67.2723	58.7334	82.6506	75.2157	67.5498	75.4229	69.4632	83.1132	70.1688	87.1767	68.4672	76.7026	50.4529	72.7827	82.165	69.1203
ARHGAP1	160.9	144.831	188.834	267.676	144.961	171.444	204.009	157.34	177.289	213.623	262.577	219.889	109.078	281.62	196.592	123.382
ARHGAP10	53.4437	63.5874	55.3381	52.7279	65.9927	39.9571	70.1846	47.1106	46.0913	49.9007	47.1243	43.3717	51.8741	38.1433	52.4004	50.1487
ARHGAP11A	0.081345	2.06295	1.49755	0.0640679	0.222447	0.232309	3.40101	4.37782	3.04654	0.930239	0.587422	4.75307	1.18434	0.700796	1.56108	4.04639
ARHGAP12	50.0272	25.3015	54.1258	76.0486	49.9765	78.83	34.3709	51.227	49.3344	63.522	43.8608	59.1163	12.554	55.6132	48.5497	36.0858
ARHGAP15	1.78959	3.45848	2.06805	4.80509	1.55713	0.696926	1.8551	5.68463	4.91378	1.32891	0.587422	6.00075	3.31615	3.15358	1.45701	2.85237
ARHGAP17	27.82	35.4949	37.2962	39.2096	42.9323	56.8382	42.152	45.9998	38.8189	51.4954	37.9866	43.7876	10.0669	39.595	40.7963	30.6464
ARHGAP18	9.43602	11.1035	9.55581	5.95831	12.8278	6.89182	13.2433	17.1846	11.6948	8.63793	2.48022	12.4174	7.10604	5.35609	11.8122	12.1392
ARHGAP19	6.5076	10.7395	6.48939	6.91933	7.48906	2.71027	9.68774	12.7414	8.94308	7.90703	2.80657	10.2191	6.15857	6.55745	5.51583	6.83243
ARHGAP20	4.71801	7.94843	6.70333	11.5963	5.26458	10.7636	5.10152	19.0795	8.74653	9.23595	2.87184	9.74379	3.67145	6.157	8.16967	6.03642
ARHGAP21	33.3514	33.614	35.0142	34.9811	35.0725	33.1427	45.8622	38.0282	42.8482	56.2795	32.6345	41.9458	19.8969	44.7508	38.2986	28.4574
ARHGAP22	1.78959	14.8654	2.06805	1.66577	2.59522	1.16154	9.22396	10.1278	7.2724	3.0565	1.30538	9.14966	7.22447	3.2537	3.22624	7.1641
ARHGAP23	52.3862	48.9041	49.0627	65.5415	59.69	84.1731	58.3326	51.227	57.9826	77.3427	74.472	55.1356	28.7795	82.5438	66.3981	44.8419
ARHGAP24	20.3362	35.0095	30.3076	24.1536	27.7318	23.5406	47.6657	46.7839	34.0034	35.3491	28.131	50.2637	25.937	23.5768	31.9502	36.2848
ARHGAP25	3.2538	8.43383	6.06152	2.05017	3.11426	2.32309	6.23519	14.4403	8.64825	3.65451	1.0443	12.0609	6.86917	2.25256	2.96606	6.76609
ARHGAP26	7.72777	12.8631	9.41318	8.3929	12.0863	3.09745	10.203	10.3238	10.1224	9.03661	3.06765	8.13963	5.68483	4.90557	9.15836	6.83243
ARHGAP27	9.51736	16.9283	8.77138	7.88035	9.41693	5.65284	12.8826	19.4715	16.5103	7.84059	2.93711	14.4969	9.71159	8.20933	6.14026	13.5985
ARHGAP28	2.92842	2.79105	3.85085	3.33153	2.89181	3.79437	5.04999	8.03689	4.52068	6.24589	1.56646	4.27776	3.07928	3.40387	3.27828	4.70973
ARHGAP29	45.4719	40.5309	51.6299	35.878	51.1629	34.8463	40.3484	65.3406	54.0516	64.5187	31.7208	37.3116	28.0689	33.7884	47.7692	36.6828
ARHGAP30	4.96204	29.1847	8.48613	4.61289	3.7816	4.02668	21.3336	29.1419	29.1879	8.70438	2.41496	42.4805	13.0277	6.10694	8.32578	17.8439
ARHGAP31	13.1779	27.1217	25.9576	12.3651	17.2767	15.797	25.7137	49.6588	24.6672	30.2328	11.9442	26.6172	18.5941	13.5654	18.2126	19.8339
ARHGAP32	15.7809	14.6227	17.1862	18.836	14.9781	15.1001	13.9648	20.1902	22.4068	23.9869	13.837	17.4675	16.3439	18.0205	18.2126	16.4509
ARHGAP33	6.34491	4.73265	6.98858	9.73832	4.67139	7.89849	5.92601	7.57951	8.94308	6.91035	8.09336	9.98144	2.48711	9.26052	8.69003	7.69477
ARHGAP35	14.8861	27.4251	27.1699	39.1455	49.235	48.2427	30.6607	36.5907	24.3724	59.6682	34.6579	31.1326	14.6858	29.6837	38.2986	20.2319
ARHGAP39	9.7614	9.04058	7.34514	9.48205	9.63938	7.51131	11.4913	12.8068	10.1224	11.4951	6.78798	9.86262	7.81664	13.6655	9.05428	8.68978
ARHGAP4	6.10087	12.0137	6.91726	5.63798	4.52309	3.25232	13.3464	10.8465	15.1344	6.113	2.93711	14.0216	11.6065	6.45734	6.14026	11.4095
ARHGAP42	5.28742	4.854	9.41318	10.1227	7.19246	12.1575	7.52346	13.1988	9.23791	11.9602	4.76464	12.5956	3.31615	10.562	7.4932	4.90873
ARHGAP44	6.5076	6.37088	7.7017	9.35391	9.86183	5.11079	7.47193	4.44316	7.2724	8.50504	7.31013	7.24843	2.25025	7.3083	8.84614	8.49078
ARHGAP5	63.9372	31.8544	61.0431	79.6364	67.1049	62.5684	32.2581	70.4372	62.3067	73.1567	58.0242	74.6232	50.6898	62.5711	105.217	51.21
ARHGAP9	0.81345	3.51915	1.14099	0.640679	0.81564	0.696926	3.24642	3.59373	4.22585	1.06313	0.587422	5.22838	2.72398	0.750853	1.04072	2.91871
ARHGDIB	43.5196	89.253	40.7191	28.6384	25.5073	25.0893	56.3744	82.4598	83.3377	38.7378	21.8651	98.8638	55.4271	36.3913	44.699	73.2993
ARHGDIG	13.91	9.58666	9.55581	17.4265	8.23055	6.65951	9.01784	5.88065	13.0707	8.4386	6.20056	8.85259	20.9628	19.6223	7.38913	11.9402
ARHGEF1	51.166	68.5628	56.8357	53.3045	40.0405	50.411	71.7305	72.8548	83.0429	60.532	42.8818	86.8623	47.492	66.2753	55.8868	63.9462
ARHGEF10L	121.529	94.9564	103.83	169.78	115.524	168.191	119.963	83.5706	114	114.287	150.38	150.969	82.3116	187.263	153.246	105.737
ARHGEF11	24.6475	26.1509	31.6625	34.8529	33.2929	39.4925	41.3275	39.5311	38.1309	49.502	33.0914	42.837	12.1987	33.8885	44.8031	27.1307
ARHGEF12	95.499	97.5655	110.89	119.487	170.172	126.608	82.6034	111.536	101.519	138.34	112.198	97.7944	49.387	104.819	101.158	77.8764
ARHGEF15	32.1313	27.9105	27.1699	21.0783	32.4773	17.036	28.754	38.1589	18.7706	25.7145	9.46401	15.5069	24.5158	15.2673	19.1493	22.2883
ARHGEF17	102.983	45.2029	105.114	154.083	103.438	221.777	93.8886	84.7467	91.8877	182.526	220.348	126.788	34.4643	207.736	165.111	83.5148
ARHGEF18	29.935	33.5533	31.7338	33.6356	27.1386	33.6847	41.2244	33.7157	38.524	33.2228	33.6136	46.1048	23.2131	39.9954	30.5972	33.4988
ARHGEF19	6.42625	12.9238	11.7665	7.56001	4.00405	8.1308	18.2418	19.1448	15.9207	11.0964	14.7508	19.4876	5.80327	18.4209	11.0317	17.5786
ARHGEF2	76.7897	88.1608	77.2309	99.3052	75.0389	85.1024	90.6937	96.5081	93.5584	108.971	100.841	100.409	54.5981	99.3128	96.475	87.4949
ARHGEF25	161.226	95.9272	156.316	218.151	119.009	210.239	131.609	140.221	140.043	176.745	195.872	168.021	97.9449	238.921	168.753	146.267
ARHGEF26	17.0824	10.0721	22.4633	20.3736	18.9822	22.5339	13.0888	23.1959	21.7189	35.482	24.4106	35.1133	9.47472	30.5347	20.5543	17.6449
ARHGEF28	3.9859	3.6405	7.55907	4.74102	3.7816	3.6395	7.11121	7.77553	8.4517	7.10968	5.87422	9.98144	2.96085	5.90671	4.319	5.30674
ARHGEF3	9.92409	13.6519	12.2657	13.5824	17.4992	7.279	17.9842	24.9601	18.6724	13.1562	6.52691	12.7739	8.88255	7.95904	10.9796	16.9816
ARHGEF37	24.4035	23.2992	20.3239	25.9475	28.3991	12.8544	29.5785	23.1306	23.5861	29.5683	5.87422	15.4475	17.6467	16.4687	23	34.6928
ARHGEF39	0.569415	1.27418	1.35493	0.576611	0.370745	0.464617	1.54592	0.980109	3.34137	0.996685	1.37065	2.55477	0.59217	0.750853	1.50905	1.72469
ARHGEF4	2.27766	1.15283	1.14099	2.11424	1.77958	0.696926	0.824488	1.63351	1.17931	1.32891	0.522152	1.42592	1.06591	1.55176	1.76923	1.06135
ARHGEF40	112.175	114.312	126.365	148.958	99.5822	144.806	146.81	149.369	152.229	165.715	141.764	164.634	68.5733	164.287	134.461	121.193
ARHGEF5	7.72777	9.28328	8.41482	13.5824	8.89789	13.5513	11.6974	10.9119	10.712	11.5615	8.94186	13.4868	4.38206	11.6132	12.5927	13.7312
ARHGEF6	36.6052	38.7107	47.5651	37.0953	43.8962	37.0145	34.8862	58.4145	46.8775	52.8243	43.5345	53.2344	23.6868	45.4016	47.4049	35.1571
ARHGEF9	14.4794	10.7395	14.5476	19.9251	14.9781	16.4165	14.377	21.4317	13.2672	19.1363	10.8347	15.3881	8.05351	15.4676	18.1606	17.9766
ARID1A	46.6107	50.1176	56.8357	65.7977	71.1831	74.2613	59.6208	72.9854	63.5843	84.386	57.3715	68.0877	37.662	55.3629	78.4705	57.0474
ARID1B	42.1367	38.832	58.9037	62.5303	63.7682	60.1679	44.78	71.3519	50.9068	80.1335	54.826	61.1363	28.661	55.5631	63.9524	40.1985
ARID2	17.5705	20.7509	26.9559	26.46	34.4052	35.0012	22.725	35.3493	23.6844	48.4389	31.5902	30.3602	13.6199	25.0284	28.5158	21.227
ARID3A	2.03362	10.2541	3.49429	2.69085	2.22447	2.40052	5.41071	6.99144	8.25515	4.11963	1.8928	8.4367	5.2111	3.95449	5.0475	6.50075
ARID3B	6.42625	6.3102	5.41971	6.66306	5.04214	7.12413	5.20458	6.14202	6.19136	6.71101	6.13529	7.01078	3.67145	7.95904	6.03619	6.36809
ARID4A	24.6475	20.5082	27.4551	32.2902	23.7277	29.5032	20.303	39.9231	30.1706	31.3623	30.1543	30.1226	32.9247	30.9852	40.38	30.0494
ARID4B	45.3905	33.8567	51.4159	57.2126	40.6337	48.3202	33.6494	76.2525	59.1619	47.8409	48.9518	54.7197	54.8349	51.6086	71.2374	59.5681
ARID5A	68.1671	34.3421	33.7306	99.113	50.7921	197.54	66.0621	33.7811	52.0861	43.987	83.936	62.7999	44.2943	71.0307	31.2217	37.1472
ARID5B	92.4893	52.7873	98.5532	143.64	103.364	159.131	56.4259	93.9598	105.548	113.489	140.785	128.392	90.4836	118.084	101.574	57.1138
ARIH1	56.0467	63.8908	61.8988	64.9008	71.3314	61.4069	59.6724	62.4003	67.2205	64.851	59.7865	69.0977	48.5579	55.2127	63.38	55.9861
ARIH2	21.2319	27.7704	29.7927	26.6228	33.4316	31.3748	29.9176	26.8027	22.6506	34.9544	23.2227	28.3942	11.738	22.2072	26.6305	25.1141
ARK2N	24.9729	27.9105	28.9527	29.3431	35.4433	17.3457	26.4352	29.4686	21.031	25.3822	24.6064	22.9336	40.8597	26.7304	34.3438	21.5586
ARL1	99.1595	81.6686	112.458	113.784	94.8367	124.98	103.37	117.546	115.769	125.13	191.89	134.332	63.9544	146.565	110.576	102.42
ARL10	21.1497	19.8644	24.5556	29.5635	19.9305	31.3438	19.2595	23.7899	25.8121	33.5351	31.1882	29.0751	14.0936	28.2716	24.6131	20.0648
ARL11	0.48807	4.06523	1.35493	0.32034	0.593193	0.309745	3.50408	5.29259	4.71723	0.930239	0.261076	10.6944	4.61893	1.55176	1.82126	3.91372
ARL13B	11.795	6.97763	16.6157	13.198	13.7176	19.2042	8.55407	15.8778	12.8741	18.0732	14.4245	16.3387	5.5664	16.1183	18.4728	8.82245
ARL14EP	34.8157	27.8498	43.2864	37.6719	37.6677	35.3883	32.155	43.9742	41.8654	46.2462	31.0681	46.283	16.3439	32.9374	41.4207	29.1871
ARL15	9.35467	8.67653	15.9026	12.1729	13.0502	10.1441	8.55407	18.0993	16.6086	16.4785	8.87659	14.6751	5.68483	8.20933	12.8529	10.8125
ARL16	15.1302	18.5666	13.9058	14.0949	8.67544	8.67285	20.0454	16.6619	14.4465	13.2227	12.858	10.5162	21.7919	16.5188	12.957	19.9003
ARL2	68.7365	66.8032	56.4791	84.4415	52.0526	65.8208	76.0075	51.9458	69.5791	48.8376	47.5811	63.3941	101.261	74.3845	59.1651	77.2794
ARL2BP	51.166	46.5378	50.6315	60.1598	36.4813	45.2227	58.7963	59.5253	62.405	36.9438	52.7374	62.3246	31.1481	60.769	52.8167	42.1222
ARL3	32.1313	23.1779	30.5928	34.7248	20.0944	20.8303	27.878	26.2016	29.3844	24.3856	23.9537	30.1226	35.1749	26.9807	27.371	34.8918
ARL4C	7.48374	17.4137	5.63365	2.94712	8.97204	1.62616	11.9551	22.0851	12.6776	3.58807	2.61076	20.3194	14.5674	2.25256	6.7647	12.6698
ARL4D	17.2451	11.4676	26.8133	29.1509	17.2026	43.9063	8.86325	14.8323	29.0896	17.741	26.8256	25.4289	10.0669	42.6985	16.7036	20.4309
ARL5A	2.7218	4.09132	4.7779	5.47268	11.5769	11.2236	5.86984	8.63999	5.18797	17.3835	5.71822	6.20751	2.84242	4.89256	7.5546	4.26662
ARL5B	11.551	9.76868	14.8329	11.7244	15.2006	9.98927	10.3061	17.1846	17.3948	14.7509	14.4897	18.2399	5.80327	10.5119	17.224	14.0629
ARL6	7.80912	5.40008	8.05826	5.76611	6.97001	4.25899	6.95662	8.03689	8.4517	7.10968	7.70175	8.13963	4.14519	6.85779	8.638	7.5621
ARL6IP1	55.884	65.5897	70.6702	68.1042	49.0125	63.2654	61.1667	85.0081	101.322	89.303	51.6931	88.3477	33.8721	65.8748	61.4026	65.1402
ARL6IP4	15.6996	16.5036	13.6919	21.5909	16.6835	14.016	24.6316	13.9175	13.8569	15.0167	13.0538	14.081	21.0813	18.7213	16.5475	26.0694
ARL6IP5	229.393	201.259	270.986	267.612	210.064	228.437	253.942	269.857	268.587	262.66	249.132	299.8	135.844	229.16	282.868	259.632
ARL6IP6	14.8861	13.2878	21.3936	18.9641	21.2066	20.8303	17.675	25.7442	26.8292	25.4487	24.4106	25.4883	7.10604	21.0739	22.1674	15.6549
ARL8A	52.6302	50.8457	47.9217	73.1655	40.0405	59.6259	47.1504	49.3321	66.1395	54.419	65.3996	65.9488	37.4251	91.4038	53.1809	59.5018
ARL8B	136.009	181.79	148.704	140.828	149.042	148.948	147.489	151.415	167.944	158.385	145.141	191.367	129.138	152.745	152.371	135.674
ARL9	12.2017	11.9445	14.2624	18.3471	12.5564	18.92	18.4479	13.4118	12.6776	12.1974	21.2124	16.3309	9.605	17.5935	16.2353	19.2369
ARMC1	26.1931	25.8476	34.0158	34.9811	29.4372	36.7048	26.4867	41.5566	36.2637	36.6116	39.5531	43.55	18.7126	32.587	35.7488	29.4524
ARMC10	6.83298	7.09898	5.9189	8.26476	7.11831	9.52465	5.97754	8.95166	9.33618	9.9004	6.65744	9.50614	4.38206	7.95904	8.638	8.49078
ARMC12	1.30152	3.1551	3.63691	0.384407	0.296596	0.464617	0.927549	1.43749	0.786205	0.531565	0.456883	2.49536	1.42121	1.55176	0.93665	1.52569
ARMC2	1.38286	2.48768	1.92542	1.7939	1.77958	1.78103	1.13367	1.82954	2.84999	1.4618	0.913767	2.79243	1.89494	0.600682	1.92534	2.45437
ARMC5	21.5564	24.5734	24.0321	26.1397	19.4271	27.2575	34.3193	24.6334	33.3154	21.7942	25.4549	31.0732	22.9762	32.4869	27.1108	27.595
ARMC7	16.025	13.5912	14.6903	17.3624	10.6775	15.4872	18.1387	15.8124	16.8051	13.422	13.5107	14.4969	15.0411	21.2742	13.5814	20.0993
ARMC8	6.34491	7.7664	10.1263	10.7634	11.4931	11.3831	9.68774	12.4801	8.74653	13.1562	8.94186	11.1103	3.43459	8.81001	10.7715	8.02644
ARMC9	15.0488	19.0665	19.1829	20.3736	14.5955	17.0693	20.2	21.4971	20.7362	18.8692	13.4454	22.4291	14.2121	23.0762	19.0452	22.2883
ARMCX1	17.5705	13.4092	21.6075	24.6021	19.1305	23.3083	17.675	29.0112	20.9327	23.5218	25.1939	22.8741	7.46134	21.124	20.7624	17.6449
ARMCX2	100.542	58.0053	121.801	149.342	108.109	127.073	86.2621	136.235	110.167	142.925	122.379	119.243	30.3191	138.407	115.676	81.6574
ARMCX3	64.7506	66.4392	85.2891	76.1127	86.3095	80.7659	71.4213	70.8292	83.436	96.2797	83.2833	100.943	40.6229	71.7816	78.0542	67.4619
ARMCX4	13.8286	14.9297	18.6837	19.927	19.5754	23.316	17.4688	38.8123	19.264	30.5005	18.667	19.2499	10.0669	17.8703	18.1086	16.7826
ARMCX5	1.54555	3.1551	3.77954	3.5878	1.55713	2.7877	1.75204	3.33237	2.65344	3.45517	3.19818	2.13888	1.53964	2.10239	3.07013	3.05137
ARMCX6	18.4653	20.0228	21.3936	25.435	20.6134	16.8037	20.7153	17.3153	21.031	21.8606	20.625	24.716	12.3171	20.1229	20.19	21.0943
ARMH3	24.8102	30.5195	23.533	30.6245	24.7658	25.6314	55.9622	25.1561	26.5344	28.3723	21.8651	26.3795	23.0946	23.0262	31.8461	39.0045
ARMH4	65.7268	26.0296	56.2652	22.1675	53.3873	19.5914	39.5754	14.3096	29.581	56.213	9.13767	36.2421	17.8835	53.3106	65.3574	48.1587
ARMT1	13.666	22.3891	21.7502	13.7746	16.1645	10.9959	14.7377	26.659	24.1758	19.9337	15.4688	25.9042	7.34291	15.5176	18.2647	16.6499
ARNT	23.4274	22.9352	44.3561	36.5828	33.7378	48.7074	27.002	37.0481	31.0551	49.1698	32.6345	35.4104	11.8434	29.033	38.871	24.2783
ARNT2	4.79935	2.48768	4.99184	9.35391	7.19246	6.4272	4.63775	3.72441	7.17412	4.18608	5.09099	4.51542	1.18434	4.00455	4.05882	3.64838
ARPC1A	68.7365	94.1677	91.7785	92.5781	68.0688	69.0731	102.34	119.835	132.77	90.4325	77.4091	122.926	58.0327	85.2969	87.0044	99.3023
ARPC1B	87.7712	364.172	131.285	99.049	62.3594	70.0798	361.641	376.296	417.278	120.865	70.2948	414.408	282.82	135.254	132.276	330.145
ARPC2	118.926	167.524	138.06	118.141	108.48	127.77	158.508	197.067	197.632	124.918	146.594	212.878	119.026	129.097	130.559	169.882
ARPC3	59.6682	97.6631	65.8352	65.4063	39.7076	54.5995	80.0939	96.1918	100.351	55.9931	60.9528	118.594	67.8106	64.6379	62.142	94.8553
ARPC4	47.1411	69.5469	63.9968	86.0791	40.9644	68.61	92.8704	104.114	77.2328	43.3611	65.5556	77.4085	62.5711	81.2448	59.8192	89.9167
ARPC5	129.989	156.178	140.699	118.526	75.2613	163.081	147.532	158.451	189.279	111.762	153.186	242.94	135.133	157.379	112.606	167.958
ARPC5L	34.897	40.6523	26.8846	27.0367	31.7358	19.1267	37.7203	26.2669	33.0206	22.1264	20.0376	25.9042	51.4004	20.9738	26.7986	41.7906
ARPIN	28.3081	33.9173	31.5912	36.2624	22.393	34.9237	41.1729	35.3493	44.8137	31.8275	42.2291	40.5793	32.214	44.5506	31.8981	43.5816
ARPP19	65.7146	58.7735	70.6295	60.5275	76.315	58.2614	53.6459	70.6619	75.7666	60.5911	56.5576	75.2761	38.2613	61.7602	73.6785	53.2067
ARRB1	75.5695	83.7922	75.3768	83.6086	53.1649	65.7433	72.2973	78.8008	99.4549	148.373	34.7231	82.3469	41.8072	60.8191	52.8167	64.6759
ARRB2	17.6519	27.3644	18.1132	19.3485	12.0863	16.1067	28.3933	29.73	32.6275	15.2161	14.2939	31.4891	23.5684	21.6246	23.2601	29.7177
ARRDC1	20.0922	21.3576	19.8247	26.0756	14.5332	21.6047	23.1887	21.6931	27.2223	22.1928	20.8861	26.9143	26.5292	27.2309	17.5882	23.2833
ARRDC3	41.4859	67.8954	77.7301	62.6584	49.9765	50.6433	47.2535	90.9541	76.8515	71.2962	50.9099	76.6432	29.1348	44.2503	78.3144	51.3427
ARRDC4	7.89046	12.135	10.3402	6.7912	9.41693	12.4672	10.8729	20.1249	14.8396	12.824	10.182	17.2299	3.55302	7.3083	9.73075	8.49078
ARSA	32.8634	52.848	38.0093	38.1845	23.876	28.4191	49.727	47.2412	71.9378	34.1531	37.8561	54.1256	42.9915	52.2093	32.5746	53.3327
ARSB	3.00976	7.88775	7.55907	6.40679	5.78363	10.0667	8.24488	9.67041	11.4	8.63793	4.4383	14.6751	1.18434	6.10694	6.66062	5.50574
ARSG	13.0152	18.8093	12.337	7.75222	7.93395	13.5513	5.66836	8.23291	18.6724	6.91035	19.7765	9.68438	14.6858	18.5711	14.6221	11.5422
ARSI	15.7809	12.317	14.0485	23.3207	11.2707	22.4565	27.6204	14.0482	24.3724	24.5849	39.0962	21.27	18.7126	30.6849	20.4502	26.401
ARSJ	8.8666	11.5889	15.1181	14.7997	10.1584	22.7662	5.35917	13.7215	10.6138	17.143	20.4945	13.7839	9.23785	15.4175	9.47057	8.75612
ARSK	6.34491	7.7664	11.0534	13.9668	8.37884	6.34977	4.8954	9.93177	13.0707	10.2326	5.93948	13.1898	10.3038	13.3652	8.32578	13.2005
ARSL	41.5673	35.2522	39.4355	56.7642	34.4793	44.9904	47.4596	44.0396	55.4275	64.3194	57.502	47.5307	28.8979	66.876	49.018	52.7357
ART1	9.2595	10.603	6.04654	3.18802	23.1783	0.696926	18.4211	3.50618	2.44608	6.84656	0.652691	1.90123	6.00579	0.650739	9.77394	10.766
ART3	73.6172	171.468	93.2048	24.4739	123.087	9.13747	269.608	76.9059	52.5775	53.223	9.9209	21.3888	163.202	19.6724	97.7759	140.231
ART4	0.569415	0.667425	0.285248	0.0640679	0.519043	0.232309	0.412244	1.30681	1.47413	0.531565	0	0.237653	0.947472	0.450512	0.208144	1.19402
ART5	2.19631	2.6697	2.21067	0.576611	2.66937	0.387181	10.1	1.24147	1.08103	1.86048	1.17484	0.415893	4.50049	1.10125	2.96606	6.10275
ARV1	15.0488	11.2856	14.9042	18.5156	11.8639	12.777	13.0372	13.6562	15.8224	14.0865	16.252	15.8634	8.52725	13.8658	17.1199	17.2469
ARVCF	35.3037	31.369	33.1601	46.8336	38.1868	41.4284	36.5351	24.9601	21.7189	39.4687	32.6345	22.5771	31.7403	50.5074	33.4592	30.0494
AS3MT	8.05315	9.22261	8.62875	11.0837	9.12034	7.279	9.53315	9.80109	7.17412	7.7077	5.4826	8.08022	4.85579	8.0091	8.69003	10.6798
ASAH1	68.4925	85.6731	97.9827	90.3357	74.2232	83.9408	71.8851	112.059	115.769	109.104	87.9827	134.334	36.0039	88.1501	85.8596	77.5447
ASAP1	23.0206	27.1217	29.3092	23.3207	30.6977	22.1468	21.1275	37.4402	39.4085	31.8275	23.4316	41.3517	11.9618	23.0762	27.1629	24.013
ASAP2	51.41	31.3083	56.1939	64.5804	53.3873	87.0383	39.8331	54.8208	55.4275	85.9807	88.2438	64.9388	24.8711	79.4403	63.38	39.3362
ASAP3	32.1313	17.9598	32.9461	42.6052	22.8379	25.0893	29.8362	28.5538	40.8827	38.7378	24.3454	34.1627	16.107	31.7361	33.6153	29.9831
ASB1	14.8048	19.7194	12.123	13.6465	14.4591	13.7836	20.6122	12.8721	17.3948	13.6214	12.7275	18.8934	20.4891	13.9659	11.8642	22.222
ASB10	4.55532	5.88548	3.20904	2.43458	7.93395	0.774362	8.34795	1.69886	0.884481	1.12958	0.848498	0.653547	6.39544	0.850967	3.64253	3.98005
ASB11	28.7961	34.16	24.8879	9.48205	43.0065	1.39385	31.2275	9.99711	9.43446	8.10637	2.48022	4.51542	36.833	2.50284	20.0859	19.0379
ASB13	16.9198	14.1373	24.1748	26.1397	22.0223	32.6006	13.9132	17.642	22.0137	30.4986	26.1729	21.0917	10.4222	25.529	22.2194	17.8439
ASB15	25.5423	25.4228	42.0741	8.84137	86.0129	1.9359	42.4612	14.8977	11.4	15.947	3.85087	5.52544	15.3964	4.00455	31.3257	20.3646
ASB16	18.384	24.2093	13.9772	6.02238	25.359	1.08411	23.1372	5.42327	6.19136	5.3821	1.697	2.31712	23.4499	2.60296	14.5181	12.6035
ASB3	14.8861	15.2901	19.6108	21.0783	16.7577	15.3324	13.2433	21.0397	16.8051	21.4619	20.3639	22.2206	8.40881	17.5199	19.1493	15.5222
ASB7	3.74187	3.70118	6.06152	5.06136	5.41288	5.96259	3.19489	6.2727	5.30688	6.24589	5.02572	5.7631	1.77651	6.50739	7.23302	4.6434
ASB8	51.166	60.8571	52.7709	57.8533	64.5838	42.8222	57.5081	53.0566	54.543	49.3691	45.8841	48.8972	37.5436	46.3527	49.9547	51.0774
ASCC1	3.9859	6.49223	6.20414	4.48475	6.59927	4.33643	5.61683	7.51417	6.78102	5.98011	3.39399	6.47606	4.14519	3.35381	5.0475	7.29677
ASCC2	44.9838	49.1468	49.4192	55.8031	37.5936	47.5458	65.1346	61.4855	62.5033	52.9572	52.6069	68.2659	42.8731	56.6143	48.0293	56.6494
ASCC3	12.9339	14.562	19.9674	18.1312	21.6515	20.1334	17.9842	22.4118	19.95	26.0467	21.7999	22.5771	8.40881	18.6712	20.5543	15.5885
ASDURF	1.35846	1.4562	2.02597	1.36016	3.33671	2.10317	1.47841	1.89488	0.884481	2.04254	1.03647	1.71408	0.710604	1.18985	1.22337	0.847088
ASF1A	8.29719	7.58438	8.62875	8.64917	9.12034	7.89849	6.28672	9.47439	7.56722	9.03661	7.50594	7.60491	3.55302	7.55859	8.37781	7.89377
ASF1B	0.569415	2.24498	0.784432	0.256272	0.296596	0.154872	3.55561	1.7642	3.83275	0.664457	0.71796	1.7824	1.53964	1.10125	0.93665	2.7197
ASH1L	30.423	29.306	48.7061	51.0621	50.8663	59.9356	33.0311	50.835	38.4258	69.1035	40.8584	50.6202	21.4366	41.6974	50.9954	30.1821
ASH2L	21.0838	25.182	25.186	31.4317	27.3803	23.2487	28.5392	27.1405	22.7921	30.3796	24.9347	28.0639	18.3892	28.8263	26.9453	27.2501
ASIC1	0.081345	0.303375	0.570496	0.768815	0.593193	0.232309	0.618366	0.653406	0.786205	0.46512	0.522152	0.297067	0.118434	0.901024	0.67647	0.796011
ASL	13.3406	16.2002	14.4763	28.5102	11.0482	16.5713	12.2643	12.9374	16.0189	18.0068	14.2287	14.6157	15.1596	19.8225	13.1131	18.1756
ASMTL	22.2072	22.7531	20.1813	23.1285	13.1985	16.339	23.7556	22.4118	22.7999	18.2061	16.3173	19.6064	27.7136	30.4846	18.4728	26.7327
ASNS	7.48374	4.30793	4.7779	4.48475	3.48501	9.13747	7.11121	4.8352	5.89654	7.97348	5.41733	5.46603	3.31615	6.00682	5.77601	6.36809
ASNSD1	15.4409	17.3197	17.1648	21.2853	19.6273	14.2823	15.604	18.0993	22.7194	19.0194	13.7019	16.5341	12.1963	16.307	22.4208	16.7428
ASPA	5.77549	10.9215	8.55744	6.9834	4.00405	6.4272	7.9357	8.3636	10.2207	9.50173	2.87184	7.66432	5.32953	5.25597	6.71266	6.96509
ASPH	222.072	173.895	262.571	237.628	274.5	281.868	175.668	237.644	218.172	389.172	380.584	254.408	123.764	266.803	293.328	180.23
ASPM	0.48807	3.1551	1.99674	0.128136	0.519043	0.542053	4.07091	5.16191	4.71723	0.730902	0.783229	4.15893	1.65808	0.750853	1.61312	4.31173
ASPN	111.361	176.686	154.462	120.64	130.057	63.1879	100.021	109.968	162.45	165.715	56.523	138.671	49.0317	94.1069	104.801	99.7667
ASPSCR1	36.2799	40.7129	30.2363	38.5689	28.3991	30.4324	38.8025	26.0709	35.4775	29.5019	34.1357	31.0138	51.5188	44.1001	31.69	35.3561
ASRGL1	18.4653	18.9306	23.8895	19.6048	9.34278	21.3724	35.2469	26.3323	24.7655	16.545	17.949	42.7776	19.4232	22.5256	20.6063	26.6
ASS1	34.4903	23.7239	25.3158	26.46	20.2427	12.777	22.3642	18.23	23.7827	28.3723	12.5969	25.4289	28.7795	30.3345	22.1674	22.9516
ASTE1	1.13883	1.15283	1.7828	1.6017	1.40883	1.47129	1.75204	2.61362	2.26034	2.92361	1.30538	2.19829	0.236868	1.75199	1.71719	1.65836
ASTN1	0.732105	0.182025	0.71312	0.192204	0.963938	0.542053	2.42193	2.15624	1.27758	1.5947	0.71796	1.01003	0.473736	1.25142	1.92534	0.46434
ASTN2	1.05748	2.30565	3.28035	2.49865	1.33468	1.85847	2.26734	4.24714	4.12758	2.92361	2.21915	3.20832	1.77651	2.25256	1.3009	3.31671
ASXL1	33.3514	44.2928	45.4257	50.6777	43.3031	54.5925	44.9346	60.1133	49.8257	60.8642	38.574	55.0168	29.9638	47.9545	48.7058	42.1222
ASXL2	20.743	22.4498	25.3871	27.4211	30.0304	25.8637	25.6107	41.4259	32.5292	36.1464	28.8489	38.084	18.4757	26.6303	31.3257	27.8604
ASXL3	3.2538	1.88093	4.49266	5.50984	3.6333	3.40719	4.38009	5.55395	4.22585	4.98342	3.00238	3.32715	1.65808	3.40387	5.72397	3.84739
ATAD1	35.5478	29.266	40.8247	33.2128	43.071	30.1947	33.1697	34.3456	37.7378	41.6541	31.2489	37.68	17.3352	32.8738	48.3858	31.9731
ATAD2	9.59871	7.88775	14.4763	12.6854	10.3067	15.1775	10.7699	17.1846	14.9379	16.545	14.3592	20.557	4.73736	11.7133	16.7556	14.7262
ATAD2B	8.62257	6.97763	12.9075	11.8526	14.2366	11.1508	8.50254	14.8323	11.1051	17.4752	9.65982	12.1203	6.15857	9.51081	11.9163	10.8788
ATAD5	1.6269	3.33713	2.28198	1.92204	1.26053	2.16821	2.26734	5.22725	2.94827	3.0565	1.63173	3.5648	0.947472	1.50171	2.65384	2.65337
ATAT1	29.8536	22.3891	26.8133	28.8946	24.0984	25.2442	25.3015	22.4772	25.0603	25.2493	25.4549	25.6072	15.3964	30.1843	26.7466	25.8704
ATE1	36.1985	40.2275	45.2831	45.7445	58.4295	44.8363	36.6897	51.9458	47.074	52.8243	46.2758	48.719	21.7919	40.1456	47.613	37.8105
ATF1	21.327	15.6542	25.8149	22.4878	24.1726	23.2309	18.3449	27.7044	24.1758	24.5849	21.9957	28.5778	9.00098	21.4744	30.5452	16.1192
ATF2	30.5857	27.7285	42.1454	38.3126	35.8881	43.674	25.4045	48.8094	41.4723	44.8508	39.8141	46.4612	19.5416	37.0421	42.9818	30.5801
ATF3	128.2	47.2052	31.3773	223.661	92.6122	281.403	40.6061	53.7753	36.9516	53.8874	225.178	66.9589	42.1625	86.4983	95.5903	43.7806
ATF4	100.542	112.734	88.7121	107.634	70.8865	124.672	133.155	100.625	121.763	88.7714	139.545	113.777	157.873	137.406	81.0723	131.408
ATF5	6.5076	10.0721	5.20578	4.80509	2.29862	4.64617	8.34795	7.18746	4.22585	6.71101	6.65744	4.33717	13.383	4.50512	4.57918	6.43442
ATF6	30.7484	40.5309	43.7143	34.6607	42.3391	41.3509	41.7397	51.8151	45.993	61.9938	43.2081	36.3016	36.2408	32.4369	47.7171	42.9846
ATF7IP	36.1985	29.306	47.779	50.7418	44.8602	41.9704	34.68	57.369	44.1258	59.336	40.3363	55.908	16.6992	46.2025	56.199	41.0609
ATF7IP2	0.97614	1.82025	1.85411	1.47356	2.74352	2.09078	3.24642	2.0909	1.96551	1.86048	0.391614	1.12885	1.65808	0.901024	3.38235	3.05137
ATG10	17.0182	17.3251	23.6463	31.9366	17.1811	29.6674	22.8868	24.7745	18.8964	24.9211	18.1846	19.2077	13.8899	19.2659	26.7408	24.476
ATG101	30.3417	31.7937	22.7485	35.5577	23.357	31.5165	29.0632	25.1561	29.2861	24.0533	26.8256	27.2707	45.834	34.9397	24.0407	37.6778
ATG12	6.42625	9.03937	9.84034	11.5963	8.67544	9.21413	12.2983	11.4339	14.1517	11.7602	8.55025	8.13904	5.09029	9.31058	9.15836	10.9451
ATG13	46.8547	60.6144	55.6947	53.1123	44.4153	48.3976	69.7723	57.3037	54.4447	63.3892	50.5835	63.0376	44.5312	62.2707	55.0542	51.608
ATG14	13.4219	12.4991	14.7616	20.6299	18.0924	16.8037	12.9342	17.1192	13.7586	15.3489	13.9676	14.7939	9.83002	15.4175	15.819	11.8075
ATG16L1	25.5423	26.8184	25.1018	32.9309	27.2127	27.7222	32.1035	34.8919	28.4017	30.6979	31.9166	34.3409	24.1605	33.438	28.9321	28.2584
ATG16L2	18.2213	15.2294	16.1878	17.0421	8.97204	20.2108	15.9745	16.3351	17.1	18.2061	22.7136	25.3101	17.5282	25.529	14.414	22.6863
ATG2A	42.0554	45.2636	42.5733	41.516	40.1146	50.4884	43.3372	43.3862	40.5878	44.585	35.1148	47.6495	32.3325	52.1092	50.5791	43.3826
ATG2B	26.4371	39.8635	45.9962	45.9367	40.8561	36.4724	39.7816	49.4628	37.0499	50.3658	33.0914	43.1341	24.8711	40.9465	39.9637	32.4374
ATG3	32.1313	30.5195	34.8716	31.0089	29.8821	27.1027	34.5255	37.8322	43.0447	29.4354	30.807	43.7876	25.2264	30.6348	32.3144	38.7392
ATG4A	19.8482	26.1509	16.8296	15.8248	18.908	13.0867	18.551	20.1902	19.7534	13.8871	12.2706	18.537	22.0287	11.5131	16.9117	22.023
ATG4B	36.6866	40.1669	34.0158	47.7306	40.0405	38.7955	46.6867	40.5765	43.5361	41.3956	39.4225	43.2529	37.5436	53.2105	43.0859	42.2549
ATG4C	11.795	8.2518	15.6173	13.8387	12.5312	11.1508	9.43009	16.1391	13.1689	15.4154	12.5317	17.2893	7.81664	11.9636	14.0498	12.2055
ATG4D	23.2647	25.2408	13.4067	14.2871	25.8039	7.82106	17.1597	11.0426	13.9551	11.2958	8.61552	10.1003	24.7527	11.2628	12.8529	16.6499
ATG5	13.7473	14.562	16.687	16.081	11.7897	14.4031	17.4173	17.1846	22.5051	15.7476	14.9466	20.26	9.59315	13.4152	15.6108	16.2519
ATG7	17.2451	21.7823	18.6837	25.0505	14.6815	26.638	22.6734	22.6732	25.2568	24.452	21.0166	26.6172	21.555	26.8305	21.1787	28.0594
ATG9A	51.0847	61.1604	49.134	61.5052	51.0887	49.4817	70.7514	50.9003	58.9654	57.1433	48.1033	55.6703	58.0327	59.6678	54.794	57.2464
ATIC	29.2842	32.4611	35.1568	39.9143	40.3371	36.2401	35.5561	43.7782	38.9171	39.5352	35.7022	42.6588	21.6734	32.3367	38.923	30.2484
ATL1	7.56508	3.3978	6.70333	7.62408	6.00607	7.04669	9.32703	6.53406	6.48619	8.83727	4.82991	7.96139	2.60555	10.3117	8.32578	6.16908
ATL2	36.7679	29.9735	42.7159	45.3601	52.6458	50.1787	32.8765	41.1646	42.3568	53.7545	51.6931	40.9952	14.8043	47.4539	45.6877	28.2584
ATL3	119.089	140.705	157.457	218.6	158.827	237.729	137.277	220.721	182.105	242.062	225.505	224.107	81.8379	200.077	173.28	160.728
ATM	12.1204	11.953	16.3304	16.4655	16.6094	16.2616	13.6556	22.5425	17.3948	20.3988	13.7065	17.1705	6.39544	13.6155	17.3801	13.3332
ATMIN	33.5141	36.5264	41.5036	49.2041	46.1949	45.0679	37.5658	52.4032	41.0792	52.0269	39.7489	44.9759	22.8578	42.4983	42.7737	33.6315
ATN1	178.959	165.097	206.234	220.65	188.709	223.324	226.528	197.917	238.81	254.753	214.213	262.726	99.603	231.563	252.791	214.392
ATOH8	20.3362	24.6341	22.392	20.3736	14.1625	15.6421	23.0341	25.2868	32.5292	20.3988	25.5855	29.6473	28.661	25.6792	24.509	22.819
ATOSA	34.0022	30.4589	39.6495	33.3794	49.235	41.5058	29.527	36.9828	29.7775	52.3592	35.4411	34.2815	14.9227	31.6359	44.1787	27.5287
ATOSB	50.7593	52.848	50.9168	56.8282	45.8983	65.511	44.3163	57.9571	53.0688	59.8675	62.9194	67.2559	44.5312	65.6746	53.0248	57.0474
ATOX1	18.0586	21.3576	15.6886	21.0143	10.6033	18.817	20.4576	23.588	23.193	16.6114	14.1634	24.0624	25.937	23.5768	17.1199	23.3497
ATP10A	22.1258	21.7823	26.1715	29.7916	28.6957	71.009	25.9714	28.6845	24.962	70.6982	78.4534	42.0647	9.71159	65.7247	34.0837	22.9516
ATP10D	6.58894	7.82708	7.91563	9.99459	6.30267	8.75029	7.47193	13.1335	10.3189	9.76751	6.65744	11.7044	4.97423	5.70648	8.11763	9.35313
ATP11A	32.7007	37.5578	36.7257	31.7136	52.4234	33.8396	47.1504	34.3692	32.6275	45.3824	28.3268	34.0439	21.1997	33.5882	39.0271	34.6928
ATP11B	27.0879	29.9128	37.1535	35.5577	37.3711	41.3509	29.4755	41.0992	31.4482	49.2362	43.7955	48.3031	12.554	37.0421	38.3506	27.6614
ATP11C	17.3265	9.70801	24.3174	22.4238	26.7678	22.6114	12.625	25.5482	19.5568	28.8374	21.5388	25.9636	5.2111	19.4221	23.8325	13.7312
ATP13A2	41.5673	49.2075	37.0109	39.7862	32.5514	37.0919	53.9525	44.5623	55.1326	41.9937	37.1381	54.0662	37.3067	56.4642	42.8257	53.2664
ATP13A3	13.8286	17.5958	20.3952	14.8638	20.3168	19.4365	18.3449	33.0623	22.6034	22.1928	16.3173	26.8548	11.6065	15.3174	17.9525	14.9915
ATP1A1	285.602	457.854	297.157	247.879	418.942	184.608	567.866	316.444	306.816	307.909	141.438	304.969	317.758	186.512	333.291	392.035
ATP1A2	166.595	86.6609	220.709	209.826	169.876	323.236	130.255	188.578	179.648	304.388	255.463	276.332	75.1997	265.201	185.246	95.9836
ATP1A3	3.09111	1.92461	1.14099	1.53763	1.03809	0.232309	3.29795	4.31248	3.6362	0.930239	0.0652691	0.950614	6.99353	2.45279	1.14479	6.30374
ATP1A4	0	0.4854	0.785858	0.829039	0	1.22194	0.0515305	0.909541	0.294827	1.79337	0	0.415893	0.473736	0.100114	0.314298	0.265337
ATP1B1	24.2408	32.6432	31.1633	15.8248	53.3132	13.4739	42.3581	27.3124	20.2448	31.8939	16.7089	18.1805	11.725	12.8646	29.1402	24.9417
ATP1B2	12.6898	6.0675	12.2657	28.1899	23.5794	25.8637	9.27549	15.0937	11.5965	26.5118	12.3359	20.6164	1.65808	18.6212	20.2941	7.96011
ATP1B3	78.1725	120.197	95.2015	74.7672	54.0547	73.1772	110.121	125.911	157.044	90.5654	97.7731	161.901	64.665	87.4494	79.5632	123.514
ATP1B4	12.0391	52.1805	14.5476	5.57391	34.331	1.16154	36.329	19.9289	19.6551	10.8306	1.17484	3.50539	37.0698	1.8521	17.7443	18.6399
ATP23	5.28742	6.49223	5.41971	5.70204	4.00405	6.58208	5.30764	5.88065	8.35343	6.37878	6.00475	8.19904	3.31615	7.10808	4.83936	7.1641
ATP2A2	802.875	868.199	999.152	508.379	2100.72	517.893	2629.81	495.87	491.575	991.236	859.855	455.998	515.662	551.577	1270.83	1286.29
ATP2A3	76.3016	35.9196	86.0023	170.036	75.4096	408.166	58.5902	54.8208	45.8947	137.875	117.419	97.0814	28.3057	172.396	134.461	58.4405
ATP2B1	9.19198	15.7755	16.2591	13.198	16.3869	16.8037	11.8005	23.6533	17.5913	20.5982	15.8604	21.6265	22.384	15.9181	18.5769	19.4359
ATP2B3	7.56508	6.5529	6.98858	7.56001	8.67099	4.80104	6.0806	7.38349	6.48619	12.226	7.89756	6.41664	4.02676	8.10921	9.9389	5.0414
ATP2C1	18.628	30.3982	29.0953	20.6299	38.3351	23.3083	33.6494	35.872	26.731	36.1464	19.0586	28.1025	12.0803	21.4243	29.1923	27.396
ATP2C2	0.081345	0.84945	0.285248	0.256272	0.519043	2.40052	0.257653	0.130681	1.17931	0.132891	0.130538	0.53472	0	0.150171	4.00678	0.199003
ATP5F1A	874.74	1001.58	808.605	541.228	1412.79	364.809	1024.06	542.126	588.315	527.384	348.223	450.542	633.597	351.487	731.843	708.821
ATP5F1B	1000.09	1223	1004.31	652.831	1839.89	356.543	555.37	551.988	724.73	516.272	422.498	479.32	1613.49	416.804	949.487	827.447
ATP5F1C	327.576	354.282	285.818	165.103	397.217	101.054	281.305	175.505	198.124	144.054	100.775	142.592	344.643	105.42	224.744	253.529
ATP5F1D	188.395	244.702	127.363	138.194	159.643	70.7767	280.841	103.761	98.9636	80.3328	64.5511	69.573	453.602	88	117.758	183.679
ATP5F1E	207.267	227.531	182.559	174.585	192.862	132.029	227.095	150.545	176.306	121.662	84.2624	132.432	441.167	121.088	147.21	233.828
ATP5IF1	204.96	194.601	161.656	122.315	197.475	76.4961	220.77	86.4789	123.47	78.9939	65.5928	86.1375	312.538	73.8479	135.315	162.816
ATP5MC1	302.996	359.214	215.674	140.565	367.917	55.7548	363.686	109.64	138.381	101.083	75.451	81.7528	561.671	91.3538	180.773	277.339
ATP5MC2	201.166	236.208	181.917	168.563	205.912	125.834	349.841	163.809	174.046	124.12	104.822	149.128	493.041	143.713	170.262	266.465
ATP5MC3	306.101	357.801	231.693	168.755	324.921	96.3306	282.748	155.707	192.424	136.014	97.1856	119.599	384.792	108.573	190.14	271.241
ATP5ME	176.774	196.279	133.209	106.663	159.521	67.2224	151.138	72.7208	108.787	66.3706	38.1171	61.8101	426.116	39.6606	83.9384	147.324
ATP5MF	144.541	177.444	117.82	87.4809	143.986	51.9163	171.049	79.3026	94.7593	60.5579	38.0878	68.5856	325.909	51.2527	94.7895	160.074
ATP5MG	169.686	185.18	138.203	106.737	174.992	68.6085	172.421	90.3007	116.457	88.6385	59.2643	84.7234	241.487	72.0819	109.796	151.64
ATP5MJ	129.095	148.108	96.4138	84.1852	120.937	45.8422	120.897	56.9117	94.3446	49.5685	29.0447	53.8285	281.991	42.1979	70.561	106.599
ATP5MK	159.901	156.025	131.768	99.138	145.902	59.5159	123.761	76.4981	121.249	64.029	45.3542	69.9111	246.372	59.3594	94.8998	134.418
ATP5PB	380.632	423.62	333.894	178.503	421.216	113.8	382.172	208.627	203.309	173.274	97.4669	140.561	409.15	105.092	281.95	283.701
ATP5PD	321.719	359.378	267.705	208.157	317.803	136.597	324.075	187.593	224.265	151.496	123.489	163.446	531.65	145.365	211.631	309.118
ATP5PF	197.132	167.879	155.519	121.104	180.747	77.5338	174.973	83.11	126.935	85.0817	68.3615	95.8248	175.719	65.9689	134.257	154.47
ATP5PO	321.231	401.062	296.872	217.831	390.988	117.161	414.975	209.155	224.068	165.782	109.521	163.09	659.559	151.973	240.771	351.24
ATP6AP1	38.4762	73.1134	52.343	49.7167	48.8642	46.4617	69.4632	55.8662	57.8843	67.243	44.7093	87.7535	21.4366	49.5062	57.3958	55.6544
ATP6AP2	85.819	103.148	104.044	92.7063	79.4878	91.8393	91.3636	126.761	131.198	99.5356	126.426	177.587	60.7566	97.2104	100.117	105.339
ATP6V0A1	16.1063	25.3015	22.8912	23.3848	32.0324	26.3283	30.5576	29.4033	24.6672	37.5418	17.3616	34.5192	8.88255	21.7247	25.0814	19.9666
ATP6V0A2	0.16269	1.03148	0.427872	1.21729	1.18639	0.387181	0.360714	0.522725	0.884481	1.86048	0.652691	0.653547	0	0.901024	0.832578	0.530674
ATP6V0B	46.2853	82.8821	32.447	46.5133	39.0024	29.6581	58.3841	49.0054	63.7809	41.7943	34.2663	62.5623	73.3106	51.3083	38.6108	65.6046
ATP6V0C	120.228	210.603	114.527	121.281	91.4258	93.0009	210.554	126.565	186.527	97.4093	87.7216	194.638	189.731	135.354	122.181	184.608
ATP6V0D1	64.0999	80.1517	61.6136	73.8703	53.3873	65.1238	77.8626	81.2184	101.912	69.8344	60.5044	97.1408	74.3766	68.8282	61.5587	89.2859
ATP6V0D2	1.05748	8.67653	1.56886	0.640679	0.222447	0.774362	3.40101	9.60507	11.2034	0.265783	0.456883	34.0439	2.84242	0.850967	3.7466	7.09776
ATP6V0E1	156.101	167.342	137.703	163.181	106.626	147.361	146.965	145.906	175.913	126.047	155.732	182.696	165.926	169.893	133.317	182.021
ATP6V0E2	23.5087	18.3239	22.6059	34.0841	18.6114	21.9919	26.9505	18.2954	25.1586	27.9072	22.8442	27.9243	25.4633	28.6325	27.2149	30.3147
ATP6V1A	19.3601	31.187	28.9527	25.2428	25.359	29.6581	26.7959	38.4856	36.8534	37.4753	29.5669	56.7398	14.4489	27.8817	32.1063	29.1871
ATP6V1B2	47.3428	88.2822	56.693	64.9008	42.6357	56.0638	74.7708	80.8263	90.5118	58.0735	60.1128	101.24	65.8493	68.678	55.1583	73.7637
ATP6V1C1	16.6757	25.0588	19.1116	17.6827	23.6536	16.339	21.5398	26.9857	24.962	21.7277	19.3196	25.8448	15.3964	16.1183	21.1267	20.4309
ATP6V1C2	0.569415	0.910126	0.499184	0.192204	0.296596	0.542053	1.03061	0.392044	0.589654	0.664457	0.522152	0.475307	0.829038	0.150171	0.520361	1.32668
ATP6V1D	62.8797	66.7425	64.6087	71.3716	62.1369	57.1479	64.8769	64.7525	72.8222	63.3892	51.1709	73.8508	58.5064	62.0705	65.0451	74.5597
ATP6V1E1	144.957	166.674	122.157	102.637	154.378	77.6685	150.933	98.6643	110.364	97.6087	82.239	101.656	143.779	87.149	110.004	135.189
ATP6V1F	25.3796	45.3243	19.8247	25.3068	24.2467	19.9785	39.2147	27.8351	37.7378	22.9902	18.5364	33.0932	52.4663	25.0284	22.7918	40.9946
ATP6V1G1	80.6942	103.026	79.085	85.4666	80.0068	66.0531	85.8499	102.062	105.941	70.0796	71.2085	117.579	67.9811	70.6803	83.7261	92.8016
ATP6V1G2	2.359	0.7281	3.13773	4.29255	2.22447	3.25232	2.62806	2.54828	2.35861	3.45517	2.67603	2.79243	1.30277	4.7554	1.8733	3.18404
ATP6V1H	27.7386	41.6231	31.5912	32.098	31.3651	27.877	30.7637	39.4657	41.6689	34.5517	32.8303	53.8285	24.0421	29.2833	35.3325	39.7342
ATP7A	0.16269	0.970801	1.56886	2.11424	3.7816	3.56206	0.824488	3.59373	1.08103	7.30902	1.43592	2.25771	0.947472	2.15245	1.61312	1.06135
ATP7B	9.59871	12.317	12.4796	8.7773	26.4712	5.73028	7.98723	13.4602	6.19136	11.1629	4.04668	5.88192	4.50049	5.15586	9.21039	6.76609
ATP8A1	5.12473	5.21805	9.4845	9.61019	10.1584	3.56206	6.59591	13.1335	10.2207	6.97679	2.67603	8.67435	5.5664	5.75654	7.38913	6.36809
ATP8B1	56.6975	48.9041	54.625	76.3689	68.662	101.132	48.8509	103.173	78.9153	65.5154	84.1318	87.7535	40.8597	63.1718	64.7329	95.7866
ATP8B2	67.7604	95.0171	103.331	109.876	94.8367	125.834	102.7	146.102	128.348	157.676	141.438	144.79	46.5446	128.997	116.249	110.845
ATP8B4	0.48807	4.1259	1.35493	0.448475	0.963938	1.08411	3.7102	5.42327	6.58447	1.12958	0.587422	10.635	3.55302	1.40159	3.01809	5.10774
ATP9A	66.7029	53.212	77.5161	104.751	74.7423	104.074	51.6851	77.5593	63.8792	99.7349	75.1247	63.8694	51.6372	79.6905	86.8483	70.7786
ATP9B	16.1877	18.5059	19.8247	22.3597	17.5733	20.598	21.4367	22.8039	21.9155	24.6513	18.4711	25.1318	18.002	24.1274	21.3868	20.6299
ATPAF1	28.7148	36.405	31.092	22.5519	40.9303	15.797	35.1953	24.4374	24.7655	19.6679	16.3825	22.1612	21.0813	19.5222	27.319	24.013
ATPSCKMT	4.22994	3.27645	4.56397	6.9834	4.30065	3.56206	4.99846	3.92044	5.69999	5.3821	2.93711	4.75307	4.38206	4.95563	3.90271	4.8424
ATR	9.51736	9.89003	13.478	14.2231	12.0863	9.60209	10.2546	16.5312	14.3482	16.3456	13.1844	15.3881	5.2111	12.5142	13.8936	11.4095
ATRAID	62.3103	64.0728	64.1808	68.4886	48.4193	65.8982	72.0397	55.9969	83.6326	55.2163	68.2062	71.4149	75.324	93.0057	57.9682	82.0554
ATRIP	7.2397	7.7664	7.1312	6.72713	7.63735	4.10412	8.96631	5.81531	6.97757	6.24589	6.13529	5.3472	6.6323	5.4562	6.81673	7.29677
ATRN	32.294	35.2522	39.8634	37.1594	42.1908	41.5832	41.1214	48.156	44.912	60.3327	36.877	42.837	17.8835	41.7474	41.3167	30.2484
ATRNL1	3.90456	6.18885	5.20578	7.11154	4.15235	5.11079	3.60714	7.57951	7.6655	8.10637	2.80657	7.66432	1.77651	4.65529	4.83936	3.38305
ATRX	111.28	85.6731	111.675	130.122	74.5198	105.391	73.3795	155.576	148.298	80.3992	106.258	111.281	160.478	118.585	177.547	153.431
ATXN1	31.2365	26.2723	39.5782	49.5245	37.9643	57.9997	32.8249	44.0396	48.7447	54.0203	47.5811	52.5808	16.4623	46.0523	46.3121	34.6928
ATXN10	44.9024	43.0793	43.0011	47.9202	39.5956	43.7514	40.2969	40.0538	56.705	40.399	40.271	36.8363	34.8196	49.306	48.5476	45.2399
ATXN1L	23.7527	23.8453	32.447	38.697	34.6276	41.7381	29.5785	40.3805	32.7258	56.6781	31.4597	42.0647	15.1596	29.4835	30.7533	25.9367
ATXN2	37.5814	35.1308	38.7937	39.5299	50.1989	37.4791	41.7397	37.8322	40.8827	53.0236	35.5716	41.4111	21.9103	36.1411	47.1968	31.6414
ATXN2L	79.5554	87.372	94.4884	90.2717	82.3796	96.4081	102.185	104.218	96.5067	114.619	92.7473	121.857	51.6372	90.653	100.117	88.5562
ATXN3	21.6378	18.2025	26.3854	30.5604	25.5814	29.6581	17.4173	31.8862	22.2103	36.7444	27.8699	28.5778	12.9093	25.9295	28.9321	18.3746
ATXN7	15.7809	14.38	18.1132	21.7831	21.5032	20.9852	15.4592	24.176	16.8051	24.7178	19.4502	22.3988	12.4356	20.1729	19.5135	16.1856
ATXN7L1	26.7625	34.0994	30.0937	30.176	23.0604	22.5339	28.1872	34.6305	37.7378	27.6414	25.1939	37.9651	28.661	33.0375	30.9095	37.2135
ATXN7L2	6.42625	7.34168	8.27219	8.00849	4.0782	6.65951	6.44132	8.03689	7.96033	6.17945	7.96283	8.31787	6.51387	8.30944	7.75338	7.3631
ATXN7L3	32.8634	35.9196	35.0855	42.7333	32.4031	43.4417	36.4836	40.2498	48.1551	43.8541	42.8165	45.0353	26.4108	45.6018	40.0678	40.2649
ATXN7L3B	38.3948	36.2127	51.6299	58.494	45.75	55.6557	42.3066	59.3293	59.555	68.9706	56.8494	61.6116	23.9237	47.8043	55.2103	39.5352
AUH	30.0976	33.5533	35.4421	23.7051	29.5855	20.9852	28.651	29.5993	27.812	24.3191	20.625	26.3795	27.2398	21.1741	27.5791	29.7177
AUP1	60.1953	68.5628	63.1111	69.7699	49.3833	54.0505	83.2218	66.5167	84.517	60.2662	62.0709	77.4156	75.4425	59.0171	58.5406	76.1517
AURKA	0.569415	3.33713	1.7828	0.512543	0.296596	0.464617	5.51377	2.67896	3.73447	1.19602	0.848498	3.68363	1.30277	0.901024	1.76923	2.98504
AURKAIP1	108.352	123.11	87.7138	159.978	87.8666	121.807	130.527	107.616	115.769	82.4591	94.7707	88.4071	306.389	184.96	99.1808	160.264
AURKB	0.32538	1.63823	1.06968	0.256272	0	0.309745	3.50408	2.28692	2.75172	0.863793	0.195807	2.91125	0.473736	0.951081	0.67647	2.25536
AUTS2	35.5478	26.3936	46.2102	51.7669	43.7479	57.3028	50.9637	45.6731	58.1792	46.1133	58.7422	45.273	17.8835	44.1502	55.3144	35.6215
AVEN	18.384	27.4251	18.1132	17.4905	15.6455	20.7529	19.4785	19.0141	21.8172	19.0699	29.1753	18.6558	23.8052	22.5256	17.9004	23.4823
AVL9	15.6996	17.8991	23.1051	20.8861	20.1685	26.096	17.778	29.2726	19.1637	28.9703	17.7532	27.3896	7.34291	18.9716	21.1787	16.2519
AVPI1	36.1985	81.7899	33.4453	39.4658	32.1065	37.4791	61.0121	55.0821	59.2602	23.0566	40.7932	66.3647	80.772	40.7963	38.923	61.9562
AVPR1A	0.894795	2.1843	1.7828	1.34543	1.40883	0.61949	1.39132	4.57384	2.06379	1.39536	0.261076	1.01003	0.947472	1.15131	1.04072	1.52569
AXIN1	44.089	47.4479	47.9217	65.6055	41.8942	60.4777	60.0331	52.0765	59.0636	51.296	55.6092	61.7899	33.3984	67.0262	52.0361	53.6644
AXIN2	22.6953	15.4721	19.1829	29.0228	18.389	39.4925	16.3867	17.5113	15.7241	33.9537	28.7837	21.0917	6.6323	27.4312	28.0475	18.7726
AXL	269.008	260.296	346.148	367.75	276.502	396.473	277.44	306.447	390.351	440.402	436.519	437.282	180.73	391.945	357.8	252.932
AZI2	23.8341	23.3599	33.8019	26.5241	27.4352	20.2108	25.6622	34.7612	34.8878	32.6248	28.1962	39.8069	12.6724	25.8794	32.6787	26.003
AZIN1	85.7376	98.9003	95.7007	96.8066	118.194	96.6404	76.9351	106.178	89.6274	102.459	97.0551	94.8831	58.5064	78.9397	111.409	83.9791
AZIN2	2.359	3.45848	1.35493	2.43458	1.40883	1.08411	2.06122	4.37782	3.53792	1.72759	1.30538	2.13888	2.60555	2.75313	1.50905	2.45437
B2M	475.787	486.856	665.127	239.742	238.315	242.53	353.757	509.182	1191.2	472.163	292.732	740.172	469.472	366.667	326.683	579.496
B3GALNT1	0.48807	2.427	1.7828	1.72983	2.22447	1.08411	3.96785	4.37782	2.75172	3.98674	1.24011	3.80245	0.473736	1.30148	2.70588	2.1227
B3GALNT2	24.5662	39.3174	39.2216	33.1872	31.3651	41.6607	35.6076	52.0111	45.1085	47.6415	47.3201	46.6395	27.832	39.645	32.1063	34.8255
B3GALT1	0.48807	1.03148	0.855744	1.34543	0.889789	1.00667	1.70051	2.28692	1.37586	1.39536	1.0443	1.60416	0.947472	0.850967	1.09276	1.32668
B3GALT2	17.7332	21.9644	8.84269	3.52373	35.7399	1.00667	6.80203	6.14202	5.01206	3.7874	1.56646	2.19829	7.34291	1.35154	10.6154	3.78105
B3GALT4	30.7484	31.0656	29.3805	37.2875	23.0604	33.1427	36.1229	30.1874	31.9396	30.6979	34.6579	35.2915	37.0698	37.8931	28.3597	38.8055
B3GALT5	0.65076	0.788775	0.641808	1.40949	0.593193	1.23898	4.58622	1.30681	0.196551	1.99337	2.7413	0.71296	0.59217	2.2025	2.4457	5.77108
B3GALT6	4.22994	7.22033	4.84922	6.21459	3.26256	4.64617	10.7183	8.29825	6.38792	5.3821	4.37303	6.2384	7.93508	5.00569	5.77601	10.4808
B3GAT3	39.2083	39.6208	33.9445	41.3238	28.2508	34.2268	42.9765	39.5964	40.5878	33.3557	39.8794	41.8864	45.7155	53.711	35.2285	44.1123
B3GLCT	22.6953	15.2294	33.0888	40.555	26.3971	69.5377	21.5398	30.318	29.3844	42.0601	65.9218	37.5492	12.4356	44.851	41.8891	23.217
B3GNT2	27.4946	20.0834	27.2412	27.6773	27.4352	25.9411	20.6122	31.6248	26.2396	36.4787	50.9099	39.8069	11.0144	39.645	29.3484	20.2983
B3GNT3	0.16269	0.4854	0.142624	0.512543	0	0.464617	3.55561	0.653406	0.0982756	0.332228	0.130538	0.772374	0.59217	1.30148	0.67647	5.63841
B3GNT4	2.27766	2.24498	2.92379	1.66577	1.40883	1.62616	2.16428	3.13635	4.61895	0.996685	1.10957	1.84181	2.96085	2.10239	1.40498	3.05137
B3GNT5	3.74187	5.94615	4.92053	2.94712	4.59724	4.33643	6.59591	12.8068	6.97757	5.58143	3.19818	7.84256	3.19772	3.60409	3.33031	6.03642
B3GNT7	2.359	5.88548	1.85411	3.52373	1.18639	4.72361	7.9357	4.37782	6.09309	6.57812	3.32872	6.71371	3.67145	7.55859	4.319	6.43442
B3GNT8	10.4935	10.9215	9.62712	20.6299	6.37682	10.6862	17.1597	14.8977	17.0017	11.3622	11.4874	13.8433	9.83002	17.3697	13.2172	17.9102
B3GNT9	37.3374	52.0592	51.7012	57.2126	33.5154	47.6233	64.3616	75.403	71.0533	63.522	73.8846	70.5237	31.1481	68.2275	52.1922	68.6559
B3GNTL1	7.40239	5.70345	6.5607	9.67425	7.7115	6.4272	6.90509	6.5994	5.50343	8.23926	4.50357	5.64427	4.85579	5.20591	6.66062	7.76111
B4GALNT1	17.3265	10.8002	16.2591	22.3597	13.6434	8.82773	11.4913	14.963	13.562	17.9403	9.85563	13.9027	11.4881	20.5734	10.8235	7.03143
B4GALNT3	25.1356	31.187	36.1552	26.5241	17.425	27.2575	34.1647	29.5993	33.7085	38.2727	40.3363	36.5986	18.831	47.7042	30.9615	36.9482
B4GALT1	53.281	111.703	85.3605	78.9957	55.2411	68.9182	96.7228	166.226	151.541	89.5023	47.9075	127.56	58.0327	61.9704	71.0293	113.697
B4GALT2	46.5293	64.0122	44.6413	59.7113	51.8302	56.2187	53.6948	50.835	67.4171	60.1998	64.4858	55.4921	42.9915	65.174	49.1221	59.5681
B4GALT3	22.9393	24.5734	21.7502	35.6858	22.0223	26.4057	25.9199	29.1419	33.0206	30.0334	32.1124	32.9744	16.3439	32.1365	26.4864	26.401
B4GALT4	23.1833	20.9329	29.3092	29.1509	18.908	31.5165	27.1566	31.2328	34.8878	33.9537	33.7441	37.0739	13.7383	27.6314	27.0588	26.3347
B4GALT5	43.5196	42.3512	52.6996	54.5218	46.0466	57.9997	72.658	48.5481	53.4619	59.6682	49.2129	58.1657	25.2264	58.2161	76.8053	58.2415
B4GALT6	0.406725	1.39553	1.71149	1.47356	3.18841	0.929234	1.28826	1.7642	1.08103	2.19271	0.522152	2.55477	0.236868	0.951081	1.61312	0.729677
B4GALT7	13.5033	15.1688	14.2624	17.6187	9.93597	15.6421	20.8183	19.0795	23.0948	17.4752	18.6017	19.1311	13.9752	18.471	14.0498	17.3796
B4GAT1	39.9404	38.832	38.7937	49.6526	33.812	39.8022	52.1489	35.5453	46.3861	46.1133	47.4506	45.0353	29.3716	61.57	39.3393	58.1088
B9D1	10.8189	12.8024	9.84106	13.2621	6.22852	8.20824	13.1918	11.8266	13.6603	11.5615	7.31013	13.1304	14.3305	13.5154	10.6674	16.4509
B9D2	2.52169	4.97535	2.63854	3.71594	2.37277	2.55539	4.48316	3.52839	4.71723	3.0565	2.41496	4.15893	3.67145	4.25483	2.75791	5.17407
BAALC	0.244035	0.2427	0.071312	0.256272	0.296596	0.464617	0.669897	1.24147	1.08103	0.46512	0.261076	0.237653	0.236868	0.80091	0.208144	1.26035
BABAM2	32.782	39.1961	30.6642	33.1231	27.361	26.7155	39.7816	38.3549	42.4551	30.4321	30.9375	41.114	39.9123	31.0353	31.5339	42.1886
BACE1	28.7148	29.306	36.2265	50.6777	37.2228	47.5458	35.3499	50.1162	41.374	53.1565	48.4949	52.7591	19.3047	46.0523	37.6221	33.4325
BACE2	23.3102	34.1977	26.481	25.417	15.5416	27.472	27.9708	33.4478	38.6754	26.3623	35.9489	32.6411	32.9815	46.3066	23.6124	35.6248
BACH1	12.4458	15.4721	22.6059	12.4292	17.9441	16.8037	18.1387	30.1874	26.3379	23.854	15.0119	32.6773	7.10604	15.7679	19.9819	13.5322
BACH2	12.7712	5.3394	12.4083	9.61019	8.45299	14.7903	6.0806	5.74997	5.89654	12.1596	17.6879	7.42667	9.83002	12.7144	12.0203	6.30175
BAD	17.8959	24.27	15.6173	20.1173	13.2727	16.4165	22.828	23.588	27.3206	15.6812	15.0772	16.9922	36.3592	21.1741	15.4547	33.3661
BAG1	98.1671	146.65	110.899	107.198	124.559	95.1977	141.836	136.053	140.351	110.534	115.095	123.56	115.318	106.432	108.136	142.79
BAG2	103.703	50.3518	90.4678	146.116	106.156	147.654	57.4534	64.482	74.3907	103.379	129.419	91.0634	26.6477	106.303	97.3856	53.7878
BAG3	167.652	196.648	155.603	156.582	207.321	165.017	203.855	130.158	166.184	120.732	144.049	156.495	135.488	127.044	143.464	146.267
BAG4	4.22994	4.1259	6.06152	7.11154	7.93395	7.51131	4.38009	9.67041	6.97757	10.8971	6.98379	7.66432	4.85579	4.25483	7.96153	6.50075
BAG5	21.5564	30.9443	19.3256	25.8834	22.3189	30.5099	25.8168	28.1618	33.6103	27.1098	26.8256	28.8155	23.9237	30.5847	25.7058	29.9167
BAG6	158.053	168.252	158.598	193.869	173.435	182.595	194.579	162.763	170.508	186.247	161.084	187.627	141.41	171.995	174.373	152.768
BAHD1	25.2983	23.4206	26.3141	33.1872	27.1386	31.9811	32.3096	28.5538	31.1534	33.2893	26.695	34.3409	15.9886	31.2355	28.3597	27.2634
BAIAP2L1	9.19198	8.2518	6.48939	5.83018	5.93193	9.91183	7.57499	6.33804	6.48619	6.24589	4.56883	7.30784	7.10604	9.11035	6.9208	11.5422
BAIAP2L2	1.30152	1.09215	0.427872	1.7939	0.667342	0.387181	0.669897	0.784087	0.982756	0.531565	0.261076	1.60416	1.53964	2.30262	0.728506	0.597008
BAIAP3	0.65076	1.15283	0.641808	0.512543	0.222447	0.309745	1.44285	0.522725	0.687929	0.863793	0.391614	0.8912	0.947472	0.80091	0.572397	1.32668
BAK1	27.4946	36.5264	32.1617	31.0729	23.4311	33.7622	38.6479	40.6418	50.4154	32.4919	34.3315	42.2429	30.6744	35.7907	29.6085	45.9033
BAMBI	36.1172	16.5643	23.3903	42.7974	33.2188	63.8849	25.4561	20.4516	22.8982	53.223	124.664	32.4991	22.0287	86.4482	35.9049	28.7891
BANF1	236.958	264.361	200.173	266.522	186.485	222.474	292.075	190.272	248.146	166.38	208.926	190.657	466.63	293.684	190.192	309.781
BANF2	1.87093	1.4562	2.3533	1.40949	2.22447	2.01334	1.70051	2.80965	0.982756	1.26247	0.391614	1.48533	2.01338	0.850967	2.28959	4.11272
BANP	13.0965	8.91923	11.6239	12.8136	10.455	11.8477	18.1903	12.8068	20.2448	13.1562	12.0748	14.7939	10.3038	15.2173	13.3212	16.9816
BAP1	106.806	144.346	103.046	107.762	132.801	92.5362	122.024	106.244	106.138	106.247	96.1413	99.1609	129.093	104.919	99.2849	116.616
BARD1	8.37853	9.58666	11.7665	14.2871	12.3087	15.5647	9.22396	15.5511	11.5965	12.4253	12.2706	14.9128	7.57978	11.5131	16.0792	10.6135
BARX1	4.8807	4.06523	2.49592	36.5187	5.85778	83.089	4.32856	25.1561	12.9724	3.58807	4.4383	20.4382	7.93508	14.116	11.0317	6.89876
BASP1	10.3308	35.0095	14.3337	12.5573	7.11831	8.90516	25.1984	28.7499	33.512	14.4852	10.2472	45.6295	17.0545	15.2673	14.8303	36.1522
BATF	1.38286	4.1259	0.213936	0.384407	0.148298	0.309745	3.0403	2.61362	4.52068	0.531565	0.0652691	3.5648	3.55302	1.05119	1.04072	2.85237
BATF2	5.85684	4.854	5.63365	3.84407	8.1564	3.87181	4.79234	4.8352	12.1862	7.64125	2.93711	4.99072	3.67145	4.85552	2.91402	4.90873
BATF3	0.569415	2.54835	0.784432	0.512543	0.148298	0.309745	1.59745	1.7642	1.57241	1.19602	0.652691	2.19829	1.65808	1.05119	0.520361	2.45437
BAX	17.8959	29.3667	15.9026	16.2732	11.4931	15.8744	25.4561	27.7698	25.9448	16.545	16.9047	32.3797	26.7661	19.9226	16.8597	27.1307
BAZ1A	7.32105	18.3845	9.69843	9.22578	7.11831	11.1508	12.2127	28.0311	25.2568	9.9004	9.46401	21.567	25.108	9.11035	15.0905	18.4409
BAZ1B	34.5716	43.5647	43.429	61.8896	54.0547	71.9382	56.8382	65.9287	49.0395	73.2231	46.6021	59.5916	40.0307	57.9158	61.5587	53.9961
BAZ2A	26.634	37.4577	41.5207	34.4775	50.2975	35.5455	40.9822	47.1262	44.0874	59.4808	31.6979	38.7452	23.219	32.9875	45.1101	40.4068
BAZ2B	23.5087	17.2317	27.3838	28.2539	19.8719	24.2375	16.4898	37.3095	26.5344	22.4586	17.3616	23.1712	30.6744	24.678	36.061	33.1671
BBC3	5.93818	9.04058	5.99021	6.59899	5.48703	4.64617	9.01784	8.95166	8.35343	3.85385	3.78561	10.1597	5.44796	7.55859	6.1923	6.76609
BBIP1	11.307	14.6227	10.1976	10.5071	9.26863	10.3764	10.5638	13.8522	20.0482	11.2958	8.15863	14.1998	19.66	10.7622	9.15836	16.4509
BBLN	62.3103	72.3853	52.9135	71.0513	34.8501	71.1639	65.856	64.2951	70.8567	47.11	64.2248	67.1371	115.828	94.8578	49.0701	85.8365
BBOX1	0.569415	0.36405	0.285248	0.384407	0.148298	0.464617	0.463775	0.849428	0.491378	0.398674	0.391614	2.37653	0.355302	0.80091	0.67647	0.46434
BBS1	12.4458	8.79788	13.8345	17.4265	9.71353	13.2416	12.2127	11.892	11.0069	18.2061	11.5526	14.7939	6.86917	16.7691	16.0792	13.0678
BBS10	6.18222	5.15738	9.27056	6.66306	6.30267	5.80771	4.07091	8.42894	6.19136	7.7077	5.41733	7.30784	2.72398	5.85665	9.15836	5.30674
BBS12	2.03362	2.00228	1.64018	2.37051	2.07617	1.16154	2.42193	2.0909	2.26034	2.3256	2.28442	2.61419	0.947472	2.05233	2.80995	3.11771
BBS2	26.1117	21.0542	36.2978	38.3126	35.7399	32.9104	31.4852	29.73	29.581	41.4621	29.5669	31.7861	14.0936	32.3367	37.8823	29.7841
BBS4	19.6855	16.2002	17.8993	19.4766	13.94	14.0934	18.1903	19.0141	15.331	18.4054	15.5993	17.7646	13.383	17.2696	18.0045	17.7776
BBS5	5.85684	5.8248	8.77138	7.36781	4.44894	6.34977	6.02907	9.80109	9.33618	8.4386	8.15863	10.3973	2.72398	8.86007	7.85745	7.3631
BBS7	8.05315	7.5237	11.4099	9.03357	13.4951	11.0292	8.55407	12.2187	7.56722	15.8805	9.12135	11.5856	3.90832	7.40842	14.6591	6.96509
BBS9	8.60793	7.88775	8.30499	9.28985	6.40203	13.0689	4.97733	12.3494	7.94558	12.0273	10.3778	9.11223	3.43459	8.7169	10.4395	10.6719
BBX	38.2321	26.9397	35.0855	51.2543	28.5474	46.5392	24.5801	58.8065	51.7913	34.0866	42.3596	42.4805	60.1645	50.4073	71.3415	59.8335
BCAM	286.253	325.279	275.336	213.987	169.653	252.132	271.205	278.874	305.637	318.075	154.296	211.452	248.83	246.38	196.592	338.371
BCAP29	30.6362	32.0413	29.0247	46.127	37.426	32.0919	36.6598	49.521	44.2122	39.4202	33.0836	38.7963	47.2528	32.3573	35.5079	41.3156
BCAP31	139.507	166.007	137.775	162.732	94.6884	131.564	198.289	158.843	208.639	118.605	146.66	183.528	159.531	163.185	138.624	188.257
BCAR1	49.7018	54.7289	47.3512	58.3659	46.9364	67.9115	71.2667	54.5594	59.3585	64.7845	70.9475	64.1664	42.8731	72.7827	62.8076	63.2165
BCAR3	12.2017	15.7755	14.4763	16.5295	12.457	14.016	15.3046	14.2442	16.0189	18.8041	19.5807	22.1018	5.09266	17.7201	15.819	13.9965
BCAS2	38.7202	35.6162	40.9331	39.5299	33.2188	33.5299	41.0698	36.7214	47.6637	31.6946	32.8303	38.9752	30.9113	28.6325	38.923	45.3063
BCAS3	32.2126	32.3398	28.9527	38.9533	31.7358	35.3883	33.5464	30.7101	25.9448	34.7511	31.6555	31.6079	28.0689	37.0921	37.8823	31.0444
BCAS4	16.5944	15.8362	15.4034	21.719	18.6114	19.5914	22.4158	15.2244	15.331	11.8938	13.576	17.9428	18.1204	19.7725	16.7556	25.1407
BCAT2	56.2094	56.3064	50.8455	43.2458	51.8302	42.8997	63.228	38.0282	56.0171	41.595	33.3525	39.5099	76.0346	50.9579	51.5158	58.9048
BCCIP	39.9721	44.0634	46.9754	46.7683	40.7375	45.541	41.6274	49.3034	46.1443	43.0415	44.6225	51.0129	34.3411	44.9611	43.1078	51.1218
BCDIN3D	8.21584	5.88548	9.34187	10.2509	6.59927	10.1441	9.89386	9.27836	7.6655	6.64457	7.1796	7.24843	9.59315	8.0091	8.89818	10.0165
BCHE	238.341	68.6235	343.153	434.637	312.909	1103	206.695	317.947	288.734	809.773	1034.91	496.339	139.634	687.381	661.587	222.021
BCKDHA	79.3114	86.4012	70.6702	60.4801	80.6	37.3242	94.8677	47.96	55.7223	56.4788	35.18	46.6989	112.512	58.4164	61.7669	81.1931
BCKDHB	26.7625	25.0588	25.1731	21.5268	31.1426	14.4031	20.5607	17.642	21.8172	18.2061	15.9909	17.6458	17.6467	15.2673	23.6764	21.028
BCKDK	68.1671	81.1225	57.3348	62.274	61.0247	55.5217	89.8177	58.8719	64.6654	52.4256	54.4997	65.6518	85.3909	61.9704	62.3913	73.83
BCL10	12.7712	13.8339	12.7648	16.3373	10.0101	10.4539	13.6556	21.1704	21.031	13.6214	15.273	18.5964	19.8969	15.0671	18.6289	18.7063
BCL11A	2.359	2.06295	3.13773	2.88306	2.96596	2.94258	1.59745	2.87499	1.17931	2.12626	1.10957	2.91125	1.89494	2.25256	3.59049	2.3217
BCL2	64.5879	41.8051	71.5259	82.8398	76.0769	105.236	41.5336	56.585	48.843	106.977	94.9012	77.8315	36.3592	92.1547	93.0926	37.4125
BCL2A1	4.71801	39.9848	7.7017	2.75492	2.22447	2.16821	21.7459	25.2215	35.4775	3.92029	2.15388	60.4234	35.0565	7.10808	11.1357	24.4773
BCL2L1	69.55	114.858	92.9195	66.6306	62.2852	75.3454	81.6759	87.5564	95.4256	75.8145	78.1923	96.4873	98.4187	82.1934	62.9117	83.1168
BCL2L11	4.79935	8.2518	6.63202	6.91933	6.74757	4.87848	4.38009	9.40904	6.87929	7.77414	4.4383	8.31787	6.15857	6.10694	7.38913	7.96011
BCL2L12	9.43602	13.8946	6.84595	10.3149	6.89586	8.59542	14.0163	12.3494	12.481	6.57812	8.48498	10.635	18.7126	12.1638	9.00225	13.9302
BCL2L13	35.6291	48.8434	42.8585	41.7723	68.662	31.5165	44.5224	44.4316	38.3275	44.1864	27.6741	35.8857	33.1615	26.43	39.9637	36.3512
BCL6	55.3146	49.5108	63.539	66.6947	64.2872	53.2761	63.4856	68.6076	69.5791	79.469	49.735	93.9325	28.5426	50.0569	73.8392	52.5367
BCL6B	19.5228	15.2294	13.8345	16.1451	21.7998	7.97593	11.4913	35.6106	13.9551	16.2127	5.87422	6.41664	10.7775	9.8612	9.52261	13.9965
BCL7A	14.2354	16.0182	13.7632	13.8387	17.9441	13.4739	18.7571	11.4999	8.0586	13.0898	9.20294	11.645	10.4222	15.7679	17.5362	12.2055
BCL7B	63.8558	72.8707	55.3381	64.132	67.0308	66.5951	77.8889	48.4827	65.4516	58.738	69.7074	59.2945	53.5322	71.5313	68.5836	69.3193
BCL7C	59.9513	50.785	57.9053	96.2941	45.3792	89.2839	65.6499	59.9173	67.3188	55.5486	71.796	60.4234	74.1397	95.2582	59.8936	66.5996
BCL9	19.1161	12.4384	19.3969	31.7136	23.4311	44.6807	21.6944	20.4516	23.193	28.6381	28.8489	27.6866	7.22447	30.6849	30.6493	16.0529
BCL9L	17.7332	23.3599	28.81	22.4878	44.3411	47.4684	35.1953	38.5509	35.4775	79.6019	42.947	42.7182	10.1853	39.0444	55.5225	30.1821
BCLAF1	62.7983	58.6121	85.5031	73.4859	67.9205	70.8541	56.529	89.3859	73.5102	90.499	64.6164	80.4457	37.4251	63.6223	77.4297	56.0524
BCLAF3	4.55532	4.3686	5.9189	5.06136	5.41288	5.3431	4.01938	7.51417	5.50343	6.44523	4.89518	7.5455	2.25025	4.80546	7.07691	4.70973
BCO2	12.5271	8.37315	13.6206	13.7105	5.33873	9.98927	8.50254	8.82098	16.412	18.0068	7.57121	10.1597	8.40881	8.86007	8.22171	6.89876
BCOR	13.4219	10.3754	11.8378	16.4014	21.0583	30.2776	13.4495	20.7783	16.3138	36.1464	28.2615	20.8541	5.68483	20.8237	26.1742	12.2055
BCORL1	13.7473	13.8946	13.264	20.758	17.2767	21.4498	12.8311	18.034	19.7534	30.4321	23.4316	22.9336	8.40881	23.9772	22.2715	14.1292
BCR	49.5391	72.0819	54.5537	53.3686	43.8221	64.7367	44.1617	60.9628	56.0171	64.1865	52.15	61.0769	46.5446	70.8305	53.337	61.6245
BDH1	85.4122	90.8912	70.0997	43.6302	94.8367	25.2442	57.2504	39.5311	42.4551	36.2793	29.3058	27.5084	134.067	35.0899	47.7171	55.7208
BDH2	8.78526	15.0474	15.8313	12.8136	8.45299	7.97593	11.1821	12.8068	20.2448	13.7542	10.3125	16.0416	11.2512	12.9147	11.7602	21.028
BDKRB1	3.33514	13.5912	4.99184	3.84407	3.70745	1.85847	17.8296	9.93177	17.0017	4.85053	2.02334	13.0709	16.5808	9.16041	5.6199	10.6135
BDKRB2	1.6269	3.09443	1.7828	2.88306	1.18639	1.62616	4.38009	4.57384	5.50343	3.52162	1.0443	3.74304	2.01338	3.20364	1.61312	2.18903
BDNF	15.3742	6.61358	7.77301	15.8888	15.2006	17.9652	7.05968	5.68463	5.11033	16.3456	25.7813	11.9421	7.22447	15.9181	12.4887	4.31173
BDP1	4.02332	5.11733	9.41889	9.8498	13.2727	13.5513	6.80203	13.3295	6.01447	16.7443	8.98037	8.73376	8.93821	11.8149	10.8776	7.0573
BEAN1	15.2929	8.31248	11.3386	13.9027	10.0101	13.0867	10.1	7.44883	9.23791	18.7377	25.5855	16.2793	5.44796	26.8805	13.009	12.7362
BECN1	57.5662	65.3306	62.4372	66.7837	66.9566	70.2826	65.2423	63.6561	71.4444	67.9606	61.7759	70.163	39.1116	55.1341	68.0169	58.0723
BEND3	3.09111	3.33713	3.35166	3.2034	2.66937	3.40719	1.90663	3.33237	2.94827	3.85385	3.06765	3.44597	1.77651	3.20364	4.21493	3.25038
BEND6	10.0868	4.79333	9.55581	10.8915	7.11831	10.9185	6.18366	9.53973	9.13963	5.98011	8.15863	9.50614	4.14519	9.01024	10.8235	9.02146
BEND7	11.2256	10.2541	11.9091	6.9834	13.7176	9.29234	10.4092	13.0028	9.82756	12.2924	10.2472	11.4668	6.86917	10.2116	12.4366	10.5471
BEST1	1.78959	1.6989	1.56886	2.11424	0.519043	1.39385	1.1852	2.87499	2.16206	1.32891	0.652691	1.36651	2.96085	1.35154	0.832578	2.25536
BET1	13.91	15.2294	17.828	15.6326	13.94	13.4739	15.0984	18.8834	22.2103	18.4719	17.6879	19.6064	10.1853	16.1183	16.1832	17.4459
BEX3	35.7918	26.0259	35.1568	49.1036	26.0263	30.8111	38.6458	30.8408	34.2677	38.0049	29.3711	28.3402	24.6343	39.4433	36.1125	43.1836
BEX4	0.894795	1.09215	1.56886	0.896951	0.593193	1.62616	0.772958	1.24147	1.38077	0.996685	1.50119	0.17824	1.78006	1.80205	1.04072	0.995014
BFAR	24.4848	31.1263	27.9543	26.9726	26.3971	26.7155	28.7025	30.4487	31.3499	29.3025	27.3477	31.6673	18.4757	28.9829	26.9547	28.5901
BFSP1	3.37826	1.42101	2.91024	3.45967	1.77958	5.37407	2.8249	3.26703	3.04654	3.37943	3.21776	4.56829	2.84242	4.98917	2.90674	2.55519
BGLAP	9.68005	0.910126	4.20741	10.6993	4.44894	4.18155	2.31887	1.37215	2.84999	3.85385	5.15626	2.73301	1.30277	16.6189	6.03619	1.52569
BGN	3001.47	3343.19	3427.18	2522.54	1766.6	3497.48	3726.33	3977.94	4040.11	4112.99	5731.86	5149.71	2579.02	4488.25	4034.78	3626.23
BHLHE22	2.03362	4.97535	3.49429	0.640679	1.26053	0.929234	2.11275	3.85509	2.35861	1.86048	0.913767	1.30709	2.01338	1.80205	1.97737	1.92369
BHLHE40	38.9643	93.3789	27.883	33.3153	41.3752	38.176	94.507	53.1872	74.3946	38.5385	29.8932	113.717	31.6219	37.0421	44.8031	66.4006
BHLHE41	43.2755	55.9424	39.5068	51.9591	44.9343	72.4803	49.727	49.9202	67.3188	91.4292	63.5721	106.885	23.8052	82.8441	57.4479	55.3891
BICC1	29.6909	34.8275	44.7839	43.374	32.1807	45.2227	35.6076	72.3974	71.7412	70.2331	63.5068	56.1456	25.3449	50.9078	44.2827	49.6843
BICD1	17.0011	12.9845	15.4747	19.6688	25.5814	44.1386	14.377	25.5482	15.9207	26.6447	48.2338	22.1612	6.86917	24.0774	20.3982	16.9816
BICD2	64.9133	51.3311	82.508	121.921	100.546	116.154	59.3116	83.1132	69.5791	118.539	98.4257	97.6756	51.1635	96.3094	103.76	56.9148
BICDL1	3.00976	3.6405	1.56886	2.75492	1.11224	1.31642	10.2546	1.96022	2.06379	2.19271	0.587422	2.73301	1.77651	4.00455	4.26696	13.1342
BICDL2	1.30152	0.303375	1.14099	2.43458	0.889789	1.31642	2.06122	0.457384	0.294827	1.92692	2.15388	1.12885	0.355302	4.00455	1.66516	1.06135
BICRA	14.9675	14.2586	15.4747	12.8136	14.2366	13.7062	18.0357	16.6619	17.4931	21.7942	16.5131	19.1905	10.1853	19.1718	21.9072	16.7826
BICRAL	26.0304	19.598	46.852	47.9869	45.3792	46.0745	28.2903	44.2356	31.1534	62.5918	42.947	41.3517	13.5015	43.2491	43.8144	21.7576
BID	1.54555	4.24725	2.28198	1.28136	1.03809	0.61949	4.38009	4.63918	5.79826	1.5947	0.71796	6.11958	2.25025	1.60182	1.71719	4.37806
BIN1	25.5423	15.5328	24.1035	42.3489	18.6114	41.9704	28.3418	22.2811	26.043	28.3723	31.4597	26.9737	15.1596	36.0409	26.0701	25.2733
BIN2	2.92842	18.6879	6.41808	3.13933	2.00202	3.02001	13.4495	17.1846	20.7362	5.71433	2.41496	28.0431	9.23785	4.45506	5.93212	15.3232
BIN3	14.4794	17.3531	14.619	17.8109	11.419	16.4165	17.1081	15.2897	17.1982	14.3523	15.4688	17.111	18.9494	17.9204	12.4887	20.0329
BIRC2	28.5521	35.1915	45.1405	34.1962	35.7977	40.1894	33.9081	59.5253	40.3913	47.8967	39.2267	50.2643	15.3964	34.7315	36.9888	34.4281
BIRC3	10.0868	10.8608	11.7665	7.38383	14.3271	14.3257	16.8495	23.2613	17.8862	12.9011	6.13529	24.4183	6.98761	9.16842	11.1966	14.1949
BIRC5	1.46421	6.0675	2.42461	2.24238	1.55713	2.40052	9.37856	7.25281	5.89654	2.92361	2.08861	5.40662	8.05351	4.25483	3.22624	6.96509
BIRC6	38.3948	37.3151	44.1421	50.2933	56.2791	56.8382	36.4836	58.6105	44.1258	63.522	48.6907	53.8879	30.6744	47.3538	50.8913	40.5966
BIRC7	2.52169	2.60903	1.99674	4.03628	1.55713	1.62616	2.3704	2.48294	1.67069	1.79403	1.10957	2.73301	4.50049	2.80318	2.28959	2.38803
BIVM	21.231	23.3599	28.4535	26.0116	25.6556	26.7929	19.7362	40.7072	35.7723	36.8773	22.6484	38.0245	10.0669	25.1285	29.4524	23.3497
BLACAT1	6.26356	4.6113	5.63365	6.27865	3.6333	4.33643	4.79234	4.5085	5.50343	5.71433	4.69937	8.08022	2.36868	8.0091	5.77601	7.89377
BLCAP	94.5229	116.132	101.334	83.1601	107.813	95.4014	108.781	83.1786	105.351	97.8744	115.526	96.7249	95.6947	110.125	94.2374	91.8729
BLM	3.57918	9.46531	4.70659	4.54882	3.33671	3.02001	6.0806	8.49428	5.79826	5.44854	1.8928	5.64427	16.9361	4.05461	6.03619	7.89377
BLMH	43.9263	59.9469	53.5553	56.1876	41.9684	53.0438	55.9106	77.7553	64.9602	59.4024	49.8003	61.9087	44.7681	50.8077	52.3483	67.1966
BLNK	1.54555	15.0474	3.49429	2.11424	1.40883	2.32309	9.37856	13.5908	10.4172	2.45849	1.0443	21.1512	5.09266	2.70307	4.47511	10.1491
BLOC1S2	6.58894	9.34396	6.98858	5.70204	8.0081	3.17488	9.68774	6.73008	8.64825	4.85053	3.52453	7.48608	5.32953	5.1058	6.14026	9.08779
BLOC1S3	11.0629	14.4407	11.6239	12.4932	7.41491	13.0867	11.852	13.9175	16.1172	14.4852	10.9652	12.2392	15.3964	20.3731	9.3665	12.2718
BLOC1S4	18.7907	26.2116	12.4796	17.8749	12.0863	14.7129	21.6944	16.6619	18.4758	15.5483	12.9233	16.101	36.0039	25.4289	14.1018	25.4723
BLOC1S5	6.2595	13.5427	15.2322	23.816	7.77527	18.7628	14.6491	14.3821	18.9269	7.88643	4.8397	22.3186	7.23869	3.8694	22.0118	12.7282
BLOC1S6	28.9588	27.4251	37.5814	37.6719	32.4031	37.7114	27.1566	39.0737	41.6689	39.07	43.3387	47.9466	18.2388	38.8942	40.4321	28.7891
BLTP1	28.1454	18.5059	33.9445	39.3377	42.265	40.1894	27.8265	42.4714	31.5465	51.5618	35.3758	39.3316	13.383	35.8407	43.0859	27.3297
BLTP2	74.6747	116.678	93.4187	80.7896	103.141	97.105	104.349	144.86	124.22	120.067	66.5092	117.52	82.3116	80.3413	96.3709	108.191
BLTP3A	20.9057	35.6162	27.6691	20.8861	45.9724	15.4872	26.8989	28.9459	25.7482	25.9802	17.6879	26.3201	16.3439	19.0216	24.2488	21.2933
BLTP3B	35.7918	29.6701	46.1389	39.3377	43.7479	59.7033	27.6204	49.0054	43.2413	60.8642	57.9589	54.7791	19.5416	46.5028	43.7103	31.1108
BLVRA	8.8666	14.2586	14.8329	17.8749	5.93193	2.94258	13.4495	19.0141	18.9672	3.98674	3.00238	21.27	12.7909	6.65756	8.32578	21.4923
BLVRB	63.8558	80.3944	57.5488	99.8178	54.1288	53.1987	73.3795	79.0621	90.1187	56.8775	46.0147	80.1486	89.1808	69.1285	58.4886	114.825
BLZF1	28.8775	27.5465	39.8634	36.4546	31.5875	33.9945	28.5994	42.2754	37.5413	35.3491	33.1567	41.5299	22.5025	28.4323	32.9389	28.5901
BMAL1	11.7137	6.12818	15.0468	18.1953	8.89789	4.56874	11.2337	11.6306	8.0586	4.38541	4.37303	7.42667	4.73736	1.55176	11.2398	4.44439
BMAL2	3.49783	5.46075	5.27709	3.84407	2.22447	0.696926	3.55561	13.4602	6.68274	1.32891	0.522152	7.72374	2.96085	2.2025	1.8733	7.76111
BMERB1	1.30152	0.4854	1.42624	3.26746	1.26053	1.62616	0.515305	1.89488	2.06379	1.52825	0.71796	1.66357	0.355302	2.45279	0.988686	1.92369
BMF	5.77549	9.22261	14.4763	8.71323	9.19448	14.016	12.1097	16.2698	11.4	18.6048	12.4664	15.5069	1.89494	14.3163	22.2715	8.68978
BMI1	30.9111	22.6318	32.8748	28.318	34.5535	29.9678	26.2806	33.9118	25.6499	35.6149	28.3268	29.6473	13.5015	27.3811	39.2873	24.809
BMP1	104.284	168.859	117.38	99.4334	79.1171	93.4655	194.992	177.204	205.003	123.522	104.626	202.6	109.788	137.156	113.543	209.948
BMP10	0	2.06295	0.071312	0	0	0.0774362	8.45101	0.914768	0.393102	0.132891	0	0.118827	0.355302	0	1.3009	20.7626
BMP2	4.47397	3.82253	4.70659	8.90544	5.48703	5.96259	5.13502	12.6761	5.50343	6.113	6.20056	5.82251	7.69821	6.25711	6.66062	9.28679
BMP2K	19.1974	19.7194	22.1067	21.4627	22.9862	24.6247	17.778	30.9714	32.0379	31.6281	18.1448	32.915	8.17195	25.0785	22.7398	18.7063
BMP3	44.9838	4.42928	37.724	51.6387	41.6718	54.5151	14.9954	21.0397	18.9672	64.1865	87.9827	29.5879	3.90832	62.5711	65.3574	11.4758
BMP4	45.8786	32.0364	52.6283	39.9784	35.8881	33.9945	37.8749	36.068	43.2413	51.6283	91.2461	46.8771	40.5044	64.7736	45.4796	35.0908
BMP5	17.0011	30.4589	21.6075	11.34	20.0202	7.35644	38.4933	15.355	22.7999	37.276	5.28679	18.0617	11.725	16.0182	37.518	36.5502
BMP6	12.7712	22.025	14.8329	3.78001	11.3448	7.74362	13.9648	11.3693	12.2845	22.1264	6.52691	13.1304	13.1462	24.2275	8.84614	11.0115
BMP8B	0.56128	2.13879	1.51823	0.540092	1.17971	0.827019	0.806453	2.0713	0.640757	1.12891	1.00906	0.491348	1.11683	0.649738	0.318981	0.953223
BMPER	5.93818	8.19113	7.55907	17.3624	6.37682	7.58875	7.9357	31.4288	20.6379	10.6313	1.95807	10.5162	6.86917	6.40728	6.55655	14.1292
BMPR1A	86.3884	56.0031	110.961	141.462	103.29	145.657	69.7723	107.028	106.039	144.121	131.191	122.867	41.4519	125.543	137.323	86.5662
BMPR1B	4.22994	2.1843	6.5607	6.9834	4.59724	5.65284	2.00969	7.31815	3.34137	8.37215	3.85087	5.40662	1.89494	4.65529	7.33709	1.59202
BMPR2	116.405	89.253	141.626	129.097	130.577	126.763	76.1106	135.386	138.569	146.845	144.897	140.631	82.6669	131.549	169.742	105.737
BMS1	26.5998	29.7308	31.8051	38.4407	30.327	35.9304	35.7107	36.3294	34.8878	37.276	35.3758	29.2908	23.5684	26.9807	34.8122	31.8404
BMT2	13.1779	10.6788	17.2575	17.0421	12.9761	16.1067	10.4092	20.3863	15.8224	18.6048	15.4035	19.7252	8.05351	16.719	19.5135	15.1242
BMX	3.9859	6.12818	7.63038	1.53763	3.85575	2.09078	5.46224	4.70452	6.87929	6.91035	1.43592	5.05014	2.84242	3.2537	4.00678	5.77108
BNC1	0	0.424725	0.142624	0.640679	0.0741491	0.232309	2.47347	0.588065	0.294827	1.12958	0.0652691	1.01003	0	1.75199	0.93665	3.71472
BNC2	8.94795	8.13045	10.6968	17.1061	8.37884	15.3324	8.6056	23.1959	18.5741	17.0101	10.1167	20.3788	7.46134	13.5154	12.8009	13.1342
BNIP1	9.84274	13.3485	10.8394	13.0699	8.23055	10.2216	9.68774	12.5454	14.6431	10.4984	10.7694	10.1597	15.9886	11.1126	15.5068	18.3082
BNIP2	74.8374	70.5651	92.7769	90.6561	81.8606	100.59	63.5887	100.69	95.7205	100.798	91.5725	103.557	38.3726	85.7474	93.1967	69.2529
BNIP3	128.444	142.89	122.942	81.6866	97.2094	83.3213	114.707	94.2865	90.0205	74.6849	68.3367	104.092	143.779	81.0421	81.1763	103.349
BNIP3L	45.9599	60.5537	59.1176	49.3964	51.237	54.9023	50.0361	82.6558	62.3067	63.8543	52.0847	68.9789	38.8464	52.5097	54.2216	56.5168
BNIPL	0.32538	1.51688	0.641808	0.192204	0	0.309745	2.06122	1.43749	1.96551	0.730902	0.261076	3.03008	0.947472	0.400455	0.520361	2.98504
BOC	104.284	134.274	161.379	120.255	88.534	76.507	153.509	189.749	150.558	148.44	98.5563	192.083	85.154	154.976	142.371	167.162
BOD1	20.8243	19.7194	18.4698	25.1787	19.2046	19.5139	20.0454	19.2101	17.9844	19.9337	19.3196	19.2499	16.3439	19.8726	18.1086	19.9666
BOD1L1	58.0803	47.3265	51.7012	72.653	41.0044	62.9556	43.9555	73.9002	69.5791	47.3757	59.5254	57.0962	82.1932	68.5779	98.4003	77.4121
BOK	37.4187	64.1335	34.8003	46.9618	23.5053	33.0653	55.6014	52.2725	61.9136	34.8175	35.9633	47.7089	54.0059	57.8157	35.6447	74.228
BOLA1	21.3124	24.3307	18.8977	23.8973	15.4972	16.4939	27.9295	20.2556	20.9327	18.6048	18.4059	23.4683	29.7269	23.8271	18.2647	25.2733
BOLA2B	47.0988	51.6345	36.2265	45.0397	33.9603	37.2468	38.854	36.9174	58.1792	29.967	24.737	40.6387	90.0098	33.5882	30.1809	57.5118
BOLA3	39.6964	52.3019	24.9592	19.6688	35.0725	11.3831	31.0214	19.0141	27.7137	11.03	9.65982	14.6751	77.3374	11.6132	20.2941	29.6514
BOLL	3.66052	0.84945	1.92542	2.37051	0.889789	1.31642	1.23673	2.02556	1.86724	2.05982	2.08861	1.66357	0.829038	1.70193	3.69456	1.79102
BOP1	39.4523	43.4433	35.5134	44.2069	35.2208	49.9463	55.8591	42.2754	46.3861	37.8076	48.5602	50.6202	39.0832	57.0148	43.19	46.434
BORA	5.85684	6.61358	9.55581	6.59899	3.6333	5.11079	5.41071	10.7159	10.6138	6.97679	8.68078	10.1003	4.50049	6.50739	8.7941	8.09278
BORCS5	3.09111	3.57983	3.85085	2.69085	4.2265	2.63283	3.50408	3.85509	3.6362	2.99005	2.21915	3.32715	4.38206	2.50284	3.22624	3.44938
BORCS6	6.45961	5.62094	4.47411	7.08143	5.55302	5.55914	6.63404	5.61733	6.03412	5.71765	7.01773	5.57951	2.90755	7.04	4.76443	6.60092
BORCS7	16.6717	15.7731	28.0213	20.6914	20.612	27.0229	24.0715	26.1846	22.798	30.2288	22.9741	31.1896	8.40881	22.5241	30.6472	19.5686
BORCS8	10.2495	12.0137	10.1976	10.8275	9.56523	8.36311	12.4189	10.3238	12.1862	6.97679	6.3311	9.98144	14.9227	8.60978	9.62668	14.3282
BPGM	10.6562	24.5127	13.1927	9.67425	12.1604	6.65951	14.1194	34.1731	17.3948	10.2991	9.79036	18.4776	16.5808	9.41069	14.6221	20.3646
BPHL	15.6557	1.11157	14.3259	20.7657	16.6109	3.57833	21.2971	11.6796	0.587688	2.61131	10.1311	4.01753	2.24906	19.7224	2.37233	0.256713
BPIFC	1.22017	0.970801	1.42624	1.85797	0.593193	0.929234	0.360714	1.17613	0.982756	1.39536	1.43592	0.8912	1.30277	0.650739	1.24887	0.729677
BPNT1	19.3601	20.8722	20.7518	18.7719	22.9121	14.7129	22.1066	27.3777	26.731	21.3291	21.6693	27.2113	16.9361	16.9192	23.104	26.0694
BPNT2	66.7842	61.2211	76.8743	76.5611	65.5478	80.5336	57.8688	79.5848	87.367	85.9142	91.7683	94.5861	36.0039	82.4937	92.5202	66.2016
BPTF	46.7205	37.0306	53.4569	68.7186	50.1277	65.6419	37.7131	64.8414	59.6238	67.5633	58.5104	56.0232	44.7361	62.482	76.9843	54.1287
BRAF	22.5326	21.843	32.6609	31.5214	39.5956	32.5232	27.0535	29.4686	26.5344	44.3192	35.4411	31.7861	10.4222	31.0353	30.7533	24.4773
BRAP	6.75163	6.3102	8.3435	7.04747	10.0843	8.1308	6.33825	10.1931	7.76377	11.9602	5.02572	7.18902	4.14519	7.00796	6.60859	5.50574
BRAT1	15.0488	15.8969	16.9009	19.0282	14.9781	14.6354	18.551	19.2755	16.0189	18.5383	15.9909	17.0516	10.3038	20.273	17.0158	14.3282
BRCA1	0.244035	0.84945	0.641808	0.32034	0.444894	0.464617	1.44285	1.7642	1.76896	0.797348	0.391614	1.72299	0.473736	0.350398	0.520361	1.85736
BRCA2	0.97614	2.9124	2.21067	1.28136	1.48298	0.61949	2.31887	5.29259	3.73447	1.39536	1.0443	3.14891	1.53964	1.20136	0.884614	3.91372
BRCC3	17.4078	13.9553	22.4633	21.3346	16.1645	20.4432	16.3352	20.4516	23.0948	20.1995	19.1238	17.8834	19.4232	19.4721	23	18.5073
BRD1	26.1931	24.0273	30.5215	35.3655	32.2548	38.9504	26.9505	35.7413	30.2689	40.997	34.0052	35.5292	13.2646	34.8896	32.5226	22.8853
BRD2	111.145	129.786	145.535	145.066	142.669	161.487	149.819	178.448	148.398	169.974	146.79	170.171	85.1446	139.521	143.641	132.505
BRD3	23.9154	21.9644	28.9527	33.3153	32.7739	39.8022	32.4127	33.193	32.2344	48.8376	33.3525	36.8363	20.726	33.7383	41.1085	32.6364
BRD4	39.2083	48.54	52.6283	54.4577	40.9303	59.8582	50.3453	60.3747	61.4223	58.4722	48.1033	54.8979	47.9658	53.4607	73.7352	51.9397
BRD7	39.6964	44.0501	43.5003	44.4631	44.1928	36.8596	43.7494	47.5026	47.2706	45.9804	39.0309	43.9065	22.9762	34.3891	44.5429	37.9432
BRF1	46.6107	45.2029	45.4257	62.3381	33.5154	42.6673	53.128	60.1787	48.6464	45.7811	46.5368	46.996	37.0698	60.4186	45.9479	49.3527
BRF2	7.64643	8.31248	8.12957	11.0197	7.63735	6.65951	8.96631	9.73575	10.4172	8.83727	6.91852	7.84256	11.2512	10.9625	9.47057	10.3481
BRI3	91.1064	102.966	67.3898	86.2354	78.598	64.8141	104.349	63.9031	86.7774	62.5918	64.5511	74.9797	154.083	91.554	64.7329	94.3936
BRIP1	0.81345	1.6989	0.998368	0.448475	0.81564	0.61949	1.1852	2.15624	1.86724	0.996685	1.10957	1.72299	0.829038	0.850967	1.35294	2.25536
BRIX1	14.3167	12.0137	18.8264	13.9668	10.0101	12.1575	14.4285	16.6619	20.9327	15.5483	14.8161	19.3688	8.64568	15.5176	16.4954	15.5885
BRK1	121.773	137.49	130.644	138.707	91.2775	143.18	150.005	162.437	167.363	118.14	114.874	158.158	175.519	165.488	116.977	176.383
BRMS1	14.4794	21.1149	17.3288	15.7607	10.0101	16.5713	22.7765	21.8891	23.193	15.7476	14.6855	22.8147	24.3974	19.4721	15.4027	23.0843
BRMS1L	27.0879	18.8699	36.0126	37.9282	33.2188	32.8329	28.5994	27.7698	28.5982	40.4654	35.0495	36.1827	11.725	33.8384	34.7081	25.008
BROX	46.9361	45.0816	59.4742	49.076	57.9104	54.1279	48.5933	61.3548	61.0292	66.4457	52.9985	61.4928	27.5951	51.6086	62.2352	48.4903
BRPF1	5.28254	6.1391	12.2436	7.37165	10.9882	13.2207	5.45451	9.49791	7.39229	13.3815	5.39318	8.79674	4.84869	13.1559	8.60313	11.8805
BRPF3	21.8818	18.9913	23.0338	30.9448	34.6276	34.4591	26.0229	27.3777	26.4361	40.8641	28.392	30.4196	10.4222	27.8316	31.5339	20.8953
BRSK1	6.83298	3.45848	5.56234	6.91933	6.67342	6.89182	5.66836	7.90621	5.11033	9.23595	6.59218	6.47606	4.97423	7.15813	8.0656	9.95014
BRSK2	2.60304	3.3978	3.28035	4.42069	3.48501	2.40052	1.95816	3.72441	5.20861	4.11963	2.28442	1.66357	2.36868	3.30375	3.48642	1.52569
BRWD1	7.2397	8.43383	9.55581	9.99459	12.9019	12.6221	11.6974	15.4857	10.5155	17.6745	8.28917	10.8726	7.34291	9.01024	9.9389	10.1491
BRWD3	5.6128	4.854	7.98694	5.89425	5.11629	5.80771	6.13213	10.0625	7.37067	6.77746	5.80895	8.19904	4.38206	5.4562	7.44116	6.50075
BSCL2	116.73	91.7407	113.03	137.298	94.6884	119.794	126.765	87.4257	128.25	104.054	118.006	116.807	88.3518	138.758	124.522	112.37
BSDC1	63.1237	74.2662	62.1841	77.7784	78.4497	62.1813	77.4504	69.1303	64.174	71.4291	59.4601	67.7906	51.6372	66.3754	67.8551	60.8948
BSG	653.143	897.486	520.091	539.94	515.383	439.553	739.392	586.084	664.413	524.799	533.302	600.883	1099.22	732.553	498.994	818.01
BSN	0.81345	0.788775	0.570496	1.15322	1.03809	1.16154	1.08214	1.04545	0.884481	1.4618	0.783229	0.71296	0.710604	1.70193	0.884614	1.45935
BST1	39.2896	42.5332	41.0757	45.1038	27.5835	16.1842	34.9892	25.8749	56.2137	50.0336	19.3196	45.1542	16.8176	27.8316	28.6719	30.8454
BTAF1	16.8384	18.3845	23.3903	23.0004	26.9903	23.076	18.0357	27.9658	24.4706	28.771	19.3849	27.2113	10.8959	18.4209	22.6877	17.5786
BTBD1	72.3157	85.8552	71.0981	68.1042	99.4339	51.6499	84.2524	82.6558	83.1412	69.1035	56.9799	74.1479	74.8503	64.7736	80.4999	80.3971
BTBD10	20.0922	14.8047	19.896	23.7692	18.908	24.6247	16.6444	23.2613	20.3431	24.2527	24.019	26.2607	8.88255	20.1229	24.4049	18.5736
BTBD19	16.4317	18.8699	17.4001	16.6577	11.419	9.60209	21.3852	28.9459	20.3431	14.2194	14.8813	28.3402	13.7383	14.7167	17.276	31.7078
BTBD2	10.5748	13.1058	10.6255	18.0031	14.3849	13.7062	11.6974	10.6505	11.9896	13.0898	9.79036	12.7145	14.2121	10.1115	12.1765	15.3895
BTBD3	15.7809	15.5935	15.1895	22.68	12.9761	14.3257	11.9551	29.0766	17.3948	20.731	10.9652	19.6064	7.57978	13.6155	17.0678	15.0579
BTBD6	70.9328	73.9629	65.607	91.6171	66.0668	70.8541	71.3698	62.6616	67.6136	61.3293	70.4906	65.8894	86.9306	79.9909	68.1153	77.3457
BTBD7	24.2408	19.4767	25.5297	35.4295	32.2548	37.8663	27.2596	35.6106	27.3206	43.1232	33.8094	30.8949	14.2121	36.5916	34.8642	20.5636
BTBD8	4.22994	6.73493	4.56397	5.44577	8.23055	5.42053	3.45255	4.57384	5.99481	6.51167	4.76464	4.39659	4.14519	4.30489	5.56786	3.71472
BTBD9	5.45011	6.37088	7.05989	8.07256	10.3809	7.97593	8.55407	8.10223	9.13963	10.2326	6.00475	8.13963	3.55302	7.70876	7.38913	7.23043
BTC	0.732105	0.4854	1.56886	0.896951	1.03809	2.16821	0.618366	1.30681	1.47413	2.92361	0.783229	1.06944	0.236868	0.500569	1.04072	0.796011
BTD	6.26356	6.97763	5.9189	6.40679	2.66937	3.94925	8.6056	9.27836	5.60171	6.97679	4.11195	15.7445	2.36868	14.0159	7.12895	5.83741
BTF3	226.456	238.796	198.411	252.361	176.84	207.969	207.934	276.982	202.707	187.102	173.08	201.312	217.536	215.775	215.869	257.675
BTF3L4	26.5998	26.3936	26.8133	24.6661	24.395	24.0052	26.1775	28.2271	29.2861	26.3125	22.0609	27.9837	17.0545	21.6246	26.9547	24.809
BTG1	101.925	106.849	108.466	99.7537	80.6742	90.6778	84.9903	142.639	123.434	116.213	92.3557	129.283	59.9276	86.8987	107.767	95.455
BTG2	22.5326	23.7846	14.9755	30.176	15.942	30.8196	36.5867	44.1049	28.3034	29.369	145.876	38.0245	28.1873	52.7599	32.4705	42.9846
BTG3	17.8146	17.171	18.3985	17.7468	14.904	18.3524	14.377	26.659	22.7017	24.9171	19.5807	26.3795	13.0277	19.5222	16.5475	20.8289
BTK	1.13883	7.40235	2.49592	1.21729	0.741491	1.31642	4.53469	8.42894	5.89654	2.19271	0.522152	12.4174	4.50049	1.80205	2.75791	6.30175
BTNL10P	1.58623	2.35723	1.14099	0.731015	1.40883	0.325232	0.103061	2.677	2.43036	0.941535	0.437303	0.653547	1.42121	0.901024	0.832057	2.60428
BTNL9	14.7706	18.0605	15.8491	6.60604	24.8792	13.3763	14.3167	45.3653	15.8008	17.8353	5.09425	8.22994	11.2512	5.0152	12.2238	17.4963
BTRC	27.576	27.7285	31.5912	37.6079	42.5616	32.2135	30.1454	32.997	26.6327	42.9903	32.4387	31.2514	20.0153	33.3879	34.8122	26.202
BUB1	0.244035	1.57755	0.641808	0.128136	0.296596	0.464617	2.21581	2.7443	2.55517	0.398674	0.522152	2.6736	0.829038	0.200227	1.3009	2.91871
BUB1B	0.81345	2.79105	1.71149	0.384407	0.370745	0.309745	3.65867	5.03123	4.32413	1.06313	0.522152	6.00075	1.65808	0.80091	1.97737	2.91871
BUB3	49.5391	42.5939	60.2586	64.9008	52.8683	52.9664	51.479	64.2951	65.4516	61.5951	49.4087	65.3547	36.4777	57.9158	58.2804	53.4654
BUD13	12.4458	12.4991	14.7616	18.0031	12.457	13.0867	14.7893	18.0993	14.9379	13.6878	15.2077	16.4575	8.40881	12.2139	15.871	14.1292
BUD23	17.0824	20.9936	17.6141	20.1173	14.7557	18.817	20.4576	17.838	21.4241	17.6081	19.5154	23.8248	17.4098	21.3242	18.9932	23.4823
BUD31	37.3374	46.4164	36.0126	42.7974	34.7018	31.594	47.7173	49.0708	54.8378	32.2926	34.7231	49.4913	60.7566	41.4971	37.6741	52.8021
BVES	6.91432	9.64733	7.55907	4.16441	21.2066	4.41386	8.6056	4.63918	3.73447	7.5748	3.78561	3.26773	4.61893	3.10353	6.24433	4.17906
BYSL	9.5377	13.4699	10.8394	12.2133	11.3203	11.2282	13.2433	10.1036	10.6138	10.1403	11.8137	10.8614	10.3038	11.1627	10.3958	10.8185
BZW1	63.5817	78.8363	86.3916	77.107	77.6066	105.15	78.582	140.318	118.786	109.306	93.7812	138.809	45.7274	82.0627	92.0831	84.4614
BZW2	124.621	175.654	106.397	67.2072	148.669	50.0238	127.641	86.8376	67.4171	58.6715	51.1709	47.293	213.063	51.3583	84.8709	100.961
C10H7orf25	10.9816	14.0159	10.7681	13.4543	12.3087	13.5513	14.9954	15.0937	13.1689	15.8141	16.4478	16.814	8.76412	12.7645	16.3393	10.8125
C10H7orf31	2.84707	2.00228	3.42298	3.07526	1.48298	1.9359	2.26734	3.65907	3.2431	2.65783	2.80657	3.86187	0.829038	2.2025	3.59049	2.25536
C11H5orf22	8.78526	10.7395	12.6935	11.1478	11.4931	11.0734	9.63621	13.3295	11.0069	13.6214	12.2706	11.348	5.32953	10.1615	11.7081	8.55712
C11H5orf34	5.04339	4.00455	5.63365	6.9834	4.96799	3.56206	4.38009	8.29825	8.94308	7.5748	4.30776	4.75307	2.36868	6.90785	6.14026	5.43941
C12H6orf132	3.66052	3.09443	2.63854	7.56001	3.11426	2.47796	3.29795	3.46305	7.07584	3.45517	4.82991	5.88192	3.07928	5.35609	4.42307	3.64838
C12H6orf136	52.6302	57.1559	37.6527	30.24	55.3894	18.8944	47.5627	27.6391	28.1068	24.6513	18.0795	22.1018	67.1521	23.8771	33.6674	42.9846
C12H6orf141	2.19631	0.424725	1.2123	1.6017	0.889789	0.929234	1.33979	2.22158	0.393102	3.45517	3.00238	1.42592	0.829038	3.40387	0.260181	1.26035
C12H6orf163	0.894795	1.27418	1.2123	1.02509	0.444894	0.309745	0.669897	1.56817	0.393102	0.996685	0.979036	0.71296	0.947472	1.05119	0.988686	0.796011
C12H6orf226	5.45011	6.97763	7.1312	6.91933	4.59724	4.72361	7.21427	5.61929	6.38792	6.17945	4.4383	5.52544	9.83002	6.65756	5.88008	6.56709
C12H6orf47	34.7343	37.8612	31.2347	50.8699	31.1426	48.5525	40.3484	40.1845	40.0965	39.7345	35.8327	42.54	34.938	35.3902	41.4728	43.8469
C12H6orf62	125.353	136.701	158.313	129.93	144.294	129.473	135.782	162.306	151.738	153.955	110.631	148.949	81.3642	109.024	142.683	127.627
C12H6orf89	47.7495	56.1851	41.8601	46.3211	50.0506	28.3416	47.7688	41.622	46.1895	38.9372	37.5297	40.817	48.4395	42.248	38.7669	50.3477
C13H1orf105	6.75163	3.70118	8.05826	6.53493	7.19246	5.88515	5.87448	4.37782	4.4224	7.10968	6.52691	5.82251	3.78989	5.30603	7.07691	6.83243
C13H1orf162	1.38286	18.8093	3.06642	0.448475	0.889789	1.16154	9.68774	13.1335	13.8569	1.52825	0.522152	16.2198	9.23785	1.50171	3.43438	8.22545
C13H1orf43	8.71124	30.3648	24.7467	30.4624	6.71716	21.0092	23.0594	14.6271	0	50.5379	0	1.155	3.62526	0	18.9427	23.8817
C13H1orf50	11.0629	9.28328	10.055	15.7607	8.37884	11.9252	14.7893	9.99711	13.0707	9.83396	12.5969	13.368	13.1462	12.6143	12.1244	15.5885
C13H1orf52	10.6562	10.3148	10.3402	10.5712	11.1965	8.28567	9.48162	11.4999	10.9086	11.03	10.7041	10.3973	8.17195	10.2617	12.0203	12.4045
C13H1orf54	7.80912	11.5283	6.5607	3.5878	5.56118	1.7036	4.48316	9.86643	7.56722	4.18608	2.67603	4.27776	8.88255	2.30262	3.07013	9.22046
C14H21orf58	0.244035	1.09215	0.784432	1.6017	0.296596	1.00667	1.64898	0.914768	1.47413	1.19602	0.848498	1.7824	0.947472	1.30148	0.468325	2.25536
C14H21orf91	5.12473	4.00455	8.914	5.31764	5.78363	6.81438	4.53469	10.3892	13.3655	9.10305	7.70175	8.31787	2.96085	6.85779	6.60859	6.56709
C14H3orf33	2.84952	2.06052	3.02292	2.30644	3.95066	0.851798	2.60023	1.45775	4.06468	2.24985	1.93914	4.14765	1.98851	0.954084	4.15456	1.90379
C14H3orf38	7.97181	7.88775	10.982	9.54612	10.9741	10.5313	7.16274	9.93177	9.82756	10.9635	8.94186	12.2986	4.26362	9.26052	8.7941	8.42445
C14H3orf70	48.4816	37.3758	49.9184	52.1513	63.9906	75.3454	42.9249	47.0452	45.7964	72.16	63.7026	63.6317	28.8979	62.9215	63.2239	40.1985
C14H3orf80	1.13883	1.09215	0.784432	0.384407	1.26053	0.464617	0.618366	1.37215	1.27758	1.4618	0.652691	1.84181	0.236868	0.850967	0.93665	1.39302
C15H4orf3	77.9285	90.4058	78.3006	86.812	72.2953	95.4788	71.5244	96.5081	96.6049	90.5654	94.7054	109.915	58.9801	82.9943	93.1967	91.2096
C15H4orf33	4.06725	2.73038	5.70496	4.93323	3.55916	4.87848	3.34948	7.64485	7.6655	7.90703	3.91614	7.60491	2.13181	3.40387	4.78732	3.38305
C15H4orf36	2.03362	2.00228	2.13936	1.72983	0.889789	1.00667	2.57653	1.63351	2.00581	1.5947	1.63173	2.13888	0.59217	2.75313	2.02941	2.2275
C15H4orf51	10.7375	7.46303	9.91237	15.1841	6.37682	12.0026	6.18366	9.40904	9.13963	7.37547	11.4221	4.99072	15.8702	9.76109	12.0203	10.4145
C16H1orf115	51.5727	37.6792	48.7774	57.597	56.4274	44.913	33.9586	78.4087	50.2188	53.8874	36.9423	32.4397	32.3325	33.1376	38.8189	46.832
C16H1orf116	0.244035	0.303375	0.499184	1.72983	0.370745	0.464617	0.309183	0.457384	0.687929	0.46512	0.326345	0.71296	0.118434	0.951081	0.364253	0.265337
C16H1orf131	8.94795	7.34168	7.91563	10.4431	6.89586	6.04002	10.6668	14.3749	13.0707	8.57149	8.41971	12.4174	12.7909	9.36063	8.01356	7.42943
C16H1orf198	52.3048	51.9985	61.0431	77.0096	62.656	74.9582	52.1489	57.9571	45.7964	63.6549	81.4558	57.8686	41.3335	60.5688	78.1582	43.0509
C16H1orf21	47.2614	85.4304	42.6446	52.5997	41.9684	39.4925	52.4065	52.4032	69.7757	40.4654	41.6417	40.9358	80.5351	52.3094	39.1832	57.6444
C16H1orf53	3.57918	6.12818	2.49592	2.69085	3.9299	2.24565	3.0403	2.61362	5.69999	2.39204	2.61076	3.74304	8.64568	3.50398	3.12217	5.30674
C16H1orf74	2.52169	2.9124	3.13773	3.52373	4.00405	3.02001	3.50408	3.72441	4.71723	4.78409	3.06765	3.38656	1.89494	3.70421	4.05882	3.58205
C17H14orf119	20.4989	24.2093	26.5994	20.4377	17.425	23.076	24.6316	28.1618	32.0379	23.6547	27.7394	29.6473	16.4623	22.876	22.1674	26.401
C17H14orf28	5.85684	5.94615	9.62712	6.66306	6.30267	7.74362	5.46224	11.1732	8.94308	7.50836	9.98617	9.26848	3.19772	8.30944	9.83483	7.3631
C17H14orf93	13.0152	12.2564	13.264	16.5295	9.12034	13.319	13.6041	17.3153	16.5103	15.0832	15.0119	17.1705	11.25	18.3709	15.4547	16.8489
C17H15orf48	0.244035	0.84945	0.71312	0.32034	0.148298	0.154872	0.412244	0.980109	1.27758	0.265783	0.130538	3.86187	0.236868	0.200227	0.260181	0.928679
C17H15orf61	9.43602	9.64733	7.63038	8.64917	8.23055	4.95592	9.48162	6.46872	6.19136	6.37878	7.24487	6.77312	14.8043	8.3595	6.29637	10.2818
C17H15orf62	0.406725	2.30565	0.285248	0.640679	0.444894	0.309745	2.31887	0.980109	0.786205	0.730902	0.848498	0.8912	1.18434	0.450512	0.312217	1.99003
C18H10orf105	0.16269	0.182025	0.285248	0.192204	0.296596	0.232309	0.824488	0.522725	0.884481	0.332228	0.130538	0.8912	0.236868	0.600682	0.0520361	1.45935
C19H17orf49	36.7679	35.9803	30.5928	35.0451	22.0223	33.9171	34.7316	35.2839	39.3102	29.5683	26.695	32.2615	44.5312	46.0023	26.6425	41.1272
C19H17orf58	15.2929	12.1957	19.2542	12.1088	6.74757	8.67285	6.28672	9.14768	16.7069	17.2759	7.50594	10.7538	6.51387	9.01024	7.44116	10.2155
C19H17orf75	13.2592	11.8923	22.5346	24.1536	18.2407	21.6821	15.3561	23.7186	20.8344	26.3125	19.1238	24.7754	7.93508	21.6246	23.6764	16.0529
C19H17orf80	10.8189	10.8608	13.5493	14.4793	12.9761	11.1508	11.3367	16.7272	11.3017	13.6214	12.4011	15.804	7.81664	16.9693	12.2805	13.4658
C1D	26.1695	19.8777	29.6494	27.8651	26.8279	23.9131	22.4158	30.3938	26.6415	30.8833	28.5572	34.7134	10.2244	29.883	39.0073	20.4953
C1GALT1	8.8666	9.16011	15.812	11.4041	11.1224	14.342	9.7908	18.3019	14.987	17.6081	13.5362	18.6558	8.40881	12.4141	12.0203	11.1886
C1GALT1C1	39.6964	33.0072	42.8585	40.8113	32.1807	31.9037	35.4015	35.4146	47.1723	36.6116	40.7932	44.2629	29.9638	37.5927	44.4909	43.9796
C1H11orf16	0.16269	3.6405	0.71312	0.576611	0.0741491	0.387181	1.70051	2.28692	3.2431	0.598011	0.130538	4.09952	3.55302	0.450512	0.572397	2.38803
C1H11orf54	15.1302	7.70573	16.9723	14.8638	12.9761	16.339	10.5122	11.4999	14.7413	20.3988	13.6412	15.5069	5.32953	12.8146	18.6289	12.4708
C1H11orf68	52.0608	51.7558	36.6544	59.7113	37.7419	68.9182	60.5999	44.8236	50.6119	48.7711	57.5673	40.6387	51.5188	62.521	49.7986	58.6395
C1H11orf87	0.81345	0.182025	0.142624	0.640679	0.296596	0.851798	0.309183	1.7642	1.08103	0.730902	0.130538	0.415893	0.118434	0.450512	0.67647	0.46434
C1H11orf96	326.356	308.836	288.029	502.677	186.485	276.602	335.361	371.135	368.534	248.175	590.816	426.231	316.456	402.407	371.642	328.354
C1H9orf152	0.32538	1.82025	0.142624	1.02509	0.667342	0.387181	0.876019	1.89488	3.04654	1.19602	0.195807	1.7824	1.18434	0.450512	0.884614	0.729677
C1H9orf153	8.41839	8.78878	8.96606	5.99868	10.458	8.01	11.1321	8.88763	6.81738	8.81269	7.86101	5.67457	5.93591	5.77556	11.2455	8.79327
C1H9orf40	3.09111	3.09443	3.92216	4.16441	3.55916	3.71694	3.34948	5.29259	3.43965	4.45186	3.32872	4.99072	1.77651	4.25483	5.09954	3.05137
C1H9orf85	8.8666	9.28328	10.4116	8.00849	6.59927	7.20157	6.49285	10.5198	9.13963	5.24921	7.31013	10.9321	5.32953	7.60864	7.64931	8.55712
C1QBP	75.3255	85.2484	58.1193	51.2543	69.9226	37.8663	73.5341	50.4429	59.2602	38.9372	45.0357	50.8578	97.3527	47.1536	54.1696	74.1617
C1QL1	0.244035	0.36405	0.570496	1.40949	0.444894	0.464617	2.31887	1.24147	1.57241	1.12958	0.71796	1.36651	1.53964	1.60182	1.14479	1.45935
C1QL3	1.78959	0.4854	1.99674	3.84407	2.96596	3.48463	0.97908	1.37215	2.35861	3.38873	3.52453	1.12885	0.59217	4.45506	3.7466	0.796011
C1QTNF12	4.71801	4.1259	3.49429	3.2034	2.22447	2.63283	3.40101	4.57384	3.6362	3.25584	2.21915	5.28779	3.67145	5.00569	2.65384	4.17906
C1QTNF2	44.2492	24.8118	40.0773	46.8907	33.5124	76.5054	26.0214	23.3743	38.9073	53.6881	75.4497	42.9523	23.9237	82.1934	39.7015	27.6614
C1QTNF3	53.6877	79.6056	97.6974	68.6167	51.3112	34.9237	83.634	19.4062	148.003	112.692	61.0918	58.2845	22.0287	92.3049	91.8437	62.2215
C1QTNF4	0.48807	0.910126	0.285248	0.512543	0.444894	0.542053	0.669897	0.392044	0.491378	0.332228	0.130538	0.297067	1.30277	1.00114	0.416289	0.995014
C1QTNF5	34.7343	76.0258	42.7159	24.9865	24.6175	25.3216	70.8545	68.4116	70.2671	31.6946	44.644	64.2853	72.6	41.2969	38.0904	78.0091
C1QTNF6	20.5803	56.4885	27.7404	17.0421	11.5673	17.3457	54.4162	100.167	126.579	33.6879	26.5645	64.5823	44.7681	32.4369	24.1448	79.4021
C1QTNF7	26.5185	24.5734	34.7289	21.2065	18.0924	48.4751	21.3336	22.9345	26.043	75.5487	74.4067	29.7067	15.5149	61.5199	23.4163	20.8953
C1QTNF9	12.6898	28.4566	12.8362	7.75222	8.52714	7.58875	9.22396	19.6022	12.0879	11.4287	9.85563	4.57483	19.1863	8.20933	6.45248	16.8489
C1R	369.144	982.45	640.881	507.29	229.788	221.08	960.993	1214.16	1621.94	578.343	359.371	1160.82	729.553	414.771	426.02	1041.91
C1RL	4.31128	23.3599	9.98368	7.17561	1.92788	4.02668	19.9423	33.4544	39.8999	9.63462	7.11433	27.0925	16.4623	9.56086	9.21039	23.7477
C1S	186.28	542.738	348.145	354.808	169.505	144.109	534.938	702.215	988.358	416.946	262.316	650.576	232.604	298.089	290.153	465.932
C2	5.05966	13.3285	10.4722	12.3279	5.84591	5.40272	24.0148	18.0562	68.8401	19.438	3.59567	27.7526	31.0297	11.482	9.47057	16.7129
C2CD2	7.94903	8.79788	12.8675	17.5264	15.073	22.3736	15.1608	14.307	14.1517	18.8181	16.1064	17.638	2.60555	15.1442	14.9729	7.56343
C2CD2L	14.4794	21.843	14.0485	16.4655	13.3468	18.2749	24.0648	18.8834	20.9327	20.2659	21.0166	26.023	15.7517	22.1752	18.1086	17.8439
C2CD3	11.8764	13.0451	9.91237	16.081	15.3489	14.7129	15.5622	14.6363	9.72929	14.2194	12.3359	15.4475	9.94846	12.7144	15.6629	10.8788
C2CD5	43.2755	44.9602	57.6914	53.3045	60.1349	54.4376	42.4096	61.8122	49.924	68.1068	47.8422	54.2444	20.9628	48.0045	60.2058	44.8419
C2H2orf42	8.29719	7.88775	10.6255	13.7746	10.0843	14.1708	9.27549	11.696	9.53274	10.9635	10.9652	13.1304	5.32953	10.2116	12.4366	10.9451
C2H2orf49	32.4567	31.187	39.4355	38.5048	46.4915	41.0412	31.6913	44.889	34.6913	48.5053	35.7674	41.9458	18.3573	37.4425	39.7556	30.7791
C2H2orf68	9.84274	14.9867	14.0485	9.99459	9.41693	11.6929	14.0678	18.0993	23.5861	12.226	9.9209	16.7546	8.40881	11.463	9.99093	14.3282
C3	128.85	245.673	140.342	149.663	67.4757	69.9249	211.275	250.581	671.517	138.406	115.33	433.836	201.101	114.68	108.86	175.918
C3AR1	1.38286	6.7956	2.70986	2.17831	1.18639	2.01334	6.02907	7.38349	15.6258	3.0565	1.697	10.0409	5.68483	2.60296	4.37103	7.23043
C3H5orf15	38.8016	40.5916	48.2069	46.4492	38.6317	43.5966	47.2535	59.1332	61.5205	53.9539	58.22	67.8501	29.6085	51.4084	43.5542	47.23
C3H5orf24	136.985	86.7653	198.675	177.917	179.811	201.799	100.948	198.309	174.243	231.895	198.222	213.71	53.0584	173.797	210.538	125.438
C3H5orf46	2.19631	0.910126	2.3533	2.81899	1.92788	1.62616	1.23673	1.89488	1.17931	0.664457	1.37065	1.90123	1.65808	1.60182	2.18552	2.38803
C3H5orf63	7.89046	9.22261	6.84595	6.7912	6.15437	3.6395	11.9036	5.74997	8.0586	4.18608	3.98141	5.82251	9.94846	3.40387	4.83936	10.4145
C3H8orf76	8.8666	12.4384	7.27382	11.5322	8.45299	9.13747	9.53315	13.3295	15.6258	9.1695	9.39874	10.7538	11.3697	10.6621	11.2398	11.8075
C4H12orf29	7.32105	6.49223	9.55581	9.03357	5.70948	7.82106	7.62652	10.7159	7.76377	7.90703	10.5736	11.1697	6.277	9.31058	12.8009	8.49078
C4H12orf42	1.70824	1.15283	1.42624	2.37051	0.834177	1.23898	0.97908	1.69886	0.982756	1.32891	0.913767	0.950614	1.42121	1.65188	1.50905	2.91871
C4H12orf75	27.7386	9.58666	28.6674	35.3014	16.3128	94.1624	12.5405	18.3607	17.5913	28.9039	65.1385	39.8664	12.0803	69.4289	33.3031	18.9053
C4H20orf96	0.48807	0.7281	0.71312	0.576611	0	0.464617	0.309183	0.784087	0.393102	0.398674	0.456883	0.653547	1.65808	1.10125	0.572397	0.597008
C5AR1	6.83298	42.2298	9.69843	5.70204	4.00405	2.94258	32.7219	35.5453	49.1378	6.44523	3.26345	68.2659	33.7537	8.65984	12.905	31.2434
C5AR2	0.32538	1.39553	1.14099	0.512543	0.296596	0.232309	1.23673	2.4176	1.76896	1.19602	0.456883	5.82251	0.710604	0.550626	0.832578	1.32668
C7	181.643	395.844	430.511	322.646	229.046	140.779	293.621	1159.34	708.174	323.923	198.679	555.515	205.483	169.793	226.669	487.026
C7H2orf69	5.69415	6.3102	7.05989	5.1895	5.56118	6.34977	5.20458	10.5852	7.86205	7.10968	7.04906	9.68438	6.04013	6.80773	7.80542	5.90375
C7H2orf76	4.63666	5.5821	6.5607	4.93323	6.00607	4.41386	4.58622	4.8352	5.40516	4.85053	5.54787	6.17899	2.48711	4.60523	4.68325	4.77606
C8H12orf4	10.0868	9.22261	12.1944	13.0058	9.26863	7.04669	13.1403	10.5198	16.0189	10.2326	9.52928	13.1898	4.26362	9.41069	9.73075	10.4145
C8H12orf40	0.81345	0.303375	0.927056	0.640679	0.296596	1.00667	0.309183	0.588065	0.786205	1.79403	1.37065	0.653547	0	0.750853	1.56108	0.265337
C8H12orf57	48.1562	52.6053	43.9282	65.2211	39.9663	45.5325	49.0055	47.8293	56.9016	36.2129	38.9004	49.8478	74.7319	53.711	47.0406	74.228
C9	0.569415	1.51688	1.2123	0.640679	0.370745	0.387181	0.97908	1.37215	3.6362	0.46512	0.326345	0.772374	1.53964	0.500569	0.416289	0.862345
C9H18orf21	27.576	22.2071	24.46	19.0922	16.3869	19.5139	23.601	20.2556	23.5861	14.8838	16.3173	27.0331	25.5817	18.6712	24.2488	27.3297
C9H18orf32	37.7441	29.9735	31.8765	37.8001	28.844	31.2842	32.9795	33.3237	46.8775	37.0767	29.5669	39.3911	24.8711	41.6473	35.0723	43.8469
C9H18orf54	3.33514	2.73038	4.99184	2.49865	3.48501	3.48463	2.98722	8.48774	5.11033	5.83924	2.73738	6.47606	0.236868	2.65301	4.15977	3.84739
C9H3orf14	3.2538	2.12363	2.3533	2.11424	1.70543	2.40052	2.26734	2.22158	3.34137	1.86048	1.56646	2.07947	2.13181	1.75199	1.8733	3.38305
C9H3orf18	8.05315	4.97535	6.84595	6.34272	6.89586	4.25899	6.85356	3.59373	4.71723	5.98011	2.7413	3.50539	4.61893	4.50512	5.51583	8.15911
C9H3orf62	0.406725	1.39553	0.784432	0.576611	0.963938	0.0774362	0.824488	1.17613	0.884481	0.132891	0.130538	1.12885	1.30277	0.550626	0.312217	1.39302
C9orf72	19.4415	21.0542	23.6043	17.1702	20.2427	13.6288	16.2321	28.6192	28.4017	26.3789	20.8861	35.4698	11.2512	17.57	21.8552	18.2419
CA1	1.46421	8.85856	0.998368	0.832883	2.74352	1.39385	0.412244	12.284	6.58447	1.19602	0.326345	2.02005	1.18434	1.30148	1.71719	3.91372
CA11	1.58623	0	0.860736	1.30058	0.192788	0	0.319489	0.207783	0.57393	0.140865	0	0.421241	0.516372	1.11627	0.424094	0.240793
CA13	3.49783	6.00683	5.49102	6.08645	4.59724	5.18822	4.48316	10.9119	10.2207	7.44191	4.04668	8.55552	3.31615	2.9033	6.1923	7.09776
CA2	2.44035	5.46075	1.56886	1.72983	2.00202	0.929234	2.06122	7.44883	4.12758	1.72759	0.326345	5.88192	0.947472	0.901024	2.13348	4.8424
CA3	68.8992	59.0368	21.037	12.7495	48.7159	5.96259	7.11121	15.0937	44.3223	8.70438	23.9537	7.30784	34.5827	10.562	12.4366	1.79102
CA4	9.19198	14.5013	9.05662	7.49594	10.0101	6.34977	8.96631	9.67041	9.82756	8.30571	2.80657	5.40662	32.4509	3.50398	4.37103	5.2404
CA5B	8.78526	23.8453	21.6075	11.1478	13.4951	15.0226	18.9117	37.3095	20.7362	22.9902	19.3849	44.7383	6.86917	17.8703	18.2647	18.5736
CA8	0.894795	2.9124	2.13936	0.640679	1.40883	0.696926	1.03061	3.39771	0.982756	2.85716	0.456883	0.831787	0.829038	0.600682	0.884614	1.79102
CA9	8.54122	4.48995	7.1312	9.28985	5.85778	24.2375	9.37856	10.4545	10.5155	3.32228	6.3311	21.2106	5.9217	5.40614	8.37781	15.3895
CAAP1	8.78526	7.09898	8.84269	8.20069	8.45299	9.44722	7.4204	11.3693	7.76377	9.23595	8.2239	12.0609	2.48711	8.96018	10.5113	7.82744
CAB39	85.1682	102.359	108.039	103.406	108.777	120.955	103.989	116.764	103.386	120.798	108.542	138.849	58.388	104.819	113.387	95.9193
CAB39L	28.9588	19.7801	30.165	35.0451	24.9882	24.7796	28.2903	25.2868	27.6154	24.7178	36.4201	37.1928	14.0936	26.2799	29.4524	34.7591
CABIN1	83.2973	43.4433	80.4399	121.409	69.4035	114.606	80.3876	64.7525	73.4119	89.0372	86.7426	75.0391	31.5034	119.886	105.946	69.8499
CABLES1	7.97181	11.2249	9.27056	7.75222	5.19043	7.04669	10.6153	10.7812	10.2207	9.83396	8.61552	11.7044	9.83002	10.9124	9.05428	9.81747
CABLES2	30.8298	36.587	29.4519	37.8641	26.3971	38.4084	37.9265	31.1021	37.443	27.3092	31.9166	33.2121	42.6362	41.7474	30.9615	41.5916
CABP4	3.41649	2.97308	3.28035	5.12543	3.18841	4.18155	1.90663	5.09657	3.6362	7.24258	4.04668	4.09952	0.947472	3.80432	4.21493	3.38305
CABP7	0.32538	0.7281	0.427872	0.448475	0.148298	0.61949	1.54592	0.326703	0.589654	0.863793	1.24011	0.831787	0.118434	2.35267	0.884614	0.995014
CACHD1	5.77549	5.3394	6.98858	9.48205	7.7115	10.0667	5.66836	11.4999	9.82756	11.4951	6.91852	10.3379	2.84242	8.05916	9.73075	7.09776
CACNA1A_1	2.44035	1.9416	1.71149	3.13933	2.22447	1.7036	3.45255	3.59373	1.96551	3.92029	1.76226	0.35648	1.18434	1.55176	2.08144	2.38803
CACNA1C	68.4925	45.9917	70.8128	100.33	107.071	82.547	72.8126	63.5111	56.4102	102.991	66.7702	56.0862	43.2284	67.3765	87.0044	52.4704
CACNA1D	0.97614	0.424725	0.499184	1.9861	0.889789	0.851798	1.8551	1.24147	1.57241	5.24921	0.391614	1.36651	0.710604	0.901024	4.73529	2.78604
CACNA1G	2.11497	8.97991	4.06478	2.71392	4.00405	4.59119	3.96785	5.18151	5.34816	7.05254	3.45926	4.61464	2.13181	4.00956	4.37936	8.02379
CACNA1H	108.27	76.0258	111.675	131.531	78.079	164.397	139.648	119.704	121.076	140.798	150.445	166.952	52.94	193.27	157.565	147.262
CACNA2D1	0.894795	2.30565	2.49592	7.36781	17.9441	11.6154	5.20458	6.2727	1.57241	16.545	3.98141	3.80245	1.30277	4.55518	3.64253	2.45437
CACNA2D2	2.11497	2.30565	2.06805	2.17831	3.04011	2.01334	1.8551	4.1818	2.45689	2.39204	1.17484	1.54475	2.01338	2.50284	2.54977	3.44938
CACNA2D3	3.22533	6.37088	1.7828	2.70302	1.77958	1.9359	8.65713	2.80965	4.4224	4.08242	0.640289	1.06944	3.55302	1.57279	5.6199	12.8025
CACNB1	8.21584	5.88548	8.3435	9.93052	8.52714	10.6088	12.0581	11.7613	15.8224	8.30571	9.52928	9.38731	7.10604	12.2639	11.2918	10.3481
CACNB2	35.7918	20.7509	38.0093	35.4936	53.3132	27.877	29.1147	25.3521	22.112	29.7677	21.343	28.6967	19.0679	19.5722	40.7443	31.0444
CACNB3	23.102	19.9621	22.5346	41.3238	19.6495	38.4084	29.527	31.2981	29.581	25.7809	28.7837	37.3116	18.4757	28.7326	26.0181	29.3861
CACNG6	22.6953	24.088	12.5509	6.9834	28.3249	0.929234	22.4673	7.64485	5.69999	5.91366	2.34969	1.48533	52.5847	2.40273	10.6154	12.7362
CACNG7	0.48807	0.667425	0.427872	0	0.222447	0.154872	0.515305	0.196022	0.786205	0.132891	0.0652691	0.237653	1.53964	0.350398	0.468325	0.995014
CACTIN	48.563	54.3648	50.7741	65.9259	39.818	56.2187	60.7545	54.8208	59.555	50.2994	52.5351	63.9288	49.6238	69.3788	64.2126	65.8699
CACUL1	35.3037	37.3758	35.7986	40.1065	32.7739	40.4217	31.3306	49.0054	44.1258	42.8574	40.5974	45.4512	24.8711	35.3402	41.785	41.5916
CACYBP	91.1145	82.9355	84.0533	75.5027	72.7106	67.6715	80.5304	75.4057	83.0901	57.217	63.5557	75.9956	96.243	66.0951	72.1621	82.7175
CAD	10.0054	14.8047	14.9755	11.7244	11.3448	15.3324	20.0969	23.3266	22.112	22.06	23.6274	21.3294	12.3171	19.322	15.871	19.7013
CADM1	10.2495	22.3284	12.8362	11.0197	10.7516	9.8344	11.1821	15.159	18.4758	13.7542	9.85563	22.9336	8.76412	11.8134	14.9344	16.2519
CADM2	11.8764	4.55063	14.8329	19.4126	8.37884	3.71694	5.61683	30.2527	15.9207	11.1629	4.76464	19.2499	7.46134	17.62	8.16967	2.58704
CADM3	83.5413	78.3921	73.1661	117.18	54.722	50.5658	92.4973	83.2439	145.939	84.7847	98.3605	121.025	125.777	99.9636	69.4162	115.952
CADM4	4.25922	2.32021	1.96821	8.3961	2.79468	1.02061	3.55561	5.26907	4.80273	3.10633	1.37065	3.27546	1.50174	4.67481	2.03825	2.71506
CADPS	3.82321	8.19113	5.06315	0.832883	8.45299	0.464617	6.54438	3.98578	2.45689	4.11963	0.587422	1.01003	4.26362	1.65188	4.11085	7.1641
CADPS2	2.19631	1.51688	2.28198	1.53763	2.00202	2.01334	2.47347	2.54828	3.14482	3.12295	0.652691	2.25771	2.13181	1.70193	1.92534	1.92369
CAGE1	1.87093	2.12363	1.99674	3.33153	1.85373	1.7036	1.1852	2.0909	0.982756	1.79403	1.30538	0.831787	1.06591	0.500569	2.54977	2.45437
CALCOCO1	110.955	90.7092	120.874	173.24	115.302	163.778	115.944	89.5166	99.9463	150.433	126.818	139.087	61.3488	150.621	140.237	90.8779
CALCOCO2	109.653	132.272	159.168	132.941	114.486	154.021	144.44	165.442	166.97	168.174	158.082	192.44	84.7987	148.569	137.063	139.965
CALCRL	17.0011	14.5013	20.3239	10.9556	21.5032	8.75029	8.81172	49.2015	22.7999	20.6646	6.00475	15.3286	6.86917	9.01024	13.0611	12.4045
CALD1	764.643	402.275	968.132	1239.59	928.42	1728.38	613.419	920.388	798.489	1406.72	1801.49	1050.78	339.432	1291.92	1355.96	749.245
CALHM2	43.1942	41.9871	34.8716	49.8448	33.812	32.6006	41.0183	34.6305	50.6119	53.9539	44.7746	50.739	35.8855	55.6632	41.5248	39.9332
CALHM5	28.9588	32.7645	27.7404	30.1119	21.5032	18.1975	20.2	21.8238	32.6275	25.9802	15.3382	27.3896	28.0689	29.934	25.1855	25.5387
CALHM6	0.32538	0.2427	0.927056	0.0640679	0.296596	0.542053	0.412244	0.653406	4.12758	0.664457	0.130538	1.18827	0.59217	0.350398	0.364253	0.862345
CALM1	674.919	651.286	676.323	943.015	631.009	920.949	645.781	758.604	864.924	756.882	1041.04	887.636	784.507	996.132	918.021	848.946
CALM2	500.922	326.492	519.508	525.613	385.872	551.113	299.547	387.796	530.787	415.75	569.277	468.177	230.828	453.265	529.259	425.998
CALM3	229.637	238.514	214.293	355.321	227.786	255.539	276.824	239.016	281.461	260.334	219.891	239.317	231.775	318.161	241.656	305.734
CALML4	3.09111	2.9124	2.63854	3.5878	2.07617	2.09078	4.94693	2.02556	4.61895	2.65783	2.02334	3.86187	2.72398	2.70307	3.27828	4.57706
CALR	326.519	401.426	343.153	419.453	309.053	369.603	562.507	408.313	551.031	398.142	422.421	431.222	284.834	373.424	402.343	478.801
CALR3	0.569415	0.84945	0.927056	0.961019	0.667342	0.774362	1.23673	0.849428	1.08103	0.398674	0.522152	1.01003	0.829038	0.650739	0.624433	0.928679
CALU	218.655	303.679	325.825	307.077	246.991	410.18	337.37	435.103	439.095	453.89	507.597	485.704	172.558	373.975	311.02	319.333
CAMK1	113.883	84.763	111.96	168.691	88.6823	116.929	124.189	89.974	148.691	111.031	105.148	140.037	86.22	157.829	108.235	138.97
CAMK1D	38.1508	53.1513	54.6963	68.1682	27.7318	42.1253	64.6708	50.9003	52.6757	47.708	42.8165	51.9273	50.8082	37.2924	51.5678	69.9163
CAMK1G	0.48807	2.30565	0.499184	0.704747	1.26053	0.61949	1.03061	1.63351	1.37586	0.46512	0.783229	0.831787	0.710604	1.55176	0.520361	1.19402
CAMK2A	12.6898	22.5104	10.7681	7.49594	16.3128	5.11079	20.0454	7.77553	7.37067	12.824	3.65507	2.85184	16.4623	3.85438	12.8009	18.8389
CAMK2B	38.7202	51.7558	35.9412	16.017	67.3274	2.63283	61.9912	18.9488	16.8051	13.2891	5.02572	4.09952	87.878	8.05916	33.9796	40.8619
CAMK2D	48.807	69.0482	64.8939	50.6777	74.7423	48.7848	80.13	67.4968	49.7275	66.1799	44.0566	54.0662	38.1357	44	66.346	48.3577
CAMK2G	131.128	72.9314	149.256	274.851	132.949	240.594	88.3749	139.502	131.001	169.636	192.478	171.17	71.1788	222.052	218.812	140.032
CAMK2N1	38.2321	27.4251	31.5199	31.0729	27.0644	26.638	29.0632	24.6987	32.7258	22.658	28.2615	37.6681	27.5951	34.4892	42.9298	36.0195
CAMK2N2	0.65076	1.88093	0.427872	0.961019	0.667342	1.08411	1.1852	1.69886	1.86724	0.930239	0.848498	1.84181	1.65808	0.80091	0.988686	1.19402
CAMKK1	40.7538	21.661	34.5863	65.6696	36.7038	84.7926	38.2872	28.9459	38.1309	66.8443	69.9684	47.8872	15.3964	85.4471	60.2578	40.3312
CAMKMT	9.02929	4.6113	7.05989	10.0587	5.70948	5.3431	4.74081	7.05678	6.58447	5.64788	5.67841	7.01078	5.32953	6.90785	5.72397	6.30175
CAMLG	17.0011	15.4721	18.5411	22.2956	16.9801	16.6488	17.0051	17.7073	21.9155	17.4752	18.8628	22.4582	10.0669	21.3743	20.3461	18.1092
CAMSAP1	19.1161	19.7194	28.1682	25.9475	30.4011	33.8396	32.2066	25.8749	21.2275	41.5285	26.4992	29.5879	8.29038	34.0887	43.3461	24.3447
CAMSAP2	33.0261	30.8836	45.0692	44.3991	52.1268	54.0505	30.6607	53.9713	44.0275	60.6649	46.4716	53.4126	18.1204	45.1513	46.052	36.6828
CAMTA1	56.2907	50.1176	53.9119	52.7279	56.7982	47.4684	43.1826	46.3265	47.6637	54.0203	53.129	48.006	53.1769	60.769	54.5859	44.7093
CAMTA2	45.8786	61.0391	51.9864	48.8838	71.0348	69.3828	74.7193	48.352	47.3688	67.7746	57.502	56.3833	37.0698	53.9613	69.208	50.215
CAND1	35.7918	38.3466	49.2053	46.0648	42.4874	53.5858	36.7928	64.6218	53.855	60.7978	55.2829	63.2752	20.9628	44.5506	49.3302	38.3412
CAND2	29.7723	47.2052	23.9608	29.4072	60.4315	18.7396	41.276	22.5425	18.7706	21.9271	10.8999	14.3186	37.662	17.2196	25.914	29.5851
CANX	192.625	192.158	253.728	258.77	263.897	254.533	245.285	304.16	290.601	297.942	291.883	296.651	123.764	230.562	292.495	219.102
CAP1	350.434	359.924	396.281	508.763	333.3	546.622	403.329	511.029	463.566	498.608	537.882	683.372	208.444	470.084	455.628	388.785
CAP2	39.6955	44.8389	43.7143	25.4343	80.9708	23.618	70.9194	26.2016	20.8344	34.3517	20.4292	14.1404	22.9762	15.9181	51.828	28.9211
CAPG	53.3623	120.925	52.1291	51.2543	30.327	25.3216	107.699	92.9143	116.653	50.8974	27.0214	142.057	87.6412	53.9613	52.3483	112.37
CAPN1	104.366	107.88	114.456	138.259	95.8747	121.343	134.082	112.778	136.996	123.722	107.172	140.691	90.1283	143.163	124.574	120.33
CAPN10	20.2549	21.843	17.6141	16.1451	12.6795	15.1001	25.5591	24.5027	27.4189	20.1995	22.1262	25.3101	22.5025	31.0853	16.4954	25.1407
CAPN12	0.81345	0.4854	0.855744	1.15322	0.444894	0.929234	1.28826	0.914768	0.687929	1.26247	1.30538	0.8912	0.59217	1.15131	1.04072	0.729677
CAPN15	32.6193	35.3772	29.3805	27.9977	27.5093	29.7355	42.3066	40.1845	40.3913	40.5318	28.9142	40.6981	19.4232	38.5938	35.0203	37.3462
CAPN2	134.382	203.625	189.975	220.778	180.85	253.836	178.862	238.624	203.922	236.547	230.204	324.397	143.068	219.149	185.249	191.308
CAPN5	50.8406	43.322	41.0757	72.0123	44.8602	45.7648	59.054	44.2356	68.2033	63.9207	45.5578	60.9581	32.3325	51.2082	55.3664	65.3392
CAPN6	4.39263	2.97308	6.27546	4.86916	3.55916	7.12413	5.30764	13.3948	14.1517	11.5615	9.65982	7.18902	3.78989	7.40842	6.29637	4.37806
CAPN7	28.6334	23.3599	33.9445	39.7221	36.7038	35.3883	30.7637	38.943	33.3154	45.0502	36.6159	35.9451	13.8568	33.0876	36.5814	26.0694
CAPN8	0.081345	0.36405	0.071312	0.192204	0.296596	0.309745	0.876019	0.261362	0.0982756	0.664457	0	0.17824	0.118434	1.10125	0.572397	1.45935
CAPNS1	355.152	371.21	328.392	413.943	263.897	399.261	415.078	358.916	428.187	302.328	376.015	424.508	358.144	393.397	352.18	416.048
CAPRIN1	139.344	148.229	183.486	174.713	176.846	195.991	154.489	249.536	228.491	235.417	186.213	237.178	73.9028	168.592	184.572	163.315
CAPRIN2	5.6128	3.82253	7.63038	8.3929	6.08022	6.58208	4.99846	3.13635	6.19136	7.17613	6.98379	6.47606	1.77651	7.80887	7.90949	5.77108
CAPS	2.27766	2.54835	1.99674	3.97221	2.66937	1.9359	1.70051	1.11079	2.45689	2.79072	0.848498	2.25771	2.01338	3.00341	3.64253	2.3217
CAPZA1	75.4068	94.4528	91.0433	79.3007	72.781	78.0836	90.535	134.758	130.106	94.8518	80.1341	152.515	48.9061	74.1668	89.0177	96.5137
CAPZA2	115.591	93.5609	123.584	107.634	104.254	134.274	88.2718	128.002	133.655	122.26	145.224	143.067	75.2056	136.505	145.025	100.629
CAPZB	164.955	145.397	189.801	234.471	157.135	249.083	186.916	178.049	208.162	219.99	220.824	223.356	77.8893	211.326	224.876	179.849
CARD10	19.7668	19.7801	15.1895	16.017	19.9461	12.0026	16.0775	27.9658	17.0017	21.7277	8.41971	12.4768	17.6467	13.7656	11.8642	18.8389
CARD11	0	0.4854	0.35656	0.256272	0.148298	0.0774362	1.44285	0.980109	0.687929	0.797348	0.0652691	0.594134	0.118434	0.100114	0.156108	0.398005
CARD19	32.9447	29.306	28.1682	38.5048	17.8699	34.5365	34.0617	28.4885	37.5413	25.7145	38.574	40.9358	41.3335	50.1069	26.0701	39.3362
CARD6	6.71178	13.8448	6.01231	6.39398	3.10981	3.72158	6.73349	19.461	22.4707	4.82462	3.36854	15.0268	19.8886	7.87194	9.61055	12.5982
CARF	5.69415	5.27873	9.76974	8.84137	7.48906	8.28567	4.79234	8.03689	6.78102	10.0997	6.46164	7.42667	3.55302	6.80773	9.99093	6.03642
CARHSP1	40.2658	41.6837	38.0806	54.0092	26.9161	36.7048	46.429	40.6418	55.0343	42.2594	44.7093	45.5106	57.0852	51.1581	38.3506	48.6893
CARM1	34.8157	41.9871	37.0822	47.7306	38.78	49.9463	42.6157	43.1248	40.3913	45.1166	48.4949	53.7097	35.1749	58.066	48.966	52.205
CARMIL1	10.1836	18.1382	15.9033	16.5487	14.6726	10.9897	16.4996	18.6502	18.123	19.735	14.1059	20.4756	8.58647	13.7266	19.7628	11.448
CARMIL2	1.13883	3.27645	1.56886	1.02509	1.03809	0.774362	3.34948	3.52839	3.6362	1.26247	0.979036	2.61419	1.77651	1.40159	1.09276	2.65337
CARMIL3	2.359	1.75958	3.13773	2.94712	3.04011	1.23898	2.16428	3.59373	2.55517	2.05982	1.30538	3.5648	1.65808	1.8521	2.08144	3.38305
CARNMT1	3.57918	4.30793	5.06315	3.13933	7.8598	3.71694	5.71989	5.55395	4.4224	6.71101	2.93711	4.99072	2.36868	2.15245	4.52714	2.78604
CARNS1	14.4794	12.8631	15.9853	9.69604	25.878	3.94925	35.8652	7.40048	11.0069	12.4918	6.13529	7.42667	12.4356	8.15927	17.6923	10.2818
CARS1	21.4751	31.2476	28.2396	28.1258	19.4271	31.9037	37.9265	39.139	35.2809	29.8341	32.1124	38.6187	27.3583	28.0819	25.5497	31.2434
CASC3	59.3005	47.8119	62.8972	79.252	64.4355	77.049	52.7673	67.7582	67.4171	82.5919	71.8612	75.752	35.6486	66.3254	66.8144	54.9911
CASD1	22.2072	14.9867	25.601	25.1787	26.3971	21.3724	18.3964	24.372	21.4241	32.8906	20.0376	23.7653	11.2512	21.0739	25.3416	17.5122
CASK	17.4892	17.4137	23.3903	27.2289	18.8339	23.8503	22.4673	29.926	31.5465	33.8873	25.3244	32.6773	9.47472	24.3777	24.6131	25.406
CASKIN2	20.333	27.4633	34.4437	21.4044	31.0173	44.9478	44.2086	32.7957	42.8207	38.0833	30.9656	44.0865	27.3002	23.2029	51.8472	37.4503
CASP1	0.48807	1.6989	0.855744	0.192204	0.0741491	0.232309	1.44285	3.20169	2.45689	0.996685	0.195807	3.38656	0.710604	0.350398	0.572397	1.26035
CASP10	2.11497	2.79105	2.9951	2.37051	2.96596	3.17488	3.19489	7.57951	3.34137	2.85716	1.82753	4.8719	1.30277	1.35154	3.01809	2.45437
CASP2	18.2213	17.4137	22.178	27.6773	20.9842	23.2309	19.8908	31.0368	24.2741	30.2992	22.7789	28.7561	8.29038	25.3788	21.9072	20.4309
CASP3	7.56508	7.15965	11.4099	11.4682	7.41491	13.2416	9.89386	17.3806	11.5965	12.0267	16.7741	15.5663	6.86917	14.0159	15.5588	11.8075
CASP6	12.3644	12.7418	15.3321	13.4543	9.63938	8.1308	17.1597	19.7982	21.031	14.0865	15.5993	21.3294	7.93508	10.9625	15.4547	17.4459
CASP7	13.0965	15.4721	16.1165	11.2119	12.3829	12.3898	16.902	18.8834	22.7999	16.1463	12.9885	19.0123	6.39544	12.5142	13.2692	17.9102
CASP8	1.46421	2.97308	0.855744	0.704747	1.03809	0.696926	1.39132	5.22725	4.32413	1.5947	0.522152	5.3472	1.53964	0.901024	0.988686	2.5207
CASP8AP2	3.49783	4.97535	7.05989	6.08645	8.45299	8.44054	4.27703	10.3238	7.56722	6.71101	5.15626	7.18902	3.55302	4.95563	7.18098	4.77606
CASP9	11.3883	10.3754	10.1976	16.017	4.52309	7.82106	10.6668	13.1335	15.9207	9.43528	10.182	15.6257	11.6065	15.5677	9.78279	10.1491
CASQ1	16.6757	21.661	32.233	24.4739	78.5239	1.16154	1.75204	3.59373	26.6327	1.72759	1.697	3.14891	10.7775	4.30489	16.7556	2.25536
CASQ2	300	491.65	249.378	110.133	536.172	30.897	511.08	156.425	151.148	194.885	34.2663	48.4219	418.546	45.9522	279.33	496.246
CASS4	0.732105	3.8832	1.14099	0.512543	0.593193	1.23898	2.16428	3.00567	2.35861	1.26247	0.391614	4.63424	1.42121	0.550626	1.92534	2.91871
CAST	192.3	214.426	219.57	202.647	205.838	209.387	180.443	200.465	184.66	195.682	179.555	200.936	144.016	167.891	197.581	162.718
CASTOR1	18.5467	20.6902	14.9755	22.1675	14.1625	21.7596	20.303	18.2954	27.1241	25.9802	18.928	22.5177	16.8176	34.0887	17.0678	22.8853
CASTOR2	1.81481	3.39113	4.3864	2.14051	5.11851	5.79532	4.579	6.46545	5.13588	8.51634	8.24609	5.21887	2.00864	4.66981	8.08277	5.5681
CASZ1	11.6323	14.1373	12.6935	11.4041	24.0243	13.2416	21.9005	8.23291	6.87929	15.0167	10.7041	6.6543	10.7775	10.0114	18.681	12.4708
CAT	133.568	128.631	142.053	113.4	193.752	91.4521	119.448	143.423	157.339	159.204	79.8893	134.868	61.1119	97.3106	104.957	127.959
CATIP	1.70824	0.84945	2.70986	3.84407	2.00202	1.47129	3.86479	2.4176	3.34137	2.59138	1.30538	2.49536	1.65808	3.40387	3.27828	3.78105
CATSPER1	2.68438	1.09215	2.28198	2.37051	0.81564	1.23898	2.11275	1.89488	2.45689	2.52493	2.08861	1.36651	1.42121	2.50284	2.02941	2.98504
CATSPER2	0.97614	1.03148	1.49755	1.72983	0.889789	0.851798	0.97908	1.04545	1.57241	1.52825	1.37065	1.06944	0.473736	1.00114	1.09276	1.06135
CATSPERG	1.22017	2.06295	2.13936	2.37051	1.26053	2.94258	2.11275	1.7642	1.67069	1.39536	1.37065	2.61419	1.89494	4.50512	2.54977	1.39302
CAV1	466.432	453.243	628.187	549.51	519.488	609.733	455.427	614.398	451.183	729.307	533.836	527.412	311.363	466.38	505.323	427.657
CAV2	147.641	101.206	181.204	133.325	152.97	138.688	108.266	135.516	122.648	211.43	163.564	128.689	80.5351	138.507	161.52	98.5063
CAV3	56.3721	70.5044	46.2102	27.357	78.9688	18.8944	64.104	22.9999	30.4654	23.0566	14.6203	13.368	136.673	19.0216	37.3619	47.827
CAVIN1	1359.19	994.585	1278.27	1923.19	1001.09	2197.79	1160.62	1201.16	1201.22	1747.45	1872.37	1474.1	1091.37	1890.55	1732.85	1298.56
CAVIN2	28.3894	29.6094	39.1503	42.7974	67.4015	36.4724	46.7897	45.1503	31.5465	91.5621	17.8837	28.9343	4.14519	31.2855	36.8416	18.5736
CAVIN3	251.193	207.387	214.221	394.21	167.503	391.75	241.678	234.573	255.91	238.208	326.998	248.288	303.191	462.075	223.183	306.132
CAVIN4	0.408352	0.548502	0.358699	0.516387	0.5969	0.155647	0.829641	0.980762	0.394085	0.400003	0.522805	0.417082	0.710604	0.400956	0.41785	0.733657
CBARP	4.71801	5.52143	4.35003	4.93323	2.66937	7.66618	6.33825	4.57384	5.60171	5.64788	6.20056	4.93131	6.277	7.10808	6.24433	5.2404
CBFA2T2	15.1359	17.2924	16.2363	17.1881	19.2788	19.7091	18.7746	17.6211	13.2073	22.5424	13.7809	17.1532	9.47472	18.4635	18.2506	8.08747
CBFB	21.6378	23.7846	22.3207	14.5434	10.8999	9.98927	24.5801	30.4487	21.1293	19.2028	18.7322	35.4104	15.5149	18.2708	22.4276	23.2833
CBL	32.6193	37.1331	33.5166	45.6804	41.8942	57.6125	35.6591	56.977	47.9585	61.3958	56.4577	60.7204	20.2522	55.3629	53.4411	38.7392
CBLB	18.7093	27.6071	22.9625	23.7051	19.4271	19.359	15.5622	35.872	28.9913	28.173	20.5598	25.9636	15.9886	21.6246	25.3416	19.1706
CBLL1	14.5608	13.4699	17.4001	20.1173	20.6876	19.2816	13.9132	19.7982	15.7241	20.3988	17.7532	20.8541	6.39544	14.8669	18.9932	13.1342
CBLN3	1.54555	0.910126	2.49592	2.56272	3.18841	1.47129	5.20458	2.54828	2.35861	3.52162	3.00238	2.79243	0.473736	2.85324	4.37103	2.65337
CBLN4	2.84707	0.303375	3.70822	3.78001	2.22447	0.774362	3.86479	1.43749	2.84999	3.38873	1.697	3.68363	2.25025	2.00227	2.23755	0.995014
CBR3	13.1624	12.5919	15.73	20.355	9.62381	12.0754	18.8107	14.8794	23.3365	19.6839	12.3933	16.2876	13.9752	17.643	11.6051	19.0757
CBR4	13.0965	13.4092	13.4067	8.90544	20.6876	6.11746	11.6974	16.4005	14.4465	8.63793	7.50594	14.1404	13.6199	10.0614	16.9117	13.0678
CBS	12.8525	9.04058	11.4812	21.3987	9.49108	12.1575	10.6153	8.88632	13.8569	12.2924	8.28917	12.1797	19.66	15.4676	12.6448	10.7461
CBX1	65.6381	61.7375	90.8586	95.1588	76.0473	89.4326	79.1473	97.4365	93.0759	91.8983	73.3951	102.509	38.7575	76.592	83.9186	81.0399
CBX2	1.54555	3.27645	1.49755	1.47356	1.03809	0.851798	2.73112	3.52839	3.53792	3.0565	0.71796	2.97067	2.13181	1.05119	1.71719	1.79102
CBX3	50.887	40.2063	60.8298	52.5491	45.6106	46.9813	41.7387	66.2854	63.9538	53.9107	53.0096	68.5921	36.03	50.7001	60.5185	54.7058
CBX4	14.9683	17.4222	15.091	18.4618	16.4448	17.2652	20.5287	19.7113	23.4741	20.6712	20.2667	23.3572	9.16324	24.9318	21.4134	19.1852
CBX5	90.6183	63.7695	98.8384	132.813	87.4959	114.683	89.9208	98.599	111.641	120.2	93.3348	113.42	43.939	111.627	118.33	84.3108
CBX6	124.946	103.815	156.459	186.245	129.538	243.924	124.91	157.602	149.379	228.307	203.77	171.294	86.9306	219.049	163.133	141.624
CBX7	101.844	60.4323	81.5096	164.911	89.7204	144.031	75.7499	64.0991	69.7757	102.526	127.144	81.0992	64.4281	161.634	115.416	87.6275
CBX8	4.39263	5.46075	2.9951	5.1895	3.85575	4.25899	4.27703	6.73008	7.2724	4.78409	2.28442	5.70368	4.73736	4.7554	3.59049	8.42445
CBY1	14.154	19.7801	15.4747	21.0143	15.942	14.4806	21.0245	20.5169	20.1465	13.6214	9.20294	19.3093	26.1739	17.8202	17.0158	22.222
CC2D1A	37.9068	32.7038	37.4388	46.5133	33.4412	46.7715	47.2535	35.5453	42.1602	41.3292	41.0542	44.6788	25.8186	50.7577	43.3461	39.9332
CC2D1B	33.2701	36.3443	42.2167	48.1791	37.0004	54.7474	44.9346	47.8947	45.2068	56.811	47.777	55.195	29.2532	50.6075	43.3981	39.6679
CC2D2A	23.9154	14.9867	27.6691	31.2651	24.0243	36.7822	20.8699	30.318	27.9103	39.1365	26.2382	32.0238	12.554	39.8453	25.0294	18.1092
CCAR1	78.8233	59.4009	89.3539	84.7618	64.7321	84.9475	70.6999	119.508	108.595	72.16	81.1294	93.0413	73.9028	76.8874	106.934	91.2759
CCAR2	49.6204	57.0952	53.0561	62.4021	48.9384	53.6633	64.7223	55.2128	63.4861	59.8011	45.6883	65.2953	36.2408	70.2798	58.4366	56.9148
CCBE1	4.63666	4.48995	5.41971	7.17561	11.938	1.16154	4.68928	5.61929	5.30688	3.32228	3.32872	2.97067	6.86917	3.05347	4.319	3.98005
CCDC102A	22.6139	30.4589	23.2477	27.2289	16.3869	28.1868	37.5142	40.5112	42.8482	28.8374	25.9118	41.1735	27.1214	35.8908	22.6877	46.5666
CCDC102B	1.95228	2.60903	2.28198	1.6017	1.63128	1.9359	1.28826	2.94033	3.04654	2.3256	1.50119	3.32715	0.829038	2.35267	1.56108	1.39302
CCDC103	0.406725	0.36405	0.641808	1.15322	0.296596	0.774362	0.824488	1.04545	0.393102	0.730902	0.261076	0.8912	0.473736	0.700796	0.624433	1.12768
CCDC106	4.31128	3.76185	3.70822	9.35391	3.11426	5.18822	4.99846	4.5085	5.30688	5.44854	4.6341	5.82251	4.50049	7.80887	4.83936	7.29677
CCDC107	31.9686	14.9261	28.81	41.3238	21.1325	32.2909	24.477	18.3607	24.0775	30.0999	41.1848	29.8849	21.9103	40.3959	30.9095	23.217
CCDC110	4.63666	2.54835	7.27382	6.7912	3.55916	6.65951	3.45255	4.1818	3.93102	4.25252	4.37303	6.41664	1.42121	4.50512	5.25565	3.78105
CCDC112	13.4219	14.8654	16.9723	10.9556	13.1244	14.7129	9.99692	14.6363	13.7586	13.0233	6.85325	19.9629	16.4623	10.562	11.8122	15.7875
CCDC115	25.2983	30.6409	25.8863	28.5743	21.874	22.9985	38.1841	28.4232	31.743	25.1165	21.8651	26.4984	27.7136	28.4323	26.7986	34.9581
CCDC117	19.0347	15.7148	18.1846	23.5129	26.842	23.4632	17.1597	26.659	30.8585	22.4586	24.3454	27.9243	8.40881	18.3208	23.052	20.0993
CCDC12	35.7105	33.9173	37.6527	48.2431	33.7378	43.4417	38.0811	38.3549	33.1189	38.9372	39.2267	35.4698	32.9247	40.496	38.5067	38.4739
CCDC120	4.47397	4.73265	5.06315	6.15052	3.18841	6.11746	5.15305	7.57951	7.17412	5.3821	6.59218	7.42667	3.31615	6.55745	6.34841	7.96011
CCDC121	0.65076	0.2427	1.7828	1.02509	0.889789	0.309745	0.927549	0.522725	0.589654	1.4618	0.71796	0.772374	0.355302	0.650739	1.24887	0.928679
CCDC122	7.89046	6.7956	5.49102	7.23967	2.59522	1.9359	3.91632	4.5085	5.60171	4.78409	2.41496	4.27776	5.68483	3.70421	5.15158	4.6434
CCDC125	5.46313	9.6716	9.84106	4.81086	3.55916	2.24565	5.47357	10.9119	9.92584	5.29705	4.05256	6.73985	7.59873	6.10694	5.84157	7.49577
CCDC126	18.0586	12.1957	21.1797	15.12	15.3489	15.0226	12.2127	26.1362	23.9793	23.1231	25.1286	25.3101	6.51387	18.1206	20.9706	15.9202
CCDC127	26.8438	34.2207	25.9576	28.3821	23.9501	23.9278	33.3918	24.5681	26.6327	20.7975	28.1962	25.6072	29.7269	29.4835	27.319	37.4125
CCDC13	1.6269	1.33485	0.998368	2.81899	1.26053	0.542053	1.28826	3.00567	1.86724	1.66114	0.391614	1.96064	1.06591	2.95336	0.572397	0.597008
CCDC134	13.0152	19.234	17.4714	17.939	9.56523	15.0226	20.2515	23.0652	26.5344	13.422	17.6879	21.3888	17.4098	14.5665	15.2466	24.2783
CCDC136	7.32105	6.12818	6.5607	20.9502	7.5632	13.3965	8.19335	5.88065	7.56722	7.44191	13.1844	10.6944	3.43459	11.413	8.58596	7.49577
CCDC137	18.3026	28.2746	18.7551	20.8861	10.3067	17.1908	24.8377	22.8692	24.2741	16.4121	20.0376	25.6666	23.3315	22.2253	15.7149	24.1457
CCDC138	1.95228	3.76185	2.92379	1.08915	3.70745	0.696926	2.06122	3.00567	3.34137	1.06313	1.30538	1.54475	1.30277	1.00114	2.28959	1.59202
CCDC14	2.52169	2.427	2.9951	3.65187	2.59522	2.09078	2.42193	3.72441	2.84999	2.52493	2.87184	4.15893	1.53964	2.75313	2.34163	2.58704
CCDC141	5.36877	8.19113	9.12794	4.03628	20.9842	1.39385	8.55407	6.01133	5.79826	6.57812	1.43592	2.43595	1.77651	2.45279	7.02488	6.03642
CCDC142	1.87093	2.30565	2.9951	3.07526	3.04011	3.40719	2.73112	4.37782	3.2431	3.72096	5.09099	4.15893	2.25025	4.20478	3.12217	2.98504
CCDC146	0.65076	0.546075	0.35656	0.768815	0	0.774362	0.463775	0.326703	0.687929	0.531565	0.326345	0.35648	0.355302	0.80091	0.520361	0.862345
CCDC149	39.371	33.1892	37.2249	45.5523	34.6276	40.8863	45.656	27.5084	29.4827	30.8308	39.292	28.2808	46.663	44.6507	32.8868	50.613
CCDC15	2.52169	2.79105	2.70986	5.89425	2.74352	4.80104	2.525	5.42327	7.37067	4.38541	2.61076	4.04011	5.13056	4.90557	4.63121	4.11272
CCDC152	0.48807	0.910126	0.142624	0.704747	0.222447	0.232309	0.103061	1.63351	1.67069	0.46512	0.0652691	0.297067	3.55302	0.150171	0.156108	1.06135
CCDC154	1.54555	2.36633	0.998368	0.832883	0.667342	1.23898	1.08214	0.849428	1.17931	1.32891	0.71796	1.48533	1.42121	1.35154	1.50905	1.45935
CCDC159	0.406725	0.424725	0.285248	0.832883	0.222447	0.774362	0.566836	0.784087	0.687929	1.26247	0.391614	0.8912	0.829038	0.300341	0.884614	0.796011
CCDC163	0.81345	1.33485	0.71312	0.448475	0.667342	0.464617	0.309183	1.56817	1.57241	0.398674	0.652691	1.96064	0.59217	1.05119	0.624433	1.52569
CCDC167	6.42625	7.0383	6.63202	4.93323	3.7816	4.18155	8.91478	7.25281	9.63101	5.78077	4.89518	7.60491	7.34291	5.25597	4.83936	11.4095
CCDC17	1.87093	1.9416	0.927056	1.08915	0.741491	0.696926	1.13367	3.59373	2.35861	1.4618	1.17484	2.13888	1.18434	1.65188	2.08144	1.19402
CCDC171	1.05748	0.36405	0.927056	1.02509	1.40883	0.542053	0.97908	1.17613	0.884481	1.26247	0.71796	0.17824	1.06591	1.30148	1.45701	0.663342
CCDC174	16.9198	15.0474	18.3985	20.6939	16.7577	19.5914	16.6444	20.5169	20.1465	15.4818	14.2939	19.6064	15.5149	17.57	17.5882	18.0429
CCDC18	1.22017	1.03148	1.56886	1.02509	0.81564	0.696926	0.669897	3.20169	2.06379	0.930239	0.456883	2.61419	2.01338	0.901024	2.08144	2.25536
CCDC181	6.18222	4.00455	5.06315	3.78001	4.15235	2.24565	3.76173	2.94033	3.93102	2.39204	1.30538	3.5648	4.85579	2.2025	5.77601	6.89876
CCDC184	20.9057	22.0857	21.251	28.1258	16.4611	17.4231	21.5913	21.6277	26.9275	21.8606	20.4292	27.9243	22.1472	28.5324	18.4728	24.013
CCDC186	30.5857	31.187	47.993	37.3516	38.4092	38.7955	35.6591	47.8947	48.0568	47.9073	41.1848	46.1048	27.3583	38.3936	49.1221	36.6828
CCDC190	14.4794	10.6181	16.8296	16.9139	10.6033	16.8811	12.4704	15.5511	15.1344	7.84059	11.8137	26.9143	9.11942	11.0125	17.4841	18.5736
CCDC191	1.46421	0.970801	2.92379	2.05017	0.963938	1.78103	1.08214	2.7443	1.47413	1.92692	1.0443	1.54475	1.06591	1.25142	2.02941	1.92369
CCDC200	1.38286	1.09215	0.998368	1.53763	0.444894	1.78103	0.0515305	1.24147	1.08103	1.12958	1.17484	0.772374	0.355302	1.65188	0.884614	1.39302
CCDC22	16.025	24.8161	19.1116	19.9892	14.2366	14.6354	22.4673	19.9942	22.9965	16.2792	16.5131	23.4089	17.6467	22.7759	17.3801	24.4773
CCDC25	33.5955	37.0724	41.9315	38.697	33.812	30.8196	31.2275	48.7441	47.3688	37.0767	33.5483	45.6295	32.6878	32.587	41.6289	38.8719
CCDC28A	6.18222	9.52598	6.20414	6.53493	7.63735	3.94925	6.33825	6.79542	6.38792	6.37878	3.65507	5.64427	7.69821	5.90671	6.14026	8.29178
CCDC28B	8.54122	9.76868	9.84106	13.7746	7.26661	8.67285	10.7699	11.9573	12.3827	8.57149	6.59218	12.4174	9.59315	10.7622	8.53392	12.7362
CCDC3	99.4036	45.3849	137.49	272.096	81.1191	163.313	79.4601	142.639	153.998	148.506	170.548	165.526	69.9945	132.4	110.421	92.0056
CCDC30	2.92842	1.6989	2.56723	2.81899	2.15032	2.63283	1.64898	2.48294	2.06379	3.0565	2.54549	2.79243	1.06591	3.00341	2.65384	3.25038
CCDC32	20.0922	20.0228	18.0419	24.7943	14.6815	21.9144	21.9005	21.3664	18.5741	17.2094	17.7532	20.8541	20.3706	20.3231	22.0113	23.1506
CCDC34	14.3167	13.4092	13.9058	12.237	8.1564	7.51131	11.9551	17.7073	15.7241	8.57149	9.52928	14.9722	24.7527	13.8658	14.5181	20.8289
CCDC39	0.97614	0.788775	2.3533	2.88306	1.33468	2.40052	1.54592	2.87499	2.16206	1.66114	1.63173	3.26773	1.18434	2.00227	3.01809	2.45437
CCDC40	0.32538	0.84945	0.142624	0.32034	0.444894	0.696926	0.154592	1.04545	0.589654	0.730902	0.979036	3.08949	0	9.56086	0.780542	0.132668
CCDC42	0.97614	0.2427	0.927056	0.576611	0.81564	0.61949	0.360714	1.04545	1.27758	1.32891	0.71796	1.48533	0.710604	0.600682	1.50905	0.663342
CCDC43	20.987	23.1779	21.3223	23.1285	20.9842	20.5206	16.799	22.4118	21.3258	19.2692	20.6903	19.4876	14.0936	20.0728	20.2941	21.625
CCDC47	70.5261	67.774	88.2129	84.4415	88.3115	75.0357	83.1187	92.3263	80.0946	88.4392	70.0337	85.9117	37.4251	70.6803	86.1718	67.7936
CCDC50	73.7799	61.5245	91.0654	97.6395	73.63	108.256	54.7254	111.014	104.958	107.509	107.041	115.262	54.3612	110.926	100.898	80.5298
CCDC51	9.7614	12.5597	9.4845	11.7885	9.56523	8.67285	11.1821	11.3693	11.4	8.4386	9.9209	10.4568	10.5406	11.8134	8.95021	13.9965
CCDC57	5.12473	7.22033	6.34677	7.43188	4.74554	7.279	7.98723	6.20736	7.17412	10.2326	4.89518	7.96139	5.44796	7.75881	6.7647	7.1641
CCDC59	12.6085	8.79788	13.6919	12.6854	11.419	8.90516	13.6556	14.8977	18.5741	9.50173	10.9652	14.6157	13.2646	13.0648	16.4954	13.7975
CCDC6	59.7886	57.7626	88.4269	90.7842	77.0409	116.077	66.2167	90.6927	83.436	102.659	97.7731	105.459	40.0307	87.5495	94.5496	70.7786
CCDC62	0.81345	1.39553	0.998368	0.961019	1.18639	1.16154	2.11275	2.4176	0.687929	1.32891	0.522152	0.71296	2.01338	0.80091	1.14479	1.59202
CCDC65	0.48807	1.33485	0.855744	1.92204	0.963938	0.851798	1.39132	1.11079	1.27758	1.19602	0.587422	0.71296	0.473736	1.15131	0.832578	1.32668
CCDC66	38.4762	29.9735	44.9979	44.7194	30.846	34.0719	31.6397	45.3464	45.2068	39.3358	40.0752	51.1549	23.3315	33.8885	41.9931	31.5088
CCDC69	78.8233	93.6216	69.8858	59.0706	100.101	55.5217	122.643	45.3464	57.0981	76.4789	39.8141	46.4018	92.2601	51.7588	72.4863	99.5677
CCDC71	15.9436	17.7171	19.0403	19.1563	12.9761	19.5139	18.9632	19.4062	18.181	17.741	19.1238	18.4181	17.1729	19.0216	17.0158	19.3696
CCDC71L	14.2354	11.4069	19.1829	15.3763	13.3468	13.2416	8.76019	15.6164	17.2965	19.3357	15.273	19.547	7.34291	17.9204	13.8416	14.3945
CCDC74B	3.9859	3.09443	1.14099	2.05017	3.33671	0.154872	2.57653	1.7642	1.47413	0.598011	0.195807	0.594134	6.277	0.600682	1.82126	1.99003
CCDC77	2.44035	3.6405	2.92379	3.84407	2.07617	2.55539	3.86479	5.74997	4.91378	2.92361	1.50119	5.94134	2.84242	2.80318	4.63121	4.70973
CCDC8	20.3362	13.0451	22.8912	39.4018	17.2767	38.9504	38.1841	17.5766	35.1827	40.8641	26.8256	32.8556	14.3305	33.9386	40.9524	22.421
CCDC80	771.476	665.18	836.775	914.185	675.201	399.106	803.206	551.083	947.77	1210.31	542.386	633.762	337.537	846.061	668.924	759.129
CCDC82	14.4794	9.28328	14.8329	14.7997	13.1985	13.4739	11.0791	16.8579	15.1344	16.2127	12.5969	19.1311	7.10604	12.4642	17.8484	11.8075
CCDC85A	3.09111	3.94388	4.99184	3.52373	5.70948	3.71694	5.35917	6.9261	2.55517	5.11632	2.7413	2.37653	5.9217	3.60409	4.26696	3.84739
CCDC85C	17.9772	16.7463	12.337	25.435	17.4992	24.9345	17.2627	15.8124	17.2965	20.5317	18.4059	13.7245	9.47472	23.3265	20.6583	17.4459
CCDC86	8.37853	13.4699	10.6255	10.5712	6.52512	8.67285	15.8199	11.3039	14.0534	9.10305	11.879	11.5856	11.9618	10.5119	9.78279	11.6085
CCDC88A	62.5543	35.0702	62.7546	71.8842	41.301	62.4136	39.0086	83.3746	76.8515	52.1598	66.1828	71.0584	51.0451	63.2719	91.4275	79.0704
CCDC88B	3.57918	5.88548	3.5656	9.22578	2.44692	7.279	6.13213	9.017	5.60171	5.24921	3.52453	7.48608	4.26362	9.8612	4.00678	8.02644
CCDC88C	5.77549	7.5237	6.06152	4.54882	8.67544	4.95592	6.33825	9.67041	7.56722	8.4386	2.93711	4.51542	4.97423	3.60409	5.46379	5.0414
CCDC89	10.3227	6.94001	15.8555	13.1455	7.70483	8.24076	10.3896	11.515	13.5227	9.87914	9.59194	14.9656	5.47047	10.4689	16.2441	10.4045
CCDC9	21.1497	20.7509	22.8198	27.8055	18.6114	27.4898	26.5382	23.4573	20.0482	23.3224	23.3663	23.0524	22.2656	27.8817	27.371	29.5187
CCDC90B	38.2321	32.8252	40.7191	46.257	35.4433	40.3443	27.8265	47.0452	45.6982	41.1299	42.5554	42.2429	29.8454	41.6473	49.8506	40.1985
CCDC91	33.4328	33.978	40.7905	34.917	26.3971	35.2335	42.8219	44.5623	41.2758	32.4919	23.3663	44.3818	37.5436	31.8362	30.6493	41.7242
CCDC92	17.9772	24.9981	14.1198	14.9278	15.2006	11.6929	25.8168	14.8977	19.3603	12.3589	9.46401	19.547	23.9237	17.9204	14.0498	19.1043
CCDC92B	3.09111	2.60903	2.9951	3.33153	1.85373	2.63283	3.40101	2.61362	2.75172	2.05982	2.54549	3.5648	2.84242	2.50284	2.34163	3.31671
CCDC93	29.7723	29.124	36.0126	37.4157	41.3752	32.7555	34.5255	39.0737	36.7551	40.8641	33.7441	39.8664	18.4757	28.0819	38.7669	26.6
CCDC97	39.0456	35.0095	36.8683	54.0092	31.7358	45.0679	49.9331	38.0936	48.7447	42.9903	43.0123	43.1935	35.8855	54.0614	41.1606	42.9846
CCHCR1	6.42625	6.73493	7.91563	9.28985	7.93395	8.1308	9.22396	8.6903	7.56722	10.7642	8.55025	11.5262	4.61893	9.91126	7.75338	7.62844
CCIN	0.244035	0.060675	0.285248	0.832883	0.370745	1.31642	0.515305	0.392044	0.589654	0.996685	0.456883	0.53472	0.236868	0.250284	0.832578	0.265337
CCL19	1.22017	7.64505	0.784432	1.28136	0.370745	1.16154	9.63621	6.14202	6.28964	0.863793	0.522152	6.17899	5.68483	2.75313	1.71719	9.95014
CCL2	1.30152	5.88548	4.7779	2.11424	1.40883	5.11079	14.6862	14.7016	20.1465	2.05982	1.82753	17.7646	4.85579	4.10466	5.25565	7.62844
CCL21	145.119	68.1987	114.384	127.944	35.4433	58.9289	115.738	55.8009	137.193	96.014	152.599	46.1642	106.591	123.49	142.371	192.834
CCL22	1.38286	8.4945	2.28198	1.02509	0.444894	1.31642	2.11275	6.14202	5.30688	1.06313	0.326345	6.83254	7.69821	0.700796	0.988686	5.70474
CCL27	1.95228	1.75958	2.21067	2.43458	0.889789	1.47129	2.00969	1.63351	2.16206	1.26247	1.56646	1.18827	3.31615	2.10239	2.49773	1.99003
CCL4	1.6269	0.7281	1.7828	1.02509	0.741491	0.929234	1.33979	2.35226	1.37586	1.12958	0.783229	3.38656	0.473736	1.50171	1.19683	1.12768
CCL5	2.60304	1.4562	2.06805	0.384407	0.148298	1.00667	3.24642	0.326703	8.74653	4.38541	0.261076	5.7631	1.18434	0.500569	0.364253	1.45935
CCL7	0.81345	3.27645	3.13773	0.704747	0.741491	1.16154	4.94693	8.29825	6.48619	0.664457	0.522152	6.41664	3.67145	1.50171	1.82126	4.90873
CCM2	31.8059	44.8389	32.0191	44.0787	31.9582	35.0012	48.3872	34.8919	42.8482	33.0235	37.7908	38.9752	42.9915	41.1968	33.095	37.3462
CCM2L	9.43602	10.1327	10.6255	7.30374	8.3047	6.50464	10.0485	20.4516	9.23791	9.50173	5.87422	7.60491	7.57978	6.30717	8.42985	9.22046
CCN1	166.106	103.33	131.357	255.695	106.478	182.285	94.3009	262.604	75.3774	281.597	812.208	107.063	187.836	449.811	304.619	152.569
CCN2	677.604	665.362	950.304	759.589	536.988	684.458	636.66	1006.05	538.059	1362.8	2328.8	1067.78	743.173	1390.13	923.381	450.476
CCN3	593.737	200.652	573.135	1104.98	578.289	1642.81	348.707	361.791	657.071	1398.42	1849.99	902.786	222.419	1155.16	1005.29	323.777
CCN4	6.26356	27.6071	10.7681	4.35662	5.26458	24.1601	17.8811	32.2783	34.4947	25.8474	17.4268	29.172	10.1853	18.3208	8.42985	27.595
CCN5	89.8049	39.8635	55.9086	137.169	66.141	68.6085	41.2244	43.0594	50.4154	51.9605	82.3696	72.9002	62.2963	110.826	82.165	62.3542
CCNA2	2.42245	2.62844	2.10798	3.42315	3.36414	3.26471	5.30455	5.40628	3.59984	2.53158	3.6381	5.22659	1.79191	3.19763	4.16341	3.14026
CCNB1	1.13883	6.24953	4.84922	0.256272	0.667342	0.696926	10.2546	6.86076	7.76377	1.66114	0.979036	9.50614	2.48711	2.2025	3.48642	6.76609
CCNB1IP1	3.00976	2.85173	5.63365	3.78001	6.82171	3.25232	2.98877	5.16191	2.35861	5.18276	3.52453	2.02005	1.18434	2.95336	4.47511	2.45437
CCNB2	1.05748	4.48995	2.28198	0.192204	0.370745	0.61949	5.41071	5.35793	6.19136	1.66114	1.24011	5.7631	3.31615	1.15131	1.76923	3.38305
CCNC	8.70391	8.13045	10.4829	6.59899	7.41491	9.06003	7.21427	15.6817	11.7931	10.2991	10.182	12.4174	3.67145	9.11035	8.53392	8.09278
CCND2	187.582	224.801	179.564	254.414	192.343	293.328	163.455	216.081	250.013	211.563	211.668	214.185	120.086	255.941	273.762	188.058
CCND3	57.6736	63.1627	43.1438	56.8923	42.7099	58.8515	59.6724	64.0338	78.6205	63.6549	65.7912	66.3647	54.5981	67.4767	56.147	67.2629
CCNDBP1	23.9154	25.7262	26.3141	26.0756	23.876	19.6688	19.2724	20.3209	24.5689	22.5251	22.5831	28.5184	13.1462	24.2776	23.6244	23.018
CCNE1	1.95228	3.33713	1.35493	2.05017	1.48298	2.55539	3.14336	2.7443	2.94827	1.39536	1.50119	3.38656	1.30277	2.15245	2.75791	4.04639
CCNE2	0.244035	0.7281	0.927056	0.128136	0.222447	0.774362	1.70051	1.63351	1.67069	1.19602	0.913767	2.55477	0.59217	1.05119	0.884614	0.46434
CCNF	0	1.88093	0.927056	0.256272	0.148298	0.464617	3.65867	2.28692	2.65344	0.531565	0.522152	3.38656	0.473736	0.550626	1.24887	3.25038
CCNG1	266.593	271.537	417.63	244.701	399.471	282.678	318.226	378.647	389	264.276	256.347	436.402	207.598	194.045	404.06	277.517
CCNG2	27.9013	30.5802	28.0969	25.9475	26.4712	24.1601	23.601	42.4714	37.9344	29.2361	25.5202	33.0338	10.8959	25.9795	26.7466	27.794
CCNH	7.07701	9.04058	7.91563	7.17561	6.89586	6.73695	9.63621	10.5852	10.1224	7.90703	8.87659	10.2785	5.2111	6.40728	8.58596	12.6698
CCNI	374.312	294.857	384.933	540.745	305.355	411.879	234.594	351.183	345.606	397.109	430.363	363.465	216.7	400.075	425.47	279.391
CCNJ	6.5076	4.67198	6.34677	7.04747	5.33873	8.59542	5.15305	8.29825	7.2724	10.0333	5.41733	8.25846	4.97423	5.70648	7.23302	5.83741
CCNJL	1.30152	0.424725	1.2123	1.40949	0.444894	1.16154	0.772958	1.7642	1.27758	1.06313	0.848498	1.06944	0.118434	1.80205	1.56108	1.52569
CCNK	28.4707	33.7353	29.951	39.2096	36.4072	31.3617	33.3918	35.3493	39.8999	35.482	27.413	35.1133	27.1214	31.0353	34.8642	32.1058
CCNL1	29.9935	27.9463	74.4419	50.4278	37.2147	24.2824	46.3667	38.7385	26.7781	43.0076	44.5957	37.3365	31.5129	44.6442	42.5744	49.3182
CCNL2	58.8938	56.4278	60.6152	64.9649	51.9043	68.6085	60.8576	73.9655	65.4516	63.7878	58.1547	73.6726	43.939	80.2412	58.3845	55.6544
CCNP	0.569415	0.4854	0.71312	0.512543	0.148298	0.232309	0.824488	0.326703	0.786205	0.664457	0.326345	0.35648	0.473736	1.05119	0.260181	1.19402
CCNQ	9.43602	8.19113	8.914	9.67425	8.60129	8.20824	8.96631	6.99144	10.2207	6.8439	7.83229	8.55552	10.8959	11.1126	8.95021	10.3481
CCNT1	18.628	15.8969	22.8912	21.9753	21.5032	21.295	16.7474	25.1561	19.8517	25.7145	20.1029	24.8942	11.725	21.8749	22.4276	18.5736
CCNT2	26.1117	26.879	45.3544	34.8529	46.1949	42.9771	30.403	55.6048	33.2172	62.5254	30.4154	40.5199	11.725	32.3367	33.7194	23.814
CCNY	50.3526	89.9811	41.147	41.7082	55.3894	42.5125	54.2101	60.1133	49.4326	43.5219	39.292	45.5106	84.4434	41.9977	48.7058	53.7307
CCNYL1	17.8959	20.8722	21.8928	14.159	21.1325	18.5072	19.7362	27.8351	30.3672	25.7145	22.5178	28.0431	16.4623	20.3231	19.9298	21.1606
CCP110	5.6128	5.52143	7.55907	6.85527	6.15437	7.82106	6.28672	9.08234	9.04136	9.23595	8.48498	10.2191	2.13181	7.45847	7.12895	5.10774
CCPG1	65.2387	68.7448	103.973	72.8452	95.5781	82.7793	93.3733	94.2211	75.3774	118.738	88.4396	102.488	39.9123	69.0785	92.4682	59.7671
CCR1	0.569415	5.5821	1.42624	0.192204	0	0.387181	3.29795	6.33804	4.52068	0.199337	0	23.4683	4.14519	0.600682	2.28959	3.78105
CCR2	0.569415	6.24953	1.7828	0.512543	0.327739	0.929234	7.25189	7.57559	7.92789	1.26247	0	12.1162	1.42121	1.02967	3.55823	4.72366
CCR5	1.6269	14.4407	3.63691	1.08915	0.784497	1.00667	11.6083	16.6004	16.0514	3.92029	0.522152	37.8505	6.6323	1.62334	4.97569	10.8649
CCR6	0	3.57983	0.142624	0.0640679	0.148298	0	1.70051	2.48294	1.27758	0.0664457	0.391614	7.66432	1.65808	0.350398	0.93665	2.65337
CCR7	0.32538	1.88093	0.855744	0.576611	0.222447	2.01334	0.669897	1.69886	2.26034	0.398674	1.24011	1.42592	1.53964	0.80091	1.24887	0.995014
CCS	27.9827	33.796	24.8879	29.279	24.0243	22.6114	29.6816	26.9203	29.4827	21.6613	26.3034	26.2607	60.9935	31.3857	22.7398	36.8818
CCSAP	4.96204	4.73265	9.62712	8.45696	9.34278	10.3764	5.41071	9.14768	6.09309	13.3556	11.4221	11.7044	2.13181	9.61092	10.3552	7.23043
CCSER1	1.46421	2.00228	1.7828	3.13933	2.22447	3.56206	2.83418	3.13635	1.96551	3.52162	4.17722	2.25771	0.947472	2.9033	2.65384	2.05636
CCSER2	31.3178	27.4858	29.4519	42.0926	48.1969	47.7007	27.2596	36.1333	32.0379	52.1598	39.0962	30.3008	35.8855	39.5449	44.0746	32.3711
CCT2	94.8483	98.8396	103.902	113.272	103.067	116.232	100.536	117.286	123.434	112.426	105.997	130.709	62.77	101.015	112.034	105.007
CCT3	97.1259	114.008	91.6359	106.609	96.4679	110.656	116.923	116.894	121.469	98.6053	106.911	127.501	92.9707	110.275	98.5044	118.009
CCT4	107.131	97.8082	101.834	117.757	106.552	110.889	86.8805	107.485	123.926	100.798	107.107	120.074	76.0346	104.869	104.541	111.375
CCT5	90.2116	106.06	89.0687	98.9849	89.7204	93.7752	110.894	116.764	122.353	89.1036	90.9851	109.024	91.7864	90.8032	94.2894	109.584
CCT6A	42.6313	49.4726	62.9685	62.0715	72.2627	72.0025	61.0967	77.3757	64.1386	76.7188	60.6167	79.5468	18.2554	53.1269	70.4938	46.0187
CCT7	132.674	161.153	129.217	153.827	128.649	133.887	166.907	151.982	149.969	126.645	141.308	154.415	175.993	147.818	141.85	176.847
CCT8	99.973	98.6576	100.407	89.8873	102.103	80.6885	109.76	103.957	111.248	90.7648	78.9756	106.172	68.218	77.0876	97.7238	98.5727
CCZ1	31.0738	30.0948	33.7306	33.3794	29.2147	29.8129	29.1147	32.0822	42.062	33.2893	32.3735	39.8664	21.4366	29.1832	33.7714	31.7078
CD101	0.32538	2.6697	0.71312	0.0640679	0.148298	0.309745	1.49439	4.70452	1.67069	0.797348	0.195807	7.5455	0.947472	0.300341	1.82126	1.32668
CD109	25.1877	26.8141	33.2314	21.8337	24.1726	19.9677	31.4511	60.165	32.3828	29.5025	31.8108	61.1363	13.7798	21.2817	42.5406	38.4016
CD14	14.4794	120.986	20.2526	8.64917	7.41491	9.67952	77.3494	87.8178	105.745	13.7542	5.61314	146.929	96.1684	21.2241	26.4864	74.0953
CD151	258.026	253.136	215.006	292.214	181.146	279.157	258.219	227.516	244.51	246.248	279.613	257.735	252.383	327.822	230.936	246.1
CD163	6.26356	47.3872	16.7583	12.1088	9.78768	9.91183	33.9071	59.5906	132.377	19.0699	5.61314	46.2236	42.6362	12.364	12.1244	35.8205
CD164	109.897	107.091	142.553	157.223	119.454	153.401	103.113	175.832	168.739	180.666	155.536	178.062	58.7433	141.861	167.296	125.106
CD180	0.081345	1.57755	0.427872	0.0640679	0.296596	0.154872	1.49439	2.0909	1.37586	0.730902	0.326345	3.92128	0.947472	1.05119	0.624433	2.5207
CD1C	0.48807	9.58666	1.42624	0.448475	0.148298	0.696926	5.30764	5.29259	4.22585	1.06977	0.0652691	11.2885	2.48711	0.550626	2.13348	3.64838
CD1D	28.1454	93.925	41.9315	13.5824	17.6475	8.05336	23.4979	36.1333	33.2172	13.1496	8.94186	16.9328	110.973	12.2139	13.3212	18.7726
CD200R1	0.406725	1.94585	0.674611	0.896951	0.519043	0.542053	1.50984	3.83419	2.85294	1.55549	0.55805	7.54668	1.06591	0.815426	1.39405	2.06299
CD22	0.48807	9.34396	1.42624	0.384407	0.444894	0.542053	3.96785	5.35793	5.79826	0.46512	0.456883	7.07019	4.26362	0.400455	2.02941	5.0414
CD244	0.244035	0.546075	0.285248	0.192204	0.370745	0.0774362	1.03061	0.522725	1.67069	0.265783	0	1.30709	0.236868	0.200227	0.416289	0.862345
CD248	38.3948	27.0004	22.2493	66.6947	26.1005	32.136	26.126	28.6192	110.069	40.3325	37.6602	43.3123	18.1204	50.6576	28.1515	25.0743
CD27	0.16269	0.970801	0.570496	0.192204	0.0741491	0	1.03061	0.522725	0.687929	0.398674	0	0.71296	0.473736	0.400455	0.156108	0.530674
CD274	4.71801	6.91695	6.77464	4.93323	5.41288	3.71694	6.49285	11.5653	12.8741	5.84722	5.87422	17.2299	2.84242	6.75768	6.71266	5.30674
CD276	69.0619	122.139	73.8792	88.4778	55.6118	68.7633	112.646	118.07	133.163	79.3361	86.6773	126.313	83.9697	105.97	70.9252	130.479
CD28	0	3.27645	0.855744	0.0640679	0.0741491	0.232309	0.669897	1.43749	1.37586	0.199337	0	1.84181	0.355302	0.250284	0.520361	1.06135
CD2AP	20.1736	16.2949	27.6691	21.1905	23.7136	28.9472	13.6267	31.9483	23.3552	41.0614	35.2792	29.6948	11.9109	33.883	26.7263	18.4409
CD2BP2	73.2105	61.5852	66.0349	88.7981	50.1989	74.7259	64.6708	75.0763	74.5912	55.1499	74.0804	74.2073	98.5371	89.3015	67.2827	93.9956
CD300A	1.22017	3.1551	1.2123	0.256272	0.296596	0.542053	2.53891	2.77698	3.8809	0.84386	0.391614	2.77757	3.31615	0.750853	0.861198	2.5207
CD300LG	21.4751	34.0387	25.2444	12.1729	28.9923	25.1668	32.5673	47.4373	22.6034	34.6182	10.8999	12.8333	21.6734	14.116	13.9977	26.998
CD302	84.0294	131.119	148.258	78.4191	68.8103	96.4081	104.762	219.087	214.732	144.386	108.477	218.582	86.5753	98.9124	114.792	130.148
CD320	10.1681	13.8339	9.69843	7.68815	9.56523	4.41386	15.9745	6.5994	15.1344	6.51167	5.09099	8.49611	24.3974	6.20705	11.9683	20.4309
CD34	205.803	225.65	208.088	218.984	166.242	92.4588	162.991	177.661	249.129	222.726	141.503	200.223	160.123	177.301	146.742	168.423
CD36	209.626	295.487	299.582	127.623	302.157	184.84	121.561	303.899	205.593	310.633	73.754	119.896	150.885	69.6291	139.717	129.683
CD37	9.59871	42.9579	14.9755	9.16171	5.11629	8.28567	28.2387	33.5851	43.9292	8.50504	5.4826	48.7784	33.0431	13.4152	13.2692	33.7641
CD38	10.5748	11.5283	10.4116	7.94442	11.8639	3.32976	11.4398	9.99711	19.5568	14.02	3.19818	12.2986	10.7775	7.3083	7.28506	7.23043
CD3E	0.548265	1.07455	0.142624	0.0640679	0.250624	0.154872	0.439555	0.835706	2.2908	0.544854	0.0652691	1.19124	0.542428	0.272309	0.171199	0.654056
CD40	7.89046	14.6227	11.6239	9.86646	6.74757	5.57541	12.5219	13.3948	14.6431	10.8971	7.76702	15.2098	13.6199	12.2139	6.29637	13.9302
CD44	157.321	202.837	193.541	145.498	115.821	164.397	217.72	251.627	251.291	204.387	253.766	370.205	128.382	191.017	155.224	190.645
CD46	2.76573	1.6989	4.06478	4.54882	2.66937	2.7877	1.49439	4.37782	2.16206	4.45186	0.652691	2.37653	1.18434	2.50284	3.1742	2.78604
CD48	8.37853	57.1559	11.4812	4.80509	5.11629	4.87848	27.9811	46.0651	40.8827	9.30239	3.19818	64.6417	26.4108	6.55745	13.3212	38.4739
CD5	0.244035	1.33485	0.285248	0.128136	0.296596	0.0774362	0.927549	0.914768	1.27758	0.930239	0	1.01003	0.355302	0.350398	0.364253	0.796011
CD52	1.13883	3.3978	1.14099	0.832883	0.519043	0.387181	1.8551	1.7642	5.11033	2.65783	0.391614	2.73301	1.77651	1.45165	0.832578	2.91871
CD53	8.29719	37.9219	13.3353	6.66306	8.52714	5.42053	24.2709	42.1447	65.8447	10.8971	4.56883	60.661	22.7393	10.2617	13.1651	27.993
CD55	59.7072	104.118	67.8177	69.834	72.8885	67.2146	87.8595	88.1445	120.388	60.9971	91.3767	103.26	75.6793	73.6337	68.2714	80.6624
CD59	70.038	85.5518	88.9261	83.4164	60.1349	26.7155	73.0188	89.9087	75.1809	78.4723	34.0704	86.09	92.2601	74.4846	57.1877	66.1352
CD5L	8.29719	41.8051	13.4067	12.1729	5.78363	4.56874	20.8183	20.8436	78.9153	11.7609	6.20056	20.4976	55.4271	10.6121	7.75338	21.028
CD6	0.894795	1.09215	0.927056	0.384407	0.0741491	0.232309	0.566836	0.588065	2.55517	0.664457	0.261076	1.12885	1.18434	0.450512	0.260181	0.597008
CD63	462.629	654.873	461.703	521.554	355.878	561.334	606.699	569.72	653.116	493.394	626.715	667.04	506.271	571.479	396.865	633.472
CD68	15.8623	99.6891	23.8182	13.198	7.93395	10.5313	70.7514	63.5764	83.8291	13.4885	12.0095	108.192	72.4816	22.6257	23.7285	70.9776
CD72	0.244035	2.00228	0.570496	0.128136	0.0741491	0.232309	1.70051	0.784087	3.73447	0.265783	0.0652691	4.15893	1.77651	0.500569	0.93665	1.72469
CD74	164.398	1094.7	281.041	70.4747	59.2451	78.7526	714.625	1035.98	1012.24	190.035	42.1638	1163.14	624.621	196.523	267.257	790.505
CD79A	0.48807	6.18885	1.35493	0.512543	0.222447	0.232309	3.0403	4.5085	5.11033	0.598011	0.195807	2.91125	3.31615	0.550626	0.93665	3.58205
CD80	1.22017	10.6788	3.42298	1.34543	0.889789	1.39385	7.36887	13.5908	12.481	1.32891	0.71796	29.7661	4.97423	2.10239	3.95474	7.69477
CD82	49.1324	62.0706	57.2635	47.0258	34.6276	29.2709	77.708	68.3463	91.986	51.4289	28.9142	76.5838	53.5322	43.3493	45.5836	78.3407
CD84	3.49783	36.1016	5.84758	3.26746	2.07617	2.32309	16.2836	26.855	28.4017	5.44854	2.08861	40.7576	13.1462	3.30375	6.14026	18.3082
CD86	0.081345	2.06295	0.855744	0.256272	0	0.464617	0.772958	2.15624	1.37586	0.531565	0.0652691	3.08949	0.236868	0.250284	0.728506	0.928679
CD8A	5.28742	3.82253	3.70822	3.52373	2.89181	2.01334	4.84387	5.09657	8.84481	5.71433	1.30538	6.6543	2.72398	9.41069	2.86199	5.83741
CD8B	0.081345	0.182025	0.641808	0.256272	0.0741491	0.309745	0.515305	0.588065	0.786205	0.730902	0.195807	0.950614	0.236868	1.25142	0.416289	0.46434
CD9	150.57	304.346	158.741	195.215	106.256	114.451	206.019	216.081	290.798	195.417	96.0761	448.749	139.278	217.848	144.973	218.903
CD93	66.6216	62.3739	66.3202	51.7028	85.1973	48.3976	49.0055	129.701	61.324	79.469	30.2196	39.8069	41.4519	34.2389	41.4207	51.5417
CD99L2	73.2105	108.608	69.8858	84.3134	82.7504	47.1586	87.4473	80.1729	92.3791	72.9573	40.0752	77.4156	82.1932	62.8714	68.6877	74.8914
CDA	2.03362	2.6697	1.49755	1.02509	1.48298	0.464617	1.28826	1.82954	0.884481	0.46512	0.587422	2.91125	2.01338	1.55176	0.780542	3.25038
CDADC1	12.9339	15.1081	15.8313	14.5434	16.0162	14.7903	13.9132	19.1448	16.0189	15.1496	13.4454	17.824	10.4222	12.4141	14.8303	11.4758
CDAN1	28.6334	31.1263	33.8019	39.2736	29.8821	33.4524	34.0617	40.0538	27.3206	36.9438	33.6788	31.905	22.8578	38.1934	37.1018	36.8818
CDC123	19.8352	6.8314	21.5598	9.77036	23.2368	24.1074	34.7403	19.3277	21.7258	23.961	34.1357	20.2065	13.4387	5.90421	30.7773	33.0073
CDC14A	3.17245	3.45848	4.27872	3.90814	3.70745	5.11079	3.9189	9.27836	5.30688	5.3821	3.19818	8.67435	1.53964	4.00455	4.05882	5.50574
CDC14B	15.6182	16.0789	18.2559	22.2956	17.0543	19.9785	17.1597	20.9743	19.1637	24.0533	15.5993	22.7553	10.6591	22.025	20.6583	16.0529
CDC16	25.6237	33.4926	36.8683	32.4184	26.6937	32.2135	38.3902	37.7015	42.062	37.9405	33.4178	40.2823	18.831	32.3868	35.4886	33.6315
CDC20	2.11497	7.94843	4.1361	1.08915	0.81564	1.47129	13.6041	8.42894	9.23791	2.79072	2.7413	9.38731	4.73736	3.65415	4.42307	11.5422
CDC23	44.7397	36.3443	58.4758	63.5554	54.6479	66.2079	46.2744	53.8406	56.9016	62.9905	63.9637	64.7606	18.5941	51.6587	60.466	43.6479
CDC25A	0	1.51688	0.71312	0.128136	0.519043	0.309745	1.1852	2.54828	1.96551	0.598011	0.587422	1.36651	0.473736	0.750853	0.260181	1.99003
CDC25B	23.102	30.7016	25.5297	24.8583	22.3189	27.7996	34.3193	30.9061	36.1654	28.173	21.7346	28.9937	24.8711	30.785	30.6493	27.2634
CDC26	8.94795	10.4968	9.62712	9.80239	7.11831	7.97593	11.4913	12.1533	15.6258	7.5748	7.76702	10.4568	13.2646	9.21046	9.99093	13.5322
CDC27	36.4426	39.9848	48.4922	40.1706	36.5555	54.7474	38.3902	68.5423	56.9999	53.4223	48.756	59.2351	23.5684	43.2491	52.6605	45.9696
CDC37	155.776	174.501	157.457	206.363	137.398	185.537	207.05	157.144	177.781	149.768	156.58	179.963	160.123	199.477	165.215	187.195
CDC37L1	21.1497	21.3576	24.8879	19.1563	24.5433	24.0052	17.3658	28.2925	25.1586	26.7776	21.5388	24.7754	12.0803	17.1194	22.7918	16.9816
CDC40	19.9295	19.3511	25.0933	25.3414	24.656	20.5903	18.0604	30.4278	27.7068	28.666	22.2111	28.7858	12.31	22.6758	26.8569	20.2319
CDC42	126.388	153.805	157.894	161.454	145.631	167.742	131.313	188.274	182.261	170.032	165.216	189.723	90.3178	155.07	163.35	144.905
CDC42BPA	68.8992	64.6189	88.8547	96.1659	77.7082	86.4188	70.1846	101.278	79.505	106.778	79.9546	87.5753	44.0574	90.9533	90.2827	70.1816
CDC42BPB	118.276	117.892	133.282	166.384	127.611	154.95	128.105	139.175	115.277	159.337	145.615	142.473	83.2591	177.001	122.493	112.901
CDC42BPG	1.6269	1.51688	2.49592	1.9861	3.11426	4.02668	1.95816	2.7443	1.57241	3.52162	1.63173	2.13888	1.18434	2.9033	3.48642	0.995014
CDC42EP1	124.702	89.3743	81.7949	132.3	111.075	142.483	101.567	69.457	88.1532	88.5721	123.293	71.9496	104.933	148.319	94.2374	81.8564
CDC42EP2	24.1595	27.4858	19.1829	22.5519	18.908	16.0293	23.0857	25.2868	36.5585	25.1165	16.0562	23.1118	25.8186	26.8305	15.1425	24.0793
CDC42EP3	26.8438	21.2363	22.0354	49.2682	41.1527	29.8129	30.8668	18.3607	19.3603	29.9005	26.1076	17.3487	14.2121	24.7281	27.7352	20.1656
CDC42EP4	43.2755	52.6053	48.1356	63.4913	39.8922	56.451	63.9494	69.261	72.5274	61.5287	46.2758	71.4149	37.1883	60.2685	58.2804	69.3856
CDC42SE1	43.845	59.0368	46.0675	51.5747	46.269	55.0571	59.157	89.8433	72.6257	62.5254	62.3972	80.3863	33.9906	58.1661	54.4298	64.5432
CDC42SE2	29.6096	46.1737	40.6478	35.4295	35.295	35.9304	36.4836	51.031	43.9292	46.0468	34.5273	56.2644	19.66	35.5904	38.5067	37.0808
CDC45	0	0.910126	0.213936	0.0640679	0.148298	0	1.13367	0.980109	1.08103	0.531565	0.195807	0.831787	0.236868	0.350398	0.468325	0.995014
CDC5L	28.4707	32.6432	39.9347	35.1733	30.1787	36.6273	29.8362	49.7242	42.2585	35.4155	31.1986	42.837	25.4633	31.0853	38.6108	35.5551
CDC6	0.32538	0.970801	0.570496	0.0640679	0.370745	0.464617	1.08214	2.0909	1.96551	0.664457	0.261076	1.24768	0.236868	0.150171	0.728506	0.530674
CDC7	6.58894	5.03603	6.77464	4.54882	4.00405	6.11746	5.5653	7.44883	5.69999	4.85053	6.46164	6.83254	2.84242	3.80432	6.60859	5.0414
CDC73	39.7777	32.6432	51.2733	51.6387	54.203	51.0305	36.9474	49.7895	39.5068	62.924	47.3201	46.9366	20.3706	44.6507	48.8099	33.8305
CDCA2	0.16269	1.27418	0.927056	0.448475	0.370745	0.61949	2.3704	2.80965	2.55517	1.06313	0.522152	1.72299	0.236868	0.350398	1.3009	1.72469
CDCA3	0.406725	3.1551	1.64018	0.384407	0.296596	0.387181	4.17397	2.80965	4.91378	0.863793	1.0443	3.03008	1.53964	1.00114	1.19683	2.85237
CDCA4	12.2831	15.5328	11.6239	17.5546	8.89789	16.339	20.4061	17.2499	21.4241	15.947	15.9257	18.1805	14.9227	23.5267	14.1538	18.1092
CDCA5	2.359	4.48995	3.70822	3.2034	1.92788	3.79437	5.97754	6.46872	5.60171	3.58807	3.32872	5.46603	2.84242	3.40387	3.95474	5.77108
CDCA7	0.081345	0.667425	0.142624	0.0640679	0.296596	0.0774362	0.515305	1.7642	0.884481	0.46512	0.0652691	0.831787	0	0.350398	0.208144	0.729677
CDCA7L	18.7093	10.7395	11.2673	18.3875	7.34076	12.08	19.3239	18.426	19.95	13.6214	10.7041	16.3387	9.94846	15.5677	14.6742	15.8539
CDCA8	0.244035	2.24498	1.2123	0.256272	0.222447	0.309745	3.40101	3.07101	3.14482	0.863793	0.195807	3.50539	1.18434	0.650739	0.832578	2.45437
CDH1	0	0.303375	0.35656	0.448475	0	0.61949	3.55561	0.392044	0.393102	1.4618	0.0652691	1.7824	0.118434	2.30262	2.28959	2.1227
CDH11	41.4859	47.8726	66.962	57.8533	47.4554	43.2094	65.0831	119.051	92.7722	81.5953	59.0685	94.6455	23.9237	50.9579	60.9343	67.3956
CDH13	203.2	238.028	216.575	172.535	318.099	159.209	322.839	190.86	176.012	212.958	161.149	173.725	162.255	160.482	196.801	177.975
CDH18	0.48807	0.84945	1.06968	0.896951	0.222447	0.61949	0.566836	0.653406	0.491378	1.4618	0.195807	0.17824	0.473736	0.550626	0.156108	0.265337
CDH19	23.1833	33.4319	41.147	38.4407	35.2208	9.44722	28.0841	66.0593	34.1999	36.2793	7.31013	46.8771	18.2388	34.2389	22.5837	12.8688
CDH2	51.7354	89.1923	64.466	25.7553	123.162	9.36978	66.1137	46.9145	40.5878	40.5983	8.94186	21.7453	72.4816	14.9169	76.389	48.0923
CDH20	5.04339	8.13045	2.9951	3.26746	8.82374	0.61949	5.77142	2.54828	4.61895	4.18608	0.391614	1.60416	3.67145	1.10125	4.21493	5.17407
CDH23	3.33514	11.6496	5.56234	2.24238	7.41491	1.62616	4.38009	5.03123	2.26034	5.58143	1.8928	2.19829	7.22447	1.15131	3.95474	2.7197
CDH24	1.38286	1.33485	1.2123	2.17831	1.03809	3.02001	2.67959	2.48294	2.84999	1.99337	1.697	3.03008	1.06591	2.50284	1.92534	3.44938
CDH3	0.48807	2.24498	0.427872	4.16441	0.81564	3.48463	4.43163	2.67896	2.75172	3.45517	0.848498	1.66357	1.30277	3.05347	3.7466	2.18903
CDH5	56.2907	62.6773	53.9832	38.5048	66.9566	32.5232	57.6111	101.735	45.0102	66.4457	22.322	28.459	29.7269	27.8316	32.9909	40.7292
CDH6	1.05748	1.39553	1.64018	1.92204	1.40883	2.40052	1.90663	4.11646	1.57241	2.59138	0.652691	1.84181	1.42121	2.15245	2.13348	1.12768
CDH8	1.30152	0.182025	1.42624	1.66577	1.18639	2.55539	3.60714	1.56817	2.16206	2.45849	5.61314	1.18827	0.236868	2.9033	1.76923	1.26035
CDHR3	1.6269	1.2135	0.998368	1.02509	1.11224	0.774362	1.33979	1.43749	1.47413	2.72427	0.261076	0.950614	1.18434	1.05119	2.23755	1.45935
CDHR4	0.81345	0.182025	1.06968	1.15322	0.593193	0.232309	0.154592	0.457384	0.982756	0.398674	0.456883	0.594134	0	0.300341	0.572397	0.597008
CDIN1	1.38286	1.9416	2.13936	2.11424	2.66937	3.79437	1.59745	2.67896	1.76896	3.38873	2.80657	2.02005	0.355302	1.55176	2.49773	1.59202
CDIP1	45.8786	61.1604	50.6315	46.193	56.724	40.1894	72.8126	41.9487	39.3102	49.8342	32.5693	40.4605	49.2685	36.942	55.9388	57.5118
CDIPT	76.1389	62.6166	69.5292	96.4863	44.9343	68.531	92.1366	64.0338	73.805	60.8642	61.4835	81.4557	79.5876	77.5381	72.1741	86.6325
CDK1	0.894795	3.94388	3.85085	0.32034	0.370745	0.464617	7.2658	5.55395	7.46895	1.52825	1.17484	7.78315	1.77651	0.600682	2.49773	5.37307
CDK10	28.7961	32.8859	27.0272	27.8695	20.6876	23.7729	28.1872	27.8351	33.3154	22.658	27.3477	30.0632	25.8186	30.2343	23.9886	30.7128
CDK12	21.9631	24.6947	27.883	31.2651	27.0644	25.6314	23.2918	35.2186	31.0551	36.9438	25.2591	33.0338	20.6075	23.9772	30.4932	26.401
CDK13	24.8916	19.9621	27.5977	28.4461	31.8099	30.2776	24.6316	35.872	31.8413	37.4089	25.4549	31.7267	13.9752	25.1786	30.0248	22.1556
CDK14	23.4274	25.1195	40.7905	33.1872	37.0745	47.3824	29.4744	41.228	37.2465	61.1273	70.6159	58.3439	21.3181	55.0581	43.7624	28.9217
CDK15	3.00976	1.4562	2.3533	4.54882	2.89181	1.9359	2.42193	3.07101	3.6362	4.38541	1.37065	2.6736	1.06591	3.05347	1.56108	1.12768
CDK16	63.7745	77.3	63.3251	70.9872	67.2532	69.8474	82.9126	73.5082	71.3481	74.2862	66.705	77.5344	59.9276	67.5768	70.7171	73.1003
CDK17	13.0965	10.3148	14.619	13.0699	16.906	11.538	11.1306	21.105	11.6948	17.3423	10.5083	15.6257	7.10604	10.1615	13.6855	10.4145
CDK18	35.7918	53.5154	29.5232	11.7885	54.8703	2.86514	40.4515	18.0993	17.0017	11.03	3.32872	13.4868	58.8617	8.0091	16.7036	27.6614
CDK19	20.5803	22.2071	28.4535	28.8306	24.3209	34.1494	23.9617	36.7868	34.1016	39.8674	32.1124	35.7074	13.6199	32.7372	28.828	23.018
CDK20	11.0629	9.70801	9.98368	11.0197	11.0482	9.13747	8.96631	10.2585	12.481	12.6247	11.3568	11.9421	6.6323	11.2628	11.3439	9.81747
CDK2AP1	54.2571	62.6773	51.202	68.1682	51.5336	55.7541	79.5631	60.048	72.6257	52.6914	44.644	68.5036	46.3077	66.1251	55.2103	78.4734
CDK3	1.07863	1.26447	0.438569	0.996897	0.604315	0.743387	1.8855	1.81778	1.30412	1.39536	1.40394	1.96421	3.16219	1.8521	1.04072	1.81291
CDK4	46.448	59.2795	50.9881	60.2238	42.5616	55.4443	59.1055	61.4202	69.9722	53.5552	55.0871	64.107	44.5312	64.6735	50.7352	71.442
CDK5RAP1	15.9436	18.3845	18.2559	15.8888	16.6094	12.1575	11.3367	16.5312	12.9724	13.4885	8.81132	13.1898	13.8568	13.0648	13.3733	17.8439
CDK5RAP2	7.40239	16.5643	11.9804	13.5824	8.52714	11.1508	18.3964	15.0937	15.6258	14.0865	8.94186	17.5269	7.69821	7.25825	13.7375	16.8489
CDK5RAP3	56.3721	51.2097	64.466	86.812	42.9323	66.75	67.505	70.2411	66.5326	65.7147	67.5535	76.9403	56.3746	84.2958	61.2985	68.7886
CDK6	28.4707	38.7107	37.5814	23.577	24.0243	29.7355	35.8652	59.1986	61.9136	37.6082	26.7603	61.7305	35.0565	25.2787	37.466	52.8021
CDK7	18.4653	17.4137	20.1813	19.861	14.0883	15.0226	14.7893	21.8238	22.0137	16.7443	18.3406	22.0424	13.9752	17.7201	17.1199	20.4309
CDK8	10.1681	6.61358	10.1976	8.90544	10.8999	8.20824	8.91478	9.67041	11.4	12.8905	10.8999	11.4074	3.90832	10.6621	12.0203	7.76111
CDKAL1	11.2256	8.85856	12.7648	13.198	10.455	12.3124	10.7699	10.7812	9.92584	12.2924	10.182	12.655	5.80327	9.51081	10.6674	9.15412
CDKL1	1.78959	2.6697	3.49429	3.5878	1.77958	4.25899	4.63775	3.46305	3.2431	3.65451	2.08861	4.63424	0.59217	4.85552	2.08144	1.85736
CDKL2	10.0038	6.06386	13.6919	16.8422	17.127	22.6803	10.5117	13.3942	10.6138	21.5091	16.9589	15.795	4.02676	15.3284	22.6357	7.42943
CDKL3	1.95228	1.33485	2.49592	2.17831	2.00202	2.09078	2.06122	2.67896	1.47413	1.79403	1.95807	2.37653	1.77651	2.15245	2.13348	1.85736
CDKL5	0.16269	0.546075	0.427872	0.640679	0.889789	1.00667	1.08214	0.849428	0.786205	1.26247	0.522152	0.35648	0.118434	0.901024	0.728506	0.530674
CDKN1A	55.0706	124.991	73.4514	39.9143	40.3371	20.2108	150.521	160.019	113.607	40.5318	37.2686	201.887	139.989	47.6541	61.6108	120.266
CDKN1B	53.3623	39.3781	61.7562	75.472	56.8723	63.3428	42.5642	67.0394	67.2205	73.7547	53.847	65.2953	28.0689	63.2719	72.07	44.7756
CDKN2AIP	14.3981	14.9867	21.4649	14.8638	15.6455	18.5847	14.274	21.105	21.1293	19.4686	18.3406	22.4582	6.6323	15.5677	20.242	13.9965
CDKN2AIPNL	16.5944	16.989	17.1862	22.2956	12.457	12.8544	17.5204	14.4403	16.6086	17.0101	16.1867	15.4475	12.554	20.8737	20.19	19.1706
CDKN2B	2.41839	5.19621	2.3155	3.12908	2.5359	3.79747	4.00701	9.0928	4.50201	2.10168	4.04407	5.66566	4.26599	3.46894	2.75375	7.97271
CDKN2C	16.6757	23.2385	16.6157	19.5407	13.7176	13.0093	21.9005	23.5226	25.0603	11.4951	8.41971	19.4876	14.5674	15.2173	16.5475	30.3811
CDKN2D	12.3644	20.4475	12.337	13.0058	10.455	10.5313	21.4882	14.3096	18.4758	11.8273	11.879	17.3487	21.1997	16.4687	13.8936	22.2883
CDKN3	6.67029	13.3485	9.19925	4.42069	2.66937	4.18155	7.4204	10.7812	15.0362	8.10637	4.69937	12.1203	14.4489	5.50626	3.69456	10.4808
CDO1	29.0402	57.4593	55.2668	21.655	13.8659	30.7422	20.8183	46.7839	39.212	58.4722	24.6717	45.273	73.7844	43.3993	21.7511	33.2998
CDON	64.5879	70.8684	87.8564	99.3693	60.3573	66.4403	73.5341	105.852	114.491	119.602	64.8122	123.402	58.5064	77.7884	77.5338	111.243
CDPF1	25.3796	29.6701	23.1051	27.5492	20.0944	28.3416	29.4755	26.5283	31.2516	23.6547	29.6974	30.7167	29.4901	32.4369	27.1108	35.6215
CDR2L	17.8146	23.2385	21.037	19.2844	15.4972	24.315	27.775	26.0709	34.8878	24.5849	26.434	31.3108	17.0545	29.884	19.4095	23.8803
CDS1	0.894795	3.33713	1.2123	2.05017	3.04011	2.24565	2.31887	1.69886	2.65344	2.92361	1.76226	1.54475	1.30277	1.65188	1.66516	2.05636
CDS2	157.891	75.2977	135.208	221.483	161.571	302.466	100.175	130.877	119.601	250.301	313.683	162.496	63.7175	275.713	164.642	92.2709
CDV3	165.781	160.907	194.824	215.653	196.421	250.506	177.368	181.908	199.794	230.301	233.141	234.802	114.17	214.994	203.409	155.023
CDYL	16.3503	20.4475	18.5411	18.0031	18.1665	17.1908	19.1178	22.9345	23.6844	21.5948	16.3825	25.9042	11.4881	21.2742	20.9706	16.8489
CDYL2	4.39263	4.79333	5.41971	6.47086	5.48703	5.18822	6.18366	7.31815	6.87929	8.83727	5.4826	8.4367	3.55302	6.90785	6.24433	6.10275
CEBPA	99.4849	56.2458	82.6506	63.4913	26.6195	83.4762	35.7107	48.4174	61.5205	149.636	27.0214	44.4412	25.937	69.9294	40.5361	48.822
CEBPB	31.6432	69.1089	33.7306	39.3377	29.6596	47.3909	63.4856	57.4344	79.6033	50.1665	46.341	98.6945	51.2819	51.8589	44.2307	54.5931
CEBPD	71.5836	236.936	188.478	70.3466	62.8784	110.811	292.436	261.428	296.006	112.625	92.9431	327.071	250.606	161.584	112.814	239.4
CEBPG	43.4382	48.7827	41.9315	52.1513	34.331	46.5392	39.0601	57.5651	62.0119	46.1797	52.9332	62.6811	55.5455	55.0626	56.199	51.6744
CEBPZ	32.9447	27.8498	42.0028	43.0536	30.9943	40.4217	30.7637	47.1759	43.5361	39.8009	35.898	44.2035	19.1863	32.9374	40.7963	32.9681
CEBPZOS	20.6616	18.5059	18.6837	19.4126	17.9441	12.5447	16.026	16.9232	19.8517	16.0134	14.1634	16.4575	22.1472	15.0671	18.4728	23.3497
CELA1	0.081345	0.60675	0.855744	0.576611	1.55713	0	0.772958	0.392044	0.393102	0.132891	0	0.653547	0.829038	0.250284	1.24887	4.90873
CELF1	59.6259	49.3288	61.6849	72.3327	62.4335	63.4977	43.1311	68.869	68.4981	61.5951	62.5278	55.4327	47.7289	61.8202	62.9117	56.4504
CELF2	74.7561	60.9784	72.5956	95.2049	68.3654	93.5429	64.9285	83.9627	86.7774	81.5953	67.9451	89.0012	98.0634	71.1809	97.8799	78.5397
CELF4	0.32538	0.36405	0.35656	0.128136	0.519043	0.232309	0.257653	1.04545	1.27758	0.199337	0	0.415893	1.89494	0.700796	0.156108	0.530674
CELF6	2.52169	0.546075	2.13936	3.52373	2.81766	1.31642	1.08214	1.63351	2.75172	0.265783	2.15388	2.6736	1.30277	3.75427	3.69456	2.18903
CELSR1	8.21584	11.6496	10.3402	6.21459	31.7358	2.47796	24.6316	7.64485	4.52068	14.1529	2.15388	2.61419	11.0144	3.2537	9.57465	11.0778
CELSR2	12.7712	10.9822	11.4099	19.797	16.4611	13.6288	13.0888	9.86643	12.0879	16.2127	12.0748	13.368	6.277	15.7679	16.7036	11.4758
CEMIP	1.6269	27.7892	4.42134	1.28136	0.889789	2.40052	17.5719	36.3294	13.0707	7.64125	0.652691	17.2893	7.22447	6.40728	5.0475	17.7112
CEMIP2	15.3742	31.6117	21.3223	13.5824	14.9781	16.0293	19.9938	31.1021	28.3034	26.1796	9.85563	25.4289	14.9227	23.0262	14.9344	17.3132
CENATAC	9.35467	6.97763	9.34187	6.72713	4.59724	8.36311	6.95662	12.7414	9.04136	7.64125	5.02572	8.73376	8.88255	11.2127	7.59727	8.35811
CENPA	0.32538	5.03603	1.85411	0.384407	0.370745	0.464617	7.11121	5.09657	6.48619	1.4618	0.456883	5.58486	2.72398	1.10125	2.13348	5.2404
CENPB	87.6899	114.615	88.3556	102.445	76.5218	108.023	106.977	90.8234	105.843	89.8345	96.5329	97.1408	126.132	122.339	92.9885	112.835
CENPC	9.27333	7.22033	10.1263	9.80239	5.41288	8.20824	8.03876	11.3039	13.1689	9.96685	7.83229	10.3973	10.0669	10.2116	12.0203	10.9451
CENPE	0.081345	1.33485	1.49755	0.192204	0.370745	0.774362	2.67959	5.94599	3.43965	0.46512	0.913767	3.86187	1.53964	0.951081	1.61312	3.51571
CENPF	0.894795	5.27873	3.77954	0.32034	0.81564	1.39385	9.17243	9.14768	9.43446	2.12626	1.17484	9.8032	3.31615	2.2025	3.90271	8.75612
CENPH	5.93818	4.3686	10.4116	9.41798	5.56118	7.20157	6.90509	8.6903	5.79826	9.36884	5.15626	9.62496	4.14519	5.70648	10.5633	9.28679
CENPI	0.81345	1.9416	2.06805	2.05017	1.40883	1.7036	2.78265	3.26703	1.96551	1.92692	2.02334	3.92128	1.30277	2.35267	1.97737	2.45437
CENPJ	0.244035	1.27418	0.71312	0.768815	0.889789	0.387181	0.669897	1.50283	1.08103	0.531565	0.71796	1.36651	0.355302	0.850967	1.04072	1.32668
CENPK	0.65076	1.09215	1.2123	0.512543	0.222447	0.232309	2.42193	4.37782	3.53792	0.996685	1.0443	3.38181	0.473736	1.00114	1.92534	2.05636
CENPL	0.406725	1.09215	1.64018	0.832883	0.593193	1.00667	0.97908	1.69886	0.687929	0.664457	1.17484	1.60416	0.59217	0.650739	1.14479	1.26035
CENPM	0.894795	2.06295	1.35493	0.832883	0.81564	0.542053	3.24642	2.54828	2.35861	1.4618	0.391614	1.96064	1.53964	0.901024	0.780542	3.05137
CENPN	2.68438	3.82253	3.5656	2.11424	2.59522	2.47796	5.25611	7.12212	6.48619	4.25252	2.61076	6.00075	3.31615	3.20364	3.53846	5.50574
CENPO	3.33514	10.0114	4.1361	4.80509	3.6333	4.25899	5.5653	6.33804	5.40516	5.24921	3.06765	6.00075	2.72398	6.00682	5.6199	7.5621
CENPP	2.76573	1.15283	1.64018	2.81899	0.81564	2.55539	1.1852	1.82954	3.93102	2.85716	1.63173	2.61419	2.48711	2.65301	3.12217	3.64838
CENPQ	1.46421	2.00228	2.9951	1.92204	2.29862	2.32309	3.60714	4.31248	2.26034	2.45849	2.15388	3.74304	1.42121	2.2025	3.38235	2.7197
CENPT	0.65076	0.970801	0.71312	0.448475	0.519043	0.232309	1.33979	1.37215	0.884481	0.797348	0.652691	1.01003	0.473736	0.500569	0.988686	1.65836
CENPU	1.77657	0.60311	0.80226	0.270367	1.11668	1.78181	1.61806	6.11	1.89574	0.998678	0	3.65867	2.67069	3.66316	1.64278	2.41987
CENPV	27.576	22.5104	23.1764	40.0424	18.389	23.5406	25.4561	21.6277	26.5344	19.7344	17.1005	24.1218	25.5817	31.0853	24.0927	27.794
CENPW	1.13883	2.12363	2.21067	1.9861	0.81564	0.774362	2.73112	3.72441	3.04654	1.39536	0.326345	2.19829	1.06591	1.60182	1.40498	2.58704
CENPX	9.59871	14.8654	5.70496	8.45696	5.63533	6.96926	11.2337	10.7812	12.481	7.10968	5.93948	8.49611	18.002	12.9147	6.97284	12.2718
CEP104	33.5141	35.4342	38.5085	45.0397	38.2609	43.674	38.9571	43.5168	41.4438	35.8142	37.7908	36.8363	34.109	49.4061	45.1153	43.1836
CEP112	2.44035	2.9124	4.92053	4.61289	2.44692	2.40052	3.81326	5.48861	4.71723	6.31234	1.82753	4.75307	4.02676	3.45392	4.63121	2.85237
CEP120	21.0684	23.0565	24.6026	28.4461	31.5875	31.3617	22.1066	33.0623	23.193	35.1497	25.3244	30.6573	11.4881	25.0785	25.914	16.8489
CEP126	2.92842	0.84945	2.85248	2.05017	1.85373	1.23898	0.515305	1.24147	0.491378	1.66114	1.95807	0.653547	1.30277	1.55176	2.65384	1.26035
CEP128	0.422181	0.929542	1.75214	0.898232	1.7996	1.17161	1.9293	1.2271	0.650585	1.1834	0.261076	1.45325	0.236868	0.553128	1.31391	1.26234
CEP135	4.47397	5.21805	6.48939	5.95831	5.56118	4.80104	5.30764	11.1079	7.86205	7.5748	6.20056	8.73376	4.02676	6.05688	7.38913	6.76609
CEP152	2.19631	2.6697	4.42134	3.52373	3.26256	2.86514	3.60714	5.09657	3.83275	3.45517	1.697	3.44597	1.89494	2.5529	3.48642	3.51571
CEP162	10.4122	7.5237	12.9075	13.3261	9.04619	12.6221	8.09029	14.6363	12.481	11.7609	10.5083	13.6651	5.2111	12.0637	12.2805	11.8738
CEP164	15.8623	14.744	13.9772	12.4292	11.5673	18.3524	19.6847	21.3664	18.4758	15.2161	15.8604	18.4776	13.9752	16.2184	19.3054	19.1706
CEP170	40.8352	33.6746	45.3544	48.8197	42.4133	41.9704	29.5785	61.2895	61.4223	55.3492	46.4063	56.7992	35.4118	48.1547	60.8823	49.419
CEP170B	22.3699	27.4251	23.7469	28.1258	27.0644	41.1961	32.8249	23.1959	30.3672	32.6913	33.8094	33.925	14.8043	40.0455	34.6561	26.998
CEP19	7.40239	7.5237	6.41808	7.43188	5.41288	5.73028	7.98723	11.7613	8.74653	7.77414	5.22152	7.90198	7.22447	5.65643	6.66062	9.41946
CEP192	9.68005	6.94972	8.21799	11.374	11.0326	13.7759	7.97074	15.3315	11.8638	14.4572	13.0166	12.4614	4.26362	11.7133	12.1088	10.2155
CEP20	17.7332	14.9867	18.0419	14.2871	16.7577	15.4098	15.4592	25.3521	22.7017	18.937	17.2963	17.7052	10.1853	14.8168	18.681	18.7726
CEP250	36.7679	41.9871	37.724	45.8085	26.1746	42.8997	46.0683	47.8947	37.1482	42.5917	36.5507	46.2236	34.2274	41.1467	43.9185	39.4025
CEP290	6.99567	3.3978	7.1312	8.5851	6.37682	5.57541	4.68928	10.0625	7.76377	7.77414	7.57121	8.19904	6.51387	8.45961	9.3665	7.69477
CEP295	11.4696	8.4945	14.9042	16.2092	12.7536	17.3457	9.17243	22.9999	19.262	15.4818	12.6622	16.3981	10.7775	16.6689	18.5769	15.5222
CEP350	25.8677	21.9037	28.2396	32.4184	36.1847	38.4084	28.9086	34.5652	29.0896	44.2528	34.9842	37.0145	20.0153	35.4903	33.3031	27.3297
CEP41	4.79935	4.24725	6.13283	6.15052	5.48703	5.57541	5.71989	5.48861	5.79826	6.71101	5.67841	5.82251	3.43459	4.7554	5.82804	5.37307
CEP43	11.551	13.7732	13.478	17.8109	12.1604	13.7836	13.501	16.8579	15.0362	17.0101	15.5993	18.1211	11.6065	18.4209	13.8416	17.0479
CEP44	1.78959	2.06295	1.85411	2.43458	4.00405	2.55539	2.26734	5.16191	2.65344	4.5183	2.08861	2.43595	1.65808	2.25256	2.28959	2.05636
CEP55	0.32538	1.51688	1.42624	0	0.370745	0.309745	3.86479	2.94033	3.2431	0.730902	0.326345	4.57483	1.06591	0.500569	1.35294	1.79102
CEP57	7.64643	6.91695	12.4083	11.4682	11.6414	14.016	9.32703	13.2641	11.4982	9.96685	9.72509	13.6651	7.93508	8.55972	11.0837	9.41946
CEP57L1	1.54555	1.51688	2.06805	1.9861	2.59522	1.9359	1.39132	2.15624	1.67069	3.98674	2.41496	2.31712	1.30277	2.00227	1.97737	2.3217
CEP63	27.1692	24.27	28.8814	34.4045	25.0624	30.2001	25.7137	32.6703	25.0603	28.6381	20.3639	31.4297	17.0545	27.0307	29.9208	22.819
CEP68	31.8872	20.6902	36.0839	25.2428	42.3391	33.0653	25.6622	41.7526	28.5982	42.6581	26.0424	30.1226	12.7909	26.1297	30.8574	23.8803
CEP70	14.6283	11.4403	15.9026	12.6662	18.4209	13.9586	12.442	15.0153	13.2672	15.3058	12.5969	14.6769	11.2512	13.0939	16.7426	13.7955
CEP72	3.9859	1.75958	2.70986	2.94712	2.29862	1.31642	2.83418	4.5085	4.91378	3.32228	1.17484	4.63424	1.65808	2.00227	3.69456	2.91871
CEP76	4.63666	4.91468	5.27709	4.80509	7.34076	5.88515	3.60714	9.017	9.63101	5.11632	5.87422	8.85259	2.36868	6.00682	6.14026	5.63841
CEP78	1.13883	1.15283	1.49755	2.05017	1.18639	1.9359	2.06122	2.7443	2.16206	1.72759	1.8928	2.02005	0.829038	1.30148	1.50905	2.18903
CEP83	6.71991	7.62442	8.88904	5.56558	4.64173	5.78139	7.83264	10.2598	10.8084	6.71699	5.9806	9.10747	5.85182	5.73852	8.96582	8.1611
CEP85	19.9295	42.3512	28.9527	12.1729	46.0466	5.96259	36.1229	18.23	16.412	12.9569	7.76702	11.645	24.5158	8.60978	19.4615	21.625
CEP85L	15.6996	11.4069	16.1878	19.6688	16.3128	19.359	8.34795	22.5425	14.5448	20.7975	16.3173	14.378	12.4356	16.0683	19.0973	11.2105
CEP89	6.75163	1.29845	10.4829	6.34721	9.08623	11.5457	10.3576	7.47888	6.41543	8.36285	14.3592	3.00513	2.32368	7.34735	10.516	11.7352
CEP95	35.4664	31.9151	47.2085	43.9506	31.0685	35.2335	31.2275	45.1503	40.6861	40.1332	30.7417	42.837	25.108	36.091	42.2533	34.3611
CEP97	5.69415	4.24725	7.55907	8.7773	7.41491	8.36311	5.87448	9.53973	6.87929	10.2326	9.46401	9.56555	2.48711	9.36063	10.7715	6.43442
CEPT1	22.2885	19.9014	27.5264	29.5353	21.4291	23.7729	20.3546	30.2527	34.9861	27.1098	24.0843	36.1827	16.6992	27.0307	26.1221	25.0743
CERCAM	63.9372	53.03	62.5406	37.2235	22.9121	42.5125	53.6433	56.9117	89.2343	52.0269	64.9427	106.528	38.0173	56.9647	39.8597	75.8864
CERK	65.076	78.4528	63.1824	65.5415	44.1928	66.5177	94.5585	78.8661	92.2808	60.0004	81.0642	94.5861	58.5064	99.0625	64.9411	96.1183
CERS1	2.76573	1.63823	2.63854	3.97221	2.66937	1.9359	2.73112	0.588065	2.06379	1.79403	2.21915	2.6736	0.829038	2.45279	4.42307	2.5207
CERS2	58.8124	66.1358	62.6119	73.9984	47.3813	65.2013	65.856	77.0366	84.9101	71.8277	72.9708	86.1494	48.2026	72.5324	66.242	68.2579
CERS4	65.7268	59.5829	51.8438	83.5445	61.5437	50.4884	76.5744	49.5282	68.3998	48.3724	48.4949	52.2243	68.4549	65.0239	68.7917	76.4834
CERS5	52.6302	52.4839	52.2717	64.8367	41.9684	56.9156	49.3147	54.2327	49.3344	52.8907	65.9218	63.6317	40.5044	68.2275	59.6334	57.9761
CERS6	0.732105	2.48768	0.641808	1.53763	1.11224	0.696926	1.28826	3.78975	2.75172	0.863793	0.456883	2.91125	0.710604	1.00114	0.832578	1.52569
CERT1	62.5543	65.165	75.5907	77.394	93.0571	98.8086	79.3055	83.1786	73.1171	105.383	74.6025	84.664	45.0049	77.2878	86.0157	71.243
CES1	107.375	42.2905	58.1906	44.335	37.0004	39.7248	39.0086	33.9771	82.1584	79.1368	35.6369	59.8292	21.9103	106.972	28.9321	15.7875
CETN2	65.32	46.0524	70.3136	74.3828	56.6499	59.2387	56.0652	55.6702	70.6602	61.8609	57.6326	70.2569	35.1749	62.0205	68.5836	67.0639
CETN3	17.2451	12.7418	23.3903	21.0143	13.1985	14.2483	15.6137	21.1704	20.3431	16.1463	15.7298	19.2499	10.5406	19.2218	23.6244	18.3082
CETP	3.00976	1.82025	1.42624	0.128136	3.55916	0.232309	3.65867	0.588065	0.589654	0.664457	0.391614	0.772374	2.36868	0.100114	1.24887	4.17906
CFAP119	0.732105	1.39553	0.641808	0.640679	0.889789	0.696926	1.44285	0.588065	0.884481	0.730902	0.130538	1.18827	0.829038	0.951081	0.884614	1.32668
CFAP20	23.9968	28.8206	22.3207	22.2956	25.878	15.4098	28.4964	22.6732	22.2103	18.2726	19.4502	22.1018	28.5426	18.3709	23	29.1871
CFAP20DC	1.22017	0.910126	1.56886	1.7939	1.18639	1.62616	0.618366	2.0909	1.37586	2.65783	1.63173	1.66357	0.59217	1.60182	1.61312	1.79102
CFAP210	0.48807	0.303375	0.499184	0.32034	0.222447	0	0.206122	0.588065	0.786205	0.265783	0	0.653547	0.947472	0.550626	0.832578	0.796011
CFAP251	0.48807	0.546075	0.641808	1.15322	0.444894	0.387181	1.33979	1.17613	0.982756	1.12958	0.456883	0.71296	0.473736	1.10125	0.832578	1.26035
CFAP298	13.0152	14.38	14.5476	13.3261	13.7176	12.777	15.4592	12.7414	15.1344	12.3589	13.3802	16.6952	9.83002	15.5176	14.0498	15.3232
CFAP300	0.81345	0.4854	1.35493	0.768815	0.148298	0.464617	0.515305	1.17613	0.491378	0.332228	0.522152	0.950614	0.710604	0.750853	0.93665	1.19402
CFAP36	12.0391	10.8002	11.1247	11.0837	8.60129	8.51798	13.501	13.0028	14.5448	7.7077	9.65982	11.9421	9.11942	9.51081	10.9796	13.4658
CFAP410	19.7668	25.2408	16.1165	17.6187	10.1584	13.319	38.1841	20.3209	22.2103	25.3158	10.3778	24.5377	39.6754	33.1376	14.9344	17.3796
CFAP418	20.9057	12.3777	29.3805	27.0367	22.4672	27.5673	17.0051	23.1306	23.4879	32.2926	28.4573	28.6967	3.07928	26.7804	31.7941	17.5786
CFAP43	1.46421	2.48768	2.49592	1.66577	1.40883	1.85847	1.13367	1.50283	5.89654	2.3256	0.71796	2.07947	0.947472	2.10239	1.8733	6.36809
CFAP45	1.87093	0.7281	0.784432	1.47356	0.889789	0.851798	1.59745	1.37215	1.57241	1.5947	1.10957	1.12885	1.77651	1.70193	0.67647	0.928679
CFAP52	0.97614	1.03148	1.64018	0.128136	0.667342	0.774362	0.412244	1.43749	0.393102	0.797348	0.587422	0.653547	0.829038	0.100114	0.780542	0.928679
CFAP53	20.4981	22.5074	21.8721	20.9534	16.5286	15.0157	17.9156	25.2267	25.4072	17.1064	18.5677	23.0684	26.4463	30.1327	20.816	25.0199
CFAP54	0.48807	0.2427	0.213936	0.448475	0.148298	0.696926	0.412244	0.326703	0.786205	0.797348	0.326345	0.415893	0.355302	0.750853	0.572397	0.265337
CFAP57	2.03362	1.2135	1.56886	1.85797	1.26053	1.39385	1.49439	1.30681	2.45689	1.52825	0.783229	1.72299	2.25025	2.65301	1.14479	1.65836
CFAP68	5.12473	3.21578	5.56234	5.31764	4.59724	5.03335	3.7102	3.52839	3.2431	4.91698	3.78561	4.27776	2.13181	3.70421	4.16289	4.24539
CFAP69	1.13883	1.75958	1.42624	1.15322	0.889789	1.16154	1.23673	3.07101	1.57241	0.930239	1.0443	2.73301	1.65808	1.15131	1.50905	2.91871
CFAP70	1.46421	1.2135	0.998368	2.05017	1.03809	0.851798	1.33979	1.24147	0.884481	1.32891	0.848498	1.18827	0.59217	0.850967	1.3009	1.45935
CFAP74	4.63666	8.0091	4.49266	3.65187	6.37682	0.774362	6.49285	3.65907	4.12758	5.31565	0.522152	1.48533	34.938	1.50171	6.34841	3.84739
CFAP91	1.30152	0.667425	1.42624	1.9861	1.85373	1.16154	1.49439	1.04545	1.67069	2.3256	1.56646	1.60416	0.236868	1.80205	1.14479	1.39302
CFAP92	1.87093	1.51688	1.99674	0.704747	2.52107	1.47129	1.44285	2.54828	0.982756	0.265783	1.0443	1.18827	1.53964	1.65188	2.49773	2.1227
CFAP95	0.732105	0.060675	1.2123	0.512543	0.667342	0.232309	0.360714	0.457384	0.294827	0.863793	0.71796	0.594134	1.42121	0.750853	0.572397	0.729677
CFAP97	14.5608	13.7732	22.5346	14.8638	20.1685	16.8037	15.5107	23.6533	17.8862	23.5882	16.9047	21.9235	8.40881	17.5199	22.8959	19.6349
CFAP97D2	6.67029	7.5237	6.13283	2.43458	6.00607	2.63283	14.8408	6.2727	7.76377	3.45517	1.697	6.11958	10.6591	2.9033	5.30768	13.6649
CFDP1	38.2321	44.1107	47.4938	51.4465	33.6637	44.1386	52.3035	54.4287	62.9947	43.0568	51.2362	47.7089	29.8454	44.1502	47.561	47.8933
CFI	10.3308	10.8608	11.196	5.95831	10.7516	7.97593	6.64744	11.3693	10.1224	10.9635	6.85325	8.79318	6.39544	7.95904	8.74207	7.82744
CFL1	336.28	363.201	320.405	439.89	237.351	428.609	421.211	388.058	499.044	341.796	437.76	479.525	299.875	491.809	354.158	443.245
CFL2	199.943	157.994	182.201	194.827	206.06	225.88	133.257	137.408	150.653	176.734	256.897	177.051	148.276	210.689	178.932	128.556
CFLAR	51.4914	60.311	65.5357	67.976	64.0648	63.1879	44.4708	69.8491	62.7981	85.9142	92.6168	75.3955	58.0327	73.033	107.142	80.8614
CFP	10.3308	16.0182	12.4083	11.9807	10.1584	15.4872	15.7168	20.8436	22.0137	12.824	16.0562	15.5069	15.3964	12.6143	11.7602	15.2569
CGAS	0.32538	2.30565	1.56886	0.512543	0.741491	0.387181	1.33979	4.44316	3.04654	0.730902	0.522152	3.08949	1.42121	0.901024	2.08144	3.18404
CGGBP1	67.9231	61.2211	88.7121	84.89	91.4258	93.0009	68.4841	113.235	97.2929	111.363	81.5211	117.223	32.214	84.7963	100.117	63.6809
CGN	5.04339	6.18885	7.7017	15.6966	6.74757	5.11079	15.9229	7.64485	7.6655	10.8971	4.6341	8.49611	4.73736	11.6633	14.6221	22.7526
CGNL1	22.1258	33.9173	33.5879	43.438	29.6596	31.2068	33.7525	40.9032	55.4275	43.389	31.3291	43.3717	14.5674	33.3379	33.3031	32.2384
CGREF1	1.87093	3.70118	3.06642	2.17831	1.92788	1.31642	6.33825	5.74997	5.60171	4.5183	6.3311	7.07019	3.31615	7.05802	3.33031	6.03642
CGRRF1	15.2929	15.1688	15.6886	15.8888	12.6053	16.1842	13.4495	18.6221	20.6379	21.1297	16.4478	20.6758	10.1853	14.967	18.6289	15.1905
CH25H	5.36877	33.2499	12.4796	5.31764	4.00405	6.04002	19.8908	28.4885	26.731	3.98674	3.39399	32.3803	19.5416	6.40728	9.52261	25.0743
CHAC1	0.48807	1.2135	0.855744	0.256272	0.370745	0.542053	1.23673	0.392044	0.294827	0.265783	0.979036	1.01003	0.59217	0.450512	0.364253	0.530674
CHAD	173.265	73.3561	126.935	192.844	94.3918	40.4991	141.657	17.7726	88.9394	112.227	40.0752	60.8393	48.0842	211.29	144.036	94.7253
CHADL	2.27766	2.06295	2.70986	4.74102	2.15032	1.62616	2.57653	3.07101	3.93102	2.52493	1.56646	4.04011	1.42121	5.70648	2.28959	4.31173
CHAF1B	0.97614	3.3978	2.13936	1.72983	0.741491	1.62616	4.2255	4.90054	5.01206	1.86048	1.50119	4.09952	1.18434	2.10239	1.92534	3.91372
CHAMP1	16.4317	15.7755	20.7518	20.8221	19.0563	20.1334	14.5316	24.0453	19.3603	26.7776	19.7113	19.4282	7.93508	18.7213	20.6063	15.0579
CHCHD1	16.9198	19.8407	15.9739	14.5434	12.5312	13.7062	15.15	14.1789	18.6724	11.2958	12.6622	17.7646	19.1863	12.7144	11.8642	20.8953
CHCHD10	282.755	310.049	198.319	137.426	309.276	45.6099	358.704	104.545	103.779	92.0272	33.8094	59.8887	665.718	62.0705	166.724	251.539
CHCHD2	161.968	149.375	122.217	95.4618	151.083	76.7795	198.246	99.4386	104.08	77.1992	68.2675	99.5887	194.4	87.9369	116.659	139.692
CHCHD3	87.0391	98.5363	90.9228	63.8116	129.983	36.9371	125.458	71.0252	63.3878	52.4921	40.7932	50.9172	114.644	39.0944	76.9094	88.4899
CHCHD4	16.3503	15.5328	17.0436	16.9139	14.9781	15.797	14.8408	15.9431	17.9844	14.5516	16.1215	19.6064	12.1987	14.116	16.5995	17.4459
CHCHD5	8.37853	10.5538	9.27056	8.8324	8.45299	8.28567	10.5112	7.64158	6.97364	5.44788	8.54372	5.75953	13.1462	6.85379	7.33241	11.7352
CHCHD6	10.9002	7.40235	9.69843	11.9807	7.5632	5.42053	12.7796	9.27836	8.64825	7.64125	9.20294	9.92203	12.7909	12.4141	9.78279	13.4658
CHCHD7	41.4046	36.9511	47.9217	44.6553	52.0526	41.9704	38.8025	44.0396	41.4723	54.8177	46.4063	44.5006	33.0431	42.5483	50.2149	43.3826
CHD1	25.2983	25.3622	27.9543	31.2011	24.9141	33.2976	22.5704	39.335	31.8413	31.6281	23.9537	37.1333	20.6075	25.0785	33.7194	31.6414
CHD1L	19.0347	18.0812	25.4584	26.5882	20.0944	25.5539	21.2821	28.3578	22.2103	26.6447	20.3639	24.8348	8.05351	19.8225	24.509	16.9152
CHD2	72.4784	78.2708	76.803	99.9459	68.5879	86.806	72.1427	96.3774	83.6326	99.2698	79.3672	82.5252	67.5074	102.567	79.5632	79.1367
CHD3	96.5565	86.7653	101.62	191.819	93.0571	166.41	120.994	143.945	140.338	134.885	120.16	150.138	74.3766	133.552	134.774	134.924
CHD4	165.862	175.351	191.473	234.809	224.968	219.067	233.536	236.729	201.17	244.254	182.101	219.473	159.767	210.689	243.685	212.004
CHD6	31.7245	28.8206	44.7126	49.973	41.7459	57.69	28.2387	54.0367	38.3275	61.3293	41.9027	46.2236	28.8979	47.8544	46.3642	33.6315
CHD7	9.7614	15.5328	12.4083	10.8915	16.906	4.72361	11.1821	20.0596	11.1051	12.1596	4.96045	9.74379	20.4891	8.15927	12.4887	10.3481
CHD8	37.9881	33.5533	45.2831	55.9953	42.6357	51.8048	45.0284	53.5139	41.0792	60.3327	43.1428	50.6796	32.0956	47.3037	48.2895	43.3163
CHD9	39.7777	25.9082	47.9217	39.594	38.1126	34.5365	27.0535	51.7497	50.9068	52.0934	36.9423	47.6495	39.3201	39.8453	49.0701	43.7806
CHD9NB	0.406725	1.09215	0.427872	0.192204	0.593193	0.232309	0.412244	0.718746	0.491378	0.46512	0.261076	0.53472	0.118434	0.450512	0.728506	0.995014
CHDH	2.92842	4.91468	3.20904	1.72983	3.04011	1.39385	3.29795	2.0909	3.73447	3.45517	0.71796	3.92128	3.31615	3.50398	4.37103	3.31671
CHEK1	9.11064	8.0091	11.2673	11.4682	10.8999	12.3124	12.1612	12.4147	15.331	13.5549	13.5107	14.6157	4.38206	13.0648	12.7488	11.6085
CHEK2	1.38286	2.79105	2.13936	1.02509	1.26053	1.00667	2.31887	2.54828	3.2431	1.92692	1.0443	3.32715	0.355302	0.850967	1.14479	2.38803
CHERP	23.102	23.1172	23.6756	31.5855	23.357	32.9878	24.6831	22.4772	26.1413	27.9072	23.4969	26.1419	15.5149	33.9386	29.6606	24.411
CHFR	19.6041	21.4183	21.5362	23.8973	19.7978	22.9211	27.1051	26.7243	25.1586	27.3092	26.0424	27.8055	12.9093	22.0751	24.1448	23.3497
CHGB	6.34491	5.03603	8.62875	8.20069	8.3047	5.42053	6.33825	12.7414	11.0069	6.24589	5.67841	8.73376	10.3038	12.8646	5.77601	5.63841
CHI3L1	54.6638	175.108	57.1209	28.9587	23.7277	44.6032	184.067	350.226	272.617	102.858	8.35444	354.401	134.304	156.027	72.4863	237.012
CHI3L2	2.84707	3.1551	2.63854	4.03628	0.963938	4.33643	11.8005	1.82954	5.50343	15.1496	0.195807	5.88192	3.07928	28.9829	2.49773	4.70973
CHIC1	10.8189	7.40235	11.4099	12.301	11.8639	10.2216	9.84233	14.6363	12.3827	12.4253	11.8137	12.655	7.57978	10.9625	13.6335	9.41946
CHIC2	10.9816	11.771	15.0468	12.6214	10.3067	11.6154	11.2852	16.8579	16.3138	15.4818	13.7065	17.2893	9.71159	15.6678	12.7488	12.6698
CHID1	21.1554	15.4254	17.6376	19.9815	11.0682	15.5624	22.5121	14.5886	22.0491	15.2333	20.2928	16.1937	24.6793	20.3236	14.6378	31.9525
CHIT1	2.68438	42.2298	7.34514	1.92204	1.26053	1.00667	25.1984	28.2925	34.9861	3.25584	1.0443	150.375	28.5426	6.00682	12.2285	51.4754
CHKB	36.3612	40.9556	36.3691	36.9672	32.6997	30.2776	34.9377	36.9174	49.0395	31.0966	41.25	45.4512	42.9915	45.3515	32.5746	40.2649
CHL1	12.1424	11.2983	12.6222	29.8556	9.78768	4.64617	7.21427	44.5466	15.331	14.8838	4.4383	24.5377	10.3298	19.5722	6.7647	2.98504
CHM	5.12473	6.85628	8.77138	6.34272	9.56523	7.279	5.82295	13.1335	7.96033	10.2326	8.2239	10.6944	3.43459	6.30717	8.95021	6.63342
CHML	7.56508	6.0675	8.55744	5.89425	8.37884	8.1308	5.30764	9.47439	9.92584	9.56817	8.28917	11.1103	4.85579	5.15586	8.53392	8.49078
CHMP1A	44.9838	50.603	44.57	59.7754	36.1847	56.1412	50.4484	54.8861	51.9878	49.6349	45.362	57.3933	51.8741	63.4721	44.9592	53.0011
CHMP1B	33.9306	34.4246	61.1629	52.3999	32.0658	54.179	53.9808	81.1994	45.2559	68.554	28.0089	81.0434	36.0513	54.3948	58.9179	27.9698
CHMP2A	90.6997	91.498	85.931	89.5669	59.0968	68.6859	107.08	85.9229	93.1653	67.1101	69.2505	91.853	120.566	83.9454	71.8619	103.15
CHMP2B	40.7538	31.0656	51.4873	49.8448	39.5956	50.2561	33.2887	44.3663	41.1775	48.306	50.9751	49.6102	19.8969	46.6029	48.7058	38.4739
CHMP3	60.1953	81.972	61.3996	67.4635	53.6839	55.0571	79.2024	75.5991	74.4929	56.0137	55.7398	73.9696	82.5485	61.62	57.5519	74.1617
CHMP4A	33.0261	36.405	34.3011	47.154	21.2808	44.3709	38.1841	45.4771	44.8137	32.4919	40.3363	44.2629	31.6219	43.6496	35.6447	47.7606
CHMP4B	112.012	109.761	119.733	154.276	106.626	137.836	130.836	113.758	133.458	118.738	141.764	153.227	93.5629	126.193	121.504	117.677
CHMP5	50.922	35.5556	62.1127	54.714	49.3091	49.6366	48.181	54.5594	62.405	53.3559	59.8517	63.4535	21.3181	54.5119	61.923	51.2764
CHMP6	54.7452	60.675	44.7839	55.0343	36.7779	49.0171	59.5178	42.6021	51.1033	38.4056	43.8608	46.5207	99.4846	66.7759	44.595	61.8235
CHMP7	37.9068	54.7896	45.4257	63.6835	49.8282	51.0305	56.3229	44.8236	49.2361	46.8442	48.038	48.6595	49.6238	55.413	49.6945	50.8784
CHN1	26.9252	31.7937	26.3854	23.577	36.7779	15.4098	24.1163	30.6447	19.95	19.7344	9.72509	16.101	18.3573	14.967	21.543	24.2783
CHN2	2.92842	10.6788	2.9951	2.24238	1.40883	2.47796	4.38009	12.5454	8.15688	3.12295	1.95807	8.08022	4.85579	4.00455	2.65384	8.42445
CHORDC1	21.231	14.1373	16.9723	18.1312	23.5794	20.9852	18.8086	22.8692	28.5982	19.8672	21.6693	30.0632	9.35629	19.5722	26.3303	19.2369
CHP1	199.295	191.248	219.784	193.869	253.071	211.323	195.61	245.485	228.491	244.387	214.409	229.633	139.515	183.508	251.282	201.324
CHP2	6.91432	17.2317	7.41645	7.75222	4.44894	5.49797	4.99846	12.284	17.1982	9.23595	5.15626	7.78315	13.0277	13.9158	3.43438	11.8075
CHPF	75.0814	149.079	95.1302	101.996	64.8063	76.8941	183.294	123.167	171.294	124.32	107.694	173.843	63.3622	142.111	102.615	144.41
CHPF2	38.6389	55.5783	48.5635	47.6665	28.9923	52.4243	54.4162	67.3008	69.6774	52.1598	64.7469	65.2359	37.662	72.2821	46.4162	64.7422
CHPT1	86.063	82.5787	84.1482	73.0374	123.162	48.2427	78.2749	57.8918	75.8688	56.7446	52.6721	73.4943	68.0996	50.9078	76.2849	65.8036
CHRAC1	15.1302	22.8138	13.9772	22.0394	10.1584	12.5447	20.4061	19.7982	22.112	17.0101	13.6412	18.7746	31.6219	20.9738	10.8235	27.0644
CHRD	29.0402	40.1669	39.5782	54.3296	22.1706	50.4884	53.0249	59.656	77.0481	34.9504	28.131	91.1401	27.3583	48.6052	38.5067	55.4554
CHRDL1	64.5066	62.1312	87.4998	63.6194	51.3853	43.4417	57.8173	82.2638	99.4549	123.39	32.4387	75.752	50.0976	67.8271	57.0836	57.8435
CHRDL2	12.2831	74.6303	35.0855	9.67425	2.00202	8.59542	113.779	91.4115	94.4429	3.32228	10.3778	161.367	32.3325	3.95449	44.3348	106.732
CHRM2	10.8189	11.5283	15.9739	14.4793	23.2087	6.4272	42.4612	10.3892	14.3482	19.535	4.4383	6.59488	10.8959	4.45506	28.5158	20.8953
CHRM3	1.22017	0.546075	0.998368	0.640679	0.741491	0.696926	0.103061	1.50283	1.08103	1.4618	0.261076	1.06944	1.77651	1.00114	1.09276	1.26035
CHRNA6	0.32538	0.60675	0.071312	0.768815	1.03809	0.309745	0.515305	1.30681	0.589654	0.46512	0.195807	1.30709	0.59217	0.500569	0.416289	0.862345
CHRNB1	1.95228	2.1843	2.21067	1.9861	1.55713	1.47129	2.3704	1.89488	2.65344	2.45849	2.21915	2.61419	1.65808	1.75199	2.96606	2.38803
CHRNB3	0.65076	0.303375	0.71312	1.08915	0.593193	1.7036	0.566836	0.588065	0.491378	0.930239	0.71796	1.54475	0.118434	1.05119	0.884614	0.597008
CHRNE	36.0358	37.6792	33.3027	42.8614	20.1685	27.7222	51.3244	49.2015	69.6774	27.3092	35.5716	57.8686	66.0862	54.3618	35.6447	61.0938
[truncated: 13,629 more rows]

## Sheet: Myocardium
	1059	1062	C42	C43	C49	E33
A4GALT	54.8285	45.174	63.866	74.1744	33.2412	38.9097
AAAS	5.51111	5.67105	8.17819	6.25031	5.59458	7.45563
AADAC	1.34245	1.6203	2.43911	0.873699	0.942245	0.231182
AADAT	23.7402	21.1886	23.315	23.4555	11.0125	15.547
AAGAB	14.1311	14.2088	15.1368	17.1379	13.7803	15.258
AAK1	131.348	122.582	115.356	102.895	153.115	70.2216
AAMDC	17.4519	21.0639	22.8846	26.0766	29.0918	34.0994
AAMP	58.1493	60.7613	61.3365	70.5008	67.0761	67.7942
AAR2	6.35898	5.60874	7.38907	8.06492	6.53682	7.8024
AARS1	84.0092	78.46	82.5711	67.5437	73.2007	71.1463
AARS2	18.7237	19.3813	25.8976	22.3801	16.3715	20.1129
AARSD1	22.3271	22.5596	37.4475	24.3964	32.2719	35.7754
AASDH	13.2832	11.716	10.6173	13.2399	14.0748	8.95831
AASDHPPT	13.9191	14.4581	12.6977	13.7776	12.7203	9.30508
AASS	99.3562	121.398	89.4967	83.9208	59.2637	55.5993
AATF	9.89174	9.84645	10.689	11.2909	10.3647	9.70965
ABAT	1.20114	2.30581	0.717385	0.403246	0.530013	1.50268
ABCA1	64.4376	81.2643	31.7084	30.2434	29.6807	34.3884
ABCA2	29.1806	22.9958	30.6324	25.5389	39.3387	22.3091
ABCA5	21.6205	21.2509	15.4955	17.0035	16.7837	9.30508
ABCA6	28.1208	44.496	8.17819	11.7613	8.95133	20.4018
ABCA7	47.4097	41.6916	38.3084	20.9016	107.475	57.5644
ABCA8	115.539	116.123	44.4585	45.6683	74.7088	45.9116
ABCA9	3.16182	3.15647	1.23892	1.64591	3.08526	1.30734
ABCB1	26.0499	35.1767	27.8539	32.4989	38.3117	34.5617
ABCB11	18.3704	6.97976	13.3434	10.6188	5.71236	8.38036
ABCB6	45.1487	42.4394	46.7018	48.7255	41.4588	42.8265
ABCB7	34.9037	27.2958	27.1172	27.0847	18.4916	19.9973
ABCC1	23.1043	19.6929	36.5149	28.6305	18.1971	15.547
ABCC10	13.4245	9.59717	13.9173	9.00582	16.4893	6.93547
ABCC3	2.47294	3.05364	0.860863	1.68019	2.53228	1.15591
ABCC4	16.9573	17.2624	17.002	23.8587	11.5425	9.88304
ABCC5	37.094	34.2756	35.7258	27.9584	35.3931	24.8521
ABCC8	2.54359	1.37102	2.22389	1.20974	1.70782	0.866933
ABCC9	112.059	107.75	92.8297	82.9342	65.3094	56.6974
ABCD1	20.6313	20.503	23.0998	21.5737	15.1937	16.9341
ABCD2	2.6849	0.623193	1.36303	0.806492	0.530013	0.404569
ABCD3	77.1556	61.2599	80.0602	95.0316	49.939	56.0039
ABCD4	17.8758	12.8378	9.97166	12.2318	16.9604	13.8131
ABCE1	59.0424	56.8738	44.8861	54.0107	42.8121	38.9005
ABCF1	73.0102	73.5741	69.7148	71.6857	92.3223	84.9479
ABCF2	50.421	52.2859	60.505	58.9397	44.0494	56.7206
ABCF3	80.547	75.7179	91.5384	82.4638	81.1508	81.3183
ABCG1	17.5225	26.8596	12.9129	6.31752	5.71236	14.7957
ABCG4	2.54359	4.17539	3.08476	3.22597	4.71122	3.69892
ABHD10	29.8872	23.9306	23.9607	21.6409	18.0793	18.09
ABHD11	18.7943	16.7016	25.1085	24.4636	26.9718	25.43
ABHD12	13.0712	18.0726	10.0434	11.8285	12.6614	15.4314
ABHD12B	1.90769	0.810151	0.932601	0.268831	0.942245	0.866933
ABHD13	9.11453	8.16383	7.24559	8.53537	8.95133	4.73924
ABHD14A	19.1476	19.9422	25.1802	27.0175	31.5652	22.0201
ABHD14B	13.6365	13.2117	14.0608	11.8958	21.0827	10.8078
ABHD16A	34.6918	27.1712	39.8149	42.1392	36.0998	33.4058
ABHD17B	6.21767	4.73627	6.67168	8.13212	10.2469	3.52553
ABHD17C	39.0724	39.2611	45.4822	33.5366	29.504	30.0537
ABHD18	37.0234	44.496	38.7388	34.4775	29.9163	32.5967
ABHD2	61.367	41.7115	29.1122	38.8984	23.2069	35.8043
ABHD3	5.3698	8.66238	7.38907	7.59446	5.88903	5.43798
ABHD4	111.706	123.704	141.468	138.179	79.443	116.342
ABHD5	14.0604	14.4581	20.3737	21.2376	17.5493	15.3736
ABHD6	10.9516	14.5204	16.4281	16.2642	14.8404	15.258
ABI1	35.045	38.0771	29.8432	26.1438	34.8042	25.8346
ABI2	10.3863	8.66238	12.5542	8.8042	11.837	5.49058
ABI3	8.76126	9.22325	12.0521	9.07303	20.9061	8.72713
ABI3BP	36.9527	13.5233	22.4542	21.3048	29.6218	10.8656
ABITRAM	18.441	19.9422	19.7998	22.649	11.4247	14.9113
ABL1	56.1003	49.1699	45.6257	51.6827	47.9367	43.5201
ABL2	42.3225	39.8843	24.6063	29.5714	24.0861	25.1989
ABLIM1	2534.48	1914.7	1869.65	2131.62	1301.36	1280.58
ABLIM2	24.1641	18.9451	27.978	35.0152	35.452	24.6787
ABLIM3	54.2633	48.1728	125.542	94.3595	171.606	47.5657
ABR	52.0023	48.7337	62.3408	72.517	67.135	35.891
ABRA	26.5664	39.3858	16.0694	26.2782	11.248	49.762
ABRACL	1.55442	1.99422	0.789124	0.604869	2.06116	1.38709
ABRAXAS1	7.84274	6.54352	5.0217	5.51103	5.71236	7.22444
ABRAXAS2	14.0604	14.5204	14.3477	13.8448	14.2515	10.3454
ABT1	10.457	9.97109	11.0477	12.3662	10.8947	9.0739
ABTB1	19.6422	23.619	16.7868	18.8181	30.0929	21.7889
ABTB2	16.8866	18.6958	17.5042	22.7834	7.59685	10.75
ABTB3	1.41311	1.86958	1.14782	1.20974	2.47339	0.577956
ACAA1	15.9681	16.7016	17.5042	21.5737	29.3863	19.0725
ACAA2	551.041	382.89	503.676	583.631	395.036	487.679
ACACA	19.9248	26.7973	21.5216	17.4068	13.3092	15.547
ACACB	157.42	83.7571	75.9711	90.0582	70.2561	120.677
ACAD10	70.1607	51.538	68.0081	82.3966	36.4531	46.1209
ACAD11	29.6046	27.919	31.9237	33.7382	18.3149	14.6223
ACAD8	24.6587	21.4378	25.1802	30.4451	19.1394	19.7083
ACAD9	78.2861	55.5265	79.9167	73.5924	52.5302	69.817
ACADL	438.416	351.169	341.619	384.495	255.407	320.708
ACADM	385.213	254.574	194.053	250.147	151.76	195.118
ACADSB	168.442	225.409	197.568	164.524	118.546	109.985
ACADVL	698.71	304.43	496.646	605.81	513.406	571.193
ACAN	3.67408	1.99422	0.215216	0.873699	0.706684	0.809138
ACAP1	2.61425	1.86958	1.21956	1.34415	8.24464	2.25403
ACAP2	33.9145	28.8538	24.4628	26.0766	40.4576	15.9516
ACAP3	45.502	33.4655	38.0932	37.0986	69.0194	38.7808
ACAT1	534.154	448.761	406.758	526.706	320.422	426.069
ACAT2	4.73391	3.92611	5.30865	5.04057	6.59571	6.24192
ACBD3	33.7026	27.2958	23.0281	27.6223	27.3251	18.3212
ACBD4	12.294	14.645	15.1368	14.4496	16.0771	15.3158
ACBD5	31.0883	34.0263	24.1042	28.0928	25.5584	18.6102
ACBD6	14.9083	14.0842	18.939	15.3905	24.675	17.9744
ACCSL	0.989174	0.810151	0.864449	1.01013	1.2367	1.10158
ACD	7.70143	7.72759	6.38473	6.45193	15.9593	9.82524
ACE	60.4103	52.7844	122.96	41.5343	91.3389	42.4797
ACE2	2.75556	3.98843	1.50651	2.21785	0.530013	4.91262
ACER2	45.7846	54.4047	35.1519	46.5749	149.817	59.8762
ACER3	7.06553	5.42178	8.32167	7.66167	4.00454	4.16128
ACIN1	107.255	101.393	101.94	97.3839	176.553	100.969
ACKR1	3.46211	1.86958	2.08042	1.34415	6.30126	10.4032
ACKR2	7.06553	6.48121	4.87822	4.83895	4.71122	7.10885
ACKR3	39.143	30.2249	47.0605	41.1983	28.9151	20.1706
ACKR4	1.41311	1.55798	0.50217	0.470453	1.11892	0.924729
ACLY	18.3979	24.1481	21.1521	23.6255	28.3286	15.5013
ACO1	115.168	77.2136	90.3188	83.9423	47.8778	69.0079
ACO2	1886.5	1824.71	1989.31	2013.34	861.153	1532.39
ACOT11	40.4855	47.5496	82.2124	61.831	158.709	32.8279
ACOT13	156.925	100.272	239.176	244.367	245.396	51.8426
ACOT7	2.19031	2.24349	1.64999	1.81461	2.82673	3.00537
ACOT8	10.3157	7.78991	13.0564	11.3581	12.0725	10.75
ACOT9	44.4422	31.4089	19.5846	23.3883	16.9604	30.0537
ACOX1	84.8365	78.6837	74.3032	86.4062	29.358	46.2688
ACOX2	6.0057	6.29425	6.8869	6.1831	3.94565	3.52553
ACP1	22.1858	21.0639	27.3324	23.3883	27.384	24.043
ACP2	20.6313	19.2567	21.4498	19.1542	22.3194	19.6505
ACP6	14.555	7.47831	9.97166	7.39284	7.71463	10.172
ACRBP	1.05983	0.934789	0.430431	0.403246	1.64893	0.635751
ACSBG1	0.777208	1.3087	2.08042	0.806492	2.82673	1.2715
ACSF2	362.532	475.309	524.983	525.765	343.625	478.778
ACSF3	19.2472	15.1355	14.5794	16.3651	9.32057	17.0277
ACSL1	96.0912	40.1336	67.6494	92.2089	8.71577	39.3588
ACSL3	16.3214	17.0755	15.8542	16.8691	17.8438	9.65186
ACSL4	84.5037	67.5541	43.5453	59.4115	32.743	32.4233
ACSL5	4.94587	3.11596	4.51953	8.73699	15.6059	5.2016
ACSL6	7.91339	4.73627	5.0217	6.11589	3.41564	4.39246
ACSM5	115.239	123.018	72.169	71.1729	39.9865	92.0105
ACSS1	3174.61	3494.49	3141.57	2869.56	1859.4	2400.08
ACSS2	25.2946	29.477	18.2933	23.6571	14.3692	24.5053
ACSS3	5.29915	5.35946	0.789124	3.15876	1.11892	3.98789
ACTA1	4307.34	4072.33	1546.69	1163.26	543.852	4304.38
ACTA2	84.6451	52.0989	44.6931	45.3652	236.739	41.3816
ACTB	561.885	546.836	609.719	503.218	858.37	446.65
ACTC1	5178.82	3358.6	6251.66	7050.62	2991.8	4110.3
ACTG2	6.92422	3.8638	3.80214	2.01623	13.5448	3.58332
ACTL6A	8.61995	9.28557	9.89992	7.9305	9.65801	5.77956
ACTL7B	1.2718	1.6203	2.22389	2.55389	3.53342	3.00537
ACTMAP	29.5339	39.6974	44.9083	36.9642	31.9185	35.4865
ACTN1	41.3962	32.8111	29.3891	34.4204	70.2703	36.8036
ACTN2	3851.21	3472.8	3371.86	3235.78	1399.94	2605.89
ACTN4	133.829	103.668	125.997	116.931	219.647	109.766
ACTR10	58.6439	52.3482	58.9691	56.5216	57.1236	52.5362
ACTR1A	77.4382	73.973	82.0689	80.3131	67.0761	78.2552
ACTR1B	55.8177	57.1468	56.0995	58.7395	26.4417	38.0873
ACTR2	99.412	90.3006	76.7602	83.5391	75.7329	51.4958
ACTR3	34.3441	36.8207	31.1611	36.5542	38.8817	25.9144
ACTR3B	32.5721	29.2901	23.7455	22.4473	12.9559	28.8978
ACTR5	4.45128	4.98554	6.16951	4.77174	8.71577	5.37499
ACTR6	5.08718	3.5522	4.80648	4.4357	5.71236	4.21908
ACTR8	64.0844	69.6106	66.7168	76.1462	55.9458	45.7741
ACTRT3	1.41311	0.997109	0.573908	0.537661	2.94452	1.38709
ACVR1	34.2678	35.0858	29.628	31.1171	21.2594	19.3037
ACVR1B	16.604	17.574	18.5803	22.3801	12.4259	13.3508
ACVR2A	16.392	11.2798	13.1999	12.5678	21.3183	9.53627
ACVR2B	3.03818	3.11596	3.80214	2.15064	2.88563	1.50268
ACVRL1	37.3767	38.3887	39.7432	36.4265	60.8337	44.098
ACY1	15.4029	15.5798	20.5172	20.0951	24.2039	19.7661
ACYP1	18.2997	14.3958	19.6564	13.1727	21.3183	16.0094
ACYP2	25.1533	20.877	22.6694	28.9665	21.1416	23.5228
ADA	5.51111	4.48699	6.59995	4.90616	21.3183	5.49058
ADAL	2.26097	1.99422	1.93694	2.41947	2.35561	2.08064
ADAM10	37.094	44.1844	32.2823	33.4022	41.871	22.8292
ADAM11	0.282621	0.934789	0.717385	0.806492	1.06003	0.231182
ADAM12	2.61425	3.61452	1.64999	0.868995	1.47226	1.04032
ADAM15	112.766	100.147	116.719	106.591	248.223	120.041
ADAM17	26.4251	23.3074	24.2476	26.211	36.0998	18.4368
ADAM19	19.3596	21.1262	34.578	31.7892	41.1054	12.1371
ADAM2	3.17949	2.74205	2.86954	2.6211	8.42131	2.71639
ADAM22	45.9252	34.4582	39.3127	54.1841	17.9056	20.8671
ADAM23	1.62507	0.623193	0.932601	0.672076	0.588903	0.462364
ADAM8	9.46781	11.7783	8.82384	9.47628	19.2571	10.1142
ADAM9	64.2257	57.4584	38.4519	42.4752	31.9185	33.1746
ADAMTS1	81.2536	91.547	48.4953	44.8275	69.4317	56.0039
ADAMTS10	24.1641	13.1494	20.8759	16.0626	39.5743	11.7325
ADAMTS12	7.91339	6.54352	5.0217	5.64544	6.00681	3.40994
ADAMTS14	0.423932	0.747831	0.789124	1.27695	1.11892	0.52016
ADAMTS15	6.99488	5.67105	6.45647	5.77986	10.6003	5.83735
ADAMTS17	1.83704	0.249277	2.72606	1.7474	1.47226	1.67607
ADAMTS19	0.777208	0.498554	0.50217	0.739284	1.00114	0.52016
ADAMTS2	7.34815	4.79858	6.81516	8.93862	7.8913	5.49058
ADAMTS20	52.073	28.4799	24.8215	32.2597	33.9797	22.8292
ADAMTS3	5.44046	3.2406	1.93694	5.04057	4.00454	1.96505
ADAMTS4	2.96752	4.79858	2.00868	2.01623	3.18008	2.88978
ADAMTS5	16.604	14.0842	18.0064	10.8204	20.2583	6.4731
ADAMTS6	12.3647	11.2798	13.0564	12.7022	18.3738	14.5645
ADAMTS7	92.4878	68.4889	107.393	103.5	117.486	68.141
ADAMTS8	9.11453	11.8407	4.87822	3.69642	2.70895	8.09138
ADAMTS9	12.7886	8.66238	15.639	16.3987	12.897	12.5994
ADAMTSL1	35.9636	34.2133	33.6454	24.598	24.9106	16.2983
ADAMTSL3	18.7237	18.8827	7.17385	8.8042	10.5414	10.8656
ADAMTSL4	594.988	574.833	438.323	426.231	222.9	548.191
ADAMTSL5	172.046	171.066	136.877	126.821	137.214	144.431
ADAP1	1.76638	1.99422	0.717385	0.806492	4.65233	1.73387
ADAP2	16.5581	16.8449	21.4262	17.1689	22.2894	16.4885
ADAR	146.673	124.073	134.94	145.572	154.108	81.7668
ADARB1	51.4371	54.654	50.1452	47.3814	86.981	50.2821
ADAT1	4.80456	4.54931	4.37605	1.81461	2.59117	3.81451
ADAT2	3.03818	2.55509	3.51519	2.41947	4.29899	3.29435
ADCK1	3.03111	3.56217	3.206	6.51242	0.240861	9.65186
ADCK2	8.12536	6.29425	5.52387	4.50291	6.30126	4.33467
ADCK5	8.19602	6.85512	8.24993	9.34186	16.3715	8.49595
ADCY10	33.5613	36.1452	35.1519	32.3269	54.7091	33.7526
ADCY2	1.2718	0.87247	1.50651	1.00811	1.17781	0.577956
ADCY3	16.392	12.9624	17.3607	14.3152	29.3863	10.4032
ADCY4	41.1214	30.2249	32.4258	22.985	73.6718	40.0523
ADCY5	366.701	305.801	432.225	560.444	122.021	200.897
ADCY6	221.292	181.598	160.551	188.786	153.641	151.598
ADCY7	8.90257	6.48121	7.67602	7.46005	8.53909	3.64112
ADCY9	279.795	208.77	389.469	388.998	140.866	159.805
ADCYAP1R1	2.26097	0.747831	3.08476	3.02434	4.2401	1.15591
ADD1	183.916	172.313	179.059	177.025	158.533	146.57
ADD3	67.8291	51.3511	60.2604	51.7499	45.5222	32.5967
ADGRA2	44.0889	35.8959	41.3931	45.3652	83.8009	38.7808
ADGRA3	35.9636	34.6495	38.2366	38.7788	24.675	21.6733
ADGRB2	11.9407	9.16093	7.96298	12.2318	7.18462	7.57122
ADGRD1	4.66325	4.73627	2.72606	2.41947	3.41564	3.23655
ADGRE5	13.4697	12.5885	19.4978	16.89	27.2603	10.5188
ADGRF5	287.779	327.799	175.042	155.989	304.522	198.932
ADGRG1	57.7254	84.0064	44.7649	43.0801	85.3909	76.059
ADGRG2	1.97835	0.685512	0.143477	0	0.824464	0.751342
ADGRG6	6.71225	6.97976	6.74342	4.03246	6.83128	3.64112
ADGRL1	4.59259	1.18407	4.16084	8.40095	2.94452	1.04032
ADGRL2	117.5	119.341	118.44	115.933	91.3978	64.0953
ADGRL3	8.26667	9.16093	4.51953	5.84706	2.00227	1.04032
ADGRL4	39.4963	48.4221	33.4302	37.7035	81.3864	46.641
ADGRV1	0.211966	0.810151	0.717385	0.739284	0.706684	0.0577956
ADH1A	15.5442	14.2711	13.5586	11.963	53.2957	10.8078
ADH5	33.3493	29.1654	38.6671	34.6119	39.9276	28.4932
ADHFE1	102.097	111.365	98.497	110.221	49.5267	59.8762
ADI1	5.72308	6.35657	6.24125	7.59446	5.24124	5.31719
ADIPOQ	35.1157	26.9842	58.8973	43.5505	64.6616	39.3588
ADIPOR1	137.849	155.175	111.051	127.426	94.4012	134.259
ADIPOR2	147.387	107.065	151.87	144.362	69.785	110.216
ADISSP	20.8433	26.735	23.1715	23.8587	20.0816	22.5981
ADK	16.2507	14.3958	13.1999	15.2561	10.1291	10.4032
ADM	14.6963	12.0899	19.1542	24.1947	20.8472	12.0215
ADNP	63.8017	50.7902	56.53	55.9168	58.5994	31.2709
ADNP2	143.925	126.757	113.132	98.728	169.722	114.146
ADO	31.4416	28.5422	32.5693	33.7382	22.9083	20.1706
ADORA1	2.54359	3.8638	0.717385	2.08344	1.06003	3.12096
ADORA1_1	6675.09	2582.02	7773.94	7957.56	9427.79	8154.17
ADORA2A	5.65242	4.36235	9.25427	8.93862	18.1971	5.89515
ADORA2B	0.847864	0.186958	1.43477	0.403246	1.17781	0.751342
ADPGK	11.4462	11.2175	12.2673	12.5006	16.666	9.59406
ADPRH	19.9248	18.3219	21.1629	18.8853	17.9027	14.7379
ADPRHL1	1054.44	1256.56	769.005	810.97	200.351	562.436
ADPRM	3.67408	3.61452	2.72606	2.6211	3.6512	3.75671
ADPRS	12.9299	13.9595	13.7021	16.9363	16.9015	13.004
ADRA1B	10.0331	11.8407	8.24993	14.5168	6.6546	11.0967
ADRA1D	1.34245	1.05943	1.29129	0.806492	1.70782	0.577956
ADRB1	57.0188	60.0135	59.8299	72.7859	41.1054	39.6478
ADRB2	3.60342	3.48988	3.80214	3.02434	5.65347	3.69892
ADRM1	64.5083	55.1526	61.6951	63.9145	94.6956	73.5159
ADSL	31.5829	29.7263	35.5823	35.5528	36.3353	38.3185
ADSS1	91.6399	98.4021	144.481	180.318	186.388	107.673
ADSS2	9.89174	8.91166	11.6934	10.0139	15.017	6.58869
ADTRP	1.05983	2.92901	1.29129	2.21785	0.706684	0.288978
AEBP1	79.2046	58.7048	61.5517	66.8716	75.4385	65.8291
AEBP2	17.2399	13.9595	13.989	12.5678	16.5482	12.0215
AEN	9.04388	8.10151	8.32167	9.34186	15.1348	12.8306
AFAP1L1	56.6656	50.7902	95.9862	77.4232	100.29	41.7862
AFAP1L2	10.3157	7.85223	10.9043	7.9305	21.1416	5.43278
AFDN	125.272	121.585	122.529	93.1498	201.64	97.3277
AFF1	56.3829	57.0221	44.6214	44.4242	30.9174	32.8417
AFF3	16.1801	11.9653	15.639	14.9873	9.48134	9.70965
AFF4	80.1938	71.4802	44.4779	51.5483	40.2221	36.9314
AFG1L	13.4952	13.1494	17.0738	16.197	11.4836	14.0443
AFG3L2	152.615	141.029	119.229	147.252	54.9447	87.7337
AFMID	4.30997	5.67105	2.51085	2.48668	4.53455	4.79703
AFTPH	23.4576	24.1176	18.7955	23.2538	21.2005	15.836
AGA	10.457	8.47542	11.1195	7.46005	20.8472	8.32256
AGAP2	19.2182	15.8914	16.9303	10.4172	18.3149	20.5174
AGAP3	36.6729	41.5202	54.2121	45.2811	61.6876	31.861
AGBL2	1.02733	0.762788	0.712364	0.403246	2.06116	0.843815
AGBL3	2.19031	1.68262	0.645647	1.34415	1.99815	1.53332
AGBL5	8.61995	8.84934	9.18253	10.7532	7.12573	7.97579
AGFG1	42.4638	39.6351	32.8563	35.62	32.8019	23.8118
AGFG2	18.865	25.0524	17.7912	20.0951	17.8438	17.7432
AGGF1	67.9012	54.7786	50.0864	52.2284	79.4725	63.3295
AGK	29.11	23.0581	25.3954	20.7672	38.8087	29.7069
AGL	247.859	232.015	190.753	203.572	93.8123	118.134
AGMO	12.8593	11.2175	5.66734	8.8042	4.65233	5.1438
AGO1	23.5946	19.3738	23.2246	21.7618	25.7362	13.5848
AGO2	20.6313	18.7581	19.4411	18.2805	7.47907	9.01611
AGO3	43.1746	43.1947	27.351	24.477	52.3523	26.872
AGO4	16.604	15.0189	11.3347	11.6269	12.5436	7.97579
AGPAT2	76.2371	87.1847	61.1212	76.2135	88.4532	80.3936
AGPAT3	57.7254	58.954	68.869	67.9469	54.6502	56.5241
AGPAT4	0.847864	0.934789	1.07608	1.14253	2.17894	1.96505
AGPAT5	55.8883	60.699	52.8713	49.532	35.1575	34.0994
AGPS	28.0311	22.8487	21.4089	20.6986	19.8213	14.7616
AGRN	96.0206	88.6803	120.808	88.8485	153.115	66.5227
AGTPBP1	81.0416	84.6296	79.4146	98.0559	58.1836	53.8655
AGTR1	2.26097	2.55509	2.51085	2.01623	4.35788	2.36962
AGTRAP	42.2519	37.1423	42.541	44.1554	58.1836	42.4797
AHCTF1	29.0393	28.7915	17.289	18.8181	21.3183	15.1424
AHCY	38.1037	45.0793	41.9491	50.2189	36.4225	42.3364
AHCYL1	77.7208	55.4642	55.4539	57.0593	62.1882	51.3225
AHCYL2	28.2621	30.5988	20.0151	20.4311	26.2651	19.9973
AHDC1	47.1977	50.1047	45.0518	47.9862	38.3576	30.4583
AHI1	9.89174	10.2204	6.81516	7.79609	12.6614	9.18949
AHNAK	1888.83	1783.76	1551.2	1437.1	1011.03	831.273
AHR	20.7727	18.0726	25.3237	16.4659	19.9049	4.91262
AHSA1	66.4866	74.5962	75.8276	94.4267	95.8145	75.7122
AHSA2P	8.6906	10.9059	9.03906	8.93862	15.9593	10.4032
AIDA	42.6051	42.751	42.7562	48.7927	70.3739	30.1115
AIF1	1.69573	2.43045	0.717385	2.15064	4.77012	2.42741
AIF1L	29.4633	16.4523	28.9106	27.0847	64.7793	15.258
AIFM1	172.328	164.024	153.879	163.718	125.377	142.639
AIFM2	59.6331	60.4497	60.8343	54.9758	74.7318	72.7646
AIG1	16.8866	15.2682	17.7912	20.7	20.376	14.2755
AIMP1	23.7402	22.3103	19.2977	20.9016	50.8812	25.0833
AIMP2	26.4957	22.8712	34.291	30.6467	37.4542	33.8104
AJAP1	0.353277	1.12175	1.21956	2.08344	4.82901	0.346773
AJUBA	22.539	14.8943	15.0651	22.1785	23.9684	13.0618
AK1	138.343	124.327	202.231	203.169	171.489	168.358
AK2	66.8399	77.2136	69.5864	75.0709	106.297	77.6194
AK3	136.365	129.936	160.981	154.174	38.5732	90.6234
AK4	71.5738	68.8628	55.0235	69.2239	16.3126	30.2849
AK6	10.322	10.9738	10.7708	10.8487	14.5194	8.81613
AKAP1	261.283	306.611	255.317	247.996	151.643	170.612
AKAP10	17.8758	16.7639	15.7825	15.0545	20.2583	12.0793
AKAP11	42.3225	33.5901	31.9237	27.3535	22.7905	15.0846
AKAP12	35.8222	25.6755	50.5757	34.2087	37.8076	18.0322
AKAP13	184.269	222.729	136.375	153.569	105.237	114.493
AKAP17A	4.38063	3.98843	2.72606	3.36038	4.2401	2.31182
AKAP3	2.19031	1.49566	1.93694	1.7474	2.06116	1.15591
AKAP5	57.9607	1.83219	33.9897	46.6865	5.16115	3.9457
AKAP6	599.581	438.79	533.017	476.569	143.103	259.444
AKAP7	34.4798	21.8117	17.002	24.3964	20.0227	23.2338
AKAP8	52.5675	49.6061	44.1909	43.2145	89.5133	52.1894
AKAP8L	48.1869	45.1815	45.6975	47.8518	70.6684	57.1598
AKAP9	128.734	141.465	113.06	125.141	167.307	92.9353
AKIP1	2.54359	2.49277	2.7978	2.6211	4.06343	3.64112
AKIRIN1	42.9196	40.358	29.1359	34.5447	28.1513	37.9827
AKIRIN2	12.7886	14.1465	12.4108	12.0302	15.9004	12.3105
AKNA	5.29915	7.22904	4.94996	6.65356	9.24578	3.75671
AKNAD1	9.18519	6.73048	10.976	8.60258	6.83128	8.14917
AKR1B1	99.2707	65.7468	88.2384	57.4625	50.2334	56.0617
AKR1B10	5.65242	4.36235	9.46949	5.10778	7.47907	9.94084
AKT1	157.279	149.94	147.351	163.315	159.534	151.887
AKT1S1	64.367	79.9556	64.3495	55.1775	82.0342	70.6262
AKT2	87.8952	87.3716	91.8971	91.4696	65.2505	75.5388
AKT3	26.0012	25.3639	21.8085	19.1542	29.5629	15.6048
AKTIP	52.2849	51.3511	44.0475	43.1473	37.7487	41.555
ALAD	31.3003	29.0408	39.5279	38.9804	43.3433	33.8682
ALAS1	188.084	149.005	165.716	164.86	120.607	152.407
ALAS2	46.2792	21.8117	15.639	15.5922	61.5993	37.8561
ALCAM	2.6849	7.97687	3.80214	1.81461	1.06003	0.809138
ALDH16A1	23.5989	20.6277	29.9867	19.8935	38.9854	27.6841
ALDH18A1	33.1373	35.6466	38.0932	32.7301	21.4361	25.0255
ALDH1A1	297.318	274.018	271.243	234.487	216.952	195.754
ALDH1A2	6.28832	7.97687	5.09344	2.75551	2.65006	6.41531
ALDH1A3	4.38063	5.23482	2.15216	1.41136	3.6512	3.17876
ALDH1L1	52.7795	117.846	68.6538	69.0894	57.6536	77.735
ALDH1L2	3.25014	2.99133	2.51085	2.55389	3.59231	2.36962
ALDH2	259.022	178.732	470.39	465.077	317.595	298.514
ALDH3A2	19.0338	20.2369	22.5259	18.3302	23.1439	14.9864
ALDH3B1	3.9567	2.18117	4.66301	3.62921	9.75165	3.40994
ALDH4A1	226.168	186.148	199.218	190.534	104.825	175.005
ALDH5A1	104.958	69.1813	123.11	148.08	68.6196	29.6595
ALDH6A1	420.682	410.497	431.723	441.016	158.297	245.111
ALDH7A1	115.592	139.034	119.588	131.593	88.3944	120.215
ALDH9A1	20.9846	24.7408	28.9824	33.335	25.2639	26.1814
ALDOA	1846.01	2248.92	2029.56	2333.85	1645.4	2160.98
ALDOB	6.0057	6.04497	3.51519	4.09967	3.6512	3.58332
ALDOC	3.3208	2.55509	3.1565	1.94902	3.82787	1.44489
ALG1	3.39145	4.23771	3.37171	2.48668	5.35902	3.40994
ALG11	26.7784	22.8712	20.3737	19.4902	13.427	14.0443
ALG12	13.4245	10.2827	13.2716	11.2909	20.5527	10.5766
ALG13	2.96752	2.18117	2.29563	1.7474	4.18121	1.38709
ALG14	8.12536	7.78991	7.74776	10.4172	9.54023	7.51342
ALG2	4.87522	4.73627	5.16518	6.38473	7.53796	5.66396
ALG3	9.60912	8.78702	10.5456	8.33375	4.82901	6.87767
ALG5	5.72308	4.67395	5.81082	5.44382	9.36356	6.18412
ALG6	5.15784	4.30003	3.94562	4.50291	7.83241	3.81451
ALG8	5.08718	4.73627	4.80648	3.69642	5.77125	3.9301
ALG9	6.21767	5.35946	3.94562	5.57823	6.24237	3.23655
ALKBH1	13.1419	11.903	12.339	14.1808	7.24351	10.3454
ALKBH2	3.17949	3.11596	3.44345	2.95714	5.71236	3.64112
ALKBH3	10.1037	4.17539	9.75286	9.27264	6.6546	10.2841
ALKBH4	9.53847	7.1044	6.67168	9.54348	13.427	8.72713
ALKBH6	3.3208	2.86669	3.1565	2.28506	4.53455	3.35214
ALKBH8	3.19079	2.49339	2.81646	2.0747	1.24847	1.51309
ALMS1	10.1037	11.0305	5.45213	4.90616	7.00795	5.08601
ALOX12B	4.38063	3.42756	3.1565	3.15876	2.4145	6.24192
ALOX15B	1.62507	1.18407	1.29129	0.0672076	2.94452	0.288978
ALOX5	2.11966	5.04786	7.8195	5.10778	6.7135	4.50805
ALOX5AP	1.83704	2.92901	0.286954	1.88181	1.06003	1.79166
ALOXE3	2.47294	2.67973	3.94562	1.94902	1.64893	1.3293
ALPK1	4.94587	3.67684	2.29563	3.22597	4.47566	2.31182
ALPK2	269.691	271.837	217.87	241.813	62.7182	205.29
ALPK3	861.924	775.937	564.726	429.39	332.848	634.711
ALPL	4.59259	4.8609	7.67602	3.83084	8.65688	8.03358
ALS2	29.0393	27.8567	30.4889	30.5123	38.4554	15.7204
ALS2CL	51.0131	55.4642	63.4886	49.2632	95.6968	45.8897
AMACR	7.77208	6.48121	8.10646	9.6779	6.30126	6.5309
AMBRA1	27.4849	23.1828	30.2737	30.5123	24.0861	21.9623
AMD1	29.0393	22.8712	19.5846	25.9421	42.1066	25.5456
AMDHD2	28.1915	22.6219	22.8846	25.2701	30.4463	24.7365
AMER1	15.4029	13.461	12.6977	16.197	14.6637	10.3454
AMER2	0.847864	1.12175	0.860863	1.27695	0	0
AMFR	129.229	140.779	115.499	116.874	77.2052	85.7108
AMHR2	1.97835	1.49566	2.08042	1.34415	5.24124	3.9301
AMIGO1	8.6906	7.85223	10.4738	11.8958	4.71122	6.24192
AMIGO2	3.67408	1.68262	3.44345	2.41947	3.18008	2.13844
AMIGO3	1.34245	1.37102	0.932601	1.54578	2.12005	1.2715
AMMECR1	2.6849	2.30581	2.65433	2.41947	1.94338	1.21371
AMMECR1L	23.3869	22.8712	19.9433	23.6571	29.4452	19.1303
AMN1	13.6365	14.2088	8.24993	12.0302	9.30467	10.5766
AMOT	7.48946	5.35946	7.53255	6.58635	10.718	3.12096
AMOTL1	48.1869	32.406	51.867	46.7093	44.2855	21.211
AMOTL2	110.858	100.895	77.8363	69.2239	75.0263	72.0133
AMPD2	6.57094	6.48121	7.96298	6.65356	15.2526	7.45563
AMPD3	30.6644	37.5162	25.1085	29.8402	17.4315	31.0362
AMPH	1.2718	0.498554	1.50651	1.20974	0.647793	0.346773
AMT	1.20114	1.68262	1.43477	0.940907	0.647793	1.04032
AMZ2	70.3727	80.3296	65.4973	79.9099	63.1893	64.0375
ANAPC1	28.3328	27.4205	24.3911	26.4798	22.8494	19.3037
ANAPC10	3.03818	2.55509	2.15216	3.36038	4.29899	3.06316
ANAPC13	42.5345	32.2191	41.1062	40.6606	37.7487	44.676
ANAPC15	12.5053	15.8291	15.4231	17.6736	13.9941	18.1102
ANAPC16	28.3328	29.8509	26.9737	28.4288	29.504	27.7997
ANAPC4	17.8758	14.8943	20.0151	20.0279	22.8494	10.9234
ANAPC5	74.4622	52.1974	62.9491	20.1267	21.7482	56.4426
ANAPC7	24.588	23.9306	24.5346	26.0094	31.8008	24.4475
ANG	1.41593	1.6203	1.00936	1.21511	2.25138	1.79513
ANGEL1	17.5225	17.3248	16.4999	18.3477	19.9638	13.4086
ANGEL2	15.5442	14.5827	12.339	14.3824	20.1405	10.2876
ANGPT1	1.69573	0.997109	0.932601	3.76363	2.47339	0.693547
ANGPT2	5.3698	7.1044	5.30865	4.50291	7.42018	3.06316
ANGPT4	0.706553	1.12175	1.57825	1.27695	1.8256	0.52016
ANGPTL1	11.0929	6.41889	8.53689	11.2237	10.2469	5.54837
ANGPTL2	49.7413	40.5075	55.4539	63.3768	40.281	36.4112
ANGPTL4	42.8878	1.68262	2.00868	18.9526	41.1643	54.0966
ANGPTL7	19.3596	10.9682	137.881	107.263	66.7227	16.2406
ANK1	505.044	302.311	549.876	662.533	401.337	343.132
ANK2	116.369	104.883	69.2994	106.121	45.5222	61.4367
ANK3	256.761	210.701	195.057	185.493	97.7579	98.0213
ANKDD1B	1.97835	3.05364	3.80214	1.88181	4.94679	2.42741
ANKFY1	45.2194	44.5583	41.6084	41.6015	50.999	34.7929
ANKH	85.8462	75.1571	116.575	130.584	50.1157	65.2512
ANKHD1	75.5305	76.0295	75.4689	69.0222	116.426	60.3386
ANKIB1	28.1208	28.2306	28.9106	30.3106	40.9288	18.4368
ANKLE2	22.821	24.1176	20.6822	24.6786	21.7894	19.9077
ANKMY2	31.371	38.8249	32.4976	35.4856	31.7419	34.9085
ANKRA2	7.77208	6.41889	6.24125	7.0568	11.3069	6.06853
ANKRD1	3783.52	2765.17	3625.67	3350.5	1847.57	2547.11
ANKRD11	108.597	107.251	101.797	100.341	76.2041	72.3022
ANKRD12	44.1956	39.1297	35.4977	30.8463	114.578	35.5316
ANKRD13A	15.7561	14.1465	10.5456	12.5006	22.6728	11.2123
ANKRD13B	3.53277	3.61452	3.80214	2.88993	4.8879	2.88978
ANKRD13C	26.7784	26.1741	23.5302	26.2782	22.3783	18.3212
ANKRD13D	6.85356	4.8609	7.8195	5.98148	11.5425	6.01074
ANKRD16	5.22849	4.05075	4.59127	5.77986	5.4768	2.6586
ANKRD17	100.896	101.954	82.6428	79.2378	99.1713	61.4945
ANKRD2	0.777208	0.997109	0.358693	0.201623	0.883355	1.2715
ANKRD23	678.195	424.846	971.07	660.464	284.489	460.747
ANKRD26	9.3265	9.47253	7.8195	7.19122	15.8415	7.28224
ANKRD27	42.7747	13.5825	15.0766	58.7422	50.4537	21.1538
ANKRD28	31.0177	25.7379	26.5433	25.2029	21.4361	16.3561
ANKRD29	10.5276	9.72181	15.0651	19.6246	12.1314	7.28224
ANKRD33B	23.3163	18.4465	30.7758	27.4207	16.4304	18.8991
ANKRD34A	1.13048	1.6203	1.07608	0.873699	0.647793	1.04032
ANKRD35	1.41311	0.685512	1.07608	0.739284	1.70782	0.52016
ANKRD37	1.05983	1.55798	0.717385	1.7474	1.2367	1.73387
ANKRD39	8.50407	9.08304	10.6001	13.2251	19.0905	11.6163
ANKRD40	122.022	114.73	121.382	119.697	87.3932	86.9823
ANKRD42	5.79374	3.92611	4.01736	4.57012	5.18235	4.16128
ANKRD44	14.2724	13.0247	10.6173	8.53537	19.3749	8.26476
ANKRD45	2.46587	2.19613	2.72606	2.06059	1.15366	1.40443
ANKRD46	25.5772	24.3045	24.1042	24.262	26.854	15.7782
ANKRD49	2.47294	2.36813	2.08042	2.41947	3.71009	2.77419
ANKRD50	19.6422	15.2682	16.9303	11.6269	21.6716	7.10885
ANKRD54	13.4952	13.461	12.626	15.3233	26.6184	13.7553
ANKRD55	0.635898	0.934789	0.645647	1.47857	0.942245	1.44489
ANKRD6	3.88604	5.42178	6.02604	5.98148	7.42018	3.00537
ANKRD65	0.847864	0.747831	0.430431	0.336038	0.706684	0.693547
ANKRD9	27.8382	25.9248	22.7411	31.9236	33.4497	25.9502
ANKS1A	167.1	165.894	172.675	184.687	199.52	103.338
ANKS3	14.4843	10.8436	12.7695	10.6188	27.5607	17.1075
ANKS6	21.1966	17.5117	17.002	22.2457	12.5436	15.6048
ANKZF1	13.1419	15.2682	13.4151	11.0221	29.4452	15.2002
ANO1	15.2615	10.4073	12.9129	10.8204	27.7373	10.5766
ANO10	18.3803	15.9712	21.9979	15.9665	23.3618	17.6167
ANO2	13.4952	19.0697	23.0998	18.6165	14.3103	12.2527
ANO5	2.76827	2.98634	2.909	1.99808	1.2844	0.37047
ANO6	44.6542	37.7655	23.9607	25.1357	36.1586	27.9153
ANOS1	28.342	21.6242	30.41	28.7649	60.3196	28.3776
ANP32A	73.1282	64.3758	69.5146	60.8901	85.0376	61.5523
ANP32B	30.0992	31.7828	28.9824	34.0071	52.0001	32.7123
ANP32E	44.2175	37.8446	32.5801	31.2213	27.6926	25.8797
ANPEP	3.67408	2.92901	6.16951	4.63733	7.36129	1.38709
ANTKMT	17.0986	20.503	26.9737	24.934	40.1043	24.1007
ANTXR1	32.996	20.1291	27.978	32.3269	32.5075	13.1196
ANTXR2	269.621	243.294	165.429	166.742	137.097	218.525
ANXA1	34.5504	35.5843	27.2606	32.7973	61.0693	27.3373
ANXA11	37.518	39.3235	37.4475	46.4405	15.1348	31.0362
ANXA2	48.2576	56.6482	49.0692	54.4382	93.93	54.5012
ANXA3	15.1909	15.5798	20.7324	16.3987	35.6286	13.3508
ANXA4	2.19031	3.11596	3.58693	2.41947	1.76671	2.02284
ANXA5	59.4918	76.715	65.2103	70.232	83.6242	61.0321
ANXA6	179.111	214.004	221.816	260.967	156	162.059
ANXA8	5.01653	3.80148	1.57825	0.470453	1.76671	2.6586
AOAH	2.47294	1.99422	0.645647	1.41136	0.883355	0.693547
AOPEP	75.8838	54.2178	80.0602	67.9469	96.8746	77.5038
AP1AR	15.282	21.8591	19.7661	17.3812	17.9445	12.0729
AP1B1	50.3066	47.6119	51.1496	51.7499	34.0975	47.6235
AP1G1	50.3066	43.8728	38.954	40.459	48.1723	28.4932
AP1M1	22.963	23.9306	20.5172	20.2295	16.6071	23.5806
AP1S1	6.07636	7.16672	5.16518	7.72888	11.248	7.51342
AP1S2	15.1909	14.832	8.24993	8.93862	17.1371	7.97579
AP2B1	70.2314	71.2309	65.856	65.7963	24.145	40.0523
AP2M1	122.407	112.52	132.855	145.353	123.385	134.029
AP2S1	6.50029	9.34789	8.46515	4.77174	5.06457	20.6908
AP3B1	44.3355	44.0392	33.2946	39.6559	25.3511	29.4272
AP3M1	28.5447	27.7944	30.4889	32.5285	26.5006	18.2634
AP3M2	5.08718	4.8609	5.38039	5.51103	5.71236	4.45026
AP3S1	22.0445	19.7552	20.3737	21.5737	26.2062	21.8467
AP3S2	18.5823	18.8204	24.7498	23.4555	27.8551	21.9623
AP4B1	24.6587	20.3161	22.2389	21.6409	31.0352	21.9623
AP4E1	12.2234	9.90877	9.75644	9.07303	21.2005	12.5416
AP4M1	2.049	2.61741	2.94128	3.29317	7.06684	4.62364
AP4S1	5.79374	7.1044	5.16518	7.39284	6.53682	6.81988
AP5B1	10.457	10.0957	7.31733	7.72888	8.95133	8.66933
AP5M1	7.48946	5.54642	6.52821	5.98148	6.00681	4.68144
AP5S1	12.3647	9.59717	13.3434	11.1565	10.8358	13.7553
AP5Z1	8.6906	8.35078	8.7521	8.26654	19.5516	11.3857
APAF1	8.30624	8.42557	6.69751	5.59302	6.69583	4.32947
APBA1	29.4633	84.6919	11.3347	61.0245	14.5459	70.8574
APBA2	0.423932	0.685512	0.286954	0.739284	0.765574	0.635751
APBA3	22.539	22.3103	25.1802	24.7996	35.6286	27.1061
APBB1	19.3596	24.1799	24.2476	21.9769	15.1937	21.0376
APBB1IP	2.049	1.43334	1.14782	1.7474	3.12119	1.67607
APBB2	20.7727	20.2538	22.1672	19.2214	28.9823	11.8816
APBB3	9.3265	4.98554	6.09778	3.69642	13.1914	9.59406
APC	76.2371	76.5281	65.1386	62.9736	43.5788	31.672
APCDD1	3.10883	1.24639	1.79346	1.41136	1.29559	1.38709
APEH	36.3168	35.9582	50.7909	50.6746	51.7646	41.555
APEX1	13.2125	11.5914	17.8629	16.0626	14.6637	16.4139
APEX2	4.23932	4.54931	5.66734	3.69642	6.30126	3.12096
APH1A	37.0234	36.5814	39.6714	40.2574	37.6309	39.5322
APH1B	14.4843	15.7045	5.52387	9.81231	12.4259	9.65186
API5	34.4798	27.6074	29.0541	32.2597	29.7985	20.4596
APIP	6.57094	4.98554	5.23691	5.98148	5.24124	4.27687
APLF	19.8541	16.2653	15.0651	17.0707	15.4293	14.8535
APLN	7.91339	4.36235	8.60863	13.0383	4.12232	6.29972
APLNR	26.0718	7.66527	117.723	54.707	140.866	15.2002
APLP2	440.395	466.398	475.053	450.56	280.495	353.593
APMAP	13.6365	14.3958	16.8586	17.4068	10.5414	17.3387
APOBEC2	125.06	132.615	150.077	184.821	149.169	196.736
APOBR	0.777208	0.934789	0.215216	0.537661	3.18008	1.21371
APOD	68.5356	246.597	32.4976	27.824	58.8314	149.864
APOE	42.6758	29.2901	25.6824	34.2087	127.674	30.5161
APOL3	5.01653	5.4841	5.45213	8.46816	10.2469	5.66396
APOLD1	15.4558	34.7193	6.67168	12.2896	17.1265	16.626
APOM	1.05983	1.6203	2.29563	1.7474	4.47566	1.50268
APOO	43.4742	46.6042	45.9643	49.8224	49.0274	46.8595
APOOL	55.5351	42.751	41.7518	49.4648	41.5766	39.4744
APP	987.832	820.807	794.778	927.869	372.187	605.986
APPBP2	25.2239	21.7494	19.3694	19.6918	23.7917	15.6626
APPL1	74.9653	82.5107	70.6625	73.9956	55.1802	44.4448
APPL2	14.9083	13.461	13.7738	10.5516	13.1325	9.36288
APTX	5.76053	4.88645	9.5154	9.12075	12.1202	7.47528
AQP1	607.494	727.204	714.372	640.892	1353.89	813.472
AQP3	86.2701	64.4381	122.386	91.1335	222.723	107.211
AQP7	20.914	11.3421	7.38907	32.4613	25.6173	40.3991
AQR	16.4627	15.5798	16.4281	15.9282	16.0182	8.26476
ARAF	59.4918	68.4266	71.3799	66.2667	43.461	59.9918
ARAP1	36.3875	34.6495	33.5736	28.8993	56.7114	23.5806
ARAP2	2.47294	2.92901	2.94128	1.34415	4.12232	1.2715
ARAP3	111.07	70.4831	126.188	82.7998	180.087	68.3721
ARCN1	51.9189	53.2207	53.7322	62.9063	52.3511	38.3185
AREL1	27.4849	24.1176	29.9867	22.7834	20.2583	16.7607
ARF1	190.909	183.571	202.087	225.902	162.636	174.556
ARF3	26.2838	23.7436	22.9563	28.8321	19.0216	17.4543
ARF4	51.3339	50.6089	46.2498	53.9751	65.5308	45.9816
ARF5	15.1909	15.3929	20.1585	21.9097	26.854	16.7607
ARF6	26.0012	23.806	20.9477	28.4288	36.9831	24.2163
ARFGAP1	19.1476	17.6364	17.2173	16.4659	37.3365	21.7889
ARFGAP2	47.8739	48.6084	53.593	52.1961	56.8233	47.8975
ARFGAP3	6.85356	5.11018	5.81082	7.79609	10.0114	8.14917
ARFGEF1	54.0513	47.6743	50.5039	52.9596	50.999	26.7015
ARFGEF2	46.6325	48.5467	40.3171	44.0882	28.6207	30.7472
ARFGEF3	66.2747	62.5686	31.4932	40.2574	39.2209	27.3373
ARFIP1	11.7994	10.4073	10.8325	12.4334	15.1937	7.57122
ARFIP2	6.6416	6.60584	7.03038	6.1831	13.1325	8.20697
ARFRP1	27.6969	28.4176	31.9954	27.3535	36.2175	34.6773
ARGLU1	65.1442	58.0193	56.53	52.4892	91.81	51.3225
ARHGAP1	75.7425	80.3296	65.0669	60.4869	52.1179	55.0214
ARHGAP10	82.9493	85.8137	76.6168	80.1115	47.5834	71.6087
ARHGAP12	25.5066	24.8031	25.6824	23.9931	23.5561	15.0846
ARHGAP17	42.1106	42.3148	39.0975	37.9051	37.4542	30.6316
ARHGAP18	26.2131	27.4205	30.0584	34.6791	33.3908	20.4596
ARHGAP19	11.3048	9.47253	9.32601	7.12401	10.4236	6.35751
ARHGAP20	2.26097	2.80437	4.0891	2.55389	4.94679	0.693547
ARHGAP21	39.8496	34.2756	32.0671	31.2515	41.6943	23.8118
ARHGAP22	3.39145	2.61741	3.87388	6.11589	8.89244	2.83198
ARHGAP23	74.5413	67.5541	53.0865	62.2343	62.3059	45.5429
ARHGAP24	43.3824	55.5888	24.8215	28.2272	11.8958	34.6195
ARHGAP25	3.39145	3.36524	5.30865	5.91427	10.2469	4.56585
ARHGAP26	33.4906	42.751	35.4388	27.0847	27.5607	19.7083
ARHGAP27	22.0445	14.2088	22.5259	19.423	42.5188	13.3508
ARHGAP28	8.33733	6.73048	9.54123	4.77174	9.36356	1.56048
ARHGAP29	85.9169	67.5541	84.2211	74.0628	92.2811	43.2889
ARHGAP30	5.86439	6.54352	2.51085	2.75551	7.3024	4.27687
ARHGAP31	61.1168	76.2788	40.604	39.0476	54.8858	44.676
ARHGAP32	23.6695	17.3248	22.8846	11.4925	25.2051	7.7446
ARHGAP33	2.40228	1.6203	2.72606	1.54578	3.76898	1.15591
ARHGAP35	85.9169	92.918	87.6645	85.6897	19.4927	55.9461
ARHGAP39	12.1527	12.5262	13.6303	13.912	12.8381	8.84272
ARHGAP4	6.50029	6.48121	6.16951	6.58635	12.367	7.51342
ARHGAP42	4.59259	3.98843	4.01736	2.01623	3.71009	1.50268
ARHGAP44	4.94587	4.48699	8.39341	10.35	6.18348	3.69892
ARHGAP5	64.2963	62.9425	44.8366	50.6073	54.768	27.973
ARHGAP9	0.777208	0.373916	0.430431	0.470453	1.29559	0.982524
ARHGDIB	11.3048	13.0247	10.0434	14.3152	24.675	11.0967
ARHGDIG	2.6849	1.68262	1.57825	1.27695	2.29672	2.83198
ARHGEF1	55.1818	48.0482	42.0388	41.0639	112.952	54.0388
ARHGEF10L	88.8137	93.0427	111.912	94.1579	96.7568	82.4165
ARHGEF11	37.5886	37.3916	37.3758	37.9723	24.0861	26.8749
ARHGEF12	253.865	238.745	218.874	218.223	146.696	122.7
ARHGEF15	83.7265	56.5236	103.949	75.1381	210.238	62.1302
ARHGEF17	23.1749	17.3248	24.8933	20.3639	34.0975	14.6223
ARHGEF18	21.9738	23.0581	20.0868	18.2805	25.9117	16.8763
ARHGEF2	51.7197	39.9467	53.6604	39.3165	77.2052	33.5792
ARHGEF25	46.5618	45.68	48.3518	38.0395	89.8666	47.2768
ARHGEF26	8.0547	6.29425	4.80648	4.23408	3.59231	2.6008
ARHGEF28	2.54359	1.74494	3.37171	1.68019	4.12232	0.866933
ARHGEF3	28.2621	24.6161	31.6367	31.1843	34.922	16.125
ARHGEF37	45.7846	47.0511	63.3451	60.9573	44.3444	31.8454
ARHGEF4	1.83704	0.436235	1.36303	3.562	0.471122	0.982524
ARHGEF40	42.8878	36.9553	54.2343	39.0476	58.7136	26.586
ARHGEF5	1.48376	1.68262	0.932601	0.806492	0.942245	0.751342
ARHGEF6	51.9316	39.0742	44.1192	40.459	54.0024	26.5282
ARHGEF9	9.89174	5.60874	9.89992	7.39284	10.0114	4.10348
ARID1A	92.9117	87.3093	80.2037	76.6167	67.9594	49.7042
ARID1B	84.2918	78.6469	79.2037	70.2992	72.9062	46.2364
ARID2	35.6809	37.0177	31.2063	29.5042	20.4938	15.547
ARID3A	6.50029	4.54931	3.94562	3.09155	9.18689	5.02821
ARID3B	6.0057	4.54931	3.37171	3.09155	5.59458	4.10348
ARID4A	27.6262	22.9958	23.0998	18.4821	36.8064	17.801
ARID4B	28.4034	27.8567	29.7715	24.262	59.1259	23.754
ARID5A	6.57094	8.7247	5.52387	4.97336	10.4236	17.1653
ARID5B	28.1915	23.619	18.7238	15.1217	26.6773	11.8481
ARIH1	77.5089	70.5454	61.5517	72.9203	49.3501	53.8077
ARIH2	34.7228	29.2209	34.5672	42.9826	24.251	28.225
ARK2C	0.494587	0.249277	1.00434	0.672076	1.06003	0.288978
ARK2N	59.6331	47.7989	45.1235	56.4544	47.0534	36.758
ARL1	58.6432	55.7758	58.3227	55.9168	51.4101	41.2082
ARL10	11.851	10.661	9.1689	11.0738	10.7769	9.35132
ARL13B	5.72308	4.48699	4.80648	3.02434	8.71577	3.46773
ARL14EP	37.8006	32.7799	27.9063	32.5285	40.1043	23.2916
ARL15	6.71225	6.91744	15.4955	12.8367	13.7803	5.95294
ARL16	16.9573	14.4581	14.9216	11.4925	21.1416	19.3615
ARL2	25.6479	25.6755	41.2497	38.7788	49.1145	38.6652
ARL2BP	28.6861	27.3582	25.5389	23.0522	30.8585	27.5107
ARL3	8.40798	10.9059	10.689	11.0221	18.3149	12.9462
ARL4C	21.2672	28.6046	19.7998	25.4717	14.0159	14.6801
ARL4D	3.17949	1.74494	2.43911	3.29317	3.59231	1.61828
ARL5A	16.8471	11.8332	13.2329	12.9455	4.94679	5.0837
ARL5B	16.9573	16.0784	13.1282	14.9201	17.5493	7.97579
ARL6	5.3698	3.73916	4.01736	4.04187	5.83014	3.8723
ARL6IP1	19.4302	16.1407	16.4281	19.0198	24.3806	12.8306
ARL6IP4	7.20684	6.85512	14.6347	11.1565	25.0284	9.18949
ARL6IP5	108.597	117.846	113.419	101.82	97.6401	78.7175
ARL6IP6	12.1527	11.8407	10.7608	11.8285	14.6637	6.87767
ARL8A	19.6422	16.0161	18.5085	17.4068	24.2039	15.6626
ARL8B	147.923	167.269	134.722	134.748	112.265	131.067
ARL9	4.69081	3.36524	4.62498	4.83895	5.30484	3.97518
ARMC1	18.7237	20.1914	19.7998	21.6409	24.2628	14.7957
ARMC10	4.59259	3.61452	3.87388	4.50291	2.76784	4.16128
ARMC2	1.41311	1.6203	1.14782	1.20974	0.824464	0.751342
ARMC5	10.1037	11.4044	9.82818	11.7613	17.2549	7.51342
ARMC7	7.77208	6.7928	8.89558	7.86329	13.2503	7.91799
ARMC8	15.3322	17.0755	14.1325	16.3315	9.54023	9.01611
ARMC9	8.40798	7.22904	10.8325	8.17446	10.4236	9.47847
ARMCX1	5.86439	5.35946	6.67168	4.30129	11.4836	5.2016
ARMCX2	69.2422	50.7279	63.7756	48.0535	133.74	41.844
ARMCX3	36.2462	41.193	43.7605	45.97	49.7623	33.5214
ARMCX4	26.4251	14.9566	14.4912	9.27465	27.5607	14.5067
ARMCX5	1.20114	1.80726	0.50217	0.940907	0.883355	1.04032
ARMCX6	5.29915	5.23482	8.7521	6.38473	13.0736	6.5309
ARMH3	29.11	25.6755	26.0411	29.2353	20.376	22.9448
ARMH4	2.47294	0.810151	0.430431	0.470453	0.294452	0.924729
ARMT1	13.7071	13.274	11.8369	14.9201	13.4859	11.6169
ARNT	38.0126	37.3916	34.4345	30.9155	32.0952	18.4946
ARNT2	1.41311	0.498554	11.9803	8.40095	1.8256	0.866933
ARPC1A	29.5339	32.6553	30.9193	30.9155	44.58	30.6894
ARPC1B	26.1425	26.9842	16.1412	24.3292	58.007	31.094
ARPC2	81.6069	76.2165	75.5407	85.6225	84.272	66.985
ARPC3	13.0811	13.8068	14.7308	18.1582	29.7349	18.253
ARPC4	18.6622	13.6579	20.8142	21.2927	21.4184	15.024
ARPC5	34.4091	38.7003	29.5563	33.2006	52.3535	39.0698
ARPC5L	35.1863	32.9669	43.8323	44.0882	56.2991	42.133
ARPIN	9.9624	7.47831	10.4738	11.1565	13.427	8.90052
ARPP19	67.083	75.3596	58.9375	66.6995	59.2631	61.4448
ARRB1	48.4695	39.6351	54.3778	54.9086	56.0047	37.5671
ARRB2	4.23932	6.91744	6.02604	5.98148	12.0725	5.60617
ARRDC1	5.79374	7.04208	6.09778	6.98959	10.718	6.64649
ARRDC3	30.5937	49.3569	30.3454	27.9584	58.0658	36.0644
ARRDC4	9.89174	3.8638	3.44345	12.5006	8.59799	8.03358
ARSA	8.90257	9.59717	8.53689	10.8204	11.7192	11.039
ARSB	2.11966	1.43334	1.64999	2.15064	1.53115	0.924729
ARSG	4.80456	6.10729	4.80648	6.85518	4.94679	8.55374
ARSI	3.39145	3.48988	4.73474	2.41947	4.06343	2.25403
ARSJ	2.40228	2.36813	1.93694	1.68019	3.41564	1.3293
ARSK	4.87522	5.23482	6.67168	6.45193	5.59458	2.83198
ARSL	9.18519	5.67105	9.75644	7.19122	18.6682	8.20697
ART1	38.811	43.0464	64.2584	69.8092	14.0989	37.5515
ART3	402.947	501.608	164.855	202.093	95.1667	280.655
ART5	2.82621	3.92611	3.08476	3.62921	3.12119	3.75671
ARV1	4.87522	5.92033	5.59561	4.4357	4.94679	4.79703
ARVCF	54.0513	59.4526	55.8126	48.5239	56.7114	60.5697
AS3MT	10.5983	6.16961	7.96298	8.8042	9.59912	9.18949
ASAH1	52.2849	51.4757	44.1192	44.8275	38.0431	39.301
ASAP1	35.3983	29.5393	35.8693	29.0337	63.1304	23.176
ASAP2	33.9852	30.3495	35.941	33.335	47.4656	18.6102
ASAP3	7.41881	6.73048	6.67168	6.25031	10.3058	3.75671
ASB1	14.767	12.9624	15.352	15.3233	16.1948	14.0443
ASB10	13.0006	15.2682	23.4585	19.1542	15.7237	15.1424
ASB11	69.8074	83.3832	80.6341	75.743	66.6049	73.7471
ASB12	16.0388	16.0784	25.1085	24.6652	16.6071	23.0026
ASB13	9.89174	7.85223	9.97166	8.26654	11.4247	6.76208
ASB14	28.6154	21.0016	40.6758	30.1762	24.6161	15.836
ASB15	168.018	180.788	192.116	223.129	91.5744	102.298
ASB16	53.3448	50.2917	69.2277	72.1138	39.6921	49.6464
ASB2	0.959499	1.70443	0.67219	1.24603	0	0.616101
ASB3	10.8809	8.47542	10.2586	8.73699	15.1348	8.26476
ASB4	13.4952	13.2117	13.3434	12.2318	8.12686	11.9059
ASB5	10.3157	7.16672	9.82818	9.00582	10.1291	8.84272
ASB7	3.81539	4.11307	4.23257	4.16687	6.0657	2.83198
ASB8	67.1932	53.3453	76.0429	75.8774	65.486	64.2687
ASCC1	5.44046	6.73048	4.44779	7.72888	4.2401	3.64112
ASCC2	28.4034	23.8683	26.615	26.0766	41.9888	27.6841
ASCC3	28.6154	26.3611	26.1128	21.5064	16.5482	13.582
ASDURF	1.83704	3.5522	3.50299	3.86242	2.75371	2.99092
ASF1A	6.14701	3.8638	4.30431	3.83084	5.12346	2.71639
ASH1L	73.2696	64.2512	49.2126	56.7232	41.1054	28.1464
ASH2L	26.0852	24.9071	30.8504	27.8293	20.7488	21.9161
ASL	4.59259	6.16961	6.24125	4.16687	10.0702	9.1317
ASMTL	17.5932	14.7697	17.7912	15.3233	35.3342	18.2634
ASNS	0.918519	1.24639	1.72173	0.537661	0.765574	1.15591
ASNSD1	12.9299	14.3958	15.0515	16.0586	18.1311	11.5481
ASPA	11.7994	5.29714	6.95864	3.15876	4.18121	10.3454
ASPH	216.629	189.825	127.264	153.771	113.069	140.848
ASPM	0.353277	0.747831	0.860863	1.14253	1.41337	0.52016
ASPN	34.0559	26.0495	20.6607	22.7162	23.9095	12.0793
ASPSCR1	31.5829	28.2306	28.4802	33.4694	31.5652	36.18
ASRGL1	4.52194	3.80148	0.932601	1.68019	3.29786	4.97042
ASS1	11.1635	16.0161	18.2216	12.5006	12.0725	16.3561
ASTE1	1.13048	2.24349	1.72173	1.47857	1.06003	0.693547
ASTN2	0.777208	0.498554	0.860863	0.336038	0.883355	0.52016
ASXL1	50.024	40.5075	42.3257	35.0824	64.7793	40.8037
ASXL2	49.6707	50.7279	35.941	40.7278	48.5256	24.6787
ASXL3	3.67408	2.80437	1.36303	0.470453	3.94565	0.404569
ATAD1	57.0266	59.1834	55.8937	59.4062	45.5369	35.8512
ATAD2	4.59259	4.54931	2.65433	3.76363	4.47566	2.13844
ATAD2B	12.2234	12.8378	11.4782	11.7613	20.9061	6.93547
ATAD5	2.26097	2.18117	1.00434	1.54578	1.29559	1.21371
ATAT1	18.5823	14.2088	18.1499	17.2724	11.6014	13.293
ATE1	46.0673	36.1452	43.4736	52.9596	33.5086	29.3023
ATF1	19.7835	17.8233	20.302	16.4659	18.0793	11.6747
ATF2	26.9903	29.2901	24.5346	22.2457	21.2005	15.836
ATF3	13.1419	26.3611	6.67168	11.2237	5.71236	46.2942
ATF4	47.6923	45.5554	53.4452	54.5054	102.94	48.8372
ATF5	3.67408	6.35657	3.94562	2.48668	5.12346	4.73924
ATF6	78.9926	51.725	48.3518	51.5483	31.9185	35.3709
ATF7IP	41.404	37.3916	31.7802	30.8483	28.9151	18.4946
ATF7IP2	2.96752	1.24639	2.36737	2.82272	4.82901	1.44489
ATG10	8.37548	9.25628	13.1174	14.2265	12.9294	9.70965
ATG101	13.7071	16.6392	17.9346	16.3315	29.9752	18.379
ATG12	8.19602	6.54228	9.6847	10.2821	7.12573	5.43278
ATG13	44.6542	50.7279	51.1496	47.583	44.8155	40.7459
ATG14	12.5766	11.8407	12.9847	12.8367	14.0159	9.24729
ATG16L1	25.4359	23.5567	24.4628	26.4798	21.4361	21.3266
ATG16L2	3.17949	2.55509	2.43911	2.35227	7.71463	3.52553
ATG2A	64.8616	61.7584	50.217	52.4892	89.3366	59.2982
ATG2B	56.4536	54.4047	48.9257	41.0639	61.0104	43.1155
ATG3	22.4684	21.8117	24.0324	22.985	25.4995	17.5698
ATG4A	22.1858	18.3842	18.5803	18.4821	19.316	21.9045
ATG4B	32.6428	29.9756	34.3628	31.9908	34.8042	28.4932
ATG4C	6.21767	6.7928	6.31299	7.9305	10.3058	4.97042
ATG4D	25.012	19.0697	27.6911	35.8889	24.9695	24.6209
ATG5	7.91339	8.84934	8.24993	8.19933	9.95246	7.05106
ATG7	14.9789	12.2769	12.5542	9.34186	10.718	10.9234
ATG9A	63.5898	65.5599	62.843	63.1752	46.7589	59.356
ATIC	27.4849	28.4799	29.5563	27.6895	23.2028	21.4999
ATL1	2.82621	2.86669	3.1565	3.02434	4.41677	1.09812
ATL2	44.5835	36.5814	31.3497	36.7626	44.05	23.8118
ATL3	42.3225	37.4539	34.5062	29.3697	54.2969	24.3319
ATM	19.2182	22.3726	15.7825	12.7695	24.3217	9.36288
ATMIN	54.122	46.4902	43.8323	44.021	32.743	33.7526
ATN1	102.309	87.3093	95.4123	100.341	112.422	76.4635
ATOH8	7.91339	11.9653	7.96298	10.6188	7.06684	9.36288
ATOSA	72.0684	66.9309	59.0408	68.283	72.0228	41.0926
ATOSB	27.6969	25.4886	25.0368	28.4288	21.7894	22.4247
ATOX1	3.53277	3.61452	2.29563	1.81461	4.06343	5.02821
ATP10A	2.75556	4.79858	3.51519	5.51103	5.12346	3.29435
ATP10D	2.33163	3.05364	3.65867	3.29317	3.41564	2.48521
ATP11A	96.2325	94.9746	85.4406	107.734	42.1066	62.9972
ATP11B	40.4148	47.1134	24.5346	29.773	35.452	22.1935
ATP11C	16.1801	16.4523	13.1282	13.6431	18.256	8.49595
ATP13A2	28.7567	26.9842	24.3911	26.0094	53.8846	23.465
ATP13A3	57.5134	66.2454	44.2627	42.5424	53.5902	26.7015
ATP1A1	709.238	684.141	578.715	741.166	265.065	525.766
ATP1A2	52.865	54.1555	28.4565	19.8263	45.8738	28.3135
ATP1B1	88.6724	91.9833	73.819	103.433	17.726	66.6383
ATP1B2	5.29915	2.55509	6.67168	7.99771	5.06457	3.40994
ATP1B3	22.3977	22.3103	18.0781	20.5655	31.9774	22.4247
ATP1B4	293.22	177.485	98.6405	81.5229	51.9413	149.748
ATP23	2.40228	1.37102	1.79346	1.54578	2.17894	2.42741
ATP2A2	3037.82	2868.56	4085.22	5092.99	1958.16	2185.02
ATP2A3	19.5009	22.6219	10.4021	8.46816	17.7849	14.4489
ATP2B1	27.8382	27.4205	22.2389	24.4636	26.6773	12.3105
ATP2B2	0.353277	1.05943	0.789124	0.739284	1.17781	0.115591
ATP2B3	6.99488	6.10729	4.51953	4.23408	0.942245	3.00537
ATP2C1	68.0411	65.9905	55.5256	61.9654	27.7373	35.2553
ATP5F1A	2190.41	1919.56	2166.16	2406.42	1656.35	1804.64
ATP5F1B	3530.53	3072	3404.28	3520.75	2037.2	563.39
ATP5F1C	509.354	505.846	567.739	609.842	654.684	552.93
ATP5F1D	299.437	266.664	350.801	318.766	477.365	377.347
ATP5F1E	149.719	172.874	229.563	232.135	346.334	280.886
ATP5IF1	243.241	233.978	253.792	279.262	510.162	323.447
ATP5MC1	467.956	412.365	609.793	636.724	800.614	577.954
ATP5MC2	199.248	235.318	199.146	224.406	227.14	227.599
ATP5MC3	435.943	349.487	465.153	491.153	610.575	443.639
ATP5ME	148.009	147.514	224.266	225.85	410.362	303.958
ATP5MF	141.585	146.796	178.116	186.609	274.422	212.048
ATP5MG	192.465	173.995	214.14	232.807	345.509	260.831
ATP5MJ	105.771	116.039	174.109	160.962	324.014	208.989
ATP5MK	129.86	126.318	145.481	149.732	335.78	189.962
ATP5PB	768.994	655.514	699.159	755.462	816.488	711.295
ATP5PD	277.887	290.532	402.453	396.256	485.374	439.073
ATP5PF	212.577	156.828	224.013	239.146	344.31	235.496
ATP5PO	462.439	521.301	654.399	611.589	809.565	631.821
ATP6AP1	63.5191	60.6367	58.6104	52.0859	24.145	43.4623
ATP6AP2	41.404	36.8307	47.1322	49.4648	62.0115	35.7177
ATP6V0A1	26.3544	32.1567	33.7889	34.4775	12.1314	24.1007
ATP6V0A2	0.565242	1.74494	0.573908	0.940907	0.588903	0.924729
ATP6V0B	34.6918	27.1712	35.5823	39.4509	38.1609	39.7055
ATP6V0C	75.6718	86.0629	87.3775	83.0014	83.1531	96.5186
ATP6V0D1	24.588	29.3524	31.1345	30.9827	36.6887	35.0819
ATP6V0E1	43.453	55.0902	47.4909	42.3408	54.5324	63.4017
ATP6V0E2	8.90257	10.5943	11.6216	10.0139	8.12686	9.70965
ATP6V1A	19.2889	17.2001	17.8629	19.423	17.9027	12.715
ATP6V1B2	42.7465	39.3235	40.3888	36.1577	44.4033	42.3063
ATP6V1C1	13.1419	18.3842	15.2086	16.3987	13.957	17.2231
ATP6V1C2	2.11966	0.87247	0.573908	0.201623	1.59004	0.809138
ATP6V1D	39.4257	43.1873	36.3714	49.9353	52.4124	42.5375
ATP6V1E1	163.072	157.419	172.818	199.136	201.052	178.877
ATP6V1F	15.0496	16.9508	24.4628	22.985	31.5652	26.4126
ATP6V1G1	54.4046	54.1555	63.7756	72.3154	64.7204	62.9972
ATP6V1G2	0.211966	0.623193	0.860863	0.739284	1.35448	0.115591
ATP6V1H	21.6205	17.3871	20.3737	25.2029	24.3217	18.2056
ATP7A	6.78291	7.91455	6.16951	6.11589	2.47339	1.79166
ATP7B	85.4223	50.6656	62.843	61.3606	51.2346	37.3937
ATP8A1	14.0604	15.9537	19.4411	22.5146	19.316	7.57122
ATP8A2	20.914	41.38	20.8759	43.1473	13.1914	26.9327
ATP8B1	21.3379	19.132	17.9346	24.7324	41.2821	14.3911
ATP8B2	40.4855	34.2133	35.941	36.2249	63.4249	24.7943
ATP9A	116.157	83.8818	91.7536	76.2135	112.068	58.7781
ATP9B	14.2017	13.2117	17.9346	13.5759	16.6071	12.426
ATPAF1	55.6057	48.2351	53.517	65.1242	29.9163	45.0227
ATPSCKMT	3.60342	2.92901	2.51085	2.82272	4.2401	2.6008
ATR	10.9516	10.9682	6.81516	8.06492	9.54023	3.98789
ATRAID	28.8274	26.2364	31.9954	36.6282	37.6309	33.348
ATRIP	9.89174	6.91744	10.1151	15.2561	8.59799	10.3454
ATRN	64.367	58.2685	57.4626	57.0593	41.8121	32.4233
ATRNL1	3.60342	4.73627	3.80214	3.15876	3.12119	1.56048
ATRX	77.1556	67.4918	73.3168	65.3258	170.37	55.6571
ATXN1	37.094	28.293	30.2737	31.5204	31.8597	17.3387
ATXN10	44.9368	44.1844	43.8323	46.9109	49.939	42.7109
ATXN1L	26.0012	24.0552	23.7455	22.4473	26.324	14.0443
ATXN2	71.5032	58.7048	65.1386	61.2262	43.8733	39.4166
ATXN2L	92.1345	82.573	68.7255	65.5946	96.1084	65.0778
ATXN3	14.9789	17.761	16.2846	12.4334	22.7317	9.70965
ATXN7	24.3761	22.6219	22.8846	23.0522	24.7339	15.4314
ATXN7L1	14.767	13.5856	12.626	10.8876	21.9072	8.78492
ATXN7L2	2.61425	2.05654	2.7978	2.35227	5.24124	2.6008
ATXN7L3	17.8758	17.0755	18.0781	18.4821	24.3806	19.4193
ATXN7L3B	33.9145	31.5336	32.928	33.671	35.8053	19.6505
AUH	49.4587	41.4423	41.7518	42.7441	37.8665	40.9193
AUP1	23.0336	23.8683	29.3411	30.9155	42.8133	31.4986
AURKA	0.918519	0.997109	0.717385	0.537661	0.588903	0.635751
AURKAIP1	70.726	65.5599	98.3535	97.0478	206.646	76.059
AURKC	0.706553	0.249277	0.240324	0.336038	1.06003	0.794689
AUTS2	21.1966	17.6987	20.9477	14.9873	29.504	15.4314
AVEN	11.7288	10.6566	8.32167	11.4925	19.2571	11.7325
AVL9	18.865	16.6392	16.4281	13.3743	17.8438	13.4086
AVPI1	21.9738	27.7944	24.1759	23.2538	28.7974	40.2257
AVPR1A	2.75556	3.73916	3.44345	1.61298	2.59117	1.3293
AVPR2	0.989174	0.810151	1.00434	0.604869	1.17781	0.693547
AXIN1	33.6319	35.0858	31.4215	34.8808	36.5709	28.3776
AXIN2	11.5875	10.0957	9.97166	9.14024	5.94792	5.31719
AXL	82.5961	61.4468	58.9691	52.1531	76.4396	53.2297
AZGP1	1.2718	18.1349	8.39341	2.08344	5.35902	24.2741
AZI2	18.865	17.5117	19.1542	19.8935	20.0816	14.6801
AZIN1	148.8	145.889	75.3255	85.8914	70.0795	121.891
AZIN2	1.90769	1.18407	0.789124	1.47857	1.8256	1.50268
B2M	64.8616	66.6816	82.3558	149.201	979.758	117.267
B3GALNT1	0.777208	1.05943	0.860863	0.537661	0.176671	0.635751
B3GALNT2	32.7134	34.8365	16.1412	19.2886	15.1348	26.008
B3GALT2	17.9464	18.0103	17.0738	66.6028	38.9854	37.3359
B3GALT4	14.9083	14.7074	16.2129	17.81	17.9027	18.8991
B3GALT6	4.66325	4.48699	3.22823	4.90616	3.94565	4.21908
B3GAT2	3.39145	1.3087	1.43477	1.14253	0.647793	1.44489
B3GAT3	16.816	19.3813	21.1629	19.087	26.0884	20.633
B3GLCT	7.34815	6.23193	6.67168	7.25842	6.94906	5.08601
B3GNT2	9.04388	10.7189	12.1238	11.963	13.8981	6.5309
B3GNT5	4.38063	3.92611	4.30431	3.36038	10.2469	2.6586
B3GNT7	0.282621	0.186958	2.08042	0.470453	1.59004	1.21371
B3GNT8	6.07636	4.92322	8.03472	5.64544	5.18235	2.88978
B3GNT9	10.1037	11.5291	13.0564	11.4925	12.7792	6.29972
B3GNTL1	9.39716	5.60874	9.6847	7.66167	7.24351	4.56585
B4GALNT1	11.6581	11.8407	20.5172	16.197	25.0284	7.22444
B4GALNT3	3.03818	2.11886	3.87388	2.41947	1.94338	2.31182
B4GALT1	61.3288	49.7308	56.3148	59.1427	66.016	47.8547
B4GALT2	72.9163	16.1407	31.7802	58.0674	36.0998	40.0523
B4GALT3	7.56012	8.22615	7.38907	8.06492	10.188	6.24192
B4GALT4	9.46781	9.0363	7.96298	8.66978	7.95019	6.99326
B4GALT5	51.1544	52.7221	47.4909	46.7765	42.5188	22.3091
B4GALT6	6.6416	6.41889	2.43911	2.68831	0.471122	1.38709
B4GALT7	6.21767	5.85801	7.31733	7.86329	10.4236	7.68681
B4GAT1	9.9624	8.47542	12.339	14.248	15.1937	12.2527
B9D1	1.90769	1.86958	1.64999	1.88181	2.59117	2.71639
B9D2	0.777208	0.997109	0.645647	0.604869	1.88449	1.04032
BABAM2	21.6912	21.1262	19.0107	19.6918	19.846	19.5927
BACE1	22.6804	19.8799	33.5019	21.7753	14.3103	16.2406
BACE2	5.5634	4.31499	4.71824	5.92704	15.3044	6.30896
BACH1	20.1368	22.8089	19.3694	16.7347	11.8958	10.9234
BACH2	22.6804	24.0552	16.4281	9.94673	10.2469	19.9973
BAD	5.29915	4.42467	7.60429	7.46005	12.7792	9.18949
BAG1	123.546	111.841	154.711	165.969	148.799	132.04
BAG2	26.7614	25.2219	23.0682	29.5653	16.5953	26.4594
BAG3	254.854	302.186	210.194	242.687	152.114	233.841
BAG4	5.44046	7.85223	5.73908	6.25031	3.29786	1.79166
BAG5	15.9681	16.8262	14.3477	13.9792	14.7815	12.715
BAG6	179.041	182.969	176.327	174.538	127.851	150.5
BAHD1	26.3544	25.9248	18.7955	19.3558	25.9117	17.1653
BAIAP2L1	5.29915	8.91166	4.66301	0.873699	0.235561	2.19623
BAIAP2L2	0.847864	0.87247	0.932601	0.873699	2.17894	1.38709
BAIAP3	0.706553	1.99422	0.860863	0.806492	2.12005	1.2715
BAK1	16.392	13.9595	15.0651	21.6409	38.0431	18.7258
BAMBI	0.989174	1.05943	1.50651	0.604869	2.76784	0.751342
BANF1	150.001	159.163	205.674	206.529	360.409	216.56
BANF2	2.61425	2.55509	1.57825	3.02434	1.76671	1.2715
BANK1	0.706553	0.249277	1.72173	0.604869	1.88449	0.173387
BANP	8.54929	8.53774	9.89992	12.7695	15.017	5.43278
BAP1	133.397	142.96	161.268	182.065	112.952	128.306
BARD1	7.91339	6.97976	8.46515	7.72888	8.83355	3.64112
BASP1	1.41311	3.36524	0.645647	1.07532	2.17894	0.809138
BATF2	2.47294	1.68262	3.44345	19.2214	39.0443	3.12096
BAX	6.50029	8.97398	7.03038	8.06492	12.4847	9.65186
BAZ1A	8.19602	8.84934	5.52387	6.92239	23.1439	5.54837
BAZ1B	55.3938	53.096	56.7452	57.3281	52.8246	38.8386
BAZ2A	116.911	114.519	64.1873	77.643	84.7797	85.7426
BAZ2B	20.0661	16.0161	15.4955	13.6431	30.5641	11.9637
BBC3	2.75556	2.99133	4.16084	2.6211	4.71122	1.73387
BBIP1	11.4462	12.5885	10.5456	9.61069	19.6694	12.3682
BBLN	15.4735	19.8175	18.7238	21.7753	35.452	27.8575
BBS1	11.6581	10.6566	9.1108	10.4172	9.77579	7.8602
BBS10	7.56012	5.73337	4.80648	4.90616	6.30126	4.33467
BBS12	1.34245	2.11886	1.79346	1.34415	1.35448	1.21371
BBS2	22.539	27.1712	17.8629	24.1275	17.3726	17.2809
BBS4	11.5168	11.8407	12.7695	14.0464	17.9027	12.8306
BBS5	1.2718	1.9319	1.21956	1.34415	2.94452	1.67607
BBS7	12.5364	10.9439	11.1883	9.6779	9.21162	6.87767
BBS9	3.03818	4.11307	5.16518	3.25823	4.71122	4.21908
BBX	23.8815	21.0016	21.2346	20.2295	41.7532	12.3682
BCAM	172.258	156.982	236.235	182.469	320.599	169.168
BCAP29	27.9413	31.3447	27.7973	23.8016	17.9433	22.4362
BCAP31	38.2952	36.5814	45.4105	46.7765	67.8416	51.0913
BCAR1	35.5396	31.9075	37.304	36.561	33.7441	29.5913
BCAR3	5.3698	3.17828	7.38907	4.50291	5.88903	4.39246
BCAS2	25.6479	26.8596	23.8889	25.4045	38.3965	24.2163
BCAS3	28.4741	26.6727	26.4715	27.2191	21.1416	24.6787
BCAS4	9.9624	7.91455	10.976	17.4068	13.8981	12.5416
BCAT2	87.2593	90.5499	75.8276	80.2459	58.5959	82.821
BCCIP	28.7673	28.369	27.0325	28.574	34.5498	28.6441
BCDIN3D	5.29915	4.73627	3.37171	4.57012	4.12232	3.52553
BCHE	8.47864	13.8972	5.88256	7.79609	5.71236	3.06316
BCKDHA	115.168	112.923	117.579	136.633	127.792	117.267
BCKDHB	44.3715	48.796	52.3691	47.247	43.5788	42.6531
BCKDK	70.726	67.7411	78.1233	77.9609	35.6875	70.7418
BCL10	6.0057	4.36235	4.73474	4.90616	7.8913	3.69892
BCL11A	3.46211	3.92611	2.72606	3.22597	2.12005	2.77419
BCL2	103.369	83.3832	65.0669	79.1034	32.8608	47.0456
BCL2A1	2.11966	2.99133	1.43477	2.68831	7.12573	4.04569
BCL2L1	76.873	100.272	56.3865	60.6213	56.2402	83.8614
BCL2L11	7.63077	7.29136	5.16518	5.57823	7.59685	5.1438
BCL2L12	8.61995	8.53774	9.25427	7.79609	12.2492	9.76745
BCL2L13	160.882	142.524	127.838	133.945	58.3014	85.364
BCL6	20.8433	20.69	10.0434	24.8668	22.9083	15.6048
BCL6B	26.7077	18.4465	39.7432	41.6015	60.8337	14.5645
BCL7A	34.7624	38.0771	33.6454	30.7811	20.376	36.0644
BCL7B	71.9978	68.1773	76.4015	78.969	59.8326	79.0643
BCL7C	20.9846	22.8712	19.2259	20.0279	31.6241	19.8239
BCL9	9.82109	10.4073	9.32601	10.6188	18.9038	8.66933
BCL9L	52.2849	47.9858	32.8563	48.2551	25.5584	27.4529
BCLAF1	77.5795	73.4744	51.6518	58.8067	66.8405	45.9475
BCLAF3	2.89687	2.99133	1.50651	1.68019	2.59117	1.44489
BCO2	2.82621	2.30581	2.58259	3.36038	7.3024	1.21371
BCOR	20.49	20.5654	17.6477	18.9526	11.6014	8.84272
BCORL1	11.2342	9.97109	10.8325	8.46816	7.36129	4.39246
BCR	30.2405	29.6017	28.6954	38.3756	29.7396	35.891
BDH1	162.225	189.7	248	228.17	163.362	187.431
BDH2	3.03818	2.67973	4.16084	3.69642	6.83128	4.79703
BDKRB2	1.20114	1.12175	0.573908	0.201623	0.412232	1.04032
BDNF	19.7835	14.8943	8.39341	4.4357	13.7803	13.9865
BDP1	29.0358	27.949	20.7862	20.6307	15.1955	13.1057
BEAN1	1.34245	0.623193	1.00434	1.34415	2.88563	0.982524
BECN1	61.6354	46.388	54.9273	60.0299	44.2184	50.0221
BEND3	2.82621	3.5522	4.23257	3.36038	4.59344	2.48521
BEND6	1.62507	2.55509	2.29563	2.41947	1.06003	1.79166
BEND7	12.7886	13.5233	12.1956	14.9873	17.9027	11.7325
BEST1	1.76638	2.92901	1.21956	0.672076	0.883355	2.42741
BEST4	0	0.87247	0.932601	0.739284	0	0.404569
BET1	6.42963	6.66816	4.73474	6.45193	11.1303	5.31719
BEX3	14.2017	10.0334	15.639	11.5584	15.4293	9.76745
BFAR	18.5117	17.8233	21.2346	22.2457	23.4972	21.1532
BFSP1	0.706553	0.623193	0.143477	0.403246	0.883355	0.809138
BGN	124	117.908	66.5734	76.8183	66.9583	119.232
BHLHE22	2.049	1.55798	2.29563	1.54578	3.35675	3.23655
BHLHE40	33.9852	52.5975	61.9821	54.2366	36.0998	50.3399
BHLHE41	18.865	11.2798	10.689	15.4578	11.9547	11.3857
BICC1	15.0496	10.532	7.24559	9.20745	9.77579	8.03358
BICD1	18.0171	15.5798	14.276	15.5922	15.017	9.65186
BICD2	79.5579	78.1484	67.3625	76.5495	54.1791	53.4031
BICDL1	2.61425	4.05075	2.36737	1.61298	2.23783	1.90725
BICRA	20.914	17.3248	15.352	15.3233	30.4463	13.9287
BICRAL	27.3436	27.4828	21.4498	25.4717	25.4995	13.9865
BID	0.282621	0.685512	0.430431	0.739284	1.35448	0.52016
BIN1	3.53277	3.11596	4.51953	4.50291	11.7192	3.64112
BIN2	2.47294	3.36524	1.50651	3.29317	8.06797	2.6586
BIN3	7.48946	7.41599	8.68036	7.32563	11.6014	8.95831
BIRC2	29.8165	28.9161	24.3194	25.2029	32.6594	19.5355
BIRC3	13.2125	13.3363	9.97166	15.7266	35.1234	6.58812
BIRC5	1.62507	2.43045	1.21956	2.01623	3.88676	2.08064
BIRC6	89.7322	75.0324	50.5039	56.8577	58.1836	35.891
BIRC7	2.82621	1.55798	2.29563	2.21785	3.00341	2.08064
BIVM	15.9681	16.8885	15.7107	16.3987	18.5504	10.4032
BLCAP	181.867	135.046	80.3472	107.129	87.6877	122.469
BLM	13.9191	17.5117	8.03472	6.31752	9.30467	24.1585
BLMH	45.0781	33.0292	36.228	37.5019	34.6275	31.0362
BLNK	0.847864	1.49566	0.215216	0.604869	0.706684	0.809138
BLOC1S2	6.35898	5.85801	5.88256	6.92239	7.12573	6.5309
BLOC1S3	5.22849	4.92322	4.80648	5.17499	4.65233	5.2016
BLOC1S4	16.392	14.4581	12.9129	16.7347	29.0918	17.3387
BLOC1S5	10.3722	11.1876	10.6603	4.85777	2.66184	11.0499
BLOC1S6	18.2997	15.0189	16.7868	18.6165	21.7305	11.3857
BLTP1	82.1721	82.1991	49.0692	53.2957	54.0613	32.4811
BLTP2	191.759	168.137	174.109	170.237	156.648	119.868
BLTP3A	135.517	106.628	111.912	100.408	76.1452	89.9877
BLTP3B	27.2729	27.2958	18.1499	24.1947	15.9004	14.6223
BLVRA	1.83704	2.86669	3.01302	1.88181	2.88563	3.69892
BLVRB	12.6473	16.203	22.9563	26.0094	45.1689	22.7137
BLZF1	25.7892	25.8002	23.1715	23.8587	23.6739	18.5524
BMAL1	5.58177	9.16093	7.10212	4.63733	6.7135	2.6008
BMF	1.97835	2.49277	2.29563	2.08344	2.23783	1.61828
BMI1	26.5664	28.9785	31.1345	30.109	29.3863	19.7083
BMP1	96.2325	108.685	108.612	80.8508	153.233	109.927
BMP2	1.05983	1.05943	1.00434	1.54578	1.73079	0.444448
BMP2K	18.865	23.432	13.8455	17.3396	15.1348	10.0564
BMP4	7.2775	7.22904	6.45647	6.31752	11.7192	9.65186
BMP5	16.7453	14.5204	14.3477	17.8772	13.4859	7.39783
BMP6	8.90257	13.461	7.31733	7.46005	6.47793	6.18412
BMP8B	1.8978	0.967818	2.27555	1.8052	2.43276	0.620724
BMPER	1.34245	0.685512	1.00434	0.873699	1.76671	0.462364
BMPR1A	27.5556	29.4147	28.1215	32.3269	22.8494	18.4368
BMPR2	177.062	156.172	133.936	131.794	145.224	76.5213
BMS1	27.9795	30.1002	29.915	29.0337	26.5006	23.8696
BMT2	7.41881	5.85801	8.32167	7.86329	9.128	3.75671
BMX	1.97835	2.67973	1.43477	1.14253	1.00114	1.84946
BNC2	3.74473	1.80726	2.72606	2.55389	4.47566	2.19623
BNIP1	11.5875	11.7783	10.689	11.4925	14.0748	11.2701
BNIP2	77.2262	69.1744	54.1626	61.6294	51.7057	46.5254
BNIP3	176.497	167.078	158.327	133.609	145.989	209.856
BNIP3L	38.2952	43.4365	31.278	33.6038	46.8178	36.7002
BOC	9.3265	8.97398	9.89992	7.46005	7.71463	8.26476
BOD1	16.0388	14.2711	17.7194	17.81	15.7826	15.8938
BOD1L1	55.1111	53.7815	52.7996	48.6583	84.9787	45.6585
BOK	9.18519	6.41889	4.66301	7.32563	6.7135	7.91799
BOLA1	12.718	12.1523	14.4194	15.4578	21.495	14.5645
BOLA2B	18.5823	19.8175	27.1172	25.4045	49.3501	34.9663
BOLA3	39.2137	40.3206	58.9691	51.145	93.6356	69.7014
BOP1	24.2348	26.9842	27.4041	22.985	35.3931	28.9556
BORA	2.11966	1.24639	1.29129	1.68019	5.12346	1.44489
BORCS5	4.23932	3.67684	3.65867	4.16687	2.59117	3.81451
BORCS6	4.64912	4.27448	4.05179	4.50627	3.42153	4.30519
BORCS7	12.718	10.3419	12.339	13.168	11.9547	8.8982
BORCS8	9.25585	7.04208	11.1912	9.47628	15.2526	9.94084
BPGM	10.7396	8.10151	7.17385	8.33375	13.4859	9.1317
BPHL	32.9119	3.60704	37.8277	22.6147	17.8632	1.75987
BPIFC	1.05983	1.49566	0.50217	0.470453	1.11892	0.693547
BPNT1	16.1094	14.2088	12.1238	19.423	25.2639	14.1599
BPNT2	59.0678	53.2207	55.5256	51.7499	52.9424	34.0994
BPTF	43.9292	43.6864	39.5143	33.4163	54.7327	25.1047
BRAF	35.6103	32.2191	29.8432	33.8726	29.9163	22.5403
BRAP	8.61995	8.22615	8.39341	8.8042	5.88903	6.06853
BRAT1	15.5442	14.5827	15.352	10.8204	24.7928	13.4664
BRCA2	2.47294	2.55509	0.50217	1.41136	2.29672	1.3293
BRCC3	9.46781	8.84934	9.46949	10.0139	15.1348	8.03358
BRD1	34.5504	31.5959	30.0584	29.3697	36.4531	22.6559
BRD2	97.0867	80.2866	105.479	106.013	140.085	85.9414
BRD3	44.4422	44.1221	44.3344	40.7278	51.529	30.1115
BRD4	60.1983	55.4642	48.1366	50.6746	59.5381	37.4515
BRD7	45.7846	46.3032	41.4649	43.4833	38.4554	40.6881
BRF1	43.3117	35.5843	41.6084	34.3431	72.1995	42.7109
BRF2	4.38063	3.73916	4.59127	3.76363	5.30013	3.98789
BRI3	70.726	94.4137	92.7579	83.9423	103.706	89.6987
BRINP2	0.565242	1.6203	1.36303	1.54578	0.294452	1.38709
BRIX1	9.25585	9.41021	6.8869	8.19933	8.71577	7.8024
BRK1	42.4638	41.5046	47.204	46.4405	68.8428	49.0106
BRMS1	6.78291	6.60584	7.03038	6.72076	12.7792	7.91799
BRMS1L	15.1909	18.0103	19.1542	18.4821	15.8415	14.2755
BROX	48.6109	51.0395	37.878	47.1126	47.8189	32.1921
BRPF1	5.208	5.93965	7.6545	8.01921	10.9589	4.86061
BRPF3	28.4034	26.1118	22.9563	26.0094	19.4338	16.5295
BRSK1	2.6849	2.30581	1.21956	2.88993	2.17894	1.79166
BRSK2	2.75556	2.43045	1.43477	0.537661	4.47566	1.90725
BRWD1	28.898	26.6103	22.5259	22.7834	22.9672	12.9462
BRWD3	7.63077	6.97976	5.45213	3.42759	8.36242	3.58332
BSCL2	48.3282	50.6033	53.9474	54.2366	70.2561	53.6921
BSDC1	79.8405	73.973	94.9818	94.3595	56.1225	69.7014
BSG	625.897	710.946	638.158	675.472	848.645	785.6
BSN	1.55442	1.3087	1.00434	1.41136	1.00114	0.404569
BST1	5.22849	4.42467	4.23257	3.83084	3.88676	7.45563
BTAF1	24.0228	23.619	18.939	19.2886	22.0839	13.8709
BTBD1	110.081	107.563	128.125	130.047	88.8066	77.2727
BTBD10	12.718	10.5943	11.6216	12.4334	10.6591	8.26476
BTBD19	2.47294	2.92901	3.51519	2.68831	3.29786	1.3293
BTBD2	16.8866	20.1914	15.8542	18.9526	11.4836	16.7029
BTBD3	10.1744	9.47253	13.1282	10.0139	16.4893	6.01074
BTBD6	48.9641	59.4526	60.1886	64.2505	55.4158	53.1141
BTBD7	33.6319	30.0379	26.6867	27.7568	18.4327	14.969
BTBD8	12.6473	9.90877	9.39775	7.52725	6.24237	4.39246
BTBD9	13.1419	10.9682	14.4912	14.1808	5.53569	8.49595
BTD	3.39145	1.86958	2.22389	2.48668	2.29672	2.94757
BTF3	96.9582	106.716	101.495	108.57	155.096	115.974
BTF3L4	17.3812	18.1972	15.1368	18.0789	19.1982	16.6451
BTG1	45.502	49.5438	43.4736	35.8889	58.2425	31.9031
BTG2	13.1419	16.9508	11.9086	7.12401	6.83128	10.461
BTG3	4.38063	2.92901	6.02604	2.95714	12.8381	2.88978
BTK	0.777208	0.997109	0.215216	0.739284	1.00114	0.924729
BTNL10P	0.580787	1.18407	0.593995	1.54578	6.74647	1.35646
BTNL9	65.4176	27.8985	55.8406	49.0401	115.614	26.2184
BTRC	42.1812	39.0119	38.8106	43.5505	25.5584	30.4583
BUB3	27.9088	33.4031	32.8563	31.7892	36.5709	22.5981
BUD13	8.54929	7.1044	7.60429	7.19122	9.65801	7.05106
BUD23	11.2342	9.65949	9.75644	13.912	12.6614	12.3105
BUD31	22.751	22.9958	22.0955	28.2272	33.8619	25.719
BVES	55.8177	39.6974	34.291	55.7151	10.718	29.3601
BYSL	8.69343	8.64555	8.93504	12.1437	8.36242	10.9234
BZW1	49.6029	48.1055	41.4921	44.9653	48.1617	35.5373
BZW2	314.487	401.461	239.75	251.961	189.803	373.359
C10H7orf25	14.767	11.7783	13.8455	13.7776	13.1914	10.5188
C10H7orf57	0.918519	4.98554	0.717385	2.48668	10.8947	13.0618
C11H5orf22	14.343	11.2798	13.9173	14.0464	12.7792	8.38036
C11H5orf34	3.03818	3.67684	1.8652	1.20974	2.4145	1.67607
C12H6orf136	82.6667	89.4282	86.7319	91.5368	74.0251	89.2363
C12H6orf226	3.9567	3.67684	4.51953	5.04057	8.4802	3.98789
C12H6orf47	21.4086	19.2567	25.1085	26.211	21.2594	22.6559
C12H6orf62	164.062	149.068	123.606	130.517	209.061	138.478
C12H6orf89	49.1761	44.2467	71.4516	67.8797	51.4112	49.7042
C13H1orf105	7.48946	7.54063	9.89992	8.13212	6.6546	6.4731
C13H1orf146	0.777208	0.747831	0.358693	0.873699	1.35448	0.115591
C13H1orf162	0.423932	1.49566	0.143477	0.806492	0.588903	0.982524
C13H1orf210	0.706553	0.186958	0.573908	0.806492	0.765574	0.173387
C13H1orf43	5.77042	0	18.1513	0	15.6212	10.6766
C13H1orf50	4.80456	7.47831	6.95864	6.1831	8.30353	5.08601
C13H1orf52	7.20684	6.73048	6.59995	7.0568	10.6003	5.77956
C13H1orf54	1.69573	2.24349	6.59995	6.1831	20.376	5.31719
C14H21orf91	3.88604	3.05364	3.08476	2.35227	6.94906	2.42741
C14H3orf33	0.353277	2.76137	0.819254	2.48937	0.576536	2.02284
C14H3orf38	8.76126	9.41021	8.32167	9.94673	7.3024	4.79703
C14H3orf70	70.726	53.8439	75.6124	80.7836	34.2742	44.8494
C14H3orf80	1.05983	0.997109	1.21956	2.21785	1.35448	1.04032
C15H4orf3	51.5784	52.0366	40.0301	39.8541	44.8744	53.4609
C15H4orf33	2.6849	2.30581	2.51085	2.55389	2.82673	1.44489
C15H4orf51	4.59259	5.04786	3.7304	3.562	10.4236	3.12096
C15H4orf54	1.83704	1.55798	0.932601	0.873699	0.883355	0.924729
C16H1orf115	37.0234	30.2249	80.2037	59.9492	126.437	34.215
C16H1orf131	5.72308	5.4841	7.31733	4.50291	7.95019	4.50805
C16H1orf198	45.6433	39.4481	41.4649	35.62	26.6184	28.551
C16H1orf21	43.5237	45.867	35.7975	41.8031	34.8631	49.8198
C16H1orf53	4.52194	2.92901	3.44345	2.82272	5.41791	2.94757
C16H1orf74	6.85356	5.60874	3.7304	3.36038	4.12232	4.73924
C17H14orf119	10.5276	10.7812	10.5456	12.299	15.6648	10.4032
C17H14orf28	6.99488	7.16672	6.31299	5.04057	8.71577	4.27687
C17H14orf93	6.14701	8.28846	7.38907	6.45193	8.42131	6.81988
C17H15orf61	8.19602	8.35078	8.89558	11.4253	6.6546	7.91799
C19H17orf49	12.9299	11.7783	12.5542	11.5597	24.0272	16.7029
C19H17orf58	2.54359	2.36813	2.29563	3.22597	2.94452	5.37499
C19H17orf75	11.8701	9.65949	10.6173	8.60258	11.248	8.09138
C19H17orf80	10.5983	7.66527	8.7521	8.26654	16.6071	7.05106
C1D	20.3713	21.6335	17.794	16.3005	24.1568	14.3795
C1GALT1	8.43271	9.41021	5.53032	6.22007	8.42131	5.1438
C1GALT1C1	25.3653	33.3408	28.3367	27.4879	26.324	24.2163
C1H11orf52	0.777208	0.623193	0.645647	1.14253	2.00227	0.635751
C1H11orf54	10.3863	9.0363	6.24125	7.79609	7.77352	4.56585
C1H11orf68	24.3054	16.7016	24.5346	30.6467	27.7373	23.6962
C1H11orf96	19.7128	14.1465	14.4912	8.66978	49.6445	22.5981
C1H9orf153	12.3887	14.7572	18.3077	19.8827	12.9877	15.8059
C1H9orf40	3.03818	3.05364	2.36737	2.41947	3.41564	2.42741
C1H9orf85	5.22849	4.36235	4.66301	4.03246	5.71236	5.02821
C1QBP	86.8354	70.2338	89.9601	92.9482	76.793	89.1207
C1QL2	1.20114	0.685512	0.789124	3.562	1.70782	2.543
C1QTNF12	2.75556	1.37102	2.08042	1.41136	7.24351	3.17876
C1QTNF2	11.8701	6.54352	8.9623	5.83967	6.29125	9.82524
C1QTNF3	3.25014	0.997109	0.215216	0.672076	0.0588903	0.809138
C1QTNF5	12.294	20.4407	19.7998	15.525	17.6671	25.6612
C1QTNF6	10.9516	8.03919	11.5499	13.1727	18.786	9.18949
C1QTNF7	7.2775	5.98265	4.37605	4.70453	4.29899	5.1438
C1QTNF9	8.83191	6.7928	19.6564	10.2828	41.9299	22.6559
C1R	87.6832	75.2194	42.541	74.8693	95.1667	94.4957
C1RL	1.2718	0.560874	0.286954	0.336038	1.00114	1.09812
C1S	57.3721	54.7163	36.5149	44.8947	97.8168	49.8776
C2	3.65712	4.02084	1.64712	4.09967	2.12417	3.10189
C2CD2	6.95531	6.90248	7.77789	8.73699	6.20174	6.46963
C2CD2L	12.6473	13.087	12.0521	14.0464	16.0182	11.6747
C2CD3	21.4792	21.1886	18.5085	16.6003	10.7769	13.004
C2CD4A	0.431704	0.997109	0.354388	1.11027	0.990535	1.44489
C2CD5	70.6553	64.0019	55.7408	53.1612	85.4498	56.8708
C2H2orf15	0.353277	0.87247	0.789124	0.537661	0.706684	0.404569
C2H2orf42	4.66325	4.92322	5.73908	6.11589	4.59344	5.49058
C2H2orf49	42.8171	35.522	36.1562	31.6548	35.2164	25.1411
C2H2orf68	6.42963	4.73627	5.66734	5.77986	7.36129	5.49058
C3	43.7356	39.4481	18.0781	26.1438	34.7453	26.9905
C3AR1	1.34245	1.37102	0.50217	0.739284	0.353342	1.04032
C3H5orf15	16.6747	14.7697	13.989	16.0626	18.9038	14.2755
C3H5orf24	74.6827	67.4918	64.5647	57.933	67.5472	32.5389
C3H5orf46	1.05983	1.6203	1.07608	1.27695	0.294452	1.61828
C3H5orf63	5.29915	6.54352	6.16951	5.91427	8.89244	8.95831
C3H8orf76	7.98405	6.7928	9.89992	9.74511	8.12686	6.87767
C4H12orf29	4.09801	4.61163	5.52387	4.4357	4.82901	3.75671
C4H12orf56	1.2718	1.05943	0.717385	1.14253	0.765574	0.635751
C5AR1	2.75556	3.61452	1.14782	2.82272	3.12119	2.42741
C5H16orf46	0.847864	0.436235	1.8652	1.27695	1.64893	0.635751
C7	180.454	110.43	106.388	96.1069	118.311	113.742
C7H2orf69	3.67408	3.92611	3.01302	2.88993	4.2401	2.543
C7H2orf76	3.81539	4.54931	2.7978	4.57012	2.70895	3.98789
C8H12orf4	4.66325	5.85801	5.30865	5.37661	5.77125	5.2594
C8H12orf57	19.2182	16.6392	23.7455	29.0337	36.3353	24.7365
C9H18orf21	12.294	12.0899	11.5499	13.9792	18.786	16.3561
C9H18orf32	8.47864	13.8349	12.9129	13.7104	25.5584	13.9865
C9H18orf54	2.40228	2.86669	1.72173	1.61298	3.82787	1.73387
C9H3orf14	0.777208	0.997109	0.573908	0.403246	2.12005	1.73387
C9H3orf18	9.18519	7.04208	10.976	9.40907	9.7169	6.87767
C9H3orf62	1.05983	1.43334	1.00434	1.61298	1.35448	1.15591
C9orf72	15.6855	17.574	14.2042	16.1298	16.1948	11.4435
CA1	3.03818	1.68262	1.07608	1.34415	6.0657	2.19623
CA13	0.847864	0.311596	0.932601	0.537661	1.11892	0.288978
CA14	40.3442	44.7452	40.1736	40.2574	25.7351	30.7472
CA2	4.52194	2.11886	4.16084	2.15064	4.29899	2.13844
CA3	12.1527	6.10729	2.94128	0.470453	0.412232	1.61828
CA4	20.5607	34.8988	27.1889	17.0707	32.6252	23.9274
CA5B	2.89687	2.80437	1.43477	1.68019	3.00341	1.15591
CA8	2.049	0.498554	1.93694	0.940907	3.94565	0.982524
CAAP1	8.33733	6.91744	6.45647	6.31752	5.12346	4.97042
CAB39	111.777	108.747	90.9645	98.5936	67.1938	72.0133
CAB39L	7.63077	7.22904	8.60863	9.14024	8.24464	3.8723
CABIN1	56.3829	45.1815	50.217	45.9028	36.5709	34.0416
CABLES1	3.9567	5.42178	2.86954	3.02434	1.76671	2.6008
CABLES2	22.1151	24.8654	24.6781	22.3129	29.7985	24.8521
CABP4	4.02735	3.61452	4.51953	3.02434	5.83014	3.52553
CABYR	1.55442	2.18117	1.79346	1.81461	0.942245	1.04032
CACHD1	3.39145	2.30581	2.58259	2.6211	3.0623	1.38709
CACNA1A	1.62507	1.18407	2.22389	1.94902	2.06116	0.577956
CACNA1A_1	1.90769	1.49566	4.80648	3.02434	10.0702	1.84946
CACNA1C	153.746	172.126	195.99	146.513	269.246	111.199
CACNA1D	0.353277	0.498554	1.72173	0.940907	0.706684	0.288978
CACNA1G	2.6849	1.05943	2.7978	2.75551	6.6546	2.13844
CACNA1H	11.3755	5.54642	5.81082	5.64544	27.6784	5.65125
CACNA2D1	74.6827	73.1628	60.5473	59.7476	16.1948	18.1478
CACNA2D2	5.93505	19.8175	3.37171	5.2422	1.94338	5.2016
CACNA2D3	0.0706553	11.6537	0.215216	0.268831	6.24237	4.91262
CACNB1	2.40228	1.80726	1.29129	2.01623	3.53342	1.84946
CACNB2	57.3721	55.2772	55.8126	65.2586	65.8983	37.4515
CACNB3	6.57094	4.73627	8.46515	6.25031	17.9615	4.39246
CACNG6	46.2086	80.8904	66.2864	68.4174	53.7669	65.7135
CACNG8	2.11966	2.67973	1.43477	2.21785	1.29559	1.44489
CACTIN	46.6325	35.522	41.6801	37.7035	79.2664	45.4273
CACUL1	29.9578	26.9219	28.8389	28.2944	26.2651	16.8185
CACYBP	56.5744	74.4678	70.6388	78.0704	108.739	69.8725
CAD	16.1801	12.1523	8.39341	11.1565	13.4859	8.43815
CADM1	8.0547	6.97976	9.03906	7.99771	12.6614	6.87767
CADM2	4.09801	2.99133	5.0217	4.63733	5.18235	1.73387
CADM3	18.9356	18.9451	11.4782	9.14024	20.4349	12.0793
CADM4	0.777208	0.302249	1.99218	0.940907	1.52938	0.577956
CADPS	33.9145	25.9871	12.7695	28.8993	29.504	18.6102
CADPS2	2.89687	1.6203	3.1565	2.82272	6.0657	1.15591
CAGE1	2.54359	0.87247	1.50651	1.61298	1.88449	1.84946
CALCOCO1	80.2644	68.4889	75.182	77.5576	50.7634	65.0778
CALCOCO2	52.2849	59.4526	47.4192	50.7418	66.1927	53.1141
CALCRL	45.1487	27.9814	34.4345	27.2191	47.8189	15.2002
CALD1	73.2696	51.3511	64.493	54.9086	136.567	48.7794
CALHM2	12.0114	11.5291	16.0694	11.0893	19.5516	10.5766
CALHM5	3.03818	3.30292	6.81516	4.57012	9.7169	2.6586
CALM1	299.437	278.505	259.98	318.027	457.048	310.247
CALM2	178.263	162.217	161.412	184.888	210.18	173.791
CALM3	179.747	158.665	170.881	186.568	194.574	189.743
CALR	193.454	184.153	244.198	274.678	243.04	194.482
CALU	121.527	119.591	110.477	114.858	91.6333	89.0052
CAMK1	17.6638	15.0189	16.1412	18.4149	30.6819	16.9341
CAMK1D	8.19602	7.29136	4.51953	3.36038	8.95133	4.10348
CAMK2A	43.3117	23.2451	36.2997	33.6038	39.751	40.3413
CAMK2B	144.561	148.258	147.853	141.943	206.823	131.716
CAMK2D	179.253	174.681	132.501	116.672	104.118	121.717
CAMK2G	39.4257	27.919	37.1606	34.0071	62.4826	27.2795
CAMK2N1	10.8809	10.7189	9.75644	14.248	30.2696	11.3857
CAMKK1	7.48946	5.85801	22.9563	14.5168	8.71577	6.93547
CAMKMT	1.55442	1.99422	2.15216	1.81461	3.23897	1.90725
CAMLG	7.84274	7.47831	7.10212	9.07303	8.42131	5.95294
CAMSAP1	55.1111	57.583	51.3648	46.0372	44.9922	36.1222
CAMSAP2	51.861	45.7424	40.3888	39.8541	46.17	21.4999
CAMSAP3	4.38063	3.98843	2.15216	2.75551	2.65006	3.23655
CAMTA1	66.7693	74.7831	61.0495	73.8612	70.0206	56.6396
CAMTA2	112.554	124.202	120.306	106.793	67.4294	108.482
CAND1	30.8764	26.6103	23.6737	27.2863	28.6796	17.5121
CAND2	104.782	99.15	128.484	106.726	61.8348	82.5898
CANX	268.278	231.329	223.968	233.143	160.476	147.841
CAP1	49.3881	50.9149	49.7148	53.6317	69.7261	46.6988
CAP2	190.555	204.53	197.352	174.403	56.6519	125.3
CAPG	5.29915	4.48699	3.01302	3.69642	3.71009	3.9301
CAPN1	53.6274	66.9932	46.4148	53.2957	43.8144	59.0671
CAPN10	11.5168	10.6566	6.31299	10.8204	14.8404	11.1545
CAPN15	25.7185	23.4944	33.4302	28.496	60.7159	29.1868
CAPN2	86.906	86.3122	87.0906	86.5634	90.6322	71.9555
CAPN3	0.706553	0.747831	0.358693	0.739284	1.88449	0.52016
CAPN5	9.67978	9.65949	9.03906	9.61069	16.7248	6.93547
CAPN6	0.635898	0.436235	0.717385	1.07532	0.765574	0.635751
CAPN7	29.5339	22.1233	27.0454	25.9421	23.6739	18.09
CAPNS1	101.814	104.073	118.153	125.141	128.204	126.746
CAPRIN1	122.446	112.736	109.186	123.192	95.6379	76.8103
CAPRIN2	0.565242	1.37102	1.64999	1.54578	2.12005	1.61828
CAPS	0.918519	1.05943	0.789124	1.27695	1.59004	1.04032
CAPZA1	40.7681	37.8901	28.8267	35.4809	48.6352	29.8711
CAPZA2	79.0633	75.2194	72.5277	78.4313	109.418	70.3372
CAPZB	67.1437	58.5321	75.4783	80.963	71.6083	67.4925
CARD10	44.6542	38.638	49.5713	39.4509	67.7239	35.2553
CARD19	8.0547	11.903	6.67168	9.20745	9.48134	12.715
CARD6	2.16347	2.08209	0.984253	2.07	6.13755	1.31369
CARF	12.0114	7.22904	7.8195	5.57823	8.83355	5.89515
CARHSP1	13.1419	14.5204	18.0064	14.248	34.6275	10.6922
CARM1	28.2621	27.3582	26.8302	28.3616	26.5595	23.2916
CARMIL1	4.81375	10.416	2.8638	4.51165	4.0652	6.76208
CARMIL2	2.82621	2.05654	1.29129	1.88181	8.36242	3.40994
CARMIL3	1.13048	1.3087	2.36737	1.94902	1.59004	1.15591
CARNMT1	18.2291	16.4523	23.315	23.8587	7.65574	9.30508
CARNS1	51.5784	52.6897	64.8337	64.022	77.1481	33.8104
CARS1	17.9464	17.2624	15.4955	14.8529	20.9649	17.8588
CASC3	43.3117	37.7655	41.8953	41.8031	42.2832	30.6316
CASD1	23.7402	20.3161	21.2346	19.5574	17.0782	13.9287
CASK	7.34815	6.16961	7.03038	7.0568	9.77579	3.46773
CASKIN2	45.5875	88.3731	39.1944	47.0057	58.4987	43.5096
CASP10	4.87522	3.67684	7.67602	6.92239	11.0714	3.23655
CASP2	15.8974	14.0218	15.5673	15.4578	16.6071	10.5766
CASP3	1.76638	1.68262	1.21956	1.88181	2.47339	1.50268
CASP6	2.40228	2.67973	2.36737	2.75551	7.12573	1.84946
CASP7	8.97322	6.91744	8.53689	14.4496	17.0782	8.14917
CASP8	0.565242	1.12175	1.36303	0.806492	1.00114	0.751342
CASP8AP2	8.83191	7.97687	7.67602	5.71265	7.36129	5.1438
CASP9	5.58177	2.99133	3.87388	1.14253	5.53569	3.23655
CASQ1	15.3322	4.11307	34.1475	28.7649	18.3149	9.59406
CASQ2	1141.3	1059.18	916.388	993.463	568.291	885.255
CASS4	1.62507	1.86958	0.573908	1.27695	0.647793	0.577956
CAST	399.768	301.314	281.717	253.574	134.8	221.241
CASTOR1	7.2775	15.7045	7.10212	5.64544	11.248	14.1599
CASTOR2	7.63572	5.44234	3.86958	4.05732	2.8762	2.74182
CASZ1	89.8735	88.2441	78.195	75.407	42.1066	50.9179
CAT	241.076	107.376	147.638	243.359	119.43	122.122
CATIP	0.282621	0.186958	0.789124	1.27695	1.53115	0.577956
CATSPER4	1.34245	2.36813	1.36303	1.27695	4.18121	3.06316
CAV1	519.599	600.322	414.362	429.793	602.448	451.094
CAV2	157.349	173.871	143.405	137.036	194.515	124.434
CAV3	116.228	126.259	141.468	127.963	123.375	129.982
CAVIN1	293.714	292.153	335.952	316.145	403.516	294.468
CAVIN2	169.997	126.134	170.523	140.666	80.0319	54.6168
CAVIN3	29.0393	26.0495	43.1866	33.1334	82.6231	39.3588
CBARP	4.73391	4.98554	1.64999	2.15064	4.29899	3.69892
CBFA2T2	13.8958	13.9919	15.7179	13.8078	16.2496	11.2834
CBFB	18.5117	18.5088	12.2673	12.7022	8.4802	12.0793
CBL	47.0564	39.0742	32.3541	34.0071	41.5177	26.586
CBLB	18.7943	17.574	15.2086	8.60258	22.9672	15.8938
CBLL1	18.2997	14.5827	12.8412	13.1055	12.897	8.20697
CBLN3	2.33163	4.54931	2.72606	2.55389	2.4145	2.08064
CBR3	1.60317	2.34819	2.57183	3.20513	8.2894	2.71003
CBR4	34.1972	27.2335	32.928	35.0824	20.5527	16.4717
CBS	8.26667	22.4349	8.68036	6.85518	11.3658	12.4838
CBX1	37.3018	33.7552	37.9023	42.6997	39.9488	28.7186
CBX2	0.777208	1.37102	2.7978	1.61298	2.94452	1.04032
CBX3	24.4114	23.5748	18.6707	20.62	33.8619	20.047
CBX4	12.5017	12.3392	11.8734	16.2306	13.6944	7.80124
CBX5	52.1436	49.6061	50.8626	47.6502	56.8291	34.0994
CBX6	75.0359	64.6251	57.4626	67.9469	57.3003	47.1612
CBX7	49.3881	49.6061	48.9257	54.1694	51.6468	41.0926
CBX8	2.33163	2.80437	2.72606	4.57012	4.8879	2.71639
CBY1	12.294	12.7131	13.8455	14.7857	12.2492	15.547
CC2D1A	21.9738	22.3726	20.589	22.649	28.444	19.7083
CC2D1B	21.2672	20.7523	21.7368	17.474	21.4361	18.668
CC2D2A	33.7732	23.619	17.4325	15.525	13.0148	13.9287
CCAR1	52.9915	46.3655	45.1235	49.5992	126.555	44.2714
CCAR2	62.106	59.5772	62.9864	56.5216	75.2618	52.9407
CCBE1	26.1425	46.7395	20.7324	27.5551	6.41904	21.7889
CCDC102A	8.0547	7.72759	14.5629	13.4415	28.6796	7.91799
CCDC106	1.20114	1.68262	2.86954	2.08344	5.71236	1.61828
CCDC107	7.20684	5.98265	11.8369	9.47628	12.6614	9.24729
CCDC112	11.1635	17.0755	6.52821	9.61069	8.77466	12.426
CCDC113	1.2718	0.685512	1.29129	1.00811	1.41337	1.79166
CCDC115	21.1966	21.0016	28.1932	23.1866	22.3194	19.9973
CCDC117	11.2342	11.716	10.6173	13.2399	17.1371	6.58869
CCDC12	35.7516	24.1799	34.6497	27.2191	34.922	27.1061
CCDC120	3.39145	0.747831	1.93694	1.61298	3.59231	1.09812
CCDC122	8.26667	7.66527	5.88256	3.83084	8.12686	11.7903
CCDC125	4.17926	4.30003	2.53094	3.14801	9.99133	4.38264
CCDC126	7.77208	5.60874	4.73474	5.17499	11.4247	4.33467
CCDC127	18.0878	18.4465	22.6694	25.5389	31.683	22.3669
CCDC13	3.74473	1.24639	1.36303	1.7474	1.06003	1.73387
CCDC134	5.22849	6.23193	4.94996	5.91427	10.8947	5.77956
CCDC136	1.48376	1.18407	1.21956	1.68019	1.47226	1.09812
CCDC137	8.40798	7.16672	8.82384	7.46005	13.7214	13.0618
CCDC138	4.73391	2.61741	2.29563	4.3685	9.48134	8.66933
CCDC14	1.76638	0.560874	1.21956	1.00811	1.00114	1.15591
CCDC141	72.351	73.1005	67.2908	67.9469	13.2503	39.9945
CCDC142	1.41311	1.74494	1.14782	0.873699	3.00341	1.2715
CCDC149	32.2188	36.7061	38.954	44.2226	64.0138	35.8332
CCDC15	1.69573	1.43334	2.43911	1.00811	4.00454	1.04032
CCDC154	1.97835	1.43334	2.08042	2.01623	4.8879	1.44489
CCDC159	1.2718	0.747831	1.14782	0.403246	2.47339	0.404569
CCDC167	2.6849	2.92901	2.65433	2.08344	3.47453	3.29435
CCDC168	0.706553	0.249277	1.43477	0.0672076	0.883355	0.693547
CCDC17	1.20114	0.623193	0.717385	0.739284	2.23783	0.635751
CCDC171	1.76638	2.30581	1.21956	2.08344	1.88449	0.751342
CCDC174	8.12536	9.0363	7.8195	9.07303	11.7192	9.53627
CCDC18	1.48376	1.12175	1.07608	0.940907	2.35561	1.21371
CCDC181	2.89687	4.79858	2.94128	3.09155	8.4802	3.8723
CCDC184	7.06553	4.48699	10.3304	13.1055	9.48134	5.83735
CCDC186	54.4046	50.8525	38.0214	38.5772	40.5165	26.5282
CCDC191	1.76638	1.49566	1.29129	1.47857	1.17781	1.04032
CCDC22	10.457	9.09862	10.8325	10.8204	14.6637	10.461
CCDC25	25.0826	20.9393	26.328	26.4798	33.273	21.9623
CCDC28A	5.15784	5.67105	5.9543	7.0568	5.77125	5.43278
CCDC28B	2.75556	2.86669	3.87388	3.96525	6.6546	3.06316
CCDC3	3.88604	2.80437	2.94128	2.21785	13.1914	3.00537
CCDC30	0.565242	1.24639	1.14782	1.07532	1.11892	0.809138
CCDC32	8.6906	8.35078	11.1912	9.27465	14.0159	10.6344
CCDC34	9.75043	10.158	10.2586	10.686	30.0929	8.43815
CCDC43	35.9636	27.6698	21.5933	20.4983	23.6739	25.0255
CCDC47	88.3898	81.389	80.7059	70.1648	62.7771	62.8238
CCDC50	35.5396	28.5422	31.3497	26.6142	61.4226	17.2231
CCDC51	7.48946	4.36235	7.53255	7.86329	8.59799	8.09138
CCDC57	6.99488	6.66816	5.73908	5.51103	5.18235	4.79703
CCDC59	7.91339	7.66527	8.32167	8.8042	18.256	7.7446
CCDC6	31.9362	27.5451	21.5933	22.0441	21.6716	19.9973
CCDC62	1.2718	1.24639	2.22389	1.68019	1.47226	1.04032
CCDC66	24.3054	21.5002	23.0281	19.0198	46.1111	21.7311
CCDC68	5.3698	3.98843	5.30865	4.30129	4.29899	2.02284
CCDC69	113.331	112.486	121.525	142.413	112.009	111.719
CCDC71	10.0331	9.59717	11.263	11.6269	11.6014	11.5591
CCDC71L	5.51111	6.7928	4.16084	6.11589	4.2401	4.62364
CCDC74B	8.97322	6.97976	21.8803	11.6941	18.3149	8.09138
CCDC77	2.19031	1.86958	2.43911	2.21785	2.47339	2.13844
CCDC8	8.54929	5.92033	8.53689	8.13212	12.0725	6.18412
CCDC80	145.55	49.9177	132.573	139.321	127.615	69.5281
CCDC82	7.13619	5.98265	7.53255	7.25842	8.18575	4.45026
CCDC85A	19.7128	21.4378	21.3063	12.7022	24.675	13.4664
CCDC85C	13.2832	13.461	21.8085	15.7938	22.3194	12.0793
CCDC86	4.45128	5.54642	5.09344	5.17499	4.94679	5.89515
CCDC88A	23.8108	16.4523	17.8629	16.4659	35.8053	14.0443
CCDC88B	2.40228	2.24349	1.07608	1.61298	9.01022	2.08064
CCDC88C	26.1425	28.2306	32.0671	26.6142	46.3467	20.0551
CCDC89	4.12203	3.5952	3.22823	3.01292	10.9312	3.20534
CCDC9	23.5282	22.1233	19.9433	17.474	32.4486	17.6276
CCDC90B	21.9031	22.8712	24.2476	23.8587	27.7962	22.0201
CCDC91	40.6268	44.309	44.5496	36.6282	63.7193	42.6531
CCDC92	19.9955	22.1233	25.3237	21.8425	18.6682	26.7593
CCDC92B	1.76638	1.24639	1.14782	0.940907	1.06003	1.3293
CCDC93	56.171	51.912	57.1039	50.6746	78.5597	45.6007
CCDC97	20.2781	21.1262	20.5172	21.6409	31.3296	20.6908
CCHCR1	5.72308	4.23771	4.80648	4.77174	10.3647	4.91262
CCL11	0.282621	0	0.717385	1.20974	1.2367	0.173387
CCL2	1.2718	2.36813	0.286954	0.806492	2.53228	0.866933
CCL21	2.82621	1.86958	10.4738	12.0974	18.9627	3.69892
CCL22	0.847864	0.436235	0.0717385	0.201623	1.00114	0.751342
CCL25	2.89687	1.43334	3.94562	7.19122	3.47453	2.25403
CCL27	0.918519	0.747831	0.717385	0.940907	2.47339	0.866933
CCM2	26.9197	28.7915	33.0715	29.9746	34.4508	33.0591
CCM2L	21.1259	14.4581	27.0454	18.3477	66.546	12.715
CCN1	78.2861	50.5409	60.0452	56.4544	41.6943	28.4932
CCN2	107.396	104.198	32.7128	20.3639	20.0227	38.5496
CCN3	14.1311	39.3235	23.0998	23.7915	26.2062	11.2701
CCN4	3.53277	3.5522	0.932601	1.61298	0.412232	1.38709
CCN5	6.85356	7.16672	8.17819	6.72076	7.12573	6.06853
CCNA2	1.23223	2.19426	2.1909	1.76622	5.73945	1.56164
CCNB1IP1	5.08718	6.16961	6.45647	6.25031	9.42245	6.70428
CCNB3	1.10293	1.3087	0.860863	1.41136	0.942245	0.769837
CCNC	6.35898	5.11018	4.87822	5.17499	8.95133	3.64112
CCND2	268.066	205.03	337.96	256.397	245.808	242.684
CCND3	23.7402	24.4292	30.0584	31.9908	28.2673	24.7365
CCNDBP1	17.7345	15.4552	21.1629	23.4555	18.3149	16.5873
CCNE1	1.55442	1.05943	1.36303	1.34415	1.11892	1.3293
CCNG1	436.449	495.945	350.565	443.302	321.168	293.203
CCNG2	19.2182	9.53485	21.1629	18.8181	27.7962	11.039
CCNH	7.06553	7.72759	4.66301	5.44382	4.53455	5.1438
CCNI	142.695	156.553	144.349	136.271	134.249	126.806
CCNJ	5.3698	4.05075	2.86954	4.16687	6.77239	3.12096
CCNK	44.3009	40.5699	41.5366	37.9051	29.1507	29.2446
CCNL1	9.04176	13.3669	12.2121	12.5127	45.044	10.4356
CCNL2	54.9698	50.2917	45.1953	40.9967	133.799	54.27
CCNQ	4.94587	4.92322	5.16518	6.1831	7.65574	5.66396
CCNT1	19.3596	19.0074	17.8629	19.2214	16.9604	10.5766
CCNT2	59.2798	50.7902	37.3758	43.2817	73.6129	36.2956
CCNY	101.532	134.61	76.545	75.9446	70.3739	99.5817
CCNYL1	16.0388	17.4494	14.7064	13.8448	23.6739	13.004
CCP110	4.38063	3.48988	3.80214	3.02434	4.2401	2.77419
CCPG1	94.6075	104.447	71.5233	91.4696	50.5868	54.27
CCR2	0.594918	0.716049	0.143477	1.1432	0.972868	0.90739
CCR5	1.38343	2.026	0.215216	1.5451	2.08943	1.57782
CCS	21.1966	33.0292	25.252	37.5019	39.6332	25.6034
CCSAP	3.67408	3.98843	2.15216	2.68831	2.23783	1.56048
CCSER1	3.17949	2.92901	2.7978	3.22597	2.29672	1.56048
CCSER2	62.106	51.6004	54.4496	58.3362	53.9435	36.469
CCT2	53.4154	59.0164	48.8539	60.7557	70.9628	57.0442
CCT3	62.0354	68.4889	76.3298	69.9631	70.9628	76.4635
CCT4	63.8724	71.4802	62.9864	77.692	76.0863	62.9972
CCT5	91.6399	94.7876	92.471	90.8647	98.5824	88.485
CCT6A	62.6161	55.4137	54.5206	63.1732	34.0168	42.6398
CCT7	125.343	120.837	131.64	137.372	156.118	119.174
CCT8	110.788	99.7109	92.471	102.088	84.1543	74.9608
CCZ1	18.7237	19.0697	21.0194	23.2538	35.2753	19.5349
CD109	13.2606	10.6684	13.8671	9.43125	14.9899	3.65383
CD14	5.93505	10.7189	3.29997	6.78797	5.88903	9.65186
CD151	105.63	105.818	96.2731	107.398	119.96	108.367
CD163	17.2399	18.6335	1.64999	6.51914	1.8256	7.16665
CD164	61.8234	56.8975	54.3061	59.8148	56.2991	42.9421
CD1D	24.5174	61.0729	23.3868	30.4451	105.178	132.293
CD22	1.20114	0.373916	0.645647	0.739284	0.647793	0.577956
CD226	1.55442	0.934789	1.8652	0.940907	4.65233	1.09812
CD247	3.25014	1.55798	1.14782	1.81461	2.70895	16.2983
CD248	4.16866	3.30292	6.45647	3.96525	8.00908	3.98789
CD274	3.60342	3.36524	4.16084	5.17499	7.59685	2.25403
CD276	26.9903	27.4828	25.3237	27.3535	21.2005	22.3669
CD2AP	13.6457	11.3564	12.2702	9.41445	23.2016	8.8589
CD2BP2	29.6752	31.7205	36.4432	30.9155	44.6977	28.9556
CD300A	0.635898	0.747831	0.50217	0.739284	1.11892	0.288978
CD300LG	58.3613	44.0597	71.0212	53.1612	102.116	53.981
CD302	28.8274	29.8509	11.7651	14.7857	22.3783	22.2513
CD320	9.9624	17.948	16.4999	12.299	19.9638	13.6975
CD34	63.8017	68.115	89.6732	76.9527	103.941	78.2552
CD36	751.278	398.22	304.1	506.208	511.286	454.909
CD37	4.73391	4.30003	1.8652	3.62921	7.8913	4.79703
CD38	23.4576	16.39	14.0608	17.0707	22.1428	9.82524
CD40	3.03818	3.42756	3.29997	4.16687	12.7792	3.9301
CD44	16.8866	19.4436	13.8455	12.2318	26.6773	11.8481
CD46	4.38063	2.67973	1.79346	1.68019	3.41564	2.02284
CD48	4.87522	6.04497	2.7978	4.3685	14.3692	5.08601
CD5	0.353277	0.810151	0.50217	1.20974	1.53115	0.751342
CD53	4.59259	4.92322	1.21956	2.08344	5.41791	2.543
CD55	119.125	108.311	88.4536	80.0443	79.443	92.9353
CD59	59.2091	87.3093	62.2691	58.1346	81.2686	70.684
CD5L	4.02735	4.11307	0.717385	0.940907	3.0623	3.81451
CD63	159.367	177.06	150.235	142.045	192.926	198.124
CD68	4.30997	7.1044	2.72606	4.63733	5.4768	6.18412
CD74	59.7037	75.531	25.252	77.5576	141.631	85.1906
CD79B	0.282621	0.747831	0.645647	0.470453	1.59004	1.15591
CD80	1.20114	1.99422	0.286954	0.940907	1.2367	0.52016
CD82	26.7077	33.5278	29.6998	24.1275	54.238	29.8225
CD84	2.33163	5.54642	1.36303	2.28506	1.8256	1.73387
CD9	17.2399	17.761	19.7281	13.0383	37.6309	17.9744
CD93	107.82	86.4992	234.944	163.247	294.393	82.1275
CD96	0.900855	0.934789	2.29563	1.54578	5.70706	2.02284
CD99L2	108.385	125.137	91.3949	96.0397	57.1236	91.2014
CDA	0.989174	0.436235	2.00868	1.68019	1.11892	0.693547
CDADC1	12.506	10.532	13.3434	12.3662	11.837	8.61154
CDAN1	29.6752	30.1625	25.3237	22.5818	57.3003	32.5389
CDC123	9.14845	6.21386	4.30144	17.8114	10.3076	3.39433
CDC14A	2.96752	3.11596	3.29997	2.15064	6.0657	2.77419
CDC14B	23.1749	29.8509	20.1585	17.2052	21.2594	16.7607
CDC16	21.9031	20.0668	19.7998	22.0441	20.5527	18.7836
CDC20	0.777208	0.685512	0.50217	1.47857	1.2367	0.693547
CDC23	32.4308	34.5872	29.6998	35.3512	22.025	23.9852
CDC25B	34.3385	39.1365	43.4018	38.1067	36.8653	29.5913
CDC26	4.09801	4.30003	3.87388	4.50291	9.18689	4.21908
CDC27	23.2456	19.7552	19.2977	20.1623	22.9672	15.2002
CDC37	111.211	109.121	121.166	126.619	135.271	121.717
CDC37L1	20.9846	20.877	17.4325	17.9444	14.487	18.8991
CDC40	19.3596	15.2888	15.2731	14.7857	15.1831	9.93332
CDC42	88.5565	88.7383	88.3647	88.0749	97.4281	75.8018
CDC42BPA	76.8023	74.2846	77.4776	54.5726	77.0285	47.7391
CDC42BPB	156.148	147.074	169.662	140.8	164.363	117.383
CDC42BPG	3.9567	5.79569	6.02604	4.57012	2.53228	2.77419
CDC42EP1	90.2268	80.5788	129.919	115.463	104.884	73.6893
CDC42EP2	14.767	13.1494	15.1368	15.4578	16.1359	18.0322
CDC42EP3	35.8929	25.4263	37.8062	42.0048	25.1462	21.4999
CDC42EP4	20.3487	18.3219	19.8716	23.2538	28.1496	19.8239
CDC42SE1	26.9197	27.8567	28.5519	31.0499	39.1032	24.1585
CDC42SE2	37.8712	32.2191	25.6824	29.8402	21.7894	21.0376
CDC5L	28.1915	30.4741	23.3868	28.6977	26.1473	22.7714
CDC7	3.10883	3.05364	3.08476	2.28506	6.47793	2.08064
CDC73	53.0621	47.0511	43.8323	42.2736	40.9877	28.4354
CDCA4	4.59259	8.97398	6.52821	5.10778	11.8958	4.85483
CDCA5	2.049	2.05654	1.72173	1.7474	2.17894	1.67607
CDCA7L	4.73391	3.2406	2.72606	2.15064	5.00568	2.77419
CDH11	14.2724	14.4581	10.976	12.5678	9.42245	6.87767
CDH13	574.922	474.25	637.756	591.494	252.522	382.433
CDH16	2.26097	3.67684	4.01736	3.02434	2.00227	2.6008
CDH19	40.0616	44.0597	29.8432	39.0476	16.7837	19.6505
CDH2	313.78	334.281	239.392	272.594	83.6242	168.994
CDH20	17.1692	17.6364	16.0694	20.4311	6.77239	10.8656
CDH23	78.7807	76.8397	59.1126	41.6687	59.4792	60.4542
CDH24	1.05983	0.249277	0.860863	1.20974	2.53228	0.577956
CDH4	0.494587	0.311596	1.29129	0.604869	0.883355	1.61828
CDH5	123.435	100.272	212.418	160.693	211.122	101.951
CDH6	0.847864	0.934789	0.645647	0.672076	2.35561	0.346773
CDHR1	0	0.0623193	15.9977	7.52725	2.65006	3.98789
CDHR3	1.13048	0.436235	2.22389	1.54578	4.71122	0.693547
CDIN1	1.48376	1.99422	2.00868	2.08344	1.64893	0.866933
CDIP1	83.3026	76.1542	80.4189	74.0628	42.0477	84.6705
CDIPT	26.9903	32.9669	31.9237	29.2353	29.6218	21.9045
CDK10	15.9681	16.7639	16.5716	16.4659	32.0363	21.8467
CDK12	29.8872	23.1205	20.302	21.372	30.2696	17.5121
CDK13	25.4359	25.5509	22.9563	25.5389	25.5584	15.547
CDK14	13.3539	14.4581	17.6771	17.2052	17.6671	9.36288
CDK15	0.635898	0.685512	1.50651	1.00811	2.4145	0.577956
CDK16	76.0958	64.5628	78.7689	85.6225	61.187	63.5173
CDK17	21.8325	24.3668	26.4715	25.6061	29.6807	13.6398
CDK18	110.434	132.678	119.516	116.874	41.1054	116.227
CDK19	14.4137	15.7668	15.5673	13.6431	19.3749	8.32256
CDK20	6.42963	6.04497	8.03472	6.45193	10.3647	5.95294
CDK2AP1	26.2131	16.3277	24.7498	30.3778	26.4417	22.1935
CDK4	15.6855	16.8262	21.5933	22.5818	25.3228	17.6854
CDK5R1	3.17949	2.05654	2.65433	4.23408	2.53228	2.08064
CDK5RAP1	16.2507	14.4581	15.8542	17.9444	28.5029	17.1653
CDK5RAP2	6.6416	5.04786	8.39341	6.58635	7.42018	16.2983
CDK5RAP3	24.3761	24.8654	24.1042	22.8506	40.9877	26.7593
CDK6	29.8165	23.1205	25.8259	29.9746	49.7034	11.3857
CDK7	7.41881	7.1044	7.31733	7.72888	11.0125	6.64649
CDK8	7.41881	7.22904	5.9543	7.32563	8.89244	4.73924
CDKAL1	8.47864	9.28557	8.60863	7.86329	8.06797	4.62364
CDKL1	0.918519	0.498554	2.15216	0.403246	0.942245	0.52016
CDKL2	4.43857	1.98238	3.37171	3.35904	5.59458	1.90205
CDKL3	0.989174	0.934789	0.50217	0.806492	1.53115	0.982524
CDKL5	2.96752	2.11886	3.37171	1.47857	0.647793	0.866933
CDKN1A	36.5994	69.9846	12.2673	18.8181	11.837	47.6813
CDKN1B	37.8006	33.6524	31.6367	28.7649	43.5788	26.4704
CDKN2AIP	19.0769	13.461	14.7064	13.4415	22.7905	12.8306
CDKN2AIPNL	7.06553	7.47831	10.8325	10.9548	13.0148	9.82524
CDKN2B	0.912867	1.00708	1.21956	0.586051	0.987002	0.539233
CDKN2C	6.50029	7.16672	9.6847	10.7532	10.8358	7.45563
CDKN2D	17.5225	14.2711	12.8412	14.1136	18.786	15.6626
CDKN3	1.62507	1.05943	0.645647	0.604869	1.8256	1.50268
CDNF	3.25014	4.23771	5.0217	3.15876	2.94452	2.543
CDO1	7.34815	16.7639	0.430431	2.35227	1.8256	10.1142
CDON	19.3596	10.532	12.626	12.9039	16.6071	9.47847
CDPF1	13.2125	11.8407	16.3564	13.4415	22.1428	15.6048
CDR2L	5.65242	5.04786	9.1108	7.46005	13.2503	4.27687
CDS2	87.0473	69.9222	86.3015	62.9736	93.4589	49.1262
CDV3	152.615	175.608	127.91	127.358	103.411	144.142
CDYL	16.1094	14.645	15.4238	15.1889	16.7837	11.6169
CDYL2	2.11966	1.43334	2.36737	1.68019	3.6512	1.21371
CEBPA	6.99488	6.29425	9.61296	7.72888	5.94792	4.56585
CEBPB	16.5333	21.3132	14.9934	16.5331	18.256	18.0322
CEBPD	24.2348	52.6598	8.32167	25.1357	64.2493	62.6504
CEBPG	29.0393	25.5509	23.315	25.0012	46.9945	23.1182
CEBPZ	27.4143	23.9929	19.5129	22.3801	28.5618	18.379
CEBPZOS	18.0171	17.761	16.0694	15.861	23.0261	18.379
CELA1	0.141311	0.747831	0.645647	1.47857	0.824464	0.346773
CELF1	75.9545	71.9165	64.3495	64.4521	65.3094	49.8198
CELF2	90.1562	75.9049	53.4452	65.5274	76.7341	69.7014
CELF6	0.706553	0.498554	3.37171	2.15064	3.47453	0.231182
CELSR1	139.615	167.078	166.649	155.451	52.1768	80.9138
CELSR2	29.6752	21.6871	23.1715	22.0441	7.24351	14.7379
CEMIP2	11.4462	10.7812	9.18253	10.6188	20.3172	7.8602
CENATAC	3.9567	3.80148	3.1565	2.75551	9.42245	4.62364
CENPB	73.4815	82.0745	67.3625	75.743	67.5472	79.7001
CENPC	4.66325	5.11018	5.23691	5.2422	7.36129	3.12096
CENPF	1.34245	0.934789	0.789124	1.41136	2.23783	1.09812
CENPH	4.02735	3.17828	2.65433	3.42759	3.76898	2.77419
CENPI	0.353277	0.436235	0.860863	1.27695	0.824464	0.693547
CENPJ	0.211966	0.997109	0.358693	0.739284	0.412232	0.693547
CENPM	0.847864	0.373916	1.14782	1.20974	2.53228	0.751342
CENPN	1.2718	1.24639	1.8652	1.81461	2.70895	0.809138
CENPO	3.9567	3.17828	3.37171	2.95714	11.6603	5.66396
CENPQ	2.26097	2.30581	1.79346	1.34415	2.00227	1.84946
CENPU	1.23647	0.535946	0	0.153905	0.83742	0.962874
CENPV	13.4952	14.2711	14.4912	14.1808	18.9038	17.2231
CENPX	3.25014	3.05364	4.59127	3.96525	8.89244	6.29972
CEP104	43.0997	37.9524	39.6714	40.9967	51.3523	34.3884
CEP112	2.40228	2.11886	1.43477	1.00811	1.8256	1.73387
CEP120	23.5282	22.1233	20.5172	21.2376	18.3149	14.969
CEP128	0.795579	0.997732	1.57897	1.14253	0.664283	0.704528
CEP135	5.65242	5.79569	4.37605	3.4948	7.42018	3.98789
CEP152	2.6849	2.24349	2.72606	2.21785	3.71009	1.38709
CEP162	3.88604	3.48988	4.51953	4.03246	6.6546	2.71639
CEP164	13.1419	8.60006	8.96732	8.60258	13.427	9.1317
CEP170	32.0775	31.222	24.3911	31.386	37.572	17.5698
CEP170B	32.5014	32.6553	25.252	23.5899	20.0816	24.5631
CEP19	4.02735	4.17539	4.37605	3.89804	7.00795	3.64112
CEP192	10.4174	9.62771	5.59561	5.27849	9.4996	3.8723
CEP20	14.2724	12.7755	11.1195	11.4925	16.5482	8.14917
CEP250	43.8063	40.1959	33.6454	25.9421	53.4724	42.8265
CEP290	10.3863	8.97398	8.96732	6.85518	15.9004	8.03358
CEP295	13.2832	12.8378	11.0477	11.7613	22.4961	9.0739
CEP350	56.5242	50.9772	43.7605	40.9967	35.452	26.1814
CEP41	4.73391	4.73627	4.73474	3.76363	4.65233	3.40994
CEP43	9.75043	9.90877	11.8369	9.00582	20.6705	9.53627
CEP44	3.3208	1.6203	2.36737	1.27695	3.53342	1.50268
CEP57	6.99488	7.16672	6.24125	4.23408	8.06797	6.06853
CEP57L1	2.54359	2.74205	2.15216	2.08344	1.88449	1.79166
CEP63	25.3653	24.3045	21.0194	23.1194	25.8528	20.922
CEP68	53.6274	49.3569	45.8409	46.1044	41.6354	30.5161
CEP70	19.9658	23.4134	19.5021	20.5131	21.4679	16.8572
CEP72	1.2718	1.12175	1.29129	1.47857	4.71122	0.635751
CEP76	3.3208	3.05364	3.01302	2.48668	4.41677	2.36962
CEP78	1.62507	1.68262	0.932601	1.07532	1.00114	0.982524
CEP83	6.44376	4.85716	5.587	5.76171	11.0767	5.52641
CEP85	88.6724	92.2325	87.9515	88.9829	105.59	104.957
CEP85L	10.0331	12.3916	8.32167	6.98959	17.9027	6.58869
CEP89	2.88627	2.54824	2.77269	2.88993	7.00795	1.15764
CEP95	24.6587	25.4263	23.4585	18.8181	40.281	22.3091
CEP97	8.97322	7.72759	6.45647	7.25842	6.77239	4.33467
CEPT1	9.53847	8.35078	7.8195	9.47628	14.8404	8.26476
CERCAM	7.56012	5.23482	5.23691	6.31752	18.256	7.8602
CERK	34.9037	36.1452	35.3671	39.1148	36.6298	40.3413
CERS1	2.19031	2.99133	2.94128	3.76363	1.41337	1.96505
CERS2	19.2889	23.432	14.8499	15.7266	21.6127	19.6505
CERS3	0.635898	0.747831	0.860863	0	1.64893	0.0577956
CERS4	38.7898	43.9974	64.206	60.4869	77.3819	47.1612
CERS5	17.0986	19.4436	14.8499	16.6003	26.2062	17.1653
CERT1	96.2325	93.8528	88.3101	98.9968	70.9039	54.4434
CES1	18.5117	12.1523	60.4756	37.4347	92.0456	13.5242
CETN2	23.5282	24.99	27.4759	29.6386	36.0409	28.0886
CETN3	6.92422	6.97976	5.9543	5.44382	10.718	6.70428
CETP	2.89687	1.24639	2.72606	4.90616	1.53115	1.2715
CFAP20	24.9413	24.3045	26.902	29.5714	30.5641	26.586
CFAP251	0.989174	0.997109	0.645647	1.27695	1.53115	0.866933
CFAP298	8.0547	8.4131	9.97166	11.2237	10.0702	9.0739
CFAP36	5.65242	6.85512	6.45647	6.92239	5.88903	7.16665
CFAP410	15.0496	20.8146	8.46515	6.58635	9.18689	16.7029
CFAP418	7.98405	6.97976	6.02604	5.17499	6.36015	3.69892
CFAP43	0.353277	0.623193	1.64999	0.672076	5.00568	1.56048
CFAP53	17.4398	15.4539	17.4669	14.4617	37.3541	18.5189
CFAP57	0.777208	0.747831	0.215216	0.268831	1.11892	0.52016
CFAP68	7.06553	3.5522	3.7304	4.77174	5.24124	3.52553
CFAP70	0.777208	0.685512	0.286954	0.940907	0.706684	0.577956
CFAP74	30.7351	31.5959	31.3497	10.4844	12.5436	14.8535
CFAP92	5.72308	3.42756	1.93694	5.2422	16.4304	2.543
CFAP97	18.7943	16.7639	15.1368	14.9201	14.6048	10.172
CFAP97D2	7.84274	9.16093	6.24125	11.963	8.95133	10.9234
CFDP1	16.6747	18.7581	20.0868	19.423	30.2696	20.4018
CFI	10.3863	10.0957	10.1151	13.8448	33.5086	10.461
CFL1	63.0245	65.4352	84.1493	85.7569	117.074	69.6436
CFL2	208.856	203.348	156.892	152.964	169.539	177.766
CFLAR	45.8553	52.2236	38.8823	41.1983	51.8824	36.0644
CFP	9.11453	7.35368	6.74342	6.45193	7.8913	5.83735
CFTR	29.6752	55.2772	30.3454	44.4915	31.4474	29.4757
CGAS	0.353277	0.685512	0.717385	0.739284	1.41337	0.635751
CGGBP1	63.3778	59.6396	56.53	58.9411	90.2788	35.3709
CGNL1	18.2997	11.4667	10.5456	13.4415	12.4259	8.03358
CGRRF1	8.26667	9.41021	8.24993	8.60258	7.59685	4.97042
CH25H	5.86439	4.79858	1.14782	0.604869	4.06343	3.23655
CHAC2	1.76638	2.18117	2.08042	2.82272	2.23783	1.61828
CHAD	4.02735	4.61163	3.51519	3.29317	3.0623	2.71639
CHADL	0.847864	0.373916	3.01302	2.28506	2.82673	0.866933
CHAMP1	12.4353	12.1523	12.339	12.0302	13.0736	7.39783
CHCHD1	12.0821	10.532	12.2673	11.0221	25.794	15.7204
CHCHD10	657.801	696.231	622.188	664.816	709.098	580.267
CHCHD2	210.346	193.965	166.255	240.141	212.615	177.906
CHCHD3	220.021	252.455	229.348	248.399	181.853	179.108
CHCHD4	12.6473	8.84934	9.25427	13.4415	11.4247	13.004
CHCHD5	8.19602	6.23193	8.32167	8.19933	10.2451	6.76208
CHCHD6	5.22849	5.4841	6.81516	6.31752	8.24464	5.2016
CHCHD7	47.551	39.5727	39.8149	42.408	57.3592	38.6074
CHD1	20.49	22.4349	18.2933	19.6246	29.504	12.0793
CHD1L	11.3755	8.91166	8.24993	7.72888	12.7203	7.51342
CHD2	84.6451	78.0861	72.8146	68.2157	109.654	72.5912
CHD3	32.3601	30.3495	41.0344	33.8054	67.3116	25.0255
CHD4	266.3	248.342	245.418	246.182	230.026	189.685
CHD6	55.1818	49.1076	39.6714	34.7463	44.2855	28.3198
CHD7	54.1926	47.8612	47.5627	40.459	43.0488	28.7244
CHD8	39.2844	38.7626	32.9997	33.0662	30.8585	21.3266
CHD9	43.9476	43.7481	32.2823	31.4532	57.2414	21.7889
CHDH	4.52194	5.23482	3.80214	2.88993	1.64893	2.6586
CHEK1	6.99488	9.09862	7.46081	6.58635	8.95133	6.24192
CHEK2	1.69573	0.560874	0.50217	1.07532	0.706684	1.21371
CHERP	26.4251	21.1886	17.6477	20.2295	24.3217	17.3387
CHFR	19.7128	17.0132	18.0781	19.1542	26.7362	16.1828
CHGB	3.10883	3.73916	3.94562	3.76363	4.8879	3.40994
CHI3L1	1.34245	1.37102	0.358693	1.41136	2.70895	1.38709
CHIC1	10.669	9.72181	8.7521	7.52725	10.7769	4.39246
CHIC2	5.86439	5.11018	7.60429	5.91427	7.47907	4.79703
CHID1	10.5382	11.4144	14.7781	10.5052	22.4131	8.72193
CHIT1	0.777208	2.67973	0.430431	0.537661	0.471122	1.15591
CHKB	25.6479	19.5683	23.602	25.0012	39.6332	28.7244
CHL1	10.3157	11.716	6.24125	1.68019	6.00681	2.6586
CHM	12.718	13.3363	9.03906	10.0811	7.24351	5.2016
CHML	6.92422	6.73048	5.9543	5.77986	8.36242	3.8723
CHMP1A	20.2781	19.5683	22.4542	23.3883	26.9718	22.4825
CHMP1B	40.9638	39.511	32.1303	19.3733	34.9962	17.0636
CHMP2A	39.9909	48.3598	53.0148	46.9781	65.1916	54.4434
CHMP2B	23.1749	23.9306	19.5846	21.1032	19.3749	18.379
CHMP3	52.0023	45.3061	47.6344	47.4486	61.1281	49.762
CHMP4A	8.61995	8.4131	7.38907	6.45193	17.3138	10.9812
CHMP4B	63.8017	56.7105	76.4733	76.3479	59.4203	62.1302
CHMP5	25.4359	20.5654	27.5476	31.1171	36.3353	19.7661
CHMP6	41.616	41.3177	45.267	40.0557	72.9062	49.8776
CHMP7	56.4536	49.8554	55.0952	50.5401	47.4656	49.3574
CHN1	29.5339	27.2958	41.3931	45.7012	29.3274	27.0483
CHN2	2.049	1.6203	2.00868	1.88181	3.47453	1.67607
CHORDC1	17.5225	15.4552	12.6977	17.9444	15.547	12.8884
CHP1	377.37	271.712	273.611	264.395	203.584	162.926
CHP2	1.48376	1.6203	4.73474	2.75551	6.0657	3.69892
CHPF	29.11	27.6074	27.1172	30.6467	17.4904	23.0026
CHPF2	15.6148	13.6479	14.7781	15.4578	26.1473	13.1196
CHPT1	143.501	144.581	179.705	151.62	124.612	126.919
CHRAC1	10.5276	5.23482	10.689	8.87141	16.4304	8.03358
CHRD	4.87522	3.5522	2.22389	2.35227	2.65006	3.17876
CHRDL1	6.85356	4.11307	4.23257	3.562	3.53342	5.66396
CHRM1	0.706553	1.12175	0.286954	0	0.117781	0.751342
CHRM2	43.8063	40.1336	24.5346	44.357	21.5539	22.0201
CHRNB1	0.918519	1.05943	1.64999	1.61298	1.70782	0.52016
CHRNE	2.96752	1.99422	2.36737	2.15064	5.65347	3.46773
CHST1	2.96752	1.49566	6.24125	3.42759	5.06457	1.61828
CHST10	9.67978	4.79858	6.52821	7.79609	8.53909	5.49058
CHST12	10.3863	11.8407	12.1956	11.4253	10.8358	9.70965
CHST14	13.6654	11.1552	12.339	13.7104	12.0136	6.99326
CHST15	23.1749	33.2785	29.3411	19.4902	36.0998	38.1451
CHST2	7.41881	9.90877	5.73908	5.71265	6.89017	5.54837
CHST3	9.9624	10.8436	6.59995	7.46005	11.1303	7.10885
CHST7	6.14701	6.54352	10.4738	9.47628	16.9015	5.72176
CHSY1	10.7396	10.6566	9.32601	10.4844	10.3058	6.93547
CHSY3	1.2718	1.80726	1.93694	1.88181	2.88563	0.866933
CHTF18	11.5875	8.22615	7.10212	5.98148	22.6728	8.49595
CHTF8	4.34106	3.29482	4.17805	4.79795	2.19955	2.16271
CHTOP	83.138	77.8324	81.7776	78.5624	95.9023	70.8285
CHUK	19.9248	15.2059	15.352	14.8529	10.7769	11.1545
CHURC1	23.9691	12.7063	19.4411	24.0099	15.398	21.9323
CIAO1	28.0502	22.9335	27.0454	26.9503	28.3851	22.9448
CIAO2A	35.8222	34.4002	34.0041	32.1252	38.0431	37.8561
CIAO2B	19.0063	19.2567	19.6564	22.2457	24.675	25.43
CIAO3	22.1858	15.8914	22.0237	20.8344	35.2164	18.2056
CIAPIN1	31.5123	33.4031	31.565	35.8217	36.0998	41.9596
CIART	3.25014	3.80148	4.37605	4.77174	10.2469	3.58332
CIB1	10.2471	9.58159	6.6724	2.28842	5.31073	13.7646
CIB2	75.7425	83.6948	116.503	123.124	143.987	126.919
CIC	61.0462	63.8773	60.1169	50.9434	66.8405	40.6303
CIDEA	2.049	0.249277	1.64999	0.0672076	1.41337	0.751342
CIITA	1.97835	1.55798	0.932601	2.48668	5.53569	0.924729
CILK1	11.5875	9.47253	9.32601	8.40095	14.3692	5.66396
CILP	23.8815	16.5146	14.7781	16.4659	14.9581	10.9234
CILP2	2.33163	3.05364	2.65433	2.21785	8.18575	3.12096
CINP	9.9624	9.72181	8.17819	10.2828	7.12573	9.1317
CIPC	96.6565	65.5599	113.706	118.89	98.229	75.1342
CIR1	15.3322	17.6364	16.2129	15.1217	36.2175	20.1706
CIRBP	40.9094	22.3726	22.8129	11.4253	32.2719	24.1585
CISD1	125.201	106.504	125.973	138.179	132.974	111.488
CISD2	9.04388	8.35078	12.339	10.4172	18.786	11.6747
CISD3	40.2029	41.2554	48.567	46.5077	75.3207	50.8601
CISH	83.4439	75.2817	85.4406	73.3907	58.0658	112.701
CIT	8.26667	7.22904	4.66301	3.76363	6.0657	5.02821
CITED1	3.9567	5.79569	3.44345	4.77174	4.00454	7.34004
CITED2	38.1539	45.8047	35.7258	44.4915	37.5131	37.3359
CITED4	5.79374	9.47253	2.58259	5.51103	6.83128	5.1438
CIZ1	49.3174	45.1815	52.2974	50.3385	63.1304	52.305
CKAP2	4.59259	4.42467	2.43911	5.37661	3.41564	2.13844
CKAP4	124.989	91.734	118.943	135.759	71.5517	83.8614
CKAP5	116.511	124.202	100.362	107.398	40.9877	71.2619
CKB	253.299	245.85	311.704	349.95	277.079	271.986
CKMT2	1132.03	1033.51	1073.81	1342.95	1000.26	1143.85
CKS1B	1.62507	1.68262	1.35442	2.52096	0.99348	1.86275
CLASP1	61.6114	60.3874	54.1626	57.6641	34.3919	34.7929
CLASP2	74.2587	67.3048	79.6298	77.1544	53.8257	35.9488
CLASRP	27.4849	24.99	22.3824	21.9769	51.7646	29.4757
CLCC1	284.6	234.009	196.205	182.536	157.002	170.497
CLCF1	0.706553	0.623193	0.50217	0.470453	0.765574	0.982524
CLCN2	4.80456	3.36524	3.51519	4.09967	3.29786	2.6586
CLCN3	46.2086	34.4002	27.6193	33.5366	25.5584	25.719
CLCN5	7.41881	6.54352	5.30865	4.30129	7.59685	3.40994
CLCN6	25.8598	24.9277	22.7411	23.5899	41.0465	18.4368
CLCN7	31.2296	26.6727	31.565	32.5285	42.1066	33.926
CLDN10	0.494587	0.249277	1.79346	1.27695	5.88903	0.635751
CLDN12	9.75043	10.0957	8.89558	11.3581	14.8992	7.16665
CLDN14	0.847864	0.0623193	0.50217	0.873699	0.412232	0.693547
CLDN15	6.21767	6.35657	4.23257	3.09155	13.1914	4.39246
CLDN2	0.918519	0.747831	0.286954	0.537661	0.824464	0.635751
CLDN3	0.989174	1.24639	1.00434	0.604869	0.176671	0.288978
CLDN5	14.555	14.7697	29.1258	30.4451	55.8869	39.8789
CLDN6	0.494587	0.679903	0.573908	0.868323	1.06003	0.615523
CLDND1	20.9147	21.5263	22.4592	19.8982	27.8575	17.875
CLEC11A	5.58177	4.05075	11.263	12.0302	19.7283	4.39246
CLEC12A	0.777208	0.747831	0.717385	0.940907	0.530013	0.173387
CLEC14A	26.9903	42.938	32.5693	27.2191	33.803	17.2809
CLEC16A	43.3117	41.8786	47.2757	41.6015	34.9808	27.7997
CLEC1A	3.67408	4.11307	4.73474	4.97336	10.8358	4.45026
CLEC2L	5.01653	3.36524	6.52821	7.32563	7.71463	6.81988
CLEC4G	1.97835	2.30581	3.87388	1.68019	3.23897	0.809138
CLGN	14.6963	11.5291	11.263	14.248	8.77466	9.94084
CLHC1	1.7572	1.11925	1.36016	1.23998	2.7066	0.857108
CLIC1	21.1259	18.1349	20.8042	24.7996	42.7544	23.0604
CLIC2	13.0712	9.72181	12.9129	12.0974	33.9797	12.1949
CLIC4	492.609	444.381	439.327	473.007	359.231	297.243
CLIC5	343.314	259.871	492.485	404.657	253.876	274.702
CLINT1	57.7254	56.025	63.8473	76.6167	53.6491	38.4918
CLIP1	179.535	214.628	163.994	149.671	103.352	114.031
CLIP2	10.1744	10.9059	11.4782	9.6779	20.6705	8.03358
CLIP3	3.60342	4.67395	3.22823	3.09155	4.77012	2.88978
CLIP4	80.547	75.6556	84.0058	86.2946	37.1598	50.7445
CLK1	97.2924	90.5499	87.6645	88.8485	268.422	81.3761
CLK2	25.7892	22.3103	24.8215	22.5818	48.8201	21.9045
CLK3	20.6313	21.0639	24.4628	23.7915	44.4622	24.8521
CLK4	19.3596	18.0103	17.0738	17.2052	32.2719	12.3105
CLMN	4.87522	4.48699	4.23257	3.76363	6.12459	3.23655
CLMP	7.2775	7.1044	5.0217	6.31752	8.42131	5.31719
CLN3	10.8103	10.158	8.32167	8.87141	12.7792	11.2701
CLN5	20.0661	16.8885	15.352	21.036	20.7294	18.0322
CLN6	4.87522	4.05075	3.44345	3.76363	5.18235	3.98789
CLN8	20.5607	12.2769	13.5586	19.0198	11.837	13.1196
CLNS1A	10.7375	11.1539	15.1935	13.3111	11.4783	11.1245
CLOCK	152.827	136.168	124.682	133.609	91.5155	76.6369
CLP1	4.38063	3.67684	5.88256	3.62921	5.00568	3.8723
CLPB	31.0177	27.7321	32.4258	33.9399	20.1405	29.9959
CLPTM1	112.554	115.914	96.9905	115.732	88.9244	102.356
CLPTM1L	7.98405	7.91455	10.8325	9.74511	16.4304	9.59406
CLPX	109.798	80.9527	70.9494	85.6897	54.8269	71.4353
CLSTN1	261.708	284.86	257.433	276.775	213.934	190.524
CLTA	43.8769	43.5612	44.3344	51.6827	63.1304	51.6114
CLTB	62.9539	58.7048	66.8603	65.5274	98.5824	75.7122
CLTC	140.321	127.63	111.625	109.616	97.4046	70.3372
CLTCL1	103.157	141.776	112.701	155.586	82.3875	113.684
CLU	40.6975	42.2525	40.7475	54.1694	33.6264	42.8843
CLUAP1	30.0285	32.5307	34.0041	50.9434	40.281	23.1182
CLUH	360.625	299.382	326.267	322.059	148.404	246.267
CLYBL	46.0673	48.7337	51.6518	51.5483	28.8563	43.809
CMAS	39.2137	34.2133	28.6954	34.948	32.9197	27.6263
CMBL	38.5778	35.5843	34.5062	32.6629	32.3308	34.7351
CMC1	14.767	13.7726	12.339	11.0221	22.0839	14.2755
CMC2	8.12536	8.78702	8.53689	10.8876	12.3081	10.3454
CMC4	2.47294	2.55509	2.08042	1.94902	4.59344	3.40994
CMIP	11.5875	13.5856	11.6934	10.1484	14.8404	12.5994
CMKLR1	20.0661	17.6987	13.4151	17.2052	16.1359	14.4489
CMKLR2	6.14701	4.61163	2.00868	1.20974	1.00114	4.39246
CMPK1	22.8217	21.2509	18.4368	22.7834	24.2628	17.9166
CMPK2	6.57094	8.22615	6.38473	9.47628	11.7192	2.71639
CMSS1	7.06553	6.91744	7.89124	6.98959	10.5414	9.01611
CMTM3	7.98405	4.23771	9.32601	8.40095	13.0736	5.02821
CMTM4	22.1858	23.9306	20.0868	21.9769	11.7192	12.2527
CMTM6	13.8484	18.7581	11.5499	15.0545	24.8517	27.6841
CMTM7	2.89687	3.42756	2.65433	4.16687	7.12573	4.33467
CMTM8	2.96752	2.86669	5.38039	4.23408	8.65688	2.6586
CMTR1	22.0445	24.6161	21.2346	27.4207	30.623	20.5174
CMTR2	8.97322	6.23193	5.59561	5.10778	5.12346	4.62364
CMYA5	920.261	935.103	1270.4	1216.79	653.66	634.496
CNBD2	1.20114	0.810151	0.932601	1.7474	0.706684	0.52016
CNBP	231.269	210.544	206.778	231.231	243.833	204.688
CNDP2	29.9578	28.106	28.1932	28.8321	42.6366	32.5967
CNEP1R1	9.67978	9.97109	9.46949	10.1484	12.6025	8.09138
CNGA2	1.90769	1.6203	3.65867	3.76363	6.89017	0.693547
CNGB1	1.2718	0.373916	0.645647	1.07532	1.53115	0.288978
CNIH1	37.094	33.964	37.304	35.7545	37.9842	25.1989
CNIH3	3.10883	2.80437	3.1565	3.89804	5.83014	1.73387
CNIH4	32.7841	34.7118	25.1802	27.2863	27.8551	23.0026
CNKSR1	15.1202	14.645	11.5499	11.2237	11.248	15.2002
CNKSR2	3.9567	3.8638	2.36737	1.34415	4.82901	1.84946
CNKSR3	11.2342	9.22325	10.4738	10.8876	9.65801	6.81988
CNN1	7.56012	4.79858	4.16084	3.89804	38.2787	6.01074
CNN2	4.38063	4.48699	2.65433	2.48668	8.77466	3.40994
CNN3	39.2137	31.3466	43.1866	42.9457	74.9085	21.1532
CNNM2	4.73391	5.23482	4.80648	3.69642	6.7135	2.88978
CNNM3	35.9713	38.1625	33.3584	22.6328	39.9276	28.7128
CNNM4	16.3843	17.4887	17.4325	19.5063	9.65801	8.04514
CNOT1	113.755	117.285	100.362	111.766	71.3751	61.9568
CNOT10	16.5333	21.9364	23.6737	26.8831	18.9038	23.465
CNOT11	10.9516	11.0928	13.0564	12.299	9.83468	9.1317
CNOT2	19.6422	17.574	19.2259	19.8263	28.5618	15.1424
CNOT3	26.0012	30.0379	29.628	22.5146	37.6309	27.4529
CNOT4	24.0935	19.8175	20.8042	25.2701	18.9627	14.1021
CNOT6	9.67978	8.03919	9.61296	7.32563	16.7248	5.54837
CNOT6L	34.3385	27.4828	24.965	26.4798	41.1054	17.3965
CNOT7	8.24335	6.89127	7.97804	9.35866	4.51276	5.15768
CNOT8	13.9191	8.97398	13.989	14.7857	12.9559	8.09138
CNOT9	17.3105	15.1436	16.5716	16.3315	20.6116	14.2177
CNP	10.5276	11.0928	11.8369	10.686	22.6139	9.99863
CNPY3	8.19602	10.0334	10.1869	10.2828	24.9695	11.6169
CNPY4	5.08718	5.35946	5.88256	4.30129	6.83128	4.45026
CNST	16.5333	13.8349	10.976	10.8204	9.65801	10.5766
CNTF	2.40228	2.49277	2.00868	2.35227	1.8256	1.61828
CNTFR	6.21767	2.18117	1.8652	4.23408	1.59004	1.90725
CNTLN	13.1419	9.09862	12.7695	9.34186	18.4916	9.42068
CNTN1	9.89174	5.73337	10.9043	9.74511	8.42131	4.79703
[truncated: 12,155 more rows]

## Sheet: Ascending aorta
	E25	E43	E53
A4GALT	58.0539	55.4644	37.927
AAAS	9.78922	8.34521	19.1913
AADAC	1.27964	1.14667	2.03863
AADAT	12.9243	10.0015	7.73275
AAGAB	18.8746	15.0978	28.2597
AAK1	35.0621	29.8134	61.6511
AAMDC	16.8272	12.5497	10.8258
AAMP	106.338	107.978	94.4801
AAR2	8.4456	8.34521	11.3882
AARD	4.79864	3.88594	1.40595
AARS1	115.295	105.685	128.364
AARS2	4.73466	5.79705	8.36542
AARSD1	29.0478	29.4312	31.4934
AASDH	9.40533	10.1289	13.7783
AASDHPPT	6.52615	6.4978	5.55352
AASS	32.355	31.9424	22.5381
AATF	14.7798	14.7156	10.6149
ABAT	3.71095	2.48445	1.05447
ABCA1	17.0832	15.48	43.2331
ABCA2	34.9981	39.5601	80.28
ABCA5	9.46931	10.8297	4.49905
ABCA6	1.15167	2.03852	12.7942
ABCA7	0.895746	0.764447	6.39709
ABCA8	44.5058	39.3461	38.9709
ABCA9	1.43319	1.93405	4.19185
ABCB1	5.82235	4.26816	6.39709
ABCB6	36.7896	32.8712	36.9063
ABCB7	13.948	15.6712	11.81
ABCC1	23.2254	24.6534	18.2774
ABCC10	11.6447	11.1482	14.4813
ABCC2	0.447873	0.445927	1.12476
ABCC3	0.831764	1.40149	19.4725
ABCC4	2.43131	2.48445	3.65548
ABCC5	32.3748	31.6608	57.6441
ABCC8	0.447873	0.700743	0.702977
ABCC9	45.6191	43.892	19.0507
ABCD1	18.6187	20.5764	16.2388
ABCD2	6.52615	5.28742	4.85054
ABCD3	38.3251	36.1838	17.8556
ABCD4	8.70153	8.85484	19.6131
ABCE1	42.2031	39.2805	21.0415
ABCF1	62.4828	66.6706	127.135
ABCF2	42.2882	40.7011	31.492
ABCF3	48.1143	52.9379	69.3135
ABCG1	1.34362	1.97482	24.8151
ABCG4	9.98117	10.5748	16.4497
ABHD10	5.18253	5.41483	4.07727
ABHD11	5.05457	6.4978	18.8398
ABHD12	23.1614	21.7867	94.6207
ABHD13	19.0666	19.4934	12.3724
ABHD14A	82.7925	79.9484	94.5504
ABHD14B	49.202	49.2431	87.38
ABHD15	0.767782	0.445927	5.27233
ABHD16A	61.9984	60.9646	41.4756
ABHD17B	5.50244	7.13484	6.88917
ABHD17C	4.2228	5.73335	11.6694
ABHD18	10.8129	10.3837	9.41989
ABHD2	22.1908	26.834	24.3223
ABHD3	3.39104	3.63112	3.58518
ABHD4	104.738	89.6951	111.844
ABHD5	7.48588	8.34521	16.3091
ABHD6	11.1968	10.5748	10.6852
ABI1	47.3466	48.3513	28.1191
ABI2	29.3037	25.163	19.121
ABI3	0.639818	0.509631	17.012
ABI3BP	130.075	115.877	78.4522
ABITRAM	4.28678	4.33186	4.07727
ABL1	241.467	240.291	189.804
ABL2	31.0952	25.8638	24.1824
ABLIM1	136.281	139.894	180.243
ABLIM2	1.53556	1.14667	3.1634
ABLIM3	9.66126	10.8934	27.4864
ABR	57.0718	54.6579	93.2147
ABRA	0.895746	0.828151	5.76441
ABRACL	3.83891	4.33186	12.8645
ABRAXAS1	4.99058	5.09631	3.65548
ABRAXAS2	16.4433	14.9067	11.2476
ABT1	20.5382	20.8312	13.1457
ABTB1	22.4576	22.8697	67.4155
ABTB2	32.7587	32.1705	14.9734
ABTB3	6.46217	5.54224	17.1526
ACAA1	51.4414	52.8742	117.96
ACAA2	76.3943	73.578	64.3224
ACACA	58.6714	52.2372	81.2641
ACACB	53.7448	54.212	66.5016
ACAD10	14.4599	11.1482	21.3002
ACAD11	9.21339	7.77188	7.24066
ACAD8	12.2845	10.1289	13.5675
ACAD9	10.8769	9.61929	17.5744
ACADL	71.7236	70.2654	30.8607
ACADM	50.2897	61.2194	27.6973
ACADSB	48.0504	53.3202	42.5301
ACADVL	56.24	59.0535	109.524
ACAN	3.83891	3.82223	58.2065
ACAP1	6.3342	6.94372	17.2932
ACAP2	46.8347	49.1157	34.4459
ACAP3	61.7425	65.615	143.407
ACAT1	64.7496	61.6654	36.3439
ACAT2	15.6756	16.1171	12.4427
ACBD3	59.5031	68.418	28.6112
ACBD4	22.0737	19.4297	34.0241
ACBD5	36.6616	34.209	27.7676
ACBD6	7.99773	7.89928	8.78721
ACCS	0.447873	0.828151	4.92084
ACCSL	1.27964	1.21037	0.421786
ACD	14.14	14.1423	18.2071
ACE	6.20624	5.66965	9.34959
ACE2	0.447873	0.382223	2.10893
ACER2	10.493	7.64447	14.6922
ACER3	1.98344	1.46519	4.56935
ACIN1	175.118	184.614	248.643
ACKR1	5.31049	4.71409	21.1596
ACKR2	5.37448	4.58668	24.3933
ACKR3	60.9107	56.1868	24.0418
ACKR4	0.7038	0.191112	3.0228
ACLY	80.7381	76.4542	27.3451
ACO1	34.9341	31.5971	24.8854
ACO2	129.883	137.346	138.838
ACOD1	0	0	3.0228
ACOT11	58.9273	59.4994	77.9601
ACOT13	10.1091	8.79114	9.34959
ACOT7	15.8035	13.8874	20.5972
ACOT8	9.21339	8.66373	12.3021
ACOT9	27.4482	29.4312	21.0893
ACOX1	39.8869	33.198	21.3733
ACOX2	0.575837	0.509631	0.773275
ACOXL	0.255927	0.700743	0.773275
ACP1	25.7207	26.6919	17.5041
ACP2	40.1166	41.2801	56.7302
ACP6	8.89348	7.19854	4.56935
ACRBP	0.831764	1.14667	1.19506
ACSF2	73.1313	65.9972	102.002
ACSF3	3.66616	3.82542	10.4329
ACSL1	4.2228	3.63112	2.10893
ACSL3	41.3963	39.369	26.7834
ACSL4	50.4177	52.3646	41.8271
ACSL5	2.23936	1.46519	7.80304
ACSL6	1.72751	1.5926	2.60101
ACSM1	0.191946	0.382223	2.03863
ACSM5	37.8773	35.7379	25.5884
ACSS1	53.4248	48.7335	63.8303
ACSS2	25.2088	21.9141	29.5953
ACSS3	1.91946	1.01926	3.0228
ACTA1	14.4599	13.0593	163.725
ACTA2	13458.3	12300.6	4217.37
ACTB	6683.67	6633.68	4130.94
ACTC1	128.412	131.357	329.626
ACTG2	1203.31	1058.7	621.642
ACTL6A	16.6993	14.6519	5.9753
ACTL7B	0.447873	0.509631	3.30399
ACTMAP	61.6785	59.5631	57.3629
ACTN1	1315.46	1244.57	691.338
ACTN2	27.7681	30.6416	77.3977
ACTN3	0.767782	0.127408	0.773275
ACTN4	1998.42	1982.73	1140.13
ACTR10	55.4723	53.129	34.7271
ACTR1A	87.7831	82.9425	115.007
ACTR1B	127.836	114.03	36.7657
ACTR2	417.354	433.378	151.14
ACTR3	123.679	122.961	76.879
ACTR3B	25.2728	25.4179	12.0209
ACTR5	7.99773	8.72743	8.43572
ACTR6	6.14226	6.4978	5.62381
ACTR8	31.9909	31.5971	25.5181
ACTRT3	2.23936	0.891855	3.30399
ACVR1	40.4365	40.8979	21.8626
ACVR1B	10.621	9.93781	34.1647
ACVR1C	2.87918	3.3126	2.10893
ACVR2A	11.5807	11.7852	8.71691
ACVR2B	2.23936	2.42075	1.47625
ACVRL1	8.70153	9.36447	55.1134
ACY1	15.4196	12.1037	13.4972
ACYP1	5.05457	4.20446	4.56935
ACYP2	6.01429	4.65038	6.74858
ADA	6.52615	6.30669	15.9576
ADAD1	2.43131	1.78371	0.702977
ADAL	1.02371	0.764447	1.89804
ADAM10	51.6973	51.4727	29.7359
ADAM12	0.639818	0.764447	3.51488
ADAM15	105.442	102.245	244.636
ADAM17	32.8227	33.1897	45.5529
ADAM18	2.94316	3.05779	2.74161
ADAM19	112.48	108.87	35.3597
ADAM2	1.27964	0.637039	2.17923
ADAM22	12.6166	9.56004	6.5876
ADAM23	0.895746	0.382223	1.05447
ADAM33	23.7373	23.443	10.2635
ADAM8	2.23936	3.05779	27.2755
ADAM9	116.255	110.271	74.3046
ADAMTS1	104.866	94.8551	76.3433
ADAMTS10	55.7922	59.0535	76.7651
ADAMTS12	12.4125	8.98225	7.87334
ADAMTS14	0.575837	0.127408	4.07727
ADAMTS15	44.7873	44.7201	89.4187
ADAMTS17	4.09484	3.82223	3.79607
ADAMTS19	1.08769	0.828151	0.702977
ADAMTS2	28.4079	24.6534	48.0133
ADAMTS3	0.767782	1.21037	5.69411
ADAMTS4	2.30335	1.91112	9.209
ADAMTS5	3.19909	2.86668	8.78721
ADAMTS6	15.3556	15.0341	23.2685
ADAMTS7	9.40533	12.5497	22.2141
ADAMTS8	45.2352	42.0446	26.7834
ADAMTS9	135.13	110.017	27.2755
ADAMTSL1	3.71095	5.16002	6.81888
ADAMTSL3	222.273	201.878	81.8968
ADAMTSL4	1139.58	1149.92	598.163
ADAMTSL5	185.035	209.14	215.603
ADAP1	0.7038	1.21037	22.0735
ADAP2	6.30989	6.8883	30.4291
ADAR	141.656	141.359	112.511
ADARB1	196.36	203.152	349.872
ADAT1	1.4076	1.5926	1.19506
ADAT2	2.55927	3.44001	2.24953
ADCK1	0.900864	0.500713	3.11419
ADCK2	7.16597	7.89928	10.1932
ADCK5	11.0049	10.7023	27.9785
ADCY10	11.1328	10.4481	13.5675
ADCY2	5.43846	4.45927	25.5181
ADCY3	25.6567	24.0164	31.8448
ADCY4	5.43846	3.63112	24.2527
ADCY5	214.659	202.26	68.3996
ADCY6	101.923	104.857	72.6878
ADCY7	79.7854	66.1883	57.3629
ADCY9	81.9607	77.2728	45.2014
ADCYAP1R1	11.0689	8.85484	18.1368
ADD1	353.116	334.828	316.621
ADD2	0.127964	0.382223	1.19506
ADD3	51.4414	57.7794	40.7024
ADGRA1	0	0	1.19506
ADGRA2	425.607	411.846	520.836
ADGRA3	38.4531	39.8786	35.43
ADGRB1	0.767782	0.700743	5.13173
ADGRB2	42.6119	40.3883	42.8113
ADGRD1	9.27737	7.26224	23.5497
ADGRE2	0.127964	0.191112	2.85971
ADGRE5	3.32706	4.01335	37.3506
ADGRF5	13.8841	12.6771	26.8537
ADGRG1	5.56642	4.8415	30.7201
ADGRG2	7.22995	8.28151	6.0456
ADGRG3	0.447873	0.764447	4.28816
ADGRG5	0.191946	0.573335	2.46042
ADGRG6	5.43846	5.03261	6.95947
ADGRL1	6.71809	7.32595	13.2863
ADGRL2	209.988	188.436	75.3591
ADGRL3	5.50244	3.63112	3.37429
ADGRL4	3.13511	4.33186	10.7555
ADGRV1	0.575837	0.127408	0.773275
ADH1A	2.94316	3.3126	6.95947
ADH5	48.1143	41.9172	28.1894
ADHFE1	25.2088	27.4564	17.012
ADI1	12.9243	9.42818	5.27233
ADIPOQ	15.9955	16.0534	63.2679
ADIPOR1	107.298	97.6581	75.2185
ADIPOR2	23.6733	22.1053	31.0716
ADISSP	15.7395	16.4356	30.7904
ADK	9.21339	10.1289	7.31096
ADM	4.28678	4.9689	7.38126
ADNP	112.688	107.285	72.5472
ADNP2	161.682	161.298	153.249
ADO	53.8727	51.6002	23.7606
ADORA1	0.447873	0.955558	6.67828
ADORA1_1	1451.98	1671.48	268.034
ADORA2A	2.04742	2.86668	2.60101
ADORA2B	0.127964	0.127408	2.60101
ADPGK	19.4505	21.2771	36.3439
ADPRH	32.3748	30.3868	38.1716
ADPRHL1	82.7682	88.83	51.9598
ADPRM	2.55927	3.69483	3.58518
ADPRS	18.6187	18.9201	19.8942
ADRA1A	150.293	138.046	25.5884
ADRA1B	42.292	34.6549	16.4497
ADRA1D	24.825	27.4564	9.98227
ADRA2A	0.511855	0.254816	0.702977
ADRB1	1.27964	0.764447	1.75744
ADRB2	0.575837	0.700743	3.44459
ADRM1	71.2118	75.1069	144.673
ADSL	12.4765	10.5748	17.9962
ADSS1	6.84606	5.22372	8.29513
ADSS2	54.5765	65.4239	40.6321
ADTRP	1.85547	1.84741	2.31982
AEBP1	743.981	702.208	1420.65
AEBP2	26.0406	28.5393	21.7923
AEN	14.8438	13.76	48.4351
AFAP1L1	3.58298	2.99408	6.25649
AFAP1L2	28.7278	24.4623	12.0912
AFDN	30.2634	28.0934	52.1609
AFF1	31.4151	34.846	26.8537
AFF2	5.69438	5.35113	3.23369
AFF3	11.8366	11.403	4.85054
AFF4	141.4	127.79	49.8411
AFG1L	3.90289	4.39557	3.93667
AFG3L2	43.4437	36.1201	14.411
AFMID	3.00715	3.2489	4.70994
AFTPH	32.1189	34.2727	21.3002
AGA	26.4885	25.2904	20.3863
AGAP2	0.511855	0.573335	5.90501
AGAP3	60.871	67.107	111.051
AGBL2	1.52149	1.76906	3.0228
AGBL3	0.255927	0.509631	0.911058
AGBL5	5.11855	4.52298	6.25649
AGFG1	33.1426	33.9542	24.6042
AGFG2	37.1735	37.7764	42.5301
AGGF1	73.471	79.9471	115.52
AGK	34.9981	33.7631	35.2894
AGL	38.2611	35.929	18.7695
AGO1	60.9933	54.3057	36.7573
AGO2	25.1449	26.5008	11.5288
AGO3	42.5934	45.3272	40.0078
AGO4	10.8769	8.66373	7.38126
AGPAT2	32.8867	29.049	43.8658
AGPAT3	78.5057	77.4639	79.2255
AGPAT5	41.9081	43.4461	24.8854
AGPS	27.756	30.4944	15.9808
AGRN	230.974	237.297	241.543
AGTPBP1	11.5807	11.4667	11.4585
AGTR1	9.8532	8.98225	3.65548
AGTRAP	73.7071	74.0876	143.97
AHCTF1	30.1354	24.0164	14.0595
AHCY	34.0953	32.0106	26.2056
AHCYL1	62.0624	60.2002	50.9658
AHCYL2	27.8321	25.5453	15.2546
AHDC1	116.639	114.603	76.2027
AHI1	17.8509	19.4934	52.1609
AHNAK	2690.76	2212.25	1028.38
AHNAK2	0.511855	0.700743	7.66245
AHR	14.8438	12.2311	3.79607
AHSA1	90.4063	82.4328	67.2046
AHSA2P	36.0218	33.7631	15.2546
AHSG	0	0.127408	1.33566
AIDA	98.596	103.965	52.0906
AIF1	2.87918	1.97482	20.0348
AIF1L	30.3914	30.4505	30.3686
AIFM1	21.4339	20.0667	18.4883
AIFM2	17.3391	15.4163	24.6042
AIG1	39.6687	39.8149	16.3794
AIMP1	28.6639	29.6223	35.8518
AIMP2	42.292	38.4134	50.2628
AJUBA	80.2972	80.9039	29.2438
AK1	16.1874	15.2252	30.931
AK2	18.5547	16.8815	25.7992
AK3	50.2897	44.4653	12.9348
AK4	13.3082	11.2756	4.28816
AK5	43.4437	39.369	7.94364
AK6	9.69261	10.0703	8.82025
AK9	0.383891	1.08297	0.632679
AKAP1	137.177	134.734	67.6264
AKAP10	27.1923	26.1823	18.8398
AKAP11	75.4346	67.2713	31.634
AKAP12	540.071	466.249	149.453
AKAP13	65.8373	61.092	154.655
AKAP17A	5.6304	5.16002	7.17036
AKAP3	1.08769	0.891855	1.40595
AKAP5	1.29691	2.80297	7.26456
AKAP6	97.1884	82.1143	35.1488
AKAP7	4.79864	3.75853	10.8258
AKAP8	76.5863	77.1454	139.541
AKAP8L	49.1381	52.0461	129.629
AKAP9	79.8493	68.4817	124.286
AKIP1	4.28678	3.63112	8.36542
AKIRIN1	44.7374	47.6766	22.8411
AKIRIN2	19.1946	19.8119	14.411
AKNA	3.58298	3.56742	32.126
AKNAD1	0.959728	0.700743	1.68714
AKR1B1	37.8133	34.2727	57.7144
AKR1B10	30.0715	25.5453	22.7764
AKT1	128.476	127.663	157.889
AKT1S1	82.4726	108.615	159.927
AKT2	128.156	131.74	168.222
AKT3	183.82	172.701	78.4522
AKTIP	42.292	42.2357	16.7308
ALAD	15.7395	14.7156	21.8626
ALAS1	37.8133	35.0371	27.627
ALAS2	5.18253	4.45927	88.2939
ALCAM	9.72524	7.51706	2.31982
ALDH16A1	32.5668	31.6608	96.7296
ALDH18A1	112.48	105.494	52.0906
ALDH1A1	179.277	166.522	86.2553
ALDH1A2	36.8535	34.209	28.1894
ALDH1A3	6.3342	7.70817	7.10007
ALDH1L1	5.43846	6.11557	5.69411
ALDH1L2	14.204	10.7023	8.85751
ALDH2	362.777	337.567	219.399
ALDH3A2	26.3605	24.526	24.9887
ALDH3B1	10.493	9.93781	37.2578
ALDH4A1	16.3794	14.843	42.8113
ALDH5A1	16.2885	17.818	13.1639
ALDH6A1	135.194	143.143	65.0957
ALDH7A1	92.3898	84.6625	56.6599
ALDH9A1	40.6925	37.3942	30.4389
ALDOA	816.024	751.133	679.357
ALDOB	11.1328	9.68299	8.08423
ALDOC	7.42189	9.17336	17.6447
ALG1	3.64697	6.17928	9.56048
ALG11	16.5073	17.2001	13.8486
ALG12	11.2608	10.5748	22.6359
ALG13	4.09484	6.05187	3.23369
ALG14	17.787	15.1615	16.7308
ALG2	7.7418	5.98817	15.3249
ALG3	15.9315	12.7408	16.2388
ALG5	9.98117	9.30077	6.67828
ALG6	5.82235	6.43409	5.69411
ALG8	3.96687	5.09631	1.82774
ALG9	11.6447	12.9319	7.31096
ALKAL2	1.4076	1.91112	4.63965
ALKBH1	9.34135	9.42818	11.107
ALKBH2	3.39104	3.37631	10.6149
ALKBH3	5.69438	6.5615	5.27233
ALKBH4	14.6518	14.9704	29.3141
ALKBH6	5.31049	6.62521	13.708
ALKBH8	1.75246	2.05381	0.901216
ALMS1	16.7632	13.0593	5.90501
ALOX12	0.127964	0.191112	4.07727
ALOX15	0.0639818	0.191112	11.7397
ALOX5	4.2228	3.88594	23.9715
ALOX5AP	1.15167	1.21037	9.84168
ALOXE3	1.02371	1.46519	1.40595
ALPK1	6.14226	6.5615	14.1298
ALPK2	2.62326	2.16593	9.34959
ALPK3	207.557	215.447	140.666
ALPL	1.08769	0.764447	6.46739
ALS2	18.6187	19.8119	16.0279
ALS2CL	15.9955	17.7097	42.8113
AMACR	6.78208	8.53632	4.63965
AMBRA1	40.1166	40.1335	34.5865
AMD1	48.5622	51.1542	47.24
AMDHD2	24.825	24.2712	68.6105
AMER1	34.4222	34.5912	14.3407
AMER2	0.255927	0.0637039	1.05447
AMFR	108.961	104.22	57.0114
AMHR2	5.43846	5.73335	17.8556
AMIGO1	9.40533	8.40891	6.0456
AMIGO2	49.266	50.0713	12.0912
AMIGO3	1.34362	1.52889	4.78024
AMMECR1	1.08769	1.5926	1.68714
AMMECR1L	41.3323	36.6934	31.9854
AMN1	3.96687	5.98817	5.83471
AMOT	14.14	14.9704	5.9753
AMOTL1	66.989	71.0935	73.1096
AMOTL2	59.6311	62.8757	46.748
AMPD2	43.5716	45.6757	68.6105
AMPD3	2.68724	2.35704	3.65548
AMPH	9.91719	10.9571	3.79607
AMT	3.71095	3.3126	6.53768
AMZ2	34.9341	40.2609	30.0874
ANAPC1	61.8704	52.3646	29.6656
ANAPC10	3.00715	3.75853	2.10893
ANAPC13	64.2378	63.6402	79.8582
ANAPC15	11.6549	11.7387	17.7888
ANAPC16	20.6022	20.449	25.6587
ANAPC4	30.1354	25.2904	23.5497
ANAPC5	12.2052	23.0627	84.2012
ANAPC7	72.4275	63.1306	55.5352
ANG	2.09732	1.08615	2.8822
ANGEL1	26.1686	25.8001	48.9272
ANGEL2	22.5216	23.7616	17.8556
ANGPT1	25.4008	25.5453	27.6973
ANGPT2	27.7041	23.6978	8.08423
ANGPT4	4.09484	2.54816	33.9538
ANGPTL1	17.2751	13.3141	12.7942
ANGPTL2	39.8607	35.6105	151.281
ANGPTL4	12.9243	13.8237	181.79
ANGPTL5	0.7038	0.318519	0.140595
ANGPTL7	32.5028	27.5201	37.1172
ANK1	14.5879	14.7793	27.9082
ANK2	33.2066	31.2786	48.5054
ANK3	16.4433	15.5438	17.012
ANKDD1A	0.127964	0.0637039	0.91387
ANKDD1B	0.7038	0.828151	4.92084
ANKFY1	120.35	110.463	65.5174
ANKH	222.913	205.7	152.757
ANKHD1	79.4015	79.1202	100.877
ANKIB1	55.1524	51.0268	29.1735
ANKLE2	30.9672	28.7305	26.7834
ANKMY1	0.383891	0.318519	1.19506
ANKMY2	36.5336	33.5082	29.3844
ANKRA2	17.723	18.6015	8.57632
ANKRD1	60.8467	64.3409	219.821
ANKRD11	117.919	129.765	149.734
ANKRD12	95.0514	110.864	161.434
ANKRD13A	35.5739	34.9097	35.0082
ANKRD13B	6.27022	7.26224	28.5409
ANKRD13C	39.5408	46.249	24.8854
ANKRD13D	9.66126	10.4474	23.6903
ANKRD16	5.56642	5.98817	4.07727
ANKRD17	61.1027	54.1483	75.0779
ANKRD23	11.3913	11.4686	19.4134
ANKRD26	13.1803	12.1674	20.1051
ANKRD27	44.1475	39.2416	13.6061
ANKRD28	13.3722	12.486	15.2546
ANKRD29	14.9078	17.2001	14.9734
ANKRD33B	8.76551	9.23706	4.14756
ANKRD34A	6.07828	5.66965	2.31982
ANKRD35	8.38162	7.77188	10.8258
ANKRD37	5.50244	5.60594	7.59215
ANKRD39	7.09943	7.83367	21.4998
ANKRD40	63.534	69.3098	44.0766
ANKRD42	12.4125	9.49188	6.1862
ANKRD44	59.4391	60.3276	27.8379
ANKRD45	3.77493	4.07705	1.75744
ANKRD46	51.6334	52.6831	25.3072
ANKRD49	3.00715	2.48445	2.74161
ANKRD50	29.7516	26.3097	16.7308
ANKRD54	25.2728	26.246	54.6916
ANKRD55	0.383891	0.191112	1.19506
ANKRD6	1.4076	0.637039	1.68714
ANKRD65	1.15167	1.01926	2.67131
ANKRD9	4.03086	6.17928	11.6694
ANKS1A	104.226	104.028	124.075
ANKS1B	33.1426	31.7882	15.3952
ANKS3	18.6187	19.3023	56.5193
ANKS6	36.2777	34.209	62.0026
ANKZF1	14.9718	18.0282	29.0329
ANLN	1.79149	1.6563	1.26536
ANO1	248.122	254.242	202.317
ANO10	95.3886	87.0921	97.3609
ANO2	0.0639818	0.191112	1.05447
ANO4	15.5476	14.5882	5.83471
ANO5	0.749867	0.663795	0.38031
ANO6	101.667	103.519	80.4205
ANOS1	36.8772	35.1633	49.5107
ANP32A	54.5125	58.735	57.5035
ANP32B	60.9747	78.2921	74.867
ANP32E	57.3009	60.7805	21.6229
ANPEP	4.54271	5.28742	4.78024
ANTKMT	34.5502	39.369	42.038
ANTXR1	628.046	570.532	218.274
ANTXR2	682.558	638.95	281.894
ANXA1	250.169	232.201	135.393
ANXA11	69.7402	58.4802	22.5656
ANXA2	220.098	199.329	453.701
ANXA3	95.9728	84.344	39.3667
ANXA4	36.9175	36.1838	12.3724
ANXA5	261.942	253.287	196.904
ANXA6	302.378	286.094	303.264
ANXA8	3.83891	4.01335	73.1096
AOAH	1.47158	1.52889	18.418
AOPEP	106.722	110.017	225.515
AOX1	0	0.228697	1.24075
AOX3	2.62326	2.54816	6.59814
AP1AR	17.89	20.9981	8.83993
AP1B1	44.9792	42.4268	56.7302
AP1G1	77.9939	75.4891	43.9361
AP1G2	0.0639818	0.0637039	2.03863
AP1M1	32.0549	27.966	35.7112
AP1S1	16.1874	14.843	29.8062
AP1S2	55.6642	56.6965	41.6865
AP2B1	78.8896	65.3602	34.3756
AP2M1	211.01	206.099	281.923
AP2S1	4.9266	3.37631	28.8923
AP3B1	53.2502	46.1216	38.5041
AP3B2	0.0639818	0.0637039	1.12476
AP3M1	23.2254	22.9334	17.2932
AP3M2	15.0997	16.1171	33.9538
AP3S1	29.8155	34.4001	29.4547
AP3S2	14.204	12.4223	29.1032
AP4B1	12.9883	13.5052	11.9506
AP4E1	18.4908	19.5571	16.8011
AP4M1	7.48588	5.41483	13.1457
AP4S1	6.97402	5.60594	3.72578
AP5B1	9.91719	10.9571	17.5744
AP5M1	7.038	7.58076	4.56935
AP5S1	8.18968	7.70817	17.4338
AP5Z1	13.2442	13.8874	49.349
APAF1	14.8495	16.2005	8.9503
APBA1	14.7158	14.3334	18.6289
APBA2	0.319909	0.318519	2.81191
APBA3	30.1354	29.4949	56.6599
APBB1	72.1075	72.0491	56.1678
APBB1IP	0.639818	1.21037	7.38126
APBB2	23.7373	21.5326	13.9892
APBB3	30.7753	33.7631	43.2331
APC	69.9322	60.6461	39.437
APC2	0.319909	0.764447	0.492084
APCDD1	82.0887	82.8788	92.6523
APEH	45.5551	42.5542	41.0538
APEX1	22.5216	24.2712	21.5814
APEX2	6.97402	8.28151	11.5991
APH1A	18.4908	16.6904	28.9626
APH1B	9.98117	11.6578	54.4807
API5	45.2352	49.1157	28.5409
APIP	6.46217	5.54224	2.67131
APLF	31.9269	29.1127	17.7853
APLN	0.575837	0.637039	6.88917
APLNR	2.75122	3.56742	9.34959
APLP1	0	0.191112	3.0931
APLP2	887.684	858.283	637.67
APMAP	18.4268	17.5823	17.8556
APOA1	0.575837	0.445927	0.843572
APOB	2.36733	1.78371	0.210893
APOBEC2	3.71095	3.37631	6.95947
APOBR	0.319909	0.318519	20.1051
APOD	89.6386	76.9543	537.496
APOE	148.694	177.033	1835.61
APOL3	1.27964	1.52889	2.8822
APOLD1	4.98227	5.34412	10.4041
APOM	0.767782	1.01926	1.19506
APOO	3.12743	3.9592	3.50996
APOOL	9.02144	9.8741	7.59215
APP	1050.52	948.487	416.654
APPBP2	45.2352	44.2105	30.3686
APPL1	65.4534	68.2906	37.7499
APPL2	27.8321	27.7112	26.5725
APTX	5.10703	5.26959	4.84703
AQP1	1153.21	1020.92	1911.25
AQP3	2.55927	2.67556	10.1229
AQP7	0.255927	1.14667	1.96834
AQP8	0.255927	0.191112	10.8961
AQR	21.6259	20.1304	9.209
AR	1.02371	0.637039	0.421786
ARAF	46.7067	44.3379	51.95
ARAP1	62.7022	69.5009	149.453
ARAP2	0.575837	0.573335	2.8822
ARAP3	18.0429	16.8178	40.14
ARC	0.0639818	0	1.12476
ARCN1	122.077	121.738	57.7826
AREL1	47.0267	39.6238	26.6428
ARF1	220.677	200.834	164.138
ARF3	69.1004	78.3558	101.229
ARF4	103.234	103.738	104.09
ARF5	20.7301	18.283	34.0944
ARF6	53.7448	62.4298	38.734
ARFGAP1	34.4222	38.8594	88.9969
ARFGAP2	57.0584	60.1346	77.3549
ARFGAP3	24.761	26.3734	42.741
ARFGEF1	37.8133	34.9097	23.3388
ARFGEF2	37.8133	31.9794	23.0576
ARFGEF3	60.1429	56.4417	34.8677
ARFIP1	21.9458	22.2964	22.1438
ARFIP2	17.467	18.5378	33.4617
ARFRP1	28.344	29.049	48.3648
ARGLU1	86.8234	80.2032	50.4737
ARHGAP1	159.571	147.793	237.536
ARHGAP10	36.7256	35.4194	52.5827
ARHGAP11A	0.255927	0.382223	0.843572
ARHGAP12	81.5769	82.1143	47.8727
ARHGAP15	0.319909	0.509631	2.31982
ARHGAP17	62.0624	61.7291	49.8411
ARHGAP18	2.8152	1.97482	4.56935
ARHGAP19	1.72751	2.35704	4.56935
ARHGAP20	7.22995	8.2178	4.63965
ARHGAP21	38.5811	35.3557	39.0152
ARHGAP22	1.4076	0.573335	23.9012
ARHGAP23	113.504	115.623	76.4839
ARHGAP24	26.1046	24.8445	26.924
ARHGAP25	0.959728	0.382223	9.0684
ARHGAP26	3.39104	2.86668	5.27233
ARHGAP27	3.32706	2.86668	18.2071
ARHGAP28	1.98344	2.16593	2.67131
ARHGAP29	13.8841	14.9704	25.729
ARHGAP30	1.72751	1.6563	20.2457
ARHGAP31	10.749	10.3837	17.2229
ARHGAP32	17.9789	15.1615	22.6359
ARHGAP33	10.621	9.36447	8.43572
ARHGAP35	88.167	80.5854	30.0171
ARHGAP39	9.78922	9.23706	15.7467
ARHGAP4	2.36733	4.01335	31.2825
ARHGAP42	18.6827	17.0726	5.83471
ARHGAP44	7.29393	6.62521	5.90501
ARHGAP5	80.8091	79.1202	62.9164
ARHGAP9	0.191946	0.254816	3.58518
ARHGDIB	7.16597	9.10966	34.7974
ARHGDIG	3.45502	4.01335	12.0912
ARHGEF1	50.2257	50.3898	143.618
[truncated: 14,924 more rows]

## Sheet: Decontaminated Aortic valve
	C45	E33	C38	C42	C43	E25	E26	1059	E35	E39	E40	E37	1062	E41	E38	1063
[truncated: 15,628 more rows]

[truncated: 1 more sheets: Contamination genes]
