# Supplementary material for: Multiomics coupled with vibrational spectroscopy identify early mechanisms of experimental aortic valve stenosis
Source: Research Square preprint supplement (doi:10.21203/rs.3.rs-4330270/v1), 2024-05-02
Supplement: Supplementary file 5 [file 44cf244f07c515fd9bdb7415.xlsx]

## Sheet: hsa_miR_21_5p_microT_human_inte
I.No	gene_symbol	gene_ensembl_id	mirna_name	mirna_db_id	interaction_score
9	GATAD2B	ENSG00000143614	hsa-miR-21-5p	MIMAT0000076	0.999951
18	GID4	ENSG00000141034	hsa-miR-21-5p	MIMAT0000076	0.999647
20	RECK	ENSG00000122707	hsa-miR-21-5p	MIMAT0000076	0.999605
21	SKI	ENSG00000157933	hsa-miR-21-5p	MIMAT0000076	0.999519
200	JAG1	ENSG00000101384	hsa-miR-21-5p	MIMAT0000076	0.979637
202	PDZD2	ENSG00000133401	hsa-miR-21-5p	MIMAT0000076	0.979536
211	PRDM11	ENSG00000019485	hsa-miR-21-5p	MIMAT0000076	0.978498
251	CNKSR3	ENSG00000153721	hsa-miR-21-5p	MIMAT0000076	0.973203
345	SLC8A3	ENSG00000100678	hsa-miR-21-5p	MIMAT0000076	0.957765
371	PLEKHA1	ENSG00000107679	hsa-miR-21-5p	MIMAT0000076	0.953855
376	RTN4	ENSG00000115310	hsa-miR-21-5p	MIMAT0000076	0.952473
444	TIMP3	ENSG00000100234	hsa-miR-21-5p	MIMAT0000076	0.94056
447	CREB5	ENSG00000146592	hsa-miR-21-5p	MIMAT0000076	0.940326
512	LATS1	ENSG00000131023	hsa-miR-21-5p	MIMAT0000076	0.932864
548	SLC22A15	ENSG00000163393	hsa-miR-21-5p	MIMAT0000076	0.926561
556	FAM107B	ENSG00000065809	hsa-miR-21-5p	MIMAT0000076	0.925138
571	RNF24	ENSG00000101236	hsa-miR-21-5p	MIMAT0000076	0.923531
607	ADNP	ENSG00000101126	hsa-miR-21-5p	MIMAT0000076	0.917235
731	GLYR1	ENSG00000140632	hsa-miR-21-5p	MIMAT0000076	0.898395
758	YAP1	ENSG00000137693	hsa-miR-21-5p	MIMAT0000076	0.894124
792	LAMA4	ENSG00000112769	hsa-miR-21-5p	MIMAT0000076	0.888995
802	PURB	ENSG00000146676	hsa-miR-21-5p	MIMAT0000076	0.888175
828	LRP6	ENSG00000070018	hsa-miR-21-5p	MIMAT0000076	0.885104
884	DCAF7	ENSG00000136485	hsa-miR-21-5p	MIMAT0000076	0.878256
891	RAB11FIP2	ENSG00000107560	hsa-miR-21-5p	MIMAT0000076	0.877736
944	PGRMC2	ENSG00000164040	hsa-miR-21-5p	MIMAT0000076	0.870568
959	FAM3C	ENSG00000196937	hsa-miR-21-5p	MIMAT0000076	0.868133
1116	NBEA	ENSG00000172915	hsa-miR-21-5p	MIMAT0000076	0.851208
1180	VCL	ENSG00000035403	hsa-miR-21-5p	MIMAT0000076	0.843352
1195	ITCH	ENSG00000078747	hsa-miR-21-5p	MIMAT0000076	0.841773
1268	STK3	ENSG00000104375	hsa-miR-21-5p	MIMAT0000076	0.833912
1272	LANCL1	ENSG00000115365	hsa-miR-21-5p	MIMAT0000076	0.83365
1347	TSHZ1	ENSG00000179981	hsa-miR-21-5p	MIMAT0000076	0.825507
1374	ATXN7L3B	ENSG00000253719	hsa-miR-21-5p	MIMAT0000076	0.823134
1375	RASA2	ENSG00000155903	hsa-miR-21-5p	MIMAT0000076	0.823125
1379	NTF3	ENSG00000185652	hsa-miR-21-5p	MIMAT0000076	0.82247
1388	LYRM1	ENSG00000102897	hsa-miR-21-5p	MIMAT0000076	0.82168
1401	SPIN1	ENSG00000106723	hsa-miR-21-5p	MIMAT0000076	0.820078
1440	RASSF8	ENSG00000123094	hsa-miR-21-5p	MIMAT0000076	0.815634
1470	BNIP2	ENSG00000140299	hsa-miR-21-5p	MIMAT0000076	0.812854
1472	CFL2	ENSG00000165410	hsa-miR-21-5p	MIMAT0000076	0.812785
1520	TENT5A	ENSG00000112773	hsa-miR-21-5p	MIMAT0000076	0.808561
1545	PAIP2B	ENSG00000124374	hsa-miR-21-5p	MIMAT0000076	0.806626
1580	FNIP2	ENSG00000052795	hsa-miR-21-5p	MIMAT0000076	0.804321
1587	NPAS3	ENSG00000151322	hsa-miR-21-5p	MIMAT0000076	0.80373
1604	CALD1	ENSG00000122786	hsa-miR-21-5p	MIMAT0000076	0.802263
1614	MAPRE1	ENSG00000101367	hsa-miR-21-5p	MIMAT0000076	0.801607
1625	ATL1	ENSG00000198513	hsa-miR-21-5p	MIMAT0000076	0.800886
1628	MPRIP	ENSG00000133030	hsa-miR-21-5p	MIMAT0000076	0.80058
1642	ZDHHC17	ENSG00000186908	hsa-miR-21-5p	MIMAT0000076	0.799083
1687	MSX1	ENSG00000163132	hsa-miR-21-5p	MIMAT0000076	0.795383
1699	TET1	ENSG00000138336	hsa-miR-21-5p	MIMAT0000076	0.794314
1700	MTMR12	ENSG00000150712	hsa-miR-21-5p	MIMAT0000076	0.794308
1801	NIPAL2	ENSG00000104361	hsa-miR-21-5p	MIMAT0000076	0.785628
1826	TBL1XR1	ENSG00000177565	hsa-miR-21-5p	MIMAT0000076	0.782761
1842	ANKRD46	ENSG00000186106	hsa-miR-21-5p	MIMAT0000076	0.781444
1849	RAB22A	ENSG00000124209	hsa-miR-21-5p	MIMAT0000076	0.781107
1856	SASH1	ENSG00000111961	hsa-miR-21-5p	MIMAT0000076	0.780854
1894	UBE2W	ENSG00000104343	hsa-miR-21-5p	MIMAT0000076	0.777092
1910	ARL1	ENSG00000120805	hsa-miR-21-5p	MIMAT0000076	0.775648
1925	HSPA4L	ENSG00000164070	hsa-miR-21-5p	MIMAT0000076	0.774453
2002	SRSF3	ENSG00000112081	hsa-miR-21-5p	MIMAT0000076	0.768939
2007	SPART	ENSG00000133104	hsa-miR-21-5p	MIMAT0000076	0.768522
2014	NFAT5	ENSG00000102908	hsa-miR-21-5p	MIMAT0000076	0.768188
2037	SLC39A9	ENSG00000029364	hsa-miR-21-5p	MIMAT0000076	0.766591
2062	SEMA3E	ENSG00000170381	hsa-miR-21-5p	MIMAT0000076	0.764513
2070	ITIH5	ENSG00000123243	hsa-miR-21-5p	MIMAT0000076	0.763696
2105	SC5D	ENSG00000109929	hsa-miR-21-5p	MIMAT0000076	0.761197
2106	GAB1	ENSG00000109458	hsa-miR-21-5p	MIMAT0000076	0.761133
2193	SMARCD1	ENSG00000066117	hsa-miR-21-5p	MIMAT0000076	0.755028
2203	ESD	ENSG00000139684	hsa-miR-21-5p	MIMAT0000076	0.754409
2208	AMER1	ENSG00000184675	hsa-miR-21-5p	MIMAT0000076	0.754064
2227	OLFM3	ENSG00000118733	hsa-miR-21-5p	MIMAT0000076	0.752418
2236	ITGB8	ENSG00000105855	hsa-miR-21-5p	MIMAT0000076	0.752056
2247	CEP97	ENSG00000182504	hsa-miR-21-5p	MIMAT0000076	0.751302
2282	ASPH	ENSG00000198363	hsa-miR-21-5p	MIMAT0000076	0.748815
2303	SACM1L	ENSG00000211456	hsa-miR-21-5p	MIMAT0000076	0.746932
2338	ARL6IP6	ENSG00000177917	hsa-miR-21-5p	MIMAT0000076	0.744476
2347	GPC4	ENSG00000076716	hsa-miR-21-5p	MIMAT0000076	0.743646
2355	APBB2	ENSG00000163697	hsa-miR-21-5p	MIMAT0000076	0.742748
2395	KAT6A	ENSG00000083168	hsa-miR-21-5p	MIMAT0000076	0.740442
2414	BRD1	ENSG00000100425	hsa-miR-21-5p	MIMAT0000076	0.738568
2415	ELL2	ENSG00000118985	hsa-miR-21-5p	MIMAT0000076	0.738467
2465	RDH11	ENSG00000072042	hsa-miR-21-5p	MIMAT0000076	0.734637
2509	DYRK1A	ENSG00000157540	hsa-miR-21-5p	MIMAT0000076	0.731874
2539	USP53	ENSG00000145390	hsa-miR-21-5p	MIMAT0000076	0.729728
2541	FOXO1	ENSG00000150907	hsa-miR-21-5p	MIMAT0000076	0.729531
2542	LAMP2	ENSG00000005893	hsa-miR-21-5p	MIMAT0000076	0.729508
2552	THRB	ENSG00000151090	hsa-miR-21-5p	MIMAT0000076	0.728769
2591	MOSMO	ENSG00000185716	hsa-miR-21-5p	MIMAT0000076	0.726717
2624	FERMT2	ENSG00000073712	hsa-miR-21-5p	MIMAT0000076	0.724741
2633	RNF180	ENSG00000164197	hsa-miR-21-5p	MIMAT0000076	0.724249
2642	KLHL42	ENSG00000087448	hsa-miR-21-5p	MIMAT0000076	0.723556
2657	ZBTB2	ENSG00000181472	hsa-miR-21-5p	MIMAT0000076	0.72276
2685	MON2	ENSG00000061987	hsa-miR-21-5p	MIMAT0000076	0.721
2705	ZC3H14	ENSG00000100722	hsa-miR-21-5p	MIMAT0000076	0.719831
2708	SNTB2	ENSG00000168807	hsa-miR-21-5p	MIMAT0000076	0.719731
2718	NT5E	ENSG00000135318	hsa-miR-21-5p	MIMAT0000076	0.719256
2737	NSD3	ENSG00000147548	hsa-miR-21-5p	MIMAT0000076	0.718293
2756	BCL2	ENSG00000171791	hsa-miR-21-5p	MIMAT0000076	0.717448
2786	TSPAN2	ENSG00000134198	hsa-miR-21-5p	MIMAT0000076	0.715439
2788	TESK2	ENSG00000070759	hsa-miR-21-5p	MIMAT0000076	0.715402
2798	LONRF1	ENSG00000154359	hsa-miR-21-5p	MIMAT0000076	0.714588
2832	PRRG4	ENSG00000135378	hsa-miR-21-5p	MIMAT0000076	0.712693
2876	VPS41	ENSG00000006715	hsa-miR-21-5p	MIMAT0000076	0.710734
2926	DIAPH2	ENSG00000147202	hsa-miR-21-5p	MIMAT0000076	0.708663
2970	JADE3	ENSG00000102221	hsa-miR-21-5p	MIMAT0000076	0.706897
3062	MIA3	ENSG00000154305	hsa-miR-21-5p	MIMAT0000076	0.70206
3107	TRIP11	ENSG00000100815	hsa-miR-21-5p	MIMAT0000076	0.699863
3165	TNKS	ENSG00000173273	hsa-miR-21-5p	MIMAT0000076	0.696649
3193	PPM1L	ENSG00000163590	hsa-miR-21-5p	MIMAT0000076	0.695112
3220	IRF2BPL	ENSG00000119669	hsa-miR-21-5p	MIMAT0000076	0.693195
3246	MFAP3L	ENSG00000198948	hsa-miR-21-5p	MIMAT0000076	0.691658
3290	MANSC1	ENSG00000111261	hsa-miR-21-5p	MIMAT0000076	0.689514
3306	EIF5	ENSG00000100664	hsa-miR-21-5p	MIMAT0000076	0.688688
3390	ARHGEF26	ENSG00000114790	hsa-miR-21-5p	MIMAT0000076	0.684903
3393	KANSL3	ENSG00000114982	hsa-miR-21-5p	MIMAT0000076	0.684635
3432	AP1AR	ENSG00000138660	hsa-miR-21-5p	MIMAT0000076	0.682666
3554	NAA16	ENSG00000172766	hsa-miR-21-5p	MIMAT0000076	0.676927
3559	SH3RF1	ENSG00000154447	hsa-miR-21-5p	MIMAT0000076	0.676735
3593	LPP	ENSG00000145012	hsa-miR-21-5p	MIMAT0000076	0.675424
3611	HAPLN1	ENSG00000145681	hsa-miR-21-5p	MIMAT0000076	0.674681
3638	BRAF	ENSG00000157764	hsa-miR-21-5p	MIMAT0000076	0.673345
3804	TRIM33	ENSG00000197323	hsa-miR-21-5p	MIMAT0000076	0.666304
3879	PROSER1	ENSG00000120685	hsa-miR-21-5p	MIMAT0000076	0.663191
3880	SESTD1	ENSG00000187231	hsa-miR-21-5p	MIMAT0000076	0.66317
3932	MXD1	ENSG00000059728	hsa-miR-21-5p	MIMAT0000076	0.660801
3953	EIF4EBP2	ENSG00000148730	hsa-miR-21-5p	MIMAT0000076	0.659923
3955	ZBTB47	ENSG00000114853	hsa-miR-21-5p	MIMAT0000076	0.659889
3976	IST1	ENSG00000182149	hsa-miR-21-5p	MIMAT0000076	0.659018
4011	PTPDC1	ENSG00000158079	hsa-miR-21-5p	MIMAT0000076	0.657504
4020	TGFB2	ENSG00000092969	hsa-miR-21-5p	MIMAT0000076	0.657116
4026	ATP11B	ENSG00000058063	hsa-miR-21-5p	MIMAT0000076	0.656771
4045	FHDC1	ENSG00000137460	hsa-miR-21-5p	MIMAT0000076	0.655889
4056	AKAP12	ENSG00000131016	hsa-miR-21-5p	MIMAT0000076	0.655435
4059	ATXN3	ENSG00000066427	hsa-miR-21-5p	MIMAT0000076	0.655372
4079	SCRN1	ENSG00000136193	hsa-miR-21-5p	MIMAT0000076	0.654555
4117	RANBP3L	ENSG00000164188	hsa-miR-21-5p	MIMAT0000076	0.652744
4123	SOCS5	ENSG00000171150	hsa-miR-21-5p	MIMAT0000076	0.652414
4132	JPH1	ENSG00000104369	hsa-miR-21-5p	MIMAT0000076	0.652095
4143	PYGO1	ENSG00000171016	hsa-miR-21-5p	MIMAT0000076	0.651722
4146	SFXN1	ENSG00000164466	hsa-miR-21-5p	MIMAT0000076	0.651461
4249	ENDOD1	ENSG00000149218	hsa-miR-21-5p	MIMAT0000076	0.647666
4267	SPRED2	ENSG00000198369	hsa-miR-21-5p	MIMAT0000076	0.646939
4345	ARFIP1	ENSG00000164144	hsa-miR-21-5p	MIMAT0000076	0.644009
4346	GNAI3	ENSG00000065135	hsa-miR-21-5p	MIMAT0000076	0.644001
4367	MCU	ENSG00000156026	hsa-miR-21-5p	MIMAT0000076	0.643252
4385	GTF2A1	ENSG00000165417	hsa-miR-21-5p	MIMAT0000076	0.642683
4415	OSR1	ENSG00000143867	hsa-miR-21-5p	MIMAT0000076	0.641456
4453	TNS1	ENSG00000079308	hsa-miR-21-5p	MIMAT0000076	0.640113
4477	RNF11	ENSG00000123091	hsa-miR-21-5p	MIMAT0000076	0.639337
4501	UBE2D2	ENSG00000131508	hsa-miR-21-5p	MIMAT0000076	0.638656
4556	GASK1B	ENSG00000164125	hsa-miR-21-5p	MIMAT0000076	0.636617
4580	DUSP10	ENSG00000143507	hsa-miR-21-5p	MIMAT0000076	0.635566
4609	PJA2	ENSG00000198961	hsa-miR-21-5p	MIMAT0000076	0.634372
4639	GOLIM4	ENSG00000173905	hsa-miR-21-5p	MIMAT0000076	0.63353
4694	DICER1	ENSG00000100697	hsa-miR-21-5p	MIMAT0000076	0.630943
4700	EXTL2	ENSG00000162694	hsa-miR-21-5p	MIMAT0000076	0.630859
4737	ARHGEF12	ENSG00000196914	hsa-miR-21-5p	MIMAT0000076	0.629547
4738	KDM4C	ENSG00000107077	hsa-miR-21-5p	MIMAT0000076	0.629541
4754	UST	ENSG00000111962	hsa-miR-21-5p	MIMAT0000076	0.629132
4805	DNM1L	ENSG00000087470	hsa-miR-21-5p	MIMAT0000076	0.627181
4834	TRAF6	ENSG00000175104	hsa-miR-21-5p	MIMAT0000076	0.626318
4856	IFFO2	ENSG00000169991	hsa-miR-21-5p	MIMAT0000076	0.625417
4913	KL	ENSG00000133116	hsa-miR-21-5p	MIMAT0000076	0.623169
4932	CREBL2	ENSG00000111269	hsa-miR-21-5p	MIMAT0000076	0.62227
4956	SMIM14	ENSG00000163683	hsa-miR-21-5p	MIMAT0000076	0.621298
4958	SOX6	ENSG00000110693	hsa-miR-21-5p	MIMAT0000076	0.621281
4975	DIPK2A	ENSG00000181744	hsa-miR-21-5p	MIMAT0000076	0.620909
4983	PANK3	ENSG00000120137	hsa-miR-21-5p	MIMAT0000076	0.620542
5152	PER2	ENSG00000132326	hsa-miR-21-5p	MIMAT0000076	0.615007
5242	ZBTB38	ENSG00000177311	hsa-miR-21-5p	MIMAT0000076	0.61267
5283	MYOCD	ENSG00000141052	hsa-miR-21-5p	MIMAT0000076	0.611388
5290	TP53BP2	ENSG00000143514	hsa-miR-21-5p	MIMAT0000076	0.610921
5320	YY1	ENSG00000100811	hsa-miR-21-5p	MIMAT0000076	0.610193
5334	KAT7	ENSG00000136504	hsa-miR-21-5p	MIMAT0000076	0.609925
5344	ZNRF3	ENSG00000183579	hsa-miR-21-5p	MIMAT0000076	0.609691
5375	ZFR	ENSG00000056097	hsa-miR-21-5p	MIMAT0000076	0.608673
5380	MACROD2	ENSG00000172264	hsa-miR-21-5p	MIMAT0000076	0.608544
5393	ACBD5	ENSG00000107897	hsa-miR-21-5p	MIMAT0000076	0.608144
5414	KIDINS220	ENSG00000134313	hsa-miR-21-5p	MIMAT0000076	0.6076
5426	UBR2	ENSG00000024048	hsa-miR-21-5p	MIMAT0000076	0.60718
5476	RERE	ENSG00000142599	hsa-miR-21-5p	MIMAT0000076	0.605904
5479	FOXK1	ENSG00000164916	hsa-miR-21-5p	MIMAT0000076	0.605855
5541	FTO	ENSG00000140718	hsa-miR-21-5p	MIMAT0000076	0.603939
5557	PELI2	ENSG00000139946	hsa-miR-21-5p	MIMAT0000076	0.603444
5562	FAM168B	ENSG00000152102	hsa-miR-21-5p	MIMAT0000076	0.603302
5588	ARL4D	ENSG00000175906	hsa-miR-21-5p	MIMAT0000076	0.602159
5590	LIMA1	ENSG00000050405	hsa-miR-21-5p	MIMAT0000076	0.602051
5691	GPATCH8	ENSG00000186566	hsa-miR-21-5p	MIMAT0000076	0.598651
5710	ZFPM2	ENSG00000169946	hsa-miR-21-5p	MIMAT0000076	0.598036
5727	FAM241A	ENSG00000174749	hsa-miR-21-5p	MIMAT0000076	0.597526
5742	ANAPC1	ENSG00000153107	hsa-miR-21-5p	MIMAT0000076	0.597192
5750	BRMS1L	ENSG00000100916	hsa-miR-21-5p	MIMAT0000076	0.596882
5897	SMARCA2	ENSG00000080503	hsa-miR-21-5p	MIMAT0000076	0.592845
5899	RASAL2	ENSG00000075391	hsa-miR-21-5p	MIMAT0000076	0.59284
5901	FBXL2	ENSG00000153558	hsa-miR-21-5p	MIMAT0000076	0.592822
5907	SRI	ENSG00000075142	hsa-miR-21-5p	MIMAT0000076	0.592691
5913	BPNT2	ENSG00000104331	hsa-miR-21-5p	MIMAT0000076	0.5926
5938	DESI2	ENSG00000121644	hsa-miR-21-5p	MIMAT0000076	0.591984
5941	ZNF35	ENSG00000169981	hsa-miR-21-5p	MIMAT0000076	0.591892
6032	PARD3B	ENSG00000116117	hsa-miR-21-5p	MIMAT0000076	0.588764
6049	TOR1AIP2	ENSG00000169905	hsa-miR-21-5p	MIMAT0000076	0.588285
6069	HECTD1	ENSG00000092148	hsa-miR-21-5p	MIMAT0000076	0.587757
6132	TASOR2	ENSG00000108021	hsa-miR-21-5p	MIMAT0000076	0.586157
6165	SMC1A	ENSG00000072501	hsa-miR-21-5p	MIMAT0000076	0.585145
6270	SLMAP	ENSG00000163681	hsa-miR-21-5p	MIMAT0000076	0.582332
6345	ZCCHC3	ENSG00000247315	hsa-miR-21-5p	MIMAT0000076	0.580193
6372	IGDCC4	ENSG00000103742	hsa-miR-21-5p	MIMAT0000076	0.579562
6386	KMT5A	ENSG00000183955	hsa-miR-21-5p	MIMAT0000076	0.579209
6406	LGR6	ENSG00000133067	hsa-miR-21-5p	MIMAT0000076	0.578823
6490	NEK7	ENSG00000151414	hsa-miR-21-5p	MIMAT0000076	0.576382
6526	SRSF10	ENSG00000188529	hsa-miR-21-5p	MIMAT0000076	0.575441
6552	FOXO3	ENSG00000118689	hsa-miR-21-5p	MIMAT0000076	0.574655
6554	PPP1R21	ENSG00000162869	hsa-miR-21-5p	MIMAT0000076	0.574637
6559	OGT	ENSG00000147162	hsa-miR-21-5p	MIMAT0000076	0.574569
6598	DENND2B	ENSG00000166444	hsa-miR-21-5p	MIMAT0000076	0.573734
6662	IGF1R	ENSG00000140443	hsa-miR-21-5p	MIMAT0000076	0.572087
6678	SERPINI1	ENSG00000163536	hsa-miR-21-5p	MIMAT0000076	0.571822
6693	ALG9	ENSG00000086848	hsa-miR-21-5p	MIMAT0000076	0.571566
6793	VIM	ENSG00000026025	hsa-miR-21-5p	MIMAT0000076	0.569326
6815	WEE1	ENSG00000166483	hsa-miR-21-5p	MIMAT0000076	0.568684
6818	VPS26A	ENSG00000122958	hsa-miR-21-5p	MIMAT0000076	0.568612
6829	ATL3	ENSG00000184743	hsa-miR-21-5p	MIMAT0000076	0.56844
6836	DLG2	ENSG00000150672	hsa-miR-21-5p	MIMAT0000076	0.568262
6853	BAHD1	ENSG00000140320	hsa-miR-21-5p	MIMAT0000076	0.567867
6860	IPO5	ENSG00000065150	hsa-miR-21-5p	MIMAT0000076	0.567559
6935	ZNF329	ENSG00000181894	hsa-miR-21-5p	MIMAT0000076	0.565627
6952	COG6	ENSG00000133103	hsa-miR-21-5p	MIMAT0000076	0.565021
6987	FRYL	ENSG00000075539	hsa-miR-21-5p	MIMAT0000076	0.564016
7030	FGF13	ENSG00000129682	hsa-miR-21-5p	MIMAT0000076	0.562995
7035	MINDY3	ENSG00000148481	hsa-miR-21-5p	MIMAT0000076	0.562735
7036	SLC5A3	ENSG00000198743	hsa-miR-21-5p	MIMAT0000076	0.562701
7070	PLEKHA3	ENSG00000116095	hsa-miR-21-5p	MIMAT0000076	0.561874
7074	SLAIN2	ENSG00000109171	hsa-miR-21-5p	MIMAT0000076	0.561797
7081	NHSL2	ENSG00000204131	hsa-miR-21-5p	MIMAT0000076	0.561713
7116	LOX	ENSG00000113083	hsa-miR-21-5p	MIMAT0000076	0.560839
7166	MTMR6	ENSG00000139505	hsa-miR-21-5p	MIMAT0000076	0.559775
7191	HDGFL3	ENSG00000166503	hsa-miR-21-5p	MIMAT0000076	0.559398
7193	SATB2	ENSG00000119042	hsa-miR-21-5p	MIMAT0000076	0.559374
7218	FAM131A	ENSG00000175182	hsa-miR-21-5p	MIMAT0000076	0.558841
7238	GAN	ENSG00000261609	hsa-miR-21-5p	MIMAT0000076	0.558387
7243	MBNL1	ENSG00000152601	hsa-miR-21-5p	MIMAT0000076	0.558249
7244	PKP4	ENSG00000144283	hsa-miR-21-5p	MIMAT0000076	0.558228
7351	PLEKHG2	ENSG00000090924	hsa-miR-21-5p	MIMAT0000076	0.556146
7356	PPP1R3B	ENSG00000173281	hsa-miR-21-5p	MIMAT0000076	0.5561
7379	LTBP1	ENSG00000049323	hsa-miR-21-5p	MIMAT0000076	0.555514
7496	APPL1	ENSG00000157500	hsa-miR-21-5p	MIMAT0000076	0.552709
7501	ZNF621	ENSG00000172888	hsa-miR-21-5p	MIMAT0000076	0.55266
7535	ASH1L	ENSG00000116539	hsa-miR-21-5p	MIMAT0000076	0.552021
7536	TEX2	ENSG00000136478	hsa-miR-21-5p	MIMAT0000076	0.551947
7607	BICRAL	ENSG00000112624	hsa-miR-21-5p	MIMAT0000076	0.550116
7622	COL4A4	ENSG00000081052	hsa-miR-21-5p	MIMAT0000076	0.549951
7639	BMP3	ENSG00000152785	hsa-miR-21-5p	MIMAT0000076	0.549675
7677	GUCY1A1	ENSG00000164116	hsa-miR-21-5p	MIMAT0000076	0.548854
7690	NPTN	ENSG00000156642	hsa-miR-21-5p	MIMAT0000076	0.548639
7700	ARMCX3	ENSG00000102401	hsa-miR-21-5p	MIMAT0000076	0.548423
7701	PAWR	ENSG00000177425	hsa-miR-21-5p	MIMAT0000076	0.548403
7704	DGKH	ENSG00000102780	hsa-miR-21-5p	MIMAT0000076	0.548385
7713	KIAA0753	ENSG00000198920	hsa-miR-21-5p	MIMAT0000076	0.54822
7724	RASA1	ENSG00000145715	hsa-miR-21-5p	MIMAT0000076	0.547906
7728	DNAJB5	ENSG00000137094	hsa-miR-21-5p	MIMAT0000076	0.547805
7808	FUBP3	ENSG00000107164	hsa-miR-21-5p	MIMAT0000076	0.54614
7820	MORC4	ENSG00000133131	hsa-miR-21-5p	MIMAT0000076	0.545899
7841	SNX19	ENSG00000120451	hsa-miR-21-5p	MIMAT0000076	0.545557
7858	SCAI	ENSG00000173611	hsa-miR-21-5p	MIMAT0000076	0.54517
7861	GLS	ENSG00000115419	hsa-miR-21-5p	MIMAT0000076	0.545085
7911	RAB2B	ENSG00000129472	hsa-miR-21-5p	MIMAT0000076	0.543529
7920	FAM181B	ENSG00000182103	hsa-miR-21-5p	MIMAT0000076	0.543258
7962	SOCS7	ENSG00000274211	hsa-miR-21-5p	MIMAT0000076	0.542257
7966	KCNT2	ENSG00000162687	hsa-miR-21-5p	MIMAT0000076	0.542174
8051	PHC3	ENSG00000173889	hsa-miR-21-5p	MIMAT0000076	0.540602
8185	RIC1	ENSG00000107036	hsa-miR-21-5p	MIMAT0000076	0.538064
8203	ATRN	ENSG00000088812	hsa-miR-21-5p	MIMAT0000076	0.53769
8213	CNNM2	ENSG00000148842	hsa-miR-21-5p	MIMAT0000076	0.537472
8218	PRXL2C	ENSG00000158122	hsa-miR-21-5p	MIMAT0000076	0.537377
8223	KLF7	ENSG00000118263	hsa-miR-21-5p	MIMAT0000076	0.537332
8250	ARNT2	ENSG00000172379	hsa-miR-21-5p	MIMAT0000076	0.536886
8261	DCAF10	ENSG00000122741	hsa-miR-21-5p	MIMAT0000076	0.536693
8392	NXPH3	ENSG00000182575	hsa-miR-21-5p	MIMAT0000076	0.53394
8416	FNBP1	ENSG00000187239	hsa-miR-21-5p	MIMAT0000076	0.533575
8426	ANKFY1	ENSG00000185722	hsa-miR-21-5p	MIMAT0000076	0.533433
8446	XPO1	ENSG00000082898	hsa-miR-21-5p	MIMAT0000076	0.533048
8455	PTCHD1	ENSG00000165186	hsa-miR-21-5p	MIMAT0000076	0.532788
8469	MTMR9	ENSG00000104643	hsa-miR-21-5p	MIMAT0000076	0.53246
8496	STARD13	ENSG00000133121	hsa-miR-21-5p	MIMAT0000076	0.532004
8559	ARID2	ENSG00000189079	hsa-miR-21-5p	MIMAT0000076	0.530473
8587	ITGA1	ENSG00000213949	hsa-miR-21-5p	MIMAT0000076	0.52999
8594	TENT4A	ENSG00000112941	hsa-miR-21-5p	MIMAT0000076	0.529894
8626	COL14A1	ENSG00000187955	hsa-miR-21-5p	MIMAT0000076	0.529333
8628	SHROOM3	ENSG00000138771	hsa-miR-21-5p	MIMAT0000076	0.529306
8645	NCKAP1	ENSG00000061676	hsa-miR-21-5p	MIMAT0000076	0.528968
8652	PTPN9	ENSG00000169410	hsa-miR-21-5p	MIMAT0000076	0.528709
8657	MFSD14A	ENSG00000156875	hsa-miR-21-5p	MIMAT0000076	0.528581
8680	KMT2D	ENSG00000167548	hsa-miR-21-5p	MIMAT0000076	0.528066
8683	PFN2	ENSG00000070087	hsa-miR-21-5p	MIMAT0000076	0.528003
8700	CCNI	ENSG00000118816	hsa-miR-21-5p	MIMAT0000076	0.527775
8717	ITGA8	ENSG00000077943	hsa-miR-21-5p	MIMAT0000076	0.527363
8718	L3MBTL1	ENSG00000185513	hsa-miR-21-5p	MIMAT0000076	0.527328
8719	SPAG9	ENSG00000008294	hsa-miR-21-5p	MIMAT0000076	0.527322
8837	ITPR1	ENSG00000150995	hsa-miR-21-5p	MIMAT0000076	0.524733
8912	PGRMC1	ENSG00000101856	hsa-miR-21-5p	MIMAT0000076	0.523078
8941	PRDM6	ENSG00000061455	hsa-miR-21-5p	MIMAT0000076	0.522588
8953	DLC1	ENSG00000164741	hsa-miR-21-5p	MIMAT0000076	0.522379
8975	KCNA2	ENSG00000177301	hsa-miR-21-5p	MIMAT0000076	0.52201
9018	ARL10	ENSG00000175414	hsa-miR-21-5p	MIMAT0000076	0.521393
9071	MYEF2	ENSG00000104177	hsa-miR-21-5p	MIMAT0000076	0.520524
9081	RCOR3	ENSG00000117625	hsa-miR-21-5p	MIMAT0000076	0.52039
9121	KLHL11	ENSG00000178502	hsa-miR-21-5p	MIMAT0000076	0.519603
9153	NR1D2	ENSG00000174738	hsa-miR-21-5p	MIMAT0000076	0.518964
9166	RNF2	ENSG00000121481	hsa-miR-21-5p	MIMAT0000076	0.518697
9230	KANSL1L	ENSG00000144445	hsa-miR-21-5p	MIMAT0000076	0.517677
9262	ESYT2	ENSG00000117868	hsa-miR-21-5p	MIMAT0000076	0.516924
9298	BTBD7	ENSG00000011114	hsa-miR-21-5p	MIMAT0000076	0.51624
9299	CRKL	ENSG00000099942	hsa-miR-21-5p	MIMAT0000076	0.516212
9338	EIF5A2	ENSG00000163577	hsa-miR-21-5p	MIMAT0000076	0.515649
9357	DZIP1	ENSG00000134874	hsa-miR-21-5p	MIMAT0000076	0.515371
9369	PDP2	ENSG00000172840	hsa-miR-21-5p	MIMAT0000076	0.515195
9437	STX7	ENSG00000079950	hsa-miR-21-5p	MIMAT0000076	0.513981
9441	RPRD2	ENSG00000163125	hsa-miR-21-5p	MIMAT0000076	0.513911
9534	CLMP	ENSG00000166250	hsa-miR-21-5p	MIMAT0000076	0.512161
9560	MAP4K5	ENSG00000012983	hsa-miR-21-5p	MIMAT0000076	0.51177
9624	DENND11	ENSG00000257093	hsa-miR-21-5p	MIMAT0000076	0.510764
9636	GARRE1	ENSG00000166398	hsa-miR-21-5p	MIMAT0000076	0.510651
9657	NDN	ENSG00000182636	hsa-miR-21-5p	MIMAT0000076	0.510242
9752	OTUD6B	ENSG00000155100	hsa-miR-21-5p	MIMAT0000076	0.508666
9756	SLC37A3	ENSG00000157800	hsa-miR-21-5p	MIMAT0000076	0.508592
9762	SH3D19	ENSG00000109686	hsa-miR-21-5p	MIMAT0000076	0.508506
9772	PLD1	ENSG00000075651	hsa-miR-21-5p	MIMAT0000076	0.508417
9796	CRIM1	ENSG00000150938	hsa-miR-21-5p	MIMAT0000076	0.508039
9812	RASSF3	ENSG00000153179	hsa-miR-21-5p	MIMAT0000076	0.50776
9848	EMC1	ENSG00000127463	hsa-miR-21-5p	MIMAT0000076	0.507067
9879	JPH2	ENSG00000149596	hsa-miR-21-5p	MIMAT0000076	0.506701
9957	HEBP2	ENSG00000051620	hsa-miR-21-5p	MIMAT0000076	0.505628
9998	LAMC1	ENSG00000135862	hsa-miR-21-5p	MIMAT0000076	0.504979
10020	AEBP2	ENSG00000139154	hsa-miR-21-5p	MIMAT0000076	0.504673
10070	SYNPO2	ENSG00000172403	hsa-miR-21-5p	MIMAT0000076	0.504002
10071	POGLUT3	ENSG00000178202	hsa-miR-21-5p	MIMAT0000076	0.503993
10099	CDC73	ENSG00000134371	hsa-miR-21-5p	MIMAT0000076	0.503623
10120	ATP9A	ENSG00000054793	hsa-miR-21-5p	MIMAT0000076	0.503279
10130	PSMD12	ENSG00000197170	hsa-miR-21-5p	MIMAT0000076	0.503158
10152	PGGT1B	ENSG00000164219	hsa-miR-21-5p	MIMAT0000076	0.502876
10306	CLASP2	ENSG00000163539	hsa-miR-21-5p	MIMAT0000076	0.500606
10311	SIAH1	ENSG00000196470	hsa-miR-21-5p	MIMAT0000076	0.500447
10315	ZMYND11	ENSG00000015171	hsa-miR-21-5p	MIMAT0000076	0.500415
10334	ZNF438	ENSG00000183621	hsa-miR-21-5p	MIMAT0000076	0.500257

## Sheet: hsa_miR_146a_5p_microT_human_in
I.No	gene_symbol	gene_ensembl_id	mirna_name	mirna_db_id	interaction_score
6	TRAF6	ENSG00000175104	hsa-miR-146a-5p	MIMAT0000449	0.999996
36	KLF7	ENSG00000118263	hsa-miR-146a-5p	MIMAT0000449	0.998901
54	ZBTB2	ENSG00000181472	hsa-miR-146a-5p	MIMAT0000449	0.997949
127	HNRNPD	ENSG00000138668	hsa-miR-146a-5p	MIMAT0000449	0.989625
160	SIPA1L1	ENSG00000197555	hsa-miR-146a-5p	MIMAT0000449	0.984228
227	BCORL1	ENSG00000085185	hsa-miR-146a-5p	MIMAT0000449	0.976422
237	SLC10A3	ENSG00000126903	hsa-miR-146a-5p	MIMAT0000449	0.974995
238	PHKB	ENSG00000102893	hsa-miR-146a-5p	MIMAT0000449	0.97462
246	EIF4G2	ENSG00000110321	hsa-miR-146a-5p	MIMAT0000449	0.974176
252	NFAT5	ENSG00000102908	hsa-miR-146a-5p	MIMAT0000449	0.973001
286	SIAH2	ENSG00000181788	hsa-miR-146a-5p	MIMAT0000449	0.967927
398	MARK1	ENSG00000116141	hsa-miR-146a-5p	MIMAT0000449	0.949596
422	RHOBTB3	ENSG00000164292	hsa-miR-146a-5p	MIMAT0000449	0.944749
429	SCN2A	ENSG00000136531	hsa-miR-146a-5p	MIMAT0000449	0.943283
442	GATAD1	ENSG00000157259	hsa-miR-146a-5p	MIMAT0000449	0.940914
459	PLEKHA1	ENSG00000107679	hsa-miR-146a-5p	MIMAT0000449	0.938637
505	ZNRF3	ENSG00000183579	hsa-miR-146a-5p	MIMAT0000449	0.933619
511	ZNF275	ENSG00000063587	hsa-miR-146a-5p	MIMAT0000449	0.93291
529	LANCL1	ENSG00000115365	hsa-miR-146a-5p	MIMAT0000449	0.929841
575	FNBP4	ENSG00000109920	hsa-miR-146a-5p	MIMAT0000449	0.922965
595	NOX4	ENSG00000086991	hsa-miR-146a-5p	MIMAT0000449	0.92006
649	MAT2A	ENSG00000168906	hsa-miR-146a-5p	MIMAT0000449	0.911221
695	ITCH	ENSG00000078747	hsa-miR-146a-5p	MIMAT0000449	0.904764
783	ZNF532	ENSG00000074657	hsa-miR-146a-5p	MIMAT0000449	0.890068
785	ZNF652	ENSG00000198740	hsa-miR-146a-5p	MIMAT0000449	0.889968
896	APPL1	ENSG00000157500	hsa-miR-146a-5p	MIMAT0000449	0.876509
950	PGAP1	ENSG00000197121	hsa-miR-146a-5p	MIMAT0000449	0.869376
970	HDGFL3	ENSG00000166503	hsa-miR-146a-5p	MIMAT0000449	0.867439
977	PTPDC1	ENSG00000158079	hsa-miR-146a-5p	MIMAT0000449	0.866418
992	PTCH1	ENSG00000185920	hsa-miR-146a-5p	MIMAT0000449	0.864801
1009	PPM1K	ENSG00000163644	hsa-miR-146a-5p	MIMAT0000449	0.862934
1026	BHLHE41	ENSG00000123095	hsa-miR-146a-5p	MIMAT0000449	0.860191
1053	LPP	ENSG00000145012	hsa-miR-146a-5p	MIMAT0000449	0.857055
1078	FER	ENSG00000151422	hsa-miR-146a-5p	MIMAT0000449	0.854673
1093	CLASP2	ENSG00000163539	hsa-miR-146a-5p	MIMAT0000449	0.853257
1114	RABGAP1	ENSG00000011454	hsa-miR-146a-5p	MIMAT0000449	0.8514
1129	ARHGEF40	ENSG00000165801	hsa-miR-146a-5p	MIMAT0000449	0.84991
1166	IQGAP1	ENSG00000140575	hsa-miR-146a-5p	MIMAT0000449	0.845073
1191	JAG1	ENSG00000101384	hsa-miR-146a-5p	MIMAT0000449	0.842236
1198	FGF13	ENSG00000129682	hsa-miR-146a-5p	MIMAT0000449	0.841612
1207	SORT1	ENSG00000134243	hsa-miR-146a-5p	MIMAT0000449	0.840624
1227	FTO	ENSG00000140718	hsa-miR-146a-5p	MIMAT0000449	0.838698
1270	PPP1R21	ENSG00000162869	hsa-miR-146a-5p	MIMAT0000449	0.833662
1284	ADARB1	ENSG00000197381	hsa-miR-146a-5p	MIMAT0000449	0.832319
1288	AMPH	ENSG00000078053	hsa-miR-146a-5p	MIMAT0000449	0.831931
1308	TBC1D20	ENSG00000125875	hsa-miR-146a-5p	MIMAT0000449	0.830032
1318	XPO1	ENSG00000082898	hsa-miR-146a-5p	MIMAT0000449	0.828709
1343	CCNI	ENSG00000118816	hsa-miR-146a-5p	MIMAT0000449	0.825855
1349	GDNF	ENSG00000168621	hsa-miR-146a-5p	MIMAT0000449	0.825305
1385	HDAC5	ENSG00000108840	hsa-miR-146a-5p	MIMAT0000449	0.822052
1403	MON2	ENSG00000061987	hsa-miR-146a-5p	MIMAT0000449	0.819611
1408	SOBP	ENSG00000112320	hsa-miR-146a-5p	MIMAT0000449	0.819144
1411	VASN	ENSG00000168140	hsa-miR-146a-5p	MIMAT0000449	0.818872
1429	SMARCA2	ENSG00000080503	hsa-miR-146a-5p	MIMAT0000449	0.81652
1452	ETV6	ENSG00000139083	hsa-miR-146a-5p	MIMAT0000449	0.814584
1481	PIAS2	ENSG00000078043	hsa-miR-146a-5p	MIMAT0000449	0.811665
1503	PLSCR4	ENSG00000114698	hsa-miR-146a-5p	MIMAT0000449	0.810251
1504	BICD1	ENSG00000151746	hsa-miR-146a-5p	MIMAT0000449	0.810162
1532	SCAI	ENSG00000173611	hsa-miR-146a-5p	MIMAT0000449	0.80763
1534	IKZF4	ENSG00000123411	hsa-miR-146a-5p	MIMAT0000449	0.807477
1541	SNX19	ENSG00000120451	hsa-miR-146a-5p	MIMAT0000449	0.807073
1548	CREBL2	ENSG00000111269	hsa-miR-146a-5p	MIMAT0000449	0.806415
1559	MOSMO	ENSG00000185716	hsa-miR-146a-5p	MIMAT0000449	0.805796
1570	ANKRD44	ENSG00000065413	hsa-miR-146a-5p	MIMAT0000449	0.805057
1571	PIAS1	ENSG00000033800	hsa-miR-146a-5p	MIMAT0000449	0.805051
1578	CAMSAP2	ENSG00000118200	hsa-miR-146a-5p	MIMAT0000449	0.804451
1610	CDKL2	ENSG00000138769	hsa-miR-146a-5p	MIMAT0000449	0.801769
1620	AUTS2	ENSG00000158321	hsa-miR-146a-5p	MIMAT0000449	0.801378
1623	SYPL2	ENSG00000143028	hsa-miR-146a-5p	MIMAT0000449	0.801004
1624	MEIS1	ENSG00000143995	hsa-miR-146a-5p	MIMAT0000449	0.800975
1657	NOTCH2	ENSG00000134250	hsa-miR-146a-5p	MIMAT0000449	0.797737
1665	EPHA5	ENSG00000145242	hsa-miR-146a-5p	MIMAT0000449	0.797035
1667	KPNA6	ENSG00000025800	hsa-miR-146a-5p	MIMAT0000449	0.796964
1676	HNRNPUL2	ENSG00000214753	hsa-miR-146a-5p	MIMAT0000449	0.796262
1712	B4GALT4	ENSG00000121578	hsa-miR-146a-5p	MIMAT0000449	0.793164
1722	TM9SF2	ENSG00000125304	hsa-miR-146a-5p	MIMAT0000449	0.792206
1743	UBE2G1	ENSG00000132388	hsa-miR-146a-5p	MIMAT0000449	0.790284
1745	ZDHHC17	ENSG00000186908	hsa-miR-146a-5p	MIMAT0000449	0.790089
1747	CCDC6	ENSG00000108091	hsa-miR-146a-5p	MIMAT0000449	0.790042
1774	ZC3H14	ENSG00000100722	hsa-miR-146a-5p	MIMAT0000449	0.787813
1818	EGFR	ENSG00000146648	hsa-miR-146a-5p	MIMAT0000449	0.78382
1891	SEC24A	ENSG00000113615	hsa-miR-146a-5p	MIMAT0000449	0.777388
1895	CPE	ENSG00000109472	hsa-miR-146a-5p	MIMAT0000449	0.776876
1921	BRAF	ENSG00000157764	hsa-miR-146a-5p	MIMAT0000449	0.774833
1955	ESYT2	ENSG00000117868	hsa-miR-146a-5p	MIMAT0000449	0.771748
1984	SERTAD2	ENSG00000179833	hsa-miR-146a-5p	MIMAT0000449	0.769816
2008	MAP1B	ENSG00000131711	hsa-miR-146a-5p	MIMAT0000449	0.768477
2054	NRP2	ENSG00000118257	hsa-miR-146a-5p	MIMAT0000449	0.764977
2082	AP3M2	ENSG00000070718	hsa-miR-146a-5p	MIMAT0000449	0.76288
2088	SS18	ENSG00000141380	hsa-miR-146a-5p	MIMAT0000449	0.762416
2102	ZNF365	ENSG00000138311	hsa-miR-146a-5p	MIMAT0000449	0.76138
2158	PLXDC2	ENSG00000120594	hsa-miR-146a-5p	MIMAT0000449	0.757654
2162	CYS1	ENSG00000205795	hsa-miR-146a-5p	MIMAT0000449	0.757472
2165	WDR7	ENSG00000091157	hsa-miR-146a-5p	MIMAT0000449	0.757181
2171	TTPA	ENSG00000137561	hsa-miR-146a-5p	MIMAT0000449	0.756754
2180	DGKH	ENSG00000102780	hsa-miR-146a-5p	MIMAT0000449	0.756172
2190	TFCP2L1	ENSG00000115112	hsa-miR-146a-5p	MIMAT0000449	0.7552
2219	PCYOX1	ENSG00000116005	hsa-miR-146a-5p	MIMAT0000449	0.753076
2223	SPIN1	ENSG00000106723	hsa-miR-146a-5p	MIMAT0000449	0.752643
2248	WDR35	ENSG00000118965	hsa-miR-146a-5p	MIMAT0000449	0.751253
2301	SRSF10	ENSG00000188529	hsa-miR-146a-5p	MIMAT0000449	0.746993
2310	EIF4EBP2	ENSG00000148730	hsa-miR-146a-5p	MIMAT0000449	0.746589
2341	XRCC1	ENSG00000073050	hsa-miR-146a-5p	MIMAT0000449	0.74416
2363	NPTN	ENSG00000156642	hsa-miR-146a-5p	MIMAT0000449	0.742145
2384	DENND2B	ENSG00000166444	hsa-miR-146a-5p	MIMAT0000449	0.740951
2398	USP33	ENSG00000077254	hsa-miR-146a-5p	MIMAT0000449	0.740158
2421	CEP170B	ENSG00000099814	hsa-miR-146a-5p	MIMAT0000449	0.737642
2437	PDZD2	ENSG00000133401	hsa-miR-146a-5p	MIMAT0000449	0.736659
2442	CALCOCO1	ENSG00000012822	hsa-miR-146a-5p	MIMAT0000449	0.736493
2487	ELAVL1	ENSG00000066044	hsa-miR-146a-5p	MIMAT0000449	0.733279
2492	ASPH	ENSG00000198363	hsa-miR-146a-5p	MIMAT0000449	0.732961
2495	WIPF2	ENSG00000171475	hsa-miR-146a-5p	MIMAT0000449	0.732703
2499	SSBP2	ENSG00000145687	hsa-miR-146a-5p	MIMAT0000449	0.732476
2510	CTBP2	ENSG00000175029	hsa-miR-146a-5p	MIMAT0000449	0.73186
2517	COG6	ENSG00000133103	hsa-miR-146a-5p	MIMAT0000449	0.731545
2527	DPP8	ENSG00000074603	hsa-miR-146a-5p	MIMAT0000449	0.730271
2557	IQSEC1	ENSG00000144711	hsa-miR-146a-5p	MIMAT0000449	0.72865
2562	PDK3	ENSG00000067992	hsa-miR-146a-5p	MIMAT0000449	0.728304
2573	ZHX3	ENSG00000174306	hsa-miR-146a-5p	MIMAT0000449	0.727618
2597	HEBP2	ENSG00000051620	hsa-miR-146a-5p	MIMAT0000449	0.726366
2651	PKN2	ENSG00000065243	hsa-miR-146a-5p	MIMAT0000449	0.722996
2671	BACH2	ENSG00000112182	hsa-miR-146a-5p	MIMAT0000449	0.722005
2706	MARF1	ENSG00000166783	hsa-miR-146a-5p	MIMAT0000449	0.719777
2719	TRIM44	ENSG00000166326	hsa-miR-146a-5p	MIMAT0000449	0.719192
2744	RBP4	ENSG00000138207	hsa-miR-146a-5p	MIMAT0000449	0.71817
2750	UBE2W	ENSG00000104343	hsa-miR-146a-5p	MIMAT0000449	0.71776
2752	CBX5	ENSG00000094916	hsa-miR-146a-5p	MIMAT0000449	0.717619
2757	STK3	ENSG00000104375	hsa-miR-146a-5p	MIMAT0000449	0.717285
2768	NHSL2	ENSG00000204131	hsa-miR-146a-5p	MIMAT0000449	0.716745
2785	ASH1L	ENSG00000116539	hsa-miR-146a-5p	MIMAT0000449	0.715676
2792	GRK5	ENSG00000198873	hsa-miR-146a-5p	MIMAT0000449	0.715226
2797	CALU	ENSG00000128595	hsa-miR-146a-5p	MIMAT0000449	0.714647
2839	RAB2B	ENSG00000129472	hsa-miR-146a-5p	MIMAT0000449	0.712164
2874	MYOCD	ENSG00000141052	hsa-miR-146a-5p	MIMAT0000449	0.710825
2900	MLLT1	ENSG00000130382	hsa-miR-146a-5p	MIMAT0000449	0.709624
2905	SMARCD3	ENSG00000082014	hsa-miR-146a-5p	MIMAT0000449	0.709487
2930	MPRIP	ENSG00000133030	hsa-miR-146a-5p	MIMAT0000449	0.708261
2940	SNX18	ENSG00000178996	hsa-miR-146a-5p	MIMAT0000449	0.707797
2942	BAG2	ENSG00000112208	hsa-miR-146a-5p	MIMAT0000449	0.70774
2944	RBM11	ENSG00000185272	hsa-miR-146a-5p	MIMAT0000449	0.707735
2950	TSPYL1	ENSG00000189241	hsa-miR-146a-5p	MIMAT0000449	0.707691
2987	SLITRK3	ENSG00000121871	hsa-miR-146a-5p	MIMAT0000449	0.706044
2989	TMEM237	ENSG00000155755	hsa-miR-146a-5p	MIMAT0000449	0.705928
2996	IL17RD	ENSG00000144730	hsa-miR-146a-5p	MIMAT0000449	0.705646
3049	SKIL	ENSG00000136603	hsa-miR-146a-5p	MIMAT0000449	0.702694
3202	ARID2	ENSG00000189079	hsa-miR-146a-5p	MIMAT0000449	0.694476
3218	RANBP3L	ENSG00000164188	hsa-miR-146a-5p	MIMAT0000449	0.693305
3251	TTL	ENSG00000114999	hsa-miR-146a-5p	MIMAT0000449	0.691238
3281	FBXL20	ENSG00000108306	hsa-miR-146a-5p	MIMAT0000449	0.689991
3285	IST1	ENSG00000182149	hsa-miR-146a-5p	MIMAT0000449	0.689763
3333	SESTD1	ENSG00000187231	hsa-miR-146a-5p	MIMAT0000449	0.687229
3334	NCKAP1	ENSG00000061676	hsa-miR-146a-5p	MIMAT0000449	0.687179
3363	ANKS1B	ENSG00000185046	hsa-miR-146a-5p	MIMAT0000449	0.686042
3386	ZNF451	ENSG00000112200	hsa-miR-146a-5p	MIMAT0000449	0.685012
3406	VIRMA	ENSG00000164944	hsa-miR-146a-5p	MIMAT0000449	0.683999
3417	IMPACT	ENSG00000154059	hsa-miR-146a-5p	MIMAT0000449	0.68336
3437	RAC1	ENSG00000136238	hsa-miR-146a-5p	MIMAT0000449	0.682561
3444	SVIL	ENSG00000197321	hsa-miR-146a-5p	MIMAT0000449	0.682304
3457	THRB	ENSG00000151090	hsa-miR-146a-5p	MIMAT0000449	0.681516
3458	SPECC1	ENSG00000128487	hsa-miR-146a-5p	MIMAT0000449	0.681509
3488	EVI5	ENSG00000067208	hsa-miR-146a-5p	MIMAT0000449	0.680422
3504	TLCD5	ENSG00000181264	hsa-miR-146a-5p	MIMAT0000449	0.679672
3508	HSPA4L	ENSG00000164070	hsa-miR-146a-5p	MIMAT0000449	0.679459
3509	KLHL11	ENSG00000178502	hsa-miR-146a-5p	MIMAT0000449	0.679375
3544	COPA	ENSG00000122218	hsa-miR-146a-5p	MIMAT0000449	0.677347
3586	DCAF7	ENSG00000136485	hsa-miR-146a-5p	MIMAT0000449	0.6757
3633	FLNA	ENSG00000196924	hsa-miR-146a-5p	MIMAT0000449	0.673785
3690	CCDC50	ENSG00000152492	hsa-miR-146a-5p	MIMAT0000449	0.671629
3701	ZEB1	ENSG00000148516	hsa-miR-146a-5p	MIMAT0000449	0.67102
3703	LIN7C	ENSG00000148943	hsa-miR-146a-5p	MIMAT0000449	0.670906
3731	CRAMP1	ENSG00000007545	hsa-miR-146a-5p	MIMAT0000449	0.66981
3732	GAN	ENSG00000261609	hsa-miR-146a-5p	MIMAT0000449	0.669806
3757	ITGAV	ENSG00000138448	hsa-miR-146a-5p	MIMAT0000449	0.668379
3778	SH3RF1	ENSG00000154447	hsa-miR-146a-5p	MIMAT0000449	0.667515
3786	YAP1	ENSG00000137693	hsa-miR-146a-5p	MIMAT0000449	0.667182
3794	SPOP	ENSG00000121067	hsa-miR-146a-5p	MIMAT0000449	0.666752
3814	SRD5A2	ENSG00000277893	hsa-miR-146a-5p	MIMAT0000449	0.665657
3836	RGS5	ENSG00000143248	hsa-miR-146a-5p	MIMAT0000449	0.664971
3845	JPH2	ENSG00000149596	hsa-miR-146a-5p	MIMAT0000449	0.664612
3851	PTCHD1	ENSG00000165186	hsa-miR-146a-5p	MIMAT0000449	0.664315
3862	KANK1	ENSG00000107104	hsa-miR-146a-5p	MIMAT0000449	0.664055
3883	PHF12	ENSG00000109118	hsa-miR-146a-5p	MIMAT0000449	0.662954
3894	FAT4	ENSG00000196159	hsa-miR-146a-5p	MIMAT0000449	0.662292
3917	TMX3	ENSG00000166479	hsa-miR-146a-5p	MIMAT0000449	0.661286
3962	CMTM4	ENSG00000183723	hsa-miR-146a-5p	MIMAT0000449	0.659641
3973	FAM241A	ENSG00000174749	hsa-miR-146a-5p	MIMAT0000449	0.659169
4002	RIC1	ENSG00000107036	hsa-miR-146a-5p	MIMAT0000449	0.658084
4006	KCNMA1	ENSG00000156113	hsa-miR-146a-5p	MIMAT0000449	0.657849
4017	MTMR9	ENSG00000104643	hsa-miR-146a-5p	MIMAT0000449	0.657266
4030	BMPR1A	ENSG00000107779	hsa-miR-146a-5p	MIMAT0000449	0.656535
4037	COL4A4	ENSG00000081052	hsa-miR-146a-5p	MIMAT0000449	0.656321
4040	MYO9A	ENSG00000066933	hsa-miR-146a-5p	MIMAT0000449	0.656194
4071	PHF2	ENSG00000197724	hsa-miR-146a-5p	MIMAT0000449	0.65489
4075	LGR4	ENSG00000205213	hsa-miR-146a-5p	MIMAT0000449	0.65477
4078	SPART	ENSG00000133104	hsa-miR-146a-5p	MIMAT0000449	0.65458
4088	TAOK1	ENSG00000160551	hsa-miR-146a-5p	MIMAT0000449	0.654145
4107	RNF14	ENSG00000013561	hsa-miR-146a-5p	MIMAT0000449	0.653099
4127	GAB1	ENSG00000109458	hsa-miR-146a-5p	MIMAT0000449	0.652302
4161	CHSY3	ENSG00000198108	hsa-miR-146a-5p	MIMAT0000449	0.650965
4184	CAMSAP1	ENSG00000130559	hsa-miR-146a-5p	MIMAT0000449	0.64985
4187	STX7	ENSG00000079950	hsa-miR-146a-5p	MIMAT0000449	0.649726
4195	ZNF445	ENSG00000185219	hsa-miR-146a-5p	MIMAT0000449	0.649536
4210	ANKRD46	ENSG00000186106	hsa-miR-146a-5p	MIMAT0000449	0.649112
4229	RXFP2	ENSG00000133105	hsa-miR-146a-5p	MIMAT0000449	0.648253
4284	SFMBT2	ENSG00000198879	hsa-miR-146a-5p	MIMAT0000449	0.646344
4288	ZNF740	ENSG00000139651	hsa-miR-146a-5p	MIMAT0000449	0.646274
4290	RERE	ENSG00000142599	hsa-miR-146a-5p	MIMAT0000449	0.646162
4312	MTR	ENSG00000116984	hsa-miR-146a-5p	MIMAT0000449	0.645254
4322	FRY	ENSG00000073910	hsa-miR-146a-5p	MIMAT0000449	0.644929
4335	FHL1	ENSG00000022267	hsa-miR-146a-5p	MIMAT0000449	0.644274
4375	KAT7	ENSG00000136504	hsa-miR-146a-5p	MIMAT0000449	0.643059
4392	SLC39A9	ENSG00000029364	hsa-miR-146a-5p	MIMAT0000449	0.642549
4406	RNF115	ENSG00000265491	hsa-miR-146a-5p	MIMAT0000449	0.641893
4455	CDK14	ENSG00000058091	hsa-miR-146a-5p	MIMAT0000449	0.640026
4465	PUM1	ENSG00000134644	hsa-miR-146a-5p	MIMAT0000449	0.639685
4476	SYNPO2	ENSG00000172403	hsa-miR-146a-5p	MIMAT0000449	0.639353
4531	LIMCH1	ENSG00000064042	hsa-miR-146a-5p	MIMAT0000449	0.637518
4536	SMYD5	ENSG00000135632	hsa-miR-146a-5p	MIMAT0000449	0.637425
4570	RBM33	ENSG00000184863	hsa-miR-146a-5p	MIMAT0000449	0.635889
4576	FBXO30	ENSG00000118496	hsa-miR-146a-5p	MIMAT0000449	0.635716
4593	KLF13	ENSG00000169926	hsa-miR-146a-5p	MIMAT0000449	0.635018
4621	LEPROTL1	ENSG00000104660	hsa-miR-146a-5p	MIMAT0000449	0.633894
4627	SPEN	ENSG00000065526	hsa-miR-146a-5p	MIMAT0000449	0.633801
4633	PRDM6	ENSG00000061455	hsa-miR-146a-5p	MIMAT0000449	0.633641
4682	FAM168A	ENSG00000054965	hsa-miR-146a-5p	MIMAT0000449	0.63159
4697	EHMT1	ENSG00000181090	hsa-miR-146a-5p	MIMAT0000449	0.630889
4714	CAPZB	ENSG00000077549	hsa-miR-146a-5p	MIMAT0000449	0.630399
4720	FAM181B	ENSG00000182103	hsa-miR-146a-5p	MIMAT0000449	0.630235
4761	CAVIN1	ENSG00000177469	hsa-miR-146a-5p	MIMAT0000449	0.628955
4848	DOCK7	ENSG00000116641	hsa-miR-146a-5p	MIMAT0000449	0.625811
4849	KCNA6	ENSG00000151079	hsa-miR-146a-5p	MIMAT0000449	0.625782
4882	VCL	ENSG00000035403	hsa-miR-146a-5p	MIMAT0000449	0.62452
4886	TUBGCP3	ENSG00000126216	hsa-miR-146a-5p	MIMAT0000449	0.624346
4887	ZNF641	ENSG00000167528	hsa-miR-146a-5p	MIMAT0000449	0.624334
4888	DAAM2	ENSG00000146122	hsa-miR-146a-5p	MIMAT0000449	0.624267
4906	GPC6	ENSG00000183098	hsa-miR-146a-5p	MIMAT0000449	0.623484
4919	THAP11	ENSG00000168286	hsa-miR-146a-5p	MIMAT0000449	0.62265
4944	MXD1	ENSG00000059728	hsa-miR-146a-5p	MIMAT0000449	0.621938
4948	GUCY1A1	ENSG00000164116	hsa-miR-146a-5p	MIMAT0000449	0.621786
4979	THUMPD1	ENSG00000066654	hsa-miR-146a-5p	MIMAT0000449	0.620715
4997	ZHX1	ENSG00000165156	hsa-miR-146a-5p	MIMAT0000449	0.620087
5008	CDC73	ENSG00000134371	hsa-miR-146a-5p	MIMAT0000449	0.619754
5044	LURAP1	ENSG00000171357	hsa-miR-146a-5p	MIMAT0000449	0.618789
5052	INPP5F	ENSG00000198825	hsa-miR-146a-5p	MIMAT0000449	0.618529
5066	PPP1R9A	ENSG00000158528	hsa-miR-146a-5p	MIMAT0000449	0.618054
5086	SLC66A3	ENSG00000162976	hsa-miR-146a-5p	MIMAT0000449	0.617139
5125	PHC1	ENSG00000111752	hsa-miR-146a-5p	MIMAT0000449	0.615886
5138	KMT2D	ENSG00000167548	hsa-miR-146a-5p	MIMAT0000449	0.615375
5147	DOCK1	ENSG00000150760	hsa-miR-146a-5p	MIMAT0000449	0.61514
5153	FAM131A	ENSG00000175182	hsa-miR-146a-5p	MIMAT0000449	0.615005
5184	SETD2	ENSG00000181555	hsa-miR-146a-5p	MIMAT0000449	0.613911
5192	KCNH1	ENSG00000143473	hsa-miR-146a-5p	MIMAT0000449	0.613821
5204	ZBTB44	ENSG00000196323	hsa-miR-146a-5p	MIMAT0000449	0.613572
5225	MECP2	ENSG00000169057	hsa-miR-146a-5p	MIMAT0000449	0.613186
5239	CACNA1C	ENSG00000151067	hsa-miR-146a-5p	MIMAT0000449	0.612721
5264	LIN52	ENSG00000205659	hsa-miR-146a-5p	MIMAT0000449	0.611979
5265	AMOTL2	ENSG00000114019	hsa-miR-146a-5p	MIMAT0000449	0.611974
5288	EDEM3	ENSG00000116406	hsa-miR-146a-5p	MIMAT0000449	0.610937
5292	ZNF260	ENSG00000254004	hsa-miR-146a-5p	MIMAT0000449	0.610906
5294	SYTL4	ENSG00000102362	hsa-miR-146a-5p	MIMAT0000449	0.610849
5351	CNNM4	ENSG00000158158	hsa-miR-146a-5p	MIMAT0000449	0.609457
5357	NDEL1	ENSG00000166579	hsa-miR-146a-5p	MIMAT0000449	0.609273
5364	ALG9	ENSG00000086848	hsa-miR-146a-5p	MIMAT0000449	0.608987
5373	NFIX	ENSG00000008441	hsa-miR-146a-5p	MIMAT0000449	0.60875
5379	ME1	ENSG00000065833	hsa-miR-146a-5p	MIMAT0000449	0.608554
5383	PPP1R12B	ENSG00000077157	hsa-miR-146a-5p	MIMAT0000449	0.608476
5424	PANK3	ENSG00000120137	hsa-miR-146a-5p	MIMAT0000449	0.607294
5456	CBL	ENSG00000110395	hsa-miR-146a-5p	MIMAT0000449	0.606424
5482	ICE1	ENSG00000164151	hsa-miR-146a-5p	MIMAT0000449	0.605802
5502	CRTAP	ENSG00000170275	hsa-miR-146a-5p	MIMAT0000449	0.605163
5508	NPAS4	ENSG00000174576	hsa-miR-146a-5p	MIMAT0000449	0.604938
5533	FAM168B	ENSG00000152102	hsa-miR-146a-5p	MIMAT0000449	0.60418
5539	SSH1	ENSG00000084112	hsa-miR-146a-5p	MIMAT0000449	0.603999
5567	PNPO	ENSG00000108439	hsa-miR-146a-5p	MIMAT0000449	0.60314
5585	ACKR3	ENSG00000144476	hsa-miR-146a-5p	MIMAT0000449	0.602497
5621	VPS26B	ENSG00000151502	hsa-miR-146a-5p	MIMAT0000449	0.601303
5639	TRMT9B	ENSG00000250305	hsa-miR-146a-5p	MIMAT0000449	0.600384
5666	RASAL2	ENSG00000075391	hsa-miR-146a-5p	MIMAT0000449	0.599467
5688	TMEM245	ENSG00000106771	hsa-miR-146a-5p	MIMAT0000449	0.598792
5701	FOXJ2	ENSG00000065970	hsa-miR-146a-5p	MIMAT0000449	0.598409
5720	TMEM106B	ENSG00000106460	hsa-miR-146a-5p	MIMAT0000449	0.597828
5735	LMCD1	ENSG00000071282	hsa-miR-146a-5p	MIMAT0000449	0.597414
5751	EMC1	ENSG00000127463	hsa-miR-146a-5p	MIMAT0000449	0.596844
5758	AEBP2	ENSG00000139154	hsa-miR-146a-5p	MIMAT0000449	0.596704
5769	GNB5	ENSG00000069966	hsa-miR-146a-5p	MIMAT0000449	0.59635
5771	PAPSS2	ENSG00000198682	hsa-miR-146a-5p	MIMAT0000449	0.596313
5802	PYGO1	ENSG00000171016	hsa-miR-146a-5p	MIMAT0000449	0.59562
5812	ZNF398	ENSG00000197024	hsa-miR-146a-5p	MIMAT0000449	0.59538
5830	DCAF10	ENSG00000122741	hsa-miR-146a-5p	MIMAT0000449	0.594755
5848	CFL2	ENSG00000165410	hsa-miR-146a-5p	MIMAT0000449	0.594273
5849	SLC5A3	ENSG00000198743	hsa-miR-146a-5p	MIMAT0000449	0.594251
5852	FRYL	ENSG00000075539	hsa-miR-146a-5p	MIMAT0000449	0.594178
5866	PHC3	ENSG00000173889	hsa-miR-146a-5p	MIMAT0000449	0.593753
5870	TGFBRAP1	ENSG00000135966	hsa-miR-146a-5p	MIMAT0000449	0.593646
5891	NPAS3	ENSG00000151322	hsa-miR-146a-5p	MIMAT0000449	0.593011
5900	ATXN1L	ENSG00000224470	hsa-miR-146a-5p	MIMAT0000449	0.592824
5930	GNAI3	ENSG00000065135	hsa-miR-146a-5p	MIMAT0000449	0.592211
5985	SNTB2	ENSG00000168807	hsa-miR-146a-5p	MIMAT0000449	0.590252
6003	TNIK	ENSG00000154310	hsa-miR-146a-5p	MIMAT0000449	0.589572
6027	NDE1	ENSG00000072864	hsa-miR-146a-5p	MIMAT0000449	0.588832
6044	FOS	ENSG00000170345	hsa-miR-146a-5p	MIMAT0000449	0.588363
6054	NPY1R	ENSG00000164128	hsa-miR-146a-5p	MIMAT0000449	0.588154
6057	ITGA9	ENSG00000144668	hsa-miR-146a-5p	MIMAT0000449	0.588044
6064	NEDD9	ENSG00000111859	hsa-miR-146a-5p	MIMAT0000449	0.587869
6081	MAPK4	ENSG00000141639	hsa-miR-146a-5p	MIMAT0000449	0.587437
6106	JAZF1	ENSG00000153814	hsa-miR-146a-5p	MIMAT0000449	0.586919
6109	NBEA	ENSG00000172915	hsa-miR-146a-5p	MIMAT0000449	0.586887
6148	CDK19	ENSG00000155111	hsa-miR-146a-5p	MIMAT0000449	0.585637
6159	KDM6B	ENSG00000132510	hsa-miR-146a-5p	MIMAT0000449	0.585323
6183	RAB18	ENSG00000099246	hsa-miR-146a-5p	MIMAT0000449	0.584821
6240	PPP2R5A	ENSG00000066027	hsa-miR-146a-5p	MIMAT0000449	0.582973
6246	SMARCAD1	ENSG00000163104	hsa-miR-146a-5p	MIMAT0000449	0.582855
6284	TTC21B	ENSG00000123607	hsa-miR-146a-5p	MIMAT0000449	0.582023
6294	ASAP2	ENSG00000151693	hsa-miR-146a-5p	MIMAT0000449	0.581875
6415	SDK1	ENSG00000146555	hsa-miR-146a-5p	MIMAT0000449	0.578589
6434	ATL3	ENSG00000184743	hsa-miR-146a-5p	MIMAT0000449	0.578016
6436	PTPRD	ENSG00000153707	hsa-miR-146a-5p	MIMAT0000449	0.57799
6451	DPY19L4	ENSG00000156162	hsa-miR-146a-5p	MIMAT0000449	0.577496
6481	STRIP1	ENSG00000143093	hsa-miR-146a-5p	MIMAT0000449	0.576625
6519	JADE3	ENSG00000102221	hsa-miR-146a-5p	MIMAT0000449	0.575637
6553	MARCHF8	ENSG00000165406	hsa-miR-146a-5p	MIMAT0000449	0.57464
6566	KLHL5	ENSG00000109790	hsa-miR-146a-5p	MIMAT0000449	0.574459
6569	ESCO1	ENSG00000141446	hsa-miR-146a-5p	MIMAT0000449	0.574436
6580	CEP97	ENSG00000182504	hsa-miR-146a-5p	MIMAT0000449	0.574241
6590	BMP3	ENSG00000152785	hsa-miR-146a-5p	MIMAT0000449	0.573973
6596	HIPK1	ENSG00000163349	hsa-miR-146a-5p	MIMAT0000449	0.573794
6617	KDM2A	ENSG00000173120	hsa-miR-146a-5p	MIMAT0000449	0.573129
6632	TENT5A	ENSG00000112773	hsa-miR-146a-5p	MIMAT0000449	0.572762
6645	KCTD15	ENSG00000153885	hsa-miR-146a-5p	MIMAT0000449	0.572514
6672	FUBP3	ENSG00000107164	hsa-miR-146a-5p	MIMAT0000449	0.571877
6675	TMEM8B	ENSG00000137103	hsa-miR-146a-5p	MIMAT0000449	0.571847
6685	PPP1R3B	ENSG00000173281	hsa-miR-146a-5p	MIMAT0000449	0.571648
6691	INPP4A	ENSG00000040933	hsa-miR-146a-5p	MIMAT0000449	0.571591
6759	SEC31A	ENSG00000138674	hsa-miR-146a-5p	MIMAT0000449	0.570123
6775	BAMBI	ENSG00000095739	hsa-miR-146a-5p	MIMAT0000449	0.569846
6791	STX17	ENSG00000136874	hsa-miR-146a-5p	MIMAT0000449	0.569352
6804	HDAC2	ENSG00000196591	hsa-miR-146a-5p	MIMAT0000449	0.569049
6840	TRPM3	ENSG00000083067	hsa-miR-146a-5p	MIMAT0000449	0.568135
6842	HNRNPH3	ENSG00000096746	hsa-miR-146a-5p	MIMAT0000449	0.568091
6854	PPP1R15B	ENSG00000158615	hsa-miR-146a-5p	MIMAT0000449	0.567851
6872	OSBPL6	ENSG00000079156	hsa-miR-146a-5p	MIMAT0000449	0.567296
6881	EFNB2	ENSG00000125266	hsa-miR-146a-5p	MIMAT0000449	0.567018
6896	RAB22A	ENSG00000124209	hsa-miR-146a-5p	MIMAT0000449	0.566686
6901	IPO9	ENSG00000198700	hsa-miR-146a-5p	MIMAT0000449	0.566579
6913	RAB3GAP1	ENSG00000115839	hsa-miR-146a-5p	MIMAT0000449	0.56631
6961	GPLD1	ENSG00000112293	hsa-miR-146a-5p	MIMAT0000449	0.564772
6966	TMX4	ENSG00000125827	hsa-miR-146a-5p	MIMAT0000449	0.564626
7039	PAK3	ENSG00000077264	hsa-miR-146a-5p	MIMAT0000449	0.562656
7040	BICD2	ENSG00000185963	hsa-miR-146a-5p	MIMAT0000449	0.562641
7058	ARID5B	ENSG00000150347	hsa-miR-146a-5p	MIMAT0000449	0.562153
7060	SF1	ENSG00000168066	hsa-miR-146a-5p	MIMAT0000449	0.562129
7088	ATXN7L3B	ENSG00000253719	hsa-miR-146a-5p	MIMAT0000449	0.561576
7091	JPH1	ENSG00000104369	hsa-miR-146a-5p	MIMAT0000449	0.561502
7103	KMT2A	ENSG00000118058	hsa-miR-146a-5p	MIMAT0000449	0.561246
7108	GSPT2	ENSG00000189369	hsa-miR-146a-5p	MIMAT0000449	0.561161
7127	PCNX1	ENSG00000100731	hsa-miR-146a-5p	MIMAT0000449	0.560636
7256	DYRK1A	ENSG00000157540	hsa-miR-146a-5p	MIMAT0000449	0.558099
7266	ATXN1	ENSG00000124788	hsa-miR-146a-5p	MIMAT0000449	0.557843
7335	ANKRD45	ENSG00000183831	hsa-miR-146a-5p	MIMAT0000449	0.556434
7400	ANKLE2	ENSG00000176915	hsa-miR-146a-5p	MIMAT0000449	0.555103
7468	RNF150	ENSG00000170153	hsa-miR-146a-5p	MIMAT0000449	0.553678
7481	PARD3B	ENSG00000116117	hsa-miR-146a-5p	MIMAT0000449	0.553233
7508	CDS2	ENSG00000101290	hsa-miR-146a-5p	MIMAT0000449	0.552556
7523	POU6F1	ENSG00000184271	hsa-miR-146a-5p	MIMAT0000449	0.552269
7545	ZNF407	ENSG00000215421	hsa-miR-146a-5p	MIMAT0000449	0.551829
7559	SOX6	ENSG00000110693	hsa-miR-146a-5p	MIMAT0000449	0.551404
7560	N4BP1	ENSG00000102921	hsa-miR-146a-5p	MIMAT0000449	0.551383
7592	NBR1	ENSG00000188554	hsa-miR-146a-5p	MIMAT0000449	0.550604
7596	FBN1	ENSG00000166147	hsa-miR-146a-5p	MIMAT0000449	0.550445
7598	SZT2	ENSG00000198198	hsa-miR-146a-5p	MIMAT0000449	0.550403
7618	GID4	ENSG00000141034	hsa-miR-146a-5p	MIMAT0000449	0.550002
7650	GPHN	ENSG00000171723	hsa-miR-146a-5p	MIMAT0000449	0.549473
7679	HEY2	ENSG00000135547	hsa-miR-146a-5p	MIMAT0000449	0.548819
7689	ROCK1	ENSG00000067900	hsa-miR-146a-5p	MIMAT0000449	0.548639
7727	IGSF9B	ENSG00000080854	hsa-miR-146a-5p	MIMAT0000449	0.547845
7745	IFFO2	ENSG00000169991	hsa-miR-146a-5p	MIMAT0000449	0.547517
7757	LDOC1	ENSG00000182195	hsa-miR-146a-5p	MIMAT0000449	0.547364
7760	LATS2	ENSG00000150457	hsa-miR-146a-5p	MIMAT0000449	0.547308
7792	LYRM1	ENSG00000102897	hsa-miR-146a-5p	MIMAT0000449	0.546457
7823	CNNM2	ENSG00000148842	hsa-miR-146a-5p	MIMAT0000449	0.54584
7842	MFAP5	ENSG00000197614	hsa-miR-146a-5p	MIMAT0000449	0.545514
7855	FAIM2	ENSG00000135472	hsa-miR-146a-5p	MIMAT0000449	0.545288
7922	PEG10	ENSG00000242265	hsa-miR-146a-5p	MIMAT0000449	0.543227
7944	KCNMB1	ENSG00000145936	hsa-miR-146a-5p	MIMAT0000449	0.542672
7954	LAMP2	ENSG00000005893	hsa-miR-146a-5p	MIMAT0000449	0.542488
7960	RBPMS2	ENSG00000166831	hsa-miR-146a-5p	MIMAT0000449	0.54232
7970	BRPF3	ENSG00000096070	hsa-miR-146a-5p	MIMAT0000449	0.542123
7979	SIAH1	ENSG00000196470	hsa-miR-146a-5p	MIMAT0000449	0.541961
8005	FOXP2	ENSG00000128573	hsa-miR-146a-5p	MIMAT0000449	0.541513
8011	XIAP	ENSG00000101966	hsa-miR-146a-5p	MIMAT0000449	0.541359
8029	MYEF2	ENSG00000104177	hsa-miR-146a-5p	MIMAT0000449	0.541062
8043	EGR1	ENSG00000120738	hsa-miR-146a-5p	MIMAT0000449	0.540748
8049	CREB3L2	ENSG00000182158	hsa-miR-146a-5p	MIMAT0000449	0.540658
8052	ARL10	ENSG00000175414	hsa-miR-146a-5p	MIMAT0000449	0.540592
8057	PIANP	ENSG00000139200	hsa-miR-146a-5p	MIMAT0000449	0.540564
8098	SPRYD7	ENSG00000123178	hsa-miR-146a-5p	MIMAT0000449	0.539752
8127	WDFY3	ENSG00000163625	hsa-miR-146a-5p	MIMAT0000449	0.539147
8167	FBXW11	ENSG00000072803	hsa-miR-146a-5p	MIMAT0000449	0.538428
8237	MTMR4	ENSG00000108389	hsa-miR-146a-5p	MIMAT0000449	0.537107
8294	ENDOD1	ENSG00000149218	hsa-miR-146a-5p	MIMAT0000449	0.535997
8310	MPP2	ENSG00000108852	hsa-miR-146a-5p	MIMAT0000449	0.535728
8362	SGCD	ENSG00000170624	hsa-miR-146a-5p	MIMAT0000449	0.534615
8365	MTMR3	ENSG00000100330	hsa-miR-146a-5p	MIMAT0000449	0.534533
8424	DDR2	ENSG00000162733	hsa-miR-146a-5p	MIMAT0000449	0.533438
8434	HECTD1	ENSG00000092148	hsa-miR-146a-5p	MIMAT0000449	0.533274
8468	PXDNL	ENSG00000147485	hsa-miR-146a-5p	MIMAT0000449	0.532499
8470	RCHY1	ENSG00000163743	hsa-miR-146a-5p	MIMAT0000449	0.532455
8503	OGN	ENSG00000106809	hsa-miR-146a-5p	MIMAT0000449	0.531877
8532	SERINC3	ENSG00000132824	hsa-miR-146a-5p	MIMAT0000449	0.531165
8584	BDNF	ENSG00000176697	hsa-miR-146a-5p	MIMAT0000449	0.530067
8586	DIP2C	ENSG00000151240	hsa-miR-146a-5p	MIMAT0000449	0.530036
8617	FBN2	ENSG00000138829	hsa-miR-146a-5p	MIMAT0000449	0.52948
8667	JMY	ENSG00000152409	hsa-miR-146a-5p	MIMAT0000449	0.528399
8699	N4BP2L2	ENSG00000244754	hsa-miR-146a-5p	MIMAT0000449	0.527782
8769	SGCB	ENSG00000163069	hsa-miR-146a-5p	MIMAT0000449	0.526348
8793	LIMA1	ENSG00000050405	hsa-miR-146a-5p	MIMAT0000449	0.525716
8834	DDX5	ENSG00000108654	hsa-miR-146a-5p	MIMAT0000449	0.524777
8859	DLC1	ENSG00000164741	hsa-miR-146a-5p	MIMAT0000449	0.52421
8866	DMD	ENSG00000198947	hsa-miR-146a-5p	MIMAT0000449	0.524049
8870	PRXL2C	ENSG00000158122	hsa-miR-146a-5p	MIMAT0000449	0.523987
8876	ERLIN2	ENSG00000147475	hsa-miR-146a-5p	MIMAT0000449	0.523845
8886	SUPT6H	ENSG00000109111	hsa-miR-146a-5p	MIMAT0000449	0.523579
8889	HS3ST1	ENSG00000002587	hsa-miR-146a-5p	MIMAT0000449	0.523533
8940	MSL2	ENSG00000174579	hsa-miR-146a-5p	MIMAT0000449	0.522594
8972	NAV2	ENSG00000166833	hsa-miR-146a-5p	MIMAT0000449	0.522056
9012	RTN4RL1	ENSG00000185924	hsa-miR-146a-5p	MIMAT0000449	0.521483
9048	DYNLL2	ENSG00000264364	hsa-miR-146a-5p	MIMAT0000449	0.520945
9070	EP400	ENSG00000183495	hsa-miR-146a-5p	MIMAT0000449	0.520529
9083	RNMT	ENSG00000101654	hsa-miR-146a-5p	MIMAT0000449	0.520346
9097	MAPK1IP1L	ENSG00000168175	hsa-miR-146a-5p	MIMAT0000449	0.520104
9127	PARVA	ENSG00000197702	hsa-miR-146a-5p	MIMAT0000449	0.519557
9161	BCL9	ENSG00000116128	hsa-miR-146a-5p	MIMAT0000449	0.518805
9219	C2CD2	ENSG00000157617	hsa-miR-146a-5p	MIMAT0000449	0.517815
9223	MAGI1	ENSG00000151276	hsa-miR-146a-5p	MIMAT0000449	0.517768
9229	TENT4A	ENSG00000112941	hsa-miR-146a-5p	MIMAT0000449	0.517682
9244	KCTD10	ENSG00000110906	hsa-miR-146a-5p	MIMAT0000449	0.517313
9283	TCF12	ENSG00000140262	hsa-miR-146a-5p	MIMAT0000449	0.516567
9287	SLC38A2	ENSG00000134294	hsa-miR-146a-5p	MIMAT0000449	0.516513
9304	GYG1	ENSG00000163754	hsa-miR-146a-5p	MIMAT0000449	0.516116
9308	DIXDC1	ENSG00000150764	hsa-miR-146a-5p	MIMAT0000449	0.516088
9371	BTBD7	ENSG00000011114	hsa-miR-146a-5p	MIMAT0000449	0.515165
9395	ELL2	ENSG00000118985	hsa-miR-146a-5p	MIMAT0000449	0.514682
9404	EXT1	ENSG00000182197	hsa-miR-146a-5p	MIMAT0000449	0.51451
9409	KLHL29	ENSG00000119771	hsa-miR-146a-5p	MIMAT0000449	0.51442
9421	LRRC75A	ENSG00000181350	hsa-miR-146a-5p	MIMAT0000449	0.514199
9425	CLASP1	ENSG00000074054	hsa-miR-146a-5p	MIMAT0000449	0.514156
9426	B3GNT2	ENSG00000170340	hsa-miR-146a-5p	MIMAT0000449	0.514153
9431	DHX35	ENSG00000101452	hsa-miR-146a-5p	MIMAT0000449	0.514094
9471	CHEK1	ENSG00000149554	hsa-miR-146a-5p	MIMAT0000449	0.513308
9478	SYMPK	ENSG00000125755	hsa-miR-146a-5p	MIMAT0000449	0.513231
9489	NUP153	ENSG00000124789	hsa-miR-146a-5p	MIMAT0000449	0.51309
9541	DCHS1	ENSG00000166341	hsa-miR-146a-5p	MIMAT0000449	0.512057
9598	PSMD12	ENSG00000197170	hsa-miR-146a-5p	MIMAT0000449	0.511199
9607	JCAD	ENSG00000165757	hsa-miR-146a-5p	MIMAT0000449	0.510959
9622	EFR3B	ENSG00000084710	hsa-miR-146a-5p	MIMAT0000449	0.510787
9669	SEH1L	ENSG00000085415	hsa-miR-146a-5p	MIMAT0000449	0.51005
9707	AIDA	ENSG00000186063	hsa-miR-146a-5p	MIMAT0000449	0.509364
9711	CORO2B	ENSG00000103647	hsa-miR-146a-5p	MIMAT0000449	0.509314
9718	NFASC	ENSG00000163531	hsa-miR-146a-5p	MIMAT0000449	0.509243
9742	ARNT2	ENSG00000172379	hsa-miR-146a-5p	MIMAT0000449	0.508778
9745	UBN1	ENSG00000118900	hsa-miR-146a-5p	MIMAT0000449	0.508727
9746	STK35	ENSG00000125834	hsa-miR-146a-5p	MIMAT0000449	0.508718
9757	DPY19L3	ENSG00000178904	hsa-miR-146a-5p	MIMAT0000449	0.508564
9800	BCL9L	ENSG00000186174	hsa-miR-146a-5p	MIMAT0000449	0.507973
9824	PCOLCE2	ENSG00000163710	hsa-miR-146a-5p	MIMAT0000449	0.507426
9839	TSHZ1	ENSG00000179981	hsa-miR-146a-5p	MIMAT0000449	0.507301
9873	FBXO3	ENSG00000110429	hsa-miR-146a-5p	MIMAT0000449	0.506793
9910	KLHL42	ENSG00000087448	hsa-miR-146a-5p	MIMAT0000449	0.50634
9947	VPS26A	ENSG00000122958	hsa-miR-146a-5p	MIMAT0000449	0.505721
9954	SLC22A15	ENSG00000163393	hsa-miR-146a-5p	MIMAT0000449	0.505674
9975	LAMC1	ENSG00000135862	hsa-miR-146a-5p	MIMAT0000449	0.505297
9993	HEG1	ENSG00000173706	hsa-miR-146a-5p	MIMAT0000449	0.505025
9996	GNL3L	ENSG00000130119	hsa-miR-146a-5p	MIMAT0000449	0.50499
10019	EIF5A2	ENSG00000163577	hsa-miR-146a-5p	MIMAT0000449	0.504686
10024	RUFY2	ENSG00000204130	hsa-miR-146a-5p	MIMAT0000449	0.50457
10081	FOXK1	ENSG00000164916	hsa-miR-146a-5p	MIMAT0000449	0.503911
10143	EFHD1	ENSG00000115468	hsa-miR-146a-5p	MIMAT0000449	0.503046
10182	MAP2	ENSG00000078018	hsa-miR-146a-5p	MIMAT0000449	0.502526
10185	AKAP11	ENSG00000023516	hsa-miR-146a-5p	MIMAT0000449	0.502472
10211	SIMC1	ENSG00000170085	hsa-miR-146a-5p	MIMAT0000449	0.502017
10245	YY1	ENSG00000100811	hsa-miR-146a-5p	MIMAT0000449	0.501531
10263	CNKSR3	ENSG00000153721	hsa-miR-146a-5p	MIMAT0000449	0.501243
10264	EPHB2	ENSG00000133216	hsa-miR-146a-5p	MIMAT0000449	0.501229
10321	PPP1R10	ENSG00000204569	hsa-miR-146a-5p	MIMAT0000449	0.500341
10332	VSIG10	ENSG00000176834	hsa-miR-146a-5p	MIMAT0000449	0.50027

## Sheet: hsa_miR_204_5p_microT_human_int
I.No	gene_symbol	gene_ensembl_id	mirna_name	mirna_db_id	interaction_score
417	IL7R	ENSG00000168685	hsa-miR-204-5p	MIMAT0000265	0.945425
471	CIITA	ENSG00000179583	hsa-miR-204-5p	MIMAT0000265	0.937211
584	FLT3	ENSG00000122025	hsa-miR-204-5p	MIMAT0000265	0.921535
622	TFEC	ENSG00000105967	hsa-miR-204-5p	MIMAT0000265	0.915598
768	FYB1	ENSG00000082074	hsa-miR-204-5p	MIMAT0000265	0.892429
969	ARHGAP30	ENSG00000186517	hsa-miR-204-5p	MIMAT0000265	0.867473
994	SP100	ENSG00000067066	hsa-miR-204-5p	MIMAT0000265	0.864723
1064	CCR5	ENSG00000160791	hsa-miR-204-5p	MIMAT0000265	0.855878
1132	CLEC5A	ENSG00000258227	hsa-miR-204-5p	MIMAT0000265	0.849621
1215	CMBL	ENSG00000164237	hsa-miR-204-5p	MIMAT0000265	0.840006
1421	MCEMP1	ENSG00000183019	hsa-miR-204-5p	MIMAT0000265	0.81724
1445	MARCHF3	ENSG00000173926	hsa-miR-204-5p	MIMAT0000265	0.815062
1453	RRM2	ENSG00000171848	hsa-miR-204-5p	MIMAT0000265	0.814334
1519	GRAMD1B	ENSG00000023171	hsa-miR-204-5p	MIMAT0000265	0.808709
1638	GNAT1	ENSG00000114349	hsa-miR-204-5p	MIMAT0000265	0.799647
1643	ARL4C	ENSG00000188042	hsa-miR-204-5p	MIMAT0000265	0.798996
1702	FCGR1A	ENSG00000150337	hsa-miR-204-5p	MIMAT0000265	0.794256
1759	REL	ENSG00000162924	hsa-miR-204-5p	MIMAT0000265	0.789214
1783	MARCHF1	ENSG00000145416	hsa-miR-204-5p	MIMAT0000265	0.787051
1930	NCKAP1L	ENSG00000123338	hsa-miR-204-5p	MIMAT0000265	0.77398
2036	GIMAP1	ENSG00000213203	hsa-miR-204-5p	MIMAT0000265	0.766627
2060	CD163	ENSG00000177575	hsa-miR-204-5p	MIMAT0000265	0.764652
2089	CDCA8	ENSG00000134690	hsa-miR-204-5p	MIMAT0000265	0.762349
2118	CYBB	ENSG00000165168	hsa-miR-204-5p	MIMAT0000265	0.760543
2386	IL6R	ENSG00000160712	hsa-miR-204-5p	MIMAT0000265	0.740884
2432	ARL11	ENSG00000152213	hsa-miR-204-5p	MIMAT0000265	0.736949
2526	TICAM2	ENSG00000243414	hsa-miR-204-5p	MIMAT0000265	0.730285
2903	MS4A6A	ENSG00000110077	hsa-miR-204-5p	MIMAT0000265	0.709586
3071	CCR2	ENSG00000121807	hsa-miR-204-5p	MIMAT0000265	0.701697
3084	GINS3	ENSG00000181938	hsa-miR-204-5p	MIMAT0000265	0.700895
3337	POU2F2	ENSG00000028277	hsa-miR-204-5p	MIMAT0000265	0.687076
3477	NDUFA5	ENSG00000128609	hsa-miR-204-5p	MIMAT0000265	0.680965
3656	FLVCR2	ENSG00000119686	hsa-miR-204-5p	MIMAT0000265	0.67266
3739	PRKCB	ENSG00000166501	hsa-miR-204-5p	MIMAT0000265	0.669251
4188	RACGAP1	ENSG00000161800	hsa-miR-204-5p	MIMAT0000265	0.649712
4445	CENPF	ENSG00000117724	hsa-miR-204-5p	MIMAT0000265	0.640499
4729	NUP210	ENSG00000132182	hsa-miR-204-5p	MIMAT0000265	0.629813
4967	CD80	ENSG00000121594	hsa-miR-204-5p	MIMAT0000265	0.621083
5043	SIRPA	ENSG00000198053	hsa-miR-204-5p	MIMAT0000265	0.618851
5150	CLU	ENSG00000120885	hsa-miR-204-5p	MIMAT0000265	0.615034
5194	TMEM266	ENSG00000169758	hsa-miR-204-5p	MIMAT0000265	0.613798
5381	BIN2	ENSG00000110934	hsa-miR-204-5p	MIMAT0000265	0.608534
5491	HCK	ENSG00000101336	hsa-miR-204-5p	MIMAT0000265	0.605514
5511	IRF8	ENSG00000140968	hsa-miR-204-5p	MIMAT0000265	0.604864
5577	MS4A2	ENSG00000149534	hsa-miR-204-5p	MIMAT0000265	0.602787
5722	TGIF1	ENSG00000177426	hsa-miR-204-5p	MIMAT0000265	0.597707
6320	SH3KBP1	ENSG00000147010	hsa-miR-204-5p	MIMAT0000265	0.58095
6469	KIF20A	ENSG00000112984	hsa-miR-204-5p	MIMAT0000265	0.576948
6488	CRLF2	ENSG00000205755	hsa-miR-204-5p	MIMAT0000265	0.576471
6626	CH25H	ENSG00000138135	hsa-miR-204-5p	MIMAT0000265	0.572899
6736	RAB39A	ENSG00000179331	hsa-miR-204-5p	MIMAT0000265	0.570634
6765	IL4R	ENSG00000077238	hsa-miR-204-5p	MIMAT0000265	0.570046
6981	SLA	ENSG00000155926	hsa-miR-204-5p	MIMAT0000265	0.564127
6992	PADI2	ENSG00000117115	hsa-miR-204-5p	MIMAT0000265	0.56381
7080	DAPP1	ENSG00000070190	hsa-miR-204-5p	MIMAT0000265	0.561714
7145	BPGM	ENSG00000172331	hsa-miR-204-5p	MIMAT0000265	0.560353
7454	JAK3	ENSG00000105639	hsa-miR-204-5p	MIMAT0000265	0.553887
7529	VNN1	ENSG00000112299	hsa-miR-204-5p	MIMAT0000265	0.552179
7649	GPR65	ENSG00000140030	hsa-miR-204-5p	MIMAT0000265	0.549474
7894	FGF11	ENSG00000161958	hsa-miR-204-5p	MIMAT0000265	0.544013
8019	CXCL14	ENSG00000145824	hsa-miR-204-5p	MIMAT0000265	0.541207
8068	CKAP2L	ENSG00000169607	hsa-miR-204-5p	MIMAT0000265	0.540326
8329	SH2D4B	ENSG00000178217	hsa-miR-204-5p	MIMAT0000265	0.535363
8413	PSTPIP1	ENSG00000140368	hsa-miR-204-5p	MIMAT0000265	0.533602
8539	RNF122	ENSG00000133874	hsa-miR-204-5p	MIMAT0000265	0.531031
8581	CENPA	ENSG00000115163	hsa-miR-204-5p	MIMAT0000265	0.530175
8596	ZNF710	ENSG00000140548	hsa-miR-204-5p	MIMAT0000265	0.529823
8708	GALNT6	ENSG00000139629	hsa-miR-204-5p	MIMAT0000265	0.527605
8981	LMO2	ENSG00000135363	hsa-miR-204-5p	MIMAT0000265	0.521949
8982	RBM47	ENSG00000163694	hsa-miR-204-5p	MIMAT0000265	0.521945
9010	BUB1B	ENSG00000156970	hsa-miR-204-5p	MIMAT0000265	0.521526
9204	RNASE6	ENSG00000169413	hsa-miR-204-5p	MIMAT0000265	0.518069
9247	SEMA4D	ENSG00000187764	hsa-miR-204-5p	MIMAT0000265	0.517265
9562	P2RY2	ENSG00000175591	hsa-miR-204-5p	MIMAT0000265	0.511753
9827	PTGDR2	ENSG00000183134	hsa-miR-204-5p	MIMAT0000265	0.50742
9896	INPP5D	ENSG00000168918	hsa-miR-204-5p	MIMAT0000265	0.506454
10008	APLN	ENSG00000171388	hsa-miR-204-5p	MIMAT0000265	0.504793
10155	NFAM1	ENSG00000235568	hsa-miR-204-5p	MIMAT0000265	0.502853
10254	FOXM1	ENSG00000111206	hsa-miR-204-5p	MIMAT0000265	0.501357
