# Supplementary material for: Multiomics coupled with vibrational spectroscopy identify early mechanisms of experimental aortic valve stenosis
Source: Research Square preprint supplement (doi:10.21203/rs.3.rs-4330270/v1), 2024-05-02
Supplement: Supplementary file 6 [file 54f128121d8af56d12cf2222.xlsx]

## Sheet: General
	2 weeks DE		4 weeks DE		7 weeks DE		7 vs 2 weeks DE
Gene	Log2Fold	FDR	Log2Fold	FDR	Log2Fold	FDR	Log2Fold	FDR	Predicted miRs
	Inflammation
IL10RA	0.05	0.974	2.286	0.019	2.427	0.007	2.378	0.002	hsa-miR-125b-5p	hsa-miR-143-3p
IL1R1	-0.111	0.87	0.37	0.547	0.696	0.062	0.808	0.016	hsa-miR-204-5p	hsa-miR-133a-3p
IL6R	0.142	0.882	1.381	0.035	1.267	0.025	1.124	0.017	hsa-miR-125b-5p	hsa-miR-21-5p	hsa-miR-23b-3p	hsa-miR-204-5p	hsa-miR-499a-5p	hsa-miR-146a-5p	hsa-miR-133a-3p
TNFRSF1B	-0.241	0.665	0.92	0.038	1.273	0.006	1.515	<0,001	hsa-miR-125b-5p
CXCR1	0.228	0.885	1.911	0.065	2.167	0.019	1.928	0.012	NA
CXCR2	-0.006	0.998	0.625	0.71	2.125	0.023	2.132	0.008	hsa-miR-23b-3p
CXCL14	-1.105	0.573	2.147	0.116	3.896	0.006	5.001	<0,001	hsa-miR-204-5p
C1R	-0.179	0.859	1.092	0.124	1.171	0.046	1.351	0.011	NA
C3AR1	0.3	0.741	2.085	0.019	1.851	0.007	1.551	0.004	hsa-miR-146a-5p	hsa-miR-21-5p
C5AR1	-0.336	0.771	2.445	0.019	2.448	0.006	2.784	0.001	NA
	DNA DAMAGE RESPONSE
PPRC1	0.546	0.14	0.247	0.657	-0.176	0.566	-0.722	0.01	NA
PERM1	-2.783	0.094	-0.92	0.681	-0.109	0.94	2.674	0.021	NA
PARPBP	0.112	0.948	1.235	0.262	1.429	0.079	1.317	0.052	hsa-miR-133a-3p
RAD51	0.751	0.488	1.917	0.045	0.941	0.019	1.23	0.052	hsa-miR-204-5p	hsa-miR-499a-5p	hsa-miR-21-5p
	HYPOXIA
HIGD1B	-1.289	0.13	1.923	0.677	0.866	0.18	2.155	0.003	NA
HILPDA	0.044	0.943	0.291	0.57	0.631	0.044	0.588	0.026	hsa-miR-143-3p
HIF3A	-0.576	0.583	-0.037	0.987	0.862	0.218	1.438	0.026	hsa-miR-146a-5p	hsa-miR-499a-5p
	Mechanotransduction
YAP1	0.328	0.545	-0.083	0.931	-0.402	0.28	-0.732	0.029	hsa-miR-21-5p	hsa-miR-146a-5p
NOTCH2	0.178	0.596	-0.209	0.596	-0.46	0.049	-0.638	0.005	hsa-miR-146a-5p	hsa-miR-204-5p	hsa-miR-499a-5p	hsa-miR-125b-5p	hsa-miR-23b-3p	hsa-miR-133a-3p
MAPK1	0.459433	0.144976	-0.0918275	0.878402	-0.355947	0.158295	-0.81538	0.0027126	hsa-miR-143-3p	hsa-miR-204-5p
MAPK4	0.876	0.176	-0.257	0.822	-1.421	0.017	-2.298	<0,001	hsa-miR-146a-5p
DDR2	0.462	0.282	-0.275	0.664	-0.71	0.047	-1.172	0.002	hsa-miR-204-5p	hsa-miR-133a-3p	hsa-miR-143-3p	hsa-miR-23b-3p	hsa-miR-146a-5p	hsa-miR-125b-5p
	EndMT
TGFB2	0.352	0.349	-0.569	0.124	-0.992	0.007	-1.344	<0,001	hsa-miR-133a-3p	hsa-miR-23b-3p	hsa-miR-21-5p
ACTA2	0.803	0.198	-0.355	0.717	-1.135	0.036	-1.938	0.001	NA
PECAM1	-0.241	0.759	0.024	0.987	0.921	0.058	1.162	0.01	hsa-miR-499a-5p	hsa-miR-143-3p	hsa-miR-125b-5p
CDH2	-1.961	0.105	-0.538	0.776	-0.053	0.964	1.908	0.025	hsa-miR-204-5p	hsa-miR-499a-5p	hsa-miR-23b-3p
MMP13	1.839	0.571	3.43	0.179	6.752	0.006	4.912	0.003	hsa-miR-204-5p
	Fibrotic-related
TAGLN	0.23	0.689	-0.143	0.903	-0.426	0.3557	-0.989	0.02	NA
PLA2G7	-0.336	0.682	0.775	0.277	0.926	0.077	1.262	0.01	hsa-miR-133a-3p
PRG4	0.971	0.369	2.715	0.019	2.892	0.007	1.921	0.013	hsa-miR-143-3p
PCOLCE2	0.384	0.237	-0.199	0.685	-0.71	0.016	-1.095	<0,001	hsa-miR-146a-5p
SERPINA3	2.595	0.207	4.131	0.043	5.105	0.009	2.509	0.032	NA
	Osteogenic-related
RUNX2	-0.796	0.386	-0.04	0.984	0.737	0.268	1.533	0.015	hsa-miR-204-5p	hsa-miR-23b-3p	hsa-miR-499a-5p
SPP1	1.312	0.106	1.304	0.103	2.0185	0.009	0.706	0.175	hsa-miR-23b-3p
CORO1A	0.219	0.858	2.593	0.019	2.508	0.006	2.289	0.002	NA
HCLS1	0.094	0.949	2.516	0.019	2.408	0.008	2.314	0.003	NA
LCP1	-0.108	0.948	2.749	0.019	3.162	0.006	3.27	0.001	NA
VWF	-0.109	0.927	0.147	0.921	1.338	0.038	1.445	0.012	NA
CD74	-0.25	0.875	2.271	0.043	2.597	0.013	2.847	0.003	NA
COL6A3	-0.035	0.977	0.938	0.259	0.987	0.104	1.021	0.05	hsa-miR-133a-3p	hsa-miR-23b-3p	hsa-miR-204-5p	hsa-miR-146a-5p
CD79A	-0.712	0.617	2.023	0.058	2.754	0.008	3.466	0.001	NA
	VIC-type related
ALPL	0.0529047	0.967901	1.18271	0.141488	1.38355	0.0382867	1.33065	0.0198936	hsa-miR-204-5p
ANPEP	-0.0778393	0.955499	0.887526	0.373143	0.0707801	0.93053	0.148619	0.812169	hsa-miR-125b-5p
BGLAP	0.010965	0.994865	-1.19624	0.2766	-2.5229	0.0117192	-2.53387	0.00384179	NA
CD34	-0.379994	0.400167	-0.246528	0.707084	-0.129983	0.721017	0.250011	0.379859	hsa-miR-143-3p	hsa-miR-23b-3p	hsa-miR-204-5p	hsa-miR-499a-5p	hsa-miR-125b-5p
CD44	0.394041	0.418707	0.521785	0.313267	0.29824	0.408893	-0.0958012	0.77382	hsa-miR-143-3p	hsa-miR-133a-3p
CD59	-0.555238	0.322154	-0.215173	0.822349	0.16106	0.731967	0.716298	0.0565894	hsa-miR-204-5p	hsa-miR-125b-5p	hsa-miR-146a-5p
COL8A1	0.50093	0.579037	0.478562	0.680055	1.055	0.0901255	0.554074	0.275103	hsa-miR-133a-3p	hsa-miR-204-5p
CTHRC1	0.278706	0.911312	0.830272	0.752433	1.23973	0.331971	0.961023	0.36911	hsa-miR-133a-3p	hsa-miR-21-5p
DES	-1.75886	0.131973	-0.302786	0.892418	0.981781	0.281028	2.74065	0.00513844	NA
ELN	1.87332	0.0707015	0.343412	0.79713	-0.201791	0.766242	-2.07511	0.00259249	hsa-miR-23b-3p
ENG	-0.2128	0.771738	0.282203	0.749375	1.0011	0.0321318	1.2139	0.00544197	NA
FKBP5	-0.156001	0.930219	0.0452669	0.988338	0.990592	0.263387	1.14659	0.126142	hsa-miR-21-5p	hsa-miR-143-3p	hsa-miR-146a-5p
GFAP	0.369843	0.7514	0.784713	0.485642	0.922694	0.184575	0.552851	0.341283	hsa-miR-125b-5p
ID4	0.157397	0.83028	0.231403	0.798207	-0.190347	0.666142	-0.347744	0.320042	hsa-miR-133a-3p	hsa-miR-143-3p	hsa-miR-21-5p
ITGB1	0.77453	0.113536	-0.165547	0.846352	-0.599828	0.119379	-1.37436	0.0016193	hsa-miR-499a-5p
MAOA	-0.0638647	0.938324	0.247678	0.766945	0.109464	0.808272	0.173329	0.624339	hsa-miR-23b-3p
MEOX1	0.660429	0.21703	0.0261995	0.984121	-0.0328173	0.952061	-0.693247	0.0607098	hsa-miR-499a-5p
NT5E	0.550133	0.370971	0.141147	0.90505	-0.37564	0.420545	-0.925773	0.0278145	hsa-miR-21-5p	hsa-miR-125b-5p	hsa-miR-143-3p
PLXNA2	0.222703	0.695894	0.500566	0.323457	0.545266	0.123631	0.322563	0.272111	hsa-miR-204-5p	hsa-miR-143-3p	hsa-miR-133a-3p	hsa-miR-146a-5p
RPS6	-0.197018	0.679928	0.011832	0.991331	0.0437044	0.900432	0.240722	0.337984	NA
SORL1	0.223647	0.777659	0.463935	0.559383	0.530559	0.245462	0.306912	0.432282	hsa-miR-499a-5p	hsa-miR-21-5p
SPP1	1.31221	0.10633	1.30443	0.103261	2.01857	0.00933262	0.706367	0.175262	hsa-miR-23b-3p
TGFBR2	0.540989	0.68921	0.150043	0.947031	-0.179833	0.853504	-0.720821	0.307245	hsa-miR-204-5p	hsa-miR-23b-3p	hsa-miR-21-5p	hsa-miR-133a-3p	hsa-miR-146a-5p
THY1	-0.361966	0.447633	-0.118258	0.89132	-0.404567	0.24189	-0.0426012	0.89921	hsa-miR-143-3p	hsa-miR-125b-5p	hsa-miR-133a-3p
TMTC1	0.131971	0.914749	-0.500965	0.676519	-0.654572	0.298386	-0.786542	0.137182	hsa-miR-146a-5p	hsa-miR-499a-5p	hsa-miR-204-5p
VIM	0.440075	0.26243	0.0353585	0.968393	-0.455479	0.141296	-0.895554	0.00470508	hsa-miR-21-5p
