# Supplementary material for: Multiomics coupled with vibrational spectroscopy identify early mechanisms of experimental aortic valve stenosis
Source: Research Square preprint supplement (doi:10.21203/rs.3.rs-4330270/v1), 2024-05-02
Supplement: Supplementary file 7 [file 68a3e68e233483837a1fa8a5.xlsx]

## Sheet: Treat.2w vs Control
ID	Description	GeneRatio	BgRatio	pvalue	p.adjust	qvalue	geneID	Count
ocu04146	Peroxisome	1/1	95/8978	0.0105814	0.0105814	NA	100344175	1

## Sheet: Treat.4w vs Control
ID	Description	GeneRatio	qvalue	geneID	Count			BgRatio	pvalue	p.adjust
ocu05152	Tuberculosis	27/183	4.48909e-13	100350237/100008983/100342022/100344453/100338894/100008706/100101598/103350027/100358696/100338854/100354902/100351865/100351616/100339049/100009097/100337909/100338413/100338913/100359306/127482571/100008833/100352415/100355948/100350656/100357790/100345556/100351814	27			67/8978	0.000403904	0.00319084
ocu05150	Staphylococcus aureus infection	19/183	5.63805e-13	100351157/100352978/100358696/100345640/100356927/100351865/100339049/100009097/100337909/100338413/100338913/100359306/127482571/100009115/100354046/100352415/100355948/100350656/100357016	19			36/8978	0.000751957	0.00540042
ocu04380	Osteoclast differentiation	21/183	8.67125e-13	100354716/100354225/100338577/100358696/100337959/100338854/127488466/100339465/100337909/100338413/100338913/100345649/100347041/100359306/100008802/100009359/103346588/103351779/100345556/100348748/103345430	21			106/8978	0.0058299	0.0287851
ocu05140	Leishmaniasis	18/183	2.15074e-12	100008801/100358696/100338854/100351865/100339049/100009097/100337909/100338413/100338913/127482571/100008802/100009359/100008833/100037719/100348648/100352415/100355948/100350656	18			46/8978	0.000314299	0.00256858
ocu04145	Phagosome	22/183	6.65073e-11	100350237/100008983/100008706/100101598/100008801/100358696/100351865/100339049/100009097/100337909/100338413/100338913/100340939/100359306/127482571/100009067/100008802/100009359/100352415/100355948/100350656/100357567	22			103/8978	0.000241101	0.00211633
ocu04650	Natural killer cell mediated cytotoxicity	18/183	7.0306e-11	100350758/103350027/100348190/100345640/100338854/100356927/100339049/100339465/100009097/100337909/100338913/103347295/100037719/100342358/100348648/100356520/100345556/103345430	18			30/8978	0.0225867	0.0907296
ocu04662	B cell receptor signaling pathway	14/183	2.96645e-09	100354716/100354225/100351207/100344783/103352489/100009097/100345649/100347041/100359306/100359054/100037719/100348648/100356520/100345556	14			73/8978	0.000110906	0.00101095
ocu04640	Hematopoietic cell lineage	16/183	3.18533e-09	100008983/100009419/100351207/100352641/100338577/100346676/100358696/100337721/100347752/100343726/100351865/100009097/127482571/100352415/100355948/100350656	16			32/8978	3.85215e-05	0.000434742
ocu05323	Rheumatoid arthritis	14/183	1.93521e-07	100350237/100009130/100009377/100338577/100009129/100345640/100356927/100339049/100009097/100348776/127482571/100352415/100355948/100350656	14			57/8978	0.00101186	0.0066946
ocu04061	Viral protein interaction with cytokine and cytokine receptor	13/183	2.57368e-07	100348362/100009130/100328940/100358097/100101579/100339537/100338577/100008874/100009129/100354902/100347752/100348776/100349872	13			71/8978	1.13373e-10	3.83848e-09
ocu04666	Fc gamma R-mediated phagocytosis	14/183	2.6874e-07	100346759/100358696/100343961/103352489/100009097/100337909/100338413/100338913/100359306/100037719/100356520/100357790/100345556/100354471	14			153/8978	6.48442e-05	0.000668177
ocu04062	Chemokine signaling pathway	18/183	6.38505e-07	100341204/100348362/100009130/100328940/100358097/100101579/100339537/100008874/100009129/100357300/100343961/100348776/100337757/100348672/100037719/100342358/100356520/100354471	18			100/8978	0.0162334	0.069951
ocu04613	Neutrophil extracellular trap formation	17/183	9.8986e-06	100352978/100008801/100358696/100356927/100351865/100339049/100009097/100337909/100338413/100338913/100008802/100009359/100348672/100037719/100356520/100357016/100345556	17			187/8978	4.18331e-08	8.26204e-07
ocu04060	Cytokine-cytokine receptor interaction	19/183	3.79624e-05	100348362/100009130/100328940/100358097/100101579/100339537/103352517/100338577/100346676/100008874/100009129/100338854/100354902/100009558/100337721/100347752/100343726/100348776/100349872	19			78/8978	0.0010169	0.0066946
ocu05416	Viral myocarditis	10/183	5.03911e-05	100009377/100345640/100356927/100339049/100009097/127482571/100356520/100352415/100355948/100350656	10			274/8978	2.90172e-06	4.9122e-05
ocu04670	Leukocyte transendothelial migration	12/183	5.82862e-05	100008801/100345640/100356927/100351865/100339049/100008993/100008802/100009359/100037719/100342358/100356520/100345444	12			219/8978	0.00513375	0.02645
ocu04664	Fc epsilon RI signaling pathway	9/183	7.3147e-05	100341714/100009413/100354225/103350027/103352489/100339465/100009097/100356520/100345556	9			66/8978	6.78921e-06	9.46496e-05
ocu05145	Toxoplasmosis	12/183	0.000163437	100341714/100101579/100338894/100338854/100354902/127482571/127488889/100008833/100337757/100352415/100355948/100350656	12			102/8978	1.61398e-08	3.4774e-07
ocu04064	NF-kappa B signaling pathway	10/183	0.000287416	100348952/100354716/100354225/100348362/100008983/100009129/100345640/100009097/100037719/100345556	10			164/8978	0.0188786	0.078495
ocu05135	Yersinia infection	12/183	0.000287416	100346759/100009130/100009129/100350748/100339465/100009097/100338413/100352110/100342358/100356520/100358702/100354471	12			40/8978	0.00122893	0.00766466
ocu05310	Asthma	6/183	0.000335977	103350027/100009097/127482571/100352415/100355948/100350656	6			100/8978	1.39129e-10	4.1217e-09
ocu05417	Lipid and atherosclerosis	15/183	0.00036067	127482704/100009130/100008983/100009129/100008801/100345640/100348776/100352110/127488889/100008993/100008802/100009359/100009498/100348672/100355091	15			127/8978	0.000257641	0.00218075
ocu04514	Cell adhesion molecules	12/183	0.000516379	100351207/100009377/100345640/100356927/100351865/100339049/127482571/100352415/100355948/100350656/100357016/100357954	12			234/8978	0.00832386	0.0386815
ocu05164	Influenza A	13/183	0.000610153	100009130/100338894/100009129/100345640/100338854/100351853/100352110/127482571/100037719/100352415/100355948/100350656/103346588	13			353/8978	0.106387	0.340727
ocu04659	Th17 cell differentiation	10/183	0.000616039	100338854/100337721/100347752/127482571/100359054/100009009/100352415/100355948/100350656/100358993	10			392/8978	0.176538	0.475448
ocu04612	Antigen processing and presentation	8/183	0.000781284	100342022/100338894/100101598/127482571/127488889/100352415/100355948/100350656	8			247/8978	0.0296063	0.116945
ocu05146	Amoebiasis	9/183	0.00163554	100008983/100009419/100009129/100351865/100339049/100009097/100008833/100348672/100037719	9			70/8978	0.00294027	0.0165915
ocu04066	HIF-1 signaling pathway	10/183	0.00168532	100008801/100340994/100008919/100338854/100347752/100008833/100009498/100009087/100037719/100009047	10			181/8978	7.99511e-05	0.000789517
ocu05330	Allograft rejection	6/183	0.00198505	100009377/100009097/127482571/100352415/100355948/100350656	6			55/8978	0.000835978	0.00582726
ocu05221	Acute myeloid leukemia	7/183	0.00246594	100348952/100008983/100358696/100351865/100009009/100358993/103351779	7			168/8978	0.00734931	0.0348357
ocu05202	Transcriptional misregulation in cancer	12/183	0.00278981	100348952/100008983/100344453/100009129/100358696/100351865/100009097/100009115/100008993/100009009/100358993/103351779	12			202/8978	0.0223388	0.0907296
ocu05322	Systemic lupus erythematosus	10/183	0.00304389	100009377/100358696/100009097/100337909/100338413/100338913/127482571/100352415/100355948/100350656	10			77/8978	0.00473024	0.0249126
ocu05143	African trypanosomiasis	5/183	0.00417354	100345640/100009097/100009087/100348672/100037719	5			259/8978	0.0390478	0.149263
ocu04672	Intestinal immune network for IgA production	6/183	0.00450341	100009377/100009097/127482571/100352415/100355948/100350656	6			84/8978	4.69703e-14	2.78299e-12
ocu05320	Autoimmune thyroid disease	6/183	0.0051737	100009377/100009097/127482571/100352415/100355948/100350656	6			119/8978	5.09166e-06	7.54203e-05
ocu04610	Complement and coagulation cascades	7/183	0.0051737	100351157/100352978/100351865/100351616/100339049/100101584/100338524	7			221/8978	4.33219e-05	0.000466695
ocu05332	Graft-versus-host disease	5/183	0.00592339	100009377/127482571/100352415/100355948/100350656	5			134/8978	0.00601138	0.0290755
ocu05340	Primary immunodeficiency	5/183	0.00592339	100354716/100354225/100338894/100343726/100009097	5			45/8978	0.00210209	0.0121511
ocu04611	Platelet activation	9/183	0.00620919	100354225/103350027/103346983/100339465/100338413/100009498/100337757/100348672/100345556	9			298/8978	0.154906	0.437055
ocu04668	TNF signaling pathway	8/183	0.00817026	100009130/100344453/100338577/100345640/127488466/100008993/103346588/100349872	8			104/8978	2.30313e-12	9.09736e-11
ocu05144	Malaria	5/183	0.00939061	100009130/100009129/100345640/100356927/100339049	5			202/8978	7.02573e-07	1.28085e-05
ocu05321	Inflammatory bowel disease	6/183	0.0128222	100338854/100337721/127482571/100352415/100355948/100350656	6			99/8978	3.13845e-05	0.000371906
ocu04658	Th1 and Th2 cell differentiation	7/183	0.0135669	100338854/100337721/127482571/100359054/100352415/100355948/100350656	7			117/8978	1.42029e-14	1.12203e-12
ocu04940	Type I diabetes mellitus	5/183	0.0139822	100009377/127482571/100352415/100355948/100350656	5			79/8978	0.00536375	0.027047
ocu05134	Legionellosis	6/183	0.0192529	100008983/100009129/100351865/100339049/100352110/127488889	6			196/8978	0.047082	0.177118
ocu05169	Epstein-Barr virus infection	11/183	0.020441	100354716/100354225/100345640/100356927/100009097/127482571/100359054/100352415/100355948/100350656/100345556	11			245/8978	0.127643	0.390901
ocu05133	Pertussis	6/183	0.0209024	100008983/100009129/100351865/100339049/100352110/100008833	6			165/8978	1.81557e-12	8.60582e-11
ocu04933	AGE-RAGE signaling pathway in diabetic complications	7/183	0.0222457	100009130/100009129/100008801/100345640/100009498/100348672/100037719	7			162/8978	0.0176663	0.0747663
ocu04142	Lysosome	8/183	0.02247	100350237/100344094/100009063/100101598/100347788/100349164/103346838/103347422	8			130/8978	0.00132213	0.00803447
ocu04630	JAK-STAT signaling pathway	9/183	0.0269217	103352517/100346676/100338854/100354902/100337721/100347752/100343726/100348648/103346588	9			40/8978	0.00122893	0.00766466
ocu05163	Human cytomegalovirus infection	11/183	0.0298937	100009130/100328940/100101579/100009129/100354902/100347752/100348776/100348672/100037719/100342358/100356520	11			213/8978	0.0117545	0.0525624
ocu04620	Toll-like receptor signaling pathway	6/183	0.0371103	100008983/100009377/100009129/100350244/100348776/100351814	6			177/8978	0.0699066	0.25489
ocu04015	Rap1 signaling pathway	10/183	0.0406212	100338577/100350748/100356927/100351865/100339049/100339465/100348672/100037719/100356520/100345444	10			179/8978	0.073273	0.25919
ocu04071	Sphingolipid signaling pathway	7/183	0.0414889	103350027/100009498/100348672/100037719/100356520/100338930/100357790	7			232/8978	0.195185	0.510083
ocu05142	Chagas disease	6/183	0.0540594	100009130/100009129/100338854/100348776/100008833/100348672	6			278/8978	0.338833	0.693468
ocu04072	Phospholipase D signaling pathway	8/183	0.0577808	100009129/103350027/100009097/100337757/100348672/100342358/100357790/100345556	8			326/8978	0.499007	0.836447
ocu05418	Fluid shear stress and atherosclerosis	8/183	0.0606624	100009130/100008919/100345640/100340132/100008993/100008802/100009498/100356520	8			439/8978	0.798075	0.937608
ocu01523	Antifolate resistance	3/183	0.0701175	100008909/100350070/100009317	3			98/8978	9.5092e-09	2.50409e-07
ocu05167	Kaposi sarcoma-associated herpesvirus infection	9/183	0.0701175	100328940/100101579/100348412/100009129/100343961/100345640/100348666/100337757/100345556	9			122/8978	0.0122321	0.0536853
ocu05166	Human T-cell leukemia virus 1 infection	10/183	0.0903771	100349688/100354874/100345640/100356927/100339049/127482571/100352415/100355948/100350656/103351779	10			87/8978	6.15649e-15	7.29544e-13
ocu04370	VEGF signaling pathway	4/183	0.0906338	100009498/100037719/100356520/100357790	4			139/8978	0.000531806	0.00393869
ocu04020	Calcium signaling pathway	10/183	0.115353	100348650/100009097/100008833/100009498/100348672/100037719/100354046/100342358/100009246/100357790	10			95/8978	0.00318511	0.0175551
ocu04814	Motor proteins	8/183	0.13688	100340694/100345407/100338825/100340939/100303760/100345621/100357527/100357567	8			111/8978	8.40858e-05	0.000797133
ocu04216	Ferroptosis	3/183	0.162397	100340335/100008801/100008919	3			110/8978	0.00178431	0.010572
ocu05206	MicroRNAs in cancer	7/183	0.196984	100341887/100345157/100008919/100008993/100037719/100301551/100356305	7			91/8978	0.0105359	0.0480194
ocu00220	Arginine biosynthesis	2/183	0.200306	100008833/100009498	2			133/8978	1.60619e-05	0.000211482
ocu04530	Tight junction	7/183	0.200306	100346759/100009419/100340933/100340939/100358993/100357567/100354471	7			146/8978	0.0777943	0.263389
ocu04371	Apelin signaling pathway	6/183	0.203552	100345621/100008833/100009498/100337757/100348672/100357790	6			146/8978	0.0777943	0.263389
ocu04210	Apoptosis	6/183	0.203552	100348952/103346801/100101598/100340939/100344824/100357567	6			171/8978	0.136473	0.409418
ocu04973	Carbohydrate digestion and absorption	3/183	0.203552	100340994/100348672/100037719	3			222/8978	0.29942	0.674516
ocu00860	Porphyrin metabolism	3/183	0.210062	100340335/100347788/100008919	3			189/8978	0.000472183	0.00360992
ocu04657	IL-17 signaling pathway	4/183	0.242109	100009130/100344453/100009129/100008993	4			198/8978	2.45094e-15	5.80873e-13
ocu00330	Arginine and proline metabolism	3/183	0.254483	100008833/100009498/127489883	3			50/8978	0.00335894	0.0180924
ocu04151	PI3K-Akt signaling pathway	11/183	0.26332	100338577/100341887/100337721/100347752/100343726/100009097/100009498/100337757/100345556/100301551/100356305	11			58/8978	0.0301852	0.117277
ocu04540	Gap junction	4/183	0.276468	100340939/100348672/100037719/100357567	4			79/8978	4.12685e-06	6.52043e-05
ocu04929	GnRH secretion	3/183	0.276468	100341204/100348672/100037719	3			134/8978	0.138335	0.409818
ocu05415	Diabetic cardiomyopathy	8/183	0.302096	100008801/100008993/100008802/100009359/100009498/100348672/100037719/100356520	8			136/8978	0.144574	0.417855
ocu04146	Peroxisome	4/183	0.302096	100350230/100344175/100008833/100144327	4			161/8978	0.23149	0.589927
ocu04621	NOD-like receptor signaling pathway	6/183	0.316406	100009130/100009129/100008801/100352110/100009115/100348672	6			169/8978	0.26204	0.63371
ocu04915	Estrogen signaling pathway	5/183	0.316715	127488889/100008993/100009498/100348672/100009009	5			175/8978	0.285544	0.659298
ocu04520	Adherens junction	4/183	0.322926	100350709/100348648/100356520/100354471	4			206/8978	0.41076	0.786894
ocu04926	Relaxin signaling pathway	5/183	0.322926	100341204/100008993/100008833/100009498/100348672	5			217/8978	0.455031	0.811585
ocu04720	Long-term potentiation	3/183	0.323124	100348672/100037719/100358702	3			218/8978	0.459016	0.811585
ocu04010	MAPK signaling pathway	9/183	0.337764	100341204/100008983/100338577/127488889/100350814/100037719/100342471/100356520/100358702	9			239/8978	0.540394	0.836447
ocu04920	Adipocytokine signaling pathway	3/183	0.354188	100359054/103346588/100349872	3			85/8978	1.40517e-08	3.33025e-07
ocu04625	C-type lectin receptor signaling pathway	4/183	0.354188	103350027/100350907/100352110/100345556	4			85/8978	0.095174	0.313281
ocu04931	Insulin resistance	4/183	0.358465	100009498/100037719/100358702/103346588	4			91/8978	0.114718	0.35774
ocu05168	Herpes simplex virus 1 infection	11/183	0.367435	100009130/100342022/100338854/100340313/127482571/100355091/100352415/100355948/100350656/103346588/100345556	11			95/8978	0.128651	0.390901
ocu04928	Parathyroid hormone synthesis, secretion and action	4/183	0.38372	100341204/103352307/100348672/100037719	4			99/8978	0.143253	0.417855
ocu05219	Bladder cancer	2/183	0.394201	100009129/100008993	2			105/8978	0.166305	0.458307
ocu04810	Regulation of actin cytoskeleton	7/183	0.394201	100346759/100356927/100351865/100351616/100339049/100340824/100356520	7			106/8978	0.170271	0.463842
ocu04935	Growth hormone synthesis, secretion and action	4/183	0.421291	127488466/100348672/100037719/103346588	4			110/8978	0.186457	0.496521
ocu04921	Oxytocin signaling pathway	5/183	0.455906	100009498/100009087/100337757/100348672/100037719	5			116/8978	0.211614	0.545136
ocu04722	Neurotrophin signaling pathway	4/183	0.463083	127485744/100359054/100358702/100338013	4			122/8978	0.237663	0.599214
ocu00533	Glycosaminoglycan biosynthesis - keratan sulfate	1/183	0.478178	100342627	1			129/8978	0.268938	0.643822
ocu04930	Type II diabetes mellitus	2/183	0.478178	100340994/103346588	2			139/8978	0.314743	0.689263
ocu02010	ABC transporters	2/183	0.483677	100008909/127482704	2			166/8978	0.439666	0.807758
ocu04110	Cell cycle	5/183	0.489742	100352234/100349688/100354874/100346129/100343390	5			171/8978	0.462295	0.811585
ocu04114	Oocyte meiosis	4/183	0.497557	100345632/100352234/100354874/100358702	4			183/8978	0.515209	0.836447
ocu05235	PD-L1 expression and PD-1 checkpoint pathway in cancer	3/183	0.498831	100338854/100359054/100348648	3			185/8978	0.523801	0.836447
ocu04912	GnRH signaling pathway	3/183	0.509518	100348672/100037719/100342358	3			216/8978	0.646511	0.876896
ocu05161	Hepatitis B	5/183	0.509518	103346801/100009129/100008993/100037719/100342358	5			274/8978	0.814967	0.937608
ocu00600	Sphingolipid metabolism	2/183	0.509518	100338930/100357790	2			365/8978	0.943881	0.990372
ocu00531	Glycosaminoglycan degradation	1/183	0.520592	100347788	1			433/8978	0.97927	0.990372
ocu00520	Amino sugar and nucleotide sugar metabolism	2/183	0.521278	100338170/100340994	2			142/8978	3.1066e-05	0.000371906
ocu05207	Chemical carcinogenesis - receptor activation	6/183	0.521278	100341204/103346801/100350230/100351853/100037719/100358702	6			43/8978	0.0567455	0.210136
ocu00590	Arachidonic acid metabolism	3/183	0.523459	100341714/100350230/100350957	3			49/8978	0.0776569	0.263389
ocu04936	Alcoholic liver disease	4/183	0.532675	100351157/100352978/100008983/100009129	4			50/8978	0.0814292	0.271813
ocu04070	Phosphatidylinositol signaling system	3/183	0.532675	103352489/100348672/100037719	3			55/8978	0.101427	0.329292
ocu04925	Aldosterone synthesis and secretion	3/183	0.534753	100009087/100348672/100037719	3			58/8978	0.114276	0.35774
ocu00120	Primary bile acid biosynthesis	1/183	0.534753	100341039	1			65/8978	0.146427	0.418111
ocu05231	Choline metabolism in cancer	3/183	0.535925	100037719/100356520/100354471	3			69/8978	0.165982	0.458307
ocu04961	Endocrine and other factor-regulated calcium reabsorption	2/183	0.535925	100348672/100037719	2			89/8978	0.27235	0.64547
ocu04978	Mineral absorption	2/183	0.535925	100008919/100009317	2			91/8978	0.283465	0.659298
ocu04914	Progesterone-mediated oocyte maturation	3/183	0.535925	100345632/100352234/100358702	3			95/8978	0.305802	0.677337
ocu05132	Salmonella infection	7/183	0.535925	100346759/100008983/100009129/100340939/100352110/100340824/100357567	7			97/8978	0.317003	0.689263
ocu04730	Long-term depression	2/183	0.542793	100348672/100037719	2			98/8978	0.322607	0.691951
ocu00511	Other glycan degradation	1/183	0.545455	103346838	1			100/8978	0.333816	0.693468
ocu05222	Small cell lung cancer	3/183	0.556849	100346466/100349119/100008833	3			101/8978	0.339419	0.693468
ocu04660	T cell receptor signaling pathway	3/183	0.577713	100339465/100359054/100348648	3			105/8978	0.361792	0.720544
ocu04725	Cholinergic synapse	3/183	0.601473	100337757/100348672/100037719	3			108/8978	0.378502	0.747541
ocu04750	Inflammatory mediator regulation of TRP channels	3/183	0.601473	100348650/100348672/100037719	3			112/8978	0.400636	0.778285
ocu04966	Collecting duct acid secretion	1/183	0.608126	100350237	1			112/8978	0.400636	0.778285
ocu04510	Focal adhesion	5/183	0.608126	103347270/100037719/100356520/100301551/100356305	5			123/8978	0.460219	0.811585
ocu05223	Non-small cell lung cancer	2/183	0.608126	100037719/100345444	2			130/8978	0.496813	0.836447
ocu04924	Renin secretion	2/183	0.60972	100009087/100348672	2			145/8978	0.570768	0.848174
ocu04977	Vitamin digestion and absorption	1/183	0.615795	100009317	1			155/8978	0.61621	0.865854
ocu00562	Inositol phosphate metabolism	2/183	0.62032	103352489/100348672	2			156/8978	0.620573	0.865854
ocu04218	Cellular senescence	4/183	0.62425	100009129/100358944/100346753/100345444	4			160/8978	0.637689	0.876896
ocu00790	Folate biosynthesis	1/183	0.627208	100350070	1			171/8978	0.681955	0.897615
ocu04971	Gastric acid secretion	2/183	0.627208	100348672/100037719	2			189/8978	0.745551	0.928465
ocu05170	Human immunodeficiency virus 1 infection	5/183	0.627208	100101579/100037719/100342358/100356520/100349872	5			275/8978	0.923209	0.990048
ocu05205	Proteoglycans in cancer	5/183	0.627208	100340933/100008993/100101584/100037719/100348648	5			331/8978	0.967731	0.990372
ocu04726	Serotonergic synapse	3/183	0.627208	100341714/100348672/100037719	3			359/8978	0.979483	0.990372
ocu04310	Wnt signaling pathway	4/183	0.627208	100009043/100348672/100037719/100356520	4			22/8978	0.0731343	0.25919
ocu04918	Thyroid hormone synthesis	2/183	0.630088	100348672/100037719	2			40/8978	0.195855	0.510083
ocu04960	Aldosterone-regulated sodium reabsorption	1/183	0.646421	100037719	1			47/8978	0.248563	0.618745
ocu04360	Axon guidance	4/183	0.646421	127488313/100346617/100356520/100342051	4			48/8978	0.256154	0.625861
ocu05100	Bacterial invasion of epithelial cells	2/183	0.646421	100346759/100340933	2			52/8978	0.28653	0.659298
ocu04022	cGMP-PKG signaling pathway	4/183	0.646421	100009498/100009087/100337757/100348672	4			54/8978	0.301682	0.674516
ocu03030	DNA replication	1/183	0.646421	100343390	1			59/8978	0.33928	0.693468
ocu04728	Dopaminergic synapse	3/183	0.646421	100341204/100348672/100037719	3			59/8978	0.33928	0.693468
ocu01521	EGFR tyrosine kinase inhibitor resistance	2/183	0.646421	100347752/100037719	2			60/8978	0.346732	0.702355
ocu00051	Fructose and mannose metabolism	1/183	0.646421	100340994	1			69/8978	0.412346	0.786894
ocu00052	Galactose metabolism	1/183	0.646421	100340994	1			70/8978	0.419445	0.788956
ocu04911	Insulin secretion	2/183	0.646421	100348672/100037719	2			72/8978	0.433511	0.802673
ocu00512	Mucin type O-glycan biosynthesis	1/183	0.646421	100348815	1			76/8978	0.461086	0.811585
ocu00760	Nicotinate and nicotinamide metabolism	1/183	0.646421	100349854	1			77/8978	0.467858	0.815312
ocu01232	Nucleotide metabolism	2/183	0.646421	100349854/100144327	2			83/8978	0.507407	0.836447
ocu05212	Pancreatic cancer	2/183	0.646421	100356520/100008661	2			84/8978	0.513812	0.836447
ocu05020	Prion disease	7/183	0.646421	100008801/100340939/127488889/100008802/100009359/100356520/100357567	7			84/8978	0.513812	0.836447
ocu04014	Ras signaling pathway	5/183	0.646421	100338577/100037719/100356520/103345683/100345444	5			86/8978	0.526457	0.836447
ocu04970	Salivary secretion	2/183	0.646421	100348672/100037719	2			86/8978	0.526457	0.836447
ocu00500	Starch and sucrose metabolism	1/183	0.646421	100340994	1			87/8978	0.532696	0.836447
ocu00053	Ascorbate and aldarate metabolism	1/183	0.649908	100347788	1			91/8978	0.557091	0.840959
ocu04512	ECM-receptor interaction	2/183	0.649908	100301551/100356305	2			91/8978	0.557091	0.840959
ocu05032	Morphine addiction	2/183	0.649908	100341204/100037719	2			92/8978	0.563048	0.844572
ocu01524	Platinum drug resistance	2/183	0.6527	103346801/100357676	2			94/8978	0.574789	0.848174
ocu01250	Biosynthesis of nucleotide sugars	1/183	0.655484	100340994	1			97/8978	0.591971	0.860718
ocu04713	Circadian entrainment	2/183	0.655484	100348672/100037719	2			100/8978	0.608633	0.865854
ocu00040	Pentose and glucuronate interconversions	1/183	0.655484	100347788	1			110/8978	0.66044	0.884318
ocu04270	Vascular smooth muscle contraction	3/183	0.655484	100009087/100348672/100037719	3			114/8978	0.679578	0.897615
ocu04916	Melanogenesis	2/183	0.665179	100348672/100037719	2			118/8978	0.697832	0.908715
ocu03440	Homologous recombination	1/183	0.666517	100008661	1			122/8978	0.715222	0.921237
ocu04261	Adrenergic signaling in cardiomyocytes	3/183	0.669147	100345621/100337757/100348672	3			134/8978	0.762432	0.928465
ocu04215	Apoptosis - multiple species	1/183	0.669147	103346801	1			135/8978	0.766045	0.928465
ocu05030	Cocaine addiction	1/183	0.669147	127488313	1			140/8978	0.783404	0.928465
ocu00983	Drug metabolism - other enzymes	2/183	0.669147	100347788/100144327	2			149/8978	0.811828	0.937608
ocu04390	Hippo signaling pathway	3/183	0.669147	103346801/100339049/100338818	3			150/8978	0.814773	0.937608
ocu00514	Other types of O-glycan biosynthesis	1/183	0.669147	100348815	1			161/8978	0.844556	0.956606
ocu03410	Base excision repair	1/183	0.677681	100344824	1			164/8978	0.851894	0.956606
ocu00565	Ether lipid metabolism	1/183	0.677681	100341396	1			171/8978	0.867807	0.956606
ocu03460	Fanconi anemia pathway	1/183	0.677681	100008661	1			180/8978	0.885971	0.958791
ocu04217	Necroptosis	3/183	0.677681	100008801/100338854/100352110	3			226/8978	0.947755	0.990372
ocu04913	Ovarian steroidogenesis	1/183	0.677681	100341714	1			276/8978	0.978465	0.990372
ocu05203	Viral carcinogenesis	4/183	0.677681	100350237/100101579/100354874/100345556	4			329/8978	0.991855	0.996058
ocu05210	Colorectal cancer	2/183	0.683417	103346801/100356520	2			14/8978	0.250631	0.618745
ocu04724	Glutamatergic synapse	2/183	0.693693	100348672/100037719	2			17/8978	0.2956	0.673628
ocu04340	Hedgehog signaling pathway	1/183	0.693693	100341204	1			19/8978	0.324079	0.691951
ocu04150	mTOR signaling pathway	3/183	0.693693	100341887/100037719/100358702	3			21/8978	0.351411	0.705801
ocu04923	Regulation of lipolysis in adipocytes	1/183	0.693693	100009087	1			26/8978	0.415029	0.786894
ocu04919	Thyroid hormone signaling pathway	2/183	0.702272	100348672/100037719	2			27/8978	0.426987	0.796818
ocu03250	Viral life cycle - HIV-1	1/183	0.711155	100101579	1			30/8978	0.461422	0.811585
ocu04972	Pancreatic secretion	2/183	0.711949	100348672/100037719	2			35/8978	0.5143	0.836447
ocu05031	Amphetamine addiction	1/183	0.715108	100037719	1			35/8978	0.5143	0.836447
ocu04623	Cytosolic DNA-sensing pathway	1/183	0.716876	100352110	1			36/8978	0.524239	0.836447
ocu01230	Biosynthesis of amino acids	1/183	0.717535	127489883	1			36/8978	0.524239	0.836447
ocu05230	Central carbon metabolism in cancer	1/183	0.717535	100340994	1			38/8978	0.543514	0.836447
ocu05220	Chronic myeloid leukemia	1/183	0.717535	100358993	1			38/8978	0.543514	0.836447
ocu04927	Cortisol synthesis and secretion	1/183	0.717535	100348672	1			38/8978	0.543514	0.836447
ocu05214	Glioma	1/183	0.717535	100037719	1			39/8978	0.552858	0.840959
ocu00010	Glycolysis / Gluconeogenesis	1/183	0.717535	100340994	1			42/8978	0.579764	0.848174
ocu04910	Insulin signaling pathway	2/183	0.717535	100340994/103346588	2			42/8978	0.579764	0.848174
ocu04213	Longevity regulating pathway - multiple species	1/183	0.717535	127488889	1			44/8978	0.596801	0.86245
ocu00310	Lysine degradation	1/183	0.717535	100345157	1			45/8978	0.60506	0.865854
ocu04932	Non-alcoholic fatty liver disease	3/183	0.717535	100009129/100347752/103346588	3			47/8978	0.621076	0.865854
ocu03013	Nucleocytoplasmic transport	2/183	0.717535	100351853/100340132	2			47/8978	0.621076	0.865854
ocu04917	Prolactin signaling pathway	1/183	0.717535	103346588	1			49/8978	0.636447	0.876896
ocu00230	Purine metabolism	2/183	0.717535	100349854/100144327	2			51/8978	0.651197	0.876896
ocu04622	RIG-I-like receptor signaling pathway	1/183	0.717535	100009129	1			51/8978	0.651197	0.876896
ocu05010	Alzheimer disease	7/183	0.7246	100338577/100008801/100340939/127488313/100008833/100348672/100357567	7			51/8978	0.651197	0.876896
ocu04144	Endocytosis	4/183	0.7246	100346759/100341204/100101579/127488889	4			55/8978	0.678935	0.897615
ocu05162	Measles	2/183	0.7246	100359306/127488889	2			56/8978	0.68552	0.897615
ocu04723	Retrograde endocannabinoid signaling	2/183	0.7246	100348672/100037719	2			60/8978	0.710542	0.920211
ocu04721	Synaptic vesicle cycle	1/183	0.7246	100350237	1			62/8978	0.722301	0.925326
ocu04742	Taste transduction	1/183	0.7246	100348672	1			63/8978	0.728	0.927613
ocu04012	ErbB signaling pathway	1/183	0.729207	100037719	1			65/8978	0.739053	0.928465
ocu04976	Bile secretion	1/183	0.739283	100008909	1			65/8978	0.739053	0.928465
ocu01240	Biosynthesis of cofactors	2/183	0.739283	100350070/100347788	2			66/8978	0.744411	0.928465
ocu01522	Endocrine resistance	1/183	0.739283	100008993	1			69/8978	0.759836	0.928465
ocu04727	GABAergic synapse	1/183	0.739283	100037719	1			70/8978	0.76477	0.928465
ocu00564	Glycerophospholipid metabolism	1/183	0.739283	100341396	1			71/8978	0.769602	0.928465
ocu05215	Prostate cancer	1/183	0.739283	100008993	1			72/8978	0.774336	0.928465
ocu05017	Spinocerebellar ataxia	2/183	0.739283	100348672/100037719	2			73/8978	0.778973	0.928465
ocu04120	Ubiquitin mediated proteolysis	2/183	0.739283	100354874/103346588	2			73/8978	0.778973	0.928465
ocu04260	Cardiac muscle contraction	1/183	0.740971	100345621	1			74/8978	0.783515	0.928465
ocu05414	Dilated cardiomyopathy	1/183	0.740971	100009097	1			79/8978	0.80487	0.937608
ocu04922	Glucagon signaling pathway	1/183	0.740971	100348672	1			81/8978	0.812813	0.937608
ocu05225	Hepatocellular carcinoma	2/183	0.740971	100008919/100037719	2			84/8978	0.824129	0.943568
ocu04350	TGF-beta signaling pathway	1/183	0.747323	100338818	1			92/8978	0.851087	0.956606
ocu05208	Chemical carcinogenesis - reactive oxygen species	3/183	0.765127	100350230/100008919/100008802	3			93/8978	0.854154	0.956606
ocu05014	Amyotrophic lateral sclerosis	4/183	0.765377	100340939/100008833/100349872/100357567	4			94/8978	0.857158	0.956606
ocu04140	Autophagy - animal	1/183	0.765377	100341887	1			96/8978	0.862982	0.956606
ocu04024	cAMP signaling pathway	2/183	0.765377	100009087/100356520	2			97/8978	0.865805	0.956606
ocu01200	Carbon metabolism	1/183	0.765377	100340994	1			102/8978	0.879076	0.958791
ocu04934	Cushing syndrome	1/183	0.765377	100348672	1			103/8978	0.881569	0.958791
ocu04068	FoxO signaling pathway	1/183	0.765377	100343726	1			104/8978	0.884011	0.958791
ocu05160	Hepatitis C	1/183	0.765377	103346588	1			110/8978	0.897647	0.96701
ocu05165	Human papillomavirus infection	3/183	0.765377	100350237/100301551/100356305	3			129/8978	0.931156	0.990372
ocu05016	Huntington disease	3/183	0.765377	100340939/100348672/100357567	3			131/8978	0.933974	0.990372
ocu04080	Neuroactive ligand-receptor interaction	4/183	0.765377	100351157/100352978/100348650/100354046	4			156/8978	0.960874	0.990372
ocu00190	Oxidative phosphorylation	1/183	0.765377	100350237	1			157/8978	0.961686	0.990372
ocu04141	Protein processing in endoplasmic reticulum	1/183	0.765377	127488889	1			162/8978	0.9655	0.990372
ocu03040	Spliceosome	1/183	0.765377	127488889	1			181/8978	0.97685	0.990372
ocu04714	Thermogenesis	2/183	0.765377	100009087/100358702	2			183/8978	0.977803	0.990372
ocu05012	Parkinson disease	2/183	0.769772	100340939/100357567	2			193/8978	0.982014	0.990372
ocu03010	Ribosome	1/183	0.772748	100341783	1			441/8978	0.99991	0.99991

## Sheet: Treat.7w vs Control
ID	Description	GeneRatio	qvalue	BgRatio	pvalue	p.adjust		geneID	Count
ocu05150	Staphylococcus aureus infection	29/634	1.08295e-10	38/8978	0.760175	0.954129		100342793/100351157/100352978/103352242/100358696/100345640/100356927/100351865/100339049/100344942/100344434/100009097/100337909/100338413/100338913/100341358/100351163/100351416/100352672/100359306/127482571/127482788/100009115/100354046/100352415/100355948/100328929/100350656/100357016	29
ocu05140	Leishmaniasis	28/634	1.37932e-10	439/8978	0.989643	0.999938		100008801/100358696/100341787/100338854/100354743/100351865/100339049/100008803/100009097/100337909/100338413/100338913/100341358/100351163/100351416/100352672/127482571/100008802/100009359/100008833/100037719/100348648/100352415/100355948/100328929/100350656/100008645/100009371	28
ocu05152	Tuberculosis	44/634	3.36825e-10	67/8978	0.0448442	0.179967		100350237/100358587/100355675/103349397/100008983/100342022/100344453/100338894/100008706/100101598/103350027/100358696/100341787/100338854/100354902/100338351/100354743/100351865/100351616/100339049/100009097/100337909/100338413/100338913/100341358/100351163/100351416/100352672/100359306/127482571/100008833/100349159/100352415/100355948/100328929/100350656/100357790/100345556/100008645/100009371…	44
ocu04640	Hematopoietic cell lineage	27/634	4.03799e-08	103/8978	0.00220665	0.0184178		100008983/100009419/100351207/100352641/100346676/100358696/108175474/127488341/103350689/127486876/103345135/100337721/100347752/100343726/100348594/100351865/100009097/100341358/100351163/100351416/100352672/127482571/100352415/100355948/100328929/100350656/100342561	27
ocu04145	Phagosome	34/634	4.6596e-07	69/8978	0.212721	0.495268		100350237/100341367/100352404/100342793/100008983/100008706/100101598/100008801/100358696/100351865/100339049/100008803/100009097/100337909/100338413/100338913/100340939/100341358/100351163/100351416/100352672/100359306/127482571/100009067/100008802/100009359/103350994/100352415/100355948/100328929/100350656/100342561/100353753/100357567	34
ocu04060	Cytokine-cytokine receptor interaction	46/634	9.35668e-07	48/8978	0.442656	0.745912		100344814/100357896/100348414/100348362/100009130/103348469/100343840/100328940/100358097/100101579/100339537/100356265/100346676/100346186/100008874/127490643/100348428/100328622/100328627/100340021/100351716/100341680/100341787/100338854/100354902/100338351/127486876/100341281/100009558/100349338/103348594/100347811/103345135/100337721/100347752/100343726/100354786/100341426/100008747/100349996…	46
ocu04380	Osteoclast differentiation	27/634	9.35668e-07	62/8978	0.272025	0.553118		100354716/100354225/100358696/100341787/100338854/127488466/100339465/100008803/100337909/100338413/100338913/100345649/100347041/100359306/103346239/100008802/100009359/100353824/103346588/103351779/100345556/100008645/100009371/100346106/100341009/100348748/103345430	27
ocu05323	Rheumatoid arthritis	23/634	6.34713e-06	55/8978	0.000363569	0.00382374		100350237/100341367/100352404/100009130/100009377/100345640/127486876/100356927/100339049/100009097/100341358/100351163/100351416/100352672/127482571/100009110/100352415/100355948/100328929/100350656/100008645/100009371/100341009	23
ocu04514	Cell adhesion molecules	29/634	2.00327e-05	186/8978	0.916453	0.999938		100351207/100345466/100009377/100338591/100342120/100347630/100345640/100351181/100356927/100351865/100339049/100350557/100009141/100341358/100351163/100351416/100352672/100356848/127482571/100348118/100351355/100338124/100358807/100352415/100355948/100328929/100350656/100357016/100008901	29
ocu05310	Asthma	12/634	2.00327e-05	50/8978	0.974578	0.999938		103350027/100009097/100341358/100351163/100351416/100352672/127482571/100351385/100352415/100355948/100328929/100350656	12
ocu04061	Viral protein interaction with cytokine and cytokine receptor	20/634	2.73777e-05	34/8978	0.216428	0.498408		100348362/100009130/103348469/100343840/100328940/100358097/100101579/100339537/100346186/100008874/127490643/100328622/100328627/100354902/100338351/100349338/100347811/100347752/100346106/100349872	20
ocu05145	Toxoplasmosis	26/634	3.12952e-05	433/8978	0.999161	0.999938		100341714/100358587/103349397/100101579/100338894/100341787/100338854/100354902/100338351/100354743/100341358/100351163/100351416/100352672/127482571/127488889/127493068/100008833/100337757/100352415/100355948/100328929/100350656/100008645/100009371/100346106	26
ocu04662	B cell receptor signaling pathway	17/634	0.000112443	169/8978	0.029168	0.136327		100354716/100354225/100351207/100344783/103352489/100009097/100345649/100347041/100359306/103346239/100340056/100353824/100359054/100037719/100348648/100356520/100345556	17
ocu04650	Natural killer cell mediated cytotoxicity	21/634	0.00015923	79/8978	0.10364	0.325878		100350758/103350027/100348190/100345640/100341787/100338854/100356927/100339049/100339465/100009097/100337909/100338913/103347295/100353824/100037719/100342358/100348648/100356520/100350793/100345556/103345430	21
ocu04062	Chemokine signaling pathway	30/634	0.000274431	139/8978	0.523401	0.814475		100341204/100358587/100348362/100009130/103348469/100343840/100328940/100358097/100101579/100339537/100346186/100008874/127490643/100348428/100328622/100328627/100357300/100342557/100342201/100343961/100008803/100340056/100337757/100348672/100350395/100342212/100037719/100342358/100356520/100354471	30
ocu05321	Inflammatory bowel disease	16/634	0.00032054	275/8978	0.999938	0.999938		100341787/100338854/103348594/100337721/100341358/100351163/100351416/100352672/127482571/100352415/100355948/100328929/100350656/100008645/100009371/100350028	16
ocu04666	Fc gamma R-mediated phagocytosis	20/634	0.000335747	156/8978	0.547537	0.834993		100346759/100357607/100353577/100358696/100343961/103352489/100008803/100009097/100337909/100338413/100338913/100359306/100340056/100338249/100037719/100358807/100356520/100357790/100345556/100354471	20
ocu04064	NF-kappa B signaling pathway	19/634	0.000673935	259/8978	0.102906	0.325878		103349397/100348952/100354716/100354225/100348362/100008983/100340021/100353742/100345640/100354743/100009097/100340056/100037719/100345556/100345225/100346106/100341009/100337888/100008901	19
ocu04512	ECM-receptor interaction	18/634	0.000673935	129/8978	0.814902	0.999938		103347121/100343947/100328589/127488341/100353907/100340334/100344425/100348594/100351181/100350557/100009141/100357231/127487418/100101608/100008982/100301551/100356305/100009165	18
ocu04928	Parathyroid hormone synthesis, secretion and action	20/634	0.000883448	60/8978	0.419109	0.726297		100341204/103349397/100340503/100348489/100357483/100343050/100009505/100356074/100355721/100357489/103352307/100008685/100009598/100101606/100348672/100350395/100342212/100037719/100356489/100341009	20
ocu04659	Th17 cell differentiation	20/634	0.000946993	51/8978	0.490103	0.787688		100341787/100338854/100341281/103348594/100337721/100347752/100341358/100351163/100351416/100352672/127482571/100353824/100359054/100009009/100352415/100355948/100328929/100350656/100358993/100008645	20
ocu04672	Intestinal immune network for IgA production	13/634	0.000946993	49/8978	0.87016	0.999938		100009377/100350557/100009097/100341358/100351163/100351416/100352672/127482571/100352415/100355948/100328929/100350656/100008645	13
ocu05416	Viral myocarditis	16/634	0.00106759	33/8978	0.415275	0.723766		100009377/100345640/100356927/100339049/100009097/100341358/100351163/100351416/100352672/127482571/100356520/100352415/100355948/100328929/100350656/100009208	16
ocu04612	Antigen processing and presentation	15/634	0.00141098	78/8978	0.00296818	0.0232127		100342022/100338894/100101593/100101598/100341358/100351163/100351416/100352672/127482571/127488889/127493068/100352415/100355948/100328929/100350656	15
ocu05417	Lipid and atherosclerosis	31/634	0.00164613	41/8978	0.561014	0.837324		127482704/100328797/100358587/100355675/103349397/100009130/100008983/100008801/100345640/100354455/100354743/100009505/100008803/100352110/100357982/127488889/127493068/100340056/100009110/100008993/100008802/100009359/100353824/100009498/100348672/100350395/100355091/100345225/100353753/100346106/100008901	31
ocu04611	Platelet activation	21/634	0.00248556	39/8978	0.295561	0.584305		100354225/103350027/103346983/127488341/100349851/100009505/100339465/100338413/100340056/100009498/100345006/100337757/100348672/100350395/100342212/100355165/100009407/100345556/100339354/100338966/100009165	21
ocu05330	Allograft rejection	11/634	0.00248556	92/8978	0.200377	0.47746		100009377/100009097/100341358/100351163/100351416/100352672/127482571/100352415/100355948/100328929/100350656	11
ocu05332	Graft-versus-host disease	10/634	0.00297149	17/8978	0.113848	0.337124		100009377/100341358/100351163/100351416/100352672/127482571/100352415/100355948/100328929/100350656	10
ocu00330	Arginine and proline metabolism	12/634	0.00298245	58/8978	0.923339	0.999938		100352530/100338523/100328683/100347984/100357007/100008833/100009498/100356084/100342773/127489883/100355148/100340020	12
ocu05143	African trypanosomiasis	9/634	0.00546057	127/8978	0.00779254	0.0457063		100009249/100009084/100345640/100009097/100009087/100348672/100350395/100037719/100008901	9
ocu05144	Malaria	10/634	0.00732971	37/8978	0.933817	0.999938		100009130/103350689/100009249/100009084/100345640/100356927/100339049/100008645/100009371/100008901	10
ocu04151	PI3K-Akt signaling pathway	41/634	0.00762348	99/8978	0.159862	0.423981		100358587/103349397/100356949/100009040/100348489/100343947/100357483/100341887/100344921/100358004/100343050/108175474/100328589/100342201/100344425/103345135/100337721/100347752/100343726/100348594/100351181/100350557/100009141/100009097/100357231/100357489/127487418/100347657/100350077/100009498/100345073/100352388/100359297/100337757/100354906/100346997/100008982/100345556/100301551/100356305…	41
ocu04670	Leukocyte transendothelial migration	18/634	0.0118301	103/8978	0.597918	0.860213		100338591/100008801/100347630/100345640/100356927/100351865/100339049/100008803/100008993/127492634/100008802/100009359/100037719/100342358/100356520/127485181/100008901/100357160	18
ocu05320	Autoimmune thyroid disease	11/634	0.0129637	38/8978	0.93851	0.999938		100009377/100009097/100341358/100351163/100351416/100352672/127482571/100352415/100355948/100328929/100350656	11
ocu05164	Influenza A	24/634	0.0135807	146/8978	0.006884	0.0428494		100355675/100009130/100009040/100338894/100345640/100341787/100338854/100354455/100351853/100341358/100351163/100351416/100352110/100352672/127482571/100341830/100037719/100352415/100355948/100328929/100350656/103346588/100346106/100337888	24
ocu05146	Amoebiasis	16/634	0.0143656	100/8978	0.0485651	0.192044		100008983/100009419/100328589/100351865/100339049/100009097/100350232/100008833/100348672/100350395/100342212/100037719/103350994/100008645/100009371/100357160	16
ocu04940	Type I diabetes mellitus	10/634	0.0143656	180/8978	0.508484	0.79942		100009377/100341358/100351163/100351416/100352672/127482571/100352415/100355948/100328929/100350656	10
ocu04658	Th1 and Th2 cell differentiation	15/634	0.0159315	102/8978	0.00509093	0.0352894		100341787/100338854/100337721/100341358/100351163/100351416/100352672/127482571/100353824/100359054/100343819/100352415/100355948/100328929/100350656	15
ocu04610	Complement and coagulation cascades	13/634	0.0181055	219/8978	0.00313316	0.0238904		100009198/100342793/100351157/100352978/100008713/100351865/100351616/100339049/127482788/100101584/100338234/100338524/100009165	13
ocu05169	Epstein-Barr virus infection	27/634	0.0186341	54/8978	0.535801	0.821202		100355675/103349397/100354716/100354225/100009040/100348489/100346379/100353742/100345640/100354455/100354743/100356927/100009097/100341358/100351163/100351416/100352672/127482571/100340056/100359054/100338269/100352415/100355948/100328929/100350656/100345556/100337888	27
ocu05322	Systemic lupus erythematosus	19/634	0.0233241	49/8978	0.262873	0.541731		100342793/100009377/100358696/100009097/100337909/100338413/100338913/100341358/100348415/100351163/100351416/100352672/127482571/127482788/127490210/100352415/100355948/100328929/100350656	19
ocu01523	Antifolate resistance	7/634	0.0233241	134/8978	0.0264466	0.128035		100008909/100341917/100350070/127488159/100352874/100009293/100009317	7
ocu05166	Human T-cell leukemia virus 1 infection	29/634	0.0254071	98/8978	0.0840885	0.297265		100355675/100349688/100357416/100354874/100348489/100351874/100357483/100338531/100346379/100345640/100356927/100339049/100341358/100351163/100351416/100352672/100357489/127482571/100353824/100342212/100352415/100355948/100328929/100350656/103351779/100008645/100009371/100346106/100338710	29
ocu05414	Dilated cardiomyopathy	15/634	0.0275251	274/8978	2.40593e-08	1.1996e-06		100101555/100009277/100348594/100351181/100350557/100009141/100009097/100349893/127487418/100342212/100009208/100339605/100008645/100009371/100351420	15
ocu04510	Focal adhesion	25/634	0.0284038	30/8978	0.00411784	0.0299033		100358587/103349397/100126563/100343947/100328589/100344425/100348594/100351181/100350557/100009141/100357231/127487418/127492634/103347270/100352388/100356902/100037719/100328756/100356520/100008982/100301551/100356305/100357160/100009165/100348821	25
ocu05410	Hypertrophic cardiomyopathy	14/634	0.0306632	91/8978	5.38254e-05	0.000864039		100101555/100009277/100348594/100351181/100350557/100009141/100349893/127487418/100352581/100009208/100339605/100008645/100009371/100351420	14
ocu04664	Fc epsilon RI signaling pathway	11/634	0.0306632	70/8978	0.223148	0.498758		100341714/100009413/100354225/103350027/103352489/100339465/100009097/100340056/100351385/100356520/100345556	11
ocu04010	MAPK signaling pathway	33/634	0.031846	36/8978	0.000688611	0.00700088		100341204/100356949/100101555/100009277/100008983/100352279/100351542/100343162/100344731/100344921/100358004/100343050/108175474/100353742/100355129/100341281/100354743/127488889/127493068/100356691/100350814/100345073/100352388/100342212/100037719/100342471/100328756/100356520/100358702/100008645/100009371/100346106/100337888	33
ocu04210	Apoptosis	19/634	0.0334218	96/8978	0.680364	0.899999		100358587/100355675/103349397/100348952/103346801/100101593/100101597/100101598/100101623/100353742/103345135/100009505/100340939/100349996/103349392/100344824/100346106/100337888/100357567	19
ocu05202	Transcriptional misregulation in cancer	23/634	0.0340856	22/8978	0.200157	0.47746		100357873/100355675/100348952/100008983/100348489/100344453/100355978/100358696/108175474/100353742/127485419/100351865/100350557/100349057/100009097/127488846/100009115/100008993/100341186/100352388/100009009/100358993/103351779	23
ocu04066	HIF-1 signaling pathway	17/634	0.0356501	72/8978	0.399335	0.712264		103349397/100348489/100008801/100008919/100341787/100338854/100347752/127487657/100348124/100351519/100008833/100009498/100009087/100009526/100037719/100342561/100009047	17
ocu04978	Mineral absorption	10/634	0.0356501	91/8978	0.312801	0.603824		100008756/100009597/100009254/100008919/100343299/100343557/100343802/100009317/100009262/100339605	10
ocu00670	One carbon pool by folate	5/634	0.0392777	24/8978	0.513333	0.802905		127488159/100343064/100352874/100349622/100009293	5
ocu04668	TNF signaling pathway	15/634	0.0449106	38/8978	0.0156449	0.0808763		100009130/100344453/100357483/100346186/100338814/100345640/127488466/100357489/100009598/100008993/103346588/100346106/100349872/100337888/100008901	15
ocu04071	Sphingolipid signaling pathway	16/634	0.0504955	100/8978	0.410747	0.722572		100355675/103349397/103350027/100351385/100009498/100348672/100350395/100346997/100037719/100356520/100008828/100338930/100357790/100338261/100346106/100337888	16
ocu05163	Human cytomegalovirus infection	26/634	0.0593688	125/8978	0.884131	0.999938		100355675/100009130/100328940/100101579/100009040/100348489/100349407/100357483/100346186/100328627/100346379/100342201/100354902/100338351/100347752/100009505/100357489/100353824/100348672/100350395/100342212/100037719/100342358/100356520/100346106/100337888	26
ocu04630	JAK-STAT signaling pathway	20/634	0.0610691	37/8978	0.746945	0.949243		103349397/100348489/100356265/100346676/100341787/100338854/100354902/100338351/127486876/100349338/103348594/103345135/100337721/100347752/100343726/100008747/100349996/100352388/100348648/103346588	20
ocu04613	Neutrophil extracellular trap formation	23/634	0.062942	47/8978	0.111272	0.33423		100352978/100008801/100358696/100338635/100356927/100351865/100339049/100008803/100009097/100337909/100338413/100338913/100348415/127490210/100008802/100009359/100348672/100350395/100037719/100356520/100357016/100345556/100009165	23
ocu03030	DNA replication	7/634	0.0630821	65/8978	0.0857682	0.297265		100337896/100343390/100355173/100358589/100345366/103346676/103351965	7
ocu04621	NOD-like receptor signaling pathway	20/634	0.0693381	84/8978	0.382159	0.6938		100356899/103349397/100358687/100009130/100101593/100008801/100338814/100340751/100338635/100354455/100009505/100352110/127488905/100009115/100341372/100341830/100345423/100348672/100350395/100354812	20
ocu04810	Regulation of actin cytoskeleton	25/634	0.085595	73/8978	0.000142347	0.00180899		100346759/100357607/100009198/100347936/100343050/100328589/100348594/100351181/100356927/100351865/100351616/100339049/100350557/100009141/127487418/100347657/100009002/100009145/127492634/100340824/100352388/100356902/100356520/100357160/100347053	25
ocu05133	Pertussis	11/634	0.085595	80/8978	0.826046	0.999938		100342793/100008983/100354743/100350620/100351865/100339049/100352110/127482788/100345423/100008833/100345225	11
ocu04142	Lysosome	16/634	0.0998651	222/8978	0.609834	0.865114		100357188/100350237/100344094/100101593/100009063/100101597/100101598/100101623/100343632/100343662/100347788/100009375/100349164/103346838/100350048/103347422	16
ocu05165	Human papillomavirus infection	33/634	0.101311	156/8978	0.137128	0.38726		100350237/100341367/100352404/100358587/100355675/100009040/100348489/100343947/100357483/100345988/100328589/103348917/103346208/100337990/100344425/100354455/100348594/100351181/100350557/100009141/100357231/127487418/100357457/100343819/100346997/100342212/100008982/100301551/100346106/100356305/100337888/100009165/100342870	33
ocu04110	Cell cycle	19/634	0.106333	74/8978	0.42508	0.728368		100352234/100349688/100357416/100354874/100351717/100009040/100348489/100351874/100349461/100346379/100353742/100346129/100337896/100343390/100346997/100352685/100008645/100009371/100345730	19
ocu04216	Ferroptosis	7/634	0.106333	177/8978	0.0438055	0.178143		100340335/100008801/100009597/100009254/100008919/100355148/100342561	7
ocu05212	Pancreatic cancer	11/634	0.109915	68/8978	0.717085	0.920898		100358587/100355675/100009040/100348489/100346379/100353742/100356520/100008661/100346449/100008645/100009371	11
ocu05222	Small cell lung cancer	13/634	0.115784	51/8978	0.708663	0.919754		100355675/103349397/100009040/100348489/100351874/100346466/100349119/100346379/100328589/100353742/100348594/100008833/100358445	13
ocu04933	AGE-RAGE signaling pathway in diabetic complications	13/634	0.122028	274/8978	0.568282	0.837324		100355675/103349397/100009130/100008801/100328589/100345640/100009498/100348672/100350395/100037719/100008645/100009371/100008901	13
ocu04657	IL-17 signaling pathway	11/634	0.122605	114/8978	0.180521	0.462585		100009130/100343840/100344453/100354455/100343055/100009110/100008685/100008993/100008985/100008704/100337888	11
ocu04970	Salivary secretion	11/634	0.130163	97/8978	0.690073	0.899999		100008756/100009450/100349851/100009505/100340903/100341160/108175363/100348672/100350395/100342212/100037719	11
ocu05161	Hepatitis B	19/634	0.131274	42/8978	0.954186	0.999938		100358587/100355675/103349397/103346801/100348489/100357483/100346379/100355500/100340334/100354455/100354743/100357489/100008993/100353824/100037719/100342358/100008645/100009371/100345225	19
ocu05135	Yersinia infection	16/634	0.1373	26/8978	0.107089	0.328938		100346759/100357607/100009130/100328589/100350748/100354743/100339465/100009097/100338413/100352110/100353824/100342358/100356520/100358702/100354471/100347053	16
ocu05206	MicroRNAs in cancer	19/634	0.138948	143/8978	0.429678	0.732134		103349397/100009040/100348489/100341887/100346379/100344921/100358004/100345157/100343465/100008919/100357231/100008993/100343819/100352388/100037719/100009371/100301551/100356305/100341510	19
ocu04918	Thyroid hormone synthesis	10/634	0.138948	175/8978	0.0397307	0.168304		100008756/100357483/100009258/100009505/100357489/100346275/100348672/100350395/100342212/100037719	10
ocu05221	Acute myeloid leukemia	9/634	0.140371	392/8978	0.504073	0.798929		100358587/100348952/100008983/100358696/108175474/100351865/100009009/100358993/103351779	9
ocu04270	Vascular smooth muscle contraction	16/634	0.149791	73/8978	0.0704506	0.255803		100009271/100101555/100349851/100008940/100009505/100009002/100009145/100009087/100343663/100348672/100350395/100356902/100342212/100037719/100344184/100355165	16
ocu05142	Chagas disease	12/634	0.149791	102/8978	2.39926e-05	0.000430455		100009130/100341787/100338854/100354743/127482788/100008833/100348672/100350395/100008645/100009371/100353753/100346106	12
ocu04929	GnRH secretion	8/634	0.149791	106/8978	0.476188	0.785067		100341204/100101555/100353026/100009505/100348672/100350395/100037719/100008982	8
ocu04915	Estrogen signaling pathway	15/634	0.149837	63/8978	0.154433	0.416832		103349397/100357483/100353026/100009505/100344942/100344434/100357489/127488889/127493068/100008993/100009498/100348672/100350395/100342212/100009009	15
ocu04961	Endocrine and other factor-regulated calcium reabsorption	8/634	0.159046	181/8978	0.00199805	0.0174116		103345727/100008756/100356074/100348672/100350395/100342212/100037719/100339605	8
ocu04924	Renin secretion	9/634	0.164541	94/8978	0.00596876	0.0393126		100101555/100101593/100349851/100009505/100009087/100343663/100348672/100350395/100342212	9
ocu05340	Primary immunodeficiency	6/634	0.171324	87/8978	0.159449	0.423981		100354716/100354225/100338894/100343726/100009097/100358807	6
ocu05220	Chronic myeloid leukemia	9/634	0.199522	23/8978	0.218973	0.498408		100358587/100355675/100009040/100348489/100346379/100353742/100358993/100008645/100009371	9
ocu05167	Kaposi sarcoma-associated herpesvirus infection	20/634	0.217642	185/8978	0.66311	0.888691		100355675/100328940/100101579/100348412/100009040/100348489/100346379/100342201/100343961/100345640/100341787/100354455/100009505/100346213/100340056/100353824/100337757/100345556/100346106/100337888	20
ocu04925	Aldosterone synthesis and secretion	11/634	0.231862	35/8978	0.718602	0.920898		100008756/100101555/100357483/100009505/100357489/100009087/100343663/100348672/100350395/100342212/100037719	11
ocu04927	Cortisol synthesis and secretion	8/634	0.231862	112/8978	0.266203	0.544912		100101555/100357483/100009505/100357489/100341186/100348672/100350395/100342212	8
ocu05218	Melanoma	8/634	0.231862	77/8978	0.174913	0.452107		100358587/100355675/100009040/100348489/100346379/100343050/100353742/100352388	8
ocu05210	Colorectal cancer	12/634	0.232015	43/8978	0.0295003	0.136327		100358587/100355675/103349397/103346801/100348489/100353742/103349392/103347805/100356520/100346449/100008645/100009371	12
ocu04371	Apelin signaling pathway	15/634	0.24039	65/8978	0.0857682	0.297265		100009271/100342201/100009505/103345364/100345621/100008833/100009498/100337757/100348672/100350395/100342212/100352581/100339605/100357790/100008982	15
ocu05030	Cocaine addiction	6/634	0.247734	202/8978	0.0153456	0.0806966		100356949/100357483/100357489/127488313/100357007/100342212	6
ocu04814	Motor proteins	19/634	0.249929	30/8978	0.889277	0.999938		100009271/100343917/100346135/100345219/100340694/100345407/100356736/100346660/100340939/100349893/100009002/100009145/100303760/100345621/127492634/100357527/100350543/100351420/100357567	19
ocu04926	Relaxin signaling pathway	14/634	0.249929	93/8978	0.33428	0.623271		100009271/100341204/100357483/100342201/100357489/100009110/100008685/100008993/100008833/100009498/100348672/100350395/100342212/100008645	14
ocu05216	Thyroid cancer	5/634	0.249929	162/8978	0.107848	0.328938		100355675/100348489/100353742/100349893/100351420	5
ocu04020	Calcium signaling pathway	24/634	0.254179	146/8978	0.0909441	0.3082		100009198/100101555/100343050/100355129/100348650/100009356/100009505/100009097/100341372/100353824/100008833/100009498/100349719/100352388/100009137/100348672/100350395/100342212/100037719/100354046/100342358/100339605/100009246/100357790	24
ocu04921	Oxytocin signaling pathway	16/634	0.254179	187/8978	1.73037e-05	0.000351842		100101555/100009277/100348489/100349851/100009505/100353824/100009498/100009087/100343663/100337757/100348672/100350395/100356902/100342212/100352581/100037719	16
ocu05412	Arrhythmogenic right ventricular cardiomyopathy	9/634	0.254179	30/8978	0.636005	0.865989		100101555/100009277/100348594/100351181/100350557/100009141/127487418/100009208/100339605	9
ocu04072	Phospholipase D signaling pathway	16/634	0.256566	50/8978	0.276685	0.55519		100328622/100328627/100341525/103350027/100009097/100347657/100351385/100352388/100337757/100348672/100350395/100338249/100342358/100346449/100357790/100345556	16
ocu04620	Toll-like receptor signaling pathway	10/634	0.256566	162/8978	0.716392	0.920898		100008983/100009377/100354455/100354743/100350244/100008982/100345225/100351814/100350028/100353753	10
ocu04966	Collecting duct acid secretion	4/634	0.256566	101/8978	0.726939	0.927683		100350237/100341367/100352404/100349024	4
ocu05223	Non-small cell lung cancer	8/634	0.260693	84/8978	1.1596e-12	1.76839e-10		100358587/100355675/100009040/100348489/100346379/100353742/100037719/100358445	8
ocu04215	Apoptosis - multiple species	6/634	0.260693	36/8978	0.247458	0.524628		100355675/103349397/103346801/100342261/103349392/100346106	6
ocu00531	Glycosaminoglycan degradation	3/634	0.262951	71/8978	0.886502	0.999938		100347788/100359235/100009375	3
ocu04935	Growth hormone synthesis, secretion and action	12/634	0.264635	30/8978	0.636005	0.865989		100101555/100357483/127485419/100009505/127488466/100357489/100348672/100350395/100342212/100037719/103346588/100359158	12
ocu04115	p53 signaling pathway	9/634	0.264635	247/8978	0.0045924	0.032574		100355675/103349397/100357416/100009040/100348489/100353742/127485419/103349392/100346325	9
ocu00240	Pyrimidine metabolism	7/634	0.288324	91/8978	0.77953	0.970435		100357182/127488159/100341892/100346325/100359019/103345293/100354042	7
ocu04068	FoxO signaling pathway	13/634	0.297032	84/8978	0.942224	0.999938		100357416/100348489/100351874/100349461/100340751/100353742/127485959/100343726/103345364/100349159/100352581/100008645/100009371	13
ocu04261	Adrenergic signaling in cardiomyocytes	15/634	0.302056	110/8978	0.0868005	0.297462		100008756/103349397/100101555/100009277/100357483/100349893/100357489/100345621/100337757/100348672/100350395/100346997/100342212/100339605/100351420	15
ocu00360	Phenylalanine metabolism	3/634	0.319743	143/8978	0.992426	0.999938		103347204/100353463/100357007	3
ocu04022	cGMP-PKG signaling pathway	17/634	0.321551	166/8978	0.19424	0.47746		100008756/100358587/100101555/100357483/100349851/100008940/100009505/100357489/100353824/100009498/100009087/100343663/100354625/100337757/100348672/100350395/100339605	17
ocu04310	Wnt signaling pathway	16/634	0.322954	45/8978	0.0947638	0.317615		100009043/100340474/100008629/103348917/100356429/100342221/100353824/100348672/100350395/100342212/100037719/100356520/100342964/100356489/100342870/100340444	16
ocu04722	Neurotrophin signaling pathway	12/634	0.322954	131/8978	0.133599	0.380818		100345676/100358587/100355675/103349397/100356949/100354743/127485744/100359054/100345073/100358702/100338013/100353479	12
ocu04623	Cytosolic DNA-sensing pathway	7/634	0.325121	97/8978	0.690073	0.899999		100349407/100343632/100338635/100354455/100352110/100352456/100353160	7
ocu04520	Adherens junction	10/634	0.330698	73/8978	0.412221	0.722572		100350709/127492634/100348648/100356520/100353636/127491099/100353957/100357160/100354471/100347053	10
ocu01232	Nucleotide metabolism	9/634	0.330698	218/8978	0.199545	0.47746		100357182/127488159/100341892/100349854/100346325/100359019/103345293/100354042/100144327	9
ocu04725	Cholinergic synapse	11/634	0.341092	143/8978	0.309608	0.603824		103349397/100101555/100357483/100342201/100009505/100358271/100337757/100348672/100350395/100342212/100037719	11
ocu04720	Long-term potentiation	7/634	0.351719	81/8978	0.932245	0.999938		100101555/100009505/100348672/100350395/100342212/100037719/100358702	7
ocu05134	Legionellosis	8/634	0.352636	202/8978	0.0777637	0.279035		100008983/100351865/100339049/100352110/127482561/127488889/127493068/100350028	8
ocu05418	Fluid shear stress and atherosclerosis	15/634	0.360809	245/8978	0.755224	0.951832		103349397/100126563/100009130/100008919/100345640/103345364/100008803/100008993/100008802/100009498/100352388/100356520/100344119/100346106/100008901	15
ocu04724	Glutamatergic synapse	11/634	0.360809	104/8978	0.198055	0.47746		100101555/100343465/100342201/127485959/100009505/100344556/100348672/100350395/100342212/100037719/103347205	11
ocu05170	Human immunodeficiency virus 1 infection	19/634	0.372411	40/8978	0.311868	0.603824		100357188/100358587/100355675/103349397/100357416/100101579/100349407/100342201/100354743/100009505/100353824/100037719/100342358/100356520/100353160/100346106/100349872/100337888/100345730	19
ocu05205	Proteoglycans in cancer	19/634	0.372411	226/8978	0.817168	0.999938		100126563/100348489/100328589/103348917/100351858/100340933/100359235/100340334/100009505/100008993/100101584/100356902/100342212/100037719/100348648/100328756/100008645/100009371/100342870	19
ocu04530	Tight junction	16/634	0.372411	112/8978	0.16632	0.437308		100346759/100357607/100009419/100338591/100345988/108177971/100340933/100340939/100009002/100009145/100342212/100352581/100357147/100358993/100357567/100354471	16
ocu04218	Cellular senescence	15/634	0.372411	105/8978	0.206135	0.484593		100357416/100009040/100348489/100351874/100346379/100358944/100353742/127485419/100009505/103351685/100341372/100346753/100353824/100008645/100009371	15
ocu04922	Glucagon signaling pathway	10/634	0.372411	14/8978	0.259715	0.538865		100357483/100009505/127487657/100351519/100009526/100009137/100348672/100350395/100342212/100352581	10
ocu04727	GABAergic synapse	9/634	0.372411	44/8978	0.377577	0.689586		100101555/100340751/100353026/100343465/100342201/100342212/100037719/100354476/100302413	9
ocu04540	Gap junction	9/634	0.372411	234/8978	0.0139753	0.0761156		100349851/100009505/100340939/100352388/100348672/100350395/100342212/100037719/100357567	9
ocu00220	Arginine biosynthesis	3/634	0.372411	149/8978	0.835144	0.999938		100343465/100008833/100009498	3
ocu04728	Dopaminergic synapse	12/634	0.377974	164/8978	0.182001	0.462585		100341204/100101555/100357483/100342201/100009505/100357489/100357007/100348672/100350395/100346997/100342212/100037719	12
ocu04625	C-type lectin receptor signaling pathway	10/634	0.377974	25/8978	0.840132	0.999938		103348469/100355500/103350027/100354455/100009505/100350907/100352110/100353824/100349159/100345556	10
ocu04920	Adipocytokine signaling pathway	7/634	0.3863	66/8978	0.322194	0.612856		100008747/100359054/100352581/103346588/100346106/100349872/100337888	7
ocu04934	Cushing syndrome	14/634	0.38875	81/8978	0.98138	0.999938		100101555/100009040/100348489/100351874/100357483/100346379/103348917/100009505/100357489/100341186/100348672/100350395/100342212/100342870	14
ocu00410	beta-Alanine metabolism	4/634	0.38875	40/8978	0.0597738	0.219651		100338523/100341559/100347984/100353463	4
ocu00340	Histidine metabolism	3/634	0.38875	89/8978	0.98881	0.999938		100338523/100347984/100357007	3
ocu05214	Glioma	7/634	0.389023	59/8978	0.00771268	0.0457063		100355675/100009040/100348489/100346379/100353742/100352388/100037719	7
ocu04370	VEGF signaling pathway	6/634	0.389023	21/8978	0.442557	0.745912		100358587/100353824/100009498/100037719/100356520/100357790	6
ocu00260	Glycine, serine and threonine metabolism	5/634	0.389023	161/8978	0.103579	0.325878		100345273/100009096/100353463/100357007/100009293	5
ocu00514	Other types of O-glycan biosynthesis	5/634	0.406437	110/8978	7.42722e-05	0.00113265		100343323/100348815/100351119/100357457/103345704	5
ocu04217	Necroptosis	14/634	0.408608	86/8978	0.573039	0.837456		100355675/103349397/100008801/100338814/100009597/100009254/100341787/100338854/100348415/100352110/127490210/100345225/100346106/100337888	14
ocu04911	Insulin secretion	8/634	0.408608	168/8978	0.0146323	0.0782954		100008756/100101555/100357483/100357489/100348672/100350395/100342212/100037719	8
ocu01240	Biosynthesis of cofactors	14/634	0.4092	130/8978	0.206548	0.484593		100345273/100338523/100341109/100350070/100357646/100347788/100352837/100343064/100338712/100353608/100339088/100009293/100037707/100352876	14
ocu04070	Phosphatidylinositol signaling system	9/634	0.4092	359/8978	0.996319	0.999938		100358338/100341525/100340475/103352489/100355074/100009505/100348672/100350395/100037719	9
ocu04730	Long-term depression	6/634	0.4092	61/8978	0.633613	0.865989		100349851/100009505/100340056/100348672/100350395/100037719	6
ocu00512	Mucin type O-glycan biosynthesis	4/634	0.4092	217/8978	0.194091	0.47746		100343323/100348815/100347030/100351119	4
ocu04726	Serotonergic synapse	11/634	0.411386	46/8978	0.222525	0.498758		100341714/100101555/100342201/100009356/100009505/100357007/100348672/100350395/100342212/100037719/100009407	11
ocu03430	Mismatch repair	3/634	0.419662	34/8978	0.917481	0.999938		103347805/100345366/103351965	3
ocu00533	Glycosaminoglycan biosynthesis - keratan sulfate	2/634	0.420305	23/8978	0.81484	0.999938		100342627/100355215	2
ocu04973	Carbohydrate digestion and absorption	5/634	0.42254	51/8978	0.884313	0.999938		100008756/100348672/100350395/100037719/100009262	5
ocu04750	Inflammatory mediator regulation of TRP channels	10/634	0.425022	32/8978	0.904412	0.999938		100009198/100348650/100341281/100009505/100348672/100350395/100342212/100037719/100344184/100354812	10
ocu05031	Amphetamine addiction	6/634	0.431423	105/8978	0.996035	0.999938		100101555/100357483/100357489/100357007/100342212/100037719	6
ocu04979	Cholesterol metabolism	5/634	0.433039	181/8978	0.996768	0.999938		100328797/100346275/100008882/100354978/100338710	5
ocu00860	Porphyrin metabolism	5/634	0.433039	42/8978	0.577655	0.837456		100345273/100340335/100347788/100008919/100037707	5
ocu05235	PD-L1 expression and PD-1 checkpoint pathway in cancer	8/634	0.45343	119/8978	0.00164103	0.0151671		100338089/103350979/100341787/100338854/100353824/100359054/100348648/100345225	8
ocu00053	Ascorbate and aldarate metabolism	4/634	0.455748	78/8978	0.653367	0.885675		100338523/100347788/100356074/100037707	4
ocu04977	Vitamin digestion and absorption	3/634	0.455748	183/8978	0.997099	0.999938		100328797/100358060/100009317	3
ocu05226	Gastric cancer	12/634	0.470972	206/8978	0.00537284	0.0364159		100355675/103349397/100348489/100351874/100346379/100343050/103348917/100353742/100358445/100008645/100009371/100342870	12
ocu04912	GnRH signaling pathway	8/634	0.470972	84/8978	0.240464	0.523868		100101555/100009505/100009598/100348672/100350395/100342212/100037719/100342358	8
ocu05219	Bladder cancer	4/634	0.470972	326/8978	0.534118	0.821202		100348489/100346379/100009110/100008993	4
ocu04919	Thyroid hormone signaling pathway	10/634	0.478017	100/8978	6.78954e-10	5.17703e-08		100008756/100358587/100343819/100009526/100348672/100350395/100342212/100037719/100303772/100303763	10
ocu01524	Platinum drug resistance	8/634	0.478017	221/8978	0.000172989	0.00211047		100358587/100355675/103349397/103346801/100348489/103349392/103347805/100357676	8
ocu00310	Lysine degradation	6/634	0.478017	135/8978	0.966359	0.999938		100352070/100338523/100345157/100350364/103345704/108176203	6
ocu00350	Tyrosine metabolism	4/634	0.482038	136/8978	0.0987553	0.320429		100350127/103347204/100353463/100357007	4
ocu04015	Rap1 signaling pathway	17/634	0.486141	183/8978	0.148682	0.412254		100344921/100358004/100343050/100350748/100356927/100351865/100339049/100339465/100347657/100350077/100352388/100348672/100350395/100037719/100356520/100346449/127485181	17
ocu01522	Endocrine resistance	8/634	0.486141	72/8978	0.399335	0.712264		100358587/100355675/103349397/100348489/100346379/100008993/100343819/100342212	8
ocu04713	Circadian entrainment	8/634	0.494575	70/8978	2.15585e-05	0.000410958		100101555/100342201/100349851/100009505/100348672/100350395/100342212/100037719	8
ocu05215	Prostate cancer	8/634	0.494575	91/8978	0.628943	0.865989		100358587/103349397/100348489/100357483/100346379/100008993/100352388/100343882	8
ocu03440	Homologous recombination	4/634	0.537866	193/8978	0.967517	0.999938		100345123/100008661/100351948/103351965	4
ocu05100	Bacterial invasion of epithelial cells	7/634	0.541152	45/8978	0.000955132	0.00939727		100346759/100357607/100126563/100328589/100340933/100357160/100347053	7
ocu03010	Ribosome	33/634	0.547705	106/8978	0.0353936	0.15645		100144340/100338677/100340199/100341094/100342098/100342135/100342677/100342978/100343607/100345060/100345097/100346213/100346272/100346996/100348336/100348918/100349729/100351184/100351957/100352118/100352318/100352673/100353302/100353606/100353689/100354980/100355379/100356144/100357498/100358359/103349305/108177974/127493194	33
ocu05230	Central carbon metabolism in cancer	6/634	0.555553	365/8978	0.908658	0.999938		108175474/100328765/100343465/127487657/100351519/100009526	6
ocu00562	Inositol phosphate metabolism	6/634	0.555553	189/8978	0.867862	0.999938		100341559/100340475/103352489/100355074/100348672/100350395	6
ocu05132	Salmonella infection	21/634	0.561972	32/8978	8.42083e-07	2.56835e-05		100346759/100357607/100355675/103349397/100008983/100338635/100354743/100340939/100352110/127492634/100340824/100345423/100358807/100328756/103350994/100350028/100353753/100346106/100337888/100357567/100347053	21
ocu05231	Choline metabolism in cancer	8/634	0.563594	85/8978	0.0360763	0.157189		100341525/100354870/100352388/100338249/100037719/100356520/100008931/100354471	8
ocu00010	Glycolysis / Gluconeogenesis	6/634	0.563594	171/8978	0.0174879	0.088897		100338523/100009096/127487657/100348124/100351519/100009526	6
ocu04710	Circadian rhythm	3/634	0.564525	98/8978	2.13443e-07	8.13752e-06		100357678/100349421/100352581	3
ocu05217	Basal cell carcinoma	5/634	0.566499	47/8978	0.235769	0.521085		100355675/100348489/103348917/100353742/100342870	5
ocu04014	Ras signaling pathway	18/634	0.568114	153/8978	7.78456e-07	2.56835e-05		100358587/100356949/100344921/100358004/100343050/108175474/100342201/100009356/103346668/100345073/100352388/100343827/100342212/100037719/100356520/100346449/103345683/127486584	18
ocu01230	Biosynthesis of amino acids	6/634	0.568114	160/8978	0.239298	0.523868		100352530/100348124/100009526/100342773/127489883/100009293	6
ocu05224	Breast cancer	11/634	0.571052	76/8978	0.450663	0.755232		100355675/100009040/100348489/100346379/100343050/103348917/100353742/100337990/100343819/100341009/100342870	11
ocu02010	ABC transporters	4/634	0.581799	130/8978	0.0002821	0.00318668		100341298/100008909/127482704/103352242	4
ocu00511	Other glycan degradation	2/634	0.581799	276/8978	0.995157	0.999938		100343662/103346838	2
ocu04971	Gastric acid secretion	6/634	0.589068	60/8978	0.931975	0.999938		100008756/100009505/100348672/100350395/100342212/100037719	6
ocu00760	Nicotinate and nicotinamide metabolism	3/634	0.589566	278/8978	0.406311	0.720493		100338712/100353608/100349854	3
ocu05203	Viral carcinogenesis	16/634	0.593432	94/8978	0.345109	0.634085		100350237/100358587/100355675/100101579/100354874/100009040/100348489/100351874/100357483/100355500/100357489/103349392/100340056/100342212/100345556/100337888	16
ocu04931	Insulin resistance	8/634	0.612339	55/8978	8.75759e-05	0.00121412		100357483/100009498/100351041/100352581/100037719/100358702/103346588/100346106	8
ocu04213	Longevity regulating pathway - multiple species	5/634	0.614383	81/8978	0.116388	0.339283		100342908/127488889/127493068/100342212/100352581	5
ocu03410	Base excision repair	4/634	0.614383	19/8978	0.751647	0.951254		100344824/100358589/100345366/100350130	4
ocu00640	Propanoate metabolism	3/634	0.614383	105/8978	0.0330958	0.148444		100341559/127487657/100351519	3
ocu00532	Glycosaminoglycan biosynthesis - chondroitin sulfate / dermatan sulfate	2/634	0.614383	81/8978	0.686074	0.899999		127489283/100343176	2
ocu04964	Proximal tubule bicarbonate reclamation	2/634	0.614383	179/8978	0.196118	0.47746		100008756/100343465	2
ocu05168	Herpes simplex virus 1 infection	28/634	0.623151	46/8978	0.000272393	0.00318668		100358587/100355675/103349397/100009130/100342022/100349407/100341787/100338854/100354455/100354743/100340313/100341358/100351163/100351416/100352672/127482571/100355091/100352415/100355948/100328929/100350656/103346588/100340192/100345556/100346106/100337888/100345767/100344648	28
ocu00600	Sphingolipid metabolism	4/634	0.623151	232/8978	0.0222319	0.10974		100343662/100338249/100338930/100357790	4
ocu00380	Tryptophan metabolism	4/634	0.623151	56/8978	0.565095	0.837324		100338523/103347204/100352837/100357007	4
ocu05225	Hepatocellular carcinoma	13/634	0.623534	134/8978	0.0503877	0.192103		100358587/100355675/100009040/100348489/100346379/103348917/100353742/100008919/100037719/100339222/100008645/100009371/100342870	13
ocu00770	Pantothenate and CoA biosynthesis	2/634	0.626252	35/8978	0.097184	0.320429		100338523/100339088	2
ocu04936	Alcoholic liver disease	10/634	0.635277	23/8978	0.490399	0.787688		100338523/100351157/100352978/100008983/100354455/100354743/127482788/100352581/100346106/100337888	10
ocu05020	Prion disease	23/634	0.640523	95/8978	0.911021	0.999938		100358587/100355675/100101555/100126563/100357483/100008801/100009505/100008803/100340939/100344965/100357489/127482788/127488889/127493068/100341372/100348118/100008802/100009359/100356593/100342212/100338269/100356520/100357567	23
ocu00520	Amino sugar and nucleotide sugar metabolism	4/634	0.640523	92/8978	0.323508	0.612856		100345391/100338170/100357646/103345585	4
ocu00620	Pyruvate metabolism	4/634	0.640523	54/8978	0.535801	0.821202		100338523/127487657/100351519/100342604	4
ocu04140	Autophagy - animal	11/634	0.65128	91/8978	0.191857	0.47746		100358587/103349397/100101593/100341887/100340751/100009505/100342212/103350994/100338966/100351532/100340527	11
ocu04340	Hedgehog signaling pathway	4/634	0.651634	116/8978	0.837277	0.999938		100341204/103349397/100346275/100342212	4
ocu00130	Ubiquinone and other terpenoid-quinone biosynthesis	1/634	0.651712	142/8978	0.0421317	0.17603		100352876	1
ocu04144	Endocytosis	19/634	0.653098	161/8978	0.246433	0.524628		103345727/100346759/100357607/100341204/100353577/100126563/100101579/100328622/100328627/100341917/127488889/127493068/100356064/100353778/100341137/100338826/100342561/100341202/100347053	19
ocu04114	Oocyte meiosis	9/634	0.653098	331/8978	0.0272553	0.129888		100345632/100352234/100357416/100354874/100009505/100346997/100342212/100358702/100352685	9
ocu00983	Drug metabolism - other enzymes	7/634	0.653098	86/8978	0.998217	0.999938		100347788/100346325/100359019/103345293/100354042/100037707/100144327	7
ocu04923	Regulation of lipolysis in adipocytes	4/634	0.653098	213/8978	0.335136	0.623271		100009087/100343663/100342212/100009407	4
ocu00250	Alanine, aspartate and glutamate metabolism	3/634	0.653098	88/8978	0.953417	0.999938		100343465/103347204/100358060	3
ocu01521	EGFR tyrosine kinase inhibitor resistance	6/634	0.653202	99/8978	5.20478e-05	0.000864039		100358587/100355675/103349397/100347752/100352388/100037719	6
ocu05213	Endometrial cancer	4/634	0.653202	37/8978	0.490691	0.787688		100358587/100355675/100348489/100353742	4
ocu03420	Nucleotide excision repair	4/634	0.653202	134/8978	0.919057	0.999938		100350600/100358589/100345366/103351965	4
ocu00040	Pentose and glucuronate interconversions	3/634	0.653202	123/8978	0.250745	0.527429		100347788/100356074/100037707	3
ocu04260	Cardiac muscle contraction	7/634	0.670951	150/8978	0.622049	0.865989		100008756/100101555/100009277/100349893/100345621/100339605/100351420	7
ocu05207	Chemical carcinogenesis - receptor activation	15/634	0.674774	157/8978	0.218411	0.498408		100341204/100358587/103349397/103346801/100101555/100357483/100354455/100351853/100357489/100343819/100342212/100037719/100358702/100341009/100037707	15
ocu00270	Cysteine and methionine metabolism	4/634	0.674774	69/8978	0.960633	0.999938		103347204/127487657/100351519/100340020	4
ocu04962	Vasopressin-regulated water reabsorption	3/634	0.674774	164/8978	0.901164	0.999938		100345676/100357483/100342212	3
ocu05162	Measles	10/634	0.675457	58/8978	0.0497424	0.192044		100358587/100355675/103349397/100009040/100354455/100354743/100359306/127488889/127493068/100337888	10
ocu04211	Longevity regulating pathway	6/634	0.675457	69/8978	0.111775	0.33423		100355675/100357483/100356074/100357489/100342212/100352581	6
ocu05211	Renal cell carcinoma	5/634	0.675457	95/8978	0.911021	0.999938		100357873/100358587/100348489/100008645/100009371	5
ocu04330	Notch signaling pathway	4/634	0.675457	23/8978	0.490399	0.787688		127491468/100337990/100357457/100343819	4
ocu00280	Valine, leucine and isoleucine degradation	4/634	0.675457	75/8978	0.618572	0.865989		100338523/100341559/103347204/100359248	4
ocu03250	Viral life cycle - HIV-1	4/634	0.675457	70/8978	0.0567158	0.210955		100101579/100009442/100338602/100353160	4
ocu00790	Folate biosynthesis	2/634	0.675457	139/8978	0.00402618	0.0299033		100341109/100350070	2
ocu04392	Hippo signaling pathway - multiple species	2/634	0.675457	110/8978	0.667246	0.888691		100358710/100341523	2
ocu00030	Pentose phosphate pathway	2/634	0.675457	118/8978	0.321528	0.612856		100328765/100009526	2
ocu03320	PPAR signaling pathway	5/634	0.690812	29/8978	0.617369	0.865989		100345743/100342604/100009110/100008882/100353957	5
ocu04360	Axon guidance	12/634	0.693163	66/8978	0.00605801	0.0393126		100344921/100358004/100338780/127488313/100353824/100356958/100346617/100356520/100339559/100359287/100342051/100345703	12
ocu04350	TGF-beta signaling pathway	7/634	0.693163	196/8978	0.0982649	0.320429		100351874/100343725/100354786/100341426/100348332/100008645/100009371	7
ocu04721	Synaptic vesicle cycle	5/634	0.693163	165/8978	9.79341e-09	5.97398e-07		103345727/100350237/100341367/100352404/100339715	5
ocu00730	Thiamine metabolism	1/634	0.693163	171/8978	0.150984	0.414052		100341109	1
ocu04976	Bile secretion	6/634	0.701983	104/8978	9.37063e-06	0.000204146		100008909/100008756/100342212/100009015/100009262/100037707	6
ocu00564	Glycerophospholipid metabolism	6/634	0.701983	35/8978	0.453522	0.755871		100358338/100341525/100343827/100341396/100338249/100356065	6
ocu04916	Melanogenesis	6/634	0.701983	57/8978	0.579355	0.837456		103348917/100348672/100350395/100342212/100037719/100342870	6
ocu04742	Taste transduction	5/634	0.701983	97/8978	0.24517	0.524628		100101555/100353026/100348672/100350395/100342212	5
ocu00603	Glycosphingolipid biosynthesis - globo and isoglobo series	1/634	0.701983	8978-11-01	0.553379	0.835547		100350048	1
ocu03460	Fanconi anemia pathway	3/634	0.717392	90/8978	0.998674	0.999938		100345123/100008661/103351965	3
ocu05160	Hepatitis C	10/634	0.718285	16/8978	0.690491	0.899999		100358587/100355675/100009040/100348489/100338591/100346379/100354455/103346588/100346106/100337888	10
ocu00480	Glutathione metabolism	4/634	0.718285	94/8978	0.345109	0.634085		100328765/100009258/100346325/100340020	4
ocu00051	Fructose and mannose metabolism	2/634	0.718285	108/8978	0.887317	0.999938		100357646/100009526	2
ocu04914	Progesterone-mediated oocyte maturation	6/634	0.723577	19/8978	0.00875059	0.0503572		100345632/100352234/100357416/100342212/100358702/100358334	6
ocu04136	Autophagy - other	2/634	0.740393	36/8978	0.928766	0.999938		100340751/100340527	2
ocu00120	Primary bile acid biosynthesis	1/634	0.741962	145/8978	0.0494532	0.192044		100341039	1
ocu05415	Diabetic cardiomyopathy	15/634	0.742413	59/8978	0.607055	0.865114		100008801/100328765/100008803/100344965/100008993/100008802/100009359/100356593/100009498/100348672/100350395/100037719/100356520/100008645/100009371	15
ocu04960	Aldosterone-regulated sodium reabsorption	2/634	0.744204	87/8978	4.55221e-13	1.38842e-10		100008756/100037719	2
ocu04150	mTOR signaling pathway	10/634	0.756882	40/8978	0.000349742	0.00380969		100341367/100352404/100341887/103348917/100342104/100037719/100358702/100356812/100346106/100342870	10
ocu05032	Morphine addiction	5/634	0.756923	83/8978	0.0309562	0.14092		100341204/100353026/100342201/100342212/100037719	5
ocu00100	Steroid biosynthesis	1/634	0.774351	85/8978	1.26591e-06	3.51003e-05		100359315	1
ocu05010	Alzheimer disease	20/634	0.779934	57/8978	0.00185277	0.0166205		100358587/100101555/100008801/103348917/100009505/100340939/100344965/100357982/127488313/100341372/100356593/100008833/100348672/100350395/100338269/100355972/100346106/100357567/100340527/100342870	20
ocu04080	Neuroactive ligand-receptor interaction	20/634	0.779934	71/8978	6.14453e-06	0.00014416		100009198/100351157/100352978/100353026/100338519/100348650/100009356/100008747/100348068/100008890/100349719/100343482/100338585/100354046/100355165/100008828/100359158/100303772/100303763/100338710	20
ocu05014	Amyotrophic lateral sclerosis	16/634	0.779934	87/8978	0.998344	0.999938		100358587/100355675/103349397/100009258/100340939/100344965/100357982/100341372/100356593/100008833/100338269/100356812/100346106/100349872/100357567/100340527	16
ocu05016	Huntington disease	14/634	0.779934	100/8978	0.566061	0.837324		103345727/100355675/100356949/100357483/100009258/100009505/100340939/100344965/100356593/100348672/100350395/100338269/100357567/100340527	14
ocu05012	Parkinson disease	14/634	0.779934	59/8978	0.054153	0.20391		100355675/100009505/100340939/100344965/100346213/100357982/100357007/100341372/100356593/100342212/100338269/100355972/100349566/100357567	14
ocu04024	cAMP signaling pathway	13/634	0.779934	57/8978	0.579355	0.837456		100008756/100358587/100356949/100101555/100009269/100357483/100353026/100345808/100009087/100343663/100342212/100356520/100359158	13
ocu04932	Non-alcoholic fatty liver disease	10/634	0.779934	116/8978	0.116802	0.339283		100355675/100347752/100008747/100357982/100356691/100356593/100352581/103346588/100008645/100346106	10
ocu04714	Thermogenesis	10/634	0.779934	55/8978	0.550573	0.835447		100357483/100344965/100356593/100009087/100343663/108176203/100342212/100352581/100358702/100339222	10
ocu05034	Alcoholism	9/634	0.779934	155/8978	0.86487	0.999938		100356949/100357483/100342201/100348415/100357489/127490210/100357007/100342212/100357908	9
ocu04390	Hippo signaling pathway	8/634	0.779934	140/8978	0.873742	0.999938		103346801/100345988/103348917/100339049/100341523/100008645/100009371/100342870	8
ocu04141	Protein processing in endoplasmic reticulum	8/634	0.779934	65/8978	0.489329	0.787688		100346462/100355675/103349397/100354561/100357489/100357982/127488889/127493068	8
ocu04723	Retrograde endocannabinoid signaling	8/634	0.779934	60/8978	0.247693	0.524628		100101555/100342201/100009505/100356593/100348672/100350395/100342212/100037719	8
ocu05017	Spinocerebellar ataxia	8/634	0.779934	65/8978	0.17298	0.450932		100009505/100357982/100341372/100348672/100350395/100037719/100338269/100340527	8
ocu01200	Carbon metabolism	7/634	0.779934	298/8978	0.00642557	0.0408291		100341559/100355655/100328765/100348124/100342604/100009526/100009293	7
ocu04910	Insulin signaling pathway	7/634	0.779934	25/8978	0.257553	0.53804		100358587/100009137/100351041/100342212/100352581/103346588/100353957	7
ocu04152	AMPK signaling pathway	6/634	0.779934	171/8978	0.776306	0.970383		100357483/100008747/100009526/100346997/100352581/100352741	6
ocu05208	Chemical carcinogenesis - reactive oxygen species	6/634	0.779934	122/8978	0.152045	0.414052		100358587/100008919/100008803/100344965/100008802/100356593	6
ocu04974	Protein digestion and absorption	6/634	0.779934	129/8978	0.565028	0.837324		100008756/100345171/100343947/100341424/100356317/100339605	6
ocu00230	Purine metabolism	6/634	0.779934	117/8978	2.75318e-08	1.1996e-06		100349851/100343663/100354625/100349854/100346325/100144327	6
ocu03013	Nucleocytoplasmic transport	5/634	0.779934	122/8978	0.938637	0.999938		100356621/103348956/100351853/100356812/100344119	5
ocu00190	Oxidative phosphorylation	5/634	0.779934	329/8978	0.988258	0.999938		100350237/100341367/100352404/100344965/100356593	5
ocu04972	Pancreatic secretion	5/634	0.779934	89/8978	0.29162	0.581334		100008756/100009505/100348672/100350395/100037719	5
ocu03040	Spliceosome	5/634	0.779934	79/8978	0.0223077	0.10974		127488889/127493068/100358910/100337770/100340192	5
ocu04660	T cell receptor signaling pathway	5/634	0.779934	19/8978	0.146502	0.409936		100339465/100353824/100359054/100348648/100358807	5
ocu04120	Ubiquitin mediated proteolysis	5/634	0.779934	353/8978	0.00102546	0.00977391		100354874/100346213/103346588/100354960/103350360	5
ocu00590	Arachidonic acid metabolism	4/634	0.779934	50/8978	0.276685	0.55519		100341714/100350957/100009407/100339354	4
ocu00561	Glycerolipid metabolism	4/634	0.779934	52/8978	0.97806	0.999938		100338523/100341525/100338249/100356065	4
ocu04146	Peroxisome	4/634	0.779934	60/8978	0.12847	0.369654		100350232/100008833/127484367/100144327	4
ocu04550	Signaling pathways regulating pluripotency of stem cells	4/634	0.779934	239/8978	0.423432	0.728368		103348917/100354786/100341426/100342870	4
ocu04012	ErbB signaling pathway	3/634	0.779934	441/8978	0.389089	0.702202		100358587/100348489/100037719	3
ocu04137	Mitophagy - animal	3/634	0.779934	86/8978	0.0388474	0.166879		100340751/100346213/103350994	3
ocu00830	Retinol metabolism	3/634	0.779934	35/8978	0.923331	0.999938		100008636/100341926/100037707	3
ocu04622	RIG-I-like receptor signaling pathway	3/634	0.779934	52/8978	0.505552	0.798929		100354455/100341830/100337888	3
ocu00140	Steroid hormone biosynthesis	3/634	0.779934	122/8978	0.0116743	0.0647392		100343882/100356754/100037707	3
ocu00982	Drug metabolism - cytochrome P450	2/634	0.779934	22/8978	0.800734	0.99278		100357007/100037707	2
ocu00565	Ether lipid metabolism	2/634	0.779934	87/8978	0.950826	0.999938		100341396/100338249	2
ocu04975	Fat digestion and absorption	2/634	0.779934	79/8978	0.664505	0.888691		100328797/100338249	2
ocu03015	mRNA surveillance pathway	2/634	0.779934	95/8978	0.00254481	0.0204255		100352625/100346997	2
ocu00510	N-Glycan biosynthesis	2/634	0.779934	111/8978	8.47404e-05	0.00121412		100353637/100345634	2
ocu04913	Ovarian steroidogenesis	2/634	0.779934	15/8978	0.666931	0.888691		100341714/100342212	2
ocu04917	Prolactin signaling pathway	2/634	0.779934	77/8978	0.0434886	0.178143		103346588/100341009	2
ocu03018	RNA degradation	2/634	0.779934	110/8978	0.0101943	0.057579		100357530/100009526	2
ocu04930	Type II diabetes mellitus	2/634	0.779934	91/8978	0.107348	0.328938		100101555/103346588	2
ocu00513	Various types of N-glycan biosynthesis	2/634	0.779934	133/8978	1.57861e-06	4.0123e-05		100353637/100345634	2
ocu01250	Biosynthesis of nucleotide sugars	1/634	0.779934	189/8978	0.00716401	0.0437005		100357646	1
ocu00650	Butanoate metabolism	1/634	0.779934	52/8978	0.505552	0.798929		100352247	1
ocu05204	Chemical carcinogenesis - DNA adducts	1/634	0.779934	198/8978	4.24757e-12	4.31837e-10		100037707	1
ocu00071	Fatty acid degradation	1/634	0.779934	50/8978	0.0022343	0.0184178		100338523	1
ocu00052	Galactose metabolism	1/634	0.779934	47/8978	0.854431	0.999938		100009526	1
ocu00534	Glycosaminoglycan biosynthesis - heparan sulfate / heparin	1/634	0.779934	41/8978	0.328255	0.618011		127489283	1
ocu00563	Glycosylphosphatidylinositol (GPI)-anchor biosynthesis	1/634	0.779934	171/8978	0.994491	0.999938		100351916	1
ocu00630	Glyoxylate and dicarboxylate metabolism	1/634	0.779934	61/8978	0.633613	0.865989		100009293	1
ocu00980	Metabolism of xenobiotics by cytochrome P450	1/634	0.779934	47/8978	0.854431	0.999938		100037707	1
ocu03050	Proteasome	1/634	0.779934	44/8978	0.609722	0.865114		100338269	1
ocu03008	Ribosome biogenesis in eukaryotes	1/634	0.779934	58/8978	0.224032	0.498758		100337799	1
ocu03020	RNA polymerase	1/634	0.779934	216/8978	0.458991	0.760828		100352456	1
ocu04130	SNARE interactions in vesicular transport	1/634	0.779934	60/8978	0.62048	0.865989		100338966	1
ocu00500	Starch and sucrose metabolism	1/634	0.779934	79/8978	0.000103216	0.00136873		100342646	1
ocu00430	Taurine and hypotaurine metabolism	1/634	0.779934	27/8978	0.296942	0.584305		103351357	1

## Sheet: Treat.4w vs Treat.2w
ID	Description	GeneRatio	BgRatio	pvalue	p.adjust	qvalue	geneID	Count
ocu05140	Leishmaniasis	27/337	84/8978	1.24687e-18	3.51617e-16	2.72998e-16	100009121/100008801/100358696/100338854/100346103/100351865/100008898/100339049/100008803/100009097/100337909/100338413/100338913/100351416/100352672/127482571/100008802/100009359/100008833/100037719/100348648/100352415/100355948/100328929/100350656/100009371/100009088	27
ocu05152	Tuberculosis	38/337	198/8978	3.22582e-17	4.022e-15	3.12271e-15	100353706/100350237/100355991/100009121/100008983/100342022/100338894/100339146/100008706/100101598/103350027/100358696/100338854/100354902/100338351/100351865/100351616/100339049/100009097/100337909/100338413/100338913/100350649/100351416/100352672/100359306/127482571/100008833/100352415/100355948/100328929/100350656/100357790/100345556/100009371/100351814/100353753/100009088	38
ocu05150	Staphylococcus aureus infection	26/337	87/8978	4.27872e-17	4.022e-15	3.12271e-15	100342793/100009121/100351157/100352978/103352242/100358696/100356927/100351865/100339049/100341376/100354174/100009097/100337909/100338413/100338913/100351416/100352672/100359306/127482571/100009115/100354046/100352415/100355948/100328929/100350656/100357016	26
ocu04145	Phagosome	30/337	165/8978	3.70438e-13	2.61159e-11	2.02766e-11	100350237/100342793/100009121/100008983/100339146/100008706/100101598/100008801/100358696/100351865/100008898/100339049/100008803/100009097/100337909/100338413/100338913/100351416/100352672/100359306/127482571/100009067/100008802/100009359/100352415/100355948/100328929/100350656/100353753/100357567	30
ocu04380	Osteoclast differentiation	25/337	117/8978	8.46811e-13	4.77601e-11	3.70814e-11	100353706/100354716/100354225/100340992/100358696/100338208/100338854/100339465/100008803/100337909/100338413/100338913/100345649/100347041/100359306/103346239/100008802/100009359/100351485/103351779/100345556/100009371/100009088/100348748/103345430	25
ocu04640	Hematopoietic cell lineage	23/337	100/8978	1.38601e-12	6.51423e-11	5.05771e-11	100008983/100009419/100351207/100352641/108178217/100340992/100346676/100358696/108175474/100337721/100347752/100343726/100346103/100351865/100009097/100351416/100352672/127482571/100352415/100355948/100328929/100350656/100009088	23
ocu04662	B cell receptor signaling pathway	19/337	71/8978	7.26635e-12	2.9273e-10	2.27278e-10	100353706/100354716/100354225/100351207/100344783/108178217/100341193/103352489/100009097/100345649/100347041/100359306/103346239/100340056/100359054/100037719/100348648/100356520/100345556	19
ocu04666	Fc gamma R-mediated phagocytosis	20/337	102/8978	8.83833e-10	3.11551e-08	2.41891e-08	100343474/100353706/100346759/100353577/100358696/100343961/103352489/100008803/100009097/100337909/100338413/100338913/100359306/100340056/100037719/100358807/100356520/100357790/100345556/100354471	20
ocu04650	Natural killer cell mediated cytotoxicity	20/337	104/8978	1.26785e-09	3.97259e-08	3.08435e-08	100355991/100342715/100350758/103350027/100348190/100338854/100356927/100339049/100339465/100009097/100337909/100338913/103347295/100037719/100342358/100348648/100356520/100345556/100009088/103345430	20
ocu04062	Chemokine signaling pathway	26/337	187/8978	6.35128e-09	1.79106e-07	1.3906e-07	100353706/100341204/100348362/100009130/100343840/100328940/100358097/100101579/100339537/127490643/100348428/100357300/100342557/100342201/100343961/127486194/100008803/100340056/100337757/100340526/100348672/100037719/100342358/100356520/100009220/100354471	26
ocu05310	Asthma	11/337	32/8978	1.1272e-08	2.88974e-07	2.24362e-07	103350027/100009097/100351416/100352672/127482571/100351385/100352415/100355948/100328929/100350656/100009088	11
ocu05145	Toxoplasmosis	21/337	133/8978	1.98288e-08	4.65976e-07	3.61788e-07	100353706/100341714/100101579/100338894/100338854/100354902/100338351/100008898/103347398/100351416/100352672/127482571/100008833/100337757/100340526/100352415/100355948/100328929/100350656/100009371/100009088	21
ocu05416	Viral myocarditis	15/337	79/8978	1.84226e-07	3.99629e-06	3.10276e-06	100355991/100009377/100356927/100339049/100009097/100351416/100352672/127482571/100356520/100352415/100355948/100328929/100350656/100351233/100009214	15
ocu05322	Systemic lupus erythematosus	20/337	139/8978	2.11675e-07	4.26373e-06	3.3104e-06	100351066/100342793/100009121/100009377/100358696/100009097/100337909/100338413/100338913/100343938/100344914/100348415/100351416/100352672/127482571/100352415/100355948/100328929/100350656/100009088	20
ocu04061	Viral protein interaction with cytokine and cytokine receptor	15/337	85/8978	5.00691e-07	8.94332e-06	6.94368e-06	100348362/100009130/100343840/100328940/100358097/100101579/100339537/100340992/127490643/100354902/100338351/103351862/100347752/100009088/100349872	15
ocu04613	Neutrophil extracellular trap formation	24/337	202/8978	5.07423e-07	8.94332e-06	6.94368e-06	100353706/100009121/100352978/100339146/100008801/100358696/100356927/100351865/100339049/100008803/100009097/100337909/100338413/100338913/100343938/100344914/100348415/100008802/100009359/100348672/100037719/100356520/100357016/100345556	24
ocu05323	Rheumatoid arthritis	16/337	98/8978	6.26531e-07	1.0393e-05	8.06926e-06	100350237/100009130/100009377/100356927/100339049/100009097/100351416/100352672/127482571/100352415/100355948/100328929/100350656/100009371/100009088/100008899	16
ocu04664	Fc epsilon RI signaling pathway	13/337	66/8978	7.88223e-07	1.23488e-05	9.58774e-06	100353706/100341714/100009413/100354225/103350027/103352489/100339465/100009097/100340056/100351385/100356520/100345556/100009088	13
ocu04514	Cell adhesion molecules	20/337	153/8978	1.02392e-06	1.51971e-05	1.17992e-05	100351207/100009377/100347630/100346103/100351181/100356927/100351865/100008898/100339049/100351416/100352672/127482571/100351027/100358807/100352415/100355948/100328929/100350656/100357016/100357954	20
ocu05135	Yersinia infection	18/337	142/8978	5.57663e-06	7.86306e-05	6.10495e-05	100343474/100353706/100346759/100009130/100350748/100346103/100008898/100339465/100009097/100338413/100352110/100350018/100342358/100356520/100009220/100358702/100009088/100354471	18
ocu05330	Allograft rejection	10/337	46/8978	5.93275e-06	7.96684e-05	6.18553e-05	100009377/100009097/100351416/100352672/127482571/100352415/100355948/100328929/100350656/100009088	10
ocu05169	Epstein-Barr virus infection	23/337	219/8978	7.41225e-06	9.50115e-05	7.37678e-05	100353706/100355991/100354716/100354225/100348489/108178217/100346379/100354455/100356927/127486194/100009097/100351416/100352672/127482571/100340056/100359054/100352415/100355948/100328929/100350656/100355388/100345556/100009088	23
ocu04670	Leukocyte transendothelial migration	16/337	119/8978	8.67968e-06	0.00010642	8.26257e-05	100351066/100008801/100347630/100346103/100356927/100351865/100008898/100339049/100008803/100008993/100008802/100009359/100037719/100342358/100356520/100009220	16
ocu05321	Inflammatory bowel disease	12/337	70/8978	9.62175e-06	0.000113056	8.77774e-05	100338854/103351862/100337721/100351416/100352672/127482571/100352415/100355948/100328929/100350656/100009371/100009088	12
ocu01523	Antifolate resistance	8/337	30/8978	1.02903e-05	0.000116075	9.01214e-05	100008909/100354688/100341917/100350070/127488159/100009293/100009317/100009088	8
ocu04060	Cytokine-cytokine receptor interaction	26/337	274/8978	1.19945e-05	0.000130095	0.000101007	100348362/100009130/100343840/100328940/100358097/100101579/100339537/103352517/100340992/100346676/127490643/100348428/100340021/100338854/100354902/100338351/100009558/103351862/100337721/100347752/100343726/100341426/100349996/100009371/100009088/100349872	26
ocu05332	Graft-versus-host disease	9/337	40/8978	1.29746e-05	0.000135512	0.000105213	100009377/100351416/100352672/127482571/100352415/100355948/100328929/100350656/100009088	9
ocu04066	HIF-1 signaling pathway	16/337	127/8978	2.00544e-05	0.000201977	0.000156817	100353706/100348305/100348489/100008801/100340994/100008919/100338854/100347752/100009107/100008833/100009087/100009526/100037719/100009588/100009047/100008899	16
ocu04610	Complement and coagulation cascades	12/337	78/8978	2.99862e-05	0.00029159	0.000226393	100342793/100009121/100351157/100352978/100008713/108178217/100351865/100351616/100339049/100101584/100009588/100338524	12
ocu04672	Intestinal immune network for IgA production	10/337	55/8978	3.15127e-05	0.000296219	0.000229987	100009377/100346103/100009097/100351416/100352672/127482571/100352415/100355948/100328929/100350656	10
ocu04658	Th1 and Th2 cell differentiation	13/337	95/8978	5.03409e-05	0.000457223	0.000354992	100338854/103351862/100337721/127486194/100351416/100352672/127482571/100359054/100352415/100355948/100328929/100350656/100355388	13
ocu05166	Human T-cell leukemia virus 1 infection	23/337	247/8978	5.18835e-05	0.000457223	0.000354992	100353706/100348299/100357348/100349688/100354874/100348489/100338531/100346379/100338208/103351862/100356927/100339049/127486194/100351416/100352672/127482571/100352415/100355948/100328929/100350656/103351779/100009371/100009088	23
ocu04659	Th17 cell differentiation	14/337	111/8978	6.52648e-05	0.000557718	0.000433017	100338854/103351862/100337721/100347752/127486194/100351416/100352672/127482571/100359054/100352415/100355948/100328929/100350656/100358993	14
ocu04612	Antigen processing and presentation	11/337	73/8978	7.82132e-05	0.00064871	0.000503664	100342022/100338894/100101598/100351416/100352672/127482571/100352415/100355948/100328929/100350656/100009088	11
ocu04940	Type I diabetes mellitus	9/337	50/8978	8.53552e-05	0.000687719	0.000533951	100009377/100351416/100352672/127482571/100352415/100355948/100328929/100350656/100009088	9
ocu05340	Primary immunodeficiency	8/337	40/8978	9.7372e-05	0.000762747	0.000592204	100354716/100354225/100338894/103351862/100343726/127486194/100009097/100358807	8
ocu04611	Platelet activation	15/337	130/8978	0.000101644	0.000774692	0.000601478	100353706/100354225/103350027/103346983/100008898/100339465/100338413/100340056/100345006/100337757/100340526/100348672/100009220/100345556/100339354	15
ocu05133	Pertussis	11/337	79/8978	0.000162469	0.00120569	0.000936109	100342793/100009121/100008983/100350620/100351865/100008898/100339049/100352110/100008833/100345225/100009088	11
ocu05221	Acute myeloid leukemia	10/337	67/8978	0.000179131	0.00129525	0.00100565	100353706/100348952/100008983/100340992/100358696/108175474/100351865/100349720/100358993/103351779	10
ocu05320	Autoimmune thyroid disease	9/337	57/8978	0.000243212	0.00171465	0.00133127	100009377/100009097/100351416/100352672/127482571/100352415/100355948/100328929/100350656	9
ocu04064	NF-kappa B signaling pathway	12/337	99/8978	0.000314828	0.0021654	0.00168124	100348952/100354716/100354225/100348362/100008983/100340021/100009097/100340056/100037719/100345556/100345225/100009088	12
ocu05164	Influenza A	17/337	181/8978	0.000445802	0.00298642	0.00231868	100353706/100355991/100009130/100338894/100338854/100354455/100009451/100351416/100352110/100352672/127482571/100037719/100352415/100355948/100328929/100350656/100009088	17
ocu05146	Amoebiasis	12/337	103/8978	0.000455376	0.00298642	0.00231868	100351066/100008983/100009419/100351865/100339049/103347398/100009097/100008833/100348672/100037719/100009371/100009088	12
ocu04810	Regulation of actin cytoskeleton	19/337	232/8978	0.00114384	0.007331	0.00569185	100351066/100343474/100353706/100346759/100352485/100347936/100338069/100346103/100351181/100356927/100351865/100351616/100008898/100339049/127487418/100009002/100340824/100356520/100009220	19
ocu05163	Human cytomegalovirus infection	19/337	234/8978	0.00126609	0.00793417	0.00616016	100353706/100355991/100009130/100328940/100101579/100348489/100349407/100346379/100342201/100354902/100338351/100347752/100348672/100037719/100342358/100356520/100009220/100009088/100008899	19
ocu05417	Lipid and atherosclerosis	18/337	221/8978	0.00163023	0.00999402	0.00775945	127482704/100353706/100355991/100009130/100008983/100008801/100354455/100008803/100352110/100340056/100008993/100008802/100009359/100348672/100355091/100345225/100353753/100009088	18
ocu04151	PI3K-Akt signaling pathway	25/337	353/8978	0.0016676	0.0100056	0.00776842	100353706/100348305/100348489/100340992/100341887/108175474/100342201/103351862/100337721/100347752/100343726/100346103/100351181/100008898/127486194/103347398/100009097/127487418/100337757/100340526/100350018/100345556/100301551/100356305/100008899	25
ocu05206	MicroRNAs in cancer	15/337	177/8978	0.00266601	0.0156628	0.0121608	100348489/100341887/100346379/100345157/100008919/100352572/127487408/100008993/100037719/100009220/100339005/100009371/100301551/100356305/100008899	15
ocu04115	p53 signaling pathway	9/337	81/8978	0.00320633	0.0184527	0.0143269	100355991/100338989/100343949/100352863/100348489/100346325/100009588/100353543/100354683	9
ocu05167	Kaposi sarcoma-associated herpesvirus infection	16/337	202/8978	0.00383548	0.0216321	0.0167953	100353706/100355991/100009121/100328940/100101579/100348489/100346379/100342201/100343961/100354455/100348666/100340056/100337757/100340526/100345556/100008899	16
ocu05142	Chagas disease	10/337	100/8978	0.0041956	0.0230538	0.0178992	100353706/100009121/100009130/100338854/100008833/100348672/100009588/100009371/100353753/100009088	10
ocu04630	JAK-STAT signaling pathway	14/337	168/8978	0.00425105	0.0230538	0.0178992	100353706/100348489/103352517/100346676/100338854/100354902/100338351/103351862/100337721/100347752/100343726/127486194/100349996/100348648	14
ocu05202	Transcriptional misregulation in cancer	15/337	189/8978	0.00495241	0.0263505	0.0204588	100348952/100008983/100348489/100340992/100358696/108175474/100351865/100349057/100009097/100009115/100008993/100349720/100355271/100358993/103351779	15
ocu05230	Central carbon metabolism in cancer	8/337	72/8978	0.00535197	0.0279492	0.0217	100353706/108175474/100340994/100009107/100352572/127487408/100009526/100339128	8
ocu04071	Sphingolipid signaling pathway	11/337	122/8978	0.00603347	0.0309353	0.0240184	100353706/100355991/103350027/100351385/100348672/100037719/100356520/100009220/100357790/100338261/100009088	11
ocu04814	Motor proteins	15/337	196/8978	0.00689495	0.0337997	0.0262424	100009271/100350318/100340694/100345407/100339334/100346660/100338825/100349824/100009002/100303760/100357003/100343338/100357527/100342965/100357567	15
ocu04512	ECM-receptor interaction	9/337	91/8978	0.00695171	0.0337997	0.0262424	100340334/100346103/100351181/100008898/103347398/127487418/100101608/100301551/100356305	9
ocu04620	Toll-like receptor signaling pathway	9/337	91/8978	0.00695171	0.0337997	0.0262424	100353706/100008983/100009377/100354455/100350244/100345225/100351814/100353753/100009088	9
ocu02010	ABC transporters	6/337	48/8978	0.00868274	0.0415005	0.0322214	100341298/100008909/100354688/127482704/103352242/100345135	6
ocu05143	African trypanosomiasis	5/337	36/8978	0.0104738	0.0492268	0.0382201	100009097/100009087/100348672/100037719/100009088	5
ocu04510	Focal adhesion	15/337	206/8978	0.0106836	0.0493897	0.0383466	100351066/100353706/100355759/100346103/100351181/100008898/103347398/127487418/103347270/100037719/100356520/100009220/100301551/100356305/100008899	15
ocu05414	Dilated cardiomyopathy	9/337	102/8978	0.0142154	0.064657	0.0502003	100346103/100351181/100008898/100009097/127487418/100351233/100009214/100009371/100009088	9
ocu05161	Hepatitis B	13/337	175/8978	0.0144646	0.0647463	0.0502696	100353706/100355991/100348489/100346379/100340334/100354455/127486194/100008993/100037719/100342358/100009371/100345225/100009088	13
ocu05203	Viral carcinogenesis	15/337	216/8978	0.0159489	0.070275	0.0545622	100351066/100350237/100009121/100101579/100354874/100352863/100348489/100338045/127486194/100343938/100344914/100340056/100355271/103348899/100345556	15
ocu04625	C-type lectin receptor signaling pathway	9/337	105/8978	0.0169259	0.0733607	0.0569579	100353706/100339146/103350027/100354455/100350649/100350907/100352110/100345556/100009088	9
ocu04530	Tight junction	13/337	179/8978	0.0171695	0.0733607	0.0569579	100351066/100343474/100345255/100346759/100009419/100340933/100008898/100349824/100009002/100009220/100358993/100357567/100354471	13
ocu04933	AGE-RAGE signaling pathway in diabetic complications	9/337	106/8978	0.0179082	0.0753747	0.0585216	100353706/100009130/100008801/100348672/100037719/100009588/100009371/100009088/100008899	9
ocu05410	Hypertrophic cardiomyopathy	8/337	94/8978	0.0245799	0.101934	0.0791428	100346103/100351181/100008898/127487418/100351233/100009214/100009371/100009088	8
ocu05144	Malaria	5/337	45/8978	0.0258447	0.105626	0.0820093	100009130/100356927/100339049/100009371/100009088	5
ocu04710	Circadian rhythm	4/337	33/8978	0.033849	0.134635	0.104532	100343508/127486976/100345297/100349720	4
ocu05205	Proteoglycans in cancer	14/337	217/8978	0.0338975	0.134635	0.104532	100353706/100348489/100340933/100101601/100340334/100008898/100008993/100101584/100037719/100348648/100009220/100009371/100009088/100008899	14
ocu04914	Progesterone-mediated oocyte maturation	8/337	101/8978	0.0357219	0.139911	0.108628	100353706/100348299/100357348/100345632/100352234/100338989/100352863/100358702	8
ocu04072	Phospholipase D signaling pathway	11/337	162/8978	0.0413259	0.159642	0.123948	100353706/103350027/100009097/100345732/100351385/100337757/100340526/100348672/100342358/100357790/100345556	11
ocu00220	Arginine biosynthesis	3/337	22/8978	0.0475997	0.181393	0.140836	100352572/127487408/100008833	3
ocu04110	Cell cycle	11/337	169/8978	0.0532001	0.200032	0.155307	100348299/100357348/100352234/100349688/100338989/100354874/100352863/100348489/100346379/100009371/100345730	11
ocu04350	TGF-beta signaling pathway	8/337	110/8978	0.0544811	0.202154	0.156954	100356824/100341426/100348332/100009220/100353573/100009371/100344573/100009088	8
ocu04015	Rap1 signaling pathway	13/337	213/8978	0.0576602	0.211171	0.163955	100353706/100348305/100340992/100350748/100356927/100351865/100008898/100339049/100339465/100348672/100037719/100356520/100008899	13
ocu05219	Bladder cancer	4/337	40/8978	0.0617787	0.223354	0.173414	100348489/100346379/100008993/100008899	4
ocu04370	VEGF signaling pathway	5/337	58/8978	0.0657057	0.231613	0.179826	100353706/100037719/100356520/100357790/100008899	5
ocu04929	GnRH secretion	5/337	58/8978	0.0657057	0.231613	0.179826	100353706/100341204/100351872/100348672/100037719	5
ocu05170	Human immunodeficiency virus 1 infection	13/337	218/8978	0.066759	0.23242	0.180453	100353706/100355991/100338989/100101579/100352863/100349407/100342201/100037719/100342358/100356520/100009088/100349872/100345730	13
ocu05134	Legionellosis	6/337	77/8978	0.0686449	0.236071	0.183288	100009121/100008983/100351865/100339049/100352110/100009088	6
ocu05412	Arrhythmogenic right ventricular cardiomyopathy	6/337	79/8978	0.075737	0.25647	0.199126	100346103/100351181/100008898/127487418/100351233/100009214	6
ocu04216	Ferroptosis	4/337	43/8978	0.0765624	0.25647	0.199126	100008801/100008919/100342288/100354683	4
ocu04936	Alcoholic liver disease	9/337	139/8978	0.0777014	0.25647	0.199126	100353706/100009121/100351157/100352978/100008983/100354455/100342572/100346561/100009088	9
ocu04520	Adherens junction	7/337	99/8978	0.0782143	0.25647	0.199126	100351066/100358428/100348648/100356520/100009220/100353573/100354471	7
ocu05212	Pancreatic cancer	6/337	83/8978	0.0911194	0.295352	0.229314	100353706/100348489/100346379/100356520/100009371/100008899	6
ocu04010	MAPK signaling pathway	16/337	298/8978	0.0950416	0.304565	0.236467	100353706/100348305/100341204/100008983/100340992/108175474/100350814/100037719/100342471/100356520/100350559/100358702/100339005/100009371/100009088/100008899	16
ocu04371	Apelin signaling pathway	9/337	146/8978	0.0981667	0.306502	0.237971	100009271/100353706/100342201/100008833/100337757/100340526/100348672/100009588/100357790	9
ocu04657	IL-17 signaling pathway	6/337	85/8978	0.0994003	0.306502	0.237971	100009130/100343840/100338208/100354455/100008993/100009088	6
ocu05222	Small cell lung cancer	7/337	105/8978	0.0994109	0.306502	0.237971	100353706/100348489/100349119/100346379/100008898/103347398/100008833	7
ocu05168	Herpes simplex virus 1 infection	20/337	392/8978	0.100327	0.306502	0.237971	100353706/100355991/100009121/100009130/100342022/100349407/100338854/100354455/100340313/100351416/100352672/127482571/100355091/100352415/100355948/100328929/100350656/103348899/100345556/100009088	20
ocu04392	Hippo signaling pathway - multiple species	3/337	30/8978	0.10108	0.306502	0.237971	127486565/100344930/100356027	3
ocu04621	NOD-like receptor signaling pathway	10/337	171/8978	0.10955	0.328461	0.25502	100009130/100008801/100354455/100352110/100009115/100350018/100348672/103345318/100009088/100354812	10
ocu04973	Carbohydrate digestion and absorption	4/337	49/8978	0.110854	0.328461	0.25502	100353706/100340994/100348672/100037719	4
ocu04114	Oocyte meiosis	8/337	129/8978	0.111816	0.328461	0.25502	100348299/100357348/100345632/100352234/100338989/100354874/100352863/100358702	8
ocu05223	Non-small cell lung cancer	5/337	69/8978	0.116549	0.338833	0.263073	100353706/100348489/100346379/127486194/100037719	5
ocu04727	GABAergic synapse	6/337	92/8978	0.131354	0.377979	0.293466	100356357/100342201/100341013/100352572/127487408/100037719	6
ocu00010	Glycolysis / Gluconeogenesis	5/337	73/8978	0.138617	0.388031	0.301271	100009096/100338306/100340994/100009107/100009526	5
ocu05220	Chronic myeloid leukemia	5/337	73/8978	0.138617	0.388031	0.301271	100353706/100348489/100346379/100358993/100009371	5
ocu04926	Relaxin signaling pathway	8/337	136/8978	0.138976	0.388031	0.301271	100009271/100353706/100341204/100342201/100008993/100008833/100348672/100008899	8
ocu00670	One carbon pool by folate	2/337	19/8978	0.158284	0.437608	0.339763	127488159/100009293	2
ocu05418	Fluid shear stress and atherosclerosis	9/337	164/8978	0.163517	0.447689	0.34759	100353706/100009130/100008919/100008803/100008993/100008802/100356520/100009088/100008899	9
ocu00052	Galactose metabolism	3/337	38/8978	0.169846	0.460439	0.357489	100338306/100340994/100009526	3
ocu04218	Cellular senescence	9/337	166/8978	0.171834	0.460439	0.357489	100353706/100338989/100352863/100348489/100346379/100358944/100346753/100009588/100009371	9
ocu05231	Choline metabolism in cancer	6/337	100/8978	0.173073	0.460439	0.357489	100353706/100345732/100037719/100356520/100008931/100354471	6
ocu04270	Vascular smooth muscle contraction	8/337	145/8978	0.17825	0.469781	0.364743	100009271/100350318/100349824/100009002/100009087/100348672/100037719/100009220	8
ocu05165	Human papillomavirus infection	16/337	331/8978	0.179978	0.469943	0.364868	100353706/100350237/100348489/100344717/100354455/100346103/100351181/100008898/103347398/100009451/127487418/100356242/100301551/100009088/100356305/100008899	16
ocu04210	Apoptosis	8/337	146/8978	0.182893	0.473172	0.367375	100353706/100348952/100355991/100101598/100359244/100349996/100009088/100357567	8
ocu04014	Ras signaling pathway	12/337	239/8978	0.187705	0.481207	0.373613	100353706/100348305/100340992/108175474/100342201/100037719/100356520/100358105/103345683/100350559/100355271/100008899	12
ocu05100	Bacterial invasion of epithelial cells	5/337	84/8978	0.207432	0.526267	0.408599	100343474/100346759/100340933/100355759/100008898	5
ocu05415	Diabetic cardiomyopathy	12/337	245/8978	0.210306	0.526267	0.408599	100353706/100008801/100008803/100008993/100008802/100009359/100356593/100348563/100348672/100037719/100356520/100009371	12
ocu04623	Cytosolic DNA-sensing pathway	4/337	63/8978	0.21088	0.526267	0.408599	100349407/100354455/100352110/100355546	4
ocu04964	Proximal tubule bicarbonate reclamation	2/337	23/8978	0.213036	0.526983	0.409155	100352572/127487408	2
ocu04660	T cell receptor signaling pathway	6/337	108/8978	0.219481	0.538206	0.417868	100353706/100339465/100359054/100348648/100358807/100009088	6
ocu04668	TNF signaling pathway	6/337	110/8978	0.231694	0.563255	0.437316	100353706/100009130/100359244/100008993/100009088/100349872	6
ocu04142	Lysosome	7/337	134/8978	0.238286	0.574331	0.445916	100348941/100350237/100344094/100009063/100101598/100349164/103347422	7
ocu05235	PD-L1 expression and PD-1 checkpoint pathway in cancer	5/337	89/8978	0.241848	0.577976	0.448746	100353706/100338854/100359054/100348648/100345225	5
ocu04725	Cholinergic synapse	6/337	112/8978	0.244115	0.578491	0.449145	100353706/100342201/100337757/100340526/100348672/100037719	6
ocu00260	Glycine, serine and threonine metabolism	3/337	46/8978	0.248179	0.583219	0.452817	100009096/100353463/100009293	3
ocu04217	Necroptosis	8/337	160/8978	0.252851	0.58929	0.45753	100355991/100008801/100338854/127486194/100348415/100352110/100345225/100009088	8
ocu05032	Morphine addiction	5/337	91/8978	0.256028	0.590587	0.458537	100341204/100356357/100342201/100341013/100037719	5
ocu04921	Oxytocin signaling pathway	8/337	161/8978	0.258155	0.590587	0.458537	100348489/100349824/100009087/100337757/100340526/100348672/100037719/100009220	8
ocu04920	Adipocytokine signaling pathway	4/337	69/8978	0.259691	0.590587	0.458537	100353706/100359054/100009088/100349872	4
ocu05214	Glioma	4/337	70/8978	0.268042	0.604702	0.469496	100353706/100348489/100346379/100037719	4
ocu00590	Arachidonic acid metabolism	5/337	95/8978	0.28495	0.637745	0.495151	100341714/100328948/100342572/100350957/100339354	5
ocu00030	Pentose phosphate pathway	2/337	29/8978	0.297392	0.660145	0.512543	100345419/100009526	2
ocu04070	Phosphatidylinositol signaling system	5/337	97/8978	0.29964	0.660145	0.512543	100358338/103352489/100345732/100348672/100037719	5
ocu05211	Renal cell carcinoma	4/337	75/8978	0.310412	0.67553	0.524488	100353706/100348489/100009371/100008899	4
ocu00790	Folate biosynthesis	2/337	30/8978	0.311415	0.67553	0.524488	100350070/103349370	2
ocu04723	Retrograde endocannabinoid signaling	7/337	149/8978	0.326746	0.703377	0.546108	100356357/100342201/100341013/100356593/100348563/100348672/100037719	7
ocu00520	Amino sugar and nucleotide sugar metabolism	3/337	54/8978	0.330718	0.70575	0.547951	100338170/100340994/103345585	3
ocu05162	Measles	7/337	150/8978	0.332854	0.70575	0.547951	100353706/100355991/100354455/103351862/127486194/100009451/100359306	7
ocu03320	PPAR signaling pathway	4/337	78/8978	0.336152	0.707423	0.54925	100345743/100355759/100346561/100008882	4
ocu05213	Endometrial cancer	3/337	57/8978	0.361824	0.75581	0.586818	100353706/100348489/100355759	3
ocu00051	Fructose and mannose metabolism	2/337	35/8978	0.380345	0.782063	0.607201	100340994/100009526	2
ocu04978	Mineral absorption	3/337	59/8978	0.382447	0.782063	0.607201	100008919/100343802/100009317	3
ocu04360	Axon guidance	8/337	185/8978	0.39264	0.782063	0.607201	100338780/100355759/100008898/100346617/100356520/100009220/100342051/100346590	8
ocu00240	Pyrimidine metabolism	3/337	60/8978	0.392705	0.782063	0.607201	127488159/100346325/100359019	3
ocu03250	Viral life cycle - HIV-1	3/337	60/8978	0.392705	0.782063	0.607201	100348480/100101579/100009451	3
ocu04730	Long-term depression	3/337	60/8978	0.392705	0.782063	0.607201	100340056/100348672/100037719	3
ocu00512	Mucin type O-glycan biosynthesis	2/337	36/8978	0.393805	0.782063	0.607201	100338673/100348815	2
ocu01521	EGFR tyrosine kinase inhibitor resistance	4/337	86/8978	0.404893	0.796994	0.618793	100353706/100347752/100037719/100008899	4
ocu05160	Hepatitis C	7/337	162/8978	0.406976	0.796994	0.618793	100353706/100355991/100348489/100346379/100354455/100009451/100009088	7
ocu04750	Inflammatory mediator regulation of TRP channels	5/337	112/8978	0.41191	0.79853	0.619986	100348650/103344944/100348672/100037719/100354812	5
ocu01232	Nucleotide metabolism	4/337	87/8978	0.413424	0.79853	0.619986	100126071/127488159/100346325/100359019	4
ocu04724	Glutamatergic synapse	5/337	114/8978	0.426849	0.818853	0.635765	100342201/100352572/127487408/100348672/100037719	5
ocu05033	Nicotine addiction	2/337	39/8978	0.433344	0.825697	0.641078	100356357/100341013	2
ocu04720	Long-term potentiation	3/337	65/8978	0.443231	0.833273	0.646961	100348672/100037719/100358702	3
ocu05218	Melanoma	3/337	65/8978	0.443231	0.833273	0.646961	100353706/100348489/100346379	3
ocu04540	Gap junction	4/337	91/8978	0.447249	0.835259	0.648503	100352863/100348672/100037719/100357567	4
ocu00604	Glycosphingolipid biosynthesis - ganglio series	1/337	16/8978	0.458094	0.844069	0.655343	100341761	1
ocu00250	Alanine, aspartate and glutamate metabolism	2/337	41/8978	0.458926	0.844069	0.655343	100352572/127487408	2
ocu04310	Wnt signaling pathway	7/337	171/8978	0.462486	0.844069	0.655343	100356824/100347243/100338208/100348672/100340572/100037719/100356520	7
ocu01522	Endocrine resistance	4/337	93/8978	0.463939	0.844069	0.655343	100353706/100348489/100346379/100008993	4
ocu04713	Circadian entrainment	4/337	94/8978	0.472218	0.844282	0.655508	100342201/100349720/100348672/100037719	4
ocu05215	Prostate cancer	4/337	94/8978	0.472218	0.844282	0.655508	100353706/100348489/100346379/100008993	4
ocu05132	Salmonella infection	11/337	278/8978	0.473037	0.844282	0.655508	100343474/100353706/100346759/100008983/100352485/100352110/100340824/100358807/100353753/100009088/100357567	11
ocu00531	Glycosaminoglycan degradation	1/337	17/8978	0.478472	0.84861	0.658869	100101601	1
ocu04722	Neurotrophin signaling pathway	5/337	122/8978	0.485694	0.856035	0.664633	100353706/100345676/127485744/100359054/100358702	5
ocu04726	Serotonergic synapse	5/337	123/8978	0.492911	0.86336	0.670321	100341714/100356357/100342201/100348672/100037719	5
ocu00564	Glycerophospholipid metabolism	4/337	97/8978	0.49676	0.86473	0.671384	100358338/100345732/100342288/100341396	4
ocu00120	Primary bile acid biosynthesis	1/337	19/8978	0.516963	0.888924	0.690168	100341039	1
ocu00360	Phenylalanine metabolism	1/337	19/8978	0.516963	0.888924	0.690168	100353463	1
ocu00983	Drug metabolism - other enzymes	4/337	100/8978	0.520806	0.890105	0.691085	100126071/100342572/100346325/100359019	4
ocu01230	Biosynthesis of amino acids	3/337	74/8978	0.52953	0.892053	0.692598	100352530/100009526/100009293	3
ocu00514	Other types of O-glycan biosynthesis	2/337	47/8978	0.531436	0.892053	0.692598	100338673/100348815	2
ocu04930	Type II diabetes mellitus	2/337	47/8978	0.531436	0.892053	0.692598	100340994/100009088	2
ocu04728	Dopaminergic synapse	5/337	130/8978	0.542303	0.904907	0.702578	100353706/100341204/100342201/100348672/100037719	5
ocu04068	FoxO signaling pathway	5/337	131/8978	0.549177	0.910312	0.706774	100353706/100338989/100348489/100343726/100009371	5
ocu04922	Glucagon signaling pathway	4/337	104/8978	0.551998	0.910312	0.706774	100353706/100009107/100009526/100348672	4
ocu00860	Porphyrin metabolism	2/337	50/8978	0.565132	0.917707	0.712516	100346798/100008919	2
ocu04931	Insulin resistance	4/337	106/8978	0.567187	0.917707	0.712516	100353706/100037719/100358702/100009088	4
ocu04932	Non-alcoholic fatty liver disease	7/337	189/8978	0.569019	0.917707	0.712516	100353706/100355991/100347752/100342572/100356593/100348563/100009088	7
ocu04915	Estrogen signaling pathway	5/337	134/8978	0.569499	0.917707	0.712516	100353706/100341376/100354174/100008993/100348672	5
ocu04144	Endocytosis	10/337	274/8978	0.582552	0.927834	0.720379	100343474/100346759/100341204/100353577/100101579/100340544/100341917/103351862/100357864/100353573	10
ocu00340	Histidine metabolism	1/337	23/8978	0.585654	0.927834	0.720379	100347399	1
ocu00532	Glycosaminoglycan biosynthesis - chondroitin sulfate / dermatan sulfate	1/337	23/8978	0.585654	0.927834	0.720379	100338181	1
ocu04928	Parathyroid hormone synthesis, secretion and action	4/337	110/8978	0.596695	0.934822	0.725805	100341204/100348489/100348672/100037719	4
ocu05210	Colorectal cancer	4/337	110/8978	0.596695	0.934822	0.725805	100353706/100348489/100356520/100009371	4
ocu00770	Pantothenate and CoA biosynthesis	1/337	24/8978	0.601247	0.935972	0.726697	100356303	1
ocu04012	ErbB signaling pathway	3/337	84/8978	0.616032	0.935972	0.726697	100353706/100348489/100037719	3
ocu04911	Insulin secretion	3/337	84/8978	0.616032	0.935972	0.726697	100351872/100348672/100037719	3
ocu00534	Glycosaminoglycan biosynthesis - heparan sulfate / heparin	1/337	25/8978	0.616255	0.935972	0.726697	100344304	1
ocu00330	Arginine and proline metabolism	2/337	55/8978	0.617343	0.935972	0.726697	100352530/100008833	2
ocu04340	Hedgehog signaling pathway	2/337	55/8978	0.617343	0.935972	0.726697	100341204/100353573	2
ocu04150	mTOR signaling pathway	6/337	171/8978	0.62506	0.936998	0.727494	100353706/100341887/100037719/100358702/100353543/100009088	6
ocu04923	Regulation of lipolysis in adipocytes	2/337	56/8978	0.62719	0.936998	0.727494	100353706/100009087	2
ocu04966	Collecting duct acid secretion	1/337	26/8978	0.630699	0.936998	0.727494	100350237	1
ocu04970	Salivary secretion	3/337	86/8978	0.631991	0.936998	0.727494	100351872/100348672/100037719	3
ocu00140	Steroid hormone biosynthesis	3/337	87/8978	0.639797	0.936998	0.727494	100328948/100342572/100356754	3
ocu04020	Calcium signaling pathway	9/337	259/8978	0.641913	0.936998	0.727494	100348650/100009097/100008833/100348672/100037719/100354046/100342358/100357790/100008899	9
ocu04744	Phototransduction	1/337	27/8978	0.644602	0.936998	0.727494	103344966	1
ocu04977	Vitamin digestion and absorption	1/337	27/8978	0.644602	0.936998	0.727494	100009317	1
ocu04919	Thyroid hormone signaling pathway	4/337	118/8978	0.651974	0.942854	0.732041	100353706/100009526/100348672/100037719	4
ocu04961	Endocrine and other factor-regulated calcium reabsorption	2/337	59/8978	0.655551	0.943191	0.732302	100348672/100037719	2
ocu04912	GnRH signaling pathway	3/337	91/8978	0.669854	0.954676	0.741219	100348672/100037719/100342358	3
ocu04330	Notch signaling pathway	2/337	61/8978	0.673486	0.954676	0.741219	127491468/100344717	2
ocu05225	Hepatocellular carcinoma	6/337	180/8978	0.67413	0.954676	0.741219	100353706/100348489/100346379/100008919/100037719/100009371	6
ocu01524	Platinum drug resistance	3/337	92/8978	0.677075	0.954676	0.741219	100353706/100355991/100348489	3
ocu00601	Glycosphingolipid biosynthesis - lacto and neolacto series	1/337	30/8978	0.683255	0.958597	0.744263	100008715	1
ocu04022	cGMP-PKG signaling pathway	6/337	183/8978	0.689545	0.962632	0.747396	100353706/100009087/100337757/100340526/100348672/100009220	6
ocu04390	Hippo signaling pathway	5/337	155/8978	0.697033	0.968293	0.751791	100339049/100344930/100009588/100009371/100356027	5
ocu05034	Alcoholism	6/337	186/8978	0.704474	0.972096	0.754744	100350843/100342201/100343938/100344914/100348415/100357908	6
ocu01040	Biosynthesis of unsaturated fatty acids	1/337	32/8978	0.706666	0.972096	0.754744	100346561	1
ocu00310	Lysine degradation	2/337	66/8978	0.715014	0.978087	0.759396	100345157/100347868	2
ocu04925	Aldosterone synthesis and secretion	3/337	98/8978	0.717958	0.978087	0.759396	100009087/100348672/100037719	3
ocu00410	beta-Alanine metabolism	1/337	34/8978	0.728351	0.987475	0.766685	100353463	1
ocu05207	Chemical carcinogenesis - receptor activation	7/337	222/8978	0.733835	0.99015	0.768762	100353706/100341204/100354455/100328948/100037719/100358702/100008899	7
ocu05216	Thyroid cancer	1/337	35/8978	0.738586	0.990805	0.76927	100348489	1
ocu04924	Renin secretion	2/337	70/8978	0.744971	0.990805	0.76927	100009087/100348672	2
ocu00500	Starch and sucrose metabolism	1/337	36/8978	0.748437	0.990805	0.76927	100340994	1
ocu04622	RIG-I-like receptor signaling pathway	2/337	71/8978	0.752027	0.990805	0.76927	100354455/100009088	2
ocu00630	Glyoxylate and dicarboxylate metabolism	1/337	37/8978	0.757918	0.990805	0.76927	100009293	1
ocu00640	Propanoate metabolism	1/337	37/8978	0.757918	0.990805	0.76927	100009107	1
ocu00562	Inositol phosphate metabolism	2/337	72/8978	0.758914	0.990805	0.76927	103352489/100348672	2
ocu04960	Aldosterone-regulated sodium reabsorption	1/337	38/8978	0.767042	0.996801	0.773926	100037719	1
ocu04120	Ubiquitin mediated proteolysis	5/337	171/8978	0.77508	0.997093	0.774152	100348299/100357348/100354874/100353573/100338187	5
ocu04971	Gastric acid secretion	2/337	76/8978	0.784833	0.997093	0.774152	100348672/100037719	2
ocu05224	Breast cancer	4/337	143/8978	0.79054	0.997093	0.774152	100353706/100348489/100346379/100344717	4
ocu05226	Gastric cancer	4/337	143/8978	0.79054	0.997093	0.774152	100353706/100348489/100346379/100009371	4
ocu04918	Thyroid hormone synthesis	2/337	77/8978	0.790919	0.997093	0.774152	100348672/100037719	2
ocu00350	Tyrosine metabolism	1/337	41/8978	0.792409	0.997093	0.774152	100353463	1
ocu00591	Linoleic acid metabolism	1/337	42/8978	0.800237	0.997093	0.774152	100342572	1
ocu01250	Biosynthesis of nucleotide sugars	1/337	42/8978	0.800237	0.997093	0.774152	100340994	1
ocu04080	Neuroactive ligand-receptor interaction	11/337	365/8978	0.814202	0.997093	0.774152	100009121/100351157/100352978/100356357/100348650/100341013/108175884/103344944/100352480/100339246/100354046	11
ocu03022	Basal transcription factors	1/337	44/8978	0.815021	0.997093	0.774152	100338045	1
ocu04962	Vasopressin-regulated water reabsorption	1/337	44/8978	0.815021	0.997093	0.774152	100345676	1
ocu04935	Growth hormone synthesis, secretion and action	3/337	116/8978	0.816643	0.997093	0.774152	100353706/100348672/100037719	3
ocu04974	Protein digestion and absorption	3/337	116/8978	0.816643	0.997093	0.774152	100344271/100351872/100356317	3
ocu05208	Chemical carcinogenesis - reactive oxygen species	8/337	275/8978	0.816768	0.997093	0.774152	100353706/100008919/100008803/100342572/100008802/100356593/100348563/100008899	8
ocu00513	Various types of N-glycan biosynthesis	1/337	47/8978	0.835176	0.999965	0.776382	100345634	1
ocu04215	Apoptosis - multiple species	1/337	47/8978	0.835176	0.999965	0.776382	100355991	1
ocu04261	Adrenergic signaling in cardiomyocytes	4/337	156/8978	0.843007	0.999965	0.776382	100353706/100337757/100340526/100348672	4
ocu00565	Ether lipid metabolism	1/337	49/8978	0.847381	0.999965	0.776382	100341396	1
ocu04979	Cholesterol metabolism	1/337	50/8978	0.853141	0.999965	0.776382	100008882	1
ocu04152	AMPK signaling pathway	3/337	125/8978	0.853924	0.999965	0.776382	100353706/100346561/100009526	3
ocu03410	Base excision repair	1/337	51/8978	0.858684	0.999965	0.776382	100338717	1
ocu04913	Ovarian steroidogenesis	1/337	51/8978	0.858684	0.999965	0.776382	100341714	1
ocu04211	Longevity regulating pathway	2/337	91/8978	0.86143	0.999965	0.776382	100353706/100353543	2
ocu00600	Sphingolipid metabolism	1/337	52/8978	0.864019	0.999965	0.776382	100357790	1
ocu01200	Carbon metabolism	3/337	129/8978	0.868259	0.999965	0.776382	100340994/100009526/100009293	3
ocu05020	Prion disease	9/337	326/8978	0.869403	0.999965	0.776382	100008801/100008803/100008802/100009359/100356593/100348563/100356520/100009088/100357567	9
ocu00620	Pyruvate metabolism	1/337	54/8978	0.874094	0.999965	0.776382	100009107	1
ocu04976	Bile secretion	2/337	96/8978	0.880827	0.999965	0.776382	100008909/100354688	2
ocu04916	Melanogenesis	2/337	97/8978	0.884394	0.999965	0.776382	100348672/100037719	2
ocu00270	Cysteine and methionine metabolism	1/337	59/8978	0.896143	0.999965	0.776382	100009107	1
ocu00510	N-Glycan biosynthesis	1/337	60/8978	0.900067	0.999965	0.776382	100345634	1
ocu05217	Basal cell carcinoma	1/337	60/8978	0.900067	0.999965	0.776382	100348489	1
ocu01212	Fatty acid metabolism	1/337	62/8978	0.907477	0.999965	0.776382	100346561	1
ocu05031	Amphetamine addiction	1/337	62/8978	0.907477	0.999965	0.776382	100037719	1
ocu04550	Signaling pathways regulating pluripotency of stem cells	3/337	143/8978	0.909132	0.999965	0.776382	100353706/100341426/127486194	3
ocu04213	Longevity regulating pathway - multiple species	1/337	65/8978	0.917578	0.999965	0.776382	100353706	1
ocu04927	Cortisol synthesis and secretion	1/337	65/8978	0.917578	0.999965	0.776382	100348672	1
ocu00480	Glutathione metabolism	1/337	68/8978	0.926579	0.999965	0.776382	100346325	1
ocu04917	Prolactin signaling pathway	1/337	69/8978	0.929356	0.999965	0.776382	100353706	1
ocu04024	cAMP signaling pathway	5/337	226/8978	0.931121	0.999965	0.776382	100354688/100353706/100009087/100356520/100009220	5
ocu04934	Cushing syndrome	3/337	157/8978	0.938183	0.999965	0.776382	100348489/100346379/100348672	3
ocu01240	Biosynthesis of cofactors	3/337	161/8978	0.944751	0.999965	0.776382	100350070/103349370/100009293	3
ocu04972	Pancreatic secretion	2/337	122/8978	0.947011	0.999965	0.776382	100348672/100037719	2
ocu05017	Spinocerebellar ataxia	3/337	164/8978	0.949247	0.999965	0.776382	100353706/100348672/100037719	3
ocu04721	Synaptic vesicle cycle	1/337	79/8978	0.951969	0.999965	0.776382	100350237	1
ocu00561	Glycerolipid metabolism	1/337	80/8978	0.953788	0.999965	0.776382	100345732	1
ocu00982	Drug metabolism - cytochrome P450	1/337	81/8978	0.955538	0.999965	0.776382	100342572	1
ocu04742	Taste transduction	1/337	81/8978	0.955538	0.999965	0.776382	100348672	1
ocu00980	Metabolism of xenobiotics by cytochrome P450	1/337	86/8978	0.963346	0.999965	0.776382	100342572	1
ocu00230	Purine metabolism	2/337	134/8978	0.963992	0.999965	0.776382	100126071/100346325	2
ocu05204	Chemical carcinogenesis - DNA adducts	1/337	87/8978	0.964735	0.999965	0.776382	100342572	1
ocu00830	Retinol metabolism	1/337	88/8978	0.966072	0.999965	0.776382	100328948	1
ocu03018	RNA degradation	1/337	89/8978	0.967358	0.999965	0.776382	100009526	1
ocu03008	Ribosome biogenesis in eukaryotes	1/337	90/8978	0.968596	0.999965	0.776382	100328976	1
ocu00190	Oxidative phosphorylation	3/337	181/8978	0.968916	0.999965	0.776382	100350237/100356593/100348563	3
ocu04910	Insulin signaling pathway	2/337	140/8978	0.970389	0.999965	0.776382	100353706/100340994	2
ocu04146	Peroxisome	1/337	95/8978	0.974116	0.999965	0.776382	100008833	1
ocu04714	Thermogenesis	5/337	276/8978	0.980061	0.999965	0.776382	100358443/100356593/100348563/100009087/100358702	5
ocu04140	Autophagy - animal	2/337	156/8978	0.982545	0.999965	0.776382	100353706/100341887	2
ocu05010	Alzheimer disease	9/337	439/8978	0.986378	0.999965	0.776382	100353706/100355991/100008801/100356593/100348563/100008833/100348672/100009088/100357567	9
ocu05014	Amyotrophic lateral sclerosis	8/337	433/8978	0.993334	0.999965	0.776382	100355991/100356593/100348563/100008833/100356186/100009088/100349872/100357567	8
ocu03013	Nucleocytoplasmic transport	1/337	135/8978	0.994509	0.999965	0.776382	100356186	1
ocu05016	Huntington disease	4/337	359/8978	0.999486	0.999965	0.776382	100356593/100348563/100348672/100357567	4
ocu05012	Parkinson disease	3/337	329/8978	0.999724	0.999965	0.776382	100356593/100348563/100357567	3
ocu03010	Ribosome	4/337	441/8978	0.999965	0.999965	0.776382	100341783/100352673/127493194/100328976	4

## Sheet: Treat.7w vs Treat.2w
ID	Description	GeneRatio	qvalue	BgRatio	pvalue	p.adjust		geneID	Count
ocu00190	Oxidative phosphorylation	101/1903	1.88236e-22	181/8978	8.51544e-25	2.80158e-22		127487406/100353292/127489209/108175623/100345365/100351820/100351492/103346545/100345802/100353482/100351840/100344371/100350580/100328815/100351669/100347710/100350237/100353383/100352404/100354566/100327269/100337966/100339628/100340645/100341175/100341219/100341474/100341772/100341993/100342996/100343793/100343982/100344154/100344965/100345307/100345745/100346096/100346169/100346411/100346670…	101
ocu05415	Diabetic cardiomyopathy	120/1903	1.40881e-20	245/8978	1.27464e-22	2.09678e-20		100353706/100354976/127487406/100353292/127489209/108175623/100345365/100351820/100351492/100351840/100344371/100350580/100328815/100342451/100101556/100327269/100353138/100008801/100328765/100009074/100008660/100008803/100337966/100339628/100340645/100341219/100341474/100341772/100341993/100342475/100342996/100343793/100343982/100344154/100344965/100345307/100345745/100346169/100346411/100346670…	120
ocu04714	Thermogenesis	126/1903	1.78986e-18	276/8978	2.4291e-20	2.66392e-18		100344347/100328719/100009272/100008902/100343958/100346742/100337882/127487406/100353292/127489209/108175623/100345365/100351820/100351492/103346545/100345802/100353482/100351840/100344371/100350580/100328815/100327269/100353138/100343130/100357483/100349069/100341777/100342500/100358443/100346181/100337966/100339628/100339718/100340645/100341037/100341219/100341474/100341772/100341993/100342996…	126
ocu05020	Prion disease	137/1903	2.32287e-16	326/8978	4.20329e-18	3.4572e-16		127487406/100353292/127489209/108175623/100345365/100351820/100351492/100351840/100344371/100350580/100328815/100358587/100355675/100358949/100009197/100101555/100126563/100342999/100327269/100343130/100357483/100008801/100009491/100356338/127489904/100009505/100351387/100008803/100337966/100339628/100340483/100340645/100340939/100341175/100341219/100341474/100341581/100341772/100341993/100342996…	137
ocu04932	Non-alcoholic fatty liver disease	91/1903	3.63447e-15	189/8978	8.22083e-17	5.4093e-15		100353706/100355675/100355991/100348477/100327269/100338345/100347752/100356696/100008856/100008747/100337966/100339628/100340645/100341175/100341219/100341474/100341993/100342572/100342996/100343793/100343982/100345307/100345745/100346169/100346411/100346670/100347143/100347571/100347864/100348135/100350787/100354254/100355084/100356756/100356786/100357329/100357840/100358208/103349801/108175419…	91
ocu05208	Chemical carcinogenesis - reactive oxygen species	118/1903	5.51292e-15	275/8978	1.49636e-16	8.20506e-15		100345909/100353706/100008996/127487406/100353292/127489209/108175623/100345365/100351820/100351492/100351840/100344371/100350580/100328815/100358587/100351964/100327269/100008806/100338345/100343573/100342500/100349021/100008919/100008856/100008803/100337966/100339628/100340645/100341219/100341474/100341772/100341993/100342572/100342996/100343223/100343793/100343982/100344154/100344965/100345307…	118
ocu05016	Huntington disease	136/1903	3.85111e-12	359/8978	1.21952e-13	5.73173e-12		100342525/127487406/100353292/127489209/108175623/100345365/100351820/100351492/100351840/100344371/100350580/100328815/100355675/100356949/100348477/100327269/100343130/100357483/100340619/100345319/100354135/100009258/100355156/100009505/100337966/100339543/100339628/100340483/100340645/100340939/100341175/100341219/100341474/100341581/100341772/100341993/100342996/100343793/100343982/100344154…	136
ocu05012	Parkinson disease	127/1903	4.65672e-12	329/8978	1.68529e-13	6.93075e-12		127487406/100353292/127489209/108175623/100345365/100351820/100351492/100351840/100344371/100350580/100328815/100355675/100352392/100342451/100101556/100327269/100340993/100339066/100359147/100009505/100337966/100339628/100340483/100340645/100340939/100341175/100341219/100341474/100341581/100341772/100341993/100342996/100343793/100343982/100344154/100344965/100345307/100345745/100346169/100346213…	127
ocu05010	Alzheimer disease	154/1903	1.0112e-10	439/8978	4.11702e-12	1.505e-10		100353706/100354159/100342209/100009337/100009546/100354976/127487406/100353292/127489209/108175623/100345365/100351820/100351492/100351840/100344371/100350580/100328815/100339765/100343442/100358587/100355991/100351964/100101555/100352392/100348477/100327269/100009227/100341681/100008801/100339336/100350521/103348917/100009074/100356338/100342235/100009505/100337966/100339305/100339628/100340483…	154
ocu04510	Focal adhesion	83/1903	5.64308e-09	206/8978	2.55282e-10	8.39879e-09		100009272/100341378/100351066/100353706/100358587/100350323/103349397/100351964/100126563/100342999/100357900/100342327/100354169/100342405/100008806/100340952/100347895/100009554/100328754/100343352/100342500/100344425/100144342/100355759/100342711/100348594/100346103/100351181/103350383/100008956/100008898/100353546/100350557/100009141/100008856/100350500/108177458/103347398/100358679/100009388…	83
ocu04260	Cardiac muscle contraction	50/1903	1.09645e-08	103/8978	5.45616e-10	1.63189e-08		100340339/108176505/100302415/100008756/100349382/100009577/100350113/100354976/100101555/100351877/100009261/100327269/100009049/100337966/100339628/100340645/100341219/100341474/100342996/100343793/100343982/100345745/100346411/100346670/100347143/100347571/100347864/100348135/100349893/100350787/100354254/100356756/100356786/100358208/103349801/108177262/127484381/127485529/127486945/127492394…	50
ocu05014	Amyotrophic lateral sclerosis	141/1903	2.03492e-07	433/8978	1.10467e-08	3.02864e-07		100009272/100342525/100354306/100009511/127487406/100353292/127489209/108175623/100345365/100351820/100351492/100351840/100344371/100350580/100328815/100358587/100355675/103349397/100355991/100101588/100350144/100338505/100327269/100345319/100009258/100356338/100337966/100338267/100339628/100340483/100340645/100340939/100341037/100341175/100341219/100341474/100341581/100341772/100341993/100342996…	141
ocu05140	Leishmaniasis	41/1903	2.71213e-07	84/8978	1.59499e-08	4.03655e-07		100008801/100008677/100340952/100358696/100338345/100341787/100338854/100354743/100346103/100351865/100008898/100339049/100008856/100008803/100009097/100337909/100338413/100338913/100343144/100351163/100351416/100352672/100352927/127482571/100347345/100008802/100009359/100008833/100037719/100348648/100352415/100355948/100328929/100350656/100342249/100008645/100009371/100358982/100009497/100009088…	41
ocu05152	Tuberculosis	75/1903	6.95609e-07	198/8978	4.40552e-08	1.0353e-06		100353706/100340118/100351669/100347710/100350237/100358587/100355675/103349397/100355991/100352392/100342451/100101556/100348477/100008983/100342022/100338894/100339146/100008706/100340619/100101598/100354135/103350027/100358696/100341787/100338854/100354902/100338351/100354743/103345503/100351865/100351616/100339049/100350946/100009124/100009097/100337909/100338413/100338913/100341175/100343144…	75
ocu04145	Phagosome	65/1903	9.28428e-07	165/8978	6.30004e-08	1.38181e-06		100009272/100351669/100347710/100350237/100353383/100352404/100354566/100342793/100008983/100339146/100008706/100101598/100008830/100008801/100338905/100349997/100358696/100351865/100008956/100008898/100339049/100353546/100350946/100008803/100009097/100337909/100338413/100338913/100340483/100340939/100341037/100341581/100343144/100348306/100351163/100351416/100352672/100352927/100354611/100355380…	65
ocu05414	Dilated cardiomyopathy	45/1903	2.06836e-06	102/8978	1.4971e-07	3.07841e-06		100009272/100340339/100343958/100346742/100337882/100338084/100354976/100101555/100351877/100009278/100328890/100355731/100342711/100348594/100346103/100351181/103350383/100008956/100008898/100353546/100350557/100009141/100350500/100009097/100339625/100341037/100346005/100349893/127487418/100346773/100101566/100353304/100347740/100009208/100351233/100009214/100339605/100008645/100009371/100358982…	45
ocu05410	Hypertrophic cardiomyopathy	42/1903	3.28124e-06	94/8978	2.52343e-07	4.88358e-06		100009272/100340339/100354976/100101555/100351877/100009278/100328890/100355731/100342711/100348594/100346103/100351181/103350383/100008956/100008898/100353546/100350557/100009141/100350500/100339625/100341037/100346005/100349893/127487418/100346773/100101566/100353304/100347740/100356542/100352581/100009208/100351233/100009214/100339605/100008645/100009371/100358982/100009088/100347570/100125984…	42
ocu05416	Viral myocarditis	37/1903	3.731e-06	79/8978	3.0381e-07	5.55297e-06		100345909/100009272/100355991/100348477/100008998/100009377/100302411/100009278/100355731/100009236/100356927/100339049/100350500/100009097/100341037/100341175/100343144/100351163/100351416/100352672/100352927/100354611/100355084/100355380/100357329/100357840/127482571/100101566/100339873/100356520/100352415/100355948/100328929/100350656/100009208/100351233/100009214	37
ocu05145	Toxoplasmosis	52/1903	1.97278e-05	133/8978	1.69565e-06	2.93616e-05		100353706/100341714/100358587/103349397/100348477/100101579/100338894/100339066/100359147/100341787/100338854/100354902/100338351/100354743/100008898/100350500/108177458/103347398/100358679/100009388/100351387/100341175/100343144/100351163/100351416/100352672/100352927/100355084/100357329/100357840/127482571/100009589/100347345/100008833/100347954/100344144/100337757/100340526/100338362/100352415…	52
ocu04810	Regulation of actin cytoskeleton	79/1903	3.2012e-05	232/8978	3.04114e-06	4.76445e-05		100009272/100341378/100351066/100339213/100353706/100340118/100346759/100357607/100344359/100350323/100009198/100351964/100358949/100009197/108178303/100342327/103345545/100352485/100354169/100347936/100342405/100008806/100008846/100351711/100343050/100008681/100009417/100344867/100338069/100342711/100348594/100346103/100351181/103350383/100356927/100351865/100008956/100351616/100008898/100339049…	79
ocu04723	Retrograde endocannabinoid signaling	56/1903	3.2012e-05	149/8978	2.96176e-06	4.76445e-05		100343958/100346742/100337882/100101555/100339619/100339376/100356357/100339066/100359147/100346625/100008941/100342201/100352954/108178552/100009505/100337783/100341013/100341993/100345307/108175419/100347345/100342678/100349642/100355529/103346555/100351141/100347823/100356593/100348563/100349288/100352718/100347938/100352330/100349320/127486401/100339424/100350704/100354603/100345777/100339082…	56
ocu04066	HIF-1 signaling pathway	49/1903	5.23116e-05	127/8978	5.20625e-06	7.7857e-05		100353706/100009055/100348305/100008996/103349397/100342451/100101556/100348489/100009037/100340619/100008801/100008806/100338850/100340879/100008769/100354135/100009554/100343352/100009074/100340994/100008919/100341787/100338854/100144342/100347752/100009106/100009107/100337922/100348124/100351519/100358185/100009316/100347345/127486621/100008833/100009087/100357349/100356560/100345647/100009526…	49
ocu01200	Carbon metabolism	49/1903	8.31226e-05	129/8978	8.64871e-06	0.000123714		100350797/100352714/100343172/100009055/100340017/100341040/100008769/100355655/100357596/100328765/100009074/100340431/100348732/100008744/127485567/100357500/100340994/100340796/100338100/100342113/100354229/100346169/100348124/100352290/100353481/127488121/100341412/100354776/100355457/100342604/100357349/100356560/100345647/100009526/100352195/100357743/100343505/127488192/100008676/100008619…	49
ocu04380	Osteoclast differentiation	45/1903	0.000126434	117/8978	1.37271e-05	0.000188176		100353706/100354716/100354225/100340992/100358696/100338345/100338208/100342500/100338097/100341787/100338854/100352905/100008856/100339465/100008803/100337909/100338413/100338913/100345649/100347041/100359306/103346239/100009316/100347345/100008802/100009359/100353824/100345181/100009487/100339873/100351485/103346588/103351779/100345556/100342249/100341923/100008645/100009371/100345812/100009088…	45
ocu05150	Staphylococcus aureus infection	36/1903	0.000134571	87/8978	1.52193e-05	0.000200286		100342793/100351157/100352978/103352242/100358696/100356927/100351865/100339049/100009029/100341376/100344942/100354174/100344434/100340860/100008885/100009097/100337909/100338413/100338913/100340175/100343144/100344686/100351163/100351416/100352672/100352927/100359306/127482571/127482788/100009115/100354046/100352415/100355948/100328929/100350656/100357016	36
ocu05412	Arrhythmogenic right ventricular cardiomyopathy	33/1903	0.000230028	79/8978	2.70557e-05	0.000342358		100009272/100350274/100354976/100101555/100351877/100344571/100343241/100009278/100328890/100355731/100348149/100008935/100342711/100348594/100346103/100351181/103350383/100008956/100008898/100353546/100350557/100009141/100350500/100339625/100341037/100346005/127487418/100009208/100351233/100009214/100339605/100339216/100340471	33
ocu05166	Human T-cell leukemia virus 1 infection	79/1903	0.000323323	247/8978	4.01315e-05	0.000481213		100343958/100346742/100337882/100353706/100348299/100342147/100357348/100355675/100349688/100357416/100354874/100345665/100358835/100348489/100351874/100358955/100345729/100343130/100357483/100340619/100338531/100346379/100009491/100340952/100354135/100338345/100338208/100009017/100352905/100344048/100356927/100339049/127486194/100008856/100340625/100343144/100349768/100351163/100351416/100352672…	79
ocu04022	cGMP-PKG signaling pathway	62/1903	0.000323323	183/8978	4.09543e-05	0.000481213		100343958/100346742/100337882/100009237/100008731/100009398/100338084/100353706/100302415/100008756/100349382/100009577/100350113/100354976/100358587/100101555/100352392/100343130/100357483/100126073/100339066/100359147/100350099/100349851/100008940/100009505/100008745/100009034/100339305/100349768/100353865/100356734/100357489/127486002/100009316/100347345/100101566/100343384/127493971/100353972…	62
ocu04151	PI3K-Akt signaling pathway	106/1903	0.000332385	353/8978	4.36058e-05	0.0004947		100353706/100348305/100358587/103349397/100356949/100347269/100009040/100348489/100009037/100357900/100343130/100357483/100340992/100341887/100344921/100358959/100008806/100338850/100009554/100351711/100343050/100008681/100009417/100343352/108175474/100343573/100346625/100008941/100342201/100352954/108178552/100342500/100008660/100344425/100338097/100144342/103345135/100337721/100347752/100343726…	106
ocu04512	ECM-receptor interaction	36/1903	0.000357536	91/8978	4.85228e-05	0.000532133		103347121/100357900/100009278/100358450/127488341/100353907/100340334/100344425/100342711/100348594/100346103/100351181/103350383/100008956/100008898/100353546/100350557/100009141/100350500/108177458/103347398/100358679/100009388/100351387/100339625/100346005/100357231/127487418/127488898/100101608/100349415/100343910/100357137/100301551/100356305/100009165	36
ocu05323	Rheumatoid arthritis	38/1903	0.000363433	98/8978	5.09672e-05	0.00054091		100351669/100347710/100350237/100353383/100352404/100354566/100008998/100009377/100008830/103345545/100343352/100338345/100009017/100356927/100339049/100008856/100009097/100343144/100351163/100351416/100352672/100352927/127482571/100144336/100009110/100352415/100355948/100328929/100350656/100008645/100009371/100358982/100009497/100009088/100341009/100126074/100101577/100008899	38
ocu05132	Salmonella infection	86/1903	0.000494083	278/8978	7.21953e-05	0.00073536		100346815/100009272/100342525/100339213/100340348/100353706/100355060/100346759/100357607/100344359/100355675/103349397/100101588/100348477/100008983/100352485/100345562/100345319/100338905/100349997/100341461/100352081/100354138/100355995/100328754/100338345/100009074/100338635/100354743/100008856/100340483/100340939/100341037/100341175/100341581/100348306/100352110/100355084/100357329/100357840…	86
ocu05135	Yersinia infection	50/1903	0.000494083	142/8978	7.37595e-05	0.00073536		100009272/100339213/100353706/100340118/100346759/100357607/100344359/100350323/100101588/100342327/100342405/100352081/100338345/100350748/100354743/100346103/100008898/100008856/100339465/100344018/100009097/100338413/100341037/100347455/100352110/100009316/100344852/100347345/100353824/100345181/103350059/127485993/100350018/100342358/100353305/100339873/100356520/100008953/103351864/100009220…	50
ocu04360	Axon guidance	61/1903	0.000742209	185/8978	0.000114159	0.00110465		100345909/100340118/100342451/100101556/108178303/103345545/100344921/100358959/100338775/100357479/100345523/100359223/100347330/100338780/100339066/100359147/100355759/100008898/100344018/100347455/100342035/100347345/100343384/100346504/100353824/100347003/103352487/100340273/100356958/100347273/100347954/100345181/100358783/100328763/103346036/100346617/100009487/100009538/100345046/100339517…	61
ocu04670	Leukocyte transendothelial migration	43/1903	0.000744254	119/8978	0.00011784	0.0011077		100009272/100341378/100351066/100350323/100354076/100340963/100338591/100343241/103345545/100008801/100347630/100008846/100339066/100359147/100346103/100356927/100351865/100008898/100339049/100346498/100008803/100341037/100347455/127486002/100008993/100338273/100353304/100343384/100008802/100009359/100357605/100345181/100037719/100342358/100339517/100353305/100339873/100356520/100348394/100009220…	43
ocu04611	Platelet activation	46/1903	0.000758134	130/8978	0.000123468	0.00112836		100009272/100343958/100346742/100337882/100353706/100340118/100354225/100351711/103350027/103346983/100339066/100359147/127488341/100350099/100349851/100008898/100009505/100339465/100338413/100341037/127486002/100340056/100347345/127493971/100353972/100349347/100350587/100345006/100345181/100344144/100337757/100340526/100348672/100350395/100350558/100009538/100008694/100355165/100009407/100009220…	46
ocu04662	B cell receptor signaling pathway	29/1903	0.000790383	71/8978	0.000132295	0.00117635		100353706/100354716/100354225/100351207/100344783/108178217/100341193/100338345/100342500/103352489/100008856/100009097/100345649/100347041/100359306/103346239/100340056/100340322/100009316/100347345/100353824/100359054/100345181/100009487/100037719/100348648/100339873/100356520/100345556	29
ocu04514	Cell adhesion molecules	52/1903	0.000883758	153/8978	0.000151922	0.00131533		100351207/100008998/100009377/100354076/100344571/100340963/100338591/100342120/100347630/100356584/100346103/100351181/103350383/100356927/100351865/100008956/100008898/100339049/100350557/100009141/100346498/100339625/100343144/100351163/100351416/100352672/100352927/100354611/100355380/100356848/127482571/100342035/100348118/100346504/100351027/100351355/100349063/100338124/100357605/100358807…	52
ocu04928	Parathyroid hormone synthesis, secretion and action	40/1903	0.000974838	110/8978	0.000171989	0.00145088		100343958/100346742/100337882/100342409/100337815/100341204/103349397/100340503/100351964/100348489/100343130/100357483/100008806/100009491/100343050/100338345/100339066/100359147/100008809/100009505/100356074/100355721/100357489/100009566/100352000/103352307/100009316/100347345/100008685/100009598/100101606/100348672/100350395/100339661/100037719/100008785/100008943/100356489/100341009/100008907	40
ocu04964	Proximal tubule bicarbonate reclamation	13/1903	0.0012245	23/8978	0.000221577	0.00182247		100302415/100008756/100349382/100009577/100350113/100009156/100009226/100343465/100352572/127487408/100341412/100348722/100339311	13
ocu05205	Proteoglycans in cancer	68/1903	0.00142674	217/8978	0.000264626	0.00212346		100009272/100353706/100356919/100353296/100340118/100351964/100342451/100101556/100126563/100342999/100342595/100348489/100008830/100351285/100008806/100340952/100009554/100008846/100328754/100350521/103348917/100346125/127488811/100351858/100342500/100008809/100340933/100101601/100359235/100340334/100144342/100008942/100344867/100008956/100008898/100353546/100009505/100341037/100347455/100008665…	68
ocu04666	Fc gamma R-mediated phagocytosis	37/1903	0.00165329	102/8978	0.000314125	0.00246065		100339213/100353706/100343468/100346759/100357607/100344359/100353577/100355195/108178303/100342327/100342405/100358696/100343961/103352489/100344018/100008803/100009097/100337909/100338413/100338913/100359306/127486002/100340056/100009316/100347345/100345181/103350059/127485993/100339661/100037719/100008966/100358807/100339873/100356520/100357790/100345556/100354471	37
ocu04350	TGF-beta signaling pathway	39/1903	0.00193009	110/8978	0.000375448	0.00287262		100356824/100009569/100350518/100351874/100340619/100345752/100344311/100354135/100350931/100008664/100342066/103345422/100355156/100355707/100350879/100341426/100353075/100342431/100347345/100346504/100348332/100009300/103352470/100341130/100009220/100345380/127488800/100351337/100342616/100338818/100338277/100353573/100358121/100008645/100009371/100358982/100345812/100344573/100009088	39
ocu04392	Hippo signaling pathway - multiple species	15/1903	0.00221049	30/8978	0.000439992	0.00328994		100359157/100341681/100357034/100358710/100352529/100341222/100356876/100358827/127486565/100344930/100357564/100359304/100341523/100356027/100341323	15
ocu04062	Chemokine signaling pathway	59/1903	0.00265956	187/8978	0.000541411	0.00395832		100343958/100346742/100337882/100353706/100341204/100358587/100350323/100351964/100348362/103348469/100343840/100328940/100358097/100101579/100339537/100342327/100346186/103345545/127490643/100348428/100328622/100328627/100357300/100352081/100342557/100343573/100339066/100359147/100346625/100008941/100342201/100352954/108178552/100342500/103351438/100343961/127486194/100008803/100337783/100347455…	59
ocu04261	Adrenergic signaling in cardiomyocytes	50/1903	0.00428558	156/8978	0.000941923	0.00637837		100340339/100343958/100346742/100337882/100009237/100008731/100009398/100338084/100353706/100302415/100008756/100349382/100009577/100350113/100354976/103349397/100101555/100351877/100352392/100342451/100101556/100343130/100357483/100344771/100339066/100359147/100009443/100349893/100353865/100356734/100357489/100347345/100101566/100353304/100347740/100344144/100337757/100340526/100348672/100350395…	50
ocu04640	Hematopoietic cell lineage	35/1903	0.00428558	100/8978	0.000957718	0.00637837		100008983/100009419/100301530/100351207/100352641/108178217/100340992/100346676/100358696/108175474/127488341/103350689/100352905/100344048/103345135/100337721/100347752/100343726/100342711/100348594/100346103/100351865/100009097/100343144/100351163/100351416/100352672/100352927/127482571/100352415/100355948/100328929/100350656/100342561/100009088	35
ocu05211	Renal cell carcinoma	28/1903	0.00428558	75/8978	0.000969358	0.00637837		100353706/100008996/100357873/100358587/100351964/100348489/100340619/100342327/100340879/100354135/100357596/100346125/100342500/100008856/100337922/100353481/100009316/100347345/100347273/100358772/100345181/100339517/100339873/103352470/100008645/100009371/100358982/100008899	28
ocu04330	Notch signaling pathway	24/1903	0.00428558	61/8978	0.000931313	0.00637837		100342209/100342336/100353839/100350485/100340619/100340618/127491468/100339336/100354135/100355156/100337990/100356696/100339551/100343400/103346650/100356351/100357457/127482739/100343819/100352722/127488671/100338948/100348281/100342593	24
ocu00020	Citrate cycle (TCA cycle)	17/1903	0.00428558	38/8978	0.000950187	0.00637837		100352714/100340017/100357596/100340796/100338100/100342113/100346169/100353481/100341412/100354776/100357349/100356560/100328584/100328585/108175360/100351138/100341093	17
ocu04922	Glucagon signaling pathway	36/1903	0.0044531	104/8978	0.00102739	0.0066277		100353706/100352392/100342451/100101556/100353138/100343130/100357483/100340619/100354135/100358471/100341777/100008660/100009505/100009106/100009107/100351519/100358185/100357349/100356560/100345647/100009526/100352195/100357743/100190898/100009137/100009297/100008676/100348672/100350395/100349219/100009487/100356542/100352581/100347428/100008972/100349271	36
ocu05230	Central carbon metabolism in cancer	27/1903	0.00466071	72/8978	0.00109638	0.00693669		100353706/100008806/100009554/100009417/108175474/100328765/100343465/100340994/100340796/100009106/100009107/100351519/100352572/100358185/127487408/100009316/100347345/100357349/100356560/100345647/100009526/100352195/100357743/100345181/100008676/100339128/100342540	27
ocu05220	Chronic myeloid leukemia	27/1903	0.00581585	73/8978	0.00139442	0.00865593		100345909/100353706/100358587/100355675/100351964/100342595/100009040/100348489/100009037/100342327/100340618/100346379/100353284/100353742/100342500/100355156/100340625/100009316/100347345/100343228/100345181/100339517/100358993/100008645/100009371/100358982/100345812	27
ocu05163	Human cytomegalovirus infection	69/1903	0.00630072	234/8978	0.00153918	0.00937757		100343958/100346742/100337882/100342409/100353706/100337815/100340118/100355675/100350323/100355991/100352392/100348477/100328940/100101579/100009040/100348489/100349407/100343130/100357483/100342327/100346186/103345545/100328627/100346379/100008806/100338850/100340952/100339066/100359147/100346625/100008941/100342201/100352954/108178552/100342500/100354902/100338351/100352905/100347752/100008956…	69
ocu04919	Thyroid hormone signaling pathway	39/1903	0.00680072	118/8978	0.00175361	0.0101217		100009272/100353706/100302415/100008756/100349382/100009577/100350113/100354976/100358587/100009569/100340619/100354135/100358471/100355156/100008956/100341037/100343400/100009316/100347345/100350850/100342832/100101566/100356750/100343819/100352722/100347954/100345647/100009526/100345181/100348672/100350395/103347252/100037719/100339855/100345380/100101617/100348990/100303772/100303763	39
ocu04115	p53 signaling pathway	29/1903	0.00680072	81/8978	0.00169944	0.0101217		100343674/100355675/103349397/100355991/100348477/100338989/100357416/100343949/100352863/100009040/100348489/100345729/100351308/100353284/100353742/127485419/100340625/100341175/100345096/100355084/100357329/100357840/100351683/100342142/100346325/100009588/100353543/100355829/100354683	29
ocu04216	Ferroptosis	18/1903	0.00680072	43/8978	0.00173574	0.0101217		100344347/100328719/100340335/100008801/100009597/100009254/100345744/100008919/100353293/127486972/100342288/127491124/100355148/100351178/100354683/100342561/100009473/100008752	18
ocu04270	Vascular smooth muscle contraction	46/1903	0.0071078	145/8978	0.00186495	0.0105788		100009271/100350318/100343958/100346742/100337882/100009237/100008731/100009398/100337815/100340118/100345154/100351964/100101555/100009077/100352392/100126073/100350099/100349851/100008940/100009505/100008745/100009034/100349824/127487399/100009316/100347345/100009002/100009145/100343384/127493971/100353972/100009087/103352511/100343663/100348672/100350395/100350558/100356902/103348434/100037719…	46
ocu04814	Motor proteins	59/1903	0.00723902	196/8978	0.00193213	0.0107741		100009506/100009271/100009272/100340339/100350318/100342525/100342414/100126568/100345952/100343917/100345319/100338905/100349997/100341461/100346135/100345219/103347325/100355710/100345407/100339334/100356736/100343439/100346660/100358865/100340483/100340939/100341037/100341581/100347489/100349824/100349893/127487399/100009002/100009145/100101566/100356178/100303760/100353304/100347740/100343384…	59
ocu05206	MicroRNAs in cancer	54/1903	0.00783249	177/8978	0.00212596	0.0116574		100345909/103349397/100347269/100009040/100348489/100009037/100340619/100342327/100341887/100357967/100346379/100344921/100358959/100008806/100354135/100009554/100345157/100008846/100343465/100342500/100355156/100358981/100008919/100340625/100343400/100352572/100357231/100358924/127487408/127488898/100009316/100347345/100338535/100359222/100351683/100008993/100343819/100352722/100358772/100345181…	54
ocu04371	Apelin signaling pathway	46/1903	0.00788301	146/8978	0.00217534	0.0117325		100009271/100008902/100343958/100346742/100337882/100353706/100352392/100008638/100009491/100339066/100359147/100346625/100008941/100342201/100352954/108178552/100358981/100009505/100339551/103345364/100337783/127491124/100009316/100347345/100358182/100353304/100347740/127493971/100353972/100008833/100352722/100339141/100344144/100337757/100340526/100348672/100350395/100349219/100356542/100352581…	46
ocu04970	Salivary secretion	30/1903	0.00810104	86/8978	0.00227215	0.012057		100343958/100346742/100337882/100009237/100008731/100009398/100338084/100302415/100008756/100349382/100009577/100350113/100352392/100009450/100350099/100349851/100009505/100008745/100351872/100340903/100341160/100353865/100356734/108175363/100348672/100350395/100037719/100008694/100009545/100008775	30
ocu05165	Human papillomavirus infection	91/1903	0.0109126	331/8978	0.00330756	0.0162416		100353706/100351669/100347710/100350237/100353383/100352404/100354566/100339765/100358587/100355675/100348477/100009040/100348489/100009037/100357900/100343130/100357483/100340619/100009227/100345988/100349185/100339336/100008806/100338850/100354135/100358471/100350521/103348917/100342500/100355156/103346208/100337990/100344425/100338097/100354455/100342711/100348594/100346103/100351181/103350383…	91
ocu04520	Adherens junction	33/1903	0.0109126	99/8978	0.00327618	0.0162416		100009272/100341378/100351066/100340619/100343241/100008806/100354135/100009554/100358428/100353037/100144342/100344867/100341037/100347345/100353304/100343384/100348648/100354193/100339873/100356520/100353636/100358923/100009220/100353573/100358121/100353957/100341443/100339216/100340471/100345812/100357160/100354471/100347053	33
ocu04064	NF-kappa B signaling pathway	33/1903	0.0109126	99/8978	0.00327618	0.0162416		103349397/100348952/100354716/100354225/100348362/100008983/103345545/100340021/100355079/100350081/100353284/100353742/100352905/100354743/100009124/100009097/100358924/100144336/100009589/100340056/100340322/100037719/100345556/100342249/100345225/100009497/100009088/100346106/100341009/100101577/100343190/100008901/100328700	33
ocu05100	Bacterial invasion of epithelial cells	29/1903	0.0109126	84/8978	0.0031763	0.0162416		100009272/100339213/100355060/100346759/100357607/100344359/100350323/100126563/100342999/100342595/100341696/100342327/100343241/100342405/100352081/100346125/100340933/100355759/100008898/100341037/100347455/100345181/100353305/100339873/100008953/103351864/100339040/100357160/100347053	29
ocu05144	Malaria	18/1903	0.0109126	45/8978	0.00317195	0.0162416		100359218/103350689/100009249/100009084/100356927/100339049/100009547/100357605/100355526/100008645/100009371/100358982/100343910/100357137/100009497/100009088/100346109/100008901	18
ocu05146	Amoebiasis	34/1903	0.0109669	103/8978	0.00342324	0.0163224		100341378/100351066/100009197/100008983/100009419/100301530/100357900/100352905/100344048/100351865/100339049/100350500/108177458/103347398/100358679/100009388/100351387/100009097/100347455/100348306/100350232/100008833/100345181/100348672/100350395/100037719/100008682/100350293/100008645/100009371/100358982/100009497/100009088/100357160	34
ocu05310	Asthma	14/1903	0.0109669	32/8978	0.00340078	0.0163224		103350027/100009097/100343144/100351163/100351416/100352672/100352927/127482571/100351385/100352415/100355948/100328929/100350656/100009088	14
ocu04218	Cellular senescence	50/1903	0.012679	166/8978	0.00404609	0.0188705		100353706/100352392/100338989/100357416/100352863/100009040/100348489/100351874/100345729/100346379/100344311/100338850/100340737/100358944/100358471/100343573/100353284/100353742/100346212/127485419/100009505/103351685/100340625/100349768/100354611/100355380/100009316/100347345/100009438/100341372/100358182/100346753/100353824/100347003/100345181/100009487/100328725/100339977/127489362/100009588…	50
ocu04650	Natural killer cell mediated cytotoxicity	34/1903	0.012679	104/8978	0.00407237	0.0188705		100355991/100351964/100342715/100350758/103350027/100342500/100348190/100356584/100338097/100341787/100338854/100356927/100339049/100339465/100009097/100337909/100338913/103347295/100009316/100347345/100353824/100345181/100009487/100037719/100342358/100339517/100348648/100339873/100356520/103350022/100350793/100345556/100009088/103345430	34
ocu04390	Hippo signaling pathway	47/1903	0.0139129	155/8978	0.00453163	0.020707		100009272/100359157/100358386/100339765/103346801/100009569/100350518/100008638/100341681/100343241/100345988/100349185/100354463/100339336/100340737/100352529/100350521/103348917/100350879/100339049/100341222/100356876/100341037/100356844/100358827/127482783/100009300/100009538/100344930/100009588/100338818/100357564/100339216/100340471/100359304/100341523/100008645/100009371/100358982/100345812…	47
ocu05213	Endometrial cancer	21/1903	0.0145393	57/8978	0.00480142	0.0216393		100353706/100339765/100358587/100355675/100351964/100348489/100343241/100008806/100340952/100009554/100343573/100353284/100353742/100342500/100355759/100009316/100347345/100347954/100345181/100339216/100340471	21
ocu05170	Human immunodeficiency virus 1 infection	62/1903	0.0189433	218/8978	0.00634149	0.0281939		100353706/100355117/100358587/100355675/103349397/100355991/100352392/100348477/100338989/100357416/100101579/100352863/108178303/100349407/100345729/100342327/100345752/100340879/100340737/100338345/100339066/100359147/100346625/100008941/100342201/100352954/108178552/100354743/100009505/100008856/100344018/100337783/100337922/100340649/100341175/100347455/100354611/100355084/100355380/100357329…	62
ocu00010	Glycolysis / Gluconeogenesis	25/1903	0.0195764	73/8978	0.00664198	0.0291361		100343172/100009055/100009096/100008769/100338306/100009074/100008744/100340994/100009106/100009107/100343223/100348124/100351519/100358185/100357349/100356560/100345647/100009526/100352195/100357743/100343505/100009155/100351563/100008676/100348316	25
ocu04672	Intestinal immune network for IgA production	20/1903	0.0200952	55/8978	0.00690893	0.0299084		100008998/100009377/103345545/100009017/100346103/100350557/100009097/100343144/100351163/100351416/100352672/100352927/127482571/100352415/100355948/100328929/100350656/100008645/100126074/100101577	20
ocu04978	Mineral absorption	21/1903	0.0217074	59/8978	0.00756141	0.0323078		100302415/100008756/100349382/100009577/100350113/100009597/100009254/100008919/100009523/100343299/100343557/100343802/100346448/100353865/100356734/100009317/100009262/100339605/100328630/100345554/100008907	21
ocu01522	Endocrine resistance	30/1903	0.023444	93/8978	0.00827239	0.0348925		100343958/100346742/100337882/100353706/100358587/100355675/103349397/100351964/100348489/100009037/100358955/100346379/100008806/100009554/100338345/100342500/100008809/100144342/100339551/100008856/100340625/100343400/100347455/100009316/100347345/100008993/100356750/100343819/100352722/100345181	30
ocu04110	Cell cycle	49/1903	0.0269821	169/8978	0.0096951	0.0401584		100345909/100348299/100342147/100357348/100352234/100349688/100338989/100357416/100354874/100345665/100358835/100352863/100009040/100348489/100009037/100351874/100358955/100349461/100345729/100340619/100345752/100346379/100344311/100354135/100352668/100353284/100353742/100355156/100340625/100348391/100357094/100354882/100349582/100348944/100009300/100346997/100009533/100339977/103352470/100352685…	49
ocu04921	Oxytocin signaling pathway	47/1903	0.0269821	161/8978	0.00976496	0.0401584		100009272/100343958/100346742/100337882/100101555/100351877/100352392/100342451/100101556/100348489/100008806/100340952/100338345/100339066/100359147/100350099/100349851/100009505/100008856/100008987/100341037/100349824/127487399/100009316/100347345/100338535/100343384/127493971/100353972/100353824/100347003/100009087/100343663/100344144/100337757/100340526/100348672/100350395/100350558/100356902…	47
ocu05133	Pertussis	26/1903	0.0276526	79/8978	0.0101327	0.0411563		100342793/100352392/100101588/100008983/108178303/100338345/100339066/100359147/100354743/100350620/100351865/100008898/100339049/100008856/100352110/100352436/127482788/100009589/100347345/100345423/100008833/100358407/100345225/100009497/100009088/100343190	26
ocu04210	Apoptosis	43/1903	0.029367	146/8978	0.0111118	0.0437078		100009272/100347778/100353706/100358587/100355675/103349397/100348952/100355991/103346801/100348477/100101597/100101598/100008830/100101623/100359244/100344529/100350715/100338345/100353284/100353742/103345135/100009505/100008856/100340483/100340939/100341037/100341175/100349996/100355084/100357329/100357840/100009316/100347345/100359222/100347954/100345181/100352852/100009088/100346106/100357567…	43
ocu04722	Neurotrophin signaling pathway	37/1903	0.029367	122/8978	0.0108946	0.0437078		100345909/100353706/100345676/100358587/100355675/103349397/100356949/100351964/100352392/100342451/100101556/100342327/100343573/100346125/100342500/100354743/103345503/100008856/100354080/100009316/100347345/100338535/100009438/127485744/100359054/100345073/100352548/100347954/100345181/100008966/100339517/100339873/100358702/100338013/100340764/100343190/100353479	37
ocu04540	Gap junction	29/1903	0.029367	91/8978	0.0111594	0.0437078		100343958/100346742/100337882/100338084/100352863/100008806/100008935/100339066/100359147/100342500/100350099/100349851/100009505/100340483/100340939/100341581/100009316/100347345/100338535/100358772/100348672/100350395/100037719/100008694/100357567/100354352/100355248/127488679/100350252	29
ocu04971	Gastric acid secretion	25/1903	0.0302352	76/8978	0.0116262	0.0450001		100009272/100343958/100346742/100337882/100302415/100008756/100349382/100009577/100350113/100009156/100352392/100342451/100101556/100008846/100339066/100359147/100009505/100008987/100009443/100341037/127493971/100353972/100348672/100350395/100037719	25
ocu04310	Wnt signaling pathway	49/1903	0.0313731	171/8978	0.0122056	0.0466936		100352764/100339765/100356824/100342451/100101556/100337886/100340619/100009227/100341681/100340618/100345752/100347243/100339336/100354135/100340737/100338208/100008629/100350521/103348917/100351609/100008856/100356429/100342221/100356844/127482783/100009566/100352000/100349525/100353824/100347003/100348672/100350395/100009487/100340572/100037719/100339873/100356520/103352470/100351121/100338148…	49
ocu05332	Graft-versus-host disease	15/1903	0.0335557	40/8978	0.0133584	0.049942		100008998/100009377/100343144/100351163/100351416/100352672/100352927/100354611/100355380/127482571/100352415/100355948/100328929/100350656/100009088	15
ocu04710	Circadian rhythm	13/1903	0.0335557	33/8978	0.0132178	0.049942		103348965/100344454/100341681/100345752/100340737/127486976/100345297/100357678/100349421/100349720/100356542/100352581/103352470	13
ocu04020	Calcium signaling pathway	70/1903	0.034276	259/8978	0.0138002	0.0510142		100343958/100346742/100337882/100009237/100008731/100009398/100338084/108176505/100354976/100345154/100009198/100101555/100352392/100342451/100101556/100009261/100357945/100126073/100008806/100009554/100351711/100343050/100008681/100009417/100343352/100355129/100356338/127489904/100009049/100348650/100009356/100009505/100009097/100349768/100353865/100356734/100341372/127493971/100353972/100353824…	70
ocu04010	MAPK signaling pathway	79/1903	0.0365843	298/8978	0.0151497	0.0544497		100353706/100348305/100341204/100356949/100351964/100101555/100351877/100008983/100342327/100340992/100340993/100352279/100343162/100355017/100344921/100358959/100008806/100340952/100009554/100343050/100008681/100009417/100328754/100343352/108175474/100338345/100353284/100353742/100355129/100342500/100144342/100352905/100341281/100354743/100008856/100009316/100344852/100356691/100350814/100356354…	79
ocu04340	Hedgehog signaling pathway	19/1903	0.0365843	55/8978	0.0151646	0.0544497		100341204/103349397/100009227/100341681/100345752/103345885/100340737/100358990/100349149/100008942/100346275/100339684/100347398/100345046/100352661/100353573/100358121/100343929/100345361	19
ocu00640	Propanoate metabolism	14/1903	0.0365843	37/8978	0.0152261	0.0544497		100343172/100352048/100339488/100341040/100355022/100009106/100009107/100351519/100352290/100358185/127488121/100338228/100351138/100341093	14
ocu01230	Biosynthesis of amino acids	24/1903	0.0377598	74/8978	0.0158861	0.0561992		100352714/100352530/100009055/100008769/100009074/100340431/100348732/127485567/100340796/100338100/100342113/100337875/100348124/100339456/100344428/100345647/100009526/100352195/100357743/100343505/100008676/100342075/100009293/100348316	24
ocu04610	Complement and coagulation cascades	25/1903	0.0384996	78/8978	0.0163715	0.0573002		100009198/100342793/100351157/100352978/100358949/100009197/100008713/108178217/103352261/100351711/100009127/103350017/100351865/100351616/100339049/100340175/100352436/127482788/100101584/100009314/100009588/100358407/100009401/100338524/100009165	25
ocu04713	Circadian entrainment	29/1903	0.0412265	94/8978	0.0177176	0.0613588		100008902/100343958/100346742/100337882/100101555/100352392/100342451/100101556/100338345/100339066/100359147/100346625/100008941/100342201/100352954/108178552/100356338/100350099/100349851/100009505/100337783/100347345/100356569/100349720/100348672/100350395/100037719/100008694/100009545	29
ocu05203	Viral carcinogenesis	59/1903	0.0416597	216/8978	0.0180922	0.0620036		100341378/100351066/100350237/100358587/100355675/100348477/100101579/100354874/100352863/100009040/100348489/100009037/100351874/100345729/100343130/100357483/100340619/100348597/100354135/100342500/100357517/100343990/100338045/100338745/100355156/100352253/100358981/100355860/127486194/100008856/100340625/100343938/100344914/100347239/100351672/100354611/100355380/100357489/100340056/100347345…	59
ocu05161	Hepatitis B	49/1903	0.0429329	175/8978	0.0188393	0.0638984		100353706/100358587/100355675/103349397/100355991/103346801/100351964/100348477/100348489/100343130/100357483/100340619/100348597/100346379/100340952/100354135/100338345/100342500/100340334/100354455/100354743/127486194/100008856/100341175/100355084/100357329/100357489/100357840/100009316/100344852/100347345/100008993/100353824/100347003/100345181/100037719/100342358/100342249/100008645/100009371…	49
ocu04068	FoxO signaling pathway	38/1903	0.0467676	131/8978	0.0207336	0.0696057		100346056/100353706/100348536/100351964/100338989/100357416/100348489/100009037/100351874/100349461/100340619/100341681/100008806/100354135/100358471/100343573/100353284/100353742/100342500/100356113/127485959/100144342/100343726/103345364/100339305/100009316/100347345/100347954/100345181/100356542/100352581/100339977/100352204/100349271/100008645/100009371/100358982/100345812	38
ocu05330	Allograft rejection	16/1903	0.0516115	46/8978	0.0231146	0.0768152		100008998/100009377/100009097/100343144/100351163/100351416/100352672/100352927/100354611/100355380/127482571/100352415/100355948/100328929/100350656/100009088	16
ocu04940	Type I diabetes mellitus	17/1903	0.0543047	50/8978	0.0245664	0.0808235		100008998/100009377/108175425/100357484/100343144/100351163/100351416/100352672/100352927/100354611/100355380/127482571/100352415/100355948/100328929/100350656/100009088	17
ocu00620	Pyruvate metabolism	18/1903	0.0564986	54/8978	0.0258145	0.0840887		100350797/100343172/100338844/103347681/100357596/100009106/100009107/100343223/100351519/100353481/100358185/100341412/100354776/100355457/100342604/100357349/100356560/100008676	18
ocu04114	Oocyte meiosis	37/1903	0.0572008	129/8978	0.0263941	0.0851339		100343958/100346742/100337882/100348299/100342147/100357348/100345632/100352234/100352392/100342451/100101556/100338989/100357416/100354874/100345665/100358835/100352863/100358916/100345752/100340737/100144342/100009505/100357094/100354882/100009316/100347345/100009300/100346997/100009533/100009487/103352470/100358702/100352685/100349099/100328734/100008930/100342694	37
ocu05222	Small cell lung cancer	31/1903	0.0581166	105/8978	0.0270795	0.0864968		100353706/100355675/103349397/100009040/100348489/100009037/100351874/100349119/100357900/100346379/100353284/100353742/100348594/100008956/100008898/100350500/108177458/103347398/100358679/100009388/100351387/100341175/100347455/100355084/100357329/100357840/100008833/100345181/100358445/100343190/100328700	31
ocu00310	Lysine degradation	21/1903	0.0606409	66/8978	0.0285301	0.0902539		100350797/100354541/100340017/100341040/100348361/100345157/100355022/100353733/100353483/100357052/100347868/100340037/100343228/100352710/108176203/103352508/100354345/100354139/100347618/100355437/100344249	21
ocu00030	Pentose phosphate pathway	1903-11-01	0.0618165	29/8978	0.0293629	0.0920036		100009055/100345419/100328765/100008744/100357500/100354229/100345647/100009526/100009155/100351563/100008619	11
ocu04024	cAMP signaling pathway	60/1903	0.0630679	226/8978	0.0302928	0.093866		100354688/100008902/100343958/100346742/100337882/100338084/100353706/100302415/100008756/100349382/100009577/100350113/100354976/100358587/100356949/100351964/100101555/100352392/100342451/100101556/100343130/100357483/100340619/100126073/100354135/100351711/100338345/100353026/100346845/100341777/100358990/100339066/100359147/100356338/127489904/100345808/108176286/100008856/100353865/100356734…	60
ocu05210	Colorectal cancer	32/1903	0.0630679	110/8978	0.0306249	0.093866		100353706/100353097/100339765/100358587/100355675/103349397/103346801/100351964/100348489/100008806/100338345/100353284/100353742/100342500/100008856/100341175/100355084/100357329/100357840/100009316/100347345/100351645/100345181/100339873/100356520/100346449/100339216/100340471/100008645/100009371/100358982/100345812	32
ocu05215	Prostate cancer	28/1903	0.0630679	94/8978	0.0308132	0.093866		100353706/100358587/103349397/100351964/100348489/100009037/100343130/100357483/100340619/100346379/100008806/100354135/100009554/100009417/100358471/100342500/100144342/100344048/100009316/100347345/100008993/100358772/100347954/100345181/100343882/100339216/100340471/100353450	28
ocu05167	Kaposi sarcoma-associated herpesvirus infection	54/1903	0.0688205	202/8978	0.0339351	0.102428		100353706/100355675/100355991/100352392/100348477/100328940/100101579/100009040/100348489/100340619/100346379/100354135/100338345/100346625/100008941/100342201/100352954/108178552/100343961/100338097/100341787/100354455/100009505/100008856/100337783/100341175/100346213/100354611/100355084/100355380/100357329/100357840/100340056/127491124/100009316/100344852/100347345/100009438/100353824/100347003…	54
ocu04620	Toll-like receptor signaling pathway	27/1903	0.0693669	91/8978	0.0351459	0.103241		100353706/100348477/100008983/100009377/100338345/100338097/100354455/100354743/100350244/100008856/100009124/100009589/100009316/100344852/100347345/100345181/100339873/100342249/100345225/100351814/100009497/100350028/100353753/100009088/100358495/100343190/100346109	27
ocu01232	Nucleotide metabolism	26/1903	0.0693669	87/8978	0.0350954	0.103241		100346236/100355968/103352472/100337703/100354649/100352295/100343821/100340249/100342139/100357182/100341585/100342587/100126071/127488159/100533971/100533972/100341410/100354529/100346932/100037712/100341892/100356979/100349854/100346325/100359019/100357952	26
ocu05212	Pancreatic cancer	25/1903	0.0693669	83/8978	0.0349706	0.103241		100353706/100358587/100355675/100351964/100355331/100009040/100348489/100346379/100008806/100009554/100353284/100353742/100340625/100009316/100347345/100345181/100339661/100339873/100356520/100346449/100008645/100009371/100358982/100345812/100008899	25
ocu00061	Fatty acid biosynthesis	1903-07-01	0.0698592	16/8978	0.0357113	0.103974		100344347/100328719/100346176/100353430/127486972/100349933/100338502	7
ocu04926	Relaxin signaling pathway	38/1903	0.0705977	136/8978	0.0364083	0.105073		100009271/100343958/100346742/100337882/100353706/100341204/100357900/100343130/100357483/100008806/100338345/100339066/100359147/100346625/100008941/100342201/100352954/108178552/100342500/100008856/100337783/100357489/100009316/100344852/100347345/100009110/100008685/100008993/100008833/100345181/100348672/100350395/100009538/100009160/100354567/100008645/100345812/100008899	38
ocu04725	Cholinergic synapse	32/1903	0.0747001	112/8978	0.0388619	0.111179		100343958/100346742/100337882/100353706/103349397/100101555/100342451/100101556/100343130/100357483/100338345/100339066/100359147/100346625/100008941/100342201/100352954/108178552/100009505/100008987/100009443/100358271/100337783/100009316/100347345/100345181/100344144/100337757/100340526/100348672/100350395/100037719	32
ocu04012	ErbB signaling pathway	25/1903	0.076396	84/8978	0.0400897	0.113703		100345909/100353706/100358587/100351964/100342451/100101556/100342595/100348489/100009037/100342327/100008806/100338850/100340952/100009554/100346125/100342500/100008809/100008856/100347455/100009316/100344852/100347345/100347273/100345181/100037719	25
ocu04530	Tight junction	48/1903	0.0782725	179/8978	0.0414285	0.116496		100009272/100341378/100351066/100339213/100358386/100345255/100346759/100357607/100344359/100009419/100301530/100340963/100338591/100345988/100349185/108177971/100009554/100008846/100340933/100008898/100346498/100008856/100340483/100340939/100341037/100349824/127486002/127487399/100339815/100341484/100338273/100009002/100009145/100353304/100343384/100009300/100356542/100352581/100009538/100357147…	48
ocu05223	Non-small cell lung cancer	21/1903	0.0849878	69/8978	0.0453673	0.12649		100353706/100358587/100355675/100351964/100009040/100348489/100346379/100008806/100009554/100343573/100353284/100353742/100342500/127486194/100340625/100009316/100347345/100347954/100345181/100037719/100358445	21
ocu04071	Sphingolipid signaling pathway	34/1903	0.0880809	122/8978	0.0474169	0.131094		100353706/100355675/103349397/100355991/100344726/103350027/100339066/100359147/100009316/100347345/100351385/100347954/100345181/100348672/100350395/100339661/100009300/100355159/100346997/100009533/100037719/100009538/100339873/100356520/100009220/103348690/100357932/100354454/100338930/100357790/100344536/100338261/100009088/100346106	34
ocu05216	Thyroid cancer	1903-12-01	0.0937549	35/8978	0.0508955	0.139539		100355675/100351964/100353555/100348489/100353284/100353742/100349893/100009316/100347345/100339216/100340471/100351420	12
ocu05321	Inflammatory bowel disease	21/1903	0.0940235	70/8978	0.0523173	0.139938		100341787/100338854/103348594/100337721/100008856/100343144/100351163/100351416/100352672/100352927/127482571/100352415/100355948/100328929/100350656/100008645/100009371/100358982/100009497/100350028/100009088	21
ocu04664	Fc epsilon RI signaling pathway	20/1903	0.0940235	66/8978	0.0520998	0.139938		100353706/100341714/100009413/100354225/103350027/100342500/103352489/100339465/100009097/100340056/100009316/100344852/100347345/100351385/100347954/100345181/100339873/100356520/100345556/100009088	20
ocu01212	Fatty acid metabolism	19/1903	0.0940235	62/8978	0.0517159	0.139938		100339733/100346654/100350797/100344347/100328719/100346176/100353138/100341040/100346386/100352022/100355022/100355110/100353430/100346561/100352290/127486972/127488121/100349933/100338502	19
ocu01240	Biosynthesis of cofactors	43/1903	0.0969909	161/8978	0.0544073	0.144355		103352472/100337703/100354649/100352295/100343821/100345847/100345273/100341109/100353810/100342074/100354177/100346972/100350070/100338344/100345744/100352837/100358591/100355836/100343223/100355645/100356833/100339456/100009474/100346668/100533971/100533972/100341410/100354529/100338502/100339088/100356784/100343023/100349278/100343612/103349370/100353716/100339200/100008619/100009293/100337960…	43
ocu04015	Rap1 signaling pathway	55/1903	0.103775	213/8978	0.0586822	0.154452		100009272/100343958/100346742/100337882/100353706/100348305/100350323/100351964/100352392/100342327/100340992/100344921/100358959/100008806/100352730/100351711/100343050/100008681/100009417/100343352/100350748/100339066/100359147/100144342/100356927/100351865/100008898/100339049/100339465/100341037/127486002/100347657/100339815/100350077/100009316/100347345/100358182/100358772/100358541/100339515…	55
ocu05142	Chagas disease	28/1903	0.111901	100/8978	0.0637836	0.166546		100353706/100348477/100338345/100339066/100359147/100341787/100338854/100354743/100008856/127482788/100344852/100347345/100008833/100345181/100348672/100350395/100009300/100009588/100008645/100009371/100358982/100345812/100009497/100353753/100009088/100346106/100343190/100346109	28
ocu04727	GABAergic synapse	26/1903	0.113861	92/8978	0.0654158	0.169463		100343958/100346742/100337882/100101555/100353026/100346845/100339376/100356357/100343465/100339066/100359147/100346625/100008941/100342201/100352954/108178552/100338344/100337783/100341013/100352572/127487408/100350903/100037719/100344654/100339311/100302413	26
ocu04911	Insulin secretion	24/1903	0.115447	84/8978	0.0668496	0.171824		100343958/100346742/100337882/100302415/100008756/100349382/100009577/100350113/100101555/100342451/100101556/100343130/100357483/100341777/100008745/100009034/100351872/100357489/100348672/100350395/100037719/100348394/100340057/100008775	24
ocu04915	Estrogen signaling pathway	36/1903	0.116828	134/8978	0.0681774	0.173879		100343958/100346742/100337882/100353706/103349397/100352392/100343130/100357483/100008806/100338345/100353026/100346845/100339066/100359147/100342500/100008809/100009505/100008856/100009029/100341376/100344942/100354174/100344434/100340860/100008885/100344686/100357489/100009316/100347345/100008993/100356750/100345181/100348672/100350395/100344462/100008966	36
ocu05224	Breast cancer	38/1903	0.121974	143/8978	0.0717325	0.181538		100353706/100339765/100355675/100351964/100347269/100355331/100009040/100348489/100009227/100339336/100346379/100008806/100009554/100343050/100008681/100338345/100350521/103348917/100353284/100353742/100342500/100337990/100144342/100339551/100008856/100343400/100009566/100352000/100009316/100347345/100356750/100343819/100352722/100345181/100339216/100340471/100341009/100342870	38
ocu04724	Glutamatergic synapse	31/1903	0.12632	114/8978	0.0748593	0.188006		100343958/100346742/100337882/100101555/100343465/100339066/100359147/100346625/100008941/100342201/100352954/108178552/100349640/100356338/127489904/100356113/127485959/100009505/100337783/100352572/127487408/100344556/100347345/100348672/100350395/100339661/100009487/100037719/100344654/100339311/100009352	31
ocu04933	AGE-RAGE signaling pathway in diabetic complications	29/1903	0.129897	106/8978	0.077567	0.19333		100353706/100355675/103349397/100009037/100357900/100008801/100354169/100009491/100009127/100358471/100008856/100347345/100339697/100345181/100348672/100350395/103347252/100037719/100008966/100009538/100339873/100009588/100008645/100009371/100358982/100345812/100009088/100008901/100008899	29
ocu04925	Aldosterone synthesis and secretion	27/1903	0.133383	98/8978	0.0802519	0.198518		100343958/100346742/100337882/100302415/100008756/100349382/100009577/100350113/100101555/100352392/100342451/100101556/100343130/100357483/100339619/100009505/100353865/100356734/100357489/100009087/100343663/100349994/100349347/100348672/100350395/100344462/100037719	27
ocu00650	Butanoate metabolism	1903-10-01	0.139484	30/8978	0.0845536	0.207598		100350797/100352247/100352493/100339007/100341040/100355022/100344837/100352290/127486533/127488121	10
ocu05214	Glioma	20/1903	0.145114	70/8978	0.0886229	0.215977		100353706/100355675/100351964/100352392/100342451/100101556/100009040/100348489/100346379/100008806/100353284/100353742/100342500/100144342/100340625/100009316/100347345/100358772/100345181/100037719	20
ocu05169	Epstein-Barr virus infection	55/1903	0.146133	219/8978	0.0899067	0.217495		100353706/100355675/103349397/100355991/100354716/100354225/100348477/100009040/100348489/100009037/100350485/108178217/100346379/100353284/100353742/100355156/100338097/100354455/100354743/100356927/127486194/100008856/100009097/100341175/100343144/100351163/100351416/100352672/100352927/100354611/100355084/100355380/100357329/100357840/103346650/127482571/100340056/100344852/127482739/100359054…	55
ocu04935	Growth hormone synthesis, secretion and action	31/1903	0.146223	116/8978	0.0906233	0.217628		100008902/100343958/100346742/100337882/100353706/100350323/100101555/100343130/100357483/100340619/100342327/100354135/100338345/100339066/100359147/100342500/127485419/100009505/100339305/100347455/100357489/100009316/100344852/100347345/100345181/100348672/100350395/100037719/100354019/103346588/100359158	31
ocu04613	Neutrophil extracellular trap formation	51/1903	0.146768	202/8978	0.0922889	0.218439		100009272/100353706/100352978/100101588/100339146/100008801/100358696/100338635/100328558/100355156/100352253/100358981/100355860/100328641/100356927/100351865/100339049/100008803/100009097/100337909/100338413/100338913/100341037/100343938/100344914/100347239/100348415/100349768/100350997/100351672/100359184/127490210/100009316/100347345/100008802/100009359/100345181/100348672/100350395/100338362…	51
ocu04912	GnRH signaling pathway	25/1903	0.146768	91/8978	0.0921982	0.218439		100343958/100346742/100337882/100101555/100352392/100342451/100101556/100008806/100009491/100340952/100342500/100008809/100009505/100008856/100009316/100344852/100347345/100338535/100009598/100348672/100350395/100339661/100037719/100008966/100342358	25
ocu05164	Influenza A	46/1903	0.152774	181/8978	0.0967568	0.227378		100009272/100353706/100355675/100355991/100101588/100348477/100009040/100338894/100340619/100354135/100358566/100338097/100341787/100338854/100354455/100350359/100341037/100341175/100343144/100349768/100351163/100351416/100352110/100352672/100352927/100355084/100357329/100357840/127482571/100009316/100347345/100341830/100347351/100345181/100037719/100352415/100355948/100328929/100350656/100009414…	46
ocu05221	Acute myeloid leukemia	19/1903	0.158656	67/8978	0.1012	0.236133		100353706/100358587/100348952/100351964/100008983/100340992/100338850/100358696/108175474/100342500/100351865/100009316/100347345/100349720/100345181/100358993/103351779/100339216/100340471	19
ocu01524	Platinum drug resistance	25/1903	0.159083	92/8978	0.102192	0.236768		100353706/100358587/100355675/103349397/100355991/103346801/100347269/100348477/100348489/100009554/100349021/100340625/100341175/100355084/100357329/100357840/100358177/100347345/100008879/100351645/100347954/100345181/100357676/100351427/100328700	25
ocu00270	Cysteine and methionine metabolism	17/1903	0.160059	59/8978	0.103543	0.238221		100347222/100340431/100348732/100345744/103347204/100351221/100009106/100009107/100351519/100358185/127490199/100339456/100341412/100354776/100344428/100342075/100340020	17
ocu04625	C-type lectin receptor signaling pathway	28/1903	0.162576	105/8978	0.105907	0.241968		100353706/100340118/100352392/100101588/100348477/103348469/100339146/103350027/100354455/103349030/100009505/100008856/100350649/100350907/100352110/100340322/100347345/100009438/100358182/100353824/100347003/100345181/100009487/100008966/100339517/127489362/100345556/100009088	28
ocu04934	Cushing syndrome	40/1903	0.167859	157/8978	0.111626	0.24983		100343958/100346742/100337882/100008996/100339765/100351964/100101555/100342451/100101556/100009040/100348489/100009037/100351874/100358955/100343130/100357483/100339336/100346379/100008806/100357596/100350521/103348917/100339066/100359147/100009505/100353733/100357052/100340625/100353481/100357489/100009316/100347345/100349994/100349347/100348672/100350395/100344462/100339216/100340471/100342870	40
ocu00450	Selenocompound metabolism	1903-07-01	0.167859	20/8978	0.111171	0.24983		100351221/100352639/100344428/100008948/100348454/100354391/100358257	7
ocu01210	2-Oxocarboxylic acid metabolism	1903-07-01	0.167859	20/8978	0.111171	0.24983		100352714/100340431/100348732/127485567/100340796/100338100/100342113	7
ocu04072	Phospholipase D signaling pathway	41/1903	0.173347	162/8978	0.117241	0.257999		100343958/100346742/100337882/100353706/100345154/100328622/100328627/100345562/100358196/100341525/100008806/100351711/103350027/100346125/100342500/100009097/100345732/127482754/100347657/103352130/100009316/100347345/100358182/100351385/100358772/100345181/100344144/100337757/100340526/103350059/127485993/100348672/100350395/100339661/100342358/100339517/100346449/100348394/127489362/100357790…	41
ocu04061	Viral protein interaction with cytokine and cytokine receptor	23/1903	0.173347	85/8978	0.117629	0.257999		100354655/100348362/103348469/100343840/100328940/100358097/100101579/100339537/100340992/100346186/103345545/127490643/100328622/100328627/100354902/100338351/100349338/100347811/100347752/100348517/100009088/100346106/100349872	23
ocu00240	Pyrimidine metabolism	17/1903	0.173347	60/8978	0.117262	0.257999		100342139/100357182/100356889/100341585/127488159/100533971/100533972/100341410/100354529/100346932/100037712/100341892/100356979/100343183/100346325/100359019/100357952	17
ocu05225	Hepatocellular carcinoma	45/1903	0.177152	180/8978	0.122216	0.263661		100009272/100353706/100358681/100339765/100358587/100355675/100351964/100009040/100348489/100009227/100349069/100339336/100346379/100008806/100340952/100350521/103348917/100346125/100353284/100353742/100342500/100349021/100008919/100144342/100340625/100341037/100358177/100009566/100352000/100009316/100347345/100008879/100345181/100037719/100339222/100345769/100339216/100340471/100008645/100009371…	45
ocu05219	Bladder cancer	1903-12-01	0.177152	40/8978	0.122614	0.263661		100351964/100348489/100346379/100008806/100009554/100008809/100340625/100009316/100347345/100009110/100008993/100008899	12
ocu05143	African trypanosomiasis	1903-11-01	0.177152	36/8978	0.122505	0.263661		100009249/100009084/108177458/100009097/100009087/100348672/100350395/100037719/100009088/100346109/100008901	11
ocu04659	Th17 cell differentiation	29/1903	0.177823	111/8978	0.123883	0.264659		100338345/100341787/100338854/100352905/100341281/103348594/103347059/100337721/100347752/100349109/127486194/100008856/100343144/100351163/100351416/100352672/100352927/127482571/100347345/100353824/100359054/100009487/100352415/100355948/100328929/100350656/100358993/100008645/100345812	29
ocu05218	Melanoma	18/1903	0.184946	65/8978	0.129682	0.275261		100353706/100358587/100355675/100351964/100009040/100348489/100346379/100008806/100343050/100008681/100353284/100353742/100144342/100340625/100009316/100347345/100358772/100345181	18
ocu04630	JAK-STAT signaling pathway	42/1903	0.186507	168/8978	0.131621	0.277585		100353706/100008601/103349397/100348489/100341861/100356265/100340619/103352517/100346676/100008806/100354135/100357263/100342500/100338097/100341787/100338854/100354902/100338351/100009017/100349338/103348594/103347059/103345135/100337721/100347752/100343726/127486194/100008747/100349996/100359222/100358772/100339509/100357839/100341019/100345181/100339517/100348648/100354019/103346588/100353407…	42
ocu04144	Endocytosis	66/1903	0.187513	274/8978	0.133179	0.279081		100339213/100346056/100343468/100346759/100357607/100344359/100341204/100353577/100355195/100126568/100345952/100126563/100342999/100342595/100101579/100338505/100357809/100328622/100328627/100345562/100008806/127488369/100340544/100346564/100009417/100341917/103351438/100144342/100353775/100352323/100356696/100343496/100348306/100349480/100354104/100354611/100355380/127482754/103350059/127485993…	66
ocu05417	Lipid and atherosclerosis	54/1903	0.187865	221/8978	0.134279	0.279606		127482704/100353706/100328797/100358587/100355675/103349397/100355991/100352392/100342451/100101556/100101588/100348477/100008983/100008801/100301544/100338345/100354455/100354743/100009505/100008856/100009124/100008803/100341175/100347455/100352110/100355084/100357329/100357840/100009589/100340056/100344852/100347345/100009110/100008993/100008802/100009359/100353824/100009322/100347954/100345181…	54
ocu04658	Th1 and Th2 cell differentiation	25/1903	0.189343	95/8978	0.136191	0.281805		100338345/100341787/100338854/100337721/100339551/127486194/100008856/100343144/100351163/100351416/100352672/100352927/127482571/100356351/100347345/100353824/100359054/100343819/100352722/100009487/100352415/100355948/100328929/100350656/100355388	25
ocu04140	Autophagy - animal	39/1903	0.195896	156/8978	0.141905	0.291559		100353706/100338183/100349970/100358587/103349397/100348536/100008830/100341887/100358284/100328641/100144342/100009505/100350946/100339305/100348191/127491124/100009316/100347345/100359276/100358182/127487216/100341987/100340433/100347954/100345181/100009300/100008966/100008682/100345210/127489362/100352116/103348188/100343190/100353118/100354086/100338966/100351532/100350795/100340527	39
ocu05226	Gastric cancer	36/1903	0.195896	143/8978	0.142678	0.291559		100353706/100339765/100355675/103349397/100351964/100348489/100009037/100351874/100009227/100343241/100339336/100346379/100008806/100009554/100343050/100008681/100009417/100350521/103348917/100346125/100353284/100353742/100342500/100009566/100352000/100009316/100347345/100345181/100358445/100339216/100340471/100008645/100009371/100358982/100345812/100342870	36
ocu04370	VEGF signaling pathway	16/1903	0.205772	58/8978	0.150801	0.306257		100353706/100358587/100347455/100009316/100347345/100009438/100342292/100353824/100345181/100009487/100037719/100353305/100339873/100356520/100357790/100008899	16
ocu00860	Porphyrin metabolism	14/1903	0.209948	50/8978	0.156689	0.312472		100345847/100345273/100346798/100340115/100340335/100346972/103348216/100008919/100009523/100355645/100356833/100037718/100037707/100340869	14
ocu04979	Cholesterol metabolism	14/1903	0.209948	50/8978	0.156689	0.312472		100328797/100009337/100327267/100008978/100009547/100346275/100341463/100008882/100340764/100354978/100338710/100008751/100009473/100008752	14
ocu00920	Sulfur metabolism	1903-05-01	0.209948	14/8978	0.156711	0.312472		100343037/127482578/127490199/100008948/100357085	5
ocu04914	Progesterone-mediated oocyte maturation	26/1903	0.210443	101/8978	0.158032	0.313209		100343958/100346742/100337882/100353706/100348299/100342147/100357348/100345632/100351964/100352234/100338989/100357416/100345665/100358835/100352863/100358916/100339066/100359147/100144342/100357094/100354882/100009316/100347345/100345181/100358702/100358334	26
ocu04060	Cytokine-cytokine receptor interaction	65/1903	0.214641	274/8978	0.167194	0.319457		100354655/100344814/100357896/100348414/100009569/100350518/100348362/103348469/100343840/100328940/100358097/100101579/100339537/100356265/103352517/100340992/100346676/100346186/103345545/127490643/100348428/100328622/100328627/100340021/100355079/100351716/100341680/100338097/100341787/100338854/100354902/100338351/100009017/103349030/100352905/100344048/100341281/100343547/100009558/100349338…	65
ocu04931	Insulin resistance	27/1903	0.214641	106/8978	0.166992	0.319457		100353706/100353138/100343130/100357483/100358471/100008660/100352900/100354727/100347954/100345181/100349219/100351041/100356542/100352581/100037719/100008966/100009538/100339517/100354193/100347428/100008972/100358702/103346588/100348990/100009088/100346106/100347046	27
ocu04070	Phosphatidylinositol signaling system	25/1903	0.214641	97/8978	0.162172	0.319457		100343037/100352392/100358338/100358196/100341525/100340475/103352489/100355074/100009233/100009505/100345732/100348191/127487216/100341987/100340433/100338397/100340704/100345181/103350059/127485993/100348672/100350395/103347252/100037719/100347235	25
ocu00790	Folate biosynthesis	1903-09-01	0.214641	30/8978	0.167597	0.319457		100009122/100341109/100350070/100338344/100009474/100338679/100341414/103349370/100337960	9
ocu01523	Antifolate resistance	1903-09-01	0.214641	30/8978	0.167597	0.319457		100008909/100354688/100341917/100350070/127488159/100352874/100009293/100009317/100009088	9
ocu04966	Collecting duct acid secretion	1903-08-01	0.214641	26/8978	0.167982	0.319457		100347710/100350237/100353383/100352404/100354566/100009156/100008847/100349024	8
ocu00220	Arginine biosynthesis	1903-07-01	0.214641	22/8978	0.166967	0.319457		100343465/100340431/100348732/127485567/100352572/127487408/100008833	7
ocu05418	Fluid shear stress and atherosclerosis	40/1903	0.227475	164/8978	0.179603	0.338559		100009272/100353706/103349397/100009569/100350518/100352392/100126563/100342999/100008830/100340993/100338345/127488811/100349021/100008919/100352905/100344048/100008956/100008856/103345364/100008803/100341037/100347455/100358177/100344852/100338535/100008879/100008993/100008802/100358772/100357605/100345181/100009538/100339873/100356520/100355526/100344119/100009088/100346106/100008901/100008899	40
ocu04215	Apoptosis - multiple species	13/1903	0.227475	47/8978	0.180084	0.338559		100355675/103349397/100355991/103346801/100342261/100348477/100344529/100341175/100355084/100357329/100357840/100346106/100328700	13
ocu03250	Viral life cycle - HIV-1	16/1903	0.2322	60/8978	0.186977	0.345591		100328920/100348480/100351714/100101579/100340648/100353973/100340619/100351751/100354135/100009442/100340649/100338602/100341571/100353160/100348942/100343451	16
ocu04730	Long-term depression	16/1903	0.2322	60/8978	0.186977	0.345591		100351964/100339066/100359147/100356759/100350099/100349851/100144342/100009505/100340056/100009316/100347345/100348672/100350395/100009300/100037719/100008694	16
ocu05217	Basal cell carcinoma	16/1903	0.2322	60/8978	0.186977	0.345591		100339765/100355675/100009569/100348489/100339336/100350521/103348917/100353284/100353742/100358990/100345046/100352661/100345361/100339216/100340471/100342870	16
ocu00230	Purine metabolism	33/1903	0.232219	134/8978	0.19011	0.34562		100346236/100008902/100343958/100346742/100337882/100355968/103352472/100337703/100354649/100352295/100343821/100340249/100342587/100350099/100349851/100126071/100533971/100533972/100341410/100354529/100343663/100346932/100356979/100343183/100008948/100354625/100352319/100348750/100352903/100009155/100351563/100349854/100346325	33
ocu01521	EGFR tyrosine kinase inhibitor resistance	22/1903	0.232219	86/8978	0.191113	0.34562		100353706/100358828/100358587/100355675/103349397/100351964/100008806/100338850/100009554/100009417/100343573/100346125/100342500/100144342/100347752/100009316/100347345/100349438/100358772/100345181/100037719/100008899	22
ocu04612	Antigen processing and presentation	19/1903	0.232219	73/8978	0.190146	0.34562		100342022/100338894/100101598/100008830/100343144/100351163/100351416/100352672/100352927/100354611/100355380/127482571/100343385/103346995/100352415/100355948/100328929/100350656/100009088	19
ocu00051	Fructose and mannose metabolism	1903-10-01	0.232219	35/8978	0.191194	0.34562		100009122/100009055/103347029/100340994/100346668/100345647/100009526/100342540/100344187/100348316	10
ocu00532	Glycosaminoglycan biosynthesis - chondroitin sulfate / dermatan sulfate	1903-07-01	0.238888	23/8978	0.198697	0.355545		127489283/100343176/100009563/100338181/100351896/100339435/100343766	7
ocu00670	One carbon pool by folate	1903-06-01	0.238888	19/8978	0.198846	0.355545		100356705/127488159/100352874/100349622/100344428/100009293	6
ocu04720	Long-term potentiation	17/1903	0.240003	65/8978	0.20086	0.357204		100337882/100351964/100101555/100352392/100342451/100101556/100340619/100354135/100356338/100009505/100009316/100347345/100348672/100350395/100009487/100037719/100358702	17
ocu03440	Homologous recombination	1903-12-01	0.246115	44/8978	0.207089	0.366302		100347469/100345123/100347269/100355331/100359326/100341377/100328725/100351948/100341460/100358262/103351965/100342809	12
ocu04621	NOD-like receptor signaling pathway	41/1903	0.247034	171/8978	0.208979	0.367668		100357637/100356899/103349397/100358687/100101588/100348477/100008801/100338814/100338635/100338097/100354455/100009505/100008856/100337809/100352110/100359184/127488905/127491124/100347345/100009115/100341372/100338171/100341830/100345423/100358139/100350018/100348672/100350395/100008966/103345318/100347560/100343136/100342249/100009497/100009088/100343190/100354812/100008751/100009473/100008752…	41
ocu05320	Autoimmune thyroid disease	15/1903	0.249736	57/8978	0.212395	0.371691		100008998/100009377/100009097/100343144/100351163/100351416/100352672/100352927/100354611/100355380/127482571/100352415/100355948/100328929/100350656	15
ocu04924	Renin secretion	18/1903	0.250283	70/8978	0.213992	0.372504		100338084/100101555/100352392/100126073/100339066/100359147/100350099/100349851/100009505/100008987/100008745/100009087/100343663/100349347/100348672/100350395/100009487/100009081	18
ocu00512	Mucin type O-glycan biosynthesis	1903-10-01	0.253178	36/8978	0.217613	0.376814		100343323/100352324/100349215/100338673/100348815/100343562/100347030/100351119/100345091/100356933	10
ocu05031	Amphetamine addiction	16/1903	0.262659	62/8978	0.22695	0.390925		100101555/100352392/100342451/100101556/100343130/100357483/100338345/100356338/127489904/100355156/100008856/100357489/100357007/100009487/100037719/100349271	16
ocu04929	GnRH secretion	15/1903	0.269271	58/8978	0.233881	0.400765		100353706/100341204/100101555/100353026/100346845/108176286/100009505/100351872/100009316/100347345/100345181/100348672/100350395/100037719/100009352	15
ocu00250	Alanine, aspartate and glutamate metabolism	1903-11-01	0.272908	41/8978	0.238275	0.406179		103352472/100337703/100346729/100343465/100340431/100348732/127485567/103347204/100352572/127486533/127487408	11
ocu00071	Fatty acid degradation	13/1903	0.283476	50/8978	0.248784	0.421907		100339733/100346654/100350797/100344347/100328719/100353138/100341040/100346167/100355022/100355110/100352290/127486972/127488121	13
ocu00562	Inositol phosphate metabolism	18/1903	0.287263	72/8978	0.253407	0.427542		100340475/103352489/100355074/100348191/127487216/100341987/100340433/100338397/100340704/100345181/100344144/103350059/127485993/100348672/100350395/103347252/100347235/100348316	18
ocu04961	Endocrine and other factor-regulated calcium reabsorption	15/1903	0.288957	59/8978	0.256209	0.430065		100302415/100008756/100349382/100009577/100350113/100356074/100349480/100353865/100356734/100348672/100350395/100037719/100008785/100339605/100008907	15
ocu05322	Systemic lupus erythematosus	33/1903	0.290516	139/8978	0.258905	0.432384		100341378/100351066/100342793/100358949/100009197/100008998/100009377/100358696/100328558/100009097/100337909/100338413/100338913/100343144/100343938/100344914/100347239/100348415/100350997/100351163/100351416/100351672/100352672/100352927/127482571/127482788/127490210/100352415/100355948/100328929/100350656/100348767/100009088	33
ocu04014	Ras signaling pathway	55/1903	0.293945	239/8978	0.26595	0.437488		100345909/100353706/100348305/100358587/100356949/100352392/100340992/100344921/100358959/100008806/100340952/100354138/100343050/100008681/100009417/100343352/108175474/100346125/100346625/100008941/100342201/100352954/108178552/100342500/100009356/100144342/100337783/100348306/103346668/100009316/100347345/100358182/100349438/100345073/100352548/100347273/100358772/100339515/100345181/100343827…	55
ocu04120	Ubiquitin mediated proteolysis	40/1903	0.293945	171/8978	0.26581	0.437488		100348299/100342147/100357348/100347269/100342595/100354874/100345665/100358835/100345752/100345084/100340879/100340737/100344755/100356696/100337922/100346213/100357094/100358924/103347952/100339509/100357839/100341019/103352470/100342142/100355829/100353573/100358121/103346588/100354913/100343190/100338187/100344895/100354960/103350360/100353960/100355519/100349814/100340823/100344222/100328700	40
ocu00330	Arginine and proline metabolism	14/1903	0.293945	55/8978	0.264666	0.437488		100352530/100346729/100328683/100302412/100347984/100340431/100348732/100352880/127489978/100357007/100008833/100341650/100355148/100340020	14
ocu04910	Insulin signaling pathway	33/1903	0.301124	140/8978	0.273807	0.448172		100353706/100358587/100351964/100352392/100342595/100342327/100338850/100340952/100355995/100358471/100342500/100008660/100340994/100339305/100009316/100347345/127486621/100347954/100190898/100009137/100009297/100345181/100349219/100351041/100356542/100352581/100009538/100354193/100347428/100008972/100354019/103346588/100353957	33
ocu05231	Choline metabolism in cancer	24/1903	0.305106	100/8978	0.280189	0.454099		100353706/100358196/100341525/100008806/100338850/100338345/100342500/100008856/100345732/100354870/100009316/100347345/100358772/100347954/100345181/103350059/127485993/100339661/100037719/100339873/100356520/100008931/100328723/100354471	24
ocu04211	Longevity regulating pathway	22/1903	0.305106	91/8978	0.278863	0.454099		100343958/100346742/100337882/100353706/100353097/100355675/100343130/100357483/100348361/100338850/100358471/100343573/100144342/100356074/100339305/100357489/100345181/100349219/100356542/100352581/100353543/100349271	22
ocu04920	Adipocytokine signaling pathway	17/1903	0.30538	69/8978	0.283203	0.454507		100344347/100328719/100353706/100353138/100008747/100339305/127486972/100359054/100344462/100349219/100356542/100352581/100339517/103346588/100009088/100346106/100349872	17
ocu00514	Other types of O-glycan biosynthesis	1903-12-01	0.30538	47/8978	0.283136	0.454507		100353814/100345726/100343323/100352324/100349215/100338673/100348815/100343562/100351119/100357457/100354727/100358153	12
ocu04923	Regulation of lipolysis in adipocytes	14/1903	0.310056	56/8978	0.288943	0.461467		100343958/100346742/100337882/100338084/100353706/100339066/100359147/100339305/100009087/100343663/100008936/100345181/100008694/100009407	14
ocu05017	Spinocerebellar ataxia	38/1903	0.314344	164/8978	0.29436	0.467848		100353706/100354976/100342336/100353839/100349346/100341258/100355989/100337993/100356338/127489904/100009505/100341175/100349768/100355084/100357329/100357840/127487016/100341372/100345181/100348672/100350395/100338362/100037719/100342159/100356829/100351783/100338005/100338269/100339897/100348757/100009414/100343365/100353118/100008751/100009473/100008752/100008976/100340527	38
ocu04668	TNF signaling pathway	26/1903	0.317257	110/8978	0.298524	0.472185		100353706/100348477/100343130/100357483/100346186/100359244/100338814/100338345/100009017/100356696/100339551/100008856/100357489/100009316/100344852/100347345/100009598/100008993/100345181/103346588/100342249/100009088/100346106/100349872/100008901/100328700	26
ocu04217	Necroptosis	37/1903	0.319648	160/8978	0.30222	0.475743		100347778/100355675/103349397/100355991/100342451/100101556/100101588/100348477/100338505/100357809/100008801/100338814/100009597/100009254/100328558/100328641/100338097/100341787/100338854/127486194/100348415/100349768/100350997/100352110/127490210/100347428/100008972/100347560/100009414/100345225/100009497/100009088/100346106/100008751/100009473/100008752/100328700	37
ocu04916	Melanogenesis	23/1903	0.32397	97/8978	0.307772	0.482176		100343958/100346742/100337882/100352392/100342451/100101556/100343130/100340619/100339336/100354135/100350521/103348917/100339066/100359147/100009316/100347345/100348672/100350395/100344462/100037719/100339216/100340471/100342870	23
ocu04152	AMPK signaling pathway	29/1903	0.338836	125/8978	0.323427	0.504301		100009237/100353706/100353138/100343130/100357483/100338850/100353220/100358471/100343573/100008660/100144342/100008747/100339305/100346561/100338228/100347954/100345647/100009526/100345181/100349219/100009300/100355159/100346997/100009533/100356542/100352581/100349271/100342882/100352741	29
ocu05202	Transcriptional misregulation in cancer	43/1903	0.339561	189/8978	0.325655	0.50538		100357873/100355675/100348952/100008983/100328634/100348489/100009037/100358955/100340992/100351285/100352251/100358696/100343352/108175474/100358471/100353284/100353742/100355156/100008709/100350879/100144342/127485419/100344048/100351865/100350557/100353733/100349057/100009097/100347455/127488846/100009115/100338305/100347507/100008993/100351373/100349720/100355271/100358993/100008943/100345380…	43
ocu05235	PD-L1 expression and PD-1 checkpoint pathway in cancer	21/1903	0.340177	89/8978	0.327784	0.506296		100353706/100338089/103350979/100008998/100008806/100338345/100341787/100338854/100008856/100009316/100347345/100353824/100359054/100345181/100009487/100339517/100348648/100345225/100009497/100343190/100346109	21
ocu05340	Primary immunodeficiency	1903-10-01	0.345829	40/8978	0.334796	0.514709		100346236/100354716/100354225/100338894/100343726/127486194/100009097/100349347/100358807/103346995	10
ocu04657	IL-17 signaling pathway	20/1903	0.346478	85/8978	0.338559	0.515675		100348477/100343840/100353220/100338345/100338208/100354455/103349030/100008856/100347345/100343055/100338535/100009110/100008685/100008993/100008985/100008704/100342249/100009088/100338995/100343190	20
ocu04973	Carbohydrate digestion and absorption	1903-12-01	0.346478	49/8978	0.337902	0.515675		100353706/100302415/100008756/100349382/100009577/100350113/100340994/100345181/100348672/100350395/100037719/100009262	12
ocu00500	Starch and sucrose metabolism	1903-09-01	0.355225	36/8978	0.348712	0.528693		100342646/100008744/100009058/100008660/100340994/100009155/100351563/100347428/100008972	9
ocu00750	Vitamin B6 metabolism	1903-03-01	0.363551	8978-10-01	0.35853	0.541084		100008601/100343023/100349278	3
ocu05032	Morphine addiction	21/1903	0.372663	91/8978	0.369202	0.554647		100343958/100346742/100337882/100341204/100353026/100346845/100339376/100356357/100339066/100359147/100346625/100008941/100342201/100352954/108178552/103351438/100337783/100341013/100352319/100348750/100037719	21
ocu00360	Phenylalanine metabolism	1903-05-01	0.378008	19/8978	0.376208	0.562602		100340431/100348732/103347204/100353463/100357007	5
ocu03320	PPAR signaling pathway	18/1903	0.384775	78/8978	0.384684	0.572674		100344347/100328719/100353138/100008823/100348000/100345743/100355759/100346561/127486972/100355457/100342604/100009110/100352900/100009322/100347954/100338869/100008882/100353957	18
ocu00730	Thiamine metabolism	1903-04-01	0.395261	15/8978	0.396955	0.588281		100354649/100352295/100343821/100341109	4
ocu00770	Pantothenate and CoA biosynthesis	1903-06-01	0.396906	24/8978	0.400403	0.590729		100356889/100344919/100339088/100356784/100343612/100356303	6
ocu04213	Longevity regulating pathway - multiple species	15/1903	0.397033	65/8978	0.402327	0.590917		100343958/100346742/100337882/100353706/100009295/100342908/100358471/100343573/100355156/100144342/100339305/100345181/100356542/100352581/100349271	15
ocu04728	Dopaminergic synapse	29/1903	0.402576	130/8978	0.411586	0.599167		100353706/100341204/100101555/100352392/100342451/100101556/100343130/100357483/100338345/100339066/100359147/100346625/100008941/100342201/100352954/108178552/100009505/100337783/100357489/103345647/100357007/100348672/100350395/100009300/100355159/100346997/100009533/100009487/100037719	29
ocu04930	Type II diabetes mellitus	1903-11-01	0.402576	47/8978	0.410951	0.599167		100101555/100340994/100339305/100347345/100345181/100008676/100008966/100009538/100354019/103346588/100009088	11
ocu04960	Aldosterone-regulated sodium reabsorption	1903-09-01	0.404444	38/8978	0.415326	0.601948		100302415/100008756/100349382/100009577/100350113/100347345/100347954/100345181/100037719	9
ocu00280	Valine, leucine and isoleucine degradation	14/1903	0.404884	61/8978	0.417609	0.602602		100339733/100350797/100008601/108176743/100352048/100341040/100355022/100355110/100344837/100342235/103347204/100357511/100352290/127488121	14
ocu00130	Ubiquinone and other terpenoid-quinone biosynthesis	1903-03-01	0.407645	8978-11-01	0.422301	0.606712		100353810/100342074/100354177	3
ocu00410	beta-Alanine metabolism	1903-08-01	0.416514	34/8978	0.435257	0.619911		100347984/100356889/100341040/100355022/100352290/100353463/127488121/100338228	8
ocu03020	RNA polymerase	1903-08-01	0.416514	34/8978	0.435257	0.619911		100340100/100345985/100340054/100347609/100349199/127486107/100341275/100352456	8
ocu03430	Mismatch repair	1903-06-01	0.421318	25/8978	0.442183	0.627061		100338764/100351645/100345366/100341460/100358262/103351965	6
ocu00604	Glycosphingolipid biosynthesis - ganglio series	1903-04-01	0.42662	16/8978	0.449678	0.634953		100008950/100341761/100345091/100356933	4
ocu04962	Vasopressin-regulated water reabsorption	1903-10-01	0.434881	44/8978	0.460353	0.647249		100343958/100345676/100343130/100357483/100345319/100338905/100349997/100341461/100348306/100008775	10
ocu04918	Thyroid hormone synthesis	17/1903	0.439738	77/8978	0.469473	0.654477		100343958/100346742/100337882/100302415/100008756/100349382/100009577/100350113/100343130/100357483/100009258/100009505/100357489/100346275/100348672/100350395/100037719	17
ocu05134	Legionellosis	17/1903	0.439738	77/8978	0.469473	0.654477		100348536/100101588/100348477/100008983/100008677/100350887/100351865/100339049/100341175/100352110/100355084/100357329/100357840/127482561/100009497/100350028/100009088	17
ocu00520	Amino sugar and nucleotide sugar metabolism	1903-12-01	0.447737	54/8978	0.480038	0.666382		100345391/100338170/103347029/100008744/100008950/100340994/100344240/100346668/103347485/100009155/100351563/103345585	12
ocu04936	Alcoholic liver disease	30/1903	0.454271	139/8978	0.489099	0.676107		100346654/100353706/100351157/100352978/100348477/100008983/100353138/100358471/100343573/100354455/100354743/100009124/100342572/100346561/127482788/100009589/100344852/100338228/100339697/100349219/100356542/100352581/100349271/100342249/100339216/100340471/100009497/100009088/100346106/100343190	30
ocu05030	Cocaine addiction	1903-10-01	0.454593	45/8978	0.491501	0.676586		100356949/100343130/100357483/100339066/100359147/100356338/127489904/100008856/100357489/100357007	10
ocu00062	Fatty acid elongation	1903-07-01	0.456189	31/8978	0.495291	0.678962		100339733/100341040/100346386/100352022/100355022/100355110/100349933	7
ocu00260	Glycine, serine and threonine metabolism	1903-10-01	0.478965	46/8978	0.522186	0.71286		100345847/100345273/100009096/100337875/100353463/100357007/100352195/100357743/100342075/100009293	10
ocu03460	Fanconi anemia pathway	1903-11-01	0.483504	51/8978	0.529322	0.719615		100345123/100347269/100355331/100359326/100341377/100345920/100341460/100358262/103351965/100347540/100357338	11
ocu00513	Various types of N-glycan biosynthesis	1903-10-01	0.502371	47/8978	0.552249	0.747695		100353637/100355011/100345726/100355816/100008950/103351004/100345634/100348676/100337742/100353213	10
ocu05160	Hepatitis C	34/1903	0.505152	162/8978	0.557592	0.751835		100353706/100358587/100355675/100355991/100351964/100348477/100009040/100348489/100340963/100338591/100346379/100008806/100009522/100358284/100342500/100338097/100354455/100341175/100355084/100357329/100357840/100009316/100347345/100352900/100339509/100345181/100009300/103346588/100009088/100346106/100343190/100328734/100008930/100342694	34
ocu00052	Galactose metabolism	1903-08-01	0.516657	38/8978	0.572628	0.768957		100009122/100345726/100338306/100340994/100345647/100009526/100009155/100351563	8
ocu00533	Glycosaminoglycan biosynthesis - keratan sulfate	1903-03-01	0.53549	14/8978	0.595924	0.796988		100342947/100345726/100357504	3
ocu04726	Serotonergic synapse	25/1903	0.562653	123/8978	0.629458	0.837416		100341714/100009546/100351964/100101555/100301544/100340993/100356357/100339066/100359147/100346625/100008941/100342201/100352954/108178552/100009356/100009505/100337783/100357007/100009316/100347345/100348672/100350395/100037719/100009407/100009352	25
ocu04130	SNARE interactions in vesicular transport	1903-07-01	0.562653	35/8978	0.634887	0.837416		100345542/100352116/100008773/100343660/100340015/100008775/100338966	7
ocu00601	Glycosphingolipid biosynthesis - lacto and neolacto series	1903-06-01	0.562653	30/8978	0.63509	0.837416		100348508/100342947/100345726/100357504/127487025/100008715	6
ocu00534	Glycosaminoglycan biosynthesis - heparan sulfate / heparin	1903-05-01	0.562653	25/8978	0.636334	0.837416		127489283/100351235/100352420/100343879/100344304	5
ocu04927	Cortisol synthesis and secretion	13/1903	0.563118	65/8978	0.641955	0.838107		100343958/100346742/100337882/100101555/100343130/100357483/100009505/100357489/100349994/100349347/100348672/100350395/100344462	13
ocu00510	N-Glycan biosynthesis	1903-12-01	0.563118	60/8978	0.64032	0.838107		100353637/100355011/100345726/100355816/100359180/103351004/127486830/100345634/100348676/100358153/100337742/100353213	12
ocu00350	Tyrosine metabolism	1903-08-01	0.580751	41/8978	0.664683	0.86435		100008601/100350127/100340431/100348732/103347204/100353463/103345647/100357007	8
ocu05162	Measles	30/1903	0.583198	150/8978	0.672623	0.867993		100353706/100358587/100355675/103349397/100355991/100348477/100008998/100009040/100009037/100009522/100358284/100338345/100338097/100354455/100354743/127486194/100008856/100341175/100355084/100357329/100357840/100359306/100338273/100345181/100342142/100351513/100342249/100009497/100343190/100346109	30
ocu03060	Protein export	1903-05-01	0.583198	26/8978	0.672761	0.867993		100358499/100354778/100343588/100338023/100358027	5
ocu04150	mTOR signaling pathway	34/1903	0.593751	171/8978	0.693439	0.883699		100353706/100353383/100352404/100354566/100351964/100341887/100339336/100338850/100346235/100350521/103348917/100342500/100144342/100342938/100345856/100358697/100009566/100352000/100009316/100347345/100359276/100347954/100345181/100037719/100358702/100345210/100356812/100353543/100342882/100009088/100346106/100353118/100349572/100342870	34
ocu03420	Nucleotide excision repair	1903-11-01	0.593751	57/8978	0.688087	0.883699		100338745/100345985/100358589/100347609/100349199/127486107/103352470/100345366/100341460/100358262/103351965	11
ocu00630	Glyoxylate and dicarboxylate metabolism	1903-07-01	0.593751	37/8978	0.695678	0.883699		100350797/100352714/100343172/100341412/100354776/127488192/100009293	7
ocu00910	Nitrogen metabolism	1903-03-01	0.593751	16/8978	0.690894	0.883699		100009083/100009156/100009226	3
ocu00480	Glutathione metabolism	13/1903	0.600767	68/8978	0.708834	0.894142		100328765/100337901/100346442/100009258/100345744/100349021/100340796/100344987/100358051/100358177/100008879/100346325/100340020	13
ocu04623	Cytosolic DNA-sensing pathway	1903-12-01	0.600767	63/8978	0.70979	0.894142		100101588/100348477/100349407/100338635/100354455/100340100/100352110/127486107/100341275/100352456/100353160/100355546	12
ocu04122	Sulfur relay system	1903-02-01	0.600767	8978-11-01	0.712052	0.894142		127490199/100351966	2
ocu04917	Prolactin signaling pathway	13/1903	0.612605	69/8978	0.729318	0.91176		100353706/100341861/100338345/100343573/100342500/100009316/100347345/100345181/100354019/103346588/100353407/100351533/100341009	13
ocu00531	Glycosaminoglycan degradation	1903-03-01	0.612605	17/8978	0.731625	0.91176		100008950/100101601/100359235	3
ocu03022	Basal transcription factors	1903-08-01	0.620398	44/8978	0.743739	0.923359		100357517/100343990/100338045/100338745/100339543/100356523/100353662/100343365	8
ocu00900	Terpenoid backbone biosynthesis	1903-04-01	0.623333	23/8978	0.750078	0.927728		100350797/100354763/100350927/100342300	4
ocu03010	Ribosome	88/1903	0.625186	441/8978	0.760791	0.930484		100144340/100338405/100338677/100338721/100338996/100340199/100341094/100341292/100342098/100342135/100342204/100342677/100342978/100343129/100343268/100343607/100344405/100345060/100345097/100345507/100345538/100345774/100346213/100346272/100346376/100346954/100346996/100347468/100348261/100348336/100348521/100348918/100349729/100350457/100350949/100351184/100351957/100352118/100352318/100352445…	88
ocu05034	Alcoholism	36/1903	0.625186	186/8978	0.759028	0.930484		100356949/100351964/100352392/100350843/100343130/100357483/100339066/100359147/100346625/100008941/100342201/100352954/108178552/100342500/100356338/127489904/100328558/100355156/100352253/100358981/100355860/100337783/100343938/100344914/100347239/100348415/100350997/100351672/100357489/127490210/100357007/100009316/100347345/100352548/100343293/100357908	36
ocu03450	Non-homologous end-joining	1903-02-01	0.625186	8978-12-01	0.757717	0.930484		100328725/100347656	2
ocu04750	Inflammatory mediator regulation of TRP channels	21/1903	0.631716	112/8978	0.771596	0.940204		100343958/100346742/100337882/100009198/100352392/100342451/100101556/100301544/100348650/100352905/100341281/100009505/103344944/100345181/100348672/100350395/100037719/100008966/100344184/100009081/100354812	21
ocu04660	T cell receptor signaling pathway	20/1903	0.64181	108/8978	0.786829	0.955228		100353706/100008998/100338345/103352473/100342500/100008856/100339465/100340322/100009316/100347345/100353824/100359054/100347273/100347954/100345181/100009487/100348648/100358807/100341923/100009088	20
ocu00380	Tryptophan metabolism	1903-09-01	0.649594	52/8978	0.802249	0.966813		100350797/100008601/100340017/100341040/100355022/103347204/100351221/100352837/100357007	9
ocu00120	Primary bile acid biosynthesis	1903-03-01	0.649594	19/8978	0.800242	0.966813		100341039/100343291/100345427	3
ocu04974	Protein digestion and absorption	21/1903	0.664475	116/8978	0.824414	0.98896		100327258/100302415/100008756/100349382/100009577/100350113/100340689/100353761/100345171/100357900/100345384/100341424/100344271/100357883/100351872/100009443/100342764/100101617/100344654/100356317/100339605	21
ocu04136	Autophagy - other	1903-06-01	0.664475	37/8978	0.826638	0.98896		100338183/100349970/100359276/100009300/100353118/100340527	6
ocu04550	Signaling pathways regulating pluripotency of stem cells	26/1903	0.669947	143/8978	0.839507	0.997104		100353706/100339765/100009569/100350518/100339336/100338685/100009417/100350521/103348917/100342500/100350879/100144342/100341426/127486194/100339907/100356661/100009316/100347345/100338305/100345181/100351337/100342616/100338277/100354709/100339216/100342870	26
ocu00563	Glycosylphosphatidylinositol (GPI)-anchor biosynthesis	1903-05-01	0.669947	32/8978	0.838914	0.997104		100351916/127486830/100348476/100339282/100348342	5
ocu05168	Herpes simplex virus 1 infection	63/1903	0.67189	392/8978	0.996268	0.999996		100353706/100358587/100355675/103349397/100355991/100348477/100342022/100349407/100009522/100358284/100338850/100352051/100343128/100338097/100341787/100338854/100354455/100354743/100340313/100341175/100343144/100345635/100348309/100351163/100351416/100352672/100352927/100354611/100355084/100355380/100357329/100357840/100358028/127482571/100347351/100345181/100355091/100339517/100352415/100355948…	63
ocu04080	Neuroactive ligand-receptor interaction	60/1903	0.67189	365/8978	0.991685	0.999996		100009237/100008731/100009398/100338084/100345154/100009198/100351157/100352978/100355898/100357945/100126073/100351711/100353026/100346845/100339376/100356357/100341777/100338519/100342060/100349640/100356338/127489904/100348650/100009356/100008747/100341013/103352130/100349075/100348068/127487729/103348903/100008936/100301541/100008890/100350587/100355479/100349719/108175884/100343482/103344944…	60
ocu05207	Chemical carcinogenesis - receptor activation	41/1903	0.67189	222/8978	0.862926	0.999996		100343958/100346742/100337882/100338084/100353706/100008996/100341204/100358587/103349397/103346801/100101555/100343130/100357483/100008806/100338850/100008681/100338345/100339066/100359147/100342500/100349021/100354455/100339551/100008856/100350359/100328948/100357489/100358177/100009316/100347345/100008879/100343819/100345181/100037719/100358702/100341009/100037718/100037707/100008907/100008899…	41
ocu04141	Protein processing in endoplasmic reticulum	30/1903	0.67189	193/8978	0.981767	0.999996		100349346/100346462/100355675/103349397/100009295/100345752/100355816/100346313/100344900/100345546/100009522/100358284/100354561/100359231/100344248/100357489/103351004/103352470/100338006/100340644/100342564/100337742/100354913/100353213/100344895/100353960/100347089/100351467/100351911/103346422	30
ocu04142	Lysosome	21/1903	0.67189	134/8978	0.957862	0.999996		100355117/100348941/100351669/100347710/100350237/100344094/100009063/100101597/100101598/100008830/100101623/100008950/100350946/100009331/100349164/103346838/100347816/103347422/100341463/100340764/100343812	21
ocu03013	Nucleocytoplasmic transport	20/1903	0.67189	135/8978	0.977242	0.999996		100358381/100008677/100352665/103348956/100358712/100350359/100350325/100358924/100341571/100347548/100344129/100356186/100347351/100356812/100343101/100344119/100352992/100341564/100343451/100354997	20
ocu04972	Pancreatic secretion	20/1903	0.67189	122/8978	0.925549	0.999996		100343958/100346742/100337882/100302415/100008756/100349382/100009577/100350113/100354976/100009156/100009505/100008745/100009443/100353865/100356734/100348672/100350395/100037719/100339873/100009352	20
ocu03040	Spliceosome	17/1903	0.67189	183/8978	0.999996	0.999996		100346500/103345365/100355678/100351285/100356502/100348667/103347114/100345325/100339904/100337770/100354441/100350234/100348389/100344333/103345768/100347748/100350179	17
ocu00983	Drug metabolism - other enzymes	17/1903	0.67189	100/8978	0.878016	0.999996		100342139/100356889/100349021/100126071/100342572/100351488/100358177/100008879/100533971/100533972/100341410/100354529/100346325/100359019/100037718/100037707/100357952	17
ocu03015	mRNA surveillance pathway	16/1903	0.67189	105/8978	0.952292	0.999996		100358381/127485576/100340648/100353973/100355660/100347351/100356494/100352625/100009300/100355159/100346997/100009533/100340576/100348044/100341564/100346627	16
ocu04976	Bile secretion	15/1903	0.67189	96/8978	0.933389	0.999996		100008909/100354688/100343958/100346742/100337882/100302415/100008756/100349382/100009577/100350113/100009156/100009015/100009262/100037718/100037707	15
ocu04146	Peroxisome	15/1903	0.67189	95/8978	0.926746	0.999996		100344347/100328719/100009020/100338389/100342558/100344837/100340796/100344175/100350232/100356864/127486972/127488880/100338228/100008833/100343561	15
ocu00564	Glycerophospholipid metabolism	14/1903	0.67189	97/8978	0.966008	0.999996		100358338/100338223/100358196/100341525/100008978/100345732/100341001/100342288/100353609/100344433/100343827/100339661/100341396/100355276	14
ocu00590	Arachidonic acid metabolism	1903-12-01	0.67189	95/8978	0.989152	0.999996		100341714/100301544/100328948/100342572/100350957/100358051/100357727/100353228/103346149/100348401/100009407/100339354	12
ocu04721	Synaptic vesicle cycle	1903-12-01	0.67189	79/8978	0.931358	0.999996		100351669/100347710/100350237/100353383/100352404/100354566/100339715/100349480/100340057/100008773/100345810/100008775	12
ocu03008	Ribosome biogenesis in eukaryotes	1903-11-01	0.67189	90/8978	0.990625	0.999996		100342038/100343424/100344594/108178276/127488125/127489678/100337799/100347351/100351855/100339092/100343451	11
ocu03018	RNA degradation	1903-11-01	0.67189	89/8978	0.989323	0.999996		100347070/100352833/100008769/100357530/100353471/103347114/100356494/100345647/100009526/100341647/100350123	11
ocu00140	Steroid hormone biosynthesis	1903-11-01	0.67189	87/8978	0.986204	0.999996		100350282/100348005/100353430/100328948/100342572/100343291/103345647/100343882/100356754/100037718/100037707	11
ocu04137	Mitophagy - animal	1903-11-01	0.67189	81/8978	0.97113	0.999996		100348536/100343573/100359077/100008856/100346213/127491124/100358182/100354979/100008682/127489362/100337985	11
ocu04742	Taste transduction	1903-10-01	0.67189	81/8978	0.986443	0.999996		100346742/100337882/100101555/100353026/100346845/100339376/100346625/100348672/100350395/100351658	10
ocu00830	Retinol metabolism	1903-09-01	0.67189	88/8978	0.997969	0.999996		100008601/100350630/100009020/100328948/100341926/100340133/100353716/100037718/100037707	9
ocu00982	Drug metabolism - cytochrome P450	1903-08-01	0.67189	81/8978	0.997891	0.999996		100008601/100349021/100342572/100358177/100357007/100008879/100037718/100037707	8
ocu00561	Glycerolipid metabolism	1903-08-01	0.67189	80/8978	0.997537	0.999996		100009122/100350630/100358196/100341525/100343223/100345732/100353609/100344187	8
ocu04622	RIG-I-like receptor signaling pathway	1903-08-01	0.67189	71/8978	0.990531	0.999996		100348477/100348597/100354455/100341830/100346051/100344187/100009088/100343190	8
ocu00600	Sphingolipid metabolism	1903-08-01	0.67189	52/8978	0.888218	0.999996		100344726/100008950/100337900/100357932/100354454/100338930/100357790/100344536	8
ocu03050	Proteasome	1903-08-01	0.67189	52/8978	0.888218	0.999996		127487016/100343608/100342159/100356829/100351783/100338005/100338269/100339897	8
ocu00970	Aminoacyl-tRNA biosynthesis	1903-07-01	0.67189	45/8978	0.869172	0.999996		100337811/100356898/100346657/100349405/100339740/100356114/100339248	7
ocu05204	Chemical carcinogenesis - DNA adducts	1903-06-01	0.67189	87/8978	0.999938	0.999996		100349021/100342572/100358177/100008879/100037718/100037707	6
ocu00980	Metabolism of xenobiotics by cytochrome P450	1903-06-01	0.67189	86/8978	0.999925	0.999996		100349021/100342572/100358177/100008879/100037718/100037707	6
ocu03410	Base excision repair	1903-06-01	0.67189	51/8978	0.973167	0.999996		100328641/103348750/100338717/100358589/100345366/100350130	6
ocu04913	Ovarian steroidogenesis	1903-06-01	0.67189	51/8978	0.973167	0.999996		100343958/100346742/100337882/100341714/100301544/100144342	6
ocu02010	ABC transporters	1903-06-01	0.67189	48/8978	0.958612	0.999996		100341298/100008909/100354688/127482704/103352242/100345135	6
ocu00040	Pentose and glucuronate interconversions	1903-06-01	0.67189	42/8978	0.906477	0.999996		100009122/100009108/100356074/100343223/100037718/100037707	6
ocu01250	Biosynthesis of nucleotide sugars	1903-06-01	0.67189	42/8978	0.906477	0.999996		103347029/100008744/100340994/100346668/100009155/100351563	6
ocu03030	DNA replication	1903-06-01	0.67189	38/8978	0.845983	0.999996		100354472/100358589/100345366/100341460/100358262/103351965	6
ocu00565	Ether lipid metabolism	1903-05-01	0.67189	49/8978	0.986825	0.999996		100341001/100338757/100340157/100339661/100341396	5
ocu00053	Ascorbate and aldarate metabolism	1903-05-01	0.67189	39/8978	0.938221	0.999996		100356074/100343223/100008619/100037718/100037707	5
ocu05033	Nicotine addiction	1903-05-01	0.67189	39/8978	0.938221	0.999996		100339376/100356357/100356338/127489904/100341013	5
ocu00760	Nicotinate and nicotinamide metabolism	1903-05-01	0.67189	35/8978	0.891558	0.999996		100008601/100346932/100356979/100349854/100349271	5
ocu04975	Fat digestion and absorption	1903-04-01	0.67189	58/8978	0.999285	0.999996		100350797/100328797/100350630/100348732	4
ocu01040	Biosynthesis of unsaturated fatty acids	1903-03-01	0.67189	32/8978	0.977915	0.999996		100346386/100352022/100346561	3
ocu04744	Phototransduction	1903-03-01	0.67189	27/8978	0.946074	0.999996		100352392/103344966/100337783	3
ocu00340	Histidine metabolism	1903-03-01	0.67189	23/8978	0.893899	0.999996		100347984/100347399/100357007	3
ocu00430	Taurine and hypotaurine metabolism	1903-03-01	0.67189	23/8978	0.893899	0.999996		103351357/100346442/100358051	3
ocu00100	Steroid biosynthesis	1903-03-01	0.67189	22/8978	0.87514	0.999996		127489716/100359315/100358493	3
ocu04614	Renin-angiotensin system	1903-03-01	0.67189	21/8978	0.853494	0.999996		100327258/100356733/100342764	3
ocu00591	Linoleic acid metabolism	1903-02-01	0.67189	42/8978	0.999456	0.999996		100301544/100342572	2
ocu04977	Vitamin digestion and absorption	1903-02-01	0.67189	27/8978	0.986796	0.999996		100328797/100009317	2
ocu00511	Other glycan degradation	1903-02-01	0.67189	21/8978	0.955484	0.999996		100008950/103346838	2
ocu04950	Maturity onset diabetes of the young	1903-01-01	0.67189	25/8978	0.997431	0.999996		100008709	1
ocu00515	Mannose type O-glycan biosynthesis	1903-01-01	0.67189	23/8978	0.995857	0.999996		100345726	1
ocu00603	Glycosphingolipid biosynthesis - globo and isoglobo series	1903-01-01	0.67189	16/8978	0.977961	0.999996		100008950	1

## Sheet: Treat.7w vs Treat.4w
ID	Description	GeneRatio	BgRatio	pvalue	p.adjust	qvalue	geneID	Count
ocu03010	Ribosome	9/12	441/8978	2.96547e-10	2.37238e-09	1.87293e-09	100340199/100341094/100341783/100342677/100345060/100346213/100349729/100353302/100353606	9
ocu04970	Salivary secretion	2/12	86/8978	0.00562415	0.0224966	0.0177605	100340903/100341160	2
ocu04137	Mitophagy - animal	1/12	81/8978	0.103111	0.20701	0.163429	100346213	1
ocu04146	Peroxisome	1/12	95/8978	0.119911	0.20701	0.163429	100350232	1
ocu05146	Amoebiasis	1/12	103/8978	0.129381	0.20701	0.163429	100350232	1
ocu04120	Ubiquitin mediated proteolysis	1/12	171/8978	0.206186	0.273251	0.215725	100346213	1
ocu05167	Kaposi sarcoma-associated herpesvirus infection	1/12	202/8978	0.239095	0.273251	0.215725	100346213	1
ocu05012	Parkinson disease	1/12	329/8978	0.361275	0.361275	0.285217	100346213	1

## Sheet: Info
Enrichment has been conducted using the R package "clusterProfiler" (version 4.8.3)

## Sheet: Top_7vs2
ID	Description	GeneRatio	BgRatio	pvalue	p.adjust	qvalue	Band
ocu00190	Oxidative phosphorylation	0.0530741	181/8978	8.51544e-25	2.80158e-22	1.88236e-22	1
ocu05415	Diabetic cardiomyopathy	0.0630583	245/8978	1.27464e-22	2.09678e-20	1.40881e-20	1
ocu04714	Thermogenesis	0.0662112	276/8978	2.4291e-20	2.66392e-18	1.78986e-18	1
ocu05020	Prion disease	0.0719916	326/8978	4.20329e-18	3.4572e-16	2.32287e-16	1
ocu04932	Non-alcoholic fatty liver disease	0.0478192	189/8978	8.22083e-17	5.4093e-15	3.63447e-15	1
ocu05208	Chemical carcinogenesis - reactive oxygen species	0.0620074	275/8978	1.49636e-16	8.20506e-15	5.51292e-15	1
ocu05016	Huntington disease	0.0714661	359/8978	1.21952e-13	5.73173e-12	3.85111e-12	2
ocu05012	Parkinson disease	0.0667367	329/8978	1.68529e-13	6.93075e-12	4.65672e-12	2
ocu05010	Alzheimer disease	0.0809249	439/8978	4.11702e-12	1.505e-10	1.0112e-10	3
ocu04510	Focal adhesion	0.0436153	206/8978	2.55282e-10	8.39879e-09	5.64308e-09	4
ocu04260	Cardiac muscle contraction	0.0262743	103/8978	5.45616e-10	1.63189e-08	1.09645e-08	5
ocu05014	Amyotrophic lateral sclerosis	141/1903	433/8978	1.10467e-08	3.02864e-07	2.03492e-07	1
ocu05140	Leishmaniasis	41/1903	84/8978	1.59499e-08	4.03655e-07	2.71213e-07	1
ocu05152	Tuberculosis	75/1903	198/8978	4.40552e-08	1.0353e-06	6.95609e-07	1
ocu04145	Phagosome	65/1903	165/8978	6.30004e-08	1.38181e-06	9.28428e-07	1
ocu05414	Dilated cardiomyopathy	45/1903	102/8978	1.4971e-07	3.07841e-06	2.06836e-06	1
ocu05410	Hypertrophic cardiomyopathy	42/1903	94/8978	2.52343e-07	4.88358e-06	3.28124e-06	1
ocu05416	Viral myocarditis	37/1903	79/8978	3.0381e-07	5.55297e-06	3.731e-06	1
ocu05145	Toxoplasmosis	52/1903	133/8978	1.69565e-06	2.93616e-05	1.97278e-05	1
ocu04810	Regulation of actin cytoskeleton	79/1903	232/8978	3.04114e-06	4.76445e-05	3.2012e-05	1
ocu04723	Retrograde endocannabinoid signaling	56/1903	149/8978	2.96176e-06	4.76445e-05	3.2012e-05	1
ocu04066	HIF-1 signaling pathway	49/1903	127/8978	5.20625e-06	7.7857e-05	5.23116e-05	1
ocu01200	Carbon metabolism	49/1903	129/8978	8.64871e-06	0.000123714	8.31226e-05	1
ocu04380	Osteoclast differentiation	45/1903	117/8978	1.37271e-05	0.000188176	0.000126434	1
ocu05150	Staphylococcus aureus infection	36/1903	87/8978	1.52193e-05	0.000200286	0.000134571	1
ocu05412	Arrhythmogenic right ventricular cardiomyopathy	33/1903	79/8978	2.70557e-05	0.000342358	0.000230028	1
ocu05166	Human T-cell leukemia virus 1 infection	79/1903	247/8978	4.01315e-05	0.000481213	0.000323323	1
ocu04022	cGMP-PKG signaling pathway	62/1903	183/8978	4.09543e-05	0.000481213	0.000323323	1
ocu04151	PI3K-Akt signaling pathway	106/1903	353/8978	4.36058e-05	0.0004947	0.000332385	1
ocu04512	ECM-receptor interaction	36/1903	91/8978	4.85228e-05	0.000532133	0.000357536	1
ocu05323	Rheumatoid arthritis	38/1903	98/8978	5.09672e-05	0.00054091	0.000363433	1
ocu05132	Salmonella infection	86/1903	278/8978	7.21953e-05	0.00073536	0.000494083	1
ocu05135	Yersinia infection	50/1903	142/8978	7.37595e-05	0.00073536	0.000494083	1
ocu04360	Axon guidance	61/1903	185/8978	0.000114159	0.00110465	0.000742209	1
ocu04670	Leukocyte transendothelial migration	43/1903	119/8978	0.00011784	0.0011077	0.000744254	1
ocu04611	Platelet activation	46/1903	130/8978	0.000123468	0.00112836	0.000758134	1
ocu04662	B cell receptor signaling pathway	29/1903	71/8978	0.000132295	0.00117635	0.000790383	1
ocu04514	Cell adhesion molecules	52/1903	153/8978	0.000151922	0.00131533	0.000883758	1
ocu04928	Parathyroid hormone synthesis, secretion and action	40/1903	110/8978	0.000171989	0.00145088	0.000974838	1
ocu04964	Proximal tubule bicarbonate reclamation	13/1903	23/8978	0.000221577	0.00182247	0.0012245	2
ocu05205	Proteoglycans in cancer	68/1903	217/8978	0.000264626	0.00212346	0.00142674	2
ocu04666	Fc gamma R-mediated phagocytosis	37/1903	102/8978	0.000314125	0.00246065	0.00165329	2
ocu04350	TGF-beta signaling pathway	39/1903	110/8978	0.000375448	0.00287262	0.00193009	2
ocu04392	Hippo signaling pathway - multiple species	15/1903	30/8978	0.000439992	0.00328994	0.00221049	2
ocu04062	Chemokine signaling pathway	59/1903	187/8978	0.000541411	0.00395832	0.00265956	2
ocu04261	Adrenergic signaling in cardiomyocytes	50/1903	156/8978	0.000941923	0.00637837	0.00428558	2
ocu04640	Hematopoietic cell lineage	35/1903	100/8978	0.000957718	0.00637837	0.00428558	2
ocu05211	Renal cell carcinoma	28/1903	75/8978	0.000969358	0.00637837	0.00428558	2
ocu04330	Notch signaling pathway	24/1903	61/8978	0.000931313	0.00637837	0.00428558	2
ocu00020	Citrate cycle (TCA cycle)	17/1903	38/8978	0.000950187	0.00637837	0.00428558	2
ocu04922	Glucagon signaling pathway	36/1903	104/8978	0.00102739	0.0066277	0.0044531	2
ocu05230	Central carbon metabolism in cancer	27/1903	72/8978	0.00109638	0.00693669	0.00466071	2
ocu05220	Chronic myeloid leukemia	27/1903	73/8978	0.00139442	0.00865593	0.00581585	2
ocu05163	Human cytomegalovirus infection	69/1903	234/8978	0.00153918	0.00937757	0.00630072	2
ocu04919	Thyroid hormone signaling pathway	39/1903	118/8978	0.00175361	0.0101217	0.00680072	2
ocu04115	p53 signaling pathway	29/1903	81/8978	0.00169944	0.0101217	0.00680072	2
ocu04216	Ferroptosis	18/1903	43/8978	0.00173574	0.0101217	0.00680072	2
ocu04270	Vascular smooth muscle contraction	46/1903	145/8978	0.00186495	0.0105788	0.0071078	2
ocu04814	Motor proteins	59/1903	196/8978	0.00193213	0.0107741	0.00723902	2
ocu05206	MicroRNAs in cancer	54/1903	177/8978	0.00212596	0.0116574	0.00783249	2
ocu04371	Apelin signaling pathway	46/1903	146/8978	0.00217534	0.0117325	0.00788301	2
ocu04970	Salivary secretion	30/1903	86/8978	0.00227215	0.012057	0.00810104	2
ocu05165	Human papillomavirus infection	91/1903	331/8978	0.00330756	0.0162416	0.0109126	3
ocu04520	Adherens junction	33/1903	99/8978	0.00327618	0.0162416	0.0109126	3
ocu04064	NF-kappa B signaling pathway	33/1903	99/8978	0.00327618	0.0162416	0.0109126	3
ocu05100	Bacterial invasion of epithelial cells	29/1903	84/8978	0.0031763	0.0162416	0.0109126	3
ocu05144	Malaria	18/1903	45/8978	0.00317195	0.0162416	0.0109126	3
ocu05146	Amoebiasis	34/1903	103/8978	0.00342324	0.0163224	0.0109669	3
ocu05310	Asthma	14/1903	32/8978	0.00340078	0.0163224	0.0109669	3
ocu04218	Cellular senescence	50/1903	166/8978	0.00404609	0.0188705	0.012679	3
ocu04650	Natural killer cell mediated cytotoxicity	34/1903	104/8978	0.00407237	0.0188705	0.012679	3
ocu04390	Hippo signaling pathway	47/1903	155/8978	0.00453163	0.020707	0.0139129	3
ocu05213	Endometrial cancer	21/1903	57/8978	0.00480142	0.0216393	0.0145393	3
ocu05170	Human immunodeficiency virus 1 infection	62/1903	218/8978	0.00634149	0.0281939	0.0189433	3
ocu00010	Glycolysis / Gluconeogenesis	25/1903	73/8978	0.00664198	0.0291361	0.0195764	3
ocu04672	Intestinal immune network for IgA production	20/1903	55/8978	0.00690893	0.0299084	0.0200952	4
ocu04978	Mineral absorption	21/1903	59/8978	0.00756141	0.0323078	0.0217074	4
ocu01522	Endocrine resistance	30/1903	93/8978	0.00827239	0.0348925	0.023444	4
ocu04110	Cell cycle	49/1903	169/8978	0.0096951	0.0401584	0.0269821	4
ocu04921	Oxytocin signaling pathway	47/1903	161/8978	0.00976496	0.0401584	0.0269821	4
ocu05133	Pertussis	26/1903	79/8978	0.0101327	0.0411563	0.0276526	4
ocu04210	Apoptosis	43/1903	146/8978	0.0111118	0.0437078	0.029367	4
ocu04722	Neurotrophin signaling pathway	37/1903	122/8978	0.0108946	0.0437078	0.029367	4
ocu04540	Gap junction	29/1903	91/8978	0.0111594	0.0437078	0.029367	4
ocu04971	Gastric acid secretion	25/1903	76/8978	0.0116262	0.0450001	0.0302352	5
ocu04310	Wnt signaling pathway	49/1903	171/8978	0.0122056	0.0466936	0.0313731	5
ocu05332	Graft-versus-host disease	15/1903	40/8978	0.0133584	0.049942	0.0335557	5
ocu04710	Circadian rhythm	13/1903	33/8978	0.0132178	0.049942	0.0335557	5
ocu04020	Calcium signaling pathway	70/1903	259/8978	0.0138002	0.0510142	0.034276	5
ocu04010	MAPK signaling pathway	79/1903	298/8978	0.0151497	0.0544497	0.0365843	5
ocu04340	Hedgehog signaling pathway	19/1903	55/8978	0.0151646	0.0544497	0.0365843	5
ocu00640	Propanoate metabolism	14/1903	37/8978	0.0152261	0.0544497	0.0365843	5
ocu01230	Biosynthesis of amino acids	24/1903	74/8978	0.0158861	0.0561992	0.0377598	5
ocu04610	Complement and coagulation cascades	25/1903	78/8978	0.0163715	0.0573002	0.0384996	5
ocu04713	Circadian entrainment	29/1903	94/8978	0.0177176	0.0613588	0.0412265	6
ocu05203	Viral carcinogenesis	59/1903	216/8978	0.0180922	0.0620036	0.0416597	6
ocu05161	Hepatitis B	49/1903	175/8978	0.0188393	0.0638984	0.0429329	6
ocu04068	FoxO signaling pathway	38/1903	131/8978	0.0207336	0.0696057	0.0467676	6
