# Supplementary material for: Multiomics coupled with vibrational spectroscopy identify early mechanisms of experimental aortic valve stenosis
Source: Research Square preprint supplement (doi:10.21203/rs.3.rs-4330270/v1), 2024-05-02
Supplement: Supplementary file 8 [file 8cc5eb4df8d828b045718547.xlsx]

## Sheet: Top metabolites
MZRT	REACTION	mass error	FORMULA	METABOLITE	HMDB	AUC	P VALUE	VIP	REGULATION (Experimental)
174.1132_1.34	no	<0.005	C8H15NO3	Hexanoylglycine	HMDB0000701	0.85	0.03	24	up
202.0699_0.91	no	<0.005	C8H11NO5	N-acetyl-L-2-aminoadipate(2-)	HMDB0062715	0.9	0.01	22	down
431.2278_4.49	[ +C_{9} H_{11} N_{3} O_{4} ]	-0.009	C9H21N2O3	3-Hydroxy-N6,N6,N6-trimethyl-L-lysine	HMDB0001422	0.9	0.01	22	down
505.3063_6.49	no	<0.005	C26H40N4O6	Neuromedin N (1-4)	HMDB0013021	0.9	0.03	22	down
256.1021_12.59	no	<0.005	C9H13N5O4	7,8-Dihydroneopterin	HMDB0002275	0.925	0.05	22	down
350.1875_4.22	[ +C_{5} H_{8} O_{4} ]	-0.002	C_{9} H_{19} N_{3} O_{3}	Gamma-glutamyl-L-putrescine	HMDB0012230	0.95	0.001	21	up
614.3504_8.47	no	0.007	C30H58NO7P	LysoPE(0:0/18:0)	HMDB0010400	0.9	0.04	21	down
583.3033_8.17		0.002	C_{6} H_{14} O_{10} P_{2}	5-Diphosphomevalonic acid	HMDB0001090	0.925	0.01	20	down
226.0826_7.45	no	<0.005	C12H13NO2	3-Indolebutyric acid	HMDB0002096	0.875	0.02	19	down
262.1319_2.18	no	<0.005	C11H19NO6	Methylmalonylcarnitine	HMDB0013133	0.85	0.02	19	down
877.5128_10.62	no	-0.007	C_{43} H_{83} O_{13} P	PI(18:0/16:0)	HMDB0009805	0.8375	0.03	19	up
187.06_1.64	no	<0.005	C8H10O5	2-hydroxy-3-(2-methylidenecyclopropyl)butanedioic acid	HMDB0059927	0.85	0.04	19	down
235.1204_3.67				unknown		0.85	0.04	19	up
614.2875_7.52	[ +C_{4} H_{2} N_{2} O]	-0.009	C_{23} H_{48} NO_{7} P	LysoPE(0:0/18:0)	HMDB0011129	0.85	0.04	19	down
393.1218_4.82	[ +C_{4} H_{3} N_{3} ]	-0.004	C_{10} H_{19} N_{3} O_{5}	Gamma glutamyl ornithine	HMDB0002248	0.95	0.001	18	down
777.4858_13.6		0.002	C40H54O	3-cis-Hydroxy-b,e-Caroten-3'-one	HMDB0002890	0.9	0.04	17	down
326.1853_7.44	[ +C_{5} H_{4} N_{2} O]	-0.001	C_{9} H_{19} N_{3} O_{4}	Gamma-glutamyl-L-putrescine	HMDB0012231	0.8	0.04	17	down
254.0984_4.89	no	0.0056	C12H15NO5	N-lactoyl-Tyrosine	HMDB0062177	0.9	0.04	15	up
902.5662_10.82	no	-0.008	C_{52} H_{82} NO_{8} P	PC(22:5(4Z,7Z,10Z,13Z,16Z)/22:6(4Z,7Z,10Z,13Z,16Z,19Z))	HMDB0008682	0.825	0.05	15	down

## Sheet: Total results
sample	class	Taurine	L-Homoserine	L-Threonine	L-Anserine	L-Carnitine	(3-Carboxypropyl)trimethylammonium chloride	Biotin	Trimethyllysine	L-Norleucine	2-Methylglutaric acid	Salicylamide	L-Valine	Uracil	4- Acetamidobutaric acid	Creatine	Deoxyguanosine	Cytosine	2-Aminoisobutyric acid	Hypoxanthine	Methyl 4-aminobutyrate	Hippuric acid	Trigonelline	L-Glutamic acid	Adenosine	Sphinganine	3-Hydroxy-3-methylglutaric acid	3-Nitro-L-tyrosine	L-Serine	3-Hydroxyphenylacetic acid	L-Phenylalanine	Octopamine	2-Aminoadipic acid	gamma-Aminobutyric acid	D-Mannosamine	Tyramine	4-Imidazoleacrylic acid	Sebacic acid	L-Methionine	O-Phosphorylethanolamine	Nicotinamide	L-Arginine	1-Aminocyclopropanecarboxylic acid	3-Methylglutaric acid	Salsolinol	Heptadecanoate	N-Acetyl-DL-serine	L-Pyroglutamic acid	5-Aminovaleric acid
1059	E7	149071	15557	24905	101388	2464425	110620	0.001	49598	419327	1762	0.001	0.001	7541	4306	5453172	40663	4834	4406	970929	5617086	14902	17771	236327	41278	4034	8359	3912	7632	3189	175498	5276	24367	4406	70403	11286	19652	3522	128290	2100	1870422	71596	4491	1762	3017	0.001	238274	94637	5447776
1062	E7	70247	2539	12813	61414	2213265	80343	383	51271	186839	0.001	0.001	0.001	2947	0.001	2103208	6978	6325	4861	1602637	3302626	44515	59625	20737	10132	4202	0.001	1912	0.001	0.001	103643	0.001	0.001	4861	45277	5943	9104	2036	41647	0.001	1272726	21575	2250	0.001	1821	0.001	20737	38857	3228964
E51	E7	108214	5252	12695	11029	1459074	83190	176	26588	232399	0.001	0.001	22322	4447	0.001	4053712	45105	3284	3044	1475668	7171044	41410	41213	45739	43450	2978	0.001	2217	0.001	2644	110605	0.001	0.001	0.001	55880	9237	18837	1644	56844	0.001	1802112	60617	4003	0.001	3644	3758	45739	60792	7001897
E54	E7	237657	4853	8808	23753	1594523	133907	640	57746	185100	2206	0.001	10272	6061	3996	4230984	197232	4923	3005	679114	8556648	31566	33774	259402	191908	2391	3281	3021	6972	4654	98270	4304	10821	0.001	68007	5363	4674	1711	73959	59284	1719464	143698	15172	2206	3103	0.001	261432	100279	8241942
E55	E7	143267	4651	8069	23715	1501104	116482	0.001	70263	226038	2528	3349	14770	5649	2809	3502860	55579	4525	6614	820454	9542743	39813	36098	192721	55946	3771	0.001	2669	0.001	2691	119944	6048	10690	6614	61141	6665	9581	2571	71434	37826	1558643	117622	7999	2528	2699	0.001	194668	83719	9198344
1120	E2	219991	3531	6258	32245	5277324	253226	484	64471	115172	0.001	0.001	4924	0.001	2722	6478852	29451	0.001	0.001	925773	1514572	3787	10142	128038	29982	4054	0.001	2681	0.001	0.001	58405	0.001	0.001	0.001	50072	7065	8955	3528	31997	22311	1700344	44993	5407	0.001	3656	2526	128599	68185	1497794
1122	E2	165188	3838	8565	29609	4006154	216883	188	71207	200664	0.001	0.001	5747	3905	0.001	4775485	35185	3348	4124	1026590	3579170	10892	11286	180797	35185	0.001	4516	0.001	0.001	0.001	102113	0.001	0.001	0.001	98529	7376	14349	0.001	50202	30594	1908267	65539	5158	0.001	0.001	3611	182393	70269	3514002
E50	E2	184720	2378	3273	10108	1211282	135964	0.001	83036	93327	4803	0.001	9176	9878	0.001	4109711	194878	2904	2927	826482	1493183	28220	49455	195830	199057	3263	0.001	5838	0.001	2579	58580	3993	0.001	0.001	72072	8018	6436	2496	16799	28922	1740835	67042	5787	4803	2521	0.001	197697	103910	1450814
1125	Control	217898	4312	7776	60352	6068197	426568	0.001	83825	156485	0.001	0.001	22231	0.001	0.001	7674794	22334	0.001	3274	1357226	3194382	9456	14866	144834	23786	0.001	2681	3275	6784	2619	100733	3221	13601	0.001	75492	5689	10881	4765	48441	25838	2053972	59475	6945	0.001	2527	3622	147018	101412	3133660
C51	Control	94375	4379	7710	2804	1233138	61609	0.001	64646	115756	0.001	0.001	12621	0.001	0.001	2079267	7727	0.001	0.001	378139	1392851	16660	28192	130558	9272	4746	0.001	0.001	0.001	3352	60234	0.001	0.001	0.001	32368	5131	51187	0.001	36030	26002	747084	54900	0.001	0.001	2911	0.001	131383	123984	1345815
C56	Control	53806	3281	3878	16490	129045	98786	0.001	25326	46205	2161	0.001	0.001	4426	0.001	2997896	0.001	0.001	2700	434479	1003771	2982	20108	85703	11252	3508	0.001	0.001	0.001	1687	27956	0.001	7153	0.001	47157	9724	11598	2168	19153	12141	792872	48954	0.001	2161	2771	3045	85761	71888	1002671
C57	Control	106555	3617	7116	10247	128831	111793	4395	40753	147564	5840	0.001	0.001	0.001	0.001	3531800	30491	0.001	7353	644812	1520215	13977	27400	151786	31314	0.001	3492	1909	0.001	2267	77553	0.001	16132	0.001	47581	9950	5142	2265	38720	24685	1242871	99303	5406	5840	3466	0.001	153653	117367	39305
1121	Control	465411	5962	9920	136622	9586137	605000	840	38901	158911	0.001	0.001	0.001	3827	0.001	11430118	149498	0.001	4029	1431920	5143132	8954	26108	128819	156643	4047	0.001	2529	9980	2834	114898	0.001	11690	0.001	55602	4970	5148	2610	52542	17943	3782120	44403	9164	0.001	0.001	3737	129692	130537	4993764
QC2	qc	177928	3287	11433	46261	3438469	221022	0.001	53003	182741	3050	0.001	13379	0.001	0.001	5898552	69274	3493	6209	1073352	4850453	25453	31063	135749	71208	4212	0.001	0.001	6037	0.001	98527	6311	0.001	0.001	56450	9675	9963	4768	56648	23412	1754803	62779	4323	3050	0.001	0.001	137588	79890	4731622
QC3	qc	166447	4930	8356	45207	3544101	211278	0.001	57842	175021	0.001	2329	12794	3176	0.001	5315970	65739	0.001	6341	1015035	4567696	21433	23096	131249	67401	3342	0.001	0.001	0.001	2905	91140	2480	0.001	0.001	57292	11217	5789	3250	48713	21470	1799175	67382	3937	0.001	3132	0.001	131947	88226	4414364
QC4	qc	162893	3854	6934	38745	3141446	201222	304	53068	162879	0.001	0.001	10558	6381	0.001	5372706	66978	3567	4987	988282	4102307	21341	35140	125003	68919	0.001	0.001	0.001	3702	0.001	90114	0.001	0.001	0.001	54699	8638	9045	0.001	47242	21342	1665825	57462	5012	0.001	2947	0.001	125756	90645	4002977
QC5	qc	165406	2921	4484	37902	3297713	204069	171	57509	169747	0.001	0.001	10160	9873	0.001	5428808	63983	0.001	4961	963610	4148893	20123	28059	115420	65616	5400	0.001	3171	0.001	0.001	94635	0.001	0.001	0.001	57576	3800	13913	0.001	48068	18294	1734462	56937	0.001	0.001	0.001	0.001	117532	78453	4064285
			IROA DB
			BIBLIOGRAPHY SUSPECT LIST
			mzrt
[truncated: 3,578 more columns]

## Sheet: higher VIPs
OPLSDA
MZRT	VIP
624.7218_13	2.23707		The higher VIP the more differentiating power
429.2651_9.54	2.21221
505.3063_6.49	2.19248
Pyrrolidonecarboxylic acid	2.19179
431.2278_4.49	2.18775
491.1134_13.7	2.18531
202.0699_0.91	2.17426
455.5433_12.85	2.15999
256.1021_12.59	2.15611
730.787_13.69	2.15554
350.1875_4.22	2.14717
Pyroglutamic acid	2.13107
796.4672_9.27	2.11886
408.2287_7.51	2.10551
Uridine	2.09597
652.3629_9.37	2.09041
614.3504_8.47	2.07528
466.7824_9.14	2.07185
356.7164_7.59	2.06069
625.8281_9.07	2.05035
212.0945_2.99	2.03724
987.1135_13.47	2.03428
304.1724_6.99	2.02589
423.1691_6.12	2.01444
557.0194_12.6	2.00515
287.2396_11.77	2.00425
381.2455_11.14	1.99756
438.7866_10.54	1.99734
481.8017_10.04	1.9852
202.1099_2.74	1.98456
664.3877_8.37	1.97677
583.3033_8.17	1.97641
L-Pyroglutamic acid	1.97601
412.2255_5.07	1.9646
467.6945_10.84	1.96115
593.0264_11.82	1.95701
325.1917_8.89	1.94415
262.1319_2.18	1.93401
421.2672_8.89	1.93244
767.9965_12.67	1.92532
770.486_10.12	1.92528
226.0826_7.45	1.92252
259.976_5.04	1.92105
602.8619_9.99	1.91683
741.7996_13.37	1.90958
648.694_0.75	1.90723
877.5128_10.62	1.90564
763.1443_13.56	1.90311
235.1204_3.67	1.89619
653.1789_9.38	1.89535
244.0949_1.25	1.88462
833.4927_10.42	1.88175
433.5302_12.7	1.87931
806.5_13.71	1.87371
675.3709_7.19	1.87214
542.6779_12.5	1.86722
614.2875_7.52	1.86714
566.6987_12.95	1.86664
790.4576_9.77	1.86455
581.8619_11.64	1.86051
571.8391_11.34	1.8548
187.06_1.64	1.85142
721.0992_13.62	1.84661
1-Pyrroline-4-hydroxy-2-carboxylate	1.83587
506.3215_7.52	1.83464
432.905_7.39	1.8289
Hippuric acid	1.82852
990.6273_11.17	1.82849
535.0754_7.74	1.82278
724.4783_11.44	1.82133
553.8471_13.3	1.81515
245.0795_1.71	1.81306
702.4402_11.74	1.80031
806.167_13.6	1.79913
226.1685_5.12	1.7941
627.7236_13.02	1.79287
466.5494_12.92	1.78622
436.0107_7.34	1.78471
491.5161_13.7	1.7833
180.0663_4.61	1.78246
102.1301_1.49	1.7824
699.0602_13.54	1.77677
Uracil	1.77329
L-Glutamine	1.76649
340.2656_6.74	1.76408
330.078_0.97	1.76038
676.5653_0.79	1.75581
219.0613_3.79	1.75532
203.1417_1.14	1.75098
130.051_0.99	1.73974
777.4858_13.6	1.73481
328.7156_13.97	1.73478
205.9624_1.02	1.73464
244.0991_3.7	1.73199
460.3198_9.69	1.73111
690.6843_13.95	1.73025
836.9679_12.62	1.72937
203.0539_1.05	1.72921
392.0398_1.62	1.72429
603.312_5.89	1.72119
455.2161_7.37	1.72105
738.4761_13.05	1.71964
495.3044_10.29	1.71886
495.251_7.27	1.71869
Resveratrol	1.71687
244.0941_0.92	1.7155
336.1726_6.47	1.7116
319.1435_5.57	1.71139
357.1561_0.89	1.70935
835.8528_13.81	1.70632
130.1591_5.11	1.70496
666.4392_10.32	1.70454
246.0997_3.72	1.70095
482.2088_5.89	1.70063
284.2113_7.54	1.69924
620.3922_13.75	1.69912
674.4225_13.2	1.69595
499.0642_13	1.69213
184.1717_11.77	1.69103
752.5899_0.75	1.69099
552.3373_10.87	1.69081
426.8302_0.76	1.68211
266.0805_1.25	1.68172
666.7513_0.75	1.67852
253.6574_6.52	1.67795
432.564_7.39	1.67603
840.4959_9.57	1.67451
684.3136_13.49	1.67267
470.2686_6.52	1.67251
622.3767_8.54	1.66939
326.1853_7.44	1.66542
687.8096_12.29	1.66433
717.7773_13.26	1.66266
311.0956_6.48	1.66146
562.3099_5.66	1.65563
697.9211_11.87	1.64996
737.7994_13.72	1.6494
855.5389_10.92	1.64874
415.9262_7.37	1.64768
648.0518_12.09	1.64471
530.2898_7.87	1.64382
330.2181_5.79	1.64215
187.1289_0.89	1.63521
618.3431_8.64	1.63477
418.2741_13.5	1.6336
392.2265_8.54	1.63058
533.2206_12.49	1.62953
466.8024_10.84	1.62546
228.1252_3.72	1.62477
231.1481_0.87	1.62123
453.2985_13.75	1.61858
386.1485_3.47	1.61611
203.935_0.77	1.6158
403.548_8.69	1.61439
112.0529_0.91	1.61208
715.7836_13.55	1.61197
528.3107_8.17	1.61126
510.2639_5.67	1.60882
855.5382_12.17	1.60804
521.3001_10.5	1.60469
827.5222_12.67	1.60396
524.4713_8.32	1.60346
809.4845_13.94	1.60237
592.0424_12.6	1.59675
460.7908_0.74	1.59671
548.3367_6.59	1.59606
444.7965_10.64	1.59577
206.1415_3.71	1.59302
914.5642_12.91	1.59228
308.6552_8.14	1.59042
754.5856_0.77	1.5897
512.0785_11.19	1.58745
310.0809_1.51	1.58657
741.4658_13.45	1.58645
124.9234_0.74	1.58595
5-Aminovaleric acid	1.58593
245.154_0.9	1.58402
290.8511_0.74	1.58039
L-Isoleucine	1.57959
721.3889_9.64	1.57943
407.2461_0.89	1.57814
687.0908_12.32	1.57642
236.1532_0.89	1.57401
704.1102_13.32	1.57115
240.8424_0.77	1.5708
640.3903_11.47	1.57056
669.0823_13.2	1.56688
L-Leucine	1.56538
542.8423_13.25	1.56498
326.1013_5.03	1.56476
716.458_12.94	1.56215
243.6545_5.84	1.56085
447.2877_13.45	1.56084
366.1844_13.07	1.56052
543.0913_13.25	1.56019
386.0321_1.63	1.5597
726.9118_12.08	1.5592
565.609_13.5	1.55873
621.3752_5.74	1.55792
182.0805_0.88	1.55567
737.4636_13.72	1.55506
L-Norleucine	1.55465
555.2786_11.49	1.55449
384.7695_0.79	1.55289
Aminocaproic acid	1.55271
667.7428_13.02	1.54755
605.3701_11.17	1.5474
753.3148_12.6	1.54266
608.8555_11.52	1.54249
118.44_0.84	1.54146
742.9713_12.14	1.53715
188.072_4.61	1.53631
211.1_10.41	1.53597
695.1068_13.12	1.53306
158.0924_1.22	1.53305
Guanosine	1.53235
168.0069_1.04	1.53097
727.4589_9.87	1.52992
345.8852_10.82	1.52903
115.0396_0.89	1.52406
267.0609_1.7	1.52405
313.0737_3.67	1.52401
146.1193_0.87	1.52289
565.0712_8.69	1.52274
4- Acetamidobutaric acid	1.52243
770.9359_12.3	1.52231
452.2854_10.24	1.52184
462.3037_13.8	1.52136
254.0984_4.89	1.52084
720.5002_0.81	1.52035
785.4212_10.22	1.51893
692.6274_0.77	1.51868
960.613_12.77	1.51819
588.2258_7.34	1.51776
794.8113_13.9	1.51728
647.9006_12.05	1.51727
325.0844_4.07	1.51676
680.9254_11.59	1.51453
L-Asparagine	1.51451
902.5662_10.82	1.5141
574.1664_2.38	1.51395
N-Carbamoylputrescine	1.51354
811.8437_13.6	1.51324
322.2531_6.77	1.51276
856.5432_13.02	1.51188
158.1545_12.95	1.51106
689.0991_13.26	1.50871
267.1322_12.43	1.50774
733.795_13.45	1.50604
592.1621_9.07	1.50419
332.5601_11.02	1.5023
765.1301_13.78	1.50099
410.21_5.89	1.49965
214.8385_0.81	1.49927
400.9397_10.19	1.49762
Betaine	1.49572
935.5571_12.87	1.49536
540.3386_10.99	1.49465
174.1132_1.34	1.49463
Methyl 4-aminobutyrate	1.49013
373.2517_0.89	1.49011
144.0645_0.75	1.48777
811.5043_12.87	1.48717
222.9928_0.77	1.4868
486.263_7.44	1.48535
365.5646_10.69	1.48325
469.2997_11.99	1.48288
512.3201_12.09	1.48238
669.9302_12.2	1.48195
185.1187_13.23	1.48157
347.2238_0.89	1.47927
144.0817_4.62	1.47808
410.2632_11.44	1.47792
262.1337_0.94	1.47708
315.1396_12.34	1.47587
266.1421_5.09	1.47583
155.1003_12.27	1.47535
beta-Leucine	1.47501
245.1541_1.38	1.47394
569.0181_12.75	1.4729
204.1254_4.24	1.47223
722.7894_13.69	1.46963
323.1753_5.42	1.46753
557.3541_12.6	1.46638
737.4498_11.97	1.46601
262.1694_1.91	1.46396
270.1957_6.04	1.46276
300.6691_8.14	1.46272
386.8848_9.49	1.46165
724.9576_11.84	1.46043
101.062_13.17	1.45994
587.0397_12.75	1.45845
488.3181_12.5	1.45842
725.4713_11.45	1.45803
610.0445_12.92	1.45773
163.0977_2.64	1.45638
650.1977_13.62	1.45537
716.1117_12.52	1.45467
662.4074_11.62	1.45308
855.0384_13.42	1.45135
275.1768_0.89	1.44967
738.1346_13.72	1.44889
715.3667_11.97	1.44861
559.6569_11.49	1.44779
340.2196_7.69	1.44347
170.0352_0.95	1.44227
203.1302_13.23	1.44147
329.6864_7.04	1.4413
677.395_12.12	1.43961
417.2513_5.17	1.43929
480.1156_13.9	1.43868
115.1129_13.22	1.43753
266.6566_7.04	1.43668
452.1566_5.02	1.43597
332.2504_12.85	1.4339
651.366_7.49	1.43324
755.4371_12.62	1.43285
389.1863_0.84	1.43109
129.0802_0.92	1.4309
275.1165_4.69	1.43048
750.7983_0.74	1.42969
305.09_12.42	1.42966
490.0472_11.04	1.42936
346.0537_0.97	1.42712
Acetylcholine	1.42569
471.2922_10.79	1.42555
469.6335_11.99	1.42326
765.4659_13.78	1.42287
242.6446_1.07	1.42277
394.2149_5.32	1.42265
754.877_12.59	1.42203
370.9096_11.52	1.41935
796.4999_13.92	1.41751
422.2723_12.6	1.41735
615.0513_12.75	1.41598
687.3751_12.3	1.41587
594.3781_8.36	1.41586
294.1765_6.02	1.41538
357.2546_0.92	1.41521
212.0364_5.69	1.41507
408.0128_1.69	1.41448
664.8604_12.2	1.41434
440.2845_11.74	1.41255
203.034_1.67	1.41249
603.6956_11.84	1.41244
458.5449_13.2	1.41191
693.4254_11.72	1.41157
136.063_1.62	1.41128
642.7311_12.09	1.41096
768.1605_13.92	1.41079
275.17_7.04	1.41019
782.483_12.41	1.4095
649.3767_8.91	1.40934
305.0912_12.1	1.40927
122.0832_0.81	1.40927
245.1524_12.11	1.40842
6-Acetyl-D-glucose	1.40682
401.1818_10.25	1.40593
326.053_1.52	1.40381
348.0757_1.6	1.40311
781.4903_13.87	1.40299
614.8281_0.74	1.40297
204.5903_0.89	1.40243
265.9658_5.72	1.40083
259.1327_2.06	1.39954
141.0674_0.88	1.39929
569.6843_11.59	1.39915
337.1543_5.54	1.39773
249.9907_5.72	1.39753
666.8354_0.74	1.39513
234.0177_5.72	1.39348
332.8452_0.78	1.39336
645.885_12.07	1.39327
D-Fructose	1.39167
Alpha-D-Glucose	1.39167
572.3632_12.7	1.39119
307.0871_1.16	1.38892
207.0173_0.77	1.38866
158.1677_1.19	1.38802
399.253_8.59	1.38761
283.1084_12.12	1.38687
202.1469_11.29	1.38635
125.0015_0.82	1.38606
752.4753_13.77	1.38601
(3-Carboxypropyl)trimethylammonium chloride	1.38588
668.1716_13.85	1.38483
571.2798_8.57	1.3846
158.1198_0.95	1.38425
334.8429_0.78	1.38379
334.2018_7.19	1.38372
437.9397_10.32	1.38371
5-hydroxyoct-5-enoylglycine	1.38287
274.1794_6.39	1.38192
125.0008_0.91	1.38153
516.7526_0.77	1.38058
781.401_12.32	1.37649
390.0199_1.02	1.37535
174.0393_1.5	1.37476
546.839_0.74	1.3717
498.9852_12.19	1.37104
525.8302_10.49	1.37045
462.5039_13.8	1.37017
571.3167_4.93	1.36993
Biotin	1.36889
479.5134_13.9	1.36883
631.6498_13.8	1.36613
576.1123_13.45	1.3658
483.9762_12.09	1.36578
614.3845_11.14	1.36569
103.0422_0.86	1.36467
279.1066_4.49	1.36451
560.6426_0.81	1.36425
740.3416_9.97	1.36375
306.1612_3.92	1.36282
Fructose	1.36141
554.3282_7.62	1.36055
Cytidine	1.36015
271.0828_0.77	1.35774
203.1034_0.89	1.35656
707.9311_12.09	1.3542
482.9692_11.84	1.35307
624.6318_0.79	1.35262
440.2203_5.22	1.35115
562.3141_6.31	1.35051
170.0346_1.02	1.34953
224.0849_7.45	1.34899
149.4205_13.54	1.34866
474.2984_10.44	1.3486
268.8502_0.79	1.34844
520.284_8.64	1.34765
537.3398_12.82	1.34764
284.1039_2.45	1.34749
162.0779_1.24	1.34613
636.2205_9.37	1.34601
610.7164_13.2	1.34564
564.8546_13.37	1.34529
736.4414_12.52	1.34523
733.127_13.45	1.34405
808.4769_12.87	1.34358
gamma-Aminobutyric acid	1.34326
315.6914_9.04	1.34233
759.4641_12.07	1.34225
710.4314_9.22	1.34084
651.1238_1.17	1.33823
229.1588_1.77	1.33719
400.7579_10.19	1.33675
512.6533_12.09	1.33589
369.2547_1.21	1.33544
407.0334_12.51	1.33488
117.1039_0.77	1.33265
436.2598_4.69	1.33162
115.066_0.87	1.33137
318.2074_7.29	1.32999
299.1517_12.59	1.32991
470.2842_10.5	1.32988
474.2626_5.09	1.32976
220.9359_0.69	1.3294
480.9634_12.14	1.32917
602.6315_13.54	1.328
444.7261_0.79	1.32746
102.0942_0.86	1.3271
787.093_13.87	1.32691
172.0602_0.91	1.32675
156.1384_12.09	1.32631
240.0817_3.74	1.32575
565.3585_13.5	1.32541
136.9527_12.13	1.32525
679.761_13.05	1.32519
191.0432_0.77	1.32516
459.9672_12.29	1.32488
399.1938_5.57	1.32442
571.0276_13.05	1.32386
157.0521_11.42	1.32356
300.7702_5.37	1.32339
235.1678_0.84	1.32334
287.0926_7.11	1.32283
937.5094_10.83	1.32106
480.3152_13.9	1.32063
424.9001_0.7	1.32028
262.1324_1.18	1.32019
515.9746_12.6	1.31997
772.8262_13.83	1.31958
205.1263_1.02	1.31884
605.2968_11.32	1.31864
D-Mannosamine	1.31788
283.0357_1.71	1.31781
146.0936_1.12	1.3173
600.7059_12.64	1.31725
397.2505_12.73	1.31594
(S)-beta-Tyrosine	1.31581
200.0708_0.79	1.31529
277.1336_11.42	1.31425
163.1247_2.18	1.31413
712.1085_13.22	1.31402
332.2253_11.04	1.31393
298.0704_0.79	1.31391
248.1545_1.25	1.31174
662.0643_13.39	1.31172
744.9638_12.97	1.31119
949.0876_12.92	1.31119
274.8776_0.74	1.31117
447.7907_13.1	1.31108
318.0987_1.18	1.31092
430.7909_12.95	1.31043
296.6853_7.07	1.30962
306.9519_13.97	1.30947
470.9779_6.52	1.30859
477.0291_7.89	1.30738
732.1225_13.72	1.30723
693.3506_11.86	1.30622
627.3837_11.32	1.30605
554.6065_0.84	1.30566
344.8713_0.74	1.30561
585.7044_13.13	1.30418
639.3952_13.07	1.30354
697.0972_13.17	1.30338
347.2034_9.21	1.30297
401.1252_5.42	1.30256
142.0879_1.77	1.30254
629.061_13.34	1.30205
321.0672_12.11	1.30167
725.7641_13.39	1.30117
320.2053_8.54	1.30067
730.3849_12.44	1.30033
285.517_12.87	1.30029
288.221_11.92	1.30025
622.411_10.04	1.30018
Octopamine	1.29968
226.109_0.89	1.29948
569.1102_13.35	1.29941
284.0787_5.02	1.29909
638.7302_12.92	1.29877
714.4495_12.52	1.29812
370.0575_1.63	1.29761
606.1425_13.94	1.29615
491.3159_13.7	1.29605
565.8274_11.54	1.2953
294.1603_11.41	1.29514
201.1621_8.84	1.29512
739.3481_12.5	1.2948
287.0569_0.77	1.29432
794.9899_12.27	1.29397
731.4_12.5	1.2937
199.628_12.66	1.29342
712.6871_0.74	1.29306
695.3955_7.82	1.29276
729.4298_4.71	1.29265
204.1269_0.92	1.29237
986.086_13.37	1.2915
499.3183_13.15	1.29139
485.9554_12.41	1.29138
710.3254_12.4	1.29121
669.6611_13.47	1.2911
441.931_12.09	1.29108
239.1203_8.76	1.2899
475.9406_12	1.2893
264.8567_0.78	1.28802
618.3713_13.16	1.28779
531.274_7.27	1.2877
198.0779_1.01	1.2874
608.3999_12.47	1.28689
752.1392_13.77	1.28668
316.1907_6.57	1.28659
785.9588_12.71	1.28462
272.1109_1.24	1.28376
236.9969_0.77	1.2837
162.5271_0.84	1.28351
777.2897_12.47	1.28272
462.2919_7.01	1.28057
191.1666_13.21	1.27982
438.1785_5.17	1.2796
360.1565_0.89	1.2787
643.0635_12.07	1.278
182.1416_4.03	1.2762
353.2231_12.73	1.2757
605.3179_6.27	1.27466
304.2167_8.59	1.27337
821.0289_12.95	1.27273
263.6514_7.59	1.27242
329.5472_13.05	1.27197
530.6535_12.71	1.27161
296.0719_0.77	1.27141
512.2598_6.26	1.2706
940.0504_13.26	1.27043
216.0664_0.79	1.26936
285.8546_12.91	1.26927
229.1588_0.91	1.26892
328.7208_9.27	1.2684
884.4777_13.02	1.26772
140.0698_0.8	1.26726
310.0463_2.24	1.26721
489.1043_7.44	1.26561
Creatinine	1.26544
265.1692_12.77	1.26521
564.2863_8.76	1.2651
286.1913_4.94	1.26484
186.0896_1.14	1.2648
508.7195_0.79	1.2646
203.0949_11.42	1.26454
436.5348_13.05	1.26387
798.4372_0.82	1.26353
564.8342_11.19	1.26189
263.1513_0.86	1.26174
687.8496_12.35	1.26136
526.7819_0.74	1.26118
634.3399_7.47	1.26111
221.1426_12.77	1.25991
444.6229_12.2	1.25967
636.9083_12.07	1.25921
586.0301_12.57	1.25901
541.6771_12.89	1.25819
511.6571_12.72	1.25816
446.0275_10.62	1.25756
800.5104_0.78	1.25686
774.5416_0.85	1.25684
237.1364_4.94	1.25585
162.1151_0.85	1.25543
385.7573_12.62	1.25437
166.0628_0.77	1.25417
142.0877_0.91	1.25381
586.8522_11.32	1.25331
734.5206_0.79	1.25331
701.7665_12.44	1.25307
488.3124_13.05	1.25219
186.1153_4.24	1.25174
981.541_11.04	1.25148
436.187_3.29	1.25105
653.8802_12.07	1.25031
742.9663_12.04	1.24996
504.7665_7.98	1.24971
471.2833_12.31	1.24864
615.3842_12.73	1.24845
489.1988_11.04	1.24783
744.921_12.54	1.24743
633.0474_13.27	1.24708
433.2579_3.69	1.24678
414.6024_11.96	1.2456
519.2192_12.48	1.24534
572.8715_13.8	1.24524
479.9151_13.9	1.24503
139.1126_12.11	1.24477
481.6325_10.79	1.24464
201.1637_8.77	1.24455
742.7954_13.75	1.24441
258.1152_0.81	1.24438
334.7034_7.19	1.24407
585.3695_13.13	1.24403
694.4313_11.97	1.24395
599.2572_11.8	1.24259
482.6411_12.5	1.24253
160.0984_0.89	1.2425
552.0256_12.85	1.24228
553.4653_12.85	1.24216
462.1039_13.8	1.24166
L-Phenylalanine	1.24104
313.1917_5.42	1.2409
222.0704_6.62	1.23996
748.4326_11.64	1.23993
536.8234_9.34	1.23973
613.1389_13.6	1.23962
965.0945_13.37	1.2385
502.6559_12.62	1.23791
443.9542_12.2	1.23786
544.9959_12.8	1.23747
515.6428_12.65	1.23743
502.9933_12.64	1.23736
633.3792_13.25	1.23708
229.6557_12.73	1.23676
565.7979_8.69	1.23664
263.1532_5.78	1.23635
526.2957_7.61	1.23625
254.0946_2.83	1.23585
686.9419_12.31	1.23561
517.3167_10.49	1.23556
459.9886_7.87	1.23538
740.4759_12.82	1.23498
177.1148_12.74	1.23471
241.6368_4.79	1.23313
429.949_12.05	1.23151
352.2029_5.84	1.23064
285.5201_13.02	1.23063
918.0355_13.2	1.23062
315.09_11.41	1.23021
559.3356_12.9	1.23017

## Sheet: t-test
	t.stat	p.value	#NAME?	FDR
Cytosine	-5.4358	0.00020521	3.6878	0.50316
772.6443_0.74	5.2373	0.00027799	3.556	0.50316
393.1218_4.82	4.0569	0.0018932	2.7228	0.99932		A variable is differentiating when p.value <0.05
805.8272_13.62	3.9211	0.0023883	2.6219	0.99932
350.1875_4.22	-3.6205	0.0040232	2.3954	0.99932
796.4672_9.27	3.3648	0.0063102	2.2	0.99932
466.7824_9.14	-3.2728	0.0074277	2.1291	0.99932
431.2278_4.49	3.2612	0.0075831	2.1202	0.99932
602.8619_9.99	3.195	0.0085304	2.069	0.99932
491.1134_13.7	3.1527	0.0091984	2.0363	0.99932
741.7996_13.37	3.1271	0.0096274	2.0165	0.99932
202.0699_0.91	3.1141	0.0098534	2.0064	0.99932
583.3033_8.17	3.0634	0.010787	1.9671	0.99932
Neopterin	-3.0353	0.011341	1.9453	0.99932
648.694_0.75	2.9865	0.012375	1.9074	0.99932
408.2287_7.51	-2.903	0.014368	1.8426	0.99932
412.2255_5.07	2.8942	0.014596	1.8358	0.99932
429.2651_9.54	2.8694	0.015259	1.8165	0.99932
833.4927_10.42	2.8568	0.015607	1.8067	0.99932
Uridine	-2.8274	0.016449	1.7839	0.99932
455.5433_12.85	2.804	0.017152	1.7657	0.99932
639.0633_12.92	2.7129	0.020187	1.6949	0.99932
680.3752_8.49	2.7045	0.02049	1.6885	0.99932
Pyroglutamic acid	2.6962	0.020796	1.682	0.99932
381.2455_11.14	2.6642	0.022021	1.6572	0.99932
226.0826_7.45	2.644	0.022829	1.6415	0.99932
624.7218_13	2.639	0.023033	1.6377	0.99932
Pyrrolidonecarboxylic acid	2.6244	0.023643	1.6263	0.99932
262.1319_2.18	2.614	0.024086	1.6182	0.99932
505.3063_6.49	2.5253	0.02821	1.5496	0.99932
174.1132_1.34	-2.5248	0.028233	1.5492	0.99932
356.7164_7.59	2.5064	0.029172	1.535	0.99932
436.0107_7.34	2.4882	0.030129	1.521	0.99932
581.8619_11.64	2.4832	0.030402	1.5171	0.99932
438.7866_10.54	2.4696	0.031144	1.5066	0.99932
603.312_5.89	-2.4643	0.031436	1.5026	0.99932
877.5128_10.62	-2.4347	0.033131	1.4798	0.99932
432.905_7.39	2.4233	0.033809	1.471	0.99932
554.3282_7.62	-2.4094	0.034651	1.4603	0.99932
187.06_1.64	2.4003	0.035213	1.4533	0.99932
226.1685_5.12	-2.3999	0.035239	1.453	0.99932
287.2396_11.77	2.3959	0.03549	1.4499	0.99932
326.1853_7.44	2.3806	0.036461	1.4382	0.99932
777.4858_13.6	2.3736	0.036919	1.4328	0.99932
130.1591_5.11	2.3655	0.037447	1.4266	0.99932
202.1099_2.74	-2.3343	0.039565	1.4027	0.99932
235.1204_3.67	-2.3307	0.03982	1.3999	0.99932
614.2875_7.52	2.3288	0.039954	1.3984	0.99932
466.5494_12.92	2.3218	0.040448	1.3931	0.99932
304.1724_6.99	2.3134	0.041053	1.3867	0.99932
726.9118_12.08	2.3121	0.041148	1.3857	0.99932
614.3504_8.47	2.3117	0.041178	1.3853	0.99932
254.0984_4.89	-2.2752	0.043908	1.3575	0.99932
207.6296_10.47	2.2671	0.044534	1.3513	0.99932
256.1021_12.59	2.2569	0.045334	1.3436	0.99932
653.1789_9.38	2.2425	0.046499	1.3326	0.99932
667.7428_13.02	2.234	0.047196	1.3261	0.99932
987.1135_13.47	2.233	0.047277	1.3254	0.99932
535.0754_7.74	-2.2324	0.047325	1.3249	0.99932
244.0941_0.92	-2.2296	0.047559	1.3228	0.99932
902.5662_10.82	2.2127	0.048985	1.3099	0.99932
557.0194_12.6	2.1851	0.05141	1.289	0.99932
325.1917_8.89	-2.1827	0.051626	1.2871	0.99932
481.8017_10.04	2.1758	0.052246	1.2819	0.99932
553.8471_13.3	2.1755	0.05227	1.2817	0.99932
676.5653_0.79	-2.162	0.053521	1.2715	0.99932
625.8281_9.07	2.1587	0.053826	1.269	0.99932
721.3889_9.64	-2.1403	0.055574	1.2551	0.99932
158.1545_12.95	-2.1383	0.055774	1.2536	0.99932
L-Pyroglutamic acid	2.1273	0.056843	1.2453	0.99932
674.4225_13.2	2.1176	0.057807	1.238	0.99932
244.0949_1.25	-2.1108	0.058499	1.2329	0.99932
245.0795_1.71	-2.0972	0.059894	1.2226	0.99932
374.6962_9.19	2.0828	0.061397	1.2119	0.99932
319.1435_5.57	2.0801	0.061692	1.2098	0.99932
259.976_5.04	2.0795	0.06175	1.2094	0.99932
205.9624_1.02	2.0737	0.062368	1.205	0.99932
336.1726_6.47	2.0709	0.062679	1.2029	0.99932
236.1532_0.89	2.0697	0.062804	1.202	0.99932
664.3877_8.37	2.0639	0.063434	1.1977	0.99932
724.4783_11.44	2.0598	0.063892	1.1946	0.99932
4- Acetamidobutaric acid	-2.0565	0.064252	1.1921	0.99932
990.6273_11.17	-2.0564	0.064263	1.192	0.99932
163.0977_2.64	-2.0549	0.064425	1.1909	0.99932
548.3367_6.59	2.0522	0.064731	1.1889	0.99932
652.3629_9.37	2.0483	0.065164	1.186	0.99932
512.3201_12.09	2.0479	0.065206	1.1857	0.99932
506.3215_7.52	2.0464	0.065377	1.1846	0.99932
622.3767_8.54	-2.0422	0.065851	1.1814	0.99932
721.0992_13.62	2.0373	0.066415	1.1777	0.99932
1-Aminocyclopropanecarboxylic acid	-2.0327	0.066938	1.1743	0.99932
562.3099_5.66	2.0322	0.066999	1.1739	0.99932
512.2598_6.26	-2.0303	0.067222	1.1725	0.99932
806.167_13.6	2.0231	0.068057	1.1671	0.99932
730.787_13.69	2.0229	0.068072	1.167	0.99932
715.3667_11.97	2.013	0.069238	1.1597	0.99932
399.253_8.59	2.0129	0.069261	1.1595	0.99932
516.7526_0.77	2.0075	0.069894	1.1556	0.99932
D-Fructose	-1.9989	0.070941	1.1491	0.99932
Alpha-D-Glucose	-1.9989	0.070941	1.1491	0.99932
759.4641_12.07	1.9984	0.071002	1.1487	0.99932
4-Imidazoleacetic acid	1.9974	0.071119	1.148	0.99932
Creatinine	-1.9945	0.071477	1.1458	0.99932
158.1198_0.95	-1.991	0.071905	1.1432	0.99932
219.0613_3.79	1.9909	0.071917	1.1432	0.99932
666.7513_0.75	-1.9853	0.07261	1.139	0.99932
162.0779_1.24	-1.9799	0.073277	1.135	0.99932
244.0991_3.7	1.9774	0.0736	1.1331	0.99932
621.3752_5.74	-1.9765	0.073708	1.1325	0.99932
835.8528_13.81	1.9724	0.074233	1.1294	0.99932
738.4761_13.05	1.9683	0.074753	1.1264	0.99932
Uracil	-1.9639	0.075313	1.1231	0.99932
5-Aminovaleric acid	-1.9596	0.075861	1.12	0.99932
650.1977_13.62	1.9583	0.07603	1.119	0.99932
482.9692_11.84	-1.9517	0.076893	1.1141	0.99932
559.6569_11.49	1.9515	0.076925	1.1139	0.99932
185.1187_13.23	1.9467	0.077551	1.1104	0.99932
569.1102_13.35	1.9462	0.077614	1.1101	0.99932
433.5302_12.7	1.9433	0.078005	1.1079	0.99932
315.1396_12.34	1.9307	0.079695	1.0986	0.99932
410.21_5.89	1.93	0.079789	1.0981	0.99932
168.0069_1.04	1.9212	0.080986	1.0916	0.99932
L-Isoleucine	-1.9179	0.081448	1.0891	0.99932
693.4254_11.72	-1.9155	0.081768	1.0874	0.99932
330.2181_5.79	-1.9102	0.082513	1.0835	0.99932
130.051_0.99	1.9098	0.082564	1.0832	0.99932
763.1443_13.56	1.9085	0.082755	1.0822	0.99932
770.486_10.12	1.9054	0.083187	1.0799	0.99932
265.9658_5.72	1.901	0.083803	1.0767	0.99932
669.0823_13.2	1.8995	0.084023	1.0756	0.99932
311.0956_6.48	1.8975	0.084308	1.0741	0.99932
340.2656_6.74	1.8929	0.08497	1.0707	0.99932
326.1013_5.03	-1.8902	0.085355	1.0688	0.99932
Hippuric acid	-1.8863	0.085924	1.0659	0.99932
158.1677_1.19	-1.8837	0.086297	1.064	0.99932
195.5792_3.47	-1.8779	0.087138	1.0598	0.99932
186.1153_4.24	1.8767	0.087328	1.0588	0.99932
263.6514_7.59	-1.8753	0.087523	1.0579	0.99932
L-Leucine	-1.8674	0.088708	1.052	0.99932
466.8024_10.84	1.8666	0.088817	1.0515	0.99932
798.4372_0.82	1.8654	0.088998	1.0506	0.99932
836.9679_12.62	1.8626	0.089425	1.0485	0.99932
1-Pyrroline-4-hydroxy-2-carboxylate	1.8589	0.089983	1.0458	0.99932
386.1485_3.47	1.8575	0.090192	1.0448	0.99932
618.3431_8.64	1.8546	0.090638	1.0427	0.99932
243.6545_5.84	-1.8511	0.091165	1.0402	0.99932
666.8354_0.74	1.85	0.091338	1.0393	0.99932
Aminocaproic acid	-1.85	0.091343	1.0393	0.99932
572.8715_13.8	1.8499	0.09135	1.0393	0.99932
209.043_1.68	1.8492	0.091457	1.0388	0.99932
333.7051_8.89	-1.8402	0.092855	1.0322	0.99932
369.2547_1.21	1.8363	0.093463	1.0294	0.99932
L-Norleucine	-1.8319	0.094148	1.0262	0.99932
528.3107_8.17	1.8306	0.09436	1.0252	0.99932
102.1301_1.49	1.825	0.095247	1.0211	0.99932
Choline	-1.8209	0.095904	1.0182	0.99932
L-Asparagine	-1.8205	0.09597	1.0179	0.99932
579.619_13.82	-1.8204	0.09598	1.0178	0.99932
394.9149_10.99	1.817	0.096541	1.0153	0.99932
542.6779_12.5	1.8155	0.096775	1.0142	0.99932
692.6274_0.77	1.8152	0.096834	1.014	0.99932
752.5899_0.75	-1.8121	0.097333	1.0117	0.99932
198.0785_2.94	-1.8097	0.097714	1.01	0.99932
392.0398_1.62	1.8091	0.097812	1.0096	0.99932
N-Carbamoylputrescine	-1.8049	0.098499	1.0066	0.99932
436.187_3.29	1.8039	0.098668	1.0058	0.99932

## Sheet: ROC
	AUC	Pval	FC	clusters
624.7218_13	1	0.0230329	1.5891	1
772.6443_0.74	0.975	0.000277992	2.2165	3		FC> 0 down regulated for treatment
350.1875_4.22	0.95	0.00402316	-1.1695	5		FC< 0 up regulated for treatment
393.1218_4.82	0.95	0.00189317	1.2085	4
639.0633_12.92	0.95	0.0201875	1.7549	3
796.4672_9.27	0.95	0.00631021	2.2526	4		The differentiating metabolites have AUC value tendend to 1
Cytosine	0.9375	0.00020521	-21.845	5
805.8272_13.62	0.9375	0.00238826	1.6313	3
256.1021_12.59	0.925	0.0453344	1.005	1
466.7824_9.14	0.925	0.00742773	-1.1536	5
491.1134_13.7	0.925	0.00919844	1.6262	2
583.3033_8.17	0.925	0.0107866	1.0769	1
833.4927_10.42	0.925	0.0156069	2.0242	3
987.1135_13.47	0.925	0.0472767	1.1867	2
L-Glutamine	0.9	0.152016	0.56702	4
Pyroglutamic acid	0.9	0.0207957	1.0781	4
202.0699_0.91	0.9	0.00985336	1.7094	2
254.0984_4.89	0.9	0.0439083	-0.97118	5
429.2651_9.54	0.9	0.0152587	1.7684	4
431.2278_4.49	0.9	0.00758308	1.1484	3
505.3063_6.49	0.9	0.0282097	1.4724	3
512.3201_12.09	0.9	0.0652062	0.79886	1
557.0194_12.6	0.9	0.0514099	1.0634	1
602.8619_9.99	0.9	0.00853039	1.5493	3
614.3504_8.47	0.9	0.0411785	1.0732	3
653.1789_9.38	0.9	0.0464987	1.0754	1
680.3752_8.49	0.9	0.0204897	1.8498	4
741.7996_13.37	0.9	0.00962744	1.1863	3
777.4858_13.6	0.9	0.0369187	1.3121	3
L-Pyroglutamic acid	0.875	0.0568429	0.49105	4
Pyrrolidonecarboxylic acid	0.875	0.0236433	0.90239	4
Neopterin	0.875	0.0113413	-2.1869	5
Resveratrol	0.875	0.107535	-0.77047	5
226.0826_7.45	0.875	0.0228288	1.5774	4
412.2255_5.07	0.875	0.0145961	1.2069	1
466.5494_12.92	0.875	0.0404482	1.2801	4
506.3215_7.52	0.875	0.0653767	0.57794	1
652.3629_9.37	0.875	0.0651639	1.3897	1
664.3877_8.37	0.875	0.0634343	1.406	4
667.7428_13.02	0.875	0.0471965	0.96193	3
715.3667_11.97	0.875	0.069238	0.94208	4
717.7773_13.26	0.875	0.114151	0.73218	3
455.5433_12.85	0.8625	0.0171524	1.7833	3
603.312_5.89	0.8625	0.0314364	-2.0516	5
5-Aminovaleric acid	0.85	0.0758609	-1.2343	5
5-hydroxyoct-5-enoylglycine	0.85	0.105931	-0.49527	5
Uridine	0.85	0.0164494	-0.72343	5
174.1132_1.34	0.85	0.0282332	-1.48	5
187.06_1.64	0.85	0.0352132	0.75892	4
205.9624_1.02	0.85	0.0623679	1.4811	1
219.0613_3.79	0.85	0.0719169	1.3634	1
226.1685_5.12	0.85	0.0352388	-0.71384	5
235.1204_3.67	0.85	0.0398195	-1.4174	5
245.0795_1.71	0.85	0.0598943	-0.7674	5
262.1319_2.18	0.85	0.0240862	2.0284	5
279.1482_4.62	0.85	0.177364	0.31525	3
314.0956_2.99	0.85	0.118296	0.658	4
319.1435_5.57	0.85	0.0616921	0.93137	4
381.2455_11.14	0.85	0.0220211	1.1338	4
386.1485_3.47	0.85	0.0901921	1.1281	3
408.2287_7.51	0.85	0.0143683	-0.91483	5
410.21_5.89	0.85	0.0797888	0.78403	1
423.1691_6.12	0.85	0.113854	-1.0317	1
432.905_7.39	0.85	0.033809	1.0467	2
438.7866_10.54	0.85	0.0311438	1.301	2
581.8619_11.64	0.85	0.030402	1.0936	3
592.0424_12.6	0.85	0.106431	0.86202	1
614.2875_7.52	0.85	0.0399544	1.5112	3
648.694_0.75	0.85	0.0123751	1.4905	3
726.9118_12.08	0.85	0.0411479	1.1182	2
730.787_13.69	0.85	0.0680716	1.1405	2
759.4641_12.07	0.85	0.0710021	0.99375	1
770.486_10.12	0.85	0.0831874	0.97998	2
790.4576_9.77	0.85	0.101112	0.83237	2
835.8528_13.81	0.85	0.0742325	0.82848	1
Uracil	0.8375	0.0753128	-1.6143	5
552.3373_10.87	0.8375	0.100723	1.2668	5
877.5128_10.62	0.8375	0.033131	-2.0355	5
Hippuric acid	0.825	0.085924	-1.3696	3
L-Isoleucine	0.825	0.0814476	-0.70091	5
L-Leucine	0.825	0.0887083	-0.66765	5
L-Asparagine	0.825	0.0959698	-0.67775	5
102.1301_1.49	0.825	0.0952472	0.55571	1
130.051_0.99	0.825	0.0825637	0.86388	1
130.1591_5.11	0.825	0.0374466	0.76122	3
158.1198_0.95	0.825	0.0719047	-1.1637	5
162.0779_1.24	0.825	0.0732767	-1.0431	4
163.0977_2.64	0.825	0.0644246	-1.174	4
168.0069_1.04	0.825	0.0809857	0.71568	1
180.0663_4.61	0.825	0.146823	-0.94325	3
185.1187_13.23	0.825	0.0775512	1.3017	4
203.0539_1.05	0.825	0.334505	-1.0756	1
212.0945_2.99	0.825	0.143753	1.1824	4
231.1481_0.87	0.825	0.316323	-1.3824	1
236.1532_0.89	0.825	0.0628037	2.4336	4
244.0941_0.92	0.825	0.0475588	-1.0211	5
259.976_5.04	0.825	0.0617503	1.0308	4
304.1724_6.99	0.825	0.0410534	1.1406	4
356.7164_7.59	0.825	0.0291715	1.7772	5
374.6962_9.19	0.825	0.061397	0.84556	3
400.9397_10.19	0.825	0.114358	-1.0357	1
422.2723_12.6	0.825	0.170263	0.71616	2
436.0107_7.34	0.825	0.0301292	1.001	3
481.8017_10.04	0.825	0.052246	1.0278	1
486.263_7.44	0.825	0.102681	-0.87579	5
553.8471_13.3	0.825	0.0522697	0.81265	4
571.8391_11.34	0.825	0.106656	-1.3707	1
593.0264_11.82	0.825	0.146693	1.2478	4
625.8281_9.07	0.825	0.0538256	0.86392	4
648.0518_12.09	0.825	0.123893	0.68182	1
721.0992_13.62	0.825	0.0664153	1.8115	1
724.4783_11.44	0.825	0.0638923	1.1874	5
724.9576_11.84	0.825	0.101251	1.0046	3
738.4761_13.05	0.825	0.0747526	1.7323	4
742.9713_12.14	0.825	0.169706	-1.2703	1
763.1443_13.56	0.825	0.0827553	1.53	1
902.5662_10.82	0.825	0.0489847	0.92181	3
990.6273_11.17	0.825	0.0642632	-1.466	3
432.564_7.39	0.8125	0.215888	1.0418	5
L-Norleucine	0.8	0.0941482	-0.73038	5
Methyl 4-aminobutyrate	0.8	0.105817	-1.0564	5
Betaine	0.8	0.105956	-1.0467	5
Aminocaproic acid	0.8	0.0913434	-0.65089	5
N-Carbamoylputrescine	0.8	0.0984991	-0.67151	5
beta-Leucine	0.8	0.117004	-0.63243	5
D-Fructose	0.8	0.0709408	-0.80972	3
Guanosine	0.8	0.143887	-0.56174	4
Alpha-D-Glucose	0.8	0.0709408	-0.80972	3
6-Acetyl-D-glucose	0.8	0.190593	0.45954	3
112.0529_0.91	0.8	0.829172	-0.81915	1
136.9527_12.13	0.8	0.974722	-0.95929	1
158.1545_12.95	0.8	0.0557743	-1.6394	5
158.1565_13.91	0.8	0.73694	-0.29911	1
158.1677_1.19	0.8	0.0862974	-6.6961	3
188.072_4.61	0.8	0.30157	0.74748	3
201.1621_8.84	0.8	0.116344	-0.79673	5
201.1637_8.77	0.8	0.129201	-0.76032	5
202.1099_2.74	0.8	0.0395651	-0.68969	5
203.1417_1.14	0.8	0.189762	-1.2466	5
207.6296_10.47	0.8	0.044534	0.94601	4
209.043_1.68	0.8	0.0914574	0.69103	4
214.132_7.24	0.8	0.111432	-3.1905	3
244.0949_1.25	0.8	0.0584989	-0.80286	5
244.0991_3.7	0.8	0.0735997	1.7276	4
247.0618_2.64	0.8	0.106646	0.42902	5
253.6574_6.52	0.8	0.137252	1.2345	3
265.9658_5.72	0.8	0.0838035	5.3531	2
266.0805_1.25	0.8	0.210173	-0.72448	1
268.1095_3.49	0.8	0.225714	-0.72921	5
275.17_7.04	0.8	0.780879	-0.84341	1
305.0912_12.1	0.8	0.339197	-1.0235	1
311.0956_6.48	0.8	0.0843084	0.7976	1
315.1396_12.34	0.8	0.0796954	1.0566	1
325.0844_4.07	0.8	0.158422	0.77058	4
325.1917_8.89	0.8	0.0516255	-1.2758	5
326.1853_7.44	0.8	0.0364611	0.9193	3
330.2181_5.79	0.8	0.0825134	-0.59811	3
344.8713_0.74	0.8	0.114797	0.99551	3
360.1565_0.89	0.8	0.641737	-0.57633	1
366.1869_5.09	0.8	0.138935	0.65664	4
371.1728_1.19	0.8	0.144151	-0.90014	4
386.8848_9.49	0.8	0.124939	0.62809	1
392.0398_1.62	0.8	0.0978117	1.2733	1
399.253_8.59	0.8	0.0692607	1.026	3
427.0524_5.02	0.8	0.129343	0.95272	4
439.2757_11.44	0.8	0.210388	0.33058	4
455.2161_7.37	0.8	0.128125	1.0154	4
469.2997_11.99	0.8	0.275479	-0.96471	1
474.2984_10.44	0.8	0.100612	0.76611	1
480.1156_13.9	0.8	0.104383	0.86838	1
516.7526_0.77	0.8	0.0698945	0.96985	3
521.8037_6.42	0.8	0.140005	0.68442	4
528.3107_8.17	0.8	0.0943602	0.80943	1
531.8336_13.2	0.8	0.1206	0.94953	3
533.2206_12.49	0.8	0.421273	-1.0762	1
535.0754_7.74	0.8	0.0473252	-0.72664	3
543.287_5.67	0.8	0.161386	0.49206	4
572.8715_13.8	0.8	0.0913504	0.99063	2
618.3431_8.64	0.8	0.0906383	0.98094	2
622.3767_8.54	0.8	0.0658511	-1.343	5
642.7311_12.09	0.8	0.105567	0.93863	3
650.1977_13.62	0.8	0.0760297	0.90997	4
651.1238_1.17	0.8	0.106042	1.0281	4
666.8354_0.74	0.8	0.0913381	1.1525	4
674.4225_13.2	0.8	0.0578068	1.1361	1
675.3709_7.19	0.8	0.114789	-1.7552	5
676.5653_0.79	0.8	0.0535211	-1.9865	5
721.3889_9.64	0.8	0.0555745	-1.5691	4
756.2289_13.8	0.8	0.114368	0.73944	3
765.1301_13.78	0.8	0.103173	-1.0501	4
770.9359_12.3	0.8	0.100929	0.91213	1
781.401_12.32	0.8	0.29572	-0.71118	3
811.8437_13.6	0.8	0.102808	1.2493	2
836.9679_12.62	0.8	0.0894253	0.99461	1
840.4959_9.57	0.8	0.170343	1.0916	4
542.6779_12.5	0.7875	0.0967746	1.5672	1
562.3099_5.66	0.7875	0.0669992	1.1473	5
692.6274_0.77	0.7875	0.0968336	0.86752	2
712.6871_0.74	0.7875	0.269316	1.0102	3
Cytidine	0.775	0.175671	-0.79946	5
1-Pyrroline-4-hydroxy-2-carboxylate	0.775	0.0899827	0.91869	4
7-Methylxanthine	0.775	0.102829	-1.6944	3
1-Methylxanthine	0.775	0.102829	-1.6944	3
122.9268_12.5	0.775	0.666141	-0.085773	1
134.1189_0.89	0.775	0.384549	0.32806	1
137.9836_0.79	0.775	0.472323	-3.0668	1
141.0674_0.88	0.775	0.974418	-0.85899	1
156.077_0.79	0.775	0.240913	0.5636	1
163.1345_9.7	0.775	0.338064	0.24631	1
163.549_9.7	0.775	0.368668	0.21853	1
182.0805_0.88	0.775	0.192622	-1.5081	3
191.1666_13.21	0.775	0.225272	0.3792	1
212.0364_5.69	0.775	0.140652	3.7843	5
239.1203_8.76	0.775	0.108006	-0.79247	5
240.1478_1.47	0.775	0.220521	0.4264	3
263.6514_7.59	0.775	0.0875229	-1.5839	4
268.18_6.49	0.775	0.177907	0.46074	2
270.1957_6.04	0.775	0.244354	0.55945	4
284.2113_7.54	0.775	0.127261	0.47996	4
287.2396_11.77	0.775	0.0354901	1.3337	4
310.0809_1.51	0.775	0.337198	-0.81536	1
326.1013_5.03	0.775	0.0853548	-1.1433	5
332.5601_11.02	0.775	0.121816	-0.99584	3
334.2018_7.19	0.775	0.124583	0.73957	1
340.2656_6.74	0.775	0.0849698	0.8265	1
374.043_0.99	0.775	0.1438	0.69763	4
392.2265_8.54	0.775	0.138781	-0.64566	3
393.1631_8.45	0.775	0.402676	0.36897	3
415.9262_7.37	0.775	0.106386	0.68602	4
417.2513_5.17	0.775	0.217399	0.65224	5
444.7965_10.64	0.775	0.134703	1.1437	4
460.3198_9.69	0.775	0.20723	-1.1094	1
465.784_10.46	0.775	0.335315	-0.080582	3
466.8024_10.84	0.775	0.0888169	0.7378	2
469.6335_11.99	0.775	0.136158	-1.1519	5
470.2686_6.52	0.775	0.141877	1.4857	5
472.8158_0.75	0.775	0.214343	0.63473	5
480.3152_13.9	0.775	0.131985	0.88151	1
482.9692_11.84	0.775	0.0768935	-0.8599	5
491.5161_13.7	0.775	0.148139	1.5053	2
495.251_7.27	0.775	0.109479	0.92545	1
498.9852_12.19	0.775	0.14922	0.90758	1
504.7665_7.98	0.775	0.117069	-2.1803	5
509.8207_13.05	0.775	0.157699	0.47445	1
520.284_8.64	0.775	0.179739	-1.1516	1
548.3367_6.59	0.775	0.0647309	1.2015	3
554.3282_7.62	0.775	0.0346511	-1.2424	5
555.3099_5.81	0.775	0.315556	0.24845	4
559.6569_11.49	0.775	0.0769254	1.0779	4
565.0712_8.69	0.775	0.190175	-0.97424	1
569.0181_12.75	0.775	0.139396	-1.7405	3
569.1102_13.35	0.775	0.0776144	0.82167	3
571.3167_4.93	0.775	0.174687	-1.0318	5
574.1664_2.38	0.775	0.129393	-1.4416	5
621.3752_5.74	0.775	0.0737076	-1.0749	3
656.8936_5.99	0.775	0.257465	0.32011	4
666.7513_0.75	0.775	0.0726101	-1.114	3
669.0823_13.2	0.775	0.0840228	0.77063	2
690.6843_13.95	0.775	0.243826	-1.1963	1
695.1068_13.12	0.775	0.154941	1.0183	1
703.7739_13.32	0.775	0.15079	0.85786	5
704.1102_13.32	0.775	0.114328	-1.5387	2
716.1117_12.52	0.775	0.767204	0.89793	5
716.458_12.94	0.775	0.100557	1.0041	2
720.5002_0.81	0.775	0.132184	-1.3194	3
725.4713_11.45	0.775	0.154546	0.95134	2
748.4326_11.64	0.775	0.141098	0.62185	1
750.7983_0.74	0.775	0.107565	1.4529	4
752.5899_0.75	0.775	0.0973327	-1.7583	3
764.7902_13.75	0.775	0.176194	0.77139	2
765.4659_13.78	0.775	0.100067	0.86449	2
794.8113_13.9	0.775	0.240773	-0.80099	2
796.4999_13.92	0.775	0.149602	0.77278	1
806.167_13.6	0.775	0.0680568	1.2825	2
806.5_13.71	0.775	0.278097	1.2431	4
243.6545_5.84	0.7625	0.0911651	-1.1708	3
436.2598_4.69	0.7625	0.148727	-1.017	5
496.284_8.59	0.7625	0.187371	0.57944	4
543.595_13.4	0.7625	0.636018	0.63806	4
634.3399_7.47	0.7625	0.131197	0.72905	4
636.2205_9.37	0.7625	0.167792	0.76575	1
809.4845_13.94	0.7625	0.146362	1.0452	1
4- Acetamidobutaric acid	0.75	0.0642517	-20.722	5
Deoxyguanosine	0.75	0.176681	-0.8483	5
Adenosine	0.75	0.289993	-0.70769	4
Creatinine	0.75	0.0714774	-0.60658	5
4,5-Dihydroorotic acid	0.75	0.314431	-0.13582	4
115.0396_0.89	0.75	0.117409	0.88059	2
115.066_0.87	0.75	0.367655	-1.7423	1
124.924_12.52	0.75	0.830652	-0.25417	1
144.0817_4.62	0.75	0.162805	0.73161	1
156.1407_8.75	0.75	0.183296	-0.72063	5
160.0984_0.89	0.75	0.579454	-0.85673	1
163.077_13.27	0.75	0.280506	0.38888	1
172.0602_0.91	0.75	0.192107	0.4787	3
172.0611_1.74	0.75	0.159118	0.48633	3
174.0393_1.5	0.75	0.859566	-0.51626	1
180.0886_0.94	0.75	0.92343	-0.27619	1
183.1522_11.93	0.75	0.192549	-0.64879	4
186.1153_4.24	0.75	0.0873281	0.49511	2
195.5792_3.47	0.75	0.087138	-1.362	4
200.1779_11.92	0.75	0.191359	-0.69053	4
206.1034_3.47	0.75	0.230462	0.41351	3
209.1052_2.64	0.75	0.121756	0.53748	4
216.0869_1.38	0.75	0.80641	-0.6261	1
235.1565_9.74	0.75	0.353041	0.31899	1
235.1678_0.84	0.75	0.212114	-1.5678	5
240.8424_0.77	0.75	0.520695	-0.91357	1
244.1425_8.09	0.75	0.149292	-3.1849	3
245.1524_12.11	0.75	0.284427	-1.19	1
262.8911_0.77	0.75	0.195567	-2.6929	5
264.9373_6.59	0.75	0.298054	-1.4882	5
267.0609_1.7	0.75	0.15778	-0.63974	5
267.1322_12.43	0.75	0.236592	-1.4145	1
275.1165_4.69	0.75	0.126342	-0.53015	3
279.1066_4.49	0.75	0.120812	0.9386	3
282.1601_6.49	0.75	0.166621	0.45597	5
283.1084_12.12	0.75	0.209136	-1.1594	1
284.0787_5.02	0.75	0.167483	0.55639	3
284.1658_13.21	0.75	0.159612	0.40128	4
287.0926_7.11	0.75	0.350153	0.58564	1
294.1765_6.02	0.75	0.921784	0.91323	2
305.09_12.42	0.75	0.140187	-1.5409	5
306.9519_13.97	0.75	0.309211	-0.77605	1
313.1917_5.42	0.75	0.159055	0.79848	4
325.0858_2.42	0.75	0.260103	0.5136	5
344.1402_1.64	0.75	0.136779	0.78021	5
349.1893_6.16	0.75	0.269022	0.44789	1
355.7185_9.19	0.75	0.240148	-0.79582	5
357.1561_0.89	0.75	0.156882	-1.3112	1
372.2288_4.04	0.75	0.199909	0.40442	4
377.7317_9.51	0.75	0.318282	-1.9171	5
394.2149_5.32	0.75	0.153661	0.73254	5
418.2741_13.5	0.75	0.142914	0.60865	2
421.2672_8.89	0.75	0.129373	1.0941	4
433.5302_12.7	0.75	0.0780055	2.308	4
436.187_3.29	0.75	0.0986677	0.93722	5
436.6927_0.82	0.75	0.136109	1.2756	3
437.9397_10.32	0.75	0.144402	1.0631	3
462.2919_7.01	0.75	0.23483	0.89146	4
474.2626_5.09	0.75	0.237268	-0.90689	3
477.0291_7.89	0.75	0.318719	0.78182	1
480.9634_12.14	0.75	0.366768	-0.89782	1
512.2598_6.26	0.75	0.0672217	-0.74146	5
519.2192_12.48	0.75	0.5579	-1.3208	1
525.8302_10.49	0.75	0.209171	0.68252	3
527.2463_12.47	0.75	0.33316	-0.98141	1
530.7748_0.74	0.75	0.116368	0.68349	2
536.808_0.74	0.75	0.207308	0.5987	1
536.8234_9.34	0.75	0.102301	-1.0455	5
542.8423_13.25	0.75	0.10017	-1.1681	3
543.0913_13.25	0.75	0.164726	0.69171	1
557.3541_12.6	0.75	0.183706	-0.96104	3
564.2863_8.76	0.75	0.114116	0.57253	4
565.609_13.5	0.75	0.217922	1.4446	4
572.3632_12.7	0.75	0.146073	0.79006	1
574.3517_11.02	0.75	0.137683	0.55447	3
584.1289_13.85	0.75	0.188556	0.79472	2
592.1621_9.07	0.75	0.129641	-1.105	3
600.7059_12.64	0.75	0.542192	-0.96586	4
629.3259_9.07	0.75	0.214308	0.51875	1
638.7302_12.92	0.75	0.206723	-0.84373	1
651.0815_12.89	0.75	0.157652	0.62093	1
659.7466_13.15	0.75	0.438606	0.49385	3
662.4074_11.62	0.75	0.245967	0.6797	2
671.3523_8.92	0.75	0.227084	0.38752	5
683.0886_13.12	0.75	0.203726	0.62077	5
687.8096_12.29	0.75	0.178341	0.75948	1
693.3506_11.86	0.75	0.230202	0.71998	5
693.4254_11.72	0.75	0.081768	-1.7327	5
697.0972_13.17	0.75	0.507784	-0.61535	3
702.4402_11.74	0.75	0.232901	0.65057	3
718.1108_13.23	0.75	0.184812	0.5299	3
727.4589_9.87	0.75	0.531226	-1.4041	4
733.127_13.45	0.75	0.142528	0.58316	2
774.5416_0.85	0.75	0.180166	-0.81398	5
794.9899_12.27	0.75	0.147771	1.0106	1
798.4372_0.82	0.75	0.0889977	0.82346	3
811.5043_12.87	0.75	0.141405	-3.9398	3
2-Deoxyguanosine	0.7375	0.367004	-0.78999	4
318.0987_1.18	0.7375	0.163764	0.53037	1
365.1328_3.34	0.7375	0.132243	1.1479	5
384.7695_0.79	0.7375	0.225063	-1.5145	5
524.4713_8.32	0.7375	0.230308	-1.4559	3
540.8068_0.75	0.7375	0.181576	0.68429	4
587.3394_5.91	0.7375	0.433185	-0.6374	3
817.0022_12.4	0.7375	0.40536	-0.51765	2
848.0207_12.52	0.7375	0.171671	0.49329	1
855.5389_10.92	0.7375	0.21602	1.3614	4
3-Nitro-L-tyrosine	0.725	0.276499	-0.85037	5
D-Mannosamine	0.725	0.139034	-0.33578	5
Fructose	0.725	0.219042	0.49413	5
1-Methylhistidine	0.725	0.275672	-0.93214	5
124.9234_0.74	0.725	0.292179	0.59472	1
135.0032_12.49	0.725	0.694819	-0.1611	1
142.9388_0.79	0.725	0.312867	-3.8047	1
144.0645_0.75	0.725	0.264436	0.93448	1
158.0924_1.22	0.725	0.103423	-0.86371	3
162.0233_0.97	0.725	0.350252	0.99538	4
162.0561_8.64	0.725	0.160861	0.51155	2
164.1368_9.83	0.725	0.393417	0.19152	1
179.1082_10.02	0.725	0.234478	0.41646	1
180.0893_0.84	0.725	0.671897	-0.188	1
187.1289_0.89	0.725	0.409462	1.8626	5
193.1254_13.25	0.725	0.485732	-0.39305	1
198.0779_1.01	0.725	0.450513	-0.62592	1
202.1101_2.12	0.725	0.167967	0.3232	3
203.1034_0.89	0.725	0.35085	-0.67966	1
203.935_0.77	0.725	0.20566	1.0228	1
223.1455_8.75	0.725	0.16501	-0.7117	5
224.0849_7.45	0.725	0.195211	1.2547	4
237.1364_4.94	0.725	0.195717	-0.64459	4
243.0559_4.04	0.725	0.212725	0.46609	4
256.1585_13.24	0.725	0.181297	-0.75345	5
263.1532_5.78	0.725	0.154946	0.64417	1
269.1304_4.61	0.725	0.305541	0.29741	3
283.0357_1.71	0.725	0.273045	-0.77078	4
284.1039_2.45	0.725	0.20543	-0.49675	5
288.221_11.92	0.725	0.235374	0.91226	5
301.1223_10.84	0.725	0.31551	0.60944	4
313.0737_3.67	0.725	0.132029	-1.2001	5
320.8736_0.71	0.725	0.35743	-0.75145	3
321.0672_12.11	0.725	0.601936	-1.1804	1
323.1753_5.42	0.725	0.179765	0.86909	1
325.1188_0.87	0.725	0.586041	-0.090136	1
327.2127_7.42	0.725	0.171008	0.82498	3
328.7156_13.97	0.725	0.159886	-1.7384	5
329.6864_7.04	0.725	0.147563	-1.6908	5
333.7051_8.89	0.725	0.0928547	-0.35193	5
336.1726_6.47	0.725	0.0626785	0.99458	1
337.1543_5.54	0.725	0.24638	-0.75793	3
366.2355_10.99	0.725	0.208584	0.45739	5
369.2547_1.21	0.725	0.0934632	1.502	2
394.9149_10.99	0.725	0.0965412	0.49343	5
402.2768_8.09	0.725	0.277962	0.52713	4
403.548_8.69	0.725	0.116306	2.3813	4
407.0334_12.51	0.725	0.699198	-0.82158	1
423.3003_8.74	0.725	0.171253	-0.91389	5
426.681_13.57	0.725	0.219929	0.33109	2
426.8302_0.76	0.725	0.175059	0.65998	2
446.147_5.02	0.725	0.245193	0.70489	3
451.2372_5.17	0.725	0.270212	-0.66021	5
462.3037_13.8	0.725	0.191474	-1.0574	4
472.2675_4.69	0.725	0.189288	0.72244	4
473.2061_6.77	0.725	0.25327	0.33744	3
476.1966_6.47	0.725	0.18601	-0.81604	5
476.2708_5.71	0.725	0.208108	0.75572	4
476.6047_7.89	0.725	0.184921	-1.5915	4
481.2711_7.87	0.725	0.607421	-0.70934	1
482.2088_5.89	0.725	0.33964	-1.2678	5
489.1043_7.44	0.725	0.189954	0.60111	1
490.0472_11.04	0.725	0.159589	0.74023	1
490.2953_7.28	0.725	0.232261	0.50362	1
495.3044_10.29	0.725	0.191617	-1.2224	2
499.0642_13	0.725	0.193839	1.2285	5
510.2639_5.67	0.725	0.180125	-1.3802	5
511.2238_7.27	0.725	0.347912	0.47859	1
512.0785_11.19	0.725	0.137553	1.0951	3
517.3167_10.49	0.725	0.182261	0.77627	4
520.8303_0.74	0.725	0.502005	-0.87881	4
521.089_8.31	0.725	0.223222	0.56466	1
526.7819_0.74	0.725	0.5125	-0.93101	1
528.3366_12.4	0.725	0.290058	0.1778	2
533.7648_11.34	0.725	0.222309	0.55027	2
543.3464_13.4	0.725	0.31715	0.65649	4
554.6065_0.84	0.725	0.224005	-1.1622	3
558.8642_0.72	0.725	0.243249	0.3567	2
571.2798_8.57	0.725	0.211729	0.82697	3
579.619_13.82	0.725	0.0959796	-0.95464	3
587.0397_12.75	0.725	0.487277	0.70395	2
587.1496_12.46	0.725	0.535431	-0.98304	1
588.2258_7.34	0.725	0.115335	1.0055	4
597.63_13.97	0.725	0.155177	0.88911	5
612.7653_9.09	0.725	0.246341	0.6331	3
614.8281_0.74	0.725	0.150407	1.3037	2
615.0513_12.75	0.725	0.192217	-1.2125	4
627.7236_13.02	0.725	0.1453	0.76099	2
628.3925_11.59	0.725	0.200179	-0.71086	5
631.2722_13.66	0.725	0.481667	0.66357	3
649.3767_8.91	0.725	0.655269	-0.79455	5
650.8618_0.74	0.725	0.654489	-0.50908	1
651.366_7.49	0.725	0.160632	0.83621	5
653.4117_13.9	0.725	0.306165	-0.02822	3
656.431_9.44	0.725	0.232512	-0.62299	5
662.7551_0.74	0.725	0.756721	-0.96853	5
668.1716_13.85	0.725	0.831321	0.61412	2
674.7562_13.2	0.725	0.195987	-0.59953	4
675.0908_13.2	0.725	0.273262	0.52442	2
679.761_13.05	0.725	0.160142	1.0243	4
680.9254_11.59	0.725	0.367577	0.56807	2
683.421_13.27	0.725	0.224113	0.80723	1
686.76_12.32	0.725	0.241541	0.36493	2
686.9419_12.31	0.725	0.209986	0.67387	2
691.7513_13.51	0.725	0.236341	0.48654	2
693.3729_7.22	0.725	0.240894	0.42477	2
694.948_12.87	0.725	0.596466	-0.28034	1
696.3581_9.64	0.725	0.175306	0.81257	1
697.9211_11.87	0.725	0.280573	0.95949	4
706.6615_0.75	0.725	0.102632	-1.2373	4
712.7762_13.37	0.725	0.273551	0.57495	3
715.7836_13.55	0.725	0.201084	0.87258	1
720.7179_0.74	0.725	0.13794	0.64882	4
733.4683_13.7	0.725	0.326038	-0.5566	3
739.3481_12.5	0.725	0.999937	-0.96	1
739.4201_8.19	0.725	0.240131	0.36711	1
741.4658_13.45	0.725	0.171756	0.81495	2
742.5555_0.78	0.725	0.200425	-1.307	4
742.9663_12.04	0.725	0.2108	0.99926	3
746.796_13.77	0.725	0.643318	-0.46272	1
754.5856_0.77	0.725	0.162936	1.4403	5
781.457_9.77	0.725	0.200867	-1.5967	4
785.4212_10.22	0.725	0.156961	-0.89422	3
787.1666_13.87	0.725	0.414032	0.32641	2
803.1791_13.92	0.725	0.104782	0.91921	2
841.1934_13.7	0.725	0.138885	0.74832	2
855.0384_13.42	0.725	0.201267	0.782	2
888.8776_13.97	0.725	0.182609	0.73194	1
894.2127_13.87	0.725	0.291061	-0.69191	5
947.0386_13	0.725	0.181986	-0.65916	4
2-Aminoadipic acid	0.7125	0.166246	0.76051	5
157.0372_1.14	0.7125	0.137649	4.4822	3
216.1007_1.08	0.7125	0.171565	-1.0338	4
315.6914_9.04	0.7125	0.409642	-0.73584	3
326.8097_0.79	0.7125	0.538738	-1.0401	4
388.7182_0.82	0.7125	0.590093	0.51926	3
494.6541_0.82	0.7125	0.362792	-0.10437	3
508.7195_0.79	0.7125	0.585603	0.83466	3
558.645_0.78	0.7125	0.353873	-0.8324	3
609.6353_13.7	0.7125	0.399602	-0.69145	3
699.0602_13.54	0.7125	0.22523	1.1313	2
734.5206_0.79	0.7125	0.207851	1.205	3
752.4414_8.97	0.7125	0.387842	0.22697	4
776.8132_13.47	0.7125	0.287908	0.5928	1
794.4796_0.78	0.7125	0.206446	0.6901	3
884.4777_13.02	0.7125	0.222268	-0.75751	2
L-Threonine	0.7	0.368802	-0.55199	5
Hypoxanthine	0.7	0.236198	-0.29354	5
Octopamine	0.7	0.307821	-1.9287	5
L-Methionine	0.7	0.326144	-0.59555	5
Theobromine	0.7	0.569128	-0.89662	4
D-Pantothenic acid	0.7	0.266957	-0.24259	5
Methionine	0.7	0.316688	-0.571	5
(S)-beta-Tyrosine	0.7	0.281786	-0.53771	5
Palmitic amide	0.7	0.230265	-0.33493	3
113.062_1.96	0.7	0.466306	0.12773	1
114.0927_4.88	0.7	0.446342	0.25737	3
121.0298_13.54	0.7	0.664379	-0.045381	1
134.0288_0.94	0.7	0.653915	-2.0441	3
139.1126_12.11	0.7	0.294297	-0.80572	5
141.0008_11.97	0.7	0.63151	-0.42263	1
147.0451_9.17	0.7	0.256184	0.43746	1
170.0352_0.95	0.7	0.161198	1.0518	1
172.0376_1.02	0.7	0.241815	0.71576	2
175.1335_6.56	0.7	0.93334	-0.035335	1
179.1302_5.59	0.7	0.203939	0.4559	4
182.1416_4.03	0.7	0.211622	-0.3413	5
184.1345_8.75	0.7	0.204167	-0.44888	5
188.13_1.44	0.7	0.411878	-1.3288	1
189.1124_10.64	0.7	0.414525	0.16425	1
196.0612_4.92	0.7	0.179495	0.79085	4
201.161_8.69	0.7	0.503345	-0.65421	1
202.1469_11.29	0.7	0.184355	-1.1339	5
203.034_1.67	0.7	0.349966	-0.32546	2
203.1302_13.23	0.7	0.146192	1.5078	2
207.1621_10.47	0.7	0.766718	-0.13888	1
212.1212_6.93	0.7	0.35115	0.21329	1
217.1103_7.65	0.7	0.347287	0.15206	1
219.051_11.93	0.7	0.634966	-0.41743	1
220.9359_0.69	0.7	0.325061	-0.47152	3
222.0193_5.03	0.7	0.248777	0.39774	3
232.8999_0.77	0.7	0.922575	-0.46677	1
234.0177_5.72	0.7	0.141433	4.0077	5
242.6446_1.07	0.7	0.260567	0.79294	4
246.0997_3.72	0.7	0.136544	1.6529	4
254.0946_2.83	0.7	0.118823	-0.63756	3
261.056_13.52	0.7	0.947576	-0.16445	3
261.061_1.19	0.7	0.584205	-0.54115	4
266.6566_7.04	0.7	0.179609	-2.3323	4
267.6635_7.74	0.7	0.880188	0.4031	4
268.8502_0.79	0.7	0.991548	-0.76067	3
270.1599_3.64	0.7	0.329126	0.22162	4
270.9827_0.69	0.7	0.340636	0.37242	1
277.0876_13.26	0.7	0.378149	0.14538	4
281.078_1.02	0.7	0.236631	0.93677	1
290.8511_0.74	0.7	0.163952	0.86261	2
299.1517_12.59	0.7	0.141915	2.5591	4
301.1434_3.34	0.7	0.327611	0.57963	5
306.0644_3.48	0.7	0.484839	-0.58832	4
306.1595_3.24	0.7	0.246856	0.80916	4
307.0871_1.16	0.7	0.190037	0.66778	4
309.045_2.31	0.7	0.523936	-0.10973	1
310.0463_2.24	0.7	0.693899	-0.81541	1
311.6915_8.54	0.7	0.32263	0.62263	5
322.8157_0.79	0.7	0.274333	-2.8214	5
332.8452_0.78	0.7	0.595396	-0.98881	3
333.1212_3.97	0.7	0.294668	-0.19101	3
334.1782_10.19	0.7	0.45724	-1.3884	3
334.8429_0.78	0.7	0.376463	-0.88781	3
336.0776_2.98	0.7	0.255366	0.51218	1
347.1661_12.52	0.7	0.212099	0.703	1
362.2281_9.94	0.7	0.316302	-0.67914	1
365.5646_10.69	0.7	0.191375	1.2672	5
365.991_13.97	0.7	0.445583	0.81022	3
366.1844_13.07	0.7	0.136926	0.859	3
367.7059_9.67	0.7	0.171322	0.66646	4
368.1976_4.91	0.7	0.279144	0.68479	3
372.1697_4.96	0.7	0.196028	-0.71526	5
379.144_5.43	0.7	0.380298	0.40246	3
383.1215_0.81	0.7	0.443177	0.75604	3
383.1274_10.86	0.7	0.30751	0.73032	1
386.2105_3.64	0.7	0.154956	-0.47924	5
388.0351_12.5	0.7	0.748916	-0.45205	1
390.0199_1.02	0.7	0.230321	1.4587	4
392.9149_10.19	0.7	0.615058	-0.6266	1
394.8799_0.74	0.7	0.425419	0.40855	1
395.1124_12.51	0.7	0.756332	-0.2176	1
395.9225_11.29	0.7	0.349656	0.58216	1
399.0983_12.51	0.7	0.715274	-0.19277	1
406.7561_10.42	0.7	0.507303	-0.03622	1
410.2632_11.44	0.7	0.193069	0.52266	2
414.1948_6.49	0.7	0.570752	0.10397	4
416.1946_3.31	0.7	0.27619	-0.68319	5
417.8753_13.5	0.7	0.420492	-0.17073	2
418.7231_9.79	0.7	0.263658	0.26636	4
422.7535_8.54	0.7	0.864526	-0.43853	1
424.9001_0.7	0.7	0.231292	-1.1752	2
437.2427_7.37	0.7	0.507119	0.31131	1
438.1785_5.17	0.7	0.201977	0.81345	4
440.2203_5.22	0.7	0.20877	0.79297	5
446.9565_6.72	0.7	0.369039	0.32808	3
448.7623_0.79	0.7	0.237375	-1.4231	4
448.7691_8.29	0.7	0.236335	0.49666	3
452.8376_0.76	0.7	0.277223	0.58348	1
453.0977_13.75	0.7	0.221123	0.56472	2
453.2985_13.75	0.7	0.19559	-1.848	3
460.7908_0.74	0.7	0.728147	-1.1286	1
462.5039_13.8	0.7	0.205848	-1.196	5
466.9551_10.69	0.7	0.84714	0.56693	5
468.0173_10.84	0.7	0.194018	0.70804	5
470.9779_6.52	0.7	0.218505	0.91948	3
471.1777_10.9	0.7	0.225925	0.41183	1
484.2852_1.06	0.7	0.415438	0.68499	1
484.3093_12.09	0.7	0.491269	0.26863	1
489.1988_11.04	0.7	0.181285	0.76967	3
497.2431_12.49	0.7	0.950831	-0.4968	1
500.5208_13.75	0.7	0.397979	0.6722	3
505.3208_8.32	0.7	0.60573	-0.92514	1
521.1301_8.39	0.7	0.202061	-0.89205	5
540.3386_10.99	0.7	0.26103	1.0708	4
543.3283_12.49	0.7	0.51329	-0.98282	1
546.839_0.74	0.7	0.200993	1.0972	3
547.6808_12.3	0.7	0.364118	-0.14692	4
549.7954_10.67	0.7	0.100336	-0.40986	4
554.6527_0.81	0.7	0.47803	0.90573	5
556.6511_0.79	0.7	0.218008	-0.98596	3
559.2213_12.5	0.7	0.718112	-0.55837	1
564.8342_11.19	0.7	0.334073	-0.65094	3
564.8546_13.37	0.7	0.142903	0.697	4
566.6987_12.95	0.7	0.149107	1.7033	2
572.0293_12.7	0.7	0.826248	0.45805	5
574.314_8.29	0.7	0.263105	0.4095	3
577.117_13.55	0.7	0.461171	-0.60522	3
579.1338_8.17	0.7	0.190654	-0.63469	5
580.3504_11.36	0.7	0.717177	0.32997	1
586.8522_11.32	0.7	0.125219	0.53149	3
587.1182_13.5	0.7	0.486675	0.44623	3
594.7026_12.67	0.7	0.199017	0.65248	1
608.8555_11.52	0.7	0.161118	0.8071	2
610.0445_12.92	0.7	0.128533	-0.61709	3
613.7103_11.9	0.7	0.202667	0.29507	3
614.3845_11.14	0.7	0.249445	0.97483	4
618.3782_11.32	0.7	0.277026	0.35166	1
619.0543_12.94	0.7	0.294889	-0.89132	3
619.327_8.12	0.7	0.186347	0.60185	4
621.2622_8.17	0.7	0.29889	0.63057	2
624.3802_11.63	0.7	0.123906	-0.84858	4
624.6318_0.79	0.7	0.229328	-1.9171	3
627.3837_11.32	0.7	0.939878	-0.76266	2
628.6293_0.78	0.7	0.167258	0.65465	3
657.3777_9.38	0.7	0.348064	0.17074	3
657.7445_13.24	0.7	0.36802	0.29594	1
658.4127_11.44	0.7	0.282953	0.64587	4
666.4392_10.32	0.7	0.198385	0.8149	1
667.3905_8.27	0.7	0.309943	0.57201	1
670.5293_0.81	0.7	0.159539	0.68	2
672.4188_11.86	0.7	0.232104	0.58432	2
673.3526_9.38	0.7	0.210231	-0.55744	3
685.2986_13.49	0.7	0.357079	0.148	2
687.0908_12.32	0.7	0.176834	0.69548	1
704.4423_13.32	0.7	0.176394	1.1029	2
704.6545_0.75	0.7	0.189536	1.0333	3
707.9311_12.09	0.7	0.205987	1.0361	4
718.7827_13.37	0.7	0.260838	0.31663	1
722.4731_13.54	0.7	0.28124	0.41893	2
725.7641_13.39	0.7	0.162609	-0.91161	3
729.4298_4.71	0.7	0.439265	-1.0941	2
731.3565_9.21	0.7	0.183386	0.49809	3
732.5243_0.79	0.7	0.399044	1.0099	3
733.795_13.45	0.7	0.428531	-0.63018	1
744.9638_12.97	0.7	0.360542	-2.1714	1
745.3575_12.44	0.7	0.726503	-0.74314	1
747.8004_13.5	0.7	0.273271	0.34073	1
750.4265_9.59	0.7	0.285704	0.56876	4
751.9576_12.32	0.7	0.290353	0.40328	3
752.1392_13.77	0.7	0.300216	0.96598	2
753.3148_12.6	0.7	0.440245	-1.1229	1
772.5421_0.82	0.7	0.2535	-1.1504	4
777.2897_12.47	0.7	0.463572	1.0237	1
803.8389_13.9	0.7	0.403106	0.29213	4
807.1715_13.71	0.7	0.254314	0.45329	4
826.0073_12.37	0.7	0.210998	0.50449	2
834.4337_9.27	0.7	0.523779	0.46645	4
835.8427_13.67	0.7	0.327995	-0.44405	5
855.5388_13.32	0.7	0.230838	0.79811	2
gamma-Aminobutyric acid	0.6875	0.139446	-20.921	5
241.6368_4.79	0.6875	0.355425	-1.5443	5
322.6813_8.54	0.6875	0.138033	-0.95973	5
381.7326_9.97	0.6875	0.330606	-0.87055	4
396.7964_0.77	0.6875	0.962852	-0.69914	3
444.7261_0.79	0.6875	0.274068	-0.56944	3
497.2781_4.99	0.6875	0.334077	-0.67557	5
520.7504_0.74	0.6875	0.330768	-1.0769	5
604.5836_0.82	0.6875	0.491774	0.8463	3
740.3416_9.97	0.6875	0.279674	-0.99705	5
767.8061_13.45	0.6875	0.272343	0.30796	2
790.4849_0.79	0.6875	0.226889	-1.3454	4
792.1608_13.66	0.6875	0.27159	0.51886	1
865.205_13.88	0.6875	0.672171	0.5231	1
869.5275_12.57	0.6875	0.528031	-0.48531	1
935.5571_12.87	0.6875	0.389087	0.97615	2
L-Phenylalanine	0.675	0.190499	-0.43871	5
L-Arginine	0.675	0.738513	-0.27078	4
4-Imidazoleacetic acid	0.675	0.0711188	0.60421	3
Choline	0.675	0.0959039	-0.49657	5
L-Lysine	0.675	0.123128	-0.5161	4
100.0775_3.09	0.675	0.631738	-0.35471	1
107.9691_12.49	0.675	0.757336	-0.26235	1
114.0689_0.89	0.675	0.8747	-0.43	1
116.8931_0.78	0.675	0.322739	0.31045	1
118.0664_8.79	0.675	0.319728	0.43543	1
118.0885_0.84	0.675	0.992926	-0.61447	1
122.0832_0.81	0.675	0.226026	1.2939	1
123.9426_12.49	0.675	0.622238	-0.10964	1
132.1031_1.62	0.675	0.263277	-0.44525	5
138.0549_0.89	0.675	0.722835	-0.41869	1
138.1289_13.87	0.675	0.500383	-0.41144	1
150.0586_1.19	0.675	0.41338	-0.56116	5
151.1127_10.32	0.675	0.439541	-0.29013	3
152.0584_2.45	0.675	0.940653	-0.36128	1
157.1231_12.09	0.675	0.661297	-0.58594	1
157.1237_6.56	0.675	0.778999	0.0039217	1
163.1247_2.18	0.675	0.370186	-0.46155	1
164.13_0.79	0.675	0.729208	-1.0827	1
164.9221_12.47	0.675	0.88733	-0.52422	1
166.0628_0.77	0.675	0.251715	0.84825	1
170.0346_1.02	0.675	0.287229	0.86756	1
170.1187_5.59	0.675	0.387536	-2.3313	5
172.0906_7.22	0.675	0.749932	-0.55753	1
174.0582_6.5	0.675	0.300949	0.55139	4
178.136_4.52	0.675	0.186557	0.86336	3
182.1962_8.47	0.675	0.447404	0.21793	3
183.1033_5.12	0.675	0.430846	0.38989	5
184.076_0.9	0.675	0.274989	0.4636	4
188.1295_0.98	0.675	0.717335	-0.38937	1
193.1614_13.72	0.675	0.246701	-0.51288	4
194.0835_5.54	0.675	0.280196	-1.1201	5
194.1042_0.92	0.675	0.30652	1.0242	1
197.1312_5.62	0.675	0.801358	-0.35412	4
198.0999_0.82	0.675	0.617575	-0.19906	1
214.1829_13.24	0.675	0.358905	0.21596	4
222.1171_7.44	0.675	0.515351	-0.70304	5
222.9928_0.77	0.675	0.339356	1.2887	1
228.029_1.79	0.675	0.521715	-0.50391	1
228.1252_3.72	0.675	0.118826	1.6951	4
242.1786_13.89	0.675	0.388893	0.35896	4
244.7896_0.79	0.675	0.224386	0.94677	1
245.0817_13.52	0.675	0.896536	-0.21822	1
245.154_0.9	0.675	0.277183	1.9023	1
249.1249_12.48	0.675	0.92679	-0.40555	1
249.9907_5.72	0.675	0.135281	3.9637	5
252.6566_6.04	0.675	0.234527	0.72232	4
253.0701_2.63	0.675	0.408636	0.48642	3
260.8192_0.81	0.675	0.269063	0.6986	3
264.8567_0.78	0.675	0.477261	-1.419	3
267.0416_1.22	0.675	0.247026	0.79321	1
267.1982_12.41	0.675	0.340999	0.37488	1
268.1455_3.23	0.675	0.603	-0.060151	5
268.1923_13.24	0.675	0.275977	0.28197	4
271.0407_0.74	0.675	0.391133	0.14093	1
271.0823_3.72	0.675	0.585594	-0.36636	5
271.0828_0.77	0.675	0.231438	0.97416	1
272.1109_1.24	0.675	0.275264	1.1312	2
274.1794_6.39	0.675	0.226764	-0.33539	5
276.8828_0.75	0.675	0.255124	0.79351	2
280.1429_1.18	0.675	0.491023	-0.4279	5
284.2138_0.89	0.675	0.688952	-2.4778	3
293.0863_3.64	0.675	0.29523	-0.46102	4
296.6853_7.07	0.675	0.291946	1.2322	3
300.6691_8.14	0.675	0.269261	-2.2515	5
301.145_1.27	0.675	0.340791	0.42778	1
306.085_2.47	0.675	0.535714	-0.4743	1
309.0813_12.49	0.675	0.916769	-0.34706	1
316.7806_0.82	0.675	0.453826	0.34058	3
320.2053_8.54	0.675	0.275245	-0.59262	4
321.1419_3.32	0.675	0.481003	0.45688	5
322.0581_2.47	0.675	0.87433	-0.31081	1
324.0576_2.47	0.675	0.70353	-0.38957	1
326.053_1.52	0.675	0.645382	-0.78954	1
330.078_0.97	0.675	0.211579	2.319	4
334.7034_7.19	0.675	0.250632	-1.3813	4
338.1825_8.44	0.675	0.343119	0.42259	1
342.2192_8.89	0.675	0.647566	0.42466	5
346.7127_9.27	0.675	0.454542	-0.34369	4
347.1616_1.64	0.675	0.203283	-0.62049	5
350.8873_10.49	0.675	0.423761	0.17321	3
358.8295_5.44	0.675	0.389277	-0.50043	5
370.9096_11.52	0.675	0.535102	-0.74151	2
371.1499_1.36	0.675	0.869122	0.65621	5
372.0602_12.48	0.675	0.85661	-0.50781	1
372.9905_13.97	0.675	0.309278	0.50629	1
373.2517_0.89	0.675	0.330649	2.4096	5
379.8882_9.94	0.675	0.364703	0.49982	3
380.7753_0.79	0.675	0.287089	0.60768	2
384.2411_10.21	0.675	0.393801	0.44165	1
389.2149_4.18	0.675	0.570822	0.018621	4
392.1602_3.67	0.675	0.316999	-0.94422	3
397.0152_12.71	0.675	0.426803	0.34269	2
400.2248_5.17	0.675	0.182673	0.46726	4
401.1818_10.25	0.675	0.195007	0.98295	5
401.9195_10.19	0.675	0.284407	0.036927	4
414.2052_4.51	0.675	0.228591	0.49175	3
428.2684_10.64	0.675	0.286269	0.42182	2
429.1777_6.12	0.675	0.490543	0.28272	3
434.231_5.12	0.675	0.743564	-0.894	1
440.2845_11.74	0.675	0.191796	0.68676	5
446.0275_10.62	0.675	0.253159	0.54696	5
447.2877_13.45	0.675	0.307941	0.8466	2
448.77_8.19	0.675	0.341283	0.29659	3
451.9461_10.54	0.675	0.401538	0.57732	1
453.3498_9.19	0.675	0.389344	0.20247	1
454.9587_11.84	0.675	0.40418	0.2448	4
458.2653_9.42	0.675	0.389166	0.52888	3
460.0211_7.87	0.675	0.220365	0.35813	4
467.2129_10.84	0.675	0.362186	0.53085	1
467.6945_10.84	0.675	0.367024	1.8489	2
471.3079_13.85	0.675	0.326454	0.60486	1
476.316_7.9	0.675	0.868138	-0.10309	1
477.3058_13	0.675	0.472863	0.51826	2
487.7969_10.66	0.675	0.280359	-0.24298	3
488.2801_6.52	0.675	0.33395	-0.42607	3
489.1791_11.05	0.675	0.379857	0.38905	3
504.0484_8.32	0.675	0.219089	0.3764	1
509.8109_10.82	0.675	0.27955	1.0784	4
514.2227_12.49	0.675	0.581055	-0.70203	1
520.2033_8.34	0.675	0.374197	0.65753	4
520.8274_13.1	0.675	0.287592	0.56244	1
521.3325_13.25	0.675	0.241127	0.55447	1
521.5827_13.25	0.675	0.293607	0.65473	3
528.7775_0.74	0.675	0.316266	0.25227	3
530.2898_7.87	0.675	0.205491	1.5195	3
531.274_7.27	0.675	0.198012	0.88406	4
531.8247_10.98	0.675	0.43871	-0.67742	1
532.0863_13.2	0.675	0.445398	0.33114	4
532.5895_13.32	0.675	0.241032	0.64959	2
534.1546_11.37	0.675	0.296949	0.36217	3
534.3221_7.74	0.675	0.384353	-0.59174	5
536.3247_11.04	0.675	0.394283	0.64465	5
541.3032_5.67	0.675	0.33131	0.51393	1
543.245_12.49	0.675	0.999173	-0.40515	1
545.3294_12.81	0.675	0.311171	0.39399	2
545.8261_11.17	0.675	0.118911	0.70401	4
548.1067_8.72	0.675	0.415263	-0.63649	1
549.1968_12.47	0.675	0.867044	-0.52092	1
555.2786_11.49	0.675	0.175375	0.90483	2
558.8369_9.58	0.675	0.892448	-0.027051	1
559.5966_11.55	0.675	0.287182	0.7734	2
560.6426_0.81	0.675	0.21458	-1.4872	2
562.0206_12.4	0.675	0.707936	-0.4583	1
586.0301_12.57	0.675	0.221466	0.85943	1
587.3484_7.74	0.675	0.153028	-0.49753	3
587.3732_13.6	0.675	0.372715	0.40189	3
589.8596_8.12	0.675	0.318675	0.26619	3
594.3781_8.36	0.675	0.165651	0.7164	1
601.0455_12.85	0.675	0.274795	0.48609	4
605.2968_11.32	0.675	0.269275	-0.70944	3
605.35_8.57	0.675	0.439055	0.19755	4
605.3701_11.17	0.675	0.451769	0.7235	2
608.3579_12.49	0.675	0.359978	-0.76103	4
609.203_9.06	0.675	0.610925	-0.54774	5
610.8737_11.36	0.675	0.389672	-0.10886	4
615.3842_12.73	0.675	0.378759	0.68774	1
616.8429_11.46	0.675	0.273858	0.54018	1
620.3922_13.75	0.675	0.222293	1.0153	1
622.411_10.04	0.675	0.295937	-0.5393	2
629.061_13.34	0.675	0.42998	0.62637	2
631.3981_13.8	0.675	0.412081	0.19048	3
631.6498_13.8	0.675	0.356627	-1.1506	5
640.2797_13.3	0.675	0.19413	-0.83361	3
642.4055_13.85	0.675	0.342647	0.31254	1
644.072_13.38	0.675	0.382535	0.24392	2
645.7414_13.06	0.675	0.226929	0.6511	3
646.3909_11.78	0.675	0.576346	0.37804	1
649.655_13.87	0.675	0.277307	0.56237	1
652.9037_13.8	0.675	0.292266	0.79315	1
654.7307_0.74	0.675	0.277096	-0.60315	3
658.3776_8.56	0.675	0.462085	-0.97844	4
660.0944_13.82	0.675	0.248399	0.4374	3
661.2681_5.39	0.675	0.372226	0.60339	5
663.9056_11.87	0.675	0.636371	-0.62702	1
664.8604_12.2	0.675	0.296219	0.9346	2
669.9302_12.2	0.675	0.333139	-1.27	2
672.745_13.3	0.675	0.349281	-0.71668	2
689.0991_13.26	0.675	0.241523	0.94263	1
691.412_13.48	0.675	0.472879	-0.33215	2
710.4314_9.22	0.675	0.409029	-0.65606	5
718.4492_13.4	0.675	0.937428	0.60489	2
722.3913_8.22	0.675	0.766012	-0.27599	1
726.7844_13.3	0.675	0.338913	0.32324	4
736.9706_12.52	0.675	0.361704	0.043243	2
737.7994_13.72	0.675	0.434518	1.2343	2
738.4582_12.19	0.675	0.680956	-0.76893	2
742.7954_13.75	0.675	0.346526	0.99012	3
745.2216_13.75	0.675	0.512178	0.41139	1
754.877_12.59	0.675	0.33471	0.80774	2
755.4371_12.62	0.675	0.516004	-0.89162	2
768.1605_13.92	0.675	0.218478	0.84288	4
777.151_13.62	0.675	0.110381	-0.59865	5
780.1346_13.82	0.675	0.748091	-0.54889	3
782.1608_13.87	0.675	0.313286	0.52158	2
787.093_13.87	0.675	0.309406	-0.7461	5
794.4476_9.87	0.675	0.290949	0.41456	1
827.5222_12.67	0.675	0.211298	1.4921	2
901.0686_12.64	0.675	0.329064	0.39836	1
937.5094_10.83	0.675	0.178863	1.0287	3
973.6104_13.39	0.675	0.431273	0.37982	2
N-Methyl-L-glutamic acid	0.6625	0.17272	0.48365	5
149.4205_13.54	0.6625	0.211624	-0.90241	1
308.6552_8.14	0.6625	0.135774	2.5742	4
338.7019_6.39	0.6625	0.62773	0.97788	3
340.6945_8.49	0.6625	0.319021	-0.26064	3
356.1978_4.34	0.6625	0.499707	-0.35292	3
365.7352_9.19	0.6625	0.343188	0.54045	4
404.7427_7.64	0.6625	0.404967	0.65277	5
484.2683_2.74	0.6625	0.693965	0.59974	4
486.6668_0.82	0.6625	0.688365	0.42753	3
515.439_11.19	0.6625	0.364247	0.41831	4
520.7434_8.34	0.6625	0.773356	-0.35411	5
674.0862_13.07	0.6625	0.406925	-1.3342	5
778.4614_0.82	0.6625	0.341211	-0.93094	5
965.5695_11.04	0.6625	0.506142	0.56035	4
Trigonelline	0.65	0.583538	-0.47442	3
L-Glutamic acid	0.65	0.948676	-0.29491	4
N-Acetyl-DL-serine	0.65	0.945035	-0.29327	4
N-Methyl-D-aspartic acid	0.65	0.925722	-0.28171	4
O-Acetylserine	0.65	0.903748	-0.26625	4
Adipic acid	0.65	0.733492	0.1405	5
Oleic acid	0.65	0.573954	0.092448	5
100.0774_1.17	0.65	0.721464	0.58119	5
101.0617_0.99	0.65	0.953572	0.0099366	1
105.035_10.37	0.65	0.576892	0.35481	1
107.0736_9.7	0.65	0.729824	-0.066644	1
114.0923_4.95	0.65	0.495048	0.23017	3
115.1129_13.22	0.65	0.1985	-0.39998	2
118.44_0.84	0.65	0.31701	-1.5268	5
128.0641_7.23	0.65	0.987816	-0.44781	1
133.1015_10.32	0.65	0.796911	-0.34292	1
140.0698_0.8	0.65	0.984229	-0.8021	1
141.1157_0.87	0.65	0.841448	-5.0479	3
147.0782_0.8	0.65	0.280037	0.56196	1
148.1157_0.85	0.65	0.739649	-0.16565	1
149.1182_6.2	0.65	0.471103	0.046306	4
155.1003_12.27	0.65	0.398985	1.003	2
156.1384_12.09	0.65	0.347784	-0.94844	5
162.5271_0.84	0.65	0.349986	1.214	5
164.0096_0.79	0.65	0.209553	0.24742	4
164.0531_7.39	0.65	0.401828	-0.85463	5
165.113_4.02	0.65	0.199005	0.35508	2
173.0819_7.64	0.65	0.437857	0.21301	1
180.8973_12.49	0.65	0.658254	-0.2336	1
184.1717_11.77	0.65	0.288901	0.97528	1
196.8694_12.49	0.65	0.891976	-0.34131	1
198.0785_2.94	0.65	0.0977139	-0.44038	5
198.1352_2.84	0.65	0.971868	-0.4541	1
198.9787_0.77	0.65	0.289613	0.64485	2
200.8622_0.82	0.65	0.632418	-0.51635	3
202.8576_0.82	0.65	0.39484	0.45342	3
203.0562_0.81	0.65	0.403844	0.41355	1
206.1415_3.71	0.65	0.134665	1.5695	4
207.0173_0.77	0.65	0.305403	0.85243	1
210.0521_2.82	0.65	0.77055	-0.30376	1
213.0548_4.54	0.65	0.542113	-0.33754	3
214.8385_0.81	0.65	0.844608	-0.86239	1
219.03_1.04	0.65	0.983355	-0.23164	1
221.0227_0.77	0.65	0.364937	0.81224	1
221.1877_0.84	0.65	0.766263	-0.73222	1
222.0704_6.62	0.65	0.696811	-0.31882	2
227.128_0.88	0.65	0.521865	0.1229	5
229.9844_0.82	0.65	0.354048	0.49528	1
230.0996_0.92	0.65	0.573337	0.1672	2
235.0941_12.64	0.65	0.402969	-0.23732	1
238.1029_7.21	0.65	0.426733	-0.51218	5
239.1061_7.22	0.65	0.420173	-0.58926	5
240.0817_3.74	0.65	0.725327	-0.42014	2
244.0015_5.03	0.65	0.339891	0.64676	4
246.7867_0.79	0.65	0.303465	0.56248	2
257.1176_2.42	0.65	0.349594	-2.0253	3
257.1644_0.94	0.65	0.581471	-0.78715	1
258.1152_0.81	0.65	0.485266	1.1844	1
262.0677_3.34	0.65	0.564114	0.45141	2
265.1006_12.53	0.65	0.760677	-0.12899	1
274.0624_0.9	0.65	0.402411	-0.68279	3
274.0956_1.02	0.65	0.790337	-0.64236	1
274.1737_8.72	0.65	0.400284	0.52002	1
274.8776_0.74	0.65	0.305422	0.62313	1
281.1155_2.07	0.65	0.796143	-0.23497	4
282.0541_1.26	0.65	0.687525	-0.32124	1
289.1184_12.46	0.65	0.878411	-1.0174	1
297.1604_4.59	0.65	0.516123	0.28741	4
298.1032_6.59	0.65	0.382036	0.45289	4
299.1505_1.19	0.65	0.344494	-0.52844	4
300.0635_2.72	0.65	0.434918	0.23769	1
301.2185_12.49	0.65	0.741085	-0.20723	1
302.1091_10.61	0.65	0.523702	0.49058	4
303.0559_12.49	0.65	0.794284	-0.28148	1
304.1664_2.52	0.65	0.503465	-0.14881	5
305.1357_7.55	0.65	0.405853	0.13682	4
307.0853_12.48	0.65	0.923921	-0.50556	1
307.6777_8.44	0.65	0.441336	0.041394	3
316.1907_6.57	0.65	0.29365	0.69502	1
316.2104_4.38	0.65	0.276353	-0.56903	5
317.1119_12.49	0.65	0.675124	-0.27528	1
318.2074_7.29	0.65	0.993996	0.8092	5
319.1959_7.99	0.65	0.425927	0.45673	5
320.2214_10.04	0.65	0.589752	-0.36296	5
322.2531_6.77	0.65	0.284962	0.58181	1
323.0595_12.49	0.65	0.901105	-0.35332	1
333.0858_12.48	0.65	0.746689	-0.18985	1
334.13_0.92	0.65	0.33267	0.64271	1
339.2079_6.12	0.65	0.496789	0.16599	3
340.2196_7.69	0.65	0.310007	-0.75127	5
342.1794_2.84	0.65	0.556934	-0.47872	5
345.0038_2.28	0.65	0.446916	0.33593	1
345.0437_12.49	0.65	0.688052	-0.43426	1
346.0537_0.97	0.65	0.387437	1.2023	4
347.2034_9.21	0.65	0.394376	-0.32734	2
348.0757_1.6	0.65	0.161399	3.5468	1
349.0597_12.51	0.65	0.885336	-0.20648	1
351.5612_10.79	0.65	0.638074	-0.78983	5
355.0793_1.14	0.65	0.966203	-0.29002	1
363.1687_5.42	0.65	0.479784	-0.30488	4
365.1643_6.16	0.65	0.333551	0.27235	1
366.1549_3.22	0.65	0.248271	-0.4301	4
370.2137_8.19	0.65	0.426627	-0.3314	5
372.2463_9.84	0.65	0.104094	-0.83457	3
381.5794_11.14	0.65	0.2172	0.53118	3
382.7734_0.79	0.65	0.287326	0.2737	3
388.1433_4.97	0.65	0.228684	-0.26343	3
395.2341_7.67	0.65	0.449945	0.44387	3
398.736_9.29	0.65	0.255572	0.58988	3
400.7579_10.19	0.65	0.465036	-0.52892	3
402.8301_0.74	0.65	0.293502	0.29306	3
405.066_5.02	0.65	0.160656	0.52803	2
407.2507_9.29	0.65	0.350644	0.52607	4
408.9257_0.68	0.65	0.654508	-0.53375	3
414.7738_12.9	0.65	0.436685	0.18308	2
416.2734_10.34	0.65	0.598812	-0.21903	1
418.2719_7.14	0.65	0.812463	-0.57576	1
422.5943_10.14	0.65	0.554345	-1.0434	5
425.7598_10.44	0.65	0.517816	0.38819	2
429.949_12.05	0.65	0.574826	0.094734	2
430.1759_5.02	0.65	0.245861	-0.53614	5
433.279_12.7	0.65	0.77752	-0.42569	1
436.0891_13.62	0.65	0.873371	-0.22608	2
439.6148_11.2	0.65	0.462731	-1.1478	4
442.2359_6.89	0.65	0.369335	-0.42982	3
444.7687_8.84	0.65	0.253934	0.86738	5
452.2854_10.24	0.65	0.33785	0.63655	1
457.2698_10.47	0.65	0.19979	1.1214	3
460.2998_10.79	0.65	0.43358	0.3762	2
461.9023_13.8	0.65	0.634989	-0.44542	2
464.8673_0.73	0.65	0.710666	0.47916	1
469.7846_10.84	0.65	0.401476	0.24572	3
470.2842_10.5	0.65	0.249034	-0.47921	2
471.1091_13.85	0.65	0.581997	-0.091846	2
471.2922_10.79	0.65	0.257312	0.60001	1
472.2954_11.04	0.65	0.33851	0.17496	2
477.5564_13	0.65	0.583161	0.29664	4
479.5134_13.9	0.65	0.715657	-1.0439	2
479.7847_10.67	0.65	0.439973	0.296	3
483.9762_12.09	0.65	0.477985	-0.59372	2
484.1238_1.14	0.65	0.408622	0.29475	4
488.3124_13.05	0.65	0.364374	0.60842	2
491.3159_13.7	0.65	0.457783	-0.91352	1
496.312_10.64	0.65	0.466971	0.51629	1
499.3183_13.15	0.65	0.18661	0.73131	2
500.3225_13.75	0.65	0.331674	0.49961	1
508.3095_10.49	0.65	0.781671	-0.1473	5
511.7543_11.24	0.65	0.315576	-0.71374	2
513.2162_12.49	0.65	0.847583	-0.37324	1
517.2949_7.77	0.65	0.428134	0.37741	4
517.5302_13.85	0.65	0.24914	0.83927	4
518.2864_4.99	0.65	0.43242	0.32185	5
518.7515_0.77	0.65	0.888901	-1.0526	5
521.3001_10.5	0.65	0.276367	1.3051	1
521.7692_8.34	0.65	0.314935	-0.49928	2
521.7991_11.19	0.65	0.506316	0.29505	2
527.2908_4.57	0.65	0.48978	-0.00036099	4
532.3392_13.33	0.65	0.601806	0.0079086	2
538.8372_11.54	0.65	0.514051	0.084126	2
549.3329_7.04	0.65	0.731191	-0.82045	3
550.3512_8.56	0.65	0.896937	-0.15461	1
554.2922_6.32	0.65	0.322168	-0.4498	2
555.2506_7.76	0.65	0.507015	0.13614	3
556.0166_12.97	0.65	0.540178	0.098895	2
562.3141_6.31	0.65	0.195827	1.031	3
565.2338_12.49	0.65	0.803101	-0.2463	1
568.3818_8.74	0.65	0.519698	0.42818	1
575.2999_7.72	0.65	0.62428	0.32759	5
575.8624_13.42	0.65	0.411311	0.43503	2
576.2891_11.54	0.65	0.527	-0.086038	2
577.2816_11.7	0.65	0.399634	-0.36834	2
585.2991_8.72	0.65	0.345876	0.26057	1
594.7687_0.74	0.65	0.835816	-0.35628	5
595.0353_12.67	0.65	0.451976	0.23773	1
596.3644_11.17	0.65	0.404237	0.5744	1
598.3787_13.65	0.65	0.408581	0.23392	2
598.7612_0.74	0.65	0.534004	-1.271	1
599.2572_11.8	0.65	0.5418	-0.51434	2
599.2795_8.17	0.65	0.603724	-0.35471	1
603.8767_11.84	0.65	0.415718	0.2226	2
604.8419_7.47	0.65	0.318443	0.36793	3
606.1425_13.94	0.65	0.764945	-0.92988	2
608.879_13.6	0.65	0.455098	0.45797	4
609.0436_12.77	0.65	0.643481	-0.39253	3
609.1332_13.6	0.65	0.935518	-0.36048	1
610.7164_13.2	0.65	0.336678	0.6488	2
612.5716_0.83	0.65	0.428596	-0.80696	3
619.8798_11.62	0.65	0.505134	-0.24064	1
625.3832_13.25	0.65	0.315151	0.58231	2
630.7317_13	0.65	0.508819	-0.54278	1
632.3758_8.14	0.65	0.454639	-0.21158	5
636.3549_8.09	0.65	0.314796	-0.15104	5
642.6993_0.75	0.65	0.345427	-0.73059	3
643.3065_8.56	0.65	0.380344	0.4352	3
648.1996_12.1	0.65	0.180756	0.65415	2
654.9063_11.61	0.65	0.35164	0.41449	3
654.986_13.39	0.65	0.325082	0.7157	2
657.0927_9.39	0.65	0.763716	-0.51264	3
658.084_12.14	0.65	0.294683	0.63032	2
658.3782_8.82	0.65	0.432872	0.3332	3
660.3904_9.27	0.65	0.818721	-0.085174	2
666.4038_8.89	0.65	0.418937	-0.30452	4
669.4043_10.52	0.65	0.386491	0.26303	3
672.0826_13.24	0.65	0.264312	-0.59165	3
677.395_12.12	0.65	0.615109	-1.3569	2
681.4135_8.34	0.65	0.486561	-0.31562	1
682.7537_13.12	0.65	0.772472	-0.48713	1
684.3136_13.49	0.65	0.364702	1.0374	1
684.5938_0.79	0.65	0.285696	1.2735	3
692.1798_12.27	0.65	0.319658	0.57224	1
695.3955_7.82	0.65	0.554874	1.0576	4
698.9323_11.87	0.65	0.584818	0.46147	5
710.4644_10.57	0.65	0.329644	0.49972	2
713.6629_13.62	0.65	0.39668	0.55643	5
716.4457_12.09	0.65	0.298181	0.67852	4
717.3796_9.67	0.65	0.566124	-0.64668	1
720.4349_8.89	0.65	0.219915	-0.32551	3
723.4501_9.97	0.65	0.346434	-0.93592	4
735.7775_13.68	0.65	0.355965	0.46306	1
736.4414_12.52	0.65	0.410701	0.6765	2
748.1353_13.5	0.65	0.898935	0.60186	5
758.4656_12.67	0.65	0.501975	-0.44711	2
759.4674_12.12	0.65	0.316303	0.2471	1
762.8095_13.55	0.65	0.260891	0.6286	1
763.4609_9.19	0.65	0.229828	-0.33651	4
764.9649_12.18	0.65	0.840647	-0.42873	1
767.9965_12.67	0.65	0.215026	3.0568	2
781.4776_12.22	0.65	0.271283	0.40091	5
786.4495_0.79	0.65	0.420955	0.38422	3
788.4437_0.81	0.65	0.265038	-1.1821	5
798.5127_0.77	0.65	0.370651	0.80851	3
799.5131_11.02	0.65	0.237614	-0.80302	3
806.8364_13.72	0.65	0.710312	1.0371	3
812.5491_0.77	0.65	0.449872	-0.52733	4
826.1758_13.67	0.65	0.338917	0.2519	4
826.5105_12.58	0.65	0.656537	-0.80756	2
831.5445_10.47	0.65	0.303011	-0.67186	4
838.4796_10.11	0.65	0.34282	-0.53685	5
839.0147_12.47	0.65	0.81411	-1.2268	3
842.5111_10.02	0.65	0.341558	-0.13891	5
848.5463_13.39	0.65	0.289038	0.55893	3
892.0488_12.67	0.65	0.332327	0.50937	1
893.4874_10.66	0.65	0.205815	0.58026	2
903.007_12.87	0.65	0.278072	-0.39793	3
922.4912_9.82	0.65	0.340757	-1.1429	5
928.5485_10.04	0.65	0.566213	-1.0196	3
943.085_13.32	0.65	0.325497	0.15361	2
950.5261_13.25	0.65	0.787897	-0.26354	2
962.0602_13.32	0.65	0.666177	-0.39949	3
986.5651_13.37	0.65	0.564892	0.59583	3
994.5471_13.37	0.65	0.271193	0.23444	2
L-Ornithine	0.6375	0.531513	0.47654	5
263.6503_5.49	0.6375	0.372258	0.89979	3
297.0969_3.67	0.6375	0.370323	0.13561	2
314.764_4.59	0.6375	0.374048	-0.81308	5
366.7082_9.19	0.6375	0.371344	-0.40583	4
394.2149_5.06	0.6375	0.44071	-0.39045	5
426.7559_7.99	0.6375	0.671544	0.24279	5
440.7315_0.79	0.6375	0.307595	-0.23426	3
445.6617_10.69	0.6375	0.607014	0.27663	5
454.7526_0.8	0.6375	0.752929	0.63469	4
512.6533_12.09	0.6375	0.410831	0.61899	2
519.2852_5.89	0.6375	0.371162	0.28876	1
526.2957_7.61	0.6375	0.386709	-0.67347	3
546.2848_6.47	0.6375	0.465983	-0.5036	2
564.6846_0.78	0.6375	0.53193	-0.69126	3
578.1667_11.69	0.6375	0.906349	0.15451	1
584.3016_7.52	0.6375	0.824321	0.15508	5
635.7334_12.82	0.6375	0.807927	0.36724	5
645.885_12.07	0.6375	0.713047	-0.78823	2
650.7462_12.9	0.6375	0.291376	-0.73584	5
669.6611_13.47	0.6375	0.663598	0.70781	3
674.5678_0.79	0.6375	0.51917	0.78968	3
711.9389_12.42	0.6375	0.454375	0.47083	2
726.4426_8.67	0.6375	0.700131	0.73191	3
758.4854_13.78	0.6375	0.990936	-0.46629	2
792.4925_0.8	0.6375	0.517293	0.2921	3
800.4397_0.77	0.6375	0.452005	-0.53486	5
800.5104_0.78	0.6375	0.241975	1.4113	4
842.548_11.23	0.6375	0.204549	-0.63513	3
Trimethyllysine	0.625	0.406427	-0.22566	4
Tyramine	0.625	0.567064	-0.10327	3
Heptadecanoate	0.625	0.467052	0.75044	2
Glycerol 3-phosphate	0.625	0.253605	0.74244	4
Pantothenic acid	0.625	0.390148	-0.24279	5
Deoxycytidine	0.625	0.326853	-0.33098	5
101.0992_10.44	0.625	0.502865	0.12796	1
102.1294_12.64	0.625	0.723683	-0.16679	1
104.1086_8.42	0.625	0.385118	0.36311	1
104.4411_0.84	0.625	0.620775	-0.37838	5
105.0341_13.02	0.625	0.649678	0.33649	2
105.0365_13.24	0.625	0.335957	0.43804	1
106.9536_12.5	0.625	0.708685	-0.23434	1
108.9509_12.5	0.625	0.734067	-0.22017	1
115.056_7.22	0.625	0.935253	-0.48126	1
115.0784_12.82	0.625	0.420133	0.21003	2
116.0728_0.89	0.625	0.682025	-0.29128	1
116.1082_1.32	0.625	0.437044	-3.5481	5
116.1089_0.89	0.625	0.826232	-3.2366	5
123.0555_1.01	0.625	0.536077	0.030306	4
125.0602_5.24	0.625	0.296138	0.30431	1
127.0141_7.24	0.625	0.902588	-0.38196	1
127.0337_0.92	0.625	0.624041	0.35755	2
129.1281_10.54	0.625	0.377172	0.20565	4
130.099_1.14	0.625	0.420737	-0.36094	5
131.0706_1.96	0.625	0.336205	-0.13589	5
136.063_1.62	0.625	0.237101	1.9429	5
136.0631_3.47	0.625	0.957904	-0.4263	1
137.0474_1.55	0.625	0.853735	-0.15663	1
139.0508_1.2	0.625	0.377249	0.96313	3
142.0278_0.82	0.625	0.194349	0.17679	4
145.1233_10.47	0.625	0.856749	-0.24373	1
146.0611_4.62	0.625	0.363766	0.25849	4
146.1193_0.87	0.625	0.260424	1.144	1
148.9363_0.77	0.625	0.269407	0.42396	1
148.9615_12.48	0.625	0.739559	-0.17832	1
150.0773_0.94	0.625	0.326231	-0.3377	5
155.1078_11.77	0.625	0.984375	0.11398	5
156.0434_0.8	0.625	0.91574	-0.50343	1
158.1543_13.82	0.625	0.6861	0.043246	1
159.0296_1.55	0.625	0.851339	-0.22533	1
159.0668_8	0.625	0.315702	0.23639	1
165.1139_4.62	0.625	0.488208	0.51341	5
169.077_7.17	0.625	0.414782	-0.5367	3
170.0615_4.61	0.625	0.270553	0.39225	1
172.0066_3.41	0.625	0.863481	-0.38379	1
172.8534_0.81	0.625	0.95556	-0.45504	1
173.0575_4.07	0.625	0.432372	0.23017	1
180.1616_9.71	0.625	0.620474	0.05531	1
181.1241_7.22	0.625	0.335877	0.18838	1
186.0896_1.14	0.625	0.149148	0.62542	1
187.1297_11.41	0.625	0.472346	0.1351	1
187.9595_0.77	0.625	0.586629	0.33281	1
190.0149_1.49	0.625	0.798336	-0.20521	1
191.0432_0.77	0.625	0.24013	0.61802	1
193.1455_6.94	0.625	0.50851	0.23907	5
193.157_0.84	0.625	0.653622	-0.93267	1
200.1308_6.78	0.625	0.464273	-0.48928	1
204.1254_4.24	0.625	0.1986	1.0089	5
207.9756_0.77	0.625	0.195668	0.20548	4
209.0628_13.54	0.625	0.438779	0.22328	1
210.8912_0.79	0.625	0.900685	-0.62969	1
211.1_10.41	0.625	0.199976	-1.5126	5
219.1764_12.7	0.625	0.524784	0.16347	1
220.1213_3.35	0.625	0.526689	-0.23303	4
221.1138_7.38	0.625	0.630087	-0.93749	5
222.1731_12.32	0.625	0.6906	-0.35515	1
223.9517_0.77	0.625	0.273116	0.12899	1
226.1323_2.64	0.625	0.381426	0.21518	3
227.1207_12.37	0.625	0.572844	0.16171	4
228.0277_5.03	0.625	0.404041	0.49154	3
228.8177_0.79	0.625	0.524092	0.40782	1
231.0875_2.64	0.625	0.396736	-0.49498	3
240.1003_7.21	0.625	0.451095	-0.56574	5
241.2082_11.89	0.625	0.60159	-0.26312	3
246.1115_1.01	0.625	0.620987	0.27331	5
248.9616_6.57	0.625	0.535921	-1.761	1
251.1532_4.59	0.625	0.22822	-0.33377	3
252.1398_13.27	0.625	0.904005	0.21521	4
252.1606_8.34	0.625	0.504891	0.31393	1
252.1713_12.87	0.625	0.654109	-0.29485	2
256.5018_12.77	0.625	0.436714	0.48482	2
258.9032_0.73	0.625	0.473717	0.24619	1
259.1327_2.06	0.625	0.188836	-0.37105	3
261.136_4.48	0.625	0.479544	0.26118	1
265.6636_6.39	0.625	0.401357	-1.249	5
267.0985_1.36	0.625	0.810555	0.29689	3
271.107_12.49	0.625	0.83298	-0.38625	1
274.1538_8.89	0.625	0.394013	-2.244	3
276.1238_0.97	0.625	0.243395	-0.20355	5
276.1492_6.06	0.625	0.389052	-0.38477	2
277.0348_1.19	0.625	0.616972	-0.25169	5
280.0976_0.78	0.625	0.510136	1.0042	2
281.013_4.04	0.625	0.566906	0.44479	1
287.0826_12.49	0.625	0.733767	-0.34062	1
290.0907_3.47	0.625	0.57709	-0.45787	4
291.1965_13.17	0.625	0.592494	-0.35474	2
293.1286_4.69	0.625	0.537646	-0.30354	5
294.1531_8.44	0.625	0.800344	0.31224	3
294.1776_8.04	0.625	0.488946	-0.63403	1
297.1828_7.54	0.625	0.385767	-0.31632	5
300.2078_5.41	0.625	0.595528	-0.076945	4
300.5297_12.95	0.625	0.446224	0.2408	2
302.7506_0.79	0.625	0.365764	-0.016857	4
305.1636_5.37	0.625	0.301351	0.34924	1
306.1019_7.24	0.625	0.493992	-0.66297	4
307.9439_3.04	0.625	0.623236	-0.37913	4
314.1881_4.59	0.625	0.27515	0.28176	1
315.1583_1.31	0.625	0.812628	0.34643	2
319.1423_4.59	0.625	0.290526	0.42345	4
321.9413_0.77	0.625	0.352714	0.58541	1
325.0573_12.49	0.625	0.964119	-0.3673	1
326.8915_0.74	0.625	0.334289	0.38949	1
329.0309_2.27	0.625	0.379631	0.31301	1
329.067_12.46	0.625	0.824064	-0.35232	1
329.5472_13.05	0.625	0.370608	0.6115	2
334.1822_12.45	0.625	0.416025	-0.018923	1
336.8379_0.77	0.625	0.371841	-0.37223	5
338.187_4.34	0.625	0.388544	-0.39091	3
338.2047_7.04	0.625	0.331536	0.55677	5
339.0357_12.47	0.625	0.636291	-0.12603	1
339.0955_12.5	0.625	0.795007	-0.34644	1
344.2416_6.18	0.625	0.657159	-0.088973	4
344.8394_6.14	0.625	0.339655	0.36091	1
345.693_9.39	0.625	0.504228	0.28694	4
351.1712_7.09	0.625	0.970411	-0.25321	1
352.2029_5.84	0.625	0.494347	-0.75517	5
355.1641_4.82	0.625	0.54922	0.39301	1
357.2039_9.64	0.625	0.556786	0.49921	4
358.2144_5.44	0.625	0.340175	-0.2874	4
361.0168_12.5	0.625	0.866303	-0.39015	1
363.0139_12.52	0.625	0.947168	-0.47148	1
365.1112_12.5	0.625	0.74047	-0.21542	1
371.2017_4.24	0.625	0.582402	0.10131	4
379.1819_7.54	0.625	0.815803	0.20677	4
379.606_9.94	0.625	0.279517	-1.7266	4
382.7293_7.24	0.625	0.411788	-0.95961	5
388.6074_6.84	0.625	0.375387	0.29048	3
388.7217_9.49	0.625	0.782788	0.075502	1
388.905_6.82	0.625	0.607269	-0.5388	5
388.9331_6.89	0.625	0.785958	-0.61549	1
389.1863_0.84	0.625	0.238804	2.294	2
391.0578_12.47	0.625	0.814551	-0.3424	1
394.2156_4.57	0.625	0.479899	0.1605	5
394.2599_10.12	0.625	0.911836	-0.20672	1
396.2561_11.29	0.625	0.50084	-0.32898	1
396.8771_0.73	0.625	0.849561	0.23597	2
397.2173_13.66	0.625	0.791566	-0.35437	3
400.2607_11.82	0.625	0.485783	0.15003	2
403.0897_6.97	0.625	0.498843	0.17661	3
404.0195_1.82	0.625	0.453966	0.3903	5
407.2077_4.42	0.625	0.893723	-0.92454	4
407.2461_0.89	0.625	0.233569	2.6315	1
407.919_9.99	0.625	0.404251	0.294	4
408.1937_5.02	0.625	0.70345	-0.21438	5
408.9137_9.79	0.625	0.46204	0.44199	4
409.0716_13.45	0.625	0.354865	0.26209	2
409.2238_3.97	0.625	0.494785	-0.59858	4
416.2311_6.58	0.625	0.654813	0.047719	1
417.5527_9.09	0.625	0.330399	-2.162	3
421.756_10.01	0.625	0.773467	-0.61278	4
422.8895_0.72	0.625	0.625928	-0.69353	3
423.6531_10.42	0.625	0.696911	0.58739	3
428.2552_6.63	0.625	0.591017	-0.55951	4
428.7043_0.82	0.625	0.528753	-0.0405	3
432.1729_5.04	0.625	0.361244	0.32584	4
433.2579_3.69	0.625	0.349341	2.6867	4
438.9416_11.44	0.625	0.503396	0.44281	1
443.2222_12.54	0.625	0.596137	-0.31426	1
444.2888_12.21	0.625	0.43592	0.15313	2
444.536_12.74	0.625	0.700884	-0.85059	3
454.6225_11.3	0.625	0.585519	0.62678	4
461.2166_2.92	0.625	0.589794	-0.60165	1
462.7876_0.74	0.625	0.404034	0.16151	3
466.2985_12.9	0.625	0.540781	0.28486	2
469.149_7.24	0.625	0.563337	-0.41682	2
470.8176_0.74	0.625	0.343007	0.43852	3
482.3011_12.47	0.625	0.643028	0.18535	2
482.7102_13.65	0.625	0.505456	-0.50225	4
483.3027_11.84	0.625	0.703358	-0.33736	1
484.281_8.87	0.625	0.477368	0.32751	2
494.8164_0.74	0.625	0.407644	0.26704	5
497.2459_7.89	0.625	0.358962	0.32092	1
497.6451_11.98	0.625	0.365885	0.096811	4
497.9779_11.99	0.625	0.439367	0.066606	1
498.691_0.79	0.625	0.350217	-0.52693	3
498.8132_13	0.625	0.28825	0.26342	5
499.9204_13.75	0.625	0.328527	0.18914	4
504.6372_0.79	0.625	0.60321	-0.70728	3
505.7937_10.87	0.625	0.519641	0.27935	1
506.3261_8.14	0.625	0.675159	-0.049251	2
508.7242_13.8	0.625	0.192023	0.5215	2
509.2406_12.49	0.625	0.871717	-0.22974	1
510.5757_13.2	0.625	0.543926	0.71035	2
512.7165_0.78	0.625	0.42624	-0.58778	2
514.811_9.14	0.625	0.522962	-0.50022	5
516.3085_10.95	0.625	0.539473	0.5639	4
525.2053_6.77	0.625	0.70862	-0.37379	2
526.3364_13.9	0.625	0.778095	0.99563	3
527.2918_4.23	0.625	0.714828	-0.70084	1
528.0023_12.4	0.625	0.406779	0.38014	1
529.1939_12.49	0.625	0.867126	-0.29503	1
530.3247_10.67	0.625	0.554937	-0.67916	4
531.116_10.17	0.625	0.436872	0.16841	1
531.2188_12.48	0.625	0.98182	-0.63726	1
532.2988_11.34	0.625	0.276205	-0.15904	5
533.3263_7.94	0.625	0.437427	0.51318	1
539.2768_7.74	0.625	0.307306	-1.0725	1
539.2864_6.44	0.625	0.884175	0.50732	4
540.1019_13.65	0.625	0.449113	-0.0251	2
543.8124_11.38	0.625	0.452695	0.48951	2
548.8369_0.73	0.625	0.552248	0.26314	3
554.3524_13.45	0.625	0.452361	0.3994	2
561.6924_12.98	0.625	0.528044	-0.052736	2
565.7979_8.69	0.625	0.337306	0.77868	1
570.3234_8.07	0.625	0.706719	-0.454	1
570.3578_10.84	0.625	0.573398	0.0548	2
570.6924_13.05	0.625	0.613474	-0.054288	2
571.1799_12.5	0.625	0.859676	-0.30007	1
575.8517_11.32	0.625	0.457367	0.42056	4
577.032_12.5	0.625	0.488522	0.41228	1
577.2318_7.77	0.625	0.249816	0.42028	3
590.3133_6.99	0.625	0.907342	0.46165	4
591.7084_12.6	0.625	0.44402	0.36051	1
593.6796_12.75	0.625	0.878783	0.058916	1
594.8851_13.9	0.625	0.348247	0.74277	3
598.1919_12.52	0.625	0.556619	0.052332	1
598.7006_11.79	0.625	0.630113	-0.019787	2
601.345_11.8	0.625	0.513506	0.064359	2
602.8669_11.49	0.625	0.314909	0.75885	3
603.6956_11.84	0.625	0.409767	-0.39082	2
604.7974_0.74	0.625	0.426348	0.24714	3
606.5809_0.82	0.625	0.705476	-0.6162	3
607.394_13.94	0.625	0.49861	-0.65613	1
608.0228_12.49	0.625	0.71031	-0.62699	4
608.3999_12.47	0.625	0.705915	0.5056	2
614.6054_0.77	0.625	0.487221	-1.0893	3
621.8486_11.94	0.625	0.652841	-0.90568	3
624.1446_13.65	0.625	0.374227	-0.49907	3
625.0542_12.97	0.625	0.614829	0.39027	3
625.2847_13.44	0.625	0.526409	0.093718	4
628.3909_11.12	0.625	0.341198	0.79068	4
631.0659_13	0.625	0.389148	-0.51793	2
632.6703_0.75	0.625	0.647872	0.44447	3
633.1578_12.48	0.625	0.558719	0.13411	1
635.3971_9.39	0.625	0.894774	-0.33059	1
638.4058_9.27	0.625	0.514894	0.34761	1
641.0921_13.39	0.625	0.346553	0.94943	2
641.8422_9.09	0.625	0.637977	-0.33942	1
645.9156_12.04	0.625	0.604197	-0.2528	2
646.3772_8.37	0.625	0.358009	0.33644	4
647.9006_12.05	0.625	0.34397	0.77345	2
649.3964_11.47	0.625	0.367056	0.39554	2
650.907_11.2	0.625	0.57481	-0.23901	4
652.4353_9.34	0.625	0.524285	0.86432	5
653.1606_13.77	0.625	0.344252	0.11009	2
659.3745_6.37	0.625	0.351321	-0.24158	5
673.3877_7.73	0.625	0.159631	-0.74162	4
675.3887_9.27	0.625	0.572288	0.37318	4
675.4052_8.54	0.625	0.335917	0.47561	5
678.3779_12.17	0.625	0.658809	-0.27755	2
680.0963_13.05	0.625	0.756879	-0.5802	1
680.9374_12.3	0.625	0.353219	0.27574	2
682.8821_11.87	0.625	0.879695	-0.4229	1
694.4313_11.97	0.625	0.96	-0.42869	2
702.0991_12.42	0.625	0.905889	-0.75565	1
704.8932_11.99	0.625	0.343895	0.79482	3
706.4247_13.54	0.625	0.529482	0.20678	2
708.1143_13.63	0.625	0.512388	0.32741	2
713.108_13.37	0.625	0.265732	0.53335	4
719.1175_13.4	0.625	0.555436	-0.3005	1
721.4346_13.63	0.625	0.759692	-0.33235	1
722.7894_13.69	0.625	0.920709	-1.6602	2
723.378_12.51	0.625	0.951469	-0.4872	1
730.7792_12.54	0.625	0.584255	-0.20495	2
731.1077_12.52	0.625	0.30143	0.37482	2
731.3224_12.49	0.625	0.519465	0.13632	2
731.4_12.5	0.625	0.549212	0.70614	2
732.4681_12.49	0.625	0.512967	-1.314	5
732.7441_0.74	0.625	0.295684	0.63244	1
745.3599_9.94	0.625	0.830293	-0.91413	5
746.4317_9.22	0.625	0.941775	0.85038	3
748.4591_13.72	0.625	0.381106	0.41913	1
750.1174_13.75	0.625	0.778072	-0.26452	1
750.7856_13.73	0.625	0.781631	-0.68335	1
753.4244_12.6	0.625	0.858318	0.34882	2
760.9313_12.07	0.625	0.410621	0.26791	1
761.8038_13.42	0.625	0.375525	0.32761	3
762.1369_13.42	0.625	0.260154	0.2887	2
766.8155_13.82	0.625	0.77046	0.34556	2
781.4903_13.87	0.625	0.458924	0.7853	2
784.4535_0.81	0.625	0.464203	0.57482	2
794.1403_13.87	0.625	0.379374	-0.66336	5
804.5004_12.51	0.625	0.975147	-0.85405	4
809.1532_13.92	0.625	0.431094	-0.219	3
809.2452_12.49	0.625	0.715837	-0.87997	1
835.031_12.92	0.625	0.565418	0.42522	2
864.8596_13.77	0.625	0.280099	-0.38846	3
881.0053_12.77	0.625	0.361005	0.51137	1
889.046_13.12	0.625	0.345848	-0.82726	3
899.0628_13.19	0.625	0.585105	0.45396	2
906.4907_13.12	0.625	0.800991	-0.92543	2
914.0544_12.77	0.625	0.982003	-0.24522	1
918.0355_13.2	0.625	0.236074	-1.2631	5
936.5817_12.98	0.625	0.380809	0.26052	5
949.0876_12.92	0.625	0.555823	1.1751	3
986.086_13.37	0.625	0.345862	-0.70123	5
Dihydroxyacetophenone	0.6125	0.314833	0.42422	5
141.5007_0.89	0.6125	0.804012	-3.0654	3
283.6869_6.59	0.6125	0.357211	0.86455	5
318.6983_7.49	0.6125	0.825848	0.44358	2
349.2258_7.84	0.6125	0.390278	0.31631	1
350.1877_4.97	0.6125	0.689578	-0.07074	3
371.7406_8.19	0.6125	0.858021	0.41977	4
378.7351_0.81	0.6125	0.453001	-0.079507	3
390.1401_4.97	0.6125	0.13949	-0.50537	3
438.7339_0.79	0.6125	0.468762	0.45009	3
458.2312_5.23	0.6125	0.536778	0.040938	5
458.5449_13.2	0.6125	0.499861	-2.1967	2
458.7934_0.74	0.6125	0.505434	-0.091061	5
459.9886_7.87	0.6125	0.740894	0.67711	2
488.8791_0.72	0.6125	0.346873	0.49361	3
510.648_11.09	0.6125	0.942699	-0.40078	1
510.7181_0.78	0.6125	0.263005	0.39897	1
515.3835_11.24	0.6125	0.850734	0.38539	5
530.3273_6.39	0.6125	0.870145	0.58665	2
541.6721_12.3	0.6125	0.433001	0.29452	1
571.6951_12.7	0.6125	0.830441	-0.62987	1
638.1464_13.85	0.6125	0.807409	-0.77411	1
644.7351_12.91	0.6125	0.536793	-0.94111	3
674.7833_0.74	0.6125	0.588556	0.89856	1
724.4461_8.19	0.6125	0.724582	-1.1096	5
791.8259_13.66	0.6125	0.76486	0.29091	5
798.486_9.77	0.6125	0.513827	0.24667	5
862.4642_12.97	0.6125	0.505871	-2.3603	2
892.5474_12.83	0.6125	0.77522	0.4412	1
928.5039_13.18	0.6125	0.726574	0.44456	2
965.0945_13.37	0.6125	0.548082	0.62459	2
974.631_11.74	0.6125	0.567564	0.74057	2
991.077_13.12	0.6125	0.555112	0.43676	5
Taurine	0.6	0.848303	0.23151	5
L-Valine	0.6	0.26561	-0.26938	4
Nicotinamide	0.6	0.489851	0.022931	5
(R)-5,6-Dihydrothymine	0.6	0.612069	0.13678	4
Betaine aldehyde	0.6	0.520302	-0.48116	5
Capric acid	0.6	0.866288	0.16244	5
Suberic acid	0.6	0.494092	0.173	4
112.8987_12.5	0.6	0.665048	-0.12707	1
122.9255_0.74	0.6	0.542147	0.28062	1
123.081_7.22	0.6	0.43197	0.25021	3
125.0008_0.91	0.6	0.262035	0.94193	4
125.017_7.27	0.6	0.873117	-0.33369	1
125.017_7.21	0.6	0.941535	-0.33569	1
129.0802_0.92	0.6	0.300079	1.3537	1
130.0519_0.8	0.6	0.33624	0.45119	1
135.1025_4.39	0.6	0.598495	0.12717	3
135.1038_12.77	0.6	0.664115	-1.2806	2
136.0613_1.86	0.6	0.872899	0.45265	5
142.902_0.82	0.6	0.918261	-0.083709	3
144.0822_8.45	0.6	0.623988	0.17724	3
146.0609_8.77	0.6	0.944757	-0.33355	1
149.0247_13.54	0.6	0.568896	0.074957	1
152.0327_1.03	0.6	0.495019	0.90518	3
154.0843_1.64	0.6	0.633656	-0.3026	5
155.1313_0.89	0.6	0.865166	-3.1027	3
162.0583_2.18	0.6	0.645796	-0.63666	5
165.1409_9.69	0.6	0.611669	0.086193	1
166.0514_5.01	0.6	0.477217	0.21017	4
169.0879_4.23	0.6	0.684847	-0.054126	4
169.9877_0.78	0.6	0.603592	-0.12997	1
172.0981_2.87	0.6	0.311359	0.30663	1
177.0567_13.54	0.6	0.561189	0.082687	1
179.0835_8.67	0.6	0.679382	0.21451	3
181.0734_3.84	0.6	0.826096	-0.25496	4
182.1044_1.64	0.6	0.211675	-0.39829	4
184.0622_5.01	0.6	0.445475	-0.70138	4
184.0748_1.02	0.6	0.715994	0.30901	4
184.0748_8.42	0.6	0.70762	-0.1613	1
187.0985_4.22	0.6	0.374324	0.2591	3
187.1348_13.14	0.6	0.844196	-0.1451	1
188.0702_2.84	0.6	0.58773	-0.18097	5
189.049_7.23	0.6	0.905056	-0.26992	1
189.0737_1.08	0.6	0.992187	-0.21542	1
190.0279_3.76	0.6	0.43174	0.24875	3
199.628_12.66	0.6	0.553919	0.66805	2
200.105_1.76	0.6	0.464427	0.30632	3
201.091_9.71	0.6	0.413388	0.17781	1
204.0871_1.04	0.6	0.476491	-0.032347	1
204.5903_0.89	0.6	0.341616	1.6569	1
206.0452_5.01	0.6	0.555158	-0.48977	3
206.0568_0.97	0.6	0.347541	0.19053	4
210.0771_1.64	0.6	0.924427	0.0048243	3
211.1343_13.22	0.6	0.709746	-0.54713	4
212.8456_0.81	0.6	0.933375	-0.35279	1
214.0909_12.62	0.6	0.478002	0.18456	1
216.0664_0.79	0.6	0.422884	0.79707	1
216.1253_1.17	0.6	0.474574	0.32929	5
218.2142_10.45	0.6	0.480482	-1.1202	5
219.0289_0.81	0.6	0.503945	0.16083	1
222.0298_1.01	0.6	0.488709	0.080062	4
222.6288_5.89	0.6	0.528805	-0.64386	3
224.0462_1.18	0.6	0.450988	0.6171	1
227.1069_13.17	0.6	0.886609	-0.88312	1
230.8123_0.79	0.6	0.857478	-0.61286	4
232.1586_2.8	0.6	0.75547	0.84348	5
240.1566_4.49	0.6	0.757899	-0.088885	4
242.9288_0.73	0.6	0.561094	-0.0062692	1
245.0655_2.05	0.6	0.450917	0.25765	1
247.1475_4.62	0.6	0.746941	-0.11473	4
248.1545_1.25	0.6	0.750022	1.4212	5
251.189_11.09	0.6	0.811226	-0.13407	1
254.143_4.23	0.6	0.851387	-0.00054365	4
256.1013_10.57	0.6	0.639675	-0.46863	1
256.1806_4.5	0.6	0.701412	-0.10669	4
260.6735_8.29	0.6	0.652616	-0.29319	4
260.9031_0.74	0.6	0.475481	0.26594	1
262.0648_3.75	0.6	0.769852	-0.27454	2
262.1694_1.91	0.6	0.266228	1.7966	5
263.1513_0.86	0.6	0.424056	1.0551	1
264.2348_12.71	0.6	0.427881	0.21221	1
271.0978_5.67	0.6	0.760554	-0.36743	1
273.6829_12.82	0.6	0.606431	0.24873	2
277.1416_0.69	0.6	0.442027	0.53347	3
282.8296_0.79	0.6	0.921929	-0.42175	1
285.5201_13.02	0.6	0.609666	0.34304	2
290.1648_5.77	0.6	0.493582	-1.0256	4
295.0705_1.53	0.6	0.479215	-0.34927	2
295.1807_5.42	0.6	0.257295	-0.7262	5
300.196_12.97	0.6	0.722426	-0.16251	2
300.5159_5.39	0.6	0.479121	-1.6141	5
305.7006_7.07	0.6	0.599372	-0.69881	5
306.1598_3.44	0.6	0.421041	0.47753	3
306.1612_3.92	0.6	0.637417	0.34064	2
307.6754_6.56	0.6	0.508969	0.38829	4
310.225_11.79	0.6	0.639684	0.23414	4
311.1985_8.6	0.6	0.595505	-0.26905	4
313.2152_9.09	0.6	0.758445	-0.0094064	4
316.872_0.74	0.6	0.935606	-0.86072	5
318.2018_9.39	0.6	0.353593	0.37708	1
324.1705_4.04	0.6	0.495345	0.24413	4
326.7148_9.41	0.6	0.725602	-0.027758	4
328.2105_6.16	0.6	0.962356	-0.19688	1
328.7208_9.27	0.6	0.494663	0.78751	2
335.1171_4.59	0.6	0.621934	-0.022036	4
341.2229_7.52	0.6	0.553021	0.10326	1
341.224_11.19	0.6	0.475154	0.1939	2
344.1169_3.92	0.6	0.451789	0.1941	5
344.5605_6.14	0.6	0.758243	0.49916	4
345.2378_6.14	0.6	0.789998	-0.072638	1
345.8852_10.82	0.6	0.149858	0.9535	3
347.2336_11.19	0.6	0.542388	-0.079578	2
348.0849_0.75	0.6	0.59843	0.52051	2
348.2004_7.84	0.6	0.396475	0.24452	3
350.076_12.47	0.6	0.992679	-0.29267	1
350.9785_13.97	0.6	0.966654	-0.36387	3
357.2442_9.71	0.6	0.495459	0.20689	1
357.8551_9.68	0.6	0.692988	0.22723	1
361.1386_12.49	0.6	0.799169	-0.16634	1
361.5765_11.38	0.6	0.757843	0.017522	2
362.233_8.04	0.6	0.493066	0.2392	1
363.2233_8.69	0.6	0.663742	0.099031	5
364.2034_6.83	0.6	0.607416	-0.49019	4
366.9044_10.99	0.6	0.567668	-0.43722	3
375.2166_13.89	0.6	0.474692	-0.213	4
376.2523_11.54	0.6	0.613502	0.045482	2
379.1821_9.94	0.6	0.633931	-0.17934	2
380.9117_11.14	0.6	0.454552	0.34311	1
383.1204_12.47	0.6	0.841894	-0.28185	1
383.1444_2.01	0.6	0.512108	0.28163	4
384.2391_6.72	0.6	0.498707	-0.29028	3
385.2146_6.12	0.6	0.407222	-0.21449	4
386.2459_9.49	0.6	0.457245	0.19648	1
389.2119_4.24	0.6	0.551064	-0.01745	4
389.2139_3.39	0.6	0.778037	-0.063956	4
393.2526_8.52	0.6	0.95816	-0.41206	3
396.7635_12.71	0.6	0.637327	0.07456	2
399.1938_5.57	0.6	0.247134	-0.47166	5
400.8337_0.75	0.6	0.72871	-0.36939	3
401.2762_10.22	0.6	0.67758	0.014204	1
404.8296_0.74	0.6	0.738881	-1.0801	1
408.0128_1.69	0.6	0.521623	1.8606	2
408.0208_12.8	0.6	0.664807	-0.013629	2
408.2585_9.79	0.6	0.811909	-0.16787	3
410.5973_11.44	0.6	0.623174	0.18442	2
412.2246_6.39	0.6	0.988948	0.53918	5
412.8599_0.73	0.6	0.95574	-0.42245	1
415.7677_8.79	0.6	0.445551	0.29689	5
416.198_5.77	0.6	0.952734	0.29354	3
418.7767_12.89	0.6	0.624863	0.076605	2
422.7719_10.44	0.6	0.209461	-0.57475	5
431.2072_4.03	0.6	0.555435	0.36797	3
432.1704_5.77	0.6	0.431314	0.18325	2
433.9379_11.74	0.6	0.792692	-0.17741	2
437.1515_5.57	0.6	0.451083	0.23419	3
439.615_11.74	0.6	0.75027	-0.30451	3
441.0418_13.06	0.6	0.615036	0.056609	2
441.931_12.09	0.6	0.540483	0.20649	2
442.2696_5.19	0.6	0.701165	0.21271	5
442.7293_0.79	0.6	0.653609	-1.2274	3
444.2523_5.89	0.6	0.364851	-0.36654	5
446.2687_6.74	0.6	0.467488	-0.21541	1
449.0412_5.04	0.6	0.516135	0.019162	3
450.7614_0.78	0.6	0.943074	-0.40268	1
451.2229_6.73	0.6	0.36635	0.094504	5
451.2254_7.42	0.6	0.501356	0.36004	3
452.1566_5.02	0.6	0.497811	1.0391	5
452.2196_5.79	0.6	0.632888	0.34979	4
453.2186_7.39	0.6	0.69343	-0.14394	1
454.6245_11.84	0.6	0.818247	-0.25487	2
455.2916_12.85	0.6	0.421361	0.24682	2
456.6053_12.2	0.6	0.644788	0.11631	2
456.9389_12.21	0.6	0.586039	0.2313	2
461.279_5.89	0.6	0.526576	0.21599	1
462.2982_7.67	0.6	0.811726	0.060419	1
462.8691_0.74	0.6	0.380385	0.28573	1
466.8178_10.85	0.6	0.692268	0.35887	3
468.8217_0.75	0.6	0.515842	0.38651	1
469.5526_13.25	0.6	0.639276	-0.73678	2
471.2833_12.31	0.6	0.48506	0.32923	2
471.5099_13.85	0.6	0.364341	-0.74891	5
473.29_10.04	0.6	0.963512	0.096055	1
477.3189_7.92	0.6	0.799208	-0.36338	2
477.7722_10.84	0.6	0.605661	0.26013	2
479.9151_13.9	0.6	0.639318	-1.0154	4
482.5109_13.65	0.6	0.695609	0.29539	3
482.6411_12.5	0.6	0.607328	0.10109	2
484.246_5.92	0.6	0.620635	-0.32805	4
484.8175_13.34	0.6	0.641378	-0.0093484	2
487.2455_6.77	0.6	0.903923	-0.21362	1
487.98_12.51	0.6	0.671131	-0.10183	2
488.3181_12.5	0.6	0.438339	0.92846	2
488.5629_13.05	0.6	0.320913	0.27145	4
488.8089_11.09	0.6	0.446782	0.16064	1
490.2163_11.04	0.6	0.839288	-0.16378	2
490.3294_8.99	0.6	0.436366	0.40761	2
496.2471_6.43	0.6	0.271944	0.48571	1
496.3283_11.74	0.6	0.717951	-0.51791	2
498.3177_11.75	0.6	0.788183	0.18007	4
501.2998_12.5	0.6	0.502444	0.077748	2
503.8159_10.29	0.6	0.597169	0.056492	1
505.2463_2.77	0.6	0.285284	-0.37651	3
507.0818_13.46	0.6	0.589275	-0.010748	2
508.2726_12.6	0.6	0.805384	-0.29063	3
511.2156_11.19	0.6	0.561062	-0.62944	2
513.3267_12.3	0.6	0.46223	0.27381	1
514.3114_10.84	0.6	0.459429	0.234	2
515.242_12.49	0.6	0.667603	0.092685	1
515.3096_12.62	0.6	0.637638	0.062755	2
517.3355_12.73	0.6	0.418873	0.20193	2
520.3033_10.39	0.6	0.44386	1.075	4
521.0161_8.31	0.6	0.38841	0.26697	4
525.2974_8.32	0.6	0.340772	0.40196	4
526.6664_12.8	0.6	0.689936	0.019733	2
536.2963_10.5	0.6	0.6893	-0.062674	4
539.6771_12.75	0.6	0.574085	0.38304	2
544.66_12.81	0.6	0.631408	0.14075	2
548.3441_10.68	0.6	0.694656	0.028651	5
548.3525_11.52	0.6	0.7728	0.037576	2
552.3116_12.85	0.6	0.416353	0.29341	2
556.8658_0.72	0.6	0.877022	-0.44554	3
556.8664_11.57	0.6	0.537617	0.061921	2
557.6877_12.6	0.6	0.834954	-0.58919	1
561.3441_10.84	0.6	0.493887	0.21342	1
561.3588_12.98	0.6	0.538292	-0.062428	2
562.3516_10.65	0.6	0.772084	0.23771	4
562.3522_11.14	0.6	0.897122	0.43097	3
564.5903_0.81	0.6	0.776151	-0.85757	3
565.3729_8.7	0.6	0.429877	0.22068	1
566.431_9.73	0.6	0.295981	0.35912	1
566.68_0.79	0.6	0.54026	-0.32712	1
566.8956_0.74	0.6	0.605358	0.21091	3
569.3248_8.72	0.6	0.448519	0.19398	3
571.3571_12.5	0.6	0.49257	0.12043	1
574.0115_12.97	0.6	0.550037	0.16181	2
574.7105_0.77	0.6	0.848993	0.3649	3
576.3081_8.61	0.6	0.781807	-0.10376	5
578.7064_0.77	0.6	0.487845	0.211	4
583.3569_11.02	0.6	0.456323	0.12724	1
585.7044_13.13	0.6	0.838174	-0.87741	2
585.8572_5.39	0.6	0.755712	0.032521	5
588.7354_0.74	0.6	0.92108	-0.2037	4
589.3541_13.08	0.6	0.760973	-0.1163	2
591.0438_13.13	0.6	0.560153	-0.065145	2
596.7654_0.74	0.6	0.868545	-0.30105	5
597.8646_11.47	0.6	0.902566	-0.038973	3
598.3074_11.7	0.6	0.462522	0.45118	2
599.0418_11.77	0.6	0.650898	-0.26206	2
600.0435_13.19	0.6	0.759982	-0.22124	2
601.3799_12.85	0.6	0.627325	-0.34465	1
601.8905_11.77	0.6	0.55226	0.39653	2
602.6315_13.54	0.6	0.250892	1.1148	1
607.3403_6.99	0.6	0.707524	-0.24201	3
610.8408_8.54	0.6	0.387736	0.2351	5
613.1716_0.92	0.6	0.218723	0.14775	4
618.6051_0.79	0.6	0.581922	0.58595	5
618.7077_13.2	0.6	0.859607	-0.4705	2
625.364_13.24	0.6	0.930001	-0.3678	2
626.8276_9.12	0.6	0.727724	-0.16943	3
628.0527_13.06	0.6	0.886177	0.059105	4
629.3955_13.35	0.6	0.691042	-0.0404	2
630.3968_13	0.6	0.508888	0.015208	2
631.1464_13.7	0.6	0.985485	-0.29128	1
635.1505_13.7	0.6	0.528603	0.42278	5
637.6449_13.72	0.6	0.396459	-0.50547	2
638.398_12.87	0.6	0.431725	0.27787	1
639.3952_13.07	0.6	0.923935	0.32331	2
640.3513_13.3	0.6	0.511538	0.36864	2
640.3903_11.47	0.6	0.836362	0.90145	4
645.0723_13.05	0.6	0.813257	-0.68518	1
645.2925_5.34	0.6	0.636873	0.48905	4
646.8895_10.34	0.6	0.766021	-0.52187	1
648.389_8.95	0.6	0.457409	-0.096664	4
649.4127_13.4	0.6	0.647897	-0.11685	2
650.0825_13.39	0.6	0.556509	-0.017986	2
653.0712_12.97	0.6	0.454637	0.17998	1
654.0712_13.12	0.6	0.587729	-0.37043	5
655.0898_13.4	0.6	0.565006	-0.0022864	2
659.41_12.97	0.6	0.34075	0.41285	4
662.0643_13.39	0.6	0.692293	-1.5831	2
662.7318_13.4	0.6	0.511604	-1.2608	2
668.0781_13.07	0.6	0.536047	0.32232	5
668.4226_13.85	0.6	0.596037	0.057261	2
670.433_13.46	0.6	0.632964	0.038564	2
673.7515_13.05	0.6	0.410979	0.49131	1
677.4078_13.45	0.6	0.613712	-0.13661	2
682.5988_0.78	0.6	0.393849	-0.63068	3
684.4201_11.72	0.6	0.633799	0.23968	5
684.4398_13.52	0.6	0.529194	-0.20315	2
687.0922_13.45	0.6	0.886152	-0.37491	4
689.7665_13.27	0.6	0.782168	0.26277	4
692.8454_0.72	0.6	0.964197	-0.37344	3
694.1079_13.57	0.6	0.572607	0.024155	2
694.6211_0.75	0.6	0.530917	0.65341	4
697.3155_9.67	0.6	0.556744	0.18472	4
699.1151_13.6	0.6	0.72022	-0.33503	2
700.9425_12.42	0.6	0.538488	0.12062	2
702.4034_8.91	0.6	0.715575	-0.36762	5
702.4049_9.17	0.6	0.990611	-0.32829	2
702.7674_13.65	0.6	0.997531	-0.45059	3
706.4056_9.29	0.6	0.842523	-0.81794	4
710.3254_12.4	0.6	0.61574	-1.4879	2
712.1085_13.22	0.6	0.213437	0.99001	4
717.1108_13.67	0.6	0.616217	0.14061	2
726.4939_0.82	0.6	0.566637	0.21891	4
727.1157_13.32	0.6	0.413538	0.1816	1
728.4441_4.49	0.6	0.714027	0.47859	4
729.1351_13.7	0.6	0.628987	-0.31348	2
732.4739_13.02	0.6	0.651838	0.077506	2
734.4513_12.52	0.6	0.349869	-0.27929	2
735.4414_13.67	0.6	0.566176	0.45618	2
736.3449_12.49	0.6	0.344001	0.32546	2
737.4498_11.97	0.6	0.36598	1.2304	3
737.4703_10.82	0.6	0.422457	-0.023217	3
742.9412_12.52	0.6	0.751589	-0.16498	2
752.4753_13.77	0.6	0.532358	0.61517	1
752.8095_13.77	0.6	0.661521	0.27083	2
757.8176_13.78	0.6	0.591096	0.3618	2
766.9816_12.72	0.6	0.612752	-0.10937	2
775.2971_12.67	0.6	0.76816	0.31587	2
775.3859_9.52	0.6	0.512211	-0.12785	3
780.4597_0.82	0.6	0.255961	0.36162	1
784.449_10.19	0.6	0.901562	-0.36341	1
785.9588_12.71	0.6	0.636441	0.32693	2
787.971_12.72	0.6	0.63022	0.20328	2
788.9956_12.8	0.6	0.663628	0.018594	2
790.4079_8.99	0.6	0.685142	0.4167	4
804.5117_0.77	0.6	0.369451	-0.40979	2
811.5044_10.42	0.6	0.752942	0.26073	3
812.1788_13.6	0.6	0.175814	-0.40299	4
814.9688_12.5	0.6	0.563612	-0.070507	4
821.1777_13.77	0.6	0.95109	-0.59899	3
821.5356_12.87	0.6	0.611073	0.62462	2
836.5212_13.81	0.6	0.602096	-0.29444	4
849.4588_10.42	0.6	0.372151	0.49384	1
855.5382_12.17	0.6	0.570974	1.2106	2
881.5118_12.77	0.6	0.359535	0.65913	1
884.5213_9.82	0.6	0.527456	1.1764	5
907.5733_13.2	0.6	0.622884	-0.13983	2
951.4968_10.46	0.6	0.70696	-0.3748	5
958.3306_0.82	0.6	0.445521	0.56174	3
960.613_12.77	0.6	0.584536	1.2962	2
980.0974_12.97	0.6	0.232803	0.34459	2
258.1969_0.89	0.5875	0.592502	-2.9668	5
308.6787_5.84	0.5875	0.458695	-0.75839	5
322.1277_3.79	0.5875	0.660503	-0.022606	1
386.7677_0.79	0.5875	0.542632	-0.55358	3
399.7444_9.78	0.5875	0.983019	-0.50497	3
400.4659_13.39	0.5875	0.377777	0.24978	2
409.5907_11.17	0.5875	0.609951	-0.53513	3
422.2105_4.17	0.5875	0.959797	0.051504	1
439.2022_7.14	0.5875	0.876416	-0.40205	1
497.2782_5.62	0.5875	0.508715	-0.59323	4
506.6293_0.79	0.5875	0.566888	0.1749	3
533.2056_7.27	0.5875	0.806642	-0.47	3
556.3081_6.07	0.5875	0.868641	0.23739	3
583.3169_7.01	0.5875	0.590946	0.17348	1
585.2947_4.91	0.5875	0.771419	-0.042617	3
616.6105_0.79	0.5875	0.720658	-0.50265	5
642.6558_13.85	0.5875	0.76907	0.38298	2
646.6942_0.75	0.5875	0.568875	-0.19189	4
656.7238_0.74	0.5875	0.666263	0.0075233	3
672.7849_0.74	0.5875	0.668792	0.24411	5
724.4977_0.81	0.5875	0.268596	0.47058	2
728.4434_11.98	0.5875	0.786555	-0.060445	1
782.4569_0.82	0.5875	0.952556	-0.36353	2
802.5123_13.92	0.5875	0.729075	0.7178	2
974.6088_13.47	0.5875	0.708366	-0.54568	2
976.1031_13.42	0.5875	0.686669	-0.18516	3
L-Anserine	0.575	0.649522	0.30549	5
L-Carnitine	0.575	0.341791	0.47571	5
L-Serine	0.575	0.599948	0.87707	5
3-Hydroxyphenylacetic acid	0.575	0.153645	0.37359	3
1-Aminocyclopropanecarboxylic acid	0.575	0.0669377	-0.5462	5
Myristate	0.575	0.545661	-1.0237	5
L-Alanine	0.575	0.888086	0.65046	5
Dimethyl-L-arginine	0.575	0.551614	-0.74133	4
Dimethylarginine	0.575	0.745236	-0.43712	4
Sarcosine	0.575	0.883631	0.63578	5
L-Lactic acid	0.575	0.879606	0.64576	5
Anserine	0.575	0.679978	0.23868	5
Quassin	0.575	0.437418	0.36758	1
Gemfibrozil	0.575	0.784039	0.031837	5
trans-Cinnamate	0.575	0.355218	0.038419	4
100.0782_0.89	0.575	0.625425	0.53034	1
101.062_13.17	0.575	0.463662	1.0398	1
112.8971_0.78	0.575	0.72824	-0.14599	1
114.8953_12.5	0.575	0.571922	-0.09698	1
117.1039_0.77	0.575	0.610246	1.1013	5
119.0897_1.02	0.575	0.641995	-0.56049	5
120.0819_2.84	0.575	0.643803	-0.21754	5
125.0015_0.82	0.575	0.251554	0.95732	4
125.1092_1.83	0.575	0.365709	0.37664	4
127.0381_1.7	0.575	0.988868	-0.26606	4
130.0786_7.22	0.575	0.811824	-0.26082	1
131.0731_12.75	0.575	0.579868	0.21818	2
136.0766_5.88	0.575	0.706623	-0.11166	5
138.0907_11.43	0.575	0.594178	0.07865	1
142.0879_1.77	0.575	0.671421	1.2474	5
144.139_13.01	0.575	0.969002	-0.036034	4
146.0936_1.12	0.575	0.414961	0.26479	2
147.0929_6.47	0.575	0.471643	0.16379	1
149.0622_10.41	0.575	0.575917	0.21309	1
151.0978_10.47	0.575	0.570502	0.21291	5
152.028_7.2	0.575	0.973195	-0.45231	1
153.0663_2.27	0.575	0.668843	-0.30617	5
153.071_7.21	0.575	0.897911	-0.33195	1
155.0713_7.67	0.575	0.468503	0.18355	1
156.1021_0.9	0.575	0.50192	-0.23426	1
162.1151_0.85	0.575	0.393582	0.84526	1
163.0767_13.06	0.575	0.533101	0.045052	1
163.9797_0.79	0.575	0.866294	0.35902	1
165.012_7.22	0.575	0.92873	-0.32727	1
166.086_0.89	0.575	0.886574	-0.21964	1
166.0874_2.84	0.575	0.336668	-0.30054	5
166.9533_0.57	0.575	0.477296	0.17678	1
167.0082_7.27	0.575	0.857295	-0.26726	1
170.1182_7.89	0.575	0.549444	0.12201	1
172.1345_1.03	0.575	0.495831	0.18141	4
176.1293_0.93	0.575	0.514307	0.18385	3
178.0882_1.08	0.575	0.967395	-0.19969	3
179.0648_7.23	0.575	0.981617	-0.39149	1
179.1297_0.98	0.575	0.370059	0.75822	5
180.8952_0.77	0.575	0.819038	-1.2714	5
181.0116_1.52	0.575	0.630005	-0.067299	1
181.0618_7.23	0.575	0.833581	-0.33117	1
186.1158_1	0.575	0.86712	-0.081652	1
187.1093_1.29	0.575	0.46558	0.25854	1
187.1107_1	0.575	0.71612	0.04301	4
190.9137_0.74	0.575	0.578211	0.18608	1
[truncated: 1,621 more rows]

## Sheet: Reactions
#	Reaction	Mass Difference (Da)	Description
1	0	-2.015650	dehydrogenation
2	0	2.015650	hydrogenation
3	0	-14.015650	demethylation
4	0	14.015650	methylation
5	-NH	-15.010899	loss of NH
6	+NH	15.010899	addition of NH
7	-O	-15.994915	loss of oxygen
8	+O	15.994915	Oxidation
9	0	-17.026549	loss of ammonia
10	0	17.026549	addition of ammonia
11	-H2O	-18.010565	loss of water
12	+H2O	18.010565	addition of water
13	-CO	-27.994915	loss of CO
14	+CO	27.994915	addition of CO
15	-C2H4	-28.031300	loss of C2H4
16	+C2H4	28.031300	addition of C2H4
17	-C2H2O	-42.010565	Deacetylation
18	+C2H2O	42.010565	Acetylation
19	0	-43.989830	loss of CO2
20	0	43.989830	addition of CO2
21	SO3H->SH	-47.984745	Sulfonic acid to Thiol
22	SH->SO3H	47.984745	Thiol to Sulfonic acid
23	-C2H3NO	-57.021464	loss of glycine
24	+C2H3NO	57.021464	glycine conjugation
25	0	-79.956817	loss of sulfate
26	0	79.956817	sulfate conjugation
27	0	-79.966333	loss of Phosphate
28	0	79.966333	addition of Phosphate
29	-C4H3N3	-93.032697	loss of Cytosine
30	+C4H3N3	93.032697	addition of Cytosine
31	-C4H2N2O	-94.016713	loss of Uracil
32	+C4H2N2O	94.016713	addition of Uracil
33	-C3H5NOS	-103.009186	loss of cysteine
34	+C3H5NOS	103.009186	cysteine conjugation
35	-C2H5NO2S	-107.004101	loss of taurine
36	+C2H5NO2S	107.004101	taurine conjugation
37	-C5H4N2O	-108.032363	loss of Thymine
38	+C5H4N2O	108.032363	addition of Thymine
39	- (C5H5N5 - H2O)	-117.043930	loss of Adenine
40	+ (C5H5N5 - H2O)	117.043930	addition of Adenine
41	-C3H5NO2S	-119.004101	loss of S-cysteine
42	+C3H5NO2S	119.004101	S-cysteine conjugation
43	-C5H8O4	-132.042260	loss of D-ribose
44	+C5H8O4	132.042260	addition of D-ribose
45	-C5H3N5	-133.038845	loss of Guanine
46	+C5H3N5	133.038845	addition of Guanine
47	-C7H13NO2	-143.094629	loss of Carnitine
48	+C7H13NO2	143.094629	addition of Carnitine
49	-C5H7NO3S	-161.014666	loss of N-acetyl-S-cysteine
50	+C5H7NO3S	161.014666	addition of N-acetyl-S-cysteine
51	-C6H10O5	-162.052825	loss of Hexose
52	+C6H10O5	162.052825	addition of Hexose
53	-C6H8O6	-176.032090	loss of glucuronic acid
54	+C6H8O6	176.032090	addition of glucuronic acid
55	-C10H12N2O4	-224.079708	loss of Thymidine
56	+C10H12N2O4	224.079708	addition of Thymidine
57	-C9H11N3O4	-225.074957	loss of Cytidine
58	+C9H11N3O4	225.074957	addition of Cytidine
59	-C9H10N2O5	-226.058973	loss of Uridine
60	+C9H10N2O5	226.058973	addition of Uridine
61	-C16H30O	-238.229665	loss of Palmitic acid
62	+C16H30O	238.229665	addition of Palmitic acid
63	-C6H11O8P	-242.019158	loss of Glucose-6-phosphate
64	+C6H11O8P	242.019158	addition of Glucose-6-phosphate
65	-C10H11N5O3	-249.086190	loss of Adenosine
66	+C10H11N5O3	249.086190	addition of Adenosine
67	-C10H11N5O4	-265.081105	loss of Guanosine
68	+C10H11N5O4	265.081105	addition of Guanosine
69	-C10H15N3O5S	-289.073244	loss of Glutathione
70	+C10H15N3O5S	289.073244	addition of Glutathione
71	-C10H15N3O6S	-305.068159	loss of S-Glutathione
72	+C10H15N3O6S	305.068159	addition of S-Glutathione
73	-C12H20O10	-324.105650	loss of di-hexose
74	+C12H20O10	324.105650	addition of di-hexose
75	-C18H30O15	-486.158475	loss of tri-hexose
76	+C18H30O15	486.158475	addition of tri-hexose

## Sheet: Suspect_list
name,formula,Neutral formula,CAS
b-Nicotinamide adenine dinucleotide hydrate,C21H28N7O14P2^1+,C21H27N7O14P2,53-84-9
L-Glutamine,C5H11N2O3^1+,C5H10N2O3,56-85-9
Hypotaurine,C2H8NO2S^1+,C2H7NO2S,300-84-5
Inosine 5'-monophosphate from Saccharomyces cerevisiae,C10H14N4O8P^1+,C10H13N4O8P,131-99-7
L-Threonine,C4H10NO3^1+,C4H9NO3,72-19-5
Purine,C5H5N4^1+,C5H4N4,120-73-0
N-Acetylneuraminic acid,C11H20NO9^1+,C11H19NO9,131-48-6
Cytidine,C9H14N3O5^1+,C9H13N3O5,65-46-3
L-Serine,C3H8NO3^1+,C3H7NO3,56-45-1
L-Citrulline,C6H14N3O3^1+,C6H13N3O3,372-75-8
Taurine,C2H8NO3S^1+,C2H7NO3S,107-35-7
Nicotinic acid,C6H6NO2^1+,C6H5NO2,59-67-6
γ-Aminobutyric acid,C4H10NO2^1+,C4H9NO2,56-12-2
Cytosine,C4H6N3O^1+,C4H5N3O,71-30-7
L-Isoleucine,C6H14NO2^1+,C6H13NO2,73-32-5
L-Glutamic acid,C5H10NO4^1+,C5H9NO4,56-86-0
L-Ascorbic acid,C6H9O6^1+,C6H8O6,50-81-7
N-Acetyl-D-glucosamine,C8H16NO6^1+,C8H15NO6,7512-17-6
Sarcosine,C3H8NO2^1+,C3H7NO2,107-97-1
(-) Quinic acid,C7H13O6^1+,C7H12O6,77-95-2
L-Methionine,C5H12NO2S^1+,C5H11NO2S,63-68-3
Adenine,C5H6N5^1+,C5H5N5,73-24-5
5'-Deoxy-5'-(methylthio)adenosine,C11H16N5O3S1+,C11H15N5O3S,2457-80-9
Thymidine,C10H14N2NaO5^1+ ,C10H14N2O5,50-89-5
O-Phosphorylethanolamine,C2H9NO4P^1+ ,C2H8NO4P,1071-23-4
Xanthine,C5H5N4O2^1+ ,C5H4N4O2,69-89-6
L-Alanine,C3H8NO2^1+,C3H7NO2,56-41-7
Uridine 5'-monophosphate,,C9H13N2O9P,58-97-9
Thymine,C5H7N2O2^1+,C5H6N2O2,65-71-4
L-Carnosine,C9H15N4O3^1+,C9H14N4O3,305-84-0
Nicotinamide,C6H7N2O^1+,C6H6N2O,98-92-0
L-Phenylalanine,C9H12NO2^1+,C9H11NO2,63-91-2
Uracil,C4H5N2O2^1+,C4H4N2O2,66-22-8
2'-Deoxycytidine 5'-monophosphate,C9H15N3O7P^1+,C9H14N3O7P,1032-65-1
Hypoxanthine,C5H5N4O^1+,C5H4N4O,68-94-0
Creatine,C4H10N3O2^1+,C4H9N3O2,57-00-1
3,4-Dihydroxy-L-phenylalanine,C9H12NO4^1+,C9H11NO4,59-92-7
Dihydrouracil,C4H7N2O2^1+,C4H6N2O2,504-07-4
L-Asparagine,C4H9N2O3^1+,C4H8N2O3,70-47-3
L-Valine,C4H10N^1+,C5H11NO2,72-18-4
Guanine,C5H6KN5O^1+ ,C5H5N5O,73-40-5
L-Homoserine,C4H10NO3^1+,C4H9NO3,672-15-1
L-(+)-Tartaric acid,,C4H6O6,87-69-4
β-Nicotinamide mononucleotide,C11H16N2O8P^1+ ,C11H15N2O8P,1094-61-7
Folic acid,C19H20N7O6^1+ ,C19H19N7O6,59-30-3
2,6-Diaminopimelic acid,C7H15N2O4^1+,C7H14N2O4,583-93-7
DL-2-Aminoadipic acid,C6H12NO4^1+,C6H11NO4,542-32-5
2'-Deoxycytidine,C18H27N6O8^+,C9H13N3O4,951-77-9
Theophylline,C7H9N4O2^1+,C7H8N4O2,58-55-9
Betaine,C5H12NO2^1+,C5H11NO2,107-43-7
O-Succinyl-L-homoserine,C8H14NO6^1+,C8H13NO6,1492-23-5
Allantoin,C4H7N4O3^1+,C4H6N4O3,97-59-6
2-Aminoethylphosphonic acid,C2H9NO3P^1+,C2H8NO3P,2041-14-7
NG,NG'-Dimethyl-L-arginine di(p-hydroxyazobenzene-p'-sulfonate) salt,C8H19N4O2^1+,C8H18N4O2,1266235-58-8
D-(+)-Glucosamine hydrochloride,C6H13NNaO5^1+,C6H13NO5,66-84-2
1-Methyladenosine,C11H16N5O4^1+,C11H15N5O4,15763-06-1
2'-Deoxyuridine,C9H12KN2O5^1+,C9H12N2O5,951-78-0
4-Imidazoleacrylic acid,C6H7N2O2^1+,C6H6N2O2,104-98-3
L-Pyroglutamic acid,C5H8NO3^1+,C5H7NO3,98-79-3
4-ACETAMIDOBUTYRIC ACID,C6H12NO3^1+,C6H11NO3,3025-96-5
Dopamine hydrochloride,C8H12NO2^1+,C8H11NO2,62-31-7
Arabinose,C5H11O5^1+,C5H10O5,147-81-9
Cytidine 5'-diphosphocholine sodium salt dihydrate,C14H27N4O11P2^1+,C14H26N4O11P2,33818-15-4
1,3-Diaminopropane,C3H11N2^1+,C3H10N2,109-76-2
1-Aminocyclopropanecarboxylic acid,C4H8NO2^1+,C4H7NO2,22059-21-8
Glutaryl-L-carnitine lithium salt,C12H22NO6^1+,C12H21NO6,102636-82-8
L-Cystathionine,C7H15N2O4S^1+,C7H14N2O4S,56-88-2
3-Hydroxy-3-methylglutaric acid,C6H11O5^1+,C6H10O5,503-49-1
L-Arginine monohydrochloride,C6H15N4O2^1+,C6H14N4O2,1119-34-2
L-Homocystine,C8H17N2O4S2^1+,C8H16N2O4S2,462-10-2
N-Methyl-L-glutamic acid,C6H12NO4^1+,C6H11NO4,6753-62-4
Thyrotropin releasing hormone,C16H23N6O4^1+,C16H22N6O4,24305-27-9
N-Methyl-D-aspartic acid,C5H10NO4^1+,C5H9NO4,6384-92-5
Nα-Acetyl-L-asparagine,C6H11N2O4^1+,C6H10N2O4,4033-40-3
Agmatine sulfate salt,C5H15N4^1+,C5H14N4,2482-00-0
N-Acetylglycine,C4H8NO3^1+,C4H7NO3,543-24-8
N-Acetyl-L-aspartic acid,C6H10NO5^1+,C6H9NO5,997-55-7
Palmitoyl-DL-carnitine chloride,C23H46NO4^1+,C23H45NO4,6865-14-1
Nicotinamide hypoxanthine dinucleotide sodium salt,C21H27N6O15P2^1+,C21H26N6O15P2,104809-38-3
S-(5'-Adenosyl)-L-methionine p-toluenesulfonate salt,C15H23N6O5S^1+,C15H22N6O5S,17176-17-9
(3-Carboxypropyl)trimethylammonium chloride,C7H16NO2^1+,C7H15NO2,6249-56-5
Adenosine 2':3'-cyclic monophosphate sodium salt,C10H13N5O6P^1+,C10H12N5O6P,37063-35-7
Phosphocholine chloride calcium salt tetrahydrate,C5H15NO4P^1+,C5H14NO4P,72556-74-2
Thiamine hydrochloride,C12H18N4OS^1+,C12H17N4OS,67-03-8
5-Methylcytosine hydrochloride,C5H8N3O^1+,C5H7N3O,58366-64-6
Cytidine 2':3'-cyclic monophosphate monosodium salt,C9H13N3O7P^1+,C9H12N3O7P,15718-51-1
Nε,Nε,Nε-Trimethyllysine hydrochloride,C9H21N2O2^1+,C9H20N2O2,55528-53-5
Pyridoxal 5'-phosphate hydrate,C8H11NO6P^1+,C8H10NO6P,853645-22-4
L-Carnitine hydrochloride,C7H16NO3^1+,C7H15NO3,6645-46-1
O-Phosphorylethanolamine,C2H9NO4P^1+,C2H8NO4P,1071-23-4
3-Nitro-L-tyrosine,C9H11N2O5^1+,C9H10N2O5,621-44-3
(+/-)-Octopamine hydrochloride,C8H10NO^1+,C8H11NO2,770-05-8
Nα-Acetyl-L-lysine,C8H17N2O3^1+,C8H16N2O3,1946-82-3
Pyridoxamine dihydrochloride,C8H13N2O2^1+,C8H12N2O2,524-36-7
5-Aminolevulinic acid hydrochloride,C5H10NO3^1+,C5H9NO3,02/09/5451
Flavin adenine dinucleotide disodium salt hydrate,C27H34N9O15P2^1+,C27H33N9O15P2,84366-81-4
2'-Deoxyguanosine monohydrate,C10H14N5O4^1+,C10H13N5O4,961-07-9
Lauroyl-L-carnitine,C19H38NO4^1+,C19H37NO4,25518-54-1
N-Acetyl-DL-methionine,C7H14NO3S^1+,C7H13NO3S,1115-47-5
Guanosine 3',5'-cyclic monophosphate sodium salt,C10H13N5O7P^1+,C10H12N5O7P,40732-48-7
L-Homocysteine thiolactone hydrochloride,C4H8NOS^1+,C4H7NOS,31828-68-9
L-Ornithine monohydrochloride,C5H13N2O2^1+,C5H12N2O2,3184-13-2
DL-Normetanephrine hydrochloride,C9H12NO2^1+,C9H13NO3,1011-74-1
Uridine 5'-diphospho-N-acetylglucosamine sodium salt,C17H28N3O17P2^1+,C17H27N3O17P2,91183-98-1
NG,NG-Dimethylarginine dihydrochloride,C8H19N4O2^1+,C8H18N4O2,220805-22-1
Selenocystamine dihydrochloride,C4H13N2Se2^1+,C4H12N2Se2,3542-13-0
Histamine dihydrochloride,C5H10N3^1+,C5H9N3,56-92-8
Thiamine monophosphate chloride dihydrate,C12H18N4O4PS^1+,C12H17N4O4PS,273724-21-3
N-Acetyl-L-alanine,C5H10NO3^1+,C5H9NO3,97-69-8
4-Guanidinobutyric acid,C5H12N3O2^1+,C5H11N3O2,463-00-3
D-Mannosamine hydrochloride,C6H14NO5^1+,C6H13NO5,5505-63-5
2'-Deoxyadenosine monohydrate,C10H14N5O3^1+,C10H13N5O3,16373-93-6
N-Acetylputrescine hydrochloride,C6H15N2O^1+,C6H14N2O,18233-70-0
N-Acetyl-D-galactosamine,C8H15NNaO6^1+,C8H15NO6,1811-31-0
N-Acetyl-DL-glutamic acid,C7H12NO5^1+,C7H11NO5,1188-37-0
Lumazine,C6H5N4O2^1+,C6H4N4O2,487-21-8
D-Pantothenic acid hemicalcium salt,C9H18NO5^1+,C9H17NO5,137-08-6
2-Aminoisobutyric acid,C4H10NO2^1+,C4H9NO2,62-57-7
Aniline-2-sulfonic acid,C6H8NO3S^1+,C6H7NO3S,88-21-1
L-Histidinol dihydrochloride,C6H12N3O^1+,C6H11N3O,1596-64-1
Sorbitol,C6H15O6^1+,C6H14O6,50-70-4
3-Ureidopropionic acid,C4H8N2NaO3^1+,C4H8N2O3,462-88-4
5-Aminovaleric acid,C5H12NO2^1+,C5H11NO2,660-88-8
L-Norleucine,C6H14NO2^1+,C6H13NO2,327-57-1
Adenosine,C10H14N5O4^1+,C10H13N5O4,58-61-7
D-Lactose monohydrate,C12H26NO11^1+,C12H22O11,64044-51-5
4-Imidazoleacetic acid hydrochloride,C5H7N2O2^1+,C5H6N2O2,3251-69-2
Methyl 4-aminobutyrate hydrochloride,C5H12NO2^1+,C5H11NO2,13031-60-2
N-Formyl-L-methionine,C6H12NO3S^1+,C6H11NO3S,4289-98-9
5-Hydroxy-L-tryptophan,C11H13N2O3^1+,C11H12N2O3,08/09/4350
Theobromine,C7H9N4O2^1+,C7H8N4O2,83-67-0
Ophthalmate,C11H20N3O6^1+,C11H19N3O6,495-27-2
Trigonelline hydrochloride,C7H8NO2^1+,C7H7NO2,6138-41-6
(-)-Epinephrine,C9H14NO3^1+,C9H13NO3,51-43-4
CDP-ethanolamine sodium salt hydrate,C11H21N4O11P2^1+,C11H20N4O11P2,3036-18-8 FREE BASE
2,5-Dimethylpyrazine,C6H9N2^1+,C6H8N2,123-32-0
L-Anserine nitrate salt,C10H17N4O3^1+,C10H16N4O3,10030-52-1
Biliverdin hydrochloride,C33H35N4O6^1+,C33H34N4O6,55482-27-4
sn-Glycerol 3-phosphate bis(cyclohexylammonium) salt,C3H10O6P^1+,C3H9O6P,29849-82-9
4-Hydroxy-L-phenylglycine,C8H9NO3^1+,C8H9NO3,32462-30-9
N-Acetyl-DL-serine,C5H10NO4^1+,C5H9NO4,97-14-3
3-Methylglutaric acid,C6H11O4^1+,C6H10O4,626-51-7
Tyramine,C8H9O^1+,C8H11NO,51-67-2
Hydrocortisone,C21H31O5^1+,C21H30O5,50-23-7
Melatonin,C13H17N2O2^1+,C13H16N2O2,73-31-4
Kynurenic acid,C10H8NO3^1+,C10H7NO3,492-27-3
3,5-Diiodo-L-tyrosine dihydrate,C9H10I2NO3^1+,C9H9I2NO3,18835-59-1
Tryptamine,C10H10N^1+,C10H12N2,61-54-1
Lumichrome,C12H11N4O2^1+,C12H10N4O2,1086-80-2
N-Acetyl-L-phenylalanine,C11H14NO3^1+,C11H13NO3,2018-61-3
N-Acetyl-L-proline,C7H12NO3^1+,C7H11NO3,68-95-1
L-Tryptophanamide hydrochloride,C11H13KN3O^1+,C11H13N3O,5022-65-1
N-Methyltryptamine,C11H15N2^1+,C11H14N2,61-49-4
3-(2-Hydroxyethyl)indole,C10H12NO^1+,C10H11NO,526-55-6
4-Hydroxy-3-methoxycinnamic acid,C10H11O4^1+,C10H10O4,1135-24-6
Glycocholic acid hydrate,C26H47N2O6^1+,C26H43NO6,475-31-0
6-(METHYLTHIO)PURINE,C6H7N4S^1+,C6H6N4S,50-66-8
Sodium glycochenodeoxycholate,C26H44NO5^1+,C26H43NO5,16564-43-5
10-Hydroxydecanoic acid,C10H21O3^1+,C10H20O3,1679-53-4
1,2-Didecanoyl-sn-glycero-3-phosphocholine,C28H57NO8P^1+,C28H56NO8P,3436-44-0
Dl-5-(1,2-dithiolan-3-yl)valeramide,C8H16NOS2^1+,C8H15NOS2,940-69-2
Indole-3-acetamide,C10H11N2O^1+,C10H10N2O,879-37-8
Hippuric acid,C9H10NO3^1+,C9H9NO3,495-69-2
3,5-Diiodo-L-thyronine,C15H14I2NO4^1+,C15H13I2NO4,1041-01-6
3-Methoxytyramine hydrochloride,C9H11O2^1+,C9H13NO2,1477-68-5
Quinaldic acid,C10H8NO2^1+,C10H7NO2,93-10-7
2-Aminophenol,C6H8NO^1+,C6H7NO,95-55-6
Pimelic acid,C7H13O4^1+,C7H12O4,111-16-0
3-Amino-4-hydroxybenzoic acid,C7H8NO3^1+,C7H7NO3,1571-72-8
Indole-3-acetic acid sodium salt,C10H10NO2^1+,C10H9NO2,6505-45-9
