# Supplementary material for: Multiomics coupled with vibrational spectroscopy identify early mechanisms of experimental aortic valve stenosis
Source: Research Square preprint supplement (doi:10.21203/rs.3.rs-4330270/v1), 2024-05-02
Supplement: Supplementary file 9 [file 8fde28b7a074ffa1c5f0c6fe.xlsx]

## Sheet: 18F_NAF measurements
NR	GROUP	SUVmax	SUVmean	SD	Vol	Injected Activity	WEIGHT	Activity/kg	Normalized SUVmax (30 MBq/kg)	Normalized SUVmean (30 MBq/kg)
C49	CONTROL	1.42	0.01	0.09	7.56	144.4	4.24	34.0566	1.25086	0.00880886
1123	CONTROL	1.55	0.03	0.12	1.42	139.44	4.8	29.05	1.60069	0.0309811
1125	CONTROL	0.59	0.01	0.05	1.75	150.99	5.82	25.9433	0.682257	0.0115637
C57	CONTROL	0.93	0.03	0.13	0.78	117.93	5.4	21.8389	1.27754	0.0412109
C56	CONTROL	0.27	0.001	0.03	1.34	119.9	4.74	25.2954	1.11483	0.0355796
		0.952	0.0162	0.084	2.57				1.18523	0.0256288
E56	E2	0.94	0.03	0.12	1.03	125.37	5	25.074	1.12467	0.0358938
E57	E2	0.61	0.01	0.07	1.76	74.95	4.44	16.8806	1.08408	0.0177718
E43	E2	1.47	0.03	0.15	5.82	147.84	4.82	30.6722	1.43778	0.0293425
1120	E2	1.79	0.02	0.12	2.52	124.63	4.08	30.5466	1.75797	0.0196421
1124	E2	0.72	0.01	0.04	3.26	134.01	4.8	27.9187	0.773674	0.0107455
		1.106	0.02	0.1	2.878				1.21118	0.0249435
E35	E4	6.16	0.11	0.57	3.71	155.07	3.72	41.6855	4.4332	0.0791642
E33	E7	6.41	0.07	0.38	6.1	144.18	3.8	37.9421	5.06825	0.0553475
E51	E7	7.93	0.09	0.49	2.42	125.08	4	31.27	7.60793	0.0863447
E53	E7	7.16	0.2	0.76	0.91	119.19	3.9	30.5615	7.02844	0.196325
1122	E7	6.35	0.06	0.46	2.32	128.07	4.74	27.019	7.0506	0.0666198
		6.9625	0.105	0.5225	3.092				6.6888	0.101159
