# Supplementary material for: Multiomics coupled with vibrational spectroscopy identify early mechanisms of experimental aortic valve stenosis
Source: Research Square preprint supplement (doi:10.21203/rs.3.rs-4330270/v1), 2024-05-02
Supplement: Supplementary file 10 [file 902bddc8fe9b4edd79c0ac6c.xlsx]

## Sheet: TEM-EDS
Energy (ev)	EDS Spectrum-Spectrum	EDS Spectrum-Background	EDS Spectrum-Modeled	EDS Spectrum-Residual
Energy	Intensity	Intensity	Intensity	Intensity
eV	Counts	Counts	Counts	Counts
-475.802	0	0	0	0
-470.802	0	0	0	0
-465.802	0	0	0	0
-460.802	0	0	0	0
-455.802	0	0	0	0
-450.802	0	0	0	0
-445.802	0	0	0	0
-440.802	0	0	0	0
-435.802	0	0	0	0
-430.802	0	0	0	0
-425.802	0	0	0	0
-420.802	0	0	0	0
-415.802	0	0	0	0
-410.802	0	0	0	0
-405.802	0	0	0	0
-400.802	0	0	0	0
-395.802	0	0	0	0
-390.802	0	0	0	0
-385.802	0	0	0	0
-380.802	0	0	0	0
-375.802	0	0	0	0
-370.802	0	0	0	0
-365.802	0	0	0	0
-360.802	0	0	0	0
-355.802	0	0	0	0
-350.802	0	0	0	0
-345.802	0	0	0	0
-340.802	0	0	0	0
-335.802	0	0	0	0
-330.802	0	0	0	0
-325.802	0	0	0	0
-320.802	0	0	0	0
-315.802	0	0	0	0
-310.802	0	0	0	0
-305.802	0	0	0	0
-300.802	0	0	0	0
-295.802	0	0	0	0
-290.802	0	0	0	0
-285.802	0	0	0	0
-280.802	0	0	0	0
-275.802	0	0	0	0
-270.802	0	0	0	0
-265.802	0	0	0	0
-260.802	0	0	0	0
-255.802	0	0	0	0
-250.802	0	0	0	0
-245.802	0	0	0	0
-240.802	0	0	0	0
-235.802	0	0	0	0
-230.802	0	0	0	0
-225.802	0	0	0	0
-220.802	0	0	0	0
-215.802	0	0	0	0
-210.802	0	0	0	0
-205.802	0	0	0	0
-200.802	0	0	0	0
-195.802	0	0	0	0
-190.802	0	0	0	0
-185.802	0	0	0	0
-180.802	0	0	0	0
-175.802	0	0	0	0
-170.802	0	0	0	0
-165.802	0	0	0	0
-160.802	0	0	0	0
-155.802	0	0	0	0
-150.802	0	0	0	0
-145.802	0	0	0	0
-140.802	0	0	0	0
-135.802	0	0	0	0
-130.802	0	0	0	0
-125.802	0	0	0	0
-120.802	0	0	0	0
-115.802	0	0	0	0
-110.802	0	0	0	0
-105.802	0	0	0	0
-100.802	0	0	0	0
-95.8022	0	0	0	0
-90.8022	0	0	0	0
-85.8022	0	0	0	0
-80.8022	0	0	0	0
-75.8022	0	0	0	0
-70.8022	0	0	0	0
-65.8022	0	0	0	0
-60.8022	0	0	0	0
-55.8022	0	0	0	0
-50.8022	0	0	0	0
-45.8022	0	0	0	0
-40.8022	0	0	0	0
-35.8022	0	0	0	0
-30.8022	0	0	0	0
-25.8022	0	0	0	0
-20.8022	0	0	0	0
-15.8022	0	0	0	0
-10.8022	0	0	0	0
-5.80216	0	0	0	0
-0.802165	0	0	0	0
4.19784	0	0	0	0
9.19783	0	0	0	0
14.1978	0	0	0	0
19.1978	0	0	0	0
24.1978	0	0	0	0
29.1978	0	0	0	0
34.1978	0	0	0	0
39.1978	0	0	0	0
44.1978	0	0	0	0
49.1978	0	0	0	0
54.1978	0	0	0	0
59.1978	0	0	0	0
64.1978	0	0	0	0
69.1978	0	0	0	0
74.1978	0	0	0	0
79.1978	0	0	0	0
84.1978	0	0	0	0
89.1978	0	0	0	0
94.1978	0	0	0	0
99.1978	0	0	0	0
104.198	0	0	0	0
109.198	0	0	0	0
114.198	0	0	0	0
119.198	0	0	0	0
124.198	0	0	0	0
129.198	0	0	0	0
134.198	0	0	0	0
139.198	0	0	0	0
144.198	0	0	0	0
149.198	0	0	0	0
154.198	0	8.17963	8.17963	-8.17963
159.198	0	8.24455	8.24455	-8.24455
164.198	7	8.30946	8.30946	-1.30946
169.198	39	8.37438	8.37438	30.6256
174.198	30	8.4393	8.4393	21.5607
179.198	38	8.50422	8.50422	29.4958
184.198	33	8.56913	8.56913	24.4309
189.198	35	8.63405	8.63405	26.366
194.198	22	8.69897	8.69897	13.301
199.198	41	8.76389	8.76389	32.2361
204.198	33	8.8288	8.8288	24.1712
209.198	43	8.89372	9.01547	33.9845
214.198	42	8.95864	9.36834	32.6317
219.198	62	9.02356	10.2806	51.7194
224.198	71	9.08847	12.6052	58.3948
229.198	67	9.15339	18.1238	48.8762
234.198	93	9.21831	30.0815	62.9185
239.198	142	9.28323	53.5263	88.4737
244.198	212	9.34814	94.8949	117.105
249.198	273	9.41306	160.232	112.768
254.198	382	9.47798	251.916	130.084
259.198	483	9.5429	364.88	118.12
264.198	588	9.60781	484.477	103.523
269.198	601	9.67273	588.302	12.6979
274.198	686	9.73765	652.604	33.3964	C	Ka
279.198	658	9.80257	661.032	-3.03155
284.198	574	9.86748	611.374	-37.374
289.198	451	9.9324	516.503	-65.5032
294.198	349	9.99732	398.983	-49.9827
299.198	252	10.0622	282.407	-30.4072
304.198	169	10.1272	183.987	-14.9867
309.198	99	10.1921	111.39	-12.3898
314.198	70	10.257	63.9646	6.03537
319.198	50	10.3219	36.3214	13.6785
324.198	26	10.3868	21.8848	4.11517
329.198	34	10.4517	15.152	18.848
334.198	25	10.5167	12.4348	12.5652
339.198	24	10.5816	11.689	12.311
344.198	21	10.6465	11.8463	9.15371
349.198	31	10.7114	13.1687	17.8313
354.198	29	10.7763	15.4295	13.5705
359.198	36	10.8413	18.9879	17.0121
364.198	23	10.9062	24.0932	-1.09322
369.198	34	10.9711	30.7068	3.29318
374.198	34	11.036	38.3445	-4.34446
379.198	46	11.1009	46.0374	-0.0374298
384.198	63	11.1658	52.4897	10.5103
389.198	45	11.2308	56.4226	-11.4226
394.198	59	11.2957	56.9896	2.01035
399.198	44	11.3606	54.0772	-10.0772
404.198	48	11.4255	48.3466	-0.346573
409.198	45	11.4904	40.9951	4.00487
414.198	30	11.5553	33.3549	-3.35493
419.198	30	11.6203	26.512	3.48799
424.198	32	11.6852	21.0907	10.9093
429.198	15	11.7501	17.2425	-2.24251
434.198	26	11.815	14.7804	11.2196
439.198	21	11.8799	13.3602	7.63978
444.198	26	11.9449	12.6281	13.3719
449.198	17	12.0098	12.4073	4.59266
454.198	26	12.0747	12.4718	13.5282
459.198	21	12.1396	12.8834	8.11664
464.198	31	12.2045	13.8379	17.1621
469.198	28	12.2694	15.825	12.175
474.198	31	12.3344	19.5741	11.4259
479.198	34	12.3993	26.1876	7.81237
484.198	34	12.4642	37.0272	-3.02716
489.198	63	12.5291	53.4577	9.54232
494.198	74	12.594	76.3836	-2.38357
499.198	111	12.6589	105.652	5.34814
504.198	134	12.7239	139.526	-5.52628
509.198	163	12.7888	174.516	-11.5158
514.198	169	12.8537	205.79	-36.7904
519.198	231	12.9186	228.209	2.79103
524.198	259	12.9835	237.688	21.3117	O	Ka
529.198	222	13.0484	232.419	-10.4189
534.198	201	13.1134	213.433	-12.4329
539.198	198	13.1783	184.279	13.7208
544.198	157	13.2432	149.945	7.05461
549.198	137	13.3081	115.478	21.5218
554.198	100	13.373	84.82	15.18
559.198	79	13.438	60.2114	18.7886
564.198	59	13.5029	42.2148	16.7853
569.198	38	13.5678	30.1684	7.8316
574.198	23	13.6327	22.7865	0.213509
579.198	25	13.6976	18.6705	6.32953
584.198	19	13.7625	16.6212	2.37886
589.198	16	13.8275	15.7552	0.244757
594.198	20	13.8924	15.4919	4.50807
599.198	19	13.9573	15.4827	3.51724
604.198	17	14.0222	15.4857	1.51429
609.198	15	14.0871	15.5417	-0.54173
614.198	21	14.152	15.5119	5.48811
619.198	15	14.217	15.413	-0.413015
624.198	13	14.2819	15.2716	-2.27164
629.198	14	14.3468	15.1181	-1.11807
634.198	22	14.4117	14.979	7.02099
639.198	16	14.4766	14.8733	1.12672
644.198	19	14.5416	14.8107	4.1893
649.198	10	14.6065	14.7936	-4.79362
654.198	15	14.6714	14.8199	0.180067
659.198	17	14.7363	14.8858	2.11418
664.198	9	14.8012	14.9874	-5.98741
669.198	15	14.8662	15.1209	-0.120857
674.198	12	14.9846	15.3346	-3.33465
679.198	21	15.0963	15.561	5.43904
684.198	15	15.2014	15.7887	-0.788691
689.198	16	15.2998	16.0031	-0.00309181
694.198	10	15.3914	16.1892	-6.18919
699.198	16	15.4764	16.3322	-0.332218
704.198	18	15.5547	16.423	1.57699
709.198	21	15.6262	16.4595	4.54049
714.198	9	15.6911	16.4474	-7.44738
719.198	16	15.7493	16.3985	-0.398462
724.198	13	15.8008	16.329	-3.32896
729.198	13	15.8456	16.2529	-3.25295
734.198	21	15.8837	16.1836	4.81639
739.198	17	15.9151	16.13	0.870037
744.198	15	15.9398	16.0973	-1.09733
749.198	15	15.9579	16.0893	-1.08933
754.198	18	15.9692	16.1095	1.89052
759.198	8	15.9738	16.1628	-8.16283
764.198	24	15.9718	16.2566	7.74342
769.198	15	15.963	16.3991	-1.39912
774.198	15	15.9476	16.5977	-1.59768
779.198	17	15.9254	16.855	0.144945
784.198	13	15.8966	17.1659	-4.1659
789.198	18	15.8611	17.5137	0.486303
794.198	23	15.8188	17.8715	5.12854
799.198	12	15.7699	18.2022	-6.20216
804.198	11	15.7143	18.4657	-7.46568
809.198	13	15.652	18.6253	-5.62526
814.198	24	15.583	18.6548	5.34522
819.198	9	15.5073	18.5438	-9.5438
824.198	23	15.4249	18.2993	4.70069
829.198	9	15.3358	17.9437	-8.94366
834.198	19	15.24	17.5162	1.48379
839.198	14	15.1375	17.0491	-3.04905
844.198	14	15.0284	16.5847	-2.58471
849.198	16	14.9125	16.161	-0.160976
854.198	12	14.8351	15.8608	-3.86081
859.198	16	14.7577	15.684	0.316044
864.198	18	14.6803	15.6793	2.32069
869.198	13	14.6029	15.9101	-2.91009
874.198	22	14.5255	16.4578	5.54225
879.198	15	14.4481	17.4196	-2.4196
884.198	16	14.3707	18.8977	-2.89768
889.198	21	14.2933	20.9777	0.0222683
894.198	20	14.2159	23.7001	-3.70007
899.198	22	14.1386	27.0268	-5.0268
904.198	22	14.0612	30.8212	-8.82123
909.198	20	13.9838	34.8315	-14.8315
914.198	38	13.9064	38.7138	-0.71384
919.198	46	13.829	42.0741	3.92593
924.198	49	13.7516	44.5331	4.46685
929.198	60	13.6742	45.7941	14.2059
934.198	32	13.5968	45.7026	-13.7026
939.198	47	13.5194	44.2757	2.72433
944.198	43	13.442	41.6949	1.30508
949.198	30	13.3646	38.267	-8.26703
954.198	42	13.2872	34.3623	7.63767
959.198	39	13.2098	30.3492	8.65076
964.198	31	13.1324	26.5398	4.46023
969.198	21	13.055	23.1563	-2.15634
974.198	24	12.9776	20.3221	3.67786
979.198	21	12.9002	18.0711	2.9289
984.198	16	12.8228	16.3697	-0.369688
989.198	18	12.7454	15.1426	2.85744
994.198	17	12.668	14.2957	2.70431
999.198	10	12.5906	13.7339	-3.73387
1004.2	14	12.5132	13.3716	0.628426
1009.2	13	12.4359	13.1383	-0.138291
1014.2	14	12.3585	12.9799	1.02009
1019.2	16	12.2811	12.8578	3.14223
1024.2	11	12.2037	12.7391	-1.7391
1029.2	8	12.1263	12.629	-4.62897
1034.2	14	12.0489	12.5068	1.49318
1039.2	11	11.9715	12.3738	-1.37385
1044.2	15	11.8941	12.2326	2.76738
1049.2	16	11.8167	12.0917	3.90832
1054.2	15	11.7393	11.9533	3.04673
1059.2	16	11.6619	11.8214	4.1786
1064.2	10	11.5845	11.6984	-1.6984
1069.2	12	11.5071	11.585	0.41498
1074.2	15	11.4297	11.4808	3.51923
1079.2	8	11.3523	11.3844	-3.38436
1084.2	13	11.2749	11.2942	1.70581
1089.2	9	11.1975	11.2086	-2.20863
1094.2	13	11.1201	11.1263	1.87374
1099.2	9	11.0427	11.046	-2.04597
1104.2	16	10.9654	10.967	5.03298
1109.2	4	11.0323	11.033	-7.03305
1114.2	10	11.0958	11.0962	-1.0962
1119.2	12	11.156	11.156	0.843994
1124.2	19	11.2128	11.2128	7.78716
1129.2	12	11.2663	11.2663	0.733688
1134.2	6	11.3164	11.3164	-5.31639
1139.2	5	11.3631	11.3631	-6.36314
1144.2	12	11.4065	11.4065	0.593506
1149.2	13	11.4465	11.4465	1.55347
1154.2	6	11.4832	11.4832	-5.4832
1159.2	16	11.5165	11.5165	4.48352
1164.2	10	11.5464	11.5464	-1.54642
1169.2	13	11.573	11.573	1.42703
1174.2	17	11.5962	11.5962	5.40381
1179.2	14	11.616	11.616	2.38397
1184.2	9	11.6325	11.6325	-2.63252
1189.2	11	11.6457	11.6457	-0.64566
1194.2	14	11.6554	11.6554	2.34459
1199.2	9	11.6618	11.6618	-2.66182
1204.2	16	11.6648	11.6648	4.33516
1209.2	6	11.6645	11.6645	-5.66454
1214.2	10	11.6609	11.6609	-1.66086
1219.2	7	11.6538	11.6538	-4.65381
1224.2	14	11.6434	11.6434	2.3566
1229.2	11	11.6296	11.6296	-0.629608
1234.2	9	11.6125	11.6125	-2.61249
1239.2	16	11.592	11.592	4.40797
1244.2	13	11.5682	11.5682	1.43184
1249.2	13	11.541	11.541	1.45904
1254.2	11	11.5104	11.5104	-0.510346
1259.2	16	11.4764	11.4764	4.52358
1264.2	15	11.4391	11.4391	3.56085
1269.2	13	11.3985	11.3985	1.60155
1274.2	14	11.3545	11.3545	2.64554
1279.2	12	11.3071	11.3071	0.692947
1284.2	11	11.2563	11.2563	-0.256317
1289.2	14	11.2022	11.2022	2.79778
1294.2	5	11.1447	11.1447	-6.14473
1299.2	6	11.0839	11.0839	-5.08391
1304.2	7	11.0197	11.0197	-4.0197
1309.2	17	10.9522	10.9522	6.04784
1314.2	7	10.8813	10.8813	-3.88126
1319.2	19	10.807	10.807	8.19296
1324.2	14	10.7293	10.7295	3.27049
1329.2	10	10.6483	10.6487	-0.648673
1334.2	9	10.564	10.5646	-1.56464
1339.2	2	10.4762	10.4775	-8.47746
1344.2	7	10.3852	10.3874	-3.3874
1349.2	11	10.2907	10.2946	0.70537
1354.2	10	10.1929	10.1995	-0.199505
1359.2	5	10.0917	10.1026	-5.10255
1364.2	12	9.9872	10.0043	1.99571
1369.2	15	9.87932	9.90549	5.09451
1374.2	9	9.76807	9.80934	-0.809343
1379.2	4	9.65344	9.71408	-5.71408
1384.2	6	9.53548	9.62246	-3.62246
1389.2	11	9.41412	9.53637	1.46363
1394.2	9	9.28943	9.45838	-0.458376
1399.2	9	9.16138	9.39195	-0.391951
1404.2	13	9.02995	9.34203	3.65797
1409.2	12	8.89517	9.31564	2.68436
1414.2	10	8.757	9.32235	0.67765
1419.2	10	8.61548	9.37464	0.625355
1424.2	6	8.60086	9.61783	-3.61783
1429.2	9	8.58624	9.94148	-0.941475
1434.2	10	8.57162	10.3614	-0.361387
1439.2	8	8.557	10.8895	-2.88953
1444.2	8	8.54238	11.5301	-3.53013
1449.2	11	8.52776	12.2759	-1.27585
1454.2	8	8.51314	13.1047	-5.10471
1459.2	19	8.49852	13.9789	5.02109
1464.2	12	8.4839	14.8461	-2.84614
1469.2	21	8.46928	15.644	5.35599
1474.2	16	8.45466	16.307	-0.307011
1479.2	14	8.44004	16.7751	-2.77511
1484.2	14	8.42542	17.0026	-3.0026
1489.2	28	8.4108	16.9648	11.0352
1494.2	12	8.39618	16.6626	-4.66261
1499.2	10	8.38156	16.1218	-6.12183
1504.2	21	8.36694	15.3896	5.61037
1509.2	13	8.35232	14.5273	-1.52725
1514.2	16	8.3377	13.6014	2.39864
1519.2	8	8.32308	12.6754	-4.67544
1524.2	15	8.30846	11.8028	3.19718
1529.2	10	8.29384	11.0223	-1.02229
1534.2	11	8.27922	10.3565	0.643461
1539.2	6	8.2646	9.81316	-3.81317
1544.2	12	8.24998	9.3881	2.6119
1549.2	8	8.23535	9.06833	-1.06833
1554.2	8	8.70093	9.3168	-1.3168
1559.2	11	9.12402	9.59221	1.40779
1564.2	8	9.50366	9.87594	-1.87594
1569.2	7	9.84033	10.1532	-3.15322
1574.2	14	10.134	10.4117	3.58832
1579.2	11	10.3843	10.6414	0.358632
1584.2	7	10.5915	10.8359	-3.83587
1589.2	15	10.7556	10.9902	4.00984
1594.2	11	10.877	11.1016	-0.101627
1599.2	9	10.9548	11.1653	-2.16534
1604.2	13	10.9895	11.1867	1.81326
1609.2	9	10.9815	11.162	-2.162
1614.2	15	10.9302	11.0914	3.90856
1619.2	7	10.8354	10.9758	-3.97582
1624.2	8	10.6977	10.8167	-2.81672
1629.2	13	10.5173	10.6154	2.38458
1634.2	10	10.2932	10.3718	-0.371835
1639.2	12	10.0261	10.0874	1.91264
1644.2	6	9.71655	9.76289	-3.76289
1649.2	12	9.36328	9.39733	2.60267
1654.2	9	8.96704	8.99133	0.00867367
1659.2	6	8.52734	8.54416	-2.54416
1664.2	10	8.04541	8.05671	1.94329
1669.2	6	7.51978	7.52712	-1.52712
1674.2	8	7.57058	7.57523	0.424768
1679.2	6	7.62139	7.62425	-1.62425
1684.2	9	7.6722	7.6739	1.3261
1689.2	11	7.72301	7.72399	3.27601
1694.2	10	7.77381	7.77437	2.22563
1699.2	14	7.82462	7.82662	6.17338
1704.2	10	7.87543	7.87886	2.12114
1709.2	10	7.92624	7.93237	2.06763
1714.2	16	7.97705	7.98823	8.01177
1719.2	17	8.02786	8.04769	8.95231
1724.2	19	8.07866	8.1129	10.8871
1729.2	31	8.12947	8.18698	22.813
1734.2	25	8.18028	8.27428	16.7257
1739.2	22	8.23109	8.3806	13.6194
1744.2	19	8.2819	8.5133	10.4867
1749.2	22	8.3327	8.6812	13.3188
1754.2	23	8.38351	8.89422	14.1058
1759.2	13	8.43432	9.16259	3.8374
1764.2	19	8.48513	9.49568	9.50432
1769.2	18	8.53593	9.90042	8.09958
1774.2	18	8.58674	10.3795	7.62049
1779.2	18	8.63755	10.9296	7.0704
1784.2	16	8.68836	11.5398	4.46017
1789.2	23	8.73917	12.1911	10.8089
1794.2	20	8.78997	12.8562	7.14378
1799.2	26	8.84078	13.5017	12.4983
1804.2	15	8.89159	14.0903	0.909668
1809.2	22	8.9424	14.5849	7.41514
1814.2	23	8.99321	14.9523	8.04766
1819.2	18	9.04401	15.1681	2.83187
1824.2	19	9.09482	15.2191	3.78092
1829.2	13	9.14563	15.1051	-2.10511
1834.2	15	9.19644	14.8395	0.160526
1839.2	20	9.24725	14.4469	5.55314
1844.2	15	9.29805	13.9603	1.03973
1849.2	31	9.34886	13.417	17.583
1854.2	18	9.39967	12.8543	5.14568
1859.2	16	9.45048	12.3061	3.69394
1864.2	18	9.50129	11.7995	6.2005
1869.2	19	9.55209	11.3541	7.64594
1874.2	17	9.6029	10.9809	6.01905
1879.2	20	9.65371	10.6839	9.31608
1884.2	19	9.70452	10.4607	8.53932
1889.2	17	9.75532	10.316	6.68402
1894.2	11	9.80613	10.2277	0.772268
1899.2	13	9.85694	10.1947	2.80527
1904.2	9	9.90775	10.2115	-1.2115
1909.2	20	9.95856	10.2757	9.72433
1914.2	10	10.0094	10.3891	-0.38907
1919.2	14	10.0602	10.5587	3.4413
1924.2	16	10.111	10.7975	5.20251
1929.2	13	10.1618	11.1248	1.87525
1934.2	21	10.2126	11.5662	9.43384
1939.2	18	10.2634	12.1531	5.84695
1944.2	12	10.3142	12.9189	-0.918871
1949.2	17	10.365	13.9039	3.09615
1954.2	12	10.4158	15.1374	-3.13742
1959.2	15	10.4666	16.6429	-1.64295
1964.2	20	10.5174	18.4282	1.57176
1969.2	19	10.5683	20.4794	-1.47938
1974.2	29	10.6191	22.7559	6.24414
1979.2	30	10.6699	25.1879	4.81206
1984.2	19	10.7207	27.6776	-8.67764
1989.2	27	10.7715	30.1036	-3.10361
1994.2	28	10.8223	32.3302	-4.33021
1999.2	28	10.8731	34.2199	-6.2199
2004.2	35	10.9239	35.6474	-0.647369
2009.2	36	10.9747	36.514	-0.513954
2014.2	30	11.0255	36.7583	-6.75826
2019.2	29	11.0763	36.365	-7.365
2024.2	37	11.1271	35.3661	1.63388
2029.2	32	11.1779	33.8372	-1.83719
2034.2	32	11.2288	31.8883	0.11171
2039.2	48	11.2796	29.6514	18.3486
2044.2	29	11.3304	27.2666	1.73336
2049.2	28	11.3812	24.8669	3.13312
2054.2	27	11.432	22.5685	4.43154
2059.2	22	11.4828	20.4623	1.53775
2064.2	26	11.5336	18.6103	7.3897
2069.2	19	11.5844	17.0461	1.95392
2074.2	24	11.6352	15.7776	8.22239
2079.2	15	11.686	14.7933	0.206755
2084.2	11	11.7368	14.0669	-3.06689
2089.2	15	11.7876	13.5645	1.43554
2094.2	6	11.8384	13.2487	-7.24868
2099.2	16	11.8893	13.0828	2.91723
2104.2	10	11.9401	13.0328	-3.03281
2109.2	12	11.9909	13.069	-1.069
2114.2	5	12.0417	13.166	-8.16596
2119.2	14	12.0925	13.3026	0.697439
2124.2	6	12.1433	13.4614	-7.46138
2129.2	14	12.1941	13.6282	0.371833
2134.2	8	12.1257	13.6722	-5.67215
2139.2	15	12.051	13.688	1.31201	P	Kb
2144.2	12	11.9703	13.6911	-1.69106
2149.2	14	11.8833	13.6605	0.339487
2154.2	7	11.7902	13.5939	-6.59395
2159.2	8	11.691	13.4901	-5.49013
2164.2	17	11.5856	13.3494	3.6506
2169.2	15	11.474	13.1733	1.82672
2174.2	14	11.3563	12.9651	1.03492
2179.2	7	11.2325	12.7289	-5.7289
2184.2	3	11.1026	12.4697	-9.4697
2189.2	12	10.9665	12.193	-0.193022
2194.2	16	10.8243	11.9046	4.09539
2199.2	13	10.6759	11.6099	1.39011
2204.2	14	10.5214	11.3138	2.68618
2209.2	3	10.3607	11.0473	-8.04726
2214.2	12	10.1939	10.7815	1.21852
2219.2	13	10.0209	10.5391	2.46089
2224.2	17	10.0096	10.4987	6.50127
2229.2	9	9.99828	10.5132	-1.51322
2234.2	15	9.98698	10.6032	4.39677
2239.2	9	9.97569	10.7979	-1.79791
2244.2	10	9.96439	11.1376	-1.13758
2249.2	16	9.95309	11.6763	4.32366
2254.2	13	9.94179	12.4841	0.515868
2259.2	15	9.9305	13.6477	1.35229
2264.2	10	9.9192	15.2697	-5.26973
2269.2	8	9.9079	17.4649	-9.4649
2274.2	15	9.8966	20.3546	-5.35463
2279.2	18	9.88531	24.0542	-6.0542
2284.2	27	9.87401	28.6607	-1.66072
2289.2	36	9.86271	34.2359	1.76408
2294.2	36	9.85142	40.7884	-4.7884
2299.2	28	9.84012	48.257	-20.2569
2304.2	52	9.82882	56.5149	-4.51495
2309.2	55	9.81752	65.3096	-10.3096
2314.2	69	9.80623	74.3363	-5.33626
2319.2	73	9.79493	83.2123	-10.2123
2324.2	74	9.78363	91.5111	-17.5111
2329.2	100	9.77233	98.7982	1.2018
2334.2	90	9.76104	104.671	-14.6713
2339.2	117	9.74974	108.802	8.19758
2344.2	98	9.73844	110.975	-12.9748
2349.2	117	9.72715	111.111	5.88933
2354.2	96	9.71585	109.284	-13.2842
2359.2	106	9.70455	105.719	0.281204
2364.2	92	9.69325	100.768	-8.76772
2369.2	96	9.68196	94.8807	1.11929
2374.2	91	9.67066	88.5596	2.44043
2379.2	106	9.65936	82.3111	23.6889
2384.2	97	9.64807	76.5991	20.4009
2389.2	69	9.63677	71.8031	-2.80307
2394.2	78	9.62547	68.1871	9.8129
2399.2	87	9.61417	65.8818	21.1182
2404.2	65	9.60288	64.8796	0.120346
2409.2	77	9.59158	65.0444	11.9556
2414.2	69	9.58028	66.1313	2.86865
2419.2	73	9.56898	67.8175	5.18254
2424.2	56	9.55769	69.7366	-13.7366
2429.2	60	9.54639	71.5171	-11.5171
2434.2	63	9.53509	72.8174	-9.81743
2439.2	77	9.5238	73.3565	3.64345
2444.2	61	9.5125	72.9368	-11.9368
2449.2	82	9.5012	71.4564	10.5436
2454.2	67	9.4899	68.9118	-1.91179
2459.2	72	9.47861	65.3897	6.61034
2464.2	57	9.46731	61.0506	-4.0506
2469.2	73	9.45601	56.1068	16.8932
2474.2	71	9.44472	50.7974	20.2026
2479.2	49	9.43342	45.3234	3.67663
2484.2	44	9.42212	40.0047	3.99529
2489.2	34	9.41082	34.962	-0.962013
2494.2	36	9.39953	30.3396	5.6604
2499.2	30	9.38823	26.2314	3.76862
2504.2	32	9.37693	22.6833	9.31669
2509.2	27	9.36563	19.7009	7.29911
2514.2	21	9.35434	17.2549	3.74506
2519.2	27	9.34304	15.2958	11.7042
2524.2	21	9.33174	13.7602	7.23975
2529.2	16	9.32045	12.5807	3.41931
2534.2	17	9.30915	11.6912	5.30883
2539.2	16	9.29785	11.0319	4.96812
2544.2	13	9.28655	10.5517	2.44835
2549.2	8	9.27526	10.2088	-2.20882
2554.2	11	9.26396	9.97114	1.02886
2559.2	15	9.25266	9.8148	5.1852
2564.2	26	9.24137	9.72313	16.2769
2569.2	14	9.23007	9.68526	4.31474
2574.2	21	9.21877	9.69463	11.3054
2579.2	13	9.20747	9.72565	3.27435
2584.2	23	9.19618	9.83071	13.1693
2589.2	15	9.18488	9.97279	5.02721
2594.2	21	9.17358	10.1525	10.8475
2599.2	24	9.16229	10.3694	13.6306
2604.2	21	9.15099	10.6203	10.3797
2609.2	40	9.13969	10.8997	29.1003
2614.2	32	9.12839	11.1997	20.8003
2619.2	29	9.1171	11.5098	17.4902
2624.2	24	9.1058	11.8173	12.1827
2629.2	23	9.0945	12.1081	10.8919
2634.2	19	9.0832	12.3676	6.63237
2639.2	35	9.07191	12.5817	22.4183
2644.2	35	9.06061	12.7377	22.2623
2649.2	22	9.04931	12.8267	9.17327
2654.2	29	9.03801	12.8425	16.1575
2659.2	24	9.02672	12.7833	11.2167
2664.2	20	9.01542	12.6521	7.34789
2669.2	21	9.00412	12.4557	8.54427
2674.2	24	8.99283	12.2046	11.7954
2679.2	16	8.98153	11.9115	4.08846
2684.2	21	8.97023	11.5908	9.40916
2689.2	17	8.95894	11.2569	5.74312
2694.2	17	8.94764	10.9232	6.07683
2699.2	19	8.93634	10.6014	8.39858
2704.2	12	8.92504	10.301	1.69904
2709.2	11	8.91375	10.0284	0.971567
2714.2	13	8.90245	9.78802	3.21198
2719.2	11	8.89115	9.58094	1.41906
2724.2	11	8.87985	9.4068	1.5932
2729.2	8	8.86856	9.26351	-1.26351
2734.2	8	8.85726	9.14796	-1.14796
2739.2	8	8.84596	9.0565	-1.0565
2744.2	16	8.83466	8.98535	7.01465
2749.2	11	8.82337	8.93093	2.06907
2754.2	10	8.81207	8.89006	1.10994
2759.2	9	8.80077	8.86012	0.139881
2764.2	7	8.78953	8.83912	-1.83912
2769.2	10	8.78499	8.83226	1.16774
2774.2	6	8.78103	8.83248	-2.83248
2779.2	10	8.77766	8.83931	1.16068
2784.2	8	8.7749	8.85261	-0.85261
2789.2	10	8.7727	8.87238	1.12762
2794.2	8	8.77111	8.89733	-0.897325
2799.2	7	8.77011	8.9312	-1.9312
2804.2	4	8.7697	8.97152	-4.97152
2809.2	9	8.76986	9.01808	-0.0180807
2814.2	11	8.77063	9.07032	1.92968
2819.2	9	8.77199	9.12719	-0.127185
2824.2	13	8.77394	9.1872	3.8128
2829.2	13	8.77644	9.24845	3.75155
2834.2	7	8.77959	9.30879	-2.30879
2839.2	10	8.78326	9.36573	0.634274
2844.2	14	8.7876	9.41692	4.58308
2849.2	11	8.79248	9.45996	1.54004
2854.2	6	8.79796	9.49292	-3.49292
2859.2	10	8.80403	9.51435	0.485652
2864.2	5	8.81067	9.52336	-4.52336
2869.2	12	8.81792	9.51988	2.48012
2874.2	7	8.82578	9.50449	-2.50449
2879.2	5	8.83417	9.47837	-4.47837
2884.2	10	8.8432	9.44343	0.556565
2889.2	6	8.85278	9.40179	-3.40179
2894.2	11	8.86299	9.35594	1.64406
2899.2	14	8.87376	9.30826	4.69174
2904.2	8	8.88513	9.26108	-1.26108
2909.2	4	8.89711	9.21643	-5.21643
2914.2	6	8.90964	9.17589	-3.17589
2919.2	14	8.92279	9.14072	4.85928
2924.2	5	8.93652	9.11163	-4.11163
2929.2	11	8.95084	9.08896	1.91104
2934.2	7	8.96574	9.07269	-2.07269
2939.2	14	8.98123	9.06253	4.93747
2944.2	10	8.99731	9.05797	0.942027
2949.2	9	9.01401	9.05844	-0.0584392
2954.2	8	9.03125	9.0632	-1.0632
2959.2	2	9.04912	9.07167	-7.07167
2964.2	9	9.06755	9.08342	-0.083416
2969.2	9	9.08659	9.09763	-0.0976248
2974.2	8	9.1062	9.11397	-1.11397
2979.2	13	9.12642	9.13216	3.86784
2984.2	7	9.14723	9.15197	-2.15197
2989.2	15	9.16863	9.17325	5.82674
2994.2	11	9.19058	9.19599	1.80401
2999.2	4	9.21317	9.22033	-5.22033
3004.2	9	9.23631	9.24638	-0.24638
3009.2	6	9.26006	9.2746	-3.27461
3014.2	10	9.28439	9.3055	0.694504
3019.2	11	9.30931	9.35144	1.64857
3024.2	4	9.33485	9.39699	-5.39699
3029.2	9	9.36096	9.45164	-0.45164
3034.2	12	9.38763	9.51861	2.48139
3039.2	11	9.41493	9.60221	1.39779
3044.2	12	9.4428	9.70794	2.29206
3049.2	7	9.47124	9.84294	-2.84294
3054.2	15	9.46049	9.97644	5.02356
3059.2	8	9.44974	10.1588	-2.15879
3064.2	10	9.439	10.4035	-0.403467
3069.2	6	9.42825	10.7264	-4.72638
3074.2	7	9.4175	11.1457	-4.14575
3079.2	13	9.40676	11.6817	1.31831
3084.2	16	9.39601	12.3555	3.64451
3089.2	16	9.38526	13.1884	2.81156
3094.2	8	9.37452	14.2003	-6.20026
3099.2	15	9.36377	15.4071	-0.407082
3104.2	12	9.35302	16.8192	-4.81916
3109.2	18	9.34227	18.4384	-0.438389
3114.2	17	9.33153	20.2559	-3.2559
3119.2	12	9.32078	22.2501	-10.2501
3124.2	24	9.31003	24.3852	-0.385189
3129.2	17	9.29929	26.6111	-9.61113
3134.2	28	9.28854	28.8643	-0.864273
3139.2	31	9.27779	31.0698	-0.0698166
3144.2	32	9.26704	33.1454	-1.14542
3149.2	32	9.2563	35.006	-3.00602
3154.2	29	9.24555	36.5695	-7.5695
3159.2	35	9.2348	37.7626	-2.76257
3164.2	36	9.22406	38.5264	-2.52642
3169.2	38	9.21331	38.8215	-0.82151
3174.2	39	9.20256	38.6308	0.369183
3179.2	33	9.19182	37.9674	-4.96743
3184.2	31	9.18107	36.8539	-5.85385
3189.2	38	9.17032	35.3463	2.65373
3194.2	47	9.15958	33.5147	13.4853
3199.2	36	9.14883	31.4414	4.55863
3204.2	32	9.13808	29.215	2.78503
3209.2	36	9.12734	26.9248	9.07518
3214.2	25	9.11659	24.6557	0.344334
3219.2	32	9.10584	22.4834	9.51658
3224.2	25	9.09509	20.4723	4.52771
3229.2	23	9.08435	18.6732	4.32683
3234.2	21	9.0736	17.1234	3.87656
3239.2	20	9.06285	15.8478	4.15224
3244.2	18	9.05211	14.8596	3.1404
3249.2	19	9.04136	14.1632	4.83683
3254.2	23	9.03061	13.7553	9.24467
3259.2	19	9.01986	13.6272	5.37279
3264.2	17	9.00912	13.7654	3.2346
3269.2	16	8.99837	14.1525	1.8475
3274.2	14	8.98762	14.767	-0.766972
3279.2	8	8.97688	15.5838	-7.58382
3284.2	12	8.96613	16.5723	-4.57234
3289.2	15	8.95538	17.697	-2.69695
3294.2	15	8.94464	18.9166	-3.9166
3299.2	19	8.93389	20.1852	-1.18515
3304.2	16	8.92314	21.4523	-5.45228
3309.2	13	8.9124	22.6652	-9.66522
3314.2	18	8.90165	23.7707	-5.77071
3319.2	19	8.8909	24.7191	-5.71907
3324.2	19	8.88016	25.455	-6.45499
3329.2	26	8.86941	25.9662	0.0338345
3334.2	28	8.85866	26.2114	1.78864
3339.2	25	8.84791	26.1783	-1.17834
3344.2	33	8.83717	25.8682	7.13183
3349.2	28	8.82642	25.2951	2.70485
3354.2	22	8.81567	24.4857	-2.48567
3359.2	23	8.80493	23.4763	-0.476311
3364.2	29	8.79418	22.3106	6.68942
3369.2	27	8.78343	21.0364	5.96355
3374.2	24	8.77268	19.7026	4.29735
3379.2	19	8.76194	18.3558	0.644218
3384.2	24	8.75119	17.0377	6.9623
3389.2	22	8.74044	15.7836	6.21638
3394.2	21	8.7297	14.6209	6.37907
3399.2	18	8.71895	13.5688	4.43121
3404.2	16	8.7082	12.639	3.36098
3409.2	14	8.69746	11.8346	2.16541
3414.2	12	8.68671	11.1539	0.846136
3419.2	11	8.67596	10.5902	0.409842
3424.2	11	8.66521	10.1336	0.86643
3429.2	12	8.65447	9.77233	2.22767
3434.2	7	8.64372	9.49395	-2.49395
3439.2	12	8.63298	9.2862	2.7138
3444.2	13	8.62223	9.13773	3.86227
3449.2	13	8.61148	9.03851	3.96149
3454.2	8	8.60073	8.98006	-0.98006
3459.2	1	8.58999	8.95545	-7.95545
3464.2	6	8.57924	8.9592	-2.9592
3469.2	9	8.56849	8.98711	0.0128918
3474.2	9	8.55775	9.03596	-0.035964
3479.2	7	8.547	9.10332	-2.10332
3484.2	5	8.53625	9.18719	-4.18719
3489.2	7	8.52551	9.28585	-2.28585
3494.2	12	8.51476	9.39203	2.60797
3499.2	10	8.50401	9.51716	0.482837
3504.2	9	8.49326	9.6504	-0.650397
3509.2	10	8.48252	9.78946	0.210539
3514.2	9	8.47177	9.93152	-0.931516
3519.2	13	8.46102	10.0732	2.9268
3524.2	13	8.45028	10.2143	2.78571
3529.2	6	8.43953	10.3539	-4.35393
3534.2	17	8.42878	10.4789	6.52113
3539.2	9	8.41804	10.5914	-1.59139
3544.2	7	8.40729	10.6896	-3.68957
3549.2	9	8.39654	10.7728	-1.77277
3554.2	11	8.38579	10.8421	0.157903
3559.2	8	8.37505	10.9009	-2.90085
3564.2	8	8.3643	10.9549	-2.95494
3569.2	7	8.35355	11.0132	-4.01323
3574.2	5	8.34281	11.0879	-6.08791
3579.2	11	8.33206	11.1942	-0.194177
3584.2	12	8.32131	11.3506	0.649401
3589.2	14	8.31057	11.5785	2.42151
3594.2	7	8.29982	11.9013	-4.90128
3599.2	10	8.28907	12.3436	-2.34359
3604.2	9	8.27833	12.9299	-3.92995
3609.2	14	8.26758	13.6832	0.3168
3614.2	14	8.25683	14.6227	-0.622691
3619.2	9	8.24608	15.7623	-6.7623
3624.2	17	8.23534	17.1084	-0.108398
3629.2	9	8.22459	18.658	-9.65799
3634.2	25	8.21384	20.3971	4.6029
3639.2	19	8.2031	22.2998	-3.29977
3644.2	25	8.19235	24.3277	0.672318
3649.2	29	8.1816	26.4307	2.56931
3654.2	28	8.17086	28.5483	-0.54829
3659.2	18	8.16011	30.6121	-12.6121
3664.2	32	8.14936	32.5491	-0.549103
3669.2	27	8.13861	34.2857	-7.28573
3674.2	32	8.12787	35.7522	-3.75217
3679.2	32	8.11712	36.8868	-4.88685
3684.2	30	8.10637	37.6403	-7.64025
3689.2	46	8.09563	37.9792	8.0208
3694.2	47	8.08488	37.8877	9.1123	Ca	Ka
3699.2	33	8.07413	37.369	-4.36901
3704.2	53	8.06339	36.4451	16.5549
3709.2	30	8.05264	35.1548	-5.15483
3714.2	41	8.04189	33.5513	7.44868
3719.2	31	8.03115	31.6981	-0.698093
3724.2	29	8.0204	29.6649	-0.664879
3729.2	28	8.00965	27.5227	0.477333
3734.2	25	7.9989	25.3421	-0.342136
3739.2	23	7.98816	23.1858	-0.185791
3744.2	24	7.97741	21.1084	2.8916
3749.2	25	7.96666	19.1542	5.84577
3754.2	21	7.95592	17.3561	3.6439
3759.2	19	7.94517	15.7354	3.26456
3764.2	21	7.93442	14.303	6.69697
3769.2	7	7.92368	13.0603	-6.06033
3774.2	16	7.91293	12.0012	3.99883
3779.2	18	7.90218	11.1136	6.88639
3784.2	14	7.89144	10.3818	3.61822
3789.2	7	7.88069	9.78759	-2.78759
3794.2	7	7.86994	9.31212	-2.31212
3799.2	8	7.85919	8.93679	-0.936788
3804.2	5	7.84845	8.64419	-3.64419
3809.2	8	7.8377	8.41861	-0.418611
3814.2	16	7.82695	8.24634	7.75366
3819.2	13	7.81621	8.11574	4.88426
3824.2	8	7.80546	8.01717	-0.0171709
3829.2	9	7.79471	7.94285	1.05715
3834.2	11	7.78397	7.88661	3.11339
3839.2	9	7.77322	7.84467	1.15532
3844.2	6	7.76247	7.81198	-1.81198
3849.2	12	7.75172	7.78653	4.21347
3854.2	9	7.74098	7.75527	1.24473
3859.2	8	7.73023	7.74363	0.256369
3864.2	9	7.71948	7.73374	1.26626
3869.2	7	7.70874	7.72581	-0.725809
3874.2	9	7.69799	7.72023	1.27977
3879.2	6	7.68724	7.71755	-1.71755
3884.2	7	7.6765	7.71855	-0.718552
3889.2	4	7.66575	7.72423	-3.72423
3894.2	5	7.655	7.73584	-2.73584
3899.2	8	7.64426	7.75487	0.245131
3904.2	9	7.63351	7.78307	1.21693
3909.2	8	7.62276	7.82227	0.17773
3914.2	6	7.61201	7.87488	-1.87488
3919.2	8	7.60127	7.94292	0.0570841
3924.2	10	7.59052	8.02854	1.97146
3929.2	6	7.57977	8.13373	-2.13374
3934.2	4	7.56903	8.26012	-4.26012
3939.2	10	7.55828	8.40875	1.59125
3944.2	8	7.54753	8.57996	-0.57996
3949.2	7	7.53679	8.7731	-1.7731
3954.2	14	7.52604	8.98642	5.01358
3959.2	7	7.51529	9.21697	-2.21697
3964.2	6	7.50454	9.46049	-3.46049
3969.2	9	7.4938	9.71153	-0.711528
3974.2	9	7.48305	9.9635	-0.963503
3979.2	8	7.4723	10.209	-2.20898
3984.2	9	7.46156	10.44	-1.43999
3989.2	9	7.45081	10.6484	-1.6484
3994.2	10	7.44006	10.8264	-0.826378
3999.2	15	7.42932	10.9669	4.03313
4004.2	10	7.41857	11.064	-1.06401
4009.2	13	7.40782	11.1135	1.8865
4014.2	9	7.39708	11.1129	-2.11291
4019.2	11	7.38633	11.0618	-0.06182
4024.2	8	7.37558	10.9619	-2.96187
4029.2	13	7.36483	10.8166	2.18336
4034.2	9	7.35409	10.6316	-1.63157
4039.2	13	7.34334	10.4131	2.58695
4044.2	7	7.33259	10.1688	-3.16879
4049.2	12	7.32185	9.90686	2.09314
4054.2	9	7.3111	9.63537	-0.635374
4059.2	9	7.30035	9.36208	-0.362078
4064.2	9	7.2896	9.09397	-0.0939703
4069.2	7	7.27886	8.83705	-1.83705
4074.2	9	7.26811	8.59615	0.403848
4079.2	10	7.25736	8.37486	1.62515
4084.2	5	7.24662	8.17552	-3.17552
4089.2	9	7.23587	7.99936	1.00065
4094.2	6	7.22512	7.8466	-1.8466
4099.2	3	7.21438	7.71665	-4.71665
4104.2	6	7.20363	7.60833	-1.60833
4109.2	8	7.19288	7.52001	0.479995
4114.2	11	7.18214	7.4498	3.5502
4119.2	6	7.17139	7.39573	-1.39573
4124.2	7	7.16064	7.35582	-0.355824
4129.2	7	7.14989	7.32818	-0.328176
4134.2	4	7.13915	7.31101	-3.31101
4139.2	7	7.12844	7.30272	-0.30272
4144.2	5	7.1218	7.30582	-2.30583
4149.2	6	7.11517	7.31487	-1.31487
4154.2	11	7.10854	7.32854	3.67146
4159.2	6	7.10192	7.3456	-1.3456
4164.2	6	7.09531	7.36482	-1.36482
4169.2	7	7.08871	7.38504	-0.385035
4174.2	4	7.08212	7.4051	-3.4051
4179.2	10	7.07554	7.42391	2.5761
4184.2	8	7.06896	7.4392	0.560799
4189.2	10	7.06239	7.45292	2.54708
4194.2	5	7.05583	7.46241	-2.46241
4199.2	5	7.04928	7.46707	-2.46707
4204.2	6	7.04274	7.46647	-1.46647
4209.2	6	7.03621	7.46038	-1.46038
4214.2	2	7.02968	7.44879	-5.44879
4219.2	13	7.02316	7.43188	5.56812
4224.2	9	7.01666	7.41014	1.58986
4229.2	11	7.01016	7.38403	3.61597
4234.2	8	7.00366	7.35432	0.645683
4239.2	7	6.99718	7.32182	-0.321824
4244.2	6	6.99071	7.28742	-1.28742
4249.2	6	6.98424	7.25199	-1.25199
4254.2	7	6.97778	7.21639	-0.21639
4259.2	8	6.97133	7.18139	0.818614
4264.2	8	6.96489	7.14766	0.852336
4269.2	2	6.95846	7.11579	-5.11579
4274.2	10	6.95204	7.0862	2.9138
4279.2	9	6.94562	7.05923	1.94077
4284.2	5	6.93921	7.03508	-2.03508
4289.2	8	6.93281	7.01385	0.986146
4294.2	10	6.92643	6.99559	3.00441
4299.2	4	6.92004	6.98024	-2.98024
4304.2	6	6.91367	6.96772	-0.967719
4309.2	7	6.9073	6.95791	0.0420871
4314.2	9	6.90095	6.95068	2.04933
4319.2	5	6.8946	6.94585	-1.94585
4324.2	7	6.88826	6.94326	0.0567389
4329.2	10	6.88193	6.94273	3.05728
4334.2	12	6.8756	6.94404	5.05596
4339.2	10	6.86929	6.94697	3.05303
4344.2	2	6.86298	6.95126	-4.95126
4349.2	7	6.85668	6.95663	0.0433679
4354.2	6	6.85039	6.96275	-0.962753
4359.2	4	6.84411	6.96927	-2.96927
4364.2	7	6.83784	6.9758	0.0241995
4369.2	8	6.83158	6.98194	1.01806
4374.2	6	6.82532	6.98729	-0.987287
4379.2	7	6.81907	6.99144	0.0085578
4384.2	5	6.81283	6.99392	-1.99392
4389.2	7	6.8066	6.99468	0.00531721
4394.2	7	6.80038	6.99329	0.00671387
4399.2	12	6.79417	6.98956	5.01044
4404.2	5	6.78796	6.9834	-1.9834
4409.2	11	6.78176	6.97482	4.02518
4414.2	8	6.77558	6.9639	1.0361
4419.2	6	6.7694	6.95081	-0.95081
4424.2	5	6.76322	6.93581	-1.93581
4429.2	7	6.75706	6.9192	0.0808029
4434.2	10	6.75091	6.90133	3.09867
4439.2	7	6.74476	6.88258	0.117422
4444.2	8	6.73862	6.86332	1.13668
4449.2	6	6.73249	6.84391	-0.843907
4454.2	2	6.72637	6.82468	-4.82468
4459.2	10	6.72026	6.80592	3.19408
4464.2	9	6.71415	6.78787	2.21213
4469.2	1	6.70805	6.7707	-5.7707
4474.2	8	6.70197	6.75454	1.24546
4479.2	5	6.69589	6.73946	-1.73946
4484.2	15	6.68982	6.72548	8.27452
4489.2	11	6.68376	6.71258	4.28742
4494.2	4	6.6777	6.70071	-2.70071
4499.2	4	6.67166	6.68979	-2.68979
4504.2	7	6.66562	6.67973	0.320268
4509.2	3	6.65959	6.67044	-3.67044
4514.2	7	6.65357	6.6618	0.338196
4519.2	4	6.64756	6.65373	-2.65373
4524.2	5	6.64155	6.64612	-1.64613
4529.2	1	6.63556	6.6389	-5.6389
4534.2	5	6.62957	6.63199	-1.63199
4539.2	1	6.62359	6.62531	-5.62531
4544.2	9	6.61762	6.61883	2.38117
4549.2	7	6.61166	6.6125	0.387495
4554.2	8	6.60571	6.60629	1.39371
4559.2	7	6.59976	6.60016	0.399843
4564.2	9	6.59383	6.59409	2.40591
4569.2	2	6.5879	6.58807	-4.58807
4574.2	10	6.58198	6.58209	3.41791
4579.2	10	6.57607	6.57607	3.42393
4584.2	6	6.57017	6.57017	-0.570168
4589.2	5	6.56427	6.56427	-1.56427
4594.2	6	6.55839	6.55839	-0.558388
4599.2	5	6.55251	6.55251	-1.55251
4604.2	5	6.54664	6.54664	-1.54664
4609.2	7	6.54078	6.54078	0.45922
4614.2	10	6.53493	6.53493	3.46507
4619.2	6	6.52909	6.52909	-0.529085
4624.2	6	6.52325	6.52325	-0.52325
4629.2	10	6.51742	6.51742	3.48258
4634.2	3	6.51161	6.51161	-3.5116
4639.2	5	6.50579	6.50579	-1.50579
4644.2	5	6.49999	6.49999	-1.49999
4649.2	3	6.4942	6.4942	-3.4942
4654.2	6	6.48841	6.48841	-0.488415
4659.2	8	6.48264	6.48264	1.51736
4664.2	9	6.47687	6.47687	2.52313
4669.2	6	6.47111	6.47111	-0.471111
4674.2	3	6.46536	6.46536	-3.46536
4679.2	3	6.45962	6.45962	-3.45962
4684.2	4	6.45388	6.45388	-2.45388
4689.2	2	6.44816	6.44816	-4.44816
4694.2	3	6.44244	6.44244	-3.44244
4699.2	7	6.43673	6.43673	0.56327
4704.2	5	6.43103	6.43103	-1.43103
4709.2	2	6.42534	6.42534	-4.42534
4714.2	4	6.41965	6.41965	-2.41965
4719.2	9	6.41398	6.41398	2.58602
4724.2	9	6.40831	6.40831	2.59169
4729.2	4	6.40265	6.40265	-2.40265
4734.2	10	6.397	6.397	3.603
4739.2	5	6.39136	6.39136	-1.39136
4744.2	8	6.38573	6.38573	1.61427
4749.2	4	6.3801	6.3801	-2.3801
4754.2	9	6.37449	6.37449	2.62551
4759.2	4	6.36888	6.36888	-2.36888
4764.2	2	6.36328	6.36328	-4.36328
4769.2	8	6.35769	6.35769	1.64231
4774.2	8	6.3521	6.3521	1.6479
4779.2	4	6.34653	6.34653	-2.34653
4784.2	10	6.34096	6.34096	3.65904
4789.2	8	6.3354	6.3354	1.6646
4794.2	5	6.32986	6.32986	-1.32986
4799.2	8	6.32432	6.32432	1.67569
4804.2	4	6.31878	6.31878	-2.31878
4809.2	2	6.31326	6.31326	-4.31326
4814.2	5	6.30774	6.30774	-1.30774
4819.2	7	6.30224	6.30224	0.697764
4824.2	10	6.29674	6.29674	3.70326
4829.2	10	6.29125	6.29125	3.70875
4834.2	8	6.28576	6.28576	1.71424
4839.2	9	6.28029	6.28029	2.71971
4844.2	9	6.27483	6.27483	2.72517
4849.2	5	6.26937	6.26937	-1.26937
4854.2	8	6.26392	6.26392	1.73608
4859.2	6	6.25848	6.25848	-0.258481
4864.2	9	6.25305	6.25305	2.74695
4869.2	8	6.24763	6.24763	1.75237
4874.2	3	6.24221	6.24221	-3.24221
4879.2	5	6.23681	6.23681	-1.2368
4884.2	8	6.23141	6.23141	1.76859
4889.2	6	6.22602	6.22602	-0.226018
4894.2	6	6.22064	6.22064	-0.220637
4899.2	10	6.21526	6.21526	3.78474
4904.2	6	6.2099	6.2099	-0.2099
4909.2	3	6.20455	6.20455	-3.20454
4914.2	4	6.1992	6.1992	-2.1992
4919.2	9	6.19386	6.19386	2.80614
4924.2	7	6.18853	6.18853	0.811473
4929.2	6	6.18321	6.18321	-0.183205
4934.2	8	6.17789	6.17789	1.82211
4939.2	7	6.17259	6.17259	0.827413
4944.2	7	6.16729	6.16729	0.832711
4949.2	3	6.162	6.162	-3.162
4954.2	7	6.15672	6.15672	0.843279
4959.2	7	6.15145	6.15145	0.84855
4964.2	7	6.14619	6.14619	0.853814
4969.2	8	6.14093	6.14093	1.85907
4974.2	7	6.13568	6.13568	0.864316
4979.2	3	6.13045	6.13045	-3.13045
4984.2	3	6.12522	6.12522	-3.12522
4989.2	10	6.12	6.12	3.88
4994.2	9	6.11478	6.11478	2.88522
4999.2	4	6.10958	6.10958	-2.10958
5004.2	7	6.10438	6.10438	0.895617
5009.2	8	6.0992	6.0992	1.9008
5014.2	3	6.09402	6.09402	-3.09402
5019.2	7	6.08885	6.08885	0.911155
5024.2	6	6.08368	6.08368	-0.083683
5029.2	4	6.07853	6.07853	-2.07853
5034.2	3	6.07338	6.07338	-3.07338
5039.2	9	6.06825	6.06825	2.93175
5044.2	8	6.06312	6.06312	1.93688
5049.2	5	6.058	6.058	-1.058
5054.2	14	6.05289	6.05289	7.94711
5059.2	4	6.04778	6.04778	-2.04778
5064.2	4	6.04269	6.04269	-2.04269
5069.2	8	6.0376	6.0376	1.9624
5074.2	9	6.03252	6.03252	2.96748
5079.2	3	6.02745	6.02745	-3.02745
5084.2	2	6.02239	6.02239	-4.02239
5089.2	6	6.01734	6.01734	-0.0173397
5094.2	4	6.01229	6.01229	-2.01229
5099.2	7	6.00726	6.00726	0.992742
5104.2	7	6.00223	6.00223	0.99777
5109.2	7	5.99721	5.99721	1.00279
5114.2	5	5.9922	5.9922	-0.992201
5119.2	9	5.9872	5.9872	3.0128
5124.2	8	5.9822	5.9822	2.0178
5129.2	4	5.97722	5.97722	-1.97722
5134.2	4	5.97224	5.97224	-1.97224
5139.2	11	5.96727	5.96727	5.03273
5144.2	7	5.96231	5.96231	1.03769
5149.2	6	5.95736	5.95736	0.0426407
5154.2	5	5.95242	5.95242	-0.952416
5159.2	1	5.94748	5.94748	-4.94748
5164.2	6	5.94256	5.94256	0.0574441
5169.2	10	5.93764	5.93764	4.06236
5174.2	8	5.93273	5.93273	2.06727
5179.2	4	5.92783	5.92783	-1.92782
5184.2	6	5.92293	5.92293	0.0770674
5189.2	8	5.91805	5.91805	2.08195
5194.2	6	5.91317	5.91317	0.0868301
5199.2	4	5.9083	5.9083	-1.9083
5204.2	8	5.90344	5.90344	2.09656
5209.2	3	5.89859	5.89859	-2.89859
5214.2	8	5.89375	5.89375	2.10625
5219.2	6	5.88891	5.88891	0.111085
5224.2	4	5.88409	5.88409	-1.88409
5229.2	6	5.87927	5.87927	0.120727
5234.2	6	5.87446	5.87446	0.125535
5239.2	10	5.86966	5.86966	4.13034
5244.2	6	5.86487	5.86487	0.13513
5249.2	5	5.86009	5.86009	-0.860088
5254.2	7	5.85531	5.85531	1.14469
5259.2	10	5.85055	5.85055	4.14945
5264.2	5	5.84579	5.84579	-0.845788
5269.2	7	5.84104	5.84104	1.15896
5274.2	3	5.8363	5.8363	-2.8363
5279.2	5	5.83156	5.83156	-0.831562
5284.2	5	5.82684	5.82684	-0.826838
5289.2	5	5.82212	5.82212	-0.82212
5294.2	5	5.81741	5.81741	-0.817413
5299.2	4	5.81271	5.81271	-1.81271
5304.2	4	5.80802	5.80802	-1.80802
5309.2	1	5.80334	5.80334	-4.80334
5314.2	7	5.79866	5.79866	1.20134
5319.2	6	5.794	5.794	0.206001
5324.2	9	5.78934	5.78934	3.21066
5329.2	6	5.78469	5.78469	0.215307
5334.2	10	5.78005	5.78005	4.21995
5339.2	4	5.77542	5.77542	-1.77542
5344.2	8	5.77079	5.77079	2.2292
5349.2	4	5.76618	5.76618	-1.76618
5354.2	5	5.76157	5.76157	-0.761573
5359.2	7	5.75697	5.75697	1.24303
5364.2	5	5.75238	5.75238	-0.752384
5369.2	4	5.7478	5.7478	-1.7478
5374.2	6	5.74323	5.74323	0.256771
5379.2	3	5.73866	5.73866	-2.73866
5384.2	5	5.73411	5.73411	-0.734107
5389.2	6	5.72956	5.72956	0.270441
5394.2	10	5.72502	5.72502	4.27498
5399.2	2	5.72049	5.72049	-3.72049
5404.2	3	5.71597	5.71597	-2.71597
5409.2	7	5.71145	5.71145	1.28855
5414.2	7	5.70694	5.70694	1.29306
5419.2	11	5.70245	5.70245	5.29755
5424.2	10	5.69796	5.69796	4.30204
5429.2	7	5.69348	5.69348	1.30652
5434.2	5	5.689	5.689	-0.689004
5439.2	5	5.68454	5.68454	-0.68454
5444.2	7	5.68009	5.68009	1.31991
5449.2	3	5.67564	5.67564	-2.67564
5454.2	3	5.6712	5.6712	-2.6712
5459.2	8	5.66677	5.66677	2.33323
5464.2	6	5.66235	5.66235	0.337654
5469.2	5	5.65793	5.65793	-0.657933
5474.2	4	5.65353	5.65353	-1.65353
5479.2	5	5.64913	5.64913	-0.64913
5484.2	3	5.64474	5.64474	-2.64474
5489.2	1	5.64036	5.64036	-4.64036
5494.2	8	5.63599	5.63599	2.36401
5499.2	8	5.63163	5.63163	2.36837
5504.2	6	5.62727	5.62727	0.372727
5509.2	4	5.62293	5.62293	-1.62293
5514.2	7	5.61859	5.61859	1.38141
5519.2	5	5.61426	5.61426	-0.61426
5524.2	4	5.60994	5.60994	-1.60994
5529.2	3	5.60563	5.60563	-2.60563
5534.2	7	5.60132	5.60132	1.39868
5539.2	5	5.59703	5.59703	-0.597026
5544.2	3	5.59274	5.59274	-2.59274
5549.2	5	5.58846	5.58846	-0.588459
5554.2	8	5.58419	5.58419	2.41581
5559.2	3	5.57993	5.57993	-2.57993
5564.2	7	5.57567	5.57567	1.42433
5569.2	7	5.57143	5.57143	1.42857
5574.2	2	5.56719	5.56719	-3.56719
5579.2	7	5.56296	5.56296	1.43704
5584.2	4	5.55874	5.55874	-1.55874
5589.2	12	5.55453	5.55453	6.44547
5594.2	3	5.55033	5.55033	-2.55033
5599.2	7	5.54613	5.54613	1.45387
5604.2	7	5.54195	5.54195	1.45805
5609.2	5	5.53777	5.53777	-0.537768
5614.2	4	5.5336	5.5336	-1.5336
5619.2	3	5.52944	5.52944	-2.52944
5624.2	6	5.52529	5.52529	0.474715
5629.2	7	5.52114	5.52114	1.47886
5634.2	7	5.517	5.517	1.483
5639.2	6	5.51288	5.51288	0.487124
5644.2	2	5.50876	5.50876	-3.50876
5649.2	4	5.50465	5.50465	-1.50465
5654.2	4	5.50054	5.50054	-1.50055
5659.2	9	5.49645	5.49645	3.50355
5664.2	3	5.49237	5.49237	-2.49236
5669.2	7	5.48829	5.48829	1.51171
5674.2	7	5.48422	5.48422	1.51578
5679.2	6	5.48016	5.48016	0.519841
5684.2	6	5.47611	5.47611	0.523893
5689.2	12	5.47206	5.47206	6.52794
5694.2	5	5.46803	5.46803	-0.468029
5699.2	7	5.464	5.464	1.536
5704.2	2	5.45998	5.45998	-3.45998
5709.2	6	5.45597	5.45597	0.544026
5714.2	5	5.45197	5.45197	-0.451972
5719.2	8	5.44798	5.44798	2.55202
5724.2	7	5.444	5.444	1.55601
5729.2	2	5.44002	5.44002	-3.44002
5734.2	5	5.43605	5.43605	-0.436051
5739.2	3	5.43209	5.43209	-2.43209
5744.2	4	5.42814	5.42814	-1.42814
5749.2	9	5.4242	5.4242	3.5758
5754.2	4	5.42026	5.42026	-1.42027
5759.2	2	5.41634	5.41634	-3.41634
5764.2	4	5.41242	5.41242	-1.41242
5769.2	5	5.40851	5.40851	-0.408513
5774.2	6	5.40461	5.40461	0.595387
5779.2	7	5.40072	5.40072	1.59928
5784.2	5	5.39684	5.39684	-0.396837
5789.2	2	5.39296	5.39296	-3.39296
5794.2	8	5.3891	5.3891	2.6109
5799.2	5	5.38524	5.38524	-0.385236
5804.2	4	5.38139	5.38139	-1.38139
5809.2	6	5.37754	5.37754	0.622455
5814.2	5	5.37371	5.37371	-0.373713
5819.2	5	5.36989	5.36989	-0.369887
5824.2	4	5.36607	5.36607	-1.36607
5829.2	3	5.36226	5.36226	-2.36226
5834.2	7	5.35846	5.35846	1.64154
5839.2	7	5.35467	5.35467	1.64533
5844.2	10	5.35089	5.35089	4.64911
5849.2	7	5.34712	5.34712	1.65288
5854.2	7	5.34335	5.34335	1.65665
5859.2	8	5.33959	5.33959	2.66041
5864.2	6	5.33584	5.33584	0.664156
5869.2	2	5.3321	5.3321	-3.3321
5874.2	4	5.32837	5.32837	-1.32837
5879.2	6	5.32465	5.32465	0.675353
5884.2	10	5.32093	5.32093	4.67907
5889.2	2	5.31722	5.31722	-3.31723
5894.2	5	5.31353	5.31353	-0.313526
5899.2	6	5.30984	5.30984	0.690163
5904.2	6	5.30616	5.30616	0.693845
5909.2	3	5.30248	5.30248	-2.30248
5914.2	4	5.29882	5.29882	-1.29882
5919.2	7	5.29516	5.29516	1.70484
5924.2	2	5.29151	5.29151	-3.29151
5929.2	6	5.28787	5.28787	0.712127
5934.2	5	5.28424	5.28424	-0.284243
5939.2	8	5.28062	5.28062	2.71938
5944.2	3	5.277	5.277	-2.277
5949.2	1	5.2734	5.2734	-4.2734
5954.2	4	5.2698	5.2698	-1.2698
5959.2	6	5.26621	5.26621	0.733788
5964.2	3	5.26263	5.26263	-2.26263
5969.2	10	5.25906	5.25906	4.74094
5974.2	5	5.25549	5.25549	-0.255495
5979.2	1	5.25194	5.25194	-4.25194
5984.2	4	5.24839	5.24839	-1.24839
5989.2	9	5.24485	5.24485	3.75515
5994.2	9	5.24132	5.24132	3.75868
5999.2	4	5.2378	5.2378	-1.2378
6004.2	5	5.23429	5.23429	-0.23429
6009.2	5	5.23078	5.23078	-0.230783
6014.2	6	5.22729	5.22729	0.772714
6019.2	5	5.2238	5.2238	-0.223798
6024.2	2	5.22032	5.22032	-3.22032
6029.2	4	5.21685	5.21685	-1.21685
6034.2	5	5.21338	5.21338	-0.213384
6039.2	7	5.20993	5.20993	1.79007
6044.2	6	5.20648	5.20648	0.793515
6049.2	5	5.20305	5.20305	-0.203047
6054.2	8	5.19962	5.19962	2.80038
6059.2	3	5.1962	5.1962	-2.1962
6064.2	6	5.19278	5.19278	0.807217
6069.2	4	5.18938	5.18938	-1.18938
6074.2	11	5.18598	5.18598	5.81402
6079.2	4	5.1826	5.1826	-1.1826
6084.2	4	5.17922	5.17922	-1.17922
6089.2	3	5.17585	5.17585	-2.17585
6094.2	8	5.17249	5.17268	2.82732
6099.2	11	5.16913	5.16942	5.83058
6104.2	5	5.16579	5.16619	-0.166193
6109.2	6	5.16245	5.16303	0.836971
6114.2	4	5.15912	5.15994	-1.15994
6119.2	4	5.1558	5.15695	-1.15695
6124.2	3	5.15249	5.15407	-2.15408
6129.2	6	5.14919	5.15137	0.848635
6134.2	4	5.14589	5.14886	-1.14886
6139.2	5	5.14261	5.14661	-0.146609
6144.2	4	5.13933	5.14468	-1.14468
6149.2	6	5.13606	5.14315	0.856849
6154.2	2	5.1328	5.14211	-3.14211
6159.2	6	5.12955	5.14167	0.858327
6164.2	2	5.1263	5.14195	-3.14195
6169.2	3	5.12307	5.14307	-2.14307
6174.2	7	5.11984	5.14518	1.85482
6179.2	6	5.11662	5.14845	0.851547
6184.2	4	5.11341	5.15303	-1.15303
6189.2	2	5.11021	5.15908	-3.15908
6194.2	5	5.10701	5.16676	-0.166765
6199.2	6	5.10383	5.17623	0.823774
6204.2	5	5.10065	5.18759	-0.187588
6209.2	6	5.09748	5.20095	0.799054
6214.2	7	5.09432	5.21636	1.78364
6219.2	5	5.09117	5.23382	-0.233818
6224.2	6	5.08803	5.25329	0.746714
6229.2	7	5.08489	5.27464	1.72536
6234.2	4	5.08177	5.29768	-1.29768
6239.2	4	5.07865	5.32215	-1.32215
6244.2	3	5.07554	5.3477	-2.3477
6249.2	6	5.07244	5.37391	0.626086
6254.2	5	5.06934	5.40031	-0.400314
6259.2	10	5.06626	5.42637	4.57363
6264.2	3	5.06318	5.45149	-2.45149
6269.2	8	5.06012	5.4751	2.5249
6274.2	6	5.0679	5.50743	0.492572
6279.2	8	5.07568	5.53705	2.46295
6284.2	8	5.08345	5.56344	2.43656
6289.2	6	5.09124	5.58612	0.413879
6294.2	8	5.09901	5.60471	2.39529
6299.2	6	5.10679	5.61892	0.381078
6304.2	7	5.11457	5.62859	1.37141
6309.2	4	5.12235	5.63365	-1.63365
6314.2	7	5.13013	5.63419	1.36581
6319.2	7	5.13791	5.6304	1.3696
6324.2	12	5.14569	5.62258	6.37742
6329.2	9	5.15347	5.61113	3.38887
6334.2	10	5.16125	5.59654	4.40346
6339.2	7	5.16903	5.57934	1.42066
6344.2	17	5.17681	5.56013	11.4399
6349.2	13	5.18459	5.53949	7.46051
6354.2	12	5.19237	5.51803	6.48197
6359.2	12	5.20015	5.49631	6.50369
6364.2	9	5.20793	5.47486	3.52514
6369.2	8	5.21571	5.45414	2.54586
6374.2	12	5.22349	5.43457	6.56543
6379.2	6	5.23127	5.41647	0.583534
6384.2	18	5.23905	5.40009	12.5999
6389.2	8	5.24683	5.38561	2.61439
6394.2	9	5.25461	5.37314	3.62686
6399.2	14	5.26239	5.36272	8.63728
6404.2	18	5.27017	5.35434	12.6457
6409.2	12	5.27794	5.34793	6.65207
6414.2	19	5.28573	5.34339	13.6566
6419.2	16	5.2935	5.3406	10.6594
6424.2	15	5.30128	5.3394	9.6606
6429.2	9	5.30906	5.33964	3.66036
6434.2	10	5.31684	5.34115	4.65885
6439.2	17	5.32462	5.34377	11.6562
6444.2	7	5.3324	5.34736	1.65264
6449.2	14	5.34018	5.35175	8.64825
6454.2	7	5.34796	5.35684	1.64316
6459.2	7	5.35574	5.36249	1.63751
6464.2	13	5.36352	5.3686	7.6314
6469.2	9	5.3713	5.37509	3.62491
6474.2	10	5.37908	5.38189	4.61811
6479.2	4	5.38686	5.38892	-1.38892
6484.2	9	5.39464	5.39614	3.60386
6489.2	11	5.40242	5.4035	5.5965
6494.2	15	5.4102	5.41097	9.58903
6499.2	5	5.41798	5.41852	-0.418522
6504.2	7	5.42576	5.42614	1.57386
6509.2	7	5.43354	5.4338	1.5662
6514.2	4	5.44132	5.44132	-1.44132
6519.2	2	5.4491	5.4491	-3.4491
6524.2	5	5.45688	5.45688	-0.456876
6529.2	11	5.46465	5.46465	5.53535
6534.2	6	5.47243	5.47243	0.527565
6539.2	7	5.48022	5.48022	1.51978
6544.2	5	5.48799	5.48799	-0.487994
6549.2	17	5.49577	5.49577	11.5042
6554.2	5	5.50355	5.50355	-0.503553
6559.2	8	5.51133	5.51133	2.48867
6564.2	5	5.51911	5.51911	-0.519113
6569.2	5	5.52689	5.52689	-0.526892
6574.2	4	5.53467	5.53467	-1.53467
6579.2	7	5.54245	5.54245	1.45755
6584.2	6	5.55023	5.55023	0.449769
6589.2	12	5.55801	5.55801	6.44199
6594.2	2	5.56579	5.56579	-3.56579
6599.2	6	5.57357	5.57357	0.42643
6604.2	5	5.58135	5.58135	-0.581349
6609.2	5	5.58913	5.58913	-0.589129
6614.2	4	5.59689	5.59689	-1.59689
6619.2	6	5.60802	5.60802	0.391983
6624.2	4	5.61905	5.61905	-1.61905
6629.2	4	5.62996	5.62996	-1.62996
6634.2	4	5.64079	5.64079	-1.64079
6639.2	7	5.65153	5.65153	1.34847
6644.2	3	5.66215	5.66215	-2.66215
6649.2	2	5.67269	5.67269	-3.67269
6654.2	3	5.68314	5.68314	-2.68314
6659.2	2	5.69347	5.69347	-3.69347
6664.2	4	5.70371	5.70371	-1.70371
6669.2	2	5.71387	5.71387	-3.71387
6674.2	5	5.72391	5.72391	-0.723915
6679.2	10	5.73386	5.73386	4.26614
6684.2	7	5.74372	5.74372	1.25628
6689.2	3	5.75347	5.75347	-2.75347
6694.2	4	5.76314	5.76314	-1.76314
6699.2	6	5.77269	5.77269	0.22731
6704.2	10	5.78217	5.78217	4.21783
6709.2	4	5.79154	5.79154	-1.79154
6714.2	7	5.8008	5.8008	1.1992
6719.2	3	5.80998	5.80998	-2.80998
6724.2	4	5.81907	5.81907	-1.81907
6729.2	2	5.82803	5.82803	-3.82803
6734.2	3	5.83692	5.83692	-2.83692
6739.2	5	5.84571	5.84571	-0.845711
6744.2	6	5.85439	5.85439	0.145607
6749.2	8	5.86299	5.86299	2.13701
6754.2	6	5.87148	5.87148	0.128517
6759.2	5	5.87987	5.87987	-0.879868
6764.2	8	5.88818	5.88818	2.11182
6769.2	4	5.89639	5.89639	-1.89638
6774.2	6	5.90448	5.90448	0.09552
6779.2	4	5.91249	5.91249	-1.91249
6784.2	3	5.92041	5.92041	-2.92041
6789.2	10	5.92821	5.92821	4.07179
6794.2	2	5.93593	5.93593	-3.93593
6799.2	9	5.94354	5.94354	3.05646
6804.2	6	5.95106	5.95106	0.0489349
6809.2	9	5.9585	5.9585	3.0415
6814.2	6	5.96582	5.96582	0.0341797
6819.2	7	5.97305	5.97305	1.02695
6824.2	6	5.98019	5.98019	0.0198135
6829.2	4	5.98721	5.98721	-1.98721
6834.2	5	5.99416	5.99416	-0.994156
6839.2	9	6.001	6.001	2.999
6844.2	8	6.00774	6.00774	1.99226
6849.2	7	6.01439	6.01439	0.985611
6854.2	9	6.02094	6.02094	2.97906
6859.2	5	6.02738	6.02738	-1.02738
6864.2	9	6.03374	6.03374	2.96625
6869.2	6	6.04	6.04	-0.0400009
6874.2	8	6.04616	6.04616	1.95384
6879.2	14	6.05222	6.05222	7.94778
6884.2	9	6.05817	6.05817	2.94183
6889.2	8	6.06406	6.06406	1.93594
6894.2	6	6.06982	6.06982	-0.0698242
6899.2	6	6.07549	6.07549	-0.0754929
6904.2	13	6.08108	6.08108	6.91892
6909.2	6	6.08655	6.08655	-0.0865555
6914.2	6	6.09193	6.09193	-0.0919266
6919.2	9	6.09722	6.09722	2.90278
6924.2	12	6.10241	6.10241	5.89759
6929.2	6	6.10749	6.10749	-0.107491
6934.2	8	6.1125	6.1125	1.8875
6939.2	7	6.11739	6.11741	0.88259
6944.2	6	6.12218	6.1222	-0.122201
6949.2	9	6.12688	6.12692	2.87308
6954.2	3	6.13149	6.13154	-3.13154
6959.2	8	6.13599	6.13605	1.86395
6964.2	12	6.1404	6.14049	5.85951
6969.2	7	6.14473	6.14485	0.855148
6974.2	13	6.14893	6.1491	6.8509
6979.2	3	6.15305	6.15328	-3.15328
6984.2	5	6.15707	6.15737	-1.15737
6989.2	7	6.16099	6.16139	0.838605
6994.2	10	6.16483	6.16535	3.83465
6999.2	5	6.16854	6.16923	-1.16923
7004.2	12	6.17218	6.17307	5.82693
7009.2	11	6.17572	6.17687	4.82313
7014.2	11	6.17915	6.18061	4.81939
7019.2	6	6.1825	6.18436	-0.184355
7024.2	3	6.18574	6.18808	-3.18808
7029.2	7	6.18887	6.19179	0.808212
7034.2	7	6.19193	6.19553	0.80447
7039.2	3	6.19489	6.19931	-3.19931
7044.2	11	6.19773	6.20312	4.79688
7049.2	7	6.20049	6.207	0.793001
7054.2	7	6.20315	6.21094	0.789055
7059.2	5	6.20571	6.21498	-1.21498
7064.2	6	6.20818	6.21911	-0.219107
7069.2	10	6.21053	6.22332	3.77668
7074.2	2	6.21281	6.22765	-4.22765
7079.2	5	6.21499	6.23209	-1.23209
7084.2	6	6.21706	6.23659	-0.236593
7089.2	4	6.21904	6.24118	-2.24119
7094.2	6	6.22092	6.24583	-0.245827
7099.2	5	6.22269	6.25048	-1.25048
7104.2	7	6.22439	6.25514	0.744862
7109.2	11	6.22598	6.25975	4.74025
7114.2	2	6.22747	6.26425	-4.26425
7119.2	6	6.22887	6.26862	-0.26862
7124.2	9	6.23017	6.2728	2.7272
7129.2	4	6.23136	6.2767	-2.2767
7134.2	8	6.23247	6.28032	1.71968
7139.2	4	6.23348	6.28358	-2.28358
7144.2	3	6.23438	6.28642	-3.28642
7149.2	8	6.2352	6.28882	1.71118
7154.2	2	6.2359	6.29072	-4.29072
7159.2	2	6.23653	6.29213	-4.29213
7164.2	8	6.23705	6.29299	1.70701
7169.2	1	6.23747	6.29331	-5.29331
7174.2	8	6.23778	6.29309	1.70691
7179.2	3	6.23802	6.29236	-3.29236
7184.2	6	6.23814	6.29111	-0.291114
7189.2	3	6.23819	6.28941	-3.28941
7194.2	3	6.23812	6.28727	-3.28727
7199.2	2	6.23795	6.28473	-4.28473
7204.2	5	6.2377	6.28187	-1.28187
7209.2	9	6.23735	6.27873	2.72127
7214.2	9	6.23689	6.27535	2.72465
7219.2	4	6.23634	6.2718	-2.2718
7224.2	4	6.2357	6.26814	-2.26814
7229.2	8	6.23496	6.26439	1.73561
7234.2	4	6.23411	6.26061	-2.26061
7239.2	2	6.23318	6.25685	-4.25685
7244.2	7	6.23213	6.25311	0.746888
7249.2	5	6.231	6.24945	-1.24945
7254.2	4	6.22976	6.24585	-2.24585
7259.2	8	6.22845	6.24237	1.75763
7264.2	12	6.22703	6.23898	5.76102
7269.2	5	6.22549	6.23566	-1.23566
7274.2	6	6.22388	6.23248	-0.232476
7279.2	4	6.22216	6.22937	-2.22937
7284.2	5	6.22035	6.22634	-1.22634
7289.2	7	6.21844	6.22338	0.776617
7294.2	7	6.21643	6.22048	0.779521
7299.2	5	6.21431	6.2176	-1.2176
7304.2	4	6.21211	6.21476	-2.21476
7309.2	5	6.20982	6.21194	-1.21194
7314.2	1	6.20741	6.20909	-5.20909
7319.2	5	6.20493	6.20625	-1.20625
7324.2	3	6.20234	6.20337	-3.20337
7329.2	4	6.19965	6.20044	-2.20044
7334.2	6	6.19686	6.19747	-0.197474
7339.2	4	6.19397	6.19444	-2.19444
7344.2	6	6.19099	6.19134	-0.191339
7349.2	8	6.18791	6.18818	1.81182
7354.2	7	6.18473	6.18493	0.815072
7359.2	8	6.18147	6.18161	1.81839
7364.2	4	6.1781	6.17821	-2.17821
7369.2	6	6.17462	6.1747	-0.174699
7374.2	8	6.17107	6.17112	1.82888
7379.2	5	6.1674	6.16744	-1.16744
7384.2	6	6.16364	6.16366	-0.163663
7389.2	9	6.15978	6.15978	2.84022
7394.2	6	6.15584	6.15584	-0.155838
7399.2	7	6.15178	6.15178	0.848221
7404.2	3	6.14764	6.14764	-3.14764
7409.2	3	6.14339	6.14339	-3.14339
7414.2	6	6.13904	6.13904	-0.139038
7419.2	6	6.1346	6.1346	-0.134605
7424.2	5	6.13007	6.13007	-1.13007
7429.2	4	6.12543	6.12543	-2.12543
7434.2	3	6.12071	6.12071	-3.12071
7439.2	9	6.11587	6.11587	2.88413
7444.2	4	6.11095	6.11095	-2.11095
7449.2	9	6.10593	6.10593	2.89407
7454.2	4	6.1008	6.1008	-2.1008
7459.2	4	6.09559	6.09559	-2.09559
7464.2	4	6.09027	6.09027	-2.09027
7469.2	6	6.08485	6.08485	-0.0848541
7474.2	11	6.07935	6.07935	4.92065
7479.2	9	6.07375	6.07375	2.92625
7484.2	3	6.06804	6.06804	-3.06804
7489.2	4	6.06224	6.06224	-2.06224
7494.2	3	6.05634	6.05634	-3.05634
7499.2	2	6.05035	6.05035	-4.05035
7504.2	7	6.04426	6.04426	0.955742
7509.2	7	6.03807	6.03807	0.961929
7514.2	3	6.03177	6.03177	-3.03177
7519.2	8	6.02539	6.02539	1.97461
7524.2	4	6.0189	6.0189	-2.0189
7529.2	6	6.01232	6.01232	-0.0123215
7534.2	8	6.00565	6.00565	1.99435
7539.2	8	5.99887	5.99887	2.00113
7544.2	10	5.992	5.992	4.008
7549.2	6	5.98504	5.98504	0.0149612
7554.2	8	5.97797	5.97797	2.02203
7559.2	3	5.97081	5.97081	-2.97081
7564.2	12	5.96355	5.96355	6.03645
7569.2	6	5.95619	5.95619	0.043808
7574.2	4	5.94874	5.94874	-1.94874
7579.2	5	5.94119	5.94119	-0.941193
7584.2	5	5.93354	5.93354	-0.93354
7589.2	7	5.9258	5.9258	1.0742
7594.2	5	5.91795	5.91795	-0.917953
7599.2	6	5.91	5.91	0.0899963
7604.2	7	5.90197	5.90197	1.09803
7609.2	5	5.89383	5.89383	-0.893829
7614.2	11	5.8856	5.8856	5.1144
7619.2	4	5.87728	5.87728	-1.87728
7624.2	4	5.86884	5.86884	-1.86884
7629.2	8	5.86032	5.86032	2.13968
7634.2	3	5.85172	5.85172	-2.85171
7639.2	9	5.84297	5.84297	3.15703
7644.2	4	5.83417	5.83417	-1.83417
7649.2	7	5.82526	5.82526	1.17474
7654.2	6	5.81624	5.81624	0.183762
7659.2	6	5.80714	5.80714	0.192856
7664.2	10	5.79794	5.79794	4.20206
7669.2	8	5.78862	5.78862	2.21138
7674.2	10	5.77924	5.77924	4.22076
7679.2	5	5.76975	5.76975	-0.769745
7684.2	4	5.76015	5.76015	-1.76015
7689.2	4	5.75046	5.75046	-1.75046
7694.2	10	5.74068	5.74068	4.25932
7699.2	2	5.73077	5.73077	-3.73077
7704.2	6	5.72081	5.72081	0.27919
7709.2	3	5.71071	5.71071	-2.71071
7714.2	3	5.70055	5.70055	-2.70055
7719.2	7	5.69028	5.69028	1.30972
7724.2	7	5.67989	5.67989	1.32011
7729.2	14	5.66942	5.66942	8.33058
7734.2	3	5.65886	5.65886	-2.65886
7739.2	6	5.64819	5.64819	0.351807
7744.2	5	5.63744	5.63744	-0.637436
7749.2	5	5.62606	5.62606	-0.626061
7754.2	6	5.61469	5.61469	0.385314
7759.2	8	5.60331	5.60331	2.39669
7764.2	10	5.59194	5.59194	4.40806
7769.2	6	5.58056	5.58056	0.419439
7774.2	7	5.56919	5.56919	1.43081
7779.2	11	5.55781	5.55781	5.44219
7784.2	11	5.54644	5.54644	5.45356
7789.2	6	5.53506	5.55322	0.446783
7794.2	5	5.52369	5.54911	-0.549108
7799.2	8	5.51231	5.54765	2.45235
7804.2	7	5.50094	5.54972	1.45028
7809.2	10	5.48956	5.6229	4.3771
7814.2	12	5.47819	5.66216	6.33784
7819.2	10	5.46681	5.71891	4.28109
7824.2	9	5.45544	5.7985	3.2015
7829.2	15	5.44406	5.90768	9.09231
7834.2	11	5.43269	6.05492	4.94508
7839.2	14	5.42131	6.25064	7.74936
7844.2	11	5.40994	6.50767	4.49233
7849.2	6	5.39856	6.84154	-0.841538
7854.2	12	5.38719	7.27089	4.72911
7859.2	12	5.37581	7.81787	4.18213
7864.2	22	5.36444	8.50851	13.4915
7869.2	18	5.35306	9.37301	8.62699
7874.2	18	5.34169	10.446	7.55397
7879.2	15	5.33031	11.7668	3.23319
7884.2	10	5.31894	13.3792	-3.37921
7889.2	23	5.30756	15.3316	7.66844
7894.2	20	5.29619	17.6762	2.32378
7899.2	31	5.28481	20.469	10.531
7904.2	29	5.27344	23.7684	5.23164
7909.2	32	5.26206	27.6339	4.36611
7914.2	35	5.25069	32.1251	2.87491
7919.2	40	5.23931	37.2994	2.70062
7924.2	46	5.22794	43.2099	2.79008
7929.2	57	5.21656	49.9032	7.09679
7934.2	72	5.20519	57.4165	14.5835
7939.2	90	5.19381	65.7749	24.2251
7944.2	92	5.18244	74.9888	17.0112
7949.2	82	5.17106	85.0511	-3.0511
7954.2	110	5.15969	95.9345	14.0655
7959.2	113	5.14831	107.59	5.41016
7964.2	137	5.13694	119.944	17.0557
7969.2	153	5.12556	132.9	20.0996
7974.2	158	5.11419	146.336	11.6637
7979.2	139	5.10281	160.106	-21.1061
7984.2	207	5.09144	174.042	32.9581
7989.2	191	5.08006	187.956	3.04384
7994.2	196	5.06869	201.646	-5.64592
7999.2	184	5.05731	214.897	-30.8969
8004.2	207	5.04594	227.489	-20.4888
8009.2	229	5.03456	239.202	-10.2017
8014.2	268	5.02319	249.822	18.1782
8019.2	265	5.01181	259.148	5.85193
8024.2	291	5.00044	266.998	24.0015
8029.2	274	4.98906	273.216	0.783814
8034.2	251	4.97769	277.674	-26.6741
8039.2	263	4.96631	280.28	-17.2798
8044.2	279	4.95494	280.978	-1.97855
8049.2	313	4.94356	279.755	33.2451
8054.2	277	4.93219	276.634	0.366455
8059.2	256	4.92081	271.678	-15.6785
8064.2	256	4.90944	264.991	-8.99085
8069.2	232	4.89806	256.705	-24.7051
8074.2	269	4.88669	246.985	22.0149
8079.2	237	4.87531	236.018	0.981796
8084.2	219	4.86394	224.01	-5.00957
8089.2	194	4.85256	211.176	-17.1757
8094.2	184	4.84119	197.738	-13.738
8099.2	182	4.82981	183.917	-1.91655
8104.2	169	4.81844	169.924	-0.924118
8109.2	162	4.80706	155.961	6.03879
8114.2	128	4.79569	142.212	-14.2115
8119.2	127	4.78432	128.839	-1.83845
8124.2	97	4.77294	115.983	-18.9826
8129.2	111	4.76157	103.76	7.23956
8134.2	114	4.75019	92.2633	21.7367
8139.2	87	4.73881	81.5582	5.44184
8144.2	79	4.72744	71.6884	7.3116
8149.2	77	4.71607	62.6757	14.3243
8154.2	70	4.70469	54.5222	15.4778
8159.2	53	4.69332	47.2129	5.78708
8164.2	44	4.68194	40.7188	3.28117
8169.2	35	4.67056	34.9994	0.000644684
8174.2	40	4.65919	30.0053	9.99466
8179.2	32	4.64781	25.6816	6.31842
8184.2	18	4.63644	21.9693	-3.96928
8189.2	19	4.62507	18.8081	0.191898
8194.2	11	4.61369	16.138	-5.138
8199.2	15	4.60231	13.9007	1.09934
8204.2	17	4.59094	12.0407	4.95931
8209.2	14	4.57957	10.5064	3.49362
8214.2	10	4.56819	9.25033	0.749673
8219.2	10	4.55682	8.22972	1.77028
8224.2	12	4.54544	7.40644	4.59356
8229.2	6	4.53407	6.74699	-0.746988
8234.2	8	4.52269	6.22233	1.77767
8239.2	4	4.51132	5.80756	-1.80756
8244.2	5	4.49994	5.48159	-0.481586
8249.2	1	4.48857	5.22675	-4.22675
8254.2	9	4.47719	5.02839	3.97161
8259.2	4	4.46582	4.87451	-0.874505
8264.2	2	4.45444	4.73397	-2.73397
8269.2	6	4.44307	4.64784	1.35216
8274.2	7	4.43169	4.58064	2.41936
8279.2	4	4.42032	4.52789	-0.527887
8284.2	6	4.40894	4.40894	1.59106
8289.2	7	4.39757	4.39757	2.60243
8294.2	11	4.38619	4.38619	6.61381
8299.2	5	4.37482	4.37482	0.625184
8304.2	1	4.36344	4.36344	-3.36344
8309.2	4	4.35207	4.35207	-0.352067
8314.2	3	4.34069	4.34069	-1.34069
8319.2	3	4.32932	4.32932	-1.32932
8324.2	2	4.31794	4.31794	-2.31794
8329.2	5	4.30657	4.30657	0.693433
8334.2	8	4.29541	4.29541	3.70459
8339.2	6	4.35059	4.35059	1.64941
8344.2	4	4.4043	4.4043	-0.404297
8349.2	3	4.45606	4.45606	-1.45606
8354.2	3	4.50659	4.50659	-1.50659
8359.2	6	4.55493	4.55493	1.44507
8364.2	4	4.60156	4.60156	-0.601562
8369.2	1	4.64697	4.64697	-3.64697
8374.2	3	4.68994	4.68994	-1.68994
8379.2	7	4.73193	4.73193	2.26807
8384.2	6	4.77173	4.77173	1.22827
8389.2	3	4.81006	4.81006	-1.81006
8394.2	2	4.84692	4.84692	-2.84692
8399.2	5	4.88159	4.88159	0.118408
8404.2	6	4.91504	4.91504	1.08496
8409.2	2	4.94629	4.94629	-2.94629
8414.2	6	4.97607	4.97607	1.02393
8419.2	3	5.00415	5.00415	-2.00415
8424.2	5	5.03027	5.03027	-0.0302734
8429.2	4	5.05518	5.05518	-1.05518
8434.2	8	5.07812	5.07812	2.92188
8439.2	3	5.09961	5.09961	-2.09961
8444.2	4	5.1189	5.1189	-1.1189
8449.2	5	5.13696	5.13696	-0.136963
8454.2	3	5.15283	5.15283	-2.15283
8459.2	15	5.16699	5.16699	9.83301
8464.2	7	5.18018	5.18018	1.81982
8469.2	3	5.19092	5.19092	-2.19092
8474.2	6	5.20019	5.20019	0.799805
8479.2	8	5.20801	5.20801	2.79199
8484.2	11	5.21387	5.21387	5.78613
8489.2	0	5.21826	5.21826	-5.21826
8494.2	4	5.22046	5.22046	-1.22046
8499.2	7	5.22168	5.22168	1.77832
8504.2	7	5.22046	5.22046	1.77954
8509.2	6	5.21753	5.21753	0.782471
8514.2	3	5.21362	5.21362	-2.21362
8519.2	5	5.20752	5.20752	-0.207519
8524.2	5	5.19995	5.19995	-0.199951
8529.2	6	5.19019	5.19019	0.809814
8534.2	5	5.17944	5.17944	-0.179443
8539.2	3	5.1665	5.1665	-2.1665
8544.2	8	5.15186	5.15186	2.84815
8549.2	4	5.13574	5.13574	-1.13574
8554.2	5	5.11768	5.11768	-0.117684
8559.2	4	5.0979	5.09791	-1.09791
8564.2	6	5.07666	5.07667	0.923325
8569.2	5	5.05347	5.05349	-0.0534878
8574.2	2	5.02905	5.02908	-3.02908
8579.2	3	5.00244	5.00248	-2.00248
8584.2	2	4.97436	4.97441	-2.97442
8589.2	7	4.94434	4.9444	2.0556
8594.2	4	4.9126	4.91268	-0.912685
8599.2	5	4.87939	4.87951	0.120491
8604.2	4	4.84424	4.84439	-0.844387
8609.2	6	4.80811	4.8083	1.1917
8614.2	9	4.76953	4.76978	4.23022
8619.2	3	4.72974	4.73005	-1.73005
8624.2	5	4.68774	4.68814	0.311859
8629.2	4	4.64404	4.64454	-0.644542
8634.2	5	4.59912	4.59975	0.400255
8639.2	2	4.55176	4.55253	-2.55253
8644.2	3	4.50366	4.50462	-1.50462
8649.2	8	4.45312	4.4543	3.5457
8654.2	6	4.40088	4.41384	1.58616
8659.2	4	4.34741	4.36504	-0.365039
8664.2	2	4.29175	4.3156	-2.3156
8669.2	2	4.23511	4.26721	-2.26721
8674.2	4	4.17603	4.21901	-0.219008
8679.2	8	4.11572	4.17297	3.82703
8684.2	5	4.05322	4.12905	0.870951
8689.2	4	4.04603	4.14591	-0.145909
8694.2	4	4.03884	4.16965	-0.169653
8699.2	7	4.03165	4.20199	2.79801
8704.2	4	4.02446	4.24498	-0.244982
8709.2	8	4.01727	4.30107	3.69893
8714.2	4	4.01008	4.37315	-0.373146
8719.2	8	4.00289	4.46456	3.53544
8724.2	6	3.9957	4.5792	1.4208
8729.2	9	3.98851	4.72149	4.27851
8734.2	6	3.98132	4.89641	1.10359
8739.2	7	3.97413	5.10952	1.89048
8744.2	8	3.96694	5.36692	2.63308
8749.2	10	3.95975	5.67521	4.32479
8754.2	4	3.95256	6.04144	-2.04144
8759.2	7	3.94537	6.47298	0.527017
8764.2	13	3.93818	6.97741	6.02259
8769.2	10	3.93099	7.56233	2.43767
8774.2	13	3.9238	8.23515	4.76485
8779.2	13	3.91661	9.00285	3.99715
8784.2	16	3.90942	9.87171	6.12829
8789.2	15	3.90223	10.847	4.153
8794.2	18	3.89504	11.9327	6.06734
8799.2	17	3.88785	13.131	3.86903
8804.2	15	3.88066	14.4422	0.557773
8809.2	25	3.87347	15.8644	9.13556
8814.2	13	3.86628	17.3931	-4.39306
8819.2	27	3.85909	19.0207	7.97927
8824.2	20	3.8519	20.7372	-0.737188
8829.2	23	3.84471	22.5291	0.470879
8834.2	24	3.83752	24.3802	-0.380241
8839.2	23	3.83033	26.2714	-3.27136
8844.2	36	3.82314	28.1806	7.81935
8849.2	35	3.81595	30.084	4.91602
8854.2	30	3.80876	31.9553	-1.95535
8859.2	31	3.80157	33.7674	-2.76744
8864.2	30	3.79438	35.4923	-5.49229
8869.2	33	3.78719	37.1019	-4.1019
8874.2	53	3.78	38.5691	14.4309
8879.2	39	3.77281	39.8681	-0.868118
8884.2	44	3.76562	40.9756	3.02441
8889.2	52	3.75843	41.871	10.129
8894.2	35	3.75124	42.5374	-7.53742
8899.2	56	3.74405	42.9621	13.0379
8904.2	45	3.73686	43.1367	1.86333
8909.2	41	3.72967	43.0577	-2.05767
8914.2	47	3.72248	42.7265	4.27353
8919.2	50	3.71529	42.1493	7.85074
8924.2	43	3.7081	41.3369	1.66308
8929.2	41	3.70091	40.3046	0.695412
8934.2	37	3.69372	39.0717	-2.07173
8939.2	43	3.68653	37.6598	5.34019
8944.2	37	3.67934	36.094	0.906014
8949.2	30	3.67215	34.4009	-4.40091
8954.2	36	3.66496	32.6084	3.39165
8959.2	35	3.65777	30.7444	4.25559
8964.2	31	3.65058	28.8368	2.16317
8969.2	31	3.64339	26.9123	4.0877
8974.2	27	3.6362	24.9959	2.00409
8979.2	28	3.62901	23.1106	4.88939
8984.2	28	3.62182	21.2769	6.72312
8989.2	25	3.61463	19.5124	5.48761
8994.2	18	3.60744	17.8319	0.168123
8999.2	14	3.60025	16.2471	-2.24706
9004.2	17	3.59306	14.7667	2.23331
9009.2	12	3.58587	13.3967	-1.39666
9014.2	13	3.57868	12.1402	0.859781
9019.2	13	3.57149	10.9982	2.00179
9024.2	7	3.5643	9.96937	-2.96937
9029.2	12	3.55711	9.05063	2.94937
9034.2	15	3.54992	8.23746	6.76254
9039.2	9	3.54273	7.5242	1.4758
9044.2	6	3.53554	6.90434	-0.904339
9049.2	7	3.52835	6.37081	0.629189
9054.2	10	3.52116	5.91628	4.08372
9059.2	4	3.51397	5.5333	-1.5333
9064.2	3	3.50678	5.21453	-2.21453
9069.2	3	3.49959	4.95289	-1.95289
9074.2	4	3.4924	4.74163	-0.74163
9079.2	4	3.48521	4.57445	-0.574454
9084.2	6	3.47802	4.44553	1.55447
9089.2	4	3.47083	4.3495	-0.349504
9094.2	4	3.46364	4.28154	-0.281543
9099.2	5	3.45645	4.23727	0.762729
9104.2	1	3.44926	4.21277	-3.21277
9109.2	2	3.44207	4.20453	-2.20453
9114.2	4	3.43488	4.20941	-0.209408
9119.2	2	3.42769	4.22461	-2.22461
9124.2	7	3.4205	4.24763	2.75237
9129.2	6	3.41331	4.27623	1.72377
9134.2	4	3.40612	4.30837	-0.308368
9139.2	4	3.39893	4.34225	-0.34225
9144.2	2	3.39174	4.37624	-2.37624
9149.2	1	3.38455	4.4089	-3.4089
9154.2	5	3.37736	4.42562	0.574377
9159.2	3	3.37017	4.45558	-1.45558
9164.2	4	3.36298	4.47984	-0.47984
9169.2	3	3.35579	4.49783	-1.49783
9174.2	2	3.3486	4.5091	-2.5091
9179.2	4	3.34141	4.51331	-0.513312
9184.2	9	3.33422	4.51024	4.48976
9189.2	1	3.32703	4.49982	-3.49982
9194.2	3	3.31984	4.4821	-1.4821
9199.2	5	3.31265	4.45729	0.542709
9204.2	9	3.30546	4.42571	4.57429
9209.2	5	3.29827	4.3878	0.612203
9214.2	3	3.29108	4.34412	-1.34411
9219.2	2	3.28389	4.2953	-2.2953
9224.2	4	3.2767	4.24207	-0.242066
9229.2	9	3.26951	4.18518	4.81482
9234.2	2	3.26232	4.12542	-2.12542
9239.2	5	3.25513	4.0636	0.936395
9244.2	7	3.24794	4.00052	2.99948
9249.2	3	3.24075	3.93692	-0.936922
9254.2	4	3.23356	3.87353	0.126467
9259.2	7	3.22637	3.81101	3.18899
9264.2	5	3.21918	3.74993	1.25007
9269.2	3	3.21199	3.69082	-0.690815
9274.2	8	3.2048	3.63408	4.36592
9279.2	0	3.19761	3.58007	-3.58007
9284.2	5	3.19042	3.52904	1.47096
9289.2	2	3.18323	3.48116	-1.48116
9294.2	6	3.17606	3.43655	2.56345
9299.2	7	3.1665	3.39285	3.60715
9304.2	3	3.1571	3.35254	-0.352543
9309.2	3	3.14774	3.31544	-0.315437
9314.2	1	3.13846	3.28146	-2.28146
9319.2	4	3.12927	3.25045	0.749548
9324.2	0	3.12012	3.22216	-3.22216
9329.2	4	3.11108	3.19648	0.80352
9334.2	2	3.10208	3.1731	-1.1731
9339.2	2	3.0932	3.15189	-1.15189
9344.2	3	3.08432	3.13252	-0.132521
9349.2	4	3.07556	3.1149	0.8851
9354.2	3	3.0669	3.0988	-0.0988002
9359.2	5	3.05826	3.08397	1.91603
9364.2	2	3.04974	3.07034	-1.07034
9369.2	2	3.04126	3.05765	-1.05765
9374.2	4	3.0329	3.04587	0.954135
9379.2	4	3.02457	3.03476	0.96524
9384.2	2	3.01633	3.02429	-1.02429
9389.2	1	3.00818	3.01436	-2.01436
9394.2	2	3.00009	3.00486	-1.00486
9399.2	2	2.99204	2.99569	-0.99569
9404.2	3	2.9841	2.98689	0.0131154
9409.2	4	2.97626	2.97837	1.02164
9414.2	5	2.96845	2.97003	2.02997
9419.2	2	2.96072	2.96191	-0.961909
9424.2	3	2.95306	2.95395	0.0460551
9429.2	2	2.9455	2.94615	-0.946146
9434.2	0	2.93802	2.9385	-2.9385
9439.2	3	2.93057	2.93057	0.0694275
9444.2	3	2.92322	2.92322	0.0767822
9449.2	2	2.91595	2.91595	-0.915955
9454.2	5	2.90875	2.90875	2.09125
9459.2	4	2.90161	2.90161	1.09839
9464.2	4	2.89456	2.89456	1.10544
9469.2	0	2.8876	2.8876	-2.8876
9474.2	2	2.88071	2.88071	-0.880707
9479.2	1	2.87384	2.87384	-1.87384
9484.2	5	2.8671	2.8671	2.1329
9489.2	5	2.86041	2.86041	2.13959
9494.2	3	2.85382	2.85382	0.146179
9499.2	2	2.84726	2.84726	-0.84726
9504.2	1	2.84079	2.84079	-1.84079
[truncated: 2,099 more rows]

## Sheet: SEM-EDS
#FORMAT	:	EMSA/MAS	Spectral	Data	File
#VERSION	:	1
#TITLE	:	Spectrum	12
#DATE	:	2024-03-24
#TIME	:	13:03:00
#OWNER	:
#NPOINTS	:	2048
#NCOLUMNS	:	1
#XUNITS	:	keV
#YUNITS	:	counts
#DATATYPE	:	XY
#XPERCHAN	:	0.01
#OFFSET	:	-0.2
#SIGNALTYPE	:	EDS
#CHOFFSET	:	20
#LIVETIME	:	60
#REALTIME	:	61.7446
#BEAMKV	:	10
#MAGCAM	:	10563
#XTILTSTGE	:	0
#AZIMANGLE	:	0
#ELEVANGLE	:	35
#XPOSITION	mm:	0.3596
#YPOSITION	mm:	0.8885
#ZPOSITION	mm:	-9.0974
##OXINSTPT	:	3
##OXINSTSTROB:	55.88
##OXINSTNDET	:	1
##OXINSTELEMS:	6,8,11,20,7,16,78,14,12,15
##OXINSTLABEL:	6,	0.277,	C
##OXINSTLABEL:	8,	0.525,	O
##OXINSTLABEL:	11,	1.041,	Na
##OXINSTLABEL:	20,	3.692,	Ca
##OXINSTLABEL:	20,	4.013,	Ca
##OXINSTLABEL:	20,	0.341,	Ca
##OXINSTLABEL:	20,	0.306,	Ca
##OXINSTLABEL:	7,	0.392,	N
##OXINSTLABEL:	16,	2.308,	S
##OXINSTLABEL:	16,	2.464,	S
##OXINSTLABEL:	78,	9.442,	Pt
##OXINSTLABEL:	78,	11.071,	Pt
##OXINSTLABEL:	78,	11.251,	Pt
##OXINSTLABEL:	78,	9.975,	Pt
##OXINSTLABEL:	78,	12.942,	Pt
##OXINSTLABEL:	78,	13.271,	Pt
##OXINSTLABEL:	78,	8.268,	Pt
##OXINSTLABEL:	78,	2.331,	Pt
##OXINSTLABEL:	78,	1.592,	Pt
##OXINSTLABEL:	78,	0.258,	Pt
##OXINSTLABEL:	78,	0.244,	Pt
##OXINSTLABEL:	14,	1.740,	Si
##OXINSTLABEL:	12,	1.254,	Mg
##OXINSTLABEL:	15,	2.014,	P
##OXINSTLABEL:	15,	2.139,	P
#SPECTRUM	:	Spectral	Data	Starts	Here
-0.2	0
-0.19	0
-0.18	0
-0.17	0
-0.16	0
-0.15	0
-0.14	0
-0.13	0
-0.12	0
-0.11	0
-0.1	1
-0.09	1
-0.08	2
-0.07	9
-0.06	29
-0.05	114
-0.04	289
-0.03	572
-0.02	1065
-0.01	1676
0	2363
0.01	2975
0.02	3490
0.03	3860
0.04	3893
0.05	3511
0.06	2735
0.07	1780
0.08	1018
0.09	462
0.1	199
0.11	89
0.12	64
0.13	59
0.14	60
0.15	62
0.16	91
0.17	98
0.18	97
0.19	147
0.2	229
0.21	365
0.22	593
0.23	948
0.24	1327
0.25	1658
0.26	1967
0.27	2063
0.28	1851
0.29	1518
0.3	1143
0.31	754
0.32	463
0.33	271
0.34	173
0.35	144
0.36	160
0.37	174
0.38	217
0.39	217
0.4	189
0.41	156
0.42	138
0.43	103
0.44	88
0.45	84
0.46	97
0.47	145
0.48	189
0.49	246
0.5	337
0.51	393
0.52	421
0.53	385
0.54	365
0.55	288
0.56	222
0.57	163
0.58	115
0.59	81
0.6	79
0.61	58
0.62	49
0.63	60
0.64	70
0.65	58
0.66	56
0.67	68
0.68	70
0.69	62
0.7	60
0.71	58
0.72	61
0.73	68
0.74	80
0.75	78
0.76	72
0.77	63
0.78	72
0.79	66
0.8	75
0.81	82
0.82	80
0.83	79
0.84	82
0.85	77
0.86	66
0.87	78
0.88	80
0.89	74
0.9	73
0.91	74
0.92	87
0.93	89
0.94	93
0.95	99
0.96	84
0.97	98
0.98	97
0.99	124
1	135
1.01	165
1.02	188
1.03	193
1.04	191
1.05	218
1.06	192
1.07	168
1.08	154
1.09	151
1.1	119
1.11	105
1.12	93
1.13	85
1.14	96
1.15	96
1.16	100
1.17	110
1.18	91
1.19	98
1.2	116
1.21	126
1.22	117
1.23	122
1.24	136
1.25	138
1.26	144
1.27	146
1.28	129
1.29	144
1.3	130
1.31	122
1.32	109
1.33	115
1.34	108
1.35	119
1.36	104
1.37	115
1.38	113
1.39	103
1.4	113
1.41	108
1.42	124
1.43	113
1.44	130
1.45	113
1.46	130
1.47	145
1.48	140
1.49	127
1.5	125
1.51	120
1.52	126
1.53	124
1.54	125
1.55	142
1.56	153
1.57	158
1.58	176
1.59	182
1.6	191
1.61	189
1.62	176
1.63	174
1.64	166
1.65	165
1.66	133
1.67	143
1.68	154
1.69	157
1.7	152
1.71	165
1.72	176
1.73	191
1.74	209
1.75	213
1.76	207
1.77	179
1.78	163
1.79	152
1.8	146
1.81	125
1.82	140
1.83	120
1.84	88
1.85	104
1.86	120
1.87	128
1.88	121
1.89	113
1.9	128
1.91	129
1.92	148
1.93	150
1.94	163
1.95	203
1.96	245
1.97	316
1.98	402
1.99	491
2	646
2.01	777
2.02	955
2.03	1137
2.04	1258
2.05	1332
2.06	1348
2.07	1267
2.08	1224
2.09	1140
2.1	1070
2.11	1008
2.12	942
2.13	841
2.14	795
2.15	733
2.16	605
2.17	492
2.18	387
2.19	319
2.2	242
2.21	187
2.22	138
2.23	130
2.24	118
2.25	122
2.26	141
2.27	151
2.28	172
2.29	187
2.3	211
2.31	240
2.32	242
2.33	244
2.34	225
2.35	206
2.36	177
2.37	134
2.38	116
2.39	111
2.4	104
2.41	83
2.42	70
2.43	67
2.44	68
2.45	79
2.46	90
2.47	71
2.48	67
2.49	73
2.5	78
2.51	73
2.52	84
2.53	80
2.54	65
2.55	66
2.56	83
2.57	81
2.58	77
2.59	89
2.6	92
2.61	80
2.62	88
2.63	91
2.64	85
2.65	91
2.66	102
2.67	88
2.68	78
2.69	70
2.7	83
2.71	62
2.72	75
2.73	70
2.74	75
2.75	67
2.76	78
2.77	76
2.78	72
2.79	70
2.8	64
2.81	62
2.82	63
2.83	64
2.84	69
2.85	66
2.86	74
2.87	67
2.88	67
2.89	60
2.9	56
2.91	51
2.92	52
2.93	62
2.94	59
2.95	57
2.96	52
2.97	56
2.98	60
2.99	60
3	60
3.01	56
3.02	63
3.03	52
3.04	60
3.05	58
3.06	53
3.07	61
3.08	63
3.09	57
3.1	49
3.11	52
3.12	60
3.13	60
3.14	63
3.15	66
3.16	57
3.17	57
3.18	63
3.19	54
3.2	51
3.21	54
3.22	56
3.23	54
3.24	62
3.25	58
3.26	65
3.27	47
3.28	67
3.29	59
3.3	54
3.31	54
3.32	46
3.33	53
3.34	43
3.35	50
3.36	48
3.37	48
3.38	50
3.39	48
3.4	50
3.41	51
3.42	61
3.43	59
3.44	44
3.45	47
3.46	55
3.47	53
3.48	52
3.49	49
3.5	53
3.51	57
3.52	55
3.53	51
3.54	49
3.55	49
3.56	51
3.57	49
3.58	56
3.59	52
3.6	57
3.61	64
3.62	76
3.63	93
3.64	91
3.65	88
3.66	98
3.67	114
3.68	125
3.69	129
3.7	128
3.71	129
3.72	115
3.73	100
3.74	90
3.75	87
3.76	93
3.77	90
3.78	51
3.79	50
3.8	55
3.81	47
3.82	48
3.83	45
3.84	46
3.85	51
3.86	48
3.87	44
3.88	45
3.89	44
3.9	41
3.91	60
3.92	57
3.93	48
3.94	50
3.95	50
3.96	42
3.97	52
3.98	57
3.99	60
4	66
4.01	55
4.02	57
4.03	55
4.04	58
4.05	60
4.06	58
4.07	55
4.08	45
4.09	40
4.1	40
4.11	42
4.12	47
4.13	42
4.14	39
4.15	35
4.16	55
4.17	43
4.18	44
4.19	43
4.2	43
4.21	44
4.22	46
4.23	42
4.24	40
4.25	35
4.26	34
4.27	54
4.28	49
4.29	36
4.3	31
4.31	42
4.32	41
4.33	43
4.34	39
4.35	38
4.36	36
4.37	43
4.38	46
4.39	37
4.4	44
4.41	44
4.42	44
4.43	47
4.44	37
4.45	36
4.46	41
4.47	42
4.48	41
4.49	47
4.5	39
4.51	39
4.52	43
4.53	44
4.54	47
4.55	40
4.56	33
4.57	37
4.58	40
4.59	38
4.6	34
4.61	35
4.62	35
4.63	37
4.64	38
4.65	48
4.66	44
4.67	38
4.68	39
4.69	37
4.7	33
4.71	37
4.72	35
4.73	39
4.74	40
4.75	48
4.76	35
4.77	29
4.78	38
4.79	28
4.8	41
4.81	45
4.82	41
4.83	39
4.84	32
4.85	29
4.86	37
4.87	42
4.88	30
4.89	27
4.9	29
4.91	35
4.92	30
4.93	30
4.94	30
4.95	36
4.96	43
4.97	43
4.98	39
4.99	39
5	35
5.01	34
5.02	33
5.03	31
5.04	43
5.05	37
5.06	34
5.07	35
5.08	26
5.09	30
5.1	36
5.11	34
5.12	39
5.13	35
5.14	35
5.15	32
5.16	31
5.17	31
5.18	31
5.19	29
5.2	24
5.21	29
5.22	35
5.23	34
5.24	35
5.25	35
5.26	29
5.27	34
5.28	34
5.29	23
5.3	26
5.31	27
5.32	29
5.33	33
5.34	35
5.35	29
5.36	24
5.37	24
5.38	30
5.39	29
5.4	32
5.41	34
5.42	33
5.43	31
5.44	38
5.45	30
5.46	24
5.47	30
5.48	27
5.49	22
5.5	21
5.51	26
5.52	35
5.53	36
5.54	34
5.55	35
5.56	27
5.57	28
5.58	23
5.59	29
5.6	27
5.61	25
5.62	35
5.63	30
5.64	34
5.65	33
5.66	32
5.67	31
5.68	30
5.69	27
5.7	19
5.71	18
5.72	26
5.73	24
5.74	25
5.75	33
5.76	32
5.77	24
5.78	22
5.79	26
5.8	29
5.81	29
5.82	31
5.83	22
5.84	26
5.85	29
5.86	26
5.87	24
5.88	31
5.89	33
5.9	26
5.91	25
5.92	29
5.93	29
5.94	22
5.95	24
5.96	28
5.97	23
5.98	22
5.99	27
6	30
6.01	35
6.02	27
6.03	21
6.04	20
6.05	30
6.06	27
6.07	20
6.08	26
6.09	28
6.1	32
6.11	32
6.12	24
6.13	23
6.14	23
6.15	27
6.16	24
6.17	18
6.18	20
6.19	29
6.2	27
6.21	26
6.22	20
6.23	21
6.24	21
6.25	22
6.26	23
6.27	23
6.28	26
6.29	20
6.3	28
6.31	26
6.32	28
6.33	28
6.34	16
6.35	29
6.36	23
6.37	27
6.38	25
6.39	32
6.4	22
6.41	18
6.42	23
6.43	20
6.44	22
6.45	23
6.46	23
6.47	16
6.48	25
6.49	23
6.5	25
6.51	25
6.52	29
6.53	22
6.54	21
6.55	23
6.56	28
6.57	30
6.58	25
6.59	25
6.6	32
6.61	27
6.62	22
6.63	22
6.64	15
6.65	20
6.66	29
6.67	18
6.68	16
6.69	24
6.7	19
6.71	17
6.72	18
6.73	22
6.74	17
6.75	16
6.76	22
6.77	23
6.78	25
6.79	24
6.8	24
6.81	24
6.82	23
6.83	20
6.84	22
6.85	22
6.86	23
6.87	23
6.88	16
6.89	22
6.9	20
6.91	21
6.92	18
6.93	21
6.94	23
6.95	25
6.96	21
6.97	23
6.98	18
6.99	17
7	15
7.01	19
7.02	21
7.03	16
7.04	17
7.05	14
7.06	14
7.07	24
7.08	25
7.09	22
7.1	22
7.11	17
7.12	14
7.13	15
7.14	17
7.15	17
7.16	14
7.17	16
7.18	18
7.19	14
7.2	19
7.21	20
7.22	15
7.23	12
7.24	15
7.25	17
7.26	21
7.27	23
7.28	25
7.29	21
7.3	14
7.31	16
7.32	16
7.33	17
7.34	18
7.35	15
7.36	17
7.37	25
7.38	18
7.39	19
7.4	18
7.41	17
7.42	23
7.43	23
7.44	15
7.45	17
7.46	15
7.47	15
7.48	17
7.49	21
7.5	18
7.51	20
7.52	17
7.53	21
7.54	14
7.55	15
7.56	13
7.57	17
7.58	18
7.59	23
7.6	13
7.61	15
7.62	19
7.63	21
7.64	18
7.65	17
7.66	13
7.67	16
7.68	16
7.69	16
7.7	11
7.71	16
7.72	15
7.73	14
7.74	21
7.75	17
7.76	11
7.77	14
7.78	12
7.79	13
7.8	15
7.81	16
7.82	14
7.83	14
7.84	21
7.85	19
7.86	17
7.87	23
7.88	16
7.89	13
7.9	14
7.91	12
7.92	14
7.93	12
7.94	7
7.95	11
7.96	15
7.97	15
7.98	14
7.99	18
8	13
8.01	14
8.02	20
8.03	16
8.04	13
8.05	17
8.06	15
8.07	11
8.08	10
8.09	9
8.1	11
8.11	11
8.12	12
8.13	14
8.14	13
8.15	8
8.16	12
8.17	13
8.18	17
8.19	14
8.2	9
8.21	11
8.22	13
8.23	13
8.24	9
8.25	14
8.26	15
8.27	14
8.28	14
8.29	10
8.3	12
8.31	9
8.32	9
8.33	10
8.34	10
8.35	11
8.36	7
8.37	8
8.38	15
8.39	13
8.4	13
8.41	16
8.42	16
8.43	19
8.44	13
8.45	17
8.46	13
8.47	6
8.48	7
8.49	11
8.5	10
8.51	10
8.52	14
8.53	15
8.54	14
8.55	13
8.56	6
8.57	8
8.58	14
8.59	14
8.6	8
8.61	10
8.62	11
8.63	6
8.64	8
8.65	9
8.66	11
8.67	13
8.68	13
8.69	11
8.7	9
8.71	7
8.72	11
8.73	11
8.74	9
8.75	9
8.76	9
8.77	9
8.78	8
8.79	8
8.8	8
8.81	8
8.82	12
8.83	12
8.84	11
8.85	12
8.86	9
8.87	13
8.88	16
8.89	12
8.9	9
8.91	7
8.92	7
8.93	9
8.94	10
8.95	8
8.96	11
8.97	8
8.98	11
8.99	8
9	7
9.01	10
9.02	7
9.03	13
9.04	12
9.05	11
9.06	10
9.07	9
9.08	10
9.09	6
9.1	5
9.11	5
9.12	7
9.13	6
9.14	6
9.15	8
9.16	5
9.17	8
9.18	8
9.19	8
9.2	8
9.21	8
9.22	5
9.23	7
9.24	8
9.25	7
9.26	6
9.27	6
9.28	9
9.29	6
9.3	7
9.31	7
9.32	9
9.33	8
9.34	8
9.35	5
9.36	9
9.37	6
9.38	6
9.39	7
9.4	6
9.41	3
9.42	6
9.43	7
9.44	3
9.45	8
9.46	6
9.47	3
9.48	3
9.49	5
9.5	3
9.51	3
9.52	5
9.53	5
9.54	3
9.55	3
9.56	5
9.57	6
9.58	2
9.59	2
9.6	3
9.61	3
9.62	2
9.63	1
9.64	0
9.65	2
9.66	2
9.67	0
9.68	1
9.69	0
9.7	0
9.71	1
9.72	0
9.73	0
9.74	1
9.75	0
9.76	0
9.77	0
9.78	0
9.79	0
9.8	0
9.81	0
9.82	0
9.83	0
9.84	0
9.85	0
9.86	0
9.87	0
9.88	0
9.89	0
9.9	0
9.91	0
9.92	0
9.93	0
9.94	0
9.95	0
9.96	0
9.97	0
9.98	0
9.99	0
10	0
10.01	0
10.02	0
10.03	0
10.04	0
10.05	0
10.06	0
10.07	0
10.08	0
10.09	0
10.1	0
10.11	0
10.12	0
10.13	0
10.14	0
10.15	0
10.16	0
10.17	0
10.18	0
10.19	0
10.2	0
10.21	0
10.22	0
10.23	0
10.24	1
10.25	0
10.26	0
10.27	0
10.28	0
10.29	0
10.3	0
10.31	0
10.32	0
10.33	0
10.34	0
10.35	0
10.36	0
10.37	0
10.38	0
10.39	0
10.4	0
10.41	0
10.42	0
10.43	0
10.44	0
10.45	0
10.46	0
10.47	0
10.48	0
10.49	0
10.5	0
10.51	0
10.52	0
10.53	0
10.54	0
10.55	0
10.56	0
10.57	0
10.58	0
10.59	0
10.6	0
10.61	0
10.62	0
10.63	0
10.64	0
10.65	0
10.66	0
10.67	0
10.68	0
10.69	0
10.7	0
10.71	0
10.72	0
10.73	0
10.74	0
10.75	0
10.76	0
10.77	0
10.78	0
10.79	0
10.8	0
10.81	0
10.82	0
10.83	0
10.84	0
10.85	0
10.86	0
10.87	0
10.88	0
10.89	0
10.9	0
10.91	0
10.92	0
10.93	0
10.94	0
10.95	0
10.96	0
10.97	0
10.98	0
10.99	0
11	0
11.01	0
11.02	0
11.03	0
11.04	0
11.05	0
11.06	0
11.07	0
11.08	0
11.09	0
11.1	0
11.11	0
11.12	0
11.13	0
11.14	0
11.15	0
11.16	0
11.17	0
11.18	0
11.19	0
11.2	0
11.21	0
11.22	0
11.23	0
11.24	0
11.25	0
11.26	0
11.27	0
11.28	0
11.29	0
11.3	0
11.31	0
11.32	0
11.33	0
11.34	0
11.35	0
11.36	0
11.37	0
11.38	0
11.39	0
11.4	0
11.41	0
11.42	0
11.43	0
11.44	0
11.45	0
11.46	0
11.47	0
11.48	0
11.49	0
11.5	0
11.51	0
11.52	0
11.53	0
11.54	0
11.55	0
11.56	0
11.57	0
11.58	0
11.59	0
11.6	0
11.61	0
11.62	0
11.63	0
11.64	0
11.65	0
11.66	0
11.67	0
11.68	0
11.69	0
11.7	0
11.71	0
11.72	0
11.73	0
11.74	0
11.75	0
11.76	0
11.77	0
11.78	0
11.79	0
11.8	0
11.81	0
11.82	0
11.83	0
11.84	0
11.85	0
11.86	0
11.87	0
11.88	0
11.89	0
11.9	0
11.91	0
11.92	0
11.93	0
11.94	0
11.95	0
11.96	0
11.97	0
11.98	0
11.99	0
12	0
12.01	0
12.02	0
12.03	0
12.04	0
12.05	0
12.06	0
12.07	0
12.08	0
12.09	0
12.1	0
12.11	0
12.12	0
12.13	0
12.14	0
12.15	0
12.16	0
12.17	0
12.18	0
12.19	0
12.2	0
12.21	0
12.22	0
12.23	0
12.24	0
12.25	0
12.26	0
12.27	0
12.28	0
12.29	0
12.3	0
12.31	0
12.32	0
12.33	0
12.34	0
12.35	0
12.36	0
12.37	0
12.38	1
12.39	1
12.4	0
12.41	0
12.42	0
12.43	0
12.44	0
12.45	0
12.46	0
12.47	0
12.48	0
12.49	0
12.5	0
12.51	0
12.52	0
12.53	0
12.54	0
12.55	0
12.56	0
12.57	0
12.58	0
12.59	0
12.6	0
12.61	0
12.62	0
12.63	0
12.64	0
12.65	0
12.66	0
12.67	0
12.68	0
12.69	0
12.7	0
12.71	0
12.72	0
12.73	0
12.74	0
12.75	0
12.76	0
12.77	0
12.78	0
12.79	0
12.8	0
12.81	0
12.82	0
12.83	0
12.84	0
12.85	0
12.86	0
12.87	0
12.88	0
12.89	0
12.9	0
12.91	0
12.92	0
12.93	0
12.94	0
12.95	0
12.96	0
12.97	0
12.98	0
12.99	0
13	0
13.01	0
13.02	0
13.03	0
13.04	0
13.05	0
13.06	0
13.07	0
13.08	0
13.09	0
13.1	0
13.11	0
13.12	0
13.13	0
13.14	0
13.15	0
13.16	0
13.17	0
13.18	0
13.19	0
13.2	0
13.21	0
13.22	0
13.23	0
13.24	0
13.25	0
13.26	0
13.27	0
13.28	0
13.29	0
13.3	0
13.31	0
13.32	0
13.33	0
13.34	0
13.35	0
13.36	0
13.37	0
13.38	0
13.39	0
13.4	0
13.41	0
13.42	0
13.43	0
13.44	0
13.45	0
13.46	0
13.47	0
13.48	0
13.49	0
13.5	0
13.51	0
13.52	0
13.53	0
13.54	0
13.55	0
13.56	0
13.57	0
13.58	0
13.59	0
13.6	0
13.61	0
13.62	0
13.63	0
13.64	0
13.65	0
13.66	0
13.67	0
13.68	0
13.69	0
13.7	0
13.71	0
13.72	0
13.73	0
13.74	0
13.75	0
13.76	0
13.77	0
13.78	0
13.79	0
13.8	0
13.81	0
13.82	0
13.83	0
13.84	0
13.85	0
13.86	0
13.87	0
13.88	0
13.89	0
13.9	0
13.91	0
13.92	0
13.93	0
13.94	0
13.95	0
13.96	0
13.97	0
13.98	0
13.99	0
14	0
14.01	0
14.02	0
14.03	0
14.04	0
14.05	0
14.06	0
14.07	0
14.08	0
14.09	0
14.1	0
14.11	0
14.12	0
14.13	0
14.14	0
14.15	0
14.16	0
14.17	0
14.18	0
14.19	0
14.2	0
14.21	0
14.22	0
14.23	0
14.24	0
14.25	0
14.26	0
14.27	0
14.28	0
14.29	0
14.3	0
14.31	0
14.32	0
14.33	0
14.34	0
14.35	0
14.36	0
14.37	0
14.38	0
14.39	0
14.4	0
14.41	0
14.42	0
14.43	0
14.44	0
14.45	0
14.46	0
14.47	0
14.48	0
14.49	0
14.5	0
14.51	0
14.52	0
14.53	0
14.54	0
14.55	0
14.56	0
14.57	0
14.58	0
14.59	0
14.6	0
14.61	0
14.62	0
14.63	0
14.64	0
14.65	0
14.66	0
14.67	0
14.68	0
14.69	0
14.7	0
14.71	0
14.72	0
14.73	0
14.74	0
14.75	0
14.76	0
14.77	0
14.78	0
14.79	0
14.8	0
14.81	0
14.82	0
14.83	0
14.84	0
14.85	0
14.86	0
14.87	0
14.88	0
14.89	0
14.9	0
14.91	0
14.92	0
14.93	0
14.94	0
14.95	0
14.96	0
14.97	0
14.98	0
14.99	0
15	0
15.01	0
15.02	0
15.03	0
15.04	0
15.05	0
15.06	0
15.07	0
15.08	0
15.09	0
15.1	0
15.11	0
15.12	0
15.13	0
15.14	0
15.15	0
15.16	0
15.17	0
15.18	0
15.19	0
15.2	0
15.21	0
15.22	0
15.23	0
15.24	0
15.25	0
15.26	0
15.27	0
15.28	0
15.29	0
15.3	0
15.31	0
15.32	0
15.33	0
15.34	0
15.35	0
15.36	0
15.37	0
15.38	0
15.39	0
15.4	0
15.41	0
15.42	0
15.43	0
15.44	0
15.45	0
15.46	0
15.47	0
15.48	0
15.49	0
15.5	0
15.51	0
15.52	0
15.53	0
15.54	0
15.55	0
15.56	0
15.57	0
15.58	0
15.59	0
15.6	0
15.61	0
15.62	0
15.63	0
15.64	0
15.65	0
15.66	0
15.67	0
15.68	0
15.69	0
15.7	0
15.71	0
15.72	0
15.73	0
15.74	0
15.75	0
15.76	0
15.77	0
15.78	0
15.79	0
15.8	0
15.81	0
15.82	0
15.83	0
15.84	0
15.85	0
15.86	0
15.87	0
15.88	0
15.89	0
15.9	0
15.91	0
15.92	0
15.93	0
15.94	0
15.95	0
15.96	0
15.97	0
15.98	0
15.99	0
16	0
16.01	0
16.02	0
16.03	0
16.04	0
16.05	0
16.06	0
16.07	0
16.08	0
16.09	0
16.1	0
16.11	0
16.12	0
16.13	0
16.14	0
16.15	0
16.16	0
16.17	0
16.18	0
16.19	0
16.2	0
16.21	0
16.22	0
16.23	0
16.24	0
16.25	0
16.26	0
16.27	0
16.28	0
16.29	0
16.3	0
16.31	0
16.32	0
16.33	0
16.34	0
16.35	0
16.36	0
16.37	0
16.38	0
16.39	0
16.4	0
16.41	0
16.42	0
16.43	0
16.44	0
16.45	0
16.46	0
16.47	0
16.48	0
16.49	0
16.5	0
16.51	0
16.52	0
16.53	0
16.54	0
16.55	0
16.56	0
16.57	0
16.58	0
16.59	0
16.6	0
16.61	0
16.62	0
16.63	0
16.64	0
16.65	0
16.66	0
16.67	0
16.68	0
16.69	0
16.7	0
16.71	0
16.72	0
16.73	0
16.74	0
16.75	0
16.76	0
16.77	0
16.78	0
16.79	0
16.8	0
16.81	0
16.82	0
16.83	0
16.84	0
16.85	0
16.86	0
16.87	0
16.88	0
16.89	0
16.9	0
16.91	0
16.92	0
16.93	0
16.94	0
16.95	0
16.96	0
16.97	0
16.98	0
16.99	0
17	0
17.01	0
17.02	0
17.03	0
17.04	0
17.05	0
17.06	0
17.07	0
17.08	0
17.09	0
17.1	0
17.11	0
17.12	0
17.13	0
17.14	0
17.15	0
17.16	0
17.17	0
17.18	0
17.19	0
17.2	0
17.21	0
17.22	0
17.23	0
17.24	0
17.25	0
17.26	0
17.27	0
17.28	0
17.29	0
17.3	0
17.31	0
17.32	0
17.33	0
17.34	0
17.35	0
17.36	0
17.37	0
17.38	0
17.39	0
17.4	0
17.41	0
17.42	0
17.43	0
17.44	0
17.45	0
17.46	0
17.47	0
17.48	0
17.49	0
17.5	0
17.51	0
17.52	0
17.53	0
17.54	0
17.55	0
17.56	0
17.57	0
17.58	0
17.59	0
17.6	0
17.61	0
17.62	0
17.63	0
17.64	0
17.65	0
17.66	0
17.67	0
17.68	0
17.69	0
17.7	0
17.71	0
17.72	0
17.73	0
17.74	0
17.75	0
17.76	0
17.77	0
17.78	0
17.79	0
17.8	0
17.81	0
17.82	0
17.83	0
17.84	0
17.85	0
17.86	0
17.87	0
17.88	0
17.89	0
17.9	0
17.91	0
17.92	0
17.93	0
17.94	0
17.95	0
17.96	0
17.97	0
17.98	0
17.99	0
18	0
18.01	0
18.02	0
18.03	0
18.04	0
18.05	0
18.06	0
18.07	0
18.08	0
18.09	0
18.1	0
18.11	0
18.12	0
18.13	0
18.14	0
18.15	0
18.16	0
18.17	0
18.18	0
18.19	0
18.2	0
18.21	0
18.22	0
18.23	0
18.24	0
18.25	0
18.26	0
18.27	0
18.28	0
18.29	0
18.3	0
18.31	0
18.32	0
18.33	0
18.34	0
18.35	0
18.36	0
18.37	0
18.38	0
18.39	0
18.4	0
18.41	0
18.42	0
18.43	0
18.44	0
18.45	0
18.46	0
18.47	0
18.48	0
18.49	0
18.5	0
18.51	0
18.52	0
18.53	0
18.54	0
18.55	0
18.56	0
18.57	0
18.58	0
18.59	0
18.6	0
18.61	0
18.62	0
18.63	0
18.64	0
18.65	0
18.66	0
18.67	0
18.68	0
18.69	0
18.7	0
18.71	0
18.72	0
18.73	0
18.74	0
18.75	0
18.76	0
18.77	0
18.78	0
18.79	0
18.8	0
18.81	0
18.82	0
18.83	0
18.84	0
18.85	0
18.86	0
18.87	0
18.88	0
18.89	0
18.9	0
18.91	0
18.92	0
18.93	0
18.94	0
18.95	0
18.96	0
18.97	0
18.98	0
18.99	0
19	0
19.01	0
19.02	0
19.03	0
19.04	0
19.05	0
19.06	0
19.07	0
19.08	0
19.09	0
19.1	0
19.11	0
19.12	0
19.13	0
19.14	0
19.15	0
19.16	0
19.17	0
19.18	0
19.19	0
19.2	0
19.21	0
19.22	0
19.23	0
19.24	0
[truncated: 104 more rows]
