# Supplementary material for: Multiomics coupled with vibrational spectroscopy identify early mechanisms of experimental aortic valve stenosis
Source: Research Square preprint supplement (doi:10.21203/rs.3.rs-4330270/v1), 2024-05-02
Supplement: Supplementary file 11 [file 961d8b4379fbdb89ececbe8c.xlsx]

## Sheet: Treatment(2w) vs Control
O.Cuniculus Gene Name	H.Sapiens Ortholog Name	H.Sapiens Ortholog Description	logFC	logCPM	F	PValue	FDR
LOC100344175	NA	NA	-1.65365	2.1347	53.5822	1.99805e-06	0.0190107
C1QTNF7	C1QTNF7	C1q and TNF related 7 [Source:HGNC Symbol;Acc:HGNC:14342]	1.34364	5.09845	51.8853	2.43291e-06	0.0190107
ATP10A	ATP10A	ATPase phospholipid transporting 10A (putative) [Source:HGNC Symbol;Acc:HGNC:13542]	1.4019	5.2392	47.5813	4.1048e-06	0.0213833
PKD1	NA	NA	0.923719	8.65407	39.7722	1.17254e-05	0.0458111
SPSB1	SPSB1	splA/ryanodine receptor domain and SOCS box containing 1 [Source:HGNC Symbol;Acc:HGNC:30628]	1.26734	3.83445	33.1122	3.26231e-05	0.0688193
RNF144B	RNF144B	ring finger protein 144B [Source:HGNC Symbol;Acc:HGNC:21578]	-1.21912	3.57275	30.9727	4.67455e-05	0.0688193
LRRK1	LRRK1	leucine rich repeat kinase 1 [Source:HGNC Symbol;Acc:HGNC:18608]	0.770521	5.76149	30.2962	5.25643e-05	0.0688193
SMURF1	SMURF1	SMAD specific E3 ubiquitin protein ligase 1 [Source:HGNC Symbol;Acc:HGNC:16807]	0.913818	5.21677	29.7442	5.79219e-05	0.0688193
EPHB3	EPHB3	EPH receptor B3 [Source:HGNC Symbol;Acc:HGNC:3394]	0.900685	5.52059	29.4077	6.14895e-05	0.0688193
CSPG4	CSPG4	chondroitin sulfate proteoglycan 4 [Source:HGNC Symbol;Acc:HGNC:2466]	0.88743	7.99072	28.471	7.28013e-05	0.0688193
NAB2	NAB2	NGFI-A binding protein 2 [Source:HGNC Symbol;Acc:HGNC:7627]	0.880189	5.31798	27.927	8.04418e-05	0.0688193
BMAL1	BMAL1	basic helix-loop-helix ARNT like 1 [Source:HGNC Symbol;Acc:HGNC:701]	-1.86032	3.0754	27.8561	8.15027e-05	0.0688193
KIZ	KIZ	kizuna centrosomal protein [Source:HGNC Symbol;Acc:HGNC:15865]	-0.636997	4.60926	27.5797	8.5792e-05	0.0688193
GADD45A	GADD45A	growth arrest and DNA damage inducible alpha [Source:HGNC Symbol;Acc:HGNC:4095]	-1.47073	6.25326	27.0187	9.53064e-05	0.0688193
SERPINE1	SERPINE1	serpin family E member 1 [Source:HGNC Symbol;Acc:HGNC:8583]	2.80135	7.23554	27.4499	9.66403e-05	0.0688193
FUNDC1	FUNDC1	FUN14 domain containing 1 [Source:HGNC Symbol;Acc:HGNC:28746]	-0.71293	4.56754	26.9158	9.7179e-05	0.0688193
LRRC4	LRRC4	leucine rich repeat containing 4 [Source:HGNC Symbol;Acc:HGNC:15586]	-2.73336	2.41313	26.7264	0.000100734	0.0688193
ADARB1	ADARB1	adenosine deaminase RNA specific B1 [Source:HGNC Symbol;Acc:HGNC:226]	0.981355	7.40954	26.6164	0.000102865	0.0688193
LOC100356864	NA	NA	-1.90014	2.48977	26.5696	0.000103789	0.0688193
OXSM	OXSM	3-oxoacyl-ACP synthase, mitochondrial [Source:HGNC Symbol;Acc:HGNC:26063]	-0.915146	3.56475	26.5346	0.000104483	0.0688193
TRIM56	TRIM56	tripartite motif containing 56 [Source:HGNC Symbol;Acc:HGNC:19028]	0.623936	5.90331	26.4604	0.000105977	0.0688193
HSPG2	HSPG2	heparan sulfate proteoglycan 2 [Source:HGNC Symbol;Acc:HGNC:5273]	0.968033	10.1947	26.2971	0.000109348	0.0688193
SH3KBP1	SH3KBP1	SH3 domain containing kinase binding protein 1 [Source:HGNC Symbol;Acc:HGNC:13867]	-1.47826	5.00275	26.2599	0.000110133	0.0688193
LOC100344156	NA	NA	-1.46591	2.33356	26.1675	0.00011211	0.0688193
PLXNA3	PLXNA3	plexin A3 [Source:HGNC Symbol;Acc:HGNC:9101]	0.689298	4.86547	26.1673	0.000112114	0.0688193
FKBP3	NA	NA	-0.961204	5.75258	26.0585	0.000114493	0.0688193
KLF13	NA	NA	0.897387	5.98874	25.3425	0.000131656	0.0707015
LOC127482710	NA	NA	-2.13424	3.83794	25.027	0.000141228	0.0707015
APOO	NA	NA	-1.92815	4.26586	24.8747	0.000145044	0.0707015
EPB41L3	EPB41L3	erythrocyte membrane protein band 4.1 like 3 [Source:HGNC Symbol;Acc:HGNC:3380]	-0.977785	4.85331	24.7723	0.000147418	0.0707015
CIART	CIART	circadian associated repressor of transcription [Source:HGNC Symbol;Acc:HGNC:25200]	1.16311	3.42765	24.7626	0.000147704	0.0707015
SEMA3F	SEMA3F	semaphorin 3F [Source:HGNC Symbol;Acc:HGNC:10728]	0.691836	6.18886	24.4058	0.000158673	0.0707015
LOC127488880	NA	NA	-3.26563	1.79541	24.0677	0.000169926	0.0707015
LOC100347316	NA	NA	-1.62465	3.52948	24.0467	0.000170654	0.0707015
F5	F5	coagulation factor V [Source:HGNC Symbol;Acc:HGNC:3542]	-3.8607	4.20469	24.5389	0.000173267	0.0707015
SSBP4	NA	NA	-0.703705	3.46073	23.7784	0.000180272	0.0707015
MAFF	MAFF	MAF bZIP transcription factor F [Source:HGNC Symbol;Acc:HGNC:6780]	1.30502	7.1173	23.6365	0.000185603	0.0707015
LOC103349936	NA	NA	-3.13079	3.90215	23.9374	0.000190175	0.0707015
PAPPA2	PAPPA2	pappalysin 2 [Source:HGNC Symbol;Acc:HGNC:14615]	2.53684	3.26084	23.394	0.000199283	0.0707015
ELN	NA	NA	1.87332	11.1957	23.2511	0.000201014	0.0707015
AKAP5	AKAP5	A-kinase anchoring protein 5 [Source:HGNC Symbol;Acc:HGNC:375]	-2.5391	3.07256	23.2765	0.000201954	0.0707015
MAP2K3	MAP2K3	mitogen-activated protein kinase kinase 3 [Source:HGNC Symbol;Acc:HGNC:6843]	0.788367	6.15385	23.1816	0.000203945	0.0707015
SCARF2	NA	NA	0.817751	6.47069	23.1125	0.000206903	0.0707015
ANKRD1	ANKRD1	ankyrin repeat domain 1 [Source:HGNC Symbol;Acc:HGNC:15819]	-3.4529	10.106	23.2754	0.000216702	0.0707015
FOS	FOS	Fos proto-oncogene, AP-1 transcription factor subunit [Source:HGNC Symbol;Acc:HGNC:3796]	3.87629	6.61171	23.3287	0.000220545	0.0707015
LOC108176497	NA	NA	2.26126	1.90613	22.7891	0.000221425	0.0707015
CHST3	CHST3	carbohydrate sulfotransferase 3 [Source:HGNC Symbol;Acc:HGNC:1971]	0.846442	6.51793	22.7318	0.000224118	0.0707015
LMCD1	LMCD1	LIM and cysteine rich domains 1 [Source:HGNC Symbol;Acc:HGNC:6633]	1.09347	8.36797	22.5543	0.000232693	0.0707015
MFGE8	NA	NA	0.967206	10.3315	22.5178	0.000234498	0.0707015
KCNQ1	KCNQ1	potassium voltage-gated channel subfamily Q member 1 [Source:HGNC Symbol;Acc:HGNC:6294]	-2.65004	1.42626	22.4541	0.000237695	0.0707015
FKBP10	FKBP10	FKBP prolyl isomerase 10 [Source:HGNC Symbol;Acc:HGNC:18169]	0.83404	8.22858	22.1429	0.000254029	0.0707015
ADCY10	ADCY10	adenylate cyclase 10 [Source:HGNC Symbol;Acc:HGNC:21285]	-0.887531	4.17119	22.0558	0.000258824	0.0707015
SLC9A5	SLC9A5	solute carrier family 9 member A5 [Source:HGNC Symbol;Acc:HGNC:11078]	-0.710125	4.00827	21.9667	0.000263835	0.0707015
PTP4A3	PTP4A3	protein tyrosine phosphatase 4A3 [Source:HGNC Symbol;Acc:HGNC:9636]	-3.39779	6.61059	22.3807	0.000267942	0.0707015
DOCK8	DOCK8	dedicator of cytokinesis 8 [Source:HGNC Symbol;Acc:HGNC:19191]	0.873568	4.67646	21.8718	0.000269297	0.0707015
ABITRAM	ABITRAM	actin binding transcription modulator [Source:HGNC Symbol;Acc:HGNC:1364]	-0.984547	3.41446	21.6134	0.000284825	0.0707015
GALNT2	GALNT2	polypeptide N-acetylgalactosaminyltransferase 2 [Source:HGNC Symbol;Acc:HGNC:4124]	0.737069	6.59074	21.5885	0.00028637	0.0707015
BLVRA	BLVRA	biliverdin reductase A [Source:HGNC Symbol;Acc:HGNC:1062]	-1.52012	3.58328	21.5576	0.000288308	0.0707015
LOC100357845	NA	NA	-1.01189	5.11277	21.5076	0.000291467	0.0707015
PER2	PER2	period circadian regulator 2 [Source:HGNC Symbol;Acc:HGNC:8846]	1.3776	3.99146	21.468	0.000294005	0.0707015
STAMBPL1	STAMBPL1	STAM binding protein like 1 [Source:HGNC Symbol;Acc:HGNC:24105]	-1.59035	1.61316	21.4448	0.000295498	0.0707015
STRADB	STRADB	STE20 related adaptor beta [Source:HGNC Symbol;Acc:HGNC:13205]	-0.984252	4.40525	21.4163	0.000297348	0.0707015
CTDSPL	NA	NA	0.649386	5.39893	21.3911	0.000298993	0.0707015
MICAL2	MICAL2	microtubule associated monooxygenase, calponin and LIM domain containing 2 [Source:HGNC Symbol;Acc:HGNC:24693]	0.689933	7.64685	21.262	0.000307587	0.0707015
ID1	ID1	inhibitor of DNA binding 1 [Source:HGNC Symbol;Acc:HGNC:5360]	1.30478	7.22012	21.2132	0.00031091	0.0707015
HAPLN1	HAPLN1	hyaluronan and proteoglycan link protein 1 [Source:HGNC Symbol;Acc:HGNC:2380]	1.24524	5.77656	21.0423	0.000322859	0.0707015
LOC127486885	NA	NA	-3.37706	6.06215	21.3665	0.000331925	0.0707015
RASSF8	RASSF8	Ras association domain family member 8 [Source:HGNC Symbol;Acc:HGNC:13232]	0.879481	6.6615	20.8547	0.000336588	0.0707015
CHN1	CHN1	chimerin 1 [Source:HGNC Symbol;Acc:HGNC:1943]	-0.983694	4.50617	20.7212	0.000346761	0.0707015
OCIAD2	OCIAD2	OCIA domain containing 2 [Source:HGNC Symbol;Acc:HGNC:28685]	-0.740366	5.16834	20.6026	0.000356088	0.0707015
MLF1	MLF1	myeloid leukemia factor 1 [Source:HGNC Symbol;Acc:HGNC:7125]	-3.09059	4.67447	21.0231	0.000357397	0.0707015
LOC100341013	NA	NA	-4.55795	0.880487	20.5604	0.000359473	0.0707015
CR2	CR2	complement C3d receptor 2 [Source:HGNC Symbol;Acc:HGNC:2336]	2.6821	1.19778	20.4758	0.000366372	0.0707015
APOOL	APOOL	apolipoprotein O like [Source:HGNC Symbol;Acc:HGNC:24009]	-0.944395	4.58903	20.4756	0.000366387	0.0707015
MRPL47	MRPL47	mitochondrial ribosomal protein L47 [Source:HGNC Symbol;Acc:HGNC:16652]	-0.841377	3.89003	20.4595	0.000367717	0.0707015
TRIM7	TRIM7	tripartite motif containing 7 [Source:HGNC Symbol;Acc:HGNC:16278]	-1.24952	2.55876	20.4286	0.000370287	0.0707015
TNFRSF25	TNFRSF25	TNF receptor superfamily member 25 [Source:HGNC Symbol;Acc:HGNC:11910]	1.24977	3.138	20.4183	0.000371144	0.0707015
FHL2	FHL2	four and a half LIM domains 2 [Source:HGNC Symbol;Acc:HGNC:3703]	-1.89833	6.86402	20.561	0.00037261	0.0707015
NDUFA5	NA	NA	-1.37091	3.93154	20.3874	0.000373738	0.0707015
LOC100353437	NA	NA	-1.23318	2.70653	20.372	0.000375045	0.0707015
PLEKHB2	PLEKHB2	pleckstrin homology domain containing B2 [Source:HGNC Symbol;Acc:HGNC:19236]	-1.43878	6.63808	20.3515	0.000376786	0.0707015
LOC103351270	NA	NA	-1.19406	2.03531	20.3497	0.000376933	0.0707015
MYO1C	MYO1C	myosin IC [Source:HGNC Symbol;Acc:HGNC:7597]	0.720799	8.93609	20.1462	0.000394722	0.0707015
ALDH18A1	ALDH18A1	aldehyde dehydrogenase 18 family member A1 [Source:HGNC Symbol;Acc:HGNC:9722]	0.644393	6.72303	20.1226	0.000396839	0.0707015
LOC108175375	NA	NA	-1.48881	3.08136	20.1175	0.000397304	0.0707015
DSCC1	DSCC1	DNA replication and sister chromatid cohesion 1 [Source:HGNC Symbol;Acc:HGNC:24453]	-2.03614	2.92592	20.0023	0.000407869	0.0707015
ACTN1	ACTN1	actinin alpha 1 [Source:HGNC Symbol;Acc:HGNC:163]	0.952831	9.28208	19.9764	0.000410288	0.0707015
LOC100337966	NA	NA	-1.96809	6.75506	20.1626	0.000413208	0.0707015
LRRC39	LRRC39	leucine rich repeat containing 39 [Source:HGNC Symbol;Acc:HGNC:28228]	-3.24774	5.09751	20.26	0.000422364	0.0707015
HIBCH	HIBCH	3-hydroxyisobutyryl-CoA hydrolase [Source:HGNC Symbol;Acc:HGNC:4908]	-1.06266	4.69477	19.8285	0.000424414	0.0707015
ZNF362	ZNF362	zinc finger protein 362 [Source:HGNC Symbol;Acc:HGNC:18079]	0.904199	6.44352	19.7926	0.000427924	0.0707015
CCN4	CCN4	cellular communication network factor 4 [Source:HGNC Symbol;Acc:HGNC:12769]	1.65309	4.2035	19.6624	0.000442372	0.0707015
MFSD13A	MFSD13A	major facilitator superfamily domain containing 13A [Source:HGNC Symbol;Acc:HGNC:26196]	-1.42323	1.78444	19.5967	0.000447681	0.0707015
LMOD2	LMOD2	leiomodin 2 [Source:HGNC Symbol;Acc:HGNC:6648]	-3.56317	7.29684	19.9856	0.00044893	0.0707015
ERF	ERF	ETS2 repressor factor [Source:HGNC Symbol;Acc:HGNC:3444]	0.517838	5.12845	19.4828	0.000459631	0.0707015
BAMBI	NA	NA	1.27308	5.41233	19.4282	0.000465492	0.0707015
LOX	LOX	lysyl oxidase [Source:HGNC Symbol;Acc:HGNC:6664]	1.49978	7.65144	19.2557	0.00048457	0.0707015
FNBP1	FNBP1	formin binding protein 1 [Source:HGNC Symbol;Acc:HGNC:17069]	0.673168	6.70954	19.2295	0.000487539	0.0707015
EDEM1	EDEM1	ER degradation enhancing alpha-mannosidase like protein 1 [Source:HGNC Symbol;Acc:HGNC:18967]	0.658151	6.65853	19.2173	0.000488929	0.0707015
PALMD	PALMD	palmdelphin [Source:HGNC Symbol;Acc:HGNC:15846]	-0.953731	5.32309	19.1939	0.000491615	0.0707015
C1QTNF2	C1QTNF2	C1q and TNF related 2 [Source:HGNC Symbol;Acc:HGNC:14325]	0.792313	5.46446	19.1881	0.000492285	0.0707015
CHPT1	MYBPC1	myosin binding protein C1 [Source:HGNC Symbol;Acc:HGNC:7549]	-0.857359	6.18669	19.105	0.000501961	0.0707015
ADRA1B	ADRA1B	adrenoceptor alpha 1B [Source:HGNC Symbol;Acc:HGNC:278]	0.994296	4.01883	19.0893	0.000503815	0.0707015
LOC100348481	FKBP3	FKBP prolyl isomerase 3 [Source:HGNC Symbol;Acc:HGNC:3719]	-1.669	2.04754	19.0878	0.000503989	0.0707015
MARVELD1	MARVELD1	MARVEL domain containing 1 [Source:HGNC Symbol;Acc:HGNC:28674]	0.89391	9.39036	19.0523	0.000508205	0.0707015
ZFP36	ZFP36	ZFP36 ring finger protein [Source:HGNC Symbol;Acc:HGNC:12862]	1.21939	6.07934	19.0136	0.000512856	0.0707015
ACSS1	ACSS1	acyl-CoA synthetase short chain family member 1 [Source:HGNC Symbol;Acc:HGNC:16091]	-2.78697	8.61532	19.2708	0.000516851	0.0707015
LOC103349878	NA	NA	-3.55515	5.38399	19.3387	0.000519428	0.0707015
RGMA	RGMA	repulsive guidance molecule BMP co-receptor a [Source:HGNC Symbol;Acc:HGNC:30308]	0.642631	5.22884	18.9241	0.00052377	0.0707015
CUNH11orf24	NA	NA	0.677009	6.42006	18.8428	0.000533929	0.0707015
CMYA5	CMYA5	cardiomyopathy associated 5 [Source:HGNC Symbol;Acc:HGNC:14305]	-2.91387	7.21341	19.2112	0.000534753	0.0707015
SLC35F1	SLC35F1	solute carrier family 35 member F1 [Source:HGNC Symbol;Acc:HGNC:21483]	-1.20601	4.0491	18.8268	0.000535954	0.0707015
RCN3	NA	NA	0.840023	7.5565	18.8234	0.000536386	0.0707015
PDSS1	PDSS1	decaprenyl diphosphate synthase subunit 1 [Source:HGNC Symbol;Acc:HGNC:17759]	-1.15589	2.88369	18.7764	0.00054238	0.0707015
CASQ1	CASQ1	calsequestrin 1 [Source:HGNC Symbol;Acc:HGNC:1512]	-4.13034	3.99916	19.1429	0.000543183	0.0707015
PDE7B	PDE7B	phosphodiesterase 7B [Source:HGNC Symbol;Acc:HGNC:8792]	-1.34006	3.18719	18.7475	0.000546113	0.0707015
TECRL	TECRL	trans-2,3-enoyl-CoA reductase like [Source:HGNC Symbol;Acc:HGNC:27365]	-3.28638	6.28043	19.1184	0.000546243	0.0707015
KYAT3	KYAT3	kynurenine aminotransferase 3 [Source:HGNC Symbol;Acc:HGNC:33238]	-1.06803	4.91018	18.7279	0.000548652	0.0707015
FOXS1	FOXS1	forkhead box S1 [Source:HGNC Symbol;Acc:HGNC:3735]	0.809396	5.5611	18.7139	0.000550481	0.0707015
NIPSNAP2	NIPSNAP2	nipsnap homolog 2 [Source:HGNC Symbol;Acc:HGNC:4179]	-1.59063	7.02516	18.6844	0.000558712	0.0707015
EPN3	EPN3	epsin 3 [Source:HGNC Symbol;Acc:HGNC:18235]	-2.38561	3.48296	18.7974	0.000558747	0.0707015
MIX23	MIX23	mitochondrial matrix import factor 23 [Source:HGNC Symbol;Acc:HGNC:31136]	-1.08679	3.22924	18.625	0.000562237	0.0707015
HADHB	HADHB	hydroxyacyl-CoA dehydrogenase trifunctional multienzyme complex subunit beta [Source:HGNC Symbol;Acc:HGNC:4803]	-1.68878	7.24969	18.6744	0.000565139	0.0707015
SUCLG1	SUCLG1	succinate-CoA ligase GDP/ADP-forming subunit alpha [Source:HGNC Symbol;Acc:HGNC:11449]	-1.34835	7.56148	18.6017	0.000565374	0.0707015
EFHD1	EFHD1	EF-hand domain family member D1 [Source:HGNC Symbol;Acc:HGNC:29556]	1.31101	7.69613	18.5939	0.000566426	0.0707015
SUGT1	NA	NA	-0.446075	4.89409	18.5673	0.000570027	0.0707015
ZSWIM4	NA	NA	0.87909	3.84288	18.4119	0.000591602	0.0725657
LOC108177262	NA	NA	-1.35593	7.24957	18.3621	0.000598713	0.0725657
USP35	USP35	ubiquitin specific peptidase 35 [Source:HGNC Symbol;Acc:HGNC:20061]	-0.735812	3.5624	18.3003	0.000607668	0.0725657
FSTL3	NA	NA	1.12016	5.93449	18.2605	0.000613507	0.0725657
ATP5F1C	ATP5F1C	ATP synthase F1 subunit gamma [Source:HGNC Symbol;Acc:HGNC:833]	-1.4461	7.85081	18.235	0.000617296	0.0725657
CAD	CAD	carbamoyl-phosphate synthetase 2, aspartate transcarbamylase, and dihydroorotase [Source:HGNC Symbol;Acc:HGNC:1424]	0.719587	4.11551	18.2149	0.000620287	0.0725657
FBLN5	FBLN5	fibulin 5 [Source:HGNC Symbol;Acc:HGNC:3602]	0.961597	9.51786	18.21	0.000621023	0.0725657
CRTAP	CRTAP	cartilage associated protein [Source:HGNC Symbol;Acc:HGNC:2379]	1.02541	7.43209	18.2021	0.000622204	0.0725657
EGR1	EGR1	early growth response 1 [Source:HGNC Symbol;Acc:HGNC:3238]	2.12705	6.78914	18.3598	0.000636362	0.0728434
LRRC2	LRRC2	leucine rich repeat containing 2 [Source:HGNC Symbol;Acc:HGNC:14676]	-2.25447	5.28125	18.404	0.000636783	0.0728434
RNF128	RNF128	ring finger protein 128 [Source:HGNC Symbol;Acc:HGNC:21153]	-1.4795	2.8703	18.0412	0.000646892	0.0728434
DNAJC19	DNAJC19	DnaJ heat shock protein family (Hsp40) member C19 [Source:HGNC Symbol;Acc:HGNC:30528]	-0.90121	5.04545	18.0307	0.000648546	0.0728434
LOC100353865	NA	NA	0.635579	6.73913	18.0238	0.000649629	0.0728434
NPAS2	NPAS2	neuronal PAS domain protein 2 [Source:HGNC Symbol;Acc:HGNC:7895]	-1.11152	3.11727	17.9685	0.000658411	0.0728434
LAMC1	LAMC1	laminin subunit gamma 1 [Source:HGNC Symbol;Acc:HGNC:6492]	0.614979	9.39467	17.9134	0.000667305	0.0728434
IER2	NA	NA	1.07725	5.65179	17.88	0.000672749	0.0728434
SLC25A3	SLC25A3	solute carrier family 25 member 3 [Source:HGNC Symbol;Acc:HGNC:10989]	-1.3364	9.44814	17.8742	0.000673706	0.0728434
MYBPC3	MYBPC3	myosin binding protein C3 [Source:HGNC Symbol;Acc:HGNC:7551]	-3.25346	9.52245	18.1773	0.000674195	0.0728434
LOC127492398	NA	NA	-3.52423	3.25966	18.1468	0.000675857	0.0728434
PLXDC2	PLXDC2	plexin domain containing 2 [Source:HGNC Symbol;Acc:HGNC:21013]	0.815805	7.32504	17.8231	0.000682162	0.0730114
CKMT2	CKMT2	creatine kinase, mitochondrial 2 [Source:HGNC Symbol;Acc:HGNC:1996]	-3.81908	7.57696	18.1355	0.00068676	0.0730114
NDUFB5	NDUFB5	NADH:ubiquinone oxidoreductase subunit B5 [Source:HGNC Symbol;Acc:HGNC:7700]	-1.37007	5.94058	17.7036	0.000704424	0.0730687
FABP3	FABP3	fatty acid binding protein 3 [Source:HGNC Symbol;Acc:HGNC:3557]	-3.24909	7.00302	18.0037	0.000708562	0.0730687
MYH7	MYH7	myosin heavy chain 7 [Source:HGNC Symbol;Acc:HGNC:7577]	-3.86251	12.2888	17.9106	0.000710907	0.0730687
CCDC74B	NA	NA	-2.78422	1.08626	17.6282	0.000715508	0.0730687
DSG2	DSG2	desmoglein 2 [Source:HGNC Symbol;Acc:HGNC:3049]	-2.4986	3.43532	17.8179	0.000716071	0.0730687
LOC103348576	NA	NA	1.09252	2.00762	17.6192	0.0007171	0.0730687
PPDPFL	PPDPFL	pancreatic progenitor cell differentiation and proliferation factor like [Source:HGNC Symbol;Acc:HGNC:31745]	-3.12932	2.83708	17.8193	0.000720027	0.0730687
TEF	TEF	TEF transcription factor, PAR bZIP family member [Source:HGNC Symbol;Acc:HGNC:11722]	0.821192	7.03673	17.5438	0.000730523	0.0736555
LOC100347143	UQCRC2	ubiquinol-cytochrome c reductase core protein 2 [Source:HGNC Symbol;Acc:HGNC:12586]	-1.53723	7.73232	17.4327	0.00075297	0.0749843
NOS3	NOS3	nitric oxide synthase 3 [Source:HGNC Symbol;Acc:HGNC:7876]	6.64234	2.48123	17.7106	0.000759916	0.0749843
HMGN3	HMGN3	high mobility group nucleosomal binding domain 3 [Source:HGNC Symbol;Acc:HGNC:12312]	-0.655221	5.93168	17.3167	0.000772739	0.0749843
SMPX	SMPX	small muscle protein X-linked [Source:HGNC Symbol;Acc:HGNC:11122]	-3.21447	6.52229	17.6343	0.000773971	0.0749843
LOC100358239	NA	NA	-0.513364	4.34845	17.2712	0.000781531	0.0749843
TMEM200B	TMEM200B	transmembrane protein 200B [Source:HGNC Symbol;Acc:HGNC:33785]	0.971504	5.95708	17.2668	0.000782381	0.0749843
H1-4	H1-4	H1.4 linker histone, cluster member [Source:HGNC Symbol;Acc:HGNC:4718]	-0.887393	3.4562	17.2519	0.000785282	0.0749843
HBEGF	HBEGF	heparin binding EGF like growth factor [Source:HGNC Symbol;Acc:HGNC:3059]	-1.52977	2.91877	17.2291	0.000789757	0.0749843
ENO3	ENO3	enolase 3 [Source:HGNC Symbol;Acc:HGNC:3354]	-3.3706	8.8558	17.5479	0.000790241	0.0749843
CBX6	NA	NA	0.569213	7.33379	17.2109	0.000793334	0.0749843
VEGFA	VEGFA	vascular endothelial growth factor A [Source:HGNC Symbol;Acc:HGNC:12680]	-1.30613	6.6677	17.1838	0.000798718	0.0749843
ADAMTS9	ADAMTS9	ADAM metallopeptidase with thrombospondin type 1 motif 9 [Source:HGNC Symbol;Acc:HGNC:13202]	2.05992	4.40368	17.3637	0.000804192	0.0749843
COQ6	COQ6	coenzyme Q6, monooxygenase [Source:HGNC Symbol;Acc:HGNC:20233]	-1.92402	5.41332	17.3278	0.000815473	0.0749843
EPHX2	ADAM2	ADAM metallopeptidase domain 2 [Source:HGNC Symbol;Acc:HGNC:198]	-1.3814	6.51114	17.1076	0.000816309	0.0749843
LOC103347974	NA	NA	-1.4076	3.29207	17.0788	0.000819937	0.0749843
AK2	NA	NA	-0.782888	5.76312	17.0395	0.000828043	0.0749843
MB	MB	myoglobin [Source:HGNC Symbol;Acc:HGNC:6915]	-4.0109	7.42703	17.3418	0.000830657	0.0749843
BCKDHB	BCKDHB	branched chain keto acid dehydrogenase E1 subunit beta [Source:HGNC Symbol;Acc:HGNC:987]	-0.754667	4.40009	16.9877	0.000838872	0.0749843
HRC	NA	NA	-3.32306	6.43867	17.301	0.00083894	0.0749843
PACSIN1	PACSIN1	protein kinase C and casein kinase substrate in neurons 1 [Source:HGNC Symbol;Acc:HGNC:8570]	-2.09023	2.91515	16.9675	0.000845444	0.0749843
QRSL1	QRSL1	glutaminyl-tRNA amidotransferase subunit QRSL1 [Source:HGNC Symbol;Acc:HGNC:21020]	-1.34155	3.14242	16.9078	0.00085589	0.0749843
LOC127486373	NA	NA	-3.55767	5.36207	17.1888	0.000862179	0.0749843
WIZ	WIZ	WIZ zinc finger [Source:HGNC Symbol;Acc:HGNC:30917]	0.424514	5.17912	16.8767	0.00086262	0.0749843
LOC108178418	NA	NA	1.64444	3.30335	16.8631	0.000865568	0.0749843
B3GALT2	B3GALT2	beta-1,3-galactosyltransferase 2 [Source:HGNC Symbol;Acc:HGNC:917]	-3.20375	3.17278	17.106	0.000866095	0.0749843
FRMD5	FRMD5	FERM domain containing 5 [Source:HGNC Symbol;Acc:HGNC:28214]	-3.00861	3.50823	17.0785	0.00087337	0.0749843
MYO1D	MYO1D	myosin ID [Source:HGNC Symbol;Acc:HGNC:7598]	0.824804	6.25296	16.7678	0.000886645	0.0749843
DNAJC28	DNAJC28	DnaJ heat shock protein family (Hsp40) member C28 [Source:HGNC Symbol;Acc:HGNC:1297]	-0.732207	3.18634	16.7527	0.000890037	0.0749843
KLHL31	KLHL31	kelch like family member 31 [Source:HGNC Symbol;Acc:HGNC:21353]	-3.02528	6.33928	17.0389	0.000894403	0.0749843
OSGEPL1	OSGEPL1	O-sialoglycoprotein endopeptidase like 1 [Source:HGNC Symbol;Acc:HGNC:23075]	-1.10111	3.5245	16.7119	0.000899268	0.0749843
LOC103352415	NA	NA	1.14154	3.17496	16.6978	0.000902496	0.0749843
B3GNT7	B3GNT7	UDP-GlcNAc:betaGal beta-1,3-N-acetylglucosaminyltransferase 7 [Source:HGNC Symbol;Acc:HGNC:18811]	1.28079	2.28112	16.6959	0.000902928	0.0749843
VDAC3	NA	NA	-0.947225	5.72016	16.6751	0.000907711	0.0749843
KBTBD12	KBTBD12	kelch repeat and BTB domain containing 12 [Source:HGNC Symbol;Acc:HGNC:25731]	-2.20247	3.7161	16.7939	0.000915188	0.0749843
ASB11	ASB11	ankyrin repeat and SOCS box containing 11 [Source:HGNC Symbol;Acc:HGNC:17186]	-2.97928	4.2264	16.9225	0.000920356	0.0749843
LOC100354095	NA	NA	-2.76806	4.08884	16.8951	0.000921347	0.0749843
PCDH17	PCDH17	protocadherin 17 [Source:HGNC Symbol;Acc:HGNC:14267]	-1.59961	2.6133	16.604	0.00092424	0.0749843
CDK18	CDK18	cyclin dependent kinase 18 [Source:HGNC Symbol;Acc:HGNC:8751]	-2.48615	4.71862	16.8976	0.000926028	0.0749843
INHBA	INHBA	inhibin subunit beta A [Source:HGNC Symbol;Acc:HGNC:6066]	1.0095	5.58156	16.5367	0.000940194	0.0753832
PABIR1	PABIR1	PP2A Aalpha (PPP2R1A) and B55A (PPP2R2A) interacting phosphatase regulator 1 [Source:HGNC Symbol;Acc:HGNC:23490]	-0.540426	4.3028	16.535	0.000940602	0.0753832
LOC127486637	NA	NA	-3.01129	-0.26882	16.5101	0.000946609	0.0754776
ACTN2	ACTN2	actinin alpha 2 [Source:HGNC Symbol;Acc:HGNC:164]	-3.14463	8.84097	16.7303	0.000965114	0.0765624
LOC127483402	NA	NA	1.49496	1.91423	16.4005	0.000973474	0.0767873
NIBAN2	NIBAN2	niban apoptosis regulator 2 [Source:HGNC Symbol;Acc:HGNC:25282]	0.631719	7.71788	16.3673	0.000981779	0.0767873
SUCLG2	SUCLG2	succinate-CoA ligase GDP-forming subunit beta [Source:HGNC Symbol;Acc:HGNC:11450]	-1.47299	7.34736	16.3598	0.00098627	0.0767873
F2R	F2R	coagulation factor II thrombin receptor [Source:HGNC Symbol;Acc:HGNC:3537]	0.752578	4.48251	16.3408	0.000988484	0.0767873
NUGGC	NUGGC	nuclear GTPase, germinal center associated [Source:HGNC Symbol;Acc:HGNC:33550]	-2.08671	1.20494	16.3249	0.000992515	0.0767873
TUBA8	TUBA8	tubulin alpha 8 [Source:HGNC Symbol;Acc:HGNC:12410]	-3.14793	6.01434	16.5874	0.000999998	0.0769169
ATP5PF	ATP5PF	ATP synthase peripheral stalk subunit F6 [Source:HGNC Symbol;Acc:HGNC:847]	-1.18852	7.04019	16.267	0.0010074	0.0769169
LOC100348135	NA	NA	-1.83004	1.62323	16.2585	0.0010096	0.0769169
ACOT13	NA	NA	-2.23793	5.7223	16.4978	0.00101912	0.0769169
MERTK	MERTK	MER proto-oncogene, tyrosine kinase [Source:HGNC Symbol;Acc:HGNC:7027]	0.880512	6.37157	16.2199	0.00101967	0.0769169
DDIT4L	DDIT4L	DNA damage inducible transcript 4 like [Source:HGNC Symbol;Acc:HGNC:30555]	-2.95525	3.63225	16.4502	0.00102372	0.0769169
IRX5	IRX5	iroquois homeobox 5 [Source:HGNC Symbol;Acc:HGNC:14361]	-2.77139	1.94008	16.1207	0.00104881	0.0776758
DCHS1	DCHS1	dachsous cadherin-related 1 [Source:HGNC Symbol;Acc:HGNC:13681]	0.536901	6.60304	16.0989	0.00105202	0.0776758
MDH1	MDH1	malate dehydrogenase 1 [Source:HGNC Symbol;Acc:HGNC:6970]	-1.7046	8.17459	16.1214	0.00106093	0.0776758
MLIP	MLIP	muscular LMNA interacting protein [Source:HGNC Symbol;Acc:HGNC:21355]	-2.70271	6.19415	16.3405	0.00106373	0.0776758
MTX2	MTX2	metaxin 2 [Source:HGNC Symbol;Acc:HGNC:7506]	-0.643053	4.04133	16.0558	0.00106382	0.0776758
PDHB	PDHB	pyruvate dehydrogenase E1 subunit beta [Source:HGNC Symbol;Acc:HGNC:8808]	-1.17698	6.324	16.0492	0.00106565	0.0776758
NFU1	NFU1	NFU1 iron-sulfur cluster scaffold [Source:HGNC Symbol;Acc:HGNC:16287]	-0.800314	4.65307	16.0384	0.00106861	0.0776758
ADCY7	ADCY7	adenylate cyclase 7 [Source:HGNC Symbol;Acc:HGNC:238]	0.923778	5.76428	15.9792	0.00108515	0.0785128
COL13A1	NA	NA	1.86546	7.63094	16.0514	0.0011044	0.078822
CCDC181	CCDC181	coiled-coil domain containing 181 [Source:HGNC Symbol;Acc:HGNC:28051]	-1.28121	2.02885	15.9082	0.00110539	0.078822
NDUFA1	NA	NA	-1.01348	5.79371	15.8987	0.00110813	0.078822
LOC103349888	NA	NA	-1.01288	4.01847	15.8875	0.00111134	0.078822
MYOM3	MYOM3	myomesin 3 [Source:HGNC Symbol;Acc:HGNC:26679]	-3.089	5.51667	16.1495	0.00111619	0.078822
ESRRB	ESRRB	estrogen related receptor beta [Source:HGNC Symbol;Acc:HGNC:3473]	-3.20805	1.89396	15.9059	0.00112205	0.078822
NPY1R	NPY1R	neuropeptide Y receptor Y1 [Source:HGNC Symbol;Acc:HGNC:7956]	1.78377	6.26195	16.016	0.0011265	0.078822
PAQR6	NA	NA	0.552063	5.74983	15.7754	0.00114436	0.078822
ECHDC1	ECHDC1	ethylmalonyl-CoA decarboxylase 1 [Source:HGNC Symbol;Acc:HGNC:21489]	-0.74927	3.88894	15.7692	0.00114622	0.078822
CLYBL	CLYBL	citramalyl-CoA lyase [Source:HGNC Symbol;Acc:HGNC:18355]	-0.994433	4.4449	15.7393	0.0011552	0.078822
TSPAN12	TSPAN12	tetraspanin 12 [Source:HGNC Symbol;Acc:HGNC:21641]	-1.58959	4.68818	15.8391	0.00115598	0.078822
NFIL3	NFIL3	nuclear factor, interleukin 3 regulated [Source:HGNC Symbol;Acc:HGNC:7787]	-1.13814	4.14921	15.7303	0.00115794	0.078822
SMAD7	SMAD7	SMAD family member 7 [Source:HGNC Symbol;Acc:HGNC:6773]	0.552757	5.1514	15.7276	0.00115876	0.078822
DECR1	NA	NA	-1.22988	5.44927	15.7231	0.00116303	0.078822
ZNF275	NA	NA	0.598168	4.41115	15.6959	0.00116842	0.078822
PPP2R2B	PPP2R2B	protein phosphatase 2 regulatory subunit Bbeta [Source:HGNC Symbol;Acc:HGNC:9305]	-1.90812	1.5384	15.6649	0.00117796	0.078822
NDUFB6	NDUFB6	NADH:ubiquinone oxidoreductase subunit B6 [Source:HGNC Symbol;Acc:HGNC:7701]	-1.23211	5.73175	15.661	0.00118212	0.078822
SLC12A7	NA	NA	-2.08274	6.78791	15.8546	0.00118355	0.078822
TUBA4A	TUBA4A	tubulin alpha 4a [Source:HGNC Symbol;Acc:HGNC:12407]	-1.73572	5.94254	15.8094	0.00118788	0.078822
NPPB	NA	NA	-4.55667	8.818	15.8965	0.0011903	0.078822
TRIM54	NA	NA	-3.25893	5.228	15.8706	0.0011982	0.0789856
LOC127484200	NA	NA	2.06825	4.5099	15.7743	0.00120825	0.0789856
MYO1G	NA	NA	-1.76374	3.56343	15.5772	0.00120845	0.0789856
PYCR3	NA	NA	0.898503	3.2402	15.5086	0.00122744	0.0789856
RUSC2	RUSC2	RUN and SH3 domain containing 2 [Source:HGNC Symbol;Acc:HGNC:23625]	0.735895	7.02854	15.5011	0.00122988	0.0789856
RAB20	NA	NA	-2.1351	2.13378	15.5009	0.00122995	0.0789856
TIGAR	TIGAR	TP53 induced glycolysis regulatory phosphatase [Source:HGNC Symbol;Acc:HGNC:1185]	-1.60015	4.08634	15.5155	0.00123285	0.0789856
LOC108176625	NA	NA	1.58612	0.451161	15.4909	0.0012332	0.0789856
NCEH1	NCEH1	neutral cholesterol ester hydrolase 1 [Source:HGNC Symbol;Acc:HGNC:29260]	-1.35298	4.5642	15.4376	0.00125377	0.0799752
POPDC3	POPDC3	popeye domain containing 3 [Source:HGNC Symbol;Acc:HGNC:17649]	-2.75018	3.4374	15.6126	0.00125977	0.0799841
LOC100345072	NA	NA	-2.73969	3.17977	15.574	0.00126797	0.0799841
EPN2	EPN2	epsin 2 [Source:HGNC Symbol;Acc:HGNC:18639]	0.566404	6.82291	15.382	0.00126926	0.0799841
LOC100350787	NA	NA	-1.69982	8.06026	15.4218	0.00127753	0.0801819
WWP2	WWP2	WW domain containing E3 ubiquitin protein ligase 2 [Source:HGNC Symbol;Acc:HGNC:16804]	0.657909	6.51077	15.333	0.00128586	0.0803703
PDHX	PDHX	pyruvate dehydrogenase complex component X [Source:HGNC Symbol;Acc:HGNC:21350]	-0.987051	4.9727	15.3185	0.00129082	0.0803703
NAA60	NAA60	N-alpha-acetyltransferase 60, NatF catalytic subunit [Source:HGNC Symbol;Acc:HGNC:25875]	0.463242	5.24889	15.2535	0.00131334	0.081448
RPA3	RPA3	replication protein A3 [Source:HGNC Symbol;Acc:HGNC:10291]	-0.98668	4.10049	15.2343	0.00132006	0.081541
FH	NA	NA	-1.3221	6.22027	15.2167	0.00133366	0.0815963
MPC2	NA	NA	-1.06293	6.97244	15.1837	0.00133802	0.0815963
SLC16A7	SLC16A7	solute carrier family 16 member 7 [Source:HGNC Symbol;Acc:HGNC:10928]	-2.05036	5.38305	15.3967	0.00134096	0.0815963
SUSD5	SUSD5	sushi domain containing 5 [Source:HGNC Symbol;Acc:HGNC:29061]	1.39243	7.82449	15.1732	0.00134184	0.0815963
SOCS3	NA	NA	1.19265	4.61201	15.1414	0.00135323	0.0819703
MMP15	MMP15	matrix metallopeptidase 15 [Source:HGNC Symbol;Acc:HGNC:7161]	-1.11572	4.48318	15.0744	0.00137771	0.0822752
LRRC10	NA	NA	-2.93774	6.03915	15.3214	0.0013805	0.0822752
ALPK2	ALPK2	alpha kinase 2 [Source:HGNC Symbol;Acc:HGNC:20565]	-3.00257	4.86123	15.3202	0.00138095	0.0822752
LOC103345489	NA	NA	-1.58831	4.58044	15.1394	0.00138873	0.0822752
ACTA1	ACTA1	actin alpha 1, skeletal muscle [Source:HGNC Symbol;Acc:HGNC:129]	-3.59635	9.97841	15.2976	0.0013891	0.0822752
ATP5PB	NA	NA	-1.49465	8.05159	15.0492	0.00139036	0.0822752
SEC61A1	SEC61A1	SEC61 translocon subunit alpha 1 [Source:HGNC Symbol;Acc:HGNC:18276]	0.523725	7.24433	15.0276	0.00139512	0.0822752
CDK5RAP1	CDK5RAP1	CDK5 regulatory subunit associated protein 1 [Source:HGNC Symbol;Acc:HGNC:15880]	-0.527736	3.87253	15.0051	0.00140357	0.0824621
PPIF	PPIF	peptidylprolyl isomerase F [Source:HGNC Symbol;Acc:HGNC:9259]	-2.67368	6.27837	15.2254	0.00141552	0.0826043
SLC16A3	SLC16A3	solute carrier family 16 member 3 [Source:HGNC Symbol;Acc:HGNC:10924]	-1.87425	2.63456	14.9709	0.00141656	0.0826043
LOC127488889	NA	NA	-1.49431	7.18876	14.9606	0.00143912	0.0833407
LOC100354746	NA	NA	1.09845	2.67262	14.9064	0.00144136	0.0833407
ANAPC1	ANAPC1	anaphase promoting complex subunit 1 [Source:HGNC Symbol;Acc:HGNC:19988]	0.697678	5.40435	14.8966	0.00144518	0.0833407
KCNJ2	KCNJ2	potassium inwardly rectifying channel subfamily J member 2 [Source:HGNC Symbol;Acc:HGNC:6263]	-2.9212	3.90976	15.1103	0.00145883	0.0834987
MRPS30	MRPS30	mitochondrial ribosomal protein S30 [Source:HGNC Symbol;Acc:HGNC:8769]	-0.857252	3.8975	14.8546	0.00146168	0.0834987
MYOZ2	MYOZ2	myozenin 2 [Source:HGNC Symbol;Acc:HGNC:1330]	-2.68935	7.92195	15.0888	0.00146711	0.0834987
MRPS35	MRPS35	mitochondrial ribosomal protein S35 [Source:HGNC Symbol;Acc:HGNC:16635]	-0.799001	4.24949	14.8182	0.00147611	0.0834987
COQ3	COQ3	coenzyme Q3, methyltransferase [Source:HGNC Symbol;Acc:HGNC:18175]	-0.986806	3.42408	14.8147	0.0014775	0.0834987
MYOC	MYOC	myocilin [Source:HGNC Symbol;Acc:HGNC:7610]	-1.57692	6.3008	14.9245	0.00147998	0.0834987
GOT2	GOT2	glutamic-oxaloacetic transaminase 2 [Source:HGNC Symbol;Acc:HGNC:4433]	-1.53544	7.83687	14.7836	0.00150262	0.0841459
TNNI3K	TNNI3K	TNNI3 interacting kinase [Source:HGNC Symbol;Acc:HGNC:19661]	-3.04414	4.9173	14.9919	0.00150497	0.0841459
AKAP7	AKAP7	A-kinase anchoring protein 7 [Source:HGNC Symbol;Acc:HGNC:377]	-1.07115	3.54636	14.733	0.0015106	0.0841459
FGF16	FGF16	fibroblast growth factor 16 [Source:HGNC Symbol;Acc:HGNC:3672]	-1.50091	3.13942	14.7262	0.00151337	0.0841459
RPL3L	RPL3L	ribosomal protein L3 like [Source:HGNC Symbol;Acc:HGNC:10351]	-3.17158	5.1086	14.9256	0.00153154	0.0841459
ANKRD23	ANKRD23	ankyrin repeat domain 23 [Source:HGNC Symbol;Acc:HGNC:24470]	-2.85785	7.0388	14.9233	0.00153247	0.0841459
LOC100341175	NA	NA	-2.05822	7.21124	14.8649	0.00153293	0.0841459
CDK14	NA	NA	0.781489	5.34968	14.6738	0.00153509	0.0841459
TRIM63	TRIM63	tripartite motif containing 63 [Source:HGNC Symbol;Acc:HGNC:16007]	-1.76654	5.40116	14.8362	0.00153991	0.0841459
PIP5K1B	PIP5K1B	phosphatidylinositol-4-phosphate 5-kinase type 1 beta [Source:HGNC Symbol;Acc:HGNC:8995]	-2.51392	3.60178	14.8059	0.0015572	0.0846588
CCBE1	CCBE1	collagen and calcium binding EGF domains 1 [Source:HGNC Symbol;Acc:HGNC:29426]	-1.46375	2.34158	14.5808	0.00157446	0.0846588
LOC127491144	NA	NA	-0.953096	3.8379	14.5694	0.00157936	0.0846588
LOC103351679	NA	NA	-1.38927	6.23266	14.5982	0.00158959	0.0846588
LOC100348091	NA	NA	-1.43181	3.64758	14.5409	0.0015917	0.0846588
SBK1	NA	NA	-1.34581	3.48766	14.5408	0.00159176	0.0846588
MYPN	MYPN	myopalladin [Source:HGNC Symbol;Acc:HGNC:23246]	-3.01601	4.76251	14.7745	0.00159412	0.0846588
PCTP	PCTP	phosphatidylcholine transfer protein [Source:HGNC Symbol;Acc:HGNC:8752]	-1.27818	3.07074	14.5299	0.00159652	0.0846588
HYOU1	HYOU1	hypoxia up-regulated 1 [Source:HGNC Symbol;Acc:HGNC:16931]	0.567204	5.94008	14.5212	0.00160029	0.0846588
RASAL2	NA	NA	0.67319	6.15565	14.4985	0.0016103	0.0846588
COLGALT1	NA	NA	0.722097	7.19116	14.4908	0.00161367	0.0846588
CHST10	CHST10	carbohydrate sulfotransferase 10 [Source:HGNC Symbol;Acc:HGNC:19650]	0.563083	4.95263	14.479	0.0016189	0.0846588
APOBEC2	APOBEC2	apolipoprotein B mRNA editing enzyme catalytic subunit 2 [Source:HGNC Symbol;Acc:HGNC:605]	-2.8806	5.68328	14.7146	0.00161972	0.0846588
LOC100341474	NA	NA	-3.28473	7.1046	14.6781	0.00163553	0.0851651
IQGAP1	IQGAP1	IQ motif containing GTPase activating protein 1 [Source:HGNC Symbol;Acc:HGNC:6110]	0.670537	8.29241	14.4311	0.00164031	0.0851651
TRIM55	TRIM55	tripartite motif containing 55 [Source:HGNC Symbol;Acc:HGNC:14215]	-2.82158	3.80546	14.6467	0.00164738	0.085249
POU3F1	NA	NA	1.57541	1.04284	14.3988	0.00165493	0.0853339
CDS2	CDS2	CDP-diacylglycerol synthase 2 [Source:HGNC Symbol;Acc:HGNC:1801]	0.74595	7.41873	14.3878	0.00165994	0.0853339
ANAPC7	ANAPC7	anaphase promoting complex subunit 7 [Source:HGNC Symbol;Acc:HGNC:17380]	0.637783	6.07225	14.3671	0.00166937	0.0855376
TCF7L1	TCF7L1	transcription factor 7 like 1 [Source:HGNC Symbol;Acc:HGNC:11640]	0.462996	4.84772	14.3436	0.00168019	0.0857008
PHB2	PHB2	prohibitin 2 [Source:HGNC Symbol;Acc:HGNC:30306]	-0.908221	6.56593	14.3238	0.00168941	0.0857008
NRG2	NA	NA	-1.69792	0.295116	14.3203	0.00169101	0.0857008
ELAVL4	ELAVL4	ELAV like RNA binding protein 4 [Source:HGNC Symbol;Acc:HGNC:3315]	-2.53564	1.09062	14.3129	0.00169449	0.0857008
STRIP2	STRIP2	striatin interacting protein 2 [Source:HGNC Symbol;Acc:HGNC:22209]	-2.09312	3.56849	14.3814	0.00171665	0.0865413
PPP1R3C	PPP1R3C	protein phosphatase 1 regulatory subunit 3C [Source:HGNC Symbol;Acc:HGNC:9293]	-1.05287	6.74423	14.193	0.00175153	0.0879893
PKIA	PKIA	cAMP-dependent protein kinase inhibitor alpha [Source:HGNC Symbol;Acc:HGNC:9017]	-2.31662	4.156	14.3689	0.00175663	0.0879893
XIRP1	XIRP1	xin actin binding repeat containing 1 [Source:HGNC Symbol;Acc:HGNC:14301]	-2.81092	6.71565	14.37	0.00177642	0.0880505
NDUFA4	NA	NA	-1.71275	7.80179	14.2064	0.00178654	0.0880505
LOC103347791	NA	NA	-1.35859	0.804078	14.112	0.00179129	0.0880505
FAM98A	FAM98A	family with sequence similarity 98 member A [Source:HGNC Symbol;Acc:HGNC:24520]	0.55408	6.52671	14.0981	0.00179825	0.0880505
NACAD	NA	NA	-1.8045	1.48425	14.0621	0.00181631	0.0880505
LOC100351672	NA	NA	-0.526156	5.20855	14.0452	0.00182489	0.0880505
MRPL39	MRPL39	mitochondrial ribosomal protein L39 [Source:HGNC Symbol;Acc:HGNC:14027]	-0.921822	4.74819	14.0439	0.00182552	0.0880505
COL4A2	COL4A2	collagen type IV alpha 2 chain [Source:HGNC Symbol;Acc:HGNC:2203]	0.735127	9.5003	14.0166	0.00183945	0.0880505
FAM20A	FAM20A	FAM20A golgi associated secretory pathway pseudokinase [Source:HGNC Symbol;Acc:HGNC:23015]	-1.41857	2.83616	14.0073	0.00184424	0.0880505
IMMT	IMMT	inner membrane mitochondrial protein [Source:HGNC Symbol;Acc:HGNC:6047]	-1.04524	7.25558	13.99	0.00185316	0.0880505
GPR157	GPR157	G protein-coupled receptor 157 [Source:HGNC Symbol;Acc:HGNC:23687]	-1.95414	2.71017	13.9912	0.00185325	0.0880505
HJV	HJV	hemojuvelin BMP co-receptor [Source:HGNC Symbol;Acc:HGNC:4887]	-2.92566	3.94244	14.1944	0.00186285	0.0880505
IMMP1L	IMMP1L	inner mitochondrial membrane peptidase subunit 1 [Source:HGNC Symbol;Acc:HGNC:26317]	-0.830981	3.80604	13.967	0.00186508	0.0880505
ARL4C	ARL4C	ADP ribosylation factor like GTPase 4C [Source:HGNC Symbol;Acc:HGNC:698]	-1.37637	3.26405	13.9497	0.00187411	0.0880505
NEK5	NA	NA	-1.76934	1.55369	13.9455	0.0018763	0.0880505
LOC103345766	NA	NA	1.29645	0.0186824	13.9312	0.00188384	0.0880505
NRAP	NRAP	nebulin related anchoring protein [Source:HGNC Symbol;Acc:HGNC:7988]	-3.07654	7.84971	14.1518	0.00188456	0.0880505
SKI	NA	NA	0.63114	7.3724	13.9281	0.00188545	0.0880505
LOC100355688	NA	NA	-1.23424	5.45943	13.943	0.00188791	0.0880505
ATP5F1A	ATP5F1A	ATP synthase F1 subunit alpha [Source:HGNC Symbol;Acc:HGNC:823]	-1.2592	9.43469	13.9231	0.00188809	0.0880505
LDHB	NA	NA	-1.75003	9.75836	13.9298	0.00189491	0.0880505
SIPA1L3	SIPA1L3	signal induced proliferation associated 1 like 3 [Source:HGNC Symbol;Acc:HGNC:23801]	0.59449	4.58304	13.89	0.00190566	0.0880505
ADGRG3	NA	NA	1.38318	0.922475	13.8547	0.0019246	0.0880505
BTG2	BTG2	BTG anti-proliferation factor 2 [Source:HGNC Symbol;Acc:HGNC:1131]	1.66138	5.29229	13.9927	0.00192826	0.0880505
LOC100341993	NA	NA	-1.8868	1.86791	13.839	0.00193307	0.0880505
LDHA	LDHA	lactate dehydrogenase A [Source:HGNC Symbol;Acc:HGNC:6535]	4.38625	4.48415	14.053	0.00193597	0.0880505
FAM162A	FAM162A	family with sequence similarity 162 member A [Source:HGNC Symbol;Acc:HGNC:17865]	-0.915665	6.37418	13.8299	0.00193806	0.0880505
PLEKHG5	PLEKHG5	pleckstrin homology and RhoGEF domain containing G5 [Source:HGNC Symbol;Acc:HGNC:29105]	0.673739	6.13716	13.7989	0.00195497	0.0880505
JAZF1	JAZF1	JAZF zinc finger 1 [Source:HGNC Symbol;Acc:HGNC:28917]	0.713428	5.39428	13.772	0.00196979	0.0880505
ACTN4	ACTN4	actinin alpha 4 [Source:HGNC Symbol;Acc:HGNC:166]	0.90702	10.089	13.7616	0.00197558	0.0880505
AASS	AASS	aminoadipate-semialdehyde synthase [Source:HGNC Symbol;Acc:HGNC:17366]	-0.632402	5.22359	13.7583	0.0019774	0.0880505
GATM	GATM	glycine amidinotransferase [Source:HGNC Symbol;Acc:HGNC:4175]	-1.4435	3.65087	13.758	0.00197757	0.0880505
BCHE	BCHE	butyrylcholinesterase [Source:HGNC Symbol;Acc:HGNC:983]	1.45569	8.84886	13.755	0.00197935	0.0880505
RAB33A	RAB33A	RAB33A, member RAS oncogene family [Source:HGNC Symbol;Acc:HGNC:9773]	-2.90237	2.58024	13.8756	0.00198126	0.0880505
VDAC1	VDAC1	voltage dependent anion channel 1 [Source:HGNC Symbol;Acc:HGNC:12669]	-1.19622	8.02411	13.7465	0.00198402	0.0880505
LOC100328948	NA	NA	-3.66311	0.5427	13.7463	0.00198411	0.0880505
P3H1	P3H1	prolyl 3-hydroxylase 1 [Source:HGNC Symbol;Acc:HGNC:19316]	0.635432	5.78363	13.7366	0.00198955	0.0880505
CHCHD3	NA	NA	-1.18904	6.29546	13.7417	0.00199092	0.0880505
ADAMTSL4	ADAMTSL4	ADAMTS like 4 [Source:HGNC Symbol;Acc:HGNC:19706]	0.653969	8.98536	13.718	0.00200001	0.0880505
RETREG1	RETREG1	reticulophagy regulator 1 [Source:HGNC Symbol;Acc:HGNC:25964]	-1.35473	5.47407	13.7835	0.0020037	0.0880505
PFKM	PFKM	phosphofructokinase, muscle [Source:HGNC Symbol;Acc:HGNC:8877]	-2.05625	7.62281	13.864	0.00201057	0.0880505
NDUFS1	NDUFS1	NADH:ubiquinone oxidoreductase core subunit S1 [Source:HGNC Symbol;Acc:HGNC:7707]	-1.32145	6.84886	13.7168	0.00201089	0.0880505
FMOD	FMOD	fibromodulin [Source:HGNC Symbol;Acc:HGNC:3774]	0.917275	9.59861	13.6964	0.00201222	0.0880505
NPL	NA	NA	-1.33683	4.14577	13.6922	0.0020146	0.0880505
CPT1B	CPT1B	carnitine palmitoyltransferase 1B [Source:HGNC Symbol;Acc:HGNC:2329]	-1.75804	6.2945	13.8393	0.00201861	0.0880505
SMIM14	NA	NA	0.915846	6.68622	13.6811	0.00202092	0.0880505
GOT1	GOT1	glutamic-oxaloacetic transaminase 1 [Source:HGNC Symbol;Acc:HGNC:4432]	-2.17545	7.35301	13.8513	0.002028	0.0880505
SAMD13	NA	NA	-1.60363	1.57451	13.6618	0.00203193	0.0880505
TNFRSF11B	TNFRSF11B	TNF receptor superfamily member 11b [Source:HGNC Symbol;Acc:HGNC:11909]	1.02701	5.59303	13.6545	0.00203612	0.0880505
AK1	AK1	adenylate kinase 1 [Source:HGNC Symbol;Acc:HGNC:361]	-1.79783	5.80689	13.8123	0.00203956	0.0880505
HPSE	HPSE	heparanase [Source:HGNC Symbol;Acc:HGNC:5164]	-1.55475	2.20603	13.6246	0.00205338	0.0884029
LOC100350556	NA	NA	0.511423	5.3198	13.6139	0.0020596	0.088427
DDAH1	DDAH1	dimethylarginine dimethylaminohydrolase 1 [Source:HGNC Symbol;Acc:HGNC:2715]	-1.95708	4.65867	13.7622	0.00207147	0.0886929
PTPRF	PTPRF	protein tyrosine phosphatase receptor type F [Source:HGNC Symbol;Acc:HGNC:9670]	0.484489	6.06701	13.5836	0.00207736	0.0887021
IRX3	NA	NA	-2.6619	3.45902	13.7282	0.00209368	0.0890872
KIRREL1	KIRREL1	kirre like nephrin family adhesion molecule 1 [Source:HGNC Symbol;Acc:HGNC:15734]	0.719386	6.69594	13.5426	0.00210165	0.0890872
BHLHE41	NA	NA	0.751454	5.88236	13.5395	0.00210348	0.0890872
EEF1A2	NA	NA	-2.85277	8.47868	13.725	0.00211849	0.0894803
C13H1orf54	NA	NA	-1.17089	2.57671	13.4967	0.00212921	0.0896909
ASAP2	ASAP2	ArfGAP with SH3 domain, ankyrin repeat and PH domain 2 [Source:HGNC Symbol;Acc:HGNC:2721]	0.576302	5.87479	13.4657	0.00214804	0.0900167
CEP85	CEP85	centrosomal protein 85 [Source:HGNC Symbol;Acc:HGNC:25309]	-1.67324	4.41242	13.5467	0.00216232	0.0900167
CLIC5	CLIC5	chloride intracellular channel 5 [Source:HGNC Symbol;Acc:HGNC:13517]	-2.0669	5.66721	13.6328	0.00217326	0.0900167
PHEX	PHEX	phosphate regulating endopeptidase X-linked [Source:HGNC Symbol;Acc:HGNC:8918]	-2.19291	0.762681	13.4246	0.00217333	0.0900167
WFDC1	NA	NA	1.00612	9.57157	13.4032	0.00218663	0.0900167
LOC100338260	NA	NA	-1.54838	1.96214	13.4013	0.00218781	0.0900167
LOC127487399	NA	NA	-1.10423	2.3904	13.3994	0.00218899	0.0900167
MYL3	NA	NA	-3.65909	10.5064	13.6015	0.00219222	0.0900167
MAPKAPK3	MAPKAPK3	MAPK activated protein kinase 3 [Source:HGNC Symbol;Acc:HGNC:6888]	-0.913842	5.36109	13.3908	0.00219437	0.0900167
LDLRAD4	LDLRAD4	low density lipoprotein receptor class A domain containing 4 [Source:HGNC Symbol;Acc:HGNC:1224]	0.583536	6.52014	13.3824	0.00219965	0.0900167
GMPR	GMPR	guanosine monophosphate reductase [Source:HGNC Symbol;Acc:HGNC:4376]	-2.39302	4.69757	13.5883	0.00220031	0.0900167
NDUFB3	NDUFB3	NADH:ubiquinone oxidoreductase subunit B3 [Source:HGNC Symbol;Acc:HGNC:7698]	-1.00886	5.81081	13.363	0.00221185	0.0901073
GPT	NA	NA	-1.71897	4.61906	13.4937	0.00221405	0.0901073
LOC100346411	NA	NA	-1.94999	8.12077	13.4559	0.00223769	0.0904145
HIBADH	HIBADH	3-hydroxyisobutyrate dehydrogenase [Source:HGNC Symbol;Acc:HGNC:4907]	-0.887283	6.79302	13.3208	0.00223869	0.0904145
ATPAF1	ATPAF1	ATP synthase mitochondrial F1 complex assembly factor 1 [Source:HGNC Symbol;Acc:HGNC:18803]	-0.836921	4.69534	13.3156	0.00224203	0.0904145
CCN3	CCN3	cellular communication network factor 3 [Source:HGNC Symbol;Acc:HGNC:7885]	1.09289	9.65879	13.3114	0.00224474	0.0904145
GPATCH11	GPATCH11	G-patch domain containing 11 [Source:HGNC Symbol;Acc:HGNC:26768]	-0.534537	3.45461	13.3014	0.00225119	0.0904413
ACAT1	ACAT1	acetyl-CoA acetyltransferase 1 [Source:HGNC Symbol;Acc:HGNC:93]	-1.39269	7.39881	13.3019	0.00226686	0.0906802
KIFC3	KIFC3	kinesin family member C3 [Source:HGNC Symbol;Acc:HGNC:6326]	0.702804	6.0268	13.2639	0.00227546	0.0906802
ACAD10	ACAD10	acyl-CoA dehydrogenase family member 10 [Source:HGNC Symbol;Acc:HGNC:21597]	-0.875288	4.25459	13.2545	0.00228166	0.0906802
PRICKLE1	PRICKLE1	prickle planar cell polarity protein 1 [Source:HGNC Symbol;Acc:HGNC:17019]	0.69376	3.70165	13.2517	0.00228349	0.0906802
AP3M2	AP3M2	adaptor related protein complex 3 subunit mu 2 [Source:HGNC Symbol;Acc:HGNC:570]	0.697404	3.99287	13.2476	0.00228615	0.0906802
ATP5MK	NA	NA	-1.28534	6.85167	13.2288	0.00230723	0.0907599
DAB1	DAB1	DAB adaptor protein 1 [Source:HGNC Symbol;Acc:HGNC:2661]	-2.69441	2.41277	13.2876	0.00230955	0.0907599
TRIOBP	NA	NA	0.485349	5.98001	13.2107	0.00231047	0.0907599
ATP5MC3	ATP5MC3	ATP synthase membrane subunit c locus 3 [Source:HGNC Symbol;Acc:HGNC:843]	-1.29795	7.78291	13.2129	0.00231338	0.0907599
CWC15	CWC15	CWC15 spliceosome associated protein homolog [Source:HGNC Symbol;Acc:HGNC:26939]	-0.57963	5.05517	13.189	0.00232494	0.0907599
DLD	NA	NA	-0.983877	6.63725	13.1862	0.00232684	0.0907599
AKT3	AKT3	AKT serine/threonine kinase 3 [Source:HGNC Symbol;Acc:HGNC:393]	0.697291	6.83147	13.178	0.00233229	0.0907599
TP53INP2	NA	NA	-1.4192	6.46272	13.2459	0.00233712	0.0907599
TIMM9	TIMM9	translocase of inner mitochondrial membrane 9 [Source:HGNC Symbol;Acc:HGNC:11819]	-0.82078	3.62298	13.1584	0.00234552	0.0907599
ANO6	ANO6	anoctamin 6 [Source:HGNC Symbol;Acc:HGNC:25240]	0.410861	6.12442	13.1573	0.00234624	0.0907599
NDUFS2	NDUFS2	NADH:ubiquinone oxidoreductase core subunit S2 [Source:HGNC Symbol;Acc:HGNC:7708]	-1.03047	7.43096	13.143	0.00235592	0.0909096
AMIGO2	NA	NA	0.911901	3.80341	13.1298	0.00236491	0.0910315
LOC127488313	NA	NA	4.37378	1.99046	13.2251	0.00239961	0.0921404
DHRS11	DHRS11	dehydrogenase/reductase 11 [Source:HGNC Symbol;Acc:HGNC:28639]	-2.05639	7.87797	13.2135	0.00241167	0.0921504
PSMA3	PSMA3	proteasome 20S subunit alpha 3 [Source:HGNC Symbol;Acc:HGNC:9532]	-0.50327	6.40096	13.0519	0.00241868	0.0921504
FAM210A	FAM210A	family with sequence similarity 210 member A [Source:HGNC Symbol;Acc:HGNC:28346]	-0.688476	4.48395	13.0429	0.00242501	0.0921504
LOC127489978	NA	NA	-4.08159	-0.202301	13.0419	0.00242571	0.0921504
TBL2	TBL2	transducin beta like 2 [Source:HGNC Symbol;Acc:HGNC:11586]	0.49273	4.51904	13.034	0.00243126	0.0921504
ACO2	ACO2	aconitase 2 [Source:HGNC Symbol;Acc:HGNC:118]	-1.68098	8.68103	13.0864	0.00243917	0.0921504
ECH1	NA	NA	-1.50569	7.25039	13.0935	0.00244115	0.0921504
NDUFA9	NDUFA9	NADH:ubiquinone oxidoreductase subunit A9 [Source:HGNC Symbol;Acc:HGNC:7693]	-1.06792	6.47097	13.0036	0.00245272	0.0923643
ANO4	ANO4	anoctamin 4 [Source:HGNC Symbol;Acc:HGNC:23837]	1.35694	2.90694	12.9599	0.00248399	0.0931253
TLCD2	TLCD2	TLC domain containing 2 [Source:HGNC Symbol;Acc:HGNC:33522]	0.864346	4.73221	12.9533	0.00248871	0.0931253
SLC6A17	SLC6A17	solute carrier family 6 member 17 [Source:HGNC Symbol;Acc:HGNC:31399]	-1.75383	2.80942	12.9494	0.00249158	0.0931253
PLOD3	NA	NA	0.558807	6.18894	12.9392	0.00249892	0.0931253
RPS6KA4	NA	NA	0.529906	5.75384	12.9336	0.00250302	0.0931253
DNAAF4	DNAAF4	dynein axonemal assembly factor 4 [Source:HGNC Symbol;Acc:HGNC:21493]	-1.38523	-0.133442	12.9258	0.00250869	0.0931253
RABL3	NA	NA	-0.499947	4.01251	12.9102	0.00252011	0.0932145
LOC103351231	NA	NA	-1.66779	-0.187255	12.9062	0.00252302	0.0932145
TMEM143	TMEM143	transmembrane protein 143 [Source:HGNC Symbol;Acc:HGNC:25603]	-1.44515	4.72638	12.9625	0.00253475	0.0932452
ETFDH	ETFDH	electron transfer flavoprotein dehydrogenase [Source:HGNC Symbol;Acc:HGNC:3483]	-1.22963	6.41928	12.895	0.00254243	0.0932452
FRAS1	FRAS1	Fraser extracellular matrix complex subunit 1 [Source:HGNC Symbol;Acc:HGNC:19185]	1.0752	6.47897	12.8759	0.00254537	0.0932452
SDHA	SDHA	succinate dehydrogenase complex flavoprotein subunit A [Source:HGNC Symbol;Acc:HGNC:10680]	-1.62285	8.73271	12.9147	0.00254772	0.0932452
ACADL	NA	NA	-0.942611	7.24595	12.862	0.00255566	0.0933173
PERM1	PERM1	PPARGC1 and ESRR induced regulator, muscle 1 [Source:HGNC Symbol;Acc:HGNC:28208]	-2.78372	5.99634	13.0156	0.00258445	0.0938121
DAP3	DAP3	death associated protein 3 [Source:HGNC Symbol;Acc:HGNC:2673]	-0.692018	4.88375	12.822	0.00258567	0.0938121
USP20	USP20	ubiquitin specific peptidase 20 [Source:HGNC Symbol;Acc:HGNC:12619]	0.53225	6.08879	12.8168	0.00258958	0.0938121
ATP5F1B	ATP5F1B	ATP synthase F1 subunit beta [Source:HGNC Symbol;Acc:HGNC:830]	-1.45608	9.73221	12.812	0.00259322	0.0938121
EDA2R	EDA2R	ectodysplasin A2 receptor [Source:HGNC Symbol;Acc:HGNC:17756]	-1.40822	3.14126	12.8008	0.0026017	0.0939014
LOC103345588	NA	NA	1.42553	1.70733	12.7889	0.00261074	0.0940108
PAQR9	PAQR9	progestin and adipoQ receptor family member 9 [Source:HGNC Symbol;Acc:HGNC:30131]	-2.55049	2.39192	12.8491	0.00261759	0.0940339
OXNAD1	OXNAD1	oxidoreductase NAD binding domain containing 1 [Source:HGNC Symbol;Acc:HGNC:25128]	-0.710401	3.84953	12.7723	0.00262342	0.0940339
MYH7B	MYH7B	myosin heavy chain 7B [Source:HGNC Symbol;Acc:HGNC:15906]	-2.64964	6.02332	12.9526	0.00263124	0.0940984
SLC25A30	SLC25A30	solute carrier family 25 member 30 [Source:HGNC Symbol;Acc:HGNC:27371]	-1.54305	5.68261	12.8779	0.00263732	0.0941006
ADSS1	ADSS1	adenylosuccinate synthase 1 [Source:HGNC Symbol;Acc:HGNC:20093]	-2.43164	5.4021	12.922	0.00265429	0.0941664
KLHL29	KLHL29	kelch like family member 29 [Source:HGNC Symbol;Acc:HGNC:29404]	0.788895	3.37557	12.7285	0.00265723	0.0941664
IGF1R	IGF1R	insulin like growth factor 1 receptor [Source:HGNC Symbol;Acc:HGNC:5465]	0.676061	6.09685	12.7223	0.0026621	0.0941664
KMT5A	NA	NA	0.421817	5.91054	12.7208	0.00266327	0.0941664
ASB15	ASB15	ankyrin repeat and SOCS box containing 15 [Source:HGNC Symbol;Acc:HGNC:19767]	-2.78179	4.51361	12.8761	0.00268931	0.0946364
TXLNB	TXLNB	taxilin beta [Source:HGNC Symbol;Acc:HGNC:21617]	-3.0238	2.7487	12.8161	0.00270134	0.0946364
TRIM3	TRIM3	tripartite motif containing 3 [Source:HGNC Symbol;Acc:HGNC:10064]	0.41377	5.29151	12.6702	0.00270309	0.0946364
MRPL1	MRPL1	mitochondrial ribosomal protein L1 [Source:HGNC Symbol;Acc:HGNC:14275]	-0.796094	3.8651	12.6651	0.00270714	0.0946364
PPA2	PPA2	inorganic pyrophosphatase 2 [Source:HGNC Symbol;Acc:HGNC:28883]	-0.628852	5.46924	12.6594	0.00271162	0.0946364
SPTSSA	NA	NA	0.805939	6.12496	12.6578	0.00271289	0.0946364
LOC127484381	NA	NA	-0.868917	3.41547	12.635	0.00273115	0.095061
PDLIM5	PDLIM5	PDZ and LIM domain 5 [Source:HGNC Symbol;Acc:HGNC:17468]	-1.25574	7.80399	12.6244	0.00273967	0.0951458
CALU	CALU	calumenin [Source:HGNC Symbol;Acc:HGNC:1458]	0.657754	8.44662	12.6	0.00275936	0.0956169
LOC100353481	NA	NA	-1.55303	3.06213	12.5811	0.00277482	0.09594
ASB16	ASB16	ankyrin repeat and SOCS box containing 16 [Source:HGNC Symbol;Acc:HGNC:19768]	-2.66277	3.60947	12.7269	0.00279104	0.0959912
NOL3	NA	NA	-1.18649	3.19656	12.5539	0.00279708	0.0959912
CISH	CISH	cytokine inducible SH2 containing protein [Source:HGNC Symbol;Acc:HGNC:1984]	-1.48751	5.07636	12.6579	0.00279945	0.0959912
MYOM2	MYOM2	myomesin 2 [Source:HGNC Symbol;Acc:HGNC:7614]	-3.19903	8.08919	12.7257	0.00280774	0.0959912
DOK5	DOK5	docking protein 5 [Source:HGNC Symbol;Acc:HGNC:16173]	-2.53367	3.33115	12.6768	0.00281214	0.0959912
NT5C3A	NT5C3A	5'-nucleotidase, cytosolic IIIA [Source:HGNC Symbol;Acc:HGNC:17820]	-0.653621	4.96362	12.5263	0.00282	0.0959912
ARHGEF17	ARHGEF17	Rho guanine nucleotide exchange factor 17 [Source:HGNC Symbol;Acc:HGNC:21726]	0.830595	6.98169	12.5257	0.00282044	0.0959912
MTHFD1L	MTHFD1L	methylenetetrahydrofolate dehydrogenase (NADP+ dependent) 1 like [Source:HGNC Symbol;Acc:HGNC:21055]	0.736318	4.94704	12.5197	0.00282544	0.0959912
TXNDC5	TXNDC5	thioredoxin domain containing 5 [Source:HGNC Symbol;Acc:HGNC:21073]	0.65209	6.83815	12.5073	0.00283581	0.0961344
LOC100344949	NA	NA	-0.58333	4.24152	12.4878	0.00285223	0.09623
SLC2A10	SLC2A10	solute carrier family 2 member 10 [Source:HGNC Symbol;Acc:HGNC:13444]	0.587385	5.17722	12.4848	0.00285472	0.09623
HSPE1	HSPE1	heat shock protein family E (Hsp10) member 1 [Source:HGNC Symbol;Acc:HGNC:5269]	-0.550978	6.95256	12.482	0.0028571	0.09623
L2HGDH	L2HGDH	L-2-hydroxyglutarate dehydrogenase [Source:HGNC Symbol;Acc:HGNC:20499]	-1.06082	3.28315	12.4592	0.00287642	0.0963079
KIAA0040	NA	NA	0.521611	5.62383	12.4575	0.00287788	0.0963079
YIPF7	YIPF7	Yip1 domain family member 7 [Source:HGNC Symbol;Acc:HGNC:26825]	-2.74576	3.40668	12.6207	0.0028779	0.0963079
KIAA1191	KIAA1191	KIAA1191 [Source:HGNC Symbol;Acc:HGNC:29209]	-1.16502	5.68349	12.4504	0.00289766	0.0967622
MTRES1	MTRES1	mitochondrial transcription rescue factor 1 [Source:HGNC Symbol;Acc:HGNC:17971]	-0.602738	3.80945	12.4084	0.00292008	0.0973027
DLST	DLST	dihydrolipoamide S-succinyltransferase [Source:HGNC Symbol;Acc:HGNC:2911]	-1.03713	7.42964	12.3815	0.00294349	0.0976519
LOC100343268	NA	NA	-0.629843	5.59288	12.3778	0.00294671	0.0976519
LOC100352669	NA	NA	-8.71902	2.01059	13.8073	0.0029493	0.0976519
ADRB1	NA	NA	-2.36634	3.42345	12.4766	0.0029792	0.0982049
LOC127486351	NA	NA	-1.36956	0.729379	12.3354	0.00298406	0.0982049
COQ8A	COQ8A	coenzyme Q8A [Source:HGNC Symbol;Acc:HGNC:16812]	-1.73896	7.41438	12.45	0.00298583	0.0982049
ADHFE1	ADHFE1	alcohol dehydrogenase iron containing 1 [Source:HGNC Symbol;Acc:HGNC:16354]	-0.833511	5.19308	12.3274	0.00299114	0.0982049
PDE3A	PDE3A	phosphodiesterase 3A [Source:HGNC Symbol;Acc:HGNC:8778]	-0.754971	5.80851	12.3057	0.00301057	0.0984361
DHRS4	DHRS4//DHRS4L2	dehydrogenase/reductase 4 [Source:HGNC Symbol;Acc:HGNC:16985]//dehydrogenase/reductase 4 like 2 [Source:HGNC Symbol;Acc:HGNC:19731]	-0.783933	6.20909	12.3002	0.00301546	0.0984361
NDUFB1	NA	NA	-1.15628	5.05047	12.3047	0.00301708	0.0984361
BCAR1	BCAR1	BCAR1 scaffold protein, Cas family member [Source:HGNC Symbol;Acc:HGNC:971]	0.429703	5.89535	12.2768	0.00303659	0.0986902
LOC100340645	COX6C//COX6C	cytochrome c oxidase subunit 6C [Source:HGNC Symbol;Acc:HGNC:2285]//cytochrome c oxidase subunit 6C [Source:HGNC Symbol;Acc:HGNC:2285]	-1.22993	7.06387	12.282	0.0030375	0.0986902
LOC127487009	NA	NA	-0.876768	8.79468	12.2672	0.00304525	0.0987078
SERTAD3	NA	NA	0.666992	4.94591	12.2547	0.00305666	0.0987078
NUMBL	NUMBL	NUMB like endocytic adaptor protein [Source:HGNC Symbol;Acc:HGNC:8061]	0.480633	5.47333	12.2463	0.00306427	0.0987078
CC2D1B	CC2D1B	coiled-coil and C2 domain containing 1B [Source:HGNC Symbol;Acc:HGNC:29386]	0.365716	5.47182	12.2395	0.00307058	0.0987078
LMNA	LMNA	lamin A/C [Source:HGNC Symbol;Acc:HGNC:6636]	0.552913	8.51458	12.2362	0.00307353	0.0987078
TSKU	TSKU	tsukushi, small leucine rich proteoglycan [Source:HGNC Symbol;Acc:HGNC:28850]	0.585821	5.13152	12.2336	0.00307593	0.0987078
ARHGAP23	ARHGAP23	Rho GTPase activating protein 23 [Source:HGNC Symbol;Acc:HGNC:29293]	0.465797	5.90305	12.2175	0.0030908	0.0989817
NPNT	NPNT	nephronectin [Source:HGNC Symbol;Acc:HGNC:27405]	1.03386	8.06162	12.189	0.00311718	0.0996224
CEP170B	NA	NA	0.521849	4.88753	12.1735	0.00313173	0.0998479
COQ5	COQ5	coenzyme Q5, methyltransferase [Source:HGNC Symbol;Acc:HGNC:28722]	-1.15183	4.49276	12.1576	0.00314662	0.0998479
AFAP1L1	AFAP1L1	actin filament associated protein 1 like 1 [Source:HGNC Symbol;Acc:HGNC:26714]	-1.25931	4.04674	12.1573	0.00314697	0.0998479
CBR4	CBR4	carbonyl reductase 4 [Source:HGNC Symbol;Acc:HGNC:25891]	-0.849699	3.6769	12.146	0.00315758	0.0998479
LOC127482725	NA	NA	1.17126	2.20283	12.1313	0.00317159	0.0998479
EHD2	NA	NA	0.547365	7.95871	12.131	0.00317181	0.0998479
KLHL34	KLHL34	kelch like family member 34 [Source:HGNC Symbol;Acc:HGNC:26634]	-1.71817	3.02112	12.1327	0.00317608	0.0998479
MMP28	MMP28	matrix metallopeptidase 28 [Source:HGNC Symbol;Acc:HGNC:14366]	0.832278	3.56814	12.1166	0.00318557	0.0998479
ACADVL	ACADVL	acyl-CoA dehydrogenase very long chain [Source:HGNC Symbol;Acc:HGNC:92]	-1.32845	7.34704	12.1368	0.00318823	0.0998479
ISCA1	TUT7	terminal uridylyl transferase 7 [Source:HGNC Symbol;Acc:HGNC:25817]	-0.796893	6.54484	12.1049	0.00319675	0.0998479
JDP2	JDP2	Jun dimerization protein 2 [Source:HGNC Symbol;Acc:HGNC:17546]	0.57171	5.66377	12.0929	0.00320828	0.0998479
DUSP1	DUSP1	dual specificity phosphatase 1 [Source:HGNC Symbol;Acc:HGNC:3064]	1.93019	7.30627	12.2242	0.00320946	0.0998479
CRHR2	CRHR2	corticotropin releasing hormone receptor 2 [Source:HGNC Symbol;Acc:HGNC:2358]	-2.09833	1.90873	12.0662	0.00323418	0.0998479
LAMA5	NA	NA	0.62242	8.1106	12.0632	0.00323708	0.0998479
CACNB2	CACNB2	calcium voltage-gated channel auxiliary subunit beta 2 [Source:HGNC Symbol;Acc:HGNC:1402]	-0.765469	4.91377	12.0593	0.00324085	0.0998479
ALKAL2	ALKAL2	ALK and LTK ligand 2 [Source:HGNC Symbol;Acc:HGNC:27683]	1.94653	1.42411	12.0578	0.00324238	0.0998479
SDHAF3	SDHAF3	succinate dehydrogenase complex assembly factor 3 [Source:HGNC Symbol;Acc:HGNC:21752]	-0.677002	3.58761	12.0563	0.00324384	0.0998479
LOC100356756	NA	NA	-2.79202	6.84377	12.2202	0.00325189	0.0998479
VLDLR	VLDLR	very low density lipoprotein receptor [Source:HGNC Symbol;Acc:HGNC:12698]	-2.30365	6.72823	12.2182	0.00325375	0.0998479
MRAS	MRAS	muscle RAS oncogene homolog [Source:HGNC Symbol;Acc:HGNC:7227]	0.446728	5.57449	12.0404	0.00325933	0.0998479
FBXO40	FBXO40	F-box protein 40 [Source:HGNC Symbol;Acc:HGNC:29816]	-2.69568	5.86889	12.2089	0.00326261	0.0998479
LOC127490235	NA	NA	-10.0423	1.63914	13.3973	0.0032648	0.0998479
MRPL51	MRPL51	mitochondrial ribosomal protein L51 [Source:HGNC Symbol;Acc:HGNC:14044]	-0.848465	4.75116	12.0282	0.00327133	0.0998523
PTBP1	NA	NA	0.379182	7.16427	12.0038	0.00329546	0.0999197
ANK3	ANK3	ankyrin 3 [Source:HGNC Symbol;Acc:HGNC:494]	-1.13976	5.18805	12.0162	0.00329689	0.0999197
NDUFAB1	NDUFAB1	NADH:ubiquinone oxidoreductase subunit AB1 [Source:HGNC Symbol;Acc:HGNC:7694]	-1.49012	6.60745	12.094	0.00330103	0.0999197
SOD2	NA	NA	-1.24789	8.25445	11.9945	0.00330472	0.0999197
GPT2	GPT2	glutamic--pyruvic transaminase 2 [Source:HGNC Symbol;Acc:HGNC:18062]	-1.66095	4.89027	12.1187	0.00330551	0.0999197
ADAMTS8	ADAMTS8	ADAM metallopeptidase with thrombospondin type 1 motif 8 [Source:HGNC Symbol;Acc:HGNC:224]	0.677276	4.85873	11.9563	0.00334303	0.100555
AIFM1	AIFM1	apoptosis inducing factor mitochondria associated 1 [Source:HGNC Symbol;Acc:HGNC:8768]	-1.21985	5.5678	11.987	0.00334987	0.100555
NDUFS5	NDUFS5	NADH:ubiquinone oxidoreductase subunit S5 [Source:HGNC Symbol;Acc:HGNC:7712]	-0.924098	5.90678	11.9406	0.00335896	0.100555
LOC103349303	NA	NA	-1.44893	1.86019	11.9335	0.00336618	0.100555
RHOT1	RHOT1	ras homolog family member T1 [Source:HGNC Symbol;Acc:HGNC:21168]	-0.776152	6.23755	11.9324	0.00336728	0.100555
MRS2	MRS2	magnesium transporter MRS2 [Source:HGNC Symbol;Acc:HGNC:13785]	-0.585696	4.79426	11.9308	0.00336893	0.100555
LOC100338096	GHITM//GHITM	growth hormone inducible transmembrane protein [Source:HGNC Symbol;Acc:HGNC:17281]//growth hormone inducible transmembrane protein [Source:HGNC Symbol;Acc:HGNC:17281]	-0.90462	5.62842	11.9244	0.00337541	0.100555
NDUFC1	NDUFC1	NADH:ubiquinone oxidoreductase subunit C1 [Source:HGNC Symbol;Acc:HGNC:7705]	-0.969186	5.41884	11.9219	0.003378	0.100555
PRDX1	PRDX1	peroxiredoxin 1 [Source:HGNC Symbol;Acc:HGNC:9352]	-0.579998	7.73831	11.9151	0.00338493	0.10057
FAM185A	FAM185A	family with sequence similarity 185 member A [Source:HGNC Symbol;Acc:HGNC:22412]	-1.0133	3.11188	11.8932	0.00340741	0.100941
LOC100358208	NA	NA	-1.3853	6.44696	11.9532	0.00341034	0.100941
JUNB	NA	NA	1.01582	6.37589	11.8804	0.00342065	0.101055
TMEM150C	TMEM150C	transmembrane protein 150C [Source:HGNC Symbol;Acc:HGNC:37263]	-1.10796	4.05527	11.8712	0.00343029	0.101148
TESC	TESC	tescalcin [Source:HGNC Symbol;Acc:HGNC:26065]	-2.68635	6.23425	12.01	0.00345974	0.10175
LOC100349793	NA	NA	-6.76393	1.05151	11.9884	0.00346373	0.10175
ARG2	ARG2	arginase 2 [Source:HGNC Symbol;Acc:HGNC:664]	1.64307	-0.517118	11.8095	0.00349507	0.102478
MTUS1	MTUS1	microtubule associated scaffold protein 1 [Source:HGNC Symbol;Acc:HGNC:29789]	-0.855458	5.45388	11.7943	0.00351126	0.10276
DHRS7C	DHRS7C	dehydrogenase/reductase 7C [Source:HGNC Symbol;Acc:HGNC:32423]	-2.77775	4.77837	11.94	0.00353225	0.103104
MOCS1	MOCS1	molybdenum cofactor synthesis 1 [Source:HGNC Symbol;Acc:HGNC:7190]	-0.91673	4.21165	11.7695	0.00353781	0.103104
LOC100354254	NA	NA	-3.0554	6.9535	11.93	0.00354279	0.103104
FAM114A1	FAM114A1	family with sequence similarity 114 member A1 [Source:HGNC Symbol;Acc:HGNC:25087]	0.648362	6.51704	11.7521	0.00355661	0.103314
DERA	DERA	deoxyribose-phosphate aldolase [Source:HGNC Symbol;Acc:HGNC:24269]	-0.559805	4.31191	11.7201	0.00359146	0.103715
SMOC2	NA	NA	1.02866	5.9807	11.7154	0.00359665	0.103715
TOMM40L	TOMM40L	translocase of outer mitochondrial membrane 40 like [Source:HGNC Symbol;Acc:HGNC:25756]	-0.711051	4.53969	11.7153	0.00359673	0.103715
SLC10A3	SLC10A3	solute carrier family 10 member 3 [Source:HGNC Symbol;Acc:HGNC:22979]	0.443744	4.80183	11.7151	0.00359698	0.103715
CISD1	CISD1	CDGSH iron sulfur domain 1 [Source:HGNC Symbol;Acc:HGNC:30880]	-1.17993	5.81702	11.7246	0.00362133	0.104225
GRAMD1B	GRAMD1B	GRAM domain containing 1B [Source:HGNC Symbol;Acc:HGNC:29214]	-1.07961	3.60484	11.6852	0.00362997	0.104256
RTN4IP1	RTN4IP1	reticulon 4 interacting protein 1 [Source:HGNC Symbol;Acc:HGNC:18647]	-1.03977	3.49736	11.6792	0.00363662	0.104256
NYNRIN	NYNRIN	NYN domain and retroviral integrase containing [Source:HGNC Symbol;Acc:HGNC:20165]	0.635274	5.95458	11.674	0.00364242	0.104256
HBQ1	NA	NA	-0.958277	6.12552	11.6609	0.00365695	0.10444
SCN10A	SCN10A	sodium voltage-gated channel alpha subunit 10 [Source:HGNC Symbol;Acc:HGNC:10582]	-2.68817	1.97882	11.6923	0.00366824	0.10444
NDUFB8	NDUFB8	NADH:ubiquinone oxidoreductase subunit B8 [Source:HGNC Symbol;Acc:HGNC:7703]	-1.17874	6.60813	11.6593	0.00366891	0.10444
DNAJC7	DNAJC7	DnaJ heat shock protein family (Hsp40) member C7 [Source:HGNC Symbol;Acc:HGNC:12392]	-0.389593	5.829	11.6301	0.00369161	0.10482
KCTD10	KCTD10	potassium channel tetramerization domain containing 10 [Source:HGNC Symbol;Acc:HGNC:23236]	0.805773	8.13268	11.6202	0.00370283	0.10482
CDH2	CDH2	cadherin 2 [Source:HGNC Symbol;Acc:HGNC:1759]	-1.96112	5.67994	11.7762	0.003709	0.10482
FBXL18	FBXL18	F-box and leucine rich repeat protein 18 [Source:HGNC Symbol;Acc:HGNC:21874]	0.436392	4.00577	11.6107	0.00371364	0.10482
PTGIS	NA	NA	0.816067	9.29095	11.6088	0.00371579	0.10482
ETFA	ETFA	electron transfer flavoprotein subunit alpha [Source:HGNC Symbol;Acc:HGNC:3481]	-1.1336	6.25604	11.6027	0.00372917	0.10487
YEATS4	YEATS4	YEATS domain containing 4 [Source:HGNC Symbol;Acc:HGNC:24859]	-0.571546	3.3868	11.5862	0.00374155	0.10487
MANSC1	MANSC1	MANSC domain containing 1 [Source:HGNC Symbol;Acc:HGNC:25505]	0.729098	5.42113	11.5861	0.00374173	0.10487
CHPF2	CHPF2	chondroitin polymerizing factor 2 [Source:HGNC Symbol;Acc:HGNC:29270]	0.549408	5.74914	11.5838	0.0037444	0.10487
BMAL2	BMAL2	basic helix-loop-helix ARNT like 2 [Source:HGNC Symbol;Acc:HGNC:18984]	-1.65606	2.10732	11.5503	0.00378303	0.105763
SPP1	SPP1	secreted phosphoprotein 1 [Source:HGNC Symbol;Acc:HGNC:11255]	1.31221	8.50842	11.526	0.00381797	0.10633
TNNC1	TNNC1	troponin C1, slow skeletal and cardiac type [Source:HGNC Symbol;Acc:HGNC:11943]	-2.59785	10.0518	11.6537	0.00382031	0.10633
B3GLCT	B3GLCT	beta 3-glucosyltransferase [Source:HGNC Symbol;Acc:HGNC:20207]	0.867123	5.12569	11.5144	0.00382499	0.10633
MVP	MVP	major vault protein [Source:HGNC Symbol;Acc:HGNC:7531]	0.535811	6.43786	11.5097	0.00383054	0.10633
CDR2L	CDR2L	cerebellar degeneration related protein 2 like [Source:HGNC Symbol;Acc:HGNC:29999]	0.494092	4.57416	11.4948	0.00384816	0.106452
BOLA3	NA	NA	-1.50372	4.83187	11.5975	0.00384858	0.106452
PYCR1	PYCR1	pyrroline-5-carboxylate reductase 1 [Source:HGNC Symbol;Acc:HGNC:9721]	1.16955	2.5581	11.4649	0.00388374	0.107195
SMYD1	SMYD1	SET and MYND domain containing 1 [Source:HGNC Symbol;Acc:HGNC:20986]	-2.47373	5.81952	11.6116	0.00389672	0.107195
RARB	RARB	retinoic acid receptor beta [Source:HGNC Symbol;Acc:HGNC:9865]	-0.659265	2.75334	11.4499	0.00390183	0.107195
MAN2A2	MAN2A2	mannosidase alpha class 2A member 2 [Source:HGNC Symbol;Acc:HGNC:6825]	0.452131	7.50054	11.449	0.00390287	0.107195
MYL2	MYL2	myosin light chain 2 [Source:HGNC Symbol;Acc:HGNC:7583]	-3.77045	11.3349	11.5932	0.00391838	0.107337
GINS3	GINS3	GINS complex subunit 3 [Source:HGNC Symbol;Acc:HGNC:25851]	-1.95132	0.0739025	11.4333	0.00392176	0.107337
SND1	SND1	staphylococcal nuclease and tudor domain containing 1 [Source:HGNC Symbol;Acc:HGNC:30646]	0.455054	6.80391	11.4219	0.00393565	0.107384
PLXNB2	NA	NA	0.446652	7.26893	11.4081	0.00395251	0.107384
STARD7	STARD7	StAR related lipid transfer domain containing 7 [Source:HGNC Symbol;Acc:HGNC:18063]	-0.810248	6.43112	11.407	0.00395377	0.107384
RAB17	NA	NA	-2.36346	2.98372	11.507	0.00395582	0.107384
LIAS	LIAS	lipoic acid synthetase [Source:HGNC Symbol;Acc:HGNC:16429]	-0.739709	4.09071	11.4037	0.00395783	0.107384
CUNH15orf39	NA	NA	0.611671	4.56009	11.3897	0.00397502	0.107663
ABCA7	NA	NA	-1.43671	1.58691	11.375	0.00399312	0.107966
LOC100341968	NA	NA	-2.93276	4.30488	11.4872	0.0040458	0.109202
ACSF2	ACSF2	acyl-CoA synthetase family member 2 [Source:HGNC Symbol;Acc:HGNC:26101]	-1.18591	7.54997	11.3275	0.00405912	0.109331
BLOC1S2	BLOC1S2	biogenesis of lysosomal organelles complex 1 subunit 2 [Source:HGNC Symbol;Acc:HGNC:20984]	-0.757426	2.75519	11.3177	0.00406459	0.109331
HADHA	HADHA	hydroxyacyl-CoA dehydrogenase trifunctional multienzyme complex subunit alpha [Source:HGNC Symbol;Acc:HGNC:4801]	-0.938061	7.22329	11.2919	0.00409723	0.109903
NAALADL2	NAALADL2	N-acetylated alpha-linked acidic dipeptidase like 2 [Source:HGNC Symbol;Acc:HGNC:23219]	0.919492	2.89772	11.2899	0.0040999	0.109903
LOC103346238	NA	NA	-2.05861	2.81427	11.2887	0.00410827	0.109934
CLIP4	CLIP4	CAP-Gly domain containing linker protein family member 4 [Source:HGNC Symbol;Acc:HGNC:26108]	-1.88711	3.4858	11.3585	0.00411515	0.109934
NDUFV2	NDUFV2	NADH:ubiquinone oxidoreductase core subunit V2 [Source:HGNC Symbol;Acc:HGNC:7717]	-0.959664	6.7429	11.2601	0.00413793	0.110118
ZHX3	ZHX3	zinc fingers and homeoboxes 3 [Source:HGNC Symbol;Acc:HGNC:15935]	0.501933	6.79942	11.2574	0.00414148	0.110118
SCIN	SCIN	scinderin [Source:HGNC Symbol;Acc:HGNC:21695]	-1.83552	0.765152	11.2421	0.00416119	0.110118
SYDE1	SYDE1	synapse defective Rho GTPase homolog 1 [Source:HGNC Symbol;Acc:HGNC:25824]	0.496842	6.06816	11.2405	0.00416324	0.110118
SLC38A3	SLC38A3	solute carrier family 38 member 3 [Source:HGNC Symbol;Acc:HGNC:18044]	-1.06065	3.79629	11.2384	0.00416602	0.110118
MPC1	MPC1	mitochondrial pyruvate carrier 1 [Source:HGNC Symbol;Acc:HGNC:21606]	-1.61447	6.86054	11.333	0.00417343	0.110118
AUH	AUH	AU RNA binding methylglutaconyl-CoA hydratase [Source:HGNC Symbol;Acc:HGNC:890]	-0.484631	4.78194	11.2255	0.0041828	0.110118
GATB	GATB	glutamyl-tRNA amidotransferase subunit B [Source:HGNC Symbol;Acc:HGNC:8849]	-1.24608	3.65976	11.222	0.00418738	0.110118
ACAA2	ACAA2	acetyl-CoA acyltransferase 2 [Source:HGNC Symbol;Acc:HGNC:83]	-1.10934	7.49102	11.2213	0.0041882	0.110118
SLC25A4	SLC25A4	solute carrier family 25 member 4 [Source:HGNC Symbol;Acc:HGNC:10990]	-1.48515	9.09596	11.2365	0.00419247	0.110118
LTBP2	LTBP2	latent transforming growth factor beta binding protein 2 [Source:HGNC Symbol;Acc:HGNC:6715]	1.04571	10.0467	11.2005	0.00421545	0.110535
PYGM	PYGM	glycogen phosphorylase, muscle associated [Source:HGNC Symbol;Acc:HGNC:9726]	-1.79605	7.51846	11.3037	0.00423012	0.110734
CAMKK1	CAMKK1	calcium/calmodulin dependent protein kinase kinase 1 [Source:HGNC Symbol;Acc:HGNC:1469]	0.779512	5.59895	11.178	0.0042452	0.110798
DNAJA3	NA	NA	-0.720828	5.78084	11.1697	0.00425622	0.110798
COL3A1	COL3A1	collagen type III alpha 1 chain [Source:HGNC Symbol;Acc:HGNC:2201]	1.13717	12.1431	11.1673	0.00425929	0.110798
MFN1	MFN1	mitofusin 1 [Source:HGNC Symbol;Acc:HGNC:18262]	-0.761502	5.85446	11.1601	0.00426893	0.110798
IDH3B	IDH3B	isocitrate dehydrogenase (NAD(+)) 3 non-catalytic subunit beta [Source:HGNC Symbol;Acc:HGNC:5385]	-1.01514	7.28769	11.1555	0.00427504	0.110798
CSRNP1	CSRNP1	cysteine and serine rich nuclear protein 1 [Source:HGNC Symbol;Acc:HGNC:14300]	0.994555	4.61139	11.1511	0.00428091	0.110798
GABARAPL1	NA	NA	-0.367624	6.87337	11.1469	0.00428658	0.110798
NMRK2	NA	NA	-3.11509	3.78343	11.295	0.00428928	0.110798
LOC100350812	NA	NA	-1.36456	3.69701	11.1353	0.00430916	0.110945
LOC127487390	NA	NA	-1.36456	3.69701	11.1353	0.00430916	0.110945
SLC35G6	NA	NA	1.66878	-0.222339	11.1236	0.00431788	0.110987
NT5C1A	NT5C1A	5'-nucleotidase, cytosolic IA [Source:HGNC Symbol;Acc:HGNC:17819]	-1.61573	5.3568	11.222	0.00433917	0.111283
MRPS36	MRPS36	mitochondrial ribosomal protein S36 [Source:HGNC Symbol;Acc:HGNC:16631]	-1.14386	5.17853	11.1304	0.00434364	0.111283
TBC1D16	TBC1D16	TBC1 domain family member 16 [Source:HGNC Symbol;Acc:HGNC:28356]	0.641817	6.01875	11.0909	0.00436235	0.111579
PRORP	PRORP	protein only RNase P catalytic subunit [Source:HGNC Symbol;Acc:HGNC:19958]	-0.505103	3.5308	11.0856	0.00436957	0.111581
CNKSR1	CNKSR1	connector enhancer of kinase suppressor of Ras 1 [Source:HGNC Symbol;Acc:HGNC:19700]	-2.04826	1.99058	11.0748	0.00438445	0.111739
SV2A	SV2A	synaptic vesicle glycoprotein 2A [Source:HGNC Symbol;Acc:HGNC:20566]	0.821037	4.63637	11.0707	0.00439007	0.111739
GNB3	GNB3	G protein subunit beta 3 [Source:HGNC Symbol;Acc:HGNC:4400]	-1.62552	5.32618	11.1672	0.00441292	0.112138
MTERF3	MTERF3	mitochondrial transcription termination factor 3 [Source:HGNC Symbol;Acc:HGNC:24258]	-0.800245	3.05746	11.0435	0.00442757	0.112328
SMC4	SMC4	structural maintenance of chromosomes 4 [Source:HGNC Symbol;Acc:HGNC:14013]	-0.57213	4.68417	11.0225	0.00445686	0.112888
LOC100345138	NA	NA	-0.82794	4.40811	11.0144	0.00446829	0.11294
VCAN	VCAN	versican [Source:HGNC Symbol;Acc:HGNC:2464]	0.80625	9.43073	11.0015	0.00448648	0.11294
ACADM	ACADM	acyl-CoA dehydrogenase medium chain [Source:HGNC Symbol;Acc:HGNC:89]	-0.98698	6.5797	11.0006	0.00448771	0.11294
CABP7	CABP7	calcium binding protein 7 [Source:HGNC Symbol;Acc:HGNC:20834]	1.87754	-0.097212	11.0005	0.00448783	0.11294
PHKG1	PHKG1	phosphorylase kinase catalytic subunit gamma 1 [Source:HGNC Symbol;Acc:HGNC:8930]	-2.23278	2.9543	11.0735	0.00450775	0.113259
HSPD1	HSPD1	heat shock protein family D (Hsp60) member 1 [Source:HGNC Symbol;Acc:HGNC:5261]	-0.536657	7.0396	10.9784	0.00451911	0.113362
C4H12orf75	NA	NA	1.26746	5.06191	11.02	0.00453742	0.113478
ITGA8	ITGA8	integrin subunit alpha 8 [Source:HGNC Symbol;Acc:HGNC:6144]	1.17234	10.1456	10.965	0.00453824	0.113478
VWA7	VWA7	von Willebrand factor A domain containing 7 [Source:HGNC Symbol;Acc:HGNC:13939]	-2.57345	1.82241	10.9865	0.00454791	0.113487
PMPCB	NA	NA	-0.486047	6.49802	10.953	0.00455546	0.113487
RAP1GAP2	RAP1GAP2//PAFAH1B1	RAP1 GTPase activating protein 2 [Source:HGNC Symbol;Acc:HGNC:29176]//platelet activating factor acetylhydrolase 1b regulatory subunit 1 [Source:HGNC Symbol;Acc:HGNC:8574]	-1.77594	3.65837	11.0197	0.00456403	0.113487
CSRP3	CSRP3	cysteine and glycine rich protein 3 [Source:HGNC Symbol;Acc:HGNC:2472]	-2.84585	8.70307	11.0881	0.00457016	0.113487
BGN	BGN	biglycan [Source:HGNC Symbol;Acc:HGNC:1044]	0.72056	11.8404	10.9388	0.0045759	0.113487
NEU3	NEU3	neuraminidase 3 [Source:HGNC Symbol;Acc:HGNC:7760]	-1.45173	4.36794	10.9865	0.00458515	0.113487
KDM8	NA	NA	-1.2912	2.14711	10.9294	0.00458945	0.113487
MTFP1	MTFP1	mitochondrial fission process 1 [Source:HGNC Symbol;Acc:HGNC:26945]	-2.41413	3.31041	11.0351	0.00459684	0.11349
MPPED2	MPPED2	metallophosphoesterase domain containing 2 [Source:HGNC Symbol;Acc:HGNC:1180]	-0.840663	2.90079	10.9154	0.00460974	0.113536
NDUFA12	NDUFA12	NADH:ubiquinone oxidoreductase subunit A12 [Source:HGNC Symbol;Acc:HGNC:23987]	-1.26135	6.17202	10.9625	0.00461974	0.113536
LOC100343793	NA	NA	-1.53539	7.93862	10.9613	0.0046356	0.113536
ENTREP1	ENTREP1	endosomal transmembrane epsin interactor 1 [Source:HGNC Symbol;Acc:HGNC:24820]	-1.49981	2.88219	10.8951	0.00463943	0.113536
RSU1	RSU1	Ras suppressor protein 1 [Source:HGNC Symbol;Acc:HGNC:10464]	0.560841	6.74	10.8837	0.00465619	0.113536
AGBL5	AGBL5	AGBL carboxypeptidase 5 [Source:HGNC Symbol;Acc:HGNC:26147]	-0.619709	2.85825	10.8791	0.00466287	0.113536
SNX9	SNX9	sorting nexin 9 [Source:HGNC Symbol;Acc:HGNC:14973]	0.428826	6.72709	10.8754	0.00466841	0.113536
UQCRQ	UQCRQ	ubiquinol-cytochrome c reductase complex III subunit VII [Source:HGNC Symbol;Acc:HGNC:29594]	-1.57166	7.8896	10.9502	0.00466958	0.113536
TTL	TTL	tubulin tyrosine ligase [Source:HGNC Symbol;Acc:HGNC:21586]	0.475711	4.2648	10.873	0.00467184	0.113536
TOR1AIP2	TOR1AIP2	torsin 1A interacting protein 2 [Source:HGNC Symbol;Acc:HGNC:24055]	0.599759	5.33844	10.872	0.00467341	0.113536
TMX2	TMX2	thioredoxin related transmembrane protein 2 [Source:HGNC Symbol;Acc:HGNC:30739]	-0.770228	5.31857	10.8617	0.00468858	0.113536
ITGA10	ITGA10	integrin subunit alpha 10 [Source:HGNC Symbol;Acc:HGNC:6135]	0.64017	5.24016	10.8596	0.0046918	0.113536
ITGB1	ITGB1	integrin subunit beta 1 [Source:HGNC Symbol;Acc:HGNC:6153]	0.77453	10.5611	10.8572	0.00469531	0.113536
FSD2	FSD2	fibronectin type III and SPRY domain containing 2 [Source:HGNC Symbol;Acc:HGNC:18024]	-2.77788	4.90646	10.997	0.00470039	0.113536
GLYAT	GLYAT	glycine-N-acyltransferase [Source:HGNC Symbol;Acc:HGNC:13734]	-1.83485	4.28322	10.9559	0.00471122	0.11355
DAAM2	DAAM2	dishevelled associated activator of morphogenesis 2 [Source:HGNC Symbol;Acc:HGNC:18143]	0.419304	5.90606	10.8331	0.00473119	0.11355
FAT1	FAT1	FAT atypical cadherin 1 [Source:HGNC Symbol;Acc:HGNC:3595]	0.763899	7.44979	10.8285	0.00473815	0.11355
CAMK2B	NA	NA	-2.54189	5.05112	10.967	0.00474431	0.11355
ZNG1A	NA	NA	-0.781737	2.66981	10.8194	0.00475184	0.11355
LOC100009428	NA	NA	-1.80833	10.7065	10.8501	0.00475298	0.11355
NDUFA8	NDUFA8	NADH:ubiquinone oxidoreductase subunit A8 [Source:HGNC Symbol;Acc:HGNC:7692]	-1.30564	6.63687	10.8639	0.00476481	0.11355
RELL2	RELL2	RELT like 2 [Source:HGNC Symbol;Acc:HGNC:26902]	1.0306	2.19085	10.8068	0.00477089	0.11355
IFTAP	IFTAP	intraflagellar transport associated protein [Source:HGNC Symbol;Acc:HGNC:25142]	-1.02804	4.28889	10.8062	0.00477181	0.11355
C2CD2L	C2CD2L	C2CD2 like [Source:HGNC Symbol;Acc:HGNC:29000]	0.46241	4.24959	10.8049	0.00477365	0.11355
LOC103348460	NA	NA	-2.34925	2.02842	10.8081	0.00480606	0.114148
AADAC	AADAC	arylacetamide deacetylase [Source:HGNC Symbol;Acc:HGNC:17]	-0.931051	2.16889	10.7765	0.00481689	0.114231
LOC100343982	NSUN4	NOP2/Sun RNA methyltransferase 4 [Source:HGNC Symbol;Acc:HGNC:31802]	-0.983884	7.58098	10.7611	0.00484054	0.114618
RALGPS1	RALGPS1	Ral GEF with PH domain and SH3 binding motif 1 [Source:HGNC Symbol;Acc:HGNC:16851]	-1.196	2.57566	10.7548	0.00485018	0.114673
LOC127485749	NA	NA	2.13392	-0.81428	10.7491	0.00485908	0.114677
FBXL2	FBXL2	F-box and leucine rich repeat protein 2 [Source:HGNC Symbol;Acc:HGNC:13598]	1.06699	2.99861	10.744	0.00486685	0.114677
LOC100350375	NA	NA	-1.92081	-0.516579	10.7405	0.00487237	0.114677
VDAC2	VDAC2	voltage dependent anion channel 2 [Source:HGNC Symbol;Acc:HGNC:12672]	-0.878174	8.01319	10.7321	0.00488533	0.114809
JHY	JHY	junctional cadherin complex regulator [Source:HGNC Symbol;Acc:HGNC:26288]	-2.627	2.77788	10.8191	0.00490999	0.114994
GSR	GSR	glutathione-disulfide reductase [Source:HGNC Symbol;Acc:HGNC:4623]	-0.488424	5.34709	10.7126	0.0049158	0.114994
FAIM	FAIM	Fas apoptotic inhibitory molecule [Source:HGNC Symbol;Acc:HGNC:18703]	-0.45904	3.34297	10.7097	0.00492033	0.114994
TMEM126A	TMEM126A	transmembrane protein 126A [Source:HGNC Symbol;Acc:HGNC:25382]	-0.594296	5.52807	10.7021	0.0049322	0.114994
HINT1	HINT1	histidine triad nucleotide binding protein 1 [Source:HGNC Symbol;Acc:HGNC:4912]	-0.575747	5.07665	10.6994	0.00493643	0.114994
NDUFAF7	NDUFAF7	NADH:ubiquinone oxidoreductase complex assembly factor 7 [Source:HGNC Symbol;Acc:HGNC:28816]	-0.669149	3.02035	10.6949	0.00494349	0.114994
MRPL42	NA	NA	-0.514243	3.65563	10.6942	0.0049447	0.114994
LOC100342838	NA	NA	11.4657	3.49276	11.7897	0.00495256	0.115005
LOC100358185	NA	NA	-1.70051	2.37329	10.6844	0.00496013	0.11501
HSPA9	HSPA9	heat shock protein family A (Hsp70) member 9 [Source:HGNC Symbol;Acc:HGNC:5244]	-0.79573	7.20849	10.6681	0.00498595	0.115305
FHIP1A	FHIP1A	FHF complex subunit HOOK interacting protein 1A [Source:HGNC Symbol;Acc:HGNC:34237]	-1.78829	3.3319	10.7163	0.0049918	0.115305
CARMIL3	CARMIL3	capping protein regulator and myosin 1 linker 3 [Source:HGNC Symbol;Acc:HGNC:20272]	-0.865237	1.33552	10.6625	0.00499497	0.115305
ELK1	ELK1	ETS transcription factor ELK1 [Source:HGNC Symbol;Acc:HGNC:3321]	0.470243	4.83365	10.6323	0.00504326	0.116248
TENT5B	TENT5B	terminal nucleotidyltransferase 5B [Source:HGNC Symbol;Acc:HGNC:28273]	1.14955	5.14801	10.6449	0.0050717	0.116731
TMEM158	NA	NA	0.947917	4.21679	10.6077	0.00508308	0.116783
ADAP2	ADAP2	ArfGAP with dual PH domains 2 [Source:HGNC Symbol;Acc:HGNC:16487]	-0.558583	4.36976	10.6009	0.00509417	0.116783
LOC108178556	NA	NA	-1.1783	1.12996	10.5967	0.00510099	0.116783
PIGT	NA	NA	0.504578	7.44351	10.5932	0.00510672	0.116783
LOC108176644	NA	NA	-0.553439	4.37896	10.5904	0.00511129	0.116783
ALDH5A1	ALDH5A1	aldehyde dehydrogenase 5 family member A1 [Source:HGNC Symbol;Acc:HGNC:408]	-0.961874	4.93537	10.583	0.00512339	0.116888
TBC1D4	TBC1D4	TBC1 domain family member 4 [Source:HGNC Symbol;Acc:HGNC:19165]	-1.09724	4.36049	10.5738	0.00513861	0.116945
LOC108178979	NA	NA	1.63737	0.763633	10.5724	0.00514084	0.116945
ME2	ME2	malic enzyme 2 [Source:HGNC Symbol;Acc:HGNC:6984]	-0.641203	5.54874	10.5666	0.00515041	0.116992
LOC100353463	NA	NA	0.657696	9.07942	10.558	0.00516462	0.117145
KDM1A	KDM1A	lysine demethylase 1A [Source:HGNC Symbol;Acc:HGNC:29079]	0.414337	6.18382	10.5523	0.00517412	0.11719
LOC100359144	NA	NA	-1.30106	2.10545	10.5344	0.0052039	0.117694
DLAT	DLAT	dihydrolipoamide S-acetyltransferase [Source:HGNC Symbol;Acc:HGNC:2896]	-1.33955	4.80518	10.5863	0.0052238	0.117833
CHCHD10	NA	NA	-2.07989	7.72082	10.6466	0.0052322	0.117833
DNER	DNER	delta/notch like EGF repeat containing [Source:HGNC Symbol;Acc:HGNC:24456]	-1.13288	6.48815	10.5294	0.00523266	0.117833
PTGR2	PTGR2	prostaglandin reductase 2 [Source:HGNC Symbol;Acc:HGNC:20149]	-0.645838	5.30819	10.5085	0.00524728	0.117992
COQ9	NA	NA	-1.52097	6.75208	10.5831	0.00526969	0.118326
ATG4A	ATG4A	autophagy related 4A cysteine peptidase [Source:HGNC Symbol;Acc:HGNC:16489]	-0.53033	4.17956	10.49	0.00527868	0.118357
LOC103350681	NA	NA	-2.79051	0.264979	10.4793	0.00529682	0.118432
STEAP3	STEAP3	STEAP3 metalloreductase [Source:HGNC Symbol;Acc:HGNC:24592]	-1.26625	2.64379	10.4791	0.00529714	0.118432
LOC100341219	NA	NA	-2.94531	6.87927	10.5929	0.00533194	0.118948
ARHGAP26	ARHGAP26	Rho GTPase activating protein 26 [Source:HGNC Symbol;Acc:HGNC:17073]	-0.973934	3.04738	10.4567	0.00533547	0.118948
KCNMB1	KCNMB1	potassium calcium-activated channel subfamily M regulatory beta subunit 1 [Source:HGNC Symbol;Acc:HGNC:6285]	0.728294	7.7834	10.4404	0.00536348	0.119327
LOC108178759	NA	NA	-2.09701	1.86715	10.438	0.00536772	0.119327
MCRIP2	NA	NA	-2.32196	5.69428	10.5594	0.00538858	0.11962
KCNN2	KCNN2	potassium calcium-activated channel subfamily N member 2 [Source:HGNC Symbol;Acc:HGNC:6291]	-2.23371	2.23516	10.4277	0.00543587	0.12027
LOC103346581	NA	NA	-6.50015	-0.0363885	11.2339	0.00545313	0.12027
CUNH22orf23	NA	NA	0.955856	1.20931	10.3881	0.00545472	0.12027
PDHA1	PDHA1	pyruvate dehydrogenase E1 subunit alpha 1 [Source:HGNC Symbol;Acc:HGNC:8806]	-1.14021	7.6013	10.3927	0.0054549	0.12027
LOC127486945	NA	NA	-1.59522	7.53077	10.4735	0.00545631	0.12027
TMEM266	TMEM266	transmembrane protein 266 [Source:HGNC Symbol;Acc:HGNC:26763]	-1.487	1.30492	10.3732	0.00548114	0.120562
ASB10	ASB10	ankyrin repeat and SOCS box containing 10 [Source:HGNC Symbol;Acc:HGNC:17185]	-2.38821	1.82753	10.3827	0.00548498	0.120562
LOC100342321	NA	NA	-1.35288	3.67821	10.368	0.00549854	0.120641
URB1	URB1	URB1 ribosome biogenesis homolog [Source:HGNC Symbol;Acc:HGNC:17344]	0.471596	4.37513	10.3585	0.00550725	0.120641
LOC127483099	NA	NA	-2.25988	1.01724	10.3531	0.00551688	0.120641
LOC127487408	NA	NA	-2.48845	4.15666	10.4834	0.00551946	0.120641
NEK7	NA	NA	0.763455	7.62362	10.3364	0.00554682	0.120902
SDHD	NA	NA	-0.85858	6.31531	10.3359	0.00554762	0.120902
AARS2	AARS2	alanyl-tRNA synthetase 2, mitochondrial [Source:HGNC Symbol;Acc:HGNC:21022]	-0.690789	3.18715	10.328	0.00556191	0.120902
ATP5MG	ATP5MG//ATP5MGL	ATP synthase membrane subunit g [Source:HGNC Symbol;Acc:HGNC:14247]//ATP synthase membrane subunit g like [Source:HGNC Symbol;Acc:HGNC:13213]	-1.0886	7.02806	10.3323	0.00556234	0.120902
DLGAP4	NA	NA	0.456607	6.67046	10.2975	0.00561716	0.121924
ID2	ID2	inhibitor of DNA binding 2 [Source:HGNC Symbol;Acc:HGNC:5361]	1.14062	6.266	10.3174	0.00562686	0.121965
PRDM2	PRDM2	PR/SET domain 2 [Source:HGNC Symbol;Acc:HGNC:9347]	0.463349	5.50012	10.2792	0.00565058	0.122309
SLC25A11	SLC25A11	solute carrier family 25 member 11 [Source:HGNC Symbol;Acc:HGNC:10981]	-1.17793	6.57045	10.2989	0.0056619	0.122385
EZR	EZR	ezrin [Source:HGNC Symbol;Acc:HGNC:12691]	-1.21085	4.84456	10.3039	0.00567481	0.122494
AFG1L	AFG1L	AFG1 like ATPase [Source:HGNC Symbol;Acc:HGNC:16411]	-0.867556	3.18037	10.2522	0.00570031	0.122875
QPRT	QPRT	quinolinate phosphoribosyltransferase [Source:HGNC Symbol;Acc:HGNC:9755]	5.21312	-0.819995	10.2479	0.00570852	0.122883
TTN	NA	NA	-2.77481	9.72048	10.3711	0.0057196	0.122952
RBFOX1	RBFOX1	RNA binding fox-1 homolog 1 [Source:HGNC Symbol;Acc:HGNC:18222]	-2.21953	3.00205	10.3175	0.00573505	0.123038
LOC103349243	NA	NA	-4.7726	0.141876	10.2476	0.00575533	0.123038
FZD2	NA	NA	0.616505	5.73391	10.2191	0.00576205	0.123038
WDR1	WDR1	WD repeat domain 1 [Source:HGNC Symbol;Acc:HGNC:12754]	0.456583	8.10994	10.2098	0.00577945	0.123038
LOC127486002	NA	NA	0.669235	6.78904	10.2047	0.00578896	0.123038
LOC100344509	ACOT4	acyl-CoA thioesterase 4 [Source:HGNC Symbol;Acc:HGNC:19748]	-0.813448	4.55153	10.2019	0.00579428	0.123038
RAB11FIP3	RAB11FIP3	RAB11 family interacting protein 3 [Source:HGNC Symbol;Acc:HGNC:17224]	0.441411	6.40345	10.1921	0.00581279	0.123038
RHBDF1	RHBDF1	rhomboid 5 homolog 1 [Source:HGNC Symbol;Acc:HGNC:20561]	0.448851	6.18072	10.19	0.00581676	0.123038
TIMMDC1	TIMMDC1	translocase of inner mitochondrial membrane domain containing 1 [Source:HGNC Symbol;Acc:HGNC:1321]	-0.502483	4.26113	10.1899	0.00581698	0.123038
LOC108175883	NA	NA	-0.738042	2.19781	10.1839	0.0058284	0.123038
NME4	NME4	NME/NM23 nucleoside diphosphate kinase 4 [Source:HGNC Symbol;Acc:HGNC:7852]	-1.45852	5.6282	10.2747	0.00583033	0.123038
LTBR	LTBR	lymphotoxin beta receptor [Source:HGNC Symbol;Acc:HGNC:6718]	0.537389	5.8772	10.179	0.00583777	0.123038
LOC100342188	NA	NA	0.712754	4.50753	10.1779	0.00583988	0.123038
LOC127487412	NA	NA	0.712754	4.50753	10.1779	0.00583988	0.123038
SLC35B4	SLC35B4	solute carrier family 35 member B4 [Source:HGNC Symbol;Acc:HGNC:20584]	0.607866	4.54011	10.1734	0.00584833	0.123038
TMEM70	NA	NA	-0.527041	4.49247	10.1705	0.0058539	0.123038
TMEM119	TMEM119	transmembrane protein 119 [Source:HGNC Symbol;Acc:HGNC:27884]	0.621199	6.96672	10.1651	0.00586426	0.123038
SLC22A4	SLC22A5	solute carrier family 22 member 5 [Source:HGNC Symbol;Acc:HGNC:10969]	-1.75563	4.0481	10.2534	0.00586533	0.123038
SLC1A4	NA	NA	0.796367	5.44179	10.1518	0.00588982	0.123299
GALNT8	GALNT8	polypeptide N-acetylgalactosaminyltransferase 8 [Source:HGNC Symbol;Acc:HGNC:4130]	-1.47401	2.87884	10.1477	0.00589765	0.123299
TMEM245	TMEM245	transmembrane protein 245 [Source:HGNC Symbol;Acc:HGNC:1363]	0.955583	7.42202	10.1457	0.00590145	0.123299
NIBAN1	NIBAN1	niban apoptosis regulator 1 [Source:HGNC Symbol;Acc:HGNC:16784]	0.801303	8.33402	10.1223	0.00594673	0.124079
RPS6KA6	NA	NA	-1.32672	2.09966	10.1106	0.00596949	0.124388
LOC127487713	NA	NA	1.73842	1.71838	10.1041	0.00598222	0.124488
ZCCHC3	NA	NA	0.446273	4.89868	10.0948	0.00600047	0.124502
MDH2	MDH2	malate dehydrogenase 2 [Source:HGNC Symbol;Acc:HGNC:6971]	-1.57449	8.74394	10.1419	0.0060028	0.124502
NAF1	NAF1	nuclear assembly factor 1 ribonucleoprotein [Source:HGNC Symbol;Acc:HGNC:25126]	0.700264	5.00881	10.0913	0.00600729	0.124502
BCORL1	BCORL1	BCL6 corepressor like 1 [Source:HGNC Symbol;Acc:HGNC:25657]	0.578997	4.20957	10.0709	0.00604764	0.124502
TMEM178B	NA	NA	-1.61934	2.09914	10.0695	0.00605038	0.124502
PACSIN2	PACSIN2	protein kinase C and casein kinase substrate in neurons 2 [Source:HGNC Symbol;Acc:HGNC:8571]	0.488754	5.89195	10.0688	0.00605173	0.124502
NDUFS4	NDUFS4	NADH:ubiquinone oxidoreductase subunit S4 [Source:HGNC Symbol;Acc:HGNC:7711]	-0.796704	6.26894	10.057	0.00607519	0.124502
LOC127486955	NA	NA	0.985298	2.96713	10.0563	0.00607666	0.124502
CSGALNACT2	CSGALNACT2	chondroitin sulfate N-acetylgalactosaminyltransferase 2 [Source:HGNC Symbol;Acc:HGNC:24292]	0.657401	6.47265	10.0493	0.00609068	0.124502
LOC127486375	NA	NA	-1.06962	-0.243474	10.0426	0.00610402	0.124502
LDB3	LDB3	LIM domain binding 3 [Source:HGNC Symbol;Acc:HGNC:15710]	-2.37604	8.138	10.1665	0.00610599	0.124502
LOC100346670	NA	NA	-1.43078	7.65272	10.0947	0.00610971	0.124502
PELO	PELO	pelota mRNA surveillance and ribosome rescue factor [Source:HGNC Symbol;Acc:HGNC:8829]	-0.38341	4.70097	10.0357	0.0061178	0.124502
LRRC59	LRRC59	leucine rich repeat containing 59 [Source:HGNC Symbol;Acc:HGNC:28817]	0.40396	6.0933	10.032	0.00612516	0.124502
NFS1	NA	NA	-0.76683	5.02573	10.0317	0.00612585	0.124502
PRCD	PRCD	photoreceptor disc component [Source:HGNC Symbol;Acc:HGNC:32528]	-1.02428	4.00312	10.0287	0.00613197	0.124502
GALNT17	GALNT17	polypeptide N-acetylgalactosaminyltransferase 17 [Source:HGNC Symbol;Acc:HGNC:16347]	-1.85059	2.8017	10.0498	0.00613922	0.124502
DSP	DSP	desmoplakin [Source:HGNC Symbol;Acc:HGNC:3052]	-2.37706	6.98327	10.1491	0.00614022	0.124502
PEX7	PEX7	peroxisomal biogenesis factor 7 [Source:HGNC Symbol;Acc:HGNC:8860]	-0.514169	4.04061	10.0212	0.00614709	0.124502
FOXP4	NA	NA	0.518498	5.72402	10.0202	0.00614909	0.124502
TGFBR1	TGFBR1	transforming growth factor beta receptor 1 [Source:HGNC Symbol;Acc:HGNC:11772]	0.755834	6.28743	10.0196	0.00615021	0.124502
C12H6orf136	NA	NA	-1.10073	5.24388	10.0292	0.00618081	0.12496
CTNNA3	CTNNA3	catenin alpha 3 [Source:HGNC Symbol;Acc:HGNC:2511]	-2.13682	4.1716	10.1217	0.00619448	0.124992
UBTD1	UBTD1	ubiquitin domain containing 1 [Source:HGNC Symbol;Acc:HGNC:25683]	0.593678	4.61816	9.99586	0.0061984	0.124992
LOC100338372	NA	NA	0.649396	3.59952	9.98818	0.00621407	0.125043
ANK1	ANK1	ankyrin 1 [Source:HGNC Symbol;Acc:HGNC:492]	-2.40623	7.01023	10.1056	0.00622666	0.125043
LOC100338527	NA	NA	-1.76582	2.26173	9.97242	0.00624636	0.125043
NUCB1	NUCB1	nucleobindin 1 [Source:HGNC Symbol;Acc:HGNC:8043]	0.435438	8.51851	9.96979	0.00625177	0.125043
MIPEP	MIPEP	mitochondrial intermediate peptidase [Source:HGNC Symbol;Acc:HGNC:7104]	-0.796234	4.15653	9.96429	0.00626309	0.125043
LOC100352572	NA	NA	-2.39265	4.21797	10.0845	0.00626923	0.125043
TULP4	TULP4	TUB like protein 4 [Source:HGNC Symbol;Acc:HGNC:15530]	0.408701	4.28827	9.9598	0.00627235	0.125043
PLK2	PLK2	polo like kinase 2 [Source:HGNC Symbol;Acc:HGNC:19699]	-0.670489	4.32383	9.9564	0.00627938	0.125043
MBIP	MBIP	MAP3K12 binding inhibitory protein 1 [Source:HGNC Symbol;Acc:HGNC:20427]	-0.520958	5.07195	9.94624	0.00630043	0.125043
LOC127482783	NA	NA	0.850135	5.32926	9.94109	0.00631114	0.125043
HMGA1	NA	NA	-1.03316	4.00338	9.94068	0.00631199	0.125043
WNT8A	WNT8A	Wnt family member 8A [Source:HGNC Symbol;Acc:HGNC:12788]	0.991993	2.8623	9.93984	0.00631374	0.125043
MTIF3	MTIF3	mitochondrial translational initiation factor 3 [Source:HGNC Symbol;Acc:HGNC:29788]	-0.737537	3.21584	9.93845	0.00631663	0.125043
LOC127490176	NA	NA	-7.82226	0.885422	10.8626	0.00631811	0.125043
AQP8	AQP8	aquaporin 8 [Source:HGNC Symbol;Acc:HGNC:642]	1.66953	2.39563	9.93636	0.00632097	0.125043
FXN	FXN	frataxin [Source:HGNC Symbol;Acc:HGNC:3951]	-1.12715	4.42382	9.91938	0.00636547	0.125764
CACNG6	CACNG6	calcium voltage-gated channel auxiliary subunit gamma 6 [Source:HGNC Symbol;Acc:HGNC:13625]	-2.70453	3.88102	10.033	0.00637411	0.125776
ATP5MF	NA	NA	-1.34895	6.92856	9.95394	0.0064043	0.126107
ATP5MC1	ATP5MC1	ATP synthase membrane subunit c locus 1 [Source:HGNC Symbol;Acc:HGNC:841]	-1.73981	7.81023	9.98532	0.00641356	0.126107
SLC43A3	SLC43A3	solute carrier family 43 member 3 [Source:HGNC Symbol;Acc:HGNC:17466]	0.548491	6.59298	9.89156	0.0064151	0.126107
FCHSD2	FCHSD2	FCH and double SH3 domains 2 [Source:HGNC Symbol;Acc:HGNC:29114]	0.691598	5.76425	9.87943	0.00644086	0.126454
MYORG	MYORG	myogenesis regulating glycosidase (putative) [Source:HGNC Symbol;Acc:HGNC:19918]	-0.916928	5.17403	9.86982	0.00646136	0.126553
ALDH6A1	ALDH6A1	aldehyde dehydrogenase 6 family member A1 [Source:HGNC Symbol;Acc:HGNC:7179]	-0.713341	7.06089	9.86443	0.00647289	0.126553
SMIM19	NA	NA	-0.421787	5.72221	9.8595	0.00648345	0.126553
IVNS1ABP	IVNS1ABP	influenza virus NS1A binding protein [Source:HGNC Symbol;Acc:HGNC:16951]	-0.951869	6.06191	9.85597	0.00649103	0.126553
ATP5MJ	NA	NA	-1.42606	6.6465	9.93458	0.00649109	0.126553
XIRP2	XIRP2	xin actin binding repeat containing 2 [Source:HGNC Symbol;Acc:HGNC:14303]	-3.61428	4.44431	9.97519	0.00649447	0.126553
NSG1	NSG1	neuronal vesicle trafficking associated 1 [Source:HGNC Symbol;Acc:HGNC:18790]	-1.62349	1.25546	9.84983	0.00650423	0.126585
POLR2M	POLR2M	RNA polymerase II subunit M [Source:HGNC Symbol;Acc:HGNC:14862]	-0.432481	5.73725	9.80492	0.00660172	0.127991
MTIF2	MTIF2	mitochondrial translational initiation factor 2 [Source:HGNC Symbol;Acc:HGNC:7441]	-0.458093	4.0837	9.80434	0.00660297	0.127991
LOC100342104	NA	NA	0.818488	3.70832	9.7978	0.00661732	0.127991
LOC100354104	NA	NA	-0.557551	3.94163	9.7978	0.00661732	0.127991
LOC100340132	NA	NA	0.751483	4.82843	9.79777	0.00661738	0.127991
ATP5PO	ATP5PO	ATP synthase peripheral stalk subunit OSCP [Source:HGNC Symbol;Acc:HGNC:850]	-1.23287	8.16615	9.79814	0.00663113	0.128017
MYZAP	MYZAP	myocardial zonula adherens protein [Source:HGNC Symbol;Acc:HGNC:43444]	-2.03002	6.53197	9.90722	0.00663925	0.128017
VPS26B	VPS26B	VPS26 retromer complex component B [Source:HGNC Symbol;Acc:HGNC:28119]	0.388771	5.74442	9.78598	0.00664332	0.128017
ATP5IF1	ATP5IF1	ATP synthase inhibitory factor subunit 1 [Source:HGNC Symbol;Acc:HGNC:871]	-1.26862	7.22026	9.82135	0.00665328	0.128051
IPO9	IPO9	importin 9 [Source:HGNC Symbol;Acc:HGNC:19425]	0.4788	6.27472	9.75895	0.00670322	0.128716
ERGIC1	ERGIC1	endoplasmic reticulum-golgi intermediate compartment 1 [Source:HGNC Symbol;Acc:HGNC:29205]	0.437971	7.54973	9.75847	0.0067043	0.128716
TNK2	TNK2	tyrosine kinase non receptor 2 [Source:HGNC Symbol;Acc:HGNC:19297]	0.561514	5.90505	9.75358	0.00671519	0.128767
LOC127493550	NA	NA	-0.405996	4.51993	9.74746	0.00672888	0.128871
OSBPL3	OSBPL3	oxysterol binding protein like 3 [Source:HGNC Symbol;Acc:HGNC:16370]	0.7451	3.32114	9.73867	0.00674857	0.12909
ARSI	ARSI	arylsulfatase family member I [Source:HGNC Symbol;Acc:HGNC:32521]	0.858909	4.44845	9.71802	0.00679511	0.129822
LOC100356833	NA	NA	-1.18906	3.37323	9.71081	0.00681144	0.129975
GOLIM4	GOLIM4	golgi integral membrane protein 4 [Source:HGNC Symbol;Acc:HGNC:15448]	0.62813	7.7813	9.70138	0.00683287	0.130104
HOOK2	NA	NA	-0.793743	2.9693	9.70051	0.00683486	0.130104
SLC14A1	SLC14A1	solute carrier family 14 member 1 (Kidd blood group) [Source:HGNC Symbol;Acc:HGNC:10918]	-2.74811	0.540795	9.68578	0.0068685	0.130194
COBL	COBL	cordon-bleu WH2 repeat protein [Source:HGNC Symbol;Acc:HGNC:22199]	-2.62533	5.33451	9.79869	0.00687813	0.130194
MRPL48	NA	NA	-0.993008	4.24317	9.67696	0.00688872	0.130194
HIGD1B	HIGD1B	HIG1 hypoxia inducible domain family member 1B [Source:HGNC Symbol;Acc:HGNC:24318]	-1.28888	1.92377	9.67648	0.00688984	0.130194
LOC127486976	NA	NA	1.15276	5.92643	9.71306	0.00690325	0.130194
BDH1	BDH1	3-hydroxybutyrate dehydrogenase 1 [Source:HGNC Symbol;Acc:HGNC:1027]	-1.28411	5.89915	9.73493	0.00691198	0.130194
UNC45A	NA	NA	0.744025	7.72537	9.66493	0.00691643	0.130194
NDUFAF4	NA	NA	-0.586193	3.19854	9.66486	0.0069166	0.130194
KIAA2013	NA	NA	0.374293	5.74495	9.6648	0.00691674	0.130194
EGF	EGF	epidermal growth factor [Source:HGNC Symbol;Acc:HGNC:3229]	-1.08668	1.26585	9.66214	0.00692289	0.130194
PPP1R18	NA	NA	0.489621	5.80268	9.63311	0.00699033	0.130716
FBN1	FBN1	fibrillin 1 [Source:HGNC Symbol;Acc:HGNC:3603]	0.819622	9.44942	9.62769	0.00700302	0.130716
SLC26A10P	NA	NA	-1.34251	3.5641	9.63046	0.00700603	0.130716
LOC100347571	NA	NA	-1.27964	8.1195	9.64601	0.00700716	0.130716
HSDL2	HSDL2	hydroxysteroid dehydrogenase like 2 [Source:HGNC Symbol;Acc:HGNC:18572]	-0.973478	5.69744	9.62873	0.00701009	0.130716
PLEKHH1	PLEKHH1	pleckstrin homology, MyTH4 and FERM domain containing H1 [Source:HGNC Symbol;Acc:HGNC:17733]	-1.58991	2.46534	9.62402	0.00701162	0.130716
MAPK7	MAPK7	mitogen-activated protein kinase 7 [Source:HGNC Symbol;Acc:HGNC:6880]	0.40944	4.56923	9.62135	0.00701787	0.130716
NDUFA11	NDUFA11	NADH:ubiquinone oxidoreductase subunit A11 [Source:HGNC Symbol;Acc:HGNC:20371]	-1.52285	1.58146	9.61059	0.00704318	0.130716
POFUT2	NA	NA	0.481767	6.93856	9.60995	0.00704469	0.130716
SLC7A1	SLC7A1	solute carrier family 7 member 1 [Source:HGNC Symbol;Acc:HGNC:11057]	0.892635	2.74052	9.60564	0.00705487	0.130716
NDUFS3	NDUFS3	NADH:ubiquinone oxidoreductase core subunit S3 [Source:HGNC Symbol;Acc:HGNC:7710]	-1.27808	7.20431	9.64832	0.00705594	0.130716
NDUFA10	NA	NA	-0.970249	6.67167	9.60278	0.00706161	0.130716
EDA	EDA	ectodysplasin A [Source:HGNC Symbol;Acc:HGNC:3157]	0.641877	3.99742	9.60156	0.0070645	0.130716
LOC100355645	NA	NA	-0.709544	4.02247	9.60019	0.00706774	0.130716
LACTB	LACTB	lactamase beta [Source:HGNC Symbol;Acc:HGNC:16468]	-0.60583	4.83928	9.59002	0.00709186	0.130751
ALDH4A1	ALDH4A1	aldehyde dehydrogenase 4 family member A1 [Source:HGNC Symbol;Acc:HGNC:406]	-1.43068	5.85615	9.67334	0.00709412	0.130751
PAFAH2	PAFAH2	platelet activating factor acetylhydrolase 2 [Source:HGNC Symbol;Acc:HGNC:8579]	-0.574572	3.51612	9.58854	0.00709537	0.130751
PDE4DIP	PDE4DIP	phosphodiesterase 4D interacting protein [Source:HGNC Symbol;Acc:HGNC:15580]	-1.47787	7.80548	9.64982	0.00710637	0.130751
LOC127486082	NA	NA	-4.53485	-0.268124	9.57952	0.00711707	0.130751
C14H3orf33	NA	NA	-1.06085	1.40238	9.57818	0.00712002	0.130751
JPT1	JPT1	Jupiter microtubule associated homolog 1 [Source:HGNC Symbol;Acc:HGNC:14569]	-0.831568	4.16118	9.5725	0.00713361	0.130751
CRIM1	CRIM1	cysteine rich transmembrane BMP regulator 1 [Source:HGNC Symbol;Acc:HGNC:2359]	0.821096	6.79074	9.56465	0.00715241	0.130751
OSBP2	OSBP2	oxysterol binding protein 2 [Source:HGNC Symbol;Acc:HGNC:8504]	0.855084	4.34983	9.56431	0.00715321	0.130751
PRDX3	NA	NA	-0.991129	6.93	9.5588	0.00716645	0.130751
GLB1	GLB1	galactosidase beta 1 [Source:HGNC Symbol;Acc:HGNC:4298]	0.8569	7.26717	9.55796	0.00716848	0.130751
VASN	VASN	vasorin [Source:HGNC Symbol;Acc:HGNC:18517]	0.586897	6.72831	9.55095	0.00718534	0.130751
PRDM8	NA	NA	-0.792973	1.57075	9.55043	0.00718659	0.130751
TMEM235	NA	NA	1.66742	-0.518888	9.54257	0.00720559	0.130751
TENT4A	TENT4A	terminal nucleotidyltransferase 4A [Source:HGNC Symbol;Acc:HGNC:16705]	0.398288	5.1589	9.54253	0.00720567	0.130751
ATP5PD	NA	NA	-1.05159	8.00524	9.53566	0.00722233	0.130751
LOC100343888	NA	NA	1.12761	3.79573	9.53402	0.0072263	0.130751
SMYD2	SMYD2	SET and MYND domain containing 2 [Source:HGNC Symbol;Acc:HGNC:20982]	-1.41845	5.9023	9.61497	0.00722812	0.130751
COPS4	COPS4	COP9 signalosome subunit 4 [Source:HGNC Symbol;Acc:HGNC:16702]	-0.462332	6.08405	9.53307	0.0072286	0.130751
CBL	CBL	Cbl proto-oncogene [Source:HGNC Symbol;Acc:HGNC:1541]	0.561609	5.51105	9.52623	0.00724523	0.1309
ATG4D	ATG4D	autophagy related 4D cysteine peptidase [Source:HGNC Symbol;Acc:HGNC:20789]	-1.03828	3.9956	9.51579	0.00727069	0.131208
GPD1L	NA	NA	-0.868481	6.35223	9.51148	0.00728124	0.131247
PARVA	PARVA	parvin alpha [Source:HGNC Symbol;Acc:HGNC:14652]	0.693261	8.1843	9.50639	0.00729369	0.13132
RCCD1	RCCD1	RCC1 domain containing 1 [Source:HGNC Symbol;Acc:HGNC:30457]	-0.632657	2.34717	9.49411	0.00732389	0.131611
LOC103351596	NA	NA	-0.960188	1.46996	9.48926	0.00733586	0.131611
ANGEL1	ANGEL1	angel homolog 1 [Source:HGNC Symbol;Acc:HGNC:19961]	0.425335	5.15038	9.48777	0.00733952	0.131611
LOC127485938	NA	NA	-0.356049	5.24392	9.4858	0.00734439	0.131611
PNPO	PNPO	pyridoxamine 5'-phosphate oxidase [Source:HGNC Symbol;Acc:HGNC:30260]	0.565282	2.93773	9.47818	0.00736327	0.131611
ABRA	ABRA	actin binding Rho activating protein [Source:HGNC Symbol;Acc:HGNC:30655]	-2.88476	3.6513	9.58622	0.00737484	0.131611
SDR39U1	SDR39U1	short chain dehydrogenase/reductase family 39U member 1 [Source:HGNC Symbol;Acc:HGNC:20275]	-0.883036	4.77253	9.47305	0.00737599	0.131611
NDUFC2	ALG8	ALG8 alpha-1,3-glucosyltransferase [Source:HGNC Symbol;Acc:HGNC:23161]	-0.920138	5.79672	9.47255	0.00737722	0.131611
DES	DES	desmin [Source:HGNC Symbol;Acc:HGNC:2770]	-1.75886	9.35004	9.53417	0.00740598	0.131973
LOC100347176	NA	NA	-0.491835	4.17676	9.45664	0.00741689	0.132017
LOC100340175	NA	NA	0.910097	8.21013	9.4399	0.00745887	0.132381
PPARGC1A	PPARGC1A	PPARG coactivator 1 alpha [Source:HGNC Symbol;Acc:HGNC:9237]	-1.47334	3.6343	9.4638	0.00746769	0.132381
ATP8A1	ATP8A1	ATPase phospholipid transporting 8A1 [Source:HGNC Symbol;Acc:HGNC:13531]	-0.90505	2.86814	9.43086	0.00748164	0.132381
CTDSP2	CTDSP2	CTD small phosphatase 2 [Source:HGNC Symbol;Acc:HGNC:17077]	0.421101	8.81584	9.429	0.00748634	0.132381
LOC100352275	NA	NA	-0.884538	5.29826	9.42842	0.00748779	0.132381
TGFB3	TGFB3	transforming growth factor beta 3 [Source:HGNC Symbol;Acc:HGNC:11769]	0.534737	7.17684	9.42828	0.00748816	0.132381
MRPS18B	NA	NA	-1.01637	4.79111	9.42091	0.00751673	0.132736
ATP7B	ATP7B	ATPase copper transporting beta [Source:HGNC Symbol;Acc:HGNC:870]	-1.21823	3.25427	9.39663	0.00756864	0.133434
WTIP	NA	NA	0.580729	4.44147	9.39379	0.0075759	0.133434
ABLIM1	ABLIM1	actin binding LIM protein 1 [Source:HGNC Symbol;Acc:HGNC:78]	-1.29027	8.63815	9.40142	0.00758184	0.133434
PPM1J	PPM1J	protein phosphatase, Mg2+/Mn2+ dependent 1J [Source:HGNC Symbol;Acc:HGNC:20785]	-0.744551	2.92006	9.38726	0.00759264	0.133473
RAD50	RAD50	RAD50 double strand break repair protein [Source:HGNC Symbol;Acc:HGNC:9816]	-0.52978	4.89391	9.37456	0.00762533	0.133798
NDUFA6	NDUFA6	NADH:ubiquinone oxidoreductase subunit A6 [Source:HGNC Symbol;Acc:HGNC:7690]	-1.38383	6.33704	9.44491	0.00762952	0.133798
KLHL38	KLHL38	kelch like family member 38 [Source:HGNC Symbol;Acc:HGNC:34435]	-1.69057	3.25326	9.41142	0.00763679	0.133798
IMMP2L	NA	NA	-0.801602	2.5174	9.3651	0.00764979	0.133876
PDK1	PDK1	pyruvate dehydrogenase kinase 1 [Source:HGNC Symbol;Acc:HGNC:8809]	-0.989485	5.11517	9.33737	0.00773206	0.135045
TTC19	TTC19	tetratricopeptide repeat domain 19 [Source:HGNC Symbol;Acc:HGNC:26006]	-0.345876	4.90421	9.33282	0.00773389	0.135045
TUBB4A	TUBB4A	tubulin beta 4A class IVa [Source:HGNC Symbol;Acc:HGNC:20774]	-0.699303	4.33605	9.32687	0.00774952	0.13515
ERAL1	ERAL1	Era like 12S mitochondrial rRNA chaperone 1 [Source:HGNC Symbol;Acc:HGNC:3424]	-0.678042	3.70175	9.32095	0.00776509	0.13515
LMTK3	NA	NA	-1.17126	0.279634	9.31971	0.00776834	0.13515
LOC103351842	NA	NA	-1.33169	0.781108	9.31591	0.00777837	0.13515
MXD4	MXD4	MAX dimerization protein 4 [Source:HGNC Symbol;Acc:HGNC:13906]	0.398348	7.28861	9.3123	0.00778792	0.13515
P3H4	P3H4	prolyl 3-hydroxylase family member 4 (inactive) [Source:HGNC Symbol;Acc:HGNC:16946]	0.653823	5.96687	9.31061	0.00779238	0.13515
RBM24	RBM24	RNA binding motif protein 24 [Source:HGNC Symbol;Acc:HGNC:21539]	-2.10785	5.69193	9.41681	0.00780043	0.13515
MARCHF3	MARCHF3	membrane associated ring-CH-type finger 3 [Source:HGNC Symbol;Acc:HGNC:28728]	-0.855285	3.49032	9.29891	0.00782338	0.135397
RGN	RGN	regucalcin [Source:HGNC Symbol;Acc:HGNC:9989]	-0.941966	2.54867	9.28228	0.0078677	0.135864
LOC103349253	NA	NA	-0.665385	4.28391	9.28144	0.00786996	0.135864
TEC	TEC	tec protein tyrosine kinase [Source:HGNC Symbol;Acc:HGNC:11719]	-0.682075	3.10115	9.27745	0.00788063	0.135864
MYO5B	MYO5B	myosin VB [Source:HGNC Symbol;Acc:HGNC:7603]	-2.3063	2.67934	9.34644	0.0078851	0.135864
MSRB3	MSRB3	methionine sulfoxide reductase B3 [Source:HGNC Symbol;Acc:HGNC:27375]	0.733981	8.84263	9.24875	0.00795794	0.136857
DDX31	DDX31	DEAD-box helicase 31 [Source:HGNC Symbol;Acc:HGNC:16715]	0.421969	3.60703	9.2421	0.00797598	0.136857
CCDC141	CCDC141	coiled-coil domain containing 141 [Source:HGNC Symbol;Acc:HGNC:26821]	-1.84499	2.64294	9.26065	0.00798386	0.136857
TMEM214	TMEM214	transmembrane protein 214 [Source:HGNC Symbol;Acc:HGNC:25983]	0.39576	5.89379	9.22961	0.00800998	0.136857
PKP2	PKP2	plakophilin 2 [Source:HGNC Symbol;Acc:HGNC:9024]	-1.94911	5.07553	9.33715	0.00801023	0.136857
LRRC20	LRRC20	leucine rich repeat containing 20 [Source:HGNC Symbol;Acc:HGNC:23421]	-1.4345	2.67475	9.22951	0.00801024	0.136857
PPP1R3A	PPP1R3A	protein phosphatase 1 regulatory subunit 3A [Source:HGNC Symbol;Acc:HGNC:9291]	-2.62151	2.22125	9.2976	0.00801549	0.136857
RAB31	VAPA	VAMP associated protein A [Source:HGNC Symbol;Acc:HGNC:12648]	0.6748	6.85449	9.22709	0.00801685	0.136857
LOC100344679	NA	NA	-0.960378	5.95009	9.22914	0.00802156	0.136857
LOC100344961	NA	NA	-0.47968	4.77772	9.21887	0.00803934	0.136973
ACTC1	ACTC1	actin alpha cardiac muscle 1 [Source:HGNC Symbol;Acc:HGNC:143]	-2.56876	10.7485	9.31194	0.00804741	0.136973
ACYP1	NA	NA	-0.572717	4.17725	9.21329	0.00805466	0.136973
NPY5R	NPY5R	neuropeptide Y receptor Y5 [Source:HGNC Symbol;Acc:HGNC:7958]	1.37179	2.11522	9.20821	0.0080686	0.137061
PTGES2	NA	NA	-1.11388	5.44353	9.22564	0.0081275	0.137912
KCTD11	NA	NA	0.385348	4.66409	9.16106	0.00819955	0.138881
MSN	NA	NA	0.455038	8.35936	9.15758	0.0082093	0.138881
LOC100349768	NA	NA	-1.3322	8.71867	9.17748	0.00821128	0.138881
INPP4A	INPP4A	inositol polyphosphate-4-phosphatase type I A [Source:HGNC Symbol;Acc:HGNC:6074]	1.09237	7.55757	9.13648	0.00827925	0.139879
GRK6	GRK6	G protein-coupled receptor kinase 6 [Source:HGNC Symbol;Acc:HGNC:4545]	0.381144	4.15858	9.12859	0.00829114	0.139929
STRIP1	STRIP1	striatin interacting protein 1 [Source:HGNC Symbol;Acc:HGNC:25916]	0.368323	5.40593	9.12391	0.00830442	0.139987
PFKP	PFKP	phosphofructokinase, platelet [Source:HGNC Symbol;Acc:HGNC:8878]	0.603007	7.09899	9.1142	0.00833208	0.139987
CRAT	NA	NA	-1.03055	7.07728	9.11679	0.00833523	0.139987
S100A1	S100A1	S100 calcium binding protein A1 [Source:HGNC Symbol;Acc:HGNC:10486]	-2.24731	5.9718	9.21787	0.00833655	0.139987
SQOR	SQOR	sulfide quinone oxidoreductase [Source:HGNC Symbol;Acc:HGNC:20390]	-0.417384	5.42419	9.11094	0.00834141	0.139987
B3GALNT2	B3GALNT2	beta-1,3-N-acetylgalactosaminyltransferase 2 [Source:HGNC Symbol;Acc:HGNC:28596]	0.439082	5.26641	9.1085	0.00834837	0.139987
PPRC1	PPRC1	PPARG related coactivator 1 [Source:HGNC Symbol;Acc:HGNC:30025]	0.546128	4.35483	9.09417	0.00838947	0.140414
CEBPB	CEBPB	CCAAT enhancer binding protein beta [Source:HGNC Symbol;Acc:HGNC:1834]	0.520247	5.71532	9.09336	0.0083918	0.140414
MYD88	NA	NA	0.49091	5.58058	9.08422	0.00841816	0.140466
HADH	HADH	hydroxyacyl-CoA dehydrogenase [Source:HGNC Symbol;Acc:HGNC:4799]	-0.728243	6.86697	9.081	0.00842746	0.140466
RRAD	RRAD	RRAD, Ras related glycolysis inhibitor and calcium channel regulator [Source:HGNC Symbol;Acc:HGNC:10446]	-2.20599	6.073	9.185	0.00842914	0.140466
LOC127484124	NA	NA	-1.09505	1.42574	9.07827	0.00843538	0.140466
LOC127485903	NA	NA	-2.31817	-0.829195	9.07673	0.00843982	0.140466
LOC100341772	NA	NA	-0.940881	5.01231	9.07497	0.00845555	0.140578
LOC103349801	NA	NA	-0.957953	7.46802	9.06507	0.00847368	0.140612
LOC127491689	NA	NA	-1.38026	1.90779	9.06436	0.00847574	0.140612
CCDC138	CCDC138	coiled-coil domain containing 138 [Source:HGNC Symbol;Acc:HGNC:26531]	-1.28333	1.11159	9.06132	0.00848458	0.140612
DEPTOR	DEPTOR	DEP domain containing MTOR interacting protein [Source:HGNC Symbol;Acc:HGNC:22953]	-0.991011	4.74224	9.0526	0.0085207	0.141061
ECPAS	ECPAS	Ecm29 proteasome adaptor and scaffold [Source:HGNC Symbol;Acc:HGNC:29020]	-0.628707	6.61765	9.04584	0.00852985	0.141063
EGR3	EGR3	early growth response 3 [Source:HGNC Symbol;Acc:HGNC:3240]	1.04412	1.20962	9.03221	0.00856992	0.141576
PCYOX1L	PCYOX1L	prenylcysteine oxidase 1 like [Source:HGNC Symbol;Acc:HGNC:28477]	-1.00941	5.67738	9.03814	0.00859393	0.14173
WDR31	WDR31	WD repeat domain 31 [Source:HGNC Symbol;Acc:HGNC:21421]	-1.05141	0.69649	9.0229	0.0085974	0.14173
DEPP1	DEPP1	DEPP autophagy regulator 1 [Source:HGNC Symbol;Acc:HGNC:23355]	-1.62635	5.24558	9.11151	0.00860868	0.141767
TRDN	TRDN	triadin [Source:HGNC Symbol;Acc:HGNC:12261]	-2.17676	5.45055	9.11112	0.00864158	0.141972
GRAP2	GRAP2	GRB2 related adaptor protein 2 [Source:HGNC Symbol;Acc:HGNC:4563]	-2.52249	5.12736	9.1095	0.0086463	0.141972
AAMDC	AAMDC	adipogenesis associated Mth938 domain containing [Source:HGNC Symbol;Acc:HGNC:30205]	-0.56902	4.56201	9.00136	0.0086614	0.141972
ABHD14A	NA	NA	0.466933	6.44808	8.99981	0.008666	0.141972
ANO2	NA	NA	-2.17543	1.92057	9.00634	0.00867916	0.141972
FAM168A	NA	NA	0.572526	5.78936	8.99274	0.00868715	0.141972
XRCC5	XRCC5	X-ray repair cross complementing 5 [Source:HGNC Symbol;Acc:HGNC:12833]	-0.694123	4.22673	8.99093	0.00869256	0.141972
MSC	MSC	musculin [Source:HGNC Symbol;Acc:HGNC:7321]	-0.889637	2.23413	8.9905	0.00869386	0.141972
CCDC40	NA	NA	3.20554	0.496104	9.00342	0.0087085	0.142063
SLC37A1	SLC37A1	solute carrier family 37 member 1 [Source:HGNC Symbol;Acc:HGNC:11024]	-1.69952	1.551	8.97515	0.00874	0.142428
ARL1	ARL1	ADP ribosylation factor like GTPase 1 [Source:HGNC Symbol;Acc:HGNC:692]	0.476396	6.84257	8.95806	0.00879167	0.142841
SPRYD3	SPRYD3	SPRY domain containing 3 [Source:HGNC Symbol;Acc:HGNC:25920]	0.321595	6.31215	8.95486	0.00880141	0.142841
MNT	MNT	MAX network transcriptional repressor [Source:HGNC Symbol;Acc:HGNC:7188]	0.484937	4.82426	8.95235	0.00880902	0.142841
MEGF8	NA	NA	0.44426	6.42625	8.95168	0.00881107	0.142841
RXRG	RXRG	retinoid X receptor gamma [Source:HGNC Symbol;Acc:HGNC:10479]	-1.94494	4.26504	9.04944	0.00881799	0.142841
ARL10	ARL10	ADP ribosylation factor like GTPase 10 [Source:HGNC Symbol;Acc:HGNC:22042]	0.368926	4.63009	8.94869	0.00882016	0.142841
TTLL7	TTLL7	tubulin tyrosine ligase like 7 [Source:HGNC Symbol;Acc:HGNC:26242]	-1.19496	2.22516	8.93867	0.00885074	0.143188
TMEM182	TMEM182	transmembrane protein 182 [Source:HGNC Symbol;Acc:HGNC:26391]	-2.28104	4.75999	9.03307	0.00887272	0.143208
LOC100352536	RPL32	ribosomal protein L32 [Source:HGNC Symbol;Acc:HGNC:10336]	-1.11929	4.74269	8.95265	0.00887924	0.143208
ACADSB	ACADSB	acyl-CoA dehydrogenase short/branched chain [Source:HGNC Symbol;Acc:HGNC:91]	-0.664337	6.284	8.92928	0.00887949	0.143208
IL17D	NA	NA	0.604038	3.06288	8.92483	0.00889318	0.143281
ATP5ME	NA	NA	-1.50032	7.07089	8.98743	0.00892394	0.143629
TRIB2	TRIB2	tribbles pseudokinase 2 [Source:HGNC Symbol;Acc:HGNC:30809]	0.736265	5.28856	8.91155	0.00893411	0.143644
LOC100351488	NA	NA	-0.913931	5.60147	8.90909	0.00895269	0.143795
TMA7	NA	NA	-0.595247	6.26521	8.89605	0.00898218	0.144121
LAMA2	LAMA2	laminin subunit alpha 2 [Source:HGNC Symbol;Acc:HGNC:6482]	-1.05187	7.31862	8.89598	0.00899339	0.144152
SLC25A26	SLC25A26	solute carrier family 25 member 26 [Source:HGNC Symbol;Acc:HGNC:20661]	-0.851615	2.28282	8.88405	0.00901958	0.144424
ARHGEF15	ARHGEF15	Rho guanine nucleotide exchange factor 15 [Source:HGNC Symbol;Acc:HGNC:15590]	-0.8114	4.56774	8.87868	0.00903639	0.144545
YIPF2	YIPF2	Yip1 domain family member 2 [Source:HGNC Symbol;Acc:HGNC:28476]	0.504694	5.62651	8.87558	0.00904608	0.144552
PDLIM7	NA	NA	0.67267	9.40804	8.85956	0.00909646	0.144948
DLGAP1	DLGAP1	DLG associated protein 1 [Source:HGNC Symbol;Acc:HGNC:2905]	-1.10056	2.18031	8.85945	0.00909681	0.144948
APLN	APLN	apelin [Source:HGNC Symbol;Acc:HGNC:16665]	-1.37923	2.78569	8.85885	0.0090987	0.144948
MAPK1	MAPK1	mitogen-activated protein kinase 1 [Source:HGNC Symbol;Acc:HGNC:6871]	0.459433	6.20062	8.85504	0.00911076	0.144976
LOC103345057	NA	NA	-2.46208	1.03576	8.85243	0.00911899	0.144976
SSH2	SSH2	slingshot protein phosphatase 2 [Source:HGNC Symbol;Acc:HGNC:30580]	-0.547315	4.20732	8.84699	0.00913623	0.145103
MRPS16	NA	NA	-0.749791	5.0302	8.84211	0.0091517	0.145201
FAM110B	FAM110B	family with sequence similarity 110 member B [Source:HGNC Symbol;Acc:HGNC:28587]	-0.909662	3.57879	8.83285	0.00918118	0.145521
BCOR	BCOR	BCL6 corepressor [Source:HGNC Symbol;Acc:HGNC:20893]	0.842036	4.24915	8.82237	0.00921466	0.145903
CMC1	CMC1	C-X9-C motif containing 1 [Source:HGNC Symbol;Acc:HGNC:28783]	-0.583777	3.51043	8.81637	0.0092339	0.14606
ANO10	ANO10	anoctamin 10 [Source:HGNC Symbol;Acc:HGNC:25519]	0.560516	6.17463	8.81037	0.00925318	0.146217
LACTB2	LACTB2	lactamase beta 2 [Source:HGNC Symbol;Acc:HGNC:18512]	-0.607269	3.50607	8.78675	0.00932953	0.147246
HHATL	NA	NA	-2.49719	4.87666	8.88042	0.0093455	0.147246
LOC127493711	NA	NA	-1.01711	3.33803	8.78152	0.00934653	0.147246
AMOTL2	AMOTL2	angiomotin like 2 [Source:HGNC Symbol;Acc:HGNC:17812]	0.470729	6.06547	8.77531	0.00936678	0.147416
RUFY4	RUFY4	RUN and FYVE domain containing 4 [Source:HGNC Symbol;Acc:HGNC:24804]	-1.25766	1.16452	8.76564	0.00939836	0.147764
MYLK3	MYLK3	myosin light chain kinase 3 [Source:HGNC Symbol;Acc:HGNC:29826]	-2.19542	5.75562	8.85533	0.00942594	0.147885
FIBIN	FIBIN	fin bud initiation factor homolog [Source:HGNC Symbol;Acc:HGNC:33747]	0.522741	6.3798	8.75639	0.00942873	0.147885
SUPT3H	SUPT3H	SPT3 homolog, SAGA and STAGA complex component [Source:HGNC Symbol;Acc:HGNC:11466]	-0.568604	2.42656	8.75466	0.00943441	0.147885
LOC100347615	NA	NA	0.508268	4.14751	8.75001	0.00944971	0.147976
EIF4G1	EIF4G1	eukaryotic translation initiation factor 4 gamma 1 [Source:HGNC Symbol;Acc:HGNC:3296]	0.377291	7.83243	8.74225	0.00947533	0.148229
NDST1	NDST1	N-deacetylase and N-sulfotransferase 1 [Source:HGNC Symbol;Acc:HGNC:7680]	0.367287	6.04071	8.73917	0.00948551	0.14824
USP13	USP13	ubiquitin specific peptidase 13 [Source:HGNC Symbol;Acc:HGNC:12611]	-1.5102	6.17489	8.80745	0.00952149	0.148517
LOC108177241	NA	NA	-2.86963	3.86342	8.8256	0.00952229	0.148517
MCTS1	NA	NA	-0.572622	4.26479	8.72506	0.00953233	0.148526
KIAA0753	KIAA0753	KIAA0753 [Source:HGNC Symbol;Acc:HGNC:29110]	0.455478	4.23027	8.72077	0.00954663	0.1486
ACAD8	NA	NA	-0.465233	4.33728	8.71202	0.00957586	0.148907
SRL	SRL	sarcalumenin [Source:HGNC Symbol;Acc:HGNC:11295]	-2.44807	7.09827	8.79644	0.00961789	0.148975
MRPS15	MRPS15	mitochondrial ribosomal protein S15 [Source:HGNC Symbol;Acc:HGNC:14504]	-0.530406	4.8187	8.69656	0.00962774	0.148975
PIP5K1C	NA	NA	0.432875	5.79297	8.69284	0.00964028	0.148975
IL17RD	IL17RD	interleukin 17 receptor D [Source:HGNC Symbol;Acc:HGNC:17616]	0.520012	4.89015	8.69234	0.00964195	0.148975
AMPD2	AMPD2	adenosine monophosphate deaminase 2 [Source:HGNC Symbol;Acc:HGNC:469]	0.399459	5.40542	8.69165	0.00964426	0.148975
TLN1	TLN1	talin 1 [Source:HGNC Symbol;Acc:HGNC:11845]	0.644853	9.61673	8.6877	0.00965759	0.148975
VNN1	NA	NA	-1.11558	4.14902	8.68718	0.00967084	0.148975
ACAD9	ACAD9	acyl-CoA dehydrogenase family member 9 [Source:HGNC Symbol;Acc:HGNC:21497]	-0.912891	4.44939	8.68247	0.0096753	0.148975
C3H5orf63	NA	NA	-0.893535	2.80203	8.68003	0.00968357	0.148975
NRBP1	NRBP1	nuclear receptor binding protein 1 [Source:HGNC Symbol;Acc:HGNC:7993]	0.42366	7.1609	8.67934	0.0096859	0.148975
HSPB7	HSPB7	heat shock protein family B (small) member 7 [Source:HGNC Symbol;Acc:HGNC:5249]	-2.00723	9.91495	8.75277	0.00968732	0.148975
ANAPC16	ANAPC16	anaphase promoting complex subunit 16 [Source:HGNC Symbol;Acc:HGNC:26976]	-0.296481	5.1293	8.67558	0.00969865	0.148975
SERTAD1	NA	NA	0.628083	5.29781	8.67396	0.00970414	0.148975
CPT2	CPT2	carnitine palmitoyltransferase 2 [Source:HGNC Symbol;Acc:HGNC:2330]	-1.05658	3.91596	8.67092	0.00971449	0.148987
OLFM4	NA	NA	2.88872	-0.520869	8.66282	0.00974207	0.149264
SEC23A	SEC23A	SEC23 homolog A, COPII coat complex component [Source:HGNC Symbol;Acc:HGNC:10701]	0.668222	5.65636	8.657	0.00976196	0.149422
DCUN1D2	DCUN1D2	defective in cullin neddylation 1 domain containing 2 [Source:HGNC Symbol;Acc:HGNC:20328]	-1.25919	4.46066	8.69007	0.00977164	0.149424
RIOX1	RIOX1	ribosomal oxygenase 1 [Source:HGNC Symbol;Acc:HGNC:20968]	-0.536332	3.86451	8.64656	0.00979775	0.149677
CD99L2	CD99L2	CD99 molecule like 2 [Source:HGNC Symbol;Acc:HGNC:18237]	-0.524302	6.23821	8.64247	0.00981179	0.149745
P3H2	P3H2	prolyl 3-hydroxylase 2 [Source:HGNC Symbol;Acc:HGNC:19317]	0.763505	5.38374	8.61994	0.00988962	0.15053
PFKFB2	PFKFB2	6-phosphofructo-2-kinase/fructose-2,6-biphosphatase 2 [Source:HGNC Symbol;Acc:HGNC:8873]	-0.466111	4.89668	8.61837	0.00989509	0.15053
TGIF2	TGIF2	TGFB induced factor homeobox 2 [Source:HGNC Symbol;Acc:HGNC:15764]	0.621933	3.03225	8.61828	0.00989538	0.15053
TRIM72	TRIM72	tripartite motif containing 72 [Source:HGNC Symbol;Acc:HGNC:32671]	-2.31694	4.68218	8.71177	0.00990178	0.15053
LOC100342996	COX7B	cytochrome c oxidase subunit 7B [Source:HGNC Symbol;Acc:HGNC:2291]	-2.71607	6.42146	8.69343	0.00996453	0.151337
H1-2	NA	NA	-0.903449	3.13363	8.59438	0.00997881	0.151407
LOC108177147	NA	NA	-0.961264	2.40351	8.58555	0.0100098	0.15173
PPP1R3B	PPP1R3B	protein phosphatase 1 regulatory subunit 3B [Source:HGNC Symbol;Acc:HGNC:14942]	0.739456	6.97726	8.58053	0.0100275	0.151851
LRP5	NA	NA	0.424276	6.59442	8.57496	0.0100472	0.1519
SEPTIN5	NA	NA	-0.549708	5.71821	8.5741	0.0100502	0.1519
OGA	OGA	O-GlcNAcase [Source:HGNC Symbol;Acc:HGNC:7056]	-0.46976	6.99911	8.57003	0.0100646	0.151971
LOC100343501	NA	NA	-0.405147	4.08341	8.56684	0.0100759	0.151995
PDZRN4	PDZRN4	PDZ domain containing ring finger 4 [Source:HGNC Symbol;Acc:HGNC:30552]	0.946514	4.53408	8.55712	0.0101104	0.152368
WRNIP1	WRNIP1	WRN helicase interacting protein 1 [Source:HGNC Symbol;Acc:HGNC:20876]	0.403815	5.70601	8.55153	0.0101303	0.152472
SERPINH1	NA	NA	0.578284	9.28597	8.54972	0.0101368	0.152472
RIPOR2	RIPOR2	RHO family interacting cell polarization regulator 2 [Source:HGNC Symbol;Acc:HGNC:13872]	-1.46545	2.9068	8.53773	0.0101915	0.153147
SUCLA2	SUCLA2	succinate-CoA ligase ADP-forming subunit beta [Source:HGNC Symbol;Acc:HGNC:11448]	-0.67142	6.12568	8.52943	0.0102095	0.153271
LOC100353731	NA	NA	-1.03945	5.63221	8.54331	0.0102449	0.153654
SDHB	SDHB	succinate dehydrogenase complex iron sulfur subunit B [Source:HGNC Symbol;Acc:HGNC:10681]	-1.23798	7.27646	8.54867	0.010266	0.153823
GZF1	NA	NA	0.499174	3.7426	8.5056	0.0102957	0.154023
ZDHHC2	ZDHHC2	zinc finger DHHC-type palmitoyltransferase 2 [Source:HGNC Symbol;Acc:HGNC:18469]	-1.30131	4.2264	8.537	0.0103081	0.154023
NDUFA2	NDUFA2	NADH:ubiquinone oxidoreductase subunit A2 [Source:HGNC Symbol;Acc:HGNC:7685]	-0.798622	5.55508	8.50139	0.0103111	0.154023
LAMC3	NA	NA	-1.6577	2.71051	8.51058	0.0103188	0.154023
PARD3B	PARD3B	par-3 family cell polarity regulator beta [Source:HGNC Symbol;Acc:HGNC:14446]	0.489825	4.747	8.49459	0.0103358	0.15413
UNC13B	UNC13B	unc-13 homolog B [Source:HGNC Symbol;Acc:HGNC:12566]	0.413348	5.23578	8.48546	0.0103692	0.154481
KRT18	NA	NA	-2.02408	2.67361	8.51937	0.0103802	0.154496
FN1	FN1	fibronectin 1 [Source:HGNC Symbol;Acc:HGNC:3778]	1.06541	11.6281	8.47972	0.0103903	0.1545
COLQ	COLQ	collagen like tail subunit of asymmetric acetylcholinesterase [Source:HGNC Symbol;Acc:HGNC:2226]	-1.85593	3.27525	8.53501	0.0104085	0.154624
HLX	HLX	H2.0 like homeobox [Source:HGNC Symbol;Acc:HGNC:4978]	-0.733042	3.48808	8.4665	0.010439	0.154929
LOC100346596	NA	NA	-2.28263	6.0298	8.55051	0.0104695	0.155234
PARVB	NA	NA	-0.93437	6.16403	8.4558	0.0104905	0.155323
TMEM43	TMEM43	transmembrane protein 43 [Source:HGNC Symbol;Acc:HGNC:28472]	0.517519	7.48136	8.45128	0.0104953	0.155323
RNASEH2B	RNASEH2B	ribonuclease H2 subunit B [Source:HGNC Symbol;Acc:HGNC:25671]	-0.323439	4.69474	8.4485	0.0105057	0.155329
CSTF2T	NA	NA	-0.61925	4.13108	8.43908	0.0105408	0.1557
ESYT2	ESYT2	extended synaptotagmin 2 [Source:HGNC Symbol;Acc:HGNC:22211]	0.579763	6.67368	8.42019	0.0106116	0.156598
LOC100357840	CYCS	cytochrome c, somatic [Source:HGNC Symbol;Acc:HGNC:19986]	-1.69251	5.71534	8.50393	0.0106404	0.156854
SEMA3E	NA	NA	2.06612	3.78439	8.50024	0.0106489	0.156854
MZF1	NA	NA	0.564203	2.46247	8.39778	0.0106962	0.157353
GPI	GPI	glucose-6-phosphate isomerase [Source:HGNC Symbol;Acc:HGNC:4458]	-0.768509	8.16851	8.396	0.010703	0.157353
SLC25A12	SLC25A12	solute carrier family 25 member 12 [Source:HGNC Symbol;Acc:HGNC:10982]	-0.78129	5.81939	8.38869	0.0107308	0.157606
YARS2	YARS2	tyrosyl-tRNA synthetase 2 [Source:HGNC Symbol;Acc:HGNC:24249]	-0.576984	3.67573	8.38619	0.0107403	0.157606
PSMA6	PSMA6	proteasome 20S subunit alpha 6 [Source:HGNC Symbol;Acc:HGNC:9535]	-0.431663	5.83926	8.3805	0.0107621	0.157776
ECHDC3	ECHDC3	enoyl-CoA hydratase domain containing 3 [Source:HGNC Symbol;Acc:HGNC:23489]	-0.731944	6.09543	8.37653	0.0107772	0.157851
PER1	PER1	period circadian regulator 1 [Source:HGNC Symbol;Acc:HGNC:8845]	0.806329	6.78575	8.36902	0.010806	0.158093
ITGA9	NA	NA	1.12923	3.28785	8.36694	0.010814	0.158093
AXL	AXL	AXL receptor tyrosine kinase [Source:HGNC Symbol;Acc:HGNC:905]	0.387303	8.38529	8.35413	0.0108634	0.15842
NEBL	NEBL	nebulette [Source:HGNC Symbol;Acc:HGNC:16932]	-1.90135	6.52144	8.44392	0.0108652	0.15842
FAM78A	FAM78A	family with sequence similarity 78 member A [Source:HGNC Symbol;Acc:HGNC:25465]	-1.74634	4.66876	8.44338	0.0108672	0.15842
PHLDA1	PHLDA1	pleckstrin homology like domain family A member 1 [Source:HGNC Symbol;Acc:HGNC:8933]	-0.748086	4.75871	8.34894	0.0108835	0.15842
LOC100339806	NA	NA	-0.892816	2.9473	8.34802	0.010887	0.15842
LOC100345136	NA	NA	-1.68231	3.17013	8.35892	0.0109125	0.158575
CSNK1E	CSNK1E	casein kinase 1 epsilon [Source:HGNC Symbol;Acc:HGNC:2453]	0.346143	5.50847	8.34003	0.010918	0.158575
NPPA	NPPA	natriuretic peptide A [Source:HGNC Symbol;Acc:HGNC:7939]	4.18039	9.0261	8.42184	0.0109493	0.15883
SSC5D	NA	NA	0.852928	4.88003	8.33031	0.0109559	0.15883
AP1S2	AP1S2	adaptor related protein complex 1 subunit sigma 2 [Source:HGNC Symbol;Acc:HGNC:560]	0.639038	6.04954	8.32544	0.0109749	0.158958
WDFY3	WDFY3	WD repeat and FYVE domain containing 3 [Source:HGNC Symbol;Acc:HGNC:20751]	0.593897	6.48528	8.31665	0.0110093	0.159177
SLIT2	SLIT2	slit guidance ligand 2 [Source:HGNC Symbol;Acc:HGNC:11086]	0.808578	6.43391	8.31639	0.0110104	0.159177
PTDSS1	PTDSS1	phosphatidylserine synthase 1 [Source:HGNC Symbol;Acc:HGNC:9587]	-0.896219	5.7777	8.3169	0.0110207	0.159179
UCK1	NA	NA	0.57893	5.35155	8.31108	0.0110312	0.159184
SLC25A20	SLC25A20	solute carrier family 25 member 20 [Source:HGNC Symbol;Acc:HGNC:1421]	-0.508465	4.82861	8.29752	0.0110847	0.159807
GOLGA2	NA	NA	0.349442	6.83526	8.29132	0.0111092	0.160014
PNRC1	PNRC1	proline rich nuclear receptor coactivator 1 [Source:HGNC Symbol;Acc:HGNC:17278]	-0.374681	5.98954	8.2754	0.0111726	0.160564
FRMD3	FRMD3	FERM domain containing 3 [Source:HGNC Symbol;Acc:HGNC:24125]	-0.735974	4.3142	8.27461	0.0111757	0.160564
LOC108177974	NA	NA	-2.41314	6.48305	8.3627	0.0111783	0.160564
TMEM71	TMEM71	transmembrane protein 71 [Source:HGNC Symbol;Acc:HGNC:26572]	-1.58448	2.23717	8.26656	0.0112079	0.160751
SIRT5	SIRT5	sirtuin 5 [Source:HGNC Symbol;Acc:HGNC:14933]	-0.509656	6.9095	8.26557	0.0112118	0.160751
PTPN3	PTPN3	protein tyrosine phosphatase non-receptor type 3 [Source:HGNC Symbol;Acc:HGNC:9655]	-1.04013	4.25617	8.24141	0.0113216	0.162138
BZW2	BZW2	basic leucine zipper and W2 domains 2 [Source:HGNC Symbol;Acc:HGNC:18808]	-1.13619	6.66278	8.2693	0.0113294	0.162138
SEPTIN2	SEPTIN2	septin 2 [Source:HGNC Symbol;Acc:HGNC:7729]	0.357784	8.5337	8.23107	0.011351	0.162299
LOC127490061	NA	NA	-0.920653	1.16097	8.22514	0.0113751	0.162408
FCHSD1	FCHSD1	FCH and double SH3 domains 1 [Source:HGNC Symbol;Acc:HGNC:25463]	0.467784	5.02431	8.22409	0.0113794	0.162408
KLHL13	KLHL13	kelch like family member 13 [Source:HGNC Symbol;Acc:HGNC:22931]	-0.98607	2.02214	8.20888	0.0114416	0.162866
CETP	CETP	cholesteryl ester transfer protein [Source:HGNC Symbol;Acc:HGNC:1869]	-2.62994	0.76174	8.21182	0.0114421	0.162866
ST3GAL5	ST3GAL5	ST3 beta-galactoside alpha-2,3-sialyltransferase 5 [Source:HGNC Symbol;Acc:HGNC:10872]	-0.923954	3.25604	8.20681	0.0114501	0.162866
SYPL2	SYPL2	synaptophysin like 2 [Source:HGNC Symbol;Acc:HGNC:27638]	0.836883	3.5838	8.20607	0.0114531	0.162866
TCP11L2	POLR3B	RNA polymerase III subunit B [Source:HGNC Symbol;Acc:HGNC:30348]	-0.545078	5.00528	8.19872	0.0114833	0.163147
DPT	DPT	dermatopontin [Source:HGNC Symbol;Acc:HGNC:3011]	-0.618665	8.65967	8.19388	0.0115032	0.163213
XXYLT1	XXYLT1	xyloside xylosyltransferase 1 [Source:HGNC Symbol;Acc:HGNC:26639]	0.453638	3.6415	8.19251	0.0115089	0.163213
FOXC1	NA	NA	0.755735	6.81826	8.18456	0.0115418	0.163304
RYR2	RYR2	ryanodine receptor 2 [Source:HGNC Symbol;Acc:HGNC:10484]	-1.64588	7.11602	8.26163	0.0115425	0.163304
SLC25A13	SLC25A13	solute carrier family 25 member 13 [Source:HGNC Symbol;Acc:HGNC:10983]	-0.845055	4.74578	8.17779	0.0115698	0.163304
CLUH	CLUH	clustered mitochondria homolog [Source:HGNC Symbol;Acc:HGNC:29094]	-0.810731	6.26729	8.17632	0.011576	0.163304
DUSP6	DUSP6	dual specificity phosphatase 6 [Source:HGNC Symbol;Acc:HGNC:3072]	0.84993	5.21846	8.17554	0.0115792	0.163304
PTPRR	PTPRR	protein tyrosine phosphatase receptor type R [Source:HGNC Symbol;Acc:HGNC:9680]	-1.13909	1.06058	8.17403	0.0115855	0.163304
YIPF5	YIPF5	Yip1 domain family member 5 [Source:HGNC Symbol;Acc:HGNC:24877]	0.603424	6.15451	8.17284	0.0115904	0.163304
DNAJB6	NA	NA	0.482008	6.58101	8.1708	0.0115989	0.163304
LOC100342735	NA	NA	1.13847	6.32898	8.19976	0.0116133	0.16336
FAM149A	FAM149A	family with sequence similarity 149 member A [Source:HGNC Symbol;Acc:HGNC:24527]	0.457364	5.76316	8.16031	0.0116427	0.163525
GPR180	GPR180	G protein-coupled receptor 180 [Source:HGNC Symbol;Acc:HGNC:28899]	0.438721	4.19302	8.15863	0.0116497	0.163525
LOC127483249	NA	NA	-1.69801	-0.687474	8.15702	0.0116565	0.163525
BICD1	BICD1	BICD cargo adaptor 1 [Source:HGNC Symbol;Acc:HGNC:1049]	0.871242	4.49184	8.15372	0.0116703	0.163573
WDR81	WDR81	WD repeat domain 81 [Source:HGNC Symbol;Acc:HGNC:26600]	0.380865	5.23697	8.13628	0.0117437	0.164443
ATP8B2	NA	NA	0.54	6.81132	8.13397	0.0117535	0.164443
LRP10	LRP10	LDL receptor related protein 10 [Source:HGNC Symbol;Acc:HGNC:14553]	0.336483	7.05811	8.13123	0.0117651	0.164458
KCNK6	NA	NA	0.567521	4.30539	8.12201	0.0118041	0.164795
CHSY1	CHSY1	chondroitin sulfate synthase 1 [Source:HGNC Symbol;Acc:HGNC:17198]	0.453764	5.04991	8.12057	0.0118102	0.164795
SLIRP	NA	NA	-0.689863	4.61438	8.11751	0.0118233	0.16483
GRIN2C	NA	NA	-2.48521	1.39115	8.1289	0.0118474	0.165019
MTRF1L	MTRF1L	mitochondrial translation release factor 1 like [Source:HGNC Symbol;Acc:HGNC:21051]	-0.448528	2.91985	8.10678	0.0118691	0.165086
DUSP13	NA	NA	-2.34165	2.7817	8.16148	0.0118733	0.165086
ZNF331	ZNF331	zinc finger protein 331 [Source:HGNC Symbol;Acc:HGNC:15489]	0.754042	3.43784	8.1025	0.0118874	0.165134
AP4B1	AP4B1	adaptor related protein complex 4 subunit beta 1 [Source:HGNC Symbol;Acc:HGNC:572]	-0.386673	4.05704	8.09648	0.0119132	0.16527
TUBB6	NA	NA	0.549458	7.33063	8.09363	0.0119254	0.16527
LOC100358227	NA	NA	1.06091	1.59877	8.09107	0.0119365	0.16527
MAP3K6	MAP3K6	mitogen-activated protein kinase kinase kinase 6 [Source:HGNC Symbol;Acc:HGNC:6858]	0.370001	4.09875	8.09038	0.0119394	0.16527
PDLIM2	PDLIM2	PDZ and LIM domain 2 [Source:HGNC Symbol;Acc:HGNC:13992]	0.664482	7.79162	8.085	0.0119626	0.165385
LOC100347051	NA	NA	-1.55996	1.01666	8.08212	0.011975	0.165385
LOC103348316	NA	NA	0.654378	4.39011	8.08023	0.0119832	0.165385
IRX6	IRX6	iroquois homeobox 6 [Source:HGNC Symbol;Acc:HGNC:14675]	-1.59545	0.59006	8.07789	0.0119933	0.165385
MRPL37	MRPL37	mitochondrial ribosomal protein L37 [Source:HGNC Symbol;Acc:HGNC:14034]	-0.39342	6.24839	8.07619	0.0120007	0.165385
BACE2	BACE2	beta-secretase 2 [Source:HGNC Symbol;Acc:HGNC:934]	0.570797	4.93075	8.07359	0.0120119	0.165394
HPCAL1	HPCAL1	hippocalcin like 1 [Source:HGNC Symbol;Acc:HGNC:5145]	0.376903	5.61916	8.04551	0.0121344	0.166784
S1PR3	S1PR3	sphingosine-1-phosphate receptor 3 [Source:HGNC Symbol;Acc:HGNC:3167]	-1.19692	3.28434	8.04451	0.0121387	0.166784
LOC108178010	NA	NA	0.768095	2.15337	8.0411	0.0121537	0.166784
FASTKD3	FASTKD3	FAST kinase domains 3 [Source:HGNC Symbol;Acc:HGNC:28758]	-0.981454	2.03183	8.03938	0.0121612	0.166784
CCN2	CCN2	cellular communication network factor 2 [Source:HGNC Symbol;Acc:HGNC:2500]	0.976179	9.85432	8.03825	0.0121662	0.166784
GMPPB	GMPPB	GDP-mannose pyrophosphorylase B [Source:HGNC Symbol;Acc:HGNC:22932]	0.44997	5.06842	8.03403	0.0121848	0.166892
ATP6V1E1	ATP6V1E1	ATPase H+ transporting V1 subunit E1 [Source:HGNC Symbol;Acc:HGNC:857]	-0.653573	6.9015	8.02799	0.0122115	0.167111
ARSL	ARSL	arylsulfatase L [Source:HGNC Symbol;Acc:HGNC:719]	0.416653	5.57557	8.02081	0.0122432	0.167399
RWDD2B	RWDD2B	RWD domain containing 2B [Source:HGNC Symbol;Acc:HGNC:1302]	-0.411193	3.02888	8.01488	0.0122695	0.167604
FSTL1	FSTL1	follistatin like 1 [Source:HGNC Symbol;Acc:HGNC:3972]	0.671095	10.0226	8.01259	0.0122797	0.167604
TLR6	TLR6	toll like receptor 6 [Source:HGNC Symbol;Acc:HGNC:16711]	0.799537	3.61645	8.00483	0.0123142	0.167809
CAND2	CAND2	cullin associated and neddylation dissociated 2 (putative) [Source:HGNC Symbol;Acc:HGNC:30689]	-1.12743	4.84996	8.03282	0.0123288	0.167809
HSPB3	HSPB3	heat shock protein family B (small) member 3 [Source:HGNC Symbol;Acc:HGNC:5248]	-2.13649	2.28702	8.02702	0.0123546	0.167809
FUNDC2	FUNDC2	FUN14 domain containing 2 [Source:HGNC Symbol;Acc:HGNC:24925]	-0.30314	6.24359	7.99463	0.0123598	0.167809
SLC47A1	SLC47A1	solute carrier family 47 member 1 [Source:HGNC Symbol;Acc:HGNC:25588]	-1.76904	4.22948	8.0624	0.0123687	0.167809
CORIN	CORIN	corin, serine peptidase [Source:HGNC Symbol;Acc:HGNC:19012]	-2.34846	4.66882	8.07495	0.0123738	0.167809
SNAI1	SNAI1	snail family transcriptional repressor 1 [Source:HGNC Symbol;Acc:HGNC:11128]	1.43326	2.91276	7.99304	0.0123801	0.167809
UBN1	UBN1	ubinuclein 1 [Source:HGNC Symbol;Acc:HGNC:12506]	0.329697	5.07096	7.98999	0.0123806	0.167809
TWF2	TWF2	twinfilin actin binding protein 2 [Source:HGNC Symbol;Acc:HGNC:9621]	-0.885171	6.0865	7.98732	0.0124057	0.168004
RHBDL2	RHBDL2	rhomboid like 2 [Source:HGNC Symbol;Acc:HGNC:16083]	1.57915	-0.0914953	7.97723	0.012438	0.168296
C9H3orf62	NA	NA	-1.54193	-0.199936	7.97259	0.012459	0.168433
APPL2	APPL2	adaptor protein, phosphotyrosine interacting with PH domain and leucine zipper 2 [Source:HGNC Symbol;Acc:HGNC:18242]	0.342162	4.59522	7.95574	0.0125354	0.169308
ADTRP	ADTRP	androgen dependent TFPI regulating protein [Source:HGNC Symbol;Acc:HGNC:21214]	-0.820402	2.70056	7.95354	0.0125454	0.169308
DCAF6	NA	NA	-0.648668	5.56747	7.94956	0.0125635	0.169407
LOC127488749	NA	NA	1.14844	-0.0366679	7.94266	0.012595	0.169686
SPARC	SPARC	secreted protein acidic and cysteine rich [Source:HGNC Symbol;Acc:HGNC:11219]	0.850396	12.0393	7.93326	0.0126382	0.17012
P2RY2	NA	NA	-0.623381	4.41946	7.92952	0.0126553	0.170129
ACTL7B	ACTL7B	actin like 7B [Source:HGNC Symbol;Acc:HGNC:162]	-1.27265	0.426895	7.92838	0.0126606	0.170129
SNED1	NA	NA	0.547546	6.63876	7.91853	0.012706	0.170592
SMIM5	NA	NA	-1.61301	3.8832	7.97167	0.0127309	0.170765
NKX2-5	NKX2-5	NK2 homeobox 5 [Source:HGNC Symbol;Acc:HGNC:2488]	-2.36158	5.05603	7.99301	0.0127407	0.170765
RANBP3L	RANBP3L	RAN binding protein 3 like [Source:HGNC Symbol;Acc:HGNC:26353]	1.07037	4.52098	7.91997	0.0127749	0.170946
PTPRE	PTPRE	protein tyrosine phosphatase receptor type E [Source:HGNC Symbol;Acc:HGNC:9669]	-1.16033	4.54027	7.93399	0.0127761	0.170946
LOC100350325	NA	NA	0.377703	5.86836	7.89511	0.0128148	0.171165
CDH20	CDH20	cadherin 20 [Source:HGNC Symbol;Acc:HGNC:1760]	-1.79495	2.01498	7.89711	0.0128188	0.171165
PDIA6	PDIA6	protein disulfide isomerase family A member 6 [Source:HGNC Symbol;Acc:HGNC:30168]	0.400008	7.54752	7.89286	0.0128253	0.171165
IGBP1	IGBP1//IGBP1C	immunoglobulin binding protein 1 [Source:HGNC Symbol;Acc:HGNC:5461]//immunoglobulin (CD79A) binding protein 1 family member C [Source:HGNC Symbol;Acc:HGNC:43611]	-0.266909	5.37575	7.88791	0.0128484	0.171206
BCL2L13	BCL2L13	BCL2 like 13 [Source:HGNC Symbol;Acc:HGNC:17164]	-0.592498	5.33176	7.88751	0.0128503	0.171206
RNF208	NA	NA	-1.23771	3.79066	7.89859	0.0128646	0.17125
NDUFAF1	NDUFAF1	NADH:ubiquinone oxidoreductase complex assembly factor 1 [Source:HGNC Symbol;Acc:HGNC:18828]	-0.689712	3.95228	7.8795	0.0128879	0.171309
GTF2E2	GTF2E2	general transcription factor IIE subunit 2 [Source:HGNC Symbol;Acc:HGNC:4651]	0.464664	5.78068	7.87774	0.0128962	0.171309
CTXN1	NA	NA	0.919708	2.04172	7.87651	0.0129019	0.171309
LOC100328613	NA	NA	-1.93973	3.97683	7.95317	0.0129236	0.171452
MRPS31	NA	NA	-0.710383	2.45402	7.85834	0.0129877	0.172156
ACTG2	ACTG2	actin gamma 2, smooth muscle [Source:HGNC Symbol;Acc:HGNC:145]	0.868289	9.41896	7.84342	0.0130587	0.172922
POLR2D	NA	NA	-0.354959	4.94032	7.84154	0.0130676	0.172922
RCOR2	RCOR2	REST corepressor 2 [Source:HGNC Symbol;Acc:HGNC:27455]	0.723089	5.90525	7.83725	0.0130881	0.173047
RNF122	NA	NA	-0.761439	2.88376	7.83358	0.0131057	0.173132
CRLF1	NA	NA	-1.13478	3.81212	7.82879	0.0131289	0.173293
LOC103350106	NA	NA	-0.9673	1.31603	7.82538	0.013145	0.173358
ATXN7L3	ATXN7L3	ataxin 7 like 3 [Source:HGNC Symbol;Acc:HGNC:25416]	0.27637	5.29866	7.81872	0.0131771	0.17354
LOC108176804	NA	NA	-1.15177	1.10129	7.81791	0.013181	0.17354
RILP	RILP	Rab interacting lysosomal protein [Source:HGNC Symbol;Acc:HGNC:30266]	-0.923705	4.05067	7.81099	0.0132143	0.173833
MYL4	MYL4	myosin light chain 4 [Source:HGNC Symbol;Acc:HGNC:7585]	4.34259	8.93776	7.88451	0.0132459	0.173999
SYNPO2L	SYNPO2L	synaptopodin 2 like [Source:HGNC Symbol;Acc:HGNC:23532]	-2.47052	5.8408	7.87968	0.0132689	0.173999
FNDC4	FNDC4	fibronectin type III domain containing 4 [Source:HGNC Symbol;Acc:HGNC:20239]	0.641409	3.44425	7.79778	0.0132784	0.173999
STARD8	STARD8	StAR related lipid transfer domain containing 8 [Source:HGNC Symbol;Acc:HGNC:19161]	-0.72801	4.00997	7.79773	0.0132786	0.173999
LOC127491831	NA	NA	-0.733579	1.05359	7.79692	0.0132826	0.173999
MAPKAPK2	MAPKAPK2	MAPK activated protein kinase 2 [Source:HGNC Symbol;Acc:HGNC:6887]	-0.828902	7.73917	7.79065	0.0133131	0.174201
WEE1	WEE1	WEE1 G2 checkpoint kinase [Source:HGNC Symbol;Acc:HGNC:12761]	0.785479	4.71773	7.78916	0.0133204	0.174201
LOC127486327	NA	NA	-2.17532	1.00031	7.77732	0.0133783	0.174717
SLC16A10	SLC16A10	solute carrier family 16 member 10 [Source:HGNC Symbol;Acc:HGNC:17027]	-0.934475	1.27668	7.77333	0.0133979	0.174717
TFPI	TFPI	tissue factor pathway inhibitor [Source:HGNC Symbol;Acc:HGNC:11760]	0.886042	4.75566	7.77607	0.0133981	0.174717
FOXO3	FOXO3//FOXO3B	forkhead box O3 [Source:HGNC Symbol;Acc:HGNC:3821]//forkhead box O3B [Source:HGNC Symbol;Acc:HGNC:3822]	0.419639	6.61588	7.7707	0.0134108	0.174717
MICAL1	MICAL1	microtubule associated monooxygenase, calponin and LIM domain containing 1 [Source:HGNC Symbol;Acc:HGNC:20619]	0.501187	6.11558	7.7667	0.0134304	0.174717
IDH3A	IDH3A	isocitrate dehydrogenase (NAD(+)) 3 catalytic subunit alpha [Source:HGNC Symbol;Acc:HGNC:5384]	-0.902502	6.48569	7.76937	0.013431	0.174717
NUP210	NUP210	nucleoporin 210 [Source:HGNC Symbol;Acc:HGNC:30052]	-1.16589	3.34113	7.76065	0.0134603	0.174717
LOC103348757	NA	NA	0.676739	1.86715	7.76032	0.0134619	0.174717
RAB39A	RAB39A	RAB39A, member RAS oncogene family [Source:HGNC Symbol;Acc:HGNC:16521]	-1.3593	-0.0971547	7.75978	0.0134646	0.174717
OMA1	OMA1	OMA1 zinc metallopeptidase [Source:HGNC Symbol;Acc:HGNC:29661]	-0.697432	2.63631	7.75783	0.0134742	0.174717
P2RX1	P2RX1	purinergic receptor P2X 1 [Source:HGNC Symbol;Acc:HGNC:8533]	1.81247	4.21765	7.83527	0.0134827	0.174717
EDNRA	EDNRA	endothelin receptor type A [Source:HGNC Symbol;Acc:HGNC:3179]	-0.73119	5.02181	7.75376	0.0134943	0.174722
LOC103345484	NA	NA	1.77322	-0.164526	7.75028	0.0135116	0.1748
TPGS2	TPGS2	tubulin polyglutamylase complex subunit 2 [Source:HGNC Symbol;Acc:HGNC:24561]	0.482023	4.8385	7.74757	0.013525	0.17483
GTPBP2	GTPBP2	GTP binding protein 2 [Source:HGNC Symbol;Acc:HGNC:4670]	0.328175	5.83208	7.7444	0.0135408	0.174889
RASGEF1A	NA	NA	-1.38611	-0.190677	7.7408	0.0135587	0.174975
CASQ2	CASQ2	calsequestrin 2 [Source:HGNC Symbol;Acc:HGNC:1513]	-2.10518	8.02761	7.81648	0.0135744	0.175033
CSRP1	CSRP1	cysteine and glycine rich protein 1 [Source:HGNC Symbol;Acc:HGNC:2469]	0.7954	11.8703	7.72032	0.0136611	0.175949
KLHL41	KLHL41	kelch like family member 41 [Source:HGNC Symbol;Acc:HGNC:16905]	-1.40386	3.53487	7.7474	0.0136682	0.175949
COMMD3	COMMD3	COMM domain containing 3 [Source:HGNC Symbol;Acc:HGNC:23332]	-0.462182	5.03105	7.71433	0.0136912	0.175949
KY	KY	kyphoscoliosis peptidase [Source:HGNC Symbol;Acc:HGNC:26576]	-1.46193	2.62238	7.71068	0.0137235	0.175949
GHITM	NA	NA	-0.876437	6.78078	7.70407	0.013743	0.175949
FAM210B	FAM210B	family with sequence similarity 210 member B [Source:HGNC Symbol;Acc:HGNC:16102]	-0.383795	5.64011	7.70292	0.0137488	0.175949
LITAF	LITAF	lipopolysaccharide induced TNF factor [Source:HGNC Symbol;Acc:HGNC:16841]	0.633827	6.85364	7.70213	0.0137528	0.175949
SNX8	NA	NA	0.499115	4.61492	7.69884	0.0137694	0.175949
PLEKHO2	PLEKHO2	pleckstrin homology domain containing O2 [Source:HGNC Symbol;Acc:HGNC:30026]	0.426942	6.21764	7.69698	0.0137789	0.175949
P2RX5	P2RX5	purinergic receptor P2X 5 [Source:HGNC Symbol;Acc:HGNC:8536]	-1.85655	3.49315	7.75617	0.0137816	0.175949
NR4A1	NR4A1	nuclear receptor subfamily 4 group A member 1 [Source:HGNC Symbol;Acc:HGNC:7980]	1.30858	4.54734	7.74718	0.0137821	0.175949
LOC127484432	NA	NA	2.39895	0.813179	7.69296	0.0138132	0.175949
LOC127490060	NA	NA	-0.854877	5.65521	7.69241	0.013816	0.175949
MAPK4	MAPK4	mitogen-activated protein kinase 4 [Source:HGNC Symbol;Acc:HGNC:6878]	0.876383	5.13469	7.68986	0.013829	0.175949
ATP1B4	ATP1B4	ATPase Na+/K+ transporting family member beta 4 [Source:HGNC Symbol;Acc:HGNC:808]	-2.28334	4.20894	7.76503	0.013829	0.175949
SESN2	SESN2	sestrin 2 [Source:HGNC Symbol;Acc:HGNC:20746]	-0.738406	2.79899	7.68688	0.0138302	0.175949
LOC103346574	NA	NA	-0.612986	4.13659	7.68559	0.0138367	0.175949
LANCL2	LANCL2	LanC like glutathione S-transferase 2 [Source:HGNC Symbol;Acc:HGNC:6509]	0.364098	5.07725	7.66746	0.0139295	0.176984
COL15A1	COL15A1	collagen type XV alpha 1 chain [Source:HGNC Symbol;Acc:HGNC:2192]	0.752437	8.89806	7.66353	0.0139497	0.177096
NLK	NLK	nemo like kinase [Source:HGNC Symbol;Acc:HGNC:29858]	-0.529735	3.45312	7.65316	0.0140032	0.177263
MORC2	MORC2	MORC family CW-type zinc finger 2 [Source:HGNC Symbol;Acc:HGNC:23573]	0.38835	5.79758	7.6517	0.0140107	0.177263
S1PR2	S1PR2	sphingosine-1-phosphate receptor 2 [Source:HGNC Symbol;Acc:HGNC:3169]	0.554299	3.74485	7.65156	0.0140114	0.177263
SYT17	SYT17	synaptotagmin 17 [Source:HGNC Symbol;Acc:HGNC:24119]	-1.60174	2.32256	7.6529	0.0140185	0.177263
COL21A1	COL21A1	collagen type XXI alpha 1 chain [Source:HGNC Symbol;Acc:HGNC:17025]	0.708313	6.66191	7.64999	0.0140195	0.177263
PCNX3	NA	NA	0.33659	5.51439	7.64437	0.0140486	0.177434
RCSD1	RCSD1	RCSD domain containing 1 [Source:HGNC Symbol;Acc:HGNC:28310]	-0.486357	5.16039	7.64299	0.0140558	0.177434
LIMS2	LIMS2	LIM zinc finger domain containing 2 [Source:HGNC Symbol;Acc:HGNC:16084]	0.69918	9.04242	7.63805	0.0140815	0.177615
ELMO1	ELMO1	engulfment and cell motility 1 [Source:HGNC Symbol;Acc:HGNC:16286]	0.62	4.55558	7.62656	0.0141413	0.178146
GSS	GSS	glutathione synthetase [Source:HGNC Symbol;Acc:HGNC:4624]	-0.400696	4.61206	7.62317	0.014159	0.178146
CASTOR1	CASTOR1	cytosolic arginine sensor for mTORC1 subunit 1 [Source:HGNC Symbol;Acc:HGNC:34423]	0.495516	4.39518	7.62044	0.0141733	0.178146
LOC100350423	NA	NA	-4.12321	1.45961	7.69315	0.0141754	0.178146
PRSS35	PRSS35	serine protease 35 [Source:HGNC Symbol;Acc:HGNC:21387]	0.584911	6.52658	7.6185	0.0141835	0.178146
PTPN9	PTPN9	protein tyrosine phosphatase non-receptor type 9 [Source:HGNC Symbol;Acc:HGNC:9661]	0.301136	6.41979	7.6095	0.0142307	0.178146
MRRF	MRRF	mitochondrial ribosome recycling factor [Source:HGNC Symbol;Acc:HGNC:7234]	-0.645904	3.81139	7.60873	0.0142348	0.178146
KLHL5	KLHL5	kelch like family member 5 [Source:HGNC Symbol;Acc:HGNC:6356]	0.56757	5.09301	7.6082	0.0142376	0.178146
LRP8	LRP8	LDL receptor related protein 8 [Source:HGNC Symbol;Acc:HGNC:6700]	0.78093	2.12855	7.60676	0.0142452	0.178146
LOC103346828	NA	NA	1.21318	0.316927	7.60569	0.0142508	0.178146
FKBP4	FKBP4	FKBP prolyl isomerase 4 [Source:HGNC Symbol;Acc:HGNC:3720]	-0.489125	6.93442	7.60358	0.014262	0.178146
LOC127492655	NA	NA	2.47237	-0.354784	7.60192	0.0142707	0.178146
SPINDOC	SPINDOC	spindlin interactor and repressor of chromatin binding [Source:HGNC Symbol;Acc:HGNC:25115]	0.439516	4.4546	7.60173	0.0142717	0.178146
OXA1L	OXA1L	OXA1L mitochondrial inner membrane protein [Source:HGNC Symbol;Acc:HGNC:8526]	-0.719915	5.17332	7.59873	0.0142876	0.178201
MLLT3	MLLT3	MLLT3 super elongation complex subunit [Source:HGNC Symbol;Acc:HGNC:7136]	-0.556037	3.58577	7.59617	0.0143011	0.178207
LOC100358827	NA	NA	0.523098	5.34855	7.59433	0.0143108	0.178207
PXDN	PXDN	peroxidasin [Source:HGNC Symbol;Acc:HGNC:14966]	0.634882	7.54495	7.59061	0.0143305	0.178309
SLC12A9	SLC12A9	solute carrier family 12 member 9 [Source:HGNC Symbol;Acc:HGNC:17435]	0.472386	5.03834	7.5835	0.0143683	0.178309
HOMER2	HOMER2	homer scaffold protein 2 [Source:HGNC Symbol;Acc:HGNC:17513]	-1.04263	4.93603	7.60856	0.0143819	0.178309
ILK	ILK	integrin linked kinase [Source:HGNC Symbol;Acc:HGNC:6040]	0.47251	8.45739	7.5796	0.0143891	0.178309
PCMT1	PCMT1	protein-L-isoaspartate (D-aspartate) O-methyltransferase [Source:HGNC Symbol;Acc:HGNC:8728]	-0.407539	5.95511	7.5785	0.0143949	0.178309
SLX4	SLX4	SLX4 structure-specific endonuclease subunit [Source:HGNC Symbol;Acc:HGNC:23845]	0.476375	3.27914	7.57737	0.014401	0.178309
MAP3K3	MAP3K3	mitogen-activated protein kinase kinase kinase 3 [Source:HGNC Symbol;Acc:HGNC:6855]	0.331375	6.54234	7.57711	0.0144024	0.178309
LTBP3	NA	NA	0.779793	6.87313	7.57468	0.0144153	0.178309
SKIL	SKIL	SKI like proto-oncogene [Source:HGNC Symbol;Acc:HGNC:10897]	0.651489	5.2166	7.57206	0.0144293	0.178309
SYVN1	SYVN1	synoviolin 1 [Source:HGNC Symbol;Acc:HGNC:20738]	0.329085	6.06842	7.57135	0.0144331	0.178309
PRMT5	PRMT5	protein arginine methyltransferase 5 [Source:HGNC Symbol;Acc:HGNC:10894]	-0.323606	4.58338	7.56789	0.0144517	0.178325
SEC14L5	SEC14L5	SEC14 like lipid binding 5 [Source:HGNC Symbol;Acc:HGNC:29032]	1.18865	-0.317118	7.56684	0.0144573	0.178325
BAG5	NA	NA	0.344522	4.75607	7.55003	0.0145477	0.179137
NARS2	NARS2	asparaginyl-tRNA synthetase 2, mitochondrial [Source:HGNC Symbol;Acc:HGNC:26274]	-0.591644	3.04781	7.54891	0.0145537	0.179137
SAP130	SAP130	Sin3A associated protein 130 [Source:HGNC Symbol;Acc:HGNC:29813]	0.398291	4.86475	7.54822	0.0145574	0.179137
B4GALNT3	B4GALNT3	beta-1,4-N-acetyl-galactosaminyltransferase 3 [Source:HGNC Symbol;Acc:HGNC:24137]	0.525459	4.99219	7.54143	0.0145942	0.179396
TSC22D1	NA	NA	-0.537142	7.38102	7.54007	0.0146015	0.179396
COL5A2	COL5A2	collagen type V alpha 2 chain [Source:HGNC Symbol;Acc:HGNC:2210]	0.828718	8.93374	7.53137	0.0146488	0.179774
UBP1	UBP1	upstream binding protein 1 [Source:HGNC Symbol;Acc:HGNC:12507]	0.370382	6.29163	7.53018	0.0146552	0.179774
USP36	USP36	ubiquitin specific peptidase 36 [Source:HGNC Symbol;Acc:HGNC:20062]	1.16427	1.02752	7.52649	0.0146753	0.179804
BCL6B	NA	NA	-0.90949	3.83948	7.51869	0.0147179	0.179804
CACNA1H	NA	NA	0.580499	6.99451	7.51471	0.0147397	0.179804
SH3PXD2A	SH3PXD2A	SH3 and PX domains 2A [Source:HGNC Symbol;Acc:HGNC:23664]	0.58259	7.71062	7.51442	0.0147413	0.179804
LOC100342572	NA	NA	1.74991	3.8518	7.57545	0.0147496	0.179804
CGREF1	NA	NA	1.06691	2.14477	7.51218	0.0147536	0.179804
LOXL4	LOXL4	lysyl oxidase like 4 [Source:HGNC Symbol;Acc:HGNC:17171]	0.719402	3.92451	7.51214	0.0147538	0.179804
LDHD	LDHD	lactate dehydrogenase D [Source:HGNC Symbol;Acc:HGNC:19708]	-0.636734	4.19495	7.51101	0.01476	0.179804
ABHD10	ABHD10	abhydrolase domain containing 10, depalmitoylase [Source:HGNC Symbol;Acc:HGNC:25656]	-0.678722	3.60065	7.50985	0.0147664	0.179804
CRIP2	NA	NA	-1.00836	7.69191	7.51131	0.0147727	0.179804
OLA1	OLA1	Obg like ATPase 1 [Source:HGNC Symbol;Acc:HGNC:28833]	-0.273144	5.21267	7.50613	0.0147868	0.179835
LOC100352290	NA	NA	-0.926134	5.12629	7.50575	0.0148388	0.180089
LOC127488121	NA	NA	-0.926134	5.12629	7.50575	0.0148388	0.180089
FJX1	FJX1	four-jointed box kinase 1 [Source:HGNC Symbol;Acc:HGNC:17166]	0.838358	2.79492	7.49606	0.0148422	0.180089
LOC103345435	NA	NA	-1.31962	0.882988	7.49388	0.0148543	0.180096
ITSN1	ITSN1	intersectin 1 [Source:HGNC Symbol;Acc:HGNC:6183]	0.450406	6.68244	7.4898	0.0148769	0.18023
SETD1B	SETD1B	SET domain containing 1B, histone lysine methyltransferase [Source:HGNC Symbol;Acc:HGNC:29187]	0.39014	4.8567	7.48727	0.0148909	0.180259
OSR1	OSR1	odd-skipped related transcription factor 1 [Source:HGNC Symbol;Acc:HGNC:8111]	0.941602	6.95056	7.48531	0.0149162	0.180426
MYO18B	MYO18B	myosin XVIIIB [Source:HGNC Symbol;Acc:HGNC:18150]	-1.6558	5.52642	7.55365	0.0149345	0.180508
PDK4	PDK4	pyruvate dehydrogenase kinase 4 [Source:HGNC Symbol;Acc:HGNC:8812]	-1.7927	6.62712	7.54458	0.0149842	0.180683
ROCK1	ROCK1	Rho associated coiled-coil containing protein kinase 1 [Source:HGNC Symbol;Acc:HGNC:10251]	0.608374	7.47518	7.46941	0.0149902	0.180683
RABIF	RABIF	RAB interacting factor [Source:HGNC Symbol;Acc:HGNC:9797]	0.393633	3.89036	7.46839	0.014996	0.180683
COG5	COG5	component of oligomeric golgi complex 5 [Source:HGNC Symbol;Acc:HGNC:14857]	-0.559624	5.78446	7.46792	0.0149986	0.180683
INTS1	NA	NA	0.343743	6.29619	7.46645	0.0150068	0.180683
INAVA	INAVA	innate immunity activator [Source:HGNC Symbol;Acc:HGNC:25599]	2.84534	-0.415728	7.46236	0.0150297	0.180819
EFEMP2	NA	NA	0.461725	8.06313	7.45579	0.0150665	0.181123
HTR2A	HTR2A	5-hydroxytryptamine receptor 2A [Source:HGNC Symbol;Acc:HGNC:5293]	1.52705	1.64881	7.44859	0.015107	0.181352
NUBPL	NUBPL	NUBP iron-sulfur cluster assembly factor, mitochondrial [Source:HGNC Symbol;Acc:HGNC:20278]	-0.660759	2.7777	7.4432	0.0151375	0.181352
LURAP1	LURAP1	leucine rich adaptor protein 1 [Source:HGNC Symbol;Acc:HGNC:32327]	0.706923	4.83506	7.43928	0.0151596	0.181352
PLEKHH3	PLEKHH3	pleckstrin homology, MyTH4 and FERM domain containing H3 [Source:HGNC Symbol;Acc:HGNC:26105]	0.320173	4.75304	7.43878	0.0151625	0.181352
NNT	NNT	nicotinamide nucleotide transhydrogenase [Source:HGNC Symbol;Acc:HGNC:7863]	-1.1563	7.88893	7.45567	0.0151885	0.181352
LOC103346635	NA	NA	-0.895648	0.90742	7.43111	0.0152059	0.181352
CYS1	NA	NA	0.606714	5.30918	7.42887	0.0152186	0.181352
LOC103348695	NA	NA	1.19231	0.572224	7.42817	0.0152226	0.181352
GCSH	NA	NA	-0.630746	3.41566	7.42758	0.015226	0.181352
CCN1	CCN1	cellular communication network factor 1 [Source:HGNC Symbol;Acc:HGNC:2654]	1.40842	7.86878	7.47455	0.0152303	0.181352
EDEM2	EDEM2	ER degradation enhancing alpha-mannosidase like protein 2 [Source:HGNC Symbol;Acc:HGNC:15877]	0.492416	5.31295	7.4262	0.0152338	0.181352
LOC127483266	NA	NA	-1.32296	0.926544	7.42322	0.0152508	0.181352
MACROD1	NA	NA	-1.2681	5.54825	7.4791	0.0152517	0.181352
PCBD1	PCBD1	pterin-4 alpha-carbinolamine dehydratase 1 [Source:HGNC Symbol;Acc:HGNC:8646]	-0.787391	3.50123	7.4217	0.0152594	0.181352
BEAN1	NA	NA	0.713206	3.78102	7.42165	0.0152597	0.181352
LOC127485947	NA	NA	-0.918817	0.676665	7.41353	0.0153061	0.181766
KDELR3	KDELR3	KDEL endoplasmic reticulum protein retention receptor 3 [Source:HGNC Symbol;Acc:HGNC:6306]	0.582881	6.50062	7.41065	0.0153226	0.181823
LTBP1	LTBP1	latent transforming growth factor beta binding protein 1 [Source:HGNC Symbol;Acc:HGNC:6714]	0.653144	8.69347	7.4059	0.0153498	0.181971
PRR14	PRR14	proline rich 14 [Source:HGNC Symbol;Acc:HGNC:28458]	0.432702	4.85759	7.39818	0.0153942	0.181971
CLIP2	CLIP2	CAP-Gly domain containing linker protein 2 [Source:HGNC Symbol;Acc:HGNC:2586]	0.426624	5.525	7.39811	0.0153946	0.181971
LOC127487032	NA	NA	-2.50694	7.99757	7.46951	0.0154026	0.181971
KEF51_p06	NA	NA	-0.863125	11.0254	7.39591	0.0154072	0.181971
SFXN3	SFXN3	sideroflexin 3 [Source:HGNC Symbol;Acc:HGNC:16087]	0.408494	6.81353	7.39579	0.0154079	0.181971
ERH	ERH	ERH mRNA splicing and mitosis factor [Source:HGNC Symbol;Acc:HGNC:3447]	-0.36985	3.80277	7.39373	0.0154198	0.181971
NDUFB10	NA	NA	-1.26832	7.72309	7.4302	0.0154303	0.181971
LOC127489197	NA	NA	1.1605	1.70524	7.39026	0.0154399	0.181971
CREM	NA	NA	-0.680126	5.80106	7.3843	0.0154743	0.18224
ADM	ADM	adrenomedullin [Source:HGNC Symbol;Acc:HGNC:259]	-0.66421	4.0899	7.37886	0.0155058	0.182474
CELA1	CELA1	chymotrypsin like elastase 1 [Source:HGNC Symbol;Acc:HGNC:3308]	-2.83305	-0.0604697	7.37504	0.015528	0.182504
IFFO2	IFFO2	intermediate filament family orphan 2 [Source:HGNC Symbol;Acc:HGNC:27006]	0.576738	4.8568	7.3744	0.0155318	0.182504
ESRRA	NA	NA	-1.07115	5.54992	7.4052	0.0155607	0.182589
RARA	RARA	retinoic acid receptor alpha [Source:HGNC Symbol;Acc:HGNC:9864]	0.401759	5.5931	7.3689	0.0155638	0.182589
AGL	AGL	amylo-alpha-1, 6-glucosidase, 4-alpha-glucanotransferase [Source:HGNC Symbol;Acc:HGNC:321]	-0.794687	5.45217	7.36714	0.0155741	0.182589
LOC127490764	NA	NA	-0.752536	2.75053	7.35943	0.0156191	0.182871
TBC1D10B	TBC1D10B	TBC1 domain family member 10B [Source:HGNC Symbol;Acc:HGNC:24510]	0.33197	5.84133	7.35793	0.0156279	0.182871
SDHAF4	NA	NA	-0.563865	3.01772	7.35703	0.0156332	0.182871
CRADD	NA	NA	-0.53633	2.7163	7.34981	0.0156755	0.18304
NT5DC3	NT5DC3	5'-nucleotidase domain containing 3 [Source:HGNC Symbol;Acc:HGNC:30826]	0.703987	4.64494	7.34823	0.0156848	0.18304
CXADR	CXADR	CXADR Ig-like cell adhesion molecule [Source:HGNC Symbol;Acc:HGNC:2559]	-1.76986	4.07638	7.4111	0.0156935	0.18304
NUDT6	NA	NA	-0.477922	3.61148	7.34659	0.0156945	0.18304
KLHL24	KLHL24	kelch like family member 24 [Source:HGNC Symbol;Acc:HGNC:25947]	-0.607944	6.68346	7.33898	0.0157394	0.183146
ADAM33	ADAM33	ADAM metallopeptidase domain 33 [Source:HGNC Symbol;Acc:HGNC:15478]	1.48385	2.52469	7.34118	0.0157413	0.183146
LOC100344022	NA	NA	-0.740412	2.0717	7.33624	0.0157556	0.183146
PDK2	NA	NA	-0.979143	6.79249	7.34496	0.0157602	0.183146
FBXO7	FBXO7	F-box protein 7 [Source:HGNC Symbol;Acc:HGNC:13586]	-0.366095	4.63309	7.33512	0.0157622	0.183146
LOC100338010	NA	NA	-0.443413	3.72287	7.32886	0.0157992	0.183209
DSC2	DSC2	desmocollin 2 [Source:HGNC Symbol;Acc:HGNC:3036]	-1.43304	4.60763	7.38666	0.0158011	0.183209
RTL10	RTL10	retrotransposon Gag like 10 [Source:HGNC Symbol;Acc:HGNC:26112]	0.484447	5.72608	7.32826	0.0158028	0.183209
NOX4	NOX4	NADPH oxidase 4 [Source:HGNC Symbol;Acc:HGNC:7891]	0.631986	4.65663	7.32592	0.0158167	0.183235
TIMM8B	TIMM8B	translocase of inner mitochondrial membrane 8 homolog B [Source:HGNC Symbol;Acc:HGNC:11818]	-0.709189	4.86354	7.31838	0.0158616	0.183618
PELI2	PELI2	pellino E3 ubiquitin protein ligase family member 2 [Source:HGNC Symbol;Acc:HGNC:8828]	0.519627	4.15544	7.31484	0.0158827	0.183726
LOC103348556	NA	NA	0.638907	5.71555	7.31124	0.0159042	0.183762
NPAS4	NPAS4	neuronal PAS domain protein 4 [Source:HGNC Symbol;Acc:HGNC:18983]	0.855018	3.73749	7.31038	0.0159093	0.183762
LOC127485807	NA	NA	1.2632	0.215341	7.30644	0.0159329	0.183874
HIGD1A	NA	NA	-0.672139	4.91038	7.30483	0.0159425	0.183874
FECH	FECH	ferrochelatase [Source:HGNC Symbol;Acc:HGNC:3647]	-0.457091	4.71537	7.29642	0.015993	0.184248
PTPDC1	PTPDC1	protein tyrosine phosphatase domain containing 1 [Source:HGNC Symbol;Acc:HGNC:30184]	0.51272	4.76192	7.29394	0.0160079	0.184248
AEBP1	AEBP1	AE binding protein 1 [Source:HGNC Symbol;Acc:HGNC:303]	0.482059	9.75301	7.29221	0.0160184	0.184248
FOXK2	FOXK2	forkhead box K2 [Source:HGNC Symbol;Acc:HGNC:6036]	0.345545	5.28664	7.29045	0.0160289	0.184248
CCDC122	CCDC122	coiled-coil domain containing 122 [Source:HGNC Symbol;Acc:HGNC:26478]	-0.895038	2.29658	7.28965	0.0160338	0.184248
RECK	RECK	reversion inducing cysteine rich protein with kazal motifs [Source:HGNC Symbol;Acc:HGNC:11345]	0.673457	6.76585	7.28516	0.0160609	0.1843
LOC127488927	NA	NA	0.624842	5.62956	7.28284	0.0160749	0.1843
HSD17B10	HSD17B10	hydroxysteroid 17-beta dehydrogenase 10 [Source:HGNC Symbol;Acc:HGNC:4800]	-0.801208	5.90567	7.28062	0.0160884	0.1843
IARS2	IARS2	isoleucyl-tRNA synthetase 2, mitochondrial [Source:HGNC Symbol;Acc:HGNC:29685]	-0.477688	4.68137	7.27984	0.0160931	0.1843
MRPS5	MRPS5	mitochondrial ribosomal protein S5 [Source:HGNC Symbol;Acc:HGNC:14498]	-0.494497	4.789	7.27755	0.016107	0.1843
RSL24D1	RSL24D1	ribosomal L24 domain containing 1 [Source:HGNC Symbol;Acc:HGNC:18479]	-0.299007	5.53937	7.27576	0.0161179	0.1843
LOC127485648	NA	NA	-0.583729	5.47784	7.27524	0.016121	0.1843
MYADML2	MYADML2	myeloid associated differentiation marker like 2 [Source:HGNC Symbol;Acc:HGNC:34548]	-2.27636	2.97921	7.3327	0.0161371	0.18435
PPIC	PPIC	peptidylprolyl isomerase C [Source:HGNC Symbol;Acc:HGNC:9256]	0.543764	6.10083	7.26942	0.0161564	0.184379
IVD	IVD	isovaleryl-CoA dehydrogenase [Source:HGNC Symbol;Acc:HGNC:6186]	-0.662613	6.40203	7.26701	0.016171	0.184379
NHSL1	NHSL1	NHS like 1 [Source:HGNC Symbol;Acc:HGNC:21021]	-0.372542	4.33737	7.2651	0.0161827	0.184379
PDGFD	PDGFD	platelet derived growth factor D [Source:HGNC Symbol;Acc:HGNC:30620]	0.57883	7.17202	7.26442	0.0161869	0.184379
PGM1	PGM1	phosphoglucomutase 1 [Source:HGNC Symbol;Acc:HGNC:8905]	-0.661673	6.5399	7.25747	0.0162293	0.184727
ADGRA2	ADGRA2	adhesion G protein-coupled receptor A2 [Source:HGNC Symbol;Acc:HGNC:17849]	0.521206	7.88632	7.25362	0.0162529	0.184755
LOC127492167	NA	NA	1.52818	0.431685	7.25214	0.0162619	0.184755
LOC127482738	NA	NA	5.16271	4.39386	7.32095	0.0162709	0.184755
SLCO5A1	SLCO5A1	solute carrier organic anion transporter family member 5A1 [Source:HGNC Symbol;Acc:HGNC:19046]	-1.60228	3.38764	7.2947	0.0162814	0.184755
ACYP2	ACYP2	acylphosphatase 2 [Source:HGNC Symbol;Acc:HGNC:180]	-0.766047	3.56774	7.24744	0.0162908	0.184755
LOC100345745	NA	NA	-1.22173	2.15103	7.24219	0.016323	0.184987
ZC3H8	ZC3H8	zinc finger CCCH-type containing 8 [Source:HGNC Symbol;Acc:HGNC:30941]	-0.458563	3.33201	7.23694	0.0163554	0.185219
GATC	NA	NA	-0.486167	3.79211	7.23321	0.0163785	0.185346
PDE7A	PDE7A	phosphodiesterase 7A [Source:HGNC Symbol;Acc:HGNC:8791]	-0.653164	3.65791	7.22847	0.0164078	0.185467
LOC127482587	NA	NA	-0.982793	0.90251	7.22703	0.0164167	0.185467
SUPV3L1	SUPV3L1	Suv3 like RNA helicase [Source:HGNC Symbol;Acc:HGNC:11471]	-0.361	3.90745	7.22412	0.0164347	0.185467
SPRY2	SPRY2	sprouty RTK signaling antagonist 2 [Source:HGNC Symbol;Acc:HGNC:11270]	-0.429921	4.56709	7.22381	0.0164367	0.185467
ITGAV	ITGAV	integrin subunit alpha V [Source:HGNC Symbol;Acc:HGNC:6150]	0.687927	7.81131	7.21567	0.0164873	0.185904
BICC1	BICC1	BicC family RNA binding protein 1 [Source:HGNC Symbol;Acc:HGNC:19351]	0.596269	5.56891	7.20947	0.0165259	0.186074
NR5A2	NR5A2	nuclear receptor subfamily 5 group A member 2 [Source:HGNC Symbol;Acc:HGNC:7984]	-1.59056	1.10733	7.20943	0.0165262	0.186074
RASL12	RASL12	RAS like family 12 [Source:HGNC Symbol;Acc:HGNC:30289]	0.622318	7.99776	7.20354	0.016563	0.186135
GPC1	NA	NA	-0.918242	6.68925	7.20573	0.0165646	0.186135
LOC127490349	NA	NA	0.572074	2.33322	7.20231	0.0165707	0.186135
PGM2	PGM2	phosphoglucomutase 2 [Source:HGNC Symbol;Acc:HGNC:8906]	-0.481337	4.19254	7.20096	0.0165792	0.186135
CXCL10	CXCL10	C-X-C motif chemokine ligand 10 [Source:HGNC Symbol;Acc:HGNC:10637]	-1.45112	3.80066	7.24067	0.0166133	0.186384
FKBP9	FKBP9	FKBP prolyl isomerase 9 [Source:HGNC Symbol;Acc:HGNC:3725]	0.442028	8.4339	7.1857	0.0166752	0.186862
ZNF106	ZNF106	zinc finger protein 106 [Source:HGNC Symbol;Acc:HGNC:12886]	-1.20173	7.13901	7.22275	0.0166914	0.186862
LOC103349515	NA	NA	0.506097	3.31912	7.18248	0.0166955	0.186862
CDKN2C	CDKN2C	cyclin dependent kinase inhibitor 2C [Source:HGNC Symbol;Acc:HGNC:1789]	-0.49435	4.17268	7.18016	0.0167102	0.186862
G3BP1	NA	NA	-0.423629	6.0419	7.17928	0.0167157	0.186862
COL4A1	COL4A1	collagen type IV alpha 1 chain [Source:HGNC Symbol;Acc:HGNC:2202]	0.702394	9.72326	7.17519	0.0167417	0.186956
LOC100328803	NA	NA	-1.17351	2.3142	7.17254	0.0167585	0.186956
ADAM17	ADAM17	ADAM metallopeptidase domain 17 [Source:HGNC Symbol;Acc:HGNC:195]	0.438213	5.39648	7.17229	0.01676	0.186956
LOC108176151	NA	NA	0.906344	1.72109	7.16857	0.0167836	0.187086
NUDT8	NA	NA	-1.43105	4.3769	7.21349	0.0168325	0.187456
DNAJC2	DNAJC2	DnaJ heat shock protein family (Hsp40) member C2 [Source:HGNC Symbol;Acc:HGNC:13192]	-0.38368	4.72135	7.1596	0.0168408	0.187456
SLC22A3	SLC22A3	solute carrier family 22 member 3 [Source:HGNC Symbol;Acc:HGNC:10967]	0.846471	5.66218	7.16001	0.0168536	0.187464
PTGR1	PTGR1	prostaglandin reductase 1 [Source:HGNC Symbol;Acc:HGNC:18429]	0.556926	3.85777	7.1524	0.0168868	0.187574
LOC100355114	NA	NA	3.54876	1.42367	7.21067	0.0168875	0.187574
CBARP	NA	NA	0.660695	2.50003	7.14952	0.0169052	0.187639
CIAO2A	CIAO2A	cytosolic iron-sulfur assembly component 2A [Source:HGNC Symbol;Acc:HGNC:26235]	-0.582244	4.64764	7.13864	0.0169752	0.188281
RAB8A	NA	NA	0.307844	4.48828	7.13344	0.0170087	0.18845
TRMT10C	TRMT10C	tRNA methyltransferase 10C, mitochondrial RNase P subunit [Source:HGNC Symbol;Acc:HGNC:26022]	-0.325853	4.32173	7.13253	0.0170146	0.18845
TBC1D20	TBC1D20	TBC1 domain family member 20 [Source:HGNC Symbol;Acc:HGNC:16133]	0.271928	5.95685	7.12731	0.0170483	0.188601
CHCHD2	CHCHD2	coiled-coil-helix-coiled-coil-helix domain containing 2 [Source:HGNC Symbol;Acc:HGNC:21645]	-0.825227	6.95446	7.1267	0.0170523	0.188601
LOC103348206	NA	NA	1.47316	2.16885	7.1228	0.0170776	0.188747
COPS3	COPS3	COP9 signalosome subunit 3 [Source:HGNC Symbol;Acc:HGNC:2239]	-0.402559	5.58216	7.11929	0.0171003	0.188856
LOC100347688	NA	NA	2.79682	5.47139	7.18474	0.0171169	0.188856
MGAT5	MGAT5	alpha-1,6-mannosylglycoprotein 6-beta-N-acetylglucosaminyltransferase [Source:HGNC Symbol;Acc:HGNC:7049]	-0.471907	4.37773	7.11569	0.0171237	0.188856
MRPL13	MRPL13	mitochondrial ribosomal protein L13 [Source:HGNC Symbol;Acc:HGNC:14278]	-0.58182	3.97995	7.10433	0.0171978	0.189539
EFR3A	EFR3A	EFR3 homolog A [Source:HGNC Symbol;Acc:HGNC:28970]	0.740324	7.18258	7.09889	0.0172334	0.189702
DCBLD2	DCBLD2	discoidin, CUB and LCCL domain containing 2 [Source:HGNC Symbol;Acc:HGNC:24627]	0.625108	6.74752	7.09837	0.0172368	0.189702
UBE2B	UBE2B	ubiquitin conjugating enzyme E2 B [Source:HGNC Symbol;Acc:HGNC:12473]	-0.417585	6.82552	7.09644	0.0172494	0.189707
LOC100356844	NA	NA	0.588795	4.62934	7.09329	0.0172701	0.189801
ALOXE3	ALOXE3	arachidonate lipoxygenase 3 [Source:HGNC Symbol;Acc:HGNC:13743]	-1.0362	0.656722	7.08939	0.0172957	0.189949
RTN4RL1	RTN4RL1	reticulon 4 receptor like 1 [Source:HGNC Symbol;Acc:HGNC:21329]	0.560467	5.33943	7.08065	0.0173534	0.190448
LOC100358347	TCAF2//TCAF2C	TRPM8 channel associated factor 2 [Source:HGNC Symbol;Acc:HGNC:26878]//TRPM8 channel associated factor 2C [Source:HGNC Symbol;Acc:HGNC:53641]	0.571345	3.71528	7.07764	0.0173733	0.190533
MGST3	MGST3	microsomal glutathione S-transferase 3 [Source:HGNC Symbol;Acc:HGNC:7064]	-0.784734	7.0942	7.0751	0.0173901	0.190584
MRPL32	NA	NA	-0.392062	3.91266	7.06542	0.0174543	0.191077
SCLT1	SCLT1	sodium channel and clathrin linker 1 [Source:HGNC Symbol;Acc:HGNC:26406]	-0.630476	1.72326	7.06462	0.0174596	0.191077
SPTB	SPTB	spectrin beta, erythrocytic [Source:HGNC Symbol;Acc:HGNC:11274]	-2.10743	5.71624	7.12713	0.0174898	0.191274
LOC127485529	NA	NA	-1.47257	7.71354	7.10576	0.0175268	0.191545
MLLT11	MLLT11	MLLT11 transcription factor 7 cofactor [Source:HGNC Symbol;Acc:HGNC:16997]	-1.1295	2.64622	7.04611	0.0175833	0.191791
SDHC	SDHC	succinate dehydrogenase complex subunit C [Source:HGNC Symbol;Acc:HGNC:10682]	-0.634871	7.59145	7.04547	0.0175876	0.191791
CASTOR2	CASTOR2	cytosolic arginine sensor for mTORC1 subunit 2 [Source:HGNC Symbol;Acc:HGNC:37073]	0.978831	2.37096	7.04474	0.0175924	0.191791
GPR22	GPR22	G protein-coupled receptor 22 [Source:HGNC Symbol;Acc:HGNC:4477]	-2.1268	3.83977	7.11062	0.0175984	0.191791
GABBR2	GABBR2	gamma-aminobutyric acid type B receptor subunit 2 [Source:HGNC Symbol;Acc:HGNC:4507]	0.828395	1.98785	7.03542	0.0176551	0.191892
PGK1	NA	NA	-0.402227	7.38614	7.03145	0.0176819	0.191892
ALKBH1	ALKBH1	alkB homolog 1, histone H2A dioxygenase [Source:HGNC Symbol;Acc:HGNC:17911]	-0.339621	3.7974	7.0305	0.0176883	0.191892
CIB2	CIB2	calcium and integrin binding family member 2 [Source:HGNC Symbol;Acc:HGNC:24579]	-1.21956	5.78546	7.07824	0.0176957	0.191892
FOXK1	FOXK1	forkhead box K1 [Source:HGNC Symbol;Acc:HGNC:23480]	0.389833	5.2575	7.02819	0.0177039	0.191892
CAV3	CAV3	caveolin 3 [Source:HGNC Symbol;Acc:HGNC:1529]	-1.5355	5.54805	7.09136	0.0177261	0.191892
TRAF3IP2	TRAF3IP2	TRAF3 interacting protein 2 [Source:HGNC Symbol;Acc:HGNC:1343]	-0.572481	2.74207	7.02473	0.0177273	0.191892
QKI	QKI	QKI, KH domain containing RNA binding [Source:HGNC Symbol;Acc:HGNC:21100]	-0.55072	7.09977	7.02362	0.0177348	0.191892
USP28	USP28	ubiquitin specific peptidase 28 [Source:HGNC Symbol;Acc:HGNC:12625]	-0.962726	5.53321	7.04674	0.0177374	0.191892
JPT2	NA	NA	0.312057	5.02418	7.02293	0.0177395	0.191892
CHD7	CHD7	chromodomain helicase DNA binding protein 7 [Source:HGNC Symbol;Acc:HGNC:20626]	-0.802424	3.60255	7.02091	0.0177532	0.191892
LOC103346912	NA	NA	1.08476	3.30342	7.02063	0.0177551	0.191892
SYT11	SYT11	synaptotagmin 11 [Source:HGNC Symbol;Acc:HGNC:19239]	0.4259	6.41031	7.00872	0.0178361	0.192634
KDR	KDR	kinase insert domain receptor [Source:HGNC Symbol;Acc:HGNC:6307]	-0.792505	4.90383	7.00423	0.0178667	0.192832
THEM4	NA	NA	-0.70416	3.81098	6.99655	0.0179192	0.193205
SMURF2	SMURF2	SMAD specific E3 ubiquitin protein ligase 2 [Source:HGNC Symbol;Acc:HGNC:16809]	0.479461	5.56589	6.99556	0.0179259	0.193205
LOC100346516	NA	NA	-0.793582	0.84297	6.99232	0.0179482	0.193311
LOC127491615	NA	NA	-1.55635	0.533756	6.98715	0.0179838	0.193471
LOC100339628	NA	NA	-2.22124	-0.937289	6.98656	0.0179878	0.193471
LOC100351012	NA	NA	2.61574	2.41396	7.03813	0.0180003	0.193472
MARCHF8	MARCHF8	membrane associated ring-CH-type finger 8 [Source:HGNC Symbol;Acc:HGNC:23356]	0.277762	5.25049	6.98235	0.0180168	0.193516
PCCB	PCCB	propionyl-CoA carboxylase subunit beta [Source:HGNC Symbol;Acc:HGNC:8654]	-0.594735	4.92486	6.97954	0.0180362	0.193591
SMO	SMO	smoothened, frizzled class receptor [Source:HGNC Symbol;Acc:HGNC:11119]	0.333035	6.05792	6.96909	0.0181085	0.194235
REPS2	REPS2	RALBP1 associated Eps domain containing 2 [Source:HGNC Symbol;Acc:HGNC:9963]	0.584547	2.29456	6.96006	0.0181712	0.194741
CDCA4	NA	NA	0.495039	4.03736	6.9579	0.0181863	0.194741
SEC31A	SEC31A	SEC31 homolog A, COPII coat complex component [Source:HGNC Symbol;Acc:HGNC:17052]	0.485481	7.04068	6.95693	0.0181931	0.194741
MRPL16	MRPL16	mitochondrial ribosomal protein L16 [Source:HGNC Symbol;Acc:HGNC:14476]	-0.531477	4.86317	6.9547	0.0182086	0.194773
OARD1	OARD1	O-acyl-ADP-ribose deacylase 1 [Source:HGNC Symbol;Acc:HGNC:21257]	-0.338462	5.08071	6.94474	0.0182783	0.195247
SLC27A4	SLC27A4	solute carrier family 27 member 4 [Source:HGNC Symbol;Acc:HGNC:10998]	0.363725	4.92649	6.94411	0.0182827	0.195247
TSEN34	NA	NA	0.492664	3.91365	6.94303	0.0182903	0.195247
YEATS2	YEATS2	YEATS domain containing 2 [Source:HGNC Symbol;Acc:HGNC:25489]	0.459404	4.68048	6.93599	0.0183398	0.195641
SLC36A1	SLC36A1	solute carrier family 36 member 1 [Source:HGNC Symbol;Acc:HGNC:18761]	0.439956	3.4567	6.92175	0.0184403	0.196521
ENO1	NA	NA	0.475071	9.196	6.92065	0.0184481	0.196521
EMC9	EMC9	ER membrane protein complex subunit 9 [Source:HGNC Symbol;Acc:HGNC:20273]	-0.883873	4.83158	6.92124	0.01846	0.196521
KCNS1	KCNS1	potassium voltage-gated channel modifier subfamily S member 1 [Source:HGNC Symbol;Acc:HGNC:6300]	0.691515	4.5626	6.91336	0.0184998	0.196811
SH3D21	NA	NA	-1.34189	1.85635	6.9114	0.0185138	0.196823
SLN	NA	NA	4.5126	5.18262	6.97421	0.0185261	0.196823
MPI	MPI	mannose phosphate isomerase [Source:HGNC Symbol;Acc:HGNC:7216]	-0.782211	4.44295	6.90687	0.018546	0.1969
SLC16A5	SLC16A5	solute carrier family 16 member 5 [Source:HGNC Symbol;Acc:HGNC:10926]	1.89602	-0.53423	6.90346	0.0185704	0.197025
MYCBP	NA	NA	-0.469042	3.75482	6.88798	0.0186813	0.197919
LOC100355158	NA	NA	0.573069	9.1695	6.88721	0.0186868	0.197919
CCT8	CCT8	chaperonin containing TCP1 subunit 8 [Source:HGNC Symbol;Acc:HGNC:1623]	-0.296067	6.56143	6.88591	0.0186961	0.197919
MOCOS	MOCOS	molybdenum cofactor sulfurase [Source:HGNC Symbol;Acc:HGNC:18234]	0.4936	2.7452	6.88463	0.0187053	0.197919
MCAM	MCAM	melanoma cell adhesion molecule [Source:HGNC Symbol;Acc:HGNC:6934]	0.729976	9.81764	6.88112	0.0187306	0.197962
PRDX4	PRDX4	peroxiredoxin 4 [Source:HGNC Symbol;Acc:HGNC:17169]	0.532593	5.855	6.87923	0.0187443	0.197962
PNMT	PNMT	phenylethanolamine N-methyltransferase [Source:HGNC Symbol;Acc:HGNC:9160]	1.18086	3.11899	6.87737	0.0187581	0.197962
ACBD6	ACBD6	acyl-CoA binding domain containing 6 [Source:HGNC Symbol;Acc:HGNC:23339]	-0.55136	3.9929	6.87695	0.0187607	0.197962
CPQ	CPQ	carboxypeptidase Q [Source:HGNC Symbol;Acc:HGNC:16910]	0.464348	6.77848	6.87529	0.0187727	0.197962
CEBPZOS	NA	NA	-0.442295	4.17991	6.86998	0.0188111	0.198234
GARRE1	GARRE1	granule associated Rac and RHOG effector 1 [Source:HGNC Symbol;Acc:HGNC:29016]	0.468802	5.28168	6.86228	0.018867	0.198299
MYH10	MYH10	myosin heavy chain 10 [Source:HGNC Symbol;Acc:HGNC:7568]	0.353701	7.87085	6.86189	0.0188698	0.198299
ACTA2	ACTA2	actin alpha 2, smooth muscle [Source:HGNC Symbol;Acc:HGNC:130]	0.802867	13.0429	6.8618	0.0188705	0.198299
YAE1	YAE1	YAE1 maturation factor of ABCE1 [Source:HGNC Symbol;Acc:HGNC:24857]	-0.540049	2.48997	6.85622	0.0189111	0.198299
ELOA	NA	NA	0.307	4.98621	6.85568	0.018915	0.198299
LOC103350202	NA	NA	-1.10365	-0.0109398	6.85548	0.0189165	0.198299
DOCK1	DOCK1	dedicator of cytokinesis 1 [Source:HGNC Symbol;Acc:HGNC:2987]	0.421303	5.66674	6.8524	0.018939	0.198299
MMP12	MMP12	matrix metallopeptidase 12 [Source:HGNC Symbol;Acc:HGNC:7158]	-3.27748	6.19717	6.91349	0.0189571	0.198299
SLC26A6	SLC26A6	solute carrier family 26 member 6 [Source:HGNC Symbol;Acc:HGNC:14472]	0.447985	3.61654	6.84869	0.0189661	0.198299
ACTB	NA	NA	0.571512	12.0781	6.84767	0.0189736	0.198299
B3GNT9	NA	NA	0.485907	5.82678	6.84618	0.0189845	0.198299
ARSJ	NA	NA	0.631039	3.71416	6.8456	0.0189887	0.198299
LOC100355134	NA	NA	-0.693198	1.88792	6.84334	0.0190053	0.198299
PROX1	PROX1	prospero homeobox 1 [Source:HGNC Symbol;Acc:HGNC:9459]	-1.58081	4.4754	6.9035	0.0190075	0.198299
ATP1A2	ATP1A2	ATPase Na+/K+ transporting subunit alpha 2 [Source:HGNC Symbol;Acc:HGNC:800]	0.562616	7.60318	6.84302	0.0190077	0.198299
FER	NA	NA	0.331643	5.27965	6.83929	0.019035	0.198452
KEF51_r01	NA	NA	-1.26693	13.0544	6.82647	0.0191294	0.199213
ANKFY1	ANKFY1	ankyrin repeat and FYVE domain containing 1 [Source:HGNC Symbol;Acc:HGNC:20763]	0.343606	6.12156	6.82359	0.0191508	0.199213
LOC103345923	NA	NA	-0.581222	5.40623	6.82318	0.0191538	0.199213
LOC100354714	NA	NA	1.30417	4.73926	6.87076	0.019159	0.199213
LOC127488271	NA	NA	-2.87164	2.29018	6.87021	0.0192227	0.199707
LOC100345538	NA	NA	-1.30969	2.4923	6.81262	0.0192321	0.199707
LIMK2	LIMK2	LIM domain kinase 2 [Source:HGNC Symbol;Acc:HGNC:6614]	0.366808	4.37529	6.80927	0.019257	0.199794
MAGI2	MAGI2	membrane associated guanylate kinase, WW and PDZ domain containing 2 [Source:HGNC Symbol;Acc:HGNC:18957]	0.712363	2.8845	6.80801	0.0192664	0.199794
ERRFI1	ERRFI1	ERBB receptor feedback inhibitor 1 [Source:HGNC Symbol;Acc:HGNC:18185]	0.726948	4.8922	6.80634	0.0192788	0.199794
MTHFD1	MTHFD1	methylenetetrahydrofolate dehydrogenase, cyclohydrolase and formyltetrahydrofolate synthetase 1 [Source:HGNC Symbol;Acc:HGNC:7432]	-0.367004	4.52472	6.8035	0.0193	0.199852
ETFRF1	ETFRF1	electron transfer flavoprotein regulatory factor 1 [Source:HGNC Symbol;Acc:HGNC:27052]	-0.48991	5.54708	6.7986	0.0193366	0.199852
LOC127490199	NA	NA	-1.60069	4.336	6.85292	0.0193498	0.199852
LOC103349519	NA	NA	1.16127	-0.335781	6.79599	0.0193561	0.199852
SLC16A13	SLC16A13	solute carrier family 16 member 13 [Source:HGNC Symbol;Acc:HGNC:31037]	-0.701988	2.15685	6.79575	0.0193579	0.199852
APBB1	APBB1	amyloid beta precursor protein binding family B member 1 [Source:HGNC Symbol;Acc:HGNC:581]	0.311982	5.92198	6.79429	0.0193689	0.199852
BTBD1	BTBD1	BTB domain containing 1 [Source:HGNC Symbol;Acc:HGNC:1120]	-0.405047	6.23465	6.79362	0.0193739	0.199852
LOC127489644	NA	NA	0.339874	4.95468	6.79071	0.0193957	0.199945
ACOX2	ACOX2	acyl-CoA oxidase 2 [Source:HGNC Symbol;Acc:HGNC:120]	-1.21416	1.73106	6.78366	0.0194487	0.200193
CSAD	CSAD	cysteine sulfinic acid decarboxylase [Source:HGNC Symbol;Acc:HGNC:18966]	0.478247	4.20246	6.78194	0.0194617	0.200193
MRPL17	MRPL17	mitochondrial ribosomal protein L17 [Source:HGNC Symbol;Acc:HGNC:14053]	0.900888	5.68985	6.79491	0.0194633	0.200193
CDK19	CDK19	cyclin dependent kinase 19 [Source:HGNC Symbol;Acc:HGNC:19338]	0.418246	4.83261	6.78048	0.0194727	0.200193
LOC100352639	NA	NA	1.58182	-0.08471	6.77803	0.0194911	0.200193
LOC127485355	NA	NA	1.1751	1.56012	6.77665	0.0195015	0.200193
SCG5	NA	NA	0.921047	2.37529	6.7756	0.0195095	0.200193
BCL9L	BCL9L	BCL9 like [Source:HGNC Symbol;Acc:HGNC:23688]	0.824779	5.19935	6.77287	0.0195466	0.200443
GAK	GAK	cyclin G associated kinase [Source:HGNC Symbol;Acc:HGNC:4113]	0.290191	5.60874	6.75814	0.0196419	0.201288
CRTC3	CRTC3	CREB regulated transcription coactivator 3 [Source:HGNC Symbol;Acc:HGNC:26148]	0.36935	6.06253	6.75601	0.0196581	0.201322
UNC45B	UNC45B	unc-45 myosin chaperone B [Source:HGNC Symbol;Acc:HGNC:14304]	-2.32686	6.15576	6.79851	0.0198052	0.202695
EVA1C	NA	NA	0.504541	4.74312	6.73336	0.0198317	0.202727
ZBTB25	ZBTB25	zinc finger and BTB domain containing 25 [Source:HGNC Symbol;Acc:HGNC:13112]	-1.54889	3.55122	6.77293	0.019836	0.202727
STAC2	STAC2	SH3 and cysteine rich domain 2 [Source:HGNC Symbol;Acc:HGNC:23990]	-0.903716	5.32698	6.74331	0.0198472	0.202727
SIPA1L2	SIPA1L2	signal induced proliferation associated 1 like 2 [Source:HGNC Symbol;Acc:HGNC:23800]	-0.678029	4.71355	6.72946	0.0198617	0.202742
MRPS22	MRPS22	mitochondrial ribosomal protein S22 [Source:HGNC Symbol;Acc:HGNC:14508]	-0.458408	3.9567	6.71999	0.0199348	0.202918
YBX2	YBX2	Y-box binding protein 2 [Source:HGNC Symbol;Acc:HGNC:17948]	-1.34354	0.204726	6.71986	0.0199359	0.202918
SGTB	SGTB	small glutamine rich tetratricopeptide repeat co-chaperone beta [Source:HGNC Symbol;Acc:HGNC:23567]	-0.958151	3.16175	6.71853	0.0199462	0.202918
NDRG3	NDRG3	NDRG family member 3 [Source:HGNC Symbol;Acc:HGNC:14462]	-0.375992	5.51127	6.71818	0.0199489	0.202918
ABCC4	ABCC4	ATP binding cassette subfamily C member 4 [Source:HGNC Symbol;Acc:HGNC:55]	-0.827383	2.87049	6.71563	0.0199687	0.202918
DAB2IP	DAB2IP	DAB2 interacting protein [Source:HGNC Symbol;Acc:HGNC:17294]	0.291256	6.79764	6.71479	0.0199752	0.202918
DOK4	DOK4	docking protein 4 [Source:HGNC Symbol;Acc:HGNC:19868]	0.374863	5.42543	6.71408	0.0199807	0.202918
ACER3	ACER3	alkaline ceramidase 3 [Source:HGNC Symbol;Acc:HGNC:16066]	-0.557678	1.42596	6.71198	0.019997	0.202918
VSTM2A	NA	NA	-1.05128	2.46298	6.70994	0.0200129	0.202918
LEPROTL1	LEPROTL1	leptin receptor overlapping transcript like 1 [Source:HGNC Symbol;Acc:HGNC:6555]	0.318664	5.78023	6.70774	0.02003	0.202918
NDUFS7	NA	NA	-1.33921	6.72692	6.7544	0.0200315	0.202918
LOC100357733	NA	NA	-0.879695	2.97667	6.70545	0.0200478	0.202918
GARNL3	GARNL3	GTPase activating Rap/RanGAP domain like 3 [Source:HGNC Symbol;Acc:HGNC:25425]	-0.561509	1.52868	6.70349	0.0200631	0.202918
PSMA1	PSMA1	proteasome 20S subunit alpha 1 [Source:HGNC Symbol;Acc:HGNC:9530]	-0.313429	5.49982	6.70302	0.0200668	0.202918
SOX4	NA	NA	-0.506163	4.4057	6.69892	0.0200988	0.202918
MXRA8	NA	NA	0.508293	9.12514	6.69686	0.020115	0.202918
NUDT2	NUDT2	nudix hydrolase 2 [Source:HGNC Symbol;Acc:HGNC:8049]	-0.495945	4.33672	6.69658	0.0201171	0.202918
STON1	STON1	stonin 1 [Source:HGNC Symbol;Acc:HGNC:17003]	0.451759	5.9008	6.69362	0.0201403	0.202918
HEY1	HEY1	hes related family bHLH transcription factor with YRPW motif 1 [Source:HGNC Symbol;Acc:HGNC:4880]	0.521237	3.71455	6.69196	0.0201533	0.202918
ATOSB	ATOSB	atos homolog B [Source:HGNC Symbol;Acc:HGNC:25666]	0.292695	5.7974	6.69177	0.0201548	0.202918
PPID	PPID	peptidylprolyl isomerase D [Source:HGNC Symbol;Acc:HGNC:9257]	-0.277397	4.82904	6.68911	0.0201757	0.202918
HS3ST6	HS3ST6	heparan sulfate-glucosamine 3-sulfotransferase 6 [Source:HGNC Symbol;Acc:HGNC:14178]	-1.48123	-0.293058	6.6887	0.0201789	0.202918
COL6A1	NA	NA	0.556414	10.2172	6.68848	0.0201806	0.202918
ITPKC	ITPKC	inositol-trisphosphate 3-kinase C [Source:HGNC Symbol;Acc:HGNC:14897]	0.404863	4.46081	6.68565	0.0202028	0.202918
AMER1	AMER1	APC membrane recruitment protein 1 [Source:HGNC Symbol;Acc:HGNC:26837]	0.477188	4.19438	6.68392	0.0202165	0.202918
IQCE	NA	NA	0.365343	3.81417	6.68392	0.0202165	0.202918
RNASEH2C	NA	NA	0.468417	4.67773	6.68117	0.0202381	0.203005
ADIPOR2	ADIPOR2	adiponectin receptor 2 [Source:HGNC Symbol;Acc:HGNC:24041]	-0.652901	6.19574	6.67893	0.0202558	0.203052
ATG7	ATG7	autophagy related 7 [Source:HGNC Symbol;Acc:HGNC:16935]	0.370647	4.51297	6.67115	0.0203173	0.203538
PXN	PXN	paxillin [Source:HGNC Symbol;Acc:HGNC:9718]	0.301659	6.49141	6.66135	0.0203951	0.204132
MED21	MED21	mediator complex subunit 21 [Source:HGNC Symbol;Acc:HGNC:11473]	-0.345686	3.74633	6.66038	0.0204027	0.204132
MEGF6	NA	NA	0.922146	2.95971	6.65445	0.0204499	0.204346
LOC127487454	NA	NA	-1.46088	1.14535	6.65402	0.0204534	0.204346
GABRA4	GABRA4	gamma-aminobutyric acid type A receptor subunit alpha4 [Source:HGNC Symbol;Acc:HGNC:4078]	-1.88286	3.02838	6.69895	0.0204634	0.204346
ART1	ART1	ADP-ribosyltransferase 1 [Source:HGNC Symbol;Acc:HGNC:723]	-2.38845	2.88908	6.71088	0.0204811	0.204392
TMEM184A	NA	NA	-1.10852	0.33502	6.6459	0.0205183	0.2046
ELOVL1	NA	NA	0.397301	5.28819	6.64468	0.0205281	0.2046
LOC100347864	NA	NA	-7.27439	0.851236	7.10642	0.0205703	0.204851
HSD17B8	HSD17B8	hydroxysteroid 17-beta dehydrogenase 8 [Source:HGNC Symbol;Acc:HGNC:3554]	-0.735786	4.08591	6.63786	0.0205828	0.204851
RASA1	RASA1	RAS p21 protein activator 1 [Source:HGNC Symbol;Acc:HGNC:9871]	0.481636	5.99466	6.63663	0.0205926	0.204851
LOC127485849	NA	NA	-0.788918	7.21442	6.6348	0.0206074	0.204868
LUZP1	LUZP1	leucine zipper protein 1 [Source:HGNC Symbol;Acc:HGNC:14985]	0.414182	4.54464	6.62641	0.020675	0.205409
GALC	GALC	galactosylceramidase [Source:HGNC Symbol;Acc:HGNC:4115]	-0.344517	4.26352	6.62189	0.0207116	0.20563
WWC2	WWC2	WW and C2 domain containing 2 [Source:HGNC Symbol;Acc:HGNC:24148]	0.323764	6.2375	6.62041	0.0207235	0.20563
MSI2	MSI2	musashi RNA binding protein 2 [Source:HGNC Symbol;Acc:HGNC:18585]	-0.474934	5.01963	6.61358	0.0207789	0.20602
NDUFA4L2	NDUFA4L2	NDUFA4 mitochondrial complex associated like 2 [Source:HGNC Symbol;Acc:HGNC:29836]	-0.926293	3.42431	6.61232	0.0207892	0.20602
SNX33	SNX33	sorting nexin 33 [Source:HGNC Symbol;Acc:HGNC:28468]	0.394828	5.74557	6.60448	0.020853	0.206277
RNF207	RNF207	ring finger protein 207 [Source:HGNC Symbol;Acc:HGNC:32947]	-1.95174	5.00294	6.66387	0.0208546	0.206277
LOC127490046	NA	NA	-1.66861	0.00244798	6.60426	0.0208548	0.206277
LOC100345990	NA	NA	0.492742	4.26782	6.59702	0.0209139	0.206732
ARHGEF3	ARHGEF3	Rho guanine nucleotide exchange factor 3 [Source:HGNC Symbol;Acc:HGNC:683]	-0.66259	3.72903	6.59524	0.0209285	0.206745
FGF1	FGF1	fibroblast growth factor 1 [Source:HGNC Symbol;Acc:HGNC:3665]	-1.23759	5.48726	6.63737	0.0209557	0.206883
LOC100343039	NA	NA	-8.22595	0.118756	7.78923	0.0210224	0.207206
CNBP	CNBP	CCHC-type zinc finger nucleic acid binding protein [Source:HGNC Symbol;Acc:HGNC:13164]	-0.286354	7.95877	6.58337	0.0210259	0.207206
TMEM9B	TMEM9B	TMEM9 domain family member B [Source:HGNC Symbol;Acc:HGNC:1168]	-0.454357	4.79536	6.58309	0.0210282	0.207206
SERPINA3	SERPINA3	serpin family A member 3 [Source:HGNC Symbol;Acc:HGNC:16]	2.595	1.44461	6.58268	0.0211055	0.207837
POGLUT3	POGLUT3	protein O-glucosyltransferase 3 [Source:HGNC Symbol;Acc:HGNC:28496]	0.633394	4.02899	6.56015	0.0212181	0.208814
ITPR1	ITPR1	inositol 1,4,5-trisphosphate receptor type 1 [Source:HGNC Symbol;Acc:HGNC:6180]	0.478516	6.38981	6.55488	0.0212621	0.209115
MMACHC	MMACHC	metabolism of cobalamin associated C [Source:HGNC Symbol;Acc:HGNC:24525]	-0.94674	2.82974	6.55131	0.0212919	0.209276
GAPDH	NA	NA	-0.866705	11.0259	6.54788	0.0213205	0.209402
DPH5	DPH5	diphthamide biosynthesis 5 [Source:HGNC Symbol;Acc:HGNC:24270]	-0.649397	1.49786	6.54655	0.0213317	0.209402
SAMD1	NA	NA	0.365974	5.15925	6.54498	0.0213448	0.209402
RRP12	RRP12	ribosomal RNA processing 12 homolog [Source:HGNC Symbol;Acc:HGNC:29100]	0.381035	4.80752	6.54292	0.0213621	0.20944
AQP3	AQP3	aquaporin 3 (Gill blood group) [Source:HGNC Symbol;Acc:HGNC:636]	-0.902302	5.30436	6.54946	0.0214159	0.209777
LOC100357329	CYCS//CYCS	cytochrome c, somatic [Source:HGNC Symbol;Acc:HGNC:19986]//cytochrome c, somatic [Source:HGNC Symbol;Acc:HGNC:19986]	-1.49205	4.83057	6.59304	0.0214323	0.209777
SMTNL1	SMTNL1	smoothelin like 1 [Source:HGNC Symbol;Acc:HGNC:32394]	0.928582	4.47081	6.53748	0.0214492	0.209777
GOLT1B	GOLT1B	golgi transport 1B [Source:HGNC Symbol;Acc:HGNC:20175]	0.488832	4.79595	6.53126	0.0214602	0.209777
LOC100344919	NA	NA	-2.65237	5.61647	6.58928	0.0214636	0.209777
LOC100343913	NA	NA	1.4779	0.388831	6.52875	0.0214813	0.209819
RAD52	RAD52	RAD52 homolog, DNA repair protein [Source:HGNC Symbol;Acc:HGNC:9824]	-0.3886	4.18528	6.52253	0.0215338	0.2102
FITM1	FITM1	fat storage inducing transmembrane protein 1 [Source:HGNC Symbol;Acc:HGNC:33714]	-2.00299	4.38094	6.57582	0.0215756	0.210397
LOXL2	LOXL2	lysyl oxidase like 2 [Source:HGNC Symbol;Acc:HGNC:6666]	0.651449	6.97517	6.51697	0.0215809	0.210397
LOC100357400	NA	NA	1.97412	3.12085	6.56332	0.0216003	0.210454
THSD4	NA	NA	-0.624627	3.41626	6.50724	0.0216637	0.210941
MRPS9	MRPS9	mitochondrial ribosomal protein S9 [Source:HGNC Symbol;Acc:HGNC:14501]	-0.626082	5.14744	6.50356	0.0216951	0.210986
KCNJ5	KCNJ5	potassium inwardly rectifying channel subfamily J member 5 [Source:HGNC Symbol;Acc:HGNC:6266]	-2.03097	4.7496	6.56153	0.0216953	0.210986
SPATS2L	SPATS2L	spermatogenesis associated serine rich 2 like [Source:HGNC Symbol;Acc:HGNC:24574]	0.323129	5.88619	6.49788	0.0217436	0.211324
UPF3B	UPF3B	UPF3B regulator of nonsense mediated mRNA decay [Source:HGNC Symbol;Acc:HGNC:20439]	-0.510006	4.04603	6.49604	0.0217594	0.211346
LOC100345307	NA	NA	-1.07784	5.92741	6.53123	0.0217806	0.21142
PHTF2	PHTF2	putative homeodomain transcription factor 2 [Source:HGNC Symbol;Acc:HGNC:13411]	0.55579	6.76692	6.49061	0.0218059	0.211535
SEMA4D	SEMA4D	semaphorin 4D [Source:HGNC Symbol;Acc:HGNC:10732]	-1.05236	4.42119	6.50569	0.0218425	0.211756
NDUFB4	NDUFB4	NADH:ubiquinone oxidoreductase subunit B4 [Source:HGNC Symbol;Acc:HGNC:7699]	-0.88637	5.76145	6.49673	0.0218558	0.211756
UCHL3	UCHL3	ubiquitin C-terminal hydrolase L3 [Source:HGNC Symbol;Acc:HGNC:12515]	-0.38051	3.78808	6.47756	0.0219183	0.212117
LOC103351388	NA	NA	-1.3377	0.641041	6.47735	0.0219202	0.212117
LNP1	LNP1	leukemia NUP98 fusion partner 1 [Source:HGNC Symbol;Acc:HGNC:28014]	-1.77096	3.53279	6.52101	0.0219583	0.212354
NIPAL4	NIPAL4	NIPA like domain containing 4 [Source:HGNC Symbol;Acc:HGNC:28018]	1.37022	3.54972	6.49877	0.0219967	0.212492
MLLT1	NA	NA	0.327388	5.70167	6.46815	0.0219998	0.212492
ANKDD1A	ANKDD1A	ankyrin repeat and death domain containing 1A [Source:HGNC Symbol;Acc:HGNC:28002]	-1.00847	-0.512355	6.79717	0.0220883	0.213216
ATP2A3	ATP2A3	ATPase sarcoplasmic/endoplasmic reticulum Ca2+ transporting 3 [Source:HGNC Symbol;Acc:HGNC:813]	1.05297	6.78788	6.47581	0.0221522	0.213701
SLCO1C1	SLCO1C1	solute carrier organic anion transporter family member 1C1 [Source:HGNC Symbol;Acc:HGNC:13819]	-0.562762	5.47482	6.44803	0.0221751	0.21378
SDC4	SDC4	syndecan 4 [Source:HGNC Symbol;Acc:HGNC:10661]	0.425875	7.21879	6.4448	0.0222034	0.21378
CHSY3	CHSY3	chondroitin sulfate synthase 3 [Source:HGNC Symbol;Acc:HGNC:24293]	0.801328	3.8708	6.4432	0.0222174	0.21378
TSTD3	NA	NA	-0.643306	1.72449	6.44242	0.0222243	0.21378
IFT88	IFT88	intraflagellar transport 88 [Source:HGNC Symbol;Acc:HGNC:20606]	-0.393295	3.74528	6.4419	0.0222288	0.21378
INPP4B	INPP4B	inositol polyphosphate-4-phosphatase type II B [Source:HGNC Symbol;Acc:HGNC:6075]	-0.983506	3.43223	6.43821	0.0222612	0.21396
PGAM2	PGAM2	phosphoglycerate mutase 2 [Source:HGNC Symbol;Acc:HGNC:8889]	-2.26644	7.08733	6.48964	0.0223093	0.21429
COQ7	COQ7	coenzyme Q7, hydroxylase [Source:HGNC Symbol;Acc:HGNC:2244]	-1.02649	4.41075	6.44374	0.0223395	0.214449
ALAS1	ALAS1	5'-aminolevulinate synthase 1 [Source:HGNC Symbol;Acc:HGNC:396]	-0.698259	6.02966	6.42576	0.022371	0.214502
HYPK	HYPK	huntingtin interacting protein K [Source:HGNC Symbol;Acc:HGNC:18418]	-0.724028	4.84608	6.42451	0.022382	0.214502
ART3	ART3	ADP-ribosyltransferase 3 (inactive) [Source:HGNC Symbol;Acc:HGNC:725]	-1.8955	6.48751	6.48079	0.0223863	0.214502
CD2AP	NA	NA	0.552512	4.65492	6.4132	0.0224823	0.215291
GMIP	GMIP	GEM interacting protein [Source:HGNC Symbol;Acc:HGNC:24852]	0.653935	3.48816	6.40894	0.0225203	0.215522
AGTPBP1	AGTPBP1	ATP/GTP binding carboxypeptidase 1 [Source:HGNC Symbol;Acc:HGNC:17258]	-0.800782	4.39401	6.40681	0.0225393	0.215572
HCN4	HCN4	hyperpolarization activated cyclic nucleotide gated potassium channel 4 [Source:HGNC Symbol;Acc:HGNC:16882]	4.43104	0.224602	6.43947	0.0225757	0.215787
GBE1	GBE1	1,4-alpha-glucan branching enzyme 1 [Source:HGNC Symbol;Acc:HGNC:4180]	0.566311	6.37282	6.39631	0.0226332	0.215978
GATA4	GATA4	GATA binding protein 4 [Source:HGNC Symbol;Acc:HGNC:4173]	-0.846749	5.87786	6.40296	0.022635	0.215978
RNF157	RNF157	ring finger protein 157 [Source:HGNC Symbol;Acc:HGNC:29402]	0.804325	3.74046	6.39587	0.0226371	0.215978
ANG	NA	NA	-0.671437	2.79538	6.39358	0.0226576	0.216043
LOC127486559	NA	NA	-1.97886	2.63958	6.42625	0.0227243	0.216406
TM4SF18	TM4SF18	transmembrane 4 L six family member 18 [Source:HGNC Symbol;Acc:HGNC:25181]	-0.825795	3.42887	6.38559	0.0227295	0.216406
THOC7	NA	NA	-0.296921	5.29424	6.38472	0.0227374	0.216406
PTCD3	NA	NA	-0.301529	5.28915	6.37659	0.0228107	0.216642
LOC127491589	NA	NA	-0.904872	2.23903	6.37542	0.0228213	0.216642
LOC127485225	NA	NA	-4.75915	0.507614	6.41965	0.0228443	0.216642
CNNM2	CNNM2	cyclin and CBS domain divalent metal cation transport mediator 2 [Source:HGNC Symbol;Acc:HGNC:103]	0.452369	3.45737	6.37157	0.0228561	0.216642
ANGPTL7	ANGPTL7	angiopoietin like 7 [Source:HGNC Symbol;Acc:HGNC:24078]	1.50807	6.73914	6.42745	0.0228566	0.216642
PRSS57	NA	NA	-1.1573	1.9053	6.37151	0.0228567	0.216642
LGALS2	LGALS2	galectin 2 [Source:HGNC Symbol;Acc:HGNC:6562]	-2.10868	0.809274	6.37124	0.0228591	0.216642
NDUFA7	NDUFA7	NADH:ubiquinone oxidoreductase subunit A7 [Source:HGNC Symbol;Acc:HGNC:7691]	-1.11864	5.80981	6.40425	0.0229127	0.217018
MEOX1	MEOX1	mesenchyme homeobox 1 [Source:HGNC Symbol;Acc:HGNC:7013]	0.660429	4.20906	6.36241	0.0229393	0.21703
CHI3L2	CHI3L2	chitinase 3 like 2 [Source:HGNC Symbol;Acc:HGNC:1933]	2.14746	2.62223	6.40483	0.0229418	0.21703
OAT	OAT	ornithine aminotransferase [Source:HGNC Symbol;Acc:HGNC:8091]	0.507332	8.64704	6.35791	0.0229803	0.217212
PHOSPHO1	PHOSPHO1	phosphoethanolamine/phosphocholine phosphatase 1 [Source:HGNC Symbol;Acc:HGNC:16815]	-1.63669	2.14287	6.35894	0.0229888	0.217212
PPP2CA	PPP2CA	protein phosphatase 2 catalytic subunit alpha [Source:HGNC Symbol;Acc:HGNC:9299]	-0.35812	6.73908	6.35512	0.0230058	0.217241
ASB8	ASB8	ankyrin repeat and SOCS box containing 8 [Source:HGNC Symbol;Acc:HGNC:17183]	-0.32813	5.69099	6.35319	0.0230235	0.217277
AKAP6	AKAP6	A-kinase anchoring protein 6 [Source:HGNC Symbol;Acc:HGNC:376]	-0.843766	6.38724	6.3498	0.0230723	0.217607
ISOC2	NA	NA	-0.947684	5.29649	6.35714	0.0231773	0.21841
DHRS7	DHRS7	dehydrogenase/reductase 7 [Source:HGNC Symbol;Acc:HGNC:21524]	-0.697667	5.11045	6.33553	0.0231855	0.21841
CFAP97D2	NA	NA	-1.05298	2.73552	6.32466	0.0232859	0.219224
FLRT1	FLRT1	fibronectin leucine rich transmembrane protein 1 [Source:HGNC Symbol;Acc:HGNC:3760]	0.748292	5.34125	6.32191	0.0233114	0.219317
LOC103347892	NA	NA	-0.682156	2.68758	6.32012	0.023328	0.219317
LOC100351828	NA	NA	-0.609639	4.39736	6.31906	0.0233378	0.219317
ZDHHC18	ZDHHC18	zinc finger DHHC-type palmitoyltransferase 18 [Source:HGNC Symbol;Acc:HGNC:20712]	0.428844	5.02851	6.31675	0.0233593	0.219323
PSMD14	PSMD14	proteasome 26S subunit, non-ATPase 14 [Source:HGNC Symbol;Acc:HGNC:16889]	-0.367725	4.74363	6.31596	0.0233666	0.219323
ZBTB24	ZBTB24	zinc finger and BTB domain containing 24 [Source:HGNC Symbol;Acc:HGNC:21143]	0.558335	3.179	6.29815	0.0235328	0.22068
LOC100350602	NA	NA	1.01156	1.51411	6.29558	0.023557	0.22068
RASIP1	RASIP1	Ras interacting protein 1 [Source:HGNC Symbol;Acc:HGNC:24716]	-0.591896	4.47529	6.29541	0.0235585	0.22068
LOC100348124	NA	NA	-0.46761	3.88145	6.29267	0.0235843	0.22068
WIPF3	WIPF3	WAS/WASL interacting protein family member 3 [Source:HGNC Symbol;Acc:HGNC:22004]	-1.12063	2.84994	6.29212	0.0235894	0.22068
ARHGAP18	ARHGAP18	Rho GTPase activating protein 18 [Source:HGNC Symbol;Acc:HGNC:21035]	-0.765429	3.30514	6.28929	0.0236161	0.22068
LRRC75A	LRRC75A	leucine rich repeat containing 75A [Source:HGNC Symbol;Acc:HGNC:32403]	0.410307	4.58605	6.28924	0.0236166	0.22068
MRPS28	MRPS28	mitochondrial ribosomal protein S28 [Source:HGNC Symbol;Acc:HGNC:14513]	-0.592891	4.02641	6.28843	0.0236241	0.22068
CUNH10orf71	NA	NA	-2.65448	3.54613	6.3397	0.0236556	0.220842
LOC100347828	NA	NA	-0.707896	1.2086	6.27833	0.0237195	0.221279
RAC1	RAC1	Rac family small GTPase 1 [Source:HGNC Symbol;Acc:HGNC:9801]	0.287222	7.90073	6.27714	0.0237307	0.221279
FUT1	FUT1	fucosyltransferase 1 (H blood group) [Source:HGNC Symbol;Acc:HGNC:4012]	0.550062	3.08002	6.27367	0.0237636	0.221454
GRK5	NA	NA	0.371453	5.27569	6.27047	0.023794	0.221534
HBA	NA	NA	-1.11063	10.751	6.26913	0.0238067	0.221534
ARHGEF40	ARHGEF40	Rho guanine nucleotide exchange factor 40 [Source:HGNC Symbol;Acc:HGNC:25516]	0.318754	7.05936	6.26828	0.0238147	0.221534
DPM1	DPM1	dolichyl-phosphate mannosyltransferase subunit 1, catalytic [Source:HGNC Symbol;Acc:HGNC:3005]	-0.357843	3.8817	6.2651	0.023845	0.221683
LOC127488149	NA	NA	-1.3514	1.88957	6.26322	0.0238629	0.221718
INKA2	INKA2	inka box actin regulator 2 [Source:HGNC Symbol;Acc:HGNC:28045]	-1.13316	4.11504	6.27664	0.0239281	0.222192
ABHD17C	NA	NA	-0.556759	3.77245	6.24743	0.0240138	0.222855
LOC127488898	NA	NA	0.968547	7.18517	6.25349	0.0240694	0.223238
LOC127483309	NA	NA	-1.76641	-0.712577	6.23316	0.0241512	0.223864
C9H3orf18	NA	NA	-0.740207	2.49293	6.22619	0.0242186	0.224356
LHFPL2	LHFPL2	LHFPL tetraspan subfamily member 2 [Source:HGNC Symbol;Acc:HGNC:6588]	0.388435	5.30019	6.21943	0.0242842	0.22483
TESK1	TESK1	testis associated actin remodelling kinase 1 [Source:HGNC Symbol;Acc:HGNC:11731]	0.404509	6.90643	6.21632	0.0243144	0.224976
PDPR	PDPR	pyruvate dehydrogenase phosphatase regulatory subunit [Source:HGNC Symbol;Acc:HGNC:30264]	-0.530432	5.20185	6.21312	0.0243456	0.22503
UBE2R2	NA	NA	-0.266619	6.38888	6.21277	0.024349	0.22503
COL5A3	COL5A3	collagen type V alpha 3 chain [Source:HGNC Symbol;Acc:HGNC:14864]	-0.766408	5.65182	6.21068	0.0243877	0.225108
RAB27A	RAB27A	RAB27A, member RAS oncogene family [Source:HGNC Symbol;Acc:HGNC:9766]	-0.617318	4.55166	6.20854	0.0243902	0.225108
SDHAF2	SDHAF2	succinate dehydrogenase complex assembly factor 2 [Source:HGNC Symbol;Acc:HGNC:26034]	-0.422525	5.73457	6.20748	0.0244006	0.225108
NDUFS8	NA	NA	-1.10144	6.36063	6.23721	0.0244496	0.225381
UGDH	UGDH	UDP-glucose 6-dehydrogenase [Source:HGNC Symbol;Acc:HGNC:12525]	0.593556	6.05139	6.20151	0.024459	0.225381
SPG7	SPG7	SPG7 matrix AAA peptidase subunit, paraplegin [Source:HGNC Symbol;Acc:HGNC:11237]	-0.512915	5.95558	6.19897	0.0244839	0.22541
ARHGEF19	ARHGEF19	Rho guanine nucleotide exchange factor 19 [Source:HGNC Symbol;Acc:HGNC:26604]	0.807418	3.64783	6.19825	0.0244911	0.22541
LOC103350899	NA	NA	-0.463471	2.61355	6.19421	0.0245307	0.225642
XNDC1N	NA	NA	-1.09255	1.31949	6.1909	0.0245633	0.225702
LOC108177235	NA	NA	-0.557862	6.58933	6.18501	0.0246214	0.225702
DENND5B	DENND5B	DENN domain containing 5B [Source:HGNC Symbol;Acc:HGNC:28338]	-1.32228	4.12374	6.22003	0.0246214	0.225702
KCNMB4	KCNMB4	potassium calcium-activated channel subfamily M regulatory beta subunit 4 [Source:HGNC Symbol;Acc:HGNC:6289]	0.694997	1.91173	6.18436	0.0246277	0.225702
POLR2K	NA	NA	-0.420199	5.02042	6.17886	0.0246822	0.225702
ADSL	ADSL	adenylosuccinate lyase [Source:HGNC Symbol;Acc:HGNC:291]	-0.562429	4.56315	6.17745	0.0246961	0.225702
SRI	NA	NA	0.641334	4.95292	6.17667	0.0247039	0.225702
TRMO	TRMO	tRNA methyltransferase O [Source:HGNC Symbol;Acc:HGNC:30967]	-0.436358	3.38548	6.17582	0.0247123	0.225702
STK40	STK40	serine/threonine kinase 40 [Source:HGNC Symbol;Acc:HGNC:21373]	0.36323	6.2418	6.17524	0.024718	0.225702
XK	XK	X-linked Kx blood group antigen, Kell and VPS13A binding protein [Source:HGNC Symbol;Acc:HGNC:12811]	-0.880339	2.7385	6.17286	0.0247416	0.225702
GPX7	GPX7	glutathione peroxidase 7 [Source:HGNC Symbol;Acc:HGNC:4559]	0.432013	5.94584	6.17136	0.0247565	0.225702
TLN2	TLN2	talin 2 [Source:HGNC Symbol;Acc:HGNC:15447]	-0.626159	5.44322	6.17009	0.0247692	0.225702
VIRMA	VIRMA	vir like m6A methyltransferase associated [Source:HGNC Symbol;Acc:HGNC:24500]	0.360048	5.70833	6.16978	0.0247723	0.225702
IQCG	IQCG	IQ motif containing G [Source:HGNC Symbol;Acc:HGNC:25251]	-0.570952	2.28775	6.16971	0.0247729	0.225702
GINM1	GINM1	glycosylated integral membrane protein 1 [Source:HGNC Symbol;Acc:HGNC:21074]	0.35944	5.2865	6.16961	0.0247739	0.225702
LOC127493465	NA	NA	-0.917051	2.14252	6.16946	0.0247754	0.225702
CUNH14orf180	NA	NA	-2.11193	3.06346	6.21939	0.0247828	0.225702
LOC100353046	NA	NA	1.3838	0.370966	6.16326	0.0248372	0.226047
LOC127482818	NA	NA	-1.02679	-0.0996736	6.16202	0.0248496	0.226047
NDRG4	NDRG4	NDRG family member 4 [Source:HGNC Symbol;Acc:HGNC:14466]	-0.714222	5.52988	6.15789	0.0248908	0.226182
LOC100359112	NA	NA	-1.02965	5.78067	6.19013	0.0248933	0.226182
UFD1	UFD1	ubiquitin recognition factor in ER associated degradation 1 [Source:HGNC Symbol;Acc:HGNC:12520]	-0.428485	5.30916	6.15252	0.0249446	0.226388
LOC127485683	NA	NA	-1.22878	0.859064	6.15248	0.024945	0.226388
ARF3	ARF3	ADP ribosylation factor 3 [Source:HGNC Symbol;Acc:HGNC:654]	0.324458	6.58199	6.15026	0.0249672	0.226458
ST8SIA4	ST8SIA4	ST8 alpha-N-acetyl-neuraminide alpha-2,8-sialyltransferase 4 [Source:HGNC Symbol;Acc:HGNC:10871]	-0.963806	2.40225	6.1486	0.0249839	0.226478
ZC3H12A	ZC3H12A	zinc finger CCCH-type containing 12A [Source:HGNC Symbol;Acc:HGNC:26259]	0.453035	4.01981	6.14515	0.0250186	0.226587
FOXJ2	FOXJ2	forkhead box J2 [Source:HGNC Symbol;Acc:HGNC:24818]	0.372112	6.00586	6.14286	0.0250416	0.226587
TCF7	TCF7	transcription factor 7 [Source:HGNC Symbol;Acc:HGNC:11639]	-0.645985	1.83787	6.1426	0.0250442	0.226587
P3H3	P3H3	prolyl 3-hydroxylase 3 [Source:HGNC Symbol;Acc:HGNC:19318]	0.396193	6.99226	6.14099	0.0250605	0.226587
PAM16	PAM16	presequence translocase associated motor 16 [Source:HGNC Symbol;Acc:HGNC:29679]	-0.878768	3.75836	6.13681	0.0251026	0.226587
COLGALT2	NA	NA	-0.897594	4.20633	6.13815	0.0251076	0.226587
SOX7	SOX7	SRY-box transcription factor 7 [Source:HGNC Symbol;Acc:HGNC:18196]	-0.722408	2.85827	6.13374	0.0251336	0.226587
CS	CS	citrate synthase [Source:HGNC Symbol;Acc:HGNC:2422]	-1.55742	7.8748	6.18034	0.0251356	0.226587
SLC38A1	SLC38A1	solute carrier family 38 member 1 [Source:HGNC Symbol;Acc:HGNC:13447]	-0.410921	5.85016	6.13249	0.0251463	0.226587
LOC100338405	NA	NA	-0.659924	4.21262	6.13169	0.0251543	0.226587
LOC127482674	NA	NA	1.37224	-0.000285825	6.1307	0.0251643	0.226587
VGLL4	VGLL4	vestigial like family member 4 [Source:HGNC Symbol;Acc:HGNC:28966]	0.343194	5.73292	6.12926	0.025179	0.226587
FAR2	FAR2	fatty acyl-CoA reductase 2 [Source:HGNC Symbol;Acc:HGNC:25531]	-1.63673	4.29908	6.17878	0.0252062	0.226587
CXXC5	NA	NA	0.28765	5.99984	6.12572	0.0252149	0.226587
AKAP10	AKAP10	A-kinase anchoring protein 10 [Source:HGNC Symbol;Acc:HGNC:368]	0.443053	4.55168	6.12483	0.0252239	0.226587
CARM1	CARM1	coactivator associated arginine methyltransferase 1 [Source:HGNC Symbol;Acc:HGNC:23393]	0.328841	5.4899	6.12443	0.0252279	0.226587
BCR	BCR	BCR activator of RhoGEF and GTPase [Source:HGNC Symbol;Acc:HGNC:1014]	0.295256	5.8291	6.12044	0.0252685	0.226821
RARG	NA	NA	0.393045	6.37331	6.11506	0.0253233	0.227117
MCTP1	MCTP1	multiple C2 and transmembrane domain containing 1 [Source:HGNC Symbol;Acc:HGNC:26183]	-0.858234	1.64055	6.11435	0.0253305	0.227117
CCNE2	CCNE2	cyclin E2 [Source:HGNC Symbol;Acc:HGNC:1590]	1.32986	0.136217	6.10444	0.0254319	0.227889
LOC100358060	NA	NA	-0.432382	5.69311	6.10309	0.0254457	0.227889
PODXL	NA	NA	-0.739997	5.63075	6.09917	0.0254864	0.228122
LOC108175419	NA	NA	-1.37872	2.00911	6.09464	0.0255326	0.228329
EFHD2	EFHD2	EF-hand domain family member D2 [Source:HGNC Symbol;Acc:HGNC:28670]	0.472318	6.83787	6.09404	0.0255387	0.228329
LOC100349429	NA	NA	1.79439	-0.229313	6.09198	0.0255599	0.228388
PRKCZ_1	NA	NA	-1.23502	3.82067	6.10871	0.0256378	0.228953
CUNH8orf58	NA	NA	0.553025	4.01697	6.07849	0.0256994	0.229336
CDH8	CDH8	cadherin 8 [Source:HGNC Symbol;Acc:HGNC:1767]	1.27788	1.06838	6.07747	0.02571	0.229336
LPCAT3	LPCAT3	lysophosphatidylcholine acyltransferase 3 [Source:HGNC Symbol;Acc:HGNC:30244]	-0.350639	4.99324	6.07439	0.025742	0.22949
PSPH	PSPH	phosphoserine phosphatase [Source:HGNC Symbol;Acc:HGNC:9577]	-0.529538	2.88225	6.06969	0.0257909	0.229534
LOC103349629	NA	NA	-1.35868	0.0460748	6.06939	0.0257941	0.229534
UBE2D3	NA	NA	-0.329955	7.25085	6.06916	0.0257964	0.229534
SRR	NA	NA	-0.374912	3.64341	6.06828	0.0258057	0.229534
PNPT1	PNPT1	polyribonucleotide nucleotidyltransferase 1 [Source:HGNC Symbol;Acc:HGNC:23166]	-0.385686	3.88085	6.05698	0.0259238	0.230453
HBB2	NA	NA	-1.09122	10.5402	6.05217	0.0259742	0.23077
SRGN	SRGN	serglycin [Source:HGNC Symbol;Acc:HGNC:9361]	-0.853081	5.37499	6.05913	0.0260052	0.230878
LMAN2L	LMAN2L	lectin, mannose binding 2 like [Source:HGNC Symbol;Acc:HGNC:19263]	-0.333812	4.66928	6.0482	0.0260159	0.230878
CINP	CINP	cyclin dependent kinase 2 interacting protein [Source:HGNC Symbol;Acc:HGNC:23789]	0.356785	4.68619	6.0451	0.0260485	0.231019
GRTP1	GRTP1	growth hormone regulated TBC protein 1 [Source:HGNC Symbol;Acc:HGNC:20310]	-1.44501	2.19658	6.04122	0.0260894	0.231019
HDAC7	NA	NA	0.315207	6.63329	6.04035	0.0260987	0.231019
LOC127486830	NA	NA	-3.40818	1.51777	6.08395	0.0261022	0.231019
TGFB1I1	TGFB1I1	transforming growth factor beta 1 induced transcript 1 [Source:HGNC Symbol;Acc:HGNC:11767]	0.552082	8.28072	6.03968	0.0261057	0.231019
NUDT4	NUDT4//NUDT4B	nudix hydrolase 4 [Source:HGNC Symbol;Acc:HGNC:8051]//nudix hydrolase 4B [Source:HGNC Symbol;Acc:HGNC:18012]	-0.584962	6.27095	6.03537	0.0261512	0.231291
NDUFV1	NA	NA	-0.822708	8.11108	6.032	0.026187	0.231476
ULK4	ULK4	unc-51 like kinase 4 [Source:HGNC Symbol;Acc:HGNC:15784]	0.63541	1.82002	6.02987	0.0262096	0.231545
TSPAN1	TSPAN1	tetraspanin 1 [Source:HGNC Symbol;Acc:HGNC:20657]	0.912481	0.995527	6.02318	0.0262807	0.232042
TMEM39A	TMEM39A	transmembrane protein 39A [Source:HGNC Symbol;Acc:HGNC:25600]	0.446676	4.27852	6.01863	0.0263291	0.232194
ATP1A1	ATP1A1	ATPase Na+/K+ transporting subunit alpha 1 [Source:HGNC Symbol;Acc:HGNC:799]	-0.673336	8.31067	6.01823	0.0263334	0.232194
TXLNA	TXLNA	taxilin alpha [Source:HGNC Symbol;Acc:HGNC:30685]	0.495323	5.69143	6.01711	0.0263453	0.232194
ZCCHC24	ZCCHC24	zinc finger CCHC-type containing 24 [Source:HGNC Symbol;Acc:HGNC:26911]	0.310063	7.28638	6.01485	0.0263695	0.232194
RAI2	RAI2	retinoic acid induced 2 [Source:HGNC Symbol;Acc:HGNC:9835]	-0.505179	4.97493	6.01235	0.0263962	0.232194
IWS1	IWS1	interacts with SUPT6H, CTD assembly factor 1 [Source:HGNC Symbol;Acc:HGNC:25467]	-0.372354	5.07665	6.01157	0.0264046	0.232194
ITGB1BP2	ITGB1BP2	integrin subunit beta 1 binding protein 2 [Source:HGNC Symbol;Acc:HGNC:6154]	-1.42567	3.5376	6.0441	0.0264083	0.232194
MFF	MFF	mitochondrial fission factor [Source:HGNC Symbol;Acc:HGNC:24858]	-0.316191	5.63058	6.01044	0.0264167	0.232194
CALD1	CALD1	caldesmon 1 [Source:HGNC Symbol;Acc:HGNC:1441]	0.673322	9.99444	6.00538	0.026471	0.23254
MAMDC2	MAMDC2	MAM domain containing 2 [Source:HGNC Symbol;Acc:HGNC:23673]	0.771435	6.72059	6.0001	0.0265276	0.232907
PORCN	PORCN	porcupine O-acyltransferase [Source:HGNC Symbol;Acc:HGNC:17652]	0.390934	3.92331	5.99745	0.0265561	0.233022
EML3	EML3	EMAP like 3 [Source:HGNC Symbol;Acc:HGNC:26666]	0.356292	6.36178	5.99611	0.0265706	0.233022
SERPINB6	NA	NA	-0.523733	6.43604	5.99027	0.0266337	0.233444
HDAC11	HDAC11	histone deacetylase 11 [Source:HGNC Symbol;Acc:HGNC:19086]	-0.764961	4.20454	5.98484	0.0266925	0.233674
KCNIP2	KCNIP2	potassium voltage-gated channel interacting protein 2 [Source:HGNC Symbol;Acc:HGNC:15522]	-2.22144	6.08695	6.03455	0.0266966	0.233674
ID3	ID3	inhibitor of DNA binding 3 [Source:HGNC Symbol;Acc:HGNC:5362]	0.518206	7.97955	5.98371	0.0267047	0.233674
PPP2R3A	PPP2R3A	protein phosphatase 2 regulatory subunit B''alpha [Source:HGNC Symbol;Acc:HGNC:9307]	-0.660346	5.31466	5.97898	0.0267561	0.233862
COX4I1	COX4I1	cytochrome c oxidase subunit 4I1 [Source:HGNC Symbol;Acc:HGNC:2265]	-0.918266	9.16023	5.9787	0.0267591	0.233862
ENTREP3	ENTREP3	endosomal transmembrane epsin interactor 3 [Source:HGNC Symbol;Acc:HGNC:1233]	0.356703	5.6591	5.97759	0.0267712	0.233862
ABL1	ABL1	ABL proto-oncogene 1, non-receptor tyrosine kinase [Source:HGNC Symbol;Acc:HGNC:76]	0.318441	6.96528	5.97354	0.0268152	0.234116
FBXO27	FBXO27	F-box protein 27 [Source:HGNC Symbol;Acc:HGNC:18753]	0.449977	5.06701	5.96962	0.0268579	0.234295
NDUFAF6	NDUFAF6	NADH:ubiquinone oxidoreductase complex assembly factor 6 [Source:HGNC Symbol;Acc:HGNC:28625]	-0.445588	3.36887	5.96759	0.0268801	0.234295
KIF26A	NA	NA	-0.658354	4.16895	5.96755	0.0268806	0.234295
LOC108176480	NA	NA	0.675169	9.43829	5.96033	0.0269596	0.234852
NUP62CL	NA	NA	-0.650665	1.70167	5.95735	0.0269923	0.234897
LOC100349036	NA	NA	-1.36677	0.289697	5.95659	0.0270006	0.234897
MCL1	MCL1	MCL1 apoptosis regulator, BCL2 family member [Source:HGNC Symbol;Acc:HGNC:6943]	0.479133	7.45564	5.95438	0.0270249	0.234897
LOC127485310	NA	NA	0.723921	2.13923	5.9523	0.0270478	0.234897
EFCC1	EFCC1	EF-hand and coiled-coil domain containing 1 [Source:HGNC Symbol;Acc:HGNC:25692]	-0.562034	2.29381	5.95212	0.0270497	0.234897
GPR37	GPR37	G protein-coupled receptor 37 [Source:HGNC Symbol;Acc:HGNC:4494]	-1.20988	1.48531	5.95164	0.027055	0.234897
MTCL1	MTCL1	microtubule crosslinking factor 1 [Source:HGNC Symbol;Acc:HGNC:29121]	0.489473	2.72174	5.94841	0.0270907	0.235077
CD1D	CD1A	CD1a molecule [Source:HGNC Symbol;Acc:HGNC:1634]	-1.30039	5.0101	5.98587	0.0271484	0.235198
ZNF652	ZNF652	zinc finger protein 652 [Source:HGNC Symbol;Acc:HGNC:29147]	0.301017	5.79107	5.94296	0.0271508	0.235198
RDH14	RDH14	retinol dehydrogenase 14 [Source:HGNC Symbol;Acc:HGNC:19979]	-0.328491	4.49526	5.94188	0.0271627	0.235198
TEP1	TEP1	telomerase associated protein 1 [Source:HGNC Symbol;Acc:HGNC:11726]	0.349975	4.86082	5.93942	0.0271899	0.235198
COL14A1	COL14A1	collagen type XIV alpha 1 chain [Source:HGNC Symbol;Acc:HGNC:2191]	0.520158	9.61193	5.93914	0.027193	0.235198
LOC103351904	NA	NA	-0.443474	3.20602	5.93896	0.027195	0.235198
CDHR4	CDHR4	cadherin related family member 4 [Source:HGNC Symbol;Acc:HGNC:34527]	-1.38031	-0.605568	5.93686	0.0272183	0.23527
FRRS1	FRRS1	ferric chelate reductase 1 [Source:HGNC Symbol;Acc:HGNC:27622]	-1.03229	0.653379	5.93501	0.0272388	0.235317
CARNS1	NA	NA	-1.18169	3.75672	5.95002	0.0272769	0.235516
CCND3	CCND3	cyclin D3 [Source:HGNC Symbol;Acc:HGNC:1585]	0.325161	5.91601	5.9297	0.0272978	0.23553
RNF8	RNF8	ring finger protein 8 [Source:HGNC Symbol;Acc:HGNC:10071]	-0.415495	4.16129	5.92872	0.0273087	0.23553
INPP5J	NA	NA	-1.55366	-0.457543	5.92419	0.0273592	0.235835
HIGD2A	NA	NA	-0.864726	4.46112	5.91675	0.0274616	0.236347
OXCT1	OXCT1	3-oxoacid CoA-transferase 1 [Source:HGNC Symbol;Acc:HGNC:8527]	-0.775985	7.99699	5.91377	0.0274756	0.236347
LOC127493588	NA	NA	1.14124	1.12193	5.91363	0.0274772	0.236347
GRAMD1A	NA	NA	0.299961	4.96531	5.91346	0.0274791	0.236347
ZNF48	ZNF48	zinc finger protein 48 [Source:HGNC Symbol;Acc:HGNC:13114]	0.308506	5.54502	5.90038	0.027626	0.237393
NAGK	NAGK	N-acetylglucosamine kinase [Source:HGNC Symbol;Acc:HGNC:17174]	0.424195	5.50773	5.89939	0.0276373	0.237393
ADCY8	ADCY8	adenylate cyclase 8 [Source:HGNC Symbol;Acc:HGNC:239]	1.19033	-0.0507312	5.8986	0.0276462	0.237393
PCOLCE2	PCOLCE2	procollagen C-endopeptidase enhancer 2 [Source:HGNC Symbol;Acc:HGNC:8739]	0.384607	8.90727	5.89396	0.0276985	0.237705
BLTP3A	BLTP3A	bridge-like lipid transfer protein family member 3A [Source:HGNC Symbol;Acc:HGNC:21216]	-0.620408	4.64723	5.89205	0.0277202	0.237705
WDR41	NA	NA	-0.514512	5.1948	5.89134	0.0277282	0.237705
MRPL2	MRPL2	mitochondrial ribosomal protein L2 [Source:HGNC Symbol;Acc:HGNC:14056]	-0.585779	4.22843	5.88952	0.0277489	0.237752
ATL3	ATL3	atlastin GTPase 3 [Source:HGNC Symbol;Acc:HGNC:24526]	0.45796	7.47795	5.88575	0.0277916	0.237987
ARAP1	NA	NA	0.364123	6.48477	5.88344	0.0278179	0.238025
LOC100344258	NA	NA	-0.989411	1.20395	5.88268	0.0278264	0.238025
FAM83D	NA	NA	1.07674	2.28971	5.87662	0.0278955	0.238359
ETS2	ETS2	ETS proto-oncogene 2, transcription factor [Source:HGNC Symbol;Acc:HGNC:3489]	0.41365	6.11776	5.87658	0.027896	0.238359
C1QBP	NA	NA	-0.630543	5.95049	5.87417	0.0279234	0.238463
MBTPS1	MBTPS1	membrane bound transcription factor peptidase, site 1 [Source:HGNC Symbol;Acc:HGNC:15456]	0.327167	6.66105	5.86879	0.027985	0.238858
CLIP3	CLIP3	CAP-Gly domain containing linker protein 3 [Source:HGNC Symbol;Acc:HGNC:24314]	0.382278	5.90322	5.86571	0.0280202	0.239029
KCNE3	NA	NA	-1.11751	2.55174	5.86183	0.0280647	0.239277
CHTF18	NA	NA	0.671423	3.34601	5.85533	0.0281394	0.239601
METTL24	METTL24	methyltransferase like 24 [Source:HGNC Symbol;Acc:HGNC:21566]	0.451665	3.51275	5.85415	0.028153	0.239601
ROBO2	ROBO2	roundabout guidance receptor 2 [Source:HGNC Symbol;Acc:HGNC:10250]	1.22619	2.46256	5.85362	0.0281592	0.239601
NOSTRIN	NOSTRIN	nitric oxide synthase trafficking [Source:HGNC Symbol;Acc:HGNC:20203]	-1.39572	0.739135	5.8532	0.028164	0.239601
LOC103351311	NA	NA	-0.571438	1.86044	5.85129	0.028186	0.239658
GYPC	NA	NA	-0.637483	6.44479	5.84876	0.0282152	0.239776
PARM1	PARM1	prostate androgen-regulated mucin-like protein 1 [Source:HGNC Symbol;Acc:HGNC:24536]	-1.76975	7.43247	5.89237	0.0282665	0.239934
SYNC	SYNC	syncoilin, intermediate filament protein [Source:HGNC Symbol;Acc:HGNC:28897]	0.857307	4.22223	5.84573	0.0282698	0.239934
MAPRE3	MAPRE3	microtubule associated protein RP/EB family member 3 [Source:HGNC Symbol;Acc:HGNC:6892]	-0.365739	5.88965	5.84074	0.0283081	0.239934
PSME1	PSME1	proteasome activator subunit 1 [Source:HGNC Symbol;Acc:HGNC:9568]	-0.414573	6.17251	5.84029	0.0283133	0.239934
TIPARP	TIPARP	TCDD inducible poly(ADP-ribose) polymerase [Source:HGNC Symbol;Acc:HGNC:23696]	-0.493099	3.8928	5.84011	0.0283153	0.239934
CPNE2	CPNE2	copine 2 [Source:HGNC Symbol;Acc:HGNC:2315]	0.348109	5.46038	5.8392	0.028326	0.239934
LOC108178648	NA	NA	-1.37847	0.761716	5.83733	0.0283477	0.239988
LOC100352880	NA	NA	-1.26758	4.93935	5.874	0.0283867	0.240188
NKPD1	NA	NA	-0.939882	0.928021	5.82737	0.0284636	0.240661
VEZT	VEZT	vezatin, adherens junctions transmembrane protein [Source:HGNC Symbol;Acc:HGNC:18258]	-0.309478	4.75864	5.82268	0.0285184	0.240661
USP2	USP2	ubiquitin specific peptidase 2 [Source:HGNC Symbol;Acc:HGNC:12618]	-1.0879	2.57806	5.8222	0.028524	0.240661
ERO1A	ERO1A	endoplasmic reticulum oxidoreductase 1 alpha [Source:HGNC Symbol;Acc:HGNC:13280]	0.297953	5.91286	5.82064	0.0285423	0.240661
PGF	PGF	placental growth factor [Source:HGNC Symbol;Acc:HGNC:8893]	-0.87994	4.3051	5.82142	0.0285528	0.240661
LOC100354137	NA	NA	-0.389302	4.11694	5.81823	0.0285706	0.240661
GSG1	GSG1	germ cell associated 1 [Source:HGNC Symbol;Acc:HGNC:19716]	1.85155	-0.147936	5.81742	0.02858	0.240661
ARPC5L	ARPC5L	actin related protein 2/3 complex subunit 5 like [Source:HGNC Symbol;Acc:HGNC:23366]	-0.59192	4.95483	5.8156	0.0286014	0.240661
AGO1	AGO1	argonaute RISC component 1 [Source:HGNC Symbol;Acc:HGNC:3262]	0.38967	5.36786	5.81491	0.0286095	0.240661
STBD1	STBD1	starch binding domain 1 [Source:HGNC Symbol;Acc:HGNC:24854]	0.498447	4.50632	5.81385	0.0286219	0.240661
COQ2	COQ2	coenzyme Q2, polyprenyltransferase [Source:HGNC Symbol;Acc:HGNC:25223]	-0.463332	3.69411	5.81361	0.0286247	0.240661
LOC127489992	NA	NA	-1.0795	1.43685	5.81253	0.0286374	0.240661
CHURC1	NA	NA	-0.527348	4.61412	5.81207	0.0286428	0.240661
GFPT1	GFPT1	glutamine--fructose-6-phosphate transaminase 1 [Source:HGNC Symbol;Acc:HGNC:4241]	0.49434	6.12836	5.80198	0.0287617	0.241531
LOC103352262	NA	NA	-1.84055	0.47962	5.79773	0.028812	0.241823
NMNAT1	NA	NA	-0.56808	2.95168	5.79453	0.0288499	0.241856
IRF4	IRF4	interferon regulatory factor 4 [Source:HGNC Symbol;Acc:HGNC:6119]	-1.14091	0.747101	5.79408	0.0288552	0.241856
ZNF703	NA	NA	0.761067	1.66983	5.79347	0.0288624	0.241856
FZD7	FZD7	frizzled class receptor 7 [Source:HGNC Symbol;Acc:HGNC:4045]	0.440135	4.86349	5.79131	0.028888	0.241941
ARHGEF4	NA	NA	-0.8769	0.557791	5.78914	0.0289138	0.241949
GSTO1	GSTO1	glutathione S-transferase omega 1 [Source:HGNC Symbol;Acc:HGNC:13312]	-0.427999	5.35799	5.78862	0.02892	0.241949
P4HB	NA	NA	0.436655	8.41198	5.77741	0.0290536	0.242911
PCDH19	PCDH19	protocadherin 19 [Source:HGNC Symbol;Acc:HGNC:14270]	-0.75899	2.45374	5.77545	0.029077	0.242911
LOC100358177	NA	NA	-0.407858	5.10853	5.77507	0.0290816	0.242911
COL1A2	COL1A2	collagen type I alpha 2 chain [Source:HGNC Symbol;Acc:HGNC:2198]	0.84225	11.4706	5.76617	0.0291883	0.243495
CXCL12	NA	NA	-0.606532	5.81674	5.76607	0.0291895	0.243495
KIF1A	NA	NA	-0.750616	4.73747	5.76534	0.0291983	0.243495
DIAPH2	DIAPH2	diaphanous related formin 2 [Source:HGNC Symbol;Acc:HGNC:2877]	0.718978	6.92351	5.75517	0.0293208	0.244387
PLOD2	PLOD2	procollagen-lysine,2-oxoglutarate 5-dioxygenase 2 [Source:HGNC Symbol;Acc:HGNC:9082]	0.649682	5.8293	5.7538	0.0293374	0.244395
LOC100353144	NA	NA	0.652595	4.70778	5.74832	0.0294036	0.244568
COPG1	COPG1	COPI coat complex subunit gamma 1 [Source:HGNC Symbol;Acc:HGNC:2236]	0.349002	7.15615	5.74589	0.0294331	0.244568
TRMT61A	TRMT61A	tRNA methyltransferase 61A [Source:HGNC Symbol;Acc:HGNC:23790]	0.346138	5.22193	5.74446	0.0294505	0.244568
GLS	GLS	glutaminase [Source:HGNC Symbol;Acc:HGNC:4331]	0.549328	7.08726	5.74416	0.0294541	0.244568
TM7SF3	TM7SF3	transmembrane 7 superfamily member 3 [Source:HGNC Symbol;Acc:HGNC:23049]	0.297142	5.63697	5.74253	0.0294739	0.244568
SFXN1	SFXN1	sideroflexin 1 [Source:HGNC Symbol;Acc:HGNC:16085]	0.415581	5.30596	5.74043	0.0294994	0.244568
LEKR1	LEKR1	leucine, glutamate and lysine rich 1 [Source:HGNC Symbol;Acc:HGNC:33765]	-1.2131	0.0486282	5.74017	0.0295026	0.244568
CFAP20	CFAP20	cilia and flagella associated protein 20 [Source:HGNC Symbol;Acc:HGNC:29523]	-0.434624	4.55516	5.73916	0.0295149	0.244568
LOC100353293	NA	NA	-0.28533	5.69665	5.73767	0.029533	0.244568
CCSER1	CCSER1	coiled-coil serine rich protein 1 [Source:HGNC Symbol;Acc:HGNC:29349]	0.706367	1.41993	5.73751	0.029535	0.244568
PRX	PRX	periaxin [Source:HGNC Symbol;Acc:HGNC:13797]	0.531767	3.15899	5.73721	0.0295386	0.244568
IP6K3	IP6K3	inositol hexakisphosphate kinase 3 [Source:HGNC Symbol;Acc:HGNC:17269]	-1.22001	2.52413	5.73661	0.0295459	0.244568
UPP1	UPP1	uridine phosphorylase 1 [Source:HGNC Symbol;Acc:HGNC:12576]	-0.983586	2.86684	5.73514	0.0295638	0.244586
COMMD1	COMMD1	copper metabolism domain containing 1 [Source:HGNC Symbol;Acc:HGNC:23024]	-0.456826	3.87173	5.72823	0.0296482	0.245154
LOC127486042	NA	NA	0.895056	2.17622	5.72403	0.0296996	0.245237
SOST	SOST	sclerostin [Source:HGNC Symbol;Acc:HGNC:13771]	1.01437	4.83239	5.75148	0.0297015	0.245237
HSF2	HSF2	heat shock transcription factor 2 [Source:HGNC Symbol;Acc:HGNC:5225]	-0.454678	3.73533	5.72333	0.0297082	0.245237
FGFR3	NA	NA	0.645961	1.11219	5.72229	0.029721	0.245237
LOC127487413	NA	NA	-0.666893	3.58734	5.72037	0.0297445	0.245302
HINT2	NA	NA	-0.718255	6.67512	5.71272	0.0298387	0.245892
LOC103347565	NA	NA	0.672264	2.99392	5.71092	0.0298609	0.245892
LARP4B	NA	NA	-0.457617	5.47982	5.71072	0.0298633	0.245892
SLC38A10	NA	NA	0.397242	8.0892	5.70813	0.0298953	0.245908
LOC127489609	NA	NA	2.10839	0.107522	5.70802	0.0298967	0.245908
LOC127490516	NA	NA	1.28479	-0.664534	5.70592	0.0299226	0.245992
FFAR4	FFAR4	free fatty acid receptor 4 [Source:HGNC Symbol;Acc:HGNC:19061]	0.73714	3.34679	5.69927	0.030005	0.246539
KEF51_p01	NA	NA	-0.901031	13.808	5.69447	0.0300646	0.24667
ADAMTS17	ADAMTS17	ADAM metallopeptidase with thrombospondin type 1 motif 17 [Source:HGNC Symbol;Acc:HGNC:17109]	0.887203	1.9762	5.69358	0.0300756	0.24667
SOBP	SOBP	sine oculis binding protein homolog [Source:HGNC Symbol;Acc:HGNC:29256]	0.445241	5.17339	5.6921	0.030094	0.24667
LOC100342021	NA	NA	-1.42762	0.815508	5.6917	0.030099	0.24667
CUL3	CUL3	cullin 3 [Source:HGNC Symbol;Acc:HGNC:2553]	-0.379523	5.46361	5.69058	0.030113	0.24667
LOC127486365	NA	NA	-0.601838	3.61513	5.68981	0.0301225	0.24667
SH3RF1	SH3RF1	SH3 domain containing ring finger 1 [Source:HGNC Symbol;Acc:HGNC:17650]	0.562332	4.24719	5.6891	0.0301314	0.24667
LOC100345732	NA	NA	-0.540133	5.77748	5.68678	0.0301603	0.246778
GNAI2	GNAI2	G protein subunit alpha i2 [Source:HGNC Symbol;Acc:HGNC:4385]	0.281106	8.24951	5.68293	0.0302084	0.247042
LOC103350141	NA	NA	-0.764033	1.75525	5.67942	0.0302524	0.247272
BRD3	BRD3	bromodomain containing 3 [Source:HGNC Symbol;Acc:HGNC:1104]	0.355212	5.03517	5.67584	0.0302972	0.247509
CRYAB	CRYAB	crystallin alpha B [Source:HGNC Symbol;Acc:HGNC:2389]	-1.21894	9.00987	5.69346	0.0303455	0.247695
LOC100355470	CD47	CD47 molecule [Source:HGNC Symbol;Acc:HGNC:1682]	-0.359115	5.62453	5.6715	0.0303517	0.247695
RBM20	RBM20	RNA binding motif protein 20 [Source:HGNC Symbol;Acc:HGNC:27424]	-1.54909	5.11942	5.71392	0.0303907	0.247884
COL1A1	COL1A1	collagen type I alpha 1 chain [Source:HGNC Symbol;Acc:HGNC:2197]	0.856273	11.6624	5.66625	0.0304178	0.247976
LOC100356572	NA	NA	-0.711264	6.25793	5.66337	0.0304541	0.248045
LOC100341037	NA	NA	0.434675	9.50004	5.66305	0.0304581	0.248045
LOC100345507	NA	NA	-2.58356	0.30031	5.66197	0.0305224	0.24844
ALDH1A1	ALDH1A1	aldehyde dehydrogenase 1 family member A1 [Source:HGNC Symbol;Acc:HGNC:402]	-0.40323	8.3605	5.65472	0.0305635	0.248528
GPR62	NA	NA	0.706474	3.97222	5.6546	0.030565	0.248528
ANO1	NA	NA	0.633767	7.291	5.64758	0.030654	0.249122
EHBP1L1	NA	NA	0.510805	7.95064	5.64617	0.030672	0.249138
LOC100350709	NA	NA	1.05393	2.77578	5.64417	0.0306975	0.249216
LOC100346169	SDHD	succinate dehydrogenase complex subunit D [Source:HGNC Symbol;Acc:HGNC:10683]	-0.721936	4.65214	5.64212	0.0307236	0.249298
PDGFRL	PDGFRL	platelet derived growth factor receptor like [Source:HGNC Symbol;Acc:HGNC:8805]	0.560247	6.9917	5.63934	0.030759	0.24937
HRH1	NA	NA	0.700108	2.48247	5.63795	0.0307767	0.24937
SNX29	SNX29	sorting nexin 29 [Source:HGNC Symbol;Acc:HGNC:30542]	0.363139	3.87612	5.63506	0.0308137	0.24937
TMED3	TMED3	transmembrane p24 trafficking protein 3 [Source:HGNC Symbol;Acc:HGNC:28889]	0.590869	6.89146	5.63277	0.030843	0.24937
KL	KL	klotho [Source:HGNC Symbol;Acc:HGNC:6344]	1.40221	2.62539	5.64174	0.030843	0.24937
TNRC18	TNRC18	trinucleotide repeat containing 18 [Source:HGNC Symbol;Acc:HGNC:11962]	0.797092	5.38773	5.63784	0.0308654	0.24937
SLC16A11	SLC16A11	solute carrier family 16 member 11 [Source:HGNC Symbol;Acc:HGNC:23093]	-1.02851	0.421703	5.63028	0.030875	0.24937
RAB11FIP5	RAB11FIP5	RAB11 family interacting protein 5 [Source:HGNC Symbol;Acc:HGNC:24845]	0.431491	6.82089	5.62961	0.0308835	0.24937
LZTS2	LZTS2	leucine zipper tumor suppressor 2 [Source:HGNC Symbol;Acc:HGNC:29381]	0.365506	7.30617	5.6295	0.030885	0.24937
TIMM8A	TIMM8A	translocase of inner mitochondrial membrane 8A [Source:HGNC Symbol;Acc:HGNC:11817]	-0.483189	3.67878	5.62895	0.030892	0.24937
CASP3	CASP3	caspase 3 [Source:HGNC Symbol;Acc:HGNC:1504]	0.563971	3.57051	5.624	0.0309555	0.249712
SULF1	SULF1	sulfatase 1 [Source:HGNC Symbol;Acc:HGNC:20391]	0.550596	5.66617	5.62146	0.0309883	0.249712
LOXL3	LOXL3	lysyl oxidase like 3 [Source:HGNC Symbol;Acc:HGNC:13869]	0.408966	6.36723	5.62083	0.0309963	0.249712
ZMPSTE24	ZMPSTE24	zinc metallopeptidase STE24 [Source:HGNC Symbol;Acc:HGNC:12877]	0.316877	5.11823	5.61937	0.0310151	0.249712
PPARGC1B	PPARGC1B	PPARG coactivator 1 beta [Source:HGNC Symbol;Acc:HGNC:30022]	-0.810803	3.51827	5.61921	0.0310172	0.249712
NFATC2IP	NFATC2IP	nuclear factor of activated T cells 2 interacting protein [Source:HGNC Symbol;Acc:HGNC:25906]	0.535838	3.74282	5.61819	0.0310303	0.249712
SLC12A4	SLC12A4	solute carrier family 12 member 4 [Source:HGNC Symbol;Acc:HGNC:10913]	0.278103	7.14598	5.61031	0.0311322	0.250403
LOC100357094	NA	NA	-0.759392	3.62558	5.59575	0.0313213	0.251795
STX2	STX2	syntaxin 2 [Source:HGNC Symbol;Acc:HGNC:3403]	0.342972	6.3712	5.58893	0.0314103	0.252381
POPDC2	POPDC2	popeye domain containing 2 [Source:HGNC Symbol;Acc:HGNC:17648]	-0.961263	6.31726	5.60534	0.0314804	0.252814
MEIS2	MEIS2	Meis homeobox 2 [Source:HGNC Symbol;Acc:HGNC:7001]	-0.342547	4.5142	5.58077	0.0315172	0.252849
UBAP2	UBAP2	ubiquitin associated protein 2 [Source:HGNC Symbol;Acc:HGNC:14185]	-0.662357	5.84836	5.58069	0.0315182	0.252849
LOC100339625	NA	NA	0.547038	6.8986	5.57853	0.0315466	0.252849
HEMK1	HEMK1	HemK methyltransferase family member 1 [Source:HGNC Symbol;Acc:HGNC:24923]	-0.330539	3.4845	5.57831	0.0315495	0.252849
RDH10	RDH10	retinol dehydrogenase 10 [Source:HGNC Symbol;Acc:HGNC:19975]	0.645275	4.16311	5.57076	0.0316489	0.253516
LOC100357281	NA	NA	1.61035	3.05045	5.59677	0.0316849	0.253674
JCHAIN	JCHAIN	joining chain of multimeric IgA and IgM [Source:HGNC Symbol;Acc:HGNC:5713]	-0.660977	3.77667	5.5634	0.0317462	0.253921
RIN1	NA	NA	0.640059	3.02451	5.56325	0.0317482	0.253921
LOC100353281	NA	NA	-0.509733	4.7512	5.56075	0.0317813	0.254055
LOC100356786	NA	NA	-2.8019	-0.926257	5.55406	0.0318702	0.254636
LOC127488978	NA	NA	-1.60841	1.53519	5.55166	0.0319021	0.254669
OLFM1	NA	NA	-0.646424	5.02778	5.55129	0.0319069	0.254669
FASTKD2	NA	NA	-0.486298	2.83616	5.5453	0.0319869	0.25514
KLHL42	KLHL42	kelch like family member 42 [Source:HGNC Symbol;Acc:HGNC:29252]	0.467829	4.44127	5.54442	0.0319986	0.25514
LOC100354303	NA	NA	-0.557493	2.90877	5.54061	0.0320495	0.25525
NFATC4	NFATC4	nuclear factor of activated T cells 4 [Source:HGNC Symbol;Acc:HGNC:7778]	0.430805	5.47882	5.53925	0.0320678	0.25525
LYSET	LYSET	lysosomal enzyme trafficking factor [Source:HGNC Symbol;Acc:HGNC:20218]	0.460521	3.62402	5.53884	0.0320733	0.25525
PRRC2B	PRRC2B	proline rich coiled-coil 2B [Source:HGNC Symbol;Acc:HGNC:28121]	0.374811	7.61292	5.53851	0.0320777	0.25525
MAFK	NA	NA	0.461648	5.68169	5.53544	0.0321188	0.255447
LOC100345217	NA	NA	-0.95077	3.87953	5.53443	0.032153	0.255494
TCF15	TCF15	transcription factor 15 [Source:HGNC Symbol;Acc:HGNC:11627]	-1.05638	2.80575	5.53257	0.0321574	0.255494
LOC100347848	NA	NA	-0.881663	-0.398686	5.53051	0.032185	0.255583
TNFAIP8L3	TNFAIP8L3	TNF alpha induced protein 8 like 3 [Source:HGNC Symbol;Acc:HGNC:20620]	0.712847	3.22905	5.52664	0.0322372	0.255698
CRYBG1	CRYBG1	crystallin beta-gamma domain containing 1 [Source:HGNC Symbol;Acc:HGNC:356]	-0.481149	4.27327	5.52584	0.032248	0.255698
CNOT10	CNOT10	CCR4-NOT transcription complex subunit 10 [Source:HGNC Symbol;Acc:HGNC:23817]	-0.271989	4.55494	5.52579	0.0322486	0.255698
MN1	NA	NA	0.710505	5.51405	5.52135	0.0323292	0.255997
EGLN3	NA	NA	-0.664292	4.97127	5.5197	0.0323308	0.255997
EDEM3	EDEM3	ER degradation enhancing alpha-mannosidase like protein 3 [Source:HGNC Symbol;Acc:HGNC:16787]	0.497217	5.71254	5.51801	0.0323537	0.255997
FRY	FRY	FRY microtubule binding protein [Source:HGNC Symbol;Acc:HGNC:20367]	0.533887	6.15769	5.51795	0.0323546	0.255997
FMC1	NA	NA	-0.67515	4.65864	5.51694	0.0323682	0.255997
THBS3	THBS3	thrombospondin 3 [Source:HGNC Symbol;Acc:HGNC:11787]	0.337341	6.18455	5.51195	0.0324359	0.256314
CMC4	CMC4	C-X9-C motif containing 4 [Source:HGNC Symbol;Acc:HGNC:35428]	-0.580168	2.30834	5.51156	0.0324411	0.256314
DAP	NA	NA	0.517943	7.89907	5.50779	0.0324924	0.25659
NISCH	NISCH	nischarin [Source:HGNC Symbol;Acc:HGNC:18006]	0.236548	6.95786	5.50372	0.0325477	0.256701
TESK2	TESK2	testis associated actin remodelling kinase 2 [Source:HGNC Symbol;Acc:HGNC:11732]	0.736317	2.86688	5.50371	0.0325478	0.256701
IPCEF1	IPCEF1	interaction protein for cytohesin exchange factors 1 [Source:HGNC Symbol;Acc:HGNC:21204]	-0.791941	2.11049	5.50313	0.0325558	0.256701
LOC100350549	NA	NA	-0.409444	2.98085	5.49867	0.0326166	0.256895
MECR	MECR	mitochondrial trans-2-enoyl-CoA reductase [Source:HGNC Symbol;Acc:HGNC:19691]	-0.725723	4.73571	5.49778	0.0326288	0.256895
CNTNAP1	CNTNAP1	contactin associated protein 1 [Source:HGNC Symbol;Acc:HGNC:8011]	-0.5733	3.40653	5.4972	0.0326367	0.256895
RNF2	RNF2	ring finger protein 2 [Source:HGNC Symbol;Acc:HGNC:10061]	0.63135	3.89072	5.49651	0.0326462	0.256895
LOC100337783	NA	NA	0.405085	6.78079	5.49493	0.0326678	0.256936
KRCC1	KRCC1	lysine rich coiled-coil 1 [Source:HGNC Symbol;Acc:HGNC:28039]	-0.403076	5.12923	5.4896	0.0327408	0.257381
TMEM116	TMEM116	transmembrane protein 116 [Source:HGNC Symbol;Acc:HGNC:25084]	-1.22541	0.297404	5.48604	0.0327897	0.257635
NACC2	NA	NA	0.731848	3.81729	5.48369	0.032822	0.25776
ZC3H14	ZC3H14	zinc finger CCCH-type containing 14 [Source:HGNC Symbol;Acc:HGNC:20509]	0.412646	4.86921	5.48238	0.03284	0.257772
SLC1A1	SLC1A1	solute carrier family 1 member 1 [Source:HGNC Symbol;Acc:HGNC:10939]	-1.17972	2.71779	5.48072	0.0328634	0.257826
ENTPD7	ENTPD7	ectonucleoside triphosphate diphosphohydrolase 7 [Source:HGNC Symbol;Acc:HGNC:19745]	0.706388	1.84949	5.47707	0.0329132	0.258042
SLC4A3	SLC4A3	solute carrier family 4 member 3 [Source:HGNC Symbol;Acc:HGNC:11029]	-0.470088	5.71896	5.4761	0.0329266	0.258042
LOC127483764	NA	NA	0.777128	0.586747	5.4751	0.0329404	0.258042
MCM6	LCT	lactase [Source:HGNC Symbol;Acc:HGNC:6530]	0.710795	3.20893	5.47154	0.0329896	0.258245
WNK4	WNK4	WNK lysine deficient protein kinase 4 [Source:HGNC Symbol;Acc:HGNC:14544]	-0.524521	4.19481	5.46948	0.0330182	0.258245
TFCP2L1	TFCP2L1	transcription factor CP2 like 1 [Source:HGNC Symbol;Acc:HGNC:17925]	1.3573	2.3393	5.47018	0.0330294	0.258245
ELAC2	NA	NA	-0.36841	4.26548	5.46664	0.0330575	0.258245
[truncated: 13,629 more rows]

## Sheet: Treatment(4w) vs Control
O.Cuniculus Gene Name	H.Sapiens Ortholog Name	H.Sapiens Ortholog Description	logFC	logCPM	F	PValue	FDR
LOC100341783	NA	NA	-5.38883	6.37457	53.3216	2.60048e-06	0.0197866
SOCS3	NA	NA	2.04071	4.61201	43.0702	7.39676e-06	0.0197866
ATP8B4	ATP8B4	ATPase phospholipid transporting 8B4 (putative) [Source:HGNC Symbol;Acc:HGNC:13536]	2.66871	1.64217	40.3717	1.07611e-05	0.0197866
TNN	TNN	tenascin N [Source:HGNC Symbol;Acc:HGNC:22942]	2.88842	2.57002	39.9082	1.14983e-05	0.0197866
PLAUR	PLAUR	plasminogen activator, urokinase receptor [Source:HGNC Symbol;Acc:HGNC:9053]	2.59194	2.84194	39.6383	1.19538e-05	0.0197866
FCGR1A	NA	NA	2.23557	3.84205	39.5528	1.21023e-05	0.0197866
C3AR1	C3AR1	complement C3a receptor 1 [Source:HGNC Symbol;Acc:HGNC:1319]	2.08493	2.30922	38.9421	1.32256e-05	0.0197866
IRF5	IRF5	interferon regulatory factor 5 [Source:HGNC Symbol;Acc:HGNC:6120]	2.59153	4.26422	38.6894	1.41087e-05	0.0197866
PRR15	PRR15	proline rich 15 [Source:HGNC Symbol;Acc:HGNC:22310]	2.24042	1.8546	38.4689	1.41773e-05	0.0197866
LAT2	NA	NA	2.26197	4.08336	38.2019	1.47482e-05	0.0197866
NFAM1	NA	NA	2.65908	2.79881	37.9408	1.53317e-05	0.0197866
CORO1A	CORO1A	coronin 1A [Source:HGNC Symbol;Acc:HGNC:2252]	2.59322	4.35747	38.1543	1.53943e-05	0.0197866
SLC37A2	CCDC15	coiled-coil domain containing 15 [Source:HGNC Symbol;Acc:HGNC:25798]	2.80855	4.47287	37.1078	1.87952e-05	0.0197866
AOAH	AOAH	acyloxyacyl hydrolase [Source:HGNC Symbol;Acc:HGNC:548]	2.69739	3.44547	35.6048	2.2021e-05	0.0197866
CTSE	CTSE	cathepsin E [Source:HGNC Symbol;Acc:HGNC:2530]	3.64811	3.15507	34.9221	2.5919e-05	0.0197866
MSR1	MSR1	macrophage scavenger receptor 1 [Source:HGNC Symbol;Acc:HGNC:7376]	3.36456	2.49365	34.305	2.68838e-05	0.0197866
SELPLG	NA	NA	2.47799	4.07757	34.3304	2.71992e-05	0.0197866
DOCK2	NA	NA	1.99395	2.91789	34.0275	2.81095e-05	0.0197866
PTK2B	PTK2B	protein tyrosine kinase 2 beta [Source:HGNC Symbol;Acc:HGNC:9612]	1.45891	3.36566	33.6231	3.00108e-05	0.0197866
C5AR1	C5AR1	complement C5a receptor 1 [Source:HGNC Symbol;Acc:HGNC:1338]	2.44493	4.43218	33.8524	3.0119e-05	0.0197866
CD22	CD22	CD22 molecule [Source:HGNC Symbol;Acc:HGNC:1643]	2.58473	1.59813	33.4443	3.08973e-05	0.0197866
LOC100337909	NA	NA	2.70998	4.42595	33.6141	3.23883e-05	0.0197866
HAVCR1	HAVCR1	hepatitis A virus cellular receptor 1 [Source:HGNC Symbol;Acc:HGNC:17866]	2.78592	3.41398	33.1006	3.29571e-05	0.0197866
PYCR3	NA	NA	1.3137	3.2402	33.0355	3.30374e-05	0.0197866
PTPN6	PTPN6	protein tyrosine phosphatase non-receptor type 6 [Source:HGNC Symbol;Acc:HGNC:9658]	2.15326	4.18284	32.9984	3.34242e-05	0.0197866
MYO1F	MYO1F	myosin IF [Source:HGNC Symbol;Acc:HGNC:7600]	2.76076	4.014	32.9105	3.57512e-05	0.0197866
PTAFR	PTAFR	platelet activating factor receptor [Source:HGNC Symbol;Acc:HGNC:9582]	2.88778	2.61433	32.3549	3.69819e-05	0.0197866
NCKAP1L	NCKAP1L	NCK associated protein 1 like [Source:HGNC Symbol;Acc:HGNC:4862]	2.02302	4.53439	32.2978	3.75398e-05	0.0197866
RPS6KA1	RPS6KA1	ribosomal protein S6 kinase A1 [Source:HGNC Symbol;Acc:HGNC:10430]	1.92143	3.26988	32.1352	3.8367e-05	0.0197866
HCK	HCK	HCK proto-oncogene, Src family tyrosine kinase [Source:HGNC Symbol;Acc:HGNC:4840]	2.72847	2.04165	31.6287	4.1789e-05	0.0197866
LOC100349504	NA	NA	4.51102	-0.0375091	31.483	4.28366e-05	0.0197866
TNFAIP8L2	TNFAIP8L2	TNF alpha induced protein 8 like 2 [Source:HGNC Symbol;Acc:HGNC:26277]	2.13884	2.64664	30.8936	4.7387e-05	0.0197866
NEK2	NEK2	NIMA related kinase 2 [Source:HGNC Symbol;Acc:HGNC:7745]	3.41378	0.746325	30.6991	4.90066e-05	0.0197866
LOC127490290	NA	NA	3.70634	-0.62081	30.3487	5.20844e-05	0.0197866
ERCC6L	ERCC6L	ERCC excision repair 6 like, spindle assembly checkpoint helicase [Source:HGNC Symbol;Acc:HGNC:20794]	2.46202	-0.220201	30.22	5.32689e-05	0.0197866
HCLS1	HCLS1	hematopoietic cell-specific Lyn substrate 1 [Source:HGNC Symbol;Acc:HGNC:4844]	2.51644	4.4932	30.5076	5.4235e-05	0.0197866
SPI1	NA	NA	2.48316	4.23259	30.4156	5.42583e-05	0.0197866
ARPC1B	ARPC1B	actin related protein 2/3 complex subunit 1B [Source:HGNC Symbol;Acc:HGNC:704]	1.63402	7.72591	30.0607	5.47779e-05	0.0197866
CD14	CD14	CD14 molecule [Source:HGNC Symbol;Acc:HGNC:1628]	2.61921	5.68467	30.5927	5.53595e-05	0.0197866
DOK2	NA	NA	2.0802	3.38392	29.7028	5.83482e-05	0.0197866
LOC127486108	NA	NA	3.89951	1.18318	29.6498	5.88987e-05	0.0197866
LOC103347778	NA	NA	2.27227	5.67985	30.0966	5.90667e-05	0.0197866
LOC127492111	NA	NA	3.80256	0.149174	29.4466	6.10642e-05	0.0197866
TREM2	TREM2	triggering receptor expressed on myeloid cells 2 [Source:HGNC Symbol;Acc:HGNC:17761]	3.08001	5.17922	30.1337	6.13777e-05	0.0197866
TIMP1	TIMP1	TIMP metallopeptidase inhibitor 1 [Source:HGNC Symbol;Acc:HGNC:11820]	1.80582	8.97942	29.2206	6.35802e-05	0.0197866
ITGB2	ITGB2	integrin subunit beta 2 [Source:HGNC Symbol;Acc:HGNC:6155]	3.30839	5.60529	29.9907	6.38208e-05	0.0197866
NPPA	NPPA	natriuretic peptide A [Source:HGNC Symbol;Acc:HGNC:7939]	9.5689	9.0261	29.9103	6.47071e-05	0.0197866
LOC103346838	NA	NA	1.2559	7.68187	29.0171	6.59458e-05	0.0197866
FAM111A	FAM111A	FAM111 trypsin like peptidase A [Source:HGNC Symbol;Acc:HGNC:24725]	1.45487	4.28828	28.9247	6.70524e-05	0.0197866
CLEC5A	CLEC5A	C-type lectin domain containing 5A [Source:HGNC Symbol;Acc:HGNC:2054]	3.49088	2.62867	28.6247	7.27016e-05	0.0197866
CTSS	CTSS	cathepsin S [Source:HGNC Symbol;Acc:HGNC:2545]	2.02417	5.79049	28.7232	7.30831e-05	0.0197866
LOC103346857	NA	NA	2.73642	2.54559	28.2605	7.56568e-05	0.0197866
SBNO2	NA	NA	0.904246	5.22118	28.2551	7.57318e-05	0.0197866
IL10RA	IL10RA	interleukin 10 receptor subunit alpha [Source:HGNC Symbol;Acc:HGNC:5964]	2.28599	3.58169	28.1818	7.71219e-05	0.0197866
AIF1	AIF1	allograft inflammatory factor 1 [Source:HGNC Symbol;Acc:HGNC:352]	2.01678	4.45243	28.1343	7.83141e-05	0.0197866
SIGLEC15	SIGLEC15	sialic acid binding Ig like lectin 15 [Source:HGNC Symbol;Acc:HGNC:27596]	3.02652	2.65424	28.0067	7.96429e-05	0.0197866
CCR6	CCR6	C-C motif chemokine receptor 6 [Source:HGNC Symbol;Acc:HGNC:1607]	4.69777	0.625143	27.9459	8.0162e-05	0.0197866
MATK	NA	NA	2.94467	3.14384	28.0319	8.10356e-05	0.0197866
CEBPB	CEBPB	CCAAT enhancer binding protein beta [Source:HGNC Symbol;Acc:HGNC:1834]	0.914315	5.71532	27.8843	8.10787e-05	0.0197866
KCNE4	KCNE4	potassium voltage-gated channel subfamily E regulatory subunit 4 [Source:HGNC Symbol;Acc:HGNC:6244]	1.52289	4.84126	27.819	8.20644e-05	0.0197866
BUB1	BUB1	BUB1 mitotic checkpoint serine/threonine kinase [Source:HGNC Symbol;Acc:HGNC:1148]	2.53773	0.414406	27.7221	8.35514e-05	0.0197866
FOXM1	FOXM1	forkhead box M1 [Source:HGNC Symbol;Acc:HGNC:3818]	2.4141	1.62353	27.7074	8.37797e-05	0.0197866
TUBA1C	TUBA1C	tubulin alpha 1c [Source:HGNC Symbol;Acc:HGNC:20768]	1.08835	5.54467	27.6572	8.45647e-05	0.0197866
BLNK	BLNK	B cell linker [Source:HGNC Symbol;Acc:HGNC:14211]	2.22399	2.71127	27.652	8.46467e-05	0.0197866
RARA	RARA	retinoic acid receptor alpha [Source:HGNC Symbol;Acc:HGNC:9864]	0.779132	5.5931	27.5858	8.56958e-05	0.0197866
IL1RN	IL1RN	interleukin 1 receptor antagonist [Source:HGNC Symbol;Acc:HGNC:6000]	3.31511	3.29028	27.9569	8.63101e-05	0.0197866
SYK	SYK	spleen associated tyrosine kinase [Source:HGNC Symbol;Acc:HGNC:11491]	2.33135	2.90413	27.4661	8.76286e-05	0.0197866
SUSD3	NA	NA	2.05514	2.40098	27.432	8.81896e-05	0.0197866
MPEG1	MPEG1	macrophage expressed 1 [Source:HGNC Symbol;Acc:HGNC:29619]	3.0223	5.66169	28.0321	8.94353e-05	0.0197866
LOC100348666	CD200R1//CD200R1L	CD200 receptor 1 [Source:HGNC Symbol;Acc:HGNC:24235]//CD200 receptor 1 like [Source:HGNC Symbol;Acc:HGNC:24665]	4.39094	-0.0357442	27.1016	9.38293e-05	0.0197866
CD68	CD68	CD68 molecule [Source:HGNC Symbol;Acc:HGNC:1693]	2.05821	5.45815	27.3479	9.40555e-05	0.0197866
PARVG	NA	NA	2.57423	1.68808	27.0451	9.48337e-05	0.0197866
LCP1	LCP1	lymphocyte cytosolic protein 1 [Source:HGNC Symbol;Acc:HGNC:6528]	2.7494	6.65421	27.5573	9.51563e-05	0.0197866
UCP2	UCP2	uncoupling protein 2 [Source:HGNC Symbol;Acc:HGNC:12518]	1.99937	5.62177	27.2036	9.66124e-05	0.0197866
SEMA4A	SEMA4A	semaphorin 4A [Source:HGNC Symbol;Acc:HGNC:10729]	1.6026	3.10501	26.9077	9.73289e-05	0.0197866
CD84	CD84	CD84 molecule [Source:HGNC Symbol;Acc:HGNC:1704]	2.4459	3.70094	26.993	9.7941e-05	0.0197866
SPHK1	SPHK1	sphingosine kinase 1 [Source:HGNC Symbol;Acc:HGNC:11240]	2.96554	2.7217	26.8002	9.97813e-05	0.0197866
ATP6V0D2	ATP6V0D2	ATPase H+ transporting V0 subunit d2 [Source:HGNC Symbol;Acc:HGNC:18266]	3.68712	2.37991	26.8971	9.99909e-05	0.0197866
BCL2A1	NA	NA	2.69137	4.14163	27.1144	0.000100847	0.0197866
CD48	NA	NA	2.10398	4.49026	26.7856	0.000102467	0.0197866
PRG4	NA	NA	2.71569	5.61477	27.1831	0.000102554	0.0197866
FCER1G	FCER1G	Fc epsilon receptor Ig [Source:HGNC Symbol;Acc:HGNC:3611]	2.49893	4.95116	26.991	0.000104909	0.0199942
PARP3	PARP3	poly(ADP-ribose) polymerase family member 3 [Source:HGNC Symbol;Acc:HGNC:273]	1.21568	4.96704	26.4453	0.000106283	0.0200119
ZNF710	ZNF710	zinc finger protein 710 [Source:HGNC Symbol;Acc:HGNC:25352]	0.796032	4.20131	26.2991	0.000109307	0.0203362
BIN2	BIN2	bridging integrator 2 [Source:HGNC Symbol;Acc:HGNC:1053]	2.04983	3.27839	25.9493	0.000116941	0.0205051
CD80	CD80	CD80 molecule [Source:HGNC Symbol;Acc:HGNC:1700]	2.76151	2.64358	25.9305	0.000117368	0.0205051
NCF4	NCF4	neutrophil cytosolic factor 4 [Source:HGNC Symbol;Acc:HGNC:7662]	2.01025	1.86527	25.8715	0.000118719	0.0205051
GMFG	NA	NA	1.90488	2.96822	25.8053	0.000120256	0.0205051
KIF18B	NA	NA	3.24314	0.693463	25.8032	0.000120307	0.0205051
LOC100009097	NA	NA	2.11643	5.40054	26.146	0.000120854	0.0205051
JUNB	NA	NA	1.51122	6.37589	25.7715	0.000121051	0.0205051
WDFY4	WDFY4	WDFY family member 4 [Source:HGNC Symbol;Acc:HGNC:29323]	2.04901	2.64428	25.6377	0.000124251	0.0205051
LOC100350957	CYP4F3	cytochrome P450 family 4 subfamily F member 3 [Source:HGNC Symbol;Acc:HGNC:2646]	3.98109	0.245855	25.6298	0.000124443	0.0205051
C13H1orf162	NA	NA	2.70651	2.67814	25.5665	0.000125994	0.0205051
LOC100347041	NA	NA	3.80565	3.67468	25.9741	0.000128893	0.0205051
RUNX1	RUNX1	RUNX family transcription factor 1 [Source:HGNC Symbol;Acc:HGNC:10471]	2.08447	4.43935	25.5787	0.000129135	0.0205051
CSF2RA	CSF2RA	colony stimulating factor 2 receptor subunit alpha [Source:HGNC Symbol;Acc:HGNC:2435]	2.4263	3.96225	25.6278	0.000130294	0.0205051
MCM6	LCT	lactase [Source:HGNC Symbol;Acc:HGNC:6530]	1.53696	3.20893	25.3173	0.000132311	0.0205051
MMP9	MMP9	matrix metallopeptidase 9 [Source:HGNC Symbol;Acc:HGNC:7176]	4.93403	3.98098	25.9348	0.000132421	0.0205051
TYROBP	TYROBP	transmembrane immune signaling adaptor TYROBP [Source:HGNC Symbol;Acc:HGNC:12449]	2.55856	5.7766	25.782	0.000132567	0.0205051
LST1	NA	NA	2.35907	2.46961	25.2719	0.0001335	0.0205051
ITGAX	ITGAX	integrin subunit alpha X [Source:HGNC Symbol;Acc:HGNC:6152]	4.15369	3.46408	25.813	0.000133832	0.0205051
CYBB	XK//CYBB	X-linked Kx blood group antigen, Kell and VPS13A binding protein [Source:HGNC Symbol;Acc:HGNC:12811]//cytochrome b-245 beta chain [Source:HGNC Symbol;Acc:HGNC:2578]	2.20591	4.5716	25.3923	0.000137658	0.0205478
LAPTM5	MATN1	matrilin 1 [Source:HGNC Symbol;Acc:HGNC:6907]	1.82923	7.54208	25.0779	0.000139309	0.0205478
LOC127489325	NA	NA	7.88762	6.14527	25.6451	0.000139908	0.0205478
SLC16A5	SLC16A5	solute carrier family 16 member 5 [Source:HGNC Symbol;Acc:HGNC:10926]	3.37943	-0.53423	25.029	0.000140073	0.0205478
PRKCB	PRKCB	protein kinase C beta [Source:HGNC Symbol;Acc:HGNC:9395]	1.62504	2.0335	25.0029	0.000140802	0.0205478
VSIG4	VSIG4	V-set and immunoglobulin domain containing 4 [Source:HGNC Symbol;Acc:HGNC:17032]	1.92029	5.51425	25.1407	0.000143265	0.0205478
INPP5D	INPP5D	inositol polyphosphate-5-phosphatase D [Source:HGNC Symbol;Acc:HGNC:6079]	1.48228	3.71037	24.8777	0.000144352	0.0205478
CENPA	CENPA	centromere protein A [Source:HGNC Symbol;Acc:HGNC:1851]	2.69105	1.54323	24.8045	0.000146473	0.0205478
LOC100345649	NA	NA	4.05376	2.56885	25.1134	0.000146652	0.0205478
CCL2	CCL2	C-C motif chemokine ligand 2 [Source:HGNC Symbol;Acc:HGNC:10618]	2.41972	2.79386	24.7608	0.000147757	0.0205478
LOC100339650	NA	NA	2.08227	2.47495	24.7191	0.000148995	0.0205478
CHIT1	CHIT1	chitinase 1 [Source:HGNC Symbol;Acc:HGNC:1936]	3.87065	4.56941	25.2533	0.000150811	0.0205478
POU2F2	POU2F2	POU class 2 homeobox 2 [Source:HGNC Symbol;Acc:HGNC:9213]	2.3152	3.34752	24.6063	0.000153031	0.0205478
GPR183	GPR183	G protein-coupled receptor 183 [Source:HGNC Symbol;Acc:HGNC:3128]	2.15442	2.56541	24.574	0.000153393	0.0205478
CCR5	CCR2	C-C motif chemokine receptor 2 [Source:HGNC Symbol;Acc:HGNC:1603]	3.10604	3.00721	24.7794	0.000153832	0.0205478
LOC127488978	NA	NA	2.80309	1.53519	24.3249	0.000161288	0.0213245
SLC46A1	SLC46A1	solute carrier family 46 member 1 [Source:HGNC Symbol;Acc:HGNC:30521]	2.44213	2.56736	24.2916	0.000162377	0.0213245
PKIB	PKIB	cAMP-dependent protein kinase inhibitor beta [Source:HGNC Symbol;Acc:HGNC:9018]	2.15491	1.57862	24.0699	0.000169848	0.0220322
PLEK2	PLEK2	pleckstrin 2 [Source:HGNC Symbol;Acc:HGNC:19238]	3.42734	1.0297	24.0487	0.000170584	0.0220322
NFKBIE	NFKBIE	NFKB inhibitor epsilon [Source:HGNC Symbol;Acc:HGNC:7799]	1.34467	3.18316	23.967	0.000173449	0.0221393
LOC100340939	NA	NA	2.42369	1.36421	23.9303	0.000174752	0.0221393
GMIP	GMIP	GEM interacting protein [Source:HGNC Symbol;Acc:HGNC:24852]	1.2662	3.48816	23.8503	0.000177632	0.0221393
HK3	HK3	hexokinase 3 [Source:HGNC Symbol;Acc:HGNC:4925]	2.51595	0.965262	23.819	0.000178777	0.0221393
MCP-1	NA	NA	2.92462	1.16009	23.791	0.000179806	0.0221393
GPR65	GPR65	G protein-coupled receptor 65 [Source:HGNC Symbol;Acc:HGNC:4517]	2.44486	1.36508	23.7881	0.000179913	0.0221393
TLR1	TLR1	toll like receptor 1 [Source:HGNC Symbol;Acc:HGNC:11847]	2.27714	1.77936	23.6476	0.00018518	0.0226093
CD72	NA	NA	3.13927	0.338337	23.595	0.000187198	0.0226785
FERMT3	NA	NA	2.21902	3.4283	23.5343	0.000190307	0.0228778
PLCB2	PLCB2	phospholipase C beta 2 [Source:HGNC Symbol;Acc:HGNC:9055]	2.11221	3.14515	23.3048	0.000198784	0.023324
ARHGAP30	ARHGAP30	Rho GTPase activating protein 30 [Source:HGNC Symbol;Acc:HGNC:27414]	2.02591	3.82745	23.2577	0.00020152	0.023324
LOC103347271	NA	NA	5.33402	2.5082	23.6326	0.000202221	0.023324
LOC100340313	NA	NA	2.50326	2.1398	23.208	0.000202823	0.023324
CD53	CD53	CD53 molecule [Source:HGNC Symbol;Acc:HGNC:1686]	1.94768	4.45462	23.3148	0.00020329	0.023324
KLRG1	KLRG1	killer cell lectin like receptor G1 [Source:HGNC Symbol;Acc:HGNC:6380]	3.76806	0.347205	23.1947	0.000203387	0.023324
TIFA	TIFA	TRAF interacting protein with forkhead associated domain [Source:HGNC Symbol;Acc:HGNC:19075]	0.863083	4.16163	23.1693	0.000204466	0.023324
XDH	XDH	xanthine dehydrogenase [Source:HGNC Symbol;Acc:HGNC:12805]	3.77279	-0.189602	22.9872	0.000212397	0.0239167
CIITA	CIITA	class II major histocompatibility complex transactivator [Source:HGNC Symbol;Acc:HGNC:7067]	2.1509	1.76512	22.9799	0.000212722	0.0239167
LOC127488977	NA	NA	3.72757	-0.187911	22.8823	0.000217127	0.0242375
GPNMB	GPNMB	glycoprotein nmb [Source:HGNC Symbol;Acc:HGNC:4462]	3.17382	6.60747	23.3517	0.00021952	0.0242494
SH2B3	SH2B3	SH2B adaptor protein 3 [Source:HGNC Symbol;Acc:HGNC:29605]	0.786833	5.14747	22.8125	0.000220336	0.0242494
LOC100352110	NA	NA	1.83673	2.54959	22.7723	0.00022221	0.0242846
SASH3	NA	NA	2.08503	2.51379	22.6762	0.000226762	0.0244668
ICAM1	ICAM1	intercellular adhesion molecule 1 [Source:HGNC Symbol;Acc:HGNC:5344]	1.18279	5.80172	22.6711	0.000227008	0.0244668
MILR1	NA	NA	2.6429	0.683367	22.5798	0.000231439	0.0247735
IGSF6	IGSF6	immunoglobulin superfamily member 6 [Source:HGNC Symbol;Acc:HGNC:5953]	2.86742	2.8252	22.6146	0.000234698	0.0247954
RHBDF2	RHBDF2	rhomboid 5 homolog 2 [Source:HGNC Symbol;Acc:HGNC:20788]	0.951305	4.31762	22.5024	0.000235267	0.0247954
LOC100125981	NA	NA	1.49064	4.75871	22.4797	0.000236404	0.0247954
IFNGR2	IFNGR2	interferon gamma receptor 2 [Source:HGNC Symbol;Acc:HGNC:5440]	0.989632	5.18771	22.4419	0.000238312	0.024829
ARHGAP9	ARHGAP9	Rho GTPase activating protein 9 [Source:HGNC Symbol;Acc:HGNC:14130]	1.80853	1.09593	22.1254	0.000254985	0.0263901
NOS2	NOS2	nitric oxide synthase 2 [Source:HGNC Symbol;Acc:HGNC:7873]	1.3895	3.08213	22.0378	0.000259829	0.0267146
DDIT4	DDIT4	DNA damage inducible transcript 4 [Source:HGNC Symbol;Acc:HGNC:24944]	1.63335	6.98726	22.0096	0.000262369	0.0267993
LOC100344175	NA	NA	-1.02691	2.1347	21.8445	0.000270891	0.0274616
CCL19	CCL19	C-C motif chemokine ligand 19 [Source:HGNC Symbol;Acc:HGNC:10617]	2.5425	1.98392	21.8194	0.000272366	0.0274616
PTPN18	PTPN18	protein tyrosine phosphatase non-receptor type 18 [Source:HGNC Symbol;Acc:HGNC:9649]	1.9248	2.338	21.7604	0.000275869	0.0276364
ABCC3	ABCC3	ATP binding cassette subfamily C member 3 [Source:HGNC Symbol;Acc:HGNC:54]	1.92323	2.94292	21.7235	0.000278084	0.0276809
LOC100350709	NA	NA	2.07987	2.77578	21.6391	0.000283235	0.0278629
ALOX5	ALOX5	arachidonate 5-lipoxygenase [Source:HGNC Symbol;Acc:HGNC:435]	1.40431	4.24546	21.6104	0.000285011	0.0278629
MYBL2	MYBL2	MYB proto-oncogene like 2 [Source:HGNC Symbol;Acc:HGNC:7548]	2.48056	0.169146	21.6063	0.000285262	0.0278629
LOC100350907	NA	NA	3.71955	2.00628	21.6048	0.000291763	0.0282877
SPC25	NA	NA	1.36725	1.76301	21.48	0.000293231	0.0282877
MAFB	MAFB	MAF bZIP transcription factor B [Source:HGNC Symbol;Acc:HGNC:6408]	1.30239	4.96771	21.4483	0.000295271	0.0283098
DRAM1	DRAM1	DNA damage regulated autophagy modulator 1 [Source:HGNC Symbol;Acc:HGNC:25645]	0.905207	4.84209	21.3165	0.000303923	0.0288132
KIF20A	KIF20A	kinesin family member 20A [Source:HGNC Symbol;Acc:HGNC:9787]	2.02191	2.22059	21.3122	0.000304209	0.0288132
HMOX1	HMOX1	heme oxygenase 1 [Source:HGNC Symbol;Acc:HGNC:5013]	1.72704	4.24665	21.2038	0.000312655	0.0294348
DOK3	DOK3	docking protein 3 [Source:HGNC Symbol;Acc:HGNC:24583]	2.46098	2.92216	21.1292	0.000317838	0.0296335
HRH1	NA	NA	-1.40075	2.48247	21.0867	0.000319709	0.0296335
PRSS53	PRSS53	serine protease 53 [Source:HGNC Symbol;Acc:HGNC:34407]	1.89367	3.2704	21.0761	0.000320454	0.0296335
TRIM14	TRIM14	tripartite motif containing 14 [Source:HGNC Symbol;Acc:HGNC:16283]	1.66173	2.21027	21.0105	0.000325143	0.029815
ARL11	ARL11	ADP ribosylation factor like GTPase 11 [Source:HGNC Symbol;Acc:HGNC:24046]	2.70226	1.49371	20.9954	0.000326233	0.029815
BIRC5	NA	NA	1.48984	2.19392	20.9207	0.000331686	0.0300802
RASSF5	RASSF5	Ras association domain family member 5 [Source:HGNC Symbol;Acc:HGNC:17609]	0.879943	3.26892	20.9031	0.000332984	0.0300802
CP	CP	ceruloplasmin [Source:HGNC Symbol;Acc:HGNC:2295]	2.28438	5.59042	21.1666	0.000338727	0.0304232
KNL1	KNL1	kinetochore scaffold 1 [Source:HGNC Symbol;Acc:HGNC:24054]	2.94722	0.511724	20.7856	0.000341811	0.0305247
MAP4K1	NA	NA	1.98363	1.82555	20.7517	0.000344405	0.0305816
FHL2	FHL2	four and a half LIM domains 2 [Source:HGNC Symbol;Acc:HGNC:3703]	-1.90976	6.86402	20.8012	0.000353284	0.0307712
KPNA2	KPNA2	karyopherin subunit alpha 2 [Source:HGNC Symbol;Acc:HGNC:6395]	0.970287	4.49363	20.6081	0.000355646	0.0307712
LOXL4	LOXL4	lysyl oxidase like 4 [Source:HGNC Symbol;Acc:HGNC:17171]	1.1945	3.92451	20.5856	0.000357442	0.0307712
SLC15A2	SLC15A2	solute carrier family 15 member 2 [Source:HGNC Symbol;Acc:HGNC:10921]	3.08958	2.07546	20.5829	0.000358885	0.0307712
LOC103347295	NA	NA	2.88698	0.306303	20.5639	0.000359186	0.0307712
LOC127488889	NA	NA	-1.76972	7.18876	20.6443	0.000359498	0.0307712
CD37	CD37	CD37 molecule [Source:HGNC Symbol;Acc:HGNC:1666]	1.60819	4.4419	20.565	0.000360323	0.0307712
LOC127482743	NA	NA	3.7319	-0.525624	20.4429	0.000369099	0.0313493
BASP1	BASP1	brain abundant membrane attached signal protein 1 [Source:HGNC Symbol;Acc:HGNC:957]	1.25091	4.33659	20.4027	0.000372458	0.0314636
CKS2	CKS2	CDC28 protein kinase regulatory subunit 2 [Source:HGNC Symbol;Acc:HGNC:2000]	1.79905	2.19872	20.3462	0.000377235	0.0316958
SLN	NA	NA	7.94808	5.18262	20.7079	0.000382747	0.0318997
CCR2	CCR2	C-C motif chemokine receptor 2 [Source:HGNC Symbol;Acc:HGNC:1603]	3.08919	1.83076	20.2486	0.000385655	0.0318997
LOC103351517	NA	NA	3.39362	3.16236	20.5582	0.000385785	0.0318997
WAS	WAS	WASP actin nucleation promoting factor [Source:HGNC Symbol;Acc:HGNC:12731]	1.68713	3.67302	20.167	0.000392863	0.0320347
HCST	HCST	hematopoietic cell signal transducer [Source:HGNC Symbol;Acc:HGNC:16977]	3.21459	1.84971	20.1611	0.00039339	0.0320347
BAZ1A	BAZ1A	bromodomain adjacent to zinc finger domain 1A [Source:HGNC Symbol;Acc:HGNC:960]	0.973431	3.89051	20.1591	0.000393567	0.0320347
RASAL3	NA	NA	2.46595	2.04331	19.9344	0.000414247	0.0335433
LOC127484430	NA	NA	-1.50532	3.48648	19.89	0.000418474	0.0337109
RACGAP1	RACGAP1	Rac GTPase activating protein 1 [Source:HGNC Symbol;Acc:HGNC:9804]	1.44953	2.38926	19.8591	0.000421449	0.0337387
ARID3A	NA	NA	1.20224	2.31541	19.8245	0.0004248	0.0337387
CRLF2	NA	NA	2.77074	0.903278	19.8195	0.000425296	0.0337387
PLXNC1	NA	NA	2.02479	0.913511	19.7391	0.000433217	0.0339539
STAB1	STAB1	stabilin 1 [Source:HGNC Symbol;Acc:HGNC:18628]	1.25216	7.37251	19.7366	0.000433474	0.0339539
CDC20	MPL	MPL proto-oncogene, thrombopoietin receptor [Source:HGNC Symbol;Acc:HGNC:7217]	2.01472	2.46533	19.7167	0.000435463	0.0339539
PIK3R5	PIK3R5	phosphoinositide-3-kinase regulatory subunit 5 [Source:HGNC Symbol;Acc:HGNC:30035]	1.9873	3.15152	19.704	0.000436731	0.0339539
RNASE6	RNASE6	ribonuclease A family member k6 [Source:HGNC Symbol;Acc:HGNC:10048]	2.02408	3.15969	19.6645	0.000440731	0.0339539
CD1C	CD1A	CD1a molecule [Source:HGNC Symbol;Acc:HGNC:1634]	3.00492	1.63212	19.6425	0.000442969	0.0339539
GRN	GRN	granulin precursor [Source:HGNC Symbol;Acc:HGNC:4601]	1.05884	7.5731	19.6401	0.000443217	0.0339539
BTK	BTK	Bruton tyrosine kinase [Source:HGNC Symbol;Acc:HGNC:1133]	2.00569	1.99494	19.5668	0.000450785	0.0342968
LRRK1	LRRK1	leucine rich repeat kinase 1 [Source:HGNC Symbol;Acc:HGNC:18608]	0.617854	5.76149	19.5543	0.000452082	0.0342968
LOC103346238	NA	NA	2.34358	2.81427	19.5173	0.000457444	0.0345359
C1RL	NA	NA	1.87216	3.91214	19.488	0.000462803	0.0345956
RHBDL2	RHBDL2	rhomboid like 2 [Source:HGNC Symbol;Acc:HGNC:16083]	2.39036	-0.0914953	19.4354	0.000464719	0.0345956
SLA	SLA	Src like adaptor [Source:HGNC Symbol;Acc:HGNC:10902]	2.78859	2.92697	19.5813	0.000464875	0.0345956
CUNH16orf54	NA	NA	1.95568	2.13579	19.4122	0.000467232	0.0345964
FMNL1	NA	NA	1.33988	4.27079	19.393	0.000469314	0.0345964
FHL3	FHL3	four and a half LIM domains 3 [Source:HGNC Symbol;Acc:HGNC:3704]	1.01186	4.64947	19.2728	0.000482634	0.0354113
KIFC1	KIFC1	kinesin family member C1 [Source:HGNC Symbol;Acc:HGNC:6389]	2.19505	1.92862	19.2489	0.000485341	0.0354433
SHKBP1	NA	NA	0.856764	3.87865	19.2289	0.000487606	0.0354433
ITGAM	ITGAM	integrin subunit alpha M [Source:HGNC Symbol;Acc:HGNC:6149]	3.21571	3.30023	19.4613	0.000494814	0.0356763
IL6R	IL6R	interleukin 6 receptor [Source:HGNC Symbol;Acc:HGNC:6019]	1.38195	3.29522	19.1613	0.000495377	0.0356763
LOC100347962	NA	NA	2.56707	0.25544	19.1107	0.00050129	0.0359365
IL7R	IL7R	interleukin 7 receptor [Source:HGNC Symbol;Acc:HGNC:6024]	2.36647	1.53966	19.0805	0.000504853	0.0360057
ALOX5AP	ALOX5AP	arachidonate 5-lipoxygenase activating protein [Source:HGNC Symbol;Acc:HGNC:436]	1.68093	3.81553	19.0636	0.000506863	0.0360057
CSRNP1	CSRNP1	cysteine and serine rich nuclear protein 1 [Source:HGNC Symbol;Acc:HGNC:14300]	1.30212	4.61139	18.9881	0.000515941	0.0362971
C1QTNF6	NA	NA	1.62316	5.48588	19.1168	0.000516995	0.0362971
BUB1B	BUB1B	BUB1 mitotic checkpoint serine/threonine kinase B [Source:HGNC Symbol;Acc:HGNC:1149]	2.09732	1.1421	18.9717	0.000517933	0.0362971
ITGAL	ITGAL	integrin subunit alpha L [Source:HGNC Symbol;Acc:HGNC:6148]	2.85184	3.24314	19.1958	0.000520628	0.0363231
PTPN7	NA	NA	2.47228	1.34617	18.8729	0.000530139	0.0366821
LOC103351715	NA	NA	5.19094	-0.576274	18.8703	0.000530468	0.0366821
GIMAP1	NA	NA	1.89267	1.96929	18.8468	0.000533417	0.0367235
CD101	CD101	CD101 molecule [Source:HGNC Symbol;Acc:HGNC:5949]	3.11166	0.718897	18.7607	0.000544409	0.0373159
RLA-DMA	NA	NA	2.30211	4.23722	18.937	0.000552756	0.0376408
TOP2A	TOP2A	DNA topoisomerase II alpha [Source:HGNC Symbol;Acc:HGNC:11989]	1.75279	3.06965	18.6873	0.000553966	0.0376408
TM4SF19	TM4SF19	transmembrane 4 L six family member 19 [Source:HGNC Symbol;Acc:HGNC:25167]	2.2685	1.53176	18.6255	0.000562177	0.0378878
MS4A4A	NA	NA	1.52009	4.11273	18.6234	0.00056245	0.0378878
COTL1	NA	NA	1.12672	6.71936	18.5555	0.000571636	0.0383413
RLA-DRB1	HLA-DRB1//HLA-DRB5	major histocompatibility complex, class II, DR beta 1 [Source:HGNC Symbol;Acc:HGNC:4948]//major histocompatibility complex, class II, DR beta 5 [Source:HGNC Symbol;Acc:HGNC:4953]	2.38342	6.97843	18.8221	0.00057467	0.0383456
ARHGAP22	ARHGAP22	Rho GTPase activating protein 22 [Source:HGNC Symbol;Acc:HGNC:30320]	1.64926	2.42803	18.5117	0.000577635	0.0383456
SH2D4B	SH2D4B	SH2 domain containing 4B [Source:HGNC Symbol;Acc:HGNC:31440]	2.25864	0.412077	18.5014	0.000579061	0.0383456
MS4A6A	NA	NA	1.44948	4.18321	18.4637	0.000584311	0.03853
CCNF	CCNF	cyclin F [Source:HGNC Symbol;Acc:HGNC:1591]	2.8504	0.581626	18.4349	0.000588351	0.0386035
HAS1	NA	NA	2.13909	2.15243	18.4007	0.000593188	0.0386035
RAC2	RAC2	Rac family small GTPase 2 [Source:HGNC Symbol;Acc:HGNC:9802]	2.5466	3.95609	18.6571	0.000593386	0.0386035
PNP	PNP	purine nucleoside phosphorylase [Source:HGNC Symbol;Acc:HGNC:7892]	1.02419	4.56213	18.3858	0.000595306	0.0386035
TNFRSF1B	TNFRSF1B	TNF receptor superfamily member 1B [Source:HGNC Symbol;Acc:HGNC:11917]	0.926903	4.55653	18.3473	0.000600833	0.0387756
B3GNT7	B3GNT7	UDP-GlcNAc:betaGal beta-1,3-N-acetylglucosaminyltransferase 7 [Source:HGNC Symbol;Acc:HGNC:18811]	1.34109	2.28112	18.3286	0.000603543	0.0387756
CENPF	NA	NA	2.30521	2.15399	18.3046	0.000607028	0.0387756
PCLAF	NA	NA	2.25032	2.05576	18.2988	0.000607885	0.0387756
CH25H	CH25H	cholesterol 25-hydroxylase [Source:HGNC Symbol;Acc:HGNC:1907]	1.52869	3.89973	18.2426	0.000616168	0.0389745
GUSB	GUSB	glucuronidase beta [Source:HGNC Symbol;Acc:HGNC:4696]	1.21463	5.56411	18.2245	0.000618848	0.0389745
LOC100338913	FCGR3B//FCGR3A	Fc gamma receptor IIIb [Source:HGNC Symbol;Acc:HGNC:3620]//Fc gamma receptor IIIa [Source:HGNC Symbol;Acc:HGNC:3619]	2.58452	3.13904	18.3452	0.000620511	0.0389745
KCNK13	KCNK13	potassium two pore domain channel subfamily K member 13 [Source:HGNC Symbol;Acc:HGNC:6275]	1.8535	0.150632	18.2103	0.000620978	0.0389745
MCEMP1	NA	NA	3.04627	0.510685	18.1803	0.000625495	0.039101
LOC100357554	NA	NA	2.92998	1.31297	18.1357	0.000632262	0.0393383
AURKA	AURKA	aurora kinase A [Source:HGNC Symbol;Acc:HGNC:11393]	2.06313	1.05105	18.1222	0.000634326	0.0393383
LOC127482571	NA	NA	2.58196	6.2134	18.4171	0.00064268	0.0396988
TIFAB	NA	NA	3.04791	1.57114	18.0287	0.000648862	0.0399229
CD180	CD180	CD180 molecule [Source:HGNC Symbol;Acc:HGNC:6726]	2.85883	0.282714	18.0053	0.000652558	0.0399928
GALNT6	GALNT6	polypeptide N-acetylgalactosaminyltransferase 6 [Source:HGNC Symbol;Acc:HGNC:4128]	3.18591	0.670712	17.9857	0.000655669	0.0400266
LOC100340132	NA	NA	1.01949	4.82843	17.9451	0.000662176	0.0402665
LOC127482738	NA	NA	7.8591	4.39386	18.2181	0.000673487	0.0407763
RLA-DMB	HLA-DMB	major histocompatibility complex, class II, DM beta [Source:HGNC Symbol;Acc:HGNC:4935]	2.407	3.82659	18.0839	0.000675778	0.0407763
CD200R1	NA	NA	2.19851	0.871135	17.8348	0.000680218	0.0408863
NCAPD2	NCAPD2	non-SMC condensin I complex subunit D2 [Source:HGNC Symbol;Acc:HGNC:24305]	0.774968	3.51569	17.7811	0.00068919	0.0412669
FYB1	FYB1	FYN binding protein 1 [Source:HGNC Symbol;Acc:HGNC:4036]	1.59287	2.67993	17.7366	0.000696747	0.0415602
EVI2B	EVI2B	ecotropic viral integration site 2B [Source:HGNC Symbol;Acc:HGNC:3500]	2.14354	1.68681	17.6606	0.000709838	0.04218
RELL2	RELL2	RELT like 2 [Source:HGNC Symbol;Acc:HGNC:26902]	1.31388	2.19085	17.6082	0.000719049	0.0425336
CCN4	CCN4	cellular communication network factor 4 [Source:HGNC Symbol;Acc:HGNC:12769]	1.56058	4.2035	17.5957	0.000723313	0.0425336
EZH2	EZH2	enhancer of zeste 2 polycomb repressive complex 2 subunit [Source:HGNC Symbol;Acc:HGNC:3527]	1.4813	1.70235	17.5805	0.000723953	0.0425336
ABCG1	NA	NA	1.8035	3.40423	17.541	0.000731039	0.0427891
PLD3	PLD3	phospholipase D family member 3 [Source:HGNC Symbol;Acc:HGNC:17158]	0.867783	7.28743	17.5022	0.000738069	0.0430028
PIMREG	PIMREG	PICALM interacting mitotic regulator [Source:HGNC Symbol;Acc:HGNC:25483]	3.40735	0.773203	17.4905	0.000740193	0.0430028
TNC	TNC	tenascin C [Source:HGNC Symbol;Acc:HGNC:5318]	1.92558	6.38679	17.6279	0.000754117	0.0435328
MYL4	MYL4	myosin light chain 4 [Source:HGNC Symbol;Acc:HGNC:7585]	7.46948	8.93776	17.7266	0.000757009	0.0435328
SERPINA3	SERPINA3	serpin family A member 3 [Source:HGNC Symbol;Acc:HGNC:16]	4.13083	1.44461	17.4426	0.000758185	0.0435328
CXCL8	CXCL8	C-X-C motif chemokine ligand 8 [Source:HGNC Symbol;Acc:HGNC:6025]	3.24308	-0.781611	17.3811	0.000760502	0.0435328
LOC100343623	NA	NA	2.81076	1.05763	17.3612	0.000764249	0.0435328
IL4R	IL4R	interleukin 4 receptor [Source:HGNC Symbol;Acc:HGNC:6015]	1.3291	4.79899	17.3521	0.000766031	0.0435328
GGH	GGH	gamma-glutamyl hydrolase [Source:HGNC Symbol;Acc:HGNC:4248]	1.63667	2.70108	17.3189	0.000772323	0.0437314
LOC100342188	NA	NA	0.929479	4.50753	17.273	0.000781181	0.0439147
LOC127487412	NA	NA	0.929479	4.50753	17.273	0.000781181	0.0439147
SMAD7	SMAD7	SMAD family member 7 [Source:HGNC Symbol;Acc:HGNC:6773]	0.578238	5.1514	17.2256	0.000790429	0.0439828
CX3CR1	CX3CR1	C-X3-C motif chemokine receptor 1 [Source:HGNC Symbol;Acc:HGNC:2558]	1.66729	2.29085	17.2127	0.000792981	0.0439828
LOC100338413	NA	NA	2.93227	0.24332	17.1989	0.000795719	0.0439828
NOS3	NOS3	nitric oxide synthase 3 [Source:HGNC Symbol;Acc:HGNC:7876]	6.60283	2.48123	17.5187	0.000795833	0.0439828
CD74	CD74	CD74 molecule [Source:HGNC Symbol;Acc:HGNC:1697]	2.2709	8.88401	17.3836	0.000796463	0.0439828
CSF1	CSF1	colony stimulating factor 1 [Source:HGNC Symbol;Acc:HGNC:2432]	0.878805	6.17371	17.1648	0.000802503	0.0440084
MLANA	MLANA	melan-A [Source:HGNC Symbol;Acc:HGNC:7124]	3.06717	1.44347	17.1611	0.000803242	0.0440084
NCF2	NCF2	neutrophil cytosolic factor 2 [Source:HGNC Symbol;Acc:HGNC:7661]	2.26789	2.91005	17.179	0.000805374	0.0440084
RBM47	RBM47	RNA binding motif protein 47 [Source:HGNC Symbol;Acc:HGNC:30358]	1.88301	1.11103	17.1118	0.000813197	0.044281
TSKU	TSKU	tsukushi, small leucine rich proteoglycan [Source:HGNC Symbol;Acc:HGNC:28850]	0.69057	5.13152	16.9832	0.000839812	0.0455609
RAD51	RAD51	RAD51 recombinase [Source:HGNC Symbol;Acc:HGNC:9817]	1.91682	0.941227	16.9703	0.000842532	0.0455609
EPHX2	ADAM2	ADAM metallopeptidase domain 2 [Source:HGNC Symbol;Acc:HGNC:198]	-1.3737	6.51114	16.9285	0.000853775	0.0458517
SCARA3	SCARA3	scavenger receptor class A member 3 [Source:HGNC Symbol;Acc:HGNC:19000]	0.991701	6.8743	16.9176	0.000853778	0.0458517
ARRB2	NA	NA	0.621444	4.48841	16.9007	0.000857403	0.0458887
IKZF1	IKZF1	IKAROS family zinc finger 1 [Source:HGNC Symbol;Acc:HGNC:13176]	2.26637	1.82509	16.8552	0.000867305	0.0461431
TCF19	TCF19	transcription factor 19 [Source:HGNC Symbol;Acc:HGNC:11629]	2.30035	1.51392	16.839	0.000870837	0.0461431
CHRDL2	CHRDL2	chordin like 2 [Source:HGNC Symbol;Acc:HGNC:24168]	2.65567	5.58907	17.1471	0.000871014	0.0461431
CCR1	CCR1	C-C motif chemokine receptor 1 [Source:HGNC Symbol;Acc:HGNC:1602]	3.72411	1.81163	16.9321	0.000875643	0.0462009
LCP2	LCP2	lymphocyte cytosolic protein 2 [Source:HGNC Symbol;Acc:HGNC:6529]	2.09751	2.50405	16.8056	0.000878207	0.0462009
DENND1C	DENND1C	DENN domain containing 1C [Source:HGNC Symbol;Acc:HGNC:26225]	1.9507	1.96696	16.7932	0.000880975	0.0462009
LOC100359306	NA	NA	1.6609	5.03972	16.918	0.000884016	0.0462053
CDK5RAP1	CDK5RAP1	CDK5 regulatory subunit associated protein 1 [Source:HGNC Symbol;Acc:HGNC:15880]	-0.557153	3.87253	16.7509	0.00089045	0.0463865
EVA1A	EVA1A	eva-1 homolog A, regulator of programmed cell death [Source:HGNC Symbol;Acc:HGNC:25816]	0.958479	2.76215	16.6692	0.00090905	0.0471981
DPP3	DPP3	dipeptidyl peptidase 3 [Source:HGNC Symbol;Acc:HGNC:3008]	0.695979	4.83062	16.5932	0.000926768	0.0478012
NAPSA	NA	NA	1.72644	2.55481	16.5932	0.000926783	0.0478012
LOC103347344	NA	NA	3.96663	0.407324	16.5732	0.000931513	0.0478871
SGPL1	NA	NA	1.16327	4.82516	16.5119	0.00094617	0.0483348
ASF1B	NA	NA	2.22168	0.617574	16.5109	0.000946407	0.0483348
LRRC59	LRRC59	leucine rich repeat containing 59 [Source:HGNC Symbol;Acc:HGNC:28817]	0.517573	6.0933	16.4558	0.000959808	0.0488595
CASS4	CASS4	Cas scaffold protein family member 4 [Source:HGNC Symbol;Acc:HGNC:15878]	1.70802	0.921003	16.4298	0.000966204	0.0489319
LOC100348776	CCL18//CCL3L3//CCL3	C-C motif chemokine ligand 18 [Source:HGNC Symbol;Acc:HGNC:10616]//C-C motif chemokine ligand 3 like 3 [Source:HGNC Symbol;Acc:HGNC:30554]//C-C motif chemokine ligand 3 [Source:HGNC Symbol;Acc:HGNC:10627]	3.9945	-0.673147	16.4246	0.000967492	0.0489319
APOBR	APOBR	apolipoprotein B receptor [Source:HGNC Symbol;Acc:HGNC:24087]	2.23696	2.19591	16.3637	0.000982705	0.0492145
SPN	NA	NA	2.90077	2.96856	16.5501	0.000983822	0.0492145
CKS1B	CKS1B	CDC28 protein kinase regulatory subunit 1B [Source:HGNC Symbol;Acc:HGNC:19083]	0.804582	3.9771	16.357	0.000984372	0.0492145
MYH8	MYH8	myosin heavy chain 8 [Source:HGNC Symbol;Acc:HGNC:7578]	5.72203	2.41942	16.6414	0.000986652	0.0492145
LOC100345136	NA	NA	2.14915	3.17013	16.3957	0.000988941	0.0492145
PADI2	PADI2	peptidyl arginine deiminase 2 [Source:HGNC Symbol;Acc:HGNC:18341]	3.21188	0.291093	16.3271	0.000991973	0.0492145
SERP1	SERP1	stress associated endoplasmic reticulum protein 1 [Source:HGNC Symbol;Acc:HGNC:10759]	0.602769	5.43591	16.3059	0.000997367	0.0493255
CD163	CD163	CD163 molecule [Source:HGNC Symbol;Acc:HGNC:1631]	2.12966	4.92553	16.4605	0.00101817	0.0499999
GEMIN6	GEMIN6	gem nuclear organelle associated protein 6 [Source:HGNC Symbol;Acc:HGNC:20044]	0.819778	2.66453	16.2185	0.00102005	0.0499999
LOC127488313	NA	NA	4.88418	1.99046	16.4285	0.0010206	0.0499999
TACSTD2	TACSTD2	tumor associated calcium signal transducer 2 [Source:HGNC Symbol;Acc:HGNC:11530]	1.9293	2.04414	16.1872	0.0010283	0.0502197
CTSB	CTSB	cathepsin B [Source:HGNC Symbol;Acc:HGNC:2527]	0.855285	9.28955	16.1525	0.00103756	0.0505139
SCRG1	SCRG1	stimulator of chondrogenesis 1 [Source:HGNC Symbol;Acc:HGNC:17036]	2.28879	3.31287	16.244	0.00104169	0.0505574
LYN	LYN	LYN proto-oncogene, Src family tyrosine kinase [Source:HGNC Symbol;Acc:HGNC:6735]	1.20524	4.07389	16.086	0.00105553	0.0510707
RRM2	RRM2	ribonucleotide reductase regulatory subunit M2 [Source:HGNC Symbol;Acc:HGNC:10452]	2.33356	2.40879	16.0158	0.00107767	0.0519811
TONSL	NA	NA	0.822617	2.67607	15.9717	0.00108727	0.0519917
CDCA3	CDCA3	cell division cycle associated 3 [Source:HGNC Symbol;Acc:HGNC:14624]	2.1094	0.956983	15.9671	0.00108856	0.0519917
LOC127488159	NA	NA	1.4286	0.486796	15.9653	0.00108909	0.0519917
RAB11FIP5	RAB11FIP5	RAB11 family interacting protein 5 [Source:HGNC Symbol;Acc:HGNC:24845]	0.728531	6.82089	15.9578	0.0010912	0.0519917
LGALS3	LGALS3	galectin 3 [Source:HGNC Symbol;Acc:HGNC:6563]	1.21142	6.83899	15.9164	0.00110303	0.0522777
ZWILCH	ZWILCH	zwilch kinetochore protein [Source:HGNC Symbol;Acc:HGNC:25468]	1.54884	1.25708	15.9134	0.00110389	0.0522777
CDCA8	CDCA8	cell division cycle associated 8 [Source:HGNC Symbol;Acc:HGNC:14629]	2.30729	0.658431	15.882	0.00111294	0.0525469
HNMT	HNMT	histamine N-methyltransferase [Source:HGNC Symbol;Acc:HGNC:5028]	1.07225	3.62616	15.8688	0.00111678	0.0525692
PLET1	NA	NA	3.69828	0.95235	15.8473	0.00112591	0.0526501
MCM2	MCM2	minichromosome maintenance complex component 2 [Source:HGNC Symbol;Acc:HGNC:6944]	1.03292	3.43821	15.8085	0.0011345	0.0526501
LOC100340733	NA	NA	5.89895	-0.262045	15.8018	0.00113649	0.0526501
LOC100349996	NA	NA	2.23075	2.92753	15.8441	0.0011381	0.0526501
STIL	STIL	STIL centriolar assembly protein [Source:HGNC Symbol;Acc:HGNC:10879]	2.70525	-0.598457	15.7953	0.00113842	0.0526501
INHBB	INHBB	inhibin subunit beta B [Source:HGNC Symbol;Acc:HGNC:6067]	1.72243	0.808176	15.7943	0.00113871	0.0526501
TBXAS1	TBXAS1	thromboxane A synthase 1 [Source:HGNC Symbol;Acc:HGNC:11609]	1.46723	2.16512	15.7765	0.00114401	0.0527393
CSF1R	CSF1R	colony stimulating factor 1 receptor [Source:HGNC Symbol;Acc:HGNC:2433]	1.53863	6.38044	15.8547	0.00115045	0.0528802
LOC100355766	NA	NA	2.5886	2.49931	15.78	0.00116066	0.0531929
FOSL1	FOSL1	FOS like 1, AP-1 transcription factor subunit [Source:HGNC Symbol;Acc:HGNC:13718]	2.36977	-0.127246	15.6996	0.0011673	0.0533408
EVI2A	EVI2A	ecotropic viral integration site 2A [Source:HGNC Symbol;Acc:HGNC:3499]	1.83446	3.15668	15.697	0.00117101	0.0533543
EFNA5	EFNA5	ephrin A5 [Source:HGNC Symbol;Acc:HGNC:3225]	-0.879268	4.94198	15.6568	0.00118048	0.0536293
INAVA	INAVA	innate immunity activator [Source:HGNC Symbol;Acc:HGNC:25599]	3.88712	-0.415728	15.6325	0.00118804	0.0536331
SAA3	NA	NA	2.87513	6.80567	15.8947	0.00119083	0.0536331
TROAP	NA	NA	2.21407	0.867358	15.6235	0.00119085	0.0536331
LOC100008803	NA	NA	2.20644	1.33217	15.5918	0.00120081	0.0539259
CXCL16	NA	NA	0.94019	5.26752	15.5798	0.00120462	0.0539423
DTX2	DTX2	deltex E3 ubiquitin ligase 2 [Source:HGNC Symbol;Acc:HGNC:15973]	0.723891	3.40435	15.531	0.0012202	0.0544837
MCM5	MCM5	minichromosome maintenance complex component 5 [Source:HGNC Symbol;Acc:HGNC:6948]	1.01953	2.98818	15.45	0.00124659	0.0553999
LRRC25	NA	NA	1.55251	3.10514	15.4385	0.0012504	0.0553999
TASL	TASL	TLR adaptor interacting with endolysosomal SLC15A4 [Source:HGNC Symbol;Acc:HGNC:25667]	2.11001	-0.0507575	15.4356	0.00125135	0.0553999
TNFRSF1A	TNFRSF1A	TNF receptor superfamily member 1A [Source:HGNC Symbol;Acc:HGNC:11916]	0.656982	7.00484	15.3658	0.00127472	0.0562751
SLC9A9	SLC9A9	solute carrier family 9 member A9 [Source:HGNC Symbol;Acc:HGNC:20653]	0.835523	3.78943	15.3187	0.00129075	0.0568202
LOC127484209	NA	NA	1.67957	0.773587	15.3083	0.00129434	0.0568202
LPXN	LPXN	leupaxin [Source:HGNC Symbol;Acc:HGNC:14061]	1.82813	2.04428	15.2947	0.00129903	0.0568229
MCOLN2	MCOLN2	mucolipin TRP cation channel 2 [Source:HGNC Symbol;Acc:HGNC:13357]	2.61693	1.28403	15.287	0.00130168	0.0568229
LOC100352673	NA	NA	2.99514	2.86978	15.4279	0.00131152	0.0569344
LOC127493194	NA	NA	2.99514	2.86978	15.4279	0.00131152	0.0569344
GJB5	NA	NA	1.11475	2.81692	15.2397	0.00131818	0.0570433
PFKFB2	PFKFB2	6-phosphofructo-2-kinase/fructose-2,6-biphosphatase 2 [Source:HGNC Symbol;Acc:HGNC:8873]	-0.620524	4.89668	15.2283	0.0013222	0.0570433
PTPRC	PTPRC	protein tyrosine phosphatase receptor type C [Source:HGNC Symbol;Acc:HGNC:9666]	2.09654	3.80575	15.3547	0.00133027	0.0570433
FKBP10	FKBP10	FKBP prolyl isomerase 10 [Source:HGNC Symbol;Acc:HGNC:18169]	0.689392	8.22858	15.1929	0.00133472	0.0570433
PPP1R3C	PPP1R3C	protein phosphatase 1 regulatory subunit 3C [Source:HGNC Symbol;Acc:HGNC:9293]	-1.08984	6.74423	15.1917	0.00133515	0.0570433
IKBKE	NA	NA	0.735686	4.656	15.1854	0.00133742	0.0570433
MYBPHL	MYBPHL	myosin binding protein H like [Source:HGNC Symbol;Acc:HGNC:30434]	6.05299	4.35351	15.4372	0.00133957	0.0570433
NUSAP1	NUSAP1	nucleolar and spindle associated protein 1 [Source:HGNC Symbol;Acc:HGNC:18538]	1.65832	1.82791	15.1484	0.00135069	0.0571659
TAGAP	TAGAP	T cell activation RhoGTPase activating protein [Source:HGNC Symbol;Acc:HGNC:15669]	1.96006	1.5946	15.1469	0.00135124	0.0571659
PLEK	PLEK	pleckstrin [Source:HGNC Symbol;Acc:HGNC:9070]	1.21394	2.71502	15.1381	0.00135441	0.0571659
C1H11orf16	NA	NA	2.43027	0.692622	15.1307	0.00135709	0.0571659
PLBD2	PLBD2	phospholipase B domain containing 2 [Source:HGNC Symbol;Acc:HGNC:27283]	0.866469	6.54755	15.1101	0.00136459	0.0572362
DEF6	DEF6	DEF6 guanine nucleotide exchange factor [Source:HGNC Symbol;Acc:HGNC:2760]	1.26034	2.88364	15.0842	0.00137409	0.0572362
LOC103346239	NA	NA	2.62595	0.791663	15.0813	0.00137518	0.0572362
ZC3H12A	ZC3H12A	zinc finger CCCH-type containing 12A [Source:HGNC Symbol;Acc:HGNC:26259]	0.709538	4.01981	15.0755	0.00137732	0.0572362
CTSH	CTSH	cathepsin H [Source:HGNC Symbol;Acc:HGNC:2535]	0.809805	6.28682	15.0736	0.001378	0.0572362
LOC127488880	NA	NA	-2.42341	1.79541	15.0662	0.00138073	0.0572362
PABIR1	PABIR1	PP2A Aalpha (PPP2R1A) and B55A (PPP2R2A) interacting phosphatase regulator 1 [Source:HGNC Symbol;Acc:HGNC:23490]	-0.514806	4.3028	15.0545	0.00138509	0.057265
TXNDC5	TXNDC5	thioredoxin domain containing 5 [Source:HGNC Symbol;Acc:HGNC:21073]	0.715589	6.83815	15.0415	0.00138994	0.0573138
CD79A	NA	NA	2.02331	1.1262	14.9537	0.00142311	0.0583107
CMBL	CMBL	carboxymethylenebutenolidase homolog [Source:HGNC Symbol;Acc:HGNC:25090]	1.13084	6.17584	14.9532	0.00142331	0.0583107
KIF4A	KIF4A	kinesin family member 4A [Source:HGNC Symbol;Acc:HGNC:13339]	2.1408	0.386708	14.9427	0.00142733	0.0583107
NAGA	NAGA	alpha-N-acetylgalactosaminidase [Source:HGNC Symbol;Acc:HGNC:7631]	0.606173	5.65555	14.9383	0.00142904	0.0583107
GIMAP4	NA	NA	1.86698	2.03381	14.9221	0.0014353	0.0584136
CEMIP	CEMIP	cell migration inducing hyaluronidase 1 [Source:HGNC Symbol;Acc:HGNC:29213]	2.52778	3.35272	15.0678	0.00144175	0.0585236
CUNH19orf38	NA	NA	2.37761	-0.53424	14.8783	0.00145236	0.058612
VCAM1	VCAM1	vascular cell adhesion molecule 1 [Source:HGNC Symbol;Acc:HGNC:12663]	1.30443	6.09156	14.8941	0.00145475	0.058612
KCNJ3	KCNJ3	potassium inwardly rectifying channel subfamily J member 3 [Source:HGNC Symbol;Acc:HGNC:6264]	5.45583	1.72109	15.0691	0.00145895	0.058612
SLC7A7	SLC7A7	solute carrier family 7 member 7 [Source:HGNC Symbol;Acc:HGNC:11065]	1.76638	3.2534	14.863	0.00146177	0.058612
SLC12A5	SLC12A5	solute carrier family 12 member 5 [Source:HGNC Symbol;Acc:HGNC:13818]	1.92019	0.0759181	14.852	0.00146267	0.058612
MARCHF1	MARCHF1	membrane associated ring-CH-type finger 1 [Source:HGNC Symbol;Acc:HGNC:26077]	1.98447	0.969913	14.7901	0.00148741	0.0594507
LOC100347711	NA	NA	3.1103	1.34269	14.7404	0.00151105	0.0601731
MCM4	MCM4	minichromosome maintenance complex component 4 [Source:HGNC Symbol;Acc:HGNC:6947]	1.54215	2.76106	14.7267	0.00151318	0.0601731
KNSTRN	KNSTRN	kinetochore localized astrin (SPAG5) binding protein [Source:HGNC Symbol;Acc:HGNC:30767]	1.50672	1.83589	14.6977	0.00152513	0.0604838
GPR34	GPR34	G protein-coupled receptor 34 [Source:HGNC Symbol;Acc:HGNC:4490]	1.26531	3.24585	14.689	0.00152874	0.0604838
LOC100009107	NA	NA	1.30763	7.43248	14.6327	0.00155235	0.0612629
LOC108177670	NA	NA	2.04566	0.533091	14.5336	0.00159488	0.0626836
PML	PML	PML nuclear body scaffold [Source:HGNC Symbol;Acc:HGNC:9113]	0.7381	4.64327	14.5164	0.00160243	0.0626836
RAB7B	NA	NA	0.780273	4.37435	14.5137	0.0016036	0.0626836
GJB3	GJB3	gap junction protein beta 3 [Source:HGNC Symbol;Acc:HGNC:4285]	1.06475	4.68687	14.5119	0.00160439	0.0626836
LOC103345609	NA	NA	1.28629	1.01997	14.4433	0.00163482	0.0637132
TFEC	TFEC	transcription factor EC [Source:HGNC Symbol;Acc:HGNC:11754]	1.43961	2.06992	14.429	0.00164126	0.0638048
CTSC	CTSC	cathepsin C [Source:HGNC Symbol;Acc:HGNC:2528]	1.01891	6.15148	14.409	0.00165028	0.0639965
SNAI1	SNAI1	snail family transcriptional repressor 1 [Source:HGNC Symbol;Acc:HGNC:11128]	1.93506	2.91276	14.3902	0.00166256	0.0641959
KCNK6	NA	NA	0.755315	4.30539	14.3797	0.00166364	0.0641959
DAPP1	DAPP1	dual adaptor of phosphotyrosine and 3-phosphoinositides 1 [Source:HGNC Symbol;Acc:HGNC:16500]	2.28049	1.20899	14.3699	0.00166811	0.0642098
ANXA8	ANXA8L1//ANXA8	annexin A8 like 1 [Source:HGNC Symbol;Acc:HGNC:23334]//annexin A8 [Source:HGNC Symbol;Acc:HGNC:546]	1.24505	6.50917	14.3483	0.00168181	0.0645783
FOLR2	FOLR3//FOLR2	folate receptor gamma [Source:HGNC Symbol;Acc:HGNC:3795]//folate receptor beta [Source:HGNC Symbol;Acc:HGNC:3793]	1.81497	4.8945	14.4935	0.00168816	0.0646631
LOC100351519	NA	NA	1.38552	1.94619	14.2749	0.00171234	0.065429
BNIPL	BNIPL	BCL2 interacting protein like [Source:HGNC Symbol;Acc:HGNC:16976]	2.50736	0.250089	14.2585	0.00172012	0.06549
IL1RAP	IL1RAP	interleukin 1 receptor accessory protein [Source:HGNC Symbol;Acc:HGNC:5995]	0.954011	2.19067	14.2453	0.00172638	0.06549
CDC45	NA	NA	2.77274	-0.647639	14.245	0.00172651	0.06549
ERF	ERF	ETS2 repressor factor [Source:HGNC Symbol;Acc:HGNC:3444]	0.441981	5.12845	14.2217	0.00173767	0.0657536
AEBP1	AEBP1	AE binding protein 1 [Source:HGNC Symbol;Acc:HGNC:303]	0.674405	9.75301	14.2113	0.0017427	0.0657849
LOC127491077	NA	NA	3.55203	2.14113	14.3497	0.00174793	0.0658233
CXCR1	CXCR1	C-X-C motif chemokine receptor 1 [Source:HGNC Symbol;Acc:HGNC:6026]	1.91121	1.90103	14.1873	0.00175429	0.0659041
MYL7	NA	NA	6.17647	6.47652	14.397	0.00176354	0.0659271
LOC108176037	NA	NA	2.38453	1.69189	14.1563	0.00176945	0.0659271
PSD4	PSD4	pleckstrin and Sec7 domain containing 4 [Source:HGNC Symbol;Acc:HGNC:19096]	0.732264	4.00909	14.1466	0.0017742	0.0659271
GPRC5A	GPRC5A	G protein-coupled receptor class C group 5 member A [Source:HGNC Symbol;Acc:HGNC:9836]	1.3604	3.17029	14.1453	0.00177481	0.0659271
CCNB2	CCNB2	cyclin B2 [Source:HGNC Symbol;Acc:HGNC:1580]	2.11259	1.49682	14.1429	0.001776	0.0659271
P2RY8	P2RY8	P2Y receptor family member 8 [Source:HGNC Symbol;Acc:HGNC:15524]	2.23937	0.315522	14.1192	0.00178775	0.0661427
GABARAPL1	NA	NA	-0.413748	6.87337	14.1141	0.00179027	0.0661427
FES	FES	FES proto-oncogene, tyrosine kinase [Source:HGNC Symbol;Acc:HGNC:3657]	0.636944	4.93751	14.082	0.00180628	0.0665767
COL6A1	NA	NA	0.808964	10.2172	14.0439	0.00182553	0.0671279
KRT19	NA	NA	2.94136	4.29137	14.2479	0.00183604	0.0672558
UBTD1	UBTD1	ubiquitin domain containing 1 [Source:HGNC Symbol;Acc:HGNC:25683]	0.703049	4.61816	14.0196	0.00183792	0.0672558
TK1	TK1	thymidine kinase 1 [Source:HGNC Symbol;Acc:HGNC:11830]	1.23083	2.6083	14.0118	0.00184192	0.0672558
ALG2	ALG2	ALG2 alpha-1,3/1,6-mannosyltransferase [Source:HGNC Symbol;Acc:HGNC:23159]	0.559017	3.46878	13.9902	0.00185306	0.067396
LOC100347327	NA	NA	1.52738	6.79822	14.071	0.00185438	0.067396
ERFE	ERFE	erythroferrone [Source:HGNC Symbol;Acc:HGNC:26727]	1.10676	3.25522	13.9648	0.00186622	0.0676689
GINS4	GINS4	GINS complex subunit 4 [Source:HGNC Symbol;Acc:HGNC:28226]	2.02319	-0.1249	13.9453	0.00187642	0.0677876
FLT3	FLT3	fms related receptor tyrosine kinase 3 [Source:HGNC Symbol;Acc:HGNC:3765]	2.07977	1.03757	13.942	0.00187817	0.0677876
LOC103346273	NA	NA	1.68973	2.58536	13.9296	0.00188469	0.0678446
IER3	IER3	immediate early response 3 [Source:HGNC Symbol;Acc:HGNC:5392]	1.18202	4.92625	13.9302	0.00188843	0.0678446
RLA-DR-ALPHA	HLA-DRA	major histocompatibility complex, class II, DR alpha [Source:HGNC Symbol;Acc:HGNC:4947]	2.17221	7.48451	14.0536	0.00191409	0.0686029
BMP1	BMP1	bone morphogenetic protein 1 [Source:HGNC Symbol;Acc:HGNC:1067]	0.670777	7.11032	13.8664	0.00191832	0.0686029
TRAPPC14	TRAPPC14	trafficking protein particle complex subunit 14 [Source:HGNC Symbol;Acc:HGNC:25604]	0.695055	2.9283	13.8482	0.00192809	0.0687949
PLTP	PLTP	phospholipid transfer protein [Source:HGNC Symbol;Acc:HGNC:9093]	1.51828	9.48805	13.7841	0.00196311	0.0698849
CCNE2	CCNE2	cyclin E2 [Source:HGNC Symbol;Acc:HGNC:1590]	1.9713	0.136217	13.764	0.00197424	0.0701214
LOC103346246	NA	NA	4.1158	-0.635558	13.7462	0.00198415	0.0703135
LOC103346828	NA	NA	1.61721	0.316927	13.7218	0.00199785	0.0704751
CDKN1A	NA	NA	1.16039	6.46466	13.7173	0.00200038	0.0704751
GAL3ST3	GAL3ST3	galactose-3-O-sulfotransferase 3 [Source:HGNC Symbol;Acc:HGNC:24144]	3.37727	0.0650558	13.714	0.00200224	0.0704751
NFATC2	NFATC2	nuclear factor of activated T cells 2 [Source:HGNC Symbol;Acc:HGNC:7776]	0.980601	3.42909	13.6902	0.00201573	0.0707908
SOWAHD	SOWAHD	sosondowah ankyrin repeat domain family member D [Source:HGNC Symbol;Acc:HGNC:32960]	1.93454	0.141003	13.6634	0.00203103	0.0711679
ARHGAP11A	ARHGAP11A//ARHGAP11B	Rho GTPase activating protein 11A [Source:HGNC Symbol;Acc:HGNC:15783]//Rho GTPase activating protein 11B [Source:HGNC Symbol;Acc:HGNC:15782]	2.5901	0.908274	13.6469	0.00204048	0.0713392
EPSTI1	EPSTI1	epithelial stromal interaction 1 [Source:HGNC Symbol;Acc:HGNC:16465]	1.48324	2.52518	13.6183	0.00205705	0.0716021
ABCA6	ABCA6	ATP binding cassette subfamily A member 6 [Source:HGNC Symbol;Acc:HGNC:36]	2.00685	4.05992	13.7569	0.00205716	0.0716021
BHLHE40	NA	NA	1.02443	5.72108	13.5936	0.00207151	0.0718935
ARHGDIB	ARHGDIB	Rho GDP dissociation inhibitor beta [Source:HGNC Symbol;Acc:HGNC:679]	0.843351	5.70105	13.5824	0.00207809	0.0718935
SLIT3	SLIT3	slit guidance ligand 3 [Source:HGNC Symbol;Acc:HGNC:11087]	1.10605	6.44405	13.5775	0.00208096	0.0718935
ASPM	NA	NA	2.03488	1.16451	13.5725	0.00208394	0.0718935
LY86	LY86	lymphocyte antigen 86 [Source:HGNC Symbol;Acc:HGNC:16837]	2.23934	2.03651	13.5523	0.00209585	0.0721272
DDAH1	DDAH1	dimethylarginine dimethylaminohydrolase 1 [Source:HGNC Symbol;Acc:HGNC:2715]	-1.94912	4.65867	13.713	0.00209994	0.0721272
EMILIN1	EMILIN1	elastin microfibril interfacer 1 [Source:HGNC Symbol;Acc:HGNC:19880]	0.696238	8.24921	13.5345	0.00210648	0.0721931
SMC2	SMC2	structural maintenance of chromosomes 2 [Source:HGNC Symbol;Acc:HGNC:14011]	0.731553	3.01697	13.5249	0.00211224	0.072232
LOC127484662	NA	NA	1.34667	1.94475	13.508	0.00212237	0.0724199
IL10RB	IL10RB	interleukin 10 receptor subunit beta [Source:HGNC Symbol;Acc:HGNC:5965]	1.11231	4.37081	13.4889	0.00213391	0.0726553
RGS10	RGS10	regulator of G protein signaling 10 [Source:HGNC Symbol;Acc:HGNC:9992]	1.30339	4.47483	13.4368	0.00217031	0.0737339
SGO1	SGO1	shugoshin 1 [Source:HGNC Symbol;Acc:HGNC:25088]	2.37393	0.164574	13.3708	0.00220697	0.0746723
PPM1E	PPM1E	protein phosphatase, Mg2+/Mn2+ dependent 1E [Source:HGNC Symbol;Acc:HGNC:19322]	1.91403	1.23833	13.3699	0.00220749	0.0746723
AKTIP	AKTIP	AKT interacting protein [Source:HGNC Symbol;Acc:HGNC:16710]	-0.47742	5.53365	13.3187	0.00224005	0.0753938
ADAM12	ADAM12	ADAM metallopeptidase domain 12 [Source:HGNC Symbol;Acc:HGNC:190]	2.16928	3.38083	13.4354	0.00224053	0.0753938
PYCR1	PYCR1	pyrroline-5-carboxylate reductase 1 [Source:HGNC Symbol;Acc:HGNC:9721]	1.26022	2.5581	13.3137	0.00224329	0.0753938
PRC1	PRC1	protein regulator of cytokinesis 1 [Source:HGNC Symbol;Acc:HGNC:9341]	1.55808	2.97776	13.2931	0.00225654	0.0756764
RASGRP4	RASGRP4	RAS guanyl releasing protein 4 [Source:HGNC Symbol;Acc:HGNC:18958]	1.96003	1.51099	13.2834	0.00226282	0.0757244
LOC127482725	NA	NA	1.22241	2.20283	13.2522	0.00228312	0.0762042
TIAM1	TIAM1	TIAM Rac1 associated GEF 1 [Source:HGNC Symbol;Acc:HGNC:11805]	1.23419	2.25182	13.2306	0.00229732	0.0762042
ABTB3	ABTB3	ankyrin repeat and BTB domain containing 3 [Source:HGNC Symbol;Acc:HGNC:23844]	0.98178	3.19438	13.2257	0.00230054	0.0762042
ALOX15	ALOX15	arachidonate 15-lipoxygenase [Source:HGNC Symbol;Acc:HGNC:433]	3.97664	1.07994	13.2978	0.00230285	0.0762042
ITGA4	ITGA4	integrin subunit alpha 4 [Source:HGNC Symbol;Acc:HGNC:6140]	1.53365	2.20591	13.22	0.00230435	0.0762042
CEP55	CEP55	centrosomal protein 55 [Source:HGNC Symbol;Acc:HGNC:1161]	2.43541	0.687752	13.2169	0.00230641	0.0762042
LOC100342104	NA	NA	0.948671	3.70832	13.1498	0.00235134	0.0774125
DEFB1	NA	NA	1.68379	2.61389	13.1475	0.00235289	0.0774125
PTGDR2	PTGDR2	prostaglandin D2 receptor 2 [Source:HGNC Symbol;Acc:HGNC:4502]	2.11463	-0.560093	13.1274	0.00236657	0.077699
IGSF9B	IGSF9B	immunoglobulin superfamily member 9B [Source:HGNC Symbol;Acc:HGNC:32326]	-0.807747	3.53759	13.0866	0.00239456	0.0784534
DSCC1	DSCC1	DNA replication and sister chromatid cohesion 1 [Source:HGNC Symbol;Acc:HGNC:24453]	-1.61489	2.92592	13.0692	0.00240661	0.078683
NCAPG2	NCAPG2	non-SMC condensin II complex subunit G2 [Source:HGNC Symbol;Acc:HGNC:21904]	0.990849	2.84345	13.0466	0.00242238	0.0790332
LAX1	LAX1	lymphocyte transmembrane adaptor 1 [Source:HGNC Symbol;Acc:HGNC:26005]	1.92625	-0.760603	13.0292	0.00243461	0.0792669
SEC14L2	SEC14L2	SEC14 like lipid binding 2 [Source:HGNC Symbol;Acc:HGNC:10699]	1.00494	2.30859	13.0159	0.00244398	0.0793652
SYNE3	SYNE3	spectrin repeat containing nuclear envelope family member 3 [Source:HGNC Symbol;Acc:HGNC:19861]	0.615567	5.0817	13.0038	0.00245259	0.0793652
GINS1	NA	NA	1.84075	-0.335826	13.0028	0.0024533	0.0793652
CAPG	CAPG	capping actin protein, gelsolin like [Source:HGNC Symbol;Acc:HGNC:1474]	0.989034	6.18139	12.9891	0.00246301	0.0793652
SLC43A3	SLC43A3	solute carrier family 43 member 3 [Source:HGNC Symbol;Acc:HGNC:17466]	0.628932	6.59298	12.9891	0.00246302	0.0793652
GPR68	GPR68	G protein-coupled receptor 68 [Source:HGNC Symbol;Acc:HGNC:4519]	1.56615	2.36942	12.9523	0.00248943	0.0799793
ADHFE1	ADHFE1	alcohol dehydrogenase iron containing 1 [Source:HGNC Symbol;Acc:HGNC:16354]	-0.853363	5.19308	12.9382	0.00249966	0.0799793
LOC100344565	NA	NA	2.4917	2.8967	13.0579	0.0025011	0.0799793
LOC100351416	NA	NA	1.85062	1.6203	12.9247	0.0025095	0.0799793
PTPRO	PTPRO	protein tyrosine phosphatase receptor type O [Source:HGNC Symbol;Acc:HGNC:9678]	2.17098	1.43874	12.9237	0.00251024	0.0799793
LOC100353567	NA	NA	0.696397	4.36786	12.9202	0.00251279	0.0799793
LRP8	LRP8	LDL receptor related protein 8 [Source:HGNC Symbol;Acc:HGNC:6700]	1.01643	2.12855	12.9122	0.00251859	0.0800011
KNTC1	KNTC1	kinetochore associated 1 [Source:HGNC Symbol;Acc:HGNC:17255]	1.69597	1.71625	12.9046	0.00252421	0.080017
MCM7	MCM7	minichromosome maintenance complex component 7 [Source:HGNC Symbol;Acc:HGNC:6950]	0.525894	4.55182	12.891	0.00253417	0.0801701
KRT32	KRT32	keratin 32 [Source:HGNC Symbol;Acc:HGNC:6449]	2.95387	3.17196	13.0569	0.00253957	0.0801785
MVP	MVP	major vault protein [Source:HGNC Symbol;Acc:HGNC:7531]	0.566457	6.43786	12.8603	0.00255694	0.0804518
ESPL1	ESPL1	extra spindle pole bodies like 1, separase [Source:HGNC Symbol;Acc:HGNC:16856]	1.75043	0.877573	12.8582	0.00255852	0.0804518
LOC100346561	SCD	stearoyl-CoA desaturase [Source:HGNC Symbol;Acc:HGNC:10571]	0.863664	6.59821	12.8355	0.00257547	0.0808222
CEBPD	NA	NA	1.22524	7.47978	12.8246	0.00258368	0.0809172
ACAN	ACAN	aggrecan [Source:HGNC Symbol;Acc:HGNC:319]	1.29737	6.60923	12.8346	0.00260111	0.0811165
COL1A1	COL1A1	collagen type I alpha 1 chain [Source:HGNC Symbol;Acc:HGNC:2197]	1.29865	11.6624	12.7998	0.00260246	0.0811165
NIBAN2	NIBAN2	niban apoptosis regulator 2 [Source:HGNC Symbol;Acc:HGNC:25282]	0.557925	7.71788	12.7898	0.00261008	0.0811165
MYD88	NA	NA	0.5826	5.58058	12.7888	0.0026108	0.0811165
SIGLEC5	NA	NA	1.52386	1.79279	12.7694	0.00262568	0.0814169
P3H1	P3H1	prolyl 3-hydroxylase 1 [Source:HGNC Symbol;Acc:HGNC:19316]	0.61072	5.78363	12.7031	0.00267709	0.0826905
PLK3	PLK3	polo like kinase 3 [Source:HGNC Symbol;Acc:HGNC:2154]	0.976375	2.38478	12.7028	0.00267733	0.0826905
PDE7B	PDE7B	phosphodiesterase 7B [Source:HGNC Symbol;Acc:HGNC:8792]	-1.0926	3.18719	12.6916	0.00268611	0.082798
RN18S	NA	NA	-1.78493	13.584	12.6704	0.00270293	0.0831523
LOC100349793	NA	NA	-7.09203	1.05151	12.822	0.00271575	0.0833827
CENPE	CENPE	centromere protein E [Source:HGNC Symbol;Acc:HGNC:1856]	2.24636	0.922976	12.6338	0.0027321	0.0837202
RAD51AP1	RAD51AP1	RAD51 associated protein 1 [Source:HGNC Symbol;Acc:HGNC:16956]	1.52483	0.0954695	12.5582	0.00279359	0.0849827
KIF23	KIF23	kinesin family member 23 [Source:HGNC Symbol;Acc:HGNC:6392]	3.02562	2.74698	12.6991	0.00279402	0.0849827
KIF2C	KIF2C	kinesin family member 2C [Source:HGNC Symbol;Acc:HGNC:6393]	2.55427	0.3636	12.5573	0.00279428	0.0849827
FGL1	FGL1	fibrinogen like 1 [Source:HGNC Symbol;Acc:HGNC:3695]	2.90632	1.20037	12.5606	0.00279693	0.0849827
BID	BID	BH3 interacting domain death agonist [Source:HGNC Symbol;Acc:HGNC:1050]	1.36409	1.49469	12.5498	0.00280049	0.0849827
TPX2	TPX2	TPX2 microtubule nucleation factor [Source:HGNC Symbol;Acc:HGNC:1249]	0.994671	2.66648	12.5174	0.00282742	0.0854748
SDF2L1	SDF2L1	stromal cell derived factor 2 like 1 [Source:HGNC Symbol;Acc:HGNC:10676]	0.984861	3.83404	12.5171	0.00282765	0.0854748
SIRPA	NA	NA	0.644515	7.40475	12.4844	0.00285508	0.0861373
IL20RB	IL20RB	interleukin 20 receptor subunit beta [Source:HGNC Symbol;Acc:HGNC:6004]	2.31467	1.40564	12.4466	0.00288721	0.0869388
LOC100343625	NA	NA	3.48705	1.48537	12.5049	0.00289539	0.0870176
CLIC2	CLIC2	chloride intracellular channel 2 [Source:HGNC Symbol;Acc:HGNC:2063]	1.05445	5.01924	12.4001	0.00292727	0.087807
NADK	NADK	NAD kinase [Source:HGNC Symbol;Acc:HGNC:29831]	0.591409	5.85482	12.3907	0.00293545	0.0878835
INHBA	INHBA	inhibin subunit beta A [Source:HGNC Symbol;Acc:HGNC:6066]	0.871129	5.58156	12.369	0.00295439	0.0882815
NLRX1	NLRX1	NLR family member X1 [Source:HGNC Symbol;Acc:HGNC:29890]	0.623619	4.26609	12.3474	0.00297343	0.0885521
LOC127482788	NA	NA	1.46664	5.50274	12.4529	0.00297805	0.0885521
LOC103348951	NA	NA	-0.591814	3.47017	12.3395	0.00298044	0.0885521
ESAM	NA	NA	-0.500509	6.29273	12.3178	0.00299968	0.0889545
LOC103349585	NA	NA	1.51697	0.377283	12.2854	0.00302881	0.0895995
MAP3K6	MAP3K6	mitogen-activated protein kinase kinase kinase 6 [Source:HGNC Symbol;Acc:HGNC:6858]	0.455414	4.09875	12.2764	0.0030369	0.0895995
LOC127494009	NA	NA	5.48073	-0.0258804	12.3157	0.00303863	0.0895995
TTC7A	TTC7A	tetratricopeptide repeat domain 7A [Source:HGNC Symbol;Acc:HGNC:19750]	0.840522	4.40535	12.2557	0.00305576	0.0899267
P4HA3	P4HA3	prolyl 4-hydroxylase subunit alpha 3 [Source:HGNC Symbol;Acc:HGNC:30135]	1.68648	3.53832	12.2849	0.00306124	0.0899267
ABCC8	NA	NA	4.43833	2.01008	12.3897	0.00307776	0.0901915
CORO7	CORO7	coronin 7 [Source:HGNC Symbol;Acc:HGNC:26161]	1.07864	3.92921	12.2272	0.00308179	0.0901915
MCUB	MCUB	mitochondrial calcium uniporter dominant negative subunit beta [Source:HGNC Symbol;Acc:HGNC:26076]	0.775408	4.15331	12.1965	0.00311024	0.0906577
CHI3L1	CHI3L1	chitinase 3 like 1 [Source:HGNC Symbol;Acc:HGNC:1932]	2.22701	7.08205	12.3721	0.00311052	0.0906577
BDKRB1	BDKRB1	bradykinin receptor B1 [Source:HGNC Symbol;Acc:HGNC:1029]	1.58571	3.11924	12.1902	0.00311612	0.0906577
ZRANB1	ZRANB1	zinc finger RANBP2-type containing 1 [Source:HGNC Symbol;Acc:HGNC:18224]	-0.577586	5.10581	12.1834	0.00312244	0.0906577
LOC127486716	NA	NA	-2.70033	-0.702544	12.1788	0.00312673	0.0906577
GLB1	GLB1	galactosidase beta 1 [Source:HGNC Symbol;Acc:HGNC:4298]	0.967948	7.26717	12.1541	0.00314996	0.0911325
P2RY13	P2RY13	purinergic receptor P2Y13 [Source:HGNC Symbol;Acc:HGNC:4537]	1.63926	0.423576	12.149	0.00315476	0.0911325
E2F2	E2F2	E2F transcription factor 2 [Source:HGNC Symbol;Acc:HGNC:3114]	1.21755	0.338942	12.1196	0.00318268	0.0917691
LPAR5	LPAR5	lysophosphatidic acid receptor 5 [Source:HGNC Symbol;Acc:HGNC:13307]	1.5391	1.79556	12.0918	0.00320936	0.092368
PHEX	PHEX	phosphate regulating endopeptidase X-linked [Source:HGNC Symbol;Acc:HGNC:8918]	-2.05039	0.762681	12.0795	0.00322124	0.0925395
TNF	TNF	tumor necrosis factor [Source:HGNC Symbol;Acc:HGNC:11892]	2.24349	-0.332952	12.0572	0.00324291	0.0929912
CHAF1B	CHAF1B	chromatin assembly factor 1 subunit B [Source:HGNC Symbol;Acc:HGNC:1911]	1.28497	1.40846	12.0339	0.00326574	0.0934744
LITAF	LITAF	lipopolysaccharide induced TNF factor [Source:HGNC Symbol;Acc:HGNC:16841]	0.792485	6.85364	11.9966	0.0033026	0.0942186
CDCA2	CDCA2	cell division cycle associated 2 [Source:HGNC Symbol;Acc:HGNC:14623]	1.87768	0.334192	11.9896	0.00330961	0.0942186
LOC127482604	NA	NA	2.62377	2.4805	12.0527	0.00331024	0.0942186
PDCL	PDCL	phosducin like [Source:HGNC Symbol;Acc:HGNC:8770]	0.562672	4.15568	11.9834	0.00331586	0.0942186
MMP14	NA	NA	0.982151	7.09148	11.9716	0.0033277	0.0943833
SLC39A1	SLC39A1	solute carrier family 39 member 1 [Source:HGNC Symbol;Acc:HGNC:12876]	0.607426	6.67586	11.9585	0.0033408	0.09453
TLCD2	TLCD2	TLC domain containing 2 [Source:HGNC Symbol;Acc:HGNC:33522]	0.829448	4.73221	11.9544	0.00334496	0.09453
CLEC7A	CLEC7A	C-type lectin domain containing 7A [Source:HGNC Symbol;Acc:HGNC:14558]	2.27432	1.29613	11.9174	0.00338263	0.095422
TMEM104	TMEM104	transmembrane protein 104 [Source:HGNC Symbol;Acc:HGNC:25984]	0.724032	3.91142	11.911	0.0033892	0.0954349
C3	NA	NA	1.36338	7.61029	11.9335	0.00339596	0.0954533
LOC100353356	NA	NA	3.09506	-0.0220646	11.892	0.00340872	0.0956399
MYO7A	MYO7A	myosin VIIA [Source:HGNC Symbol;Acc:HGNC:7606]	1.35123	3.77152	11.8658	0.00343588	0.0962294
STXBP2	STXBP2	syntaxin binding protein 2 [Source:HGNC Symbol;Acc:HGNC:11445]	1.58014	2.43279	11.8419	0.00346082	0.0964719
KIF14	KIF14	kinesin family member 14 [Source:HGNC Symbol;Acc:HGNC:19181]	2.35524	0.256255	11.8358	0.00346723	0.0964719
LOC100348711	NA	NA	3.11367	0.583636	11.8356	0.00346744	0.0964719
LIG1	LIG1	DNA ligase 1 [Source:HGNC Symbol;Acc:HGNC:6598]	0.601771	3.22405	11.8339	0.00346924	0.0964719
FTL	NA	NA	0.989226	9.99541	11.8116	0.00349281	0.0969549
LGALS9	LGALS9//LGALS9B//LGALS9C	galectin 9 [Source:HGNC Symbol;Acc:HGNC:6570]//galectin 9B [Source:HGNC Symbol;Acc:HGNC:24842]//galectin 9C [Source:HGNC Symbol;Acc:HGNC:33874]	2.3757	3.89657	11.9522	0.00350118	0.097015
IL17RA	IL17RA	interleukin 17 receptor A [Source:HGNC Symbol;Acc:HGNC:5985]	0.672488	3.92941	11.7776	0.00352918	0.0973944
HES6	NA	NA	0.900011	2.41649	11.7683	0.00353911	0.0973944
DKK3	DKK3	dickkopf WNT signaling pathway inhibitor 3 [Source:HGNC Symbol;Acc:HGNC:2893]	2.48012	8.56012	11.9316	0.00354108	0.0973944
SKA1	SKA1	spindle and kinetochore associated complex subunit 1 [Source:HGNC Symbol;Acc:HGNC:28109]	2.58063	-0.621381	11.7517	0.00355706	0.0973944
LOC108177987	NA	NA	2.15484	1.66778	11.7516	0.0035572	0.0973944
EXO1	EXO1	exonuclease 1 [Source:HGNC Symbol;Acc:HGNC:3511]	2.86024	-0.75349	11.7451	0.00356422	0.0973944
EFHD2	EFHD2	EF-hand domain family member D2 [Source:HGNC Symbol;Acc:HGNC:28670]	0.656707	6.83787	11.7428	0.00356677	0.0973944
MEIS3	MEIS3	Meis homeobox 3 [Source:HGNC Symbol;Acc:HGNC:29537]	1.16688	3.81638	11.7363	0.00357379	0.0973944
EPHB3	EPHB3	EPH receptor B3 [Source:HGNC Symbol;Acc:HGNC:3394]	0.566565	5.52059	11.7253	0.00358576	0.0973944
CENPK	CENPK	centromere protein K [Source:HGNC Symbol;Acc:HGNC:29479]	1.93382	0.727593	11.7213	0.00359021	0.0973944
CHSY1	CHSY1	chondroitin sulfate synthase 1 [Source:HGNC Symbol;Acc:HGNC:17198]	0.544931	5.04991	11.7144	0.00359779	0.0973944
TNFSF13B	NA	NA	2.09766	1.34195	11.7128	0.00359945	0.0973944
FBXL19	FBXL19	F-box and leucine rich repeat protein 19 [Source:HGNC Symbol;Acc:HGNC:25300]	0.457161	4.08727	11.712	0.00360039	0.0973944
LMNB1	LMNB1	lamin B1 [Source:HGNC Symbol;Acc:HGNC:6637]	1.14328	2.76629	11.7068	0.00360613	0.0973944
LOC100354870	NA	NA	2.57922	1.19224	11.7047	0.00360835	0.0973944
LOC100343231	NA	NA	-0.403465	6.43485	11.6928	0.00362152	0.0975813
RTN4RL2	NA	NA	1.43829	2.0791	11.6579	0.0036604	0.0984591
GBA1	GBA1	glucosylceramidase beta 1 [Source:HGNC Symbol;Acc:HGNC:4177]	0.561066	4.66917	11.6342	0.00368698	0.0990037
SLC15A3	SLC15A3	solute carrier family 15 member 3 [Source:HGNC Symbol;Acc:HGNC:18068]	0.859519	5.68711	11.6205	0.00370248	0.0992493
FRMD7	FRMD7	FERM domain containing 7 [Source:HGNC Symbol;Acc:HGNC:8079]	1.72907	-0.469308	11.6148	0.00370899	0.0992535
SEC61A1	SEC61A1	SEC61 translocon subunit alpha 1 [Source:HGNC Symbol;Acc:HGNC:18276]	0.459891	7.24433	11.6032	0.00372214	0.0994353
RNPEP	RNPEP	arginyl aminopeptidase [Source:HGNC Symbol;Acc:HGNC:10078]	0.508456	4.25938	11.5857	0.00374219	0.0998002
CKAP2L	CKAP2L	cytoskeleton associated protein 2 like [Source:HGNC Symbol;Acc:HGNC:26877]	1.62706	1.14524	11.5788	0.00375016	0.0998425
KIF21B	KIF21B	kinesin family member 21B [Source:HGNC Symbol;Acc:HGNC:29442]	1.4232	2.3177	11.5709	0.00375918	0.0999123
SLC38A7	SLC38A7	solute carrier family 38 member 7 [Source:HGNC Symbol;Acc:HGNC:25582]	0.678819	4.05441	11.5608	0.00377083	0.100052
GIMAP8	GIMAP8	GTPase, IMAP family member 8 [Source:HGNC Symbol;Acc:HGNC:21792]	1.81802	0.807445	11.5463	0.00378768	0.100329
SLCO2B1	SLCO2B1	solute carrier organic anion transporter family member 2B1 [Source:HGNC Symbol;Acc:HGNC:10962]	1.17596	4.32034	11.5283	0.00380875	0.100535
BMP10	BMP10	bone morphogenetic protein 10 [Source:HGNC Symbol;Acc:HGNC:20869]	6.57125	1.19917	11.6445	0.00381515	0.100535
LOC100353437	NA	NA	-0.915985	2.70653	11.5105	0.00382963	0.100535
LOC127488905	NA	NA	2.41725	2.0325	11.5235	0.00383077	0.100535
CHPF	CHPF	chondroitin polymerizing factor [Source:HGNC Symbol;Acc:HGNC:24291]	0.749648	6.86668	11.5088	0.00383167	0.100535
FGR	FGR	FGR proto-oncogene, Src family tyrosine kinase [Source:HGNC Symbol;Acc:HGNC:3697]	1.59962	2.96155	11.5067	0.00383408	0.100535
RUNX3	NA	NA	1.84673	1.309	11.4899	0.00385398	0.100888
P2RY11	NA	NA	2.29592	-0.671842	11.4679	0.00388022	0.101405
LOC100341358	NA	NA	2.36678	1.28374	11.4332	0.00392196	0.102325
UCK1	NA	NA	0.678029	5.35155	11.3949	0.00396857	0.103261
SPP1	SPP1	secreted phosphoprotein 1 [Source:HGNC Symbol;Acc:HGNC:11255]	1.30443	8.50842	11.3948	0.00397549	0.103261
AKAP1	AKAP1	A-kinase anchoring protein 1 [Source:HGNC Symbol;Acc:HGNC:367]	-0.547526	6.74077	11.3786	0.00398867	0.103261
SNX10	SNX10	sorting nexin 10 [Source:HGNC Symbol;Acc:HGNC:14974]	1.24935	4.27958	11.3794	0.00399434	0.103261
LYL1	NA	NA	0.84407	3.38312	11.3687	0.00400094	0.103261
SIRPB2	SIRPB2	signal regulatory protein beta 2 [Source:HGNC Symbol;Acc:HGNC:16247]	3.51353	0.140215	11.3647	0.00400592	0.103261
LOC100356864	NA	NA	-1.20237	2.48977	11.3614	0.00401	0.103261
LOC127482726	NA	NA	-0.601576	4.33666	11.3608	0.00401071	0.103261
MTHFD1L	MTHFD1L	methylenetetrahydrofolate dehydrogenase (NADP+ dependent) 1 like [Source:HGNC Symbol;Acc:HGNC:21055]	0.700452	4.94704	11.3504	0.00402364	0.103423
BATF	BATF	basic leucine zipper ATF-like transcription factor [Source:HGNC Symbol;Acc:HGNC:958]	2.31276	0.940889	11.3341	0.00404406	0.103778
SH3BP1	SH3BP1	SH3 domain binding protein 1 [Source:HGNC Symbol;Acc:HGNC:10824]	1.11592	2.86254	11.3223	0.00405882	0.103986
NFASC	NFASC	neurofascin [Source:HGNC Symbol;Acc:HGNC:29866]	-1.52451	1.72183	11.2922	0.00409685	0.104788
SHTN1	SHTN1	shootin 1 [Source:HGNC Symbol;Acc:HGNC:29319]	1.03904	2.97037	11.2565	0.00414259	0.10569
MCP2	NA	NA	2.50459	1.26893	11.2539	0.00414603	0.10569
RENBP	RENBP	renin binding protein [Source:HGNC Symbol;Acc:HGNC:9959]	0.970534	4.05768	11.2489	0.00415239	0.10569
ALS2CL	ALS2CL	ALS2 C-terminal like [Source:HGNC Symbol;Acc:HGNC:20605]	-0.619115	4.37354	11.2432	0.00415978	0.105706
LOC100358478	NA	NA	2.49882	-0.982618	11.2233	0.00418565	0.106101
HROB	HROB	homologous recombination factor with OB-fold [Source:HGNC Symbol;Acc:HGNC:28460]	1.96707	-0.37678	11.2166	0.00419443	0.106101
LIMD2	LIMD2	LIM domain containing 2 [Source:HGNC Symbol;Acc:HGNC:28142]	0.944389	3.74031	11.2156	0.0041957	0.106101
LOC100359168	NA	NA	2.00413	-0.0648591	11.2092	0.00420405	0.106137
NDC80	NDC80	NDC80 kinetochore complex component [Source:HGNC Symbol;Acc:HGNC:16909]	1.96814	0.631364	11.2041	0.00421073	0.106137
TTYH3	TTYH3	tweety family member 3 [Source:HGNC Symbol;Acc:HGNC:22222]	0.661657	4.95539	11.1941	0.00422391	0.106207
G6PD	G6PD	glucose-6-phosphate dehydrogenase [Source:HGNC Symbol;Acc:HGNC:4057]	0.575832	4.77254	11.1917	0.00422708	0.106207
ALDH1A1	ALDH1A1	aldehyde dehydrogenase 1 family member A1 [Source:HGNC Symbol;Acc:HGNC:402]	-0.567583	8.3605	11.1681	0.00425823	0.106686
S1PR2	S1PR2	sphingosine-1-phosphate receptor 2 [Source:HGNC Symbol;Acc:HGNC:3169]	0.669275	3.74485	11.1652	0.00426209	0.106686
KEF51_p06	NA	NA	-1.0643	11.0254	11.1618	0.00426664	0.106686
DAB2	DAB2	DAB adaptor protein 2 [Source:HGNC Symbol;Acc:HGNC:2662]	0.642925	6.13307	11.0655	0.00439724	0.109777
HIVEP3	HIVEP3	HIVEP zinc finger 3 [Source:HGNC Symbol;Acc:HGNC:13561]	0.806105	2.75555	11.0544	0.00441254	0.109782
MPPED2	MPPED2	metallophosphoesterase domain containing 2 [Source:HGNC Symbol;Acc:HGNC:1180]	-0.844529	2.90079	11.054	0.00441309	0.109782
CAD	CAD	carbamoyl-phosphate synthetase 2, aspartate transcarbamylase, and dihydroorotase [Source:HGNC Symbol;Acc:HGNC:1424]	0.559564	4.11551	11.049	0.00441999	0.109782
LOC100349740	NA	NA	2.21667	1.91579	11.0499	0.00442591	0.109782
SLC39A11	SLC39A11	solute carrier family 39 member 11 [Source:HGNC Symbol;Acc:HGNC:14463]	0.766318	2.42157	11.0399	0.00443257	0.109782
TNFAIP6	TNFAIP6	TNF alpha induced protein 6 [Source:HGNC Symbol;Acc:HGNC:11898]	1.9463	3.51419	11.1284	0.00444295	0.109865
MRC1	MRC1	mannose receptor C-type 1 [Source:HGNC Symbol;Acc:HGNC:7228]	1.30557	5.33992	11.0817	0.00447079	0.110316
SLC12A9	SLC12A9	solute carrier family 12 member 9 [Source:HGNC Symbol;Acc:HGNC:17435]	0.569123	5.03834	11.0094	0.00447532	0.110316
IRF8	IRF8	interferon regulatory factor 8 [Source:HGNC Symbol;Acc:HGNC:5358]	1.06561	3.57095	10.9593	0.00454635	0.111888
LOC103350039	NA	NA	1.43164	5.19707	11.0491	0.00455343	0.111888
UNC13C	UNC13C	unc-13 homolog C [Source:HGNC Symbol;Acc:HGNC:23149]	4.00337	0.0349835	10.9537	0.00456179	0.111918
UBE2C	UBE2C	ubiquitin conjugating enzyme E2 C [Source:HGNC Symbol;Acc:HGNC:15937]	1.86706	1.558	10.933	0.00458429	0.112294
FN1	FN1	fibronectin 1 [Source:HGNC Symbol;Acc:HGNC:3778]	1.21291	11.6281	10.9207	0.00460211	0.112554
SPAG5	SPAG5	sperm associated antigen 5 [Source:HGNC Symbol;Acc:HGNC:13452]	2.42539	0.949708	10.9088	0.00461932	0.112798
KIF11	KIF11	kinesin family member 11 [Source:HGNC Symbol;Acc:HGNC:6388]	1.85549	1.07855	10.8954	0.00463895	0.113101
ADAM8	ADAM8	ADAM metallopeptidase domain 8 [Source:HGNC Symbol;Acc:HGNC:215]	1.22167	3.10592	10.8699	0.00467642	0.113837
DCSTAMP	NA	NA	4.18054	0.240716	10.8889	0.00470524	0.114111
SGO2	NA	NA	1.72821	0.615241	10.8481	0.00470878	0.114111
FXYD5	NA	NA	1.24503	6.6616	10.8792	0.00470962	0.114111
MAD2L1	MAD2L1	mitotic arrest deficient 2 like 1 [Source:HGNC Symbol;Acc:HGNC:6763]	0.91832	2.37281	10.8418	0.00471824	0.114143
ADAMTS4	ADAMTS4	ADAM metallopeptidase with thrombospondin type 1 motif 4 [Source:HGNC Symbol;Acc:HGNC:220]	1.17741	2.68721	10.8369	0.00472561	0.114145
SPRED3	SPRED3	sprouty related EVH1 domain containing 3 [Source:HGNC Symbol;Acc:HGNC:31041]	1.47204	0.217014	10.831	0.00473446	0.114182
P2RY12	NA	NA	1.30925	1.77522	10.8173	0.00475492	0.114499
TRIP13	NA	NA	1.53098	0.671084	10.8041	0.00477495	0.114783
FLVCR2	FLVCR2	FLVCR heme transporter 2 [Source:HGNC Symbol;Acc:HGNC:20105]	1.39064	1.99433	10.7998	0.00478139	0.114783
CDCA5	CDCA5	cell division cycle associated 5 [Source:HGNC Symbol;Acc:HGNC:14626]	0.753177	2.06784	10.7933	0.00479126	0.114843
CCL7	NA	NA	1.68665	1.63063	10.7752	0.00481895	0.11533
LOC103345448	NA	NA	0.798335	5.71758	10.7614	0.00484002	0.115657
LOC100351957	NA	NA	4.92922	1.16523	10.8565	0.00485277	0.115698
CIRBP	NA	NA	-0.819615	5.77149	10.7507	0.00485651	0.115698
LOC100356848	NA	NA	2.92125	0.183492	10.739	0.0048746	0.115794
DUSP10	DUSP10	dual specificity phosphatase 10 [Source:HGNC Symbol;Acc:HGNC:3065]	-0.813898	3.61098	10.7385	0.00487537	0.115794
CXCL14	NA	NA	2.14661	0.608649	10.7287	0.00489064	0.11598
TPP1	TPP1	tripeptidyl peptidase 1 [Source:HGNC Symbol;Acc:HGNC:2073]	0.594873	5.95021	10.7124	0.00491608	0.116396
SMAP2	SMAP2	small ArfGAP2 [Source:HGNC Symbol;Acc:HGNC:25082]	0.712522	4.90965	10.7079	0.00492307	0.116396
HIBCH	HIBCH	3-hydroxyisobutyryl-CoA hydrolase [Source:HGNC Symbol;Acc:HGNC:4908]	-0.774545	4.69477	10.6997	0.00493607	0.116527
CPTP	NA	NA	0.572113	4.63019	10.6865	0.00495679	0.11684
LOC100345885	NA	NA	2.65264	0.336897	10.6614	0.00499668	0.117603
LOC100349893	NA	NA	0.730726	4.28805	10.6563	0.00500479	0.117616
CGAS	NA	NA	1.40949	0.805572	10.6475	0.00501879	0.117768
ABHD12	ABHD12	abhydrolase domain containing 12, lysophospholipase [Source:HGNC Symbol;Acc:HGNC:15868]	0.739555	5.5917	10.6245	0.00505589	0.11822
RMI2	RMI2	RecQ mediated genome instability 2 [Source:HGNC Symbol;Acc:HGNC:28349]	2.30411	0.189051	10.6216	0.00506049	0.11822
ARHGEF39	ARHGEF39	Rho guanine nucleotide exchange factor 39 [Source:HGNC Symbol;Acc:HGNC:25909]	1.4464	0.434912	10.6215	0.00506075	0.11822
ABRACL	ABRACL	ABRA C-terminal like [Source:HGNC Symbol;Acc:HGNC:21230]	0.766354	3.4245	10.5949	0.00510397	0.119052
LOC100338260	NA	NA	-1.36104	1.96214	10.5824	0.00512442	0.119351
OLFM4	NA	NA	3.14816	-0.520869	10.5594	0.00516238	0.119928
C16H1orf115	NA	NA	-0.633816	5.51807	10.558	0.00516455	0.119928
AURKB	AURKB	aurora kinase B [Source:HGNC Symbol;Acc:HGNC:11390]	2.39998	0.469484	10.5498	0.00517827	0.120068
DOCK8	DOCK8	dedicator of cytokinesis 8 [Source:HGNC Symbol;Acc:HGNC:19191]	0.60475	4.67646	10.5427	0.00518995	0.120161
METRNL	METRNL	meteorin like, glial cell differentiation regulator [Source:HGNC Symbol;Acc:HGNC:27584]	0.832673	4.22677	10.5266	0.00521692	0.120607
LOC108176625	NA	NA	1.30577	0.451161	10.5197	0.00522849	0.120696
CDK6	CDK6	cyclin dependent kinase 6 [Source:HGNC Symbol;Acc:HGNC:1777]	0.610067	5.24814	10.5139	0.00523827	0.120743
UBE2T	UBE2T	ubiquitin conjugating enzyme E2 T [Source:HGNC Symbol;Acc:HGNC:25009]	2.00812	0.0627372	10.4837	0.00528922	0.121673
DDIAS	DDIAS	DNA damage induced apoptosis suppressor [Source:HGNC Symbol;Acc:HGNC:26351]	1.80542	0.403235	10.4783	0.00529853	0.121673
SBK1	NA	NA	-1.13276	3.48766	10.4763	0.00530199	0.121673
SERPING1	SERPING1	serpin family G member 1 [Source:HGNC Symbol;Acc:HGNC:1228]	0.874726	9.54359	10.4462	0.00535349	0.122564
LOC108176040	NA	NA	2.11431	0.133277	10.4445	0.00535648	0.122564
ARHGAP4	ARHGAP4	Rho GTPase activating protein 4 [Source:HGNC Symbol;Acc:HGNC:674]	0.894447	3.09579	10.4174	0.00540338	0.123283
LASP1	LASP1	LIM and SH3 protein 1 [Source:HGNC Symbol;Acc:HGNC:6513]	0.570425	6.74985	10.4173	0.00540367	0.123283
SLC35F6	SLC35F6	solute carrier family 35 member F6 [Source:HGNC Symbol;Acc:HGNC:26055]	0.469719	3.83955	10.4074	0.00542096	0.123406
LOC103349392	NA	NA	2.10158	0.0149393	10.4051	0.00542485	0.123406
BRCA1	BRCA1	BRCA1 DNA repair associated [Source:HGNC Symbol;Acc:HGNC:1100]	1.51822	-0.0145135	10.3979	0.0054376	0.123516
PLOD3	NA	NA	0.500256	6.18894	10.385	0.00546029	0.123851
TGFB2	TGFB2	transforming growth factor beta 2 [Source:HGNC Symbol;Acc:HGNC:11768]	-0.569114	4.15292	10.3798	0.00546937	0.123875
C1R	C1R	complement C1r [Source:HGNC Symbol;Acc:HGNC:1246]	1.09239	9.44778	10.3754	0.0054772	0.123875
AKAP5	AKAP5	A-kinase anchoring protein 5 [Source:HGNC Symbol;Acc:HGNC:375]	-1.62569	3.07256	10.3726	0.00550309	0.123913
IBSP	IBSP	integrin binding sialoprotein [Source:HGNC Symbol;Acc:HGNC:5341]	2.82111	0.387768	10.3575	0.00550896	0.123913
NGEF	NA	NA	1.13685	3.26087	10.3574	0.00550915	0.123913
OTULINL	OTULINL	OTU deubiquitinase with linear linkage specificity like [Source:HGNC Symbol;Acc:HGNC:25629]	1.17642	2.36312	10.3566	0.0055106	0.123913
FUT7	NA	NA	1.91109	0.554816	10.3186	0.00557888	0.125268
POC1A	POC1A	POC1 centriolar protein A [Source:HGNC Symbol;Acc:HGNC:24488]	0.94586	1.95285	10.3024	0.00560819	0.125746
NUP50	NUP50	nucleoporin 50 [Source:HGNC Symbol;Acc:HGNC:8065]	0.38751	5.07657	10.2905	0.00562982	0.12605
LOC127489312	NA	NA	1.55543	-0.175541	10.2827	0.00564407	0.126142
KIZ	KIZ	kizuna centrosomal protein [Source:HGNC Symbol;Acc:HGNC:15865]	-0.386751	4.60926	10.2713	0.0056651	0.126142
CPLX2	CPLX2	complexin 2 [Source:HGNC Symbol;Acc:HGNC:2310]	2.22266	1.70211	10.2707	0.00566608	0.126142
PCNA	PCNA	proliferating cell nuclear antigen [Source:HGNC Symbol;Acc:HGNC:8729]	0.465881	5.27197	10.2707	0.00566621	0.126142
SLC25A45	NA	NA	1.45797	-0.376115	10.259	0.00568777	0.126442
GNG11	GNG11	G protein subunit gamma 11 [Source:HGNC Symbol;Acc:HGNC:4403]	-0.607583	7.24254	10.2511	0.00570224	0.126583
LOC100351012	NA	NA	3.19475	2.41396	10.3079	0.00579092	0.12837
CDK1	CDK1	cyclin dependent kinase 1 [Source:HGNC Symbol;Acc:HGNC:1722]	2.03605	1.67891	10.1952	0.00580703	0.128544
GALM	GALM	galactose mutarotase [Source:HGNC Symbol;Acc:HGNC:24063]	0.525101	4.64108	10.1786	0.00583842	0.128955
C2CD2L	C2CD2L	C2CD2 like [Source:HGNC Symbol;Acc:HGNC:29000]	0.448203	4.24959	10.1717	0.0058516	0.128955
IL11	NA	NA	2.51763	0.388298	10.1668	0.00586093	0.128955
ANLN	ANLN	anillin, actin binding protein [Source:HGNC Symbol;Acc:HGNC:14082]	1.69904	1.80833	10.165	0.00586444	0.128955
FGF16	FGF16	fibroblast growth factor 16 [Source:HGNC Symbol;Acc:HGNC:3672]	-1.23282	3.13942	10.1606	0.00587283	0.128955
CCNB1	NA	NA	2.00797	2.04512	10.1613	0.00588006	0.128955
SLC47A1	SLC47A1	solute carrier family 47 member 1 [Source:HGNC Symbol;Acc:HGNC:25588]	1.90655	4.22948	10.2616	0.00588334	0.128955
LTA4H	LTA4H	leukotriene A4 hydrolase [Source:HGNC Symbol;Acc:HGNC:6710]	0.496955	4.74207	10.1444	0.00590407	0.129208
GALNT10	GALNT10	polypeptide N-acetylgalactosaminyltransferase 10 [Source:HGNC Symbol;Acc:HGNC:19873]	0.627179	4.58377	10.1352	0.00592184	0.129208
PPP2R5A	PPP2R5A	protein phosphatase 2 regulatory subunit B'alpha [Source:HGNC Symbol;Acc:HGNC:9309]	-0.404911	6.02665	10.1331	0.00592577	0.129208
AP1B1	AP1B1	adaptor related protein complex 1 subunit beta 1 [Source:HGNC Symbol;Acc:HGNC:554]	0.453941	5.67772	10.132	0.00592797	0.129208
KCNAB2	KCNAB2	potassium voltage-gated channel subfamily A regulatory beta subunit 2 [Source:HGNC Symbol;Acc:HGNC:6229]	0.725077	4.7088	10.124	0.00594344	0.129365
TRABD2A	TRABD2A	TraB domain containing 2A [Source:HGNC Symbol;Acc:HGNC:27013]	0.996191	2.30989	10.1113	0.00596811	0.129721
ACTR3B	ACTR3C//ACTR3B	actin related protein 3C [Source:HGNC Symbol;Acc:HGNC:37282]//actin related protein 3B [Source:HGNC Symbol;Acc:HGNC:17256]	-0.500184	4.61711	10.1008	0.00598877	0.129913
LOC100357281	NA	NA	2.19424	3.05045	10.1804	0.00599357	0.129913
LOC100357943	NA	NA	1.66258	0.112525	10.0878	0.00601431	0.130182
ADAM17	ADAM17	ADAM metallopeptidase domain 17 [Source:HGNC Symbol;Acc:HGNC:195]	0.519468	5.39648	10.0818	0.00602608	0.130257
STRADB	STRADB	STE20 related adaptor beta [Source:HGNC Symbol;Acc:HGNC:13205]	-0.669226	4.40525	10.0613	0.00606665	0.130952
PKMYT1	PKMYT1	protein kinase, membrane associated tyrosine/threonine 1 [Source:HGNC Symbol;Acc:HGNC:29650]	0.963174	2.2433	10.0516	0.00608605	0.13119
CD244	CD244	CD244 molecule [Source:HGNC Symbol;Acc:HGNC:18171]	1.78567	-0.664165	10.0429	0.00610337	0.131382
C1QTNF5	C1QTNF5	C1q and TNF related 5 [Source:HGNC Symbol;Acc:HGNC:14344]	0.768244	5.66227	10.0305	0.00612836	0.131709
SLC6A16	NA	NA	2.4018	-0.800519	10.0193	0.00615075	0.131709
LOC127485862	NA	NA	-1.3723	13.0314	10.019	0.00615135	0.131709
OLR1	OLR1	oxidized low density lipoprotein receptor 1 [Source:HGNC Symbol;Acc:HGNC:8133]	2.46447	-0.634655	10.0186	0.00615225	0.131709
CHN2	NA	NA	1.08624	2.34227	9.98865	0.0062131	0.132672
NEK5	NA	NA	-1.47034	1.55369	9.98403	0.00622255	0.132672
SPAG1	SPAG1	sperm associated antigen 1 [Source:HGNC Symbol;Acc:HGNC:11212]	1.00636	1.87915	9.98396	0.00622269	0.132672
WDHD1	WDHD1	WD repeat and HMG-box DNA binding protein 1 [Source:HGNC Symbol;Acc:HGNC:23170]	1.01586	1.26782	9.9774	0.00623613	0.132777
LOC127489992	NA	NA	-1.42877	1.43685	9.96855	0.00625433	0.132931
PRR11	PRR11	proline rich 11 [Source:HGNC Symbol;Acc:HGNC:25619]	2.3252	-0.171032	9.96561	0.00626037	0.132931
ACVR1B	ACVR1B	activin A receptor type 1B [Source:HGNC Symbol;Acc:HGNC:172]	0.511485	4.16958	9.95518	0.00628191	0.133122
PRXL2A	PRXL2A	peroxiredoxin like 2A [Source:HGNC Symbol;Acc:HGNC:28651]	-0.716615	5.65154	9.95053	0.00629154	0.133122
INCENP	INCENP	inner centromere protein [Source:HGNC Symbol;Acc:HGNC:6058]	1.13019	1.63646	9.94504	0.00630294	0.133122
LOC127485974	NA	NA	-2.66139	2.64106	10.0387	0.00630347	0.133122
DEPDC1B	DEPDC1B	DEP domain containing 1B [Source:HGNC Symbol;Acc:HGNC:24902]	2.17081	-0.404009	9.93467	0.00632452	0.133279
CNBP	CNBP	CCHC-type zinc finger nucleic acid binding protein [Source:HGNC Symbol;Acc:HGNC:13164]	-0.351825	7.95877	9.93098	0.00633219	0.133279
EHD3	EHD3	EH domain containing 3 [Source:HGNC Symbol;Acc:HGNC:3244]	0.500835	6.07775	9.92587	0.00634289	0.133279
FHOD3	FHOD3	formin homology 2 domain containing 3 [Source:HGNC Symbol;Acc:HGNC:26178]	-0.786226	7.19691	9.92051	0.00635411	0.133279
NEK6	NA	NA	0.65464	6.21464	9.9172	0.00636105	0.133279
LOC108177728	NA	NA	1.1991	2.10505	9.91672	0.00636205	0.133279
POLE	POLE	DNA polymerase epsilon, catalytic subunit [Source:HGNC Symbol;Acc:HGNC:9177]	1.36257	1.26137	9.90818	0.00638001	0.133476
SAMHD1	SAMHD1	SAM and HD domain containing deoxynucleoside triphosphate triphosphohydrolase 1 [Source:HGNC Symbol;Acc:HGNC:15925]	0.83741	5.64145	9.89072	0.0064169	0.134069
PTK7	PTK7	protein tyrosine kinase 7 (inactive) [Source:HGNC Symbol;Acc:HGNC:9618]	0.693577	5.51839	9.88076	0.00643803	0.134227
IFNGR1	IFNGR1	interferon gamma receptor 1 [Source:HGNC Symbol;Acc:HGNC:5439]	0.54281	5.91246	9.87905	0.00644167	0.134227
CLCF1	CLCF1	cardiotrophin like cytokine factor 1 [Source:HGNC Symbol;Acc:HGNC:17412]	1.0661	1.96516	9.87024	0.00646047	0.134344
LOC127488919	NA	NA	1.52273	1.40387	9.86837	0.00646446	0.134344
C2	C2	complement C2 [Source:HGNC Symbol;Acc:HGNC:1248]	1.77251	4.11574	9.95157	0.00648222	0.134516
RGS18	RGS18	regulator of G protein signaling 18 [Source:HGNC Symbol;Acc:HGNC:14261]	1.50385	1.16746	9.85648	0.00648993	0.134516
GMPPB	GMPPB	GDP-mannose pyrophosphorylase B [Source:HGNC Symbol;Acc:HGNC:22932]	0.497992	5.06842	9.84945	0.00650505	0.13465
PLPP4	PLPP4	phospholipid phosphatase 4 [Source:HGNC Symbol;Acc:HGNC:23531]	1.13953	0.59246	9.84065	0.00652401	0.134864
MAST1	NA	NA	1.31224	0.579225	9.82965	0.00654782	0.135156
UCK2	UCK2	uridine-cytidine kinase 2 [Source:HGNC Symbol;Acc:HGNC:12562]	0.574095	4.4321	9.82614	0.00655544	0.135156
TREX1	TREX1	three prime repair exonuclease 1 [Source:HGNC Symbol;Acc:HGNC:12269]	0.781944	3.76997	9.82014	0.00656849	0.135247
RGS19	NA	NA	0.962241	4.01299	9.80729	0.00659653	0.135646
RIN1	NA	NA	0.847827	3.02451	9.77232	0.00667352	0.137048
ADGRG5	NA	NA	1.71199	0.25813	9.76154	0.00669747	0.13736
LOC100352672	NA	NA	1.70129	2.31852	9.74863	0.00672627	0.137769
WNT1	WNT1	Wnt family member 1 [Source:HGNC Symbol;Acc:HGNC:12774]	2.63854	-0.730325	9.73832	0.00674936	0.138055
HK2	HK2	hexokinase 2 [Source:HGNC Symbol;Acc:HGNC:4923]	0.954268	3.66389	9.73452	0.00675789	0.138055
CX3CL1	CX3CL1	C-X3-C motif chemokine ligand 1 [Source:HGNC Symbol;Acc:HGNC:10647]	1.46893	4.91373	9.80932	0.00677908	0.138307
NUF2	NUF2	NUF2 component of NDC80 kinetochore complex [Source:HGNC Symbol;Acc:HGNC:14621]	1.80323	1.18836	9.71729	0.00679677	0.138487
ECM1	ECM1	extracellular matrix protein 1 [Source:HGNC Symbol;Acc:HGNC:3153]	1.41872	6.40295	9.7849	0.00681707	0.13872
PDLIM3	PDLIM3	PDZ and LIM domain 3 [Source:HGNC Symbol;Acc:HGNC:20767]	-0.518275	8.21846	9.69993	0.00683617	0.138928
LOC103348770	NA	NA	-2.0759	0.58474	9.66458	0.00691724	0.140393
CYSLTR2	NA	NA	1.42658	1.8571	9.6575	0.00693362	0.140543
GLMP	GLMP	glycosylated lysosomal membrane protein [Source:HGNC Symbol;Acc:HGNC:29436]	0.634468	5.06969	9.63674	0.00698186	0.141283
CDR2L	CDR2L	cerebellar degeneration related protein 2 like [Source:HGNC Symbol;Acc:HGNC:29999]	0.452023	4.57416	9.63402	0.00698821	0.141283
PDCD2L	NA	NA	-0.796911	2.26225	9.62276	0.00701457	0.141488
SLC11A2	SLC11A2	solute carrier family 11 member 2 [Source:HGNC Symbol;Acc:HGNC:10908]	0.724086	3.62689	9.61585	0.0070308	0.141488
ALPL	ALPL	alkaline phosphatase, biomineralization associated [Source:HGNC Symbol;Acc:HGNC:438]	1.18271	3.24855	9.61373	0.00703578	0.141488
MFNG	MFNG	MFNG O-fucosylpeptide 3-beta-N-acetylglucosaminyltransferase [Source:HGNC Symbol;Acc:HGNC:7038]	0.733178	5.1302	9.61123	0.00704167	0.141488
SRSF5	SRSF5	serine and arginine rich splicing factor 5 [Source:HGNC Symbol;Acc:HGNC:10787]	-0.408209	6.48617	9.60941	0.00704597	0.141488
JAK3	NA	NA	1.03756	3.9304	9.60656	0.00705268	0.141488
RARB	RARB	retinoic acid receptor beta [Source:HGNC Symbol;Acc:HGNC:9865]	-0.60149	2.75334	9.59737	0.0070744	0.141514
MNDA	MNDA	myeloid cell nuclear differentiation antigen [Source:HGNC Symbol;Acc:HGNC:7183]	0.753624	5.88883	9.5963	0.00707694	0.141514
FABP5	FABP5	fatty acid binding protein 5 [Source:HGNC Symbol;Acc:HGNC:3560]	1.04736	5.38002	9.6098	0.00708113	0.141514
CENPN	CENPN	centromere protein N [Source:HGNC Symbol;Acc:HGNC:30873]	0.777066	2.03265	9.58749	0.00709786	0.141598
TTK	TTK	TTK protein kinase [Source:HGNC Symbol;Acc:HGNC:12401]	2.15158	0.194428	9.58513	0.00710348	0.141598
MAP2K3	MAP2K3	mitogen-activated protein kinase kinase 3 [Source:HGNC Symbol;Acc:HGNC:6843]	0.505022	6.15385	9.57412	0.00712974	0.141941
CASP1	CASP1//CARD16	caspase 1 [Source:HGNC Symbol;Acc:HGNC:1499]//caspase recruitment domain family member 16 [Source:HGNC Symbol;Acc:HGNC:33701]	2.07577	0.291355	9.56242	0.00715776	0.142224
VSTM2A	NA	NA	-1.25944	2.46298	9.5517	0.00718353	0.142224
SOX7	SOX7	SRY-box transcription factor 7 [Source:HGNC Symbol;Acc:HGNC:18196]	-0.904093	2.85827	9.54774	0.0071931	0.142224
SEMA3F	SEMA3F	semaphorin 3F [Source:HGNC Symbol;Acc:HGNC:10728]	0.431531	6.18886	9.54486	0.00720005	0.142224
GSR	GSR	glutathione-disulfide reductase [Source:HGNC Symbol;Acc:HGNC:4623]	-0.460481	5.34709	9.54227	0.0072063	0.142224
PTGS1	PTGS1	prostaglandin-endoperoxide synthase 1 [Source:HGNC Symbol;Acc:HGNC:9604]	0.761656	5.7127	9.54225	0.00720636	0.142224
EEF1AKMT3	NA	NA	0.879035	1.97514	9.5417	0.00720768	0.142224
ADPRH	ADPRH	ADP-ribosylarginine hydrolase [Source:HGNC Symbol;Acc:HGNC:269]	0.508438	5.69557	9.52579	0.00724629	0.142445
PHLDA3	PHLDA3	pleckstrin homology like domain family A member 3 [Source:HGNC Symbol;Acc:HGNC:8934]	0.588323	6.25673	9.52419	0.00725019	0.142445
LOC100338696	NA	NA	2.3804	4.8182	9.6348	0.00725774	0.142445
C5AR2	C5AR2	complement C5a receptor 2 [Source:HGNC Symbol;Acc:HGNC:4527]	1.87886	0.441845	9.51932	0.00726206	0.142445
MRPL32	NA	NA	-0.454865	3.91266	9.5168	0.00726823	0.142445
TXNRD3	TXNRD3	thioredoxin reductase 3 [Source:HGNC Symbol;Acc:HGNC:20667]	2.65075	1.78169	9.55704	0.00727355	0.142445
TMEM198	NA	NA	0.968319	2.60546	9.49934	0.00731101	0.142938
FCHO1	NA	NA	0.893731	1.92139	9.49691	0.007317	0.142938
LOC100351163	NA	NA	1.9748	6.84583	9.56774	0.00741994	0.144768
DMAC2L	DMAC2L	distal membrane arm assembly component 2 like [Source:HGNC Symbol;Acc:HGNC:18799]	-0.405104	4.58702	9.43628	0.00746798	0.145523
LOXL2	LOXL2	lysyl oxidase like 2 [Source:HGNC Symbol;Acc:HGNC:6666]	0.784747	6.97517	9.42692	0.0074916	0.145802
CTSV	CTSV	cathepsin V [Source:HGNC Symbol;Acc:HGNC:2538]	0.695702	6.69544	9.4135	0.00752561	0.146281
TMEM151A	NA	NA	1.85124	1.92836	9.40167	0.00755576	0.146685
SIAH2	SIAH2	siah E3 ubiquitin protein ligase 2 [Source:HGNC Symbol;Acc:HGNC:10858]	-0.593585	4.48059	9.39171	0.00758123	0.146997
LOC127486686	NA	NA	2.01743	-0.296425	9.38746	0.00759213	0.147026
CARD6	CARD6	caspase recruitment domain family member 6 [Source:HGNC Symbol;Acc:HGNC:16394]	1.08532	3.33713	9.36976	0.00763772	0.147453
LOC127493068	NA	NA	-1.01184	7.05805	9.36338	0.00765447	0.147453
TADA3	TADA3	transcriptional adaptor 3 [Source:HGNC Symbol;Acc:HGNC:19422]	-4.2981	3.44352	9.4725	0.0076575	0.147453
ECEL1	ECEL1	endothelin converting enzyme like 1 [Source:HGNC Symbol;Acc:HGNC:3147]	1.56601	-0.217402	9.36127	0.0076597	0.147453
MMP12	MMP12	matrix metallopeptidase 12 [Source:HGNC Symbol;Acc:HGNC:7158]	3.61889	6.19717	9.46841	0.0076679	0.147453
RTL10	RTL10	retrotransposon Gag like 10 [Source:HGNC Symbol;Acc:HGNC:26112]	0.54752	5.72608	9.357	0.00767079	0.147453
TSPAN33	TSPAN33	tetraspanin 33 [Source:HGNC Symbol;Acc:HGNC:28743]	1.34108	0.878973	9.35141	0.00768533	0.147551
SLC46A2	SLC46A2	solute carrier family 46 member 2 [Source:HGNC Symbol;Acc:HGNC:16055]	1.3803	0.608453	9.3457	0.00770021	0.147655
SH3BP2	SH3BP2	SH3 domain binding protein 2 [Source:HGNC Symbol;Acc:HGNC:10825]	0.727126	5.17936	9.33924	0.00771708	0.147797
PVALB	PVALB	parvalbumin [Source:HGNC Symbol;Acc:HGNC:9704]	3.59969	1.33478	10.0739	0.00773971	0.147894
REEP4	NA	NA	0.982559	2.21257	9.33008	0.00774107	0.147894
TNFRSF25	TNFRSF25	TNF receptor superfamily member 25 [Source:HGNC Symbol;Acc:HGNC:11910]	0.840913	3.138	9.32384	0.00775748	0.148027
CNGA2	CNGA2	cyclic nucleotide gated channel subunit alpha 2 [Source:HGNC Symbol;Acc:HGNC:2149]	-0.977226	1.68287	9.30973	0.00779471	0.148556
BAG2	NA	NA	-0.639812	6.50437	9.28067	0.00787202	0.149836
UNC13D	NA	NA	1.74585	2.02803	9.27463	0.00788818	0.149836
LOC127487009	NA	NA	-0.760827	8.79468	9.27371	0.00789066	0.149836
COL6A2	NA	NA	0.624414	11.004	9.24643	0.00796423	0.15105
FKBP11	FKBP11	FKBP prolyl isomerase 11 [Source:HGNC Symbol;Acc:HGNC:18624]	0.866252	4.45048	9.23777	0.00798774	0.151248
TPM3	NA	NA	0.642666	5.58373	9.23546	0.00799404	0.151248
IL2RG	NA	NA	2.01511	0.405259	9.22008	0.00803602	0.151688
RAB31	VAPA	VAMP associated protein A [Source:HGNC Symbol;Acc:HGNC:12648]	0.674377	6.85449	9.21937	0.00803796	0.151688
OARD1	OARD1	O-acyl-ADP-ribose deacylase 1 [Source:HGNC Symbol;Acc:HGNC:21257]	-0.38977	5.08071	9.21628	0.00804644	0.151688
TLR4	TLR4	toll like receptor 4 [Source:HGNC Symbol;Acc:HGNC:11850]	1.24652	4.00778	9.22049	0.00806617	0.151877
LOC127488890	NA	NA	-1.19216	5.11679	9.24351	0.00810147	0.151989
C1S	C1S	complement C1s [Source:HGNC Symbol;Acc:HGNC:1247]	1.0603	8.63666	9.19523	0.00810442	0.151989
NGF	NGF	nerve growth factor [Source:HGNC Symbol;Acc:HGNC:7808]	-0.781097	3.30425	9.19302	0.00811053	0.151989
LOC100350649	NA	NA	2.10259	1.14567	9.19053	0.00811742	0.151989
ANXA2	NA	NA	0.570221	8.73391	9.18452	0.00813409	0.151989
HVCN1	HVCN1	hydrogen voltage gated channel 1 [Source:HGNC Symbol;Acc:HGNC:28240]	0.750372	3.55612	9.18353	0.00813686	0.151989
PDK1	PDK1	pyruvate dehydrogenase kinase 1 [Source:HGNC Symbol;Acc:HGNC:8809]	-0.979999	5.11517	9.18573	0.00814113	0.151989
LOC100009451	NA	NA	1.42006	4.43332	9.24531	0.0081577	0.151989
PDIA6	PDIA6	protein disulfide isomerase family A member 6 [Source:HGNC Symbol;Acc:HGNC:30168]	0.431303	7.54752	9.1732	0.00816559	0.151989
PTCD3	NA	NA	-0.361587	5.28915	9.17185	0.00816936	0.151989
CLPX	CLPX	caseinolytic mitochondrial matrix peptidase chaperone subunit X [Source:HGNC Symbol;Acc:HGNC:2088]	-0.399615	5.61377	9.15987	0.00820288	0.152316
GALNT3	GALNT3	polypeptide N-acetylgalactosaminyltransferase 3 [Source:HGNC Symbol;Acc:HGNC:4125]	2.10145	-0.456603	9.15861	0.00820642	0.152316
PTPN1	PTPN1	protein tyrosine phosphatase non-receptor type 1 [Source:HGNC Symbol;Acc:HGNC:9642]	0.359408	5.31848	9.15359	0.00822052	0.152397
RHOG	RHOG	ras homolog family member G [Source:HGNC Symbol;Acc:HGNC:672]	0.537228	5.60494	9.1434	0.00824921	0.152662
ARF3	ARF3	ADP ribosylation factor 3 [Source:HGNC Symbol;Acc:HGNC:654]	0.395656	6.58199	9.14157	0.00825437	0.152662
AKNA	AKNA	AT-hook transcription factor [Source:HGNC Symbol;Acc:HGNC:24108]	1.00141	3.2445	9.12925	0.00828924	0.153041
FUNDC2	FUNDC2	FUN14 domain containing 2 [Source:HGNC Symbol;Acc:HGNC:24925]	-0.323838	6.24359	9.12741	0.00829448	0.153041
FMN1	FMN1	formin 1 [Source:HGNC Symbol;Acc:HGNC:3768]	2.28511	-0.495968	9.12341	0.00830584	0.15307
CLDN7	CLDN7	claudin 7 [Source:HGNC Symbol;Acc:HGNC:2049]	1.70649	0.751887	9.0989	0.00837588	0.154095
STK10	STK10	serine/threonine kinase 10 [Source:HGNC Symbol;Acc:HGNC:11388]	0.728524	3.63662	9.09155	0.00839701	0.154095
CTSK	CTSK	cathepsin K [Source:HGNC Symbol;Acc:HGNC:2536]	0.753989	9.47117	9.08903	0.00840427	0.154095
KCNIP4	KCNIP4	potassium voltage-gated channel interacting protein 4 [Source:HGNC Symbol;Acc:HGNC:30083]	4.23771	0.193809	9.12794	0.00840492	0.154095
SLC27A4	SLC27A4	solute carrier family 27 member 4 [Source:HGNC Symbol;Acc:HGNC:10998]	0.415725	4.92649	9.08282	0.00842221	0.154095
AP5Z1	AP5Z1	adaptor related protein complex 5 subunit zeta 1 [Source:HGNC Symbol;Acc:HGNC:22197]	0.501627	4.17524	9.07573	0.00844271	0.154095
EPCAM	EPCAM	epithelial cell adhesion molecule [Source:HGNC Symbol;Acc:HGNC:11529]	2.61064	0.70959	9.07122	0.0084558	0.154095
ADCY7	ADCY7	adenylate cyclase 7 [Source:HGNC Symbol;Acc:HGNC:238]	0.69375	5.76428	9.07056	0.00845772	0.154095
KIF18A	KIF18A	kinesin family member 18A [Source:HGNC Symbol;Acc:HGNC:29441]	1.17499	0.185694	9.06997	0.00845944	0.154095
DDX41	DDX41	DEAD-box helicase 41 [Source:HGNC Symbol;Acc:HGNC:18674]	0.324469	5.1419	9.06977	0.00846002	0.154095
PLEKHM1	PLEKHM1	pleckstrin homology and RUN domain containing M1 [Source:HGNC Symbol;Acc:HGNC:29017]	0.350434	4.87121	9.06395	0.00847694	0.15415
TGFBI	TGFBI	transforming growth factor beta induced [Source:HGNC Symbol;Acc:HGNC:11771]	0.714761	8.56306	9.06039	0.00848731	0.15415
GALE	GALE	UDP-galactose-4-epimerase [Source:HGNC Symbol;Acc:HGNC:4116]	0.764175	3.40678	9.05855	0.00849268	0.15415
LOC103345489	NA	NA	-1.2153	4.58044	9.08978	0.00851493	0.154375
FAM210A	FAM210A	family with sequence similarity 210 member A [Source:HGNC Symbol;Acc:HGNC:28346]	-0.571448	4.48395	9.04672	0.00852727	0.15442
HAUS8	NA	NA	1.08188	1.72706	9.03441	0.00856343	0.154748
LOC103351113	NA	NA	-1.13649	0.88907	9.0338	0.00856522	0.154748
ANKRD40	ANKRD40	ankyrin repeat domain 40 [Source:HGNC Symbol;Acc:HGNC:28233]	-0.400575	6.26763	9.01288	0.00862711	0.155641
CD300A	NA	NA	1.55262	0.843451	9.00653	0.00864597	0.155641
PTPDC1	PTPDC1	protein tyrosine phosphatase domain containing 1 [Source:HGNC Symbol;Acc:HGNC:30184]	-0.572819	4.76192	9.00626	0.00864678	0.155641
RSL24D1	RSL24D1	ribosomal L24 domain containing 1 [Source:HGNC Symbol;Acc:HGNC:18479]	-0.332563	5.53937	9.00368	0.00865446	0.155641
LOC100352072	NA	NA	-2.29985	0.260659	8.99783	0.00867193	0.155685
HOMER3	NA	NA	0.898818	3.02656	8.99619	0.00867682	0.155685
DAAM1	DAAM1	dishevelled associated activator of morphogenesis 1 [Source:HGNC Symbol;Acc:HGNC:18142]	-0.506118	4.92468	8.97926	0.0087276	0.156394
LOC127485954	NA	NA	0.816877	4.70786	8.97635	0.00873636	0.156394
NCAPG	NCAPG	non-SMC condensin I complex subunit G [Source:HGNC Symbol;Acc:HGNC:24304]	1.96959	0.567411	8.97288	0.00874684	0.156402
CHN1	CHN1	chimerin 1 [Source:HGNC Symbol;Acc:HGNC:1943]	-0.641442	4.50617	8.96659	0.00876585	0.156489
CLN3	CLN3	CLN3 lysosomal/endosomal transmembrane protein, battenin [Source:HGNC Symbol;Acc:HGNC:2074]	0.530965	4.37959	8.96322	0.00877602	0.156489
LOC100358051	NA	NA	2.46537	4.55165	9.06274	0.00878403	0.156489
CLDN4	CLDN4	claudin 4 [Source:HGNC Symbol;Acc:HGNC:2046]	3.05872	-0.0847436	8.95804	0.00879173	0.156489
SLAMF8	SLAMF8	SLAM family member 8 [Source:HGNC Symbol;Acc:HGNC:21391]	1.43762	1.46805	8.94568	0.00882935	0.15698
LYSET	LYSET	lysosomal enzyme trafficking factor [Source:HGNC Symbol;Acc:HGNC:20218]	0.584365	3.62402	8.9423	0.00883966	0.156984
STX11	STX11	syntaxin 11 [Source:HGNC Symbol;Acc:HGNC:11429]	1.28699	-0.582909	8.93545	0.0088606	0.157178
NCAPH	NCAPH	non-SMC condensin I complex subunit H [Source:HGNC Symbol;Acc:HGNC:1112]	1.4832	2.47958	8.92094	0.00890516	0.157789
MYEF2	MYEF2	myelin expression factor 2 [Source:HGNC Symbol;Acc:HGNC:17940]	-0.399514	4.75773	8.91309	0.00892938	0.157936
SIPA1	NA	NA	0.461433	5.29388	8.90865	0.00894308	0.157936
CDH1	CDH1	cadherin 1 [Source:HGNC Symbol;Acc:HGNC:1748]	3.14095	0.228676	8.90763	0.00895723	0.157936
ARHGEF19	ARHGEF19	Rho guanine nucleotide exchange factor 19 [Source:HGNC Symbol;Acc:HGNC:26604]	0.967958	3.64783	8.89895	0.00897317	0.157936
MS4A2	MS4A2	membrane spanning 4-domains A2 [Source:HGNC Symbol;Acc:HGNC:7316]	2.27151	-0.72418	8.89795	0.00897626	0.157936
EXOSC5	EXOSC5	exosome component 5 [Source:HGNC Symbol;Acc:HGNC:24662]	0.708406	3.01589	8.89211	0.00899443	0.157936
MTFR2	MTFR2	mitochondrial fission regulator 2 [Source:HGNC Symbol;Acc:HGNC:21115]	1.45688	0.143299	8.89114	0.00899744	0.157936
NECAP2	NECAP2	NECAP endocytosis associated 2 [Source:HGNC Symbol;Acc:HGNC:25528]	0.461608	5.68038	8.8892	0.0090035	0.157936
LOC127488290	NA	NA	1.65556	-0.361857	8.88891	0.00900441	0.157936
LY96	NA	NA	1.06875	2.39451	8.87681	0.00904224	0.158422
RAB13	RAB13	RAB13, member RAS oncogene family [Source:HGNC Symbol;Acc:HGNC:9762]	0.563537	5.86621	8.86675	0.00907382	0.158797
BAX	BAX	BCL2 associated X, apoptosis regulator [Source:HGNC Symbol;Acc:HGNC:959]	0.536366	4.42349	8.85679	0.0091052	0.159102
FMNL3	FMNL3	formin like 3 [Source:HGNC Symbol;Acc:HGNC:23698]	0.483118	5.25132	8.85477	0.0091116	0.159102
LOC108177687	NA	NA	-1.36031	0.903183	8.83247	0.00918239	0.160159
PSTPIP1	NA	NA	1.23074	3.42634	8.81344	0.00924332	0.160867
ANKS6	ANKS6	ankyrin repeat and sterile alpha motif domain containing 6 [Source:HGNC Symbol;Acc:HGNC:26724]	0.392242	5.08118	8.8113	0.0092502	0.160867
LGMN	LGMN	legumain [Source:HGNC Symbol;Acc:HGNC:9472]	0.619988	7.62436	8.81017	0.00925384	0.160867
PLK1	PLK1	polo like kinase 1 [Source:HGNC Symbol;Acc:HGNC:9077]	0.605996	3.16709	8.79385	0.00930651	0.161602
SHANK1	NA	NA	1.59461	-0.595999	8.77886	0.0093552	0.162268
MAP3K8	MAP3K8	mitogen-activated protein kinase kinase kinase 8 [Source:HGNC Symbol;Acc:HGNC:6860]	0.573317	3.15988	8.77253	0.00937585	0.162445
EGR3	EGR3	early growth response 3 [Source:HGNC Symbol;Acc:HGNC:3240]	1.02405	1.20962	8.76838	0.00938939	0.162499
SERPINE2	SERPINE2	serpin family E member 2 [Source:HGNC Symbol;Acc:HGNC:8951]	0.997284	6.88333	8.76866	0.00939975	0.162499
GPR132	NA	NA	2.43941	-0.29885	8.75109	0.00944617	0.163121
JCHAIN	JCHAIN	joining chain of multimeric IgA and IgM [Source:HGNC Symbol;Acc:HGNC:5713]	0.818493	3.77667	8.7479	0.00945669	0.163123
NRROS	NRROS	negative regulator of reactive oxygen species [Source:HGNC Symbol;Acc:HGNC:24613]	0.963286	2.98826	8.71253	0.00957415	0.164967
KRT75	NA	NA	2.42645	0.310962	8.70606	0.00959581	0.165137
NYAP2	NYAP2	neuronal tyrosine-phosphorylated phosphoinositide-3-kinase adaptor 2 [Source:HGNC Symbol;Acc:HGNC:29291]	2.52293	-0.701587	8.69535	0.0096318	0.165137
TMED3	TMED3	transmembrane p24 trafficking protein 3 [Source:HGNC Symbol;Acc:HGNC:28889]	0.735251	6.89146	8.69463	0.00963422	0.165137
AGTPBP1	AGTPBP1	ATP/GTP binding carboxypeptidase 1 [Source:HGNC Symbol;Acc:HGNC:17258]	-0.934388	4.39401	8.69334	0.00963857	0.165137
KYAT3	KYAT3	kynurenine aminotransferase 3 [Source:HGNC Symbol;Acc:HGNC:33238]	-0.721253	4.91018	8.69313	0.00963927	0.165137
GPR158	GPR158	G protein-coupled receptor 158 [Source:HGNC Symbol;Acc:HGNC:23689]	5.89618	-0.717232	10.3706	0.00964744	0.165137
LOC127490349	NA	NA	0.627404	2.33322	8.68113	0.00967983	0.16551
LOC103350681	NA	NA	-2.4727	0.264979	8.67344	0.00970593	0.165652
LOC100343299	NA	NA	1.68687	3.7841	8.73515	0.00970946	0.165652
LOC103348620	NA	NA	2.78887	0.11067	8.66932	0.00971994	0.165652
ARHGAP24	ARHGAP24	Rho GTPase activating protein 24 [Source:HGNC Symbol;Acc:HGNC:25361]	0.513983	5.01463	8.66527	0.00973372	0.165707
MTARC2	NA	NA	-0.468581	7.02454	8.65234	0.0097779	0.166237
UTRN	UTRN	utrophin [Source:HGNC Symbol;Acc:HGNC:12635]	-0.546547	6.63003	8.64994	0.00978613	0.166237
CTSZ	CTSZ	cathepsin Z [Source:HGNC Symbol;Acc:HGNC:2547]	0.615393	7.18406	8.64321	0.00980924	0.166448
SLC35F1	SLC35F1	solute carrier family 35 member F1 [Source:HGNC Symbol;Acc:HGNC:21483]	-0.807493	4.0491	8.62001	0.0098894	0.167523
IYD	IYD	iodotyrosine deiodinase [Source:HGNC Symbol;Acc:HGNC:21071]	3.30678	-0.739747	8.6163	0.00990226	0.167523
LOC100342838	NA	NA	10.4519	3.49276	9.35557	0.00992326	0.167523
GDF11	GDF11	growth differentiation factor 11 [Source:HGNC Symbol;Acc:HGNC:4216]	-1.08377	2.49649	8.60509	0.00994135	0.167523
VEGFD	VEGFD	vascular endothelial growth factor D [Source:HGNC Symbol;Acc:HGNC:3708]	-0.547865	5.56458	8.60442	0.00994365	0.167523
TGIF1	TGIF1	TGFB induced factor homeobox 1 [Source:HGNC Symbol;Acc:HGNC:11776]	0.465875	3.82741	8.60234	0.00995092	0.167523
COG5	COG5	component of oligomeric golgi complex 5 [Source:HGNC Symbol;Acc:HGNC:14857]	-0.600501	5.78446	8.59887	0.00996308	0.167523
ME3	ME3	malic enzyme 3 [Source:HGNC Symbol;Acc:HGNC:6985]	-1.01484	4.83582	8.60463	0.00997525	0.167523
IRAG2	IRAG2	inositol 1,4,5-triphosphate receptor associated 2 [Source:HGNC Symbol;Acc:HGNC:6690]	1.95956	1.02238	8.59279	0.00998439	0.167523
CAMKMT	CAMKMT	calmodulin-lysine N-methyltransferase [Source:HGNC Symbol;Acc:HGNC:26276]	-0.571946	2.71025	8.59156	0.00998869	0.167523
LOC100343913	NA	NA	1.69351	0.388831	8.59105	0.0099905	0.167523
REL	REL	REL proto-oncogene, NF-kB subunit [Source:HGNC Symbol;Acc:HGNC:9954]	0.901517	2.23634	8.57022	0.0100639	0.168518
HAUS6	HAUS6	HAUS augmin like complex subunit 6 [Source:HGNC Symbol;Acc:HGNC:25948]	0.663761	2.87457	8.56811	0.0100714	0.168518
TNS3	NA	NA	0.472066	6.62268	8.56295	0.0100897	0.168644
PPP4C	PPP4C	protein phosphatase 4 catalytic subunit [Source:HGNC Symbol;Acc:HGNC:9319]	0.322162	5.85934	8.55778	0.0101081	0.16877
PPM1J	PPM1J	protein phosphatase, Mg2+/Mn2+ dependent 1J [Source:HGNC Symbol;Acc:HGNC:20785]	-0.708643	2.92006	8.55052	0.010134	0.168842
ARHGEF1	NA	NA	0.394994	5.91072	8.54829	0.0101419	0.168842
CGREF1	NA	NA	1.13749	2.14477	8.54749	0.0101448	0.168842
ITIH2	ITIH2	inter-alpha-trypsin inhibitor heavy chain 2 [Source:HGNC Symbol;Acc:HGNC:6167]	-1.75528	0.230249	8.53767	0.01018	0.169142
HYOU1	HYOU1	hypoxia up-regulated 1 [Source:HGNC Symbol;Acc:HGNC:16931]	0.43427	5.94008	8.53424	0.0101923	0.169142
LOC108177025	NA	NA	2.31771	-0.232083	8.53341	0.0101952	0.169142
ALG3	ALG3	ALG3 alpha-1,3- mannosyltransferase [Source:HGNC Symbol;Acc:HGNC:23056]	0.451132	4.08417	8.52818	0.010214	0.169274
ADORA2A	ADORA2A	adenosine A2a receptor [Source:HGNC Symbol;Acc:HGNC:263]	-0.670198	2.1732	8.52048	0.0102418	0.169482
AAAS	AAAS	aladin WD repeat nucleoporin [Source:HGNC Symbol;Acc:HGNC:13666]	0.577148	3.68507	8.51869	0.0102483	0.169482
SLC36A1	SLC36A1	solute carrier family 36 member 1 [Source:HGNC Symbol;Acc:HGNC:18761]	0.487446	3.4567	8.51382	0.0102659	0.169594
TMEM116	TMEM116	transmembrane protein 116 [Source:HGNC Symbol;Acc:HGNC:25084]	-1.53729	0.297404	8.49803	0.0103233	0.170362
CCDC102A	NA	NA	0.523525	4.94753	8.48114	0.0103851	0.171201
LSAMP	LSAMP	limbic system associated membrane protein [Source:HGNC Symbol;Acc:HGNC:6705]	1.52984	2.20931	8.47584	0.0104046	0.171341
ITGB7	ITGB7	integrin subunit beta 7 [Source:HGNC Symbol;Acc:HGNC:6162]	0.586342	3.27129	8.46952	0.0104278	0.171364
LOC127485591	NA	NA	0.810957	4.63596	8.46395	0.0104484	0.171364
SP100	NA	NA	1.03011	2.88188	8.46367	0.0104494	0.171364
KYNU	KYNU	kynureninase [Source:HGNC Symbol;Acc:HGNC:6469]	1.81085	-0.863899	8.46356	0.0104498	0.171364
STAT3	STAT3	signal transducer and activator of transcription 3 [Source:HGNC Symbol;Acc:HGNC:11364]	0.484684	8.1324	8.45477	0.0104824	0.171718
MXD3	NA	NA	1.28123	0.657951	8.436	0.0105523	0.172514
MYH7	MYH7	myosin heavy chain 7 [Source:HGNC Symbol;Acc:HGNC:7577]	-2.50838	12.2888	8.50602	0.0105531	0.172514
LOC127483140	NA	NA	2.80453	-0.524405	8.432	0.0105672	0.172565
FGF23	FGF23	fibroblast growth factor 23 [Source:HGNC Symbol;Acc:HGNC:3680]	3.52447	1.20317	8.4741	0.010594	0.1727
LOC100341366	PLSCR1	phospholipid scramblase 1 [Source:HGNC Symbol;Acc:HGNC:9092]	1.15091	2.42816	8.4239	0.0105976	0.1727
LOC103345588	NA	NA	1.15479	1.70733	8.41415	0.0106343	0.173118
SMYD2	SMYD2	SET and MYND domain containing 2 [Source:HGNC Symbol;Acc:HGNC:20982]	-1.32737	5.9023	8.47216	0.0106624	0.173394
CLCN7	NA	NA	0.458438	5.01358	8.39946	0.0106899	0.173586
LMAN2L	LMAN2L	lectin, mannose binding 2 like [Source:HGNC Symbol;Acc:HGNC:19263]	-0.39327	4.66928	8.39774	0.0106964	0.173586
BCL6B	NA	NA	-0.961219	3.83948	8.38709	0.0107369	0.174063
CARMIL2	CARMIL2	capping protein regulator and myosin 1 linker 2 [Source:HGNC Symbol;Acc:HGNC:27089]	0.984455	1.03033	8.38123	0.0107593	0.174244
LOC108175785	NA	NA	-0.699231	2.42981	8.37166	0.0107959	0.174503
CHST3	CHST3	carbohydrate sulfotransferase 3 [Source:HGNC Symbol;Acc:HGNC:1971]	0.511466	6.51793	8.36851	0.010808	0.174503
LOC127483246	NA	NA	-1.83475	-0.602237	8.36636	0.0108163	0.174503
PHLDB2	PHLDB2	pleckstrin homology like domain family B member 2 [Source:HGNC Symbol;Acc:HGNC:29573]	-0.646584	6.19875	8.36542	0.0108199	0.174503
LOC127482710	NA	NA	-1.18869	3.83794	8.3454	0.0109199	0.175935
GAS7	GAS7	growth arrest specific 7 [Source:HGNC Symbol;Acc:HGNC:4169]	0.737789	6.13204	8.33471	0.0109387	0.176056
RAD9A	RAD9A	RAD9 checkpoint clamp component A [Source:HGNC Symbol;Acc:HGNC:9827]	0.558314	3.88017	8.32882	0.0109617	0.176245
ATP7B	ATP7B	ATPase copper transporting beta [Source:HGNC Symbol;Acc:HGNC:870]	-1.14114	3.25427	8.32053	0.0109941	0.176584
DLGAP5	DLGAP5	DLG associated protein 5 [Source:HGNC Symbol;Acc:HGNC:16864]	2.47508	0.999356	8.31498	0.0110282	0.176699
IRX5	IRX5	iroquois homeobox 5 [Source:HGNC Symbol;Acc:HGNC:14361]	-1.8998	1.94008	8.31257	0.0110377	0.176699
GPD1L	NA	NA	-0.810507	6.35223	8.30766	0.0110447	0.176699
CFAP68	CFAP68	cilia and flagella associated protein 68 [Source:HGNC Symbol;Acc:HGNC:1163]	-0.575582	2.10179	8.30401	0.011059	0.176699
HMGN5	HMGN5	high mobility group nucleosome binding domain 5 [Source:HGNC Symbol;Acc:HGNC:8013]	0.753673	3.75951	8.30211	0.0110666	0.176699
PXMP2	PXMP2	peroxisomal membrane protein 2 [Source:HGNC Symbol;Acc:HGNC:9716]	-0.701047	3.25541	8.30146	0.0110691	0.176699
VASH1	VASH1	vasohibin 1 [Source:HGNC Symbol;Acc:HGNC:19964]	0.501193	6.38488	8.29613	0.0110902	0.176855
LOC100357658	NA	NA	0.942754	0.848716	8.2805	0.0111522	0.177662
KCNJ2	KCNJ2	potassium inwardly rectifying channel subfamily J member 2 [Source:HGNC Symbol;Acc:HGNC:6263]	-2.08787	3.90976	8.363	0.0111771	0.177763
TNIK	TNIK	TRAF2 and NCK interacting kinase [Source:HGNC Symbol;Acc:HGNC:30765]	-0.559417	4.02618	8.2732	0.0111813	0.177763
FGD1	FGD1	FYVE, RhoGEF and PH domain containing 1 [Source:HGNC Symbol;Acc:HGNC:3663]	0.40237	4.48708	8.27	0.0111941	0.177786
CTBS	CTBS	chitobiase [Source:HGNC Symbol;Acc:HGNC:2496]	0.764199	4.29814	8.25448	0.0112564	0.178337
KCNN4	KCNN4	potassium calcium-activated channel subfamily N member 4 [Source:HGNC Symbol;Acc:HGNC:6293]	1.71694	1.40357	8.25302	0.0112622	0.178337
PPP1R18	NA	NA	0.4529	5.80268	8.25283	0.011263	0.178337
LOC127488989	NA	NA	0.901758	2.63149	8.24813	0.0112819	0.178363
WDR76	WDR76	WD repeat domain 76 [Source:HGNC Symbol;Acc:HGNC:25773]	0.704803	1.62324	8.24536	0.0112931	0.178363
S100A9	S100A9	S100 calcium binding protein A9 [Source:HGNC Symbol;Acc:HGNC:10499]	2.04341	0.742287	8.24297	0.0113028	0.178363
PIK3R6	PIK3R6	phosphoinositide-3-kinase regulatory subunit 6 [Source:HGNC Symbol;Acc:HGNC:27101]	1.30869	1.28074	8.2411	0.0113103	0.178363
AP4B1	AP4B1	adaptor related protein complex 4 subunit beta 1 [Source:HGNC Symbol;Acc:HGNC:572]	-0.38951	4.05704	8.23751	0.0113249	0.178413
MMP1	MMP1	matrix metallopeptidase 1 [Source:HGNC Symbol;Acc:HGNC:7155]	3.38078	1.38787	8.27041	0.0114035	0.17947
RGMA	RGMA	repulsive guidance molecule BMP co-receptor a [Source:HGNC Symbol;Acc:HGNC:30308]	0.422539	5.22884	8.21108	0.0114326	0.17967
MMP13	MMP13	matrix metallopeptidase 13 [Source:HGNC Symbol;Acc:HGNC:7159]	3.43365	1.09445	8.20825	0.0114567	0.17967
ACADL	NA	NA	-0.75006	7.24595	8.20213	0.0114693	0.17967
LOC100356572	NA	NA	-0.857592	6.25793	8.20069	0.0114752	0.17967
ARHGEF12	ARHGEF12	Rho guanine nucleotide exchange factor 12 [Source:HGNC Symbol;Acc:HGNC:14193]	-0.547478	6.73035	8.19464	0.0115001	0.17967
MYC	MYC	MYC proto-oncogene, bHLH transcription factor [Source:HGNC Symbol;Acc:HGNC:7553]	0.554721	4.57636	8.19401	0.0115027	0.17967
STAC2	STAC2	SH3 and cysteine rich domain 2 [Source:HGNC Symbol;Acc:HGNC:23990]	0.984874	5.32698	8.20985	0.0115072	0.17967
TRPM1	TRPM1	transient receptor potential cation channel subfamily M member 1 [Source:HGNC Symbol;Acc:HGNC:7146]	2.48085	-0.704243	8.19145	0.0115133	0.17967
PIGT	NA	NA	0.4434	7.44351	8.18991	0.0115196	0.17967
LOC103350037	NA	NA	1.03925	3.45174	8.18505	0.0115397	0.179689
RND3	RND3	Rho family GTPase 3 [Source:HGNC Symbol;Acc:HGNC:671]	-0.626193	5.87093	8.18011	0.0115602	0.179689
THSD4	NA	NA	-0.700311	3.41626	8.17635	0.0115759	0.179689
LOC103349936	NA	NA	-1.71433	3.90215	8.24258	0.0115768	0.179689
PLOD1	PLOD1	procollagen-lysine,2-oxoglutarate 5-dioxygenase 1 [Source:HGNC Symbol;Acc:HGNC:9081]	0.383146	6.28765	8.17573	0.0115784	0.179689
ARPC3	ARPC3	actin related protein 2/3 complex subunit 3 [Source:HGNC Symbol;Acc:HGNC:706]	0.47741	6.19697	8.17037	0.0116007	0.179857
SH2D1B	NA	NA	1.828	0.380987	8.16324	0.0116305	0.18014
ATP6V1B2	ATP6V1B2	ATPase H+ transporting V1 subunit B2 [Source:HGNC Symbol;Acc:HGNC:854]	0.438844	6.07486	8.15641	0.011659	0.180403
IL32	NA	NA	2.05077	2.30931	8.17489	0.0117168	0.181118
FGF11	FGF11	fibroblast growth factor 11 [Source:HGNC Symbol;Acc:HGNC:3667]	0.460465	3.63819	8.13669	0.011742	0.181327
NUDT6	NA	NA	-0.502229	3.61148	8.13281	0.0117583	0.181401
DUSP5	DUSP5	dual specificity phosphatase 5 [Source:HGNC Symbol;Acc:HGNC:3071]	1.10806	0.589161	8.12968	0.0117716	0.181427
CLEC12A	NA	NA	1.31326	1.34479	8.10836	0.0118623	0.182614
LOC100338778	NA	NA	1.70598	0.408699	8.10439	0.0118793	0.182614
RUBCNL	RUBCNL	rubicon like autophagy enhancer [Source:HGNC Symbol;Acc:HGNC:20420]	1.23667	0.561901	8.10228	0.0118883	0.182614
SLC39A7	SLC39A7	solute carrier family 39 member 7 [Source:HGNC Symbol;Acc:HGNC:4927]	0.460678	6.08099	8.10063	0.0118954	0.182614
CUNH22orf23	NA	NA	0.841936	1.20931	8.09661	0.0119126	0.182699
NHERF1	NHERF1	NHERF family PDZ scaffold protein 1 [Source:HGNC Symbol;Acc:HGNC:11075]	0.669187	3.73055	8.08302	0.0119711	0.183417
IL3RA	IL3RA	interleukin 3 receptor subunit alpha [Source:HGNC Symbol;Acc:HGNC:6012]	2.84844	1.6216	8.10447	0.0120057	0.183766
CLYBL	CLYBL	citramalyl-CoA lyase [Source:HGNC Symbol;Acc:HGNC:18355]	-0.706371	4.4449	8.0718	0.0120197	0.1838
MUC16	NA	NA	3.2291	1.10049	8.11632	0.0120376	0.183894
COL2A1	COL2A1	collagen type II alpha 1 chain [Source:HGNC Symbol;Acc:HGNC:2200]	2.91121	4.6653	8.147	0.0120612	0.184075
LOC100009168	NA	NA	2.46056	0.981242	8.06059	0.0120814	0.184202
SULF2	SULF2	sulfatase 2 [Source:HGNC Symbol;Acc:HGNC:20392]	0.523821	5.15962	8.04051	0.0121563	0.185164
ATP1B3	ATP1B3	ATPase Na+/K+ transporting subunit beta 3 [Source:HGNC Symbol;Acc:HGNC:806]	0.575311	6.6167	8.0158	0.0122654	0.186645
PLCG2	PLCG2	phospholipase C gamma 2 [Source:HGNC Symbol;Acc:HGNC:9066]	1.39765	1.85155	8.00487	0.0123141	0.187202
KLHDC1	KLHDC1	kelch domain containing 1 [Source:HGNC Symbol;Acc:HGNC:19836]	-0.586742	3.76958	7.9942	0.0123617	0.187744
CASKIN2	NA	NA	0.609394	5.10659	7.99075	0.0123772	0.187797
LOC103351645	NA	NA	3.16079	0.0867724	7.96774	0.0124941	0.189386
MAP3K20	MAP3K20	mitogen-activated protein kinase kinase kinase 20 [Source:HGNC Symbol;Acc:HGNC:17797]	-0.614386	7.13195	7.95548	0.0125366	0.189846
TPST2	TPST2	tyrosylprotein sulfotransferase 2 [Source:HGNC Symbol;Acc:HGNC:12021]	0.526186	5.36775	7.94103	0.0126025	0.19066
COL9A1	COL9A1	collagen type IX alpha 1 chain [Source:HGNC Symbol;Acc:HGNC:2217]	2.93092	0.21584	7.93182	0.012658	0.191173
PPP1R12B	PPP1R12B	protein phosphatase 1 regulatory subunit 12B [Source:HGNC Symbol;Acc:HGNC:7619]	-0.687965	8.28813	7.92832	0.0126608	0.191173
MYH6	NA	NA	3.84273	10.8959	8.00554	0.0126838	0.191244
ITIH5	ITIH5	inter-alpha-trypsin inhibitor heavy chain 5 [Source:HGNC Symbol;Acc:HGNC:21449]	-0.727104	4.9944	7.92199	0.01269	0.191244
PIK3CG	PIK3CG	phosphatidylinositol-4,5-bisphosphate 3-kinase catalytic subunit gamma [Source:HGNC Symbol;Acc:HGNC:8978]	1.34402	1.91472	7.91184	0.012737	0.191766
ACAD10	ACAD10	acyl-CoA dehydrogenase family member 10 [Source:HGNC Symbol;Acc:HGNC:21597]	-0.672322	4.25459	7.90763	0.0127565	0.191785
LOC100355286	NA	NA	3.06588	2.30373	7.98195	0.0127628	0.191785
AASS	AASS	aminoadipate-semialdehyde synthase [Source:HGNC Symbol;Acc:HGNC:17366]	-0.477598	5.22359	7.89831	0.0127999	0.192158
LOC100343012	NA	NA	1.53932	0.650021	7.88539	0.0128602	0.192879
FGD2	FGD2	FYVE, RhoGEF and PH domain containing 2 [Source:HGNC Symbol;Acc:HGNC:3664]	1.24592	1.39169	7.87958	0.0128875	0.193103
AKAP6	AKAP6	A-kinase anchoring protein 6 [Source:HGNC Symbol;Acc:HGNC:376]	-0.941101	6.38724	7.87757	0.0129104	0.19326
LOC100357377	NA	NA	1.60388	3.81933	7.92633	0.0129397	0.193513
OGA	OGA	O-GlcNAcase [Source:HGNC Symbol;Acc:HGNC:7056]	-0.449782	6.99911	7.86297	0.0129658	0.193718
LOC100345538	NA	NA	-1.41116	2.4923	7.83497	0.013099	0.195522
AQP7	NA	NA	-1.37431	3.7691	7.86176	0.0131149	0.195538
TDP1	TDP1	tyrosyl-DNA phosphodiesterase 1 [Source:HGNC Symbol;Acc:HGNC:18884]	0.647844	2.69208	7.82952	0.0131251	0.195538
HMMR	HMMR	hyaluronan mediated motility receptor [Source:HGNC Symbol;Acc:HGNC:5012]	1.8015	-0.404287	7.81352	0.0132022	0.196498
NFX1	NFX1	nuclear transcription factor, X-box binding 1 [Source:HGNC Symbol;Acc:HGNC:7803]	-0.326302	4.63025	7.80105	0.0132625	0.197209
LTBR	LTBR	lymphotoxin beta receptor [Source:HGNC Symbol;Acc:HGNC:6718]	0.469788	5.8772	7.79181	0.0133075	0.197646
AFMID	NA	NA	0.929813	1.99766	7.78981	0.0133172	0.197646
MEAK7	NA	NA	0.586189	2.69183	7.78328	0.0133491	0.197814
CAMK2N2	CAMK2N2	calcium/calmodulin dependent protein kinase II inhibitor 2 [Source:HGNC Symbol;Acc:HGNC:24197]	0.924741	0.355828	7.78231	0.0133538	0.197814
LOC103351100	NA	NA	3.21638	0.319555	7.76679	0.0134437	0.198957
PKIA	PKIA	cAMP-dependent protein kinase inhibitor alpha [Source:HGNC Symbol;Acc:HGNC:9017]	-1.66307	4.156	7.82524	0.01346	0.19897
AFAP1L1	AFAP1L1	actin filament associated protein 1 like 1 [Source:HGNC Symbol;Acc:HGNC:26714]	-0.997488	4.04674	7.75867	0.0134701	0.19897
CDC42EP3	CDC42EP3	CDC42 effector protein 3 [Source:HGNC Symbol;Acc:HGNC:16943]	-0.684413	4.72555	7.74997	0.0135131	0.199418
MEIS2	MEIS2	Meis homeobox 2 [Source:HGNC Symbol;Acc:HGNC:7001]	-0.403136	4.5142	7.73548	0.0135852	0.200292
IL21R	NA	NA	2.12145	0.81068	7.72847	0.0136202	0.200551
RHOF	RHOF	ras homolog family member F, filopodia associated [Source:HGNC Symbol;Acc:HGNC:15703]	1.07133	1.96561	7.72683	0.0136284	0.200551
GRIP2	GRIP2	glutamate receptor interacting protein 2 [Source:HGNC Symbol;Acc:HGNC:23841]	-1.16531	1.58864	7.72365	0.0136444	0.200597
LEP	LEP	leptin [Source:HGNC Symbol;Acc:HGNC:6553]	-1.71424	2.74226	7.74919	0.0136593	0.200628
NAB2	NAB2	NGFI-A binding protein 2 [Source:HGNC Symbol;Acc:HGNC:7627]	0.460643	5.31798	7.71164	0.0137047	0.201054
THEMIS2	THEMIS2	thymocyte selection associated family member 2 [Source:HGNC Symbol;Acc:HGNC:16839]	1.16134	2.90702	7.70979	0.0137141	0.201054
SLAMF6	SLAMF6	SLAM family member 6 [Source:HGNC Symbol;Acc:HGNC:21392]	2.1807	-0.447861	7.70518	0.0137373	0.201206
RALB	RALB	RAS like proto-oncogene B [Source:HGNC Symbol;Acc:HGNC:9840]	0.493634	5.78319	7.68791	0.013825	0.201854
LOC127485894	NA	NA	2.34696	0.0534015	7.68782	0.0138254	0.201854
SLC66A1	SLC66A1	solute carrier family 66 member 1 [Source:HGNC Symbol;Acc:HGNC:26001]	0.702778	2.83731	7.68741	0.0138275	0.201854
COCH	COCH	cochlin [Source:HGNC Symbol;Acc:HGNC:2180]	1.57137	-0.585521	7.68629	0.0138332	0.201854
IL4I1	NA	NA	1.33254	1.47845	7.68308	0.0138495	0.201867
LRRC75B	NA	NA	-2.51776	-0.183866	7.67966	0.013867	0.201867
AQP11	AQP11	aquaporin 11 [Source:HGNC Symbol;Acc:HGNC:19940]	-1.18508	-0.224705	7.67851	0.0138729	0.201867
GRB14	GRB14	growth factor receptor bound protein 14 [Source:HGNC Symbol;Acc:HGNC:4565]	-0.596978	6.77082	7.67377	0.0138971	0.201882
KRT5	KRT5	keratin 5 [Source:HGNC Symbol;Acc:HGNC:6442]	2.22063	-0.413116	7.67326	0.0138997	0.201882
TCEAL4	NA	NA	-0.335535	6.24654	7.66191	0.013958	0.202541
LRRC74B	LRRC74B	leucine rich repeat containing 74B [Source:HGNC Symbol;Acc:HGNC:34301]	1.71716	-0.79634	7.65444	0.0139965	0.202911
KIF20B	KIF20B	kinesin family member 20B [Source:HGNC Symbol;Acc:HGNC:7212]	0.911442	1.77218	7.64727	0.0140336	0.203083
STK17B	STK17B	serine/threonine kinase 17b [Source:HGNC Symbol;Acc:HGNC:11396]	0.943168	4.07448	7.64546	0.014043	0.203083
MYO1G	NA	NA	1.17222	3.56343	7.64732	0.0140474	0.203083
SSC5D	NA	NA	0.815673	4.88003	7.63741	0.0140848	0.203435
BATF3	NA	NA	1.36254	0.417021	7.63245	0.0141106	0.20362
TAPBP	TAPBP	TAP binding protein [Source:HGNC Symbol;Acc:HGNC:11566]	0.543054	5.70584	7.62371	0.0141562	0.20409
SLC4A11	SLC4A11	solute carrier family 4 member 11 [Source:HGNC Symbol;Acc:HGNC:16438]	1.31588	0.658709	7.61804	0.0141859	0.20433
LOC100353151	NA	NA	-0.701181	5.96752	7.61339	0.0142103	0.204492
COL4A2	COL4A2	collagen type IV alpha 2 chain [Source:HGNC Symbol;Acc:HGNC:2203]	0.540109	9.5003	7.60312	0.0142644	0.205081
RAB8A	NA	NA	0.317355	4.48828	7.59441	0.0143104	0.205244
LOC103351859	NA	NA	-0.999792	0.477895	7.59416	0.0143117	0.205244
TNFAIP8L3	TNFAIP8L3	TNF alpha induced protein 8 like 3 [Source:HGNC Symbol;Acc:HGNC:20620]	0.835303	3.22905	7.59353	0.0143151	0.205244
GAB3	GAB3	GRB2 associated binding protein 3 [Source:HGNC Symbol;Acc:HGNC:17515]	0.67823	2.15677	7.57333	0.0144225	0.206548
LOC100354746	NA	NA	0.780805	2.67262	7.57147	0.0144325	0.206548
PHETA2	PHETA2	PH domain containing endocytic trafficking adaptor 2 [Source:HGNC Symbol;Acc:HGNC:27161]	0.633094	3.50309	7.56434	0.0144707	0.206792
MAL2	MAL2	mal, T cell differentiation protein 2 [Source:HGNC Symbol;Acc:HGNC:13634]	-1.5392	1.88797	7.56335	0.014476	0.206792
LOC127487418	NA	NA	-1.33184	4.32933	7.60789	0.0145012	0.206963
GAS1	NA	NA	0.590156	7.63299	7.53006	0.0146559	0.208832
SLC35E4	SLC35E4	solute carrier family 35 member E4 [Source:HGNC Symbol;Acc:HGNC:17058]	0.554707	3.02125	7.5279	0.0146677	0.208832
ZCCHC4	ZCCHC4	zinc finger CCHC-type containing 4 [Source:HGNC Symbol;Acc:HGNC:22917]	-0.555027	2.39146	7.52706	0.0146722	0.208832
LOC103349888	NA	NA	-0.690812	4.01847	7.51337	0.014747	0.209705
RTN4IP1	RTN4IP1	reticulon 4 interacting protein 1 [Source:HGNC Symbol;Acc:HGNC:18647]	-0.827941	3.49736	7.51072	0.0147616	0.209722
DNASE2	DNASE2	deoxyribonuclease 2, lysosomal [Source:HGNC Symbol;Acc:HGNC:2960]	0.516355	4.88475	7.49345	0.0148567	0.210882
LOC103351625	NA	NA	1.71414	-0.0509124	7.48812	0.0148862	0.211108
TGFB1	NA	NA	0.720531	5.63352	7.47281	0.0149713	0.212123
LPCAT2	LPCAT2	lysophosphatidylcholine acyltransferase 2 [Source:HGNC Symbol;Acc:HGNC:26032]	1.31852	2.39988	7.47029	0.0149853	0.21213
FBLN1	FBLN1	fibulin 1 [Source:HGNC Symbol;Acc:HGNC:3600]	0.733929	10.4929	7.46229	0.01503	0.21257
RCC2	RCC2	regulator of chromosome condensation 2 [Source:HGNC Symbol;Acc:HGNC:30297]	0.395615	5.30195	7.45515	0.0150701	0.212944
LOC127487407	NA	NA	0.832451	2.5469	7.44132	0.0151481	0.213823
EPHA4	EPHA4	EPH receptor A4 [Source:HGNC Symbol;Acc:HGNC:3388]	2.00873	4.06282	7.51043	0.0151729	0.213823
HCN4	HCN4	hyperpolarization activated cyclic nucleotide gated potassium channel 4 [Source:HGNC Symbol;Acc:HGNC:16882]	4.73172	0.224602	7.48379	0.0151784	0.213823
FBLN7	FBLN7	fibulin 7 [Source:HGNC Symbol;Acc:HGNC:26740]	0.805688	5.21802	7.43443	0.015187	0.213823
ALDH6A1	ALDH6A1	aldehyde dehydrogenase 6 family member A1 [Source:HGNC Symbol;Acc:HGNC:7179]	-0.617869	7.06089	7.42428	0.0152447	0.214401
LOC127482791	NA	NA	2.82219	-0.400429	7.42238	0.0152555	0.214401
KIAA1522	NA	NA	0.785439	3.57094	7.41762	0.0152827	0.214589
ZWINT	ZWINT	ZW10 interacting kinetochore protein [Source:HGNC Symbol;Acc:HGNC:13195]	1.39121	0.0222512	7.40984	0.0153272	0.214946
NEIL3	NEIL3	nei like DNA glycosylase 3 [Source:HGNC Symbol;Acc:HGNC:24573]	1.73934	-0.219137	7.40654	0.0153461	0.214946
REEP1	REEP1	receptor accessory protein 1 [Source:HGNC Symbol;Acc:HGNC:25786]	-0.820503	3.78453	7.40411	0.0153601	0.214946
TMEM70	NA	NA	-0.448556	4.49247	7.40358	0.0153631	0.214946
CDC6	CDC6	cell division cycle 6 [Source:HGNC Symbol;Acc:HGNC:1744]	1.69937	-0.246478	7.39233	0.0154279	0.215659
PBK	PBK	PDZ binding kinase [Source:HGNC Symbol;Acc:HGNC:18282]	1.28185	0.448038	7.38708	0.0154582	0.215799
DLC1	DLC1	DLC1 Rho GTPase activating protein [Source:HGNC Symbol;Acc:HGNC:2897]	-0.412666	6.32777	7.38108	0.015493	0.215799
CUNH15orf39	NA	NA	0.491723	4.56009	7.38105	0.0154932	0.215799
LOC100350534	NA	NA	0.917758	6.60592	7.38228	0.0155008	0.215799
HEY2	HEY2	hes related family bHLH transcription factor with YRPW motif 2 [Source:HGNC Symbol;Acc:HGNC:4881]	-0.695013	5.93909	7.37867	0.0155069	0.215799
FBXO28	FBXO28	F-box protein 28 [Source:HGNC Symbol;Acc:HGNC:29046]	-0.325453	4.50273	7.37397	0.0155343	0.215946
LOC103345407	NA	NA	-1.37607	-0.550693	7.3721	0.0155451	0.215946
KALRN	KALRN	kalirin RhoGEF kinase [Source:HGNC Symbol;Acc:HGNC:4814]	-0.581132	5.4494	7.36697	0.0155751	0.216068
TBL2	TBL2	transducin beta like 2 [Source:HGNC Symbol;Acc:HGNC:11586]	0.369945	4.51904	7.36585	0.0155816	0.216068
EPC1	EPC1	enhancer of polycomb homolog 1 [Source:HGNC Symbol;Acc:HGNC:19876]	-0.436005	4.65095	7.36178	0.0156054	0.216207
PMPCB	NA	NA	-0.397805	6.49802	7.35543	0.0156426	0.216359
ADAMTSL1	ADAMTSL1	ADAMTS like 1 [Source:HGNC Symbol;Acc:HGNC:14632]	1.24132	3.51373	7.36394	0.0156441	0.216359
ABR	ABR	ABR activator of RhoGEF and GTPase [Source:HGNC Symbol;Acc:HGNC:81]	0.418222	6.11695	7.34885	0.0156812	0.216587
PRTG	NA	NA	1.95842	-0.149728	7.34765	0.0156882	0.216587
SLC2A10	SLC2A10	solute carrier family 2 member 10 [Source:HGNC Symbol;Acc:HGNC:13444]	0.449731	5.17722	7.33898	0.0157394	0.216594
GAL3ST4	GAL3ST4	galactose-3-O-sulfotransferase 4 [Source:HGNC Symbol;Acc:HGNC:24145]	0.50073	6.24167	7.33769	0.015747	0.216594
LOC100355380	NA	NA	2.1382	3.80913	7.40887	0.0157505	0.216594
SHPRH	SHPRH	SNF2 histone linker PHD RING helicase [Source:HGNC Symbol;Acc:HGNC:19336]	-0.624963	4.34812	7.33587	0.0157577	0.216594
LOC108177496	NA	NA	1.33444	0.340092	7.33582	0.0157581	0.216594
ACE	ACE	angiotensin I converting enzyme [Source:HGNC Symbol;Acc:HGNC:2707]	-0.819716	4.1318	7.33339	0.0157724	0.216601
SMPD1	SMPD1	sphingomyelin phosphodiesterase 1 [Source:HGNC Symbol;Acc:HGNC:11120]	0.392237	5.21233	7.32983	0.0157935	0.2167
TEP1	TEP1	telomerase associated protein 1 [Source:HGNC Symbol;Acc:HGNC:11726]	0.388263	4.86082	7.3205	0.0158489	0.217269
BCKDHB	BCKDHB	branched chain keto acid dehydrogenase E1 subunit beta [Source:HGNC Symbol;Acc:HGNC:987]	-0.492226	4.40009	7.31323	0.0158923	0.217276
PLK4	PLK4	polo like kinase 4 [Source:HGNC Symbol;Acc:HGNC:11397]	1.19889	1.05007	7.31066	0.0159076	0.217276
LOC100344007	NA	NA	-1.59107	2.3926	7.30897	0.0159327	0.217276
LOC103349875	NA	NA	1.12214	1.16389	7.30502	0.0159414	0.217276
GPRASP1	GPRASP1	G protein-coupled receptor associated sorting protein 1 [Source:HGNC Symbol;Acc:HGNC:24834]	-0.660474	2.16505	7.30345	0.0159508	0.217276
HHIPL1	NA	NA	0.606195	5.07897	7.30324	0.0159521	0.217276
LOC100349941	NA	NA	-1.87931	1.36157	7.30236	0.0159573	0.217276
DPEP1	DPEP1	dipeptidase 1 [Source:HGNC Symbol;Acc:HGNC:3002]	2.98875	-0.756074	7.30181	0.0159606	0.217276
NECTIN1	NECTIN1	nectin cell adhesion molecule 1 [Source:HGNC Symbol;Acc:HGNC:9706]	0.594876	3.02398	7.29709	0.015989	0.217349
GNB4	GNB4	G protein subunit beta 4 [Source:HGNC Symbol;Acc:HGNC:20731]	0.526161	5.49574	7.29547	0.0159987	0.217349
LOC103348163	NA	NA	2.25748	1.82413	7.32053	0.0160077	0.217349
UGT1A7	NA	NA	0.842173	3.32398	7.28448	0.016065	0.217938
RRS1	RRS1	ribosome biogenesis regulator 1 homolog [Source:HGNC Symbol;Acc:HGNC:17083]	0.445671	3.12494	7.28066	0.0160881	0.218062
CACNB2	CACNB2	calcium voltage-gated channel auxiliary subunit beta 2 [Source:HGNC Symbol;Acc:HGNC:1402]	-0.591957	4.91377	7.27825	0.0161027	0.218071
LOC103345409	NA	NA	-1.26872	1.39039	7.26986	0.0161537	0.218571
FOXS1	FOXS1	forkhead box S1 [Source:HGNC Symbol;Acc:HGNC:3735]	0.502201	5.5611	7.25022	0.0162737	0.220004
VXN	VXN	vexin [Source:HGNC Symbol;Acc:HGNC:28498]	-0.789689	3.34998	7.22889	0.0164052	0.22159
RAB12	RAB12	RAB12, member RAS oncogene family [Source:HGNC Symbol;Acc:HGNC:31332]	-0.3214	6.69294	7.22361	0.0164379	0.221841
LOC100358778	NA	NA	0.366859	4.65093	7.22028	0.0164586	0.221928
GNAT1	NA	NA	2.32443	-0.845477	7.20598	0.0165477	0.22277
CNR1	NA	NA	-1.61162	-0.0842079	7.2057	0.0165495	0.22277
IER2	NA	NA	0.67981	5.65179	7.20106	0.0165786	0.222969
CRACDL	CRACDL	CRACD like [Source:HGNC Symbol;Acc:HGNC:33454]	0.950126	1.77099	7.19578	0.0166117	0.223223
AHSG	AHSG	alpha 2-HS glycoprotein [Source:HGNC Symbol;Acc:HGNC:349]	3.66029	0.466258	7.20755	0.0166341	0.223331
DST	DST	dystonin [Source:HGNC Symbol;Acc:HGNC:1090]	-0.556532	8.73424	7.18977	0.0166495	0.223346
ETV1	ETV1	ETS variant transcription factor 1 [Source:HGNC Symbol;Acc:HGNC:3490]	0.744343	2.78058	7.18684	0.016668	0.223402
EGFLAM	EGFLAM	EGF like, fibronectin type III and laminin G domains [Source:HGNC Symbol;Acc:HGNC:26810]	-0.653683	3.77426	7.1822	0.0166972	0.223603
SIPA1L2	SIPA1L2	signal induced proliferation associated 1 like 2 [Source:HGNC Symbol;Acc:HGNC:23800]	-0.699517	4.71355	7.16924	0.0167794	0.224392
CLIP2	CLIP2	CAP-Gly domain containing linker protein 2 [Source:HGNC Symbol;Acc:HGNC:2586]	0.419706	5.525	7.16837	0.0167849	0.224392
HAAO	HAAO	3-hydroxyanthranilate 3,4-dioxygenase [Source:HGNC Symbol;Acc:HGNC:4796]	1.20812	1.15196	7.16249	0.0168224	0.224701
GLIPR1	GLIPR1	GLI pathogenesis related 1 [Source:HGNC Symbol;Acc:HGNC:17001]	0.700501	5.7887	7.15372	0.0168784	0.225025
CIP2A	CIP2A	cellular inhibitor of PP2A [Source:HGNC Symbol;Acc:HGNC:29302]	1.00515	0.43356	7.15253	0.0168859	0.225025
FAM20A	FAM20A	FAM20A golgi associated secretory pathway pseudokinase [Source:HGNC Symbol;Acc:HGNC:23015]	-0.997234	2.83616	7.15193	0.0168898	0.225025
NDUFA4L2	NDUFA4L2	NDUFA4 mitochondrial complex associated like 2 [Source:HGNC Symbol;Acc:HGNC:29836]	0.934049	3.42431	7.14481	0.0169355	0.225441
VAC14	VAC14	VAC14 component of PIKFYVE complex [Source:HGNC Symbol;Acc:HGNC:25507]	0.372117	4.29127	7.13993	0.0169669	0.225666
LOC103351005	NA	NA	1.50264	-0.593108	7.13755	0.0169822	0.225678
N6AMT1	N6AMT1	N-6 adenine-specific DNA methyltransferase 1 [Source:HGNC Symbol;Acc:HGNC:16021]	-0.637434	2.20556	7.11778	0.0171101	0.227185
ALDH1A2	ALDH1A2	aldehyde dehydrogenase 1 family member A2 [Source:HGNC Symbol;Acc:HGNC:15472]	0.772956	5.25017	7.10629	0.017185	0.227986
PHF11	PHF11	PHD finger protein 11 [Source:HGNC Symbol;Acc:HGNC:17024]	0.827196	1.87932	7.10114	0.0172186	0.228238
ENTPD7	ENTPD7	ectonucleoside triphosphate diphosphohydrolase 7 [Source:HGNC Symbol;Acc:HGNC:19745]	0.802098	1.84949	7.0903	0.0172898	0.228633
HMGCS2	HMGCS2	3-hydroxy-3-methylglutaryl-CoA synthase 2 [Source:HGNC Symbol;Acc:HGNC:5008]	-1.69304	3.10194	7.13354	0.0172946	0.228633
DGAT2	NA	NA	-1.21283	6.3123	7.13154	0.0173114	0.228633
CASP8	NA	NA	1.33488	1.04551	7.08658	0.0173142	0.228633
EFCC1	EFCC1	EF-hand and coiled-coil domain containing 1 [Source:HGNC Symbol;Acc:HGNC:25692]	-0.61197	2.29381	7.08547	0.0173216	0.228633
TNFRSF11B	TNFRSF11B	TNF receptor superfamily member 11b [Source:HGNC Symbol;Acc:HGNC:11909]	0.736491	5.59303	7.08264	0.0173402	0.228686
CLSPN	CLSPN	claspin [Source:HGNC Symbol;Acc:HGNC:19715]	2.42964	-0.552531	7.07844	0.017368	0.228859
LOC103351270	NA	NA	-0.69104	2.03531	7.07215	0.0174096	0.229215
TRPM6	TRPM6	transient receptor potential cation channel subfamily M member 6 [Source:HGNC Symbol;Acc:HGNC:17995]	1.52714	-0.450401	7.06672	0.0174456	0.229267
SCARF2	NA	NA	0.450276	6.47069	7.06507	0.0174566	0.229267
ADCY9	ADCY9	adenylate cyclase 9 [Source:HGNC Symbol;Acc:HGNC:240]	-0.790865	5.97648	7.06492	0.0174576	0.229267
SCRN2	SCRN2	secernin 2 [Source:HGNC Symbol;Acc:HGNC:30381]	-0.553973	3.7519	7.06043	0.0174875	0.229467
TAF9B	NA	NA	-0.374732	4.44625	7.05163	0.0175463	0.229951
LOC100347175	TIMM23B//TIMM23	translocase of inner mitochondrial membrane 23 homolog B [Source:HGNC Symbol;Acc:HGNC:23581]//translocase of inner mitochondrial membrane 23 [Source:HGNC Symbol;Acc:HGNC:17312]	1.41249	4.65526	7.1033	0.0175636	0.229951
TRPV2	TRPV2	transient receptor potential cation channel subfamily V member 2 [Source:HGNC Symbol;Acc:HGNC:18082]	0.700125	3.17279	7.0483	0.0175685	0.229951
SH3BGR	SH3BGR	SH3 domain binding glutamate rich protein [Source:HGNC Symbol;Acc:HGNC:10822]	-0.695877	6.94339	7.04027	0.0176225	0.230463
CLIC1	CLIC1	chloride intracellular channel 1 [Source:HGNC Symbol;Acc:HGNC:2062]	0.453255	7.10611	7.02717	0.0177108	0.231338
LOC100354674	NA	NA	1.80166	1.1424	7.02597	0.0177189	0.231338
PSTK	NA	NA	-0.480479	4.09971	7.02215	0.0177448	0.231482
MCCC2	MCCC2	methylcrotonyl-CoA carboxylase subunit 2 [Source:HGNC Symbol;Acc:HGNC:6937]	-0.414159	5.04392	7.00252	0.0178783	0.23303
ZNF703	NA	NA	0.834387	1.66983	6.99894	0.0179028	0.233155
SLC45A3	SLC45A3	solute carrier family 45 member 3 [Source:HGNC Symbol;Acc:HGNC:8642]	0.97942	1.79811	6.98856	0.0179741	0.233803
CCDC77	CCDC77	coiled-coil domain containing 77 [Source:HGNC Symbol;Acc:HGNC:28203]	0.617836	1.86888	6.98733	0.0179825	0.233803
PANK1	PANK1	pantothenate kinase 1 [Source:HGNC Symbol;Acc:HGNC:8598]	-0.776504	4.40877	6.98504	0.0179982	0.233813
CPNE2	CPNE2	copine 2 [Source:HGNC Symbol;Acc:HGNC:2315]	0.380389	5.46038	6.97786	0.0180478	0.234262
LUM	LUM	lumican [Source:HGNC Symbol;Acc:HGNC:6724]	0.782757	10.0376	6.97345	0.0180783	0.234463
MORN1	NA	NA	2.68964	-0.471106	6.95921	0.0181772	0.23555
RHOT1	RHOT1	ras homolog family member T1 [Source:HGNC Symbol;Acc:HGNC:21168]	-0.590432	6.23755	6.9513	0.0182324	0.235891
IKBIP	IKBIP	IKBKB interacting protein [Source:HGNC Symbol;Acc:HGNC:26430]	0.543434	5.3203	6.94918	0.0182472	0.235891
CEP126	CEP126	centrosomal protein 126 [Source:HGNC Symbol;Acc:HGNC:29264]	-1.27213	0.776697	6.94895	0.0182488	0.235891
LIAS	LIAS	lipoic acid synthetase [Source:HGNC Symbol;Acc:HGNC:16429]	-0.574526	4.09071	6.94587	0.0182704	0.235893
KEF51_p12	NA	NA	-0.961611	12.3868	6.9438	0.0182849	0.235893
CPXM1	CPXM1	carboxypeptidase X, M14 family member 1 [Source:HGNC Symbol;Acc:HGNC:15771]	1.29307	3.22657	6.95039	0.0182942	0.235893
CD276	NA	NA	0.462053	6.56305	6.93916	0.0183175	0.235998
GTSE1	GTSE1	G2 and S-phase expressed 1 [Source:HGNC Symbol;Acc:HGNC:13698]	0.956866	1.99946	6.93384	0.0183549	0.236171
DYNLL2	DYNLL2	dynein light chain LC8-type 2 [Source:HGNC Symbol;Acc:HGNC:24596]	-0.45943	7.76976	6.93296	0.0183611	0.236171
PKDCC	PKDCC	protein kinase domain containing, cytoplasmic [Source:HGNC Symbol;Acc:HGNC:25123]	0.434039	5.97953	6.91971	0.0184547	0.23718
SNCB	SNCB	synuclein beta [Source:HGNC Symbol;Acc:HGNC:11140]	2.76085	3.60192	6.97635	0.0185111	0.237709
APBB1IP	NA	NA	0.898888	3.11104	6.89741	0.0186136	0.238829
OSMR	OSMR	oncostatin M receptor [Source:HGNC Symbol;Acc:HGNC:8507]	0.664221	6.24592	6.89202	0.0186522	0.239128
LOC127493712	NA	NA	-0.779894	4.32188	6.88264	0.0187197	0.239796
LOC103348460	NA	NA	-1.82566	2.02842	6.88546	0.0187792	0.240362
NAV1	NAV1	neuron navigator 1 [Source:HGNC Symbol;Acc:HGNC:15989]	0.42542	6.9652	6.86871	0.0188203	0.240691
HTRA1	HTRA1	HtrA serine peptidase 1 [Source:HGNC Symbol;Acc:HGNC:9476]	0.566266	9.26128	6.86572	0.0188421	0.240772
PTCH2	PTCH2	patched 2 [Source:HGNC Symbol;Acc:HGNC:9586]	-0.894253	2.56689	6.85656	0.0189087	0.241323
SHISA5	SHISA5	shisa family member 5 [Source:HGNC Symbol;Acc:HGNC:30376]	0.562753	7.14143	6.85554	0.0189161	0.241323
EDEM1	EDEM1	ER degradation enhancing alpha-mannosidase like protein 1 [Source:HGNC Symbol;Acc:HGNC:18967]	0.391973	6.65853	6.85111	0.0189484	0.241538
IMPA2	IMPA2	inositol monophosphatase 2 [Source:HGNC Symbol;Acc:HGNC:6051]	0.563207	4.06791	6.84793	0.0189717	0.241638
ZFAND5	ZFAND5	zinc finger AN1-type containing 5 [Source:HGNC Symbol;Acc:HGNC:13008]	-0.42199	6.9548	6.83303	0.0190811	0.242636
PTTG1	PTTG1//PTTG2	PTTG1 regulator of sister chromatid separation, securin [Source:HGNC Symbol;Acc:HGNC:9690]//pituitary tumor-transforming 2 [Source:HGNC Symbol;Acc:HGNC:9691]	0.589153	3.42662	6.83303	0.0190811	0.242636
MUSTN1	MUSTN1	musculoskeletal, embryonic nuclear protein 1 [Source:HGNC Symbol;Acc:HGNC:22144]	-1.00191	3.59923	6.82788	0.019119	0.242829
LOC103347285	NA	NA	0.415438	5.31506	6.82546	0.0191369	0.242829
HMCN2	NA	NA	-1.48423	3.33429	6.85598	0.019145	0.242829
COL1A2	COL1A2	collagen type I alpha 2 chain [Source:HGNC Symbol;Acc:HGNC:2198]	0.917327	11.4706	6.82255	0.0191584	0.242829
FAXDC2	FAXDC2	fatty acid hydroxylase domain containing 2 [Source:HGNC Symbol;Acc:HGNC:1334]	-0.386093	4.67832	6.81554	0.0192104	0.243021
WBP1L	WBP1L	WW domain binding protein 1 like [Source:HGNC Symbol;Acc:HGNC:23510]	0.344496	5.76947	6.81447	0.0192183	0.243021
XYLT2	XYLT2	xylosyltransferase 2 [Source:HGNC Symbol;Acc:HGNC:15517]	0.353005	4.56305	6.81421	0.0192203	0.243021
MXRA7	NA	NA	-0.526824	6.52712	6.81051	0.0192478	0.243173
PCDH17	PCDH17	protocadherin 17 [Source:HGNC Symbol;Acc:HGNC:14267]	-1.00197	2.6133	6.80673	0.0192759	0.24318
PDE3A	PDE3A	phosphodiesterase 3A [Source:HGNC Symbol;Acc:HGNC:8778]	-0.559354	5.80851	6.80625	0.0192795	0.24318
LOC127489378	NA	NA	1.34588	2.36626	6.79688	0.0193494	0.243865
CRADD	NA	NA	-0.513847	2.7163	6.7862	0.0194296	0.244435
GPR62	NA	NA	0.773561	3.97222	6.78573	0.0194331	0.244435
SIRT5	SIRT5	sirtuin 5 [Source:HGNC Symbol;Acc:HGNC:14933]	-0.461413	6.9095	6.7846	0.0194416	0.244435
ZFYVE9	ZFYVE9	zinc finger FYVE-type containing 9 [Source:HGNC Symbol;Acc:HGNC:6775]	-0.378791	4.53082	6.77452	0.0195176	0.245194
LOC100340530	NA	NA	1.16734	4.22002	6.78947	0.0195805	0.245787
LOC100342735	NA	NA	1.0331	6.32898	6.78327	0.0196274	0.246177
KEF51_p01	NA	NA	-0.982774	13.808	6.75452	0.0196695	0.246346
LOC127490289	NA	NA	2.93374	-1.07494	6.75084	0.0196976	0.246346
PPP2R2B	PPP2R2B	protein phosphatase 2 regulatory subunit Bbeta [Source:HGNC Symbol;Acc:HGNC:9305]	-1.21761	1.5384	6.74799	0.0197193	0.246346
CD86	CD86	CD86 molecule [Source:HGNC Symbol;Acc:HGNC:1705]	2.10241	-0.0289936	6.74719	0.0197255	0.246346
LLGL2	LLGL2	LLGL scribble cell polarity complex component 2 [Source:HGNC Symbol;Acc:HGNC:6629]	1.4456	0.296675	6.74392	0.0197505	0.246346
LOC127484719	NA	NA	-0.913206	1.71852	6.74153	0.0197688	0.246346
EMID1	NA	NA	1.14664	2.32501	6.74059	0.019776	0.246346
UBASH3B	UBASH3B	ubiquitin associated and SH3 domain containing B [Source:HGNC Symbol;Acc:HGNC:29884]	1.12412	2.82946	6.74005	0.0197802	0.246346
PI4K2B	PI4K2B	phosphatidylinositol 4-kinase type 2 beta [Source:HGNC Symbol;Acc:HGNC:18215]	0.637721	2.85267	6.73972	0.0197827	0.246346
TSPAN11	TSPAN11	tetraspanin 11 [Source:HGNC Symbol;Acc:HGNC:30795]	0.842859	4.46588	6.73285	0.0198356	0.246627
PRAM1	PRAM1	PML-RARA regulated adaptor molecule 1 [Source:HGNC Symbol;Acc:HGNC:30091]	0.863978	1.84037	6.73268	0.0198368	0.246627
TMEM241	TMEM241	transmembrane protein 241 [Source:HGNC Symbol;Acc:HGNC:31723]	0.457148	3.37119	6.71832	0.0199478	0.247752
LOC127482640	NA	NA	2.48718	5.33161	6.77679	0.0199703	0.247752
TUBB	TUBB	tubulin beta class I [Source:HGNC Symbol;Acc:HGNC:20778]	0.383374	8.25574	6.71483	0.0199749	0.247752
LGALSL	LGALSL	galectin like [Source:HGNC Symbol;Acc:HGNC:25012]	-0.405626	5.33624	6.70993	0.0200129	0.247885
CCDC43	CCDC43	coiled-coil domain containing 43 [Source:HGNC Symbol;Acc:HGNC:26472]	-0.31611	4.35795	6.70937	0.0200173	0.247885
CXCR4	CXCR4	C-X-C motif chemokine receptor 4 [Source:HGNC Symbol;Acc:HGNC:2561]	1.37517	2.93626	6.71141	0.0200602	0.247975
VAMP8	VAMP8	vesicle associated membrane protein 8 [Source:HGNC Symbol;Acc:HGNC:12647]	0.462805	5.47737	6.7035	0.020063	0.247975
PLEKHO2	PLEKHO2	pleckstrin homology domain containing O2 [Source:HGNC Symbol;Acc:HGNC:30026]	0.398233	6.21764	6.70233	0.0200722	0.247975
STS	NA	NA	-0.275837	4.93739	6.68651	0.0201961	0.249138
GSDME	GSDME	gasdermin E [Source:HGNC Symbol;Acc:HGNC:2810]	0.852933	3.20382	6.68621	0.0201984	0.249138
FBXL18	FBXL18	F-box and leucine rich repeat protein 18 [Source:HGNC Symbol;Acc:HGNC:21874]	0.330765	4.00577	6.68243	0.0202282	0.249138
DNAJC19	DNAJC19	DnaJ heat shock protein family (Hsp40) member C19 [Source:HGNC Symbol;Acc:HGNC:30528]	-0.544332	5.04545	6.68219	0.0202301	0.249138
SLC25A29	SLC25A29	solute carrier family 25 member 29 [Source:HGNC Symbol;Acc:HGNC:20116]	-0.5002	5.7276	6.67028	0.0203242	0.250054
NEK8	NEK8	NIMA related kinase 8 [Source:HGNC Symbol;Acc:HGNC:13387]	0.424835	3.56658	6.66873	0.0203364	0.250054
LOC127488766	NA	NA	1.16345	-0.210037	6.6663	0.0203557	0.250094
MREG	MREG	melanoregulin [Source:HGNC Symbol;Acc:HGNC:25478]	1.98308	-0.597807	6.66331	0.0203795	0.250189
LOC127483434	NA	NA	-0.545541	2.2301	6.65448	0.0204498	0.250855
APLNR	APLNR	apelin receptor [Source:HGNC Symbol;Acc:HGNC:339]	-1.1058	4.49629	6.67723	0.0204809	0.25104
GSDMD	GSDMD	gasdermin D [Source:HGNC Symbol;Acc:HGNC:25697]	0.798309	3.16224	6.64305	0.0205411	0.251581
ATP9A	ATP9A	ATPase phospholipid transporting 9A (putative) [Source:HGNC Symbol;Acc:HGNC:13540]	-0.431969	6.23243	6.63835	0.0205788	0.251845
GPX8	GPX8	glutathione peroxidase 8 (putative) [Source:HGNC Symbol;Acc:HGNC:33100]	0.482657	5.99663	6.63521	0.020604	0.251956
AMIGO2	NA	NA	-0.651476	3.80341	6.62895	0.0206545	0.252375
TPM4	TPM4	tropomyosin 4 [Source:HGNC Symbol;Acc:HGNC:12013]	0.46807	7.88577	6.62453	0.0206902	0.252586
DDX31	DDX31	DEAD-box helicase 31 [Source:HGNC Symbol;Acc:HGNC:16715]	0.356857	3.60703	6.62281	0.0207041	0.252586
CD5L	NA	NA	1.50149	4.41594	6.67017	0.0207364	0.252783
SLC29A1	SLC29A1	solute carrier family 29 member 1 (Augustine blood group) [Source:HGNC Symbol;Acc:HGNC:11003]	0.417362	7.06833	6.61337	0.0207806	0.253125
LOC100345020	NA	NA	-0.745421	7.21045	6.60912	0.0208152	0.253348
ASRGL1	ASRGL1	asparaginase and isoaspartyl peptidase 1 [Source:HGNC Symbol;Acc:HGNC:16448]	0.636603	4.5005	6.59847	0.0209021	0.254208
ZHX2	ZHX2	zinc fingers and homeoboxes 2 [Source:HGNC Symbol;Acc:HGNC:18513]	-0.341604	4.67934	6.59421	0.0209369	0.254434
MYL3	NA	NA	-2.42413	10.5064	6.6415	0.0210352	0.255429
LOC127489197	NA	NA	1.09232	1.70524	6.57909	0.0210612	0.255547
PGM3	PGM3	phosphoglucomutase 3 [Source:HGNC Symbol;Acc:HGNC:8907]	0.471544	5.18907	6.57378	0.0211051	0.255881
SPARC	SPARC	secreted protein acidic and cysteine rich [Source:HGNC Symbol;Acc:HGNC:11219]	0.772951	12.0393	6.57013	0.0211353	0.255887
C17H15orf48	C15orf48	chromosome 15 open reading frame 48 [Source:HGNC Symbol;Acc:HGNC:29898]	1.79071	-0.324963	6.56963	0.0211394	0.255887
MMP17	NA	NA	1.13397	2.42917	6.56778	0.0211548	0.255887
B4GALNT1	B4GALNT1	beta-1,4-N-acetyl-galactosaminyltransferase 1 [Source:HGNC Symbol;Acc:HGNC:4117]	-0.644582	3.79661	6.56388	0.0211871	0.25598
ARVCF	ARVCF	ARVCF delta catenin family member [Source:HGNC Symbol;Acc:HGNC:728]	-0.5647	5.12298	6.56291	0.0211952	0.25598
LIN7B	NA	NA	-0.591722	3.82278	6.54109	0.0213774	0.257982
LOC127491615	NA	NA	-1.49216	0.533756	6.53898	0.0213952	0.257997
POLA2	POLA2	DNA polymerase alpha 2, accessory subunit [Source:HGNC Symbol;Acc:HGNC:30073]	0.472985	3.55849	6.53171	0.0214563	0.258497
TSPYL2	TSPYL2	TSPY like 2 [Source:HGNC Symbol;Acc:HGNC:24358]	-0.375821	4.67586	6.53012	0.0214697	0.258497
LOC127489812	NA	NA	-2.22673	1.07272	6.529	0.0215228	0.258936
SNX25	SNX25	sorting nexin 25 [Source:HGNC Symbol;Acc:HGNC:21883]	0.562853	3.81537	6.51845	0.0215684	0.25918
RNF170	RNF170	ring finger protein 170 [Source:HGNC Symbol;Acc:HGNC:25358]	0.39164	3.73233	6.51659	0.0215841	0.25918
COL6A3	NA	NA	0.938245	8.86434	6.51376	0.0216082	0.25918
LOC100347496	NA	NA	-1.17885	5.01473	6.55363	0.0216238	0.25918
RABL3	NA	NA	-0.353831	4.01251	6.51167	0.021626	0.25918
LOC127486565	NA	NA	0.610254	4.27947	6.50738	0.0216625	0.25923
AMDHD2	AMDHD2	amidohydrolase domain containing 2 [Source:HGNC Symbol;Acc:HGNC:24262]	0.534016	5.39681	6.50729	0.0216633	0.25923
NFS1	NA	NA	-0.614911	5.02573	6.50276	0.0217019	0.259284
SLC16A7	SLC16A7	solute carrier family 16 member 7 [Source:HGNC Symbol;Acc:HGNC:10928]	-1.30315	5.38305	6.55205	0.0217063	0.259284
METTL2A	METTL2A//METTL2B	methyltransferase 2A, methylcytidine [Source:HGNC Symbol;Acc:HGNC:25755]//methyltransferase 2B, methylcytidine [Source:HGNC Symbol;Acc:HGNC:18272]	-0.358061	3.96425	6.50092	0.0217176	0.259284
KEF51_p04	NA	NA	-0.883477	13.7887	6.4927	0.021788	0.259925
ZFP36L1	NA	NA	0.46188	7.94267	6.4907	0.0218052	0.259932
LOC127489847	NA	NA	0.609722	3.45764	6.4882	0.0218266	0.259958
ADAMTSL4	ADAMTSL4	ADAMTS like 4 [Source:HGNC Symbol;Acc:HGNC:19706]	-0.448785	8.98536	6.48658	0.0218406	0.259958
CHRD	CHRD	chordin [Source:HGNC Symbol;Acc:HGNC:1949]	0.679579	5.51924	6.4833	0.0218688	0.259991
SEPTIN3	NA	NA	1.26252	0.293549	6.48239	0.0218767	0.259991
DHX35	DHX35	DEAH-box helicase 35 [Source:HGNC Symbol;Acc:HGNC:15861]	-0.517188	3.30944	6.47783	0.021916	0.26026
CRABP1	CRABP1	cellular retinoic acid binding protein 1 [Source:HGNC Symbol;Acc:HGNC:2338]	1.17368	3.08702	6.47173	0.0219863	0.260897
GPX1	NA	NA	0.639784	8.52494	6.45796	0.0220884	0.26191
GSG1	GSG1	germ cell associated 1 [Source:HGNC Symbol;Acc:HGNC:19716]	1.95082	-0.147936	6.45109	0.0221484	0.262212
ATG14	ATG14	autophagy related 14 [Source:HGNC Symbol;Acc:HGNC:19962]	-0.38088	3.89929	6.45079	0.0221509	0.262212
PARPBP	PARPBP	PARP1 binding protein [Source:HGNC Symbol;Acc:HGNC:26074]	1.23572	-0.045936	6.44928	0.0221642	0.262212
SHCBP1	SHCBP1	SHC binding and spindle associated 1 [Source:HGNC Symbol;Acc:HGNC:29547]	1.24276	1.02203	6.43841	0.0222595	0.262925
HIBADH	HIBADH	3-hydroxyisobutyrate dehydrogenase [Source:HGNC Symbol;Acc:HGNC:4907]	-0.6139	6.79302	6.43655	0.0222758	0.262925
LOC100345907	NA	NA	2.10434	1.10021	6.4372	0.0222877	0.262925
LOC100344965	NA	NA	-3.2352	2.15849	6.49145	0.0222936	0.262925
HTR7	HTR7	5-hydroxytryptamine receptor 7 [Source:HGNC Symbol;Acc:HGNC:5302]	0.699566	2.81387	6.42728	0.0223575	0.262925
TPD52	NA	NA	0.455557	4.15088	6.42721	0.0223582	0.262925
L1TD1	NA	NA	1.01604	0.45187	6.4272	0.0223583	0.262925
KDELR3	KDELR3	KDEL endoplasmic reticulum protein retention receptor 3 [Source:HGNC Symbol;Acc:HGNC:6306]	0.542568	6.50062	6.42711	0.022359	0.262925
SEL1L3	SEL1L3	SEL1L family member 3 [Source:HGNC Symbol;Acc:HGNC:29108]	0.882436	2.32749	6.41427	0.0224729	0.263948
NEURL1	NEURL1	neuralized E3 ubiquitin protein ligase 1 [Source:HGNC Symbol;Acc:HGNC:7761]	1.01037	1.3387	6.41349	0.0224798	0.263948
LOC100346376	NA	NA	2.99447	0.166038	6.41471	0.0225114	0.26406
M6PR	M6PR	mannose-6-phosphate receptor, cation dependent [Source:HGNC Symbol;Acc:HGNC:6752]	0.362726	5.69352	6.40681	0.0225393	0.26406
ARPC2	ARPC2	actin related protein 2/3 complex subunit 2 [Source:HGNC Symbol;Acc:HGNC:705]	0.357998	7.19607	6.40583	0.0225481	0.26406
LOC100344368	NA	NA	2.08463	1.39852	6.41531	0.0225613	0.26406
TMEM94	TMEM94	transmembrane protein 94 [Source:HGNC Symbol;Acc:HGNC:28983]	0.827393	4.1871	6.40294	0.0225739	0.26406
TRAF3IP3	TRAF3IP3	TRAF3 interacting protein 3 [Source:HGNC Symbol;Acc:HGNC:30766]	1.02522	1.16883	6.39855	0.0226131	0.264322
LOC127489521	NA	NA	1.78855	0.587561	6.3909	0.0226817	0.264925
ECI2	NA	NA	-0.358149	5.25667	6.3849	0.0227357	0.265357
CSK	NA	NA	0.323723	6.21635	6.38142	0.0227671	0.265426
ECPAS	ECPAS	Ecm29 proteasome adaptor and scaffold [Source:HGNC Symbol;Acc:HGNC:29020]	-0.527155	6.61765	6.38033	0.0227769	0.265426
NRXN2	NRXN2	neurexin 2 [Source:HGNC Symbol;Acc:HGNC:8009]	1.49437	-0.641892	6.37513	0.0228239	0.265426
PGAP6	NA	NA	0.463083	4.51703	6.37445	0.0228301	0.265426
FTH1	NA	NA	0.509256	11.7322	6.37109	0.0228605	0.265426
LPL	LPL	lipoprotein lipase [Source:HGNC Symbol;Acc:HGNC:6677]	-1.46837	8.54454	6.41211	0.0228723	0.265426
TMEM233	TMEM233	transmembrane protein 233 [Source:HGNC Symbol;Acc:HGNC:37219]	-1.4328	1.48308	6.36937	0.0228761	0.265426
TSPAN17	NA	NA	0.402921	5.29428	6.36922	0.0228774	0.265426
NOC2L	NOC2L	NOC2 like nucleolar associated transcriptional repressor [Source:HGNC Symbol;Acc:HGNC:24517]	0.318268	5.28151	6.35988	0.0229624	0.266214
LOC127482584	NA	NA	0.854726	3.75327	6.34547	0.0230941	0.26752
GPT2	GPT2	glutamic--pyruvic transaminase 2 [Source:HGNC Symbol;Acc:HGNC:18062]	-1.18639	4.89027	6.38446	0.0231093	0.26752
LOC100348415	NA	NA	0.37119	5.59746	6.33228	0.0232154	0.26855
LOC100357544	NA	NA	7.65005	0.745455	6.75729	0.0232483	0.268731
HNRNPD	HNRNPD	heterogeneous nuclear ribonucleoprotein D [Source:HGNC Symbol;Acc:HGNC:5036]	-0.358563	7.0176	6.32578	0.0232755	0.268773
CACNA1C	CACNA1C	calcium voltage-gated channel subunit alpha1 C [Source:HGNC Symbol;Acc:HGNC:1390]	-0.49901	6.16481	6.32461	0.0232864	0.268773
OGG1	NA	NA	-2.81404	-0.674635	6.32114	0.0233185	0.268934
IRAK1	IRAK1	interleukin 1 receptor associated kinase 1 [Source:HGNC Symbol;Acc:HGNC:6112]	0.532349	5.54394	6.3194	0.0233347	0.268934
SFRP1	NA	NA	1.03102	6.70039	6.33785	0.0233671	0.269098
LOC127486955	NA	NA	0.779094	2.96713	6.31416	0.0233834	0.269098
LOC108178879	NA	NA	-10.4649	3.50031	6.73753	0.0234118	0.26922
NOD1	NOD1	nucleotide binding oligomerization domain containing 1 [Source:HGNC Symbol;Acc:HGNC:16390]	0.437474	5.28531	6.30932	0.0234284	0.26922
L2HGDH	L2HGDH	L-2-hydroxyglutarate dehydrogenase [Source:HGNC Symbol;Acc:HGNC:20499]	-0.746671	3.28315	6.3001	0.0235146	0.269873
FUNDC1	FUNDC1	FUN14 domain containing 1 [Source:HGNC Symbol;Acc:HGNC:28746]	-0.342492	4.56754	6.29954	0.0235198	0.269873
KDR	KDR	kinase insert domain receptor [Source:HGNC Symbol;Acc:HGNC:6307]	-0.750183	4.90383	6.29658	0.0235476	0.269961
HCAR2	NA	NA	1.33659	1.00815	6.29463	0.0235659	0.269961
PRMT9	PRMT9	protein arginine methyltransferase 9 [Source:HGNC Symbol;Acc:HGNC:25099]	-0.956916	3.14566	6.29321	0.0235792	0.269961
SLC9A1	SLC9A1	solute carrier family 9 member A1 [Source:HGNC Symbol;Acc:HGNC:11071]	0.399091	5.2144	6.28761	0.0236319	0.270366
TLR2	TLR2	toll like receptor 2 [Source:HGNC Symbol;Acc:HGNC:11848]	1.07268	1.96946	6.28251	0.02368	0.270717
LOC127483402	NA	NA	0.919454	1.91423	6.28054	0.0236986	0.270732
LOC100134865	NA	NA	0.894851	2.53917	6.27248	0.0237749	0.271369
LBH	LBH	LBH regulator of WNT signaling pathway [Source:HGNC Symbol;Acc:HGNC:29532]	-0.978263	6.90863	6.28733	0.0238002	0.271369
CELF1	CELF1	CUGBP Elav-like family member 1 [Source:HGNC Symbol;Acc:HGNC:2549]	-0.322224	5.9065	6.26916	0.0238064	0.271369
GUF1	GUF1	GTP binding elongation factor GUF1 [Source:HGNC Symbol;Acc:HGNC:25799]	-0.378106	3.91805	6.26568	0.0238395	0.271548
FHOD1	FHOD1	formin homology 2 domain containing 1 [Source:HGNC Symbol;Acc:HGNC:17905]	0.332439	4.79083	6.26149	0.0238793	0.271601
PHLDA1	PHLDA1	pleckstrin homology like domain family A member 1 [Source:HGNC Symbol;Acc:HGNC:8933]	-0.645769	4.75871	6.25911	0.023902	0.271601
PRDX4	PRDX4	peroxiredoxin 4 [Source:HGNC Symbol;Acc:HGNC:17169]	0.507777	5.855	6.25847	0.0239082	0.271601
SKAP2	SKAP2	src kinase associated phosphoprotein 2 [Source:HGNC Symbol;Acc:HGNC:15687]	0.812719	4.20743	6.25742	0.0239182	0.271601
LOC100343802	NA	NA	1.18096	6.13133	6.29498	0.0239501	0.271601
PIM2	NA	NA	0.555695	1.87335	6.2526	0.0239643	0.271601
LOC127486885	NA	NA	-1.70806	6.06215	6.30606	0.0239704	0.271601
SLC6A17	SLC6A17	solute carrier family 6 member 17 [Source:HGNC Symbol;Acc:HGNC:31399]	-1.18804	2.80942	6.25062	0.0239832	0.271601
LOC103350682	NA	NA	-1.00016	1.02648	6.24144	0.0240714	0.271782
EFCAB8	NA	NA	-0.808742	2.4119	6.2408	0.0240775	0.271782
LYVE1	LYVE1	lymphatic vessel endothelial hyaluronan receptor 1 [Source:HGNC Symbol;Acc:HGNC:14687]	0.674741	5.20958	6.24044	0.024081	0.271782
LGALS4	LGALS4	galectin 4 [Source:HGNC Symbol;Acc:HGNC:6565]	-1.09316	1.34115	6.24028	0.0240825	0.271782
PHLPP1	PHLPP1	PH domain and leucine rich repeat protein phosphatase 1 [Source:HGNC Symbol;Acc:HGNC:20610]	-0.495652	3.9826	6.23991	0.0240861	0.271782
DENND2D	DENND2D	DENN domain containing 2D [Source:HGNC Symbol;Acc:HGNC:26192]	0.948475	1.01221	6.23545	0.0241291	0.271926
LOC127491300	NA	NA	1.94336	1.70129	6.24544	0.0241337	0.271926
ITPRIPL1	NA	NA	0.717046	3.34591	6.23039	0.024178	0.272181
IRX3	NA	NA	-1.7228	3.45902	6.27279	0.0241912	0.272181
DCBLD2	DCBLD2	discoidin, CUB and LCCL domain containing 2 [Source:HGNC Symbol;Acc:HGNC:24627]	-0.585851	6.74752	6.22349	0.0242447	0.272439
SLC39A8	SLC39A8	solute carrier family 39 member 8 [Source:HGNC Symbol;Acc:HGNC:20862]	0.652973	2.88037	6.2224	0.0242554	0.272439
LRRN4	LRRN4	leucine rich repeat neuronal 4 [Source:HGNC Symbol;Acc:HGNC:16208]	2.67666	3.08376	6.27424	0.0242726	0.272439
MB	MB	myoglobin [Source:HGNC Symbol;Acc:HGNC:6915]	-2.22762	7.42703	6.27307	0.0242838	0.272439
GPX7	GPX7	glutathione peroxidase 7 [Source:HGNC Symbol;Acc:HGNC:4559]	0.432991	5.94584	6.20198	0.0244545	0.273944
LOC127488118	NA	NA	8.02333	2.32747	6.2546	0.0244613	0.273944
ELAPOR2	ELAPOR2	endosome-lysosome associated apoptosis and autophagy regulator family member 2 [Source:HGNC Symbol;Acc:HGNC:21945]	1.29418	2.62559	6.20038	0.0244706	0.273944
LOC127485548	NA	NA	-1.44272	-0.573825	6.19539	0.0245191	0.274291
RNF150	RNF150	ring finger protein 150 [Source:HGNC Symbol;Acc:HGNC:23138]	-0.805373	3.87496	6.19307	0.0245419	0.274349
BOD1	NA	NA	-0.307577	4.30221	6.18948	0.0245772	0.274384
JCAD	JCAD	junctional cadherin 5 associated [Source:HGNC Symbol;Acc:HGNC:29283]	-0.414493	6.31408	6.18919	0.0245801	0.274384
LOC100356957	NA	NA	1.85676	0.901319	6.18362	0.024635	0.274801
CREB5	CREB5	cAMP responsive element binding protein 5 [Source:HGNC Symbol;Acc:HGNC:16844]	-0.836763	5.04057	6.18604	0.0246582	0.274863
JPT2	NA	NA	0.292305	5.02418	6.17236	0.0247466	0.275641
DDOST	DDOST	dolichyl-diphosphooligosaccharide--protein glycosyltransferase non-catalytic subunit [Source:HGNC Symbol;Acc:HGNC:2728]	0.420324	7.04375	6.17009	0.0247692	0.275641
COQ10B	COQ10B	coenzyme Q10B [Source:HGNC Symbol;Acc:HGNC:25819]	-0.377446	5.46678	6.16891	0.0247809	0.275641
CFL2	CFL2	cofilin 2 [Source:HGNC Symbol;Acc:HGNC:1875]	-0.462762	7.50093	6.16645	0.0248053	0.275717
REEP2	REEP2	receptor accessory protein 2 [Source:HGNC Symbol;Acc:HGNC:17975]	0.726162	2.45397	6.15695	0.0249002	0.276575
BGLAP	BGLAP	bone gamma-carboxyglutamate protein [Source:HGNC Symbol;Acc:HGNC:1043]	-1.19624	2.33652	6.15495	0.0249202	0.2766
PLA2G7	PLA2G7	phospholipase A2 group VII [Source:HGNC Symbol;Acc:HGNC:9040]	0.775387	4.75874	6.14649	0.0250051	0.277246
ACADM	ACADM	acyl-CoA dehydrogenase medium chain [Source:HGNC Symbol;Acc:HGNC:89]	-0.734037	6.5797	6.14562	0.0250139	0.277246
ORC1	ORC1	origin recognition complex subunit 1 [Source:HGNC Symbol;Acc:HGNC:8487]	1.45137	-0.0181013	6.14006	0.0250698	0.277669
SCN8A	SCN8A	sodium voltage-gated channel alpha subunit 8 [Source:HGNC Symbol;Acc:HGNC:10596]	2.89039	0.19349	6.14433	0.0251293	0.278121
HDLBP	HDLBP	high density lipoprotein binding protein [Source:HGNC Symbol;Acc:HGNC:4857]	0.324395	8.35327	6.1325	0.0251462	0.278121
LOC127483137	NA	NA	0.863858	1.43773	6.13042	0.0251672	0.278156
SLC25A20	SLC25A20	solute carrier family 25 member 20 [Source:HGNC Symbol;Acc:HGNC:1421]	-0.435876	4.82861	6.12137	0.0252591	0.278975
LOC100353317	NA	NA	2.02261	1.05283	6.11729	0.0253192	0.279441
AP1S2	AP1S2	adaptor related protein complex 1 subunit sigma 2 [Source:HGNC Symbol;Acc:HGNC:560]	0.546988	6.04954	6.11171	0.0253574	0.279583
B3GNTL1	B3GNTL1	UDP-GlcNAc:betaGal beta-1,3-N-acetylglucosaminyltransferase like 1 [Source:HGNC Symbol;Acc:HGNC:21727]	-0.491902	2.7463	6.1107	0.0253678	0.279583
ADCY2	ADCY2	adenylate cyclase 2 [Source:HGNC Symbol;Acc:HGNC:233]	0.642767	3.62925	6.10208	0.025456	0.280357
ADCY6	ADCY6	adenylate cyclase 6 [Source:HGNC Symbol;Acc:HGNC:237]	-0.333996	6.68559	6.09731	0.0255051	0.280507
SND1	SND1	staphylococcal nuclease and tudor domain containing 1 [Source:HGNC Symbol;Acc:HGNC:30646]	0.332101	6.80391	6.09567	0.025522	0.280507
DUSP8	NA	NA	-0.877308	4.82766	6.10422	0.0255346	0.280507
CCL22	CCL22	C-C motif chemokine ligand 22 [Source:HGNC Symbol;Acc:HGNC:10621]	1.36186	1.72684	6.09188	0.0255609	0.280507
LOC127486882	NA	NA	1.4044	3.04295	6.10933	0.0255747	0.280507
LOC127493710	NA	NA	-1.12517	3.70851	6.09932	0.0255904	0.280507
LOC127485947	NA	NA	-0.823333	0.676665	6.08855	0.0255953	0.280507
HM13	HM13	histocompatibility minor 13 [Source:HGNC Symbol;Acc:HGNC:16435]	0.411779	6.42396	6.07882	0.025696	0.281414
SLITRK2	SLITRK2	SLIT and NTRK like family member 2 [Source:HGNC Symbol;Acc:HGNC:13449]	-0.802544	0.868801	6.07639	0.0257213	0.281493
CCBE1	CCBE1	collagen and calcium binding EGF domains 1 [Source:HGNC Symbol;Acc:HGNC:29426]	-0.92592	2.34158	6.07068	0.0257806	0.281875
FOXO1	NA	NA	-0.519991	6.17199	6.06957	0.0257922	0.281875
MYOCD	MYOCD	myocardin [Source:HGNC Symbol;Acc:HGNC:16067]	-0.714986	6.8749	6.06576	0.0258319	0.282111
MKNK1	NA	NA	0.385803	4.19367	6.0627	0.0258639	0.282263
GCSH	NA	NA	-0.567523	3.41566	6.05189	0.0259771	0.283031
NT5C3B	NA	NA	0.437584	5.04923	6.05073	0.0259893	0.283031
SPOCK2	SPOCK2	SPARC (osteonectin), cwcv and kazal like domains proteoglycan 2 [Source:HGNC Symbol;Acc:HGNC:13564]	-0.387006	5.32842	6.05052	0.0259915	0.283031
CAV2	CAV2	caveolin 2 [Source:HGNC Symbol;Acc:HGNC:1528]	-0.404189	7.1064	6.04907	0.0260067	0.283031
PLA1A	PLA1A	phospholipase A1 member A [Source:HGNC Symbol;Acc:HGNC:17661]	1.02393	1.7634	6.0425	0.026076	0.283415
ITGB8	ITGB8	integrin subunit beta 8 [Source:HGNC Symbol;Acc:HGNC:6163]	-0.549677	4.88143	6.04228	0.0260782	0.283415
TRIM25	NA	NA	0.463404	5.04367	6.02553	0.0262557	0.285145
FAAH	FAAH	fatty acid amide hydrolase [Source:HGNC Symbol;Acc:HGNC:3553]	0.675876	2.34549	6.02263	0.0262865	0.285281
RPN2	RPN2	ribophorin II [Source:HGNC Symbol;Acc:HGNC:10382]	0.330753	7.39484	6.02025	0.0263119	0.285297
LOC100338372	NA	NA	0.503347	3.59952	6.01907	0.0263245	0.285297
LOC103346860	NA	NA	0.697426	8.03034	6.01315	0.0263877	0.285784
PYGM	PYGM	glycogen phosphorylase, muscle associated [Source:HGNC Symbol;Acc:HGNC:9726]	-1.29455	7.51846	6.04716	0.0264324	0.28607
LOC100343557	NA	NA	0.903607	6.81916	6.00902	0.0265369	0.286952
HOMER2	HOMER2	homer scaffold protein 2 [Source:HGNC Symbol;Acc:HGNC:17513]	-0.923583	4.93603	6.01624	0.0265506	0.286952
LOC127493711	NA	NA	-0.83619	3.33803	5.99415	0.0265918	0.287199
LOC100347316	NA	NA	-0.787948	3.52948	5.9836	0.0267059	0.287409
NAGLU	NAGLU	N-acetyl-alpha-glucosaminidase [Source:HGNC Symbol;Acc:HGNC:7632]	0.552957	5.97141	5.98239	0.026719	0.287409
LOC100347615	NA	NA	0.419698	4.14751	5.98209	0.0267222	0.287409
ST7	ST7	suppression of tumorigenicity 7 [Source:HGNC Symbol;Acc:HGNC:11351]	0.379861	3.8143	5.98147	0.026729	0.287409
LOC100351949	NA	NA	-0.809293	3.01227	5.98135	0.0267303	0.287409
TGM1	TGM1	transglutaminase 1 [Source:HGNC Symbol;Acc:HGNC:11777]	1.37363	0.428226	5.98127	0.0267311	0.287409
CREB3L1	CREB3L1	cAMP responsive element binding protein 3 like 1 [Source:HGNC Symbol;Acc:HGNC:18856]	0.600228	4.56477	5.98045	0.02674	0.287409
LOC108177974	NA	NA	-2.01633	6.48305	6.0269	0.0267784	0.287521
PPP1R9B	NA	NA	0.302793	6.70794	5.97406	0.0268096	0.287521
ZDHHC21	ZDHHC21	zinc finger DHHC-type palmitoyltransferase 21 [Source:HGNC Symbol;Acc:HGNC:20750]	0.730517	1.29977	5.97378	0.0268126	0.287521
MPZL3	MPZL3	myelin protein zero like 3 [Source:HGNC Symbol;Acc:HGNC:27279]	-0.586569	1.14113	5.97273	0.026824	0.287521
LRRC4	LRRC4	leucine rich repeat containing 4 [Source:HGNC Symbol;Acc:HGNC:15586]	-1.2002	2.41313	5.96292	0.0269312	0.288472
TSPO	NA	NA	0.554742	5.96111	5.95912	0.0269728	0.28872
PLXNB2	NA	NA	0.321949	7.26893	5.93878	0.027197	0.290742
TNIP2	TNIP2	TNFAIP3 interacting protein 2 [Source:HGNC Symbol;Acc:HGNC:19118]	0.552712	3.82917	5.9386	0.027199	0.290742
CMTM6	CMTM6	CKLF like MARVEL transmembrane domain containing 6 [Source:HGNC Symbol;Acc:HGNC:19177]	0.589207	5.54132	5.93267	0.0272647	0.291246
PCED1B	PCED1B	PC-esterase domain containing 1B [Source:HGNC Symbol;Acc:HGNC:28255]	1.65001	0.0156028	5.92701	0.0273277	0.291394
PPDPFL	PPDPFL	pancreatic progenitor cell differentiation and proliferation factor like [Source:HGNC Symbol;Acc:HGNC:31745]	-1.67893	2.83708	5.95587	0.0273631	0.291394
PRDM8	NA	NA	-0.618897	1.57075	5.92356	0.0273661	0.291394
MYO5A	MYO5A	myosin VA [Source:HGNC Symbol;Acc:HGNC:7602]	0.471301	4.26766	5.9233	0.027369	0.291394
TENM2	TENM2	teneurin transmembrane protein 2 [Source:HGNC Symbol;Acc:HGNC:29943]	-1.61275	1.6051	5.92306	0.0273718	0.291394
GAK	GAK	cyclin G associated kinase [Source:HGNC Symbol;Acc:HGNC:4113]	0.271432	5.60874	5.91856	0.0274219	0.291672
LOC100344744	NA	NA	2.06722	-0.0335945	5.91662	0.0274437	0.291672
WDR81	WDR81	WD repeat domain 81 [Source:HGNC Symbol;Acc:HGNC:26600]	0.324435	5.23697	5.91517	0.0274599	0.291672
INPP5F	INPP5F	inositol polyphosphate-5-phosphatase F [Source:HGNC Symbol;Acc:HGNC:17054]	-0.376313	4.88963	5.91404	0.0274726	0.291672
LMNA	LMNA	lamin A/C [Source:HGNC Symbol;Acc:HGNC:6636]	0.383724	8.51458	5.91204	0.027495	0.291712
LOC108177262	NA	NA	-0.759444	7.24957	5.90962	0.0275221	0.291801
NAGPA	NAGPA	N-acetylglucosamine-1-phosphodiester alpha-N-acetylglucosaminidase [Source:HGNC Symbol;Acc:HGNC:17378]	0.493089	5.19948	5.9056	0.0275673	0.292083
SLC51A	SLC51A	solute carrier family 51 subunit alpha [Source:HGNC Symbol;Acc:HGNC:29955]	1.14461	0.139151	5.89747	0.0276589	0.292855
COL5A2	COL5A2	collagen type V alpha 2 chain [Source:HGNC Symbol;Acc:HGNC:2210]	0.731592	8.93374	5.88679	0.0277798	0.293935
KLF10	KLF10	KLF transcription factor 10 [Source:HGNC Symbol;Acc:HGNC:11810]	0.784884	5.53384	5.8804	0.0278933	0.294658
LOC103345386	NA	NA	0.874567	0.725988	5.87587	0.027904	0.294658
STAMBPL1	STAMBPL1	STAM binding protein like 1 [Source:HGNC Symbol;Acc:HGNC:24105]	-0.806582	1.61316	5.8748	0.0279163	0.294658
RHOBTB1	RHOBTB1	Rho related BTB domain containing 1 [Source:HGNC Symbol;Acc:HGNC:18738]	-0.617042	5.39728	5.87416	0.0279235	0.294658
CD274	CD274	CD274 molecule [Source:HGNC Symbol;Acc:HGNC:17635]	0.792686	2.81949	5.86708	0.0280046	0.295263
ACOT9	ACOT9	acyl-CoA thioesterase 9 [Source:HGNC Symbol;Acc:HGNC:17152]	-0.347352	5.16097	5.86584	0.0280187	0.295263
CCR7	CCR7	C-C motif chemokine receptor 7 [Source:HGNC Symbol;Acc:HGNC:1608]	1.29393	0.315212	5.86089	0.0280755	0.295663
S100A6	NA	NA	0.659382	8.36823	5.85823	0.028106	0.295785
CABP7	CABP7	calcium binding protein 7 [Source:HGNC Symbol;Acc:HGNC:20834]	1.37671	-0.097212	5.85407	0.028154	0.296091
LOC100354095	NA	NA	-1.55359	4.08884	5.89646	0.0281783	0.296147
SERPINB9	SERPINB9	serpin family B member 9 [Source:HGNC Symbol;Acc:HGNC:8955]	0.60273	5.49281	5.84964	0.0282051	0.296229
LOC100342219	NA	NA	3.95254	-0.114271	5.87822	0.0282295	0.296287
NSUN6	NSUN6	NOP2/Sun RNA methyltransferase 6 [Source:HGNC Symbol;Acc:HGNC:23529]	-0.609772	1.21296	5.84414	0.0282687	0.296499
SNX29	SNX29	sorting nexin 29 [Source:HGNC Symbol;Acc:HGNC:30542]	0.369187	3.87612	5.83585	0.0283648	0.297308
CRACR2B	NA	NA	-0.596139	4.86884	5.82757	0.0284613	0.297731
PDHX	PDHX	pyruvate dehydrogenase complex component X [Source:HGNC Symbol;Acc:HGNC:21350]	-0.603391	4.9727	5.82719	0.0284657	0.297731
RASSF6	RASSF6	Ras association domain family member 6 [Source:HGNC Symbol;Acc:HGNC:20796]	1.98629	-0.86297	5.82702	0.0284677	0.297731
HSH2D	HSH2D	hematopoietic SH2 domain containing [Source:HGNC Symbol;Acc:HGNC:24920]	1.28397	-0.68899	5.82584	0.0284814	0.297731
TFDP2	TFDP2	transcription factor Dp-2 [Source:HGNC Symbol;Acc:HGNC:11751]	-0.426907	4.29515	5.81961	0.0285543	0.298293
BAK1	BAK1	BCL2 antagonist/killer 1 [Source:HGNC Symbol;Acc:HGNC:949]	0.327342	5.1381	5.81784	0.0285751	0.298311
LOC127489094	NA	NA	-1.42841	2.59625	5.82153	0.0286288	0.29863
LOC103351842	NA	NA	-1.03421	0.781108	5.8104	0.0286625	0.29863
NT5DC2	NT5DC2	5'-nucleotidase domain containing 2 [Source:HGNC Symbol;Acc:HGNC:25717]	0.395515	6.32149	5.81036	0.028663	0.29863
TRNT1	TRNT1	tRNA nucleotidyl transferase 1 [Source:HGNC Symbol;Acc:HGNC:17341]	0.272102	5.54993	5.80151	0.0287673	0.299487
RNASEH2C	NA	NA	0.436088	4.67773	5.80013	0.0287836	0.299487
ADAP2	ADAP2	ArfGAP with dual PH domains 2 [Source:HGNC Symbol;Acc:HGNC:16487]	0.408777	4.36976	5.79093	0.0288925	0.300421
LOC127486741	NA	NA	1.2277	1.82237	5.77999	0.0290228	0.301559
PPIL1	PPIL1	peptidylprolyl isomerase like 1 [Source:HGNC Symbol;Acc:HGNC:9260]	0.314436	3.77592	5.77837	0.0290421	0.301559
ANKH	ANKH	ANKH inorganic pyrophosphate transport regulator [Source:HGNC Symbol;Acc:HGNC:15492]	0.502745	7.90885	5.77688	0.0290599	0.301559
KCNQ4	KCNQ4	potassium voltage-gated channel subfamily Q member 4 [Source:HGNC Symbol;Acc:HGNC:6298]	-0.676494	3.77175	5.77343	0.0291012	0.301787
RABEP2	RABEP2	rabaptin, RAB GTPase binding effector protein 2 [Source:HGNC Symbol;Acc:HGNC:24817]	0.42199	4.657	5.77132	0.0291264	0.301849
PNPLA6	PNPLA6	patatin like phospholipase domain containing 6 [Source:HGNC Symbol;Acc:HGNC:16268]	0.331821	4.96697	5.76748	0.0291726	0.301917
TRADD	TRADD	TNFRSF1A associated via death domain [Source:HGNC Symbol;Acc:HGNC:12030]	0.495342	4.04844	5.76457	0.0292075	0.301917
ADK	ADK	adenosine kinase [Source:HGNC Symbol;Acc:HGNC:257]	0.523135	4.52001	5.76285	0.0292282	0.301917
BBOX1	BBOX1	gamma-butyrobetaine hydroxylase 1 [Source:HGNC Symbol;Acc:HGNC:964]	1.33941	-0.467267	5.76158	0.0292435	0.301917
RASD2	RASD2	RASD family member 2 [Source:HGNC Symbol;Acc:HGNC:18229]	1.74438	2.07406	5.77538	0.0292475	0.301917
HSDL2	HSDL2	hydroxysteroid dehydrogenase like 2 [Source:HGNC Symbol;Acc:HGNC:18572]	-0.749357	5.69744	5.76277	0.029249	0.301917
ANTXR2	ANTXR2	ANTXR cell adhesion molecule 2 [Source:HGNC Symbol;Acc:HGNC:21732]	-0.523118	8.38034	5.75664	0.029303	0.30216
ACADSB	ACADSB	acyl-CoA dehydrogenase short/branched chain [Source:HGNC Symbol;Acc:HGNC:91]	-0.5322	6.284	5.75597	0.0293112	0.30216
SRCIN1	SRCIN1	SRC kinase signaling inhibitor 1 [Source:HGNC Symbol;Acc:HGNC:29506]	-0.888749	2.33218	5.74834	0.0294034	0.302756
SLC24A4	SLC24A4	solute carrier family 24 member 4 [Source:HGNC Symbol;Acc:HGNC:10978]	1.04661	1.83717	5.74798	0.0294078	0.302756
LOC100358984	NA	NA	-1.30192	2.54572	5.74322	0.0294854	0.303276
CNKSR3	CNKSR3	CNKSR family member 3 [Source:HGNC Symbol;Acc:HGNC:23034]	-0.869178	3.8785	5.74063	0.029497	0.303276
SDC4	SDC4	syndecan 4 [Source:HGNC Symbol;Acc:HGNC:10661]	0.401413	7.21879	5.72949	0.0296329	0.304331
KRT8	KRT8	keratin 8 [Source:HGNC Symbol;Acc:HGNC:6446]	1.80356	3.64449	5.77199	0.0296797	0.304331
ABL2	ABL2	ABL proto-oncogene 2, non-receptor tyrosine kinase [Source:HGNC Symbol;Acc:HGNC:77]	-0.310132	4.46435	5.72559	0.0296805	0.304331
TTPA	GGH	gamma-glutamyl hydrolase [Source:HGNC Symbol;Acc:HGNC:4248]	-0.763759	1.31308	5.72543	0.0296825	0.304331
ELMOD1	ELMOD1	ELMO domain containing 1 [Source:HGNC Symbol;Acc:HGNC:25334]	2.05237	-0.223483	5.72424	0.029697	0.304331
DUSP7	DUSP7	dual specificity phosphatase 7 [Source:HGNC Symbol;Acc:HGNC:3073]	0.344026	5.63088	5.71577	0.0298011	0.305198
SLC35C1	SLC35C1	solute carrier family 35 member C1 [Source:HGNC Symbol;Acc:HGNC:20197]	0.521542	2.61094	5.70585	0.0299235	0.30625
OSGEPL1	OSGEPL1	O-sialoglycoprotein endopeptidase like 1 [Source:HGNC Symbol;Acc:HGNC:23075]	-0.634681	3.5245	5.70376	0.0299493	0.306251
LOC127482603	NA	NA	1.73388	0.449489	5.70268	0.0299627	0.306251
B4GALT1	NA	NA	0.545033	6.45697	5.6997	0.0299996	0.306427
LOC100345135	NA	NA	0.559703	4.51441	5.69779	0.0300234	0.30647
SLC20A1	SLC20A1	solute carrier family 20 member 1 [Source:HGNC Symbol;Acc:HGNC:10946]	0.460218	5.65515	5.695	0.030058	0.30658
RNF130	NA	NA	0.293185	6.23525	5.69152	0.0301013	0.30658
SLC10A4	SLC10A4	solute carrier family 10 member 4 [Source:HGNC Symbol;Acc:HGNC:22980]	1.27928	0.677403	5.69136	0.0301032	0.30658
EIF4A1	EIF4A1	eukaryotic translation initiation factor 4A1 [Source:HGNC Symbol;Acc:HGNC:3282]	0.354914	8.16956	5.68689	0.030159	0.30658
HCAR1	HCAR1	hydroxycarboxylic acid receptor 1 [Source:HGNC Symbol;Acc:HGNC:4532]	-1.0291	2.62763	5.6867	0.0301613	0.30658
BRIP1	BRIP1	BRCA1 interacting helicase 1 [Source:HGNC Symbol;Acc:HGNC:20473]	0.803839	0.431846	5.68659	0.0301626	0.30658
SAMD9L	SAMD9L	sterile alpha motif domain containing 9 like [Source:HGNC Symbol;Acc:HGNC:1349]	0.686452	4.48998	5.68589	0.0301715	0.30658
P3H4	P3H4	prolyl 3-hydroxylase family member 4 (inactive) [Source:HGNC Symbol;Acc:HGNC:16946]	0.509862	5.96687	5.67924	0.0302545	0.307013
MPZL1	MPZL1	myelin protein zero like 1 [Source:HGNC Symbol;Acc:HGNC:7226]	0.459952	6.03869	5.67846	0.0302644	0.307013
RCAN2	RCAN2	regulator of calcineurin 2 [Source:HGNC Symbol;Acc:HGNC:3041]	-0.659558	7.38368	5.67441	0.0303151	0.307013
CDS2	CDS2	CDP-diacylglycerol synthase 2 [Source:HGNC Symbol;Acc:HGNC:1801]	-0.467203	7.41873	5.6731	0.0303316	0.307013
TEAD1	TEAD1	TEA domain transcription factor 1 [Source:HGNC Symbol;Acc:HGNC:11714]	-0.563338	6.40929	5.67121	0.0303554	0.307013
KIF26A	NA	NA	-0.641068	4.16895	5.67105	0.0303574	0.307013
CARS1	NA	NA	0.341327	4.92191	5.67064	0.0303625	0.307013
CD82	CD82	CD82 molecule [Source:HGNC Symbol;Acc:HGNC:6210]	0.466079	5.79054	5.6695	0.0303768	0.307013
PACSIN1	PACSIN1	protein kinase C and casein kinase substrate in neurons 1 [Source:HGNC Symbol;Acc:HGNC:8570]	-1.16401	2.91515	5.66998	0.0303909	0.307013
SLC31A1	SLC31A1	solute carrier family 31 member 1 [Source:HGNC Symbol;Acc:HGNC:11016]	0.337791	3.86846	5.66075	0.0304872	0.307787
ANKRD13B	ANKRD13B	ankyrin repeat domain 13B [Source:HGNC Symbol;Acc:HGNC:26363]	0.499457	3.43613	5.65907	0.0305084	0.307802
PRSS56	PRSS56	serine protease 56 [Source:HGNC Symbol;Acc:HGNC:39433]	1.14112	1.49703	5.64916	0.0306339	0.30845
LOC103345926	NA	NA	2.32294	4.11566	5.69385	0.030641	0.30845
DENND2C	DENND2C	DENN domain containing 2C [Source:HGNC Symbol;Acc:HGNC:24748]	0.490714	1.97243	5.64789	0.0306501	0.30845
PRR7	NA	NA	0.841481	1.25088	5.64685	0.0306634	0.30845
PEX7	PEX7	peroxisomal biogenesis factor 7 [Source:HGNC Symbol;Acc:HGNC:8860]	-0.384763	4.04061	5.64457	0.0306924	0.30845
SNX8	NA	NA	0.427097	4.61492	5.64383	0.0307018	0.30845
APOL3	NA	NA	-0.954177	2.07592	5.64183	0.0307273	0.30845
SLC66A3	SLC66A3	solute carrier family 66 member 3 [Source:HGNC Symbol;Acc:HGNC:28503]	-0.379125	5.79082	5.64102	0.0307376	0.30845
IL6ST	IL6ST	interleukin 6 cytokine family signal transducer [Source:HGNC Symbol;Acc:HGNC:6021]	0.562711	7.51489	5.64003	0.0307503	0.30845
SMCO4	NA	NA	0.535683	3.60212	5.63234	0.0308486	0.309237
LOC127488080	NA	NA	2.12387	-0.770085	5.62593	0.0309307	0.309758
F13A1	NA	NA	0.799471	4.80909	5.62572	0.0309594	0.309758
CNDP2	CNDP2	carnosine dipeptidase 2 [Source:HGNC Symbol;Acc:HGNC:24437]	0.5239	5.99437	5.62347	0.0309623	0.309758
KASH5	NA	NA	1.48827	-0.771286	5.62184	0.0309834	0.309758
VAV3	VAV3	vav guanine nucleotide exchange factor 3 [Source:HGNC Symbol;Acc:HGNC:12659]	0.714387	3.263	5.6194	0.0310147	0.309758
NOP14	NOP14	NOP14 nucleolar protein [Source:HGNC Symbol;Acc:HGNC:16821]	0.300984	4.65653	5.61842	0.0310274	0.309758
LOC100337809	NA	NA	1.46955	2.56252	5.62742	0.0310392	0.309758
NCAM1	NCAM1	neural cell adhesion molecule 1 [Source:HGNC Symbol;Acc:HGNC:7656]	-0.391872	7.74435	5.61433	0.0310802	0.309969
ARL4C	ARL4C	ADP ribosylation factor like GTPase 4C [Source:HGNC Symbol;Acc:HGNC:698]	0.834839	3.26405	5.61275	0.0311006	0.309975
TMEM167A	TMEM167A	transmembrane protein 167A [Source:HGNC Symbol;Acc:HGNC:28330]	0.398462	6.02625	5.60272	0.0312306	0.310705
KCNV1	KCNV1	potassium voltage-gated channel modifier subfamily V member 1 [Source:HGNC Symbol;Acc:HGNC:18861]	-1.68734	-0.89738	5.60237	0.0312351	0.310705
LOC127486369	NA	NA	1.66416	-0.4917	5.60197	0.0312404	0.310705
RNF115	RNF115	ring finger protein 115 [Source:HGNC Symbol;Acc:HGNC:18154]	-0.416875	6.67008	5.60096	0.0312534	0.310705
HIF1A	HIF1A	hypoxia inducible factor 1 subunit alpha [Source:HGNC Symbol;Acc:HGNC:4910]	0.78091	8.36336	5.59794	0.0312927	0.31072
HADH	HADH	hydroxyacyl-CoA dehydrogenase [Source:HGNC Symbol;Acc:HGNC:4799]	-0.570364	6.86697	5.59779	0.0312947	0.31072
ADAM2	ADAM2	ADAM metallopeptidase domain 2 [Source:HGNC Symbol;Acc:HGNC:198]	-0.841069	1.36448	5.59252	0.0313634	0.311108
LOC100342972	NA	NA	-2.01327	5.31553	5.63619	0.0313736	0.311108
TRIM9	TRIM9	tripartite motif containing 9 [Source:HGNC Symbol;Acc:HGNC:16288]	1.25895	-0.16626	5.58439	0.0314697	0.311718
PODXL	NA	NA	-0.707298	5.63075	5.58402	0.031475	0.311718
ECH1	NA	NA	-0.971381	7.25039	5.59454	0.0315538	0.312301
SMC4	SMC4	structural maintenance of chromosomes 4 [Source:HGNC Symbol;Acc:HGNC:14013]	0.403257	4.68417	5.57615	0.0315779	0.312341
LOC100352317	NA	NA	2.6521	-1.44548	5.57147	0.0316396	0.312704
TYRO3	TYRO3	TYRO3 protein tyrosine kinase [Source:HGNC Symbol;Acc:HGNC:12446]	0.420809	4.50618	5.57034	0.0316545	0.312704
LONP2	LONP2	lon peptidase 2, peroxisomal [Source:HGNC Symbol;Acc:HGNC:20598]	-0.426207	5.83256	5.56817	0.0316831	0.312788
MYCT1	MYCT1	MYC target 1 [Source:HGNC Symbol;Acc:HGNC:23172]	-0.79668	3.5946	5.56218	0.0317623	0.313267
ITPRIPL2	ITPRIPL2	ITPRIP like 2 [Source:HGNC Symbol;Acc:HGNC:27257]	0.336497	5.98368	5.56012	0.0317896	0.313267
CD44	CD44	CD44 molecule (Indian blood group) [Source:HGNC Symbol;Acc:HGNC:1681]	0.521785	7.62221	5.55996	0.0317918	0.313267
LRRC49	LRRC49	leucine rich repeat containing 49 [Source:HGNC Symbol;Acc:HGNC:25965]	0.305295	4.1728	5.55361	0.0318761	0.313554
GOLM1	GOLM1	golgi membrane protein 1 [Source:HGNC Symbol;Acc:HGNC:15451]	0.43181	4.67144	5.55285	0.0318862	0.313554
INF2	NA	NA	0.374838	6.26736	5.55163	0.0319025	0.313554
TMEM8B	TMEM8B	transmembrane protein 8B [Source:HGNC Symbol;Acc:HGNC:21427]	-0.36945	6.01704	5.55023	0.0319211	0.313554
PPM1H	PPM1H	protein phosphatase, Mg2+/Mn2+ dependent 1H [Source:HGNC Symbol;Acc:HGNC:18583]	0.408806	4.18733	5.55023	0.0319212	0.313554
UPK1B	UPK1B	uroplakin 1B [Source:HGNC Symbol;Acc:HGNC:12578]	2.27921	1.32655	5.56486	0.0319546	0.313685
KAT7	KAT7	lysine acetyltransferase 7 [Source:HGNC Symbol;Acc:HGNC:17016]	-0.31066	5.58235	5.53553	0.0321176	0.315087
LOC100342250	NA	NA	1.76326	-0.192145	5.53397	0.0321386	0.315096
LOC100359089	NA	NA	-0.526658	4.24073	5.52505	0.0322586	0.316074
PDIA5	PDIA5	protein disulfide isomerase family A member 5 [Source:HGNC Symbol;Acc:HGNC:24811]	0.451717	4.42049	5.5235	0.0322795	0.31608
MTIF2	MTIF2	mitochondrial translational initiation factor 2 [Source:HGNC Symbol;Acc:HGNC:7441]	-0.342546	4.0837	5.51827	0.0323503	0.316575
HEXA	HEXA	hexosaminidase subunit alpha [Source:HGNC Symbol;Acc:HGNC:4878]	0.626481	7.50171	5.51378	0.032411	0.31697
LOC100352927	NA	NA	1.64408	1.84412	5.51021	0.0324893	0.317318
LOC127489199	NA	NA	0.552992	2.12854	5.50694	0.0325039	0.317318
XPNPEP1	XPNPEP1	X-prolyl aminopeptidase 1 [Source:HGNC Symbol;Acc:HGNC:12822]	0.300458	5.19077	5.50668	0.0325074	0.317318
IRAK2	IRAK2	interleukin 1 receptor associated kinase 2 [Source:HGNC Symbol;Acc:HGNC:6113]	0.620701	2.62486	5.5019	0.0325726	0.317641
LOC100350303	NA	NA	0.746736	2.85347	5.50127	0.0325812	0.317641
LOC108175883	NA	NA	-0.53828	2.19781	5.49346	0.0326879	0.318483
LOC103349543	NA	NA	-1.33258	-0.217654	5.48886	0.0327509	0.318537
HSPB6	HSPB6	heat shock protein family B (small) member 6 [Source:HGNC Symbol;Acc:HGNC:26511]	-0.800993	10.2254	5.48845	0.0327566	0.318537
TBC1D8	TBC1D8	TBC1 domain family member 8 [Source:HGNC Symbol;Acc:HGNC:17791]	-0.332837	5.0536	5.48716	0.0327743	0.318537
RAVER1	RAVER1	ribonucleoprotein, PTB binding 1 [Source:HGNC Symbol;Acc:HGNC:30296]	0.29592	4.56239	5.48711	0.032775	0.318537
PPP2CA	PPP2CA	protein phosphatase 2 catalytic subunit alpha [Source:HGNC Symbol;Acc:HGNC:9299]	-0.332509	6.73908	5.48352	0.0328244	0.318819
TNFAIP8	NA	NA	0.636969	4.26407	5.47672	0.032918	0.31953
RPL26L1	RPL26L1	ribosomal protein L26 like 1 [Source:HGNC Symbol;Acc:HGNC:17050]	0.361655	4.10412	5.46983	0.0330134	0.3201
ST3GAL5	ST3GAL5	ST3 beta-galactoside alpha-2,3-sialyltransferase 5 [Source:HGNC Symbol;Acc:HGNC:10872]	0.736532	3.25604	5.46951	0.0330177	0.3201
P4HB	NA	NA	0.42459	8.41198	5.46405	0.0330935	0.320529
PAPPA2	PAPPA2	pappalysin 2 [Source:HGNC Symbol;Acc:HGNC:14615]	1.20256	3.26084	5.47144	0.033103	0.320529
SPTBN5	SPTBN5	spectrin beta, non-erythrocytic 5 [Source:HGNC Symbol;Acc:HGNC:15680]	2.56565	0.869921	5.47937	0.0331597	0.320618
PCYT1B	PCYT1B	phosphate cytidylyltransferase 1B, choline [Source:HGNC Symbol;Acc:HGNC:8755]	0.738063	2.27144	5.45858	0.0331695	0.320618
PI15	PI15	peptidase inhibitor 15 [Source:HGNC Symbol;Acc:HGNC:8946]	0.90715	6.45509	5.47415	0.0331747	0.320618
LOC100352968	NA	NA	-1.67779	5.3499	5.496	0.0332409	0.320618
ARG2	ARG2	arginase 2 [Source:HGNC Symbol;Acc:HGNC:664]	1.13411	-0.517118	5.4509	0.0332767	0.320618
SHISA2	SHISA2	shisa family member 2 [Source:HGNC Symbol;Acc:HGNC:20366]	0.918967	1.8482	5.45088	0.033277	0.320618
LDAF1	LDAF1	lipid droplet assembly factor 1 [Source:HGNC Symbol;Acc:HGNC:30136]	-0.417908	5.40106	5.44997	0.0332898	0.320618
QPRT	QPRT	quinolinate phosphoribosyltransferase [Source:HGNC Symbol;Acc:HGNC:9755]	4.06202	-0.819995	5.44839	0.0333124	0.320618
SHMT2	SHMT2	serine hydroxymethyltransferase 2 [Source:HGNC Symbol;Acc:HGNC:10852]	0.555133	3.93722	5.44623	0.0333422	0.320618
TFRC	TFRC	transferrin receptor [Source:HGNC Symbol;Acc:HGNC:11763]	0.516048	6.08468	5.44563	0.0333505	0.320618
MAPK13	MAPK13	mitogen-activated protein kinase 13 [Source:HGNC Symbol;Acc:HGNC:6875]	1.18368	0.248538	5.44148	0.0334087	0.320618
SLC35B1	SLC35B1	solute carrier family 35 member B1 [Source:HGNC Symbol;Acc:HGNC:20798]	0.301379	5.25023	5.44077	0.0334187	0.320618
IRS1	IRS1	insulin receptor substrate 1 [Source:HGNC Symbol;Acc:HGNC:6125]	-0.498152	4.83532	5.4396	0.0334351	0.320618
LOC127486365	NA	NA	-0.587286	3.61513	5.43829	0.0334535	0.320618
NDUFAF5	NDUFAF5	NADH:ubiquinone oxidoreductase complex assembly factor 5 [Source:HGNC Symbol;Acc:HGNC:15899]	-0.470864	3.06211	5.43827	0.0334539	0.320618
CKAP2	CKAP2	cytoskeleton associated protein 2 [Source:HGNC Symbol;Acc:HGNC:1990]	0.872059	2.40261	5.43742	0.0334658	0.320618
TMEM178B	NA	NA	-1.1685	2.09914	5.43722	0.0334686	0.320618
SH3D21	NA	NA	-1.17792	1.85635	5.43631	0.0334814	0.320618
LOC100356150	NA	NA	0.45093	4.8126	5.42956	0.0335767	0.321333
CUNH4orf46	NA	NA	0.54937	4.26472	5.4229	0.0336709	0.322037
BTRC	BTRC	beta-transducin repeat containing E3 ubiquitin protein ligase [Source:HGNC Symbol;Acc:HGNC:1144]	-0.341514	4.99933	5.41422	0.0337941	0.323018
PCDH19	PCDH19	protocadherin 19 [Source:HGNC Symbol;Acc:HGNC:14270]	-0.732508	2.45374	5.40773	0.0338866	0.323286
KLHL11	KLHL11	kelch like family member 11 [Source:HGNC Symbol;Acc:HGNC:19008]	-0.606017	4.27864	5.40727	0.0338932	0.323286
C1H9orf152	NA	NA	1.37498	0.176206	5.40632	0.0339068	0.323286
KLF4	NA	NA	0.401962	5.45083	5.40578	0.0339144	0.323286
LOC127492279	NA	NA	-1.34731	-0.265912	5.40391	0.0339413	0.323286
FAM241A	FAM241A	family with sequence similarity 241 member A [Source:HGNC Symbol;Acc:HGNC:26813]	-0.520298	5.14527	5.40356	0.0339462	0.323286
PLXNA2	PLXNA2	plexin A2 [Source:HGNC Symbol;Acc:HGNC:9100]	0.500566	5.046	5.40086	0.0339849	0.323457
ZBTB25	ZBTB25	zinc finger and BTB domain containing 25 [Source:HGNC Symbol;Acc:HGNC:13112]	-1.37812	3.55122	5.42219	0.0340689	0.324058
MAGI1	MAGI1	membrane associated guanylate kinase, WW and PDZ domain containing 1 [Source:HGNC Symbol;Acc:HGNC:946]	-0.395588	5.66195	5.39283	0.0341001	0.324158
LOC100347176	NA	NA	-0.369806	4.17676	5.37692	0.0343297	0.326143
CD3E	CD3E	CD3 epsilon subunit of T-cell receptor complex [Source:HGNC Symbol;Acc:HGNC:1674]	1.74827	-0.563169	5.37377	0.0343755	0.326379
LOC100357474	NA	NA	1.36068	0.673551	5.36606	0.0344877	0.327246
CDC25B	NA	NA	0.281091	4.80871	5.35421	0.0346608	0.328689
TXN	TXN	thioredoxin [Source:HGNC Symbol;Acc:HGNC:12435]	0.440468	6.61962	5.35157	0.0346995	0.328813
LTBP4	NA	NA	-0.463744	10.7485	5.35044	0.034716	0.328813
KRT16	KRT16	keratin 16 [Source:HGNC Symbol;Acc:HGNC:6423]	1.82772	0.375277	5.34583	0.0347838	0.329174
TOR4A	NA	NA	0.597461	3.6436	5.34499	0.0347963	0.329174
CLEC11A	NA	NA	0.871412	6.42338	5.35474	0.0348481	0.329465
PKP1	PKP1	plakophilin 1 [Source:HGNC Symbol;Acc:HGNC:9023]	1.4209	-0.0461968	5.33849	0.034892	0.329588
MAN1C1	NA	NA	0.543435	4.69426	5.33773	0.0349033	0.329588
CDK5RAP2	CDK5RAP2	CDK5 regulatory subunit associated protein 2 [Source:HGNC Symbol;Acc:HGNC:18672]	0.508223	3.66892	5.33333	0.0349683	0.329752
CPVL	CPVL	carboxypeptidase vitellogenic like [Source:HGNC Symbol;Acc:HGNC:14399]	1.53758	1.04391	5.33228	0.0349839	0.329752
SGTB	SGTB	small glutamine rich tetratricopeptide repeat co-chaperone beta [Source:HGNC Symbol;Acc:HGNC:23567]	-0.849091	3.16175	5.33099	0.035003	0.329752
IGFBP4	IGFBP4	insulin like growth factor binding protein 4 [Source:HGNC Symbol;Acc:HGNC:5473]	0.861925	8.28053	5.33229	0.035005	0.329752
LOC100339316	NA	NA	0.827545	3.90065	5.32779	0.0350504	0.329981
POLR3H	POLR3H	RNA polymerase III subunit H [Source:HGNC Symbol;Acc:HGNC:30349]	0.544264	3.84514	5.32464	0.0350972	0.330158
SNAI2	NA	NA	0.585338	4.97729	5.32368	0.0351115	0.330158
KEF51_p05	NA	NA	-1.08809	8.83628	5.33448	0.035171	0.330276
CD5	CD5	CD5 molecule [Source:HGNC Symbol;Acc:HGNC:1685]	1.68317	-0.509195	5.31941	0.0351751	0.330276
ATP6V0C	ATP6V0C	ATPase H+ transporting V0 subunit c [Source:HGNC Symbol;Acc:HGNC:855]	0.510106	7.16152	5.31802	0.0351959	0.330276
IL1RL2	IL1RL2	interleukin 1 receptor like 2 [Source:HGNC Symbol;Acc:HGNC:5999]	2.07329	1.56447	5.33238	0.0352087	0.330276
CDC42EP4	NA	NA	0.294059	5.82086	5.31557	0.0352325	0.330276
CD302	CD302	CD302 molecule [Source:HGNC Symbol;Acc:HGNC:30843]	0.602456	6.96864	5.31433	0.0352509	0.330276
EXOC6	EXOC6	exocyst complex component 6 [Source:HGNC Symbol;Acc:HGNC:23196]	-0.361118	3.47823	5.31038	0.03531	0.330586
PRKAB2	PRKAB2	protein kinase AMP-activated non-catalytic subunit beta 2 [Source:HGNC Symbol;Acc:HGNC:9379]	-0.511871	5.70466	5.30901	0.0353305	0.330586
LOC100346947	NA	NA	-0.300011	4.36503	5.30789	0.0353474	0.330586
KEF51_p13	NA	NA	-0.850535	12.2909	5.30535	0.0353854	0.330601
SMARCA4	SMARCA4	SWI/SNF related, matrix associated, actin dependent regulator of chromatin, subfamily a, member 4 [Source:HGNC Symbol;Acc:HGNC:11100]	0.284066	5.85296	5.30496	0.0353913	0.330601
FILIP1	FILIP1	filamin A interacting protein 1 [Source:HGNC Symbol;Acc:HGNC:21015]	-0.570187	6.13125	5.29863	0.0354864	0.331173
SESN2	SESN2	sestrin 2 [Source:HGNC Symbol;Acc:HGNC:20746]	0.599632	2.79899	5.29806	0.035495	0.331173
LOC100357502	NA	NA	0.628651	4.47095	5.29565	0.0355313	0.331314
HHAT	HHAT	hedgehog acyltransferase [Source:HGNC Symbol;Acc:HGNC:18270]	0.52569	2.59302	5.28996	0.0356173	0.331568
STMN1	NA	NA	0.679108	4.21307	5.28951	0.035624	0.331568
CRB2	NA	NA	2.66002	1.26579	5.31715	0.0356433	0.331568
LOC127491115	NA	NA	1.0204	0.545326	5.28629	0.0356729	0.331568
POMT1	NA	NA	1.24991	4.43499	5.31631	0.0356848	0.331568
LOC100345861	NA	NA	-0.448851	4.4649	5.2843	0.035703	0.331568
PIP4K2C	PIP4K2C	phosphatidylinositol-5-phosphate 4-kinase type 2 gamma [Source:HGNC Symbol;Acc:HGNC:23786]	0.268888	4.40072	5.28339	0.0357168	0.331568
GJA5	GJA5	gap junction protein alpha 5 [Source:HGNC Symbol;Acc:HGNC:4279]	0.93001	4.48626	5.2966	0.0357383	0.331568
RAD51B	RAD51B	RAD51 paralog B [Source:HGNC Symbol;Acc:HGNC:9822]	0.576503	2.78114	5.28124	0.0357495	0.331568
SLC25A5	SLC25A5	solute carrier family 25 member 5 [Source:HGNC Symbol;Acc:HGNC:10991]	0.653637	7.48158	5.2793	0.0357789	0.331645
LOC127486883	NA	NA	1.42119	4.88959	5.3164	0.0358251	0.331876
UBR3	UBR3	ubiquitin protein ligase E3 component n-recognin 3 [Source:HGNC Symbol;Acc:HGNC:30467]	-0.508143	5.49956	5.27261	0.0358808	0.332195
NSG1	NSG1	neuronal vesicle trafficking associated 1 [Source:HGNC Symbol;Acc:HGNC:18790]	-1.15697	1.25546	5.26979	0.0359238	0.332279
LOC127489609	NA	NA	2.01874	0.107522	5.26923	0.0359324	0.332279
KIF15	KIF15	kinesin family member 15 [Source:HGNC Symbol;Acc:HGNC:17273]	0.802985	1.29438	5.26476	0.0360007	0.332714
ACAT1	ACAT1	acetyl-CoA acetyltransferase 1 [Source:HGNC Symbol;Acc:HGNC:93]	-0.865859	7.39881	5.26545	0.0360647	0.333001
TREML2	TREML2	triggering receptor expressed on myeloid cells like 2 [Source:HGNC Symbol;Acc:HGNC:21092]	1.80279	1.15752	5.26136	0.0360744	0.333001
CHPT1	MYBPC1	myosin binding protein C1 [Source:HGNC Symbol;Acc:HGNC:7549]	-0.446787	6.18669	5.25611	0.0361335	0.333155
RRBP1	RRBP1	ribosome binding protein 1 [Source:HGNC Symbol;Acc:HGNC:10448]	0.351829	8.22809	5.2561	0.0361337	0.333155
TEX264	TEX264	testis expressed 264, ER-phagy receptor [Source:HGNC Symbol;Acc:HGNC:30247]	0.427203	5.29906	5.25071	0.0362167	0.333461
TMEM126A	TMEM126A	transmembrane protein 126A [Source:HGNC Symbol;Acc:HGNC:25382]	-0.415019	5.52807	5.25015	0.0362253	0.333461
EML3	EML3	EMAP like 3 [Source:HGNC Symbol;Acc:HGNC:26666]	0.333285	6.36178	5.24979	0.0362309	0.333461
ARSA	ARSA	arylsulfatase A [Source:HGNC Symbol;Acc:HGNC:713]	0.480085	5.42378	5.24648	0.0362819	0.333734
TMC8	NA	NA	0.878622	1.98329	5.24483	0.0363074	0.333772
ARHGEF15	ARHGEF15	Rho guanine nucleotide exchange factor 15 [Source:HGNC Symbol;Acc:HGNC:15590]	-0.620305	4.56774	5.24306	0.0363349	0.333828
LOC100359112	NA	NA	0.937779	5.78067	5.2607	0.0364402	0.334599
CCNB1IP1	CCNB1IP1	cyclin B1 interacting protein 1 [Source:HGNC Symbol;Acc:HGNC:19437]	-0.84406	1.9033	5.23147	0.0365148	0.334835
PDP2	PDP2	pyruvate dehydrogenase phosphatase catalytic subunit 2 [Source:HGNC Symbol;Acc:HGNC:30263]	-0.422517	3.95023	5.23046	0.0365305	0.334835
LOC127488702	NA	NA	-0.936753	1.64094	5.22961	0.0365437	0.334835
RIN3	RIN3	Ras and Rab interactor 3 [Source:HGNC Symbol;Acc:HGNC:18751]	0.627037	4.94823	5.2284	0.0365626	0.334835
BHLHE41	NA	NA	0.465567	5.88236	5.22773	0.036573	0.334835
AMIGO3	AMIGO3	adhesion molecule with Ig like domain 3 [Source:HGNC Symbol;Acc:HGNC:24075]	0.56266	1.71054	5.22529	0.036611	0.334987
PSMD12	PSMD12	proteasome 26S subunit, non-ATPase 12 [Source:HGNC Symbol;Acc:HGNC:9557]	-0.273535	6.72693	5.2236	0.0366375	0.335032
TGIF2	TGIF2	TGFB induced factor homeobox 2 [Source:HGNC Symbol;Acc:HGNC:15764]	0.483381	3.03225	5.2208	0.0366813	0.335237
LOC103352165	NA	NA	1.05683	-0.403357	5.2175	0.036733	0.335513
LOC127485225	NA	NA	-3.90456	0.507614	5.24799	0.0367703	0.335614
LOC100342859	NA	NA	2.19793	1.76962	5.23966	0.036787	0.335614
ANKRD23	ANKRD23	ankyrin repeat domain 23 [Source:HGNC Symbol;Acc:HGNC:24470]	-1.61705	7.0388	5.24961	0.0368452	0.335851
SLC25A3	SLC25A3	solute carrier family 25 member 3 [Source:HGNC Symbol;Acc:HGNC:10989]	-0.71265	9.44814	5.20966	0.036856	0.335851
LOC127490176	NA	NA	-3.50382	0.885422	5.49859	0.0368774	0.335851
PTPN2	PTPN2	protein tyrosine phosphatase non-receptor type 2 [Source:HGNC Symbol;Acc:HGNC:9650]	0.440951	5.11022	5.20579	0.036917	0.335883
LPIN1	LPIN1	lipin 1 [Source:HGNC Symbol;Acc:HGNC:13345]	-0.976273	5.05577	5.23088	0.036924	0.335883
INSR	INSR	insulin receptor [Source:HGNC Symbol;Acc:HGNC:6091]	-0.439571	6.36131	5.20302	0.0369608	0.335975
LCLAT1	LCLAT1	lysocardiolipin acyltransferase 1 [Source:HGNC Symbol;Acc:HGNC:26756]	-0.470398	5.4115	5.20199	0.036977	0.335975
SLC6A13	NA	NA	1.22786	-0.0658088	5.19856	0.0370313	0.336095
EPN3	EPN3	epsin 3 [Source:HGNC Symbol;Acc:HGNC:18235]	-1.1959	3.48296	5.21357	0.0370403	0.336095
NEGR1	NEGR1	neuronal growth regulator 1 [Source:HGNC Symbol;Acc:HGNC:17302]	-1.01511	1.47823	5.19707	0.0370548	0.336095
BGN	BGN	biglycan [Source:HGNC Symbol;Acc:HGNC:1044]	0.495124	11.8404	5.19274	0.0371234	0.336397
VSIG2	NA	NA	-0.820537	1.33673	5.19226	0.0371311	0.336397
TMEM268	TMEM268	transmembrane protein 268 [Source:HGNC Symbol;Acc:HGNC:24513]	0.422693	2.90832	5.18706	0.0372137	0.336832
ATP5F1B	ATP5F1B	ATP synthase F1 subunit beta [Source:HGNC Symbol;Acc:HGNC:830]	-0.915237	9.73221	5.18653	0.0372222	0.336832
RPRD1A	RPRD1A	regulation of nuclear pre-mRNA domain containing 1A [Source:HGNC Symbol;Acc:HGNC:25560]	-0.342904	5.37786	5.1839	0.0372639	0.337014
SOAT1	SOAT1	sterol O-acyltransferase 1 [Source:HGNC Symbol;Acc:HGNC:11177]	0.389412	4.3585	5.17784	0.0373608	0.337692
LRRK2	LRRK2	leucine rich repeat kinase 2 [Source:HGNC Symbol;Acc:HGNC:18618]	-0.373516	4.31233	5.1765	0.0373821	0.337692
IL18BP	IL18BP	interleukin 18 binding protein [Source:HGNC Symbol;Acc:HGNC:5987]	0.751579	3.72144	5.16643	0.0375436	0.338955
PCNX3	NA	NA	0.276446	5.51439	5.16383	0.0375855	0.339089
NACAD	NA	NA	-1.06067	1.48425	5.16282	0.0376018	0.339089
LPAR2	LPAR2	lysophosphatidic acid receptor 2 [Source:HGNC Symbol;Acc:HGNC:3168]	1.25266	-0.0202493	5.16069	0.0376361	0.339203
METTL17	METTL17	methyltransferase like 17 [Source:HGNC Symbol;Acc:HGNC:19280]	-0.321215	4.19788	5.15288	0.0377622	0.340143
ARPC1A	ARPC1A	actin related protein 2/3 complex subunit 1A [Source:HGNC Symbol;Acc:HGNC:703]	0.30733	6.49191	5.14996	0.0378095	0.3403
CD52	NA	NA	1.31856	0.912307	5.14806	0.0378403	0.3403
LOC100339065	NA	NA	1.40192	4.24489	5.18216	0.037845	0.3403
ID1	ID1	inhibitor of DNA binding 1 [Source:HGNC Symbol;Acc:HGNC:5360]	0.635041	7.22012	5.14436	0.0379004	0.340602
LOC127485982	NA	NA	0.537442	5.11905	5.14188	0.0379407	0.340768
CAMTA1	CAMTA1	calmodulin binding transcription activator 1 [Source:HGNC Symbol;Acc:HGNC:18806]	-0.351656	5.69965	5.13823	0.0380002	0.341107
LOC127489447	NA	NA	3.13969	0.416029	5.15551	0.0380312	0.341189
MATCAP2	MATCAP2	microtubule associated tyrosine carboxypeptidase 2 [Source:HGNC Symbol;Acc:HGNC:22206]	1.24649	0.035068	5.13373	0.0380737	0.341374
RELB	NA	NA	0.466868	3.94184	5.12972	0.0381392	0.34144
ACTN3	ACTN3	actinin alpha 3 [Source:HGNC Symbol;Acc:HGNC:165]	0.954663	-0.214721	5.12917	0.0381482	0.34144
SLC38A5	SLC38A5	solute carrier family 38 member 5 [Source:HGNC Symbol;Acc:HGNC:18070]	0.717045	3.9769	5.12882	0.038154	0.34144
FEN1	FEN1	flap structure-specific endonuclease 1 [Source:HGNC Symbol;Acc:HGNC:3650]	0.471321	2.69374	5.12794	0.0381684	0.34144
LOC127487458	NA	NA	-0.702118	2.18041	5.12262	0.0382556	0.342024
ITGB3	ITGB3	integrin subunit beta 3 [Source:HGNC Symbol;Acc:HGNC:6156]	0.702439	4.94642	5.11786	0.0383379	0.342522
PGAP4	NA	NA	-0.391635	4.60621	5.11627	0.0383601	0.342522
LOC108176034	NA	NA	-0.972682	-0.277673	5.11488	0.0383831	0.342522
TMEM214	TMEM214	transmembrane protein 214 [Source:HGNC Symbol;Acc:HGNC:25983]	0.294368	5.89379	5.11392	0.038399	0.342522
CTXN1	NA	NA	-0.754376	2.04172	5.1069	0.038515	0.343167
STK38	STK38	serine/threonine kinase 38 [Source:HGNC Symbol;Acc:HGNC:17847]	0.270806	6.44367	5.10689	0.0385151	0.343167
CDC42BPB	CDC42BPB	CDC42 binding protein kinase beta [Source:HGNC Symbol;Acc:HGNC:1738]	-0.257907	7.0635	5.10459	0.0385533	0.343311
LOC127493005	NA	NA	-0.859159	0.637429	5.10203	0.0385957	0.343493
SGCG	SGCG	sarcoglycan gamma [Source:HGNC Symbol;Acc:HGNC:10809]	-0.508851	5.85299	5.10012	0.0386274	0.343579
S100A8	S100A8	S100 calcium binding protein A8 [Source:HGNC Symbol;Acc:HGNC:10498]	2.06414	1.30419	5.10631	0.038678	0.343608
PLA2G4F	PLA2G4F	phospholipase A2 group IVF [Source:HGNC Symbol;Acc:HGNC:27396]	0.784902	0.943947	5.09624	0.038692	0.343608
LOC100349233	NA	NA	6.9053	-0.219469	5.37674	0.0386966	0.343608
LOC100343767	GIMAP6	GTPase, IMAP family member 6 [Source:HGNC Symbol;Acc:HGNC:21918]	1.44411	0.179038	5.08665	0.038852	0.344792
PLD2	PLD2	phospholipase D2 [Source:HGNC Symbol;Acc:HGNC:9068]	0.300391	5.20407	5.08396	0.0388969	0.344842
LOC108178936	NA	NA	-0.931571	-0.032233	5.08367	0.0389018	0.344842
MTHFS	MTHFS	methenyltetrahydrofolate synthetase [Source:HGNC Symbol;Acc:HGNC:7437]	0.57245	3.5328	5.08085	0.0389491	0.345066
GMNN	GMNN	geminin DNA replication inhibitor [Source:HGNC Symbol;Acc:HGNC:17493]	0.482217	2.27313	5.07835	0.0389911	0.345185
CHPF2	CHPF2	chondroitin polymerizing factor 2 [Source:HGNC Symbol;Acc:HGNC:29270]	0.363233	5.74914	5.07693	0.0390149	0.345185
LOC103345529	NA	NA	-1.27325	-0.442902	5.07611	0.0390288	0.345185
LOC100341932	NA	NA	-5.87762	0.216896	5.34416	0.0390775	0.345421
SH3BGRL3	SH3BGRL3	SH3 domain binding glutamate rich protein like 3 [Source:HGNC Symbol;Acc:HGNC:15568]	0.546514	6.59632	5.06952	0.0391397	0.345775
TEDC1	NA	NA	0.517683	2.52077	5.06313	0.0392476	0.346453
BDH1	BDH1	3-hydroxybutyrate dehydrogenase 1 [Source:HGNC Symbol;Acc:HGNC:1027]	-0.919379	5.89915	5.08413	0.0392609	0.346453
FASTKD2	NA	NA	-0.46319	2.83616	5.05705	0.0393508	0.347051
HTRA4	HTRA4	HtrA serine peptidase 4 [Source:HGNC Symbol;Acc:HGNC:26909]	1.15107	1.8514	5.05539	0.0393789	0.347103
HAND2	HAND2	heart and neural crest derivatives expressed 2 [Source:HGNC Symbol;Acc:HGNC:4808]	-0.360688	5.70429	5.05086	0.039456	0.347586
B3GNT3	NA	NA	2.50947	0.163612	5.04692	0.0395767	0.348453
LOC100341926	NA	NA	-0.502387	3.86518	5.03886	0.039661	0.348769
[truncated: 13,852 more rows]

## Sheet: Treatment(7w) vs Control
O.Cuniculus Gene Name	H.Sapiens Ortholog Name	H.Sapiens Ortholog Description	logFC	logCPM	F	PValue	FDR
[truncated: 15,628 more rows]

[truncated: 4 more sheets: Treatment(7w) vs Treatment(2w), Treatment(4w) vs Treatment(2w), Treatment(7w) vs Treatment(4w), Info]
