# Supplementary material for: Multiomics coupled with vibrational spectroscopy identify early mechanisms of experimental aortic valve stenosis
Source: Research Square preprint supplement (doi:10.21203/rs.3.rs-4330270/v1), 2024-05-02
Supplement: Supplementary file 12 [file b7bea7748b916b4f8a20b477.xlsx]

## Sheet: Sheet1
	MR21						MR146						MiR204
	Δct			average	ΔΔCt	2^-ΔΔCt	Δct			average	ΔΔCt	2^-ΔΔCt	Δct			average	ΔΔCt	2^-ΔΔCt
1	7.3	7.1	7.1	7.16667	-3.23333	9.40438	13.3	12.8	12.6	12.9	-2.55	5.85634	10,4*	8.9	9.8	9.35	-0.16	1.11729
2	8.5	8	8.2	8.23333	-2.16667	4.48985	17.1	16	17	16.7	1.25	0.420448	11,4*	10.2	9.6	9.9	0.39	0.76313
3	8.8	8.8	8.6	8.73333	-1.66667	3.1748	18.2	18.8	18.4	18.4667	3.01667	0.123564	10.4	9,6*	11	10.7	1.19	0.438303
4	9.1	8.2	8.4	8.56667	-1.83333	3.56359	14.9	14.8	15	14.9	-0.55	1.46409	11	10.4	10.8	10.7333	1.22333	0.428292
5	8.5	10,5*	9	8.75	-1.65	3.13834	15.3	16,7*	15.5	15.4	-0.05	1.03526	10.9	9,6*	11.2	11.05	1.54	0.343885
6	8.44	8.24	8.2	8.29333	-2.10667	4.30695	15.8	15.6	15	15.4667	0.0166667	0.988514	10.6	8,8*	9.8	10.2	0.69	0.619854
8	8.5	8.6	8.6	8.56667	-1.83333	3.56359	17.6	16.82	17.2	17.2067	1.75667	0.295931	10.8	9,2*	11.4	11.1	1.59	0.332171
9	8.48	9	8.5	8.66	-1.74	3.34035	17	18,4*	17.4	17.2	1.75	0.297302	10.4	9.7	11,6*	10.05	0.54	0.687771
10	9.2	8.8	8.6	8.86667	-1.53333	2.89454	18.2	17.62	17.6	17.8067	2.35667	0.195242	11.4	12.2	11.4	11.6667	2.15667	0.224274
11	7.6	7.8	7.5	7.63333	-2.76667	6.80534	15.6	14.8	15	15.1333	-0.316667	1.24545	10.2	11	10.8	10.6667	1.15667	0.448548
14	10.2	9.6	9.8	9.86667	-0.533333	1.44727	14	15.6	15	14.8667	-0.583333	1.49831	11.8	12.4	11.2	11.8	2.29	0.204476
15	7.5	7.2	6.9	7.2	-3.2	9.18959	13.8	14.6	14.2	14.2	-1.25	2.37841	10.3	11	10.9	10.7333	1.22333	0.428292
16	7.55	7.4	7.2	7.38333	-3.01667	8.09296	16	15.7	15	15.5667	0.116667	0.922316	12,2*	10.8	11	10.9	1.39	0.381565
17	7.28	6.8	6.8	6.96	-3.44	10.8528	15.7	14.66	15.5	15.2867	-0.163333	1.11987	12,8*	11.6	10.9	11.25	1.74	0.29937
19	9.15	9	9	9.05	-1.35	2.54912	14.2	15.2	15	14.8	-0.65	1.56917	11.6	10.9	10.4	10.9667	1.45667	0.364334
23	8.75	8.4	8.6	8.58333	-1.81667	3.52266	15	16.4	16	15.8	0.35	0.784584	10.8	11.6	12	11.4667	1.95667	0.257623
24	7.8	7.2	7.4	7.46667	-2.93333	7.63873	16.8	16	15.9	16.2333	0.783333	0.581023	11	10.4	11.4	10.9333	1.42333	0.37285
					AVERAGE fold	5.17499					AVERAGE fold	1.22211					AVERAGE fold	0.453648
C1	11.5	11.7	11	11.4	1	0.5	15.4	15.3	15	15.2333	-0.216667	1.16205	9.1	10	9.8	9.63333	0.123333	0.918064
C2	10.6	12,1*	10.8	10.7	0.3	0.812252	15.2	15.7	15	15.3	-0.15	1.10957	12,9*	10.9	11.2	11.05	1.54	0.343885
C3	7.6	13,5*	9.8	8.7	-1.7	3.24901	11,5*	13.6	14.2	13.9	-1.55	2.92817	9,8*	8.1	8.6	8.35	-1.16	2.23457
C4	9.5	10.5	9.6	9.86667	-0.533333	1.44727	12.3	12.8	13.2	12.7667	-2.68333	6.42338	10,7*	8.9	9.4	9.15	-0.36	1.28343
C5	10.4	10.4	10.2	10.3333	-0.0666667	1.04729	12	12.2	11.8	12	-3.45	10.9283	9.8	10.2	10	10	0.49	0.712025
C6	9.92	11,64*	10.8	10.36	-0.04	1.02811	14.8	15.6	15	15.1333	-0.316667	1.24545	7.8	9,8*	8.2	8	-1.51	2.8481
C7	10.78	11	10.6	10.7933	0.393333	0.761368	16.2	17	16.8	16.6667	1.21667	0.430276	10,1*	8.6	9.1	8.85	-0.66	1.58008
C8	11.2	11	10.9	11.0333	0.633333	0.644685	18	17.8	17.6	17.8	2.35	0.196146	11*	9.4	9.8	9.6	0.09	0.939523
C9	10.98	10.7	10.8	10.8267	0.426667	0.743979	17.6	18.2	18.4	18.0667	2.61667	0.163044	10.6	10.2	10.6	10.4667	0.956667	0.515246
C10	9.8	10.2	9.85	9.95	-0.45	1.36604	17	17.8	18.2	17.6667	2.21667	0.215138	10	9.8	10.2	10	0.49	0.712025
			average	10.3963	AVERAGE fold	1.16			average	15.4533	AVERAGE fold	2.48015			average	9.51	AVERAGE fold	1.2087
	* Not used
