# Supplementary material for: Multiomics coupled with vibrational spectroscopy identify early mechanisms of experimental aortic valve stenosis
Source: Research Square preprint supplement (doi:10.21203/rs.3.rs-4330270/v1), 2024-05-02
Supplement: Supplementary file 13 [file b8f57cc9c58c9cf125bdaaf0.xlsx]

## Sheet: STITCH.enrichment.KEGG_final_wi
pathway.ID	pathway.description	observed.gene.count	false.discovery.rate	matching.proteins.in.your.network..IDs.	matching.proteins.in.your.network..labels.	Predicted miRs
5200	Pathways in cancer	25	7.11e-19	ENSP00000216797,ENSP00000226574,ENSP00000261769,ENSP00000262320,ENSP00000262367,ENSP00000263253,ENSP00000265165,ENSP00000275493,ENSP00000302625,ENSP00000304669,ENSP00000306245,ENSP00000311113,ENSP00000324806,ENSP00000327251,ENSP00000335153,ENSP00000344456,ENSP00000353483,ENSP00000359424,ENSP00000360266,ENSP00000362649,ENSP00000363822,ENSP00000384273,ENSP00000430432,ENSP00000430684,ENSP00000444972	AR,AXIN1,AXIN2,CDH1,CHUK,CREBBP,CTNNA1,CTNNB1,EGFR,EP300,FOS,GSK3B,HDAC1,HDAC2,HSP90AA1,IKBKB,JUN,JUP,LEF1,MAPK8,NFKB1,NFKBIA,NOS2,RELA,TCF7L2	hsa-miR-125b-5p,hsa-miR-143-3p,hsa-miR-133a-3p,hsa-miR-23b-3p,hsa-miR-21-5p,hsa-miR-146a-5p,hsa-miR-204-5p,hsa-miR-499a-5p
5215	Prostate cancer	15	2.18e-16	ENSP00000216797,ENSP00000226574,ENSP00000262367,ENSP00000263253,ENSP00000265165,ENSP00000275493,ENSP00000324806,ENSP00000335153,ENSP00000344456,ENSP00000359424,ENSP00000363822,ENSP00000384273,ENSP00000387699,ENSP00000430684,ENSP00000444972	AR,CHUK,CREB1,CREBBP,CTNNB1,EGFR,EP300,GSK3B,HSP90AA1,IKBKB,LEF1,NFKB1,NFKBIA,RELA,TCF7L2	hsa-miR-204-5p,hsa-miR-125b-5p,hsa-miR-143-3p,hsa-miR-133a-3p,hsa-miR-23b-3p,hsa-miR-146a-5p,hsa-miR-21-5p,hsa-miR-499a-5p
5166	HTLV-I infection	20	2.06e-15	ENSP00000216797,ENSP00000226574,ENSP00000262367,ENSP00000263253,ENSP00000264832,ENSP00000306245,ENSP00000310170,ENSP00000324806,ENSP00000344456,ENSP00000349252,ENSP00000353483,ENSP00000359424,ENSP00000360266,ENSP00000368438,ENSP00000384273,ENSP00000386105,ENSP00000387699,ENSP00000399168,ENSP00000406046,ENSP00000430684	CHUK,CREB1,CREBBP,CTNNB1,EP300,FOS,FOSL1,GSK3B,HLA-B,ICAM1,IKBKB,ITGAL,JUN,MAPK8,NFKB1,NFKBIA,PCNA,POLD1,POLD2,RELA	hsa-miR-499a-5p,hsa-miR-146a-5p,hsa-miR-21-5p,hsa-miR-133a-3p,hsa-miR-23b-3p,hsa-miR-125b-5p,hsa-miR-143-3p,hsa-miR-204-5p
4310	Wnt signaling pathway	15	1.47e-13	ENSP00000231487,ENSP00000262320,ENSP00000262367,ENSP00000263253,ENSP00000265165,ENSP00000302625,ENSP00000310170,ENSP00000324806,ENSP00000326366,ENSP00000344456,ENSP00000353483,ENSP00000359206,ENSP00000360266,ENSP00000366466,ENSP00000444972	AXIN1,AXIN2,BTRC,CREBBP,CTNNB1,CTNNBIP1,EP300,FOSL1,GSK3B,JUN,LEF1,MAPK8,PSEN1,SKP1,TCF7L2	hsa-miR-204-5p,hsa-miR-23b-3p,hsa-miR-499a-5p,hsa-miR-125b-5p,hsa-miR-146a-5p,hsa-miR-133a-3p,hsa-miR-143-3p,hsa-miR-21-5p
240	Pyrimidine metabolism	13	9.93e-13	ENSP00000219240,ENSP00000252029,ENSP00000264705,ENSP00000276651,ENSP00000315644,ENSP00000330032,ENSP00000346155,ENSP00000354532,ENSP00000359211,ENSP00000362481,ENSP00000386105,ENSP00000387230,ENSP00000406046	CAD,DHODH,DPYD,DPYS,PNP,POLD1,POLD2,TYMP,TYMS,UCKL1,UPP1,UPP2,UPRT	hsa-miR-133a-3p,hsa-miR-499a-5p,hsa-miR-21-5p,hsa-miR-23b-3p,hsa-miR-146a-5p,hsa-miR-204-5p,hsa-miR-143-3p
5169	Epstein-Barr virus infection	16	9.93e-13	ENSP00000216797,ENSP00000226574,ENSP00000262367,ENSP00000263253,ENSP00000264832,ENSP00000312988,ENSP00000324806,ENSP00000349252,ENSP00000353483,ENSP00000359424,ENSP00000360266,ENSP00000362649,ENSP00000384273,ENSP00000399168,ENSP00000430432,ENSP00000430684	CHUK,CREBBP,EP300,GSK3B,HDAC1,HDAC2,HLA-B,ICAM1,IKBKB,ITGAL,JUN,MAPK8,NFKB1,NFKBIA,NFKBIB,RELA	hsa-miR-499a-5p,hsa-miR-146a-5p,hsa-miR-21-5p,hsa-miR-23b-3p,hsa-miR-133a-3p,hsa-miR-204-5p,hsa-miR-125b-5p,hsa-miR-143-3p
4668	TNF signaling pathway	12	4.86e-11	ENSP00000164227,ENSP00000216797,ENSP00000226574,ENSP00000264832,ENSP00000303315,ENSP00000306245,ENSP00000353483,ENSP00000359424,ENSP00000360266,ENSP00000384273,ENSP00000387699,ENSP00000430684	BCL3,CHUK,CREB1,FOS,ICAM1,IKBKB,JUN,JUNB,MAPK8,NFKB1,NFKBIA,RELA	hsa-miR-146a-5p,hsa-miR-133a-3p,hsa-miR-23b-3p,hsa-miR-21-5p,hsa-miR-499a-5p,hsa-miR-125b-5p,hsa-miR-204-5p,hsa-miR-143-3p
4380	Osteoclast differentiation	12	2.56e-10	ENSP00000216797,ENSP00000226574,ENSP00000252818,ENSP00000303315,ENSP00000306245,ENSP00000310170,ENSP00000353483,ENSP00000359424,ENSP00000360266,ENSP00000384273,ENSP00000387699,ENSP00000430684	CHUK,CREB1,FOS,FOSL1,IKBKB,JUN,JUNB,JUND,MAPK8,NFKB1,NFKBIA,RELA	hsa-miR-146a-5p,hsa-miR-133a-3p,hsa-miR-23b-3p,hsa-miR-21-5p,hsa-miR-499a-5p,hsa-miR-125b-5p,hsa-miR-204-5p,hsa-miR-143-3p
5213	Endometrial cancer	9	3.67e-10	ENSP00000261769,ENSP00000262320,ENSP00000265165,ENSP00000275493,ENSP00000302625,ENSP00000304669,ENSP00000324806,ENSP00000344456,ENSP00000444972	AXIN1,AXIN2,CDH1,CTNNA1,CTNNB1,EGFR,GSK3B,LEF1,TCF7L2	hsa-miR-204-5p,hsa-miR-499a-5p,hsa-miR-143-3p,hsa-miR-23b-3p,hsa-miR-146a-5p,hsa-miR-133a-3p,hsa-miR-125b-5p
5168	Herpes simplex infection	13	7.96e-10	ENSP00000216797,ENSP00000226574,ENSP00000231487,ENSP00000262367,ENSP00000263253,ENSP00000306245,ENSP00000312988,ENSP00000353483,ENSP00000359424,ENSP00000360266,ENSP00000384273,ENSP00000399168,ENSP00000430684	CHUK,CREBBP,EP300,FOS,HLA-B,IKBKB,JUN,MAPK8,NFKB1,NFKBIA,NFKBIB,RELA,SKP1	hsa-miR-146a-5p,hsa-miR-133a-3p,hsa-miR-23b-3p,hsa-miR-499a-5p,hsa-miR-21-5p,hsa-miR-204-5p,hsa-miR-125b-5p,hsa-miR-143-3p
5161	Hepatitis B	12	7.97e-10	ENSP00000216797,ENSP00000226574,ENSP00000262367,ENSP00000263253,ENSP00000306245,ENSP00000353483,ENSP00000359424,ENSP00000360266,ENSP00000368438,ENSP00000384273,ENSP00000387699,ENSP00000430684	CHUK,CREB1,CREBBP,EP300,FOS,IKBKB,JUN,MAPK8,NFKB1,NFKBIA,PCNA,RELA	hsa-miR-146a-5p,hsa-miR-23b-3p,hsa-miR-133a-3p,hsa-miR-21-5p,hsa-miR-499a-5p,hsa-miR-204-5p,hsa-miR-125b-5p,hsa-miR-143-3p
5210	Colorectal cancer	9	9.55e-10	ENSP00000262320,ENSP00000265165,ENSP00000302625,ENSP00000306245,ENSP00000324806,ENSP00000344456,ENSP00000353483,ENSP00000360266,ENSP00000444972	AXIN1,AXIN2,CTNNB1,FOS,GSK3B,JUN,LEF1,MAPK8,TCF7L2	hsa-miR-204-5p,hsa-miR-146a-5p,hsa-miR-499a-5p,hsa-miR-23b-3p,hsa-miR-125b-5p,hsa-miR-133a-3p,hsa-miR-21-5p
4662	B cell receptor signaling pathway	9	5.24e-09	ENSP00000216797,ENSP00000226574,ENSP00000306245,ENSP00000312988,ENSP00000324806,ENSP00000359424,ENSP00000360266,ENSP00000384273,ENSP00000430684	CHUK,FOS,GSK3B,IKBKB,JUN,NFKB1,NFKBIA,NFKBIB,RELA	hsa-miR-146a-5p,hsa-miR-133a-3p,hsa-miR-23b-3p,hsa-miR-21-5p,hsa-miR-499a-5p,hsa-miR-125b-5p,hsa-miR-204-5p,hsa-miR-143-3p
3410	Base excision repair	7	1.46e-08	ENSP00000242576,ENSP00000249910,ENSP00000338606,ENSP00000368438,ENSP00000376611,ENSP00000386105,ENSP00000406046	MBD4,PCNA,POLD1,POLD2,SMUG1,TDG,UNG	hsa-miR-133a-3p,hsa-miR-125b-5p,hsa-miR-204-5p
4621	NOD-like receptor signaling pathway	8	2.22e-08	ENSP00000216797,ENSP00000226574,ENSP00000312988,ENSP00000335153,ENSP00000353483,ENSP00000359424,ENSP00000384273,ENSP00000430684	CHUK,HSP90AA1,IKBKB,MAPK8,NFKB1,NFKBIA,NFKBIB,RELA	hsa-miR-146a-5p,hsa-miR-21-5p,hsa-miR-23b-3p,hsa-miR-133a-3p,hsa-miR-499a-5p,hsa-miR-125b-5p,hsa-miR-204-5p,hsa-miR-143-3p
5131	Shigellosis	8	2.41e-08	ENSP00000216797,ENSP00000226574,ENSP00000312988,ENSP00000353483,ENSP00000359206,ENSP00000359424,ENSP00000384273,ENSP00000430684	BTRC,CHUK,IKBKB,MAPK8,NFKB1,NFKBIA,NFKBIB,RELA	hsa-miR-146a-5p,hsa-miR-23b-3p,hsa-miR-499a-5p,hsa-miR-125b-5p,hsa-miR-133a-3p,hsa-miR-21-5p,hsa-miR-204-5p,hsa-miR-143-3p
5164	Influenza A	11	6.02e-08	ENSP00000216797,ENSP00000226574,ENSP00000262367,ENSP00000263253,ENSP00000264832,ENSP00000312988,ENSP00000324806,ENSP00000353483,ENSP00000360266,ENSP00000384273,ENSP00000430684	CREBBP,EP300,GSK3B,ICAM1,IKBKB,JUN,MAPK8,NFKB1,NFKBIA,NFKBIB,RELA	hsa-miR-23b-3p,hsa-miR-204-5p,hsa-miR-133a-3p,hsa-miR-125b-5p,hsa-miR-146a-5p,hsa-miR-499a-5p,hsa-miR-21-5p,hsa-miR-143-3p
5120	Epithelial cell signaling in Helicobacter pylori infection	8	6.31e-08	ENSP00000216797,ENSP00000226574,ENSP00000275493,ENSP00000353483,ENSP00000359424,ENSP00000360266,ENSP00000384273,ENSP00000430684	CHUK,EGFR,IKBKB,JUN,MAPK8,NFKB1,NFKBIA,RELA	hsa-miR-23b-3p,hsa-miR-146a-5p,hsa-miR-21-5p,hsa-miR-133a-3p,hsa-miR-499a-5p,hsa-miR-125b-5p,hsa-miR-204-5p,hsa-miR-143-3p
5142	Chagas disease (American trypanosomiasis)	9	7.2e-08	ENSP00000216797,ENSP00000226574,ENSP00000306245,ENSP00000327251,ENSP00000353483,ENSP00000359424,ENSP00000360266,ENSP00000384273,ENSP00000430684	CHUK,FOS,IKBKB,JUN,MAPK8,NFKB1,NFKBIA,NOS2,RELA	hsa-miR-133a-3p,hsa-miR-499a-5p,hsa-miR-23b-3p,hsa-miR-146a-5p,hsa-miR-21-5p,hsa-miR-125b-5p,hsa-miR-204-5p,hsa-miR-143-3p
4660	T cell receptor signaling pathway	9	8.22e-08	ENSP00000216797,ENSP00000226574,ENSP00000306245,ENSP00000312988,ENSP00000324806,ENSP00000359424,ENSP00000360266,ENSP00000384273,ENSP00000430684	CHUK,FOS,GSK3B,IKBKB,JUN,NFKB1,NFKBIA,NFKBIB,RELA	hsa-miR-146a-5p,hsa-miR-133a-3p,hsa-miR-23b-3p,hsa-miR-21-5p,hsa-miR-499a-5p,hsa-miR-125b-5p,hsa-miR-204-5p,hsa-miR-143-3p
5140	Leishmaniasis	8	8.78e-08	ENSP00000216797,ENSP00000226574,ENSP00000306245,ENSP00000312988,ENSP00000327251,ENSP00000360266,ENSP00000384273,ENSP00000441691	FOS,ITGAM,JUN,NFKB1,NFKBIA,NFKBIB,NOS2,RELA	hsa-miR-146a-5p,hsa-miR-23b-3p,hsa-miR-133a-3p,hsa-miR-125b-5p,hsa-miR-499a-5p,hsa-miR-143-3p
4520	Adherens junction	8	9.42e-08	ENSP00000261769,ENSP00000262367,ENSP00000263253,ENSP00000265165,ENSP00000275493,ENSP00000304669,ENSP00000344456,ENSP00000444972	CDH1,CREBBP,CTNNA1,CTNNB1,EGFR,EP300,LEF1,TCF7L2	hsa-miR-499a-5p,hsa-miR-146a-5p,hsa-miR-143-3p,hsa-miR-23b-3p,hsa-miR-204-5p,hsa-miR-133a-3p
4722	Neurotrophin signaling pathway	9	2.94e-07	ENSP00000216797,ENSP00000226574,ENSP00000312988,ENSP00000324806,ENSP00000326366,ENSP00000353483,ENSP00000360266,ENSP00000384273,ENSP00000430684	GSK3B,IKBKB,JUN,MAPK8,NFKB1,NFKBIA,NFKBIB,PSEN1,RELA	hsa-miR-499a-5p,hsa-miR-23b-3p,hsa-miR-125b-5p,hsa-miR-204-5p,hsa-miR-133a-3p,hsa-miR-146a-5p,hsa-miR-21-5p,hsa-miR-143-3p
5221	Acute myeloid leukemia	7	3.63e-07	ENSP00000226574,ENSP00000265165,ENSP00000311113,ENSP00000359424,ENSP00000384273,ENSP00000430684,ENSP00000444972	CHUK,IKBKB,JUP,LEF1,NFKB1,RELA,TCF7L2	hsa-miR-146a-5p,hsa-miR-133a-3p,hsa-miR-499a-5p,hsa-miR-23b-3p,hsa-miR-21-5p,hsa-miR-204-5p,hsa-miR-125b-5p,hsa-miR-143-3p
1100	Metabolic pathways	24	5.47e-07	ENSP00000219240,ENSP00000252029,ENSP00000253004,ENSP00000264705,ENSP00000264709,ENSP00000276651,ENSP00000301956,ENSP00000315644,ENSP00000327251,ENSP00000327453,ENSP00000328547,ENSP00000330032,ENSP00000346155,ENSP00000352516,ENSP00000354532,ENSP00000359211,ENSP00000362481,ENSP00000378890,ENSP00000379895,ENSP00000386105,ENSP00000386284,ENSP00000387230,ENSP00000406046,ENSP00000409612	ACADM,ACSM1,ACSM2B,ALAD,ASS1,CAD,DHODH,DNMT1,DNMT3A,DNMT3B,DPYD,DPYS,GATM,GCH1,NOS2,PNP,POLD1,POLD2,TYMP,TYMS,UCKL1,UPP1,UPP2,UPRT	hsa-miR-125b-5p,hsa-miR-204-5p,hsa-miR-133a-3p,hsa-miR-23b-3p,hsa-miR-499a-5p,hsa-miR-21-5p,hsa-miR-143-3p,hsa-miR-146a-5p
5203	Viral carcinogenesis	10	1.17e-06	ENSP00000216797,ENSP00000226574,ENSP00000262367,ENSP00000263253,ENSP00000360266,ENSP00000362649,ENSP00000384273,ENSP00000387699,ENSP00000399168,ENSP00000430432	CREB1,CREBBP,EP300,HDAC1,HDAC2,HLA-B,JUN,NFKB1,NFKBIA,RELA	hsa-miR-143-3p,hsa-miR-204-5p,hsa-miR-146a-5p,hsa-miR-499a-5p,hsa-miR-125b-5p,hsa-miR-23b-3p,hsa-miR-133a-3p
4920	Adipocytokine signaling pathway	7	1.31e-06	ENSP00000216797,ENSP00000226574,ENSP00000312988,ENSP00000353483,ENSP00000359424,ENSP00000384273,ENSP00000430684	CHUK,IKBKB,MAPK8,NFKB1,NFKBIA,NFKBIB,RELA	hsa-miR-146a-5p,hsa-miR-23b-3p,hsa-miR-133a-3p,hsa-miR-21-5p,hsa-miR-499a-5p,hsa-miR-125b-5p,hsa-miR-204-5p,hsa-miR-143-3p
4620	Toll-like receptor signaling pathway	8	1.36e-06	ENSP00000216797,ENSP00000226574,ENSP00000306245,ENSP00000353483,ENSP00000359424,ENSP00000360266,ENSP00000384273,ENSP00000430684	CHUK,FOS,IKBKB,JUN,MAPK8,NFKB1,NFKBIA,RELA	hsa-miR-146a-5p,hsa-miR-133a-3p,hsa-miR-23b-3p,hsa-miR-499a-5p,hsa-miR-21-5p,hsa-miR-125b-5p,hsa-miR-204-5p,hsa-miR-143-3p
4622	RIG-I-like receptor signaling pathway	7	1.4e-06	ENSP00000216797,ENSP00000226574,ENSP00000312988,ENSP00000353483,ENSP00000359424,ENSP00000384273,ENSP00000430684	CHUK,IKBKB,MAPK8,NFKB1,NFKBIA,NFKBIB,RELA	hsa-miR-146a-5p,hsa-miR-23b-3p,hsa-miR-133a-3p,hsa-miR-21-5p,hsa-miR-499a-5p,hsa-miR-125b-5p,hsa-miR-204-5p,hsa-miR-143-3p
5133	Pertussis	7	1.4e-06	ENSP00000226574,ENSP00000306245,ENSP00000327251,ENSP00000353483,ENSP00000360266,ENSP00000384273,ENSP00000441691	FOS,ITGAM,JUN,MAPK8,NFKB1,NOS2,RELA	hsa-miR-146a-5p,hsa-miR-23b-3p,hsa-miR-133a-3p,hsa-miR-125b-5p,hsa-miR-499a-5p,hsa-miR-21-5p,hsa-miR-204-5p,hsa-miR-143-3p
5206	MicroRNAs in cancer	9	1.4e-06	ENSP00000226574,ENSP00000262367,ENSP00000263253,ENSP00000264709,ENSP00000275493,ENSP00000328547,ENSP00000352516,ENSP00000362649,ENSP00000430684	CREBBP,DNMT1,DNMT3A,DNMT3B,EGFR,EP300,HDAC1,IKBKB,NFKB1	hsa-miR-23b-3p,hsa-miR-125b-5p,hsa-miR-143-3p,hsa-miR-204-5p,hsa-miR-21-5p,hsa-miR-133a-3p,hsa-miR-146a-5p,hsa-miR-499a-5p
5220	Chronic myeloid leukemia	7	1.4e-06	ENSP00000216797,ENSP00000226574,ENSP00000359424,ENSP00000362649,ENSP00000384273,ENSP00000430432,ENSP00000430684	CHUK,HDAC1,HDAC2,IKBKB,NFKB1,NFKBIA,RELA	hsa-miR-23b-3p,hsa-miR-146a-5p,hsa-miR-133a-3p,hsa-miR-21-5p,hsa-miR-499a-5p,hsa-miR-125b-5p,hsa-miR-204-5p,hsa-miR-143-3p
983	Drug metabolism - other enzymes	6	1.52e-06	ENSP00000252029,ENSP00000276651,ENSP00000330032,ENSP00000346155,ENSP00000359211,ENSP00000387230	DPYD,DPYS,TYMP,UCKL1,UPP1,UPP2	hsa-miR-23b-3p,hsa-miR-146a-5p
4390	Hippo signaling pathway	9	1.57e-06	ENSP00000261769,ENSP00000262320,ENSP00000265165,ENSP00000302625,ENSP00000304669,ENSP00000324806,ENSP00000344456,ENSP00000359206,ENSP00000444972	AXIN1,AXIN2,BTRC,CDH1,CTNNA1,CTNNB1,GSK3B,LEF1,TCF7L2	hsa-miR-204-5p,hsa-miR-146a-5p,hsa-miR-125b-5p,hsa-miR-23b-3p,hsa-miR-499a-5p,hsa-miR-143-3p,hsa-miR-133a-3p
5145	Toxoplasmosis	8	2.44e-06	ENSP00000216797,ENSP00000226574,ENSP00000312988,ENSP00000327251,ENSP00000353483,ENSP00000359424,ENSP00000384273,ENSP00000430684	CHUK,IKBKB,MAPK8,NFKB1,NFKBIA,NFKBIB,NOS2,RELA	hsa-miR-146a-5p,hsa-miR-21-5p,hsa-miR-23b-3p,hsa-miR-133a-3p,hsa-miR-499a-5p,hsa-miR-125b-5p,hsa-miR-204-5p,hsa-miR-143-3p
5217	Basal cell carcinoma	6	6.25e-06	ENSP00000262320,ENSP00000265165,ENSP00000302625,ENSP00000324806,ENSP00000344456,ENSP00000444972	AXIN1,AXIN2,CTNNB1,GSK3B,LEF1,TCF7L2	hsa-miR-204-5p,hsa-miR-146a-5p,hsa-miR-23b-3p,hsa-miR-125b-5p,hsa-miR-499a-5p,hsa-miR-133a-3p
5160	Hepatitis C	8	6.41e-06	ENSP00000216797,ENSP00000226574,ENSP00000275493,ENSP00000324806,ENSP00000353483,ENSP00000359424,ENSP00000384273,ENSP00000430684	CHUK,EGFR,GSK3B,IKBKB,MAPK8,NFKB1,NFKBIA,RELA	hsa-miR-23b-3p,hsa-miR-146a-5p,hsa-miR-21-5p,hsa-miR-133a-3p,hsa-miR-499a-5p,hsa-miR-125b-5p,hsa-miR-204-5p,hsa-miR-143-3p
4623	Cytosolic DNA-sensing pathway	6	1.05e-05	ENSP00000216797,ENSP00000226574,ENSP00000312988,ENSP00000359424,ENSP00000384273,ENSP00000430684	CHUK,IKBKB,NFKB1,NFKBIA,NFKBIB,RELA	hsa-miR-133a-3p,hsa-miR-146a-5p,hsa-miR-23b-3p,hsa-miR-499a-5p,hsa-miR-21-5p,hsa-miR-204-5p,hsa-miR-125b-5p,hsa-miR-143-3p
4916	Melanogenesis	7	1.05e-05	ENSP00000262367,ENSP00000263253,ENSP00000265165,ENSP00000324806,ENSP00000344456,ENSP00000387699,ENSP00000444972	CREB1,CREBBP,CTNNB1,EP300,GSK3B,LEF1,TCF7L2	hsa-miR-146a-5p,hsa-miR-204-5p,hsa-miR-125b-5p,hsa-miR-143-3p,hsa-miR-499a-5p,hsa-miR-23b-3p,hsa-miR-133a-3p
5212	Pancreatic cancer	6	1.05e-05	ENSP00000226574,ENSP00000275493,ENSP00000353483,ENSP00000359424,ENSP00000384273,ENSP00000430684	CHUK,EGFR,IKBKB,MAPK8,NFKB1,RELA	hsa-miR-23b-3p,hsa-miR-146a-5p,hsa-miR-21-5p,hsa-miR-133a-3p,hsa-miR-499a-5p,hsa-miR-125b-5p,hsa-miR-204-5p,hsa-miR-143-3p
5412	Arrhythmogenic right ventricular cardiomyopathy (ARVC)	6	2.96e-05	ENSP00000265165,ENSP00000269141,ENSP00000304669,ENSP00000311113,ENSP00000344456,ENSP00000444972	CDH2,CTNNA1,CTNNB1,JUP,LEF1,TCF7L2	hsa-miR-499a-5p,hsa-miR-23b-3p,hsa-miR-204-5p,hsa-miR-143-3p,hsa-miR-133a-3p,hsa-miR-146a-5p,hsa-miR-125b-5p
4110	Cell cycle	7	4.61e-05	ENSP00000231487,ENSP00000262367,ENSP00000263253,ENSP00000324806,ENSP00000362649,ENSP00000368438,ENSP00000430432	CREBBP,EP300,GSK3B,HDAC1,HDAC2,PCNA,SKP1	hsa-miR-23b-3p,hsa-miR-146a-5p,hsa-miR-133a-3p,hsa-miR-204-5p,hsa-miR-125b-5p,hsa-miR-499a-5p,hsa-miR-143-3p
5152	Tuberculosis	8	4.61e-05	ENSP00000226574,ENSP00000262367,ENSP00000263253,ENSP00000327251,ENSP00000353483,ENSP00000384273,ENSP00000387699,ENSP00000441691	CREB1,CREBBP,EP300,ITGAM,MAPK8,NFKB1,NOS2,RELA	hsa-miR-204-5p,hsa-miR-146a-5p,hsa-miR-125b-5p,hsa-miR-499a-5p,hsa-miR-143-3p,hsa-miR-23b-3p,hsa-miR-21-5p
4330	Notch signaling pathway	5	4.95e-05	ENSP00000262367,ENSP00000263253,ENSP00000326366,ENSP00000362649,ENSP00000430432	CREBBP,EP300,HDAC1,HDAC2,PSEN1	hsa-miR-23b-3p,hsa-miR-125b-5p,hsa-miR-499a-5p,hsa-miR-146a-5p,hsa-miR-143-3p,hsa-miR-133a-3p
5132	Salmonella infection	6	4.95e-05	ENSP00000226574,ENSP00000306245,ENSP00000327251,ENSP00000353483,ENSP00000360266,ENSP00000384273	FOS,JUN,MAPK8,NFKB1,NOS2,RELA	hsa-miR-146a-5p,hsa-miR-133a-3p,hsa-miR-125b-5p,hsa-miR-499a-5p,hsa-miR-21-5p,hsa-miR-204-5p,hsa-miR-143-3p
3430	Mismatch repair	4	5.52e-05	ENSP00000223129,ENSP00000368438,ENSP00000386105,ENSP00000406046	PCNA,POLD1,POLD2,RPA3	hsa-miR-146a-5p
5222	Small cell lung cancer	6	5.85e-05	ENSP00000216797,ENSP00000226574,ENSP00000327251,ENSP00000359424,ENSP00000384273,ENSP00000430684	CHUK,IKBKB,NFKB1,NFKBIA,NOS2,RELA	hsa-miR-21-5p,hsa-miR-133a-3p,hsa-miR-146a-5p,hsa-miR-23b-3p,hsa-miR-499a-5p,hsa-miR-204-5p,hsa-miR-125b-5p,hsa-miR-143-3p
4064	NF-kappa B signaling pathway	6	7.5e-05	ENSP00000216797,ENSP00000226574,ENSP00000264832,ENSP00000359424,ENSP00000384273,ENSP00000430684	CHUK,ICAM1,IKBKB,NFKB1,NFKBIA,RELA	hsa-miR-133a-3p,hsa-miR-146a-5p,hsa-miR-23b-3p,hsa-miR-499a-5p,hsa-miR-21-5p,hsa-miR-204-5p,hsa-miR-125b-5p,hsa-miR-143-3p
4514	Cell adhesion molecules (CAMs)	7	8.68e-05	ENSP00000261769,ENSP00000264832,ENSP00000269141,ENSP00000344115,ENSP00000349252,ENSP00000399168,ENSP00000441691	CDH1,CDH2,CDH5,HLA-B,ICAM1,ITGAL,ITGAM	hsa-miR-143-3p,hsa-miR-146a-5p,hsa-miR-23b-3p,hsa-miR-499a-5p,hsa-miR-204-5p,hsa-miR-125b-5p,hsa-miR-133a-3p
4010	MAPK signaling pathway	9	9.38e-05	ENSP00000226574,ENSP00000252818,ENSP00000275493,ENSP00000306245,ENSP00000353483,ENSP00000359424,ENSP00000360266,ENSP00000384273,ENSP00000430684	CHUK,EGFR,FOS,IKBKB,JUN,JUND,MAPK8,NFKB1,RELA	hsa-miR-146a-5p,hsa-miR-23b-3p,hsa-miR-133a-3p,hsa-miR-499a-5p,hsa-miR-21-5p,hsa-miR-125b-5p,hsa-miR-204-5p,hsa-miR-143-3p
5216	Thyroid cancer	4	9.69e-05	ENSP00000261769,ENSP00000265165,ENSP00000344456,ENSP00000444972	CDH1,CTNNB1,LEF1,TCF7L2	hsa-miR-499a-5p,hsa-miR-143-3p,hsa-miR-23b-3p,hsa-miR-146a-5p,hsa-miR-133a-3p
4066	HIF-1 signaling pathway	6	0.00017	ENSP00000226574,ENSP00000262367,ENSP00000263253,ENSP00000275493,ENSP00000327251,ENSP00000384273	CREBBP,EGFR,EP300,NFKB1,NOS2,RELA	hsa-miR-23b-3p,hsa-miR-133a-3p,hsa-miR-146a-5p,hsa-miR-499a-5p,hsa-miR-143-3p,hsa-miR-125b-5p
3030	DNA replication	4	0.000268	ENSP00000223129,ENSP00000368438,ENSP00000386105,ENSP00000406046	PCNA,POLD1,POLD2,RPA3	hsa-miR-146a-5p
4670	Leukocyte transendothelial migration	6	0.000271	ENSP00000264832,ENSP00000304669,ENSP00000344115,ENSP00000344456,ENSP00000349252,ENSP00000441691	CDH5,CTNNA1,CTNNB1,ICAM1,ITGAL,ITGAM	hsa-miR-125b-5p,hsa-miR-143-3p,hsa-miR-204-5p,hsa-miR-133a-3p,hsa-miR-146a-5p,hsa-miR-23b-3p,hsa-miR-499a-5p
4917	Prolactin signaling pathway	5	0.000271	ENSP00000226574,ENSP00000306245,ENSP00000324806,ENSP00000353483,ENSP00000384273	FOS,GSK3B,MAPK8,NFKB1,RELA	hsa-miR-146a-5p,hsa-miR-23b-3p,hsa-miR-125b-5p,hsa-miR-204-5p,hsa-miR-133a-3p,hsa-miR-499a-5p,hsa-miR-21-5p,hsa-miR-143-3p
4919	Thyroid hormone signaling pathway	6	0.000294	ENSP00000262367,ENSP00000263253,ENSP00000324806,ENSP00000344456,ENSP00000362649,ENSP00000430432	CREBBP,CTNNB1,EP300,GSK3B,HDAC1,HDAC2	hsa-miR-23b-3p,hsa-miR-146a-5p,hsa-miR-204-5p,hsa-miR-125b-5p,hsa-miR-133a-3p,hsa-miR-499a-5p
4068	FoxO signaling pathway	6	0.000366	ENSP00000262367,ENSP00000263253,ENSP00000275493,ENSP00000353483,ENSP00000359424,ENSP00000430684	CHUK,CREBBP,EGFR,EP300,IKBKB,MAPK8	hsa-miR-146a-5p,hsa-miR-133a-3p,hsa-miR-23b-3p,hsa-miR-499a-5p,hsa-miR-21-5p,hsa-miR-125b-5p,hsa-miR-204-5p
4062	Chemokine signaling pathway	7	0.00041	ENSP00000216797,ENSP00000226574,ENSP00000312988,ENSP00000324806,ENSP00000359424,ENSP00000384273,ENSP00000430684	CHUK,GSK3B,IKBKB,NFKB1,NFKBIA,NFKBIB,RELA	hsa-miR-146a-5p,hsa-miR-133a-3p,hsa-miR-23b-3p,hsa-miR-499a-5p,hsa-miR-21-5p,hsa-miR-125b-5p,hsa-miR-204-5p,hsa-miR-143-3p
5162	Measles	6	0.000528	ENSP00000216797,ENSP00000226574,ENSP00000312988,ENSP00000324806,ENSP00000359424,ENSP00000384273	CHUK,GSK3B,NFKB1,NFKBIA,NFKBIB,RELA	hsa-miR-146a-5p,hsa-miR-23b-3p,hsa-miR-133a-3p,hsa-miR-21-5p,hsa-miR-499a-5p,hsa-miR-125b-5p,hsa-miR-204-5p,hsa-miR-143-3p
4210	Apoptosis	5	0.000627	ENSP00000216797,ENSP00000226574,ENSP00000359424,ENSP00000384273,ENSP00000430684	CHUK,IKBKB,NFKB1,NFKBIA,RELA	hsa-miR-133a-3p,hsa-miR-146a-5p,hsa-miR-23b-3p,hsa-miR-499a-5p,hsa-miR-21-5p,hsa-miR-204-5p,hsa-miR-125b-5p,hsa-miR-143-3p
3420	Nucleotide excision repair	4	0.000692	ENSP00000223129,ENSP00000368438,ENSP00000386105,ENSP00000406046	PCNA,POLD1,POLD2,RPA3	hsa-miR-146a-5p
5030	Cocaine addiction	4	0.000872	ENSP00000226574,ENSP00000360266,ENSP00000384273,ENSP00000387699	CREB1,JUN,NFKB1,RELA	hsa-miR-499a-5p,hsa-miR-204-5p,hsa-miR-143-3p,hsa-miR-146a-5p,hsa-miR-125b-5p,hsa-miR-133a-3p
4915	Estrogen signaling pathway	5	0.000964	ENSP00000275493,ENSP00000306245,ENSP00000335153,ENSP00000360266,ENSP00000387699	CREB1,EGFR,FOS,HSP90AA1,JUN	hsa-miR-146a-5p,hsa-miR-204-5p,hsa-miR-125b-5p,hsa-miR-499a-5p,hsa-miR-143-3p,hsa-miR-23b-3p,hsa-miR-133a-3p
4932	Non-alcoholic fatty liver disease (NAFLD)	6	0.000993	ENSP00000226574,ENSP00000324806,ENSP00000353483,ENSP00000360266,ENSP00000384273,ENSP00000430684	GSK3B,IKBKB,JUN,MAPK8,NFKB1,RELA	hsa-miR-23b-3p,hsa-miR-204-5p,hsa-miR-133a-3p,hsa-miR-125b-5p,hsa-miR-146a-5p,hsa-miR-499a-5p,hsa-miR-21-5p,hsa-miR-143-3p
5134	Legionellosis	4	0.00113	ENSP00000216797,ENSP00000226574,ENSP00000384273,ENSP00000441691	ITGAM,NFKB1,NFKBIA,RELA	hsa-miR-23b-3p,hsa-miR-143-3p,hsa-miR-499a-5p,hsa-miR-146a-5p,hsa-miR-125b-5p
5202	Transcriptional misregulation in cancer	6	0.00173	ENSP00000226574,ENSP00000311113,ENSP00000362649,ENSP00000384273,ENSP00000430432,ENSP00000441691	HDAC1,HDAC2,ITGAM,JUP,NFKB1,RELA	hsa-miR-125b-5p,hsa-miR-23b-3p,hsa-miR-499a-5p,hsa-miR-146a-5p,hsa-miR-133a-3p,hsa-miR-143-3p
3440	Homologous recombination	3	0.00217	ENSP00000223129,ENSP00000386105,ENSP00000406046	POLD1,POLD2,RPA3	hsa-miR-146a-5p
5031	Amphetamine addiction	4	0.00237	ENSP00000306245,ENSP00000360266,ENSP00000362649,ENSP00000387699	CREB1,FOS,HDAC1,JUN	hsa-miR-143-3p,hsa-miR-146a-5p,hsa-miR-499a-5p,hsa-miR-204-5p,hsa-miR-125b-5p,hsa-miR-133a-3p
4612	Antigen processing and presentation	4	0.00247	ENSP00000335153,ENSP00000387699,ENSP00000399168,ENSP00000452780	B2M,CREB1,HLA-B,HSP90AA1	hsa-miR-204-5p,hsa-miR-146a-5p,hsa-miR-125b-5p,hsa-miR-499a-5p,hsa-miR-143-3p,hsa-miR-133a-3p
410	beta-Alanine metabolism	3	0.00254	ENSP00000276651,ENSP00000359211,ENSP00000409612	ACADM,DPYD,DPYS	hsa-miR-23b-3p
4710	Circadian rhythm	3	0.00254	ENSP00000231487,ENSP00000359206,ENSP00000387699	BTRC,CREB1,SKP1	hsa-miR-146a-5p,hsa-miR-23b-3p,hsa-miR-499a-5p,hsa-miR-125b-5p,hsa-miR-204-5p,hsa-miR-143-3p,hsa-miR-133a-3p
4151	PI3K-Akt signaling pathway	8	0.00314	ENSP00000226574,ENSP00000275493,ENSP00000324806,ENSP00000335153,ENSP00000359424,ENSP00000384273,ENSP00000387699,ENSP00000430684	CHUK,CREB1,EGFR,GSK3B,HSP90AA1,IKBKB,NFKB1,RELA	hsa-miR-21-5p,hsa-miR-23b-3p,hsa-miR-146a-5p,hsa-miR-133a-3p,hsa-miR-499a-5p,hsa-miR-204-5p,hsa-miR-125b-5p,hsa-miR-143-3p
270	Cysteine and methionine metabolism	3	0.00468	ENSP00000264709,ENSP00000328547,ENSP00000352516	DNMT1,DNMT3A,DNMT3B	hsa-miR-23b-3p,hsa-miR-143-3p,hsa-miR-204-5p,hsa-miR-125b-5p,hsa-miR-21-5p
5219	Bladder cancer	3	0.00501	ENSP00000252029,ENSP00000261769,ENSP00000275493	CDH1,EGFR,TYMP	hsa-miR-499a-5p,hsa-miR-143-3p,hsa-miR-146a-5p,hsa-miR-23b-3p,hsa-miR-133a-3p
4012	ErbB signaling pathway	4	0.00537	ENSP00000275493,ENSP00000324806,ENSP00000353483,ENSP00000360266	EGFR,GSK3B,JUN,MAPK8	hsa-miR-146a-5p,hsa-miR-23b-3p,hsa-miR-133a-3p,hsa-miR-204-5p,hsa-miR-125b-5p,hsa-miR-499a-5p,hsa-miR-21-5p
5323	Rheumatoid arthritis	4	0.00579	ENSP00000264832,ENSP00000306245,ENSP00000349252,ENSP00000360266	FOS,ICAM1,ITGAL,JUN	hsa-miR-146a-5p,hsa-miR-23b-3p,hsa-miR-133a-3p,hsa-miR-143-3p,hsa-miR-499a-5p,hsa-miR-125b-5p
4014	Ras signaling pathway	6	0.00666	ENSP00000226574,ENSP00000275493,ENSP00000353483,ENSP00000359424,ENSP00000384273,ENSP00000430684	CHUK,EGFR,IKBKB,MAPK8,NFKB1,RELA	hsa-miR-23b-3p,hsa-miR-146a-5p,hsa-miR-21-5p,hsa-miR-133a-3p,hsa-miR-499a-5p,hsa-miR-125b-5p,hsa-miR-204-5p,hsa-miR-143-3p
5146	Amoebiasis	4	0.0118	ENSP00000226574,ENSP00000327251,ENSP00000384273,ENSP00000441691	ITGAM,NFKB1,NOS2,RELA	hsa-miR-23b-3p,hsa-miR-499a-5p,hsa-miR-143-3p,hsa-miR-146a-5p,hsa-miR-125b-5p
5150	Staphylococcus aureus infection	3	0.0118	ENSP00000264832,ENSP00000349252,ENSP00000441691	ICAM1,ITGAL,ITGAM	hsa-miR-133a-3p,hsa-miR-143-3p,hsa-miR-23b-3p,hsa-miR-499a-5p
770	Pantothenate and CoA biosynthesis	2	0.012	ENSP00000276651,ENSP00000359211	DPYD,DPYS	hsa-miR-23b-3p
5416	Viral myocarditis	3	0.0143	ENSP00000264832,ENSP00000349252,ENSP00000399168	HLA-B,ICAM1,ITGAL	hsa-miR-23b-3p,hsa-miR-143-3p,hsa-miR-133a-3p,hsa-miR-499a-5p
5016	Huntington s disease	5	0.0146	ENSP00000262367,ENSP00000263253,ENSP00000362649,ENSP00000387699,ENSP00000430432	CREB1,CREBBP,EP300,HDAC1,HDAC2	hsa-miR-204-5p,hsa-miR-143-3p,hsa-miR-146a-5p,hsa-miR-499a-5p,hsa-miR-125b-5p,hsa-miR-23b-3p
330	Arginine and proline metabolism	3	0.0155	ENSP00000253004,ENSP00000327251,ENSP00000379895	ASS1,GATM,NOS2	hsa-miR-23b-3p,hsa-miR-204-5p,hsa-miR-143-3p,hsa-miR-499a-5p
5321	Inflammatory bowel disease (IBD)	3	0.0193	ENSP00000226574,ENSP00000360266,ENSP00000384273	JUN,NFKB1,RELA	hsa-miR-133a-3p,hsa-miR-125b-5p,hsa-miR-143-3p,hsa-miR-499a-5p,hsa-miR-146a-5p
4728	Dopaminergic synapse	4	0.0202	ENSP00000306245,ENSP00000324806,ENSP00000353483,ENSP00000387699	CREB1,FOS,GSK3B,MAPK8	hsa-miR-204-5p,hsa-miR-499a-5p,hsa-miR-143-3p,hsa-miR-146a-5p,hsa-miR-125b-5p,hsa-miR-23b-3p,hsa-miR-133a-3p,hsa-miR-21-5p
5211	Renal cell carcinoma	3	0.0206	ENSP00000262367,ENSP00000263253,ENSP00000360266	CREBBP,EP300,JUN	hsa-miR-23b-3p,hsa-miR-133a-3p,hsa-miR-125b-5p
4510	Focal adhesion	5	0.0217	ENSP00000275493,ENSP00000324806,ENSP00000344456,ENSP00000353483,ENSP00000360266	CTNNB1,EGFR,GSK3B,JUN,MAPK8	hsa-miR-146a-5p,hsa-miR-23b-3p,hsa-miR-133a-3p,hsa-miR-204-5p,hsa-miR-125b-5p,hsa-miR-499a-5p,hsa-miR-21-5p
4015	Rap1 signaling pathway	5	0.0224	ENSP00000261769,ENSP00000275493,ENSP00000344456,ENSP00000349252,ENSP00000441691	CDH1,CTNNB1,EGFR,ITGAL,ITGAM	hsa-miR-23b-3p,hsa-miR-499a-5p,hsa-miR-143-3p,hsa-miR-146a-5p,hsa-miR-133a-3p
5100	Bacterial invasion of epithelial cells	3	0.0286	ENSP00000261769,ENSP00000304669,ENSP00000344456	CDH1,CTNNA1,CTNNB1	hsa-miR-499a-5p,hsa-miR-143-3p,hsa-miR-23b-3p,hsa-miR-146a-5p,hsa-miR-204-5p,hsa-miR-133a-3p
650	Butanoate metabolism	2	0.0317	ENSP00000301956,ENSP00000327453	ACSM1,ACSM2B	hsa-miR-125b-5p,hsa-miR-204-5p
4350	TGF-beta signaling pathway	3	0.0324	ENSP00000231487,ENSP00000262367,ENSP00000263253	CREBBP,EP300,SKP1	hsa-miR-23b-3p,hsa-miR-146a-5p,hsa-miR-133a-3p,hsa-miR-143-3p,hsa-miR-499a-5p
4912	GnRH signaling pathway	3	0.0445	ENSP00000275493,ENSP00000353483,ENSP00000360266	EGFR,JUN,MAPK8	hsa-miR-133a-3p,hsa-miR-23b-3p,hsa-miR-146a-5p,hsa-miR-125b-5p,hsa-miR-21-5p,hsa-miR-204-5p,hsa-miR-499a-5p

## Sheet: Lipid_C01194_associated_genes_a
,Lipid,KeggGeneID,Symbol,Name,Predicted miRs,,,,,
2,C01194,hsa:10423,CDIPT,(RefSeq) CDP-diacylglycerol--inositol 3-phosphatidyltransferase,hsa-miR-125b-5p,,,,,
3,C01194,hsa:113026,PLCD3,(RefSeq) phospholipase C delta 3,hsa-miR-499a-5p,,,,,
4,C01194,hsa:200576,PIKFYVE,"(RefSeq) phosphoinositide kinase, FYVE-type zinc finger containing",hsa-miR-133a-3p,hsa-miR-21-5p,hsa-miR-23b-3p,,,
5,C01194,hsa:22876,INPP5F,(RefSeq) inositol polyphosphate-5-phosphatase F,hsa-miR-143-3p,hsa-miR-133a-3p,hsa-miR-146a-5p,hsa-miR-125b-5p,,
6,C01194,hsa:22908,SACM1L,(RefSeq) SAC1 like phosphatidylinositide phosphatase,hsa-miR-133a-3p,hsa-miR-21-5p,,,,
7,C01194,hsa:23007,PLCH1,(RefSeq) phospholipase C eta 1,hsa-miR-204-5p,hsa-miR-125b-5p,hsa-miR-146a-5p,hsa-miR-23b-3p,,
8,C01194,hsa:23236,PLCB1,(RefSeq) phospholipase C beta 1,hsa-miR-21-5p,hsa-miR-125b-5p,hsa-miR-133a-3p,hsa-miR-204-5p,,
9,C01194,hsa:253558,LCLAT1,(RefSeq) lysocardiolipin acyltransferase 1,hsa-miR-125b-5p,hsa-miR-204-5p,hsa-miR-21-5p,hsa-miR-133a-3p,,
10,C01194,hsa:4534,MTM1,(RefSeq) myotubularin 1,hsa-miR-143-3p,hsa-miR-23b-3p,hsa-miR-125b-5p,,,
11,C01194,hsa:51196,PLCE1,(RefSeq) phospholipase C epsilon 1,hsa-miR-499a-5p,hsa-miR-143-3p,hsa-miR-146a-5p,hsa-miR-21-5p,,
12,C01194,hsa:51227,PIGP,(RefSeq) phosphatidylinositol glycan anchor biosynthesis class P,NA,,,,,
13,C01194,hsa:5277,PIGA,(RefSeq) phosphatidylinositol glycan anchor biosynthesis class A,hsa-miR-133a-3p,hsa-miR-23b-3p,hsa-miR-499a-5p,,,
14,C01194,hsa:5279,PIGC,(RefSeq) phosphatidylinositol glycan anchor biosynthesis class C,NA,,,,,
15,C01194,hsa:5283,PIGH,(RefSeq) phosphatidylinositol glycan anchor biosynthesis class H,NA,,,,,
16,C01194,hsa:5286,PIK3C2A,(RefSeq) phosphatidylinositol-4-phosphate 3-kinase catalytic subunit type 2 alpha,hsa-miR-133a-3p,hsa-miR-23b-3p,hsa-miR-204-5p,,,
17,C01194,hsa:5287,PIK3C2B,(RefSeq) phosphatidylinositol-4-phosphate 3-kinase catalytic subunit type 2 beta,hsa-miR-125b-5p,hsa-miR-204-5p,,,,
18,C01194,hsa:5288,PIK3C2G,(RefSeq) phosphatidylinositol-4-phosphate 3-kinase catalytic subunit type 2 gamma,hsa-miR-143-3p,,,,,
19,C01194,hsa:5289,PIK3C3,(RefSeq) phosphatidylinositol 3-kinase catalytic subunit type 3,hsa-miR-204-5p,hsa-miR-499a-5p,hsa-miR-23b-3p,hsa-miR-21-5p,,
20,C01194,hsa:5295,PIK3R1,(RefSeq) phosphoinositide-3-kinase regulatory subunit 1,hsa-miR-21-5p,hsa-miR-143-3p,hsa-miR-499a-5p,,,
21,C01194,hsa:5296,PIK3R2,(RefSeq) phosphoinositide-3-kinase regulatory subunit 2,NA,,,,,
22,C01194,hsa:5297,PI4KA,(RefSeq) phosphatidylinositol 4-kinase alpha,NA,,,,,
23,C01194,hsa:5298,PI4KB,(RefSeq) phosphatidylinositol 4-kinase beta,hsa-miR-204-5p,hsa-miR-146a-5p,,,,
24,C01194,hsa:5330,PLCB2,(RefSeq) phospholipase C beta 2,NA,,,,,
25,C01194,hsa:5331,PLCB3,(RefSeq) phospholipase C beta 3,hsa-miR-125b-5p,,,,,
26,C01194,hsa:5332,PLCB4,(RefSeq) phospholipase C beta 4,hsa-miR-23b-3p,hsa-miR-143-3p,,,,
27,C01194,hsa:5333,PLCD1,(RefSeq) phospholipase C delta 1,NA,,,,,
28,C01194,hsa:5335,PLCG1,(RefSeq) phospholipase C gamma 1,hsa-miR-204-5p,hsa-miR-125b-5p,,,,
29,C01194,hsa:5336,PLCG2,(RefSeq) phospholipase C gamma 2,hsa-miR-23b-3p,hsa-miR-499a-5p,hsa-miR-125b-5p,hsa-miR-143-3p,,
30,C01194,hsa:55300,PI4K2B,(RefSeq) phosphatidylinositol 4-kinase type 2 beta,hsa-miR-125b-5p,hsa-miR-133a-3p,hsa-miR-499a-5p,hsa-miR-23b-3p,,
31,C01194,hsa:55361,PI4K2A,(RefSeq) phosphatidylinositol 4-kinase type 2 alpha,hsa-miR-125b-5p,hsa-miR-133a-3p,hsa-miR-143-3p,hsa-miR-146a-5p,,
32,C01194,hsa:56894,AGPAT3,(RefSeq) 1-acylglycerol-3-phosphate O-acyltransferase 3,hsa-miR-125b-5p,,,,,
33,C01194,hsa:56895,AGPAT4,(RefSeq) 1-acylglycerol-3-phosphate O-acyltransferase 4,hsa-miR-204-5p,hsa-miR-23b-3p,hsa-miR-143-3p,hsa-miR-125b-5p,hsa-miR-133a-3p,hsa-miR-146a-5p
34,C01194,hsa:5728,PTEN,(RefSeq) phosphatase and tensin homolog,hsa-miR-23b-3p,hsa-miR-499a-5p,hsa-miR-133a-3p,hsa-miR-204-5p,hsa-miR-146a-5p,
35,C01194,hsa:79143,MBOAT7,(RefSeq) membrane bound O-acyltransferase domain containing 7,NA,,,,,
36,C01194,hsa:84812,PLCD4,(RefSeq) phospholipase C delta 4,hsa-miR-133a-3p,,,,,
37,C01194,hsa:84992,PIGY,(RefSeq) phosphatidylinositol glycan anchor biosynthesis class Y,hsa-miR-23b-3p,,,,,
38,C01194,hsa:8503,PIK3R3,(RefSeq) phosphoinositide-3-kinase regulatory subunit 3,hsa-miR-23b-3p,hsa-miR-133a-3p,hsa-miR-146a-5p,,,
39,C01194,hsa:8818,DPM2,"(RefSeq) dolichyl-phosphate mannosyltransferase subunit 2, regulatory",hsa-miR-133a-3p,hsa-miR-125b-5p,,,,
40,C01194,hsa:89869,PLCZ1,(RefSeq) phospholipase C zeta 1,NA,,,,,
41,C01194,hsa:9091,PIGQ,(RefSeq) phosphatidylinositol glycan anchor biosynthesis class Q,NA,,,,,
42,C01194,hsa:9651,PLCH2,(RefSeq) phospholipase C eta 2,hsa-miR-125b-5p,,,,,

## Sheet: Lipid_C04438_associated_genes_a
,Lipid,KeggGeneID,Symbol,Name,Predicted miRs,,,,
2,C04438,hsa:100137049,PLA2G4B,(RefSeq) phospholipase A2 group IVB,NA,,,,
3,C04438,hsa:10162,LPCAT3,(RefSeq) lysophosphatidylcholine acyltransferase 3,hsa-miR-125b-5p,,,,
4,C04438,hsa:10434,LYPLA1,(RefSeq) lysophospholipase 1,hsa-miR-23b-3p,hsa-miR-146a-5p,hsa-miR-133a-3p,,
5,C04438,hsa:10908,PNPLA6,(RefSeq) patatin like phospholipase domain containing 6,NA,,,,
6,C04438,hsa:11145,PLAAT3,(RefSeq) phospholipase A and acyltransferase 3,hsa-miR-204-5p,hsa-miR-125b-5p,hsa-miR-143-3p,,
7,C04438,hsa:123745,PLA2G4E,(RefSeq) phospholipase A2 group IVE,hsa-miR-23b-3p,hsa-miR-146a-5p,,,
8,C04438,hsa:129642,MBOAT2,(RefSeq) membrane bound O-acyltransferase domain containing 2,hsa-miR-23b-3p,hsa-miR-125b-5p,hsa-miR-143-3p,hsa-miR-499a-5p,hsa-miR-21-5p
9,C04438,hsa:151056,PLB1,(RefSeq) phospholipase B1,hsa-miR-204-5p,hsa-miR-133a-3p,,,
10,C04438,hsa:154141,MBOAT1,(RefSeq) membrane bound O-acyltransferase domain containing 1,hsa-miR-23b-3p,hsa-miR-133a-3p,,,
11,C04438,hsa:254531,LPCAT4,(RefSeq) lysophosphatidylcholine acyltransferase 4,hsa-miR-143-3p,hsa-miR-125b-5p,,,
12,C04438,hsa:255189,PLA2G4F,(RefSeq) phospholipase A2 group IVF,hsa-miR-125b-5p,hsa-miR-204-5p,,,
13,C04438,hsa:26279,PLA2G2D,(RefSeq) phospholipase A2 group IID,hsa-miR-133a-3p,,,,
14,C04438,hsa:283748,PLA2G4D,(RefSeq) phospholipase A2 group IVD,hsa-miR-146a-5p,hsa-miR-125b-5p,,,
15,C04438,hsa:30814,PLA2G2E,(RefSeq) phospholipase A2 group IIE,NA,,,,
16,C04438,hsa:375775,PNPLA7,(RefSeq) patatin like phospholipase domain containing 7,NA,,,,
17,C04438,hsa:391013,PLA2G2C,(RefSeq) phospholipase A2 group IIC,hsa-miR-204-5p,hsa-miR-133a-3p,hsa-miR-146a-5p,hsa-miR-143-3p,
18,C04438,hsa:50487,PLA2G3,(RefSeq) phospholipase A2 group III,hsa-miR-143-3p,,,,
19,C04438,hsa:5319,PLA2G1B,(RefSeq) phospholipase A2 group IB,NA,,,,
20,C04438,hsa:5320,PLA2G2A,(RefSeq) phospholipase A2 group IIA,NA,,,,
21,C04438,hsa:5321,PLA2G4A,(RefSeq) phospholipase A2 group IVA,NA,,,,
22,C04438,hsa:5322,PLA2G5,(RefSeq) phospholipase A2 group V,hsa-miR-125b-5p,,,,
23,C04438,hsa:54979,PLAAT2,(RefSeq) phospholipase A and acyltransferase 2,NA,,,,
24,C04438,hsa:64600,PLA2G2F,(RefSeq) phospholipase A2 group IIF,hsa-miR-125b-5p,,,,
25,C04438,hsa:81579,PLA2G12A,(RefSeq) phospholipase A2 group XIIA,NA,,,,
26,C04438,hsa:8398,PLA2G6,(RefSeq) phospholipase A2 group VI,??,,,,
27,C04438,hsa:8399,PLA2G10,(RefSeq) phospholipase A2 group X,??,,,,
28,C04438,hsa:84647,PLA2G12B,(RefSeq) phospholipase A2 group XIIB,hsa-miR-204-5p,hsa-miR-133a-3p,,,
29,C04438,hsa:8605,PLA2G4C,(RefSeq) phospholipase A2 group IVC,hsa-miR-23b-3p,,,,
30,C04438,hsa:8681,JMJD7-PLA2G4B,(RefSeq) JMJD7-PLA2G4B readthrough,??,,,,

## Sheet: Lipid_C05973_associated_genes_a
,Lipid,KeggGeneID,Symbol,Name,Predicted miRs,,
2,C05973,hsa:10908,PNPLA6,(RefSeq) patatin like phospholipase domain containing 6,NA,,
3,C05973,hsa:11145,PLAAT3,(RefSeq) phospholipase A and acyltransferase 3,hsa-miR-204-5p,hsa-miR-125b-5p,hsa-miR-143-3p
4,C05973,hsa:11313,LYPLA2,(RefSeq) lysophospholipase 2,hsa-miR-125b-5p,,
5,C05973,hsa:151056,PLB1,(RefSeq) phospholipase B1,hsa-miR-204-5p,hsa-miR-133a-3p,
6,C05973,hsa:375775,PNPLA7,(RefSeq) patatin like phospholipase domain containing 7,NA,,
7,C05973,hsa:54979,PLAAT2,(RefSeq) phospholipase A and acyltransferase 2,NA,,
