# Supplementary material for: Multiomics coupled with vibrational spectroscopy identify early mechanisms of experimental aortic valve stenosis
Source: Research Square preprint supplement (doi:10.21203/rs.3.rs-4330270/v1), 2024-05-02
Supplement: Supplementary file 14 [file c0ddb79d11fdde9e5e1c3b94.xlsx]

## Sheet: ROS
	2 weeks DE		4 weeks DE		7 weeks DE		7 vs 2 weeks DE
Gene	Log2Fold	FDR	Log2Fold	FDR	Log2Fold	FDR	Log2Fold	FDR	Predicted miRs
ROS-related
NOS2	-0.610351	0.347683	1.3895	0.0267146	2.22518	0.00333063	2.83553	0.000382567	hsa-miR-499a-5p
NOX4	0.631986	0.183235	0.120255	0.901326	-0.0645158	0.88398	-0.696502	0.038562	hsa-miR-146a-5p	hsa-miR-23b-3p	hsa-miR-143a-3p	hsa-miR-133a-3p	hsa-miR-204-5p
MAOB	0.116258	0.80517	-0.058952	0.932355	-0.630103	0.0310081	-0.746361	0.00577915	hsa-miR-499a-5p
SOD3	0.207404	0.754677	-0.308762	0.681286	-0.839656	0.0453911	-1.04706	0.0074662	NA
DDAH2	0.251412	0.597289	-0.277081	0.637822	-0.44752	0.15723	-0.698932	0.0173322	NA
GSTO1	-0.427999	0.241949	0.12291	0.850675	0.318615	0.270494	0.746614	0.00853489	NA
COX6C	-1.22993	0.0986902	-0.409237	0.711625	0.249692	0.677926	1.47962	0.00849412	hsa-miR-21-5p
NDUFA4L2	-0.926293	0.20602	0.934049	0.225441	2.01624	0.00660376	2.94253	0.000410714	NA
SDHD	-0.721936	0.249298	-0.371966	0.647781	0.277841	0.587504	0.999777	0.0261646	hsa-miR-204-5p	hsa-miR-23b-3p	hsa-miR-499a-5p
Mevalonate related
MVK	0.0240879	0.977986	0.281112	0.741751	-0.122838	0.797749	-0.146926	0.702599	hsa-miR-125b-5p	hsa-miR-204-5p
PMVK	-0.418637	0.397863	-0.0519961	0.958118	0.0291882	0.951001	0.447825	0.148889	NA
MVD	3.28017	0.89451	-0.0648071	0.9578	-0.243201	0.611097	-0.358338	0.350804	NA
Phospholipid related
PLA2G7	-0.335732	0.682833	0.775387	0.277246	0.926352	0.0779642	1.26208	0.0106333	hsa-miR-133a-3p
CDS2	0.74595	0.0853339	-0.467203	0.307013	-0.941388	0.0125557	-1.68734	0.000382567	hsa-miR-125b-5p	hsa-miR-133a-3p	hsa-miR-23b-3p	hsa-miR-146a-5p
PIK3R5	-0.108014	0.943488	1.9873	0.0339539	2.08333	0.0134678	2.19135	0.00379957	hsa-miR-125b-5p	hsa-miR-499a-5p
PIK3CB	-0.351445	0.290425	0.12081	0.833802	0.263492	0.307318	0.614937	0.0125191	hsa-miR-204-5p	hsa-miR-23b-3p	hsa-miR-146a-5p	hsa-miR-125b-5p	hsa-miR-21-5p
PIK3C2A	0.28513	0.585788	-0.137934	0.865811	-0.373914	0.288186	-0.659044	0.0354292	hsa-miR-133a-3p	hsa-miR-23b-3p	hsa-miR-204-5p
PIK3CG	-0.371823	0.78558	1.34402	0.191766	1.57212	0.0552708	1.94395	0.0106186	hsa-miR-143-3p
Transglutaminase and Putrescine/Ornithine related
GCLC	0.0141048	0.986816	-0.152118	0.872401	-0.117375	0.79592	-0.13148	0.719596	hsa-miR-133a-3p
TGM2	-0.413938	0.309706	0.0942202	0.907081	0.206148	0.523668	0.620086	0.0291349	hsa-miR-143-3p	hsa-miR-204-5p	hsa-miR-133a-3p
TGM3	-0.525593	0.670631	-0.582388	0.698515	-0.954889	0.236669	-0.429296	0.54417	NA
F13A1	-0.118412	0.913164	0.799471	0.309758	1.08742	0.0585824	1.20584	0.0184042	hsa-miR-143-3p
EPB42	-0.196009	0.926666	0.1724	0.949568	1.75718	0.0833469	1.95319	0.0290791	NA
AZIN2	-0.109588	0.810462	0.104244	0.942413	0.743672	0.17281	0.910034	0.0556154	hsa-miR-499a-5p	hsa-miR-143-3p	hsa-miR-23b-3p	hsa-miR-125b-5p
CGAS	-0.322545	0.803518	1.40949	0.117768	1.78816	0.0226974	2.1107	0.00407169	NA
Other
POU2F2	0.0606298	0.970543	2.3152	0.0205478	2.92573	0.00620498	2.8651	0.00128115	hsa-miR-133a-3p	hsa-miR-204-5p	hsa-miR-125b-5p
