# Supplementary material for: Multiomics coupled with vibrational spectroscopy identify early mechanisms of experimental aortic valve stenosis
Source: Research Square preprint supplement (doi:10.21203/rs.3.rs-4330270/v1), 2024-05-02
Supplement: Supplementary file 15 [file c31c67d4613a5092a7d96208.xlsx]

## Sheet: analysis_results_optimal_cluste
cluster	gene
1	CDK5RAP1
1	LOC100344175
1	SH3KBP1
2	ACTA2
2	ACTG2
2	ACTR3B
2	ADAMTS9
2	ADAMTSL4
2	ALKAL2
2	AMIGO2
2	AMOTL2
2	ANAPC1
2	ANAPC7
2	AP3M2
2	ARHGAP23
2	ARSJ
2	ATP10A
2	BAMBI
2	BICD1
2	C1QTNF7
2	C4H12orf75
2	CBX6
2	CDS2
2	CHST7
2	CIART
2	CR2
2	CRIM1
2	CSPG4
2	CTDSPL
2	CTXN1
2	DAAM2
2	ELN
2	EPN2
2	FAM98A
2	FSTL3
2	GALNT2
2	HEY1
2	HSPG2
2	IL17RD
2	KCTD10
2	KDM1A
2	KIAA0753
2	KL
2	KLF13
2	KMT5A
2	LMCD1
2	LOC100341181
2	LOC100342572
2	LOC100349824
2	LOC103348556
2	LOC103352415
2	LOC108176497
2	LOC108178418
2	LOC127486976
2	LOC127487713
2	LOC127492655
2	MAFF
2	MARVELD1
2	MFGE8
2	MMP28
2	NPNT
2	NREP
2	PAQR6
2	PER2
2	PKD1
2	POGLUT3
2	PRICKLE1
2	PTPDC1
2	PTS
2	RANBP3L
2	RASAL2
2	RASSF8
2	SERPINE1
2	SGCG
2	SMURF1
2	SPRYD3
2	SPSB1
2	STBD1
2	TEF
2	TENT5B
2	TRIM3
2	TRIM56
2	WFDC1
2	WTIP
2	ZHX3
3	LOC100341783
3	LOC100343457
3	LOC127485862
3	RN18S
4	AAAS
4	ABHD12
4	ALG2
4	AMDHD2
4	ARPC3
4	ASF1B
4	ATP6V1B2
4	BAX
4	BMP1
4	BRMS1
4	CAMK2N2
4	CD180
4	CD276
4	CDC45
4	CDK6
4	CDKN2D
4	CHI3L1
4	CKS1B
4	CLIC1
4	CORO7
4	CST3
4	CTSB
4	CTSH
4	CTSZ
4	CX3CR1
4	DPP3
4	ETV1
4	EVA1A
4	FHL3
4	GEMIN6
4	GLMP
4	GMIP
4	GPR68
4	GRN
4	HAS1
4	HES6
4	ICAM1
4	IL1RAP
4	IRAK1
4	JUNB
4	KCNK13
4	KLF2
4	KPNA2
4	LOC100347175
4	LOC100347962
4	LOC100350709
4	LOC103346838
4	LOXL4
4	LRRC49
4	MAP3K11
4	MCM6
4	MCUB
4	NAGA
4	NECAP2
4	NEK6
4	NEK8
4	NLRX1
4	NT5C3B
4	PARP3
4	PHLDA3
4	PLBD2
4	PLK3
4	PTGS1
4	PYCR3
4	RALB
4	RARA
4	RASSF5
4	S100A6
4	SBNO2
4	SCRG1
4	SDF2L1
4	SEC14L2
4	SGPL1
4	SH2B3
4	SHKBP1
4	SLC9A9
4	SLC12A5
4	SLC39A11
4	SOCS3
4	SPC25
4	TMEM151A
4	TMEM268
4	TNFRSF1A
4	TONSL
4	TPM3
4	UCK2
4	VAMP8
4	WBP1L
4	WDR46
5	ABTB3
5	ADAMTS4
5	ALOX5
5	ALOX5AP
5	AOAH
5	APOBR
5	ARHGAP4
5	ARHGAP9
5	ARHGAP11A
5	ARHGAP30
5	ARL11
5	ARPC1B
5	ARRB2
5	ATP8B4
5	BCL2A1
5	BDKRB1
5	BID
5	BIN2
5	BLNK
5	BNIPL
5	BUB1
5	BUB1B
5	C1R
5	C3AR1
5	C5AR1
5	CAPG
5	CASS4
5	CCNB2
5	CCNF
5	CCR6
5	CD1C
5	CD53
5	CD68
5	CD80
5	CD101
5	CD163
5	CDC20
5	CDCA3
5	CDCA8
5	CDKN1A
5	CEBPD
5	CENPA
5	CENPF
5	CHRDL2
5	CIITA
5	CKS2
5	CLEC7A
5	CLIC2
5	CORO1A
5	CSF1R
5	CTSE
5	CTSS
5	CUNH16orf54
5	CXCL16
5	CYBB
5	DAPP1
5	DDIAS
5	DEF6
5	DENND1C
5	DOCK2
5	DOK2
5	DRAM1
5	ECM1
5	EVI2A
5	EVI2B
5	EZH2
5	FAM111A
5	FCER1G
5	FCGR1A
5	FCHO1
5	FERMT3
5	FES
5	FLVCR2
5	FMNL1
5	FMNL3
5	FOLR2
5	FYB1
5	G6PD
5	GALNT6
5	GGH
5	GIMAP4
5	GIMAP8
5	GINS4
5	GPR183
5	GSDMD
5	HAVCR1
5	HCLS1
5	HMGN5
5	HPRT1
5	HROB
5	IFNGR1
5	IFNGR2
5	IKZF1
5	IL4R
5	IL6R
5	IL7R
5	IL10RA
5	IRF5
5	ITGA4
5	ITGAM
5	ITGB2
5	ITGB7
5	JAK3
5	KCNAB2
5	KCNE4
5	KIF4A
5	KIF20B
5	KRT19
5	LAPTM5
5	LAT2
5	LCP2
5	LGALS3
5	LGALS9
5	LOC100008803
5	LOC100125981
5	LOC100337909
5	LOC100338913
5	LOC100339650
5	LOC100340313
5	LOC100343938
5	LOC100344565
5	LOC100345135
5	LOC100345649
5	LOC100347041
5	LOC100348415
5	LOC100349504
5	LOC100349996
5	LOC100350649
5	LOC100350957
5	LOC100351519
5	LOC100352110
5	LOC103346857
5	LOC103347295
5	LOC103347344
5	LOC103347778
5	LOC103349585
5	LOC103351517
5	LOC103351715
5	LOC108177987
5	LOC127482743
5	LOC127486108
5	LOC127486565
5	LOC127488159
5	LOC127492111
5	LPAR5
5	LPCAT3
5	LPXN
5	LST1
5	LYN
5	MAP4K1
5	MARCHF1
5	MAST1
5	MATK
5	MEAK7
5	MEIS3
5	METRNL
5	MNDA
5	MPEG1
5	MREG
5	MS4A4A
5	MS4A6A
5	MTFR2
5	MYO1F
5	NFAM1
5	NFKBIE
5	NPPA
5	NRM
5	NRROS
5	P2RY8
5	P2RY12
5	PARVG
5	PCLAF
5	PIK3R5
5	PIK3R6
5	PIMREG
5	PKIB
5	PLCB2
5	PLD3
5	PLXNC1
5	PRC1
5	PRG4
5	PTAFR
5	PTGDR2
5	PTPN6
5	PTPRC
5	RAC2
5	RACGAP1
5	RAD51
5	RASAL3
5	RENBP
5	RGS19
5	RNASE6
5	RRM2
5	RUNX3
5	SASH3
5	SELPLG
5	SESN2
5	SH3BP1
5	SIGLEC5
5	SIGLEC15
5	SIPA1
5	SLA
5	SLC15A2
5	SLC25A45
5	SLC37A2
5	SLC47A1
5	SMC4
5	SNX10
5	SP100
5	SPI1
5	ST3GAL4
5	STMN1
5	STXBP2
5	SUSD3
5	SYK
5	TAGAP
5	TCF19
5	TFRC
5	TK1
5	TOP2A
5	TREM2
5	TREX1
5	TROAP
5	TRPV2
5	TSPAN17
5	UBE2C
5	UNC13D
5	WAS
5	WDFY4
5	WIPI1
5	ZWILCH
6	ABCA6
6	ABCC3
6	ABCG1
6	ACVRL1
6	AEN
6	AIF1
6	ALPL
6	ANXA8
6	ARHGAP22
6	ARHGAP25
6	ARHGDIB
6	ARID3A
6	ASPM
6	ATP6V1F
6	AVPI1
6	B3GALT6
6	BASP1
6	BATF
6	BAZ1A
6	BIRC5
6	BTK
6	C1H11orf16
6	C1QTNF5
6	C1QTNF6
6	C1RL
6	C13H1orf162
6	CARD6
6	CARMIL2
6	CCL7
6	CCL19
6	CD14
6	CD22
6	CD37
6	CD48
6	CD74
6	CD84
6	CD300A
6	CENPE
6	CFAP69
6	CGAS
6	CH25H
6	CLEC12A
6	CP
6	CSF2RA
6	CSTB
6	CXCR1
6	DCTPP1
6	DOK3
6	E2F2
6	FAH
6	FGD2
6	FGL1
6	FGR
6	FLT3
6	FTH1
6	FTL
6	FURIN
6	FXYD5
6	GAB3
6	GIMAP1
6	GINS1
6	GJB3
6	GMFG
6	GNAT1
6	GP1BB
6	GPNMB
6	GPR34
6	GPR65
6	HCK
6	HILPDA
6	HMMR
6	HMOX1
6	HOMER3
6	HVCN1
6	IBSP
6	IL10RB
6	IL21R
6	IRF8
6	KIF11
6	KIF18A
6	KIF21B
6	KNTC1
6	LAX1
6	LCP1
6	LIMD2
6	LOC100338413
6	LOC100339316
6	LOC100340830
6	LOC100340939
6	LOC100341358
6	LOC100343299
6	LOC100343623
6	LOC100347327
6	LOC100347711
6	LOC100348711
6	LOC100349893
6	LOC100351163
6	LOC100351416
6	LOC100351957
6	LOC100352672
6	LOC100352673
6	LOC100354870
6	LOC100356848
6	LOC100357554
6	LOC100359112
6	LOC100359168
6	LOC100359306
6	LOC103346239
6	LOC103346273
6	LOC103350039
6	LOC108177670
6	LOC127482571
6	LOC127482738
6	LOC127482788
6	LOC127486741
6	LOC127488290
6	LOC127488905
6	LOC127488977
6	LOC127488978
6	LOC127489325
6	LOC127491077
6	LOC127493194
6	LRRC25
6	LRRC74B
6	LY86
6	LYL1
6	MAFB
6	MCP2
6	MCP-1
6	MFNG
6	MILR1
6	MMP14
6	MMP17
6	MTHFS
6	MXD3
6	MYO7A
6	N4BP2L1
6	NAPSA
6	NCAPH
6	NCF4
6	NFATC2
6	NOD1
6	P2RY13
6	PLA1A
6	PLAUR
6	PLTP
6	PNP
6	POC1A
6	POU2F2
6	PRKCB
6	PTK2B
6	PTPN18
6	RAB13
6	RBM47
6	RFC5
6	RGS10
6	RLA-DMA
6	RLA-DMB
6	RLA-DR-ALPHA
6	RLA-DRB1
6	RPS6KA1
6	RTN4RL2
6	RUNX1
6	S100A9
6	SAA3
6	SAMHD1
6	SCARA3
6	SGO1
6	SH3BGRL3
6	SH3BP2
6	SHMT2
6	SLAMF8
6	SLC7A7
6	SLC15A3
6	SLC29A1
6	SLC45A4
6	SLC46A1
6	SLC46A2
6	SLC51A
6	SLCO2B1
6	SMAP2
6	SOWAHD
6	SP110
6	SPHK1
6	SRGAP2
6	STAB1
6	STARD3
6	STIL
6	STK10
6	STOM
6	TACSTD2
6	TBC1D1
6	TBXAS1
6	TEAD4
6	TEDC1
6	THEMIS2
6	TIMP1
6	TLR1
6	TMSB10
6	TNC
6	TNFAIP6
6	TNFAIP8L2
6	TNFRSF1B
6	TNN
6	TPST2
6	TRABD2A
6	TRAF3IP3
6	TRAPPC1
6	TYROBP
6	UCP2
6	VCAM1
6	VMP1
6	VRK1
6	VSIG4
7	ACSM1
7	ADAM12
7	AHSG
7	BAD
7	BATF3
7	BLM
7	BMP10
7	BPGM
7	CCL22
7	CD79A
7	CDKN2B
7	CEMIP
7	CHN2
7	CHST15
7	CLDN7
7	CLU
7	CX3CL1
7	DEFB1
7	DPEP1
7	DUSP5
7	EEF1AKMT4
7	EFNA1
7	ENG
7	EPCAM
7	FABP5
7	FGF23
7	FMN1
7	GCNT1
7	GJB5
7	GJC3
7	GLP2R
7	GPR158
7	HCST
7	IGFBP3
7	IL4I1
7	IL20RB
7	IL34
7	INAVA
7	INHBB
7	JAML
7	KCNIP1
7	KLRG1
7	KYNU
7	LMO2
7	LOC100144340
7	LOC100328693
7	LOC100343557
7	LOC100343802
7	LOC100344156
7	LOC100345136
7	LOC100345907
7	LOC100346606
7	LOC100348124
7	LOC100348918
7	LOC100351119
7	LOC100351184
7	LOC100353356
7	LOC100356144
7	LOC100356803
7	LOC100358359
7	LOC100358478
7	LOC100358778
7	LOC103345057
7	LOC103346238
7	LOC103346668
7	LOC103348133
7	LOC103348404
7	LOC103349305
7	LOC108176037
7	LOC108176040
7	LOC108177025
7	LOC108177736
7	LOC127483137
7	LOC127484192
7	LOC127484209
7	LOC127484346
7	LOC127490210
7	LOC127491115
7	LOC127493069
7	MLANA
7	MS4A2
7	NALF2
7	NDUFA4L2
7	NHP2
7	NOS2
7	NRXN2
7	P2RX6
7	PCED1B
7	PKN3
7	POLE4
7	PRKCH
7	PRR15
7	PRR16
7	PRSS53
7	PTGIR
7	RAD51B
7	S100A8
7	SERPINA3
7	SLC35D2
7	SLC38A5
7	SLCO2A1
7	SYT12
7	TIFAB
7	TLR5
7	UGT1A7
8	ADAM8
8	ATP6V0D2
8	AURKA
8	BHLHE40
8	C3
8	CCL2
8	CCNB1
8	CCR1
8	CCR2
8	CCR5
8	CD72
8	CD82
8	CD200R1
8	CD244
8	CDK1
8	CEP55
8	CHIT1
8	CKAP2L
8	CLEC5A
8	CMBL
8	COTL1
8	CRLF2
8	DCSTAMP
8	DDIT4
8	DHRS7
8	DTX2
8	ECEL1
8	ERCC6L
8	FAM210B
8	FGF11
8	FOSL1
8	FOXM1
8	GABRB2
8	GALM
8	GPRC5A
8	GUSB
8	HK3
8	HNMT
8	HSH2D
8	IGSF6
8	IKBKE
8	IL1RN
8	IL2RG
8	INPP5D
8	IQGAP3
8	IRAG2
8	ITGAL
8	ITGAX
8	JCHAIN
8	KCNN4
8	KIF18B
8	KIF20A
8	KIFC1
8	KNL1
8	KNSTRN
8	KRT16
8	LOC100009097
8	LOC100009107
8	LOC100009451
8	LOC100345732
8	LOC100346561
8	LOC100348776
8	LOC100350907
8	LOC100355766
8	LOC103346246
8	LOC103347271
8	LOC127490290
8	LRRTM3
8	MCEMP1
8	MCM2
8	MMP9
8	MMP12
8	MSR1
8	MYBL2
8	MYH8
8	MYL4
8	MYL7
8	MYO19
8	NCF2
8	NCKAP1L
8	NEIL3
8	NEK2
8	P2RY11
8	PADI2
8	PHF11
8	PLEK
8	PLET1
8	PSTPIP1
8	PTPN7
8	PTPRO
8	RAB7B
8	RASGRP4
8	RASSF6
8	REL
8	RHBDF2
8	RHOF
8	SEMA4A
8	SGO2
8	SH2D4B
8	SHTN1
8	SIRPA
8	SLC16A5
8	SLC31A2
8	SLN
8	SPN
8	SULF2
8	TASL
8	TFEC
8	TGIF1
8	TIFA
8	TM4SF19
8	TNF
8	TPX2
8	TRAPPC14
8	TRIM14
8	TUBA1C
8	XDH
8	ZNF710
9	B3GNT7
9	CCDC102A
9	CCN4
9	CEBPB
9	CHTF18
9	COL6A1
9	CPTP
9	DDX41
9	DNASE2
9	DUSP7
9	EIF4A1
9	EML3
9	GBA1
9	GMPPB
9	INHBA
9	LOC100340132
9	LOC100342104
9	LOC100342188
9	LOC108176625
9	LOC127487412
9	LOC127488313
9	LRRC59
9	LRRK1
9	METTL21A
9	MTHFD1L
9	MVP
9	NADK
9	PDGFA
9	PHETA1
9	PLOD1
9	PLOD3
9	POLA2
9	PYCR1
9	RAB31
9	RELL2
9	RIN1
9	RNASEH2C
9	S1PR2
9	SLC12A9
9	SLC43A3
9	SNAI1
9	SNX8
9	TMED3
9	TMEM183A
9	UBTD1
9	UCK1
9	VASH1
9	ZC3H12A
10	CSF1
10	CSRNP1
10	CXCL8
10	LOC100348666
10	LOC100352669
10	NCAPD2
10	NHSL1
10	OASL
10	PLEK2
10	SERP1
10	SMAD7
10	TMEM229B
10	TSKU
11	AIF1L
11	ANTXR2
11	ARHGAP12
11	BAG2
11	BGLAP
11	CNKSR3
11	CNN1
11	CREB5
11	DGKH
11	DHX35
11	DNAJB4
11	DST
11	EPHA10
11	ESAM
11	FAIM2
11	FAM181B
11	GDF11
11	GNG11
11	GPC3
11	GRB14
11	HCAR1
11	HEY2
11	HRH1
11	IGSF9B
11	ITGB8
11	ITIH2
11	ITIH5
11	KCNK15
11	KLHDC1
11	KLHL11
11	LEP
11	LIMA1
11	LOC100344965
11	LOC103348951
11	LOC108175785
11	LOC108177485
11	LOC108177633
11	LOC127482579
11	LOC127483424
11	LOC127484430
11	LOC127487418
11	MC5R
11	ME3
11	MYOCD
11	NFASC
11	NLGN3
11	PANK1
11	PDZD2
11	PHLDB2
11	PHLPP1
11	PPP1R12B
11	RADIL
11	RNF150
11	RNF180
11	RPA4
11	SHPRH
11	SIAH2
11	SLC8A3
11	SLC24A3
11	SRD5A2
11	SSTR1
11	SYNPO2
11	TGFB2
11	TMOD2
11	TRPM3
11	TTPA
12	AASS
12	ADAMTS16
12	ALDH6A1
12	ARNT2
12	CACNB2
12	CDC42EP3
12	CNGA2
12	DUSP10
12	EFNA5
12	EPHX2
12	FHL2
12	FST
12	IGFBPL1
12	LOC100347176
12	LOC103350682
12	LOC103351270
12	LOC108177974
12	LOC127488889
12	LOC127489992
12	LOC127490046
12	LOC127493068
12	MPPED2
12	OSGEPL1
12	PHEX
12	PLPP3
12	RARB
12	RNF175
12	SNCG
12	SOWAHA
12	TNIK
12	VSTM2A
12	VXN
13	ACAN
13	ANKH
13	AP1S1
13	BOK
13	CHST2
13	CLCF1
13	CLEC11A
13	CNDP2
13	EGR3
13	EMID1
13	ERP29
13	EXOSC5
13	FBLN7
13	FKBP11
13	FN1
13	GADD45G
13	GPX1
13	HAUS8
13	HFE
13	HHIPL1
13	HTR7
13	HTRA1
13	HYAL2
13	IGFBP7
13	IL11
13	INKA1
13	ITGA3
13	LOC100009168
13	LOC100357658
13	LOC100357943
13	LOC103349265
13	LOC103349392
13	LOC103351100
13	LOC127484662
13	NOS3
13	NR2C2AP
13	P4HA3
13	PLPP4
13	POLR3H
13	RHBDL2
13	SAT2
13	SELENOH
13	SERPINE2
13	SHANK1
13	SPAAR
13	TGFB1
13	TOGARAM2
13	TRADD
13	TSPO
13	VKORC1
14	ALAS2
14	APOA4
14	APOD
14	C1QTNF9
14	CKMT1B
14	CPLX2
14	CRLF1
14	CXCL14
14	CXCR2
14	DLX3
14	FAM167B
14	GALNT15
14	GYPA
14	HBA
14	HBB2
14	IL3RA
14	KRT5
14	KRT17
14	KRT75
14	LOC100009286
14	LOC100338677
14	LOC100339459
14	LOC100339471
14	LOC100340199
14	LOC100340499
14	LOC100340903
14	LOC100341094
14	LOC100341142
14	LOC100341160
14	LOC100342098
14	LOC100342135
14	LOC100342677
14	LOC100342906
14	LOC100342978
14	LOC100343607
14	LOC100343809
14	LOC100345060
14	LOC100345097
14	LOC100346213
14	LOC100346272
14	LOC100346996
14	LOC100348203
14	LOC100348336
14	LOC100349285
14	LOC100349729
14	LOC100350232
14	LOC100351004
14	LOC100352118
14	LOC100352318
14	LOC100353302
14	LOC100353606
14	LOC100353689
14	LOC100355379
14	LOC100355721
14	LOC100356891
14	LOC100357005
14	LOC100357892
14	LOC100357982
14	LOC103349307
14	LOC103351810
14	LOC108175363
14	LOC108176212
14	LOC108177222
14	LOC127482561
14	LOC127482604
14	LOC127485727
14	LOC127486261
14	LOC127488213
14	LOC127490622
14	LRP2
14	MMP1
14	MMP13
14	NES
14	NFE2
14	PEX12
14	PLEKHG4
14	PTX3
14	PVALB
14	RIPOR3
14	SLC4A1
14	SLC5A1
14	TNFSF8
14	TNFSF11
14	TRPM1
14	TSPAN33
14	VIL1
14	VWF
14	WDR86
15	ACTN4
15	ADAMTS8
15	AKT3
15	ALDH18A1
15	ANO10
15	ANXA4
15	ARHGEF17
15	ARL10
15	ASAP2
15	ASB13
15	ATL2
15	ATP1A2
15	BCL2
15	BDNF
15	BMP3
15	C1QL3
15	C1QTNF2
15	C14H3orf70
15	CAMKK1
15	CCN3
15	CDC42BPB
15	COL21A1
15	CRTC3
15	CSPG5
15	CSRP1
15	CSRP2
15	CTNNAL1
15	CYFIP2
15	DAB2IP
15	DACT1
15	DCBLD2
15	DDR2
15	DIAPH2
15	DLC1
15	DLG2
15	DLGAP4
15	DNAJB6
15	DNM1L
15	DSTN
15	DZIP1
15	EDA
15	EFHD1
15	EFR3A
15	EIF4EBP2
15	ERGIC1
15	ESD
15	FAM83D
15	FAM131B
15	FAM241A
15	FAT4
15	FBLN5
15	FER
15	FERMT2
15	FIBIN
15	FNBP1
15	FOXJ2
15	FOXN3
15	FRYL
15	FRZB
15	FZD7
15	GBE1
15	GDF10
15	GLS
15	GPRC5B
15	GTF2E2
15	GUCY1B1
15	HLF
15	HPSE2
15	ILK
15	INPP4A
15	ITGA8
15	ITGB1
15	ITPR1
15	JCAD
15	KANK1
15	KCNA5
15	KCNAB1
15	KCNQ4
15	KIAA0040
15	LAMA5
15	LDLRAD4
15	LGALSL
15	LIMS2
15	LMOD1
15	LOC100341051
15	LOC100341926
15	LOC100353463
15	LOC100354088
15	LOC108176480
15	LOC108178478
15	LOC127482726
15	LOC127488927
15	LTBP4
15	MAGI2
15	MAN2A2
15	MAP1B
15	MAP2
15	MAPK4
15	MCAM
15	MCU
15	METTL24
15	MFAP3L
15	MPP2
15	MTHFR
15	MTUS2
15	MYH10
15	MYH11
15	MYO1C
15	NDST1
15	NEDD9
15	NET1
15	NIBAN1
15	NIPAL4
15	NOTCH2
15	NPAS4
15	NPR1
15	NR1D1
15	NR1D2
15	NTF3
15	NXPH3
15	OGN
15	OSR1
15	OSR2
15	PALLD
15	PBXIP1
15	PCOLCE2
15	PDE5A
15	PDLIM3
15	PDLIM7
15	PDZRN4
15	PELI2
15	PFKP
15	PGM5
15	PGRMC2
15	PHF1
15	PHTF2
15	PKN2
15	PLCB4
15	POGK
15	PPP1R3B
15	PPP1R9A
15	PRDM16
15	PRKAG3
15	PRSS35
15	PRUNE2
15	PTCHD1
15	PXDNL
15	RASL12
15	RA_M006_JSM7BED4F
15	RND3
15	ROCK1
15	RUSC2
15	SCRN1
15	SEMA3B
15	SEMA3C
15	SGCD
15	SLC12A4
15	SLC22A3
15	SLC66A3
15	SLMAP
15	SMOC2
15	SMTN
15	SOD3
15	SORBS1
15	SOST
15	SPTSSA
15	STON1
15	STS
15	SUN2
15	SUSD5
15	SVIL
15	SYPL2
15	SYT11
15	TBC1D8
15	TENT5A
15	TES
15	TESK1
15	TLR6
15	TMEM117
15	TMEM245
15	TNS1
15	TPPP
15	TRMT9B
15	TSPAN2
15	UNC45A
15	USP20
15	UTRN
15	VCL
15	WDFY3
15	WEE1
15	WNT8A
15	YPEL1
15	ZBTB38
15	ZNF362
15	ZNF365
15	ZNRF3
15	ZYX
16	ABI3BP
16	ADAMTS19
16	ADO
16	AGRN
16	AIG1
16	ANKRD46
16	BBS2
16	BCL9
16	BRMS1L
16	C1H11orf54
16	CABIN1
16	CACNA1C
16	CALCOCO1
16	CAPRIN2
16	CASD1
16	CAV2
16	CBX5
16	CDC73
16	CELSR2
16	CLASP1
16	CNNM3
16	CNTN1
16	CORO1C
16	DBN1
16	DENND2B
16	DGCR2
16	DIP2C
16	DPP4
16	EPB41L4B
16	FBXO28
16	FBXO30
16	FILIP1L
16	GABBR1
16	GDNF
16	HIVEP1
16	HNRNPH1
16	IKZF4
16	INPP5F
16	IPO8
16	IRAG1
16	IRF2BPL
16	JPH2
16	KAT7
16	KCNA6
16	KDM6B
16	L3MBTL1
16	LGR4
16	LGR6
16	LHFPL6
16	LIN7C
16	LIN52
16	LOC100357489
16	LOC103350369
16	LOC103350420
16	LOC108177938
16	LOC127489711
16	LRMDA
16	LSS
16	LYRM1
16	LZTS3
16	MAOB
16	MDC1
16	MFAP5
16	MYEF2
16	NCAM1
16	NR3C1
16	NTN4
16	OBSL1
16	PAPOLB
16	PATZ1
16	PHKB
16	PKNOX2
16	PPP2R5A
16	PRDM11
16	PSMD12
16	PTBP2
16	RAB4A
16	RAB11FIP2
16	RAB12
16	RBMX
16	RNF112
16	RNF146
16	RPRD1B
16	SCN11A
16	SEH1L
16	SGCB
16	SIMC1
16	SMARCA2
16	SMARCD1
16	SMS
16	SNCAIP
16	SYNE1
16	TCEAL4
16	TFCP2
16	THRA
16	THRB
16	TINF2
16	TLCD4
16	TMEM8B
16	TMEM106B
16	TOR1AIP1
16	UBE2E1
16	UBE2E2
16	USP53
16	VPS13B
16	WASL
16	XRCC1
16	ZBTB4
16	ZFPM2
16	ZHX2
16	ZNF260
16	ZNF274
16	ZNF311
16	ZNF398
16	ZNF532
16	ZSCAN26
17	ADAP2
17	ANGPT4
17	APLN
17	ARL4C
17	BLVRA
17	BMAL2
17	CFAP97D2
17	DERA
17	DUSP13
17	GIMAP2
17	GRAMD1B
17	H1-2
17	H1-4
17	JPT1
17	KRT18
17	LOC100328948
17	MARCHF3
17	NDUFA5
17	NUP210
17	P2RY2
17	PALMD
17	RAB39A
17	RASGEF1A
17	RNF122
17	SCLT1
17	SEMA4D
17	SLC16A3
17	SRGN
17	ST3GAL5
17	STAC2
17	STEAP3
17	TICAM2
17	TMEM266
17	VEGFA
17	VNN1
18	ALDH1A1
18	ALDH2
18	ANGPTL5
18	ANKRD45
18	CDKAL1
18	CETN2
18	CFAP68
18	CNBP
18	CORO2B
18	CTC1
18	DAAM1
18	DMAC2L
18	DNAJC27
18	EIF4E3
18	EPC1
18	GABARAPL1
18	GPLD1
18	HNRNPD
18	IFIT2
18	LOC100009143
18	LOC100343231
18	LOC100355760
18	LOC100357231
18	LOC100358060
18	LONRF3
18	LRRN4CL
18	MAMLD1
18	MBD6
18	MCCC2
18	MEIS2
18	MSH2
18	MTARC2
18	NADK2
18	OARD1
18	PBX1
18	PRKACB
18	RIOX1
18	RPF1
18	SF3A1
18	SFRP4
18	SMIM19
18	SRSF5
18	SUMO2
18	TACC2
18	TPCN3
18	VPS26A
18	ZC3H12C
18	ZFAND5
18	ZNF770
18	ZRANB3
19	AP2S1
19	DUSP4
19	LDHA
19	LOC100354980
19	LOC100357498
19	LOC103345766
19	LOC103351520
19	LOC127487747
19	PAPPA2
19	PODNL1
19	SPP1
20	ABCC4
20	EPB41L3
20	GINS3
20	HPSE
20	LOC100341013
20	LOC100342321
20	LOC100344914
20	LOC100352572
20	LOC100357733
20	LOC103346581
20	LOC103347974
20	LOC103351231
20	LOC127487408
20	MYO1G
20	NFIL3
20	RNF128
20	RNF144B
20	SLC9A5
20	SSBP4
20	YEATS4

## Sheet: DP_GP_per_cluster_information
cluster_id	cluster_genes
cluster1	CDK5RAP1	LOC100344175	SH3KBP1
cluster2	ACTA2	ACTG2	ACTR3B	ADAMTS9	ADAMTSL4	ALKAL2	AMIGO2	AMOTL2	ANAPC1	ANAPC7	AP3M2	ARHGAP23	ARSJ	ATP10A	BAMBI	BICD1	C1QTNF7	C4H12orf75	CBX6	CDS2	CHST7	CIART	CR2	CRIM1	CSPG4	CTDSPL	CTXN1	DAAM2	ELN	EPN2	FAM98A	FSTL3	GALNT2	HEY1	HSPG2	IL17RD	KCTD10	KDM1A	KIAA0753	KL	KLF13	KMT5A	LMCD1	LOC100341181	LOC100342572	LOC100349824	LOC103348556	LOC103352415	LOC108176497
cluster3	LOC100341783	LOC100343457	LOC127485862	RN18S
cluster4	AAAS	ABHD12	ALG2	AMDHD2	ARPC3	ASF1B	ATP6V1B2	BAX	BMP1	BRMS1	CAMK2N2	CD180	CD276	CDC45	CDK6	CDKN2D	CHI3L1	CKS1B	CLIC1	CORO7	CST3	CTSB	CTSH	CTSZ	CX3CR1	DPP3	ETV1	EVA1A	FHL3	GEMIN6	GLMP	GMIP	GPR68	GRN	HAS1	HES6	ICAM1	IL1RAP	IRAK1	JUNB	KCNK13	KLF2	KPNA2	LOC100347175	LOC100347962	LOC100350709	LOC103346838	LOXL4	LRRC49
cluster5	ABTB3	ADAMTS4	ALOX5	ALOX5AP	AOAH	APOBR	ARHGAP4	ARHGAP9	ARHGAP11A	ARHGAP30	ARL11	ARPC1B	ARRB2	ATP8B4	BCL2A1	BDKRB1	BID	BIN2	BLNK	BNIPL	BUB1	BUB1B	C1R	C3AR1	C5AR1	CAPG	CASS4	CCNB2	CCNF	CCR6	CD1C	CD53	CD68	CD80	CD101	CD163	CDC20	CDCA3	CDCA8	CDKN1A	CEBPD	CENPA	CENPF	CHRDL2	CIITA	CKS2	CLEC7A	CLIC2	CORO1A
cluster6	ABCA6	ABCC3	ABCG1	ACVRL1	AEN	AIF1	ALPL	ANXA8	ARHGAP22	ARHGAP25	ARHGDIB	ARID3A	ASPM	ATP6V1F	AVPI1	B3GALT6	BASP1	BATF	BAZ1A	BIRC5	BTK	C1H11orf16	C1QTNF5	C1QTNF6	C1RL	C13H1orf162	CARD6	CARMIL2	CCL7	CCL19	CD14	CD22	CD37	CD48	CD74	CD84	CD300A	CENPE	CFAP69	CGAS	CH25H	CLEC12A	CP	CSF2RA	CSTB	CXCR1	DCTPP1	DOK3	E2F2
cluster7	ACSM1	ADAM12	AHSG	BAD	BATF3	BLM	BMP10	BPGM	CCL22	CD79A	CDKN2B	CEMIP	CHN2	CHST15	CLDN7	CLU	CX3CL1	DEFB1	DPEP1	DUSP5	EEF1AKMT4	EFNA1	ENG	EPCAM	FABP5	FGF23	FMN1	GCNT1	GJB5	GJC3	GLP2R	GPR158	HCST	IGFBP3	IL4I1	IL20RB	IL34	INAVA	INHBB	JAML	KCNIP1	KLRG1	KYNU	LMO2	LOC100144340	LOC100328693	LOC100343557	LOC100343802	LOC100344156
cluster8	ADAM8	ATP6V0D2	AURKA	BHLHE40	C3	CCL2	CCNB1	CCR1	CCR2	CCR5	CD72	CD82	CD200R1	CD244	CDK1	CEP55	CHIT1	CKAP2L	CLEC5A	CMBL	COTL1	CRLF2	DCSTAMP	DDIT4	DHRS7	DTX2	ECEL1	ERCC6L	FAM210B	FGF11	FOSL1	FOXM1	GABRB2	GALM	GPRC5A	GUSB	HK3	HNMT	HSH2D	IGSF6	IKBKE	IL1RN	IL2RG	INPP5D	IQGAP3	IRAG2	ITGAL	ITGAX	JCHAIN
cluster9	B3GNT7	CCDC102A	CCN4	CEBPB	CHTF18	COL6A1	CPTP	DDX41	DNASE2	DUSP7	EIF4A1	EML3	GBA1	GMPPB	INHBA	LOC100340132	LOC100342104	LOC100342188	LOC108176625	LOC127487412	LOC127488313	LRRC59	LRRK1	METTL21A	MTHFD1L	MVP	NADK	PDGFA	PHETA1	PLOD1	PLOD3	POLA2	PYCR1	RAB31	RELL2	RIN1	RNASEH2C	S1PR2	SLC12A9	SLC43A3	SNAI1	SNX8	TMED3	TMEM183A	UBTD1	UCK1	VASH1	ZC3H12A
cluster10	CSF1	CSRNP1	CXCL8	LOC100348666	LOC100352669	NCAPD2	NHSL1	OASL	PLEK2	SERP1	SMAD7	TMEM229B	TSKU
cluster11	AIF1L	ANTXR2	ARHGAP12	BAG2	BGLAP	CNKSR3	CNN1	CREB5	DGKH	DHX35	DNAJB4	DST	EPHA10	ESAM	FAIM2	FAM181B	GDF11	GNG11	GPC3	GRB14	HCAR1	HEY2	HRH1	IGSF9B	ITGB8	ITIH2	ITIH5	KCNK15	KLHDC1	KLHL11	LEP	LIMA1	LOC100344965	LOC103348951	LOC108175785	LOC108177485	LOC108177633	LOC127482579	LOC127483424	LOC127484430	LOC127487418	MC5R	ME3	MYOCD	NFASC	NLGN3	PANK1	PDZD2	PHLDB2
cluster12	AASS	ADAMTS16	ALDH6A1	ARNT2	CACNB2	CDC42EP3	CNGA2	DUSP10	EFNA5	EPHX2	FHL2	FST	IGFBPL1	LOC100347176	LOC103350682	LOC103351270	LOC108177974	LOC127488889	LOC127489992	LOC127490046	LOC127493068	MPPED2	OSGEPL1	PHEX	PLPP3	RARB	RNF175	SNCG	SOWAHA	TNIK	VSTM2A	VXN
cluster13	ACAN	ANKH	AP1S1	BOK	CHST2	CLCF1	CLEC11A	CNDP2	EGR3	EMID1	ERP29	EXOSC5	FBLN7	FKBP11	FN1	GADD45G	GPX1	HAUS8	HFE	HHIPL1	HTR7	HTRA1	HYAL2	IGFBP7	IL11	INKA1	ITGA3	LOC100009168	LOC100357658	LOC100357943	LOC103349265	LOC103349392	LOC103351100	LOC127484662	NOS3	NR2C2AP	P4HA3	PLPP4	POLR3H	RHBDL2	SAT2	SELENOH	SERPINE2	SHANK1	SPAAR	TGFB1	TOGARAM2	TRADD	TSPO
cluster14	ALAS2	APOA4	APOD	C1QTNF9	CKMT1B	CPLX2	CRLF1	CXCL14	CXCR2	DLX3	FAM167B	GALNT15	GYPA	HBA	HBB2	IL3RA	KRT5	KRT17	KRT75	LOC100009286	LOC100338677	LOC100339459	LOC100339471	LOC100340199	LOC100340499	LOC100340903	LOC100341094	LOC100341142	LOC100341160	LOC100342098	LOC100342135	LOC100342677	LOC100342906	LOC100342978	LOC100343607	LOC100343809	LOC100345060	LOC100345097	LOC100346213	LOC100346272	LOC100346996	LOC100348203	LOC100348336	LOC100349285	LOC100349729	LOC100350232	LOC100351004	LOC100352118	LOC100352318
cluster15	ACTN4	ADAMTS8	AKT3	ALDH18A1	ANO10	ANXA4	ARHGEF17	ARL10	ASAP2	ASB13	ATL2	ATP1A2	BCL2	BDNF	BMP3	C1QL3	C1QTNF2	C14H3orf70	CAMKK1	CCN3	CDC42BPB	COL21A1	CRTC3	CSPG5	CSRP1	CSRP2	CTNNAL1	CYFIP2	DAB2IP	DACT1	DCBLD2	DDR2	DIAPH2	DLC1	DLG2	DLGAP4	DNAJB6	DNM1L	DSTN	DZIP1	EDA	EFHD1	EFR3A	EIF4EBP2	ERGIC1	ESD	FAM83D	FAM131B	FAM241A
cluster16	ABI3BP	ADAMTS19	ADO	AGRN	AIG1	ANKRD46	BBS2	BCL9	BRMS1L	C1H11orf54	CABIN1	CACNA1C	CALCOCO1	CAPRIN2	CASD1	CAV2	CBX5	CDC73	CELSR2	CLASP1	CNNM3	CNTN1	CORO1C	DBN1	DENND2B	DGCR2	DIP2C	DPP4	EPB41L4B	FBXO28	FBXO30	FILIP1L	GABBR1	GDNF	HIVEP1	HNRNPH1	IKZF4	INPP5F	IPO8	IRAG1	IRF2BPL	JPH2	KAT7	KCNA6	KDM6B	L3MBTL1	LGR4	LGR6	LHFPL6
cluster17	ADAP2	ANGPT4	APLN	ARL4C	BLVRA	BMAL2	CFAP97D2	DERA	DUSP13	GIMAP2	GRAMD1B	H1-2	H1-4	JPT1	KRT18	LOC100328948	MARCHF3	NDUFA5	NUP210	P2RY2	PALMD	RAB39A	RASGEF1A	RNF122	SCLT1	SEMA4D	SLC16A3	SRGN	ST3GAL5	STAC2	STEAP3	TICAM2	TMEM266	VEGFA	VNN1
cluster18	ALDH1A1	ALDH2	ANGPTL5	ANKRD45	CDKAL1	CETN2	CFAP68	CNBP	CORO2B	CTC1	DAAM1	DMAC2L	DNAJC27	EIF4E3	EPC1	GABARAPL1	GPLD1	HNRNPD	IFIT2	LOC100009143	LOC100343231	LOC100355760	LOC100357231	LOC100358060	LONRF3	LRRN4CL	MAMLD1	MBD6	MCCC2	MEIS2	MSH2	MTARC2	NADK2	OARD1	PBX1	PRKACB	RIOX1	RPF1	SF3A1	SFRP4	SMIM19	SRSF5	SUMO2	TACC2	TPCN3	VPS26A	ZC3H12C	ZFAND5	ZNF770
cluster19	AP2S1	DUSP4	LDHA	LOC100354980	LOC100357498	LOC103345766	LOC103351520	LOC127487747	PAPPA2	PODNL1	SPP1
cluster20	ABCC4	EPB41L3	GINS3	HPSE	LOC100341013	LOC100342321	LOC100344914	LOC100352572	LOC100357733	LOC103346581	LOC103347974	LOC103351231	LOC127487408	MYO1G	NFIL3	RNF128	RNF144B	SLC9A5	SSBP4	YEATS4
[truncated: 213 more columns]
