# Supplementary material for: Multiomics coupled with vibrational spectroscopy identify early mechanisms of experimental aortic valve stenosis
Source: Research Square preprint supplement (doi:10.21203/rs.3.rs-4330270/v1), 2024-05-02
Supplement: Supplementary file 16 [file da0041719135ce97affc538d.xlsx]

## Sheet: AmyPredFRL
Name	Class	Probability
sp|P01870|IGHG_RABIT Ig gamma chain C region OS=Oryctolagus cuniculus OX=9986 PE=1 SV=1	AMY	0.989
sp|Q9MZD2|FLNB_RABIT Filamin-B (Fragment) OS=Oryctolagus cuniculus OX=9986 GN=FLNB PE=1 SV=1	AMY	0.985
sp|A4L9I9|CRBA2_RABIT Beta-crystallin A2 OS=Oryctolagus cuniculus OX=9986 GN=CRYBA2 PE=2 SV=1	AMY	0.982
sp|P17165|APOB_RABIT Apolipoprotein B (Fragment) OS=Oryctolagus cuniculus OX=9986 GN=APOB PE=1 SV=1	AMY	0.979
sp|P23108|IGJ_RABIT Immunoglobulin J chain OS=Oryctolagus cuniculus OX=9986 GN=JCHAIN PE=1 SV=1	AMY	0.974
sp|P25915|FRIH_RABIT Ferritin heavy chain (Fragment) OS=Oryctolagus cuniculus OX=9986 GN=FTH1 PE=2 SV=1	AMY	0.970
sp|P01685|KV04_RABIT Ig kappa chain V region 4135 OS=Oryctolagus cuniculus OX=9986 PE=1 SV=1	AMY	0.952
sp|P01694|KV13_RABIT Ig kappa chain V region 3547 OS=Oryctolagus cuniculus OX=9986 PE=1 SV=1	AMY	0.943
sp|P01840|KAC4_RABIT Ig kappa-b4 chain C region OS=Oryctolagus cuniculus OX=9986 PE=1 SV=1	AMY	0.941
sp|P37153|APOD_RABIT Apolipoprotein D OS=Oryctolagus cuniculus OX=9986 GN=APOD PE=2 SV=1	AMY	0.934
sp|P01686|KV05_RABIT Ig kappa chain V region BS-1 OS=Oryctolagus cuniculus OX=9986 PE=1 SV=1	AMY	0.929
sp|P01885|B2MG_RABIT Beta-2-microglobulin OS=Oryctolagus cuniculus OX=9986 GN=B2M PE=1 SV=1	AMY	0.912
sp|P14943|EST2_RABIT Cocaine esterase OS=Oryctolagus cuniculus OX=9986 GN=CES2 PE=1 SV=2	AMY	0.885
sp|P09451|FRIL_RABIT Ferritin light chain OS=Oryctolagus cuniculus OX=9986 GN=FTL PE=2 SV=2	AMY	0.874
sp|P62943|FKB1A_RABIT Peptidyl-prolyl cis-trans isomerase FKBP1A OS=Oryctolagus cuniculus OX=9986 GN=FKBP1A PE=1 SV=2	AMY	0.865
sp|P23775|CBG_RABIT Corticosteroid-binding globulin OS=Oryctolagus cuniculus OX=9986 GN=SERPINA6 PE=1 SV=1	AMY	0.854
sp|Q9TTC6|PPIA_RABIT Peptidyl-prolyl cis-trans isomerase A OS=Oryctolagus cuniculus OX=9986 GN=PPIA PE=2 SV=3	AMY	0.829
sp|P02251|H13_RABIT Histone H1.3 OS=Oryctolagus cuniculus OX=9986 PE=1 SV=1	AMY	0.816
sp|P14478|FIBB_RABIT Fibrinogen beta chain (Fragment) OS=Oryctolagus cuniculus OX=9986 GN=FGB PE=1 SV=2	AMY	0.770
sp|P47845|LEG3_RABIT Galectin-3 OS=Oryctolagus cuniculus OX=9986 GN=LGALS3 PE=2 SV=2	AMY	0.705
sp|Q28640|HRG_RABIT Histidine-rich glycoprotein (Fragment) OS=Oryctolagus cuniculus OX=9986 GN=HRG PE=1 SV=1	AMY	0.683
sp|P36233|SPRC_RABIT SPARC (Fragment) OS=Oryctolagus cuniculus OX=9986 GN=SPARC PE=1 SV=2	AMY	0.661
sp|O97862|CYTC_RABIT Cystatin-C OS=Oryctolagus cuniculus OX=9986 GN=CST3 PE=2 SV=1	AMY	0.645
sp|Q8MK67|PEBP1_RABIT Phosphatidylethanolamine-binding protein 1 OS=Oryctolagus cuniculus OX=9986 GN=PEBP1 PE=2 SV=1	AMY	0.636
sp|P47841|MGP_RABIT Matrix Gla protein OS=Oryctolagus cuniculus OX=9986 GN=MGP PE=3 SV=1	AMY	0.612
sp|P33477|ANX11_RABIT Annexin A11 OS=Oryctolagus cuniculus OX=9986 GN=ANXA11 PE=1 SV=1	AMY	0.579
sp|Q28618|YBOX1_RABIT Y-box-binding protein 1 OS=Oryctolagus cuniculus OX=9986 GN=YBX1 PE=1 SV=3	AMY	0.568
sp|P80191|FETUA_RABIT Alpha-2-HS-glycoprotein (Fragment) OS=Oryctolagus cuniculus OX=9986 GN=AHSG PE=1 SV=2	AMY	0.533
sp|Q9N2G5|CLIC6_RABIT Chloride intracellular channel protein 6 OS=Oryctolagus cuniculus OX=9986 GN=CLIC6 PE=1 SV=1	AMY	0.526
sp|O19045|FA10_RABIT Coagulation factor X OS=Oryctolagus cuniculus OX=9986 GN=F10 PE=2 SV=1	AMY	0.507
sp|P13280|GLYG_RABIT Glycogenin-1 OS=Oryctolagus cuniculus OX=9986 GN=GYG1 PE=1 SV=3	non-AMY	0.445
sp|Q28902|COCA1_RABIT Collagen alpha-1(XII) chain (Fragment) OS=Oryctolagus cuniculus OX=9986 GN=COL12A1 PE=2 SV=1	non-AMY	0.437
sp|P06912|RET4_RABIT Retinol-binding protein 4 OS=Oryctolagus cuniculus OX=9986 GN=RBP4 PE=1 SV=2	non-AMY	0.423
sp|P53815|SSRA_RABIT Translocon-associated protein subunit alpha OS=Oryctolagus cuniculus OX=9986 GN=SSR1 PE=2 SV=1	non-AMY	0.405
sp|Q09YN8|TES_RABIT Testin OS=Oryctolagus cuniculus OX=9986 GN=TES PE=3 SV=1	non-AMY	0.289
sp|P22458|VTNC_RABIT Vitronectin OS=Oryctolagus cuniculus OX=9986 GN=VTN PE=1 SV=1	non-AMY	0.286
sp|Q28680|CD14_RABIT Monocyte differentiation antigen CD14 OS=Oryctolagus cuniculus OX=9986 GN=CD14 PE=2 SV=1	non-AMY	0.265
sp|P20614|TIMP1_RABIT Metalloproteinase inhibitor 1 OS=Oryctolagus cuniculus OX=9986 GN=TIMP1 PE=2 SV=2	non-AMY	0.258
sp|P26432|SL9A3_RABIT Sodium/hydrogen exchanger 3 OS=Oryctolagus cuniculus OX=9986 GN=SLC9A3 PE=1 SV=1	non-AMY	0.238
sp|P47776|HEP2_RABIT Heparin cofactor 2 OS=Oryctolagus cuniculus OX=9986 GN=SERPIND1 PE=2 SV=1	non-AMY	0.225
sp|P02602|MYL1_RABIT Myosin light chain 1/3, skeletal muscle isoform OS=Oryctolagus cuniculus OX=9986 GN=MYL1 PE=1 SV=3	non-AMY	0.210
sp|Q9XSC5|CLUS_RABIT Clusterin OS=Oryctolagus cuniculus OX=9986 GN=CLU PE=2 SV=1	non-AMY	0.204
sp|Q28679|CO8G_RABIT Complement component C8 gamma chain OS=Oryctolagus cuniculus OX=9986 GN=C8G PE=2 SV=1	non-AMY	0.204
sp|P40144|ADCY5_RABIT Adenylate cyclase type 5 OS=Oryctolagus cuniculus OX=9986 GN=ADCY5 PE=1 SV=1	non-AMY	0.142
sp|P53789|VTDB_RABIT Vitamin D-binding protein OS=Oryctolagus cuniculus OX=9986 GN=GC PE=2 SV=1	non-AMY	0.142
sp|P00567|KCRB_RABIT Creatine kinase B-type OS=Oryctolagus cuniculus OX=9986 GN=CKB PE=2 SV=1	non-AMY	0.141
sp|P12247|CO3_RABIT Complement C3 alpha chain (Fragment) OS=Oryctolagus cuniculus OX=9986 GN=C3 PE=2 SV=1	non-AMY	0.133
sp|O97529|ANXA8_RABIT Annexin A8 OS=Oryctolagus cuniculus OX=9986 GN=ANXA8 PE=2 SV=1	non-AMY	0.126
sp|P50757|MMP2_RABIT 72 kDa type IV collagenase OS=Oryctolagus cuniculus OX=9986 GN=MMP2 PE=2 SV=1	non-AMY	0.124
sp|Q05555|CP2AA_RABIT Cytochrome P450 2A10 OS=Oryctolagus cuniculus OX=9986 GN=CYP2A10 PE=1 SV=1	non-AMY	0.119
sp|Q9GLC3|AT1B3_RABIT Sodium/potassium-transporting ATPase subunit beta-3 OS=Oryctolagus cuniculus OX=9986 GN=ATP1B3 PE=2 SV=1	non-AMY	0.118
sp|P62497|ERF1_RABIT Eukaryotic peptide chain release factor subunit 1 OS=Oryctolagus cuniculus OX=9986 GN=ETF1 PE=1 SV=3	non-AMY	0.112
sp|Q28623|SLMAP_RABIT Sarcolemmal membrane-associated protein OS=Oryctolagus cuniculus OX=9986 GN=SLMAP PE=1 SV=2	non-AMY	0.111
sp|P18287|APOE_RABIT Apolipoprotein E OS=Oryctolagus cuniculus OX=9986 GN=APOE PE=2 SV=1	non-AMY	0.105
sp|Q8MJF1|MIME_RABIT Mimecan OS=Oryctolagus cuniculus OX=9986 GN=OGN PE=1 SV=1	non-AMY	0.100
sp|Q28677|S12A4_RABIT Solute carrier family 12 member 4 OS=Oryctolagus cuniculus OX=9986 GN=SLC12A4 PE=1 SV=1	non-AMY	0.099
sp|P25947|VT5_RFVKA Ankyrin repeat protein T5 OS=Rabbit fibroma virus (strain Kasza) OX=10272 GN=T5 PE=4 SV=2	non-AMY	0.094
sp|O77676|KGP1_RABIT cGMP-dependent protein kinase 1 OS=Oryctolagus cuniculus OX=9986 GN=PRKG1 PE=1 SV=3	non-AMY	0.093
sp|P12345|AATM_RABIT Aspartate aminotransferase, mitochondrial OS=Oryctolagus cuniculus OX=9986 GN=GOT2 PE=1 SV=2	non-AMY	0.093
sp|P13806|CA2D1_RABIT Voltage-dependent calcium channel subunit alpha-2/delta-1 OS=Oryctolagus cuniculus OX=9986 GN=CACNA2D1 PE=1 SV=1	non-AMY	0.092
sp|P19134|TRFE_RABIT Serotransferrin OS=Oryctolagus cuniculus OX=9986 GN=TF PE=1 SV=4	non-AMY	0.091
sp|P00489|PYGM_RABIT Glycogen phosphorylase, muscle form OS=Oryctolagus cuniculus OX=9986 GN=PYGM PE=1 SV=3	non-AMY	0.090
sp|P21927|CHLE_RABIT Cholinesterase OS=Oryctolagus cuniculus OX=9986 GN=BCHE PE=2 SV=1	non-AMY	0.090
sp|P29294|MYLK_RABIT Myosin light chain kinase, smooth muscle OS=Oryctolagus cuniculus OX=9986 GN=MYLK PE=1 SV=2	non-AMY	0.089
sp|Q95209|SORL_RABIT Sortilin-related receptor OS=Oryctolagus cuniculus OX=9986 GN=SORL1 PE=1 SV=1	non-AMY	0.089
sp|Q28749|FINC_RABIT Fibronectin (Fragment) OS=Oryctolagus cuniculus OX=9986 GN=FN1 PE=2 SV=2	non-AMY	0.088
sp|P10829|KPCG_RABIT Protein kinase C gamma type OS=Oryctolagus cuniculus OX=9986 GN=PRKCG PE=1 SV=1	non-AMY	0.088
sp|P41975|SODE_RABIT Extracellular superoxide dismutase [Cu-Zn] OS=Oryctolagus cuniculus OX=9986 GN=SOD3 PE=2 SV=2	non-AMY	0.087
sp|P04191|AT2A1_RABIT Sarcoplasmic/endoplasmic reticulum calcium ATPase 1 OS=Oryctolagus cuniculus OX=9986 GN=ATP2A1 PE=1 SV=1	non-AMY	0.087
sp|Q28685|DAG1_RABIT Dystroglycan 1 OS=Oryctolagus cuniculus OX=9986 GN=DAG1 PE=1 SV=1	non-AMY	0.086
sp|P52786|CP2J1_RABIT Cytochrome P450 2J1 OS=Oryctolagus cuniculus OX=9986 GN=CYP2J1 PE=1 SV=2	non-AMY	0.085
sp|O77708|KCC2D_RABIT Calcium/calmodulin-dependent protein kinase type II subunit delta OS=Oryctolagus cuniculus OX=9986 GN=CAMK2D PE=2 SV=2	non-AMY	0.083
sp|Q28689|MRP2_RABIT ATP-binding cassette sub-family C member 2 OS=Oryctolagus cuniculus OX=9986 GN=ABCC2 PE=1 SV=1	non-AMY	0.083
sp|P47859|PFKAP_RABIT ATP-dependent 6-phosphofructokinase, platelet type OS=Oryctolagus cuniculus OX=9986 GN=PFKP PE=1 SV=1	non-AMY	0.083
sp|O19132|NOS1_RABIT Nitric oxide synthase 1 OS=Oryctolagus cuniculus OX=9986 GN=NOS1 PE=2 SV=1	non-AMY	0.083
sp|Q6IVG4|ACAP2_RABIT Arf-GAP with coiled-coil, ANK repeat and PH domain-containing protein 2 OS=Oryctolagus cuniculus OX=9986 GN=ACAP2 PE=2 SV=1	non-AMY	0.082
sp|P80508|PE2R_RABIT Prostaglandin-E(2) 9-reductase OS=Oryctolagus cuniculus OX=9986 GN=AKR1C5 PE=1 SV=1	non-AMY	0.077
sp|Q95215|BGH3_RABIT Transforming growth factor-beta-induced protein ig-h3 OS=Oryctolagus cuniculus OX=9986 GN=TGFBI PE=2 SV=2	non-AMY	0.076
sp|Q9GLY5|ITIH3_RABIT Inter-alpha-trypsin inhibitor heavy chain H3 OS=Oryctolagus cuniculus OX=9986 GN=ITIH3 PE=2 SV=1	non-AMY	0.075
sp|P30957|RYR2_RABIT Ryanodine receptor 2 OS=Oryctolagus cuniculus OX=9986 GN=RYR2 PE=1 SV=3	non-AMY	0.074
sp|P19517|CACB1_RABIT Voltage-dependent L-type calcium channel subunit beta-1 OS=Oryctolagus cuniculus OX=9986 GN=CACNB1 PE=1 SV=1	non-AMY	0.073
sp|P35748|MYH11_RABIT Myosin-11 OS=Oryctolagus cuniculus OX=9986 GN=MYH11 PE=2 SV=2	non-AMY	0.068
sp|Q29512|HMDH_RABIT 3-hydroxy-3-methylglutaryl-coenzyme A reductase OS=Oryctolagus cuniculus OX=9986 GN=HMGCR PE=3 SV=1	non-AMY	0.068
sp|P62143|PP1B_RABIT Serine/threonine-protein phosphatase PP1-beta catalytic subunit OS=Oryctolagus cuniculus OX=9986 GN=PPP1CB PE=1 SV=3	non-AMY	0.064
sp|P21195|PDIA1_RABIT Protein disulfide-isomerase OS=Oryctolagus cuniculus OX=9986 GN=P4HB PE=2 SV=1	non-AMY	0.064
sp|P27170|PON1_RABIT Serum paraoxonase/arylesterase 1 OS=Oryctolagus cuniculus OX=9986 GN=PON1 PE=1 SV=2	non-AMY	0.063
sp|Q28641|MYH4_RABIT Myosin-4 OS=Oryctolagus cuniculus OX=9986 GN=MYH4 PE=1 SV=2	non-AMY	0.062
sp|O77507|RAD51_RABIT DNA repair protein RAD51 homolog 1 OS=Oryctolagus cuniculus OX=9986 GN=RAD51 PE=2 SV=1	non-AMY	0.060
sp|P98137|CO8B_RABIT Complement component C8 beta chain OS=Oryctolagus cuniculus OX=9986 GN=C8B PE=1 SV=1	non-AMY	0.059
sp|I1VZH0|RN207_RABIT RING finger protein 207 OS=Oryctolagus cuniculus OX=9986 GN=RNF207 PE=2 SV=1	non-AMY	0.056
sp|P62740|ACTA_RABIT Actin, aortic smooth muscle OS=Oryctolagus cuniculus OX=9986 GN=ACTA2 PE=2 SV=1	non-AMY	0.051
sp|O97755|VATD_RABIT V-type proton ATPase subunit D OS=Oryctolagus cuniculus OX=9986 GN=ATP6V1D PE=2 SV=1	non-AMY	0.051
sp|Q09YN4|CAZA2_RABIT F-actin-capping protein subunit alpha-2 OS=Oryctolagus cuniculus OX=9986 GN=CAPZA2 PE=3 SV=3	non-AMY	0.049
sp|Q28709|CD63_RABIT CD63 antigen OS=Oryctolagus cuniculus OX=9986 GN=CD63 PE=2 SV=2	non-AMY	0.015
