# Supplementary material for: Multiomics coupled with vibrational spectroscopy identify early mechanisms of experimental aortic valve stenosis
Source: Research Square preprint supplement (doi:10.21203/rs.3.rs-4330270/v1), 2024-05-02
Supplement: Supplementary file 17 [file f2abb55edd68b0071b3837d4.xlsx]

## Sheet: All proteins
Accession	Description	Symbol	C38.xlsx	C39.xlsx	C40.xlsx	C41.xlsx	C42.xlsx	C43.xlsx	E28.xlsx	E30.xlsx	E31.xlsx	E32.xlsx	E33.xlsx	Average_Control	Average_Case	St_Dv_Control	St_Dv_Case	MW_p_CasevsControl	BH_p_CasevsControl	Ratio_CasevsControl	Log2_Ratio.CasevsControl
P01885	Beta-2-microglobulin OS=Oryctolagus cuniculus OX=9986 GN=B2M PE=1 SV=1 - [B2MG_RABIT]	B2M	0	0	0	0	0	0	234.028	253.68	55.7116	43.8206	214.366	0	160.321	0	101.962	0.00389049	0.0619913	only in case	only in case
P17165	Apolipoprotein B (Fragment) OS=Oryctolagus cuniculus OX=9986 GN=APOB PE=1 SV=1 - [APOB_RABIT]	APOB	0	0	0	0	0	0	105.756	105.202	202.724	125.602	220.129	0	151.883	0	55.317	0.00389049	0.0619913	only in case	only in case
P37153	Apolipoprotein D OS=Oryctolagus cuniculus OX=9986 GN=APOD PE=2 SV=1 - [APOD_RABIT]	APOD	0	0	0	0	0	0	186.398	239.02	761.113	278.667	314.185	0	355.877	0	231.46	0.00389049	0.0619913	only in case	only in case
Q28618	Y-box-binding protein 1 OS=Oryctolagus cuniculus OX=9986 GN=YBX1 PE=1 SV=3 - [YBOX1_RABIT]	YBX1	0	0	0	0	0	0	30.5625	16.8996	41.1373	134.423	59.4698	0	56.4985	0	46.2543	0.00389049	0.0619913	only in case	only in case
Q29512	3-hydroxy-3-methylglutaryl-coenzyme A reductase OS=Oryctolagus cuniculus OX=9986 GN=HMGCR PE=3 SV=1 - [HMDH_RABIT]	HMGCR	0	0	0	0	0	0	9.93192	183.712	95.0089	238.786	42.6145	0	114.011	0	95.8098	0.00389049	0.0619913	only in case	only in case
O77676	cGMP-dependent protein kinase 1 OS=Oryctolagus cuniculus OX=9986 GN=PRKG1 PE=1 SV=3 - [KGP1_RABIT]	PRKG1	308.483	160.946	224.958	289.011	403.738	165.808	96.563	99.049	57.066	96.2295	88.77	258.824	87.5355	93.548	17.4611	0.004329	0.0619913	0.338205	-1.56403
P00567	Creatine kinase B-type OS=Oryctolagus cuniculus OX=9986 GN=CKB PE=2 SV=1 - [KCRB_RABIT]	CKB	2478.39	3088.68	3030.11	4429.72	4629.12	2257.73	1387.26	1540.06	1047.23	1497.07	1834.13	3318.96	1461.15	991.92	284.35	0.004329	0.0619913	0.440243	-1.18363
P01685	Ig kappa chain V region 4135 OS=Oryctolagus cuniculus OX=9986 PE=1 SV=1 - [KV04_RABIT]	Not available	564.731	9782.31	1071.91	470.508	1161.85	979.184	65322.5	134336	63676.7	132756	140282	2338.42	107275	3657.39	39153.1	0.004329	0.0619913	45.8749	5.51963
P01870	Ig gamma chain C region OS=Oryctolagus cuniculus OX=9986 PE=1 SV=1 - [IGHG_RABIT]	Not available	3929.97	5671.38	7044.68	3820.67	8593.59	6886.19	14456.5	17697.6	17005	12115.8	10673.9	5991.08	14389.8	1883.9	3031.67	0.004329	0.0619913	2.40186	1.26415
P13806	Voltage-dependent calcium channel subunit alpha-2/delta-1 OS=Oryctolagus cuniculus OX=9986 GN=CACNA2D1 PE=1 SV=1 - [CA2D1_RABIT]	CACNA2D1	1080.41	963.687	1375.05	226.713	214.956	122.501	114.854	109.566	60.4557	110.397	121.249	663.887	103.304	539.424	24.3975	0.004329	0.0619913	0.155605	-2.68404
P14943	Cocaine esterase OS=Oryctolagus cuniculus OX=9986 GN=CES2 PE=1 SV=2 - [EST2_RABIT]	CES2	34.2533	59.9431	15.3742	51.5062	32.6374	30.7309	64.8243	116.765	80.6729	74.0054	64.6754	37.4075	80.1886	15.9334	21.5233	0.004329	0.0619913	2.14365	1.10007
P18287	Apolipoprotein E OS=Oryctolagus cuniculus OX=9986 GN=APOE PE=2 SV=1 - [APOE_RABIT]	APOE	70.0279	100.4	0	28.676	132.923	28.8116	576.606	541.207	1481.22	470.76	726.419	60.1398	759.243	50.2082	414.262	0.004329	0.0619913	12.6246	3.65817
P19134	Serotransferrin OS=Oryctolagus cuniculus OX=9986 GN=TF PE=1 SV=4 - [TRFE_RABIT]	TF	1085.61	2302.04	2027.7	1332.37	2458.74	1367.85	4463.63	7340.95	6292.19	6257.07	5684.57	1762.38	6007.68	573.608	1049.91	0.004329	0.0619913	3.40884	1.76928
P22458	Vitronectin OS=Oryctolagus cuniculus OX=9986 GN=VTN PE=1 SV=1 - [VTNC_RABIT]	VTN	594.658	345.579	419.701	605.043	309.946	596.793	968.749	796.169	1764.2	2497.46	1283.88	478.62	1462.09	136.407	685.903	0.004329	0.0619913	3.05481	1.61108
P29294	Myosin light chain kinase, smooth muscle OS=Oryctolagus cuniculus OX=9986 GN=MYLK PE=1 SV=2 - [MYLK_RABIT]	MYLK	1574.87	1045.77	2112.99	2062.96	2726.85	1493.3	899.258	855.34	214.355	209.133	339	1836.12	503.417	588.549	345.591	0.004329	0.0619913	0.274174	-1.86684
P47776	Heparin cofactor 2 OS=Oryctolagus cuniculus OX=9986 GN=SERPIND1 PE=2 SV=1 - [HEP2_RABIT]	SERPIND1	105.201	134.647	142.007	89.9983	205.077	125.416	212.109	240.082	272.951	270.976	274.77	133.724	254.178	39.8877	27.5098	0.004329	0.0619913	1.90076	0.926574
P47845	Galectin-3 OS=Oryctolagus cuniculus OX=9986 GN=LGALS3 PE=2 SV=2 - [LEG3_RABIT]	LGALS3	95.5647	84.4431	134.631	169.325	195.678	87.4392	374.765	311.371	259.835	222.629	628.116	127.847	359.343	46.7467	160.757	0.004329	0.0619913	2.81074	1.49095
P47859	ATP-dependent 6-phosphofructokinase, platelet type OS=Oryctolagus cuniculus OX=9986 GN=PFKP PE=1 SV=1 - [PFKAP_RABIT]	PFKP	318.686	317.814	502.077	428.566	475.816	305.136	204.508	238.597	128.037	204.196	175.002	391.349	190.068	88.2048	41.3458	0.004329	0.0619913	0.485674	-1.04194
P53815	Translocon-associated protein subunit alpha OS=Oryctolagus cuniculus OX=9986 GN=SSR1 PE=2 SV=1 - [SSRA_RABIT]	SSR1	10.5191	8.15129	39.1438	26.3098	0	8.48212	48.7284	79.3649	72.7714	41.5519	117.877	15.4344	72.0588	14.4511	30.1172	0.004329	0.0619913	4.66872	2.22303
P62143	Serine/threonine-protein phosphatase PP1-beta catalytic subunit OS=Oryctolagus cuniculus OX=9986 GN=PPP1CB PE=1 SV=3 - [PP1B_RABIT]	PPP1CB	274.351	203.711	296.591	392.524	426.711	275.161	109.721	123.154	121.616	195.759	128.273	311.508	135.705	82.9213	34.2521	0.004329	0.0619913	0.435638	-1.1988
P80191	Alpha-2-HS-glycoprotein (Fragment) OS=Oryctolagus cuniculus OX=9986 GN=AHSG PE=1 SV=2 - [FETUA_RABIT]	AHSG	0	424.789	316.749	142.87	834.933	261.775	1513.59	838.47	1905	3548.74	3263.81	330.186	2213.92	287.294	1157.77	0.004329	0.0619913	6.70507	2.74525
Q28749	Fibronectin (Fragment) OS=Oryctolagus cuniculus OX=9986 GN=FN1 PE=2 SV=2 - [FINC_RABIT]	FN1	868.005	590.147	1458.07	1022.35	1355.05	1802.06	2656.71	4812.74	4494.34	4680.85	7030.49	1182.61	4735.03	439.319	1553.66	0.004329	0.0619913	4.00386	2.00139
Q9N2G5	Chloride intracellular channel protein 6 OS=Oryctolagus cuniculus OX=9986 GN=CLIC6 PE=1 SV=1 - [CLIC6_RABIT]	CLIC6	208.191	167.094	233.509	293.618	229.604	184.203	94.7105	132.048	88.2256	120.894	110.099	219.37	109.195	44.5238	18.0933	0.004329	0.0619913	0.497769	-1.00645
Q9TTC6	Peptidyl-prolyl cis-trans isomerase A OS=Oryctolagus cuniculus OX=9986 GN=PPIA PE=2 SV=3 - [PPIA_RABIT]	PPIA	4148.9	4803.64	8028.47	6895.9	11376.4	3703.24	2537.23	3436.71	2471.18	2371.58	3474.41	6492.76	2858.22	2915.44	548.633	0.004329	0.0619913	0.440217	-1.18371
Q9XSC5	Clusterin OS=Oryctolagus cuniculus OX=9986 GN=CLU PE=2 SV=1 - [CLUS_RABIT]	CLU	60.6916	0	46.1604	7.87617	96.7424	32.1383	141.685	106.408	280.358	416.537	162.055	40.6015	221.408	35.7138	127.136	0.004329	0.0619913	5.45321	2.44711
O19045	Coagulation factor X OS=Oryctolagus cuniculus OX=9986 GN=F10 PE=2 SV=1 - [FA10_RABIT]	F10	0	17.6491	0	0	0	0	85.3536	49.8741	117.411	172.016	109.262	2.94152	106.783	7.20522	44.923	0.00549411	0.0678239	36.3021	5.18198
P23775	Corticosteroid-binding globulin OS=Oryctolagus cuniculus OX=9986 GN=SERPINA6 PE=1 SV=1 - [CBG_RABIT]	SERPINA6	55.9904	107.896	139.172	96.9325	113.882	36.7215	0	0	0	0	0	91.7657	0	38.2964	0	0.00549411	0.0678239	only in control	only in control
Q28680	Monocyte differentiation antigen CD14 OS=Oryctolagus cuniculus OX=9986 GN=CD14 PE=2 SV=1 - [CD14_RABIT]	CD14	0	0	0	0	11.3329	0	59.8483	69.3449	87.7131	61.5962	92.0902	1.88882	74.1185	4.62664	14.9251	0.00549411	0.0678239	39.2407	5.29428
Q28902	Collagen alpha-1(XII) chain (Fragment) OS=Oryctolagus cuniculus OX=9986 GN=COL12A1 PE=2 SV=1 - [COCA1_RABIT]	COL12A1	4.67207	0	0	0	0	0	18.526	46.3638	350.592	55.8452	81.3537	0.778678	110.536	1.90736	136.064	0.00549411	0.0678239	141.954	7.14928
O77507	DNA repair protein RAD51 homolog 1 OS=Oryctolagus cuniculus OX=9986 GN=RAD51 PE=2 SV=1 - [RAD51_RABIT]	RAD51	109.274	0	0	80.1395	0	0	177.22	179.798	318.154	216.122	248.065	31.5689	227.872	49.7666	58.2523	0.00673595	0.072083	7.21822	2.85164
P47841	Matrix Gla protein OS=Oryctolagus cuniculus OX=9986 GN=MGP PE=3 SV=1 - [MGP_RABIT]	MGP	0	0	66.0463	0	0	66.4422	114.764	252.686	203.882	185.471	143.064	22.0814	179.973	34.2086	53.6273	0.00673595	0.072083	8.15044	3.02688
O97862	Cystatin-C OS=Oryctolagus cuniculus OX=9986 GN=CST3 PE=2 SV=1 - [CYTC_RABIT]	CST3	62.9166	0	111.534	48.4354	0	0	172.924	183.182	126.785	148.477	168.511	37.1476	159.976	45.7484	22.4328	0.00754623	0.072083	4.3065	2.10651
Q28677	Solute carrier family 12 member 4 OS=Oryctolagus cuniculus OX=9986 GN=SLC12A4 PE=1 SV=1 - [S12A4_RABIT]	SLC12A4	0	34.2621	0	126.411	114.686	0	141.096	137.843	238.649	178.71	209.797	45.8931	181.219	59.4464	43.6249	0.00754623	0.072083	3.94872	1.98138
Q9GLY5	Inter-alpha-trypsin inhibitor heavy chain H3 OS=Oryctolagus cuniculus OX=9986 GN=ITIH3 PE=2 SV=1 - [ITIH3_RABIT]	ITIH3	0	40.8093	36.8815	0	0	20.1163	70.5045	88.6771	195.907	909.351	83.6082	16.3012	269.61	19.1621	361.136	0.00754623	0.072083	16.5393	4.04782
O77708	Calcium/calmodulin-dependent protein kinase type II subunit delta OS=Oryctolagus cuniculus OX=9986 GN=CAMK2D PE=2 SV=2 - [KCC2D_RABIT]	CAMK2D	141.831	54.6684	140.453	112.649	253.176	122.596	52.3392	81.5148	0	24.4643	46.8414	137.562	41.0319	64.9755	30.6536	0.00865801	0.072083	0.298279	-1.74526
P00489	Glycogen phosphorylase, muscle form OS=Oryctolagus cuniculus OX=9986 GN=PYGM PE=1 SV=3 - [PYGM_RABIT]	PYGM	714.172	448.171	607.924	624.458	1022.01	521.34	509.957	342.928	206.523	321.909	186.59	656.345	313.582	200.985	129.501	0.00865801	0.072083	0.477769	-1.06561
P12247	Complement C3 alpha chain (Fragment) OS=Oryctolagus cuniculus OX=9986 GN=C3 PE=2 SV=1 - [CO3_RABIT]	C3	0	165.642	135.89	35.9609	121.951	53.0945	231.533	151.226	291.008	314.768	308.394	85.423	259.386	64.9692	68.8175	0.00865801	0.072083	3.03648	1.6024
P27170	Serum paraoxonase/arylesterase 1 OS=Oryctolagus cuniculus OX=9986 GN=PON1 PE=1 SV=2 - [PON1_RABIT]	PON1	185.009	328.729	166.501	133.359	276.506	242.449	337.772	387.841	659.018	392.187	315.575	222.092	418.479	73.6015	138.376	0.00865801	0.072083	1.88426	0.913997
P35748	Myosin-11 OS=Oryctolagus cuniculus OX=9986 GN=MYH11 PE=2 SV=2 - [MYH11_RABIT]	MYH11	16615.2	9370.56	20465.4	13430.9	17633.6	16278.4	11879.2	9091.63	3010.05	5628.04	6450.84	15632.3	7211.96	3815.82	3393.4	0.00865801	0.072083	0.461348	-1.11607
P62740	Actin, aortic smooth muscle OS=Oryctolagus cuniculus OX=9986 GN=ACTA2 PE=2 SV=1 - [ACTA_RABIT]	ACTA2	187964	117990	178824	134748	140134	145062	123872	112222	55801.9	109362	82840	150787	96819.8	27008.6	27405.7	0.00865801	0.072083	0.642096	-0.639139
P80508	Prostaglandin-E(2) 9-reductase OS=Oryctolagus cuniculus OX=9986 GN=AKR1C5 PE=1 SV=1 - [PE2R_RABIT]	AKR1C5	915.708	1113.89	994.231	1481.03	2863.98	669.535	543.277	746.161	460.549	476.984	574.977	1339.73	560.39	792.797	113.953	0.00865801	0.072083	0.418286	-1.25744
Q09YN8	Testin OS=Oryctolagus cuniculus OX=9986 GN=TES PE=3 SV=1 - [TES_RABIT]	TES	750.247	349.361	504.461	694.895	831.497	415.04	294.176	370.151	20.2181	198.417	184.894	590.917	213.571	195.363	131.769	0.00865801	0.072083	0.361424	-1.46824
Q28640	Histidine-rich glycoprotein (Fragment) OS=Oryctolagus cuniculus OX=9986 GN=HRG PE=1 SV=1 - [HRG_RABIT]	HRG	600.133	1729.28	1191.32	869.11	2606.03	693.86	3942.97	3148.6	2526.77	3814.67	3680.96	1281.62	3422.79	767.161	584.988	0.00865801	0.072083	2.67067	1.4172
P62497	Eukaryotic peptide chain release factor subunit 1 OS=Oryctolagus cuniculus OX=9986 GN=ETF1 PE=1 SV=3 - [ERF1_RABIT]	ETF1	0	0	0	0	28.8904	0	45.6002	42.4193	28.5363	39.1469	42.0528	4.81507	39.5511	11.7945	6.5682	0.0097364	0.0774585	8.21403	3.03809
Q9GLC3	Sodium/potassium-transporting ATPase subunit beta-3 OS=Oryctolagus cuniculus OX=9986 GN=ATP1B3 PE=2 SV=1 - [AT1B3_RABIT]	ATP1B3	0	0	0	33.974	0	0	28.3099	62.106	89.0157	62.9091	133.137	5.66233	75.0956	13.8698	38.9511	0.0097364	0.0774585	13.2623	3.72926
O97529	Annexin A8 OS=Oryctolagus cuniculus OX=9986 GN=ANXA8 PE=2 SV=1 - [ANXA8_RABIT]	ANXA8	150.35	0	0	0	75.8466	0	211.96	163.052	90.5852	185.85	298.779	37.6994	190.045	62.9766	75.7328	0.011644	0.0886926	5.04107	2.33373
P06912	Retinol-binding protein 4 OS=Oryctolagus cuniculus OX=9986 GN=RBP4 PE=1 SV=2 - [RET4_RABIT]	RBP4	0	27.2172	133.888	0	0	0	138.063	70.2829	152.764	224.823	152.815	26.8508	147.75	53.5555	54.9683	0.011644	0.0886926	5.50261	2.46012
O97755	V-type proton ATPase subunit D OS=Oryctolagus cuniculus OX=9986 GN=ATP6V1D PE=2 SV=1 - [VATD_RABIT]	ATP6V1D	0	0	0	0	0	0	0	351.555	452.137	570.906	768.839	0	428.687	0	285.57	0.0150243	0.101625	only in case	only in case
P02251	Histone H1.3 OS=Oryctolagus cuniculus OX=9986 PE=1 SV=1 - [H13_RABIT]	Not available	0	0	0	0	0	0	60.9157	0	81.2653	44.351	145.842	0	66.4747	0	53.519	0.0150243	0.101625	only in case	only in case
P98137	Complement component C8 beta chain OS=Oryctolagus cuniculus OX=9986 GN=C8B PE=1 SV=1 - [CO8B_RABIT]	C8B	0	0	0	0	0	0	0	54.0216	68.738	75.2009	77.1258	0	55.0172	0	32.0637	0.0150243	0.101625	only in case	only in case
P21927	Cholinesterase OS=Oryctolagus cuniculus OX=9986 GN=BCHE PE=2 SV=1 - [CHLE_RABIT]	BCHE	70.8086	36.0063	44.975	40.4406	59.8133	0	0	0	0	0	0	42.0073	0	24.3247	0	0.0168867	0.101625	only in control	only in control
P01840	Ig kappa-b4 chain C region OS=Oryctolagus cuniculus OX=9986 PE=1 SV=1 - [KAC4_RABIT]	Not available	1543.05	1423.5	2263.69	1377.12	1852.59	2404.8	2036.1	2829.78	5542.94	2715.26	4241	1810.79	3473.02	440.331	1407.75	0.017316	0.101625	1.91795	0.939568
P02602	Myosin light chain 1/3, skeletal muscle isoform OS=Oryctolagus cuniculus OX=9986 GN=MYL1 PE=1 SV=3 - [MYL1_RABIT]	MYL1	3435.16	1595.74	2923.41	2064.42	2435.24	3282.88	2138.36	1454.96	956.148	1511.53	1535.85	2622.81	1519.37	719.421	419.777	0.017316	0.101625	0.579291	-0.78764
P09451	Ferritin light chain OS=Oryctolagus cuniculus OX=9986 GN=FTL PE=2 SV=2 - [FRIL_RABIT]	FTL	60.4039	9.69024	20.383	88.5391	122.709	0	117.403	112.884	135.081	160.408	150.636	50.2876	135.282	48.7477	20.5455	0.017316	0.101625	2.69017	1.4277
P12345	Aspartate aminotransferase, mitochondrial OS=Oryctolagus cuniculus OX=9986 GN=GOT2 PE=1 SV=2 - [AATM_RABIT]	GOT2	439.585	541.116	387.025	541.832	678.608	304.332	245.812	315.384	281.371	277.995	308.542	482.083	285.821	132.751	27.7129	0.017316	0.101625	0.592888	-0.75417
P33477	Annexin A11 OS=Oryctolagus cuniculus OX=9986 GN=ANXA11 PE=1 SV=1 - [ANX11_RABIT]	ANXA11	602.596	254.817	482.46	409.833	386.447	324.065	323.712	282.899	183.1	182.199	226.595	410.036	239.701	121.955	62.4616	0.017316	0.101625	0.584585	-0.774516
P41975	Extracellular superoxide dismutase [Cu-Zn] OS=Oryctolagus cuniculus OX=9986 GN=SOD3 PE=2 SV=2 - [SODE_RABIT]	SOD3	935.746	816.677	1139.01	1522.34	2273.94	871.682	925.717	587.703	322.887	416.569	739.309	1259.9	598.437	559.284	242.938	0.017316	0.101625	0.474988	-1.07404
P62975	Ubiquitin OS=Oryctolagus cuniculus OX=9986 PE=1 SV=1 - [UBIQ_RABIT]	Not available	3140.61	3042.29	3350.15	3962.14	4841.83	3199.79	2612.8	2700.6	3149.7	2650.06	2650.15	3589.47	2752.66	695.309	224.134	0.017316	0.101625	0.766872	-0.382943
Q28623	Sarcolemmal membrane-associated protein OS=Oryctolagus cuniculus OX=9986 GN=SLMAP PE=1 SV=2 - [SLMAP_RABIT]	SLMAP	1377.26	851.922	1621.8	1143.94	1516.61	992.42	1035.2	789.98	179.696	567.551	669.053	1250.66	648.296	303.834	314.764	0.017316	0.101625	0.518363	-0.947965
Q28685	Dystroglycan OS=Oryctolagus cuniculus OX=9986 GN=DAG1 PE=1 SV=1 - [DAG1_RABIT]	DAG1	168.217	115.285	137.944	157.923	253.759	109.166	48.5355	122.429	0	59.5445	34.7797	157.049	53.0578	52.6885	44.7888	0.017316	0.101625	0.337842	-1.56558
Q95215	Transforming growth factor-beta-induced protein ig-h3 OS=Oryctolagus cuniculus OX=9986 GN=TGFBI PE=2 SV=2 - [BGH3_RABIT]	TGFBI	217.356	279.009	346.755	389.841	834.181	355.748	554.378	650.716	1520.32	835.296	1538.46	403.815	1019.83	219.691	476.028	0.017316	0.101625	2.5255	1.33657
P25915	Ferritin heavy chain (Fragment) OS=Oryctolagus cuniculus OX=9986 GN=FTH1 PE=2 SV=1 - [FRIH_RABIT]	FTH1	53.6658	60.8652	0	117.388	0	67.6103	77.2567	100.203	311.356	312.194	276.625	49.9216	215.527	44.6828	116.918	0.0221735	0.126002	4.31731	2.11013
P62943	Peptidyl-prolyl cis-trans isomerase FKBP1A OS=Oryctolagus cuniculus OX=9986 GN=FKBP1A PE=1 SV=2 - [FKB1A_RABIT]	FKBP1A	65.9859	84.7112	102.545	96.5767	73.6963	63.5554	36.3629	72.9511	0	0	57.7032	81.1784	33.4034	16.1461	33.1468	0.0221735	0.126002	0.411482	-1.2811
P13280	Glycogenin-1 OS=Oryctolagus cuniculus OX=9986 GN=GYG1 PE=1 SV=3 - [GLYG_RABIT]	GYG1	154.574	0	206.589	129.975	227.445	127.427	0	0	0	0	119.219	141.002	23.8438	80.1819	53.3163	0.0276595	0.139083	0.169103	-2.56403
P10829	Protein kinase C gamma type OS=Oryctolagus cuniculus OX=9986 GN=PRKCG PE=1 SV=1 - [KPCG_RABIT]	PRKCG	8.95353	0	0	0	0	0	93.8654	21.9424	23.2065	0	27.8029	1.49225	33.3634	3.65526	35.4899	0.0285193	0.139083	22.3577	4.4827
P50757	72 kDa type IV collagenase OS=Oryctolagus cuniculus OX=9986 GN=MMP2 PE=2 SV=1 - [MMP2_RABIT]	MMP2	0	0	15.0998	0	0	0	142.296	174.372	122.446	25.8231	0	2.51664	92.9873	6.16447	75.9609	0.0285193	0.139083	36.9491	5.20747
P04191	Sarcoplasmic/endoplasmic reticulum calcium ATPase 1 OS=Oryctolagus cuniculus OX=9986 GN=ATP2A1 PE=1 SV=1 - [AT2A1_RABIT]	ATP2A1	242.875	106.644	210.234	164.034	191.069	183.993	164.383	131.094	87.167	90.9668	81.3255	183.141	110.987	46.0058	35.7191	0.030303	0.139083	0.60602	-0.722563
P13490	L-lactate dehydrogenase B chain (Fragment) OS=Oryctolagus cuniculus OX=9986 GN=LDHB PE=2 SV=1 - [LDHB_RABIT]	LDHB	1331.43	1497.49	1721.93	1245.19	2300.88	1079.48	1024.56	1112.22	1203.02	752.33	1117.89	1529.4	1042.01	437.189	173.804	0.030303	0.139083	0.681317	-0.553602
P14478	Fibrinogen beta chain (Fragment) OS=Oryctolagus cuniculus OX=9986 GN=FGB PE=1 SV=2 - [FIBB_RABIT]	FGB	226.702	257.788	386.738	373.469	0	503.019	776.155	325.107	781.586	512.694	924.49	291.286	664.006	173.687	240.833	0.030303	0.139083	2.27957	1.18876
P21195	Protein disulfide-isomerase OS=Oryctolagus cuniculus OX=9986 GN=P4HB PE=2 SV=1 - [PDIA1_RABIT]	P4HB	448.014	324.882	381.117	576.436	684.42	258.334	586.112	665.267	687.415	580.277	953.516	445.534	694.517	159.974	152.307	0.030303	0.139083	1.55884	0.640476
P25704	Beta-enolase OS=Oryctolagus cuniculus OX=9986 GN=ENO3 PE=1 SV=4 - [ENOB_RABIT]	ENO3	2496.89	2060.41	2153.95	2940.77	3942.58	1988.76	1501.26	1602.32	1731.23	1502.91	2423.16	2597.23	1752.18	747.392	386.717	0.030303	0.139083	0.674634	-0.567823
P30957	Ryanodine receptor 2 OS=Oryctolagus cuniculus OX=9986 GN=RYR2 PE=1 SV=3 - [RYR2_RABIT]	RYR2	296.675	94.4993	586.999	475.059	186.154	275.392	27.4422	228.247	71.8792	55.1472	139.625	319.13	104.468	182.552	80.5988	0.030303	0.139083	0.327353	-1.61108
P53789	Vitamin D-binding protein OS=Oryctolagus cuniculus OX=9986 GN=GC PE=2 SV=1 - [VTDB_RABIT]	GC	384.43	541.508	611.688	323.308	968.227	441.149	1096.98	1198.98	890.114	851.716	626.044	545.051	932.767	232.076	223.777	0.030303	0.139083	1.71134	0.775125
Q09YN4	F-actin-capping protein subunit alpha-2 OS=Oryctolagus cuniculus OX=9986 GN=CAPZA2 PE=3 SV=3 - [CAZA2_RABIT]	CAPZA2	478.643	254.066	407.929	354.67	217.748	263.232	219.662	137.445	161.747	255.035	196.028	329.381	193.983	101.586	46.44	0.030303	0.139083	0.588932	-0.763827
Q28689	Canalicular multispecific organic anion transporter 1 OS=Oryctolagus cuniculus OX=9986 GN=ABCC2 PE=1 SV=1 - [MRP2_RABIT]	ABCC2	1832.2	931.296	546.263	1523.22	1145.22	955.529	629.459	717.791	318.701	364.634	592.943	1155.62	524.705	459.276	173.905	0.030303	0.139083	0.454046	-1.13909
Q8MJF1	Mimecan OS=Oryctolagus cuniculus OX=9986 GN=OGN PE=1 SV=1 - [MIME_RABIT]	OGN	9159.16	5840.44	9472.81	9353.79	16966.8	8125.93	5337.97	8885.42	6228.69	4740.08	5261.49	9819.82	6090.73	3756.54	1651.35	0.030303	0.139083	0.620249	-0.689081
Q8MK67	Phosphatidylethanolamine-binding protein 1 OS=Oryctolagus cuniculus OX=9986 GN=PEBP1 PE=2 SV=1 - [PEBP1_RABIT]	PEBP1	273.62	307.623	302.606	438.436	565.521	218.209	167.724	240.96	201.721	238.239	256.823	351.003	221.093	127.679	36.0169	0.030303	0.139083	0.629891	-0.666826
Q9XS70	Coronin-1B OS=Oryctolagus cuniculus OX=9986 GN=CORO1B PE=1 SV=1 - [COR1B_RABIT]	CORO1B	496.064	407.127	506.651	680.353	733.282	377.205	399.375	375.85	369.528	414.349	326.995	533.447	377.219	144.221	33.3655	0.030303	0.139083	0.707136	-0.499941
P40144	Adenylate cyclase type 5 OS=Oryctolagus cuniculus OX=9986 GN=ADCY5 PE=1 SV=1 - [ADCY5_RABIT]	ADCY5	107.185	73.7791	57.6286	89.5679	78.7859	72.7855	70.3413	70.4811	0	64.8652	0	79.9553	41.1375	16.8715	37.6215	0.0353443	0.160168	0.514507	-0.958738
P01694	Ig kappa chain V region 3547 OS=Oryctolagus cuniculus OX=9986 PE=1 SV=1 - [KV13_RABIT]	Not available	0	1.75752	0	0	0	10.5451	27.0896	12.3227	27.5233	0	32.5387	2.05045	19.8949	4.2205	13.444	0.044368	0.172198	9.70271	3.27839
P20614	Metalloproteinase inhibitor 1 OS=Oryctolagus cuniculus OX=9986 GN=TIMP1 PE=2 SV=2 - [TIMP1_RABIT]	TIMP1	0	3.21064	0	0	19.2639	0	0	34.865	79.3253	69.6645	55.4207	3.74575	47.8551	7.71	31.552	0.044368	0.172198	12.7758	3.67535
Q28641	Myosin-4 OS=Oryctolagus cuniculus OX=9986 GN=MYH4 PE=1 SV=2 - [MYH4_RABIT]	MYH4	64.3633	0	0	0	0	79.0373	123.433	521.43	656.004	0	585.754	23.9001	377.324	37.3155	295.257	0.044368	0.172198	15.7876	3.98072
Q9MZD2	Filamin-B (Fragment) OS=Oryctolagus cuniculus OX=9986 GN=FLNB PE=1 SV=1 - [FLNB_RABIT]	FLNB	0	0	0	40.0375	0	0	35.5365	24.3477	35.6297	34.5545	83.1507	6.67292	42.6438	16.3452	23.1339	0.044368	0.172198	6.39058	2.67595
O19132	Nitric oxide synthase, brain OS=Oryctolagus cuniculus OX=9986 GN=NOS1 PE=2 SV=1 - [NOS1_RABIT]	NOS1	28.469	0	59.7178	46.6616	24.8761	0	0	0	0	0	0	26.6208	0	24.1696	0	0.0445506	0.172198	only in control	only in control
P19517	Voltage-dependent L-type calcium channel subunit beta-1 OS=Oryctolagus cuniculus OX=9986 GN=CACNB1 PE=1 SV=1 - [CACB1_RABIT]	CACNB1	22.0905	0	0	12.733	54.9032	12.2525	0	0	0	0	0	16.9965	0	20.4025	0	0.0445506	0.172198	only in control	only in control
Q6IVG4	Arf-GAP with coiled-coil, ANK repeat and PH domain-containing protein 2 OS=Oryctolagus cuniculus OX=9986 GN=ACAP2 PE=2 SV=1 - [ACAP2_RABIT]	ACAP2	436.114	385.568	0	290.617	46.0907	0	0	0	0	0	0	193.065	0	200.896	0	0.0445506	0.172198	only in control	only in control
Q9GKY1	Anion exchange protein 4 OS=Oryctolagus cuniculus OX=9986 GN=SLC4A9 PE=1 SV=2 - [B3A4_RABIT]	SLC4A9	24.0395	0	25.5014	100.455	0	18.2801	0	0	0	0	0	28.0461	0	37.2403	0	0.0445506	0.172198	only in control	only in control
I1VZH0	RING finger protein 207 OS=Oryctolagus cuniculus OX=9986 GN=RNF207 PE=2 SV=1 - [RN207_RABIT]	RNF207	0	0	0	0	8.09308	0	10.7863	265.941	0	6.66641	93.8046	1.34885	75.4396	3.30399	113.169	0.0464841	0.172198	55.9289	5.80552
Q28709	CD63 antigen OS=Oryctolagus cuniculus OX=9986 GN=CD63 PE=2 SV=2 - [CD63_RABIT]	CD63	0	0	0	0	27.9087	0	22.6143	0	96.7834	48.8299	32.2531	4.65145	40.0962	11.3937	36.2786	0.0464841	0.172198	8.62013	3.10771
Q95209	Sortilin-related receptor OS=Oryctolagus cuniculus OX=9986 GN=SORL1 PE=1 SV=1 - [SORL_RABIT]	SORL1	0	0	0	0	0	0	15.1766	0	15.1766	75.8828	0	0	21.2472	0	31.4708	0.0475819	0.172198	onlly in case	onlly in case
A4L9I9	Beta-crystallin A2 OS=Oryctolagus cuniculus OX=9986 GN=CRYBA2 PE=2 SV=1 - [CRBA2_RABIT]	CRYBA2	0	0	0	0	0	0	37.9636	0	162.701	0	340.662	0	108.265	0	146.079	0.048406	0.172198	onlly in case	onlly in case
P01686	Ig kappa chain V region BS-1 OS=Oryctolagus cuniculus OX=9986 PE=1 SV=1 - [KV05_RABIT]	Not available	0	0	0	0	0	0	344.513	569.483	658.995	0	0	0	314.598	0	309.198	0.048406	0.172198	onlly in case	onlly in case
P23108	Immunoglobulin J chain OS=Oryctolagus cuniculus OX=9986 GN=JCHAIN PE=1 SV=1 - [IGJ_RABIT]	JCHAIN	0	0	0	0	0	0	1731.53	113.021	0	368.911	0	0	442.693	0	736.069	0.048406	0.172198	onlly in case	onlly in case
P25947	Ankyrin repeat protein T5 OS=Rabbit fibroma virus (strain Kasza) OX=10272 GN=T5 PE=4 SV=2 - [VT5_RFVKA]	T5	0	0	0	0	0	0	0	31.1157	41.273	0	14.4777	0	17.3733	0	18.5209	0.048406	0.172198	onlly in case	onlly in case
P26432	Sodium/hydrogen exchanger 3 OS=Oryctolagus cuniculus OX=9986 GN=SLC9A3 PE=1 SV=1 - [SL9A3_RABIT]	SLC9A3	0	0	0	0	0	0	11.4641	0	0	42.9774	14.3429	0	13.7569	0	17.5922	0.048406	0.172198	onlly in case	onlly in case
P36233	SPARC (Fragment) OS=Oryctolagus cuniculus OX=9986 GN=SPARC PE=1 SV=2 - [SPRC_RABIT]	SPARC	0	0	0	0	0	0	0	23.0431	0	47.0858	91.2919	0	32.2842	0	38.311	0.048406	0.172198	onlly in case	onlly in case
P52786	Cytochrome P450 2J1 OS=Oryctolagus cuniculus OX=9986 GN=CYP2J1 PE=1 SV=2 - [CP2J1_RABIT]	CYP2J1	0	0	0	0	0	0	0	9.38298	185.813	0	17.2729	0	42.4939	0	80.4431	0.048406	0.172198	onlly in case	onlly in case
Q05555	Cytochrome P450 2A10 OS=Oryctolagus cuniculus OX=9986 GN=CYP2A10 PE=1 SV=1 - [CP2AA_RABIT]	CYP2A10	0	0	0	0	0	0	295.047	0	56.2386	34.1847	0	0	77.0941	0	124.164	0.048406	0.172198	onlly in case	onlly in case
Q28679	Complement component C8 gamma chain OS=Oryctolagus cuniculus OX=9986 GN=C8G PE=2 SV=1 - [CO8G_RABIT]	C8G	0	0	0	0	0	0	0	88.7974	146.522	0	138.687	0	74.8012	0	71.7836	0.048406	0.172198	onlly in case	onlly in case
O97572	Ras-related protein Rab-7a OS=Oryctolagus cuniculus OX=9986 GN=RAB7A PE=2 SV=1 - [RAB7A_RABIT]	RAB7A	286.422	237.816	314.785	420.841	446.858	222.399	173.014	243.544	204.359	207.185	269.874	321.52	219.595	93.4696	37.608	0.0519481	0.172198	0.682991	-0.550061
P00563	Creatine kinase M-type OS=Oryctolagus cuniculus OX=9986 GN=CKM PE=1 SV=1 - [KCRM_RABIT]	CKM	702.261	872.748	775.745	432.94	1340.17	411.034	401.461	466.185	247.965	454.509	297.045	755.816	373.433	341.037	96.875	0.0519481	0.172198	0.494079	-1.01719
P01687	Ig kappa chain V region BS-5 OS=Oryctolagus cuniculus OX=9986 PE=1 SV=1 - [KV06_RABIT]	Not available	164.793	162.123	369.619	186.065	349.479	344.851	369.077	417.522	607.325	705.551	309.009	262.822	481.697	101.277	167.717	0.0519481	0.172198	1.83279	0.874041
P06813	Calpain small subunit 1 OS=Oryctolagus cuniculus OX=9986 GN=CAPNS1 PE=1 SV=1 - [CPNS1_RABIT]	CAPNS1	263.85	197.042	711.283	353.616	406.897	267.63	188.47	198.71	206.425	199.957	248.199	366.72	208.352	184.229	23.1856	0.0519481	0.172198	0.568151	-0.815654
P07489	Transthyretin OS=Oryctolagus cuniculus OX=9986 GN=TTR PE=1 SV=1 - [TTHY_RABIT]	TTR	990.016	1243.82	1563.63	1183.84	2581.92	1244.59	2332.62	2300.21	1626.02	2895.52	1568.81	1467.97	2144.64	576.081	553.152	0.0519481	0.172198	1.46096	0.546912
P09809	Apolipoprotein A-I OS=Oryctolagus cuniculus OX=9986 GN=APOA1 PE=1 SV=2 - [APOA1_RABIT]	APOA1	567.803	1742.76	488.681	435.826	808.838	703.339	1280.33	1282.57	2310.76	1103.29	879.439	791.208	1371.28	486.048	550.566	0.0519481	0.172198	1.73314	0.793391
P29694	Elongation factor 1-gamma OS=Oryctolagus cuniculus OX=9986 GN=EEF1G PE=2 SV=3 - [EF1G_RABIT]	EEF1G	143.003	113.373	214.992	214.865	251.61	158.599	279.346	230.516	171.799	282.071	291.018	182.74	250.95	52.5145	50.1565	0.0519481	0.172198	1.37326	0.457606
P63150	Serine/threonine-protein phosphatase 2A 55 kDa regulatory subunit B alpha isoform OS=Oryctolagus cuniculus OX=9986 GN=PPP2R2A PE=2 SV=1 - [2ABA_RABIT]	PPP2R2A	47.2913	29.6937	46.7806	56.0775	83.506	40.2519	29.1406	30.824	31.3312	37.5108	39.7747	50.6002	33.7163	18.3439	4.63933	0.0519481	0.172198	0.666327	-0.585697
P68003	Voltage-dependent anion-selective channel protein 2 OS=Oryctolagus cuniculus OX=9986 GN=VDAC2 PE=2 SV=1 - [VDAC2_RABIT]	VDAC2	943.603	467.044	719.3	578.839	807.741	585.648	527.375	545.391	373.694	568.455	553.595	683.696	513.702	174.214	79.6598	0.0519481	0.172198	0.75136	-0.412423
P33674	Casein kinase II subunit alpha OS=Oryctolagus cuniculus OX=9986 GN=CSNK2A1 PE=2 SV=1 - [CSK21_RABIT]	CSNK2A1	15.8477	0	26.1943	0	114.256	0	38.6975	30.0421	623.679	27.8097	30.9372	26.0497	150.233	44.5427	264.696	0.0530274	0.17258	5.76717	2.52786
P43348	Translationally-controlled tumor protein OS=Oryctolagus cuniculus OX=9986 GN=TPT1 PE=2 SV=2 - [TCTP_RABIT]	TPT1	0	12.4576	31.4746	32.279	0	0	35.639	23.8783	55.3437	23.9671	37.0563	12.7019	35.1769	15.6189	12.8818	0.0530274	0.17258	2.76943	1.46959
Q09YN0	Ankyrin repeat, SAM and basic leucine zipper domain-containing protein 1 OS=Oryctolagus cuniculus OX=9986 GN=ASZ1 PE=3 SV=1 - [ASZ1_RABIT]	ASZ1	43.0882	13.4753	43.3963	21.6153	56.6839	59.1052	11.4444	0	55.1272	12.0939	0	39.5607	15.7331	18.4652	22.7958	0.0546812	0.176359	0.397695	-1.33026
P51976	Corticosteroid 11-beta-dehydrogenase isozyme 2 OS=Oryctolagus cuniculus OX=9986 GN=HSD11B2 PE=2 SV=1 - [DHI2_RABIT]	HSD11B2	170.96	378.901	113.926	34.2889	0	389.946	147.657	0	0	0	0	181.337	29.5315	168.349	66.0344	0.0688944	0.218267	0.162854	-2.61835
Q10983	Galactoside alpha-(1,2)-fucosyltransferase 2 OS=Oryctolagus cuniculus OX=9986 GN=FUT2 PE=1 SV=1 - [FUT2_RABIT]	FUT2	0	0	0	388.037	0	0	283.009	272.84	198.611	176.625	260.579	64.6729	238.333	158.416	47.6115	0.0688944	0.218267	3.6852	1.88174
G1T7U7	N-acylethanolamine-hydrolyzing acid amidase OS=Oryctolagus cuniculus OX=9986 GN=NAAA PE=1 SV=2 - [NAAA_RABIT]	NAAA	0	0	0	36.8417	0	133.392	44.616	43.1505	43.8573	41.6221	69.3372	28.3724	48.5166	53.518	11.6913	0.0758531	0.236134	1.71	0.773993
P08049	Neprilysin OS=Oryctolagus cuniculus OX=9986 GN=MME PE=1 SV=2 - [NEP_RABIT]	MME	38.9613	0	0	0	169.672	0	208.182	77.1251	6.80011	76.6027	96.3975	34.7722	93.0216	67.8998	72.8523	0.0758531	0.236134	2.67517	1.41963
O77770	Leukocyte cell-derived chemotaxin 1 OS=Oryctolagus cuniculus OX=9986 GN=CNMD PE=2 SV=1 - [CNMD_RABIT]	CNMD	31.9766	20.7523	37.0861	52.8221	56.6595	26.326	28.7973	0	20.5419	36.0869	0	37.6038	17.0852	14.407	16.5378	0.0821386	0.239397	0.454349	-1.13813
O46377	Biglycan (Fragment) OS=Oryctolagus cuniculus OX=9986 GN=BGN PE=2 SV=1 - [PGS1_RABIT]	BGN	8162.86	2705.67	6306.3	5937.81	7917.64	5834.48	4412.25	5823.85	4801.44	5627.58	4813.58	6144.13	5095.74	1960.02	601.327	0.0822511	0.239397	0.829367	-0.269917
O77506	LIM and SH3 domain protein 1 OS=Oryctolagus cuniculus OX=9986 GN=LASP1 PE=1 SV=1 - [LASP1_RABIT]	LASP1	22.1661	34.8647	22.8285	25.1648	86.6991	11.3891	57.5714	66.9001	63.7935	54.1625	63.3561	33.852	61.1567	26.9517	5.16118	0.0822511	0.239397	1.80659	0.853268
P00169	Cytochrome b5 OS=Oryctolagus cuniculus OX=9986 GN=CYB5A PE=1 SV=4 - [CYB5_RABIT]	CYB5A	483.96	200.916	792.739	457.886	720.144	626.395	266.709	505.85	195.163	132.265	352.614	547.007	290.52	213.71	145.711	0.0822511	0.239397	0.531109	-0.912921
P03988	Ig mu chain C region secreted form OS=Oryctolagus cuniculus OX=9986 PE=2 SV=1 - [IGHM_RABIT]	Not available	105.007	433.332	360.292	202.962	236.578	141.936	498.277	939.411	281.595	363.272	285.304	246.684	473.572	127.124	274.81	0.0822511	0.239397	1.91975	0.940917
P27124	Peptidyl-prolyl cis-trans isomerase FKBP4 OS=Oryctolagus cuniculus OX=9986 GN=FKBP4 PE=1 SV=3 - [FKBP4_RABIT]	FKBP4	53.5818	44.2066	57.8365	62.1572	98.5253	52.7179	33.8553	43.2908	50.6258	33.5433	59.3567	61.5042	44.1344	19.0977	11.0951	0.0822511	0.239397	0.717583	-0.478782
P49065	Albumin OS=Oryctolagus cuniculus OX=9986 GN=ALB PE=1 SV=2 - [ALBU_RABIT]	ALB	34064.7	64275.6	45131.9	41517.8	95249.5	40477	94772.5	108013	75564.6	81877	60320.5	53452.8	84109.6	22891.3	18227.8	0.0822511	0.239397	1.57353	0.654005
Q8WN94	Acyl-CoA-binding protein OS=Oryctolagus cuniculus OX=9986 GN=DBI PE=3 SV=3 - [ACBP_RABIT]	DBI	214.733	299.434	247.682	368.63	390.439	355.174	95.0975	368.53	247.289	180.728	213.332	312.682	220.995	70.6774	99.9855	0.0822511	0.239397	0.706774	-0.50068
Q00554	Cystic fibrosis transmembrane conductance regulator OS=Oryctolagus cuniculus OX=9986 GN=CFTR PE=2 SV=4 - [CFTR_RABIT]	CFTR	0	6.95054	6.6229	32.7868	0	0	19.907	242.331	64.8783	62.1531	0	7.72671	77.8539	12.7196	96.0296	0.0926007	0.265208	10.0759	3.33284
Q866F4	Adenylate cyclase type 10 OS=Oryctolagus cuniculus OX=9986 GN=ADCY10 PE=2 SV=1 - [ADCYA_RABIT]	ADCY10	0	109.312	159.415	345.046	369.208	132.925	0	28.6325	0	0	143.163	185.984	34.359	143.43	62.0739	0.0926007	0.265208	0.184742	-2.43642
P68135	Actin, alpha skeletal muscle OS=Oryctolagus cuniculus OX=9986 GN=ACTA1 PE=1 SV=1 - [ACTS_RABIT]	ACTA1	187964	117990	178824	134748	140134	0	123872	112222	0	109362	82840	126610	85659.4	67593.1	50182.5	0.0995755	0.278017	0.67656	-0.563709
P27411	Genome polyprotein OS=Rabbit hemorrhagic disease virus (strain V-351) OX=11977 GN=ORF1 PE=3 SV=2 - [POLG_RHDV3]	ORF1	90.733	48.9219	51.533	120.896	0	48.6466	0	54.7508	0	0	0	60.1218	10.9502	41.4152	24.4853	0.103604	0.278017	0.182133	-2.45694
O18998	Deoxyribonuclease-1 OS=Oryctolagus cuniculus OX=9986 GN=DNASE1 PE=1 SV=1 - [DNAS1_RABIT]	DNASE1	5.50892	5.42708	0	27.6264	0	0	0	0	0	0	0	6.42707	0	10.7255	0	0.104062	0.278017	only in control	only in control
P50119	Gastrotropin OS=Oryctolagus cuniculus OX=9986 GN=FABP6 PE=2 SV=2 - [FABP6_RABIT]	FABP6	219.627	104.295	0	0	0	136.63	0	0	0	0	0	76.7584	0	92.1191	0	0.104062	0.278017	only in control	only in control
P54286	Voltage-dependent L-type calcium channel subunit beta-3 OS=Oryctolagus cuniculus OX=9986 GN=CACNB3 PE=1 SV=1 - [CACB3_RABIT]	CACNB3	907.008	0	0	0	1343.55	623.754	0	0	0	0	0	479.052	0	572.698	0	0.104062	0.278017	only in control	only in control
Q28654	Serine/threonine-protein phosphatase 2A 56 kDa regulatory subunit epsilon isoform (Fragment) OS=Oryctolagus cuniculus OX=9986 GN=PPP2R5E PE=2 SV=1 - [2A5E_RABIT]	PPP2R5E	12.2718	0	0	219.791	0	205.51	0	0	0	0	0	72.9289	0	108.426	0	0.104062	0.278017	only in control	only in control
Q4PLJ0	NEDD8 OS=Oryctolagus cuniculus OX=9986 GN=NEDD8 PE=3 SV=1 - [NEDD8_RABIT]	NEDD8	0	0	0	32.7076	79.6388	36.38	0	0	0	0	0	24.7877	0	31.7775	0	0.104062	0.278017	only in control	only in control
Q9TSY7	Solute carrier family 22 member 6 OS=Oryctolagus cuniculus OX=9986 GN=SLC22A6 PE=2 SV=1 - [S22A6_RABIT]	SLC22A6	11.9543	0	374.093	0	0	823.162	0	0	0	0	0	201.535	0	338.818	0	0.104062	0.278017	only in control	only in control
Q9XT31	Voltage-gated potassium channel subunit beta-1 OS=Oryctolagus cuniculus OX=9986 GN=KCNAB1 PE=1 SV=1 - [KCAB1_RABIT]	KCNAB1	0	8.51775	24.6824	0	0	32.8993	0	0	0	0	0	11.0166	0	14.3941	0	0.104062	0.278017	only in control	only in control
P05772	Protein kinase C beta type OS=Oryctolagus cuniculus OX=9986 GN=PRKCB PE=2 SV=3 - [KPCB_RABIT]	PRKCB	11.464	0	0	0	0	0	16.7727	14.0605	0	0	11.8558	1.91066	8.53782	4.68014	7.98611	0.11275	0.28996	4.46852	2.1598
P15196	Sex hormone-binding globulin OS=Oryctolagus cuniculus OX=9986 GN=SHBG PE=1 SV=2 - [SHBG_RABIT]	SHBG	0	0	17.1364	0	0	0	0	46.8355	0	72.322	23.8315	2.85607	28.5978	6.99592	31.2362	0.11275	0.28996	10.013	3.3238
P23791	Sodium/hydrogen exchanger 1 OS=Oryctolagus cuniculus OX=9986 GN=SLC9A1 PE=2 SV=1 - [SL9A1_RABIT]	SLC9A1	0	0	0	17.9564	0	0	424.112	458.066	0	328.514	0	2.99273	242.139	7.33066	226.088	0.11275	0.28996	80.9089	6.33823
P50117	Protein S100-A9 OS=Oryctolagus cuniculus OX=9986 GN=S100A9 PE=2 SV=3 - [S10A9_RABIT]	S100A9	0	0	0	0	0	16.0005	0	34.9086	64.2887	0	46.511	2.66674	29.1416	6.53216	28.5864	0.11275	0.28996	10.9278	3.44993
Q85297	Probable dual specificity protein phosphatase H1 homolog OS=Myxoma virus (strain Lausanne) OX=31530 GN=m069L PE=1 SV=2 - [DUSP_MYXVL]	m069L	0	0	0	0	20.9611	0	82.0069	42.9952	0	150.036	0	3.49352	55.0077	8.55733	63.1574	0.11275	0.28996	15.7457	3.97688
P13019	Bleomycin hydrolase (Fragment) OS=Oryctolagus cuniculus OX=9986 GN=BLMH PE=1 SV=1 - [BLMH_RABIT]	BLMH	226.606	57.4731	235.881	276.354	269.026	183.605	197.847	122.649	0	0	232.738	208.158	110.647	80.9608	108.558	0.119846	0.28996	0.531553	-0.911714
O62742	Sterol carrier protein 2 OS=Oryctolagus cuniculus OX=9986 GN=SCP2 PE=1 SV=1 - [SCP2_RABIT]	SCP2	217.34	119.931	272.758	157.72	533.39	77.3364	142.94	116.17	75.1723	94.4319	121.307	229.746	110.004	164.122	26.0111	0.125541	0.28996	0.478809	-1.06248
O97972	Indolethylamine N-methyltransferase OS=Oryctolagus cuniculus OX=9986 GN=INMT PE=1 SV=1 - [INMT_RABIT]	INMT	86.7555	155.842	197.071	309.804	157.392	110.08	113.391	132.165	140.868	81.9732	0	169.491	93.6793	78.9378	57.0291	0.125541	0.28996	0.552711	-0.855403
P06814	Calpain-2 catalytic subunit (Fragment) OS=Oryctolagus cuniculus OX=9986 GN=CAPN2 PE=1 SV=1 - [CAN2_RABIT]	CAPN2	213.64	158.873	262.269	347.698	357.335	162.865	190.965	203.282	127.015	93.0694	198.272	250.447	162.52	87.6741	49.5803	0.125541	0.28996	0.648922	-0.623882
P15122	Aldo-keto reductase family 1 member B1 OS=Oryctolagus cuniculus OX=9986 GN=AKR1B1 PE=2 SV=3 - [ALDR_RABIT]	AKR1B1	330.857	428.845	392.602	512.752	809.127	258.958	278.12	337.822	282.095	293.698	310.785	455.523	300.504	193.474	24.4162	0.125541	0.28996	0.65969	-0.600139
P19007	Haptoglobin OS=Oryctolagus cuniculus OX=9986 GN=HP PE=1 SV=2 - [HPT_RABIT]	HP	140.925	298.231	439.612	87.7081	291.769	291.917	98.1948	63.2915	371.667	22.6008	33.4145	258.36	117.834	126.172	144.903	0.125541	0.28996	0.456083	-1.13263
P20058	Hemopexin OS=Oryctolagus cuniculus OX=9986 GN=HPX PE=1 SV=2 - [HEMO_RABIT]	HPX	470.099	938.309	874.18	454.481	680.47	607.178	760.029	753.063	1252.77	1326.94	714.249	670.786	961.41	202.06	301.476	0.125541	0.28996	1.43326	0.519298
P20647	Sarcoplasmic/endoplasmic reticulum calcium ATPase 2 OS=Oryctolagus cuniculus OX=9986 GN=ATP2A2 PE=2 SV=2 - [AT2A2_RABIT]	ATP2A2	242.592	151.912	413.525	316.361	342.437	270.927	500.658	151.762	66.3941	72.4448	136.5	289.626	185.552	89.8685	180.161	0.125541	0.28996	0.640661	-0.642368
P29751	Actin, cytoplasmic 1 OS=Oryctolagus cuniculus OX=9986 GN=ACTB PE=2 SV=1 - [ACTB_RABIT]	ACTB	152527	66661.7	101710	67825.4	114282	117662	99261.5	95504.2	52545.7	94056.3	54472.5	103445	79168	32721.2	23510.1	0.125541	0.28996	0.765317	-0.38587
P41982	Superoxide dismutase [Mn], mitochondrial (Fragment) OS=Oryctolagus cuniculus OX=9986 GN=SOD2 PE=2 SV=1 - [SODM_RABIT]	SOD2	95.6952	108.629	62.7927	87.9776	152.286	60.2881	52.3113	78.633	91.9373	54.0415	62.3605	94.6115	67.8567	33.9369	17.0201	0.125541	0.28996	0.717214	-0.479524
P46406	Glyceraldehyde-3-phosphate dehydrogenase OS=Oryctolagus cuniculus OX=9986 GN=GAPDH PE=1 SV=3 - [G3P_RABIT]	GAPDH	5723.11	5151.32	5745.69	6621.82	7515.34	4726.1	4608.31	5105.48	3908.42	4977.02	5887.19	5913.9	4897.28	1012.21	723.011	0.125541	0.28996	0.828097	-0.272128
P51662	Annexin A1 OS=Oryctolagus cuniculus OX=9986 GN=ANXA1 PE=1 SV=1 - [ANXA1_RABIT]	ANXA1	1939.75	1408.74	1879.61	1960.98	2223.51	1250.62	1604.34	1772.31	1174.19	1155.95	1863.58	1777.2	1514.07	369.573	331.949	0.125541	0.28996	0.851943	-0.231172
P58772	Tropomyosin alpha-1 chain OS=Oryctolagus cuniculus OX=9986 GN=TPM1 PE=1 SV=1 - [TPM1_RABIT]	TPM1	9002.82	4180.32	5641.35	4047.27	9534.83	6235.42	4834.01	5000.08	1046.76	3511.2	4741.59	6440.33	3826.73	2351.89	1662.54	0.125541	0.28996	0.594181	-0.751025
P58776	Tropomyosin beta chain OS=Oryctolagus cuniculus OX=9986 GN=TPM2 PE=1 SV=1 - [TPM2_RABIT]	TPM2	9002.82	4182.3	5641.35	4126.75	9534.83	6235.42	4834.01	5000.08	1046.76	3511.2	4842.46	6453.91	3846.9	2335.51	1676.96	0.125541	0.28996	0.596057	-0.746477
P84246	Histone H3.3 OS=Oryctolagus cuniculus OX=9986 GN=H3-3A PE=2 SV=2 - [H33_RABIT]	H3-3A	9881.31	2350.43	8764.41	6782.26	10912.2	8649.4	5442.12	7618.5	6174.7	3686.04	5715.4	7890	5727.35	3044.8	1416.42	0.125541	0.28996	0.725901	-0.462156
Q28888	Decorin OS=Oryctolagus cuniculus OX=9986 GN=DCN PE=2 SV=1 - [PGS2_RABIT]	DCN	4545.47	4296.94	6455.03	7422.43	17292.5	6439.37	2634.94	6638.59	4713.94	2116.38	1813.03	7741.95	3583.38	4832.25	2049.28	0.125541	0.28996	0.462852	-1.11138
B6A7Q3	Cyclin-dependent kinase 14 OS=Oryctolagus cuniculus OX=9986 GN=CDK14 PE=3 SV=1 - [CDK14_RABIT]	CDK14	0	98.3187	0	69.3762	108.867	89.2017	0	75.2318	0	0	0	60.9606	15.0464	48.9723	33.6447	0.135378	0.308695	0.246821	-2.01846
Q28653	Serine/threonine-protein phosphatase 2A 56 kDa regulatory subunit delta isoform OS=Oryctolagus cuniculus OX=9986 GN=PPP2R5D PE=2 SV=1 - [2A5D_RABIT]	PPP2R5D	0	10.6147	21.1105	28.3213	56.3565	0	0	18.6464	0	0	0	19.4005	3.72928	21.3457	8.33893	0.135378	0.308695	0.192226	-2.37912
P12337	Liver carboxylesterase 1 OS=Oryctolagus cuniculus OX=9986 PE=1 SV=3 - [EST1_RABIT]	Not available	0	0	33.4849	65.165	82.5601	27.6026	73.9674	134.756	99.548	0	76.0382	34.8021	76.8619	33.7007	49.455	0.166994	0.36729	2.20854	1.14309
P80456	Aldehyde oxidase 1 OS=Oryctolagus cuniculus OX=9986 GN=AOX1 PE=1 SV=2 - [AOXA_RABIT]	AOX1	0	27.745	0	56.7208	20.913	52.3074	37.7669	70.7842	96.6056	67.9371	0	26.281	54.6188	24.5613	36.9756	0.166994	0.36729	2.07826	1.05537
O19053	Alcohol dehydrogenase class-3 OS=Oryctolagus cuniculus OX=9986 GN=ADH5 PE=2 SV=3 - [ADHX_RABIT]	ADH5	275.822	132.845	296.03	339.798	484.032	200.686	210.558	184.884	178.559	196.702	204.11	288.202	194.963	120.848	13.2342	0.177489	0.36729	0.676479	-0.563883
O46378	Fibromodulin (Fragment) OS=Oryctolagus cuniculus OX=9986 GN=FMOD PE=2 SV=1 - [FMOD_RABIT]	FMOD	1056.66	48.0412	493.73	534.612	172.189	291.165	82.9205	50.6031	92.9743	262.358	228.615	432.733	143.494	357.574	95.1633	0.177489	0.36729	0.3316	-1.59249
O77819	Rho-associated protein kinase 1 OS=Oryctolagus cuniculus OX=9986 GN=ROCK1 PE=1 SV=1 - [ROCK1_RABIT]	ROCK1	25.8342	14.5912	53.7918	24.0571	59.3218	20.1813	28.7761	104.01	157.075	523.86	18.6647	32.9629	166.477	18.7598	207.68	0.177489	0.36729	5.05044	2.33641
P01697	Ig kappa chain V region AH80-5 OS=Oryctolagus cuniculus OX=9986 PE=1 SV=1 - [KV16_RABIT]	Not available	0	14.6104	227.961	88.3675	257.596	123.422	378.348	255.781	182.063	164.303	204.956	118.66	237.09	106.861	86.1128	0.177489	0.36729	1.99807	0.998609
P30946	Heat shock protein HSP 90-alpha OS=Oryctolagus cuniculus OX=9986 GN=HSP90AA1 PE=1 SV=2 - [HS90A_RABIT]	HSP90AA1	1203.87	968.201	1086.42	1285.37	1869.06	702.04	793.525	1303.31	525.089	264.795	867.892	1185.83	750.922	392.004	389.856	0.177489	0.36729	0.633248	-0.659158
P37709	Trichohyalin OS=Oryctolagus cuniculus OX=9986 GN=TCHH PE=2 SV=1 - [TRHY_RABIT]	TCHH	1339.44	493.942	782.409	1378.95	850.303	956.22	833.394	654.811	556.093	500.016	805.41	966.877	669.945	340.59	147.592	0.177489	0.36729	0.692895	-0.529291
P43242	Heme oxygenase 2 OS=Oryctolagus cuniculus OX=9986 GN=HMOX2 PE=2 SV=1 - [HMOX2_RABIT]	HMOX2	220.25	1456.21	1240.32	745.867	1578.74	957.323	2136.01	1319.13	2006.24	1762.84	561.676	1033.12	1557.18	503.718	637.708	0.177489	0.36729	1.50726	0.591927
P48738	Phosphatidylinositol transfer protein alpha isoform OS=Oryctolagus cuniculus OX=9986 GN=PITPNA PE=3 SV=2 - [PIPNA_RABIT]	PITPNA	83.7506	72.4546	86.2877	105.213	201.496	64.7815	46.1223	84.1345	44.4603	58.9954	95.4532	102.331	65.8332	50.4918	22.9366	0.177489	0.36729	0.643338	-0.636351
P54938	Neurofilament medium polypeptide (Fragment) OS=Oryctolagus cuniculus OX=9986 GN=NEFM PE=2 SV=1 - [NFM_RABIT]	NEFM	3977.55	2424.38	3016.74	3874.48	3060.49	1971.49	3517.52	4428.69	2246.76	4434.6	6112.79	3054.19	4148.07	786.869	1417.18	0.177489	0.36729	1.35816	0.441652
P83468	14 kDa phosphohistidine phosphatase OS=Oryctolagus cuniculus OX=9986 GN=PHPT1 PE=1 SV=1 - [PHP14_RABIT]	PHPT1	12.6699	51.8149	39.7181	94.6012	107.757	23.791	16.3836	26.9875	20.4192	25.8103	15.6428	55.0586	21.0487	38.3693	5.22795	0.177489	0.36729	0.382296	-1.38724
Q28670	Aggrecan core protein (Fragment) OS=Oryctolagus cuniculus OX=9986 GN=ACAN PE=2 SV=1 - [PGCA_RABIT]	ACAN	385.595	107.809	14.1402	88.5822	0	158.538	165.383	115.372	147.437	310.44	253.666	125.777	198.46	140.405	80.914	0.177489	0.36729	1.57786	0.657973
Q29504	Ubiquitin-like modifier-activating enzyme 1 OS=Oryctolagus cuniculus OX=9986 GN=UBA1 PE=1 SV=1 - [UBA1_RABIT]	UBA1	279.557	333.627	357.339	507.438	784.904	218.316	271.795	305.337	255.996	267.488	327.396	413.53	285.602	206.076	29.7133	0.177489	0.36729	0.690644	-0.533985
Q6Q6X0	14-3-3 protein theta OS=Oryctolagus cuniculus OX=9986 GN=YWHAQ PE=2 SV=1 - [1433T_RABIT]	YWHAQ	1875.38	1539.22	1932.79	2719.5	3083.48	1321.41	1281.11	2021.64	1685.25	1277.88	1399.42	2078.63	1533.06	685.181	319.503	0.177489	0.36729	0.737535	-0.439217
Q9TT15	Voltage-dependent anion-selective channel protein 1 OS=Oryctolagus cuniculus OX=9986 GN=VDAC1 PE=2 SV=3 - [VDAC1_RABIT]	VDAC1	658.879	224.095	500.682	551.999	558.837	436.756	291.168	251.878	336.603	282.26	519.536	488.541	336.289	148.825	106.841	0.177489	0.36729	0.688353	-0.538779
O77768	Heterogeneous nuclear ribonucleoprotein C OS=Oryctolagus cuniculus OX=9986 GN=HNRNPC PE=2 SV=1 - [HNRPC_RABIT]	HNRNPC	218.366	218.471	386.872	240.232	473.469	0	91.8616	371.393	50.0158	0	58.9608	256.235	114.446	163.113	147.36	0.200217	0.411941	0.446646	-1.1628
P01839	Ig kappa-b4 chain C region OS=Oryctolagus cuniculus OX=9986 GN=K-BAS PE=4 SV=1 - [KACB_RABIT]	K-BAS	91.5223	0	0	0	471.474	0	196.758	462.432	273.766	244.442	0	93.8327	235.48	188.593	165.834	0.213259	0.424147	2.50957	1.32744
P79227	Macrophage metalloelastase OS=Oryctolagus cuniculus OX=9986 GN=MMP12 PE=2 SV=1 - [MMP12_RABIT]	MMP12	2.03391	106.31	0.264983	1.7945	0	0	0.442121	0	0	0.0884242	0	18.4006	0.106109	43.0763	0.191699	0.213259	0.424147	0.0057666	-7.43806
P81436	UDP-N-acetylglucosamine--peptide N-acetylglucosaminyltransferase 110 kDa subunit OS=Oryctolagus cuniculus OX=9986 GN=OGT PE=1 SV=2 - [OGT1_RABIT]	OGT	0	0	116.923	25.9077	0	0	52.2774	58.7592	0	58.2944	82.5762	23.8051	50.3815	46.7805	30.4598	0.213259	0.424147	2.11642	1.08162
Q6RZI9	Cell surface-binding protein OS=Rabbitpox virus (strain Utrecht) OX=45417 GN=RPXV102 PE=2 SV=1 - [CAHH_RABPU]	RPXV102	284.451	0	143.483	146.471	119.825	0	0	0	0	126.436	91.6936	115.705	43.6259	106.757	60.9871	0.213259	0.424147	0.377045	-1.40719
Q9GKY7	Junctophilin-2 OS=Oryctolagus cuniculus OX=9986 GN=JPH2 PE=2 SV=1 - [JPH2_RABIT]	JPH2	28.8945	19.5516	10.4592	27.031	0	0	12.5497	10.1608	0	0	0	14.3227	4.5421	12.856	6.27661	0.213259	0.424147	0.317125	-1.65688
Q9N0V3	Bile salt export pump OS=Oryctolagus cuniculus OX=9986 GN=ABCB11 PE=2 SV=1 - [ABCBB_RABIT]	ABCB11	97.5716	17.1637	0	0	0	0	43.5875	0	17.9474	15.2087	113.834	19.1225	38.1155	39.0404	45.1316	0.213259	0.424147	1.99322	0.995102
O77814	Creatine kinase S-type, mitochondrial OS=Oryctolagus cuniculus OX=9986 GN=CKMT2 PE=2 SV=1 - [KCRS_RABIT]	CKMT2	772.961	0	436.998	503.114	0	539.461	300.914	0	293.066	349.028	0	375.422	188.602	312.066	173.497	0.224496	0.444031	0.502372	-0.993172
Q7M3I4	Corticosteroid 11-beta-dehydrogenase isozyme 1 OS=Oryctolagus cuniculus OX=9986 GN=HSD11B1 PE=1 SV=2 - [DHI1_RABIT]	HSD11B1	9.46719	1778.53	4492.33	23.4983	11238.2	3253.83	0	0	0	4163.46	4146.4	3465.97	1661.97	4198.84	2275.76	0.231045	0.454474	0.479511	-1.06036
P01690	Ig kappa chain V region 3381 (Fragment) OS=Oryctolagus cuniculus OX=9986 PE=1 SV=1 - [KV09_RABIT]	Not available	163.51	0	0	0	365.826	377.77	0	0	0	0	10.3191	151.184	2.06382	182.282	4.61484	0.244817	0.455349	0.013651	-6.19485
O77751	Transmembrane protein 109 OS=Oryctolagus cuniculus OX=9986 GN=TMEM109 PE=1 SV=1 - [TM109_RABIT]	TMEM109	199.844	37.0579	584.413	500.363	334.708	367.059	203.533	247.064	324.807	149.232	195.284	337.241	223.984	198.789	66.1962	0.246753	0.455349	0.664166	-0.590383
P00919	Carbonic anhydrase 2 OS=Oryctolagus cuniculus OX=9986 GN=CA2 PE=1 SV=3 - [CAH2_RABIT]	CA2	720.522	1789.34	552.083	465.277	538.121	1031.93	1433.41	751.908	2001.99	912.504	558.86	849.544	1131.74	503.239	584.995	0.246753	0.455349	1.33217	0.413775
P00949	Phosphoglucomutase-1 OS=Oryctolagus cuniculus OX=9986 GN=PGM1 PE=1 SV=2 - [PGM1_RABIT]	PGM1	152.813	138.776	131.773	221.42	323.269	109.314	97.1004	120.663	151.432	129.725	142.047	179.561	128.193	80.0018	20.9628	0.246753	0.455349	0.713927	-0.486151
P06815	Calpain-1 catalytic subunit (Fragment) OS=Oryctolagus cuniculus OX=9986 GN=CAPN1 PE=1 SV=1 - [CAN1_RABIT]	CAPN1	202.807	162.942	236.779	305.674	928.913	154.019	125.707	183.593	110.254	296.029	177.928	331.856	178.702	297.662	72.9449	0.246753	0.455349	0.538494	-0.892999
P30947	Heat shock protein HSP 90-beta OS=Oryctolagus cuniculus OX=9986 GN=HSP90AB1 PE=1 SV=2 - [HS90B_RABIT]	HSP90AB1	1126.84	849.018	1009.83	1198.45	1865.39	702.04	828.025	1317.37	572.297	418.897	948.307	1125.26	816.98	405.44	348.605	0.246753	0.455349	0.726035	-0.461889
P41316	Alpha-crystallin B chain OS=Oryctolagus cuniculus OX=9986 GN=CRYAB PE=1 SV=1 - [CRYAB_RABIT]	CRYAB	446.878	275.19	634.833	585.549	645.852	323.649	356.613	346.063	314.497	398.485	284.532	485.325	340.038	161.208	43.1863	0.246753	0.455349	0.70064	-0.513255
P48747	Complement component C9 OS=Oryctolagus cuniculus OX=9986 GN=C9 PE=1 SV=1 - [CO9_RABIT]	C9	58.7287	78.8203	235.293	55.2022	45.8283	76.9611	478.148	50.147	149.492	235.175	196.703	91.8055	221.933	71.4497	159.072	0.246753	0.455349	2.41743	1.27347
P98049	Cytochrome c oxidase subunit 2 OS=Oryctolagus cuniculus OX=9986 GN=MT-CO2 PE=3 SV=2 - [COX2_RABIT]	MT-CO2	64.5878	0	60.3407	36.6996	91.2517	52.2361	143.535	37.7423	92.6126	148.379	47.084	50.8527	93.8704	30.6561	51.91	0.246753	0.455349	1.84593	0.884348
Q28686	Alpha-sarcoglycan OS=Oryctolagus cuniculus OX=9986 GN=SGCA PE=1 SV=1 - [SGCA_RABIT]	SGCA	93.1593	148.342	98.7654	62.0655	89.3225	113.8	67.2747	35.6735	346.898	56.5983	65.5554	100.909	114.4	28.7187	130.576	0.246753	0.455349	1.13369	0.181029
Q28735	Transmembrane emp24 domain-containing protein 10 OS=Oryctolagus cuniculus OX=9986 GN=TMED10 PE=1 SV=1 - [TMEDA_RABIT]	TMED10	190.685	69.4292	131.183	170.256	214.33	157.688	157.901	254.452	196.889	207.383	167.343	155.595	196.794	50.8348	38.1332	0.246753	0.455349	1.26478	0.338886
Q6XLQ7	Calumenin OS=Oryctolagus cuniculus OX=9986 GN=CALU PE=1 SV=2 - [CALU_RABIT]	CALU	7.99527	0	148.796	110.184	122.248	83.4587	148.987	148.402	73.1004	107.706	287.157	78.7803	153.071	61.6711	81.349	0.246753	0.455349	1.94301	0.95829
P01826	Ig heavy chain V-A1 region BS-5 OS=Oryctolagus cuniculus OX=9986 PE=1 SV=1 - [HV1A_RABIT]	Not available	124.148	0	0	0	368.365	396.356	351.125	1275.71	523.506	287.543	0	148.145	487.577	187.895	479.273	0.262193	0.478903	3.29122	1.71862
Q9TTT8	Cytochrome c oxidase subunit 4 isoform 1, mitochondrial OS=Oryctolagus cuniculus OX=9986 GN=COX4I1 PE=2 SV=1 - [COX41_RABIT]	COX4I1	0	0	81.6391	55.1579	0	78.3515	63.1094	0	102.235	68.2279	107.631	35.8581	68.2407	40.3274	42.9835	0.262193	0.478903	1.90308	0.928333
P14755	Lambda-crystallin OS=Oryctolagus cuniculus OX=9986 GN=CRYL1 PE=1 SV=3 - [CRYL1_RABIT]	CRYL1	18.0044	18.7951	0	28.1437	61.0875	0	0	0	0	32.2949	0	21.0051	6.45897	22.6003	14.4427	0.273502	0.497024	0.307495	-1.70136
P48829	Zona pellucida sperm-binding protein 2 (Fragment) OS=Oryctolagus cuniculus OX=9986 GN=ZP2 PE=1 SV=1 - [ZP2_RABIT]	ZP2	0	63.1108	0	89.4285	0	25.4232	150.115	133.933	0	0	185.708	29.6604	93.9511	38.3362	87.7865	0.292263	0.52578	3.16756	1.66337
Q28611	UDP-glucuronosyltransferase 1-6 OS=Oryctolagus cuniculus OX=9986 GN=UGT1 PE=1 SV=1 - [UD16_RABIT]	UGT1	0	20.8137	29.7926	27.7656	0	0	0	39.8902	30.2842	32.8592	0	13.062	20.6067	14.6154	19.137	0.292263	0.52578	1.57761	0.65774
O18757	Calcium-binding mitochondrial carrier protein SCaMC-1 OS=Oryctolagus cuniculus OX=9986 GN=SLC25A24 PE=1 SV=1 - [SCMC1_RABIT]	SLC25A24	13.2744	0	16.0256	14.279	55.6382	39.4935	26.5353	0	8.19169	14.4232	0	23.1185	9.83003	20.423	11.1367	0.310863	0.540292	0.425203	-1.23378
P11716	Ryanodine receptor 1 OS=Oryctolagus cuniculus OX=9986 GN=RYR1 PE=1 SV=1 - [RYR1_RABIT]	RYR1	67.525	19.7244	0	48.0896	0	0	29.8152	21.2808	106.387	32.436	18.4828	22.5565	41.6804	29.0121	36.6315	0.310863	0.540292	1.84782	0.885825
P26013	Integrin beta-8 OS=Oryctolagus cuniculus OX=9986 GN=ITGB8 PE=2 SV=1 - [ITB8_RABIT]	ITGB8	62.5303	60.3534	0	109.41	175.453	0	26.9746	0	20.5826	49.3358	30.0515	67.9578	25.3889	67.227	17.7863	0.310863	0.540292	0.373598	-1.42044
P57100	Heart- and neural crest derivatives-expressed protein 1 OS=Oryctolagus cuniculus OX=9986 GN=HAND1 PE=2 SV=1 - [HAND1_RABIT]	HAND1	1177.94	1440.72	0	1485.3	0	1313.59	989.308	873.71	452.953	0	767.152	902.926	616.625	707.562	398.327	0.310863	0.540292	0.682918	-0.550215
O19048	Poly(rC)-binding protein 1 OS=Oryctolagus cuniculus OX=9986 GN=PCBP1 PE=2 SV=1 - [PCBP1_RABIT]	PCBP1	188.499	131.478	337.092	429.697	312.377	122.481	121.342	186.528	164.011	171.397	193.93	253.604	167.442	124.724	28.3659	0.329004	0.540292	0.660248	-0.598919
O46373	ADP/ATP translocase 1 OS=Oryctolagus cuniculus OX=9986 GN=SLC25A4 PE=2 SV=3 - [ADT1_RABIT]	SLC25A4	1185.49	626.524	1196.42	871.12	945.353	895.253	928.194	1063.12	548.421	795.966	832.296	953.36	833.6	214.471	189.982	0.329004	0.540292	0.87438	-0.193667
O77622	T-complex protein 1 subunit zeta OS=Oryctolagus cuniculus OX=9986 GN=CCT6 PE=1 SV=3 - [TCPZ_RABIT]	CCT6	132.565	84.5979	93.286	98.1436	117.206	105.192	150.095	79.1326	98.3163	203.799	209.726	105.165	148.214	17.3734	59.4535	0.329004	0.540292	1.40934	0.495022
P00008	Cytochrome c OS=Oryctolagus cuniculus OX=9986 GN=CYCS PE=1 SV=2 - [CYC_RABIT]	CYCS	154.145	119.001	155.921	253.825	277.591	79.7769	57.7759	207.058	26.2822	89.1197	160.413	173.377	108.13	77.1036	74.3578	0.329004	0.540292	0.62367	-0.681146
P00389	NADPH--cytochrome P450 reductase OS=Oryctolagus cuniculus OX=9986 GN=POR PE=1 SV=1 - [NCPR_RABIT]	POR	0	18.3035	43.044	302.87	44.1754	68.0655	25.0347	42.9702	22.6774	14.8435	30.5387	79.4098	27.2129	111.953	10.4603	0.329004	0.540292	0.34269	-1.54503
P00511	ATP-dependent 6-phosphofructokinase, muscle type OS=Oryctolagus cuniculus OX=9986 GN=PFKM PE=1 SV=3 - [PFKAM_RABIT]	PFKM	283.761	104.563	120.008	109.008	451.152	287.209	212.879	158.883	99.7935	167.538	96.7423	225.95	147.167	139.603	49.1355	0.329004	0.540292	0.651326	-0.618549
P11974	Pyruvate kinase PKM OS=Oryctolagus cuniculus OX=9986 GN=PKM PE=1 SV=4 - [KPYM_RABIT]	PKM	1450.8	1483.84	1523.46	2111.73	2697.13	888.445	1574.84	1882.46	1672.46	2082.5	2669.96	1692.57	1976.44	626.43	434.378	0.329004	0.540292	1.16772	0.223694
P13491	L-lactate dehydrogenase A chain OS=Oryctolagus cuniculus OX=9986 GN=LDHA PE=1 SV=3 - [LDHA_RABIT]	LDHA	1212.92	736.554	896.716	449.624	2173.35	1045.02	967.664	1486.24	1636.88	904.846	1264.33	1085.7	1251.99	593.807	318.006	0.329004	0.540292	1.15317	0.205602
P27115	Alpha-1,3-mannosyl-glycoprotein 2-beta-N-acetylglucosaminyltransferase OS=Oryctolagus cuniculus OX=9986 GN=MGAT1 PE=1 SV=1 - [MGAT1_RABIT]	MGAT1	0	91.5074	55.4564	27.3551	157.53	68.5619	109.483	130.328	48.1589	96.1563	80.9348	66.7351	93.0123	54.7581	30.949	0.329004	0.540292	1.39375	0.478976
P42928	Serine proteinase inhibitor 1 OS=Rabbitpox virus (strain Utrecht) OX=45417 GN=SPI-1 PE=3 SV=1 - [SPI1_RABPU]	SPI-1	180.514	112.607	162.359	145.312	163.506	120.008	130.635	129.593	90.9468	125.769	149.421	147.384	125.273	26.6268	21.2666	0.329004	0.540292	0.849976	-0.234506
P68105	Elongation factor 1-alpha 1 OS=Oryctolagus cuniculus OX=9986 GN=EEF1A1 PE=1 SV=1 - [EF1A1_RABIT]	EEF1A1	2541.96	1656.82	2320.54	2901.64	3396.92	1540.04	2962.62	2960.4	2088.97	2612.94	2995.88	2392.99	2724.16	716.032	388.054	0.329004	0.540292	1.13839	0.186999
Q01971	Ras-related protein Rab-2A OS=Oryctolagus cuniculus OX=9986 GN=RAB2A PE=2 SV=1 - [RAB2A_RABIT]	RAB2A	183.905	155.072	206.363	295.46	247.697	148.542	127.4	196.109	128.232	196.131	190.824	206.173	167.739	56.789	36.5096	0.329004	0.540292	0.813584	-0.297637
Q29502	Serine/threonine-protein kinase PAK 2 OS=Oryctolagus cuniculus OX=9986 GN=PAK2 PE=1 SV=1 - [PAK2_RABIT]	PAK2	32.9396	35.9424	58.8005	38.0653	35.5893	50.2595	0	38.8309	24.8036	34.9178	39.9533	41.9327	27.7011	10.2549	16.5968	0.329004	0.540292	0.660609	-0.598132
Q8MI17	Retinal dehydrogenase 1 OS=Oryctolagus cuniculus OX=9986 GN=ALDH1A1 PE=1 SV=1 - [AL1A1_RABIT]	ALDH1A1	1023.43	1735.7	1383.6	1309.85	2036.35	875.376	637.818	1958.28	1712.15	633.36	487.636	1394.05	1085.85	434.246	692.231	0.329004	0.540292	0.778917	-0.360459
Q9TS33	Ryanodine receptor 3 OS=Oryctolagus cuniculus OX=9986 PE=1 SV=1 - [RYR3_RABIT]	Not available	2658.88	1651.72	5333.81	3169.15	921.84	5182.4	3531.02	1282.99	5810.79	3604.63	5607.28	3152.97	3967.34	1808.36	1844.95	0.329004	0.540292	1.25829	0.331462
Q9MZR1	Interleukin-6 OS=Oryctolagus cuniculus OX=9986 GN=IL6 PE=2 SV=1 - [IL6_RABIT]	IL6	838.458	0	0	76.0013	0	489.169	0	0	0	0	93.0529	233.938	18.6106	352.055	41.6145	0.341314	0.557948	0.0795534	-3.65193
P09849	Lactase-phlorizin hydrolase OS=Oryctolagus cuniculus OX=9986 GN=LCT PE=1 SV=1 - [LPH_RABIT]	LCT	0	27.1437	2.72046	135.372	742.248	40.1212	33.0791	0	0	0	165.395	157.934	39.6949	290.501	71.7137	0.350122	0.564611	0.251338	-1.9923
Q6TYA7	Gap junction alpha-1 protein OS=Oryctolagus cuniculus OX=9986 GN=GJA1 PE=1 SV=1 - [CXA1_RABIT]	GJA1	270.683	0	0	0	800.521	493.036	411.147	836.16	689.694	436.694	0	260.707	474.739	331.475	319.257	0.350122	0.564611	1.82097	0.864707
Q9MZ30	Carbonic anhydrase 12 OS=Oryctolagus cuniculus OX=9986 GN=CA12 PE=2 SV=2 - [CAH12_RABIT]	CA12	108.869	0	92.9395	0	0	50.1501	74.8128	101.886	350.618	0	84.0002	41.9931	122.263	49.8492	133.44	0.350122	0.564611	2.91151	1.54177
P48833	Zona pellucida sperm-binding protein 3 (Fragment) OS=Oryctolagus cuniculus OX=9986 GN=ZP3 PE=1 SV=1 - [ZP3_RABIT]	ZP3	982.414	1141.83	1629.2	1221.02	2508.82	0	1723.44	2265.83	1710.39	2198.56	0	1247.21	1579.64	821.585	920.184	0.360216	0.575703	1.26654	0.340889
P80912	Histidine triad nucleotide-binding protein 1 OS=Oryctolagus cuniculus OX=9986 GN=HINT1 PE=1 SV=2 - [HINT1_RABIT]	HINT1	0	83.5076	100.884	123.493	120.333	195.802	0	291.276	64.3701	42.0308	65.3841	104.003	92.6122	63.7497	114.173	0.360216	0.575703	0.890472	-0.167358
P07293	Voltage-dependent L-type calcium channel subunit alpha-1S OS=Oryctolagus cuniculus OX=9986 GN=CACNA1S PE=1 SV=1 - [CAC1S_RABIT]	CACNA1S	0	28.5385	273.193	1005.19	0	605.427	0	0	0	1289.97	0	318.725	257.993	410.582	576.891	0.370287	0.581415	0.809454	-0.304979
P27112	Potassium-transporting ATPase alpha chain 1 OS=Oryctolagus cuniculus OX=9986 GN=ATP4A PE=2 SV=3 - [ATP4A_RABIT]	ATP4A	0	0	71.2454	0	0	57.2591	58.6658	94.5907	58.7026	0	0	21.4174	42.3918	33.4732	41.3816	0.370287	0.581415	1.97931	0.985001
P49656	Inward rectifier potassium channel 2 OS=Oryctolagus cuniculus OX=9986 GN=KCNJ2 PE=2 SV=1 - [KCNJ2_RABIT]	KCNJ2	0	16.478	0	0	0	98.868	256.041	0	0	27.2106	56.6502	19.2243	67.9803	39.5701	107.703	0.370287	0.581415	3.53616	1.82218
Q9TS53	Annexin A6 (Fragments) OS=Oryctolagus cuniculus OX=9986 GN=ANXA6 PE=1 SV=1 - [ANXA6_RABIT]	ANXA6	715.868	0	109.227	931.835	0	871.483	941.97	0	0	0	0	438.069	188.394	447.386	421.262	0.370287	0.581415	0.430056	-1.2174
P0C794	Matrix protein OS=Borna disease virus 1 OX=1714621 GN=M PE=1 SV=1 - [MATRX_BDV1]	M	0	127.739	43.2051	82.2865	0	146.727	0	0	143.713	0	11.3482	66.6596	31.0123	62.9647	63.193	0.388861	0.605271	0.465233	-1.10397
Q9Q926	Probable metalloendopeptidase G1-type OS=Rabbit fibroma virus (strain Kasza) OX=10272 GN=GP045L PE=3 SV=1 - [MP44_RFVKA]	GP045L	150.758	173.298	0	5.91046	0	307.597	26.3878	0	0	0	152.662	106.261	35.8099	126.225	66.3139	0.388861	0.605271	0.337	-1.56918
P29678	Dual specificity mitogen-activated protein kinase kinase 1 OS=Oryctolagus cuniculus OX=9986 GN=MAP2K1 PE=1 SV=2 - [MP2K1_RABIT]	MAP2K1	224.149	54.9572	100.039	67.5163	0	0	83.9809	0	37.6666	0	27.8877	74.4436	29.907	83.1605	34.5584	0.400394	0.617849	0.401741	-1.31566
P31429	Dipeptidase 1 OS=Oryctolagus cuniculus OX=9986 GN=DPEP1 PE=1 SV=1 - [DPEP1_RABIT]	DPEP1	0	179.214	0	13.827	96.2987	101.655	292.464	0	310.665	276.933	0	65.1658	176.012	72.714	161.119	0.400394	0.617849	2.70099	1.43349
Q28634	Cadherin-16 OS=Oryctolagus cuniculus OX=9986 GN=CDH16 PE=1 SV=1 - [CAD16_RABIT]	CDH16	380.948	6.00388	0	0	1817.26	546.893	1045.21	0	526.866	665.593	978.918	458.518	643.317	705.019	418.944	0.407016	0.6227	1.40304	0.488552
Q8WND5	Elongator complex protein 1 OS=Oryctolagus cuniculus OX=9986 GN=ELP1 PE=2 SV=1 - [ELP1_RABIT]	ELP1	32.7488	0	0	156.471	27.7517	12.2702	29.7663	33.9673	34.0936	0	57.7522	38.207	31.1159	59.5278	20.5943	0.407016	0.6227	0.814403	-0.296185
P60990	Prolactin-inducible protein homolog OS=Oryctolagus cuniculus OX=9986 GN=PIP PE=3 SV=1 - [PIP_RABIT]	PIP	1759.92	0	0	1070.4	1240.57	0	723.456	0	0	0	772.16	678.482	299.123	777.182	409.953	0.425806	0.623693	0.440871	-1.18157
P83268	Eukaryotic translation initiation factor 2 subunit 1 (Fragment) OS=Oryctolagus cuniculus OX=9986 GN=EIF2S1 PE=1 SV=1 - [IF2A_RABIT]	EIF2S1	524.704	0	0	0	642.943	410.613	0	290.643	0	137.352	0	263.043	85.5988	297.369	129.134	0.425806	0.623693	0.325417	-1.61964
P00939	Triosephosphate isomerase OS=Oryctolagus cuniculus OX=9986 GN=TPI1 PE=1 SV=3 - [TPIS_RABIT]	TPI1	701.597	1043.79	1042.97	1131.4	1781.85	760.631	883.753	1079.97	1107.87	1160.81	1189.32	1077.04	1084.34	385.5	120.08	0.428571	0.623693	1.00678	0.00975017
P02252	Histone H1.4 OS=Oryctolagus cuniculus OX=9986 GN=H1-4 PE=1 SV=2 - [H14_RABIT]	H1-4	659.506	406.029	737.062	681.545	953.177	776.957	714.529	641.57	391.378	353.457	989.179	702.379	618.023	178.751	259.32	0.428571	0.623693	0.879899	-0.184591
P07452	Carbonic anhydrase 1 (Fragment) OS=Oryctolagus cuniculus OX=9986 GN=CA1 PE=2 SV=1 - [CAH1_RABIT]	CA1	571.261	1435.43	634.746	481.84	408.536	1112.79	1470.6	543.063	1691.18	727.381	524.333	774.1	991.311	407.843	549.588	0.428571	0.623693	1.2806	0.356818
P15253	Calreticulin OS=Oryctolagus cuniculus OX=9986 GN=CALR PE=1 SV=1 - [CALR_RABIT]	CALR	648.334	499.923	585.135	813.879	740.835	213.717	643.171	676.889	621.793	650.262	1059.12	583.637	730.247	212.489	184.896	0.428571	0.623693	1.2512	0.323312
P24480	Protein S100-A11 OS=Oryctolagus cuniculus OX=9986 GN=S100A11 PE=1 SV=2 - [S10AB_RABIT]	S100A11	251.867	130.016	214.129	484.89	578.267	309.879	431.552	382.755	453.278	427.724	357.979	328.174	410.658	170.609	39.0449	0.428571	0.623693	1.25134	0.323474
Q01059	Cytoplasmic aconitate hydratase OS=Oryctolagus cuniculus OX=9986 GN=ACO1 PE=1 SV=1 - [ACOC_RABIT]	ACO1	76.856	71.3133	138.604	135.183	136.372	70.0009	92.248	96.5198	192.63	114.333	137.14	104.721	126.574	35.1447	40.9464	0.428571	0.623693	1.20868	0.273428
Q08863	Glutathione S-transferase alpha I OS=Oryctolagus cuniculus OX=9986 PE=1 SV=1 - [GSTA1_RABIT]	Not available	189.971	185.028	151.997	309.474	865.47	198.403	179.774	471.791	303.908	129.243	42.6013	316.724	225.463	274.124	167.044	0.428571	0.623693	0.711861	-0.490332
Q09YN7	Caveolin-2 OS=Oryctolagus cuniculus OX=9986 GN=CAV2 PE=3 SV=1 - [CAV2_RABIT]	CAV2	87.2407	99.3744	78.1219	36.8231	25.5525	109.387	0	79.3073	74.2321	79.4487	53.4729	72.75	57.2922	34.0833	33.7621	0.428571	0.623693	0.787521	-0.344609
Q6SQH4	Protein S100-A10 OS=Oryctolagus cuniculus OX=9986 GN=S100a10 PE=3 SV=3 - [S10AA_RABIT]	S100a10	283.974	316.67	541.073	946.482	773.941	527.681	475.792	874.437	635.005	539.372	1218.54	564.97	748.63	257.602	303.228	0.428571	0.623693	1.32508	0.406078
Q95MF9	Chloride intracellular channel protein 1 OS=Oryctolagus cuniculus OX=9986 GN=CLIC1 PE=2 SV=3 - [CLIC1_RABIT]	CLIC1	136.197	123.208	129.805	424.627	535.345	255.76	454.56	464.371	242.627	196.792	376.112	267.49	346.893	175.264	122.115	0.428571	0.623693	1.29684	0.375003
P49139	MAP kinase-activated protein kinase 2 (Fragment) OS=Oryctolagus cuniculus OX=9986 GN=MAPKAPK2 PE=1 SV=2 - [MAPK2_RABIT]	MAPKAPK2	85.9274	0	0	0	2.83465	14.7937	42.2538	10.942	11.7066	19.6347	0	17.2593	16.9074	34.1266	15.7985	0.454772	0.659144	0.979613	-0.0297163
Q09081	Potassium voltage-gated channel subfamily A member 2 OS=Oryctolagus cuniculus OX=9986 GN=KCNA2 PE=1 SV=2 - [KCNA2_RABIT]	KCNA2	0	12.0487	0	12.0487	0	72.2923	0	0	0	0	46.227	16.0649	9.2454	28.171	20.6733	0.457858	0.660262	0.575501	-0.797109
P00820	Acylphosphatase-2 OS=Oryctolagus cuniculus OX=9986 GN=ACYP2 PE=1 SV=2 - [ACYP2_RABIT]	ACYP2	80.4098	0	110.955	17.8408	0	0	0	110.371	0	0	0	34.8677	22.0742	48.581	49.3594	0.459233	0.660262	0.633086	-0.659528
Q9Q8J2	Transcript termination protein A18 OS=Myxoma virus (strain Lausanne) OX=31530 GN=m108R PE=3 SV=1 - [A18_MYXVL]	m108R	499.544	198.37	9.7146	0	103.329	468.31	202.633	88.2196	39.7076	50.1803	0	213.211	76.1482	221.912	77.3709	0.464192	0.664722	0.357149	-1.4854
Q9TUN9	Short transient receptor potential channel 1 OS=Oryctolagus cuniculus OX=9986 GN=TRPC1 PE=2 SV=1 - [TRPC1_RABIT]	TRPC1	0	23.2035	0	33.5397	0	0	0	0	16.3534	24.8472	56.9196	9.4572	19.624	15.0112	23.4475	0.485903	0.693041	2.07504	1.05314
P13834	Glycogen [starch] synthase, muscle OS=Oryctolagus cuniculus OX=9986 GN=GYS1 PE=1 SV=4 - [GYS1_RABIT]	GYS1	19.7504	0	0	0	110.181	8.32166	0	0	45.3054	31.3817	147.486	23.0422	44.8346	43.3902	60.7017	0.502731	0.708574	1.94576	0.960336
P16472	DNA topoisomerase 1 OS=Rabbit fibroma virus (strain Kasza) OX=10272 GN=TOP1 PE=3 SV=1 - [TOP1_RFVKA]	TOP1	9.08801	85.3399	0	32.131	0	0	0	129.701	0	116.352	31.122	21.0932	55.435	33.8478	63.1734	0.502731	0.708574	2.62811	1.39402
Q9GKX2	Dehydrogenase/reductase SDR family member 4 (Fragment) OS=Oryctolagus cuniculus OX=9986 GN=DHRS4 PE=1 SV=1 - [DHRS4_RABIT]	DHRS4	0	3997.06	0	0	80.2641	0	48.9213	78.4618	0	42.0134	104.702	679.555	54.8196	1625.56	39.5321	0.502731	0.708574	0.0806699	-3.63182
P80584	Tubulin-specific chaperone A OS=Oryctolagus cuniculus OX=9986 GN=TBCA PE=1 SV=2 - [TBCA_RABIT]	TBCA	22.8349	0	0	0	104.681	24.2059	21.5133	39.3372	28.4008	17.9083	21.4319	25.2869	25.7183	40.5682	8.51061	0.518992	0.728625	1.01706	0.0244029
Q9TV52	Potassium-transporting ATPase alpha chain 2 OS=Oryctolagus cuniculus OX=9986 GN=ATP12A PE=2 SV=1 - [AT12A_RABIT]	ATP12A	37.355	78.1723	165.966	137.595	236.085	77.3198	0	85.7263	187.933	0	98.9389	122.082	74.5195	72.4893	78.5664	0.521869	0.729801	0.610405	-0.71216
O62695	Histone H2A.V OS=Oryctolagus cuniculus OX=9986 GN=H2AZ2 PE=2 SV=3 - [H2AV_RABIT]	H2AZ2	6713.34	2704.02	4387.85	5543.58	8320.29	4171.89	2936.03	5515.02	4914.57	3739.89	5077.64	5306.83	4436.63	2001.12	1065.31	0.536797	0.739128	0.836024	-0.258384
O77503	Protein argonaute-2 (Fragment) OS=Oryctolagus cuniculus OX=9986 GN=AGO2 PE=1 SV=2 - [AGO2_RABIT]	AGO2	112.432	219.612	246.17	1826.23	367.113	200.74	135.089	503.893	199.8	272.152	0	495.382	222.187	657.148	186.621	0.536797	0.739128	0.448516	-1.15677
P30801	Protein S100-A6 OS=Oryctolagus cuniculus OX=9986 GN=S100A6 PE=1 SV=2 - [S10A6_RABIT]	S100A6	1741.02	611.491	661.328	814.338	3552.47	1125.26	1177.11	1545.12	1503.53	965.341	1581.98	1417.65	1354.62	1125.47	270.743	0.536797	0.739128	0.955536	-0.0656184
Q28717	Serine/threonine-protein phosphatase 2A activator OS=Oryctolagus cuniculus OX=9986 GN=PTPA PE=1 SV=1 - [PTPA_RABIT]	PTPA	43.4258	40.7731	32.4365	65.4219	89.277	16.6313	55.6554	39.4982	39.6536	26.9454	35.808	47.9943	39.5121	25.7165	10.3955	0.536797	0.739128	0.823268	-0.280567
P07952	Bisphosphoglycerate mutase OS=Oryctolagus cuniculus OX=9986 GN=BPGM PE=2 SV=2 - [PMGE_RABIT]	BPGM	169.863	65.4914	0	360.961	0	0	195.051	109.148	61.5314	187.794	0	99.386	110.705	144.34	83.2663	0.575062	0.788783	1.11389	0.155607
P56201	GDH/6PGL endoplasmic bifunctional protein OS=Oryctolagus cuniculus OX=9986 GN=H6PD PE=1 SV=3 - [G6PE_RABIT]	H6PD	1680.86	1786.26	1698.99	1493.44	0	1017	1335.36	679.987	4710.49	1320.9	0	1279.43	1609.35	684.934	1818.59	0.583025	0.793623	1.25787	0.33098
Q28740	Basigin OS=Oryctolagus cuniculus OX=9986 GN=BSG PE=2 SV=1 - [BASI_RABIT]	BSG	51.5067	14.6917	0	107.003	94.8613	103.559	138.616	0	110.375	86.2434	68.0884	61.9369	80.6646	46.9561	52.2905	0.583025	0.793623	1.30237	0.381138
P12798	Phosphorylase b kinase regulatory subunit beta OS=Oryctolagus cuniculus OX=9986 GN=PHKB PE=1 SV=3 - [KPBB_RABIT]	PHKB	0	1.07206	0	1.07206	0	6.43234	0	0	0	56.4547	0	1.42941	11.2909	2.50656	25.2473	0.595925	0.800536	7.89903	2.98168
P02562	Myosin heavy chain, skeletal muscle (Fragments) OS=Oryctolagus cuniculus OX=9986 PE=1 SV=2 - [MYSS_RABIT]	Not available	0	40.9385	182.108	63.5236	0	0	0	0	0	0	190.759	47.7616	38.1519	70.9752	85.3102	0.597048	0.800536	0.798797	-0.324098
Q02343	Voltage-dependent R-type calcium channel subunit alpha-1E OS=Oryctolagus cuniculus OX=9986 GN=CACNA1E PE=2 SV=1 - [CAC1E_RABIT]	CACNA1E	7.52126	35.7442	0.94378	0	0	0	887.136	0	0	0	0	7.3682	177.427	14.2082	396.739	0.597048	0.800536	24.0801	4.58977
Q9TSJ4	Interleukin-10 OS=Oryctolagus cuniculus OX=9986 GN=IL10 PE=2 SV=1 - [IL10_RABIT]	IL10	0	0	190.274	168.378	0	79.9843	0	0	193.576	0	0	73.106	38.7152	88.1882	86.5698	0.597048	0.800536	0.529576	-0.91709
P31661	Sodium- and chloride-dependent creatine transporter 1 OS=Oryctolagus cuniculus OX=9986 GN=SLC6A8 PE=2 SV=1 - [SC6A8_RABIT]	SLC6A8	0	1865.5	0	0	0	2769.62	0	2354.81	786.116	1952.14	0	772.52	1018.61	1230.46	1093.86	0.618665	0.817644	1.31856	0.398963
Q28690	Translation initiation factor eIF-2B subunit beta OS=Oryctolagus cuniculus OX=9986 GN=EIF2B2 PE=1 SV=1 - [EI2BB_RABIT]	EIF2B2	710.641	0	0	0	0	50.1956	84.3054	25.3715	0	194.862	0	126.806	60.9077	286.723	82.4219	0.618665	0.817644	0.480322	-1.05793
P01847	Ig lambda chain C region OS=Oryctolagus cuniculus OX=9986 PE=1 SV=2 - [LAC_RABIT]	Not available	63.0096	74.6884	0	0	0	72.67	0	52.6945	169.208	0	158.911	35.0613	76.1627	38.6101	83.1519	0.632142	0.817644	2.17227	1.1192
P15541	Aminopeptidase N OS=Oryctolagus cuniculus OX=9986 GN=ANPEP PE=1 SV=4 - [AMPN_RABIT]	ANPEP	100.195	0	37.7023	109.64	0	0	0	0	33.629	37.3826	12.3554	41.2563	16.6734	51.5151	17.9653	0.632142	0.817644	0.404142	-1.30707
P61015	Cardiac phospholamban OS=Oryctolagus cuniculus OX=9986 GN=PLN PE=1 SV=1 - [PPLA_RABIT]	PLN	105.08	0	0	0	76.0005	1407.34	40.2844	40.7724	0	50.1351	0	264.737	26.2384	561.589	24.2718	0.632142	0.817644	0.0991112	-3.33481
P98118	Vitamin K-dependent protein S (Fragment) OS=Oryctolagus cuniculus OX=9986 GN=PROS1 PE=2 SV=1 - [PROS_RABIT]	PROS1	0	167.713	494.339	0	0	0	0	35.7152	131.658	93.1403	67.7704	110.342	65.6567	199.723	50.8017	0.632142	0.817644	0.595029	-0.748968
Q28668	Collagen alpha-2(I) chain (Fragment) OS=Oryctolagus cuniculus OX=9986 GN=COL1A2 PE=2 SV=1 - [CO1A2_RABIT]	COL1A2	56.8082	11.9938	0	0	0	20.6707	0	49.3237	36.9318	0	48.2533	14.9121	26.9018	22.1994	25.0332	0.632142	0.817644	1.80402	0.851216
Q9BG98	Calcium-activated potassium channel subunit alpha-1 OS=Oryctolagus cuniculus OX=9986 GN=KCNMA1 PE=2 SV=1 - [KCMA1_RABIT]	KCNMA1	23.2222	25.4795	39.5061	23.2222	0	74.3478	124.744	0	0	6.43354	26.2355	30.963	31.4825	24.7542	53.2328	0.644288	0.817644	1.01678	0.0240073
Q9TU29	Guanine nucleotide-binding protein subunit alpha-15 OS=Oryctolagus cuniculus OX=9986 GN=GNA15 PE=2 SV=1 - [GNA15_RABIT]	GNA15	0	0	0	198.437	285.2	148.861	148.594	182.567	129.104	146.261	211.278	105.416	163.561	123.451	32.9725	0.645055	0.817644	1.55157	0.633729
Q5IH81	Eukaryotic translation initiation factor 3 subunit I OS=Oryctolagus cuniculus OX=9986 GN=EIF3I PE=1 SV=1 - [EIF3I_RABIT]	EIF3I	0	118.978	45.4771	121.467	32.418	0	24.5388	55.0636	9.00121	24.6122	26.0948	53.0567	27.8621	55.0254	16.7361	0.647329	0.817644	0.525139	-0.929229
O18750	Endoplasmin (Fragment) OS=Oryctolagus cuniculus OX=9986 GN=HSP90B1 PE=2 SV=1 - [ENPL_RABIT]	HSP90B1	518.997	316.693	559.2	616.96	652.711	273.322	518.488	730.832	482.958	509.516	796.37	489.647	607.633	158.245	144.843	0.662338	0.817644	1.24096	0.311457
O46379	Lumican (Fragment) OS=Oryctolagus cuniculus OX=9986 GN=LUM PE=2 SV=1 - [LUM_RABIT]	LUM	4398.96	3124.8	4405.76	5919.59	10843.2	4417.69	3066.2	7085.07	6306.15	3860.02	4203.38	5518.32	4904.16	2754.85	1708.9	0.662338	0.817644	0.888705	-0.170224
P04068	Epoxide hydrolase 1 OS=Oryctolagus cuniculus OX=9986 GN=EPHX1 PE=1 SV=2 - [HYEP_RABIT]	EPHX1	177.281	216.689	217.98	249.901	629.427	215.323	247.557	257.55	274.395	155.922	218.179	284.434	230.721	170.573	46.5371	0.662338	0.817644	0.811158	-0.301945
P08628	Thioredoxin OS=Oryctolagus cuniculus OX=9986 GN=TXN PE=1 SV=2 - [THIO_RABIT]	TXN	333.239	415.726	442.57	264.785	425.205	256.094	268.686	390.083	288.881	277.139	358.095	356.27	316.577	83.2706	54.1822	0.662338	0.817644	0.888587	-0.170415
P09212	Superoxide dismutase [Cu-Zn] OS=Oryctolagus cuniculus OX=9986 GN=SOD1 PE=1 SV=3 - [SODC_RABIT]	SOD1	215.942	220.629	302.621	291.344	511.396	227.133	219.188	318.473	261.49	251.927	163.719	294.844	242.959	112.504	56.9433	0.662338	0.817644	0.824027	-0.279237
P29562	Eukaryotic initiation factor 4A-I (Fragment) OS=Oryctolagus cuniculus OX=9986 GN=EIF4A1 PE=1 SV=2 - [IF4A1_RABIT]	EIF4A1	588.972	515.482	642.233	768.329	878.617	375.81	543.49	613.481	539.801	493.915	704.642	628.24	579.066	179.157	82.1765	0.662338	0.817644	0.921727	-0.117589
P46409	Glutathione S-transferase Mu 1 OS=Oryctolagus cuniculus OX=9986 PE=1 SV=2 - [GSTMU_RABIT]	Not available	648.232	694.838	1114.54	1332.06	2920.94	859.346	910.848	1292.66	315.295	837.696	1085.97	1261.66	888.495	853.141	365.372	0.662338	0.817644	0.704228	-0.505886
P53787	Elongation factor 1-delta OS=Oryctolagus cuniculus OX=9986 GN=EEF1D PE=2 SV=1 - [EF1D_RABIT]	EEF1D	116.18	87.4844	124.953	133.473	184.87	86.9189	92.3162	205.556	131.172	70.3922	206.95	122.313	141.277	36.1892	63.1834	0.662338	0.817644	1.15504	0.207947
Q29426	Keratin, type II cytoskeletal 3 OS=Oryctolagus cuniculus OX=9986 GN=KRT3 PE=2 SV=1 - [K2C3_RABIT]	KRT3	1256.92	289.13	223.653	128.005	1599.61	799.615	898.405	1415.95	1370.67	1033.52	119.03	716.155	967.515	608.393	522.658	0.662338	0.817644	1.35099	0.434012
Q8HZQ5	Ezrin OS=Oryctolagus cuniculus OX=9986 GN=EZR PE=1 SV=3 - [EZRI_RABIT]	EZR	1531.47	986.949	1462.87	2019.93	2144.38	912.468	1197.87	1436.27	1210.65	1317.28	1816.33	1509.68	1395.68	509.073	254.018	0.662338	0.817644	0.924489	-0.113272
Q9N0Z6	Sodium/potassium-transporting ATPase subunit alpha-1 OS=Oryctolagus cuniculus OX=9986 GN=ATP1A1 PE=1 SV=2 - [AT1A1_RABIT]	ATP1A1	84.808	82.8221	92.7255	122.682	112.495	291.316	141.162	155.644	107.389	75.113	181.043	131.141	132.07	80.0405	41.5031	0.662338	0.817644	1.00708	0.0101813
Q9N1E2	Glucose-6-phosphate isomerase OS=Oryctolagus cuniculus OX=9986 GN=GPI PE=1 SV=3 - [G6PI_RABIT]	GPI	189.906	202.438	161.138	192.279	577.641	168.36	165.813	150.95	297.271	161.726	230.99	248.627	201.35	161.928	62.1542	0.662338	0.817644	0.809848	-0.304277
Q9TT13	Voltage-dependent anion-selective channel protein 3 OS=Oryctolagus cuniculus OX=9986 GN=VDAC3 PE=2 SV=1 - [VDAC3_RABIT]	VDAC3	228.457	60.2339	222.991	175.107	232.001	156.692	190.176	144.758	157.166	120.652	230.516	179.247	168.654	66.0426	42.7122	0.662338	0.817644	0.9409	-0.087887
Q99105	Myosin heavy chain, embryonic smooth muscle isoform (Fragment) OS=Oryctolagus cuniculus OX=9986 PE=2 SV=1 - [MYSU_RABIT]	Not available	1071.01	555.394	1074.4	853.318	0	1008.9	1135.38	981.566	0	446.151	625.111	760.503	637.641	420.879	449.844	0.714379	0.878858	0.838446	-0.254209
P27884	Voltage-dependent P/Q-type calcium channel subunit alpha-1A OS=Oryctolagus cuniculus OX=9986 GN=CACNA1A PE=1 SV=1 - [CAC1A_RABIT]	CACNA1A	24.2914	0	0	190.465	0	0	0	10.0693	2.35195	0	58.9611	35.7927	14.2765	76.394	25.3192	0.76521	0.917833	0.398865	-1.32603
P41110	Eukaryotic translation initiation factor 4 gamma 1 OS=Oryctolagus cuniculus OX=9986 GN=EIF4G1 PE=1 SV=1 - [IF4G1_RABIT]	EIF4G1	29.4286	0	19.7302	25.1714	0	0	0	34.2714	0	26.5243	8.96243	12.3884	13.9516	13.9147	15.6936	0.773938	0.917833	1.12619	0.171447
Q05017	Phospholipase B1, membrane-associated OS=Oryctolagus cuniculus OX=9986 GN=PLB1 PE=1 SV=1 - [PLB1_RABIT]	PLB1	94.2231	48.6075	0	0	28.6051	28.8001	0	0	0	158.153	42.3313	33.3726	40.0968	35.2306	68.4935	0.773938	0.917833	1.20149	0.264822
Q3Y5G8	Interleukin-15 OS=Oryctolagus cuniculus OX=9986 GN=IL15 PE=1 SV=1 - [IL15_RABIT]	IL15	21.0557	33.4266	0	77.3828	137.812	0	0	0	0	112.442	87.5942	44.9462	40.0073	53.7029	55.4822	0.773938	0.917833	0.890115	-0.167936
Q95216	Helicase-like transcription factor OS=Oryctolagus cuniculus OX=9986 GN=HLTF PE=1 SV=1 - [HLTF_RABIT]	HLTF	30.6072	0	0	48.0532	0	20.0841	27.0749	31.6502	0	34.0401	0	16.4574	18.553	20.1206	17.1204	0.773938	0.917833	1.12733	0.172916
P10830	Protein kinase C epsilon type OS=Oryctolagus cuniculus OX=9986 GN=PRKCE PE=2 SV=1 - [KPCE_RABIT]	PRKCE	185.787	120.376	109.102	35.7808	256.663	0	0	165.168	340.482	294.87	0	117.952	160.104	94.4366	159.68	0.782252	0.917833	1.35737	0.440816
Q28626	Alpha-1-syntrophin OS=Oryctolagus cuniculus OX=9986 GN=SNTA1 PE=1 SV=1 - [SNTA1_RABIT]	SNTA1	119.525	0	19.9532	0	70.707	22.3578	71.0919	41.8974	0	49.6216	20.0582	38.7572	36.5338	47.2674	27.3883	0.782252	0.917833	0.942633	-0.0852324
Q6SPE9	Atherin OS=Oryctolagus cuniculus OX=9986 GN=SAMD1 PE=2 SV=1 - [SAMD1_RABIT]	SAMD1	22.8722	0	39.3151	41.1224	0	18.9641	0	30.3494	74.4526	15.632	23.2252	20.379	28.7319	18.0427	27.9305	0.782252	0.917833	1.40988	0.495569
P18688	Phosphorylase b kinase regulatory subunit alpha, skeletal muscle isoform OS=Oryctolagus cuniculus OX=9986 GN=PHKA1 PE=1 SV=1 - [KPB1_RABIT]	PHKA1	114.285	79.149	236.465	0	118.183	0	72.0274	89.656	107.495	79.1441	94.6358	91.347	88.5917	88.4793	13.7716	0.783711	0.917833	0.969837	-0.0441863
Q9MZS1	Potassium/sodium hyperpolarization-activated cyclic nucleotide-gated channel 1 OS=Oryctolagus cuniculus OX=9986 GN=HCN1 PE=2 SV=2 - [HCN1_RABIT]	HCN1	0	117.184	51.9609	120.622	33.7495	0	38.7873	25.1469	67.6	73.5723	94.2065	53.9193	59.8626	54.1791	27.7339	0.783711	0.917833	1.11023	0.150852
O79432	ATP synthase subunit a OS=Oryctolagus cuniculus OX=9986 GN=MT-ATP6 PE=3 SV=1 - [ATP6_RABIT]	MT-ATP6	92.5419	45.7844	164.453	31.9702	72.5005	79.1962	76.701	80.0773	99.0089	120.681	28.4422	81.0743	80.9821	46.5126	34.2074	0.792208	0.917833	0.998863	-0.0016412
P00883	Fructose-bisphosphate aldolase A OS=Oryctolagus cuniculus OX=9986 GN=ALDOA PE=1 SV=2 - [ALDOA_RABIT]	ALDOA	1156.62	964.886	1067.68	1183.19	2012.59	963.928	959.538	1167.59	977.337	1158.99	1120.43	1224.81	1076.78	396.809	100.678	0.792208	0.917833	0.879135	-0.185844
P02057	Hemoglobin subunit beta-1/2 OS=Oryctolagus cuniculus OX=9986 GN=HBB1 PE=1 SV=2 - [HBB_RABIT]	HBB1	128384	224589	183544	153430	102295	232142	159313	138717	277907	180883	175702	170731	186504	52177.2	53679.2	0.792208	0.917833	1.09239	0.127487
P02170	Myoglobin OS=Oryctolagus cuniculus OX=9986 GN=MB PE=1 SV=2 - [MYG_RABIT]	MB	107.209	176.432	568.659	89.0902	178.438	44.3118	290.445	162.645	123.863	256.209	71.9867	194.023	181.03	190.717	90.9943	0.792208	0.917833	0.933032	-0.100002
P10160	Eukaryotic translation initiation factor 5A-1 OS=Oryctolagus cuniculus OX=9986 GN=EIF5A PE=1 SV=2 - [IF5A1_RABIT]	EIF5A	174.641	127.195	310.741	341.904	283.511	149.555	119.993	221.853	186.095	176.59	298.415	231.258	200.589	91.6519	65.7722	0.792208	0.917833	0.867384	-0.205256
P62160	Calmodulin OS=Oryctolagus cuniculus OX=9986 GN=CALM PE=1 SV=2 - [CALM_RABIT]	CALM	566.076	497.342	793.476	1069.34	1148	893.651	553.578	575.237	609.827	676.13	1718.72	827.981	826.698	262.33	500.807	0.792208	0.917833	0.998451	-0.00223668
P63169	Dynein light chain 1, cytoplasmic OS=Oryctolagus cuniculus OX=9986 GN=DYNLL1 PE=1 SV=1 - [DYL1_RABIT]	DYNLL1	202.895	16.4776	67.1317	102.135	111.178	64.3301	17.4678	56.6438	75.4991	198.685	86.822	94.0246	87.0235	62.9783	67.7532	0.792208	0.917833	0.92554	-0.111633
Q9Q927	RNA helicase NPH-II OS=Rabbit fibroma virus (strain Kasza) OX=10272 GN=NPH2 PE=2 SV=1 - [NPH2_RFVKA]	NPH2	29.724	64.6714	30.9154	70.3739	199.738	70.2913	41.8491	104.242	70.0992	43.5903	72.0148	77.6189	66.359	62.7088	25.4961	0.792208	0.917833	0.854933	-0.226117
P04461	Myosin-7 (Fragment) OS=Oryctolagus cuniculus OX=9986 GN=MYH7 PE=1 SV=1 - [MYH7_RABIT]	MYH7	117.765	37.0425	0	220.19	0	0	162.41	0	0	80.3822	0	62.4995	48.5584	89.7631	72.5408	0.842187	0.969463	0.776941	-0.364123
Q3BCQ8	Thiopurine S-methyltransferase OS=Oryctolagus cuniculus OX=9986 GN=TPMT PE=2 SV=1 - [TPMT_RABIT]	TPMT	0	110.989	0	63.4972	92.2007	0	23.8606	0	0	119.303	0	44.4478	28.6328	50.9858	51.7286	0.842187	0.969463	0.644189	-0.634445
O46480	Nuclear distribution protein nudE-like 1 OS=Oryctolagus cuniculus OX=9986 GN=NDEL1 PE=1 SV=3 - [NDEL1_RABIT]	NDEL1	0	90.2007	81.9087	84.4876	0	0	51.6768	13.7134	0	47.9807	63.0284	42.7662	35.2799	46.9248	26.9719	0.851762	0.97422	0.824948	-0.277625
P47823	Translation initiation factor eIF-2B subunit epsilon OS=Oryctolagus cuniculus OX=9986 GN=EIF2B5 PE=1 SV=1 - [EI2BE_RABIT]	EIF2B5	303.729	0	171.812	97.2114	0	0	33.5032	0	41.8785	45.7953	79.8423	95.4587	40.2039	123.731	28.5768	0.851762	0.97422	0.421165	-1.24754
P11611	Serine/threonine-protein phosphatase 2A catalytic subunit beta isoform OS=Oryctolagus cuniculus OX=9986 GN=PPP2CB PE=1 SV=1 - [PP2AB_RABIT]	PPP2CB	90.9236	75.6592	0	0	0	0	62.6196	70.656	0	71.2954	0	27.7638	40.9142	43.2815	37.5055	0.920703	1	1.47365	0.559397
Q8WMG3	Sodium/potassium-transporting ATPase subunit beta-2 OS=Oryctolagus cuniculus OX=9986 GN=ATP1B2 PE=2 SV=1 - [AT1B2_RABIT]	ATP1B2	22.5536	0	0	0	17.6468	0	0	13.9853	0	4.38645	7.94699	6.70007	5.26374	10.495	5.90441	0.920703	1	0.785625	-0.348088
P07768	Sucrase-isomaltase, intestinal OS=Oryctolagus cuniculus OX=9986 GN=SI PE=1 SV=3 - [SUIS_RABIT]	SI	1375.02	0	0	115.248	22.8839	0	173.476	0	0	34.6953	34.6953	252.192	48.5734	551.884	71.9457	0.923534	1	0.192605	-2.37628
O62646	Synaptophysin-like protein 2 OS=Oryctolagus cuniculus OX=9986 GN=SYPL2 PE=2 SV=1 - [SYPL2_RABIT]	SYPL2	0	13.7508	0	0	63.3677	38.2736	23.9977	47.7044	25.6706	0	0	19.232	19.4745	26.2686	20.0891	0.923725	1	1.01261	0.0180783
P15285	Pulmonary surfactant-associated protein B OS=Oryctolagus cuniculus OX=9986 GN=SFTPB PE=2 SV=2 - [PSPB_RABIT]	SFTPB	0	118.025	191.745	197.906	294.562	0	257.435	321.486	0	0	0	133.706	115.784	117.784	160.153	0.923725	1	0.865958	-0.207631
P22687	Cholesteryl ester transfer protein (Fragment) OS=Oryctolagus cuniculus OX=9986 GN=CETP PE=1 SV=1 - [CETP_RABIT]	CETP	1315.79	0	65.1198	0	0	216.292	0	58.9482	0	839.202	21.1242	266.2	183.855	520.988	367.14	0.923725	1	0.690665	-0.533942
P34088	V(D)J recombination-activating protein 1 OS=Oryctolagus cuniculus OX=9986 GN=RAG1 PE=3 SV=1 - [RAG1_RABIT]	RAG1	0	0	4.95196	9.97582	0	83.3588	5.02131	0	35.5987	0	8.124	16.3811	9.7488	33.0536	14.8601	0.923725	1	0.595125	-0.748736
P52639	RNA-directed RNA polymerase L OS=Borna disease virus (strain V) OX=928296 GN=L PE=1 SV=2 - [L_BDVV]	L	0	50.4139	200.67	80.5308	0	0	0	45.5451	93.3813	0	26.4282	55.269	33.0709	78.6982	38.8086	0.923725	1	0.598362	-0.740909
O77821	Acyl-protein thioesterase 1 OS=Oryctolagus cuniculus OX=9986 GN=LYPLA1 PE=1 SV=1 - [LYPA1_RABIT]	LYPLA1	0	19.8457	24.8636	32.0357	27.6682	0	13.8883	0	36.0806	25.3381	0	17.4022	15.0614	14.0488	15.831	0.925558	1	0.865489	-0.208413
P12864	Glutaredoxin-1 OS=Oryctolagus cuniculus OX=9986 GN=GLRX PE=1 SV=1 - [GLRX1_RABIT]	GLRX	54.2201	0	85.5078	27.4135	0	78.9831	38.3534	0	86.8585	0	29.6913	41.0207	30.9806	37.8022	35.7	0.925558	1	0.755243	-0.404988
P13642	Serine--tRNA ligase, cytoplasmic OS=Oryctolagus cuniculus OX=9986 GN=SARS1 PE=1 SV=2 - [SYSC_RABIT]	SARS1	16.1351	30.3076	23.1068	27.6848	0	0	41.0861	0	0	20.4221	21.5098	16.2057	16.6036	13.4426	17.2439	0.925558	1	1.02455	0.034992
P51542	Cytochrome P450 7A1 OS=Oryctolagus cuniculus OX=9986 GN=CYP7A1 PE=1 SV=1 - [CP7A1_RABIT]	CYP7A1	5470.5	0	928.172	98.5292	928.172	0	451.656	1546.29	0.241948	536.88	174.87	1237.56	541.988	2119.89	601.056	0.926933	1	0.437948	-1.19117
O19049	Heterogeneous nuclear ribonucleoprotein K OS=Oryctolagus cuniculus OX=9986 GN=HNRNPK PE=2 SV=1 - [HNRPK_RABIT]	HNRNPK	215.775	150.243	272.429	331.424	413.179	188.123	193.738	254.839	294.042	305.679	187.122	261.862	247.084	97.844	55.0903	0.930736	1	0.943566	-0.083805
P01948	Hemoglobin subunit alpha-1/2 OS=Oryctolagus cuniculus OX=9986 PE=1 SV=2 - [HBA_RABIT]	Not available	79027.5	154108	99422.4	80980.8	41241	133636	77052.5	79661.8	166102	106397	99341.1	98069.3	105711	40721.5	36013.9	0.930736	1	1.07792	0.108252
P11909	Glutathione peroxidase 1 OS=Oryctolagus cuniculus OX=9986 GN=GPX1 PE=2 SV=2 - [GPX1_RABIT]	GPX1	203.606	231.051	236.117	349.566	289.886	189.175	184.182	822.812	244.83	158.067	264.837	249.9	334.946	59.8466	276.163	0.930736	1	1.34032	0.422573
P12822	Angiotensin-converting enzyme OS=Oryctolagus cuniculus OX=9986 GN=ACE PE=1 SV=3 - [ACE_RABIT]	ACE	136.8	63.5763	153.017	23.1397	77.2253	97.2948	98.7762	205.305	65.2572	63.6747	75.6097	91.8422	101.725	48.0124	59.576	0.930736	1	1.1076	0.147438
P62493	Ras-related protein Rab-11A OS=Oryctolagus cuniculus OX=9986 GN=RAB11A PE=2 SV=3 - [RB11A_RABIT]	RAB11A	196.972	117.037	281.699	352.823	390.315	326.303	331.912	344.621	297.726	323.69	274.82	277.525	314.553	102.989	28.0657	0.930736	1	1.13343	0.180689
P79398	Eukaryotic translation initiation factor 4 gamma 2 OS=Oryctolagus cuniculus OX=9986 GN=EIF4G2 PE=2 SV=1 - [IF4G2_RABIT]	EIF4G2	112.187	78.9788	82.7833	81.7654	317.523	165.893	0	150.531	145.842	120.238	127.477	139.855	108.818	93.1096	62.1102	0.930736	1	0.778074	-0.362021
Q00804	Plasma membrane calcium-transporting ATPase 1 OS=Oryctolagus cuniculus OX=9986 GN=ATP2B1 PE=2 SV=3 - [AT2B1_RABIT]	ATP2B1	39.9335	28.1124	41.4591	41.3843	82.8915	33.3666	72.0499	63.2073	0	34.9048	39.2667	44.5246	41.8857	19.5255	28.1713	0.930736	1	0.940733	-0.088143
Q09YN6	Caveolin-1 OS=Oryctolagus cuniculus OX=9986 GN=CAV1 PE=3 SV=1 - [CAV1_RABIT]	CAV1	771.386	362.418	649.291	433.307	569.505	865.546	582.268	903.939	625.375	488.489	437.339	608.576	607.482	193.41	181.625	0.930736	1	0.998203	-0.00259484
G1SRW8	Protein SLFN14 OS=Oryctolagus cuniculus OX=9986 GN=SLFN14 PE=1 SV=2 - [SLN14_RABIT]	SLFN14	92.8496	557.097	0	92.8496	0	0	0	0	0	355.518	833.636	123.799	237.831	217.091	366.921	1	1	1.9211	0.941932
I6M4H4	Zona pellucida sperm-binding protein 1 OS=Oryctolagus cuniculus OX=9986 GN=ZP1 PE=1 SV=1 - [ZP1_RABIT]	ZP1	4885.23	6.88503	46.1956	0	700.14	5333.9	2876.65	292.844	206.745	192.798	12.5423	1828.73	716.316	2559.02	1211.96	1	1	0.391702	-1.35217
P00569	Adenylate kinase isoenzyme 1 OS=Oryctolagus cuniculus OX=9986 GN=AK1 PE=1 SV=1 - [KAD1_RABIT]	AK1	118.672	37.216	0	90.2335	154.45	65.9684	85.3699	59.8439	64.6445	102.726	106.997	77.7566	83.9162	55.7497	21.4447	1	1	1.07922	0.109985
P02103	Hemoglobin subunit epsilon OS=Oryctolagus cuniculus OX=9986 GN=HBE1 PE=2 SV=2 - [HBE_RABIT]	HBE1	0	87913.2	0	94378.4	61654.3	129917	65131.8	0	111563	0	108448	62310.5	57028.5	52953	55199.9	1	1	0.915232	-0.127791
P02691	Myelin P2 protein OS=Oryctolagus cuniculus OX=9986 GN=PMP2 PE=1 SV=3 - [MYP2_RABIT]	PMP2	564.088	2727.89	2877.82	2036.66	1258.96	984.938	1900.88	1773.62	3284.21	1939.45	153.818	1741.73	1810.39	953.188	1111.59	1	1	1.03942	0.055784
P08507	Glycerol-3-phosphate dehydrogenase [NAD(+)], cytoplasmic OS=Oryctolagus cuniculus OX=9986 GN=GPD1 PE=3 SV=2 - [GPDA_RABIT]	GPD1	32.8772	59.6013	73.6505	43.0564	523.578	80.1673	119.763	140.348	82.5621	0	21.7902	135.488	72.8927	190.96	60.7564	1	1	0.538	-0.894322
P23035	Alpha-1-antiproteinase F OS=Oryctolagus cuniculus OX=9986 PE=1 SV=1 - [A1AF_RABIT]	Not available	1928.29	3297.39	2100.22	1939.47	3959.72	1982.35	3817.5	3259.82	1359.36	4076.72	1659.79	2534.57	2834.64	875.016	1249.63	1	1	1.11839	0.161421
P23612	Tryptophan--tRNA ligase, cytoplasmic OS=Oryctolagus cuniculus OX=9986 GN=WARS1 PE=2 SV=3 - [SYWC_RABIT]	WARS1	229.904	0	5.04978	42.3579	62.4224	2465.31	63.7538	4.16103	367.098	58.6807	27.1197	467.508	104.163	982.34	148.974	1	1	0.222804	-2.16615
P24461	Cytochrome P450 2G1 OS=Oryctolagus cuniculus OX=9986 GN=CYP2G1 PE=1 SV=1 - [CP2G1_RABIT]	CYP2G1	41.366	97.2222	170.617	0	325.146	488.374	114.466	135.888	136.036	136.251	161.762	187.121	136.881	186.771	16.7601	1	1	0.731509	-0.451053
P35574	Glycogen debranching enzyme OS=Oryctolagus cuniculus OX=9986 GN=AGL PE=1 SV=1 - [GDE_RABIT]	AGL	91.7026	21.895	0	110.915	35.0716	516.823	116.602	85.7412	0	93.4854	45.7095	129.401	68.3076	194.452	45.9532	1	1	0.527875	-0.921733
P40826	Ubiquitin carboxyl-terminal hydrolase 14 OS=Oryctolagus cuniculus OX=9986 GN=USP14 PE=1 SV=3 - [UBP14_RABIT]	USP14	33.3821	0	0	51.3826	29.2242	0	23.4698	20.7812	27.3677	21.0287	28.3305	18.9982	24.1956	22.1044	3.51332	1	1	1.27358	0.348884
P42675	Neurolysin, mitochondrial OS=Oryctolagus cuniculus OX=9986 GN=NLN PE=1 SV=1 - [NEUL_RABIT]	NLN	14.0553	0	78.5743	0	0	5.75733	31.6992	0	57.2248	0	0	16.3978	17.7848	30.9557	25.9712	1	1	1.08458	0.117143
P47844	Carbonyl reductase [NADPH] 1 OS=Oryctolagus cuniculus OX=9986 GN=CBR1 PE=2 SV=2 - [CBR1_RABIT]	CBR1	216.723	21.6525	0	0	67.308	165.473	101.553	0	206.349	97.7489	0	78.526	81.1302	92.034	85.9322	1	1	1.03316	0.0470683
P48799	Fibroblast growth factor 2 (Fragment) OS=Oryctolagus cuniculus OX=9986 GN=FGF2 PE=2 SV=1 - [FGF2_RABIT]	FGF2	30.4621	24.6251	32.8195	41.1632	34.7244	27.2991	0	37.9937	30.9701	33.6891	31.3645	31.8489	26.8035	5.84424	15.2416	1	1	0.841582	-0.248824
P79226	Fructose-bisphosphate aldolase B OS=Oryctolagus cuniculus OX=9986 GN=ALDOB PE=1 SV=3 - [ALDOB_RABIT]	ALDOB	0	26.0252	0	0	829.337	433.156	196.05	385.606	378.431	0	0	214.753	192.017	346.233	191.039	1	1	0.894132	-0.161441
P82810	Morphine 6-dehydrogenase (Fragments) OS=Oryctolagus cuniculus OX=9986 PE=1 SV=1 - [MORA_RABIT]	Not available	257.514	83.903	164.699	112.235	426.88	206.085	197.834	404.17	238.853	157.433	89.2009	208.553	217.498	123.942	118.065	1	1	1.04289	0.0605938
Q05152	Voltage-dependent N-type calcium channel subunit alpha-1B OS=Oryctolagus cuniculus OX=9986 GN=CACNA1B PE=1 SV=1 - [CAC1B_RABIT]	CACNA1B	59.8844	0	0	25.0892	67.2283	27.3958	2604.89	0	0	0	227.334	29.9329	566.445	28.6702	1143.77	1	1	18.9238	4.24213
Q09YM8	Cortactin-binding protein 2 OS=Oryctolagus cuniculus OX=9986 GN=CTTNBP2 PE=3 SV=1 - [CTTB2_RABIT]	CTTNBP2	81.4205	58.7295	5.75594	0	121.886	70.3852	63.7271	93.0888	183.431	0	0	56.3629	68.0493	46.6074	76.1904	1	1	1.20734	0.271835
Q28635	Beta-sarcoglycan OS=Oryctolagus cuniculus OX=9986 GN=SGCB PE=1 SV=1 - [SGCB_RABIT]	SGCB	195.759	41.9141	92.2455	66.7306	64.4537	204.347	124.788	67.9636	97.053	76.2081	50.8533	110.908	83.3732	70.9205	28.4985	1	1	0.751731	-0.411711
Q28706	Keratin, type I cytoskeletal 12 (Fragment) OS=Oryctolagus cuniculus OX=9986 GN=KRT12 PE=2 SV=1 - [K1C12_RABIT]	KRT12	558.673	682.723	747.812	823.41	1083.65	493.337	849.753	571.167	1492.78	396.384	561.053	731.601	774.227	210.569	433.435	1	1	1.05826	0.0816998
Q28719	Prostaglandin reductase 1 OS=Oryctolagus cuniculus OX=9986 GN=PTGR1 PE=2 SV=1 - [PTGR1_RABIT]	PTGR1	70.8162	66.6073	121.378	198.062	194.846	81.8723	40.6078	175.733	141.776	85.0246	156.764	122.264	119.981	60.647	55.8084	1	1	0.981331	-0.0271887
Q6RZF9	Intermediate transcription factor 3 large subunit OS=Rabbitpox virus (strain Utrecht) OX=45417 GN=VITF3L PE=3 SV=1 - [VTF3L_RABPU]	VITF3L	0	60.18	0	0	386.486	216.18	0	389.756	0	357.55	0	110.474	149.461	159.059	204.975	1	1	1.3529	0.43606
Q95L11	Potassium voltage-gated channel subfamily B member 2 OS=Oryctolagus cuniculus OX=9986 GN=KCNB2 PE=2 SV=1 - [KCNB2_RABIT]	KCNB2	121.206	336.779	1875.17	0	0	258.471	217.779	0	493.767	225.82	160.52	431.938	219.577	719.967	178.132	1	1	0.508353	-0.976097
Q9TV64	Aldo-keto reductase family 1 member D1 OS=Oryctolagus cuniculus OX=9986 GN=AKR1D1 PE=2 SV=1 - [AK1D1_RABIT]	AKR1D1	750.275	0	0	0	1563.94	555.896	222.84	564.528	0	422.845	380.257	478.352	318.094	623.687	215.536	1	1	0.664979	-0.58862
Q9XSM3	Transient receptor potential cation channel subfamily V member 5 OS=Oryctolagus cuniculus OX=9986 GN=Trpv5 PE=1 SV=1 - [TRPV5_RABIT]	Trpv5	14.8546	14.426	0	61.4273	0	13.2744	0	163.656	0	0	102.576	17.3304	53.2464	22.6991	76.0415	1	1	3.07243	1.61938

## Sheet: p<0.05
Accession	Description	Symbol	C38.xlsx	C39.xlsx	C40.xlsx	C41.xlsx	C42.xlsx	C43.xlsx	E28.xlsx	E30.xlsx	E31.xlsx	E32.xlsx	E33.xlsx	Average_Control	Average_Case	St_Dv_Control	St_Dv_Case	MW_p_CasevsControl	BH_p_CasevsControl	Ratio_CasevsControl	Log2_Ratio.CasevsControl
P13806	Voltage-dependent calcium channel subunit alpha-2/delta-1 OS=Oryctolagus cuniculus OX=9986 GN=CACNA2D1 PE=1 SV=1 - [CA2D1_RABIT]	CACNA2D1	1080.41	963.687	1375.05	226.713	214.956	122.501	114.854	109.566	60.4557	110.397	121.249	663.887	103.304	539.424	24.3975	0.004329	0.0619913	0.155605	-2.68404
P13280	Glycogenin-1 OS=Oryctolagus cuniculus OX=9986 GN=GYG1 PE=1 SV=3 - [GLYG_RABIT]	GYG1	154.574	0	206.589	129.975	227.445	127.427	0	0	0	0	119.219	141.002	23.8438	80.1819	53.3163	0.0276595	0.139083	0.169103	-2.56403
P29294	Myosin light chain kinase, smooth muscle OS=Oryctolagus cuniculus OX=9986 GN=MYLK PE=1 SV=2 - [MYLK_RABIT]	MYLK	1574.87	1045.77	2112.99	2062.96	2726.85	1493.3	899.258	855.34	214.355	209.133	339	1836.12	503.417	588.549	345.591	0.004329	0.0619913	0.274174	-1.86684
O77708	Calcium/calmodulin-dependent protein kinase type II subunit delta OS=Oryctolagus cuniculus OX=9986 GN=CAMK2D PE=2 SV=2 - [KCC2D_RABIT]	CAMK2D	141.831	54.6684	140.453	112.649	253.176	122.596	52.3392	81.5148	0	24.4643	46.8414	137.562	41.0319	64.9755	30.6536	0.00865801	0.072083	0.298279	-1.74526
P30957	Ryanodine receptor 2 OS=Oryctolagus cuniculus OX=9986 GN=RYR2 PE=1 SV=3 - [RYR2_RABIT]	RYR2	296.675	94.4993	586.999	475.059	186.154	275.392	27.4422	228.247	71.8792	55.1472	139.625	319.13	104.468	182.552	80.5988	0.030303	0.139083	0.327353	-1.61108
Q28685	Dystroglycan OS=Oryctolagus cuniculus OX=9986 GN=DAG1 PE=1 SV=1 - [DAG1_RABIT]	DAG1	168.217	115.285	137.944	157.923	253.759	109.166	48.5355	122.429	0	59.5445	34.7797	157.049	53.0578	52.6885	44.7888	0.017316	0.101625	0.337842	-1.56558
O77676	cGMP-dependent protein kinase 1 OS=Oryctolagus cuniculus OX=9986 GN=PRKG1 PE=1 SV=3 - [KGP1_RABIT]	PRKG1	308.483	160.946	224.958	289.011	403.738	165.808	96.563	99.049	57.066	96.2295	88.77	258.824	87.5355	93.548	17.4611	0.004329	0.0619913	0.338205	-1.56403
Q09YN8	Testin OS=Oryctolagus cuniculus OX=9986 GN=TES PE=3 SV=1 - [TES_RABIT]	TES	750.247	349.361	504.461	694.895	831.497	415.04	294.176	370.151	20.2181	198.417	184.894	590.917	213.571	195.363	131.769	0.00865801	0.072083	0.361424	-1.46824
P62943	Peptidyl-prolyl cis-trans isomerase FKBP1A OS=Oryctolagus cuniculus OX=9986 GN=FKBP1A PE=1 SV=2 - [FKB1A_RABIT]	FKBP1A	65.9859	84.7112	102.545	96.5767	73.6963	63.5554	36.3629	72.9511	0	0	57.7032	81.1784	33.4034	16.1461	33.1468	0.0221735	0.126002	0.411482	-1.2811
P80508	Prostaglandin-E(2) 9-reductase OS=Oryctolagus cuniculus OX=9986 GN=AKR1C5 PE=1 SV=1 - [PE2R_RABIT]	AKR1C5	915.708	1113.89	994.231	1481.03	2863.98	669.535	543.277	746.161	460.549	476.984	574.977	1339.73	560.39	792.797	113.953	0.00865801	0.072083	0.418286	-1.25744
P62143	Serine/threonine-protein phosphatase PP1-beta catalytic subunit OS=Oryctolagus cuniculus OX=9986 GN=PPP1CB PE=1 SV=3 - [PP1B_RABIT]	PPP1CB	274.351	203.711	296.591	392.524	426.711	275.161	109.721	123.154	121.616	195.759	128.273	311.508	135.705	82.9213	34.2521	0.004329	0.0619913	0.435638	-1.1988
Q9TTC6	Peptidyl-prolyl cis-trans isomerase A OS=Oryctolagus cuniculus OX=9986 GN=PPIA PE=2 SV=3 - [PPIA_RABIT]	PPIA	4148.9	4803.64	8028.47	6895.9	11376.4	3703.24	2537.23	3436.71	2471.18	2371.58	3474.41	6492.76	2858.22	2915.44	548.633	0.004329	0.0619913	0.440217	-1.18371
P00567	Creatine kinase B-type OS=Oryctolagus cuniculus OX=9986 GN=CKB PE=2 SV=1 - [KCRB_RABIT]	CKB	2478.39	3088.68	3030.11	4429.72	4629.12	2257.73	1387.26	1540.06	1047.23	1497.07	1834.13	3318.96	1461.15	991.92	284.35	0.004329	0.0619913	0.440243	-1.18363
Q28689	Canalicular multispecific organic anion transporter 1 OS=Oryctolagus cuniculus OX=9986 GN=ABCC2 PE=1 SV=1 - [MRP2_RABIT]	ABCC2	1832.2	931.296	546.263	1523.22	1145.22	955.529	629.459	717.791	318.701	364.634	592.943	1155.62	524.705	459.276	173.905	0.030303	0.139083	0.454046	-1.13909
P35748	Myosin-11 OS=Oryctolagus cuniculus OX=9986 GN=MYH11 PE=2 SV=2 - [MYH11_RABIT]	MYH11	16615.2	9370.56	20465.4	13430.9	17633.6	16278.4	11879.2	9091.63	3010.05	5628.04	6450.84	15632.3	7211.96	3815.82	3393.4	0.00865801	0.072083	0.461348	-1.11607
P41975	Extracellular superoxide dismutase [Cu-Zn] OS=Oryctolagus cuniculus OX=9986 GN=SOD3 PE=2 SV=2 - [SODE_RABIT]	SOD3	935.746	816.677	1139.01	1522.34	2273.94	871.682	925.717	587.703	322.887	416.569	739.309	1259.9	598.437	559.284	242.938	0.017316	0.101625	0.474988	-1.07404
P00489	Glycogen phosphorylase, muscle form OS=Oryctolagus cuniculus OX=9986 GN=PYGM PE=1 SV=3 - [PYGM_RABIT]	PYGM	714.172	448.171	607.924	624.458	1022.01	521.34	509.957	342.928	206.523	321.909	186.59	656.345	313.582	200.985	129.501	0.00865801	0.072083	0.477769	-1.06561
P47859	ATP-dependent 6-phosphofructokinase, platelet type OS=Oryctolagus cuniculus OX=9986 GN=PFKP PE=1 SV=1 - [PFKAP_RABIT]	PFKP	318.686	317.814	502.077	428.566	475.816	305.136	204.508	238.597	128.037	204.196	175.002	391.349	190.068	88.2048	41.3458	0.004329	0.0619913	0.485674	-1.04194
Q9N2G5	Chloride intracellular channel protein 6 OS=Oryctolagus cuniculus OX=9986 GN=CLIC6 PE=1 SV=1 - [CLIC6_RABIT]	CLIC6	208.191	167.094	233.509	293.618	229.604	184.203	94.7105	132.048	88.2256	120.894	110.099	219.37	109.195	44.5238	18.0933	0.004329	0.0619913	0.497769	-1.00645
P40144	Adenylate cyclase type 5 OS=Oryctolagus cuniculus OX=9986 GN=ADCY5 PE=1 SV=1 - [ADCY5_RABIT]	ADCY5	107.185	73.7791	57.6286	89.5679	78.7859	72.7855	70.3413	70.4811	0	64.8652	0	79.9553	41.1375	16.8715	37.6215	0.0353443	0.160168	0.514507	-0.958738
Q28623	Sarcolemmal membrane-associated protein OS=Oryctolagus cuniculus OX=9986 GN=SLMAP PE=1 SV=2 - [SLMAP_RABIT]	SLMAP	1377.26	851.922	1621.8	1143.94	1516.61	992.42	1035.2	789.98	179.696	567.551	669.053	1250.66	648.296	303.834	314.764	0.017316	0.101625	0.518363	-0.947965
P02602	Myosin light chain 1/3, skeletal muscle isoform OS=Oryctolagus cuniculus OX=9986 GN=MYL1 PE=1 SV=3 - [MYL1_RABIT]	MYL1	3435.16	1595.74	2923.41	2064.42	2435.24	3282.88	2138.36	1454.96	956.148	1511.53	1535.85	2622.81	1519.37	719.421	419.777	0.017316	0.101625	0.579291	-0.78764
P33477	Annexin A11 OS=Oryctolagus cuniculus OX=9986 GN=ANXA11 PE=1 SV=1 - [ANX11_RABIT]	ANXA11	602.596	254.817	482.46	409.833	386.447	324.065	323.712	282.899	183.1	182.199	226.595	410.036	239.701	121.955	62.4616	0.017316	0.101625	0.584585	-0.774516
Q09YN4	F-actin-capping protein subunit alpha-2 OS=Oryctolagus cuniculus OX=9986 GN=CAPZA2 PE=3 SV=3 - [CAZA2_RABIT]	CAPZA2	478.643	254.066	407.929	354.67	217.748	263.232	219.662	137.445	161.747	255.035	196.028	329.381	193.983	101.586	46.44	0.030303	0.139083	0.588932	-0.763827
P12345	Aspartate aminotransferase, mitochondrial OS=Oryctolagus cuniculus OX=9986 GN=GOT2 PE=1 SV=2 - [AATM_RABIT]	GOT2	439.585	541.116	387.025	541.832	678.608	304.332	245.812	315.384	281.371	277.995	308.542	482.083	285.821	132.751	27.7129	0.017316	0.101625	0.592888	-0.75417
P04191	Sarcoplasmic/endoplasmic reticulum calcium ATPase 1 OS=Oryctolagus cuniculus OX=9986 GN=ATP2A1 PE=1 SV=1 - [AT2A1_RABIT]	ATP2A1	242.875	106.644	210.234	164.034	191.069	183.993	164.383	131.094	87.167	90.9668	81.3255	183.141	110.987	46.0058	35.7191	0.030303	0.139083	0.60602	-0.722563
Q8MJF1	Mimecan OS=Oryctolagus cuniculus OX=9986 GN=OGN PE=1 SV=1 - [MIME_RABIT]	OGN	9159.16	5840.44	9472.81	9353.79	16966.8	8125.93	5337.97	8885.42	6228.69	4740.08	5261.49	9819.82	6090.73	3756.54	1651.35	0.030303	0.139083	0.620249	-0.689081
Q8MK67	Phosphatidylethanolamine-binding protein 1 OS=Oryctolagus cuniculus OX=9986 GN=PEBP1 PE=2 SV=1 - [PEBP1_RABIT]	PEBP1	273.62	307.623	302.606	438.436	565.521	218.209	167.724	240.96	201.721	238.239	256.823	351.003	221.093	127.679	36.0169	0.030303	0.139083	0.629891	-0.666826
P62740	Actin, aortic smooth muscle OS=Oryctolagus cuniculus OX=9986 GN=ACTA2 PE=2 SV=1 - [ACTA_RABIT]	ACTA2	187964	117990	178824	134748	140134	145062	123872	112222	55801.9	109362	82840	150787	96819.8	27008.6	27405.7	0.00865801	0.072083	0.642096	-0.639139
P25704	Beta-enolase OS=Oryctolagus cuniculus OX=9986 GN=ENO3 PE=1 SV=4 - [ENOB_RABIT]	ENO3	2496.89	2060.41	2153.95	2940.77	3942.58	1988.76	1501.26	1602.32	1731.23	1502.91	2423.16	2597.23	1752.18	747.392	386.717	0.030303	0.139083	0.674634	-0.567823
P13490	L-lactate dehydrogenase B chain (Fragment) OS=Oryctolagus cuniculus OX=9986 GN=LDHB PE=2 SV=1 - [LDHB_RABIT]	LDHB	1331.43	1497.49	1721.93	1245.19	2300.88	1079.48	1024.56	1112.22	1203.02	752.33	1117.89	1529.4	1042.01	437.189	173.804	0.030303	0.139083	0.681317	-0.553602
Q9XS70	Coronin-1B OS=Oryctolagus cuniculus OX=9986 GN=CORO1B PE=1 SV=1 - [COR1B_RABIT]	CORO1B	496.064	407.127	506.651	680.353	733.282	377.205	399.375	375.85	369.528	414.349	326.995	533.447	377.219	144.221	33.3655	0.030303	0.139083	0.707136	-0.499941
P62975	Ubiquitin OS=Oryctolagus cuniculus OX=9986 PE=1 SV=1 - [UBIQ_RABIT]	Not available	3140.61	3042.29	3350.15	3962.14	4841.83	3199.79	2612.8	2700.6	3149.7	2650.06	2650.15	3589.47	2752.66	695.309	224.134	0.017316	0.101625	0.766872	-0.382943
P21195	Protein disulfide-isomerase OS=Oryctolagus cuniculus OX=9986 GN=P4HB PE=2 SV=1 - [PDIA1_RABIT]	P4HB	448.014	324.882	381.117	576.436	684.42	258.334	586.112	665.267	687.415	580.277	953.516	445.534	694.517	159.974	152.307	0.030303	0.139083	1.55884	0.640476
P53789	Vitamin D-binding protein OS=Oryctolagus cuniculus OX=9986 GN=GC PE=2 SV=1 - [VTDB_RABIT]	GC	384.43	541.508	611.688	323.308	968.227	441.149	1096.98	1198.98	890.114	851.716	626.044	545.051	932.767	232.076	223.777	0.030303	0.139083	1.71134	0.775125
P27170	Serum paraoxonase/arylesterase 1 OS=Oryctolagus cuniculus OX=9986 GN=PON1 PE=1 SV=2 - [PON1_RABIT]	PON1	185.009	328.729	166.501	133.359	276.506	242.449	337.772	387.841	659.018	392.187	315.575	222.092	418.479	73.6015	138.376	0.00865801	0.072083	1.88426	0.913997
P47776	Heparin cofactor 2 OS=Oryctolagus cuniculus OX=9986 GN=SERPIND1 PE=2 SV=1 - [HEP2_RABIT]	SERPIND1	105.201	134.647	142.007	89.9983	205.077	125.416	212.109	240.082	272.951	270.976	274.77	133.724	254.178	39.8877	27.5098	0.004329	0.0619913	1.90076	0.926574
P01840	Ig kappa-b4 chain C region OS=Oryctolagus cuniculus OX=9986 PE=1 SV=1 - [KAC4_RABIT]	Not available	1543.05	1423.5	2263.69	1377.12	1852.59	2404.8	2036.1	2829.78	5542.94	2715.26	4241	1810.79	3473.02	440.331	1407.75	0.017316	0.101625	1.91795	0.939568
P14943	Cocaine esterase OS=Oryctolagus cuniculus OX=9986 GN=CES2 PE=1 SV=2 - [EST2_RABIT]	CES2	34.2533	59.9431	15.3742	51.5062	32.6374	30.7309	64.8243	116.765	80.6729	74.0054	64.6754	37.4075	80.1886	15.9334	21.5233	0.004329	0.0619913	2.14365	1.10007
P14478	Fibrinogen beta chain (Fragment) OS=Oryctolagus cuniculus OX=9986 GN=FGB PE=1 SV=2 - [FIBB_RABIT]	FGB	226.702	257.788	386.738	373.469	0	503.019	776.155	325.107	781.586	512.694	924.49	291.286	664.006	173.687	240.833	0.030303	0.139083	2.27957	1.18876
P01870	Ig gamma chain C region OS=Oryctolagus cuniculus OX=9986 PE=1 SV=1 - [IGHG_RABIT]	Not available	3929.97	5671.38	7044.68	3820.67	8593.59	6886.19	14456.5	17697.6	17005	12115.8	10673.9	5991.08	14389.8	1883.9	3031.67	0.004329	0.0619913	2.40186	1.26415
Q95215	Transforming growth factor-beta-induced protein ig-h3 OS=Oryctolagus cuniculus OX=9986 GN=TGFBI PE=2 SV=2 - [BGH3_RABIT]	TGFBI	217.356	279.009	346.755	389.841	834.181	355.748	554.378	650.716	1520.32	835.296	1538.46	403.815	1019.83	219.691	476.028	0.017316	0.101625	2.5255	1.33657
Q28640	Histidine-rich glycoprotein (Fragment) OS=Oryctolagus cuniculus OX=9986 GN=HRG PE=1 SV=1 - [HRG_RABIT]	HRG	600.133	1729.28	1191.32	869.11	2606.03	693.86	3942.97	3148.6	2526.77	3814.67	3680.96	1281.62	3422.79	767.161	584.988	0.00865801	0.072083	2.67067	1.4172
P09451	Ferritin light chain OS=Oryctolagus cuniculus OX=9986 GN=FTL PE=2 SV=2 - [FRIL_RABIT]	FTL	60.4039	9.69024	20.383	88.5391	122.709	0	117.403	112.884	135.081	160.408	150.636	50.2876	135.282	48.7477	20.5455	0.017316	0.101625	2.69017	1.4277
P47845	Galectin-3 OS=Oryctolagus cuniculus OX=9986 GN=LGALS3 PE=2 SV=2 - [LEG3_RABIT]	LGALS3	95.5647	84.4431	134.631	169.325	195.678	87.4392	374.765	311.371	259.835	222.629	628.116	127.847	359.343	46.7467	160.757	0.004329	0.0619913	2.81074	1.49095
P12247	Complement C3 alpha chain (Fragment) OS=Oryctolagus cuniculus OX=9986 GN=C3 PE=2 SV=1 - [CO3_RABIT]	C3	0	165.642	135.89	35.9609	121.951	53.0945	231.533	151.226	291.008	314.768	308.394	85.423	259.386	64.9692	68.8175	0.00865801	0.072083	3.03648	1.6024
P22458	Vitronectin OS=Oryctolagus cuniculus OX=9986 GN=VTN PE=1 SV=1 - [VTNC_RABIT]	VTN	594.658	345.579	419.701	605.043	309.946	596.793	968.749	796.169	1764.2	2497.46	1283.88	478.62	1462.09	136.407	685.903	0.004329	0.0619913	3.05481	1.61108
P19134	Serotransferrin OS=Oryctolagus cuniculus OX=9986 GN=TF PE=1 SV=4 - [TRFE_RABIT]	TF	1085.61	2302.04	2027.7	1332.37	2458.74	1367.85	4463.63	7340.95	6292.19	6257.07	5684.57	1762.38	6007.68	573.608	1049.91	0.004329	0.0619913	3.40884	1.76928
Q28677	Solute carrier family 12 member 4 OS=Oryctolagus cuniculus OX=9986 GN=SLC12A4 PE=1 SV=1 - [S12A4_RABIT]	SLC12A4	0	34.2621	0	126.411	114.686	0	141.096	137.843	238.649	178.71	209.797	45.8931	181.219	59.4464	43.6249	0.00754623	0.072083	3.94872	1.98138
Q28749	Fibronectin (Fragment) OS=Oryctolagus cuniculus OX=9986 GN=FN1 PE=2 SV=2 - [FINC_RABIT]	FN1	868.005	590.147	1458.07	1022.35	1355.05	1802.06	2656.71	4812.74	4494.34	4680.85	7030.49	1182.61	4735.03	439.319	1553.66	0.004329	0.0619913	4.00386	2.00139
O97862	Cystatin-C OS=Oryctolagus cuniculus OX=9986 GN=CST3 PE=2 SV=1 - [CYTC_RABIT]	CST3	62.9166	0	111.534	48.4354	0	0	172.924	183.182	126.785	148.477	168.511	37.1476	159.976	45.7484	22.4328	0.00754623	0.072083	4.3065	2.10651
P25915	Ferritin heavy chain (Fragment) OS=Oryctolagus cuniculus OX=9986 GN=FTH1 PE=2 SV=1 - [FRIH_RABIT]	FTH1	53.6658	60.8652	0	117.388	0	67.6103	77.2567	100.203	311.356	312.194	276.625	49.9216	215.527	44.6828	116.918	0.0221735	0.126002	4.31731	2.11013
P53815	Translocon-associated protein subunit alpha OS=Oryctolagus cuniculus OX=9986 GN=SSR1 PE=2 SV=1 - [SSRA_RABIT]	SSR1	10.5191	8.15129	39.1438	26.3098	0	8.48212	48.7284	79.3649	72.7714	41.5519	117.877	15.4344	72.0588	14.4511	30.1172	0.004329	0.0619913	4.66872	2.22303
O97529	Annexin A8 OS=Oryctolagus cuniculus OX=9986 GN=ANXA8 PE=2 SV=1 - [ANXA8_RABIT]	ANXA8	150.35	0	0	0	75.8466	0	211.96	163.052	90.5852	185.85	298.779	37.6994	190.045	62.9766	75.7328	0.011644	0.0886926	5.04107	2.33373
Q9XSC5	Clusterin OS=Oryctolagus cuniculus OX=9986 GN=CLU PE=2 SV=1 - [CLUS_RABIT]	CLU	60.6916	0	46.1604	7.87617	96.7424	32.1383	141.685	106.408	280.358	416.537	162.055	40.6015	221.408	35.7138	127.136	0.004329	0.0619913	5.45321	2.44711
P06912	Retinol-binding protein 4 OS=Oryctolagus cuniculus OX=9986 GN=RBP4 PE=1 SV=2 - [RET4_RABIT]	RBP4	0	27.2172	133.888	0	0	0	138.063	70.2829	152.764	224.823	152.815	26.8508	147.75	53.5555	54.9683	0.011644	0.0886926	5.50261	2.46012
Q9MZD2	Filamin-B (Fragment) OS=Oryctolagus cuniculus OX=9986 GN=FLNB PE=1 SV=1 - [FLNB_RABIT]	FLNB	0	0	0	40.0375	0	0	35.5365	24.3477	35.6297	34.5545	83.1507	6.67292	42.6438	16.3452	23.1339	0.044368	0.172198	6.39058	2.67595
P80191	Alpha-2-HS-glycoprotein (Fragment) OS=Oryctolagus cuniculus OX=9986 GN=AHSG PE=1 SV=2 - [FETUA_RABIT]	AHSG	0	424.789	316.749	142.87	834.933	261.775	1513.59	838.47	1905	3548.74	3263.81	330.186	2213.92	287.294	1157.77	0.004329	0.0619913	6.70507	2.74525
O77507	DNA repair protein RAD51 homolog 1 OS=Oryctolagus cuniculus OX=9986 GN=RAD51 PE=2 SV=1 - [RAD51_RABIT]	RAD51	109.274	0	0	80.1395	0	0	177.22	179.798	318.154	216.122	248.065	31.5689	227.872	49.7666	58.2523	0.00673595	0.072083	7.21822	2.85164
P47841	Matrix Gla protein OS=Oryctolagus cuniculus OX=9986 GN=MGP PE=3 SV=1 - [MGP_RABIT]	MGP	0	0	66.0463	0	0	66.4422	114.764	252.686	203.882	185.471	143.064	22.0814	179.973	34.2086	53.6273	0.00673595	0.072083	8.15044	3.02688
P62497	Eukaryotic peptide chain release factor subunit 1 OS=Oryctolagus cuniculus OX=9986 GN=ETF1 PE=1 SV=3 - [ERF1_RABIT]	ETF1	0	0	0	0	28.8904	0	45.6002	42.4193	28.5363	39.1469	42.0528	4.81507	39.5511	11.7945	6.5682	0.0097364	0.0774585	8.21403	3.03809
Q28709	CD63 antigen OS=Oryctolagus cuniculus OX=9986 GN=CD63 PE=2 SV=2 - [CD63_RABIT]	CD63	0	0	0	0	27.9087	0	22.6143	0	96.7834	48.8299	32.2531	4.65145	40.0962	11.3937	36.2786	0.0464841	0.172198	8.62013	3.10771
P01694	Ig kappa chain V region 3547 OS=Oryctolagus cuniculus OX=9986 PE=1 SV=1 - [KV13_RABIT]	Not available	0	1.75752	0	0	0	10.5451	27.0896	12.3227	27.5233	0	32.5387	2.05045	19.8949	4.2205	13.444	0.044368	0.172198	9.70271	3.27839
P18287	Apolipoprotein E OS=Oryctolagus cuniculus OX=9986 GN=APOE PE=2 SV=1 - [APOE_RABIT]	APOE	70.0279	100.4	0	28.676	132.923	28.8116	576.606	541.207	1481.22	470.76	726.419	60.1398	759.243	50.2082	414.262	0.004329	0.0619913	12.6246	3.65817
P20614	Metalloproteinase inhibitor 1 OS=Oryctolagus cuniculus OX=9986 GN=TIMP1 PE=2 SV=2 - [TIMP1_RABIT]	TIMP1	0	3.21064	0	0	19.2639	0	0	34.865	79.3253	69.6645	55.4207	3.74575	47.8551	7.71	31.552	0.044368	0.172198	12.7758	3.67535
Q9GLC3	Sodium/potassium-transporting ATPase subunit beta-3 OS=Oryctolagus cuniculus OX=9986 GN=ATP1B3 PE=2 SV=1 - [AT1B3_RABIT]	ATP1B3	0	0	0	33.974	0	0	28.3099	62.106	89.0157	62.9091	133.137	5.66233	75.0956	13.8698	38.9511	0.0097364	0.0774585	13.2623	3.72926
Q28641	Myosin-4 OS=Oryctolagus cuniculus OX=9986 GN=MYH4 PE=1 SV=2 - [MYH4_RABIT]	MYH4	64.3633	0	0	0	0	79.0373	123.433	521.43	656.004	0	585.754	23.9001	377.324	37.3155	295.257	0.044368	0.172198	15.7876	3.98072
Q9GLY5	Inter-alpha-trypsin inhibitor heavy chain H3 OS=Oryctolagus cuniculus OX=9986 GN=ITIH3 PE=2 SV=1 - [ITIH3_RABIT]	ITIH3	0	40.8093	36.8815	0	0	20.1163	70.5045	88.6771	195.907	909.351	83.6082	16.3012	269.61	19.1621	361.136	0.00754623	0.072083	16.5393	4.04782
P10829	Protein kinase C gamma type OS=Oryctolagus cuniculus OX=9986 GN=PRKCG PE=1 SV=1 - [KPCG_RABIT]	PRKCG	8.95353	0	0	0	0	0	93.8654	21.9424	23.2065	0	27.8029	1.49225	33.3634	3.65526	35.4899	0.0285193	0.139083	22.3577	4.4827
O19045	Coagulation factor X OS=Oryctolagus cuniculus OX=9986 GN=F10 PE=2 SV=1 - [FA10_RABIT]	F10	0	17.6491	0	0	0	0	85.3536	49.8741	117.411	172.016	109.262	2.94152	106.783	7.20522	44.923	0.00549411	0.0678239	36.3021	5.18198
P50757	72 kDa type IV collagenase OS=Oryctolagus cuniculus OX=9986 GN=MMP2 PE=2 SV=1 - [MMP2_RABIT]	MMP2	0	0	15.0998	0	0	0	142.296	174.372	122.446	25.8231	0	2.51664	92.9873	6.16447	75.9609	0.0285193	0.139083	36.9491	5.20747
Q28680	Monocyte differentiation antigen CD14 OS=Oryctolagus cuniculus OX=9986 GN=CD14 PE=2 SV=1 - [CD14_RABIT]	CD14	0	0	0	0	11.3329	0	59.8483	69.3449	87.7131	61.5962	92.0902	1.88882	74.1185	4.62664	14.9251	0.00549411	0.0678239	39.2407	5.29428
P01685	Ig kappa chain V region 4135 OS=Oryctolagus cuniculus OX=9986 PE=1 SV=1 - [KV04_RABIT]	Not available	564.731	9782.31	1071.91	470.508	1161.85	979.184	65322.5	134336	63676.7	132756	140282	2338.42	107275	3657.39	39153.1	0.004329	0.0619913	45.8749	5.51963
I1VZH0	RING finger protein 207 OS=Oryctolagus cuniculus OX=9986 GN=RNF207 PE=2 SV=1 - [RN207_RABIT]	RNF207	0	0	0	0	8.09308	0	10.7863	265.941	0	6.66641	93.8046	1.34885	75.4396	3.30399	113.169	0.0464841	0.172198	55.9289	5.80552
Q28902	Collagen alpha-1(XII) chain (Fragment) OS=Oryctolagus cuniculus OX=9986 GN=COL12A1 PE=2 SV=1 - [COCA1_RABIT]	COL12A1	4.67207	0	0	0	0	0	18.526	46.3638	350.592	55.8452	81.3537	0.778678	110.536	1.90736	136.064	0.00549411	0.0678239	141.954	7.14928
P01885	Beta-2-microglobulin OS=Oryctolagus cuniculus OX=9986 GN=B2M PE=1 SV=1 - [B2MG_RABIT]	B2M	0	0	0	0	0	0	234.028	253.68	55.7116	43.8206	214.366	0	160.321	0	101.962	0.00389049	0.0619913	only in case	only in case
P17165	Apolipoprotein B (Fragment) OS=Oryctolagus cuniculus OX=9986 GN=APOB PE=1 SV=1 - [APOB_RABIT]	APOB	0	0	0	0	0	0	105.756	105.202	202.724	125.602	220.129	0	151.883	0	55.317	0.00389049	0.0619913	only in case	only in case
P37153	Apolipoprotein D OS=Oryctolagus cuniculus OX=9986 GN=APOD PE=2 SV=1 - [APOD_RABIT]	APOD	0	0	0	0	0	0	186.398	239.02	761.113	278.667	314.185	0	355.877	0	231.46	0.00389049	0.0619913	only in case	only in case
Q28618	Y-box-binding protein 1 OS=Oryctolagus cuniculus OX=9986 GN=YBX1 PE=1 SV=3 - [YBOX1_RABIT]	YBX1	0	0	0	0	0	0	30.5625	16.8996	41.1373	134.423	59.4698	0	56.4985	0	46.2543	0.00389049	0.0619913	only in case	only in case
Q29512	3-hydroxy-3-methylglutaryl-coenzyme A reductase OS=Oryctolagus cuniculus OX=9986 GN=HMGCR PE=3 SV=1 - [HMDH_RABIT]	HMGCR	0	0	0	0	0	0	9.93192	183.712	95.0089	238.786	42.6145	0	114.011	0	95.8098	0.00389049	0.0619913	only in case	only in case
O97755	V-type proton ATPase subunit D OS=Oryctolagus cuniculus OX=9986 GN=ATP6V1D PE=2 SV=1 - [VATD_RABIT]	ATP6V1D	0	0	0	0	0	0	0	351.555	452.137	570.906	768.839	0	428.687	0	285.57	0.0150243	0.101625	only in case	only in case
P02251	Histone H1.3 OS=Oryctolagus cuniculus OX=9986 PE=1 SV=1 - [H13_RABIT]	Not available	0	0	0	0	0	0	60.9157	0	81.2653	44.351	145.842	0	66.4747	0	53.519	0.0150243	0.101625	only in case	only in case
P98137	Complement component C8 beta chain OS=Oryctolagus cuniculus OX=9986 GN=C8B PE=1 SV=1 - [CO8B_RABIT]	C8B	0	0	0	0	0	0	0	54.0216	68.738	75.2009	77.1258	0	55.0172	0	32.0637	0.0150243	0.101625	only in case	only in case
Q95209	Sortilin-related receptor OS=Oryctolagus cuniculus OX=9986 GN=SORL1 PE=1 SV=1 - [SORL_RABIT]	SORL1	0	0	0	0	0	0	15.1766	0	15.1766	75.8828	0	0	21.2472	0	31.4708	0.0475819	0.172198	only in case	only in case
A4L9I9	Beta-crystallin A2 OS=Oryctolagus cuniculus OX=9986 GN=CRYBA2 PE=2 SV=1 - [CRBA2_RABIT]	CRYBA2	0	0	0	0	0	0	37.9636	0	162.701	0	340.662	0	108.265	0	146.079	0.048406	0.172198	only in case	only in case
P01686	Ig kappa chain V region BS-1 OS=Oryctolagus cuniculus OX=9986 PE=1 SV=1 - [KV05_RABIT]	Not available	0	0	0	0	0	0	344.513	569.483	658.995	0	0	0	314.598	0	309.198	0.048406	0.172198	only in case	only in case
P23108	Immunoglobulin J chain OS=Oryctolagus cuniculus OX=9986 GN=JCHAIN PE=1 SV=1 - [IGJ_RABIT]	JCHAIN	0	0	0	0	0	0	1731.53	113.021	0	368.911	0	0	442.693	0	736.069	0.048406	0.172198	only in case	only in case
P25947	Ankyrin repeat protein T5 OS=Rabbit fibroma virus (strain Kasza) OX=10272 GN=T5 PE=4 SV=2 - [VT5_RFVKA]	T5	0	0	0	0	0	0	0	31.1157	41.273	0	14.4777	0	17.3733	0	18.5209	0.048406	0.172198	only in case	only in case
P26432	Sodium/hydrogen exchanger 3 OS=Oryctolagus cuniculus OX=9986 GN=SLC9A3 PE=1 SV=1 - [SL9A3_RABIT]	SLC9A3	0	0	0	0	0	0	11.4641	0	0	42.9774	14.3429	0	13.7569	0	17.5922	0.048406	0.172198	only in case	only in case
P36233	SPARC (Fragment) OS=Oryctolagus cuniculus OX=9986 GN=SPARC PE=1 SV=2 - [SPRC_RABIT]	SPARC	0	0	0	0	0	0	0	23.0431	0	47.0858	91.2919	0	32.2842	0	38.311	0.048406	0.172198	only in case	only in case
P52786	Cytochrome P450 2J1 OS=Oryctolagus cuniculus OX=9986 GN=CYP2J1 PE=1 SV=2 - [CP2J1_RABIT]	CYP2J1	0	0	0	0	0	0	0	9.38298	185.813	0	17.2729	0	42.4939	0	80.4431	0.048406	0.172198	only in case	only in case
Q05555	Cytochrome P450 2A10 OS=Oryctolagus cuniculus OX=9986 GN=CYP2A10 PE=1 SV=1 - [CP2AA_RABIT]	CYP2A10	0	0	0	0	0	0	295.047	0	56.2386	34.1847	0	0	77.0941	0	124.164	0.048406	0.172198	only in case	only in case
Q28679	Complement component C8 gamma chain OS=Oryctolagus cuniculus OX=9986 GN=C8G PE=2 SV=1 - [CO8G_RABIT]	C8G	0	0	0	0	0	0	0	88.7974	146.522	0	138.687	0	74.8012	0	71.7836	0.048406	0.172198	only in case	only in case
P23775	Corticosteroid-binding globulin OS=Oryctolagus cuniculus OX=9986 GN=SERPINA6 PE=1 SV=1 - [CBG_RABIT]	SERPINA6	55.9904	107.896	139.172	96.9325	113.882	36.7215	0	0	0	0	0	91.7657	0	38.2964	0	0.00549411	0.0678239	only in control	only in control
P21927	Cholinesterase OS=Oryctolagus cuniculus OX=9986 GN=BCHE PE=2 SV=1 - [CHLE_RABIT]	BCHE	70.8086	36.0063	44.975	40.4406	59.8133	0	0	0	0	0	0	42.0073	0	24.3247	0	0.0168867	0.101625	only in control	only in control
O19132	Nitric oxide synthase, brain OS=Oryctolagus cuniculus OX=9986 GN=NOS1 PE=2 SV=1 - [NOS1_RABIT]	NOS1	28.469	0	59.7178	46.6616	24.8761	0	0	0	0	0	0	26.6208	0	24.1696	0	0.0445506	0.172198	only in control	only in control
P19517	Voltage-dependent L-type calcium channel subunit beta-1 OS=Oryctolagus cuniculus OX=9986 GN=CACNB1 PE=1 SV=1 - [CACB1_RABIT]	CACNB1	22.0905	0	0	12.733	54.9032	12.2525	0	0	0	0	0	16.9965	0	20.4025	0	0.0445506	0.172198	only in control	only in control
Q6IVG4	Arf-GAP with coiled-coil, ANK repeat and PH domain-containing protein 2 OS=Oryctolagus cuniculus OX=9986 GN=ACAP2 PE=2 SV=1 - [ACAP2_RABIT]	ACAP2	436.114	385.568	0	290.617	46.0907	0	0	0	0	0	0	193.065	0	200.896	0	0.0445506	0.172198	only in control	only in control
Q9GKY1	Anion exchange protein 4 OS=Oryctolagus cuniculus OX=9986 GN=SLC4A9 PE=1 SV=2 - [B3A4_RABIT]	SLC4A9	24.0395	0	25.5014	100.455	0	18.2801	0	0	0	0	0	28.0461	0	37.2403	0	0.0445506	0.172198	only in control	only in control

## Sheet: Fold change >1.5 <0.67 p<0.05
Accession	Description	Symbol	C38.xlsx	C39.xlsx	C40.xlsx	C41.xlsx	C42.xlsx	C43.xlsx	E28.xlsx	E30.xlsx	E31.xlsx	E32.xlsx	E33.xlsx	Average_Control	Average_Case	St_Dv_Control	St_Dv_Case	Log2_Ratio.CasevsControl	MW_p_CasevsControl	BH_p_CasevsControl	Ratio_CasevsControl
Q9N2G5	Chloride intracellular channel protein 6 OS=Oryctolagus cuniculus OX=9986 GN=CLIC6 PE=1 SV=1 - [CLIC6_RABIT]	CLIC6	208.191	167.094	233.509	293.618	229.604	184.203	94.7105	132.048	88.2256	120.894	110.099	219.37	109.195	44.5238	18.0933	-1.00645	0.004329	0.0619913	0.497769	DOWN
P47859	ATP-dependent 6-phosphofructokinase, platelet type OS=Oryctolagus cuniculus OX=9986 GN=PFKP PE=1 SV=1 - [PFKAP_RABIT]	PFKP	318.686	317.814	502.077	428.566	475.816	305.136	204.508	238.597	128.037	204.196	175.002	391.349	190.068	88.2048	41.3458	-1.04194	0.004329	0.0619913	0.485674	DOWN
P00567	Creatine kinase B-type OS=Oryctolagus cuniculus OX=9986 GN=CKB PE=2 SV=1 - [KCRB_RABIT]	CKB	2478.39	3088.68	3030.11	4429.72	4629.12	2257.73	1387.26	1540.06	1047.23	1497.07	1834.13	3318.96	1461.15	991.92	284.35	-1.18363	0.004329	0.0619913	0.440243	DOWN
Q9TTC6	Peptidyl-prolyl cis-trans isomerase A OS=Oryctolagus cuniculus OX=9986 GN=PPIA PE=2 SV=3 - [PPIA_RABIT]	PPIA	4148.9	4803.64	8028.47	6895.9	11376.4	3703.24	2537.23	3436.71	2471.18	2371.58	3474.41	6492.76	2858.22	2915.44	548.633	-1.18371	0.004329	0.0619913	0.440217	DOWN
P62143	Serine/threonine-protein phosphatase PP1-beta catalytic subunit OS=Oryctolagus cuniculus OX=9986 GN=PPP1CB PE=1 SV=3 - [PP1B_RABIT]	PPP1CB	274.351	203.711	296.591	392.524	426.711	275.161	109.721	123.154	121.616	195.759	128.273	311.508	135.705	82.9213	34.2521	-1.1988	0.004329	0.0619913	0.435638	DOWN
O77676	cGMP-dependent protein kinase 1 OS=Oryctolagus cuniculus OX=9986 GN=PRKG1 PE=1 SV=3 - [KGP1_RABIT]	PRKG1	308.483	160.946	224.958	289.011	403.738	165.808	96.563	99.049	57.066	96.2295	88.77	258.824	87.5355	93.548	17.4611	-1.56403	0.004329	0.0619913	0.338205	DOWN
P29294	Myosin light chain kinase, smooth muscle OS=Oryctolagus cuniculus OX=9986 GN=MYLK PE=1 SV=2 - [MYLK_RABIT]	MYLK	1574.87	1045.77	2112.99	2062.96	2726.85	1493.3	899.258	855.34	214.355	209.133	339	1836.12	503.417	588.549	345.591	-1.86684	0.004329	0.0619913	0.274174	DOWN
P13806	Voltage-dependent calcium channel subunit alpha-2/delta-1 OS=Oryctolagus cuniculus OX=9986 GN=CACNA2D1 PE=1 SV=1 - [CA2D1_RABIT]	CACNA2D1	1080.41	963.687	1375.05	226.713	214.956	122.501	114.854	109.566	60.4557	110.397	121.249	663.887	103.304	539.424	24.3975	-2.68404	0.004329	0.0619913	0.155605	DOWN
P23775	Corticosteroid-binding globulin OS=Oryctolagus cuniculus OX=9986 GN=SERPINA6 PE=1 SV=1 - [CBG_RABIT]	SERPINA6	55.9904	107.896	139.172	96.9325	113.882	36.7215	0	0	0	0	0	91.7657	0	38.2964	0	Only in Control	0.00549411	0.0678239	Only in Control	DOWN
P62740	Actin, aortic smooth muscle OS=Oryctolagus cuniculus OX=9986 GN=ACTA2 PE=2 SV=1 - [ACTA_RABIT]	ACTA2	187964	117990	178824	134748	140134	145062	123872	112222	55801.9	109362	82840	150787	96819.8	27008.6	27405.7	-0.639139	0.00865801	0.072083	0.642096	DOWN
P00489	Glycogen phosphorylase, muscle form OS=Oryctolagus cuniculus OX=9986 GN=PYGM PE=1 SV=3 - [PYGM_RABIT]	PYGM	714.172	448.171	607.924	624.458	1022.01	521.34	509.957	342.928	206.523	321.909	186.59	656.345	313.582	200.985	129.501	-1.06561	0.00865801	0.072083	0.477769	DOWN
P35748	Myosin-11 OS=Oryctolagus cuniculus OX=9986 GN=MYH11 PE=2 SV=2 - [MYH11_RABIT]	MYH11	16615.2	9370.56	20465.4	13430.9	17633.6	16278.4	11879.2	9091.63	3010.05	5628.04	6450.84	15632.3	7211.96	3815.82	3393.4	-1.11607	0.00865801	0.072083	0.461348	DOWN
P80508	Prostaglandin-E(2) 9-reductase OS=Oryctolagus cuniculus OX=9986 GN=AKR1C5 PE=1 SV=1 - [PE2R_RABIT]	AKR1C5	915.708	1113.89	994.231	1481.03	2863.98	669.535	543.277	746.161	460.549	476.984	574.977	1339.73	560.39	792.797	113.953	-1.25744	0.00865801	0.072083	0.418286	DOWN
Q09YN8	Testin OS=Oryctolagus cuniculus OX=9986 GN=TES PE=3 SV=1 - [TES_RABIT]	TES	750.247	349.361	504.461	694.895	831.497	415.04	294.176	370.151	20.2181	198.417	184.894	590.917	213.571	195.363	131.769	-1.46824	0.00865801	0.072083	0.361424	DOWN
O77708	Calcium/calmodulin-dependent protein kinase type II subunit delta OS=Oryctolagus cuniculus OX=9986 GN=CAMK2D PE=2 SV=2 - [KCC2D_RABIT]	CAMK2D	141.831	54.6684	140.453	112.649	253.176	122.596	52.3392	81.5148	0	24.4643	46.8414	137.562	41.0319	64.9755	30.6536	-1.74526	0.00865801	0.072083	0.298279	DOWN
P21927	Cholinesterase OS=Oryctolagus cuniculus OX=9986 GN=BCHE PE=2 SV=1 - [CHLE_RABIT]	BCHE	70.8086	36.0063	44.975	40.4406	59.8133	0	0	0	0	0	0	42.0073	0	24.3247	0	Only in Control	0.0168867	0.101625	Only in Control	DOWN
P12345	Aspartate aminotransferase, mitochondrial OS=Oryctolagus cuniculus OX=9986 GN=GOT2 PE=1 SV=2 - [AATM_RABIT]	GOT2	439.585	541.116	387.025	541.832	678.608	304.332	245.812	315.384	281.371	277.995	308.542	482.083	285.821	132.751	27.7129	-0.75417	0.017316	0.101625	0.592888	DOWN
P33477	Annexin A11 OS=Oryctolagus cuniculus OX=9986 GN=ANXA11 PE=1 SV=1 - [ANX11_RABIT]	ANXA11	602.596	254.817	482.46	409.833	386.447	324.065	323.712	282.899	183.1	182.199	226.595	410.036	239.701	121.955	62.4616	-0.774516	0.017316	0.101625	0.584585	DOWN
P02602	Myosin light chain 1/3, skeletal muscle isoform OS=Oryctolagus cuniculus OX=9986 GN=MYL1 PE=1 SV=3 - [MYL1_RABIT]	MYL1	3435.16	1595.74	2923.41	2064.42	2435.24	3282.88	2138.36	1454.96	956.148	1511.53	1535.85	2622.81	1519.37	719.421	419.777	-0.78764	0.017316	0.101625	0.579291	DOWN
Q28623	Sarcolemmal membrane-associated protein OS=Oryctolagus cuniculus OX=9986 GN=SLMAP PE=1 SV=2 - [SLMAP_RABIT]	SLMAP	1377.26	851.922	1621.8	1143.94	1516.61	992.42	1035.2	789.98	179.696	567.551	669.053	1250.66	648.296	303.834	314.764	-0.947965	0.017316	0.101625	0.518363	DOWN
P41975	Extracellular superoxide dismutase [Cu-Zn] OS=Oryctolagus cuniculus OX=9986 GN=SOD3 PE=2 SV=2 - [SODE_RABIT]	SOD3	935.746	816.677	1139.01	1522.34	2273.94	871.682	925.717	587.703	322.887	416.569	739.309	1259.9	598.437	559.284	242.938	-1.07404	0.017316	0.101625	0.474988	DOWN
Q28685	Dystroglycan OS=Oryctolagus cuniculus OX=9986 GN=DAG1 PE=1 SV=1 - [DAG1_RABIT]	DAG1	168.217	115.285	137.944	157.923	253.759	109.166	48.5355	122.429	0	59.5445	34.7797	157.049	53.0578	52.6885	44.7888	-1.56558	0.017316	0.101625	0.337842	DOWN
P62943	Peptidyl-prolyl cis-trans isomerase FKBP1A OS=Oryctolagus cuniculus OX=9986 GN=FKBP1A PE=1 SV=2 - [FKB1A_RABIT]	FKBP1A	65.9859	84.7112	102.545	96.5767	73.6963	63.5554	36.3629	72.9511	0	0	57.7032	81.1784	33.4034	16.1461	33.1468	-1.2811	0.0221735	0.126002	0.411482	DOWN
P13280	Glycogenin-1 OS=Oryctolagus cuniculus OX=9986 GN=GYG1 PE=1 SV=3 - [GLYG_RABIT]	GYG1	154.574	0	206.589	129.975	227.445	127.427	0	0	0	0	119.219	141.002	23.8438	80.1819	53.3163	-2.56403	0.0276595	0.139083	0.169103	DOWN
Q8MK67	Phosphatidylethanolamine-binding protein 1 OS=Oryctolagus cuniculus OX=9986 GN=PEBP1 PE=2 SV=1 - [PEBP1_RABIT]	PEBP1	273.62	307.623	302.606	438.436	565.521	218.209	167.724	240.96	201.721	238.239	256.823	351.003	221.093	127.679	36.0169	-0.666826	0.030303	0.139083	0.629891	DOWN
Q8MJF1	Mimecan OS=Oryctolagus cuniculus OX=9986 GN=OGN PE=1 SV=1 - [MIME_RABIT]	OGN	9159.16	5840.44	9472.81	9353.79	16966.8	8125.93	5337.97	8885.42	6228.69	4740.08	5261.49	9819.82	6090.73	3756.54	1651.35	-0.689081	0.030303	0.139083	0.620249	DOWN
P04191	Sarcoplasmic/endoplasmic reticulum calcium ATPase 1 OS=Oryctolagus cuniculus OX=9986 GN=ATP2A1 PE=1 SV=1 - [AT2A1_RABIT]	ATP2A1	242.875	106.644	210.234	164.034	191.069	183.993	164.383	131.094	87.167	90.9668	81.3255	183.141	110.987	46.0058	35.7191	-0.722563	0.030303	0.139083	0.60602	DOWN
Q09YN4	F-actin-capping protein subunit alpha-2 OS=Oryctolagus cuniculus OX=9986 GN=CAPZA2 PE=3 SV=3 - [CAZA2_RABIT]	CAPZA2	478.643	254.066	407.929	354.67	217.748	263.232	219.662	137.445	161.747	255.035	196.028	329.381	193.983	101.586	46.44	-0.763827	0.030303	0.139083	0.588932	DOWN
Q28689	Canalicular multispecific organic anion transporter 1 OS=Oryctolagus cuniculus OX=9986 GN=ABCC2 PE=1 SV=1 - [MRP2_RABIT]	ABCC2	1832.2	931.296	546.263	1523.22	1145.22	955.529	629.459	717.791	318.701	364.634	592.943	1155.62	524.705	459.276	173.905	-1.13909	0.030303	0.139083	0.454046	DOWN
P30957	Ryanodine receptor 2 OS=Oryctolagus cuniculus OX=9986 GN=RYR2 PE=1 SV=3 - [RYR2_RABIT]	RYR2	296.675	94.4993	586.999	475.059	186.154	275.392	27.4422	228.247	71.8792	55.1472	139.625	319.13	104.468	182.552	80.5988	-1.61108	0.030303	0.139083	0.327353	DOWN
P40144	Adenylate cyclase type 5 OS=Oryctolagus cuniculus OX=9986 GN=ADCY5 PE=1 SV=1 - [ADCY5_RABIT]	ADCY5	107.185	73.7791	57.6286	89.5679	78.7859	72.7855	70.3413	70.4811	0	64.8652	0	79.9553	41.1375	16.8715	37.6215	-0.958738	0.0353443	0.160168	0.514507	DOWN
O19132	Nitric oxide synthase, brain OS=Oryctolagus cuniculus OX=9986 GN=NOS1 PE=2 SV=1 - [NOS1_RABIT]	NOS1	28.469	0	59.7178	46.6616	24.8761	0	0	0	0	0	0	26.6208	0	24.1696	0	Only in Control	0.0445506	0.172198	Only in Control	DOWN
P19517	Voltage-dependent L-type calcium channel subunit beta-1 OS=Oryctolagus cuniculus OX=9986 GN=CACNB1 PE=1 SV=1 - [CACB1_RABIT]	CACNB1	22.0905	0	0	12.733	54.9032	12.2525	0	0	0	0	0	16.9965	0	20.4025	0	Only in Control	0.0445506	0.172198	Only in Control	DOWN
Q6IVG4	Arf-GAP with coiled-coil, ANK repeat and PH domain-containing protein 2 OS=Oryctolagus cuniculus OX=9986 GN=ACAP2 PE=2 SV=1 - [ACAP2_RABIT]	ACAP2	436.114	385.568	0	290.617	46.0907	0	0	0	0	0	0	193.065	0	200.896	0	Only in Control	0.0445506	0.172198	Only in Control	DOWN
Q9GKY1	Anion exchange protein 4 OS=Oryctolagus cuniculus OX=9986 GN=SLC4A9 PE=1 SV=2 - [B3A4_RABIT]	SLC4A9	24.0395	0	25.5014	100.455	0	18.2801	0	0	0	0	0	28.0461	0	37.2403	0	Only in Control	0.0445506	0.172198	Only in Control	DOWN
P17165	Apolipoprotein B (Fragment) OS=Oryctolagus cuniculus OX=9986 GN=APOB PE=1 SV=1 - [APOB_RABIT]	APOB	0	0	0	0	0	0	105.756	105.202	202.724	125.602	220.129	0	151.883	0	55.317	Only in Case	0.00389049	0.0619913	Only in Case	Up
P37153	Apolipoprotein D OS=Oryctolagus cuniculus OX=9986 GN=APOD PE=2 SV=1 - [APOD_RABIT]	APOD	0	0	0	0	0	0	186.398	239.02	761.113	278.667	314.185	0	355.877	0	231.46	Only in Case	0.00389049	0.0619913	Only in Case	Up
P01885	Beta-2-microglobulin OS=Oryctolagus cuniculus OX=9986 GN=B2M PE=1 SV=1 - [B2MG_RABIT]	B2M	0	0	0	0	0	0	234.028	253.68	55.7116	43.8206	214.366	0	160.321	0	101.962	Only in Case	0.00389049	0.0619913	Only in Case	Up
Q28618	Y-box-binding protein 1 OS=Oryctolagus cuniculus OX=9986 GN=YBX1 PE=1 SV=3 - [YBOX1_RABIT]	YBX1	0	0	0	0	0	0	30.5625	16.8996	41.1373	134.423	59.4698	0	56.4985	0	46.2543	Only in Case	0.00389049	0.0619913	Only in Case	Up
Q29512	3-hydroxy-3-methylglutaryl-coenzyme A reductase OS=Oryctolagus cuniculus OX=9986 GN=HMGCR PE=3 SV=1 - [HMDH_RABIT]	HMGCR	0	0	0	0	0	0	9.93192	183.712	95.0089	238.786	42.6145	0	114.011	0	95.8098	Only in Case	0.00389049	0.0619913	Only in Case	Up
P01685	Ig kappa chain V region 4135 OS=Oryctolagus cuniculus OX=9986 PE=1 SV=1 - [KV04_RABIT]	KV04_RABIT	564.731	9782.31	1071.91	470.508	1161.85	979.184	65322.5	134336	63676.7	132756	140282	2338.42	107275	3657.39	39153.1	5.51963	0.004329	0.0619913	45.8749	Up
P18287	Apolipoprotein E OS=Oryctolagus cuniculus OX=9986 GN=APOE PE=2 SV=1 - [APOE_RABIT]	APOE	70.0279	100.4	0	28.676	132.923	28.8116	576.606	541.207	1481.22	470.76	726.419	60.1398	759.243	50.2082	414.262	3.65817	0.004329	0.0619913	12.6246	Up
P80191	Alpha-2-HS-glycoprotein (Fragment) OS=Oryctolagus cuniculus OX=9986 GN=AHSG PE=1 SV=2 - [FETUA_RABIT]	AHSG	0	424.789	316.749	142.87	834.933	261.775	1513.59	838.47	1905	3548.74	3263.81	330.186	2213.92	287.294	1157.77	2.74525	0.004329	0.0619913	6.70507	Up
Q9XSC5	Clusterin OS=Oryctolagus cuniculus OX=9986 GN=CLU PE=2 SV=1 - [CLUS_RABIT]	CLU	60.6916	0	46.1604	7.87617	96.7424	32.1383	141.685	106.408	280.358	416.537	162.055	40.6015	221.408	35.7138	127.136	2.44711	0.004329	0.0619913	5.45321	Up
P53815	Translocon-associated protein subunit alpha OS=Oryctolagus cuniculus OX=9986 GN=SSR1 PE=2 SV=1 - [SSRA_RABIT]	SSR1	10.5191	8.15129	39.1438	26.3098	0	8.48212	48.7284	79.3649	72.7714	41.5519	117.877	15.4344	72.0588	14.4511	30.1172	2.22303	0.004329	0.0619913	4.66872	Up
Q28749	Fibronectin (Fragment) OS=Oryctolagus cuniculus OX=9986 GN=FN1 PE=2 SV=2 - [FINC_RABIT]	FN1	868.005	590.147	1458.07	1022.35	1355.05	1802.06	2656.71	4812.74	4494.34	4680.85	7030.49	1182.61	4735.03	439.319	1553.66	2.00139	0.004329	0.0619913	4.00386	Up
P19134	Serotransferrin OS=Oryctolagus cuniculus OX=9986 GN=TF PE=1 SV=4 - [TRFE_RABIT]	TF	1085.61	2302.04	2027.7	1332.37	2458.74	1367.85	4463.63	7340.95	6292.19	6257.07	5684.57	1762.38	6007.68	573.608	1049.91	1.76928	0.004329	0.0619913	3.40884	Up
P22458	Vitronectin OS=Oryctolagus cuniculus OX=9986 GN=VTN PE=1 SV=1 - [VTNC_RABIT]	VTN	594.658	345.579	419.701	605.043	309.946	596.793	968.749	796.169	1764.2	2497.46	1283.88	478.62	1462.09	136.407	685.903	1.61108	0.004329	0.0619913	3.05481	Up
P47845	Galectin-3 OS=Oryctolagus cuniculus OX=9986 GN=LGALS3 PE=2 SV=2 - [LEG3_RABIT]	LGALS3	95.5647	84.4431	134.631	169.325	195.678	87.4392	374.765	311.371	259.835	222.629	628.116	127.847	359.343	46.7467	160.757	1.49095	0.004329	0.0619913	2.81074	Up
P01870	Ig gamma chain C region OS=Oryctolagus cuniculus OX=9986 PE=1 SV=1 - [IGHG_RABIT]	IGHG_RABIT	3929.97	5671.38	7044.68	3820.67	8593.59	6886.19	14456.5	17697.6	17005	12115.8	10673.9	5991.08	14389.8	1883.9	3031.67	1.26415	0.004329	0.0619913	2.40186	Up
P14943	Cocaine esterase OS=Oryctolagus cuniculus OX=9986 GN=CES2 PE=1 SV=2 - [EST2_RABIT]	CES2	34.2533	59.9431	15.3742	51.5062	32.6374	30.7309	64.8243	116.765	80.6729	74.0054	64.6754	37.4075	80.1886	15.9334	21.5233	1.10007	0.004329	0.0619913	2.14365	Up
P47776	Heparin cofactor 2 OS=Oryctolagus cuniculus OX=9986 GN=SERPIND1 PE=2 SV=1 - [HEP2_RABIT]	SERPIND1	105.201	134.647	142.007	89.9983	205.077	125.416	212.109	240.082	272.951	270.976	274.77	133.724	254.178	39.8877	27.5098	0.926574	0.004329	0.0619913	1.90076	Up
Q28902	Collagen alpha-1(XII) chain (Fragment) OS=Oryctolagus cuniculus OX=9986 GN=COL12A1 PE=2 SV=1 - [COCA1_RABIT]	COL12A1	4.67207	0	0	0	0	0	18.526	46.3638	350.592	55.8452	81.3537	0.778678	110.536	1.90736	136.064	7.14928	0.00549411	0.0678239	141.954	Up
Q28680	Monocyte differentiation antigen CD14 OS=Oryctolagus cuniculus OX=9986 GN=CD14 PE=2 SV=1 - [CD14_RABIT]	CD14	0	0	0	0	11.3329	0	59.8483	69.3449	87.7131	61.5962	92.0902	1.88882	74.1185	4.62664	14.9251	5.29428	0.00549411	0.0678239	39.2407	Up
O19045	Coagulation factor X OS=Oryctolagus cuniculus OX=9986 GN=F10 PE=2 SV=1 - [FA10_RABIT]	F10	0	17.6491	0	0	0	0	85.3536	49.8741	117.411	172.016	109.262	2.94152	106.783	7.20522	44.923	5.18198	0.00549411	0.0678239	36.3021	Up
P47841	Matrix Gla protein OS=Oryctolagus cuniculus OX=9986 GN=MGP PE=3 SV=1 - [MGP_RABIT]	MGP	0	0	66.0463	0	0	66.4422	114.764	252.686	203.882	185.471	143.064	22.0814	179.973	34.2086	53.6273	3.02688	0.00673595	0.072083	8.15044	Up
O77507	DNA repair protein RAD51 homolog 1 OS=Oryctolagus cuniculus OX=9986 GN=RAD51 PE=2 SV=1 - [RAD51_RABIT]	RAD51	109.274	0	0	80.1395	0	0	177.22	179.798	318.154	216.122	248.065	31.5689	227.872	49.7666	58.2523	2.85164	0.00673595	0.072083	7.21822	Up
Q9GLY5	Inter-alpha-trypsin inhibitor heavy chain H3 OS=Oryctolagus cuniculus OX=9986 GN=ITIH3 PE=2 SV=1 - [ITIH3_RABIT]	ITIH3	0	40.8093	36.8815	0	0	20.1163	70.5045	88.6771	195.907	909.351	83.6082	16.3012	269.61	19.1621	361.136	4.04782	0.00754623	0.072083	16.5393	Up
O97862	Cystatin-C OS=Oryctolagus cuniculus OX=9986 GN=CST3 PE=2 SV=1 - [CYTC_RABIT]	CST3	62.9166	0	111.534	48.4354	0	0	172.924	183.182	126.785	148.477	168.511	37.1476	159.976	45.7484	22.4328	2.10651	0.00754623	0.072083	4.3065	Up
Q28677	Solute carrier family 12 member 4 OS=Oryctolagus cuniculus OX=9986 GN=SLC12A4 PE=1 SV=1 - [S12A4_RABIT]	SLC12A4	0	34.2621	0	126.411	114.686	0	141.096	137.843	238.649	178.71	209.797	45.8931	181.219	59.4464	43.6249	1.98138	0.00754623	0.072083	3.94872	Up
P12247	Complement C3 alpha chain (Fragment) OS=Oryctolagus cuniculus OX=9986 GN=C3 PE=2 SV=1 - [CO3_RABIT]	C3	0	165.642	135.89	35.9609	121.951	53.0945	231.533	151.226	291.008	314.768	308.394	85.423	259.386	64.9692	68.8175	1.6024	0.00865801	0.072083	3.03648	Up
Q28640	Histidine-rich glycoprotein (Fragment) OS=Oryctolagus cuniculus OX=9986 GN=HRG PE=1 SV=1 - [HRG_RABIT]	HRG	600.133	1729.28	1191.32	869.11	2606.03	693.86	3942.97	3148.6	2526.77	3814.67	3680.96	1281.62	3422.79	767.161	584.988	1.4172	0.00865801	0.072083	2.67067	Up
P27170	Serum paraoxonase/arylesterase 1 OS=Oryctolagus cuniculus OX=9986 GN=PON1 PE=1 SV=2 - [PON1_RABIT]	PON1	185.009	328.729	166.501	133.359	276.506	242.449	337.772	387.841	659.018	392.187	315.575	222.092	418.479	73.6015	138.376	0.913997	0.00865801	0.072083	1.88426	Up
Q9GLC3	Sodium/potassium-transporting ATPase subunit beta-3 OS=Oryctolagus cuniculus OX=9986 GN=ATP1B3 PE=2 SV=1 - [AT1B3_RABIT]	ATP1B3	0	0	0	33.974	0	0	28.3099	62.106	89.0157	62.9091	133.137	5.66233	75.0956	13.8698	38.9511	3.72926	0.0097364	0.0774585	13.2623	Up
P62497	Eukaryotic peptide chain release factor subunit 1 OS=Oryctolagus cuniculus OX=9986 GN=ETF1 PE=1 SV=3 - [ERF1_RABIT]	ETF1	0	0	0	0	28.8904	0	45.6002	42.4193	28.5363	39.1469	42.0528	4.81507	39.5511	11.7945	6.5682	3.03809	0.0097364	0.0774585	8.21403	Up
P06912	Retinol-binding protein 4 OS=Oryctolagus cuniculus OX=9986 GN=RBP4 PE=1 SV=2 - [RET4_RABIT]	RBP4	0	27.2172	133.888	0	0	0	138.063	70.2829	152.764	224.823	152.815	26.8508	147.75	53.5555	54.9683	2.46012	0.011644	0.0886926	5.50261	Up
O97529	Annexin A8 OS=Oryctolagus cuniculus OX=9986 GN=ANXA8 PE=2 SV=1 - [ANXA8_RABIT]	ANXA8	150.35	0	0	0	75.8466	0	211.96	163.052	90.5852	185.85	298.779	37.6994	190.045	62.9766	75.7328	2.33373	0.011644	0.0886926	5.04107	Up
P98137	Complement component C8 beta chain OS=Oryctolagus cuniculus OX=9986 GN=C8B PE=1 SV=1 - [CO8B_RABIT]	C8B	0	0	0	0	0	0	0	54.0216	68.738	75.2009	77.1258	0	55.0172	0	32.0637	Only in Case	0.0150243	0.101625	Only in Case	Up
O97755	V-type proton ATPase subunit D OS=Oryctolagus cuniculus OX=9986 GN=ATP6V1D PE=2 SV=1 - [VATD_RABIT]	ATP6V1D	0	0	0	0	0	0	0	351.555	452.137	570.906	768.839	0	428.687	0	285.57	Only in Case	0.0150243	0.101625	Only in Case	Up
P02251	Histone H1.3 OS=Oryctolagus cuniculus OX=9986 PE=1 SV=1 - [H13_RABIT]	H13_RABIT	0	0	0	0	0	0	60.9157	0	81.2653	44.351	145.842	0	66.4747	0	53.519	Only in Case	0.0150243	0.101625	Only in Case	Up
P09451	Ferritin light chain OS=Oryctolagus cuniculus OX=9986 GN=FTL PE=2 SV=2 - [FRIL_RABIT]	FTL	60.4039	9.69024	20.383	88.5391	122.709	0	117.403	112.884	135.081	160.408	150.636	50.2876	135.282	48.7477	20.5455	1.4277	0.017316	0.101625	2.69017	Up
Q95215	Transforming growth factor-beta-induced protein ig-h3 OS=Oryctolagus cuniculus OX=9986 GN=TGFBI PE=2 SV=2 - [BGH3_RABIT]	TGFBI	217.356	279.009	346.755	389.841	834.181	355.748	554.378	650.716	1520.32	835.296	1538.46	403.815	1019.83	219.691	476.028	1.33657	0.017316	0.101625	2.5255	Up
P01840	Ig kappa-b4 chain C region OS=Oryctolagus cuniculus OX=9986 PE=1 SV=1 - [KAC4_RABIT]	KAC4_RABIT	1543.05	1423.5	2263.69	1377.12	1852.59	2404.8	2036.1	2829.78	5542.94	2715.26	4241	1810.79	3473.02	440.331	1407.75	0.939568	0.017316	0.101625	1.91795	Up
P25915	Ferritin heavy chain (Fragment) OS=Oryctolagus cuniculus OX=9986 GN=FTH1 PE=2 SV=1 - [FRIH_RABIT]	FTH1	53.6658	60.8652	0	117.388	0	67.6103	77.2567	100.203	311.356	312.194	276.625	49.9216	215.527	44.6828	116.918	2.11013	0.0221735	0.126002	4.31731	Up
P50757	72 kDa type IV collagenase OS=Oryctolagus cuniculus OX=9986 GN=MMP2 PE=2 SV=1 - [MMP2_RABIT]	MMP2	0	0	15.0998	0	0	0	142.296	174.372	122.446	25.8231	0	2.51664	92.9873	6.16447	75.9609	5.20747	0.0285193	0.139083	36.9491	Up
P10829	Protein kinase C gamma type OS=Oryctolagus cuniculus OX=9986 GN=PRKCG PE=1 SV=1 - [KPCG_RABIT]	PRKCG	8.95353	0	0	0	0	0	93.8654	21.9424	23.2065	0	27.8029	1.49225	33.3634	3.65526	35.4899	4.4827	0.0285193	0.139083	22.3577	Up
P14478	Fibrinogen beta chain (Fragment) OS=Oryctolagus cuniculus OX=9986 GN=FGB PE=1 SV=2 - [FIBB_RABIT]	FGB	226.702	257.788	386.738	373.469	0	503.019	776.155	325.107	781.586	512.694	924.49	291.286	664.006	173.687	240.833	1.18876	0.030303	0.139083	2.27957	Up
P53789	Vitamin D-binding protein OS=Oryctolagus cuniculus OX=9986 GN=GC PE=2 SV=1 - [VTDB_RABIT]	GC	384.43	541.508	611.688	323.308	968.227	441.149	1096.98	1198.98	890.114	851.716	626.044	545.051	932.767	232.076	223.777	0.775125	0.030303	0.139083	1.71134	Up
P21195	Protein disulfide-isomerase OS=Oryctolagus cuniculus OX=9986 GN=P4HB PE=2 SV=1 - [PDIA1_RABIT]	P4HB	448.014	324.882	381.117	576.436	684.42	258.334	586.112	665.267	687.415	580.277	953.516	445.534	694.517	159.974	152.307	0.640476	0.030303	0.139083	1.55884	Up
Q28641	Myosin-4 OS=Oryctolagus cuniculus OX=9986 GN=MYH4 PE=1 SV=2 - [MYH4_RABIT]	MYH4	64.3633	0	0	0	0	79.0373	123.433	521.43	656.004	0	585.754	23.9001	377.324	37.3155	295.257	3.98072	0.044368	0.172198	15.7876	Up
P20614	Metalloproteinase inhibitor 1 OS=Oryctolagus cuniculus OX=9986 GN=TIMP1 PE=2 SV=2 - [TIMP1_RABIT]	TIMP1	0	3.21064	0	0	19.2639	0	0	34.865	79.3253	69.6645	55.4207	3.74575	47.8551	7.71	31.552	3.67535	0.044368	0.172198	12.7758	Up
P01694	Ig kappa chain V region 3547 OS=Oryctolagus cuniculus OX=9986 PE=1 SV=1 - [KV13_RABIT]	KV13_RABIT	0	1.75752	0	0	0	10.5451	27.0896	12.3227	27.5233	0	32.5387	2.05045	19.8949	4.2205	13.444	3.27839	0.044368	0.172198	9.70271	Up
Q9MZD2	Filamin-B (Fragment) OS=Oryctolagus cuniculus OX=9986 GN=FLNB PE=1 SV=1 - [FLNB_RABIT]	FLNB	0	0	0	40.0375	0	0	35.5365	24.3477	35.6297	34.5545	83.1507	6.67292	42.6438	16.3452	23.1339	2.67595	0.044368	0.172198	6.39058	Up
I1VZH0	RING finger protein 207 OS=Oryctolagus cuniculus OX=9986 GN=RNF207 PE=2 SV=1 - [RN207_RABIT]	RNF207	0	0	0	0	8.09308	0	10.7863	265.941	0	6.66641	93.8046	1.34885	75.4396	3.30399	113.169	5.80552	0.0464841	0.172198	55.9289	Up
Q28709	CD63 antigen OS=Oryctolagus cuniculus OX=9986 GN=CD63 PE=2 SV=2 - [CD63_RABIT]	CD63	0	0	0	0	27.9087	0	22.6143	0	96.7834	48.8299	32.2531	4.65145	40.0962	11.3937	36.2786	3.10771	0.0464841	0.172198	8.62013	Up
Q95209	Sortilin-related receptor OS=Oryctolagus cuniculus OX=9986 GN=SORL1 PE=1 SV=1 - [SORL_RABIT]	SORL1	0	0	0	0	0	0	15.1766	0	15.1766	75.8828	0	0	21.2472	0	31.4708	Only in Case	0.0475819	0.172198	Only in Case	Up
P36233	SPARC (Fragment) OS=Oryctolagus cuniculus OX=9986 GN=SPARC PE=1 SV=2 - [SPRC_RABIT]	SPARC	0	0	0	0	0	0	0	23.0431	0	47.0858	91.2919	0	32.2842	0	38.311	Only in Case	0.048406	0.172198	Only in Case	Up
Q28679	Complement component C8 gamma chain OS=Oryctolagus cuniculus OX=9986 GN=C8G PE=2 SV=1 - [CO8G_RABIT]	C8G	0	0	0	0	0	0	0	88.7974	146.522	0	138.687	0	74.8012	0	71.7836	Only in Case	0.048406	0.172198	Only in Case	Up
A4L9I9	Beta-crystallin A2 OS=Oryctolagus cuniculus OX=9986 GN=CRYBA2 PE=2 SV=1 - [CRBA2_RABIT]	CRYBA2	0	0	0	0	0	0	37.9636	0	162.701	0	340.662	0	108.265	0	146.079	Only in Case	0.048406	0.172198	Only in Case	Up
P01686	Ig kappa chain V region BS-1 OS=Oryctolagus cuniculus OX=9986 PE=1 SV=1 - [KV05_RABIT]	KV05_RABIT	0	0	0	0	0	0	344.513	569.483	658.995	0	0	0	314.598	0	309.198	Only in Case	0.048406	0.172198	Only in Case	Up
P23108	Immunoglobulin J chain OS=Oryctolagus cuniculus OX=9986 GN=JCHAIN PE=1 SV=1 - [IGJ_RABIT]	JCHAIN	0	0	0	0	0	0	1731.53	113.021	0	368.911	0	0	442.693	0	736.069	Only in Case	0.048406	0.172198	Only in Case	Up
P25947	Ankyrin repeat protein T5 OS=Rabbit fibroma virus (strain Kasza) OX=10272 GN=T5 PE=4 SV=2 - [VT5_RFVKA]	T5	0	0	0	0	0	0	0	31.1157	41.273	0	14.4777	0	17.3733	0	18.5209	Only in Case	0.048406	0.172198	Only in Case	Up
P26432	Sodium/hydrogen exchanger 3 OS=Oryctolagus cuniculus OX=9986 GN=SLC9A3 PE=1 SV=1 - [SL9A3_RABIT]	SLC9A3	0	0	0	0	0	0	11.4641	0	0	42.9774	14.3429	0	13.7569	0	17.5922	Only in Case	0.048406	0.172198	Only in Case	Up
P52786	Cytochrome P450 2J1 OS=Oryctolagus cuniculus OX=9986 GN=CYP2J1 PE=1 SV=2 - [CP2J1_RABIT]	CYP2J1	0	0	0	0	0	0	0	9.38298	185.813	0	17.2729	0	42.4939	0	80.4431	Only in Case	0.048406	0.172198	Only in Case	Up
Q05555	Cytochrome P450 2A10 OS=Oryctolagus cuniculus OX=9986 GN=CYP2A10 PE=1 SV=1 - [CP2AA_RABIT]	CYP2A10	0	0	0	0	0	0	295.047	0	56.2386	34.1847	0	0	77.0941	0	124.164	Only in Case	0.048406	0.172198	Only in Case	Up
